# Supplementary material for: Matriptase activation of Gq drives epithelial disruption and inflammation via RSK and DUOX
Source: eLife journal article supplement (doi:10.7554/elife.66596), 2021-06-24
Supplement: supp [file elife_poa_e66596_Figure_1_source_data_3.pdf › elife_poa_e66596_Figure_1_source_data_3.pdf]

# 2011\_07 NGSE110704

## Analysis Information

|                         |                                 |               |                     |
|-------------------------|---------------------------------|---------------|---------------------|
| Report Type             | Protein-Peptide Summary by Spot | Analysis Type | Combined (MS+MS/MS) |
| Sample Set Name         | NGSE110704                      | Database      | NCBIInr             |
| Analysis Name           | Nebrafish_Top50                 | Creation Date | 08/26/2011 13:07:53 |
| Reported By             | 08/29/2011 11:15:22 - admin     | Last Modified | 08/26/2011 18:29:58 |
| MS Acq. : Proc. Methods | (Unspecified) : (Unspecified)   |               |                     |
| Interpretation Method   | (Unspecified)                   |               |                     |

|                |           |                        |                |                |                    |
|----------------|-----------|------------------------|----------------|----------------|--------------------|
| Gel Idx/Pos    | 174/H1    | Instr./Gel Origin      | BA2060/110707A | Process Status | Analysis Succeeded |
| Plate [#] Name | [1] 31496 | Instrument Sample Name |                | Spectra        | 11                 |

| Rank | Protein Name                                      | Accession No. | Protein MW | Protein PI | Pep. Count | Protein Score | Protein Score C. I. % | Total Ion Score | Total Ion C. I. % |
|------|---------------------------------------------------|---------------|------------|------------|------------|---------------|-----------------------|-----------------|-------------------|
| 1    | pyruvate carboxylase, mitochondrial [Danio rerio] | gi 18858695   | 129801.9   | 6.44       | 21         | 295           | 100                   | 219             | 100               |

### Peptide Information

| Calc. Mass | Obsrv. Mass | ± da    | ± ppm | Start Seq. | End Sequence Seq.   | Ion Score | C. I. % | Modification           | Rank | Result Type |
|------------|-------------|---------|-------|------------|---------------------|-----------|---------|------------------------|------|-------------|
| 877.4162   | 877.423     | 0.0068  | 8     | 388        | 395 GFQPDGTGR       |           |         |                        |      | Mascot      |
| 1064.5299  | 1064.5403   | 0.0104  | 10    | 720        | 727 YSLDYLYLK       |           |         |                        |      | Mascot      |
| 1100.6099  | 1100.6183   | 0.0084  | 8     | 140        | 149 FIGPSPEVVR      |           |         |                        |      | Mascot      |
| 1111.5854  | 1111.5952   | 0.0098  | 9     | 574        | 583 DAHQSLLATR      |           |         |                        |      | Mascot      |
| 1151.6418  | 1151.6522   | 0.0104  | 9     | 246        | 255 HIEVQILGDK      |           |         |                        |      | Mascot      |
| 1164.5796  | 1164.5923   | 0.0127  | 11    | 322        | 330 HYFIEVNSR       |           |         |                        |      | Mascot      |
| 1165.5823  | 1165.7551   | 0.1728  | 148   | 620        | 628 FLSECPWKR       |           |         |                        |      | Mascot      |
| 1263.6481  | 1263.6631   | 0.015   | 12    | 256        | 265 YGNVIHLIER      | 59        | 99.97   |                        |      | Mascot      |
| 1263.6692  | 1263.6631   | -0.0061 | -5    | 80         | 90 QKADEAYLIGR      |           |         |                        |      | Mascot      |
| 1275.6296  | 1275.6111   | -0.0185 | -15   | 369        | 379 IQINGCAIQCR     |           |         | Carbamidomethyl (C)[6] |      | Mascot      |
| 1351.7004  | 1351.7147   | 0.0143  | 11    | 1076       | 1086 EVFFELNGQLR    |           |         |                        |      | Mascot      |
| 1474.6705  | 1474.6882   | 0.0177  | 12    | 845        | 857 GLYAPFDCTATMK   |           |         | Carbamidomethyl (C)[8] |      | Mascot      |
| 1502.8069  | 1502.7963   | -0.0106 | -7    | 1132       | 1145 VEKGQPLCVLSAMK |           |         |                        |      | Mascot      |
| 1518.8019  | 1518.7903   | -0.0116 | -8    | 1132       | 1145 VEKGQPLCVLSAMK |           |         | Oxidation (M)[13]      |      | Mascot      |
| 1658.7665  | 1658.9414   | 0.1749  | 105   | 664        | 677 FCEVAKENGMDIFR  |           |         |                        |      | Mascot      |
| 1658.7665  | 1658.9414   | 0.1749  | 105   | 664        | 677 FCEVAKENGMDIFR  | 3         | 0       |                        |      | Mascot      |

2

|   |                                    |           |        |    |              |     |                                    |         |      |                   |     |     |     |        |
|---|------------------------------------|-----------|--------|----|--------------|-----|------------------------------------|---------|------|-------------------|-----|-----|-----|--------|
|   | 2545.3257                          | 2545.3594 | 0.0337 | 13 | 331          | 352 | LQVEHTVTEEITDVDLVH<br>AQLR         | 161     | 100  |                   |     |     |     | Mascot |
|   | 2545.3257                          | 2545.3594 | 0.0337 | 13 | 331          | 352 | LQVEHTVTEEITDVDLVH<br>AQLR         |         |      |                   |     |     |     | Mascot |
|   | 3364.5286                          | 3364.6116 | 0.083  | 25 | 858          | 888 | SGNADVYENEIPGGQYT<br>NLHFQAHSMLGNK |         |      | Oxidation (M)[26] |     |     |     | Mascot |
| 3 | pyruvate carboxylase [Danio rerio] |           |        |    | gi 169153894 |     |                                    | 51981.8 | 7.64 | 12                | 272 | 100 | 219 | 100    |

#### Peptide Information

| Calc. Mass | Obsrv. Mass | ± da    | ± ppm | Start Seq. | End Seq. | Sequence                   | Ion Score | C. I. | % | Modification           | Rank | Result Type |
|------------|-------------|---------|-------|------------|----------|----------------------------|-----------|-------|---|------------------------|------|-------------|
| 877.4162   | 877.423     | 0.0068  | 8     | 388        | 395      | GFQPD TGR                  |           |       |   |                        |      | Mascot      |
| 1100.6099  | 1100.6183   | 0.0084  | 8     | 140        | 149      | FIGPSPEVVR                 |           |       |   |                        |      | Mascot      |
| 1151.6418  | 1151.6522   | 0.0104  | 9     | 246        | 255      | HIEVQILGDK                 |           |       |   |                        |      | Mascot      |
| 1164.5796  | 1164.5923   | 0.0127  | 11    | 322        | 330      | HYFIEVNSR                  |           |       |   |                        |      | Mascot      |
| 1263.6481  | 1263.6631   | 0.015   | 12    | 256        | 265      | YGNVIHLYER                 | 59        | 99.97 |   |                        |      | Mascot      |
| 1263.6692  | 1263.6631   | -0.0061 | -5    | 80         | 90       | QKADEAYLIGR                |           |       |   |                        |      | Mascot      |
| 1275.6296  | 1275.6111   | -0.0185 | -15   | 369        | 379      | IQINGCAIQCR                |           |       |   | Carbamidomethyl (C)[6] |      | Mascot      |
| 1721.7911  | 1721.8103   | 0.0192  | 11    | 65         | 79       | TVAVYSEQDTGQMHR            |           |       |   |                        |      | Mascot      |
| 1737.7861  | 1737.8036   | 0.0175  | 10    | 65         | 79       | TVAVYSEQDTGQMHR            |           |       |   | Oxidation (M)[13]      |      | Mascot      |
| 1768.8751  | 1768.8936   | 0.0185  | 10    | 303        | 318      | QVGYENAGTVEFLVDK           |           |       |   |                        |      | Mascot      |
| 1857.9381  | 1857.9545   | 0.0164  | 9     | 222        | 239      | AYSEALAAFNGALFVEK          |           |       |   |                        |      | Mascot      |
| 1993.9396  | 1994.0005   | 0.0609  | 31    | 65         | 81       | TVAVYSEQDTGQMHRQK          |           |       |   | Oxidation (M)[13]      |      | Mascot      |
| 2545.3257  | 2545.3594   | 0.0337  | 13    | 331        | 352      | LQVEHTVTEEITDVDLVH<br>AQLR | 161       | 100   |   |                        |      | Mascot      |
| 2545.3257  | 2545.3594   | 0.0337  | 13    | 331        | 352      | LQVEHTVTEEITDVDLVH<br>AQLR |           |       |   |                        |      | Mascot      |

|   |                                                                                                |  |  |  |              |  |  |         |      |    |    |       |  |  |
|---|------------------------------------------------------------------------------------------------|--|--|--|--------------|--|--|---------|------|----|----|-------|--|--|
| 4 | novel protein similar to vertebrate vasodilator-stimulated phosphoprotein (VASP) [Danio rerio] |  |  |  | gi 169145929 |  |  | 44137.1 | 8.42 | 11 | 55 | 84.57 |  |  |
|---|------------------------------------------------------------------------------------------------|--|--|--|--------------|--|--|---------|------|----|----|-------|--|--|

#### Peptide Information

| Calc. Mass | Obsrv. Mass | ± da    | ± ppm | Start Seq. | End Seq. | Sequence       | Ion Score | C. I. | % | Modification | Rank | Result Type |
|------------|-------------|---------|-------|------------|----------|----------------|-----------|-------|---|--------------|------|-------------|
| 980.4465   | 980.4255    | -0.021  | -21   | 2          | 10       | SESSICQAR      |           |       |   |              |      | Mascot      |
| 1111.4871  | 1111.5952   | 0.1081  | 97    | 1          | 10       | MSESSICQAR     |           |       |   |              |      | Mascot      |
| 1501.791   | 1501.6599   | -0.1311 | -87   | 22         | 35       | KWVPAGTGPQAFSR |           |       |   |              |      | Mascot      |
| 1501.791   | 1501.6599   | -0.1311 | -87   | 22         | 35       | KWVPAGTGPQAFSR |           |       |   |              |      | Mascot      |
| 1502.8213  | 1502.7963   | -0.025  | -17   | 404        | 416      | NEIIGAFIQELQK  |           |       |   |              |      | Mascot      |
| 1561.7295  | 1561.8402   | 0.1107  | 71    | 72         | 83       | YNQATPNFHQWR   |           |       |   |              |      | Mascot      |
| 1658.9224  | 1658.9414   | 0.019   | 11    | 404        | 417      | NEIIGAFIQELQKR |           |       |   |              |      | Mascot      |
| 1658.9224  | 1658.9414   | 0.019   | 11    | 404        | 417      | NEIIGAFIQELQKR |           |       |   |              |      | Mascot      |

|           |           |         |     |     |     |                                     |  |  |                        |  |        |
|-----------|-----------|---------|-----|-----|-----|-------------------------------------|--|--|------------------------|--|--------|
| 1859.9299 | 1859.9314 | 0.0015  | 1   | 69  | 83  | GLKYNQATPNFHQWR                     |  |  |                        |  | Mascot |
| 1859.9718 | 1859.9314 | -0.0404 | -22 | 53  | 68  | KMQTDQQVVINCPIVK                    |  |  | Oxidation (M)[2]       |  | Mascot |
| 2176.9849 | 2176.9849 | 0       | 0   | 2   | 21  | SESSICQARATVMIYDDG<br>SK            |  |  | Oxidation (M)[13]      |  | Mascot |
| 2283.9705 | 2284.2034 | 0.2329  | 102 | 366 | 386 | MKPVSQSAEAESEGES<br>EMER            |  |  | Oxidation (M)[1]       |  | Mascot |
| 2683.1868 | 2683.2405 | 0.0537  | 20  | 292 | 322 | NSVSMPSGGGGGGGGG<br>GGGGLMGEMSAILAR |  |  | Oxidation (M)[5,22,25] |  | Mascot |

5 Zgc:110347 [Danio rerio] gi|62204405 21385.7 8.64 7 44 0

#### Peptide Information

| Calc. Mass | Obsrv. Mass | ± da    | ± ppm | Start Seq. | End Seq. | Sequence                 | Ion Score | C. I. | % Modification    | Rank | Result Type |
|------------|-------------|---------|-------|------------|----------|--------------------------|-----------|-------|-------------------|------|-------------|
| 980.4465   | 980.4255    | -0.021  | -21   | 2          | 10       | SESSICQAR                |           |       |                   |      | Mascot      |
| 1111.4871  | 1111.5952   | 0.1081  | 97    | 1          | 10       | MSESSICQAR               |           |       |                   |      | Mascot      |
| 1501.791   | 1501.6599   | -0.1311 | -87   | 22         | 35       | KWVPAGTGPQAFSR           |           |       |                   |      | Mascot      |
| 1501.791   | 1501.6599   | -0.1311 | -87   | 22         | 35       | KWVPAGTGPQAFSR           |           |       |                   |      | Mascot      |
| 1561.7295  | 1561.8402   | 0.1107  | 71    | 72         | 83       | YNQATPNFHQWR             |           |       |                   |      | Mascot      |
| 1859.9299  | 1859.9314   | 0.0015  | 1     | 69         | 83       | GLKYNQATPNFHQWR          |           |       |                   |      | Mascot      |
| 1859.9718  | 1859.9314   | -0.0404 | -22   | 53         | 68       | KMQTDQQVVINCPIVK         |           |       | Oxidation (M)[2]  |      | Mascot      |
| 2176.9849  | 2176.9849   | 0       | 0     | 2          | 21       | SESSICQARATVMIYDDG<br>SK |           |       | Oxidation (M)[13] |      | Mascot      |

6 vasodilator-stimulated phosphoprotein [Danio rerio] gi|237681322 46817.5 8.74 10 43 0

#### Peptide Information

| Calc. Mass | Obsrv. Mass | ± da    | ± ppm | Start Seq. | End Seq. | Sequence                 | Ion Score | C. I. | % Modification    | Rank | Result Type |
|------------|-------------|---------|-------|------------|----------|--------------------------|-----------|-------|-------------------|------|-------------|
| 980.4465   | 980.4255    | -0.021  | -21   | 2          | 10       | SESSICQAR                |           |       |                   |      | Mascot      |
| 1111.4871  | 1111.5952   | 0.1081  | 97    | 1          | 10       | MSESSICQAR               |           |       |                   |      | Mascot      |
| 1501.791   | 1501.6599   | -0.1311 | -87   | 22         | 35       | KWVPAGTGPQAFSR           |           |       |                   |      | Mascot      |
| 1501.791   | 1501.6599   | -0.1311 | -87   | 22         | 35       | KWVPAGTGPQAFSR           |           |       |                   |      | Mascot      |
| 1502.8213  | 1502.7963   | -0.025  | -17   | 429        | 441      | NEIIGAFIQELQK            |           |       |                   |      | Mascot      |
| 1561.7295  | 1561.8402   | 0.1107  | 71    | 72         | 83       | YNQATPNFHQWR             |           |       |                   |      | Mascot      |
| 1658.9224  | 1658.9414   | 0.019   | 11    | 429        | 442      | NEIIGAFIQELQKR           |           |       |                   |      | Mascot      |
| 1658.9224  | 1658.9414   | 0.019   | 11    | 429        | 442      | NEIIGAFIQELQKR           |           |       |                   |      | Mascot      |
| 1859.9299  | 1859.9314   | 0.0015  | 1     | 69         | 83       | GLKYNQATPNFHQWR          |           |       |                   |      | Mascot      |
| 1859.9718  | 1859.9314   | -0.0404 | -22   | 53         | 68       | KMQTDQQVVINCPIVK         |           |       | Oxidation (M)[2]  |      | Mascot      |
| 2176.9849  | 2176.9849   | 0       | 0     | 2          | 21       | SESSICQARATVMIYDDG<br>SK |           |       | Oxidation (M)[13] |      | Mascot      |
| 2283.9705  | 2284.2034   | 0.2329  | 102   | 391        | 411      | MKPVSQSAEAESEGES<br>EMER |           |       | Oxidation (M)[1]  |      | Mascot      |

7 novel NACHT domain containing protein [Danio rerio] gi|157886383 55615.1 5.32 10 42 0



| Peptide Information |                  |         |       |            |             |                                  |           |       |                                           |      |             |
|---------------------|------------------|---------|-------|------------|-------------|----------------------------------|-----------|-------|-------------------------------------------|------|-------------|
| Calc. Mass          | Obsrv. Mass      | ± da    | ± ppm | Start Seq. | End Seq.    | Sequence                         | Ion Score | C. I. | % Modification                            | Rank | Result Type |
| 964.5284            | 964.4287         | -0.0997 | -103  | 410        | 417         | VAFQQLMK                         |           |       |                                           |      | Mascot      |
| 980.5233            | 980.4255         | -0.0978 | -100  | 410        | 417         | VAFQQLMK                         |           |       | Oxidation (M)[7]                          |      | Mascot      |
| 1077.5497           | 1077.5269        | -0.0228 | -21   | 398        | 406         | LTDEDMLK                         |           |       |                                           |      | Mascot      |
| 1139.4819           | 1139.5138        | 0.0319  | 28    | 39         | 48          | SSEPSCVSMR                       |           |       | Carbamidomethyl (C)[6]                    |      | Mascot      |
| 1280.5245           | 1280.6072        | 0.0827  | 65    | 3          | 13          | SDPEPSCVSMR                      |           |       | Carbamidomethyl (C)[7], Oxidation (M)[10] |      | Mascot      |
| 1322.5504           | 1322.6648        | 0.1144  | 86    | 14         | 24          | SDSMDQPMHFK                      |           |       |                                           |      | Mascot      |
| 1363.6094           | 1363.6885        | 0.0791  | 58    | 2          | 13          | RSDPEPSCVSMR                     |           |       |                                           |      | Mascot      |
| 1363.6094           | 1363.6885        | 0.0791  | 58    | 2          | 13          | RSDPEPSCVSMR                     |           |       |                                           |      | Mascot      |
| 1379.6042           | 1379.6506        | 0.0464  | 34    | 2          | 13          | RSDPEPSCVSMR                     |           |       | Oxidation (M)[11]                         |      | Mascot      |
| 1483.725            | 1483.6519        | -0.0731 | -49   | 234        | 245         | VLFIFDGLDECR                     |           |       | Carbamidomethyl (C)[11]                   |      | Mascot      |
| 2318.0791           | 2318.2329        | 0.1538  | 66    | 429        | 449         | ECGIDVAEASVYGLCTQ IFR            |           |       | Carbamidomethyl (C)[2]                    |      | Mascot      |
| 2661.2388           | 2661.2351        | -0.0037 | -1    | 49         | 72          | SDDES VHQLPHVKGSDT ETDL SHK      |           |       |                                           |      | Mascot      |
| 3364.7532           | 3364.6116        | -0.1416 | -42   | 361        | 389         | MLSEAETA EIPKTLTQMY THFLILQTN IK |           |       |                                           |      | Mascot      |
| 8                   | GR [Danio rerio] |         |       |            | qil68132008 | 35860.4                          | 9.13      | 11    | 42                                        | 0    |             |

| Peptide Information |                                                     |         |       |            |                                |           |         |                                              |        | Rank | Result Type |
|---------------------|-----------------------------------------------------|---------|-------|------------|--------------------------------|-----------|---------|----------------------------------------------|--------|------|-------------|
| Calc. Mass          | Obsrv. Mass                                         | ± da    | ± ppm | Start Seq. | End Sequence Seq.              | Ion Score | C. I. % | Modification                                 |        |      |             |
| 877.4083            | 877.423                                             | 0.0147  | 17    | 16         | 22 NDCIIDK                     |           |         | Carbamidomethyl (C)[3]                       | Mascot |      |             |
| 1045.5941           | 1045.5701                                           | -0.024  | -23   | 135        | 143 WAKALPGFR                  |           |         |                                              | Mascot |      |             |
| 1351.645            | 1351.7147                                           | 0.0697  | 52    | 302        | 313 SLSVEFPEMLAE               |           |         |                                              | Mascot |      |             |
| 1352.6483           | 1352.7048                                           | 0.0565  | 42    | 35         | 46 KCLMAGMNLEAR                |           |         | Oxidation (M)[4]                             | Mascot |      |             |
| 1352.6483           | 1352.7048                                           | 0.0565  | 42    | 36         | 47 CLMAGMNLEARK                |           |         | Oxidation (M)[3]                             | Mascot |      |             |
| 1474.6855           | 1474.6882                                           | 0.0027  | 2     | 3          | 15 AVEGQHNYLCAGR               |           |         | Carbamidomethyl (C)[10]                      | Mascot |      |             |
| 1658.7223           | 1658.9414                                           | 0.2191  | 132   | 194        | 206 LPYMSDQCEQMLK              |           |         | Carbamidomethyl (C)[8], Oxidation (M)[4]     | Mascot |      |             |
| 1658.7223           | 1658.9414                                           | 0.2191  | 132   | 194        | 206 LPYMSDQCEQMLK              |           |         | Carbamidomethyl (C)[8], Oxidation (M)[4]     | Mascot |      |             |
| 1860.8363           | 1860.9238                                           | 0.0875  | 47    | 192        | 206 MKLPYMSDQCEQMLK            |           |         | Oxidation (M)[1]                             | Mascot |      |             |
| 2284.0979           | 2284.2034                                           | 0.1055  | 46    | 96         | 116 AIEPDTLYAGYDSTIPDTS<br>VR  |           |         |                                              | Mascot |      |             |
| 2362.1416           | 2362.1172                                           | -0.0244 | -10   | 207        | 225 ISNEFVRLQVSTEEYLCM<br>K    |           |         | Carbamidomethyl (C)[17], Oxidation (M)[18]   | Mascot |      |             |
| 2683.1697           | 2683.2405                                           | 0.0708  | 26    | 170        | 191 SYQHCNGNMLCFAPDLV<br>INEER |           |         | Carbamidomethyl (C)[5, 11], Oxidation (M)[9] | Mascot |      |             |
| 9                   | novel NACHT domain containing protein [Danio rerio] |         |       |            | gi 157886384                   | 52335.5   | 5.14    | 10                                           | 42     | 0    |             |

### Peptide Information

| Calc. Mass | Obsrv. Mass | ± da    | ± ppm | Start Seq. | End Seq. | Sequence                          | Ion Score | C. I. | % Modification          | Rank | Result Type |
|------------|-------------|---------|-------|------------|----------|-----------------------------------|-----------|-------|-------------------------|------|-------------|
| 964.5284   | 964.4287    | -0.0997 | -103  | 412        | 419      | VAFQQLMK                          |           |       |                         |      | Mascot      |
| 980.5233   | 980.4255    | -0.0978 | -100  | 412        | 419      | VAFQQLMK                          |           |       | Oxidation (M)[7]        |      | Mascot      |
| 1077.5497  | 1077.5269   | -0.0228 | -21   | 400        | 408      | LTDEDMLK                          |           |       |                         |      | Mascot      |
| 1151.4819  | 1151.6522   | 0.1703  | 148   | 42         | 51       | EADPSCVSMR                        |           |       | Carbamidomethyl (C)[6]  |      | Mascot      |
| 1423.6886  | 1423.7625   | 0.0739  | 52    | 52         | 63       | SDTFMNQPINIK                      |           |       | Oxidation (M)[5]        |      | Mascot      |
| 1483.725   | 1483.6519   | -0.0731 | -49   | 236        | 247      | VLFIIDGLDECR                      |           |       | Carbamidomethyl (C)[11] |      | Mascot      |
| 1545.7842  | 1545.8455   | 0.0613  | 40    | 145        | 157      | CRDIFTPLPGQNK                     |           |       | Carbamidomethyl (C)[1]  |      | Mascot      |
| 1561.7275  | 1561.8402   | 0.1127  | 72    | 3          | 16       | SEPEPSCVSIRSDR                    |           |       |                         |      | Mascot      |
| 1658.7769  | 1658.9414   | 0.1645  | 99    | 26         | 39       | SEDQTHLSTFHQK                     |           |       |                         |      | Mascot      |
| 1658.7769  | 1658.9414   | 0.1645  | 99    | 26         | 39       | SEDQTHLSTFHQK                     |           |       |                         |      | Mascot      |
| 2318.0791  | 2318.2329   | 0.1538  | 66    | 431        | 451      | ECGIDVAEASVYSGLCTQ<br>IFR         |           |       | Carbamidomethyl (C)[2]  |      | Mascot      |
| 3364.7532  | 3364.6116   | -0.1416 | -42   | 363        | 391      | MLSEAETAIEPKLTQTMY<br>THFLILQTNIK |           |       |                         |      | Mascot      |

10 PREDICTED: copine-4-like [Danio rerio] gi|189530019 62246.7 5.53 11 39 0

### Peptide Information

| Calc. Mass | Obsrv. Mass | ± da    | ± ppm | Start Seq. | End Seq. | Sequence                   | Ion Score | C. I. | % Modification                           | Rank | Result Type |
|------------|-------------|---------|-------|------------|----------|----------------------------|-----------|-------|------------------------------------------|------|-------------|
| 996.4819   | 996.6053    | 0.1234  | 124   | 66         | 74       | SCINPTFSK                  |           |       |                                          |      | Mascot      |
| 1100.5345  | 1100.6183   | 0.0838  | 76    | 354        | 363      | MFPAFGFGAR                 |           |       |                                          |      | Mascot      |
| 1139.5731  | 1139.5138   | -0.0593 | -52   | 172        | 180      | SDPFLEIYR                  |           |       |                                          |      | Mascot      |
| 1363.6311  | 1363.6885   | 0.0574  | 42    | 417        | 428      | VANFASEEMHTK               |           |       |                                          |      | Mascot      |
| 1363.6311  | 1363.6885   | 0.0574  | 42    | 417        | 428      | VANFASEEMHTK               |           |       |                                          |      | Mascot      |
| 1379.626   | 1379.6506   | 0.0246  | 18    | 417        | 428      | VANFASEEMHTK               |           |       | Oxidation (M)[9]                         |      | Mascot      |
| 1483.6271  | 1483.6519   | 0.0248  | 17    | 541        | 553      | CPSEFESSRTFGH              |           |       |                                          |      | Mascot      |
| 1501.6852  | 1501.6599   | -0.0253 | -17   | 49         | 60       | MQSHGQWLEVDR               |           |       | Oxidation (M)[1]                         |      | Mascot      |
| 1501.6852  | 1501.6599   | -0.0253 | -17   | 49         | 60       | MQSHGQWLEVDR               |           |       | Oxidation (M)[1]                         |      | Mascot      |
| 1545.7729  | 1545.8455   | 0.0726  | 47    | 193        | 205      | TETVMNNLNPNVWK             |           |       |                                          |      | Mascot      |
| 1561.7679  | 1561.8402   | 0.0723  | 46    | 193        | 205      | TETVMNNLNPNVWK             |           |       | Oxidation (M)[5]                         |      | Mascot      |
| 1593.8417  | 1593.7393   | -0.1024 | -64   | 273        | 286      | NYKNSGIVILNQCK             |           |       |                                          |      | Mascot      |
| 1593.8417  | 1593.7393   | -0.1024 | -64   | 273        | 286      | NYKNSGIVILNQCK             |           |       |                                          |      | Mascot      |
| 1721.8315  | 1721.8103   | -0.0212 | -12   | 222        | 235      | ILKCTVWDWDSNGK             |           |       | Carbamidomethyl (C)[4]                   |      | Mascot      |
| 2225.0359  | 2225.1482   | 0.1123  | 50    | 104        | 123      | EADCLGAMECTLGQIVS<br>QRK   |           |       | Carbamidomethyl (C)[4], Oxidation (M)[8] |      | Mascot      |
| 2661.3149  | 2661.2351   | -0.0798 | -30   | 429        | 451      | EAMQYFILLITDGVITDM<br>ADTR |           |       | Oxidation (M)[3,19]                      |      | Mascot      |

11 PREDICTED: zinc finger protein 729-like [Danio rerio] gi|326665698 111881.8 9.22 19 38 0

Peptide Information

| Calc. Mass | Obsrv. Mass | ± da    | ± ppm | Start Seq. | End Seq. | Sequence                   | Ion Score | C. I. % | Modification               | Rank | Result Type |
|------------|-------------|---------|-------|------------|----------|----------------------------|-----------|---------|----------------------------|------|-------------|
| 882.4791   | 882.575     | 0.0959  | 109   | 858        | 864      | NLITHER                    |           |         |                            |      | Mascot      |
| 1064.6034  | 1064.5403   | -0.0631 | -59   | 694        | 702      | HMLIHTGKK                  |           |         |                            |      | Mascot      |
| 1100.5847  | 1100.6183   | 0.0336  | 31    | 638        | 646      | IHTGERPYK                  |           |         |                            |      | Mascot      |
| 1111.5854  | 1111.5952   | 0.0098  | 9     | 715        | 724      | LSSGLNDHLR                 |           |         |                            |      | Mascot      |
| 1263.502   | 1263.6631   | 0.1611  | 128   | 365        | 373      | EYVCFECEK                  |           |         | Carbamidomethyl (C)[4,7]   |      | Mascot      |
| 1263.502   | 1263.6631   | 0.1611  | 128   | 365        | 373      | EYVCFECEK                  |           |         | Carbamidomethyl (C)[4,7]   |      | Mascot      |
| 1322.7063  | 1322.6648   | -0.0415 | -31   | 955        | 965      | QVRFSQSETLK                |           |         |                            |      | Mascot      |
| 1352.5834  | 1352.7048   | 0.1214  | 90    | 703        | 714      | AHTCDQCGKSFR               |           |         |                            |      | Mascot      |
| 1352.5834  | 1352.7048   | 0.1214  | 90    | 703        | 714      | AHTCDQCGKSFR               |           |         |                            |      | Mascot      |
| 1379.5203  | 1379.6506   | 0.1303  | 94    | 16         | 27       | DSENMSDPEPCR               |           |         |                            |      | Mascot      |
| 1501.787   | 1501.6599   | -0.1271 | -85   | 712        | 724      | SFRLSSGLNDHLR              |           |         |                            |      | Mascot      |
| 1501.787   | 1501.6599   | -0.1271 | -85   | 712        | 724      | SFRLSSGLNDHLR              |           |         |                            |      | Mascot      |
| 1502.709   | 1502.7963   | 0.0873  | 58    | 527        | 540      | VHATEKPSCSVCVK             |           |         | Carbamidomethyl (C)[9]     |      | Mascot      |
| 1529.8435  | 1529.8517   | 0.0082  | 5     | 374        | 386      | TFITSGELKLHQR              |           |         |                            |      | Mascot      |
| 1545.7227  | 1545.8455   | 0.1228  | 79    | 346        | 358      | SFGRSSQHDHMK               |           |         | Oxidation (M)[12]          |      | Mascot      |
| 1658.886   | 1658.9414   | 0.0554  | 33    | 2          | 15       | QEYSHQAQVKSLLK             |           |         |                            |      | Mascot      |
| 1658.886   | 1658.9414   | 0.0554  | 33    | 2          | 15       | QEYSHQAQVKSLLK             |           |         |                            |      | Mascot      |
| 1737.8047  | 1737.8036   | -0.0011 | -1    | 554        | 568      | IHTGVREYVCSECGK            |           |         | Carbamidomethyl (C)[10]    |      | Mascot      |
| 1751.8315  | 1751.8743   | 0.0428  | 24    | 315        | 330      | CGKGFSQSSSLNLHMR           |           |         |                            |      | Mascot      |
| 1791.8629  | 1791.9619   | 0.099   | 55    | 303        | 317      | IHTGEKPFCTRCGK             |           |         | Carbamidomethyl (C)[10,13] |      | Mascot      |
| 1800.7437  | 1800.8799   | 0.1362  | 76    | 790        | 804      | CSHCDMRFSWLGCQK            |           |         |                            |      | Mascot      |
| 1807.8279  | 1807.9532   | 0.1253  | 69    | 958        | 972      | FSQSETLKNTQECHV            |           |         | Carbamidomethyl (C)[13]    |      | Mascot      |
| 1857.7651  | 1857.9545   | 0.1894  | 102   | 790        | 804      | CSHCDMRFSWLGCQK            |           |         | Carbamidomethyl (C)[1]     |      | Mascot      |
| 2545.2727  | 2545.3594   | 0.0867  | 34    | 318        | 339      | GFSQSSSLNLHMRIHTGE<br>KPFR |           |         | Oxidation (M)[12]          |      | Mascot      |
| 2545.2727  | 2545.3594   | 0.0867  | 34    | 318        | 339      | GFSQSSSLNLHMRIHTGE<br>KPFR |           |         | Oxidation (M)[12]          |      | Mascot      |

12 PREDICTED: protein NLRC3 [Danio rerio] gi|189529139 76683.4 5.89 11 38 0

Peptide Information

| Calc. Mass | Obsrv. Mass | ± da    | ± ppm | Start Seq. | End Seq. | Sequence | Ion Score | C. I. % | Modification     | Rank | Result Type |
|------------|-------------|---------|-------|------------|----------|----------|-----------|---------|------------------|------|-------------|
| 964.5284   | 964.4287    | -0.0997 | -103  | 431        | 438      | VAFQQLMK |           |         |                  |      | Mascot      |
| 980.5233   | 980.4255    | -0.0978 | -100  | 431        | 438      | VAFQQLMK |           |         | Oxidation (M)[7] |      | Mascot      |

|           |           |         |     |     |     |                                    |  |  |  |                                           |  |        |
|-----------|-----------|---------|-----|-----|-----|------------------------------------|--|--|--|-------------------------------------------|--|--------|
| 1077.5497 | 1077.5269 | -0.0228 | -21 | 419 | 427 | LTDEDMLK                           |  |  |  |                                           |  | Mascot |
| 1139.4819 | 1139.5138 | 0.0319  | 28  | 60  | 69  | SSEPSCVSMR                         |  |  |  | Carbamidomethyl (C)[6]                    |  | Mascot |
| 1280.5245 | 1280.6072 | 0.0827  | 65  | 24  | 34  | SDPEPSCVSMR                        |  |  |  | Carbamidomethyl (C)[7], Oxidation (M)[10] |  | Mascot |
| 1322.5504 | 1322.6648 | 0.1144  | 86  | 35  | 45  | SDSMDQPMHFK                        |  |  |  |                                           |  | Mascot |
| 1363.6094 | 1363.6885 | 0.0791  | 58  | 23  | 34  | RSDPEPSCVSMR                       |  |  |  |                                           |  | Mascot |
| 1363.6094 | 1363.6885 | 0.0791  | 58  | 23  | 34  | RSDPEPSCVSMR                       |  |  |  |                                           |  | Mascot |
| 1379.6042 | 1379.6506 | 0.0464  | 34  | 23  | 34  | RSDPEPSCVSMR                       |  |  |  | Oxidation (M)[11]                         |  | Mascot |
| 1483.725  | 1483.6519 | -0.0731 | -49 | 255 | 266 | VLFIIDGLDECR                       |  |  |  | Carbamidomethyl (C)[11]                   |  | Mascot |
| 1751.8599 | 1751.8743 | 0.0144  | 8   | 507 | 520 | DEFEQINKQSLWSK                     |  |  |  |                                           |  | Mascot |
| 2318.0791 | 2318.2329 | 0.1538  | 66  | 450 | 470 | ECGIDVAEASVYSGLTQ<br>IFR           |  |  |  | Carbamidomethyl (C)[2]                    |  | Mascot |
| 2661.2388 | 2661.2351 | -0.0037 | -1  | 70  | 93  | SDDESVDHQLHVKGSDT<br>ETDLSHK       |  |  |  |                                           |  | Mascot |
| 3364.7532 | 3364.6116 | -0.1416 | -42 | 382 | 410 | MLSEAETAIEIPKTLTQMY<br>THFLILQTNIK |  |  |  |                                           |  | Mascot |

13 DBF4 homolog [Danio rerio] gi|205830371 69253.7 9.28 12 38 0

#### Peptide Information

| Calc. Mass | Obsrv. Mass | ± da    | ± ppm | Start Seq. | End Seq. | Sequence                | Ion Score | C. I. | % Modification                            | Rank | Result Type |
|------------|-------------|---------|-------|------------|----------|-------------------------|-----------|-------|-------------------------------------------|------|-------------|
| 1045.4731  | 1045.5701   | 0.097   | 93    | 16         | 25       | LEGHNCASSK              |           |       |                                           |      | Mascot      |
| 1165.6034  | 1165.7551   | 0.1517  | 130   | 78         | 87       | YLVSCKEPAR              |           |       |                                           |      | Mascot      |
| 1275.5166  | 1275.6111   | 0.0945  | 74    | 290        | 300      | KGGYCECEVK              |           |       | Carbamidomethyl (C)[5]                    |      | Mascot      |
| 1280.6304  | 1280.6072   | -0.0232 | -18   | 30         | 40       | STCDLQNKPFK             |           |       |                                           |      | Mascot      |
| 1483.8156  | 1483.6519   | -0.1637 | -110  | 583        | 595      | SEKPPASLLDLWK           |           |       |                                           |      | Mascot      |
| 1501.7897  | 1501.6599   | -0.1298 | -86   | 164        | 176      | VLHVDDVISYVDK           |           |       |                                           |      | Mascot      |
| 1501.7897  | 1501.6599   | -0.1298 | -86   | 164        | 176      | VLHVDDVISYVDK           |           |       |                                           |      | Mascot      |
| 1593.8092  | 1593.7393   | -0.0699 | -44   | 554        | 567      | QKQVSASHIESSHR          |           |       |                                           |      | Mascot      |
| 1593.8092  | 1593.7393   | -0.0699 | -44   | 554        | 567      | QKQVSASHIESSHR          |           |       |                                           |      | Mascot      |
| 1658.8245  | 1658.9414   | 0.1169  | 70    | 190        | 204      | GAASIQHTEKNSYPR         |           |       |                                           |      | Mascot      |
| 1658.8245  | 1658.9414   | 0.1169  | 70    | 190        | 204      | GAASIQHTEKNSYPR         | 3         |       | 0                                         |      | Mascot      |
| 1721.7332  | 1721.8103   | 0.0771  | 45    | 291        | 305      | GGYCECEVKFENLK          |           |       |                                           |      | Mascot      |
| 1791.8979  | 1791.9619   | 0.064   | 36    | 328        | 344      | VTAGLTCDLVNISTPCK       |           |       | Carbamidomethyl (C)[7]                    |      | Mascot      |
| 1859.012   | 1858.9478   | -0.0642 | -35   | 54         | 70       | TQLLENDIKTLGGTVEK       |           |       |                                           |      | Mascot      |
| 2224.989   | 2225.1482   | 0.1592  | 72    | 241        | 259      | SFPPCSPFLMEEQGKDD<br>PK |           |       | Carbamidomethyl (C)[5], Oxidation (M)[10] |      | Mascot      |

14 novel protein similar to vertebrate beta-1,4-N-acetyl-galactosaminyl transferase 3 (B4GALNT3) [Dani] gi|220672916 50299.9 5.53 9 37 0

#### Peptide Information

|  | Calc. Mass | Obsrv. Mass | ± da    | ± ppm | Start Seq. | End Sequence Seq.              | Ion Score | C. I. % | Modification      | Rank | Result Type |
|--|------------|-------------|---------|-------|------------|--------------------------------|-----------|---------|-------------------|------|-------------|
|  | 964.4119   | 964.4287    | 0.0168  | 17    | 186        | 193 TDDWGSQR                   |           |         |                   |      | Mascot      |
|  | 1322.6368  | 1322.6648   | 0.028   | 21    | 366        | 377 SDLDRIGGMNTK               |           |         | Oxidation (M)[9]  |      | Mascot      |
|  | 1474.8013  | 1474.6882   | -0.1131 | -77   | 146        | 157 IVNVEKKPDYNR               |           |         |                   |      | Mascot      |
|  | 1545.7809  | 1545.8455   | 0.0646  | 42    | 276        | 287 YQYLRLSGNFER               |           |         |                   |      | Mascot      |
|  | 1658.9587  | 1658.9414   | -0.0173 | -10   | 394        | 407 ILQGGLEVERLYLR             |           |         |                   |      | Mascot      |
|  | 1658.9587  | 1658.9414   | -0.0173 | -10   | 394        | 407 ILQGGLEVERLYLR             |           |         |                   |      | Mascot      |
|  | 1791.96    | 1791.9619   | 0.0019  | 1     | 158        | 173 GSRYLLELDLLEASGR           |           |         |                   |      | Mascot      |
|  | 1857.9528  | 1857.9545   | 0.0017  | 1     | 94         | 108 LLDLHSMRSDWDLK             |           |         | Oxidation (M)[7]  |      | Mascot      |
|  | 1859.8997  | 1859.9314   | 0.0317  | 17    | 230        | 243 WVKQFISDMEEIYR             |           |         | Oxidation (M)[9]  |      | Mascot      |
|  | 1859.8997  | 1859.9314   | 0.0317  | 17    | 230        | 243 WVKQFISDMEEIYR             |           |         | Oxidation (M)[9]  |      | Mascot      |
|  | 2661.2585  | 2661.2351   | -0.0234 | -9    | 27         | 49 WGHANEDRNGVEKPIQD<br>NAMHVK |           |         | Oxidation (M)[20] |      | Mascot      |

15 novel protein similar to human and rodent member RAS gi|33468618 19809.1 6.58 6 37 0  
 oncogene family RAB7 (RAB7) [Danio rerio]

#### Peptide Information

|  | Calc. Mass | Obsrv. Mass | ± da    | ± ppm | Start Seq. | End Sequence Seq.                | Ion Score | C. I. % | Modification           | Rank | Result Type |
|--|------------|-------------|---------|-------|------------|----------------------------------|-----------|---------|------------------------|------|-------------|
|  | 1064.5986  | 1064.5403   | -0.0583 | -55   | 39         | 48 ATIGVDFLTK                    |           |         |                        |      | Mascot      |
|  | 1363.7117  | 1363.6885   | -0.0232 | -17   | 165        | 176 TFHSVARAALQY                 |           |         |                        |      | Mascot      |
|  | 1363.7117  | 1363.6885   | -0.0232 | -17   | 165        | 176 TFHSVARAALQY                 |           |         |                        |      | Mascot      |
|  | 1859.0061  | 1858.9478   | -0.0583 | -31   | 33         | 48 FTNLYRATIGVDFLTK              |           |         |                        |      | Mascot      |
|  | 2031.948   | 2032.0435   | 0.0955  | 47    | 140        | 157 AQKWCVDIGAIFYESSA<br>K       |           |         |                        |      | Mascot      |
|  | 2177.2078  | 2176.9849   | -0.2229 | -102  | 2          | 21 TEWNTPHLKLILIGNSGV<br>GK      |           |         |                        |      | Mascot      |
|  | 2683.2893  | 2683.2405   | -0.0488 | -18   | 81         | 104 GAHCCLLVFDVTSSVSFE<br>ALDVWK |           |         | Carbamidomethyl (C)[4] |      | Mascot      |

16 PREDICTED: hypothetical protein LOC100537292 gi|326672395 272747.6 8.49 22 37 0  
 [Danio rerio]

#### Peptide Information

|  | Calc. Mass | Obsrv. Mass | ± da    | ± ppm | Start Seq. | End Sequence Seq. | Ion Score | C. I. % | Modification | Rank | Result Type |
|--|------------|-------------|---------|-------|------------|-------------------|-----------|---------|--------------|------|-------------|
|  | 1045.5889  | 1045.5701   | -0.0188 | -18   | 755        | 763 ILIQNETSK     |           |         |              |      | Mascot      |
|  | 1064.4751  | 1064.5403   | 0.0652  | 61    | 232        | 241 MSCPDAAELK    |           |         |              |      | Mascot      |
|  | 1100.6058  | 1100.6183   | 0.0125  | 11    | 2252       | 2260 KVENVEQVR    |           |         |              |      | Mascot      |
|  | 1139.5803  | 1139.5138   | -0.0665 | -58   | 1247       | 1256 HNIDADVLSR   |           |         |              |      | Mascot      |
|  | 1275.582   | 1275.6111   | 0.0291  | 23    | 477        | 488 CGEEGHIA TKCK |           |         |              |      | Mascot      |

|           |                                        |         |      |              |      |                            |      |    |    |   |                                            |  |        |
|-----------|----------------------------------------|---------|------|--------------|------|----------------------------|------|----|----|---|--------------------------------------------|--|--------|
| 1352.6298 | 1352.7048                              | 0.075   | 55   | 391          | 402  | SNIASSMMIENR               |      |    |    |   |                                            |  | Mascot |
| 1352.6567 | 1352.7048                              | 0.0481  | 36   | 1082         | 1092 | SFLGFCGFYRR                |      |    |    |   |                                            |  | Mascot |
| 1474.7471 | 1474.6882                              | -0.0589 | -40  | 972          | 985  | MPQGITGAPATFQR             |      |    |    |   |                                            |  | Mascot |
| 1501.8295 | 1501.6599                              | -0.1696 | -113 | 1573         | 1586 | TLLSMLGTLEPAQK             |      |    |    |   |                                            |  | Mascot |
| 1501.8295 | 1501.6599                              | -0.1696 | -113 | 2046         | 2059 | TLLSMLGTLEPAQK             |      |    |    |   |                                            |  | Mascot |
| 1593.7577 | 1593.7393                              | -0.0184 | -12  | 1277         | 1290 | AICQLSNLSWSDEK             |      |    |    |   |                                            |  | Mascot |
| 1593.7908 | 1593.7393                              | -0.0515 | -32  | 824          | 837  | NVFSTQEWDVGLAK             |      |    |    |   |                                            |  | Mascot |
| 1658.707  | 1658.9414                              | 0.2344  | 141  | 199          | 211  | LMISECECSEKEK              |      |    |    |   | Carbamidomethyl (C)[6,8], Oxidation (M)[2] |  | Mascot |
| 1658.707  | 1658.9414                              | 0.2344  | 141  | 199          | 211  | LMISECECSEKEK              |      |    |    |   | Carbamidomethyl (C)[6,8], Oxidation (M)[2] |  | Mascot |
| 1716.9564 | 1717.0227                              | 0.0663  | 39   | 2046         | 2061 | TLLSMLGTLEPAQKSK           |      |    |    |   |                                            |  | Mascot |
| 1721.8857 | 1721.8103                              | -0.0754 | -44  | 823          | 837  | KNVFSTQEWDVGLAK            |      |    |    |   |                                            |  | Mascot |
| 1751.8058 | 1751.8743                              | 0.0685  | 39   | 1136         | 1149 | WDNACEQAFQEIIK             |      |    |    |   | Carbamidomethyl (C)[5]                     |  | Mascot |
| 1808.0792 | 1807.9532                              | -0.126  | -70  | 1390         | 1404 | VQLVLPEKYHLTVLR            |      |    |    |   |                                            |  | Mascot |
| 1860.8981 | 1860.9238                              | 0.0257  | 14   | 654          | 670  | MTNGEGTNITRSAHSLR          |      |    |    |   | Oxidation (M)[1]                           |  | Mascot |
| 2016.0198 | 2016.0427                              | 0.0229  | 11   | 1992         | 2008 | FFVHYGLPSRIHSDQGR          |      |    |    |   |                                            |  | Mascot |
| 2225.0479 | 2225.1482                              | 0.1003  | 45   | 1            | 18   | MSFRSDPQLQSELLEWC<br>R     |      |    |    |   |                                            |  | Mascot |
| 2233.168  | 2233.1099                              | -0.0581 | -26  | 304          | 322  | VEQLIRGAVESDMMLLQL<br>R    |      |    |    |   | Oxidation (M)[13,14]                       |  | Mascot |
| 2283.2244 | 2283.2114                              | -0.013  | -6   | 1199         | 1217 | LSASEQRYHIHQLEFLAL<br>K    |      |    |    |   |                                            |  | Mascot |
| 2379.1497 | 2379.3738                              | 0.2241  | 94   | 913          | 934  | TTPDQYVTPRIDDALDCL<br>AGSK |      |    |    |   |                                            |  | Mascot |
| 2379.1497 | 2379.3738                              | 0.2241  | 94   | 913          | 934  | TTPDQYVTPRIDDALDCL<br>AGSK |      |    |    |   |                                            |  | Mascot |
| 17        | PREDICTED: protein NLRC3 [Danio rerio] |         |      | gi 326674410 |      | 79200.8                    | 6.13 | 11 | 36 | 0 |                                            |  |        |

Peptide Information

| Calc. Mass | Obsrv. Mass | ± da    | ± ppm | Start Seq. | End Seq. | Sequence       | Ion Score | C. I. % | Modification            | Rank | Result | Type |
|------------|-------------|---------|-------|------------|----------|----------------|-----------|---------|-------------------------|------|--------|------|
| 964.5284   | 964.4287    | -0.0997 | -103  | 428        | 435      | VAFQQLMK       |           |         |                         |      | Mascot |      |
| 980.5233   | 980.4255    | -0.0978 | -100  | 428        | 435      | VAFQQLMK       |           |         | Oxidation (M)[7]        |      | Mascot |      |
| 1077.5497  | 1077.5269   | -0.0228 | -21   | 416        | 424      | LTDEDMLK       |           |         |                         |      | Mascot |      |
| 1151.4819  | 1151.6522   | 0.1703  | 148   | 58         | 67       | EADPSCVSMR     |           |         | Carbamidomethyl (C)[6]  |      | Mascot |      |
| 1423.6886  | 1423.7625   | 0.0739  | 52    | 68         | 79       | SDTFMNQPINIK   |           |         | Oxidation (M)[5]        |      | Mascot |      |
| 1483.725   | 1483.6519   | -0.0731 | -49   | 252        | 263      | VLFIFDGLDECR   |           |         | Carbamidomethyl (C)[11] |      | Mascot |      |
| 1545.7842  | 1545.8455   | 0.0613  | 40    | 161        | 173      | CRDIFTPLPGQNK  |           |         | Carbamidomethyl (C)[1]  |      | Mascot |      |
| 1561.7275  | 1561.8402   | 0.1127  | 72    | 19         | 32       | SEPEPSCVSIRSDR |           |         |                         |      | Mascot |      |
| 1658.7769  | 1658.9414   | 0.1645  | 99    | 42         | 55       | SEDQTHLSTFHQK  |           |         |                         |      | Mascot |      |
| 1658.7769  | 1658.9414   | 0.1645  | 99    | 42         | 55       | SEDQTHLSTFHQK  |           |         |                         |      | Mascot |      |

|    |                           |           |         |     |             |     |                                   |      |                         |        |   |
|----|---------------------------|-----------|---------|-----|-------------|-----|-----------------------------------|------|-------------------------|--------|---|
|    | 2211.0459                 | 2211.1294 | 0.0835  | 38  | 11          | 29  | VDSVHQERSEPEPSCVSI<br>R           |      | Carbamidomethyl (C)[15] | Mascot |   |
|    | 2211.0459                 | 2211.1294 | 0.0835  | 38  | 11          | 29  | VDSVHQERSEPEPSCVSI<br>R           |      | Carbamidomethyl (C)[15] | Mascot |   |
|    | 2318.0791                 | 2318.2329 | 0.1538  | 66  | 447         | 467 | ECGIDVAEASVYGLCTQ<br>IFR          |      | Carbamidomethyl (C)[2]  | Mascot |   |
|    | 3364.7532                 | 3364.6116 | -0.1416 | -42 | 379         | 407 | MLSEAETAIEPKTLTQMY<br>THFLILQTNIK |      |                         | Mascot |   |
| 18 | annexin A1b [Danio rerio] |           |         |     | gi 32308159 |     | 37416.3                           | 6.11 | 8                       | 36     | 0 |

#### Peptide Information

| Calc. Mass | Obsrv. Mass | ± da    | ± ppm | Start Seq. | End Seq. | Sequence                   | Ion Score | C. I. % | Modification            | Rank | Result Type |
|------------|-------------|---------|-------|------------|----------|----------------------------|-----------|---------|-------------------------|------|-------------|
| 1045.5061  | 1045.5701   | 0.064   | 61    | 201        | 209      | ALYEAGEHR                  |           |         |                         |      | Mascot      |
| 1064.5404  | 1064.5403   | -0.0001 | 0     | 141        | 149      | TNNEIKAMK                  |           |         | Oxidation (M)[8]        |      | Mascot      |
| 1275.5979  | 1275.6111   | 0.0132  | 10    | 1          | 10       | MAFFNSFFHK                 |           |         |                         |      | Mascot      |
| 1483.8478  | 1483.6519   | -0.1959 | -132  | 55         | 68       | GVDEAAIIEVLAKR             |           |         |                         |      | Mascot      |
| 1751.9075  | 1751.8743   | -0.0332 | -19   | 34         | 49       | FSQAFNAQNDAAVLKK           |           |         |                         |      | Mascot      |
| 1860.8915  | 1860.9238   | 0.0323  | 17    | 2          | 17       | AFFNSFFHKISEDGSK           |           |         |                         |      | Mascot      |
| 2177.127   | 2176.9849   | -0.1421 | -65   | 247        | 265      | ALESELHGHLEDCLLTIVK        |           |         | Carbamidomethyl (C)[13] |      | Mascot      |
| 2545.2273  | 2545.3594   | 0.1321  | 52    | 307        | 328      | IMQEYSTMQGQSLQAAI<br>QKETK |           |         | Oxidation (M)[2,8]      |      | Mascot      |
| 2545.2273  | 2545.3594   | 0.1321  | 52    | 307        | 328      | IMQEYSTMQGQSLQAAI<br>QKETK |           |         | Oxidation (M)[2,8]      |      | Mascot      |

|    |                                       |  |  |  |             |  |         |      |    |    |   |
|----|---------------------------------------|--|--|--|-------------|--|---------|------|----|----|---|
| 19 | glucocorticoid receptor [Danio rerio] |  |  |  | gi 99028943 |  | 81868.7 | 6.07 | 13 | 36 | 0 |
|----|---------------------------------------|--|--|--|-------------|--|---------|------|----|----|---|

#### Peptide Information

| Calc. Mass | Obsrv. Mass | ± da    | ± ppm | Start Seq. | End Seq. | Sequence                   | Ion Score | C. I. % | Modification                             | Rank | Result Type |
|------------|-------------|---------|-------|------------|----------|----------------------------|-----------|---------|------------------------------------------|------|-------------|
| 877.4083   | 877.423     | 0.0147  | 17    | 427        | 433      | NDCIIDK                    |           |         | Carbamidomethyl (C)[3]                   |      | Mascot      |
| 980.5047   | 980.4255    | -0.0792 | -81   | 16         | 23       | LNTLDYNK                   |           |         |                                          |      | Mascot      |
| 1045.5941  | 1045.5701   | -0.024  | -23   | 546        | 554      | WAKALPGFR                  |           |         |                                          |      | Mascot      |
| 1064.4677  | 1064.5403   | 0.0726  | 68    | 1          | 10       | MDQGGLENGK                 |           |         | Oxidation (M)[1]                         |      | Mascot      |
| 1352.6483  | 1352.7048   | 0.0565  | 42    | 446        | 457      | KCLMAGMNLEAR               |           |         | Oxidation (M)[4]                         |      | Mascot      |
| 1352.6483  | 1352.7048   | 0.0565  | 42    | 447        | 458      | CLMAGMNLEARK               |           |         | Oxidation (M)[3]                         |      | Mascot      |
| 1474.6855  | 1474.6882   | 0.0027  | 2     | 414        | 426      | AVEGQHNYLCAGR              |           |         | Carbamidomethyl (C)[10]                  |      | Mascot      |
| 1658.7223  | 1658.9414   | 0.2191  | 132   | 605        | 617      | LPYMSDQCEQMLK              |           |         | Carbamidomethyl (C)[8], Oxidation (M)[4] |      | Mascot      |
| 1658.7223  | 1658.9414   | 0.2191  | 132   | 605        | 617      | LPYMSDQCEQMLK              |           |         | Carbamidomethyl (C)[8], Oxidation (M)[4] |      | Mascot      |
| 1860.8363  | 1860.9238   | 0.0875  | 47    | 603        | 617      | MKLPYMSDQCEQMLK            |           |         | Oxidation (M)[1]                         |      | Mascot      |
| 2233.0002  | 2233.1099   | 0.1097  | 49    | 359        | 380      | NFSSSPYSRPEDSTATSS<br>AGGK |           |         |                                          |      | Mascot      |
| 2284.0979  | 2284.2034   | 0.1055  | 46    | 507        | 527      | AIEPDTLYAGYDSTIPDTS<br>VR  |           |         |                                          |      | Mascot      |

|    |                                          |           |         |     |              |     |                          |      |    |    |   |  |                                            |        |
|----|------------------------------------------|-----------|---------|-----|--------------|-----|--------------------------|------|----|----|---|--|--------------------------------------------|--------|
|    | 2362.1416                                | 2362.1172 | -0.0244 | -10 | 618          | 636 | ISNEFVRLQVSTEEYLCMK      |      |    |    |   |  | Carbamidomethyl (C)[17], Oxidation (M)[18] | Mascot |
|    | 2683.2014                                | 2683.2405 | 0.0391  | 15  | 144          | 167 | TEDFSPMIKGDMDLDQDSFGHIGK |      |    |    |   |  |                                            | Mascot |
| 20 | SHC-transforming protein 2 [Danio rerio] |           |         |     | gi 113678838 |     | 56008                    | 7.05 | 10 | 35 | 0 |  |                                            |        |

#### Peptide Information

| Calc. Mass | Obsrv. Mass | ± da    | ± ppm | Start Seq. | End Seq. | Sequence            | Ion Score | C. I. | % Modification                               | Rank | Result Type |
|------------|-------------|---------|-------|------------|----------|---------------------|-----------|-------|----------------------------------------------|------|-------------|
| 877.4811   | 877.423     | -0.0581 | -66   | 96         | 103      | TLQSIMGK            |           |       |                                              |      | Mascot      |
| 1111.5742  | 1111.5952   | 0.021   | 19    | 247        | 257      | EPPVGGVDSR          |           |       |                                              |      | Mascot      |
| 1352.728   | 1352.7048   | -0.0232 | -17   | 391        | 402      | RAPVAPTEDQLR        |           |       |                                              |      | Mascot      |
| 1352.728   | 1352.7048   | -0.0232 | -17   | 392        | 403      | APVAPTEDQLRR        |           |       |                                              |      | Mascot      |
| 1363.7362  | 1363.6885   | -0.0477 | -35   | 96         | 107      | TLQSIMGKSNLR        |           |       | Oxidation (M)[6]                             |      | Mascot      |
| 1363.7362  | 1363.6885   | -0.0477 | -35   | 96         | 107      | TLQSIMGKSNLR        |           |       | Oxidation (M)[6]                             |      | Mascot      |
| 1502.7164  | 1502.7963   | 0.0799  | 53    | 48         | 59       | YMGCIENVLKSMR       |           |       | Carbamidomethyl (C)[4], Oxidation (M)[2]     |      | Mascot      |
| 1518.7113  | 1518.7903   | 0.079   | 52    | 48         | 59       | YMGCIENVLKSMR       |           |       | Carbamidomethyl (C)[4], Oxidation (M)[2, 11] |      | Mascot      |
| 1529.774   | 1529.8517   | 0.0777  | 51    | 72         | 85       | EAINRLCESVPGGK      |           |       | Carbamidomethyl (C)[7]                       |      | Mascot      |
| 1768.8687  | 1768.8936   | 0.0249  | 14    | 357        | 370      | KDIFDMRPFEDALR      |           |       | Oxidation (M)[6]                             |      | Mascot      |
| 2177.0808  | 2176.9849   | -0.0959 | -44   | 371        | 389      | LHEASGVCVLEDKWPSPPR |           |       | Carbamidomethyl (C)[8]                       |      | Mascot      |
| 2284.1501  | 2284.2034   | 0.0533  | 23    | 203        | 222      | AIPAMDSHAEPNILSRNIR |           |       | Oxidation (M)[5]                             |      | Mascot      |

|    |                                            |  |  |  |              |  |       |      |    |    |   |  |  |  |
|----|--------------------------------------------|--|--|--|--------------|--|-------|------|----|----|---|--|--|--|
| 21 | glucocorticoid receptor beta [Danio rerio] |  |  |  | gi 151177061 |  | 80782 | 6.02 | 13 | 34 | 0 |  |  |  |
|----|--------------------------------------------|--|--|--|--------------|--|-------|------|----|----|---|--|--|--|

#### Peptide Information

| Calc. Mass | Obsrv. Mass | ± da    | ± ppm | Start Seq. | End Seq. | Sequence               | Ion Score | C. I. | % Modification                           | Rank | Result Type |
|------------|-------------|---------|-------|------------|----------|------------------------|-----------|-------|------------------------------------------|------|-------------|
| 877.4083   | 877.423     | 0.0147  | 17    | 427        | 433      | NDCIIDK                |           |       | Carbamidomethyl (C)[3]                   |      | Mascot      |
| 980.5047   | 980.4255    | -0.0792 | -81   | 16         | 23       | LNTLDYNK               |           |       |                                          |      | Mascot      |
| 1045.5941  | 1045.5701   | -0.024  | -23   | 546        | 554      | WAKALPGFR              |           |       |                                          |      | Mascot      |
| 1064.4677  | 1064.5403   | 0.0726  | 68    | 1          | 10       | MDQGGLENGK             |           |       | Oxidation (M)[1]                         |      | Mascot      |
| 1352.6483  | 1352.7048   | 0.0565  | 42    | 446        | 457      | KCLMAGMNLEAR           |           |       | Oxidation (M)[4]                         |      | Mascot      |
| 1352.6483  | 1352.7048   | 0.0565  | 42    | 447        | 458      | CLMAGMNLEARK           |           |       | Oxidation (M)[3]                         |      | Mascot      |
| 1474.6855  | 1474.6882   | 0.0027  | 2     | 414        | 426      | AVEGQHNYLCAGR          |           |       | Carbamidomethyl (C)[10]                  |      | Mascot      |
| 1658.7223  | 1658.9414   | 0.2191  | 132   | 605        | 617      | LPYMSDQCEQMLK          |           |       | Carbamidomethyl (C)[8], Oxidation (M)[4] |      | Mascot      |
| 1658.7223  | 1658.9414   | 0.2191  | 132   | 605        | 617      | LPYMSDQCEQMLK          |           |       | Carbamidomethyl (C)[8], Oxidation (M)[4] |      | Mascot      |
| 1860.8363  | 1860.9238   | 0.0875  | 47    | 603        | 617      | MKLPYMSDQCEQMLK        |           |       | Oxidation (M)[1]                         |      | Mascot      |
| 2233.0002  | 2233.1099   | 0.1097  | 49    | 359        | 380      | NFSSSPYSRPEDSTATSSAGGK |           |       |                                          |      | Mascot      |
| 2284.0979  | 2284.2034   | 0.1055  | 46    | 507        | 527      | AIEPDTLYAGYDSTIPDTSVR  |           |       |                                          |      | Mascot      |



|                     |                                              | 2362.1416  | 2362.1172   | -0.0244 | -10   | 618        | 636          | ISNEFVRLQVSTEEYLCMK      |           |       |    | Carbamidomethyl (C)[17], Oxidation (M)[18] | Mascot           |
|---------------------|----------------------------------------------|------------|-------------|---------|-------|------------|--------------|--------------------------|-----------|-------|----|--------------------------------------------|------------------|
|                     |                                              | 2683.2014  | 2683.2405   | 0.0391  | 15    | 144        | 167          | TEDFSPMIKGDMDLDQDSFGHIGK |           |       |    |                                            | Mascot           |
| 22                  | finTRIM family protein [Danio rerio]         |            |             |         |       |            | gi 208019329 | 6388.3                   | 6.95      | 4     | 34 | 0                                          |                  |
| Peptide Information |                                              |            |             |         |       |            |              |                          |           |       |    |                                            |                  |
|                     |                                              | Calc. Mass | Obsrv. Mass | ± da    | ± ppm | Start Seq. | End Seq.     | Sequence                 | Ion Score | C. I. | %  | Modification                               | Rank Result Type |
|                     |                                              | 1502.8247  | 1502.7963   | -0.0284 | -19   | 5          | 17           | NTMLAEVVQLKK             |           |       |    |                                            | Mascot           |
|                     |                                              | 1518.8196  | 1518.7903   | -0.0293 | -19   | 5          | 17           | NTMLAEVVQLKK             |           |       |    | Oxidation (M)[3]                           | Mascot           |
|                     |                                              | 1800.9888  | 1800.8799   | -0.1089 | -60   | 1          | 16           | ALNKNTMLAEVVQLK          |           |       |    |                                            | Mascot           |
|                     |                                              | 1859.012   | 1858.9478   | -0.0642 | -35   | 43         | 60           | QSPQVLSGVSELLSKSS        |           |       |    |                                            | Mascot           |
|                     |                                              | 2210.9441  | 2211.1294   | 0.1853  | 84    | 20         | 40           | HHTAAVPAGDGDVECDVCTEK    |           |       |    | Carbamidomethyl (C)[15]                    | Mascot           |
|                     |                                              | 2210.9441  | 2211.1294   | 0.1853  | 84    | 20         | 40           | HHTAAVPAGDGDVECDVCTEK    |           |       |    | Carbamidomethyl (C)[15]                    | Mascot           |
| 23                  | Nop56 protein [Danio rerio]                  |            |             |         |       |            | gi 34784843  | 52829.9                  | 9.07      | 9     | 34 | 0                                          |                  |
| Peptide Information |                                              |            |             |         |       |            |              |                          |           |       |    |                                            |                  |
|                     |                                              | Calc. Mass | Obsrv. Mass | ± da    | ± ppm | Start Seq. | End Seq.     | Sequence                 | Ion Score | C. I. | %  | Modification                               | Rank Result Type |
|                     |                                              | 964.5574   | 964.4287    | -0.1287 | -133  | 369        | 376          | ISRYLANK                 |           |       |    |                                            | Mascot           |
|                     |                                              | 980.5676   | 980.4255    | -0.1421 | -145  | 128        | 135          | LHFHSLVK                 |           |       |    |                                            | Mascot           |
|                     |                                              | 1045.571   | 1045.5701   | -0.0009 | -1    | 91         | 100          | KPMLGVSDAK               |           |       |    |                                            | Mascot           |
|                     |                                              | 1275.6943  | 1275.6111   | -0.0832 | -65   | 78         | 89           | LFLETNLPSGGK             |           |       |    |                                            | Mascot           |
|                     |                                              | 1751.9591  | 1751.8743   | -0.0848 | -48   | 349        | 364          | YGLIFHSTFIGRAAAK         |           |       |    |                                            | Mascot           |
|                     |                                              | 1808.0177  | 1807.9532   | -0.0645 | -36   | 128        | 144          | LHFHSLVKGLTAQAASK        |           |       |    |                                            | Mascot           |
|                     |                                              | 2016.0621  | 2016.0427   | -0.0194 | -10   | 136        | 155          | GLTAQAASKAQLGLGHSYSR     |           |       |    |                                            | Mascot           |
|                     |                                              | 2211.2358  | 2211.1294   | -0.1064 | -48   | 1          | 20           | MVLLHVLFEHAAGYALLAVK     |           |       |    | Oxidation (M)[1]                           | Mascot           |
|                     |                                              | 2211.2358  | 2211.1294   | -0.1064 | -48   | 1          | 20           | MVLLHVLFEHAAGYALLAVK     |           |       |    | Oxidation (M)[1]                           | Mascot           |
|                     |                                              | 2362.0347  | 2362.1172   | 0.0825  | 35    | 222        | 241          | KELSEEMLEAMEEITMDSAK     |           |       |    | Oxidation (M)[7,11,16]                     | Mascot           |
| 24                  | hypothetical protein LOC494576 [Danio rerio] |            |             |         |       |            | gi 61806526  | 23120.7                  | 8.19      | 6     | 33 | 0                                          |                  |
| Peptide Information |                                              |            |             |         |       |            |              |                          |           |       |    |                                            |                  |
|                     |                                              | Calc. Mass | Obsrv. Mass | ± da    | ± ppm | Start Seq. | End Seq.     | Sequence                 | Ion Score | C. I. | %  | Modification                               | Rank Result Type |
|                     |                                              | 1064.5986  | 1064.5403   | -0.0583 | -55   | 39         | 48           | ATIGVDFTLK               |           |       |    |                                            | Mascot           |
|                     |                                              | 1545.7656  | 1545.8455   | 0.0799  | 52    | 157        | 170          | EDIGVDKTFHSAAR           |           |       |    |                                            | Mascot           |
|                     |                                              | 1859.0061  | 1858.9478   | -0.0583 | -31   | 33         | 48           | FTNLYRATIGVDFTLK         |           |       |    |                                            | Mascot           |

|    |                                                                                                     |           |         |      |     |     |                              |      |   |    |                        |  |  |        |
|----|-----------------------------------------------------------------------------------------------------|-----------|---------|------|-----|-----|------------------------------|------|---|----|------------------------|--|--|--------|
|    | 2031.948                                                                                            | 2032.0435 | 0.0955  | 47   | 139 | 156 | AQKWCVDIGAIFYESSA<br>K       |      |   |    |                        |  |  | Mascot |
|    | 2177.2078                                                                                           | 2176.9849 | -0.2229 | -102 | 2   | 21  | TEWNTPHLKLILIGNSGV<br>GK     |      |   |    |                        |  |  | Mascot |
|    | 2683.2893                                                                                           | 2683.2405 | -0.0488 | -18  | 80  | 103 | GAHCCLLVFDVTSSVSFE<br>ALDVWK |      |   |    | Carbamidomethyl (C)[4] |  |  | Mascot |
| 25 | novel protein similar to BCL2-related ovarian killer (bok, gi 169154887<br>zgc:64041) [Danio rerio] |           |         |      |     |     | 24238.7                      | 7.71 | 7 | 33 | 0                      |  |  |        |

#### Peptide Information

| Calc. Mass | Obsrv. Mass | ± da    | ± ppm | Start Seq. | End Seq. | Sequence         | Ion Score | C. I. | % Modification         | Rank | Result Type |
|------------|-------------|---------|-------|------------|----------|------------------|-----------|-------|------------------------|------|-------------|
| 842.5134   | 842.5162    | 0.0028  | 3     | 164        | 170      | SLVPWLK          |           |       |                        |      | Mascot      |
| 980.4288   | 980.4255    | -0.0033 | -3    | 181        | 188      | CVVNMDSR         |           |       | Carbamidomethyl (C)[1] |      | Mascot      |
| 1139.5449  | 1139.5138   | -0.0311 | -27   | 1          | 9        | MRDMNVFAR        |           |       |                        |      | Mascot      |
| 1275.6262  | 1275.6111   | -0.0151 | -12   | 36         | 45       | ELCRDFIHSR       |           |       |                        |      | Mascot      |
| 1351.7039  | 1351.7147   | 0.0108  | 8     | 29         | 39       | ELVFQSKELCR      |           |       |                        |      | Mascot      |
| 1791.8881  | 1791.9619   | 0.0738  | 41    | 173        | 188      | GGWVDILKCVVNMDSR |           |       |                        |      | Mascot      |
| 1800.8407  | 1800.8799   | 0.0392  | 22    | 77         | 90       | LGDELECMRPYVYR   |           |       | Carbamidomethyl (C)[7] |      | Mascot      |
| 1807.8829  | 1807.9532   | 0.0703  | 39    | 173        | 188      | GGWVDILKCVVNMDSR |           |       | Oxidation (M)[13]      |      | Mascot      |

|    |                                    |  |  |  |  |  |             |         |      |   |    |   |  |  |
|----|------------------------------------|--|--|--|--|--|-------------|---------|------|---|----|---|--|--|
| 26 | nucleolar protein 56 [Danio rerio] |  |  |  |  |  | gi 41054986 | 54124.7 | 9.27 | 9 | 33 | 0 |  |  |
|----|------------------------------------|--|--|--|--|--|-------------|---------|------|---|----|---|--|--|

#### Peptide Information

| Calc. Mass | Obsrv. Mass | ± da    | ± ppm | Start Seq. | End Seq. | Sequence                 | Ion Score | C. I. | % Modification         | Rank | Result Type |
|------------|-------------|---------|-------|------------|----------|--------------------------|-----------|-------|------------------------|------|-------------|
| 964.5574   | 964.4287    | -0.1287 | -133  | 369        | 376      | ISRYLANK                 |           |       |                        |      | Mascot      |
| 980.5676   | 980.4255    | -0.1421 | -145  | 128        | 135      | LHFHSLVK                 |           |       |                        |      | Mascot      |
| 1045.571   | 1045.5701   | -0.0009 | -1    | 91         | 100      | KPMLGVSDAK               |           |       |                        |      | Mascot      |
| 1275.6943  | 1275.6111   | -0.0832 | -65   | 78         | 89       | LFLETNLPSSGK             |           |       |                        |      | Mascot      |
| 1751.9591  | 1751.8743   | -0.0848 | -48   | 349        | 364      | YGLIFHSTFIGRAAAK         |           |       |                        |      | Mascot      |
| 1808.0177  | 1807.9532   | -0.0645 | -36   | 128        | 144      | LHFHSLVKGLTAQAASK        |           |       |                        |      | Mascot      |
| 2016.0621  | 2016.0427   | -0.0194 | -10   | 136        | 155      | GLTAQAASKAQLGLGHS<br>YSR |           |       |                        |      | Mascot      |
| 2211.2358  | 2211.1294   | -0.1064 | -48   | 1          | 20       | MVLLHVLFEHAAGYALLA<br>VK |           |       | Oxidation (M)[1]       |      | Mascot      |
| 2211.2358  | 2211.1294   | -0.1064 | -48   | 1          | 20       | MVLLHVLFEHAAGYALLA<br>VK |           |       | Oxidation (M)[1]       |      | Mascot      |
| 2362.0347  | 2362.1172   | 0.0825  | 35    | 222        | 241      | KELSEEMLEAMEEITMDS<br>AK |           |       | Oxidation (M)[7,11,16] |      | Mascot      |

|    |                                          |  |  |  |  |  |             |         |      |   |    |   |  |  |
|----|------------------------------------------|--|--|--|--|--|-------------|---------|------|---|----|---|--|--|
| 27 | pyruvate carboxylase, like [Danio rerio] |  |  |  |  |  | gi 83415094 | 24854.1 | 9.35 | 7 | 33 | 0 |  |  |
|----|------------------------------------------|--|--|--|--|--|-------------|---------|------|---|----|---|--|--|

#### Peptide Information

| Calc. Mass | Obsrv. Mass | ± da | ± ppm | Start | End | Sequence | Ion | C. I. | % Modification | Rank | Result Type |
|------------|-------------|------|-------|-------|-----|----------|-----|-------|----------------|------|-------------|
|------------|-------------|------|-------|-------|-----|----------|-----|-------|----------------|------|-------------|

| Seq.      |                            |         |     | Seq.        |     | Score             |      |                        |        |   |
|-----------|----------------------------|---------|-----|-------------|-----|-------------------|------|------------------------|--------|---|
| 1100.6099 | 1100.6183                  | 0.0084  | 8   | 140         | 149 | FIGPTPDVVR        |      |                        | Mascot |   |
| 1322.6157 | 1322.6648                  | 0.0491  | 37  | 127         | 139 | ADFAQACVDAGVR     |      |                        | Mascot |   |
| 1379.6372 | 1379.6506                  | 0.0134  | 10  | 127         | 139 | ADFAQACVDAGVR     |      | Carbamidomethyl (C)[7] | Mascot |   |
| 1717.0046 | 1717.0227                  | 0.0181  | 11  | 91          | 106 | GLPPVAAYLHIPDIIK  |      |                        | Mascot |   |
| 1721.7911 | 1721.8103                  | 0.0192  | 11  | 65          | 79  | TVAVYSEQDTGQMHR   |      |                        | Mascot |   |
| 1737.7861 | 1737.8036                  | 0.0175  | 10  | 65          | 79  | TVAVYSEQDTGQMHR   |      | Oxidation (M)[13]      | Mascot |   |
| 1792.0374 | 1791.9619                  | -0.0755 | -42 | 2           | 18  | LLQVGGRHSALGLLAMR |      |                        | Mascot |   |
| 1808.0322 | 1807.9532                  | -0.079  | -44 | 2           | 18  | LLQVGGRHSALGLLAMR |      | Oxidation (M)[16]      | Mascot |   |
| 1860.8875 | 1860.9238                  | 0.0363  | 20  | 110         | 126 | ANDVDAIHPGYGFLSER |      |                        | Mascot |   |
| 1993.9396 | 1994.0005                  | 0.0609  | 31  | 65          | 81  | TVAVYSEQDTGQMHRQK |      | Oxidation (M)[13]      | Mascot |   |
| 28        | keratin-like [Danio rerio] |         |     | gi 41055898 |     | 44743.4           | 4.87 | 8                      | 33     | 0 |

#### Peptide Information

| Calc. Mass | Obsrv. Mass | ± da    | ± ppm | Start Seq. | End Seq. | Sequence                      | Ion Score | C. I. | % Modification        | Rank | Result Type |
|------------|-------------|---------|-------|------------|----------|-------------------------------|-----------|-------|-----------------------|------|-------------|
| 1064.5623  | 1064.5403   | -0.022  | -21   | 390        | 398      | KLLDGEDFK                     |           |       |                       |      | Mascot      |
| 1423.6482  | 1423.7625   | 0.1143  | 80    | 334        | 345      | NTEIRSNNGEMEK                 |           |       | Oxidation (M)[10]     |      | Mascot      |
| 1474.5607  | 1474.6882   | 0.1275  | 86    | 250        | 261      | GQDMSQVMEDMR                  |           |       | Oxidation (M)[4,8,11] |      | Mascot      |
| 1483.7322  | 1483.6519   | -0.0803 | -54   | 36         | 49       | ISSASAMSYRSAPR                |           |       |                       |      | Mascot      |
| 1858.0181  | 1857.9545   | -0.0636 | -34   | 158        | 173      | LVLQIDNARLAVDDFR              |           |       |                       |      | Mascot      |
| 2031.8569  | 2032.0435   | 0.1866  | 92    | 250        | 266      | GQDMSQVMEDMRANYE K            |           |       |                       |      | Mascot      |
| 2211.0784  | 2211.1294   | 0.051   | 23    | 362        | 380      | ANITEQQQEYEALLNMK MK          |           |       |                       |      | Mascot      |
| 2211.0784  | 2211.1294   | 0.051   | 23    | 362        | 380      | ANITEQQQEYEALLNMK MK          |           |       |                       |      | Mascot      |
| 2545.1504  | 2545.3594   | 0.209   | 82    | 61         | 89       | VSSAGMGSGAGGSLLAS SGSSGMLGNEK |           |       | Oxidation (M)[6,24]   |      | Mascot      |
| 2545.1504  | 2545.3594   | 0.209   | 82    | 61         | 89       | VSSAGMGSGAGGSLLAS SGSSGMLGNEK |           |       | Oxidation (M)[6,24]   |      | Mascot      |

29 Zgc:109744 [Danio rerio] gi|71534073 88043.4 5.85 11 33 0

#### Peptide Information

| Calc. Mass | Obsrv. Mass | ± da   | ± ppm | Start Seq. | End Seq. | Sequence    | Ion Score | C. I. | % Modification         | Rank | Result Type |
|------------|-------------|--------|-------|------------|----------|-------------|-----------|-------|------------------------|------|-------------|
| 1045.6041  | 1045.5701   | -0.034 | -33   | 489        | 497      | IPSSLPIYR   |           |       |                        |      | Mascot      |
| 1064.5121  | 1064.5403   | 0.0282 | 26    | 582        | 589      | YIFCLYDK    |           |       |                        |      | Mascot      |
| 1151.5361  | 1151.6522   | 0.1161 | 101   | 590        | 599      | LLECSQDTSR  |           |       |                        |      | Mascot      |
| 1164.5314  | 1164.5923   | 0.0609 | 52    | 707        | 717      | AVNQTEGCASK |           |       | Carbamidomethyl (C)[8] |      | Mascot      |

|    |                                              |           |         |     |             |     |                                      |      |   |                        |   |  |  |  |  |  |        |
|----|----------------------------------------------|-----------|---------|-----|-------------|-----|--------------------------------------|------|---|------------------------|---|--|--|--|--|--|--------|
|    | 1351.6488                                    | 1351.7147 | 0.0659  | 49  | 629         | 640 | DNADNQYGTLLK                         |      |   |                        |   |  |  |  |  |  | Mascot |
|    | 1363.7303                                    | 1363.6885 | -0.0418 | -31 | 478         | 487 | RLWLAFCLE                            | 1    | 0 | Carbamidomethyl (C)[7] |   |  |  |  |  |  | Mascot |
|    | 1363.7303                                    | 1363.6885 | -0.0418 | -31 | 478         | 487 | RLWLAFCLE                            |      |   | Carbamidomethyl (C)[7] |   |  |  |  |  |  | Mascot |
|    | 1751.8282                                    | 1751.8743 | 0.0461  | 26  | 287         | 300 | HEPMQHEPKQHEPK                       |      |   |                        |   |  |  |  |  |  | Mascot |
|    | 1857.9891                                    | 1857.9545 | -0.0346 | -19 | 362         | 377 | VVSLDLLQNHFNAMLK                     |      |   | Oxidation (M)[14]      |   |  |  |  |  |  | Mascot |
|    | 2016.0073                                    | 2016.0427 | 0.0354  | 18  | 62          | 77  | EEQDVSWVDLIQWLQK                     |      |   |                        |   |  |  |  |  |  | Mascot |
|    | 2318.0249                                    | 2318.2329 | 0.208   | 90  | 458         | 477 | YINMASEMLCPSDVTNP<br>NYR             |      |   |                        |   |  |  |  |  |  | Mascot |
|    | 3364.6729                                    | 3364.6116 | -0.0613 | -18 | 330         | 361 | TDTGDNVTLLDIAVLSWQ<br>KMAGIYGGPNEAAK |      |   | Oxidation (M)[20]      |   |  |  |  |  |  | Mascot |
| 30 | hypothetical protein LOC550535 [Danio rerio] |           |         |     | gi 62955647 |     | 31091                                | 4.83 | 7 | 33                     | 0 |  |  |  |  |  |        |

#### Peptide Information

| Calc. Mass | Obsrv. Mass | ± da    | ± ppm | Start Seq. | End Seq. | Sequence               | Ion Score | C. I. | % Modification         | Rank | Result Type |
|------------|-------------|---------|-------|------------|----------|------------------------|-----------|-------|------------------------|------|-------------|
| 1280.6229  | 1280.6072   | -0.0157 | -12   | 75         | 84       | DEVIYERNR              |           |       |                        |      | Mascot      |
| 1316.594   | 1316.6786   | 0.0846  | 64    | 65         | 74       | NELECAVYYR             |           |       | Carbamidomethyl (C)[5] |      | Mascot      |
| 1322.6812  | 1322.6648   | -0.0164 | -12   | 82         | 93       | NSRFGVEGTLSR           |           |       |                        |      | Mascot      |
| 1352.6627  | 1352.7048   | 0.0421  | 31    | 136        | 147      | CDFLLDASQGKR           |           |       |                        |      | Mascot      |
| 1352.6627  | 1352.7048   | 0.0421  | 31    | 136        | 147      | CDFLLDASQGKR           |           |       |                        |      | Mascot      |
| 1518.6616  | 1518.7903   | 0.1287  | 85    | 184        | 196      | NSECFAAWCRFGK          |           |       |                        |      | Mascot      |
| 1737.8475  | 1737.8036   | -0.0439 | -25   | 132        | 146      | NEIKCDFLLDASQGK        |           |       | Carbamidomethyl (C)[5] |      | Mascot      |
| 1859.9531  | 1859.9314   | -0.0217 | -12   | 159        | 176      | ALSSDAVVQNAMEQVGL<br>K |           |       |                        |      | Mascot      |
| 1859.9531  | 1859.9314   | -0.0217 | -12   | 159        | 176      | ALSSDAVVQNAMEQVGL<br>K |           |       |                        |      | Mascot      |

31 PREDICTED: vacuolar protein sorting-associated protein 41 homolog [Danio rerio]

gi|125853163 99028.4 5.84 14 33 0

#### Peptide Information

| Calc. Mass | Obsrv. Mass | ± da    | ± ppm | Start Seq. | End Seq. | Sequence    | Ion Score | C. I. | % Modification         | Rank | Result Type |
|------------|-------------|---------|-------|------------|----------|-------------|-----------|-------|------------------------|------|-------------|
| 877.5141   | 877.423     | -0.0911 | -104  | 527        | 533      | ALEIYLR     |           |       |                        |      | Mascot      |
| 996.4744   | 996.6053    | 0.1309  | 131   | 409        | 417      | GDYDTAARK   |           |       |                        |      | Mascot      |
| 1045.5272  | 1045.5701   | 0.0429  | 41    | 2          | 10       | AEVEEQGRK   |           |       |                        |      | Mascot      |
| 1064.4677  | 1064.5403   | 0.0726  | 68    | 1          | 9        | MAVEEQGR    |           |       | Oxidation (M)[1]       |      | Mascot      |
| 1095.4636  | 1095.5372   | 0.0736  | 67    | 326        | 333      | NFQENQCR    |           |       | Carbamidomethyl (C)[7] |      | Mascot      |
| 1280.7109  | 1280.6072   | -0.1037 | -81   | 536        | 545      | HKDVYQLIHK  |           |       |                        |      | Mascot      |
| 1316.6263  | 1316.6786   | 0.0523  | 40    | 247        | 257      | DPTEMRDLP   |           |       |                        |      | Mascot      |
| 1352.713   | 1352.7048   | -0.0082 | -6    | 554        | 564      | DKIVLLMDFDK |           |       | Oxidation (M)[7]       |      | Mascot      |
| 1352.713   | 1352.7048   | -0.0082 | -6    | 554        | 564      | DKIVLLMDFDK |           |       | Oxidation (M)[7]       |      | Mascot      |

|           |           |         |     |     |     |                     |        |
|-----------|-----------|---------|-----|-----|-----|---------------------|--------|
| 1474.8264 | 1474.6882 | -0.1382 | -94 | 67  | 79  | VFLLDIQGNVTQK       | Mascot |
| 1501.7242 | 1501.6599 | -0.0643 | -43 | 375 | 387 | YEEALMAAEISFK       | Mascot |
| 1501.7242 | 1501.6599 | -0.0643 | -43 | 375 | 387 | YEEALMAAEISFK       | Mascot |
| 1529.655  | 1529.8517 | 0.1967  | 129 | 326 | 336 | NFQENQCRDYR         | Mascot |
| 1751.9949 | 1751.8743 | -0.1206 | -69 | 763 | 777 | ILVADSLSLLQRMHR     | Mascot |
| 1859.0248 | 1858.9478 | -0.077  | -41 | 456 | 470 | LRPAIYEMILHDFLK     | Mascot |
| 2283.1292 | 2283.2114 | 0.0822  | 36  | 334 | 352 | DYRLEHSEGESLFYIISPK | Mascot |

### Peptide Information

|    |                                  |              |         |      |   |    |   |
|----|----------------------------------|--------------|---------|------|---|----|---|
| 33 | Wu:fa07b03 protein [Danio rerio] | gi 112419196 | 32306.1 | 8.35 | 7 | 33 | 0 |
|----|----------------------------------|--------------|---------|------|---|----|---|

| Calc. Mass | Obsrv. Mass | ± da | ± ppm | Start Seq. | End Sequence Seq. | Ion Score | C. I. % Modification | Rank | Result Type |
|------------|-------------|------|-------|------------|-------------------|-----------|----------------------|------|-------------|
|------------|-------------|------|-------|------------|-------------------|-----------|----------------------|------|-------------|

|           |           |         |      |     |     |                          |  |  |  |                        |  |        |
|-----------|-----------|---------|------|-----|-----|--------------------------|--|--|--|------------------------|--|--------|
| 1139.6418 | 1139.5138 | -0.128  | -112 | 108 | 118 | TGAHIELSLAK              |  |  |  |                        |  | Mascot |
| 1151.5878 | 1151.6522 | 0.0644  | 56   | 220 | 228 | AVERLCFEK                |  |  |  | Carbamidomethyl (C)[6] |  | Mascot |
| 1164.5929 | 1164.5923 | -0.0006 | -1   | 119 | 129 | DQGLSIMVTGK              |  |  |  | Oxidation (M)[7]       |  | Mascot |
| 1363.6906 | 1363.6885 | -0.0021 | -2   | 229 | 240 | AFHPFIAGAYNR             |  |  |  |                        |  | Mascot |
| 1363.6906 | 1363.6885 | -0.0021 | -2   | 229 | 240 | AFHPFIAGAYNR             |  |  |  |                        |  | Mascot |
| 1501.7605 | 1501.6599 | -0.1006 | -67  | 186 | 199 | SDDPNANIRITGTK           |  |  |  |                        |  | Mascot |
| 1501.7605 | 1501.6599 | -0.1006 | -67  | 186 | 199 | SDDPNANIRITGTK           |  |  |  |                        |  | Mascot |
| 1791.8694 | 1791.9619 | 0.0925  | 52   | 1   | 16  | MSSVAVLTQESFAEHR         |  |  |  |                        |  | Mascot |
| 1807.8643 | 1807.9532 | 0.0889  | 49   | 1   | 16  | MSSVAVLTQESFAEHR         |  |  |  | Oxidation (M)[1]       |  | Mascot |
| 2177.1018 | 2176.9849 | -0.1169 | -54  | 1   | 20  | MSSVAVLTQESFAEHRS<br>GLK |  |  |  |                        |  | Mascot |

34 intraflagellar transport protein 172 homolog [Danio rerio] gi|50539690 197598.9 5.6 19 33 0

#### Peptide Information

| Calc. Mass | Obsrv. Mass | ± da    | ± ppm | Start Seq. | End Seq. | Sequence        | Ion Score | C. I. % | Modification           | Rank | Result Type |
|------------|-------------|---------|-------|------------|----------|-----------------|-----------|---------|------------------------|------|-------------|
| 877.46     | 877.423     | -0.037  | -42   | 782        | 789      | AAWLAMSK        |           |         |                        |      | Mascot      |
| 882.4501   | 882.575     | 0.1249  | 142   | 828        | 834      | ALECYRK         |           |         |                        |      | Mascot      |
| 1064.5483  | 1064.5403   | -0.008  | -8    | 815        | 823      | AGDLFERTR       |           |         |                        |      | Mascot      |
| 1095.5867  | 1095.5372   | -0.0495 | -45   | 1291       | 1299     | AVDCYLKVK       |           |         | Carbamidomethyl (C)[4] |      | Mascot      |
| 1139.4899  | 1139.5138   | 0.0239  | 21    | 1489       | 1497     | DRDCAEAFR       |           |         | Carbamidomethyl (C)[4] |      | Mascot      |
| 1165.6034  | 1165.7551   | 0.1517  | 130   | 1480       | 1488     | MFQELVNLR       |           |         | Oxidation (M)[1]       |      | Mascot      |
| 1263.6588  | 1263.6631   | 0.0043  | 3     | 1310       | 1320     | CWMKAAELAİK     |           |         |                        |      | Mascot      |
| 1263.6588  | 1263.6631   | 0.0043  | 3     | 1310       | 1320     | CWMKAAELAİK     |           |         |                        |      | Mascot      |
| 1275.6692  | 1275.6111   | -0.0581 | -46   | 51         | 61       | DRFTTKPADPK     |           |         |                        |      | Mascot      |
| 1351.7368  | 1351.7147   | -0.0221 | -16   | 1215       | 1225     | EFQKAEALLR      |           |         |                        |      | Mascot      |
| 1352.7208  | 1352.7048   | -0.016  | -12   | 53         | 64       | FTTKPADPKYK     |           |         |                        |      | Mascot      |
| 1352.7208  | 1352.7048   | -0.016  | -12   | 53         | 64       | FTTKPADPKYK     |           |         |                        |      | Mascot      |
| 1363.6675  | 1363.6885   | 0.021   | 15    | 1643       | 1653     | EWVLTVSMDQR     |           |         |                        |      | Mascot      |
| 1363.6675  | 1363.6885   | 0.021   | 15    | 1643       | 1653     | EWVLTVSMDQR     |           |         |                        |      | Mascot      |
| 1379.6624  | 1379.6506   | -0.0118 | -9    | 1643       | 1653     | EWVLTVSMDQR     |           |         | Oxidation (M)[8]       |      | Mascot      |
| 1474.8086  | 1474.6882   | -0.1204 | -82   | 1679       | 1691     | SLPCVITGYPVLR   |           |         | Carbamidomethyl (C)[4] |      | Mascot      |
| 1502.7169  | 1502.7963   | 0.0794  | 53    | 1698       | 1710     | RPGMAANKDDWNK   |           |         |                        |      | Mascot      |
| 1518.7118  | 1518.7903   | 0.0785  | 52    | 1698       | 1710     | RPGMAANKDDWNK   |           |         | Oxidation (M)[4]       |      | Mascot      |
| 1529.6545  | 1529.8517   | 0.1972  | 129   | 1238       | 1250     | DAGMWTAMDARICK  |           |         | Oxidation (M)[4,9]     |      | Mascot      |
| 1658.9159  | 1658.9414   | 0.0255  | 15    | 1168       | 1182     | AGKPKEAVLMHVHNK |           |         |                        |      | Mascot      |
| 1658.9159  | 1658.9414   | 0.0255  | 15    | 1168       | 1182     | AGKPKEAVLMHVHNK |           |         |                        |      | Mascot      |

|    |                                              |           |         |     |             |      |                               |      |                                          |        |   |
|----|----------------------------------------------|-----------|---------|-----|-------------|------|-------------------------------|------|------------------------------------------|--------|---|
|    | 1716.9465                                    | 1717.0227 | 0.0762  | 44  | 1679        | 1693 | SLPCVITGYPVLRNK               |      | Carbamidomethyl (C)[4]                   | Mascot |   |
|    | 2211.0508                                    | 2211.1294 | 0.0786  | 36  | 19          | 38   | VTCTMAWAPNNAKFAVCT<br>IDR     |      |                                          | Mascot |   |
|    | 2211.0508                                    | 2211.1294 | 0.0786  | 36  | 19          | 38   | VTCTMAWAPNNAKFAVCT<br>IDR     |      |                                          | Mascot |   |
|    | 2284.0671                                    | 2284.2034 | 0.1363  | 60  | 19          | 38   | VTCTMAWAPNNAKFAVCT<br>IDR     |      | Carbamidomethyl (C)[3], Oxidation (M)[4] | Mascot |   |
|    | 2318.0396                                    | 2318.2329 | 0.1933  | 83  | 297         | 318  | DGSRLSVGTLCGGVEMF<br>DCCLR    |      |                                          | Mascot |   |
|    | 2683.3008                                    | 2683.2405 | -0.0603 | -22 | 520         | 543  | STMLSFCPPYVQWVPGSD<br>VVVAQNR |      |                                          | Mascot |   |
| 35 | hypothetical protein LOC569975 [Danio rerio] |           |         |     | gi 71834622 |      | 27594.2                       | 6.28 | 8                                        | 32     | 0 |

#### Peptide Information

| Calc. Mass | Obsrv. Mass | ± da    | ± ppm | Start Seq. | End Seq. | Sequence        | Ion Score | C. I. | % Modification             | Rank | Result Type |
|------------|-------------|---------|-------|------------|----------|-----------------|-----------|-------|----------------------------|------|-------------|
| 877.3897   | 877.423     | 0.0333  | 38    | 15         | 21       | EESEEV          |           |       |                            |      | Mascot      |
| 1322.5656  | 1322.6648   | 0.0992  | 75    | 84         | 93       | GFFFSCLER       |           |       | Carbamidomethyl (C)[6,9]   |      | Mascot      |
| 1474.7914  | 1474.6882   | -0.1032 | -70   | 138        | 148      | EHLLEHYRIHK     |           |       |                            |      | Mascot      |
| 1483.6052  | 1483.6519   | 0.0467  | 31    | 211        | 221      | CDQCERSYTHK     |           |       | Carbamidomethyl (C)[1,4]   |      | Mascot      |
| 1800.8771  | 1800.8799   | 0.0028  | 2     | 146        | 160      | IHKVEKPFCEECGK  |           |       | Carbamidomethyl (C)[10]    |      | Mascot      |
| 1807.8254  | 1807.9532   | 0.1278  | 71    | 94         | 107      | MSFESKEHLMHF    |           |       |                            |      | Mascot      |
| 1857.8986  | 1857.9545   | 0.0559  | 30    | 146        | 160      | IHKVEKPFCEECGK  |           |       | Carbamidomethyl (C)[10,13] |      | Mascot      |
| 1860.8732  | 1860.9238   | 0.0506  | 27    | 202        | 216      | IHELDKPFKCDQCER |           |       |                            |      | Mascot      |
| 2031.8761  | 2032.0435   | 0.1674  | 82    | 84         | 99       | GFFFSCLERMSFESK |           |       | Carbamidomethyl (C)[6,9]   |      | Mascot      |

|    |                                                            |  |  |  |              |  |        |      |    |    |   |
|----|------------------------------------------------------------|--|--|--|--------------|--|--------|------|----|----|---|
| 36 | PREDICTED: e3 ubiquitin-protein ligase BRE1A [Danio rerio] |  |  |  | gi 189527718 |  | 115551 | 5.66 | 16 | 32 | 0 |
|----|------------------------------------------------------------|--|--|--|--------------|--|--------|------|----|----|---|

#### Peptide Information

| Calc. Mass | Obsrv. Mass | ± da    | ± ppm | Start Seq. | End Seq. | Sequence         | Ion Score | C. I. | % Modification         | Rank | Result Type |
|------------|-------------|---------|-------|------------|----------|------------------|-----------|-------|------------------------|------|-------------|
| 842.5206   | 842.5162    | -0.0044 | -5    | 61         | 67       | ALQIKNR          |           |       |                        |      | Mascot      |
| 980.4795   | 980.4255    | -0.054  | -55   | 910        | 917      | EKESFNAR         |           |       |                        |      | Mascot      |
| 1045.5823  | 1045.5701   | -0.0122 | -12   | 786        | 793      | LMQQLREK         |           |       |                        |      | Mascot      |
| 1151.5474  | 1151.6522   | 0.1048  | 91    | 189        | 198      | VESSCKQASR       |           |       | Carbamidomethyl (C)[5] |      | Mascot      |
| 1280.5908  | 1280.6072   | 0.0164  | 13    | 958        | 968      | LTCPCCN          |           |       | Carbamidomethyl (C)[3] |      | Mascot      |
| 1322.7137  | 1322.6648   | -0.0489 | -37   | 682        | 692      | LLDLMYRSAPK      |           |       | Oxidation (M)[5]       |      | Mascot      |
| 1379.5909  | 1379.6506   | 0.0597  | 43    | 998        | 1009     | CNAAFGANDFHR     |           |       | Carbamidomethyl (C)[1] |      | Mascot      |
| 1502.7996  | 1502.7963   | -0.0033 | -2    | 859        | 871      | ELGLRTQALEM      |           |       |                        |      | Mascot      |
| 1518.7944  | 1518.7903   | -0.0041 | -3    | 859        | 871      | ELGLRTQALEM      |           |       | Oxidation (M)[11]      |      | Mascot      |
| 1638.7826  | 1638.8779   | 0.0953  | 58    | 317        | 332      | VCGEASSVCGTITINK |           |       | Carbamidomethyl (C)[2] |      | Mascot      |

|    |                                                   |           |         |     |             |          |                        |    |                        |   |   |        |
|----|---------------------------------------------------|-----------|---------|-----|-------------|----------|------------------------|----|------------------------|---|---|--------|
|    | 1658.8846                                         | 1658.9414 | 0.0568  | 34  | 816         | 829      | EEKEELADQLLTLK         |    |                        |   |   | Mascot |
|    | 1658.8846                                         | 1658.9414 | 0.0568  | 34  | 816         | 829      | EEKEELADQLLTLK         |    |                        |   |   | Mascot |
|    | 1716.8551                                         | 1717.0227 | 0.1676  | 98  | 216         | 231      | DLESGKDGGGLWDVAVR      |    |                        |   |   | Mascot |
|    | 1721.9293                                         | 1721.8103 | -0.119  | -69 | 296         | 309      | ENRLNTHLVEVLER         |    |                        |   |   | Mascot |
|    | 1737.8622                                         | 1737.8036 | -0.0586 | -34 | 317         | 333      | VCGEASSVCGTITINKR      |    |                        |   |   | Mascot |
|    | 1768.9188                                         | 1768.8936 | -0.0252 | -14 | 6           | 23       | RPSDAGSSATLGAPPEK<br>K |    |                        |   |   | Mascot |
|    | 1857.876                                          | 1857.9545 | 0.0785  | 42  | 429         | 443      | QLDHMENDEVSLQRK        |    | Oxidation (M)[5]       |   |   | Mascot |
|    | 1858.7871                                         | 1858.9478 | 0.1607  | 86  | 122         | 138      | CDQSGSEPVESQPPEGR      |    | Carbamidomethyl (C)[1] |   |   | Mascot |
| 37 | phosphatidylinositol 4-kinase alpha [Danio rerio] |           |         |     | gi 77993310 | 232707.4 | 6.2                    | 20 | 32                     | 0 | 5 | 0      |



|    |                                                            |           |        |    |     |              |                          |      |   |    |   |                  |        |
|----|------------------------------------------------------------|-----------|--------|----|-----|--------------|--------------------------|------|---|----|---|------------------|--------|
|    | 2283.0857                                                  | 2283.2114 | 0.1257 | 55 | 500 | 518          | AR<br>SQPSMYEQLRDISINNIR |      |   |    |   | Oxidation (M)[5] | Mascot |
| 38 | novel protein similar to vertebrate (PIWIL2) [Danio rerio] |           |        |    |     | gi 123232882 | 22624.7                  | 6.37 | 6 | 32 | 0 |                  |        |

Peptide Information

| Calc. Mass | Obsrv. Mass | ± da    | ± ppm | Start Seq. | End Seq. | Sequence                    | Ion Score | C. I. | % Modification          | Rank | Result Type |
|------------|-------------|---------|-------|------------|----------|-----------------------------|-----------|-------|-------------------------|------|-------------|
| 1379.7893  | 1379.6506   | -0.1387 | -101  | 115        | 128      | GAAIGPVPTLDIQK              |           |       |                         |      | Mascot      |
| 1423.7614  | 1423.7625   | 0.0011  | 1     | 40         | 52       | GLIMPIDEPLPGR               |           |       | Oxidation (M)[4]        |      | Mascot      |
| 1483.7825  | 1483.6519   | -0.1306 | -88   | 135        | 148      | MPELQAEVAPTVAK              |           |       |                         |      | Mascot      |
| 1518.7184  | 1518.7903   | 0.0719  | 47    | 186        | 198      | DLRDQADDQPFAK               |           |       |                         |      | Mascot      |
| 1800.8334  | 1800.8799   | 0.0465  | 26    | 199        | 214      | DGVQQAIWGQICSQNP            |           |       | Carbamidomethyl (C)[12] |      | Mascot      |
| 2233.1646  | 2233.1099   | -0.0547 | -24   | 149        | 171      | VGSPGTGSSLVSMFRGL<br>GIEPGK |           |       |                         |      | Mascot      |

|    |                                                   |  |  |  |  |              |          |      |    |    |   |  |
|----|---------------------------------------------------|--|--|--|--|--------------|----------|------|----|----|---|--|
| 39 | PREDICTED: ephrin type-B receptor 1 [Danio rerio] |  |  |  |  | gi 326665193 | 107747.2 | 6.03 | 12 | 32 | 0 |  |
|----|---------------------------------------------------|--|--|--|--|--------------|----------|------|----|----|---|--|

Peptide Information

| Calc. Mass | Obsrv. Mass | ± da    | ± ppm | Start Seq. | End Seq. | Sequence                   | Ion Score | C. I. | % Modification               | Rank | Result Type |
|------------|-------------|---------|-------|------------|----------|----------------------------|-----------|-------|------------------------------|------|-------------|
| 877.4236   | 877.423     | -0.0006 | -1    | 247        | 254      | ACPPGTFK                   |           |       | Carbamidomethyl (C)[2]       |      | Mascot      |
| 996.5359   | 996.6053    | 0.0694  | 70    | 630        | 638      | TLKAGYSEK                  |           |       |                              |      | Mascot      |
| 1151.6895  | 1151.6522   | -0.0373 | -32   | 932        | 942      | IGVTLAGHQKK                |           |       |                              |      | Mascot      |
| 1165.61    | 1165.7551   | 0.1451  | 124   | 849        | 858      | FTDIVNTLDK                 |           |       |                              |      | Mascot      |
| 1280.6416  | 1280.6072   | -0.0344 | -27   | 69         | 79       | FTVRDCSSIPR                |           |       |                              |      | Mascot      |
| 1518.7482  | 1518.7903   | 0.0421  | 28    | 557        | 570      | LQHYSTGRGSPGMK             |           |       |                              |      | Mascot      |
| 1658.9012  | 1658.9414   | 0.0402  | 24    | 764        | 777      | IPVRWTSPEAIAYR             |           |       |                              |      | Mascot      |
| 1658.9012  | 1658.9414   | 0.0402  | 24    | 764        | 777      | IPVRWTSPEAIAYR             | 3         | 0     |                              |      | Mascot      |
| 1721.8826  | 1721.8103   | -0.0723 | -42   | 471        | 485      | VDGLRPGTMYVMQVR            |           |       |                              |      | Mascot      |
| 1737.8774  | 1737.8036   | -0.0738 | -42   | 471        | 485      | VDGLRPGTMYVMQVR            |           |       | Oxidation (M)[9]             |      | Mascot      |
| 1859.7898  | 1859.9314   | 0.1416  | 76    | 288        | 305      | ADGEQPDMPCTSVPSGP<br>R     |           |       | Oxidation (M)[8]             |      | Mascot      |
| 1859.7898  | 1859.9314   | 0.1416  | 76    | 288        | 305      | ADGEQPDMPCTSVPSGP<br>R     |           |       | Oxidation (M)[8]             |      | Mascot      |
| 2232.918   | 2233.1099   | 0.1919  | 86    | 216        | 234      | LYCNGDGDWMVPIGSCT<br>CK    |           |       | Carbamidomethyl (C)[3,16,18] |      | Mascot      |
| 2318.3079  | 2318.2329   | -0.075  | -32   | 862        | 883      | NPTSLKAVASIPTIPSQPL<br>LDR |           |       |                              |      | Mascot      |
| 2362.1609  | 2362.1172   | -0.0437 | -19   | 641        | 660      | RDFLSEASIMGQFDHPNII<br>R   |           |       | Oxidation (M)[10]            |      | Mascot      |

|    |                                                  |  |  |  |  |              |         |      |   |    |   |  |
|----|--------------------------------------------------|--|--|--|--|--------------|---------|------|---|----|---|--|
| 40 | RAB39B, member RAS oncogene family [Danio rerio] |  |  |  |  | gi 148922827 | 24462.5 | 6.54 | 6 | 32 | 0 |  |
|----|--------------------------------------------------|--|--|--|--|--------------|---------|------|---|----|---|--|

Peptide Information

| Calc. Mass | Obsrv. Mass | ± da    | ± ppm | Start Seq. | End Seq. | Sequence                  | Ion Score | C. I. | % Modification | Rank | Result Type |
|------------|-------------|---------|-------|------------|----------|---------------------------|-----------|-------|----------------|------|-------------|
| 1316.6593  | 1316.6786   | 0.0193  | 15    | 60         | 70       | LQIWDTAGQER               |           |       |                |      | Mascot      |
| 1518.8274  | 1518.7903   | -0.0371 | -24   | 81         | 94       | NSVGGLLLFDITNR            |           |       |                |      | Mascot      |
| 1658.8319  | 1658.9414   | 0.1095  | 66    | 141        | 155      | LAAAYGMRYVETSAR           |           |       |                |      | Mascot      |
| 1658.8319  | 1658.9414   | 0.1095  | 66    | 141        | 155      | LAAAYGMRYVETSAR           |           |       |                |      | Mascot      |
| 1800.8776  | 1800.8799   | 0.0023  | 1     | 95         | 108      | RSFQNVHEWLEEAR            |           |       |                |      | Mascot      |
| 2362.1462  | 2362.1172   | -0.029  | -12   | 28         | 48       | FTEGRFAQVSDPTVGVD<br>FFSR |           |       |                |      | Mascot      |
| 2379.1899  | 2379.3738   | 0.1839  | 77    | 170        | 190      | DIFELVKCGDITIQEGWE<br>GVK |           |       |                |      | Mascot      |
| 2379.1899  | 2379.3738   | 0.1839  | 77    | 170        | 190      | DIFELVKCGDITIQEGWE<br>GVK |           |       |                |      | Mascot      |

41 RecName: Full=Intraflagellar transport protein 172 homolog  
gi|82232659 197655 5.61 19 32 0

#### Peptide Information

| Calc. Mass | Obsrv. Mass | ± da    | ± ppm | Start Seq. | End Seq. | Sequence        | Ion Score | C. I. | % Modification         | Rank | Result Type |
|------------|-------------|---------|-------|------------|----------|-----------------|-----------|-------|------------------------|------|-------------|
| 877.46     | 877.423     | -0.037  | -42   | 782        | 789      | AAWLAMSK        |           |       |                        |      | Mascot      |
| 882.4501   | 882.575     | 0.1249  | 142   | 828        | 834      | ALECYRK         |           |       |                        |      | Mascot      |
| 1064.5483  | 1064.5403   | -0.008  | -8    | 815        | 823      | AGDLFERTR       |           |       |                        |      | Mascot      |
| 1095.5867  | 1095.5372   | -0.0495 | -45   | 1291       | 1299     | AVDCYLKVK       |           |       | Carbamidomethyl (C)[4] |      | Mascot      |
| 1139.4899  | 1139.5138   | 0.0239  | 21    | 1489       | 1497     | DRDCAEAFR       |           |       | Carbamidomethyl (C)[4] |      | Mascot      |
| 1165.6034  | 1165.7551   | 0.1517  | 130   | 1480       | 1488     | MFQELVNLR       |           |       | Oxidation (M)[1]       |      | Mascot      |
| 1263.6588  | 1263.6631   | 0.0043  | 3     | 1310       | 1320     | CWMKAAELAIK     |           |       |                        |      | Mascot      |
| 1263.6588  | 1263.6631   | 0.0043  | 3     | 1310       | 1320     | CWMKAAELAIK     |           |       |                        |      | Mascot      |
| 1275.6692  | 1275.6111   | -0.0581 | -46   | 51         | 61       | DRFTTKPADPK     |           |       |                        |      | Mascot      |
| 1351.7368  | 1351.7147   | -0.0221 | -16   | 1215       | 1225     | EFQKAEAFLLR     |           |       |                        |      | Mascot      |
| 1352.7208  | 1352.7048   | -0.016  | -12   | 53         | 64       | FTTKPADPKYGK    |           |       |                        |      | Mascot      |
| 1352.7208  | 1352.7048   | -0.016  | -12   | 53         | 64       | FTTKPADPKYGK    |           |       |                        |      | Mascot      |
| 1363.6675  | 1363.6885   | 0.021   | 15    | 1643       | 1653     | EWVLTVSMDQR     |           |       |                        |      | Mascot      |
| 1363.6675  | 1363.6885   | 0.021   | 15    | 1643       | 1653     | EWVLTVSMDQR     |           |       |                        |      | Mascot      |
| 1379.6624  | 1379.6506   | -0.0118 | -9    | 1643       | 1653     | EWVLTVSMDQR     |           |       | Oxidation (M)[8]       |      | Mascot      |
| 1474.8086  | 1474.6882   | -0.1204 | -82   | 1679       | 1691     | SLPCVITGYPVLR   |           |       | Carbamidomethyl (C)[4] |      | Mascot      |
| 1502.7169  | 1502.7963   | 0.0794  | 53    | 1698       | 1710     | RPGMAANKDDWNK   |           |       |                        |      | Mascot      |
| 1518.7118  | 1518.7903   | 0.0785  | 52    | 1698       | 1710     | RPGMAANKDDWNK   |           |       | Oxidation (M)[4]       |      | Mascot      |
| 1529.6545  | 1529.8517   | 0.1972  | 129   | 1238       | 1250     | DAGMWTAMDARICK  |           |       | Oxidation (M)[4,9]     |      | Mascot      |
| 1658.9159  | 1658.9414   | 0.0255  | 15    | 1168       | 1182     | AGKPKEAVLMHVHNK |           |       |                        |      | Mascot      |

|    |                                                         |           |         |     |              |          |                              |    |    |   |  |                                          |  |        |
|----|---------------------------------------------------------|-----------|---------|-----|--------------|----------|------------------------------|----|----|---|--|------------------------------------------|--|--------|
|    | 1658.9159                                               | 1658.9414 | 0.0255  | 15  | 1168         | 1182     | AGKPKEAVLMHVVHNK             |    |    |   |  |                                          |  | Mascot |
|    | 1716.9465                                               | 1717.0227 | 0.0762  | 44  | 1679         | 1693     | SLPCVITGYPVLRNK              |    |    |   |  | Carbamidomethyl (C)[4]                   |  | Mascot |
|    | 2211.0508                                               | 2211.1294 | 0.0786  | 36  | 19           | 38       | VTCMAWAPNNAKFAVCT<br>IDR     |    |    |   |  |                                          |  | Mascot |
|    | 2211.0508                                               | 2211.1294 | 0.0786  | 36  | 19           | 38       | VTCMAWAPNNAKFAVCT<br>IDR     |    |    |   |  |                                          |  | Mascot |
|    | 2284.0671                                               | 2284.2034 | 0.1363  | 60  | 19           | 38       | VTCMAWAPNNAKFAVCT<br>IDR     |    |    |   |  | Carbamidomethyl (C)[3], Oxidation (M)[4] |  | Mascot |
|    | 2318.0396                                               | 2318.2329 | 0.1933  | 83  | 297          | 318      | DGSRLSVGTLCGGVEMF<br>DCCLR   |    |    |   |  |                                          |  | Mascot |
|    | 2683.3008                                               | 2683.2405 | -0.0603 | -22 | 520          | 543      | STMLSFCPPYQWVPGSD<br>VVVAQNR |    |    |   |  |                                          |  | Mascot |
| 42 | PREDICTED: dynein heavy chain 7, axonemal [Danio rerio] |           |         |     | gi 189523512 | 455205.4 | 5.74                         | 31 | 31 | 0 |  |                                          |  |        |

Peptide Information

| Calc. Mass | Obsrv. Mass | ± da    | ± ppm | Start Seq. | End Seq. | Sequence                | Ion Score | C. I. | % Modification          | Rank | Result Type |
|------------|-------------|---------|-------|------------|----------|-------------------------|-----------|-------|-------------------------|------|-------------|
| 877.4698   | 877.423     | -0.0468 | -53   | 695        | 701      | LELVMEK                 |           |       | Oxidation (M)[5]        |      | Mascot      |
| 964.492    | 964.4287    | -0.0633 | -66   | 2966       | 2972     | WLKNMEK                 |           |       | Oxidation (M)[5]        |      | Mascot      |
| 980.5159   | 980.4255    | -0.0904 | -92   | 52         | 59       | KQEYSGIR                |           |       |                         |      | Mascot      |
| 1064.5048  | 1064.5403   | 0.0355  | 33    | 2698       | 2706     | VEDYWGPAAK              |           |       |                         |      | Mascot      |
| 1100.5444  | 1100.6183   | 0.0739  | 67    | 3937       | 3945     | QCYISPVYK               |           |       |                         |      | Mascot      |
| 1164.5929  | 1164.5923   | -0.0006 | -1    | 986        | 995      | DTMKQVSLDK              |           |       |                         |      | Mascot      |
| 1275.6725  | 1275.6111   | -0.0614 | -48   | 3767       | 3777     | DSCVNIQKAIK             |           |       | Carbamidomethyl (C)[3]  |      | Mascot      |
| 1316.6879  | 1316.6786   | -0.0093 | -7    | 1588       | 1599     | VLAAALNDICEK            |           |       | Carbamidomethyl (C)[10] |      | Mascot      |
| 1322.6627  | 1322.6648   | 0.0021  | 2     | 2738       | 2748     | YITNPDFVPEK             |           |       |                         |      | Mascot      |
| 1352.7572  | 1352.7048   | -0.0524 | -39   | 1949       | 1959     | SVYILDFLLNR             |           |       |                         |      | Mascot      |
| 1352.7572  | 1352.7048   | -0.0524 | -39   | 1949       | 1959     | SVYILDFLLNR             |           |       |                         |      | Mascot      |
| 1379.626   | 1379.6506   | 0.0246  | 18    | 3726       | 3737     | LPQDFDTDAAMR            |           |       |                         |      | Mascot      |
| 1423.725   | 1423.7625   | 0.0375  | 26    | 2724       | 2735     | DNIPVSYMSIIR            |           |       | Oxidation (M)[8]        |      | Mascot      |
| 1483.7063  | 1483.6519   | -0.0544 | -37   | 3032       | 3044     | LGDSTIEYAPDFR           |           |       |                         |      | Mascot      |
| 1561.8431  | 1561.8402   | -0.0029 | -2    | 1767       | 1781     | GTKELSPTSNTSLVK         |           |       |                         |      | Mascot      |
| 1593.79    | 1593.7393   | -0.0507 | -32   | 1842       | 1855     | EMLVGGLSEETRTR          |           |       | Oxidation (M)[2]        |      | Mascot      |
| 1593.79    | 1593.7393   | -0.0507 | -32   | 1842       | 1855     | EMLVGGLSEETRTR          |           |       | Oxidation (M)[2]        |      | Mascot      |
| 1638.8156  | 1638.8779   | 0.0623  | 38    | 552        | 565      | LCEEYDTIANKALR          |           |       |                         |      | Mascot      |
| 1721.7529  | 1721.8103   | 0.0574  | 33    | 2031       | 2042     | QWLDHWNWYDMK            |           |       |                         |      | Mascot      |
| 1737.7479  | 1737.8036   | 0.0557  | 32    | 2031       | 2042     | QWLDHWNWYDMK            |           |       | Oxidation (M)[11]       |      | Mascot      |
| 1800.9602  | 1800.8799   | -0.0803 | -45   | 2973       | 2988     | SNSLHVIKLSADAFVR        |           |       |                         |      | Mascot      |
| 1858.9004  | 1858.9478   | 0.0474  | 25    | 2415       | 2430     | QTDGSTLALFNMFLER        |           |       | Oxidation (M)[12]       |      | Mascot      |
| 1859.9233  | 1859.9314   | 0.0081  | 4     | 108        | 126      | SVTEISTPSTSGPPTAAE<br>K |           |       |                         |      | Mascot      |

|           |                                                         |         |     |      |              |                              |      |    |    |   |                                          |  |        |
|-----------|---------------------------------------------------------|---------|-----|------|--------------|------------------------------|------|----|----|---|------------------------------------------|--|--------|
| 1859.9233 | 1859.9314                                               | 0.0081  | 4   | 108  | 126          | SVTEISTPSTSGPPTAAE<br>K      |      |    |    |   |                                          |  | Mascot |
| 1861.0767 | 1860.9238                                               | -0.1529 | -82 | 1198 | 1214         | QNRVTLGALVVLVDVHAR           |      |    |    |   |                                          |  | Mascot |
| 1994.1433 | 1994.0005                                               | -0.1428 | -72 | 1930 | 1948         | LLITHQKPTVFVGPTGTG<br>K      |      |    |    |   |                                          |  | Mascot |
| 2016.067  | 2016.0427                                               | -0.0243 | -12 | 2275 | 2291         | APMNLVLFRAIEHVCR             |      |    |    |   |                                          |  | Mascot |
| 2032.0619 | 2032.0435                                               | -0.0184 | -9  | 2275 | 2291         | APMNLVLFRAIEHVCR             |      |    |    |   | Oxidation (M)[3]                         |  | Mascot |
| 2210.8865 | 2211.1294                                               | 0.2429  | 110 | 3601 | 3618         | YMTGECNYGGRVTDDW<br>DR       |      |    |    |   | Carbamidomethyl (C)[6], Oxidation (M)[2] |  | Mascot |
| 2210.8865 | 2211.1294                                               | 0.2429  | 110 | 3601 | 3618         | YMTGECNYGGRVTDDW<br>DR       |      |    |    |   | Carbamidomethyl (C)[6], Oxidation (M)[2] |  | Mascot |
| 2225.0154 | 2225.1482                                               | 0.1328  | 60  | 3226 | 3243         | DHFTYSLYCNVCRSLFEK           |      |    |    |   |                                          |  | Mascot |
| 2283.2383 | 2283.2114                                               | -0.0269 | -12 | 3806 | 3825         | SYP SLKPLGGYISDFLER<br>LK    |      |    |    |   |                                          |  | Mascot |
| 2284.1025 | 2284.2034                                               | 0.1009  | 44  | 3024 | 3044         | QGG SVCIRLGDSTIEYAP<br>DFR   |      |    |    |   |                                          |  | Mascot |
| 2318.2095 | 2318.2329                                               | 0.0234  | 10  | 3424 | 3446         | LTSLSLGQGQGIAMSMI<br>ETGVK   |      |    |    |   |                                          |  | Mascot |
| 2362.1167 | 2362.1172                                               | 0.0005  | 0   | 3738 | 3757         | KYPTSYNQSMNTVLVQE<br>MGR     |      |    |    |   | Oxidation (M)[10]                        |  | Mascot |
| 2661.3489 | 2661.2351                                               | -0.1138 | -43 | 1417 | 1440         | TVAMMVDPYALIAEIVLYS<br>CGFVR |      |    |    |   |                                          |  | Mascot |
| 2683.3547 | 2683.2405                                               | -0.1142 | -43 | 2714 | 2735         | FLQSLHEYKNKNIPVSYM<br>SIIR   |      |    |    |   | Oxidation (M)[18]                        |  | Mascot |
| 43        | PREDICTED: hypothetical protein LOC497432 [Danio rerio] |         |     |      | gi 326676501 | 147234.8                     | 5.75 | 19 | 31 | 0 |                                          |  |        |

Peptide Information

| Calc. Mass | Obsrv. Mass | ± da    | ± ppm | Start Seq. | End Seq. | Sequence       | Ion Score | C. I. | % Modification                                | Rank | Result Type |
|------------|-------------|---------|-------|------------|----------|----------------|-----------|-------|-----------------------------------------------|------|-------------|
| 877.4413   | 877.423     | -0.0183 | -21   | 594        | 601      | FAPQTGEK       |           |       |                                               |      | Mascot      |
| 996.4996   | 996.6053    | 0.1057  | 106   | 1020       | 1027     | NDYKESLK       |           |       |                                               |      | Mascot      |
| 1095.5503  | 1095.5372   | -0.0131 | -12   | 87         | 96       | GNCGEYVLLK     |           |       |                                               |      | Mascot      |
| 1111.4871  | 1111.5952   | 0.1081  | 97    | 218        | 227      | VGSCEIMNSR     |           |       | Oxidation (M)[7]                              |      | Mascot      |
| 1139.5739  | 1139.5138   | -0.0601 | -53   | 908        | 917      | SSKTACIHHR     |           |       |                                               |      | Mascot      |
| 1151.5249  | 1151.6522   | 0.1273  | 111   | 1004       | 1013     | LNTTDEEMAK     |           |       |                                               |      | Mascot      |
| 1263.6943  | 1263.6631   | -0.0312 | -25   | 729        | 740      | IIAVYGADADKK   |           |       |                                               |      | Mascot      |
| 1263.6943  | 1263.6631   | -0.0312 | -25   | 729        | 740      | IIAVYGADADKK   |           |       |                                               |      | Mascot      |
| 1322.6949  | 1322.6648   | -0.0301 | -23   | 649        | 661      | ETIGVFGKTGEGK  |           |       |                                               |      | Mascot      |
| 1351.6648  | 1351.7147   | 0.0499  | 37    | 911        | 922      | TACIHHRNNSAK   |           |       |                                               |      | Mascot      |
| 1474.6995  | 1474.6882   | -0.0113 | -8    | 582        | 593      | SSEKFMEAVQYR   |           |       |                                               |      | Mascot      |
| 1501.6517  | 1501.6599   | 0.0082  | 5     | 392        | 403      | TVCTEAMLCCLK   |           |       | Carbamidomethyl (C)[3,9,10], Oxidation (M)[7] |      | Mascot      |
| 1501.6517  | 1501.6599   | 0.0082  | 5     | 392        | 403      | TVCTEAMLCCLK   |           |       | Carbamidomethyl (C)[3,9,10], Oxidation (M)[7] |      | Mascot      |
| 1561.7423  | 1561.8402   | 0.0979  | 63    | 1240       | 1252     | SLMCYICESLSKSK |           |       | Carbamidomethyl (C)[4]                        |      | Mascot      |
| 1658.8359  | 1658.9414   | 0.1055  | 64    | 186        | 198      | MNPVKQDFTFYIR  |           |       |                                               |      | Mascot      |

|           |           |        |     |      |      |                          |  |  |  |  |  |                                            |  |  |  |  |        |
|-----------|-----------|--------|-----|------|------|--------------------------|--|--|--|--|--|--------------------------------------------|--|--|--|--|--------|
| 1658.8359 | 1658.9414 | 0.1055 | 64  | 186  | 198  | MNPVKQDFTFYIR            |  |  |  |  |  |                                            |  |  |  |  | Mascot |
| 1751.8641 | 1751.8743 | 0.0102 | 6   | 162  | 175  | MHNKLLLCVENFMK           |  |  |  |  |  | Oxidation (M)[1,13]                        |  |  |  |  | Mascot |
| 1769.0176 | 1768.8936 | -0.124 | -70 | 432  | 447  | CQGCPLKPVLTALKLK         |  |  |  |  |  | Carbamidomethyl (C)[1]                     |  |  |  |  | Mascot |
| 1791.7869 | 1791.9619 | 0.175  | 98  | 205  | 217  | LDYFFIPDECMWR            |  |  |  |  |  | Carbamidomethyl (C)[10]                    |  |  |  |  | Mascot |
| 1807.7819 | 1807.9532 | 0.1713 | 95  | 205  | 217  | LDYFFIPDECMWR            |  |  |  |  |  | Carbamidomethyl (C)[10], Oxidation (M)[11] |  |  |  |  | Mascot |
| 1993.9034 | 1994.0005 | 0.0971 | 49  | 1224 | 1239 | DSMFEEAKMQFLNEFK         |  |  |  |  |  |                                            |  |  |  |  | Mascot |
| 2284.1277 | 2284.2034 | 0.0757 | 33  | 807  | 826  | QELLEHIVLFDVPGTGDC<br>NK |  |  |  |  |  | Carbamidomethyl (C)[18]                    |  |  |  |  | Mascot |
| 2362.1074 | 2362.1172 | 0.0098 | 4   | 779  | 797  | CHIQQSEYNPGGWYWPL<br>VK  |  |  |  |  |  | Carbamidomethyl (C)[1]                     |  |  |  |  | Mascot |

44 PREDICTED: NACHT, LRR and PYD domains-containing protein 1 [Danio rerio] gi|326674408 105937.2 5.98 12 31 0

#### Peptide Information

| Calc. Mass | Obsrv. Mass | ± da    | ± ppm | Start Seq. | End Seq. | Sequence                           | Ion Score | C. I. | % Modification                            | Rank | Result Type |
|------------|-------------|---------|-------|------------|----------|------------------------------------|-----------|-------|-------------------------------------------|------|-------------|
| 964.5284   | 964.4287    | -0.0997 | -103  | 433        | 440      | VAFQQLMK                           |           |       |                                           |      | Mascot      |
| 980.5233   | 980.4255    | -0.0978 | -100  | 433        | 440      | VAFQQLMK                           |           |       | Oxidation (M)[7]                          |      | Mascot      |
| 1077.5497  | 1077.5269   | -0.0228 | -21   | 421        | 429      | LTDEDMLK                           |           |       |                                           |      | Mascot      |
| 1280.5245  | 1280.6072   | 0.0827  | 65    | 24         | 34       | SDPEPSCVSMR                        |           |       | Carbamidomethyl (C)[7], Oxidation (M)[10] |      | Mascot      |
| 1363.6094  | 1363.6885   | 0.0791  | 58    | 23         | 34       | RSDPEPSCVSMR                       |           |       |                                           |      | Mascot      |
| 1363.6094  | 1363.6885   | 0.0791  | 58    | 23         | 34       | RSDPEPSCVSMR                       |           |       |                                           |      | Mascot      |
| 1379.6914  | 1379.6506   | -0.0408 | -30   | 326        | 337      | VTEVRGFNDSQK                       |           |       |                                           |      | Mascot      |
| 1423.6774  | 1423.7625   | 0.0851  | 60    | 908        | 919      | LFSDLMDPLNK                        |           |       | Oxidation (M)[6]                          |      | Mascot      |
| 1483.725   | 1483.6519   | -0.0731 | -49   | 257        | 268      | VLFIIDGLDECR                       |           |       | Carbamidomethyl (C)[11]                   |      | Mascot      |
| 1737.9065  | 1737.8036   | -0.1029 | -59   | 876        | 892      | GCAALASALRSNPEHLK                  |           |       |                                           |      | Mascot      |
| 1768.9229  | 1768.8936   | -0.0293 | -17   | 893        | 907      | HLDLSDNLQIISSWK                    |           |       |                                           |      | Mascot      |
| 2225.1052  | 2225.1482   | 0.043   | 19    | 751        | 771      | LGLYDCGLTDKGCAALA<br>SALR          |           |       | Carbamidomethyl (C)[6,13]                 |      | Mascot      |
| 2318.0791  | 2318.2329   | 0.1538  | 66    | 452        | 472      | ECGIDVAEASVYSGLTQ<br>IFR           |           |       | Carbamidomethyl (C)[2]                    |      | Mascot      |
| 3364.7532  | 3364.6116   | -0.1416 | -42   | 384        | 412      | MLSEAETAIEPKLTQTQMY<br>THFLILQTNIK |           |       |                                           |      | Mascot      |

45 RAB39B, member RAS oncogene family [Danio rerio] gi|121582364 24474.5 6.54 6 31 0

#### Peptide Information

| Calc. Mass | Obsrv. Mass | ± da    | ± ppm | Start Seq. | End Seq. | Sequence       | Ion Score | C. I. | % Modification | Rank | Result Type |
|------------|-------------|---------|-------|------------|----------|----------------|-----------|-------|----------------|------|-------------|
| 1316.6593  | 1316.6786   | 0.0193  | 15    | 60         | 70       | LQIWDTAGQER    |           |       |                |      | Mascot      |
| 1518.8274  | 1518.7903   | -0.0371 | -24   | 81         | 94       | NSVGGLLLFDITNR |           |       |                |      | Mascot      |
| 1545.7543  | 1545.8455   | 0.0912  | 59    | 177        | 190      | NGEISIQEGWEGVK |           |       |                |      | Mascot      |

|    |                                                 |           |        |     |              |     |                           |      |   |    |   |  |  |  |  |  |        |
|----|-------------------------------------------------|-----------|--------|-----|--------------|-----|---------------------------|------|---|----|---|--|--|--|--|--|--------|
|    | 1658.8319                                       | 1658.9414 | 0.1095 | 66  | 141          | 155 | LAAAYGMRYVETSAR           |      |   |    |   |  |  |  |  |  | Mascot |
|    | 1658.8319                                       | 1658.9414 | 0.1095 | 66  | 141          | 155 | LAAAYGMRYVETSAR           |      |   |    |   |  |  |  |  |  | Mascot |
|    | 1800.8776                                       | 1800.8799 | 0.0023 | 1   | 95           | 108 | RSFQNVHEWLEEAR            |      |   |    |   |  |  |  |  |  | Mascot |
|    | 2362.1462                                       | 2362.1172 | -0.029 | -12 | 28           | 48  | FTEGRFAQVSDPTVGVD<br>FFSR |      |   |    |   |  |  |  |  |  | Mascot |
| 46 | brain-derived neurotrophic factor [Danio rerio] |           |        |     | gi 169145642 |     | 25880.8                   | 5.62 | 6 | 31 | 0 |  |  |  |  |  |        |

Peptide Information

| Calc. Mass | Obsrv. Mass | ± da    | ± ppm | Start Seq. | End Seq. | Sequence                     | Ion Score | C. I. | % Modification         | Rank | Result Type |
|------------|-------------|---------|-------|------------|----------|------------------------------|-----------|-------|------------------------|------|-------------|
| 877.4196   | 877.423     | 0.0034  | 4     | 225        | 232      | EGCRGIDK                     |           |       |                        |      | Mascot      |
| 964.4053   | 964.4287    | 0.0234  | 24    | 233        | 239      | RHYSQC                       |           |       | Carbamidomethyl (C)[7] |      | Mascot      |
| 980.5094   | 980.4255    | -0.0839 | -86   | 1          | 7        | MFQQVRR                      |           |       | Oxidation (M)[1]       |      | Mascot      |
| 1993.9535  | 1994.0005   | 0.047   | 24    | 167        | 184      | GELSVCDISQWVTAVD<br>K        |           |       | Carbamidomethyl (C)[6] |      | Mascot      |
| 2545.3542  | 2545.3594   | 0.0052  | 2     | 186        | 209      | TAIDMSGQTVTVLEKVPV<br>TNGQLK |           |       | Oxidation (M)[5]       |      | Mascot      |
| 2545.3542  | 2545.3594   | 0.0052  | 2     | 186        | 209      | TAIDMSGQTVTVLEKVPV<br>TNGQLK |           |       | Oxidation (M)[5]       |      | Mascot      |
| 2683.3301  | 2683.2405   | -0.0896 | -33   | 8          | 30       | VMTILFVTMVISYFSCMR<br>AAPMR  |           |       | Oxidation (M)[2]       |      | Mascot      |

|    |                                                                      |  |  |  |              |  |        |      |    |    |   |  |  |  |  |  |  |
|----|----------------------------------------------------------------------|--|--|--|--------------|--|--------|------|----|----|---|--|--|--|--|--|--|
| 47 | novel protein similar to H.sapiens TTN, titin (TTN)<br>[Danio rerio] |  |  |  | gi 169154823 |  | 842970 | 5.81 | 39 | 31 | 0 |  |  |  |  |  |  |
|----|----------------------------------------------------------------------|--|--|--|--------------|--|--------|------|----|----|---|--|--|--|--|--|--|

Peptide Information

| Calc. Mass | Obsrv. Mass | ± da    | ± ppm | Start Seq. | End Seq. | Sequence    | Ion Score | C. I. | % Modification         | Rank | Result Type |
|------------|-------------|---------|-------|------------|----------|-------------|-----------|-------|------------------------|------|-------------|
| 842.444    | 842.5162    | 0.0722  | 86    | 3102       | 3108     | SYKVSMK     |           |       |                        |      | Mascot      |
| 877.4447   | 877.423     | -0.0217 | -25   | 6550       | 6557     | NLSVEMGK    |           |       |                        |      | Mascot      |
| 882.4679   | 882.575     | 0.1071  | 121   | 2483       | 2489     | YKVSTER     |           |       |                        |      | Mascot      |
| 964.4227   | 964.4287    | 0.006   | 6     | 4320       | 4327     | LHTTMDCK    |           |       | Oxidation (M)[5]       |      | Mascot      |
| 980.4366   | 980.4255    | -0.0111 | -11   | 1600       | 1606     | YRMHSDR     |           |       | Oxidation (M)[3]       |      | Mascot      |
| 996.536    | 996.6053    | 0.0693  | 70    | 2586       | 2593     | LTITETYS    |           |       |                        |      | Mascot      |
| 1045.5347  | 1045.5701   | 0.0354  | 34    | 6656       | 6665     | CQIGGTPEIK  |           |       |                        |      | Mascot      |
| 1064.5657  | 1064.5403   | -0.0254 | -24   | 7229       | 7237     | KETTVMVK    |           |       |                        |      | Mascot      |
| 1077.5323  | 1077.5269   | -0.0054 | -5    | 1326       | 1336     | APEAPGPEPGR |           |       |                        |      | Mascot      |
| 1095.5867  | 1095.5372   | -0.0495 | -45   | 4924       | 4933     | VSCTAALFVK  |           |       | Carbamidomethyl (C)[3] |      | Mascot      |
| 1100.5582  | 1100.6183   | 0.0601  | 55    | 5147       | 5156     | EPANITEQAK  |           |       |                        |      | Mascot      |
| 1111.5928  | 1111.5952   | 0.0024  | 2     | 7404       | 7414     | IVCGPHISSAK |           |       |                        |      | Mascot      |
| 1151.5249  | 1151.6522   | 0.1273  | 111   | 2297       | 2306     | NGVEIEMSEK  |           |       | Oxidation (M)[7]       |      | Mascot      |
| 1263.6368  | 1263.6631   | 0.0263  | 21    | 5550       | 5560     | GTAPFEVTWQK |           |       |                        |      | Mascot      |

|  |  |  |  |  |  |  |  |  |  |  |  |  |  |  |  |  |  |  |  |  |  |  |  |  |  |  |  |  |  |  |  |  |  |  |  |  |  |  |  |  |  |  |  |  |  |  |  |  |  |  |  |  |  |  |  |  |  |  |  |  |  |  |  |  |  |  |  |  |  |  |  |  |  |  |  |  |  |  |  |  |  |  |  |  |  |  |  |  |  |  |  |  |  |  |  |  |  |  |  |  |  |  |  |  |  |  |  |  |  |  |  |  |  |  |  |  |  |  |  |  |  |  |  |  |  |  |  |  |  |  |  |  |  |  |  |  |  |  |  |  |  |  |  |  |  |  |  |  |  |  |  |  |  |  |  |  |  |  |  |  |  |  |  |  |  |  |  |  |  |  |  |  |  |  |  |  |  |  |  |  |  |  |  |  |  |  |  |  |  |  |  |  |  |  |  |  |  |  |  |  |  |  |  |  |  |  |  |  |  |  |  |  |  |  |  |  |  |  |  |  |  |  |  |  |  |  |  |  |  |  |  |  |  |  |  |  |  |  |  |  |  |  |  |  |  |  |  |  |  |  |  |  |  |  |  |  |  |  |  |  |  |  |  |  |  |  |  |  |  |  |  |  |  |  |  |  |  |  |  |  |  |  |  |  |  |  |  |  |  |  |  |  |  |  |  |  |  |  |  |  |  |  |  |  |  |  |  |  |  |  |  |  |  |  |  |  |  |  |  |  |  |  |  |  |  |  |  |  |  |  |  |  |  |  |  |  |  |  |  |  |  |  |  |  |  |  |  |  |  |  |  |  |  |  |  |  |  |  |  |  |  |  |  |  |  |  |  |  |  |  |  |  |  |  |  |  |  |  |  |  |  |  |  |  |  |  |  |  |  |  |  |  |  |  |  |  |  |  |  |  |  |  |  |  |  |  |  |  |  |  |  |  |  |  |  |  |  |  |  |  |  |  |  |  |  |  |  |  |  |  |  |  |  |  |  |  |  |  |  |  |  |  |  |  |  |  |  |  |  |  |  |  |  |  |  |  |  |  |  |  |  |  |  |  |  |  |  |  |  |  |  |  |  |  |  |  |  |  |  |  |  |  |  |  |  |  |  |  |  |  |  |  |  |  |  |  |  |  |  |  |  |  |  |  |  |  |  |  |  |  |  |  |  |  |  |  |  |  |  |  |  |  |  |  |  |  |  |  |  |  |  |  |  |  |  |  |  |  |  |  |  |  |  |  |  |  |  |  |  |  |  |  |  |  |  |  |  |  |  |  |  |  |  |  |  |  |  |  |  |  |  |  |  |  |  |  |  |  |  |  |  |  |  |  |  |  |  |  |  |  |  |  |  |  |  |  |  |  |  |  |  |  |  |  |  |  |  |  |  |  |  |  |  |  |  |  |  |  |  |  |  |  |  |  |  |  |  |  |  |  |  |  |  |  |  |  |  |  |  |  |  |  |  |  |  |  |  |  |  |  |  |  |  |  |  |  |  |  |  |  |  |  |  |  |  |  |  |  |  |  |  |  |  |  |  |  |  |  |  |  |  |  |  |  |  |  |  |  |  |  |  |  |  |  |  |  |  |  |  |  |  |  |  |  |  |  |  |  |  |  |  |  |  |  |  |  |  |  |  |  |  |  |  |  |  |  |  |  |  |  |  |  |  |  |  |  |  |  |  |  |  |  |  |  |  |  |  |  |  |  |  |  |  |  |  |  |  |  |  |  |  |  |  |  |  |  |  |  |  |  |  |  |  |  |  |  |  |  |  |  |  |  |  |  |  |  |  |  |  |  |  |  |  |  |  |  |  |  |  |  |  |  |  |  |  |  |  |  |  |  |  |  |  |  |  |  |  |  |  |  |  |  |  |  |  |  |  |  |  |  |  |  |  |  |  |  |  |  |  |  |  |  |  |  |  |  |  |  |  |  |  |  |  |  |  |  |  |  |  |  |  |  |  |  |  |  |  |  |  |  |  |  |  |  |  |  |  |  |  |  |  |  |  |  |  |  |  |  |  |  |  |  |  |  |  |  |  |  |  |  |  |  |  |  |  |  |  |  |  |  |  |  |  |  |  |  |  |  |  |  |  |  |  |  |  |  |  |  |  |  |  |  |  |  |  |  |  |  |  |  |  |  |  |  |  |  |  |  |  |  |  |  |  |  |  |  |  |  |  |  |  |  |  |  |  |  |  |  |  |  |  |  |  |  |  |  |  |  |  |  |  |  |  |  |  |  |  |  |  |  |  |  |  |  |  |  |  |  |  |  |  |  |  |  |  |  |  |  |  |  |  |  |  |  |  |  |  |  |  |  |  |  |  |  |  |  |  |  |  |  |  |  |  |  |  |  |  |  |  |  |  |  |  |  |  |  |  |  |  |  |  |  |  |  |  |  |  |  |  |  |  |  |  |  |  |  |  |  |  |  |  |  |  |  |  |  |  |  |  |  |  |  |  |  |  |  |  |  |  |  |  |  |  |  |  |  |  |  |  |  |  |  |  |  |  |  |  |  |  |  |  |  |  |  |  |  |  |  |  |  |  |  |  |  |  |  |  |  |  |  |  |  |  |  |  |  |  |  |  |  |  |  |  |  |  |  |  |  |  |  |  |  |  |  |  |  |  |  |  |  |  |  |  |  |  |  |  |  |  |  |  |  |  |  |  |  |  |  |  |  |  |  |  |  |  |  |  |  |  |  |  |  |  |  |  |  |  |  |  |  |  |  |  |  |  |  |  |  |  |  |  |  |  |  |  |  |  |  |  |  |  |  |  |  |  |  |  |  |  |  |  |  |  |  |  |  |  |  |  |  |  |  |  |  |  |  |  |  |  |  |  |  |  |  |  |  |  |  |  |  |  |  |  |  |  |  |  |  |  |  |  |  |  |  |  |  |  |  |  |  |  |  |  |  |  |  |  |  |  |  |  |  |  |  |  |  |  |  |  |  |  |  |  |  |  |  |  |  |  |  |  |  |  |  |  |  |  |  |  |  |  |  |  |  |  |  |  |  |  |  |  |  |  |  |  |  |  |  |  |  |  |  |  |  |  |  |  |  |  |  |  |  |  |  |  |  |  |  |  |  |  |  |  |  |  |  |  |  |  |  |  |  |  |  |  |  |  |  |  |  |  |  |  |  |  |  |  |  |  |  |  |  |  |  |  |  |  |  |  |  |  |  |  |  |  |  |  |  |  |  |  |  |  |  |  |  |  |  |  |  |  |  |  |  |  |  |  |  |  |  |  |  |  |  |  |  |  |  |  |  |  |  |  |  |  |  |  |  |  |  |  |  |  |  |  |  |  |  |  |  |  |  |  |  |  |  |  |  |  |  |  |  |  |  |  |  |  |  |  |  |  |  |  |  |  |  |  |  |  |  |  |  |  |  |  |  |  |
|--|--|--|--|--|--|--|--|--|--|--|--|--|--|--|--|--|--|--|--|--|--|--|--|--|--|--|--|--|--|--|--|--|--|--|--|--|--|--|--|--|--|--|--|--|--|--|--|--|--|--|--|--|--|--|--|--|--|--|--|--|--|--|--|--|--|--|--|--|--|--|--|--|--|--|--|--|--|--|--|--|--|--|--|--|--|--|--|--|--|--|--|--|--|--|--|--|--|--|--|--|--|--|--|--|--|--|--|--|--|--|--|--|--|--|--|--|--|--|--|--|--|--|--|--|--|--|--|--|--|--|--|--|--|--|--|--|--|--|--|--|--|--|--|--|--|--|--|--|--|--|--|--|--|--|--|--|--|--|--|--|--|--|--|--|--|--|--|--|--|--|--|--|--|--|--|--|--|--|--|--|--|--|--|--|--|--|--|--|--|--|--|--|--|--|--|--|--|--|--|--|--|--|--|--|--|--|--|--|--|--|--|--|--|--|--|--|--|--|--|--|--|--|--|--|--|--|--|--|--|--|--|--|--|--|--|--|--|--|--|--|--|--|--|--|--|--|--|--|--|--|--|--|--|--|--|--|--|--|--|--|--|--|--|--|--|--|--|--|--|--|--|--|--|--|--|--|--|--|--|--|--|--|--|--|--|--|--|--|--|--|--|--|--|--|--|--|--|--|--|--|--|--|--|--|--|--|--|--|--|--|--|--|--|--|--|--|--|--|--|--|--|--|--|--|--|--|--|--|--|--|--|--|--|--|--|--|--|--|--|--|--|--|--|--|--|--|--|--|--|--|--|--|--|--|--|--|--|--|--|--|--|--|--|--|--|--|--|--|--|--|--|--|--|--|--|--|--|--|--|--|--|--|--|--|--|--|--|--|--|--|--|--|--|--|--|--|--|--|--|--|--|--|--|--|--|--|--|--|--|--|--|--|--|--|--|--|--|--|--|--|--|--|--|--|--|--|--|--|--|--|--|--|--|--|--|--|--|--|--|--|--|--|--|--|--|--|--|--|--|--|--|--|--|--|--|--|--|--|--|--|--|--|--|--|--|--|--|--|--|--|--|--|--|--|--|--|--|--|--|--|--|--|--|--|--|--|--|--|--|--|--|--|--|--|--|--|--|--|--|--|--|--|--|--|--|--|--|--|--|--|--|--|--|--|--|--|--|--|--|--|--|--|--|--|--|--|--|--|--|--|--|--|--|--|--|--|--|--|--|--|--|--|--|--|--|--|--|--|--|--|--|--|--|--|--|--|--|--|--|--|--|--|--|--|--|--|--|--|--|--|--|--|--|--|--|--|--|--|--|--|--|--|--|--|--|--|--|--|--|--|--|--|--|--|--|--|--|--|--|--|--|--|--|--|--|--|--|--|--|--|--|--|--|--|--|--|--|--|--|--|--|--|--|--|--|--|--|--|--|--|--|--|--|--|--|--|--|--|--|--|--|--|--|--|--|--|--|--|--|--|--|--|--|--|--|--|--|--|--|--|--|--|--|--|--|--|--|--|--|--|--|--|--|--|--|--|--|--|--|--|--|--|--|--|--|--|--|--|--|--|--|--|--|--|--|--|--|--|--|--|--|--|--|--|--|--|--|--|--|--|--|--|--|--|--|--|--|--|--|--|--|--|--|--|--|--|--|--|--|--|--|--|--|--|--|--|--|--|--|--|--|--|--|--|--|--|--|--|--|--|--|--|--|--|--|--|--|--|--|--|--|--|--|--|--|--|--|--|--|--|--|--|--|--|--|--|--|--|--|--|--|--|--|--|--|--|--|--|--|--|--|--|--|--|--|--|--|--|--|--|--|--|--|--|--|--|--|--|--|--|--|--|--|--|--|--|--|--|--|--|--|--|--|--|--|--|--|--|--|--|--|--|--|--|--|--|--|--|--|--|--|--|--|--|--|--|--|--|--|--|--|--|--|--|--|--|--|--|--|--|--|--|--|--|--|--|--|--|--|--|--|--|--|--|--|--|--|--|--|--|--|--|--|--|--|--|--|--|--|--|--|--|--|--|--|--|--|--|--|--|--|--|--|--|--|--|--|--|--|--|--|--|--|--|--|--|--|--|--|--|--|--|--|--|--|--|--|--|--|--|--|--|--|--|--|--|--|--|--|--|--|--|--|--|--|--|--|--|--|--|--|--|--|--|--|--|--|--|--|--|--|--|--|--|--|--|--|--|--|--|--|--|--|--|--|--|--|--|--|--|--|--|--|--|--|--|--|--|--|--|--|--|--|--|--|--|--|--|--|--|--|--|--|--|--|--|--|--|--|--|--|--|--|--|--|--|--|--|--|--|--|--|--|--|--|--|--|--|--|--|--|--|--|--|--|--|--|--|--|--|--|--|--|--|--|--|--|--|--|--|--|--|--|--|--|--|--|--|--|--|--|--|--|--|--|--|--|--|--|--|--|--|--|--|--|--|--|--|--|--|--|--|--|--|--|--|--|--|--|--|--|--|--|--|--|--|--|--|--|--|--|--|--|--|--|--|--|--|--|--|--|--|--|--|--|--|--|--|--|--|--|--|--|--|--|--|--|--|--|--|--|--|--|--|--|--|--|--|--|--|--|--|--|--|--|--|--|--|--|--|--|--|--|--|--|--|--|--|--|--|--|--|--|--|--|--|--|--|--|--|--|--|--|--|--|--|--|--|--|--|--|--|--|--|--|--|--|--|--|--|--|--|--|--|--|--|--|--|--|--|--|--|--|--|--|--|--|--|--|--|--|--|--|--|--|--|--|--|--|--|--|--|--|--|--|--|--|--|--|--|--|--|--|--|--|--|--|--|--|--|--|--|--|--|--|--|--|--|--|--|--|--|--|--|--|--|--|--|--|--|--|--|--|--|--|--|--|--|--|--|--|--|--|--|--|--|--|--|--|--|--|--|--|--|--|--|--|--|--|--|--|--|--|--|--|--|--|--|--|--|--|--|--|--|--|--|--|--|--|--|--|--|--|--|--|--|--|--|--|--|--|--|--|--|--|--|--|--|--|--|--|--|--|--|--|--|--|--|--|--|--|--|--|--|--|--|--|--|--|--|--|--|--|--|--|--|--|--|--|--|--|--|--|--|--|--|--|--|--|--|--|--|--|--|--|--|--|--|--|--|--|--|--|--|--|--|--|--|--|--|--|--|--|--|--|--|--|--|--|--|--|--|--|--|--|--|--|--|--|--|--|--|--|--|--|--|--|--|--|--|--|--|--|--|--|--|--|--|--|--|--|--|--|--|--|--|--|--|--|--|--|--|--|--|--|--|--|--|--|--|--|--|--|--|--|--|--|--|--|--|--|--|--|--|--|--|--|--|--|--|--|--|--|--|--|--|--|--|--|--|--|--|--|--|--|--|--|--|--|--|--|--|--|--|--|--|--|
|  |  |  |  |  |  |  |  |  |  |  |  |  |  |  |  |  |  |  |  |  |  |  |  |  |  |  |  |  |  |  |  |  |  |  |  |  |  |  |  |  |  |  |  |  |  |  |  |  |  |  |  |  |  |  |  |  |  |  |  |  |  |  |  |  |  |  |  |  |  |  |  |  |  |  |  |  |  |  |  |  |  |  |  |  |  |  |  |  |  |  |  |  |  |  |  |  |  |  |  |  |  |  |  |  |  |  |  |  |  |  |  |  |  |  |  |  |  |  |  |  |  |  |  |  |  |  |  |  |  |  |  |  |  |  |  |  |  |  |  |  |  |  |  |  |  |  |  |  |  |  |  |  |  |  |  |  |  |  |  |  |  |  |  |  |  |  |  |  |  |  |  |  |  |  |  |  |  |  |  |  |  |  |  |  |  |  |  |  |  |  |  |  |  |  |  |  |  |  |  |  |  |  |  |  |  |  |  |  |  |  |  |  |  |  |  |  |  |  |  |  |  |  |  |  |  |  |  |  |  |  |  |  |  |  |  |  |  |  |  |  |  |  |  |  |  |  |  |  |  |  |  |  |  |  |  |  |  |  |  |  |  |  |  |  |  |  |  |  |  |  |  |  |  |  |  |  |  |  |  |  |  |  |  |  |  |  |  |  |  |  |  |  |  |  |  |  |  |  |  |  |  |  |  |  |  |  |  |  |  |  |  |  |  |  |  |  |  |  |  |  |  |  |  |  |  |  |  |  |  |  |  |  |  |  |  |  |  |  |  |  |  |  |  |  |  |  |  |  |  |  |  |  |  |  |  |  |  |  |  |  |  |  |  |  |  |  |  |  |  |  |  |  |  |  |  |  |  |  |  |  |  |  |  |  |  |  |  |  |  |  |  |  |  |  |  |  |  |  |  |  |  |  |  |  |  |  |  |  |  |  |  |  |  |  |  |  |  |  |  |  |  |  |  |  |  |  |  |  |  |  |  |  |  |  |  |  |  |  |  |  |  |  |  |  |  |  |  |  |  |  |  |  |  |  |  |  |  |  |  |  |  |  |  |  |  |  |  |  |  |  |  |  |  |  |  |  |  |  |  |  |  |  |  |  |  |  |  |  |  |  |  |  |  |  |  |  |  |  |  |  |  |  |  |  |  |  |  |  |  |  |  |  |  |  |  |  |  |  |  |  |  |  |  |  |  |  |  |  |  |  |  |  |  |  |  |  |  |  |  |  |  |  |  |  |  |  |  |  |  |  |  |  |  |  |  |  |  |  |  |  |  |  |  |  |  |  |  |  |  |  |  |  |  |  |  |  |  |  |  |  |  |  |  |  |  |  |  |  |  |  |  |  |  |  |  |  |  |  |  |  |  |  |  |  |  |  |  |  |  |  |  |  |  |  |  |  |  |  |  |  |  |  |  |  |  |  |  |  |  |  |  |  |  |  |  |  |  |  |  |  |  |  |  |  |  |  |  |  |  |  |  |  |  |  |  |  |  |  |  |  |  |  |  |  |  |  |  |  |  |  |  |  |  |  |  |  |  |  |  |  |  |  |  |  |  |  |  |  |  |  |  |  |  |  |  |  |  |  |  |  |  |  |  |  |  |  |  |  |  |  |  |  |  |  |  |  |  |  |  |  |  |  |  |  |  |  |  |  |  |  |  |  |  |  |  |  |  |  |  |  |  |  |  |  |  |  |  |  |  |  |  |  |  |  |  |  |  |  |  |  |  |  |  |  |  |  |  |  |  |  |  |  |  |  |  |  |  |  |  |  |  |  |  |  |  |  |  |  |  |  |  |  |  |  |  |  |  |  |  |  |  |  |  |  |  |  |  |  |  |  |  |  |  |  |  |  |  |  |  |  |  |  |  |  |  |  |  |  |  |  |  |  |  |  |  |  |  |  |  |  |  |  |  |  |  |  |  |  |  |  |  |  |  |  |  |  |  |  |  |  |  |  |  |  |  |  |  |  |  |  |  |  |  |  |  |  |  |  |  |  |  |  |  |  |  |  |  |  |  |  |  |  |  |  |  |  |  |  |  |  |  |  |  |  |  |  |  |  |  |  |  |  |  |  |  |  |  |  |  |  |  |  |  |  |  |  |  |  |  |  |  |  |  |  |  |  |  |  |  |  |  |  |  |  |  |  |  |  |  |  |  |  |  |  |  |  |  |  |  |  |  |  |  |  |  |  |  |  |  |  |  |  |  |  |  |  |  |  |  |  |  |  |  |  |  |  |  |  |  |  |  |  |  |  |  |  |  |  |  |  |  |  |  |  |  |  |  |  |  |  |  |  |  |  |  |  |  |  |  |  |  |  |  |  |  |  |  |  |  |  |  |  |  |  |  |  |  |  |  |  |  |  |  |  |  |  |  |  |  |  |  |  |  |  |  |  |  |  |  |  |  |  |  |  |  |  |  |  |  |  |  |  |  |  |  |  |  |  |  |  |  |  |  |  |  |  |  |  |  |  |  |  |  |  |  |  |  |  |  |  |  |  |  |  |  |  |  |  |  |  |  |  |  |  |  |  |  |  |  |  |  |  |  |  |  |  |  |  |  |  |  |  |  |  |  |  |  |  |  |  |  |  |  |  |  |  |  |  |  |  |  |  |  |  |  |  |  |  |  |  |  |  |  |  |  |  |  |  |  |  |  |  |  |  |  |  |  |  |  |  |  |  |  |  |  |  |  |  |  |  |  |  |  |  |  |  |  |  |  |  |  |  |  |  |  |  |  |  |  |  |  |  |  |  |  |  |  |  |  |  |  |  |  |  |  |  |  |  |  |  |  |  |  |  |  |  |  |  |  |  |  |  |  |  |  |  |  |  |  |  |  |  |  |  |  |  |  |  |  |  |  |  |  |  |  |  |  |  |  |  |  |  |  |  |  |  |  |  |  |  |  |  |  |  |  |  |  |  |  |  |  |  |  |  |  |  |  |  |  |  |  |  |  |  |  |  |  |  |  |  |  |  |  |  |  |  |  |  |  |  |  |  |  |  |  |  |  |  |  |  |  |  |  |  |  |  |  |  |  |  |  |  |  |  |  |  |  |  |  |  |  |  |  |  |  |  |  |  |  |  |  |  |  |  |  |  |  |  |  |  |  |  |  |  |  |  |  |  |  |  |  |  |  |  |  |  |  |  |  |  |  |  |  |  |  |  |  |  |  |  |  |  |  |  |  |  |  |  |  |  |  |  |  |  |  |  |  |  |  |  |  |  |  |  |  |  |  |  |  |  |  |  |  |  |  |  |  |  |  |  |  |  |  |  |  |  |  |  |  |  |  |  |  |  |  |  |  |  |  |  |  |  |  |  |  |  |  |  |  |  |  |  |  |  |  |  |  |  |  |  |  |  |  |  |  |  |  |  |  |  |  |  |  |  |  |  |  |
|--|--|--|--|--|--|--|--|--|--|--|--|--|--|--|--|--|--|--|--|--|--|--|--|--|--|--|--|--|--|--|--|--|--|--|--|--|--|--|--|--|--|--|--|--|--|--|--|--|--|--|--|--|--|--|--|--|--|--|--|--|--|--|--|--|--|--|--|--|--|--|--|--|--|--|--|--|--|--|--|--|--|--|--|--|--|--|--|--|--|--|--|--|--|--|--|--|--|--|--|--|--|--|--|--|--|--|--|--|--|--|--|--|--|--|--|--|--|--|--|--|--|--|--|--|--|--|--|--|--|--|--|--|--|--|--|--|--|--|--|--|--|--|--|--|--|--|--|--|--|--|--|--|--|--|--|--|--|--|--|--|--|--|--|--|--|--|--|--|--|--|--|--|--|--|--|--|--|--|--|--|--|--|--|--|--|--|--|--|--|--|--|--|--|--|--|--|--|--|--|--|--|--|--|--|--|--|--|--|--|--|--|--|--|--|--|--|--|--|--|--|--|--|--|--|--|--|--|--|--|--|--|--|--|--|--|--|--|--|--|--|--|--|--|--|--|--|--|--|--|--|--|--|--|--|--|--|--|--|--|--|--|--|--|--|--|--|--|--|--|--|--|--|--|--|--|--|--|--|--|--|--|--|--|--|--|--|--|--|--|--|--|--|--|--|--|--|--|--|--|--|--|--|--|--|--|--|--|--|--|--|--|--|--|--|--|--|--|--|--|--|--|--|--|--|--|--|--|--|--|--|--|--|--|--|--|--|--|--|--|--|--|--|--|--|--|--|--|--|--|--|--|--|--|--|--|--|--|--|--|--|--|--|--|--|--|--|--|--|--|--|--|--|--|--|--|--|--|--|--|--|--|--|--|--|--|--|--|--|--|--|--|--|--|--|--|--|--|--|--|--|--|--|--|--|--|--|--|--|--|--|--|--|--|--|--|--|--|--|--|--|--|--|--|--|--|--|--|--|--|--|--|--|--|--|--|--|--|--|--|--|--|--|--|--|--|--|--|--|--|--|--|--|--|--|--|--|--|--|--|--|--|--|--|--|--|--|--|--|--|--|--|--|--|--|--|--|--|--|--|--|--|--|--|--|--|--|--|--|--|--|--|--|--|--|--|--|--|--|--|--|--|--|--|--|--|--|--|--|--|--|--|--|--|--|--|--|--|--|--|--|--|--|--|--|--|--|--|--|--|--|--|--|--|--|--|--|--|--|--|--|--|--|--|--|--|--|--|--|--|--|--|--|--|--|--|--|--|--|--|--|--|--|--|--|--|--|--|--|--|--|--|--|--|--|--|--|--|--|--|--|--|--|--|--|--|--|--|--|--|--|--|--|--|--|--|--|--|--|--|--|--|--|--|--|--|--|--|--|--|--|--|--|--|--|--|--|--|--|--|--|--|--|--|--|--|--|--|--|--|--|--|--|--|--|--|--|--|--|--|--|--|--|--|--|--|--|--|--|--|--|--|--|--|--|--|--|--|--|--|--|--|--|--|--|--|--|--|--|--|--|--|--|--|--|--|--|--|--|--|--|--|--|--|--|--|--|--|--|--|--|--|--|--|--|--|--|--|--|--|--|--|--|--|--|--|--|--|--|--|--|--|--|--|--|--|--|--|--|--|--|--|--|--|--|--|--|--|--|--|--|--|--|--|--|--|--|--|--|--|--|--|--|--|--|--|--|--|--|--|--|--|--|--|--|--|--|--|--|--|--|--|--|--|--|--|--|--|--|--|--|--|--|--|--|--|--|--|--|--|--|--|--|--|--|--|--|--|--|--|--|--|--|--|--|--|--|--|--|--|--|--|--|--|--|--|--|--|--|--|--|--|--|--|--|--|--|--|--|--|--|--|--|--|--|--|--|--|--|--|--|--|--|--|--|--|--|--|--|--|--|--|--|--|--|--|--|--|--|--|--|--|--|--|--|--|--|--|--|--|--|--|--|--|--|--|--|--|--|--|--|--|--|--|--|--|--|--|--|--|--|--|--|--|--|--|--|--|--|--|--|--|--|--|--|--|--|--|--|--|--|--|--|--|--|--|--|--|--|--|--|--|--|--|--|--|--|--|--|--|--|--|--|--|--|--|--|--|--|--|--|--|--|--|--|--|--|--|--|--|--|--|--|--|--|--|--|--|--|--|--|--|--|--|--|--|--|--|--|--|--|--|--|--|--|--|--|--|--|--|--|--|--|--|--|--|--|--|--|--|--|--|--|--|--|--|--|--|--|--|--|--|--|--|--|--|--|--|--|--|--|--|--|--|--|--|--|--|--|--|--|--|--|--|--|--|--|--|--|--|--|--|--|--|--|--|--|--|--|--|--|--|--|--|--|--|--|--|--|--|--|--|--|--|--|--|--|--|--|--|--|--|--|--|--|--|--|--|--|--|--|--|--|--|--|--|--|--|--|--|--|--|--|--|--|--|--|--|--|--|--|--|--|--|--|--|--|--|--|--|--|--|--|--|--|--|--|--|--|--|--|--|--|--|--|--|--|--|--|--|--|--|--|--|--|--|--|--|--|--|--|--|--|--|--|--|--|--|--|--|--|--|--|--|--|--|--|--|--|--|--|--|--|--|--|--|--|--|--|--|--|--|--|--|--|--|--|--|--|--|--|--|--|--|--|--|--|--|--|--|--|--|--|--|--|--|--|--|--|--|--|--|--|--|--|--|--|--|--|--|--|--|--|--|--|--|--|--|--|--|--|--|--|--|--|--|--|--|--|--|--|--|--|--|--|--|--|--|--|--|--|--|--|--|--|--|--|--|--|--|--|--|--|--|--|--|--|--|--|--|--|--|--|--|--|--|--|--|--|--|--|--|--|--|--|--|--|--|--|--|--|--|--|--|--|--|--|--|--|--|--|--|--|--|--|--|--|--|--|--|--|--|--|--|--|--|--|--|--|--|--|--|--|--|--|--|--|--|--|--|--|--|--|--|--|--|--|--|--|--|--|--|--|--|--|--|--|--|--|--|--|--|--|--|--|--|--|--|--|--|--|--|--|--|--|--|--|--|--|--|--|--|--|--|--|--|--|--|--|--|--|--|--|--|--|--|--|--|--|--|--|--|--|--|--|--|--|--|--|--|--|--|--|--|--|--|--|--|--|--|--|--|--|--|--|--|--|--|--|--|--|--|--|--|--|--|--|--|--|--|--|--|--|--|--|--|--|--|--|--|--|--|--|--|--|--|--|--|--|--|--|--|--|--|--|--|--|--|--|--|--|--|--|--|--|--|--|--|--|--|--|--|--|--|--|--|--|--|--|--|--|--|--|--|--|--|--|--|--|--|--|--|--|--|--|--|--|--|--|--|--|--|--|--|--|--|--|--|--|--|--|--|--|--|--|--|--|--|--|--|--|--|--|--|--|--|--|--|

### Peptide Information

| Calc. Mass | Obsrv. Mass | $\pm$ da | $\pm$ ppm | Start Seq. | End Seq. | Sequence               | Ion Score | C. I. | % Modification          | Rank | Result Type |
|------------|-------------|----------|-----------|------------|----------|------------------------|-----------|-------|-------------------------|------|-------------|
| 877.4559   | 877.423     | -0.0329  | -37       | 167        | 174      | SVACVDRK               |           |       |                         |      | Mascot      |
| 980.5597   | 980.4255    | -0.1342  | -137      | 445        | 453      | GAKVVMFTK              |           |       |                         |      | Mascot      |
| 996.5546   | 996.6053    | 0.0507   | 51        | 445        | 453      | GAKVVMFTK              |           |       | Oxidation (M)[6]        |      | Mascot      |
| 1151.5691  | 1151.6522   | 0.0831   | 72        | 307        | 315      | LYLQDSQER              |           |       |                         |      | Mascot      |
| 1502.7533  | 1502.7963   | 0.043    | 29        | 448        | 460      | VVMFTKHSGSHTR          |           |       | Oxidation (M)[3]        |      | Mascot      |
| 1658.7849  | 1658.9414   | 0.1565   | 94        | 158        | 173      | GVANHMAGRSVACVDR       |           |       | Oxidation (M)[6]        |      | Mascot      |
| 1658.7849  | 1658.9414   | 0.1565   | 94        | 158        | 173      | GVANHMAGRSVACVDR       |           |       | Oxidation (M)[6]        |      | Mascot      |
| 1716.9391  | 1717.0227   | 0.0836   | 49        | 225        | 241      | YTGGRGVVGPILSDAR       |           |       |                         |      | Mascot      |
| 1859.8187  | 1859.9314   | 0.1127   | 61        | 97         | 115      | DPAGNAIGVTACDVDGDGR    |           |       | Carbamidomethyl (C)[12] |      | Mascot      |
| 1859.8268  | 1859.9314   | 0.1046   | 56        | 242        | 257      | SDIFCDNENGPNFLFK       |           |       |                         |      | Mascot      |
| 2661.2805  | 2661.2351   | -0.0454  | -17       | 294        | 315      | TDIVYGNWNGPHRLYLQDSQER |           |       |                         |      | Mascot      |

49 PREDICTED: DENN domain-containing protein 2A [Danio rerio] gi|326679977 79687.7 8.23 10 30 0

### Peptide Information

| Calc. Mass | Obsrv. Mass | $\pm$ da | $\pm$ ppm | Start Seq. | End Seq. | Sequence           | Ion Score | C. I. | % Modification    | Rank | Result Type |
|------------|-------------|----------|-----------|------------|----------|--------------------|-----------|-------|-------------------|------|-------------|
| 964.4516   | 964.4287    | -0.0229  | -24       | 2          | 11       | PSASTMTGGR         |           |       |                   |      | Mascot      |
| 980.4465   | 980.4255    | -0.021   | -21       | 2          | 11       | PSASTMTGGR         |           |       | Oxidation (M)[6]  |      | Mascot      |
| 1095.4922  | 1095.5372   | 0.045    | 41        | 1          | 11       | MPSASTMTGGR        |           |       |                   |      | Mascot      |
| 1111.4871  | 1111.5952   | 0.1081   | 97        | 1          | 11       | MPSASTMTGGR        |           |       | Oxidation (M)[1]  |      | Mascot      |
| 1280.6189  | 1280.6072   | -0.0117  | -9        | 193        | 204      | RVSQSTESSSGR       |           |       |                   |      | Mascot      |
| 1501.8308  | 1501.6599   | -0.1709  | -114      | 379        | 391      | RAISPALVQPFMR      |           |       | Oxidation (M)[12] |      | Mascot      |
| 1501.8308  | 1501.6599   | -0.1709  | -114      | 379        | 391      | RAISPALVQPFMR      |           |       | Oxidation (M)[12] |      | Mascot      |
| 1518.7581  | 1518.7903   | 0.0322   | 21        | 242        | 253      | TLERDLMDLQER       |           |       |                   |      | Mascot      |
| 1800.9677  | 1800.8799   | -0.0878  | -49       | 392        | 408      | GIMEAPFPAPGRTISIK  |           |       | Oxidation (M)[3]  |      | Mascot      |
| 2016.1165  | 2016.0427   | -0.0738  | -37       | 267        | 284      | TKAGVPYLPEVTQQFPLK |           |       |                   |      | Mascot      |
| 2284.0662  | 2284.2034   | 0.1372   | 60        | 668        | 687      | GLFEMRAQDYLDLPGG   |           |       | Oxidation (M)[5]  |      | Mascot      |
| 2379.1624  | 2379.3738   | 0.2114   | 89        | 641        | 659      | RFLEVMETQMFAGFLQER |           |       |                   |      | Mascot      |
| 2379.1624  | 2379.3738   | 0.2114   | 89        | 641        | 659      | RFLEVMETQMFAGFLQER |           |       |                   |      | Mascot      |
| 2545.1624  | 2545.3594   | 0.197    | 77        | 144        | 167      | VSPSPSTPSSPDDTPCLS |           |       |                   |      | Mascot      |
| 2545.1624  | 2545.3594   | 0.197    | 77        | 144        | 167      | GDYPNRR            |           |       |                   |      | Mascot      |



|    |                     |             |       |      |   |    |   |
|----|---------------------|-------------|-------|------|---|----|---|
| 50 | NOP56 [Danio rerio] | gi 49619095 | 60635 | 8.72 | 9 | 30 | 0 |
|----|---------------------|-------------|-------|------|---|----|---|

| Peptide Information |             |         |       | Start Seq. | End Seq. | Sequence                 | Ion Score | C. I. | % Modification         | Rank | Result Type |
|---------------------|-------------|---------|-------|------------|----------|--------------------------|-----------|-------|------------------------|------|-------------|
| Calc. Mass          | Obsrv. Mass | ± da    | ± ppm |            |          |                          |           |       |                        |      |             |
| 964.5574            | 964.4287    | -0.1287 | -133  | 369        | 376      | ISRYLANK                 |           |       |                        |      | Mascot      |
| 980.5676            | 980.4255    | -0.1421 | -145  | 128        | 135      | LHFHSLVK                 |           |       |                        |      | Mascot      |
| 1045.571            | 1045.5701   | -0.0009 | -1    | 91         | 100      | KPMLGVSDAK               |           |       |                        |      | Mascot      |
| 1275.6943           | 1275.6111   | -0.0832 | -65   | 78         | 89       | LFLETNLPSGGK             |           |       |                        |      | Mascot      |
| 1751.9591           | 1751.8743   | -0.0848 | -48   | 349        | 364      | YGLIFHSTFIGRAAAK         |           |       |                        |      | Mascot      |
| 1808.0177           | 1807.9532   | -0.0645 | -36   | 128        | 144      | LHFHSLVKGLTAQAASK        |           |       |                        |      | Mascot      |
| 2016.0621           | 2016.0427   | -0.0194 | -10   | 136        | 155      | GLTAQAASKAQLGLGHS<br>YSR |           |       |                        |      | Mascot      |
| 2211.2358           | 2211.1294   | -0.1064 | -48   | 1          | 20       | MVLLHVLFEHAAGYALLA<br>VK |           |       | Oxidation (M)[1]       |      | Mascot      |
| 2211.2358           | 2211.1294   | -0.1064 | -48   | 1          | 20       | MVLLHVLFEHAAGYALLA<br>VK |           |       | Oxidation (M)[1]       |      | Mascot      |
| 2362.0347           | 2362.1172   | 0.0825  | 35    | 222        | 241      | KELSEEMLEAMEEITMDS<br>AK |           |       | Oxidation (M)[7,11,16] |      | Mascot      |

|                       |           |                               |                |                       |                    |
|-----------------------|-----------|-------------------------------|----------------|-----------------------|--------------------|
| <b>Gel Idx/Pos</b>    | 175/H2    | <b>Instr./Gel Origin</b>      | BA2060/110707A | <b>Process Status</b> | Analysis Succeeded |
| <b>Plate [#] Name</b> | [1] 31496 | <b>Instrument Sample Name</b> |                | <b>Spectra</b>        | 11                 |

| Rank | Protein Name                                                                      | Accession No. | Protein MW | Protein PI | Pep. Count | Protein Score | Protein Score C. I. % | Total Ion Score | Total Ion C. I. % |
|------|-----------------------------------------------------------------------------------|---------------|------------|------------|------------|---------------|-----------------------|-----------------|-------------------|
| 1    | novel protein similar to H.sapiens NCL, nucleolin (NCL, zgc:152810) [Danio rerio] | gi 220672795  | 74887.4    | 4.62       | 19         | 557           | 100                   | 459             | 100               |

| Peptide Information |             |         |       |            | Ion Score | C. I. %       | Modification | Rank | Result Type |
|---------------------|-------------|---------|-------|------------|-----------|---------------|--------------|------|-------------|
| Calc. Mass          | Obsrv. Mass | ± da    | ± ppm | Start Seq. |           |               |              |      |             |
| 882.577             | 882.5717    | -0.0053 | -6    | 349        | 356       | KLLGQPVK      |              |      | Mascot      |
| 940.5137            | 940.5209    | 0.0072  | 8     | 414        | 421       | GIAYIEFK      |              |      | Mascot      |
| 1022.4901           | 1022.5009   | 0.0108  | 11    | 571        | 580       | DSFDGAIAAR    |              |      | Mascot      |
| 1024.4694           | 1024.5231   | 0.0537  | 52    | 532        | 539       | LEYSQNDR      |              |      | Mascot      |
| 1058.5476           | 1058.5569   | 0.0093  | 9     | 313        | 321       | EGLEIQDVR     |              |      | Mascot      |
| 1146.6014           | 1146.6381   | 0.0367  | 32    | 689        | 699       | GGFGDRPQGKK   |              |      | Mascot      |
| 1205.6161           | 1205.6255   | 0.0094  | 8     | 394        | 403       | EIFDQAVDIR    | 86           | 100  | Mascot      |
| 1205.6161           | 1205.6255   | 0.0094  | 8     | 394        | 403       | EIFDQAVDIR    |              |      | Mascot      |
| 1252.642            | 1252.7349   | 0.0929  | 74    | 298        | 308       | DFDELKSAISK   |              |      | Mascot      |
| 1309.6132           | 1309.6219   | 0.0087  | 7     | 532        | 541       | LEYSQNDRER    |              |      | Mascot      |
| 1359.6499           | 1359.6603   | 0.0104  | 8     | 429        | 441       | ALEEAQGSDVQGR |              |      | Mascot      |

|   |                         |           |         |    |             |     |                                  |      |        |                         |     |     |     |  |  |  |  |  |        |
|---|-------------------------|-----------|---------|----|-------------|-----|----------------------------------|------|--------|-------------------------|-----|-----|-----|--|--|--|--|--|--------|
|   | 1380.6866               | 1380.6865 | -0.0001 | 0  | 529         | 539 | SIRLEYSQNDR                      |      |        |                         |     |     |     |  |  |  |  |  | Mascot |
|   | 1434.7224               | 1434.7333 | 0.0109  | 8  | 382         | 393 | NLPYSITQDDL                      |      |        |                         |     |     |     |  |  |  |  |  | Mascot |
|   | 1434.7224               | 1434.7333 | 0.0109  | 8  | 382         | 393 | NLPYSITQDDL                      | 97   | 100    |                         |     |     |     |  |  |  |  |  | Mascot |
|   | 1563.6956               | 1563.7495 | 0.0539  | 34 | 606         | 620 | AAKEAMDDGEIDGNK                  |      |        |                         |     |     |     |  |  |  |  |  | Mascot |
|   | 1563.6956               | 1563.7495 | 0.0539  | 34 | 606         | 620 | AAKEAMDDGEIDGNK                  |      |        |                         |     |     |     |  |  |  |  |  | Mascot |
|   | 1661.7693               | 1661.7815 | 0.0122  | 7  | 328         | 341 | FGYVDFASEEELQK                   |      |        |                         |     |     |     |  |  |  |  |  | Mascot |
|   | 1677.6849               | 1677.6991 | 0.0142  | 8  | 592         | 605 | GFGFVDFDNEQDCK                   | 74   | 99.999 | Carbamidomethyl (C)[13] |     |     |     |  |  |  |  |  | Mascot |
|   | 1677.6849               | 1677.6991 | 0.0142  | 8  | 592         | 605 | GFGFVDFDNEQDCK                   |      |        | Carbamidomethyl (C)[13] |     |     |     |  |  |  |  |  | Mascot |
|   | 2297.0891               | 2297.1531 | 0.064   | 28 | 559         | 580 | GLSDDTTDQTLKDSFDG<br>AIAAR       |      |        |                         |     |     |     |  |  |  |  |  | Mascot |
|   | 2396.2344               | 2396.2654 | 0.031   | 13 | 465         | 486 | VLVVNNLAFSASEDSLQS<br>VFEK       |      |        |                         |     |     |     |  |  |  |  |  | Mascot |
|   | 2587.231                | 2587.2673 | 0.0363  | 14 | 281         | 303 | TDGEGFSLFLGNLNNK<br>DFDELK       |      |        |                         |     |     |     |  |  |  |  |  | Mascot |
|   | 3249.4275               | 3249.4709 | 0.0434  | 13 | 501         | 528 | GYAFVEFENVEDSKEALE<br>NCNNTDIEGR |      |        | Carbamidomethyl (C)[20] |     |     |     |  |  |  |  |  | Mascot |
|   | 3249.4275               | 3249.4709 | 0.0434  | 13 | 501         | 528 | GYAFVEFENVEDSKEALE<br>NCNNTDIEGR | 202  | 100    | Carbamidomethyl (C)[20] |     |     |     |  |  |  |  |  | Mascot |
| 2 | nucleolin [Danio rerio] |           |         |    | gi 49618989 |     | 70862.8                          | 4.74 | 17     | 543                     | 100 | 459 | 100 |  |  |  |  |  |        |

Peptide Information

| Calc. Mass | Obsrv. Mass | ± da    | ± ppm | Start Seq. | End Seq. | Sequence        | Ion Score | C. I.  | % Modification          | Rank | Result Type |
|------------|-------------|---------|-------|------------|----------|-----------------|-----------|--------|-------------------------|------|-------------|
| 882.577    | 882.5717    | -0.0053 | -6    | 312        | 319      | KLLGQPVK        |           |        |                         |      | Mascot      |
| 1022.4901  | 1022.5009   | 0.0108  | 11    | 534        | 543      | DSFDGAIAAR      |           |        |                         |      | Mascot      |
| 1024.4694  | 1024.5231   | 0.0537  | 52    | 495        | 502      | LEYSQNDR        |           |        |                         |      | Mascot      |
| 1058.5476  | 1058.5569   | 0.0093  | 9     | 276        | 284      | EGLEIQDVR       |           |        |                         |      | Mascot      |
| 1205.6161  | 1205.6255   | 0.0094  | 8     | 357        | 366      | EIFDQAVDIR      | 86        | 100    |                         |      | Mascot      |
| 1205.6161  | 1205.6255   | 0.0094  | 8     | 357        | 366      | EIFDQAVDIR      |           |        |                         |      | Mascot      |
| 1252.642   | 1252.7349   | 0.0929  | 74    | 261        | 271      | DFDELKSAISK     |           |        |                         |      | Mascot      |
| 1309.6132  | 1309.6219   | 0.0087  | 7     | 495        | 504      | LEYSQNDRER      |           |        |                         |      | Mascot      |
| 1359.6499  | 1359.6603   | 0.0104  | 8     | 392        | 404      | ALEEAQGSQDVQGR  |           |        |                         |      | Mascot      |
| 1380.6866  | 1380.6865   | -0.0001 | 0     | 492        | 502      | SIRLEYSQNDR     |           |        |                         |      | Mascot      |
| 1434.7224  | 1434.7333   | 0.0109  | 8     | 345        | 356      | NLPYSITQDDL     |           |        |                         |      | Mascot      |
| 1434.7224  | 1434.7333   | 0.0109  | 8     | 345        | 356      | NLPYSITQDDL     | 97        | 100    |                         |      | Mascot      |
| 1563.6956  | 1563.7495   | 0.0539  | 34    | 569        | 583      | AAKEAMDDGEIDGNK |           |        |                         |      | Mascot      |
| 1563.6956  | 1563.7495   | 0.0539  | 34    | 569        | 583      | AAKEAMDDGEIDGNK |           |        |                         |      | Mascot      |
| 1661.7693  | 1661.7815   | 0.0122  | 7     | 291        | 304      | FGYVDFASEEELQK  |           |        |                         |      | Mascot      |
| 1677.6849  | 1677.6991   | 0.0142  | 8     | 555        | 568      | GFGFVDFDNEQDCK  | 74        | 99.999 | Carbamidomethyl (C)[13] |      | Mascot      |
| 1677.6849  | 1677.6991   | 0.0142  | 8     | 555        | 568      | GFGFVDFDNEQDCK  |           |        | Carbamidomethyl (C)[13] |      | Mascot      |

|   |                                                            |           |        |    |     |     |                                  |  |     |     |                         |  |  |  |  |  |  |  |  |              |          |      |    |     |     |     |     |
|---|------------------------------------------------------------|-----------|--------|----|-----|-----|----------------------------------|--|-----|-----|-------------------------|--|--|--|--|--|--|--|--|--------------|----------|------|----|-----|-----|-----|-----|
|   | 2297.0891                                                  | 2297.1531 | 0.064  | 28 | 522 | 543 | GLSDDTTDQTLKDSFDG<br>AIAAR       |  |     |     |                         |  |  |  |  |  |  |  |  | Mascot       |          |      |    |     |     |     |     |
|   | 2396.2344                                                  | 2396.2654 | 0.031  | 13 | 428 | 449 | VLVVNNLAFSASEDSLQS<br>VFEK       |  |     |     |                         |  |  |  |  |  |  |  |  | Mascot       |          |      |    |     |     |     |     |
|   | 2587.231                                                   | 2587.2673 | 0.0363 | 14 | 244 | 266 | TDGEGFSLFLGNLNNNK<br>DFDELK      |  |     |     |                         |  |  |  |  |  |  |  |  | Mascot       |          |      |    |     |     |     |     |
|   | 3249.4275                                                  | 3249.4709 | 0.0434 | 13 | 464 | 491 | GYAFVEFENVEDSKEALE<br>NCNNTDIEGR |  |     |     |                         |  |  |  |  |  |  |  |  | Mascot       |          |      |    |     |     |     |     |
|   | 3249.4275                                                  | 3249.4709 | 0.0434 | 13 | 464 | 491 | GYAFVEFENVEDSKEALE<br>NCNNTDIEGR |  | 202 | 100 | Carbamidomethyl (C)[20] |  |  |  |  |  |  |  |  | Mascot       |          |      |    |     |     |     |     |
| 3 | PREDICTED: neutral alpha-glucosidase AB-like [Danio rerio] |           |        |    |     |     |                                  |  |     |     |                         |  |  |  |  |  |  |  |  | gi 292621001 | 106709.9 | 5.34 | 25 | 389 | 100 | 256 | 100 |

|   |                                                            |           |         |     |     |     |                            |  |  |  |              |         |      |    |     |                        |        |     |
|---|------------------------------------------------------------|-----------|---------|-----|-----|-----|----------------------------|--|--|--|--------------|---------|------|----|-----|------------------------|--------|-----|
|   | 1925.891                                                   | 1925.9102 | 0.0192  | 10  | 331 | 347 | MLDFVQGSSETPQTDVR          |  |  |  |              |         |      |    |     | Oxidation (M)[1]       | Mascot |     |
|   | 2028.0695                                                  | 2028.0717 | 0.0022  | 1   | 921 | 938 | KPGINAGMDWTILLQSQR         |  |  |  |              |         |      |    |     |                        | Mascot |     |
|   | 2044.0645                                                  | 2044.0875 | 0.023   | 11  | 921 | 938 | KPGINAGMDWTILLQSQR         |  |  |  |              |         |      |    |     | Oxidation (M)[8]       | Mascot |     |
|   | 2071.0051                                                  | 2071.0205 | 0.0154  | 7   | 903 | 920 | ETPVEFEFDASMSVLTLR         |  |  |  |              |         |      |    |     |                        | Mascot |     |
|   | 2087.0002                                                  | 2087.0176 | 0.0174  | 8   | 903 | 920 | ETPVEFEFDASMSVLTLR         |  |  |  |              |         |      |    |     | Oxidation (M)[12]      | Mascot |     |
|   | 2233.0515                                                  | 2233.1084 | 0.0569  | 25  | 811 | 830 | SSACMENDPYTLYVALS<br>PKK   |  |  |  |              |         |      |    |     | Oxidation (M)[5]       | Mascot |     |
|   | 2354.2615                                                  | 2354.2368 | -0.0247 | -10 | 777 | 797 | HNGAQNLVIPVTLSIPVF<br>QR   |  |  |  |              |         |      |    |     |                        | Mascot |     |
|   | 2677.0872                                                  | 2677.1145 | 0.0273  | 10  | 490 | 511 | NYEGWCWPGNSGYPDF<br>TNPEMR |  |  |  |              |         |      |    |     | Carbamidomethyl (C)[6] | Mascot |     |
| 4 | PREDICTED: neutral alpha-glucosidase AB-like [Danio rerio] |           |         |     |     |     |                            |  |  |  | gi 326673856 | 84660.6 | 5.01 | 19 | 272 | 100                    | 178    | 100 |

| Peptide Information |             |         |       |            |          |                       |           |       |                        |      |        |        |  |  |  |  |  |  |
|---------------------|-------------|---------|-------|------------|----------|-----------------------|-----------|-------|------------------------|------|--------|--------|--|--|--|--|--|--|
| Calc. Mass          | Obsrv. Mass | ± da    | ± ppm | Start Seq. | End Seq. | Sequence              | Ion Score | C. I. | % Modification         | Rank | Result | Type   |  |  |  |  |  |  |
| 883.442             | 883.4474    | 0.0054  | 6     | 595        | 602      | AFFAGSQR              |           |       |                        |      |        | Mascot |  |  |  |  |  |  |
| 973.5061            | 973.5176    | 0.0115  | 12    | 574        | 582      | ATAEGQIQR             |           |       |                        |      |        | Mascot |  |  |  |  |  |  |
| 1055.5996           | 1055.606    | 0.0064  | 6     | 168        | 176      | GLLAFEHLR             | 37        | 94.65 |                        |      |        | Mascot |  |  |  |  |  |  |
| 1055.5996           | 1055.606    | 0.0064  | 6     | 168        | 176      | GLLAFEHLR             |           |       |                        |      |        | Mascot |  |  |  |  |  |  |
| 1058.6469           | 1058.5569   | -0.09   | -85   | 143        | 151      | LIVSARPFR             |           |       |                        |      |        | Mascot |  |  |  |  |  |  |
| 1146.6266           | 1146.6381   | 0.0115  | 10    | 46         | 55       | TLKPGQSPYR            |           |       |                        |      |        | Mascot |  |  |  |  |  |  |
| 1155.6885           | 1155.6981   | 0.0096  | 8     | 79         | 87       | VHLLLELYR             |           |       |                        |      |        | Mascot |  |  |  |  |  |  |
| 1231.5194           | 1231.6849   | 0.1655  | 134   | 34         | 43       | TCDQSSFCKR            |           |       | Carbamidomethyl (C)[2] |      |        | Mascot |  |  |  |  |  |  |
| 1317.7273           | 1317.7367   | 0.0094  | 7     | 583        | 594      | SGGVERPFVLTR          |           |       |                        |      |        | Mascot |  |  |  |  |  |  |
| 1317.7273           | 1317.7367   | 0.0094  | 7     | 583        | 594      | SGGVERPFVLTR          | 8         | 0     |                        |      |        | Mascot |  |  |  |  |  |  |
| 1332.7006           | 1332.71     | 0.0094  | 7     | 56         | 67       | ALLDTLELSDSR          |           |       |                        |      |        | Mascot |  |  |  |  |  |  |
| 1434.9154           | 1434.7333   | -0.1821 | -127  | 95         | 106      | VKINELKPLKPR          |           |       |                        |      |        | Mascot |  |  |  |  |  |  |
| 1434.9154           | 1434.7333   | -0.1821 | -127  | 95         | 106      | VKINELKPLKPR          |           |       |                        |      |        | Mascot |  |  |  |  |  |  |
| 1448.7532           | 1448.757    | 0.0038  | 3     | 562        | 573      | DVHNIYGLYVQK          |           |       |                        |      |        | Mascot |  |  |  |  |  |  |
| 1563.7379           | 1563.7495   | 0.0116  | 7     | 655        | 666      | WYQTGAYQPFFR          |           |       |                        |      |        | Mascot |  |  |  |  |  |  |
| 1563.7379           | 1563.7495   | 0.0116  | 7     | 655        | 666      | WYQTGAYQPFFR          | 91        | 100   |                        |      |        | Mascot |  |  |  |  |  |  |
| 1642.8588           | 1642.8677   | 0.0089  | 5     | 677        | 690      | EPWLFGPENTALIR        |           |       |                        |      |        | Mascot |  |  |  |  |  |  |
| 1691.8217           | 1691.8334   | 0.0117  | 7     | 431        | 443      | YFTWDPHKFPEPK         |           |       |                        |      |        | Mascot |  |  |  |  |  |  |
| 1785.9415           | 1785.9579   | 0.0164  | 9     | 152        | 167      | LDIMEGPEVLLSLNSR      |           |       |                        |      |        | Mascot |  |  |  |  |  |  |
| 1798.9598           | 1798.9722   | 0.0124  | 7     | 676        | 690      | REPWLFGPENTALIR       |           |       |                        |      |        | Mascot |  |  |  |  |  |  |
| 1798.9598           | 1798.9722   | 0.0124  | 7     | 676        | 690      | REPWLFGPENTALIR       | 43        | 98.55 |                        |      |        | Mascot |  |  |  |  |  |  |
| 1860.8663           | 1860.8818   | 0.0155  | 8     | 603        | 619      | YGAVWTGDNAADWGH<br>LK |           |       |                        |      |        | Mascot |  |  |  |  |  |  |
| 1909.896            | 1909.9108   | 0.0148  | 8     | 331        | 347      | MLDFVQGSSETPQTDVR     |           |       |                        |      |        | Mascot |  |  |  |  |  |  |

|   |                                  |           |        |    |              |          |                            |    |     |     |    |     |                        |        |
|---|----------------------------------|-----------|--------|----|--------------|----------|----------------------------|----|-----|-----|----|-----|------------------------|--------|
|   | 1925.891                         | 1925.9102 | 0.0192 | 10 | 331          | 347      | MLDFVQGSSETPQTDVR          |    |     |     |    |     | Oxidation (M)[1]       | Mascot |
|   | 2677.0872                        | 2677.1145 | 0.0273 | 10 | 490          | 511      | NYEGWCWPGNSGYPDF<br>TNPEMR |    |     |     |    |     | Carbamidomethyl (C)[6] | Mascot |
| 5 | Zgc:171967 protein [Danio rerio] |           |        |    | gi 190339135 | 104064.6 | 5.22                       | 12 | 120 | 100 | 88 | 100 |                        |        |

Peptide Information

| Calc. Mass | Obsrv. Mass | ± da    | ± ppm | Start Seq. | End Seq. | Sequence        | Ion Score | C. I. | % | Modification           | Rank | Result Type |
|------------|-------------|---------|-------|------------|----------|-----------------|-----------|-------|---|------------------------|------|-------------|
| 883.442    | 883.4474    | 0.0054  | 6     | 576        | 583      | AFFAGSQR        |           |       |   |                        |      | Mascot      |
| 996.5585   | 996.6018    | 0.0433  | 43    | 453        | 460      | IHNEIRSK        |           |       |   |                        |      | Mascot      |
| 1055.5996  | 1055.606    | 0.0064  | 6     | 163        | 171      | GLLAFEHLR       | 37        | 94.65 |   |                        |      | Mascot      |
| 1055.5996  | 1055.606    | 0.0064  | 6     | 163        | 171      | GLLAFEHLR       |           |       |   |                        |      | Mascot      |
| 1205.5811  | 1205.6255   | 0.0444  | 37    | 533        | 542      | DAVHGVWEHR      |           |       |   |                        |      | Mascot      |
| 1205.5811  | 1205.6255   | 0.0444  | 37    | 533        | 542      | DAVHGVWEHR      |           |       |   |                        |      | Mascot      |
| 1231.5194  | 1231.6849   | 0.1655  | 134   | 29         | 38       | TCDQSSFCKR      |           |       |   | Carbamidomethyl (C)[2] |      | Mascot      |
| 1309.6383  | 1309.6219   | -0.0164 | -13   | 253        | 263      | LKSTENS DPYR    |           |       |   |                        |      | Mascot      |
| 1317.7273  | 1317.7367   | 0.0094  | 7     | 564        | 575      | SGGVERPFLTR     |           |       |   |                        |      | Mascot      |
| 1317.7273  | 1317.7367   | 0.0094  | 7     | 564        | 575      | SGGVERPFLTR     | 8         | 0     |   |                        |      | Mascot      |
| 1332.7006  | 1332.71     | 0.0094  | 7     | 51         | 62       | ALLDTLELSDSR    |           |       |   |                        |      | Mascot      |
| 1434.9154  | 1434.7333   | -0.1821 | -127  | 90         | 101      | VKINELKPIKPR    |           |       |   |                        |      | Mascot      |
| 1434.9154  | 1434.7333   | -0.1821 | -127  | 90         | 101      | VKINELKPIKPR    |           |       |   |                        |      | Mascot      |
| 1448.7532  | 1448.757    | 0.0038  | 3     | 543        | 554      | DVHNLYGLYVQK    |           |       |   |                        |      | Mascot      |
| 1642.8588  | 1642.8677   | 0.0089  | 5     | 658        | 671      | EPWLFGPENTALIR  |           |       |   |                        |      | Mascot      |
| 1798.9598  | 1798.9722   | 0.0124  | 7     | 657        | 671      | REPWLFGPENTALIR |           |       |   |                        |      | Mascot      |
| 1798.9598  | 1798.9722   | 0.0124  | 7     | 657        | 671      | REPWLFGPENTALIR | 43        | 98.55 |   |                        |      | Mascot      |

|   |                                                 |  |  |  |              |         |     |   |    |        |    |        |  |  |
|---|-------------------------------------------------|--|--|--|--------------|---------|-----|---|----|--------|----|--------|--|--|
| 6 | hypothetical protein LOC100126019 [Danio rerio] |  |  |  | gi 157787145 | 49134.9 | 8.2 | 6 | 69 | 99.477 | 51 | 99.767 |  |  |
|---|-------------------------------------------------|--|--|--|--------------|---------|-----|---|----|--------|----|--------|--|--|

Peptide Information

| Calc. Mass | Obsrv. Mass | ± da   | ± ppm | Start Seq. | End Seq. | Sequence        | Ion Score | C. I. | % | Modification | Rank | Result Type |
|------------|-------------|--------|-------|------------|----------|-----------------|-----------|-------|---|--------------|------|-------------|
| 883.442    | 883.4474    | 0.0054 | 6     | 47         | 54       | AFFAGSQR        |           |       |   |              |      | Mascot      |
| 1205.5811  | 1205.6255   | 0.0444 | 37    | 4          | 13       | DAVHGVWEHR      |           |       |   |              |      | Mascot      |
| 1205.5811  | 1205.6255   | 0.0444 | 37    | 4          | 13       | DAVHGVWEHR      |           |       |   |              |      | Mascot      |
| 1317.7273  | 1317.7367   | 0.0094 | 7     | 35         | 46       | SGGVERPFLTR     |           |       |   |              |      | Mascot      |
| 1317.7273  | 1317.7367   | 0.0094 | 7     | 35         | 46       | SGGVERPFLTR     | 8         | 0     |   |              |      | Mascot      |
| 1448.7532  | 1448.757    | 0.0038 | 3     | 14         | 25       | DVHNLYGLYVQK    |           |       |   |              |      | Mascot      |
| 1642.8588  | 1642.8677   | 0.0089 | 5     | 129        | 142      | EPWLFGPENTALIR  |           |       |   |              |      | Mascot      |
| 1798.9598  | 1798.9722   | 0.0124 | 7     | 128        | 142      | REPWLFGPENTALIR |           |       |   |              |      | Mascot      |

|   |                                               |           |        |   |             |         |                 |    |    |        |  |        |
|---|-----------------------------------------------|-----------|--------|---|-------------|---------|-----------------|----|----|--------|--|--------|
|   | 1798.9598                                     | 1798.9722 | 0.0124 | 7 | 128         | 142     | REPWLFGPENTALIR |    | 43 | 98.55  |  | Mascot |
| 7 | calcium-binding protein 39-like [Danio rerio] |           |        |   | gi 55925566 | 38782.2 | 6.81            | 10 | 51 | 62.986 |  |        |

Peptide Information

| Calc. Mass | Obsrv. Mass | ± da    | ± ppm | Start Seq. | End Seq. | Sequence              | Ion Score | C. I. % | Modification                                  | Rank | Result Type |
|------------|-------------|---------|-------|------------|----------|-----------------------|-----------|---------|-----------------------------------------------|------|-------------|
| 882.5155   | 882.5717    | 0.0562  | 64    | 186        | 192      | DLLTRHK               |           |         |                                               |      | Mascot      |
| 1041.6302  | 1041.5912   | -0.039  | -37   | 228        | 236      | LLGELLDR              |           |         |                                               |      | Mascot      |
| 1115.667   | 1115.5195   | -0.1475 | -132  | 10         | 19       | SPTEIVKTLK            |           |         |                                               |      | Mascot      |
| 1165.6068  | 1165.7517   | 0.1449  | 124   | 254        | 262      | LMNLLRDK              |           |         | Oxidation (M)[2,3]                            |      | Mascot      |
| 1252.6466  | 1252.7349   | 0.0883  | 70    | 145        | 154      | ECIRHEPLAK            |           |         | Carbamidomethyl (C)[2]                        |      | Mascot      |
| 1359.7379  | 1359.6603   | -0.0776 | -57   | 213        | 223      | LLHSENYVTKR           |           |         |                                               |      | Mascot      |
| 1451.7233  | 1451.7589   | 0.0356  | 25    | 35         | 47       | ASEEVSKCLVAMK         |           |         | Carbamidomethyl (C)[8]                        |      | Mascot      |
| 1563.7954  | 1563.7495   | -0.0459 | -29   | 263        | 275      | SPNIQFEAFHVK          |           |         |                                               |      | Mascot      |
| 1563.7954  | 1563.7495   | -0.0459 | -29   | 263        | 275      | SPNIQFEAFHVK          |           |         |                                               |      | Mascot      |
| 2028.1058  | 2028.0717   | -0.0341 | -17   | 228        | 244      | LLGELLDRHNFTVMTR      |           |         |                                               |      | Mascot      |
| 2044.1008  | 2044.0875   | -0.0133 | -7    | 228        | 244      | LLGELLDRHNFTVMTR      |           |         | Oxidation (M)[15]                             |      | Mascot      |
| 2396.1519  | 2396.2654   | 0.1135  | 47    | 129        | 148      | GYETPQVALNCGIMLRE CIR |           |         | Carbamidomethyl (C)[11,18], Oxidation (M)[14] |      | Mascot      |

|   |                             |  |  |  |              |         |      |   |    |   |  |  |
|---|-----------------------------|--|--|--|--------------|---------|------|---|----|---|--|--|
| 8 | Synbl protein [Danio rerio] |  |  |  | gi 141796272 | 31226.2 | 5.37 | 9 | 44 | 0 |  |  |
|---|-----------------------------|--|--|--|--------------|---------|------|---|----|---|--|--|

Peptide Information

| Calc. Mass | Obsrv. Mass | ± da    | ± ppm | Start Seq. | End Seq. | Sequence              | Ion Score | C. I. % | Modification     | Rank | Result Type |
|------------|-------------|---------|-------|------------|----------|-----------------------|-----------|---------|------------------|------|-------------|
| 842.5709   | 842.5159    | -0.055  | -65   | 18         | 24       | VEKLLLK               |           |         |                  |      | Mascot      |
| 883.3904   | 883.4474    | 0.057   | 65    | 25         | 31       | YNTENSR               |           |         |                  |      | Mascot      |
| 1045.6769  | 1045.5726   | -0.1043 | -100  | 171        | 179      | LLFLLSALR             |           |         |                  |      | Mascot      |
| 1058.6503  | 1058.5569   | -0.0934 | -88   | 256        | 264      | LRLIAGIMR             |           |         | Oxidation (M)[8] |      | Mascot      |
| 1115.6605  | 1115.5195   | -0.141  | -126  | 46         | 55       | LCQGLLTVLR            |           |         |                  |      | Mascot      |
| 1563.7384  | 1563.7495   | 0.0111  | 7     | 2          | 16       | SLSDILSEIDGGDDK       |           |         |                  |      | Mascot      |
| 1563.7384  | 1563.7495   | 0.0111  | 7     | 2          | 16       | SLSDILSEIDGGDDK       |           |         |                  |      | Mascot      |
| 1625.8169  | 1625.8036   | -0.0133 | -8    | 32         | 45       | TFAFDLEEEGARIK        |           |         |                  |      | Mascot      |
| 1691.8334  | 1691.8334   | 0       | 0     | 2          | 17       | SLSDILSEIDGGDDKK      |           |         |                  |      | Mascot      |
| 2283.0193  | 2283.2014   | 0.1821  | 80    | 98         | 118      | ICVAGHEGEPLAAQSAE EER |           |         |                  |      | Mascot      |

|   |                                                                                                        |  |  |  |             |         |      |    |    |   |  |  |
|---|--------------------------------------------------------------------------------------------------------|--|--|--|-------------|---------|------|----|----|---|--|--|
| 9 | novel protein similar to human and mouse GRIP and coiled-coil domain containing 1 (GCC1) [Danio rerio] |  |  |  | gi 56207500 | 91060.6 | 5.23 | 14 | 42 | 0 |  |  |
|---|--------------------------------------------------------------------------------------------------------|--|--|--|-------------|---------|------|----|----|---|--|--|

Peptide Information

| Calc. Mass | Obsrv. Mass | ± da    | ± ppm | Start Seq. | End Sequence Seq.             | Ion Score | C. I. | % Modification          | Rank | Result Type |
|------------|-------------|---------|-------|------------|-------------------------------|-----------|-------|-------------------------|------|-------------|
| 842.4518   | 842.5159    | 0.0641  | 76    | 31         | 36 YQTRFK                     |           |       |                         |      | Mascot      |
| 902.524    | 902.5206    | -0.0034 | -4    | 518        | 525 MRAQGVLK                  |           |       |                         |      | Mascot      |
| 1022.5152  | 1022.5009   | -0.0143 | -14   | 744        | 752 DGANLEYLK                 |           |       |                         |      | Mascot      |
| 1058.5112  | 1058.5569   | 0.0457  | 43    | 83         | 92 ALPSDLGDDR                 |           |       |                         |      | Mascot      |
| 1115.5691  | 1115.5195   | -0.0496 | -44   | 215        | 223 QELEELQAR                 |           |       |                         |      | Mascot      |
| 1309.6747  | 1309.6219   | -0.0528 | -40   | 705        | 715 LEEDLHQLQGK               |           |       |                         |      | Mascot      |
| 1359.6499  | 1359.6603   | 0.0104  | 8     | 531        | 542 DGNQAKELEEER              |           |       |                         |      | Mascot      |
| 1434.7145  | 1434.7333   | 0.0188  | 13    | 390        | 402 VSELSELLGACEK             |           |       | Carbamidomethyl (C)[11] |      | Mascot      |
| 1434.7145  | 1434.7333   | 0.0188  | 13    | 390        | 402 VSELSELLGACEK             | 4         | 0     | Carbamidomethyl (C)[11] |      | Mascot      |
| 1477.7314  | 1477.7069   | -0.0245 | -17   | 378        | 389 MEEIRVASLEER              |           |       | Oxidation (M)[1]        |      | Mascot      |
| 1661.8527  | 1661.7815   | -0.0712 | -43   | 390        | 404 VSELSELLGACEKAR           |           |       | Carbamidomethyl (C)[11] |      | Mascot      |
| 1677.8806  | 1677.6991   | -0.1815 | -108  | 552        | 565 YINLRIQSDEAEVK            |           |       |                         |      | Mascot      |
| 1677.8806  | 1677.6991   | -0.1815 | -108  | 552        | 565 YINLRIQSDEAEVK            |           |       |                         |      | Mascot      |
| 1785.8501  | 1785.9579   | 0.1078  | 60    | 481        | 496 LLEGGEKDHEVSESEK          |           |       |                         |      | Mascot      |
| 2027.978   | 2028.0717   | 0.0937  | 46    | 230        | 246 QHQAELQNLQEQAESK          |           |       |                         |      | Mascot      |
| 2297.1077  | 2297.1531   | 0.0454  | 20    | 293        | 313 ATLAEAMQAADRGLDYE<br>SQLK |           |       | Oxidation (M)[7]        |      | Mascot      |

10 novel protein [Danio rerio] gi|157888764 66709.9 9.51 10 41 0 7 0

#### Peptide Information

| Calc. Mass | Obsrv. Mass | ± da    | ± ppm | Start Seq. | End Sequence Seq.           | Ion Score | C. I. | % Modification            | Rank | Result Type |
|------------|-------------|---------|-------|------------|-----------------------------|-----------|-------|---------------------------|------|-------------|
| 883.3679   | 883.4474    | 0.0795  | 90    | 121        | 127 FEDESEK                 |           |       |                           |      | Mascot      |
| 1055.632   | 1055.606    | -0.026  | -25   | 533        | 541 EGRPKLSLR               | 3         | 0     |                           |      | Mascot      |
| 1055.632   | 1055.606    | -0.026  | -25   | 533        | 541 EGRPKLSLR               |           |       |                           |      | Mascot      |
| 1146.5974  | 1146.6381   | 0.0407  | 35    | 371        | 381 SGSKSRPSGQR             |           |       |                           |      | Mascot      |
| 1317.6481  | 1317.7367   | 0.0886  | 67    | 237        | 246 WVTNPQTCRR              |           |       | Carbamidomethyl (C)[8]    |      | Mascot      |
| 1317.6481  | 1317.7367   | 0.0886  | 67    | 237        | 246 WVTNPQTCRR              |           |       | Carbamidomethyl (C)[8]    |      | Mascot      |
| 1448.6257  | 1448.757    | 0.1313  | 91    | 561        | 573 SNSMEHLCSPTAR           |           |       | Oxidation (M)[4]          |      | Mascot      |
| 1477.6926  | 1477.7069   | 0.0143  | 10    | 542        | 554 RFFSAMGLNSMGK           |           |       | Oxidation (M)[6,11]       |      | Mascot      |
| 1625.8242  | 1625.8036   | -0.0206 | -13   | 222        | 236 STHGITDSQEKA VPR        |           |       |                           |      | Mascot      |
| 1661.8389  | 1661.7815   | -0.0574 | -35   | 543        | 557 FFSAMGLNSMGKLVK         |           |       | Oxidation (M)[5,10]       |      | Mascot      |
| 1798.9293  | 1798.9722   | 0.0429  | 24    | 477        | 493 DSKSTVPVSSDSHLALR       |           |       |                           |      | Mascot      |
| 1798.9293  | 1798.9722   | 0.0429  | 24    | 477        | 493 DSKSTVPVSSDSHLALR       | 7         | 0     |                           |      | Mascot      |
| 2225.0359  | 2225.1377   | 0.1018  | 46    | 197        | 216 DEMLRTCEACGSILAAQ<br>TK |           |       | Carbamidomethyl (C)[7,10] |      | Mascot      |

11    PREDICTED: zgc:171573 [Danio rerio]                      gi|68441609                      43885.4    8.27    10    40    0

Peptide Information

| Calc. Mass | Obsrv. Mass | ± da    | ± ppm | Start Seq. | End Seq. | Sequence                 | Ion Score | C. I. % | Modification              | Rank | Result Type |
|------------|-------------|---------|-------|------------|----------|--------------------------|-----------|---------|---------------------------|------|-------------|
| 902.4689   | 902.5206    | 0.0517  | 57    | 87         | 93       | DERQLNK                  |           |         |                           |      | Mascot      |
| 1022.5265  | 1022.5009   | -0.0256 | -25   | 27         | 34       | QERIFSDK                 |           |         |                           |      | Mascot      |
| 1252.5593  | 1252.7349   | 0.1756  | 140   | 358        | 367      | YYSQFNTSSR               |           |         |                           |      | Mascot      |
| 1317.7307  | 1317.7367   | 0.006   | 5     | 304        | 315      | MSSARAALLLER             |           |         |                           |      | Mascot      |
| 1317.7307  | 1317.7367   | 0.006   | 5     | 304        | 315      | MSSARAALLLER             |           |         |                           |      | Mascot      |
| 1332.6682  | 1332.71     | 0.0418  | 31    | 110        | 120      | EFDLNDPELLK              |           |         |                           |      | Mascot      |
| 1727.8711  | 1727.8621   | -0.009  | -5    | 344        | 357      | KHLQDVYTNIPDER           |           |         |                           |      | Mascot      |
| 1727.8711  | 1727.8621   | -0.009  | -5    | 344        | 357      | KHLQDVYTNIPDER           |           |         |                           |      | Mascot      |
| 2027.9087  | 2028.0717   | 0.163   | 80    | 169        | 184      | QEEENQYDQIRMSLSR         |           |         | Oxidation (M)[11]         |      | Mascot      |
| 2211.042   | 2211.1277   | 0.0857  | 39    | 65         | 83       | VYADDLLCSDGIACILEQ<br>R  |           |         | Carbamidomethyl (C)[8,14] |      | Mascot      |
| 2211.042   | 2211.1277   | 0.0857  | 39    | 65         | 83       | VYADDLLCSDGIACILEQ<br>R  |           |         | Carbamidomethyl (C)[8,14] |      | Mascot      |
| 2225.2288  | 2225.1377   | -0.0911 | -41   | 198        | 217      | DLIIATKDFNLALAAEITH<br>R |           |         |                           |      | Mascot      |
| 2396.0645  | 2396.2654   | 0.2009  | 84    | 261        | 279      | DCYKGMSPQELQTYTQY<br>QR  |           |         | Carbamidomethyl (C)[2]    |      | Mascot      |

12    lft81 protein [Danio rerio]                      gi|145337899                      29908.3    5.76    9    40    0

Peptide Information

| Calc. Mass | Obsrv. Mass | ± da   | ± ppm | Start Seq. | End Seq. | Sequence                  | Ion Score | C. I. % | Modification                              | Rank | Result Type |
|------------|-------------|--------|-------|------------|----------|---------------------------|-----------|---------|-------------------------------------------|------|-------------|
| 883.4164   | 883.4474    | 0.031  | 35    | 218        | 223      | QMKMWK                    |           |         | Oxidation (M)[2,4]                        |      | Mascot      |
| 1045.5636  | 1045.5726   | 0.009  | 9     | 14         | 21       | TEEILRER                  |           |         |                                           |      | Mascot      |
| 1115.6055  | 1115.5195   | -0.086 | -77   | 155        | 163      | EIIESQIQR                 |           |         |                                           |      | Mascot      |
| 1448.6976  | 1448.757    | 0.0594 | 41    | 135        | 146      | TLREETAQEEESR             |           |         |                                           |      | Mascot      |
| 1581.7651  | 1581.8031   | 0.038  | 24    | 221        | 232      | MWKDLETLLCEK              |           |         | Carbamidomethyl (C)[11], Oxidation (M)[1] |      | Mascot      |
| 1727.8018  | 1727.8621   | 0.0603 | 35    | 113        | 128      | AQYETCAAGLESNRSK          |           |         |                                           |      | Mascot      |
| 1727.8018  | 1727.8621   | 0.0603 | 35    | 113        | 128      | AQYETCAAGLESNRSK          |           |         |                                           |      | Mascot      |
| 1912.9399  | 1912.9994   | 0.0595 | 31    | 96         | 111      | ALRQEHAELAPEYEEK          |           |         |                                           |      | Mascot      |
| 2225.0879  | 2225.1377   | 0.0498 | 22    | 147        | 163      | YHHINCEREIIESQIQR         |           |         | Carbamidomethyl (C)[6]                    |      | Mascot      |
| 2283.1914  | 2283.2014   | 0.01   | 4     | 234        | 254      | QCYLKAQSQAPIGHVIQD<br>VGK |           |         |                                           |      | Mascot      |

13    hypothetical protein LOC492329 [Danio rerio]                      gi|55925514                      119622.9    8.99    17    39    0

Peptide Information

| Calc. Mass | Obsrv. Mass | ± da | ± ppm | Start | End | Sequence | Ion | C. I. % | Modification | Rank | Result Type |
|------------|-------------|------|-------|-------|-----|----------|-----|---------|--------------|------|-------------|
|------------|-------------|------|-------|-------|-----|----------|-----|---------|--------------|------|-------------|



|    |                                                 |           |         | Seq. | Seq.         |     | Score                     |                                          |        |    |   |
|----|-------------------------------------------------|-----------|---------|------|--------------|-----|---------------------------|------------------------------------------|--------|----|---|
|    | 842.4366                                        | 842.5159  | 0.0793  | 94   | 90           | 96  | NTTLEHK                   |                                          | Mascot |    |   |
|    | 1058.4645                                       | 1058.5569 | 0.0924  | 87   | 694          | 701 | KEACEMFK                  | Carbamidomethyl (C)[4], Oxidation (M)[6] | Mascot |    |   |
|    | 1231.7191                                       | 1231.6849 | -0.0342 | -28  | 179          | 190 | AAMLVKVSSIGR              |                                          | Mascot |    |   |
|    | 1434.7006                                       | 1434.7333 | 0.0327  | 23   | 231          | 244 | CTTTPGGKIAADSR            | Carbamidomethyl (C)[1]                   | Mascot |    |   |
|    | 1434.7522                                       | 1434.7333 | -0.0189 | -13  | 666          | 677 | KVSIANMLSWNR              | Oxidation (M)[7]                         | Mascot |    |   |
|    | 1451.6445                                       | 1451.7589 | 0.1144  | 79   | 774          | 784 | FCCYLEGYIQR               | Carbamidomethyl (C)[2]                   | Mascot |    |   |
|    | 1477.7614                                       | 1477.7069 | -0.0545 | -37  | 682          | 693 | KPMLMTNDRTVR              | Oxidation (M)[3]                         | Mascot |    |   |
|    | 1563.8376                                       | 1563.7495 | -0.0881 | -56  | 794          | 806 | ITQFILDQQDSKK             |                                          | Mascot |    |   |
|    | 1563.8376                                       | 1563.7495 | -0.0881 | -56  | 793          | 805 | KITQFILDQQDSK             |                                          | Mascot |    |   |
|    | 1625.8131                                       | 1625.8036 | -0.0095 | -6   | 956          | 968 | ELEEPLIPMTFYK             | Oxidation (M)[9]                         | Mascot |    |   |
|    | 1691.8898                                       | 1691.8334 | -0.0564 | -33  | 667          | 681 | VSIANMLSWNRGSIK           | Oxidation (M)[6]                         | Mascot |    |   |
|    | 1730.9119                                       | 1730.9097 | -0.0022 | -1   | 327          | 341 | MKLLQHPAQPHSSR            |                                          | Mascot |    |   |
|    | 1860.8909                                       | 1860.8818 | -0.0091 | -5   | 542          | 558 | TNNNPSMAFTPLDIPGR         | Oxidation (M)[7]                         | Mascot |    |   |
|    | 1913.0248                                       | 1912.9994 | -0.0254 | -13  | 718          | 734 | HAALLIVTKCWGMQGLR         | Oxidation (M)[13]                        | Mascot |    |   |
|    | 1925.9347                                       | 1925.9102 | -0.0245 | -13  | 118          | 135 | TPLPPVEPCTKEPECASK        |                                          | Mascot |    |   |
|    | 2086.9612                                       | 2087.0176 | 0.0564  | 27   | 18           | 35  | EYMYVNLTGICGWDPP<br>K     |                                          | Mascot |    |   |
|    | 2225.1133                                       | 2225.1377 | 0.0244  | 11   | 753          | 773 | SLAAGWELMAVCLAFFA<br>PSPK | Oxidation (M)[9]                         | Mascot |    |   |
| 14 | hypothetical protein LOC100126120 [Danio rerio] |           |         |      | gi 157954484 |     | 52911.3                   | 7.59                                     | 12     | 39 | 0 |

Peptide Information

| Calc. Mass | Obsrv. Mass | ± da    | ± ppm | Start Seq. | End Sequence Seq. | Ion Score       | C. I. % | Modification             | Rank | Result Type |
|------------|-------------|---------|-------|------------|-------------------|-----------------|---------|--------------------------|------|-------------|
| 1022.5126  | 1022.5009   | -0.0117 | -11   | 407        | 414               | NHERHTK         |         |                          |      | Mascot      |
| 1045.6516  | 1045.5726   | -0.079  | -76   | 399        | 406               | FRQLQILK        |         |                          |      | Mascot      |
| 1058.4281  | 1058.5569   | 0.1288  | 122   | 244        | 252               | EFVCSECGK       |         | Carbamidomethyl (C)[4]   |      | Mascot      |
| 1115.4496  | 1115.5195   | 0.0699  | 63    | 244        | 252               | EFVCSECGK       |         | Carbamidomethyl (C)[4,7] |      | Mascot      |
| 1252.7412  | 1252.7349   | -0.0063 | -5    | 141        | 150               | TFIKPSYLKR      |         |                          |      | Mascot      |
| 1332.653   | 1332.71     | 0.057   | 43    | 11         | 21                | QEETEELIDVK     |         |                          |      | Mascot      |
| 1451.6021  | 1451.7589   | 0.1568  | 108   | 22         | 33                | QSEELSEDEEK     |         |                          |      | Mascot      |
| 1625.8217  | 1625.8036   | -0.0181 | -11   | 318        | 330               | LHQMIHTGERPYK   |         | Oxidation (M)[4]         |      | Mascot      |
| 1677.736   | 1677.6991   | -0.0369 | -22   | 244        | 258               | EFVCSECGKSFNTAR |         |                          |      | Mascot      |
| 1677.736   | 1677.6991   | -0.0369 | -22   | 244        | 258               | EFVCSECGKSFNTAR |         |                          |      | Mascot      |
| 1798.8615  | 1798.9722   | 0.1107  | 62    | 275        | 289               | CSHCDSFIYLQNLK  |         |                          |      | Mascot      |
| 1798.8615  | 1798.9722   | 0.1107  | 62    | 275        | 289               | CSHCDSFIYLQNLK  |         |                          |      | Mascot      |
| 1912.9044  | 1912.9994   | 0.095   | 50    | 275        | 289               | CSHCDSFIYLQNLK  |         | Carbamidomethyl (C)[1,4] |      | Mascot      |

|  |           |           |        |    |     |     |                         |  |  |  |  |                         |        |
|--|-----------|-----------|--------|----|-----|-----|-------------------------|--|--|--|--|-------------------------|--------|
|  | 2086.9895 | 2087.0176 | 0.0281 | 13 | 122 | 140 | VYQSVQAEVKSNSCSLC<br>GK |  |  |  |  | Carbamidomethyl (C)[14] | Mascot |
|  | 2210.978  | 2211.1277 | 0.1497 | 68 | 435 | 452 | SLHLQWHMMIHAGEETQ<br>M  |  |  |  |  | Oxidation (M)[8,9]      | Mascot |
|  | 2210.978  | 2211.1277 | 0.1497 | 68 | 435 | 452 | SLHLQWHMMIHAGEETQ<br>M  |  |  |  |  | Oxidation (M)[8,9]      | Mascot |
|  | 2283.0579 | 2283.2014 | 0.1435 | 63 | 318 | 336 | LHQMIHTGERPYKCSHC<br>DK |  |  |  |  |                         | Mascot |

15 tektin 2 (testicular) [Danio rerio] gi|94733681 48602.7 5.71 9 38 0

#### Peptide Information

| Calc. Mass | Obsrv. Mass | ± da    | ± ppm | Start Seq. | End Seq. | Sequence                   | Ion Score | C. I. % | Modification                              | Rank | Result Type |
|------------|-------------|---------|-------|------------|----------|----------------------------|-----------|---------|-------------------------------------------|------|-------------|
| 1045.5789  | 1045.5726   | -0.0063 | -6    | 68         | 75       | INDITRWK                   |           |         |                                           |      | Mascot      |
| 1115.5691  | 1115.5195   | -0.0496 | -44   | 140        | 149      | EVEVIDGAQR                 |           |         |                                           |      | Mascot      |
| 1798.9657  | 1798.9722   | 0.0065  | 4     | 165        | 179      | LQEARQQLTIDLQDK            |           |         |                                           |      | Mascot      |
| 1798.9657  | 1798.9722   | 0.0065  | 4     | 165        | 179      | LQEARQQLTIDLQDK            |           |         |                                           |      | Mascot      |
| 1909.8518  | 1909.9108   | 0.059   | 31    | 80         | 96       | ACAQEVDEEMDALTLISK         |           |         | Carbamidomethyl (C)[2]                    |      | Mascot      |
| 1925.8467  | 1925.9102   | 0.0635  | 33    | 80         | 96       | ACAQEVDEEMDALTLISK         |           |         | Carbamidomethyl (C)[2], Oxidation (M)[10] |      | Mascot      |
| 2070.9199  | 2071.0205   | 0.1006  | 49    | 269        | 284      | THHEEQAHHDMQWQLK           |           |         | Oxidation (M)[11]                         |      | Mascot      |
| 2211.0261  | 2211.1277   | 0.1016  | 46    | 268        | 284      | RTHHEEQAHHDMQWQL<br>K      |           |         |                                           |      | Mascot      |
| 2211.0261  | 2211.1277   | 0.1016  | 46    | 268        | 284      | RTHHEEQAHHDMQWQL<br>K      |           |         |                                           |      | Mascot      |
| 2283.1365  | 2283.2014   | 0.0649  | 28    | 2          | 22       | ATLSSKPASRYSVSDWA<br>TNNK  |           |         |                                           |      | Mascot      |
| 2337.0947  | 2337.2498   | 0.1551  | 66    | 76         | 96       | ENLKACAQEVDEEMDAL<br>TLISK |           |         |                                           |      | Mascot      |
| 2396.2966  | 2396.2654   | -0.0312 | -13   | 102        | 123      | ALAATVLPLEVTAECNLN<br>REGR |           |         | Carbamidomethyl (C)[15]                   |      | Mascot      |

16 ATR-interacting protein [Danio rerio] gi|113678194 81922.4 5.71 13 38 0

#### Peptide Information

| Calc. Mass | Obsrv. Mass | ± da    | ± ppm | Start Seq. | End Seq. | Sequence         | Ion Score | C. I. % | Modification           | Rank | Result Type |
|------------|-------------|---------|-------|------------|----------|------------------|-----------|---------|------------------------|------|-------------|
| 973.5424   | 973.5176    | -0.0248 | -25   | 206        | 214      | LQSVERGGK        |           |         |                        |      | Mascot      |
| 1024.4945  | 1024.5231   | 0.0286  | 28    | 236        | 244      | ENFSAEISK        |           |         |                        |      | Mascot      |
| 1309.6356  | 1309.6219   | -0.0137 | -10   | 151        | 160      | QAHQEREQQR       |           |         |                        |      | Mascot      |
| 1448.7065  | 1448.757    | 0.0505  | 35    | 563        | 574      | LCLHDYPCPFLK     |           |         |                        |      | Mascot      |
| 1477.9001  | 1477.7069   | -0.1932 | -131  | 631        | 642      | TVVVVLHRQWLK     |           |         |                        |      | Mascot      |
| 1642.8403  | 1642.8677   | 0.0274  | 17    | 465        | 478      | NMLGEIQNQMPVLR   |           |         |                        |      | Mascot      |
| 1665.79    | 1665.9108   | 0.1208  | 73    | 54         | 68       | RSFDAVLACADEPSK  |           |         | Carbamidomethyl (C)[9] |      | Mascot      |
| 1798.9414  | 1798.9722   | 0.0308  | 17    | 465        | 479      | NMLGEIQNQMPVLR   |           |         |                        |      | Mascot      |
| 1799.0021  | 1798.9722   | -0.0299 | -17   | 505        | 520      | ILSVLAERAEDNLISR |           |         |                        |      | Mascot      |

|    |                                     |           |         |     |     |              |                                   |      |    |                                              |   |  |  |        |
|----|-------------------------------------|-----------|---------|-----|-----|--------------|-----------------------------------|------|----|----------------------------------------------|---|--|--|--------|
|    | 1860.9813                           | 1860.8818 | -0.0995 | -53 | 586 | 601          | SSTEDAWSRLELVVIR                  |      |    |                                              |   |  |  | Mascot |
|    | 2087.0955                           | 2087.0176 | -0.0779 | -37 | 442 | 459          | ALQHIVCYSKEALEDVIR                |      |    |                                              |   |  |  | Mascot |
|    | 2297.0107                           | 2297.1531 | 0.1424  | 62  | 611 | 630          | AGTWAALCESSQCQVNE<br>VVR          |      |    | Carbamidomethyl (C)[8,12,14]                 |   |  |  | Mascot |
|    | 3249.7043                           | 3249.4709 | -0.2334 | -72 | 521 | 548          | LQVVMSSPVLISKCLTLET<br>TYSIVHLCVR |      |    | Carbamidomethyl (C)[13,26], Oxidation (M)[5] |   |  |  | Mascot |
|    | 3249.7043                           | 3249.4709 | -0.2334 | -72 | 521 | 548          | LQVVMSSPVLISKCLTLET<br>TYSIVHLCVR |      |    | Carbamidomethyl (C)[13,26], Oxidation (M)[5] |   |  |  | Mascot |
| 17 | PREDICTED: coronin-2B [Danio rerio] |           |         |     |     | gi 292627941 | 53560.2                           | 7.91 | 10 | 37                                           | 0 |  |  |        |

#### Peptide Information

|  | Calc. Mass | Obsrv. Mass | ± da    | ± ppm | Start Seq. | End Seq. | Sequence                  | Ion Score | C. I. | % Modification                            | Rank | Result Type |
|--|------------|-------------|---------|-------|------------|----------|---------------------------|-----------|-------|-------------------------------------------|------|-------------|
|  | 882.5519   | 882.5717    | 0.0198  | 22    | 199        | 205      | LRIIDPR                   |           |       |                                           |      | Mascot      |
|  | 883.442    | 883.4474    | 0.0054  | 6     | 71         | 77       | VDPHYPR                   |           |       |                                           |      | Mascot      |
|  | 1022.5741  | 1022.5009   | -0.0732 | -72   | 231        | 239      | RVFTTGVSRR                |           |       |                                           |      | Mascot      |
|  | 1252.7233  | 1252.7349   | 0.0116  | 9     | 398        | 408      | RPNPVSLRASR               |           |       |                                           |      | Mascot      |
|  | 1317.7776  | 1317.7367   | -0.0409 | -31   | 386        | 397      | GPVLISLKEAYK              |           |       |                                           |      | Mascot      |
|  | 1317.7776  | 1317.7367   | -0.0409 | -31   | 386        | 397      | GPVLISLKEAYK              |           |       |                                           |      | Mascot      |
|  | 1359.7123  | 1359.6603   | -0.052  | -38   | 310        | 322      | SAAPQKSLCVMPPK            |           |       |                                           |      | Mascot      |
|  | 1691.8097  | 1691.8334   | 0.0237  | 14    | 324        | 337      | GVDVSECEIFRFYK            |           |       |                                           |      | Mascot      |
|  | 1913.1041  | 1912.9994   | -0.1047 | -55   | 338        | 354      | LVTFRGLVEPVSMIVPR         |           |       |                                           |      | Mascot      |
|  | 2211.0435  | 2211.1277   | 0.0842  | 38    | 71         | 89       | VDPHYPRVCGHQGSVM<br>DIK   |           |       | Carbamidomethyl (C)[9], Oxidation (M)[16] |      | Mascot      |
|  | 2211.0435  | 2211.1277   | 0.0842  | 38    | 71         | 89       | VDPHYPRVCGHQGSVM<br>DIK   |           |       | Carbamidomethyl (C)[9], Oxidation (M)[16] |      | Mascot      |
|  | 2396.1414  | 2396.2654   | 0.124   | 52    | 135        | 156      | VGLIEWHTCSGILFSAG<br>YDCK |           |       |                                           |      | Mascot      |

|    |                                    |  |  |  |  |              |      |      |   |    |   |  |  |  |
|----|------------------------------------|--|--|--|--|--------------|------|------|---|----|---|--|--|--|
| 18 | hypothetical protein [Danio rerio] |  |  |  |  | gi 295821973 | 4314 | 4.67 | 4 | 37 | 0 |  |  |  |
|----|------------------------------------|--|--|--|--|--------------|------|------|---|----|---|--|--|--|

#### Peptide Information

|  | Calc. Mass | Obsrv. Mass | ± da   | ± ppm | Start Seq. | End Seq. | Sequence                | Ion Score | C. I. | % Modification           | Rank | Result Type |
|--|------------|-------------|--------|-------|------------|----------|-------------------------|-----------|-------|--------------------------|------|-------------|
|  | 973.4149   | 973.5176    | 0.1027 | 106   | 32         | 39       | EGFVEYTE                |           |       |                          |      | Mascot      |
|  | 1317.6     | 1317.7367   | 0.1367 | 104   | 17         | 28       | ATACQMLVCYAK            |           |       | Oxidation (M)[6]         |      | Mascot      |
|  | 1317.6     | 1317.7367   | 0.1367 | 104   | 17         | 28       | ATACQMLVCYAK            |           |       | Oxidation (M)[6]         |      | Mascot      |
|  | 1785.8696  | 1785.9579   | 0.0883 | 49    | 17         | 31       | ATACQMLVCYAKELK         |           |       | Carbamidomethyl (C)[4,9] |      | Mascot      |
|  | 2086.9971  | 2087.0176   | 0.0205 | 10    | 10         | 28       | TAGLEEKATACQMLVCY<br>AK |           |       | Carbamidomethyl (C)[11]  |      | Mascot      |

|    |                                                                                                     |  |  |  |  |              |         |      |    |    |   |  |  |  |
|----|-----------------------------------------------------------------------------------------------------|--|--|--|--|--------------|---------|------|----|----|---|--|--|--|
| 19 | PREDICTED: MAM domain-containing glycosylphosphatidylinositol anchor protein 1-like, partial [Danio |  |  |  |  | gi 326673130 | 86011.6 | 8.77 | 12 | 36 | 0 |  |  |  |
|----|-----------------------------------------------------------------------------------------------------|--|--|--|--|--------------|---------|------|----|----|---|--|--|--|

| Peptide Information |                                                            |         |       |              |          |                |           |       |                        |                  |
|---------------------|------------------------------------------------------------|---------|-------|--------------|----------|----------------|-----------|-------|------------------------|------------------|
| Calc. Mass          | Obsrv. Mass                                                | ± da    | ± ppm | Start Seq.   | End Seq. | Sequence       | Ion Score | C. I. | % Modification         | Rank Result Type |
| 973.4777            | 973.5176                                                   | 0.0399  | 41    | 347          | 353      | VNYTWYK        |           |       |                        | Mascot           |
| 996.4567            | 996.6018                                                   | 0.1451  | 146   | 731          | 738      | ICGFTQDR       |           |       | Carbamidomethyl (C)[2] | Mascot           |
| 1022.4571           | 1022.5009                                                  | 0.0438  | 43    | 323          | 331      | DSESIQMGR      |           |       |                        | Mascot           |
| 1058.5048           | 1058.5569                                                  | 0.0521  | 49    | 137          | 146      | CTVNSNPPAR     |           |       |                        | Mascot           |
| 1115.5262           | 1115.5195                                                  | -0.0067 | -6    | 137          | 146      | CTVNSNPPAR     |           |       | Carbamidomethyl (C)[1] | Mascot           |
| 1317.7083           | 1317.7367                                                  | 0.0284  | 22    | 32           | 43       | EGDTLVQLCLVK   |           |       |                        | Mascot           |
| 1317.7083           | 1317.7367                                                  | 0.0284  | 22    | 32           | 43       | EGDTLVQLCLVK   |           |       |                        | Mascot           |
| 1451.6947           | 1451.7589                                                  | 0.0642  | 44    | 200          | 212      | NVCGIPDSSVTFR  |           |       | Carbamidomethyl (C)[3] | Mascot           |
| 1477.7579           | 1477.7069                                                  | -0.051  | -35   | 493          | 505      | CQTAPYNGLNIR   |           |       |                        | Mascot           |
| 1625.8182           | 1625.8036                                                  | -0.0146 | -9    | 544          | 556      | SNPNRIVSAYWYR  |           |       |                        | Mascot           |
| 1642.8257           | 1642.8677                                                  | 0.042   | 26    | 86           | 100      | YYCKAENGVGVAIK |           |       | Carbamidomethyl (C)[3] | Mascot           |
| 1661.7588           | 1661.7815                                                  | 0.0227  | 14    | 576          | 589      | FKLDTTNGTYEGR  |           |       |                        | Mascot           |
| 1665.7247           | 1665.9108                                                  | 0.1861  | 112   | 461          | 474      | DLPMPSGDWMVETR |           |       | Oxidation (M)[4,10]    | Mascot           |
| 1730.8972           | 1730.9097                                                  | 0.0125  | 7     | 147          | 160      | FIWQRANPIEQSK  |           |       |                        | Mascot           |
| 20                  | PREDICTED: hypothetical protein LOC100149379 [Danio rerio] |         |       | gi 326679369 |          | 173931.4       | 5.87      | 16    | 34                     | 0 17 0           |

| Peptide Information |             |         |       |            |          |               |           |       |                        |                  |
|---------------------|-------------|---------|-------|------------|----------|---------------|-----------|-------|------------------------|------------------|
| Calc. Mass          | Obsrv. Mass | ± da    | ± ppm | Start Seq. | End Seq. | Sequence      | Ion Score | C. I. | % Modification         | Rank Result Type |
| 902.4941            | 902.5206    | 0.0265  | 29    | 678        | 685      | EKADLQAK      |           |       |                        | Mascot           |
| 1045.5347           | 1045.5726   | 0.0379  | 36    | 1206       | 1214     | ETILPCQ GK    |           |       | Carbamidomethyl (C)[6] | Mascot           |
| 1058.6569           | 1058.5569   | -0.1    | -94   | 627        | 635      | TQVTKLLQK     |           |       |                        | Mascot           |
| 1205.5327           | 1205.6255   | 0.0928  | 77    | 1141       | 1150     | NQCDASNQIR    | 17        | 0     | Carbamidomethyl (C)[3] | Mascot           |
| 1205.5327           | 1205.6255   | 0.0928  | 77    | 1141       | 1150     | NQCDASNQIR    |           |       | Carbamidomethyl (C)[3] | Mascot           |
| 1252.6685           | 1252.7349   | 0.0664  | 53    | 1359       | 1368     | IKEGLQFDFR    |           |       |                        | Mascot           |
| 1262.5681           | 1262.684    | 0.1159  | 92    | 407        | 416      | LEQMVEENDR    |           |       |                        | Mascot           |
| 1317.6719           | 1317.7367   | 0.0648  | 49    | 1315       | 1325     | MPDKLLQSEEK   |           |       |                        | Mascot           |
| 1317.6719           | 1317.7367   | 0.0648  | 49    | 1315       | 1325     | MPDKLLQSEEK   |           |       |                        | Mascot           |
| 1332.7378           | 1332.71     | -0.0278 | -21   | 632        | 642      | LLQKINDMVMK   |           |       |                        | Mascot           |
| 1434.6642           | 1434.7333   | 0.0691  | 48    | 407        | 417      | LEQMVEENDRR   |           |       | Oxidation (M)[4]       | Mascot           |
| 1434.6642           | 1434.7333   | 0.0691  | 48    | 407        | 417      | LEQMVEENDRR   |           |       | Oxidation (M)[4]       | Mascot           |
| 1451.7238           | 1451.7589   | 0.0351  | 24    | 830        | 842      | HETGQNPKLEGNK |           |       |                        | Mascot           |
| 1563.6454           | 1563.7495   | 0.1041  | 67    | 1346       | 1358     | ECGQIYESWSSMK |           |       | Oxidation (M)[12]      | Mascot           |

|    |                                                                                   |           |         |     |             |      |                          |      |                    |        |   |
|----|-----------------------------------------------------------------------------------|-----------|---------|-----|-------------|------|--------------------------|------|--------------------|--------|---|
|    | 1563.6454                                                                         | 1563.7495 | 0.1041  | 67  | 1346        | 1358 | ECGQIYESWSSMK            |      | Oxidation (M)[12]  | Mascot |   |
|    | 1661.7186                                                                         | 1661.7815 | 0.0629  | 38  | 1282        | 1294 | WIMNMLDDFTSEK            |      | Oxidation (M)[3,5] | Mascot |   |
|    | 1912.995                                                                          | 1912.9994 | 0.0044  | 2   | 391         | 406  | HHYLELNTQVSMVLTK         |      |                    | Mascot |   |
|    | 2028.072                                                                          | 2028.0717 | -0.0003 | 0   | 1319        | 1335 | LLQSEEKLNNISEQINR        |      |                    | Mascot |   |
|    | 2071.0164                                                                         | 2071.0205 | 0.0041  | 2   | 1464        | 1481 | AQMNSIDYFLVVDTEGLR       |      |                    | Mascot |   |
|    | 2087.0112                                                                         | 2087.0176 | 0.0064  | 3   | 1464        | 1481 | AQMNSIDYFLVVDTEGLR       |      | Oxidation (M)[3]   | Mascot |   |
|    | 2297.3149                                                                         | 2297.1531 | -0.1618 | -70 | 294         | 313  | LITLVELPALTLSSQKEEM<br>R |      |                    | Mascot |   |
| 21 | novel protein similar to vertebrate protein kinase C, theta (PRKCQ) [Danio rerio] |           |         |     | gij55962227 |      | 81064.5                  | 7.59 | 14                 | 34     | 0 |

#### Peptide Information

| Calc. Mass | Obsrv. Mass | ± da    | ± ppm | Start Seq. | End Seq. | Sequence                | Ion Score | C. I. | % Modification                            | Rank | Result Type |
|------------|-------------|---------|-------|------------|----------|-------------------------|-----------|-------|-------------------------------------------|------|-------------|
| 850.4781   | 850.546     | 0.0679  | 80    | 31         | 37       | GQVYKQK                 |           |       |                                           |      | Mascot      |
| 940.492    | 940.5209    | 0.0289  | 31    | 386        | 394      | MLGKGSFGK               |           |       | Oxidation (M)[1]                          |      | Mascot      |
| 1024.6084  | 1024.5231   | -0.0853 | -83   | 56         | 64       | GRVMHVVVK               |           |       |                                           |      | Mascot      |
| 1045.5789  | 1045.5726   | -0.0063 | -6    | 614        | 621      | LFVREPER                |           |       |                                           |      | Mascot      |
| 1252.7048  | 1252.7349   | 0.0301  | 24    | 402        | 413      | GSGQFFAVKALK            |           |       |                                           |      | Mascot      |
| 1359.5238  | 1359.6603   | 0.1365  | 100   | 257        | 267      | CEECGMNVHHK             |           |       | Carbamidomethyl (C)[1], Oxidation (M)[6]  |      | Mascot      |
| 1380.7004  | 1380.6865   | -0.0139 | -10   | 24         | 35       | EAVETEKQVYK             |           |       |                                           |      | Mascot      |
| 1661.6652  | 1661.7815   | 0.1163  | 70    | 257        | 270      | CEECGMNVHHKCQK          |           |       | Oxidation (M)[6]                          |      | Mascot      |
| 1665.9032  | 1665.9108   | 0.0076  | 5     | 376        | 389      | FTIDSFILHKMLGK          |           |       | Oxidation (M)[11]                         |      | Mascot      |
| 1727.8322  | 1727.8621   | 0.0299  | 17    | 173        | 186      | EFVWGLNKQGYQCR          |           |       |                                           |      | Mascot      |
| 1727.8322  | 1727.8621   | 0.0299  | 17    | 173        | 186      | EFVWGLNKQGYQCR          |           |       |                                           |      | Mascot      |
| 1785.7828  | 1785.9579   | 0.1751  | 98    | 253        | 267      | QGLKCEECGMNVHHK         |           |       | Carbamidomethyl (C)[5], Oxidation (M)[10] |      | Mascot      |
| 1925.829   | 1925.9102   | 0.0812  | 42    | 415        | 430      | DVVLMDDDVECTMVER        |           |       | Carbamidomethyl (C)[11]                   |      | Mascot      |
| 2028.0259  | 2028.0717   | 0.0458  | 23    | 482        | 499      | STFYAAEICGLQLHSK        |           |       |                                           |      | Mascot      |
| 2284.0989  | 2284.197    | 0.0981  | 43    | 537        | 556      | TCTFCGTPDYIAPELLGQ<br>K |           |       | Carbamidomethyl (C)[2,5]                  |      | Mascot      |

|                     |                                               |             |  |         |              |            |          |              |           |       |                |                  |
|---------------------|-----------------------------------------------|-------------|--|---------|--------------|------------|----------|--------------|-----------|-------|----------------|------------------|
| 22                  | PREDICTED: catenin alpha-1-like [Danio rerio] |             |  |         | gi 326679802 | 78904.3    | 5.52     | 10           | 34        | 0     |                |                  |
| Peptide Information |                                               |             |  |         |              |            |          |              |           |       |                |                  |
| Calc. Mass          |                                               | Obsrv. Mass |  | ± da    | ± ppm        | Start Seq. | End Seq. | Sequence     | Ion Score | C. I. | % Modification | Rank Result Type |
| 1205.6637           |                                               | 1205.6255   |  | -0.0382 | -32          | 617        | 626      | LVYDGVRDIR   | 12        | 0     |                | Mascot           |
| 1205.6637           |                                               | 1205.6255   |  | -0.0382 | -32          | 617        | 626      | LVYDGVRDIR   |           |       |                | Mascot           |
| 1231.6165           |                                               | 1231.6849   |  | 0.0684  | 56           | 88         | 98       | EELTAAVEDVR  |           |       |                | Mascot           |
| 1332.6754           |                                               | 1332.71     |  | 0.0346  | 26           | 359        | 370      | EKSDALNTAIDR |           |       |                | Mascot           |

|    |                                                            |           |         |     |     |              |                           |      |    |    |   |  |                                            |  |        |
|----|------------------------------------------------------------|-----------|---------|-----|-----|--------------|---------------------------|------|----|----|---|--|--------------------------------------------|--|--------|
|    | 1359.7114                                                  | 1359.6603 | -0.0511 | -38 | 88  | 99           | EELTAAVEDVRK              |      |    |    |   |  |                                            |  | Mascot |
|    | 1451.7158                                                  | 1451.7589 | 0.0431  | 30  | 361 | 373          | SDALNTAIDRMTK             |      |    |    |   |  | Oxidation (M)[11]                          |  | Mascot |
|    | 1691.8711                                                  | 1691.8334 | -0.0377 | -22 | 164 | 178          | VRNAGTEQDLGIQYK           |      |    |    |   |  |                                            |  | Mascot |
|    | 1730.8741                                                  | 1730.9097 | 0.0356  | 21  | 526 | 540          | CVIALQEKDVDGLDR           |      |    |    |   |  | Carbamidomethyl (C)[1]                     |  | Mascot |
|    | 1909.9436                                                  | 1909.9108 | -0.0328 | -17 | 342 | 358          | QALQDLLSEYMGNAGRK         |      |    |    |   |  | Oxidation (M)[11]                          |  | Mascot |
|    | 2071.0818                                                  | 2071.0205 | -0.0613 | -30 | 57  | 75           | KAHVLAASVDEATQNFLE<br>K   |      |    |    |   |  |                                            |  | Mascot |
|    | 2211.0381                                                  | 2211.1277 | 0.0896  | 41  | 309 | 329          | LESIISGAALMADSSCTR<br>DDR |      |    |    |   |  |                                            |  | Mascot |
|    | 2211.0381                                                  | 2211.1277 | 0.0896  | 41  | 309 | 329          | LESIISGAALMADSSCTR<br>DDR |      |    |    |   |  |                                            |  | Mascot |
|    | 2284.0544                                                  | 2284.197  | 0.1426  | 62  | 309 | 329          | LESIISGAALMADSSCTR<br>DDR |      |    |    |   |  | Carbamidomethyl (C)[16], Oxidation (M)[11] |  | Mascot |
| 23 | lactosylceramide alpha-2,3-sialyltransferase [Danio rerio] |           |         |     |     | gi 117606180 | 41829.7                   | 9.18 | 10 | 33 | 0 |  |                                            |  |        |

#### Peptide Information

| Calc. Mass | Obsrv. Mass | ± da    | ± ppm | Start Seq. | End Seq. | Sequence               | Ion Score | C. I. | % Modification                           | Rank | Result Type |
|------------|-------------|---------|-------|------------|----------|------------------------|-----------|-------|------------------------------------------|------|-------------|
| 973.5101   | 973.5176    | 0.0075  | 8     | 226        | 233      | TPVSLWDR               |           |       |                                          |      | Mascot      |
| 1022.4836  | 1022.5009   | 0.0173  | 17    | 66         | 73       | ECRPSFAR               |           |       | Carbamidomethyl (C)[2]                   |      | Mascot      |
| 1041.438   | 1041.5912   | 0.1532  | 147   | 187        | 195      | MSYPESCPK              |           |       |                                          |      | Mascot      |
| 1058.6027  | 1058.5569   | -0.0458 | -43   | 140        | 150      | CVVVGNGGILK            |           |       |                                          |      | Mascot      |
| 1115.624   | 1115.5195   | -0.1045 | -94   | 140        | 150      | CVVVGNGGILK            |           |       | Carbamidomethyl (C)[1]                   |      | Mascot      |
| 1332.7383  | 1332.71     | -0.0283 | -21   | 55         | 65       | VHSHVREILDK            |           |       |                                          |      | Mascot      |
| 1380.6287  | 1380.6865   | 0.0578  | 42    | 4          | 14       | VMKQSSCYFSK            |           |       | Carbamidomethyl (C)[7], Oxidation (M)[2] |      | Mascot      |
| 1563.7948  | 1563.7495   | -0.0453 | -29   | 61         | 73       | EILDKECRPSFAR          |           |       |                                          |      | Mascot      |
| 1563.7948  | 1563.7495   | -0.0453 | -29   | 61         | 73       | EILDKECRPSFAR          |           |       |                                          |      | Mascot      |
| 1691.8978  | 1691.8334   | -0.0644 | -38   | 234        | 247      | LFFWQNVPMSPVPK         |           |       |                                          |      | Mascot      |
| 1910.1105  | 1909.9108   | -0.1997 | -105  | 16         | 32       | TMILLLSLALMSLAFLK      |           |       | Oxidation (M)[2,11]                      |      | Mascot      |
| 2297.01    | 2297.1531   | 0.1431  | 62    | 187        | 205      | MSYPESCPKVWEDTPD<br>LK |           |       | Carbamidomethyl (C)[7]                   |      | Mascot      |

24 PREDICTED: ephrin type-A receptor 7-like [Danio rerio] gi|292629941 40322.6 8.74 8 33 0

#### Peptide Information

| Calc. Mass | Obsrv. Mass | ± da    | ± ppm | Start Seq. | End Seq. | Sequence      | Ion Score | C. I. | % Modification         | Rank | Result Type |
|------------|-------------|---------|-------|------------|----------|---------------|-----------|-------|------------------------|------|-------------|
| 902.5128   | 902.5206    | 0.0078  | 9     | 13         | 20       | GCLKLPSK      |           |       | Carbamidomethyl (C)[2] |      | Mascot      |
| 1055.5415  | 1055.606    | 0.0645  | 61    | 350        | 358      | AQVIQMHGR     |           |       | Oxidation (M)[6]       |      | Mascot      |
| 1055.5415  | 1055.606    | 0.0645  | 61    | 350        | 358      | AQVIQMHGR     |           |       | Oxidation (M)[6]       |      | Mascot      |
| 1359.6975  | 1359.6603   | -0.0372 | -27   | 258        | 270      | SPDNIGSSTLGRR |           |       |                        |      | Mascot      |

|           |                                                                                         |         |     |     |     |                                  |  |  |                         |  |  |  |        |
|-----------|-----------------------------------------------------------------------------------------|---------|-----|-----|-----|----------------------------------|--|--|-------------------------|--|--|--|--------|
| 1581.9144 | 1581.8031                                                                               | -0.1113 | -70 | 122 | 136 | LAAHKVLVNSSLVCK                  |  |  |                         |  |  |  | Mascot |
| 2070.959  | 2071.0205                                                                               | 0.0615  | 30  | 304 | 321 | YKDNFTAAGYCYLESVA<br>R           |  |  |                         |  |  |  | Mascot |
| 2283.2012 | 2283.2014                                                                               | 0.0002  | 0   | 89  | 110 | HEGQLTVLQLADLLSGVA<br>SGMK       |  |  | Oxidation (M)[21]       |  |  |  | Mascot |
| 2284.1133 | 2284.197                                                                                | 0.0837  | 37  | 67  | 87  | GNTMMIVVESMVNGALD<br>SFLR        |  |  |                         |  |  |  | Mascot |
| 3249.6006 | 3249.4709                                                                               | -0.1297 | -40 | 210 | 237 | AIEDGFRLPAPLNCPPSL<br>HQLMLDCWQK |  |  | Carbamidomethyl (C)[14] |  |  |  | Mascot |
| 3249.6006 | 3249.4709                                                                               | -0.1297 | -40 | 210 | 237 | AIEDGFRLPAPLNCPPSL<br>HQLMLDCWQK |  |  | Carbamidomethyl (C)[14] |  |  |  | Mascot |
| 25        | PREDICTED: zinc finger protein 484-like [Danio rerio] gi 326680627 46462.1 9.69 11 33 0 |         |     |     |     |                                  |  |  |                         |  |  |  |        |

#### Peptide Information

| Calc. Mass | Obsrv. Mass | ± da    | ± ppm | Start Seq. | End Seq. | Sequence                | Ion Score | C. I. | % Modification                                 | Rank | Result Type |
|------------|-------------|---------|-------|------------|----------|-------------------------|-----------|-------|------------------------------------------------|------|-------------|
| 1022.4472  | 1022.5009   | 0.0537  | 53    | 209        | 216      | STFNNHMR                |           |       | Oxidation (M)[7]                               |      | Mascot      |
| 1058.4142  | 1058.5569   | 0.1427  | 135   | 2          | 10       | CNFSSNQCR               |           |       |                                                |      | Mascot      |
| 1115.4972  | 1115.5195   | 0.0223  | 20    | 298        | 306      | HMMIHTGEK               |           |       | Oxidation (M)[2,3]                             |      | Mascot      |
| 1155.5792  | 1155.6981   | 0.1189  | 103   | 316        | 324      | SFERNFDLK               |           |       |                                                |      | Mascot      |
| 1205.4496  | 1205.6255   | 0.1759  | 146   | 1          | 10       | MCNFSSNQCR              |           |       | Oxidation (M)[1]                               |      | Mascot      |
| 1205.4496  | 1205.6255   | 0.1759  | 146   | 1          | 10       | MCNFSSNQCR              |           |       | Oxidation (M)[1]                               |      | Mascot      |
| 1317.5497  | 1317.7367   | 0.187   | 142   | 1          | 11       | MCNFSSNQCRK             |           |       |                                                |      | Mascot      |
| 1317.5497  | 1317.7367   | 0.187   | 142   | 1          | 11       | MCNFSSNQCRK             |           |       |                                                |      | Mascot      |
| 1661.8138  | 1661.7815   | -0.0323 | -19   | 273        | 287      | IHTGEKPFICTQCQK         |           |       |                                                |      | Mascot      |
| 1691.7628  | 1691.8334   | 0.0706  | 42    | 217        | 231      | THTGEKPFACAQCQK         |           |       | Carbamidomethyl (C)[10,13]                     |      | Mascot      |
| 2070.9331  | 2071.0205   | 0.0874  | 42    | 375        | 393      | SSHLNEHLQCGMSSSVP<br>NK |           |       | Oxidation (M)[12]                              |      | Mascot      |
| 2210.9814  | 2211.1277   | 0.1463  | 66    | 298        | 315      | HMMIHTGEKQFTCTLCG<br>K  |           |       | Carbamidomethyl (C)[13,16], Oxidation (M)[2,3] |      | Mascot      |
| 2210.9814  | 2211.1277   | 0.1463  | 66    | 298        | 315      | HMMIHTGEKQFTCTLCG<br>K  |           |       | Carbamidomethyl (C)[13,16], Oxidation (M)[2,3] |      | Mascot      |
| 2283.0063  | 2283.2014   | 0.1951  | 85    | 58         | 76       | CQQCGKSFTQNSNLEVH<br>MR |           |       | Carbamidomethyl (C)[1], Oxidation (M)[18]      |      | Mascot      |

26 novel protein similar to bloodthirsty (bty) [Danio rerio] gi|148725963 63618.3 5.75 11 33 0

#### Peptide Information

| Calc. Mass | Obsrv. Mass | ± da    | ± ppm | Start Seq. | End Seq. | Sequence        | Ion Score | C. I. | % Modification                            | Rank | Result Type |
|------------|-------------|---------|-------|------------|----------|-----------------|-----------|-------|-------------------------------------------|------|-------------|
| 1146.6517  | 1146.6381   | -0.0136 | -12   | 362        | 370      | ITQTELKWK       |           |       |                                           |      | Mascot      |
| 1661.6604  | 1661.7815   | 0.1211  | 73    | 179        | 191      | DDQTCVCSFCIEK   |           |       | Carbamidomethyl (C)[5,7,10]               |      | Mascot      |
| 1677.7617  | 1677.6991   | -0.0626 | -37   | 522        | 535      | LYPYFSPCPNYEGK  |           |       |                                           |      | Mascot      |
| 1677.8782  | 1677.6991   | -0.1791 | -107  | 457        | 471      | ITLTPGNGFCTVWLR |           |       |                                           |      | Mascot      |
| 1909.9147  | 1909.9108   | -0.0039 | -2    | 154        | 168      | LMDPVRNLEDYICQK |           |       | Carbamidomethyl (C)[13], Oxidation (M)[2] |      | Mascot      |

|    |                                                               |           |         |     |     |              |                                  |      |                             |        |   |
|----|---------------------------------------------------------------|-----------|---------|-----|-----|--------------|----------------------------------|------|-----------------------------|--------|---|
|    | 2027.8732                                                     | 2028.0717 | 0.1985  | 98  | 127 | 142          | SCLVCQSSYCQTHLER                 |      | Carbamidomethyl (C)[2,5,10] | Mascot |   |
|    | 2071.0818                                                     | 2071.0205 | -0.0613 | -30 | 332 | 348          | NWPEISLKTQENLETLR                |      |                             | Mascot |   |
|    | 2225.0247                                                     | 2225.1377 | 0.113   | 51  | 261 | 278          | AIERCQTELLEMEEQQ<br>K            |      | Oxidation (M)[12]           | Mascot |   |
|    | 2283.0679                                                     | 2283.2014 | 0.1335  | 58  | 124 | 142          | ALKSCLVCQSSYCQTHL<br>ER          |      | Carbamidomethyl (C)[5,8]    | Mascot |   |
|    | 2283.9038                                                     | 2284.197  | 0.2932  | 128 | 66  | 83           | CWNNSTCSCPYCKETF<br>R            |      | Carbamidomethyl (C)[1,8]    | Mascot |   |
|    | 3249.377                                                      | 3249.4709 | 0.0939  | 29  | 179 | 206          | DDQTCVCSFCIEKDHEN<br>HNTVPLEEESK |      |                             | Mascot |   |
|    | 3249.377                                                      | 3249.4709 | 0.0939  | 29  | 179 | 206          | DDQTCVCSFCIEKDHEN<br>HNTVPLEEESK |      |                             | Mascot |   |
| 27 | PREDICTED: hypothetical protein LOC100148510<br>[Danio rerio] |           |         |     |     | gi 326667766 | 309668.8                         | 6.59 | 20                          | 33     | 0 |

Peptide Information

| Calc. Mass | Obsrv. Mass | ± da    | ± ppm | Start Seq. | End Seq. | Sequence               | Ion Score | C. I. | % Modification                           | Rank | Result Type |
|------------|-------------|---------|-------|------------|----------|------------------------|-----------|-------|------------------------------------------|------|-------------|
| 842.5093   | 842.5159    | 0.0066  | 8     | 135        | 142      | VVIGIADR               |           |       |                                          |      | Mascot      |
| 850.4417   | 850.546     | 0.1043  | 123   | 338        | 344      | FLANTER                |           |       |                                          |      | Mascot      |
| 883.4784   | 883.4474    | -0.031  | -35   | 1527       | 1533     | LHSHYVK                |           |       |                                          |      | Mascot      |
| 902.4941   | 902.5206    | 0.0265  | 29    | 427        | 433      | VEKELER                |           |       |                                          |      | Mascot      |
| 996.6564   | 996.6018    | -0.0546 | -55   | 1597       | 1605     | LGSLLPKIR              |           |       |                                          |      | Mascot      |
| 1115.6167  | 1115.5195   | -0.0972 | -87   | 321        | 331      | TSINVRSPGGK            |           |       |                                          |      | Mascot      |
| 1146.5823  | 1146.6381   | 0.0558  | 49    | 967        | 977      | IAADLCELNGK            |           |       |                                          |      | Mascot      |
| 1155.6554  | 1155.6981   | 0.0427  | 37    | 549        | 558      | EMSKLLIGHK             |           |       |                                          |      | Mascot      |
| 1165.6285  | 1165.7517   | 0.1232  | 106   | 2054       | 2062     | QLEMFKELK              |           |       |                                          |      | Mascot      |
| 1205.6484  | 1205.6255   | -0.0229 | -19   | 2671       | 2681     | TVSDSSKIVNR            | 14        |       | 0                                        |      | Mascot      |
| 1205.6484  | 1205.6255   | -0.0229 | -19   | 2671       | 2681     | TVSDSSKIVNR            |           |       |                                          |      | Mascot      |
| 1252.566   | 1252.7349   | 0.1689  | 135   | 368        | 378      | STACEMDLVQR            |           |       |                                          |      | Mascot      |
| 1309.5875  | 1309.6219   | 0.0344  | 26    | 368        | 378      | STACEMDLVQR            |           |       | Carbamidomethyl (C)[4]                   |      | Mascot      |
| 1332.6715  | 1332.71     | 0.0385  | 29    | 148        | 158      | LQMEPELTLDK            |           |       | Oxidation (M)[3]                         |      | Mascot      |
| 1359.6573  | 1359.6603   | 0.003   | 2     | 1716       | 1727     | SGFTSDIKTTMR           |           |       | Oxidation (M)[11]                        |      | Mascot      |
| 1434.7443  | 1434.7333   | -0.011  | -8    | 1735       | 1746     | NLMESKICKPAK           |           |       | Carbamidomethyl (C)[8], Oxidation (M)[3] |      | Mascot      |
| 1434.7443  | 1434.7333   | -0.011  | -8    | 1735       | 1746     | NLMESKICKPAK           |           |       | Carbamidomethyl (C)[8], Oxidation (M)[3] |      | Mascot      |
| 1448.6863  | 1448.757    | 0.0707  | 49    | 1431       | 1443     | EASLVEDQSTVDR          |           |       |                                          |      | Mascot      |
| 1581.7504  | 1581.8031   | 0.0527  | 33    | 573        | 586      | DQNEHDENLGAVLK         |           |       |                                          |      | Mascot      |
| 1677.7941  | 1677.6991   | -0.095  | -57   | 2392       | 2406     | CSYGSHSSTFLVVYK        |           |       |                                          |      | Mascot      |
| 1677.7941  | 1677.6991   | -0.095  | -57   | 2392       | 2406     | CSYGSHSSTFLVVYK        |           |       |                                          |      | Mascot      |
| 1785.9528  | 1785.9579   | 0.0051  | 3     | 1083       | 1100     | ATPVVATGLSPAQLMTG<br>R |           |       | Oxidation (M)[15]                        |      | Mascot      |
| 2027.9919  | 2028.0717   | 0.0798  | 39    | 2481       | 2498     | TSGDEVFLTGLRPDTEYK     |           |       |                                          |      | Mascot      |



2284.26592284.197-0.0689-309891008

DIEIAHLQTLSSFNVISRLK

Mascot

28

PREDICTED: tetratricopeptide repeat protein 17 [Danio rerio]

gi|326669568133164.15.9614320

| Peptide Information |             |         |       |            |          |                                  |           |         |                           |      |             |
|---------------------|-------------|---------|-------|------------|----------|----------------------------------|-----------|---------|---------------------------|------|-------------|
| Calc. Mass          | Obsrv. Mass | ± da    | ± ppm | Start Seq. | End Seq. | Sequence                         | Ion Score | C. I. % | Modification              | Rank | Result Type |
| 1279.6865           | 1279.7827   | 0.0962  | 75    | 348        | 357      | LEQRLEAQHR                       |           |         |                           |      | Mascot      |
| 1309.647            | 1309.6219   | -0.0251 | -19   | 1083       | 1093     | QALNYAPHHMK                      |           |         |                           |      | Mascot      |
| 1317.6545           | 1317.7367   | 0.0822  | 62    | 1013       | 1024     | GGIHYTGESQLR                     |           |         |                           |      | Mascot      |
| 1317.6545           | 1317.7367   | 0.0822  | 62    | 1013       | 1024     | GGIHYTGESQLR                     |           |         |                           |      | Mascot      |
| 1434.5768           | 1434.7333   | 0.1565  | 109   | 816        | 827      | AEGGEEEEQDWR                     |           |         |                           |      | Mascot      |
| 1434.5768           | 1434.7333   | 0.1565  | 109   | 816        | 827      | AEGGEEEEQDWR                     |           |         |                           |      | Mascot      |
| 1448.6984           | 1448.757    | 0.0586  | 40    | 553        | 565      | MPDCSLKNVVGNR                    |           |         | Oxidation (M)[1]          |      | Mascot      |
| 1451.7787           | 1451.7589   | -0.0198 | -14   | 265        | 277      | DVALVNMANVLHR                    |           |         |                           |      | Mascot      |
| 1625.7917           | 1625.8036   | 0.0119  | 7     | 1033       | 1046     | DKFPSQSFEQVGTR                   |           |         |                           |      | Mascot      |
| 1661.9109           | 1661.7815   | -0.1294 | -78   | 954        | 969      | VDLTTVASTWLAVSAK                 |           |         |                           |      | Mascot      |
| 1860.9861           | 1860.8818   | -0.1043 | -56   | 262        | 277      | QHKDVALVNMANVLHR                 |           |         | Oxidation (M)[10]         |      | Mascot      |
| 1912.9375           | 1912.9994   | 0.0619  | 32    | 1054       | 1069     | NQTSWVLSSMAALYWR                 |           |         |                           |      | Mascot      |
| 2233.1111           | 2233.1084   | -0.0027 | -1    | 1147       | 1165     | AMHWYESTLKLQPEFGP<br>AK          |           |         |                           |      | Mascot      |
| 2284.1472           | 2284.197    | 0.0498  | 22    | 711        | 730      | QALSLSVHCGQCRASLP<br>LMR         |           |         | Carbamidomethyl (C)[9,12] |      | Mascot      |
| 2354.2258           | 2354.2368   | 0.011   | 5     | 630        | 651      | GNGTQALVCLRQALHSA<br>PPQHR       |           |         |                           |      | Mascot      |
| 3249.6111           | 3249.4709   | -0.1402 | -43   | 1119       | 1146     | MAVEIAPHFVVNHFTLAN<br>VYIAMEEFEK |           |         |                           |      | Mascot      |
| 3249.6111           | 3249.4709   | -0.1402 | -43   | 1119       | 1146     | MAVEIAPHFVVNHFTLAN<br>VYIAMEEFEK |           |         |                           |      | Mascot      |

29

PREDICTED: LAG1 longevity assurance homolog 2-like [Danio rerio]

gi|6844026545162.18.578320

| Peptide Information |             |         |       |            |          |                |           |       |                |      |             |
|---------------------|-------------|---------|-------|------------|----------|----------------|-----------|-------|----------------|------|-------------|
| Calc. Mass          | Obsrv. Mass | ± da    | ± ppm | Start Seq. | End Seq. | Sequence       | Ion Score | C. I. | % Modification | Rank | Result Type |
| 1115.5455           | 1115.5195   | -0.026  | -23   | 251        | 258      | MFNYARWK       |           |       |                |      | Mascot      |
| 1205.6273           | 1205.6255   | -0.0018 | -1    | 103        | 112      | LSKQTGWTER     |           |       |                |      | Mascot      |
| 1205.6273           | 1205.6255   | -0.0018 | -1    | 103        | 112      | LSKQTGWTER     |           |       |                |      | Mascot      |
| 1317.7008           | 1317.7367   | 0.0359  | 27    | 94         | 105      | NPTQSSVEKLSK   |           |       |                |      | Mascot      |
| 1317.7008           | 1317.7367   | 0.0359  | 27    | 94         | 105      | NPTQSSVEKLSK   |           |       |                |      | Mascot      |
| 1448.7532           | 1448.757    | 0.0038  | 3     | 2          | 13       | LAGLSELFQWER   |           |       |                |      | Mascot      |
| 1581.6287           | 1581.8031   | 0.1744  | 110   | 345        | 357      | DETDESEEEEEELK |           |       |                |      | Mascot      |

|           |           |        |    |     |     |                         |        |
|-----------|-----------|--------|----|-----|-----|-------------------------|--------|
| 1727.7831 | 1727.8621 | 0.079  | 46 | 330 | 344 | FLSSNSSVEDERSDR         | Mascot |
| 1727.7831 | 1727.8621 | 0.079  | 46 | 330 | 344 | FLSSNSSVEDERSDR         | Mascot |
| 1925.8961 | 1925.9102 | 0.0141 | 7  | 364 | 381 | KGAAQNGHATYNNHNS<br>K   | Mascot |
| 2027.8914 | 2028.0717 | 0.1803 | 89 | 365 | 383 | NGAAQNGHATYNNHNSK<br>TE | Mascot |

30 Zgc:173726 protein [Danio rerio] gi|160774356 52871.3 8.07 11 32 0

#### Peptide Information

| Calc. Mass | Obsrv. Mass | ± da    | ± ppm | Start Seq. | End Seq. | Sequence                | Ion Score | C. I. % | Modification             | Rank | Result Type |
|------------|-------------|---------|-------|------------|----------|-------------------------|-----------|---------|--------------------------|------|-------------|
| 1022.5126  | 1022.5009   | -0.0117 | -11   | 407        | 414      | NHERHTK                 |           |         |                          |      | Mascot      |
| 1045.6516  | 1045.5726   | -0.079  | -76   | 399        | 406      | FRQLQILK                |           |         |                          |      | Mascot      |
| 1058.4281  | 1058.5569   | 0.1288  | 122   | 244        | 252      | EFVCSECGK               |           |         | Carbamidomethyl (C)[4]   |      | Mascot      |
| 1115.4496  | 1115.5195   | 0.0699  | 63    | 244        | 252      | EFVCSECGK               |           |         | Carbamidomethyl (C)[4,7] |      | Mascot      |
| 1252.7412  | 1252.7349   | -0.0063 | -5    | 141        | 150      | TFIKPSYLKR              |           |         |                          |      | Mascot      |
| 1332.653   | 1332.71     | 0.057   | 43    | 11         | 21       | QEETEELIDVK             |           |         |                          |      | Mascot      |
| 1451.6021  | 1451.7589   | 0.1568  | 108   | 22         | 33       | QSEELSEDEEK             |           |         |                          |      | Mascot      |
| 1625.8217  | 1625.8036   | -0.0181 | -11   | 318        | 330      | LHQMIHTGERPYK           |           |         | Oxidation (M)[4]         |      | Mascot      |
| 1677.736   | 1677.6991   | -0.0369 | -22   | 244        | 258      | EFVCSECGKSFNTAR         |           |         |                          |      | Mascot      |
| 1677.736   | 1677.6991   | -0.0369 | -22   | 244        | 258      | EFVCSECGKSFNTAR         |           |         |                          |      | Mascot      |
| 1798.8615  | 1798.9722   | 0.1107  | 62    | 275        | 289      | CSHCDSFIYLNK            |           |         |                          |      | Mascot      |
| 1798.8615  | 1798.9722   | 0.1107  | 62    | 275        | 289      | CSHCDSFIYLNK            |           |         |                          |      | Mascot      |
| 1912.9044  | 1912.9994   | 0.095   | 50    | 275        | 289      | CSHCDSFIYLNK            |           |         | Carbamidomethyl (C)[1,4] |      | Mascot      |
| 2086.9895  | 2087.0176   | 0.0281  | 13    | 122        | 140      | VYQSVQAEVKSNSCLC<br>GK  |           |         | Carbamidomethyl (C)[14]  |      | Mascot      |
| 2283.0579  | 2283.2014   | 0.1435  | 63    | 318        | 336      | LHQMIHTGERPYKCSHC<br>DK |           |         |                          |      | Mascot      |

31 hypothetical protein LOC798684 [Danio rerio] gi|192455690 14330.4 9.37 5 32 0

#### Peptide Information

| Calc. Mass | Obsrv. Mass | ± da    | ± ppm | Start Seq. | End Seq. | Sequence                  | Ion Score | C. I. % | Modification                                | Rank | Result Type |
|------------|-------------|---------|-------|------------|----------|---------------------------|-----------|---------|---------------------------------------------|------|-------------|
| 1581.7512  | 1581.8031   | 0.0519  | 33    | 2          | 16       | ATMVYQVQAPACGAR           |           |         | Oxidation (M)[3]                            |      | Mascot      |
| 1785.808   | 1785.9579   | 0.1499  | 84    | 1          | 16       | MATMVYQVQAPACGAR          |           |         | Carbamidomethyl (C)[13], Oxidation (M)[1,4] |      | Mascot      |
| 1925.9677  | 1925.9102   | -0.0575 | -30   | 111        | 127      | LCDLQVEPGATFITYQK         |           |         |                                             |      | Mascot      |
| 2233.0786  | 2233.1084   | 0.0298  | 13    | 1          | 20       | MATMVYQVQAPACGAR<br>QHVR  |           |         | Oxidation (M)[1]                            |      | Mascot      |
| 2337.1001  | 2337.2498   | 0.1497  | 64    | 111        | 131      | LCDLQVEPGATFITYQKC<br>HGG |           |         | Carbamidomethyl (C)[2]                      |      | Mascot      |

32 protein kinase C, theta [Danio rerio] gi|269315875 81814.9 8.06 14 32 0

| Peptide Information |             |         |       |            |          |                      |           |       |                                           |      |             |  |  |  |  |
|---------------------|-------------|---------|-------|------------|----------|----------------------|-----------|-------|-------------------------------------------|------|-------------|--|--|--|--|
| Calc. Mass          | Obsrv. Mass | ± da    | ± ppm | Start Seq. | End Seq. | Sequence             | Ion Score | C. I. | % Modification                            | Rank | Result Type |  |  |  |  |
| 850.4781            | 850.546     | 0.0679  | 80    | 42         | 48       | GQVYKQK              |           |       |                                           |      | Mascot      |  |  |  |  |
| 940.492             | 940.5209    | 0.0289  | 31    | 391        | 399      | MLGKGSFGK            |           |       | Oxidation (M)[1]                          |      | Mascot      |  |  |  |  |
| 1024.6084           | 1024.5231   | -0.0853 | -83   | 67         | 75       | GRVMHVVVK            |           |       |                                           |      | Mascot      |  |  |  |  |
| 1045.5789           | 1045.5726   | -0.0063 | -6    | 619        | 626      | LFVREPER             |           |       |                                           |      | Mascot      |  |  |  |  |
| 1252.7048           | 1252.7349   | 0.0301  | 24    | 407        | 418      | GSGQFFAVKALK         |           |       |                                           |      | Mascot      |  |  |  |  |
| 1359.5238           | 1359.6603   | 0.1365  | 100   | 262        | 272      | CEECGMNVHHK          |           |       | Carbamidomethyl (C)[1], Oxidation (M)[6]  |      | Mascot      |  |  |  |  |
| 1380.7004           | 1380.6865   | -0.0139 | -10   | 35         | 46       | EAVETEKQVYK          |           |       |                                           |      | Mascot      |  |  |  |  |
| 1661.6652           | 1661.7815   | 0.1163  | 70    | 262        | 275      | CEECGMNVHHKCQK       |           |       | Oxidation (M)[6]                          |      | Mascot      |  |  |  |  |
| 1665.9032           | 1665.9108   | 0.0076  | 5     | 381        | 394      | FTIDSFILHKMLGK       |           |       | Oxidation (M)[11]                         |      | Mascot      |  |  |  |  |
| 1727.8322           | 1727.8621   | 0.0299  | 17    | 178        | 191      | EFVWGLNKQGYQCR       |           |       |                                           |      | Mascot      |  |  |  |  |
| 1727.8322           | 1727.8621   | 0.0299  | 17    | 178        | 191      | EFVWGLNKQGYQCR       |           |       |                                           |      | Mascot      |  |  |  |  |
| 1785.7828           | 1785.9579   | 0.1751  | 98    | 258        | 272      | QGLKCEECGMNVHHK      |           |       | Carbamidomethyl (C)[5], Oxidation (M)[10] |      | Mascot      |  |  |  |  |
| 1925.829            | 1925.9102   | 0.0812  | 42    | 420        | 435      | DVVLMDDDVECTMVER     |           |       | Carbamidomethyl (C)[11]                   |      | Mascot      |  |  |  |  |
| 2028.0259           | 2028.0717   | 0.0458  | 23    | 487        | 504      | STFYAAEIIICGLQLHISK  |           |       |                                           |      | Mascot      |  |  |  |  |
| 2284.0989           | 2284.197    | 0.0981  | 43    | 542        | 561      | TCTFCGTPDYIAPEILLGQK |           |       | Carbamidomethyl (C)[2,5]                  |      | Mascot      |  |  |  |  |

33 Wu:fo94f09 protein [Danio rerio] gi|92096553 74291.7 8.89 11 32 0

| Peptide Information |             |         |       |            |          |                         |           |       |                |                          |  |  | Rank   | Result Type |
|---------------------|-------------|---------|-------|------------|----------|-------------------------|-----------|-------|----------------|--------------------------|--|--|--------|-------------|
| Calc. Mass          | Obsrv. Mass | ± da    | ± ppm | Start Seq. | End Seq. | Sequence                | Ion Score | C. I. | % Modification |                          |  |  |        |             |
| 973.4117            | 973.5176    | 0.1059  | 109   | 347        | 355      | CDLCSFASK               |           |       |                |                          |  |  | Mascot |             |
| 1146.6742           | 1146.6381   | -0.0361 | -31   | 273        | 282      | ANLKSHVHLK              |           |       |                |                          |  |  | Mascot |             |
| 1205.5004           | 1205.6255   | 0.1251  | 104   | 283        | 293      | HSASDSFHCSK             |           |       |                |                          |  |  | Mascot |             |
| 1205.5004           | 1205.6255   | 0.1251  | 104   | 283        | 293      | HSASDSFHCSK             |           |       |                |                          |  |  | Mascot |             |
| 1262.5219           | 1262.684    | 0.1621  | 128   | 283        | 293      | HSASDSFHCSK             |           |       |                | Carbamidomethyl (C)[9]   |  |  | Mascot |             |
| 1434.5632           | 1434.7333   | 0.1701  | 119   | 262        | 272      | CDLCDYRCAMK             |           |       |                | Carbamidomethyl (C)[1,4] |  |  | Mascot |             |
| 1434.5632           | 1434.7333   | 0.1701  | 119   | 262        | 272      | CDLCDYRCAMK             |           |       |                | Carbamidomethyl (C)[1,4] |  |  | Mascot |             |
| 1451.6794           | 1451.7589   | 0.0795  | 55    | 79         | 92       | NAGASESLQTCVSK          |           |       |                | Carbamidomethyl (C)[11]  |  |  | Mascot |             |
| 1625.7072           | 1625.8036   | 0.0964  | 59    | 595        | 609      | ESLNIDGSSSQDMSR         |           |       |                |                          |  |  | Mascot |             |
| 1642.7788           | 1642.8677   | 0.0889  | 54    | 65         | 78       | QNCCQIPSTHISVR          |           |       |                | Carbamidomethyl (C)[3]   |  |  | Mascot |             |
| 1912.868            | 1912.9994   | 0.1314  | 69    | 253        | 268      | VHSGEKPYKCDLCDYR        |           |       |                |                          |  |  | Mascot |             |
| 2210.9263           | 2211.1277   | 0.2014  | 91    | 310        | 329      | QHQAQPLQCSECSYSC<br>SSK |           |       |                |                          |  |  | Mascot |             |
| 2210.9263           | 2211.1277   | 0.2014  | 91    | 310        | 329      | QHQAQPLQCSECSYSC<br>SSK |           |       |                |                          |  |  | Mascot |             |

|    |                               |           |        |    |              |     |                    |      |   |    |                         |        |
|----|-------------------------------|-----------|--------|----|--------------|-----|--------------------|------|---|----|-------------------------|--------|
|    | 2233.0964                     | 2233.1084 | 0.012  | 5  | 206          | 224 | CQICPYASRNSSLTVHLR |      |   |    | Carbamidomethyl (C)[1]  | Mascot |
|    | 2283.0798                     | 2283.2014 | 0.1216 | 53 | 197          | 214 | IHYDERPFKCQICPYASR |      |   |    | Carbamidomethyl (C)[10] | Mascot |
| 34 | junctophilin 1b [Danio rerio] |           |        |    | gi 113195560 |     | 73661.8            | 9.34 | 9 | 32 | 0                       |        |

#### Peptide Information

| Calc. Mass | Obsrv. Mass | ± da    | ± ppm | Start Seq. | End Seq. | Sequence           | Ion Score | C. I. | % Modification                           | Rank | Result Type |
|------------|-------------|---------|-------|------------|----------|--------------------|-----------|-------|------------------------------------------|------|-------------|
| 850.4682   | 850.546     | 0.0778  | 91    | 78         | 83       | GRWLVR             |           |       |                                          |      | Mascot      |
| 1055.5918  | 1055.606    | 0.0142  | 13    | 600        | 609      | APTPKPVMAK         |           |       | Oxidation (M)[8]                         |      | Mascot      |
| 1055.6095  | 1055.606    | -0.0035 | -3    | 610        | 618      | ESKPEPKLK          |           |       |                                          |      | Mascot      |
| 1115.603   | 1115.5195   | -0.0835 | -75   | 591        | 599      | MPPPVKQYR          |           |       |                                          |      | Mascot      |
| 1205.7001  | 1205.6255   | -0.0746 | -62   | 213        | 223      | GSLFGSLKQLR        | 7         | 0     |                                          |      | Mascot      |
| 1205.7001  | 1205.6255   | -0.0746 | -62   | 213        | 223      | GSLFGSLKQLR        |           |       |                                          |      | Mascot      |
| 1262.6277  | 1262.684    | 0.0563  | 45    | 447        | 457      | SPSGSPHFYRK        |           |       |                                          |      | Mascot      |
| 1642.7101  | 1642.8677   | 0.1576  | 96    | 314        | 327      | RHGYGCTMFPDGTK     |           |       | Carbamidomethyl (C)[6], Oxidation (M)[8] |      | Mascot      |
| 1727.8387  | 1727.8621   | 0.0234  | 14    | 412        | 426      | DLSPNFHQPGPDYIK    |           |       |                                          |      | Mascot      |
| 1727.8387  | 1727.8621   | 0.0234  | 14    | 412        | 426      | DLSPNFHQPGPDYIK    |           |       |                                          |      | Mascot      |
| 1909.7333  | 1909.9108   | 0.1775  | 93    | 6          | 22       | FD FDDGGTFCGGWEDGK |           |       | Carbamidomethyl (C)[10]                  |      | Mascot      |

|    |                        |  |  |  |             |  |         |      |   |    |   |  |
|----|------------------------|--|--|--|-------------|--|---------|------|---|----|---|--|
| 35 | tektin 2 [Danio rerio] |  |  |  | gi 37682089 |  | 48740.9 | 5.63 | 8 | 31 | 0 |  |
|----|------------------------|--|--|--|-------------|--|---------|------|---|----|---|--|

#### Peptide Information

| Calc. Mass | Obsrv. Mass | ± da    | ± ppm | Start Seq. | End Seq. | Sequence               | Ion Score | C. I. | % Modification                            | Rank | Result Type |
|------------|-------------|---------|-------|------------|----------|------------------------|-----------|-------|-------------------------------------------|------|-------------|
| 1045.5789  | 1045.5726   | -0.0063 | -6    | 68         | 75       | INDITRWK               |           |       |                                           |      | Mascot      |
| 1115.5691  | 1115.5195   | -0.0496 | -44   | 140        | 149      | EVEVIDGAQR             |           |       |                                           |      | Mascot      |
| 1798.9657  | 1798.9722   | 0.0065  | 4     | 168        | 182      | LQEARQQLTIDLQDK        |           |       |                                           |      | Mascot      |
| 1798.9657  | 1798.9722   | 0.0065  | 4     | 168        | 182      | LQEARQQLTIDLQDK        |           |       |                                           |      | Mascot      |
| 1909.8518  | 1909.9108   | 0.059   | 31    | 80         | 96       | ACAQEVDEEMDALTLISK     |           |       | Carbamidomethyl (C)[2]                    |      | Mascot      |
| 1925.8467  | 1925.9102   | 0.0635  | 33    | 80         | 96       | ACAQEVDEEMDALTLISK     |           |       | Carbamidomethyl (C)[2], Oxidation (M)[10] |      | Mascot      |
| 2070.9199  | 2071.0205   | 0.1006  | 49    | 272        | 287      | THHEEQAHHDMQWQLK       |           |       | Oxidation (M)[11]                         |      | Mascot      |
| 2211.0261  | 2211.1277   | 0.1016  | 46    | 271        | 287      | RTHHEEQAHHDMQWQLK      |           |       |                                           |      | Mascot      |
| 2211.0261  | 2211.1277   | 0.1016  | 46    | 271        | 287      | RTHHEEQAHHDMQWQLK      |           |       |                                           |      | Mascot      |
| 2283.1365  | 2283.2014   | 0.0649  | 28    | 2          | 22       | ATLSSKPASRYSVSDWATNNK  |           |       |                                           |      | Mascot      |
| 2396.2966  | 2396.2654   | -0.0312 | -13   | 102        | 123      | ALAATVLPLEVTAECNLNREGR |           |       | Carbamidomethyl (C)[15]                   |      | Mascot      |

|    |                            |  |  |  |             |  |          |      |    |    |   |  |
|----|----------------------------|--|--|--|-------------|--|----------|------|----|----|---|--|
| 36 | Ect2 protein [Danio rerio] |  |  |  | gi 66911847 |  | 109863.5 | 8.59 | 14 | 31 | 0 |  |
|----|----------------------------|--|--|--|-------------|--|----------|------|----|----|---|--|

| Peptide Information |                                                                                 |         |       |            |             |                                      |           |       |                                           |      |             |
|---------------------|---------------------------------------------------------------------------------|---------|-------|------------|-------------|--------------------------------------|-----------|-------|-------------------------------------------|------|-------------|
| Calc. Mass          | Obsrv. Mass                                                                     | ± da    | ± ppm | Start Seq. | End Seq.    | Sequence                             | Ion Score | C. I. | % Modification                            | Rank | Result Type |
| 940.404             | 940.5209                                                                        | 0.1169  | 124   | 816        | 823         | DMDSTLSR                             |           |       | Oxidation (M)[2]                          |      | Mascot      |
| 973.4995            | 973.5176                                                                        | 0.0181  | 19    | 562        | 568         | CERQKPR                              |           |       | Carbamidomethyl (C)[1]                    |      | Mascot      |
| 1231.5624           | 1231.6849                                                                       | 0.1225  | 99    | 631        | 640         | EVMTHINEDK                           |           |       | Oxidation (M)[3]                          |      | Mascot      |
| 1317.6831           | 1317.7367                                                                       | 0.0536  | 41    | 1          | 13          | MADSSILTLGPGR                        |           |       |                                           |      | Mascot      |
| 1317.6831           | 1317.7367                                                                       | 0.0536  | 41    | 1          | 13          | MADSSILTLGPGR                        |           |       |                                           |      | Mascot      |
| 1380.7052           | 1380.6865                                                                       | -0.0187 | -14   | 953        | 964         | CRDLLAPPEPGR                         |           |       | Carbamidomethyl (C)[1]                    |      | Mascot      |
| 1434.7303           | 1434.7333                                                                       | 0.003   | 2     | 784        | 795         | TLCRQVANTICR                         |           |       | Carbamidomethyl (C)[3]                    |      | Mascot      |
| 1434.7303           | 1434.7333                                                                       | 0.003   | 2     | 784        | 795         | TLCRQVANTICR                         |           |       | Carbamidomethyl (C)[3]                    |      | Mascot      |
| 1448.7969           | 1448.757                                                                        | -0.0399 | -28   | 217        | 229         | VTHLIARSTHGEK                        |           |       |                                           |      | Mascot      |
| 1563.6924           | 1563.7495                                                                       | 0.0571  | 37    | 871        | 884         | MSRMSSSSTLAMSR                       |           |       | Oxidation (M)[1,4]                        |      | Mascot      |
| 1563.6924           | 1563.7495                                                                       | 0.0571  | 37    | 871        | 884         | MSRMSSSSTLAMSR                       |           |       | Oxidation (M)[1,4]                        |      | Mascot      |
| 1625.7588           | 1625.8036                                                                       | 0.0448  | 28    | 920        | 934         | TPCSPERADEPAAPK                      |           |       | Carbamidomethyl (C)[3]                    |      | Mascot      |
| 1691.8706           | 1691.8334                                                                       | -0.0372 | -22   | 54         | 68          | VVLVGAECKMAELEK                      |           |       | Carbamidomethyl (C)[8], Oxidation (M)[10] |      | Mascot      |
| 1785.9391           | 1785.9579                                                                       | 0.0188  | 11    | 232        | 247         | LAVCMGTPILTPDWIR                     |           |       |                                           |      | Mascot      |
| 2337.1426           | 2337.2498                                                                       | 0.1072  | 46    | 874        | 896         | MSSSSTLAMSR<br>SASTFSL<br>TGSIK      |           |       |                                           |      | Mascot      |
| 2677.4929           | 2677.1145                                                                       | -0.3784 | -141  | 575        | 597         | INQSKPECGRQTLVELLI<br>RPVQR          |           |       |                                           |      | Mascot      |
| 3249.6257           | 3249.4709                                                                       | -0.1548 | -48   | 163        | 190         | GEPLPFSSRP<br>LYSMTML<br>NLSLCFTGFRK |           |       | Carbamidomethyl (C)[22]                   |      | Mascot      |
| 3249.6257           | 3249.4709                                                                       | -0.1548 | -48   | 163        | 190         | GEPLPFSSRP<br>LYSMTML<br>NLSLCFTGFRK |           |       | Carbamidomethyl (C)[22]                   |      | Mascot      |
| 37                  | novel protein similar to TNF receptor-associated factor 5 (TRAF5) [Danio rerio] |         |       |            | gi 94732880 | 29458.8                              | 6.45      | 8     | 31                                        | 0    |             |

| Peptide Information |             |          |           |            |          |               |           |       |                          |      |             |  |  |
|---------------------|-------------|----------|-----------|------------|----------|---------------|-----------|-------|--------------------------|------|-------------|--|--|
| Calc. Mass          | Obsrv. Mass | $\pm$ da | $\pm$ ppm | Start Seq. | End Seq. | Sequence      | Ion Score | C. I. | % Modification           | Rank | Result Type |  |  |
| 1024.5105           | 1024.5231   | 0.0126   | 12        | 127        | 134      | ACPHERVR      |           |       | Carbamidomethyl (C)[2]   |      | Mascot      |  |  |
| 1055.4939           | 1055.606    | 0.1121   | 106       | 222        | 230      | NYGCTVRDK     |           |       |                          |      | Mascot      |  |  |
| 1055.4939           | 1055.606    | 0.1121   | 106       | 222        | 230      | NYGCTVRDK     |           |       |                          |      | Mascot      |  |  |
| 1317.662            | 1317.7367   | 0.0747   | 57        | 116        | 126      | FSLCNLQDHLK   |           |       |                          |      | Mascot      |  |  |
| 1317.662            | 1317.7367   | 0.0747   | 57        | 116        | 126      | FSLCNLQDHLK   |           |       |                          |      | Mascot      |  |  |
| 1380.606            | 1380.6865   | 0.0805   | 58        | 1          | 13       | MAAEENESSGLSR |           |       |                          |      | Mascot      |  |  |
| 1448.6256           | 1448.757    | 0.1314   | 91        | 135        | 146      | CSHSDCSDIVLR  |           |       | Carbamidomethyl (C)[1,6] |      | Mascot      |  |  |
| 1563.7042           | 1563.7495   | 0.0453   | 29        | 169        | 181      | QNFPVSQMMGHQK |           |       | Oxidation (M)[8,9]       |      | Mascot      |  |  |
| 1563.7042           | 1563.7495   | 0.0453   | 29        | 169        | 181      | QNFPVSQMMGHQK |           |       | Oxidation (M)[8,9]       |      | Mascot      |  |  |

|    |                                        |           |        |    |             |     |                         |     |    |    |   |                                           |        |
|----|----------------------------------------|-----------|--------|----|-------------|-----|-------------------------|-----|----|----|---|-------------------------------------------|--------|
|    | 2070.8599                              | 2071.0205 | 0.1606 | 78 | 182         | 200 | SSCPDVEVPCSNCTQM<br>IK  |     |    |    |   | Oxidation (M)[17]                         | Mascot |
|    | 2210.9661                              | 2211.1277 | 0.1616 | 73 | 182         | 201 | SSCPDVEVPCSNCTQM<br>IKR |     |    |    |   |                                           | Mascot |
|    | 2210.9661                              | 2211.1277 | 0.1616 | 73 | 182         | 201 | SSCPDVEVPCSNCTQM<br>IKR |     |    |    |   |                                           | Mascot |
|    | 2283.9824                              | 2284.197  | 0.2146 | 94 | 182         | 201 | SSCPDVEVPCSNCTQM<br>IKR |     |    |    |   | Carbamidomethyl (C)[3], Oxidation (M)[17] | Mascot |
| 38 | Si:ch211-154o6.7 protein [Danio rerio] |           |        |    | gi 92097789 |     | 59687.2                 | 8.6 | 10 | 31 | 0 |                                           |        |

#### Peptide Information

|  | Calc. Mass | Obsrv. Mass | ± da    | ± ppm | Start Seq. | End Seq. | Sequence                          | Ion Score | C. I. | % | Modification                             | Rank | Result Type |
|--|------------|-------------|---------|-------|------------|----------|-----------------------------------|-----------|-------|---|------------------------------------------|------|-------------|
|  | 902.5054   | 902.5206    | 0.0152  | 17    | 18         | 25       | AQNTVLTR                          |           |       |   |                                          |      | Mascot      |
|  | 1055.4648  | 1055.606    | 0.1412  | 134   | 294        | 302      | GFPMTNNMK                         |           |       |   | Oxidation (M)[4]                         |      | Mascot      |
|  | 1055.4648  | 1055.606    | 0.1412  | 134   | 294        | 302      | GFPMTNNMK                         |           |       |   | Oxidation (M)[4]                         |      | Mascot      |
|  | 1058.6066  | 1058.5569   | -0.0497 | -47   | 18         | 26       | AQNTVLTRR                         |           |       |   |                                          |      | Mascot      |
|  | 1661.897   | 1661.7815   | -0.1155 | -69   | 12         | 25       | ENIQFKAQNTVLTR                    |           |       |   |                                          |      | Mascot      |
|  | 1665.874   | 1665.9108   | 0.0368  | 22    | 305        | 319      | AGVKPSNTQYMSRVK                   |           |       |   |                                          |      | Mascot      |
|  | 1677.8339  | 1677.6991   | -0.1348 | -80   | 491        | 506      | QPCCVSLVPGVYLDGK                  |           |       |   |                                          |      | Mascot      |
|  | 1677.8339  | 1677.6991   | -0.1348 | -80   | 491        | 506      | QPCCVSLVPGVYLDGK                  |           |       |   |                                          |      | Mascot      |
|  | 1691.8785  | 1691.8334   | -0.0451 | -27   | 455        | 468      | EKPQKIGLYLDCER                    |           |       |   |                                          |      | Mascot      |
|  | 1909.8163  | 1909.9108   | 0.0945  | 49    | 125        | 140      | LADMEKMLMCSEHDEK                  |           |       |   |                                          |      | Mascot      |
|  | 1925.8112  | 1925.9102   | 0.099   | 51    | 125        | 140      | LADMEKMLMCSEHDEK                  |           |       |   | Oxidation (M)[4]                         |      | Mascot      |
|  | 2677.115   | 2677.1145   | -0.0005 | 0     | 40         | 61       | CSVCLSDFTDPVTLSCEH<br>SFCR        |           |       |   | Carbamidomethyl (C)[1,4,16,21]           |      | Mascot      |
|  | 3249.4795  | 3249.4709   | -0.0086 | -3    | 62         | 90       | QCITGHMQASLGPSACP<br>ECQKPYNEKDLK |           |       |   | Carbamidomethyl (C)[2], Oxidation (M)[7] |      | Mascot      |
|  | 3249.4795  | 3249.4709   | -0.0086 | -3    | 62         | 90       | QCITGHMQASLGPSACP<br>ECQKPYNEKDLK |           |       |   | Carbamidomethyl (C)[2], Oxidation (M)[7] |      | Mascot      |

39 novel protein [Danio rerio] gi|56208048 32038.8 9.45 7 31 0

#### Peptide Information

|  | Calc. Mass | Obsrv. Mass | ± da    | ± ppm | Start Seq. | End Seq. | Sequence          | Ion Score | C. I. | % | Modification             | Rank | Result Type |
|--|------------|-------------|---------|-------|------------|----------|-------------------|-----------|-------|---|--------------------------|------|-------------|
|  | 1155.5793  | 1155.6981   | 0.1188  | 103   | 126        | 135      | DKFTFTGSR         |           |       |   |                          |      | Mascot      |
|  | 1252.6644  | 1252.7349   | 0.0705  | 56    | 91         | 101      | IPVRDPDSPTR       |           |       |   |                          |      | Mascot      |
|  | 1309.6429  | 1309.6219   | -0.021  | -16   | 275        | 286      | VNQGSFGCSRVR      |           |       |   |                          |      | Mascot      |
|  | 1380.6471  | 1380.6865   | 0.0394  | 29    | 232        | 242      | CQRTTACSLQR       |           |       |   | Carbamidomethyl (C)[1,7] |      | Mascot      |
|  | 1448.705   | 1448.757    | 0.052   | 36    | 31         | 43       | SSNKPDENMISVK     |           |       |   |                          |      | Mascot      |
|  | 1677.7351  | 1677.6991   | -0.036  | -21   | 2          | 17       | TGDDFQPNPSGTAEK   |           |       |   |                          |      | Mascot      |
|  | 1677.7351  | 1677.6991   | -0.036  | -21   | 2          | 17       | TGDDFQPNPSGTAEK   |           |       |   |                          |      | Mascot      |
|  | 1909.9324  | 1909.9108   | -0.0216 | -11   | 31         | 47       | SSNKPDENMISVKAFDK |           |       |   |                          |      | Mascot      |

|    |                                   |           |        |    |              |          |                   |    |    |   |  |                  |        |
|----|-----------------------------------|-----------|--------|----|--------------|----------|-------------------|----|----|---|--|------------------|--------|
|    | 1925.9272                         | 1925.9102 | -0.017 | -9 | 31           | 47       | SSNKPDENMISVKAFDK |    |    |   |  | Oxidation (M)[9] | Mascot |
| 40 | piwi-like protein 2 [Danio rerio] |           |        |    | gi 124286793 | 116155.3 | 8.99              | 13 | 31 | 0 |  |                  |        |

Peptide Information

| Calc. Mass | Obsrv. Mass | ± da    | ± ppm | Start Seq. | End Seq. | Sequence                    | Ion Score | C. I. | % Modification         | Rank | Result Type |
|------------|-------------|---------|-------|------------|----------|-----------------------------|-----------|-------|------------------------|------|-------------|
| 902.4689   | 902.5206    | 0.0517  | 57    | 715        | 721      | VELRDDR                     |           |       |                        |      | Mascot      |
| 1205.6346  | 1205.6255   | -0.0091 | -8    | 55         | 65       | AFSVLGEMPVR                 |           |       |                        |      | Mascot      |
| 1205.6346  | 1205.6255   | -0.0091 | -8    | 55         | 65       | AFSVLGEMPVR                 |           |       |                        |      | Mascot      |
| 1317.6686  | 1317.7367   | 0.0681  | 52    | 502        | 512      | IDDIEWSKSPK                 |           |       |                        |      | Mascot      |
| 1317.6686  | 1317.7367   | 0.0681  | 52    | 502        | 512      | IDDIEWSKSPK                 |           |       |                        |      | Mascot      |
| 1332.7126  | 1332.71     | -0.0026 | -2    | 739        | 750      | VQLVVCIMTGNR                |           |       |                        |      | Mascot      |
| 1434.7522  | 1434.7333   | -0.0189 | -13   | 53         | 65       | GRAFSVLGEMPVR               |           |       | Oxidation (M)[10]      |      | Mascot      |
| 1434.7522  | 1434.7333   | -0.0189 | -13   | 53         | 65       | GRAFSVLGEMPVR               |           |       | Oxidation (M)[10]      |      | Mascot      |
| 1581.8206  | 1581.8031   | -0.0175 | -11   | 55         | 68       | AFSVLGEMPVRFRGR             |           |       | Oxidation (M)[8]       |      | Mascot      |
| 1661.839   | 1661.7815   | -0.0575 | -35   | 294        | 309      | GSPIPIGSNYIPICCK            |           |       |                        |      | Mascot      |
| 1727.8931  | 1727.8621   | -0.031  | -18   | 760        | 775      | LCCIQSPVPSQAINVR            |           |       |                        |      | Mascot      |
| 1727.8931  | 1727.8621   | -0.031  | -18   | 760        | 775      | LCCIQSPVPSQAINVR            |           |       |                        |      | Mascot      |
| 1913.0095  | 1912.9994   | -0.0101 | -5    | 759        | 775      | KLCCIQSPVPSQAINVR           |           |       | Carbamidomethyl (C)[3] |      | Mascot      |
| 1926.059   | 1925.9102   | -0.1488 | -77   | 69         | 87       | GITQSIAAEPLVGMARGV<br>R     |           |       |                        |      | Mascot      |
| 2070.9656  | 2071.0205   | 0.0549  | 27    | 513        | 530      | DTFTLADGSVTTFVDYYR          |           |       |                        |      | Mascot      |
| 2233.1646  | 2233.1084   | -0.0562 | -25   | 149        | 171      | VGSPGTGSSLVSMFRGL<br>GIEPGK |           |       |                        |      | Mascot      |
| 2587.4238  | 2587.2673   | -0.1565 | -60   | 559        | 581      | VITGEILLPELSFMTGIPE<br>KMR  |           |       |                        |      | Mascot      |

|    |                                                                 |  |  |  |              |         |   |   |    |   |  |  |
|----|-----------------------------------------------------------------|--|--|--|--------------|---------|---|---|----|---|--|--|
| 41 | PREDICTED: oocyte zinc finger protein XICOF6-like [Danio rerio] |  |  |  | gi 326680772 | 41201.6 | 9 | 9 | 31 | 0 |  |  |
|----|-----------------------------------------------------------------|--|--|--|--------------|---------|---|---|----|---|--|--|

Peptide Information

| Calc. Mass | Obsrv. Mass | ± da    | ± ppm | Start Seq. | End Seq. | Sequence        | Ion Score | C. I. | % Modification          | Rank | Result Type |
|------------|-------------|---------|-------|------------|----------|-----------------|-----------|-------|-------------------------|------|-------------|
| 1563.7333  | 1563.7495   | 0.0162  | 10    | 102        | 114      | SFNQSSNINLHMR   |           |       | Oxidation (M)[12]       |      | Mascot      |
| 1563.7333  | 1563.7495   | 0.0162  | 10    | 102        | 114      | SFNQSSNINLHMR   |           |       | Oxidation (M)[12]       |      | Mascot      |
| 1625.6948  | 1625.8036   | 0.1088  | 67    | 298        | 310      | SFYCSSHLNQHMR   |           |       | Oxidation (M)[12]       |      | Mascot      |
| 1661.8138  | 1661.7815   | -0.0323 | -19   | 227        | 241      | IHTGEKPFICTQCGK |           |       |                         |      | Mascot      |
| 1665.7723  | 1665.9108   | 0.1385  | 83    | 311        | 325      | IHTGEKPYTCTQCGK |           |       |                         |      | Mascot      |
| 1677.7836  | 1677.6991   | -0.0845 | -50   | 115        | 128      | IHTGEKPFTCTQCR  |           |       | Carbamidomethyl (C)[10] |      | Mascot      |
| 1677.7836  | 1677.6991   | -0.0845 | -50   | 115        | 128      | IHTGEKPFTCTQCR  |           |       | Carbamidomethyl (C)[10] |      | Mascot      |

|    |                                           |           |         |    |              |         |                                  |   |                                            |        |
|----|-------------------------------------------|-----------|---------|----|--------------|---------|----------------------------------|---|--------------------------------------------|--------|
|    | 2233.0237                                 | 2233.1084 | 0.0847  | 38 | 270          | 288     | SFNCSSQLNQHMRIHTG<br>EK          |   | Oxidation (M)[12]                          | Mascot |
|    | 2337.1873                                 | 2337.2498 | 0.0625  | 27 | 339          | 359     | IHTGEKPAASVWEEFQQ<br>LIGP        |   |                                            | Mascot |
|    | 3249.4333                                 | 3249.4709 | 0.0376  | 12 | 186          | 213     | SFSLSSSFNQHMRMHTG<br>EKPFTCTQCGK |   | Carbamidomethyl (C)[23], Oxidation (M)[12] | Mascot |
|    | 3249.4775                                 | 3249.4709 | -0.0066 | -2 | 242          | 269     | SFSYSSHLNHHMRIHTGE<br>KPFTCTQCGK |   | Oxidation (M)[12]                          | Mascot |
| 42 | PREDICTED: protein G7c-like [Danio rerio] |           |         |    | gi 326665656 | 34821.8 | 8.47                             | 7 | 31                                         | 0      |

#### Peptide Information

| Calc. Mass | Obsrv. Mass | ± da    | ± ppm | Start Seq. | End Seq. | Sequence        | Ion Score | C. I. % | Modification | Rank | Result Type |
|------------|-------------|---------|-------|------------|----------|-----------------|-----------|---------|--------------|------|-------------|
| 1045.6074  | 1045.5726   | -0.0348 | -33   | 111        | 119      | NLIKGM EK       |           |         |              |      | Mascot      |
| 1058.5629  | 1058.5569   | -0.006  | -6    | 294        | 302      | FSIFSSKSR       |           |         |              |      | Mascot      |
| 1115.5844  | 1115.5195   | -0.0649 | -58   | 291        | 300      | GSRF SIFSSK     |           |         |              |      | Mascot      |
| 1317.7018  | 1317.7367   | 0.0349  | 26    | 56         | 67       | QLNPKTLAMACK    |           |         |              |      | Mascot      |
| 1317.7018  | 1317.7367   | 0.0349  | 26    | 56         | 67       | QLNPKTLAMACK    |           |         |              |      | Mascot      |
| 1380.7594  | 1380.6865   | -0.0729 | -53   | 27         | 38       | NHQDITSIALR     |           |         |              |      | Mascot      |
| 1434.8175  | 1434.7333   | -0.0842 | -59   | 281        | 293      | LVGLHQDKPKGSR   |           |         |              |      | Mascot      |
| 1434.8175  | 1434.7333   | -0.0842 | -59   | 281        | 293      | LVGLHQDKPKGSR   |           |         |              |      | Mascot      |
| 1642.8547  | 1642.8677   | 0.013   | 8     | 46         | 60       | NADGNFVTPKQLNPK |           |         |              |      | Mascot      |

|    |                                                                           |  |  |  |              |         |      |    |    |   |
|----|---------------------------------------------------------------------------|--|--|--|--------------|---------|------|----|----|---|
| 43 | PREDICTED: zinc finger protein 64 homolog, isoforms 1 and 2 [Danio rerio] |  |  |  | gi 292627186 | 71408.1 | 8.74 | 11 | 31 | 0 |
|----|---------------------------------------------------------------------------|--|--|--|--------------|---------|------|----|----|---|

#### Peptide Information

| Calc. Mass | Obsrv. Mass | ± da    | ± ppm | Start Seq. | End Seq. | Sequence                | Ion Score | C. I. % | Modification             | Rank | Result Type |
|------------|-------------|---------|-------|------------|----------|-------------------------|-----------|---------|--------------------------|------|-------------|
| 973.4117   | 973.5176    | 0.1059  | 109   | 323        | 331      | CDLCSFASK               |           |         |                          |      | Mascot      |
| 1146.6742  | 1146.6381   | -0.0361 | -31   | 249        | 258      | ANLKSHVHLK              |           |         |                          |      | Mascot      |
| 1205.5004  | 1205.6255   | 0.1251  | 104   | 259        | 269      | HSASDSFHCSK             |           |         |                          |      | Mascot      |
| 1205.5004  | 1205.6255   | 0.1251  | 104   | 259        | 269      | HSASDSFHCSK             |           |         |                          |      | Mascot      |
| 1262.5219  | 1262.684    | 0.1621  | 128   | 259        | 269      | HSASDSFHCSK             |           |         | Carbamidomethyl (C)[9]   |      | Mascot      |
| 1434.5632  | 1434.7333   | 0.1701  | 119   | 238        | 248      | CDLCDYRCAMK             |           |         | Carbamidomethyl (C)[1,4] |      | Mascot      |
| 1434.5632  | 1434.7333   | 0.1701  | 119   | 238        | 248      | CDLCDYRCAMK             |           |         | Carbamidomethyl (C)[1,4] |      | Mascot      |
| 1451.6794  | 1451.7589   | 0.0795  | 55    | 55         | 68       | NAGASESLQTCVSK          |           |         | Carbamidomethyl (C)[11]  |      | Mascot      |
| 1625.7072  | 1625.8036   | 0.0964  | 59    | 571        | 585      | ESLNIDGSSSQDMSR         |           |         |                          |      | Mascot      |
| 1642.7788  | 1642.8677   | 0.0889  | 54    | 41         | 54       | QNCCQIPSTHISVR          |           |         | Carbamidomethyl (C)[3]   |      | Mascot      |
| 1912.868   | 1912.9994   | 0.1314  | 69    | 229        | 244      | VHSGEKPYKCDLCDYR        |           |         |                          |      | Mascot      |
| 2210.9263  | 2211.1277   | 0.2014  | 91    | 286        | 305      | QHQAQPLQCSECSYSC<br>SSK |           |         |                          |      | Mascot      |



|    |                                       |           |        |    |              |     |                         |       |   |    |   |  |                         |  |        |
|----|---------------------------------------|-----------|--------|----|--------------|-----|-------------------------|-------|---|----|---|--|-------------------------|--|--------|
|    | 2210.9263                             | 2211.1277 | 0.2014 | 91 | 286          | 305 | QHQPAPLQCSECSYSC<br>SSK |       |   |    |   |  |                         |  | Mascot |
|    | 2233.0964                             | 2233.1084 | 0.012  | 5  | 182          | 200 | CQICPYASRNSSLTVHL<br>R  |       |   |    |   |  | Carbamidomethyl (C)[1]  |  | Mascot |
|    | 2283.0798                             | 2283.2014 | 0.1216 | 53 | 173          | 190 | IHYDERPFKCQICPYASR      |       |   |    |   |  | Carbamidomethyl (C)[10] |  | Mascot |
| 44 | PREDICTED: insulin-like [Danio rerio] |           |        |    | gi 326666044 |     | 7864.3                  | 10.45 | 4 | 30 | 0 |  |                         |  |        |

#### Peptide Information

| Calc. Mass | Obsrv. Mass | ± da    | ± ppm | Start Seq. | End Seq. | Sequence                     | Ion Score | C. I. | % Modification            | Rank | Result Type |
|------------|-------------|---------|-------|------------|----------|------------------------------|-----------|-------|---------------------------|------|-------------|
| 1309.6932  | 1309.6219   | -0.0713 | -54   | 62         | 72       | IMIRNSATFLQ                  |           |       | Oxidation (M)[2]          |      | Mascot      |
| 2071.1401  | 2071.0205   | -0.1196 | -58   | 27         | 44       | RLCGIQLVEALLIVCGEK           |           |       | Carbamidomethyl (C)[3,15] |      | Mascot      |
| 2297.228   | 2297.1531   | -0.0749 | -33   | 2          | 25       | QGSGLLLSLCAGSLLT<br>HSGAGGK  |           |       | Carbamidomethyl (C)[11]   |      | Mascot      |
| 2396.3079  | 2396.2654   | -0.0425 | -18   | 2          | 26       | QGSGLLLSLCAGSLLT<br>HSGAGGKR |           |       |                           |      | Mascot      |

|    |                                                         |  |  |  |              |  |          |      |   |  |    |   |  |  |  |
|----|---------------------------------------------------------|--|--|--|--------------|--|----------|------|---|--|----|---|--|--|--|
| 45 | PREDICTED: hypothetical protein LOC565437 [Danio rerio] |  |  |  | gi 326673124 |  | 224597.9 | 4.83 | 1 |  | 21 | 0 |  |  |  |
|----|---------------------------------------------------------|--|--|--|--------------|--|----------|------|---|--|----|---|--|--|--|

#### Peptide Information

| Calc. Mass | Obsrv. Mass | ± da   | ± ppm | Start Seq. | End Seq. | Sequence   | Ion Score | C. I. | % Modification | Rank | Result Type |
|------------|-------------|--------|-------|------------|----------|------------|-----------|-------|----------------|------|-------------|
| 1205.5466  | 1205.6255   | 0.0789 | 65    | 894        | 903      | DPKCEESEIR | 21        | 0     |                | 2    | Mascot      |

|    |                                      |  |  |  |              |  |          |      |   |  |    |   |  |  |  |
|----|--------------------------------------|--|--|--|--------------|--|----------|------|---|--|----|---|--|--|--|
| 46 | novel collagen protein [Danio rerio] |  |  |  | gi 169158763 |  | 111361.2 | 9.91 | 1 |  | 20 | 0 |  |  |  |
|----|--------------------------------------|--|--|--|--------------|--|----------|------|---|--|----|---|--|--|--|

#### Peptide Information

| Calc. Mass | Obsrv. Mass | ± da    | ± ppm | Start Seq. | End Seq. | Sequence   | Ion Score | C. I. | % Modification | Rank | Result Type |
|------------|-------------|---------|-------|------------|----------|------------|-----------|-------|----------------|------|-------------|
| 1205.7001  | 1205.6255   | -0.0746 | -62   | 939        | 948      | ELSLIQPHLR | 20        | 0     |                | 3    | Mascot      |

|    |                                                         |  |  |  |              |  |          |      |   |  |    |   |  |  |  |
|----|---------------------------------------------------------|--|--|--|--------------|--|----------|------|---|--|----|---|--|--|--|
| 47 | PREDICTED: hypothetical protein LOC560266 [Danio rerio] |  |  |  | gi 326676456 |  | 255155.6 | 8.69 | 1 |  | 20 | 0 |  |  |  |
|----|---------------------------------------------------------|--|--|--|--------------|--|----------|------|---|--|----|---|--|--|--|

#### Peptide Information

| Calc. Mass | Obsrv. Mass | ± da   | ± ppm | Start Seq. | End Seq. | Sequence   | Ion Score | C. I. | % Modification | Rank | Result Type |
|------------|-------------|--------|-------|------------|----------|------------|-----------|-------|----------------|------|-------------|
| 1205.5393  | 1205.6255   | 0.0862 | 72    | 414        | 423      | EIRSEEDDGR | 20        | 0     |                | 4    | Mascot      |

|    |                            |  |  |  |             |  |         |      |   |  |    |   |  |  |  |
|----|----------------------------|--|--|--|-------------|--|---------|------|---|--|----|---|--|--|--|
| 48 | Brd8 protein [Danio rerio] |  |  |  | gi 28277586 |  | 93582.2 | 4.71 | 1 |  | 19 | 0 |  |  |  |
|----|----------------------------|--|--|--|-------------|--|---------|------|---|--|----|---|--|--|--|

#### Peptide Information

| Calc. Mass | Obsrv. Mass | ± da   | ± ppm | Start Seq. | End Seq. | Sequence    | Ion Score | C. I. | % Modification | Rank | Result Type |
|------------|-------------|--------|-------|------------|----------|-------------|-----------|-------|----------------|------|-------------|
| 1205.5757  | 1205.6255   | 0.0498 | 41    | 839        | 849      | QDTVEKDGGTR | 19        | 0     |                | 5    | Mascot      |

49 inositol hexaphosphate kinase 2 [Danio rerio] gi|77404257 48702.1 6.01 1 18 0

Peptide Information

| Calc. Mass | Obsrv. Mass | ± da    | ± ppm | Start Seq. | End Seq. | Sequence   | Ion Score | C. I. % | Modification | Rank | Result Type |
|------------|-------------|---------|-------|------------|----------|------------|-----------|---------|--------------|------|-------------|
| 1205.671   | 1205.6255   | -0.0455 | -38   | 208        | 217      | YRVPCVLDLK | 18        | 0       |              | 6    | Mascot      |

50 PREDICTED: hypothetical protein LOC100320750 [Danio rerio] gi|292623710 15386.5 4.36 1 18 0

Peptide Information

| Calc. Mass | Obsrv. Mass | ± da   | ± ppm | Start Seq. | End Seq. | Sequence   | Ion Score | C. I. % | Modification | Rank | Result Type |
|------------|-------------|--------|-------|------------|----------|------------|-----------|---------|--------------|------|-------------|
| 1205.5831  | 1205.6255   | 0.0424 | 35    | 1          | 10       | MDQSLDIDIR | 18        | 0       |              | 7    | Mascot      |

|                |           |                        |                |                |                    |
|----------------|-----------|------------------------|----------------|----------------|--------------------|
| Gel Idx/Pos    | 176/H3    | Instr./Gel Origin      | BA2060/110707A | Process Status | Analysis Succeeded |
| Plate [#] Name | [1] 31496 | Instrument Sample Name |                | Spectra        | 11                 |

| Rank | Protein Name                               | Accession No. | Protein MW | Protein PI | Pep. Count | Protein Score | Protein Score C. I. % | Total Ion Score | Total Ion C. I. % |
|------|--------------------------------------------|---------------|------------|------------|------------|---------------|-----------------------|-----------------|-------------------|
| 1    | liver glycogen phosphorylase [Danio rerio] | gi 56606106   | 111467.3   | 5.5        | 33         | 1,050         | 100                   | 796             | 100               |

Peptide Information

| Calc. Mass | Obsrv. Mass | ± da    | ± ppm | Start Seq. | End Seq. | Sequence      | Ion Score | C. I. % | Modification     | Rank | Result Type |
|------------|-------------|---------|-------|------------|----------|---------------|-----------|---------|------------------|------|-------------|
| 842.5206   | 842.5123    | -0.0083 | -10   | 853        | 859      | RAINQIK       |           |         |                  |      | Mascot      |
| 862.4781   | 862.4818    | 0.0037  | 4     | 947        | 954      | IPPPGEPR      |           |         |                  |      | Mascot      |
| 893.4151   | 893.416     | 0.0009  | 1     | 500        | 506      | YGNPWEEK      |           |         |                  |      | Mascot      |
| 914.5458   | 914.5472    | 0.0014  | 2     | 713        | 719      | HLQIIYK       |           |         |                  |      | Mascot      |
| 916.4846   | 916.4868    | 0.0022  | 2     | 586        | 593      | NLAENISR      |           |         |                  |      | Mascot      |
| 946.4741   | 946.4759    | 0.0018  | 2     | 564        | 571      | APNDFNLR      |           |         |                  |      | Mascot      |
| 946.4741   | 946.4759    | 0.0018  | 2     | 250        | 257      | APNDFNLR      | 55        | 99.905  |                  |      | Mascot      |
| 994.5832   | 994.5829    | -0.0003 | 0     | 35         | 42       | HLHFTLVK      |           |         |                  |      | Mascot      |
| 1053.5728  | 1053.576    | 0.0032  | 3     | 755        | 762      | VIFLENYR      |           |         |                  |      | Mascot      |
| 1053.5728  | 1053.576    | 0.0032  | 3     | 755        | 762      | VIFLENYR      | 47        | 99.413  |                  |      | Mascot      |
| 1161.5575  | 1161.5631   | 0.0056  | 5     | 476        | 484      | YEYGIFNQK     |           |         |                  |      | Mascot      |
| 1176.5677  | 1176.6029   | 0.0352  | 30    | 428        | 438      | MSPIEEGGGKR   |           |         | Oxidation (M)[1] |      | Mascot      |
| 1220.5834  | 1220.5864   | 0.003   | 2     | 886        | 895      | VFADYESYVK    |           |         |                  |      | Mascot      |
| 1355.7892  | 1355.6809   | -0.1083 | -80   | 18         | 30       | GIVGVENVAELKK |           |         |                  |      | Mascot      |

|           |           |         |     |     |     |                          |     |     |  |  |  |  |                        |  |  |  |        |
|-----------|-----------|---------|-----|-----|-----|--------------------------|-----|-----|--|--|--|--|------------------------|--|--|--|--------|
| 1355.7892 | 1355.7896 | 0.0004  | 0   | 18  | 30  | GIVGVENVAELKK            |     |     |  |  |  |  |                        |  |  |  | Mascot |
| 1363.653  | 1363.6586 | 0.0056  | 4   | 673 | 683 | LDWDTAWDITK              |     |     |  |  |  |  |                        |  |  |  | Mascot |
| 1371.6692 | 1371.6747 | 0.0055  | 4   | 51  | 61  | DYYFALSHTVR              |     |     |  |  |  |  |                        |  |  |  | Mascot |
| 1371.6692 | 1371.6747 | 0.0055  | 4   | 51  | 61  | DYYFALSHTVR              | 91  | 100 |  |  |  |  |                        |  |  |  | Mascot |
| 1386.5995 | 1386.6051 | 0.0056  | 4   | 71  | 81  | TQQFCYEADPK              |     |     |  |  |  |  | Carbamidomethyl (C)[5] |  |  |  | Mascot |
| 1442.6951 | 1442.6982 | 0.0031  | 2   | 594 | 605 | VLYPNDNFFEGK             |     |     |  |  |  |  |                        |  |  |  | Mascot |
| 1511.7013 | 1511.7045 | 0.0032  | 2   | 633 | 646 | NTSGPLSFDSFPDK           |     |     |  |  |  |  |                        |  |  |  | Mascot |
| 1519.754  | 1519.7588 | 0.0048  | 3   | 673 | 684 | LDWDTAWDITKR             |     |     |  |  |  |  |                        |  |  |  | Mascot |
| 1542.7006 | 1542.7043 | 0.0037  | 2   | 71  | 82  | TQQFCYEADPKR             |     |     |  |  |  |  | Carbamidomethyl (C)[5] |  |  |  | Mascot |
| 1556.7454 | 1556.7462 | 0.0008  | 1   | 83  | 94  | VYYLSLEFYMR              |     |     |  |  |  |  | Oxidation (M)[10]      |  |  |  | Mascot |
| 1618.7133 | 1618.717  | 0.0037  | 2   | 487 | 499 | DGWQVEEADDWLR            |     |     |  |  |  |  |                        |  |  |  | Mascot |
| 1624.7965 | 1624.8014 | 0.0049  | 3   | 258 | 271 | DFNVGDYIQAVLDR           | 118 | 100 |  |  |  |  |                        |  |  |  | Mascot |
| 1624.7965 | 1624.8014 | 0.0049  | 3   | 572 | 585 | DFNVGDYIQAVLDR           |     |     |  |  |  |  |                        |  |  |  | Mascot |
| 1719.8788 | 1719.884  | 0.0052  | 3   | 507 | 520 | ARPEFMLPVHIFYGR          |     |     |  |  |  |  |                        |  |  |  | Mascot |
| 1735.8737 | 1735.8815 | 0.0078  | 4   | 507 | 520 | ARPEFMLPVHIFYGR          |     |     |  |  |  |  | Oxidation (M)[6]       |  |  |  | Mascot |
| 1735.8737 | 1735.8815 | 0.0078  | 4   | 193 | 206 | ARPEFMLPVHIFYGR          | 13  | 0   |  |  |  |  | Oxidation (M)[6]       |  |  |  | Mascot |
| 1751.9326 | 1751.9026 | -0.03   | -17 | 611 | 625 | QEYFVVAATLQDVIR          |     |     |  |  |  |  |                        |  |  |  | Mascot |
| 1781.9756 | 1781.9781 | 0.0025  | 1   | 735 | 751 | LITSVADVNNDPVIGR         | 136 | 100 |  |  |  |  |                        |  |  |  | Mascot |
| 1781.9756 | 1781.9781 | 0.0025  | 1   | 735 | 751 | LITSVADVNNDPVIGR         |     |     |  |  |  |  |                        |  |  |  | Mascot |
| 1859.8922 | 1859.8964 | 0.0042  | 2   | 485 | 499 | IKDGWQVEEADDWLR          | 81  | 100 |  |  |  |  |                        |  |  |  | Mascot |
| 1859.8922 | 1859.8964 | 0.0042  | 2   | 485 | 499 | IKDGWQVEEADDWLR          |     |     |  |  |  |  |                        |  |  |  | Mascot |
| 1861.9443 | 1861.932  | -0.0123 | -7  | 685 | 700 | TFAYTNHTVLPEALER         |     |     |  |  |  |  |                        |  |  |  | Mascot |
| 1970.9969 | 1971.0005 | 0.0036  | 2   | 838 | 853 | GYNALQYYENLPELKR         | 114 | 100 |  |  |  |  |                        |  |  |  | Mascot |
| 1970.9969 | 1971.0005 | 0.0036  | 2   | 838 | 853 | GYNALQYYENLPELKR         |     |     |  |  |  |  |                        |  |  |  | Mascot |
| 1993.1117 | 1993.1134 | 0.0017  | 1   | 609 | 625 | LKQEYFVVAATLQDVIR        |     |     |  |  |  |  |                        |  |  |  | Mascot |
| 1993.1117 | 1993.1134 | 0.0017  | 1   | 295 | 311 | LKQEYFVVAATLQDVIR        | 150 | 100 |  |  |  |  |                        |  |  |  | Mascot |
| 2066.0327 | 2066.0371 | 0.0044  | 2   | 929 | 946 | TITEYATEIWGVEPTDLK       |     |     |  |  |  |  |                        |  |  |  | Mascot |
| 2120.0991 | 2120.1094 | 0.0103  | 5   | 647 | 665 | VAIQLNDTHPAMAIPELM<br>R  |     |     |  |  |  |  |                        |  |  |  | Mascot |
| 2136.094  | 2136.0969 | 0.0029  | 1   | 647 | 665 | VAIQLNDTHPAMAIPELM<br>R  |     |     |  |  |  |  | Oxidation (M)[12]      |  |  |  | Mascot |
| 2152.0889 | 2152.093  | 0.0041  | 2   | 647 | 665 | VAIQLNDTHPAMAIPELM<br>R  |     |     |  |  |  |  | Oxidation (M)[12,18]   |  |  |  | Mascot |
| 2248.1543 | 2248.1423 | -0.012  | -5  | 406 | 424 | INLIHLNHIASLFPEDMDR      |     |     |  |  |  |  |                        |  |  |  | Mascot |
| 2264.1492 | 2264.1484 | -0.0008 | 0   | 406 | 424 | INLIHLNHIASLFPEDMDR      |     |     |  |  |  |  | Oxidation (M)[17]      |  |  |  | Mascot |
| 2283.2739 | 2283.1802 | -0.0937 | -41 | 731 | 751 | MIIKLITSVADVNNDPVI<br>GR |     |     |  |  |  |  | Oxidation (M)[1]       |  |  |  | Mascot |

2

glycogen phosphorylase, muscle form [Danio rerio]

gi|66472494

96870.5

6.67

18

105

100

47

99.413

| Calc. Mass                                      | Obsrv. Mass | ± da    | ± ppm | Start Seq.  | End Seq. | Sequence           | Ion Score | C. I.  | % Modification         | Rank | Result Type |        |
|-------------------------------------------------|-------------|---------|-------|-------------|----------|--------------------|-----------|--------|------------------------|------|-------------|--------|
| 842.4617                                        | 842.5123    | 0.0506  | 60    | 835         | 842      | LAAPDDIK           |           |        |                        |      | Mascot      |        |
| 845.4628                                        | 845.4667    | 0.0039  | 5     | 571         | 576      | IHEYKR             |           |        |                        |      | Mascot      |        |
| 862.424                                         | 862.4818    | 0.0578  | 67    | 365         | 371      | AWDICVR            |           |        |                        |      | Mascot      |        |
| 893.4151                                        | 893.416     | 0.0009  | 1     | 186         | 192      | YGNPWEK            |           |        |                        |      | Mascot      |        |
| 914.5166                                        | 914.5472    | 0.0306  | 33    | 484         | 491      | TNGITPRR           |           |        |                        |      | Mascot      |        |
| 916.4846                                        | 916.4868    | 0.0022  | 2     | 271         | 278      | NLAENISR           |           |        |                        |      | Mascot      |        |
| 994.5832                                        | 994.5829    | -0.0003 | 0     | 35          | 42       | HLHFTLVK           |           |        |                        |      | Mascot      |        |
| 1053.5728                                       | 1053.576    | 0.0032  | 3     | 643         | 650      | VIFLENYR           |           |        |                        |      | Mascot      |        |
| 1053.5728                                       | 1053.576    | 0.0032  | 3     | 643         | 650      | VIFLENYR           | 47        | 99.413 |                        |      | Mascot      |        |
| 1197.4882                                       | 1197.5883   | 0.1001  | 84    | 471         | 479      | DFYEMDPHK          |           |        | Oxidation (M)[5]       |      | Mascot      |        |
| 1355.6742                                       | 1355.6809   | 0.0067  | 5     | 51          | 61       | DYYFALAHTVR        |           |        |                        |      | Mascot      |        |
| 1355.6742                                       | 1355.7896   | 0.1154  | 85    | 51          | 61       | DYYFALAHTVR        |           |        |                        |      | Mascot      |        |
| 1371.7994                                       | 1371.6747   | -0.1247 | -91   | 459         | 470      | IHSDILKATVFK       |           |        |                        |      | Mascot      |        |
| 1371.7994                                       | 1371.6747   | -0.1247 | -91   | 459         | 470      | IHSDILKATVFK       |           |        |                        |      | Mascot      |        |
| 1386.6536                                       | 1386.6051   | -0.0485 | -35   | 71          | 81       | TQQSYEKDPK         |           |        |                        |      | Mascot      |        |
| 1442.6951                                       | 1442.6982   | 0.0031  | 2     | 279         | 290      | VLYPNDNFFEGK       |           |        |                        |      | Mascot      |        |
| 1511.7754                                       | 1511.7045   | -0.0709 | -47   | 50          | 61       | RDYYFALAHTVR       |           |        |                        |      | Mascot      |        |
| 1556.7454                                       | 1556.7462   | 0.0008  | 1     | 83          | 94       | VYYISLEFYMGR       |           |        | Oxidation (M)[10]      |      | Mascot      |        |
| 1961.0538                                       | 1960.9794   | -0.0744 | -38   | 576         | 590      | RQLLNCLHIITFYNR    |           |        | Carbamidomethyl (C)[6] |      | Mascot      |        |
| 2007.1273                                       | 2007.0828   | -0.0445 | -22   | 294         | 310      | LKQEYFVVAATLQDIIR  |           |        |                        |      | Mascot      |        |
| 2120.1023                                       | 2120.1094   | 0.0071  | 3     | 817         | 834      | TISQYAREIWGVEPTLEK |           |        |                        |      | Mascot      |        |
| brain glycogen phosphorylase Pygb [Danio rerio] |             |         |       | gi 46403219 |          | 97393.7            | 6.11      | 14     | 103                    | 100  | 60          | 99.969 |

Peptide Information

|  | Calc. Mass | Obsrv. Mass | ± da    | ± ppm | Start Seq. | End Sequence Seq. | Ion Score | C. I.  | % Modification   | Rank | Result Type |
|--|------------|-------------|---------|-------|------------|-------------------|-----------|--------|------------------|------|-------------|
|  | 845.4628   | 845.4667    | 0.0039  | 5     | 571        | 576 IHEYKR        |           |        |                  |      | Mascot      |
|  | 893.4151   | 893.416     | 0.0009  | 1     | 186        | 192 YGNPWEK       |           |        |                  |      | Mascot      |
|  | 914.5166   | 914.5472    | 0.0306  | 33    | 484        | 491 TNGITPRR      |           |        |                  |      | Mascot      |
|  | 916.4846   | 916.4868    | 0.0022  | 2     | 271        | 278 NLAENISR      |           |        |                  |      | Mascot      |
|  | 994.5832   | 994.5829    | -0.0003 | 0     | 35         | 42 HLHFTLVK       |           |        |                  |      | Mascot      |
|  | 1053.5728  | 1053.576    | 0.0032  | 3     | 643        | 650 VFLENYR       |           |        |                  |      | Mascot      |
|  | 1053.5728  | 1053.576    | 0.0032  | 3     | 643        | 650 VFLENYR       | 47        | 99.413 |                  |      | Mascot      |
|  | 1220.682   | 1220.5864   | -0.0956 | -78   | 599        | 609 FVPRTVMIGGK   |           |        | Oxidation (M)[7] |      | Mascot      |
|  | 1355.6742  | 1355.6809   | 0.0067  | 5     | 51         | 61 DYYFALAHTVR    |           |        |                  |      | Mascot      |

|   |                                                  |           |         |     |     |     |                          |         |      |    |                  |     |    |        |  |  |        |
|---|--------------------------------------------------|-----------|---------|-----|-----|-----|--------------------------|---------|------|----|------------------|-----|----|--------|--|--|--------|
|   | 1355.6742                                        | 1355.7896 | 0.1154  | 85  | 51  | 61  | DYYFALAHTVR              |         |      |    |                  |     |    |        |  |  | Mascot |
|   | 1442.6951                                        | 1442.6982 | 0.0031  | 2   | 279 | 290 | VLYPNDNFFEGK             |         |      |    |                  |     |    |        |  |  | Mascot |
|   | 1735.8737                                        | 1735.8815 | 0.0078  | 4   | 193 | 206 | ARPEYMLPVHIFYGR          |         |      |    |                  |     |    |        |  |  | Mascot |
|   | 1735.8737                                        | 1735.8815 | 0.0078  | 4   | 193 | 206 | ARPEYMLPVHIFYGR          | 13      |      | 0  |                  |     |    |        |  |  | Mascot |
|   | 1751.8685                                        | 1751.9026 | 0.0341  | 19  | 193 | 206 | ARPEYMLPVHIFYGR          |         |      |    | Oxidation (M)[6] |     |    |        |  |  | Mascot |
|   | 1838.8821                                        | 1838.8909 | 0.0088  | 5   | 171 | 185 | IAHGWQIEEADDWLR          |         |      |    |                  |     |    |        |  |  | Mascot |
|   | 1970.8953                                        | 1971.0005 | 0.1052  | 53  | 772 | 787 | FKVFADYESYISCQDR         |         |      |    |                  |     |    |        |  |  | Mascot |
|   | 1970.8953                                        | 1971.0005 | 0.1052  | 53  | 772 | 787 | FKVFADYESYISCQDR         |         |      |    |                  |     |    |        |  |  | Mascot |
|   | 2007.1273                                        | 2007.0828 | -0.0445 | -22 | 294 | 310 | LKQEYFVVAATLQDIIR        |         |      |    |                  |     |    |        |  |  | Mascot |
|   | 2120.0964                                        | 2120.1094 | 0.013   | 6   | 439 | 458 | RINMAHLCVVGSHAVNG<br>VAR |         |      |    | Oxidation (M)[4] |     |    |        |  |  | Mascot |
| 4 | glycogen phosphorylase, brain form [Danio rerio] |           |         |     |     |     | gi 136256027             | 97365.7 | 6.11 | 13 | 97               | 100 | 60 | 99.969 |  |  |        |

Peptide Information

|  | Calc. Mass | Obsrv. Mass | ± da    | ± ppm | Start Seq. | End Seq. | Sequence                 | Ion Score | C. I. | % Modification   | Rank | Result Type |
|--|------------|-------------|---------|-------|------------|----------|--------------------------|-----------|-------|------------------|------|-------------|
|  | 845.4628   | 845.4667    | 0.0039  | 5     | 571        | 576      | IHEYKR                   |           |       |                  |      | Mascot      |
|  | 893.4151   | 893.416     | 0.0009  | 1     | 186        | 192      | YGNPWEK                  |           |       |                  |      | Mascot      |
|  | 914.5166   | 914.5472    | 0.0306  | 33    | 484        | 491      | TNGITPRR                 |           |       |                  |      | Mascot      |
|  | 916.4846   | 916.4868    | 0.0022  | 2     | 271        | 278      | NLAENISR                 |           |       |                  |      | Mascot      |
|  | 994.5832   | 994.5829    | -0.0003 | 0     | 35         | 42       | HLHFTLVK                 |           |       |                  |      | Mascot      |
|  | 1053.5728  | 1053.576    | 0.0032  | 3     | 643        | 650      | VIFLENYR                 |           |       |                  |      | Mascot      |
|  | 1053.5728  | 1053.576    | 0.0032  | 3     | 643        | 650      | VIFLENYR                 | 47        |       | 99.413           |      | Mascot      |
|  | 1220.682   | 1220.5864   | -0.0956 | -78   | 599        | 609      | FVPRTVMIGGK              |           |       | Oxidation (M)[7] |      | Mascot      |
|  | 1355.6742  | 1355.6809   | 0.0067  | 5     | 51         | 61       | DYYFALAHTVR              |           |       |                  |      | Mascot      |
|  | 1355.6742  | 1355.7896   | 0.1154  | 85    | 51         | 61       | DYYFALAHTVR              |           |       |                  |      | Mascot      |
|  | 1442.6951  | 1442.6982   | 0.0031  | 2     | 279        | 290      | VLYPNDNFFEGK             |           |       |                  |      | Mascot      |
|  | 1735.8737  | 1735.8815   | 0.0078  | 4     | 193        | 206      | ARPEYMLPVHIFYGR          |           |       |                  |      | Mascot      |
|  | 1735.8737  | 1735.8815   | 0.0078  | 4     | 193        | 206      | ARPEYMLPVHIFYGR          | 13        |       | 0                |      | Mascot      |
|  | 1751.8685  | 1751.9026   | 0.0341  | 19    | 193        | 206      | ARPEYMLPVHIFYGR          |           |       | Oxidation (M)[6] |      | Mascot      |
|  | 1838.8821  | 1838.8909   | 0.0088  | 5     | 171        | 185      | IAHGWQIEEADDWLR          |           |       |                  |      | Mascot      |
|  | 2007.1273  | 2007.0828   | -0.0445 | -22   | 294        | 310      | LKQEYFVVAATLQDIIR        |           |       |                  |      | Mascot      |
|  | 2120.0964  | 2120.1094   | 0.013   | 6     | 439        | 458      | RINMAHLCVVGSHAVNG<br>VAR |           |       | Oxidation (M)[4] |      | Mascot      |

|   |                                                                                                  |  |  |  |  |  |             |         |      |   |    |        |    |   |  |  |  |
|---|--------------------------------------------------------------------------------------------------|--|--|--|--|--|-------------|---------|------|---|----|--------|----|---|--|--|--|
| 5 | novel protein similar to vertebrate NifU-like N-terminal domain containing (NIFUN) [Danio rerio] |  |  |  |  |  | gi 37606130 | 17748.2 | 8.87 | 7 | 52 | 73.186 | 14 | 0 |  |  |  |
|---|--------------------------------------------------------------------------------------------------|--|--|--|--|--|-------------|---------|------|---|----|--------|----|---|--|--|--|

Peptide Information

|  | Calc. Mass | Obsrv. Mass | ± da | ± ppm | Start | End | Sequence | Ion | C. I. | % Modification | Rank | Result Type |
|--|------------|-------------|------|-------|-------|-----|----------|-----|-------|----------------|------|-------------|
|--|------------|-------------|------|-------|-------|-----|----------|-----|-------|----------------|------|-------------|

|                     |                                                                                    |             |         |       |              |          |                                      |           |         |       |    |                  |        |        | Seq.      | Seq.      | Score   |     |     |     |                            |  |  |  |  |                                           |        |
|---------------------|------------------------------------------------------------------------------------|-------------|---------|-------|--------------|----------|--------------------------------------|-----------|---------|-------|----|------------------|--------|--------|-----------|-----------|---------|-----|-----|-----|----------------------------|--|--|--|--|-------------------------------------------|--------|
|                     |                                                                                    |             |         |       |              |          |                                      |           |         |       |    |                  |        |        | 862.5145  | 862.4818  | -0.0327 | -38 | 81  | 87  | IIDARFK                    |  |  |  |  | Mascot                                    |        |
|                     |                                                                                    |             |         |       |              |          |                                      |           |         |       |    |                  |        |        | 916.5461  | 916.4868  | -0.0593 | -65 | 116 | 123 | IKNTEIAK                   |  |  |  |  | Mascot                                    |        |
|                     |                                                                                    |             |         |       |              |          |                                      |           |         |       |    |                  |        |        | 946.525   | 946.4759  | -0.0491 | -52 | 1   | 9   | MALAAAARR                  |  |  |  |  | Oxidation (M)[1]                          | Mascot |
|                     |                                                                                    |             |         |       |              |          |                                      |           |         |       |    |                  |        |        | 946.525   | 946.4759  | -0.0491 | -52 | 1   | 9   | MALAAAARR                  |  |  |  |  | 14 0 Oxidation (M)[1]                     | Mascot |
|                     |                                                                                    |             |         |       |              |          |                                      |           |         |       |    |                  |        |        | 1045.5636 | 1045.5667 | 0.0031  | 3   | 44  | 53  | NVGSLDKNAK                 |  |  |  |  | Mascot                                    |        |
|                     |                                                                                    |             |         |       |              |          |                                      |           |         |       |    |                  |        |        | 1161.5746 | 1161.5631 | -0.0115 | -10 | 155 | 164 | DEKETLAEAR                 |  |  |  |  | Mascot                                    |        |
|                     |                                                                                    |             |         |       |              |          |                                      |           |         |       |    |                  |        |        | 2100.043  | 2100.0022 | -0.0408 | -19 | 88  | 108 | TFGCGSAIASSSLATEWV<br>K GK |  |  |  |  | Mascot                                    |        |
|                     |                                                                                    |             |         |       |              |          |                                      |           |         |       |    |                  |        |        | 2283.1545 | 2283.1802 | 0.0257  | 11  | 124 | 143 | ELCLPPVKLHCSMLAEDA<br>IK   |  |  |  |  | Carbamidomethyl (C)[3], Oxidation (M)[13] | Mascot |
| 6                   | calcium/calmodulin-dependent protein kinase II inhibitor 2 [Danio rerio]           |             |         |       | gi 223029393 |          |                                      |           | 8468.1  | 5.24  | 6  | 50               | 57.502 |        |           |           |         |     |     |     |                            |  |  |  |  |                                           |        |
| Peptide Information |                                                                                    |             |         |       |              |          |                                      |           |         |       |    |                  |        |        |           |           |         |     |     |     |                            |  |  |  |  |                                           |        |
| Calc. Mass          |                                                                                    | Obsrv. Mass | ± da    | ± ppm | Start Seq.   | End Seq. | Sequence                             | Ion Score |         | C. I. | %  | Modification     | Rank   | Result | Type      |           |         |     |     |     |                            |  |  |  |  |                                           |        |
| 842.5206            |                                                                                    | 842.5123    | -0.0083 | -10   | 48           | 55       | LGQIGRAK                             |           |         |       |    |                  |        | Mascot |           |           |         |     |     |     |                            |  |  |  |  |                                           |        |
| 845.4363            |                                                                                    | 845.4667    | 0.0304  | 36    | 57           | 63       | VVIEDDR                              |           |         |       |    |                  |        | Mascot |           |           |         |     |     |     |                            |  |  |  |  |                                           |        |
| 994.4509            |                                                                                    | 994.5829    | 0.132   | 133   | 70           | 79       | GMTDKSSPGV                           |           |         |       |    | Oxidation (M)[2] |        | Mascot |           |           |         |     |     |     |                            |  |  |  |  |                                           |        |
| 1001.5374           |                                                                                    | 1001.566    | 0.0286  | 29    | 56           | 63       | RVVIEDDR                             |           |         |       |    |                  |        | Mascot |           |           |         |     |     |     |                            |  |  |  |  |                                           |        |
| 1542.8373           |                                                                                    | 1542.7043   | -0.133  | -86   | 57           | 69       | VVIEDDRIDEVLK                        |           |         |       |    |                  |        | Mascot |           |           |         |     |     |     |                            |  |  |  |  |                                           |        |
| 3337.4082           |                                                                                    | 3337.7339   | 0.3257  | 98    | 12           | 43       | MSGYGADTDVSQMSFSC<br>GLQDTNSFFGASQAK |           |         |       |    |                  |        | Mascot |           |           |         |     |     |     |                            |  |  |  |  |                                           |        |
| 7                   | MCM4 minichromosome maintenance deficient 4, mitotin (S. cerevisiae) [Danio rerio] |             |         |       | gi 33989734  |          |                                      |           | 83986.4 | 5.88  | 12 | 50               | 52.316 | 10     | 0         |           |         |     |     |     |                            |  |  |  |  |                                           |        |
| Peptide Information |                                                                                    |             |         |       |              |          |                                      |           |         |       |    |                  |        |        |           |           |         |     |     |     |                            |  |  |  |  |                                           |        |
| Calc. Mass          |                                                                                    | Obsrv. Mass | ± da    | ± ppm | Start Seq.   | End Seq. | Sequence                             | Ion Score |         | C. I. | %  | Modification     | Rank   | Result | Type      |           |         |     |     |     |                            |  |  |  |  |                                           |        |
| 845.4839            |                                                                                    | 845.4667    | -0.0172 | -20   | 98           | 105      | ADLGSVRK                             |           |         |       |    |                  |        | Mascot |           |           |         |     |     |     |                            |  |  |  |  |                                           |        |
| 855.4359            |                                                                                    | 855.4388    | 0.0029  | 3     | 671          | 677      | DYIAFAR                              |           |         |       |    |                  |        | Mascot |           |           |         |     |     |     |                            |  |  |  |  |                                           |        |
| 914.5166            |                                                                                    | 914.5472    | 0.0306  | 33    | 87           | 95       | SGIRGTPAR                            |           |         |       |    |                  |        | Mascot |           |           |         |     |     |     |                            |  |  |  |  |                                           |        |
| 994.5792            |                                                                                    | 994.5829    | 0.0037  | 4     | 722          | 730      | LAEAHAKVR                            |           |         |       |    |                  |        | Mascot |           |           |         |     |     |     |                            |  |  |  |  |                                           |        |
| 1001.5486           |                                                                                    | 1001.566    | 0.0174  | 17    | 96           | 104      | QRADLGSVR                            |           |         |       |    |                  |        | Mascot |           |           |         |     |     |     |                            |  |  |  |  |                                           |        |
| 1109.5851           |                                                                                    | 1109.5858   | 0.0007  | 1     | 396          | 404      | THIDAIHFR                            |           |         |       |    |                  |        | Mascot |           |           |         |     |     |     |                            |  |  |  |  |                                           |        |
| 1587.8601           |                                                                                    | 1587.7875   | -0.0726 | -46   | 364          | 377      | VQPGDRVNITGIYR                       |           |         |       |    |                  |        | Mascot |           |           |         |     |     |     |                            |  |  |  |  |                                           |        |
| 1719.921            |                                                                                    | 1719.884    | -0.037  | -22   | 707          | 721      | GMVSAYPRQLESIR                       |           |         |       |    |                  |        | Mascot |           |           |         |     |     |     |                            |  |  |  |  |                                           |        |
| 1735.9159           |                                                                                    | 1735.8815   | -0.0344 | -20   | 707          | 721      | GMVSAYPRQLESIR                       |           |         |       |    | Oxidation (M)[2] |        | Mascot |           |           |         |     |     |     |                            |  |  |  |  |                                           |        |
| 1735.9701           |                                                                                    | 1735.8815   | -0.0886 | -51   | 611          | 625      | TTIENIQLPHTLLSR                      | 4         |         | 0     |    |                  |        | Mascot |           |           |         |     |     |     |                            |  |  |  |  |                                           |        |

|   |                                                     |           |        |    |     |     |                           |         |      |    |    |       |    |  |   |  |        |
|---|-----------------------------------------------------|-----------|--------|----|-----|-----|---------------------------|---------|------|----|----|-------|----|--|---|--|--------|
|   | 1790.8556                                           | 1790.9106 | 0.055  | 31 | 12  | 28  | DPPTPASEDPLSPPSQR         |         |      |    |    |       |    |  |   |  | Mascot |
|   | 1992.9219                                           | 1993.1134 | 0.1915 | 96 | 162 | 178 | EEENAGLDLNEPLYMQK         |         |      |    |    |       |    |  |   |  | Mascot |
|   | 1992.9219                                           | 1993.1134 | 0.1915 | 96 | 162 | 178 | EEENAGLDLNEPLYMQK         | 10      |      | 0  |    |       |    |  |   |  | Mascot |
|   | 2225.0754                                           | 2225.1245 | 0.0491 | 22 | 60  | 80  | SVLQSEIDASSPLMYGTP<br>SSR |         |      |    |    |       |    |  |   |  | Mascot |
| 8 | DNA replication licensing factor MCM4 [Danio rerio] |           |        |    |     |     | gi 321267495              | 94464.9 | 5.99 | 13 | 47 | 4.859 | 10 |  | 0 |  |        |

#### Peptide Information

|  | Calc. Mass | Obsrv. Mass | ± da    | ± ppm | Start Seq. | End Seq. | Sequence                  | Ion Score | C. I. | % Modification   | Rank | Result Type |
|--|------------|-------------|---------|-------|------------|----------|---------------------------|-----------|-------|------------------|------|-------------|
|  | 845.4839   | 845.4667    | -0.0172 | -20   | 98         | 105      | ADLGSVRK                  |           |       |                  |      | Mascot      |
|  | 855.4359   | 855.4388    | 0.0029  | 3     | 671        | 677      | DYIAFAR                   |           |       |                  |      | Mascot      |
|  | 914.5166   | 914.5472    | 0.0306  | 33    | 87         | 95       | SGIRGTPAR                 |           |       |                  |      | Mascot      |
|  | 994.5792   | 994.5829    | 0.0037  | 4     | 722        | 730      | LAEAHAKVR                 |           |       |                  |      | Mascot      |
|  | 1001.5486  | 1001.566    | 0.0174  | 17    | 96         | 104      | QRADLGSVR                 |           |       |                  |      | Mascot      |
|  | 1109.5851  | 1109.5858   | 0.0007  | 1     | 396        | 404      | THIDAIHFR                 |           |       |                  |      | Mascot      |
|  | 1197.5898  | 1197.5883   | -0.0015 | -1    | 802        | 810      | YQQLFDDLRL                |           |       |                  |      | Mascot      |
|  | 1587.8601  | 1587.7875   | -0.0726 | -46   | 364        | 377      | VQPGDRVNITGIYR            |           |       |                  |      | Mascot      |
|  | 1719.921   | 1719.884    | -0.037  | -22   | 707        | 721      | GMVSAYPRQLESILR           |           |       |                  |      | Mascot      |
|  | 1735.9159  | 1735.8815   | -0.0344 | -20   | 707        | 721      | GMVSAYPRQLESILR           |           |       | Oxidation (M)[2] |      | Mascot      |
|  | 1735.9701  | 1735.8815   | -0.0886 | -51   | 611        | 625      | TTIENIQLPHTLLSR           | 4         |       | 0                |      | Mascot      |
|  | 1790.8556  | 1790.9106   | 0.055   | 31    | 12         | 28       | DPPTPASEDPLSPPSQR         |           |       |                  |      | Mascot      |
|  | 1992.9219  | 1993.1134   | 0.1915  | 96    | 162        | 178      | EEENAGLDLNEPLYMQK         |           |       |                  |      | Mascot      |
|  | 1992.9219  | 1993.1134   | 0.1915  | 96    | 162        | 178      | EEENAGLDLNEPLYMQK         | 10        |       | 0                |      | Mascot      |
|  | 2225.0754  | 2225.1245   | 0.0491  | 22    | 60         | 80       | SVLQSEIDASSPLMYGTP<br>SSR |           |       |                  |      | Mascot      |

|   |                                       |  |  |  |  |  |              |         |      |   |    |   |  |  |  |  |
|---|---------------------------------------|--|--|--|--|--|--------------|---------|------|---|----|---|--|--|--|--|
| 9 | Si:dkeyp-11g8.5 protein [Danio rerio] |  |  |  |  |  | gi 133778765 | 35914.5 | 9.16 | 9 | 42 | 0 |  |  |  |  |
|---|---------------------------------------|--|--|--|--|--|--------------|---------|------|---|----|---|--|--|--|--|

#### Peptide Information

|  | Calc. Mass | Obsrv. Mass | ± da    | ± ppm | Start Seq. | End Seq. | Sequence         | Ion Score | C. I. | % Modification         | Rank | Result Type |
|--|------------|-------------|---------|-------|------------|----------|------------------|-----------|-------|------------------------|------|-------------|
|  | 862.4814   | 862.4818    | 0.0004  | 0     | 43         | 50       | MVLASVAR         |           |       | Oxidation (M)[1]       |      | Mascot      |
|  | 994.5203   | 994.5829    | 0.0626  | 63    | 288        | 296      | TDATLAQFK        |           |       |                        |      | Mascot      |
|  | 1371.7128  | 1371.6747   | -0.0381 | -28   | 276        | 287      | VSRTDFDPTGVR     |           |       |                        |      | Mascot      |
|  | 1371.7227  | 1371.6747   | -0.048  | -35   | 77         | 89       | VLRGPTQADESAK    |           |       |                        |      | Mascot      |
|  | 1386.7886  | 1386.6051   | -0.1835 | -132  | 38         | 50       | ELAARMVLASVAR    |           |       |                        |      | Mascot      |
|  | 1442.6338  | 1442.6982   | 0.0644  | 45    | 119        | 131      | QLPCQCHGSMGPK    |           |       | Carbamidomethyl (C)[4] |      | Mascot      |
|  | 1735.8345  | 1735.8815   | 0.047   | 27    | 204        | 219      | TLQKVEEADTSDQSGK |           |       |                        |      | Mascot      |

|           |           |        |    |     |     |                                |  |  |  |                                             |  |        |
|-----------|-----------|--------|----|-----|-----|--------------------------------|--|--|--|---------------------------------------------|--|--------|
| 1735.8345 | 1735.8815 | 0.047  | 27 | 204 | 219 | TLQKVEEADTSDQSGK               |  |  |  |                                             |  | Mascot |
| 1781.9254 | 1781.9781 | 0.0527 | 30 | 104 | 118 | VFLKPGSMVEENLYR                |  |  |  |                                             |  | Mascot |
| 1781.9254 | 1781.9781 | 0.0527 | 30 | 104 | 118 | VFLKPGSMVEENLYR                |  |  |  |                                             |  | Mascot |
| 3337.5913 | 3337.7339 | 0.1426 | 43 | 93  | 118 | QLLHCQWCEERVFLKPG<br>SMVEENLYR |  |  |  | Carbamidomethyl (C)[5,8], Oxidation (M)[19] |  | Mascot |

10 novel protein similar to vertebrate polymerase (DNA directed) kappa (POLK) [Danio rerio] gi|169153899 97852.6 6.97 16 41 0

#### Peptide Information

| Calc. Mass | Obsrv. Mass | ± da    | ± ppm | Start Seq. | End Seq. | Sequence                   | Ion Score | C. I. % | Modification                              | Rank | Result Type |
|------------|-------------|---------|-------|------------|----------|----------------------------|-----------|---------|-------------------------------------------|------|-------------|
| 845.4727   | 845.4667    | -0.006  | -7    | 89         | 95       | LTVDLER                    |           |         |                                           |      | Mascot      |
| 864.3879   | 864.4891    | 0.1012  | 117   | 26         | 33       | AGMEGLDR                   |           |         | Oxidation (M)[3]                          |      | Mascot      |
| 893.476    | 893.416     | -0.06   | -67   | 74         | 80       | ITKEQMK                    |           |         | Oxidation (M)[6]                          |      | Mascot      |
| 916.4482   | 916.4868    | 0.0386  | 42    | 81         | 88       | QAQAEVDR                   |           |         |                                           |      | Mascot      |
| 1371.6433  | 1371.6747   | 0.0314  | 23    | 804        | 814      | NMRENQSVEHK                |           |         |                                           |      | Mascot      |
| 1371.6433  | 1371.6747   | 0.0314  | 23    | 804        | 814      | NMRENQSVEHK                |           |         |                                           |      | Mascot      |
| 1519.7122  | 1519.7588   | 0.0466  | 31    | 656        | 669      | QEELSGEPSSLESK             |           |         |                                           |      | Mascot      |
| 1571.9268  | 1571.7905   | -0.1363 | -87   | 830        | 842      | LILLQIHTDHIQK              |           |         |                                           |      | Mascot      |
| 1781.8486  | 1781.9781   | 0.1295  | 73    | 234        | 249      | AEVFGTSAEEAVREMR           |           |         |                                           |      | Mascot      |
| 1781.8486  | 1781.9781   | 0.1295  | 73    | 234        | 249      | AEVFGTSAEEAVREMR           |           |         |                                           |      | Mascot      |
| 1790.761   | 1790.9106   | 0.1496  | 84    | 639        | 655      | GSAMDSNEHTDLSAAER          |           |         |                                           |      | Mascot      |
| 1838.7571  | 1838.8909   | 0.1338  | 73    | 372        | 387      | TFGEMSDAGEQYSLCK           |           |         | Carbamidomethyl (C)[15], Oxidation (M)[5] |      | Mascot      |
| 1859.8956  | 1859.8964   | 0.0008  | 0     | 623        | 638      | DVNLTAFNQHIDECLK           |           |         |                                           |      | Mascot      |
| 1859.8956  | 1859.8964   | 0.0008  | 0     | 623        | 638      | DVNLTAFNQHIDECLK           |           |         |                                           |      | Mascot      |
| 1960.7712  | 1960.9794   | 0.2082  | 106   | 682        | 700      | ASTSTSEPMADGDDGND<br>FK    |           |         | Oxidation (M)[9]                          |      | Mascot      |
| 2211.064   | 2211.1106   | 0.0466  | 21    | 604        | 622      | ISTQVLQCLTCPVCNKEM<br>K    |           |         | Carbamidomethyl (C)[8], Oxidation (M)[18] |      | Mascot      |
| 2225.0974  | 2225.1245   | 0.0271  | 12    | 256        | 277      | TSLTASAGIAPNMMLAKV<br>CSDK |           |         | Oxidation (M)[13]                         |      | Mascot      |
| 2248.0737  | 2248.1423   | 0.0686  | 31    | 620        | 638      | EMKDVNLTAFNQHIDECL<br>K    |           |         |                                           |      | Mascot      |
| 2264.0686  | 2264.1484   | 0.0798  | 35    | 620        | 638      | EMKDVNLTAFNQHIDECL<br>K    |           |         | Oxidation (M)[2]                          |      | Mascot      |
| 2283.0347  | 2283.1802   | 0.1455  | 64    | 847        | 867      | DMIIHEDFAGFTSGNNVN<br>ASK  |           |         | Oxidation (M)[2]                          |      | Mascot      |

11 PREDICTED: FCH and double SH3 domains protein 2-like, partial [Danio rerio] gi|326675898 21477.2 9.13 7 40 0

#### Peptide Information

| Calc. Mass | Obsrv. Mass | ± da | ± ppm | Start Seq. | End Seq. | Sequence | Ion Score | C. I. % | Modification | Rank | Result Type |
|------------|-------------|------|-------|------------|----------|----------|-----------|---------|--------------|------|-------------|
|------------|-------------|------|-------|------------|----------|----------|-----------|---------|--------------|------|-------------|



|           |           |         |      |     |     |                 |   |   |  |  |                  |  |        |
|-----------|-----------|---------|------|-----|-----|-----------------|---|---|--|--|------------------|--|--------|
| 893.4628  | 893.416   | -0.0468 | -52  | 93  | 99  | NVYGVWR         |   |   |  |  |                  |  | Mascot |
| 946.5138  | 946.4759  | -0.0379 | -40  | 140 | 147 | KCIEQLGR        |   |   |  |  |                  |  | Mascot |
| 946.5138  | 946.4759  | -0.0379 | -40  | 140 | 147 | KCIEQLGR        |   |   |  |  |                  |  | Mascot |
| 1053.5436 | 1053.576  | 0.0324  | 31   | 26  | 34  | NTHVEQLGR       |   |   |  |  |                  |  | Mascot |
| 1053.5436 | 1053.576  | 0.0324  | 31   | 26  | 34  | NTHVEQLGR       | 7 | 0 |  |  |                  |  | Mascot |
| 1386.7595 | 1386.6051 | -0.1544 | -111 | 1   | 13  | MASLCHLKIVAGK   |   |   |  |  | Oxidation (M)[1] |  | Mascot |
| 1587.8588 | 1587.7875 | -0.0713 | -45  | 148 | 161 | IQTELQDSVKDLAK  |   |   |  |  |                  |  | Mascot |
| 1751.9398 | 1751.9026 | -0.0372 | -21  | 20  | 34  | VTQELKNTHVEQLGR |   |   |  |  |                  |  | Mascot |
| 1861.8828 | 1861.932  | 0.0492  | 26   | 78  | 92  | DWPGIKPDDQRTDYR |   |   |  |  |                  |  | Mascot |

12 PREDICTED: supervillin [Danio rerio] gi|326672283 147558.1 5.63 18 40 0

Peptide Information

| Calc. Mass | Obsrv. Mass | ± da    | ± ppm | Start Seq. | End Seq. | Sequence                  | Ion Score | C. I. % | Modification                             | Rank | Result Type |
|------------|-------------|---------|-------|------------|----------|---------------------------|-----------|---------|------------------------------------------|------|-------------|
| 842.5457   | 842.5123    | -0.0334 | -40   | 717        | 724      | KVAVQLGK                  |           |         |                                          |      | Mascot      |
| 946.4992   | 946.4759    | -0.0233 | -25   | 297        | 303      | EEQWKVK                   |           |         |                                          |      | Mascot      |
| 946.4992   | 946.4759    | -0.0233 | -25   | 297        | 303      | EEQWKVK                   |           |         |                                          |      | Mascot      |
| 981.5952   | 981.5854    | -0.0098 | -10   | 463        | 471      | NPLRALAAR                 |           |         |                                          |      | Mascot      |
| 1109.5771  | 1109.5858   | 0.0087  | 8     | 989        | 997      | LFCVRGETK                 |           |         | Carbamidomethyl (C)[3]                   |      | Mascot      |
| 1179.5562  | 1179.666    | 0.1098  | 93    | 385        | 394      | NSTIEVMEEK                |           |         |                                          |      | Mascot      |
| 1179.5674  | 1179.666    | 0.0986  | 84    | 1058       | 1068     | EMGLNSNSSLK               |           |         |                                          |      | Mascot      |
| 1220.5688  | 1220.5864   | 0.0176  | 14    | 73         | 83       | DVGNARDQMAK               |           |         | Oxidation (M)[9]                         |      | Mascot      |
| 1386.7528  | 1386.6051   | -0.1477 | -107  | 779        | 789      | FLDWAERKPPK               |           |         |                                          |      | Mascot      |
| 1442.629   | 1442.6982   | 0.0692  | 48    | 1091       | 1102     | KAYDCMLEDPGK              |           |         | Carbamidomethyl (C)[5], Oxidation (M)[6] |      | Mascot      |
| 1519.7421  | 1519.7588   | 0.0167  | 11    | 276        | 289      | SSADVEPKMSLAER            |           |         |                                          |      | Mascot      |
| 1571.7853  | 1571.7905   | 0.0052  | 3     | 632        | 644      | EFWSLLGGKTDYR             |           |         |                                          |      | Mascot      |
| 1582.6663  | 1582.7301   | 0.0638  | 40    | 975        | 988      | GCREGSSTNTGDWR            |           |         | Carbamidomethyl (C)[2]                   |      | Mascot      |
| 1832.8007  | 1832.9417   | 0.141   | 77    | 395        | 409      | EKEVMTFDDEETFGR           |           |         |                                          |      | Mascot      |
| 1859.965   | 1859.8964   | -0.0686 | -37   | 1296       | 1310     | DEFNTLPNWKQLNLK           |           |         |                                          |      | Mascot      |
| 1859.965   | 1859.8964   | -0.0686 | -37   | 1296       | 1310     | DEFNTLPNWKQLNLK           |           |         |                                          |      | Mascot      |
| 1861.8578  | 1861.932    | 0.0742  | 40    | 579        | 593      | QCFFWSGEFANVIEK           |           |         | Carbamidomethyl (C)[2]                   |      | Mascot      |
| 2006.9698  | 2007.0828   | 0.113   | 56    | 139        | 156      | STSLDLEPGEQERTTICK        |           |         |                                          |      | Mascot      |
| 2248.1528  | 2248.1423   | -0.0105 | -5    | 558        | 578      | LVEPTANSLNSGDCYLLI<br>TPK |           |         |                                          |      | Mascot      |
| 2284.2092  | 2284.1797   | -0.0295 | -13   | 958        | 977      | EPFCFLQLFLGGLVIHKG<br>CR  |           |         | Carbamidomethyl (C)[4]                   |      | Mascot      |

13 RecName: Full=Acyl-CoA synthetase family member 2, gi|123914455 67470.3 8.42 12 40 0  
mitochondrial; Flags: Precursor

Peptide Information

| Calc. Mass | Obsrv. Mass | ± da    | ± ppm | Start Seq. | End Sequence Seq.             | Ion Score | C. I. % | Modification                             | Rank | Result Type |
|------------|-------------|---------|-------|------------|-------------------------------|-----------|---------|------------------------------------------|------|-------------|
| 842.5458   | 842.5123    | -0.0335 | -40   | 5          | 11 ILLTNLR                    |           |         |                                          |      | Mascot      |
| 864.4243   | 864.4891    | 0.0648  | 75    | 472        | 478 ECITKDR                   |           |         |                                          |      | Mascot      |
| 870.5771   | 870.542     | -0.0351 | -40   | 500        | 506 IKDLIIR                   |           |         |                                          |      | Mascot      |
| 907.4665   | 907.4691    | 0.0026  | 3     | 470        | 476 TRECITK                   |           |         | Carbamidomethyl (C)[4]                   |      | Mascot      |
| 914.5417   | 914.5472    | 0.0055  | 6     | 331        | 338 ANLRAIEK                  |           |         |                                          |      | Mascot      |
| 1161.5754  | 1161.5631   | -0.0123 | -11   | 164        | 174 VQCNAVVCPTK               |           |         |                                          |      | Mascot      |
| 1197.5027  | 1197.5883   | 0.0856  | 71    | 177        | 185 SQHYCDMLK                 |           |         | Carbamidomethyl (C)[5], Oxidation (M)[7] |      | Mascot      |
| 1511.7886  | 1511.7045   | -0.0841 | -56   | 421        | 434 IVTVGCISPHEAK             |           |         | Carbamidomethyl (C)[6]                   |      | Mascot      |
| 1582.8621  | 1582.7301   | -0.132  | -83   | 420        | 434 KIVTVGCISPHEAK            |           |         |                                          |      | Mascot      |
| 1624.6876  | 1624.8014   | 0.1138  | 70    | 536        | 548 DERMGEEVCACIR             | 1         | 0       | Carbamidomethyl (C)[9,11]                |      | Mascot      |
| 1624.6876  | 1624.8014   | 0.1138  | 70    | 536        | 548 DERMGEEVCACIR             |           |         | Carbamidomethyl (C)[9,11]                |      | Mascot      |
| 2065.9688  | 2066.0371   | 0.0683  | 33    | 479        | 495 WYKTGDIASLDQFAYCK         |           |         | Carbamidomethyl (C)[16]                  |      | Mascot      |
| 2211.1689  | 2211.1106   | -0.0583 | -26   | 435        | 455 VVDPTTGEIVPLGAQGEL<br>MIR |           |         | Oxidation (M)[19]                        |      | Mascot      |

14 PREDICTED: titin [Danio rerio] gi|189523699 3645668 6.16 72 39 0 9 0

Peptide Information

| Calc. Mass | Obsrv. Mass | ± da    | ± ppm | Start Seq. | End Sequence Seq. | Ion Score | C. I. % | Modification           | Rank | Result Type |
|------------|-------------|---------|-------|------------|-------------------|-----------|---------|------------------------|------|-------------|
| 842.5094   | 842.5123    | 0.0029  | 3     | 15232      | 15239 LSIPGVTR    |           |         |                        |      | Mascot      |
| 845.4587   | 845.4667    | 0.008   | 9     | 29341      | 29347 IRAENSR     |           |         |                        |      | Mascot      |
| 855.4206   | 855.4388    | 0.0182  | 21    | 8657       | 8663 EEAIEHK      |           |         |                        |      | Mascot      |
| 862.4814   | 862.4818    | 0.0004  | 0     | 27341      | 27348 IVCSSVVR    |           |         |                        |      | Mascot      |
| 864.4937   | 864.4891    | -0.0046 | -5    | 20241      | 20247 GYIVERK     |           |         |                        |      | Mascot      |
| 870.4203   | 870.542     | 0.1217  | 140   | 6908       | 6915 LSDSGTYK     |           |         |                        |      | Mascot      |
| 882.4679   | 882.5694    | 0.1015  | 115   | 2876       | 2882 YKVSTER      |           |         |                        |      | Mascot      |
| 893.4145   | 893.416     | 0.0015  | 2     | 23146      | 23153 TSEGCIAR    |           |         | Carbamidomethyl (C)[5] |      | Mascot      |
| 907.4705   | 907.4691    | -0.0014 | -2    | 27434      | 27440 NSLLWMK     |           |         | Oxidation (M)[6]       |      | Mascot      |
| 914.5669   | 914.5472    | -0.0197 | -22   | 9214       | 9221 DKIGLQLK     |           |         |                        |      | Mascot      |
| 916.4985   | 916.4868    | -0.0117 | -13   | 9747       | 9754 GDEILLEK     |           |         |                        |      | Mascot      |
| 946.5203   | 946.4759    | -0.0444 | -47   | 12485      | 12493 AGQEITLSK   |           |         |                        |      | Mascot      |
| 946.5832   | 946.4759    | -0.1073 | -113  | 2700       | 2707 FRIVVQGK     |           |         |                        |      | Mascot      |
| 981.5112   | 981.5854    | 0.0742  | 76    | 3392       | 3399 RFSSSLER     |           |         |                        |      | Mascot      |
| 994.5203   | 994.5829    | 0.0626  | 63    | 9416       | 9423 EKEVFSQK     |           |         |                        |      | Mascot      |
| 1001.6141  | 1001.566    | -0.0481 | -48   | 11629      | 11636 LEFVRPIK    |           |         |                        |      | Mascot      |

|           |           |         |      |       |       |                   |    |                         |        |
|-----------|-----------|---------|------|-------|-------|-------------------|----|-------------------------|--------|
| 1045.5347 | 1045.5667 | 0.032   | 31   | 7144  | 7153  | CQIGGTPEIK        |    |                         | Mascot |
| 1053.5364 | 1053.576  | 0.0396  | 38   | 9270  | 9277  | RDIYFPDK          | 5  | 0                       | Mascot |
| 1053.584  | 1053.576  | -0.008  | -8   | 24308 | 24315 | YEFRVIAR          |    |                         | Mascot |
| 1109.6255 | 1109.5858 | -0.0397 | -36  | 17783 | 17790 | NFVFLKWR          |    |                         | Mascot |
| 1161.703  | 1161.5631 | -0.1399 | -120 | 9689  | 9698  | VKAVPYPIK         |    |                         | Mascot |
| 1176.5677 | 1176.6029 | 0.0352  | 30   | 17549 | 17559 | AVNMIGEGETR       |    |                         | Mascot |
| 1179.6732 | 1179.666  | -0.0072 | -6   | 28209 | 28218 | ITGYIVETRK        |    |                         | Mascot |
| 1179.7096 | 1179.666  | -0.0436 | -37  | 10001 | 10010 | KEITPTHILK        |    |                         | Mascot |
| 1197.6011 | 1197.5883 | -0.0128 | -11  | 15414 | 15423 | GTSYWSRVNK        |    |                         | Mascot |
| 1220.5865 | 1220.5864 | -0.0001 | 0    | 18604 | 18614 | RGSDDIVTSDR       |    |                         | Mascot |
| 1355.714  | 1355.6809 | -0.0331 | -24  | 13271 | 13281 | EYLFRVIACNK       |    |                         | Mascot |
| 1355.7794 | 1355.7896 | 0.0102  | 8    | 18483 | 18494 | NSATLGWLKPLR      |    |                         | Mascot |
| 1363.7004 | 1363.6586 | -0.0418 | -31  | 29924 | 29934 | GLKENVEYHFK       |    |                         | Mascot |
| 1371.6387 | 1371.6747 | 0.036   | 26   | 26182 | 26194 | YDITASNSNGTTK     |    |                         | Mascot |
| 1371.7478 | 1371.6747 | -0.0731 | -53  | 3410  | 3422  | LTPAEVTIGESVR     | 11 | 0                       | Mascot |
| 1386.6648 | 1386.6051 | -0.0597 | -43  | 17536 | 17546 | GLTEDTEYRFR       |    |                         | Mascot |
| 1419.7227 | 1419.7164 | -0.0063 | -4   | 4116  | 4127  | ESPFVSDVKQQR      |    |                         | Mascot |
| 1442.6945 | 1442.6982 | 0.0037  | 3    | 6367  | 6379  | ADTGYTYCKLANK     |    | Carbamidomethyl (C)[8]  | Mascot |
| 1511.7375 | 1511.7045 | -0.033  | -22  | 22038 | 22050 | IGGLEEGIEYEFR     |    |                         | Mascot |
| 1519.7274 | 1519.7588 | 0.0314  | 21   | 11644 | 11656 | ETAEFIELSHEK      |    |                         | Mascot |
| 1542.7369 | 1542.7043 | -0.0326 | -21  | 19518 | 19530 | ITNLEAGQAYCFR     |    | Carbamidomethyl (C)[11] | Mascot |
| 1556.7526 | 1556.7462 | -0.0064 | -4   | 31126 | 31138 | MTASEALEHPWLR     |    | Oxidation (M)[1]        | Mascot |
| 1571.7853 | 1571.7905 | 0.0052  | 3    | 21648 | 21660 | IGDLQEGNLYFFR     |    |                         | Mascot |
| 1582.7716 | 1582.7301 | -0.0415 | -26  | 17623 | 17635 | TMLTNNFPVQMR      |    | Oxidation (M)[2, 12]    | Mascot |
| 1587.7649 | 1587.7875 | 0.0226  | 14   | 6149  | 6161  | DESWILEDPSIQR     |    |                         | Mascot |
| 1618.7959 | 1618.717  | -0.0789 | -49  | 30832 | 30847 | FGVSDPSAPTPVTTK   |    |                         | Mascot |
| 1624.8074 | 1624.8014 | -0.006  | -4   | 15583 | 15596 | IFMDISADELLCVR    |    |                         | Mascot |
| 1624.8727 | 1624.8014 | -0.0713 | -44  | 7363  | 7376  | ISCVENTPHLTILK    |    | Carbamidomethyl (C)[3]  | Mascot |
| 1719.8734 | 1719.884  | 0.0106  | 6    | 23154 | 23169 | DPCDPPGTPVPVIVTR  |    | Carbamidomethyl (C)[3]  | Mascot |
| 1735.8496 | 1735.8815 | 0.0319  | 18   | 25594 | 25610 | GVNKYGTGEALESDBAK |    |                         | Mascot |
| 1735.9589 | 1735.8815 | -0.0774 | -45  | 26957 | 26971 | NTEYSTTLIIPKVTR   | 2  | 0                       | Mascot |
| 1751.8997 | 1751.9026 | 0.0029  | 2    | 9851  | 9865  | EVHLPVIQDDSMQLK   |    |                         | Mascot |
| 1781.8956 | 1781.9781 | 0.0825  | 46   | 8632  | 8646  | DVYFSAKQDEEIPK    |    |                         | Mascot |
| 1781.9644 | 1781.9781 | 0.0137  | 8    | 19357 | 19372 | DILLAPEAELDADLRK  |    |                         | Mascot |
| 1790.9183 | 1790.9106 | -0.0077 | -4   | 7435  | 7450  | VAGSQPLTVNWKDGR   |    |                         | Mascot |
| 1832.9574 | 1832.9417 | -0.0157 | -9   | 18442 | 18458 | VMAVNKYGIGLPQDSPK |    | Oxidation (M)[2]        | Mascot |

|           |           |         |     |       |       |                                      |                                          |        |
|-----------|-----------|---------|-----|-------|-------|--------------------------------------|------------------------------------------|--------|
| 1838.9    | 1838.8909 | -0.0091 | -5  | 25318 | 25333 | DPCAPPSQPRVMNITR                     | Carbamidomethyl (C)[3]                   | Mascot |
| 1859.9021 | 1859.8964 | -0.0057 | -3  | 28719 | 28734 | ELDPGEKYSLTYTSTR                     |                                          | Mascot |
| 1859.928  | 1859.8964 | -0.0316 | -17 | 2604  | 2619  | NQELKPSANVQIMSER                     | Oxidation (M)[13]                        | Mascot |
| 1861.9337 | 1861.932  | -0.0017 | -1  | 12684 | 12698 | LQVCEIRPRDQGEYR                      |                                          | Mascot |
| 1960.9498 | 1960.9794 | 0.0296  | 15  | 1778  | 1794  | TEEGYEAISSVELKSR                     |                                          | Mascot |
| 1971.0375 | 1971.0005 | -0.037  | -19 | 13319 | 13335 | IFLSWEPPKWDGGTPIK                    |                                          | Mascot |
| 1971.0375 | 1971.0005 | -0.037  | -19 | 13319 | 13335 | IFLSWEPPKWDGGTPIK                    |                                          | Mascot |
| 1992.98   | 1993.1134 | 0.1334  | 67  | 2757  | 2773  | DTITFEVTVNYEGITYK                    |                                          | Mascot |
| 1993.027  | 1993.1134 | 0.0864  | 43  | 32557 | 32575 | AVQESVSSKIQQGSEMVI<br>K              | Oxidation (M)[16]                        | Mascot |
| 2007.0182 | 2007.0828 | 0.0646  | 32  | 19472 | 19490 | DHVSITWDAPLIDGGSPV<br>K              |                                          | Mascot |
| 2066.0474 | 2066.0371 | -0.0103 | -5  | 976   | 993   | KQDVTYVTEVTAMVQEP<br>K               |                                          | Mascot |
| 2120.1089 | 2120.1094 | 0.0005  | 0   | 5556  | 5574  | MDNTNVLAKDVS LQCV<br>LK              | Oxidation (M)[1]                         | Mascot |
| 2136.0906 | 2136.0969 | 0.0063  | 3   | 22659 | 22677 | SAFISVRVLDTPDMPANF<br>R              |                                          | Mascot |
| 2152.0854 | 2152.093  | 0.0076  | 4   | 22659 | 22677 | SAFISVRVLDTPDMPANF<br>R              | Oxidation (M)[14]                        | Mascot |
| 2211.1438 | 2211.1106 | -0.0332 | -15 | 6982  | 7001  | SCEIALRGDTAILELHNID<br>K             |                                          | Mascot |
| 2225.1382 | 2225.1245 | -0.0137 | -6  | 29539 | 29559 | VAATNRFGIGGFLQSEVV<br>ECK            |                                          | Mascot |
| 2232.9575 | 2233.0947 | 0.1372  | 61  | 1525  | 1542  | MINEFGYCSLDYEVAYSR                   | Carbamidomethyl (C)[8], Oxidation (M)[1] | Mascot |
| 2248.0107 | 2248.1423 | 0.1316  | 59  | 7076  | 7094  | YNITTTESSCILECLNSDK                  | Carbamidomethyl (C)[10,14]               | Mascot |
| 2264.2537 | 2264.1484 | -0.1053 | -47 | 25712 | 25732 | AEDPLFLPSPPAKPKIIDS<br>TK            |                                          | Mascot |
| 2283.1899 | 2283.1802 | -0.0097 | -4  | 3763  | 3783  | EHPSQVMSALTESVTPLT<br>IVK            | Oxidation (M)[7]                         | Mascot |
| 2284.1819 | 2284.1797 | -0.0022 | -1  | 21598 | 21618 | EITKDSVSLIWDPPVIDGG<br>SR            |                                          | Mascot |
| 3337.4834 | 3337.7339 | 0.2505  | 75  | 4869  | 4900  | DTGTYTCTAANEAGSSS<br>CSSSVTVQEPV FVK | Carbamidomethyl (C)[7,18]                | Mascot |

15 Si:dkey-63j12.1 [Danio rerio] gi|63100606 31611.3 10.27 10 39 0

| Peptide Information |             |         |       |            |                    |           |         |                  |                  |
|---------------------|-------------|---------|-------|------------|--------------------|-----------|---------|------------------|------------------|
| Calc. Mass          | Obsrv. Mass | ± da    | ± ppm | Start Seq. | End Sequence Seq.  | Ion Score | C. I. % | Modification     | Rank Result Type |
| 893.5025            | 893.416     | -0.0865 | -97   | 189        | 195 CKIFLNR        |           |         |                  | Mascot           |
| 916.5098            | 916.4868    | -0.023  | -25   | 150        | 158 TPGAVESKK      |           |         |                  | Mascot           |
| 1045.5748           | 1045.5667   | -0.0081 | -8    | 237        | 245 RASQVLSEK      |           |         |                  | Mascot           |
| 1179.5536           | 1179.666    | 0.1124  | 95    | 198        | 207 TSMTANQDRR     |           |         |                  | Mascot           |
| 1179.5536           | 1179.666    | 0.1124  | 95    | 198        | 207 TSMTANQDRR     |           |         |                  | Mascot           |
| 1571.7379           | 1571.7905   | 0.0526  | 33    | 175        | 188 LMGDACSVNMVIYR |           |         |                  | Mascot           |
| 1587.7328           | 1587.7875   | 0.0547  | 34    | 175        | 188 LMGDACSVNMVIYR |           |         | Oxidation (M)[2] | Mascot           |

|    |                             |           |        |    |             |     |                        |      |    |    |   |  |  |  |  |                         |        |
|----|-----------------------------|-----------|--------|----|-------------|-----|------------------------|------|----|----|---|--|--|--|--|-------------------------|--------|
|    | 1790.849                    | 1790.9106 | 0.0616 | 34 | 159         | 174 | SPAATNQTNFINCQPK       |      |    |    |   |  |  |  |  | Carbamidomethyl (C)[13] | Mascot |
|    | 1859.8634                   | 1859.8964 | 0.033  | 18 | 175         | 190 | LMGDACSVNMVIYRCK       |      |    |    |   |  |  |  |  | Carbamidomethyl (C)[6]  | Mascot |
|    | 1859.8634                   | 1859.8964 | 0.033  | 18 | 175         | 190 | LMGDACSVNMVIYRCK       |      |    |    |   |  |  |  |  | Carbamidomethyl (C)[6]  | Mascot |
|    | 1861.9225                   | 1861.932  | 0.0095 | 5  | 158         | 174 | KSPAATNQTNFINCQPK      |      |    |    |   |  |  |  |  |                         | Mascot |
|    | 1960.8865                   | 1960.9794 | 0.0929 | 47 | 256         | 272 | TSHMMHGARQFAEAAQ<br>R  |      |    |    |   |  |  |  |  | Oxidation (M)[4,5]      | Mascot |
|    | 2233.0027                   | 2233.0947 | 0.092  | 41 | 119         | 136 | CMFVQVLYHACQNYWE<br>AK |      |    |    |   |  |  |  |  |                         | Mascot |
| 16 | cullin 1-like [Danio rerio] |           |        |    | gi 47087291 |     | 89546.8                | 8.18 | 14 | 38 | 0 |  |  |  |  |                         |        |

Peptide Information

|  | Calc. Mass | Obsrv. Mass | ± da    | ± ppm | Start Seq. | End Seq. | Sequence                 | Ion Score | C. I. | % | Modification           | Rank | Result Type |
|--|------------|-------------|---------|-------|------------|----------|--------------------------|-----------|-------|---|------------------------|------|-------------|
|  | 864.4825   | 864.4891    | 0.0066  | 8     | 220        | 227      | GPTLSVYK                 |           |       |   |                        |      | Mascot      |
|  | 882.4501   | 882.5694    | 0.1193  | 135   | 320        | 326      | MYNLVSR                  |           |       |   |                        |      | Mascot      |
|  | 893.4363   | 893.416     | -0.0203 | -23   | 514        | 520      | DLNEQFK                  |           |       |   |                        |      | Mascot      |
|  | 914.5128   | 914.5472    | 0.0344  | 38    | 680        | 687      | VNINVPMK                 |           |       |   |                        |      | Mascot      |
|  | 946.5277   | 946.4759    | -0.0518 | -55   | 750        | 757      | CIDILIEK                 |           |       |   |                        |      | Mascot      |
|  | 946.5277   | 946.4759    | -0.0518 | -55   | 750        | 757      | CIDILIEK                 |           |       |   |                        |      | Mascot      |
|  | 1176.6194  | 1176.6029   | -0.0165 | -14   | 167        | 175      | ECLFRPLNK                |           |       |   | Carbamidomethyl (C)[2] |      | Mascot      |
|  | 1582.7642  | 1582.7301   | -0.0341 | -22   | 314        | 326      | NEDLGRMYNLVSR            |           |       |   | Oxidation (M)[7]       |      | Mascot      |
|  | 1587.7584  | 1587.7875   | 0.0291  | 18    | 492        | 504      | QACGFEYTSKLQR            |           |       |   | Carbamidomethyl (C)[3] |      | Mascot      |
|  | 1618.7384  | 1618.717    | -0.0214 | -13   | 228        | 240      | EYFEAQFLADTER            |           |       |   |                        |      | Mascot      |
|  | 1624.8224  | 1624.8014   | -0.021  | -13   | 26         | 39       | SGIQQVYTRQSMAR           |           |       |   |                        |      | Mascot      |
|  | 1624.8224  | 1624.8014   | -0.021  | -13   | 26         | 39       | SGIQQVYTRQSMAR           |           |       |   |                        |      | Mascot      |
|  | 1735.9449  | 1735.8815   | -0.0634 | -37   | 725        | 739      | HQQLLAEVLNQLSSR          |           |       |   |                        |      | Mascot      |
|  | 1735.9449  | 1735.8815   | -0.0634 | -37   | 725        | 739      | HQQLLAEVLNQLSSR          |           |       |   |                        |      | Mascot      |
|  | 2152.126   | 2152.093    | -0.033  | -15   | 577        | 594      | LTWLYHLSKGELVTNCFK       |           |       |   |                        |      | Mascot      |
|  | 2264.2622  | 2264.1484   | -0.1138 | -50   | 725        | 743      | HQQLLAEVLNQLSSRFKP<br>R  |           |       |   |                        |      | Mascot      |
|  | 2283.1423  | 2283.1802   | 0.0379  | 17    | 96         | 115      | SYLTNLLKDGEDLMDESV<br>LK |           |       |   |                        |      | Mascot      |

|    |                       |  |  |  |              |  |           |      |    |    |   |   |   |
|----|-----------------------|--|--|--|--------------|--|-----------|------|----|----|---|---|---|
| 17 | titin a [Danio rerio] |  |  |  | gi 110005909 |  | 3646149.2 | 6.18 | 72 | 38 | 0 | 9 | 0 |
|----|-----------------------|--|--|--|--------------|--|-----------|------|----|----|---|---|---|

Peptide Information

|  | Calc. Mass | Obsrv. Mass | ± da   | ± ppm | Start Seq. | End Seq. | Sequence | Ion Score | C. I. | % | Modification | Rank | Result Type |
|--|------------|-------------|--------|-------|------------|----------|----------|-----------|-------|---|--------------|------|-------------|
|  | 842.5094   | 842.5123    | 0.0029 | 3     | 15232      | 15239    | LSIPGVTR |           |       |   |              |      | Mascot      |
|  | 845.4587   | 845.4667    | 0.008  | 9     | 29341      | 29347    | IRAENSR  |           |       |   |              |      | Mascot      |
|  | 855.4206   | 855.4388    | 0.0182 | 21    | 8657       | 8663     | EAAIEHK  |           |       |   |              |      | Mascot      |

|           |           |         |      |       |       |               |    |                         |        |
|-----------|-----------|---------|------|-------|-------|---------------|----|-------------------------|--------|
| 862.4814  | 862.4818  | 0.0004  | 0    | 27341 | 27348 | IVCSSVVR      |    |                         | Mascot |
| 864.4937  | 864.4891  | -0.0046 | -5   | 20241 | 20247 | GYIVERK       |    |                         | Mascot |
| 870.493   | 870.542   | 0.049   | 56   | 8546  | 8553  | TDIPLPSK      |    |                         | Mascot |
| 882.4679  | 882.5694  | 0.1015  | 115  | 2876  | 2882  | YKVSTER       |    |                         | Mascot |
| 893.4145  | 893.416   | 0.0015  | 2    | 23146 | 23153 | TSEGCAR       |    | Carbamidomethyl (C)[5]  | Mascot |
| 907.4705  | 907.4691  | -0.0014 | -2   | 27434 | 27440 | NSLLWMK       |    | Oxidation (M)[6]        | Mascot |
| 914.5669  | 914.5472  | -0.0197 | -22  | 9214  | 9221  | DKIGLQLK      |    |                         | Mascot |
| 916.4985  | 916.4868  | -0.0117 | -13  | 9747  | 9754  | GDEILLEK      |    |                         | Mascot |
| 946.5203  | 946.4759  | -0.0444 | -47  | 12485 | 12493 | AGQEITLSK     |    |                         | Mascot |
| 946.5832  | 946.4759  | -0.1073 | -113 | 2700  | 2707  | FRIVVQ GK     |    |                         | Mascot |
| 981.5112  | 981.5854  | 0.0742  | 76   | 3392  | 3399  | RFSSSLER      |    |                         | Mascot |
| 994.5203  | 994.5829  | 0.0626  | 63   | 9416  | 9423  | EKEVFSQK      |    |                         | Mascot |
| 1001.5625 | 1001.566  | 0.0035  | 3    | 8691  | 8698  | EEIINQKK      |    |                         | Mascot |
| 1045.5347 | 1045.5667 | 0.032   | 31   | 7144  | 7153  | CQIGGTPEIK    |    |                         | Mascot |
| 1053.5364 | 1053.576  | 0.0396  | 38   | 9270  | 9277  | RDIYFPDK      | 5  | 0                       | Mascot |
| 1053.584  | 1053.576  | -0.008  | -8   | 24308 | 24315 | YEFRVIAR      |    |                         | Mascot |
| 1109.6255 | 1109.5858 | -0.0397 | -36  | 17783 | 17790 | NFVFLKWR      |    |                         | Mascot |
| 1161.703  | 1161.5631 | -0.1399 | -120 | 9689  | 9698  | VKAVPYPIK     |    |                         | Mascot |
| 1176.5677 | 1176.6029 | 0.0352  | 30   | 17549 | 17559 | AVNMIGEGETR   |    |                         | Mascot |
| 1179.6732 | 1179.666  | -0.0072 | -6   | 28209 | 28218 | ITGYIVETRK    |    |                         | Mascot |
| 1179.7096 | 1179.666  | -0.0436 | -37  | 10001 | 10010 | KEITPTHILK    |    |                         | Mascot |
| 1197.6011 | 1197.5883 | -0.0128 | -11  | 15414 | 15423 | GTSYWSRVNK    |    |                         | Mascot |
| 1220.5865 | 1220.5864 | -0.0001 | 0    | 18604 | 18614 | RGSDDIVTSDR   |    |                         | Mascot |
| 1355.714  | 1355.6809 | -0.0331 | -24  | 13271 | 13281 | EYLFRIACNK    |    |                         | Mascot |
| 1355.7794 | 1355.7896 | 0.0102  | 8    | 18483 | 18494 | NSATLGWLKPLR  |    |                         | Mascot |
| 1363.7004 | 1363.6586 | -0.0418 | -31  | 29924 | 29934 | GLKENVEYHFK   |    |                         | Mascot |
| 1371.6387 | 1371.6747 | 0.036   | 26   | 26182 | 26194 | YDITASNSNGTTK |    |                         | Mascot |
| 1371.7478 | 1371.6747 | -0.0731 | -53  | 3410  | 3422  | LTPAEVTIGESVR | 11 | 0                       | Mascot |
| 1386.6648 | 1386.6051 | -0.0597 | -43  | 17536 | 17546 | GLTEDTEYRFR   |    |                         | Mascot |
| 1419.7227 | 1419.7164 | -0.0063 | -4   | 4116  | 4127  | ESPFVSDVKQQR  |    |                         | Mascot |
| 1442.6945 | 1442.6982 | 0.0037  | 3    | 6367  | 6379  | ADTGTYTCKLANK |    | Carbamidomethyl (C)[8]  | Mascot |
| 1511.7375 | 1511.7045 | -0.033  | -22  | 22038 | 22050 | IGGLEEGIEYFR  |    |                         | Mascot |
| 1519.7274 | 1519.7588 | 0.0314  | 21   | 11644 | 11656 | ETAEFSIELSHEK |    |                         | Mascot |
| 1542.7369 | 1542.7043 | -0.0326 | -21  | 19518 | 19530 | ITNLEAGQAYCFR |    | Carbamidomethyl (C)[11] | Mascot |
| 1556.7526 | 1556.7462 | -0.0064 | -4   | 31126 | 31138 | MTASEALEHPWLR |    | Oxidation (M)[1]        | Mascot |
| 1571.7853 | 1571.7905 | 0.0052  | 3    | 21648 | 21660 | IGDLQEGNLYFFR |    |                         | Mascot |
| 1582.7716 | 1582.7301 | -0.0415 | -26  | 17623 | 17635 | TMLTNNFPVQMR  |    | Oxidation (M)[2, 12]    | Mascot |

|           |           |         |     |       |       |                           |                                          |     |        |
|-----------|-----------|---------|-----|-------|-------|---------------------------|------------------------------------------|-----|--------|
| 1587.7649 | 1587.7875 | 0.0226  | 14  | 6149  | 6161  | DESWILEDPSIQR             |                                          |     | Mascot |
| 1618.7959 | 1618.717  | -0.0789 | -49 | 30832 | 30847 | FGVSDPSAPDPTTK            |                                          |     | Mascot |
| 1624.8074 | 1624.8014 | -0.006  | -4  | 15583 | 15596 | IFMDISADELLCVR            |                                          |     | Mascot |
| 1624.8727 | 1624.8014 | -0.0713 | -44 | 7363  | 7376  | ISCVENPHLTILK             | Carbamidomethyl (C)[3]                   |     | Mascot |
| 1719.8734 | 1719.884  | 0.0106  | 6   | 23154 | 23169 | DPCDPPGTPVPVIVTR          | Carbamidomethyl (C)[3]                   |     | Mascot |
| 1735.8496 | 1735.8815 | 0.0319  | 18  | 25594 | 25610 | GVNKYGTGEALESDBAK         |                                          |     | Mascot |
| 1735.9589 | 1735.8815 | -0.0774 | -45 | 26957 | 26971 | NTEYSTTLIIPKVTR           |                                          | 2 0 | Mascot |
| 1751.7177 | 1751.9026 | 0.1849  | 106 | 4585  | 4600  | DHEGEYTCEAVGEAGK          | Carbamidomethyl (C)[8]                   |     | Mascot |
| 1781.8956 | 1781.9781 | 0.0825  | 46  | 8632  | 8646  | DVYFSAKQDEEIPK            |                                          |     | Mascot |
| 1781.9644 | 1781.9781 | 0.0137  | 8   | 19357 | 19372 | DILLAPEAELDADLRK          |                                          |     | Mascot |
| 1790.9183 | 1790.9106 | -0.0077 | -4  | 7435  | 7450  | VAGSQPLTVNWKDGR           |                                          |     | Mascot |
| 1832.9562 | 1832.9417 | -0.0145 | -8  | 522   | 537   | ELLIPPEMTTTTEK            | Oxidation (M)[9]                         |     | Mascot |
| 1838.9    | 1838.8909 | -0.0091 | -5  | 25318 | 25333 | DPCAPPSQPRVMNITR          | Carbamidomethyl (C)[3]                   |     | Mascot |
| 1859.9021 | 1859.8964 | -0.0057 | -3  | 28719 | 28734 | ELDPGEKYSLYTSTR           |                                          |     | Mascot |
| 1859.928  | 1859.8964 | -0.0316 | -17 | 2604  | 2619  | NQELKPSANVQIMSER          | Oxidation (M)[13]                        |     | Mascot |
| 1861.9337 | 1861.932  | -0.0017 | -1  | 12684 | 12698 | LQVCEIRPRDQGEYR           |                                          |     | Mascot |
| 1960.9498 | 1960.9794 | 0.0296  | 15  | 1778  | 1794  | TEEGYEAISSVELKSR          |                                          |     | Mascot |
| 1971.0375 | 1971.0005 | -0.037  | -19 | 13319 | 13335 | IFLSWEPPKWDGGTPIK         |                                          |     | Mascot |
| 1971.0375 | 1971.0005 | -0.037  | -19 | 13319 | 13335 | IFLSWEPPKWDGGTPIK         |                                          |     | Mascot |
| 1992.98   | 1993.1134 | 0.1334  | 67  | 2757  | 2773  | DTITFEVTVNYEGITYK         |                                          |     | Mascot |
| 1993.027  | 1993.1134 | 0.0864  | 43  | 32557 | 32575 | AVQESVSSKIQQGSEMVI<br>K   | Oxidation (M)[16]                        |     | Mascot |
| 2007.0182 | 2007.0828 | 0.0646  | 32  | 19472 | 19490 | DHVSITWDAPLIDGGSPV<br>K   |                                          |     | Mascot |
| 2066.0474 | 2066.0371 | -0.0103 | -5  | 976   | 993   | KQDVTYVTEVTAMVQEP<br>K    |                                          |     | Mascot |
| 2120.1089 | 2120.1094 | 0.0005  | 0   | 5556  | 5574  | MDNTNVLLAKDVSQCV<br>LK    | Oxidation (M)[1]                         |     | Mascot |
| 2136.0906 | 2136.0969 | 0.0063  | 3   | 22659 | 22677 | SAFISVRVLDTPDMPANF<br>R   |                                          |     | Mascot |
| 2152.0854 | 2152.093  | 0.0076  | 4   | 22659 | 22677 | SAFISVRVLDTPDMPANF<br>R   | Oxidation (M)[14]                        |     | Mascot |
| 2211.1438 | 2211.1106 | -0.0332 | -15 | 6982  | 7001  | SCEIALRGDTAILELHNID<br>K  |                                          |     | Mascot |
| 2225.1382 | 2225.1245 | -0.0137 | -6  | 29539 | 29559 | VAATNRFGIGGFLQSEVV<br>ECK |                                          |     | Mascot |
| 2232.9575 | 2233.0947 | 0.1372  | 61  | 1525  | 1542  | MINEFGYCSLDYEVAYS         | Carbamidomethyl (C)[8], Oxidation (M)[1] |     | Mascot |
| 2248.0107 | 2248.1423 | 0.1316  | 59  | 7076  | 7094  | YNITTTESSCILECLNSDK       | Carbamidomethyl (C)[10,14]               |     | Mascot |
| 2264.2537 | 2264.1484 | -0.1053 | -47 | 25712 | 25732 | AEDPLFLPSPPAKPKIIDS<br>TK |                                          |     | Mascot |
| 2283.1899 | 2283.1802 | -0.0097 | -4  | 3763  | 3783  | EHPSQVMSALTESVTPLT<br>IVK | Oxidation (M)[7]                         |     | Mascot |
| 2284.1819 | 2284.1797 | -0.0022 | -1  | 21598 | 21618 | EITKDSVSLIWDPPVIDGG<br>SR |                                          |     | Mascot |
| 3337.4834 | 3337.7339 | 0.2505  | 75  | 4869  | 4900  | DTGTYTCTAANEAGSSS         | Carbamidomethyl (C)[7,18]                |     | Mascot |

18 RecName: Full=Methionine aminopeptidase 1; Short=MAP 1; Short=MetAP 1; AltName: Full=Peptidase M 1  
 gi|172046804 43538.2 6.23 9 38 0  
 CSSSVTVQEPPVFK

Peptide Information

| Calc. Mass | Obsrv. Mass | ± da    | ± ppm | Start Seq. | End Seq. | Sequence                 | Ion Score | C. I. % | Modification                                | Rank | Result Type |
|------------|-------------|---------|-------|------------|----------|--------------------------|-----------|---------|---------------------------------------------|------|-------------|
| 845.5025   | 845.4667    | -0.0358 | -42   | 140        | 146      | VVCKLAR                  |           |         | Carbamidomethyl (C)[3]                      |      | Mascot      |
| 914.5305   | 914.5472    | 0.0167  | 18    | 270        | 277      | ELGNIIQK                 |           |         |                                             |      | Mascot      |
| 1001.4621  | 1001.566    | 0.1039  | 104   | 289        | 297      | SYCGHGIHK                |           |         |                                             |      | Mascot      |
| 1719.8767  | 1719.884    | 0.0073  | 4     | 129        | 143      | ILNAEEIEGMRVCK           |           |         | Oxidation (M)[10]                           |      | Mascot      |
| 1832.8088  | 1832.9417   | 0.1329  | 73    | 191        | 207      | SCCTSVNEVICHGIPDR        |           |         |                                             |      | Mascot      |
| 2006.8542  | 2007.0828   | 0.2286  | 114   | 2          | 19       | AAVETRECETEGCHSEA<br>K   |           |         | Carbamidomethyl (C)[8]                      |      | Mascot      |
| 2210.9111  | 2211.1106   | 0.1995  | 90    | 1          | 19       | MAAVETRECETEGCHSE<br>AK  |           |         | Carbamidomethyl (C)[9,14], Oxidation (M)[1] |      | Mascot      |
| 2225.0781  | 2225.1245   | 0.0464  | 21    | 278        | 297      | HAQANGFSVVRSYCGHG<br>IHK |           |         | Carbamidomethyl (C)[14]                     |      | Mascot      |
| 2248.1277  | 2248.1423   | 0.0146  | 6     | 353        | 372      | SAQFEHTLLVTETGCEILT<br>R |           |         |                                             |      | Mascot      |

19 E74-like factor 2a (ets domain transcription factor) [Danio rerio]  
 gi|51870940 55871.4 4.95 10 38 0

Peptide Information

| Calc. Mass | Obsrv. Mass | ± da    | ± ppm | Start Seq. | End Seq. | Sequence                  | Ion Score | C. I. % | Modification           | Rank | Result Type |
|------------|-------------|---------|-------|------------|----------|---------------------------|-----------|---------|------------------------|------|-------------|
| 845.4111   | 845.4667    | 0.0556  | 66    | 296        | 303      | ETPAASNR                  |           |         |                        |      | Mascot      |
| 916.5363   | 916.4868    | -0.0495 | -54   | 227        | 234      | AVSKLWGR                  |           |         |                        |      | Mascot      |
| 946.5567   | 946.4759    | -0.0808 | -85   | 222        | 230      | LVDSKAVSK                 |           |         |                        |      | Mascot      |
| 946.5567   | 946.4759    | -0.0808 | -85   | 222        | 230      | LVDSKAVSK                 |           |         |                        |      | Mascot      |
| 981.5073   | 981.5854    | 0.0781  | 80    | 204        | 211      | ETCPKYIK                  |           |         |                        |      | Mascot      |
| 1001.5122  | 1001.566    | 0.0538  | 54    | 295        | 303      | RETPAASNR                 |           |         |                        |      | Mascot      |
| 1355.6688  | 1355.6809   | 0.0121  | 9     | 495        | 506      | VEPPEVSVDQEK              |           |         |                        |      | Mascot      |
| 1355.6688  | 1355.7896   | 0.1208  | 89    | 495        | 506      | VEPPEVSVDQEK              |           |         |                        |      | Mascot      |
| 1386.6028  | 1386.6051   | 0.0023  | 2     | 168        | 179      | NCCDGSLLDLVYK             |           |         | Carbamidomethyl (C)[2] |      | Mascot      |
| 1542.7039  | 1542.7043   | 0.0004  | 0     | 168        | 180      | NCCDGSLLDLVYKR            |           |         | Carbamidomethyl (C)[2] |      | Mascot      |
| 1618.817   | 1618.717    | -0.1    | -62   | 120        | 133      | STEELLSEVEVEVR            |           |         |                        |      | Mascot      |
| 2225.0867  | 2225.1245   | 0.0378  | 17    | 99         | 119      | TIEAAEALLHMDSPASLQ<br>GDR |           |         |                        |      | Mascot      |

20 Heterogeneous nuclear ribonucleoprotein K [Danio rerio]  
 gi|32451938 46356.1 8.16 10 37 0



| Peptide Information |                                                       |         |       |            |              |                         |           |         |                                          |      |             |
|---------------------|-------------------------------------------------------|---------|-------|------------|--------------|-------------------------|-----------|---------|------------------------------------------|------|-------------|
| Calc. Mass          | Obsrv. Mass                                           | ± da    | ± ppm | Start Seq. | End Seq.     | Sequence                | Ion Score | C. I. % | Modification                             | Rank | Result Type |
| 893.4575            | 893.416                                               | -0.0415 | -46   | 148        | 155          | DSTQTTIK                |           |         |                                          |      | Mascot      |
| 916.4053            | 916.4868                                              | 0.0815  | 89    | 305        | 311          | GHMDERR                 |           |         | Oxidation (M)[3]                         |      | Mascot      |
| 994.4886            | 994.5829                                              | 0.0943  | 95    | 225        | 233          | RPMGGFSSR               |           |         |                                          |      | Mascot      |
| 1045.5823           | 1045.5667                                             | -0.0156 | -15   | 175        | 183          | AERVVQCIK               |           |         |                                          |      | Mascot      |
| 1053.4669           | 1053.576                                              | 0.1091  | 104   | 116        | 124          | GVDFDCELR               |           |         |                                          |      | Mascot      |
| 1053.4669           | 1053.576                                              | 0.1091  | 104   | 116        | 124          | GVDFDCELR               |           |         |                                          |      | Mascot      |
| 1618.6663           | 1618.717                                              | 0.0507  | 31    | 319        | 333          | NDRYGGSMNDGYGGR         |           |         |                                          |      | Mascot      |
| 1782.0623           | 1781.9781                                             | -0.0842 | -47   | 87         | 103          | ILSVSADIPTVAEILLK       |           |         |                                          |      | Mascot      |
| 1782.0623           | 1781.9781                                             | -0.0842 | -47   | 87         | 103          | ILSVSADIPTVAEILLK       |           |         |                                          |      | Mascot      |
| 1790.9316           | 1790.9106                                             | -0.021  | -12   | 38         | 52           | NSDEMVELRILLQSK         |           |         | Oxidation (M)[5]                         |      | Mascot      |
| 2100.1807           | 2100.0022                                             | -0.1785 | -85   | 178        | 195          | VVQCIKTMLELIVEAPIK      |           |         | Carbamidomethyl (C)[4], Oxidation (M)[8] |      | Mascot      |
| 2136.0576           | 2136.0969                                             | 0.0393  | 18    | 156        | 174          | LFQECCPQSTDRVVLVG<br>GK |           |         | Carbamidomethyl (C)[5]                   |      | Mascot      |
| 21                  | PREDICTED: zinc finger protein 420-like [Danio rerio] |         |       |            | gi 326675809 |                         | 60606.6   | 8.42    | 13                                       | 37   | 0           |

| Peptide Information |                                                            |         |       |            |              |                         |           |         |                            |      |             |
|---------------------|------------------------------------------------------------|---------|-------|------------|--------------|-------------------------|-----------|---------|----------------------------|------|-------------|
| Calc. Mass          | Obsrv. Mass                                                | ± da    | ± ppm | Start Seq. | End Seq.     | Sequence                | Ion Score | C. I. % | Modification               | Rank | Result Type |
| 855.4682            | 855.4388                                                   | -0.0294 | -34   | 202        | 208          | VHKNETK                 |           |         |                            |      | Mascot      |
| 981.5251            | 981.5854                                                   | 0.0603  | 61    | 386        | 394          | TYITAGDLK               |           |         |                            |      | Mascot      |
| 1001.4972           | 1001.566                                                   | 0.0688  | 69    | 2          | 10           | SDPEPCLIK               |           |         |                            |      | Mascot      |
| 1109.6201           | 1109.5858                                                  | -0.0343 | -31   | 386        | 395          | TYITAGDLKK              |           |         |                            |      | Mascot      |
| 1386.6028           | 1386.6051                                                  | 0.0023  | 2     | 347        | 357          | EKPYSCSVCEK             |           |         | Carbamidomethyl (C)[6,9]   |      | Mascot      |
| 1790.8677           | 1790.9106                                                  | 0.0429  | 24    | 324        | 338          | CDHCGKTLRPSSELK         |           |         | Carbamidomethyl (C)[1]     |      | Mascot      |
| 1859.8868           | 1859.8964                                                  | 0.0096  | 5     | 47         | 61           | QEETEEQIDLIVEER         |           |         |                            |      | Mascot      |
| 1859.8868           | 1859.8964                                                  | 0.0096  | 5     | 47         | 61           | QEETEEQIDLIVEER         |           |         |                            |      | Mascot      |
| 1861.8142           | 1861.932                                                   | 0.1178  | 63    | 259        | 273          | IHTGEKPYMCSHCNK         |           |         | Carbamidomethyl (C)[10,13] |      | Mascot      |
| 1960.8939           | 1960.9794                                                  | 0.0855  | 44    | 259        | 274          | IHTGEKPYMCSHCNKR        |           |         | Carbamidomethyl (C)[10]    |      | Mascot      |
| 2099.897            | 2100.0022                                                  | 0.1052  | 50    | 237        | 254          | EYMCSECEKTFITSGDLK      |           |         | Oxidation (M)[3]           |      | Mascot      |
| 2248.1292           | 2248.1423                                                  | 0.0131  | 6     | 161        | 179          | SFVQISHLNQHMIIHNGE<br>K |           |         | Oxidation (M)[12]          |      | Mascot      |
| 2264.0989           | 2264.1484                                                  | 0.0495  | 22    | 302        | 320          | SFRQSAHLNEHMLIHNG<br>EK |           |         | Oxidation (M)[12]          |      | Mascot      |
| 2284.1187           | 2284.1797                                                  | 0.061   | 27    | 445        | 463          | RPSNLNEHMMIHTGERP<br>HK |           |         |                            |      | Mascot      |
| 22                  | PREDICTED: hypothetical protein LOC100538018 [Danio rerio] |         |       |            | gi 326665968 |                         | 5761.7    | 7.85    | 5                          | 36   | 0           |

### Peptide Information

| Calc. Mass | Obsrv. Mass | ± da   | ± ppm | Start Seq. | End Sequence Seq. | Ion Score | C. I. % | Modification             | Rank | Result Type |
|------------|-------------|--------|-------|------------|-------------------|-----------|---------|--------------------------|------|-------------|
| 862.3901   | 862.4818    | 0.0917 | 106   | 9          | 15 TELDNDR        |           |         |                          |      | Mascot      |
| 914.4261   | 914.5472    | 0.1211 | 132   | 2          | 8 MTHQNQR         |           |         |                          |      | Mascot      |
| 1045.4667  | 1045.5667   | 0.1    | 96    | 1          | 8 MMTHQNQR        |           |         |                          |      | Mascot      |
| 1511.6254  | 1511.7045   | 0.0791 | 52    | 17         | 28 ACEYTETNCHVK   |           |         | Carbamidomethyl (C)[2,9] |      | Mascot      |
| 1582.6989  | 1582.7301   | 0.0312 | 20    | 16         | 28 KACEYTETNCHVK  |           |         | Carbamidomethyl (C)[3]   |      | Mascot      |

23

PREDICTED: hypothetical protein LOC100536324  
[Danio rerio]

gi|326675438

274951.1

9.13

23

36

0

### Peptide Information

| Calc. Mass | Obsrv. Mass | ± da    | ± ppm | Start Seq. | End Sequence Seq.     | Ion Score | C. I. % | Modification     | Rank | Result Type |
|------------|-------------|---------|-------|------------|-----------------------|-----------|---------|------------------|------|-------------|
| 845.4475   | 845.4667    | 0.0192  | 23    | 1116       | 1123 EALAQASR         |           |         |                  |      | Mascot      |
| 855.4094   | 855.4388    | 0.0294  | 34    | 103        | 109 YVTEESK           |           |         |                  |      | Mascot      |
| 870.5406   | 870.542     | 0.0014  | 2     | 1174       | 1181 VLSPVTVR         |           |         |                  |      | Mascot      |
| 994.5363   | 994.5829    | 0.0466  | 47    | 870        | 878 VACHPGVRR         |           |         |                  |      | Mascot      |
| 1001.5486  | 1001.566    | 0.0174  | 17    | 1116       | 1124 EALAQASRR        |           |         |                  |      | Mascot      |
| 1053.5146  | 1053.576    | 0.0614  | 58    | 397        | 404 EAMDRYIR          |           |         |                  |      | Mascot      |
| 1053.5146  | 1053.576    | 0.0614  | 58    | 397        | 404 EAMDRYIR          |           |         |                  |      | Mascot      |
| 1355.7794  | 1355.6809   | -0.0985 | -73   | 1145       | 1155 VWLSTRDLPLR      |           |         |                  |      | Mascot      |
| 1355.7834  | 1355.7896   | 0.0062  | 5     | 957        | 968 FSKAAHFIPLPK      |           |         |                  |      | Mascot      |
| 1363.6522  | 1363.6586   | 0.0064  | 5     | 1836       | 1847 ELLDDGMANNKK     |           |         | Oxidation (M)[7] |      | Mascot      |
| 1371.7015  | 1371.6747   | -0.0268 | -20   | 974        | 985 ETAQAVVDHVFR      |           |         |                  |      | Mascot      |
| 1371.7015  | 1371.6747   | -0.0268 | -20   | 974        | 985 ETAQAVVDHVFR      |           |         |                  |      | Mascot      |
| 1386.7587  | 1386.6051   | -0.1536 | -111  | 2252       | 2263 EIVSRQELDAVK     |           |         |                  |      | Mascot      |
| 1419.72    | 1419.7164   | -0.0036 | -3    | 2336       | 2346 HTHDTQIRQQR      |           |         |                  |      | Mascot      |
| 1571.7959  | 1571.7905   | -0.0054 | -3    | 2146       | 2158 MDHDVRQLISSVR    |           |         | Oxidation (M)[1] |      | Mascot      |
| 1582.7489  | 1582.7301   | -0.0188 | -12   | 1662       | 1676 LGNSDSLCSRSSTQK  |           |         |                  |      | Mascot      |
| 1618.8112  | 1618.717    | -0.0942 | -58   | 1357       | 1371 GSPSEYGLPPNYIPK  |           |         |                  |      | Mascot      |
| 1624.8363  | 1624.8014   | -0.0349 | -21   | 257        | 271 TPLPTTSPEPMLGR    |           |         |                  |      | Mascot      |
| 1624.8363  | 1624.8014   | -0.0349 | -21   | 257        | 271 TPLPTTSPEPMLGR    |           |         |                  |      | Mascot      |
| 1719.7391  | 1719.884    | 0.1449  | 84    | 241        | 256 VSGASWMNEGSPNDPR  |           |         | Oxidation (M)[7] |      | Mascot      |
| 1781.9432  | 1781.9781   | 0.0349  | 20    | 802        | 818 LFDVPGGEATPEAILPR |           |         |                  |      | Mascot      |
| 1781.9432  | 1781.9781   | 0.0349  | 20    | 802        | 818 LFDVPGGEATPEAILPR |           |         |                  |      | Mascot      |
| 1832.8848  | 1832.9417   | 0.0569  | 31    | 2264       | 2278 EALLQCQTEYEHQK   |           |         |                  |      | Mascot      |

|    |                                                                    |           |         |     |      |              |                            |      |   |    |   |                  |   |  |  |        |
|----|--------------------------------------------------------------------|-----------|---------|-----|------|--------------|----------------------------|------|---|----|---|------------------|---|--|--|--------|
|    | 1859.8453                                                          | 1859.8964 | 0.0511  | 27  | 240  | 256          | RVSGASWMNEGSPNDP<br>R      |      |   |    |   |                  |   |  |  | Mascot |
|    | 1859.8453                                                          | 1859.8964 | 0.0511  | 27  | 240  | 256          | RVSGASWMNEGSPNDP<br>R      |      |   |    |   |                  |   |  |  | Mascot |
|    | 1971.1241                                                          | 1971.0005 | -0.1236 | -63 | 1423 | 1440         | VVLMCQVVQRNALIGALK         |      |   |    |   | Oxidation (M)[4] |   |  |  | Mascot |
|    | 1971.1241                                                          | 1971.0005 | -0.1236 | -63 | 1423 | 1440         | VVLMCQVVQRNALIGALK         |      |   |    |   | Oxidation (M)[4] |   |  |  | Mascot |
|    | 2211.0825                                                          | 2211.1106 | 0.0281  | 13  | 1907 | 1925         | VEIFFPSMQALAQMDV<br>EK     |      |   |    |   |                  |   |  |  | Mascot |
|    | 2248.1311                                                          | 2248.1423 | 0.0112  | 5   | 1795 | 1816         | MEANGAILGVSLIMDDVL<br>SSGR |      |   |    |   |                  |   |  |  | Mascot |
|    | 2264.126                                                           | 2264.1484 | 0.0224  | 10  | 1795 | 1816         | MEANGAILGVSLIMDDVL<br>SSGR |      |   |    |   | Oxidation (M)[1] |   |  |  | Mascot |
| 24 | PREDICTED: oocyte zinc finger protein XICOF6-like<br>[Danio rerio] |           |         |     |      | gi 326667152 | 41141.8                    | 8.96 | 8 | 36 | 0 | 12               | 0 |  |  |        |

#### Peptide Information

| Calc. Mass | Obsrv. Mass | ± da    | ± ppm | Start Seq. | End Seq. | Sequence               | Ion Score | C. I. | % Modification             | Rank | Result Type |
|------------|-------------|---------|-------|------------|----------|------------------------|-----------|-------|----------------------------|------|-------------|
| 893.4474   | 893.416     | -0.0314 | -35   | 74         | 82       | SFGGNGNLK              |           |       |                            |      | Mascot      |
| 907.4268   | 907.4691    | 0.0423  | 47    | 39         | 45       | EEEHVK                 |           |       |                            |      | Mascot      |
| 1001.4178  | 1001.566    | 0.1482  | 148   | 66         | 73       | FTCTQCGK               |           |       | Carbamidomethyl (C)[3,6]   |      | Mascot      |
| 1109.5269  | 1109.5858   | 0.0589  | 53    | 302        | 310      | SSHLNQHMR              |           |       |                            |      | Mascot      |
| 1556.7499  | 1556.7462   | -0.0037 | -2    | 298        | 310      | SFGRSSHLNQHMR          |           |       |                            |      | Mascot      |
| 1582.7543  | 1582.7301   | -0.0242 | -15   | 242        | 254      | SFGRSSYLNQHMR          |           |       |                            |      | Mascot      |
| 1624.8013  | 1624.8014   | 0.0001  | 0     | 270        | 282      | IFGRSSYLNQHMR          | 12        | 0     | Oxidation (M)[12]          |      | Mascot      |
| 1624.8013  | 1624.8014   | 0.0001  | 0     | 270        | 282      | IFGRSSYLNQHMR          |           |       | Oxidation (M)[12]          |      | Mascot      |
| 2211.0432  | 2211.1106   | 0.0674  | 30    | 227        | 245      | IHTGEKPFCTQCGKSFG<br>R |           |       | Carbamidomethyl (C)[10,13] |      | Mascot      |

25 LOC794225 protein [Danio rerio] gi|111306309 57174.6 7.72 12 36 0

#### Peptide Information

| Calc. Mass | Obsrv. Mass | ± da    | ± ppm | Start Seq. | End Seq. | Sequence       | Ion Score | C. I. | % Modification   | Rank | Result Type |
|------------|-------------|---------|-------|------------|----------|----------------|-----------|-------|------------------|------|-------------|
| 893.4219   | 893.416     | -0.0059 | -7    | 243        | 249      | MPEMTLR        |           |       | Oxidation (M)[1] |      | Mascot      |
| 916.4846   | 916.4868    | 0.0022  | 2     | 151        | 157      | RELQENK        |           |       |                  |      | Mascot      |
| 994.4509   | 994.5829    | 0.132   | 133   | 319        | 326      | QMQSEVEK       |           |       | Oxidation (M)[2] |      | Mascot      |
| 1053.5398  | 1053.576    | 0.0362  | 34    | 21         | 29       | VHESLMPPK      |           |       | Oxidation (M)[6] |      | Mascot      |
| 1053.5398  | 1053.576    | 0.0362  | 34    | 21         | 29       | VHESLMPPK      |           |       | Oxidation (M)[6] |      | Mascot      |
| 1419.7009  | 1419.7164   | 0.0155  | 11    | 474        | 486      | THSTSTKMGNLSR  |           |       |                  |      | Mascot      |
| 1511.7925  | 1511.7045   | -0.088  | -58   | 66         | 77       | AQIRDLEERPER   |           |       |                  |      | Mascot      |
| 1556.9006  | 1556.7462   | -0.1544 | -99   | 303        | 316      | SVANQKVVLQLTEK |           |       |                  |      | Mascot      |
| 1571.7847  | 1571.7905   | 0.0058  | 4     | 481        | 494      | MGNLSRSAYTSLQK |           |       | Oxidation (M)[1] |      | Mascot      |

|    |                                                          |           |         |     |     |              |                          |      |    |    |   |  |                  |        |
|----|----------------------------------------------------------|-----------|---------|-----|-----|--------------|--------------------------|------|----|----|---|--|------------------|--------|
|    | 1587.7948                                                | 1587.7875 | -0.0073 | -5  | 223 | 236          | EMLQHVAAVAAEFR           |      |    |    |   |  | Oxidation (M)[2] | Mascot |
|    | 1624.7887                                                | 1624.8014 | 0.0127  | 8   | 78  | 90           | YQLKCDELEVQEK            |      |    |    |   |  |                  | Mascot |
|    | 1624.7887                                                | 1624.8014 | 0.0127  | 8   | 78  | 90           | YQLKCDELEVQEK            |      |    |    |   |  |                  | Mascot |
|    | 1961.0558                                                | 1960.9794 | -0.0764 | -39 | 419 | 437          | SQMMQKLLAVLDGAAAL<br>GK  |      |    |    |   |  | Oxidation (M)[3] | Mascot |
|    | 2282.9929                                                | 2283.1802 | 0.1873  | 82  | 42  | 61           | TGNMEETEQKNAEELTE<br>SDK |      |    |    |   |  |                  | Mascot |
| 26 | PREDICTED: uncharacterized protein C3orf63 [Danio rerio] |           |         |     |     | gi 326679102 | 191042.7                 | 6.38 | 18 | 35 | 0 |  |                  |        |

#### Peptide Information

|  | Calc. Mass | Obsrv. Mass | ± da    | ± ppm | Start Seq. | End Seq. | Sequence                               | Ion Score | C. I. | % Modification                             | Rank | Result Type |
|--|------------|-------------|---------|-------|------------|----------|----------------------------------------|-----------|-------|--------------------------------------------|------|-------------|
|  | 907.5836   | 907.4691    | -0.1145 | -126  | 581        | 587      | LIQLHKR                                |           |       |                                            |      | Mascot      |
|  | 1053.6666  | 1053.576    | -0.0906 | -86   | 154        | 162      | VKIENIPK                               |           |       |                                            |      | Mascot      |
|  | 1053.6666  | 1053.576    | -0.0906 | -86   | 154        | 162      | VKIENIPK                               |           |       |                                            |      | Mascot      |
|  | 1220.5946  | 1220.5864   | -0.0082 | -7    | 1129       | 1138     | FLEEQGSPWK                             |           |       |                                            |      | Mascot      |
|  | 1363.762   | 1363.6586   | -0.1034 | -76   | 843        | 854      | YVTPLPVQGYVK                           |           |       |                                            |      | Mascot      |
|  | 1386.7263  | 1386.6051   | -0.1212 | -87   | 35         | 46       | LLSTFYLDATSR                           |           |       |                                            |      | Mascot      |
|  | 1442.6177  | 1442.6982   | 0.0805  | 56    | 1616       | 1630     | DSALASSSSCSQGSR                        |           |       |                                            |      | Mascot      |
|  | 1556.7745  | 1556.7462   | -0.0283 | -18   | 1656       | 1670     | GLLPLPGAPMGAMCR                        |           |       | Carbamidomethyl (C)[14], Oxidation (M)[10] |      | Mascot      |
|  | 1571.6473  | 1571.7905   | 0.1432  | 91    | 319        | 331      | CGMHCSLYEVMGK                          |           |       | Carbamidomethyl (C)[1,5]                   |      | Mascot      |
|  | 1587.6422  | 1587.7875   | 0.1453  | 92    | 319        | 331      | CGMHCSLYEVMGK                          |           |       | Carbamidomethyl (C)[1,5], Oxidation (M)[3] |      | Mascot      |
|  | 1624.8329  | 1624.8014   | -0.0315 | -19   | 950        | 963      | EVHLFQPEKSADPK                         |           |       |                                            |      | Mascot      |
|  | 1624.9056  | 1624.8014   | -0.1042 | -64   | 945        | 958      | LGTVKEVHLFQPEK                         |           |       |                                            |      | Mascot      |
|  | 1735.8683  | 1735.8815   | 0.0132  | 8     | 1032       | 1047     | SLGNIACNPLNYLESK                       |           |       |                                            |      | Mascot      |
|  | 1735.953   | 1735.8815   | -0.0715 | -41   | 212        | 226      | HVLPYAVVSFQYKGK                        |           |       |                                            |      | Mascot      |
|  | 2007.0481  | 2007.0828   | 0.0347  | 17    | 808        | 824      | LMEAQHIIYNSQPPLPR                      |           |       |                                            |      | Mascot      |
|  | 2119.8855  | 2120.1094   | 0.2239  | 106   | 1671       | 1689     | GGHNNSMYNPRGGPPD<br>MMR                |           |       | Oxidation (M)[7,17]                        |      | Mascot      |
|  | 2135.8804  | 2136.0969   | 0.2165  | 101   | 1671       | 1689     | GGHNNSMYNPRGGPPD<br>MMR                |           |       | Oxidation (M)[7,17,18]                     |      | Mascot      |
|  | 2233.1387  | 2233.0947   | -0.044  | -20   | 28         | 46       | EFEDVVKLLSTFYLDATS<br>R                |           |       |                                            |      | Mascot      |
|  | 2264.134   | 2264.1484   | 0.0144  | 6     | 1032       | 1051     | SLGNIACNPLNYLESKSQ<br>QK               |           |       | Carbamidomethyl (C)[7]                     |      | Mascot      |
|  | 2284.0034  | 2284.1797   | 0.1763  | 77    | 714        | 732      | VDEEQVTQDFLEEQTAC<br>SR                |           |       | Carbamidomethyl (C)[17]                    |      | Mascot      |
|  | 3337.4944  | 3337.7339   | 0.2395  | 72    | 1616       | 1649     | DSALASSSSCSQGSRTPT<br>VNSSSESQGSQAPPAR |           |       | Carbamidomethyl (C)[10]                    |      | Mascot      |

|    |                                       |  |  |  |  |              |          |      |    |    |   |  |  |  |
|----|---------------------------------------|--|--|--|--|--------------|----------|------|----|----|---|--|--|--|
| 27 | plexin B2b long isoform [Danio rerio] |  |  |  |  | gi 222354810 | 207361.6 | 6.44 | 19 | 35 | 0 |  |  |  |
|----|---------------------------------------|--|--|--|--|--------------|----------|------|----|----|---|--|--|--|

#### Peptide Information

|  | Calc. Mass | Obsrv. Mass | ± da | ± ppm | Start | End | Sequence | Ion | C. I. | % Modification | Rank | Result Type |
|--|------------|-------------|------|-------|-------|-----|----------|-----|-------|----------------|------|-------------|
|--|------------|-------------|------|-------|-------|-----|----------|-----|-------|----------------|------|-------------|

|                     |                                                                                |             |         |       |              |                   |                                  |           |       |                          |                        | Seq. | Seq.   | Score |  |        |  |  |
|---------------------|--------------------------------------------------------------------------------|-------------|---------|-------|--------------|-------------------|----------------------------------|-----------|-------|--------------------------|------------------------|------|--------|-------|--|--------|--|--|
|                     | 870.4791                                                                       | 870.542     | 0.0629  | 72    | 1735         | 1741              | TEHKLSR                          |           |       |                          |                        |      |        |       |  | Mascot |  |  |
|                     | 907.4995                                                                       | 907.4691    | -0.0304 | -33   | 372          | 378               | DIVNRYK                          |           |       |                          |                        |      |        |       |  | Mascot |  |  |
|                     | 914.473                                                                        | 914.5472    | 0.0742  | 81    | 908          | 914               | TVQFTYR                          |           |       |                          |                        |      |        |       |  | Mascot |  |  |
|                     | 994.5502                                                                       | 994.5829    | 0.0327  | 33    | 479          | 487               | VPVQACHLK                        |           |       |                          |                        |      |        |       |  | Mascot |  |  |
|                     | 1109.4714                                                                      | 1109.5858   | 0.1144  | 103   | 488          | 497               | QDCQSCVAQK                       |           |       |                          |                        |      |        |       |  | Mascot |  |  |
|                     | 1442.7849                                                                      | 1442.6982   | -0.0867 | -60   | 1175         | 1187              | RDTGSDPLDLLIK                    |           |       |                          |                        |      |        |       |  | Mascot |  |  |
|                     | 1511.6406                                                                      | 1511.7045   | 0.0639  | 42    | 498          | 509               | DPYCGWCVLEGR                     |           |       | Carbamidomethyl (C)[4,7] |                        |      |        |       |  | Mascot |  |  |
|                     | 1519.8148                                                                      | 1519.7588   | -0.056  | -37   | 1114         | 1127              | SVITENSMIIVTGR                   |           |       |                          |                        |      |        |       |  | Mascot |  |  |
|                     | 1542.8196                                                                      | 1542.7043   | -0.1153 | -75   | 1621         | 1633              | SMTKAITEIYLTR                    |           |       | Oxidation (M)[2]         |                        |      |        |       |  | Mascot |  |  |
|                     | 1582.7583                                                                      | 1582.7301   | -0.0282 | -18   | 523          | 535               | HGWLWSPNQQCVK                    |           |       |                          |                        |      |        |       |  | Mascot |  |  |
|                     | 1587.8417                                                                      | 1587.7875   | -0.0542 | -34   | 685          | 698               | FENPDPVLIPVGYK                   |           |       |                          |                        |      |        |       |  | Mascot |  |  |
|                     | 1618.851                                                                       | 1618.717    | -0.134  | -83   | 1381         | 1394              | TLLGLMEDYVHSK                    |           |       |                          |                        |      |        |       |  | Mascot |  |  |
|                     | 1624.8037                                                                      | 1624.8014   | -0.0023 | -1    | 1246         | 1258              | HQLENLEESVRDR                    |           |       |                          |                        |      |        |       |  | Mascot |  |  |
|                     | 1624.8152                                                                      | 1624.8014   | -0.0138 | -8    | 377          | 391               | YKCGADFLPSPLASR                  |           |       |                          |                        |      |        |       |  | Mascot |  |  |
|                     | 1719.8041                                                                      | 1719.884    | 0.0799  | 46    | 72           | 87                | DAKGCTPPVSTCQDLK                 |           |       | Carbamidomethyl (C)[5]   |                        |      |        |       |  | Mascot |  |  |
|                     | 1781.9102                                                                      | 1781.9781   | 0.0679  | 38    | 872          | 888               | YSVSTSVICEIGPASLR                |           |       |                          |                        |      |        |       |  | Mascot |  |  |
|                     | 1781.9102                                                                      | 1781.9781   | 0.0679  | 38    | 872          | 888               | YSVSTSVICEIGPASLR                |           |       |                          |                        |      |        |       |  | Mascot |  |  |
|                     | 1838.9316                                                                      | 1838.8909   | -0.0407 | -22   | 872          | 888               | YSVSTSVICEIGPASLR                |           |       | Carbamidomethyl (C)[9]   |                        |      |        |       |  | Mascot |  |  |
|                     | 2066.0779                                                                      | 2066.0371   | -0.0408 | -20   | 1789         | 1805              | EHTDKLNTQVALHQLYR                |           |       |                          |                        |      |        |       |  | Mascot |  |  |
|                     | 2136.1118                                                                      | 2136.0969   | -0.0149 | -7    | 329          | 347               | NINQKLLAIVTACYTDNG<br>K          |           |       | Carbamidomethyl (C)[13]  |                        |      |        |       |  | Mascot |  |  |
|                     | 3337.5974                                                                      | 3337.7339   | 0.1365  | 41    | 1086         | 1113              | TFVQLDNLQMELTPFAYY<br>PNPTFDELSK |           |       | Oxidation (M)[10]        |                        |      |        |       |  | Mascot |  |  |
| 28                  | PREDICTED: protein-glutamine<br>gamma-glutamyltransferase 2-like [Danio rerio] |             |         |       | gi 326668941 |                   | 74951.8                          | 5.69      | 11    | 35                       | 0                      |      |        |       |  |        |  |  |
| Peptide Information |                                                                                |             |         |       |              |                   |                                  |           |       |                          |                        |      |        |       |  |        |  |  |
|                     | Calc. Mass                                                                     | Obsrv. Mass | ± da    | ± ppm | Start Seq.   | End Sequence Seq. |                                  | Ion Score | C. I. | %                        | Modification           | Rank | Result | Type  |  |        |  |  |
|                     | 862.4338                                                                       | 862.4818    | 0.048   | 56    | 16           | 22                | VDLECVK                          |           |       |                          | Carbamidomethyl (C)[5] |      | Mascot |       |  |        |  |  |
|                     | 994.4774                                                                       | 994.5829    | 0.1055  | 106   | 196          | 203               | CNPVYVSR                         |           |       |                          | Carbamidomethyl (C)[1] |      | Mascot |       |  |        |  |  |
|                     | 1045.5425                                                                      | 1045.5667   | 0.0242  | 23    | 437          | 445               | AVYTEAVHR                        |           |       |                          |                        |      | Mascot |       |  |        |  |  |
|                     | 1571.6425                                                                      | 1571.7905   | 0.148   | 94    | 1            | 15                | MCSSSSSNTPDQGVR                  |           |       |                          | Oxidation (M)[1]       |      | Mascot |       |  |        |  |  |
|                     | 1582.8013                                                                      | 1582.7301   | -0.0712 | -45   | 524          | 537               | ALSFTLPYSAYGHR                   |           |       |                          |                        |      | Mascot |       |  |        |  |  |
|                     | 1587.7723                                                                      | 1587.7875   | 0.0152  | 10    | 138          | 150               | QEYIMSEQGVLYK                    |           |       |                          |                        |      | Mascot |       |  |        |  |  |
|                     | 1618.8403                                                                      | 1618.717    | -0.1233 | -76   | 538          | 551               | MLENNCIKVSIAIR                   |           |       |                          | Carbamidomethyl (C)[6] |      | Mascot |       |  |        |  |  |
|                     | 1624.8541                                                                      | 1624.8014   | -0.0527 | -32   | 413          | 427               | AVGSSSRDLITDLYK                  |           |       |                          |                        |      | Mascot |       |  |        |  |  |

|    |                                                                                    |           |         |     |              |     |                          |      |    |    |   |   |   |  |  |  |                           |        |
|----|------------------------------------------------------------------------------------|-----------|---------|-----|--------------|-----|--------------------------|------|----|----|---|---|---|--|--|--|---------------------------|--------|
|    | 1624.8541                                                                          | 1624.8014 | -0.0527 | -32 | 413          | 427 | AVGSSSRDITDLYK           |      |    |    |   |   |   |  |  |  |                           | Mascot |
|    | 1960.923                                                                           | 1960.9794 | 0.0564  | 29  | 255          | 270 | YGQCWVFAAVMCTVLR         |      |    |    |   |   |   |  |  |  | Carbamidomethyl (C)[4,12] | Mascot |
|    | 2211.0017                                                                          | 2211.1106 | 0.1089  | 49  | 2            | 22  | CSSSSSNTPDQGVVDL<br>ECVK |      |    |    |   |   |   |  |  |  |                           | Mascot |
|    | 2248.0598                                                                          | 2248.1423 | 0.0825  | 37  | 271          | 290 | CLGIPCRVVTNYQSAHDT<br>DR |      |    |    |   |   |   |  |  |  |                           | Mascot |
| 29 | novel protein similar to vertebrate kinesin family member 5A (KIF5A) [Danio rerio] |           |         |     | gi 169158591 |     | 96952.9                  | 5.41 | 13 | 35 | 0 | 5 | 0 |  |  |  |                           |        |

#### Peptide Information

| Calc. Mass | Obsrv. Mass | ± da    | ± ppm | Start Seq. | End Seq. | Sequence                   | Ion Score | C. I. | % Modification          | Rank | Result Type |
|------------|-------------|---------|-------|------------|----------|----------------------------|-----------|-------|-------------------------|------|-------------|
| 882.5117   | 882.5694    | 0.0577  | 65    | 596        | 602      | LYISKMK                    |           |       |                         |      | Mascot      |
| 907.4917   | 907.4691    | -0.0226 | -25   | 603        | 610      | SEVKSMVK                   |           |       |                         |      | Mascot      |
| 1001.4832  | 1001.566    | 0.0828  | 83    | 547        | 554      | EMANHQKK                   |           |       | Oxidation (M)[2]        |      | Mascot      |
| 1053.6051  | 1053.576    | -0.0291 | -28   | 640        | 648      | ISQHEAKIK                  |           |       |                         |      | Mascot      |
| 1053.6051  | 1053.576    | -0.0291 | -28   | 640        | 648      | ISQHEAKIK                  |           |       |                         |      | Mascot      |
| 1386.7046  | 1386.6051   | -0.0995 | -72   | 678        | 689      | ISAEKVVHAMEK               |           |       | Oxidation (M)[10]       |      | Mascot      |
| 1571.8275  | 1571.7905   | -0.037  | -24   | 566        | 580      | DLTEIGIAVGNNDIK            |           |       |                         |      | Mascot      |
| 1624.7314  | 1624.8014   | 0.07    | 43    | 1          | 14       | MADPAECTIKVMCR             | 7         | 0     | Carbamidomethyl (C)[13] |      | Mascot      |
| 1624.7314  | 1624.8014   | 0.07    | 43    | 1          | 14       | MADPAECTIKVMCR             |           |       | Carbamidomethyl (C)[7]  |      | Mascot      |
| 1790.8741  | 1790.9106   | 0.0365  | 20    | 327        | 341      | NTVCVNVELTAEQWK            |           |       | Carbamidomethyl (C)[4]  |      | Mascot      |
| 1838.8674  | 1838.8909   | 0.0235  | 13    | 188        | 203      | SNRHVAVTNMNEHSSR           |           |       |                         |      | Mascot      |
| 1861.9476  | 1861.932    | -0.0156 | -8    | 327        | 342      | NTVCVNVELTAEQWKK           |           |       |                         |      | Mascot      |
| 1970.9198  | 1971.0005   | 0.0807  | 41    | 296        | 313      | TTIVICCSPSAFNEAETK         |           |       | Carbamidomethyl (C)[6]  |      | Mascot      |
| 1970.9198  | 1971.0005   | 0.0807  | 41    | 296        | 313      | TTIVICCSPSAFNEAETK         |           |       | Carbamidomethyl (C)[6]  |      | Mascot      |
| 2264.1558  | 2264.1484   | -0.0074 | -3    | 581        | 600      | HEGSGLIDEEFTVARLYIS<br>K   |           |       |                         |      | Mascot      |
| 2284.1819  | 2284.1797   | -0.0022 | -1    | 257        | 278      | SLSSLGNVISALAEGSTY<br>VPYR |           |       |                         |      | Mascot      |

30 novel protein [Danio rerio] gi|148726576 48128.2 9.12 9 35 0

#### Peptide Information

| Calc. Mass | Obsrv. Mass | ± da    | ± ppm | Start Seq. | End Seq. | Sequence  | Ion Score | C. I. | % Modification | Rank | Result Type |
|------------|-------------|---------|-------|------------|----------|-----------|-----------|-------|----------------|------|-------------|
| 893.509    | 893.416     | -0.093  | -104  | 154        | 161      | KLGSDFVK  |           |       |                |      | Mascot      |
| 914.5781   | 914.5472    | -0.0309 | -34   | 13         | 20       | ALVKSLQR  |           |       |                |      | Mascot      |
| 946.5064   | 946.4759    | -0.0305 | -32   | 5          | 12       | VSVDNRTR  |           |       |                |      | Mascot      |
| 946.5064   | 946.4759    | -0.0305 | -32   | 5          | 12       | VSVDNRTR  |           |       |                |      | Mascot      |
| 1045.6     | 1045.5667   | -0.0333 | -32   | 17         | 25       | SLQRVTDVK |           |       |                |      | Mascot      |
| 1220.6382  | 1220.5864   | -0.0518 | -42   | 374        | 383      | LDYLQAEGR |           |       |                |      | Mascot      |

|    |                                                       |             |         |      |     |     |                        |                   |   |  |        |
|----|-------------------------------------------------------|-------------|---------|------|-----|-----|------------------------|-------------------|---|--|--------|
|    | 1511.8944                                             | 1511.7045   | -0.1899 | -126 | 404 | 416 | GIVQKLAEWVQLK          |                   |   |  | Mascot |
|    | 1751.8698                                             | 1751.9026   | 0.0328  | 19   | 309 | 324 | YETATKTSASTYTSLK       |                   |   |  | Mascot |
|    | 1960.9269                                             | 1960.9794   | 0.0525  | 27   | 237 | 252 | SHYLGSCQHMKMWQAIR      | Oxidation (M)[11] |   |  | Mascot |
|    | 2152.0896                                             | 2152.093    | 0.0034  | 2    | 409 | 426 | LAEWVQLKADMYDGLPF<br>R |                   |   |  | Mascot |
| 31 | PREDICTED: zinc finger protein 180-like [Danio rerio] | q 292613218 | 41233.8 | 9.06 | 8   | 35  | 0                      | 12                | 0 |  |        |

### Peptide Information

| Calc. Mass | Obsrv. Mass | ± da    | ± ppm | Start Seq. | End Seq. | Sequence               | Ion Score | C. I. % | Modification               | Rank | Result Type |
|------------|-------------|---------|-------|------------|----------|------------------------|-----------|---------|----------------------------|------|-------------|
| 893.4474   | 893.416     | -0.0314 | -35   | 74         | 82       | SFGGNGNLK              |           |         |                            |      | Mascot      |
| 907.4268   | 907.4691    | 0.0423  | 47    | 39         | 45       | EEEHVK                 |           |         |                            |      | Mascot      |
| 1001.4178  | 1001.566    | 0.1482  | 148   | 66         | 73       | FTCTQCGK               |           |         | Carbamidomethyl (C)[3,6]   |      | Mascot      |
| 1109.5269  | 1109.5858   | 0.0589  | 53    | 302        | 310      | SSHLNQHMR              |           |         |                            |      | Mascot      |
| 1556.7499  | 1556.7462   | -0.0037 | -2    | 298        | 310      | SFGRSSHLNQHMR          |           |         |                            |      | Mascot      |
| 1582.7543  | 1582.7301   | -0.0242 | -15   | 242        | 254      | SFGRSSYLNQHMR          |           |         |                            |      | Mascot      |
| 1624.8013  | 1624.8014   | 0.0001  | 0     | 270        | 282      | IFGRSSYLNQHMR          | 12        | 0       | Oxidation (M)[12]          |      | Mascot      |
| 1624.8013  | 1624.8014   | 0.0001  | 0     | 270        | 282      | IFGRSSYLNQHMR          |           |         | Oxidation (M)[12]          |      | Mascot      |
| 2211.0432  | 2211.1106   | 0.0674  | 30    | 227        | 245      | IHTGEKPFCTQCGKSFG<br>R |           |         | Carbamidomethyl (C)[10,13] |      | Mascot      |

|    |                                                  |              |        |      |    |    |   |
|----|--------------------------------------------------|--------------|--------|------|----|----|---|
| 32 | RecName: Full=Tudor domain-containing protein 7B | gi 334351210 | 121757 | 8.62 | 14 | 35 | 0 |
|----|--------------------------------------------------|--------------|--------|------|----|----|---|

### Peptide Information

| Calc. Mass | Obsrv. Mass | ± da    | ± ppm | Start Seq. | End Seq. | Sequence             | Ion Score | C. I. % | Modification           | Rank | Result Type |
|------------|-------------|---------|-------|------------|----------|----------------------|-----------|---------|------------------------|------|-------------|
| 864.4495   | 864.4891    | 0.0396  | 46    | 939        | 945      | MEEKALK              |           |         | Oxidation (M)[1]       |      | Mascot      |
| 870.4679   | 870.542     | 0.0741  | 85    | 984        | 991      | HELVSGTK             |           |         |                        |      | Mascot      |
| 914.5305   | 914.5472    | 0.0167  | 18    | 867        | 875      | KTSPPLGSK            |           |         |                        |      | Mascot      |
| 916.441    | 916.4868    | 0.0458  | 50    | 465        | 472      | YIGEGYSK             |           |         |                        |      | Mascot      |
| 946.5567   | 946.4759    | -0.0808 | -85   | 578        | 586      | KLESIATGK            |           |         |                        |      | Mascot      |
| 946.5567   | 946.4759    | -0.0808 | -85   | 578        | 586      | KLESIATGK            |           |         |                        |      | Mascot      |
| 1109.5811  | 1109.5858   | 0.0047  | 4     | 122        | 130      | TSLRQPDHR            |           |         |                        |      | Mascot      |
| 1161.5609  | 1161.5631   | 0.0022  | 2     | 367        | 375      | LYQDTYKCK            |           |         |                        |      | Mascot      |
| 1419.7743  | 1419.7164   | -0.0579 | -41   | 956        | 966      | VENNWYRVLVK          |           |         |                        |      | Mascot      |
| 1519.8114  | 1519.7588   | -0.0526 | -35   | 404        | 416      | AILYAKVVEDENR        |           |         |                        |      | Mascot      |
| 1582.7782  | 1582.7301   | -0.0481 | -30   | 1054       | 1066     | VMIYLVDTSQEER        |           |         |                        |      | Mascot      |
| 1751.8281  | 1751.9026   | 0.0745  | 43    | 949        | 962      | NQVCAAKVENNWYR       |           |         | Carbamidomethyl (C)[4] |      | Mascot      |
| 2152.1497  | 2152.093    | -0.0567 | -26   | 13         | 32       | AVLQSSKSGLSLSDLQVEYK |           |         |                        |      | Mascot      |

|                     |                                                                              |             |         |       |            |                   |                           |           |       |    |                        |                  |
|---------------------|------------------------------------------------------------------------------|-------------|---------|-------|------------|-------------------|---------------------------|-----------|-------|----|------------------------|------------------|
|                     | 2225.1013                                                                    | 2225.1245   | 0.0232  | 10    | 925        | 942               | LVVLMGEMILHYNKMEEK        |           |       |    | Oxidation (M)[5,8,15]  | Mascot           |
|                     | 2283.0308                                                                    | 2283.1802   | 0.1494  | 65    | 1067       | 1085              | DIWLHDIMAEFTDEMTKT<br>A   |           |       |    | Oxidation (M)[8]       | Mascot           |
| 33                  | PREDICTED: neuroblast differentiation-associated protein AHNAK [Danio rerio] |             |         |       |            | gi 292618776      | 360101                    | 9.01      | 26    | 34 | 0                      |                  |
| Peptide Information |                                                                              |             |         |       |            |                   |                           |           |       |    |                        |                  |
|                     | Calc. Mass                                                                   | Obsrv. Mass | ± da    | ± ppm | Start Seq. | End Sequence Seq. |                           | Ion Score | C. I. | %  | Modification           | Rank Result Type |
|                     | 845.4727                                                                     | 845.4667    | -0.006  | -7    | 584        | 591               | SPDASKLK                  |           |       |    |                        | Mascot           |
|                     | 864.4681                                                                     | 864.4891    | 0.021   | 24    | 3301       | 3307              | MNVLKLM                   |           |       |    | Oxidation (M)[1]       | Mascot           |
|                     | 914.5822                                                                     | 914.5472    | -0.035  | -38   | 2414       | 2421              | LPKFGKPK                  |           |       |    |                        | Mascot           |
|                     | 946.572                                                                      | 946.4759    | -0.0961 | -102  | 2520       | 2528              | FGLSGPKLK                 |           |       |    |                        | Mascot           |
|                     | 946.572                                                                      | 946.4759    | -0.0961 | -102  | 1135       | 1143              | FGLSGPKLK                 |           |       |    |                        | Mascot           |
|                     | 1109.533                                                                     | 1109.5858   | 0.0528  | 48    | 2227       | 2236              | MPSLNMSGLK                |           |       |    | Oxidation (M)[1,6]     | Mascot           |
|                     | 1176.6107                                                                    | 1176.6029   | -0.0078 | -7    | 472        | 482               | TGLDSTDINIK               |           |       |    |                        | Mascot           |
|                     | 1363.6926                                                                    | 1363.6586   | -0.034  | -25   | 2319       | 2330              | TPEMDLSAPKFK              |           |       |    |                        | Mascot           |
|                     | 1419.6937                                                                    | 1419.7164   | 0.0227  | 16    | 2084       | 2095              | TPDMDLSPPRFK              |           |       |    | Oxidation (M)[4]       | Mascot           |
|                     | 1542.8599                                                                    | 1542.7043   | -0.1556 | -101  | 132        | 145               | SKVNIATLLQNADR            |           |       |    |                        | Mascot           |
|                     | 1556.6608                                                                    | 1556.7462   | 0.0854  | 55    | 146        | 158               | MCLAPSETEFDEK             |           |       |    | Carbamidomethyl (C)[2] | Mascot           |
|                     | 1582.827                                                                     | 1582.7301   | -0.0969 | -61   | 3073       | 3086              | MHANNFAIPRGNIK            |           |       |    |                        | Mascot           |
|                     | 1735.7744                                                                    | 1735.8815   | 0.1071  | 62    | 3246       | 3258              | RHYTTDDICYTYK             |           |       |    | Carbamidomethyl (C)[9] | Mascot           |
|                     | 1735.7744                                                                    | 1735.8815   | 0.1071  | 62    | 3246       | 3258              | RHYTTDDICYTYK             |           |       |    | Carbamidomethyl (C)[9] | Mascot           |
|                     | 1781.8119                                                                    | 1781.9781   | 0.1662  | 93    | 1581       | 1596              | TDLTVPDMDMPSGKMK          |           |       |    | Oxidation (M)[8]       | Mascot           |
|                     | 1781.8119                                                                    | 1781.9781   | 0.1662  | 93    | 2279       | 2294              | TDLTVPDMDMPSGKMK          |           |       |    | Oxidation (M)[8]       | Mascot           |
|                     | 1790.8524                                                                    | 1790.9106   | 0.0582  | 32    | 3209       | 3224              | TENLPVRNSNMGMSPK          |           |       |    | Oxidation (M)[11]      | Mascot           |
|                     | 1832.9324                                                                    | 1832.9417   | 0.0093  | 5     | 2794       | 2810              | GHKPDITAPDMNVNVPK         |           |       |    |                        | Mascot           |
|                     | 1859.8844                                                                    | 1859.8964   | 0.012   | 6     | 2393       | 2409              | GNKPDITGPDMDFDIPK         |           |       |    |                        | Mascot           |
|                     | 1859.9904                                                                    | 1859.8964   | -0.094  | -51   | 1287       | 1303              | LNMAKPKMPSLNMSGLK         |           |       |    |                        | Mascot           |
|                     | 1960.9321                                                                    | 1960.9794   | 0.0473  | 24    | 2077       | 2093              | TPDYDLKTPDMDLSPPR         |           |       |    |                        | Mascot           |
|                     | 1970.9232                                                                    | 1971.0005   | 0.0773  | 39    | 333        | 351               | AALSGPKMMTSEMDVST<br>SK   |           |       |    |                        | Mascot           |
|                     | 1970.9232                                                                    | 1971.0005   | 0.0773  | 39    | 333        | 351               | AALSGPKMMTSEMDVST<br>SK   |           |       |    |                        | Mascot           |
|                     | 1992.9695                                                                    | 1993.1134   | 0.1439  | 72    | 1948       | 1965              | GGIDTPDMDLTLRQADFK        |           |       |    |                        | Mascot           |
|                     | 1992.9695                                                                    | 1993.1134   | 0.1439  | 72    | 1948       | 1965              | GGIDTPDMDLTLRQADFK        |           |       |    |                        | Mascot           |
|                     | 2065.9602                                                                    | 2066.0371   | 0.0769  | 37    | 2493       | 2511              | GMTTDLTPPDINMPSGK<br>MK   |           |       |    | Oxidation (M)[2,13]    | Mascot           |
|                     | 2120.0803                                                                    | 2120.1094   | 0.0291  | 14    | 2258       | 2278              | LNAGMSSPDIDIHGPKLK<br>GPK |           |       |    | Oxidation (M)[5]       | Mascot           |
|                     | 2135.9663                                                                    | 2136.0969   | 0.1306  | 61    | 2689       | 2708              | GPHMDADIDHPDLNLSA<br>SSK  |           |       |    | Oxidation (M)[4]       | Mascot           |



|    |                                                                                         |           |         |    |      |      |                           |  |  |  |  |                      |        |
|----|-----------------------------------------------------------------------------------------|-----------|---------|----|------|------|---------------------------|--|--|--|--|----------------------|--------|
|    | 2225.0464                                                                               | 2225.1245 | 0.0781  | 35 | 1248 | 1267 | IKGGIDTPDMDMTLPQAD<br>FK  |  |  |  |  | Oxidation (M)[10,12] | Mascot |
|    | 2283.1648                                                                               | 2283.1802 | 0.0154  | 7  | 2583 | 2603 | KPNIDMNAPDLDINSPSG<br>KLK |  |  |  |  | Oxidation (M)[6]     | Mascot |
|    | 2284.1853                                                                               | 2284.1797 | -0.0056 | -2 | 2630 | 2650 | TPQIKGGIDTPDMDLNL<br>QAK  |  |  |  |  | Oxidation (M)[13]    | Mascot |
| 34 | PREDICTED: zinc finger protein 502-like [Danio rerio] gi 326667257 34114.4 9.49 11 34 0 |           |         |    |      |      |                           |  |  |  |  |                      |        |

#### Peptide Information

| Calc. Mass | Obsrv. Mass | ± da    | ± ppm | Start Seq. | End Seq. | Sequence           | Ion Score | C. I. % | Modification               | Rank | Result Type |
|------------|-------------|---------|-------|------------|----------|--------------------|-----------|---------|----------------------------|------|-------------|
| 842.4553   | 842.5123    | 0.057   | 68    | 285        | 291      | SLINHMK            |           |         |                            |      | Mascot      |
| 862.4702   | 862.4818    | 0.0116  | 13    | 2          | 8        | ENLMVLK            |           |         | Oxidation (M)[4]           |      | Mascot      |
| 916.5071   | 916.4868    | -0.0203 | -22   | 36         | 43       | TSSRGRPR           |           |         |                            |      | Mascot      |
| 994.5237   | 994.5829    | 0.0592  | 60    | 252        | 260      | SLTCKDSIK          |           |         |                            |      | Mascot      |
| 1001.5275  | 1001.566    | 0.0385  | 38    | 265        | 272      | IHSGERFR           |           |         |                            |      | Mascot      |
| 1197.5793  | 1197.5883   | 0.009   | 8     | 146        | 155      | QNGNLEVHMR         |           |         |                            |      | Mascot      |
| 1735.8254  | 1735.8815   | 0.0561  | 32    | 72         | 86       | VHTGEKPYTCKQCGK    |           |         | Carbamidomethyl (C)[10]    |      | Mascot      |
| 1735.8254  | 1735.8815   | 0.0561  | 32    | 72         | 86       | VHTGEKPYTCKQCGK    |           |         | Carbamidomethyl (C)[10]    |      | Mascot      |
| 1781.8058  | 1781.9781   | 0.1723  | 97    | 156        | 170      | THTGERSFICTQCGK    |           |         | Carbamidomethyl (C)[10,13] |      | Mascot      |
| 1781.8058  | 1781.9781   | 0.1723  | 97    | 156        | 170      | THTGERSFICTQCGK    |           |         | Carbamidomethyl (C)[10,13] |      | Mascot      |
| 1832.8748  | 1832.9417   | 0.0669  | 37    | 112        | 127      | YGKSFYTTGNLAAHMR   |           |         | Oxidation (M)[15]          |      | Mascot      |
| 1970.9575  | 1971.0005   | 0.043   | 22    | 83         | 99       | QCGKSFYTIGNLTVHMR  |           |         | Oxidation (M)[16]          |      | Mascot      |
| 1970.9575  | 1971.0005   | 0.043   | 22    | 83         | 99       | QCGKSFYTIGNLTVHMR  |           |         | Oxidation (M)[16]          |      | Mascot      |
| 2099.9524  | 2100.0022   | 0.0498  | 24    | 128        | 145      | IHTGEEPYSCLQCGKSYK |           |         | Carbamidomethyl (C)[10]    |      | Mascot      |

35 PREDICTED: e3 ubiquitin-protein ligase HERC2, partial [Danio rerio] gi|326668760 399265.3 6.21 26 34 0

#### Peptide Information

| Calc. Mass | Obsrv. Mass | ± da    | ± ppm | Start Seq. | End Seq. | Sequence   | Ion Score | C. I. % | Modification     | Rank | Result Type |
|------------|-------------|---------|-------|------------|----------|------------|-----------|---------|------------------|------|-------------|
| 842.4267   | 842.5123    | 0.0856  | 102   | 1467       | 1473     | WGSVTHR    |           |         |                  |      | Mascot      |
| 855.4067   | 855.4388    | 0.0321  | 38    | 301        | 307      | THQEQR     |           |         |                  |      | Mascot      |
| 862.4927   | 862.4818    | -0.0109 | -13   | 676        | 682      | ISTRVMR    |           |         |                  |      | Mascot      |
| 907.4605   | 907.4691    | 0.0086  | 9     | 1578       | 1584     | RHHSSQR    |           |         |                  |      | Mascot      |
| 994.4622   | 994.5829    | 0.1207  | 121   | 895        | 902      | TERSQDMK   |           |         |                  |      | Mascot      |
| 1045.5524  | 1045.5667   | 0.0143  | 14    | 806        | 815      | ILVESGANDK |           |         |                  |      | Mascot      |
| 1053.5648  | 1053.576    | 0.0112  | 11    | 533        | 541      | MLLEVTFGK  |           |         | Oxidation (M)[1] |      | Mascot      |
| 1053.5648  | 1053.576    | 0.0112  | 11    | 533        | 541      | MLLEVTFGK  | 4         | 0       | Oxidation (M)[1] |      | Mascot      |
| 1176.5864  | 1176.6029   | 0.0165  | 14    | 1378       | 1387     | ENIQVGMMVR |           |         |                  |      | Mascot      |

|           |           |         |      |      |      |                          |                                           |        |
|-----------|-----------|---------|------|------|------|--------------------------|-------------------------------------------|--------|
| 1179.6343 | 1179.666  | 0.0317  | 27   | 3592 | 3600 | LKYAIHFCK                | Carbamidomethyl (C)[8]                    | Mascot |
| 1179.6343 | 1179.666  | 0.0317  | 27   | 3592 | 3600 | LKYAIHFCK                | Carbamidomethyl (C)[8]                    | Mascot |
| 1197.5316 | 1197.5883 | 0.0567  | 47   | 1822 | 1832 | VYACGEATNGR              | Carbamidomethyl (C)[4]                    | Mascot |
| 1355.6525 | 1355.6809 | 0.0284  | 21   | 2269 | 2279 | VSPHPWMDSKR              | Oxidation (M)[7]                          | Mascot |
| 1355.6525 | 1355.7896 | 0.1371  | 101  | 2269 | 2279 | VSPHPWMDSKR              | Oxidation (M)[7]                          | Mascot |
| 1419.7451 | 1419.7164 | -0.0287 | -20  | 3222 | 3233 | DRQHGPVVELNR             |                                           | Mascot |
| 1511.7383 | 1511.7045 | -0.0338 | -22  | 2462 | 2474 | RHDPLTIMDGANR            | Oxidation (M)[8]                          | Mascot |
| 1542.641  | 1542.7043 | 0.0633  | 41   | 370  | 382  | SESADLEECKMER            | Oxidation (M)[11]                         | Mascot |
| 1556.908  | 1556.7462 | -0.1618 | -104 | 2998 | 3012 | VPMKIDSLTGLGVVK          |                                           | Mascot |
| 1582.9026 | 1582.7301 | -0.1725 | -109 | 1631 | 1643 | LELFPDMLVHKLK            |                                           | Mascot |
| 1587.8345 | 1587.7875 | -0.047  | -30  | 1894 | 1906 | MNCDKPRLIEALK            | Carbamidomethyl (C)[3]                    | Mascot |
| 1624.917  | 1624.8014 | -0.1156 | -71  | 2701 | 2714 | RSPLPRPFLDEVAK           |                                           | Mascot |
| 1624.917  | 1624.8014 | -0.1156 | -71  | 2701 | 2714 | RSPLPRPFLDEVAK           |                                           | Mascot |
| 1838.8715 | 1838.8909 | 0.0194  | 11   | 1579 | 1593 | HHSSQRGMLIDEWSR          |                                           | Mascot |
| 1859.7034 | 1859.8964 | 0.193   | 104  | 1534 | 1548 | SCDDDFDFCESCFKTR         | Carbamidomethyl (C)[2]                    | Mascot |
| 1859.7034 | 1859.8964 | 0.193   | 104  | 1534 | 1548 | SCDDDFDFCESCFKTR         | Carbamidomethyl (C)[2]                    | Mascot |
| 1861.6648 | 1861.932  | 0.2672  | 144  | 1532 | 1546 | CRSCDDDFDFCESCFK         | Carbamidomethyl (C)[1]                    | Mascot |
| 1961.0273 | 1960.9794 | -0.0479 | -24  | 2203 | 2219 | QQALSHVLSSLQIMYAR        | Oxidation (M)[14]                         | Mascot |
| 2211.1665 | 2211.1106 | -0.0559 | -25  | 1261 | 1280 | TSPVPPAPIVLQLMEMGF<br>QR |                                           | Mascot |
| 2233.1255 | 2233.0947 | -0.0308 | -14  | 3327 | 3345 | DCFLLNPAAKSPLHISMF<br>R  | Carbamidomethyl (C)[2], Oxidation (M)[17] | Mascot |
| 2264.0864 | 2264.1484 | 0.062   | 27   | 380  | 400  | MEREGTNEEPAPLSPA<br>PVDK |                                           | Mascot |
| 2284.2158 | 2284.1797 | -0.0361 | -16  | 533  | 551  | MLLEVTFGKLYAWSIQNV<br>R  | Oxidation (M)[1]                          | Mascot |

36

PREDICTED: inactive ubiquitin carboxyl-terminal hydrolase 53-like [Danio rerio]

gi|326663976

107397.4

8.94

14

34

0

| Peptide Information |             |         |       |            |          |             |           |       |                  |      |             |
|---------------------|-------------|---------|-------|------------|----------|-------------|-----------|-------|------------------|------|-------------|
| Calc. Mass          | Obsrv. Mass | ± da    | ± ppm | Start Seq. | End Seq. | Sequence    | Ion Score | C. I. | % Modification   | Rank | Result Type |
| 870.4944            | 870.542     | 0.0476  | 55    | 816        | 822      | TPPFRPR     |           |       |                  |      | Mascot      |
| 893.3781            | 893.416     | 0.0379  | 42    | 947        | 953      | MENQSER     |           |       |                  |      | Mascot      |
| 916.4886            | 916.4868    | -0.0018 | -2    | 67         | 74       | HALAETFK    |           |       |                  |      | Mascot      |
| 994.4622            | 994.5829    | 0.1207  | 121   | 377        | 385      | TPMQSSTSR   |           |       |                  |      | Mascot      |
| 1053.5323           | 1053.576    | 0.0437  | 41    | 435        | 444      | LSSPPENGPR  |           |       |                  |      | Mascot      |
| 1053.5323           | 1053.576    | 0.0437  | 41    | 435        | 444      | LSSPPENGPR  |           |       |                  |      | Mascot      |
| 1109.5004           | 1109.5858   | 0.0854  | 77    | 477        | 487      | SNQGMASGVSR |           |       | Oxidation (M)[5] |      | Mascot      |
| 1220.6211           | 1220.5864   | -0.0347 | -28   | 268        | 277      | HYLAFAFHSK  |           |       |                  |      | Mascot      |

|           |           |         |     |     |     |                           |  |  |  |  |                  |  |        |
|-----------|-----------|---------|-----|-----|-----|---------------------------|--|--|--|--|------------------|--|--------|
| 1355.6887 | 1355.6809 | -0.0078 | -6  | 531 | 540 | RQQQQQQQQR                |  |  |  |  |                  |  | Mascot |
| 1355.6887 | 1355.7896 | 0.1009  | 74  | 531 | 540 | RQQQQQQQQR                |  |  |  |  |                  |  | Mascot |
| 1419.6831 | 1419.7164 | 0.0333  | 23  | 190 | 202 | NCPSNCGQSIKIR             |  |  |  |  |                  |  | Mascot |
| 1511.7775 | 1511.7045 | -0.073  | -48 | 15  | 28  | SYQPGSMISLALTK            |  |  |  |  | Oxidation (M)[7] |  | Mascot |
| 1571.7369 | 1571.7905 | 0.0536  | 34  | 560 | 572 | QKGLMTIYEDDSR             |  |  |  |  | Oxidation (M)[5] |  | Mascot |
| 1832.8998 | 1832.9417 | 0.0419  | 23  | 461 | 476 | TEHSSVHPRVSPQESR          |  |  |  |  |                  |  | Mascot |
| 1859.9697 | 1859.8964 | -0.0733 | -39 | 918 | 932 | YHHQRPLVLSMPEPR           |  |  |  |  |                  |  | Mascot |
| 1859.9697 | 1859.8964 | -0.0733 | -39 | 918 | 932 | YHHQRPLVLSMPEPR           |  |  |  |  |                  |  | Mascot |
| 2248.0518 | 2248.1423 | 0.0905  | 40  | 786 | 806 | SSYPWEESAIQSGPSIAS<br>HSK |  |  |  |  |                  |  | Mascot |

37 truncated RAF1 [Danio rerio] gi|41224402 32290.4 9.5 8 33 0

#### Peptide Information

| Calc. Mass | Obsrv. Mass | ± da    | ± ppm | Start Seq. | End Seq. | Sequence                | Ion Score | C. I. | % Modification           | Rank | Result Type |
|------------|-------------|---------|-------|------------|----------|-------------------------|-----------|-------|--------------------------|------|-------------|
| 845.3934   | 845.4667    | 0.0733  | 87    | 33         | 40       | SPAPCQSR                |           |       |                          |      | Mascot      |
| 882.4791   | 882.5694    | 0.0903  | 102   | 215        | 222      | IPSSSVHR                |           |       |                          |      | Mascot      |
| 946.5567   | 946.4759    | -0.0808 | -85   | 10         | 18       | TVTNGLLTK               |           |       |                          |      | Mascot      |
| 946.5567   | 946.4759    | -0.0808 | -85   | 10         | 18       | TVTNGLLTK               |           |       |                          |      | Mascot      |
| 1001.5526  | 1001.566    | 0.0134  | 13    | 53         | 60       | VFLPNQQR                |           |       |                          |      | Mascot      |
| 1045.452   | 1045.5667   | 0.1147  | 110   | 165        | 172      | FHEHCSTK                |           |       | Carbamidomethyl (C)[5]   |      | Mascot      |
| 1371.7855  | 1371.6747   | -0.1108 | -81   | 50         | 60       | TIRVFLPNQQR             |           |       |                          |      | Mascot      |
| 1371.7855  | 1371.6747   | -0.1108 | -81   | 50         | 60       | TIRVFLPNQQR             |           |       |                          |      | Mascot      |
| 1556.7843  | 1556.7462   | -0.0381 | -24   | 19         | 32       | DSVFESSYVSPVIK          |           |       |                          |      | Mascot      |
| 2211.0908  | 2211.1106   | 0.0198  | 9     | 81         | 99       | VRGLQPECCAVFSLHPG<br>QR |           |       | Carbamidomethyl (C)[8,9] |      | Mascot      |

38 PREDICTED: GDH/6PGL endoplasmic bifunctional protein-like [Danio rerio] gi|326668807 89431.1 6.59 11 33 0

#### Peptide Information

| Calc. Mass | Obsrv. Mass | ± da    | ± ppm | Start Seq. | End Seq. | Sequence     | Ion Score | C. I. | % Modification | Rank | Result Type |
|------------|-------------|---------|-------|------------|----------|--------------|-----------|-------|----------------|------|-------------|
| 845.4515   | 845.4667    | 0.0152  | 18    | 210        | 216      | IDHYLGK      |           |       |                |      | Mascot      |
| 855.373    | 855.4388    | 0.0658  | 77    | 121        | 127      | TAEDYEK      |           |       |                |      | Mascot      |
| 1179.6117  | 1179.666    | 0.0543  | 46    | 369        | 378      | ALDERVSYAR   |           |       |                |      | Mascot      |
| 1179.6117  | 1179.666    | 0.0543  | 46    | 369        | 378      | ALDERVSYAR   |           |       |                |      | Mascot      |
| 1371.8093  | 1371.6747   | -0.1346 | -98   | 245        | 256      | IEIVLKETLDAK |           |       |                |      | Mascot      |
| 1371.8093  | 1371.6747   | -0.1346 | -98   | 245        | 256      | IEIVLKETLDAK |           |       |                |      | Mascot      |
| 1386.7739  | 1386.6051   | -0.1688 | -122  | 210        | 221      | IDHYLGKQVVSK |           |       |                |      | Mascot      |

|    |                                   |           |         |      |              |     |                         |      |   |                                           |   |  |        |
|----|-----------------------------------|-----------|---------|------|--------------|-----|-------------------------|------|---|-------------------------------------------|---|--|--------|
|    | 1618.9275                         | 1618.717  | -0.2105 | -130 | 716          | 729 | LVTLTESPIKPHQR          |      |   |                                           |   |  | Mascot |
|    | 1624.8118                         | 1624.8014 | -0.0104 | -6   | 461          | 474 | EAYGELISHVFFGR          |      |   |                                           |   |  | Mascot |
|    | 1624.8118                         | 1624.8014 | -0.0104 | -6   | 461          | 474 | EAYGELISHVFFGR          |      |   |                                           |   |  | Mascot |
|    | 1735.8319                         | 1735.8815 | 0.0496  | 29   | 553          | 567 | SSEMISAWAQLVER          |      |   |                                           |   |  | Mascot |
|    | 1735.8319                         | 1735.8815 | 0.0496  | 29   | 553          | 567 | SSEMISAWAQLVER          |      |   |                                           |   |  | Mascot |
|    | 1751.8269                         | 1751.9026 | 0.0757  | 43   | 553          | 567 | SSEMISAWAQLVER          |      |   | Oxidation (M)[4]                          |   |  | Mascot |
|    | 1861.9918                         | 1861.932  | -0.0598 | -32  | 505          | 521 | IYPGGVSNGNLLNFQLR       |      |   |                                           |   |  | Mascot |
|    | 1993.1188                         | 1993.1134 | -0.0054 | -3   | 29           | 48  | QSLGHVTVVVGGTGDL<br>ARK |      |   |                                           |   |  | Mascot |
|    | 1993.1188                         | 1993.1134 | -0.0054 | -3   | 29           | 48  | QSLGHVTVVVGGTGDL<br>ARK |      |   |                                           |   |  | Mascot |
|    | 2248.1287                         | 2248.1423 | 0.0136  | 6    | 1            | 19  | MENTGIWELLMAICGQ<br>R   |      |   | Carbamidomethyl (C)[16]                   |   |  | Mascot |
|    | 2264.1235                         | 2264.1484 | 0.0249  | 11   | 1            | 19  | MENTGIWELLMAICGQ<br>R   |      |   | Carbamidomethyl (C)[16], Oxidation (M)[1] |   |  | Mascot |
| 39 | novel lipin protein [Danio rerio] |           |         |      | gi 220673084 |     | 33713                   | 5.92 | 7 | 33                                        | 0 |  |        |

#### Peptide Information

| Calc. Mass | Obsrv. Mass | ± da    | ± ppm | Start Seq. | End Seq. | Sequence                | Ion Score | C. I. | % Modification         | Rank | Result Type |
|------------|-------------|---------|-------|------------|----------|-------------------------|-----------|-------|------------------------|------|-------------|
| 916.4345   | 916.4868    | 0.0523  | 57    | 129        | 135      | FLYCSAR                 |           |       | Carbamidomethyl (C)[4] |      | Mascot      |
| 981.4492   | 981.5854    | 0.1362  | 139   | 136        | 144      | AIGMADMTR               |           |       | Oxidation (M)[4]       |      | Mascot      |
| 1511.6708  | 1511.7045   | 0.0337  | 22    | 2          | 15       | KEESSSSDEDLSAK          |           |       |                        |      | Mascot      |
| 1838.9282  | 1838.8909   | -0.0373 | -20   | 212        | 227      | DTDVFSYKEVGVLNR         |           |       |                        |      | Mascot      |
| 1970.9758  | 1971.0005   | 0.0247  | 13    | 195        | 211      | NLFLPNTEPFYAAFGR        |           |       |                        |      | Mascot      |
| 1970.9758  | 1971.0005   | 0.0247  | 13    | 195        | 211      | NLFLPNTEPFYAAFGR        |           |       |                        |      | Mascot      |
| 2120.0164  | 2120.1094   | 0.093   | 44    | 136        | 153      | AIGMADMTRGYLHWVNE<br>R  |           |       |                        |      | Mascot      |
| 2136.0112  | 2136.0969   | 0.0857  | 40    | 136        | 153      | AIGMADMTRGYLHWVNE<br>R  |           |       | Oxidation (M)[4]       |      | Mascot      |
| 2152.0061  | 2152.093    | 0.0869  | 40    | 136        | 153      | AIGMADMTRGYLHWVNE<br>R  |           |       | Oxidation (M)[4,7]     |      | Mascot      |
| 2247.9287  | 2248.1423   | 0.2136  | 95    | 266        | 284      | SSSSDFPCSDTFSQFTY<br>WR |           |       |                        |      | Mascot      |

40 Wingless-type MMTV integration site family, member 16 gi|42542493 26754.7 9.08 9 33 0  
[Danio rerio]

#### Peptide Information

| Calc. Mass | Obsrv. Mass | ± da    | ± ppm | Start Seq. | End Seq. | Sequence   | Ion Score | C. I. | % Modification   | Rank | Result Type |
|------------|-------------|---------|-------|------------|----------|------------|-----------|-------|------------------|------|-------------|
| 855.3699   | 855.4388    | 0.0689  | 81    | 90         | 96       | TMLTDCR    |           |       | Oxidation (M)[2] |      | Mascot      |
| 907.4995   | 907.4691    | -0.0304 | -33   | 55         | 62       | RFIDSAK    |           |       |                  |      | Mascot      |
| 916.5322   | 916.4868    | -0.0454 | -50   | 174        | 182      | LGVTGTRGR  |           |       |                  |      | Mascot      |
| 994.5792   | 994.5829    | 0.0037  | 4     | 2          | 11       | AAGLVHAVTR |           |       |                  |      | Mascot      |

|           |           |         |     |     |     |              |                                             |        |
|-----------|-----------|---------|-----|-----|-----|--------------|---------------------------------------------|--------|
| 1161.5139 | 1161.5631 | 0.0492  | 42  | 97  | 107 | CHGVSGSCAVK  | Carbamidomethyl (C)[1,8]                    | Mascot |
| 1371.6296 | 1371.6747 | 0.0451  | 33  | 108 | 118 | TCWRTMAAFER  |                                             | Mascot |
| 1371.6296 | 1371.6747 | 0.0451  | 33  | 108 | 118 | TCWRTMAAFER  |                                             | Mascot |
| 1419.7227 | 1419.7164 | -0.0063 | -4  | 127 | 138 | YETSVHVVDRSK |                                             | Mascot |
| 1442.5167 | 1442.6982 | 0.1815  | 126 | 229 | 239 | CETMNDMHTCK  | Carbamidomethyl (C)[1,10], Oxidation (M)[4] | Mascot |
| 1582.6229 | 1582.7301 | 0.1072  | 68  | 228 | 239 | RCETMNDMHTCK | Carbamidomethyl (C)[2,11]                   | Mascot |

41 PREDICTED: rho GTPase-activating protein 21-like [Danio rerio] gi|326679518 211650.9 8.29 19 33 0

Peptide Information

| Calc. Mass | Obsrv. Mass | ± da    | ± ppm | Start Seq. | End Seq. | Sequence               | Ion Score | C. I. % | Modification           | Rank | Result Type |
|------------|-------------|---------|-------|------------|----------|------------------------|-----------|---------|------------------------|------|-------------|
| 862.5145   | 862.4818    | -0.0327 | -38   | 934        | 940      | QIYAVLR                |           |         |                        |      | Mascot      |
| 893.4474   | 893.416     | -0.0314 | -35   | 1377       | 1385     | SKGSWGSGK              |           |         |                        |      | Mascot      |
| 916.5098   | 916.4868    | -0.023  | -25   | 84         | 92       | VNGESIIGK              |           |         |                        |      | Mascot      |
| 1045.5248  | 1045.5667   | 0.0419  | 40    | 372        | 379      | RLYMYGSR               |           |         |                        |      | Mascot      |
| 1053.4377  | 1053.576    | 0.1383  | 131   | 888        | 896      | CSEDSGSRR              |           |         | Carbamidomethyl (C)[1] |      | Mascot      |
| 1053.5186  | 1053.576    | 0.0574  | 54    | 941        | 948      | GHCLYLYK               |           |         | Carbamidomethyl (C)[3] |      | Mascot      |
| 1161.5609  | 1161.5631   | 0.0022  | 2     | 1          | 10       | MSFLFSSQAK             |           |         | Oxidation (M)[1]       |      | Mascot      |
| 1176.5239  | 1176.6029   | 0.079   | 67    | 71         | 80       | DEDNISRGDR             |           |         |                        |      | Mascot      |
| 1197.6123  | 1197.5883   | -0.024  | -20   | 1829       | 1837     | DWIVSEHRR              |           |         |                        |      | Mascot      |
| 1220.5464  | 1220.5864   | 0.04    | 33    | 1186       | 1196     | GMADIDIQDDK            |           |         |                        |      | Mascot      |
| 1386.6694  | 1386.6051   | -0.0643 | -46   | 447        | 458      | LGGAECARNWPR           |           |         | Carbamidomethyl (C)[6] |      | Mascot      |
| 1571.7952  | 1571.7905   | -0.0047 | -3    | 126        | 139      | DITALAYSQDAYLK         |           |         |                        |      | Mascot      |
| 1790.8627  | 1790.9106   | 0.0479  | 27    | 1838       | 1855     | RGSQGSQASTELEGQAGK     |           |         |                        |      | Mascot      |
| 1861.955   | 1861.932    | -0.023  | -12   | 1143       | 1158     | FVPLIVECCNLVEER        |           |         |                        |      | Mascot      |
| 1992.9583  | 1993.1134   | 0.1551  | 78    | 1039       | 1056     | EYNTLMSPSSKTEPSPK      |           |         |                        |      | Mascot      |
| 1992.9583  | 1993.1134   | 0.1551  | 78    | 1039       | 1056     | EYNTLMSPSSKTEPSPK      |           |         |                        |      | Mascot      |
| 2066.1077  | 2066.0371   | -0.0706 | -34   | 623        | 640      | TPLIANHMPHNAKLQPR      |           |         |                        |      | Mascot      |
| 2151.9829  | 2152.093    | 0.1101  | 51    | 897        | 915      | DSNSDVFTDATKEGSLYFR    |           |         |                        |      | Mascot      |
| 2248.0549  | 2248.1423   | 0.0874  | 39    | 477        | 496      | AYSCDYLGGRNSDIATSIIVDK |           |         | Carbamidomethyl (C)[4] |      | Mascot      |
| 2283.0723  | 2283.1802   | 0.1079  | 47    | 1781       | 1799     | HTMGGQRDFAELDVIHDWR    |           |         |                        |      | Mascot      |

42 v-raf-1 murine leukemia viral oncogene homolog 1a [Danio rerio] gi|289449304 70289 9.46 11 32 0

Peptide Information

| Calc. Mass | Obsrv. Mass | ± da | ± ppm | Start | End | Sequence | Ion | C. I. % | Modification | Rank | Result Type |
|------------|-------------|------|-------|-------|-----|----------|-----|---------|--------------|------|-------------|
|------------|-------------|------|-------|-------|-----|----------|-----|---------|--------------|------|-------------|

|                     |                                |             |         |       |              |          |                         |          |       |           |         | Seq.         | Seq.                                       | Score |  |  |                          |             |  |
|---------------------|--------------------------------|-------------|---------|-------|--------------|----------|-------------------------|----------|-------|-----------|---------|--------------|--------------------------------------------|-------|--|--|--------------------------|-------------|--|
|                     | 845.3934                       | 845.4667    | 0.0733  | 87    | 33           | 40       | SPAPCQSR                |          |       |           |         |              |                                            |       |  |  |                          | Mascot      |  |
|                     | 882.4791                       | 882.5694    | 0.0903  | 102   | 215          | 222      | IPSSSVHR                |          |       |           |         |              |                                            |       |  |  |                          | Mascot      |  |
|                     | 946.5389                       | 946.4759    | -0.063  | -67   | 563          | 570      | LVADCIKK                |          |       |           |         |              |                                            |       |  |  | Carbamidomethyl (C)[5]   | Mascot      |  |
|                     | 946.5567                       | 946.4759    | -0.0808 | -85   | 10           | 18       | TVTNGLLTK               |          |       |           |         |              |                                            |       |  |  |                          | Mascot      |  |
|                     | 1001.5526                      | 1001.566    | 0.0134  | 13    | 53           | 60       | VFLPNQQR                |          |       |           |         |              |                                            |       |  |  |                          | Mascot      |  |
|                     | 1045.452                       | 1045.5667   | 0.1147  | 110   | 165          | 172      | FHEHCSTK                |          |       |           |         |              |                                            |       |  |  | Carbamidomethyl (C)[5]   | Mascot      |  |
|                     | 1371.7855                      | 1371.6747   | -0.1108 | -81   | 50           | 60       | TIRVFLPNQQR             |          |       |           |         |              |                                            |       |  |  |                          | Mascot      |  |
|                     | 1371.7855                      | 1371.6747   | -0.1108 | -81   | 50           | 60       | TIRVFLPNQQR             |          |       |           |         |              |                                            |       |  |  |                          | Mascot      |  |
|                     | 1556.7843                      | 1556.7462   | -0.0381 | -24   | 19           | 32       | DSVFESSYVSPVIK          |          |       |           |         |              |                                            |       |  |  |                          | Mascot      |  |
|                     | 1582.812                       | 1582.7301   | -0.0819 | -52   | 381          | 393      | HVNILLFMGYMTK           |          |       |           |         |              |                                            |       |  |  | Oxidation (M)[8]         | Mascot      |  |
|                     | 1861.9476                      | 1861.932    | -0.0156 | -8    | 447          | 462      | DMKSNNIFLHEGLTVK        |          |       |           |         |              |                                            |       |  |  | Oxidation (M)[2]         | Mascot      |  |
|                     | 2211.0908                      | 2211.1106   | 0.0198  | 9     | 81           | 99       | VRGLQPECCAVFSLHPG<br>QR |          |       |           |         |              |                                            |       |  |  | Carbamidomethyl (C)[8,9] | Mascot      |  |
| 43                  | CXC chemokine 64 [Danio rerio] |             |         |       | gij187608560 |          |                         | 11150.2  | 10.14 | 6         | 32      | 0            |                                            |       |  |  |                          |             |  |
| Peptide Information |                                |             |         |       |              |          |                         |          |       |           |         |              |                                            |       |  |  |                          |             |  |
|                     | Calc. Mass                     | Obsrv. Mass | ± da    | ± ppm | Start Seq.   | End Seq. | Sequence                |          |       | Ion Score | C. I. % | Modification |                                            |       |  |  | Rank                     | Result Type |  |
|                     | 855.5046                       | 855.4388    | -0.0658 | -77   | 22           | 28       | IPDLKNR                 |          |       |           |         |              |                                            |       |  |  |                          | Mascot      |  |
|                     | 1045.6326                      | 1045.5667   | -0.0659 | -63   | 59           | 67       | LEIVVTLMK               |          |       |           |         |              |                                            |       |  |  |                          | Mascot      |  |
|                     | 1519.7355                      | 1519.7588   | 0.0233  | 15    | 29           | 42       | CLCADKGANNVNLK          |          |       |           |         |              | Carbamidomethyl (C)[1]                     |       |  |  |                          | Mascot      |  |
|                     | 1542.8308                      | 1542.7043   | -0.1265 | -82   | 73           | 86       | CLNPESNLGKNILK          |          |       |           |         |              |                                            |       |  |  |                          | Mascot      |  |
|                     | 1971.0441                      | 1971.0005   | -0.0436 | -22   | 2            | 19       | KTAAAFVALGCFLMVEVK      |          |       |           |         |              | Carbamidomethyl (C)[11], Oxidation (M)[14] |       |  |  |                          | Mascot      |  |
|                     | 1971.0441                      | 1971.0005   | -0.0436 | -22   | 3            | 21       | TAAAFVALGCFLMVEVK<br>GK |          |       |           |         |              | Oxidation (M)[13]                          |       |  |  |                          | Mascot      |  |
| 44                  | plexin b2b [Danio rerio]       |             |         |       | gij309243104 |          |                         | 203041.6 | 6.62  | 18        | 32      | 0            |                                            |       |  |  |                          |             |  |
| Peptide Information |                                |             |         |       |              |          |                         |          |       |           |         |              |                                            |       |  |  |                          |             |  |
|                     | Calc. Mass                     | Obsrv. Mass | ± da    | ± ppm | Start Seq.   | End Seq. | Sequence                |          |       | Ion Score | C. I. % | Modification |                                            |       |  |  | Rank                     | Result Type |  |
|                     | 870.4791                       | 870.542     | 0.0629  | 72    | 1699         | 1705     | TEHKLSR                 |          |       |           |         |              |                                            |       |  |  |                          | Mascot      |  |
|                     | 907.4995                       | 907.4691    | -0.0304 | -33   | 372          | 378      | DIVNRYK                 |          |       |           |         |              |                                            |       |  |  |                          | Mascot      |  |
|                     | 914.473                        | 914.5472    | 0.0742  | 81    | 908          | 914      | TVQFTYR                 |          |       |           |         |              |                                            |       |  |  |                          | Mascot      |  |
|                     | 994.5502                       | 994.5829    | 0.0327  | 33    | 479          | 487      | VPVQACHLK               |          |       |           |         |              |                                            |       |  |  |                          | Mascot      |  |
|                     | 1109.4714                      | 1109.5858   | 0.1144  | 103   | 488          | 497      | QDCQSCVAQK              |          |       |           |         |              |                                            |       |  |  |                          | Mascot      |  |
|                     | 1442.7849                      | 1442.6982   | -0.0867 | -60   | 1175         | 1187     | RDTGSDPLDLLIK           |          |       |           |         |              |                                            |       |  |  |                          | Mascot      |  |
|                     | 1511.6406                      | 1511.7045   | 0.0639  | 42    | 498          | 509      | DPYCGWCVLEGR            |          |       |           |         |              | Carbamidomethyl (C)[4,7]                   |       |  |  |                          | Mascot      |  |

|    |                                                  |           |         |     |             |      |                                  |      |   |                         |   |  |  |        |
|----|--------------------------------------------------|-----------|---------|-----|-------------|------|----------------------------------|------|---|-------------------------|---|--|--|--------|
|    | 1519.8148                                        | 1519.7588 | -0.056  | -37 | 1114        | 1127 | SVITENSMIIVTGR                   |      |   |                         |   |  |  | Mascot |
|    | 1542.8196                                        | 1542.7043 | -0.1153 | -75 | 1585        | 1597 | SMTKAITEIYLTR                    |      |   | Oxidation (M)[2]        |   |  |  | Mascot |
|    | 1587.8417                                        | 1587.7875 | -0.0542 | -34 | 685         | 698  | FENPDPVLIPVGYS                   |      |   |                         |   |  |  | Mascot |
|    | 1618.851                                         | 1618.717  | -0.134  | -83 | 1345        | 1358 | TLLLGLMEDYVHSG                   |      |   |                         |   |  |  | Mascot |
|    | 1624.8037                                        | 1624.8014 | -0.0023 | -1  | 1246        | 1258 | HQLENLEESVRDR                    |      |   |                         |   |  |  | Mascot |
|    | 1624.8152                                        | 1624.8014 | -0.0138 | -8  | 377         | 391  | YKCGADFLPSPLASR                  |      |   |                         |   |  |  | Mascot |
|    | 1719.8041                                        | 1719.884  | 0.0799  | 46  | 72          | 87   | DAKGCTPPVSTCQDLK                 |      |   | Carbamidomethyl (C)[5]  |   |  |  | Mascot |
|    | 1781.9102                                        | 1781.9781 | 0.0679  | 38  | 872         | 888  | YSVSTSVICEIGPASLR                |      |   |                         |   |  |  | Mascot |
|    | 1781.9102                                        | 1781.9781 | 0.0679  | 38  | 872         | 888  | YSVSTSVICEIGPASLR                |      |   |                         |   |  |  | Mascot |
|    | 1838.9316                                        | 1838.8909 | -0.0407 | -22 | 872         | 888  | YSVSTSVICEIGPASLR                |      |   | Carbamidomethyl (C)[9]  |   |  |  | Mascot |
|    | 2066.0779                                        | 2066.0371 | -0.0408 | -20 | 1753        | 1769 | EHTDKLNTQVALHQLYR                |      |   |                         |   |  |  | Mascot |
|    | 2136.1118                                        | 2136.0969 | -0.0149 | -7  | 329         | 347  | NINQKLLAIVTACYTDNG<br>K          |      |   | Carbamidomethyl (C)[13] |   |  |  | Mascot |
|    | 3337.5974                                        | 3337.7339 | 0.1365  | 41  | 1086        | 1113 | TFVQLDNLQMEITPFAYY<br>PNPTFDELSK |      |   | Oxidation (M)[10]       |   |  |  | Mascot |
| 45 | phosphorylase, glycogen (muscle) b [Danio rerio] |           |         |     | gi 41054784 |      | 36631.2                          | 6.27 | 8 | 32                      | 0 |  |  |        |

#### Peptide Information

| Calc. Mass | Obsrv. Mass | ± da    | ± ppm | Start Seq. | End Seq. | Sequence     | Ion Score | C. I. | % Modification    | Rank | Result Type |
|------------|-------------|---------|-------|------------|----------|--------------|-----------|-------|-------------------|------|-------------|
| 893.4151   | 893.416     | 0.0009  | 1     | 186        | 192      | YGNPWEEK     |           |       |                   |      | Mascot      |
| 994.5832   | 994.5829    | -0.0003 | 0     | 35         | 42       | HLHFTLVK     |           |       |                   |      | Mascot      |
| 1045.5525  | 1045.5667   | 0.0142  | 14    | 2          | 10       | SKPLTDQEK    |           |       |                   |      | Mascot      |
| 1176.5929  | 1176.6029   | 0.01    | 8     | 1          | 10       | MSKPLTDQEK   |           |       |                   |      | Mascot      |
| 1355.6742  | 1355.6809   | 0.0067  | 5     | 51         | 61       | DYYFALAHTVR  |           |       |                   |      | Mascot      |
| 1355.6742  | 1355.7896   | 0.1154  | 85    | 51         | 61       | DYYFALAHTVR  |           |       |                   |      | Mascot      |
| 1442.678   | 1442.6982   | 0.0202  | 14    | 236        | 246      | NNMLMHDRFK   |           |       |                   |      | Mascot      |
| 1511.7754  | 1511.7045   | -0.0709 | -47   | 50         | 61       | RDYYFALAHTVR |           |       |                   |      | Mascot      |
| 1556.7454  | 1556.7462   | 0.0008  | 1     | 83         | 94       | VYYLSLEFYMGR |           |       | Oxidation (M)[10] |      | Mascot      |

|    |                                                                                                |  |  |  |             |  |         |       |   |    |   |  |  |  |
|----|------------------------------------------------------------------------------------------------|--|--|--|-------------|--|---------|-------|---|----|---|--|--|--|
| 46 | novel protein similar to vertebrate syntaxin binding protein 6 (amisyn) (STXBP6) [Danio rerio] |  |  |  | gi 94734057 |  | 31605.2 | 10.27 | 9 | 32 | 0 |  |  |  |
|----|------------------------------------------------------------------------------------------------|--|--|--|-------------|--|---------|-------|---|----|---|--|--|--|

#### Peptide Information

| Calc. Mass | Obsrv. Mass | ± da    | ± ppm | Start Seq. | End Seq. | Sequence   | Ion Score | C. I. | % Modification | Rank | Result Type |
|------------|-------------|---------|-------|------------|----------|------------|-----------|-------|----------------|------|-------------|
| 893.5025   | 893.416     | -0.0865 | -97   | 189        | 195      | CKIFLNR    |           |       |                |      | Mascot      |
| 916.5098   | 916.4868    | -0.023  | -25   | 150        | 158      | TPGAVESKK  |           |       |                |      | Mascot      |
| 1045.5748  | 1045.5667   | -0.0081 | -8    | 237        | 245      | RASQVLSEK  |           |       |                |      | Mascot      |
| 1179.5536  | 1179.666    | 0.1124  | 95    | 198        | 207      | TSMTANQDRR |           |       |                |      | Mascot      |

|    |                                          |           |        |    |              |     |                        |      |   |    |                         |  |        |
|----|------------------------------------------|-----------|--------|----|--------------|-----|------------------------|------|---|----|-------------------------|--|--------|
|    | 1179.5536                                | 1179.666  | 0.1124 | 95 | 198          | 207 | TSMTANQDRR             |      |   |    |                         |  | Mascot |
|    | 1571.7379                                | 1571.7905 | 0.0526 | 33 | 175          | 188 | LMGDACSVNMVIYR         |      |   |    |                         |  | Mascot |
|    | 1587.7328                                | 1587.7875 | 0.0547 | 34 | 175          | 188 | LMGDACSVNMVIYR         |      |   |    | Oxidation (M)[2]        |  | Mascot |
|    | 1790.849                                 | 1790.9106 | 0.0616 | 34 | 159          | 174 | SPAATNQTNFINCQPK       |      |   |    | Carbamidomethyl (C)[13] |  | Mascot |
|    | 1859.8634                                | 1859.8964 | 0.033  | 18 | 175          | 190 | LMGDACSVNMVIYRCK       |      |   |    | Carbamidomethyl (C)[6]  |  | Mascot |
|    | 1859.8634                                | 1859.8964 | 0.033  | 18 | 175          | 190 | LMGDACSVNMVIYRCK       |      |   |    | Carbamidomethyl (C)[6]  |  | Mascot |
|    | 1861.9225                                | 1861.932  | 0.0095 | 5  | 158          | 174 | KSPAATNQTNFINCQPK      |      |   |    |                         |  | Mascot |
|    | 2233.0027                                | 2233.0947 | 0.092  | 41 | 119          | 136 | CMFVQVLYHACQNFWEA<br>K |      |   |    | Oxidation (M)[2]        |  | Mascot |
| 47 | methionyl aminopeptidase 1 [Danio rerio] |           |        |    | gi 220679064 |     | 45363                  | 6.14 | 8 | 32 | 0                       |  |        |

#### Peptide Information

| Calc. Mass | Obsrv. Mass | ± da    | ± ppm | Start Seq. | End Seq. | Sequence                 | Ion Score | C. I. | % Modification          | Rank | Result Type |
|------------|-------------|---------|-------|------------|----------|--------------------------|-----------|-------|-------------------------|------|-------------|
| 845.5025   | 845.4667    | -0.0358 | -42   | 159        | 165      | VVCKLAR                  |           |       | Carbamidomethyl (C)[3]  |      | Mascot      |
| 864.4243   | 864.4891    | 0.0648  | 75    | 19         | 26       | SMAAVETR                 |           |       |                         |      | Mascot      |
| 914.5305   | 914.5472    | 0.0167  | 18    | 289        | 296      | ELGNIIQK                 |           |       |                         |      | Mascot      |
| 1001.4621  | 1001.566    | 0.1039  | 104   | 308        | 316      | SYCGHGIHK                |           |       |                         |      | Mascot      |
| 1719.8767  | 1719.884    | 0.0073  | 4     | 148        | 162      | ILNAEEIEGMRVVCK          |           |       | Oxidation (M)[10]       |      | Mascot      |
| 1832.8088  | 1832.9417   | 0.1329  | 73    | 210        | 226      | SCCTSVNEVICHGIPDR        |           |       |                         |      | Mascot      |
| 2225.0781  | 2225.1245   | 0.0464  | 21    | 297        | 316      | HAQANGFSVRSYCGHG<br>IHK  |           |       | Carbamidomethyl (C)[14] |      | Mascot      |
| 2248.1277  | 2248.1423   | 0.0146  | 6     | 372        | 391      | SAQFEHTLLVTETGCEILT<br>R |           |       |                         |      | Mascot      |

48 V-type proton ATPase subunit C 1-A [Danio rerio] gi|41151984 44286.9 6.93 8 32 0

#### Peptide Information

| Calc. Mass | Obsrv. Mass | ± da    | ± ppm | Start Seq. | End Seq. | Sequence          | Ion Score | C. I. | % Modification   | Rank | Result Type |
|------------|-------------|---------|-------|------------|----------|-------------------|-----------|-------|------------------|------|-------------|
| 864.4573   | 864.4891    | 0.0318  | 37    | 232        | 238      | KAIDDFR           |           |       |                  |      | Mascot      |
| 893.4839   | 893.416     | -0.0679 | -76   | 243        | 249      | ENKFTVR           |           |       |                  |      | Mascot      |
| 1001.5162  | 1001.566    | 0.0498  | 50    | 233        | 240      | AIDDFRHK          |           |       |                  |      | Mascot      |
| 1386.7335  | 1386.6051   | -0.1284 | -93   | 128        | 139      | QVSQIDNDLKAR      |           |       |                  |      | Mascot      |
| 1442.7137  | 1442.6982   | -0.0155 | -11   | 105        | 115      | FQWDMAKYPIK       |           |       | Oxidation (M)[5] |      | Mascot      |
| 1624.7999  | 1624.8014   | 0.0015  | 1     | 71         | 84       | KVAQYMADVLEDSR    | 4         | 0     |                  |      | Mascot      |
| 1624.7999  | 1624.8014   | 0.0015  | 1     | 71         | 84       | KVAQYMADVLEDSR    |           |       |                  |      | Mascot      |
| 1832.9501  | 1832.9417   | -0.0084 | -5    | 29         | 44       | TNNLSTNNKFNIPDLK  |           |       |                  |      | Mascot      |
| 1961.0677  | 1960.9794   | -0.0883 | -45   | 310        | 326      | YGLPVNFQAMLLQPNKK |           |       |                  |      | Mascot      |

49 novel protein [Danio rerio] gi|169146110 25865.2 5.07 7 32 0



| Peptide Information |                                                                                  |         |       |            |                          |           |         |                                          |      |             |
|---------------------|----------------------------------------------------------------------------------|---------|-------|------------|--------------------------|-----------|---------|------------------------------------------|------|-------------|
| Calc. Mass          | Obsrv. Mass                                                                      | ± da    | ± ppm | Start Seq. | End Sequence Seq.        | Ion Score | C. I. % | Modification                             | Rank | Result Type |
| 893.4475            | 893.416                                                                          | -0.0315 | -35   | 26         | 32 NTFVQER               |           |         |                                          |      | Mascot      |
| 914.5166            | 914.5472                                                                         | 0.0306  | 33    | 88         | 95 QLAAAERR              |           |         |                                          |      | Mascot      |
| 1045.5411           | 1045.5667                                                                        | 0.0256  | 24    | 99         | 107 VIADLEEEK            |           |         |                                          |      | Mascot      |
| 1179.5319           | 1179.666                                                                         | 0.1341  | 114   | 73         | 82 LVMAHCTNMK            |           |         | Oxidation (M)[3,9]                       |      | Mascot      |
| 1179.5319           | 1179.666                                                                         | 0.1341  | 114   | 73         | 82 LVMAHCTNMK            |           |         | Oxidation (M)[3,9]                       |      | Mascot      |
| 1220.5585           | 1220.5864                                                                        | 0.0279  | 23    | 73         | 82 LVMAHCTNMK            |           |         | Carbamidomethyl (C)[6], Oxidation (M)[3] |      | Mascot      |
| 1386.7335           | 1386.6051                                                                        | -0.1284 | -93   | 129        | 139 DRLLQQLESER          |           |         |                                          |      | Mascot      |
| 1992.8927           | 1993.1134                                                                        | 0.2207  | 111   | 111        | 128 AQDAAAGDDITDMLERE R  |           |         | Oxidation (M)[13]                        |      | Mascot      |
| 1992.8927           | 1993.1134                                                                        | 0.2207  | 111   | 111        | 128 AQDAAAGDDITDMLERE R  |           |         | Oxidation (M)[13]                        |      | Mascot      |
| 2248.2546           | 2248.1423                                                                        | -0.1123 | -50   | 2          | 21 LLSILEGELEAQDVVIHTL R |           |         |                                          |      | Mascot      |
| 50                  | cytochrome P450, family 2, subfamily AD, polypeptide 3 gi 70887751 [Danio rerio] |         |       |            |                          | 56608.1   | 6.25    | 1                                        | 20   | 0           |

| Peptide Information |             |         |       |            |                   |           |         |              |      |             |
|---------------------|-------------|---------|-------|------------|-------------------|-----------|---------|--------------|------|-------------|
| Calc. Mass          | Obsrv. Mass | ± da    | ± ppm | Start Seq. | End Sequence Seq. | Ion Score | C. I. % | Modification | Rank | Result Type |
| 946.4774            | 946.4759    | -0.0015 | -2    | 439        | 447 ACLGENLAR     | 20        | 0       |              | 2    | Mascot      |

|                |           |                        |                |                |                    |
|----------------|-----------|------------------------|----------------|----------------|--------------------|
| Gel Idx/Pos    | 177/H4    | Instr./Gel Origin      | BA2060/110707A | Process Status | Analysis Succeeded |
| Plate [#] Name | [1] 31496 | Instrument Sample Name |                | Spectra        | 11                 |

| Rank | Protein Name                                                            | Accession No. | Protein MW | Protein PI | Pep. Count | Protein Score | Protein Score C. I. % | Total Ion Score | Total Ion C. I. % |
|------|-------------------------------------------------------------------------|---------------|------------|------------|------------|---------------|-----------------------|-----------------|-------------------|
| 1    | Methylenetetrahydrofolate dehydrogenase (NADP+ dependent) [Danio rerio] | gi 49902652   | 100427.7   | 7.28       | 13         | 403           | 100                   | 364             | 100               |

| Peptide Information |             |         |       |            |                   |           |         |                        |      |             |
|---------------------|-------------|---------|-------|------------|-------------------|-----------|---------|------------------------|------|-------------|
| Calc. Mass          | Obsrv. Mass | ± da    | ± ppm | Start Seq. | End Sequence Seq. | Ion Score | C. I. % | Modification           | Rank | Result Type |
| 950.4875            | 950.4852    | -0.0023 | -2    | 402        | 409 LNAFACVR      |           |         | Carbamidomethyl (C)[6] |      | Mascot      |
| 982.5679            | 982.567     | -0.0009 | -1    | 478        | 486 LVPLAEGQR     |           |         |                        |      | Mascot      |
| 1088.6211           | 1088.615    | -0.0061 | -6    | 487        | 495 KFSPVQINR     |           |         |                        |      | Mascot      |
| 1155.6885           | 1155.6885   | 0       | 0     | 878        | 888 GVPTGFVLPIR   |           |         |                        |      | Mascot      |
| 1155.6885           | 1155.6885   | 0       | 0     | 878        | 888 GVPTGFVLPIR   | 37        | 95.174  |                        |      | Mascot      |
| 1458.7224           | 1458.7205   | -0.0019 | -1    | 520        | 531 LDIDPESVTWQR  |           |         |                        |      | Mascot      |

|           |           |         |    |     |     |                               |     |     |                                            |        |
|-----------|-----------|---------|----|-----|-----|-------------------------------|-----|-----|--------------------------------------------|--------|
| 1458.7224 | 1458.7205 | -0.0019 | -1 | 520 | 531 | LDIDPESVTWQR                  | 89  | 100 |                                            | Mascot |
| 1592.8165 | 1592.814  | -0.0025 | -2 | 336 | 349 | EIGLLSDEVELYGR                | 136 | 100 |                                            | Mascot |
| 1592.8165 | 1592.814  | -0.0025 | -2 | 336 | 349 | EIGLLSDEVELYGR                |     |     |                                            | Mascot |
| 2125.9893 | 2125.9878 | -0.0015 | -1 | 721 | 738 | EYIEENLTLEAGCANMR             |     |     | Carbamidomethyl (C)[14]                    | Mascot |
| 2141.9841 | 2141.9885 | 0.0044  | 2  | 721 | 738 | EYIEENLTLEAGCANMR             |     |     | Carbamidomethyl (C)[14], Oxidation (M)[17] | Mascot |
| 2204.105  | 2204.1025 | -0.0025 | -1 | 595 | 615 | SGQPVTTEDLGVCGALT<br>VLMR     |     |     | Carbamidomethyl (C)[13]                    | Mascot |
| 2218.1133 | 2218.1294 | 0.0161  | 7  | 228 | 249 | TGAVVIDCGINTIADSSRP<br>SGK    |     |     | Carbamidomethyl (C)[8]                     | Mascot |
| 2220.0999 | 2220.1204 | 0.0205  | 9  | 595 | 615 | SGQPVTTEDLGVCGALT<br>VLMR     |     |     | Carbamidomethyl (C)[13], Oxidation (M)[20] | Mascot |
| 2238.1111 | 2238.1086 | -0.0025 | -1 | 657 | 678 | LVGPQGFFVTEAGFGADI<br>GMEK    |     |     | Oxidation (M)[20]                          | Mascot |
| 2269.2664 | 2269.2627 | -0.0037 | -2 | 93  | 112 | IHGLIVQLPLDSIHTINTER          |     |     |                                            | Mascot |
| 2269.2664 | 2269.2627 | -0.0037 | -2 | 93  | 112 | IHGLIVQLPLDSIHTINTER          | 101 | 100 |                                            | Mascot |
| 2297.0068 | 2297.1938 | 0.187   | 81 | 137 | 156 | GDLGDCFIPCTPNGCME<br>LIK      |     |     | Carbamidomethyl (C)[6,10,15]               | Mascot |
| 2500.1309 | 2500.1299 | -0.001  | 0  | 775 | 799 | EAGAFDAVPCSHWADG<br>GAGAVDLAR |     |     | Carbamidomethyl (C)[10]                    | Mascot |

2 C-1-tetrahydrofolate synthase, cytoplasmic [Danio rerio] gi|41054762 100397.5 7.06 11 302 100 275 100

#### Peptide Information

| Calc. Mass | Obsrv. Mass | ± da    | ± ppm | Start Seq. | End Seq. | Sequence                      | Ion Score | C. I. % | Modification                               | Rank | Result Type |
|------------|-------------|---------|-------|------------|----------|-------------------------------|-----------|---------|--------------------------------------------|------|-------------|
| 950.4875   | 950.4852    | -0.0023 | -2    | 402        | 409      | LNAFACVR                      |           |         | Carbamidomethyl (C)[6]                     |      | Mascot      |
| 982.5679   | 982.567     | -0.0009 | -1    | 478        | 486      | LVPLAEGQR                     |           |         |                                            |      | Mascot      |
| 1088.6211  | 1088.615    | -0.0061 | -6    | 487        | 495      | KFSPVQINR                     |           |         |                                            |      | Mascot      |
| 1155.6885  | 1155.6885   | 0       | 0     | 878        | 888      | GVPTGFVLPIR                   |           |         |                                            |      | Mascot      |
| 1155.6885  | 1155.6885   | 0       | 0     | 878        | 888      | GVPTGFVLPIR                   | 37        | 95.174  |                                            |      | Mascot      |
| 1592.8165  | 1592.814    | -0.0025 | -2    | 336        | 349      | EIGLLSDEVELYGR                | 136       | 100     |                                            |      | Mascot      |
| 1592.8165  | 1592.814    | -0.0025 | -2    | 336        | 349      | EIGLLSDEVELYGR                |           |         |                                            |      | Mascot      |
| 2125.9893  | 2125.9878   | -0.0015 | -1    | 721        | 738      | EYIEENLTLEAGCANMR             |           |         | Carbamidomethyl (C)[14]                    |      | Mascot      |
| 2141.9841  | 2141.9885   | 0.0044  | 2     | 721        | 738      | EYIEENLTLEAGCANMR             |           |         | Carbamidomethyl (C)[14], Oxidation (M)[17] |      | Mascot      |
| 2204.105   | 2204.1025   | -0.0025 | -1    | 595        | 615      | SGQPVTTEDLGVCGALT<br>VLMR     |           |         | Carbamidomethyl (C)[13]                    |      | Mascot      |
| 2220.0999  | 2220.1204   | 0.0205  | 9     | 595        | 615      | SGQPVTTEDLGVCGALT<br>VLMR     |           |         | Carbamidomethyl (C)[13], Oxidation (M)[20] |      | Mascot      |
| 2238.1111  | 2238.1086   | -0.0025 | -1    | 657        | 678      | LVGPQGFFVTEAGFGADI<br>GMEK    |           |         | Oxidation (M)[20]                          |      | Mascot      |
| 2269.2664  | 2269.2627   | -0.0037 | -2    | 93         | 112      | IHGLIVQLPLDSIHTINTER          |           |         |                                            |      | Mascot      |
| 2269.2664  | 2269.2627   | -0.0037 | -2    | 93         | 112      | IHGLIVQLPLDSIHTINTER          | 101       | 100     |                                            |      | Mascot      |
| 2297.0068  | 2297.1938   | 0.187   | 81    | 137        | 156      | GDLGDCFIPCTPNGCME<br>LIK      |           |         | Carbamidomethyl (C)[6,10,15]               |      | Mascot      |
| 2500.1309  | 2500.1299   | -0.001  | 0     | 775        | 799      | EAGAFDAVPCSHWADG<br>GAGAVDLAR |           |         | Carbamidomethyl (C)[10]                    |      | Mascot      |

3 vitellogenin 1 [Danio rerio] gi|94733730 149140.4 8.74 18 300 100 252 100

Peptide Information

| Calc. Mass | Obsrv. Mass | ± da    | ± ppm | Start Seq. | End Seq. | Sequence             | Ion Score | C. I.  | % Modification                            | Rank | Result Type |
|------------|-------------|---------|-------|------------|----------|----------------------|-----------|--------|-------------------------------------------|------|-------------|
| 888.5301   | 888.5256    | -0.0045 | -5    | 425        | 432      | FATIPALR             |           |        |                                           |      | Mascot      |
| 1023.5105  | 1023.5066   | -0.0039 | -4    | 195        | 203      | DVGLAYTER            |           |        |                                           |      | Mascot      |
| 1088.5405  | 1088.615    | 0.0745  | 68    | 415        | 424      | MTASLATHEK           |           |        |                                           |      | Mascot      |
| 1097.6677  | 1097.6646   | -0.0031 | -3    | 514        | 523      | VQVDAILALR           |           |        |                                           |      | Mascot      |
| 1115.6935  | 1115.6925   | -0.001  | -1    | 333        | 341      | FVQLVQLLR            |           |        |                                           |      | Mascot      |
| 1115.6935  | 1115.6925   | -0.001  | -1    | 333        | 341      | FVQLVQLLR            | 52        | 99.845 |                                           |      | Mascot      |
| 1121.599   | 1121.5931   | -0.0059 | -5    | 348        | 356      | IEAIWSQFK            |           |        |                                           |      | Mascot      |
| 1382.7889  | 1382.6827   | -0.1062 | -77   | 303        | 315      | ISDAPAQIVEVLK        |           |        |                                           |      | Mascot      |
| 1432.6671  | 1432.6503   | -0.0168 | -12   | 184        | 194      | DLSHCQERIMK          |           |        | Carbamidomethyl (C)[5], Oxidation (M)[10] |      | Mascot      |
| 1463.8944  | 1463.8929   | -0.0015 | -1    | 532        | 544      | LVQPVALQLVLDR        |           |        |                                           |      | Mascot      |
| 1515.7478  | 1515.7451   | -0.0027 | -2    | 733        | 745      | VFGQEVAYVNFDK        |           |        |                                           |      | Mascot      |
| 1622.8536  | 1622.8505   | -0.0031 | -2    | 668        | 683      | AYLAGAAADVIEFGVR     |           |        |                                           |      | Mascot      |
| 1622.8536  | 1622.8505   | -0.0031 | -2    | 668        | 683      | AYLAGAAADVIEFGVR     | 121       | 100    |                                           |      | Mascot      |
| 1666.8767  | 1666.8771   | 0.0004  | 0     | 483        | 498      | VMGNAGHPSSLKPIMK     |           |        |                                           |      | Mascot      |
| 1695.8999  | 1695.8931   | -0.0068 | -4    | 119        | 134      | VFAPAGVSPTVMNLHR     |           |        |                                           |      | Mascot      |
| 1699.9377  | 1699.9332   | -0.0045 | -3    | 34         | 49       | YEALLGGLPQEGLAR      |           |        |                                           |      | Mascot      |
| 1699.9377  | 1699.9332   | -0.0045 | -3    | 34         | 49       | YEALLGGLPQEGLAR      | 80        | 100    |                                           |      | Mascot      |
| 1711.8948  | 1711.8909   | -0.0039 | -2    | 119        | 134      | VFAPAGVSPTVMNLHR     |           |        | Oxidation (M)[12]                         |      | Mascot      |
| 1954.8745  | 1954.8737   | -0.0008 | 0     | 147        | 163      | TQNIYEMQEAGAQQVCR    |           |        | Carbamidomethyl (C)[16]                   |      | Mascot      |
| 2269.1975  | 2269.2627   | 0.0652  | 29    | 1179       | 1198     | ADQKLLGYQLAAYFDKPTAR |           |        |                                           |      | Mascot      |
| 2269.1975  | 2269.2627   | 0.0652  | 29    | 1179       | 1198     | ADQKLLGYQLAAYFDKPTAR |           |        |                                           |      | Mascot      |
| 2299.2292  | 2299.1831   | -0.0461 | -20   | 1039       | 1058     | QINIIDDDTPEGQAFLKL   |           |        |                                           |      | Mascot      |
| 2627.3716  | 2627.3674   | -0.0042 | -2    | 897        | 920      | VEALPVELPEHIASASFET  |           |        |                                           |      | Mascot      |

4 novel protein similar to vitellogenin 1 (vg1) [Danio rerio] gi|94733731 149169.2 8.84 13 275 100 252 100

Peptide Information

| Calc. Mass | Obsrv. Mass | ± da    | ± ppm | Start Seq. | End Seq. | Sequence   | Ion Score | C. I. | % Modification | Rank | Result Type |
|------------|-------------|---------|-------|------------|----------|------------|-----------|-------|----------------|------|-------------|
| 1023.5105  | 1023.5066   | -0.0039 | -4    | 199        | 207      | DVGLAYTER  |           |       |                |      | Mascot      |
| 1097.6677  | 1097.6646   | -0.0031 | -3    | 518        | 527      | VQVDAILALR |           |       |                |      | Mascot      |
| 1115.6935  | 1115.6925   | -0.001  | -1    | 337        | 345      | FVQLVQLLR  |           |       |                |      | Mascot      |

|           |           |         |     |      |      |                          |     |        |                                           |        |
|-----------|-----------|---------|-----|------|------|--------------------------|-----|--------|-------------------------------------------|--------|
| 1115.6935 | 1115.6925 | -0.001  | -1  | 337  | 345  | FVQLVQLLR                | 52  | 99.845 |                                           | Mascot |
| 1121.599  | 1121.5931 | -0.0059 | -5  | 352  | 360  | IEAIWSQFK                |     |        |                                           | Mascot |
| 1432.6671 | 1432.6503 | -0.0168 | -12 | 188  | 198  | DLSHCQERIMK              |     |        | Carbamidomethyl (C)[5], Oxidation (M)[10] | Mascot |
| 1463.8944 | 1463.8929 | -0.0015 | -1  | 536  | 548  | LVQPVALQLVLDR            |     |        |                                           | Mascot |
| 1515.7478 | 1515.7451 | -0.0027 | -2  | 737  | 749  | VFGQEVAYVNFDK            |     |        |                                           | Mascot |
| 1622.8536 | 1622.8505 | -0.0031 | -2  | 672  | 687  | AYLAGAAADVIEFGVR         |     |        |                                           | Mascot |
| 1622.8536 | 1622.8505 | -0.0031 | -2  | 672  | 687  | AYLAGAAADVIEFGVR         | 121 | 100    |                                           | Mascot |
| 1666.8767 | 1666.8771 | 0.0004  | 0   | 487  | 502  | VMGNAGHPSSLKPIMK         |     |        |                                           | Mascot |
| 1699.9377 | 1699.9332 | -0.0045 | -3  | 38   | 53   | YEALLLGGLPQEGLAR         |     |        |                                           | Mascot |
| 1699.9377 | 1699.9332 | -0.0045 | -3  | 38   | 53   | YEALLLGGLPQEGLAR         | 80  | 100    |                                           | Mascot |
| 1954.8745 | 1954.8737 | -0.0008 | 0   | 151  | 167  | TQNIYEMQEAGAQGVCR        |     |        | Carbamidomethyl (C)[16]                   | Mascot |
| 2269.1975 | 2269.2627 | 0.0652  | 29  | 1181 | 1200 | ADQKLLGYQLAAYFDKPT<br>AR |     |        |                                           | Mascot |
| 2269.1975 | 2269.2627 | 0.0652  | 29  | 1181 | 1200 | ADQKLLGYQLAAYFDKPT<br>AR |     |        |                                           | Mascot |
| 2299.2292 | 2299.1831 | -0.0461 | -20 | 1043 | 1062 | QINIIDDDTPEGQAFLLKL<br>R |     |        |                                           | Mascot |

5 Vtg1 protein [Danio rerio] gi|145337918 116565.5 9.07 14 211 100 174 100

Peptide Information

| Calc. Mass | Obsrv. Mass | ± da    | ± ppm | Start Seq. | End Seq. | Sequence                 | Ion Score | C. I. % | Modification | Rank | Result Type |
|------------|-------------|---------|-------|------------|----------|--------------------------|-----------|---------|--------------|------|-------------|
| 888.5301   | 888.5256    | -0.0045 | -5    | 131        | 138      | FATIPALR                 |           |         |              |      | Mascot      |
| 1088.5405  | 1088.615    | 0.0745  | 68    | 121        | 130      | MTASLATHEK               |           |         |              |      | Mascot      |
| 1097.6677  | 1097.6646   | -0.0031 | -3    | 220        | 229      | VQVDAILALR               |           |         |              |      | Mascot      |
| 1115.6935  | 1115.6925   | -0.001  | -1    | 39         | 47       | FVQLVQLLR                |           |         |              |      | Mascot      |
| 1115.6935  | 1115.6925   | -0.001  | -1    | 39         | 47       | FVQLVQLLR                | 52        | 99.845  |              |      | Mascot      |
| 1121.599   | 1121.5931   | -0.0059 | -5    | 54         | 62       | IEAIWSQFK                |           |         |              |      | Mascot      |
| 1382.7889  | 1382.6827   | -0.1062 | -77   | 9          | 21       | ISDAPAQIVEVLK            |           |         |              |      | Mascot      |
| 1463.8944  | 1463.8929   | -0.0015 | -1    | 238        | 250      | LVQPVALQLVLDR            |           |         |              |      | Mascot      |
| 1515.7478  | 1515.7451   | -0.0027 | -2    | 439        | 451      | VFGQEVAYVNFDK            |           |         |              |      | Mascot      |
| 1622.8536  | 1622.8505   | -0.0031 | -2    | 374        | 389      | AYLAGAAADVIEFGVR         |           |         |              |      | Mascot      |
| 1622.8536  | 1622.8505   | -0.0031 | -2    | 374        | 389      | AYLAGAAADVIEFGVR         | 121       | 100     |              |      | Mascot      |
| 1666.8767  | 1666.8771   | 0.0004  | 0     | 189        | 204      | VMGNAGHPSSLKPIMK         |           |         |              |      | Mascot      |
| 1699.9047  | 1699.9332   | 0.0285  | 17    | 303        | 320      | ITAPDMASVAGAAANVAIK      |           |         |              |      | Mascot      |
| 1699.9047  | 1699.9332   | 0.0285  | 17    | 303        | 320      | ITAPDMASVAGAAANVAIK      |           |         |              |      | Mascot      |
| 2269.1975  | 2269.2627   | 0.0652  | 29    | 885        | 904      | ADQKLLGYQLAAYFDKPT<br>AR |           |         |              |      | Mascot      |
| 2269.1975  | 2269.2627   | 0.0652  | 29    | 885        | 904      | ADQKLLGYQLAAYFDKPT<br>AR |           |         |              |      | Mascot      |
| 2299.2292  | 2299.1831   | -0.0461 | -20   | 745        | 764      | QINIIDDDTPEGQAFLLKL      |           |         |              |      | Mascot      |

|   |                              |           |         |    |             |          |                                   |    |     |     |     |     |  |  |  |  |        |
|---|------------------------------|-----------|---------|----|-------------|----------|-----------------------------------|----|-----|-----|-----|-----|--|--|--|--|--------|
|   | 2627.3716                    | 2627.3674 | -0.0042 | -2 | 603         | 626      | R<br>VEALPVELPEHIASASFET<br>YAVVR |    |     |     |     |     |  |  |  |  | Mascot |
| 6 | vitellogenin 1 [Danio rerio] |           |         |    | gi 21391472 | 127954.2 | 8.69                              | 14 | 207 | 100 | 174 | 100 |  |  |  |  |        |

| Peptide Information |             |         |       |            |          |                          |           |                      |  |  |      |             |  |  |  |  |
|---------------------|-------------|---------|-------|------------|----------|--------------------------|-----------|----------------------|--|--|------|-------------|--|--|--|--|
| Calc. Mass          | Obsrv. Mass | ± da    | ± ppm | Start Seq. | End Seq. | Sequence                 | Ion Score | C. I. % Modification |  |  | Rank | Result Type |  |  |  |  |
| 888.5301            | 888.5256    | -0.0045 | -5    | 234        | 241      | FATIPALR                 |           |                      |  |  |      | Mascot      |  |  |  |  |
| 1023.5105           | 1023.5066   | -0.0039 | -4    | 4          | 12       | DVGLAYTER                |           |                      |  |  |      | Mascot      |  |  |  |  |
| 1088.5405           | 1088.615    | 0.0745  | 68    | 224        | 233      | MTASLATHEK               |           |                      |  |  |      | Mascot      |  |  |  |  |
| 1097.6677           | 1097.6646   | -0.0031 | -3    | 323        | 332      | VQVDAILALR               |           |                      |  |  |      | Mascot      |  |  |  |  |
| 1115.6935           | 1115.6925   | -0.001  | -1    | 142        | 150      | FVQLVQLLR                |           |                      |  |  |      | Mascot      |  |  |  |  |
| 1115.6935           | 1115.6925   | -0.001  | -1    | 142        | 150      | FVQLVQLLR                | 52        | 99.845               |  |  |      | Mascot      |  |  |  |  |
| 1121.599            | 1121.5931   | -0.0059 | -5    | 157        | 165      | IEAIWSQFK                |           |                      |  |  |      | Mascot      |  |  |  |  |
| 1382.7889           | 1382.6827   | -0.1062 | -77   | 112        | 124      | ISDAPAQIVEVLK            |           |                      |  |  |      | Mascot      |  |  |  |  |
| 1463.8944           | 1463.8929   | -0.0015 | -1    | 341        | 353      | LVQPVALQLVLDLDR          |           |                      |  |  |      | Mascot      |  |  |  |  |
| 1515.7478           | 1515.7451   | -0.0027 | -2    | 542        | 554      | VFGQEVAYVNFDK            |           |                      |  |  |      | Mascot      |  |  |  |  |
| 1622.8536           | 1622.8505   | -0.0031 | -2    | 477        | 492      | AYLAGAAADVIEFGVR         |           |                      |  |  |      | Mascot      |  |  |  |  |
| 1622.8536           | 1622.8505   | -0.0031 | -2    | 477        | 492      | AYLAGAAADVIEFGVR         | 121       | 100                  |  |  |      | Mascot      |  |  |  |  |
| 1666.8767           | 1666.8771   | 0.0004  | 0     | 292        | 307      | VMGNAGHPSSLKPIMK         |           |                      |  |  |      | Mascot      |  |  |  |  |
| 1699.9047           | 1699.9332   | 0.0285  | 17    | 406        | 423      | ITAPDMASVAGAANVAIK       |           |                      |  |  |      | Mascot      |  |  |  |  |
| 1699.9047           | 1699.9332   | 0.0285  | 17    | 406        | 423      | ITAPDMASVAGAANVAIK       |           |                      |  |  |      | Mascot      |  |  |  |  |
| 2269.1975           | 2269.2627   | 0.0652  | 29    | 986        | 1005     | ADQKLLGYQLAAYFDKPTAR     |           |                      |  |  |      | Mascot      |  |  |  |  |
| 2269.1975           | 2269.2627   | 0.0652  | 29    | 986        | 1005     | ADQKLLGYQLAAYFDKPTAR     |           |                      |  |  |      | Mascot      |  |  |  |  |
| 2299.2292           | 2299.1831   | -0.0461 | -20   | 848        | 867      | QINIIDDDTPEGQAFLLKL<br>R |           |                      |  |  |      | Mascot      |  |  |  |  |

|   |                                              |  |  |  |              |          |      |    |     |     |     |     |  |  |  |  |  |
|---|----------------------------------------------|--|--|--|--------------|----------|------|----|-----|-----|-----|-----|--|--|--|--|--|
| 7 | hypothetical protein LOC678536 [Danio rerio] |  |  |  | gi 160420306 | 148750.2 | 8.89 | 19 | 184 | 100 | 130 | 100 |  |  |  |  |  |
|---|----------------------------------------------|--|--|--|--------------|----------|------|----|-----|-----|-----|-----|--|--|--|--|--|

| Peptide Information |             |         |       |            |          |            |           |                      |  |  |      |             |  |  |  |  |
|---------------------|-------------|---------|-------|------------|----------|------------|-----------|----------------------|--|--|------|-------------|--|--|--|--|
| Calc. Mass          | Obsrv. Mass | ± da    | ± ppm | Start Seq. | End Seq. | Sequence   | Ion Score | C. I. % Modification |  |  | Rank | Result Type |  |  |  |  |
| 864.4461            | 864.5085    | 0.0624  | 72    | 87         | 94       | DSFVPATK   |           |                      |  |  |      | Mascot      |  |  |  |  |
| 1023.5105           | 1023.5066   | -0.0039 | -4    | 195        | 203      | DVGLAYTER  |           |                      |  |  |      | Mascot      |  |  |  |  |
| 1045.5465           | 1045.5631   | 0.0166  | 16    | 1346       | 1353     | DFLSWIHK   |           |                      |  |  |      | Mascot      |  |  |  |  |
| 1097.6677           | 1097.6646   | -0.0031 | -3    | 514        | 523      | VQVDAILALR |           |                      |  |  |      | Mascot      |  |  |  |  |
| 1115.6935           | 1115.6925   | -0.001  | -1    | 333        | 341      | FVQLVQLLR  |           |                      |  |  |      | Mascot      |  |  |  |  |
| 1115.6935           | 1115.6925   | -0.001  | -1    | 333        | 341      | FVQLVQLLR  | 52        | 99.845               |  |  |      | Mascot      |  |  |  |  |
| 1121.599            | 1121.5931   | -0.0059 | -5    | 348        | 356      | IEAIWSQFK  |           |                      |  |  |      | Mascot      |  |  |  |  |

|   |                                                             |             |           |         |     |      |      |                            |     |     |                                           |  |  |        |
|---|-------------------------------------------------------------|-------------|-----------|---------|-----|------|------|----------------------------|-----|-----|-------------------------------------------|--|--|--------|
|   |                                                             | 1382.7889   | 1382.6827 | -0.1062 | -77 | 303  | 315  | ISDAPAQIVEVLK              |     |     |                                           |  |  | Mascot |
|   |                                                             | 1432.6671   | 1432.6503 | -0.0168 | -12 | 184  | 194  | DLSHCQERIMK                |     |     | Carbamidomethyl (C)[5], Oxidation (M)[10] |  |  | Mascot |
|   |                                                             | 1477.91     | 1477.9099 | -0.0001 | 0   | 532  | 544  | LVQPIALQLVLDR              |     |     |                                           |  |  | Mascot |
|   |                                                             | 1515.7478   | 1515.7451 | -0.0027 | -2  | 733  | 745  | VFGQEYAYVNFDK              |     |     |                                           |  |  | Mascot |
|   |                                                             | 1608.838    | 1608.8344 | -0.0036 | -2  | 668  | 683  | AYLAGAAADVVEFGVR           |     |     |                                           |  |  | Mascot |
|   |                                                             | 1666.8767   | 1666.8771 | 0.0004  | 0   | 483  | 498  | VMGNAGHPSSLKPIMK           |     |     |                                           |  |  | Mascot |
|   |                                                             | 1695.8999   | 1695.8931 | -0.0068 | -4  | 119  | 134  | VFAPAGVSPTVMNLHR           |     |     |                                           |  |  | Mascot |
|   |                                                             | 1699.9377   | 1699.9332 | -0.0045 | -3  | 34   | 49   | YEALLLGGLPQEGLAR           |     |     |                                           |  |  | Mascot |
|   |                                                             | 1699.9377   | 1699.9332 | -0.0045 | -3  | 34   | 49   | YEALLLGGLPQEGLAR           | 80  | 100 |                                           |  |  | Mascot |
|   |                                                             | 1711.8948   | 1711.8909 | -0.0039 | -2  | 119  | 134  | VFAPAGVSPTVMNLHR           |     |     | Oxidation (M)[12]                         |  |  | Mascot |
|   |                                                             | 1936.9181   | 1936.916  | -0.0021 | -1  | 147  | 163  | TQNIYLQEAGAQGVCRR          |     |     | Carbamidomethyl (C)[16]                   |  |  | Mascot |
|   |                                                             | 2218.1641   | 2218.1294 | -0.0347 | -16 | 1326 | 1345 | DIYLPVTVPINPDGFTID<br>K    |     |     |                                           |  |  | Mascot |
|   |                                                             | 2233.2009   | 2233.082  | -0.1189 | -53 | 593  | 614  | SLTRITAPDMAYVAGAAN<br>VAIK |     |     |                                           |  |  | Mascot |
|   |                                                             | 2269.1975   | 2269.2627 | 0.0652  | 29  | 1177 | 1196 | ADQKLLGYQLAAYFDKPT<br>AR   |     |     |                                           |  |  | Mascot |
|   |                                                             | 2269.1975   | 2269.2627 | 0.0652  | 29  | 1177 | 1196 | ADQKLLGYQLAAYFDKPT<br>AR   |     |     |                                           |  |  | Mascot |
|   |                                                             | 2299.2292   | 2299.1831 | -0.0461 | -20 | 1039 | 1058 | QINIIDDTPPEGQAFLKL<br>R    |     |     |                                           |  |  | Mascot |
| 8 | novel protein similar to vitellogenin 1 (vg1) [Danio rerio] | gi 94733733 | 149143.4  | 8.92    | 19  | 183  | 100  | 130                        | 100 |     |                                           |  |  |        |

### Peptide Information

| Calc. Mass | Obsrv. Mass | ± da    | ± ppm | Start Seq. | End Seq. | Sequence         | Ion Score | C. I. % | Modification                              | Rank | Result Type |
|------------|-------------|---------|-------|------------|----------|------------------|-----------|---------|-------------------------------------------|------|-------------|
| 864.4461   | 864.5085    | 0.0624  | 72    | 91         | 98       | DSFVPATK         |           |         |                                           |      | Mascot      |
| 1023.5105  | 1023.5066   | -0.0039 | -4    | 199        | 207      | DVGLAYTER        |           |         |                                           |      | Mascot      |
| 1045.5465  | 1045.5631   | 0.0166  | 16    | 1350       | 1357     | DFLSWIHK         |           |         |                                           |      | Mascot      |
| 1097.6677  | 1097.6646   | -0.0031 | -3    | 518        | 527      | VQVDAILALR       |           |         |                                           |      | Mascot      |
| 1115.6935  | 1115.6925   | -0.001  | -1    | 337        | 345      | FVQLVQLLR        |           |         |                                           |      | Mascot      |
| 1115.6935  | 1115.6925   | -0.001  | -1    | 337        | 345      | FVQLVQLLR        | 52        | 99.845  |                                           |      | Mascot      |
| 1121.599   | 1121.5931   | -0.0059 | -5    | 352        | 360      | IEAIWSQFK        |           |         |                                           |      | Mascot      |
| 1382.7889  | 1382.6827   | -0.1062 | -77   | 307        | 319      | ISDAPAQIVEVLK    |           |         |                                           |      | Mascot      |
| 1432.6671  | 1432.6503   | -0.0168 | -12   | 188        | 198      | DLSHCQERIMK      |           |         | Carbamidomethyl (C)[5], Oxidation (M)[10] |      | Mascot      |
| 1477.91    | 1477.9099   | -0.0001 | 0     | 536        | 548      | LVQPIALQLVLDR    |           |         |                                           |      | Mascot      |
| 1515.7478  | 1515.7451   | -0.0027 | -2    | 737        | 749      | VFGQEVAYVNFDK    |           |         |                                           |      | Mascot      |
| 1608.838   | 1608.8344   | -0.0036 | -2    | 672        | 687      | AYLAGAAADVVEFGVR |           |         |                                           |      | Mascot      |
| 1666.8767  | 1666.8771   | 0.0004  | 0     | 487        | 502      | VMGNAGHPSSLKPIMK |           |         |                                           |      | Mascot      |
| 1695.8999  | 1695.8931   | -0.0068 | -4    | 123        | 138      | VFAPAGVSPTVMNLHR |           |         |                                           |      | Mascot      |

|           |                              |         |     |      |              |                            |          |      |    |     |                         |     |     |  |  |  |        |
|-----------|------------------------------|---------|-----|------|--------------|----------------------------|----------|------|----|-----|-------------------------|-----|-----|--|--|--|--------|
| 1699.9377 | 1699.9332                    | -0.0045 | -3  | 38   | 53           | YEALLLGGLPQEGLAR           |          |      |    |     |                         |     |     |  |  |  | Mascot |
| 1699.9377 | 1699.9332                    | -0.0045 | -3  | 38   | 53           | YEALLLGGLPQEGLAR           | 80       | 100  |    |     |                         |     |     |  |  |  | Mascot |
| 1711.8948 | 1711.8909                    | -0.0039 | -2  | 123  | 138          | VFAPAGVSPTVMNLHR           |          |      |    |     | Oxidation (M)[12]       |     |     |  |  |  | Mascot |
| 1936.9181 | 1936.916                     | -0.0021 | -1  | 151  | 167          | TQNIYEQEAGAQQGVCR          |          |      |    |     | Carbamidomethyl (C)[16] |     |     |  |  |  | Mascot |
| 2218.1641 | 2218.1294                    | -0.0347 | -16 | 1330 | 1349         | DIYLPVTVPINPDGFTID<br>K    |          |      |    |     |                         |     |     |  |  |  | Mascot |
| 2233.2009 | 2233.082                     | -0.1189 | -53 | 597  | 618          | SLTRITAPDMAYVAGAAN<br>VAIK |          |      |    |     |                         |     |     |  |  |  | Mascot |
| 2269.1975 | 2269.2627                    | 0.0652  | 29  | 1181 | 1200         | ADQKLLGYQLAAYFDKPT<br>AR   |          |      |    |     |                         |     |     |  |  |  | Mascot |
| 2269.1975 | 2269.2627                    | 0.0652  | 29  | 1181 | 1200         | ADQKLLGYQLAAYFDKPT<br>AR   |          |      |    |     |                         |     |     |  |  |  | Mascot |
| 2299.2292 | 2299.1831                    | -0.0461 | -20 | 1043 | 1062         | QINIIDDDTPEGQAFLLKL<br>R   |          |      |    |     |                         |     |     |  |  |  | Mascot |
| 9         | vitellogenin 1 [Danio rerio] |         |     |      | gi 166795887 |                            | 149452.5 | 8.68 | 17 | 174 | 100                     | 132 | 100 |  |  |  |        |

Peptide Information

| Calc. Mass | Obsrv. Mass | ± da    | ± ppm | Start Seq. | End Seq. | Sequence                   | Ion Score | C. I.  | % Modification                            | Rank | Result Type |
|------------|-------------|---------|-------|------------|----------|----------------------------|-----------|--------|-------------------------------------------|------|-------------|
| 888.5301   | 888.5256    | -0.0045 | -5    | 425        | 432      | FATIPALR                   |           |        |                                           |      | Mascot      |
| 1088.5405  | 1088.615    | 0.0745  | 68    | 415        | 424      | MTASLATHEK                 |           |        |                                           |      | Mascot      |
| 1097.6677  | 1097.6646   | -0.0031 | -3    | 514        | 523      | VQVDAILALR                 |           |        |                                           |      | Mascot      |
| 1115.6935  | 1115.6925   | -0.001  | -1    | 333        | 341      | FVQLVQLLR                  |           |        |                                           |      | Mascot      |
| 1115.6935  | 1115.6925   | -0.001  | -1    | 333        | 341      | FVQLVQLLR                  | 52        | 99.845 |                                           |      | Mascot      |
| 1121.599   | 1121.5931   | -0.0059 | -5    | 348        | 356      | IEAIWSQFK                  |           |        |                                           |      | Mascot      |
| 1382.7889  | 1382.6827   | -0.1062 | -77   | 303        | 315      | ISDAPAQIVEVLK              |           |        |                                           |      | Mascot      |
| 1432.6671  | 1432.6503   | -0.0168 | -12   | 184        | 194      | DLSHCQERIMK                |           |        | Carbamidomethyl (C)[5], Oxidation (M)[10] |      | Mascot      |
| 1463.8944  | 1463.8929   | -0.0015 | -1    | 532        | 544      | LVQPVALQLVLDR              |           |        |                                           |      | Mascot      |
| 1515.7478  | 1515.7451   | -0.0027 | -2    | 733        | 745      | VFGQEVAYVNFDK              |           |        |                                           |      | Mascot      |
| 1666.8767  | 1666.8771   | 0.0004  | 0     | 483        | 498      | VMGNAGHPSSLKPIMK           |           |        |                                           |      | Mascot      |
| 1695.8999  | 1695.8931   | -0.0068 | -4    | 119        | 134      | VFAPAGVSPTVMNLHR           |           |        |                                           |      | Mascot      |
| 1699.9377  | 1699.9332   | -0.0045 | -3    | 34         | 49       | YEALLLGGLPQEGLAR           |           |        |                                           |      | Mascot      |
| 1699.9377  | 1699.9332   | -0.0045 | -3    | 34         | 49       | YEALLLGGLPQEGLAR           | 80        | 100    |                                           |      | Mascot      |
| 1711.8948  | 1711.8909   | -0.0039 | -2    | 119        | 134      | VFAPAGVSPTVMNLHR           |           |        | Oxidation (M)[12]                         |      | Mascot      |
| 1954.8745  | 1954.8737   | -0.0008 | 0     | 147        | 163      | TQNIYEMQEAGAQQGVCR         |           |        | Carbamidomethyl (C)[16]                   |      | Mascot      |
| 2233.2009  | 2233.082    | -0.1189 | -53   | 593        | 614      | SLTRITAPDMAYVAGAAN<br>VAIK |           |        |                                           |      | Mascot      |
| 2269.1975  | 2269.2627   | 0.0652  | 29    | 1179       | 1198     | ADQKLLGYQLAAYFDKPT<br>AR   |           |        |                                           |      | Mascot      |
| 2269.1975  | 2269.2627   | 0.0652  | 29    | 1179       | 1198     | ADQKLLGYQLAAYFDKPT<br>AR   |           |        |                                           |      | Mascot      |
| 2299.2292  | 2299.1831   | -0.0461 | -20   | 1039       | 1058     | QINIIDDDTPEGQAFLLKL<br>R   |           |        |                                           |      | Mascot      |
| 2627.3716  | 2627.3674   | -0.0042 | -2    | 897        | 920      | VEALPVELPEHIASASFET        |           |        |                                           |      | Mascot      |

10    novel protein similar to vitellogenin 1 (vg1) [Danio rerio]    gi|94733734    149808.5    8.83    16    169    100    132    100

YAVVR

Peptide Information

| Calc. Mass | Obsrv. Mass | ± da    | ± ppm | Start Seq. | End Seq. | Sequence                | Ion Score | C. I. % | Modification                              | Rank | Result Type |
|------------|-------------|---------|-------|------------|----------|-------------------------|-----------|---------|-------------------------------------------|------|-------------|
| 864.4461   | 864.5085    | 0.0624  | 72    | 91         | 98       | DSFVPATK                |           |         |                                           |      | Mascot      |
| 1023.5105  | 1023.5066   | -0.0039 | -4    | 199        | 207      | DVGLAYTER               |           |         |                                           |      | Mascot      |
| 1097.6677  | 1097.6646   | -0.0031 | -3    | 518        | 527      | VQVDAILALR              |           |         |                                           |      | Mascot      |
| 1115.6935  | 1115.6925   | -0.001  | -1    | 337        | 345      | FVQLVQLLR               |           |         |                                           |      | Mascot      |
| 1115.6935  | 1115.6925   | -0.001  | -1    | 337        | 345      | FVQLVQLLR               | 52        | 99.845  |                                           |      | Mascot      |
| 1121.599   | 1121.5931   | -0.0059 | -5    | 352        | 360      | IEAIWSQFK               |           |         |                                           |      | Mascot      |
| 1432.6671  | 1432.6503   | -0.0168 | -12   | 188        | 198      | DLSHCQERIMK             |           |         | Carbamidomethyl (C)[5], Oxidation (M)[10] |      | Mascot      |
| 1463.8944  | 1463.8929   | -0.0015 | -1    | 536        | 548      | LVQPVALQLVLDR           |           |         |                                           |      | Mascot      |
| 1515.7478  | 1515.7451   | -0.0027 | -2    | 737        | 749      | VFGQEVAYVNFDK           |           |         |                                           |      | Mascot      |
| 1666.8767  | 1666.8771   | 0.0004  | 0     | 487        | 502      | VMGNAGHPSSLKPIMK        |           |         |                                           |      | Mascot      |
| 1695.8999  | 1695.8931   | -0.0068 | -4    | 123        | 138      | VFAPAGVSPTVMNLHR        |           |         |                                           |      | Mascot      |
| 1699.9377  | 1699.9332   | -0.0045 | -3    | 38         | 53       | YEALLLGGLPQEGLAR        |           |         |                                           |      | Mascot      |
| 1699.9377  | 1699.9332   | -0.0045 | -3    | 38         | 53       | YEALLLGGLPQEGLAR        | 80        | 100     |                                           |      | Mascot      |
| 1711.8948  | 1711.8909   | -0.0039 | -2    | 123        | 138      | VFAPAGVSPTVMNLHR        |           |         | Oxidation (M)[12]                         |      | Mascot      |
| 1936.9181  | 1936.916    | -0.0021 | -1    | 151        | 167      | TQNIYELQEAGAQQGVCRR     |           |         | Carbamidomethyl (C)[16]                   |      | Mascot      |
| 2194.0469  | 2194.0884   | 0.0415  | 19    | 1063       | 1083     | EILDTEAKNAPVSSSSSSR     |           |         |                                           |      | Mascot      |
| 2233.2009  | 2233.082    | -0.1189 | -53   | 597        | 618      | SLTRITAPDMAYVAGAAANVAIK |           |         |                                           |      | Mascot      |
| 2269.1975  | 2269.2627   | 0.0652  | 29    | 1186       | 1205     | ADQKLLGYQLAAYFDKPTAR    |           |         |                                           |      | Mascot      |
| 2269.1975  | 2269.2627   | 0.0652  | 29    | 1186       | 1205     | ADQKLLGYQLAAYFDKPTAR    |           |         |                                           |      | Mascot      |
| 2299.2292  | 2299.1831   | -0.0461 | -20   | 1043       | 1062     | QINIIDDDTPEGQAFLKLRR    |           |         |                                           |      | Mascot      |

11    vitellogenin 6 [Danio rerio]    gi|303227889    150936.1    8.84    16    168    100    132    100

Peptide Information

| Calc. Mass | Obsrv. Mass | ± da    | ± ppm | Start Seq. | End Seq. | Sequence   | Ion Score | C. I. % | Modification | Rank | Result Type |
|------------|-------------|---------|-------|------------|----------|------------|-----------|---------|--------------|------|-------------|
| 864.4461   | 864.5085    | 0.0624  | 72    | 98         | 105      | DSFVPATK   |           |         |              |      | Mascot      |
| 1023.5105  | 1023.5066   | -0.0039 | -4    | 206        | 214      | DVGLAYTER  |           |         |              |      | Mascot      |
| 1097.6677  | 1097.6646   | -0.0031 | -3    | 525        | 534      | VQVDAILALR |           |         |              |      | Mascot      |
| 1115.6935  | 1115.6925   | -0.001  | -1    | 344        | 352      | FVQLVQLLR  |           |         |              |      | Mascot      |
| 1115.6935  | 1115.6925   | -0.001  | -1    | 344        | 352      | FVQLVQLLR  | 52        | 99.845  |              |      | Mascot      |



|    |                                                                         |           |         |     |      |      |                            |      |     |     |                                           |     |        |
|----|-------------------------------------------------------------------------|-----------|---------|-----|------|------|----------------------------|------|-----|-----|-------------------------------------------|-----|--------|
|    | 1121.599                                                                | 1121.5931 | -0.0059 | -5  | 359  | 367  | IEAIWSQFK                  |      |     |     |                                           |     | Mascot |
|    | 1432.6671                                                               | 1432.6503 | -0.0168 | -12 | 195  | 205  | DLSHCQERIMK                |      |     |     | Carbamidomethyl (C)[5], Oxidation (M)[10] |     | Mascot |
|    | 1463.8944                                                               | 1463.8929 | -0.0015 | -1  | 543  | 555  | LVQPVALQLVLDR              |      |     |     |                                           |     | Mascot |
|    | 1515.7478                                                               | 1515.7451 | -0.0027 | -2  | 744  | 756  | VFGQEYAYVNFDK              |      |     |     |                                           |     | Mascot |
|    | 1666.8767                                                               | 1666.8771 | 0.0004  | 0   | 494  | 509  | VMGNAGHPSSLKPIMK           |      |     |     |                                           |     | Mascot |
|    | 1695.8999                                                               | 1695.8931 | -0.0068 | -4  | 130  | 145  | VFAPAGVSPTVMNLHR           |      |     |     |                                           |     | Mascot |
|    | 1699.9377                                                               | 1699.9332 | -0.0045 | -3  | 45   | 60   | YEALLGGLPQEGLAR            |      |     |     |                                           |     | Mascot |
|    | 1699.9377                                                               | 1699.9332 | -0.0045 | -3  | 45   | 60   | YEALLGGLPQEGLAR            | 80   | 100 |     |                                           |     | Mascot |
|    | 1711.8948                                                               | 1711.8909 | -0.0039 | -2  | 130  | 145  | VFAPAGVSPTVMNLHR           |      |     |     | Oxidation (M)[12]                         |     | Mascot |
|    | 1936.9181                                                               | 1936.916  | -0.0021 | -1  | 158  | 174  | TQNIYELQEAGAQQVCR          |      |     |     | Carbamidomethyl (C)[16]                   |     | Mascot |
|    | 2194.0469                                                               | 2194.0884 | 0.0415  | 19  | 1070 | 1090 | EILDTEAKNAPVSSSESS<br>SSR  |      |     |     |                                           |     | Mascot |
|    | 2233.2009                                                               | 2233.082  | -0.1189 | -53 | 604  | 625  | SLTRITAPDMAYVAGAAN<br>VAIK |      |     |     |                                           |     | Mascot |
|    | 2269.1975                                                               | 2269.2627 | 0.0652  | 29  | 1197 | 1216 | ADQKLLGYQLAAYFDKPT<br>AR   |      |     |     |                                           |     | Mascot |
|    | 2269.1975                                                               | 2269.2627 | 0.0652  | 29  | 1197 | 1216 | ADQKLLGYQLAAYFDKPT<br>AR   |      |     |     |                                           |     | Mascot |
|    | 2299.2292                                                               | 2299.1831 | -0.0461 | -20 | 1050 | 1069 | QINIIDDDTPEGQAFLKL<br>R    |      |     |     |                                           |     | Mascot |
| 12 | novel protein similar to vitellogenin 1 (vg1) [Danio rerio] gi 94732723 |           |         |     |      |      | 147084.2                   | 8.73 | 12  | 150 | 100                                       | 130 | 100    |

### Peptide Information

| Calc. Mass | Obsrv. Mass | ± da    | ± ppm | Start Seq. | End Seq. | Sequence                           | Ion Score | C. I. % | Modification                              | Rank | Result Type |
|------------|-------------|---------|-------|------------|----------|------------------------------------|-----------|---------|-------------------------------------------|------|-------------|
| 1097.6677  | 1097.6646   | -0.0031 | -3    | 514        | 523      | VQVDAILALR                         |           |         |                                           |      | Mascot      |
| 1115.6935  | 1115.6925   | -0.001  | -1    | 333        | 341      | FVQLVQLLR                          |           |         |                                           |      | Mascot      |
| 1115.6935  | 1115.6925   | -0.001  | -1    | 333        | 341      | FVQLVQLLR                          | 52        | 99.845  |                                           |      | Mascot      |
| 1432.6671  | 1432.6503   | -0.0168 | -12   | 184        | 194      | DLSHCQERIMK                        |           |         | Carbamidomethyl (C)[5], Oxidation (M)[10] |      | Mascot      |
| 1477.91    | 1477.9099   | -0.0001 | 0     | 532        | 544      | LVQPIALQLVLDR                      |           |         |                                           |      | Mascot      |
| 1515.7478  | 1515.7451   | -0.0027 | -2    | 733        | 745      | VFGQEVAYVNFDK                      |           |         |                                           |      | Mascot      |
| 1622.7743  | 1622.8505   | 0.0762  | 47    | 981        | 994      | GCVEVHSYNAAFIR                     |           |         | Carbamidomethyl (C)[2]                    |      | Mascot      |
| 1622.7743  | 1622.8505   | 0.0762  | 47    | 981        | 994      | GCVEVHSYNAAFIR                     |           |         | Carbamidomethyl (C)[2]                    |      | Mascot      |
| 1625.6742  | 1625.8387   | 0.1645  | 101   | 1098       | 1113     | SSSSSSSSMSRRMSK                    |           |         | Oxidation (M)[9]                          |      | Mascot      |
| 1666.8767  | 1666.8771   | 0.0004  | 0     | 483        | 498      | VMGNAGHPSSLKPIMK                   |           |         |                                           |      | Mascot      |
| 1699.9377  | 1699.9332   | -0.0045 | -3    | 34         | 49       | YEALLLGGLPQEGLAR                   |           |         |                                           |      | Mascot      |
| 1699.9377  | 1699.9332   | -0.0045 | -3    | 34         | 49       | YEALLLGGLPQEGLAR                   | 80        | 100     |                                           |      | Mascot      |
| 1936.9181  | 1936.916    | -0.0021 | -1    | 147        | 163      | TQNIYELQEAGAQQVCR                  |           |         | Carbamidomethyl (C)[16]                   |      | Mascot      |
| 2217.9824  | 2218.1294   | 0.147   | 66    | 192        | 210      | IMKDVGLAYTESPECTE<br>R             |           |         | Carbamidomethyl (C)[13], Oxidation (M)[2] |      | Mascot      |
| 3337.7539  | 3337.7656   | 0.0117  | 4     | 1164       | 1193     | LLGYQLAAYFDKPTARVQ<br>LIASSIAENDNR |           |         |                                           |      | Mascot      |

13 vitellogenin 7 [Danio rerio] gi|156713467 148739.2 8.76 9 142 100 130 100

Peptide Information

| Calc. Mass | Obsrv. Mass | ± da    | ± ppm | Start Seq. | End Seq. | Sequence                        | Ion Score | C. I.  | % Modification                            | Rank | Result Type |
|------------|-------------|---------|-------|------------|----------|---------------------------------|-----------|--------|-------------------------------------------|------|-------------|
| 1097.6677  | 1097.6646   | -0.0031 | -3    | 514        | 523      | VQVDAILALR                      |           |        |                                           |      | Mascot      |
| 1115.6935  | 1115.6925   | -0.001  | -1    | 333        | 341      | FVQLVQLLR                       |           |        |                                           |      | Mascot      |
| 1115.6935  | 1115.6925   | -0.001  | -1    | 333        | 341      | FVQLVQLLR                       | 52        | 99.845 |                                           |      | Mascot      |
| 1432.6671  | 1432.6503   | -0.0168 | -12   | 184        | 194      | DLSHCQERIMK                     |           |        | Carbamidomethyl (C)[5], Oxidation (M)[10] |      | Mascot      |
| 1477.91    | 1477.9099   | -0.0001 | 0     | 532        | 544      | LVQPIALQLVLDR                   |           |        |                                           |      | Mascot      |
| 1515.7478  | 1515.7451   | -0.0027 | -2    | 733        | 745      | VFGQEVAYVNFDK                   |           |        |                                           |      | Mascot      |
| 1666.8767  | 1666.8771   | 0.0004  | 0     | 483        | 498      | VMGNAGHPSSLKPIMK                |           |        |                                           |      | Mascot      |
| 1699.9377  | 1699.9332   | -0.0045 | -3    | 34         | 49       | YEALLLGGLPQEGLAR                |           |        |                                           |      | Mascot      |
| 1699.9377  | 1699.9332   | -0.0045 | -3    | 34         | 49       | YEALLLGGLPQEGLAR                | 80        | 100    |                                           |      | Mascot      |
| 2217.9824  | 2218.1294   | 0.147   | 66    | 192        | 210      | IMKDVGLAYTESPECTE R             |           |        | Carbamidomethyl (C)[13], Oxidation (M)[2] |      | Mascot      |
| 3337.7539  | 3337.7656   | 0.0117  | 4     | 1179       | 1208     | LLGYQLAAYFDKPTARVQ LIASSIAENDNR |           |        |                                           |      | Mascot      |

14 vitellogenin 1 [Danio rerio] gi|21391474 21118.2 9 4 99 100 80 100

Peptide Information

| Calc. Mass | Obsrv. Mass | ± da    | ± ppm | Start Seq. | End Seq. | Sequence           | Ion Score | C. I. | % Modification          | Rank | Result Type |
|------------|-------------|---------|-------|------------|----------|--------------------|-----------|-------|-------------------------|------|-------------|
| 864.4461   | 864.5085    | 0.0624  | 72    | 87         | 94       | DSFVPATK           |           |       |                         |      | Mascot      |
| 1695.8999  | 1695.8931   | -0.0068 | -4    | 119        | 134      | VFAPAGVSPTVMNLHR   |           |       |                         |      | Mascot      |
| 1699.9377  | 1699.9332   | -0.0045 | -3    | 34         | 49       | YEALLLGGLPQEGLAR   |           |       |                         |      | Mascot      |
| 1699.9377  | 1699.9332   | -0.0045 | -3    | 34         | 49       | YEALLLGGLPQEGLAR   | 80        | 100   |                         |      | Mascot      |
| 1711.8948  | 1711.8909   | -0.0039 | -2    | 119        | 134      | VFAPAGVSPTVMNLHR   |           |       | Oxidation (M)[12]       |      | Mascot      |
| 1936.9181  | 1936.916    | -0.0021 | -1    | 147        | 163      | TQNIYELQEAGAQGVC R |           |       | Carbamidomethyl (C)[16] |      | Mascot      |

15 Zgc:136383 protein [Danio rerio] gi|159155252 123957.1 8.78 14 86 99.988 52 99.845

Peptide Information

| Calc. Mass | Obsrv. Mass | ± da    | ± ppm | Start Seq. | End Seq. | Sequence   | Ion Score | C. I.  | % Modification | Rank | Result Type |
|------------|-------------|---------|-------|------------|----------|------------|-----------|--------|----------------|------|-------------|
| 1045.5465  | 1045.5631   | 0.0166  | 16    | 1123       | 1130     | DFLSWIHK   |           |        |                |      | Mascot      |
| 1097.6677  | 1097.6646   | -0.0031 | -3    | 291        | 300      | VQVDAILALR |           |        |                |      | Mascot      |
| 1115.6935  | 1115.6925   | -0.001  | -1    | 110        | 118      | FVQLVQLLR  |           |        |                |      | Mascot      |
| 1115.6935  | 1115.6925   | -0.001  | -1    | 110        | 118      | FVQLVQLLR  | 52        | 99.845 |                |      | Mascot      |
| 1121.599   | 1121.5931   | -0.0059 | -5    | 125        | 133      | IEAIWSQFK  |           |        |                |      | Mascot      |

|    |                                                |           |         |     |      |      |                            |         |      |   |    |        |    |     |  |  |        |
|----|------------------------------------------------|-----------|---------|-----|------|------|----------------------------|---------|------|---|----|--------|----|-----|--|--|--------|
|    | 1382.7889                                      | 1382.6827 | -0.1062 | -77 | 80   | 92   | ISDAPAQIVEVLK              |         |      |   |    |        |    |     |  |  | Mascot |
|    | 1477.91                                        | 1477.9099 | -0.0001 | 0   | 309  | 321  | LVQPIALQLVLDR              |         |      |   |    |        |    |     |  |  | Mascot |
|    | 1515.7478                                      | 1515.7451 | -0.0027 | -2  | 510  | 522  | VFGQEVAYVNFDK              |         |      |   |    |        |    |     |  |  | Mascot |
|    | 1608.838                                       | 1608.8344 | -0.0036 | -2  | 445  | 460  | AYLAGAAADVVEFGVR           |         |      |   |    |        |    |     |  |  | Mascot |
|    | 1666.8767                                      | 1666.8771 | 0.0004  | 0   | 260  | 275  | VMGNAGHPSSLKPIMK           |         |      |   |    |        |    |     |  |  | Mascot |
|    | 1699.9524                                      | 1699.9332 | -0.0192 | -11 | 1087 | 1101 | SLNVIARIEITMSR             |         |      |   |    |        |    |     |  |  | Mascot |
|    | 1699.9524                                      | 1699.9332 | -0.0192 | -11 | 1087 | 1101 | SLNVIARIEITMSR             |         |      |   |    |        |    |     |  |  | Mascot |
|    | 2218.1641                                      | 2218.1294 | -0.0347 | -16 | 1103 | 1122 | DIYLPVTVPINPDGFTID<br>K    |         |      |   |    |        |    |     |  |  | Mascot |
|    | 2233.2009                                      | 2233.082  | -0.1189 | -53 | 370  | 391  | SLTRITAPDMAYVAGAAN<br>VAIK |         |      |   |    |        |    |     |  |  | Mascot |
|    | 2269.1975                                      | 2269.2627 | 0.0652  | 29  | 954  | 973  | ADQKLLGYQLAAYFDKPT<br>AR   |         |      |   |    |        |    |     |  |  | Mascot |
|    | 2269.1975                                      | 2269.2627 | 0.0652  | 29  | 954  | 973  | ADQKLLGYQLAAYFDKPT<br>AR   |         |      |   |    |        |    |     |  |  | Mascot |
|    | 2299.2292                                      | 2299.1831 | -0.0461 | -20 | 816  | 835  | QINIIDDDTPEGQAFLLKL<br>R   |         |      |   |    |        |    |     |  |  | Mascot |
| 16 | Unknown (protein for MGC:174137) [Danio rerio] |           |         |     |      |      | gi 152012733               | 17051.5 | 7.71 | 1 | 84 | 99.984 | 80 | 100 |  |  |        |

#### Peptide Information

| Calc. Mass | Obsrv. Mass | ± da    | ± ppm | Start Seq. | End Seq. | Sequence         | Ion Score | C. I. | % Modification | Rank | Result Type |
|------------|-------------|---------|-------|------------|----------|------------------|-----------|-------|----------------|------|-------------|
| 1699.9377  | 1699.9332   | -0.0045 | -3    | 34         | 49       | YEALLLGGLPQEGLAR |           |       |                |      | Mascot      |
| 1699.9377  | 1699.9332   | -0.0045 | -3    | 34         | 49       | YEALLLGGLPQEGLAR | 80        | 100   |                |      | Mascot      |

17 novel protein similar to vitellogenin 1 (vg1) [Danio rerio] gi|94732724 24001.7 5.6 1 52 72.561 52 99.845

#### Peptide Information

| Calc. Mass | Obsrv. Mass | ± da   | ± ppm | Start Seq. | End Seq. | Sequence  | Ion Score | C. I.  | % Modification | Rank | Result Type |
|------------|-------------|--------|-------|------------|----------|-----------|-----------|--------|----------------|------|-------------|
| 1115.6935  | 1115.6925   | -0.001 | -1    | 128        | 136      | FVQLVQLLR |           |        |                |      | Mascot      |
| 1115.6935  | 1115.6925   | -0.001 | -1    | 128        | 136      | FVQLVQLLR | 52        | 99.845 |                |      | Mascot      |

18 Synembryn-like [Danio rerio] gi|94574123 59482.8 5.37 10 48 29.471 17 0

#### Peptide Information

| Calc. Mass | Obsrv. Mass | ± da    | ± ppm | Start Seq. | End Seq. | Sequence   | Ion Score | C. I. | % Modification | Rank | Result Type |
|------------|-------------|---------|-------|------------|----------|------------|-----------|-------|----------------|------|-------------|
| 842.5709   | 842.5099    | -0.061  | -72   | 18         | 24       | VEKLLLK    |           |       |                |      | Mascot      |
| 868.4999   | 868.538     | 0.0381  | 44    | 251        | 257      | DSLHKLR    |           |       |                |      | Mascot      |
| 1045.6769  | 1045.5631   | -0.1138 | -109  | 171        | 179      | LLFLLSALR  |           |       |                |      | Mascot      |
| 1115.6605  | 1115.6925   | 0.032   | 29    | 46         | 55       | LCQGLLTVLR |           |       |                |      | Mascot      |
| 1115.6605  | 1115.6925   | 0.032   | 29    | 46         | 55       | LCQGLLTVLR | 17        | 0     |                |      | Mascot      |

|    |                             |           |         |     |              |     |                            |      |   |    |        |    |   |                         |  |  |        |
|----|-----------------------------|-----------|---------|-----|--------------|-----|----------------------------|------|---|----|--------|----|---|-------------------------|--|--|--------|
|    | 1164.6736                   | 1164.5659 | -0.1077 | -92 | 76           | 86  | DKHVLGPVATK                |      |   |    |        |    |   |                         |  |  | Mascot |
|    | 1382.7136                   | 1382.6827 | -0.0309 | -22 | 399          | 410 | QGAAEFLFVLCK               |      |   |    |        |    |   | Carbamidomethyl (C)[11] |  |  | Mascot |
|    | 1625.8169                   | 1625.8387 | 0.0218  | 13  | 32           | 45  | TFAFDLEEEGARIK             |      |   |    |        |    |   |                         |  |  | Mascot |
|    | 1695.8809                   | 1695.8931 | 0.0122  | 7   | 315          | 328 | NMDTVQILLNFMIK             |      |   |    |        |    |   | Oxidation (M)[2]        |  |  | Mascot |
|    | 1711.8757                   | 1711.8909 | 0.0152  | 9   | 315          | 328 | NMDTVQILLNFMIK             |      |   |    |        |    |   | Oxidation (M)[2,12]     |  |  | Mascot |
|    | 1954.9539                   | 1954.8737 | -0.0802 | -41 | 486          | 501 | EYEAQRLVSMIDELSR           |      |   |    |        |    |   | Oxidation (M)[10]       |  |  | Mascot |
|    | 2283.0193                   | 2283.176  | 0.1567  | 69  | 98           | 118 | ICVAGHEGEPLLEEAQSAE<br>EER |      |   |    |        |    |   |                         |  |  | Mascot |
|    | 2283.0193                   | 2283.176  | 0.1567  | 69  | 98           | 118 | ICVAGHEGEPLLEEAQSAE<br>EER |      |   |    |        |    |   |                         |  |  | Mascot |
| 19 | Synbl protein [Danio rerio] |           |         |     | gi 141796272 |     | 31226.2                    | 5.37 | 7 | 47 | 11.209 | 17 | 0 |                         |  |  |        |

#### Peptide Information

| Calc. Mass | Obsrv. Mass | $\pm$ da | $\pm$ ppm | Start Seq. | End Seq. | Sequence                   | Ion Score | C. I. | % Modification | Rank | Result Type |
|------------|-------------|----------|-----------|------------|----------|----------------------------|-----------|-------|----------------|------|-------------|
| 842.5709   | 842.5099    | -0.061   | -72       | 18         | 24       | VEKLLLK                    |           |       |                |      | Mascot      |
| 868.4999   | 868.538     | 0.0381   | 44        | 251        | 257      | DSLHKLR                    |           |       |                |      | Mascot      |
| 1045.6769  | 1045.5631   | -0.1138  | -109      | 171        | 179      | LLFLLSALR                  |           |       |                |      | Mascot      |
| 1115.6605  | 1115.6925   | 0.032    | 29        | 46         | 55       | LCQGLLTVLR                 |           |       |                |      | Mascot      |
| 1115.6605  | 1115.6925   | 0.032    | 29        | 46         | 55       | LCQGLLTVLR                 | 17        |       | 0              |      | Mascot      |
| 1164.6736  | 1164.5659   | -0.1077  | -92       | 76         | 86       | DKHVLGPVATK                |           |       |                |      | Mascot      |
| 1625.8169  | 1625.8387   | 0.0218   | 13        | 32         | 45       | TFAFDLEEEGARIK             |           |       |                |      | Mascot      |
| 2283.0193  | 2283.176    | 0.1567   | 69        | 98         | 118      | ICVAGHEGEPLLEEAQSAE<br>EER |           |       |                |      | Mascot      |
| 2283.0193  | 2283.176    | 0.1567   | 69        | 98         | 118      | ICVAGHEGEPLLEEAQSAE<br>EER |           |       |                |      | Mascot      |

|    |                             |  |  |  |             |  |         |      |   |    |       |    |   |  |  |  |  |
|----|-----------------------------|--|--|--|-------------|--|---------|------|---|----|-------|----|---|--|--|--|--|
| 20 | Synbl protein [Danio rerio] |  |  |  | gi 63101126 |  | 33515.4 | 5.82 | 7 | 47 | 7.024 | 17 | 0 |  |  |  |  |
|----|-----------------------------|--|--|--|-------------|--|---------|------|---|----|-------|----|---|--|--|--|--|

#### Peptide Information

| Calc. Mass | Obsrv. Mass | $\pm$ da | $\pm$ ppm | Start Seq. | End Seq. | Sequence                   | Ion Score | C. I. | % Modification | Rank | Result Type |
|------------|-------------|----------|-----------|------------|----------|----------------------------|-----------|-------|----------------|------|-------------|
| 842.5709   | 842.5099    | -0.061   | -72       | 41         | 47       | VEKLLLK                    |           |       |                |      | Mascot      |
| 868.4999   | 868.538     | 0.0381   | 44        | 274        | 280      | DSLHKLR                    |           |       |                |      | Mascot      |
| 1045.6769  | 1045.5631   | -0.1138  | -109      | 194        | 202      | LLFLLSALR                  |           |       |                |      | Mascot      |
| 1115.6605  | 1115.6925   | 0.032    | 29        | 69         | 78       | LCQGLLTVLR                 |           |       |                |      | Mascot      |
| 1115.6605  | 1115.6925   | 0.032    | 29        | 69         | 78       | LCQGLLTVLR                 | 17        |       | 0              |      | Mascot      |
| 1164.6736  | 1164.5659   | -0.1077  | -92       | 99         | 109      | DKHVLGPVATK                |           |       |                |      | Mascot      |
| 1625.8169  | 1625.8387   | 0.0218   | 13        | 55         | 68       | TFAFDLEEEGARIK             |           |       |                |      | Mascot      |
| 2283.0193  | 2283.176    | 0.1567   | 69        | 121        | 141      | ICVAGHEGEPLLEEAQSAE<br>EER |           |       |                |      | Mascot      |
| 2283.0193  | 2283.176    | 0.1567   | 69        | 121        | 141      | ICVAGHEGEPLLEEAQSAE<br>EER |           |       |                |      | Mascot      |

21 novel protein [Danio rerio] gi|94733078 59497.8 5.33 9 43 0 17 0

Peptide Information

| Calc. Mass | Obsrv. Mass | ± da    | ± ppm | Start Seq. | End Seq. | Sequence                  | Ion Score | C. I. | % Modification          | Rank | Result Type |
|------------|-------------|---------|-------|------------|----------|---------------------------|-----------|-------|-------------------------|------|-------------|
| 842.5709   | 842.5099    | -0.061  | -72   | 18         | 24       | VEKLLLK                   |           |       |                         |      | Mascot      |
| 868.4999   | 868.538     | 0.0381  | 44    | 251        | 257      | DSLHKLR                   |           |       |                         |      | Mascot      |
| 1045.6769  | 1045.5631   | -0.1138 | -109  | 171        | 179      | LLFLLSALR                 |           |       |                         |      | Mascot      |
| 1115.6605  | 1115.6925   | 0.032   | 29    | 46         | 55       | LCQGLLTVLR                |           |       |                         |      | Mascot      |
| 1115.6605  | 1115.6925   | 0.032   | 29    | 46         | 55       | LCQGLLTVLR                | 17        | 0     |                         |      | Mascot      |
| 1164.6736  | 1164.5659   | -0.1077 | -92   | 76         | 86       | DKHVLGPVATK               |           |       |                         |      | Mascot      |
| 1382.7136  | 1382.6827   | -0.0309 | -22   | 399        | 410      | QGAAEFLFVLCK              |           |       | Carbamidomethyl (C)[11] |      | Mascot      |
| 1625.8169  | 1625.8387   | 0.0218  | 13    | 32         | 45       | TFAFDLEEEGARIK            |           |       |                         |      | Mascot      |
| 1954.9539  | 1954.8737   | -0.0802 | -41   | 486        | 501      | EYEAQRLVSMIDLSR           |           |       | Oxidation (M)[10]       |      | Mascot      |
| 2283.0193  | 2283.176    | 0.1567  | 69    | 98         | 118      | ICVAGHEGEPLLEAQSAE<br>EER |           |       |                         |      | Mascot      |
| 2283.0193  | 2283.176    | 0.1567  | 69    | 98         | 118      | ICVAGHEGEPLLEAQSAE<br>EER |           |       |                         |      | Mascot      |

22 BarH-like 1.2 [Danio rerio] gi|62955401 22067.8 6.9 7 43 0

Peptide Information

| Calc. Mass | Obsrv. Mass | ± da    | ± ppm | Start Seq. | End Seq. | Sequence                     | Ion Score | C. I. | % Modification          | Rank | Result Type |
|------------|-------------|---------|-------|------------|----------|------------------------------|-----------|-------|-------------------------|------|-------------|
| 1023.5833  | 1023.5066   | -0.0767 | -75   | 81         | 89       | TVTSSFLIR                    |           |       |                         |      | Mascot      |
| 1155.5865  | 1155.6885   | 0.102   | 88    | 54         | 63       | SSVEDAVHRR                   |           |       |                         |      | Mascot      |
| 1155.5865  | 1155.6885   | 0.102   | 88    | 53         | 62       | RSSVEDAVHR                   |           |       |                         |      | Mascot      |
| 1608.7612  | 1608.8344   | 0.0732  | 46    | 121        | 134      | LHSNSSSDSEYRVK               |           |       |                         |      | Mascot      |
| 1622.886   | 1622.8505   | -0.0355 | -22   | 66         | 80       | ALGLDSPLQISQQPR              |           |       |                         |      | Mascot      |
| 1622.886   | 1622.8505   | -0.0355 | -22   | 66         | 80       | ALGLDSPLQISQQPR              |           |       |                         |      | Mascot      |
| 2299.062   | 2299.1831   | 0.1211  | 53    | 31         | 52       | SPAELSPRDLDSGCSS<br>PPSPR    |           |       | Carbamidomethyl (C)[15] |      | Mascot      |
| 2627.4514  | 2627.3674   | -0.084  | -32   | 66         | 89       | ALGLDSPLQISQQPRTVT<br>SSFLIR |           |       |                         |      | Mascot      |

23 novel protein similar to vertebrate complement component 3 (C3) [Danio rerio] gi|169153736 187400.5 8.04 19 41 0

Peptide Information

| Calc. Mass | Obsrv. Mass | ± da    | ± ppm | Start Seq. | End Seq. | Sequence  | Ion Score | C. I. | % Modification | Rank | Result Type |
|------------|-------------|---------|-------|------------|----------|-----------|-----------|-------|----------------|------|-------------|
| 842.5206   | 842.5099    | -0.0107 | -13   | 516        | 523      | GKIIQAGR  |           |       |                |      | Mascot      |
| 982.5931   | 982.567     | -0.0261 | -27   | 971        | 979      | LQLDAVVPK |           |       |                |      | Mascot      |

|           |           |         |     |      |      |                            |                         |        |
|-----------|-----------|---------|-----|------|------|----------------------------|-------------------------|--------|
| 1088.5591 | 1088.615  | 0.0559  | 51  | 709  | 717  | ARMIEPMPK                  | Oxidation (M)[3]        | Mascot |
| 1097.679  | 1097.6646 | -0.0144 | -13 | 518  | 527  | IIQAGRVNVK                 |                         | Mascot |
| 1121.6201 | 1121.5931 | -0.027  | -24 | 1059 | 1067 | EEAIKYIQK                  |                         | Mascot |
| 1155.5641 | 1155.6885 | 0.1244  | 108 | 1388 | 1397 | TSSDVEKSFR                 |                         | Mascot |
| 1155.5641 | 1155.6885 | 0.1244  | 108 | 1388 | 1397 | TSSDVEKSFR                 |                         | Mascot |
| 1179.619  | 1179.5988 | -0.0202 | -17 | 137  | 146  | AEKVMPVSFR                 | Oxidation (M)[5]        | Mascot |
| 1475.7965 | 1475.7527 | -0.0438 | -30 | 1467 | 1478 | EAEIISFRLNQR               |                         | Mascot |
| 1515.8451 | 1515.7451 | -0.1    | -66 | 862  | 875  | STPSVNVVMVILEK             |                         | Mascot |
| 1592.8014 | 1592.814  | 0.0126  | 8   | 343  | 358  | ASVLTSSGSDLVEAEK           |                         | Mascot |
| 1592.8014 | 1592.814  | 0.0126  | 8   | 343  | 358  | ASVLTSSGSDLVEAEK           |                         | Mascot |
| 1608.8632 | 1608.8344 | -0.0288 | -18 | 285  | 299  | GVAYVLFGEINGEK             |                         | Mascot |
| 1622.7996 | 1622.8505 | 0.0509  | 31  | 1101 | 1114 | VFSMAHSFINVNEK             |                         | Mascot |
| 1622.8033 | 1622.8505 | 0.0472  | 29  | 1186 | 1199 | SRQAAGYLTEHFSR             |                         | Mascot |
| 2142.1965 | 2141.9885 | -0.208  | -97 | 411  | 429  | RPISVHSGTINIHNMPKK         |                         | Mascot |
| 2204.1228 | 2204.1025 | -0.0203 | -9  | 307  | 326  | QIDDLNNGGSVSLTMEEI<br>KR   |                         | Mascot |
| 2217.2349 | 2217.189  | -0.0459 | -21 | 182  | 202  | TISLEIQNPDGIAVHGIGR<br>VK  |                         | Mascot |
| 2218.1797 | 2218.1294 | -0.0503 | -23 | 1    | 19   | MLLQLLLWGTLLCQICDG<br>K    | Carbamidomethyl (C)[13] | Mascot |
| 2220.1177 | 2220.1204 | 0.0027  | 1   | 307  | 326  | QIDDLNNGGSVSLTMEEI<br>KR   | Oxidation (M)[15]       | Mascot |
| 2233.1533 | 2233.082  | -0.0713 | -32 | 911  | 932  | TGELPLQVTAVAASFMG<br>QDAVK |                         | Mascot |
| 2238.2129 | 2238.1086 | -0.1043 | -47 | 73   | 92   | VVKVTVVVDYPNSQTAL<br>SR    |                         | Mascot |

24 Zgc:171573 protein [Danio rerio] gi|166796220 28101.6 9.65 8 41 0

#### Peptide Information

| Calc. Mass | Obsrv. Mass | ± da    | ± ppm | Start Seq. | End Seq. | Sequence                | Ion Score | C. I. % Modification      | Rank | Result Type |
|------------|-------------|---------|-------|------------|----------|-------------------------|-----------|---------------------------|------|-------------|
| 864.4937   | 864.5085    | 0.0148  | 17    | 30         | 36       | IFSDKVR                 |           |                           |      | Mascot      |
| 1097.5334  | 1097.6646   | 0.1312  | 120   | 2          | 10       | NQVEHLSDR               |           |                           |      | Mascot      |
| 1121.5255  | 1121.5931   | 0.0676  | 60    | 168        | 176      | KQEENMTK                |           |                           |      | Mascot      |
| 1608.9067  | 1608.8344   | -0.0723 | -45   | 127        | 141      | ILPGLVGEDLGQKNR         |           |                           |      | Mascot      |
| 1625.7046  | 1625.8387   | 0.1341  | 82    | 177        | 189      | SECLWTAELSNCR           |           | Carbamidomethyl (C)[3,12] |      | Mascot      |
| 1711.9701  | 1711.8909   | -0.0792 | -46   | 35         | 50       | VRTIGVDIDALGQQVK        |           |                           |      | Mascot      |
| 1937.045   | 1936.916    | -0.129  | -67   | 122        | 139      | QEGQRILPGLVGEDLGQ<br>K  |           |                           |      | Mascot      |
| 2211.042   | 2211.1021   | 0.0601  | 27    | 65         | 83       | VYADDLLCSDGIACILEQ<br>R |           | Carbamidomethyl (C)[8,14] |      | Mascot      |

25 PREDICTED: l-amino-acid oxidase [Danio rerio] gi|326674145 56155.4 6.03 10 40 0

| Peptide Information |                                         |         |       |              |          |                       |           |         |                   |      |             |
|---------------------|-----------------------------------------|---------|-------|--------------|----------|-----------------------|-----------|---------|-------------------|------|-------------|
| Calc. Mass          | Obsrv. Mass                             | ± da    | ± ppm | Start Seq.   | End Seq. | Sequence              | Ion Score | C. I. % | Modification      | Rank | Result Type |
| 868.4523            | 868.538                                 | 0.0857  | 99    | 181          | 187      | LQDDLHK               |           |         |                   |      | Mascot      |
| 888.4785            | 888.5256                                | 0.0471  | 53    | 366          | 373      | SITDLPSR              |           |         |                   |      | Mascot      |
| 1088.5582           | 1088.615                                | 0.0568  | 52    | 495          | 504      | AADKINDDVK            |           |         |                   |      | Mascot      |
| 1121.5739           | 1121.5931                               | 0.0192  | 17    | 354          | 362      | FWKNNDGIK             |           |         |                   |      | Mascot      |
| 1432.6559           | 1432.6503                               | -0.0056 | -4    | 181          | 192      | LQDDLHKMGCEK          |           |         | Oxidation (M)[8]  |      | Mascot      |
| 1448.8583           | 1448.9192                               | 0.0609  | 42    | 52           | 67       | HVLIVGAGAAGLTAAK      |           |         |                   |      | Mascot      |
| 1475.6722           | 1475.7527                               | 0.0805  | 55    | 27           | 38       | CLQSDSDYDYLLK         |           |         |                   |      | Mascot      |
| 1592.9635           | 1592.814                                | -0.1495 | -94   | 108          | 121      | IPSFHRILLAVAQK        |           |         |                   |      | Mascot      |
| 1592.9635           | 1592.814                                | -0.1495 | -94   | 108          | 121      | IPSFHRILLAVAQK        |           |         |                   |      | Mascot      |
| 1625.7489           | 1625.8387                               | 0.0898  | 55    | 94           | 107      | NGREGWYAE LGAMR       |           |         | Oxidation (M)[13] |      | Mascot      |
| 2283.1477           | 2283.176                                | 0.0283  | 12    | 317          | 336      | ATLFFDFNPPLSADKMEA LR |           |         |                   |      | Mascot      |
| 2283.1477           | 2283.176                                | 0.0283  | 12    | 317          | 336      | ATLFFDFNPPLSADKMEA LR |           |         |                   |      | Mascot      |
| 2299.1428           | 2299.1831                               | 0.0403  | 18    | 317          | 336      | ATLFFDFNPPLSADKMEA LR |           |         | Oxidation (M)[16] |      | Mascot      |
| 26                  | PREDICTED: caspase-8-like [Danio rerio] |         |       | gi 125845888 |          | 39333.1               | 7.51      | 10      | 39                | 0    |             |

| Peptide Information |                                       |             |         |       |             |          |                                               |           |         |                         |      |             |   |
|---------------------|---------------------------------------|-------------|---------|-------|-------------|----------|-----------------------------------------------|-----------|---------|-------------------------|------|-------------|---|
|                     | Calc. Mass                            | Obsrv. Mass | ± da    | ± ppm | Start Seq.  | End Seq. | Sequence                                      | Ion Score | C. I. % | Modification            | Rank | Result Type |   |
|                     | 996.5043                              | 996.5963    | 0.092   | 92    | 296         | 303      | NLEKH CPR                                     |           |         |                         |      | Mascot      |   |
|                     | 1121.5334                             | 1121.5931   | 0.0597  | 53    | 272         | 281      | STTNGHVS YR                                   |           |         |                         |      | Mascot      |   |
|                     | 1164.5565                             | 1164.5659   | 0.0094  | 8     | 5           | 14       | ESVDKICENK                                    |           |         |                         |      | Mascot      |   |
|                     | 1179.5826                             | 1179.5988   | 0.0162  | 14    | 207         | 216      | DPFTGVK CQK                                   |           |         | Carbamidomethyl (C)[8]  |      | Mascot      |   |
|                     | 1382.6521                             | 1382.6827   | 0.0306  | 22    | 285         | 295      | EGSWFIQSLCR                                   |           |         | Carbamidomethyl (C)[10] |      | Mascot      |   |
|                     | 1448.793                              | 1448.9192   | 0.1262  | 87    | 327         | 338      | QMPIYEVALTRK                                  |           |         |                         |      | Mascot      |   |
|                     | 1493.7126                             | 1493.7314   | 0.0188  | 13    | 80          | 91       | QDCVLENF PMLK                                 |           |         | Carbamidomethyl (C)[3]  |      | Mascot      |   |
|                     | 1954.9989                             | 1954.8737   | -0.1252 | -64   | 223         | 240      | LF F I Q G C R G A N S L Q A C V K            |           |         |                         |      | Mascot      |   |
|                     | 2204.1082                             | 2204.1025   | -0.0057 | -3    | 252         | 271      | VEGDNLDITIPSDTDFLIA R                         |           |         |                         |      | Mascot      |   |
|                     | 2627.3608                             | 2627.3674   | 0.0066  | 3     | 300         | 322      | H C P R G A D I L T I L L Y V N N E V S S Q K |           |         | Carbamidomethyl (C)[2]  |      | Mascot      |   |
| 27                  | protein aurora borealis [Danio rerio] |             |         |       | gi 55925389 |          | 60297.1                                       | 5.05      | 8       | 39                      | 0    | 16          | 0 |

| Peptide Information |             |      |       |            |                   |          |           |         |              |                  |
|---------------------|-------------|------|-------|------------|-------------------|----------|-----------|---------|--------------|------------------|
| Calc. Mass          | Obsrv. Mass | ± da | ± ppm | Start Seq. | End Sequence Seq. | Sequence | Ion Score | C. I. % | Modification | Rank Result Type |

|  |           |           |         |     |     |     |                          |    |  |   |  |                  |  |  |  |  |        |
|--|-----------|-----------|---------|-----|-----|-----|--------------------------|----|--|---|--|------------------|--|--|--|--|--------|
|  | 882.5407  | 882.5657  | 0.025   | 28  | 278 | 285 | SPILSPIR                 |    |  |   |  |                  |  |  |  |  | Mascot |
|  | 1023.5469 | 1023.5066 | -0.0403 | -39 | 48  | 57  | SSSATPAKFK               |    |  |   |  |                  |  |  |  |  | Mascot |
|  | 1121.5885 | 1121.5931 | 0.0046  | 4   | 121 | 129 | QSMKLPHHK                |    |  |   |  | Oxidation (M)[3] |  |  |  |  | Mascot |
|  | 1164.5579 | 1164.5659 | 0.008   | 7   | 334 | 343 | SCSPFQSRPR               |    |  |   |  |                  |  |  |  |  | Mascot |
|  | 1434.7019 | 1434.7253 | 0.0234  | 16  | 334 | 345 | SCSPFQSRPRNR             |    |  |   |  |                  |  |  |  |  | Mascot |
|  | 1458.7546 | 1458.7205 | -0.0341 | -23 | 286 | 298 | LQQSVTPESGERK            |    |  |   |  |                  |  |  |  |  | Mascot |
|  | 1458.7546 | 1458.7205 | -0.0341 | -23 | 286 | 298 | LQQSVTPESGERK            | 16 |  | 0 |  |                  |  |  |  |  | Mascot |
|  | 1954.9504 | 1954.8737 | -0.0767 | -39 | 79  | 95  | QAVFFSQARADSEIEEK        |    |  |   |  |                  |  |  |  |  | Mascot |
|  | 2194.1826 | 2194.0884 | -0.0942 | -43 | 278 | 297 | SPILSPIRLQQSVTPESGE<br>R |    |  |   |  |                  |  |  |  |  | Mascot |

28 gamma-soluble NSF attachment protein [Danio rerio] gi|61806530 33925.8 5.45 9 39 0

#### Peptide Information

| Calc. Mass | Obsrv. Mass | ± da    | ± ppm | Start Seq. | End Seq. | Sequence                 | Ion Score | C. I. | % Modification   | Rank | Result Type |
|------------|-------------|---------|-------|------------|----------|--------------------------|-----------|-------|------------------|------|-------------|
| 1045.5598  | 1045.5631   | 0.0033  | 3     | 123        | 131      | LMEPLDSK                 |           |       |                  |      | Mascot      |
| 1279.7303  | 1279.7744   | 0.0441  | 34    | 196        | 206      | CIAQVLVQLHR              |           |       |                  |      | Mascot      |
| 1463.7489  | 1463.8929   | 0.144   | 98    | 166        | 178      | QQKFDEAAASLQK            |           |       |                  |      | Mascot      |
| 1592.8213  | 1592.814    | -0.0073 | -5    | 1          | 14       | MAQKISEAHEHIAK           |           |       |                  |      | Mascot      |
| 1592.8213  | 1592.814    | -0.0073 | -5    | 1          | 14       | MAQKISEAHEHIAK           |           |       |                  |      | Mascot      |
| 1608.8163  | 1608.8344   | 0.0181  | 11    | 1          | 14       | MAQKISEAHEHIAK           |           |       | Oxidation (M)[1] |      | Mascot      |
| 2126.1538  | 2125.9878   | -0.166  | -78   | 196        | 214      | CIAQVLVQLHRADYVAAQ<br>K  |           |       |                  |      | Mascot      |
| 2142.115   | 2141.9885   | -0.1265 | -59   | 255        | 273      | SPLVTYMDNDYAKLAISL<br>K  |           |       |                  |      | Mascot      |
| 2218.0815  | 2218.1294   | 0.0479  | 22    | 26         | 45       | WKPDYDSAASEYAKAAV<br>AFK |           |       |                  |      | Mascot      |
| 2225.022   | 2225.1177   | 0.0957  | 43    | 21         | 39       | TSFMKWKPDYDSAASEY<br>AK  |           |       |                  |      | Mascot      |
| 2225.022   | 2225.1177   | 0.0957  | 43    | 21         | 39       | TSFMKWKPDYDSAASEY<br>AK  |           |       |                  |      | Mascot      |
| 2299.1062  | 2299.1831   | 0.0769  | 33    | 49         | 68       | QLEQAKDAYLQEAHAHA<br>NNR |           |       |                  |      | Mascot      |

29 PREDICTED: cyclin-dependent kinase 2-associated protein 1-like [Danio rerio] gi|326671486 9491 9.3 5 39 0

#### Peptide Information

| Calc. Mass | Obsrv. Mass | ± da    | ± ppm | Start Seq. | End Seq. | Sequence     | Ion Score | C. I. | % Modification         | Rank | Result Type |
|------------|-------------|---------|-------|------------|----------|--------------|-----------|-------|------------------------|------|-------------|
| 850.4451   | 850.5413    | 0.0962  | 113   | 58         | 64       | SAMERLK      |           |       | Oxidation (M)[3]       |      | Mascot      |
| 950.4247   | 950.4852    | 0.0605  | 64    | 76         | 83       | ECLAETER     |           |       |                        |      | Mascot      |
| 1121.595   | 1121.5931   | -0.0019 | -2    | 48         | 57       | EIRPTYAGSK   |           |       |                        |      | Mascot      |
| 1432.7212  | 1432.6503   | -0.0709 | -49   | 72         | 83       | GLVRECLAETER |           |       | Carbamidomethyl (C)[6] |      | Mascot      |



|    |                                     |           |        |    |    |             |                 |      |   |    |   |  |  |                   |  |  |  |  |        |
|----|-------------------------------------|-----------|--------|----|----|-------------|-----------------|------|---|----|---|--|--|-------------------|--|--|--|--|--------|
|    | 1695.8483                           | 1695.8931 | 0.0448 | 26 | 48 | 62          | EIRPTYAGSKSAMER |      |   |    |   |  |  |                   |  |  |  |  | Mascot |
|    | 1711.8431                           | 1711.8909 | 0.0478 | 28 | 48 | 62          | EIRPTYAGSKSAMER |      |   |    |   |  |  | Oxidation (M)[13] |  |  |  |  | Mascot |
| 30 | ADP/ATP translocase 1 [Danio rerio] |           |        |    |    | gi 47550717 | 32667.2         | 9.74 | 8 | 37 | 0 |  |  |                   |  |  |  |  |        |

#### Peptide Information

|  | Calc. Mass | Obsrv. Mass | ± da    | ± ppm | Start Seq. | End Sequence Seq.              | Ion Score | C. I. | % Modification   | Rank | Result Type |
|--|------------|-------------|---------|-------|------------|--------------------------------|-----------|-------|------------------|------|-------------|
|  | 950.4764   | 950.4852    | 0.0088  | 9     | 253        | 260 GTIDCWKK                   |           |       |                  |      | Mascot      |
|  | 996.4536   | 996.5963    | 0.1427  | 143   | 237        | 244 RMMMQSGR                   |           |       |                  |      | Mascot      |
|  | 1082.5551  | 1082.5773   | 0.0222  | 21    | 1          | 10 MSDAAISFLK                  |           |       |                  |      | Mascot      |
|  | 1097.5297  | 1097.6646   | 0.1349  | 123   | 44         | 52 QITADMQYK                   |           |       |                  |      | Mascot      |
|  | 1622.7954  | 1622.8505   | 0.0551  | 34    | 148        | 163 GAAEREFTGLGNCVAK           |           |       |                  |      | Mascot      |
|  | 1622.7954  | 1622.8505   | 0.0551  | 34    | 148        | 163 GAAEREFTGLGNCVAK           |           |       |                  |      | Mascot      |
|  | 1689.8635  | 1689.9281   | 0.0646  | 38    | 81         | 94 YFPTQALNFAFKDK              |           |       |                  |      | Mascot      |
|  | 2283.2053  | 2283.176    | -0.0293 | -13   | 1          | 23 MSDAAISFLKDFLAGGVA<br>AAISK |           |       |                  |      | Mascot      |
|  | 2283.2053  | 2283.176    | -0.0293 | -13   | 1          | 23 MSDAAISFLKDFLAGGVA<br>AAISK |           |       |                  |      | Mascot      |
|  | 2284.2236  | 2284.1724   | -0.0512 | -22   | 73         | 92 GNLANVIRYFPTQALNFA<br>FK    |           |       |                  |      | Mascot      |
|  | 2299.2002  | 2299.1831   | -0.0171 | -7    | 1          | 23 MSDAAISFLKDFLAGGVA<br>AAISK |           |       | Oxidation (M)[1] |      | Mascot      |

31 novel protein similar to H.sapiens TTN, titin (TTN)  
[Danio rerio]

gi|169154823 842970 5.81 42 36 0

#### Peptide Information

|  | Calc. Mass | Obsrv. Mass | ± da    | ± ppm | Start Seq. | End Sequence Seq. | Ion Score | C. I. | % Modification   | Rank | Result Type |
|--|------------|-------------|---------|-------|------------|-------------------|-----------|-------|------------------|------|-------------|
|  | 842.444    | 842.5099    | 0.0659  | 78    | 3102       | 3108 SYKVSMK      |           |       |                  |      | Mascot      |
|  | 850.4814   | 850.5413    | 0.0599  | 70    | 1088       | 1094 LTSVRMK      |           |       | Oxidation (M)[6] |      | Mascot      |
|  | 870.4203   | 870.5364    | 0.1161  | 133   | 6420       | 6427 LSDSGTYK     |           |       |                  |      | Mascot      |
|  | 882.4679   | 882.5657    | 0.0978  | 111   | 2483       | 2489 YKVSTER      |           |       |                  |      | Mascot      |
|  | 996.536    | 996.5963    | 0.0603  | 61    | 2586       | 2593 LTITETYSR    |           |       |                  |      | Mascot      |
|  | 1023.5217  | 1023.5066   | -0.0151 | -15   | 6866       | 6874 DIRTGGNYK    |           |       |                  |      | Mascot      |
|  | 1045.5347  | 1045.5631   | 0.0284  | 27    | 6656       | 6665 CQIGGTPEIK   |           |       |                  |      | Mascot      |
|  | 1051.5571  | 1051.7139   | 0.1568  | 149   | 6666       | 6674 ISWFKADGK    |           |       |                  |      | Mascot      |
|  | 1088.631   | 1088.615    | -0.016  | -15   | 6362       | 6371 LKDTQSIVGK   |           |       |                  |      | Mascot      |
|  | 1115.5367  | 1115.6925   | 0.1558  | 140   | 1711       | 1719 EDQGKYTFK    |           |       |                  |      | Mascot      |
|  | 1115.6418  | 1115.6925   | 0.0507  | 45    | 2536       | 2544 EITVLEKQR    |           |       |                  |      | Mascot      |
|  | 1121.5771  | 1121.5931   | 0.016   | 14    | 1241       | 1250 CRVTGYPTPK   |           |       |                  |      | Mascot      |

|           |           |         |     |      |      |                            |                                           |        |
|-----------|-----------|---------|-----|------|------|----------------------------|-------------------------------------------|--------|
| 1155.6521 | 1155.6885 | 0.0364  | 31  | 980  | 989  | YPHIKIEGAK                 |                                           | Mascot |
| 1155.6521 | 1155.6885 | 0.0364  | 31  | 980  | 989  | YPHIKIEGAK                 |                                           | Mascot |
| 1279.6376 | 1279.7744 | 0.1368  | 107 | 3711 | 3722 | SETTTAVVSEQK               |                                           | Mascot |
| 1432.7213 | 1432.6503 | -0.071  | -50 | 7324 | 7335 | RMEQTEPVTVAR               | Oxidation (M)[2]                          | Mascot |
| 1458.7838 | 1458.7205 | -0.0633 | -43 | 5831 | 5843 | ISGSLPITVEWEK              |                                           | Mascot |
| 1458.8049 | 1458.7205 | -0.0844 | -58 | 3261 | 3273 | AEPLSTLETEKIK              |                                           | Mascot |
| 1463.8944 | 1463.8929 | -0.0015 | -1  | 123  | 136  | LDVRVTGIPAPVVK             |                                           | Mascot |
| 1475.804  | 1475.7527 | -0.0513 | -35 | 1964 | 1976 | GKHYSLTIIAMK               |                                           | Mascot |
| 1477.7645 | 1477.9099 | 0.1454  | 98  | 4285 | 4298 | SFESTTVAVGNPLR             |                                           | Mascot |
| 1493.6438 | 1493.7314 | 0.0876  | 59  | 5126 | 5138 | YTCHAQNEAGSQK              | Carbamidomethyl (C)[3]                    | Mascot |
| 1555.7209 | 1555.749  | 0.0281  | 18  | 1587 | 1599 | WMKNNAEIFSGDK              | Oxidation (M)[2]                          | Mascot |
| 1592.7697 | 1592.814  | 0.0443  | 28  | 5321 | 5335 | NQAGSDQCSGTLKVK            | Carbamidomethyl (C)[8]                    | Mascot |
| 1592.7697 | 1592.814  | 0.0443  | 28  | 5321 | 5335 | NQAGSDQCSGTLKVK            | Carbamidomethyl (C)[8]                    | Mascot |
| 1622.6752 | 1622.8505 | 0.1753  | 108 | 2945 | 2958 | KDYEGEYSCTASNR             |                                           | Mascot |
| 1622.7876 | 1622.8505 | 0.0629  | 39  | 4732 | 4746 | VGKEQCSCSINVLDK            |                                           | Mascot |
| 1625.7258 | 1625.8387 | 0.1129  | 69  | 5508 | 5522 | NEAGSESCSMDLRVK            |                                           | Mascot |
| 1666.7238 | 1666.8771 | 0.1533  | 92  | 6892 | 6907 | ADSGRYSCHASNDVGK           |                                           | Mascot |
| 1689.9242 | 1689.9281 | 0.0039  | 2   | 207  | 221  | TIISASQISQTRQTR            |                                           | Mascot |
| 1695.958  | 1695.8931 | -0.0649 | -38 | 833  | 846  | LYKPVFVQKPSSFR             |                                           | Mascot |
| 1699.8538 | 1699.9332 | 0.0794  | 47  | 1552 | 1566 | QVVSFTQTLEDAYAK            |                                           | Mascot |
| 1699.8538 | 1699.9332 | 0.0794  | 47  | 1552 | 1566 | QVVSFTQTLEDAYAK            |                                           | Mascot |
| 2125.9932 | 2125.9878 | -0.0054 | -3  | 2455 | 2472 | AVFECELSEPNVQVTWM<br>K     | Oxidation (M)[17]                         | Mascot |
| 2194.1101 | 2194.0884 | -0.0217 | -10 | 742  | 761  | LPVVLPEDEGIYTAFASN<br>MK   |                                           | Mascot |
| 2203.9885 | 2204.1025 | 0.114   | 52  | 1567 | 1584 | EKDTMVTFECETNEPFVK         | Carbamidomethyl (C)[10]                   | Mascot |
| 2211.1438 | 2211.1021 | -0.0417 | -19 | 6494 | 6513 | SCEIALRGDTAILELHNID<br>K   |                                           | Mascot |
| 2216.9626 | 2217.189  | 0.2264  | 102 | 1132 | 1149 | MINEFGYCSLDYEVAYSR         | Carbamidomethyl (C)[8]                    | Mascot |
| 2218.0696 | 2218.1294 | 0.0598  | 27  | 5489 | 5507 | LEISSDIKDSGVYYCEAR         | Carbamidomethyl (C)[16]                   | Mascot |
| 2219.9834 | 2220.1204 | 0.137   | 62  | 1567 | 1584 | EKDTMVTFECETNEPFVK         | Carbamidomethyl (C)[10], Oxidation (M)[5] | Mascot |
| 2232.9575 | 2233.082  | 0.1245  | 56  | 1132 | 1149 | MINEFGYCSLDYEVAYSR         | Carbamidomethyl (C)[8], Oxidation (M)[1]  | Mascot |
| 2238.0933 | 2238.1086 | 0.0153  | 7   | 2454 | 2472 | KAVFECELSEPNVQVTW<br>MK    |                                           | Mascot |
| 2269.1724 | 2269.2627 | 0.0903  | 40  | 2563 | 2581 | NGVEIQFSVDQRFNYAIR         |                                           | Mascot |
| 2269.1724 | 2269.2627 | 0.0903  | 40  | 2563 | 2581 | NGVEIQFSVDQRFNYAIR         |                                           | Mascot |
| 2283.104  | 2283.176  | 0.072   | 32  | 2409 | 2430 | NVHFGDVGDYKFVAGSA<br>ETAAK |                                           | Mascot |
| 2283.1899 | 2283.176  | -0.0139 | -6  | 3240 | 3260 | EHPSQVMSALTESVTPLT<br>IVK  | Oxidation (M)[7]                          | Mascot |
| 2297.1516 | 2297.1938 | 0.0422  | 18  | 6550 | 6570 | NLSVEMGKSLILECTYAG<br>SPK  | Carbamidomethyl (C)[14]                   | Mascot |

|    |                                 |           |        |    |              |       |                                     |   |    |   |  |                           |        |
|----|---------------------------------|-----------|--------|----|--------------|-------|-------------------------------------|---|----|---|--|---------------------------|--------|
|    | 3337.4834                       | 3337.7656 | 0.2822 | 85 | 4346         | 4377  | DTGTYTCTAANEAGSSS<br>CSSSVTVQEPPVFK |   |    |   |  | Carbamidomethyl (C)[7,18] | Mascot |
| 32 | butyrophilin-like [Danio rerio] |           |        |    | gi 168229192 | 30370 | 5.21                                | 7 | 34 | 0 |  |                           |        |

Peptide Information

| Calc. Mass | Obsrv. Mass | ± da    | ± ppm | Start Seq. | End Seq. | Sequence                 | Ion Score | C. I. | % | Modification           | Rank | Result Type |
|------------|-------------|---------|-------|------------|----------|--------------------------|-----------|-------|---|------------------------|------|-------------|
| 888.4672   | 888.5256    | 0.0584  | 66    | 83         | 90       | ESLSPDLK                 |           |       |   |                        |      | Mascot      |
| 1023.4537  | 1023.5066   | 0.0529  | 52    | 152        | 160      | HGNHCGKDR                |           |       |   |                        |      | Mascot      |
| 1043.5779  | 1043.4567   | -0.1212 | -116  | 220        | 227      | HLLTMRTR                 |           |       |   | Oxidation (M)[5]       |      | Mascot      |
| 1082.559   | 1082.5773   | 0.0183  | 17    | 74         | 82       | HAEQITIDR                |           |       |   |                        |      | Mascot      |
| 1689.7496  | 1689.9281   | 0.1785  | 106   | 47         | 61       | QAGTDCENGPVEERK          |           |       |   | Carbamidomethyl (C)[6] |      | Mascot      |
| 2218.3647  | 2218.1294   | -0.2353 | -106  | 17         | 37       | ALFITVIICALLGLAAVILYK    |           |       |   |                        |      | Mascot      |
| 2233.0217  | 2233.082    | 0.0603  | 27    | 248        | 267      | IVDCPVEEDSPAEDTEPF<br>LK |           |       |   |                        |      | Mascot      |

|    |                                                                 |  |  |  |              |          |      |    |    |   |    |   |  |
|----|-----------------------------------------------------------------|--|--|--|--------------|----------|------|----|----|---|----|---|--|
| 33 | PREDICTED: zinc finger protein 845-like isoform 1 [Danio rerio] |  |  |  | gi 326664549 | 110747.2 | 8.71 | 12 | 34 | 0 | 16 | 0 |  |
|----|-----------------------------------------------------------------|--|--|--|--------------|----------|------|----|----|---|----|---|--|

Peptide Information

| Calc. Mass | Obsrv. Mass | ± da    | ± ppm | Start Seq. | End Seq. | Sequence                  | Ion Score | C. I. | % | Modification                                 | Rank | Result Type |
|------------|-------------|---------|-------|------------|----------|---------------------------|-----------|-------|---|----------------------------------------------|------|-------------|
| 996.5546   | 996.5963    | 0.0417  | 42    | 692        | 700      | CFGTKISLK                 |           |       |   |                                              |      | Mascot      |
| 1043.5844  | 1043.4567   | -0.1277 | -122  | 220        | 229      | SSSGKPQKPK                |           |       |   |                                              |      | Mascot      |
| 1088.5483  | 1088.615    | 0.0667  | 61    | 890        | 898      | THTGERPYK                 |           |       |   |                                              |      | Mascot      |
| 1115.6418  | 1115.6925   | 0.0507  | 45    | 39         | 48       | EVASLEAKLR                |           |       |   |                                              |      | Mascot      |
| 1115.6418  | 1115.6925   | 0.0507  | 45    | 39         | 48       | EVASLEAKLR                | 16        |       | 0 |                                              |      | Mascot      |
| 1121.552   | 1121.5931   | 0.0411  | 37    | 905        | 913      | CFSRPEAVR                 |           |       |   | Carbamidomethyl (C)[1]                       |      | Mascot      |
| 1711.8328  | 1711.8909   | 0.0581  | 34    | 773        | 787      | QALQCSYCPKLLCNK           |           |       |   |                                              |      | Mascot      |
| 2216.9924  | 2217.189    | 0.1966  | 89    | 590        | 607      | HERTHTGEKPYQCSQCQ<br>K    |           |       |   | Carbamidomethyl (C)[13]                      |      | Mascot      |
| 2220.0283  | 2220.1204   | 0.0921  | 41    | 220        | 238      | SSSGKPQKPKNYHCEQC<br>GK   |           |       |   | Carbamidomethyl (C)[14,17]                   |      | Mascot      |
| 2225.0227  | 2225.1177   | 0.095   | 43    | 673        | 691      | THEIIHTGEKPYQCShCN<br>K   |           |       |   |                                              |      | Mascot      |
| 2225.0227  | 2225.1177   | 0.095   | 43    | 729        | 747      | THEIIHTGEKPYQCShCN<br>K   |           |       |   |                                              |      | Mascot      |
| 2269.0059  | 2269.2627   | 0.2568  | 113   | 313        | 332      | THTGARPYQCShCQKSF<br>CSK  |           |       |   |                                              |      | Mascot      |
| 2269.0059  | 2269.2627   | 0.2568  | 113   | 313        | 332      | THTGARPYQCShCQKSF<br>CSK  |           |       |   |                                              |      | Mascot      |
| 2284.0386  | 2284.1724   | 0.1338  | 59    | 919        | 937      | HTGEKPYHCSLCSERFS<br>FR   |           |       |   |                                              |      | Mascot      |
| 2627.2388  | 2627.3674   | 0.1286  | 49    | 246        | 266      | LMIHIRAHTGERPFQCNQ<br>CDK |           |       |   | Carbamidomethyl (C)[16,19], Oxidation (M)[2] |      | Mascot      |

|    |                                                           |  |  |  |              |          |      |    |    |   |  |  |
|----|-----------------------------------------------------------|--|--|--|--------------|----------|------|----|----|---|--|--|
| 34 | probable E3 ubiquitin-protein ligase MYCBP2 [Danio rerio] |  |  |  | gi 302393529 | 501527.2 | 6.49 | 27 | 33 | 0 |  |  |
|----|-----------------------------------------------------------|--|--|--|--------------|----------|------|----|----|---|--|--|

**Peptide Information**

| Calc. Mass | Obsrv. Mass | $\pm$ da | $\pm$ ppm | Start Seq. | End Sequence Seq.             | Ion Score | C. I. % Modification                      | Rank | Result Type |
|------------|-------------|----------|-----------|------------|-------------------------------|-----------|-------------------------------------------|------|-------------|
| 850.4702   | 850.5413    | 0.0711   | 84        | 3680       | 3687 SITISCVK                 |           |                                           |      | Mascot      |
| 870.4103   | 870.5364    | 0.1261   | 145       | 4446       | 4453 AYFGGEAR                 |           |                                           |      | Mascot      |
| 950.4173   | 950.4852    | 0.0679   | 71        | 898        | 906 DGSSERGDK                 |           |                                           |      | Mascot      |
| 982.4952   | 982.567     | 0.0718   | 73        | 378        | 387 VGSGYSGTVR                |           |                                           |      | Mascot      |
| 1043.5745  | 1043.4567   | -0.1178  | -113      | 4193       | 4200 THQRQVFK                 |           |                                           |      | Mascot      |
| 1082.639   | 1082.5773   | -0.0617  | -57       | 2786       | 2794 KVPLMEPLR                |           |                                           |      | Mascot      |
| 1115.599   | 1115.6925   | 0.0935   | 84        | 2379       | 2387 RPSENMLIR                |           |                                           |      | Mascot      |
| 1115.599   | 1115.6925   | 0.0935   | 84        | 2379       | 2387 RPSENMLIR                | 13        | 0                                         |      | Mascot      |
| 1121.5619  | 1121.5931   | 0.0312   | 28        | 2304       | 2312 SIQQENMKK                |           | Oxidation (M)[7]                          |      | Mascot      |
| 1155.5901  | 1155.6885   | 0.0984   | 85        | 3708       | 3717 VTSMIFLCGK               |           | Carbamidomethyl (C)[8]                    |      | Mascot      |
| 1155.5901  | 1155.6885   | 0.0984   | 85        | 3708       | 3717 VTSMIFLCGK               |           | Carbamidomethyl (C)[8]                    |      | Mascot      |
| 1179.7096  | 1179.5988   | -0.1108  | -94       | 2797       | 2807 STSPKPKLPPK              |           |                                           |      | Mascot      |
| 1279.7004  | 1279.7744   | 0.074    | 58        | 1383       | 1393 QQTSEPVHILK              |           |                                           |      | Mascot      |
| 1382.6434  | 1382.6827   | 0.0393   | 28        | 2772       | 2783 SDSYTLDPDCLR             |           |                                           |      | Mascot      |
| 1432.6274  | 1432.6503   | 0.0229   | 16        | 4077       | 4089 DMAAGHLSDAWSR            |           | Oxidation (M)[2]                          |      | Mascot      |
| 1448.7347  | 1448.9192   | 0.1845   | 127       | 1087       | 1098 CLLINKLDGSCR             |           | Carbamidomethyl (C)[1,11]                 |      | Mascot      |
| 1458.6174  | 1458.7205   | 0.1031   | 71        | 1131       | 1143 EMCCYNAVIADAR            |           |                                           |      | Mascot      |
| 1458.7223  | 1458.7205   | -0.0018  | -1        | 1210       | 1221 VYSKEDYSVVNR             |           |                                           |      | Mascot      |
| 1475.7675  | 1475.7527   | -0.0148  | -10       | 4401       | 4412 ALMRLEYEGLHK             |           | Oxidation (M)[3]                          |      | Mascot      |
| 1515.6389  | 1515.7451   | 0.1062   | 70        | 1131       | 1143 EMCCYNAVIADAR            |           | Carbamidomethyl (C)[3]                    |      | Mascot      |
| 1555.7858  | 1555.749    | -0.0368  | -24       | 2147       | 2161 ELAYLGSVCAALMK           |           | Oxidation (M)[14]                         |      | Mascot      |
| 1592.6688  | 1592.814    | 0.1452   | 91        | 739        | 751 EEKSMMCQPGMHK             |           | Carbamidomethyl (C)[7]                    |      | Mascot      |
| 1592.6688  | 1592.814    | 0.1452   | 91        | 739        | 751 EEKSMMCQPGMHK             |           | Carbamidomethyl (C)[7]                    |      | Mascot      |
| 1608.6637  | 1608.8344   | 0.1707   | 106       | 739        | 751 EEKSMMCQPGMHK             |           | Carbamidomethyl (C)[7], Oxidation (M)[5]  |      | Mascot      |
| 1625.839   | 1625.8387   | -0.0003  | 0         | 3703       | 3717 DIGNKVTSMIFLCGK          |           |                                           |      | Mascot      |
| 1699.7592  | 1699.9332   | 0.174    | 102       | 2969       | 2983 NSLSCQQGFDEKESK          |           |                                           |      | Mascot      |
| 1699.7592  | 1699.9332   | 0.174    | 102       | 2969       | 2983 NSLSCQQGFDEKESK          |           |                                           |      | Mascot      |
| 2204.2544  | 2204.1025   | -0.1519  | -69       | 3999       | 4018 LGILDMFLGCIKALTVQL<br>K  |           | Carbamidomethyl (C)[10]                   |      | Mascot      |
| 2210.9666  | 2211.1021   | 0.1355   | 61        | 4239       | 4258 EHTGKPASSSSDACRFC<br>GTR |           | Carbamidomethyl (C)[14,17]                |      | Mascot      |
| 2217.155   | 2217.189    | 0.034    | 15        | 2244       | 2262 WLQPDYADPQKTSILN<br>K    |           |                                           |      | Mascot      |
| 2220.2493  | 2220.1204   | -0.1289  | -58       | 3999       | 4018 LGILDMFLGCIKALTVQL<br>K  |           | Carbamidomethyl (C)[10], Oxidation (M)[6] |      | Mascot      |
| 2233.0837  | 2233.082    | -0.0017  | -1        | 626        | 646 LETKMAVYTACNNGSSSI        |           | Oxidation (M)[5]                          |      | Mascot      |

|                     |                                       | 2269.2273  | 2269.2627   | 0.0354  | 16    | 863        | 882         | VTK<br>GPLVFPGPLFMNQREQV<br>LAR  |                        |       |    |                         |      |        |      |  | Mascot |
|---------------------|---------------------------------------|------------|-------------|---------|-------|------------|-------------|----------------------------------|------------------------|-------|----|-------------------------|------|--------|------|--|--------|
|                     |                                       | 2269.2273  | 2269.2627   | 0.0354  | 16    | 863        | 882         | GPLVFPGPLFMNQREQV<br>LAR         |                        |       |    |                         |      |        |      |  | Mascot |
|                     |                                       | 3337.3352  | 3337.7656   | 0.4304  | 129   | 4495       | 4522        | CRYCCSVAVFFCFGTTH<br>FCNACHDDFQR | Carbamidomethyl (C)[1] |       |    |                         |      |        |      |  | Mascot |
| 35                  | protein tyrosine kinase [Danio rerio] |            |             |         |       |            | gi 3093296  | 81950.7                          | 6.66                   | 12    | 33 | 0                       |      |        |      |  |        |
| Peptide Information |                                       |            |             |         |       |            |             |                                  |                        |       |    |                         |      |        |      |  |        |
|                     |                                       | Calc. Mass | Obsrv. Mass | ± da    | ± ppm | Start Seq. | End Seq.    | Sequence                         | Ion Score              | C. I. | %  | Modification            | Rank | Result | Type |  |        |
|                     |                                       | 850.4668   | 850.5413    | 0.0745  | 88    | 574        | 581         | IGDFGLTK                         |                        |       |    |                         |      |        |      |  | Mascot |
|                     |                                       | 1023.475   | 1023.5066   | 0.0316  | 31    | 267        | 275         | MVHGYVCSK                        |                        |       |    |                         |      |        |      |  | Mascot |
|                     |                                       | 1088.4895  | 1088.615    | 0.1255  | 115   | 585        | 593         | DNEGYYTVK                        |                        |       |    |                         |      |        |      |  | Mascot |
|                     |                                       | 1155.623   | 1155.6885   | 0.0655  | 57    | 313        | 322         | IPWIAPECVK                       |                        |       |    |                         |      |        |      |  | Mascot |
|                     |                                       | 1155.623   | 1155.6885   | 0.0655  | 57    | 313        | 322         | IPWIAPECVK                       |                        |       |    |                         |      |        |      |  | Mascot |
|                     |                                       | 1164.7211  | 1164.5659   | -0.1552 | -133  | 176        | 186         | VVLKVLGSGHR                      |                        |       |    |                         |      |        |      |  | Mascot |
|                     |                                       | 1448.822   | 1448.9192   | 0.0972  | 67    | 75         | 86          | ELLEHLQGQLLR                     |                        |       |    |                         |      |        |      |  | Mascot |
|                     |                                       | 1689.8927  | 1689.9281   | 0.0354  | 21    | 267        | 281         | MVHGYVCSKNILVAR                  |                        |       |    |                         |      |        |      |  | Mascot |
|                     |                                       | 1936.9988  | 1936.916    | -0.0828 | -43   | 471        | 485         | EEQSNLWREIHILR                   |                        |       |    |                         |      |        |      |  | Mascot |
|                     |                                       | 2218.063   | 2218.1294   | 0.0664  | 30    | 534        | 552         | TLLNYSVQICQGM DYLGSR             |                        |       |    | Carbamidomethyl (C)[10] |      |        |      |  | Mascot |
|                     |                                       | 2284.1528  | 2284.1724   | 0.0196  | 9     | 408        | 427         | QNPSIQPVPMLEVDPTVF<br>EK         |                        |       |    | Oxidation (M)[10]       |      |        |      |  | Mascot |
|                     |                                       | 2500.2217  | 2500.1299   | -0.0918 | -37   | 334        | 354         | WSFGTTLWEICYNGEIP<br>LKDK        |                        |       |    |                         |      |        |      |  | Mascot |
|                     |                                       | 2627.2268  | 2627.3674   | 0.1406  | 54    | 217        | 237         | HQENIMVEEFVQYGPLDL<br>FMR        |                        |       |    | Oxidation (M)[6,20]     |      |        |      |  | Mascot |
| 36                  | Esrom [Danio rerio]                   |            |             |         |       |            | gi 56961715 | 501488.2                         | 6.51                   | 27    | 33 | 0                       |      |        |      |  |        |
| Peptide Information |                                       |            |             |         |       |            |             |                                  |                        |       |    |                         |      |        |      |  |        |
|                     |                                       | Calc. Mass | Obsrv. Mass | ± da    | ± ppm | Start Seq. | End Seq.    | Sequence                         | Ion Score              | C. I. | %  | Modification            | Rank | Result | Type |  |        |
|                     |                                       | 850.4702   | 850.5413    | 0.0711  | 84    | 3680       | 3687        | SITISCVK                         |                        |       |    |                         |      |        |      |  | Mascot |
|                     |                                       | 870.4103   | 870.5364    | 0.1261  | 145   | 4446       | 4453        | AYFGGEAR                         |                        |       |    |                         |      |        |      |  | Mascot |
|                     |                                       | 950.4173   | 950.4852    | 0.0679  | 71    | 898        | 906         | DGSSERGDK                        |                        |       |    |                         |      |        |      |  | Mascot |
|                     |                                       | 982.4952   | 982.567     | 0.0718  | 73    | 378        | 387         | VGSGYSGTVR                       |                        |       |    |                         |      |        |      |  | Mascot |
|                     |                                       | 1043.5745  | 1043.4567   | -0.1178 | -113  | 4193       | 4200        | THQRQVFK                         |                        |       |    |                         |      |        |      |  | Mascot |
|                     |                                       | 1082.639   | 1082.5773   | -0.0617 | -57   | 2786       | 2794        | KVPLMEPLR                        |                        |       |    |                         |      |        |      |  | Mascot |
|                     |                                       | 1115.599   | 1115.6925   | 0.0935  | 84    | 2379       | 2387        | RPSENMLIR                        |                        |       |    |                         |      |        |      |  | Mascot |
|                     |                                       | 1115.599   | 1115.6925   | 0.0935  | 84    | 2379       | 2387        | RPSENMLIR                        | 13                     |       | 0  |                         |      |        |      |  | Mascot |
|                     |                                       | 1121.5619  | 1121.5931   | 0.0312  | 28    | 2304       | 2312        | SIQQENMKK                        |                        |       |    | Oxidation (M)[7]        |      |        |      |  | Mascot |

|           |           |         |     |      |      |                               |                                           |        |
|-----------|-----------|---------|-----|------|------|-------------------------------|-------------------------------------------|--------|
| 1155.5901 | 1155.6885 | 0.0984  | 85  | 3708 | 3717 | VTSMIFLCGK                    | Carbamidomethyl (C)[8]                    | Mascot |
| 1155.5901 | 1155.6885 | 0.0984  | 85  | 3708 | 3717 | VTSMIFLCGK                    | Carbamidomethyl (C)[8]                    | Mascot |
| 1179.7096 | 1179.5988 | -0.1108 | -94 | 2797 | 2807 | STSPKPKLPPK                   |                                           | Mascot |
| 1279.7004 | 1279.7744 | 0.074   | 58  | 1383 | 1393 | QQTSEPVHILK                   |                                           | Mascot |
| 1382.6434 | 1382.6827 | 0.0393  | 28  | 2772 | 2783 | SDSYTLDPDTLR                  |                                           | Mascot |
| 1432.6274 | 1432.6503 | 0.0229  | 16  | 4077 | 4089 | DMAAGHLSDAWSR                 | Oxidation (M)[2]                          | Mascot |
| 1448.7347 | 1448.9192 | 0.1845  | 127 | 1087 | 1098 | CLLINKLDGSCR                  | Carbamidomethyl (C)[1,11]                 | Mascot |
| 1458.6174 | 1458.7205 | 0.1031  | 71  | 1131 | 1143 | EMCCYNAVIADAR                 |                                           | Mascot |
| 1458.7223 | 1458.7205 | -0.0018 | -1  | 1210 | 1221 | VYSKEDYSVNR                   |                                           | Mascot |
| 1475.7675 | 1475.7527 | -0.0148 | -10 | 4401 | 4412 | ALMRLEYEGLHK                  | Oxidation (M)[3]                          | Mascot |
| 1515.6389 | 1515.7451 | 0.1062  | 70  | 1131 | 1143 | EMCCYNAVIADAR                 | Carbamidomethyl (C)[3]                    | Mascot |
| 1555.7858 | 1555.749  | -0.0368 | -24 | 2147 | 2161 | ELAYLGSVCAALMK                | Oxidation (M)[14]                         | Mascot |
| 1592.6688 | 1592.814  | 0.1452  | 91  | 739  | 751  | EEKSMQCQPGMHK                 | Carbamidomethyl (C)[7]                    | Mascot |
| 1592.6688 | 1592.814  | 0.1452  | 91  | 739  | 751  | EEKSMQCQPGMHK                 | Carbamidomethyl (C)[7]                    | Mascot |
| 1608.6637 | 1608.8344 | 0.1707  | 106 | 739  | 751  | EEKSMQCQPGMHK                 | Carbamidomethyl (C)[7], Oxidation (M)[5]  | Mascot |
| 1625.839  | 1625.8387 | -0.0003 | 0   | 3703 | 3717 | DIGNKVTSMIFLCGK               |                                           | Mascot |
| 1699.7592 | 1699.9332 | 0.174   | 102 | 2969 | 2983 | NSLSCQQGFDEKESK               |                                           | Mascot |
| 1699.7592 | 1699.9332 | 0.174   | 102 | 2969 | 2983 | NSLSCQQGFDEKESK               |                                           | Mascot |
| 2204.2544 | 2204.1025 | -0.1519 | -69 | 3999 | 4018 | LGILDMFLGCIKALTVQLK           | Carbamidomethyl (C)[10]                   | Mascot |
| 2210.9666 | 2211.1021 | 0.1355  | 61  | 4239 | 4258 | EHTGKPASSSSDACRFGTR           | Carbamidomethyl (C)[14,17]                | Mascot |
| 2217.155  | 2217.189  | 0.034   | 15  | 2244 | 2262 | WLQPDSYADPQKTSILNK            |                                           | Mascot |
| 2220.2493 | 2220.1204 | -0.1289 | -58 | 3999 | 4018 | LGILDMFLGCIKALTVQLK           | Carbamidomethyl (C)[10], Oxidation (M)[6] | Mascot |
| 2233.0837 | 2233.082  | -0.0017 | -1  | 626  | 646  | LETKMAVYTACNNGSSSIVTK         | Oxidation (M)[5]                          | Mascot |
| 2269.2273 | 2269.2627 | 0.0354  | 16  | 863  | 882  | GPLVFPGPLFMNQREQVLAR          |                                           | Mascot |
| 2269.2273 | 2269.2627 | 0.0354  | 16  | 863  | 882  | GPLVFPGPLFMNQREQVLAR          |                                           | Mascot |
| 3337.3352 | 3337.7656 | 0.4304  | 129 | 4495 | 4522 | CRYCCSVAVFFCFGTTTHFCNACHDDFQR | Carbamidomethyl (C)[1]                    | Mascot |

37 novel protein similar to a human protein associated with gi|26788088 335701.2 6.91 21 33 0  
Myc [Danio rerio]

#### Peptide Information

| Calc. Mass | Obsrv. Mass | ± da    | ± ppm | Start Seq. | End Seq. | Sequence   | Ion Score | C. I. | % Modification | Rank | Result | Type |
|------------|-------------|---------|-------|------------|----------|------------|-----------|-------|----------------|------|--------|------|
| 950.4173   | 950.4852    | 0.0679  | 71    | 446        | 454      | DGSSSERGDK |           |       |                |      | Mascot |      |
| 1082.639   | 1082.5773   | -0.0617 | -57   | 2452       | 2460     | KVPLMEPLR  |           |       |                |      | Mascot |      |
| 1115.599   | 1115.6925   | 0.0935  | 84    | 1878       | 1886     | RPSENMLIR  |           |       |                |      | Mascot |      |
| 1115.599   | 1115.6925   | 0.0935  | 84    | 1878       | 1886     | RPSENMLIR  | 13        | 0     |                |      | Mascot |      |

|           |           |         |     |      |      |                       |                                           |        |
|-----------|-----------|---------|-----|------|------|-----------------------|-------------------------------------------|--------|
| 1121.5619 | 1121.5931 | 0.0312  | 28  | 1803 | 1811 | SIQQENMKK             | Oxidation (M)[7]                          | Mascot |
| 1179.7096 | 1179.5988 | -0.1108 | -94 | 2463 | 2473 | STSPKPKLPPK           |                                           | Mascot |
| 1279.7004 | 1279.7744 | 0.074   | 58  | 931  | 941  | QQTSEPVHILK           |                                           | Mascot |
| 1382.6434 | 1382.6827 | 0.0393  | 28  | 2438 | 2449 | SDSYTLDPDTRL          |                                           | Mascot |
| 1448.7347 | 1448.9192 | 0.1845  | 127 | 635  | 646  | CLLINKLDGSCR          | Carbamidomethyl (C)[1,11]                 | Mascot |
| 1458.6174 | 1458.7205 | 0.1031  | 71  | 679  | 691  | EMCCYNAVIADAR         |                                           | Mascot |
| 1458.7223 | 1458.7205 | -0.0018 | -1  | 758  | 769  | VYSKEDYSVNR           |                                           | Mascot |
| 1475.7853 | 1475.7527 | -0.0326 | -22 | 455  | 468  | DASKITTYPPGAVR        |                                           | Mascot |
| 1515.6389 | 1515.7451 | 0.1062  | 70  | 679  | 691  | EMCCYNAVIADAR         | Carbamidomethyl (C)[3]                    | Mascot |
| 1555.7858 | 1555.749  | -0.0368 | -24 | 1685 | 1699 | ELAYLGSVCAALMK        | Oxidation (M)[14]                         | Mascot |
| 1592.6688 | 1592.814  | 0.1452  | 91  | 271  | 283  | EEKSMQCQPGMHK         | Carbamidomethyl (C)[7]                    | Mascot |
| 1592.6688 | 1592.814  | 0.1452  | 91  | 271  | 283  | EEKSMQCQPGMHK         | Carbamidomethyl (C)[7]                    | Mascot |
| 1608.8024 | 1608.8344 | 0.032   | 20  | 2077 | 2091 | TGPSGHNIRSCPNLR       |                                           | Mascot |
| 1699.7592 | 1699.9332 | 0.174   | 102 | 2635 | 2649 | NSLSCQQGFDEKESK       |                                           | Mascot |
| 1699.7592 | 1699.9332 | 0.174   | 102 | 2635 | 2649 | NSLSCQQGFDEKESK       |                                           | Mascot |
| 1955.0564 | 1954.8737 | -0.1827 | -93 | 2086 | 2103 | SCPNLRGIPGMLVLGNK     | Carbamidomethyl (C)[2], Oxidation (M)[12] | Mascot |
| 2204.1995 | 2204.1025 | -0.097  | -44 | 350  | 369  | GIFDAVKEMIPDLLLGTSR   | Oxidation (M)[9]                          | Mascot |
| 2217.155  | 2217.189  | 0.034   | 15  | 1743 | 1761 | WLQPDSYADPQKTSILNK    |                                           | Mascot |
| 2219.9001 | 2220.1204 | 0.2203  | 99  | 2698 | 2716 | CEDGKESVSYEMTSHSSMR   | Carbamidomethyl (C)[1]                    | Mascot |
| 2233.0837 | 2233.082  | -0.0017 | -1  | 158  | 178  | LETKMAVYTACNNGSSSIVTK | Oxidation (M)[5]                          | Mascot |
| 2269.2273 | 2269.2627 | 0.0354  | 16  | 411  | 430  | GPLVFPGPLFMNQREQVLAR  |                                           | Mascot |
| 2269.2273 | 2269.2627 | 0.0354  | 16  | 411  | 430  | GPLVFPGPLFMNQREQVLAR  |                                           | Mascot |

38

PREDICTED: partner and localizer of BRCA2 [Danio rerio]

gi|292609460

35211.4

5.68

7

33

0

| Peptide Information |             |         |       |            |          |                         |           |         |                         |                  |
|---------------------|-------------|---------|-------|------------|----------|-------------------------|-----------|---------|-------------------------|------------------|
| Calc. Mass          | Obsrv. Mass | ± da    | ± ppm | Start Seq. | End Seq. | Sequence                | Ion Score | C. I. % | Modification            | Rank Result Type |
| 1432.7577           | 1432.6503   | -0.1074 | -75   | 289        | 301      | ATVVLDSECLAR            |           |         |                         | Mascot           |
| 1434.7223           | 1434.7253   | 0.003   | 2     | 151        | 163      | QNIQTFAAVEGEK           |           |         |                         | Mascot           |
| 1477.7931           | 1477.9099   | 0.1168  | 79    | 129        | 142      | VSMLTSLQEGSVVK          |           |         |                         | Mascot           |
| 1493.788            | 1493.7314   | -0.0566 | -38   | 129        | 142      | VSMLTSLQEGSVVK          |           |         | Oxidation (M)[3]        | Mascot           |
| 1592.7948           | 1592.814    | 0.0192  | 12    | 284        | 298      | DSVAKATVVLDSECR         | 4         | 0       |                         | Mascot           |
| 1592.7948           | 1592.814    | 0.0192  | 12    | 284        | 298      | DSVAKATVVLDSECR         |           |         |                         | Mascot           |
| 2220.0974           | 2220.1204   | 0.023   | 10    | 1          | 19       | MHTFKALEDGCVLDLCLV<br>R |           |         | Carbamidomethyl (C)[11] | Mascot           |

|    |                                |           |         |     |              |     |                          |      |   |    |   |  |  |        |
|----|--------------------------------|-----------|---------|-----|--------------|-----|--------------------------|------|---|----|---|--|--|--------|
|    | 2233.2446                      | 2233.082  | -0.1626 | -73 | 174          | 193 | TLLIWSMKSGQLLTICL<br>GK  |      |   |    |   |  |  | Mascot |
|    | 2284.1531                      | 2284.1724 | 0.0193  | 8   | 182          | 202 | SGQLLTICLGKTLTMTN<br>CMK |      |   |    |   |  |  | Mascot |
| 39 | Barhl1.2 protein [Danio rerio] |           |         |     | gi 161611956 |     | 32929.5                  | 9.15 | 7 | 33 | 0 |  |  |        |

Peptide Information

| Calc. Mass | Obsrv. Mass | ± da    | ± ppm | Start Seq. | End Seq. | Sequence                     | Ion Score | C. I. | % Modification          | Rank | Result Type |
|------------|-------------|---------|-------|------------|----------|------------------------------|-----------|-------|-------------------------|------|-------------|
| 1023.5118  | 1023.5066   | -0.0052 | -5    | 201        | 207      | TWYQNRR                      |           |       |                         |      | Mascot      |
| 1155.5865  | 1155.6885   | 0.102   | 88    | 54         | 63       | SSVEDAVHRR                   |           |       |                         |      | Mascot      |
| 1155.5865  | 1155.6885   | 0.102   | 88    | 53         | 62       | RSSVEDAVHR                   |           |       |                         |      | Mascot      |
| 1608.7612  | 1608.8344   | 0.0732  | 46    | 121        | 134      | LHSNSSSDSEYRVK               |           |       |                         |      | Mascot      |
| 1622.886   | 1622.8505   | -0.0355 | -22   | 66         | 80       | ALGLDSPLQISQQPR              |           |       |                         |      | Mascot      |
| 1622.886   | 1622.8505   | -0.0355 | -22   | 66         | 80       | ALGLDSPLQISQQPR              |           |       |                         |      | Mascot      |
| 2299.062   | 2299.1831   | 0.1211  | 53    | 31         | 52       | SPAELSPRSDLSGCSS<br>PPSPR    |           |       | Carbamidomethyl (C)[15] |      | Mascot      |
| 2627.4514  | 2627.3674   | -0.084  | -32   | 66         | 89       | ALGLDSPLQISQQPRTVT<br>SSFLIR |           |       |                         |      | Mascot      |

|    |                                  |  |  |  |              |  |       |      |   |    |   |  |  |
|----|----------------------------------|--|--|--|--------------|--|-------|------|---|----|---|--|--|
| 40 | Zgc:171915 protein [Danio rerio] |  |  |  | gi 156230187 |  | 32406 | 8.38 | 7 | 33 | 0 |  |  |
|----|----------------------------------|--|--|--|--------------|--|-------|------|---|----|---|--|--|

Peptide Information

| Calc. Mass | Obsrv. Mass | ± da    | ± ppm | Start Seq. | End Seq. | Sequence                      | Ion Score | C. I. | % Modification          | Rank | Result Type |
|------------|-------------|---------|-------|------------|----------|-------------------------------|-----------|-------|-------------------------|------|-------------|
| 842.5246   | 842.5099    | -0.0147 | -17   | 263        | 269      | GKIHIFK                       |           |       |                         |      | Mascot      |
| 1382.8187  | 1382.6827   | -0.136  | -98   | 149        | 160      | LPLKVLACNNK                   |           |       | Carbamidomethyl (C)[9]  |      | Mascot      |
| 1477.7943  | 1477.9099   | 0.1156  | 78    | 229        | 240      | VTSIPVCYRNLR                  |           |       | Carbamidomethyl (C)[7]  |      | Mascot      |
| 1515.7761  | 1515.7451   | -0.031  | -20   | 51         | 66       | ALDEAAATGGLNLSGR              |           |       |                         |      | Mascot      |
| 1625.8179  | 1625.8387   | 0.0208  | 13    | 265        | 277      | IHIFKYLNMEACK                 |           |       | Oxidation (M)[9]        |      | Mascot      |
| 1666.8444  | 1666.8771   | 0.0327  | 20    | 265        | 277      | IHIFKYLNMEACK                 |           |       | Carbamidomethyl (C)[12] |      | Mascot      |
| 2211.1841  | 2211.1021   | -0.082  | -37   | 210        | 228      | LPELAELPLVRDFSCN<br>K         |           |       | Carbamidomethyl (C)[17] |      | Mascot      |
| 2627.4338  | 2627.3674   | -0.0664 | -25   | 241        | 264      | HLQSIILDNNPLQSPPAQI<br>CIK GK |           |       |                         |      | Mascot      |

|    |                                    |  |  |  |              |  |         |      |    |    |   |  |  |
|----|------------------------------------|--|--|--|--------------|--|---------|------|----|----|---|--|--|
| 41 | LOC100149217 protein [Danio rerio] |  |  |  | gi 158253697 |  | 48680.3 | 9.76 | 11 | 32 | 0 |  |  |
|----|------------------------------------|--|--|--|--------------|--|---------|------|----|----|---|--|--|

Peptide Information

| Calc. Mass | Obsrv. Mass | ± da    | ± ppm | Start Seq. | End Seq. | Sequence   | Ion Score | C. I. | % Modification         | Rank | Result Type |
|------------|-------------|---------|-------|------------|----------|------------|-----------|-------|------------------------|------|-------------|
| 1023.572   | 1023.5066   | -0.0654 | -64   | 75         | 83       | TFLISSDLK  |           |       |                        |      | Mascot      |
| 1043.4285  | 1043.4567   | 0.0282  | 27    | 22         | 30       | GFACTQCEK  |           |       | Carbamidomethyl (C)[4] |      | Mascot      |
| 1155.5865  | 1155.6885   | 0.102   | 88    | 190        | 199      | QSSSLNNHIR |           |       |                        |      | Mascot      |



|    |                                 |           |        |    |             |       |                         |   |    |                         |  |  |        |
|----|---------------------------------|-----------|--------|----|-------------|-------|-------------------------|---|----|-------------------------|--|--|--------|
|    | 1155.5865                       | 1155.6885 | 0.102  | 88 | 190         | 199   | QSSSLNNHIR              |   |    |                         |  |  | Mascot |
|    | 1493.7166                       | 1493.7314 | 0.0148 | 10 | 327         | 339   | SFTQSSSLVNHMR           |   |    |                         |  |  | Mascot |
|    | 1625.8217                       | 1625.8387 | 0.017  | 10 | 140         | 152   | LHQMIHTGERPYK           |   |    | Oxidation (M)[4]        |  |  | Mascot |
|    | 1689.7948                       | 1689.9281 | 0.1333 | 79 | 284         | 298   | IHTGEKPHVCSHCNK         |   |    |                         |  |  | Mascot |
|    | 1695.7828                       | 1695.8931 | 0.1103 | 65 | 228         | 242   | LHTNEKLYSCAECGK         |   |    |                         |  |  | Mascot |
|    | 1711.7778                       | 1711.8909 | 0.1131 | 66 | 377         | 391   | CDQCGETFLRPSDLK         |   |    |                         |  |  | Mascot |
|    | 2193.9475                       | 2194.0884 | 0.1409 | 64 | 168         | 186   | THEMIHTGEKPYTCSQC<br>GR |   |    | Oxidation (M)[4]        |  |  | Mascot |
|    | 2218.0127                       | 2218.1294 | 0.1167 | 53 | 308         | 326   | VHERSHTGEKPYTCTQC<br>GK |   |    | Carbamidomethyl (C)[14] |  |  | Mascot |
|    | 2283.0579                       | 2283.176  | 0.1181 | 52 | 140         | 158   | LHQMIHTGERPYKCSHC<br>DK |   |    |                         |  |  | Mascot |
|    | 2283.0579                       | 2283.176  | 0.1181 | 52 | 140         | 158   | LHQMIHTGERPYKCSHC<br>DK |   |    |                         |  |  | Mascot |
|    | 2299.053                        | 2299.1831 | 0.1301 | 57 | 140         | 158   | LHQMIHTGERPYKCSHC<br>DK |   |    | Oxidation (M)[4]        |  |  | Mascot |
| 42 | small GTPase RhoA [Danio rerio] |           |        |    | gi 56118288 | 21849 | 5.83                    | 7 | 32 | 0                       |  |  |        |

#### Peptide Information

| Calc. Mass | Obsrv. Mass | ± da    | ± ppm | Start Seq. | End Seq. | Sequence          | Ion Score | C. I. | % Modification                            | Rank | Result Type |
|------------|-------------|---------|-------|------------|----------|-------------------|-----------|-------|-------------------------------------------|------|-------------|
| 982.4662   | 982.567     | 0.1008  | 103   | 169        | 176      | EVFEMATR          |           |       |                                           |      | Mascot      |
| 1023.5906  | 1023.5066   | -0.084  | -82   | 19         | 27       | TCLLIVFSK         |           |       |                                           |      | Mascot      |
| 1088.5768  | 1088.615    | 0.0382  | 35    | 8          | 18       | LVIVGDGACGK       |           |       | Carbamidomethyl (C)[9]                    |      | Mascot      |
| 1155.5502  | 1155.6885   | 0.1383  | 120   | 120        | 128      | DLRNDHTR          |           |       |                                           |      | Mascot      |
| 1155.5502  | 1155.6885   | 0.1383  | 120   | 120        | 128      | DLRNDHTR          |           |       |                                           |      | Mascot      |
| 1164.5062  | 1164.5659   | 0.0597  | 51    | 141        | 150      | AEEGRDMANR        |           |       | Oxidation (M)[7]                          |      | Mascot      |
| 1592.8213  | 1592.814    | -0.0073 | -5    | 169        | 182      | EVFEMATRAALQAR    |           |       |                                           |      | Mascot      |
| 1592.8213  | 1592.814    | -0.0073 | -5    | 169        | 182      | EVFEMATRAALQAR    |           |       |                                           |      | Mascot      |
| 1608.8163  | 1608.8344   | 0.0181  | 11    | 169        | 182      | EVFEMATRAALQAR    |           |       | Oxidation (M)[5]                          |      | Mascot      |
| 1936.835   | 1936.916    | 0.081   | 42    | 146        | 162      | DMANRIGAFGYMECSAK |           |       | Carbamidomethyl (C)[14], Oxidation (M)[2] |      | Mascot      |

43 complement component 3-like isoform 1 [Danio rerio] gi|153792045 188748 7.66 17 32 0

#### Peptide Information

| Calc. Mass | Obsrv. Mass | ± da    | ± ppm | Start Seq. | End Seq. | Sequence   | Ion Score | C. I. | % Modification   | Rank | Result Type |
|------------|-------------|---------|-------|------------|----------|------------|-----------|-------|------------------|------|-------------|
| 842.5206   | 842.5099    | -0.0107 | -13   | 516        | 523      | GKIIQAGR   |           |       |                  |      | Mascot      |
| 982.5931   | 982.567     | -0.0261 | -27   | 971        | 979      | LQLDAVVPK  |           |       |                  |      | Mascot      |
| 1088.5591  | 1088.615    | 0.0559  | 51    | 709        | 717      | ARMIEPMPK  |           |       | Oxidation (M)[3] |      | Mascot      |
| 1097.679   | 1097.6646   | -0.0144 | -13   | 518        | 527      | IIQAGRVNVK |           |       |                  |      | Mascot      |
| 1121.6201  | 1121.5931   | -0.027  | -24   | 1049       | 1057     | EEAIKYIQK  |           |       |                  |      | Mascot      |

|  |           |           |         |     |      |      |                            |  |  |  |  |  |                   |  |  |  |  |  |        |
|--|-----------|-----------|---------|-----|------|------|----------------------------|--|--|--|--|--|-------------------|--|--|--|--|--|--------|
|  | 1155.5641 | 1155.6885 | 0.1244  | 108 | 1378 | 1387 | TSSDVEKSFR                 |  |  |  |  |  |                   |  |  |  |  |  | Mascot |
|  | 1155.5641 | 1155.6885 | 0.1244  | 108 | 1378 | 1387 | TSSDVEKSFR                 |  |  |  |  |  |                   |  |  |  |  |  | Mascot |
|  | 1475.7965 | 1475.7527 | -0.0438 | -30 | 1457 | 1468 | EAEIISFRLNQR               |  |  |  |  |  |                   |  |  |  |  |  | Mascot |
|  | 1515.8451 | 1515.7451 | -0.1    | -66 | 862  | 875  | STPSVNVVMVILEK             |  |  |  |  |  |                   |  |  |  |  |  | Mascot |
|  | 1592.8014 | 1592.814  | 0.0126  | 8   | 343  | 358  | ASVLTSSGSDLVEAEK           |  |  |  |  |  |                   |  |  |  |  |  | Mascot |
|  | 1592.8014 | 1592.814  | 0.0126  | 8   | 343  | 358  | ASVLTSSGSDLVEAEK           |  |  |  |  |  |                   |  |  |  |  |  | Mascot |
|  | 1608.8632 | 1608.8344 | -0.0288 | -18 | 285  | 299  | GVAYVLFGIEINGEK            |  |  |  |  |  |                   |  |  |  |  |  | Mascot |
|  | 1622.8033 | 1622.8505 | 0.0472  | 29  | 1176 | 1189 | SRQAAGYLTEHFSR             |  |  |  |  |  |                   |  |  |  |  |  | Mascot |
|  | 1622.8033 | 1622.8505 | 0.0472  | 29  | 1176 | 1189 | SRQAAGYLTEHFSR             |  |  |  |  |  |                   |  |  |  |  |  | Mascot |
|  | 1625.7992 | 1625.8387 | 0.0395  | 24  | 1091 | 1104 | VFSMAHSFITVNEK             |  |  |  |  |  | Oxidation (M)[4]  |  |  |  |  |  | Mascot |
|  | 2142.1965 | 2141.9885 | -0.208  | -97 | 411  | 429  | RPISVHSGTINIHNMPKK         |  |  |  |  |  |                   |  |  |  |  |  | Mascot |
|  | 2204.1228 | 2204.1025 | -0.0203 | -9  | 307  | 326  | QIDDLNNGGSVSLTMEEI<br>KR   |  |  |  |  |  |                   |  |  |  |  |  | Mascot |
|  | 2217.2349 | 2217.189  | -0.0459 | -21 | 182  | 202  | TISLEIQNPDGIAVHGIGR<br>VK  |  |  |  |  |  |                   |  |  |  |  |  | Mascot |
|  | 2220.1177 | 2220.1204 | 0.0027  | 1   | 307  | 326  | QIDDLNNGGSVSLTMEEI<br>KR   |  |  |  |  |  | Oxidation (M)[15] |  |  |  |  |  | Mascot |
|  | 2233.1533 | 2233.082  | -0.0713 | -32 | 911  | 932  | TGELPLQVTAVAASFMG<br>QDAVK |  |  |  |  |  |                   |  |  |  |  |  | Mascot |
|  | 2238.2129 | 2238.1086 | -0.1043 | -47 | 73   | 92   | VVKVTVVVYDYPNSQTAL<br>SR   |  |  |  |  |  |                   |  |  |  |  |  | Mascot |

44

hypothetical protein LOC100158483 [Xenopus (Silurana) tropicalis]

gi|189230142

60297.2

5.13

7

32

0

16

0

| Peptide Information |             |         |       |            |          |                          |           |       |                            |      |             |
|---------------------|-------------|---------|-------|------------|----------|--------------------------|-----------|-------|----------------------------|------|-------------|
| Calc. Mass          | Obsrv. Mass | ± da    | ± ppm | Start Seq. | End Seq. | Sequence                 | Ion Score | C. I. | % Modification             | Rank | Result Type |
| 882.5407            | 882.5657    | 0.025   | 28    | 278        | 285      | SPILSPIR                 |           |       |                            |      | Mascot      |
| 1023.5469           | 1023.5066   | -0.0403 | -39   | 48         | 57       | SSSATPAKFK               |           |       |                            |      | Mascot      |
| 1121.5885           | 1121.5931   | 0.0046  | 4     | 121        | 129      | QSMKLPHHK                |           |       | Oxidation (M)[3]           |      | Mascot      |
| 1164.5942           | 1164.5659   | -0.0283 | -24   | 334        | 343      | SCSPFKSRPR               |           |       |                            |      | Mascot      |
| 1458.7546           | 1458.7205   | -0.0341 | -23   | 286        | 298      | LQQSVTPESGERK            |           |       |                            |      | Mascot      |
| 1458.7546           | 1458.7205   | -0.0341 | -23   | 286        | 298      | LQQSVTPESGERK            | 16        | 0     |                            |      | Mascot      |
| 1954.9504           | 1954.8737   | -0.0767 | -39   | 79         | 95       | QAVFFSQARADSEIEEK        |           |       |                            |      | Mascot      |
| 2194.0266           | 2194.0884   | 0.0618  | 28    | 320        | 339      | SGESPLVEGCSPIRSCSP<br>FK |           |       | Carbamidomethyl (C)[10,16] |      | Mascot      |

45

novel protein similar to vertebrate transmembrane protein 16H (TMEM16H) [Danio rerio]

gi|169158193

112029.6

5.99

9

32

0

21

0

| Peptide Information |             |        |       |            |          |          |           |       |                |      |             |
|---------------------|-------------|--------|-------|------------|----------|----------|-----------|-------|----------------|------|-------------|
| Calc. Mass          | Obsrv. Mass | ± da   | ± ppm | Start Seq. | End Seq. | Sequence | Ion Score | C. I. | % Modification | Rank | Result Type |
| 864.4686            | 864.5085    | 0.0399 | 46    | 789        | 794      | LEYQRR   |           |       |                |      | Mascot      |

|    |                                                         |           |         |     |              |          |                          |    |   |  |    |                        |  |  |  |  |        |
|----|---------------------------------------------------------|-----------|---------|-----|--------------|----------|--------------------------|----|---|--|----|------------------------|--|--|--|--|--------|
|    | 982.5203                                                | 982.567   | 0.0467  | 48  | 856          | 864      | FSSTGDKLK                |    |   |  |    |                        |  |  |  |  | Mascot |
|    | 1115.6782                                               | 1115.6925 | 0.0143  | 13  | 2            | 11       | SSAVLEKLLR               |    |   |  |    |                        |  |  |  |  | Mascot |
|    | 1115.6782                                               | 1115.6925 | 0.0143  | 13  | 2            | 11       | SSAVLEKLLR               | 21 | 0 |  |    |                        |  |  |  |  | Mascot |
|    | 1121.4891                                               | 1121.5931 | 0.104   | 93  | 614          | 624      | AAGGENNTMEK              |    |   |  |    |                        |  |  |  |  | Mascot |
|    | 1463.8654                                               | 1463.8929 | 0.0275  | 19  | 437          | 448      | LKEMLATLLIFR             |    |   |  |    | Oxidation (M)[4]       |  |  |  |  | Mascot |
|    | 1515.7537                                               | 1515.7451 | -0.0086 | -6  | 527          | 540      | VPKTEEVDDDAGLK           |    |   |  |    |                        |  |  |  |  | Mascot |
|    | 1555.7097                                               | 1555.749  | 0.0393  | 25  | 203          | 215      | QPLDDVCDYFGVK            |    |   |  |    | Carbamidomethyl (C)[7] |  |  |  |  | Mascot |
|    | 1666.921                                                | 1666.8771 | -0.0439 | -26 | 174          | 186      | RVILQMFLHEQR             |    |   |  |    |                        |  |  |  |  | Mascot |
|    | 2283.1477                                               | 2283.176  | 0.0283  | 12  | 769          | 788      | YVIHVAIPDVPNWWADEM<br>AK |    |   |  |    | Oxidation (M)[18]      |  |  |  |  | Mascot |
|    | 2283.1477                                               | 2283.176  | 0.0283  | 12  | 769          | 788      | YVIHVAIPDVPNWWADEM<br>AK |    |   |  |    | Oxidation (M)[18]      |  |  |  |  | Mascot |
| 46 | PREDICTED: hypothetical protein LOC562947 [Danio rerio] |           |         |     | gi 292610701 | 116105.3 | 5.91                     | 1  |   |  | 21 | 0                      |  |  |  |  |        |

Peptide Information

| Calc. Mass | Obsrv. Mass | ± da   | ± ppm | Start Seq. | End Seq. | Sequence   | Ion Score | C. I. | % Modification | Rank | Result Type |
|------------|-------------|--------|-------|------------|----------|------------|-----------|-------|----------------|------|-------------|
| 1115.6782  | 1115.6925   | 0.0143 | 13    | 2          | 11       | SSAVLEKLLR | 21        | 0     |                | 2    | Mascot      |

|    |                                     |  |  |  |              |          |     |   |  |  |    |   |  |  |  |  |  |
|----|-------------------------------------|--|--|--|--------------|----------|-----|---|--|--|----|---|--|--|--|--|--|
| 47 | PREDICTED: wu:fb77e12 [Danio rerio] |  |  |  | gi 326679169 | 160931.2 | 6.5 | 1 |  |  | 19 | 0 |  |  |  |  |  |
|----|-------------------------------------|--|--|--|--------------|----------|-----|---|--|--|----|---|--|--|--|--|--|

Peptide Information

| Calc. Mass | Obsrv. Mass | ± da   | ± ppm | Start Seq. | End Seq. | Sequence   | Ion Score | C. I. | % Modification | Rank | Result Type |
|------------|-------------|--------|-------|------------|----------|------------|-----------|-------|----------------|------|-------------|
| 1115.5328  | 1115.6925   | 0.1597 | 143   | 480        | 489      | DTPSDPQSIR | 19        | 0     |                | 3    | Mascot      |

|    |                                                               |  |  |  |              |          |      |   |  |  |    |   |  |  |  |  |  |
|----|---------------------------------------------------------------|--|--|--|--------------|----------|------|---|--|--|----|---|--|--|--|--|--|
| 48 | PREDICTED: poly [ADP-ribose] polymerase 14-like [Danio rerio] |  |  |  | gi 326671190 | 198536.4 | 6.57 | 1 |  |  | 18 | 0 |  |  |  |  |  |
|----|---------------------------------------------------------------|--|--|--|--------------|----------|------|---|--|--|----|---|--|--|--|--|--|

Peptide Information

| Calc. Mass | Obsrv. Mass | ± da   | ± ppm | Start Seq. | End Seq. | Sequence  | Ion Score | C. I. | % Modification | Rank | Result Type |
|------------|-------------|--------|-------|------------|----------|-----------|-----------|-------|----------------|------|-------------|
| 1115.6241  | 1115.6925   | 0.0684 | 61    | 1417       | 1425     | EMINNLIIR | 18        | 0     |                | 4    | Mascot      |

|    |                                                                                       |  |  |  |              |          |      |   |  |  |    |   |  |  |  |  |  |
|----|---------------------------------------------------------------------------------------|--|--|--|--------------|----------|------|---|--|--|----|---|--|--|--|--|--|
| 49 | PREDICTED: low-density lipoprotein receptor-related protein 1B, partial [Danio rerio] |  |  |  | gi 326678476 | 326092.8 | 5.15 | 1 |  |  | 17 | 0 |  |  |  |  |  |
|----|---------------------------------------------------------------------------------------|--|--|--|--------------|----------|------|---|--|--|----|---|--|--|--|--|--|

Peptide Information

| Calc. Mass | Obsrv. Mass | ± da   | ± ppm | Start Seq. | End Seq. | Sequence    | Ion Score | C. I. | % Modification | Rank | Result Type |
|------------|-------------|--------|-------|------------|----------|-------------|-----------|-------|----------------|------|-------------|
| 1115.6418  | 1115.6925   | 0.0507 | 45    | 2089       | 2098     | KDAVDVVITIR | 17        | 0     |                | 5    | Mascot      |

|    |                                              |  |  |  |              |          |      |   |  |  |    |   |  |  |  |  |  |
|----|----------------------------------------------|--|--|--|--------------|----------|------|---|--|--|----|---|--|--|--|--|--|
| 50 | PREDICTED: hypothetical protein LOC100536674 |  |  |  | gi 326678668 | 141952.3 | 9.22 | 1 |  |  | 16 | 0 |  |  |  |  |  |
|----|----------------------------------------------|--|--|--|--------------|----------|------|---|--|--|----|---|--|--|--|--|--|

[Danio rerio]

Peptide Information

| Calc. Mass | Obsrv. Mass | ± da   | ± ppm | Start Seq. | End Sequence Seq. | Ion Score | C. I. % | Modification     | Rank | Result Type |
|------------|-------------|--------|-------|------------|-------------------|-----------|---------|------------------|------|-------------|
| 1115.6354  | 1115.6925   | 0.0571 | 51    | 263        | 271 VMKPEARIR     | 16        | 0       | Oxidation (M)[2] | 7    | Mascot      |

|                |           |                        |                |                |                    |
|----------------|-----------|------------------------|----------------|----------------|--------------------|
| Gel Idx/Pos    | 178/H5    | Instr./Gel Origin      | BA2060/110707A | Process Status | Analysis Succeeded |
| Plate [#] Name | [1] 31496 | Instrument Sample Name |                | Spectra        | 11                 |

| Rank | Protein Name                                            | Accession No. | Protein MW | Protein PI | Pep. Count | Protein Score | Protein Score C. I. % | Total Ion Score | Total Ion C. I. % |
|------|---------------------------------------------------------|---------------|------------|------------|------------|---------------|-----------------------|-----------------|-------------------|
| 1    | transitional endoplasmic reticulum ATPase [Danio rerio] | gi 41393119   | 89367.7    | 5.14       | 34         | 1,310         | 100                   | 1047            | 100               |

Peptide Information

| Calc. Mass | Obsrv. Mass | ± da    | ± ppm | Start Seq. | End Sequence Seq.  | Ion Score | C. I. % | Modification            | Rank | Result Type |
|------------|-------------|---------|-------|------------|--------------------|-----------|---------|-------------------------|------|-------------|
| 819.4722   | 819.4641    | -0.0081 | -10   | 149        | 155 GDIFLVR        |           |         |                         |      | Mascot      |
| 837.5305   | 837.522     | -0.0085 | -10   | 232        | 239 AIGVKPPR       |           |         |                         |      | Mascot      |
| 947.5672   | 947.5545    | -0.0127 | -13   | 148        | 155 KGDIFLVR       |           |         |                         |      | Mascot      |
| 986.5339   | 986.519     | -0.0149 | -15   | 218        | 225 EMVELPLR       |           |         |                         |      | Mascot      |
| 989.4897   | 989.4801    | -0.0096 | -10   | 701        | 708 ESIENEIR       |           |         |                         |      | Mascot      |
| 1051.5242  | 1051.5104   | -0.0138 | -13   | 46         | 53 MDELQLFR        |           |         |                         |      | Mascot      |
| 1067.519   | 1067.5068   | -0.0122 | -11   | 46         | 53 MDELQLFR        |           |         | Oxidation (M)[1]        |      | Mascot      |
| 1075.5378  | 1075.5247   | -0.0131 | -12   | 278        | 287 LAGESESNLR     |           |         |                         |      | Mascot      |
| 1145.5909  | 1145.5791   | -0.0118 | -10   | 701        | 709 ESIENEIRR      |           |         |                         |      | Mascot      |
| 1162.531   | 1162.5184   | -0.0126 | -11   | 733        | 741 KDHFEEMR       |           |         |                         |      | Mascot      |
| 1172.6674  | 1172.6554   | -0.012  | -10   | 240        | 251 GILLYGPPGTGK   |           |         |                         |      | Mascot      |
| 1242.6324  | 1242.6195   | -0.0129 | -10   | 366        | 377 EVDIGIPDATGR   |           |         |                         |      | Mascot      |
| 1251.619   | 1251.6042   | -0.0148 | -12   | 513        | 524 GVLFGPPGCGK    |           |         | Carbamidomethyl (C)[10] |      | Mascot      |
| 1329.691   | 1329.6761   | -0.0149 | -11   | 454        | 465 WALSQSNPSALR   | 96        | 100     |                         |      | Mascot      |
| 1329.691   | 1329.6761   | -0.0149 | -11   | 454        | 465 WALSQSNPSALR   |           |         |                         |      | Mascot      |
| 1540.804   | 1540.7844   | -0.0196 | -13   | 96         | 109 LGDVISIQPCPDVK |           |         | Carbamidomethyl (C)[10] |      | Mascot      |
| 1556.8571  | 1556.8376   | -0.0195 | -13   | 639        | 651 LDQLIYIPLDEK   |           |         |                         |      | Mascot      |
| 1578.7944  | 1578.7739   | -0.0205 | -13   | 530        | 543 AIANECQANFISIK |           |         | Carbamidomethyl (C)[6]  |      | Mascot      |
| 1578.7944  | 1578.7739   | -0.0205 | -13   | 530        | 543 AIANECQANFISIK | 67        | 99.996  | Carbamidomethyl (C)[6]  |      | Mascot      |
| 1629.8054  | 1629.7854   | -0.02   | -12   | 754        | 766 KYEMFAQTLQQSR  | 88        | 100     |                         |      | Mascot      |
| 1629.8054  | 1629.7854   | -0.02   | -12   | 754        | 766 KYEMFAQTLQQSR  |           |         |                         |      | Mascot      |

|           |           |         |     |     |     |                                     |     |        |  |  |                                           |        |
|-----------|-----------|---------|-----|-----|-----|-------------------------------------|-----|--------|--|--|-------------------------------------------|--------|
| 1645.8003 | 1645.7821 | -0.0182 | -11 | 754 | 766 | KYEMFAQTLQQSR                       |     |        |  |  | Oxidation (M)[4]                          | Mascot |
| 1660.8289 | 1660.7837 | -0.0452 | -27 | 363 | 377 | FDREVDIGIPDATGR                     |     |        |  |  |                                           | Mascot |
| 1799.8051 | 1799.783  | -0.0221 | -12 | 678 | 693 | MTNGFSGADLTEICQR                    |     |        |  |  | Carbamidomethyl (C)[14]                   | Mascot |
| 1810.9949 | 1810.9752 | -0.0197 | -11 | 296 | 312 | NAPAIIFIDELDAIAPK                   |     |        |  |  |                                           | Mascot |
| 1815.8    | 1815.782  | -0.018  | -10 | 678 | 693 | MTNGFSGADLTEICQR                    |     |        |  |  | Carbamidomethyl (C)[14], Oxidation (M)[1] | Mascot |
| 1823.9174 | 1823.894  | -0.0234 | -13 | 488 | 502 | ELQELVQYPVEHPDK                     |     |        |  |  |                                           | Mascot |
| 1823.9174 | 1823.894  | -0.0234 | -13 | 488 | 502 | ELQELVQYPVEHPDK                     | 62  | 99.986 |  |  |                                           | Mascot |
| 1923.952  | 1923.9279 | -0.0241 | -13 | 568 | 584 | QAAPCVLFFDELDSIAK                   |     |        |  |  | Carbamidomethyl (C)[5]                    | Mascot |
| 1951.9218 | 1951.9008 | -0.021  | -11 | 544 | 560 | GPELLTMWFGGESEANVR                  | 102 | 100    |  |  | Oxidation (M)[7]                          | Mascot |
| 1951.9218 | 1951.9008 | -0.021  | -11 | 544 | 560 | GPELLTMWFGGESEANVR                  |     |        |  |  | Oxidation (M)[7]                          | Mascot |
| 2124.9204 | 2124.8955 | -0.0249 | -12 | 192 | 210 | EDEEESLNEVGYYDIGGVR                 |     |        |  |  |                                           | Mascot |
| 2124.9204 | 2124.8955 | -0.0249 | -12 | 192 | 210 | EDEEESLNEVGYYDIGGVR                 | 142 | 100    |  |  |                                           | Mascot |
| 2146.155  | 2146.1343 | -0.0207 | -10 | 339 | 358 | AHVIVMAATNRPN SIDPALR               |     |        |  |  |                                           | Mascot |
| 2155.9812 | 2155.9529 | -0.0283 | -13 | 714 | 732 | QTNPSAMEVEEDDPVPEIR                 |     |        |  |  |                                           | Mascot |
| 2160.103  | 2160.0588 | -0.0442 | -20 | 26  | 45  | LIVDESINEDNSVVSLSQAK                |     |        |  |  |                                           | Mascot |
| 2162.1499 | 2162.1187 | -0.0312 | -14 | 339 | 358 | AHVIVMAATNRPN SIDPALR               |     |        |  |  | Oxidation (M)[6]                          | Mascot |
| 2171.9761 | 2171.9614 | -0.0147 | -7  | 714 | 732 | QTNPSAMEVEEDDPVPEIR                 |     |        |  |  | Oxidation (M)[7]                          | Mascot |
| 2256.137  | 2256.0806 | -0.0564 | -25 | 257 | 277 | AVANETGAFFFLINGPEIMSK               |     |        |  |  |                                           | Mascot |
| 2284.0762 | 2284.1499 | 0.0737  | 32  | 714 | 733 | QTNPSAMEVEEDDPVPEIRK                |     |        |  |  |                                           | Mascot |
| 2457.1199 | 2457.344  | 0.2241  | 91  | 712 | 732 | ERQTNPSAMEVEEDDPVPEIR               |     |        |  |  | Oxidation (M)[9]                          | Mascot |
| 2484.2617 | 2484.2402 | -0.0215 | -9  | 466 | 487 | ETVVEVPNITWEDIGGLD DVKR             |     |        |  |  |                                           | Mascot |
| 2484.2617 | 2484.2402 | -0.0215 | -9  | 466 | 487 | ETVVEVPNITWEDIGGLD DVKR             | 217 | 100    |  |  |                                           | Mascot |
| 2518.4253 | 2518.4089 | -0.0164 | -7  | 616 | 638 | NVFIIGATNRPD IIDPAILR PGR           | 22  | 0      |  |  |                                           | Mascot |
| 2518.4253 | 2518.4089 | -0.0164 | -7  | 616 | 638 | NVFIIGATNRPD IIDPAILR PGR           |     |        |  |  |                                           | Mascot |
| 3081.502  | 3081.4858 | -0.0162 | -5  | 165 | 191 | VVETDPSPYCIVAPDTVIHCEGEPIKR         |     |        |  |  | Carbamidomethyl (C)[10,20]                | Mascot |
| 3672.7922 | 3672.7708 | -0.0214 | -6  | 390 | 424 | LADDVDLEQVANETHGHVGADLAALCSEAALQAIR | 252 | 100    |  |  | Carbamidomethyl (C)[26]                   | Mascot |
| 3672.7922 | 3672.7708 | -0.0214 | -6  | 390 | 424 | LADDVDLEQVANETHGHVGADLAALCSEAALQAIR |     |        |  |  | Carbamidomethyl (C)[26]                   | Mascot |

2

CDC48 [Danio rerio]

gi|34740143

89351.7

5.13

32

1,280

100

1047

100

| Peptide Information |             |         |       |            |          |          |           |         |              |      |        |        |
|---------------------|-------------|---------|-------|------------|----------|----------|-----------|---------|--------------|------|--------|--------|
| Calc. Mass          | Obsrv. Mass | ± da    | ± ppm | Start Seq. | End Seq. | Sequence | Ion Score | C. I. % | Modification | Rank | Result | Type   |
| 819.4722            | 819.4641    | -0.0081 | -10   | 149        | 155      | GDIFLVR  |           |         |              |      |        | Mascot |

|           |           |         |     |     |     |                          |     |        |                                           |        |
|-----------|-----------|---------|-----|-----|-----|--------------------------|-----|--------|-------------------------------------------|--------|
| 837.5305  | 837.522   | -0.0085 | -10 | 232 | 239 | AIGVKPPR                 |     |        |                                           | Mascot |
| 947.5672  | 947.5545  | -0.0127 | -13 | 148 | 155 | KGDIFLVR                 |     |        |                                           | Mascot |
| 986.5339  | 986.519   | -0.0149 | -15 | 218 | 225 | EMVELPLR                 |     |        |                                           | Mascot |
| 989.4897  | 989.4801  | -0.0096 | -10 | 701 | 708 | ESIENEIR                 |     |        |                                           | Mascot |
| 1051.5242 | 1051.5104 | -0.0138 | -13 | 46  | 53  | MDELQLFR                 |     |        |                                           | Mascot |
| 1067.519  | 1067.5068 | -0.0122 | -11 | 46  | 53  | MDELQLFR                 |     |        | Oxidation (M)[1]                          | Mascot |
| 1075.5378 | 1075.5247 | -0.0131 | -12 | 278 | 287 | LAGESESNLR               |     |        |                                           | Mascot |
| 1162.531  | 1162.5184 | -0.0126 | -11 | 733 | 741 | KDHFEEMR                 |     |        |                                           | Mascot |
| 1172.6674 | 1172.6554 | -0.012  | -10 | 240 | 251 | GILLYGPPGTGK             |     |        |                                           | Mascot |
| 1242.6324 | 1242.6195 | -0.0129 | -10 | 366 | 377 | EVDIGIPDATGR             |     |        |                                           | Mascot |
| 1251.619  | 1251.6042 | -0.0148 | -12 | 513 | 524 | GVLFYGPFGCGK             |     |        | Carbamidomethyl (C)[10]                   | Mascot |
| 1329.691  | 1329.6761 | -0.0149 | -11 | 454 | 465 | WALSQSNPSALR             | 96  | 100    |                                           | Mascot |
| 1329.691  | 1329.6761 | -0.0149 | -11 | 454 | 465 | WALSQSNPSALR             |     |        |                                           | Mascot |
| 1540.804  | 1540.7844 | -0.0196 | -13 | 96  | 109 | LGDVISIQPCPDVK           |     |        | Carbamidomethyl (C)[10]                   | Mascot |
| 1578.7944 | 1578.7739 | -0.0205 | -13 | 530 | 543 | AIANECQANFISIK           |     |        | Carbamidomethyl (C)[6]                    | Mascot |
| 1578.7944 | 1578.7739 | -0.0205 | -13 | 530 | 543 | AIANECQANFISIK           | 67  | 99.996 | Carbamidomethyl (C)[6]                    | Mascot |
| 1629.8054 | 1629.7854 | -0.02   | -12 | 754 | 766 | KYEMFAQTLQQSR            | 88  | 100    |                                           | Mascot |
| 1629.8054 | 1629.7854 | -0.02   | -12 | 754 | 766 | KYEMFAQTLQQSR            |     |        |                                           | Mascot |
| 1645.8003 | 1645.7821 | -0.0182 | -11 | 754 | 766 | KYEMFAQTLQQSR            |     |        | Oxidation (M)[4]                          | Mascot |
| 1660.8289 | 1660.7837 | -0.0452 | -27 | 363 | 377 | FDREVDIGIPDATGR          |     |        |                                           | Mascot |
| 1799.8051 | 1799.783  | -0.0221 | -12 | 678 | 693 | MTNGFSGADLTEICQR         |     |        | Carbamidomethyl (C)[14]                   | Mascot |
| 1810.9949 | 1810.9752 | -0.0197 | -11 | 296 | 312 | NAPAIIFIDELDAIPK         |     |        |                                           | Mascot |
| 1815.8    | 1815.782  | -0.018  | -10 | 678 | 693 | MTNGFSGADLTEICQR         |     |        | Carbamidomethyl (C)[14], Oxidation (M)[1] | Mascot |
| 1823.9174 | 1823.894  | -0.0234 | -13 | 488 | 502 | ELQELVQYPVEHPDK          |     |        |                                           | Mascot |
| 1823.9174 | 1823.894  | -0.0234 | -13 | 488 | 502 | ELQELVQYPVEHPDK          | 62  | 99.986 |                                           | Mascot |
| 1923.952  | 1923.9279 | -0.0241 | -13 | 568 | 584 | QAAPCVLFFDELDSIAK        |     |        | Carbamidomethyl (C)[5]                    | Mascot |
| 1951.9218 | 1951.9008 | -0.021  | -11 | 544 | 560 | GPELLTMWFGSEANVR         | 102 | 100    | Oxidation (M)[7]                          | Mascot |
| 1951.9218 | 1951.9008 | -0.021  | -11 | 544 | 560 | GPELLTMWFGSEANVR         |     |        | Oxidation (M)[7]                          | Mascot |
| 2124.9204 | 2124.8955 | -0.0249 | -12 | 192 | 210 | EDEEESLNEVGYYDIGG<br>VR  |     |        |                                           | Mascot |
| 2124.9204 | 2124.8955 | -0.0249 | -12 | 192 | 210 | EDEEESLNEVGYYDIGG<br>VR  | 142 | 100    |                                           | Mascot |
| 2146.155  | 2146.1343 | -0.0207 | -10 | 339 | 358 | AHVIVMAATNRPNSIDPA<br>LR |     |        |                                           | Mascot |
| 2155.9812 | 2155.9529 | -0.0283 | -13 | 714 | 732 | QTNPSAMEVEEDDPVPEI<br>R  |     |        |                                           | Mascot |
| 2160.103  | 2160.0588 | -0.0442 | -20 | 26  | 45  | LIVDESINEDNSVVSLSQA<br>K |     |        |                                           | Mascot |
| 2162.1499 | 2162.1187 | -0.0312 | -14 | 339 | 358 | AHVIVMAATNRPNSIDPA<br>LR |     |        | Oxidation (M)[6]                          | Mascot |
| 2171.9761 | 2171.9614 | -0.0147 | -7  | 714 | 732 | QTNPSAMEVEEDDPVPEI<br>R  |     |        | Oxidation (M)[7]                          | Mascot |

|   |                                                              |           |         |     |     |             |                                          |      |    |     |     |                            |     |  |  |  |  |        |
|---|--------------------------------------------------------------|-----------|---------|-----|-----|-------------|------------------------------------------|------|----|-----|-----|----------------------------|-----|--|--|--|--|--------|
|   | 2256.137                                                     | 2256.0806 | -0.0564 | -25 | 257 | 277         | AVANETGAFFFLINGPEI<br>MSK                |      |    |     |     |                            |     |  |  |  |  | Mascot |
|   | 2284.0762                                                    | 2284.1499 | 0.0737  | 32  | 714 | 733         | QTNPSAMEVEEDDPVPEI<br>RK                 |      |    |     |     |                            |     |  |  |  |  | Mascot |
|   | 2457.1199                                                    | 2457.344  | 0.2241  | 91  | 712 | 732         | ERQTNPSAMEVEEDDPV<br>PEIR                |      |    |     |     | Oxidation (M)[9]           |     |  |  |  |  | Mascot |
|   | 2484.2617                                                    | 2484.2402 | -0.0215 | -9  | 466 | 487         | ETVVEVPNITWEDIGGLD<br>DVKR               |      |    |     |     |                            |     |  |  |  |  | Mascot |
|   | 2484.2617                                                    | 2484.2402 | -0.0215 | -9  | 466 | 487         | ETVVEVPNITWEDIGGLD<br>DVKR               | 217  |    | 100 |     |                            |     |  |  |  |  | Mascot |
|   | 2518.4253                                                    | 2518.4089 | -0.0164 | -7  | 616 | 638         | NVFIIGATNRPDIIDPAILR<br>PGR              | 22   |    | 0   |     |                            |     |  |  |  |  | Mascot |
|   | 2518.4253                                                    | 2518.4089 | -0.0164 | -7  | 616 | 638         | NVFIIGATNRPDIIDPAILR<br>PGR              |      |    |     |     |                            |     |  |  |  |  | Mascot |
|   | 3081.502                                                     | 3081.4858 | -0.0162 | -5  | 165 | 191         | VVETDPSPYCIVAPDTVH<br>CEGEPIKR           |      |    |     |     | Carbamidomethyl (C)[10,20] |     |  |  |  |  | Mascot |
|   | 3672.7922                                                    | 3672.7708 | -0.0214 | -6  | 390 | 424         | LADDVDLEQVANETHGH<br>VGADLAALCSEAAALQAIR | 252  |    | 100 |     | Carbamidomethyl (C)[26]    |     |  |  |  |  | Mascot |
|   | 3672.7922                                                    | 3672.7708 | -0.0214 | -6  | 390 | 424         | LADDVDLEQVANETHGH<br>VGADLAALCSEAAALQAIR |      |    |     |     | Carbamidomethyl (C)[26]    |     |  |  |  |  | Mascot |
| 3 | transitional endoplasmic reticulum ATPase-like [Danio rerio] |           |         |     |     | gi 90093334 | 89437.9                                  | 5.44 | 15 | 363 | 100 | 308                        | 100 |  |  |  |  |        |

#### Peptide Information

| Calc. Mass | Obsrv. Mass | ± da    | ± ppm | Start Seq. | End Seq. | Sequence                | Ion Score | C. I. | % Modification             | Rank             | Result Type |
|------------|-------------|---------|-------|------------|----------|-------------------------|-----------|-------|----------------------------|------------------|-------------|
| 819.4722   | 819.4641    | -0.0081 | -10   | 151        | 157      | GDIFLVR                 |           |       |                            |                  | Mascot      |
| 837.5305   | 837.522     | -0.0085 | -10   | 234        | 241      | AIGVKPPR                |           |       |                            |                  | Mascot      |
| 986.5339   | 986.519     | -0.0149 | -15   | 220        | 227      | EMVELPLR                |           |       |                            |                  | Mascot      |
| 1075.5378  | 1075.5247   | -0.0131 | -12   | 280        | 289      | LAGESESNLR              |           |       |                            |                  | Mascot      |
| 1162.531   | 1162.5184   | -0.0126 | -11   | 735        | 743      | KDHFEEAMR               |           |       |                            |                  | Mascot      |
| 1172.6674  | 1172.6554   | -0.012  | -10   | 242        | 253      | GILLYGPPGTGK            |           |       |                            |                  | Mascot      |
| 1251.619   | 1251.6042   | -0.0148 | -12   | 515        | 526      | GVLFYGPFGCGK            |           |       | Carbamidomethyl (C)[10]    |                  | Mascot      |
| 1329.691   | 1329.6761   | -0.0149 | -11   | 456        | 467      | WALSQSNPSALR            | 96        |       | 100                        |                  | Mascot      |
| 1329.691   | 1329.6761   | -0.0149 | -11   | 456        | 467      | WALSQSNPSALR            |           |       |                            |                  | Mascot      |
| 1629.8054  | 1629.7854   | -0.02   | -12   | 756        | 768      | KYEMFAQTLQQSR           | 88        |       | 100                        |                  | Mascot      |
| 1629.8054  | 1629.7854   | -0.02   | -12   | 756        | 768      | KYEMFAQTLQQSR           |           |       |                            |                  | Mascot      |
| 1645.8003  | 1645.7821   | -0.0182 | -11   | 756        | 768      | KYEMFAQTLQQSR           |           |       | Oxidation (M)[4]           |                  | Mascot      |
| 1810.9949  | 1810.9752   | -0.0197 | -11   | 298        | 314      | NAPAIIFIDELDAIAPK       |           |       |                            |                  | Mascot      |
| 1823.8262  | 1823.894    | 0.0678  | 37    | 68         | 83       | QTVCIVLTDTCGNER         |           |       | Carbamidomethyl (C)[4]     |                  | Mascot      |
| 1823.8262  | 1823.894    | 0.0678  | 37    | 68         | 83       | QTVCIVLTDTCGNER         |           |       | Carbamidomethyl (C)[4]     |                  | Mascot      |
| 1951.9218  | 1951.9008   | -0.021  | -11   | 546        | 562      | GPELLTMWFGSEANVR        | 102       |       | 100                        | Oxidation (M)[7] | Mascot      |
| 1951.9218  | 1951.9008   | -0.021  | -11   | 546        | 562      | GPELLTMWFGSEANVR        |           |       |                            | Oxidation (M)[7] | Mascot      |
| 2156.011   | 2155.9529   | -0.0581 | -27   | 680        | 698      | ITEGFSGADLTEICQRAC<br>K |           |       | Carbamidomethyl (C)[14,18] |                  | Mascot      |
| 2256.137   | 2256.0806   | -0.0564 | -25   | 259        | 279      | AVANETGAFFFLINGPEI      |           |       |                            |                  | Mascot      |

|                     |                                   |             |         |       |              |          |                                    |           |       |    |                         |      |        |        |
|---------------------|-----------------------------------|-------------|---------|-------|--------------|----------|------------------------------------|-----------|-------|----|-------------------------|------|--------|--------|
|                     | 2518.4253                         | 2518.4089   | -0.0164 | -7    | 618          | 640      | MSK<br>NVFIIGATNRPDIIDPAILR<br>PGR | 22        | 0     |    |                         |      |        | Mascot |
|                     | 2518.4253                         | 2518.4089   | -0.0164 | -7    | 618          | 640      | NVFIIGATNRPDIIDPAILR<br>PGR        |           |       |    |                         |      |        | Mascot |
| 4                   | Zgc:162848 protein [Danio rerio]  |             |         |       | gi 141795670 |          | 51350.1                            | 5.88      | 9     | 52 | 71.922                  | 17   | 0      |        |
| Peptide Information |                                   |             |         |       |              |          |                                    |           |       |    |                         |      |        |        |
|                     | Calc. Mass                        | Obsrv. Mass | ± da    | ± ppm | Start Seq.   | End Seq. | Sequence                           | Ion Score | C. I. | %  | Modification            | Rank | Result | Type   |
|                     | 947.4792                          | 947.5545    | 0.0753  | 79    | 90           | 98       | AETDAATLR                          |           |       |    |                         |      | Mascot |        |
|                     | 1045.5411                         | 1045.55     | 0.0089  | 9     | 174          | 182      | DAVEEELLK                          |           |       |    |                         |      | Mascot |        |
|                     | 1126.6327                         | 1126.5721   | -0.0606 | -54   | 351          | 360      | EAPLRVAQSR                         |           |       |    |                         |      | Mascot |        |
|                     | 1329.7485                         | 1329.6761   | -0.0724 | -54   | 196          | 206      | KTLDQTINQIR                        | 17        |       | 0  |                         |      | Mascot |        |
|                     | 1329.7485                         | 1329.6761   | -0.0724 | -54   | 196          | 206      | KTLDQTINQIR                        |           |       |    |                         |      | Mascot |        |
|                     | 1473.7656                         | 1473.7635   | -0.0021 | -1    | 271          | 283      | LAEREETASQALR                      |           |       |    |                         |      | Mascot |        |
|                     | 1816.9058                         | 1816.7664   | -0.1394 | -77   | 361          | 374      | LHYRTLRLPNMEQCR                    |           |       |    |                         |      | Mascot |        |
|                     | 1967.8777                         | 1967.8976   | 0.0199  | 10    | 223          | 238      | QQAYTLDDHCGRFSNR                   |           |       |    | Carbamidomethyl (C)[10] |      | Mascot |        |
|                     | 1967.8777                         | 1967.8976   | 0.0199  | 10    | 223          | 238      | QQAYTLDDHCGRFSNR                   | 3         |       | 0  | Carbamidomethyl (C)[10] |      | Mascot |        |
|                     | 2154.9873                         | 2154.936    | -0.0513 | -24   | 245          | 262      | HPSSAVLQDQVCDEEVW<br>R             |           |       |    | Carbamidomethyl (C)[12] |      | Mascot |        |
|                     | 2283.0823                         | 2283.1531   | 0.0708  | 31    | 245          | 263      | HPSSAVLQDQVCDEEVW<br>RK            |           |       |    | Carbamidomethyl (C)[12] |      | Mascot |        |
| 5                   | PREDICTED: myosin-X [Danio rerio] |             |         |       | gi 326665155 |          | 237030.3                           | 6.18      | 21    | 46 | 0                       |      |        |        |
| Peptide Information |                                   |             |         |       |              |          |                                    |           |       |    |                         |      |        |        |
|                     | Calc. Mass                        | Obsrv. Mass | ± da    | ± ppm | Start Seq.   | End Seq. | Sequence                           | Ion Score | C. I. | %  | Modification            | Rank | Result | Type   |
|                     | 1045.6                            | 1045.55     | -0.05   | -48   | 1416         | 1425     | GSSQANLKLK                         |           |       |    |                         |      | Mascot |        |
|                     | 1145.468                          | 1145.5791   | 0.1111  | 97    | 2            | 10       | DNFFTEGCR                          |           |       |    | Carbamidomethyl (C)[8]  |      | Mascot |        |
|                     | 1165.6323                         | 1165.7307   | 0.0984  | 84    | 1893         | 1902     | SSFLEGTLLRR                        |           |       |    |                         |      | Mascot |        |
|                     | 1172.6633                         | 1172.6554   | -0.0079 | -7    | 693          | 703      | ALALSEDLKGR                        |           |       |    |                         |      | Mascot |        |
|                     | 1329.7122                         | 1329.6761   | -0.0361 | -27   | 571          | 581      | DDVLNLLRESR                        |           |       |    |                         |      | Mascot |        |
|                     | 1329.7122                         | 1329.6761   | -0.0361 | -27   | 571          | 581      | DDVLNLLRESR                        |           |       |    |                         |      | Mascot |        |
|                     | 1438.6665                         | 1438.7064   | 0.0399  | 28    | 1942         | 1953     | LQGMEQDQAMKK                       |           |       |    | Oxidation (M)[4,10]     |      | Mascot |        |
|                     | 1520.7744                         | 1520.8969   | 0.1225  | 81    | 466          | 477      | HIFSLEQLEYNK                       |           |       |    |                         |      | Mascot |        |
|                     | 1533.7921                         | 1533.7505   | -0.0416 | -27   | 1679         | 1691     | YAAFSQDALRHVR                      |           |       |    |                         |      | Mascot |        |
|                     | 1540.6486                         | 1540.7844   | 0.1358  | 88    | 2056         | 2069     | FSTCQSISSHGSNW                     |           |       |    |                         |      | Mascot |        |
|                     | 1718.9111                         | 1718.8932   | -0.0179 | -10   | 1830         | 1844     | YPAPEETLQFLAALR                    |           |       |    |                         |      | Mascot |        |
|                     | 1799.8938                         | 1799.783    | -0.1108 | -62   | 1207         | 1219     | WCVLKDETFWFR                       |           |       |    | Carbamidomethyl (C)[2]  |      | Mascot |        |
|                     | 1800.9564                         | 1800.7736   | -0.1828 | -102  | 687          | 701      | YYVLMRALSEDLK                      |           |       |    | Oxidation (M)[5]        |      | Mascot |        |



|           |           |         |     |      |      |                                     |                                                    |
|-----------|-----------|---------|-----|------|------|-------------------------------------|----------------------------------------------------|
| 1823.8956 | 1823.894  | -0.0016 | -1  | 1525 | 1539 | ENCLNSEVVEQIYKR                     | Mascot                                             |
| 1823.8956 | 1823.894  | -0.0016 | -1  | 1525 | 1539 | ENCLNSEVVEQIYKR                     | Mascot                                             |
| 1952.0594 | 1951.9008 | -0.1586 | -81 | 2029 | 2045 | ELLFNTSMVVDIAKLMK                   | Mascot                                             |
| 1952.0594 | 1951.9008 | -0.1586 | -81 | 2029 | 2045 | ELLFNTSMVVDIAKLMK                   | Mascot                                             |
| 1968.0544 | 1967.8976 | -0.1568 | -80 | 2029 | 2045 | ELLFNTSMVVDIAKLMK                   | Oxidation (M)[8] Mascot                            |
| 1968.0544 | 1967.8976 | -0.1568 | -80 | 2029 | 2045 | ELLFNTSMVVDIAKLMK                   | Oxidation (M)[8] Mascot                            |
| 2124.9551 | 2124.8955 | -0.0596 | -28 | 400  | 416  | DSMAMALYSQCFTWIIR                   | Carbamidomethyl (C)[11], Oxidation (M)[3,5] Mascot |
| 2124.9551 | 2124.8955 | -0.0596 | -28 | 400  | 416  | DSMAMALYSQCFTWIIR                   | Carbamidomethyl (C)[11], Oxidation (M)[3,5] Mascot |
| 2233.0972 | 2233.0588 | -0.0384 | -17 | 124  | 142  | HHLGEIPPHIYAIAINECYR                | Mascot                                             |
| 2256.0601 | 2256.0806 | 0.0205  | 9   | 968  | 986  | AAQQFLTSLNFDEIDECV<br>R             | Carbamidomethyl (C)[17] Mascot                     |
| 2283.1501 | 2283.1531 | 0.003   | 1   | 1913 | 1932 | QEEEPAAIEVWLQDEKA<br>GLK            | Mascot                                             |
| 2484.3279 | 2484.2402 | -0.0877 | -35 | 330  | 353  | LLSGILHVGNIETAGGA<br>QVCSK          | Carbamidomethyl (C)[22] Mascot                     |
| 2484.3279 | 2484.2402 | -0.0877 | -35 | 330  | 353  | LLSGILHVGNIETAGGA<br>QVCSK          | Carbamidomethyl (C)[22] Mascot                     |
| 2518.2129 | 2518.4089 | 0.196   | 78  | 189  | 212  | TASSHVEEAILESSPIMEA<br>FGNAK        | Mascot                                             |
| 2518.2129 | 2518.4089 | 0.196   | 78  | 189  | 212  | TASSHVEEAILESSPIMEA<br>FGNAK        | Mascot                                             |
| 3672.7249 | 3672.7708 | 0.0459  | 12  | 1798 | 1829 | LFCFSEPNVPADSVEFA<br>FMFEQAHEAVIRGR | Mascot                                             |
| 3672.7249 | 3672.7708 | 0.0459  | 12  | 1798 | 1829 | LFCFSEPNVPADSVEFA<br>FMFEQAHEAVIRGR | Mascot                                             |

6 PREDICTED: nephronectin-like [Danio rerio] gi|326664063 25190.6 6.49 10 46 0

Peptide Information

| Calc. Mass | Obsrv. Mass | ± da   | ± ppm | Start Seq. | End Seq. | Sequence                | Ion Score | C. I. % | Modification                | Rank | Result Type |
|------------|-------------|--------|-------|------------|----------|-------------------------|-----------|---------|-----------------------------|------|-------------|
| 819.4393   | 819.4641    | 0.0248 | 30    | 141        | 147      | LDCISLR                 |           |         |                             |      | Mascot      |
| 882.5083   | 882.5549    | 0.0466 | 53    | 2          | 8        | PFKSYIK                 |           |         |                             |      | Mascot      |
| 947.5342   | 947.5545    | 0.0203 | 21    | 140        | 147      | KLDCISLR                |           |         |                             |      | Mascot      |
| 1126.4768  | 1126.5721   | 0.0953 | 85    | 148        | 156      | CQFGCQIDR               |           |         | Carbamidomethyl (C)[1]      |      | Mascot      |
| 1162.469   | 1162.5184   | 0.0494 | 42    | 84         | 93       | CSCMEGYK GK             |           |         | Carbamidomethyl (C)[1]      |      | Mascot      |
| 1520.6732  | 1520.8969   | 0.2237 | 147   | 71         | 83       | RPCENGFCIGPDR           |           |         | Carbamidomethyl (C)[3]      |      | Mascot      |
| 2000.8485  | 2001.062    | 0.2135 | 107   | 42         | 59       | APGVCALEPSMTCCYGW<br>R  |           |         | Carbamidomethyl (C)[5]      |      | Mascot      |
| 2040.9412  | 2041.073    | 0.1318 | 65    | 141        | 156      | LDCISLR CQFGCQIDR       |           |         | Carbamidomethyl (C)[3,8,12] |      | Mascot      |
| 2159.9849  | 2160.0588   | 0.0739 | 34    | 157        | 175      | NDEVGCVCPGLQLAPD<br>YR  |           |         | Carbamidomethyl (C)[6,8]    |      | Mascot      |
| 2161.822   | 2162.1187   | 0.2967 | 137   | 179        | 197      | DINECDDPSHTCTEHQS<br>CK |           |         |                             |      | Mascot      |

7 26S proteasome non-ATPase regulatory subunit 2 [Danio rerio] gi|41054527 99415.5 5.24 14 43 0

| Peptide Information |                                 |         |       |              |          |                          |           |                      |                                           |   |      |             |
|---------------------|---------------------------------|---------|-------|--------------|----------|--------------------------|-----------|----------------------|-------------------------------------------|---|------|-------------|
| Calc. Mass          | Obsrv. Mass                     | ± da    | ± ppm | Start Seq.   | End Seq. | Sequence                 | Ion Score | C. I. % Modification |                                           |   | Rank | Result Type |
| 1165.6112           | 1165.7307                       | 0.1195  | 103   | 249          | 257      | FNRYPEALR                |           |                      |                                           |   |      | Mascot      |
| 1473.7842           | 1473.7635                       | -0.0207 | -14   | 432          | 446      | SGALLACGIVNSGVR          |           |                      | Carbamidomethyl (C)[7]                    |   |      | Mascot      |
| 1520.9159           | 1520.8969                       | -0.019  | -12   | 678          | 692      | AVPLALALISVSNPR          |           |                      |                                           |   |      | Mascot      |
| 1629.8893           | 1629.7854                       | -0.1039 | -64   | 730          | 743      | LAAMLRQLAQYHAK           |           |                      | Oxidation (M)[4]                          |   |      | Mascot      |
| 1629.8893           | 1629.7854                       | -0.1039 | -64   | 730          | 743      | LAAMLRQLAQYHAK           |           |                      | Oxidation (M)[4]                          |   |      | Mascot      |
| 1718.9047           | 1718.8932                       | -0.0115 | -7    | 803          | 817      | SHYILYGLVAAMQPR          |           |                      |                                           |   |      | Mascot      |
| 1810.8905           | 1810.9752                       | 0.0847  | 47    | 599          | 613      | VQQLLHICSEHFDNK          |           |                      |                                           |   |      | Mascot      |
| 1973.9716           | 1973.9464                       | -0.0252 | -13   | 134          | 150      | LLGSQEELASWGHEYVR        |           |                      |                                           |   |      | Mascot      |
| 2001.0837           | 2001.062                        | -0.0217 | -11   | 818          | 834      | MLVTFDEELRPLPVSVR        |           |                      |                                           |   |      | Mascot      |
| 2041.0964           | 2041.073                        | -0.0234 | -11   | 560          | 578      | GEAIETTLAALQVPEPFR       |           |                      |                                           |   |      | Mascot      |
| 2049.0876           | 2049.0649                       | -0.0227 | -11   | 850          | 868      | AITGFQTHHTTPVLLAHGER     |           |                      |                                           |   |      | Mascot      |
| 2172.0818           | 2171.9614                       | -0.1204 | -55   | 159          | 176      | EWQEIEEGDKAQQEVLLK       |           |                      |                                           |   |      | Mascot      |
| 2225.1191           | 2225.0969                       | -0.0222 | -10   | 258          | 276      | LALMLNDVELVENIFTSCK      |           |                      | Carbamidomethyl (C)[18], Oxidation (M)[4] |   |      | Mascot      |
| 2457.3638           | 2457.344                        | -0.0198 | -8    | 869          | 890      | AELATEEFIPVTPILEGFVILR   |           |                      |                                           |   |      | Mascot      |
| 2518.4966           | 2518.4089                       | -0.0877 | -35   | 678          | 701      | AVPLALALISVSNPRLNILDTLSK |           |                      |                                           |   |      | Mascot      |
| 2518.4966           | 2518.4089                       | -0.0877 | -35   | 678          | 701      | AVPLALALISVSNPRLNILDTLSK |           |                      |                                           |   |      | Mascot      |
| 8                   | LOC559407 protein [Danio rerio] |         |       | gi 108742068 |          | 52727.9                  | 5.76      | 8                    | 42                                        | 0 | 17   | 0           |

| Peptide Information |                        |             |         |       |              |          |                         |           |       |                         |      |             |   |
|---------------------|------------------------|-------------|---------|-------|--------------|----------|-------------------------|-----------|-------|-------------------------|------|-------------|---|
|                     | Calc. Mass             | Obsrv. Mass | ± da    | ± ppm | Start Seq.   | End Seq. | Sequence                | Ion Score | C. I. | % Modification          | Rank | Result Type |   |
|                     | 947.4792               | 947.5545    | 0.0753  | 79    | 102          | 110      | AETDAATLR               |           |       |                         |      | Mascot      |   |
|                     | 1045.5411              | 1045.55     | 0.0089  | 9     | 186          | 194      | DAVEEELLK               |           |       |                         |      | Mascot      |   |
|                     | 1126.6327              | 1126.5721   | -0.0606 | -54   | 363          | 372      | EAPLRVAQSR              |           |       |                         |      | Mascot      |   |
|                     | 1329.7485              | 1329.6761   | -0.0724 | -54   | 208          | 218      | KTLDQTINQIR             | 17        |       | 0                       |      | Mascot      |   |
|                     | 1329.7485              | 1329.6761   | -0.0724 | -54   | 208          | 218      | KTLDQTINQIR             |           |       |                         |      | Mascot      |   |
|                     | 1473.7656              | 1473.7635   | -0.0021 | -1    | 283          | 295      | LAEREETASQALR           |           |       |                         |      | Mascot      |   |
|                     | 1816.9058              | 1816.7664   | -0.1394 | -77   | 373          | 386      | LHYRTLRLPNMEQCR         |           |       |                         |      | Mascot      |   |
|                     | 2154.9873              | 2154.936    | -0.0513 | -24   | 257          | 274      | HPSSAVLQDQVCDEEVW<br>R  |           |       | Carbamidomethyl (C)[12] |      | Mascot      |   |
|                     | 2283.0823              | 2283.1531   | 0.0708  | 31    | 257          | 275      | HPSSAVLQDQVCDEEVW<br>RK |           |       | Carbamidomethyl (C)[12] |      | Mascot      |   |
| 9                   | tektin-4 [Danio rerio] |             |         |       | gi 224589086 |          | 51528.2                 | 5.75      | 8     | 41                      | 0    | 17          | 0 |

### Peptide Information

| Calc. Mass | Obsrv. Mass | ± da    | ± ppm | Start Seq. | End Seq. | Sequence                | Ion Score | C. I. | % Modification          | Rank | Result Type |
|------------|-------------|---------|-------|------------|----------|-------------------------|-----------|-------|-------------------------|------|-------------|
| 947.4792   | 947.5545    | 0.0753  | 79    | 91         | 99       | AETDAATLR               |           |       |                         |      | Mascot      |
| 1045.5411  | 1045.55     | 0.0089  | 9     | 175        | 183      | DAVEEELLK               |           |       |                         |      | Mascot      |
| 1126.6327  | 1126.5721   | -0.0606 | -54   | 352        | 361      | EAPLRVAQSR              |           |       |                         |      | Mascot      |
| 1329.7485  | 1329.6761   | -0.0724 | -54   | 197        | 207      | KTLDQTINQIR             | 17        | 0     |                         |      | Mascot      |
| 1329.7485  | 1329.6761   | -0.0724 | -54   | 197        | 207      | KTLDQTINQIR             |           |       |                         |      | Mascot      |
| 1473.7656  | 1473.7635   | -0.0021 | -1    | 272        | 284      | LAEREETASQALR           |           |       |                         |      | Mascot      |
| 1816.9058  | 1816.7664   | -0.1394 | -77   | 362        | 375      | LHYRTLRLPNMEQCR         |           |       |                         |      | Mascot      |
| 2154.9873  | 2154.936    | -0.0513 | -24   | 246        | 263      | HPSSAVLQDQVCDEEVW<br>R  |           |       | Carbamidomethyl (C)[12] |      | Mascot      |
| 2283.0823  | 2283.1531   | 0.0708  | 31    | 246        | 264      | HPSSAVLQDQVCDEEVW<br>RK |           |       | Carbamidomethyl (C)[12] |      | Mascot      |

10 PREDICTED: hypothetical protein LOC100537298  
[Danio rerio]

gi|326667816

6120

8.38

6

41

0

### Peptide Information

| Calc. Mass | Obsrv. Mass | ± da    | ± ppm | Start Seq. | End Seq. | Sequence               | Ion Score | C. I. | % Modification            | Rank | Result Type |
|------------|-------------|---------|-------|------------|----------|------------------------|-----------|-------|---------------------------|------|-------------|
| 1165.5895  | 1165.7307   | 0.1412  | 121   | 10         | 18       | CLRVNYGQR              |           |       | Carbamidomethyl (C)[1]    |      | Mascot      |
| 1282.6572  | 1282.6714   | 0.0142  | 11    | 2          | 12       | AESSIFTRCLR            |           |       |                           |      | Mascot      |
| 1578.7511  | 1578.7739   | 0.0228  | 14    | 38         | 51       | VLSCMHLPTCAIMK         |           |       | Oxidation (M)[5,13]       |      | Mascot      |
| 1578.7511  | 1578.7739   | 0.0228  | 14    | 38         | 51       | VLSCMHLPTCAIMK         |           |       | Oxidation (M)[5,13]       |      | Mascot      |
| 1660.8042  | 1660.7837   | -0.0205 | -12   | 38         | 51       | VLSCMHLPTCAIMK         |           |       | Carbamidomethyl (C)[4,10] |      | Mascot      |
| 1718.8573  | 1718.8932   | 0.0359  | 21    | 37         | 51       | RVLSCMHLPTCAIMK        |           |       | Oxidation (M)[6]          |      | Mascot      |
| 1816.9053  | 1816.7664   | -0.1389 | -76   | 37         | 51       | RVLSCMHLPTCAIMK        |           |       | Carbamidomethyl (C)[5,11] |      | Mascot      |
| 1974.0043  | 1973.9464   | -0.0579 | -29   | 38         | 54       | VLSCMHLPTCAIMKVTL      |           |       | Carbamidomethyl (C)[4,10] |      | Mascot      |
| 2225.0073  | 2225.0969   | 0.0896  | 40    | 19         | 37       | CANDCPDVLNTAEQSL<br>RR |           |       | Carbamidomethyl (C)[1]    |      | Mascot      |

11 PREDICTED: TBC1 domain family member 9 isoform 2  
[Danio rerio]

gi|125804583

142731.7

5.41

16

40

0

### Peptide Information

| Calc. Mass | Obsrv. Mass | ± da    | ± ppm | Start Seq. | End Seq. | Sequence      | Ion Score | C. I. | % Modification | Rank | Result Type |
|------------|-------------|---------|-------|------------|----------|---------------|-----------|-------|----------------|------|-------------|
| 842.5457   | 842.5001    | -0.0456 | -54   | 193        | 199      | EVKLIVR       |           |       |                |      | Mascot      |
| 947.4468   | 947.5545    | 0.1077  | 114   | 469        | 476      | SPEEFNPK      |           |       |                |      | Mascot      |
| 1172.5405  | 1172.6554   | 0.1149  | 98    | 628        | 636      | MLPDYYNTR     |           |       |                |      | Mascot      |
| 1556.8795  | 1556.8376   | -0.0419 | -27   | 196        | 208      | LVVRWADVTQLEK |           |       |                |      | Mascot      |

|           |           |         |     |      |      |                           |                         |        |
|-----------|-----------|---------|-----|------|------|---------------------------|-------------------------|--------|
| 1629.8629 | 1629.7854 | -0.0775 | -48 | 506  | 519  | TKDLVLQGIPENMR            | Oxidation (M)[13]       | Mascot |
| 1629.8629 | 1629.7854 | -0.0775 | -48 | 506  | 519  | TKDLVLQGIPENMR            | Oxidation (M)[13]       | Mascot |
| 1645.5845 | 1645.7821 | 0.1976  | 120 | 1073 | 1085 | HNNEDDDEEEDER             |                         | Mascot |
| 1660.821  | 1660.7837 | -0.0373 | -22 | 1157 | 1170 | LQCEDIADDTVLIR            | Carbamidomethyl (C)[3]  | Mascot |
| 1973.9385 | 1973.9464 | 0.0079  | 4   | 1231 | 1248 | KVGHQHMSVSDYEISLS<br>G    |                         | Mascot |
| 2001.062  | 2001.062  | 0       | 0   | 241  | 257  | LMEQLANIAMRQLLDNK         |                         | Mascot |
| 2048.8953 | 2049.0649 | 0.1696  | 83  | 489  | 505  | NHFTEYGQGVCMYRTDK         |                         | Mascot |
| 2146.1213 | 2146.1343 | 0.013   | 6   | 908  | 926  | EFISGLSVLCHGDLTEKL<br>K   | Carbamidomethyl (C)[10] | Mascot |
| 2160.0793 | 2160.0588 | -0.0205 | -9  | 2    | 19   | WVNPEEVLLASALWMTE<br>R    | Oxidation (M)[15]       | Mascot |
| 2225.137  | 2225.0969 | -0.0401 | -18 | 1100 | 1119 | KPCDITPLDEIKLEDSSP<br>K   |                         | Mascot |
| 2457.2231 | 2457.344  | 0.1209  | 49  | 220  | 240  | VSTRCEHVFSVFLNINE<br>TFK  |                         | Mascot |
| 2484.2122 | 2484.2402 | 0.028   | 11  | 446  | 466  | QFNLNDNRVPTATQALM<br>TMYR |                         | Mascot |
| 2484.2122 | 2484.2402 | 0.028   | 11  | 446  | 466  | QFNLNDNRVPTATQALM<br>TMYR |                         | Mascot |
| 2518.262  | 2518.4089 | 0.1469  | 58  | 561  | 582  | DLHRSLPEHPAFQNMGI<br>AALR | Oxidation (M)[16]       | Mascot |
| 2518.262  | 2518.4089 | 0.1469  | 58  | 561  | 582  | DLHRSLPEHPAFQNMGI<br>AALR | Oxidation (M)[16]       | Mascot |

12 Prmt1 protein [Danio rerio] gi|27882547 43538.7 5.73 10 39 0

Peptide Information

| Calc. Mass | Obsrv. Mass | ± da    | ± ppm | Start Seq. | End Seq. | Sequence                 | Ion Score | C. I. % | Modification            | Rank | Result Type |
|------------|-------------|---------|-------|------------|----------|--------------------------|-----------|---------|-------------------------|------|-------------|
| 1051.651   | 1051.5104   | -0.1406 | -134  | 142        | 150      | LDHIVTIK                 |           |         |                         |      | Mascot      |
| 1051.651   | 1051.7001   | 0.0491  | 47    | 142        | 150      | LDHIVTIK                 |           |         |                         |      | Mascot      |
| 1075.618   | 1075.5247   | -0.0933 | -87   | 251        | 260      | QLVSTACLIK               |           |         |                         |      | Mascot      |
| 1162.5166  | 1162.5184   | 0.0018  | 2     | 14         | 23       | CVLHELCCSR               |           |         |                         |      | Mascot      |
| 1251.658   | 1251.6042   | -0.0538 | -43   | 203        | 213      | ATLYVTAIEDR              |           |         |                         |      | Mascot      |
| 1556.7373  | 1556.8376   | 0.1003  | 64    | 364        | 376      | GQLCEVSKTSEYR            |           |         | Carbamidomethyl (C)[4]  |      | Mascot      |
| 1718.7771  | 1718.8932   | 0.1161  | 68    | 10         | 23       | EQNKCVLHELCCSR           |           |         | Carbamidomethyl (C)[5]  |      | Mascot      |
| 1924.0459  | 1923.9279   | -0.118  | -61   | 121        | 138      | VIGIECSSISDYAVKIVK       |           |         |                         |      | Mascot      |
| 2172.053   | 2171.9614   | -0.0916 | -42   | 353        | 371      | DLDFTVDIDFKGQLCEVS<br>K  |           |         |                         |      | Mascot      |
| 2457.1365  | 2457.344    | 0.2075  | 84    | 217        | 235      | DYKIHWWENVYGLDMSC<br>IK  |           |         | Carbamidomethyl (C)[17] |      | Mascot      |
| 2484.2129  | 2484.2402   | 0.0273  | 11    | 285        | 304      | NDYIHALVTYFNIEFTRCH<br>K |           |         |                         |      | Mascot      |
| 2484.2129  | 2484.2402   | 0.0273  | 11    | 285        | 304      | NDYIHALVTYFNIEFTRCH<br>K |           |         |                         |      | Mascot      |

13 Metap2 protein [Danio rerio] gi|46249906 52802.2 5.82 10 39 0

| Peptide Information |                                                                |          |           |            |                          |           |       |                         |      |             |
|---------------------|----------------------------------------------------------------|----------|-----------|------------|--------------------------|-----------|-------|-------------------------|------|-------------|
| Calc. Mass          | Obsrv. Mass                                                    | $\pm$ da | $\pm$ ppm | Start Seq. | End Sequence Seq.        | Ion Score | C. I. | % Modification          | Rank | Result Type |
| 819.4207            | 819.4641                                                       | 0.0434   | 53        | 277        | 284 DATNTGIK             |           |       |                         |      | Mascot      |
| 1165.6184           | 1165.7307                                                      | 0.1123   | 96        | 166        | 175 QAAEAHRQVR           |           |       |                         |      | Mascot      |
| 1282.7075           | 1282.6714                                                      | -0.0361  | -28       | 418        | 428 LGETKYLMAK           |           |       | Oxidation (M)[8]        |      | Mascot      |
| 1533.7689           | 1533.7505                                                      | -0.0184  | -12       | 277        | 291 DATNTGKICAGIDVR      |           |       |                         |      | Mascot      |
| 1800.7646           | 1800.7736                                                      | 0.009    | 5         | 152        | 165 FLDQANEDMWNDFR       |           |       |                         |      | Mascot      |
| 1816.7595           | 1816.7664                                                      | 0.0069   | 4         | 152        | 165 FLDQANEDMWNDFR       |           |       | Oxidation (M)[9]        |      | Mascot      |
| 2040.9832           | 2041.073                                                       | 0.0898   | 44        | 46         | 65 AAAVENHDGEGDTIAK VTK  |           |       |                         |      | Mascot      |
| 2146.1226           | 2146.1343                                                      | 0.0117   | 5         | 394        | 412 AKHLLNVVNENFGTLAFC R |           |       |                         |      | Mascot      |
| 2156.0588           | 2155.9529                                                      | -0.1059  | -49       | 177        | 194 YVQSWIKPGMTMIEICEK   |           |       |                         |      | Mascot      |
| 2160.113            | 2160.0588                                                      | -0.0542  | -25       | 396        | 413 HLLNVVNENFGTLAFCRR   |           |       | Carbamidomethyl (C)[16] |      | Mascot      |
| 2172.0537           | 2171.9614                                                      | -0.0923  | -42       | 177        | 194 YVQSWIKPGMTMIEICEK   |           |       | Oxidation (M)[10]       |      | Mascot      |
| 2284.1538           | 2284.1499                                                      | -0.0039  | -2        | 176        | 194 KYVQSWIKPGMTMIEICE K |           |       |                         |      | Mascot      |
| 14                  | Echinoderm microtubule associated protein like 1 [Danio rerio] |          |           |            | gi 115313535             | 30885.7   | 9.96  | 8                       | 39   | 0           |

| Peptide Information |                                                                |          |           |            |                              |           |       |                   |      |             |
|---------------------|----------------------------------------------------------------|----------|-----------|------------|------------------------------|-----------|-------|-------------------|------|-------------|
| Calc. Mass          | Obsrv. Mass                                                    | $\pm$ da | $\pm$ ppm | Start Seq. | End Sequence Seq.            | Ion Score | C. I. | % Modification    | Rank | Result Type |
| 986.5741            | 986.519                                                        | -0.0551  | -56       | 57         | 65 SALADVVR                  |           |       |                   |      | Mascot      |
| 1165.5782           | 1165.7307                                                      | 0.1525   | 131       | 176        | 185 EPVFSAGMRR               |           |       | Oxidation (M)[8]  |      | Mascot      |
| 1473.7617           | 1473.7635                                                      | 0.0018   | 1         | 45         | 56 VQMQEDEIQLLK              |           |       |                   |      | Mascot      |
| 1533.7577           | 1533.7505                                                      | -0.0072  | -5        | 66         | 78 LNISEEQQAMLNK             |           |       | Oxidation (M)[10] |      | Mascot      |
| 1645.8578           | 1645.7821                                                      | -0.0757  | -46       | 66         | 79 LNISEEQQAMLNKK            |           |       |                   |      | Mascot      |
| 1718.8191           | 1718.8932                                                      | 0.0741   | 43        | 212        | 228 SSSAVPSQSTNNPSEVK        |           |       |                   |      | Mascot      |
| 1973.9572           | 1973.9464                                                      | -0.0108  | -5        | 251        | 267 KCTSQPVHSPLEPTYR         |           |       |                   |      | Mascot      |
| 2457.4485           | 2457.344                                                       | -0.1045  | -43       | 84         | 106 ARPMIAALPLRPTVNNGT VLPKK |           |       |                   |      | Mascot      |
| 15                  | PREDICTED: atrial natriuretic peptide receptor 1 [Danio rerio] |          |           |            | gi 292609933                 | 123931.2  | 7.58  | 11                | 38   | 0 15 0      |

| Peptide Information |             |          |           |            |                   |           |       |                |      |             |
|---------------------|-------------|----------|-----------|------------|-------------------|-----------|-------|----------------|------|-------------|
| Calc. Mass          | Obsrv. Mass | $\pm$ da | $\pm$ ppm | Start Seq. | End Sequence Seq. | Ion Score | C. I. | % Modification | Rank | Result Type |
| 842.5246            | 842.5001    | -0.0245  | -29       | 634        | 640 KAVHFIK       |           |       |                |      | Mascot      |
| 947.468             | 947.5545    | 0.0865   | 91        | 881        | 888 TAEHQEEK      |           |       |                |      | Mascot      |

|    |                            |           |         |      |              |      |                             |      |   |    |   |   |                         |  |  |  |  |        |
|----|----------------------------|-----------|---------|------|--------------|------|-----------------------------|------|---|----|---|---|-------------------------|--|--|--|--|--------|
|    | 1075.563                   | 1075.5247 | -0.0383 | -36  | 881          | 889  | TAELEQEEKK                  |      |   |    |   |   |                         |  |  |  |  | Mascot |
|    | 1126.5964                  | 1126.5721 | -0.0243 | -22  | 135          | 144  | LGAFVFEICK                  |      |   |    |   |   |                         |  |  |  |  | Mascot |
|    | 1329.7849                  | 1329.6761 | -0.1088 | -82  | 902          | 914  | SVASQLIAGKTVR               | 15   |   | 0  |   |   |                         |  |  |  |  | Mascot |
|    | 1329.7849                  | 1329.6761 | -0.1088 | -82  | 902          | 914  | SVASQLIAGKTVR               |      |   |    |   |   |                         |  |  |  |  | Mascot |
|    | 1556.894                   | 1556.8376 | -0.0564 | -36  | 990          | 1003 | EIARMSLAIVQGLR              |      |   |    |   |   |                         |  |  |  |  | Mascot |
|    | 1816.9565                  | 1816.7664 | -0.1901 | -105 | 1004         | 1018 | SFHSPHVPEQQLRVR             |      |   |    |   |   |                         |  |  |  |  | Mascot |
|    | 1923.8688                  | 1923.9279 | 0.0591  | 31   | 415          | 431  | DSPDCGFRGELCINLER           |      |   |    |   |   |                         |  |  |  |  | Mascot |
|    | 1968.0259                  | 1967.8976 | -0.1283 | -65  | 12           | 29   | FTLLISMPTSIPFSSGR           |      |   |    |   |   |                         |  |  |  |  | Mascot |
|    | 1968.0259                  | 1967.8976 | -0.1283 | -65  | 12           | 29   | FTLLISMPTSIPFSSGR           | 4    |   | 0  |   |   |                         |  |  |  |  | Mascot |
|    | 2049.1636                  | 2049.0649 | -0.0987 | -48  | 200          | 218  | VLNEMAQVARIIVISAHGK         |      |   |    |   |   |                         |  |  |  |  | Mascot |
|    | 2484.2339                  | 2484.2402 | 0.0063  | 3    | 400          | 422  | GVQILWPGGLTSPPKDS<br>PDCGFR |      |   |    |   |   | Carbamidomethyl (C)[20] |  |  |  |  | Mascot |
|    | 2484.2339                  | 2484.2402 | 0.0063  | 3    | 400          | 422  | GVQILWPGGLTSPPKDS<br>PDCGFR |      |   |    |   |   | Carbamidomethyl (C)[20] |  |  |  |  | Mascot |
| 16 | Wars protein [Danio rerio] |           |         |      | gi 182890772 |      | 52294.4                     | 6.24 | 8 | 38 | 0 | 8 | 0                       |  |  |  |  |        |

Peptide Information

| Calc. Mass | Obsrv. Mass | ± da    | ± ppm | Start Seq. | End Seq. | Sequence                   | Ion Score | C. I. | % | Modification                              | Rank | Result Type |
|------------|-------------|---------|-------|------------|----------|----------------------------|-----------|-------|---|-------------------------------------------|------|-------------|
| 1251.6038  | 1251.6042   | 0.0004  | 0     | 214        | 224      | DIIACGFDVNK                |           |       |   | Carbamidomethyl (C)[5]                    |      | Mascot      |
| 1329.7122  | 1329.6761   | -0.0361 | -27   | 105        | 115      | VDQELVDRISR                |           |       |   |                                           |      | Mascot      |
| 1329.7122  | 1329.6761   | -0.0361 | -27   | 105        | 115      | VDQELVDRISR                |           |       |   |                                           |      | Mascot      |
| 1951.9807  | 1951.9008   | -0.0799 | -41   | 442        | 457      | HKHVTDDIVQQFMTPR           |           |       |   |                                           |      | Mascot      |
| 1951.9807  | 1951.9008   | -0.0799 | -41   | 442        | 457      | HKHVTDDIVQQFMTPR           |           |       |   |                                           |      | Mascot      |
| 1967.9379  | 1967.8976   | -0.0403 | -20   | 2          | 19       | SSPLDLIECVTAQGETV<br>R     |           |       |   |                                           |      | Mascot      |
| 1967.9379  | 1967.8976   | -0.0403 | -20   | 2          | 19       | SSPLDLIECVTAQGETV<br>R     | 10        |       | 0 |                                           |      | Mascot      |
| 2049.1279  | 2049.0649   | -0.063  | -31   | 156        | 174      | GPSSQAIHVGHLIPFIFTK        |           |       |   |                                           |      | Mascot      |
| 2155.9998  | 2155.9529   | -0.0469 | -22   | 1          | 19       | MSSPLDLIECVTAQGET<br>VR    |           |       |   | Carbamidomethyl (C)[10]                   |      | Mascot      |
| 2171.9946  | 2171.9614   | -0.0332 | -15   | 1          | 19       | MSSPLDLIECVTAQGET<br>VR    |           |       |   | Carbamidomethyl (C)[10], Oxidation (M)[1] |      | Mascot      |
| 2457.136   | 2457.344    | 0.208   | 85    | 295        | 314      | DVQCLIPCAIDQDPYFRM<br>TR   |           |       |   | Carbamidomethyl (C)[4], Oxidation (M)[18] |      | Mascot      |
| 2484.2109  | 2484.2402   | 0.0293  | 12    | 1          | 22       | MSSPLDLIECVTAQGET<br>VRSIK |           |       |   | Carbamidomethyl (C)[10]                   |      | Mascot      |
| 2484.2109  | 2484.2402   | 0.0293  | 12    | 1          | 22       | MSSPLDLIECVTAQGET<br>VRSIK |           |       |   | Carbamidomethyl (C)[10]                   |      | Mascot      |

17 PREDICTED: DNA replication licensing factor  
MCM8-like [Danio rerio] gi|326675408 93684.5 7.98 13 38 0

Peptide Information

| Calc. Mass | Obsrv. Mass | ± da | ± ppm | Start Seq. | End Seq. | Sequence | Ion Score | C. I. | % | Modification | Rank | Result Type |
|------------|-------------|------|-------|------------|----------|----------|-----------|-------|---|--------------|------|-------------|
|------------|-------------|------|-------|------------|----------|----------|-----------|-------|---|--------------|------|-------------|

|    |                                          |           |         |      |             |     |                             |      |    |                         |   |  |        |
|----|------------------------------------------|-----------|---------|------|-------------|-----|-----------------------------|------|----|-------------------------|---|--|--------|
|    | 947.4904                                 | 947.5545  | 0.0641  | 68   | 629         | 639 | SGAVSGAAATR                 |      |    |                         |   |  | Mascot |
|    | 989.4972                                 | 989.4801  | -0.0171 | -17  | 156         | 163 | DLKEMPEK                    |      |    |                         |   |  | Mascot |
|    | 1051.4772                                | 1051.5104 | 0.0332  | 32   | 276         | 284 | CLQSECRGR                   |      |    |                         |   |  | Mascot |
|    | 1145.7153                                | 1145.5791 | -0.1362 | -119 | 230         | 239 | FVVRGTVVR                   |      |    |                         |   |  | Mascot |
|    | 1162.5521                                | 1162.5184 | -0.0337 | -29  | 305         | 314 | VQELMSGDQR                  |      |    |                         |   |  | Mascot |
|    | 1251.611                                 | 1251.6042 | -0.0068 | -5   | 776         | 787 | SQLGSGMSNRSK                |      |    |                         |   |  | Mascot |
|    | 1473.7301                                | 1473.7635 | 0.0334  | 23   | 473         | 485 | SQMLQAVCNVAPR               |      |    | Carbamidomethyl (C)[8]  |   |  | Mascot |
|    | 1578.8308                                | 1578.7739 | -0.0569 | -36  | 805         | 817 | SMFELQDLRQLAK               |      |    |                         |   |  | Mascot |
|    | 1578.8599                                | 1578.7739 | -0.086  | -54  | 145         | 158 | QVSHSLPDLARDLK              |      |    |                         |   |  | Mascot |
|    | 1660.9237                                | 1660.7837 | -0.14   | -84  | 235         | 249 | GTVVRVSNIKPLCMK             |      |    | Oxidation (M)[14]       |   |  | Mascot |
|    | 1923.9698                                | 1923.9279 | -0.0419 | -22  | 401         | 416 | DLYAIQEIQAQEDLFK            |      |    |                         |   |  | Mascot |
|    | 2001.095                                 | 2001.062  | -0.033  | -16  | 454         | 472 | IPIRGDPHMLIVGDPGLG<br>K     |      |    | Oxidation (M)[9]        |   |  | Mascot |
|    | 2518.2717                                | 2518.4089 | 0.1372  | 54   | 66          | 88  | GNAPQVSQARVTQATLDI<br>TCPYK |      |    | Carbamidomethyl (C)[20] |   |  | Mascot |
|    | 2518.2717                                | 2518.4089 | 0.1372  | 54   | 66          | 88  | GNAPQVSQARVTQATLDI<br>TCPYK |      |    | Carbamidomethyl (C)[20] |   |  | Mascot |
| 18 | methionyl aminopeptidase 2 [Danio rerio] |           |         |      | gi 41054491 |     | 53147.4                     | 5.74 | 10 | 37                      | 0 |  |        |

#### Peptide Information

|  | Calc. Mass | Obsrv. Mass | ± da    | ± ppm | Start Seq. | End Seq. | Sequence                | Ion Score | C. I. | % Modification          | Rank | Result Type |
|--|------------|-------------|---------|-------|------------|----------|-------------------------|-----------|-------|-------------------------|------|-------------|
|  | 819.4207   | 819.4641    | 0.0434  | 53    | 280        | 287      | DATNTGIK                |           |       |                         |      | Mascot      |
|  | 1165.6184  | 1165.7307   | 0.1123  | 96    | 169        | 178      | QAAEAHRQVR              |           |       |                         |      | Mascot      |
|  | 1282.7075  | 1282.6714   | -0.0361 | -28   | 421        | 431      | LGETKYLMAK              |           |       | Oxidation (M)[8]        |      | Mascot      |
|  | 1533.7689  | 1533.7505   | -0.0184 | -12   | 280        | 294      | DATNTGIKCAGIDVR         |           |       |                         |      | Mascot      |
|  | 1800.7646  | 1800.7736   | 0.009   | 5     | 155        | 168      | FLDQANEDMWNDFR          |           |       |                         |      | Mascot      |
|  | 1816.7595  | 1816.7664   | 0.0069  | 4     | 155        | 168      | FLDQANEDMWNDFR          |           |       | Oxidation (M)[9]        |      | Mascot      |
|  | 2040.9832  | 2041.073    | 0.0898  | 44    | 49         | 68       | AAAVENHDGEGDTIAK<br>VTK |           |       |                         |      | Mascot      |
|  | 2146.1226  | 2146.1343   | 0.0117  | 5     | 397        | 415      | AKHLLNVVNENFGTLAFC<br>R |           |       |                         |      | Mascot      |
|  | 2156.0588  | 2155.9529   | -0.1059 | -49   | 180        | 197      | YVQSWIKPGMTMIEICEK      |           |       |                         |      | Mascot      |
|  | 2160.113   | 2160.0588   | -0.0542 | -25   | 399        | 416      | HLLNVVNENFGTLAFCRR      |           |       | Carbamidomethyl (C)[16] |      | Mascot      |
|  | 2172.0537  | 2171.9614   | -0.0923 | -42   | 180        | 197      | YVQSWIKPGMTMIEICEK      |           |       | Oxidation (M)[10]       |      | Mascot      |
|  | 2284.1538  | 2284.1499   | -0.0039 | -2    | 179        | 197      | KYVQSWIKPGMTMIEICE<br>K |           |       |                         |      | Mascot      |

19 hypothetical protein LOC406277 [Danio rerio] gi|47086959 38211.2 9.31 8 36 0

#### Peptide Information

|  | Calc. Mass | Obsrv. Mass | ± da | ± ppm | Start | End | Sequence | Ion | C. I. | % Modification | Rank | Result Type |
|--|------------|-------------|------|-------|-------|-----|----------|-----|-------|----------------|------|-------------|
|--|------------|-------------|------|-------|-------|-----|----------|-----|-------|----------------|------|-------------|

|    |                      |           |           | Seq.    | Seq. | Score       |         |                           |    |    |                         |  |        |
|----|----------------------|-----------|-----------|---------|------|-------------|---------|---------------------------|----|----|-------------------------|--|--------|
| 20 | lefty1 [Danio rerio] | 1251.5575 | 1251.6042 | 0.0467  | 37   | 36          | 45      | NFAFVHMDDR                |    |    |                         |  | Mascot |
|    |                      | 1282.6174 | 1282.6714 | 0.054   | 42   | 226         | 236     | ARPYGVAYDDR               |    |    |                         |  | Mascot |
|    |                      | 1799.8883 | 1799.783  | -0.1053 | -59  | 95          | 110     | ALFEDYGTVAECAIK           |    |    | Carbamidomethyl (C)[12] |  | Mascot |
|    |                      | 1816.9149 | 1816.7664 | -0.1485 | -82  | 20          | 35      | SLFSQYGTVTECAIK           |    |    | Carbamidomethyl (C)[12] |  | Mascot |
|    |                      | 1823.9949 | 1823.894  | -0.1009 | -55  | 237         | 254     | RPGGIPIPPPPSSAIMR         |    |    |                         |  | Mascot |
|    |                      | 1823.9949 | 1823.894  | -0.1009 | -55  | 237         | 254     | RPGGIPIPPPPSSAIMR         |    |    |                         |  | Mascot |
|    |                      | 2041.1328 | 2041.073  | -0.0598 | -29  | 2           | 19      | VKIFIGNLPQQAEDLK          |    |    |                         |  | Mascot |
|    |                      | 2172.1733 | 2171.9614 | -0.2119 | -98  | 1           | 19      | MVKIFIGNLPQQAEDEL<br>K    |    |    |                         |  | Mascot |
|    |                      | 2457.0967 | 2457.344  | 0.2473  | 101  | 147         | 167     | SRPRGEEDDYGHPDAGY<br>WPPR |    |    |                         |  | Mascot |
| 20 | lefty1 [Danio rerio] |           |           |         |      | gi 18858969 | 41014.5 | 8.65                      | 10 | 36 | 0                       |  |        |

Peptide Information

|  | Calc. Mass | Obsrv. Mass | ± da    | ± ppm | Start Seq. | End Seq. | Sequence                   | Ion Score | C. I. % | Modification                                 | Rank | Result Type |
|--|------------|-------------|---------|-------|------------|----------|----------------------------|-----------|---------|----------------------------------------------|------|-------------|
|  | 986.4689   | 986.519     | 0.0501  | 51    | 305        | 312      | NYGYGERK                   |           |         |                                              |      | Mascot      |
|  | 996.5546   | 996.5847    | 0.0301  | 30    | 58         | 65       | NKYISMLK                   |           |         |                                              |      | Mascot      |
|  | 1520.7413  | 1520.8969   | 0.1556  | 102   | 20         | 32       | GFTHEDMKDALLK              |           |         | Oxidation (M)[7]                             |      | Mascot      |
|  | 1533.8748  | 1533.7505   | -0.1243 | -81   | 45         | 57       | RDLENLVIPTHVK              |           |         |                                              |      | Mascot      |
|  | 1823.9104  | 1823.894    | -0.0164 | -9    | 313        | 328      | CAVVESAPLPMMYLVK           |           |         | Carbamidomethyl (C)[1], Oxidation (M)[11]    |      | Mascot      |
|  | 1823.9104  | 1823.894    | -0.0164 | -9    | 313        | 328      | CAVVESAPLPMMYLVK           |           |         | Carbamidomethyl (C)[1], Oxidation (M)[11]    |      | Mascot      |
|  | 1952.0054  | 1951.9008   | -0.1046 | -54   | 313        | 329      | CAVVESAPLPMMYLVKK          |           |         | Carbamidomethyl (C)[1], Oxidation (M)[11]    |      | Mascot      |
|  | 1952.0599  | 1951.9008   | -0.1591 | -82   | 165        | 181      | TSLVDSRLPIHETGWK           |           |         |                                              |      | Mascot      |
|  | 1968.0002  | 1967.8976   | -0.1026 | -52   | 313        | 329      | CAVVESAPLPMMYLVKK          |           |         | Carbamidomethyl (C)[1], Oxidation (M)[11,12] |      | Mascot      |
|  | 1968.0002  | 1967.8976   | -0.1026 | -52   | 312        | 328      | KCAVVESAPLPMMYLVK          |           |         | Carbamidomethyl (C)[2], Oxidation (M)[12,13] |      | Mascot      |
|  | 2283.0999  | 2283.1531   | 0.0532  | 23    | 84         | 104      | GIPGNADISGEFVYSDDT<br>RQR  |           |         |                                              |      | Mascot      |
|  | 2484.1655  | 2484.2402   | 0.0747  | 30    | 6          | 27       | AACLLCAALFAMARGFTH<br>EDMK |           |         | Carbamidomethyl (C)[3,6]                     |      | Mascot      |
|  | 2484.1655  | 2484.2402   | 0.0747  | 30    | 6          | 27       | AACLLCAALFAMARGFTH<br>EDMK |           |         | Carbamidomethyl (C)[3,6]                     |      | Mascot      |

21 novel protein similar to TBC1 domain family, member 9 (TBC1D9) [Danio rerio] gi|122890626 138295.5 5.38 15 35 0

Peptide Information

|  | Calc. Mass | Obsrv. Mass | ± da    | ± ppm | Start Seq. | End Seq. | Sequence | Ion Score | C. I. % | Modification | Rank | Result Type |
|--|------------|-------------|---------|-------|------------|----------|----------|-----------|---------|--------------|------|-------------|
|  | 842.5457   | 842.5001    | -0.0456 | -54   | 152        | 158      | EVKLVVR  |           |         |              |      | Mascot      |
|  | 947.4468   | 947.5545    | 0.1077  | 114   | 428        | 435      | SPEEFNPK |           |         |              |      | Mascot      |



|           |           |         |     |      |      |                            |                         |        |
|-----------|-----------|---------|-----|------|------|----------------------------|-------------------------|--------|
| 1172.5405 | 1172.6554 | 0.1149  | 98  | 587  | 595  | MLPDYYNTR                  |                         | Mascot |
| 1556.8795 | 1556.8376 | -0.0419 | -27 | 155  | 167  | LVVRWADVTQLEK              |                         | Mascot |
| 1629.8629 | 1629.7854 | -0.0775 | -48 | 465  | 478  | TKDLVLQGIPENMR             | Oxidation (M)[13]       | Mascot |
| 1629.8629 | 1629.7854 | -0.0775 | -48 | 465  | 478  | TKDLVLQGIPENMR             | Oxidation (M)[13]       | Mascot |
| 1645.5845 | 1645.7821 | 0.1976  | 120 | 1032 | 1044 | HNNEDDDEEEDER              |                         | Mascot |
| 1660.821  | 1660.7837 | -0.0373 | -22 | 1116 | 1129 | LQCEDIADDTVLIR             | Carbamidomethyl (C)[3]  | Mascot |
| 1973.9385 | 1973.9464 | 0.0079  | 4   | 1190 | 1207 | KVGHQHMSVSDYEISLS<br>G     |                         | Mascot |
| 2001.062  | 2001.062  | 0       | 0   | 200  | 216  | LMEQLANIAMRQLLDNK          |                         | Mascot |
| 2048.8953 | 2049.0649 | 0.1696  | 83  | 448  | 464  | NHFTEYGGQVCMYRTDK          |                         | Mascot |
| 2146.1213 | 2146.1343 | 0.013   | 6   | 867  | 885  | EFISGLSVLCHGDLTEKL<br>K    | Carbamidomethyl (C)[10] | Mascot |
| 2225.137  | 2225.0969 | -0.0401 | -18 | 1059 | 1078 | KPCDITPPLDEIKLEDSSP<br>K   |                         | Mascot |
| 2457.2231 | 2457.344  | 0.1209  | 49  | 179  | 199  | VSTRCSEHVFSVFLNINE<br>TFK  |                         | Mascot |
| 2484.2122 | 2484.2402 | 0.028   | 11  | 405  | 425  | QFNLNDNRVPTATQALM<br>TMYR  |                         | Mascot |
| 2484.2122 | 2484.2402 | 0.028   | 11  | 405  | 425  | QFNLNDNRVPTATQALM<br>TMYR  |                         | Mascot |
| 2518.262  | 2518.4089 | 0.1469  | 58  | 520  | 541  | DLHRSLPEHPAFQNEMGI<br>AALR | Oxidation (M)[16]       | Mascot |
| 2518.262  | 2518.4089 | 0.1469  | 58  | 520  | 541  | DLHRSLPEHPAFQNEMGI<br>AALR | Oxidation (M)[16]       | Mascot |

### Peptide Information

|    |                                                         |           |        |    |     |             |                                |      |    |    |   |  |        |
|----|---------------------------------------------------------|-----------|--------|----|-----|-------------|--------------------------------|------|----|----|---|--|--------|
|    | 2161.9966                                               | 2162.1187 | 0.1221 | 56 | 677 | 695         | VGR<br>EDVSQRMEMNGSSSHIN<br>IK |      |    |    |   |  | Mascot |
|    | 2484.0999                                               | 2484.2402 | 0.1403 | 56 | 974 | 993         | WCVLSGYCISYWTPDD<br>EKR        |      |    |    |   |  | Mascot |
|    | 2484.0999                                               | 2484.2402 | 0.1403 | 56 | 973 | 992         | RWCVLSGYCISYWTPD<br>DEK        |      |    |    |   |  | Mascot |
| 23 | leucine-rich repeat LGI family, member 2b [Danio rerio] |           |        |    |     | gi 88900439 | 62395.5                        | 5.89 | 10 | 35 | 0 |  |        |

#### Peptide Information

| Calc. Mass | Obsrv. Mass | ± da    | ± ppm | Start Seq. | End Seq. | Sequence                   | Ion Score | C. I. | % Modification                             | Rank | Result Type |
|------------|-------------|---------|-------|------------|----------|----------------------------|-----------|-------|--------------------------------------------|------|-------------|
| 882.4944   | 882.5549    | 0.0605  | 69    | 127        | 133      | YAFRGLR                    |           |       |                                            |      | Mascot      |
| 1242.6113  | 1242.6195   | 0.0082  | 7     | 305        | 314      | YDQAQNKFTK                 |           |       |                                            |      | Mascot      |
| 1282.679   | 1282.6714   | -0.0076 | -6    | 121        | 130      | IEEINKYAFR                 |           |       |                                            |      | Mascot      |
| 1438.7649  | 1438.7064   | -0.0585 | -41   | 134        | 146      | DVTHLSLANNNLK              |           |       |                                            |      | Mascot      |
| 1578.8527  | 1578.7739   | -0.0788 | -50   | 533        | 545      | TKVFEHILVDYSK              |           |       |                                            |      | Mascot      |
| 1578.8527  | 1578.7739   | -0.0788 | -50   | 533        | 545      | TKVFEHILVDYSK              |           |       |                                            |      | Mascot      |
| 1973.9055  | 1973.9464   | 0.0409  | 21    | 184        | 201      | RSNATISDVYCASPSAMK         |           |       | Carbamidomethyl (C)[11], Oxidation (M)[17] |      | Mascot      |
| 2041.1337  | 2041.073    | -0.0607 | -30   | 13         | 29       | KCLLLTLFVSSFQLCR           |           |       | Carbamidomethyl (C)[2]                     |      | Mascot      |
| 2233.0923  | 2233.0588   | -0.0335 | -15   | 474        | 491      | EQHYLILSSDYSFSQIFR         |           |       |                                            |      | Mascot      |
| 2284.0439  | 2284.1499   | 0.106   | 46    | 36         | 57       | CPSGCTCTTDSIICIGSSL<br>LPR |           |       | Carbamidomethyl (C)[1]                     |      | Mascot      |
| 2457.0793  | 2457.344    | 0.2647  | 108   | 166        | 184      | GNMFHCDCESMWLMLW<br>LKR    |           |       | Carbamidomethyl (C)[6]                     |      | Mascot      |

|    |                                    |  |  |  |  |              |         |      |   |    |   |  |  |
|----|------------------------------------|--|--|--|--|--------------|---------|------|---|----|---|--|--|
| 24 | LOC100148802 protein [Danio rerio] |  |  |  |  | gi 120537559 | 28840.7 | 9.21 | 7 | 35 | 0 |  |  |
|----|------------------------------------|--|--|--|--|--------------|---------|------|---|----|---|--|--|

#### Peptide Information

| Calc. Mass | Obsrv. Mass | ± da    | ± ppm | Start Seq. | End Seq. | Sequence                | Ion Score | C. I. | % Modification | Rank | Result Type |
|------------|-------------|---------|-------|------------|----------|-------------------------|-----------|-------|----------------|------|-------------|
| 986.5628   | 986.519     | -0.0438 | -44   | 36         | 45       | EAKGGLNLGK              |           |       |                |      | Mascot      |
| 1162.6466  | 1162.5184   | -0.1282 | -110  | 153        | 162      | EKFNSTVIPK              |           |       |                |      | Mascot      |
| 1251.6262  | 1251.6042   | -0.022  | -18   | 65         | 74       | GSIMFQERQR              |           |       |                |      | Mascot      |
| 1578.7251  | 1578.7739   | 0.0488  | 31    | 52         | 64       | DVMMEELNLNTNR           |           |       |                |      | Mascot      |
| 1578.7251  | 1578.7739   | 0.0488  | 31    | 52         | 64       | DVMMEELNLNTNR           |           |       |                |      | Mascot      |
| 1718.8132  | 1718.8932   | 0.08    | 47    | 248        | 263      | APRGWGIGYSPESNDL        |           |       |                |      | Mascot      |
| 1810.9309  | 1810.9752   | 0.0443  | 24    | 155        | 169      | FNSTVIPKLYCSPWR         |           |       |                |      | Mascot      |
| 1952.0348  | 1951.9008   | -0.134  | -69   | 134        | 152      | GSPNALAPGYSGPLREIP<br>R |           |       |                |      | Mascot      |
| 1952.0348  | 1951.9008   | -0.134  | -69   | 134        | 152      | GSPNALAPGYSGPLREIP<br>R |           |       |                |      | Mascot      |

|    |                                                                                |  |  |  |  |              |         |      |    |    |   |  |  |
|----|--------------------------------------------------------------------------------|--|--|--|--|--------------|---------|------|----|----|---|--|--|
| 25 | PREDICTED: putative uncharacterized zinc finger protein 814-like [Danio rerio] |  |  |  |  | gi 292610426 | 61962.5 | 9.03 | 14 | 35 | 0 |  |  |
|----|--------------------------------------------------------------------------------|--|--|--|--|--------------|---------|------|----|----|---|--|--|

### Peptide Information

| Calc. Mass | Obsrv. Mass | ± da    | ± ppm | Start Seq. | End Seq. | Sequence                | Ion Score | C. I. % | Modification                              | Rank | Result Type |
|------------|-------------|---------|-------|------------|----------|-------------------------|-----------|---------|-------------------------------------------|------|-------------|
| 996.5472   | 996.5847    | 0.0375  | 38    | 350        | 358      | IHTGEKPSK               |           |         |                                           |      | Mascot      |
| 1045.5789  | 1045.55     | -0.0289 | -28   | 365        | 373      | SFTHKGQLK               |           |         |                                           |      | Mascot      |
| 1520.7638  | 1520.8969   | 0.1331  | 88    | 490        | 502      | LHTDERPHVCSVK           |           |         |                                           |      | Mascot      |
| 1660.7571  | 1660.7837   | 0.0266  | 16    | 210        | 224      | IHTGEKPYTCSHCGK         |           |         |                                           |      | Mascot      |
| 1718.7625  | 1718.8932   | 0.1307  | 76    | 154        | 168      | LHTEDGPFICGQCGK         |           |         | Carbamidomethyl (C)[10,13]                |      | Mascot      |
| 1799.8414  | 1799.783    | -0.0584 | -32   | 350        | 364      | IHTGEKPSKCECEK          |           |         | Carbamidomethyl (C)[10,13]                |      | Mascot      |
| 1810.7986  | 1810.9752   | 0.1766  | 98    | 528        | 543      | EQTEELLGQCPFLCGS        |           |         | Carbamidomethyl (C)[10]                   |      | Mascot      |
| 1923.9731  | 1923.9279   | -0.0452 | -23   | 2          | 17       | EFIKMEIVDSIDAELR        |           |         | Oxidation (M)[5]                          |      | Mascot      |
| 1952.0197  | 1951.9008   | -0.1189 | -61   | 512        | 527      | EVIEEFLLFPETCRVK        |           |         |                                           |      | Mascot      |
| 1952.0197  | 1951.9008   | -0.1189 | -61   | 512        | 527      | EVIEEFLLFPETCRVK        |           |         |                                           |      | Mascot      |
| 2146.0281  | 2146.1343   | 0.1062  | 49    | 402        | 420      | THSRTHSGVKPYSCLCQ GK    |           |         | Carbamidomethyl (C)[14]                   |      | Mascot      |
| 2156.0198  | 2155.9529   | -0.0669 | -31   | 374        | 392      | DHMRHSGEKPYACPLC AK     |           |         |                                           |      | Mascot      |
| 2172.0146  | 2171.9614   | -0.0532 | -24   | 374        | 392      | DHMRHSGEKPYACPLC AK     |           |         | Oxidation (M)[3]                          |      | Mascot      |
| 2225.1106  | 2225.0969   | -0.0137 | -6    | 178        | 196      | HHVKIHYAGKPFTCELCG K    |           |         | Carbamidomethyl (C)[14]                   |      | Mascot      |
| 2256.022   | 2256.0806   | 0.0586  | 26    | 262        | 280      | SHMRIHTGEKPFSCCHQC GK   |           |         | Carbamidomethyl (C)[14], Oxidation (M)[3] |      | Mascot      |
| 2484.1746  | 2484.2402   | 0.0656  | 26    | 62         | 84       | LDSEDPTIHTSEKPNTCP VCGK |           |         |                                           |      | Mascot      |
| 2484.1746  | 2484.2402   | 0.0656  | 26    | 62         | 84       | LDSEDPTIHTSEKPNTCP VCGK |           |         |                                           |      | Mascot      |

26 protein arginine N-methyltransferase 1 [Danio rerio] gi|41055247 39343.7 5.47 8 35 0

### Peptide Information

| Calc. Mass | Obsrv. Mass | ± da    | ± ppm | Start Seq. | End Seq. | Sequence             | Ion Score | C. I. % | Modification           | Rank | Result Type |
|------------|-------------|---------|-------|------------|----------|----------------------|-----------|---------|------------------------|------|-------------|
| 1051.651   | 1051.5104   | -0.1406 | -134  | 105        | 113      | LDHIVTIHK            |           |         |                        |      | Mascot      |
| 1051.651   | 1051.7001   | 0.0491  | 47    | 105        | 113      | LDHIVTIHK            |           |         |                        |      | Mascot      |
| 1075.618   | 1075.5247   | -0.0933 | -87   | 214        | 223      | QLVSTACLIK           |           |         |                        |      | Mascot      |
| 1251.658   | 1251.6042   | -0.0538 | -43   | 166        | 176      | ATLYVTAIEDR          |           |         |                        |      | Mascot      |
| 1556.7373  | 1556.8376   | 0.1003  | 64    | 327        | 339      | GQLCEVSKTSEYR        |           |         | Carbamidomethyl (C)[4] |      | Mascot      |
| 1924.0459  | 1923.9279   | -0.118  | -61   | 84         | 101      | VIGIECSSISDYAVKIVK   |           |         |                        |      | Mascot      |
| 1951.8914  | 1951.9008   | 0.0094  | 5     | 2          | 20       | EVSQGESSAKPAAEDMT SK |           |         |                        |      | Mascot      |
| 1951.8914  | 1951.9008   | 0.0094  | 5     | 2          | 20       | EVSQGESSAKPAAEDMT SK |           |         |                        |      | Mascot      |
| 1967.8862  | 1967.8976   | 0.0114  | 6     | 2          | 20       | EVSQGESSAKPAAEDMT SK |           |         | Oxidation (M)[16]      |      | Mascot      |

|    |                                                         |           |         |     |     |              |                          |      |   |    |   |  |                   |        |
|----|---------------------------------------------------------|-----------|---------|-----|-----|--------------|--------------------------|------|---|----|---|--|-------------------|--------|
|    | 1967.8862                                               | 1967.8976 | 0.0114  | 6   | 2   | 20           | EVSQGESSAKPAAEDMT<br>SK  |      |   |    |   |  | Oxidation (M)[16] | Mascot |
|    | 2172.053                                                | 2171.9614 | -0.0916 | -42 | 316 | 334          | DLDFTVDIDFKGQLCEVS<br>K  |      |   |    |   |  |                   | Mascot |
|    | 2484.2129                                               | 2484.2402 | 0.0273  | 11  | 248 | 267          | NDYIHALVTYFNIEFTRCH<br>K |      |   |    |   |  |                   | Mascot |
|    | 2484.2129                                               | 2484.2402 | 0.0273  | 11  | 248 | 267          | NDYIHALVTYFNIEFTRCH<br>K |      |   |    |   |  |                   | Mascot |
| 27 | pyruvate dehydrogenase kinase, isozyme 3b [Danio rerio] |           |         |     |     | gi 123702577 | 21003.7                  | 8.49 | 7 | 34 | 0 |  |                   |        |

#### Peptide Information

| Calc. Mass | Obsrv. Mass | ± da    | ± ppm | Start Seq. | End Seq. | Sequence            | Ion Score | C. I. | % | Modification           | Rank | Result Type |
|------------|-------------|---------|-------|------------|----------|---------------------|-----------|-------|---|------------------------|------|-------------|
| 882.4468   | 882.5549    | 0.1081  | 123   | 30         | 36       | QFLDFGR             |           |       |   |                        |      | Mascot      |
| 1045.5499  | 1045.55     | 0.0001  | 0     | 43         | 50       | TSYMFLRK            |           |       |   |                        |      | Mascot      |
| 1165.6836  | 1165.7307   | 0.0471  | 40    | 1          | 9        | MKLFICLLK           |           |       |   | Carbamidomethyl (C)[6] |      | Mascot      |
| 1556.7162  | 1556.8376   | 0.1214  | 78    | 30         | 42       | QFLDFGRENACEK       |           |       |   |                        |      | Mascot      |
| 1800.8949  | 1800.7736   | -0.1213 | -67   | 118        | 133      | HNDVVPTMAQGVIEYK    |           |       |   |                        |      | Mascot      |
| 1816.8898  | 1816.7664   | -0.1234 | -68   | 118        | 133      | HNDVVPTMAQGVIEYK    |           |       |   | Oxidation (M)[8]       |      | Mascot      |
| 2155.0852  | 2154.936    | -0.1492 | -69   | 96         | 113      | RSPEDPHTLNDFLEMLIK  |           |       |   |                        |      | Mascot      |
| 2284.1641  | 2284.1499   | -0.0142 | -6    | 97         | 115      | SPEDPHTLNDFLEMLIKIR |           |       |   | Oxidation (M)[14]      |      | Mascot      |

|    |                                                         |  |  |  |  |             |         |     |   |    |   |    |   |  |
|----|---------------------------------------------------------|--|--|--|--|-------------|---------|-----|---|----|---|----|---|--|
| 28 | tryptophanyl-tRNA synthetase, cytoplasmic [Danio rerio] |  |  |  |  | gi 41152126 | 52339.4 | 6.2 | 7 | 34 | 0 | 10 | 0 |  |
|----|---------------------------------------------------------|--|--|--|--|-------------|---------|-----|---|----|---|----|---|--|

#### Peptide Information

| Calc. Mass | Obsrv. Mass | ± da    | ± ppm | Start Seq. | End Seq. | Sequence                   | Ion Score | C. I. | % | Modification                              | Rank | Result Type |
|------------|-------------|---------|-------|------------|----------|----------------------------|-----------|-------|---|-------------------------------------------|------|-------------|
| 1251.6038  | 1251.6042   | 0.0004  | 0     | 214        | 224      | DIIACGFVDVNK               |           |       |   | Carbamidomethyl (C)[5]                    |      | Mascot      |
| 1329.7122  | 1329.6761   | -0.0361 | -27   | 105        | 115      | VDQELVDRISR                |           |       |   |                                           |      | Mascot      |
| 1329.7122  | 1329.6761   | -0.0361 | -27   | 105        | 115      | VDQELVDRISR                |           |       |   |                                           |      | Mascot      |
| 1967.9379  | 1967.8976   | -0.0403 | -20   | 2          | 19       | SSPLDLIECVTAQGETV<br>R     |           |       |   |                                           |      | Mascot      |
| 1967.9379  | 1967.8976   | -0.0403 | -20   | 2          | 19       | SSPLDLIECVTAQGETV<br>R     | 10        | 0     |   |                                           |      | Mascot      |
| 2049.1279  | 2049.0649   | -0.063  | -31   | 156        | 174      | GPSSQAIHVGHLPFIFTK         |           |       |   |                                           |      | Mascot      |
| 2155.9998  | 2155.9529   | -0.0469 | -22   | 1          | 19       | MSSPLDLIECVTAQGET<br>VR    |           |       |   | Carbamidomethyl (C)[10]                   |      | Mascot      |
| 2171.9946  | 2171.9614   | -0.0332 | -15   | 1          | 19       | MSSPLDLIECVTAQGET<br>VR    |           |       |   | Carbamidomethyl (C)[10], Oxidation (M)[1] |      | Mascot      |
| 2457.136   | 2457.344    | 0.208   | 85    | 295        | 314      | DVQCLIPCAIDQDPYFRM<br>TR   |           |       |   | Carbamidomethyl (C)[4], Oxidation (M)[18] |      | Mascot      |
| 2484.2109  | 2484.2402   | 0.0293  | 12    | 1          | 22       | MSSPLDLIECVTAQGET<br>VRSIK |           |       |   | Carbamidomethyl (C)[10]                   |      | Mascot      |
| 2484.2109  | 2484.2402   | 0.0293  | 12    | 1          | 22       | MSSPLDLIECVTAQGET<br>VRSIK |           |       |   | Carbamidomethyl (C)[10]                   |      | Mascot      |

|    |                                            |  |  |  |  |             |         |      |   |    |   |    |   |  |
|----|--------------------------------------------|--|--|--|--|-------------|---------|------|---|----|---|----|---|--|
| 29 | Tryptophanyl-tRNA synthetase [Danio rerio] |  |  |  |  | gi 55777372 | 52313.4 | 6.33 | 7 | 34 | 0 | 10 | 0 |  |
|----|--------------------------------------------|--|--|--|--|-------------|---------|------|---|----|---|----|---|--|

| Peptide Information |                                                                  |         |       |            |             |                            |           |       |    |                                           |                  |
|---------------------|------------------------------------------------------------------|---------|-------|------------|-------------|----------------------------|-----------|-------|----|-------------------------------------------|------------------|
| Calc. Mass          | Obsrv. Mass                                                      | ± da    | ± ppm | Start Seq. | End Seq.    | Sequence                   | Ion Score | C. I. | %  | Modification                              | Rank Result Type |
| 1251.6038           | 1251.6042                                                        | 0.0004  | 0     | 214        | 224         | DIIACGFDVNK                |           |       |    | Carbamidomethyl (C)[5]                    | Mascot           |
| 1329.7122           | 1329.6761                                                        | -0.0361 | -27   | 105        | 115         | VDQELVDRISR                |           |       |    |                                           | Mascot           |
| 1329.7122           | 1329.6761                                                        | -0.0361 | -27   | 105        | 115         | VDQELVDRISR                |           |       |    |                                           | Mascot           |
| 1967.9379           | 1967.8976                                                        | -0.0403 | -20   | 2          | 19          | SSPLDLYECVTAQGETV<br>R     |           |       |    |                                           | Mascot           |
| 1967.9379           | 1967.8976                                                        | -0.0403 | -20   | 2          | 19          | SSPLDLYECVTAQGETV<br>R     | 10        |       | 0  |                                           | Mascot           |
| 2049.1279           | 2049.0649                                                        | -0.063  | -31   | 156        | 174         | GPSSQAIHVGHLIPFIFTK        |           |       |    |                                           | Mascot           |
| 2155.9998           | 2155.9529                                                        | -0.0469 | -22   | 1          | 19          | MSSPLDLYECVTAQGET<br>VR    |           |       |    | Carbamidomethyl (C)[10]                   | Mascot           |
| 2171.9946           | 2171.9614                                                        | -0.0332 | -15   | 1          | 19          | MSSPLDLYECVTAQGET<br>VR    |           |       |    | Carbamidomethyl (C)[10], Oxidation (M)[1] | Mascot           |
| 2457.136            | 2457.344                                                         | 0.208   | 85    | 295        | 314         | DVQCLIPCAIDQDPYFRM<br>TR   |           |       |    | Carbamidomethyl (C)[4], Oxidation (M)[18] | Mascot           |
| 2484.2109           | 2484.2402                                                        | 0.0293  | 12    | 1          | 22          | MSSPLDLYECVTAQGET<br>VRSIK |           |       |    | Carbamidomethyl (C)[10]                   | Mascot           |
| 2484.2109           | 2484.2402                                                        | 0.0293  | 12    | 1          | 22          | MSSPLDLYECVTAQGET<br>VRSIK |           |       |    | Carbamidomethyl (C)[10]                   | Mascot           |
| 30                  | coiled-coil domain-containing protein 80 precursor [Danio rerio] |         |       |            | gi 55742450 | 99857.2                    | 9.69      | 10    | 34 | 0 21 0                                    |                  |

| Peptide Information |                                     |         |       |            |              |                           |           |       |    |                   |                  |
|---------------------|-------------------------------------|---------|-------|------------|--------------|---------------------------|-----------|-------|----|-------------------|------------------|
| Calc. Mass          | Obsrv. Mass                         | ± da    | ± ppm | Start Seq. | End Seq.     | Sequence                  | Ion Score | C. I. | %  | Modification      | Rank Result Type |
| 842.459             | 842.5001                            | 0.0411  | 49    | 90         | 97           | RPAQGGTR                  |           |       |    |                   | Mascot           |
| 1045.5312           | 1045.55                             | 0.0188  | 18    | 599        | 606          | IDHYQLEK                  |           |       |    |                   | Mascot           |
| 1329.7485           | 1329.6761                           | -0.0724 | -54   | 771        | 782          | EGISATLVDIR               | 21        |       | 0  |                   | Mascot           |
| 1329.7485           | 1329.6761                           | -0.0724 | -54   | 771        | 782          | EGISATLVDIR               |           |       |    |                   | Mascot           |
| 1438.6379           | 1438.7064                           | 0.0685  | 48    | 66         | 77           | QQMQGDEGVQFR              |           |       |    | Oxidation (M)[3]  | Mascot           |
| 1578.7441           | 1578.7739                           | 0.0298  | 19    | 66         | 78           | QQMQGDEGVQFR              |           |       |    |                   | Mascot           |
| 1578.7441           | 1578.7739                           | 0.0298  | 19    | 65         | 77           | RQQMQGDEGVQFR             |           |       |    |                   | Mascot           |
| 1660.8363           | 1660.7837                           | -0.0526 | -32   | 599        | 611          | IDHYQLEKDKPMK             |           |       |    | Oxidation (M)[12] | Mascot           |
| 2041.0166           | 2041.073                            | 0.0564  | 28    | 150        | 166          | LMMSLLKPEVYCELAER         |           |       |    | Oxidation (M)[2]  | Mascot           |
| 2233.1155           | 2233.0588                           | -0.0567 | -25   | 336        | 356          | STTTTTTTTTTTTRPTTTT<br>TR |           |       |    |                   | Mascot           |
| 2457.1941           | 2457.344                            | 0.1499  | 61    | 232        | 251          | YPYPVRLEAMYEVIDQSP<br>MR  |           |       |    |                   | Mascot           |
| 31                  | PREDICTED: myozenin-2 [Danio rerio] |         |       |            | gi 292620473 | 31899.1                   | 9.54      | 7     | 33 | 0                 |                  |

| Peptide Information |             |      |       |            |          |          |           |       |   |              |                  |
|---------------------|-------------|------|-------|------------|----------|----------|-----------|-------|---|--------------|------------------|
| Calc. Mass          | Obsrv. Mass | ± da | ± ppm | Start Seq. | End Seq. | Sequence | Ion Score | C. I. | % | Modification | Rank Result Type |

|    |                                                                                           |           |         |      |     |     |                         |  |  |  |  |  |  |  |  |  |        |
|----|-------------------------------------------------------------------------------------------|-----------|---------|------|-----|-----|-------------------------|--|--|--|--|--|--|--|--|--|--------|
|    | 986.5628                                                                                  | 986.519   | -0.0438 | -44  | 60  | 69  | EAKGGLNLGK              |  |  |  |  |  |  |  |  |  | Mascot |
|    | 1162.6466                                                                                 | 1162.5184 | -0.1282 | -110 | 177 | 186 | EKFNSTVIPK              |  |  |  |  |  |  |  |  |  | Mascot |
|    | 1251.6262                                                                                 | 1251.6042 | -0.022  | -18  | 89  | 98  | GSIMFQERQR              |  |  |  |  |  |  |  |  |  | Mascot |
|    | 1578.7251                                                                                 | 1578.7739 | 0.0488  | 31   | 76  | 88  | DVMMEELNLNTNR           |  |  |  |  |  |  |  |  |  | Mascot |
|    | 1578.7251                                                                                 | 1578.7739 | 0.0488  | 31   | 76  | 88  | DVMMEELNLNTNR           |  |  |  |  |  |  |  |  |  | Mascot |
|    | 1718.8132                                                                                 | 1718.8932 | 0.08    | 47   | 272 | 287 | APRGWGIGYSPESNDL        |  |  |  |  |  |  |  |  |  | Mascot |
|    | 1810.9309                                                                                 | 1810.9752 | 0.0443  | 24   | 179 | 193 | FNSTVIPKLYCSPWR         |  |  |  |  |  |  |  |  |  | Mascot |
|    | 1952.0348                                                                                 | 1951.9008 | -0.134  | -69  | 158 | 176 | GSPNALAPGYSGPLREIP<br>R |  |  |  |  |  |  |  |  |  | Mascot |
|    | 1952.0348                                                                                 | 1951.9008 | -0.134  | -69  | 158 | 176 | GSPNALAPGYSGPLREIP<br>R |  |  |  |  |  |  |  |  |  | Mascot |
| 32 | leucine-rich repeat LGI family, member 2b [Danio rerio] gi 220679474 63071.9 6.09 10 33 0 |           |         |      |     |     |                         |  |  |  |  |  |  |  |  |  |        |

#### Peptide Information

| Calc. Mass | Obsrv. Mass | ± da    | ± ppm | Start Seq. | End Seq. | Sequence                   | Ion Score | C. I. % | Modification                               | Rank | Result Type |
|------------|-------------|---------|-------|------------|----------|----------------------------|-----------|---------|--------------------------------------------|------|-------------|
| 882.4944   | 882.5549    | 0.0605  | 69    | 133        | 139      | YAFRGLR                    |           |         |                                            |      | Mascot      |
| 1242.6113  | 1242.6195   | 0.0082  | 7     | 311        | 320      | YDQAQNKFTK                 |           |         |                                            |      | Mascot      |
| 1282.679   | 1282.6714   | -0.0076 | -6    | 127        | 136      | IEEINKYAFR                 |           |         |                                            |      | Mascot      |
| 1438.7649  | 1438.7064   | -0.0585 | -41   | 140        | 152      | DVTHLSLANNLNK              |           |         |                                            |      | Mascot      |
| 1578.8527  | 1578.7739   | -0.0788 | -50   | 539        | 551      | TKVFEHILVDYSK              |           |         |                                            |      | Mascot      |
| 1578.8527  | 1578.7739   | -0.0788 | -50   | 539        | 551      | TKVFEHILVDYSK              |           |         |                                            |      | Mascot      |
| 1973.9055  | 1973.9464   | 0.0409  | 21    | 190        | 207      | RSNATISDVYCASPSAMK         |           |         | Carbamidomethyl (C)[11], Oxidation (M)[17] |      | Mascot      |
| 2139.1816  | 2138.9331   | -0.2485 | -116  | 20         | 37       | CLLLTLLFVGSFQLCRAK         |           |         | Carbamidomethyl (C)[1,15]                  |      | Mascot      |
| 2233.0923  | 2233.0588   | -0.0335 | -15   | 480        | 497      | EQHYLILSSDYSFSQIFR         |           |         |                                            |      | Mascot      |
| 2284.0439  | 2284.1499   | 0.106   | 46    | 42         | 63       | CPSGCTCTTDSIICIGSSL<br>LPR |           |         | Carbamidomethyl (C)[1]                     |      | Mascot      |
| 2457.0793  | 2457.344    | 0.2647  | 108   | 172        | 190      | GNMFHCDCESMWMLW<br>LKR     |           |         | Carbamidomethyl (C)[6]                     |      | Mascot      |

33 Zgc:152774 protein [Danio rerio] gi|62202673 48140.9 9.53 8 33 0

#### Peptide Information

| Calc. Mass | Obsrv. Mass | ± da    | ± ppm | Start Seq. | End Seq. | Sequence                | Ion Score | C. I. % | Modification     | Rank | Result Type |
|------------|-------------|---------|-------|------------|----------|-------------------------|-----------|---------|------------------|------|-------------|
| 1075.5128  | 1075.5247   | 0.0119  | 11    | 80         | 88       | MLSFGFTEK               |           |         | Oxidation (M)[1] |      | Mascot      |
| 1162.5997  | 1162.5184   | -0.0813 | -70   | 336        | 346      | VGCQIKSSGQR             |           |         |                  |      | Mascot      |
| 1578.7303  | 1578.7739   | 0.0436  | 28    | 317        | 328      | EHFGIMMYHKNR            |           |         | Oxidation (M)[6] |      | Mascot      |
| 1578.7303  | 1578.7739   | 0.0436  | 28    | 317        | 328      | EHFGIMMYHKNR            |           |         | Oxidation (M)[6] |      | Mascot      |
| 1967.9677  | 1967.8976   | -0.0701 | -36   | 122        | 140      | NGGCQSVGMLSQSFLQA<br>IK |           |         |                  |      | Mascot      |

|    |                                                                           |           |         |     |              |     |                                   |                                           |    |    |   |  |  |        |
|----|---------------------------------------------------------------------------|-----------|---------|-----|--------------|-----|-----------------------------------|-------------------------------------------|----|----|---|--|--|--------|
|    | 1967.9677                                                                 | 1967.8976 | -0.0701 | -36 | 122          | 140 | NGGCQSVGMLSQSFLQA<br>IK           |                                           |    |    |   |  |  | Mascot |
|    | 1973.8579                                                                 | 1973.9464 | 0.0885  | 45  | 59           | 76  | DQLCLSFTDNGSGMTPS<br>K            | Carbamidomethyl (C)[4], Oxidation (M)[14] |    |    |   |  |  | Mascot |
|    | 2040.9841                                                                 | 2041.073  | 0.0889  | 44  | 122          | 140 | NGGCQSVGMLSQSFLQA<br>IK           | Carbamidomethyl (C)[4], Oxidation (M)[9]  |    |    |   |  |  | Mascot |
|    | 2139.1379                                                                 | 2138.9331 | -0.2048 | -96 | 347          | 366 | SGVGVIGVIECNFLKPAH<br>NK          | Carbamidomethyl (C)[11]                   |    |    |   |  |  | Mascot |
|    | 2457.2144                                                                 | 2457.344  | 0.1296  | 53  | 174          | 194 | YSLFQSESELQEQLDSIQ<br>GKK         |                                           |    |    |   |  |  | Mascot |
|    | 3081.6213                                                                 | 3081.4858 | -0.1355 | -44 | 141          | 169 | AQAVIVPIAPFNQQTNAL<br>VVTEDSEASLR |                                           |    |    |   |  |  | Mascot |
| 34 | PREDICTED: echinoderm microtubule associated protein like 6 [Danio rerio] |           |         |     | gi 326672044 |     | 191942.5                          | 7.32                                      | 18 | 33 | 0 |  |  |        |

Peptide Information

| Calc. Mass | Obsrv. Mass | ± da    | ± ppm | Start Seq. | End Seq. | Sequence                                    | Ion Score | C. I. | % Modification            | Rank | Result Type |
|------------|-------------|---------|-------|------------|----------|---------------------------------------------|-----------|-------|---------------------------|------|-------------|
| 842.4617   | 842.5001    | 0.0384  | 46    | 433        | 439      | EDLPQLK                                     |           |       |                           |      | Mascot      |
| 996.5546   | 996.5847    | 0.0301  | 30    | 714        | 721      | CLKTYAIK                                    |           |       | Carbamidomethyl (C)[1]    |      | Mascot      |
| 1051.5167  | 1051.5104   | -0.0063 | -6    | 519        | 528      | DYVASGQVGR                                  |           |       |                           |      | Mascot      |
| 1051.651   | 1051.7001   | 0.0491  | 47    | 1117       | 1126     | AAPLPDKLVK                                  |           |       |                           |      | Mascot      |
| 1145.5143  | 1145.5791   | 0.0648  | 57    | 1077       | 1085     | EKNMDYTTK                                   |           |       | Oxidation (M)[4]          |      | Mascot      |
| 1172.6382  | 1172.6554   | 0.0172  | 15    | 1544       | 1553     | DRSVAIQDIR                                  |           |       |                           |      | Mascot      |
| 1282.6677  | 1282.6714   | 0.0037  | 3     | 983        | 994      | LLATGDDFGFVK                                |           |       |                           |      | Mascot      |
| 1533.7994  | 1533.7505   | -0.0489 | -32   | 176        | 188      | FWALCGNALTPKR                               |           |       | Carbamidomethyl (C)[5]    |      | Mascot      |
| 1578.8123  | 1578.7739   | -0.0384 | -24   | 862        | 875      | EIISDIRFSQDAGK                              |           |       |                           |      | Mascot      |
| 1578.8123  | 1578.7739   | -0.0384 | -24   | 862        | 875      | EIISDIRFSQDAGK                              |           |       |                           |      | Mascot      |
| 1800.8737  | 1800.7736   | -0.1001 | -56   | 1717       | 1732     | YVISVGNDCSVFVWR                             |           |       |                           |      | Mascot      |
| 1816.8759  | 1816.7664   | -0.1095 | -60   | 548        | 564      | GQHQRGVCALEFTADGK                           |           |       |                           |      | Mascot      |
| 1823.9208  | 1823.894    | -0.0268 | -15   | 296        | 311      | ILAGTQDSEIFEVMVR                            |           |       | Oxidation (M)[14]         |      | Mascot      |
| 1823.9208  | 1823.894    | -0.0268 | -15   | 296        | 311      | ILAGTQDSEIFEVMVR                            |           |       | Oxidation (M)[14]         |      | Mascot      |
| 1968.076   | 1967.8976   | -0.1784 | -91   | 723        | 741      | AALSPSSKGLLLEDNPSI<br>R                     |           |       |                           |      | Mascot      |
| 1968.076   | 1967.8976   | -0.1784 | -91   | 723        | 741      | AALSPSSKGLLLEDNPSI<br>R                     |           |       |                           |      | Mascot      |
| 2139.0862  | 2138.9331   | -0.1531 | -72   | 1616       | 1634     | QIHEVPSGKLVSDQALM<br>DR                     |           |       | Oxidation (M)[17]         |      | Mascot      |
| 2160.0325  | 2160.0588   | 0.0263  | 12    | 897        | 915      | VGICKGASSCITHVDWDV<br>R                     |           |       | Carbamidomethyl (C)[4,10] |      | Mascot      |
| 2283.2019  | 2283.1531   | -0.0488 | -21   | 1285       | 1304     | IFVVEFRPDSDTQFVSVG<br>IK                    |           |       |                           |      | Mascot      |
| 3081.3723  | 3081.4858   | 0.1135  | 37    | 231        | 260      | TIQAAHGAGIFSMHSCEE<br>GFATGGRDGCVR          |           |       | Oxidation (M)[13]         |      | Mascot      |
| 3672.8223  | 3672.7708   | -0.0515 | -14   | 765        | 799      | SGPMTLLVQGHMEGEV<br>WGLAAHPLLPICATVSDD<br>K |           |       |                           |      | Mascot      |
| 3672.8223  | 3672.7708   | -0.0515 | -14   | 765        | 799      | SGPMTLLVQGHMEGEV                            |           |       |                           |      | Mascot      |

WG<sup>+</sup>LA<sup>+</sup>AH<sup>+</sup>PL<sup>+</sup>L<sup>+</sup>PICATVSD<sup>+</sup>D<sup>+</sup>K

35 novel protein [Danio rerio] gi|220679558 45035 4.99 8 32 0

Peptide Information

| Calc. Mass | Obsrv. Mass | ± da    | ± ppm | Start Seq. | End Seq. | Sequence                   | Ion Score | C. I. | % Modification                            | Rank | Result Type |
|------------|-------------|---------|-------|------------|----------|----------------------------|-----------|-------|-------------------------------------------|------|-------------|
| 819.4094   | 819.4641    | 0.0547  | 67    | 375        | 381      | LDETDVK                    |           |       |                                           |      | Mascot      |
| 842.473    | 842.5001    | 0.0271  | 32    | 382        | 388      | DPKDVLR                    |           |       |                                           |      | Mascot      |
| 882.4791   | 882.5549    | 0.0758  | 86    | 1          | 7        | VSTYTRR                    |           |       |                                           |      | Mascot      |
| 989.5197   | 989.4801    | -0.0396 | -40   | 236        | 243      | LRAEMQNK                   |           |       |                                           |      | Mascot      |
| 1045.5889  | 1045.55     | -0.0389 | -37   | 54         | 62       | VIDTLESLR                  |           |       |                                           |      | Mascot      |
| 1242.5541  | 1242.6195   | 0.0654  | 53    | 7          | 16       | RCPGCQMIYR                 |           |       | Oxidation (M)[7]                          |      | Mascot      |
| 1718.8629  | 1718.8932   | 0.0303  | 18    | 202        | 215      | LVEELMKQEVDVDR             |           |       | Oxidation (M)[6]                          |      | Mascot      |
| 2256.0278  | 2256.0806   | 0.0528  | 23    | 253        | 274      | ICGSSGGCSVVMCPHGV<br>VYSLK |           |       | Carbamidomethyl (C)[2], Oxidation (M)[12] |      | Mascot      |

36 TUWD12 [Danio rerio] gi|37682095 54354 6.31 9 32 0

Peptide Information

| Calc. Mass | Obsrv. Mass | ± da    | ± ppm | Start Seq. | End Seq. | Sequence                                                                    | Ion Score | C. I. | % Modification                            | Rank | Result Type |
|------------|-------------|---------|-------|------------|----------|-----------------------------------------------------------------------------|-----------|-------|-------------------------------------------|------|-------------|
| 819.4458   | 819.4641    | 0.0183  | 22    | 454        | 460      | LTLTEDK                                                                     |           |       |                                           |      | Mascot      |
| 1045.5789  | 1045.55     | -0.0289 | -28   | 212        | 219      | IWDIRTNK                                                                    |           |       |                                           |      | Mascot      |
| 1162.6313  | 1162.5184   | -0.1129 | -97   | 117        | 127      | LVTASDDKSVK                                                                 |           |       |                                           |      | Mascot      |
| 1165.5708  | 1165.7307   | 0.1599  | 137   | 107        | 116      | SVNFSRDGQR                                                                  |           |       |                                           |      | Mascot      |
| 1172.6497  | 1172.6554   | 0.0057  | 5     | 41         | 50       | SLMIWNLAPK                                                                  |           |       |                                           |      | Mascot      |
| 1815.8442  | 1815.782    | -0.0622 | -34   | 16         | 31       | GHKDVISCADFNPNK                                                             |           |       | Carbamidomethyl (C)[8]                    |      | Mascot      |
| 2000.854   | 2001.062    | 0.208   | 104   | 395        | 410      | THTQAREEEDENQEER                                                            |           |       |                                           |      | Mascot      |
| 2139.2073  | 2138.9331   | -0.2742 | -128  | 262        | 280      | LIYTLHG <sup>+</sup> HKG <sup>+</sup> PVLT <sup>+</sup> VTFS <sup>+</sup> R |           |       |                                           |      | Mascot      |
| 2160.0537  | 2160.0588   | 0.0051  | 2     | 463        | 480      | TCLDNQVLLMQNQQLD<br>R                                                       |           |       |                                           |      | Mascot      |
| 2233.0701  | 2233.0588   | -0.0113 | -5    | 463        | 480      | TCLDNQVLLMQNQQLD<br>R                                                       |           |       | Carbamidomethyl (C)[2], Oxidation (M)[10] |      | Mascot      |

37 novel protein similar to H.sapiens natriuretic peptide receptor [Danio rerio] gi|220679014 36034.1 6.04 5 32 0 15 0

Peptide Information

| Calc. Mass | Obsrv. Mass | ± da    | ± ppm | Start Seq. | End Seq. | Sequence                | Ion Score | C. I. | % Modification | Rank | Result Type |
|------------|-------------|---------|-------|------------|----------|-------------------------|-----------|-------|----------------|------|-------------|
| 947.468    | 947.5545    | 0.0865  | 91    | 100        | 107      | TAE <sup>+</sup> LQEEK  |           |       |                |      | Mascot      |
| 1075.563   | 1075.5247   | -0.0383 | -36   | 100        | 108      | TAE <sup>+</sup> LQEEKK |           |       |                |      | Mascot      |



|  |           |           |         |      |     |     |                 |    |   |  |        |
|--|-----------|-----------|---------|------|-----|-----|-----------------|----|---|--|--------|
|  | 1329.7849 | 1329.6761 | -0.1088 | -82  | 121 | 133 | SVASQLIAGKTVR   | 15 | 0 |  | Mascot |
|  | 1329.7849 | 1329.6761 | -0.1088 | -82  | 121 | 133 | SVASQLIAGKTVR   |    |   |  | Mascot |
|  | 1556.894  | 1556.8376 | -0.0564 | -36  | 209 | 222 | EIARMSLAIVQGLR  |    |   |  | Mascot |
|  | 1816.9565 | 1816.7664 | -0.1901 | -105 | 223 | 237 | SFHSPHVPEQQLRVR |    |   |  | Mascot |

38 LOC100148802 protein [Danio rerio] gi|148745689 29506 9.62 7 32 0

#### Peptide Information

| Calc. Mass | Obsrv. Mass | ± da    | ± ppm | Start Seq. | End Seq. | Sequence                | Ion Score | C. I. | % Modification | Rank | Result Type |
|------------|-------------|---------|-------|------------|----------|-------------------------|-----------|-------|----------------|------|-------------|
| 986.5628   | 986.519     | -0.0438 | -44   | 37         | 46       | EAKGGLNLGK              |           |       |                |      | Mascot      |
| 1162.6466  | 1162.5184   | -0.1282 | -110  | 154        | 163      | EKFNSTVIPK              |           |       |                |      | Mascot      |
| 1251.6262  | 1251.6042   | -0.022  | -18   | 66         | 75       | GSIMFQERQR              |           |       |                |      | Mascot      |
| 1578.7251  | 1578.7739   | 0.0488  | 31    | 53         | 65       | DVMMEELNLNTNR           |           |       |                |      | Mascot      |
| 1578.7251  | 1578.7739   | 0.0488  | 31    | 53         | 65       | DVMMEELNLNTNR           |           |       |                |      | Mascot      |
| 1718.8132  | 1718.8932   | 0.08    | 47    | 249        | 264      | APRGWGIGYSPESNDL        |           |       |                |      | Mascot      |
| 1810.9309  | 1810.9752   | 0.0443  | 24    | 156        | 170      | FNSTVIPKLYCSPWR         |           |       |                |      | Mascot      |
| 1952.0348  | 1951.9008   | -0.134  | -69   | 135        | 153      | GSPNALAPGYSGPLREIP<br>R |           |       |                |      | Mascot      |
| 1952.0348  | 1951.9008   | -0.134  | -69   | 135        | 153      | GSPNALAPGYSGPLREIP<br>R |           |       |                |      | Mascot      |

39 novel protein similar to vertebrate leucine rich repeat (in gi|169154866 56467.8 6.27 11 32 0  
FLII) interacting protein family [Danio

#### Peptide Information

| Calc. Mass | Obsrv. Mass | ± da    | ± ppm | Start Seq. | End Seq. | Sequence                | Ion Score | C. I. | % Modification         | Rank | Result Type |
|------------|-------------|---------|-------|------------|----------|-------------------------|-----------|-------|------------------------|------|-------------|
| 819.4219   | 819.4641    | 0.0422  | 51    | 81         | 86       | YSRHTR                  |           |       |                        |      | Mascot      |
| 842.5458   | 842.5001    | -0.0457 | -54   | 291        | 297      | KILALER                 |           |       |                        |      | Mascot      |
| 947.4727   | 947.5545    | 0.0818  | 86    | 314        | 320      | DEVCLRLR                |           |       | Carbamidomethyl (C)[4] |      | Mascot      |
| 1145.6022  | 1145.5791   | -0.0231 | -20   | 125        | 136      | ASSARASPVGSR            |           |       |                        |      | Mascot      |
| 1520.7737  | 1520.8969   | 0.1232  | 81    | 325        | 339      | KNGIVMGSEVTANGK         |           |       | Oxidation (M)[6]       |      | Mascot      |
| 1629.8442  | 1629.7854   | -0.0588 | -36   | 411        | 424      | SEQEVTALQNIIR           |           |       |                        |      | Mascot      |
| 1629.8442  | 1629.7854   | -0.0588 | -36   | 411        | 424      | SEQEVTALQNIIR           |           |       |                        |      | Mascot      |
| 1645.869   | 1645.7821   | -0.0869 | -53   | 326        | 341      | NGIVMGSEVTANGKIR        |           |       |                        |      | Mascot      |
| 1718.7228  | 1718.8932   | 0.1704  | 99    | 68         | 80       | WGHIQWMEDSER            |           |       | Oxidation (M)[8]       |      | Mascot      |
| 1799.8671  | 1799.783    | -0.0841 | -47   | 104        | 120      | GSLRPSDYNGFLGSSSR       |           |       |                        |      | Mascot      |
| 2000.8899  | 2001.062    | 0.1721  | 86    | 157        | 175      | GSCDTSISADTEASIREM<br>K |           |       |                        |      | Mascot      |
| 2124.9192  | 2124.8955   | -0.0237 | -11   | 68         | 83       | WGHIQWMEDSERYSR         |           |       | Oxidation (M)[8]       |      | Mascot      |

|    | 2124.9192                      | 2124.8955   | -0.0237 | -11   | 68         | 83       | WGHIQWMEDSERYSR           |           |       |    | Oxidation (M)[8]                          | Mascot           |
|----|--------------------------------|-------------|---------|-------|------------|----------|---------------------------|-----------|-------|----|-------------------------------------------|------------------|
| 40 | Zgc:158627 [Danio rerio]       |             |         |       |            |          | gi 120537829              | 45729.4   | 9.41  | 8  | 32                                        | 0                |
|    | Peptide Information            |             |         |       |            |          |                           |           |       |    |                                           |                  |
|    | Calc. Mass                     | Obsrv. Mass | ± da    | ± ppm | Start Seq. | End Seq. | Sequence                  | Ion Score | C. I. | %  | Modification                              | Rank Result Type |
|    | 947.454                        | 947.5545    | 0.1005  | 106   | 362        | 371      | AAAGESQTGR                |           |       |    |                                           | Mascot           |
|    | 1473.7292                      | 1473.7635   | 0.0343  | 23    | 375        | 388      | SKPDANISSQQNGK            |           |       |    |                                           | Mascot           |
|    | 1556.7373                      | 1556.8376   | 0.1003  | 64    | 346        | 361      | SGAETASGMAAFSLTR          |           |       |    |                                           | Mascot           |
|    | 1578.7832                      | 1578.7739   | -0.0093 | -6    | 288        | 301      | EVSPCYKSSPPLSK            |           |       |    | Carbamidomethyl (C)[5]                    | Mascot           |
|    | 1578.7832                      | 1578.7739   | -0.0093 | -6    | 288        | 301      | EVSPCYKSSPPLSK            |           |       |    | Carbamidomethyl (C)[5]                    | Mascot           |
|    | 1629.8303                      | 1629.7854   | -0.0449 | -28   | 374        | 388      | RSKPDANISSQQNGK           |           |       |    |                                           | Mascot           |
|    | 1629.8303                      | 1629.7854   | -0.0449 | -28   | 374        | 388      | RSKPDANISSQQNGK           |           |       |    |                                           | Mascot           |
|    | 1816.9122                      | 1816.7664   | -0.1458 | -80   | 179        | 194      | IPEFIRSGHSGTLCR           |           |       |    | Carbamidomethyl (C)[15]                   | Mascot           |
|    | 2001.0247                      | 2001.062    | 0.0373  | 19    | 42         | 62       | EEDRLALAGTAGLAGDA<br>AATK |           |       |    |                                           | Mascot           |
|    | 2146.1138                      | 2146.1343   | 0.0205  | 10    | 389        | 408      | LRQYSESPGETGGIVSQ<br>KPL  |           |       |    |                                           | Mascot           |
| 41 | beta-sarcoglycan [Danio rerio] |             |         |       |            |          | gi 77993312               | 34432.7   | 8.71  | 8  | 32                                        | 0                |
|    | Peptide Information            |             |         |       |            |          |                           |           |       |    |                                           |                  |
|    | Calc. Mass                     | Obsrv. Mass | ± da    | ± ppm | Start Seq. | End Seq. | Sequence                  | Ion Score | C. I. | %  | Modification                              | Rank Result Type |
|    | 819.4094                       | 819.4641    | 0.0547  | 67    | 147        | 153      | LSVEEDK                   |           |       |    |                                           | Mascot           |
|    | 1067.519                       | 1067.5068   | -0.0122 | -11   | 222        | 231      | GNEGVYIMGK                |           |       |    |                                           | Mascot           |
|    | 1162.5739                      | 1162.5184   | -0.0555 | -48   | 36         | 45       | AGYVPIEEER                |           |       |    |                                           | Mascot           |
|    | 1473.7994                      | 1473.7635   | -0.0359 | -24   | 106        | 118      | QKADMGIVHPLHK             |           |       |    |                                           | Mascot           |
|    | 1520.8253                      | 1520.8969   | 0.0716  | 47    | 218        | 231      | AIIRGNEGVYIMGK            |           |       |    |                                           | Mascot           |
|    | 1540.8118                      | 1540.7844   | -0.0274 | -18   | 36         | 48       | AGYVPIEEERLHK             |           |       |    |                                           | Mascot           |
|    | 1800.9238                      | 1800.7736   | -0.1502 | -83   | 126        | 141      | DQDLVITGNPNPVVFR          |           |       |    |                                           | Mascot           |
|    | 2282.9587                      | 2283.1531   | 0.1944  | 85    | 293        | 313      | VQVKYSNMGCGTSDNP<br>CGAAH |           |       |    | Carbamidomethyl (C)[10], Oxidation (M)[8] | Mascot           |
| 42 | rho-kinase 2 [Danio rerio]     |             |         |       |            |          | gi 291163435              | 162039.2  | 5.75  | 17 | 31                                        | 0                |
|    | Peptide Information            |             |         |       |            |          |                           |           |       |    |                                           |                  |
|    | Calc. Mass                     | Obsrv. Mass | ± da    | ± ppm | Start Seq. | End Seq. | Sequence                  | Ion Score | C. I. | %  | Modification                              | Rank Result Type |
|    | 819.4207                       | 819.4641    | 0.0434  | 53    | 810        | 816      | SSEQQLK                   |           |       |    |                                           | Mascot           |
|    | 989.5699                       | 989.4801    | -0.0898 | -91   | 932        | 939      | VMKELEIK                  |           |       |    |                                           | Mascot           |
|    | 996.522                        | 996.5847    | 0.0627  | 63    | 945        | 952      | HRQDLAEK                  |           |       |    |                                           | Mascot           |

|    |                                       |           |         |     |              |      |                   |      |    |    |   |                                                |                        |  |  |  |        |
|----|---------------------------------------|-----------|---------|-----|--------------|------|-------------------|------|----|----|---|------------------------------------------------|------------------------|--|--|--|--------|
|    | 1051.5782                             | 1051.5104 | -0.0678 | -64 | 61           | 69   | YEKAVSNLK         |      |    |    |   |                                                |                        |  |  |  | Mascot |
|    | 1051.5782                             | 1051.7001 | 0.1219  | 116 | 61           | 69   | YEKAVSNLK         |      |    |    |   |                                                |                        |  |  |  | Mascot |
|    | 1126.5851                             | 1126.5721 | -0.013  | -12 | 536          | 545  | NQISHLSAEK        |      |    |    |   |                                                |                        |  |  |  | Mascot |
|    | 1242.5306                             | 1242.6195 | 0.0889  | 72  | 748          | 757  | ENSVLDCDYK        |      |    |    |   |                                                | Carbamidomethyl (C)[7] |  |  |  | Mascot |
|    | 1251.6804                             | 1251.6042 | -0.0762 | -61 | 758          | 767  | QAKHELQELR        |      |    |    |   |                                                |                        |  |  |  | Mascot |
|    | 1282.7378                             | 1282.6714 | -0.0664 | -52 | 87           | 98   | GAFGAVQLVRHK      |      |    |    |   |                                                |                        |  |  |  | Mascot |
|    | 1329.6719                             | 1329.6761 | 0.0042  | 3   | 1000         | 1010 | QMKSLTVSYEK       |      |    |    |   |                                                | Oxidation (M)[2]       |  |  |  | Mascot |
|    | 1329.6831                             | 1329.6761 | -0.007  | -5  | 200          | 210  | DIKPDNMLLDR       |      |    |    |   |                                                |                        |  |  |  | Mascot |
|    | 1438.7358                             | 1438.7064 | -0.0294 | -20 | 310          | 322  | DAKDLICAFSSR      |      |    |    |   |                                                |                        |  |  |  | Mascot |
|    | 1473.7908                             | 1473.7635 | -0.0273 | -19 | 659          | 670  | RQLQEDLTLEK       |      |    |    |   |                                                |                        |  |  |  | Mascot |
|    | 1520.7566                             | 1520.8969 | 0.1403  | 92  | 329          | 341  | TGVDEIKCHPFFK     |      |    |    |   |                                                |                        |  |  |  | Mascot |
|    | 1629.7827                             | 1629.7854 | 0.0027  | 2   | 884          | 896  | DAQQRIEDLQEER     |      |    |    |   |                                                |                        |  |  |  | Mascot |
|    | 1629.7827                             | 1629.7854 | 0.0027  | 2   | 884          | 896  | DAQQRIEDLQEER     |      |    |    |   |                                                |                        |  |  |  | Mascot |
|    | 1810.8528                             | 1810.9752 | 0.1224  | 68  | 297          | 312  | NSLTFPDDIEMSKDAK  |      |    |    |   |                                                |                        |  |  |  | Mascot |
|    | 1951.838                              | 1951.9008 | 0.0628  | 32  | 216          | 232  | LADFGTCMKMDSTGMVR |      | 2  |    | 0 | Carbamidomethyl (C)[7], Oxidation (M)[10,15]   |                        |  |  |  | Mascot |
|    | 1951.838                              | 1951.9008 | 0.0628  | 32  | 216          | 232  | LADFGTCMKMDSTGMVR |      |    |    |   | Carbamidomethyl (C)[7], Oxidation (M)[8,10]    |                        |  |  |  | Mascot |
|    | 1967.833                              | 1967.8976 | 0.0646  | 33  | 216          | 232  | LADFGTCMKMDSTGMVR |      |    |    |   | Carbamidomethyl (C)[7], Oxidation (M)[8,10,15] |                        |  |  |  | Mascot |
|    | 1967.833                              | 1967.8976 | 0.0646  | 33  | 216          | 232  | LADFGTCMKMDSTGMVR |      |    |    |   | Carbamidomethyl (C)[7], Oxidation (M)[8,10,15] |                        |  |  |  | Mascot |
|    | 2000.9303                             | 2001.062  | 0.1317  | 66  | 742          | 757  | LMQLEKENSVLDCDYK  |      |    |    |   | Carbamidomethyl (C)[13], Oxidation (M)[2]      |                        |  |  |  | Mascot |
| 43 | Transferrin receptor 1a [Danio rerio] |           |         |     | gi 190337022 |      | 84943             | 6.38 | 11 | 31 | 0 |                                                |                        |  |  |  |        |

Peptide Information

| Calc. Mass | Obsrv. Mass | ± da    | ± ppm | Start Seq. | End Seq. | Sequence              | Ion Score | C. I. % | Modification      | Rank | Result | Type |
|------------|-------------|---------|-------|------------|----------|-----------------------|-----------|---------|-------------------|------|--------|------|
| 837.4386   | 837.522     | 0.0834  | 100   | 431        | 437      | TITDMIK               |           |         | Oxidation (M)[5]  |      | Mascot |      |
| 842.4842   | 842.5001    | 0.0159  | 19    | 66         | 72       | LNQRSPK               |           |         |                   |      | Mascot |      |
| 947.5672   | 947.5545    | -0.0127 | -13   | 401        | 408      | YLVIGVQR              |           |         |                   |      | Mascot |      |
| 1045.5935  | 1045.55     | -0.0435 | -42   | 683        | 690      | IINNRMIR              |           |         | Oxidation (M)[7]  |      | Mascot |      |
| 1067.5844  | 1067.5068   | -0.0776 | -73   | 625        | 633      | SYVSQIRSK             |           |         |                   |      | Mascot |      |
| 1799.9174  | 1799.783    | -0.1344 | -75   | 203        | 219      | NNVVGTTTEGYLAYSIAIK   |           |         |                   |      | Mascot |      |
| 1816.9705  | 1816.7664   | -0.2041 | -112  | 385        | 400      | IHNVFGVIKGYLDADR      |           |         |                   |      | Mascot |      |
| 1951.8596  | 1951.9008   | 0.0412  | 21    | 672        | 687      | NSDLDDMEQCRIINNR      |           |         | Oxidation (M)[7]  |      | Mascot |      |
| 1951.8596  | 1951.9008   | 0.0412  | 21    | 672        | 687      | NSDLDDMEQCRIINNR      |           |         | Oxidation (M)[7]  |      | Mascot |      |
| 2040.947   | 2041.073    | 0.126   | 62    | 477        | 494      | MFSYISLDDLISGSDSFK    |           |         | Oxidation (M)[1]  |      | Mascot |      |
| 2049.1128  | 2049.0649   | -0.0479 | -23   | 691        | 708      | VEGSLSPYVSPRQTLFR     |           |         |                   |      | Mascot |      |
| 2283.0339  | 2283.1531   | 0.1192  | 52    | 662        | 682      | AASALTSAIRNSDLDDMEQCR |           |         | Oxidation (M)[17] |      | Mascot |      |

44 finTRIM family protein [Danio rerio] gi|208019415 24902.8 9.08 8 31 0

Peptide Information

| Calc. Mass | Obsrv. Mass | ± da    | ± ppm | Start Seq. | End Seq. | Sequence                   | Ion Score | C. I. % | Modification            | Rank | Result Type |
|------------|-------------|---------|-------|------------|----------|----------------------------|-----------|---------|-------------------------|------|-------------|
| 996.522    | 996.5847    | 0.0627  | 63    | 72         | 80       | HNLIDATGR                  |           |         |                         |      | Mascot      |
| 1045.5636  | 1045.55     | -0.0136 | -13   | 195        | 203      | DQEKITVGR                  |           |         |                         |      | Mascot      |
| 1075.6007  | 1075.5247   | -0.076  | -71   | 139        | 146      | FQQQIQKR                   |           |         |                         |      | Mascot      |
| 1251.6328  | 1251.6042   | -0.0286 | -23   | 163        | 173      | FAQTAVKDSER                |           |         |                         |      | Mascot      |
| 1578.8597  | 1578.7739   | -0.0858 | -54   | 150        | 162      | LQELNEAVKIHGR              |           |         |                         |      | Mascot      |
| 1578.8597  | 1578.7739   | -0.0858 | -54   | 150        | 162      | LQELNEAVKIHGR              |           |         |                         |      | Mascot      |
| 1800.9888  | 1800.7736   | -0.2152 | -119  | 1          | 16       | ALNKNTMLAEVVEQLK           |           |         |                         |      | Mascot      |
| 1816.9836  | 1816.7664   | -0.2172 | -120  | 1          | 16       | ALNKNTMLAEVVEQLK           |           |         | Oxidation (M)[7]        |      | Mascot      |
| 2154.8928  | 2154.936    | 0.0432  | 20    | 20         | 40       | HHTAAVPAGDGDVECDSC<br>TGR  |           |         | Carbamidomethyl (C)[15] |      | Mascot      |
| 2282.9878  | 2283.1531   | 0.1653  | 72    | 20         | 41       | HHTAAVPAGDGDVECDSC<br>TGRK |           |         | Carbamidomethyl (C)[15] |      | Mascot      |

45 novel protein [Danio rerio] gi|126632583 6089.9 8.37 5 31 0

Peptide Information

| Calc. Mass | Obsrv. Mass | ± da    | ± ppm | Start Seq. | End Seq. | Sequence               | Ion Score | C. I. % | Modification              | Rank | Result Type |
|------------|-------------|---------|-------|------------|----------|------------------------|-----------|---------|---------------------------|------|-------------|
| 1165.5895  | 1165.7307   | 0.1412  | 121   | 10         | 18       | CLRVNYGQR              |           |         | Carbamidomethyl (C)[1]    |      | Mascot      |
| 1578.7035  | 1578.7739   | 0.0704  | 45    | 38         | 51       | VSSCMYLPTCAIMK         |           |         | Oxidation (M)[5,13]       |      | Mascot      |
| 1578.7035  | 1578.7739   | 0.0704  | 45    | 38         | 51       | VSSCMYLPTCAIMK         |           |         | Oxidation (M)[5,13]       |      | Mascot      |
| 1660.7566  | 1660.7837   | 0.0271  | 16    | 38         | 51       | VSSCMYLPTCAIMK         |           |         | Carbamidomethyl (C)[4,10] |      | Mascot      |
| 1718.8097  | 1718.8932   | 0.0835  | 49    | 37         | 51       | RVSSCMYLPTCAIMK        |           |         | Oxidation (M)[6]          |      | Mascot      |
| 1816.8577  | 1816.7664   | -0.0913 | -50   | 37         | 51       | RVSSCMYLPTCAIMK        |           |         | Carbamidomethyl (C)[5,11] |      | Mascot      |
| 1973.9567  | 1973.9464   | -0.0103 | -5    | 38         | 54       | VSSCMYLPTCAIMKVTLL     |           |         | Carbamidomethyl (C)[4,10] |      | Mascot      |
| 2225.0073  | 2225.0969   | 0.0896  | 40    | 19         | 37       | CANDCPDVLNTAEQSL<br>RR |           |         | Carbamidomethyl (C)[1]    |      | Mascot      |

46 tetratricopeptide repeat protein 38 [Danio rerio] gi|170763463 52758.4 5.84 7 31 0 12 0

Peptide Information

| Calc. Mass | Obsrv. Mass | ± da    | ± ppm | Start Seq. | End Seq. | Sequence        | Ion Score | C. I. % | Modification       | Rank | Result Type |
|------------|-------------|---------|-------|------------|----------|-----------------|-----------|---------|--------------------|------|-------------|
| 996.5038   | 996.5847    | 0.0809  | 81    | 1          | 8        | MICVVIMR        |           |         | Oxidation (M)[1,7] |      | Mascot      |
| 1145.6538  | 1145.5791   | -0.0747 | -65   | 457        | 466      | LIQRAHSLHA      |           |         |                    |      | Mascot      |
| 1660.7716  | 1660.7837   | 0.0121  | 7     | 432        | 444      | EHQQLARCMLMER   |           |         | Oxidation (M)[9]   |      | Mascot      |
| 1718.892   | 1718.8932   | 0.0012  | 1     | 95         | 109      | TVELADTQQLTSREK |           |         |                    |      | Mascot      |

|    |                                              |           |         |     |              |     |                     |      |   |    |   |   |                                           |        |
|----|----------------------------------------------|-----------|---------|-----|--------------|-----|---------------------|------|---|----|---|---|-------------------------------------------|--------|
|    | 1799.8666                                    | 1799.783  | -0.0836 | -46 | 285          | 300 | SGAMLDIVDSCSLLYR    |      |   |    |   |   | Carbamidomethyl (C)[11]                   | Mascot |
|    | 1815.8616                                    | 1815.782  | -0.0796 | -44 | 285          | 300 | SGAMLDIVDSCSLLYR    |      |   |    |   |   | Carbamidomethyl (C)[11], Oxidation (M)[4] | Mascot |
|    | 1967.9821                                    | 1967.8976 | -0.0845 | -43 | 265          | 281 | GNYEAAALKIFDEQVSQR  |      |   |    |   |   |                                           | Mascot |
|    | 1967.9821                                    | 1967.8976 | -0.0845 | -43 | 265          | 281 | GNYEAAALKIFDEQVSQR  | 12   | 0 |    |   |   |                                           | Mascot |
|    | 2146.0342                                    | 2146.1343 | 0.1001  | 47  | 282          | 300 | CVKSGAMLDIVDSCSLLYR |      |   |    |   |   | Carbamidomethyl (C)[1], Oxidation (M)[7]  | Mascot |
| 47 | hypothetical protein LOC796228 [Danio rerio] |           |         |     | gi 160333607 |     | 34755.4             | 7.57 | 6 | 31 | 0 | 7 | 0                                         |        |

#### Peptide Information

| Calc. Mass | Obsrv. Mass | ± da    | ± ppm | Start Seq. | End Seq. | Sequence            | Ion Score | C. I. | % | Modification            | Rank | Result Type |
|------------|-------------|---------|-------|------------|----------|---------------------|-----------|-------|---|-------------------------|------|-------------|
| 819.428    | 819.4641    | 0.0361  | 44    | 165        | 171      | VAMEEIK             |           |       |   |                         |      | Mascot      |
| 1145.6525  | 1145.5791   | -0.0734 | -64   | 144        | 154      | AVQSSVLTNVK         |           |       |   |                         |      | Mascot      |
| 1660.7773  | 1660.7837   | 0.0064  | 4     | 177        | 191      | NETSATQHQTIESSK     |           |       |   |                         |      | Mascot      |
| 1800.92    | 1800.7736   | -0.1464 | -81   | 270        | 285      | ASFDLPYTGTVKITCK    |           |       |   | Carbamidomethyl (C)[15] |      | Mascot      |
| 1967.9684  | 1967.8976   | -0.0708 | -36   | 95         | 111      | TTKGVEFFAHMTDWGLK   |           |       |   |                         |      | Mascot      |
| 1967.9684  | 1967.8976   | -0.0708 | -36   | 95         | 111      | TTKGVEFFAHMTDWGLK   | 7         | 0     |   |                         |      | Mascot      |
| 2284.0854  | 2284.1499   | 0.0645  | 28    | 98         | 116      | GVEFFAHMTDWGLKTEYPR |           |       |   |                         |      | Mascot      |

|    |                                         |  |  |  |            |  |         |      |   |    |   |  |  |  |
|----|-----------------------------------------|--|--|--|------------|--|---------|------|---|----|---|--|--|--|
| 48 | signaling molecule lefty1 [Danio rerio] |  |  |  | gi 4959540 |  | 40991.5 | 8.65 | 9 | 31 | 0 |  |  |  |
|----|-----------------------------------------|--|--|--|------------|--|---------|------|---|----|---|--|--|--|

#### Peptide Information

| Calc. Mass | Obsrv. Mass | ± da    | ± ppm | Start Seq. | End Seq. | Sequence                   | Ion Score | C. I. | % | Modification                                 | Rank | Result Type |
|------------|-------------|---------|-------|------------|----------|----------------------------|-----------|-------|---|----------------------------------------------|------|-------------|
| 986.4689   | 986.519     | 0.0501  | 51    | 305        | 312      | NYGYGERK                   |           |       |   |                                              |      | Mascot      |
| 996.5546   | 996.5847    | 0.0301  | 30    | 58         | 65       | NKYISMLK                   |           |       |   |                                              |      | Mascot      |
| 1520.7413  | 1520.8969   | 0.1556  | 102   | 20         | 32       | GFTHEDMKDALLK              |           |       |   | Oxidation (M)[7]                             |      | Mascot      |
| 1823.9104  | 1823.894    | -0.0164 | -9    | 313        | 328      | CAVVESAPLPMMYLVK           |           |       |   | Carbamidomethyl (C)[1], Oxidation (M)[11]    |      | Mascot      |
| 1823.9104  | 1823.894    | -0.0164 | -9    | 313        | 328      | CAVVESAPLPMMYLVK           |           |       |   | Carbamidomethyl (C)[1], Oxidation (M)[11]    |      | Mascot      |
| 1952.0054  | 1951.9008   | -0.1046 | -54   | 313        | 329      | CAVVESAPLPMMYLVKK          |           |       |   | Carbamidomethyl (C)[1], Oxidation (M)[11]    |      | Mascot      |
| 1952.0599  | 1951.9008   | -0.1591 | -82   | 165        | 181      | TSLVDSRLPIHETGWK           |           |       |   |                                              |      | Mascot      |
| 1968.0002  | 1967.8976   | -0.1026 | -52   | 313        | 329      | CAVVESAPLPMMYLVKK          |           |       |   | Carbamidomethyl (C)[1], Oxidation (M)[11,12] |      | Mascot      |
| 1968.0002  | 1967.8976   | -0.1026 | -52   | 312        | 328      | KCAVVESAPLPMMYLVK          |           |       |   | Carbamidomethyl (C)[2], Oxidation (M)[12,13] |      | Mascot      |
| 2283.0999  | 2283.1531   | 0.0532  | 23    | 84         | 104      | GIPGNADISGEFVYSDTT<br>RQR  |           |       |   |                                              |      | Mascot      |
| 2484.1655  | 2484.2402   | 0.0747  | 30    | 6          | 27       | AACLLCAALFAMARGFTH<br>EDMK |           |       |   | Carbamidomethyl (C)[3,6]                     |      | Mascot      |
| 2484.1655  | 2484.2402   | 0.0747  | 30    | 6          | 27       | AACLLCAALFAMARGFTH<br>EDMK |           |       |   | Carbamidomethyl (C)[3,6]                     |      | Mascot      |

|    |                                            |  |  |  |              |  |         |     |   |  |    |   |  |  |
|----|--------------------------------------------|--|--|--|--------------|--|---------|-----|---|--|----|---|--|--|
| 49 | bone morphogenetic protein 3 [Danio rerio] |  |  |  | gi 118150546 |  | 51942.4 | 9.4 | 1 |  | 23 | 0 |  |  |
|----|--------------------------------------------|--|--|--|--------------|--|---------|-----|---|--|----|---|--|--|

| Peptide Information |                                               |               |       |            |             |                         |            |                |                          |                  |                    |
|---------------------|-----------------------------------------------|---------------|-------|------------|-------------|-------------------------|------------|----------------|--------------------------|------------------|--------------------|
| Calc. Mass          | Obsrv. Mass                                   | ± da          | ± ppm | Start Seq. | End Seq.    | Sequence                | Ion Score  | C. I. %        | Modification             | Rank Result Type |                    |
| 1629.882            | 1629.7854                                     | -0.0966       | -59   | 195        | 208         | HHDQLLIGININSR          | 23         | 0              |                          | 2 Mascot         |                    |
| 50                  | Ccdc80 protein [Danio rerio]                  |               |       |            | gi 59862002 | 24401.9                 | 5.97       | 1              | 21                       | 0                |                    |
| Peptide Information |                                               |               |       |            |             |                         |            |                |                          |                  |                    |
| Calc. Mass          | Obsrv. Mass                                   | ± da          | ± ppm | Start Seq. | End Seq.    | Sequence                | Ion Score  | C. I. %        | Modification             | Rank Result Type |                    |
| 1329.7485           | 1329.6761                                     | -0.0724       | -54   | 113        | 124         | EGISATLVLRDIR           | 21         | 0              |                          | 2 Mascot         |                    |
| Gel Idx/Pos         |                                               | 179/H6        |       |            |             | Instr./Gel Origin       |            | BA2060/110707A |                          | Process Status   | Analysis Succeeded |
| Plate [#] Name      |                                               | [1] 31496     |       |            |             | Instrument Sample Name  |            |                |                          | Spectra          | 11                 |
| Rank                | Protein Name                                  | Accession No. |       |            | Protein MW  | Protein PI              | Pep. Count | Protein Score  | Protein Score C. I. %    | Total Ion Score  | Total Ion C. I. %  |
| 1                   | gelsolin b [Danio rerio]                      | gi 148230943  |       |            | 80133.8     | 5.62                    | 12         | 257            | 100                      | 217              | 100                |
| Peptide Information |                                               |               |       |            |             |                         |            |                |                          |                  |                    |
| Calc. Mass          | Obsrv. Mass                                   | ± da          | ± ppm | Start Seq. | End Seq.    | Sequence                | Ion Score  | C. I. %        | Modification             | Rank Result Type |                    |
| 853.3621            | 853.3546                                      | -0.0075       | -9    | 179        | 184         | CNQFER                  |            |                | Carbamidomethyl (C)[1]   | Mascot           |                    |
| 875.4661            | 875.4556                                      | -0.0105       | -12   | 104        | 110         | TFLGYFK                 |            |                |                          | Mascot           |                    |
| 987.537             | 987.524                                       | -0.013        | -13   | 13         | 20          | QTGLQVWR                | 51         | 99.81          |                          | Mascot           |                    |
| 987.537             | 987.524                                       | -0.013        | -13   | 13         | 20          | QTGLQVWR                |            |                |                          | Mascot           |                    |
| 1007.4792           | 1007.4681                                     | -0.0111       | -11   | 676        | 684         | YIESDPAGR               |            |                |                          | Mascot           |                    |
| 1022.5053           | 1022.495                                      | -0.0103       | -10   | 2          | 9           | VHHPEFEK                |            |                |                          | Mascot           |                    |
| 1100.5735           | 1100.5676                                     | -0.0059       | -5    | 367        | 376         | VFPDASSLHK              |            |                |                          | Mascot           |                    |
| 1294.5262           | 1294.5137                                     | -0.0125       | -10   | 193        | 202         | DIRDNECCGR              |            |                | Carbamidomethyl (C)[7,8] | Mascot           |                    |
| 1456.6777           | 1456.6569                                     | -0.0208       | -14   | 308        | 320         | AAEDFISQMGYPK           |            |                |                          | Mascot           |                    |
| 1472.6726           | 1472.6549                                     | -0.0177       | -12   | 308        | 320         | AAEDFISQMGYPK           |            |                | Oxidation (M)[9]         | Mascot           |                    |
| 1625.7476           | 1625.7463                                     | -0.0013       | -1    | 203        | 216         | AKLFCVEEGSENDK          |            |                | Carbamidomethyl (C)[6]   | Mascot           |                    |
| 1952.0123           | 1951.9854                                     | -0.0269       | -14   | 321        | 337         | HTEVQIIPENGETPLFK       |            |                |                          | Mascot           |                    |
| 2097.1299           | 2097.1064                                     | -0.0235       | -11   | 451        | 472         | GASAILAAQLDAELGGSA VQVR |            |                |                          | Mascot           |                    |
| 2097.1299           | 2097.1064                                     | -0.0235       | -11   | 451        | 472         | GASAILAAQLDAELGGSA VQVR | 165        | 100            |                          | Mascot           |                    |
| 2152.0959           | 2152.0684                                     | -0.0275       | -13   | 32         | 50          | NLYGGFYTGDTYLVLNTI K    |            |                |                          | Mascot           |                    |
| 2                   | acylamino-acid-releasing enzyme [Danio rerio] | gi 38564417   |       |            | 81411.5     | 5.72                    | 9          | 125            | 100                      | 105              | 100                |

| Peptide Information |                                                                               |             |         |       |             |          |                       |           |        |     |                         |      |             |
|---------------------|-------------------------------------------------------------------------------|-------------|---------|-------|-------------|----------|-----------------------|-----------|--------|-----|-------------------------|------|-------------|
|                     | Calc. Mass                                                                    | Obsrv. Mass | ± da    | ± ppm | Start Seq.  | End Seq. | Sequence              | Ion Score | C. I.  | %   | Modification            | Rank | Result Type |
|                     | 1100.5887                                                                     | 1100.5676   | -0.0211 | -19   | 116         | 123      | QFLEIWHK              |           |        |     |                         |      | Mascot      |
|                     | 1205.6525                                                                     | 1205.6239   | -0.0286 | -24   | 433         | 444      | VGFLPGKGSESK          |           |        |     |                         |      | Mascot      |
|                     | 1272.6868                                                                     | 1272.7003   | 0.0135  | 11    | 663         | 674      | TPVLLMLGEGDK          |           |        |     |                         |      | Mascot      |
|                     | 1587.8853                                                                     | 1587.8649   | -0.0204 | -13   | 5           | 17       | VLRDPVEISQLYR         |           |        |     |                         |      | Mascot      |
|                     | 1587.8853                                                                     | 1587.8649   | -0.0204 | -13   | 5           | 17       | VLRDPVEISQLYR         | 43        | 98.845 |     |                         |      | Mascot      |
|                     | 1625.7588                                                                     | 1625.7463   | -0.0125 | -8    | 74          | 88       | SVVYSGPSGNCTEIR       |           |        |     | Carbamidomethyl (C)[11] |      | Mascot      |
|                     | 1815.8911                                                                     | 1815.87     | -0.0211 | -12   | 349         | 365      | AGDDGFTGIYSFLLSPR     |           |        |     |                         |      | Mascot      |
|                     | 1865.8453                                                                     | 1865.8218   | -0.0235 | -13   | 38          | 52       | YGGQYSNIYTEWTQR       | 61        | 99.981 |     |                         |      | Mascot      |
|                     | 1865.8453                                                                     | 1865.8218   | -0.0235 | -13   | 38          | 52       | YGGQYSNIYTEWTQR       |           |        |     |                         |      | Mascot      |
|                     | 1961.9901                                                                     | 1961.97     | -0.0201 | -10   | 312         | 328      | IVYLESGVFGPHLQCSR     |           |        |     | Carbamidomethyl (C)[15] |      | Mascot      |
|                     | 2472.1936                                                                     | 2472.1626   | -0.031  | -13   | 395         | 415      | EVTCLTSQSQEGSWNLLNIHR |           |        |     | Carbamidomethyl (C)[4]  |      | Mascot      |
| 3                   | Acylpeptide hydrolase [Danio rerio]                                           |             |         |       | gj 55777111 |          | 81351.5               | 5.66      | 8      | 121 | 100                     | 105  | 100         |
| Peptide Information |                                                                               |             |         |       |             |          |                       |           |        |     |                         |      |             |
|                     | Calc. Mass                                                                    | Obsrv. Mass | ± da    | ± ppm | Start Seq.  | End Seq. | Sequence              | Ion Score | C. I.  | %   | Modification            | Rank | Result Type |
|                     | 1100.5887                                                                     | 1100.5676   | -0.0211 | -19   | 116         | 123      | QFLEIWHK              |           |        |     |                         |      | Mascot      |
|                     | 1205.6525                                                                     | 1205.6239   | -0.0286 | -24   | 433         | 444      | VGFLPGKGSESK          |           |        |     |                         |      | Mascot      |
|                     | 1272.6868                                                                     | 1272.7003   | 0.0135  | 11    | 663         | 674      | TPVLLMLGEGDK          |           |        |     |                         |      | Mascot      |
|                     | 1587.8853                                                                     | 1587.8649   | -0.0204 | -13   | 5           | 17       | VLRDPVEISQLYR         |           |        |     |                         |      | Mascot      |
|                     | 1587.8853                                                                     | 1587.8649   | -0.0204 | -13   | 5           | 17       | VLRDPVEISQLYR         | 43        | 98.845 |     |                         |      | Mascot      |
|                     | 1625.7588                                                                     | 1625.7463   | -0.0125 | -8    | 74          | 88       | SVVYSGPSGNCTEIR       |           |        |     | Carbamidomethyl (C)[11] |      | Mascot      |
|                     | 1865.8453                                                                     | 1865.8218   | -0.0235 | -13   | 38          | 52       | YGGQYSNIYTEWTQR       | 61        | 99.981 |     |                         |      | Mascot      |
|                     | 1865.8453                                                                     | 1865.8218   | -0.0235 | -13   | 38          | 52       | YGGQYSNIYTEWTQR       |           |        |     |                         |      | Mascot      |
|                     | 1961.9901                                                                     | 1961.97     | -0.0201 | -10   | 312         | 328      | IVYLESGVFGPHLQCSR     |           |        |     | Carbamidomethyl (C)[15] |      | Mascot      |
|                     | 2472.1936                                                                     | 2472.1626   | -0.031  | -13   | 395         | 415      | EVTCLTSQSQEGSWNLLNIHR |           |        |     | Carbamidomethyl (C)[4]  |      | Mascot      |
| 4                   | coiled-coil-helix-coiled-coil-helix domain-containing protein 6 [Danio rerio] |             |         |       | gj 53933232 |          | 27523                 | 9.24      | 10     | 54  | 83.843                  |      |             |
| Peptide Information |                                                                               |             |         |       |             |          |                       |           |        |     |                         |      |             |
|                     | Calc. Mass                                                                    | Obsrv. Mass | ± da    | ± ppm | Start Seq.  | End Seq. | Sequence              | Ion Score | C. I.  | %   | Modification            | Rank | Result Type |
|                     | 850.4165                                                                      | 850.5328    | 0.1163  | 137   | 164         | 169      | NEERFR                |           |        |     |                         |      | Mascot      |
|                     | 850.4165                                                                      | 850.5328    | 0.1163  | 137   | 164         | 169      | NEERFR                |           |        |     |                         |      | Mascot      |

|   |                                              |           |         |      |             |          |                           |                                          |        |       |
|---|----------------------------------------------|-----------|---------|------|-------------|----------|---------------------------|------------------------------------------|--------|-------|
|   | 1045.5385                                    | 1045.5532 | 0.0147  | 14   | 108         | 116      | EAARQDISR                 |                                          | Mascot |       |
|   | 1235.5936                                    | 1235.6188 | 0.0252  | 20   | 211         | 221      | EQTLQCSDLAK               |                                          | Mascot |       |
|   | 1294.6526                                    | 1294.5137 | -0.1389 | -107 | 75          | 85       | TTFPDSKEELK               |                                          | Mascot |       |
|   | 1371.6395                                    | 1371.6206 | -0.0189 | -14  | 222         | 232      | EYMQCINAACK               | Carbamidomethyl (C)[5], Oxidation (M)[3] | Mascot |       |
|   | 1638.7805                                    | 1638.8395 | 0.059   | 36   | 168         | 181      | FRMSAEQFHAAATR            | Oxidation (M)[3]                         | Mascot |       |
|   | 1874.9719                                    | 1874.9208 | -0.0511 | -27  | 87          | 101      | RYEQQQAIQEELAR            |                                          | Mascot |       |
|   | 1961.9498                                    | 1961.97   | 0.0202  | 10   | 170         | 187      | MSAEQFHAAATRSEANIK        |                                          | Mascot |       |
|   | 2317.1904                                    | 2317.1436 | -0.0468 | -20  | 188         | 207      | ARNVEPVCLNLQAQILNC<br>YR  |                                          | Mascot |       |
|   | 2501.147                                     | 2501.2251 | 0.0781  | 31   | 211         | 231      | EQTLQCSDLAKEYMQCI<br>NAAK | Carbamidomethyl (C)[6,16]                | Mascot |       |
| 5 | hypothetical protein LOC553448 [Danio rerio] |           |         |      | g 224496090 | 145429.2 | 8.16                      | 17                                       | 47     | 7.024 |

### Peptide Information

| Calc. Mass | Obsrv. Mass | ± da    | ± ppm | Start Seq. | End Seq. | Sequence                  | Ion Score | C. I. % | Modification            | Rank | Result Type |
|------------|-------------|---------|-------|------------|----------|---------------------------|-----------|---------|-------------------------|------|-------------|
| 850.4781   | 850.5328    | 0.0547  | 64    | 161        | 169      | AAPPAPAQK                 |           |         |                         |      | Mascot      |
| 850.4781   | 850.5328    | 0.0547  | 64    | 369        | 377      | AAPPAPAQK                 |           |         |                         |      | Mascot      |
| 856.4523   | 856.5167    | 0.0644  | 75    | 170        | 178      | SAPPASAQK                 |           |         |                         |      | Mascot      |
| 1007.5077  | 1007.4681   | -0.0396 | -39   | 781        | 789      | VASVEVEMK                 |           |         | Oxidation (M)[8]        |      | Mascot      |
| 1100.6058  | 1100.5676   | -0.0382 | -35   | 657        | 665      | LQQENSILR                 |           |         |                         |      | Mascot      |
| 1156.6321  | 1156.597    | -0.0351 | -30   | 611        | 620      | EQDIILQAR                 |           |         |                         |      | Mascot      |
| 1163.6089  | 1163.6011   | -0.0078 | -7    | 1285       | 1295     | MTKDLGQAATK               |           |         |                         |      | Mascot      |
| 1179.6038  | 1179.5908   | -0.013  | -11   | 1285       | 1295     | MTKDLGQAATK               |           |         | Oxidation (M)[1]        |      | Mascot      |
| 1199.5902  | 1199.5568   | -0.0334 | -28   | 473        | 483      | AEESKQDAPPK               |           |         |                         |      | Mascot      |
| 1235.6782  | 1235.6188   | -0.0594 | -48   | 1014       | 1023     | TKWLQDFAVK                |           |         |                         |      | Mascot      |
| 1272.6179  | 1272.7003   | 0.0824  | 65    | 701        | 711      | NDALQADEQLR               |           |         |                         |      | Mascot      |
| 1312.7332  | 1312.6016   | -0.1316 | -100  | 610        | 620      | REQDIILQAR                |           |         |                         |      | Mascot      |
| 1472.7703  | 1472.6549   | -0.1154 | -78   | 1110       | 1121     | VQELEETAERLR              |           |         |                         |      | Mascot      |
| 1587.849   | 1587.8649   | 0.0159  | 10    | 537        | 550      | AGIIQDTWQKATQK            |           |         |                         |      | Mascot      |
| 1587.849   | 1587.8649   | 0.0159  | 10    | 537        | 550      | AGIIQDTWQKATQK            |           |         |                         |      | Mascot      |
| 1625.8606  | 1625.7463   | -0.1143 | -70   | 790        | 803      | ERTGHLESLSQSLK            |           |         |                         |      | Mascot      |
| 2194.0366  | 2194.0774   | 0.0408  | 19    | 1262       | 1281     | SAEDTAAMGDVVQLKEC<br>LEK  |           |         | Carbamidomethyl (C)[17] |      | Mascot      |
| 2225.1521  | 2225.0945   | -0.0576 | -26   | 758        | 778      | NNLQAQLEQAQKDAAAL<br>AEAK |           |         |                         |      | Mascot      |
| 2225.1521  | 2225.0945   | -0.0576 | -26   | 758        | 778      | NNLQAQLEQAQKDAAAL<br>AEAK |           |         |                         |      | Mascot      |
| 2233.1743  | 2233.063    | -0.1113 | -50   | 954        | 972      | ISEKESLMTTLQQEVQQL<br>K   |           |         |                         |      | Mascot      |
| 2317.1379  | 2317.1436   | 0.0057  | 2     | 1164       | 1184     | QALADTESQLNSAQKEA<br>QTOR |           |         |                         |      | Mascot      |



## Peptide Information

| Calc. Mass | Obsrv. Mass | ± da    | ± ppm | Start Seq. | End Seq. | Sequence          | Ion Score | C. I. % | Modification                             | Rank | Result Type |
|------------|-------------|---------|-------|------------|----------|-------------------|-----------|---------|------------------------------------------|------|-------------|
| 836.3818   | 836.3273    | -0.0545 | -65   | 3557       | 3563     | CSLEAEK           |           |         | Carbamidomethyl (C)[1]                   |      | Mascot      |
| 842.4995   | 842.5021    | 0.0026  | 3     | 15         | 21       | AKLAHFR           |           |         |                                          |      | Mascot      |
| 850.4087   | 850.5328    | 0.1241  | 146   | 2129       | 2136     | TPSSMTAR          |           |         |                                          |      | Mascot      |
| 850.4087   | 850.5328    | 0.1241  | 146   | 2129       | 2136     | TPSSMTAR          |           |         |                                          |      | Mascot      |
| 853.3897   | 853.3546    | -0.0351 | -41   | 27         | 34       | SESSSTQK          |           |         |                                          |      | Mascot      |
| 864.3581   | 864.4857    | 0.1276  | 148   | 1982       | 1988     | EESDQEK           |           |         |                                          |      | Mascot      |
| 875.458    | 875.4556    | -0.0024 | -3    | 2850       | 2857     | SLGEERGK          |           |         |                                          |      | Mascot      |
| 882.5155   | 882.5558    | 0.0403  | 46    | 3606       | 3612     | SEIHKLR           |           |         |                                          |      | Mascot      |
| 962.4424   | 962.5256    | 0.0832  | 86    | 1946       | 1953     | ELEEEASR          |           |         |                                          |      | Mascot      |
| 987.5105   | 987.524     | 0.0135  | 14    | 2715       | 2722     | QAEIEELR          | 7         | 0       |                                          |      | Mascot      |
| 987.5105   | 987.524     | 0.0135  | 14    | 2715       | 2722     | QAEIEELR          |           |         |                                          |      | Mascot      |
| 1007.4904  | 1007.4681   | -0.0223 | -22   | 427        | 434      | HLQEEHSK          |           |         |                                          |      | Mascot      |
| 1022.4935  | 1022.495    | 0.0015  | 1     | 3557       | 3565     | CSLEAEKSR         |           |         |                                          |      | Mascot      |
| 1045.4908  | 1045.5532   | 0.0624  | 60    | 1472       | 1480     | QAEAEVNER         |           |         |                                          |      | Mascot      |
| 1100.5695  | 1100.5676   | -0.0019 | -2    | 1216       | 1224     | VALQEQQER         |           |         |                                          |      | Mascot      |
| 1156.5454  | 1156.597    | 0.0516  | 45    | 3752       | 3761     | RQESASAHDR        |           |         |                                          |      | Mascot      |
| 1163.566   | 1163.6011   | 0.0351  | 30    | 3404       | 3412     | ELLCRMADR         |           |         | Carbamidomethyl (C)[4]                   |      | Mascot      |
| 1179.5674  | 1179.5908   | 0.0234  | 20    | 1115       | 1124     | TSVEQLQSK         |           |         | Carbamidomethyl (C)[9]                   |      | Mascot      |
| 1199.6993  | 1199.5568   | -0.1425 | -119  | 2856       | 2866     | GKVAVLEQEVK       |           |         |                                          |      | Mascot      |
| 1235.7358  | 1235.6188   | -0.117  | -95   | 3888       | 3897     | LLELELLHQK        |           |         |                                          |      | Mascot      |
| 1272.7046  | 1272.7003   | -0.0043 | -3    | 1342       | 1353     | LVEGALEDVSK       |           |         |                                          |      | Mascot      |
| 1294.646   | 1294.5137   | -0.1323 | -102  | 4205       | 4216     | MYTSPVLGAAER      |           |         |                                          |      | Mascot      |
| 1371.7842  | 1371.6206   | -0.1636 | -119  | 1989       | 2000     | AVALEELEKTLR      |           |         |                                          |      | Mascot      |
| 1456.6294  | 1456.6569   | 0.0275  | 19    | 3995       | 4007     | SSAVTEECMVSEK     |           |         | Carbamidomethyl (C)[8]                   |      | Mascot      |
| 1472.6243  | 1472.6549   | 0.0306  | 21    | 3995       | 4007     | SSAVTEECMVSEK     |           |         | Carbamidomethyl (C)[8], Oxidation (M)[9] |      | Mascot      |
| 1475.7271  | 1475.7354   | 0.0083  | 6     | 2723       | 2734     | SLVERLQCDQER      |           |         |                                          |      | Mascot      |
| 1587.7649  | 1587.8649   | 0.1     | 63    | 390        | 402      | TKYEADISNYDLR     |           |         |                                          |      | Mascot      |
| 1587.8047  | 1587.8649   | 0.0602  | 38    | 1603       | 1616     | SLEQCESPQVVALK    |           |         | Carbamidomethyl (C)[4]                   |      | Mascot      |
| 1625.901   | 1625.7463   | -0.1547 | -95   | 1954       | 1966     | QRLHFLEEAELLK     |           |         |                                          |      | Mascot      |
| 1638.881   | 1638.8395   | -0.0415 | -25   | 2528       | 2541     | TVTQLEQELQKGHK    |           |         |                                          |      | Mascot      |
| 1815.9633  | 1815.87     | -0.0933 | -51   | 358        | 372      | VELNQEMVRLDNLVK   |           |         | Oxidation (M)[7]                         |      | Mascot      |
| 1993.9937  | 1993.9501   | -0.0436 | -22   | 3014       | 3031     | ELHEQQEAAVAKQGEAQ |           |         |                                          |      | Mascot      |

|   |                                          |           |         |     |              |      |                            |      |                         |        |   |
|---|------------------------------------------|-----------|---------|-----|--------------|------|----------------------------|------|-------------------------|--------|---|
|   | 2082.9834                                | 2082.9888 | 0.0054  | 3   | 3995         | 4012 | K<br>SSAVTEECMVSEKLAWQ     |      | Carbamidomethyl (C)[8]  | Mascot |   |
|   | 2247.1404                                | 2247.0789 | -0.0615 | -27 | 3304         | 3321 | K<br>LELEENTERLDAHFVEYLR   |      |                         | Mascot |   |
|   | 2284.1013                                | 2284.1504 | 0.0491  | 21  | 3955         | 3974 | K<br>ENSEFSECLAALSEEKISL   |      | Carbamidomethyl (C)[8]  | Mascot |   |
|   | 2300.0935                                | 2300.1565 | 0.063   | 27  | 3545         | 3563 | EK<br>LQQEQTQSHDLRCSLEA    |      | Carbamidomethyl (C)[13] | Mascot |   |
|   | 2317.1956                                | 2317.1436 | -0.052  | -22 | 849          | 868  | ELK<br>LQALEQVKSMENVLET    |      |                         | Mascot |   |
|   | 2501.2075                                | 2501.2251 | 0.0176  | 7   | 2956         | 2977 | ETSK<br>LEELEEHVQADMVNLSAL |      | Oxidation (M)[12]       | Mascot |   |
| 7 | transmembrane protein 200A [Danio rerio] |           |         |     | gi 113679869 |      | 54934.7                    | 9.28 | 11                      | 46     | 0 |

#### Peptide Information

| Calc. Mass | Obsrv. Mass | ± da    | ± ppm | Start Seq. | End Seq. | Sequence                             | Ion Score | C. I. % | Modification                                | Rank | Result Type |
|------------|-------------|---------|-------|------------|----------|--------------------------------------|-----------|---------|---------------------------------------------|------|-------------|
| 970.5316   | 970.4955    | -0.0361 | -37   | 413        | 420      | LTVQPEQR                             |           |         |                                             |      | Mascot      |
| 1163.6068  | 1163.6011   | -0.0057 | -5    | 422        | 430      | HPSWPRLDR                            |           |         |                                             |      | Mascot      |
| 1371.5983  | 1371.6206   | 0.0223  | 16    | 353        | 366      | SNSATESASSTSSR                       |           |         |                                             |      | Mascot      |
| 1456.7253  | 1456.6569   | -0.0684 | -47   | 245        | 257      | GGFCLLSPTYKDR                        |           |         |                                             |      | Mascot      |
| 1587.925   | 1587.8649   | -0.0601 | -38   | 1          | 16       | MIATGGVITGLAALKR                     |           |         | Oxidation (M)[1]                            |      | Mascot      |
| 1587.925   | 1587.8649   | -0.0601 | -38   | 1          | 16       | MIATGGVITGLAALKR                     |           |         | Oxidation (M)[1]                            |      | Mascot      |
| 1874.7466  | 1874.9208   | 0.1742  | 93    | 181        | 197      | CTNGACMGYPYGGDTEIR                   |           |         | Carbamidomethyl (C)[1,6], Oxidation (M)[7]  |      | Mascot      |
| 2096.8938  | 2097.1064   | 0.2126  | 101   | 226        | 244      | FSHRTSSADDDGLMSE<br>AR               |           |         |                                             |      | Mascot      |
| 2096.8938  | 2097.1064   | 0.2126  | 101   | 226        | 244      | FSHRTSSADDDGLMSE<br>AR               |           |         |                                             |      | Mascot      |
| 2194.1899  | 2194.0774   | -0.1125 | -51   | 280        | 299      | CQTRSIVSSSISAFPLVI<br>K              |           |         | Carbamidomethyl (C)[1]                      |      | Mascot      |
| 2259.9426  | 2260.127    | 0.1844  | 82    | 178        | 197      | EQKCTNGACMGYPYGGD<br>TEIR            |           |         | Carbamidomethyl (C)[4,9], Oxidation (M)[10] |      | Mascot      |
| 2284.0952  | 2284.1504   | 0.0552  | 24    | 17         | 37       | QDSTRSQYHLSAQSPGP<br>APEK            |           |         |                                             |      | Mascot      |
| 3337.8242  | 3337.7273   | -0.0969 | -29   | 57         | 87       | LYSASGFFLVLGVLILMA<br>GIAMAVLGYPWPHK |           |         |                                             |      | Mascot      |

|   |                                                            |  |  |  |  |              |        |      |   |    |   |
|---|------------------------------------------------------------|--|--|--|--|--------------|--------|------|---|----|---|
| 8 | PREDICTED: hypothetical protein LOC100537182 [Danio rerio] |  |  |  |  | gi 326677217 | 4808.4 | 4.86 | 5 | 44 | 0 |
|---|------------------------------------------------------------|--|--|--|--|--------------|--------|------|---|----|---|

#### Peptide Information

| Calc. Mass | Obsrv. Mass | ± da    | ± ppm | Start Seq. | End Seq. | Sequence  | Ion Score | C. I. % | Modification     | Rank | Result Type |
|------------|-------------|---------|-------|------------|----------|-----------|-----------|---------|------------------|------|-------------|
| 853.3906   | 853.3546    | -0.036  | -42   | 11         | 17       | VCKNMDK   |           |         | Oxidation (M)[5] |      | Mascot      |
| 856.5614   | 856.5167    | -0.0447 | -52   | 2          | 9        | AAVLITLR  |           |         |                  |      | Mascot      |
| 987.6019   | 987.524     | -0.0779 | -79   | 1          | 9        | MAAVLITLR |           |         |                  |      | Mascot      |
| 987.6019   | 987.524     | -0.0779 | -79   | 1          | 9        | MAAVLITLR |           |         |                  |      | Mascot      |
| 1100.4677  | 1100.5676   | 0.0999  | 91    | 14         | 21       | NMDKYEER  |           |         | Oxidation (M)[2] |      | Mascot      |

|   |                                                                      |           |        |    |              |        |                            |    |    |   |  |  |        |
|---|----------------------------------------------------------------------|-----------|--------|----|--------------|--------|----------------------------|----|----|---|--|--|--------|
|   | 2317.0942                                                            | 2317.1436 | 0.0494 | 21 | 22           | 43     | IWEELTGQAGDNELEGK<br>VQGSG |    |    |   |  |  | Mascot |
| 9 | novel protein similar to H.sapiens TTN, titin (TTN)<br>[Danio rerio] |           |        |    | gi 169154823 | 842970 | 5.81                       | 44 | 42 | 0 |  |  |        |

| Peptide Information |             |         |       |            |          |               |           |       |   |                                          |      |             |
|---------------------|-------------|---------|-------|------------|----------|---------------|-----------|-------|---|------------------------------------------|------|-------------|
| Calc. Mass          | Obsrv. Mass | ± da    | ± ppm | Start Seq. | End Seq. | Sequence      | Ion Score | C. I. | % | Modification                             | Rank | Result Type |
| 842.444             | 842.5021    | 0.0581  | 69    | 3102       | 3108     | SYKVSMK       |           |       |   |                                          |      | Mascot      |
| 850.4814            | 850.5328    | 0.0514  | 60    | 1088       | 1094     | LTSVRMK       |           |       |   | Oxidation (M)[6]                         |      | Mascot      |
| 850.4814            | 850.5328    | 0.0514  | 60    | 1088       | 1094     | LTSVRMK       |           |       |   | Oxidation (M)[6]                         |      | Mascot      |
| 853.3839            | 853.3546    | -0.0293 | -34   | 1858       | 1863     | WYQNDK        |           |       |   |                                          |      | Mascot      |
| 856.4886            | 856.5167    | 0.0281  | 33    | 6818       | 6824     | LTLQEPR       |           |       |   |                                          |      | Mascot      |
| 870.4203            | 870.532     | 0.1117  | 128   | 6420       | 6427     | LSDSGTYK      |           |       |   |                                          |      | Mascot      |
| 882.4679            | 882.5558    | 0.0879  | 100   | 2483       | 2489     | YKVSTER       |           |       |   |                                          |      | Mascot      |
| 970.5792            | 970.4955    | -0.0837 | -86   | 3602       | 3609     | QQRALVQK      |           |       |   |                                          |      | Mascot      |
| 987.5581            | 987.524     | -0.0341 | -35   | 4726       | 4734     | VEVSNRVGK     |           |       |   |                                          |      | Mascot      |
| 987.5581            | 987.524     | -0.0341 | -35   | 4726       | 4734     | VEVSNRVGK     |           |       |   |                                          |      | Mascot      |
| 996.536             | 996.584     | 0.048   | 48    | 2586       | 2593     | LTITETYR      |           |       |   |                                          |      | Mascot      |
| 996.536             | 996.584     | 0.048   | 48    | 2586       | 2593     | LTITETYR      |           |       |   |                                          |      | Mascot      |
| 1007.5043           | 1007.4681   | -0.0362 | -36   | 3593       | 3601     | ESPFVSDVK     |           |       |   |                                          |      | Mascot      |
| 1045.5347           | 1045.5532   | 0.0185  | 18    | 6656       | 6665     | CQIGGTPEIK    |           |       |   |                                          |      | Mascot      |
| 1051.5571           | 1051.7001   | 0.143   | 136   | 6666       | 6674     | ISWFKADGK     |           |       |   |                                          |      | Mascot      |
| 1051.5571           | 1051.7001   | 0.143   | 136   | 6666       | 6674     | ISWFKADGK     |           |       |   |                                          |      | Mascot      |
| 1100.5582           | 1100.5676   | 0.0094  | 9     | 5147       | 5156     | EPANITEQAK    |           |       |   |                                          |      | Mascot      |
| 1156.4939           | 1156.597    | 0.1031  | 89    | 7094       | 7104     | ATNEAGSEFCK   |           |       |   |                                          |      | Mascot      |
| 1163.5435           | 1163.6011   | 0.0576  | 50    | 5993       | 6002     | MGEPLQLECK    |           |       |   | Oxidation (M)[1]                         |      | Mascot      |
| 1199.5613           | 1199.5568   | -0.0045 | -4    | 1404       | 1413     | DESYEGMLKK    |           |       |   |                                          |      | Mascot      |
| 1205.646            | 1205.6239   | -0.0221 | -18   | 4383       | 4392     | ILWKQGMSSR    |           |       |   |                                          |      | Mascot      |
| 1235.6161           | 1235.6188   | 0.0027  | 2     | 790        | 800      | RVQSTSPMSAR   |           |       |   | Oxidation (M)[8]                         |      | Mascot      |
| 1272.5962           | 1272.7003   | 0.1041  | 82    | 4882       | 4892     | EMLTGGTCFIK   |           |       |   | Carbamidomethyl (C)[8], Oxidation (M)[2] |      | Mascot      |
| 1279.6376           | 1279.7589   | 0.1213  | 95    | 3711       | 3722     | SETTTAVVSEQK  |           |       |   |                                          |      | Mascot      |
| 1312.6348           | 1312.6016   | -0.0332 | -25   | 4387       | 4398     | QGMSSRLSCTVK  |           |       |   | Oxidation (M)[3]                         |      | Mascot      |
| 1371.6208           | 1371.6206   | -0.0002 | 0     | 7094       | 7106     | ATNEAGSEFCKSK |           |       |   |                                          |      | Mascot      |
| 1412.7605           | 1412.6305   | -0.13   | -92   | 273        | 285      | VSTARQQSPSPVR |           |       |   |                                          |      | Mascot      |
| 1456.7617           | 1456.6569   | -0.1048 | -72   | 7158       | 7170     | VGGDPIPNVKWMK |           |       |   | Oxidation (M)[12]                        |      | Mascot      |
| 1472.6145           | 1472.6549   | 0.0404  | 27    | 5689       | 5701     | YTCQAMNEAGQEK |           |       |   |                                          |      | Mascot      |
| 1475.804            | 1475.7354   | -0.0686 | -46   | 1964       | 1976     | GKHYSLTIINAMK |           |       |   |                                          |      | Mascot      |

|           |           |         |     |      |      |                                      |                                          |        |
|-----------|-----------|---------|-----|------|------|--------------------------------------|------------------------------------------|--------|
| 1587.7393 | 1587.8649 | 0.1256  | 79  | 4879 | 4892 | EDKEMLTGGTCFIK                       | Oxidation (M)[5]                         | Mascot |
| 1587.7649 | 1587.8649 | 0.1     | 63  | 5655 | 5667 | DESWILEDPSIQR                        |                                          | Mascot |
| 1625.7258 | 1625.7463 | 0.0205  | 13  | 5508 | 5522 | NEAGSESCSMDLRVK                      |                                          | Mascot |
| 1638.9061 | 1638.8395 | -0.0666 | -41 | 7253 | 7266 | DIDIVELLRNVDPK                       |                                          | Mascot |
| 1815.8191 | 1815.87   | 0.0509  | 28  | 5122 | 5138 | HGGKYTCHAQNEAGSQ<br>K                |                                          | Mascot |
| 1993.9358 | 1993.9501 | 0.0143  | 7   | 4299 | 4315 | LECQVDEDTGVSIIWMR                    |                                          | Mascot |
| 2097.0547 | 2097.1064 | 0.0517  | 25  | 6191 | 6208 | GSQPMTVSWVQDKDHIL<br>R               |                                          | Mascot |
| 2097.0547 | 2097.1064 | 0.0517  | 25  | 6191 | 6208 | GSQPMTVSWVQDKDHIL<br>R               |                                          | Mascot |
| 2194.1101 | 2194.0774 | -0.0327 | -15 | 742  | 761  | LPVVLPEDEGIYAFASN<br>MK              |                                          | Mascot |
| 2211.1438 | 2211.0801 | -0.0637 | -29 | 6494 | 6513 | SCEIALRGDTAILELHNID<br>K             |                                          | Mascot |
| 2232.9575 | 2233.063  | 0.1055  | 47  | 1132 | 1149 | MINEFGYCSLDYEVAYS                    | Carbamidomethyl (C)[8], Oxidation (M)[1] | Mascot |
| 2260.1277 | 2260.127  | -0.0007 | 0   | 5668 | 5688 | TFENNVATLTIPVCESIHS<br>GK            |                                          | Mascot |
| 2283.104  | 2283.1536 | 0.0496  | 22  | 2409 | 2430 | NVHFGDVGDYKFVAGSA<br>ETAAK           |                                          | Mascot |
| 2283.1899 | 2283.1536 | -0.0363 | -16 | 3240 | 3260 | EHPSQVMSALTESVTPLT<br>IVK            | Oxidation (M)[7]                         | Mascot |
| 2297.1516 | 2297.1614 | 0.0098  | 4   | 6550 | 6570 | NLSVEMGKSLILECTYAG<br>SPK            | Carbamidomethyl (C)[14]                  | Mascot |
| 2317.1492 | 2317.1436 | -0.0056 | -2  | 5668 | 5688 | TFENNVATLTIPVCESIHS<br>GK            | Carbamidomethyl (C)[14]                  | Mascot |
| 2472.1033 | 2472.1626 | 0.0593  | 24  | 4481 | 4502 | GCTAHLECEMTGTAPFEI<br>TWFK           |                                          | Mascot |
| 2486.2078 | 2486.1956 | -0.0122 | -5  | 2501 | 2525 | MSDAGEYSVVAGSSVSK<br>ANLTVEGK        |                                          | Mascot |
| 2501.1753 | 2501.2251 | 0.0498  | 20  | 463  | 486  | DETMSEISSVSVDTGAPA<br>APFFVK         | Oxidation (M)[4]                         | Mascot |
| 3337.4834 | 3337.7273 | 0.2439  | 73  | 4346 | 4377 | DTGTYTCTAANEAGSSS<br>CSSSVTVQEPVFFVK | Carbamidomethyl (C)[7,18]                | Mascot |

10 PREDICTED: transposon TX1 uncharacterized 149 kDa gi|326678664 127486.3 9.2 18 41 0  
protein-like [Danio rerio]

#### Peptide Information

| Calc. Mass | Obsrv. Mass | ± da    | ± ppm | Start Seq. | End Seq. | Sequence  | Ion Score | C. I. % Modification   | Rank | Result Type |
|------------|-------------|---------|-------|------------|----------|-----------|-----------|------------------------|------|-------------|
| 850.5145   | 850.5328    | 0.0183  | 22    | 117        | 123      | GRILYTK   |           |                        |      | Mascot      |
| 850.5145   | 850.5328    | 0.0183  | 22    | 117        | 123      | GRILYTK   |           |                        |      | Mascot      |
| 853.46     | 853.3546    | -0.1054 | -123  | 388        | 394      | AKFCSIK   |           | Carbamidomethyl (C)[4] |      | Mascot      |
| 875.4668   | 875.4556    | -0.0112 | -13   | 1          | 6        | MYRLHR    |           |                        |      | Mascot      |
| 996.6564   | 996.584     | -0.0724 | -73   | 535        | 543      | RAVLSLLPK |           |                        |      | Mascot      |
| 996.6564   | 996.584     | -0.0724 | -73   | 535        | 543      | RAVLSLLPK |           |                        |      | Mascot      |
| 1022.5629  | 1022.495    | -0.0679 | -66   | 1050       | 1058     | KANIFQSSK |           |                        |      | Mascot      |
| 1045.5538  | 1045.5532   | -0.0006 | -1    | 940        | 947      | RTADLQWR  |           |                        |      | Mascot      |

|           |           |         |     |      |      |                            |                        |  |  |  |  |  |        |
|-----------|-----------|---------|-----|------|------|----------------------------|------------------------|--|--|--|--|--|--------|
| 1100.6211 | 1100.5676 | -0.0535 | -49 | 200  | 208  | KNGLVDIWR                  |                        |  |  |  |  |  | Mascot |
| 1235.6453 | 1235.6188 | -0.0265 | -21 | 283  | 292  | LLQDVLFCER                 |                        |  |  |  |  |  | Mascot |
| 1312.6896 | 1312.6016 | -0.088  | -67 | 370  | 380  | KAELGSFLYER                |                        |  |  |  |  |  | Mascot |
| 1638.889  | 1638.8395 | -0.0495 | -30 | 914  | 926  | ELLWTPTTYFLVR              |                        |  |  |  |  |  | Mascot |
| 1815.6643 | 1815.87   | 0.2057  | 113 | 1062 | 1078 | TEVDDGCSDDGMESGN<br>K      | Carbamidomethyl (C)[7] |  |  |  |  |  | Mascot |
| 1912.9507 | 1912.9598 | 0.0091  | 5   | 847  | 862  | CIVLDPPEDIICEIQR           | Carbamidomethyl (C)[1] |  |  |  |  |  | Mascot |
| 2097.0281 | 2097.1064 | 0.0783  | 37  | 476  | 493  | DITFKELTEAMQQLSNGR         | Oxidation (M)[11]      |  |  |  |  |  | Mascot |
| 2097.0281 | 2097.1064 | 0.0783  | 37  | 476  | 493  | DITFKELTEAMQQLSNGR         | Oxidation (M)[11]      |  |  |  |  |  | Mascot |
| 2260.208  | 2260.127  | -0.081  | -36 | 681  | 700  | QGCPLSGQLYSLMIEPLL<br>LK   | Carbamidomethyl (C)[3] |  |  |  |  |  | Mascot |
| 2283.1914 | 2283.1536 | -0.0378 | -17 | 319  | 337  | AQIRVFCQNYTLNSSLQI<br>K    | Carbamidomethyl (C)[7] |  |  |  |  |  | Mascot |
| 2283.1914 | 2283.1536 | -0.0378 | -17 | 319  | 337  | AQIRVFCQNYTLNSSLQI<br>K    | Carbamidomethyl (C)[7] |  |  |  |  |  | Mascot |
| 2299.041  | 2299.1592 | 0.1182  | 51  | 390  | 408  | FCSIKDMDAPSSYFFNLE<br>K    | Carbamidomethyl (C)[2] |  |  |  |  |  | Mascot |
| 2472.3716 | 2472.1626 | -0.209  | -85 | 681  | 702  | QGCPLSGQLYSLMIEPLL<br>LKLR |                        |  |  |  |  |  | Mascot |
| 2486.2349 | 2486.1956 | -0.0393 | -16 | 124  | 145  | IEIEGFLFGFINVYAPNNG<br>SER |                        |  |  |  |  |  | Mascot |

11 homeobox protein Hox-C1a [Danio rerio] gi|18858843 34195.5 8.59 8 41 0

#### Peptide Information

| Calc. Mass | Obsrv. Mass | ± da    | ± ppm | Start Seq. | End Seq. | Sequence                  | Ion Score | C. I. | % Modification         | Rank | Result Type |
|------------|-------------|---------|-------|------------|----------|---------------------------|-----------|-------|------------------------|------|-------------|
| 850.4087   | 850.5328    | 0.1241  | 146   | 196        | 202      | CSDRELK                   |           |       |                        |      | Mascot      |
| 850.4087   | 850.5328    | 0.1241  | 146   | 196        | 202      | CSDRELK                   |           |       |                        |      | Mascot      |
| 1007.4727  | 1007.4681   | -0.0046 | -5    | 17         | 25       | GYHATGVMR                 |           |       | Oxidation (M)[8]       |      | Mascot      |
| 1100.5007  | 1100.5676   | 0.0669  | 61    | 113        | 122      | GFSPSSDTFR                |           |       |                        |      | Mascot      |
| 1865.8619  | 1865.8218   | -0.0401 | -21   | 276        | 293      | EGLAQGLMLISGCDEDS<br>K    |           |       |                        |      | Mascot      |
| 1865.8619  | 1865.8218   | -0.0401 | -21   | 276        | 293      | EGLAQGLMLISGCDEDS<br>K    |           |       |                        |      | Mascot      |
| 1912.9585  | 1912.9598   | 0.0013  | 1     | 9          | 25       | DTTSLFIKGYHATGVMR         |           |       | Oxidation (M)[16]      |      | Mascot      |
| 1993.9569  | 1993.9501   | -0.0068 | -3    | 276        | 294      | EGLAQGLMLISGCDEDS<br>KK   |           |       |                        |      | Mascot      |
| 2247.0459  | 2247.0789   | 0.033   | 15    | 123        | 142      | TFSSAHCELGPNNTQT<br>EVR   |           |       | Carbamidomethyl (C)[7] |      | Mascot      |
| 2298.0774  | 2298.1658   | 0.0884  | 38    | 273        | 293      | MLREGLAQGLMLISGCD<br>EDSK |           |       | Oxidation (M)[1,11]    |      | Mascot      |

12 novel protein similar to vertebrate NADH dehydrogenase (ubiquinone) 1 alpha subcomplex, assembly fa

#### Peptide Information

| Calc. Mass | Obsrv. Mass | ± da | ± ppm | Start Seq. | End Seq. | Sequence | Ion Score | C. I. | % Modification | Rank | Result Type |
|------------|-------------|------|-------|------------|----------|----------|-----------|-------|----------------|------|-------------|
|------------|-------------|------|-------|------------|----------|----------|-----------|-------|----------------|------|-------------|

|    |                                 |           |         |     |              |    |             |      |   |    |   |                        |  |  |  |  |        |
|----|---------------------------------|-----------|---------|-----|--------------|----|-------------|------|---|----|---|------------------------|--|--|--|--|--------|
|    | 842.5246                        | 842.5021  | -0.0225 | -27 | 74           | 80 | KHFGLLK     |      |   |    |   |                        |  |  |  |  | Mascot |
|    | 875.5308                        | 875.4556  | -0.0752 | -86 | 2            | 9  | AVSRTTLK    |      |   |    |   |                        |  |  |  |  | Mascot |
|    | 996.5512                        | 996.584   | 0.0328  | 33  | 87           | 95 | WIGPEGKPI   |      |   |    |   |                        |  |  |  |  | Mascot |
|    | 996.5512                        | 996.584   | 0.0328  | 33  | 87           | 95 | WIGPEGKPI   |      |   |    |   |                        |  |  |  |  | Mascot |
|    | 1022.5662                       | 1022.495  | -0.0712 | -70 | 1            | 9  | MAVSRTTLK   |      |   |    |   | Oxidation (M)[1]       |  |  |  |  | Mascot |
|    | 1163.6201                       | 1163.6011 | -0.019  | -16 | 31           | 40 | CASIQITRSK  |      |   |    |   | Carbamidomethyl (C)[1] |  |  |  |  | Mascot |
|    | 1272.6405                       | 1272.7003 | 0.0598  | 47  | 10           | 20 | SLYGVCGVVYR |      |   |    |   | Carbamidomethyl (C)[6] |  |  |  |  | Mascot |
| 13 | si:ch1073-126c3.2 [Danio rerio] |           |         |     | gi 221307488 |    | 24754.2     | 6.97 | 7 | 40 | 0 |                        |  |  |  |  |        |

#### Peptide Information

|    | Calc. Mass                                         | Obsrv. Mass | ± da    | ± ppm | Start Seq.  | End Seq. | Sequence                | Ion Score | C. I. | %  | Modification                             | Rank | Result | Type   |
|----|----------------------------------------------------|-------------|---------|-------|-------------|----------|-------------------------|-----------|-------|----|------------------------------------------|------|--------|--------|
|    | 864.4243                                           | 864.4857    | 0.0614  | 71    | 1           | 8        | MESATIGR                |           |       |    |                                          |      |        | Mascot |
|    | 1371.6572                                          | 1371.6206   | -0.0366 | -27   | 132         | 143      | SRLFEECSTATK            |           |       |    |                                          |      |        | Mascot |
|    | 1638.8069                                          | 1638.8395   | 0.0326  | 20    | 199         | 213      | SELAKVETTESESTK         |           |       |    |                                          |      |        | Mascot |
|    | 1951.9277                                          | 1951.9854   | 0.0577  | 30    | 204         | 221      | VETTESESTKLLCGNINN      |           |       |    |                                          |      |        | Mascot |
|    | 2211.0295                                          | 2211.0801   | 0.0506  | 23    | 114         | 131      | IYCKPMCNAGYDFNFLRR      |           |       |    |                                          |      |        | Mascot |
|    | 2284.0459                                          | 2284.1504   | 0.1045  | 46    | 114         | 131      | IYCKPMCNAGYDFNFLRR      |           |       |    | Carbamidomethyl (C)[3], Oxidation (M)[6] |      |        | Mascot |
|    | 2298.0503                                          | 2298.1658   | 0.1155  | 50    | 112         | 130      | DKIYCKPMCNAGYDFNFLR     |           |       |    |                                          |      |        | Mascot |
|    | 2472.1611                                          | 2472.1626   | 0.0015  | 1     | 162         | 184      | SHIAVSGAPSAYFPQGEDCHITK |           |       |    | Carbamidomethyl (C)[19]                  |      |        | Mascot |
| 14 | ribosome production factor 2 homolog [Danio rerio] |             |         |       | gi 47550781 |          | 35438.5                 | 10        | 9     | 40 | 0                                        |      |        |        |

#### Peptide Information

|  | Calc. Mass | Obsrv. Mass | ± da    | ± ppm | Start Seq. | End Seq. | Sequence             | Ion Score | C. I. | % | Modification           | Rank | Result | Type   |
|--|------------|-------------|---------|-------|------------|----------|----------------------|-----------|-------|---|------------------------|------|--------|--------|
|  | 850.5396   | 850.5328    | -0.0068 | -8    | 197        | 203      | SYKVLLK              |           |       |   |                        |      |        | Mascot |
|  | 850.5396   | 850.5328    | -0.0068 | -8    | 197        | 203      | SYKVLLK              |           |       |   |                        |      |        | Mascot |
|  | 856.4523   | 856.5167    | 0.0644  | 75    | 2          | 9        | SHTDGIVK             |           |       |   |                        |      |        | Mascot |
|  | 987.4927   | 987.524     | 0.0313  | 32    | 1          | 9        | MSHTDGIVK            |           |       |   |                        |      |        | Mascot |
|  | 987.4927   | 987.524     | 0.0313  | 32    | 1          | 9        | MSHTDGIVK            |           |       |   |                        |      |        | Mascot |
|  | 1163.5327  | 1163.6011   | 0.0684  | 59    | 228        | 237      | NHTASDDLK            |           |       |   |                        |      |        | Mascot |
|  | 1952.0117  | 1951.9854   | -0.0263 | -13   | 32         | 50       | NSMIKGGNTSSTVSQALK   |           |       |   | Oxidation (M)[3]       |      |        | Mascot |
|  | 2247.2607  | 2247.0789   | -0.1818 | -81   | 172        | 192      | VSAVRLAGLEHVLHFTAL   |           |       |   |                        |      |        | Mascot |
|  | 2260.0566  | 2260.127    | 0.0704  | 31    | 108        | 125      | MFDHFVLDLDFELGIENFR  |           |       |   |                        |      |        | Mascot |
|  | 2283.0784  | 2283.1536   | 0.0752  | 33    | 135        | 154      | CPEGTKPMLVFAGDLFETDR |           |       |   | Carbamidomethyl (C)[1] |      |        | Mascot |

|    |                                                    |           |         |     |              |         |                          |    |    |   |  |                                          |        |
|----|----------------------------------------------------|-----------|---------|-----|--------------|---------|--------------------------|----|----|---|--|------------------------------------------|--------|
|    | 2283.0784                                          | 2283.1536 | 0.0752  | 33  | 135          | 154     | CPEGTKPMLVFAGDLFE<br>TDR |    |    |   |  | Carbamidomethyl (C)[1]                   | Mascot |
|    | 2298.2427                                          | 2298.1658 | -0.0769 | -33 | 177          | 196     | LAGLEHVLHFTALEGKIY<br>MR |    |    |   |  |                                          | Mascot |
|    | 2299.0732                                          | 2299.1592 | 0.086   | 37  | 135          | 154     | CPEGTKPMLVFAGDLFE<br>TDR |    |    |   |  | Carbamidomethyl (C)[1], Oxidation (M)[8] | Mascot |
| 15 | PREDICTED: b-cell receptor CD22-like [Danio rerio] |           |         |     | gi 326664439 | 59170.3 | 6.94                     | 10 | 40 | 0 |  |                                          |        |

Peptide Information

| Calc. Mass | Obsrv. Mass | ± da    | ± ppm | Start Seq. | End Seq. | Sequence                  | Ion Score | C. I. | % | Modification           | Rank | Result Type |
|------------|-------------|---------|-------|------------|----------|---------------------------|-----------|-------|---|------------------------|------|-------------|
| 836.4512   | 836.3273    | -0.1239 | -148  | 86         | 92       | LQYLGDK                   |           |       |   |                        |      | Mascot      |
| 875.458    | 875.4556    | -0.0024 | -3    | 342        | 350      | GETLVGSGR                 |           |       |   |                        |      | Mascot      |
| 882.454    | 882.5558    | 0.1018  | 115   | 283        | 290      | ARNAHGEK                  |           |       |   |                        |      | Mascot      |
| 987.5945   | 987.524     | -0.0705 | -71   | 262        | 270      | SGRILNISK                 | 2         |       | 0 |                        |      | Mascot      |
| 987.5945   | 987.524     | -0.0705 | -71   | 262        | 270      | SGRILNISK                 |           |       |   |                        |      | Mascot      |
| 1022.5265  | 1022.495    | -0.0315 | -31   | 115        | 123      | FTTNVANQK                 |           |       |   |                        |      | Mascot      |
| 1100.4742  | 1100.5676   | 0.0934  | 85    | 271        | 280      | ISSDDSGEYK                |           |       |   |                        |      | Mascot      |
| 1205.5586  | 1205.6239   | 0.0653  | 54    | 106        | 114      | KDEGQYYFR                 |           |       |   |                        |      | Mascot      |
| 1412.7209  | 1412.6305   | -0.0904 | -64   | 161        | 171      | LTDTPTFIWYR               |           |       |   |                        |      | Mascot      |
| 1874.9105  | 1874.9208   | 0.0103  | 5     | 157        | 171      | SSCKLTDTPTFIWYR           |           |       |   | Carbamidomethyl (C)[3] |      | Mascot      |
| 2472.2051  | 2472.1626   | -0.0425 | -17   | 198        | 219      | CAVHGHTLTSPEVYLN<br>MYPPK |           |       |   | Oxidation (M)[18]      |      | Mascot      |

|    |                                                             |  |  |  |              |         |      |   |    |   |    |       |
|----|-------------------------------------------------------------|--|--|--|--------------|---------|------|---|----|---|----|-------|
| 16 | PREDICTED: interleukin-1 receptor-like 2-like [Danio rerio] |  |  |  | gi 326670867 | 62378.6 | 7.52 | 6 | 39 | 0 | 24 | 7.384 |
|----|-------------------------------------------------------------|--|--|--|--------------|---------|------|---|----|---|----|-------|

Peptide Information

| Calc. Mass | Obsrv. Mass | ± da   | ± ppm | Start Seq. | End Seq. | Sequence         | Ion Score | C. I. | %     | Modification             | Rank | Result Type |
|------------|-------------|--------|-------|------------|----------|------------------|-----------|-------|-------|--------------------------|------|-------------|
| 850.4338   | 850.5328    | 0.099  | 116   | 540        | 547      | KGTDSMVL         |           |       |       |                          |      | Mascot      |
| 850.4338   | 850.5328    | 0.099  | 116   | 540        | 547      | KGTDSMVL         |           |       |       |                          |      | Mascot      |
| 864.4308   | 864.4857    | 0.0549 | 64    | 128        | 135      | DELTSTAK         |           |       |       |                          |      | Mascot      |
| 987.537    | 987.524     | -0.013 | -13   | 507        | 514      | TQGILNWR         | 24        |       | 7.384 |                          |      | Mascot      |
| 987.537    | 987.524     | -0.013 | -13   | 507        | 514      | TQGILNWR         |           |       |       |                          |      | Mascot      |
| 1235.5508  | 1235.6188   | 0.068  | 55    | 157        | 167      | NCQPLNMSNSK      |           |       |       |                          |      | Mascot      |
| 1412.6256  | 1412.6305   | 0.0049 | 3     | 352        | 364      | SVCSRSVACSDGK    |           |       |       | Carbamidomethyl (C)[3,9] |      | Mascot      |
| 1874.9218  | 1874.9208   | -0.001 | -1    | 39         | 54       | TYTFVAGLAFNLQCNR |           |       |       | Carbamidomethyl (C)[14]  |      | Mascot      |

|    |                                                                    |  |  |  |              |         |      |   |    |   |    |        |
|----|--------------------------------------------------------------------|--|--|--|--------------|---------|------|---|----|---|----|--------|
| 17 | polymerase I and transcript release factor isoform 2 [Danio rerio] |  |  |  | gi 167621556 | 51742.2 | 5.07 | 4 | 38 | 0 | 29 | 69.543 |
|----|--------------------------------------------------------------------|--|--|--|--------------|---------|------|---|----|---|----|--------|

Peptide Information

| Calc. Mass | Obsrv. Mass | ± da | ± ppm | Start | End | Sequence | Ion | C. I. | % | Modification | Rank | Result Type |
|------------|-------------|------|-------|-------|-----|----------|-----|-------|---|--------------|------|-------------|
|------------|-------------|------|-------|-------|-----|----------|-----|-------|---|--------------|------|-------------|

|    |                                                                                                | Seq.      |         | Seq. |     | Score        |            |      |        |                  |        |
|----|------------------------------------------------------------------------------------------------|-----------|---------|------|-----|--------------|------------|------|--------|------------------|--------|
|    | 987.5945                                                                                       | 987.524   | -0.0705 | -71  | 128 | 136          | VSVNVKSVR  | 29   | 69.543 |                  | Mascot |
|    | 987.5945                                                                                       | 987.524   | -0.0705 | -71  | 128 | 136          | VSVNVKSVR  |      |        |                  | Mascot |
|    | 1156.5667                                                                                      | 1156.597  | 0.0303  | 26   | 249 | 258          | TVFSKGNMEK |      |        | Oxidation (M)[8] | Mascot |
|    | 1163.6782                                                                                      | 1163.6011 | -0.0771 | -66  | 244 | 253          | VQNIKTVFSK |      |        |                  | Mascot |
|    | 1199.6935                                                                                      | 1199.5568 | -0.1367 | -114 | 367 | 376          | VPFTHVKK   |      |        |                  | Mascot |
| 18 | PREDICTED: 1-phosphatidylinositol-4,5-bisphosphate phosphodiesterase beta-4-like [Danio rerio] |           |         |      |     | gi 326675406 | 130576.6   | 6.89 | 16     | 38               | 0      |

#### Peptide Information

|  | Calc. Mass | Obsrv. Mass | ± da    | ± ppm | Start Seq. | End Sequence Seq. | Ion Score               | C. I. % | Modification                              | Rank | Result Type |
|--|------------|-------------|---------|-------|------------|-------------------|-------------------------|---------|-------------------------------------------|------|-------------|
|  | 842.4981   | 842.5021    | 0.004   | 5     | 442        | 448               | LKPEVEK                 |         |                                           |      | Mascot      |
|  | 853.4413   | 853.3546    | -0.0867 | -102  | 318        | 324               | SSVEIYR                 |         |                                           |      | Mascot      |
|  | 970.5931   | 970.4955    | -0.0976 | -101  | 442        | 449               | LKPEVEKK                |         |                                           |      | Mascot      |
|  | 1022.5451  | 1022.495    | -0.0501 | -49   | 595        | 602               | QMSRIYPK                |         |                                           |      | Mascot      |
|  | 1100.5115  | 1100.5676   | 0.0561  | 51    | 355        | 363               | AMCTDVLFK               |         | Carbamidomethyl (C)[3], Oxidation (M)[2]  |      | Mascot      |
|  | 1294.5701  | 1294.5137   | -0.0564 | -44   | 115        | 125               | ANNVCPMTCLR             |         | Carbamidomethyl (C)[5], Oxidation (M)[7]  |      | Mascot      |
|  | 1312.6136  | 1312.6016   | -0.012  | -9    | 261        | 271               | KGLLSCDGFCR             |         | Carbamidomethyl (C)[6,10]                 |      | Mascot      |
|  | 1412.6331  | 1412.6305   | -0.0026 | -2    | 855        | 866               | TNQAGMMMPQK             |         | Oxidation (M)[6,7,8]                      |      | Mascot      |
|  | 1865.8085  | 1865.8218   | 0.0133  | 7     | 2          | 17                | DSAMDPLVFESNCFFK        |         | Oxidation (M)[4]                          |      | Mascot      |
|  | 1865.8085  | 1865.8218   | 0.0133  | 7     | 2          | 17                | DSAMDPLVFESNCFFK        |         | Oxidation (M)[4]                          |      | Mascot      |
|  | 1912.8562  | 1912.9598   | 0.1036  | 54    | 987        | 1003              | VKDMSAQASECSEMLR        |         | Carbamidomethyl (C)[12]                   |      | Mascot      |
|  | 1993.9316  | 1993.9501   | 0.0185  | 9     | 56         | 73                | VLCALASGKCESNLED R      |         | Carbamidomethyl (C)[3]                    |      | Mascot      |
|  | 2096.9568  | 2097.1064   | 0.1496  | 71    | 642        | 658               | FEYNGSCGFLLKPDFMR       |         | Carbamidomethyl (C)[7], Oxidation (M)[16] |      | Mascot      |
|  | 2096.9568  | 2097.1064   | 0.1496  | 71    | 642        | 658               | FEYNGSCGFLLKPDFMR       |         | Carbamidomethyl (C)[7], Oxidation (M)[16] |      | Mascot      |
|  | 2151.9983  | 2152.0684   | 0.0701  | 33    | 325        | 342               | QVLLTGRCVELDCWDG K      |         | Carbamidomethyl (C)[7,9]                  |      | Mascot      |
|  | 2247.2205  | 2247.0789   | -0.1416 | -63   | 780        | 798               | NEYNKPLPLATVFCNIILK     |         | Carbamidomethyl (C)[14]                   |      | Mascot      |
|  | 2472.1169  | 2472.1626   | 0.0457  | 18    | 333        | 354               | CVELDCWDGKGEDQEPII THGK |         |                                           |      | Mascot      |
|  | 2486.1907  | 2486.1956   | 0.0049  | 2     | 371        | 391               | ETAFILTSEYPVILSFENHC TK |         | Carbamidomethyl (C)[19]                   |      | Mascot      |

19 PREDICTED: zinc finger protein 420 isoform 2 [Danio rerio] gi|326678086 70371 9.08 13 36 0

#### Peptide Information

|  | Calc. Mass | Obsrv. Mass | ± da | ± ppm | Start Seq. | End Sequence Seq. | Ion Score | C. I. % | Modification | Rank | Result Type |
|--|------------|-------------|------|-------|------------|-------------------|-----------|---------|--------------|------|-------------|
|--|------------|-------------|------|-------|------------|-------------------|-----------|---------|--------------|------|-------------|



|    |                                                                                       |           |         |     |     |     |                         |  |  |  |          |                                          |    |    |   |  |        |
|----|---------------------------------------------------------------------------------------|-----------|---------|-----|-----|-----|-------------------------|--|--|--|----------|------------------------------------------|----|----|---|--|--------|
|    | 842.5206                                                                              | 842.5021  | -0.0185 | -22 | 25  | 31  | QRQGLLK                 |  |  |  |          |                                          |    |    |   |  | Mascot |
|    | 864.4798                                                                              | 864.4857  | 0.0059  | 7   | 591 | 597 | HRSVHTK                 |  |  |  |          |                                          |    |    |   |  | Mascot |
|    | 987.5621                                                                              | 987.524   | -0.0381 | -39 | 497 | 505 | TFITAGHLK               |  |  |  |          |                                          |    |    |   |  | Mascot |
|    | 987.5621                                                                              | 987.524   | -0.0381 | -39 | 497 | 505 | TFITAGHLK               |  |  |  |          |                                          |    |    |   |  | Mascot |
|    | 1007.392                                                                              | 1007.4681 | 0.0761  | 76  | 36  | 43  | MSDPEPCR                |  |  |  |          | Carbamidomethyl (C)[7], Oxidation (M)[1] |    |    |   |  | Mascot |
|    | 1045.536                                                                              | 1045.5532 | 0.0172  | 16  | 134 | 141 | FHCARNLK                |  |  |  |          | Carbamidomethyl (C)[3]                   |    |    |   |  | Mascot |
|    | 1100.5881                                                                             | 1100.5676 | -0.0205 | -19 | 165 | 173 | ATDLKMHLR               |  |  |  |          | Oxidation (M)[6]                         |    |    |   |  | Mascot |
|    | 1156.5238                                                                             | 1156.597  | 0.0732  | 63  | 575 | 584 | CDQCGKSFLR              |  |  |  |          |                                          |    |    |   |  | Mascot |
|    | 1625.8428                                                                             | 1625.7463 | -0.0965 | -59 | 593 | 606 | SVHTKEKPPSCSLR          |  |  |  |          | Carbamidomethyl (C)[11]                  |    |    |   |  | Mascot |
|    | 1961.8956                                                                             | 1961.97   | 0.0744  | 38  | 454 | 469 | VHTNEKPYSCPECGKR        |  |  |  |          | Carbamidomethyl (C)[10,13]               |    |    |   |  | Mascot |
|    | 2102.0085                                                                             | 2101.9805 | -0.028  | -13 | 488 | 505 | EFVCFECEKTFITAGHLK      |  |  |  |          |                                          |    |    |   |  | Mascot |
|    | 2211.0798                                                                             | 2211.0801 | 0.0003  | 0   | 450 | 468 | IHLRVHTNEKPYSCPECG<br>K |  |  |  |          |                                          |    |    |   |  | Mascot |
|    | 2283.0579                                                                             | 2283.1536 | 0.0957  | 42  | 227 | 245 | HQMIHTGEKPYKCSHCD<br>LR |  |  |  |          |                                          |    |    |   |  | Mascot |
|    | 2283.0579                                                                             | 2283.1536 | 0.0957  | 42  | 227 | 245 | HQMIHTGEKPYKCSHCD<br>LR |  |  |  |          |                                          |    |    |   |  | Mascot |
|    | 2298.0906                                                                             | 2298.1658 | 0.0752  | 33  | 478 | 496 | LHQHVHTGVREFVCFEC<br>EK |  |  |  |          |                                          |    |    |   |  | Mascot |
|    | 2299.053                                                                              | 2299.1592 | 0.1062  | 46  | 227 | 245 | HQMIHTGEKPYKCSHCD<br>LR |  |  |  |          | Oxidation (M)[3]                         |    |    |   |  | Mascot |
| 20 | PREDICTED: WD repeat- and FYVE domain-containing gij326673033 protein 4 [Danio rerio] |           |         |     |     |     |                         |  |  |  | 526148.3 | 6.32                                     | 34 | 36 | 0 |  |        |

#### Peptide Information

| Calc. Mass | Obsrv. Mass | ± da    | ± ppm | Start Seq. | End Seq. | Sequence   | Ion Score | C. I. % | Modification           | Rank | Result Type |
|------------|-------------|---------|-------|------------|----------|------------|-----------|---------|------------------------|------|-------------|
| 836.3567   | 836.3273    | -0.0294 | -35   | 4178       | 4184     | DNMSDVR    |           |         |                        |      | Mascot      |
| 850.5145   | 850.5328    | 0.0183  | 22    | 2616       | 2622     | RSFSLLK    |           |         |                        |      | Mascot      |
| 850.5145   | 850.5328    | 0.0183  | 22    | 2616       | 2622     | RSFSLLK    |           |         |                        |      | Mascot      |
| 962.4434   | 962.5256    | 0.0822  | 85    | 1341       | 1348     | MADLPMER   |           |         |                        |      | Mascot      |
| 987.4642   | 987.524     | 0.0598  | 61    | 2447       | 2454     | DEAFNHVR   |           |         |                        |      | Mascot      |
| 987.4642   | 987.524     | 0.0598  | 61    | 2447       | 2454     | DEAFNHVR   |           |         |                        |      | Mascot      |
| 1007.4826  | 1007.4681   | -0.0145 | -14   | 2558       | 2566     | LASQSMDQK  |           |         |                        |      | Mascot      |
| 1022.5009  | 1022.495    | -0.0059 | -6    | 4283       | 4291     | ASMKDPVMK  |           |         | Oxidation (M)[3]       |      | Mascot      |
| 1051.5492  | 1051.7001   | 0.1509  | 144   | 2205       | 2213     | DLGMIPYVK  |           |         | Oxidation (M)[4]       |      | Mascot      |
| 1051.5492  | 1051.7001   | 0.1509  | 144   | 2205       | 2213     | DLGMIPYVK  |           |         | Oxidation (M)[4]       |      | Mascot      |
| 1100.4355  | 1100.5676   | 0.1321  | 120   | 1322       | 1330     | IMSDCCLCR  |           |         | Carbamidomethyl (C)[5] |      | Mascot      |
| 1156.5891  | 1156.597    | 0.0079  | 7     | 1173       | 1181     | MLQEQSHKR  |           |         |                        |      | Mascot      |
| 1179.6844  | 1179.5908   | -0.0936 | -79   | 1279       | 1288     | DQHIATLLLR |           |         |                        |      | Mascot      |
| 1199.5153  | 1199.5568   | 0.0415  | 35    | 1322       | 1331     | IMSDCCLCRR |           |         |                        |      | Mascot      |

|           |           |         |      |      |      |                                  |                                            |        |
|-----------|-----------|---------|------|------|------|----------------------------------|--------------------------------------------|--------|
| 1205.667  | 1205.6239 | -0.0431 | -36  | 3995 | 4005 | LCSVVSSSLKGR                     | Carbamidomethyl (C)[2]                     | Mascot |
| 1272.6848 | 1272.7003 | 0.0155  | 12   | 1150 | 1159 | LIAHFSDWKR                       |                                            | Mascot |
| 1412.7393 | 1412.6305 | -0.1088 | -77  | 1087 | 1098 | GLRVGDFIEHNR                     |                                            | Mascot |
| 1456.8444 | 1456.6569 | -0.1875 | -129 | 3362 | 3374 | ILLMDSLINIPAK                    | Oxidation (M)[4]                           | Mascot |
| 1587.9117 | 1587.8649 | -0.0468 | -29  | 1051 | 1063 | FHTFLANRVTIIR                    |                                            | Mascot |
| 1587.9117 | 1587.8649 | -0.0468 | -29  | 1051 | 1063 | FHTFLANRVTIIR                    |                                            | Mascot |
| 1625.7518 | 1625.7463 | -0.0055 | -3   | 1336 | 1348 | MMLQKMADLPMER                    | Oxidation (M)[1,2]                         | Mascot |
| 1638.6848 | 1638.8395 | 0.1547  | 94   | 35   | 47   | SCLYMMPELGYDK                    | Carbamidomethyl (C)[2], Oxidation (M)[5,6] | Mascot |
| 1815.9785 | 1815.87   | -0.1085 | -60  | 3735 | 3748 | MAIQWLRIEEELLR                   | Oxidation (M)[1]                           | Mascot |
| 1866.0154 | 1865.8218 | -0.1936 | -104 | 1591 | 1607 | NLKPGDIVIIMDPTAPR                | Oxidation (M)[11]                          | Mascot |
| 1866.0154 | 1865.8218 | -0.1936 | -104 | 1591 | 1607 | NLKPGDIVIIMDPTAPR                | Oxidation (M)[11]                          | Mascot |
| 1952.0885 | 1951.9854 | -0.1031 | -53  | 2812 | 2830 | SCLVTVYLNATAIGTGKIK              |                                            | Mascot |
| 1961.8796 | 1961.97   | 0.0904  | 46   | 777  | 792  | ENFYVDDCLKSVESEK                 | Carbamidomethyl (C)[8]                     | Mascot |
| 1993.9907 | 1993.9501 | -0.0406 | -20  | 2521 | 2537 | QIMCEFGLLSTLLTHCK                | Carbamidomethyl (C)[4]                     | Mascot |
| 2097.0076 | 2097.1064 | 0.0988  | 47   | 721  | 737  | FLWWPEGDLTKDASEFR                |                                            | Mascot |
| 2097.1526 | 2097.1064 | -0.0462 | -22  | 2617 | 2635 | SFSLLKTPLDSGMVVPLH<br>R          |                                            | Mascot |
| 2102.04   | 2101.9805 | -0.0595 | -28  | 758  | 776  | KTADDNQAEFPAEIPQTV<br>K          |                                            | Mascot |
| 2224.9355 | 2225.0945 | 0.159   | 71   | 257  | 274  | HLCFGCLSTSHMSRDCE<br>K           | Carbamidomethyl (C)[3,6,16]                | Mascot |
| 2224.9355 | 2225.0945 | 0.159   | 71   | 257  | 274  | HLCFGCLSTSHMSRDCE<br>K           | Carbamidomethyl (C)[3,6,16]                | Mascot |
| 2233.0127 | 2233.063  | 0.0503  | 23   | 3183 | 3201 | SWSFECLSCICPGFEVLQ<br>K          | Carbamidomethyl (C)[6]                     | Mascot |
| 2283.1948 | 2283.1536 | -0.0412 | -18  | 2024 | 2043 | IIQSSFMRSSNTVICSQIL<br>R         |                                            | Mascot |
| 2283.1948 | 2283.1536 | -0.0412 | -18  | 2024 | 2043 | IIQSSFMRSSNTVICSQIL<br>R         |                                            | Mascot |
| 2284.1389 | 2284.1504 | 0.0115  | 5    | 2349 | 2369 | LGEALLHLGCFQKGDVP<br>ESDR        |                                            | Mascot |
| 2299.1772 | 2299.1592 | -0.018  | -8   | 2789 | 2807 | CAKHLIPGQWHHLCLVM<br>AK          | Carbamidomethyl (C)[1,14]                  | Mascot |
| 2300.1206 | 2300.1565 | 0.0359  | 16   | 910  | 927  | NYGWDETVPQELLHRWT<br>R           |                                            | Mascot |
| 2486.2603 | 2486.1956 | -0.0647 | -26  | 1878 | 1901 | VLRSVSAAQAHNTVSAL<br>QASNCMK     |                                            | Mascot |
| 3337.6045 | 3337.7273 | 0.1228  | 37   | 3638 | 3666 | EGQVSMADVSPWEEQ<br>ATKSWQLFIDSQK |                                            | Mascot |

21 PREDICTED: RNA-directed DNA polymerase from mobile element jockey-like [Danio rerio] gi|326672568 119050.6 9.55 16 36 0

Peptide Information

| Calc. Mass | Obsrv. Mass | ± da   | ± ppm | Start Seq. | End Seq. | Sequence | Ion Score | C. I. % | Modification     | Rank | Result Type |
|------------|-------------|--------|-------|------------|----------|----------|-----------|---------|------------------|------|-------------|
| 864.3628   | 864.4857    | 0.1229 | 142   | 168        | 174      | MNENGQR  |           |         | Oxidation (M)[1] |      | Mascot      |
| 870.4402   | 870.532     | 0.0918 | 105   | 916        | 922      | WLGHVCR  |           |         |                  |      | Mascot      |

|           |           |         |     |      |      |                     |   |                         |        |
|-----------|-----------|---------|-----|------|------|---------------------|---|-------------------------|--------|
| 987.5945  | 987.524   | -0.0705 | -71 | 817  | 826  | IGKAASTLAR          | 6 | 0                       | Mascot |
| 987.5945  | 987.524   | -0.0705 | -71 | 817  | 826  | IGKAASTLAR          |   |                         | Mascot |
| 996.4819  | 996.584   | 0.1021  | 102 | 1041 | 1048 | QSVMPQYK            |   | Oxidation (M)[4]        | Mascot |
| 996.4819  | 996.584   | 0.1021  | 102 | 1041 | 1048 | QSVMPQYK            |   | Oxidation (M)[4]        | Mascot |
| 1100.6534 | 1100.5676 | -0.0858 | -78 | 355  | 363  | NLQILRSTR           |   |                         | Mascot |
| 1163.58   | 1163.6011 | 0.0211  | 18  | 330  | 340  | ASTMIPCIEAK         |   |                         | Mascot |
| 1179.5748 | 1179.5908 | 0.016   | 14  | 330  | 340  | ASTMIPCIEAK         |   | Oxidation (M)[4]        | Mascot |
| 1235.548  | 1235.6188 | 0.0708  | 57  | 50   | 58   | DYTFYWQGR           |   |                         | Mascot |
| 1279.6892 | 1279.7589 | 0.0697  | 54  | 485  | 497  | APGSDGIPPDLLK       |   |                         | Mascot |
| 1475.7787 | 1475.7354 | -0.0433 | -29 | 498  | 509  | QCKDSLHLPLHK        |   | Carbamidomethyl (C)[2]  | Mascot |
| 1638.8519 | 1638.8395 | -0.0124 | -8  | 485  | 500  | APGSDGIPPDLLKQCK    |   |                         | Mascot |
| 1912.9069 | 1912.9598 | 0.0529  | 28  | 417  | 432  | SSTGEIIFDKQQQMER    |   | Oxidation (M)[14]       | Mascot |
| 1961.8513 | 1961.97   | 0.1187  | 61  | 1007 | 1024 | VQSVSQGATYQCDCCKK   |   | Carbamidomethyl (C)[12] | Mascot |
| 2101.9858 | 2101.9805 | -0.0053 | -3  | 653  | 672  | GTIQFNGSCSEPFSSSGVK |   | Carbamidomethyl (C)[9]  | Mascot |
| 2151.9863 | 2152.0684 | 0.0821  | 38  | 286  | 304  | ELDTAQTGDSALEMWESLR |   |                         | Mascot |
| 2194.0308 | 2194.0774 | 0.0466  | 21  | 322  | 340  | THDWFEAKASTMIPCIEAK |   | Oxidation (M)[12]       | Mascot |
| 2233.0364 | 2233.063  | 0.0266  | 12  | 457  | 475  | CLPTMEELDEEPTAEELRK |   |                         | Mascot |

22 hypothetical protein LOC795694 [Danio rerio] gi|157841207 31024 4.24 8 36 0

#### Peptide Information

| Calc. Mass | Obsrv. Mass | ± da    | ± ppm | Start Seq. | End Seq. | Sequence              | Ion Score | C. I. % | Modification                                | Rank | Result Type |
|------------|-------------|---------|-------|------------|----------|-----------------------|-----------|---------|---------------------------------------------|------|-------------|
| 970.6043   | 970.4955    | -0.1088 | -112  | 166        | 173      | QLKEILAR              |           |         |                                             |      | Mascot      |
| 1022.4216  | 1022.495    | 0.0734  | 72    | 254        | 261      | MNECPICR              |           |         | Carbamidomethyl (C)[4]                      |      | Mascot      |
| 1235.5442  | 1235.6188   | 0.0746  | 60    | 253        | 261      | RMNECPICR             |           |         | Carbamidomethyl (C)[5,8]                    |      | Mascot      |
| 1638.8698  | 1638.8395   | -0.0303 | -18   | 44         | 57       | EELVELVLDQQAPR        |           |         |                                             |      | Mascot      |
| 1815.8265  | 1815.87     | 0.0435  | 24    | 28         | 41       | DYLHLHQTPQMCR         |           |         | Carbamidomethyl (C)[13], Oxidation (M)[12]  |      | Mascot      |
| 1961.9537  | 1961.97     | 0.0163  | 8     | 185        | 199      | WELMEKVTHLFNDQR       |           |         | Oxidation (M)[4]                            |      | Mascot      |
| 2193.9402  | 2194.0774   | 0.1372  | 63    | 174        | 190      | NFVNYQGCKEKLWELMEK    |           |         | Carbamidomethyl (C)[8], Oxidation (M)[15]   |      | Mascot      |
| 2486.0562  | 2486.1956   | 0.1394  | 56    | 228        | 249      | ICMDSPIDCVLLECGHMTCSK |           |         | Carbamidomethyl (C)[2], Oxidation (M)[3,17] |      | Mascot      |

23 novel protein [Danio rerio] gi|94733366 36191.6 9.32 10 36 0

#### Peptide Information

| Calc. Mass | Obsrv. Mass | ± da | ± ppm | Start Seq. | End Seq. | Sequence | Ion Score | C. I. % | Modification | Rank | Result Type |
|------------|-------------|------|-------|------------|----------|----------|-----------|---------|--------------|------|-------------|
|------------|-------------|------|-------|------------|----------|----------|-----------|---------|--------------|------|-------------|

|    |                                |           |         |     |             |     |                     |      |    |                                          |   |  |        |
|----|--------------------------------|-----------|---------|-----|-------------|-----|---------------------|------|----|------------------------------------------|---|--|--------|
|    | 864.4798                       | 864.4857  | 0.0059  | 7   | 292         | 298 | HRSVHTK             |      |    |                                          |   |  | Mascot |
|    | 962.3931                       | 962.5256  | 0.1325  | 138 | 108         | 114 | CSHCDDR             |      |    | Carbamidomethyl (C)[1,4]                 |   |  | Mascot |
|    | 987.5621                       | 987.524   | -0.0381 | -39 | 198         | 206 | TFITAGHLK           |      |    |                                          |   |  | Mascot |
|    | 987.5621                       | 987.524   | -0.0381 | -39 | 198         | 206 | TFITAGHLK           |      |    |                                          |   |  | Mascot |
|    | 1007.392                       | 1007.4681 | 0.0761  | 76  | 19          | 26  | MSDPEPCR            |      |    | Carbamidomethyl (C)[7], Oxidation (M)[1] |   |  | Mascot |
|    | 1156.5238                      | 1156.597  | 0.0732  | 63  | 276         | 285 | CDQCGKSFLR          |      |    |                                          |   |  | Mascot |
|    | 1625.8428                      | 1625.7463 | -0.0965 | -59 | 294         | 307 | SVHTKEKPPSCSLR      |      |    | Carbamidomethyl (C)[11]                  |   |  | Mascot |
|    | 1961.8956                      | 1961.97   | 0.0744  | 38  | 155         | 170 | VHTNEKPYSCPECGKR    |      |    | Carbamidomethyl (C)[10,13]               |   |  | Mascot |
|    | 2102.0085                      | 2101.9805 | -0.028  | -13 | 189         | 206 | EFVCFECEKTFITAGHLK  |      |    |                                          |   |  | Mascot |
|    | 2211.0798                      | 2211.0801 | 0.0003  | 0   | 151         | 169 | IHLRVHTNEKPYSCPECGK |      |    |                                          |   |  | Mascot |
|    | 2298.0906                      | 2298.1658 | 0.0752  | 33  | 179         | 197 | LHQHVHTGVREFVCFCEK  |      |    |                                          |   |  | Mascot |
| 24 | integrin beta 3a [Danio rerio] |           |         |     | gi 82524316 |     | 85636.2             | 5.46 | 14 | 36                                       | 0 |  |        |

Peptide Information

|  | Calc. Mass | Obsrv. Mass | ± da    | ± ppm | Start Seq. | End Seq. | Sequence               | Ion Score | C. I. % | Modification             | Rank | Result | Type |
|--|------------|-------------|---------|-------|------------|----------|------------------------|-----------|---------|--------------------------|------|--------|------|
|  | 987.4603   | 987.524     | 0.0637  | 65    | 174        | 182      | MGFGAFVDK              |           |         | Oxidation (M)[1]         |      | Mascot |      |
|  | 987.4603   | 987.524     | 0.0637  | 65    | 174        | 182      | MGFGAFVDK              |           |         | Oxidation (M)[1]         |      | Mascot |      |
|  | 1156.552   | 1156.597    | 0.045   | 39    | 749        | 757      | EFAKFEEEEK             |           |         |                          |      | Mascot |      |
|  | 1163.5837  | 1163.6011   | 0.0174  | 15    | 54         | 64       | GGSALSRCDLK            |           |         | Carbamidomethyl (C)[8]   |      | Mascot |      |
|  | 1205.595   | 1205.6239   | 0.0289  | 24    | 762        | 771      | WEAANNPLYK             |           |         |                          |      | Mascot |      |
|  | 1279.5844  | 1279.7589   | 0.1745  | 136   | 624        | 635      | CPTCPDACTIKK           |           |         |                          |      | Mascot |      |
|  | 1312.6453  | 1312.6016   | -0.0437 | -33   | 414        | 425      | IGDMVSFSIEAK           |           |         | Oxidation (M)[4]         |      | Mascot |      |
|  | 1412.662   | 1412.6305   | -0.0315 | -22   | 21         | 34       | GSNICTSRGVSTCK         |           |         |                          |      | Mascot |      |
|  | 1472.7128  | 1472.6549   | -0.0579 | -39   | 772        | 785      | GATTTTFQNVAYRGS        |           |         |                          |      | Mascot |      |
|  | 1475.5746  | 1475.7354   | 0.1608  | 109   | 587        | 601      | TDTCMGSGGLMCSGR        |           |         |                          |      | Mascot |      |
|  | 1874.7295  | 1874.9208   | 0.1913  | 102   | 539        | 553      | VWGPFCEDDFSCPR         |           |         | Carbamidomethyl (C)[6,8] |      | Mascot |      |
|  | 2082.98    | 2082.9888   | 0.0088  | 4     | 240        | 258      | DSEGGGDAIFQAVVCKDK     |           |         | Carbamidomethyl (C)[16]  |      | Mascot |      |
|  | 2259.8708  | 2260.127    | 0.2562  | 113   | 602        | 623      | GHCVCVGCNCTQPGAYGSTCDK |           |         | Carbamidomethyl (C)[3]   |      | Mascot |      |
|  | 2284.3535  | 2284.1504   | -0.2031 | -89   | 1          | 20       | MGLNLIKVWMPVLLISIAK    |           |         | Oxidation (M)[1,10]      |      | Mascot |      |
|  | 2317.2771  | 2317.1436   | -0.1335 | -58   | 8          | 28       | VWMPVLLISIAKGSNICTSR   |           |         | Oxidation (M)[3]         |      | Mascot |      |

|    |                                              |  |  |  |              |  |         |       |   |    |   |  |  |
|----|----------------------------------------------|--|--|--|--------------|--|---------|-------|---|----|---|--|--|
| 25 | hypothetical protein LOC564090 [Danio rerio] |  |  |  | gi 192453584 |  | 12976.7 | 10.42 | 5 | 36 | 0 |  |  |
|----|----------------------------------------------|--|--|--|--------------|--|---------|-------|---|----|---|--|--|

Peptide Information

|  | Calc. Mass | Obsrv. Mass | ± da | ± ppm | Start Seq. | End Seq. | Sequence | Ion Score | C. I. % | Modification | Rank | Result | Type |
|--|------------|-------------|------|-------|------------|----------|----------|-----------|---------|--------------|------|--------|------|
|--|------------|-------------|------|-------|------------|----------|----------|-----------|---------|--------------|------|--------|------|

|    |                                                      |           |         |     |     |             |                           |      |    |    |   |  |                  |  |  |  |        |
|----|------------------------------------------------------|-----------|---------|-----|-----|-------------|---------------------------|------|----|----|---|--|------------------|--|--|--|--------|
|    | 1100.5219                                            | 1100.5676 | 0.0457  | 42  | 100 | 108         | NDQQEPIK                  |      |    |    |   |  |                  |  |  |  | Mascot |
|    | 1625.8621                                            | 1625.7463 | -0.1158 | -71 | 1   | 14          | MIFGFPRPTAGYIR            |      |    |    |   |  |                  |  |  |  | Mascot |
|    | 2211.0889                                            | 2211.0801 | -0.0088 | -4  | 100 | 118         | NDQQEPIKNISDTQQPV<br>K    |      |    |    |   |  |                  |  |  |  | Mascot |
|    | 2225.123                                             | 2225.0945 | -0.0285 | -13 | 88  | 108         | LAPANAGMASIKNDQQE<br>EPIK |      |    |    |   |  |                  |  |  |  | Mascot |
|    | 2225.123                                             | 2225.0945 | -0.0285 | -13 | 88  | 108         | LAPANAGMASIKNDQQE<br>EPIK |      |    |    |   |  |                  |  |  |  | Mascot |
|    | 2260.085                                             | 2260.127  | 0.042   | 19  | 65  | 85          | ILQWMSRPAMNADSPGS<br>PSAK |      |    |    |   |  | Oxidation (M)[5] |  |  |  | Mascot |
| 26 | truncated SH3 binding domain protein 4 [Danio rerio] |           |         |     |     | gi 33438222 | 84564.4                   | 8.75 | 12 | 35 | 0 |  |                  |  |  |  |        |

#### Peptide Information

|  | Calc. Mass | Obsrv. Mass | ± da    | ± ppm | Start Seq. | End Seq. | Sequence                           | Ion Score | C. I. % | Modification                                 | Rank | Result Type |
|--|------------|-------------|---------|-------|------------|----------|------------------------------------|-----------|---------|----------------------------------------------|------|-------------|
|  | 842.5822   | 842.5021    | -0.0801 | -95   | 634        | 640      | LIKTVIR                            |           |         |                                              |      | Mascot      |
|  | 850.4338   | 850.5328    | 0.099   | 116   | 358        | 364      | LSNMEIK                            |           |         | Oxidation (M)[4]                             |      | Mascot      |
|  | 850.4338   | 850.5328    | 0.099   | 116   | 358        | 364      | LSNMEIK                            |           |         | Oxidation (M)[4]                             |      | Mascot      |
|  | 870.4726   | 870.532     | 0.0594  | 68    | 1          | 7        | MAAHRIR                            |           |         | Oxidation (M)[1]                             |      | Mascot      |
|  | 1163.6432  | 1163.6011   | -0.0421 | -36   | 742        | 750      | HPYPRQLPR                          |           |         |                                              |      | Mascot      |
|  | 1272.7522  | 1272.7003   | -0.0519 | -41   | 476        | 487      | TLLVSEVGKQAK                       |           |         |                                              |      | Mascot      |
|  | 1294.6637  | 1294.5137   | -0.15   | -116  | 553        | 563      | KADEISDFTLR                        |           |         |                                              |      | Mascot      |
|  | 1371.7161  | 1371.6206   | -0.0955 | -70   | 8          | 19       | VTNNNNVLPRCK                       |           |         |                                              |      | Mascot      |
|  | 1815.8959  | 1815.87     | -0.0259 | -14   | 432        | 446      | HVSFSSNVWNHMKK                     |           |         | Oxidation (M)[12]                            |      | Mascot      |
|  | 2097.0137  | 2097.1064   | 0.0927  | 44    | 373        | 390      | VSMVTRTESPMAEIVCVR                 |           |         | Carbamidomethyl (C)[16], Oxidation (M)[4,11] |      | Mascot      |
|  | 2097.0137  | 2097.1064   | 0.0927  | 44    | 373        | 390      | VSMVTRTESPMAEIVCVR                 |           |         | Carbamidomethyl (C)[16], Oxidation (M)[4,11] |      | Mascot      |
|  | 2284.2368  | 2284.1504   | -0.0864 | -38   | 463        | 484      | TVVAIFGHDCAPKTLVLS<br>EVGK         |           |         |                                              |      | Mascot      |
|  | 2300.0686  | 2300.1565   | 0.0879  | 38    | 568        | 587      | DDQDCILAQFCVQTPQP<br>PPK           |           |         | Carbamidomethyl (C)[5]                       |      | Mascot      |
|  | 3337.6052  | 3337.7273   | 0.1221  | 37    | 269        | 298      | LARSCHDLESLGQNPBW<br>GQTQPVETNIVCK |           |         | Carbamidomethyl (C)[5]                       |      | Mascot      |

27 PREDICTED: zinc finger protein 420 isoform 1 [Danio rerio] gi|326678084 37946.4 9.32 10 35 0

#### Peptide Information

|  | Calc. Mass | Obsrv. Mass | ± da    | ± ppm | Start Seq. | End Seq. | Sequence  | Ion Score | C. I. % | Modification                             | Rank | Result Type |
|--|------------|-------------|---------|-------|------------|----------|-----------|-----------|---------|------------------------------------------|------|-------------|
|  | 864.4798   | 864.4857    | 0.0059  | 7     | 309        | 315      | HRSVHTK   |           |         |                                          |      | Mascot      |
|  | 962.3931   | 962.5256    | 0.1325  | 138   | 125        | 131      | CSHC DKR  |           |         | Carbamidomethyl (C)[1,4]                 |      | Mascot      |
|  | 987.5621   | 987.524     | -0.0381 | -39   | 215        | 223      | TFITAGHLK |           |         |                                          |      | Mascot      |
|  | 987.5621   | 987.524     | -0.0381 | -39   | 215        | 223      | TFITAGHLK |           |         |                                          |      | Mascot      |
|  | 1007.392   | 1007.4681   | 0.0761  | 76    | 36         | 43       | MSDPEPCR  |           |         | Carbamidomethyl (C)[7], Oxidation (M)[1] |      | Mascot      |

|    |                                                            |           |         |     |     |     |                    |          |      |    |    |   |                            |  |  |  |        |
|----|------------------------------------------------------------|-----------|---------|-----|-----|-----|--------------------|----------|------|----|----|---|----------------------------|--|--|--|--------|
|    | 1156.5238                                                  | 1156.597  | 0.0732  | 63  | 293 | 302 | CDQCGKSFLR         |          |      |    |    |   |                            |  |  |  | Mascot |
|    | 1625.8428                                                  | 1625.7463 | -0.0965 | -59 | 311 | 324 | SVHTKEKPPSCSLR     |          |      |    |    |   | Carbamidomethyl (C)[11]    |  |  |  | Mascot |
|    | 1961.8956                                                  | 1961.97   | 0.0744  | 38  | 172 | 187 | VHTNEKPYSCPECKR    |          |      |    |    |   | Carbamidomethyl (C)[10,13] |  |  |  | Mascot |
|    | 2102.0085                                                  | 2101.9805 | -0.028  | -13 | 206 | 223 | EFVCFECEKTFITAGHLK |          |      |    |    |   |                            |  |  |  | Mascot |
|    | 2211.0798                                                  | 2211.0801 | 0.0003  | 0   | 168 | 186 | IHLRVHTNEKPYSCPECK |          |      |    |    |   |                            |  |  |  | Mascot |
|    | 2298.0906                                                  | 2298.1658 | 0.0752  | 33  | 196 | 214 | LHQHVHTGVREFVCFECK |          |      |    |    |   |                            |  |  |  | Mascot |
| 28 | PREDICTED: hypothetical protein LOC100537186 [Danio rerio] |           |         |     |     |     | gi 326680843       | 136727.7 | 9.59 | 17 | 35 | 0 |                            |  |  |  |        |

#### Peptide Information

| Calc. Mass | Obsrv. Mass | ± da    | ± ppm | Start Seq. | End Seq. | Sequence            | Ion Score | C. I. | % Modification          | Rank | Result Type |
|------------|-------------|---------|-------|------------|----------|---------------------|-----------|-------|-------------------------|------|-------------|
| 864.3628   | 864.4857    | 0.1229  | 142   | 319        | 325      | MNENGQR             |           |       | Oxidation (M)[1]        |      | Mascot      |
| 870.4402   | 870.532     | 0.0918  | 105   | 1069       | 1075     | WLGHVCR             |           |       |                         |      | Mascot      |
| 987.5945   | 987.524     | -0.0705 | -71   | 970        | 979      | IGKAASTLAR          | 6         | 0     |                         |      | Mascot      |
| 987.5945   | 987.524     | -0.0705 | -71   | 970        | 979      | IGKAASTLAR          |           |       |                         |      | Mascot      |
| 996.4819   | 996.584     | 0.1021  | 102   | 1194       | 1201     | QSVMPQYK            |           |       | Oxidation (M)[4]        |      | Mascot      |
| 996.4819   | 996.584     | 0.1021  | 102   | 1194       | 1201     | QSVMPQYK            |           |       | Oxidation (M)[4]        |      | Mascot      |
| 1100.6534  | 1100.5676   | -0.0858 | -78   | 506        | 514      | NLQILRSTR           |           |       |                         |      | Mascot      |
| 1163.58    | 1163.6011   | 0.0211  | 18    | 481        | 491      | ASTMIPCIEAK         |           |       |                         |      | Mascot      |
| 1179.5748  | 1179.5908   | 0.016   | 14    | 481        | 491      | ASTMIPCIEAK         |           |       | Oxidation (M)[4]        |      | Mascot      |
| 1235.548   | 1235.6188   | 0.0708  | 57    | 50         | 58       | DYTFYWQGR           |           |       |                         |      | Mascot      |
| 1279.6892  | 1279.7589   | 0.0697  | 54    | 636        | 648      | APGSDGIPDLLK        |           |       |                         |      | Mascot      |
| 1475.7787  | 1475.7354   | -0.0433 | -29   | 649        | 660      | QCKDSLHLPLHK        |           |       | Carbamidomethyl (C)[2]  |      | Mascot      |
| 1638.8519  | 1638.8395   | -0.0124 | -8    | 636        | 651      | APGSDGIPDLLKQCK     |           |       |                         |      | Mascot      |
| 1912.9069  | 1912.9598   | 0.0529  | 28    | 568        | 583      | SSTGEIIFDKQQQMER    |           |       | Oxidation (M)[14]       |      | Mascot      |
| 1961.8513  | 1961.97     | 0.1187  | 61    | 1160       | 1177     | VQSVSQGATYQCDCCKK   |           |       | Carbamidomethyl (C)[12] |      | Mascot      |
| 2083.0417  | 2082.9888   | -0.0529 | -25   | 754        | 770      | EQEQQMPLYISFIDLT    |           |       |                         |      | Mascot      |
| 2101.9858  | 2101.9805   | -0.0053 | -3    | 806        | 825      | GTIQFNGSCSEPFSSSGVK |           |       | Carbamidomethyl (C)[9]  |      | Mascot      |
| 2151.9863  | 2152.0684   | 0.0821  | 38    | 437        | 455      | ELDTAQTGDSALEMWESLR |           |       |                         |      | Mascot      |
| 2194.0308  | 2194.0774   | 0.0466  | 21    | 473        | 491      | THDWFEAKASTMIPCIEAK |           |       | Oxidation (M)[12]       |      | Mascot      |
| 2233.0364  | 2233.063    | 0.0266  | 12    | 608        | 626      | CLPTMEELDEEPTAEELRK |           |       |                         |      | Mascot      |

|    |                                                                     |  |  |  |  |  |             |         |      |   |    |   |  |  |  |  |  |
|----|---------------------------------------------------------------------|--|--|--|--|--|-------------|---------|------|---|----|---|--|--|--|--|--|
| 29 | novel protein similar to vertebrate copine IV (CPNE4) [Danio rerio] |  |  |  |  |  | gi 94732437 | 25404.6 | 5.47 | 7 | 35 | 0 |  |  |  |  |  |
|----|---------------------------------------------------------------------|--|--|--|--|--|-------------|---------|------|---|----|---|--|--|--|--|--|

#### Peptide Information

|                     |                                                            | Calc. Mass | Obsrv. Mass | ± da    | ± ppm | Start Seq. | End Sequence Seq.           | Ion Score | C. I. % | Modification                             | Rank | Result Type |
|---------------------|------------------------------------------------------------|------------|-------------|---------|-------|------------|-----------------------------|-----------|---------|------------------------------------------|------|-------------|
|                     |                                                            | 996.4819   | 996.584     | 0.1021  | 102   | 66         | 74 SCINPTFSK                |           |         |                                          |      | Mascot      |
|                     |                                                            | 996.4819   | 996.584     | 0.1021  | 102   | 66         | 74 SCINPTFSK                |           |         |                                          |      | Mascot      |
|                     |                                                            | 1475.6543  | 1475.7354   | 0.0811  | 55    | 209        | 221 TSLNSLCSGDHER           |           |         | Carbamidomethyl (C)[7]                   |      | Mascot      |
|                     |                                                            | 1913.016   | 1912.9598   | -0.0562 | -29   | 31         | 48 GISDRDALSKPDCVVIK        |           |         |                                          |      | Mascot      |
|                     |                                                            | 1962.012   | 1961.97     | -0.042  | -21   | 75         | 89 VFTLDFYFEEVQRLR          |           |         |                                          |      | Mascot      |
|                     |                                                            | 2096.9409  | 2097.1064   | 0.1655  | 79    | 104        | 122 EADCLGAMECTLGQIVS QR    |           |         | Carbamidomethyl (C)[4], Oxidation (M)[8] |      | Mascot      |
|                     |                                                            | 2096.9409  | 2097.1064   | 0.1655  | 79    | 104        | 122 EADCLGAMECTLGQIVS QR    |           |         | Carbamidomethyl (C)[4], Oxidation (M)[8] |      | Mascot      |
|                     |                                                            | 2152.0195  | 2152.0684   | 0.0489  | 23    | 104        | 123 EADCLGAMECTLGQIVS QRK   |           |         |                                          |      | Mascot      |
|                     |                                                            | 2225.0359  | 2225.0945   | 0.0586  | 26    | 104        | 123 EADCLGAMECTLGQIVS QRK   |           |         | Carbamidomethyl (C)[4], Oxidation (M)[8] |      | Mascot      |
|                     |                                                            | 2225.0359  | 2225.0945   | 0.0586  | 26    | 104        | 123 EADCLGAMECTLGQIVS QRK   |           |         | Carbamidomethyl (C)[4], Oxidation (M)[8] |      | Mascot      |
|                     |                                                            | 2260.0801  | 2260.127    | 0.0469  | 21    | 2          | 22 SDIYESAANSLGLFSSPC LTK   |           |         | Carbamidomethyl (C)[18]                  |      | Mascot      |
| 30                  | Integrin beta 3a [Danio rerio]                             |            |             |         |       |            | gi 190337291                | 85666.2   | 5.46    | 14                                       | 35   | 0           |
| Peptide Information |                                                            |            |             |         |       |            |                             |           |         |                                          |      |             |
|                     |                                                            | Calc. Mass | Obsrv. Mass | ± da    | ± ppm | Start Seq. | End Sequence Seq.           | Ion Score | C. I. % | Modification                             | Rank | Result Type |
|                     |                                                            | 987.4603   | 987.524     | 0.0637  | 65    | 174        | 182 MGFGAFVDK               |           |         | Oxidation (M)[1]                         |      | Mascot      |
|                     |                                                            | 987.4603   | 987.524     | 0.0637  | 65    | 174        | 182 MGFGAFVDK               |           |         | Oxidation (M)[1]                         |      | Mascot      |
|                     |                                                            | 1156.552   | 1156.597    | 0.045   | 39    | 749        | 757 EFAKFEEEEK              |           |         |                                          |      | Mascot      |
|                     |                                                            | 1163.5837  | 1163.6011   | 0.0174  | 15    | 54         | 64 GGSALSRCDLK              |           |         | Carbamidomethyl (C)[8]                   |      | Mascot      |
|                     |                                                            | 1205.595   | 1205.6239   | 0.0289  | 24    | 762        | 771 WEAANNPLYK              |           |         |                                          |      | Mascot      |
|                     |                                                            | 1279.5844  | 1279.7589   | 0.1745  | 136   | 624        | 635 CPTCPDACTIKK            |           |         |                                          |      | Mascot      |
|                     |                                                            | 1312.6453  | 1312.6016   | -0.0437 | -33   | 414        | 425 IGDMVSFSIEAK            |           |         | Oxidation (M)[4]                         |      | Mascot      |
|                     |                                                            | 1412.662   | 1412.6305   | -0.0315 | -22   | 21         | 34 GSNICTSRGVSTCK           |           |         |                                          |      | Mascot      |
|                     |                                                            | 1472.7128  | 1472.6549   | -0.0579 | -39   | 772        | 785 GATTTTFQNVAYRGS         |           |         |                                          |      | Mascot      |
|                     |                                                            | 1475.5746  | 1475.7354   | 0.1608  | 109   | 587        | 601 TDTCMGSGGLMCSGR         |           |         |                                          |      | Mascot      |
|                     |                                                            | 1874.7295  | 1874.9208   | 0.1913  | 102   | 539        | 553 VWGPFCECDDFSCPR         |           |         | Carbamidomethyl (C)[6,8]                 |      | Mascot      |
|                     |                                                            | 2082.98    | 2082.9888   | 0.0088  | 4     | 240        | 258 DSPEGGFDAIFQAVVCK DK    |           |         | Carbamidomethyl (C)[16]                  |      | Mascot      |
|                     |                                                            | 2259.8708  | 2260.127    | 0.2562  | 113   | 602        | 623 GHCVCVGCNCTQPGAY GSTCDK |           |         | Carbamidomethyl (C)[3]                   |      | Mascot      |
|                     |                                                            | 2284.3535  | 2284.1504   | -0.2031 | -89   | 1          | 20 MGLNLIKVVWMPVLLISIA K    |           |         | Oxidation (M)[1,10]                      |      | Mascot      |
|                     |                                                            | 2317.2771  | 2317.1436   | -0.1335 | -58   | 8          | 28 VWMPVLLISIAKGSNICT SR    |           |         | Oxidation (M)[3]                         |      | Mascot      |
| 31                  | PREDICTED: hypothetical protein LOC100535533 [Danio rerio] |            |             |         |       |            | gi 326671744                | 3229.6    | 9.19    | 4                                        | 35   | 0           |

| Peptide Information |                                                        |          |           |              |                              |           |         |                         |                  |
|---------------------|--------------------------------------------------------|----------|-----------|--------------|------------------------------|-----------|---------|-------------------------|------------------|
| Calc. Mass          | Obsrv. Mass                                            | $\pm$ da | $\pm$ ppm | Start Seq.   | End Sequence Seq.            | Ion Score | C. I. % | Modification            | Rank Result Type |
| 996.4641            | 996.584                                                | 0.1199   | 120       | 4            | 12 AGPVFSCMK                 |           |         | Carbamidomethyl (C)[7]  | Mascot           |
| 996.4641            | 996.584                                                | 0.1199   | 120       | 4            | 12 AGPVFSCMK                 |           |         | Carbamidomethyl (C)[7]  | Mascot           |
| 1312.621            | 1312.6016                                              | -0.0194  | -15       | 1            | 12 MGKAGPVFSCMK              |           |         | Carbamidomethyl (C)[10] | Mascot           |
| 1993.9912           | 1993.9501                                              | -0.0411  | -21       | 13           | 30 HNGHAISMEIQKTGLWTA        |           |         |                         | Mascot           |
| 2317.0886           | 2317.1436                                              | 0.055    | 24        | 4            | 24 AGPVFSCMKHNGHAISM<br>EIQK |           |         | Oxidation (M)[8,17]     | Mascot           |
| 32                  | PREDICTED: phenylserine dehydratase-like [Danio rerio] |          |           | gi 326673212 | 49208.8                      | 7.51      | 10      | 34                      | 0                |

| Peptide Information |                                        |          |           |             |                                    |           |         |                        |                  |
|---------------------|----------------------------------------|----------|-----------|-------------|------------------------------------|-----------|---------|------------------------|------------------|
| Calc. Mass          | Obsrv. Mass                            | $\pm$ da | $\pm$ ppm | Start Seq.  | End Sequence Seq.                  | Ion Score | C. I. % | Modification           | Rank Result Type |
| 1272.6656           | 1272.7003                              | 0.0347   | 27        | 163         | 172 QYGMEIYLKK                     |           |         |                        | Mascot           |
| 1312.7583           | 1312.6016                              | -0.1567  | -119      | 432         | 442 LLDLLAREDVR                    |           |         |                        | Mascot           |
| 1456.6591           | 1456.6569                              | -0.0022  | -2        | 81          | 93 DFGAEEYLNGDVK                   |           |         |                        | Mascot           |
| 1472.7817           | 1472.6549                              | -0.1268  | -86       | 160         | 171 LSKQYGMIEYLK                   |           |         |                        | Mascot           |
| 1993.9623           | 1993.9501                              | -0.0122  | -6        | 415         | 431 VCRFTVQLADWPGDMAK              |           |         | Carbamidomethyl (C)[2] | Mascot           |
| 2193.8818           | 2194.0774                              | 0.1956   | 89        | 22          | 39 GFSDCEEYDPFWQSAEQ<br>R          |           |         |                        | Mascot           |
| 2284.0774           | 2284.1504                              | 0.073    | 32        | 243         | 263 DYGAMVISYGSTARDSIN<br>HAR      |           |         |                        | Mascot           |
| 2298.1626           | 2298.1658                              | 0.0032   | 1         | 124         | 144 SSTPPAPEHLRFQDISAA<br>AFR      |           |         |                        | Mascot           |
| 2300.0723           | 2300.1565                              | 0.0842   | 37        | 243         | 263 DYGAMVISYGSTARDSIN<br>HAR      |           |         | Oxidation (M)[5]       | Mascot           |
| 2317.1777           | 2317.1436                              | -0.0341  | -15       | 382         | 404 CTVDTEGAMGLAAILAGQ<br>LPELK    |           |         | Oxidation (M)[9]       | Mascot           |
| 2486.2993           | 2486.1956                              | -0.1037  | -42       | 382         | 406 CTVDTEGAMGLAAILAGQ<br>LPELK GK |           |         |                        | Mascot           |
| 33                  | Si:ch211-218c6.6 protein [Danio rerio] |          |           | gi 61402728 | 45287.5                            | 5.86      | 8       | 34                     | 0                |

| Peptide Information |             |          |           |            |                   |           |         |                  |                  |
|---------------------|-------------|----------|-----------|------------|-------------------|-----------|---------|------------------|------------------|
| Calc. Mass          | Obsrv. Mass | $\pm$ da | $\pm$ ppm | Start Seq. | End Sequence Seq. | Ion Score | C. I. % | Modification     | Rank Result Type |
| 875.4329            | 875.4556    | 0.0227   | 26        | 112        | 118 DVNRTDR       |           |         |                  | Mascot           |
| 987.4927            | 987.524     | 0.0313   | 32        | 288        | 295 HINELSMK      |           |         | Oxidation (M)[7] | Mascot           |
| 987.4927            | 987.524     | 0.0313   | 32        | 288        | 295 HINELSMK      |           |         | Oxidation (M)[7] | Mascot           |
| 1156.611            | 1156.597    | -0.014   | -12       | 237        | 245 ELHFQDVLR     |           |         |                  | Mascot           |
| 1312.712            | 1312.6016   | -0.1104  | -84       | 236        | 245 RELHFQDVLR    |           |         |                  | Mascot           |



|    |                                          |           |         |    |              |     |                            |      |    |    |                                            |        |
|----|------------------------------------------|-----------|---------|----|--------------|-----|----------------------------|------|----|----|--------------------------------------------|--------|
|    | 1951.9946                                | 1951.9854 | -0.0092 | -5 | 280          | 295 | YGFNEILKHINELSMK           |      |    |    | Oxidation (M)[15]                          | Mascot |
|    | 2152.0876                                | 2152.0684 | -0.0192 | -9 | 296          | 313 | LDIEEILSKSESICMQUIK        |      |    |    | Carbamidomethyl (C)[14], Oxidation (M)[15] | Mascot |
|    | 2260.0923                                | 2260.127  | 0.0347  | 15 | 254          | 272 | LPCQNFHLLVCCAILDSE<br>K    |      |    |    | Carbamidomethyl (C)[3,11]                  | Mascot |
|    | 2317.1138                                | 2317.1436 | 0.0298  | 13 | 254          | 272 | LPCQNFHLLVCCAILDSE<br>K    |      |    |    | Carbamidomethyl (C)[3,11,12]               | Mascot |
|    | 2501.1912                                | 2501.2251 | 0.0339  | 14 | 1            | 22  | GDLGPRPEMQRTGPVTM<br>EEWAK |      |    |    | Oxidation (M)[9]                           | Mascot |
| 34 | PREDICTED: si:dkeyp-11g8.5 [Danio rerio] |           |         |    | gi 326677187 |     | 79872.5                    | 8.33 | 12 | 34 | 0                                          |        |

Peptide Information

| Calc. Mass | Obsrv. Mass | ± da    | ± ppm | Start Seq. | End Seq. | Sequence                       | Ion Score | C. I. % | Modification                                | Rank | Result Type |
|------------|-------------|---------|-------|------------|----------|--------------------------------|-----------|---------|---------------------------------------------|------|-------------|
| 1100.5881  | 1100.5676   | -0.0205 | -19   | 167        | 175      | TDMISHLKR                      |           |         |                                             |      | Mascot      |
| 1205.5046  | 1205.6239   | 0.1193  | 99    | 127        | 135      | MCICHLPCR                      |           |         | Carbamidomethyl (C)[2,4], Oxidation (M)[1]  |      | Mascot      |
| 1294.5869  | 1294.5137   | -0.0732 | -57   | 55         | 66       | NENTTSSAVSER                   |           |         |                                             |      | Mascot      |
| 1371.7128  | 1371.6206   | -0.0922 | -67   | 666        | 677      | VSRTHFDP TGVR                  |           |         |                                             |      | Mascot      |
| 1815.9646  | 1815.87     | -0.0946 | -52   | 374        | 388      | SLNVTLRHYGCQIVR                |           |         | Carbamidomethyl (C)[11]                     |      | Mascot      |
| 1993.8695  | 1993.9501   | 0.0806  | 40    | 180        | 197      | GETEASYSGNLDAYEIMK             |           |         | Oxidation (M)[17]                           |      | Mascot      |
| 2211.1616  | 2211.0801   | -0.0815 | -37   | 353        | 373      | NVRNLGIVSVTSTD TGSL<br>YSK     |           |         |                                             |      | Mascot      |
| 2225.1409  | 2225.0945   | -0.0464 | -21   | 299        | 320      | TGRQLDGAGDPESPIAS<br>VEVVK     |           |         |                                             |      | Mascot      |
| 2225.1409  | 2225.0945   | -0.0464 | -21   | 299        | 320      | TGRQLDGAGDPESPIAS<br>VEVVK     |           |         |                                             |      | Mascot      |
| 2297.0447  | 2297.1614   | 0.1167  | 51    | 118        | 135      | VYVEFEGQRMCI CHLPC<br>R        |           |         | Carbamidomethyl (C)[11,13]                  |      | Mascot      |
| 2486.1504  | 2486.1956   | 0.0452  | 18    | 176        | 197      | HINKGETEASYSGNLDAY<br>EIMK     |           |         | Oxidation (M)[21]                           |      | Mascot      |
| 2501.293   | 2501.2251   | -0.0679 | -27   | 589        | 610      | LNASNIINESLNMLNHLYS<br>GKR     |           |         |                                             |      | Mascot      |
| 3337.5913  | 3337.7273   | 0.136   | 41    | 449        | 474      | QLLHCQWCEERVFLKPG<br>SMVEENLYR |           |         | Carbamidomethyl (C)[5,8], Oxidation (M)[19] |      | Mascot      |

35 interleukin 4/13B [Danio rerio] gi|193788073 13301.7 8.6 6 34 0

Peptide Information

| Calc. Mass | Obsrv. Mass | ± da    | ± ppm | Start Seq. | End Seq. | Sequence                | Ion Score | C. I. % | Modification           | Rank | Result Type |
|------------|-------------|---------|-------|------------|----------|-------------------------|-----------|---------|------------------------|------|-------------|
| 1163.6276  | 1163.6011   | -0.0265 | -23   | 54         | 64       | KTLCQAGMALK             |           |         |                        |      | Mascot      |
| 1179.6224  | 1179.5908   | -0.0316 | -27   | 54         | 64       | KTLCQAGMALK             |           |         | Oxidation (M)[8]       |      | Mascot      |
| 1371.5933  | 1371.6206   | 0.0273  | 20    | 108        | 118      | ACCHYLYSAQR             |           |         | Carbamidomethyl (C)[2] |      | Mascot      |
| 1472.641   | 1472.6549   | 0.0139  | 9     | 108        | 119      | ACCHYLYSAQRT            |           |         | Carbamidomethyl (C)[2] |      | Mascot      |
| 2299.269   | 2299.1592   | -0.1098 | -48   | 13         | 32       | TDEILLMEIIQSVNRILNGK    |           |         |                        |      | Mascot      |
| 2300.0903  | 2300.1565   | 0.0662  | 29    | 36         | 54       | MDLDQFIPDIYETGHYSK<br>K |           |         |                        |      | Mascot      |
| 2486.1543  | 2486.1956   | 0.0413  | 17    | 33         | 53       | GEKMDLDQFIPDIYETGH      |           |         |                        |      | Mascot      |

36 Zgc:171573 protein [Danio rerio] YSK gi|166796220 28101.6 9.65 7 33 0

Peptide Information

| Calc. Mass | Obsrv. Mass | ± da    | ± ppm | Start Seq. | End Seq. | Sequence                  | Ion Score | C. I. | % Modification            | Rank | Result Type |
|------------|-------------|---------|-------|------------|----------|---------------------------|-----------|-------|---------------------------|------|-------------|
| 864.4937   | 864.4857    | -0.008  | -9    | 30         | 36       | IFSDKVR                   |           |       |                           |      | Mascot      |
| 1022.5265  | 1022.495    | -0.0315 | -31   | 27         | 34       | QERIFSDK                  |           |       |                           |      | Mascot      |
| 1235.6239  | 1235.6188   | -0.0051 | -4    | 100        | 109      | QQFQQASSRR                |           |       |                           |      | Mascot      |
| 1456.8005  | 1456.6569   | -0.1436 | -99   | 37         | 50       | TIGVDIDALGQQVK            |           |       |                           |      | Mascot      |
| 1625.7046  | 1625.7463   | 0.0417  | 26    | 177        | 189      | SECLWTAELSNCR             |           |       | Carbamidomethyl (C)[3,12] |      | Mascot      |
| 2096.999   | 2097.1064   | 0.1074  | 51    | 65         | 83       | VYADDLLCSDGIACILEQ<br>R   |           |       |                           |      | Mascot      |
| 2096.999   | 2097.1064   | 0.1074  | 51    | 65         | 83       | VYADDLLCSDGIACILEQ<br>R   |           |       |                           |      | Mascot      |
| 2211.042   | 2211.0801   | 0.0381  | 17    | 65         | 83       | VYADDLLCSDGIACILEQ<br>R   |           |       | Carbamidomethyl (C)[8,14] |      | Mascot      |
| 2486.0745  | 2486.1956   | 0.1211  | 49    | 169        | 189      | QEENNMTKSECLWTAEL<br>SNCR |           |       |                           |      | Mascot      |

37 PREDICTED: hypothetical protein LOC567610 [Danio rerio] gi|189529058 18686.6 9.77 6 33 0

Peptide Information

| Calc. Mass | Obsrv. Mass | ± da    | ± ppm | Start Seq. | End Seq. | Sequence                   | Ion Score | C. I. | % Modification          | Rank | Result Type |
|------------|-------------|---------|-------|------------|----------|----------------------------|-----------|-------|-------------------------|------|-------------|
| 875.5131   | 875.4556    | -0.0575 | -66   | 2          | 8        | NTKIMLR                    |           |       |                         |      | Mascot      |
| 970.4476   | 970.4955    | 0.0479  | 49    | 158        | 165      | ESSYEVTR                   |           |       |                         |      | Mascot      |
| 1022.5485  | 1022.495    | -0.0535 | -52   | 1          | 8        | MNTKIMLR                   |           |       | Oxidation (M)[1]        |      | Mascot      |
| 1312.6704  | 1312.6016   | -0.0688 | -52   | 93         | 104      | TSTTQRTTTTSK               |           |       |                         |      | Mascot      |
| 2102.2478  | 2101.9805   | -0.2673 | -127  | 126        | 146      | VGLVIAAILFVMGILVLGC<br>GK  |           |       | Oxidation (M)[12]       |      | Mascot      |
| 2299.3755  | 2299.1592   | -0.2163 | -94   | 125        | 146      | RVGLVIAAILFVMGILVLG<br>CGK |           |       | Carbamidomethyl (C)[20] |      | Mascot      |

38 polymerase I and transcript release factor isoform 1 [Danio rerio] gi|147898795 19874.3 5.41 1 33 0 29 69.543

Peptide Information

| Calc. Mass | Obsrv. Mass | ± da    | ± ppm | Start Seq. | End Seq. | Sequence  | Ion Score | C. I.  | % Modification | Rank | Result Type |
|------------|-------------|---------|-------|------------|----------|-----------|-----------|--------|----------------|------|-------------|
| 987.5945   | 987.524     | -0.0705 | -71   | 128        | 136      | VSVNVKSVR | 29        | 69.543 |                |      | Mascot      |
| 987.5945   | 987.524     | -0.0705 | -71   | 128        | 136      | VSVNVKSVR |           |        |                |      | Mascot      |

39 hypothetical protein LOC553738 [Danio rerio] gi|66472320 27546.3 9.57 9 33 0

Peptide Information

|    | Calc. Mass                             | Obsrv. Mass | ± da    | ± ppm | Start Seq.   | End Sequence Seq.           | Ion Score | C. I. % | Modification                                  | Rank | Result Type |
|----|----------------------------------------|-------------|---------|-------|--------------|-----------------------------|-----------|---------|-----------------------------------------------|------|-------------|
|    | 853.4413                               | 853.3546    | -0.0867 | -102  | 223          | 230 FSQSGSLK                |           |         |                                               |      | Mascot      |
|    | 1165.6212                              | 1165.7299   | 0.1087  | 93    | 194          | 203 TFVTADDLKR              |           |         |                                               |      | Mascot      |
|    | 1165.6212                              | 1165.7299   | 0.1087  | 93    | 194          | 203 TFVTADDLKR              |           |         |                                               |      | Mascot      |
|    | 1179.615                               | 1179.5908   | -0.0242 | -21   | 166          | 175 SCTRQSSLIK              |           |         | Carbamidomethyl (C)[2]                        |      | Mascot      |
|    | 1865.9031                              | 1865.8218   | -0.0813 | -44   | 10           | 25 MVRTGEKPITCTQCGK         |           |         | Carbamidomethyl (C)[11,14]                    |      | Mascot      |
|    | 1865.9031                              | 1865.8218   | -0.0813 | -44   | 10           | 25 MVRTGEKPITCTQCGK         |           |         | Carbamidomethyl (C)[11,14]                    |      | Mascot      |
|    | 1961.8779                              | 1961.97     | 0.0921  | 47    | 207          | 222 IHTGEKPYMCSHCDKR        |           |         | Carbamidomethyl (C)[10]                       |      | Mascot      |
|    | 2233.0752                              | 2233.063    | -0.0122 | -5    | 147          | 165 FHLRVHTNERPYSCSVC GK    |           |         |                                               |      | Mascot      |
|    | 2284.0168                              | 2284.1504   | 0.1336  | 58    | 204          | 221 HQRHTGEKPYMCSHCD K      |           |         | Carbamidomethyl (C)[13,16]                    |      | Mascot      |
|    | 2298.0171                              | 2298.1658   | 0.1487  | 65    | 151          | 169 VHTNERPYSCSVC GKSC TR   |           |         | Carbamidomethyl (C)[10,13,17]                 |      | Mascot      |
|    | 2300.0117                              | 2300.1565   | 0.1448  | 63    | 204          | 221 HQRHTGEKPYMCSHCD K      |           |         | Carbamidomethyl (C)[13,16], Oxidation (M)[12] |      | Mascot      |
|    | 2486.1763                              | 2486.1956   | 0.0193  | 8     | 13           | 35 TGEKPITCTQCGKSFSQS SNLNR |           |         |                                               |      | Mascot      |
| 40 | extended synaptotagmin-3 [Danio rerio] |             |         |       | gi 181339841 | 98050.5                     | 7.91      | 13      | 33                                            | 0    |             |

#### Peptide Information

|  | Calc. Mass | Obsrv. Mass | ± da    | ± ppm | Start Seq. | End Sequence Seq.            | Ion Score | C. I. % | Modification                              | Rank | Result Type |
|--|------------|-------------|---------|-------|------------|------------------------------|-----------|---------|-------------------------------------------|------|-------------|
|  | 856.4159   | 856.5167    | 0.1008  | 118   | 460        | 466 EVTHNEK                  |           |         |                                           |      | Mascot      |
|  | 1045.4077  | 1045.5532   | 0.1455  | 139   | 389        | 397 FSMDCGDVR                |           |         | Oxidation (M)[3]                          |      | Mascot      |
|  | 1272.6881  | 1272.7003   | 0.0122  | 10    | 292        | 301 VEQMRFLPR                |           |         |                                           |      | Mascot      |
|  | 1294.65    | 1294.5137   | -0.1363 | -105  | 766        | 775 MYLLPDQTWK               |           |         |                                           |      | Mascot      |
|  | 1412.8406  | 1412.6305   | -0.2101 | -149  | 206        | 218 VGIKGLQLQGMLR            |           |         |                                           |      | Mascot      |
|  | 1587.8101  | 1587.8649   | 0.0548  | 35    | 766        | 777 MYLLPDQTWKHR             |           |         |                                           |      | Mascot      |
|  | 1587.8101  | 1587.8649   | 0.0548  | 35    | 766        | 777 MYLLPDQTWKHR             |           |         |                                           |      | Mascot      |
|  | 1865.9069  | 1865.8218   | -0.0851 | -46   | 405        | 419 WYTLEDIESGQIHFK          |           |         |                                           |      | Mascot      |
|  | 1865.9069  | 1865.8218   | -0.0851 | -46   | 405        | 419 WYTLEDIESGQIHFK          |           |         |                                           |      | Mascot      |
|  | 2194.1211  | 2194.0774   | -0.0437 | -20   | 589        | 608 VVTSAPQDKNTSTPNRP EPR    |           |         |                                           |      | Mascot      |
|  | 2233.2009  | 2233.063    | -0.1379 | -62   | 541        | 559 FSLPLVRLNVSMDTLQD R      |           |         | Oxidation (M)[14]                         |      | Mascot      |
|  | 2299.1201  | 2299.1592   | 0.0391  | 17    | 480        | 499 TNNPNSYVEFSIDLQSQK SK    |           |         |                                           |      | Mascot      |
|  | 2300.1082  | 2300.1565   | 0.0483  | 21    | 786        | 805 TVNPVFDETFEFAVSLEE AR    |           |         |                                           |      | Mascot      |
|  | 2472.1455  | 2472.1626   | 0.0171  | 7     | 434        | 456 ETSDGLACAMLALYLDCA SNLPK |           |         | Carbamidomethyl (C)[8], Oxidation (M)[10] |      | Mascot      |
|  | 2486.1995  | 2486.1956   | -0.0039 | -2    | 98         | 118 AMDMPPWIHFADVEKAA WINK   |           |         | Oxidation (M)[2]                          |      | Mascot      |

41 PREDICTED: NACHT, LRR and PYD domains-containing protein 3-like [Danio rerio] gi|292610040 106687 6.59 11 32 0

Peptide Information

| Calc. Mass | Obsrv. Mass | $\pm$ da | $\pm$ ppm | Start Seq. | End Seq. | Sequence                 | Ion Score | C. I. | % Modification          | Rank | Result Type |
|------------|-------------|----------|-----------|------------|----------|--------------------------|-----------|-------|-------------------------|------|-------------|
| 970.4741   | 970.4955    | 0.0214   | 22        | 374        | 380      | HEKHYEK                  |           |       |                         |      | Mascot      |
| 987.5581   | 987.524     | -0.0341  | -35       | 496        | 504      | AVDKALQSR                | 10        | 0     |                         |      | Mascot      |
| 987.5581   | 987.524     | -0.0341  | -35       | 496        | 504      | AVDKALQSR                |           |       |                         |      | Mascot      |
| 1022.5815  | 1022.495    | -0.0865  | -85       | 394        | 401      | LAFRQLMK                 |           |       | Oxidation (M)[7]        |      | Mascot      |
| 1179.6732  | 1179.5908   | -0.0824  | -70       | 311        | 320      | LADEIIQHLK               |           |       |                         |      | Mascot      |
| 1475.7351  | 1475.7354   | 0.0003   | 0         | 939        | 950      | LETLHISWGFIC             |           |       | Carbamidomethyl (C)[12] |      | Mascot      |
| 1625.7332  | 1625.7463   | 0.0131   | 8         | 715        | 731      | CCGVSDDEGCAALASVLK       |           |       |                         |      | Mascot      |
| 1913.014   | 1912.9598   | -0.0542  | -28       | 46         | 62       | GGIDPGFSHRKPLQTFR        |           |       |                         |      | Mascot      |
| 1951.9397  | 1951.9854   | 0.0457   | 23        | 713        | 731      | LRCCGVSDDEGCAALASV<br>LK |           |       | Carbamidomethyl (C)[3]  |      | Mascot      |
| 2083.0894  | 2082.9888   | -0.1006  | -48       | 357        | 373      | TLTEMYTHFLIIQTSIR        |           |       | Oxidation (M)[5]        |      | Mascot      |
| 2102.1282  | 2101.9805   | -0.1477  | -70       | 190        | 207      | DRTLSLADLLHVFFPETK       |           |       |                         |      | Mascot      |
| 2211.0513  | 2211.0801   | 0.0288   | 13        | 478        | 495      | STRPHEFTCHTVFDLHQ<br>R   |           |       |                         |      | Mascot      |

42 novel protein similar to Janus kinase family (a protein tyrosine kinase, leukocyte) [Danio rerio] gi|169145296 125997.7 6.83 15 32 0

Peptide Information

| Calc. Mass | Obsrv. Mass | $\pm$ da | $\pm$ ppm | Start Seq. | End Seq. | Sequence          | Ion Score | C. I. | % Modification                           | Rank | Result Type |
|------------|-------------|----------|-----------|------------|----------|-------------------|-----------|-------|------------------------------------------|------|-------------|
| 850.4603   | 850.5328    | 0.0725   | 85        | 399        | 405      | NGMFLLR           |           |       |                                          |      | Mascot      |
| 850.4603   | 850.5328    | 0.0725   | 85        | 399        | 405      | NGMFLLR           |           |       |                                          |      | Mascot      |
| 856.3981   | 856.5167    | 0.1186   | 138       | 882        | 889      | GICYSTGR          |           |       |                                          |      | Mascot      |
| 864.4825   | 864.4857    | 0.0032   | 4         | 959        | 966      | IADFGLTK          |           |       |                                          |      | Mascot      |
| 987.4894   | 987.524     | 0.0346   | 35        | 406        | 413      | HSPKEFDK          |           |       |                                          |      | Mascot      |
| 987.4894   | 987.524     | 0.0346   | 35        | 406        | 413      | HSPKEFDK          |           |       |                                          |      | Mascot      |
| 1007.4938  | 1007.4681   | -0.0257  | -26       | 228        | 236      | CSAGERSLK         |           |       | Carbamidomethyl (C)[1]                   |      | Mascot      |
| 1100.5959  | 1100.5676   | -0.0283  | -26       | 939        | 947      | YVHRDLAAR         |           |       |                                          |      | Mascot      |
| 1163.6354  | 1163.6011   | -0.0343  | -29       | 395        | 405      | AGGKNGMFLLR       |           |       |                                          |      | Mascot      |
| 1179.6302  | 1179.5908   | -0.0394  | -33       | 395        | 405      | AGGKNGMFLLR       |           |       | Oxidation (M)[7]                         |      | Mascot      |
| 1475.7094  | 1475.7354   | 0.026    | 18        | 308        | 319      | RLCQEQMPLGR       |           |       | Oxidation (M)[7]                         |      | Mascot      |
| 1625.8025  | 1625.7463   | -0.0562  | -35       | 616        | 629      | SMCVSVSWKLDVAK    |           |       | Carbamidomethyl (C)[3], Oxidation (M)[2] |      | Mascot      |
| 1962.0364  | 1961.97     | -0.0664  | -34       | 625        | 641      | LDVAKQLACALNFLEEK |           |       | Carbamidomethyl (C)[9]                   |      | Mascot      |
| 2097.0684  | 2097.1064   | 0.038    | 18        | 865        | 881      | EIQTISSLHCDYIVKYK |           |       | Carbamidomethyl (C)[10]                  |      | Mascot      |

|    |                                              |           |         |     |             |     |                         |      |                         |        |   |
|----|----------------------------------------------|-----------|---------|-----|-------------|-----|-------------------------|------|-------------------------|--------|---|
|    | 2097.0684                                    | 2097.1064 | 0.038   | 18  | 865         | 881 | EIQTISSLHCDYIVKYK       |      | Carbamidomethyl (C)[10] | Mascot |   |
|    | 2211.0791                                    | 2211.0801 | 0.001   | 0   | 290         | 307 | QEWQTFCDPFIIDISIK       |      |                         | Mascot |   |
|    | 2225.0115                                    | 2225.0945 | 0.083   | 37  | 564         | 582 | NCWESLFEAASLSMQIS<br>HR |      | Oxidation (M)[13]       | Mascot |   |
|    | 2225.0115                                    | 2225.0945 | 0.083   | 37  | 564         | 582 | NCWESLFEAASLSMQIS<br>HR |      | Oxidation (M)[13]       | Mascot |   |
|    | 2247.1333                                    | 2247.0789 | -0.0544 | -24 | 920         | 938 | LLLFASQICKGMEYLQSM<br>R |      | Oxidation (M)[12]       | Mascot |   |
|    | 2299.1614                                    | 2299.1592 | -0.0022 | -1  | 894         | 912 | LVMEYLPYGSLIGYMEKH<br>R |      |                         | Mascot |   |
| 43 | SH3 domain-binding protein 4-A [Danio rerio] |           |         |     | gi 45387913 |     | 104947.5                | 7.73 | 13                      | 32     | 0 |

#### Peptide Information

|  | Calc. Mass | Obsrv. Mass | ± da    | ± ppm | Start Seq. | End Seq. | Sequence                              | Ion Score | C. I. | % Modification                               | Rank | Result Type |
|--|------------|-------------|---------|-------|------------|----------|---------------------------------------|-----------|-------|----------------------------------------------|------|-------------|
|  | 842.5822   | 842.5021    | -0.0801 | -95   | 634        | 640      | LIKTVIR                               |           |       |                                              |      | Mascot      |
|  | 850.4338   | 850.5328    | 0.099   | 116   | 358        | 364      | LSNMEIK                               |           |       | Oxidation (M)[4]                             |      | Mascot      |
|  | 850.4338   | 850.5328    | 0.099   | 116   | 358        | 364      | LSNMEIK                               |           |       | Oxidation (M)[4]                             |      | Mascot      |
|  | 870.4726   | 870.532     | 0.0594  | 68    | 1          | 7        | MAAHRIR                               |           |       | Oxidation (M)[1]                             |      | Mascot      |
|  | 1045.4796  | 1045.5532   | 0.0736  | 70    | 762        | 770      | AELDSEPER                             |           |       |                                              |      | Mascot      |
|  | 1272.7522  | 1272.7003   | -0.0519 | -41   | 476        | 487      | TLLVSEVGKQAK                          |           |       |                                              |      | Mascot      |
|  | 1294.6637  | 1294.5137   | -0.15   | -116  | 553        | 563      | KADEISDFTLR                           |           |       |                                              |      | Mascot      |
|  | 1371.7161  | 1371.6206   | -0.0955 | -70   | 8          | 19       | VTNNNNVLPRCK                          |           |       |                                              |      | Mascot      |
|  | 1412.6031  | 1412.6305   | 0.0274  | 19    | 780        | 790      | EDCLNMETKEK                           |           |       | Carbamidomethyl (C)[3], Oxidation (M)[6]     |      | Mascot      |
|  | 1815.8959  | 1815.87     | -0.0259 | -14   | 432        | 446      | HVSFSSNVWNHMKK                        |           |       | Oxidation (M)[12]                            |      | Mascot      |
|  | 2097.0137  | 2097.1064   | 0.0927  | 44    | 373        | 390      | VSVMTRTESMAEIVCVR                     |           |       | Carbamidomethyl (C)[16], Oxidation (M)[4,11] |      | Mascot      |
|  | 2097.0137  | 2097.1064   | 0.0927  | 44    | 373        | 390      | VSVMTRTESMAEIVCVR                     |           |       | Carbamidomethyl (C)[16], Oxidation (M)[4,11] |      | Mascot      |
|  | 2284.2368  | 2284.1504   | -0.0864 | -38   | 463        | 484      | TVVAIFGHDCAPKTLVLS<br>EVGK            |           |       |                                              |      | Mascot      |
|  | 2300.0686  | 2300.1565   | 0.0879  | 38    | 568        | 587      | DDQDCILAQFCVQTPQP<br>PPK              |           |       | Carbamidomethyl (C)[5]                       |      | Mascot      |
|  | 3337.6052  | 3337.7273   | 0.1221  | 37    | 269        | 298      | LARSCHDLES LGQNP GW<br>GQTQP VETNIVCK |           |       | Carbamidomethyl (C)[5]                       |      | Mascot      |

44 PREDICTED: RNA-directed DNA polymerase from mobile element jockey-like [Danio rerio] gi|326667425 118942.6 9.57 15 32 0

#### Peptide Information

|  | Calc. Mass | Obsrv. Mass | ± da    | ± ppm | Start Seq. | End Seq. | Sequence  | Ion Score | C. I. | % Modification   | Rank | Result Type |
|--|------------|-------------|---------|-------|------------|----------|-----------|-----------|-------|------------------|------|-------------|
|  | 864.3628   | 864.4857    | 0.1229  | 142   | 168        | 174      | MNENGQR   |           |       | Oxidation (M)[1] |      | Mascot      |
|  | 870.4402   | 870.532     | 0.0918  | 105   | 916        | 922      | WLGHVCR   |           |       |                  |      | Mascot      |
|  | 987.5945   | 987.524     | -0.0705 | -71   | 817        | 826      | IGKAATLAR | 6         | 0     |                  |      | Mascot      |
|  | 987.5945   | 987.524     | -0.0705 | -71   | 817        | 826      | IGKAATLAR |           |       |                  |      | Mascot      |

|    |                                         |           |         |     |             |      |                         |       |                         |        |   |
|----|-----------------------------------------|-----------|---------|-----|-------------|------|-------------------------|-------|-------------------------|--------|---|
|    | 996.4819                                | 996.584   | 0.1021  | 102 | 1041        | 1048 | QSVMPQYK                |       | Oxidation (M)[4]        | Mascot |   |
|    | 996.4819                                | 996.584   | 0.1021  | 102 | 1041        | 1048 | QSVMPQYK                |       | Oxidation (M)[4]        | Mascot |   |
|    | 1100.6534                               | 1100.5676 | -0.0858 | -78 | 355         | 363  | NLQILRSTR               |       |                         | Mascot |   |
|    | 1163.58                                 | 1163.6011 | 0.0211  | 18  | 330         | 340  | ASTMIPCIEAK             |       |                         | Mascot |   |
|    | 1179.5748                               | 1179.5908 | 0.016   | 14  | 330         | 340  | ASTMIPCIEAK             |       | Oxidation (M)[4]        | Mascot |   |
|    | 1235.548                                | 1235.6188 | 0.0708  | 57  | 50          | 58   | DYTFYWQGR               |       |                         | Mascot |   |
|    | 1279.6892                               | 1279.7589 | 0.0697  | 54  | 485         | 497  | APGSDGIPDLLK            |       |                         | Mascot |   |
|    | 1475.7787                               | 1475.7354 | -0.0433 | -29 | 498         | 509  | QCKDSSLHPLHK            |       | Carbamidomethyl (C)[2]  | Mascot |   |
|    | 1638.8519                               | 1638.8395 | -0.0124 | -8  | 485         | 500  | APGSDGIPDLLKQCK         |       |                         | Mascot |   |
|    | 1961.8513                               | 1961.97   | 0.1187  | 61  | 1007        | 1024 | VQSVSQGATYQCDCCK<br>KK  |       | Carbamidomethyl (C)[12] | Mascot |   |
|    | 2101.9858                               | 2101.9805 | -0.0053 | -3  | 653         | 672  | GTIQFNGSCSEPFSSSG<br>VK |       | Carbamidomethyl (C)[9]  | Mascot |   |
|    | 2151.9863                               | 2152.0684 | 0.0821  | 38  | 286         | 304  | ELDTAQTGDSALEMWES<br>LR |       |                         | Mascot |   |
|    | 2194.0308                               | 2194.0774 | 0.0466  | 21  | 322         | 340  | THDWFEAKASTMIPCIEA<br>K |       | Oxidation (M)[12]       | Mascot |   |
|    | 2233.0364                               | 2233.063  | 0.0266  | 12  | 457         | 475  | CLPTMEELDEEPTAEELR<br>K |       |                         | Mascot |   |
| 45 | 60S ribosomal protein L28 [Danio rerio] |           |         |     | gi 41055030 |      | 15629.8                 | 12.11 | 6                       | 32     | 0 |

#### Peptide Information

| Calc. Mass | Obsrv. Mass | $\pm$ da | $\pm$ ppm | Start Seq. | End Seq. | Sequence        | Ion Score | C. I. % | Modification | Rank | Result Type |
|------------|-------------|----------|-----------|------------|----------|-----------------|-----------|---------|--------------|------|-------------|
| 856.4787   | 856.5167    | 0.038    | 44        | 41         | 47       | FNGLIHR         |           |         |              |      | Mascot      |
| 1051.5895  | 1051.7001   | 0.1106   | 105       | 13         | 21       | NSSSFLIKR       |           |         |              |      | Mascot      |
| 1051.5895  | 1051.7001   | 0.1106   | 105       | 13         | 21       | NSSSFLIKR       |           |         |              |      | Mascot      |
| 1199.663   | 1199.5568   | -0.1062  | -89       | 48         | 59       | KTIGIEPAADGK    |           |         |              |      | Mascot      |
| 1279.6753  | 1279.7589   | 0.0836   | 65        | 69         | 80       | SGQRKPATSYGK    |           |         |              |      | Mascot      |
| 1294.6273  | 1294.5137   | -0.1136  | -88       | 24         | 34       | QTYSTEPNNLK     |           |         |              |      | Mascot      |
| 1639.0013  | 1638.8395   | -0.1618  | -99       | 114        | 128      | RVSAILSSQKPVVVR |           |         |              |      | Mascot      |

46 PREDICTED: fibroblast growth factor receptor substrate 2-like [Danio rerio] gi|326668781 70183.2 5.85 10 32 0

#### Peptide Information

| Calc. Mass | Obsrv. Mass | $\pm$ da | $\pm$ ppm | Start Seq. | End Seq. | Sequence  | Ion Score | C. I. % | Modification           | Rank | Result Type |
|------------|-------------|----------|-----------|------------|----------|-----------|-----------|---------|------------------------|------|-------------|
| 970.4999   | 970.4955    | -0.0044  | -5        | 394        | 402      | GMVAAGHRR |           |         | Oxidation (M)[2]       |      | Mascot      |
| 1007.5131  | 1007.4681   | -0.045   | -45       | 57         | 63       | WPYLCLR   |           |         | Carbamidomethyl (C)[5] |      | Mascot      |
| 1100.5636  | 1100.5676   | 0.004    | 4         | 509        | 516      | VFNFDfRR  |           |         |                        |      | Mascot      |
| 1163.6143  | 1163.6011   | -0.0132  | -11       | 57         | 64       | WPYLCLRR  |           |         | Carbamidomethyl (C)[5] |      | Mascot      |

|    |                                                              |           |         |     |     |     |                           |  |  |  |             |         |                        |   |    |   |        |
|----|--------------------------------------------------------------|-----------|---------|-----|-----|-----|---------------------------|--|--|--|-------------|---------|------------------------|---|----|---|--------|
|    | 1199.5878                                                    | 1199.5568 | -0.031  | -26 | 80  | 90  | CQTGQGIFAFK               |  |  |  |             |         |                        |   |    |   | Mascot |
|    | 1205.49                                                      | 1205.6239 | 0.1339  | 111 | 1   | 10  | MGSCWSCLYR                |  |  |  |             |         |                        |   |    |   | Mascot |
|    | 1412.7103                                                    | 1412.6305 | -0.0798 | -56 | 79  | 90  | RCQTGQGIFAFK              |  |  |  |             |         | Carbamidomethyl (C)[2] |   |    |   | Mascot |
|    | 1815.8993                                                    | 1815.87   | -0.0293 | -16 | 256 | 270 | FMLGPTPAQRHLMER           |  |  |  |             |         | Oxidation (M)[2,13]    |   |    |   | Mascot |
|    | 2225.1672                                                    | 2225.0945 | -0.0727 | -33 | 475 | 493 | DALQNYVNTEQLPPPTRL<br>R   |  |  |  |             |         |                        |   |    |   | Mascot |
|    | 2225.1672                                                    | 2225.0945 | -0.0727 | -33 | 475 | 493 | DALQNYVNTEQLPPPTRL<br>R   |  |  |  |             |         |                        |   |    |   | Mascot |
|    | 2472.1282                                                    | 2472.1626 | 0.0344  | 14  | 315 | 335 | HPSMEPCPESQLTYENIN<br>GLR |  |  |  |             |         | Carbamidomethyl (C)[7] |   |    |   | Mascot |
| 47 | isocitrate dehydrogenase [NADP], mitochondrial [Danio rerio] |           |         |     |     |     |                           |  |  |  | gi 41054651 | 50364.5 | 8.35                   | 9 | 32 | 0 |        |

#### Peptide Information

| Calc. Mass | Obsrv. Mass | ± da    | ± ppm | Start Seq. | End Seq. | Sequence                   | Ion Score | C. I. | % Modification          | Rank | Result Type |
|------------|-------------|---------|-------|------------|----------|----------------------------|-----------|-------|-------------------------|------|-------------|
| 856.4311   | 856.5167    | 0.0856  | 100   | 255        | 261      | AYDGRFK                    |           |       |                         |      | Mascot      |
| 1205.6096  | 1205.6239   | 0.0143  | 12    | 129        | 138      | MWKSPNGTIR                 |           |       | Oxidation (M)[1]        |      | Mascot      |
| 1294.646   | 1294.5137   | -0.1323 | -102  | 192        | 203      | MVFTPADGSKNK               |           |       |                         |      | Mascot      |
| 1371.6508  | 1371.6206   | -0.0302 | -22   | 412        | 424      | DLAGCIHGLANCK              |           |       | Carbamidomethyl (C)[5]  |      | Mascot      |
| 1625.8428  | 1625.7463   | -0.0965 | -59   | 21         | 35       | SPAVLAPACQLQQR             |           |       | Carbamidomethyl (C)[9]  |      | Mascot      |
| 1874.9872  | 1874.9208   | -0.0664 | -35   | 359        | 375      | GRPTSTNPIASIFAWTR          |           |       |                         |      | Mascot      |
| 2284.2078  | 2284.1504   | -0.0574 | -25   | 14         | 35       | SAATLSKSPAVLAPACQS<br>LQQR |           |       | Carbamidomethyl (C)[16] |      | Mascot      |
| 2297.1667  | 2297.1614   | -0.0053 | -2    | 287        | 307      | LIDDMVAQVLKSSGAFV<br>WACK  |           |       | Oxidation (M)[5]        |      | Mascot      |
| 2300.126   | 2300.1565   | 0.0305  | 13    | 392        | 411      | FSQTLERVCVETVESGV<br>MTK   |           |       | Carbamidomethyl (C)[9]  |      | Mascot      |

48 Tlk1a protein [Danio rerio] gi|156230424 38213.5 9.84 8 32 0

#### Peptide Information

| Calc. Mass | Obsrv. Mass | ± da    | ± ppm | Start Seq. | End Seq. | Sequence                 | Ion Score | C. I. | % Modification   | Rank | Result Type |
|------------|-------------|---------|-------|------------|----------|--------------------------|-----------|-------|------------------|------|-------------|
| 875.4832   | 875.4556    | -0.0276 | -32   | 184        | 191      | LATIESNK                 |           |       |                  |      | Mascot      |
| 1199.7007  | 1199.5568   | -0.1439 | -120  | 261        | 270      | LRLGHFTTVR               |           |       |                  |      | Mascot      |
| 1371.7478  | 1371.6206   | -0.1272 | -93   | 215        | 225      | QIDEQQKLEK               |           |       |                  |      | Mascot      |
| 1587.8588  | 1587.8649   | 0.0061  | 4     | 184        | 197      | LATIESNKNLDLEK           |           |       |                  |      | Mascot      |
| 1587.8588  | 1587.8649   | 0.0061  | 4     | 184        | 197      | LATIESNKNLDLEK           |           |       |                  |      | Mascot      |
| 1815.8719  | 1815.87     | -0.0019 | -1    | 313        | 330      | KPPSASSSQSPSTNSEP<br>K   |           |       |                  |      | Mascot      |
| 1994.0474  | 1993.9501   | -0.0973 | -49   | 174        | 191      | SVQTDLTVMKLATIESNK       |           |       | Oxidation (M)[9] |      | Mascot      |
| 2299.0779  | 2299.1592   | 0.0813  | 35    | 271        | 290      | HGASFTEQWTDGYAFQN<br>LVK |           |       |                  |      | Mascot      |
| 2317.0081  | 2317.1436   | 0.1355  | 58    | 2          | 22       | MAGSPMEQMGAMEELH         |           |       |                  |      | Mascot      |

49      PREDICTED: hypothetical protein LOC100538026      gi|326673594      14275.3      8.81      6      32      0  
 [Danio rerio]

Peptide Information

| Calc. Mass | Obsrv. Mass | ± da    | ± ppm | Start Seq. | End Seq. | Sequence              | Ion Score | C. I. % | Modification           | Rank | Result Type |
|------------|-------------|---------|-------|------------|----------|-----------------------|-----------|---------|------------------------|------|-------------|
| 1163.6276  | 1163.6011   | -0.0265 | -23   | 62         | 72       | KTLCQAGMALK           |           |         |                        |      | Mascot      |
| 1179.6224  | 1179.5908   | -0.0316 | -27   | 62         | 72       | KTLCQAGMALK           |           |         | Oxidation (M)[8]       |      | Mascot      |
| 1371.5933  | 1371.6206   | 0.0273  | 20    | 116        | 126      | ACCHYLYSAQR           |           |         | Carbamidomethyl (C)[2] |      | Mascot      |
| 1472.641   | 1472.6549   | 0.0139  | 9     | 116        | 127      | ACCHYLYSAQRT          |           |         | Carbamidomethyl (C)[2] |      | Mascot      |
| 2299.269   | 2299.1592   | -0.1098 | -48   | 21         | 40       | TDEILLMEIIQSVNRILNGK  |           |         |                        |      | Mascot      |
| 2300.0903  | 2300.1565   | 0.0662  | 29    | 44         | 62       | MDLDQFIPDIYETGHYSK    |           |         |                        |      | Mascot      |
| 2486.1543  | 2486.1956   | 0.0413  | 17    | 41         | 61       | GEKMDLDQFIPDIYETGHYSK |           |         |                        |      | Mascot      |

50      PREDICTED: interferon-induced very large GTPase 1-like [Danio rerio]      gi|326676497      194760.8      7      20      31      0

Peptide Information

| Calc. Mass | Obsrv. Mass | ± da    | ± ppm | Start Seq. | End Seq. | Sequence            | Ion Score | C. I. % | Modification            | Rank | Result Type |
|------------|-------------|---------|-------|------------|----------|---------------------|-----------|---------|-------------------------|------|-------------|
| 864.4178   | 864.4857    | 0.0679  | 79    | 551        | 556      | EMCRLR              |           |         | Carbamidomethyl (C)[3]  |      | Mascot      |
| 962.5153   | 962.5256    | 0.0103  | 11    | 77         | 85       | NEATSVTLK           |           |         |                         |      | Mascot      |
| 987.4781   | 987.524     | 0.0459  | 46    | 1420       | 1427     | NYESFVTK            |           |         |                         |      | Mascot      |
| 987.4781   | 987.524     | 0.0459  | 46    | 1420       | 1427     | NYESFVTK            |           |         |                         |      | Mascot      |
| 1100.5769  | 1100.5676   | -0.0093 | -8    | 1185       | 1193     | LLHSNLEMK           |           |         | Oxidation (M)[8]        |      | Mascot      |
| 1163.5361  | 1163.6011   | 0.065   | 56    | 1049       | 1058     | CEADNELGKK          |           |         | Carbamidomethyl (C)[1]  |      | Mascot      |
| 1205.6447  | 1205.6239   | -0.0208 | -17   | 473        | 482      | LQMTVDEILK          |           |         | Oxidation (M)[3]        |      | Mascot      |
| 1235.6276  | 1235.6188   | -0.0088 | -7    | 274        | 283      | ECTLMLWALR          |           |         |                         |      | Mascot      |
| 1279.6827  | 1279.7589   | 0.0762  | 60    | 1478       | 1488     | FVTNVCKNLNK         |           |         |                         |      | Mascot      |
| 1371.7777  | 1371.6206   | -0.1571 | -115  | 1132       | 1142     | EKVLNLIQVCR         |           |         | Carbamidomethyl (C)[10] |      | Mascot      |
| 1412.6362  | 1412.6305   | -0.0057 | -4    | 461        | 472      | DVKMNDDDFVAK        |           |         | Oxidation (M)[4]        |      | Mascot      |
| 1456.6486  | 1456.6569   | 0.0083  | 6     | 187        | 198      | RMSDENQAQSFK        |           |         | Oxidation (M)[2]        |      | Mascot      |
| 1475.7522  | 1475.7354   | -0.0168 | -11   | 428        | 440      | LVLVCNTNDLESR       |           |         |                         |      | Mascot      |
| 1815.8768  | 1815.87     | -0.0068 | -4    | 881        | 896      | MSFFQQLDVMTQAAAK    |           |         |                         |      | Mascot      |
| 1912.9507  | 1912.9598   | 0.0091  | 5     | 1601       | 1617     | LIADICSSLVASEMTFR   |           |         | Carbamidomethyl (C)[6]  |      | Mascot      |
| 2097.0657  | 2097.1064   | 0.0407  | 19    | 646        | 663      | KLENHIANSSSLGVQHFMR |           |         | Oxidation (M)[17]       |      | Mascot      |
| 2097.0657  | 2097.1064   | 0.0407  | 19    | 646        | 663      | KLENHIANSSSLGVQHFMR |           |         | Oxidation (M)[17]       |      | Mascot      |
| 2225.0828  | 2225.0945   | 0.0117  | 5     | 464        | 482      | MNDDDFVAKLQMTVDEIL  |           |         |                         |      | Mascot      |



|           |           |        |    |      |      |                            |  |  |  |                         |        |
|-----------|-----------|--------|----|------|------|----------------------------|--|--|--|-------------------------|--------|
| 2225.0828 | 2225.0945 | 0.0117 | 5  | 464  | 482  | K<br>MNDDDFVAKLQMTVDEIL    |  |  |  |                         | Mascot |
| 2284.0913 | 2284.1504 | 0.0591 | 26 | 297  | 316  | K<br>DCSGENSIVQTDPLISF     |  |  |  | Carbamidomethyl (C)[2]  | Mascot |
| 2297.0974 | 2297.1614 | 0.064  | 28 | 156  | 174  | VR<br>TNINMEYMLMELGLQSHL   |  |  |  | Oxidation (M)[5,8]      | Mascot |
| 2300.0759 | 2300.1565 | 0.0806 | 35 | 356  | 375  | K<br>ICNGLVEMTWYLPCKGE     |  |  |  |                         | Mascot |
| 2486.1755 | 2486.1956 | 0.0201 | 8  | 1262 | 1282 | TDK<br>TEPKSDYNSADIQELLCFI |  |  |  | Carbamidomethyl (C)[17] | Mascot |
|           |           |        |    |      |      | DK                         |  |  |  |                         |        |

|                       |           |                               |                |                       |                    |
|-----------------------|-----------|-------------------------------|----------------|-----------------------|--------------------|
| <b>Gel Idx/Pos</b>    | 180/H7    | <b>Instr./Gel Origin</b>      | BA2060/110707A | <b>Process Status</b> | Analysis Succeeded |
| <b>Plate [#] Name</b> | [1] 31496 | <b>Instrument Sample Name</b> |                | <b>Spectra</b>        | 11                 |

| Rank | Protein Name             | Accession No. | Protein MW | Protein PI | Pep. Count | Protein Score | Protein Score C. I. % | Total Ion Score | Total Ion C. I. % |
|------|--------------------------|---------------|------------|------------|------------|---------------|-----------------------|-----------------|-------------------|
| 1    | gelsolin b [Danio rerio] | gi 148230943  | 80133.8    | 5.62       | 16         | 469           | 100                   | 398             | 100               |

#### Peptide Information

| Calc. Mass | Obsrv. Mass | ± da    | ± ppm | Start Seq. | End Seq. | Sequence                   | Ion Score | C. I. % | Modification             | Rank | Result Type |
|------------|-------------|---------|-------|------------|----------|----------------------------|-----------|---------|--------------------------|------|-------------|
| 823.4169   | 823.399     | -0.0179 | -22   | 517        | 524      | ANPAGHTR                   |           |         |                          |      | Mascot      |
| 853.3621   | 853.3448    | -0.0173 | -20   | 179        | 184      | CNQFER                     |           |         | Carbamidomethyl (C)[1]   |      | Mascot      |
| 875.4661   | 875.4468    | -0.0193 | -22   | 104        | 110      | TFLGYFK                    |           |         |                          |      | Mascot      |
| 987.537    | 987.5167    | -0.0203 | -21   | 13         | 20       | QTGLQVWR                   | 52        | 99.834  |                          |      | Mascot      |
| 987.537    | 987.5167    | -0.0203 | -21   | 13         | 20       | QTGLQVWR                   |           |         |                          |      | Mascot      |
| 1007.4792  | 1007.4591   | -0.0201 | -20   | 676        | 684      | YIESDPAGR                  |           |         |                          |      | Mascot      |
| 1022.5053  | 1022.4899   | -0.0154 | -15   | 2          | 9        | VHHPEFEK                   |           |         |                          |      | Mascot      |
| 1294.5262  | 1294.5033   | -0.0229 | -18   | 193        | 202      | DIRDNECCGR                 |           |         | Carbamidomethyl (C)[7,8] |      | Mascot      |
| 1456.6777  | 1456.6481   | -0.0296 | -20   | 308        | 320      | AAEDFISQMGYPK              |           |         |                          |      | Mascot      |
| 1472.6726  | 1472.6449   | -0.0277 | -19   | 308        | 320      | AAEDFISQMGYPK              | 44        | 98.921  | Oxidation (M)[9]         |      | Mascot      |
| 1472.6726  | 1472.6449   | -0.0277 | -19   | 308        | 320      | AAEDFISQMGYPK              |           |         | Oxidation (M)[9]         |      | Mascot      |
| 1578.6522  | 1578.7957   | 0.1435  | 91    | 377        | 391      | SEAMAAQHGMVDDGK            |           |         | Oxidation (M)[4,10]      |      | Mascot      |
| 1625.7476  | 1625.7368   | -0.0108 | -7    | 203        | 216      | AKLFVCEESENDK              |           |         | Carbamidomethyl (C)[6]   |      | Mascot      |
| 1952.0123  | 1951.9774   | -0.0349 | -18   | 321        | 337      | HTEVQIIPENGETPLFK          |           |         |                          |      | Mascot      |
| 2097.1299  | 2097.0923   | -0.0376 | -18   | 451        | 472      | GASAILAAQLDAELGGSA         | 210       | 100     |                          |      | Mascot      |
| 2097.1299  | 2097.0923   | -0.0376 | -18   | 451        | 472      | VQVR<br>GASAILAAQLDAELGGSA |           |         |                          |      | Mascot      |
| 2121.1438  | 2121.1003   | -0.0435 | -21   | 217        | 236      | ILAILGPKPDLPAQSEDT         |           |         |                          |      | Mascot      |
| 2152.0959  | 2152.0601   | -0.0358 | -17   | 32         | 50       | K<br>NLYGGFYTGDTYLVNTI     |           |         |                          |      | Mascot      |
| 2152.0959  | 2152.0601   | -0.0358 | -17   | 32         | 50       | K<br>NLYGGFYTGDTYLVNTI     | 92        | 100     |                          |      | Mascot      |

|   |                                               |           |         |     |             |     |                                    |      |   |    |        |    |     |  |  |  |        |
|---|-----------------------------------------------|-----------|---------|-----|-------------|-----|------------------------------------|------|---|----|--------|----|-----|--|--|--|--------|
|   | 2155.96                                       | 2155.9233 | -0.0367 | -17 | 433         | 450 | QGQIIMWQGEESQDE<br>K               |      |   |    |        |    |     |  |  |  | Mascot |
|   | 3387.667                                      | 3387.6663 | -0.0007 | 0   | 399         | 428 | IEGSDKVPVDPSIYGQFY<br>GGDSYIILYTYK |      |   |    |        |    |     |  |  |  | Mascot |
| 2 | acylamino-acid-releasing enzyme [Danio rerio] |           |         |     | gi 38564417 |     | 81411.5                            | 5.72 | 8 | 89 | 99.994 | 78 | 100 |  |  |  |        |

Peptide Information

| Calc. Mass | Obsrv. Mass | ± da    | ± ppm | Start Seq. | End Seq. | Sequence                  | Ion Score | C. I. | % Modification          | Rank | Result Type |
|------------|-------------|---------|-------|------------|----------|---------------------------|-----------|-------|-------------------------|------|-------------|
| 1019.5554  | 1019.5233   | -0.0321 | -31   | 129        | 137      | CLNLTTLNK                 |           |       |                         |      | Mascot      |
| 1047.5316  | 1047.5      | -0.0316 | -30   | 107        | 115      | ENTIKGEEK                 |           |       |                         |      | Mascot      |
| 1587.8853  | 1587.8539   | -0.0314 | -20   | 5          | 17       | VLRDPVEISQLYR             |           |       |                         |      | Mascot      |
| 1625.7588  | 1625.7368   | -0.022  | -14   | 74         | 88       | SVVYSGPSGNCTEIR           |           |       | Carbamidomethyl (C)[11] |      | Mascot      |
| 1815.8911  | 1815.8549   | -0.0362 | -20   | 349        | 365      | AGDDGFTGIYSFLLSPR         |           |       |                         |      | Mascot      |
| 1865.8453  | 1865.8141   | -0.0312 | -17   | 38         | 52       | YGGQYSNIYTEWTQR           |           |       |                         |      | Mascot      |
| 1865.8453  | 1865.8141   | -0.0312 | -17   | 38         | 52       | YGGQYSNIYTEWTQR           | 78        | 100   |                         |      | Mascot      |
| 1961.9901  | 1961.9539   | -0.0362 | -18   | 312        | 328      | IVYLESVGFPHLQCSR          |           |       | Carbamidomethyl (C)[15] |      | Mascot      |
| 2306.0581  | 2306.1123   | 0.0542  | 24    | 710        | 730      | ADAESDGFMMGALWMIQ<br>HLSL |           |       |                         |      | Mascot      |

|   |                                     |  |  |  |             |  |         |      |   |    |        |    |     |  |  |  |  |
|---|-------------------------------------|--|--|--|-------------|--|---------|------|---|----|--------|----|-----|--|--|--|--|
| 3 | Acylpeptide hydrolase [Danio rerio] |  |  |  | gi 55777111 |  | 81351.5 | 5.66 | 6 | 82 | 99.975 | 78 | 100 |  |  |  |  |
|---|-------------------------------------|--|--|--|-------------|--|---------|------|---|----|--------|----|-----|--|--|--|--|

Peptide Information

| Calc. Mass | Obsrv. Mass | ± da    | ± ppm | Start Seq. | End Seq. | Sequence         | Ion Score | C. I. | % Modification          | Rank | Result Type |
|------------|-------------|---------|-------|------------|----------|------------------|-----------|-------|-------------------------|------|-------------|
| 1019.5554  | 1019.5233   | -0.0321 | -31   | 129        | 137      | CLNLTTLNK        |           |       |                         |      | Mascot      |
| 1047.5316  | 1047.5      | -0.0316 | -30   | 107        | 115      | ENTIKGEEK        |           |       |                         |      | Mascot      |
| 1587.8853  | 1587.8539   | -0.0314 | -20   | 5          | 17       | VLRDPVEISQLYR    |           |       |                         |      | Mascot      |
| 1625.7588  | 1625.7368   | -0.022  | -14   | 74         | 88       | SVVYSGPSGNCTEIR  |           |       | Carbamidomethyl (C)[11] |      | Mascot      |
| 1865.8453  | 1865.8141   | -0.0312 | -17   | 38         | 52       | YGGQYSNIYTEWTQR  |           |       |                         |      | Mascot      |
| 1865.8453  | 1865.8141   | -0.0312 | -17   | 38         | 52       | YGGQYSNIYTEWTQR  | 78        | 100   |                         |      | Mascot      |
| 1961.9901  | 1961.9539   | -0.0362 | -18   | 312        | 328      | IVYLESVGFPHLQCSR |           |       | Carbamidomethyl (C)[15] |      | Mascot      |

|   |                                                                      |  |  |  |              |  |         |       |    |    |        |  |  |  |  |  |  |
|---|----------------------------------------------------------------------|--|--|--|--------------|--|---------|-------|----|----|--------|--|--|--|--|--|--|
| 4 | PREDICTED: serine/arginine repetitive matrix protein 4 [Danio rerio] |  |  |  | gi 189518857 |  | 64253.1 | 11.33 | 13 | 53 | 76.646 |  |  |  |  |  |  |
|---|----------------------------------------------------------------------|--|--|--|--------------|--|---------|-------|----|----|--------|--|--|--|--|--|--|

Peptide Information

| Calc. Mass | Obsrv. Mass | ± da    | ± ppm | Start Seq. | End Seq. | Sequence | Ion Score | C. I. | % Modification         | Rank | Result Type |
|------------|-------------|---------|-------|------------|----------|----------|-----------|-------|------------------------|------|-------------|
| 875.458    | 875.4468    | -0.0112 | -13   | 336        | 343      | LKGEESGR |           |       |                        |      | Mascot      |
| 970.3716   | 970.491     | 0.1194  | 123   | 177        | 184      | SSSCMENR |           |       | Carbamidomethyl (C)[4] |      | Mascot      |
| 996.5836   | 996.5763    | -0.0073 | -7    | 59         | 67       | RLETPVGP |           |       |                        |      | Mascot      |

|           |           |         |     |     |     |                            |  |  |  |  |                          |  |        |
|-----------|-----------|---------|-----|-----|-----|----------------------------|--|--|--|--|--------------------------|--|--------|
| 996.5836  | 996.5763  | -0.0073 | -7  | 59  | 67  | RLETPVGPK                  |  |  |  |  |                          |  | Mascot |
| 1007.5228 | 1007.4591 | -0.0637 | -63 | 377 | 385 | SRSISSQSR                  |  |  |  |  |                          |  | Mascot |
| 1047.4346 | 1047.5    | 0.0654  | 62  | 443 | 450 | YCSSCKSR                   |  |  |  |  | Carbamidomethyl (C)[2,5] |  | Mascot |
| 1279.8572 | 1279.7505 | -0.1067 | -83 | 8   | 19  | LLAGILARLLAR               |  |  |  |  |                          |  | Mascot |
| 1456.7166 | 1456.6481 | -0.0685 | -47 | 60  | 72  | LETPVGPKDDEEK              |  |  |  |  |                          |  | Mascot |
| 1467.6724 | 1467.726  | 0.0536  | 37  | 524 | 535 | SRSHSHYSSYR                |  |  |  |  |                          |  | Mascot |
| 1662.9326 | 1662.7861 | -0.1465 | -88 | 498 | 511 | SSSILSWRLFPLTR             |  |  |  |  |                          |  | Mascot |
| 2071.8994 | 2072.0278 | 0.1284  | 62  | 218 | 235 | ISSKCCCHFSESTVSPSR         |  |  |  |  | Carbamidomethyl (C)[5,6] |  | Mascot |
| 2119.0876 | 2119.0757 | -0.0119 | -6  | 236 | 256 | SGVEGLSKVVIVQNSESS<br>DGK  |  |  |  |  |                          |  | Mascot |
| 2155.9739 | 2155.9233 | -0.0506 | -23 | 259 | 279 | ADYDSGNDTSSPPSSKT<br>GITR  |  |  |  |  |                          |  | Mascot |
| 2300.0105 | 2300.1404 | 0.1299  | 56  | 222 | 243 | CCCHFSESTVSPSRSGV<br>EGLSK |  |  |  |  |                          |  | Mascot |

5 PREDICTED: zinc finger protein 420 isoform 2 [Danio rerio] gi|326678086 70371 9.08 16 50 50.069

#### Peptide Information

| Calc. Mass | Obsrv. Mass | ± da    | ± ppm | Start Seq. | End Seq. | Sequence                | Ion Score | C. I. % | Modification                             | Rank | Result Type |
|------------|-------------|---------|-------|------------|----------|-------------------------|-----------|---------|------------------------------------------|------|-------------|
| 842.5206   | 842.4943    | -0.0263 | -31   | 25         | 31       | QRQGLLK                 |           |         |                                          |      | Mascot      |
| 864.4798   | 864.4702    | -0.0096 | -11   | 591        | 597      | HRSVHTK                 |           |         |                                          |      | Mascot      |
| 987.5621   | 987.5167    | -0.0454 | -46   | 497        | 505      | TFITAGHLK               |           |         |                                          |      | Mascot      |
| 987.5621   | 987.5167    | -0.0454 | -46   | 497        | 505      | TFITAGHLK               |           |         |                                          |      | Mascot      |
| 1007.392   | 1007.4591   | 0.0671  | 67    | 36         | 43       | MSDPEPCR                |           |         | Carbamidomethyl (C)[7], Oxidation (M)[1] |      | Mascot      |
| 1019.4397  | 1019.5233   | 0.0836  | 82    | 572        | 580      | THKCDQCGK               |           |         |                                          |      | Mascot      |
| 1045.536   | 1045.5457   | 0.0097  | 9     | 134        | 141      | FHCARNLK                |           |         | Carbamidomethyl (C)[3]                   |      | Mascot      |
| 1062.5149  | 1062.674    | 0.1591  | 150   | 110        | 117      | YNLNVHMR                |           |         | Oxidation (M)[7]                         |      | Mascot      |
| 1578.7567  | 1578.7957   | 0.039   | 25    | 46         | 58       | QEETEELIDVMVK           |           |         | Oxidation (M)[11]                        |      | Mascot      |
| 1625.8428  | 1625.7368   | -0.106  | -65   | 593        | 606      | SVHTKEKPSCSLR           |           |         | Carbamidomethyl (C)[11]                  |      | Mascot      |
| 1662.7363  | 1662.7861   | 0.0498  | 30    | 258        | 272      | THTGEKPYTCTHCGK         |           |         |                                          |      | Mascot      |
| 1961.8956  | 1961.9539   | 0.0583  | 30    | 454        | 469      | VHTNEKPYSCPECGKR        |           |         | Carbamidomethyl (C)[10,13]               |      | Mascot      |
| 2118.9958  | 2119.0757   | 0.0799  | 38    | 538        | 555      | VHTGEKPFACHTCGKSF<br>R  |           |         | Carbamidomethyl (C)[10,13]               |      | Mascot      |
| 2211.0798  | 2211.0659   | -0.0139 | -6    | 450        | 468      | IHLRVHTNEKPYSCPECG<br>K |           |         |                                          |      | Mascot      |
| 2230.0605  | 2230.1414   | 0.0809  | 36    | 276        | 294      | CSSHLNEHMIHTGEKTH<br>R  |           |         |                                          |      | Mascot      |
| 2283.0579  | 2283.1443   | 0.0864  | 38    | 227        | 245      | HQMIHTGEKPYKCSHCD<br>LR |           |         |                                          |      | Mascot      |
| 2283.0579  | 2283.1443   | 0.0864  | 38    | 227        | 245      | HQMIHTGEKPYKCSHCD<br>LR |           |         |                                          |      | Mascot      |
| 2298.0906  | 2298.1453   | 0.0547  | 24    | 478        | 496      | LHQHVHTGVREFVCFEC<br>EK |           |         |                                          |      | Mascot      |

6 mitochondrial import inner membrane translocase subunit TIM14 [Danio rerio] gi|41152151 12425.5 10.16 6 43 0

Peptide Information

| Calc. Mass | Obsrv. Mass | ± da    | ± ppm | Start Seq. | End Seq. | Sequence                | Ion Score | C. I. % | Modification | Rank | Result Type |
|------------|-------------|---------|-------|------------|----------|-------------------------|-----------|---------|--------------|------|-------------|
| 987.5469   | 987.5167    | -0.0302 | -31   | 107        | 115      | DLLDGQAKK               |           |         |              |      | Mascot      |
| 987.5469   | 987.5167    | -0.0302 | -31   | 107        | 115      | DLLDGQAKK               |           |         |              |      | Mascot      |
| 1007.458   | 1007.4591   | 0.0011  | 1     | 42         | 50       | SAFGSGYYR               |           |         |              |      | Mascot      |
| 1399.7791  | 1399.6824   | -0.0967 | -69   | 61         | 74       | EASLILGSPTANK           |           |         |              |      | Mascot      |
| 1924.9983  | 1924.9486   | -0.0497 | -26   | 1          | 20       | MASTMVAVGLTLAAAGFTGR    |           |         |              |      | Mascot      |
| 1953.0375  | 1952.9709   | -0.0666 | -34   | 84         | 101      | LMILNHPDRGGSPYLAAGFTGR  |           |         |              |      | Mascot      |
| 2283.2278  | 2283.1443   | -0.0835 | -37   | 2          | 24       | ASTMVAVGLTLAAAGFTGRYAVR |           |         |              |      | Mascot      |
| 2283.2278  | 2283.1443   | -0.0835 | -37   | 2          | 24       | ASTMVAVGLTLAAAGFTGRYAVR |           |         |              |      | Mascot      |

7 novel protein [Danio rerio] gi|94733366 36191.6 9.32 11 42 0

Peptide Information

| Calc. Mass | Obsrv. Mass | ± da    | ± ppm | Start Seq. | End Seq. | Sequence            | Ion Score | C. I. % | Modification                             | Rank | Result Type |
|------------|-------------|---------|-------|------------|----------|---------------------|-----------|---------|------------------------------------------|------|-------------|
| 864.4798   | 864.4702    | -0.0096 | -11   | 292        | 298      | HRSVHTK             |           |         |                                          |      | Mascot      |
| 987.5621   | 987.5167    | -0.0454 | -46   | 198        | 206      | TFITAGHLK           |           |         |                                          |      | Mascot      |
| 987.5621   | 987.5167    | -0.0454 | -46   | 198        | 206      | TFITAGHLK           |           |         |                                          |      | Mascot      |
| 1007.392   | 1007.4591   | 0.0671  | 67    | 19         | 26       | MSDPEPCR            |           |         | Carbamidomethyl (C)[7], Oxidation (M)[1] |      | Mascot      |
| 1019.4397  | 1019.5233   | 0.0836  | 82    | 273        | 281      | THKCDQCGK           |           |         |                                          |      | Mascot      |
| 1047.5681  | 1047.5      | -0.0681 | -65   | 10         | 18       | QSLKDKSEK           |           |         |                                          |      | Mascot      |
| 1625.8428  | 1625.7368   | -0.106  | -65   | 294        | 307      | SVHTKEKPPSCSLR      |           |         | Carbamidomethyl (C)[11]                  |      | Mascot      |
| 1961.8956  | 1961.9539   | 0.0583  | 30    | 155        | 170      | VHTNEKPYSCPECGKR    |           |         | Carbamidomethyl (C)[10,13]               |      | Mascot      |
| 2071.9551  | 2072.0278   | 0.0727  | 35    | 77         | 94       | CFTCTLCGKGFSYNRPFK  |           |         |                                          |      | Mascot      |
| 2118.9958  | 2119.0757   | 0.0799  | 38    | 239        | 256      | VHTGEKPFACHTCGKSF   |           |         | Carbamidomethyl (C)[10,13]               |      | Mascot      |
| 2211.0798  | 2211.0659   | -0.0139 | -6    | 151        | 169      | IHLRVHTNEKPYSCPECGK |           |         |                                          |      | Mascot      |
| 2298.0906  | 2298.1453   | 0.0547  | 24    | 179        | 197      | LHQHVHTGVREFVCFCEK  |           |         |                                          |      | Mascot      |

8 RecName: Full=Serine/arginine repetitive matrix protein 4; AltName: Full=Neural-specific serine/arg gi|281312156 65482.9 11.48 11 41 0

Peptide Information

| Calc. Mass | Obsrv. Mass | ± da | ± ppm | Start Seq. | End Seq. | Sequence | Ion Score | C. I. % | Modification | Rank | Result Type |
|------------|-------------|------|-------|------------|----------|----------|-----------|---------|--------------|------|-------------|
|------------|-------------|------|-------|------------|----------|----------|-----------|---------|--------------|------|-------------|

|  |           |           |         |     |     |     |                            |  |  |  |                          |  |        |
|--|-----------|-----------|---------|-----|-----|-----|----------------------------|--|--|--|--------------------------|--|--------|
|  | 875.458   | 875.4468  | -0.0112 | -13 | 347 | 354 | LKGEESGR                   |  |  |  |                          |  | Mascot |
|  | 970.3716  | 970.491   | 0.1194  | 123 | 188 | 195 | SSSCMENR                   |  |  |  | Carbamidomethyl (C)[4]   |  | Mascot |
|  | 1007.5228 | 1007.4591 | -0.0637 | -63 | 388 | 396 | SRSISSQSR                  |  |  |  |                          |  | Mascot |
|  | 1047.4346 | 1047.5    | 0.0654  | 62  | 454 | 461 | YCSSCKSR                   |  |  |  | Carbamidomethyl (C)[2,5] |  | Mascot |
|  | 1456.7166 | 1456.6481 | -0.0685 | -47 | 45  | 57  | LETPVGPKDDEEK              |  |  |  |                          |  | Mascot |
|  | 1467.6724 | 1467.726  | 0.0536  | 37  | 535 | 546 | SRSHSHYSSYR                |  |  |  |                          |  | Mascot |
|  | 1662.9326 | 1662.7861 | -0.1465 | -88 | 509 | 522 | SSSILSWRLFPLTR             |  |  |  |                          |  | Mascot |
|  | 2071.8994 | 2072.0278 | 0.1284  | 62  | 229 | 246 | ISSKCCCHFSESTVSPSR         |  |  |  | Carbamidomethyl (C)[5,6] |  | Mascot |
|  | 2119.0876 | 2119.0757 | -0.0119 | -6  | 247 | 267 | SGVEGLSKVVIVQNSESS<br>DGK  |  |  |  |                          |  | Mascot |
|  | 2155.9739 | 2155.9233 | -0.0506 | -23 | 270 | 290 | ADYDSGNDTSSPPSSKT<br>GITR  |  |  |  |                          |  | Mascot |
|  | 2300.0105 | 2300.1404 | 0.1299  | 56  | 233 | 254 | CCCHFSESTVSPSRSGV<br>EGLSK |  |  |  |                          |  | Mascot |

9 PREDICTED: clathrin light chain B-like isoform 2 [Danio rerio] gi|326673837 23720.3 4.55 7 40 0

#### Peptide Information

| Calc. Mass | Obsrv. Mass | ± da    | ± ppm | Start Seq. | End Seq. | Sequence          | Ion Score | C. I. | % Modification    | Rank | Result Type |
|------------|-------------|---------|-------|------------|----------|-------------------|-----------|-------|-------------------|------|-------------|
| 836.397    | 836.3209    | -0.0761 | -91   | 182        | 188      | LCDFNPK           |           |       |                   |      | Mascot      |
| 875.437    | 875.4468    | 0.0098  | 11    | 108        | 113      | WREEQK            |           |       |                   |      | Mascot      |
| 1062.634   | 1062.674    | 0.04    | 38    | 199        | 207      | MRSVLISLK         |           |       | Oxidation (M)[1]  |      | Mascot      |
| 1467.9258  | 1467.726    | -0.1998 | -136  | 201        | 213      | SVLISLKQTPLLR     |           |       |                   |      | Mascot      |
| 1952.8807  | 1952.9709   | 0.0902  | 46    | 137        | 151      | ELEDWHIHQTEQMEK   |           |       |                   |      | Mascot      |
| 2096.9707  | 2097.0923   | 0.1216  | 58    | 136        | 151      | KELEDWHIHQTEQMEK  |           |       | Oxidation (M)[14] |      | Mascot      |
| 2096.9707  | 2097.0923   | 0.1216  | 58    | 136        | 151      | KELEDWHIHQTEQMEK  |           |       | Oxidation (M)[14] |      | Mascot      |
| 2211.0134  | 2211.0659   | 0.0525  | 24    | 137        | 153      | ELEDWHIHQTEQMEKNK |           |       | Oxidation (M)[13] |      | Mascot      |

10 PREDICTED: phenylserine dehydratase-like [Danio rerio] gi|326673212 49208.8 7.51 11 40 0

#### Peptide Information

| Calc. Mass | Obsrv. Mass | ± da    | ± ppm | Start Seq. | End Seq. | Sequence        | Ion Score | C. I. | % Modification          | Rank | Result Type |
|------------|-------------|---------|-------|------------|----------|-----------------|-----------|-------|-------------------------|------|-------------|
| 1092.6663  | 1092.5464   | -0.1199 | -110  | 185        | 194      | GVLYLLSSLK      |           |       |                         |      | Mascot      |
| 1456.6591  | 1456.6481   | -0.011  | -8    | 81         | 93       | DFGAEEYLNGDVK   |           |       |                         |      | Mascot      |
| 1472.7817  | 1472.6449   | -0.1368 | -93   | 160        | 171      | LSKQYGM EIY LK  |           |       |                         |      | Mascot      |
| 1472.7817  | 1472.6449   | -0.1368 | -93   | 160        | 171      | LSKQYGM EIY LK  |           |       |                         |      | Mascot      |
| 1578.7621  | 1578.7957   | 0.0336  | 21    | 418        | 431      | FTVQLADWPGDMAK  |           |       |                         |      | Mascot      |
| 1796.896   | 1796.6711   | -0.2249 | -125  | 145        | 159      | LQQSSLQKTPCTYSR |           |       | Carbamidomethyl (C)[11] |      | Mascot      |

|    |                                                                      |           |         |     |     |              |                            |      |    |    |   |                   |        |
|----|----------------------------------------------------------------------|-----------|---------|-----|-----|--------------|----------------------------|------|----|----|---|-------------------|--------|
|    | 1952.9357                                                            | 1952.9709 | 0.0352  | 18  | 415 | 431          | VCRFTVQLADWPGDMAK          |      |    |    |   | Oxidation (M)[15] | Mascot |
|    | 2104.1582                                                            | 2103.949  | -0.2092 | -99 | 300 | 322          | LDVVVPAGGHCGLLAG<br>TAAAIK |      |    |    |   |                   | Mascot |
|    | 2193.8818                                                            | 2194.0471 | 0.1653  | 75  | 22  | 39           | GFSDCEEYDPFWQSAEQ<br>R     |      |    |    |   |                   | Mascot |
|    | 2230.0332                                                            | 2230.1414 | 0.1082  | 49  | 268 | 287          | ENGYLCLEEDDSAVYLA<br>GLR   |      |    |    |   |                   | Mascot |
|    | 2284.0774                                                            | 2284.1365 | 0.0591  | 26  | 243 | 263          | DYGAMVISYGSTARDSIN<br>HAR  |      |    |    |   |                   | Mascot |
|    | 2298.1626                                                            | 2298.1453 | -0.0173 | -8  | 124 | 144          | SSTPPAPEHLRFQDISAA<br>AFR  |      |    |    |   |                   | Mascot |
|    | 2300.0723                                                            | 2300.1404 | 0.0681  | 30  | 243 | 263          | DYGAMVISYGSTARDSIN<br>HAR  |      |    |    |   | Oxidation (M)[5]  | Mascot |
| 11 | PREDICTED: mitochondrial ribonuclease P protein 3-like [Danio rerio] |           |         |     |     | gi 292623047 | 66491.7                    | 8.72 | 12 | 40 | 0 |                   |        |

Peptide Information

| Calc. Mass | Obsrv. Mass | ± da    | ± ppm | Start Seq. | End Seq. | Sequence                           | Ion Score | C. I. | % Modification         | Rank | Result Type |
|------------|-------------|---------|-------|------------|----------|------------------------------------|-----------|-------|------------------------|------|-------------|
| 842.477    | 842.4943    | 0.0173  | 21    | 389        | 395      | SFKSFVK                            |           |       |                        |      | Mascot      |
| 848.4446   | 848.5095    | 0.0649  | 76    | 572        | 577      | WLCLTR                             |           |       | Carbamidomethyl (C)[3] |      | Mascot      |
| 870.4211   | 870.5259    | 0.1048  | 120   | 1          | 8        | MGFVAMSK                           |           |       |                        |      | Mascot      |
| 970.4601   | 970.491     | 0.0309  | 32    | 447        | 453      | HSRNWDR                            |           |       |                        |      | Mascot      |
| 1007.5012  | 1007.4591   | -0.0421 | -42   | 142        | 149      | VMMENLVR                           |           |       | Oxidation (M)[2]       |      | Mascot      |
| 1165.5592  | 1165.7224   | 0.1632  | 140   | 226        | 235      | EAISMLQDMK                         |           |       |                        |      | Mascot      |
| 1165.5592  | 1165.7224   | 0.1632  | 140   | 226        | 235      | EAISMLQDMK                         |           |       |                        |      | Mascot      |
| 1683.7933  | 1683.7981   | 0.0048  | 3     | 93         | 107      | HKSGLDTENDTTPVR                    |           |       |                        |      | Mascot      |
| 1815.9058  | 1815.8549   | -0.0509 | -28   | 366        | 381      | HNVMEKVIEGGDVFNK                   |           |       |                        |      | Mascot      |
| 2119.009   | 2119.0757   | 0.0667  | 31    | 244        | 263      | NYGDVIAGAVLHGDSETS<br>WK           |           |       |                        |      | Mascot      |
| 2230.1628  | 2230.1414   | -0.0214 | -10   | 65         | 85       | GFTPRTRPAFPHSVFSA<br>GAAR          |           |       |                        |      | Mascot      |
| 2297.2751  | 2297.1523   | -0.1228 | -53   | 159        | 178      | SLLSYVVQDKGTLSEILL<br>R            |           |       |                        |      | Mascot      |
| 3387.8667  | 3387.6663   | -0.2004 | -59   | 412        | 442      | MLPHAAQSETLLAVVSEL<br>EQQLNILLVLRK |           |       |                        |      | Mascot      |

|    |                                                            |  |  |  |  |              |         |      |    |    |   |  |  |
|----|------------------------------------------------------------|--|--|--|--|--------------|---------|------|----|----|---|--|--|
| 12 | PREDICTED: zinc finger protein 420 isoform 1 [Danio rerio] |  |  |  |  | gi 326678084 | 37946.4 | 9.32 | 11 | 40 | 0 |  |  |
|----|------------------------------------------------------------|--|--|--|--|--------------|---------|------|----|----|---|--|--|

Peptide Information

| Calc. Mass | Obsrv. Mass | ± da    | ± ppm | Start Seq. | End Seq. | Sequence  | Ion Score | C. I. | % Modification | Rank | Result Type |
|------------|-------------|---------|-------|------------|----------|-----------|-----------|-------|----------------|------|-------------|
| 864.4798   | 864.4702    | -0.0096 | -11   | 309        | 315      | HRSVHTK   |           |       |                |      | Mascot      |
| 987.5621   | 987.5167    | -0.0454 | -46   | 215        | 223      | TFITAGHLK |           |       |                |      | Mascot      |
| 987.5621   | 987.5167    | -0.0454 | -46   | 215        | 223      | TFITAGHLK |           |       |                |      | Mascot      |

|           |           |         |     |     |     |                         |                                          |        |
|-----------|-----------|---------|-----|-----|-----|-------------------------|------------------------------------------|--------|
| 1007.392  | 1007.4591 | 0.0671  | 67  | 36  | 43  | MSDPEPCR                | Carbamidomethyl (C)[7], Oxidation (M)[1] | Mascot |
| 1019.4397 | 1019.5233 | 0.0836  | 82  | 290 | 298 | THKCDQCGK               |                                          | Mascot |
| 1047.5681 | 1047.5    | -0.0681 | -65 | 27  | 35  | QSLLDSEK                |                                          | Mascot |
| 1625.8428 | 1625.7368 | -0.106  | -65 | 311 | 324 | SVHTKEKPPSCSLR          | Carbamidomethyl (C)[11]                  | Mascot |
| 1961.8956 | 1961.9539 | 0.0583  | 30  | 172 | 187 | VHTNEKPYSCECGKR         | Carbamidomethyl (C)[10,13]               | Mascot |
| 2071.9551 | 2072.0278 | 0.0727  | 35  | 94  | 111 | CFTCTLCGKGFSYNRPF<br>K  |                                          | Mascot |
| 2118.9958 | 2119.0757 | 0.0799  | 38  | 256 | 273 | VHTGEKPFACHTCGKSF<br>R  | Carbamidomethyl (C)[10,13]               | Mascot |
| 2211.0798 | 2211.0659 | -0.0139 | -6  | 168 | 186 | IHLRVHTNEKPYSCECG<br>K  |                                          | Mascot |
| 2298.0906 | 2298.1453 | 0.0547  | 24  | 196 | 214 | LHQHVHTGVREFVCFEC<br>EK |                                          | Mascot |

13 PREDICTED: proto-oncogene DBL-like [Danio rerio] gi|326671273 124312.6 6.3 15 39 0

#### Peptide Information

| Calc. Mass | Obsrv. Mass | ± da    | ± ppm | Start Seq. | End Seq. | Sequence                            | Ion Score | C. I. % | Modification                               | Rank | Result Type |
|------------|-------------|---------|-------|------------|----------|-------------------------------------|-----------|---------|--------------------------------------------|------|-------------|
| 823.4494   | 823.399     | -0.0504 | -61   | 485        | 491      | MVSIAFR                             |           |         |                                            |      | Mascot      |
| 850.4199   | 850.5258    | 0.1059  | 125   | 151        | 157      | SVMREGR                             |           |         | Oxidation (M)[3]                           |      | Mascot      |
| 850.4199   | 850.5258    | 0.1059  | 125   | 151        | 157      | SVMREGR                             |           |         | Oxidation (M)[3]                           |      | Mascot      |
| 1007.4938  | 1007.4591   | -0.0347 | -34   | 147        | 154      | DDIRSVMR                            |           |         | Oxidation (M)[7]                           |      | Mascot      |
| 1047.5503  | 1047.5      | -0.0503 | -48   | 1071       | 1079     | CGKDDVLIK                           |           |         | Carbamidomethyl (C)[1]                     |      | Mascot      |
| 1165.6462  | 1165.7224   | 0.0762  | 65    | 96         | 106      | TAIESFAVTVK                         |           |         |                                            |      | Mascot      |
| 1165.6462  | 1165.7224   | 0.0762  | 65    | 96         | 106      | TAIESFAVTVK                         |           |         |                                            |      | Mascot      |
| 1279.6398  | 1279.7505   | 0.1107  | 87    | 865        | 874      | DMARFKPMQR                          |           |         |                                            |      | Mascot      |
| 1472.6144  | 1472.6449   | 0.0305  | 21    | 754        | 765      | QCSDSAFIQECK                        |           |         | Carbamidomethyl (C)[2,11]                  |      | Mascot      |
| 1472.6144  | 1472.6449   | 0.0305  | 21    | 754        | 765      | QCSDSAFIQECK                        |           |         | Carbamidomethyl (C)[2,11]                  |      | Mascot      |
| 1578.7217  | 1578.7957   | 0.074   | 47    | 618        | 629      | KIEVMHDYEENR                        |           |         | Oxidation (M)[5]                           |      | Mascot      |
| 1683.9152  | 1683.7981   | -0.1171 | -70   | 875        | 887      | HLFLHERALLFCK                       |           |         | Carbamidomethyl (C)[12]                    |      | Mascot      |
| 1866.0192  | 1865.8141   | -0.2051 | -110  | 462        | 479      | RVTAANVLTGQLGSPEP<br>R              |           |         |                                            |      | Mascot      |
| 1866.0192  | 1865.8141   | -0.2051 | -110  | 462        | 479      | RVTAANVLTGQLGSPEP<br>R              |           |         |                                            |      | Mascot      |
| 2072.0618  | 2072.0278   | -0.034  | -16   | 158        | 177      | QLLSNLEASKAVEGAAAE<br>DR            |           |         |                                            |      | Mascot      |
| 2121.0137  | 2121.1003   | 0.0866  | 41    | 906        | 924      | HCLMMSAVGITENVKGD<br>VK             |           |         | Carbamidomethyl (C)[2], Oxidation (M)[4,5] |      | Mascot      |
| 2233.1282  | 2233.0454   | -0.0828 | -37   | 709        | 727      | IFLQDLESCLETPEVGA<br>R              |           |         | Carbamidomethyl (C)[9]                     |      | Mascot      |
| 2306.3079  | 2306.1123   | -0.1956 | -85   | 463        | 484      | VTAANVLTGQLGSPEPRL<br>LIEK          |           |         |                                            |      | Mascot      |
| 3387.6091  | 3387.6663   | 0.0572  | 17    | 376        | 406      | SNLDILNLEFQAVLTPQL<br>QGMGMGCGYSPMK |           |         | Oxidation (M)[21,23]                       |      | Mascot      |

14 PREDICTED: clathrin light chain B-like isoform 1 [Danio rerio] gi|326673839 25713.3 4.57 7 38 0

### Peptide Information

| Calc. Mass | Obsrv. Mass | $\pm$ da | $\pm$ ppm | Start Seq. | End Seq. | Sequence          | Ion Score | C. I. | % Modification    | Rank | Result Type |
|------------|-------------|----------|-----------|------------|----------|-------------------|-----------|-------|-------------------|------|-------------|
| 836.397    | 836.3209    | -0.0761  | -91       | 200        | 206      | LCDFNPK           |           |       |                   |      | Mascot      |
| 875.437    | 875.4468    | 0.0098   | 11        | 108        | 113      | WREEQK            |           |       |                   |      | Mascot      |
| 1062.634   | 1062.674    | 0.04     | 38        | 217        | 225      | MRSVLISLK         |           |       | Oxidation (M)[1]  |      | Mascot      |
| 1467.9258  | 1467.726    | -0.1998  | -136      | 219        | 231      | SVLISLKQTPLLR     |           |       |                   |      | Mascot      |
| 1952.8807  | 1952.9709   | 0.0902   | 46        | 137        | 151      | ELEDWHIHQTEQMEK   |           |       |                   |      | Mascot      |
| 2096.9707  | 2097.0923   | 0.1216   | 58        | 136        | 151      | KELEDWHIHQTEQMEK  |           |       | Oxidation (M)[14] |      | Mascot      |
| 2096.9707  | 2097.0923   | 0.1216   | 58        | 136        | 151      | KELEDWHIHQTEQMEK  |           |       | Oxidation (M)[14] |      | Mascot      |
| 2211.0134  | 2211.0659   | 0.0525   | 24        | 137        | 153      | ELEDWHIHQTEQMEKNK |           |       | Oxidation (M)[13] |      | Mascot      |

15 PREDICTED: pericentrin [Danio rerio] gi|326668478 491858 4.98 30 38 0

### Peptide Information

| Calc. Mass | Obsrv. Mass | $\pm$ da | $\pm$ ppm | Start Seq. | End Seq. | Sequence      | Ion Score | C. I. | % Modification                           | Rank | Result Type |
|------------|-------------|----------|-----------|------------|----------|---------------|-----------|-------|------------------------------------------|------|-------------|
| 836.3818   | 836.3209    | -0.0609  | -73       | 3557       | 3563     | CSLEAEK       |           |       | Carbamidomethyl (C)[1]                   |      | Mascot      |
| 842.4995   | 842.4943    | -0.0052  | -6        | 15         | 21       | AKLAHFR       |           |       |                                          |      | Mascot      |
| 850.4087   | 850.5258    | 0.1171   | 138       | 2129       | 2136     | TPSSMTAR      |           |       |                                          |      | Mascot      |
| 850.4087   | 850.5258    | 0.1171   | 138       | 2129       | 2136     | TPSSMTAR      |           |       |                                          |      | Mascot      |
| 853.3897   | 853.3448    | -0.0449  | -53       | 27         | 34       | SESSSTQK      |           |       |                                          |      | Mascot      |
| 864.3581   | 864.4702    | 0.1121   | 130       | 1982       | 1988     | EESDQEK       |           |       |                                          |      | Mascot      |
| 875.458    | 875.4468    | -0.0112  | -13       | 2850       | 2857     | SLGEERGK      |           |       |                                          |      | Mascot      |
| 882.5155   | 882.5498    | 0.0343   | 39        | 3606       | 3612     | SEIHKLR       |           |       |                                          |      | Mascot      |
| 987.5105   | 987.5167    | 0.0062   | 6         | 2715       | 2722     | QAEIEELR      | 10        | 0     |                                          |      | Mascot      |
| 987.5105   | 987.5167    | 0.0062   | 6         | 2715       | 2722     | QAEIEELR      |           |       |                                          |      | Mascot      |
| 1007.4904  | 1007.4591   | -0.0313  | -31       | 427        | 434      | HLQEEHSK      |           |       |                                          |      | Mascot      |
| 1019.5189  | 1019.5233   | 0.0044   | 4         | 3623       | 3631     | QTCLQAVEK     |           |       |                                          |      | Mascot      |
| 1022.4935  | 1022.4899   | -0.0036  | -4        | 3557       | 3565     | CSLEAEKSR     |           |       |                                          |      | Mascot      |
| 1045.4908  | 1045.5457   | 0.0549   | 53        | 1472       | 1480     | QAEAEVNER     |           |       |                                          |      | Mascot      |
| 1294.646   | 1294.5033   | -0.1427  | -110      | 4205       | 4216     | MYTSPVLGAAER  |           |       |                                          |      | Mascot      |
| 1371.7842  | 1371.6129   | -0.1713  | -125      | 1989       | 2000     | AVALEELEKTLR  |           |       |                                          |      | Mascot      |
| 1399.6079  | 1399.6824   | 0.0745   | 53        | 3995       | 4007     | SSAVTEECMVSEK |           |       |                                          |      | Mascot      |
| 1456.6294  | 1456.6481   | 0.0187   | 13        | 3995       | 4007     | SSAVTEECMVSEK |           |       | Carbamidomethyl (C)[8]                   |      | Mascot      |
| 1472.6243  | 1472.6449   | 0.0206   | 14        | 3995       | 4007     | SSAVTEECMVSEK |           |       | Carbamidomethyl (C)[8], Oxidation (M)[9] |      | Mascot      |
| 1472.6243  | 1472.6449   | 0.0206   | 14        | 3995       | 4007     | SSAVTEECMVSEK |           |       | Carbamidomethyl (C)[8], Oxidation (M)[9] |      | Mascot      |



|    |                                                                                 |           |           |         |      |              |      |                          |      |   |                                              |   |    |        |
|----|---------------------------------------------------------------------------------|-----------|-----------|---------|------|--------------|------|--------------------------|------|---|----------------------------------------------|---|----|--------|
|    |                                                                                 | 1475.7271 | 1475.6984 | -0.0287 | -19  | 2723         | 2734 | SILVERLQCDQER            |      |   |                                              |   |    | Mascot |
|    |                                                                                 | 1556.7485 | 1556.7091 | -0.0394 | -25  | 1515         | 1526 | EQLRQMEETHQK             |      |   |                                              |   |    | Mascot |
|    |                                                                                 | 1578.7845 | 1578.7957 | 0.0112  | 7    | 3312         | 3323 | LDAHFVEYLRCR             |      |   | Carbamidomethyl (C)[11]                      |   |    | Mascot |
|    |                                                                                 | 1587.8047 | 1587.8539 | 0.0492  | 31   | 1603         | 1616 | SLEQCESPQVVALK           |      |   | Carbamidomethyl (C)[4]                       |   |    | Mascot |
|    |                                                                                 | 1625.901  | 1625.7368 | -0.1642 | -101 | 1954         | 1966 | QRLHFLLEEALLK            |      |   |                                              |   |    | Mascot |
|    |                                                                                 | 1662.8195 | 1662.7861 | -0.0334 | -20  | 310          | 323  | NSQRAQEQUEAFQK           |      |   |                                              |   |    | Mascot |
|    |                                                                                 | 1683.8007 | 1683.7981 | -0.0026 | -2   | 1617         | 1631 | QKLQAQYDGEMSAAK          |      |   | Oxidation (M)[11]                            |   |    | Mascot |
|    |                                                                                 | 1815.9633 | 1815.8549 | -0.1084 | -60  | 358          | 372  | VELNQEMVRDLNLVK          |      |   | Oxidation (M)[7]                             |   |    | Mascot |
|    |                                                                                 | 1923.0294 | 1922.9604 | -0.069  | -36  | 1326         | 1341 | VTEESHREEIALQLR          |      |   |                                              |   |    | Mascot |
|    |                                                                                 | 2071.9573 | 2072.0278 | 0.0705  | 34   | 2788         | 2804 | QQRASEESLCQELNSHR        |      |   | Carbamidomethyl (C)[10]                      |   |    | Mascot |
|    |                                                                                 | 2103.9243 | 2103.949  | 0.0247  | 12   | 3990         | 4007 | MEQVKSSAVTEECMVSE<br>K   |      |   | Carbamidomethyl (C)[13], Oxidation (M)[1,14] |   |    | Mascot |
|    |                                                                                 | 2156.0002 | 2155.9233 | -0.0769 | -36  | 441          | 459  | ELLSQAQSQYSDSPHNH<br>SK  |      |   |                                              |   |    | Mascot |
|    |                                                                                 | 2247.1404 | 2247.0593 | -0.0811 | -36  | 3304         | 3321 | LEENTERLDAHFVEYLR        |      |   |                                              |   |    | Mascot |
|    |                                                                                 | 2284.1013 | 2284.1365 | 0.0352  | 15   | 3955         | 3974 | ENSEFSECLAALSEEKISL<br>K |      |   | Carbamidomethyl (C)[8]                       |   |    | Mascot |
|    |                                                                                 | 2300.0935 | 2300.1404 | 0.0469  | 20   | 3545         | 3563 | LQQEQTQSHDLRCSLEA<br>EK  |      |   | Carbamidomethyl (C)[13]                      |   |    | Mascot |
| 16 | novel protein similar to H.sapiens DOK7, docking protein 7 (DOK7) [Danio rerio] |           |           |         |      | gi 220676956 |      | 42560.3                  | 7.12 | 3 | 37                                           | 0 | 30 | 71.498 |

18 cullin 3b [Danio rerio] gi|299523039 88726.4 8.68 15 36 0

Peptide Information

| Calc. Mass | Obsrv. Mass | ± da    | ± ppm | Start Seq. | End Seq. | Sequence           | Ion Score | C. I. % | Modification       | Rank | Result Type |
|------------|-------------|---------|-------|------------|----------|--------------------|-----------|---------|--------------------|------|-------------|
| 875.4217   | 875.4468    | 0.0251  | 29    | 691        | 697      | QKVDDDR            |           |         |                    |      | Mascot      |
| 1022.5298  | 1022.4899   | -0.0399 | -39   | 1          | 10       | MSNLSKGGTK         |           |         |                    |      | Mascot      |
| 1045.4908  | 1045.5457   | 0.0549  | 53    | 679        | 687      | QGSDPERK           |           |         |                    |      | Mascot      |
| 1092.5507  | 1092.5464   | -0.0043 | -4    | 59         | 67       | NAYTMVLHK          |           |         | Oxidation (M)[5]   |      | Mascot      |
| 1165.6688  | 1165.7224   | 0.0536  | 46    | 698        | 707      | KHEIEAAIVR         |           |         |                    |      | Mascot      |
| 1165.6688  | 1165.7224   | 0.0536  | 46    | 698        | 707      | KHEIEAAIVR         |           |         |                    |      | Mascot      |
| 1399.7225  | 1399.6824   | -0.0401 | -29   | 414        | 424      | AMVLFRFMQEK        |           |         |                    |      | Mascot      |
| 1556.7703  | 1556.7091   | -0.0612 | -39   | 46         | 58       | KNNSGLSFEELYR      |           |         |                    |      | Mascot      |
| 1578.6411  | 1578.7957   | 0.1546  | 98    | 475        | 487      | DMSISNTTMDDEFK     |           |         | Oxidation (M)[2,9] |      | Mascot      |
| 1796.7715  | 1796.6711   | -0.1004 | -56   | 569        | 586      | EDGSDMVGGAQVTGSN   |           |         | Oxidation (M)[6]   |      | Mascot      |
|            |             |         |       |            |          | TR                 |           |         |                    |      |             |
| 1924.8665  | 1924.9486   | 0.0821  | 43    | 569        | 587      | EDGSDMVGGAQVTGSN   |           |         | Oxidation (M)[6]   |      | Mascot      |
|            |             |         |       |            |          | TRK                |           |         |                    |      |             |
| 1962.0082  | 1961.9539   | -0.0543 | -28   | 180        | 197      | GAIRNACQMLMILGLEGR |           |         | Oxidation (M)[9]   |      | Mascot      |
| 2097.0654  | 2097.0923   | 0.0269  | 13    | 271        | 288      | HMKTIVEMENSGLVHML  |           |         |                    |      | Mascot      |
|            |             |         |       |            |          | K                  |           |         |                    |      |             |
| 2097.0654  | 2097.0923   | 0.0269  | 13    | 271        | 288      | HMKTIVEMENSGLVHML  |           |         |                    |      | Mascot      |
|            |             |         |       |            |          | K                  |           |         |                    |      |             |
| 2194.1423  | 2194.0471   | -0.0952 | -43   | 401        | 419      | GLTEQEVESILDKAMVLF |           |         | Oxidation (M)[15]  |      | Mascot      |
|            |             |         |       |            |          | R                  |           |         |                    |      |             |
| 2230.1978  | 2230.1414   | -0.0564 | -25   | 28         | 45       | YVNNIWDLLKNAIQEIQR |           |         |                    |      | Mascot      |
| 2306.2148  | 2306.1123   | -0.1025 | -44   | 588        | 606      | HILQVSTFQMTILMLFNN |           |         |                    |      | Mascot      |
|            |             |         |       |            |          | R                  |           |         |                    |      |             |

19 mitogen-activated protein kinase 1 [Danio rerio] gi|40254655 42048.5 6.32 8 36 0

Peptide Information

| Calc. Mass | Obsrv. Mass | ± da    | ± ppm | Start Seq. | End Seq. | Sequence          | Ion Score | C. I. % | Modification     | Rank | Result Type |
|------------|-------------|---------|-------|------------|----------|-------------------|-----------|---------|------------------|------|-------------|
| 864.4362   | 864.4702    | 0.034   | 39    | 363        | 369      | FQPGYRP           |           |         |                  |      | Mascot      |
| 987.508    | 987.5167    | 0.0087  | 9     | 302        | 309      | MLTFNPHK          |           |         |                  |      | Mascot      |
| 987.508    | 987.5167    | 0.0087  | 9     | 302        | 309      | MLTFNPHK          |           |         |                  |      | Mascot      |
| 1467.7512  | 1467.726    | -0.0252 | -17   | 204        | 216      | APEIMLNSKGYTK     |           |         | Oxidation (M)[5] |      | Mascot      |
| 1578.8373  | 1578.7957   | -0.0416 | -26   | 350        | 362      | ETLKELIFEETAR     |           |         |                  |      | Mascot      |
| 1952.9865  | 1952.9709   | -0.0156 | -8    | 354        | 369      | ELIFEETARFQPGYRP  |           |         |                  |      | Mascot      |
| 2156.0222  | 2155.9233   | -0.0989 | -46   | 1          | 24       | MATAAVSAPAGGGPNPG |           |         |                  |      | Mascot      |
|            |             |         |       |            |          | SGAEMVR           |           |         |                  |      |             |
| 2246.9844  | 2247.0593   | 0.0749  | 33    | 34         | 54       | YSNLSYIGGGAYGMVCS |           |         |                  |      | Mascot      |
|            |             |         |       |            |          | AYDR              |           |         |                  |      |             |
| 3387.7842  | 3387.6663   | -0.1179 | -35   | 241        | 270      | HYLDQLNHILGILGPSQ |           |         |                  |      | Mascot      |

20 vasa-like protein [Danio rerio] EDLNCIINIKAR  
gi|19482136 76747.5 5.53 12 36 0

Peptide Information

| Calc. Mass | Obsrv. Mass | ± da    | ± ppm | Start Seq. | End Seq. | Sequence                            | Ion Score | C. I. % | Modification                               | Rank | Result Type |
|------------|-------------|---------|-------|------------|----------|-------------------------------------|-----------|---------|--------------------------------------------|------|-------------|
| 823.4168   | 823.399     | -0.0178 | -22   | 106        | 113      | GGFRSGSR                            |           |         |                                            |      | Mascot      |
| 853.4426   | 853.3448    | -0.0978 | -115  | 197        | 204      | GFGRGGR                             |           |         |                                            |      | Mascot      |
| 882.4315   | 882.5498    | 0.1183  | 134   | 678        | 685      | VFASTDSR                            |           |         |                                            |      | Mascot      |
| 970.4913   | 970.491     | -0.0003 | 0     | 531        | 538      | TMVFEVK                             |           |         | Oxidation (M)[2]                           |      | Mascot      |
| 1371.5742  | 1371.6129   | 0.0387  | 28    | 439        | 449      | MLDMGFPEMR                          |           |         | Oxidation (M)[1]                           |      | Mascot      |
| 1467.7325  | 1467.726    | -0.0065 | -4    | 207        | 219      | NEEVFSKVTTADK                       |           |         |                                            |      | Mascot      |
| 1472.709   | 1472.6449   | -0.0641 | -44   | 540        | 552      | SADFIATFLCQEK                       |           |         |                                            |      | Mascot      |
| 1472.709   | 1472.6449   | -0.0641 | -44   | 540        | 552      | SADFIATFLCQEK                       |           |         |                                            |      | Mascot      |
| 1815.8582  | 1815.8549   | -0.0033 | -2    | 464        | 478      | QTLMFSAITYPEIQR                     |           |         | Oxidation (M)[4]                           |      | Mascot      |
| 1865.7532  | 1865.8141   | 0.0609  | 33    | 80         | 97       | SEIDENGSDGGWNGGES<br>R              |           |         |                                            |      | Mascot      |
| 1865.7532  | 1865.8141   | 0.0609  | 33    | 80         | 97       | SEIDENGSDGGWNGGES<br>R              |           |         |                                            |      | Mascot      |
| 1951.9952  | 1951.9774   | -0.0178 | -9    | 403        | 420      | GCNVLCATPGRHLHLGR                   |           |         | Carbamidomethyl (C)[2]                     |      | Mascot      |
| 2230.0444  | 2230.1414   | 0.097   | 43    | 461        | 478      | EERQTLMFSAITYPEIQR                  |           |         | Oxidation (M)[7]                           |      | Mascot      |
| 3387.5969  | 3387.6663   | 0.0694  | 20    | 259        | 289      | YDDILVDVSGSNPPKAIM<br>TFEEAGLCDSLSK |           |         | Carbamidomethyl (C)[26], Oxidation (M)[18] |      | Mascot      |

21 PREDICTED: neuronal acetylcholine receptor subunit beta-2-like [Danio rerio] gi|292620953 51265.9 5.66 9 36 0

Peptide Information

| Calc. Mass | Obsrv. Mass | ± da    | ± ppm | Start Seq. | End Seq. | Sequence                  | Ion Score | C. I. % | Modification                             | Rank | Result Type |
|------------|-------------|---------|-------|------------|----------|---------------------------|-----------|---------|------------------------------------------|------|-------------|
| 987.4564   | 987.5167    | 0.0603  | 61    | 315        | 323      | SPSTHSMPK                 |           |         | Oxidation (M)[7]                         |      | Mascot      |
| 987.4564   | 987.5167    | 0.0603  | 61    | 315        | 323      | SPSTHSMPK                 |           |         | Oxidation (M)[7]                         |      | Mascot      |
| 1062.5652  | 1062.674    | 0.1088  | 102   | 2          | 9        | EMLYLHLK                  |           |         | Oxidation (M)[2]                         |      | Mascot      |
| 1467.6566  | 1467.726    | 0.0694  | 47    | 407        | 419      | CSADMEEAVKGVK             |           |         | Carbamidomethyl (C)[1], Oxidation (M)[5] |      | Mascot      |
| 1587.6454  | 1587.8539   | 0.2085  | 131   | 82         | 93       | LMWDPEEYEGMR              |           |         | Oxidation (M)[2,11]                      |      | Mascot      |
| 1683.7505  | 1683.7981   | 0.0476  | 28    | 82         | 94       | LMWDPEEYEGMRK             |           |         |                                          |      | Mascot      |
| 1815.8483  | 1815.8549   | 0.0066  | 4     | 151        | 164      | DFPFDQQNCTLKFR            |           |         | Carbamidomethyl (C)[9]                   |      | Mascot      |
| 1952.9535  | 1952.9709   | 0.0174  | 9     | 147        | 162      | IEVRDFPFDQQNCTLK          |           |         |                                          |      | Mascot      |
| 2230.3857  | 2230.1414   | -0.2443 | -110  | 256        | 275      | ITLCISVLLALTIVLLLSK       |           |         | Carbamidomethyl (C)[4]                   |      | Mascot      |
| 2297.2822  | 2297.1523   | -0.1299 | -57   | 43         | 63       | SQQVTIAIQVSLAQLISVN<br>ER |           |         |                                          |      | Mascot      |

22 Lad1 protein [Danio rerio] gi|115528644 50936.1 6 9 36 0

| Peptide Information |                        |          |           |            |                             |           |         |                        |      |        |        |
|---------------------|------------------------|----------|-----------|------------|-----------------------------|-----------|---------|------------------------|------|--------|--------|
| Calc. Mass          | Obsrv. Mass            | $\pm$ da | $\pm$ ppm | Start Seq. | End Sequence Seq.           | Ion Score | C. I. % | Modification           | Rank | Result | Type   |
| 882.5155            | 882.5498               | 0.0343   | 39        | 109        | 115 HVETLRK                 |           |         |                        |      |        | Mascot |
| 987.4602            | 987.5167               | 0.0565   | 57        | 188        | 196 SQTHSNASR               |           |         |                        |      |        | Mascot |
| 987.4602            | 987.5167               | 0.0565   | 57        | 188        | 196 SQTHSNASR               |           |         |                        |      |        | Mascot |
| 1047.5793           | 1047.5                 | -0.0793  | -76       | 339        | 347 LSSRSIQEK               |           |         |                        |      |        | Mascot |
| 1092.5354           | 1092.5464              | 0.011    | 10        | 369        | 378 TVCLADEVSR              |           |         |                        |      |        | Mascot |
| 1796.9324           | 1796.6711              | -0.2613  | -145      | 363        | 378 SPVVHKTVCLADEVSR        |           |         | Carbamidomethyl (C)[9] |      |        | Mascot |
| 1815.8242           | 1815.8549              | 0.0307   | 17        | 118        | 133 EEGEEGEKDILDAEPR        |           |         |                        |      |        | Mascot |
| 2071.9568           | 2072.0278              | 0.071    | 34        | 155        | 173 NIFSPEPPTNSTDTETHG<br>K |           |         |                        |      |        | Mascot |
| 2104.0669           | 2103.949               | -0.1179  | -56       | 420        | 438 TFNISSSPTDLRHVDISSK     |           |         |                        |      |        | Mascot |
| 2230.1497           | 2230.1414              | -0.0083  | -4        | 1          | 20 HTSLQPSSTLENTIMSISR<br>K |           |         |                        |      |        | Mascot |
| 23                  | cullin-1 [Danio rerio] |          |           |            | gi 45433528                 | 89971.2   | 8.19    | 13                     | 36   | 0      |        |

| Peptide Information |             |          |           |            |                        |           |         |                        |      |        |        |
|---------------------|-------------|----------|-----------|------------|------------------------|-----------|---------|------------------------|------|--------|--------|
| Calc. Mass          | Obsrv. Mass | $\pm$ da | $\pm$ ppm | Start Seq. | End Sequence Seq.      | Ion Score | C. I. % | Modification           | Rank | Result | Type   |
| 823.409             | 823.399     | -0.01    | -12       | 35         | 41 QSMAKSR             |           |         | Oxidation (M)[3]       |      |        | Mascot |
| 836.3566            | 836.3209    | -0.0357  | -43       | 149        | 155 ECDEGRK            |           |         |                        |      |        | Mascot |
| 864.4825            | 864.4702    | -0.0123  | -14       | 223        | 230 GPTLSVYK           |           |         |                        |      |        | Mascot |
| 882.4501            | 882.5498    | 0.0997   | 113       | 323        | 329 MYNLVSR            |           |         |                        |      |        | Mascot |
| 987.5331            | 987.5167    | -0.0164  | -17       | 466        | 473 FYAKMLAK           |           |         | Oxidation (M)[5]       |      |        | Mascot |
| 987.5331            | 987.5167    | -0.0164  | -17       | 466        | 473 FYAKMLAK           |           |         | Oxidation (M)[5]       |      |        | Mascot |
| 996.6564            | 996.5763    | -0.0801  | -80       | 710        | 718 LLIQAAIVR          |           |         |                        |      |        | Mascot |
| 996.6564            | 996.5763    | -0.0801  | -80       | 710        | 718 LLIQAAIVR          |           |         |                        |      |        | Mascot |
| 1399.6865           | 1399.6824   | -0.0041  | -3        | 567        | 578 FTAFYASRHSGR       |           |         |                        |      |        | Mascot |
| 1456.7325           | 1456.6481   | -0.0844  | -58       | 1          | 13 MSSNRTQTPHGLK       |           |         |                        |      |        | Mascot |
| 1472.7274           | 1472.6449   | -0.0825  | -56       | 1          | 13 MSSNRTQTPHGLK       |           |         | Oxidation (M)[1]       |      |        | Mascot |
| 1472.7274           | 1472.6449   | -0.0825  | -56       | 1          | 13 MSSNRTQTPHGLK       |           |         | Oxidation (M)[1]       |      |        | Mascot |
| 1587.7584           | 1587.8539   | 0.0955   | 60        | 495        | 507 QACGFEYTSKLQR      |           |         | Carbamidomethyl (C)[3] |      |        | Mascot |
| 1683.9104           | 1683.7981   | -0.1123  | -67       | 156        | 169 GIYEIYSLALVTWR     |           |         |                        |      |        | Mascot |
| 2072.0005           | 2072.0278   | 0.0273   | 13        | 248        | 264 ESTEFLQQNPVTEYMKK  |           |         |                        |      |        | Mascot |
| 2152.126            | 2152.0601   | -0.0659  | -31       | 580        | 597 LTWLYHLSKGELVTNCFK |           |         |                        |      |        | Mascot |
| 2152.126            | 2152.0601   | -0.0659  | -31       | 580        | 597 LTWLYHLSKGELVTNCFK |           |         |                        |      |        | Mascot |
| 2247.075            | 2247.0593   | -0.0157  | -7        | 378        | 398 YNALVMSAFNNDAGFVA  |           |         | Oxidation (M)[6]       |      |        | Mascot |

24 probable ATP-dependent RNA helicase DDX4 [Danio rerio] ALDK gi|18859541 76956.6 5.64 12 36 0

Peptide Information

| Calc. Mass | Obsrv. Mass | ± da    | ± ppm | Start Seq. | End Seq. | Sequence                          | Ion Score | C. I. % | Modification                               | Rank | Result Type |
|------------|-------------|---------|-------|------------|----------|-----------------------------------|-----------|---------|--------------------------------------------|------|-------------|
| 823.4168   | 823.399     | -0.0178 | -22   | 106        | 113      | GGFRSGSR                          |           |         |                                            |      | Mascot      |
| 853.4426   | 853.3448    | -0.0978 | -115  | 198        | 205      | GFGRGGFR                          |           |         |                                            |      | Mascot      |
| 882.4315   | 882.5498    | 0.1183  | 134   | 679        | 686      | VFASTDSR                          |           |         |                                            |      | Mascot      |
| 970.4913   | 970.491     | -0.0003 | 0     | 532        | 539      | TMVFEVK                           |           |         | Oxidation (M)[2]                           |      | Mascot      |
| 1371.5742  | 1371.6129   | 0.0387  | 28    | 440        | 450      | MLDMGFEPEMR                       |           |         | Oxidation (M)[1]                           |      | Mascot      |
| 1467.7325  | 1467.726    | -0.0065 | -4    | 208        | 220      | NEEVFSKVTADK                      |           |         |                                            |      | Mascot      |
| 1472.709   | 1472.6449   | -0.0641 | -44   | 541        | 553      | SADFIATFLCQEK                     |           |         |                                            |      | Mascot      |
| 1472.709   | 1472.6449   | -0.0641 | -44   | 541        | 553      | SADFIATFLCQEK                     |           |         |                                            |      | Mascot      |
| 1815.8582  | 1815.8549   | -0.0033 | -2    | 465        | 479      | QTLMFSAITYPEDIQR                  |           |         | Oxidation (M)[4]                           |      | Mascot      |
| 1865.7532  | 1865.8141   | 0.0609  | 33    | 80         | 97       | SEIDENGSDGGWNGGES<br>R            |           |         |                                            |      | Mascot      |
| 1865.7532  | 1865.8141   | 0.0609  | 33    | 80         | 97       | SEIDENGSDGGWNGGES<br>R            |           |         |                                            |      | Mascot      |
| 1951.9952  | 1951.9774   | -0.0178 | -9    | 404        | 421      | GCVNLCATPGRHLHLGR                 |           |         | Carbamidomethyl (C)[2]                     |      | Mascot      |
| 2230.0444  | 2230.1414   | 0.097   | 43    | 462        | 479      | EERQTLMFSAITYPEDIQR               |           |         | Oxidation (M)[7]                           |      | Mascot      |
| 3387.5969  | 3387.6663   | 0.0694  | 20    | 260        | 290      | YDDLVDVSGSNPPKAIM<br>TFEEAGLCDSLK |           |         | Carbamidomethyl (C)[26], Oxidation (M)[18] |      | Mascot      |

25 truncated RAF1 [Danio rerio] gi|41224402 32290.4 9.5 7 35 0

Peptide Information

| Calc. Mass | Obsrv. Mass | ± da    | ± ppm | Start Seq. | End Seq. | Sequence                | Ion Score | C. I. % | Modification             | Rank | Result Type |
|------------|-------------|---------|-------|------------|----------|-------------------------|-----------|---------|--------------------------|------|-------------|
| 882.4791   | 882.5498    | 0.0707  | 80    | 215        | 222      | IPSSSVHR                |           |         |                          |      | Mascot      |
| 987.5006   | 987.5167    | 0.0161  | 16    | 2          | 9        | EQLQGAWR                | 8         | 0       |                          |      | Mascot      |
| 987.5006   | 987.5167    | 0.0161  | 16    | 2          | 9        | EQLQGAWR                |           |         |                          |      | Mascot      |
| 1045.452   | 1045.5457   | 0.0937  | 90    | 165        | 172      | FHEHCSTK                |           |         | Carbamidomethyl (C)[5]   |      | Mascot      |
| 1371.7855  | 1371.6129   | -0.1726 | -126  | 50         | 60       | TIRVFLPNQQR             |           |         |                          |      | Mascot      |
| 1556.7843  | 1556.7091   | -0.0752 | -48   | 19         | 32       | DSVFESSYVSPVIK          |           |         |                          |      | Mascot      |
| 1925.0459  | 1924.9486   | -0.0973 | -51   | 61         | 77       | TVVNVVRPGMTLHSLIK       |           |         | Carbamidomethyl (C)[14]  |      | Mascot      |
| 2097.0481  | 2097.0923   | 0.0442  | 21    | 81         | 99       | VRGLQPECCAVFSLHPG<br>QR |           |         |                          |      | Mascot      |
| 2097.0481  | 2097.0923   | 0.0442  | 21    | 81         | 99       | VRGLQPECCAVFSLHPG<br>QR |           |         |                          |      | Mascot      |
| 2211.0908  | 2211.0659   | -0.0249 | -11   | 81         | 99       | VRGLQPECCAVFSLHPG<br>QR |           |         | Carbamidomethyl (C)[8,9] |      | Mascot      |

26 PREDICTED: protein tyrosine phosphatase type IVA 3 [Danio rerio] gi|125840045 19894.2 8.99 6 35 0

Peptide Information

| Calc. Mass | Obsrv. Mass | $\pm$ da | $\pm$ ppm | Start Seq. | End Seq. | Sequence               | Ion Score | C. I. % | Modification                 | Rank | Result Type |
|------------|-------------|----------|-----------|------------|----------|------------------------|-----------|---------|------------------------------|------|-------------|
| 1399.6886  | 1399.6824   | -0.0062  | -4        | 44         | 55       | TVVRVCESTYDK           |           |         |                              |      | Mascot      |
| 1456.7101  | 1456.6481   | -0.062   | -43       | 44         | 55       | TVVRVCESTYDK           |           |         | Carbamidomethyl (C)[6]       |      | Mascot      |
| 1467.8604  | 1467.726    | -0.1344  | -92       | 111        | 125      | APVLVAVALIEGGMK        |           |         |                              |      | Mascot      |
| 2071.9729  | 2072.0278   | 0.0549   | 26        | 2          | 18       | AWLNGLYPVEVCYNMR       |           |         | Carbamidomethyl (C)[12]      |      | Mascot      |
| 2096.9746  | 2097.0923   | 0.1177   | 56        | 61         | 79       | HGITVMDWPFDDGAPPP TK   |           |         | Oxidation (M)[6]             |      | Mascot      |
| 2096.9746  | 2097.0923   | 0.1177   | 56        | 61         | 79       | HGITVMDWPFDDGAPPP TK   |           |         | Oxidation (M)[6]             |      | Mascot      |
| 2120.9309  | 2121.1003   | 0.1694   | 80        | 91         | 110      | SFSEDPGCCVAVHCVAG LGR  |           |         | Carbamidomethyl (C)[8,9]     |      | Mascot      |
| 2306.0474  | 2306.1123   | 0.0649   | 28        | 90         | 110      | KSFSEDPGCCVAVHCVA GLGR |           |         | Carbamidomethyl (C)[9,10,15] |      | Mascot      |

27 vasa-like protein [Danio rerio] gi|19309904 76832.5 5.57 12 35 0

Peptide Information

| Calc. Mass | Obsrv. Mass | $\pm$ da | $\pm$ ppm | Start Seq. | End Seq. | Sequence                       | Ion Score | C. I. % | Modification                               | Rank | Result Type |
|------------|-------------|----------|-----------|------------|----------|--------------------------------|-----------|---------|--------------------------------------------|------|-------------|
| 823.4168   | 823.399     | -0.0178  | -22       | 105        | 112      | GGFRSGSR                       |           |         |                                            |      | Mascot      |
| 853.4426   | 853.3448    | -0.0978  | -115      | 197        | 204      | GFGRGGFR                       |           |         |                                            |      | Mascot      |
| 882.4315   | 882.5498    | 0.1183   | 134       | 678        | 685      | VFASTDSR                       |           |         |                                            |      | Mascot      |
| 970.4913   | 970.491     | -0.0003  | 0         | 531        | 538      | TMVFEVK                        |           |         | Oxidation (M)[2]                           |      | Mascot      |
| 1371.5742  | 1371.6129   | 0.0387   | 28        | 439        | 449      | MLDMGFEPEMR                    |           |         | Oxidation (M)[1]                           |      | Mascot      |
| 1467.7325  | 1467.726    | -0.0065  | -4        | 207        | 219      | NEEVFSKVTADK                   |           |         |                                            |      | Mascot      |
| 1472.709   | 1472.6449   | -0.0641  | -44       | 540        | 552      | SADFIATFLCQEK                  |           |         |                                            |      | Mascot      |
| 1472.709   | 1472.6449   | -0.0641  | -44       | 540        | 552      | SADFIATFLCQEK                  |           |         |                                            |      | Mascot      |
| 1815.8582  | 1815.8549   | -0.0033  | -2        | 464        | 478      | QTLMFSAITYPEIQR                |           |         | Oxidation (M)[4]                           |      | Mascot      |
| 1865.7532  | 1865.8141   | 0.0609   | 33        | 79         | 96       | SEIDENGSDGGWNGGES R            |           |         |                                            |      | Mascot      |
| 1865.7532  | 1865.8141   | 0.0609   | 33        | 79         | 96       | SEIDENGSDGGWNGGES R            |           |         |                                            |      | Mascot      |
| 1951.9952  | 1951.9774   | -0.0178  | -9        | 403        | 420      | GCNVLCATPGRHLHLGR              |           |         | Carbamidomethyl (C)[2]                     |      | Mascot      |
| 2230.0444  | 2230.1414   | 0.097    | 43        | 461        | 478      | EERQTLMFSAITYPEIQR             |           |         | Oxidation (M)[7]                           |      | Mascot      |
| 3387.5969  | 3387.6663   | 0.0694   | 20        | 259        | 289      | YDDILVDVSGSNPPKAIM TFEAGLCDSLK |           |         | Carbamidomethyl (C)[26], Oxidation (M)[18] |      | Mascot      |

28 PREDICTED: interleukin-1 receptor-like 2-like [Danio rerio] gi|326670867 62378.6 7.52 5 35 0 25 16.656

Peptide Information

|  | Calc. Mass | Obsrv. Mass | ± da    | ± ppm | Start Seq. | End Sequence Seq.           | Ion Score | C. I. % | Modification           | Rank | Result Type |
|--|------------|-------------|---------|-------|------------|-----------------------------|-----------|---------|------------------------|------|-------------|
|  | 823.3614   | 823.399     | 0.0376  | 46    | 357        | 364 SVACSDGK                |           |         | Carbamidomethyl (C)[4] |      | Mascot      |
|  | 850.4338   | 850.5258    | 0.092   | 108   | 540        | 547 KGTDSMVL                |           |         |                        |      | Mascot      |
|  | 850.4338   | 850.5258    | 0.092   | 108   | 540        | 547 KGTDSMVL                |           |         |                        |      | Mascot      |
|  | 864.4308   | 864.4702    | 0.0394  | 46    | 128        | 135 DELTSTAK                |           |         |                        |      | Mascot      |
|  | 987.537    | 987.5167    | -0.0203 | -21   | 507        | 514 TQGILNWR                | 25        | 16.656  |                        |      | Mascot      |
|  | 987.537    | 987.5167    | -0.0203 | -21   | 507        | 514 TQGILNWR                |           |         |                        |      | Mascot      |
|  | 2156.1379  | 2155.9233   | -0.2146 | -100  | 430        | 449 LIILTSQSCSSPQKHASD<br>K |           |         |                        |      | Mascot      |

29 neural orphan nuclear receptor Nur77 [Danio rerio] gi|47060283 63776.2 5.79 10 35 0

#### Peptide Information

|  | Calc. Mass | Obsrv. Mass | ± da    | ± ppm | Start Seq. | End Sequence Seq.                   | Ion Score | C. I. % | Modification             | Rank | Result Type |
|--|------------|-------------|---------|-------|------------|-------------------------------------|-----------|---------|--------------------------|------|-------------|
|  | 836.4368   | 836.3209    | -0.1159 | -139  | 299        | 306 CLAVGMVK                        |           |         | Oxidation (M)[6]         |      | Mascot      |
|  | 882.5519   | 882.5498    | -0.0021 | -2    | 319        | 326 GRGPSKPK                        |           |         |                          |      | Mascot      |
|  | 1019.5302  | 1019.5233   | -0.0069 | -7    | 546        | 554 TLCTQGLQR                       |           |         |                          |      | Mascot      |
|  | 1062.5248  | 1062.674    | 0.1492  | 140   | 31         | 39 LAMDVTEQR                        |           |         |                          |      | Mascot      |
|  | 1467.697   | 1467.726    | 0.029   | 20    | 273        | 285 YVCLANKDCPVDK                   |           |         |                          |      | Mascot      |
|  | 1578.7145  | 1578.7957   | 0.0812  | 51    | 431        | 443 FIYAFMSNPETDK                   |           |         | Oxidation (M)[6]         |      | Mascot      |
|  | 1683.925   | 1683.7981   | -0.1269 | -75   | 546        | 559 TLCTQGLQRIFYLK                  |           |         |                          |      | Mascot      |
|  | 1796.7261  | 1796.6711   | -0.055  | -31   | 239        | 254 CAVCGDNASCQHYGVR                |           |         | Carbamidomethyl (C)[1,4] |      | Mascot      |
|  | 1924.9835  | 1924.9486   | -0.0349 | -18   | 519        | 536 DHVSTSALEVGRPNLS<br>R           |           |         |                          |      | Mascot      |
|  | 3337.5066  | 3337.7131   | 0.2065  | 62    | 2          | 30 TCVQSQHGVQSYESSLF<br>SSEFLNPDTSR |           |         | Carbamidomethyl (C)[2]   |      | Mascot      |

30 PREDICTED: interferon-induced very large GTPase 1-like [Danio rerio] gi|326665761 191677.2 6.42 21 34 0

#### Peptide Information

|  | Calc. Mass | Obsrv. Mass | ± da    | ± ppm | Start Seq. | End Sequence Seq. | Ion Score | C. I. % | Modification     | Rank | Result Type |
|--|------------|-------------|---------|-------|------------|-------------------|-----------|---------|------------------|------|-------------|
|  | 842.473    | 842.4943    | 0.0213  | 25    | 920        | 927 SIISHASK      |           |         |                  |      | Mascot      |
|  | 848.4413   | 848.5095    | 0.0682  | 80    | 975        | 980 WSWTLR        |           |         |                  |      | Mascot      |
|  | 864.4573   | 864.4702    | 0.0129  | 15    | 163        | 169 DAFKQKQK      |           |         |                  |      | Mascot      |
|  | 875.4217   | 875.4468    | 0.0251  | 29    | 1199       | 1205 EDQSQIR      |           |         |                  |      | Mascot      |
|  | 970.5679   | 970.491     | -0.0769 | -79   | 919        | 927 KSIISHASK     |           |         |                  |      | Mascot      |
|  | 1019.5554  | 1019.5233   | -0.0321 | -31   | 1128       | 1135 IKDIDIMR     |           |         | Oxidation (M)[7] |      | Mascot      |
|  | 1022.5121  | 1022.4899   | -0.0222 | -22   | 529        | 536 TEMMNIRK      |           |         |                  |      | Mascot      |

|           |           |         |     |      |      |                                  |  |  |  |                         |  |  |        |
|-----------|-----------|---------|-----|------|------|----------------------------------|--|--|--|-------------------------|--|--|--------|
| 1045.5887 | 1045.5457 | -0.043  | -41 | 613  | 621  | QAELEKISK                        |  |  |  |                         |  |  | Mascot |
| 1051.5419 | 1051.6937 | 0.1518  | 144 | 1623 | 1630 | NLEQKYEK                         |  |  |  |                         |  |  | Mascot |
| 1092.5571 | 1092.5464 | -0.0107 | -10 | 1328 | 1336 | EPIEQSVYK                        |  |  |  |                         |  |  | Mascot |
| 1456.739  | 1456.6481 | -0.0909 | -62 | 599  | 610  | EQKDNNNKPELK                     |  |  |  |                         |  |  | Mascot |
| 1472.6937 | 1472.6449 | -0.0488 | -33 | 636  | 648  | EISQIYESCSSVK                    |  |  |  |                         |  |  | Mascot |
| 1472.6937 | 1472.6449 | -0.0488 | -33 | 636  | 648  | EISQIYESCSSVK                    |  |  |  |                         |  |  | Mascot |
| 1587.7948 | 1587.8539 | 0.0591  | 37  | 622  | 635  | DLQAAAFGLEHIMR                   |  |  |  | Oxidation (M)[13]       |  |  | Mascot |
| 1625.7476 | 1625.7368 | -0.0108 | -7  | 870  | 883  | DEVCDARFSDVIK                    |  |  |  |                         |  |  | Mascot |
| 1662.8195 | 1662.7861 | -0.0334 | -20 | 509  | 522  | NKELHRPQGDEPDK                   |  |  |  |                         |  |  | Mascot |
| 1865.8956 | 1865.8141 | -0.0815 | -44 | 1578 | 1592 | QFLESDFSFPYKDYK                  |  |  |  |                         |  |  | Mascot |
| 1865.8956 | 1865.8141 | -0.0815 | -44 | 1578 | 1592 | QFLESDFSFPYKDYK                  |  |  |  |                         |  |  | Mascot |
| 2152.0544 | 2152.0601 | 0.0057  | 3   | 492  | 508  | ESFLPHQGKLWHQWCQ<br>K            |  |  |  |                         |  |  | Mascot |
| 2152.0544 | 2152.0601 | 0.0057  | 3   | 492  | 508  | ESFLPHQGKLWHQWCQ<br>K            |  |  |  |                         |  |  | Mascot |
| 2194.0129 | 2194.0471 | 0.0342  | 16  | 198  | 216  | IDPMDVQMAVFHCADGF<br>LK          |  |  |  | Carbamidomethyl (C)[13] |  |  | Mascot |
| 2225.1033 | 2225.0793 | -0.024  | -11 | 293  | 310  | SHLMNSLINEKHNTFFHR               |  |  |  |                         |  |  | Mascot |
| 2225.1033 | 2225.0793 | -0.024  | -11 | 293  | 310  | SHLMNSLINEKHNTFFHR               |  |  |  |                         |  |  | Mascot |
| 2230.0444 | 2230.1414 | 0.097   | 43  | 170  | 190  | TDTGSTSHGGDIFKAMSL<br>YNK        |  |  |  |                         |  |  | Mascot |
| 3337.7024 | 3337.7131 | 0.0107  | 3   | 387  | 414  | IIQELFTNPKPLICLFTEDD<br>SNIFELER |  |  |  |                         |  |  | Mascot |

31    sarcosine dehydrogenase, mitochondrial [Danio rerio]    gi|41055040    74649.1    6.04    11    34    0

| Peptide Information |             |         |       |            |          |                         |           |       |   |                                            |      |             |
|---------------------|-------------|---------|-------|------------|----------|-------------------------|-----------|-------|---|--------------------------------------------|------|-------------|
| Calc. Mass          | Obsrv. Mass | ± da    | ± ppm | Start Seq. | End Seq. | Sequence                | Ion Score | C. I. | % | Modification                               | Rank | Result Type |
| 823.4308            | 823.399     | -0.0318 | -39   | 159        | 164      | LDEYKR                  |           |       |   |                                            |      | Mascot      |
| 970.5138            | 970.491     | -0.0228 | -23   | 16         | 23       | QPLSPLCR                |           |       |   | Carbamidomethyl (C)[7]                     |      | Mascot      |
| 1092.5758           | 1092.5464   | -0.0294 | -27   | 186        | 194      | DLYPLMNVK               |           |       |   |                                            |      | Mascot      |
| 1371.5846           | 1371.6129   | 0.0283  | 21    | 28         | 39       | CYSSQSTHTTEK            |           |       |   |                                            |      | Mascot      |
| 1399.7474           | 1399.6824   | -0.065  | -46   | 16         | 27       | QPLSPLCRATTR            |           |       |   | Carbamidomethyl (C)[7]                     |      | Mascot      |
| 1475.7853           | 1475.6984   | -0.0869 | -59   | 49         | 62       | HEDGLSGPTKPLPK          |           |       |   |                                            |      | Mascot      |
| 1556.7196           | 1556.7091   | -0.0105 | -7    | 511        | 524      | APGSTVYTCMLNQR          |           |       |   | Oxidation (M)[10]                          |      | Mascot      |
| 1587.7916           | 1587.8539   | 0.0623  | 39    | 11         | 23       | AMVCRQPLSPLCR           |           |       |   | Carbamidomethyl (C)[4,12]                  |      | Mascot      |
| 1625.8038           | 1625.7368   | -0.067  | -41   | 2          | 15       | AFLGTAAWRAMVCR          |           |       |   | Carbamidomethyl (C)[13], Oxidation (M)[11] |      | Mascot      |
| 1683.828            | 1683.7981   | -0.0299 | -18   | 1          | 15       | MAFLGTAAWRAMVCR         |           |       |   |                                            |      | Mascot      |
| 2120.9661           | 2121.1003   | 0.1342  | 63    | 581        | 599      | CTLIDHTEDMGMISIQGP<br>K |           |       |   | Oxidation (M)[10,12]                       |      | Mascot      |

32    synaptosome-associated protein 25a [Danio rerio]    gi|55251216    22862.9    4.65    8    34    0



| Peptide Information |                                              |             |         |       |             |                      |         |           |         |                            |                  |
|---------------------|----------------------------------------------|-------------|---------|-------|-------------|----------------------|---------|-----------|---------|----------------------------|------------------|
|                     | Calc. Mass                                   | Obsrv. Mass | ± da    | ± ppm | Start Seq.  | End Sequence Seq.    |         | Ion Score | C. I. % | Modification               | Rank Result Type |
|                     | 823.325                                      | 823.399     | 0.074   | 90    | 2           | 8 AEDSDMR            |         |           |         |                            | Mascot           |
|                     | 970.3604                                     | 970.491     | 0.1306  | 135   | 1           | 8 MAEDSDMR           |         |           |         | Oxidation (M)[1]           | Mascot           |
|                     | 1092.5605                                    | 1092.5464   | -0.0141 | -13   | 32          | 40 MLQLVEESK         |         |           |         | Oxidation (M)[1]           | Mascot           |
|                     | 1371.5676                                    | 1371.6129   | 0.0453  | 33    | 84          | 94 CCGLFICPCNK       |         |           |         | Carbamidomethyl (C)[1,2,7] | Mascot           |
|                     | 1475.6335                                    | 1475.6984   | 0.0649  | 44    | 84          | 96 CCGLFICPCNKMK     |         |           |         | Oxidation (M)[12]          | Mascot           |
|                     | 1662.8003                                    | 1662.7861   | -0.0142 | -9    | 46          | 59 TLVMLDEQGEQLDR    |         |           |         | Oxidation (M)[4]           | Mascot           |
|                     | 1924.8124                                    | 1924.9486   | 0.1362  | 71    | 2           | 17 AEDSDMRNELADMQQR  |         |           |         | Oxidation (M)[6]           | Mascot           |
|                     | 2071.8477                                    | 2072.0278   | 0.1801  | 87    | 1           | 17 MAEDSDMRNELADMQQR |         |           |         | Oxidation (M)[1,7]         | Mascot           |
| 33                  | hypothetical protein LOC553738 [Danio rerio] |             |         |       | gi 66472320 |                      | 27546.3 | 9.57      | 9       | 33                         | 0                |

| Peptide Information |                                                               |             |         |       |             |                           |         |           |         |                                               |                  |
|---------------------|---------------------------------------------------------------|-------------|---------|-------|-------------|---------------------------|---------|-----------|---------|-----------------------------------------------|------------------|
|                     | Calc. Mass                                                    | Obsrv. Mass | ± da    | ± ppm | Start Seq.  | End Sequence Seq.         |         | Ion Score | C. I. % | Modification                                  | Rank Result Type |
|                     | 853.4413                                                      | 853.3448    | -0.0965 | -113  | 223         | 230 FSQSGSLK              |         |           |         |                                               | Mascot           |
|                     | 1047.6097                                                     | 1047.5      | -0.1097 | -105  | 143         | 150 SFLKFHLR              |         |           |         |                                               | Mascot           |
|                     | 1165.6212                                                     | 1165.7224   | 0.1012  | 87    | 194         | 203 TFLTADDLKR            |         |           |         |                                               | Mascot           |
|                     | 1165.6212                                                     | 1165.7224   | 0.1012  | 87    | 194         | 203 TFLTADDLKR            |         |           |         |                                               | Mascot           |
|                     | 1865.9031                                                     | 1865.8141   | -0.089  | -48   | 10          | 25 MVRTGEKPITCTQCGK       |         |           |         | Carbamidomethyl (C)[11,14]                    | Mascot           |
|                     | 1865.9031                                                     | 1865.8141   | -0.089  | -48   | 10          | 25 MVRTGEKPITCTQCGK       |         |           |         | Carbamidomethyl (C)[11,14]                    | Mascot           |
|                     | 1961.8779                                                     | 1961.9539   | 0.076   | 39    | 207         | 222 IHTGEKPYMCSHCDKR      |         |           |         | Carbamidomethyl (C)[10]                       | Mascot           |
|                     | 2120.9497                                                     | 2121.1003   | 0.1506  | 71    | 64          | 81 HMMIHTGERPFICTQCGK     |         |           |         | Oxidation (M)[2,3]                            | Mascot           |
|                     | 2233.0752                                                     | 2233.0454   | -0.0298 | -13   | 147         | 165 FHLRVHTNERPYSCSVC GK  |         |           |         |                                               | Mascot           |
|                     | 2284.0168                                                     | 2284.1365   | 0.1197  | 52    | 204         | 221 HQRIHTGEKPYMCSHCD K   |         |           |         | Carbamidomethyl (C)[13,16]                    | Mascot           |
|                     | 2298.0171                                                     | 2298.1453   | 0.1282  | 56    | 151         | 169 VHTNERPYSCSVC GKSC TR |         |           |         | Carbamidomethyl (C)[10,13,17]                 | Mascot           |
|                     | 2300.0117                                                     | 2300.1404   | 0.1287  | 56    | 204         | 221 HQRIHTGEKPYMCSHCD K   |         |           |         | Carbamidomethyl (C)[13,16], Oxidation (M)[12] | Mascot           |
| 34                  | immunoglobulin heavy chain variable segment 9-2 [Danio rerio] |             |         |       | gi 56207380 |                           | 12773.2 | 7.57      | 5       | 33                                            | 0                |

| Peptide Information |             |        |       |            |          |                |           |         |                  |                  |
|---------------------|-------------|--------|-------|------------|----------|----------------|-----------|---------|------------------|------------------|
| Calc. Mass          | Obsrv. Mass | ± da   | ± ppm | Start Seq. | End Seq. | Sequence       | Ion Score | C. I. % | Modification     | Rank Result Type |
| 1467.755            | 1467.726    | -0.029 | -20   | 77         | 90       | STAQSVQGRFTASK |           |         |                  | Mascot           |
| 1578.7581           | 1578.7957   | 0.0376 | 24    | 91         | 103      | DSSNLYLHMNQLK  |           |         | Oxidation (M)[9] | Mascot           |

|    |                                      |           |         |     |    |     |                     |          |      |    |    |                   |  |  |  |  |        |
|----|--------------------------------------|-----------|---------|-----|----|-----|---------------------|----------|------|----|----|-------------------|--|--|--|--|--------|
|    | 2097.0435                            | 2097.0923 | 0.0488  | 23  | 86 | 103 | FTASKDSSNLYLHMNQLK  |          |      |    |    |                   |  |  |  |  | Mascot |
|    | 2097.0435                            | 2097.0923 | 0.0488  | 23  | 86 | 103 | FTASKDSSNLYLHMNQLK  |          |      |    |    |                   |  |  |  |  | Mascot |
|    | 2225.03                              | 2225.0793 | 0.0493  | 22  | 39 | 57  | LSCACSGFTLRSTNMYWIR |          |      |    |    | Oxidation (M)[15] |  |  |  |  | Mascot |
|    | 2225.03                              | 2225.0793 | 0.0493  | 22  | 39 | 57  | LSCACSGFTLRSTNMYWIR |          |      |    |    | Oxidation (M)[15] |  |  |  |  | Mascot |
|    | 2233.0811                            | 2233.0454 | -0.0357 | -16 | 58 | 76  | QAPGKGLEWIIYYSDSDK  |          |      |    |    |                   |  |  |  |  | Mascot |
| 35 | contactin-1a precursor [Danio rerio] |           |         |     |    |     | gi 136256388        | 114246.1 | 6.19 | 13 | 32 | 0                 |  |  |  |  |        |

#### Peptide Information

|  | Calc. Mass | Obsrv. Mass | ± da    | ± ppm | Start Seq. | End Seq. | Sequence              | Ion Score | C. I. | % Modification         | Rank | Result Type |
|--|------------|-------------|---------|-------|------------|----------|-----------------------|-----------|-------|------------------------|------|-------------|
|  | 875.437    | 875.4468    | 0.0098  | 11    | 74         | 81       | ANPPASYR              |           |       |                        |      | Mascot      |
|  | 987.5118   | 987.5167    | 0.0049  | 5     | 383        | 390      | GHEVRFSR              |           |       |                        |      | Mascot      |
|  | 987.5118   | 987.5167    | 0.0049  | 5     | 383        | 390      | GHEVRFSR              |           |       |                        |      | Mascot      |
|  | 1045.5173  | 1045.5457   | 0.0284  | 27    | 562        | 569      | DAQHYQRK              |           |       |                        |      | Mascot      |
|  | 1062.5513  | 1062.674    | 0.1227  | 115   | 442        | 449      | VVFECRPR              |           |       | Carbamidomethyl (C)[5] |      | Mascot      |
|  | 1578.8082  | 1578.7957   | -0.0125 | -8    | 501        | 516      | GRANSTGSLSDATK        |           |       |                        |      | Mascot      |
|  | 1796.9249  | 1796.6711   | -0.2538 | -141  | 717        | 735      | EARPIVAPSDIGGGGTSR    |           |       |                        |      | Mascot      |
|  | 1815.9058  | 1815.8549   | -0.0509 | -28   | 883        | 897      | LDNMKPDShYLVVR        |           |       |                        |      | Mascot      |
|  | 2071.925   | 2072.0278   | 0.1028  | 50    | 116        | 134      | HAGNYTCVASNQYGSVTSR   |           |       | Carbamidomethyl (C)[7] |      | Mascot      |
|  | 2224.9749  | 2225.0793   | 0.1044  | 47    | 388        | 406      | FSRLGFEDSGMYQCVAENR   |           |       | Oxidation (M)[11]      |      | Mascot      |
|  | 2225.1772  | 2225.0793   | -0.0979 | -44   | 695        | 716      | VIATNTLTGTPPSEPSKTTTR |           |       |                        |      | Mascot      |
|  | 2230.0305  | 2230.1414   | 0.1109  | 50    | 114        | 134      | SKHAGNYTCVASNQYGSVTSR |           |       |                        |      | Mascot      |
|  | 2283.092   | 2283.1443   | 0.0523  | 23    | 594        | 614      | YSCTAQTPVDNTTASAEVVVR |           |       | Carbamidomethyl (C)[3] |      | Mascot      |
|  | 2283.092   | 2283.1443   | 0.0523  | 23    | 594        | 614      | YSCTAQTPVDNTTASAEVVVR |           |       | Carbamidomethyl (C)[3] |      | Mascot      |
|  | 2284.2131  | 2284.1365   | -0.0766 | -34   | 442        | 460      | VVFECRPRAAPRPNITWSK   |           |       | Carbamidomethyl (C)[5] |      | Mascot      |

|    |                                  |  |  |  |  |  |              |         |      |   |    |   |  |  |  |  |  |
|----|----------------------------------|--|--|--|--|--|--------------|---------|------|---|----|---|--|--|--|--|--|
| 36 | WD repeat domain 8 [Danio rerio] |  |  |  |  |  | gi 159155126 | 50930.5 | 6.22 | 9 | 32 | 0 |  |  |  |  |  |
|----|----------------------------------|--|--|--|--|--|--------------|---------|------|---|----|---|--|--|--|--|--|

#### Peptide Information

|  | Calc. Mass | Obsrv. Mass | ± da    | ± ppm | Start Seq. | End Seq. | Sequence      | Ion Score | C. I. | % Modification | Rank | Result Type |
|--|------------|-------------|---------|-------|------------|----------|---------------|-----------|-------|----------------|------|-------------|
|  | 853.4236   | 853.3448    | -0.0788 | -92   | 147        | 153      | YMALAER       |           |       |                |      | Mascot      |
|  | 870.4355   | 870.5259    | 0.0904  | 104   | 2          | 8        | NFSEVFK       |           |       |                |      | Mascot      |
|  | 1279.7633  | 1279.7505   | -0.0128 | -10   | 247        | 256      | VRILNHITWK    |           |       |                |      | Mascot      |
|  | 1399.6093  | 1399.6824   | 0.0731  | 52    | 134        | 146      | ACQKGMDFTADGR |           |       |                |      | Mascot      |

|           |           |         |    |     |     |                         |                                          |        |
|-----------|-----------|---------|----|-----|-----|-------------------------|------------------------------------------|--------|
| 1456.6307 | 1456.6481 | 0.0174  | 12 | 134 | 146 | ACQKGMDFDADGR           | Carbamidomethyl (C)[2]                   | Mascot |
| 1472.6256 | 1472.6449 | 0.0193  | 13 | 134 | 146 | ACQKGMDFDADGR           | Carbamidomethyl (C)[2], Oxidation (M)[6] | Mascot |
| 1472.6256 | 1472.6449 | 0.0193  | 13 | 134 | 146 | ACQKGMDFDADGR           | Carbamidomethyl (C)[2], Oxidation (M)[6] | Mascot |
| 1587.8013 | 1587.8539 | 0.0526  | 33 | 258 | 271 | ITEFEHPATITNSK          |                                          | Mascot |
| 1865.8309 | 1865.8141 | -0.0168 | -9 | 347 | 361 | NGNMPQSLWVWDMQK         | Oxidation (M)[4,13]                      | Mascot |
| 1865.8309 | 1865.8141 | -0.0168 | -9 | 347 | 361 | NGNMPQSLWVWDMQK         | Oxidation (M)[4,13]                      | Mascot |
| 1924.9374 | 1924.9486 | 0.0112  | 6  | 71  | 86  | GLVQVWSLEQPDWHCK        |                                          | Mascot |
| 2071.9971 | 2072.0278 | 0.0307  | 15 | 228 | 246 | SVAWSPSSQFLAIGSYDE<br>K |                                          | Mascot |
| 2284.0525 | 2284.1365 | 0.084   | 37 | 155 | 172 | DCKDYISVFVCDDWHLL<br>R  | Carbamidomethyl (C)[2]                   | Mascot |

37 PREDICTED: hypothetical protein LOC569436 [Danio rerio]

gi|326678363 352771.2 7.92 26 32 0

#### Peptide Information

| Calc. Mass | Obsrv. Mass | ± da    | ± ppm | Start Seq. | End Seq. | Sequence          | Ion Score | C. I. | % Modification            | Rank | Result Type |
|------------|-------------|---------|-------|------------|----------|-------------------|-----------|-------|---------------------------|------|-------------|
| 823.3549   | 823.399     | 0.0441  | 54    | 401        | 407      | CEQCGKR           |           |       |                           |      | Mascot      |
| 836.3818   | 836.3209    | -0.0609 | -73   | 2995       | 3002     | LGDSGMEK          |           |       |                           |      | Mascot      |
| 842.4743   | 842.4943    | 0.02    | 24    | 2664       | 2669     | HFRINR            |           |       |                           |      | Mascot      |
| 864.4131   | 864.4702    | 0.0571  | 66    | 603        | 610      | LGAEMSEK          |           |       |                           |      | Mascot      |
| 875.4655   | 875.4468    | -0.0187 | -21   | 2205       | 2211     | NIVCEK            |           |       | Carbamidomethyl (C)[4]    |      | Mascot      |
| 987.4677   | 987.5167    | 0.049   | 50    | 94         | 101      | QTLSDHMR          | 7         | 0     |                           |      | Mascot      |
| 987.4677   | 987.5167    | 0.049   | 50    | 94         | 101      | QTLSDHMR          |           |       |                           |      | Mascot      |
| 1047.6058  | 1047.5      | -0.1058 | -101  | 1369       | 1376     | FQILQSRR          |           |       |                           |      | Mascot      |
| 1062.55    | 1062.674    | 0.124   | 117   | 1488       | 1496     | NESMIDLLK         |           |       |                           |      | Mascot      |
| 1092.6122  | 1092.5464   | -0.0658 | -60   | 2545       | 2554     | LFVGDMGILK        |           |       |                           |      | Mascot      |
| 1165.5483  | 1165.7224   | 0.1741  | 149   | 922        | 932      | SKGDGPNFSEK       |           |       |                           |      | Mascot      |
| 1165.5483  | 1165.7224   | 0.1741  | 149   | 922        | 932      | SKGDGPNFSEK       |           |       |                           |      | Mascot      |
| 1456.6962  | 1456.6481   | -0.0481 | -33   | 94         | 105      | QTLSDHMRTHSK      |           |       | Oxidation (M)[7]          |      | Mascot      |
| 1467.8318  | 1467.726    | -0.1058 | -72   | 491        | 503      | TFAGPENLKIHLK     |           |       |                           |      | Mascot      |
| 1475.647   | 1475.6984   | 0.0514  | 35    | 1333       | 1345     | RNNENNQADDASK     |           |       |                           |      | Mascot      |
| 1578.703   | 1578.7957   | 0.0927  | 59    | 854        | 868      | GDGPNFSEQQPSSTK   |           |       |                           |      | Mascot      |
| 1625.7523  | 1625.7368   | -0.0155 | -10   | 1          | 13       | MHSAHQEEQKCIK     |           |       | Carbamidomethyl (C)[11]   |      | Mascot      |
| 1683.7512  | 1683.7981   | 0.0469  | 28    | 130        | 144      | KHCGNAQHICDLGK    |           |       | Carbamidomethyl (C)[3]    |      | Mascot      |
| 1815.8629  | 1815.8549   | -0.008  | -4    | 527        | 541      | ANYRFVNIQDVCAMR   |           |       | Oxidation (M)[14]         |      | Mascot      |
| 1865.9174  | 1865.8141   | -0.1033 | -55   | 53         | 68       | HHVKPEEISLSCSQSK  |           |       | Carbamidomethyl (C)[12]   |      | Mascot      |
| 1865.9174  | 1865.8141   | -0.1033 | -55   | 53         | 68       | HHVKPEEISLSCSQSK  |           |       | Carbamidomethyl (C)[12]   |      | Mascot      |
| 2120.877   | 2121.1003   | 0.2233  | 105   | 238        | 255      | HMCIHSGEKPYACDQCG |           |       | Carbamidomethyl (C)[3,13] |      | Mascot      |

|    |                                                         |           |         |     |      |              |                                     |      |                                                |        |   |
|----|---------------------------------------------------------|-----------|---------|-----|------|--------------|-------------------------------------|------|------------------------------------------------|--------|---|
|    | 2151.9521                                               | 2152.0601 | 0.108   | 50  | 131  | 149          | K<br>HCGNAQHICDLGKSFS<br>FK         |      | Carbamidomethyl (C)[2]                         | Mascot |   |
|    | 2151.9521                                               | 2152.0601 | 0.108   | 50  | 131  | 149          | HCGNAQHICDLGKSFS<br>FK              |      | Carbamidomethyl (C)[2]                         | Mascot |   |
|    | 2193.8933                                               | 2194.0471 | 0.1538  | 70  | 238  | 255          | HMCIHSGEKPYACDQCG<br>K              |      | Carbamidomethyl (C)[3,13,16], Oxidation (M)[2] | Mascot |   |
|    | 2224.9797                                               | 2225.0793 | 0.0996  | 45  | 321  | 339          | HHMSLHNEEKPYVCGQC<br>GR             |      |                                                | Mascot |   |
|    | 2224.9797                                               | 2225.0793 | 0.0996  | 45  | 321  | 339          | HHMSLHNEEKPYVCGQC<br>GR             |      |                                                | Mascot |   |
|    | 2232.8818                                               | 2233.0454 | 0.1636  | 73  | 181  | 199          | YHMKMHSDETAFSCEEC<br>GK             |      |                                                | Mascot |   |
|    | 2283.2068                                               | 2283.1443 | -0.0625 | -27 | 1358 | 1375         | TLTQMYTHFLRFQILQSR                  |      |                                                | Mascot |   |
|    | 2283.2068                                               | 2283.1443 | -0.0625 | -27 | 1358 | 1375         | TLTQMYTHFLRFQILQSR                  |      |                                                | Mascot |   |
|    | 2297.144                                                | 2297.1523 | 0.0083  | 4   | 2728 | 2748         | LNLSDCSISEEGYKALAS<br>ALR           |      | Carbamidomethyl (C)[6]                         | Mascot |   |
|    | 2297.9961                                               | 2298.1453 | 0.1492  | 65  | 321  | 339          | HHMSLHNEEKPYVCGQC<br>GR             |      | Carbamidomethyl (C)[14], Oxidation (M)[3]      | Mascot |   |
|    | 2306.1003                                               | 2306.1123 | 0.012   | 5   | 1875 | 1895         | ITEDDCCVLISALNSNPSN<br>LK           |      | Carbamidomethyl (C)[6]                         | Mascot |   |
|    | 3387.5833                                               | 3387.6663 | 0.083   | 25  | 1409 | 1438         | LLFYEKDLIEDCGIDVSEA<br>SVFSGMCTQIFK |      |                                                | Mascot |   |
| 38 | PREDICTED: hypothetical protein LOC558327 [Danio rerio] |           |         |     |      | gi 326678977 | 53299.3                             | 6.37 | 9                                              | 32     | 0 |

#### Peptide Information

| Calc. Mass | Obsrv. Mass | ± da    | ± ppm | Start Seq. | End Seq. | Sequence                | Ion Score | C. I. % | Modification           | Rank | Result Type |
|------------|-------------|---------|-------|------------|----------|-------------------------|-----------|---------|------------------------|------|-------------|
| 848.422    | 848.5095    | 0.0875  | 103   | 10         | 17       | GGTQTQTR                |           |         |                        |      | Mascot      |
| 882.5155   | 882.5498    | 0.0343  | 39    | 132        | 138      | HVETLRK                 |           |         |                        |      | Mascot      |
| 987.4602   | 987.5167    | 0.0565  | 57    | 211        | 219      | SQTHSNASR               |           |         |                        |      | Mascot      |
| 987.4602   | 987.5167    | 0.0565  | 57    | 211        | 219      | SQTHSNASR               |           |         |                        |      | Mascot      |
| 1047.5793  | 1047.5      | -0.0793 | -76   | 362        | 370      | LSSRSIQEK               |           |         |                        |      | Mascot      |
| 1092.5354  | 1092.5464   | 0.011   | 10    | 392        | 401      | TVCLADEVSR              |           |         |                        |      | Mascot      |
| 1796.9324  | 1796.6711   | -0.2613 | -145  | 386        | 401      | SPVVKHTVCLADEVSR        |           |         | Carbamidomethyl (C)[9] |      | Mascot      |
| 1815.8242  | 1815.8549   | 0.0307  | 17    | 141        | 156      | EEGEEGEKDILDAEPR        |           |         |                        |      | Mascot      |
| 2071.9568  | 2072.0278   | 0.071   | 34    | 178        | 196      | NIFSPEPPTNSTDTETHG<br>K |           |         |                        |      | Mascot      |
| 2104.0669  | 2103.949    | -0.1179 | -56   | 443        | 461      | TFNISSPTDLRHVDISSK      |           |         |                        |      | Mascot      |

39 PREDICTED: UPF0639 protein-like [Danio rerio] gi|326675781 53022.8 5.16 9 32 0

#### Peptide Information

| Calc. Mass | Obsrv. Mass | ± da    | ± ppm | Start Seq. | End Seq. | Sequence | Ion Score | C. I. % | Modification | Rank | Result Type |
|------------|-------------|---------|-------|------------|----------|----------|-----------|---------|--------------|------|-------------|
| 823.5188   | 823.399     | -0.1198 | -145  | 51         | 56       | RFFIIK   |           |         |              |      | Mascot      |
| 853.4413   | 853.3448    | -0.0965 | -113  | 69         | 75       | KSFETNK  |           |         |              |      | Mascot      |

|    |                                             |           |         |     |             |     |                          |      |   |    |   |  |                                          |  |  |  |        |
|----|---------------------------------------------|-----------|---------|-----|-------------|-----|--------------------------|------|---|----|---|--|------------------------------------------|--|--|--|--------|
|    | 875.4468                                    | 875.4468  | 0       | 0   | 211         | 217 | TEQEQIK                  |      |   |    |   |  |                                          |  |  |  | Mascot |
|    | 882.4866                                    | 882.5498  | 0.0632  | 72  | 443         | 449 | AYKIMTR                  |      |   |    |   |  |                                          |  |  |  | Mascot |
|    | 1062.5314                                   | 1062.674  | 0.1426  | 134 | 247         | 255 | SLEELSQEK                |      |   |    |   |  |                                          |  |  |  | Mascot |
|    | 1371.7478                                   | 1371.6129 | -0.1349 | -98 | 191         | 201 | LNQLLEEEKQK              |      |   |    |   |  |                                          |  |  |  | Mascot |
|    | 1951.9099                                   | 1951.9774 | 0.0675  | 35  | 171         | 185 | LMEETEELCLQREQK          |      |   |    |   |  | Carbamidomethyl (C)[9], Oxidation (M)[2] |  |  |  | Mascot |
|    | 2230.1384                                   | 2230.1414 | 0.003   | 1   | 142         | 162 | NAQLGEAMIESLEAQL<br>QLAK |      |   |    |   |  | Oxidation (M)[8]                         |  |  |  | Mascot |
|    | 2283.219                                    | 2283.1443 | -0.0747 | -33 | 370         | 389 | LKLAEEALQDLEQGLNTI<br>ER |      |   |    |   |  |                                          |  |  |  | Mascot |
|    | 2283.219                                    | 2283.1443 | -0.0747 | -33 | 370         | 389 | LKLAEEALQDLEQGLNTI<br>ER |      |   |    |   |  |                                          |  |  |  | Mascot |
| 40 | immunoglobulin mu heavy chain [Danio rerio] |           |         |     | gi 51559357 |     | 23906.6                  | 8.05 | 6 | 32 | 0 |  |                                          |  |  |  |        |

#### Peptide Information

| Calc. Mass | Obsrv. Mass | ± da    | ± ppm | Start Seq. | End Seq. | Sequence                | Ion Score | C. I. | % Modification    | Rank | Result Type |
|------------|-------------|---------|-------|------------|----------|-------------------------|-----------|-------|-------------------|------|-------------|
| 864.4097   | 864.4702    | 0.0605  | 70    | 209        | 215      | SDWIDTK                 |           |       |                   |      | Mascot      |
| 1467.755   | 1467.726    | -0.029  | -20   | 77         | 90       | STAQSVQGRFTASK          |           |       |                   |      | Mascot      |
| 1578.7581  | 1578.7957   | 0.0376  | 24    | 91         | 103      | DSSNLYLHMNQLK           |           |       | Oxidation (M)[9]  |      | Mascot      |
| 2097.0435  | 2097.0923   | 0.0488  | 23    | 86         | 103      | FTASKDSSNLYLHMNQL<br>K  |           |       |                   |      | Mascot      |
| 2097.0435  | 2097.0923   | 0.0488  | 23    | 86         | 103      | FTASKDSSNLYLHMNQL<br>K  |           |       |                   |      | Mascot      |
| 2225.03    | 2225.0793   | 0.0493  | 22    | 39         | 57       | LSCACSGFTLRSTNMYWI<br>R |           |       | Oxidation (M)[15] |      | Mascot      |
| 2225.03    | 2225.0793   | 0.0493  | 22    | 39         | 57       | LSCACSGFTLRSTNMYWI<br>R |           |       | Oxidation (M)[15] |      | Mascot      |
| 2233.0811  | 2233.0454   | -0.0357 | -16   | 58         | 76       | QAPGKGLEWIIYYSDSD<br>K  |           |       |                   |      | Mascot      |

41 fascin 2A [Danio rerio] gi|184186129 54837.1 5.91 9 32 0

#### Peptide Information

| Calc. Mass | Obsrv. Mass | ± da    | ± ppm | Start Seq. | End Seq. | Sequence                | Ion Score | C. I. | % Modification   | Rank | Result Type |
|------------|-------------|---------|-------|------------|----------|-------------------------|-----------|-------|------------------|------|-------------|
| 996.493    | 996.5763    | 0.0833  | 84    | 186        | 193      | TCDNRFLK                |           |       |                  |      | Mascot      |
| 996.493    | 996.5763    | 0.0833  | 84    | 186        | 193      | TCDNRFLK                |           |       |                  |      | Mascot      |
| 1092.5718  | 1092.5464   | -0.0254 | -23   | 1          | 11       | MSTNGISAALK             |           |       |                  |      | Mascot      |
| 1165.6034  | 1165.7224   | 0.119   | 102   | 88         | 97       | FLIVMQSDGR              |           |       |                  |      | Mascot      |
| 1165.6034  | 1165.7224   | 0.119   | 102   | 88         | 97       | FLIVMQSDGR              |           |       |                  |      | Mascot      |
| 1294.5038  | 1294.5033   | -0.0005 | 0     | 77         | 87       | CEEEVPNTDCR             |           |       |                  |      | Mascot      |
| 1815.9309  | 1815.8549   | -0.076  | -42   | 198        | 213      | LVMEHGPNTSFTLELK        |           |       |                  |      | Mascot      |
| 2104.0742  | 2103.949    | -0.1252 | -60   | 198        | 216      | LVMEHGPNTSFTLELKSG<br>K |           |       | Oxidation (M)[3] |      | Mascot      |
| 2230.1172  | 2230.1414   | 0.0242  | 11    | 194        | 213      | NDGKLVMEHGPNTSFTL       |           |       |                  |      | Mascot      |

|    |                                              |           |         |     |     |             |                                   |      |    |    |   |                  |        |
|----|----------------------------------------------|-----------|---------|-----|-----|-------------|-----------------------------------|------|----|----|---|------------------|--------|
|    | 2246.9983                                    | 2247.0593 | 0.061   | 27  | 467 | 488         | ELK<br>GDQGGTLMGDGLSVNA<br>SSLWEH |      |    |    |   | Oxidation (M)[8] | Mascot |
|    | 2283.2205                                    | 2283.1443 | -0.0762 | -33 | 2   | 22          | STNGISAALKLQFGLINHE<br>NR         |      |    |    |   |                  | Mascot |
|    | 2283.2205                                    | 2283.1443 | -0.0762 | -33 | 2   | 22          | STNGISAALKLQFGLINHE<br>NR         |      |    |    |   |                  | Mascot |
| 42 | SH3 domain-binding protein 4-A [Danio rerio] |           |         |     |     | gi 45387913 | 104947.5                          | 7.73 | 13 | 32 | 0 |                  |        |

#### Peptide Information

| Calc. Mass | Obsrv. Mass | ± da    | ± ppm | Start Seq. | End Seq. | Sequence                           | Ion Score | C. I. | % | Modification                                 | Rank | Result Type |
|------------|-------------|---------|-------|------------|----------|------------------------------------|-----------|-------|---|----------------------------------------------|------|-------------|
| 842.5822   | 842.4943    | -0.0879 | -104  | 634        | 640      | LIKTVIR                            |           |       |   |                                              |      | Mascot      |
| 850.4338   | 850.5258    | 0.092   | 108   | 358        | 364      | LSNMEIK                            |           |       |   | Oxidation (M)[4]                             |      | Mascot      |
| 850.4338   | 850.5258    | 0.092   | 108   | 358        | 364      | LSNMEIK                            |           |       |   | Oxidation (M)[4]                             |      | Mascot      |
| 870.4726   | 870.5259    | 0.0533  | 61    | 1          | 7        | MAAHRIR                            |           |       |   | Oxidation (M)[1]                             |      | Mascot      |
| 1045.4796  | 1045.5457   | 0.0661  | 63    | 762        | 770      | AELDSEPER                          |           |       |   |                                              |      | Mascot      |
| 1294.6637  | 1294.5033   | -0.1604 | -124  | 553        | 563      | KADEISDFTLR                        |           |       |   |                                              |      | Mascot      |
| 1371.7161  | 1371.6129   | -0.1032 | -75   | 8          | 19       | VTNNNNVLPRCK                       |           |       |   |                                              |      | Mascot      |
| 1815.8959  | 1815.8549   | -0.041  | -23   | 432        | 446      | HVSFSSNVWNHMKK                     |           |       |   | Oxidation (M)[12]                            |      | Mascot      |
| 2097.0137  | 2097.0923   | 0.0786  | 37    | 373        | 390      | VSVMTRTESMAEIVCVR                  |           |       |   | Carbamidomethyl (C)[16], Oxidation (M)[4,11] |      | Mascot      |
| 2097.0137  | 2097.0923   | 0.0786  | 37    | 373        | 390      | VSVMTRTESMAEIVCVR                  |           |       |   | Carbamidomethyl (C)[16], Oxidation (M)[4,11] |      | Mascot      |
| 2121.0474  | 2121.1003   | 0.0529  | 25    | 744        | 761      | AFADALSYVNLPLTYFCR                 |           |       |   | Carbamidomethyl (C)[17]                      |      | Mascot      |
| 2230.2417  | 2230.1414   | -0.1003 | -45   | 813        | 831      | LIMDFVLLTTAVEVAPRW<br>R            |           |       |   |                                              |      | Mascot      |
| 2284.2368  | 2284.1365   | -0.1003 | -44   | 463        | 484      | TVVAIFGHDCAPKLLVS<br>EVGK          |           |       |   |                                              |      | Mascot      |
| 2300.0686  | 2300.1404   | 0.0718  | 31    | 568        | 587      | DDQDCILAQCVCQTPQP<br>PPK           |           |       |   | Carbamidomethyl (C)[5]                       |      | Mascot      |
| 3337.6052  | 3337.7131   | 0.1079  | 32    | 269        | 298      | LARSCHDLESLGQNPGW<br>GQTQPVETNIVCK |           |       |   | Carbamidomethyl (C)[5]                       |      | Mascot      |

|    |                                                                    |  |  |  |  |              |         |      |   |    |   |    |       |
|----|--------------------------------------------------------------------|--|--|--|--|--------------|---------|------|---|----|---|----|-------|
| 43 | polymerase I and transcript release factor isoform 2 [Danio rerio] |  |  |  |  | gi 167621556 | 51742.2 | 5.07 | 3 | 32 | 0 | 24 | 6.271 |
|----|--------------------------------------------------------------------|--|--|--|--|--------------|---------|------|---|----|---|----|-------|

#### Peptide Information

| Calc. Mass | Obsrv. Mass | ± da    | ± ppm | Start Seq. | End Seq. | Sequence  | Ion Score | C. I. | % | Modification     | Rank | Result Type |
|------------|-------------|---------|-------|------------|----------|-----------|-----------|-------|---|------------------|------|-------------|
| 823.3978   | 823.399     | 0.0012  | 1     | 254        | 260      | GNMEKTK   |           |       |   | Oxidation (M)[3] |      | Mascot      |
| 848.393    | 848.5095    | 0.1165  | 137   | 329        | 335      | MSVNPFR   |           |       |   | Oxidation (M)[1] |      | Mascot      |
| 987.5945   | 987.5167    | -0.0778 | -79   | 128        | 136      | VSVNVKSVR | 24        | 6.271 |   |                  |      | Mascot      |
| 987.5945   | 987.5167    | -0.0778 | -79   | 128        | 136      | VSVNVKSVR |           |       |   |                  |      | Mascot      |

|    |                                                                    |  |  |  |  |             |         |     |   |    |   |  |  |
|----|--------------------------------------------------------------------|--|--|--|--|-------------|---------|-----|---|----|---|--|--|
| 44 | odorant receptor, family F, subfamily 115, member 12 [Danio rerio] |  |  |  |  | gi 82658220 | 35276.8 | 9.3 | 7 | 32 | 0 |  |  |
|----|--------------------------------------------------------------------|--|--|--|--|-------------|---------|-----|---|----|---|--|--|

| Peptide Information |                                                                                               |             |         |       |              |          |                                    |           |         |                                            |                  |
|---------------------|-----------------------------------------------------------------------------------------------|-------------|---------|-------|--------------|----------|------------------------------------|-----------|---------|--------------------------------------------|------------------|
|                     | Calc. Mass                                                                                    | Obsrv. Mass | ± da    | ± ppm | Start Seq.   | End Seq. | Sequence                           | Ion Score | C. I. % | Modification                               | Rank Result Type |
|                     | 850.4525                                                                                      | 850.5258    | 0.0733  | 86    | 221          | 227      | IAMVCIK                            |           |         | Carbamidomethyl (C)[5], Oxidation (M)[3]   | Mascot           |
|                     | 850.4888                                                                                      | 850.5258    | 0.037   | 44    | 301          | 307      | MLKLCVK                            |           |         | Oxidation (M)[1]                           | Mascot           |
|                     | 996.4819                                                                                      | 996.5763    | 0.0944  | 95    | 133          | 140      | YPTIMNNK                           |           |         | Oxidation (M)[5]                           | Mascot           |
|                     | 996.4819                                                                                      | 996.5763    | 0.0944  | 95    | 133          | 140      | YPTIMNNK                           |           |         | Oxidation (M)[5]                           | Mascot           |
|                     | 1045.516                                                                                      | 1045.5457   | 0.0297  | 28    | 83           | 91       | DLLTDPSEK                          |           |         |                                            | Mascot           |
|                     | 1399.7792                                                                                     | 1399.6824   | -0.0968 | -69   | 80           | 91       | LLKDLLTDPSEK                       |           |         |                                            | Mascot           |
|                     | 1467.7698                                                                                     | 1467.726    | -0.0438 | -30   | 133          | 144      | YPTIMNNKMIVK                       |           |         | Oxidation (M)[5]                           | Mascot           |
|                     | 2298.1118                                                                                     | 2298.1453   | 0.0335  | 15    | 167          | 186      | LSHCRSVIENHVCNPSL<br>FK            |           |         |                                            | Mascot           |
| 45                  | Vasa protein [Danio rerio]                                                                    |             |         |       | gij120537661 |          | 73965.2                            | 5.4       | 11      | 32                                         | 0                |
| Peptide Information |                                                                                               |             |         |       |              |          |                                    |           |         |                                            |                  |
|                     | Calc. Mass                                                                                    | Obsrv. Mass | ± da    | ± ppm | Start Seq.   | End Seq. | Sequence                           | Ion Score | C. I. % | Modification                               | Rank Result Type |
|                     | 823.4168                                                                                      | 823.399     | -0.0178 | -22   | 90           | 97       | GGFRSGSR                           |           |         |                                            | Mascot           |
|                     | 853.4426                                                                                      | 853.3448    | -0.0978 | -115  | 164          | 171      | GGFRGGFR                           |           |         |                                            | Mascot           |
|                     | 882.4315                                                                                      | 882.5498    | 0.1183  | 134   | 651          | 658      | VFASTDSR                           |           |         |                                            | Mascot           |
|                     | 970.4913                                                                                      | 970.491     | -0.0003 | 0     | 504          | 511      | TMVFEVETK                          |           |         | Oxidation (M)[2]                           | Mascot           |
|                     | 1371.5742                                                                                     | 1371.6129   | 0.0387  | 28    | 412          | 422      | MLDMGFEPEMR                        |           |         | Oxidation (M)[1]                           | Mascot           |
|                     | 1472.709                                                                                      | 1472.6449   | -0.0641 | -44   | 513          | 525      | SADFIATFLCQEK                      |           |         |                                            | Mascot           |
|                     | 1472.709                                                                                      | 1472.6449   | -0.0641 | -44   | 513          | 525      | SADFIATFLCQEK                      |           |         |                                            | Mascot           |
|                     | 1815.8582                                                                                     | 1815.8549   | -0.0033 | -2    | 437          | 451      | QTLMFSAITYPEDIQR                   |           |         | Oxidation (M)[4]                           | Mascot           |
|                     | 1865.7532                                                                                     | 1865.8141   | 0.0609  | 33    | 64           | 81       | SEIDENGSDGGWNGGES<br>R             |           |         |                                            | Mascot           |
|                     | 1865.7532                                                                                     | 1865.8141   | 0.0609  | 33    | 64           | 81       | SEIDENGSDGGWNGGES<br>R             |           |         |                                            | Mascot           |
|                     | 1951.9952                                                                                     | 1951.9774   | -0.0178 | -9    | 376          | 393      | GCNVLCATPGRHLHLIGR                 |           |         | Carbamidomethyl (C)[2]                     | Mascot           |
|                     | 2230.0444                                                                                     | 2230.1414   | 0.097   | 43    | 434          | 451      | EERQTLMFSAITYPEDIQR                |           |         | Oxidation (M)[7]                           | Mascot           |
|                     | 3387.5969                                                                                     | 3387.6663   | 0.0694  | 20    | 232          | 262      | YDDILVDVSGSNPPKAIM<br>TFEEAGLCDSLK |           |         | Carbamidomethyl (C)[26], Oxidation (M)[18] | Mascot           |
| 46                  | novel protein similar to vertebrate spectrin, beta, non-erythrocytic 1 (SPTBN1) [Danio rerio] |             |         |       | gij220673237 |          | 79469.5                            | 5.08      | 10      | 31                                         | 0                |
| Peptide Information |                                                                                               |             |         |       |              |          |                                    |           |         |                                            |                  |
|                     | Calc. Mass                                                                                    | Obsrv. Mass | ± da    | ± ppm | Start Seq.   | End Seq. | Sequence                           | Ion Score | C. I. % | Modification                               | Rank Result Type |
|                     | 987.5217                                                                                      | 987.5167    | -0.005  | -5    | 216          | 223      | ELDEVRRAR                          |           |         |                                            | Mascot           |
|                     | 987.5217                                                                                      | 987.5167    | -0.005  | -5    | 216          | 223      | ELDEVRRAR                          |           |         |                                            | Mascot           |

|           |           |         |      |     |     |                                      |  |  |  |                        |  |        |
|-----------|-----------|---------|------|-----|-----|--------------------------------------|--|--|--|------------------------|--|--------|
| 1007.5996 | 1007.4591 | -0.1405 | -139 | 500 | 508 | LINQHAALK                            |  |  |  |                        |  | Mascot |
| 1371.7566 | 1371.6129 | -0.1437 | -105 | 205 | 215 | KHMVALPLQYR                          |  |  |  | Oxidation (M)[3]       |  | Mascot |
| 1472.8108 | 1472.6449 | -0.1659 | -113 | 337 | 348 | WNSIVELVEQKK                         |  |  |  |                        |  | Mascot |
| 1472.8108 | 1472.6449 | -0.1659 | -113 | 337 | 348 | WNSIVELVEQKK                         |  |  |  |                        |  | Mascot |
| 1587.6921 | 1587.8539 | 0.1618  | 102  | 509 | 520 | EEIGRYEEDYER                         |  |  |  |                        |  | Mascot |
| 1662.8228 | 1662.7861 | -0.0367 | -22  | 449 | 463 | RTLQGCEDSLTVAGR                      |  |  |  | Carbamidomethyl (C)[6] |  | Mascot |
| 1924.983  | 1924.9486 | -0.0344 | -18  | 58  | 75  | MSILATQSCGKDLSSVLR                   |  |  |  | Oxidation (M)[1]       |  | Mascot |
| 2233.1934 | 2233.0454 | -0.148  | -66  | 377 | 397 | AIDATQYVGSDLGSLAL<br>QRR             |  |  |  |                        |  | Mascot |
| 2283.114  | 2283.1443 | 0.0303  | 13   | 166 | 185 | LVSSEDFGHDEYSTQSLL<br>KK             |  |  |  |                        |  | Mascot |
| 2283.114  | 2283.1443 | 0.0303  | 13   | 166 | 185 | LVSSEDFGHDEYSTQSLL<br>KK             |  |  |  |                        |  | Mascot |
| 3337.7273 | 3337.7131 | -0.0142 | -4   | 580 | 610 | QAEAFLLNNQESALAHVEL<br>PSTVETVEAAIKK |  |  |  |                        |  | Mascot |

47 ADP/ATP translocase 1 [Danio rerio] gi|47550717 32667.2 9.74 7 31 0

#### Peptide Information

| Calc. Mass | Obsrv. Mass | ± da    | ± ppm | Start Seq. | End Seq. | Sequence                    | Ion Score | C. I. % | Modification           | Rank | Result Type |
|------------|-------------|---------|-------|------------|----------|-----------------------------|-----------|---------|------------------------|------|-------------|
| 848.4875   | 848.5095    | 0.022   | 26    | 98         | 105      | IFLGGVDK                    |           |         |                        |      | Mascot      |
| 996.4536   | 996.5763    | 0.1227  | 123   | 237        | 244      | RMMMQSGR                    |           |         |                        |      | Mascot      |
| 996.4536   | 996.5763    | 0.1227  | 123   | 237        | 244      | RMMMQSGR                    |           |         |                        |      | Mascot      |
| 1007.4978  | 1007.4591   | -0.0387 | -38   | 253        | 260      | GTIDCWKK                    |           |         | Carbamidomethyl (C)[5] |      | Mascot      |
| 1952.9933  | 1952.9709   | -0.0224 | -11   | 44         | 60       | QITADMQYKGIIDCVVR           |           |         |                        |      | Mascot      |
| 2152.1648  | 2152.0601   | -0.1047 | -49   | 2          | 23       | SDAAISFLKDFLAGGVAA<br>AISK  |           |         |                        |      | Mascot      |
| 2152.1648  | 2152.0601   | -0.1047 | -49   | 2          | 23       | SDAAISFLKDFLAGGVAA<br>AISK  |           |         |                        |      | Mascot      |
| 2283.2053  | 2283.1443   | -0.061  | -27   | 1          | 23       | MSDAAISFLKDFLAGGVA<br>AAISK |           |         |                        |      | Mascot      |
| 2283.2053  | 2283.1443   | -0.061  | -27   | 1          | 23       | MSDAAISFLKDFLAGGVA<br>AAISK |           |         |                        |      | Mascot      |
| 2284.2236  | 2284.1365   | -0.0871 | -38   | 73         | 92       | GNLANVIRYFPTQALNFA<br>FK    |           |         |                        |      | Mascot      |

48 Ddx52 protein [Danio rerio] gi|81294184 66316.2 9.69 10 31 0

#### Peptide Information

| Calc. Mass | Obsrv. Mass | ± da    | ± ppm | Start Seq. | End Seq. | Sequence | Ion Score | C. I. % | Modification | Rank | Result Type |
|------------|-------------|---------|-------|------------|----------|----------|-----------|---------|--------------|------|-------------|
| 823.4645   | 823.399     | -0.0655 | -80   | 145        | 150      | IRHQNR   |           |         |              |      | Mascot      |
| 836.426    | 836.3209    | -0.1051 | -126  | 21         | 27       | FAKDAER  |           |         |              |      | Mascot      |
| 864.4573   | 864.4702    | 0.0129  | 15    | 259        | 266      | LSEGVGFR |           |         |              |      | Mascot      |
| 870.5407   | 870.5259    | -0.0148 | -17   | 239        | 246      | ALIISPTR |           |         |              |      | Mascot      |



|    |                                                              |           |         |      |     |             |                           |         |      |    |    |   |  |  |  |  |        |
|----|--------------------------------------------------------------|-----------|---------|------|-----|-------------|---------------------------|---------|------|----|----|---|--|--|--|--|--------|
|    | 1371.8181                                                    | 1371.6129 | -0.2052 | -150 | 465 | 476         | IWVLICTALLAR              |         |      |    |    |   |  |  |  |  | Mascot |
|    | 1625.8646                                                    | 1625.7368 | -0.1278 | -79  | 171 | 183         | EYDLDPRIIHNIK             |         |      |    |    |   |  |  |  |  | Mascot |
|    | 1961.9199                                                    | 1961.9539 | 0.034   | 17   | 33  | 50          | SQSKDSSDQLSGISYFG<br>R    |         |      |    |    |   |  |  |  |  | Mascot |
|    | 2121.0459                                                    | 2121.1003 | 0.0544  | 26   | 382 | 401         | NSAAETVEQQLLFVGSE<br>NGK  |         |      |    |    |   |  |  |  |  | Mascot |
|    | 2283.3223                                                    | 2283.1443 | -0.178  | -78  | 407 | 426         | NLIKQGFLPPVLVVFVQSID<br>R |         |      |    |    |   |  |  |  |  | Mascot |
|    | 2283.3223                                                    | 2283.1443 | -0.178  | -78  | 407 | 426         | NLIKQGFLPPVLVVFVQSID<br>R |         |      |    |    |   |  |  |  |  | Mascot |
|    | 2297.1604                                                    | 2297.1523 | -0.0081 | -4   | 184 | 204         | AAGFQTPTPIQMMAVPL<br>MMHK |         |      |    |    |   |  |  |  |  | Mascot |
| 49 | transitional endoplasmic reticulum ATPase-like [Danio rerio] |           |         |      |     |             |                           |         |      |    |    |   |  |  |  |  |        |
|    |                                                              |           |         |      |     | gi 90093334 |                           | 89437.9 | 5.44 | 11 | 31 | 0 |  |  |  |  |        |

#### Peptide Information

| Calc. Mass | Obsrv. Mass | ± da    | ± ppm | Start Seq. | End Seq. | Sequence                            | Ion Score | C. I. | % Modification             | Rank | Result Type |
|------------|-------------|---------|-------|------------|----------|-------------------------------------|-----------|-------|----------------------------|------|-------------|
| 823.3831   | 823.399     | 0.0159  | 19    | 291        | 297      | AFEEAEK                             |           |       |                            |      | Mascot      |
| 850.4417   | 850.5258    | 0.0841  | 99    | 563        | 569      | DVFDKAR                             |           |       |                            |      | Mascot      |
| 850.4417   | 850.5258    | 0.0841  | 99    | 563        | 569      | DVFDKAR                             |           |       |                            |      | Mascot      |
| 1467.8352  | 1467.726    | -0.1092 | -74   | 380        | 391      | LEILQIHTKNMK                        |           |       |                            |      | Mascot      |
| 1683.9462  | 1683.7981   | -0.1481 | -88   | 214        | 227      | QLAQIKEMVELPLR                      |           |       | Oxidation (M)[8]           |      | Mascot      |
| 1796.8483  | 1796.6711   | -0.1772 | -99   | 680        | 695      | ITEGFSGADLTEICQR                    |           |       | Carbamidomethyl (C)[14]    |      | Mascot      |
| 1922.9059  | 1922.9604   | 0.0545  | 28    | 67         | 83       | RQTVCIVLTDTCGNER                    |           |       |                            |      | Mascot      |
| 1951.9218  | 1951.9774   | 0.0556  | 28    | 546        | 562      | GPELLTMWFGSEANVR                    |           |       | Oxidation (M)[7]           |      | Mascot      |
| 2103.9954  | 2103.949    | -0.0464 | -22   | 775        | 796      | FPTAPKSGGGQGSSQGS<br>GGHFR          |           |       |                            |      | Mascot      |
| 2156.011   | 2155.9233   | -0.0877 | -41   | 680        | 698      | ITEGFSGADLTEICQRAC<br>K             |           |       | Carbamidomethyl (C)[14,18] |      | Mascot      |
| 2247.1172  | 2247.0593   | -0.0579 | -26   | 28         | 47       | LIVDEATNEDNSIVCLSQV<br>K            |           |       | Carbamidomethyl (C)[15]    |      | Mascot      |
| 3387.6963  | 3387.6663   | -0.03   | -9    | 162        | 192      | AVEFKVVETDPTPHCIVA<br>PDTIIHCEGEPIK |           |       |                            |      | Mascot      |

|    |                                                                    |  |  |  |  |              |  |         |      |   |  |    |       |  |  |  |  |
|----|--------------------------------------------------------------------|--|--|--|--|--------------|--|---------|------|---|--|----|-------|--|--|--|--|
| 50 | polymerase I and transcript release factor isoform 1 [Danio rerio] |  |  |  |  |              |  |         |      |   |  |    |       |  |  |  |  |
|    |                                                                    |  |  |  |  | gi 147898795 |  | 19874.3 | 5.41 | 1 |  | 24 | 6.271 |  |  |  |  |

#### Peptide Information

| Calc. Mass | Obsrv. Mass | ± da    | ± ppm | Start Seq. | End Seq. | Sequence  | Ion Score | C. I. | % Modification | Rank | Result Type |
|------------|-------------|---------|-------|------------|----------|-----------|-----------|-------|----------------|------|-------------|
| 987.5945   | 987.5167    | -0.0778 | -79   | 128        | 136      | VSVNVKSVR | 24        | 6.271 |                | 4    | Mascot      |

|                |           |                        |                |                |                    |
|----------------|-----------|------------------------|----------------|----------------|--------------------|
| Gel Idx/Pos    | 181/H8    | Instr./Gel Origin      | BA2060/110707A | Process Status | Analysis Succeeded |
| Plate [#] Name | [1] 31496 | Instrument Sample Name |                | Spectra        | 11                 |

| Rank | Protein Name           | Accession No. | Protein MW | Protein PI | Pep. Count | Protein Score | Protein Score C. I. % | Total Ion Score | Total Ion C. I. % |
|------|------------------------|---------------|------------|------------|------------|---------------|-----------------------|-----------------|-------------------|
| 1    | villin 2 [Danio rerio] | gi 71892458   | 68683.2    | 5.7        | 12         | 196           | 100                   | 164             | 100               |

Peptide Information

| Calc. Mass | Obsrv. Mass | ± da    | ± ppm | Start Seq. | End Seq. | Sequence            | Ion Score | C. I. % | Modification       | Rank | Result Type |
|------------|-------------|---------|-------|------------|----------|---------------------|-----------|---------|--------------------|------|-------------|
| 1104.5836  | 1104.5546   | -0.029  | -26   | 238        | 246      | IGFPWSEIR           |           |         |                    |      | Mascot      |
| 1104.5836  | 1104.5546   | -0.029  | -26   | 238        | 246      | IGFPWSEIR           | 57        | 99.938  |                    |      | Mascot      |
| 1120.5634  | 1120.5374   | -0.026  | -23   | 575        | 583      | QRIDEFEAL           |           |         |                    |      | Mascot      |
| 1182.5942  | 1182.5671   | -0.0271 | -23   | 264        | 273      | APDFVIFYAPR         | 66        | 99.993  |                    |      | Mascot      |
| 1182.5942  | 1182.5671   | -0.0271 | -23   | 264        | 273      | APDFVIFYAPR         |           |         |                    |      | Mascot      |
| 1233.6123  | 1233.5854   | -0.0269 | -22   | 172        | 180      | IQVWHEEHR           |           |         |                    |      | Mascot      |
| 1233.6123  | 1233.5854   | -0.0269 | -22   | 172        | 180      | IQVWHEEHR           | 42        | 98.074  |                    |      | Mascot      |
| 1310.6892  | 1310.6559   | -0.0333 | -25   | 263        | 273      | KAPDFVIFYAPR        |           |         |                    |      | Mascot      |
| 1391.6583  | 1391.7091   | 0.0508  | 37    | 317        | 327      | QMERARLENEK         |           |         | Oxidation (M)[2]   |      | Mascot      |
| 1413.806   | 1413.7682   | -0.0378 | -27   | 527        | 539      | QLLALTSELAQAR       |           |         |                    |      | Mascot      |
| 1457.7495  | 1457.7173   | -0.0322 | -22   | 140        | 151      | ELHRPGYLTSER        |           |         |                    |      | Mascot      |
| 1531.7533  | 1531.7145   | -0.0388 | -25   | 360        | 371      | KVENELQEQMQR        |           |         |                    |      | Mascot      |
| 1616.7448  | 1616.7039   | -0.0409 | -25   | 346        | 357      | ELMMQLYQFEER        |           |         |                    |      | Mascot      |
| 1632.7396  | 1632.6975   | -0.0421 | -26   | 346        | 357      | ELMMQLYQFEER        |           |         | Oxidation (M)[3]   |      | Mascot      |
| 1648.7345  | 1648.6963   | -0.0382 | -23   | 346        | 357      | ELMMQLYQFEER        |           |         | Oxidation (M)[3,4] |      | Mascot      |
| 1651.8174  | 1651.7683   | -0.0491 | -30   | 413        | 427      | SQEQLAAELAEYTAK     |           |         |                    |      | Mascot      |
| 2207.123   | 2207.0408   | -0.0822 | -37   | 82         | 100      | AKFFPEDVADELIQDITQK |           |         |                    |      | Mascot      |

|   |                           |             |         |      |   |     |     |     |     |
|---|---------------------------|-------------|---------|------|---|-----|-----|-----|-----|
| 2 | Ezr protein [Danio rerio] | gi 50418501 | 40608.3 | 9.33 | 7 | 182 | 100 | 164 | 100 |
|---|---------------------------|-------------|---------|------|---|-----|-----|-----|-----|

Peptide Information

| Calc. Mass | Obsrv. Mass | ± da    | ± ppm | Start Seq. | End Seq. | Sequence    | Ion Score | C. I. % | Modification | Rank | Result Type |
|------------|-------------|---------|-------|------------|----------|-------------|-----------|---------|--------------|------|-------------|
| 1104.5836  | 1104.5546   | -0.029  | -26   | 238        | 246      | IGFPWSEIR   |           |         |              |      | Mascot      |
| 1104.5836  | 1104.5546   | -0.029  | -26   | 238        | 246      | IGFPWSEIR   | 57        | 99.938  |              |      | Mascot      |
| 1182.5942  | 1182.5671   | -0.0271 | -23   | 264        | 273      | APDFVIFYAPR | 66        | 99.993  |              |      | Mascot      |
| 1182.5942  | 1182.5671   | -0.0271 | -23   | 264        | 273      | APDFVIFYAPR |           |         |              |      | Mascot      |
| 1233.6123  | 1233.5854   | -0.0269 | -22   | 172        | 180      | IQVWHEEHR   |           |         |              |      | Mascot      |

|   |                                       |           |         |     |             |     |                     |     |        |                  |     |    |        |  |        |
|---|---------------------------------------|-----------|---------|-----|-------------|-----|---------------------|-----|--------|------------------|-----|----|--------|--|--------|
|   | 1233.6123                             | 1233.5854 | -0.0269 | -22 | 172         | 180 | IQVWHEEHR           | 42  | 98.074 |                  |     |    |        |  | Mascot |
|   | 1310.6892                             | 1310.6559 | -0.0333 | -25 | 263         | 273 | KAPDFVIFYAPR        |     |        |                  |     |    |        |  | Mascot |
|   | 1391.6583                             | 1391.7091 | 0.0508  | 37  | 317         | 327 | QMERAAQLENEK        |     |        | Oxidation (M)[2] |     |    |        |  | Mascot |
|   | 1457.7495                             | 1457.7173 | -0.0322 | -22 | 140         | 151 | ELHRPGYLTSER        |     |        |                  |     |    |        |  | Mascot |
|   | 2207.123                              | 2207.0408 | -0.0822 | -37 | 82          | 100 | AKFFPEDVADELIQDITQK |     |        |                  |     |    |        |  | Mascot |
| 3 | Si:dkey-276i5.1 protein [Danio rerio] |           |         |     | gi 66910298 |     | 86251.9             | 6.8 | 14     | 102              | 100 | 55 | 99.916 |  |        |

Peptide Information

| Calc. Mass | Obsrv. Mass | ± da    | ± ppm | Start Seq. | End Seq. | Sequence               | Ion Score | C. I.  | % Modification                           | Rank | Result Type |
|------------|-------------|---------|-------|------------|----------|------------------------|-----------|--------|------------------------------------------|------|-------------|
| 1042.5792  | 1042.557    | -0.0222 | -21   | 184        | 191      | NNILQVWR               |           |        |                                          |      | Mascot      |
| 1104.616   | 1104.5546   | -0.0614 | -56   | 335        | 343      | RLLEFNQ GK             |           |        |                                          |      | Mascot      |
| 1104.616   | 1104.5546   | -0.0614 | -56   | 335        | 343      | RLLEFNQ GK             |           |        |                                          |      | Mascot      |
| 1277.6267  | 1277.6538   | 0.0271  | 21    | 405        | 416      | AQTSGQSAQIMR           |           |        |                                          |      | Mascot      |
| 1391.743   | 1391.7091   | -0.0339 | -24   | 344        | 356      | LPFAAAQIGNSFR          |           |        |                                          |      | Mascot      |
| 1443.709   | 1443.6772   | -0.0318 | -22   | 609        | 619      | IMYSIFEHTFR            |           |        |                                          |      | Mascot      |
| 1626.7581  | 1626.7155   | -0.0426 | -26   | 476        | 489      | TSYGWIEIVGCADR         |           |        | Carbamidomethyl (C)[11]                  |      | Mascot      |
| 1638.8553  | 1638.8115   | -0.0438 | -27   | 15         | 29       | SMLSLSATSALLLR         |           |        | Carbamidomethyl (C)[6], Oxidation (M)[2] |      | Mascot      |
| 1638.8553  | 1638.8115   | -0.0438 | -27   | 15         | 29       | SMLSLSATSALLLR         |           |        | Carbamidomethyl (C)[6], Oxidation (M)[2] |      | Mascot      |
| 1718.8306  | 1718.8324   | 0.0018  | 1     | 390        | 404      | FSNVADLDIMLYSSK        |           |        | Oxidation (M)[10]                        |      | Mascot      |
| 1755.9122  | 1755.9348   | 0.0226  | 13    | 108        | 124      | AENAPDQVSKAVAEK        |           |        |                                          |      | Mascot      |
| 2192.1709  | 2192.1182   | -0.0527 | -24   | 589        | 608      | TLHVEEVVPNVIEPSFGIG R  | 55        | 99.916 |                                          |      | Mascot      |
| 2192.1709  | 2192.1182   | -0.0527 | -24   | 589        | 608      | TLHVEEVVPNVIEPSFGIG R  |           |        |                                          |      | Mascot      |
| 2207.0437  | 2207.0408   | -0.0029 | -1    | 368        | 385      | VREFTMAEIEHFVDPNEK     |           |        | Oxidation (M)[6]                         |      | Mascot      |
| 2221.1611  | 2221.103    | -0.0581 | -26   | 417        | 437      | LGDAVEQGVINNSVLGYF IGR |           |        |                                          |      | Mascot      |
| 2230.1213  | 2230.1079   | -0.0134 | -6    | 386        | 404      | VHFKFSNVADLDIMLYSS K   |           |        | Oxidation (M)[14]                        |      | Mascot      |
| 2298.9968  | 2299.1296   | 0.1328  | 58    | 539        | 557      | FAMEYLAICDECYTEQE K    |           |        |                                          |      | Mascot      |

|   |                                                 |  |  |  |              |  |         |      |    |    |        |    |        |  |  |
|---|-------------------------------------------------|--|--|--|--------------|--|---------|------|----|----|--------|----|--------|--|--|
| 4 | PREDICTED: glycyl-tRNA synthetase [Danio rerio] |  |  |  | gi 189536638 |  | 86255.8 | 6.76 | 13 | 96 | 99.999 | 55 | 99.916 |  |  |
|---|-------------------------------------------------|--|--|--|--------------|--|---------|------|----|----|--------|----|--------|--|--|

Peptide Information

| Calc. Mass | Obsrv. Mass | ± da    | ± ppm | Start Seq. | End Seq. | Sequence     | Ion Score | C. I. | % Modification | Rank | Result Type |
|------------|-------------|---------|-------|------------|----------|--------------|-----------|-------|----------------|------|-------------|
| 1042.5792  | 1042.557    | -0.0222 | -21   | 184        | 191      | NNILQVWR     |           |       |                |      | Mascot      |
| 1104.616   | 1104.5546   | -0.0614 | -56   | 335        | 343      | RLLEFNQ GK   |           |       |                |      | Mascot      |
| 1104.616   | 1104.5546   | -0.0614 | -56   | 335        | 343      | RLLEFNQ GK   |           |       |                |      | Mascot      |
| 1277.6267  | 1277.6538   | 0.0271  | 21    | 405        | 416      | AQTSGQSAQIMR |           |       |                |      | Mascot      |

|   |                          |           |         |     |             |     |                           |      |        |    |        |                         |        |  |  |  |        |
|---|--------------------------|-----------|---------|-----|-------------|-----|---------------------------|------|--------|----|--------|-------------------------|--------|--|--|--|--------|
|   | 1391.743                 | 1391.7091 | -0.0339 | -24 | 344         | 356 | LPFAAAQIGNSFR             |      |        |    |        |                         |        |  |  |  | Mascot |
|   | 1443.709                 | 1443.6772 | -0.0318 | -22 | 609         | 619 | IMYSIFEHTFR               |      |        |    |        |                         |        |  |  |  | Mascot |
|   | 1626.7581                | 1626.7155 | -0.0426 | -26 | 476         | 489 | TSYGWIEIVGCADR            |      |        |    |        | Carbamidomethyl (C)[11] |        |  |  |  | Mascot |
|   | 1718.8306                | 1718.8324 | 0.0018  | 1   | 390         | 404 | FSNVADLDIMLYSSK           |      |        |    |        | Oxidation (M)[10]       |        |  |  |  | Mascot |
|   | 1755.9122                | 1755.9348 | 0.0226  | 13  | 108         | 124 | AENAPDVDVSKAVAEK          |      |        |    |        |                         |        |  |  |  | Mascot |
|   | 2192.1709                | 2192.1182 | -0.0527 | -24 | 589         | 608 | TLHVEEVVPNVIEPSFGIG<br>R  | 55   | 99.916 |    |        |                         |        |  |  |  | Mascot |
|   | 2192.1709                | 2192.1182 | -0.0527 | -24 | 589         | 608 | TLHVEEVVPNVIEPSFGIG<br>R  |      |        |    |        |                         |        |  |  |  | Mascot |
|   | 2207.0437                | 2207.0408 | -0.0029 | -1  | 368         | 385 | VREFTMAEIEHFVDPNEK        |      |        |    |        | Oxidation (M)[6]        |        |  |  |  | Mascot |
|   | 2221.1611                | 2221.103  | -0.0581 | -26 | 417         | 437 | LGDAVEQGVINNSVLGYF<br>IGR |      |        |    |        |                         |        |  |  |  | Mascot |
|   | 2230.1213                | 2230.1079 | -0.0134 | -6  | 386         | 404 | VHFKFSNVADLDIMLYSS<br>K   |      |        |    |        | Oxidation (M)[14]       |        |  |  |  | Mascot |
|   | 2298.9968                | 2299.1296 | 0.1328  | 58  | 539         | 557 | FAMEYLAICDECYTEQE<br>K    |      |        |    |        |                         |        |  |  |  | Mascot |
| 5 | ezrin like [Danio rerio] |           |         |     | gi 66472810 |     | 70053.6                   | 5.42 | 7      | 68 | 99.357 | 57                      | 99.938 |  |  |  |        |

#### Peptide Information

| Calc. Mass | Obsrv. Mass | ± da    | ± ppm | Start Seq. | End Seq. | Sequence       | Ion Score | C. I.  | % | Modification      | Rank | Result Type |
|------------|-------------|---------|-------|------------|----------|----------------|-----------|--------|---|-------------------|------|-------------|
| 850.4199   | 850.5237    | 0.1038  | 122   | 582        | 588      | MGNTKQR        |           |        |   | Oxidation (M)[1]  |      | Mascot      |
| 850.4199   | 850.5237    | 0.1038  | 122   | 582        | 588      | MGNTKQR        |           |        |   | Oxidation (M)[1]  |      | Mascot      |
| 864.4977   | 864.4717    | -0.026  | -30   | 54         | 60       | GFLTWLK        |           |        |   |                   |      | Mascot      |
| 1104.5836  | 1104.5546   | -0.029  | -26   | 238        | 246      | IGFPWSEIR      |           |        |   |                   |      | Mascot      |
| 1104.5836  | 1104.5546   | -0.029  | -26   | 238        | 246      | IGFPWSEIR      | 57        | 99.938 |   |                   |      | Mascot      |
| 1120.5634  | 1120.5374   | -0.026  | -23   | 587        | 595      | QRIDEFEAL      |           |        |   |                   |      | Mascot      |
| 1391.6583  | 1391.7091   | 0.0508  | 37    | 317        | 327      | QMERARLENEK    |           |        |   | Oxidation (M)[2]  |      | Mascot      |
| 1463.6794  | 1463.7169   | 0.0375  | 26    | 401        | 412      | EELARQAEDQMK   |           |        |   | Oxidation (M)[11] |      | Mascot      |
| 1651.8174  | 1651.7683   | -0.0491 | -30   | 413        | 427      | TQEQLAADLAETAK |           |        |   |                   |      | Mascot      |

6 Ezrl protein [Danio rerio] gi|157422742 52248.2 7.62 6 66 98.908 57 99.938

#### Peptide Information

| Calc. Mass | Obsrv. Mass | ± da    | ± ppm | Start Seq. | End Seq. | Sequence     | Ion Score | C. I.  | % | Modification      | Rank | Result Type |
|------------|-------------|---------|-------|------------|----------|--------------|-----------|--------|---|-------------------|------|-------------|
| 864.4977   | 864.4717    | -0.026  | -30   | 54         | 60       | GFLTWLK      |           |        |   |                   |      | Mascot      |
| 1042.6255  | 1042.557    | -0.0685 | -66   | 428        | 436      | LALLEEARK    |           |        |   |                   |      | Mascot      |
| 1104.5836  | 1104.5546   | -0.029  | -26   | 238        | 246      | IGFPWSEIR    |           |        |   |                   |      | Mascot      |
| 1104.5836  | 1104.5546   | -0.029  | -26   | 238        | 246      | IGFPWSEIR    | 57        | 99.938 |   |                   |      | Mascot      |
| 1391.6583  | 1391.7091   | 0.0508  | 37    | 317        | 327      | QMERARLENEK  |           |        |   | Oxidation (M)[2]  |      | Mascot      |
| 1463.6794  | 1463.7169   | 0.0375  | 26    | 401        | 412      | EELARQAEDQMK |           |        |   | Oxidation (M)[11] |      | Mascot      |

Mascot

### Peptide Information

|   |                                 |             |         |      |   |    |       |    |        |
|---|---------------------------------|-------------|---------|------|---|----|-------|----|--------|
| 8 | PREDICTED: moesin [Danio rerio] | qi326673460 | 67949.1 | 6.64 | 3 | 63 | 97.61 | 57 | 99.938 |
|---|---------------------------------|-------------|---------|------|---|----|-------|----|--------|

### Peptide Information

|   |                            |             |         |      |   |    |        |    |        |
|---|----------------------------|-------------|---------|------|---|----|--------|----|--------|
| 9 | Ezrl protein [Danio rerio] | gjl32450442 | 39229.6 | 9.18 | 2 | 62 | 97.439 | 57 | 99.938 |
|---|----------------------------|-------------|---------|------|---|----|--------|----|--------|

### Peptide Information

|    |                           |             |         |      |   |    |        |    |        |
|----|---------------------------|-------------|---------|------|---|----|--------|----|--------|
| 10 | Rdx protein [Danio rerio] | gi 29436484 | 52007.1 | 8.41 | 2 | 56 | 90.037 | 57 | 99.938 |
|----|---------------------------|-------------|---------|------|---|----|--------|----|--------|

## Peptide Information

|    |                                 |             |         |      |   |    |        |    |        |
|----|---------------------------------|-------------|---------|------|---|----|--------|----|--------|
| 11 | LOC553434 protein [Danio rerio] | gil94574164 | 37971.8 | 9.24 | 1 | 56 | 90.037 | 57 | 99.938 |
|----|---------------------------------|-------------|---------|------|---|----|--------|----|--------|

### Peptide Information

|                     |                                                                                                     | Calc. Mass | Obsrv. Mass | ± da    | ± ppm | Start Seq.   | End Sequence Seq.              |      | Ion Score | C. I. % | Modification                             | Rank | Result Type |
|---------------------|-----------------------------------------------------------------------------------------------------|------------|-------------|---------|-------|--------------|--------------------------------|------|-----------|---------|------------------------------------------|------|-------------|
|                     |                                                                                                     | 1104.5836  | 1104.5546   | -0.029  | -26   | 227          | 235 IGFPWSEIR                  |      |           |         |                                          |      | Mascot      |
|                     |                                                                                                     | 1104.5836  | 1104.5546   | -0.029  | -26   | 227          | 235 IGFPWSEIR                  |      | 57        | 99.938  |                                          |      | Mascot      |
| 12                  | PREDICTED: serine/threonine-protein phosphatase 6 regulatory ankyrin repeat subunit C-like [Danio r |            |             |         |       | gi 326671533 | 11978.2                        | 6.02 | 6         | 48      | 20.865                                   |      |             |
| Peptide Information |                                                                                                     |            |             |         |       |              |                                |      |           |         |                                          |      |             |
|                     |                                                                                                     | Calc. Mass | Obsrv. Mass | ± da    | ± ppm | Start Seq.   | End Sequence Seq.              |      | Ion Score | C. I. % | Modification                             | Rank | Result Type |
|                     |                                                                                                     | 1190.7004  | 1190.6184   | -0.082  | -69   | 22           | 32 ALQTPHIAAR                  |      |           |         |                                          |      | Mascot      |
|                     |                                                                                                     | 1493.7594  | 1493.7106   | -0.0488 | -33   | 101          | 114 NGVSLHLLTEEPQG             |      |           |         |                                          |      | Mascot      |
|                     |                                                                                                     | 2207.0762  | 2207.0408   | -0.0354 | -16   | 46           | 67 GATVLAVDDEDGHTPALA<br>CAPNK |      |           |         | Carbamidomethyl (C)[18]                  |      | Mascot      |
|                     |                                                                                                     | 2211.0632  | 2211.0518   | -0.0114 | -5    | 2            | 21 CALLMLAETDDTSLISST<br>NR    |      |           |         | Carbamidomethyl (C)[1]                   |      | Mascot      |
|                     |                                                                                                     | 2306.3049  | 2306.1018   | -0.2031 | -88   | 68           | 88 EVAKCLALIISTMKPFIGL<br>MK   |      |           |         |                                          |      | Mascot      |
|                     |                                                                                                     | 2584.5298  | 2584.1545   | -0.3753 | -145  | 22           | 45 ALQTPHIAARNGLVTVV<br>EVLLTR |      |           |         |                                          |      | Mascot      |
| 13                  | PREDICTED: slit and trk like 4 protein [Danio rerio]                                                |            |             |         |       | gi 125834768 | 92595.8                        | 7.75 | 14        | 46      | 0                                        |      |             |
| Peptide Information |                                                                                                     |            |             |         |       |              |                                |      |           |         |                                          |      |             |
|                     |                                                                                                     | Calc. Mass | Obsrv. Mass | ± da    | ± ppm | Start Seq.   | End Sequence Seq.              |      | Ion Score | C. I. % | Modification                             | Rank | Result Type |
|                     |                                                                                                     | 864.4434   | 864.4717    | 0.0283  | 33    | 667          | 673 HNHKSNK                    |      |           |         |                                          |      | Mascot      |
|                     |                                                                                                     | 1045.52    | 1045.5411   | 0.0211  | 20    | 802          | 809 KSDYYELK                   |      |           |         |                                          |      | Mascot      |
|                     |                                                                                                     | 1104.616   | 1104.5546   | -0.0614 | -56   | 415          | 424 GVFANLTNLR                 |      |           |         |                                          |      | Mascot      |
|                     |                                                                                                     | 1104.616   | 1104.5546   | -0.0614 | -56   | 415          | 424 GVFANLTNLR                 |      |           |         |                                          |      | Mascot      |
|                     |                                                                                                     | 1165.5959  | 1165.7177   | 0.1218  | 104   | 323          | 332 NGQIVSYQTR                 |      |           |         |                                          |      | Mascot      |
|                     |                                                                                                     | 1165.5959  | 1165.7177   | 0.1218  | 104   | 323          | 332 NGQIVSYQTR                 |      |           |         |                                          |      | Mascot      |
|                     |                                                                                                     | 1277.6228  | 1277.6538   | 0.031   | 24    | 569          | 578 ELKNEIMCPK                 |      |           |         | Carbamidomethyl (C)[8], Oxidation (M)[7] |      | Mascot      |
|                     |                                                                                                     | 1413.7008  | 1413.7682   | 0.0674  | 48    | 762          | 774 DFSSIGVSGFEIR              |      |           |         |                                          |      | Mascot      |
|                     |                                                                                                     | 1443.6793  | 1443.6772   | -0.0021 | -1    | 333          | 345 IPPLSCPQPCTCK              |      |           |         | Carbamidomethyl (C)[6]                   |      | Mascot      |
|                     |                                                                                                     | 1463.7311  | 1463.7169   | -0.0142 | -10   | 556          | 568 CASPVQFSNIELR              |      |           |         |                                          |      | Mascot      |
|                     |                                                                                                     | 1531.6555  | 1531.7145   | 0.059   | 39    | 749          | 760 DTMFLHNFMESK               |      |           |         | Oxidation (M)[3,9]                       |      | Mascot      |
|                     |                                                                                                     | 1616.9006  | 1616.7039   | -0.1967 | -122  | 95           | 110 LQNIEGGAFVGLSALK           |      |           |         |                                          |      | Mascot      |
|                     |                                                                                                     | 1632.7434  | 1632.6975   | -0.0459 | -28   | 346          | 360 AHPSPDFGISVSCQER           |      |           |         |                                          |      | Mascot      |
|                     |                                                                                                     | 1670.7148  | 1670.817    | 0.1022  | 61    | 259          | 273 QELCPMGTGSDFDVR            |      |           |         | Oxidation (M)[6]                         |      | Mascot      |
|                     |                                                                                                     | 1718.98    | 1718.8324   | -0.1476 | -86   | 361          | 376 NIQSLADLIPKPPNAK           |      |           |         |                                          |      | Mascot      |

|    |                                                                                 |              |          |      |    |    |   |
|----|---------------------------------------------------------------------------------|--------------|----------|------|----|----|---|
| 15 | PREDICTED: transformation/transcription domain-associated protein [Danio rerio] | gij326672350 | 433471.2 | 8.52 | 32 | 43 | 0 |
|----|---------------------------------------------------------------------------------|--------------|----------|------|----|----|---|

|           |           |         |      |      |      |                               |                          |        |
|-----------|-----------|---------|------|------|------|-------------------------------|--------------------------|--------|
| 1443.8352 | 1443.6772 | -0.158  | -109 | 422  | 433  | LLNLVDCIRSK                   | Carbamidomethyl (C)[8]   | Mascot |
| 1475.8217 | 1475.7218 | -0.0999 | -68  | 1963 | 1975 | LGFTPSVTIEQRK                 |                          | Mascot |
| 1493.7126 | 1493.7106 | -0.002  | -1   | 1311 | 1322 | LFTMDLNVMEHK                  | Oxidation (M)[4]         | Mascot |
| 1531.7937 | 1531.7145 | -0.0792 | -52  | 3099 | 3112 | AFSAAVQMHDVLVK                | Oxidation (M)[8]         | Mascot |
| 1579.8301 | 1579.7042 | -0.1259 | -80  | 3722 | 3735 | CFAQPNFKVDGILK                |                          | Mascot |
| 1626.8632 | 1626.7155 | -0.1477 | -91  | 1248 | 1262 | QAMHSLQVLAQVTGK               | Oxidation (M)[3]         | Mascot |
| 1632.8752 | 1632.6975 | -0.1777 | -109 | 1831 | 1843 | RLMTFAWPCLLPK                 | Carbamidomethyl (C)[9]   | Mascot |
| 1637.8896 | 1637.7745 | -0.1151 | -70  | 1678 | 1690 | NYSEIELLFQLLR                 |                          | Mascot |
| 1638.8958 | 1638.8115 | -0.0843 | -51  | 443  | 455  | DILMRMLEVFVLK                 | Oxidation (M)[4,6]       | Mascot |
| 1638.8958 | 1638.8115 | -0.0843 | -51  | 443  | 455  | DILMRMLEVFVLK                 | Oxidation (M)[4,6]       | Mascot |
| 1648.8337 | 1648.6963 | -0.1374 | -83  | 1691 | 1704 | AFTGRFLCNMTFLK                |                          | Mascot |
| 1651.8076 | 1651.7683 | -0.0393 | -24  | 2167 | 2181 | GIAACMTCGNTKVLR               | Carbamidomethyl (C)[5,8] | Mascot |
| 1718.8054 | 1718.8324 | 0.027   | 16   | 3311 | 3326 | CYSVAFEKSGAVSDAK              | Carbamidomethyl (C)[1]   | Mascot |
| 1797.9282 | 1797.9182 | -0.01   | -6   | 971  | 985  | HSLYQLLAHPNFTK                |                          | Mascot |
| 1853.8922 | 1853.8535 | -0.0387 | -21  | 2348 | 2364 | NSGNPMATNQVPNPRES             |                          | Mascot |
| 2192.2107 | 2192.1182 | -0.0925 | -42  | 2579 | 2599 | TGALLNALVQLCHISTPLA<br>EK     |                          | Mascot |
| 2192.2107 | 2192.1182 | -0.0925 | -42  | 2579 | 2599 | TGALLNALVQLCHISTPLA<br>EK     |                          | Mascot |
| 2207.145  | 2207.0408 | -0.1042 | -47  | 1    | 20   | MSFVPTSPSTVVDQTTL<br>MKK      |                          | Mascot |
| 2211.0745 | 2211.0518 | -0.0227 | -10  | 1075 | 1094 | GMDPLVLIDIAICMAYEE<br>K       | Oxidation (M)[2]         | Mascot |
| 2221.103  | 2221.103  | 0       | 0    | 3074 | 3092 | EMTAEFYALKGMFLAQIN<br>K       | Oxidation (M)[2]         | Mascot |
| 2230.0769 | 2230.1079 | 0.031   | 14   | 1323 | 1341 | VFYTELLNLCEAEDAALM<br>K       | Carbamidomethyl (C)[10]  | Mascot |
| 2283.0981 | 2283.1248 | 0.0267  | 12   | 3617 | 3634 | EWALHTFPNATDYWTFR<br>K        |                          | Mascot |
| 2283.0981 | 2283.1248 | 0.0267  | 12   | 3617 | 3634 | EWALHTFPNATDYWTFR<br>K        |                          | Mascot |
| 2284.1384 | 2284.1189 | -0.0195 | -9   | 1175 | 1196 | ALLFVMMDLTGEVSNGA<br>VAMAK    | Oxidation (M)[6]         | Mascot |
| 2297.0537 | 2297.0979 | 0.0442  | 19   | 1696 | 1713 | FLCNMTFLKEYMEEIIPK            | Oxidation (M)[5,12]      | Mascot |
| 2584.2395 | 2584.1545 | -0.085  | -33  | 1288 | 1310 | HQPANAQIGLMEGNTFC<br>TTLQPR   | Carbamidomethyl (C)[17]  | Mascot |
| 2872.5024 | 2872.3237 | -0.1787 | -62  | 581  | 605  | LVKYAMQALDIYQVQIAG<br>NGQTYIR | Oxidation (M)[6]         | Mascot |

16

PREDICTED: hypothetical protein LOC100000098

[Danio rerio]

gi|125854762

35807.9

9.77

8

40

0

| Peptide Information |             |         |       |            |                   |             |         |                        |                  |
|---------------------|-------------|---------|-------|------------|-------------------|-------------|---------|------------------------|------------------|
| Calc. Mass          | Obsrv. Mass | ± da    | ± ppm | Start Seq. | End Sequence Seq. | Ion Score   | C. I. % | Modification           | Rank Result Type |
| 1120.5132           | 1120.5374   | 0.0242  | 22    | 278        | 285               | LNECFYFK    |         | Carbamidomethyl (C)[4] | Mascot           |
| 1233.6547           | 1233.5854   | -0.0693 | -56   | 239        | 249               | QTTINSANRTK |         |                        | Mascot           |



|    |                                 |           |         |     |             |     |                                 |      |    |    |   |  |                        |  |  |  |        |
|----|---------------------------------|-----------|---------|-----|-------------|-----|---------------------------------|------|----|----|---|--|------------------------|--|--|--|--------|
|    | 1233.6547                       | 1233.5854 | -0.0693 | -56 | 239         | 249 | QTTINSANRTK                     |      |    |    |   |  |                        |  |  |  | Mascot |
|    | 1457.8362                       | 1457.7173 | -0.1189 | -82 | 6           | 18  | VIIPNIENATVFK                   |      |    |    |   |  |                        |  |  |  | Mascot |
|    | 1670.8167                       | 1670.817  | 0.0003  | 0   | 222         | 235 | CEEEPIDLSLPNRR                  |      |    |    |   |  |                        |  |  |  | Mascot |
|    | 2225.0244                       | 2225.0647 | 0.0403  | 18  | 114         | 132 | VIFNLPPEQDQTSDDDEYS<br>K        |      |    |    |   |  |                        |  |  |  | Mascot |
|    | 2225.0244                       | 2225.0647 | 0.0403  | 18  | 114         | 132 | VIFNLPPEQDQTSDDDEYS<br>K        |      |    |    |   |  |                        |  |  |  | Mascot |
|    | 2230.1094                       | 2230.1079 | -0.0015 | -1  | 288         | 307 | GEDSPKPLCPLMKLTESA<br>EK        |      |    |    |   |  | Carbamidomethyl (C)[9] |  |  |  | Mascot |
|    | 2501.2605                       | 2501.1995 | -0.061  | -24 | 39          | 59  | HVANFLTHYSLHEMLSTQ<br>TKK       |      |    |    |   |  | Oxidation (M)[14]      |  |  |  | Mascot |
|    | 2872.4324                       | 2872.3237 | -0.1087 | -38 | 160         | 186 | SFLDPPVEISSSSSGNEAI<br>STRPPEIR |      |    |    |   |  |                        |  |  |  | Mascot |
| 17 | Zgc:73317 protein [Danio rerio] |           |         |     | gi 60649764 |     | 50586.6                         | 6.03 | 10 | 38 | 0 |  |                        |  |  |  |        |

#### Peptide Information

| Calc. Mass | Obsrv. Mass | ± da    | ± ppm | Start Seq. | End Seq. | Sequence                   | Ion Score | C. I. | % Modification | Rank | Result Type |
|------------|-------------|---------|-------|------------|----------|----------------------------|-----------|-------|----------------|------|-------------|
| 842.5206   | 842.4905    | -0.0301 | -36   | 8          | 14       | LERAVVR                    |           |       |                |      | Mascot      |
| 850.4166   | 850.5237    | 0.1071  | 126   | 291        | 298      | THHGSPSK                   |           |       |                |      | Mascot      |
| 850.4166   | 850.5237    | 0.1071  | 126   | 291        | 298      | THHGSPSK                   |           |       |                |      | Mascot      |
| 1042.6003  | 1042.557    | -0.0433 | -42   | 2          | 10       | EALVGRLE                   |           |       |                |      | Mascot      |
| 1104.5718  | 1104.5546   | -0.0172 | -16   | 360        | 369      | VNSIIVDNCK                 |           |       |                |      | Mascot      |
| 1104.5718  | 1104.5546   | -0.0172 | -16   | 360        | 369      | VNSIIVDNCK                 |           |       |                |      | Mascot      |
| 1118.6204  | 1118.604    | -0.0164 | -15   | 311        | 320      | HPPVLELEGK                 |           |       |                |      | Mascot      |
| 1120.5674  | 1120.5374   | -0.03   | -27   | 443        | 451      | EFVPVEQFK                  |           |       |                |      | Mascot      |
| 1179.5562  | 1179.5767   | 0.0205  | 17    | 416        | 426      | DSLDCCEIVSAK               |           |       |                |      | Mascot      |
| 1310.631   | 1310.6559   | 0.0249  | 19    | 201        | 211      | EHHCTGLIWSK                |           |       |                |      | Mascot      |
| 1853.8221  | 1853.8535   | 0.0314  | 17    | 427        | 442      | SSEMNILVPEGEDDYR           |           |       |                |      | Mascot      |
| 2297.0789  | 2297.0979   | 0.019   | 8     | 406        | 426      | TEGCHVYLSKDSLDCCEIV<br>SAK |           |       |                |      | Mascot      |

|    |                       |  |  |  |              |  |           |      |    |    |   |  |  |  |  |  |  |
|----|-----------------------|--|--|--|--------------|--|-----------|------|----|----|---|--|--|--|--|--|--|
| 18 | titin a [Danio rerio] |  |  |  | gi 110005909 |  | 3646149.2 | 6.18 | 70 | 38 | 0 |  |  |  |  |  |  |
|----|-----------------------|--|--|--|--------------|--|-----------|------|----|----|---|--|--|--|--|--|--|

#### Peptide Information

| Calc. Mass | Obsrv. Mass | ± da    | ± ppm | Start Seq. | End Seq. | Sequence | Ion Score | C. I. | % Modification   | Rank | Result Type |
|------------|-------------|---------|-------|------------|----------|----------|-----------|-------|------------------|------|-------------|
| 842.4981   | 842.4905    | -0.0076 | -9    | 8812       | 8818     | EDILPKK  |           |       |                  |      | Mascot      |
| 850.4814   | 850.5237    | 0.0423  | 50    | 1481       | 1487     | LTSVRMK  |           |       | Oxidation (M)[6] |      | Mascot      |
| 850.5396   | 850.5237    | -0.0159 | -19   | 17926      | 17932    | FLLTKTK  |           |       |                  |      | Mascot      |
| 864.4686   | 864.4717    | 0.0031  | 4     | 10287      | 10293    | VYAEARR  |           |       |                  |      | Mascot      |
| 870.493    | 870.5187    | 0.0257  | 30    | 8546       | 8553     | TDIPLPSK |           |       |                  |      | Mascot      |
| 882.4679   | 882.5462    | 0.0783  | 89    | 2876       | 2882     | YKVSTER  |           |       |                  |      | Mascot      |

|           |           |         |     |       |       |                |                        |        |
|-----------|-----------|---------|-----|-------|-------|----------------|------------------------|--------|
| 996.536   | 996.572   | 0.036   | 36  | 2979  | 2986  | LTITETYSR      |                        | Mascot |
| 996.591   | 996.572   | -0.019  | -19 | 9064  | 9072  | MKAVPLPPK      | Oxidation (M)[1]       | Mascot |
| 1042.5204 | 1042.557  | 0.0366  | 35  | 27162 | 27169 | ELSEVYFR       |                        | Mascot |
| 1045.5347 | 1045.5411 | 0.0064  | 6   | 7144  | 7153  | CQIGGTPEIK     |                        | Mascot |
| 1051.6259 | 1051.6859 | 0.06    | 57  | 32375 | 32384 | SPIASPPRVK     |                        | Mascot |
| 1062.6306 | 1062.6647 | 0.0341  | 32  | 28602 | 28610 | IVGYVVERK      |                        | Mascot |
| 1104.5419 | 1104.5546 | 0.0127  | 11  | 10607 | 10615 | EAEKEEIK       |                        | Mascot |
| 1104.5419 | 1104.5546 | 0.0127  | 11  | 10607 | 10615 | EAEKEEIK       |                        | Mascot |
| 1118.6205 | 1118.604  | -0.0165 | -15 | 24180 | 24188 | EKNSILWTK      |                        | Mascot |
| 1120.5481 | 1120.5374 | -0.0107 | -10 | 11575 | 11584 | GSQEIKTDDK     |                        | Mascot |
| 1165.6211 | 1165.7177 | 0.0966  | 83  | 28447 | 28457 | VSAENKFGVSK    |                        | Mascot |
| 1165.6211 | 1165.7177 | 0.0966  | 83  | 28447 | 28457 | VSAENKFGVSK    |                        | Mascot |
| 1179.6078 | 1179.5767 | -0.0311 | -26 | 28311 | 28319 | VTWKLEEMK      | Oxidation (M)[8]       | Mascot |
| 1182.6187 | 1182.5671 | -0.0516 | -44 | 28547 | 28557 | VYAMNIAGLSK    | Oxidation (M)[4]       | Mascot |
| 1182.6729 | 1182.5671 | -0.1058 | -89 | 725   | 736   | VPETAAIPSAVK   |                        | Mascot |
| 1190.6263 | 1190.6184 | -0.0079 | -7  | 29946 | 29956 | SLKSDESVTPK    |                        | Mascot |
| 1221.5304 | 1221.5538 | 0.0234  | 19  | 10260 | 10269 | DKDEDPEMVK     | Oxidation (M)[8]       | Mascot |
| 1233.662  | 1233.5854 | -0.0766 | -62 | 32566 | 32576 | IQGGSEMVIR     | Oxidation (M)[7]       | Mascot |
| 1233.6626 | 1233.5854 | -0.0772 | -63 | 5108  | 5118  | GSAPITVQWFK    |                        | Mascot |
| 1277.7688 | 1277.6538 | -0.115  | -90 | 16200 | 16211 | EKIVVHAGGVIR   |                        | Mascot |
| 1279.7256 | 1279.7423 | 0.0167  | 13  | 26573 | 26583 | LNTGTIELKIK    |                        | Mascot |
| 1310.6587 | 1310.6559 | -0.0028 | -2  | 17534 | 17544 | VKGLTEDTEYR    |                        | Mascot |
| 1328.6627 | 1328.5773 | -0.0854 | -64 | 8734  | 8744  | QDISQTKPHMK    | Oxidation (M)[10]      | Mascot |
| 1335.6208 | 1335.6929 | 0.0721  | 54  | 18202 | 18212 | DKVEMEGEQVR    | Oxidation (M)[5]       | Mascot |
| 1391.6914 | 1391.7091 | 0.0177  | 13  | 2956  | 2967  | NGVEIQFSVDQR   |                        | Mascot |
| 1413.7737 | 1413.7682 | -0.0055 | -4  | 31447 | 31459 | VSGTPAPTLKWEK  |                        | Mascot |
| 1443.7446 | 1443.6772 | -0.0674 | -47 | 16899 | 16912 | AMAGTHINIMAGIK | Oxidation (M)[2]       | Mascot |
| 1457.7594 | 1457.7173 | -0.0421 | -29 | 1571  | 1583  | SLVEDSQLPEGRK  |                        | Mascot |
| 1463.7264 | 1463.7169 | -0.0095 | -6  | 27984 | 27996 | LTSPEIDIDAFK   |                        | Mascot |
| 1469.6866 | 1469.7172 | 0.0306  | 21  | 5242  | 5254  | GDSSEYKVEVSNR  |                        | Mascot |
| 1475.7601 | 1475.7218 | -0.0383 | -26 | 30138 | 30150 | VFAENETGLSRPR  |                        | Mascot |
| 1485.7155 | 1485.712  | -0.0035 | -2  | 19518 | 19530 | ITNLEAGQAYCFR  |                        | Mascot |
| 1493.7166 | 1493.7106 | -0.006  | -4  | 28125 | 28136 | LSWQEVSECTR    |                        | Mascot |
| 1531.8115 | 1531.7145 | -0.097  | -63 | 24478 | 24490 | ETSRLSWTVVEPK  |                        | Mascot |
| 1579.7897 | 1579.7042 | -0.0855 | -54 | 11668 | 11681 | LHPSKVHMSDQK   | Oxidation (M)[9]       | Mascot |
| 1616.806  | 1616.7039 | -0.1021 | -63 | 5165  | 5178  | QKCEATVTVQEPAR | Carbamidomethyl (C)[3] | Mascot |

|           |           |         |     |       |       |                                     |                                          |        |
|-----------|-----------|---------|-----|-------|-------|-------------------------------------|------------------------------------------|--------|
| 1626.7209 | 1626.7155 | -0.0054 | -3  | 4784  | 4798  | ASNSVGTATCCTELR                     | Carbamidomethyl (C)[10,11]               | Mascot |
| 1632.7687 | 1632.6975 | -0.0712 | -44 | 17019 | 17033 | DAASPQWVPICSSSK                     | Carbamidomethyl (C)[11]                  | Mascot |
| 1637.7628 | 1637.7745 | 0.0117  | 7   | 28440 | 28452 | YMEYTFRVSAENK                       |                                          | Mascot |
| 1638.9061 | 1638.8115 | -0.0946 | -58 | 7730  | 7743  | DIDIVELLRNVDPK                      |                                          | Mascot |
| 1638.9061 | 1638.8115 | -0.0946 | -58 | 7730  | 7743  | DIDIVELLRNVDPK                      |                                          | Mascot |
| 1648.6432 | 1648.6963 | 0.0531  | 32  | 12151 | 12164 | SVFDDEAEYECDAR                      |                                          | Mascot |
| 1651.8174 | 1651.7683 | -0.0491 | -30 | 25798 | 25813 | IGPSESPETDPQVAK                     |                                          | Mascot |
| 1670.7955 | 1670.817  | 0.0215  | 13  | 19173 | 19187 | DHMTVTWKAPANDGK                     |                                          | Mascot |
| 1682.7472 | 1682.7767 | 0.0295  | 18  | 6002  | 6016  | NEAGSESCSMDLRVK                     | Carbamidomethyl (C)[8]                   | Mascot |
| 1718.8894 | 1718.8324 | -0.057  | -33 | 11872 | 11885 | EEGKHKMLILYNVR                      | Oxidation (M)[7]                         | Mascot |
| 1755.8582 | 1755.9348 | 0.0766  | 44  | 17130 | 17145 | TVSIPECHVTGLEEGK                    | Carbamidomethyl (C)[7]                   | Mascot |
| 1797.9381 | 1797.9182 | -0.0199 | -11 | 22684 | 22700 | NSVTLTWEPLLDGGAK                    |                                          | Mascot |
| 1853.8309 | 1853.8535 | 0.0226  | 12  | 18756 | 18771 | HPFDPPSEPLNCCVVK                    | Carbamidomethyl (C)[12]                  | Mascot |
| 1959.952  | 1960.0217 | 0.0697  | 36  | 17483 | 17498 | DYSCTYADLVWIKPTK                    | Carbamidomethyl (C)[4]                   | Mascot |
| 2192.1155 | 2192.1182 | 0.0027  | 1   | 21661 | 21680 | ILAENEYGVGLPVETMEA<br>IK            | Oxidation (M)[16]                        | Mascot |
| 2192.1155 | 2192.1182 | 0.0027  | 1   | 21661 | 21680 | ILAENEYGVGLPVETMEA<br>IK            | Oxidation (M)[16]                        | Mascot |
| 2207.0801 | 2207.0408 | -0.0393 | -18 | 26462 | 26480 | FTVSGLTQNESYEFVRM<br>AK             |                                          | Mascot |
| 2211.0713 | 2211.0518 | -0.0195 | -9  | 29957 | 29976 | TPLCPPEPPSFPPEIMDV<br>TK            | Oxidation (M)[16]                        | Mascot |
| 2221.1248 | 2221.103  | -0.0218 | -10 | 29857 | 29876 | VIGRPDPPEGPLFDDIQ<br>AR             |                                          | Mascot |
| 2225.0801 | 2225.0647 | -0.0154 | -7  | 488   | 506   | IRKPMHVEGAQMEEEEAD<br>VR            |                                          | Mascot |
| 2225.0801 | 2225.0647 | -0.0154 | -7  | 488   | 506   | IRKPMHVEGAQMEEEEAD<br>VR            |                                          | Mascot |
| 2230.1106 | 2230.1079 | -0.0027 | -1  | 29738 | 29759 | FRVMACNAGGAGEPAEI<br>PGVVK          | Carbamidomethyl (C)[6]                   | Mascot |
| 2232.9575 | 2233.03   | 0.0725  | 32  | 1525  | 1542  | MINEFGYCSLDYEVAYSR                  | Carbamidomethyl (C)[8], Oxidation (M)[1] | Mascot |
| 2283.104  | 2283.1248 | 0.0208  | 9   | 2802  | 2823  | NVHFGDVGDKFVAGSA<br>ETAAK           |                                          | Mascot |
| 2283.1284 | 2283.1248 | -0.0036 | -2  | 13772 | 13793 | VRAVNVAGESEPSEPSD<br>PVLCK          |                                          | Mascot |
| 2284.1389 | 2284.1189 | -0.02   | -9  | 21385 | 21405 | ACDTIFQPGPPGNPRVLD<br>TTK           | Carbamidomethyl (C)[2]                   | Mascot |
| 2297.1516 | 2297.0979 | -0.0537 | -23 | 7038  | 7058  | NLSVEMGKSLILECTYAG<br>SPK           | Carbamidomethyl (C)[14]                  | Mascot |
| 2299.1233 | 2299.1296 | 0.0063  | 3   | 30037 | 30058 | VVAQNDIGQSEPGPVSE<br>SVVCK          | Carbamidomethyl (C)[21]                  | Mascot |
| 2306.0732 | 2306.1018 | 0.0286  | 12  | 17825 | 17842 | ETFFMVDKCVENHIYQFR                  |                                          | Mascot |
| 2501.1753 | 2501.1995 | 0.0242  | 10  | 856   | 879   | DETMSEISSVSVDTGAPA<br>APFFVK        | Oxidation (M)[4]                         | Mascot |
| 2584.2922 | 2584.1545 | -0.1377 | -53 | 26393 | 26416 | SSDPVLAIDACEPPNSVR<br>VTDITK        | Carbamidomethyl (C)[11]                  | Mascot |
| 2872.4258 | 2872.3237 | -0.1021 | -36 | 28183 | 28208 | RLDVIDTTSTASLVWMK<br>PEHDGGSR       |                                          | Mascot |
| 3337.4834 | 3337.6814 | 0.198   | 59  | 4869  | 4900  | DTGTYTCTAANEAGSSS<br>CSSSVTVQEPPVFK | Carbamidomethyl (C)[7,18]                | Mascot |

Peptide Information

| Calc. Mass | Obsrv. Mass | ± da    | ± ppm | Start Seq. | End Seq. | Sequence      | Ion Score | C. I. % | Modification      | Rank | Result Type |
|------------|-------------|---------|-------|------------|----------|---------------|-----------|---------|-------------------|------|-------------|
| 842.4981   | 842.4905    | -0.0076 | -9    | 8812       | 8818     | EDILPKK       |           |         |                   |      | Mascot      |
| 850.4814   | 850.5237    | 0.0423  | 50    | 1481       | 1487     | LTSVRMK       |           |         | Oxidation (M)[6]  |      | Mascot      |
| 850.5396   | 850.5237    | -0.0159 | -19   | 17926      | 17932    | FLLTKTK       |           |         |                   |      | Mascot      |
| 864.4686   | 864.4717    | 0.0031  | 4     | 10287      | 10293    | VYAEARR       |           |         |                   |      | Mascot      |
| 870.4203   | 870.5187    | 0.0984  | 113   | 6908       | 6915     | LSDSGTYK      |           |         |                   |      | Mascot      |
| 882.4679   | 882.5462    | 0.0783  | 89    | 2876       | 2882     | YKVSTER       |           |         |                   |      | Mascot      |
| 996.536    | 996.572     | 0.036   | 36    | 2979       | 2986     | LTITETYS      |           |         |                   |      | Mascot      |
| 996.591    | 996.572     | -0.019  | -19   | 9064       | 9072     | MKAVPLPPK     |           |         | Oxidation (M)[1]  |      | Mascot      |
| 1042.5204  | 1042.557    | 0.0366  | 35    | 27162      | 27169    | ELSEVYFR      |           |         |                   |      | Mascot      |
| 1045.5347  | 1045.5411   | 0.0064  | 6     | 7144       | 7153     | CQIGGTPEIK    |           |         |                   |      | Mascot      |
| 1051.6259  | 1051.6859   | 0.06    | 57    | 32375      | 32384    | SPIASPPRVK    |           |         |                   |      | Mascot      |
| 1062.6306  | 1062.6647   | 0.0341  | 32    | 28602      | 28610    | IVGYVVERK     |           |         |                   |      | Mascot      |
| 1104.5419  | 1104.5546   | 0.0127  | 11    | 10607      | 10615    | EAEKEEIK      |           |         |                   |      | Mascot      |
| 1104.5419  | 1104.5546   | 0.0127  | 11    | 10607      | 10615    | EAEKEEIK      |           |         |                   |      | Mascot      |
| 1118.6205  | 1118.604    | -0.0165 | -15   | 24180      | 24188    | EKNSILWTK     |           |         |                   |      | Mascot      |
| 1120.5481  | 1120.5374   | -0.0107 | -10   | 11575      | 11584    | GSQEIKTDDK    |           |         |                   |      | Mascot      |
| 1165.6212  | 1165.7177   | 0.0965  | 83    | 8759       | 8768     | ETFSVQVVTR    |           |         |                   |      | Mascot      |
| 1165.6212  | 1165.7177   | 0.0965  | 83    | 8759       | 8768     | ETFSVQVVTR    |           |         |                   |      | Mascot      |
| 1179.6078  | 1179.5767   | -0.0311 | -26   | 28311      | 28319    | VTWKLEEMK     |           |         | Oxidation (M)[8]  |      | Mascot      |
| 1182.6187  | 1182.5671   | -0.0516 | -44   | 28547      | 28557    | VYAMNIAGLSK   |           |         | Oxidation (M)[4]  |      | Mascot      |
| 1182.6729  | 1182.5671   | -0.1058 | -89   | 725        | 736      | VPETAIPSAVK   |           |         |                   |      | Mascot      |
| 1190.6263  | 1190.6184   | -0.0079 | -7    | 29946      | 29956    | SLKSDESVTPK   |           |         |                   |      | Mascot      |
| 1221.5304  | 1221.5538   | 0.0234  | 19    | 10260      | 10269    | DKDEDPEMVK    |           |         | Oxidation (M)[8]  |      | Mascot      |
| 1233.662   | 1233.5854   | -0.0766 | -62   | 32566      | 32576    | IQGGSEMIKIR   |           |         | Oxidation (M)[7]  |      | Mascot      |
| 1233.6626  | 1233.5854   | -0.0772 | -63   | 5108       | 5118     | GSAPITVQWFK   |           |         |                   |      | Mascot      |
| 1277.7688  | 1277.6538   | -0.115  | -90   | 16200      | 16211    | EKIVVHAGGVIR  |           |         |                   |      | Mascot      |
| 1279.7256  | 1279.7423   | 0.0167  | 13    | 26573      | 26583    | LNTGTYELKIK   |           |         |                   |      | Mascot      |
| 1310.6587  | 1310.6559   | -0.0028 | -2    | 17534      | 17544    | VKGLTEDTEYS   |           |         |                   |      | Mascot      |
| 1328.6627  | 1328.5773   | -0.0854 | -64   | 8734       | 8744     | QDISQTKPHMK   |           |         | Oxidation (M)[10] |      | Mascot      |
| 1335.6208  | 1335.6929   | 0.0721  | 54    | 18202      | 18212    | DKVEMEGEQVR   |           |         | Oxidation (M)[5]  |      | Mascot      |
| 1391.6914  | 1391.7091   | 0.0177  | 13    | 2956       | 2967     | NGVEIQFSVDQR  |           |         |                   |      | Mascot      |
| 1413.7737  | 1413.7682   | -0.0055 | -4    | 31447      | 31459    | VSGTPAPTLKWEK |           |         |                   |      | Mascot      |

|           |           |         |     |       |       |                            |                                          |        |
|-----------|-----------|---------|-----|-------|-------|----------------------------|------------------------------------------|--------|
| 1443.7446 | 1443.6772 | -0.0674 | -47 | 16899 | 16912 | AMAGTHINIMAGIK             | Oxidation (M)[2]                         | Mascot |
| 1457.7594 | 1457.7173 | -0.0421 | -29 | 1571  | 1583  | SLVEDSQLPEGRK              |                                          | Mascot |
| 1463.7264 | 1463.7169 | -0.0095 | -6  | 27984 | 27996 | LTSPEIDIDADFK              |                                          | Mascot |
| 1469.6866 | 1469.7172 | 0.0306  | 21  | 5242  | 5254  | GDSSEYKVEVSNR              |                                          | Mascot |
| 1475.7601 | 1475.7218 | -0.0383 | -26 | 30138 | 30150 | VFAENETGLSRPR              |                                          | Mascot |
| 1485.7155 | 1485.712  | -0.0035 | -2  | 19518 | 19530 | ITNLEAGQAYCFR              |                                          | Mascot |
| 1493.7166 | 1493.7106 | -0.006  | -4  | 28125 | 28136 | LSWQEVSECTR                |                                          | Mascot |
| 1531.8115 | 1531.7145 | -0.097  | -63 | 24478 | 24490 | ETSRLSWTVVEPK              |                                          | Mascot |
| 1579.7897 | 1579.7042 | -0.0855 | -54 | 11668 | 11681 | LHPSKVVMSEDGK              | Oxidation (M)[9]                         | Mascot |
| 1616.806  | 1616.7039 | -0.1021 | -63 | 5165  | 5178  | QKCEATVTVQEPAR             | Carbamidomethyl (C)[3]                   | Mascot |
| 1626.7209 | 1626.7155 | -0.0054 | -3  | 4784  | 4798  | ASNSVGATCCTELR             | Carbamidomethyl (C)[10,11]               | Mascot |
| 1632.7687 | 1632.6975 | -0.0712 | -44 | 17019 | 17033 | DAASPQWVICSSSK             | Carbamidomethyl (C)[11]                  | Mascot |
| 1637.7628 | 1637.7745 | 0.0117  | 7   | 28440 | 28452 | YMEYTFRVSAENK              |                                          | Mascot |
| 1638.9061 | 1638.8115 | -0.0946 | -58 | 7730  | 7743  | DIDIVELLRNVDPK             |                                          | Mascot |
| 1638.9061 | 1638.8115 | -0.0946 | -58 | 7730  | 7743  | DIDIVELLRNVDPK             |                                          | Mascot |
| 1648.6432 | 1648.6963 | 0.0531  | 32  | 12151 | 12164 | SVFDDEAEYECAR              |                                          | Mascot |
| 1651.8174 | 1651.7683 | -0.0491 | -30 | 25798 | 25813 | IGPSESPETDPQVAK            |                                          | Mascot |
| 1670.7955 | 1670.817  | 0.0215  | 13  | 19173 | 19187 | DHMTVTWKAPANDGK            |                                          | Mascot |
| 1682.7472 | 1682.7767 | 0.0295  | 18  | 6002  | 6016  | NEAGSESCSMDLRVK            | Carbamidomethyl (C)[8]                   | Mascot |
| 1718.8894 | 1718.8324 | -0.057  | -33 | 11872 | 11885 | EEGTKHMLILYNVR             | Oxidation (M)[7]                         | Mascot |
| 1755.8582 | 1755.9348 | 0.0766  | 44  | 17130 | 17145 | TVSIPECHVTGLEEGK           | Carbamidomethyl (C)[7]                   | Mascot |
| 1797.9381 | 1797.9182 | -0.0199 | -11 | 22684 | 22700 | NSVTLTWEPLLDGGAK           |                                          | Mascot |
| 1853.8309 | 1853.8535 | 0.0226  | 12  | 18756 | 18771 | HPFDPPSEPLNCCVVK           | Carbamidomethyl (C)[12]                  | Mascot |
| 1959.952  | 1960.0217 | 0.0697  | 36  | 17483 | 17498 | DYSCTYADLVWIKPTK           | Carbamidomethyl (C)[4]                   | Mascot |
| 2192.1155 | 2192.1182 | 0.0027  | 1   | 21661 | 21680 | ILAENEYGVGLPVETMEA<br>IK   | Oxidation (M)[16]                        | Mascot |
| 2192.1155 | 2192.1182 | 0.0027  | 1   | 21661 | 21680 | ILAENEYGVGLPVETMEA<br>IK   | Oxidation (M)[16]                        | Mascot |
| 2207.0801 | 2207.0408 | -0.0393 | -18 | 26462 | 26480 | FTVSGLTQNESYEFVRM<br>AK    |                                          | Mascot |
| 2211.0713 | 2211.0518 | -0.0195 | -9  | 29957 | 29976 | TPLCPPEPPSFPPEIMDV<br>TK   | Oxidation (M)[16]                        | Mascot |
| 2221.1248 | 2221.103  | -0.0218 | -10 | 29857 | 29876 | VIGRPDPPEGPLFDDIQ<br>AR    |                                          | Mascot |
| 2225.0479 | 2225.0647 | 0.0168  | 8   | 18756 | 18774 | HPFDPPSEPLNCCVNVK<br>SK    | Carbamidomethyl (C)[12,13]               | Mascot |
| 2225.0479 | 2225.0647 | 0.0168  | 8   | 18756 | 18774 | HPFDPPSEPLNCCVNVK<br>SK    | Carbamidomethyl (C)[12,13]               | Mascot |
| 2230.1106 | 2230.1079 | -0.0027 | -1  | 29738 | 29759 | FRVMACNAGGAGEPAEI<br>PGVVK | Carbamidomethyl (C)[6]                   | Mascot |
| 2232.9575 | 2233.03   | 0.0725  | 32  | 1525  | 1542  | MINEFGYCSLDYEVAYS          | Carbamidomethyl (C)[8], Oxidation (M)[1] | Mascot |
| 2283.104  | 2283.1248 | 0.0208  | 9   | 2802  | 2823  | NVHFGDVGDKFVAGSA<br>ETAAK  |                                          | Mascot |
| 2283.1284 | 2283.1248 | -0.0036 | -2  | 13772 | 13793 | VRAVNVAGESEPSPSD           |                                          | Mascot |

|    |                                         |           |         |     |             |       |                                      |                           |        |    |   |
|----|-----------------------------------------|-----------|---------|-----|-------------|-------|--------------------------------------|---------------------------|--------|----|---|
|    | 2284.1389                               | 2284.1189 | -0.02   | -9  | 21385       | 21405 | PVLCK<br>ACDTIFQPGPPGNPRVLD<br>TTK   | Carbamidomethyl (C)[2]    | Mascot |    |   |
|    | 2297.1013                               | 2297.0979 | -0.0034 | -1  | 488         | 506   | IRKPMHVEGPQMEETD<br>VR               | Oxidation (M)[5]          | Mascot |    |   |
|    | 2299.1233                               | 2299.1296 | 0.0063  | 3   | 30037       | 30058 | VVAQNDIGQSEPGPVSE<br>SVVCK           | Carbamidomethyl (C)[21]   | Mascot |    |   |
|    | 2306.0732                               | 2306.1018 | 0.0286  | 12  | 17825       | 17842 | ETFFMVDKCVENHIYQFR                   |                           | Mascot |    |   |
|    | 2501.1753                               | 2501.1995 | 0.0242  | 10  | 856         | 879   | DETMSEISSVSDTGAPA<br>APFFVK          | Oxidation (M)[4]          | Mascot |    |   |
|    | 2584.2922                               | 2584.1545 | -0.1377 | -53 | 26393       | 26416 | SSDPVLAIACEPPNSVR<br>VTDITK          | Carbamidomethyl (C)[11]   | Mascot |    |   |
|    | 2872.4258                               | 2872.3237 | -0.1021 | -36 | 28183       | 28208 | RLDVIDTTSTASLVWMK<br>PEHDGGSR        |                           | Mascot |    |   |
|    | 3337.4834                               | 3337.6814 | 0.198   | 59  | 4869        | 4900  | DTGTYTCTAANEAGSSS<br>CSSSVTVQEPVVFVK | Carbamidomethyl (C)[7,18] | Mascot |    |   |
| 20 | Glutathione peroxidase 1b [Danio rerio] |           |         |     | gi 51859004 |       | 16361.4                              | 7.68                      | 6      | 37 | 0 |

Peptide Information

| Calc. Mass | Obsrv. Mass | ± da    | ± ppm | Start Seq. | End Seq. | Sequence                 | Ion Score | C. I. | % Modification | Rank | Result Type |
|------------|-------------|---------|-------|------------|----------|--------------------------|-----------|-------|----------------|------|-------------|
| 1120.5972  | 1120.5374   | -0.0598 | -53   | 91         | 99       | FIIWSPVCR                |           |       |                |      | Mascot      |
| 1165.6099  | 1165.7177   | 0.1078  | 92    | 125        | 135      | FLTSGIDGDIK              |           |       |                |      | Mascot      |
| 1165.6099  | 1165.7177   | 0.1078  | 92    | 125        | 135      | FLTSGIDGDIK              |           |       |                |      | Mascot      |
| 1179.6409  | 1179.5767   | -0.0642 | -54   | 109        | 119      | FLIGSDGVPFK              |           |       |                |      | Mascot      |
| 1279.6429  | 1279.7423   | 0.0994  | 78    | 40         | 50       | YVRPGNGYEPK              |           |       |                |      | Mascot      |
| 1335.7419  | 1335.6929   | -0.049  | -37   | 109        | 120      | FLIGSDGVPFKR             |           |       |                |      | Mascot      |
| 2297.1602  | 2297.0979   | -0.0623 | -27   | 100        | 119      | NDIAWNFEKFLIGSDGVP<br>FK |           |       |                |      | Mascot      |

|    |                        |  |  |  |             |  |         |      |   |    |   |
|----|------------------------|--|--|--|-------------|--|---------|------|---|----|---|
| 21 | tektin 2 [Danio rerio] |  |  |  | gi 37682089 |  | 48740.9 | 5.63 | 9 | 36 | 0 |
|----|------------------------|--|--|--|-------------|--|---------|------|---|----|---|

Peptide Information

| Calc. Mass | Obsrv. Mass | ± da    | ± ppm | Start Seq. | End Seq. | Sequence             | Ion Score | C. I. | % Modification     | Rank | Result Type |
|------------|-------------|---------|-------|------------|----------|----------------------|-----------|-------|--------------------|------|-------------|
| 1045.5789  | 1045.5411   | -0.0378 | -36   | 68         | 75       | INDITRWK             |           |       |                    |      | Mascot      |
| 1190.5834  | 1190.6184   | 0.035   | 29    | 234        | 243      | EEMQASVQIR           |           |       |                    |      | Mascot      |
| 1328.6943  | 1328.5773   | -0.117  | -88   | 127        | 138      | ELVSDPVEAEK          |           |       |                    |      | Mascot      |
| 1579.8915  | 1579.7042   | -0.1873 | -119  | 357        | 370      | QKLAQAQHSLSLQSLK     |           |       |                    |      | Mascot      |
| 1616.752   | 1616.7039   | -0.0481 | -30   | 371        | 383      | QHEAQMMEELSRK        |           |       |                    |      | Mascot      |
| 1632.7468  | 1632.6975   | -0.0493 | -30   | 371        | 383      | QHEAQMMEELSRK        |           |       | Oxidation (M)[6]   |      | Mascot      |
| 1648.7417  | 1648.6963   | -0.0454 | -28   | 371        | 383      | QHEAQMMEELSRK        |           |       | Oxidation (M)[6,7] |      | Mascot      |
| 1854.0219  | 1853.8535   | -0.1684 | -91   | 299        | 315      | DIIGLEEDLQAKTAPLK    |           |       |                    |      | Mascot      |
| 2211.0261  | 2211.0518   | 0.0257  | 12    | 271        | 287      | RTHHEEQAHDMQWQL<br>K |           |       |                    |      | Mascot      |
| 2283.1365  | 2283.1248   | -0.0117 | -5    | 2          | 22       | ATLSSKPASRYSVSDWA    |           |       |                    |      | Mascot      |

|    |                                                            |           |         |    |    |              |                                   |                        |    |    |   |  |  |  |  |  |        |
|----|------------------------------------------------------------|-----------|---------|----|----|--------------|-----------------------------------|------------------------|----|----|---|--|--|--|--|--|--------|
|    | 2283.1365                                                  | 2283.1248 | -0.0117 | -5 | 2  | 22           | TNNK<br>ATLSSKPASRYSVSDWA<br>TNNK |                        |    |    |   |  |  |  |  |  | Mascot |
|    | 2584.1211                                                  | 2584.1545 | 0.0334  | 13 | 80 | 101          | ACAQEVDEEMDALTSK<br>EEMER         | Carbamidomethyl (C)[2] |    |    |   |  |  |  |  |  | Mascot |
| 22 | PREDICTED: hypothetical protein LOC100007481 [Danio rerio] |           |         |    |    | gi 326664865 | 157182.2                          | 8.05                   | 16 | 35 | 0 |  |  |  |  |  |        |

#### Peptide Information

| Calc. Mass | Obsrv. Mass | ± da    | ± ppm | Start Seq. | End Seq. | Sequence                     | Ion Score | C. I. | % Modification                            | Rank | Result Type |
|------------|-------------|---------|-------|------------|----------|------------------------------|-----------|-------|-------------------------------------------|------|-------------|
| 864.4607   | 864.4717    | 0.011   | 13    | 883        | 889      | VSVKEMR                      |           |       | Oxidation (M)[6]                          |      | Mascot      |
| 882.4719   | 882.5462    | 0.0743  | 84    | 684        | 690      | QFAEFLK                      |           |       |                                           |      | Mascot      |
| 1045.5173  | 1045.5411   | 0.0238  | 23    | 874        | 882      | QGSQSFVHR                    |           |       |                                           |      | Mascot      |
| 1118.551   | 1118.604    | 0.053   | 47    | 206        | 215      | CEDGLQVAVK                   |           |       | Carbamidomethyl (C)[1]                    |      | Mascot      |
| 1221.6296  | 1221.5538   | -0.0758 | -62   | 336        | 346      | LIDFGCGDLLR                  |           |       |                                           |      | Mascot      |
| 1233.6222  | 1233.5854   | -0.0368 | -30   | 180        | 189      | DDIHSKYSIR                   |           |       |                                           |      | Mascot      |
| 1233.6222  | 1233.5854   | -0.0368 | -30   | 180        | 189      | DDIHSKYSIR                   |           |       |                                           |      | Mascot      |
| 1310.6812  | 1310.6559   | -0.0253 | -19   | 943        | 954      | SSNPPSLPNNKR                 |           |       |                                           |      | Mascot      |
| 1335.6176  | 1335.6929   | 0.0753  | 56    | 347        | 358      | TSSYNTYSGTVR                 |           |       |                                           |      | Mascot      |
| 1413.7557  | 1413.7682   | 0.0125  | 9     | 463        | 474      | RAIQEISNQAR                  |           |       |                                           |      | Mascot      |
| 1475.7682  | 1475.7218   | -0.0464 | -31   | 931        | 942      | EYGHFQLPLPFK                 |           |       |                                           |      | Mascot      |
| 1616.8563  | 1616.7039   | -0.1524 | -94   | 322        | 335      | MPNLLVNTETLEVK               |           |       | Oxidation (M)[1]                          |      | Mascot      |
| 1632.7906  | 1632.6975   | -0.0931 | -57   | 1074       | 1087     | SDIKEVHCCLVMAK               |           |       | Carbamidomethyl (C)[8]                    |      | Mascot      |
| 1648.7855  | 1648.6963   | -0.0892 | -54   | 1074       | 1087     | SDIKEVHCCLVMAK               |           |       | Carbamidomethyl (C)[8], Oxidation (M)[12] |      | Mascot      |
| 1755.7683  | 1755.9348   | 0.1665  | 95    | 359        | 373      | YCPPEFIDTGEYHGK              |           |       |                                           |      | Mascot      |
| 1853.8527  | 1853.8535   | 0.0008  | 0     | 1033       | 1047     | DFTVPRCYYPSFSK               |           |       | Carbamidomethyl (C)[7]                    |      | Mascot      |
| 2299.1062  | 2299.1296   | 0.0234  | 10    | 665        | 683      | WNRIVVEELDMTGDYPS<br>FK      |           |       |                                           |      | Mascot      |
| 2501.1216  | 2501.1995   | 0.0779  | 31    | 192        | 215      | MGQGGCGSVYEGTRCE<br>DGLQVAVK |           |       | Carbamidomethyl (C)[6]                    |      | Mascot      |

|    |                                                         |  |  |  |  |              |           |      |    |    |   |  |  |  |  |  |  |
|----|---------------------------------------------------------|--|--|--|--|--------------|-----------|------|----|----|---|--|--|--|--|--|--|
| 23 | PREDICTED: hypothetical protein LOC559994 [Danio rerio] |  |  |  |  | gi 326677062 | 1030064.3 | 5.62 | 45 | 34 | 0 |  |  |  |  |  |  |
|----|---------------------------------------------------------|--|--|--|--|--------------|-----------|------|----|----|---|--|--|--|--|--|--|

#### Peptide Information

| Calc. Mass | Obsrv. Mass | ± da    | ± ppm | Start Seq. | End Seq. | Sequence | Ion Score | C. I. | % Modification | Rank | Result Type |
|------------|-------------|---------|-------|------------|----------|----------|-----------|-------|----------------|------|-------------|
| 850.5032   | 850.5237    | 0.0205  | 24    | 247        | 253      | LKELYGK  |           |       |                |      | Mascot      |
| 850.5185   | 850.5237    | 0.0052  | 6     | 8569       | 8575     | IKPFAFK  |           |       |                |      | Mascot      |
| 864.4321   | 864.4717    | 0.0396  | 46    | 3272       | 3278     | EERAFAFR |           |       |                |      | Mascot      |
| 870.5559   | 870.5187    | -0.0372 | -43   | 1536       | 1542     | ALLLVWR  |           |       |                |      | Mascot      |

|           |           |         |     |      |      |                            |                                          |        |
|-----------|-----------|---------|-----|------|------|----------------------------|------------------------------------------|--------|
| 882.4679  | 882.5462  | 0.0783  | 89  | 3102 | 3108 | NLHEELK                    |                                          | Mascot |
| 1045.5636 | 1045.5411 | -0.0225 | -22 | 8277 | 8285 | DLEVRSAQK                  |                                          | Mascot |
| 1062.536  | 1062.6647 | 0.1287  | 121 | 3153 | 3160 | TKCLEQQR                   | Carbamidomethyl (C)[3]                   | Mascot |
| 1118.5687 | 1118.604  | 0.0353  | 32  | 6531 | 6541 | ESGKSVASEPK                |                                          | Mascot |
| 1120.5238 | 1120.5374 | 0.0136  | 12  | 6138 | 6146 | QCVMEQVAR                  | Carbamidomethyl (C)[2]                   | Mascot |
| 1179.5674 | 1179.5767 | 0.0093  | 8   | 2826 | 2835 | DMDLLSQSVR                 | Oxidation (M)[2]                         | Mascot |
| 1182.6841 | 1182.5671 | -0.117  | -99 | 1064 | 1073 | VPERLQEALK                 |                                          | Mascot |
| 1182.6841 | 1182.5671 | -0.117  | -99 | 1064 | 1073 | VPERLQEALK                 |                                          | Mascot |
| 1190.573  | 1190.6184 | 0.0454  | 38  | 6663 | 6671 | HMLMELLCK                  | Carbamidomethyl (C)[8], Oxidation (M)[2] | Mascot |
| 1221.6144 | 1221.5538 | -0.0606 | -50 | 5301 | 5311 | TLQQGVTMSEK                |                                          | Mascot |
| 1279.6562 | 1279.7423 | 0.0861  | 67  | 5890 | 5900 | TLKQDVTMSEK                |                                          | Mascot |
| 1310.7175 | 1310.6559 | -0.0616 | -47 | 4148 | 4158 | TLNLHTEAKQR                |                                          | Mascot |
| 1328.6416 | 1328.5773 | -0.0643 | -48 | 1103 | 1113 | DGSIRFCIDFR                |                                          | Mascot |
| 1391.7351 | 1391.7091 | -0.026  | -19 | 8002 | 8013 | GGTWMLVIDQKK               | Oxidation (M)[5]                         | Mascot |
| 1413.7526 | 1413.7682 | 0.0156  | 11  | 2698 | 2709 | TPIKHFFDSPPK               |                                          | Mascot |
| 1457.6794 | 1457.7173 | 0.0379  | 26  | 7671 | 7683 | SESAPALTEYDFK              |                                          | Mascot |
| 1463.6649 | 1463.7169 | 0.052   | 36  | 3192 | 3204 | TSDQSYSSVSFQK              |                                          | Mascot |
| 1475.7522 | 1475.7218 | -0.0304 | -21 | 6801 | 6813 | QEAKILECSVAER              |                                          | Mascot |
| 1485.705  | 1485.712  | 0.007   | 5   | 3155 | 3165 | CLEQQRHCVQK                | Carbamidomethyl (C)[1,8]                 | Mascot |
| 1616.8391 | 1616.7039 | -0.1352 | -84 | 3905 | 3919 | ISHTSIYHGSSKTAK            |                                          | Mascot |
| 1632.8447 | 1632.6975 | -0.1472 | -90 | 5443 | 5457 | LTEKSMPAVASPVMR            | Oxidation (M)[6]                         | Mascot |
| 1637.7874 | 1637.7745 | -0.0129 | -8  | 6757 | 6771 | MACQETADKIEAISK            |                                          | Mascot |
| 1638.9438 | 1638.8115 | -0.1323 | -81 | 3297 | 3310 | HVLKEPTLPALQHR             |                                          | Mascot |
| 1638.9438 | 1638.8115 | -0.1323 | -81 | 3297 | 3310 | HVLKEPTLPALQHR             |                                          | Mascot |
| 1648.7847 | 1648.6963 | -0.0884 | -54 | 7781 | 7796 | MPDTESAKPGKDSGTK           |                                          | Mascot |
| 1651.7719 | 1651.7683 | -0.0036 | -2  | 605  | 616  | ERFCMYQGLLYR               | Carbamidomethyl (C)[4], Oxidation (M)[5] | Mascot |
| 1670.8141 | 1670.817  | 0.0029  | 2   | 7083 | 7096 | CSAPVDLMLGHLWR             | Carbamidomethyl (C)[1], Oxidation (M)[8] | Mascot |
| 1682.8088 | 1682.7767 | -0.0321 | -19 | 4188 | 4202 | LTEKSMATEASPVMR            | Oxidation (M)[6,14]                      | Mascot |
| 1755.9785 | 1755.9348 | -0.0437 | -25 | 1231 | 1247 | LQAAGLTVNPQKCTIAK          |                                          | Mascot |
| 2191.8423 | 2192.1182 | 0.2759  | 126 | 7839 | 7857 | MSESGDEKEEPMNGEM<br>STR    | Oxidation (M)[1,12,16]                   | Mascot |
| 2191.8423 | 2192.1182 | 0.2759  | 126 | 7839 | 7857 | MSESGDEKEEPMNGEM<br>STR    | Oxidation (M)[1,12,16]                   | Mascot |
| 2207.207  | 2207.0408 | -0.1662 | -75 | 6697 | 6714 | IHLLELQAKEHEEYLTk          |                                          | Mascot |
| 2211.126  | 2211.0518 | -0.0742 | -34 | 8508 | 8526 | MSAAELQTTGVIYRLELC<br>R    | Carbamidomethyl (C)[18]                  | Mascot |
| 2221.1406 | 2221.103  | -0.0376 | -17 | 3041 | 3057 | HQLIQWREQQICVQAR           | Carbamidomethyl (C)[13]                  | Mascot |
| 2224.9873 | 2225.0647 | 0.0774  | 35  | 4312 | 4333 | VTDAETSSQIGACAEDNE<br>SGIK |                                          | Mascot |
| 2224.9873 | 2225.0647 | 0.0774  | 35  | 4312 | 4333 | VTDAETSSQIGACAEDNE         |                                          | Mascot |



|           |           |         |     |      |      |                             |                                           |        |
|-----------|-----------|---------|-----|------|------|-----------------------------|-------------------------------------------|--------|
| 2230.1643 | 2230.1079 | -0.0564 | -25 | 6653 | 6671 | SGIK<br>DSLLALESVKHMLMELLCK | Carbamidomethyl (C)[18]                   | Mascot |
| 2233.0012 | 2233.03   | 0.0288  | 13  | 8235 | 8252 | DSTELEEWMRCAHEQLQK          |                                           | Mascot |
| 2283.1333 | 2283.1248 | -0.0085 | -4  | 7195 | 7214 | ESPQICQDLQSLLGHCRLR         |                                           | Mascot |
| 2283.1333 | 2283.1248 | -0.0085 | -4  | 7195 | 7214 | ESPQICQDLQSLLGHCRLR         |                                           | Mascot |
| 2284.022  | 2284.1189 | 0.0969  | 42  | 3439 | 3458 | RVLDCDAPFESEADTLMDR         |                                           | Mascot |
| 2297.1455 | 2297.0979 | -0.0476 | -21 | 8621 | 8639 | VLLNQHWERLGELMNSSDR         |                                           | Mascot |
| 2299.0984 | 2299.1296 | 0.0312  | 14  | 2881 | 2901 | VEDIQHLTVSSSDLAPCQNSR       |                                           | Mascot |
| 2306.0176 | 2306.1018 | 0.0842  | 37  | 8235 | 8252 | DSTELEEWMRCAHEQLQK          | Carbamidomethyl (C)[11], Oxidation (M)[9] | Mascot |
| 2501.1218 | 2501.1995 | 0.0777  | 31  | 2814 | 2835 | GMGDFCSDAQLRDMDLLSQSVR      | Carbamidomethyl (C)[6]                    | Mascot |
| 2584.248  | 2584.1545 | -0.0935 | -36 | 4168 | 4191 | CASIEATEMSLGTGDIVQSKLTEK    | Carbamidomethyl (C)[1], Oxidation (M)[9]  | Mascot |
| 2872.3003 | 2872.3237 | 0.0234  | 8   | 659  | 681  | HFYWPGLNSVVAQYCKTCPECQK     | Carbamidomethyl (C)[15,18,21]             | Mascot |

24 tektin 2 [Danio rerio] gi|310689065 48533.7 5.63 9 34 0

#### Peptide Information

| Calc. Mass | Obsrv. Mass | ± da    | ± ppm | Start Seq. | End Seq. | Sequence                | Ion Score | C. I. % | Modification           | Rank | Result Type |
|------------|-------------|---------|-------|------------|----------|-------------------------|-----------|---------|------------------------|------|-------------|
| 1045.5789  | 1045.5411   | -0.0378 | -36   | 68         | 75       | INDITRWK                |           |         |                        |      | Mascot      |
| 1190.5834  | 1190.6184   | 0.035   | 29    | 231        | 240      | EEMQASVQIR              |           |         |                        |      | Mascot      |
| 1328.6943  | 1328.5773   | -0.117  | -88   | 127        | 138      | ELVSDPVEAELK            |           |         |                        |      | Mascot      |
| 1579.8915  | 1579.7042   | -0.1873 | -119  | 354        | 367      | QKLAQAQHSLSLK           |           |         |                        |      | Mascot      |
| 1616.752   | 1616.7039   | -0.0481 | -30   | 368        | 380      | QHEAQMMEELSRK           |           |         |                        |      | Mascot      |
| 1632.7468  | 1632.6975   | -0.0493 | -30   | 368        | 380      | QHEAQMMEELSRK           |           |         | Oxidation (M)[6]       |      | Mascot      |
| 1648.7417  | 1648.6963   | -0.0454 | -28   | 368        | 380      | QHEAQMMEELSRK           |           |         | Oxidation (M)[6,7]     |      | Mascot      |
| 1854.0219  | 1853.8535   | -0.1684 | -91   | 296        | 312      | DIIGLEEDLQAKTAPLK       |           |         |                        |      | Mascot      |
| 2211.0261  | 2211.0518   | 0.0257  | 12    | 268        | 284      | RTHHEEQAHHDMQWQLK       |           |         |                        |      | Mascot      |
| 2283.1365  | 2283.1248   | -0.0117 | -5    | 2          | 22       | ATLSSKPASRYSVSDWATNNK   |           |         |                        |      | Mascot      |
| 2283.1365  | 2283.1248   | -0.0117 | -5    | 2          | 22       | ATLSSKPASRYSVSDWATNNK   |           |         |                        |      | Mascot      |
| 2584.1211  | 2584.1545   | 0.0334  | 13    | 80         | 101      | ACAAQEVDDEMDALTLSKEEMER |           |         | Carbamidomethyl (C)[2] |      | Mascot      |

25 steroid hormone receptor ERR1 [Danio rerio] gi|47086129 47615.2 8.16 9 33 0

#### Peptide Information

| Calc. Mass | Obsrv. Mass | ± da | ± ppm | Start Seq. | End Seq. | Sequence | Ion Score | C. I. % | Modification | Rank | Result Type |
|------------|-------------|------|-------|------------|----------|----------|-----------|---------|--------------|------|-------------|
|------------|-------------|------|-------|------------|----------|----------|-----------|---------|--------------|------|-------------|

|    |                                                                                  |           |         |      |     |              |                         |      |    |    |   |  |                           |  |  |  |        |
|----|----------------------------------------------------------------------------------|-----------|---------|------|-----|--------------|-------------------------|------|----|----|---|--|---------------------------|--|--|--|--------|
|    | 1051.7238                                                                        | 1051.6859 | -0.0379 | -36  | 392 | 400          | LLLTLP LLR              |      |    |    |   |  |                           |  |  |  | Mascot |
|    | 1221.6144                                                                        | 1221.5538 | -0.0606 | -50  | 239 | 249          | TLTTLCDLADR             |      |    |    |   |  |                           |  |  |  | Mascot |
|    | 1277.6888                                                                        | 1277.6538 | -0.035  | -27  | 55  | 65           | YSPPLYTPALR             |      |    |    |   |  |                           |  |  |  | Mascot |
|    | 1328.5825                                                                        | 1328.5773 | -0.0052 | -4   | 14  | 29           | AEPSSPEGGGGGGGGGR       |      |    |    |   |  |                           |  |  |  | Mascot |
|    | 1335.8834                                                                        | 1335.6929 | -0.1905 | -143 | 389 | 400          | AGRLLLTLP LLR           |      |    |    |   |  |                           |  |  |  | Mascot |
|    | 1626.9174                                                                        | 1626.7155 | -0.2019 | -124 | 314 | 329          | VAGLTELNAAISQLAR        |      |    |    |   |  |                           |  |  |  | Mascot |
|    | 1638.6949                                                                        | 1638.8115 | 0.1166  | 71   | 30  | 48           | TSPGGASSDSSQSGGG<br>GSR |      |    |    |   |  |                           |  |  |  | Mascot |
|    | 1638.6949                                                                        | 1638.8115 | 0.1166  | 71   | 30  | 48           | TSPGGASSDSSQSGGG<br>GSR |      |    |    |   |  |                           |  |  |  | Mascot |
|    | 1853.7566                                                                        | 1853.8535 | 0.0969  | 52   | 70  | 89           | EEGADGAEESTGSGG<br>GRCK |      |    |    |   |  |                           |  |  |  | Mascot |
|    | 2233.0525                                                                        | 2233.03   | -0.0225 | -10  | 417 | 436          | GGVPMHKLFLFLEMM<br>DSP  |      |    |    |   |  |                           |  |  |  | Mascot |
|    | 2297.032                                                                         | 2297.0979 | 0.0659  | 29   | 417 | 436          | GGVPMHKLFLFLEMM<br>DSP  |      |    |    |   |  | Oxidation (M)[5,12,16,17] |  |  |  | Mascot |
| 26 | PREDICTED: pleckstrin homology domain-containing family H member 2 [Danio rerio] |           |         |      |     | gi 326672868 | 159281.4                | 6.64 | 17 | 33 | 0 |  |                           |  |  |  |        |

#### Peptide Information

| Calc. Mass | Obsrv. Mass | ± da    | ± ppm | Start Seq. | End Seq. | Sequence                 | Ion Score | C. I. % | Modification                             | Rank | Result Type |
|------------|-------------|---------|-------|------------|----------|--------------------------|-----------|---------|------------------------------------------|------|-------------|
| 842.4195   | 842.4905    | 0.071   | 84    | 1269       | 1275     | WSFFGAK                  |           |         |                                          |      | Mascot      |
| 864.4396   | 864.4717    | 0.0321  | 37    | 131        | 136      | EWVMRK                   |           |         | Oxidation (M)[4]                         |      | Mascot      |
| 996.4236   | 996.572     | 0.1484  | 149   | 1073       | 1080     | LNQDMGMR                 |           |         | Oxidation (M)[5,7]                       |      | Mascot      |
| 996.4236   | 996.572     | 0.1484  | 149   | 1073       | 1080     | LNQDMGMR                 |           |         | Oxidation (M)[5,7]                       |      | Mascot      |
| 1165.7191  | 1165.7177   | -0.0014 | -1    | 358        | 368      | SPILTPVLTPK              |           |         |                                          |      | Mascot      |
| 1165.7191  | 1165.7177   | -0.0014 | -1    | 358        | 368      | SPILTPVLTPK              |           |         |                                          |      | Mascot      |
| 1179.6521  | 1179.5767   | -0.0754 | -64   | 1217       | 1225     | QVLERFYPK                |           |         |                                          |      | Mascot      |
| 1190.576   | 1190.6184   | 0.0424  | 36    | 1147       | 1156     | QVSGETERER               |           |         |                                          |      | Mascot      |
| 1221.6321  | 1221.5538   | -0.0783 | -64   | 1332       | 1344     | LVVAESSGSGTSK            |           |         |                                          |      | Mascot      |
| 1279.6012  | 1279.7423   | 0.1411  | 110   | 213        | 224      | SISTLQEDSGDK             |           |         |                                          |      | Mascot      |
| 1310.5317  | 1310.6559   | 0.1242  | 95    | 2          | 13       | AECDESTGGAWK             |           |         | Carbamidomethyl (C)[3]                   |      | Mascot      |
| 1443.6686  | 1443.6772   | 0.0086  | 6     | 787        | 797      | MWEARVEEHK               |           |         |                                          |      | Mascot      |
| 1457.5671  | 1457.7173   | 0.1502  | 103   | 1          | 13       | MAECDESTGGAWK            |           |         | Carbamidomethyl (C)[4], Oxidation (M)[1] |      | Mascot      |
| 1463.7965  | 1463.7169   | -0.0796 | -54   | 151        | 162      | HQLEAEIQVLR              |           |         |                                          |      | Mascot      |
| 1475.7827  | 1475.7218   | -0.0609 | -41   | 780        | 791      | FPLGQIKMWEAR             |           |         |                                          |      | Mascot      |
| 1797.8282  | 1797.9182   | 0.09    | 50    | 254        | 271      | LSCGASSVLSSTASEGE<br>R   |           |         | Carbamidomethyl (C)[3]                   |      | Mascot      |
| 1853.9537  | 1853.8535   | -0.1002 | -54   | 1252       | 1267     | GQTSSECIRIYLTVAR         |           |         | Carbamidomethyl (C)[7]                   |      | Mascot      |
| 2230.1497  | 2230.1079   | -0.0418 | -19   | 676        | 695      | KPLGQIELNACSTITRGD<br>EK |           |         | Carbamidomethyl (C)[11]                  |      | Mascot      |
| 3337.6892  | 3337.6814   | -0.0078 | -2    | 1369       | 1399     | STQQHMAAAHLSAPAL         |           |         |                                          |      | Mascot      |

27      amylo-1, 6-glucosidase, 4-alpha-glucanotransferase      gi|289547621      173383.7      6.08      17      33      0  
 [Danio rerio]

Peptide Information

| Calc. Mass | Obsrv. Mass | ± da    | ± ppm | Start Seq. | End Seq. | Sequence                 | Ion Score | C. I. % | Modification              | Rank | Result Type |
|------------|-------------|---------|-------|------------|----------|--------------------------|-----------|---------|---------------------------|------|-------------|
| 850.5257   | 850.5237    | -0.002  | -2    | 422        | 428      | KHPLVTR                  |           |         |                           |      | Mascot      |
| 850.5257   | 850.5237    | -0.002  | -2    | 422        | 428      | KHPLVTR                  |           |         |                           |      | Mascot      |
| 1104.6047  | 1104.5546   | -0.0501 | -45   | 306        | 314      | IEALVEQFR                |           |         |                           |      | Mascot      |
| 1104.6047  | 1104.5546   | -0.0501 | -45   | 306        | 314      | IEALVEQFR                |           |         |                           |      | Mascot      |
| 1182.6113  | 1182.5671   | -0.0442 | -37   | 781        | 790      | TVERQTGTYSK              |           |         |                           |      | Mascot      |
| 1182.6113  | 1182.5671   | -0.0442 | -37   | 781        | 790      | TVERQTGTYSK              |           |         |                           |      | Mascot      |
| 1190.6085  | 1190.6184   | 0.0099  | 8     | 1280       | 1291     | DGSAVEIVGLCK             |           |         |                           |      | Mascot      |
| 1328.6117  | 1328.5773   | -0.0344 | -26   | 45         | 55       | VYTNYPTEGER              |           |         |                           |      | Mascot      |
| 1391.5492  | 1391.7091   | 0.1599  | 115   | 579        | 591      | EAMSAGDSHEEGR            |           |         | Oxidation (M)[3]          |      | Mascot      |
| 1413.722   | 1413.7682   | 0.0462  | 33    | 876        | 889      | AGSVPDSNTPDILK           |           |         |                           |      | Mascot      |
| 1443.8358  | 1443.6772   | -0.1586 | -110  | 286        | 297      | GVLWQEVFPKIK             |           |         |                           |      | Mascot      |
| 1457.6591  | 1457.7173   | 0.0582  | 40    | 950        | 961      | NDLGHPFCDNLR             |           |         | Carbamidomethyl (C)[8]    |      | Mascot      |
| 1463.7345  | 1463.7169   | -0.0176 | -12   | 5          | 16       | QTRVMVLNDMEK             |           |         |                           |      | Mascot      |
| 1475.7675  | 1475.7218   | -0.0457 | -31   | 483        | 494      | ELICWGDSVKLR             |           |         | Carbamidomethyl (C)[4]    |      | Mascot      |
| 1616.7849  | 1616.7039   | -0.081  | -50   | 136        | 148      | CLGPLDEWSDRLR            |           |         | Carbamidomethyl (C)[1]    |      | Mascot      |
| 1637.7635  | 1637.7745   | 0.011   | 7     | 735        | 748      | HCPSTHQSVVAVCR           |           |         | Carbamidomethyl (C)[2,13] |      | Mascot      |
| 2210.9812  | 2211.0518   | 0.0706  | 32    | 1334       | 1351     | NFEKMFYVSHDPNDPNEK       |           |         |                           |      | Mascot      |
| 2297.0801  | 2297.0979   | 0.0178  | 8     | 525        | 544      | LDNCHSTPLHVAEFMLDAAR     |           |         | Carbamidomethyl (C)[4]    |      | Mascot      |
| 2306.0461  | 2306.1018   | 0.0557  | 24    | 636        | 658      | SVYDSLPSAIVSMACCATGSTR   |           |         |                           |      | Mascot      |
| 2584.3379  | 2584.1545   | -0.1834 | -71   | 974        | 996      | LVSRRGGPLAEVGQWFQAMFAYLK |           |         | Oxidation (M)[18]         |      | Mascot      |

28      ryanodine receptor 1b (skeletal) [Danio rerio]      gi|169146264      308125.7      4.98      23      33      0

Peptide Information

| Calc. Mass | Obsrv. Mass | ± da    | ± ppm | Start Seq. | End Seq. | Sequence  | Ion Score | C. I. % | Modification     | Rank | Result Type |
|------------|-------------|---------|-------|------------|----------|-----------|-----------|---------|------------------|------|-------------|
| 864.4495   | 864.4717    | 0.0222  | 26    | 1832       | 1839     | IEIMGASK  |           |         | Oxidation (M)[4] |      | Mascot      |
| 1042.5527  | 1042.557    | 0.0043  | 4     | 1592       | 1600     | DIIDEPGKR |           |         |                  |      | Mascot      |
| 1045.5425  | 1045.5411   | -0.0014 | -1    | 300        | 307      | LLTNHYER  |           |         |                  |      | Mascot      |
| 1051.5605  | 1051.6859   | 0.1254  | 119   | 157        | 165      | ASMVLFLDR |           |         |                  |      | Mascot      |
| 1104.587   | 1104.5546   | -0.0324 | -29   | 1291       | 1299     | MTPLYNIPR |           |         |                  |      | Mascot      |

|    |                               |           |         |      |              |      |                                   |      |   |    |                                              |  |        |
|----|-------------------------------|-----------|---------|------|--------------|------|-----------------------------------|------|---|----|----------------------------------------------|--|--------|
|    | 1104.62                       | 1104.5546 | -0.0654 | -59  | 460          | 467  | EIYRWPIK                          |      |   |    |                                              |  | Mascot |
|    | 1118.5299                     | 1118.604  | 0.0741  | 66   | 147          | 156  | MSASFVPDHK                        |      |   |    |                                              |  | Mascot |
|    | 1120.5819                     | 1120.5374 | -0.0445 | -40  | 1291         | 1299 | MTPLYNIPR                         |      |   |    | Oxidation (M)[1]                             |  | Mascot |
|    | 1413.7419                     | 1413.7682 | 0.0263  | 19   | 1291         | 1301 | MTPLYNIPRHR                       |      |   |    | Oxidation (M)[1]                             |  | Mascot |
|    | 1443.7994                     | 1443.6772 | -0.1222 | -85  | 1953         | 1964 | SIVNFLSLFTFR                      |      |   |    |                                              |  | Mascot |
|    | 1457.7094                     | 1457.7173 | 0.0079  | 5    | 1224         | 1235 | WQMALYKETSGK                      |      |   |    | Oxidation (M)[3]                             |  | Mascot |
|    | 1463.5872                     | 1463.7169 | 0.1297  | 89   | 2692         | 2703 | CWDFFPAGDCFR                      |      |   |    |                                              |  | Mascot |
|    | 1531.7322                     | 1531.7145 | -0.0177 | -12  | 1854         | 1865 | NQWEMPQVRESK                      |      |   |    |                                              |  | Mascot |
|    | 1579.7971                     | 1579.7042 | -0.0929 | -59  | 233          | 245  | AIMIDSM LHTIYR                    |      |   |    | Oxidation (M)[3]                             |  | Mascot |
|    | 1648.7035                     | 1648.6963 | -0.0072 | -4   | 2692         | 2704 | CWDFFPAGDCFRK                     |      |   |    | Carbamidomethyl (C)[1]                       |  | Mascot |
|    | 1651.7228                     | 1651.7683 | 0.0455  | 28   | 2619         | 2631 | DQREQVREDMETK                     |      |   |    | Oxidation (M)[10]                            |  | Mascot |
|    | 1670.882                      | 1670.817  | -0.065  | -39  | 1457         | 1472 | LGISILNGGNSDVQQR                  |      |   |    |                                              |  | Mascot |
|    | 1682.9635                     | 1682.7767 | -0.1868 | -111 | 270          | 282  | YLRPSMLQHLLRR                     |      |   |    |                                              |  | Mascot |
|    | 1755.8547                     | 1755.9348 | 0.0801  | 46   | 749          | 764  | AGLRSFFESAADDIEK                  |      |   |    |                                              |  | Mascot |
|    | 1853.9027                     | 1853.8535 | -0.0492 | -27  | 1866         | 1881 | RQFIFDVVNEGGESEK                  |      |   |    |                                              |  | Mascot |
|    | 2229.8894                     | 2230.1079 | 0.2185  | 98   | 2550         | 2566 | CDDMMTCYLFHMYVGVR                 |      |   |    | Carbamidomethyl (C)[1,7], Oxidation (M)[4,5] |  | Mascot |
|    | 2283.2205                     | 2283.1248 | -0.0957 | -42  | 1050         | 1068 | DEFAVLCRDLYALYPLLIR               |      |   |    |                                              |  | Mascot |
|    | 2283.2205                     | 2283.1248 | -0.0957 | -42  | 1050         | 1068 | DEFAVLCRDLYALYPLLIR               |      |   |    |                                              |  | Mascot |
|    | 2872.5247                     | 2872.3237 | -0.201  | -70  | 258          | 281  | DVIEDCLMSLVKYLRPSM<br>LQHLLR      |      |   |    |                                              |  | Mascot |
|    | 3337.5386                     | 3337.6814 | 0.1428  | 43   | 946          | 975  | GPENFPEQEGCLCTDVT<br>SEQLNQLLSIMK |      |   |    | Carbamidomethyl (C)[11]                      |  | Mascot |
| 29 | Ppp1r3b protein [Danio rerio] |           |         |      | gi 190337192 |      | 33606.4                           | 5.74 | 8 | 33 | 0                                            |  |        |

Peptide Information

|    | Calc. Mass                                              | Obsrv. Mass | ± da    | ± ppm | Start Seq.  | End Seq. | Sequence                 | Ion Score | C. I. | %  | Modification              | Rank | Result Type |
|----|---------------------------------------------------------|-------------|---------|-------|-------------|----------|--------------------------|-----------|-------|----|---------------------------|------|-------------|
|    | 1051.5782                                               | 1051.6859   | 0.1077  | 102   | 157         | 165      | NISFEKSVK                |           |       |    |                           |      | Mascot      |
|    | 1179.6521                                               | 1179.5767   | -0.0754 | -64   | 166         | 174      | LRITFDTWK                |           |       |    |                           |      | Mascot      |
|    | 1233.7062                                               | 1233.5854   | -0.1208 | -98   | 233         | 242      | NYRIIQSALR               |           |       |    |                           |      | Mascot      |
|    | 1233.7062                                               | 1233.5854   | -0.1208 | -98   | 233         | 242      | NYRIIQSALR               |           |       |    |                           |      | Mascot      |
|    | 1335.5997                                               | 1335.6929   | 0.0932  | 70    | 175         | 185      | NHTDVECQYVK              |           |       |    |                           |      | Mascot      |
|    | 1797.8081                                               | 1797.9182   | 0.1101  | 61    | 132         | 145      | IENDHVCLEHCMLK           |           |       |    | Carbamidomethyl (C)[7,11] |      | Mascot      |
|    | 2211.1001                                               | 2211.0518   | -0.0483 | -22   | 2           | 20       | PIELAMSLYLSSDEFLNP<br>R  |           |       |    | Oxidation (M)[6]          |      | Mascot      |
|    | 2229.9829                                               | 2230.1079   | 0.125   | 56    | 175         | 193      | NHTDVECQYVKDITYTGS<br>NR |           |       |    |                           |      | Mascot      |
|    | 2284.0703                                               | 2284.1189   | 0.0486  | 21    | 168         | 185      | ITFDTWKNHTDVECQYVK       |           |       |    | Carbamidomethyl (C)[14]   |      | Mascot      |
| 30 | PREDICTED: hypothetical protein LOC562472 [Danio rerio] |             |         |       | gi 68362780 |          | 171051.4                 | 8.98      | 19    | 32 | 0                         |      |             |

| Peptide Information |                                                         |         |       |            |                              |           |         |                   |      |             |
|---------------------|---------------------------------------------------------|---------|-------|------------|------------------------------|-----------|---------|-------------------|------|-------------|
| Calc. Mass          | Obsrv. Mass                                             | ± da    | ± ppm | Start Seq. | End Sequence Seq.            | Ion Score | C. I. % | Modification      | Rank | Result Type |
| 882.5229            | 882.5462                                                | 0.0233  | 26    | 758        | 764 LMQLLHK                  |           |         |                   |      | Mascot      |
| 996.5109            | 996.572                                                 | 0.0611  | 61    | 375        | 382 DKVTYTNR                 |           |         |                   |      | Mascot      |
| 996.5109            | 996.572                                                 | 0.0611  | 61    | 375        | 382 DKVTYTNR                 |           |         |                   |      | Mascot      |
| 1042.4663           | 1042.557                                                | 0.0907  | 87    | 1111       | 1118 FDTYPMPR                |           |         | Oxidation (M)[6]  |      | Mascot      |
| 1051.5605           | 1051.6859                                               | 0.1254  | 119   | 361        | 369 LTSLCYVPR                |           |         |                   |      | Mascot      |
| 1062.5612           | 1062.6647                                               | 0.1035  | 97    | 206        | 214 DLREALMAK                |           |         | Oxidation (M)[7]  |      | Mascot      |
| 1233.6949           | 1233.5854                                               | -0.1095 | -89   | 1342       | 1352 KFLVQVDASAR             |           |         |                   |      | Mascot      |
| 1233.6949           | 1233.5854                                               | -0.1095 | -89   | 1342       | 1352 KFLVQVDASAR             |           |         |                   |      | Mascot      |
| 1277.6848           | 1277.6538                                               | -0.031  | -24   | 75         | 84 REEGLIYELR                |           |         |                   |      | Mascot      |
| 1310.6012           | 1310.6559                                               | 0.0547  | 42    | 798        | 808 FVSDNGKDWDK              |           |         |                   |      | Mascot      |
| 1335.7518           | 1335.6929                                               | -0.0589 | -44   | 1383       | 1394 YATIEKEGLAIK            |           |         |                   |      | Mascot      |
| 1463.7642           | 1463.7169                                               | -0.0473 | -32   | 1140       | 1151 GYWQVPLEKTSR            |           |         |                   |      | Mascot      |
| 1485.7656           | 1485.712                                                | -0.0536 | -36   | 118        | 131 GPSVTQNPTLSTQR           |           |         |                   |      | Mascot      |
| 1531.8049           | 1531.7145                                               | -0.0904 | -59   | 1225       | 1238 AGLTLNVAKCEWAR          |           |         |                   |      | Mascot      |
| 1579.8148           | 1579.7042                                               | -0.1106 | -70   | 361        | 374 LTSLCYVPREGDVK           |           |         |                   |      | Mascot      |
| 1632.8163           | 1632.6975                                               | -0.1188 | -73   | 132        | 146 VADSPPPPPMRPESR          |           |         |                   |      | Mascot      |
| 1638.8308           | 1638.8115                                               | -0.0193 | -12   | 1105       | 1118 LNAVSKFDTPMPR           |           |         |                   |      | Mascot      |
| 1638.8308           | 1638.8115                                               | -0.0193 | -12   | 1105       | 1118 LNAVSKFDTPMPR           |           |         |                   |      | Mascot      |
| 1648.8112           | 1648.6963                                               | -0.1149 | -70   | 132        | 146 VADSPPPPPMRPESR          |           |         | Oxidation (M)[10] |      | Mascot      |
| 1797.8112           | 1797.9182                                               | 0.107   | 60    | 147        | 161 MPAFQEGEDVENYLR          |           |         |                   |      | Mascot      |
| 2297.1328           | 2297.0979                                               | -0.0349 | -15   | 500        | 521 ADLEPLPAMDDSLIQGEG GKPK  |           |         | Oxidation (M)[9]  |      | Mascot      |
| 2501.2903           | 2501.1995                                               | -0.0908 | -36   | 1167       | 1188 TMPFGLHGAPATFQRLM NQVLR |           |         | Oxidation (M)[2]  |      | Mascot      |
| 2584.2712           | 2584.1545                                               | -0.1167 | -45   | 848        | 870 SWEASSTTAEGETNIVKF VLQMR |           |         |                   |      | Mascot      |
| 31                  | PREDICTED: hypothetical protein LOC560599 [Danio rerio] |         |       |            | gi 125820806                 | 23741.5   | 4.38    | 6                 | 32   | 0           |

| Peptide Information |             |         |       |            |          |                |           |       |                  |                  |
|---------------------|-------------|---------|-------|------------|----------|----------------|-----------|-------|------------------|------------------|
| Calc. Mass          | Obsrv. Mass | ± da    | ± ppm | Start Seq. | End Seq. | Sequence       | Ion Score | C. I. | % Modification   | Rank Result Type |
| 1120.5004           | 1120.5374   | 0.037   | 33    | 156        | 164      | KEEEVEDDK      |           |       |                  | Mascot           |
| 1469.7819           | 1469.7172   | -0.0647 | -44   | 55         | 67       | DQLRQGVGVENR   |           |       |                  | Mascot           |
| 1475.7787           | 1475.7218   | -0.0569 | -39   | 46         | 58       | MVFAPGGLRDQLR  |           |       | Oxidation (M)[1] | Mascot           |
| 1651.8398           | 1651.7683   | -0.0715 | -43   | 32         | 45       | KLNTETNGQYTVQR |           |       |                  | Mascot           |

|    |                                         |           |         |     |              |     |                         |      |   |    |   |  |  |        |
|----|-----------------------------------------|-----------|---------|-----|--------------|-----|-------------------------|------|---|----|---|--|--|--------|
|    | 2233.1624                               | 2233.03   | -0.1324 | -59 | 59           | 77  | QGVGVVENRFDVHIWPQ<br>PR |      |   |    |   |  |  | Mascot |
|    | 2298.8535                               | 2299.1296 | 0.2761  | 120 | 87           | 105 | DEDDENDQDKQNDTCTE<br>ER |      |   |    |   |  |  | Mascot |
| 32 | glutathione peroxidase 1b [Danio rerio] |           |         |     | gi 169636422 |     | 21638                   | 7.66 | 6 | 32 | 0 |  |  |        |

Peptide Information

| Calc. Mass | Obsrv. Mass | ± da    | ± ppm | Start Seq. | End Seq. | Sequence                 | Ion Score | C. I. | % Modification | Rank | Result Type |
|------------|-------------|---------|-------|------------|----------|--------------------------|-----------|-------|----------------|------|-------------|
| 1120.5972  | 1120.5374   | -0.0598 | -53   | 139        | 147      | FIIWSPVCR                |           |       |                |      | Mascot      |
| 1165.6099  | 1165.7177   | 0.1078  | 92    | 173        | 183      | FLTSGIDGDIK              |           |       |                |      | Mascot      |
| 1165.6099  | 1165.7177   | 0.1078  | 92    | 173        | 183      | FLTSGIDGDIK              |           |       |                |      | Mascot      |
| 1179.6409  | 1179.5767   | -0.0642 | -54   | 157        | 167      | FLIGSDGVPFK              |           |       |                |      | Mascot      |
| 1279.6429  | 1279.7423   | 0.0994  | 78    | 88         | 98       | YVRPGNGYEPK              |           |       |                |      | Mascot      |
| 1335.7419  | 1335.6929   | -0.049  | -37   | 157        | 168      | FLIGSDGVPFKR             |           |       |                |      | Mascot      |
| 2297.1602  | 2297.0979   | -0.0623 | -27   | 148        | 167      | NDIAWNFEKFLIGSDGVP<br>FK |           |       |                |      | Mascot      |

|    |                                       |  |  |  |              |  |         |      |    |    |   |  |  |
|----|---------------------------------------|--|--|--|--------------|--|---------|------|----|----|---|--|--|
| 33 | unnamed protein product [Danio rerio] |  |  |  | gi 157676717 |  | 68416.5 | 6.64 | 10 | 32 | 0 |  |  |
|----|---------------------------------------|--|--|--|--------------|--|---------|------|----|----|---|--|--|

Peptide Information

| Calc. Mass | Obsrv. Mass | ± da    | ± ppm | Start Seq. | End Seq. | Sequence                   | Ion Score | C. I. | % Modification                                | Rank | Result Type |
|------------|-------------|---------|-------|------------|----------|----------------------------|-----------|-------|-----------------------------------------------|------|-------------|
| 1104.616   | 1104.5546   | -0.0614 | -56   | 415        | 424      | GVFANLTNLR                 |           |       |                                               |      | Mascot      |
| 1104.616   | 1104.5546   | -0.0614 | -56   | 415        | 424      | GVFANLTNLR                 |           |       |                                               |      | Mascot      |
| 1165.5959  | 1165.7177   | 0.1218  | 104   | 323        | 332      | NGQIVSYQTR                 |           |       |                                               |      | Mascot      |
| 1165.5959  | 1165.7177   | 0.1218  | 104   | 323        | 332      | NGQIVSYQTR                 |           |       |                                               |      | Mascot      |
| 1277.6228  | 1277.6538   | 0.031   | 24    | 569        | 578      | ELKNEIMCPK                 |           |       | Carbamidomethyl (C)[8], Oxidation (M)[7]      |      | Mascot      |
| 1443.6793  | 1443.6772   | -0.0021 | -1    | 333        | 345      | IPPLSCPQPCTCK              |           |       | Carbamidomethyl (C)[6]                        |      | Mascot      |
| 1463.7311  | 1463.7169   | -0.0142 | -10   | 556        | 568      | CASPVQFSNIELR              |           |       |                                               |      | Mascot      |
| 1616.9006  | 1616.7039   | -0.1967 | -122  | 95         | 110      | LQNIEGGAFVGLSALK           |           |       |                                               |      | Mascot      |
| 1632.7434  | 1632.6975   | -0.0459 | -28   | 346        | 360      | AHPSPDFGISVSCQER           |           |       |                                               |      | Mascot      |
| 1670.7148  | 1670.817    | 0.1022  | 61    | 259        | 273      | QELCPMGTGSDFDVVR           |           |       | Oxidation (M)[6]                              |      | Mascot      |
| 1718.98    | 1718.8324   | -0.1476 | -86   | 361        | 376      | NIQSLADLIPKPPNAK           |           |       |                                               |      | Mascot      |
| 2584.0491  | 2584.1545   | 0.1054  | 41    | 24         | 45       | AETCSACSCMSIENVLYV<br>NCEK |           |       | Carbamidomethyl (C)[4,7,9], Oxidation (M)[10] |      | Mascot      |

|    |                                                     |  |  |  |             |  |         |      |   |    |   |  |  |
|----|-----------------------------------------------------|--|--|--|-------------|--|---------|------|---|----|---|--|--|
| 34 | adenylyl cyclase-associated protein 2 [Danio rerio] |  |  |  | gi 41387192 |  | 51394.1 | 5.94 | 9 | 32 | 0 |  |  |
|----|-----------------------------------------------------|--|--|--|-------------|--|---------|------|---|----|---|--|--|

Peptide Information

| Calc. Mass | Obsrv. Mass | ± da    | ± ppm | Start Seq. | End Seq. | Sequence | Ion Score | C. I. | % Modification | Rank | Result Type |
|------------|-------------|---------|-------|------------|----------|----------|-----------|-------|----------------|------|-------------|
| 842.5206   | 842.4905    | -0.0301 | -36   | 8          | 14       | LERAVVR  |           |       |                |      | Mascot      |

|           |           |         |     |     |     |                        |        |
|-----------|-----------|---------|-----|-----|-----|------------------------|--------|
| 1042.6003 | 1042.557  | -0.0433 | -42 | 2   | 10  | EALVGRLER              | Mascot |
| 1104.5718 | 1104.5546 | -0.0172 | -16 | 360 | 369 | VNSIIVDNCK             | Mascot |
| 1104.5718 | 1104.5546 | -0.0172 | -16 | 360 | 369 | VNSIIVDNCK             | Mascot |
| 1118.6204 | 1118.604  | -0.0164 | -15 | 311 | 320 | HPPVLELEGK             | Mascot |
| 1120.5674 | 1120.5374 | -0.03   | -27 | 443 | 451 | EFPVPEQFK              | Mascot |
| 1179.5562 | 1179.5767 | 0.0205  | 17  | 416 | 426 | DSLDCIEIVSAK           | Mascot |
| 1310.631  | 1310.6559 | 0.0249  | 19  | 201 | 211 | EGHCTGLIWSK            | Mascot |
| 1853.8221 | 1853.8535 | 0.0314  | 17  | 427 | 442 | SSEMNILVPEGEDDYR       | Mascot |
| 2297.0789 | 2297.0979 | 0.019   | 8   | 406 | 426 | TEGCHVYLSKDSLDCIEIVSAK | Mascot |

35 caspase-2 [Danio rerio] gi|111607486 49545.4 6.17 8 32 0

#### Peptide Information

| Calc. Mass | Obsrv. Mass | ± da    | ± ppm | Start Seq. | End Seq. | Sequence             | Ion Score | C. I. | % Modification                            | Rank | Result Type |
|------------|-------------|---------|-------|------------|----------|----------------------|-----------|-------|-------------------------------------------|------|-------------|
| 996.507    | 996.572     | 0.065   | 65    | 93         | 100      | LLMDFTEK             |           |       |                                           |      | Mascot      |
| 996.507    | 996.572     | 0.065   | 65    | 93         | 100      | LLMDFTEK             |           |       |                                           |      | Mascot      |
| 1042.4366  | 1042.557    | 0.1204  | 115   | 1          | 9        | MLGECGMTK            |           |       | Carbamidomethyl (C)[5], Oxidation (M)[1]  |      | Mascot      |
| 1062.5361  | 1062.6647   | 0.1286  | 121   | 213        | 221      | DLTAEAMRR            |           |       |                                           |      | Mascot      |
| 1104.5167  | 1104.5546   | 0.0379  | 34    | 189        | 198      | GGEVDEETLR           |           |       |                                           |      | Mascot      |
| 1104.5167  | 1104.5546   | 0.0379  | 34    | 189        | 198      | GGEVDEETLR           | 10        |       | 0                                         |      | Mascot      |
| 1277.5388  | 1277.6538   | 0.115   | 90    | 413        | 423      | EMSEFTSSLCK          |           |       | Oxidation (M)[2]                          |      | Mascot      |
| 1469.6703  | 1469.7172   | 0.0469  | 32    | 400        | 412      | EGYAPGSAHHRCK        |           |       | Carbamidomethyl (C)[12]                   |      | Mascot      |
| 2207.189   | 2207.0408   | -0.1482 | -67   | 380        | 399      | ANNTHLSDILVQVNGQIKSR |           |       |                                           |      | Mascot      |
| 2211.0349  | 2211.0518   | 0.0169  | 8     | 413        | 430      | EMSEFTSSLCKDLYLFPK   |           |       | Carbamidomethyl (C)[10], Oxidation (M)[2] |      | Mascot      |

36 alpha-1,3-mannosyl-glycoprotein 4-beta-N-acetylglucosaminyltransferase C [Danio rerio] gi|55925363 52220.8 7.19 6 32 0 17 0

#### Peptide Information

| Calc. Mass | Obsrv. Mass | ± da    | ± ppm | Start Seq. | End Seq. | Sequence           | Ion Score | C. I. | % Modification | Rank | Result Type |
|------------|-------------|---------|-------|------------|----------|--------------------|-----------|-------|----------------|------|-------------|
| 1104.5181  | 1104.5546   | 0.0365  | 33    | 161        | 169      | RNFNDAPDR          |           |       |                |      | Mascot      |
| 1104.5181  | 1104.5546   | 0.0365  | 33    | 161        | 169      | RNFNDAPDR          | 17        |       | 0              |      | Mascot      |
| 1120.6949  | 1120.5374   | -0.1575 | -141  | 141        | 150      | GRLLVIHANK         |           |       |                |      | Mascot      |
| 1277.7212  | 1277.6538   | -0.0674 | -53   | 130        | 140      | ISREFAVQLSK        |           |       |                |      | Mascot      |
| 1310.7216  | 1310.6559   | -0.0657 | -50   | 151        | 161      | EHYPPLTGLKR        |           |       |                |      | Mascot      |
| 1469.811   | 1469.7172   | -0.0938 | -64   | 430        | 442      | VTAAQPEWVIISR      |           |       |                |      | Mascot      |
| 2297.1367  | 2297.0979   | -0.0388 | -17   | 364        | 385      | VQIHTGSDGKDELASADV |           |       |                |      | Mascot      |

37 arf-GAP with coiled-coil, ANK repeat and PH domain-containing protein 3 [Danio rerio] ELGR gi|131889644 94940.4 5.88 13 32 0

Peptide Information

| Calc. Mass | Obsrv. Mass | ± da    | ± ppm | Start Seq. | End Seq. | Sequence                | Ion Score | C. I. % | Modification           | Rank | Result Type |
|------------|-------------|---------|-------|------------|----------|-------------------------|-----------|---------|------------------------|------|-------------|
| 842.4478   | 842.4905    | 0.0427  | 51    | 494        | 501      | KPGPNSSR                |           |         |                        |      | Mascot      |
| 1062.5135  | 1062.6647   | 0.1512  | 142   | 130        | 138      | EDMEIAQVK               |           |         |                        |      | Mascot      |
| 1118.6245  | 1118.604    | -0.0205 | -18   | 837        | 845      | TWLIYTPPK               |           |         |                        |      | Mascot      |
| 1165.5453  | 1165.7177   | 0.1724  | 148   | 789        | 797      | LARMNEEMR               |           |         | Oxidation (M)[4]       |      | Mascot      |
| 1165.5453  | 1165.7177   | 0.1724  | 148   | 789        | 797      | LARMNEEMR               |           |         | Oxidation (M)[4]       |      | Mascot      |
| 1179.6368  | 1179.5767   | -0.0601 | -51   | 664        | 673      | ELDPNTLLHK              |           |         |                        |      | Mascot      |
| 1182.5129  | 1182.5671   | 0.0542  | 46    | 340        | 349      | SCMLQAESEK              |           |         | Carbamidomethyl (C)[2] |      | Mascot      |
| 1182.5129  | 1182.5671   | 0.0542  | 46    | 340        | 349      | SCMLQAESEK              |           |         | Carbamidomethyl (C)[2] |      | Mascot      |
| 1279.5769  | 1279.7423   | 0.1654  | 129   | 521        | 532      | MCGSEALLEGGR            |           |         | Carbamidomethyl (C)[2] |      | Mascot      |
| 1391.6658  | 1391.7091   | 0.0433  | 31    | 317        | 328      | LCSVKPCEDIER            |           |         |                        |      | Mascot      |
| 1485.7809  | 1485.712    | -0.0689 | -46   | 105        | 116      | QQLHSFVKEDVR            |           |         |                        |      | Mascot      |
| 1493.8071  | 1493.7106   | -0.0965 | -65   | 664        | 676      | ELDPNTLLHKASR           |           |         |                        |      | Mascot      |
| 1638.8533  | 1638.8115   | -0.0418 | -26   | 56         | 69       | LFVNGIRDLSHHCK          |           |         |                        |      | Mascot      |
| 1638.8533  | 1638.8115   | -0.0418 | -26   | 56         | 69       | LFVNGIRDLSHHCK          |           |         |                        |      | Mascot      |
| 1755.8516  | 1755.9348   | 0.0832  | 47    | 39         | 55       | LCSGMIEAGRAYATANK       |           |         |                        |      | Mascot      |
| 2284.1431  | 2284.1189   | -0.0242 | -11   | 259        | 278      | VEFNVDAPNGVMEGYL<br>FKR |           |         |                        |      | Mascot      |

38 Zgc:153795 protein [Danio rerio] gi|92097819 42352.1 5.79 10 31 0

Peptide Information

| Calc. Mass | Obsrv. Mass | ± da    | ± ppm | Start Seq. | End Seq. | Sequence        | Ion Score | C. I. % | Modification                                | Rank | Result Type |
|------------|-------------|---------|-------|------------|----------|-----------------|-----------|---------|---------------------------------------------|------|-------------|
| 1233.535   | 1233.5854   | 0.0504  | 41    | 253        | 263      | CVVPSDSGPCR     |           |         | Carbamidomethyl (C)[1,10]                   |      | Mascot      |
| 1233.535   | 1233.5854   | 0.0504  | 41    | 253        | 263      | CVVPSDSGPCR     |           |         | Carbamidomethyl (C)[1,10]                   |      | Mascot      |
| 1277.71    | 1277.6538   | -0.0562 | -44   | 233        | 244      | EQEGPVIPAIPK    |           |         |                                             |      | Mascot      |
| 1632.8003  | 1632.6975   | -0.1028 | -63   | 362        | 375      | EELLPAEEPVSYEK  |           |         |                                             |      | Mascot      |
| 1637.7522  | 1637.7745   | 0.0223  | 14    | 253        | 267      | CVVPSDSGPCRASFR |           |         | Carbamidomethyl (C)[1]                      |      | Mascot      |
| 1638.692   | 1638.8115   | 0.1195  | 73    | 26         | 40       | TADGPQECNLVNCMK |           |         | Oxidation (M)[14]                           |      | Mascot      |
| 1638.692   | 1638.8115   | 0.1195  | 73    | 26         | 40       | TADGPQECNLVNCMK |           |         | Oxidation (M)[14]                           |      | Mascot      |
| 1648.7893  | 1648.6963   | -0.093  | -56   | 177        | 191      | CQSPAVTGNCRAAIK |           |         | Carbamidomethyl (C)[1,10]                   |      | Mascot      |
| 1651.76    | 1651.7683   | 0.0083  | 5     | 11         | 25       | ACCEREDCQLALIGK |           |         |                                             |      | Mascot      |
| 1682.6342  | 1682.7767   | 0.1425  | 85    | 293        | 306      | YGSEECMSVCSTK   |           |         | Carbamidomethyl (C)[7,11], Oxidation (M)[8] |      | Mascot      |



|    |                                                                                         |           |        |    |     |     |                         |  |  |  |  |  |                            |  |  |  |        |
|----|-----------------------------------------------------------------------------------------|-----------|--------|----|-----|-----|-------------------------|--|--|--|--|--|----------------------------|--|--|--|--------|
|    | 2211.0122                                                                               | 2211.0518 | 0.0396 | 18 | 158 | 176 | NDVDPKALTEMTSEEFQ<br>EK |  |  |  |  |  |                            |  |  |  | Mascot |
|    | 2220.9319                                                                               | 2221.103  | 0.1711 | 77 | 288 | 306 | GNLNRYGSEEECMSVCS<br>TK |  |  |  |  |  | Carbamidomethyl (C)[12,16] |  |  |  | Mascot |
| 39 | PREDICTED: zinc finger protein 271-like [Danio rerio] gi 326666322 31744.7 9.68 10 31 0 |           |        |    |     |     |                         |  |  |  |  |  |                            |  |  |  |        |

#### Peptide Information

| Calc. Mass | Obsrv. Mass | ± da    | ± ppm | Start Seq. | End Seq. | Sequence                  | Ion Score | C. I. | % | Modification               | Rank | Result Type |
|------------|-------------|---------|-------|------------|----------|---------------------------|-----------|-------|---|----------------------------|------|-------------|
| 996.5359   | 996.572     | 0.0361  | 36    | 138        | 146      | SFTQVSSLK                 |           |       |   |                            |      | Mascot      |
| 996.5359   | 996.572     | 0.0361  | 36    | 138        | 146      | SFTQVSSLK                 |           |       |   |                            |      | Mascot      |
| 1062.5803  | 1062.6647   | 0.0844  | 79    | 259        | 267      | AHERIHTAK                 |           |       |   |                            |      | Mascot      |
| 1118.551   | 1118.604    | 0.053   | 47    | 7          | 16       | ISIMSHTGEK                |           |       |   | Oxidation (M)[4]           |      | Mascot      |
| 1182.4594  | 1182.5671   | 0.1077  | 91    | 157        | 164      | EYFCFECK                  |           |       |   | Carbamidomethyl (C)[4,7]   |      | Mascot      |
| 1182.4594  | 1182.5671   | 0.1077  | 91    | 157        | 164      | EYFCFECK                  |           |       |   | Carbamidomethyl (C)[4,7]   |      | Mascot      |
| 1190.6389  | 1190.6184   | -0.0205 | -17   | 147        | 156      | NHEKIHTGVR                |           |       |   |                            |      | Mascot      |
| 1310.5543  | 1310.6559   | 0.1016  | 78    | 157        | 165      | EYFCFECKK                 |           |       |   | Carbamidomethyl (C)[4,7]   |      | Mascot      |
| 1718.7626  | 1718.8324   | 0.0698  | 41    | 235        | 249      | IHTGEKPYTCSHCDK           |           |       |   |                            |      | Mascot      |
| 2207.012   | 2207.0408   | 0.0288  | 13    | 207        | 224      | IHTGEKPYACSHCDKTFR        |           |       |   | Carbamidomethyl (C)[10,13] |      | Mascot      |
| 2224.9976  | 2225.0647   | 0.0671  | 30    | 204        | 221      | HERIHTGEKPYACSHCD<br>K    |           |       |   | Carbamidomethyl (C)[13,16] |      | Mascot      |
| 2224.9976  | 2225.0647   | 0.0671  | 30    | 204        | 221      | HERIHTGEKPYACSHCD<br>K    |           |       |   | Carbamidomethyl (C)[13,16] |      | Mascot      |
| 2283.0757  | 2283.1248   | 0.0491  | 22    | 38         | 57       | RIHTGEKPFSCQTQCGQSF<br>TR |           |       |   |                            |      | Mascot      |
| 2283.0757  | 2283.1248   | 0.0491  | 22    | 38         | 57       | RIHTGEKPFSCQTQCGQSF<br>TR |           |       |   |                            |      | Mascot      |

|    |                                                                                                    |  |  |  |  |  |  |  |  |  |  |  |  |  |  |  |  |
|----|----------------------------------------------------------------------------------------------------|--|--|--|--|--|--|--|--|--|--|--|--|--|--|--|--|
| 40 | ectodermal-neural cortex (with BTB-like domain) [Danio rerio] gi 47777321 31766.1 6.05 5 31 0 15 0 |  |  |  |  |  |  |  |  |  |  |  |  |  |  |  |  |
|----|----------------------------------------------------------------------------------------------------|--|--|--|--|--|--|--|--|--|--|--|--|--|--|--|--|

#### Peptide Information

| Calc. Mass | Obsrv. Mass | ± da    | ± ppm | Start Seq. | End Seq. | Sequence       | Ion Score | C. I. | % | Modification     | Rank | Result Type |
|------------|-------------|---------|-------|------------|----------|----------------|-----------|-------|---|------------------|------|-------------|
| 864.421    | 864.4717    | 0.0507  | 59    | 254        | 260      | SLSWDTR        |           |       |   |                  |      | Mascot      |
| 1104.6523  | 1104.5546   | -0.0977 | -88   | 43         | 51       | RVFTDVVLR      |           |       |   |                  |      | Mascot      |
| 1104.6523  | 1104.5546   | -0.0977 | -88   | 43         | 51       | RVFTDVVLR      | 15        |       | 0 |                  |      | Mascot      |
| 1120.6514  | 1120.5374   | -0.114  | -102  | 265        | 273      | LWKTQFVAK      |           |       |   |                  |      | Mascot      |
| 1179.5952  | 1179.5767   | -0.0185 | -16   | 52         | 61       | AGHRVFPCHR     |           |       |   |                  |      | Mascot      |
| 1637.7628  | 1637.7745   | 0.0117  | 7     | 70         | 83       | YFEAMFSGGLKESR |           |       |   | Oxidation (M)[5] |      | Mascot      |

|    |                                                                                                                                       |  |  |  |  |  |  |  |  |  |  |  |  |  |  |  |  |
|----|---------------------------------------------------------------------------------------------------------------------------------------|--|--|--|--|--|--|--|--|--|--|--|--|--|--|--|--|
| 41 | PREDICTED: u2 small nuclear ribonucleoprotein auxiliary factor 35 kDa subunit-related protein 2 [Da gi 189525066 74762.6 9.52 12 31 0 |  |  |  |  |  |  |  |  |  |  |  |  |  |  |  |  |
|----|---------------------------------------------------------------------------------------------------------------------------------------|--|--|--|--|--|--|--|--|--|--|--|--|--|--|--|--|

#### Peptide Information

|  | Calc. Mass | Obsrv. Mass | $\pm$ da | $\pm$ ppm | Start Seq. | End Sequence Seq.                | Ion Score | C. I. % | Modification                             | Rank | Result Type |
|--|------------|-------------|----------|-----------|------------|----------------------------------|-----------|---------|------------------------------------------|------|-------------|
|  | 996.4971   | 996.572     | 0.0749   | 75        | 183        | 190 ANCPFFLK                     |           |         | Carbamidomethyl (C)[3]                   |      | Mascot      |
|  | 996.4971   | 996.572     | 0.0749   | 75        | 183        | 190 ANCPFFLK                     |           |         | Carbamidomethyl (C)[3]                   |      | Mascot      |
|  | 1104.5531  | 1104.5546   | 0.0015   | 1         | 76         | 84 LKVDEESER                     |           |         |                                          |      | Mascot      |
|  | 1104.5531  | 1104.5546   | 0.0015   | 1         | 76         | 84 LKVDEESER                     |           |         |                                          |      | Mascot      |
|  | 1182.5975  | 1182.5671   | -0.0304  | -26       | 181        | 190 DKANCPFFLK                   |           |         |                                          |      | Mascot      |
|  | 1182.5975  | 1182.5671   | -0.0304  | -26       | 181        | 190 DKANCPFFLK                   |           |         |                                          |      | Mascot      |
|  | 1391.6082  | 1391.7091   | 0.1009   | 73        | 217        | 228 GMFVSFGMEQSR                 |           |         | Oxidation (M)[2]                         |      | Mascot      |
|  | 1413.6692  | 1413.7682   | 0.099    | 70        | 85         | 94 LHQEWMERER                    |           |         |                                          |      | Mascot      |
|  | 1463.6267  | 1463.7169   | 0.0902   | 62        | 373        | 384 HMSGRDGMWSQR                 |           |         | Oxidation (M)[2]                         |      | Mascot      |
|  | 1469.7343  | 1469.7172   | -0.0171  | -12       | 500        | 513 SNSPEHVSKNQSVK               |           |         |                                          |      | Mascot      |
|  | 1531.7144  | 1531.7145   | 0.0001   | 0         | 217        | 229 GMFVSFGMEQSRR                |           |         |                                          |      | Mascot      |
|  | 1638.7839  | 1638.8115   | 0.0276   | 17        | 203        | 216 KHDHPASSCTLMVR               |           |         | Carbamidomethyl (C)[9]                   |      | Mascot      |
|  | 1638.7839  | 1638.8115   | 0.0276   | 17        | 203        | 216 KHDHPASSCTLMVR               |           |         | Carbamidomethyl (C)[9]                   |      | Mascot      |
|  | 1670.6744  | 1670.817    | 0.1426   | 85        | 5          | 19 GCCSIQTETQDSEN                |           |         |                                          |      | Mascot      |
|  | 2232.9165  | 2233.03     | 0.1135   | 51        | 1          | 19 MTEKGCCSIQTETQDSE<br>NR       |           |         | Carbamidomethyl (C)[6], Oxidation (M)[1] |      | Mascot      |
|  | 2872.3027  | 2872.3237   | 0.021    | 7         | 271        | 294 VSCNFEPHLRGNVYVQY<br>ETEEQCK |           |         |                                          |      | Mascot      |

42 hypothetical protein LOC436894 [Danio rerio] gi|50540310 28008.1 8.18 8 31 0

#### Peptide Information

|  | Calc. Mass | Obsrv. Mass | $\pm$ da | $\pm$ ppm | Start Seq. | End Sequence Seq.  | Ion Score | C. I. % | Modification           | Rank | Result Type |
|--|------------|-------------|----------|-----------|------------|--------------------|-----------|---------|------------------------|------|-------------|
|  | 864.4495   | 864.4717    | 0.0222   | 26        | 184        | 190 LETMNLK        |           |         | Oxidation (M)[4]       |      | Mascot      |
|  | 996.5433   | 996.572     | 0.0287   | 29        | 114        | 121 MLLELFSK       |           |         | Oxidation (M)[1]       |      | Mascot      |
|  | 996.5433   | 996.572     | 0.0287   | 29        | 114        | 121 MLLELFSK       |           |         | Oxidation (M)[1]       |      | Mascot      |
|  | 1182.5836  | 1182.5671   | -0.0165  | -14       | 30         | 38 FCPFAQRTR       |           |         | Carbamidomethyl (C)[2] |      | Mascot      |
|  | 1182.5836  | 1182.5671   | -0.0165  | -14       | 30         | 38 FCPFAQRTR       |           |         | Carbamidomethyl (C)[2] |      | Mascot      |
|  | 1190.6099  | 1190.6184   | 0.0085   | 7         | 21         | 29 DHIRLYSMR       |           |         |                        |      | Mascot      |
|  | 1391.7893  | 1391.7091   | -0.0802  | -58       | 45         | 56 GIKYDTININLK    |           |         |                        |      | Mascot      |
|  | 1463.804   | 1463.7169   | -0.0871  | -60       | 110        | 121 AQRRLLELFSK    |           |         |                        |      | Mascot      |
|  | 1616.8544  | 1616.7039   | -0.1505  | -93       | 101        | 113 LLPFDPFERAQQR  |           |         |                        |      | Mascot      |
|  | 1718.7804  | 1718.8324   | 0.052    | 30        | 214        | 227 ATMFSTETYMVFYK |           |         |                        |      | Mascot      |

43 PREDICTED: tRNA-dihydrouridine synthase 2-like [Danio rerio] gi|292628574 56676.6 6.04 11 31 0

#### Peptide Information

|  | Calc. Mass | Obsrv. Mass | ± da    | ± ppm | Start Seq. | End Sequence Seq.           | Ion Score | C. I. % | Modification     | Rank | Result Type |
|--|------------|-------------|---------|-------|------------|-----------------------------|-----------|---------|------------------|------|-------------|
|  | 842.473    | 842.4905    | 0.0175  | 21    | 436        | 443 TLGLPEGR                |           |         |                  |      | Mascot      |
|  | 1045.4628  | 1045.5411   | 0.0783  | 75    | 288        | 295 YCLCQMLR                |           |         | Oxidation (M)[6] |      | Mascot      |
|  | 1051.6007  | 1051.6859   | 0.0852  | 81    | 180        | 190 TGVAIAIVHGR             |           |         |                  |      | Mascot      |
|  | 1062.5538  | 1062.6647   | 0.1109  | 104   | 328        | 336 TTAELESRR               |           |         |                  |      | Mascot      |
|  | 1182.6113  | 1182.5671   | -0.0442 | -37   | 444        | 454 IGEEHSGLVNK             |           |         |                  |      | Mascot      |
|  | 1182.6113  | 1182.5671   | -0.0442 | -37   | 444        | 454 IGEEHSGLVNK             |           |         |                  |      | Mascot      |
|  | 1277.6041  | 1277.6538   | 0.0497  | 39    | 129        | 141 GGMGSALLSDPEK           |           |         | Oxidation (M)[3] |      | Mascot      |
|  | 1310.7361  | 1310.6559   | -0.0802 | -61   | 180        | 192 TGVAIAIVHGRMK           |           |         |                  |      | Mascot      |
|  | 1391.6802  | 1391.7091   | 0.0289  | 21    | 386        | 396 LEQPVYETEQR             |           |         |                  |      | Mascot      |
|  | 1648.8176  | 1648.6963   | -0.1213 | -74   | 384        | 396 EKLEQPVYETEQR           |           |         |                  |      | Mascot      |
|  | 1959.9658  | 1960.0217   | 0.0559  | 29    | 60         | 76 VENDVLQTIDFVAPDER        |           |         |                  |      | Mascot      |
|  | 2299.1387  | 2299.1296   | -0.0091 | -4    | 259        | 278 QQGALSVDQVMQEITY<br>AVR |           |         |                  |      | Mascot      |

44 conserved oligomeric Golgi complex subunit 2 [Danio rerio] gi|47087011 82297.4 6.05 12 31 0

#### Peptide Information

|  | Calc. Mass | Obsrv. Mass | ± da    | ± ppm | Start Seq. | End Sequence Seq.              | Ion Score | C. I. % | Modification                              | Rank | Result Type |
|--|------------|-------------|---------|-------|------------|--------------------------------|-----------|---------|-------------------------------------------|------|-------------|
|  | 864.4495   | 864.4717    | 0.0222  | 26    | 649        | 655 KMEESLK                    |           |         |                                           |      | Mascot      |
|  | 1045.5598  | 1045.5411   | -0.0187 | -18   | 517        | 525 IPDISEMIK                  |           |         |                                           |      | Mascot      |
|  | 1120.5527  | 1120.5374   | -0.0153 | -14   | 352        | 361 QCGSQASVKR                 |           |         | Carbamidomethyl (C)[2]                    |      | Mascot      |
|  | 1310.6772  | 1310.6559   | -0.0213 | -16   | 262        | 273 SSPNGLKVMYAK               |           |         | Oxidation (M)[9]                          |      | Mascot      |
|  | 1335.7208  | 1335.6929   | -0.0279 | -21   | 375        | 384 WNLPVYFQLR                 |           |         |                                           |      | Mascot      |
|  | 1469.7634  | 1469.7172   | -0.0462 | -31   | 43         | 53 EDLEQYRLLK                  |           |         |                                           |      | Mascot      |
|  | 1632.9155  | 1632.6975   | -0.218  | -134  | 274        | 286 LLEFVPHHCRLLR              |           |         |                                           |      | Mascot      |
|  | 1638.7866  | 1638.8115   | 0.0249  | 15    | 2          | 15 MTLPKAPDSLCFDK              |           |         | Carbamidomethyl (C)[11], Oxidation (M)[1] |      | Mascot      |
|  | 1638.7866  | 1638.8115   | 0.0249  | 15    | 2          | 15 MTLPKAPDSLCFDK              |           |         | Carbamidomethyl (C)[11], Oxidation (M)[1] |      | Mascot      |
|  | 1718.74    | 1718.8324   | 0.0924  | 54    | 7          | 20 APDSLCFDKDEFMK              |           |         | Carbamidomethyl (C)[6], Oxidation (M)[13] |      | Mascot      |
|  | 1755.8635  | 1755.9348   | 0.0713  | 41    | 424        | 437 CWTQDQVYLPPLAHR            |           |         | Carbamidomethyl (C)[1]                    |      | Mascot      |
|  | 2230.1284  | 2230.1079   | -0.0205 | -9    | 594        | 613 ASAYMDNALRPLHQLVT<br>DSK   |           |         |                                           |      | Mascot      |
|  | 2584.3188  | 2584.1545   | -0.1643 | -64   | 614        | 635 NVVKDSIIQEWLQVTLSD<br>CTHR |           |         |                                           |      | Mascot      |

45 protein-associating with the carboxyl-terminal domain of ezrin [Danio rerio] gi|41054469 85270.2 5.3 11 30 0

#### Peptide Information

|    | Calc. Mass                                   | Obsrv. Mass | ± da    | ± ppm | Start Seq.   | End Sequence Seq.             | Ion Score | C. I. % | Modification            | Rank | Result Type |
|----|----------------------------------------------|-------------|---------|-------|--------------|-------------------------------|-----------|---------|-------------------------|------|-------------|
|    | 882.4427                                     | 882.5462    | 0.1035  | 117   | 349          | 355 VNEEHVR                   |           |         |                         |      | Mascot      |
|    | 1045.5823                                    | 1045.5411   | -0.0412 | -39   | 622          | 630 ALRLNPSMK                 |           |         | Oxidation (M)[8]        |      | Mascot      |
|    | 1165.6622                                    | 1165.7177   | 0.0555  | 48    | 59           | 67 TLRHPCLLR                  |           |         | Carbamidomethyl (C)[6]  |      | Mascot      |
|    | 1165.6622                                    | 1165.7177   | 0.0555  | 48    | 59           | 67 TLRHPCLLR                  |           |         | Carbamidomethyl (C)[6]  |      | Mascot      |
|    | 1179.6885                                    | 1179.5767   | -0.1118 | -95   | 308          | 317 SFLPHLLQPK                |           |         |                         |      | Mascot      |
|    | 1190.6263                                    | 1190.6184   | -0.0079 | -7    | 258          | 267 SLTLKNEEEK                |           |         |                         |      | Mascot      |
|    | 1328.6997                                    | 1328.5773   | -0.1224 | -92   | 268          | 277 NEFFKFLDR                 |           |         |                         |      | Mascot      |
|    | 1531.8552                                    | 1531.7145   | -0.1407 | -92   | 294          | 307 LLNSLVFAEPMVK             |           |         |                         |      | Mascot      |
|    | 1797.9705                                    | 1797.9182   | -0.0523 | -29   | 604          | 621 STALSLSSEPSAGPLRPSK       |           |         |                         |      | Mascot      |
|    | 2283.0889                                    | 2283.1248   | 0.0359  | 16    | 688          | 706 KFEPELDFADFMIPDIK         |           |         | Oxidation (M)[14]       |      | Mascot      |
|    | 2283.0889                                    | 2283.1248   | 0.0359  | 16    | 688          | 706 KFEPELDFADFMIPDIK         |           |         | Oxidation (M)[14]       |      | Mascot      |
|    | 2297.1189                                    | 2297.0979   | -0.021  | -9    | 318          | 337 QDSSVNAGEECLLSLSLYRR      |           |         | Carbamidomethyl (C)[11] |      | Mascot      |
|    | 2872.1187                                    | 2872.3237   | 0.205   | 71    | 568          | 592 EDDGEEPWDDFEDSEVTSDQSPSTR |           |         |                         |      | Mascot      |
| 46 | hypothetical protein LOC562009 [Danio rerio] |             |         |       | gi 116235420 |                               | 47967.8   | 5.46    | 10                      | 30   | 0           |

#### Peptide Information

|    | Calc. Mass                                        | Obsrv. Mass | ± da    | ± ppm | Start Seq.  | End Sequence Seq.        | Ion Score | C. I. % | Modification                                | Rank | Result Type |
|----|---------------------------------------------------|-------------|---------|-------|-------------|--------------------------|-----------|---------|---------------------------------------------|------|-------------|
|    | 1233.535                                          | 1233.5854   | 0.0504  | 41    | 304         | 314 CVVPSDSGPCR          |           |         | Carbamidomethyl (C)[1,10]                   |      | Mascot      |
|    | 1233.535                                          | 1233.5854   | 0.0504  | 41    | 304         | 314 CVVPSDSGPCR          |           |         | Carbamidomethyl (C)[1,10]                   |      | Mascot      |
|    | 1277.71                                           | 1277.6538   | -0.0562 | -44   | 284         | 295 EQEGPVIPAIK          |           |         |                                             |      | Mascot      |
|    | 1632.8003                                         | 1632.6975   | -0.1028 | -63   | 413         | 426 EELLPAEEPVSYEK       |           |         |                                             |      | Mascot      |
|    | 1637.7522                                         | 1637.7745   | 0.0223  | 14    | 304         | 318 CVVPSDSGPCRASFR      |           |         | Carbamidomethyl (C)[1]                      |      | Mascot      |
|    | 1638.692                                          | 1638.8115   | 0.1195  | 73    | 77          | 91 TADGPQECNLVNCMK       |           |         | Oxidation (M)[14]                           |      | Mascot      |
|    | 1638.692                                          | 1638.8115   | 0.1195  | 73    | 77          | 91 TADGPQECNLVNCMK       |           |         | Oxidation (M)[14]                           |      | Mascot      |
|    | 1648.7893                                         | 1648.6963   | -0.093  | -56   | 228         | 242 CQSPAVTGNCRASIK      |           |         | Carbamidomethyl (C)[1,10]                   |      | Mascot      |
|    | 1651.76                                           | 1651.7683   | 0.0083  | 5     | 62          | 76 ACCEREDCQLALIGK       |           |         |                                             |      | Mascot      |
|    | 1682.6342                                         | 1682.7767   | 0.1425  | 85    | 344         | 357 YGSEEECMSVCSTK       |           |         | Carbamidomethyl (C)[7,11], Oxidation (M)[8] |      | Mascot      |
|    | 2211.0122                                         | 2211.0518   | 0.0396  | 18    | 209         | 227 NDVDPKALTEMTSEEFQEK  |           |         |                                             |      | Mascot      |
|    | 2220.9319                                         | 2221.103    | 0.1711  | 77    | 339         | 357 GNLNRYGSEEECMSVCS TK |           |         | Carbamidomethyl (C)[12,16]                  |      | Mascot      |
| 47 | tropomyosin alpha-4 chain isoform 2 [Danio rerio] |             |         |       | gi 47085929 |                          | 28484.4   | 4.63    | 8                                           | 30   | 0           |

#### Peptide Information

|  | Calc. Mass | Obsrv. Mass | ± da | ± ppm | Start Seq. | End Sequence Seq. | Ion Score | C. I. % | Modification | Rank | Result Type |
|--|------------|-------------|------|-------|------------|-------------------|-----------|---------|--------------|------|-------------|
|--|------------|-------------|------|-------|------------|-------------------|-----------|---------|--------------|------|-------------|

[illegible]

### Peptide Information

| Calc. Mass | Obsrv. Mass | ± da    | ± ppm | Start Seq. | End Seq. | Sequence    | Ion Score | C. I. % | Modification     | Rank | Result Type |
|------------|-------------|---------|-------|------------|----------|-------------|-----------|---------|------------------|------|-------------|
| 842.5094   | 842.4905    | -0.0189 | -22   | 1522       | 1529     | LSIPGVTR    |           |         |                  |      | Mascot      |
| 850.5396   | 850.5237    | -0.0159 | -19   | 4200       | 4206     | FLLTKTK     |           |         |                  |      | Mascot      |
| 850.5396   | 850.5237    | -0.0159 | -19   | 4200       | 4206     | FLLTKTK     |           |         |                  |      | Mascot      |
| 864.4937   | 864.4717    | -0.022  | -25   | 6550       | 6556     | GYIVERK     |           |         |                  |      | Mascot      |
| 882.4315   | 882.5462    | 0.1147  | 130   | 12144      | 12151    | DGSSFTLR    |           |         |                  |      | Mascot      |
| 996.5373   | 996.572     | 0.0347  | 35    | 670        | 676      | QYQFRVR     |           |         |                  |      | Mascot      |
| 996.5373   | 996.572     | 0.0347  | 35    | 670        | 676      | QYQFRVR     |           |         |                  |      | Mascot      |
| 1042.5204  | 1042.557    | 0.0366  | 35    | 13471      | 13478    | ELSEVYFR    |           |         |                  |      | Mascot      |
| 1045.6404  | 1045.5411   | -0.0993 | -95   | 2435       | 2444     | GTKFVVPGLK  |           |         |                  |      | Mascot      |
| 1051.6259  | 1051.6859   | 0.06    | 57    | 18684      | 18693    | SPIASPPRVK  |           |         |                  |      | Mascot      |
| 1062.6306  | 1062.6647   | 0.0341  | 32    | 14911      | 14919    | IVGYVVERK   |           |         |                  |      | Mascot      |
| 1104.5684  | 1104.5546   | -0.0138 | -12   | 148        | 157      | GWQAVDTTVK  |           |         |                  |      | Mascot      |
| 1104.5684  | 1104.5546   | -0.0138 | -12   | 148        | 157      | GWQAVDTTVK  |           |         |                  |      | Mascot      |
| 1118.6205  | 1118.604    | -0.0165 | -15   | 10489      | 10497    | EKNSILWTK   |           |         |                  |      | Mascot      |
| 1120.6361  | 1120.5374   | -0.0987 | -88   | 2970       | 2980     | VPDAPQAPVVK |           |         |                  |      | Mascot      |
| 1165.6211  | 1165.7177   | 0.0966  | 83    | 14756      | 14766    | VSAENKFGVSK |           |         |                  |      | Mascot      |
| 1165.6211  | 1165.7177   | 0.0966  | 83    | 14756      | 14766    | VSAENKFGVSK |           |         |                  |      | Mascot      |
| 1179.6078  | 1179.5767   | -0.0311 | -26   | 14620      | 14628    | VTWKLEEMK   |           |         | Oxidation (M)[8] |      | Mascot      |
| 1182.6187  | 1182.5671   | -0.0516 | -44   | 14856      | 14866    | VYAMNIAGLSK |           |         | Oxidation (M)[4] |      | Mascot      |
| 1182.6187  | 1182.5671   | -0.0516 | -44   | 14856      | 14866    | VYAMNIAGLSK |           |         | Oxidation (M)[4] |      | Mascot      |

|           |           |         |      |       |       |                      |                                          |        |
|-----------|-----------|---------|------|-------|-------|----------------------|------------------------------------------|--------|
| 1190.6263 | 1190.6184 | -0.0079 | -7   | 16255 | 16265 | SLKSDESVTPK          |                                          | Mascot |
| 1221.6626 | 1221.5538 | -0.1088 | -89  | 10810 | 10819 | LLPGNEYIFR           |                                          | Mascot |
| 1233.662  | 1233.5854 | -0.0766 | -62  | 18875 | 18885 | IQGGSEMVIKR          | Oxidation (M)[7]                         | Mascot |
| 1233.7201 | 1233.5854 | -0.1347 | -109 | 9620  | 9630  | NTDFKAVLVVK          |                                          | Mascot |
| 1277.7688 | 1277.6538 | -0.115  | -90  | 2490  | 2501  | EKIVVHAGGVIR         |                                          | Mascot |
| 1279.7256 | 1279.7423 | 0.0167  | 13   | 12882 | 12892 | LNTGTYELKIK          |                                          | Mascot |
| 1310.6587 | 1310.6559 | -0.0028 | -2   | 3808  | 3818  | VKGLTEDTEYR          |                                          | Mascot |
| 1335.6208 | 1335.6929 | 0.0721  | 54   | 4476  | 4486  | DKVEMEGEQVR          | Oxidation (M)[5]                         | Mascot |
| 1391.6624 | 1391.7091 | 0.0467  | 34   | 8975  | 8986  | VLDTPDMPANFR         | Oxidation (M)[7]                         | Mascot |
| 1413.7737 | 1413.7682 | -0.0055 | -4   | 17756 | 17768 | VSGTPAPTCLKWEK       |                                          | Mascot |
| 1443.7446 | 1443.6772 | -0.0674 | -47  | 3189  | 3202  | AMAGTHINIMAGIK       | Oxidation (M)[2]                         | Mascot |
| 1457.6147 | 1457.7173 | 0.1026  | 70   | 3989  | 4000  | TWAMISSDCTNR         | Carbamidomethyl (C)[9], Oxidation (M)[4] | Mascot |
| 1463.7264 | 1463.7169 | -0.0095 | -6   | 14293 | 14305 | LTSPEIDIDADFK        |                                          | Mascot |
| 1469.8032 | 1469.7172 | -0.086  | -59  | 15675 | 15687 | EMPKIDLTGIPQK        |                                          | Mascot |
| 1475.7601 | 1475.7218 | -0.0383 | -26  | 16447 | 16459 | VFAENETGLSRPR        |                                          | Mascot |
| 1485.7155 | 1485.712  | -0.0035 | -2   | 5792  | 5804  | ITNLEAGQAYCFR        |                                          | Mascot |
| 1493.7166 | 1493.7106 | -0.006  | -4   | 14434 | 14445 | LSWQEVSECTR          |                                          | Mascot |
| 1531.8115 | 1531.7145 | -0.097  | -63  | 10787 | 10799 | ETSRLSWTVVEPK        |                                          | Mascot |
| 1579.8148 | 1579.7042 | -0.1106 | -70  | 12951 | 12963 | ETSRIMWSIIEK         |                                          | Mascot |
| 1616.8101 | 1616.7039 | -0.1062 | -66  | 8743  | 8755  | VTGLLEMRSYEFR        | Oxidation (M)[7]                         | Mascot |
| 1626.7693 | 1626.7155 | -0.0538 | -33  | 7694  | 7708  | ACDTIFQPGPPGNPR      | Carbamidomethyl (C)[2]                   | Mascot |
| 1632.7687 | 1632.6975 | -0.0712 | -44  | 3309  | 3323  | DAASPQWVPICSSK       | Carbamidomethyl (C)[11]                  | Mascot |
| 1637.7628 | 1637.7745 | 0.0117  | 7    | 14749 | 14761 | YMEYTRVSAENK         |                                          | Mascot |
| 1651.8174 | 1651.7683 | -0.0491 | -30  | 12107 | 12122 | IGPSESPETDPQVAK      |                                          | Mascot |
| 1670.7955 | 1670.817  | 0.0215  | 13   | 5447  | 5461  | DHMTVTWKAPANDGK      |                                          | Mascot |
| 1682.8265 | 1682.7767 | -0.0498 | -30  | 3222  | 3236  | AEIETSGTTTKLEMR      | Oxidation (M)[14]                        | Mascot |
| 1718.9006 | 1718.8324 | -0.0682 | -40  | 2542  | 2556  | SCLRQHQGIYLTAK       |                                          | Mascot |
| 1755.8582 | 1755.9348 | 0.0766  | 44   | 3404  | 3419  | TVSIPECHVTGLEEGK     | Carbamidomethyl (C)[7]                   | Mascot |
| 1797.9381 | 1797.9182 | -0.0199 | -11  | 8993  | 9009  | NSVTLTWEPPLLDGGAK    |                                          | Mascot |
| 1853.8309 | 1853.8535 | 0.0226  | 12   | 5030  | 5045  | HPFDPPSEPLNCCVNK     | Carbamidomethyl (C)[12]                  | Mascot |
| 1959.952  | 1960.0217 | 0.0697  | 36   | 3757  | 3772  | DYSCTYADLVWIKPTK     | Carbamidomethyl (C)[4]                   | Mascot |
| 2192.1155 | 2192.1182 | 0.0027  | 1    | 7970  | 7989  | ILAENEYGVGLPVETMEAIK | Oxidation (M)[16]                        | Mascot |
| 2192.1155 | 2192.1182 | 0.0027  | 1    | 7970  | 7989  | ILAENEYGVGLPVETMEAIK | Oxidation (M)[16]                        | Mascot |
| 2207.0801 | 2207.0408 | -0.0393 | -18  | 12771 | 12789 | FTVSGLTQNESYEFRVMAK  |                                          | Mascot |
| 2211.0713 | 2211.0518 | -0.0195 | -9   | 16266 | 16285 | TPLCPPEPPSFPPEIMDVTK | Oxidation (M)[16]                        | Mascot |

|  |           |           |         |     |       |       |                                |                            |  |  |  |  |        |
|--|-----------|-----------|---------|-----|-------|-------|--------------------------------|----------------------------|--|--|--|--|--------|
|  | 2221.1248 | 2221.103  | -0.0218 | -10 | 16166 | 16185 | VIGRPDPPEGPLEFDDIQ<br>AR       |                            |  |  |  |  | Mascot |
|  | 2225.0479 | 2225.0647 | 0.0168  | 8   | 5030  | 5048  | HPFDPPSEPLNCCVNKV<br>SK        | Carbamidomethyl (C)[12,13] |  |  |  |  | Mascot |
|  | 2225.0479 | 2225.0647 | 0.0168  | 8   | 5030  | 5048  | HPFDPPSEPLNCCVNKV<br>SK        | Carbamidomethyl (C)[12,13] |  |  |  |  | Mascot |
|  | 2230.1106 | 2230.1079 | -0.0027 | -1  | 16047 | 16068 | FRVMACNAGGAGEPAEI<br>PGVVK     | Carbamidomethyl (C)[6]     |  |  |  |  | Mascot |
|  | 2283.1284 | 2283.1248 | -0.0036 | -2  | 76    | 97    | VRAVNVAGESEPSEPSD<br>PVLCK     |                            |  |  |  |  | Mascot |
|  | 2283.1284 | 2283.1248 | -0.0036 | -2  | 76    | 97    | VRAVNVAGESEPSEPSD<br>PVLCK     |                            |  |  |  |  | Mascot |
|  | 2284.1389 | 2284.1189 | -0.02   | -9  | 7694  | 7714  | ACDTIFQPGPPGNPRVLD<br>TTK      | Carbamidomethyl (C)[2]     |  |  |  |  | Mascot |
|  | 2299.1233 | 2299.1296 | 0.0063  | 3   | 16346 | 16367 | VVAQNIDIGQSEPGPVSE<br>SVVCK    | Carbamidomethyl (C)[21]    |  |  |  |  | Mascot |
|  | 2306.0732 | 2306.1018 | 0.0286  | 12  | 4099  | 4116  | ETFFMVDKCVENHIYQFR             |                            |  |  |  |  | Mascot |
|  | 2501.3545 | 2501.1995 | -0.155  | -62 | 18126 | 18146 | SLSPTYIELMRPVSELIRQ<br>PR      | Oxidation (M)[10]          |  |  |  |  | Mascot |
|  | 2584.2922 | 2584.1545 | -0.1377 | -53 | 12702 | 12725 | SSDPVLAIACEPPNSVR<br>VTDITK    | Carbamidomethyl (C)[11]    |  |  |  |  | Mascot |
|  | 2872.4258 | 2872.3237 | -0.1021 | -36 | 14492 | 14517 | RLDVIDTTSTTASLVWMK<br>PEHDGGSR |                            |  |  |  |  | Mascot |

49 PREDICTED: sterol 26-hydroxylase, mitochondrial [Danio rerio] gi|326670761 63520.1 8.95 9 30 0

#### Peptide Information

| Calc. Mass | Obsrv. Mass | ± da    | ± ppm | Start Seq. | End Seq. | Sequence             | Ion Score | C. I. | % Modification          | Rank | Result Type |
|------------|-------------|---------|-------|------------|----------|----------------------|-----------|-------|-------------------------|------|-------------|
| 864.4243   | 864.4717    | 0.0474  | 55    | 318        | 324      | MEAIQTR              |           |       | Oxidation (M)[1]        |      | Mascot      |
| 1051.5969  | 1051.6859   | 0.089   | 85    | 309        | 317      | FGTKMINLK            |           |       |                         |      | Mascot      |
| 1104.5466  | 1104.5546   | 0.008   | 7     | 1          | 9        | MNESVIQQR            |           |       |                         |      | Mascot      |
| 1104.5466  | 1104.5546   | 0.008   | 7     | 1          | 9        | MNESVIQQR            |           |       |                         |      | Mascot      |
| 1120.5415  | 1120.5374   | -0.0041 | -4    | 1          | 9        | MNESVIQQR            |           |       | Oxidation (M)[1]        |      | Mascot      |
| 1413.6532  | 1413.7682   | 0.115   | 81    | 169        | 181      | GISYGPFTEEGEK        |           |       |                         |      | Mascot      |
| 1463.7709  | 1463.7169   | -0.054  | -37   | 313        | 324      | MINLKMEAIQTR         |           |       | Oxidation (M)[1]        |      | Mascot      |
| 1670.8418  | 1670.817    | -0.0248 | -15   | 31         | 46       | SVSIMAVSFALSSAER     |           |       | Oxidation (M)[5]        |      | Mascot      |
| 1797.8654  | 1797.9182   | 0.0528  | 29    | 166        | 181      | DLRGISYGPFTEEGEK     |           |       |                         |      | Mascot      |
| 1853.9479  | 1853.8535   | -0.0944 | -51   | 47         | 62       | LWCFLRPTTAATGFR      |           |       | Carbamidomethyl (C)[4]  |      | Mascot      |
| 2283.2053  | 2283.1248   | -0.0805 | -35   | 240        | 259      | FSLEGIASILFETRIGCLEK |           |       | Carbamidomethyl (C)[17] |      | Mascot      |
| 2283.2053  | 2283.1248   | -0.0805 | -35   | 240        | 259      | FSLEGIASILFETRIGCLEK |           |       | Carbamidomethyl (C)[17] |      | Mascot      |

50 PREDICTED: saccin [Danio rerio] gi|326670429 254713.7 7.13 1 20 0

#### Peptide Information

| Calc. Mass | Obsrv. Mass | ± da | ± ppm | Start Seq. | End Seq. | Sequence | Ion Score | C. I. | % Modification | Rank | Result Type |
|------------|-------------|------|-------|------------|----------|----------|-----------|-------|----------------|------|-------------|
|------------|-------------|------|-------|------------|----------|----------|-----------|-------|----------------|------|-------------|

1104.6234 1104.5546 -0.0688 -62 306 314 WLVTTCLLR

20 0

2 Mascot

|                |           |                        |                |                |                    |
|----------------|-----------|------------------------|----------------|----------------|--------------------|
| Gel Idx/Pos    | 182/H9    | Instr./Gel Origin      | BA2060/110707A | Process Status | Analysis Succeeded |
| Plate [#] Name | [1] 31496 | Instrument Sample Name |                | Spectra        | 11                 |

| Rank | Protein Name                                 | Accession No. | Protein MW | Protein PI | Pep. Count | Protein Score | Protein Score C. I. % | Total Ion Score | Total Ion C. I. % |
|------|----------------------------------------------|---------------|------------|------------|------------|---------------|-----------------------|-----------------|-------------------|
| 1    | protein disulfide-isomerase A4 [Danio rerio] | gi 41054259   | 72669.4    | 4.99       | 24         | 603           | 100                   | 441             | 100               |

## Peptide Information

| Calc. Mass | Obsrv. Mass | ± da    | ± ppm | Start Seq. | End Seq. | Sequence           | Ion Score | C. I. % | Modification     | Rank | Result Type |
|------------|-------------|---------|-------|------------|----------|--------------------|-----------|---------|------------------|------|-------------|
| 829.4276   | 829.5081    | 0.0805  | 97    | 500        | 506      | SFVMAFK            |           |         |                  |      | Mascot      |
| 882.577    | 882.5466    | -0.0304 | -34   | 525        | 533      | GPVKVVVGK          |           |         |                  |      | Mascot      |
| 885.5152   | 885.4941    | -0.0211 | -24   | 295        | 301      | QVQELLR            |           |         |                  |      | Mascot      |
| 907.4784   | 907.4562    | -0.0222 | -24   | 429        | 435      | VATQFWR            | 49        | 99.638  |                  |      | Mascot      |
| 907.4784   | 907.4562    | -0.0222 | -24   | 429        | 435      | VATQFWR            |           |         |                  |      | Mascot      |
| 939.4318   | 939.4149    | -0.0169 | -18   | 263        | 270      | AFDYNGPR           |           |         |                  |      | Mascot      |
| 939.4318   | 939.4149    | -0.0169 | -18   | 263        | 270      | AFDYNGPR           | 49        | 99.691  |                  |      | Mascot      |
| 940.4846   | 940.4044    | -0.0802 | -85   | 156        | 163      | SEHAIVER           |           |         |                  |      | Mascot      |
| 1011.4781  | 1011.454    | -0.0241 | -24   | 96         | 103      | QFAPEYEK           |           |         |                  |      | Mascot      |
| 1041.6316  | 1041.6078   | -0.0238 | -23   | 392        | 400      | HILPLVGHR          |           |         |                  |      | Mascot      |
| 1068.5724  | 1068.5441   | -0.0283 | -26   | 247        | 256      | FGVSGYPTLK         |           |         |                  |      | Mascot      |
| 1140.5935  | 1140.5654   | -0.0281 | -25   | 132        | 141      | FEVSGYPTIK         |           |         |                  |      | Mascot      |
| 1248.6067  | 1248.5758   | -0.0309 | -25   | 235        | 246      | VDATAESDLATR       |           |         |                  |      | Mascot      |
| 1470.6747  | 1470.6367   | -0.038  | -26   | 378        | 390      | DSTPASEVQDFFK      |           |         |                  |      | Mascot      |
| 1598.7697  | 1598.7292   | -0.0405 | -25   | 378        | 391      | DSTPASEVQDFFKK     |           |         |                  |      | Mascot      |
| 1683.8376  | 1683.7931   | -0.0445 | -26   | 597        | 611      | VEGFPTIYFAPSNNK    |           |         |                  |      | Mascot      |
| 1683.8376  | 1683.7931   | -0.0445 | -26   | 597        | 611      | VEGFPTIYFAPSNNK    | 71        | 99.998  |                  |      | Mascot      |
| 1700.7472  | 1700.7043   | -0.0429 | -25   | 486        | 499      | YAMEPEEFDSDVLR     |           |         |                  |      | Mascot      |
| 1700.7472  | 1700.7043   | -0.0429 | -25   | 486        | 499      | YAMEPEEFDSDVLR     | 119       | 100     |                  |      | Mascot      |
| 1711.7996  | 1711.7498   | -0.0498 | -29   | 273        | 288      | FGIVDYMSDQAGPPSK   |           |         |                  |      | Mascot      |
| 1716.7421  | 1716.6989   | -0.0432 | -25   | 486        | 499      | YAMEPEEFDSDVLR     |           |         | Oxidation (M)[3] |      | Mascot      |
| 1716.7421  | 1716.6989   | -0.0432 | -25   | 486        | 499      | YAMEPEEFDSDVLR     | 69        | 99.997  | Oxidation (M)[3] |      | Mascot      |
| 1727.7944  | 1727.7474   | -0.047  | -27   | 273        | 288      | FGIVDYMSDQAGPPSK   |           |         | Oxidation (M)[7] |      | Mascot      |
| 1828.8422  | 1828.7953   | -0.0469 | -26   | 485        | 499      | KYAMEPEEFDSDVLR    |           |         |                  |      | Mascot      |
| 1844.837   | 1844.792    | -0.045  | -24   | 485        | 499      | KYAMEPEEFDSDVLR    |           |         | Oxidation (M)[4] |      | Mascot      |
| 2017.0083  | 2016.9615   | -0.0468 | -23   | 464        | 484      | SLGLSESGEEVNVGIVGE |           |         |                  |      | Mascot      |



|   |                                                        |             |         |      |    |                              |     |     |                         |        |
|---|--------------------------------------------------------|-------------|---------|------|----|------------------------------|-----|-----|-------------------------|--------|
|   |                                                        |             |         |      |    | GKK<br>EVAQPDWKPPPEATLVLTK   |     |     |                         | Mascot |
|   |                                                        |             |         |      |    | SLGLSESGEEVNVGIVGE<br>GGKK   |     |     |                         | Mascot |
|   |                                                        |             |         |      |    | EENGVLVLTDANFDTFIE<br>GK     |     |     |                         | Mascot |
|   |                                                        |             |         |      |    | VKEVAQPDWKPPPEATLVLTk        |     |     |                         | Mascot |
|   |                                                        |             |         |      |    | DFPEYTFIAIDEEDYADELK         | 153 | 100 |                         | Mascot |
|   |                                                        |             |         |      |    | DFPEYTFIAIDEEDYADELK         |     |     |                         | Mascot |
|   |                                                        |             |         |      |    | DGDDAVIGVFSSDEDAYEIYQEACNSLR |     |     | Carbamidomethyl (C)[26] | Mascot |
| 2 | Protein disulfide isomerase associated 4 [Danio rerio] | gi 39645929 | 72766.5 | 4.99 | 24 | 601                          | 100 | 441 | 100                     |        |

### Peptide Information

| Calc. Mass | Obsrv. Mass | ± da    | ± ppm | Start Seq. | End Sequence Seq. | Ion Score        | C. I. % | Modification | Rank             | Result Type |
|------------|-------------|---------|-------|------------|-------------------|------------------|---------|--------------|------------------|-------------|
| 829.4276   | 829.5081    | 0.0805  | 97    | 500        | 506               | SFVMAFK          |         |              |                  | Mascot      |
| 882.577    | 882.5466    | -0.0304 | -34   | 525        | 533               | GPVKVVVGK        |         |              |                  | Mascot      |
| 885.5152   | 885.4941    | -0.0211 | -24   | 295        | 301               | QVQELLR          |         |              |                  | Mascot      |
| 907.4784   | 907.4562    | -0.0222 | -24   | 429        | 435               | VATQFWR          | 49      | 99.638       |                  | Mascot      |
| 907.4784   | 907.4562    | -0.0222 | -24   | 429        | 435               | VATQFWR          |         |              |                  | Mascot      |
| 939.4318   | 939.4149    | -0.0169 | -18   | 263        | 270               | AFDYNGPR         |         |              |                  | Mascot      |
| 939.4318   | 939.4149    | -0.0169 | -18   | 263        | 270               | AFDYNGPR         | 49      | 99.691       |                  | Mascot      |
| 940.4846   | 940.4044    | -0.0802 | -85   | 156        | 163               | SEHAIVER         |         |              |                  | Mascot      |
| 1011.4781  | 1011.454    | -0.0241 | -24   | 96         | 103               | QFAPEYEK         |         |              |                  | Mascot      |
| 1041.6316  | 1041.6078   | -0.0238 | -23   | 392        | 400               | HILPLVGHR        |         |              |                  | Mascot      |
| 1068.5724  | 1068.5441   | -0.0283 | -26   | 247        | 256               | FGVSGYPTLK       |         |              |                  | Mascot      |
| 1140.5935  | 1140.5654   | -0.0281 | -25   | 132        | 141               | FEVSGYPTIK       |         |              |                  | Mascot      |
| 1248.6067  | 1248.5758   | -0.0309 | -25   | 235        | 246               | VDATAESDLATR     |         |              |                  | Mascot      |
| 1470.6747  | 1470.6367   | -0.038  | -26   | 378        | 390               | DSTPASEVQDFFK    |         |              |                  | Mascot      |
| 1598.7697  | 1598.7292   | -0.0405 | -25   | 378        | 391               | DSTPASEVQDFFKK   |         |              |                  | Mascot      |
| 1683.8376  | 1683.7931   | -0.0445 | -26   | 597        | 611               | VEGFPTIYFAPSNNK  |         |              |                  | Mascot      |
| 1683.8376  | 1683.7931   | -0.0445 | -26   | 597        | 611               | VEGFPTIYFAPSNNK  | 71      | 99.998       |                  | Mascot      |
| 1700.7472  | 1700.7043   | -0.0429 | -25   | 486        | 499               | YAMEPEEFDSVLR    |         |              |                  | Mascot      |
| 1700.7472  | 1700.7043   | -0.0429 | -25   | 486        | 499               | YAMEPEEFDSVLR    | 119     | 100          |                  | Mascot      |
| 1711.7996  | 1711.7498   | -0.0498 | -29   | 273        | 288               | FGIVDYMSDQAGPPSK |         |              |                  | Mascot      |
| 1716.7421  | 1716.6989   | -0.0432 | -25   | 486        | 499               | YAMEPEEFDSVLR    |         |              | Oxidation (M)[3] | Mascot      |
| 1716.7421  | 1716.6989   | -0.0432 | -25   | 486        | 499               | YAMEPEEFDSVLR    | 69      | 99.997       | Oxidation (M)[3] | Mascot      |
| 1727.7944  | 1727.7474   | -0.047  | -27   | 273        | 288               | FGIVDYMSDQAGPPSK |         |              | Oxidation (M)[7] | Mascot      |

|           |           |         |     |     |     |                                  |     |     |                         |        |
|-----------|-----------|---------|-----|-----|-----|----------------------------------|-----|-----|-------------------------|--------|
| 1828.8422 | 1828.7953 | -0.0469 | -26 | 485 | 499 | KYAMEPEEFDSDVLR                  |     |     |                         | Mascot |
| 1844.837  | 1844.792  | -0.045  | -24 | 485 | 499 | KYAMEPEEFDSDVLR                  |     |     | Oxidation (M)[4]        | Mascot |
| 2017.0083 | 2016.9615 | -0.0468 | -23 | 464 | 484 | SLGLSESGEEVNVGIVGE<br>G GK       |     |     |                         | Mascot |
| 2119.1433 | 2119.0906 | -0.0527 | -25 | 166 | 184 | EVAQPDWKPPPEATLVL<br>TK          |     |     |                         | Mascot |
| 2145.1033 | 2145.0481 | -0.0552 | -26 | 464 | 485 | SLGLSESGEEVNVGIVGE<br>G GKK      |     |     |                         | Mascot |
| 2211.0815 | 2211.0491 | -0.0324 | -15 | 60  | 79  | EENGVLVLTDFNFDTFIE<br>GK         |     |     |                         | Mascot |
| 2346.3066 | 2346.2458 | -0.0608 | -26 | 164 | 184 | VKEVAQPDWKPPPEATL<br>VLTK        |     |     |                         | Mascot |
| 2381.0344 | 2380.978  | -0.0564 | -24 | 444 | 463 | DFPEYTFIAIDEEDYADE<br>LK         | 153 | 100 |                         | Mascot |
| 2381.0344 | 2380.978  | -0.0564 | -24 | 444 | 463 | DFPEYTFIAIDEEDYADE<br>LK         |     |     |                         | Mascot |
| 3308.4536 | 3308.3765 | -0.0771 | -23 | 302 | 331 | DGDDAIVGVFSSDEDA<br>AYEIQEACNSLR |     |     | Carbamidomethyl (C)[26] | Mascot |

### Peptide Information

|   |                             |           |         |     |             |     |                                   |      |        |     |     |     |                         |        |
|---|-----------------------------|-----------|---------|-----|-------------|-----|-----------------------------------|------|--------|-----|-----|-----|-------------------------|--------|
|   | 1716.7421                   | 1716.6989 | -0.0432 | -25 | 483         | 496 | YAMEPEEFDSVDLR                    |      |        |     |     |     | Oxidation (M)[3]        | Mascot |
|   | 1716.7421                   | 1716.6989 | -0.0432 | -25 | 483         | 496 | YAMEPEEFDSVDLR                    | 69   | 99.997 |     |     |     | Oxidation (M)[3]        | Mascot |
|   | 1727.7944                   | 1727.7474 | -0.047  | -27 | 270         | 285 | FGIVDYMSDQAGPPSK                  |      |        |     |     |     | Oxidation (M)[7]        | Mascot |
|   | 1828.8422                   | 1828.7953 | -0.0469 | -26 | 482         | 496 | KYAMEPEEFDSVDLR                   |      |        |     |     |     |                         | Mascot |
|   | 1844.837                    | 1844.792  | -0.045  | -24 | 482         | 496 | KYAMEPEEFDSVDLR                   |      |        |     |     |     | Oxidation (M)[4]        | Mascot |
|   | 2017.0083                   | 2016.9615 | -0.0468 | -23 | 461         | 481 | SLGLSESGEEVNVGIVGE<br>GGK         |      |        |     |     |     |                         | Mascot |
|   | 2119.1433                   | 2119.0906 | -0.0527 | -25 | 163         | 181 | EVAQPDWKPPPEATLVL<br>TK           |      |        |     |     |     |                         | Mascot |
|   | 2145.1033                   | 2145.0481 | -0.0552 | -26 | 461         | 482 | SLGLSESGEEVNVGIVGE<br>GGKK        |      |        |     |     |     |                         | Mascot |
|   | 2211.0815                   | 2211.0491 | -0.0324 | -15 | 57          | 76  | EEENGVLVLTANFDTFIE<br>GK          |      |        |     |     |     |                         | Mascot |
|   | 2346.3066                   | 2346.2458 | -0.0608 | -26 | 161         | 181 | VKEVAQPDWKPPPEATL<br>VLTK         |      |        |     |     |     |                         | Mascot |
|   | 2381.0344                   | 2380.978  | -0.0564 | -24 | 441         | 460 | DFPEYTFIAIDEEDYADE<br>LK          | 153  | 100    |     |     |     |                         | Mascot |
|   | 2381.0344                   | 2380.978  | -0.0564 | -24 | 441         | 460 | DFPEYTFIAIDEEDYADE<br>LK          |      |        |     |     |     |                         | Mascot |
|   | 3308.4536                   | 3308.3765 | -0.0771 | -23 | 299         | 328 | DGDDAIVGVFSSDEDA<br>AYEIYQEACNSLR |      |        |     |     |     | Carbamidomethyl (C)[26] | Mascot |
| 4 | Pdia4 protein [Danio rerio] |           |         |     | gi 66911899 |     | 25713.2                           | 6.13 | 5      | 208 | 100 | 190 | 100                     |        |

#### Peptide Information

| Calc. Mass | Obsrv. Mass | ± da    | ± ppm | Start Seq. | End Seq. | Sequence        | Ion Score | C. I.  | % Modification   | Rank | Result Type |
|------------|-------------|---------|-------|------------|----------|-----------------|-----------|--------|------------------|------|-------------|
| 829.4276   | 829.5081    | 0.0805  | 97    | 83         | 89       | SFVMAFK         |           |        |                  |      | Mascot      |
| 882.577    | 882.5466    | -0.0304 | -34   | 108        | 116      | GPVKVVVGK       |           |        |                  |      | Mascot      |
| 1683.8376  | 1683.7931   | -0.0445 | -26   | 180        | 194      | VEGFPTIYFAPSNNK |           |        |                  |      | Mascot      |
| 1683.8376  | 1683.7931   | -0.0445 | -26   | 180        | 194      | VEGFPTIYFAPSNNK | 71        | 99.998 |                  |      | Mascot      |
| 1700.7472  | 1700.7043   | -0.0429 | -25   | 69         | 82       | YAMEPEEFDSVDLR  |           |        |                  |      | Mascot      |
| 1700.7472  | 1700.7043   | -0.0429 | -25   | 69         | 82       | YAMEPEEFDSVDLR  | 119       | 100    |                  |      | Mascot      |
| 1716.7421  | 1716.6989   | -0.0432 | -25   | 69         | 82       | YAMEPEEFDSVDLR  |           |        | Oxidation (M)[3] |      | Mascot      |
| 1716.7421  | 1716.6989   | -0.0432 | -25   | 69         | 82       | YAMEPEEFDSVDLR  | 69        | 99.997 | Oxidation (M)[3] |      | Mascot      |
| 1828.8422  | 1828.7953   | -0.0469 | -26   | 68         | 82       | KYAMEPEEFDSVDLR |           |        |                  |      | Mascot      |
| 1844.837   | 1844.792    | -0.045  | -24   | 68         | 82       | KYAMEPEEFDSVDLR |           |        | Oxidation (M)[4] |      | Mascot      |

|   |                                                       |  |  |  |             |  |         |      |    |    |        |    |   |  |
|---|-------------------------------------------------------|--|--|--|-------------|--|---------|------|----|----|--------|----|---|--|
| 5 | phenylalanyl-tRNA synthetase beta chain [Danio rerio] |  |  |  | gi 56090156 |  | 66112.6 | 5.06 | 10 | 58 | 92.783 | 23 | 0 |  |
|---|-------------------------------------------------------|--|--|--|-------------|--|---------|------|----|----|--------|----|---|--|

#### Peptide Information

| Calc. Mass | Obsrv. Mass | ± da    | ± ppm | Start Seq. | End Seq. | Sequence | Ion Score | C. I. | % Modification         | Rank | Result Type |
|------------|-------------|---------|-------|------------|----------|----------|-----------|-------|------------------------|------|-------------|
| 842.5168   | 842.4906    | -0.0262 | -31   | 469        | 475      | KMPLPLK  |           |       | Oxidation (M)[2]       |      | Mascot      |
| 940.4781   | 940.4044    | -0.0737 | -78   | 148        | 154      | LHQNICR  |           |       | Carbamidomethyl (C)[6] |      | Mascot      |

|   |                               |           |         |      |              |     |                          |      |   |    |                         |  |        |
|---|-------------------------------|-----------|---------|------|--------------|-----|--------------------------|------|---|----|-------------------------|--|--------|
|   | 1011.5516                     | 1011.454  | -0.0976 | -96  | 148          | 155 | LHQNICRK                 |      |   |    |                         |  | Mascot |
|   | 1068.5731                     | 1068.5441 | -0.029  | -27  | 148          | 155 | LHQNICRK                 |      |   |    | Carbamidomethyl (C)[6]  |  | Mascot |
|   | 1350.7086                     | 1350.6696 | -0.039  | -29  | 72           | 82  | YDLLCLEGLVR              |      |   |    | Carbamidomethyl (C)[5]  |  | Mascot |
|   | 1599.8965                     | 1599.8459 | -0.0506 | -32  | 558          | 572 | SIGHLGVLHPDVISR          |      |   |    |                         |  | Mascot |
|   | 1700.9177                     | 1700.7043 | -0.2134 | -125 | 320          | 335 | VGINESAESIAQLLTR         |      |   |    |                         |  | Mascot |
|   | 1700.9177                     | 1700.7043 | -0.2134 | -125 | 320          | 335 | VGINESAESIAQLLTR         | 23   |   | 0  |                         |  | Mascot |
|   | 1829.0127                     | 1828.7953 | -0.2174 | -119 | 319          | 335 | KVGINESAESIAQLLTR        |      |   |    |                         |  | Mascot |
|   | 1940.9559                     | 1940.9021 | -0.0538 | -28  | 340          | 357 | SEVSGEDGQIQVEIPPTR       |      |   |    |                         |  | Mascot |
|   | 2156.2437                     | 2156.1914 | -0.0523 | -24  | 110          | 129 | LLITEETASVRPFAVA<br>AVLR |      |   |    |                         |  | Mascot |
|   | 2168.1267                     | 2167.981  | -0.1457 | -67  | 246          | 264 | ISLNTKNVFIECTATDLTK      |      |   |    | Carbamidomethyl (C)[12] |  | Mascot |
| 6 | Ppp1r3b protein [Danio rerio] |           |         |      | gi 190337192 |     | 33606.4                  | 5.74 | 9 | 45 | 0                       |  |        |

#### Peptide Information

| Calc. Mass | Obsrv. Mass | ± da    | ± ppm | Start Seq. | End Seq. | Sequence                | Ion Score | C. I. | % Modification          | Rank | Result Type |
|------------|-------------|---------|-------|------------|----------|-------------------------|-----------|-------|-------------------------|------|-------------|
| 940.4635   | 940.4044    | -0.0591 | -63   | 67         | 74       | HVSFADHK                |           |       |                         |      | Mascot      |
| 1051.5782  | 1051.6881   | 0.1099  | 105   | 157        | 165      | NISFEKSVK               |           |       |                         |      | Mascot      |
| 1068.5585  | 1068.5441   | -0.0144 | -13   | 66         | 74       | KHVSFADHK               |           |       |                         |      | Mascot      |
| 1179.6521  | 1179.5751   | -0.077  | -65   | 166        | 174      | LRITFDTWK               |           |       |                         |      | Mascot      |
| 1683.7651  | 1683.7931   | 0.028   | 17    | 132        | 145      | IENDHVCLEHCMLK          |           |       |                         |      | Mascot      |
| 1683.7651  | 1683.7931   | 0.028   | 17    | 132        | 145      | IENDHVCLEHCMLK          |           |       |                         |      | Mascot      |
| 1940.9027  | 1940.9021   | -0.0006 | 0     | 132        | 147      | IENDHVCLEHCMLKEK        |           |       |                         |      | Mascot      |
| 1997.9242  | 1997.839    | -0.0852 | -43   | 132        | 147      | IENDHVCLEHCMLKEK        |           |       | Carbamidomethyl (C)[7]  |      | Mascot      |
| 1997.9242  | 1997.839    | -0.0852 | -43   | 132        | 147      | IENDHVCLEHCMLKEK        |           |       | Carbamidomethyl (C)[7]  |      | Mascot      |
| 2038.9685  | 2038.8834   | -0.0851 | -42   | 21         | 39       | ASKYSGPLQPCLNQCQS<br>SK |           |       |                         |      | Mascot      |
| 2211.1001  | 2211.0491   | -0.051  | -23   | 2          | 20       | PIELAMSLYLSSDEFLNP<br>R |           |       | Oxidation (M)[6]        |      | Mascot      |
| 2284.0703  | 2284.1143   | 0.044   | 19    | 168        | 185      | ITFDTWKNHTDVECQYVK      |           |       | Carbamidomethyl (C)[14] |      | Mascot      |

7 RecName: Full=Adenosine deaminase; AltName: Full=Adenosine aminohydrolase

gi|81167689 40817.5 6.13 10 41 0

#### Peptide Information

| Calc. Mass | Obsrv. Mass | ± da    | ± ppm | Start Seq. | End Seq. | Sequence   | Ion Score | C. I. | % Modification           | Rank | Result Type |
|------------|-------------|---------|-------|------------|----------|------------|-----------|-------|--------------------------|------|-------------|
| 939.4208   | 939.4149    | -0.0059 | -6    | 150        | 156      | SILCCMR    |           |       | Carbamidomethyl (C)[4,5] |      | Mascot      |
| 939.4208   | 939.4149    | -0.0059 | -6    | 150        | 156      | SILCCMR    |           |       | Carbamidomethyl (C)[4,5] |      | Mascot      |
| 1068.5111  | 1068.5441   | 0.033   | 31    | 148        | 156      | ARSILCCMR  |           |       | Oxidation (M)[8]         |      | Mascot      |
| 1234.679   | 1234.6483   | -0.0307 | -25   | 91         | 101      | AKEGVYVEAR |           |       |                          |      | Mascot      |

|           |           |         |     |     |     |                                  |                                              |        |
|-----------|-----------|---------|-----|-----|-----|----------------------------------|----------------------------------------------|--------|
| 1248.6405 | 1248.5758 | -0.0647 | -52 | 1   | 11  | MNGKPAFDKPK                      | Oxidation (M)[1]                             | Mascot |
| 1470.741  | 1470.6367 | -0.1043 | -71 | 343 | 354 | LLNQLYEAYGMR                     |                                              | Mascot |
| 1598.8359 | 1598.7292 | -0.1067 | -67 | 343 | 355 | LLNQLYEAYGMRK                    |                                              | Mascot |
| 1599.9329 | 1599.8459 | -0.087  | -54 | 12  | 25  | VELHVHLDGAIRLK                   |                                              | Mascot |
| 1727.8785 | 1727.7474 | -0.1311 | -76 | 341 | 354 | EKLLNQLYEAYGMR                   |                                              | Mascot |
| 1887.8914 | 1887.9225 | 0.0311  | 16  | 157 | 171 | HMPNWSMEVVELCKK                  | Carbamidomethyl (C)[13]                      | Mascot |
| 3308.4956 | 3308.3765 | -0.1191 | -36 | 250 | 277 | QLLHQNMHFEMCPVSSR<br>LTGACEPDFTK | Carbamidomethyl (C)[12], Oxidation (M)[7,11] | Mascot |

8 PREDICTED: si:dkey-170m15.2 [Danio rerio] gi|292624792 132327.3 7.37 15 41 0

#### Peptide Information

| Calc. Mass | Obsrv. Mass | ± da    | ± ppm | Start Seq. | End Seq. | Sequence                 | Ion Score | C. I. % | Modification                                | Rank | Result Type |
|------------|-------------|---------|-------|------------|----------|--------------------------|-----------|---------|---------------------------------------------|------|-------------|
| 885.4788   | 885.4941    | 0.0153  | 17    | 919        | 926      | STPKSTHK                 |           |         |                                             |      | Mascot      |
| 939.4968   | 939.4149    | -0.0819 | -87   | 75         | 83       | DCPLVAPPK                |           |         |                                             |      | Mascot      |
| 939.4968   | 939.4149    | -0.0819 | -87   | 75         | 83       | DCPLVAPPK                |           |         |                                             |      | Mascot      |
| 996.5182   | 996.5735    | 0.0553  | 55    | 75         | 83       | DCPLVAPPK                |           |         | Carbamidomethyl (C)[2]                      |      | Mascot      |
| 1011.4411  | 1011.454    | 0.0129  | 13    | 48         | 56       | MADSSESLR                |           |         | Oxidation (M)[1]                            |      | Mascot      |
| 1045.516   | 1045.5391   | 0.0231  | 22    | 98         | 106      | QTNITDEPK                |           |         |                                             |      | Mascot      |
| 1165.6034  | 1165.7177   | 0.1143  | 98    | 440        | 449      | FCEQAVTIVR               |           |         |                                             |      | Mascot      |
| 1434.879   | 1434.7368   | -0.1422 | -99   | 724        | 736      | LIGSREPLLLAR             |           |         |                                             |      | Mascot      |
| 1700.7942  | 1700.7043   | -0.0899 | -53   | 42         | 56       | TSMLTRMADSSESLR          |           |         | Oxidation (M)[3]                            |      | Mascot      |
| 1700.7942  | 1700.7043   | -0.0899 | -53   | 42         | 56       | TSMLTRMADSSESLR          | 0         | 0       | Oxidation (M)[7]                            |      | Mascot      |
| 1707.8846  | 1707.7374   | -0.1472 | -86   | 436        | 449      | ESLRFCEQAVTIVR           |           |         | Carbamidomethyl (C)[6]                      |      | Mascot      |
| 1711.8506  | 1711.7498   | -0.1008 | -59   | 1122       | 1135     | MLEAREAFQSCILK           |           |         | Carbamidomethyl (C)[11], Oxidation (M)[1]   |      | Mascot      |
| 1716.7891  | 1716.6989   | -0.0902 | -53   | 42         | 56       | TSMLTRMADSSESLR          |           |         | Oxidation (M)[3,7]                          |      | Mascot      |
| 1716.7891  | 1716.6989   | -0.0902 | -53   | 42         | 56       | TSMLTRMADSSESLR          | 3         | 0       | Oxidation (M)[3,7]                          |      | Mascot      |
| 1727.8633  | 1727.7474   | -0.1159 | -67   | 773        | 787      | ATVQCQTSKSDVYIK          |           |         | Carbamidomethyl (C)[5]                      |      | Mascot      |
| 1829.0565  | 1828.7953   | -0.2612 | -143  | 372        | 388      | SIISKLPVVQIQTACK         |           |         |                                             |      | Mascot      |
| 1887.9196  | 1887.9225   | 0.0029  | 2     | 525        | 541      | LLEARSADETPEGWTGR        |           |         |                                             |      | Mascot      |
| 1940.7823  | 1940.9021   | 0.1198  | 62    | 1104       | 1119     | QMETCIGFQDTMDAYR         |           |         | Oxidation (M)[2,12]                         |      | Mascot      |
| 1997.8038  | 1997.839    | 0.0352  | 18    | 1104       | 1119     | QMETCIGFQDTMDAYR         |           |         | Carbamidomethyl (C)[5], Oxidation (M)[2,12] |      | Mascot      |
| 1997.8038  | 1997.839    | 0.0352  | 18    | 1104       | 1119     | QMETCIGFQDTMDAYR         |           |         | Carbamidomethyl (C)[5], Oxidation (M)[2,12] |      | Mascot      |
| 2168.0098  | 2167.981    | -0.0288 | -13   | 1141       | 1158     | KMEEEKPMETVEQVETES<br>K  |           |         | Oxidation (M)[2]                            |      | Mascot      |
| 2283.1875  | 2283.1204   | -0.0671 | -29   | 663        | 682      | MFSPIPVCILHVINNDTLE<br>K |           |         |                                             |      | Mascot      |

9 exosome component 10 [Danio rerio] gi|210147550 102307.7 8.64 14 41 0

### Peptide Information

| Calc. Mass | Obsrv. Mass | $\pm$ da | $\pm$ ppm | Start Seq. | End Seq. | Sequence                  | Ion Score | C. I. % | Modification           | Rank | Result Type |
|------------|-------------|----------|-----------|------------|----------|---------------------------|-----------|---------|------------------------|------|-------------|
| 882.4389   | 882.5466    | 0.1077   | 122       | 880        | 887      | SMSYVPAK                  |           |         |                        |      | Mascot      |
| 939.5258   | 939.4149    | -0.1109  | -118      | 399        | 406      | NSLDHLLK                  |           |         |                        |      | Mascot      |
| 939.5258   | 939.4149    | -0.1109  | -118      | 399        | 406      | NSLDHLLK                  |           |         |                        |      | Mascot      |
| 996.5948   | 996.5735    | -0.0213  | -21       | 179        | 186      | NIQRPQLK                  |           |         |                        |      | Mascot      |
| 1041.5377  | 1041.6078   | 0.0701   | 67        | 891        | 898      | GFRHNWPK                  |           |         |                        |      | Mascot      |
| 1045.5636  | 1045.5391   | -0.0245  | -23       | 105        | 113      | NKLTGLEDR                 |           |         |                        |      | Mascot      |
| 1570.7972  | 1570.736    | -0.0612  | -39       | 597        | 610      | KPQSTLFGPHDTSR            |           |         |                        |      | Mascot      |
| 1652.89    | 1652.7042   | -0.1858  | -112      | 393        | 406      | CLNLGRNSLDHLLK            |           |         | Carbamidomethyl (C)[1] |      | Mascot      |
| 1844.9348  | 1844.792    | -0.1428  | -77       | 779        | 795      | ERAASDVSEDSLKPNVK         |           |         |                        |      | Mascot      |
| 1888.0022  | 1887.9225   | -0.0797  | -42       | 781        | 798      | AASDVSEDSLKPNVKLSK        |           |         |                        |      | Mascot      |
| 2017.0138  | 2016.9615   | -0.0523  | -26       | 302        | 318      | LAKTTEFAVDLEHHSYR         |           |         |                        |      | Mascot      |
| 2119.0542  | 2119.0906   | 0.0364   | 17        | 499        | 515      | SFNTQQLAAFRLMYAWR         |           |         | Oxidation (M)[13]      |      | Mascot      |
| 2283.1079  | 2283.1204   | 0.0125   | 5         | 830        | 848      | QDFKPYDYSQSNFKLFA<br>GK   |           |         |                        |      | Mascot      |
| 2346.2188  | 2346.2458   | 0.027    | 12        | 107        | 127      | LTGLEDRFDLVVDANDAI<br>LEK |           |         |                        |      | Mascot      |
| 2381.0935  | 2380.978    | -0.1155  | -49       | 518        | 537      | LAREEDESTGYILPNHMM<br>MK  |           |         | Oxidation (M)[17]      |      | Mascot      |
| 2381.0935  | 2380.978    | -0.1155  | -49       | 518        | 537      | LAREEDESTGYILPNHMM<br>MK  |           |         | Oxidation (M)[17]      |      | Mascot      |

10 PREDICTED: calcium-dependent secretion activator 1 gi|326668736 141178 5.62 16 38 0  
[Danio rerio]

### Peptide Information

| Calc. Mass | Obsrv. Mass | $\pm$ da | $\pm$ ppm | Start Seq. | End Seq. | Sequence          | Ion Score | C. I. % | Modification            | Rank | Result Type |
|------------|-------------|----------|-----------|------------|----------|-------------------|-----------|---------|-------------------------|------|-------------|
| 868.4635   | 868.4709    | 0.0074   | 9         | 1125       | 1131     | HSQDILR           |           |         |                         |      | Mascot      |
| 1041.5364  | 1041.6078   | 0.0714   | 69        | 123        | 130      | DRFESFLK          |           |         |                         |      | Mascot      |
| 1045.5459  | 1045.5391   | -0.0068  | -7        | 280        | 288      | LQMADQIAR         |           |         |                         |      | Mascot      |
| 1179.6343  | 1179.5751   | -0.0592  | -50       | 578        | 586      | ILWVQAMYR         |           |         |                         |      | Mascot      |
| 1350.6504  | 1350.6696   | 0.0192   | 14        | 161        | 173      | MVQTGGLSALDCR     |           |         |                         |      | Mascot      |
| 1493.7166  | 1493.697    | -0.0196  | -13       | 789        | 800      | CLEQAAQINYQR      |           |         | Carbamidomethyl (C)[1]  |      | Mascot      |
| 1599.7791  | 1599.8459   | 0.0668   | 42        | 982        | 995      | MKLMSSDMIETSVK    |           |         |                         |      | Mascot      |
| 1700.7288  | 1700.7043   | -0.0245  | -14       | 1032       | 1046     | DQSAKLCAMEMGQEK   |           |         | Oxidation (M)[9,11]     |      | Mascot      |
| 1700.7288  | 1700.7043   | -0.0245  | -14       | 1032       | 1046     | DQSAKLCAMEMGQEK   |           |         | Oxidation (M)[9,11]     |      | Mascot      |
| 1838.9213  | 1838.8722   | -0.0491  | -27       | 1016       | 1031     | IPLSLCTMFNVMDAK   |           |         | Carbamidomethyl (C)[6]  |      | Mascot      |
| 1910.9463  | 1910.8079   | -0.1384  | -72       | 161        | 177      | MVQTGGLSALDCREVFK |           |         | Carbamidomethyl (C)[12] |      | Mascot      |

|    |                                      |           |         |     |             |     |                            |     |                                            |        |   |
|----|--------------------------------------|-----------|---------|-----|-------------|-----|----------------------------|-----|--------------------------------------------|--------|---|
|    | 1910.9463                            | 1910.8079 | -0.1384 | -72 | 161         | 177 | MVQTGGLSALDCREVFK          |     | Carbamidomethyl (C)[12]                    | Mascot |   |
|    | 2145.1775                            | 2145.0481 | -0.1294 | -60 | 587         | 606 | ATGQSHKVPPTQVQKL<br>NSK    |     |                                            | Mascot |   |
|    | 2156.0554                            | 2156.1914 | 0.136   | 63  | 789         | 806 | CLEQAAQINYQRITDYAR         |     |                                            | Mascot |   |
|    | 2168.0474                            | 2167.981  | -0.0664 | -31 | 377         | 395 | SLAPNRIVYCTMEVEGG<br>QK    |     | Carbamidomethyl (C)[10], Oxidation (M)[12] | Mascot |   |
|    | 2224.9397                            | 2225.0632 | 0.1235  | 56  | 1           | 20  | MLDPSSSEESDGIVEEE<br>SR    |     |                                            | Mascot |   |
|    | 2224.9397                            | 2225.0632 | 0.1235  | 56  | 1           | 20  | MLDPSSSEESDGIVEEE<br>SR    |     |                                            | Mascot |   |
|    | 2233.166                             | 2233.0325 | -0.1335 | -60 | 84          | 101 | LQLYVFVMRCIAYPFNAK         |     | Carbamidomethyl (C)[10]                    | Mascot |   |
|    | 2346.1055                            | 2346.2458 | 0.1403  | 60  | 50          | 72  | GSSARPTSPSPAASEE<br>KEDVEK |     |                                            | Mascot |   |
| 11 | CTAGE family, member 5 [Danio rerio] |           |         |     | gi 41053471 |     | 77796.7                    | 5.5 | 13                                         | 38     | 0 |

#### Peptide Information

| Calc. Mass | Obsrv. Mass | ± da    | ± ppm | Start Seq. | End Seq. | Sequence                | Ion Score | C. I. % | Modification            | Rank | Result Type |
|------------|-------------|---------|-------|------------|----------|-------------------------|-----------|---------|-------------------------|------|-------------|
| 850.4417   | 850.5214    | 0.0797  | 94    | 404        | 410      | LTDAQFR                 |           |         |                         |      | Mascot      |
| 940.4734   | 940.4044    | -0.069  | -73   | 264        | 271      | EDLHEGIK                |           |         |                         |      | Mascot      |
| 1011.5217  | 1011.454    | -0.0677 | -67   | 117        | 124      | IHEINTER                |           |         |                         |      | Mascot      |
| 1051.567   | 1051.6881   | 0.1211  | 115   | 15         | 23       | VLETFSEVK               |           |         |                         |      | Mascot      |
| 1068.5659  | 1068.5441   | -0.0218 | -20   | 634        | 643      | GPLPPGMFPR              |           |         |                         |      | Mascot      |
| 1350.5236  | 1350.6696   | 0.146   | 108   | 170        | 181      | SHAGMMEDCANK            |           |         | Carbamidomethyl (C)[9]  |      | Mascot      |
| 1683.7386  | 1683.7931   | 0.0545  | 32    | 157        | 169      | LSELEEEEMKMCER          |           |         | Carbamidomethyl (C)[11] |      | Mascot      |
| 1683.7386  | 1683.7931   | 0.0545  | 32    | 157        | 169      | LSELEEEEMKMCER          |           |         | Carbamidomethyl (C)[11] |      | Mascot      |
| 1711.6469  | 1711.7498   | 0.1029  | 60    | 170        | 184      | SHAGMMEDCANKDDR         |           |         | Oxidation (M)[5,6]      |      | Mascot      |
| 1819.8966  | 1819.7543   | -0.1423 | -78   | 29         | 45       | LESTLQNNGMSARAAEK       |           |         |                         |      | Mascot      |
| 1828.6903  | 1828.7953   | 0.105   | 57    | 166        | 181      | MCERSHAGMMEDCANK        |           |         | Oxidation (M)[1]        |      | Mascot      |
| 1844.6853  | 1844.792    | 0.1067  | 58    | 166        | 181      | MCERSHAGMMEDCANK        |           |         | Oxidation (M)[1,9]      |      | Mascot      |
| 2020.0016  | 2019.8184   | -0.1832 | -91   | 46         | 63       | DTLEVASQKLEQSNAQM<br>K  |           |         |                         |      | Mascot      |
| 2233.0725  | 2233.0325   | -0.04   | -18   | 605        | 623      | DPHFPHRGPFGPPDYFP<br>PR |           |         |                         |      | Mascot      |
| 2283.136   | 2283.1204   | -0.0156 | -7    | 294        | 311      | LQKKLQIMTEMYQENEL<br>K  |           |         | Oxidation (M)[8]        |      | Mascot      |

12 Unknown (protein for IMAGE:7251921) [Danio rerio] gi|148744663 44771.3 6.74 10 38 0

#### Peptide Information

| Calc. Mass | Obsrv. Mass | ± da   | ± ppm | Start Seq. | End Seq. | Sequence | Ion Score | C. I. % | Modification | Rank | Result Type |
|------------|-------------|--------|-------|------------|----------|----------|-----------|---------|--------------|------|-------------|
| 907.3751   | 907.4562    | 0.0811 | 89    | 91         | 98       | SESDADQR |           |         |              |      | Mascot      |
| 907.3751   | 907.4562    | 0.0811 | 89    | 91         | 98       | SESDADQR |           |         |              |      | Mascot      |

|    |                               |           |         |      |             |     |                           |      |   |                                             |   |        |
|----|-------------------------------|-----------|---------|------|-------------|-----|---------------------------|------|---|---------------------------------------------|---|--------|
|    | 1570.7361                     | 1570.736  | -0.0001 | 0    | 188         | 201 | RCIAGVCVCQMPYK            |      |   |                                             |   | Mascot |
|    | 1599.7432                     | 1599.8459 | 0.1027  | 64   | 241         | 253 | TCKTDENVQTTFR             |      |   | Carbamidomethyl (C)[2]                      |   | Mascot |
|    | 1700.7739                     | 1700.7043 | -0.0696 | -41  | 188         | 201 | RCIAGVCVCQMPYK            |      |   | Carbamidomethyl (C)[2,7], Oxidation (M)[11] |   | Mascot |
|    | 1700.7739                     | 1700.7043 | -0.0696 | -41  | 188         | 201 | RCIAGVCVCQMPYK            |      |   | Carbamidomethyl (C)[2,7], Oxidation (M)[11] |   | Mascot |
|    | 1711.7882                     | 1711.7498 | -0.0384 | -22  | 244         | 258 | TDENVQTTFRNSGDK           |      |   |                                             |   | Mascot |
|    | 1998.0802                     | 1997.839  | -0.2412 | -121 | 3           | 20  | ILCAFIFICVLQSASLEK        |      |   |                                             |   | Mascot |
|    | 1998.0802                     | 1997.839  | -0.2412 | -121 | 3           | 20  | ILCAFIFICVLQSASLEK        |      |   |                                             |   | Mascot |
|    | 2144.969                      | 2145.0481 | 0.0791  | 37   | 111         | 130 | STTESPNTNSQQNPANT<br>PEK  |      |   |                                             |   | Mascot |
|    | 2211.2029                     | 2211.0491 | -0.1538 | -70  | 2           | 20  | RILCAFIFICVLQSASLEK       |      |   | Carbamidomethyl (C)[4]                      |   | Mascot |
|    | 2283.083                      | 2283.1204 | 0.0374  | 16   | 268         | 287 | GKMLVCGSEWNIAANV<br>FCR   |      |   | Carbamidomethyl (C)[6,19]                   |   | Mascot |
|    | 2283.9502                     | 2284.1143 | 0.1641  | 72   | 209         | 229 | ACTLDGAEFYSMCQTNAI<br>ACR |      |   | Oxidation (M)[12]                           |   | Mascot |
|    | 2403.03                       | 2402.9583 | -0.0717 | -30  | 300         | 319 | ASKMQYVELEGEDWPD<br>QCMK  |      |   | Oxidation (M)[4]                            |   | Mascot |
| 13 | Ppp4r2a protein [Danio rerio] |           |         |      | gi 38173867 |     | 48758.5                   | 4.37 | 9 | 36                                          | 0 |        |

#### Peptide Information

| Calc. Mass | Obsrv. Mass | ± da    | ± ppm | Start Seq. | End Seq. | Sequence                | Ion Score | C. I. | % Modification                           | Rank | Result Type |
|------------|-------------|---------|-------|------------|----------|-------------------------|-----------|-------|------------------------------------------|------|-------------|
| 850.4199   | 850.5214    | 0.1015  | 119   | 165        | 172      | KGSSCVNR                |           |       |                                          |      | Mascot      |
| 907.4413   | 907.4562    | 0.0149  | 16    | 165        | 172      | KGSSCVNR                | 3         | 0     | Carbamidomethyl (C)[5]                   |      | Mascot      |
| 907.4413   | 907.4562    | 0.0149  | 16    | 165        | 172      | KGSSCVNR                |           |       | Carbamidomethyl (C)[5]                   |      | Mascot      |
| 1045.5598  | 1045.5391   | -0.0207 | -20   | 127        | 135      | LCELLTEPK               |           |       |                                          |      | Mascot      |
| 1140.5605  | 1140.5654   | 0.0049  | 4     | 76         | 84       | LEKVMDDFK               |           |       | Oxidation (M)[5]                         |      | Mascot      |
| 1598.6937  | 1598.7292   | 0.0355  | 22    | 79         | 91       | VMDDFKASCPEQR           |           |       | Carbamidomethyl (C)[9], Oxidation (M)[2] |      | Mascot      |
| 1683.8444  | 1683.7931   | -0.0513 | -30   | 151        | 165      | NVMVSCVYPTSEKK          |           |       |                                          |      | Mascot      |
| 1683.8444  | 1683.7931   | -0.0513 | -30   | 151        | 165      | NVMVSCVYPTSEKK          |           |       |                                          |      | Mascot      |
| 1707.837   | 1707.7374   | -0.0996 | -58   | 20         | 34       | HTSTMEIDTLLGAFR         |           |       | Oxidation (M)[5]                         |      | Mascot      |
| 2119.0276  | 2119.0906   | 0.063   | 30    | 92         | 109      | GPANPNVEYIPFEEMKQ<br>R  |           |       |                                          |      | Mascot      |
| 2186.0798  | 2185.9915   | -0.0883 | -40   | 1          | 19       | SLLPSFCFQLDSERLESS<br>K |           |       |                                          |      | Mascot      |
| 2186.0798  | 2185.9915   | -0.0883 | -40   | 1          | 19       | SLLPSFCFQLDSERLESS<br>K |           |       |                                          |      | Mascot      |
| 2211.075   | 2211.0491   | -0.0259 | -12   | 20         | 38       | HTSTMEIDTLLGAFRDFF<br>K |           |       |                                          |      | Mascot      |

|    |                                                                  |  |  |  |              |  |        |      |    |    |   |  |
|----|------------------------------------------------------------------|--|--|--|--------------|--|--------|------|----|----|---|--|
| 14 | PREDICTED: calcium-dependent secretion activator 1 [Danio rerio] |  |  |  | gi 326668734 |  | 142952 | 5.72 | 16 | 36 | 0 |  |
|----|------------------------------------------------------------------|--|--|--|--------------|--|--------|------|----|----|---|--|

#### Peptide Information

| Calc. Mass | Obsrv. Mass | ± da | ± ppm | Start Seq. | End Seq. | Sequence | Ion Score | C. I. | % Modification | Rank | Result Type |
|------------|-------------|------|-------|------------|----------|----------|-----------|-------|----------------|------|-------------|
|------------|-------------|------|-------|------------|----------|----------|-----------|-------|----------------|------|-------------|



|    |                             |           |         |     |             |      |                            |      |    |    |   |                                            |  |  |  |        |
|----|-----------------------------|-----------|---------|-----|-------------|------|----------------------------|------|----|----|---|--------------------------------------------|--|--|--|--------|
|    | 868.4635                    | 868.4709  | 0.0074  | 9   | 1138        | 1144 | HSQDILR                    |      |    |    |   |                                            |  |  |  | Mascot |
|    | 1041.5364                   | 1041.6078 | 0.0714  | 69  | 123         | 130  | DRFESFLK                   |      |    |    |   |                                            |  |  |  | Mascot |
|    | 1045.5459                   | 1045.5391 | -0.0068 | -7  | 280         | 288  | LQMADQIAR                  |      |    |    |   |                                            |  |  |  | Mascot |
|    | 1179.6343                   | 1179.5751 | -0.0592 | -50 | 578         | 586  | ILWVQAMYP                  |      |    |    |   |                                            |  |  |  | Mascot |
|    | 1350.6504                   | 1350.6696 | 0.0192  | 14  | 161         | 173  | MVQTGGLSALDCR              |      |    |    |   |                                            |  |  |  | Mascot |
|    | 1493.7166                   | 1493.697  | -0.0196 | -13 | 802         | 813  | CLEQAAQINYQR               |      |    |    |   | Carbamidomethyl (C)[1]                     |  |  |  | Mascot |
|    | 1599.7791                   | 1599.8459 | 0.0668  | 42  | 995         | 1008 | MKLMSSDMIETSVK             |      |    |    |   |                                            |  |  |  | Mascot |
|    | 1700.7288                   | 1700.7043 | -0.0245 | -14 | 1045        | 1059 | DQSAKLCAMEMGQEK            |      |    |    |   | Oxidation (M)[9,11]                        |  |  |  | Mascot |
|    | 1700.7288                   | 1700.7043 | -0.0245 | -14 | 1045        | 1059 | DQSAKLCAMEMGQEK            |      |    |    |   | Oxidation (M)[9,11]                        |  |  |  | Mascot |
|    | 1838.9213                   | 1838.8722 | -0.0491 | -27 | 1029        | 1044 | IPLSLCTMFNMVMDAK           |      |    |    |   | Carbamidomethyl (C)[6]                     |  |  |  | Mascot |
|    | 1910.9463                   | 1910.8079 | -0.1384 | -72 | 161         | 177  | MVQTGGLSALDCREVFK          |      |    |    |   | Carbamidomethyl (C)[12]                    |  |  |  | Mascot |
|    | 1910.9463                   | 1910.8079 | -0.1384 | -72 | 161         | 177  | MVQTGGLSALDCREVFK          |      |    |    |   | Carbamidomethyl (C)[12]                    |  |  |  | Mascot |
|    | 2145.1775                   | 2145.0481 | -0.1294 | -60 | 587         | 606  | ATGQSHKVPPTQVQKL<br>NSK    |      |    |    |   |                                            |  |  |  | Mascot |
|    | 2156.0554                   | 2156.1914 | 0.136   | 63  | 802         | 819  | CLEQAAQINYQRITDYAR         |      |    |    |   |                                            |  |  |  | Mascot |
|    | 2168.0474                   | 2167.981  | -0.0664 | -31 | 377         | 395  | SLAPNRIVYCTMEVEGG<br>QK    |      |    |    |   | Carbamidomethyl (C)[10], Oxidation (M)[12] |  |  |  | Mascot |
|    | 2224.9397                   | 2225.0632 | 0.1235  | 56  | 1           | 20   | MLDPSSSEESDGIIVVEE<br>SR   |      |    |    |   |                                            |  |  |  | Mascot |
|    | 2224.9397                   | 2225.0632 | 0.1235  | 56  | 1           | 20   | MLDPSSSEESDGIIVVEE<br>SR   |      |    |    |   |                                            |  |  |  | Mascot |
|    | 2233.166                    | 2233.0325 | -0.1335 | -60 | 84          | 101  | LQLYVFMRCIAYPFNAK          |      |    |    |   | Carbamidomethyl (C)[10]                    |  |  |  | Mascot |
|    | 2346.1055                   | 2346.2458 | 0.1403  | 60  | 50          | 72   | GSSARPTSPSPAASEE<br>KEDVEK |      |    |    |   |                                            |  |  |  | Mascot |
| 15 | novel protein [Danio rerio] |           |         |     | gi 94733367 |      | 48029.7                    | 9.11 | 12 | 36 | 0 |                                            |  |  |  |        |

#### Peptide Information

|  | Calc. Mass | Obsrv. Mass | ± da    | ± ppm | Start Seq. | End Sequence Seq.           | Ion Score | C. I. % | Modification                                 | Rank | Result Type |
|--|------------|-------------|---------|-------|------------|-----------------------------|-----------|---------|----------------------------------------------|------|-------------|
|  | 885.4901   | 885.4941    | 0.004   | 5     | 1          | 7 PISERQR                   |           |         |                                              |      | Mascot      |
|  | 1045.5789  | 1045.5391   | -0.0398 | -38   | 282        | 290 SFAQKSHLK               |           |         |                                              |      | Mascot      |
|  | 1068.5507  | 1068.5441   | -0.0066 | -6    | 310        | 318 SFMKATDLR               |           |         |                                              |      | Mascot      |
|  | 1248.5712  | 1248.5758   | 0.0046  | 4     | 17         | 26 MSDPEPCRIK               |           |         | Carbamidomethyl (C)[7], Oxidation (M)[1]     |      | Mascot      |
|  | 1707.7941  | 1707.7374   | -0.0567 | -33   | 295        | 309 IHTGVREFVCSDCGK         |           |         | Carbamidomethyl (C)[10]                      |      | Mascot      |
|  | 1819.9358  | 1819.7543   | -0.1815 | -100  | 25         | 39 IKQEETEELIDVMVK          |           |         | Oxidation (M)[13]                            |      | Mascot      |
|  | 1910.8557  | 1910.8079   | -0.0478 | -25   | 210        | 225 MIHTGEKPFTCTQCGK        |           |         | Carbamidomethyl (C)[11,14], Oxidation (M)[1] |      | Mascot      |
|  | 1910.8557  | 1910.8079   | -0.0478 | -25   | 210        | 225 MIHTGEKPFTCTQCGK        |           |         | Carbamidomethyl (C)[11,14], Oxidation (M)[1] |      | Mascot      |
|  | 2016.963   | 2016.9615   | -0.0015 | -1    | 264        | 281 HLIGHTKEKPYSCECGK       |           |         |                                              |      | Mascot      |
|  | 2156.0125  | 2156.1914   | 0.1789  | 83    | 123        | 141 RHLGVHSTERPYSCPEC<br>GK |           |         |                                              |      | Mascot      |
|  | 2225.03    | 2225.0632   | 0.0332  | 15    | 207        | 225 YHKMIHTGEKPFTCTQC<br>GK |           |         | Oxidation (M)[4]                             |      | Mascot      |

|    |                                                                                    |           |        |    |     |             |                          |     |   |    |   |                            |        |
|----|------------------------------------------------------------------------------------|-----------|--------|----|-----|-------------|--------------------------|-----|---|----|---|----------------------------|--------|
|    | 2225.03                                                                            | 2225.0632 | 0.0332 | 15 | 207 | 225         | YHKMIHTGEKPFCTCTQC<br>GK |     |   |    |   | Oxidation (M)[4]           | Mascot |
|    | 2232.9883                                                                          | 2233.0325 | 0.0442 | 20 | 95  | 113         | HHMMIHAGEKPHKCDQC<br>SK  |     |   |    |   | Oxidation (M)[3]           | Mascot |
|    | 2283.0757                                                                          | 2283.1204 | 0.0447 | 20 | 351 | 369         | IHTGEKPFCTCTQCGRSFT<br>R |     |   |    |   | Carbamidomethyl (C)[10,13] | Mascot |
| 16 | novel protein similar to vertebrate tropomyosin 4 (TPM4) (zgc:63909) [Danio rerio] |           |        |    |     | gi 94732583 | 23433.8                  | 4.6 | 8 | 35 | 0 |                            |        |

#### Peptide Information

| Calc. Mass | Obsrv. Mass | ± da    | ± ppm | Start Seq. | End Seq. | Sequence       | Ion Score | C. I. | % Modification   | Rank | Result Type |
|------------|-------------|---------|-------|------------|----------|----------------|-----------|-------|------------------|------|-------------|
| 850.3975   | 850.5214    | 0.1239  | 146   | 54         | 60       | AMKDEEK        |           |       |                  |      | Mascot      |
| 940.4482   | 940.4044    | -0.0438 | -47   | 73         | 80       | HIAEEADR       |           |       |                  |      | Mascot      |
| 1068.5432  | 1068.5441   | 0.0009  | 1     | 73         | 81       | HIAEEADRK      |           |       |                  |      | Mascot      |
| 1165.5592  | 1165.7177   | 0.1585  | 136   | 61         | 69       | MEIQEMQLK      |           |       | Oxidation (M)[1] |      | Mascot      |
| 1234.5732  | 1234.6483   | 0.0751  | 61    | 99         | 109      | AEERAEEVAECK   |           |       |                  |      | Mascot      |
| 1434.7322  | 1434.7368   | 0.0046  | 3     | 172        | 184      | SIDDLLEKLSSAK  |           |       |                  |      | Mascot      |
| 1493.7338  | 1493.697    | -0.0368 | -25   | 61         | 72       | MEIQEMQLKEAK   |           |       | Oxidation (M)[1] |      | Mascot      |
| 1727.8922  | 1727.7474   | -0.1448 | -84   | 12         | 25       | IQLVEEELDRAQER |           |       |                  |      | Mascot      |

|    |                                                                 |  |  |  |  |              |          |      |    |    |   |  |  |
|----|-----------------------------------------------------------------|--|--|--|--|--------------|----------|------|----|----|---|--|--|
| 17 | PREDICTED: metabotropic glutamate receptor 5-like [Danio rerio] |  |  |  |  | gi 292611331 | 130054.1 | 8.37 | 16 | 35 | 0 |  |  |
|----|-----------------------------------------------------------------|--|--|--|--|--------------|----------|------|----|----|---|--|--|

#### Peptide Information

| Calc. Mass | Obsrv. Mass | ± da    | ± ppm | Start Seq. | End Seq. | Sequence                | Ion Score | C. I. | % Modification                            | Rank | Result Type |
|------------|-------------|---------|-------|------------|----------|-------------------------|-----------|-------|-------------------------------------------|------|-------------|
| 850.5257   | 850.5214    | -0.0043 | -5    | 270        | 276      | LRSHLPK                 |           |       |                                           |      | Mascot      |
| 1051.5684  | 1051.6881   | 0.1197  | 114   | 950        | 957      | YPVTYRPR                |           |       |                                           |      | Mascot      |
| 1068.5684  | 1068.5441   | -0.0243 | -23   | 841        | 850      | SAFTTSTVVR              |           |       |                                           |      | Mascot      |
| 1140.4659  | 1140.5654   | 0.0995  | 87    | 134        | 144      | CSTEGGGTPMK             |           |       | Carbamidomethyl (C)[1], Oxidation (M)[10] |      | Mascot      |
| 1234.5555  | 1234.6483   | 0.0928  | 75    | 74         | 83       | VEAMMHTLDR              |           |       | Oxidation (M)[4,5]                        |      | Mascot      |
| 1475.7238  | 1475.7256   | 0.0018  | 1     | 391        | 402      | ESLRHQYAQDTK            |           |       |                                           |      | Mascot      |
| 1598.76    | 1598.7292   | -0.0308 | -19   | 277        | 290      | ARVVACFCEGMTVR          |           |       | Carbamidomethyl (C)[6]                    |      | Mascot      |
| 1683.8271  | 1683.7931   | -0.034  | -20   | 193        | 206      | YFMRVVPDAQQAR           |           |       | Oxidation (M)[3]                          |      | Mascot      |
| 1683.8271  | 1683.7931   | -0.034  | -20   | 193        | 206      | YFMRVVPDAQQAR           |           |       | Oxidation (M)[3]                          |      | Mascot      |
| 1707.9349  | 1707.7374   | -0.1975 | -116  | 655        | 671      | LGIGLSPAMSYALVTK        |           |       |                                           |      | Mascot      |
| 1933.8596  | 1933.9635   | 0.1039  | 54    | 1096       | 1113     | ASPASLFDSTYDSSCAVR      |           |       | Carbamidomethyl (C)[15]                   |      | Mascot      |
| 1940.9712  | 1940.9021   | -0.0691 | -36   | 317        | 334      | YDVTGDFQREAAGGITIK      |           |       |                                           |      | Mascot      |
| 2118.9988  | 2119.0906   | 0.0918  | 43    | 279        | 297      | VVACFCEGMTVRGILMA<br>MR |           |       | Oxidation (M)[9,16]                       |      | Mascot      |
| 2149.0938  | 2148.9441   | -0.1497 | -70   | 888        | 904      | TVTWAQNERSYRPNLWK       |           |       |                                           |      | Mascot      |

|    |                                              |           |         |    |             |         |                             |   |                                                  |        |
|----|----------------------------------------------|-----------|---------|----|-------------|---------|-----------------------------|---|--------------------------------------------------|--------|
|    | 2167.9932                                    | 2167.981  | -0.0122 | -6 | 423         | 442     | SLCPGYAGLCEAMRPID<br>GGK    |   | Carbamidomethyl (C)[3,10], Oxidation (M)[13]     | Mascot |
|    | 2233.0417                                    | 2233.0325 | -0.0092 | -4 | 279         | 297     | VVACFCEGMTVRGILMA<br>MR     |   | Carbamidomethyl (C)[4,6], Oxidation<br>(M)[9,16] | Mascot |
|    | 2283.0522                                    | 2283.1204 | 0.0682  | 30 | 450         | 471     | TNFSGVSGEVVLFDENG<br>DSPGR  |   |                                                  | Mascot |
|    | 2498.1873                                    | 2498.2664 | 0.0791  | 32 | 805         | 827     | IITMCFSVSLSATTALCCM<br>FVPK |   | Oxidation (M)[4,19]                              | Mascot |
| 18 | integrin-linked protein kinase [Danio rerio] |           |         |    | gi 41055748 | 51030.6 | 7.26                        | 9 | 35                                               | 0      |

#### Peptide Information

| Calc. Mass | Obsrv. Mass | ± da    | ± ppm | Start Seq. | End Seq. | Sequence                  | Ion Score | C. I. % | Modification                             | Rank | Result Type |
|------------|-------------|---------|-------|------------|----------|---------------------------|-----------|---------|------------------------------------------|------|-------------|
| 885.4788   | 885.4941    | 0.0153  | 17    | 364        | 370      | KPEEINR                   |           |         |                                          |      | Mascot      |
| 907.4454   | 907.4562    | 0.0108  | 12    | 342        | 349      | LSFQCPGR                  |           |         |                                          |      | Mascot      |
| 907.4454   | 907.4562    | 0.0108  | 12    | 342        | 349      | LSFQCPGR                  |           |         |                                          |      | Mascot      |
| 940.408    | 940.4044    | -0.0036 | -4    | 132        | 139      | YGETPMDK                  |           |         |                                          |      | Mascot      |
| 1041.58    | 1041.6078   | 0.0278  | 27    | 364        | 371      | KPEEINRR                  |           |         |                                          |      | Mascot      |
| 1234.679   | 1234.6483   | -0.0307 | -25   | 155        | 165      | QGQSLSKVPYK               |           |         |                                          |      | Mascot      |
| 1711.9312  | 1711.7498   | -0.1814 | -106  | 212        | 225      | WQGTEIVVKMLHVR            |           |         | Oxidation (M)[10]                        |      | Mascot      |
| 1940.8953  | 1940.9021   | 0.0068  | 4     | 1          | 17       | MDDIFTQCREGNAVAVR         |           |         | Oxidation (M)[1]                         |      | Mascot      |
| 1997.9167  | 1997.839    | -0.0777 | -39   | 1          | 17       | MDDIFTQCREGNAVAVR         |           |         | Carbamidomethyl (C)[8], Oxidation (M)[1] |      | Mascot      |
| 1997.9167  | 1997.839    | -0.0777 | -39   | 1          | 17       | MDDIFTQCREGNAVAVR         |           |         | Carbamidomethyl (C)[8], Oxidation (M)[1] |      | Mascot      |
| 2168.0918  | 2167.981    | -0.1108 | -51   | 192        | 209      | QLNMLNKINENHSGELW<br>K    |           |         |                                          |      | Mascot      |
| 2346.1807  | 2346.2458   | 0.0651  | 28    | 297        | 317      | FALDIACGMAFLHTLEPMI<br>PR |           |         |                                          |      | Mascot      |
| 2403.2021  | 2402.9583   | -0.2438 | -101  | 297        | 317      | FALDIACGMAFLHTLEPMI<br>PR |           |         | Carbamidomethyl (C)[7]                   |      | Mascot      |

19 inositol monophosphatase 1 [Danio rerio] gi|57526522 30559.3 4.86 7 35 0

#### Peptide Information

| Calc. Mass | Obsrv. Mass | ± da    | ± ppm | Start Seq. | End Seq. | Sequence                          | Ion Score | C. I. % | Modification           | Rank | Result Type |
|------------|-------------|---------|-------|------------|----------|-----------------------------------|-----------|---------|------------------------|------|-------------|
| 868.4709   | 868.4709    | 0       | 0     | 175        | 181      | IFSSMRK                           |           |         |                        |      | Mascot      |
| 885.5264   | 885.4941    | -0.0323 | -36   | 249        | 256      | RVLAANNK                          |           |         |                        |      | Mascot      |
| 1248.7609  | 1248.5758   | -0.1851 | -148  | 181        | 191      | KILCLPVHGIR                       |           |         |                        |      | Mascot      |
| 1838.8854  | 1838.8722   | -0.0132 | -7    | 2          | 17       | PDLWQDAMDHAVTLAR                  |           |         |                        |      | Mascot      |
| 1844.9963  | 1844.792    | -0.2043 | -111  | 46         | 61       | TDQNVEQLIITSVKEK                  |           |         |                        |      | Mascot      |
| 2225.0618  | 2225.0632   | 0.0014  | 1     | 116        | 134      | TLEFGVVYSCIEDKMYTA<br>R           |           |         |                        |      | Mascot      |
| 2225.0618  | 2225.0632   | 0.0014  | 1     | 116        | 134      | TLEFGVVYSCIEDKMYTA<br>R           |           |         |                        |      | Mascot      |
| 3308.5964  | 3308.3765   | -0.2199 | -66   | 138        | 167      | GAFCNGQPLQVSDQKEI<br>NQSIATEFGSNR |           |         | Carbamidomethyl (C)[4] |      | Mascot      |

20 hypothetical protein LOC100170532 [Xenopus (Silurana) tropicalis] gi|194332586 43090.5 8.65 8 34 0

Peptide Information

| Calc. Mass | Obsrv. Mass | ± da    | ± ppm | Start Seq. | End Seq. | Sequence                | Ion Score | C. I. % | Modification     | Rank | Result Type |
|------------|-------------|---------|-------|------------|----------|-------------------------|-----------|---------|------------------|------|-------------|
| 907.46     | 907.4562    | -0.0038 | -4    | 1          | 8        | MAACAIRR                |           |         | Oxidation (M)[1] |      | Mascot      |
| 907.46     | 907.4562    | -0.0038 | -4    | 1          | 8        | MAACAIRR                |           |         | Oxidation (M)[1] |      | Mascot      |
| 939.4642   | 939.4149    | -0.0493 | -52   | 150        | 157      | DSPHISQR                |           |         |                  |      | Mascot      |
| 939.4642   | 939.4149    | -0.0493 | -52   | 150        | 157      | DSPHISQR                |           |         |                  |      | Mascot      |
| 1011.508   | 1011.454    | -0.054  | -53   | 208        | 215      | FLMFNPSR                |           |         |                  |      | Mascot      |
| 1140.6735  | 1140.5654   | -0.1081 | -95   | 308        | 318      | GVVGKEPVLSR             |           |         |                  |      | Mascot      |
| 1475.6815  | 1475.7256   | 0.0441  | 30    | 262        | 272      | EAQNSHVYWWR             |           |         |                  |      | Mascot      |
| 2145.0625  | 2145.0481   | -0.0144 | -7    | 227        | 243      | AWQEKNHPWLELSDVH<br>R   |           |         |                  |      | Mascot      |
| 2233.1511  | 2233.0325   | -0.1186 | -53   | 81         | 99       | QHGGYETGQLFLHSVLG<br>YR |           |         |                  |      | Mascot      |
| 2346.1584  | 2346.2458   | 0.0874  | 37    | 232        | 250      | NHPWLELSDVHRETTENI<br>R |           |         |                  |      | Mascot      |

21 PREDICTED: cytosolic carboxypeptidase 1-like [Danio rerio] gi|326680138 40420.7 5.5 8 34 0

Peptide Information

| Calc. Mass | Obsrv. Mass | ± da    | ± ppm | Start Seq. | End Seq. | Sequence           | Ion Score | C. I. % | Modification                                 | Rank | Result Type |
|------------|-------------|---------|-------|------------|----------|--------------------|-----------|---------|----------------------------------------------|------|-------------|
| 829.489    | 829.5081    | 0.0191  | 23    | 88         | 94       | DRQIGLK            |           |         |                                              |      | Mascot      |
| 885.5516   | 885.4941    | -0.0575 | -65   | 90         | 97       | QIGLKAQK           |           |         |                                              |      | Mascot      |
| 1011.5833  | 1011.454    | -0.1293 | -128  | 271        | 279      | IPLPLTSDR          |           |         |                                              |      | Mascot      |
| 1320.7206  | 1320.5513   | -0.1693 | -128  | 150        | 160      | LMSPTTKHLR         |           |         |                                              |      | Mascot      |
| 1683.9462  | 1683.7931   | -0.1531 | -91   | 252        | 266      | GLESLEPAIQLMRK     |           |         |                                              |      | Mascot      |
| 1683.9462  | 1683.7931   | -0.1531 | -91   | 252        | 266      | GLESLEPAIQLMRK     |           |         |                                              |      | Mascot      |
| 1700.8346  | 1700.7043   | -0.1303 | -77   | 161        | 176      | TVKAAADAFTAMLC SK  |           |         | Carbamidomethyl (C)[14], Oxidation (M)[12]   |      | Mascot      |
| 1700.9153  | 1700.7043   | -0.211  | -124  | 143        | 157      | GLDVVFRLMSPTTK     |           |         |                                              |      | Mascot      |
| 1716.9102  | 1716.6989   | -0.2113 | -123  | 143        | 157      | GLDVVFRLMSPTTK     |           |         | Oxidation (M)[9]                             |      | Mascot      |
| 1716.9102  | 1716.6989   | -0.2113 | -123  | 143        | 157      | GLDVVFRLMSPTTK     |           |         | Oxidation (M)[9]                             |      | Mascot      |
| 1819.7958  | 1819.7543   | -0.0415 | -23   | 164        | 180      | AAADAFTAMLC SKMNCR |           |         | Oxidation (M)[9]                             |      | Mascot      |
| 1933.8387  | 1933.9635   | 0.1248  | 65    | 164        | 180      | AAADAFTAMLC SKMNCR |           |         | Carbamidomethyl (C)[11,16], Oxidation (M)[9] |      | Mascot      |

22 PREDICTED: protein C20orf11 homolog isoform 1 [Danio rerio] gi|189535879 26855.6 4.85 7 34 0

Peptide Information

|    | Calc. Mass                        | Obsrv. Mass | ± da    | ± ppm | Start Seq.   | End Sequence Seq.          | Ion Score | C. I. | % Modification   | Rank | Result Type |   |
|----|-----------------------------------|-------------|---------|-------|--------------|----------------------------|-----------|-------|------------------|------|-------------|---|
|    | 850.4417                          | 850.5214    | 0.0797  | 94    | 45           | 51 EAAEKFR                 |           |       |                  |      | Mascot      |   |
|    | 1434.7145                         | 1434.7368   | 0.0223  | 16    | 217          | 229 MTDLSKGTIEDPK          |           |       |                  |      | Mascot      |   |
|    | 1470.7952                         | 1470.6367   | -0.1585 | -108  | 199          | 210 LLLWAQNELDQK           |           |       |                  |      | Mascot      |   |
|    | 1570.724                          | 1570.736    | 0.012   | 8     | 1            | 13 MMSYAEKPEDITR           |           |       |                  |      | Mascot      |   |
|    | 1598.89                           | 1598.7292   | -0.1608 | -101  | 199          | 211 LLLWAQNELDQKK          |           |       |                  |      | Mascot      |   |
|    | 2149.033                          | 2148.9441   | -0.0889 | -41   | 52           | 70 MESGIEPSVDLDSLDERI<br>K |           |       | Oxidation (M)[1] |      | Mascot      |   |
|    | 2211.0234                         | 2211.0491   | 0.0257  | 12    | 50           | 68 FRMESGIEPSVDLDSLDE<br>R |           |       | Oxidation (M)[3] |      | Mascot      |   |
| 23 | PREDICTED: dystonin [Danio rerio] |             |         |       | gi 326672751 | 766703.7                   | 5.12      | 35    | 34               | 0    | 16          | 0 |

#### Peptide Information

|  | Calc. Mass | Obsrv. Mass | ± da    | ± ppm | Start Seq. | End Sequence Seq.     | Ion Score | C. I. | % Modification           | Rank | Result Type |
|--|------------|-------------|---------|-------|------------|-----------------------|-----------|-------|--------------------------|------|-------------|
|  | 829.4413   | 829.5081    | 0.0668  | 81    | 6329       | 6335 KQPDVDK          |           |       |                          |      | Mascot      |
|  | 842.5168   | 842.4906    | -0.0262 | -31   | 1683       | 1689 LCLLPVK          |           |       | Carbamidomethyl (C)[2]   |      | Mascot      |
|  | 850.4087   | 850.5214    | 0.1127  | 133   | 3487       | 3493 MEALSQR          |           |       | Oxidation (M)[1]         |      | Mascot      |
|  | 907.4189   | 907.4562    | 0.0373  | 41    | 4813       | 4820 TLGCVDDK         | 2         |       | 0 Carbamidomethyl (C)[4] |      | Mascot      |
|  | 907.4731   | 907.4562    | -0.0169 | -19   | 542        | 549 TLTSEQTK          |           |       |                          |      | Mascot      |
|  | 939.5006   | 939.4149    | -0.0857 | -91   | 849        | 856 SLQDAIHR          |           |       |                          |      | Mascot      |
|  | 939.5006   | 939.4149    | -0.0857 | -91   | 849        | 856 SLQDAIHR          | 13        |       | 0                        |      | Mascot      |
|  | 940.4482   | 940.4044    | -0.0438 | -47   | 3787       | 3795 HPSGNDSVK        |           |       |                          |      | Mascot      |
|  | 996.5108   | 996.5735    | 0.0627  | 63    | 3265       | 3273 LDSAGSRYK        |           |       |                          |      | Mascot      |
|  | 1011.4741  | 1011.454    | -0.0201 | -20   | 5260       | 5267 EKYETADR         |           |       |                          |      | Mascot      |
|  | 1041.5826  | 1041.6078   | 0.0252  | 24    | 2558       | 2566 DPDILLDLK        |           |       |                          |      | Mascot      |
|  | 1051.6047  | 1051.6881   | 0.0834  | 79    | 97         | 104 WINQHLLK          |           |       |                          |      | Mascot      |
|  | 1140.6047  | 1140.5654   | -0.0393 | -34   | 351        | 360 HFPSSPVELK        |           |       |                          |      | Mascot      |
|  | 1234.7629  | 1234.6483   | -0.1146 | -93   | 5570       | 5580 LNHQAGLLKK       |           |       |                          |      | Mascot      |
|  | 1248.5637  | 1248.5758   | 0.0121  | 10    | 446        | 456 VQRDCAAGEDK       |           |       | Carbamidomethyl (C)[5]   |      | Mascot      |
|  | 1434.7271  | 1434.7368   | 0.0097  | 7     | 4627       | 4639 SAQLHEALLHCGR    |           |       |                          |      | Mascot      |
|  | 1493.7338  | 1493.697    | -0.0368 | -25   | 4037       | 4049 LKEAECICAELSK    |           |       | Carbamidomethyl (C)[6]   |      | Mascot      |
|  | 1598.7656  | 1598.7292   | -0.0364 | -23   | 310        | 325 VPEGGDGINANDVDVK  |           |       |                          |      | Mascot      |
|  | 1652.8499  | 1652.7042   | -0.1457 | -88   | 1400       | 1413 LLNWMSSMKTNLK    |           |       |                          |      | Mascot      |
|  | 1683.8661  | 1683.7931   | -0.073  | -43   | 163        | 177 LVNIRNDDITDGNPK   |           |       |                          |      | Mascot      |
|  | 1683.8661  | 1683.7931   | -0.073  | -43   | 163        | 177 LVNIRNDDITDGNPK   | 3         |       | 0                        |      | Mascot      |
|  | 1700.8966  | 1700.7043   | -0.1923 | -113  | 4328       | 4343 VLDVHSSLGVQAFSNK |           |       |                          |      | Mascot      |

|    |                                                           |           |         |      |              |         |                                     |   |    |                                            |        |
|----|-----------------------------------------------------------|-----------|---------|------|--------------|---------|-------------------------------------|---|----|--------------------------------------------|--------|
|    | 1700.8966                                                 | 1700.7043 | -0.1923 | -113 | 4328         | 4343    | VLDVHSSLGVQAFSNK                    | 0 | 0  |                                            | Mascot |
|    | 1711.865                                                  | 1711.7498 | -0.1152 | -67  | 4967         | 4980    | LQSSHEELNVWLEK                      |   |    |                                            | Mascot |
|    | 1819.9436                                                 | 1819.7543 | -0.1893 | -104 | 3656         | 3671    | TDLKTVNDLLDAWTSK                    |   |    |                                            | Mascot |
|    | 1828.9916                                                 | 1828.7953 | -0.1963 | -107 | 4327         | 4343    | KVLDVHSSLGVQAFSNK                   |   |    |                                            | Mascot |
|    | 1844.98                                                   | 1844.792  | -0.188  | -102 | 5225         | 5239    | QMRELIAEHKPHIDK                     |   |    |                                            | Mascot |
|    | 1887.991                                                  | 1887.9225 | -0.0685 | -36  | 6269         | 6285    | LSSALDELQATQELLEK                   |   |    |                                            | Mascot |
|    | 1933.9647                                                 | 1933.9635 | -0.0012 | -1   | 4019         | 4034    | QIQATNEMLSQLREEK                    |   |    | Oxidation (M)[8]                           | Mascot |
|    | 1940.9688                                                 | 1940.9021 | -0.0667 | -34  | 3838         | 3853    | WKHMLAQIDAGWEEVK                    |   |    |                                            | Mascot |
|    | 2144.9214                                                 | 2145.0481 | 0.1267  | 59   | 6646         | 6666    | SSDSFDSQGSSNESTPIQ<br>GSK           |   |    |                                            | Mascot |
|    | 2155.928                                                  | 2156.1914 | 0.2634  | 122  | 3034         | 3052    | EMGGMQKENGNMPEFT<br>PMK             |   |    |                                            | Mascot |
|    | 2168.1604                                                 | 2167.981  | -0.1794 | -83  | 428          | 445     | SLRPEVDRLEMLQQIANR                  |   |    |                                            | Mascot |
|    | 2186.0723                                                 | 2185.9915 | -0.0808 | -37  | 2957         | 2974    | TVGDLQYQQEHQLEEL<br>K               |   |    |                                            | Mascot |
|    | 2186.0723                                                 | 2185.9915 | -0.0808 | -37  | 2957         | 2974    | TVGDLQYQQEHQLEEL<br>K               |   |    |                                            | Mascot |
|    | 2211.1301                                                 | 2211.0491 | -0.081  | -37  | 6571         | 6590    | STVMVRVGGGWALDE<br>FLVK             |   |    | Oxidation (M)[4]                           | Mascot |
|    | 2225.1548                                                 | 2225.0632 | -0.0916 | -41  | 5419         | 5438    | DTQELLKEEPPGVDP<br>SVVK             |   |    |                                            | Mascot |
|    | 2225.1548                                                 | 2225.0632 | -0.0916 | -41  | 5419         | 5438    | DTQELLKEEPPGVDP<br>SVVK             |   |    |                                            | Mascot |
|    | 2346.0952                                                 | 2346.2458 | 0.1506  | 64   | 2505         | 2524    | SYLNELIQMKMDGASL<br>DETR            |   |    | Oxidation (M)[9,11]                        | Mascot |
|    | 3308.5596                                                 | 3308.3765 | -0.1831 | -55  | 950          | 980     | VISTSGNEAMVPSVCF<br>SVPPPNKEATEMASR |   |    | Carbamidomethyl (C)[15], Oxidation (M)[10] | Mascot |
| 24 | nucleolar MIF4G domain-containing protein 1 [Danio rerio] |           |         |      | gi 148540048 | 55892.4 | 8.35                                | 9 | 34 | 0                                          |        |

Peptide Information

| Calc. Mass | Obsrv. Mass | ± da    | ± ppm | Start Seq. | End Seq. | Sequence         | Ion Score | C. I. % | Modification           | Rank | Result Type |
|------------|-------------|---------|-------|------------|----------|------------------|-----------|---------|------------------------|------|-------------|
| 868.4774   | 868.4709    | -0.0065 | -7    | 115        | 122      | LVTSFSSK         |           |         |                        |      | Mascot      |
| 907.4414   | 907.4562    | 0.0148  | 16    | 277        | 283      | MNTDVRR          |           |         | Oxidation (M)[1]       |      | Mascot      |
| 907.4414   | 907.4562    | 0.0148  | 16    | 277        | 283      | MNTDVRR          |           |         | Oxidation (M)[1]       |      | Mascot      |
| 940.5137   | 940.4044    | -0.1093 | -116  | 332        | 339      | FYAVLAEK         |           |         |                        |      | Mascot      |
| 996.5724   | 996.5735    | 0.0011  | 1     | 114        | 122      | KLVTSFSSK        |           |         |                        |      | Mascot      |
| 1140.5419  | 1140.5654   | 0.0235  | 21    | 76         | 85       | IYSELDGTDK       |           |         |                        |      | Mascot      |
| 1570.8547  | 1570.736    | -0.1187 | -76   | 220        | 233      | VSLDNLLEAERVGR   |           |         |                        |      | Mascot      |
| 1716.8118  | 1716.6989   | -0.1129 | -66   | 314        | 327      | EIVHVLMDCCLEK    |           |         | Carbamidomethyl (C)[9] |      | Mascot      |
| 1716.8118  | 1716.6989   | -0.1129 | -66   | 314        | 327      | EIVHVLMDCCLEK    |           |         | Carbamidomethyl (C)[9] |      | Mascot      |
| 1828.8745  | 1828.7953   | -0.0792 | -43   | 2          | 17       | ASISSQLEELYMNTSR |           |         |                        |      | Mascot      |
| 1844.8527  | 1844.792    | -0.0607 | -33   | 172        | 186      | FMLETMMALKNNDMR  |           |         |                        |      | Mascot      |

25 PREDICTED: zinc finger protein 227-like [Danio rerio] gi|125847909 86097.2 8.77 14 33 0

Peptide Information

| Calc. Mass | Obsrv. Mass | ± da    | ± ppm | Start Seq. | End Sequence Seq.                    | Ion Score | C. I. % | Modification                                  | Rank | Result Type |
|------------|-------------|---------|-------|------------|--------------------------------------|-----------|---------|-----------------------------------------------|------|-------------|
| 850.4127   | 850.5214    | 0.1087  | 128   | 181        | 187 QEPFVCK                          |           |         |                                               |      | Mascot      |
| 882.4944   | 882.5466    | 0.0522  | 59    | 352        | 358 AHVKHYK                          |           |         |                                               |      | Mascot      |
| 907.4341   | 907.4562    | 0.0221  | 24    | 181        | 187 QEPFVCK                          | 1         | 0       | Carbamidomethyl (C)[6]                        |      | Mascot      |
| 907.4341   | 907.4562    | 0.0221  | 24    | 181        | 187 QEPFVCK                          |           |         | Carbamidomethyl (C)[6]                        |      | Mascot      |
| 1140.4958  | 1140.5654   | 0.0696  | 61    | 608        | 617 RDCVCSICNK                       |           |         |                                               |      | Mascot      |
| 1165.6221  | 1165.7177   | 0.0956  | 82    | 552        | 561 LYGCPICLKR                       |           |         |                                               |      | Mascot      |
| 1234.5092  | 1234.6483   | 0.1391  | 113   | 356        | 364 HYKCSHCDK                        |           |         | Carbamidomethyl (C)[4,7]                      |      | Mascot      |
| 1470.811   | 1470.6367   | -0.1743 | -119  | 510        | 521 KHLQAHMLVHTR                     |           |         |                                               |      | Mascot      |
| 1475.6406  | 1475.7256   | 0.085   | 58    | 686        | 697 FGYSSSIQMHMR                     |           |         | Oxidation (M)[9,11]                           |      | Mascot      |
| 1599.8536  | 1599.8459   | -0.0077 | -5    | 511        | 523 HLQAHMLVHTREK                    |           |         |                                               |      | Mascot      |
| 1707.8304  | 1707.7374   | -0.093  | -54   | 412        | 426 TVTCPNCQKVPFGTR                  |           |         | Carbamidomethyl (C)[4]                        |      | Mascot      |
| 1716.8923  | 1716.6989   | -0.1934 | -113  | 545        | 560 AGHTGVKLYGCPICLK                 |           |         | Carbamidomethyl (C)[11]                       |      | Mascot      |
| 1716.8923  | 1716.6989   | -0.1934 | -113  | 545        | 560 AGHTGVKLYGCPICLK                 |           |         | Carbamidomethyl (C)[11]                       |      | Mascot      |
| 1911.0017  | 1910.8079   | -0.1938 | -101  | 370        | 386 SCLIRHAATHHTGAQLFK               |           |         | Carbamidomethyl (C)[2]                        |      | Mascot      |
| 1911.0017  | 1910.8079   | -0.1938 | -101  | 370        | 386 SCLIRHAATHHTGAQLFK               |           |         | Carbamidomethyl (C)[2]                        |      | Mascot      |
| 2145.0969  | 2145.0481   | -0.0488 | -23   | 62         | 80 EFAAFMELLSKATVETMV<br>K           |           |         |                                               |      | Mascot      |
| 2156.0957  | 2156.1914   | 0.0957  | 44    | 618        | 636 AFIFPSSLNQHMLVHTGE<br>K          |           |         |                                               |      | Mascot      |
| 3308.5317  | 3308.3765   | -0.1552 | -47   | 609        | 636 DCVCSICNKAFIFPSSLN<br>QHMLVHTGEK |           |         | Carbamidomethyl (C)[2,4,7], Oxidation (M)[21] |      | Mascot      |

26 LOC100001129 protein [Danio rerio] gi|160774064 68472.7 6.3 11 33 0

Peptide Information

| Calc. Mass | Obsrv. Mass | ± da    | ± ppm | Start Seq. | End Sequence Seq.          | Ion Score | C. I. % | Modification            | Rank | Result Type |
|------------|-------------|---------|-------|------------|----------------------------|-----------|---------|-------------------------|------|-------------|
| 868.529    | 868.4709    | -0.0581 | -67   | 292        | 298 FLKFVSK                |           |         |                         |      | Mascot      |
| 1041.5364  | 1041.6078   | 0.0714  | 69    | 123        | 130 DRFESFLK               |           |         |                         |      | Mascot      |
| 1045.5459  | 1045.5391   | -0.0068 | -7    | 280        | 288 LQMADQIAR              |           |         |                         |      | Mascot      |
| 1179.6343  | 1179.5751   | -0.0592 | -50   | 578        | 586 ILWVQAMYP              |           |         |                         |      | Mascot      |
| 1350.6504  | 1350.6696   | 0.0192  | 14    | 161        | 173 MVQTGGLSALDCR          |           |         |                         |      | Mascot      |
| 1910.9463  | 1910.8079   | -0.1384 | -72   | 161        | 177 MVQTGGLSALDCREVFK      |           |         | Carbamidomethyl (C)[12] |      | Mascot      |
| 1910.9463  | 1910.8079   | -0.1384 | -72   | 161        | 177 MVQTGGLSALDCREVFK      |           |         | Carbamidomethyl (C)[12] |      | Mascot      |
| 2017.0825  | 2016.9615   | -0.121  | -60   | 587        | 605 ATGQSHKVPPTQVQKL<br>NS |           |         |                         |      | Mascot      |

|    |                                                                         |           |         |     |              |     |                            |   |   |    |   |                                            |        |
|----|-------------------------------------------------------------------------|-----------|---------|-----|--------------|-----|----------------------------|---|---|----|---|--------------------------------------------|--------|
|    | 2168.0474                                                               | 2167.981  | -0.0664 | -31 | 377          | 395 | SLAPNRIVYCTMEVEGG<br>QK    |   |   |    |   | Carbamidomethyl (C)[10], Oxidation (M)[12] | Mascot |
|    | 2224.9397                                                               | 2225.0632 | 0.1235  | 56  | 1            | 20  | MLDPSSSEEEEDGIVEEE<br>SR   |   |   |    |   |                                            | Mascot |
|    | 2224.9397                                                               | 2225.0632 | 0.1235  | 56  | 1            | 20  | MLDPSSSEEEEDGIVEEE<br>SR   |   |   |    |   |                                            | Mascot |
|    | 2233.166                                                                | 2233.0325 | -0.1335 | -60 | 84           | 101 | LQLYVFVMRCIAYPFNAK         |   |   |    |   | Carbamidomethyl (C)[10]                    | Mascot |
|    | 2346.1055                                                               | 2346.2458 | 0.1403  | 60  | 50           | 72  | GSSARPTSPSPAASEE<br>KEDVEK |   |   |    |   |                                            | Mascot |
| 27 | novel protein similar to vertebrate N-glycanase 1 (NGLY1) [Danio rerio] |           |         |     | gi 126632448 |     | 72396.7                    | 6 | 8 | 33 | 0 |                                            |        |

#### Peptide Information

|  | Calc. Mass | Obsrv. Mass | ± da    | ± ppm | Start Seq. | End Seq. | Sequence                 | Ion Score | C. I. | % Modification                           | Rank | Result Type |
|--|------------|-------------|---------|-------|------------|----------|--------------------------|-----------|-------|------------------------------------------|------|-------------|
|  | 907.4454   | 907.4562    | 0.0108  | 12    | 444        | 451      | MSGSLAWR                 | 14        | 0     |                                          |      | Mascot      |
|  | 907.4454   | 907.4562    | 0.0108  | 12    | 444        | 451      | MSGSLAWR                 |           |       |                                          |      | Mascot      |
|  | 1011.4386  | 1011.454    | 0.0154  | 15    | 545        | 553      | FNCAPAGMK                |           |       | Carbamidomethyl (C)[3], Oxidation (M)[8] |      | Mascot      |
|  | 1041.5979  | 1041.6078   | 0.0099  | 10    | 358        | 366      | LSYILAFSK                |           |       |                                          |      | Mascot      |
|  | 1320.7271  | 1320.5513   | -0.1758 | -133  | 43         | 54       | SIRIGNPTFSTK             |           |       |                                          |      | Mascot      |
|  | 1350.7198  | 1350.6696   | -0.0502 | -37   | 180        | 190      | ALECIPHELLR              |           |       | Carbamidomethyl (C)[4]                   |      | Mascot      |
|  | 1470.6691  | 1470.6367   | -0.0324 | -22   | 541        | 553      | MSWKFNAPAGMK             |           |       |                                          |      | Mascot      |
|  | 1570.7318  | 1570.736    | 0.0042  | 3     | 367        | 379      | DQVADVTWRYSCK            |           |       |                                          |      | Mascot      |
|  | 2283.083   | 2283.1204   | 0.0374  | 16    | 294        | 313      | CGEWANCFTLLCRALGL<br>EAR |           |       | Carbamidomethyl (C)[1]                   |      | Mascot      |

|    |                                                                                                    |  |  |  |  |              |          |      |    |    |   |
|----|----------------------------------------------------------------------------------------------------|--|--|--|--|--------------|----------|------|----|----|---|
| 28 | novel protein similar to vertebrate cytoplasmic linker associated protein 1 (CLASP1) [Danio rerio] |  |  |  |  | gi 159569348 | 164674.4 | 8.99 | 17 | 33 | 0 |
|----|----------------------------------------------------------------------------------------------------|--|--|--|--|--------------|----------|------|----|----|---|

#### Peptide Information

|  | Calc. Mass | Obsrv. Mass | ± da    | ± ppm | Start Seq. | End Seq. | Sequence              | Ion Score | C. I. | % Modification                           | Rank | Result Type |
|--|------------|-------------|---------|-------|------------|----------|-----------------------|-----------|-------|------------------------------------------|------|-------------|
|  | 829.5002   | 829.5081    | 0.0079  | 10    | 719        | 726      | LGIGRGTR              |           |       |                                          |      | Mascot      |
|  | 1165.6801  | 1165.7177   | 0.0376  | 32    | 1313       | 1322     | DHTIRALALR            |           |       |                                          |      | Mascot      |
|  | 1434.6715  | 1434.7368   | 0.0653  | 46    | 1240       | 1251     | QDCGENKMVLPK          |           |       | Carbamidomethyl (C)[3], Oxidation (M)[8] |      | Mascot      |
|  | 1470.6715  | 1470.6367   | -0.0348 | -24   | 185        | 196      | DAAMNCLVEIYR          |           |       | Carbamidomethyl (C)[6], Oxidation (M)[4] |      | Mascot      |
|  | 1475.6802  | 1475.7256   | 0.0454  | 31    | 1288       | 1299     | EDSLAVWDEHFK          |           |       |                                          |      | Mascot      |
|  | 1570.9462  | 1570.736    | -0.2102 | -134  | 421        | 435      | VMATSGVAAIRLILR       |           |       |                                          |      | Mascot      |
|  | 1598.6752  | 1598.7292   | 0.054   | 34    | 989        | 1002     | QMDPGDFVNSSETR        |           |       | Oxidation (M)[2]                         |      | Mascot      |
|  | 1683.7649  | 1683.7931   | 0.0282  | 17    | 266        | 282      | GGSMGSMRRPSSASGS<br>R |           |       | Oxidation (M)[4]                         |      | Mascot      |
|  | 1683.7649  | 1683.7931   | 0.0282  | 17    | 266        | 282      | GGSMGSMRRPSSASGS<br>R |           |       | Oxidation (M)[4]                         |      | Mascot      |
|  | 1700.9078  | 1700.7043   | -0.2035 | -120  | 1186       | 1201     | TSLLNTPSPRSFAGPR      |           |       |                                          |      | Mascot      |



|           |                    |         |      |      |            |                             |      |   |                          |   |  |        |
|-----------|--------------------|---------|------|------|------------|-----------------------------|------|---|--------------------------|---|--|--------|
| 1700.9078 | 1700.7043          | -0.2035 | -120 | 1186 | 1201       | TSLNTPSPRSFAGPR             |      |   |                          |   |  | Mascot |
| 1711.803  | 1711.7498          | -0.0532 | -31  | 2    | 15         | EPNMEYCLTQVLQK              |      |   | Oxidation (M)[4]         |   |  | Mascot |
| 1727.9287 | 1727.7474          | -0.1813 | -105 | 1180 | 1195       | TALDNKTSLNTPSPR             |      |   |                          |   |  | Mascot |
| 2017.0171 | 2016.9615          | -0.0556 | -28  | 347  | 364        | SLLMAGATEHEGFIQQLR          |      |   | Oxidation (M)[4]         |   |  | Mascot |
| 2168.1306 | 2167.981           | -0.1496 | -69  | 532  | 551        | ALQSHLKSSDSIVSLPQS<br>DR    |      |   |                          |   |  | Mascot |
| 2225.207  | 2225.0632          | -0.1438 | -65  | 379  | 399        | SQVVREACITLGHLSLL<br>GNK    |      |   |                          |   |  | Mascot |
| 2225.207  | 2225.0632          | -0.1438 | -65  | 379  | 399        | SQVVREACITLGHLSLL<br>GNK    |      |   |                          |   |  | Mascot |
| 2284.0769 | 2284.1143          | 0.0374  | 16   | 1    | 19         | MEPNMEYCLTQVLQKDV<br>AR     |      |   | Oxidation (M)[1]         |   |  | Mascot |
| 2403.0994 | 2402.9583          | -0.1411 | -59  | 835  | 855        | QTEDVAEVLNHCASSNW<br>SERK   |      |   |                          |   |  | Mascot |
| 2498.2629 | 2498.2664          | 0.0035  | 1    | 145  | 167        | EGVCLCLISTLNTYGAQG<br>LTLSK |      |   | Carbamidomethyl (C)[4,6] |   |  | Mascot |
| 29        | Pbx2 [Danio rerio] |         |      |      | gi 7861936 | 18895.6                     | 9.08 | 6 | 33                       | 0 |  |        |

#### Peptide Information

| Calc. Mass | Obsrv. Mass | ± da    | ± ppm | Start Seq. | End Seq. | Sequence                  | Ion Score | C. I. | % Modification         | Rank | Result Type |
|------------|-------------|---------|-------|------------|----------|---------------------------|-----------|-------|------------------------|------|-------------|
| 1051.5782  | 1051.6881   | 0.1099  | 105   | 133        | 141      | FSSIQTQLK                 |           |       |                        |      | Mascot      |
| 1179.6442  | 1179.5751   | -0.0691 | -59   | 1          | 10       | ALFSVLCEIK                |           |       | Carbamidomethyl (C)[7] |      | Mascot      |
| 1493.7563  | 1493.697    | -0.0593 | -40   | 142        | 154      | QSTCEAVMILRSR             |           |       |                        |      | Mascot      |
| 1997.9055  | 1997.839    | -0.0665 | -33   | 93         | 109      | YEQACSESTTHVMNLLR         |           |       | Oxidation (M)[13]      |      | Mascot      |
| 1997.9055  | 1997.839    | -0.0665 | -33   | 93         | 109      | YEQACSESTTHVMNLLR         |           |       | Oxidation (M)[13]      |      | Mascot      |
| 2038.9321  | 2038.8834   | -0.0487 | -24   | 93         | 109      | YEQACSESTTHVMNLLR         |           |       | Carbamidomethyl (C)[5] |      | Mascot      |
| 2283.1836  | 2283.1204   | -0.0632 | -28   | 133        | 152      | FSSIQTQLKQSTCEAVMI<br>LR  |           |       |                        |      | Mascot      |
| 2498.1399  | 2498.2664   | 0.1265  | 51    | 93         | 113      | YEQACSESTTHVMNLLR<br>EQSR |           |       | Oxidation (M)[13]      |      | Mascot      |

30 peptide-N(4)-(N-acetyl-beta-glucosaminy)asparagine  
amidase [Danio rerio] gi|66472548 72442.7 6 8 33 0

#### Peptide Information

| Calc. Mass | Obsrv. Mass | ± da    | ± ppm | Start Seq. | End Seq. | Sequence     | Ion Score | C. I. | % Modification                           | Rank | Result Type |
|------------|-------------|---------|-------|------------|----------|--------------|-----------|-------|------------------------------------------|------|-------------|
| 907.4454   | 907.4562    | 0.0108  | 12    | 444        | 451      | MSGSLAWR     | 14        | 0     |                                          |      | Mascot      |
| 907.4454   | 907.4562    | 0.0108  | 12    | 444        | 451      | MSGSLAWR     |           |       |                                          |      | Mascot      |
| 1011.4386  | 1011.454    | 0.0154  | 15    | 545        | 553      | FNCAPAGMK    |           |       | Carbamidomethyl (C)[3], Oxidation (M)[8] |      | Mascot      |
| 1041.5979  | 1041.6078   | 0.0099  | 10    | 358        | 366      | LSYLAFSK     |           |       |                                          |      | Mascot      |
| 1320.7271  | 1320.5513   | -0.1758 | -133  | 43         | 54       | SIRIGNPTFSTK |           |       |                                          |      | Mascot      |
| 1350.7198  | 1350.6696   | -0.0502 | -37   | 180        | 190      | ALECIPELLR   |           |       | Carbamidomethyl (C)[4]                   |      | Mascot      |
| 1470.6691  | 1470.6367   | -0.0324 | -22   | 541        | 553      | MSWKFNAPAGMK |           |       |                                          |      | Mascot      |

|    |                                   |           |        |    |             |     |                          |      |   |    |   |  |  |                        |  |  |  |        |
|----|-----------------------------------|-----------|--------|----|-------------|-----|--------------------------|------|---|----|---|--|--|------------------------|--|--|--|--------|
|    | 1570.7318                         | 1570.736  | 0.0042 | 3  | 367         | 379 | DQVADVTWRYSCK            |      |   |    |   |  |  |                        |  |  |  | Mascot |
|    | 2283.083                          | 2283.1204 | 0.0374 | 16 | 294         | 313 | CGEWANCFTLLCRALGL<br>EAR |      |   |    |   |  |  | Carbamidomethyl (C)[1] |  |  |  | Mascot |
| 31 | adenosine deaminase [Danio rerio] |           |        |    | gi 50540360 |     | 41148.6                  | 6.04 | 9 | 32 | 0 |  |  |                        |  |  |  |        |

Peptide Information

| Calc. Mass | Obsrv. Mass | ± da    | ± ppm | Start Seq. | End Seq. | Sequence                        | Ion Score | C. I. | % | Modification                                 | Rank | Result Type |
|------------|-------------|---------|-------|------------|----------|---------------------------------|-----------|-------|---|----------------------------------------------|------|-------------|
| 939.4208   | 939.4149    | -0.0059 | -6    | 153        | 159      | SILCCMR                         |           |       |   | Carbamidomethyl (C)[4,5]                     |      | Mascot      |
| 939.4208   | 939.4149    | -0.0059 | -6    | 153        | 159      | SILCCMR                         |           |       |   | Carbamidomethyl (C)[4,5]                     |      | Mascot      |
| 1068.5111  | 1068.5441   | 0.033   | 31    | 151        | 159      | ARSILCCMR                       |           |       |   | Oxidation (M)[8]                             |      | Mascot      |
| 1234.679   | 1234.6483   | -0.0307 | -25   | 94         | 104      | AKEGVIYVEAR                     |           |       |   |                                              |      | Mascot      |
| 1470.741   | 1470.6367   | -0.1043 | -71   | 346        | 357      | LLNQLYEAYGMR                    |           |       |   |                                              |      | Mascot      |
| 1598.8359  | 1598.7292   | -0.1067 | -67   | 346        | 358      | LLNQLYEAYGMRK                   |           |       |   |                                              |      | Mascot      |
| 1599.9329  | 1599.8459   | -0.087  | -54   | 15         | 28       | VELHVHLDGAIRLK                  |           |       |   |                                              |      | Mascot      |
| 1727.8785  | 1727.7474   | -0.1311 | -76   | 344        | 357      | EKLLNQLYEAYGMR                  |           |       |   |                                              |      | Mascot      |
| 1887.8914  | 1887.9225   | 0.0311  | 16    | 160        | 174      | HMPNWSMEVELCKK                  |           |       |   | Carbamidomethyl (C)[13]                      |      | Mascot      |
| 3308.4956  | 3308.3765   | -0.1191 | -36   | 253        | 280      | QLLHQNMHFEMCPVSSR<br>LTGACEPDTK |           |       |   | Carbamidomethyl (C)[12], Oxidation (M)[7,11] |      | Mascot      |

|    |                                                                                                   |  |  |  |             |  |          |      |    |    |   |   |   |  |  |  |  |  |
|----|---------------------------------------------------------------------------------------------------|--|--|--|-------------|--|----------|------|----|----|---|---|---|--|--|--|--|--|
| 32 | novel protein similar to vertebrate microtubule-actin crosslinking factor 1 (MACF1) [Danio rerio] |  |  |  | gi 94732207 |  | 181610.2 | 5.27 | 16 | 32 | 0 | 3 | 0 |  |  |  |  |  |
|----|---------------------------------------------------------------------------------------------------|--|--|--|-------------|--|----------|------|----|----|---|---|---|--|--|--|--|--|

Peptide Information

| Calc. Mass | Obsrv. Mass | ± da    | ± ppm | Start Seq. | End Seq. | Sequence        | Ion Score | C. I. | % | Modification             | Rank | Result Type |
|------------|-------------|---------|-------|------------|----------|-----------------|-----------|-------|---|--------------------------|------|-------------|
| 885.377    | 885.4941    | 0.1171  | 132   | 803        | 809      | DCESYLR         |           |       |   |                          |      | Mascot      |
| 939.4716   | 939.4149    | -0.0567 | -60   | 522        | 529      | LQCASVYR        |           |       |   |                          |      | Mascot      |
| 939.4716   | 939.4149    | -0.0567 | -60   | 522        | 529      | LQCASVYR        |           |       |   |                          |      | Mascot      |
| 996.493    | 996.5735    | 0.0805  | 81    | 522        | 529      | LQCASVYR        |           |       |   | Carbamidomethyl (C)[3]   |      | Mascot      |
| 1011.4854  | 1011.454    | -0.0314 | -31   | 644        | 651      | EARTYESR        |           |       |   |                          |      | Mascot      |
| 1068.4891  | 1068.5441   | 0.055   | 51    | 725        | 732      | REQYADMR        |           |       |   |                          |      | Mascot      |
| 1140.4659  | 1140.5654   | 0.0995  | 87    | 1337       | 1345     | LDECQTCSK       |           |       |   | Carbamidomethyl (C)[4,7] |      | Mascot      |
| 1234.7267  | 1234.6483   | -0.0784 | -63   | 487        | 496      | QLHLDLQVLR      |           |       |   |                          |      | Mascot      |
| 1248.5637  | 1248.5758   | 0.0121  | 10    | 1023       | 1032     | ELEREAENCR      |           |       |   |                          |      | Mascot      |
| 1320.61    | 1320.5513   | -0.0587 | -44   | 437        | 447      | IQNTALDCEEK     |           |       |   | Carbamidomethyl (C)[8]   |      | Mascot      |
| 1470.7621  | 1470.6367   | -0.1254 | -85   | 1480       | 1492     | STQVFLMSKQASK   |           |       |   | Oxidation (M)[7]         |      | Mascot      |
| 1652.8677  | 1652.7042   | -0.1635 | -99   | 881        | 894      | AICDYRQIEITISK  |           |       |   |                          |      | Mascot      |
| 1683.8661  | 1683.7931   | -0.073  | -43   | 154        | 168      | LVNIRNDDITDGNPK |           |       |   |                          |      | Mascot      |
| 1683.8661  | 1683.7931   | -0.073  | -43   | 154        | 168      | LVNIRNDDITDGNPK | 3         |       | 0 |                          |      | Mascot      |

|           |           |         |     |      |      |                         |  |  |  |                          |  |  |        |
|-----------|-----------|---------|-----|------|------|-------------------------|--|--|--|--------------------------|--|--|--------|
| 1711.832  | 1711.7498 | -0.0822 | -48 | 803  | 816  | DCESYLRLQLQDTIK         |  |  |  |                          |  |  | Mascot |
| 1828.8606 | 1828.7953 | -0.0653 | -36 | 22   | 40   | SERSGGSLSPCAHSTAG<br>PK |  |  |  |                          |  |  | Mascot |
| 1887.8575 | 1887.9225 | 0.065   | 34  | 1337 | 1352 | LDECQTCSKQYSAAVK        |  |  |  | Carbamidomethyl (C)[4,7] |  |  | Mascot |
| 2168.1167 | 2167.981  | -0.1357 | -63 | 1119 | 1137 | RCVSFFEEKPTSSSVPL<br>R  |  |  |  |                          |  |  | Mascot |
| 2225.1382 | 2225.0632 | -0.075  | -34 | 1119 | 1137 | RCVSFFEEKPTSSSVPL<br>R  |  |  |  | Carbamidomethyl (C)[2]   |  |  | Mascot |
| 2225.1382 | 2225.0632 | -0.075  | -34 | 1119 | 1137 | RCVSFFEEKPTSSSVPL<br>R  |  |  |  | Carbamidomethyl (C)[2]   |  |  | Mascot |
| 2381.1541 | 2380.978  | -0.1761 | -74 | 830  | 848  | LEDLLQDSMEEKEQLIEY<br>R |  |  |  |                          |  |  | Mascot |
| 2381.1541 | 2380.978  | -0.1761 | -74 | 830  | 848  | LEDLLQDSMEEKEQLIEY<br>R |  |  |  |                          |  |  | Mascot |

33 Tnfrsa protein [Danio rerio] gi|190336943 48606.4 5.31 9 32 0

#### Peptide Information

| Calc. Mass | Obsrv. Mass | ± da    | ± ppm | Start Seq. | End Seq. | Sequence                | Ion Score | C. I. % | Modification                                | Rank | Result Type |
|------------|-------------|---------|-------|------------|----------|-------------------------|-----------|---------|---------------------------------------------|------|-------------|
| 939.4274   | 939.4149    | -0.0125 | -13   | 1          | 8        | MDKSEAMK                |           |         |                                             |      | Mascot      |
| 939.4274   | 939.4149    | -0.0125 | -13   | 1          | 8        | MDKSEAMK                |           |         |                                             |      | Mascot      |
| 1011.5158  | 1011.454    | -0.0618 | -61   | 360        | 366      | YHNKFFR                 |           |         |                                             |      | Mascot      |
| 1041.4669  | 1041.6078   | 0.1409  | 135   | 59         | 67       | NCEAGTYVK               |           |         | Carbamidomethyl (C)[2]                      |      | Mascot      |
| 1475.6973  | 1475.7256   | 0.0283  | 19    | 214        | 226      | QQSETNGNLEEVK           |           |         |                                             |      | Mascot      |
| 1727.762   | 1727.7474   | -0.0146 | -8    | 321        | 334      | DQTESWPREDPPR           |           |         |                                             |      | Mascot      |
| 2016.8927  | 2016.9615   | 0.0688  | 34    | 227        | 243      | VPIDECPRSEEEQENSR       |           |         |                                             |      | Mascot      |
| 2211.0537  | 2211.0491   | -0.0046 | -2    | 310        | 328      | SSPPAQRPTDRDQTESW<br>PR |           |         |                                             |      | Mascot      |
| 2283.9038  | 2284.1143   | 0.2105  | 92    | 41         | 58       | QMTCLNHEYPHNGFCC<br>K   |           |         | Carbamidomethyl (C)[4,16], Oxidation (M)[2] |      | Mascot      |
| 2498.0469  | 2498.2664   | 0.2195  | 88    | 38         | 58       | TARQMTCLNHEYPHNG<br>FCK |           |         | Oxidation (M)[5]                            |      | Mascot      |

34 MHC class II antigen [Danio rerio] gi|297179855 8402.9 5.07 4 32 0

#### Peptide Information

| Calc. Mass | Obsrv. Mass | ± da    | ± ppm | Start Seq. | End Seq. | Sequence          | Ion Score | C. I. % | Modification           | Rank | Result Type |
|------------|-------------|---------|-------|------------|----------|-------------------|-----------|---------|------------------------|------|-------------|
| 940.4193   | 940.4044    | -0.0149 | -16   | 57         | 64       | AEVDTFCR          |           |         |                        |      | Mascot      |
| 1041.4749  | 1041.6078   | 0.1329  | 128   | 65         | 73       | HNAQIWDSA         |           |         |                        |      | Mascot      |
| 1068.5143  | 1068.5441   | 0.0298  | 28    | 56         | 64       | KAEVDTFCR         |           |         |                        |      | Mascot      |
| 2019.8977  | 2019.8184   | -0.0793 | -39   | 57         | 73       | AEVDTFCRHNAQIWDSA |           |         | Carbamidomethyl (C)[7] |      | Mascot      |

35 Synbl protein [Danio rerio] gi|141796272 31226.2 5.37 7 32 0

#### Peptide Information

|  | Calc. Mass | Obsrv. Mass | ± da    | ± ppm | Start Seq. | End Seq. | Sequence                   | Ion Score | C. I. | % Modification   | Rank | Result Type |
|--|------------|-------------|---------|-------|------------|----------|----------------------------|-----------|-------|------------------|------|-------------|
|  | 842.5709   | 842.4906    | -0.0803 | -95   | 18         | 24       | VEKLLLK                    |           |       |                  |      | Mascot      |
|  | 868.4999   | 868.4709    | -0.029  | -33   | 251        | 257      | DSLHKLR                    |           |       |                  |      | Mascot      |
|  | 1045.6769  | 1045.5391   | -0.1378 | -132  | 171        | 179      | LLFLLSALR                  |           |       |                  |      | Mascot      |
|  | 1350.7375  | 1350.6696   | -0.0679 | -50   | 21         | 31       | LLLKYNTENSR                |           |       |                  |      | Mascot      |
|  | 1470.6603  | 1470.6367   | -0.0236 | -16   | 238        | 250      | ALFNLTMSPCDK               |           |       | Oxidation (M)[7] |      | Mascot      |
|  | 1838.8688  | 1838.8722   | 0.0034  | 2     | 1          | 17       | MSLSDILSEIDGGDDKK          |           |       | Oxidation (M)[1] |      | Mascot      |
|  | 2283.0193  | 2283.1204   | 0.1011  | 44    | 98         | 118      | ICVAGHEGEPLLEEAQSAE<br>EER |           |       |                  |      | Mascot      |

36 PREDICTED: hypothetical protein LOC100002065 [Danio rerio] gi|189530999 48002.4 8.91 8 32 0

#### Peptide Information

|  | Calc. Mass | Obsrv. Mass | ± da    | ± ppm | Start Seq. | End Seq. | Sequence                         | Ion Score | C. I. | % Modification                            | Rank | Result Type |
|--|------------|-------------|---------|-------|------------|----------|----------------------------------|-----------|-------|-------------------------------------------|------|-------------|
|  | 1011.5945  | 1011.454    | -0.1405 | -139  | 179        | 187      | TALHSLLTR                        |           |       |                                           |      | Mascot      |
|  | 1179.7208  | 1179.5751   | -0.1457 | -124  | 188        | 197      | LNNLKHLSLK                       |           |       |                                           |      | Mascot      |
|  | 1320.6876  | 1320.5513   | -0.1363 | -103  | 260        | 271      | CIFCPLACPLIK                     |           |       |                                           |      | Mascot      |
|  | 1434.7306  | 1434.7368   | 0.0062  | 4     | 260        | 271      | CIFCPLACPLIK                     |           |       | Carbamidomethyl (C)[1,4]                  |      | Mascot      |
|  | 1470.7303  | 1470.6367   | -0.0936 | -64   | 137        | 148      | NLTHLCLCGVQR                     |           |       | Carbamidomethyl (C)[6,8]                  |      | Mascot      |
|  | 1475.825   | 1475.7256   | -0.0994 | -67   | 304        | 317      | LSLMGVKADLASVR                   |           |       | Oxidation (M)[4]                          |      | Mascot      |
|  | 1716.8091  | 1716.6989   | -0.1102 | -64   | 114        | 126      | HLDRVICQCSQR                     |           |       | Carbamidomethyl (C)[8,10,12]              |      | Mascot      |
|  | 1716.8091  | 1716.6989   | -0.1102 | -64   | 114        | 126      | HLDRVICQCSQR                     |           |       | Carbamidomethyl (C)[8,10,12]              |      | Mascot      |
|  | 2149.137   | 2148.9441   | -0.1929 | -90   | 253        | 271      | LSVHYTKCIFCPLACPLIK              |           |       |                                           |      | Mascot      |
|  | 3308.5852  | 3308.3765   | -0.2087 | -63   | 272        | 299      | WLEELCVLSELNISYGYS<br>LEMYAGSIPR |           |       | Carbamidomethyl (C)[6], Oxidation (M)[21] |      | Mascot      |

37 PREDICTED: disks large homolog 3 [Danio rerio] gi|326673729 89938 6.56 10 32 0

#### Peptide Information

|  | Calc. Mass | Obsrv. Mass | ± da    | ± ppm | Start Seq. | End Seq. | Sequence      | Ion Score | C. I. | % Modification         | Rank | Result Type |
|--|------------|-------------|---------|-------|------------|----------|---------------|-----------|-------|------------------------|------|-------------|
|  | 907.4301   | 907.4562    | 0.0261  | 29    | 584        | 591      | TGMIESNR      | 9         | 0     |                        |      | Mascot      |
|  | 907.4301   | 907.4562    | 0.0261  | 29    | 584        | 591      | TGMIESNR      |           |       |                        |      | Mascot      |
|  | 1045.5459  | 1045.5391   | -0.0068 | -7    | 178        | 186      | LGVNDCVLR     |           |       | Carbamidomethyl (C)[6] |      | Mascot      |
|  | 1234.5521  | 1234.6483   | 0.0962  | 78    | 373        | 382      | HMLGEEDFTR    |           |       |                        |      | Mascot      |
|  | 1434.6907  | 1434.7368   | 0.0461  | 32    | 580        | 591      | FHARTGMIESNR  |           |       | Oxidation (M)[7]       |      | Mascot      |
|  | 1470.7223  | 1470.6367   | -0.0856 | -58   | 758        | 769      | QTYEQANKVFDK  |           |       |                        |      | Mascot      |
|  | 1570.8019  | 1570.736    | -0.0659 | -42   | 652        | 664      | FGSCVPHTTRPRR |           |       | Carbamidomethyl (C)[4] |      | Mascot      |



| Peptide Information |                                                         |             |          |           |            |                         |           |       |                        |      |             |
|---------------------|---------------------------------------------------------|-------------|----------|-----------|------------|-------------------------|-----------|-------|------------------------|------|-------------|
|                     | Calc. Mass                                              | Obsrv. Mass | $\pm$ da | $\pm$ ppm | Start Seq. | End Sequence Seq.       | Ion Score | C. I. | % Modification         | Rank | Result Type |
|                     | 829.4606                                                | 829.5081    | 0.0475   | 57        | 671        | 676 KFPFYK              |           |       |                        |      | Mascot      |
|                     | 907.4301                                                | 907.4562    | 0.0261   | 29        | 645        | 652 TGMIESNR            | 9         | 0     |                        |      | Mascot      |
|                     | 907.4301                                                | 907.4562    | 0.0261   | 29        | 645        | 652 TGMIESNR            |           |       |                        |      | Mascot      |
|                     | 1045.5459                                               | 1045.5391   | -0.0068  | -7        | 239        | 247 LGVNDCVLR           |           |       | Carbamidomethyl (C)[6] |      | Mascot      |
|                     | 1234.5521                                               | 1234.6483   | 0.0962   | 78        | 434        | 443 HMLGEEDFTR          |           |       |                        |      | Mascot      |
|                     | 1434.6907                                               | 1434.7368   | 0.0461   | 32        | 641        | 652 FHARTGMIESNR        |           |       | Oxidation (M)[7]       |      | Mascot      |
|                     | 1470.7223                                               | 1470.6367   | -0.0856  | -58       | 855        | 866 QTYEQANKVFDK        |           |       |                        |      | Mascot      |
|                     | 1570.8019                                               | 1570.736    | -0.0659  | -42       | 749        | 761 FGSCVPHTTRPRR       |           |       | Carbamidomethyl (C)[4] |      | Mascot      |
|                     | 1911.052                                                | 1910.8079   | -0.2441  | -128      | 719        | 734 QEIHYPTRPVILGPMK    |           |       | Oxidation (M)[15]      |      | Mascot      |
|                     | 1911.052                                                | 1910.8079   | -0.2441  | -128      | 719        | 734 QEIHYPTRPVILGPMK    |           |       | Oxidation (M)[15]      |      | Mascot      |
|                     | 1933.9225                                               | 1933.9635   | 0.041    | 21        | 428        | 443 YSPVPRHMLGEEDFTR    |           |       |                        |      | Mascot      |
|                     | 2186.1743                                               | 2185.9915   | -0.1828  | -84       | 896        | 914 LIIEEQSGPYIWIPSAEKL |           |       |                        |      | Mascot      |
|                     | 2186.1743                                               | 2185.9915   | -0.1828  | -84       | 896        | 914 LIIEEQSGPYIWIPSAEKL |           |       |                        |      | Mascot      |
| 41                  | PREDICTED: hypothetical protein LOC563653 [Danio rerio] |             |          |           |            | gi 292621547            | 110431.7  | 9.74  | 13                     | 31   | 0           |

| Peptide Information |            |             |          |           |            |                            |           |       |                        |      |             |
|---------------------|------------|-------------|----------|-----------|------------|----------------------------|-----------|-------|------------------------|------|-------------|
|                     | Calc. Mass | Obsrv. Mass | $\pm$ da | $\pm$ ppm | Start Seq. | End Sequence Seq.          | Ion Score | C. I. | % Modification         | Rank | Result Type |
|                     | 842.4366   | 842.4906    | 0.054    | 64        | 593        | 599 ENQVPQK                |           |       |                        |      | Mascot      |
|                     | 1011.533   | 1011.454    | -0.079   | -78       | 573        | 581 QASHVRDAK              |           |       |                        |      | Mascot      |
|                     | 1045.5823  | 1045.5391   | -0.0432  | -41       | 247        | 256 VVSPKMAGTR             |           |       |                        |      | Mascot      |
|                     | 1140.6484  | 1140.5654   | -0.083   | -73       | 523        | 532 SHRTSQALLK             |           |       |                        |      | Mascot      |
|                     | 1320.6444  | 1320.5513   | -0.0931  | -70       | 912        | 921 YRENHDAFLR             |           |       |                        |      | Mascot      |
|                     | 1493.7893  | 1493.697    | -0.0923  | -62       | 896        | 908 GYLTVPASMQR            |           |       | Oxidation (M)[10]      |      | Mascot      |
|                     | 1570.8911  | 1570.736    | -0.1551  | -99       | 193        | 206 LSVLSEERLQAAVR         |           |       |                        |      | Mascot      |
|                     | 1598.6421  | 1598.7292   | 0.0871   | 54        | 795        | 806 MEEMERDQDEV            |           |       | Oxidation (M)[1,4]     |      | Mascot      |
|                     | 1700.8271  | 1700.7043   | -0.1228  | -72       | 321        | 334 ECVVEALEPNEKQR         |           |       | Carbamidomethyl (C)[2] |      | Mascot      |
|                     | 1700.8271  | 1700.7043   | -0.1228  | -72       | 321        | 334 ECVVEALEPNEKQR         |           |       | Carbamidomethyl (C)[2] |      | Mascot      |
|                     | 1707.9427  | 1707.7374   | -0.2053  | -120      | 75         | 89 TNYSNPVVVIFSLR          |           |       |                        |      | Mascot      |
|                     | 1828.9399  | 1828.7953   | -0.1446  | -79       | 286        | 301 NTIVNSSEPQLTQEIR       |           |       |                        |      | Mascot      |
|                     | 2211.0454  | 2211.0491   | 0.0037   | 2         | 783        | 800 LQGPTLESMLLRMEEMER     |           |       | Oxidation (M)[9,13,16] |      | Mascot      |
|                     | 2498.2278  | 2498.2664   | 0.0386   | 15        | 394        | 415 AMQVFINQLSDPAENRVPTHCK |           |       |                        |      | Mascot      |

42 inositol(myo)-1(or 4)-monophosphatase 1 [Danio rerio] gi|169153986 25887.8 4.8 6 31 0

Peptide Information

| Calc. Mass | Obsrv. Mass | ± da    | ± ppm | Start Seq. | End Sequence Seq.                     | Ion Score | C. I. % Modification   | Rank | Result Type |
|------------|-------------|---------|-------|------------|---------------------------------------|-----------|------------------------|------|-------------|
| 868.4709   | 868.4709    | 0       | 0     | 175        | 181 IFSSMRK                           |           |                        |      | Mascot      |
| 1248.7609  | 1248.5758   | -0.1851 | -148  | 181        | 191 KILCLPVHGIR                       |           |                        |      | Mascot      |
| 1838.8854  | 1838.8722   | -0.0132 | -7    | 2          | 17 PDLWQDAMDHAVTLAR                   |           |                        |      | Mascot      |
| 1844.9963  | 1844.792    | -0.2043 | -111  | 46         | 61 TDQNVEQLIITSVKEK                   |           |                        |      | Mascot      |
| 2225.0618  | 2225.0632   | 0.0014  | 1     | 116        | 134 TLEFGVVYSCIEDKMYTA<br>R           |           |                        |      | Mascot      |
| 2225.0618  | 2225.0632   | 0.0014  | 1     | 116        | 134 TLEFGVVYSCIEDKMYTA<br>R           |           |                        |      | Mascot      |
| 3308.5964  | 3308.3765   | -0.2199 | -66   | 138        | 167 GAFcNGQPLQVSDQKEI<br>NQSIATEFGSNR |           | Carbamidomethyl (C)[4] |      | Mascot      |

43 PREDICTED: serine/arginine repetitive matrix protein 4 [Danio rerio] gi|189518857 64253.1 11.33 9 31 0

Peptide Information

| Calc. Mass | Obsrv. Mass | ± da    | ± ppm | Start Seq. | End Sequence Seq.             | Ion Score | C. I. % Modification   | Rank | Result Type |
|------------|-------------|---------|-------|------------|-------------------------------|-----------|------------------------|------|-------------|
| 996.5836   | 996.5735    | -0.0101 | -10   | 59         | 67 RLETPVGPK                  |           |                        |      | Mascot      |
| 1011.4815  | 1011.454    | -0.0275 | -27   | 288        | 296 FSCLTSPEK                 |           |                        |      | Mascot      |
| 1041.5952  | 1041.6078   | 0.0126  | 12    | 49         | 56 FEARLLHR                   |           |                        |      | Mascot      |
| 1068.5031  | 1068.5441   | 0.041   | 38    | 288        | 296 FSCLTSPEK                 |           | Carbamidomethyl (C)[3] |      | Mascot      |
| 1248.6219  | 1248.5758   | -0.0461 | -37   | 325        | 335 ENTLHSSVFSK               |           |                        |      | Mascot      |
| 1599.6349  | 1599.8459   | 0.211   | 132   | 222        | 235 CCCHFSESTVSPSR            |           | Carbamidomethyl (C)[1] |      | Mascot      |
| 1700.955   | 1700.7043   | -0.2507 | -147  | 1          | 15 MEELICRLLAGILAR            |           |                        |      | Mascot      |
| 1700.955   | 1700.7043   | -0.2507 | -147  | 1          | 15 MEELICRLLAGILAR            |           |                        |      | Mascot      |
| 1716.9498  | 1716.6989   | -0.2509 | -146  | 1          | 15 MEELICRLLAGILAR            |           | Oxidation (M)[1]       |      | Mascot      |
| 1716.9498  | 1716.6989   | -0.2509 | -146  | 1          | 15 MEELICRLLAGILAR            |           | Oxidation (M)[1]       |      | Mascot      |
| 2019.9263  | 2019.8184   | -0.1079 | -53   | 29         | 48 GSGPFAAGCETAGMRIS<br>TYK   |           | Oxidation (M)[14]      |      | Mascot      |
| 2119.0876  | 2119.0906   | 0.003   | 1     | 236        | 256 SGVEGLSKVVIVQNSESS<br>DGK |           |                        |      | Mascot      |
| 2155.9739  | 2156.1914   | 0.2175  | 101   | 259        | 279 ADYDSGNDTSSPPSSKT<br>GITR |           |                        |      | Mascot      |

44 39S ribosomal protein L17, mitochondrial [Danio rerio] gi|52219200 19088.2 9.81 7 31 0

Peptide Information

| Calc. Mass | Obsrv. Mass | ± da   | ± ppm | Start Seq. | End Sequence Seq. | Ion Score | C. I. % Modification | Rank | Result Type |
|------------|-------------|--------|-------|------------|-------------------|-----------|----------------------|------|-------------|
| 850.5032   | 850.5214    | 0.0182 | 21    | 59         | 65 LIDYAKK        |           |                      |      | Mascot      |

|    |                                                                  |           |         |     |     |     |                          |          |      |    |    |   |  |  |  |                  |        |
|----|------------------------------------------------------------------|-----------|---------|-----|-----|-----|--------------------------|----------|------|----|----|---|--|--|--|------------------|--------|
|    | 885.5516                                                         | 885.4941  | -0.0575 | -65 | 31  | 38  | NLLTGLVR                 |          |      |    |    |   |  |  |  |                  | Mascot |
|    | 1011.5179                                                        | 1011.454  | -0.0639 | -63 | 119 | 127 | AAMAVLEYK                |          |      |    |    |   |  |  |  | Oxidation (M)[3] | Mascot |
|    | 1140.5394                                                        | 1140.5654 | 0.026   | 23  | 75  | 83  | MADFWLTEK                |          |      |    |    |   |  |  |  |                  | Mascot |
|    | 1179.6521                                                        | 1179.5751 | -0.077  | -65 | 128 | 138 | GNPFPPLNPVK              |          |      |    |    |   |  |  |  |                  | Mascot |
|    | 1470.712                                                         | 1470.6367 | -0.0753 | -51 | 72  | 83  | AMKMADFWLTEK             |          |      |    |    |   |  |  |  |                  | Mascot |
|    | 2156.1572                                                        | 2156.1914 | 0.0342  | 16  | 119 | 138 | AAMAVLEYKGNPFPPLN<br>PVK |          |      |    |    |   |  |  |  |                  | Mascot |
| 45 | PREDICTED: calcium-dependent secretion activator 1 [Danio rerio] |           |         |     |     |     |                          |          |      |    |    |   |  |  |  |                  |        |
|    |                                                                  |           |         |     |     |     | gi 326668730             | 145894.4 | 5.69 | 16 | 31 | 0 |  |  |  |                  |        |

#### Peptide Information

|  | Calc. Mass | Obsrv. Mass | ± da    | ± ppm | Start Seq. | End Seq. | Sequence                   | Ion Score | C. I. | % Modification                             | Rank | Result Type |
|--|------------|-------------|---------|-------|------------|----------|----------------------------|-----------|-------|--------------------------------------------|------|-------------|
|  | 868.4635   | 868.4709    | 0.0074  | 9     | 1165       | 1171     | HSQDILR                    |           |       |                                            |      | Mascot      |
|  | 1041.5364  | 1041.6078   | 0.0714  | 69    | 123        | 130      | DRFESFLK                   |           |       |                                            |      | Mascot      |
|  | 1045.5459  | 1045.5391   | -0.0068 | -7    | 280        | 288      | LQMADQIAR                  |           |       |                                            |      | Mascot      |
|  | 1179.6343  | 1179.5751   | -0.0592 | -50   | 578        | 586      | ILWVQAMYP                  |           |       |                                            |      | Mascot      |
|  | 1350.6504  | 1350.6696   | 0.0192  | 14    | 161        | 173      | MVQTGGLSALDCR              |           |       |                                            |      | Mascot      |
|  | 1493.7166  | 1493.697    | -0.0196 | -13   | 806        | 817      | CLEQAAQINYQR               |           |       | Carbamidomethyl (C)[1]                     |      | Mascot      |
|  | 1599.7791  | 1599.8459   | 0.0668  | 42    | 1022       | 1035     | MKLMSSDMIETSVK             |           |       |                                            |      | Mascot      |
|  | 1700.7288  | 1700.7043   | -0.0245 | -14   | 1072       | 1086     | DQSAKLCAMEMGQEK            |           |       | Oxidation (M)[9,11]                        |      | Mascot      |
|  | 1700.7288  | 1700.7043   | -0.0245 | -14   | 1072       | 1086     | DQSAKLCAMEMGQEK            |           |       | Oxidation (M)[9,11]                        |      | Mascot      |
|  | 1838.9213  | 1838.8722   | -0.0491 | -27   | 1056       | 1071     | IPLSLCTMFNVMDAK            |           |       | Carbamidomethyl (C)[6]                     |      | Mascot      |
|  | 1910.9463  | 1910.8079   | -0.1384 | -72   | 161        | 177      | MVQTGGLSALDCREVFK          |           |       | Carbamidomethyl (C)[12]                    |      | Mascot      |
|  | 1910.9463  | 1910.8079   | -0.1384 | -72   | 161        | 177      | MVQTGGLSALDCREVFK          |           |       | Carbamidomethyl (C)[12]                    |      | Mascot      |
|  | 2145.1775  | 2145.0481   | -0.1294 | -60   | 587        | 606      | ATGQSHKVPPTQVQKL<br>NSK    |           |       |                                            |      | Mascot      |
|  | 2156.0554  | 2156.1914   | 0.136   | 63    | 806        | 823      | CLEQAAQINYQRITDYAR         |           |       |                                            |      | Mascot      |
|  | 2168.0474  | 2167.981    | -0.0664 | -31   | 377        | 395      | SLAPNRIVYCTMEVEGG<br>QK    |           |       | Carbamidomethyl (C)[10], Oxidation (M)[12] |      | Mascot      |
|  | 2224.9397  | 2225.0632   | 0.1235  | 56    | 1          | 20       | MLDPSSEEEESDGIVEEE<br>SR   |           |       |                                            |      | Mascot      |
|  | 2224.9397  | 2225.0632   | 0.1235  | 56    | 1          | 20       | MLDPSSEEEESDGIVEEE<br>SR   |           |       |                                            |      | Mascot      |
|  | 2233.166   | 2233.0325   | -0.1335 | -60   | 84         | 101      | LQLYVFVMRCIAYPFNAK         |           |       | Carbamidomethyl (C)[10]                    |      | Mascot      |
|  | 2346.1055  | 2346.2458   | 0.1403  | 60    | 50         | 72       | GSSARPTSPSPAASEE<br>KEDVEK |           |       |                                            |      | Mascot      |

46 Ppp4r2a protein [Danio rerio] gi|156230689 49479.9 4.37 8 30 0

#### Peptide Information

|  | Calc. Mass | Obsrv. Mass | ± da | ± ppm | Start Seq. | End Seq. | Sequence | Ion Score | C. I. | % Modification | Rank | Result Type |
|--|------------|-------------|------|-------|------------|----------|----------|-----------|-------|----------------|------|-------------|
|--|------------|-------------|------|-------|------------|----------|----------|-----------|-------|----------------|------|-------------|



|    |                                                              |           |         |     |     |     |                         |         |      |                                          |    |   |  |  |  |  |        |
|----|--------------------------------------------------------------|-----------|---------|-----|-----|-----|-------------------------|---------|------|------------------------------------------|----|---|--|--|--|--|--------|
|    | 850.4199                                                     | 850.5214  | 0.1015  | 119 | 172 | 179 | KGSSCVNR                |         |      |                                          |    |   |  |  |  |  | Mascot |
|    | 907.4413                                                     | 907.4562  | 0.0149  | 16  | 172 | 179 | KGSSCVNR                | 3       | 0    | Carbamidomethyl (C)[5]                   |    |   |  |  |  |  | Mascot |
|    | 907.4413                                                     | 907.4562  | 0.0149  | 16  | 172 | 179 | KGSSCVNR                |         |      | Carbamidomethyl (C)[5]                   |    |   |  |  |  |  | Mascot |
|    | 1045.5598                                                    | 1045.5391 | -0.0207 | -20 | 134 | 142 | LCELLTEPK               |         |      |                                          |    |   |  |  |  |  | Mascot |
|    | 1140.5605                                                    | 1140.5654 | 0.0049  | 4   | 83  | 91  | LEKVMDDFK               |         |      | Oxidation (M)[5]                         |    |   |  |  |  |  | Mascot |
|    | 1598.6937                                                    | 1598.7292 | 0.0355  | 22  | 86  | 98  | VMDDFKASCPEQR           |         |      | Carbamidomethyl (C)[9], Oxidation (M)[2] |    |   |  |  |  |  | Mascot |
|    | 1683.8444                                                    | 1683.7931 | -0.0513 | -30 | 158 | 172 | NVMVVSCVYPTSEKK         |         |      |                                          |    |   |  |  |  |  | Mascot |
|    | 1683.8444                                                    | 1683.7931 | -0.0513 | -30 | 158 | 172 | NVMVVSCVYPTSEKK         |         |      |                                          |    |   |  |  |  |  | Mascot |
|    | 1707.837                                                     | 1707.7374 | -0.0996 | -58 | 27  | 41  | HTSTMEIDTLLGAFR         |         |      | Oxidation (M)[5]                         |    |   |  |  |  |  | Mascot |
|    | 2119.0276                                                    | 2119.0906 | 0.063   | 30  | 99  | 116 | GPANPNVEYIPFEEMKQ<br>R  |         |      |                                          |    |   |  |  |  |  | Mascot |
|    | 2211.075                                                     | 2211.0491 | -0.0259 | -12 | 27  | 45  | HTSTMEIDTLLGAFRDFE<br>K |         |      |                                          |    |   |  |  |  |  | Mascot |
| 47 | bcl-2-related ovarian killer protein homolog B [Danio rerio] |           |         |     |     |     | gi 41055421             | 23818.6 | 7.71 | 6                                        | 30 | 0 |  |  |  |  |        |

#### Peptide Information

| Calc. Mass | Obsrv. Mass | ± da    | ± ppm | Start Seq. | End Seq. | Sequence               | Ion Score | C. I. | % | Modification      | Rank | Result | Type   |
|------------|-------------|---------|-------|------------|----------|------------------------|-----------|-------|---|-------------------|------|--------|--------|
| 842.5134   | 842.4906    | -0.0228 | -27   | 161        | 167      | SLVPWLK                |           |       |   |                   |      |        | Mascot |
| 850.4668   | 850.5214    | 0.0546  | 64    | 26         | 32       | ELVFQSK                |           |       |   |                   |      |        | Mascot |
| 939.4022   | 939.4149    | 0.0127  | 14    | 178        | 185      | CVVNMDSR               |           |       |   | Oxidation (M)[5]  |      |        | Mascot |
| 939.4022   | 939.4149    | 0.0127  | 14    | 178        | 185      | CVVNMDSR               |           |       |   | Oxidation (M)[5]  |      |        | Mascot |
| 2149.0593  | 2148.9441   | -0.1152 | -54   | 7          | 25       | SSVLAEMIDVFDRTHTK      |           |       |   |                   |      |        | Mascot |
| 2156.0803  | 2156.1914   | 0.1111  | 52    | 2          | 20       | NVFARSSVLAEMIDVFD<br>R |           |       |   | Oxidation (M)[13] |      |        | Mascot |
| 2186.0732  | 2185.9915   | -0.0817 | -37   | 74         | 91       | LGDELECMRPYVYRNIAK     |           |       |   | Oxidation (M)[8]  |      |        | Mascot |
| 2186.0732  | 2185.9915   | -0.0817 | -37   | 74         | 91       | LGDELECMRPYVYRNIAK     |           |       |   | Oxidation (M)[8]  |      |        | Mascot |

48 novel protein [Danio rerio] gi|169154274 85664.7 5.94 11 30 0 5 0

#### Peptide Information

| Calc. Mass | Obsrv. Mass | ± da    | ± ppm | Start Seq. | End Seq. | Sequence         | Ion Score | C. I. | % | Modification     | Rank | Result | Type   |
|------------|-------------|---------|-------|------------|----------|------------------|-----------|-------|---|------------------|------|--------|--------|
| 940.5396   | 940.4044    | -0.1352 | -144  | 440        | 447      | NPLCLPKR         |           |       |   |                  |      |        | Mascot |
| 1165.5881  | 1165.7177   | 0.1296  | 111   | 1          | 10       | MLESSVNKK        |           |       |   | Oxidation (M)[1] |      |        | Mascot |
| 1348.7075  | 1348.6322   | -0.0753 | -56   | 11         | 22       | RCIPSSLTQLCK     |           |       |   |                  |      |        | Mascot |
| 1599.8893  | 1599.8459   | -0.0434 | -27   | 366        | 378      | VPDWVFPETLKLK    |           |       |   |                  |      |        | Mascot |
| 1700.9364  | 1700.7043   | -0.2321 | -136  | 118        | 133      | LAAQLAVDCTSLLNIR |           |       |   |                  |      |        | Mascot |
| 1700.9364  | 1700.7043   | -0.2321 | -136  | 118        | 133      | LAAQLAVDCTSLLNIR | 5         | 0     |   |                  |      |        | Mascot |

|    |                                                                                                                              |           |         |      |     |              |                          |      |   |  |                         |        |  |        |
|----|------------------------------------------------------------------------------------------------------------------------------|-----------|---------|------|-----|--------------|--------------------------|------|---|--|-------------------------|--------|--|--------|
|    | 1819.9371                                                                                                                    | 1819.7543 | -0.1828 | -100 | 344 | 360          | AQGDVVSVAFTPQTIMR        |      |   |  |                         |        |  | Mascot |
|    | 1828.9956                                                                                                                    | 1828.7953 | -0.2003 | -110 | 361 | 376          | TAAVRVPDWVFPETLK         |      |   |  |                         |        |  | Mascot |
|    | 2020.032                                                                                                                     | 2019.8184 | -0.2136 | -106 | 80  | 95           | QTFSEVLHICEQLFLR         |      |   |  | Carbamidomethyl (C)[10] |        |  | Mascot |
|    | 2168.0806                                                                                                                    | 2167.981  | -0.0996 | -46  | 641 | 659          | DHLQEIAAAWEQATCLIQ<br>K  |      |   |  |                         |        |  | Mascot |
|    | 2225.1018                                                                                                                    | 2225.0632 | -0.0386 | -17  | 641 | 659          | DHLQEIAAAWEQATCLIQ<br>K  |      |   |  | Carbamidomethyl (C)[15] |        |  | Mascot |
|    | 2225.1018                                                                                                                    | 2225.0632 | -0.0386 | -17  | 641 | 659          | DHLQEIAAAWEQATCLIQ<br>K  |      |   |  | Carbamidomethyl (C)[15] |        |  | Mascot |
|    | 2233.1758                                                                                                                    | 2233.0325 | -0.1433 | -64  | 341 | 360          | QLRAQGDVVSVAFPTQTI<br>MR |      |   |  | Oxidation (M)[19]       |        |  | Mascot |
|    | 2381.2031                                                                                                                    | 2380.978  | -0.2251 | -95  | 641 | 660          | DHLQEIAAAWEQATCLIQ<br>KR |      |   |  | Carbamidomethyl (C)[15] |        |  | Mascot |
|    | 2381.2031                                                                                                                    | 2380.978  | -0.2251 | -95  | 641 | 660          | DHLQEIAAAWEQATCLIQ<br>KR |      |   |  | Carbamidomethyl (C)[15] |        |  | Mascot |
| 49 | novel protein similar to vertebrate transient receptor potential cation channel, subfamily V, member 4 (TRPV4) [Danio rerio] |           |         |      |     | gi 123227302 | 97398.1                  | 8.04 | 1 |  | 25                      | 24.383 |  |        |

#### Peptide Information

| Calc. Mass | Obsrv. Mass | ± da    | ± ppm | Start Seq. | End Seq. | Sequence | Ion Score | C. I. % | Modification | Rank | Result Type |
|------------|-------------|---------|-------|------------|----------|----------|-----------|---------|--------------|------|-------------|
| 907.4896   | 907.4562    | -0.0334 | -37   | 277        | 283      | GRFFQPR  | 25        | 24.383  |              | 2    | Mascot      |

|    |                                                                     |  |  |  |  |              |         |     |   |  |    |   |  |  |
|----|---------------------------------------------------------------------|--|--|--|--|--------------|---------|-----|---|--|----|---|--|--|
| 50 | PREDICTED: poly(A) RNA polymerase, mitochondrial-like [Danio rerio] |  |  |  |  | gi 326672376 | 63999.1 | 9.2 | 1 |  | 19 | 0 |  |  |
|----|---------------------------------------------------------------------|--|--|--|--|--------------|---------|-----|---|--|----|---|--|--|

#### Peptide Information

| Calc. Mass | Obsrv. Mass | ± da   | ± ppm | Start Seq. | End Seq. | Sequence  | Ion Score | C. I. % | Modification | Rank | Result Type |
|------------|-------------|--------|-------|------------|----------|-----------|-----------|---------|--------------|------|-------------|
| 907.4488   | 907.4562    | 0.0074 | 8     | 1          | 9        | MAASLGVCR | 19        | 0       |              | 3    | Mascot      |

|                       |           |                               |                |                       |                    |
|-----------------------|-----------|-------------------------------|----------------|-----------------------|--------------------|
| <b>Gel Idx/Pos</b>    | 183/H10   | <b>Instr./Gel Origin</b>      | BA2060/110707A | <b>Process Status</b> | Analysis Succeeded |
| <b>Plate [#] Name</b> | [1] 31496 | <b>Instrument Sample Name</b> |                | <b>Spectra</b>        | 11                 |

| Rank | Protein Name                        | Accession No. | Protein MW | Protein PI | Pep. Count | Protein Score | Protein Score C. I. % | Total Ion Score | Total Ion C. I. % |
|------|-------------------------------------|---------------|------------|------------|------------|---------------|-----------------------|-----------------|-------------------|
| 1    | thimet oligopeptidase [Danio rerio] | gi 50539778   | 77928.1    | 5.51       | 28         | 1,100         | 100                   | 909             | 100               |

#### Peptide Information

| Calc. Mass | Obsrv. Mass | ± da    | ± ppm | Start Seq. | End Seq. | Sequence | Ion Score | C. I. % | Modification           | Rank | Result Type |
|------------|-------------|---------|-------|------------|----------|----------|-----------|---------|------------------------|------|-------------|
| 809.3787   | 809.3594    | -0.0193 | -24   | 113        | 118      | EDVYQR   |           |         |                        |      | Mascot      |
| 908.4294   | 908.4072    | -0.0222 | -24   | 228        | 234      | CFVPETR  |           |         | Carbamidomethyl (C)[1] |      | Mascot      |
| 965.4686   | 965.4443    | -0.0243 | -25   | 237        | 244      | LEEAFNSR |           |         |                        |      | Mascot      |

|           |           |         |     |     |     |                        |     |        |        |
|-----------|-----------|---------|-----|-----|-----|------------------------|-----|--------|--------|
| 1093.5636 | 1093.5359 | -0.0277 | -25 | 236 | 244 | KLEEFNSR               |     |        | Mascot |
| 1118.6317 | 1118.6045 | -0.0272 | -24 | 541 | 550 | LANTGLFNLR             |     |        | Mascot |
| 1118.6317 | 1118.6045 | -0.0272 | -24 | 541 | 550 | LANTGLFNLR             | 90  | 100    | Mascot |
| 1183.5605 | 1183.5306 | -0.0299 | -25 | 218 | 226 | YPHYFPTMK              |     |        | Mascot |
| 1194.5823 | 1194.553  | -0.0293 | -25 | 624 | 633 | FKQEGVMDPK             |     |        | Mascot |
| 1199.5554 | 1199.5233 | -0.0321 | -27 | 218 | 226 | YPHYFPTMK              |     |        | Mascot |
| 1221.5746 | 1221.5453 | -0.0293 | -24 | 565 | 575 | TGLDPAEEYAR            |     |        | Mascot |
| 1221.5746 | 1221.5453 | -0.0293 | -24 | 565 | 575 | TGLDPAEEYAR            | 95  | 100    | Mascot |
| 1242.6075 | 1242.5757 | -0.0318 | -26 | 355 | 364 | EYFPMEVVT              |     |        | Mascot |
| 1258.6024 | 1258.5682 | -0.0342 | -27 | 355 | 364 | EYFPMEVVT              |     |        | Mascot |
| 1325.6947 | 1325.6576 | -0.0371 | -28 | 524 | 535 | TGNPIEELLDK            |     |        | Mascot |
| 1343.597  | 1343.5637 | -0.0333 | -25 | 102 | 112 | LSEFDVEMSMR            | 70  | 99.997 | Mascot |
| 1343.597  | 1343.5637 | -0.0333 | -25 | 102 | 112 | LSEFDVEMSMR            |     |        | Mascot |
| 1359.5919 | 1359.5563 | -0.0356 | -26 | 102 | 112 | LSEFDVEMSMR            |     |        | Mascot |
| 1375.5868 | 1375.5514 | -0.0354 | -26 | 102 | 112 | LSEFDVEMSMR            |     |        | Mascot |
| 1492.7642 | 1492.7264 | -0.0378 | -25 | 64  | 76  | ALADVEVEYTVQR          | 90  | 100    | Mascot |
| 1492.7642 | 1492.7264 | -0.0378 | -25 | 64  | 76  | ALADVEVEYTVQR          |     |        | Mascot |
| 1629.7438 | 1629.7004 | -0.0434 | -27 | 178 | 190 | HLNEDTTCLHFSR          |     |        | Mascot |
| 1629.7438 | 1629.7004 | -0.0434 | -27 | 178 | 190 | HLNEDTTCLHFSR          | 91  | 100    | Mascot |
| 1682.8173 | 1682.7738 | -0.0435 | -26 | 322 | 335 | NLPFTGELYAWDTR         |     |        | Mascot |
| 1682.8173 | 1682.7738 | -0.0435 | -26 | 322 | 335 | NLPFTGELYAWDTR         | 118 | 100    | Mascot |
| 1797.9534 | 1797.9053 | -0.0481 | -27 | 400 | 415 | SSGLVVGQFYLDLFR        | 141 | 100    | Mascot |
| 1797.9534 | 1797.9053 | -0.0481 | -27 | 400 | 415 | SSGLVVGQFYLDLFR        |     |        | Mascot |
| 1910.048  | 1909.9938 | -0.0542 | -28 | 119 | 136 | IVALEEKLEPGLSPEAK      |     |        | Mascot |
| 2107.9792 | 2107.9185 | -0.0607 | -29 | 496 | 512 | DFVEAPSQMLNWWWEK       |     |        | Mascot |
| 2123.9744 | 2123.9202 | -0.0542 | -26 | 496 | 512 | DFVEAPSQMLNWWWEK       |     |        | Mascot |
| 2141.1125 | 2141.0518 | -0.0607 | -28 | 23  | 40  | WDLTPEQINQLTEELIAK     |     |        | Mascot |
| 2165.9478 | 2165.895  | -0.0528 | -24 | 102 | 118 | LSEFDVEMSMREDVYQR      |     |        | Mascot |
| 2189.0378 | 2188.9788 | -0.059  | -27 | 419 | 438 | YGHAACFGLQPGCLLPNGTR   |     |        | Mascot |
| 2229.092  | 2229.0354 | -0.0566 | -25 | 44  | 63  | VYDTVGALDLDVSNYEN      | 51  | 99.799 | Mascot |
| 2229.092  | 2229.0354 | -0.0566 | -25 | 44  | 63  | VYDTVGALDLDVSNYEN      |     |        | Mascot |
| 2283.0632 | 2283.1169 | 0.0537  | 24  | 665 | 686 | QDAFLLSKGLTADVESGTPCAC |     |        | Mascot |
| 2306.1033 | 2306.0447 | -0.0586 | -25 | 191 | 211 | EELGGLPEDFLNSLEKDESGK  |     |        | Mascot |
| 2351.0859 | 2351.0234 | -0.0625 | -27 | 336 | 354 | YYMTQVEETQYAVDQNLK     |     |        | Mascot |
| 2357.187  | 2357.124  | -0.063  | -27 | 43  | 63  | KVYDTVGALDLDVSNYE      |     |        | Mascot |

|   |                                                                      |           |         |     |     |              |                                 |      |     |    |                  |        |
|---|----------------------------------------------------------------------|-----------|---------|-----|-----|--------------|---------------------------------|------|-----|----|------------------|--------|
|   | 2367.0808                                                            | 2367.0222 | -0.0586 | -25 | 336 | 354          | NTLK<br>YYMTQVEETQYAVDQNQ<br>LK |      |     |    | Oxidation (M)[3] | Mascot |
|   | 2370.2551                                                            | 2370.1721 | -0.083  | -35 | 23  | 42           | WDLTPEQINQLTEELIAK<br>K         |      |     |    |                  | Mascot |
|   | 2410.2976                                                            | 2410.2312 | -0.0664 | -28 | 21  | 40           | LRWDLTPEQINQLTEELIA<br>K        |      |     |    |                  | Mascot |
|   | 2731.3184                                                            | 2731.2441 | -0.0743 | -27 | 496 | 517          | DFVEAPSQMLENWWWE<br>KEPIQR      |      |     |    |                  | Mascot |
|   | 2731.3184                                                            | 2731.2441 | -0.0743 | -27 | 496 | 517          | DFVEAPSQMLENWWWE<br>KEPIQR      | 163  | 100 |    |                  | Mascot |
|   | 2747.3132                                                            | 2747.2437 | -0.0695 | -25 | 496 | 517          | DFVEAPSQMLENWWWE<br>KEPIQR      |      |     |    | Oxidation (M)[9] | Mascot |
| 2 | novel protein similar to H.sapiens TTN, titin (TTN)<br>[Danio rerio] |           |         |     |     | gi 169154588 | 2451841.5                       | 6.24 | 65  | 60 | 96.034           |        |

Peptide Information

| Calc. Mass | Obsrv. Mass | ± da    | ± ppm | Start Seq. | End Seq. | Sequence    | Ion Score | C. I. | % Modification                           | Rank | Result Type |
|------------|-------------|---------|-------|------------|----------|-------------|-----------|-------|------------------------------------------|------|-------------|
| 809.3675   | 809.3594    | -0.0081 | -10   | 21789      | 21795    | AEAFEDK     |           |       |                                          |      | Mascot      |
| 842.5094   | 842.4899    | -0.0195 | -23   | 4439       | 4446     | LSIPGVTR    |           |       |                                          |      | Mascot      |
| 882.4315   | 882.5447    | 0.1132  | 128   | 15166      | 15173    | DGSSFTLR    |           |       |                                          |      | Mascot      |
| 891.4166   | 891.3801    | -0.0365 | -41   | 15504      | 15512    | ESVASDAGR   |           |       |                                          |      | Mascot      |
| 907.4705   | 907.4323    | -0.0382 | -42   | 16765      | 16771    | NSLLWMK     |           |       | Oxidation (M)[6]                         |      | Mascot      |
| 908.4294   | 908.4072    | -0.0222 | -24   | 8865       | 8872     | NSCTLGWK    |           |       |                                          |      | Mascot      |
| 965.4509   | 965.4443    | -0.0066 | -7    | 8865       | 8872     | NSCTLGWK    |           |       | Carbamidomethyl (C)[3]                   |      | Mascot      |
| 996.5373   | 996.5723    | 0.035   | 35    | 3587       | 3593     | QYQFRVR     |           |       |                                          |      | Mascot      |
| 1042.5204  | 1042.557    | 0.0366  | 35    | 16493      | 16500    | ELSEVYFR    |           |       |                                          |      | Mascot      |
| 1045.6404  | 1045.5388   | -0.1016 | -97   | 5457       | 5466     | GTKFVVPGLK  |           |       |                                          |      | Mascot      |
| 1093.5095  | 1093.5359   | 0.0264  | 24    | 5041       | 5048     | ETWKQCNK    |           |       | Carbamidomethyl (C)[6]                   |      | Mascot      |
| 1118.6205  | 1118.6045   | -0.016  | -14   | 13511      | 13519    | EKNSILWTK   |           |       |                                          |      | Mascot      |
| 1118.6681  | 1118.6045   | -0.0636 | -57   | 2058       | 2066     | ILAYVVERR   |           |       |                                          |      | Mascot      |
| 1123.4871  | 1123.5106   | 0.0235  | 21    | 9489       | 9497     | LAENVMDCR   |           |       | Carbamidomethyl (C)[8], Oxidation (M)[6] |      | Mascot      |
| 1157.7252  | 1157.6738   | -0.0514 | -44   | 11658      | 11667    | VQTLNLKITK  |           |       |                                          |      | Mascot      |
| 1165.6211  | 1165.7151   | 0.094   | 81    | 17778      | 17788    | VSAENKFGVSK |           |       |                                          |      | Mascot      |
| 1183.6028  | 1183.5306   | -0.0722 | -61   | 1355       | 1364     | KYEMISEGVK  |           |       |                                          |      | Mascot      |
| 1194.5923  | 1194.553    | -0.0393 | -33   | 156        | 165      | TLEEEMSVIK  |           |       | Oxidation (M)[6]                         |      | Mascot      |
| 1199.5977  | 1199.5233   | -0.0744 | -62   | 1355       | 1364     | KYEMISEGVK  |           |       | Oxidation (M)[4]                         |      | Mascot      |
| 1221.6051  | 1221.5453   | -0.0598 | -49   | 268        | 276      | DTPNWKWFK   |           |       |                                          |      | Mascot      |
| 1221.6051  | 1221.5453   | -0.0598 | -49   | 268        | 276      | DTPNWKWFK   |           |       |                                          |      | Mascot      |
| 1242.6113  | 1242.5757   | -0.0356 | -29   | 14517      | 14526    | LTQGTEYQFR  |           |       |                                          |      | Mascot      |
| 1258.6976  | 1258.5682   | -0.1294 | -103  | 19126      | 19136    | GKPLPTCKWTK |           |       |                                          |      | Mascot      |

|           |           |         |      |       |       |                          |                            |     |        |
|-----------|-----------|---------|------|-------|-------|--------------------------|----------------------------|-----|--------|
| 1325.6888 | 1325.6576 | -0.0312 | -24  | 19425 | 19434 | EILGYWIEFR               |                            |     | Mascot |
| 1343.6776 | 1343.5637 | -0.1139 | -85  | 4252  | 4264  | YGCGPPVDLGPIR            |                            |     | Mascot |
| 1343.6776 | 1343.5637 | -0.1139 | -85  | 4252  | 4264  | YGCGPPVDLGPIR            |                            |     | Mascot |
| 1359.6328 | 1359.5563 | -0.0765 | -56  | 20560 | 20570 | NTEVTWYFGSR              |                            |     | Mascot |
| 1367.6412 | 1367.5828 | -0.0584 | -43  | 7028  | 7037  | LMENHEYLF                | Oxidation (M)[2]           |     | Mascot |
| 1375.5769 | 1375.5514 | -0.0255 | -19  | 20550 | 20559 | FVCCNIENYDR              | Carbamidomethyl (C)[3,4]   |     | Mascot |
| 1391.6624 | 1391.7058 | 0.0434  | 31   | 11997 | 12008 | VLDTDPMPANFR             | Oxidation (M)[7]           |     | Mascot |
| 1492.7166 | 1492.7264 | 0.0098  | 7    | 18002 | 18014 | DEYTPPKAELDSK            |                            |     | Mascot |
| 1492.7465 | 1492.7264 | -0.0201 | -13  | 14627 | 14640 | VYAENIAGIGPCTK           | Carbamidomethyl (C)[12]    |     | Mascot |
| 1626.7693 | 1626.7129 | -0.0564 | -35  | 10716 | 10730 | ACDTIFQPGPPGNPR          | Carbamidomethyl (C)[2]     |     | Mascot |
| 1629.7809 | 1629.7004 | -0.0805 | -49  | 6389  | 6400  | TEVWLQWNWPD              |                            |     | Mascot |
| 1629.9104 | 1629.7004 | -0.21   | -129 | 5809  | 5822  | LVVRVGETCIQSR            | Carbamidomethyl (C)[9]     |     | Mascot |
| 1682.8265 | 1682.7738 | -0.0527 | -31  | 6244  | 6258  | AEIETSGTTTKLEMR          | Oxidation (M)[14]          |     | Mascot |
| 1682.8265 | 1682.7738 | -0.0527 | -31  | 6244  | 6258  | AEIETSGTTTKLEMR          | Oxidation (M)[14]          |     | Mascot |
| 1698.8367 | 1698.765  | -0.0717 | -42  | 11047 | 11061 | ITGYIVEMQGNSDK           | Oxidation (M)[8]           |     | Mascot |
| 1714.7965 | 1714.7611 | -0.0354 | -21  | 11274 | 11287 | TGCEYQFRIAENR            | Carbamidomethyl (C)[3]     |     | Mascot |
| 1797.8734 | 1797.9053 | 0.0319  | 18   | 14649 | 14664 | DPCAPPSQPRVMNITR         | Oxidation (M)[12]          |     | Mascot |
| 1797.9713 | 1797.9053 | -0.066  | -37  | 6208  | 6224  | ELKAMAGTHINIMAGIK        |                            | 1 0 | Mascot |
| 1820.1255 | 1819.8815 | -0.244  | -134 | 15462 | 15478 | IEIPLTGKPLPKVLSK         |                            |     | Mascot |
| 1842.8293 | 1842.7349 | -0.0944 | -51  | 1063  | 1077  | FETEISEEDVHGHWK          |                            |     | Mascot |
| 1909.9728 | 1909.9938 | 0.021   | 11   | 1419  | 1434  | LICEVSKPSAEVTWYK         | Carbamidomethyl (C)[3]     |     | Mascot |
| 1970.877  | 1970.8958 | 0.0188  | 10   | 5938  | 5953  | DLWMPVTESCTRTSCK         | Carbamidomethyl (C)[10,15] |     | Mascot |
| 2099.0227 | 2098.9607 | -0.062  | -30  | 2364  | 2382  | WTFGENALTAGDRVSMV<br>TK  | Oxidation (M)[16]          |     | Mascot |
| 2108.1069 | 2107.9185 | -0.1884 | -89  | 2167  | 2184  | DRTSVVWAPVMVTKPHE<br>R   |                            |     | Mascot |
| 2124.1018 | 2123.9202 | -0.1816 | -85  | 2167  | 2184  | DRTSVVWAPVMVTKPHE<br>R   | Oxidation (M)[11]          |     | Mascot |
| 2140.989  | 2141.0518 | 0.0628  | 29   | 1278  | 1296  | LVIHDCTLDDSKTYTCDA<br>K  |                            |     | Mascot |
| 2166.0825 | 2165.895  | -0.1875 | -87  | 13016 | 13034 | GRPIPEINWTKDDGLPD<br>K   |                            |     | Mascot |
| 2189.0066 | 2188.9788 | -0.0278 | -13  | 19865 | 19884 | CENIGGESDWSEISEPVI<br>PK |                            |     | Mascot |
| 2190.0205 | 2189.9678 | -0.0527 | -24  | 16484 | 16500 | CQCEVTELKELSEVYFR        | Carbamidomethyl (C)[1,3]   |     | Mascot |
| 2190.2029 | 2189.9678 | -0.2351 | -107 | 10448 | 10467 | LDAAHTGRPIPSIVWTKD<br>GK |                            |     | Mascot |
| 2194.0583 | 2194.0261 | -0.0322 | -15  | 13155 | 13174 | VMAENEFGIGLPVETES<br>VK  | Oxidation (M)[2]           |     | Mascot |
| 2211.021  | 2211.0452 | 0.0242  | 11   | 7302  | 7320  | MVWSTYSASLVNVCNV<br>TR   | Oxidation (M)[1]           |     | Mascot |
| 2215.1111 | 2215.0227 | -0.0884 | -40  | 20741 | 20759 | LNVAPHAVAEDTMRPMF<br>KR  | Oxidation (M)[13,16]       |     | Mascot |
| 2221.1248 | 2221.0967 | -0.0281 | -13  | 19188 | 19207 | VIGRPDPPEGPLEFDDIQ<br>AR |                            |     | Mascot |

|   |                                                                             |           |         |     |              |         |                               |   |                                          |        |
|---|-----------------------------------------------------------------------------|-----------|---------|-----|--------------|---------|-------------------------------|---|------------------------------------------|--------|
|   | 2225.0479                                                                   | 2225.0618 | 0.0139  | 6   | 8052         | 8070    | HPFDPPSEPLNCCVNKV<br>SK       |   | Carbamidomethyl (C)[12,13]               | Mascot |
|   | 2229.1736                                                                   | 2229.0354 | -0.1382 | -62 | 7725         | 7743    | ITNLTPGIEYYFRVMAVN<br>K       |   |                                          | Mascot |
|   | 2229.1736                                                                   | 2229.0354 | -0.1382 | -62 | 7725         | 7743    | ITNLTPGIEYYFRVMAVN<br>K       |   |                                          | Mascot |
|   | 2283.1284                                                                   | 2283.1169 | -0.0115 | -5  | 2993         | 3014    | VRAVNVAGESEPESEPSD<br>PVLCK   |   |                                          | Mascot |
|   | 2284.1389                                                                   | 2284.1128 | -0.0261 | -11 | 10716        | 10736   | ACDTIFQPGPPGNPRVLD<br>TTK     |   | Carbamidomethyl (C)[2]                   | Mascot |
|   | 2306.0732                                                                   | 2306.0447 | -0.0285 | -12 | 7121         | 7138    | ETFFMVVDKCVENHIYQFR           |   |                                          | Mascot |
|   | 2351.1272                                                                   | 2351.0234 | -0.1038 | -44 | 7301         | 7320    | RMVWSTYSASLVNYYCN<br>VTR      |   |                                          | Mascot |
|   | 2357.0979                                                                   | 2357.124  | 0.0261  | 11  | 5253         | 5270    | ECQYIVQRLTEGHEYEFK            |   | Carbamidomethyl (C)[2]                   | Mascot |
|   | 2367.1221                                                                   | 2367.0222 | -0.0999 | -42 | 7301         | 7320    | RMVWSTYSASLVNYYCN<br>VTR      |   | Oxidation (M)[2]                         | Mascot |
|   | 2370.124                                                                    | 2370.1721 | 0.0481  | 20  | 2995         | 3016    | AVNVAGESEPESEPSDPV<br>LCKER   |   | Carbamidomethyl (C)[19]                  | Mascot |
|   | 2410.0762                                                                   | 2410.2312 | 0.155   | 64  | 1463         | 1483    | MDDAGEYHCKLPTSQTT<br>GNLR     |   | Carbamidomethyl (C)[9], Oxidation (M)[1] | Mascot |
|   | 2474.1868                                                                   | 2474.0852 | -0.1016 | -41 | 8873         | 8895    | KPISDGGSHVVAYALEIC<br>EGEDK   |   | Carbamidomethyl (C)[18]                  | Mascot |
|   | 2683.2014                                                                   | 2683.2458 | 0.0444  | 17  | 4189         | 4212    | LMMLNWSDDDDGGSD<br>VTGFIIR    |   |                                          | Mascot |
|   | 2731.3396                                                                   | 2731.2441 | -0.0955 | -35 | 8873         | 8897    | KPISDGGSHVVAYALEIC<br>EGEDKWK |   |                                          | Mascot |
|   | 2731.3396                                                                   | 2731.2441 | -0.0955 | -35 | 8873         | 8897    | KPISDGGSHVVAYALEIC<br>EGEDKWK |   |                                          | Mascot |
|   | 2747.4556                                                                   | 2747.2437 | -0.2119 | -77 | 21863        | 21887   | TSFSFVGQVFQAIYTKVT<br>AFVAAHK |   |                                          | Mascot |
|   | 2763.4238                                                                   | 2763.2476 | -0.1762 | -64 | 16346        | 16370   | GKLTLSWEPPYIDGGSPI<br>TNYVVEK |   |                                          | Mascot |
| 3 | PREDICTED: NACHT, LRR and PYD<br>domains-containing protein 1 [Danio rerio] |           |         |     | gi 326674401 | 10256.3 | 7.63                          | 7 | 55                                       | 86.561 |

Peptide Information

|   | Calc. Mass                                                    | Obsrv. Mass | ± da    | ± ppm | Start Seq.   | End Seq. | Sequence                    | Ion Score | C. I. % | Modification                             | Rank | Result Type |
|---|---------------------------------------------------------------|-------------|---------|-------|--------------|----------|-----------------------------|-----------|---------|------------------------------------------|------|-------------|
|   | 1042.5779                                                     | 1042.557    | -0.0209 | -20   | 86           | 94       | ELDLLVNNL                   |           |         |                                          |      | Mascot      |
|   | 1258.7001                                                     | 1258.5682   | -0.1319 | -105  | 72           | 83       | ALTEALKSNPSK                |           |         |                                          |      | Mascot      |
|   | 1325.6453                                                     | 1325.6576   | 0.0123  | 9     | 44           | 54       | LCVGLQNPHCK                 |           |         | Carbamidomethyl (C)[2,10]                |      | Mascot      |
|   | 1797.8357                                                     | 1797.9053   | 0.0696  | 39    | 6            | 23       | CGLTEESCAALASALSSK          | 2         | 0       | Carbamidomethyl (C)[1]                   |      | Mascot      |
|   | 1797.8357                                                     | 1797.9053   | 0.0696  | 39    | 6            | 23       | CGLTEESCAALASALSSK          |           |         | Carbamidomethyl (C)[1]                   |      | Mascot      |
|   | 2141.1018                                                     | 2141.0518   | -0.05   | -23   | 60           | 78       | LSNCNVTHEELRALTEAL<br>K     |           |         |                                          |      | Mascot      |
|   | 2166.1145                                                     | 2165.895    | -0.2195 | -101  | 2            | 23       | ILAKCGLTEESCAALASAL<br>SSK  |           |         |                                          |      | Mascot      |
|   | 2370.1714                                                     | 2370.1721   | 0.0007  | 0     | 1            | 23       | MILAKCGLTEESCAALAS<br>ALSSK |           |         | Carbamidomethyl (C)[6], Oxidation (M)[1] |      | Mascot      |
| 4 | PREDICTED: BDNF/NT-3 growth factors receptor<br>[Danio rerio] |             |         |       | gi 326670340 | 87835.2  | 6.08                        | 14        | 48      | 22.666                                   |      |             |

### Peptide Information

| Calc. Mass | Obsrv. Mass | $\pm$ da | $\pm$ ppm | Start Seq. | End Seq. | Sequence                    | Ion Score | C. I. | % Modification                               | Rank | Result Type |
|------------|-------------|----------|-----------|------------|----------|-----------------------------|-----------|-------|----------------------------------------------|------|-------------|
| 809.4225   | 809.3594    | -0.0631  | -78       | 45         | 51       | SIMAFPK                     |           |       | Oxidation (M)[3]                             |      | Mascot      |
| 842.4042   | 842.4899    | 0.0857   | 102       | 79         | 84       | DLEFYR                      |           |       |                                              |      | Mascot      |
| 882.4138   | 882.5447    | 0.1309   | 148       | 650        | 657      | IGDFGMSR                    |           |       |                                              |      | Mascot      |
| 907.4519   | 907.4323    | -0.0196  | -22       | 499        | 507      | ELGEGAFGK                   |           |       |                                              |      | Mascot      |
| 965.5315   | 965.4443    | -0.0872  | -90       | 123        | 129      | LSWRTFR                     |           |       |                                              |      | Mascot      |
| 1118.5801  | 1118.6045   | 0.0244   | 22        | 529        | 538      | TLKEASENAR                  |           |       |                                              |      | Mascot      |
| 1118.5801  | 1118.6045   | 0.0244   | 22        | 529        | 538      | TLKEASENAR                  |           |       |                                              |      | Mascot      |
| 1258.6824  | 1258.5682   | -0.1142  | -91       | 639        | 649      | NCLVGENLLVK                 |           |       | Carbamidomethyl (C)[2]                       |      | Mascot      |
| 1325.6017  | 1325.6576   | 0.0559   | 42        | 677        | 686      | WMPPEsimyr                  |           |       | Oxidation (M)[2]                             |      | Mascot      |
| 1375.7368  | 1375.5514   | -0.1854  | -135      | 464        | 474      | IPVIENPQYFR                 |           |       |                                              |      | Mascot      |
| 1682.824   | 1682.7738   | -0.0502  | -30       | 37         | 51       | ISCVDAERSIMAFPK             |           |       | Oxidation (M)[11]                            |      | Mascot      |
| 1682.824   | 1682.7738   | -0.0502  | -30       | 37         | 51       | ISCVDAERSIMAFPK             |           |       | Oxidation (M)[11]                            |      | Mascot      |
| 2190.022   | 2189.9678   | -0.0542  | -25       | 739        | 755      | EVYDLMLGCWQREPHTR           |           |       | Carbamidomethyl (C)[9]                       |      | Mascot      |
| 2190.022   | 2189.9678   | -0.0542  | -25       | 739        | 755      | EVYDLMLGCWQREPHTR           |           |       | Carbamidomethyl (C)[9]                       |      | Mascot      |
| 2306.3118  | 2306.0447   | -0.2671  | -116      | 760        | 780      | EIHNLLLNLAKASPVYLDI<br>LG   |           |       |                                              |      | Mascot      |
| 2410.2686  | 2410.2312   | -0.0374  | -16       | 508        | 528      | VFLAECYNLSADQEKILV<br>AVK   |           |       | Carbamidomethyl (C)[6]                       |      | Mascot      |
| 2683.2524  | 2683.2458   | -0.0066  | -2        | 200        | 223      | GLNVTLCNTSGMPTPN<br>LTWTTCK |           |       | Carbamidomethyl (C)[8,23], Oxidation (M)[13] |      | Mascot      |

5 PREDICTED: inactive ubiquitin carboxyl-terminal hydrolase 53-like [Danio rerio] gi|326663976 107397.4 8.94 16 41 0

### Peptide Information

| Calc. Mass | Obsrv. Mass | $\pm$ da | $\pm$ ppm | Start Seq. | End Seq. | Sequence       | Ion Score | C. I. | % Modification         | Rank | Result Type |
|------------|-------------|----------|-----------|------------|----------|----------------|-----------|-------|------------------------|------|-------------|
| 891.4716   | 891.3801    | -0.0915  | -103      | 298        | 305      | DVASKCIR       |           |       |                        |      | Mascot      |
| 996.4965   | 996.5723    | 0.0758   | 76        | 586        | 593      | QMMVTRSK       |           |       | Oxidation (M)[2]       |      | Mascot      |
| 1042.5099  | 1042.557    | 0.0471   | 45        | 697        | 705      | LRYS SCGTR     |           |       |                        |      | Mascot      |
| 1093.5055  | 1093.5359   | 0.0304   | 28        | 477        | 487      | SNQGMASGVSR    |           |       |                        |      | Mascot      |
| 1157.6273  | 1157.6738   | 0.0465   | 40        | 57         | 66       | ERALPSDTLR     |           |       |                        |      | Mascot      |
| 1194.5784  | 1194.553    | -0.0254  | -21       | 346        | 356      | GTDTQLSGCKK    |           |       | Carbamidomethyl (C)[9] |      | Mascot      |
| 1199.5876  | 1199.5233   | -0.0643  | -54       | 532        | 540      | QQQQQQQQR      |           |       |                        |      | Mascot      |
| 1325.6478  | 1325.6576   | 0.0098   | 7         | 1          | 14       | MSGTGARSGTGLSK |           |       | Oxidation (M)[1]       |      | Mascot      |
| 1359.6838  | 1359.5563   | -0.1275  | -94       | 662        | 673      | MEAARSPLYHGK   |           |       |                        |      | Mascot      |
| 1375.6787  | 1375.5514   | -0.1273  | -93       | 662        | 673      | MEAARSPLYHGK   |           |       | Oxidation (M)[1]       |      | Mascot      |
| 1391.7139  | 1391.7058   | -0.0081  | -6        | 458        | 469      | VSRTEHSSVHPR   |           |       |                        |      | Mascot      |

|           |           |         |     |     |     |                             |  |  |  |                                          |  |        |
|-----------|-----------|---------|-----|-----|-----|-----------------------------|--|--|--|------------------------------------------|--|--------|
| 1626.8281 | 1626.7129 | -0.1152 | -71 | 445 | 457 | FHCEQRPRTLPSR               |  |  |  |                                          |  | Mascot |
| 1698.731  | 1698.765  | 0.034   | 20  | 852 | 867 | MEINGTCPSSSDVSSK            |  |  |  | Carbamidomethyl (C)[7]                   |  | Mascot |
| 1714.7258 | 1714.7611 | 0.0353  | 21  | 852 | 867 | MEINGTCPSSSDVSSK            |  |  |  | Carbamidomethyl (C)[7], Oxidation (M)[1] |  | Mascot |
| 1797.8105 | 1797.9053 | 0.0948  | 53  | 851 | 867 | RMEINGTCPSSSDVSSK           |  |  |  |                                          |  | Mascot |
| 1797.8105 | 1797.9053 | 0.0948  | 53  | 851 | 867 | RMEINGTCPSSSDVSSK           |  |  |  |                                          |  | Mascot |
| 2189.1396 | 2188.9788 | -0.1608 | -73 | 918 | 936 | YHHQRPLVLSMPEPRGA<br>GK     |  |  |  | Oxidation (M)[11]                        |  | Mascot |
| 2306.0505 | 2306.0447 | -0.0058 | -3  | 642 | 661 | LSQDAQHLRDQGHNNQ<br>DDSK    |  |  |  |                                          |  | Mascot |
| 2474.0405 | 2474.0852 | 0.0447  | 18  | 852 | 874 | MEINGTCPSSSDVSSKS<br>GSDQER |  |  |  | Carbamidomethyl (C)[7], Oxidation (M)[1] |  | Mascot |

6 PREDICTED: interferon-induced very large GTPase 1 gi|326665713 165664.4 5.71 19 40 0  
[Danio rerio]

#### Peptide Information

| Calc. Mass | Obsrv. Mass | ± da    | ± ppm | Start Seq. | End Seq. | Sequence                 | Ion Score | C. I. % | Modification                              | Rank | Result Type |
|------------|-------------|---------|-------|------------|----------|--------------------------|-----------|---------|-------------------------------------------|------|-------------|
| 908.4359   | 908.4072    | -0.0287 | -32   | 1377       | 1383     | FQEDLEK                  |           |         |                                           |      | Mascot      |
| 996.4268   | 996.5723    | 0.1455  | 146   | 760        | 767      | DEVYDAER                 |           |         |                                           |      | Mascot      |
| 1042.5316  | 1042.557    | 0.0254  | 24    | 381        | 389      | ESFLPHQ GK               |           |         |                                           |      | Mascot      |
| 1045.6404  | 1045.5388   | -0.1016 | -97   | 1160       | 1168     | KFNISVL PK               |           |         |                                           |      | Mascot      |
| 1093.4691  | 1093.5359   | 0.0668  | 61    | 1105       | 1114     | SNCESLNGNR               |           |         |                                           |      | Mascot      |
| 1118.6165  | 1118.6045   | -0.012  | -11   | 662        | 671      | SLELSGKQTR               |           |         |                                           |      | Mascot      |
| 1118.6165  | 1118.6045   | -0.012  | -11   | 662        | 671      | SLELSGKQTR               |           |         |                                           |      | Mascot      |
| 1183.6074  | 1183.5306   | -0.0768 | -65   | 31         | 39       | LLMMNYRAR                |           |         | Oxidation (M)[3]                          |      | Mascot      |
| 1199.6024  | 1199.5233   | -0.0791 | -66   | 31         | 39       | LLMMNYRAR                |           |         | Oxidation (M)[3,4]                        |      | Mascot      |
| 1221.6222  | 1221.5453   | -0.0769 | -63   | 969        | 978      | THHENTLLEK               |           |         |                                           |      | Mascot      |
| 1221.6395  | 1221.5453   | -0.0942 | -77   | 637        | 646      | VSEEMIKEIK               |           |         | Oxidation (M)[5]                          |      | Mascot      |
| 1258.6426  | 1258.5682   | -0.0744 | -59   | 832        | 841      | DLWEALLNER               |           |         |                                           |      | Mascot      |
| 1626.885   | 1626.7129   | -0.1721 | -106  | 376        | 389      | LTEIKESFLPHQ GK          |           |         |                                           |      | Mascot      |
| 1682.8325  | 1682.7738   | -0.0587 | -35   | 1372       | 1383     | WVWVRFQEDLEK             |           |         |                                           |      | Mascot      |
| 1682.8325  | 1682.7738   | -0.0587 | -35   | 1372       | 1383     | WVWVRFQEDLEK             |           |         |                                           |      | Mascot      |
| 1698.8441  | 1698.765    | -0.0791 | -47   | 1023       | 1036     | IMTDVSEILCNLYK           |           |         | Carbamidomethyl (C)[10]                   |      | Mascot      |
| 1714.839   | 1714.7611   | -0.0779 | -45   | 1023       | 1036     | IMTDVSEILCNLYK           |           |         | Carbamidomethyl (C)[10], Oxidation (M)[2] |      | Mascot      |
| 2108.0667  | 2107.9185   | -0.1482 | -70   | 206        | 224      | SRILMDGVVEIAWFCPSG<br>K  |           |         |                                           |      | Mascot      |
| 2124.0615  | 2123.9202   | -0.1413 | -67   | 206        | 224      | SRILMDGVVEIAWFCPSG<br>K  |           |         | Oxidation (M)[5]                          |      | Mascot      |
| 2189.0339  | 2188.9788   | -0.0551 | -25   | 87         | 105      | IHPMDVQMAVFHCADAF<br>LK  |           |         | Oxidation (M)[4]                          |      | Mascot      |
| 2306.1775  | 2306.0447   | -0.1328 | -58   | 459        | 478      | ILLDEHTSADLSALHHKY<br>DK |           |         |                                           |      | Mascot      |



|   |                                                                                                     |           |         |     |      |              |                             |      |   |                   |   |  |        |
|---|-----------------------------------------------------------------------------------------------------|-----------|---------|-----|------|--------------|-----------------------------|------|---|-------------------|---|--|--------|
|   | 2357.1443                                                                                           | 2357.124  | -0.0203 | -9  | 1239 | 1259         | QELPDIMSQTSTGFNKT<br>GQK    |      |   |                   |   |  | Mascot |
|   | 2410.2244                                                                                           | 2410.2312 | 0.0068  | 3   | 282  | 302          | TAKPLICLFTEDESPLTE<br>KK    |      |   | Oxidation (M)[19] |   |  | Mascot |
|   | 2731.3184                                                                                           | 2731.2441 | -0.0743 | -27 | 150  | 172          | DNEIISQSQPVYNAQTPM<br>VFFFR |      |   |                   |   |  | Mascot |
|   | 2731.3184                                                                                           | 2731.2441 | -0.0743 | -27 | 150  | 172          | DNEIISQSQPVYNAQTPM<br>VFFFR |      |   |                   |   |  | Mascot |
|   | 2747.3132                                                                                           | 2747.2437 | -0.0695 | -25 | 150  | 172          | DNEIISQSQPVYNAQTPM<br>VFFFR |      |   | Oxidation (M)[18] |   |  | Mascot |
| 7 | novel protein similar to H.sapiens NTRK2, neurotrophic tyrosine kinase, receptor, type 2 (NTRK2) [D |           |         |     |      |              |                             |      |   |                   |   |  |        |
|   |                                                                                                     |           |         |     |      | gi 220673329 | 44252.6                     | 6.45 | 9 | 40                | 0 |  |        |

#### Peptide Information

| Calc. Mass | Obsrv. Mass | ± da    | ± ppm | Start Seq. | End Seq. | Sequence                  | Ion Score | C. I. | % Modification         | Rank | Result Type |
|------------|-------------|---------|-------|------------|----------|---------------------------|-----------|-------|------------------------|------|-------------|
| 882.4138   | 882.5447    | 0.1309  | 148   | 262        | 269      | IGDFGMSR                  |           |       |                        |      | Mascot      |
| 907.4519   | 907.4323    | -0.0196 | -22   | 111        | 119      | ELGEGAFGK                 |           |       |                        |      | Mascot      |
| 1118.5801  | 1118.6045   | 0.0244  | 22    | 141        | 150      | TLKEASENAR                |           |       |                        |      | Mascot      |
| 1118.5801  | 1118.6045   | 0.0244  | 22    | 141        | 150      | TLKEASENAR                |           |       |                        |      | Mascot      |
| 1258.6824  | 1258.5682   | -0.1142 | -91   | 251        | 261      | NCLVGENLLVK               |           |       | Carbamidomethyl (C)[2] |      | Mascot      |
| 1325.6017  | 1325.6576   | 0.0559  | 42    | 289        | 298      | WMPPEMIMYR                |           |       | Oxidation (M)[2]       |      | Mascot      |
| 1375.7368  | 1375.5514   | -0.1854 | -135  | 76         | 86       | IPVIENPQYFR               |           |       |                        |      | Mascot      |
| 2190.022   | 2189.9678   | -0.0542 | -25   | 351        | 367      | EVYDLMLGCWQREPHT          |           |       | Carbamidomethyl (C)[9] |      | Mascot      |
| 2190.022   | 2189.9678   | -0.0542 | -25   | 351        | 367      | EVYDLMLGCWQREPHT          |           |       | Carbamidomethyl (C)[9] |      | Mascot      |
| 2306.3118  | 2306.0447   | -0.2671 | -116  | 372        | 392      | EIHNNLLNLAKASPVYLDI<br>LG |           |       |                        |      | Mascot      |
| 2410.2686  | 2410.2312   | -0.0374 | -16   | 120        | 140      | VFLAECYNLSADQEKILV<br>AVK |           |       | Carbamidomethyl (C)[6] |      | Mascot      |

|   |                                                                |  |  |  |  |              |          |      |    |    |   |  |  |
|---|----------------------------------------------------------------|--|--|--|--|--------------|----------|------|----|----|---|--|--|
| 8 | PREDICTED: telomerase-binding protein EST1A-like [Danio rerio] |  |  |  |  |              |          |      |    |    |   |  |  |
|   |                                                                |  |  |  |  | gi 326671361 | 172765.9 | 8.16 | 19 | 39 | 0 |  |  |

#### Peptide Information

| Calc. Mass | Obsrv. Mass | ± da    | ± ppm | Start Seq. | End Seq. | Sequence    | Ion Score | C. I. | % Modification | Rank | Result Type |
|------------|-------------|---------|-------|------------|----------|-------------|-----------|-------|----------------|------|-------------|
| 842.4114   | 842.4899    | 0.0785  | 93    | 267        | 273      | HSEEGRK     |           |       |                |      | Mascot      |
| 908.4909   | 908.4072    | -0.0837 | -92   | 1439       | 1446     | AAVMFLEK    |           |       |                |      | Mascot      |
| 996.5512   | 996.5723    | 0.0211  | 21    | 809        | 816      | LQSVFQFK    |           |       |                |      | Mascot      |
| 1042.4735  | 1042.557    | 0.0835  | 80    | 376        | 383      | RYSQSDMR    |           |       |                |      | Mascot      |
| 1093.4392  | 1093.5359   | 0.0967  | 88    | 257        | 266      | DGQDDSNQSK  |           |       |                |      | Mascot      |
| 1118.5623  | 1118.6045   | 0.0422  | 38    | 1          | 9        | MADELERVR   |           |       |                |      | Mascot      |
| 1118.5623  | 1118.6045   | 0.0422  | 38    | 1          | 9        | MADELERVR   |           |       |                |      | Mascot      |
| 1183.5226  | 1183.5306   | 0.008   | 7     | 857        | 867      | EQASESANYGK |           |       |                |      | Mascot      |

|   |                                                                                    |           |         |     |      |      |                           |  |  |  |              |        |                               |    |    |   |        |
|---|------------------------------------------------------------------------------------|-----------|---------|-----|------|------|---------------------------|--|--|--|--------------|--------|-------------------------------|----|----|---|--------|
|   | 1194.6226                                                                          | 1194.553  | -0.0696 | -58 | 320  | 330  | ASEAPHLEGRK               |  |  |  |              |        |                               |    |    |   | Mascot |
|   | 1492.7502                                                                          | 1492.7264 | -0.0238 | -16 | 412  | 424  | AEGQQFSARTLER             |  |  |  |              |        |                               |    |    |   | Mascot |
|   | 1492.7502                                                                          | 1492.7264 | -0.0238 | -16 | 412  | 424  | AEGQQFSARTLER             |  |  |  |              |        |                               |    |    |   | Mascot |
|   | 1698.9021                                                                          | 1698.765  | -0.1371 | -81 | 774  | 788  | QLLKDQNSDTAPQIK           |  |  |  |              |        |                               |    |    |   | Mascot |
|   | 1970.9932                                                                          | 1970.8958 | -0.0974 | -49 | 1262 | 1278 | YFLEALCGQEEPLAFK          |  |  |  |              |        |                               |    |    |   | Mascot |
|   | 2107.9084                                                                          | 2107.9185 | 0.0101  | 5   | 389  | 409  | TYSTSSASSGTSMDGLA<br>EAER |  |  |  |              |        |                               |    |    |   | Mascot |
|   | 2123.9033                                                                          | 2123.9202 | 0.0169  | 8   | 389  | 409  | TYSTSSASSGTSMDGLA<br>EAER |  |  |  |              |        | Oxidation (M)[13]             |    |    |   | Mascot |
|   | 2210.9263                                                                          | 2211.0452 | 0.1189  | 54  | 1480 | 1497 | GNNDDEVILSCCLHYCQD<br>K   |  |  |  |              |        | Carbamidomethyl (C)[10,11,15] |    |    |   | Mascot |
|   | 2215.1614                                                                          | 2215.0227 | -0.1387 | -63 | 1056 | 1073 | MLQITINMFTIYNAQIR         |  |  |  |              |        | Oxidation (M)[1,9]            |    |    |   | Mascot |
|   | 2221.2451                                                                          | 2221.0967 | -0.1484 | -67 | 1036 | 1055 | VLLFRALLQHSPSPLGS<br>TR   |  |  |  |              |        |                               |    |    |   | Mascot |
|   | 2229.1257                                                                          | 2229.0354 | -0.0903 | -41 | 10   | 30   | ISAAELRAQASSFNIHGD<br>DVK |  |  |  |              |        |                               |    |    |   | Mascot |
|   | 2229.1257                                                                          | 2229.0354 | -0.0903 | -41 | 10   | 30   | ISAAELRAQASSFNIHGD<br>DVK |  |  |  |              |        |                               |    |    |   | Mascot |
|   | 2283.1301                                                                          | 2283.1169 | -0.0132 | -6  | 1138 | 1156 | ELLPSMKVWSDWMLGH<br>PEK   |  |  |  |              |        |                               |    |    |   | Mascot |
|   | 2351.1765                                                                          | 2351.0234 | -0.1531 | -65 | 743  | 762  | VILTDFEFSQNVDTL<br>WK     |  |  |  |              |        |                               |    |    |   | Mascot |
|   | 2410.0583                                                                          | 2410.2312 | 0.1729  | 72  | 1480 | 1499 | GNNDDEVILSCCLHYCQD<br>KAK |  |  |  |              |        | Carbamidomethyl (C)[10,11,15] |    |    |   | Mascot |
| 9 | PREDICTED: retrotransposable element Tf2 155 kDa protein type 1-like [Danio rerio] |           |         |     |      |      |                           |  |  |  | gi 326675725 | 129547 | 9.45                          | 15 | 38 | 0 |        |

Peptide Information

| Calc. Mass | Obsrv. Mass | ± da    | ± ppm | Start Seq. | End Seq. | Sequence               | Ion Score | C. I. % | Modification              | Rank | Result Type |
|------------|-------------|---------|-------|------------|----------|------------------------|-----------|---------|---------------------------|------|-------------|
| 809.4039   | 809.3594    | -0.0445 | -55   | 127        | 133      | AFSDELK                |           |         |                           |      | Mascot      |
| 908.4584   | 908.4072    | -0.0512 | -56   | 765        | 771      | LFDRSDR                |           |         |                           |      | Mascot      |
| 1157.646   | 1157.6738   | 0.0278  | 24    | 1114       | 1123     | NIPLRTVCNK             |           |         |                           |      | Mascot      |
| 1343.7529  | 1343.5637   | -0.1892 | -141  | 595        | 607      | QLAAPLTNLTSSK          |           |         |                           |      | Mascot      |
| 1343.7529  | 1343.5637   | -0.1892 | -141  | 595        | 607      | QLAAPLTNLTSSK          |           |         |                           |      | Mascot      |
| 1375.7004  | 1375.5514   | -0.149  | -108  | 107        | 118      | AALWGTTWENK            |           |         |                           |      | Mascot      |
| 1492.7502  | 1492.7264   | -0.0238 | -16   | 134        | 147      | VVFDQAASGREASR         |           |         |                           |      | Mascot      |
| 1492.7502  | 1492.7264   | -0.0238 | -16   | 134        | 147      | VVFDQAASGREASR         |           |         |                           |      | Mascot      |
| 1626.9148  | 1626.7129   | -0.2019 | -124  | 833        | 847      | VACHPGVSRTLFIK         |           |         |                           |      | Mascot      |
| 1682.8285  | 1682.7738   | -0.0547 | -33   | 608        | 622      | TPFRWSNAAEAASK         |           |         |                           |      | Mascot      |
| 1682.9547  | 1682.7738   | -0.1809 | -107  | 204        | 218      | TLEGLINLAVRVDNR        |           |         |                           |      | Mascot      |
| 1797.8622  | 1797.9053   | 0.0431  | 24    | 858        | 873      | DVRDFVLACSVCAASK       |           |         | Carbamidomethyl (C)[9,12] |      | Mascot      |
| 1797.8622  | 1797.9053   | 0.0431  | 24    | 858        | 873      | DVRDFVLACSVCAASK       |           |         | Carbamidomethyl (C)[9,12] |      | Mascot      |
| 2099.0227  | 2098.9607   | -0.062  | -30   | 556        | 573      | MDPEKIQAVVNWPTDPS<br>R |           |         | Oxidation (M)[1]          |      | Mascot      |

|    |                                     |           |        |    |              |     |                            |      |   |    |   |    |                                          |  |  |  |  |  |        |
|----|-------------------------------------|-----------|--------|----|--------------|-----|----------------------------|------|---|----|---|----|------------------------------------------|--|--|--|--|--|--------|
|    | 2221.0818                           | 2221.0967 | 0.0149 | 7  | 53           | 72  | SSEPRLPPQSYAGEPH<br>LCR    |      |   |    |   |    |                                          |  |  |  |  |  | Mascot |
|    | 2225.0122                           | 2225.0618 | 0.0496 | 22 | 269          | 289 | AGGLCMYCGVGGHFVAL<br>CPAK  |      |   |    |   |    | Carbamidomethyl (C)[5,8,18]              |  |  |  |  |  | Mascot |
|    | 2283.0652                           | 2283.1169 | 0.0517 | 23 | 268          | 289 | RAGGLCMYCGVGGHFV<br>ALCPAK |      |   |    |   |    | Carbamidomethyl (C)[6], Oxidation (M)[7] |  |  |  |  |  | Mascot |
|    | 2370.1006                           | 2370.1721 | 0.0715 | 30 | 107          | 126 | AALWGTTVWENKSPCCN<br>TFK   |      |   |    |   |    | Carbamidomethyl (C)[15,16]               |  |  |  |  |  | Mascot |
| 10 | vitamin D3 receptor B [Danio rerio] |           |        |    | gi 229606097 |     | 47632.7                    | 6.61 | 7 | 38 | 0 | 20 | 0                                        |  |  |  |  |  |        |

#### Peptide Information

| Calc. Mass | Obsrv. Mass | ± da    | ± ppm | Start Seq. | End Seq. | Sequence                | Ion Score | C. I. | % | Modification             | Rank | Result Type |
|------------|-------------|---------|-------|------------|----------|-------------------------|-----------|-------|---|--------------------------|------|-------------|
| 908.3964   | 908.4072    | 0.0108  | 12    | 22         | 29       | ICGVCGDK                |           |       |   | Carbamidomethyl (C)[2,5] |      | Mascot      |
| 1118.6238  | 1118.6045   | -0.0193 | -17   | 262        | 271      | SSAIEVIMLR              |           |       |   |                          |      | Mascot      |
| 1118.6238  | 1118.6045   | -0.0193 | -17   | 262        | 271      | SSAIEVIMLR              | 20        |       | 0 |                          |      | Mascot      |
| 1123.5421  | 1123.5106   | -0.0315 | -28   | 82         | 90       | RCLDIGMMK               |           |       |   | Carbamidomethyl (C)[2]   |      | Mascot      |
| 1343.7417  | 1343.5637   | -0.178  | -132  | 250        | 261      | ELTAEDQIALLK            |           |       |   |                          |      | Mascot      |
| 1343.7417  | 1343.5637   | -0.178  | -132  | 250        | 261      | ELTAEDQIALLK            |           |       |   |                          |      | Mascot      |
| 1375.7329  | 1375.5514   | -0.1815 | -132  | 129        | 140      | NIIDTLVDAHHK            |           |       |   |                          |      | Mascot      |
| 2107.9832  | 2107.9185   | -0.0647 | -31   | 141        | 157      | TYDDSYSDFSRFRPPVR       |           |       |   |                          |      | Mascot      |
| 2123.9248  | 2123.9202   | -0.0046 | -2    | 30         | 48       | ATGFHFNAMTCEGCKGF<br>FR |           |       |   |                          |      | Mascot      |

11 hyaluronan-binding protein 2 [Danio rerio] gi|160333545 55971.4 8.88 10 38 0

#### Peptide Information

| Calc. Mass | Obsrv. Mass | ± da    | ± ppm | Start Seq. | End Seq. | Sequence                 | Ion Score | C. I. | % | Modification                 | Rank | Result Type |
|------------|-------------|---------|-------|------------|----------|--------------------------|-----------|-------|---|------------------------------|------|-------------|
| 908.4334   | 908.4072    | -0.0262 | -29   | 201        | 207      | EPWCFVK                  |           |       |   |                              |      | Mascot      |
| 965.4549   | 965.4443    | -0.0106 | -11   | 201        | 207      | EPWCFVK                  |           |       |   | Carbamidomethyl (C)[4]       |      | Mascot      |
| 1093.5248  | 1093.5359   | 0.0111  | 10    | 92         | 100      | CWPPYRGSK                |           |       |   |                              |      | Mascot      |
| 1165.571   | 1165.7151   | 0.1441  | 124   | 201        | 209      | EPWCFVKEK                |           |       |   |                              |      | Mascot      |
| 1199.5408  | 1199.5233   | -0.0175 | -15   | 416        | 425      | CMSRNVYGNR               |           |       |   |                              |      | Mascot      |
| 1367.6776  | 1367.5828   | -0.0948 | -69   | 486        | 495      | FIDWINEKMR               |           |       |   | Oxidation (M)[9]             |      | Mascot      |
| 1820.05    | 1819.8815   | -0.1685 | -93   | 46         | 63       | AAASNASVHRPILAKSVK       |           |       |   |                              |      | Mascot      |
| 1842.8877  | 1842.7349   | -0.1528 | -83   | 237        | 253      | LEFSDCGKAAFSMIAPR        |           |       |   |                              |      | Mascot      |
| 2141.012   | 2141.0518   | 0.0398  | 19    | 456        | 474      | DNIHYIYGVSWSGDSCG<br>KK  |           |       |   |                              |      | Mascot      |
| 2210.9487  | 2211.0452   | 0.0965  | 44    | 103        | 122      | NAYACNPSPCQNGGTCV<br>KGR |           |       |   | Carbamidomethyl (C)[5,10,16] |      | Mascot      |
| 2228.9304  | 2229.0354   | 0.105   | 47    | 101        | 120      | CKNAYACNPSPCQNGGT<br>CVK |           |       |   | Carbamidomethyl (C)[1,7,12]  |      | Mascot      |
| 2228.9304  | 2229.0354   | 0.105   | 47    | 101        | 120      | CKNAYACNPSPCQNGGT<br>CVK |           |       |   | Carbamidomethyl (C)[1,7,12]  |      | Mascot      |

12 intraflagellar transport protein 74 homolog [Danio rerio] gi|50539838 57170.8 5.07 10 37 0

Peptide Information

| Calc. Mass | Obsrv. Mass | ± da    | ± ppm | Start Seq. | End Seq. | Sequence                    | Ion Score | C. I. % | Modification      | Rank | Result Type |
|------------|-------------|---------|-------|------------|----------|-----------------------------|-----------|---------|-------------------|------|-------------|
| 891.4166   | 891.3801    | -0.0365 | -41   | 332        | 339      | GLNSESER                    |           |         |                   |      | Mascot      |
| 1042.6003  | 1042.557    | -0.0433 | -42   | 104        | 112      | RAAQDIIQK                   |           |         |                   |      | Mascot      |
| 1045.5385  | 1045.5388   | 0.0003  | 0     | 179        | 187      | RASLQAEDR                   |           |         |                   |      | Mascot      |
| 1118.5874  | 1118.6045   | 0.0171  | 15    | 224        | 232      | IIQLSEEMR                   |           |         |                   |      | Mascot      |
| 1118.5874  | 1118.6045   | 0.0171  | 15    | 224        | 232      | IIQLSEEMR                   |           |         |                   |      | Mascot      |
| 1157.6161  | 1157.6738   | 0.0577  | 50    | 94         | 103      | AVEEQVVQK                   |           |         |                   |      | Mascot      |
| 1367.6471  | 1367.5828   | -0.0643 | -47   | 320        | 331      | ETEMQKSQSTAK                |           |         |                   |      | Mascot      |
| 1492.7312  | 1492.7264   | -0.0048 | -3    | 105        | 117      | AAQDIIQKMSEDK               |           |         | Oxidation (M)[9]  |      | Mascot      |
| 1492.7312  | 1492.7264   | -0.0048 | -3    | 105        | 117      | AAQDIIQKMSEDK               |           |         | Oxidation (M)[9]  |      | Mascot      |
| 2099.084   | 2098.9607   | -0.1233 | -59   | 279        | 297      | DSQSSIVALLEHSSRNIS<br>R     |           |         |                   |      | Mascot      |
| 2221.0408  | 2221.0967   | 0.0559  | 25    | 9          | 26       | DIDTFNQENSVYLSYEKR          |           |         |                   |      | Mascot      |
| 2731.2727  | 2731.2441   | -0.0286 | -10   | 126        | 148      | SSNEELLQELETHQEELD<br>TLMSR |           |         |                   |      | Mascot      |
| 2731.2727  | 2731.2441   | -0.0286 | -10   | 126        | 148      | SSNEELLQELETHQEELD<br>TLMSR |           |         |                   |      | Mascot      |
| 2747.2676  | 2747.2437   | -0.0239 | -9    | 126        | 148      | SSNEELLQELETHQEELD<br>TLMSR |           |         | Oxidation (M)[21] |      | Mascot      |

13 beta-adrenergic receptor kinase 2 [Danio rerio] gi|197927112 79453.5 7.57 13 37 0

Peptide Information

| Calc. Mass | Obsrv. Mass | ± da    | ± ppm | Start Seq. | End Seq. | Sequence                 | Ion Score | C. I. % | Modification           | Rank | Result Type |
|------------|-------------|---------|-------|------------|----------|--------------------------|-----------|---------|------------------------|------|-------------|
| 1093.5649  | 1093.5359   | -0.029  | -27   | 387        | 395      | GHSPFRQHK                |           |         |                        |      | Mascot      |
| 1118.5043  | 1118.6045   | 0.1002  | 90    | 216        | 224      | MYAMKCLDK                |           |         | Oxidation (M)[1]       |      | Mascot      |
| 1118.5043  | 1118.6045   | 0.1002  | 90    | 216        | 224      | MYAMKCLDK                |           |         | Oxidation (M)[1]       |      | Mascot      |
| 1165.7303  | 1165.7151   | -0.0152 | -13   | 31         | 40       | KIILPEPSIR               |           |         |                        |      | Mascot      |
| 1242.5316  | 1242.5757   | 0.0441  | 35    | 558        | 567      | DCIMHGYMLK               |           |         | Oxidation (M)[4,8]     |      | Mascot      |
| 1325.6406  | 1325.6576   | 0.017   | 13    | 333        | 344      | ISDLGLACDFSK             |           |         | Carbamidomethyl (C)[8] |      | Mascot      |
| 1359.7168  | 1359.5563   | -0.1605 | -118  | 568        | 578      | LGNPFLTQWQR              |           |         |                        |      | Mascot      |
| 1375.7039  | 1375.5514   | -0.1525 | -111  | 116        | 127      | ELLSCSHPFSSK             |           |         |                        |      | Mascot      |
| 1626.9247  | 1626.7129   | -0.2118 | -130  | 32         | 45       | IILPEPSIRSVMQK           |           |         | Oxidation (M)[12]      |      | Mascot      |
| 2098.9248  | 2098.9607   | 0.0359  | 17    | 365        | 383      | GTAYDSSADWFSLGCM<br>L FK |           |         |                        |      | Mascot      |
| 2194.1438  | 2194.0261   | -0.1177 | -54   | 345        | 364      | KKPHASVGTHGYMAPEV<br>LQK |           |         | Oxidation (M)[13]      |      | Mascot      |
| 2225.0696  | 2225.0618   | -0.0078 | -4    | 626        | 644      | GGKQFVLQCESDPEFVQ        |           |         |                        |      | Mascot      |

|  |  |  |  |  |  |    |  |  |  |  |  |  |  |  |  |  |  |  |  |  |  |  |  |  |  |  |  |  |  |  |  |  |  |  |  |  |  |  |  |  |  |  |  |  |  |  |  |  |  |  |  |  |  |  |  |  |  |  |  |  |  |  |  |  |  |  |  |  |  |  |  |  |  |  |  |  |  |  |  |  |  |  |  |  |  |  |  |  |  |  |  |  |  |  |  |  |  |  |  |  |  |  |  |  |  |  |  |  |  |  |  |  |  |  |  |  |  |  |  |  |  |  |  |  |  |  |  |  |  |  |  |  |  |  |  |  |  |  |  |  |  |  |  |  |  |  |  |  |  |  |  |  |  |  |  |  |  |  |  |  |  |  |  |  |  |  |  |  |  |  |  |  |  |  |  |  |  |  |  |  |  |  |  |  |  |  |  |  |  |  |  |  |  |  |  |  |  |  |  |  |  |  |  |  |  |  |  |  |  |  |  |  |  |  |  |  |  |  |  |  |  |  |  |  |  |  |  |  |  |  |  |  |  |  |  |  |  |  |  |  |  |  |  |  |  |  |  |  |  |  |  |  |  |  |  |  |  |  |  |  |  |  |  |  |  |  |  |  |  |  |  |  |  |  |  |  |  |  |  |  |  |  |  |  |  |  |  |  |  |  |  |  |  |  |  |  |  |  |  |  |  |  |  |  |  |  |  |  |  |  |  |  |  |  |  |  |  |  |  |  |  |  |  |  |  |  |  |  |  |  |  |  |  |  |  |  |  |  |  |  |  |  |  |  |  |  |  |  |  |  |  |  |  |  |  |  |  |  |  |  |  |  |  |  |  |  |  |  |  |  |  |  |  |  |  |  |  |  |  |  |  |  |  |  |  |  |  |  |  |  |  |  |  |  |  |  |  |  |  |  |  |  |  |  |  |  |  |  |  |  |  |  |  |  |  |  |  |  |  |  |  |  |  |  |  |  |  |  |  |  |  |  |  |  |  |  |  |  |  |  |  |  |  |  |  |  |  |  |  |  |  |  |  |  |  |  |  |  |  |  |  |  |  |  |  |  |  |  |  |  |  |  |  |  |  |  |  |  |  |  |  |  |  |  |  |  |  |  |  |  |  |  |  |  |  |  |  |  |  |  |  |  |  |  |  |  |  |  |  |  |  |  |  |  |  |  |  |  |  |  |  |  |  |  |  |  |  |  |  |  |  |  |  |  |  |  |  |  |  |  |  |  |  |  |  |  |  |  |  |  |  |  |  |  |  |  |  |  |  |  |  |  |  |  |  |  |  |  |  |  |  |  |  |  |  |  |  |  |  |  |  |  |  |  |  |  |  |  |  |  |  |  |  |  |  |  |  |  |  |  |  |  |  |  |  |  |  |  |  |  |  |  |  |  |  |  |  |  |  |  |  |  |  |  |  |  |  |  |  |  |  |  |  |  |  |  |  |  |  |  |  |  |  |  |  |  |  |  |  |  |  |  |  |  |  |  |  |  |  |  |  |  |  |  |  |  |  |  |  |  |  |  |  |  |  |  |  |  |  |  |  |  |  |  |  |  |  |  |  |  |  |  |  |  |  |  |  |  |  |  |  |  |  |  |  |  |  |  |  |  |  |  |  |  |  |  |  |  |  |  |  |  |  |  |  |  |  |  |  |  |  |  |  |  |  |  |  |  |  |  |  |  |  |  |  |  |  |  |  |  |  |  |  |  |  |  |  |  |  |  |  |  |  |  |  |  |  |  |  |  |  |  |  |  |  |  |  |  |  |  |  |  |  |  |  |  |  |  |  |  |  |  |  |  |  |  |  |  |  |  |  |  |  |  |  |  |  |  |  |  |  |  |  |  |  |  |  |  |  |  |  |  |  |  |  |  |  |  |  |  |  |  |  |  |  |  |  |  |  |  |  |  |  |  |  |  |  |  |  |  |  |  |  |  |  |  |  |  |  |  |  |  |  |  |  |  |  |  |  |  |  |  |  |  |  |  |  |  |  |  |  |  |  |  |  |  |  |  |  |  |  |  |  |  |  |  |  |  |  |  |  |  |  |  |  |  |  |  |  |  |  |  |  |  |  |  |  |  |  |  |  |  |  |  |  |  |  |  |  |  |  |  |  |  |  |  |  |  |  |  |  |  |  |  |  |  |  |  |  |  |  |  |  |  |  |  |  |  |  |  |  |  |  |  |  |  |  |  |  |  |  |  |  |  |  |  |  |  |  |  |  |  |  |  |  |  |  |  |  |  |  |  |  |  |  |  |  |  |  |  |  |  |  |  |  |  |  |  |  |  |  |  |  |  |  |  |  |  |  |  |  |  |  |  |  |  |  |  |  |  |  |  |  |  |  |  |  |  |  |  |  |  |  |  |  |  |  |  |  |  |  |  |  |  |  |  |  |  |  |  |  |  |  |  |  |  |  |  |  |  |  |  |  |  |  |  |  |  |  |  |  |  |  |  |  |  |  |  |  |  |  |  |  |  |  |  |  |  |  |  |  |  |  |  |  |  |  |  |  |  |  |  |  |  |  |  |  |  |  |  |  |  |  |  |  |  |  |  |  |  |  |  |  |  |  |  |  |  |  |  |  |  |  |  |  |  |  |  |  |  |  |  |  |  |  |  |  |  |  |  |  |  |  |  |  |  |  |  |  |  |  |  |  |  |  |  |  |  |  |  |  |  |  |  |  |  |  |  |  |  |  |  |  |  |  |  |  |  |  |  |  |  |  |  |  |  |  |  |  |  |  |  |  |  |  |  |  |  |  |  |  |  |  |  |  |  |  |  |  |  |  |  |  |  |  |  |  |  |  |  |  |  |  |  |  |  |  |  |  |  |  |  |  |  |  |  |  |  |  |  |  |  |  |  |  |  |  |  |  |  |  |  |  |  |  |  |  |  |  |  |  |  |  |  |  |  |  |  |  |  |  |  |  |  |  |  |  |  |  |  |  |  |  |  |  |  |  |  |  |  |  |  |  |  |  |  |  |  |  |  |  |  |  |  |  |  |  |  |  |  |  |  |  |  |  |  |  |  |  |  |  |  |  |  |  |  |  |  |  |  |  |  |  |  |  |  |  |  |  |  |  |  |  |  |  |  |
|--|--|--|--|--|--|----|--|--|--|--|--|--|--|--|--|--|--|--|--|--|--|--|--|--|--|--|--|--|--|--|--|--|--|--|--|--|--|--|--|--|--|--|--|--|--|--|--|--|--|--|--|--|--|--|--|--|--|--|--|--|--|--|--|--|--|--|--|--|--|--|--|--|--|--|--|--|--|--|--|--|--|--|--|--|--|--|--|--|--|--|--|--|--|--|--|--|--|--|--|--|--|--|--|--|--|--|--|--|--|--|--|--|--|--|--|--|--|--|--|--|--|--|--|--|--|--|--|--|--|--|--|--|--|--|--|--|--|--|--|--|--|--|--|--|--|--|--|--|--|--|--|--|--|--|--|--|--|--|--|--|--|--|--|--|--|--|--|--|--|--|--|--|--|--|--|--|--|--|--|--|--|--|--|--|--|--|--|--|--|--|--|--|--|--|--|--|--|--|--|--|--|--|--|--|--|--|--|--|--|--|--|--|--|--|--|--|--|--|--|--|--|--|--|--|--|--|--|--|--|--|--|--|--|--|--|--|--|--|--|--|--|--|--|--|--|--|--|--|--|--|--|--|--|--|--|--|--|--|--|--|--|--|--|--|--|--|--|--|--|--|--|--|--|--|--|--|--|--|--|--|--|--|--|--|--|--|--|--|--|--|--|--|--|--|--|--|--|--|--|--|--|--|--|--|--|--|--|--|--|--|--|--|--|--|--|--|--|--|--|--|--|--|--|--|--|--|--|--|--|--|--|--|--|--|--|--|--|--|--|--|--|--|--|--|--|--|--|--|--|--|--|--|--|--|--|--|--|--|--|--|--|--|--|--|--|--|--|--|--|--|--|--|--|--|--|--|--|--|--|--|--|--|--|--|--|--|--|--|--|--|--|--|--|--|--|--|--|--|--|--|--|--|--|--|--|--|--|--|--|--|--|--|--|--|--|--|--|--|--|--|--|--|--|--|--|--|--|--|--|--|--|--|--|--|--|--|--|--|--|--|--|--|--|--|--|--|--|--|--|--|--|--|--|--|--|--|--|--|--|--|--|--|--|--|--|--|--|--|--|--|--|--|--|--|--|--|--|--|--|--|--|--|--|--|--|--|--|--|--|--|--|--|--|--|--|--|--|--|--|--|--|--|--|--|--|--|--|--|--|--|--|--|--|--|--|--|--|--|--|--|--|--|--|--|--|--|--|--|--|--|--|--|--|--|--|--|--|--|--|--|--|--|--|--|--|--|--|--|--|--|--|--|--|--|--|--|--|--|--|--|--|--|--|--|--|--|--|--|--|--|--|--|--|--|--|--|--|--|--|--|--|--|--|--|--|--|--|--|--|--|--|--|--|--|--|--|--|--|--|--|--|--|--|--|--|--|--|--|--|--|--|--|--|--|--|--|--|--|--|--|--|--|--|--|--|--|--|--|--|--|--|--|--|--|--|--|--|--|--|--|--|--|--|--|--|--|--|--|--|--|--|--|--|--|--|--|--|--|--|--|--|--|--|--|--|--|--|--|--|--|--|--|--|--|--|--|--|--|--|--|--|--|--|--|--|--|--|--|--|--|--|--|--|--|--|--|--|--|--|--|--|--|--|--|--|--|--|--|--|--|--|--|--|--|--|--|--|--|--|--|--|--|--|--|--|--|--|--|--|--|--|--|--|--|--|--|--|--|--|--|--|--|--|--|--|--|--|--|--|--|--|--|--|--|--|--|--|--|--|--|--|--|--|--|--|--|--|--|--|--|--|--|--|--|--|--|--|--|--|--|--|--|--|--|--|--|--|--|--|--|--|--|--|--|--|--|--|--|--|--|--|--|--|--|--|--|--|--|--|--|--|--|--|--|--|--|--|--|--|--|--|--|--|--|--|--|--|--|--|--|--|--|--|--|--|--|--|--|--|--|--|--|--|--|--|--|--|--|--|--|--|--|--|--|--|--|--|--|--|--|--|--|--|--|--|--|--|--|--|--|--|--|--|--|--|--|--|--|--|--|--|--|--|--|--|--|--|--|--|--|--|--|--|--|--|--|--|--|--|--|--|--|--|--|--|--|--|--|--|--|--|--|--|--|--|--|--|--|--|--|--|--|--|--|--|--|--|--|--|--|--|--|--|--|--|--|--|--|--|--|--|--|--|--|--|--|--|--|--|--|--|--|--|--|--|--|--|--|--|--|--|--|--|--|--|--|--|--|--|--|--|--|--|--|--|--|--|--|--|--|--|--|--|--|--|--|--|--|--|--|--|--|--|--|--|--|--|--|--|--|--|--|--|--|--|--|--|--|--|--|--|--|--|--|--|--|--|--|--|--|--|--|--|--|--|--|--|--|--|--|--|--|--|--|--|--|--|--|--|--|--|--|--|--|--|--|--|--|--|--|--|--|--|--|--|--|--|--|--|--|--|--|--|--|--|--|--|--|--|--|--|--|--|--|--|--|--|--|--|--|--|--|--|--|--|--|--|--|--|--|--|--|--|--|--|--|--|--|--|--|--|--|--|--|--|--|--|--|--|--|--|--|--|--|--|--|--|--|--|--|--|--|--|--|--|--|--|--|--|--|--|--|--|--|--|--|--|--|--|--|--|--|--|--|--|--|--|--|--|--|--|--|--|--|--|--|--|--|--|--|--|--|--|--|--|--|--|--|--|--|--|--|--|--|--|--|--|--|--|--|--|--|--|--|--|--|--|--|--|--|--|--|--|--|--|--|--|--|--|--|--|--|--|--|--|--|--|--|--|--|--|--|--|--|--|--|--|--|--|--|--|--|--|--|--|--|--|--|--|--|--|--|--|--|--|--|--|--|--|--|--|--|--|--|--|--|--|--|--|--|--|--|--|--|--|--|--|--|--|--|--|--|--|--|--|--|--|--|--|--|--|--|--|--|--|--|--|--|--|--|--|--|--|--|--|--|--|--|--|--|--|--|--|--|--|--|--|--|--|--|--|--|--|--|--|--|--|--|--|--|--|--|--|--|--|--|--|--|--|--|--|--|--|--|--|--|--|--|--|--|--|--|--|--|--|--|--|--|--|--|--|--|--|--|--|--|--|--|--|--|--|--|--|--|--|--|--|--|--|--|--|--|--|--|--|--|
|  |  |  |  |  |  | WK |  |  |  |  |  |  |  |  |  |  |  |  |  |  |  |  |  |  |  |  |  |  |  |  |  |  |  |  |  |  |  |  |  |  |  |  |  |  |  |  |  |  |  |  |  |  |  |  |  |  |  |  |  |  |  |  |  |  |  |  |  |  |  |  |  |  |  |  |  |  |  |  |  |  |  |  |  |  |  |  |  |  |  |  |  |  |  |  |  |  |  |  |  |  |  |  |  |  |  |  |  |  |  |  |  |  |  |  |  |  |  |  |  |  |  |  |  |  |  |  |  |  |  |  |  |  |  |  |  |  |  |  |  |  |  |  |  |  |  |  |  |  |  |  |  |  |  |  |  |  |  |  |  |  |  |  |  |  |  |  |  |  |  |  |  |  |  |  |  |  |  |  |  |  |  |  |  |  |  |  |  |  |  |  |  |  |  |  |  |  |  |  |  |  |  |  |  |  |  |  |  |  |  |  |  |  |  |  |  |  |  |  |  |  |  |  |  |  |  |  |  |  |  |  |  |  |  |  |  |  |  |  |  |  |  |  |  |  |  |  |  |  |  |  |  |  |  |  |  |  |  |  |  |  |  |  |  |  |  |  |  |  |  |  |  |  |  |  |  |  |  |  |  |  |  |  |  |  |  |  |  |  |  |  |  |  |  |  |  |  |  |  |  |  |  |  |  |  |  |  |  |  |  |  |  |  |  |  |  |  |  |  |  |  |  |  |  |  |  |  |  |  |  |  |  |  |  |  |  |  |  |  |  |  |  |  |  |  |  |  |  |  |  |  |  |  |  |  |  |  |  |  |  |  |  |  |  |  |  |  |  |  |  |  |  |  |  |  |  |  |  |  |  |  |  |  |  |  |  |  |  |  |  |  |  |  |  |  |  |  |  |  |  |  |  |  |  |  |  |  |  |  |  |  |  |  |  |  |  |  |  |  |  |  |  |  |  |  |  |  |  |  |  |  |  |  |  |  |  |  |  |  |  |  |  |  |  |  |  |  |  |  |  |  |  |  |  |  |  |  |  |  |  |  |  |  |  |  |  |  |  |  |  |  |  |  |  |  |  |  |  |  |  |  |  |  |  |  |  |  |  |  |  |  |  |  |  |  |  |  |  |  |  |  |  |  |  |  |  |  |  |  |  |  |  |  |  |  |  |  |  |  |  |  |  |  |  |  |  |  |  |  |  |  |  |  |  |  |  |  |  |  |  |  |  |  |  |  |  |  |  |  |  |  |  |  |  |  |  |  |  |  |  |  |  |  |  |  |  |  |  |  |  |  |  |  |  |  |  |  |  |  |  |  |  |  |  |  |  |  |  |  |  |  |  |  |  |  |  |  |  |  |  |  |  |  |  |  |  |  |  |  |  |  |  |  |  |  |  |  |  |  |  |  |  |  |  |  |  |  |  |  |  |  |  |  |  |  |  |  |  |  |  |  |  |  |  |  |  |  |  |  |  |  |  |  |  |  |  |  |  |  |  |  |  |  |  |  |  |  |  |  |  |  |  |  |  |  |  |  |  |  |  |  |  |  |  |  |  |  |  |  |  |  |  |  |  |  |  |  |  |  |  |  |  |  |  |  |  |  |  |  |  |  |  |  |  |  |  |  |  |  |  |  |  |  |  |  |  |  |  |  |  |  |  |  |  |  |  |  |  |  |  |  |  |  |  |  |  |  |  |  |  |  |  |  |  |  |  |  |  |  |  |  |  |  |  |  |  |  |  |  |  |  |  |  |  |  |  |  |  |  |  |  |  |  |  |  |  |  |  |  |  |  |  |  |  |  |  |  |  |  |  |  |  |  |  |  |  |  |  |  |  |  |  |  |  |  |  |  |  |  |  |  |  |  |  |  |  |  |  |  |  |  |  |  |  |  |  |  |  |  |  |  |  |  |  |  |  |  |  |  |  |  |  |  |  |  |  |  |  |  |  |  |  |  |  |  |  |  |  |  |  |  |  |  |  |  |  |  |  |  |  |  |  |  |  |  |  |  |  |  |  |  |  |  |  |  |  |  |  |  |  |  |  |  |  |  |  |  |  |  |  |  |  |  |  |  |  |  |  |  |  |  |  |  |  |  |  |  |  |  |  |  |  |  |  |  |  |  |  |  |  |  |  |  |  |  |  |  |  |  |  |  |  |  |  |  |  |  |  |  |  |  |  |  |  |  |  |  |  |  |  |  |  |  |  |  |  |  |  |  |  |  |  |  |  |  |  |  |  |  |  |  |  |  |  |  |  |  |  |  |  |  |  |  |  |  |  |  |  |  |  |  |  |  |  |  |  |  |  |  |  |  |  |  |  |  |  |  |  |  |  |  |  |  |  |  |  |  |  |  |  |  |  |  |  |  |  |  |  |  |  |  |  |  |  |  |  |  |  |  |  |  |  |  |  |  |  |  |  |  |  |  |  |  |  |  |  |  |  |  |  |  |  |  |  |  |  |  |  |  |  |  |  |  |  |  |  |  |  |  |  |  |  |  |  |  |  |  |  |  |  |  |  |  |  |  |  |  |  |  |  |  |  |  |  |  |  |  |  |  |  |  |  |  |  |  |  |  |  |  |  |  |  |  |  |  |  |  |  |  |  |  |  |  |  |  |  |  |  |  |  |  |  |  |  |  |  |  |  |  |  |  |  |  |  |  |  |  |  |  |  |  |  |  |  |  |  |  |  |  |  |  |  |  |  |  |  |  |  |  |  |  |  |  |  |  |  |  |  |  |  |  |  |  |  |  |  |  |  |  |  |  |  |  |  |  |  |  |  |  |  |  |  |  |  |  |  |  |  |  |  |  |  |  |  |  |  |  |  |  |  |  |  |  |  |  |  |  |  |  |  |  |  |  |  |  |  |  |  |  |  |  |  |  |  |  |  |  |  |  |  |  |  |  |  |  |  |  |  |  |  |  |  |  |  |  |  |  |  |  |  |  |  |  |  |  |  |  |  |  |  |  |  |  |  |  |  |  |  |  |  |  |  |  |  |  |  |  |  |  |  |  |  |  |  |  |  |  |  |  |  |  |  |  |  |  |  |  |  |  |  |  |  |  |  |  |  |  |  |  |  |  |  |  |  |  |  |  |
|--|--|--|--|--|--|----|--|--|--|--|--|--|--|--|--|--|--|--|--|--|--|--|--|--|--|--|--|--|--|--|--|--|--|--|--|--|--|--|--|--|--|--|--|--|--|--|--|--|--|--|--|--|--|--|--|--|--|--|--|--|--|--|--|--|--|--|--|--|--|--|--|--|--|--|--|--|--|--|--|--|--|--|--|--|--|--|--|--|--|--|--|--|--|--|--|--|--|--|--|--|--|--|--|--|--|--|--|--|--|--|--|--|--|--|--|--|--|--|--|--|--|--|--|--|--|--|--|--|--|--|--|--|--|--|--|--|--|--|--|--|--|--|--|--|--|--|--|--|--|--|--|--|--|--|--|--|--|--|--|--|--|--|--|--|--|--|--|--|--|--|--|--|--|--|--|--|--|--|--|--|--|--|--|--|--|--|--|--|--|--|--|--|--|--|--|--|--|--|--|--|--|--|--|--|--|--|--|--|--|--|--|--|--|--|--|--|--|--|--|--|--|--|--|--|--|--|--|--|--|--|--|--|--|--|--|--|--|--|--|--|--|--|--|--|--|--|--|--|--|--|--|--|--|--|--|--|--|--|--|--|--|--|--|--|--|--|--|--|--|--|--|--|--|--|--|--|--|--|--|--|--|--|--|--|--|--|--|--|--|--|--|--|--|--|--|--|--|--|--|--|--|--|--|--|--|--|--|--|--|--|--|--|--|--|--|--|--|--|--|--|--|--|--|--|--|--|--|--|--|--|--|--|--|--|--|--|--|--|--|--|--|--|--|--|--|--|--|--|--|--|--|--|--|--|--|--|--|--|--|--|--|--|--|--|--|--|--|--|--|--|--|--|--|--|--|--|--|--|--|--|--|--|--|--|--|--|--|--|--|--|--|--|--|--|--|--|--|--|--|--|--|--|--|--|--|--|--|--|--|--|--|--|--|--|--|--|--|--|--|--|--|--|--|--|--|--|--|--|--|--|--|--|--|--|--|--|--|--|--|--|--|--|--|--|--|--|--|--|--|--|--|--|--|--|--|--|--|--|--|--|--|--|--|--|--|--|--|--|--|--|--|--|--|--|--|--|--|--|--|--|--|--|--|--|--|--|--|--|--|--|--|--|--|--|--|--|--|--|--|--|--|--|--|--|--|--|--|--|--|--|--|--|--|--|--|--|--|--|--|--|--|--|--|--|--|--|--|--|--|--|--|--|--|--|--|--|--|--|--|--|--|--|--|--|--|--|--|--|--|--|--|--|--|--|--|--|--|--|--|--|--|--|--|--|--|--|--|--|--|--|--|--|--|--|--|--|--|--|--|--|--|--|--|--|--|--|--|--|--|--|--|--|--|--|--|--|--|--|--|--|--|--|--|--|--|--|--|--|--|--|--|--|--|--|--|--|--|--|--|--|--|--|--|--|--|--|--|--|--|--|--|--|--|--|--|--|--|--|--|--|--|--|--|--|--|--|--|--|--|--|--|--|--|--|--|--|--|--|--|--|--|--|--|--|--|--|--|--|--|--|--|--|--|--|--|--|--|--|--|--|--|--|--|--|--|--|--|--|--|--|--|--|--|--|--|--|--|--|--|--|--|--|--|--|--|--|--|--|--|--|--|--|--|--|--|--|--|--|--|--|--|--|--|--|--|--|--|--|--|--|--|--|--|--|--|--|--|--|--|--|--|--|--|--|--|--|--|--|--|--|--|--|--|--|--|--|--|--|--|--|--|--|--|--|--|--|--|--|--|--|--|--|--|--|--|--|--|--|--|--|--|--|--|--|--|--|--|--|--|--|--|--|--|--|--|--|--|--|--|--|--|--|--|--|--|--|--|--|--|--|--|--|--|--|--|--|--|--|--|--|--|--|--|--|--|--|--|--|--|--|--|--|--|--|--|--|--|--|--|--|--|--|--|--|--|--|--|--|--|--|--|--|--|--|--|--|--|--|--|--|--|--|--|--|--|--|--|--|--|--|--|--|--|--|--|--|--|--|--|--|--|--|--|--|--|--|--|--|--|--|--|--|--|--|--|--|--|--|--|--|--|--|--|--|--|--|--|--|--|--|--|--|--|--|--|--|--|--|--|--|--|--|--|--|--|--|--|--|--|--|--|--|--|--|--|--|--|--|--|--|--|--|--|--|--|--|--|--|--|--|--|--|--|--|--|--|--|--|--|--|--|--|--|--|--|--|--|--|--|--|--|--|--|--|--|--|--|--|--|--|--|--|--|--|--|--|--|--|--|--|--|--|--|--|--|--|--|--|--|--|--|--|--|--|--|--|--|--|--|--|--|--|--|--|--|--|--|--|--|--|--|--|--|--|--|--|--|--|--|--|--|--|--|--|--|--|--|--|--|--|--|--|--|--|--|--|--|--|--|--|--|--|--|--|--|--|--|--|--|--|--|--|--|--|--|--|--|--|--|--|--|--|--|--|--|--|--|--|--|--|--|--|--|--|--|--|--|--|--|--|--|--|--|--|--|--|--|--|--|--|--|--|--|--|--|--|--|--|--|--|--|--|--|--|--|--|--|--|--|--|--|--|--|--|--|--|--|--|--|--|--|--|--|--|--|--|--|--|--|--|--|--|--|--|--|--|--|--|--|--|--|--|--|--|--|--|--|--|--|--|--|--|--|--|--|--|--|--|--|--|--|--|--|--|--|--|--|--|--|--|--|--|--|--|--|--|--|--|--|--|--|--|--|--|--|--|--|--|--|--|--|--|--|--|--|--|--|--|--|--|--|--|--|--|--|--|--|--|--|--|--|--|--|--|--|--|--|--|--|--|--|--|--|--|--|--|--|--|--|--|--|--|--|--|--|--|--|--|--|--|--|--|--|--|--|--|--|--|--|--|--|--|--|--|--|--|--|--|--|--|--|--|--|--|--|--|--|--|--|--|--|--|--|--|--|--|--|--|--|--|--|--|--|--|--|--|--|--|--|--|--|--|--|--|--|--|--|--|--|--|--|--|--|--|--|--|--|--|--|--|--|--|--|--|--|--|--|--|--|--|--|--|--|--|--|--|--|--|--|--|--|--|--|--|--|--|--|--|--|--|--|--|--|--|--|--|--|--|--|--|--|--|--|--|--|--|

Peptide Information

| Calc. Mass | Obsrv. Mass | ± da    | ± ppm | Start Seq. | End Seq. | Sequence                | Ion Score | C. I. % | Modification             | Rank | Result Type |
|------------|-------------|---------|-------|------------|----------|-------------------------|-----------|---------|--------------------------|------|-------------|
| 842.5206   | 842.4899    | -0.0307 | -36   | 25         | 31       | QRQGLLK                 |           |         |                          |      | Mascot      |
| 908.3171   | 908.4072    | 0.0901  | 99    | 127        | 133      | CSHCNMR                 |           |         | Carbamidomethyl (C)[1]   |      | Mascot      |
| 965.3386   | 965.4443    | 0.1057  | 109   | 127        | 133      | CSHCNMR                 |           |         | Carbamidomethyl (C)[1,4] |      | Mascot      |
| 1045.536   | 1045.5388   | 0.0028  | 3     | 134        | 141      | FHCARNLK                |           |         | Carbamidomethyl (C)[3]   |      | Mascot      |
| 1093.4531  | 1093.5359   | 0.0828  | 76    | 62         | 70       | EDLSEDEEK               |           |         |                          |      | Mascot      |
| 1118.4645  | 1118.6045   | 0.14    | 125   | 348        | 356      | GFVCFECEK               |           |         | Carbamidomethyl (C)[4]   |      | Mascot      |
| 1118.4645  | 1118.6045   | 0.14    | 125   | 208        | 216      | EFVCFECGK               |           |         | Carbamidomethyl (C)[4]   |      | Mascot      |
| 1183.6443  | 1183.5306   | -0.1137 | -96   | 478        | 487      | LHQHVHTGVR              |           |         |                          |      | Mascot      |
| 1242.6073  | 1242.5757   | -0.0316 | -25   | 71         | 80       | HQVKSEETR               |           |         |                          |      | Mascot      |
| 1629.8716  | 1629.7004   | -0.1712 | -105  | 295        | 309      | CGHCGKTLRPAVLK          |           |         |                          |      | Mascot      |
| 1629.8716  | 1629.7004   | -0.1712 | -105  | 295        | 309      | CGHCGKTLRPAVLK          |           |         |                          |      | Mascot      |
| 1819.9358  | 1819.8815   | -0.0543 | -30   | 44         | 58       | IKQEETEELIDVMVK         |           |         | Oxidation (M)[13]        |      | Mascot      |
| 2189.0378  | 2188.9788   | -0.059  | -27   | 339        | 356      | HQQIHTAVRGFVCFECEK      |           |         | Carbamidomethyl (C)[13]  |      | Mascot      |
| 2211.0798  | 2211.0452   | -0.0346 | -16   | 450        | 468      | IHLRVHTNEKPYSCPECG<br>K |           |         |                          |      | Mascot      |
| 2214.9841  | 2215.0227   | 0.0386  | 17    | 506        | 524      | QHQMHTGEKPYTCSHC<br>SK  |           |         |                          |      | Mascot      |
| 2221.0139  | 2221.0967   | 0.0828  | 37    | 239        | 257      | CSHCDLRFSGHSLTVH<br>ER  |           |         |                          |      | Mascot      |
| 2283.0579  | 2283.1169   | 0.059   | 26    | 227        | 245      | HQMIHTGEKPYKCSHCD<br>LR |           |         |                          |      | Mascot      |

|    |                                                                                                  |  |  |  |  |              |          |      |    |    |   |
|----|--------------------------------------------------------------------------------------------------|--|--|--|--|--------------|----------|------|----|----|---|
| 15 | PREDICTED: von Willebrand factor D and EGF domain-containing protein-like, partial [Danio rerio] |  |  |  |  | gi 292626323 | 108459.6 | 6.25 | 14 | 36 | 0 |
|----|--------------------------------------------------------------------------------------------------|--|--|--|--|--------------|----------|------|----|----|---|

Peptide Information

| Calc. Mass | Obsrv. Mass | ± da    | ± ppm | Start Seq. | End Seq. | Sequence  | Ion Score | C. I. % | Modification           | Rank | Result Type |
|------------|-------------|---------|-------|------------|----------|-----------|-----------|---------|------------------------|------|-------------|
| 907.4917   | 907.4323    | -0.0594 | -65   | 620        | 627      | ASELTMMK  |           |         |                        |      | Mascot      |
| 908.3679   | 908.4072    | 0.0393  | 43    | 394        | 400      | QWDCGSR   |           |         | Carbamidomethyl (C)[4] |      | Mascot      |
| 1093.5775  | 1093.5359   | -0.0416 | -38   | 648        | 656      | ELELDSLFK |           |         |                        |      | Mascot      |

|           |           |         |      |     |     |                           |                                          |        |
|-----------|-----------|---------|------|-----|-----|---------------------------|------------------------------------------|--------|
| 1343.6624 | 1343.5637 | -0.0987 | -73  | 190 | 200 | YSSNTMKVEIR               | Oxidation (M)[6]                         | Mascot |
| 1343.6624 | 1343.5637 | -0.0987 | -73  | 190 | 200 | YSSNTMKVEIR               | Oxidation (M)[6]                         | Mascot |
| 1359.7089 | 1359.5563 | -0.1526 | -112 | 73  | 84  | CGTQAPVWLSLK              | Carbamidomethyl (C)[1]                   | Mascot |
| 1629.7477 | 1629.7004 | -0.0473 | -29  | 502 | 516 | NSHNDLHHPAGTSSR           |                                          | Mascot |
| 1629.7477 | 1629.7004 | -0.0473 | -29  | 502 | 516 | NSHNDLHHPAGTSSR           |                                          | Mascot |
| 1714.9296 | 1714.7611 | -0.1685 | -98  | 752 | 766 | LEEAVDLCILDQLK            |                                          | Mascot |
| 1970.884  | 1970.8958 | 0.0118  | 6    | 580 | 595 | CLSYDNTDYTSLPFK           | Carbamidomethyl (C)[1]                   | Mascot |
| 2108.0085 | 2107.9185 | -0.09   | -43  | 67  | 84  | CVEMNRCGTQAPVWLSLK        | Carbamidomethyl (C)[1], Oxidation (M)[4] | Mascot |
| 2166.199  | 2165.895  | -0.304  | -140 | 868 | 887 | VFGLGFIDSSDLACLVLRLK      |                                          | Mascot |
| 2210.9641 | 2211.0452 | 0.0811  | 37   | 394 | 413 | QWDCGSRHYAVACTCGVAAR      | Carbamidomethyl (C)[4]                   | Mascot |
| 2215.0171 | 2215.0227 | 0.0056  | 3    | 549 | 566 | WNFCACQKGYSLSLHSTR        | Carbamidomethyl (C)[4,6]                 | Mascot |
| 2351.2534 | 2351.0234 | -0.23   | -98  | 954 | 975 | ILTYDGICQICVAPSGICKLK     |                                          | Mascot |
| 2763.3657 | 2763.2476 | -0.1181 | -43  | 344 | 368 | ITVQDVPTATCYSLTDPHIITFDGR |                                          | Mascot |

16 VDR-B [Danio rerio] gi|68132044 47285.6 6.81 7 35 0 20 0

#### Peptide Information

| Calc. Mass | Obsrv. Mass | ± da    | ± ppm | Start Seq. | End Seq. | Sequence            | Ion Score | C. I. | % Modification           | Rank | Result | Type |
|------------|-------------|---------|-------|------------|----------|---------------------|-----------|-------|--------------------------|------|--------|------|
| 908.3964   | 908.4072    | 0.0108  | 12    | 19         | 26       | ICGVCGDK            |           |       | Carbamidomethyl (C)[2,5] |      | Mascot |      |
| 1118.6238  | 1118.6045   | -0.0193 | -17   | 259        | 268      | SSAIEVIMLR          |           |       |                          |      | Mascot |      |
| 1118.6238  | 1118.6045   | -0.0193 | -17   | 259        | 268      | SSAIEVIMLR          | 20        | 0     |                          |      | Mascot |      |
| 1123.5421  | 1123.5106   | -0.0315 | -28   | 79         | 87       | RCLDIGMMK           |           |       | Carbamidomethyl (C)[2]   |      | Mascot |      |
| 1343.7417  | 1343.5637   | -0.178  | -132  | 247        | 258      | ELTAEDQIALLK        |           |       |                          |      | Mascot |      |
| 1343.7417  | 1343.5637   | -0.178  | -132  | 247        | 258      | ELTAEDQIALLK        |           |       |                          |      | Mascot |      |
| 1375.7329  | 1375.5514   | -0.1815 | -132  | 126        | 137      | NIIDTLVDAHHK        |           |       |                          |      | Mascot |      |
| 2107.9832  | 2107.9185   | -0.0647 | -31   | 138        | 154      | TYDDSYSDFSRFRPPVR   |           |       |                          |      | Mascot |      |
| 2123.9248  | 2123.9202   | -0.0046 | -2    | 27         | 45       | ATGFHFNAMTCEGCKGFFR |           |       |                          |      | Mascot |      |

17 PREDICTED: retrotransposable element Tf2 155 kDa protein type 1-like [Danio rerio] gi|326663868 132660.5 9.38 15 35 0

#### Peptide Information

| Calc. Mass | Obsrv. Mass | ± da    | ± ppm | Start Seq. | End Seq. | Sequence   | Ion Score | C. I. | % Modification | Rank | Result | Type |
|------------|-------------|---------|-------|------------|----------|------------|-----------|-------|----------------|------|--------|------|
| 809.4039   | 809.3594    | -0.0445 | -55   | 153        | 159      | AFSDELK    |           |       |                |      | Mascot |      |
| 908.4584   | 908.4072    | -0.0512 | -56   | 791        | 797      | LFDRSDR    |           |       |                |      | Mascot |      |
| 1157.646   | 1157.6738   | 0.0278  | 24    | 1140       | 1149     | NIPLRTVCNK |           |       |                |      | Mascot |      |

|           |                                                                         |           |           |         |      |                       |                            |                         |                                          |    |   |        |  |        |
|-----------|-------------------------------------------------------------------------|-----------|-----------|---------|------|-----------------------|----------------------------|-------------------------|------------------------------------------|----|---|--------|--|--------|
| 18        | novel protein similar to human adrenergic receptor kinase [Danio rerio] | 1375.7004 | 1375.5514 | -0.149  | -108 | 133                   | 144                        | AALWGTTVWENK            |                                          |    |   |        |  | Mascot |
|           |                                                                         | 1492.7502 | 1492.7264 | -0.0238 | -16  | 160                   | 173                        | VVFDQAASGREASR          |                                          |    |   |        |  | Mascot |
|           |                                                                         | 1492.7502 | 1492.7264 | -0.0238 | -16  | 160                   | 173                        | VVFDQAASGREASR          |                                          |    |   |        |  | Mascot |
|           |                                                                         | 1626.9148 | 1626.7129 | -0.2019 | -124 | 859                   | 873                        | VACHPGVSRTLFLVIK        |                                          |    |   |        |  | Mascot |
|           |                                                                         | 1682.8285 | 1682.7738 | -0.0547 | -33  | 634                   | 648                        | TPFRWSNAAEAAFSK         |                                          |    |   |        |  | Mascot |
|           |                                                                         | 1682.9547 | 1682.7738 | -0.1809 | -107 | 230                   | 244                        | TLEGLINLAVRVDNR         |                                          |    |   |        |  | Mascot |
|           |                                                                         | 1797.8622 | 1797.9053 | 0.0431  | 24   | 884                   | 899                        | DVRDFVLACSVCAASK        | Carbamidomethyl (C)[9,12]                |    |   |        |  | Mascot |
|           |                                                                         | 1797.8622 | 1797.9053 | 0.0431  | 24   | 884                   | 899                        | DVRDFVLACSVCAASK        | Carbamidomethyl (C)[9,12]                |    |   |        |  | Mascot |
|           |                                                                         | 2099.0227 | 2098.9607 | -0.062  | -30  | 582                   | 599                        | MDPEKIQAVVNWPTPDS R     | Oxidation (M)[1]                         |    |   |        |  | Mascot |
|           |                                                                         | 2108.1499 | 2107.9185 | -0.2314 | -110 | 615                   | 633                        | FIRNFSQLAAPLTNLTSSK     |                                          |    |   |        |  | Mascot |
|           |                                                                         | 2221.0818 | 2221.0967 | 0.0149  | 7    | 79                    | 98                         | SSEPRLPPPQSYAGEPH LCR   |                                          |    |   |        |  | Mascot |
|           |                                                                         | 2225.0122 | 2225.0618 | 0.0496  | 22   | 295                   | 315                        | AGGLCMYCGVGGHFVAL CPAK  | Carbamidomethyl (C)[5,8,18]              |    |   |        |  | Mascot |
|           |                                                                         | 2283.0652 | 2283.1169 | 0.0517  | 23   | 294                   | 315                        | RAGGLCMYCGVGGHFV ALCPAK | Carbamidomethyl (C)[6], Oxidation (M)[7] |    |   |        |  | Mascot |
| 2370.1006 | 2370.1721                                                               | 0.0715    | 30        | 133     | 152  | AALWGTTVWENKSPCCN TFK | Carbamidomethyl (C)[15,16] |                         |                                          |    |   | Mascot |  |        |
| 18        | novel protein similar to human adrenergic receptor kinase [Danio rerio] |           |           |         |      | gi 29561781           | 68278.7                    | 8.24                    | 12                                       | 35 | 0 |        |  |        |

| Calc. Mass | Obsrv. Mass | ± da    | ± ppm | Start Seq. | End Seq. | Sequence                 | Ion Score | C. I. % | Modification                              | Rank | Result Type |
|------------|-------------|---------|-------|------------|----------|--------------------------|-----------|---------|-------------------------------------------|------|-------------|
| 809.4403   | 809.3594    | -0.0809 | -100  | 1          | 6        | IKEYEK                   |           |         |                                           |      | Mascot      |
| 1093.5649  | 1093.5359   | -0.029  | -27   | 299        | 307      | GHSPFRQHK                |           |         |                                           |      | Mascot      |
| 1118.5043  | 1118.6045   | 0.1002  | 90    | 128        | 136      | MYAMKCLDK                |           |         | Oxidation (M)[1]                          |      | Mascot      |
| 1118.5043  | 1118.6045   | 0.1002  | 90    | 128        | 136      | MYAMKCLDK                |           |         | Oxidation (M)[1]                          |      | Mascot      |
| 1242.5316  | 1242.5757   | 0.0441  | 35    | 461        | 470      | DCIMHGMLK                |           |         | Oxidation (M)[4,8]                        |      | Mascot      |
| 1325.6406  | 1325.6576   | 0.017   | 13    | 245        | 256      | ISDLGLACDFSK             |           |         | Carbamidomethyl (C)[8]                    |      | Mascot      |
| 1359.7168  | 1359.5563   | -0.1605 | -118  | 471        | 481      | LGNPFLTQWQR              |           |         |                                           |      | Mascot      |
| 1375.7039  | 1375.5514   | -0.1525 | -111  | 28         | 39       | ELLSCSHPFSSK             |           |         |                                           |      | Mascot      |
| 2098.9248  | 2098.9607   | 0.0359  | 17    | 277        | 295      | GTAYDSSADWFSLGCM<br>L FK |           |         |                                           |      | Mascot      |
| 2194.1438  | 2194.0261   | -0.1177 | -54   | 257        | 276      | KKPHASVGTHGYMAPEV<br>LQK |           |         | Oxidation (M)[13]                         |      | Mascot      |
| 2225.0696  | 2225.0618   | -0.0078 | -4    | 529        | 547      | GGKQFVLQCESDPEFVQ<br>WK  |           |         |                                           |      | Mascot      |
| 2474.2095  | 2474.0852   | -0.1243 | -50   | 19         | 38       | QIYDVYIMKELLSCSHPF<br>SK |           |         | Carbamidomethyl (C)[14], Oxidation (M)[8] |      | Mascot      |
| 2731.3232  | 2731.2441   | -0.0791 | -29   | 86         | 107      | FCQWKVNLNIHMTMD<br>FSVHR |           |         |                                           |      | Mascot      |
| 2731.3232  | 2731.2441   | -0.0791 | -29   | 86         | 107      | FCQWKVNLNIHMTMD<br>FSVHR |           |         |                                           |      | Mascot      |
| 2747.3181  | 2747.2437   | -0.0744 | -27   | 86         | 107      | FCQWKVNLNIHMTMD          |           |         | Oxidation (M)[15]                         |      | Mascot      |

19      PREDICTED: retrotransposable element Tf2 155 kDa      gi|326673018      132510.4      9.38      15      34      0  
protein type 1-like [Danio rerio]

Peptide Information

| Calc. Mass | Obsrv. Mass | ± da    | ± ppm | Start Seq. | End Seq. | Sequence               | Ion Score | C. I. % | Modification                             | Rank | Result Type |
|------------|-------------|---------|-------|------------|----------|------------------------|-----------|---------|------------------------------------------|------|-------------|
| 809.4039   | 809.3594    | -0.0445 | -55   | 153        | 159      | AFSDELK                |           |         |                                          |      | Mascot      |
| 908.4584   | 908.4072    | -0.0512 | -56   | 791        | 797      | LFDRSDR                |           |         |                                          |      | Mascot      |
| 1157.646   | 1157.6738   | 0.0278  | 24    | 1140       | 1149     | NIPLRTVCNK             |           |         |                                          |      | Mascot      |
| 1375.7004  | 1375.5514   | -0.149  | -108  | 133        | 144      | AALWGTTWENK            |           |         |                                          |      | Mascot      |
| 1492.7502  | 1492.7264   | -0.0238 | -16   | 160        | 173      | VVFDQAASGREASR         |           |         |                                          |      | Mascot      |
| 1492.7502  | 1492.7264   | -0.0238 | -16   | 160        | 173      | VVFDQAASGREASR         |           |         |                                          |      | Mascot      |
| 1626.9148  | 1626.7129   | -0.2019 | -124  | 859        | 873      | VACHPGVSRTLFIK         |           |         |                                          |      | Mascot      |
| 1682.8285  | 1682.7738   | -0.0547 | -33   | 634        | 648      | TPFRWSNAAEAASK         |           |         |                                          |      | Mascot      |
| 1682.9547  | 1682.7738   | -0.1809 | -107  | 230        | 244      | TLEGLINLAVRVNDR        |           |         |                                          |      | Mascot      |
| 1797.8622  | 1797.9053   | 0.0431  | 24    | 884        | 899      | DVRDFVLACSVCAASK       |           |         | Carbamidomethyl (C)[9,12]                |      | Mascot      |
| 1797.8622  | 1797.9053   | 0.0431  | 24    | 884        | 899      | DVRDFVLACSVCAASK       |           |         | Carbamidomethyl (C)[9,12]                |      | Mascot      |
| 2099.0227  | 2098.9607   | -0.062  | -30   | 582        | 599      | MDPEKIQAVVNWPTDPSR     |           |         | Oxidation (M)[1]                         |      | Mascot      |
| 2108.1499  | 2107.9185   | -0.2314 | -110  | 615        | 633      | FIRNFSQLAAPLTNLTSSK    |           |         |                                          |      | Mascot      |
| 2221.0818  | 2221.0967   | 0.0149  | 7     | 79         | 98       | SSEPRLPPQSYAGEPHLCR    |           |         |                                          |      | Mascot      |
| 2225.0122  | 2225.0618   | 0.0496  | 22    | 295        | 315      | AGGLCMYCGVGGHFVALCPAK  |           |         | Carbamidomethyl (C)[5,8,18]              |      | Mascot      |
| 2283.0652  | 2283.1169   | 0.0517  | 23    | 294        | 315      | RAGGLCMYCGVGGHFVALCPAK |           |         | Carbamidomethyl (C)[6], Oxidation (M)[7] |      | Mascot      |
| 2370.1006  | 2370.1721   | 0.0715  | 30    | 133        | 152      | AALWGTTWENKSPCCN TFK   |           |         | Carbamidomethyl (C)[15,16]               |      | Mascot      |

20      ATP-binding cassette, sub-family B (MDR/TAP), member 3 like 1 [Danio rerio]      gi|54633310      81688.4      8.72      12      34      0

Peptide Information

| Calc. Mass | Obsrv. Mass | ± da    | ± ppm | Start Seq. | End Seq. | Sequence      | Ion Score | C. I. % | Modification     | Rank | Result Type |
|------------|-------------|---------|-------|------------|----------|---------------|-----------|---------|------------------|------|-------------|
| 809.3895   | 809.3594    | -0.0301 | -37   | 383        | 389      | MTELG MK      |           |         |                  |      | Mascot      |
| 965.4907   | 965.4443    | -0.0464 | -48   | 382        | 389      | RMTELG MK     |           |         |                  |      | Mascot      |
| 996.6676   | 996.5723    | -0.0953 | -96   | 616        | 624      | IAIARALIR     |           |         |                  |      | Mascot      |
| 1242.6624  | 1242.5757   | -0.0867 | -70   | 360        | 369      | LMETHNLKTR    |           |         |                  |      | Mascot      |
| 1258.6572  | 1258.5682   | -0.089  | -71   | 360        | 369      | LMETHNLKTR    |           |         | Oxidation (M)[2] |      | Mascot      |
| 1492.7213  | 1492.7264   | 0.0051  | 3     | 356        | 367      | YDGR LMETHNLK |           |         | Oxidation (M)[6] |      | Mascot      |
| 1492.7213  | 1492.7264   | 0.0051  | 3     | 356        | 367      | YDGR LMETHNLK |           |         | Oxidation (M)[6] |      | Mascot      |



|    |                                                   |           |         |      |              |     |                            |                                            |        |    |   |
|----|---------------------------------------------------|-----------|---------|------|--------------|-----|----------------------------|--------------------------------------------|--------|----|---|
|    | 1629.6996                                         | 1629.7004 | 0.0008  | 0    | 563          | 576 | DNIAYGLQGCSMER             | Carbamidomethyl (C)[10], Oxidation (M)[12] | Mascot |    |   |
|    | 1629.6996                                         | 1629.7004 | 0.0008  | 0    | 563          | 576 | DNIAYGLQGCSMER             | Carbamidomethyl (C)[10], Oxidation (M)[12] | Mascot |    |   |
|    | 1819.8651                                         | 1819.8815 | 0.0164  | 9    | 212          | 227 | GGLFMCAINSFTCRVK           | Carbamidomethyl (C)[6], Oxidation (M)[5]   | Mascot |    |   |
|    | 1842.9973                                         | 1842.7349 | -0.2624 | -142 | 474          | 488 | LTFSYPRRPDHNVLK            |                                            | Mascot |    |   |
|    | 2099.1643                                         | 2098.9607 | -0.2036 | -97  | 275          | 292 | TLVKTLGMLYLMVSLSW<br>K     | Oxidation (M)[8]                           | Mascot |    |   |
|    | 2108.0303                                         | 2107.9185 | -0.1118 | -53  | 192          | 211 | SAIIFMGLFSLGSSFSAG<br>CR   | Carbamidomethyl (C)[19]                    | Mascot |    |   |
|    | 2124.0251                                         | 2123.9202 | -0.1049 | -49  | 192          | 211 | SAIIFMGLFSLGSSFSAG<br>CR   | Carbamidomethyl (C)[19], Oxidation (M)[6]  | Mascot |    |   |
|    | 2211.2173                                         | 2211.0452 | -0.1721 | -78  | 228          | 246 | VQLFGSLIRQDIGFFETIK        |                                            | Mascot |    |   |
|    | 2221.1533                                         | 2221.0967 | -0.0566 | -25  | 489          | 510 | DFSLELKPGQITALVGMS<br>GGGK | Oxidation (M)[17]                          | Mascot |    |   |
| 21 | PREDICTED: zinc finger protein 658B [Danio rerio] |           |         |      | gi 326667382 |     | 85432.5                    | 9.09                                       | 16     | 34 | 0 |

#### Peptide Information

| Calc. Mass | Obsrv. Mass | ± da    | ± ppm | Start Seq. | End Seq. | Sequence                 | Ion Score | C. I. | % Modification                               | Rank | Result Type |
|------------|-------------|---------|-------|------------|----------|--------------------------|-----------|-------|----------------------------------------------|------|-------------|
| 809.4264   | 809.3594    | -0.067  | -83   | 452        | 457      | FTERTR                   |           |       |                                              |      | Mascot      |
| 891.4053   | 891.3801    | -0.0252 | -28   | 6          | 12       | EESEELR                  |           |       |                                              |      | Mascot      |
| 1045.5282  | 1045.5388   | 0.0106  | 10    | 459        | 467      | LHMAKQACK                |           |       | Oxidation (M)[3]                             |      | Mascot      |
| 1118.5687  | 1118.6045   | 0.0358  | 32    | 486        | 494      | EESEDLRIK                |           |       |                                              |      | Mascot      |
| 1118.5687  | 1118.6045   | 0.0358  | 32    | 484        | 492      | IKEESEDLR                | 11        | 0     |                                              |      | Mascot      |
| 1221.6521  | 1221.5453   | -0.1068 | -87   | 584        | 593      | IHMRIHTGEK               |           |       |                                              |      | Mascot      |
| 1221.6521  | 1221.5453   | -0.1068 | -87   | 584        | 593      | IHMRIHTGEK               |           |       |                                              |      | Mascot      |
| 1359.6686  | 1359.5563   | -0.1123 | -83   | 99         | 110      | IHTGEKLSTCDR             |           |       |                                              |      | Mascot      |
| 1698.7838  | 1698.765    | -0.0188 | -11   | 155        | 169      | IHSGEKPFACQHCGK          |           |       | Carbamidomethyl (C)[10]                      |      | Mascot      |
| 1714.7676  | 1714.7611   | -0.0065 | -4    | 594        | 607      | LFTCDQCGKSFSHK           |           |       | Carbamidomethyl (C)[4,7]                     |      | Mascot      |
| 1797.8635  | 1797.9053   | 0.0418  | 23    | 155        | 170      | IHSGEKPFACQHCGKR         | 3         | 0     |                                              |      | Mascot      |
| 1797.8635  | 1797.9053   | 0.0418  | 23    | 155        | 170      | IHSGEKPFACQHCGKR         |           |       |                                              |      | Mascot      |
| 1819.8318  | 1819.8815   | 0.0497  | 27    | 468        | 483      | SGHNNNPQDLPNEDLR         |           |       |                                              |      | Mascot      |
| 2189.0161  | 2188.9788   | -0.0373 | -17   | 349        | 367      | VHMRVHTGERPYTCAQC<br>GK  |           |       | Oxidation (M)[3]                             |      | Mascot      |
| 2220.9695  | 2221.0967   | 0.1272  | 57    | 291        | 308      | HMRVHTGERPYSCTECG<br>K   |           |       | Carbamidomethyl (C)[13,16], Oxidation (M)[2] |      | Mascot      |
| 2225.0591  | 2225.0618   | 0.0027  | 1     | 207        | 225      | SHIIRHTGEKPFPCDQCE<br>K  |           |       |                                              |      | Mascot      |
| 2228.9998  | 2229.0354   | 0.0356  | 16    | 644        | 663      | VHSGERPYTCQQCGKSF<br>ACK |           |       |                                              |      | Mascot      |
| 2228.9998  | 2229.0354   | 0.0356  | 16    | 644        | 663      | VHSGERPYTCQQCGKSF<br>ACK |           |       |                                              |      | Mascot      |
| 2284.0598  | 2284.1128   | 0.053   | 23    | 183        | 202      | VHTGERPYTCQQCGKSF<br>SQK |           |       |                                              |      | Mascot      |

22 PREDICTED: MICAL-like 1 [Danio rerio] gi|326668603 96087.1 6.54 12 34 0

| Peptide Information |                             |         |       |              |          |                              |           |       |                           |                  |
|---------------------|-----------------------------|---------|-------|--------------|----------|------------------------------|-----------|-------|---------------------------|------------------|
| Calc. Mass          | Obsrv. Mass                 | ± da    | ± ppm | Start Seq.   | End Seq. | Sequence                     | Ion Score | C. I. | % Modification            | Rank Result Type |
| 842.4301            | 842.4899                    | 0.0598  | 71    | 376          | 382      | MHSPARK                      |           |       | Oxidation (M)[1]          | Mascot           |
| 891.4141            | 891.3801                    | -0.034  | -38   | 6            | 12       | ALQDWCR                      |           |       |                           | Mascot           |
| 1045.4697           | 1045.5388                   | 0.0691  | 66    | 827          | 835      | DFHGQGEQK                    |           |       |                           | Mascot           |
| 1165.5684           | 1165.7151                   | 0.1467  | 126   | 180          | 187      | LYHRNCFR                     |           |       | Carbamidomethyl (C)[6]    | Mascot           |
| 1183.6793           | 1183.5306                   | -0.1487 | -126  | 606          | 617      | SARPPSLSAGLK                 |           |       |                           | Mascot           |
| 1258.5402           | 1258.5682                   | 0.028   | 22    | 155          | 166      | STLSSTCSACGK                 |           |       | Carbamidomethyl (C)[7,10] | Mascot           |
| 1492.7754           | 1492.7264                   | -0.049  | -33   | 642          | 655      | TTTSANSFVSRPPK               |           |       |                           | Mascot           |
| 1492.7754           | 1492.7264                   | -0.049  | -33   | 642          | 655      | TTTSANSFVSRPPK               |           |       |                           | Mascot           |
| 1819.8894           | 1819.8815                   | -0.0079 | -4    | 767          | 781      | CLLNKPEKEWTSEDK              |           |       |                           | Mascot           |
| 2189.9978           | 2189.9678                   | -0.03   | -14   | 236          | 255      | LT TSAEDPLCGNDSEISP<br>QR    |           |       | Carbamidomethyl (C)[10]   | Mascot           |
| 2189.9978           | 2189.9678                   | -0.03   | -14   | 236          | 255      | LT TSAEDPLCGNDSEISP<br>QR    |           |       | Carbamidomethyl (C)[10]   | Mascot           |
| 2410.2573           | 2410.2312                   | -0.0261 | -11   | 557          | 579      | SVSEPSINTPASALSQKA<br>ELQPR  |           |       |                           | Mascot           |
| 2474.1755           | 2474.0852                   | -0.0903 | -36   | 676          | 696      | VQSDQFIPVEDIHVEMSD<br>LEK    |           |       | Oxidation (M)[16]         | Mascot           |
| 2747.3611           | 2747.2437                   | -0.1174 | -43   | 194          | 217      | TLLPGSYKFTEDPGALVC<br>THHFTR |           |       | Carbamidomethyl (C)[18]   | Mascot           |
| 23                  | Transferrin-a [Danio rerio] |         |       | gi 159155968 |          | 56844.4                      | 5.78      | 7     | 34                        | 0 18 0           |

| Peptide Information |                             |         |       |              |          |                             |           |       |                                            |                  |
|---------------------|-----------------------------|---------|-------|--------------|----------|-----------------------------|-----------|-------|--------------------------------------------|------------------|
| Calc. Mass          | Obsrv. Mass                 | ± da    | ± ppm | Start Seq.   | End Seq. | Sequence                    | Ion Score | C. I. | % Modification                             | Rank Result Type |
| 1221.5793           | 1221.5453                   | -0.034  | -28   | 93           | 102      | TCNFAREPAR                  |           |       | Carbamidomethyl (C)[2]                     | Mascot           |
| 1221.5793           | 1221.5453                   | -0.034  | -28   | 93           | 102      | TCNFAREPAR                  | 18        | 0     | Carbamidomethyl (C)[2]                     | Mascot           |
| 1359.6586           | 1359.5563                   | -0.1023 | -75   | 289          | 301      | SCHTGLGRSAGWK               |           |       |                                            | Mascot           |
| 1492.8005           | 1492.7264                   | -0.0741 | -50   | 498          | 510      | TYKTSQNVPLVK                |           |       |                                            | Mascot           |
| 1492.8005           | 1492.7264                   | -0.0741 | -50   | 498          | 510      | TYKTSQNVPLVK                |           |       |                                            | Mascot           |
| 1629.736            | 1629.7004                   | -0.0356 | -22   | 74           | 86       | QNYELLCMDGSRK               |           |       | Carbamidomethyl (C)[7], Oxidation (M)[8]   | Mascot           |
| 1629.736            | 1629.7004                   | -0.0356 | -22   | 74           | 86       | QNYELLCMDGSRK               |           |       | Carbamidomethyl (C)[7], Oxidation (M)[8]   | Mascot           |
| 2189.9124           | 2189.9678                   | 0.0554  | 25    | 319          | 339      | FFSEGCAPGADPTSNMC<br>KPCK   |           |       |                                            | Mascot           |
| 2189.9124           | 2189.9678                   | 0.0554  | 25    | 319          | 339      | FFSEGCAPGADPTSNMC<br>KPCK   |           |       |                                            | Mascot           |
| 2357.1223           | 2357.124                    | 0.0017  | 1     | 173          | 195      | DGNPSAPTSQTKLAMCTI<br>GHAEK |           |       |                                            | Mascot           |
| 2370.084            | 2370.1721                   | 0.0881  | 37    | 398          | 417      | DLKSEDFELICPNTPDIT<br>MK    |           |       | Carbamidomethyl (C)[11], Oxidation (M)[19] | Mascot           |
| 24                  | novel protein [Danio rerio] |         |       | gi 220679558 |          | 45035                       | 4.99      | 8     | 34                                         | 0                |

| Peptide Information |                                                                      |             |         |       |              |                                    |           |         |                                                |      |             |    |   |
|---------------------|----------------------------------------------------------------------|-------------|---------|-------|--------------|------------------------------------|-----------|---------|------------------------------------------------|------|-------------|----|---|
|                     | Calc. Mass                                                           | Obsrv. Mass | ± da    | ± ppm | Start Seq.   | End Sequence Seq.                  | Ion Score | C. I. % | Modification                                   | Rank | Result Type |    |   |
|                     | 842.473                                                              | 842.4899    | 0.0169  | 20    | 382          | 388 DPKDVLRL                       |           |         |                                                |      | Mascot      |    |   |
|                     | 882.4791                                                             | 882.5447    | 0.0656  | 74    | 1            | 7 VSTYTRR                          |           |         |                                                |      | Mascot      |    |   |
|                     | 1045.5889                                                            | 1045.5388   | -0.0501 | -48   | 54           | 62 VIDTLESLR                       |           |         |                                                |      | Mascot      |    |   |
|                     | 1242.5541                                                            | 1242.5757   | 0.0216  | 17    | 7            | 16 RCPGCQMIYR                      |           |         | Oxidation (M)[7]                               |      | Mascot      |    |   |
|                     | 2098.9644                                                            | 2098.9607   | -0.0037 | -2    | 220          | 237 DCNVDSNGSAFDMILRL<br>R         |           |         | Carbamidomethyl (C)[2], Oxidation (M)[13]      |      | Mascot      |    |   |
|                     | 2214.9939                                                            | 2215.0227   | 0.0288  | 13    | 217          | 235 LCKDCNVDSNGSAFDMIL<br>R        |           |         | Carbamidomethyl (C)[2,5]                       |      | Mascot      |    |   |
|                     | 2370.0708                                                            | 2370.1721   | 0.1013  | 43    | 253          | 274 ICGSSGGCSVVMCPHGV<br>VYSLK     |           |         | Carbamidomethyl (C)[2,8,13], Oxidation (M)[12] |      | Mascot      |    |   |
|                     | 2731.3074                                                            | 2731.2441   | -0.0633 | -23   | 249          | 274 IYQKICGSSGGCSVVMCP<br>HGVVYSLK |           |         | Oxidation (M)[16]                              |      | Mascot      |    |   |
|                     | 2731.3074                                                            | 2731.2441   | -0.0633 | -23   | 249          | 274 IYQKICGSSGGCSVVMCP<br>HGVVYSLK |           |         | Oxidation (M)[16]                              |      | Mascot      |    |   |
| 25                  | Transferrin-a [Danio rerio]                                          |             |         |       | gij68085326  |                                    | 56868.3   | 5.58    | 7                                              | 33   | 0           | 18 | 0 |
| Peptide Information |                                                                      |             |         |       |              |                                    |           |         |                                                |      |             |    |   |
|                     | Calc. Mass                                                           | Obsrv. Mass | ± da    | ± ppm | Start Seq.   | End Sequence Seq.                  | Ion Score | C. I. % | Modification                                   | Rank | Result Type |    |   |
|                     | 1221.5793                                                            | 1221.5453   | -0.034  | -28   | 93           | 102 TCNFAREPAR                     |           |         | Carbamidomethyl (C)[2]                         |      | Mascot      |    |   |
|                     | 1221.5793                                                            | 1221.5453   | -0.034  | -28   | 93           | 102 TCNFAREPAR                     | 18        | 0       | Carbamidomethyl (C)[2]                         |      | Mascot      |    |   |
|                     | 1359.6586                                                            | 1359.5563   | -0.1023 | -75   | 289          | 301 SCHTGLGRSAGWK                  |           |         |                                                |      | Mascot      |    |   |
|                     | 1492.8005                                                            | 1492.7264   | -0.0741 | -50   | 498          | 510 TYKTSQNPDLVK                   |           |         |                                                |      | Mascot      |    |   |
|                     | 1492.8005                                                            | 1492.7264   | -0.0741 | -50   | 498          | 510 TYKTSQNPDLVK                   |           |         |                                                |      | Mascot      |    |   |
|                     | 1629.736                                                             | 1629.7004   | -0.0356 | -22   | 74           | 86 QNYELLCMDGSRK                   |           |         | Carbamidomethyl (C)[7], Oxidation (M)[8]       |      | Mascot      |    |   |
|                     | 1629.736                                                             | 1629.7004   | -0.0356 | -22   | 74           | 86 QNYELLCMDGSRK                   |           |         | Carbamidomethyl (C)[7], Oxidation (M)[8]       |      | Mascot      |    |   |
|                     | 2141.0002                                                            | 2141.0518   | 0.0516  | 24    | 501          | 520 TSQNPDLVKACTFGNCI<br>SS        |           |         | Carbamidomethyl (C)[12]                        |      | Mascot      |    |   |
|                     | 2357.1223                                                            | 2357.124    | 0.0017  | 1     | 173          | 195 DGNPSAPTSQTKLAMCTI<br>GHAEK    |           |         |                                                |      | Mascot      |    |   |
|                     | 2370.084                                                             | 2370.1721   | 0.0881  | 37    | 398          | 417 DLKSEDFELICNPDPDTT<br>MK       |           |         | Carbamidomethyl (C)[11], Oxidation (M)[19]     |      | Mascot      |    |   |
| 26                  | PREDICTED: cytoplasmic FMR1-interacting protein 2-like [Danio rerio] |             |         |       | gij326673718 |                                    | 62081     | 7.56    | 10                                             | 33   | 0           |    |   |
| Peptide Information |                                                                      |             |         |       |              |                                    |           |         |                                                |      |             |    |   |
|                     | Calc. Mass                                                           | Obsrv. Mass | ± da    | ± ppm | Start Seq.   | End Sequence Seq.                  | Ion Score | C. I. % | Modification                                   | Rank | Result Type |    |   |
|                     | 965.505                                                              | 965.4443    | -0.0607 | -63   | 276          | 283 TDVFQSLR                       |           |         |                                                |      | Mascot      |    |   |
|                     | 1042.5469                                                            | 1042.557    | 0.0101  | 10    | 192          | 200 NFVGPPHFK                      |           |         |                                                |      | Mascot      |    |   |
|                     | 1045.5524                                                            | 1045.5388   | -0.0136 | -13   | 475          | 483 QDGKDEIIK                      |           |         |                                                |      | Mascot      |    |   |

|    |                             |           |         |      |              |     |                            |      |   |    |   |    |                                            |  |  |  |  |        |
|----|-----------------------------|-----------|---------|------|--------------|-----|----------------------------|------|---|----|---|----|--------------------------------------------|--|--|--|--|--------|
|    | 1093.5775                   | 1093.5359 | -0.0416 | -38  | 267          | 275 | DIIEYAELK                  |      |   |    |   |    |                                            |  |  |  |  | Mascot |
|    | 1165.5895                   | 1165.7151 | 0.1256  | 108  | 25           | 34  | CGVQARFTAR                 |      |   |    |   |    | Carbamidomethyl (C)[1]                     |  |  |  |  | Mascot |
|    | 1359.7487                   | 1359.5563 | -0.1924 | -141 | 236          | 246 | TLIEVMPKICR                |      |   |    |   |    | Carbamidomethyl (C)[10]                    |  |  |  |  | Mascot |
|    | 1375.7435                   | 1375.5514 | -0.1921 | -140 | 236          | 246 | TLIEVMPKICR                |      |   |    |   |    | Carbamidomethyl (C)[10], Oxidation (M)[6]  |  |  |  |  | Mascot |
|    | 1626.871                    | 1626.7129 | -0.1581 | -97  | 61           | 74  | FVHERSVIAALNDR             |      |   |    |   |    |                                            |  |  |  |  | Mascot |
|    | 1698.8375                   | 1698.765  | -0.0725 | -43  | 372          | 385 | LCCGLSMFEVILTR             |      |   |    |   |    | Carbamidomethyl (C)[2,3]                   |  |  |  |  | Mascot |
|    | 1714.8324                   | 1714.7611 | -0.0713 | -42  | 372          | 385 | LCCGLSMFEVILTR             |      |   |    |   |    | Carbamidomethyl (C)[2,3], Oxidation (M)[7] |  |  |  |  | Mascot |
|    | 2190.0859                   | 2189.9678 | -0.1181 | -54  | 35           | 55  | GGVSEIECPELDFAAARA<br>LNK  |      |   |    |   |    |                                            |  |  |  |  | Mascot |
|    | 2190.0859                   | 2189.9678 | -0.1181 | -54  | 35           | 55  | GGVSEIECPELDFAAARA<br>LNK  |      |   |    |   |    |                                            |  |  |  |  | Mascot |
|    | 2306.261                    | 2306.0447 | -0.2163 | -94  | 201          | 220 | TICRLLG YQGIAV VMEELL<br>K |      |   |    |   |    | Carbamidomethyl (C)[3]                     |  |  |  |  | Mascot |
| 27 | Transferrin-a [Danio rerio] |           |         |      | gi 112180541 |     | 56852.3                    | 5.58 | 7 | 33 | 0 | 18 | 0                                          |  |  |  |  |        |

Peptide Information

| Calc. Mass | Obsrv. Mass | ± da    | ± ppm | Start Seq. | End Seq. | Sequence                     | Ion Score | C. I. | % Modification                             | Rank | Result Type |
|------------|-------------|---------|-------|------------|----------|------------------------------|-----------|-------|--------------------------------------------|------|-------------|
| 1221.5793  | 1221.5453   | -0.034  | -28   | 93         | 102      | TCNFAREPAR                   |           |       | Carbamidomethyl (C)[2]                     |      | Mascot      |
| 1221.5793  | 1221.5453   | -0.034  | -28   | 93         | 102      | TCNFAREPAR                   | 18        | 0     | Carbamidomethyl (C)[2]                     |      | Mascot      |
| 1359.6586  | 1359.5563   | -0.1023 | -75   | 289        | 301      | SCHTGLGRSAGWK                |           |       |                                            |      | Mascot      |
| 1492.8005  | 1492.7264   | -0.0741 | -50   | 498        | 510      | TYKTSQNV PDLVK               |           |       |                                            |      | Mascot      |
| 1492.8005  | 1492.7264   | -0.0741 | -50   | 498        | 510      | TYKTSQNV PDLVK               |           |       |                                            |      | Mascot      |
| 1629.736   | 1629.7004   | -0.0356 | -22   | 74         | 86       | QNYELLCMDGSRK                |           |       | Carbamidomethyl (C)[7], Oxidation (M)[8]   |      | Mascot      |
| 1629.736   | 1629.7004   | -0.0356 | -22   | 74         | 86       | QNYELLCMDGSRK                |           |       | Carbamidomethyl (C)[7], Oxidation (M)[8]   |      | Mascot      |
| 2141.0002  | 2141.0518   | 0.0516  | 24    | 501        | 520      | TSQNV PDLV KACTFGNCI<br>SS   |           |       | Carbamidomethyl (C)[12]                    |      | Mascot      |
| 2357.1223  | 2357.124    | 0.0017  | 1     | 173        | 195      | DGNPSAPTSQTKLAMCTI<br>GHA EK |           |       |                                            |      | Mascot      |
| 2370.084   | 2370.1721   | 0.0881  | 37    | 398        | 417      | DLKSEDFELICNPDPDTT<br>MK     |           |       | Carbamidomethyl (C)[11], Oxidation (M)[19] |      | Mascot      |

28 PREDICTED: retrotransposable element Tf2 155 kDa protein type 1-like [Danio rerio] gi|326680732 128413.4 9.38 14 33 0

Peptide Information

| Calc. Mass | Obsrv. Mass | ± da    | ± ppm | Start Seq. | End Seq. | Sequence       | Ion Score | C. I. | % Modification | Rank | Result Type |
|------------|-------------|---------|-------|------------|----------|----------------|-----------|-------|----------------|------|-------------|
| 809.4039   | 809.3594    | -0.0445 | -55   | 115        | 121      | AFSDELK        |           |       |                |      | Mascot      |
| 908.4584   | 908.4072    | -0.0512 | -56   | 753        | 759      | LFDRSDR        |           |       |                |      | Mascot      |
| 1157.646   | 1157.6738   | 0.0278  | 24    | 1102       | 1111     | NIPLRTVCNK     |           |       |                |      | Mascot      |
| 1375.7004  | 1375.5514   | -0.149  | -108  | 95         | 106      | AALWGTTVWENK   |           |       |                |      | Mascot      |
| 1492.7502  | 1492.7264   | -0.0238 | -16   | 122        | 135      | VVFDQAASGREASR |           |       |                |      | Mascot      |

|           |           |         |      |     |     |                            |  |  |  |                                          |  |        |
|-----------|-----------|---------|------|-----|-----|----------------------------|--|--|--|------------------------------------------|--|--------|
| 1492.7502 | 1492.7264 | -0.0238 | -16  | 122 | 135 | VVFDQAASGREASR             |  |  |  |                                          |  | Mascot |
| 1626.9148 | 1626.7129 | -0.2019 | -124 | 821 | 835 | VACHPGVSRTLFLVIK           |  |  |  |                                          |  | Mascot |
| 1682.8285 | 1682.7738 | -0.0547 | -33  | 596 | 610 | TPFRWSNAAEAAFSK            |  |  |  |                                          |  | Mascot |
| 1682.9547 | 1682.7738 | -0.1809 | -107 | 192 | 206 | TLEGLINLAVRVDNR            |  |  |  |                                          |  | Mascot |
| 1797.8622 | 1797.9053 | 0.0431  | 24   | 846 | 861 | DVRDFVLACSVCAASK           |  |  |  | Carbamidomethyl (C)[9,12]                |  | Mascot |
| 1797.8622 | 1797.9053 | 0.0431  | 24   | 846 | 861 | DVRDFVLACSVCAASK           |  |  |  | Carbamidomethyl (C)[9,12]                |  | Mascot |
| 2099.0227 | 2098.9607 | -0.062  | -30  | 544 | 561 | MDPEKIQAVVNWPTPDS<br>R     |  |  |  | Oxidation (M)[1]                         |  | Mascot |
| 2108.1499 | 2107.9185 | -0.2314 | -110 | 577 | 595 | FIRNFSQLAAPLTNLTSSK        |  |  |  |                                          |  | Mascot |
| 2225.0122 | 2225.0618 | 0.0496  | 22   | 257 | 277 | AGGLCMYCGVGGHVAL<br>CPAK   |  |  |  | Carbamidomethyl (C)[5,8,18]              |  | Mascot |
| 2283.0652 | 2283.1169 | 0.0517  | 23   | 256 | 277 | RAGGLCMYCGVGGHFV<br>ALCPAK |  |  |  | Carbamidomethyl (C)[6], Oxidation (M)[7] |  | Mascot |
| 2370.1006 | 2370.1721 | 0.0715  | 30   | 95  | 114 | AALWGTTVWENKSPCCN<br>TFK   |  |  |  | Carbamidomethyl (C)[15,16]               |  | Mascot |

29 PREDICTED: transposon TX1 uncharacterized 149 kDa gi|326664779 protein-like, partial [Danio rerio] 131029.7 9.39 16 32 0

#### Peptide Information

| Calc. Mass | Obsrv. Mass | ± da    | ± ppm | Start Seq. | End Seq. | Sequence                 | Ion Score | C. I. % | Modification            | Rank | Result Type |
|------------|-------------|---------|-------|------------|----------|--------------------------|-----------|---------|-------------------------|------|-------------|
| 809.3973   | 809.3594    | -0.0379 | -47   | 179        | 184      | LVDCFR                   |           |         | Carbamidomethyl (C)[4]  |      | Mascot      |
| 882.4468   | 882.5447    | 0.0979  | 111   | 50         | 55       | YTKWER                   |           |         |                         |      | Mascot      |
| 1157.6313  | 1157.6738   | 0.0425  | 37    | 752        | 761      | DDHFKVLGVK               |           |         |                         |      | Mascot      |
| 1199.5878  | 1199.5233   | -0.0645 | -54   | 176        | 184      | DFKLVD CFR               |           |         | Carbamidomethyl (C)[7]  |      | Mascot      |
| 1325.6995  | 1325.6576   | -0.0419 | -32   | 1110       | 1120     | RMIATTLQGYR              |           |         | Oxidation (M)[2]        |      | Mascot      |
| 1343.6677  | 1343.5637   | -0.104  | -77   | 283        | 292      | AHWWEMVKTR               |           |         |                         |      | Mascot      |
| 1343.6677  | 1343.5637   | -0.104  | -77   | 283        | 292      | AHWWEMVKTR               |           |         |                         |      | Mascot      |
| 1359.6626  | 1359.5563   | -0.1063 | -78   | 283        | 292      | AHWWEMVKTR               |           |         | Oxidation (M)[6]        |      | Mascot      |
| 1367.6525  | 1367.5828   | -0.0697 | -51   | 708        | 718      | RAMDLTDWFGFR             |           |         |                         |      | Mascot      |
| 1375.6899  | 1375.5514   | -0.1385 | -101  | 179        | 189      | LVDCFRTHQR               |           |         |                         |      | Mascot      |
| 1797.8264  | 1797.9053   | 0.0789  | 44    | 124        | 137      | YELFEDFQPHMLGR           |           |         | Oxidation (M)[11]       |      | Mascot      |
| 1797.8264  | 1797.9053   | 0.0789  | 44    | 124        | 137      | YELFEDFQPHMLGR           |           |         | Oxidation (M)[11]       |      | Mascot      |
| 1842.9974  | 1842.7349   | -0.2625 | -142  | 609        | 624      | MGFPGKFIAWVGLLYK         |           |         | Oxidation (M)[1]        |      | Mascot      |
| 1909.9324  | 1909.9938   | 0.0614  | 32    | 251        | 266      | LNCSLLEDKEIAGEYR         |           |         | Carbamidomethyl (C)[3]  |      | Mascot      |
| 1971.1169  | 1970.8958   | -0.2211 | -112  | 802        | 819      | AVILPLMLLVCSVFSPPR       |           |         | Oxidation (M)[7]        |      | Mascot      |
| 2108.0779  | 2107.9185   | -0.1594 | -76   | 519        | 535      | NWRPITLLNCDCKLFSK        |           |         | Carbamidomethyl (C)[10] |      | Mascot      |
| 2194.1941  | 2194.0261   | -0.168  | -77   | 31         | 49       | TFRSDVLLIQECALPFLTK      |           |         |                         |      | Mascot      |
| 2225.051   | 2225.0618   | 0.0108  | 5     | 541        | 560      | MSMVLEDVIHPDQACAV<br>PGR |           |         | Carbamidomethyl (C)[15] |      | Mascot      |
| 2229.1445  | 2229.0354   | -0.1091 | -49   | 953        | 971      | ETVSRVPGLTLCEAQVQV       |           |         | Carbamidomethyl (C)[12] |      | Mascot      |

|    |                                                    |           |         |     |              |         |                               |   |    |   |  |                         |        |
|----|----------------------------------------------------|-----------|---------|-----|--------------|---------|-------------------------------|---|----|---|--|-------------------------|--------|
|    | 2229.1445                                          | 2229.0354 | -0.1091 | -49 | 953          | 971     | WR<br>ETVSRVPGLTLCEAQQV<br>WR |   |    |   |  | Carbamidomethyl (C)[12] | Mascot |
| 30 | inosine triphosphate pyrophosphatase [Danio rerio] |           |         |     | gi 153791470 | 22854.6 | 5.89                          | 6 | 32 | 0 |  |                         |        |

Peptide Information

| Calc. Mass | Obsrv. Mass | ± da    | ± ppm | Start Seq. | End Seq. | Sequence                   | Ion Score | C. I. | % Modification          | Rank | Result Type |
|------------|-------------|---------|-------|------------|----------|----------------------------|-----------|-------|-------------------------|------|-------------|
| 1157.6565  | 1157.6738   | 0.0173  | 15    | 78         | 88       | ALEGLPGYIK                 |           |       |                         |      | Mascot      |
| 1242.694   | 1242.5757   | -0.1183 | -95   | 19         | 29       | LEEVVQILGDK                |           |       |                         |      | Mascot      |
| 2215.0559  | 2215.0227   | -0.0332 | -15   | 179        | 198      | ALAALSEHFCQDNGAPE<br>TKR   |           |       | Carbamidomethyl (C)[10] |      | Mascot      |
| 2221.074   | 2221.0967   | 0.0227  | 10    | 58         | 77       | EAARQVDGPVLVEDTCL<br>CFR   |           |       |                         |      | Mascot      |
| 2367.0969  | 2367.0222   | -0.0747 | -32   | 102        | 123      | MLAGFEDKSAWALCTFA<br>FCAGK |           |       |                         |      | Mascot      |
| 2474.1995  | 2474.0852   | -0.1143 | -46   | 110        | 131      | SAWALCTFAFCAGKEEP<br>VQLFR |           |       |                         |      | Mascot      |

|    |                                          |  |  |  |              |         |      |    |    |   |  |  |
|----|------------------------------------------|--|--|--|--------------|---------|------|----|----|---|--|--|
| 31 | PREDICTED: perforin-1-like [Danio rerio] |  |  |  | gi 292624265 | 63633.9 | 8.25 | 11 | 32 | 0 |  |  |
|----|------------------------------------------|--|--|--|--------------|---------|------|----|----|---|--|--|

Peptide Information

| Calc. Mass | Obsrv. Mass | ± da    | ± ppm | Start Seq. | End Seq. | Sequence                     | Ion Score | C. I. | % Modification         | Rank | Result Type |
|------------|-------------|---------|-------|------------|----------|------------------------------|-----------|-------|------------------------|------|-------------|
| 882.577    | 882.5447    | -0.0323 | -37   | 85         | 92       | QKLPVAVK                     |           |       |                        |      | Mascot      |
| 907.4739   | 907.4323    | -0.0416 | -46   | 96         | 103      | TLPKCSMK                     |           |       |                        |      | Mascot      |
| 908.4472   | 908.4072    | -0.04   | -44   | 192        | 199      | SLPASYDR                     |           |       |                        |      | Mascot      |
| 1123.5057  | 1123.5106   | 0.0049  | 4     | 364        | 373      | ICSEPCKMGR                   |           |       |                        |      | Mascot      |
| 1367.6742  | 1367.5828   | -0.0914 | -67   | 449        | 459      | WRDTFDFGPVK                  |           |       |                        |      | Mascot      |
| 1375.6423  | 1375.5514   | -0.0909 | -66   | 263        | 273      | AEAHFCKEQQK                  |           |       | Carbamidomethyl (C)[6] |      | Mascot      |
| 1682.8384  | 1682.7738   | -0.0646 | -38   | 40         | 54       | YNLAGEGFDVVTLE               |           |       |                        |      | Mascot      |
| 1682.8384  | 1682.7738   | -0.0646 | -38   | 40         | 54       | YNLAGEGFDVVTLE               |           |       |                        |      | Mascot      |
| 2188.9856  | 2188.9788   | -0.0068 | -3    | 466        | 484      | LCFEVYDADSNWNSDLL<br>GK      |           |       |                        |      | Mascot      |
| 2283.1069  | 2283.1169   | 0.01    | 4     | 351        | 370      | AVEEYIIENALMKICSEPC<br>K     |           |       |                        |      | Mascot      |
| 2357.25    | 2357.124    | -0.126  | -53   | 204        | 224      | SLITYTGTHYTTNVKLGG<br>QIK    |           |       |                        |      | Mascot      |
| 2763.3486  | 2763.2476   | -0.101  | -37   | 489        | 512      | LRSGVVTDACVFNYGTFF<br>FTYEVK |           |       |                        |      | Mascot      |

|    |                                                 |  |  |  |             |       |      |   |    |   |  |  |
|----|-------------------------------------------------|--|--|--|-------------|-------|------|---|----|---|--|--|
| 32 | dnaJ homolog subfamily C member 4 [Danio rerio] |  |  |  | gi 47086683 | 28185 | 9.24 | 7 | 32 | 0 |  |  |
|----|-------------------------------------------------|--|--|--|-------------|-------|------|---|----|---|--|--|

Peptide Information

| Calc. Mass | Obsrv. Mass | ± da    | ± ppm | Start Seq. | End Seq. | Sequence | Ion Score | C. I. | % Modification | Rank | Result Type |
|------------|-------------|---------|-------|------------|----------|----------|-----------|-------|----------------|------|-------------|
| 809.3788   | 809.3594    | -0.0194 | -24   | 94         | 99       | QDYDLR   |           |       |                |      | Mascot      |

|    |                                              |           |         |      |              |     |                          |      |    |    |   |  |                           |  |  |  |        |
|----|----------------------------------------------|-----------|---------|------|--------------|-----|--------------------------|------|----|----|---|--|---------------------------|--|--|--|--------|
|    | 1042.6003                                    | 1042.557  | -0.0433 | -42  | 213          | 220 | QQEILRQK                 |      |    |    |   |  |                           |  |  |  | Mascot |
|    | 1157.6062                                    | 1157.6738 | 0.0676  | 58   | 219          | 227 | QKHAEFLE                 |      |    |    |   |  |                           |  |  |  | Mascot |
|    | 1194.6729                                    | 1194.553  | -0.1199 | -100 | 193          | 202 | VITKIYNESK               |      |    |    |   |  |                           |  |  |  | Mascot |
|    | 1970.8145                                    | 1970.8958 | 0.0813  | 41   | 112          | 129 | TSSSSSNPSWEANESM<br>R    |      |    |    |   |  |                           |  |  |  | Mascot |
|    | 2357.0525                                    | 2357.124  | 0.0715  | 30   | 2            | 18  | QWEAHIRLCQTCFWYCR        |      |    |    |   |  | Carbamidomethyl (C)[9,12] |  |  |  | Mascot |
|    | 2410.25                                      | 2410.2312 | -0.0188 | -8   | 32           | 52  | SQTNYYELGVKPDATLE<br>QIK |      |    |    |   |  |                           |  |  |  | Mascot |
| 33 | hypothetical protein LOC572032 [Danio rerio] |           |         |      | gi 130501553 |     | 75267.4                  | 9.23 | 10 | 31 | 0 |  |                           |  |  |  |        |

Peptide Information

| Calc. Mass | Obsrv. Mass | ± da    | ± ppm | Start Seq. | End Seq. | Sequence                      | Ion Score | C. I. | % Modification          | Rank | Result Type |
|------------|-------------|---------|-------|------------|----------|-------------------------------|-----------|-------|-------------------------|------|-------------|
| 965.5162   | 965.4443    | -0.0719 | -74   | 68         | 75       | VRADYSVR                      |           |       |                         |      | Mascot      |
| 1042.5211  | 1042.557    | 0.0359  | 34    | 202        | 210      | NRHGCTLNK                     |           |       |                         |      | Mascot      |
| 1118.6204  | 1118.6045   | -0.0159 | -14   | 382        | 392      | SFIGVLSPNGK                   |           |       |                         |      | Mascot      |
| 1118.6204  | 1118.6045   | -0.0159 | -14   | 382        | 392      | SFIGVLSPNGK                   |           |       |                         |      | Mascot      |
| 1221.6045  | 1221.5453   | -0.0592 | -48   | 227        | 237      | NIGNCFKGSPK                   |           |       | Carbamidomethyl (C)[5]  |      | Mascot      |
| 1221.6045  | 1221.5453   | -0.0592 | -48   | 227        | 237      | NIGNCFKGSPK                   |           |       | Carbamidomethyl (C)[5]  |      | Mascot      |
| 1842.8802  | 1842.7349   | -0.1453 | -79   | 11         | 25       | NNDVFRNTMEAIQK                |           |       | Oxidation (M)[9]        |      | Mascot      |
| 1909.9865  | 1909.9938   | 0.0073  | 4     | 48         | 65       | GPVPIDSAEGEREALK              |           |       |                         |      | Mascot      |
| 2221.0342  | 2221.0967   | 0.0625  | 28    | 248        | 266      | SSPLNISYESSACFYSPR<br>R       |           |       | Carbamidomethyl (C)[13] |      | Mascot      |
| 2233.1096  | 2233.0288   | -0.0808 | -36   | 267        | 287      | NSVDVSGVTDQSAWIDV<br>ALTR     |           |       |                         |      | Mascot      |
| 2306.1121  | 2306.0447   | -0.0674 | -29   | 246        | 265      | LKSSPLNISYESSACFYS<br>PR      |           |       | Carbamidomethyl (C)[15] |      | Mascot      |
| 2731.3242  | 2731.2441   | -0.0801 | -29   | 145        | 169      | SLSSNGSTLLDVYPSMLN<br>QIGEAYR |           |       | Oxidation (M)[16]       |      | Mascot      |
| 2731.3242  | 2731.2441   | -0.0801 | -29   | 145        | 169      | SLSSNGSTLLDVYPSMLN<br>QIGEAYR |           |       | Oxidation (M)[16]       |      | Mascot      |

34 novel protein (zgc:114168) [Danio rerio] gi|220673162 33328.8 5.18 7 31 0

Peptide Information

| Calc. Mass | Obsrv. Mass | ± da    | ± ppm | Start Seq. | End Seq. | Sequence                | Ion Score | C. I. | % Modification                            | Rank | Result Type |
|------------|-------------|---------|-------|------------|----------|-------------------------|-----------|-------|-------------------------------------------|------|-------------|
| 965.4549   | 965.4443    | -0.0106 | -11   | 276        | 283      | YCPGVLQW                |           |       |                                           |      | Mascot      |
| 1045.516   | 1045.5388   | 0.0228  | 22    | 256        | 264      | STELPDVER               |           |       |                                           |      | Mascot      |
| 1367.757   | 1367.5828   | -0.1742 | -127  | 265        | 275      | LKPYQSLIDK              |           |       |                                           |      | Mascot      |
| 1626.8638  | 1626.7129   | -0.1509 | -93   | 112        | 125      | DWFQLVGLIHDVGK          |           |       |                                           |      | Mascot      |
| 2166.0171  | 2165.895    | -0.1221 | -56   | 167        | 185      | NPALNTEFGIYEPQCGLD<br>K |           |       | Carbamidomethyl (C)[15]                   |      | Mascot      |
| 2215.0271  | 2215.0227   | -0.0044 | -2    | 3          | 21       | VVNMGPDPPLAYRPECH       |           |       | Carbamidomethyl (C)[16], Oxidation (M)[4] |      | Mascot      |

2233.13992233.0288-0.1111-50107125EHPDKDWFQLVGLIHDV  
GK

Mascot

35PREDICTED: titin [Danio rerio]gi|18952369936456686.1668310

| Peptide Information |             |         |       |            |          |               |           |         |                                          |      |             |
|---------------------|-------------|---------|-------|------------|----------|---------------|-----------|---------|------------------------------------------|------|-------------|
| Calc. Mass          | Obsrv. Mass | ± da    | ± ppm | Start Seq. | End Seq. | Sequence      | Ion Score | C. I. % | Modification                             | Rank | Result Type |
| 809.3675            | 809.3594    | -0.0081 | -10   | 32458      | 32464    | AEAFEDK       |           |         |                                          |      | Mascot      |
| 842.4981            | 842.4899    | -0.0082 | -10   | 8812       | 8818     | EDILPKK       |           |         |                                          |      | Mascot      |
| 882.4679            | 882.5447    | 0.0768  | 87    | 2876       | 2882     | YKVSTER       |           |         |                                          |      | Mascot      |
| 891.3624            | 891.3801    | 0.0177  | 20    | 4693       | 4701     | HGSDSCSAK     |           |         |                                          |      | Mascot      |
| 907.4301            | 907.4323    | 0.0022  | 2     | 1543       | 1550     | DSGVITCR      |           |         | Carbamidomethyl (C)[7]                   |      | Mascot      |
| 908.389             | 908.4072    | 0.0182  | 20    | 1240       | 1247     | CSEGQTAR      |           |         | Carbamidomethyl (C)[1]                   |      | Mascot      |
| 965.4509            | 965.4443    | -0.0066 | -7    | 19569      | 19576    | NSCTLGWK      |           |         | Carbamidomethyl (C)[3]                   |      | Mascot      |
| 996.591             | 996.5723    | -0.0187 | -19   | 9064       | 9072     | MKAVPLPPK     |           |         | Oxidation (M)[1]                         |      | Mascot      |
| 1042.5204           | 1042.557    | 0.0366  | 35    | 27162      | 27169    | ELSEVYFR      |           |         |                                          |      | Mascot      |
| 1045.5347           | 1045.5388   | 0.0041  | 4     | 7144       | 7153     | CQIGGTPEIK    |           |         |                                          |      | Mascot      |
| 1093.5524           | 1093.5359   | -0.0165 | -15   | 9592       | 9600     | EDGIEFQKK     |           |         |                                          |      | Mascot      |
| 1118.6205           | 1118.6045   | -0.016  | -14   | 24180      | 24188    | EKNSILWTK     |           |         |                                          |      | Mascot      |
| 1118.6238           | 1118.6045   | -0.0193 | -17   | 4857       | 4866     | IACLDIQKSK    | 4         | 0       |                                          |      | Mascot      |
| 1123.4871           | 1123.5106   | 0.0235  | 21    | 20158      | 20166    | LAENVMDCR     |           |         | Carbamidomethyl (C)[8], Oxidation (M)[6] |      | Mascot      |
| 1157.6525           | 1157.6738   | 0.0213  | 18    | 8082       | 8091     | VPIESVTRK     |           |         |                                          |      | Mascot      |
| 1165.6212           | 1165.7151   | 0.0939  | 81    | 8759       | 8768     | ETFSVQVVTR    |           |         |                                          |      | Mascot      |
| 1183.5697           | 1183.5306   | -0.0391 | -33   | 9922       | 9931     | EMGSLLKMDK    |           |         | Oxidation (M)[2,8]                       |      | Mascot      |
| 1194.5923           | 1194.553    | -0.0393 | -33   | 10919      | 10928    | TLEEEMSVIK    |           |         | Oxidation (M)[6]                         |      | Mascot      |
| 1199.5613           | 1199.5233   | -0.038  | -32   | 1797       | 1806     | DESYEGMLKK    |           |         |                                          |      | Mascot      |
| 1221.5304           | 1221.5453   | 0.0149  | 12    | 10260      | 10269    | DKDEDPENVK    |           |         | Oxidation (M)[8]                         |      | Mascot      |
| 1221.6409           | 1221.5453   | -0.0956 | -78   | 4906       | 4915     | ILWKQGMSSR    |           |         | Oxidation (M)[7]                         |      | Mascot      |
| 1242.5419           | 1242.5757   | 0.0338  | 27    | 5340       | 5350     | YTCQVSNDAK    |           |         | Carbamidomethyl (C)[3]                   |      | Mascot      |
| 1258.595            | 1258.5682   | -0.0268 | -21   | 2987       | 2998     | SDAGEYTFIAGK  |           |         |                                          |      | Mascot      |
| 1325.6888           | 1325.6576   | -0.0312 | -24   | 30094      | 30103    | EILGYWIEFR    |           |         |                                          |      | Mascot      |
| 1343.6698           | 1343.5637   | -0.1061 | -79   | 5309       | 5320     | EMLTGGTCFIKK  |           |         | Oxidation (M)[2]                         |      | Mascot      |
| 1343.6698           | 1343.5637   | -0.1061 | -79   | 5309       | 5320     | EMLTGGTCFIKK  |           |         | Oxidation (M)[2]                         |      | Mascot      |
| 1359.6328           | 1359.5563   | -0.0765 | -56   | 31229      | 31239    | NTEVTWYFGSR   |           |         |                                          |      | Mascot      |
| 1367.6406           | 1367.5828   | -0.0578 | -42   | 6380       | 6392     | AGSCECSGTLRVK |           |         | Carbamidomethyl (C)[4]                   |      | Mascot      |
| 1375.5769           | 1375.5514   | -0.0255 | -19   | 31219      | 31228    | FVCCIENYDR    |           |         | Carbamidomethyl (C)[3,4]                 |      | Mascot      |
| 1391.6914           | 1391.7058   | 0.0144  | 10    | 2956       | 2967     | NGVEIQFSVDQR  |           |         |                                          |      | Mascot      |



|           |           |         |      |       |       |                              |                                           |        |
|-----------|-----------|---------|------|-------|-------|------------------------------|-------------------------------------------|--------|
| 1492.7061 | 1492.7264 | 0.0203  | 14   | 6635  | 6649  | ATNNVGS DLCQGSVK             |                                           | Mascot |
| 1492.7166 | 1492.7264 | 0.0098  | 7    | 28671 | 28683 | DEYTPPKAELDSK                |                                           | Mascot |
| 1626.7209 | 1626.7129 | -0.008  | -5   | 4784  | 4798  | ASNSVG TATCCTELR             | Carbamidomethyl (C)[10,11]                | Mascot |
| 1629.7809 | 1629.7004 | -0.0805 | -49  | 17093 | 17104 | TEVWLQWNWPDR                 |                                           | Mascot |
| 1629.9421 | 1629.7004 | -0.2417 | -148 | 3489  | 3503  | TILKVELSQLSAAEK              |                                           | Mascot |
| 1682.7472 | 1682.7738 | 0.0266  | 16   | 6002  | 6016  | NEAGSESCSMDLRVK              | Carbamidomethyl (C)[8]                    | Mascot |
| 1682.7472 | 1682.7738 | 0.0266  | 16   | 6002  | 6016  | NEAGSESCSMDLRVK              | Carbamidomethyl (C)[8]                    | Mascot |
| 1698.7421 | 1698.765  | 0.0229  | 13   | 6002  | 6016  | NEAGSESCSMDLRVK              | Carbamidomethyl (C)[8], Oxidation (M)[10] | Mascot |
| 1714.7965 | 1714.7611 | -0.0354 | -21  | 21943 | 21956 | TGCEYQFRIAENR                | Carbamidomethyl (C)[3]                    | Mascot |
| 1797.8774 | 1797.9053 | 0.0279  | 16   | 1083  | 1097  | SYRILEGMGVTFHCK              | Carbamidomethyl (C)[14]                   | Mascot |
| 1797.9713 | 1797.9053 | -0.066  | -37  | 16896 | 16912 | ELKAMAGTHINIMAGIK            | 1 0                                       | Mascot |
| 1819.8684 | 1819.8815 | 0.0131  | 7    | 1661  | 1675  | LHYDGIHYLEITDCK              |                                           | Mascot |
| 1842.8293 | 1842.7349 | -0.0944 | -51  | 11826 | 11840 | FETEISEEDVHGHWK              |                                           | Mascot |
| 1909.9728 | 1909.9938 | 0.021   | 11   | 12198 | 12213 | LICEVSKPSAEVTWYK             | Carbamidomethyl (C)[3]                    | Mascot |
| 1970.877  | 1970.8958 | 0.0188  | 10   | 16626 | 16641 | DLWMPVTESCTRTSCK             | Carbamidomethyl (C)[10,15]                | Mascot |
| 2099.0227 | 2098.9607 | -0.062  | -30  | 13143 | 13161 | WTFGENALTAGDRVSMV<br>TK      | Oxidation (M)[16]                         | Mascot |
| 2108.1069 | 2107.9185 | -0.1884 | -89  | 12946 | 12963 | DRTSVVWAPVMVTKPHE<br>R       |                                           | Mascot |
| 2124.1018 | 2123.9202 | -0.1816 | -85  | 12946 | 12963 | DRTSVVWAPVMVTKPHE<br>R       | Oxidation (M)[11]                         | Mascot |
| 2140.989  | 2141.0518 | 0.0628  | 29   | 12057 | 12075 | LVIHDCTLDDSKTYTCDA<br>K      |                                           | Mascot |
| 2166.0825 | 2165.895  | -0.1875 | -87  | 23685 | 23703 | GRPIPEINWTKDDGLPD<br>K       |                                           | Mascot |
| 2189.0066 | 2188.9788 | -0.0278 | -13  | 30534 | 30553 | CENIGGESDWSEISEPVI<br>PK     |                                           | Mascot |
| 2190.0093 | 2189.9678 | -0.0415 | -19  | 1962  | 1979  | DTMVT FECETNEPFVKVK          | Carbamidomethyl (C)[8], Oxidation (M)[3]  | Mascot |
| 2190.0093 | 2189.9678 | -0.0415 | -19  | 1962  | 1979  | DTMVT FECETNEPFVKVK          | Carbamidomethyl (C)[8], Oxidation (M)[3]  | Mascot |
| 2194.0583 | 2194.0261 | -0.0322 | -15  | 23824 | 23843 | VMAENEF GIGLPVETEE<br>VK     | Oxidation (M)[2]                          | Mascot |
| 2211.021  | 2211.0452 | 0.0242  | 11   | 18006 | 18024 | MVWSTYSASLVN YCNV<br>TR      | Oxidation (M)[1]                          | Mascot |
| 2215.1111 | 2215.0227 | -0.0884 | -40  | 31410 | 31428 | LN VAPHAVAEDTMRPMF<br>KR     | Oxidation (M)[13,16]                      | Mascot |
| 2221.0742 | 2221.0967 | 0.0225  | 10   | 8387  | 8403  | ELFLKQCMFFEVL MEEK           | Carbamidomethyl (C)[7]                    | Mascot |
| 2225.0479 | 2225.0618 | 0.0139  | 6    | 18756 | 18774 | HPFDPPSEPLNCCVNKV<br>SK      | Carbamidomethyl (C)[12,13]                | Mascot |
| 2229.1736 | 2229.0354 | -0.1382 | -62  | 18429 | 18447 | ITNLTPGIEYYFRVMAVN<br>K      |                                           | Mascot |
| 2229.239  | 2229.0354 | -0.2036 | -91  | 588   | 606   | VKVLLDWPAQSPDIHIER           |                                           | Mascot |
| 2232.9575 | 2233.0288 | 0.0713  | 32   | 1525  | 1542  | MINEFGYCSLDYEVAYS R          | Carbamidomethyl (C)[8], Oxidation (M)[1]  | Mascot |
| 2283.1284 | 2283.1169 | -0.0115 | -5   | 13772 | 13793 | VRAVNVAGESEPS E PSD<br>PVLCK |                                           | Mascot |
| 2284.1389 | 2284.1128 | -0.0261 | -11  | 21385 | 21405 | ACDTIFQPGPPGNPRVLD<br>TTK    | Carbamidomethyl (C)[2]                    | Mascot |
| 2306.0732 | 2306.0447 | -0.0285 | -12  | 17825 | 17842 | ETFFMVDKCVENHIYQFR           |                                           | Mascot |

|           |           |         |     |       |       |                                |                                           |        |
|-----------|-----------|---------|-----|-------|-------|--------------------------------|-------------------------------------------|--------|
| 2351.1006 | 2351.0234 | -0.0772 | -33 | 4822  | 4841  | LECQVDEDTGVSIWMRD<br>GK        | Carbamidomethyl (C)[3]                    | Mascot |
| 2357.0979 | 2357.124  | 0.0261  | 11  | 16046 | 16063 | ECQYIVQRLTEGHEYEFR             | Carbamidomethyl (C)[2]                    | Mascot |
| 2367.0955 | 2367.0222 | -0.0733 | -31 | 4822  | 4841  | LECQVDEDTGVSIWMRD<br>GK        | Carbamidomethyl (C)[3], Oxidation (M)[16] | Mascot |
| 2370.124  | 2370.1721 | 0.0481  | 20  | 13774 | 13795 | AVNVAGESEPSESPDPV<br>LCKER     | Carbamidomethyl (C)[19]                   | Mascot |
| 2410.0762 | 2410.2312 | 0.155   | 64  | 12242 | 12262 | MDDAGEYHCKLPTSQTT<br>GNLR      | Carbamidomethyl (C)[9], Oxidation (M)[1]  | Mascot |
| 2474.1028 | 2474.0852 | -0.0176 | -7  | 2045  | 2065  | NLESVEVPETYSGEFECE<br>LSR      | Carbamidomethyl (C)[17]                   | Mascot |
| 2683.2014 | 2683.2458 | 0.0444  | 17  | 14982 | 15005 | LMMLNWSDDDDGGSD<br>VTGFIIR     |                                           | Mascot |
| 2731.22   | 2731.2441 | 0.0241  | 9   | 5004  | 5027  | GCTAHLECEMTGTAPFEI<br>TWFKDK   | Oxidation (M)[10]                         | Mascot |
| 2731.22   | 2731.2441 | 0.0241  | 9   | 5004  | 5027  | GCTAHLECEMTGTAPFEI<br>TWFKDK   | Oxidation (M)[10]                         | Mascot |
| 2747.397  | 2747.2437 | -0.1533 | -56 | 8392  | 8414  | QCMFFEVLMEKKPKPAI<br>QEPPK     |                                           | Mascot |
| 2763.2195 | 2763.2476 | 0.0281  | 10  | 5801  | 5827  | LDSSDSGNYTCAKNQA<br>GSDQCSGTLK |                                           | Mascot |

36 PREDICTED: p2Y purinoceptor 4-like [Danio rerio] gi|326669372 48084.4 9.33 9 31 0

#### Peptide Information

| Calc. Mass | Obsrv. Mass | ± da    | ± ppm | Start Seq. | End Seq. | Sequence                  | Ion Score | C. I. % | Modification              | Rank | Result Type |
|------------|-------------|---------|-------|------------|----------|---------------------------|-----------|---------|---------------------------|------|-------------|
| 891.4794   | 891.3801    | -0.0993 | -111  | 284        | 290      | SPYVNRR                   |           |         |                           |      | Mascot      |
| 1118.5486  | 1118.6045   | 0.0559  | 50    | 144        | 152      | YLGICHPMK                 |           |         | Carbamidomethyl (C)[5]    |      | Mascot      |
| 1118.5486  | 1118.6045   | 0.0559  | 50    | 144        | 152      | YLGICHPMK                 |           |         | Carbamidomethyl (C)[5]    |      | Mascot      |
| 1123.5895  | 1123.5106   | -0.0789 | -70   | 183        | 191      | FAQTQYLPR                 |           |         |                           |      | Mascot      |
| 1698.7947  | 1698.765    | -0.0297 | -17   | 327        | 340      | VQCHTMRMVSICYK            |           |         |                           |      | Mascot      |
| 1714.7896  | 1714.7611   | -0.0285 | -17   | 327        | 340      | VQCHTMRMVSICYK            |           |         | Oxidation (M)[6]          |      | Mascot      |
| 2124.0754  | 2123.9202   | -0.1552 | -73   | 6          | 24       | SLRTMTTSWIETVTGVDA<br>R   |           |         |                           |      | Mascot      |
| 2166.1602  | 2165.895    | -0.2652 | -122  | 164        | 182      | GTCVLVWIAVFALTCPIFR       |           |         | Carbamidomethyl (C)[3]    |      | Mascot      |
| 2284.1226  | 2284.1128   | -0.0098 | -4    | 364        | 383      | NGPCCQKPEHAQHGLL<br>WPLR  |           |         |                           |      | Mascot      |
| 2410.3354  | 2410.2312   | -0.1042 | -43   | 296        | 315      | TIITITLLFALCFFPFHVTR      |           |         | Carbamidomethyl (C)[12]   |      | Mascot      |
| 2747.3513  | 2747.2437   | -0.1076 | -39   | 123        | 143      | FLFYFNLYCSIFFLTCISV<br>HR |           |         | Carbamidomethyl (C)[9,16] |      | Mascot      |

37 PREDICTED: NACHT, LRR and PYD domains-containing protein 12, partial [Danio rerio]

#### Peptide Information

| Calc. Mass | Obsrv. Mass | ± da    | ± ppm | Start Seq. | End Seq. | Sequence | Ion Score | C. I. % | Modification     | Rank | Result Type |
|------------|-------------|---------|-------|------------|----------|----------|-----------|---------|------------------|------|-------------|
| 891.4604   | 891.3801    | -0.0803 | -90   | 278        | 284      | EMNLKEK  |           |         |                  |      | Mascot      |
| 907.4553   | 907.4323    | -0.023  | -25   | 278        | 284      | EMNLKEK  |           |         | Oxidation (M)[2] |      | Mascot      |

|           |           |         |      |     |     |                             |                                          |        |
|-----------|-----------|---------|------|-----|-----|-----------------------------|------------------------------------------|--------|
| 1045.5272 | 1045.5388 | 0.0116  | 11   | 634 | 642 | GLLTQQDDR                   |                                          | Mascot |
| 1157.5367 | 1157.6738 | 0.1371  | 118  | 862 | 871 | LNLDHGGEMR                  | Oxidation (M)[9]                         | Mascot |
| 1343.6082 | 1343.5637 | -0.0445 | -33  | 1   | 11  | FSCSMAEERVK                 | Carbamidomethyl (C)[3]                   | Mascot |
| 1343.6082 | 1343.5637 | -0.0445 | -33  | 1   | 11  | FSCSMAEERVK                 | Carbamidomethyl (C)[3]                   | Mascot |
| 1359.6031 | 1359.5563 | -0.0468 | -34  | 1   | 11  | FSCSMAEERVK                 | Carbamidomethyl (C)[3], Oxidation (M)[5] | Mascot |
| 1391.6736 | 1391.7058 | 0.0322  | 23   | 325 | 336 | LPLNFAGNETCR                | Carbamidomethyl (C)[11]                  | Mascot |
| 1629.8231 | 1629.7004 | -0.1227 | -75  | 605 | 618 | ALESENGHLDLYLR              |                                          | Mascot |
| 1629.8231 | 1629.7004 | -0.1227 | -75  | 605 | 618 | ALESENGHLDLYLR              |                                          | Mascot |
| 2141.0947 | 2141.0518 | -0.0429 | -20  | 666 | 683 | SINLFYCLNELNDQTLLK          |                                          | Mascot |
| 2190.1917 | 2189.9678 | -0.2239 | -102 | 69  | 87  | THKSFTGNLLIFQNLESK          |                                          | Mascot |
| 2190.1917 | 2189.9678 | -0.2239 | -102 | 69  | 87  | THKSFTGNLLIFQNLESK          |                                          | Mascot |
| 2215.124  | 2215.0227 | -0.1013 | -46  | 832 | 851 | ELDLSYNHPGDSGVKLLT<br>EK    |                                          | Mascot |
| 2220.9517 | 2221.0967 | 0.145   | 65   | 905 | 921 | CVWENQSYDPDPRFD<br>R        | Carbamidomethyl (C)[1]                   | Mascot |
| 2306.0466 | 2306.0447 | -0.0019 | -1   | 18  | 38  | HSERSGPCVSSSVSLNS<br>DWSK   | Carbamidomethyl (C)[8]                   | Mascot |
| 2370.1265 | 2370.1721 | 0.0456  | 19   | 464 | 481 | CLTQMYTHFLRCIQQS<br>R       | Carbamidomethyl (C)[1,12]                | Mascot |
| 2683.3284 | 2683.2458 | -0.0826 | -31  | 139 | 161 | QDQAAETLEDELFFINQL<br>KCSLK |                                          | Mascot |

### Peptide Information

|           |           |         |      |       |       |                         |                                           |        |
|-----------|-----------|---------|------|-------|-------|-------------------------|-------------------------------------------|--------|
| 1157.6385 | 1157.6738 | 0.0353  | 30   | 117   | 126   | QGSQVRLDVR              |                                           | Mascot |
| 1165.6211 | 1165.7151 | 0.094   | 81   | 28447 | 28457 | VSAENKFGVSK             |                                           | Mascot |
| 1183.5962 | 1183.5306 | -0.0656 | -55  | 6129  | 6137  | MVEFKCVVR               | Carbamidomethyl (C)[6], Oxidation (M)[1]  | Mascot |
| 1194.5923 | 1194.553  | -0.0393 | -33  | 10919 | 10928 | TLEEEMSVIK              | Oxidation (M)[6]                          | Mascot |
| 1199.5613 | 1199.5233 | -0.038  | -32  | 1797  | 1806  | DESYEGMLKK              |                                           | Mascot |
| 1221.5304 | 1221.5453 | 0.0149  | 12   | 10260 | 10269 | DKDEDPEMVK              | Oxidation (M)[8]                          | Mascot |
| 1221.6409 | 1221.5453 | -0.0956 | -78  | 4906  | 4915  | ILWKQGMSSR              | Oxidation (M)[7]                          | Mascot |
| 1242.5419 | 1242.5757 | 0.0338  | 27   | 5340  | 5350  | YTCQVSNDAGK             | Carbamidomethyl (C)[3]                    | Mascot |
| 1258.595  | 1258.5682 | -0.0268 | -21  | 2987  | 2998  | SDAGEYTFIAGK            |                                           | Mascot |
| 1325.6888 | 1325.6576 | -0.0312 | -24  | 30094 | 30103 | EILGYWIEFR              |                                           | Mascot |
| 1343.6698 | 1343.5637 | -0.1061 | -79  | 5309  | 5320  | EMLTGGTCFIKK            | Oxidation (M)[2]                          | Mascot |
| 1343.6698 | 1343.5637 | -0.1061 | -79  | 5309  | 5320  | EMLTGGTCFIKK            | Oxidation (M)[2]                          | Mascot |
| 1359.6328 | 1359.5563 | -0.0765 | -56  | 31229 | 31239 | NTEVTWYFGSR             |                                           | Mascot |
| 1367.6406 | 1367.5828 | -0.0578 | -42  | 6380  | 6392  | AGSCECSGTLRVK           | Carbamidomethyl (C)[4]                    | Mascot |
| 1375.5769 | 1375.5514 | -0.0255 | -19  | 31219 | 31228 | FVCCIENYDR              | Carbamidomethyl (C)[3,4]                  | Mascot |
| 1391.6914 | 1391.7058 | 0.0144  | 10   | 2956  | 2967  | NGVEIQFSVDQR            |                                           | Mascot |
| 1492.7061 | 1492.7264 | 0.0203  | 14   | 6635  | 6649  | ATNNVGS DLCQGSVK        |                                           | Mascot |
| 1492.7166 | 1492.7264 | 0.0098  | 7    | 28671 | 28683 | DEYTPKAELDSK            |                                           | Mascot |
| 1626.7209 | 1626.7129 | -0.008  | -5   | 4784  | 4798  | ASNSVGTATCCTELR         | Carbamidomethyl (C)[10,11]                | Mascot |
| 1629.7809 | 1629.7004 | -0.0805 | -49  | 17093 | 17104 | TEVWLQWNWPDR            |                                           | Mascot |
| 1629.9421 | 1629.7004 | -0.2417 | -148 | 3489  | 3503  | TILKVELSQLSAAEK         |                                           | Mascot |
| 1682.7472 | 1682.7738 | 0.0266  | 16   | 6002  | 6016  | NEAGSESCSMDLRVK         | Carbamidomethyl (C)[8]                    | Mascot |
| 1682.7472 | 1682.7738 | 0.0266  | 16   | 6002  | 6016  | NEAGSESCSMDLRVK         | Carbamidomethyl (C)[8]                    | Mascot |
| 1698.7421 | 1698.765  | 0.0229  | 13   | 6002  | 6016  | NEAGSESCSMDLRVK         | Carbamidomethyl (C)[8], Oxidation (M)[10] | Mascot |
| 1714.7965 | 1714.7611 | -0.0354 | -21  | 21943 | 21956 | TGCEYQFRIAENR           | Carbamidomethyl (C)[3]                    | Mascot |
| 1797.8774 | 1797.9053 | 0.0279  | 16   | 1083  | 1097  | SYRILEGMGVTFHCK         | Carbamidomethyl (C)[14]                   | Mascot |
| 1797.9713 | 1797.9053 | -0.066  | -37  | 16896 | 16912 | ELKAMAGTHINIMAGIK       | 1 0                                       | Mascot |
| 1819.8684 | 1819.8815 | 0.0131  | 7    | 1661  | 1675  | LHYDGIHYLEITDCK         |                                           | Mascot |
| 1842.8293 | 1842.7349 | -0.0944 | -51  | 11826 | 11840 | FETEISEEDVHGHWK         |                                           | Mascot |
| 1909.9728 | 1909.9938 | 0.021   | 11   | 12198 | 12213 | LICEVSKPSAEVTWYK        | Carbamidomethyl (C)[3]                    | Mascot |
| 1970.877  | 1970.8958 | 0.0188  | 10   | 16626 | 16641 | DLWMPVTESCTRTSCK        | Carbamidomethyl (C)[10,15]                | Mascot |
| 2099.0227 | 2098.9607 | -0.062  | -30  | 13143 | 13161 | WTFGENALTAGDRVSMV<br>TK | Oxidation (M)[16]                         | Mascot |
| 2108.1069 | 2107.9185 | -0.1884 | -89  | 12946 | 12963 | DRTSVVWAPVMVTKPHE<br>R  |                                           | Mascot |
| 2124.1018 | 2123.9202 | -0.1816 | -85  | 12946 | 12963 | DRTSVVWAPVMVTKPHE<br>R  | Oxidation (M)[11]                         | Mascot |
| 2140.989  | 2141.0518 | 0.0628  | 29   | 12057 | 12075 | LVIHDCTLDDSKTYTCDA<br>K |                                           | Mascot |
| 2166.0825 | 2165.895  | -0.1875 | -87  | 23685 | 23703 | GRPIPEINWTKDDGDLPD      |                                           | Mascot |

|           |           |         |     |       |       |                                 |                                           |  |  |  |  |        |
|-----------|-----------|---------|-----|-------|-------|---------------------------------|-------------------------------------------|--|--|--|--|--------|
| 2189.0066 | 2188.9788 | -0.0278 | -13 | 30534 | 30553 | K<br>CENIGGESDWSEISEPVI<br>PK   |                                           |  |  |  |  | Mascot |
| 2190.0093 | 2189.9678 | -0.0415 | -19 | 1962  | 1979  | DTMVT FECETNEPFVKVK             | Carbamidomethyl (C)[8], Oxidation (M)[3]  |  |  |  |  | Mascot |
| 2190.0093 | 2189.9678 | -0.0415 | -19 | 1962  | 1979  | DTMVT FECETNEPFVKVK             | Carbamidomethyl (C)[8], Oxidation (M)[3]  |  |  |  |  | Mascot |
| 2194.0583 | 2194.0261 | -0.0322 | -15 | 23824 | 23843 | VMAENEF GIGLPVETEE<br>VK        | Oxidation (M)[2]                          |  |  |  |  | Mascot |
| 2211.021  | 2211.0452 | 0.0242  | 11  | 18006 | 18024 | MVWSTYSASLVNYCNV<br>TR          | Oxidation (M)[1]                          |  |  |  |  | Mascot |
| 2215.1111 | 2215.0227 | -0.0884 | -40 | 31410 | 31428 | LNVAPHAVAEDTMRPMF<br>KR         | Oxidation (M)[13, 16]                     |  |  |  |  | Mascot |
| 2221.1248 | 2221.0967 | -0.0281 | -13 | 29857 | 29876 | VIGRPDPPEGP LEFDDIQ<br>AR       |                                           |  |  |  |  | Mascot |
| 2225.0479 | 2225.0618 | 0.0139  | 6   | 18756 | 18774 | HPFDPPSEPLNCCVNKV<br>SK         | Carbamidomethyl (C)[12, 13]               |  |  |  |  | Mascot |
| 2229.1736 | 2229.0354 | -0.1382 | -62 | 18429 | 18447 | ITNLTPGIEYYFRVMAVN<br>K         |                                           |  |  |  |  | Mascot |
| 2229.1736 | 2229.0354 | -0.1382 | -62 | 18429 | 18447 | ITNLTPGIEYYFRVMAVN<br>K         |                                           |  |  |  |  | Mascot |
| 2232.9575 | 2233.0288 | 0.0713  | 32  | 1525  | 1542  | MINEFGYCSLDYEVAYS<br>R          | Carbamidomethyl (C)[8], Oxidation (M)[1]  |  |  |  |  | Mascot |
| 2283.1284 | 2283.1169 | -0.0115 | -5  | 13772 | 13793 | VRAVNVAGESEPS<br>PVLCK          |                                           |  |  |  |  | Mascot |
| 2284.1389 | 2284.1128 | -0.0261 | -11 | 21385 | 21405 | ACDTIFQPGPPGNPRVLD<br>TTK       | Carbamidomethyl (C)[2]                    |  |  |  |  | Mascot |
| 2306.0732 | 2306.0447 | -0.0285 | -12 | 17825 | 17842 | ETFFMVDKCVENHIYQFR              |                                           |  |  |  |  | Mascot |
| 2351.1006 | 2351.0234 | -0.0772 | -33 | 4822  | 4841  | LECQVDEDTGVSIIW<br>MRD GK       | Carbamidomethyl (C)[3]                    |  |  |  |  | Mascot |
| 2357.0979 | 2357.124  | 0.0261  | 11  | 16046 | 16063 | ECQYIVQRLTEGHEYE<br>FR          | Carbamidomethyl (C)[2]                    |  |  |  |  | Mascot |
| 2367.0955 | 2367.0222 | -0.0733 | -31 | 4822  | 4841  | LECQVDEDTGVSIIW<br>MRD GK       | Carbamidomethyl (C)[3], Oxidation (M)[16] |  |  |  |  | Mascot |
| 2370.124  | 2370.1721 | 0.0481  | 20  | 13774 | 13795 | AVNVAGESEPS<br>DPV LCKER        | Carbamidomethyl (C)[19]                   |  |  |  |  | Mascot |
| 2410.0762 | 2410.2312 | 0.155   | 64  | 12242 | 12262 | MDDAGEYHCKLPTSQ<br>TT GNLR      | Carbamidomethyl (C)[9], Oxidation (M)[1]  |  |  |  |  | Mascot |
| 2474.1028 | 2474.0852 | -0.0176 | -7  | 2045  | 2065  | NLESVEVPETYSGEFE<br>CE LSR      | Carbamidomethyl (C)[17]                   |  |  |  |  | Mascot |
| 2683.2014 | 2683.2458 | 0.0444  | 17  | 14982 | 15005 | LMMLNWSDPDDGGSD<br>VTGFIER      |                                           |  |  |  |  | Mascot |
| 2731.22   | 2731.2441 | 0.0241  | 9   | 5004  | 5027  | GCTAHLECEMTGTAPF<br>EI TWFKDK   | Oxidation (M)[10]                         |  |  |  |  | Mascot |
| 2731.22   | 2731.2441 | 0.0241  | 9   | 5004  | 5027  | GCTAHLECEMTGTAPF<br>EI TWFKDK   | Oxidation (M)[10]                         |  |  |  |  | Mascot |
| 2747.4556 | 2747.2437 | -0.2119 | -77 | 32532 | 32556 | TSFSFVGQVFQAIYTK<br>VT AFVAAHK  |                                           |  |  |  |  | Mascot |
| 2763.2195 | 2763.2476 | 0.0281  | 10  | 5801  | 5827  | LDSSDSGNYTCIAKNQ<br>A GSDQCSTLK |                                           |  |  |  |  | Mascot |

39    novel protein similar to human titin (TTN) [Danio rerio]    gi|29561775    2113153    6.46    60    30    0

| Peptide Information |             |         |       |            |                   |           |       |                |      |        |        |
|---------------------|-------------|---------|-------|------------|-------------------|-----------|-------|----------------|------|--------|--------|
| Calc. Mass          | Obsrv. Mass | ± da    | ± ppm | Start Seq. | End Sequence Seq. | Ion Score | C. I. | % Modification | Rank | Result | Type   |
| 809.3675            | 809.3594    | -0.0081 | -10   | 18767      | 18773             | AEAFEDK   |       |                |      |        | Mascot |
| 842.5094            | 842.4899    | -0.0195 | -23   | 1522       | 1529              | LSIPGVTR  |       |                |      |        | Mascot |

|           |           |         |      |       |       |                 |                                          |        |
|-----------|-----------|---------|------|-------|-------|-----------------|------------------------------------------|--------|
| 882.4315  | 882.5447  | 0.1132  | 128  | 12144 | 12151 | DGSSFTLR        |                                          | Mascot |
| 891.4166  | 891.3801  | -0.0365 | -41  | 12482 | 12490 | ESVASDAGR       |                                          | Mascot |
| 907.4705  | 907.4323  | -0.0382 | -42  | 13743 | 13749 | NSLLWMK         | Oxidation (M)[6]                         | Mascot |
| 908.4294  | 908.4072  | -0.0222 | -24  | 5843  | 5850  | NSCTLGWK        |                                          | Mascot |
| 965.4509  | 965.4443  | -0.0066 | -7   | 5843  | 5850  | NSCTLGWK        | Carbamidomethyl (C)[3]                   | Mascot |
| 996.5373  | 996.5723  | 0.035   | 35   | 670   | 676   | QYQFRVR         |                                          | Mascot |
| 1042.5204 | 1042.557  | 0.0366  | 35   | 13471 | 13478 | ELSEVYFR        |                                          | Mascot |
| 1045.6404 | 1045.5388 | -0.1016 | -97  | 2435  | 2444  | GTKFVVPGLK      |                                          | Mascot |
| 1093.5095 | 1093.5359 | 0.0264  | 24   | 2124  | 2131  | ETWKQCCK        | Carbamidomethyl (C)[6]                   | Mascot |
| 1118.5477 | 1118.6045 | 0.0568  | 51   | 2114  | 2123  | LSWDTSGPQK      |                                          | Mascot |
| 1118.6205 | 1118.6045 | -0.016  | -14  | 10489 | 10497 | EKNSILWTK       |                                          | Mascot |
| 1123.4871 | 1123.5106 | 0.0235  | 21   | 6467  | 6475  | LAENVMDCR       | Carbamidomethyl (C)[8], Oxidation (M)[6] | Mascot |
| 1157.7252 | 1157.6738 | -0.0514 | -44  | 8636  | 8645  | VQTLNLKITK      |                                          | Mascot |
| 1165.6211 | 1165.7151 | 0.094   | 81   | 14756 | 14766 | VSAENKFGVSK     |                                          | Mascot |
| 1194.6035 | 1194.553  | -0.0505 | -42  | 4241  | 4251  | DMKISGISTDK     |                                          | Mascot |
| 1199.6531 | 1199.5233 | -0.1298 | -108 | 1118  | 1127  | TRTFTVYGVV      |                                          | Mascot |
| 1221.6626 | 1221.5453 | -0.1173 | -96  | 10810 | 10819 | LLPGNEYIFR      |                                          | Mascot |
| 1221.6626 | 1221.5453 | -0.1173 | -96  | 8646  | 8655  | LLPGNEYIFR      |                                          | Mascot |
| 1242.6113 | 1242.5757 | -0.0356 | -29  | 11495 | 11504 | LTQGTEYQFR      |                                          | Mascot |
| 1258.6976 | 1258.5682 | -0.1294 | -103 | 16104 | 16114 | GKPLPTCKWTK     |                                          | Mascot |
| 1325.6888 | 1325.6576 | -0.0312 | -24  | 16403 | 16412 | EILGYWIEFR      |                                          | Mascot |
| 1343.6776 | 1343.5637 | -0.1139 | -85  | 1335  | 1347  | YGCGRPVDLGP     |                                          | Mascot |
| 1343.6776 | 1343.5637 | -0.1139 | -85  | 1335  | 1347  | YGCGRPVDLGP     |                                          | Mascot |
| 1359.6328 | 1359.5563 | -0.0765 | -56  | 17538 | 17548 | NTEVTWYFGSR     |                                          | Mascot |
| 1367.6412 | 1367.5828 | -0.0584 | -43  | 4006  | 4015  | LMENHEYLF       | Oxidation (M)[2]                         | Mascot |
| 1375.5769 | 1375.5514 | -0.0255 | -19  | 17528 | 17537 | FVCCINENYDR     | Carbamidomethyl (C)[3,4]                 | Mascot |
| 1391.6624 | 1391.7058 | 0.0434  | 31   | 8975  | 8986  | VLDTPDMPANFR    | Oxidation (M)[7]                         | Mascot |
| 1492.7166 | 1492.7264 | 0.0098  | 7    | 14980 | 14992 | DEYTPPKAELDSK   |                                          | Mascot |
| 1492.827  | 1492.7264 | -0.1006 | -67  | 2373  | 2386  | ARNLFTPPGPPTPK  |                                          | Mascot |
| 1626.7693 | 1626.7129 | -0.0564 | -35  | 7694  | 7708  | ACDTIFQPGPPGNPR | Carbamidomethyl (C)[2]                   | Mascot |
| 1629.7809 | 1629.7004 | -0.0805 | -49  | 3367  | 3378  | TEVWLQWNWPDR    |                                          | Mascot |
| 1629.9104 | 1629.7004 | -0.21   | -129 | 2787  | 2800  | LVVRVGETCIQSR   | Carbamidomethyl (C)[9]                   | Mascot |
| 1682.8265 | 1682.7738 | -0.0527 | -31  | 3222  | 3236  | AEIETSGTTTKLEMR | Oxidation (M)[14]                        | Mascot |
| 1682.8265 | 1682.7738 | -0.0527 | -31  | 3222  | 3236  | AEIETSGTTTKLEMR | Oxidation (M)[14]                        | Mascot |
| 1698.8367 | 1698.765  | -0.0717 | -42  | 8025  | 8039  | ITGYIVEMQGNKSDK | Oxidation (M)[8]                         | Mascot |
| 1714.7965 | 1714.7611 | -0.0354 | -21  | 8252  | 8265  | TGCEYQFRIAENR   | Carbamidomethyl (C)[3]                   | Mascot |
| 1797.8734 | 1797.9053 | 0.0319  | 18   | 11627 | 11642 | DPCAPPSQPRVMNTR | Oxidation (M)[12]                        | Mascot |

|           |           |         |      |       |       |                               |   |                            |        |
|-----------|-----------|---------|------|-------|-------|-------------------------------|---|----------------------------|--------|
| 1797.9713 | 1797.9053 | -0.066  | -37  | 3186  | 3202  | ELKAMAGTHINIMAGIK             | 1 | 0                          | Mascot |
| 1820.1255 | 1819.8815 | -0.244  | -134 | 12440 | 12456 | IEIPLTGKPLPKVSLSK             |   |                            | Mascot |
| 1842.9232 | 1842.7349 | -0.1883 | -102 | 2216  | 2231  | APQDKPDDKVPVQYDK              |   |                            | Mascot |
| 1970.877  | 1970.8958 | 0.0188  | 10   | 2916  | 2931  | DLWMPVTESCTRTSCK              |   | Carbamidomethyl (C)[10,15] | Mascot |
| 2166.0825 | 2165.895  | -0.1875 | -87  | 9994  | 10012 | GRPIPEINWTKDDGDLPD<br>K       |   |                            | Mascot |
| 2189.0066 | 2188.9788 | -0.0278 | -13  | 16843 | 16862 | CENIGGESDWSEISEPVI<br>PK      |   |                            | Mascot |
| 2190.0205 | 2189.9678 | -0.0527 | -24  | 13462 | 13478 | CQCEVTELKELSEVYFR             |   | Carbamidomethyl (C)[1,3]   | Mascot |
| 2190.2029 | 2189.9678 | -0.2351 | -107 | 7426  | 7445  | LDAHVTGRPIPSIVWTKD<br>GK      |   |                            | Mascot |
| 2194.0583 | 2194.0261 | -0.0322 | -15  | 10133 | 10152 | VMAENEFGIGLPVETEES<br>VK      |   | Oxidation (M)[2]           | Mascot |
| 2211.021  | 2211.0452 | 0.0242  | 11   | 4280  | 4298  | MVWSTYSASLVNYCNV<br>TR        |   | Oxidation (M)[1]           | Mascot |
| 2215.1111 | 2215.0227 | -0.0884 | -40  | 17719 | 17737 | LNVAHAVAEDTMRPMF<br>KR        |   | Oxidation (M)[13,16]       | Mascot |
| 2221.1248 | 2221.0967 | -0.0281 | -13  | 16166 | 16185 | VIGRPDPPEGPLEFDDIQ<br>AR      |   |                            | Mascot |
| 2225.0479 | 2225.0618 | 0.0139  | 6    | 5030  | 5048  | HPFDPPEPLNCCVNKV<br>SK        |   | Carbamidomethyl (C)[12,13] | Mascot |
| 2229.1736 | 2229.0354 | -0.1382 | -62  | 4703  | 4721  | ITNLTPGIEYYFRVMAVN<br>K       |   |                            | Mascot |
| 2229.1736 | 2229.0354 | -0.1382 | -62  | 4703  | 4721  | ITNLTPGIEYYFRVMAVN<br>K       |   |                            | Mascot |
| 2283.1284 | 2283.1169 | -0.0115 | -5   | 76    | 97    | VRAVNVAGESEPSDPSD<br>PVLCK    |   |                            | Mascot |
| 2284.1389 | 2284.1128 | -0.0261 | -11  | 7694  | 7714  | ACDTIFQPGPPGNPRVLD<br>TTK     |   | Carbamidomethyl (C)[2]     | Mascot |
| 2306.0732 | 2306.0447 | -0.0285 | -12  | 4099  | 4116  | ETFFMVDKCVENHIYQFR            |   |                            | Mascot |
| 2351.1272 | 2351.0234 | -0.1038 | -44  | 4279  | 4298  | RMVWSTYSASLVNYCN<br>VTR       |   |                            | Mascot |
| 2357.0979 | 2357.124  | 0.0261  | 11   | 2336  | 2353  | ECQYIVQRLTEGHEYEFR            |   | Carbamidomethyl (C)[2]     | Mascot |
| 2367.1221 | 2367.0222 | -0.0999 | -42  | 4279  | 4298  | RMVWSTYSASLVNYCN<br>VTR       |   | Oxidation (M)[2]           | Mascot |
| 2370.124  | 2370.1721 | 0.0481  | 20   | 78    | 99    | AVNVAGESEPSDPSDV<br>LCKER     |   | Carbamidomethyl (C)[19]    | Mascot |
| 2474.1868 | 2474.0852 | -0.1016 | -41  | 5851  | 5873  | KPISDGGSHVVAYALEIC<br>EGEDK   |   | Carbamidomethyl (C)[18]    | Mascot |
| 2683.2014 | 2683.2458 | 0.0444  | 17   | 1272  | 1295  | LMMLNWSDPDDGGSD<br>VTGFIIR    |   |                            | Mascot |
| 2731.3396 | 2731.2441 | -0.0955 | -35  | 5851  | 5875  | KPISDGGSHVVAYALEIC<br>EGEDKWK |   |                            | Mascot |
| 2731.3396 | 2731.2441 | -0.0955 | -35  | 5851  | 5875  | KPISDGGSHVVAYALEIC<br>EGEDKWK |   |                            | Mascot |
| 2747.4556 | 2747.2437 | -0.2119 | -77  | 18841 | 18865 | TSFSFVGQVFQAIYTKVT<br>AFVAAHK |   |                            | Mascot |
| 2763.4238 | 2763.2476 | -0.1762 | -64  | 13324 | 13348 | GKLTLSWEPPYIDGGSPI<br>TNYVVEK |   |                            | Mascot |

40 Zgc:162551 [Danio rerio] gi|134024880 35020.5 8.35 9 30 0

Peptide Information

| Calc. Mass | Obsrv. Mass | ± da | ± ppm | Start Seq. | End Sequence Seq. | Ion Score | C. I. % Modification | Rank Result Type |
|------------|-------------|------|-------|------------|-------------------|-----------|----------------------|------------------|
|------------|-------------|------|-------|------------|-------------------|-----------|----------------------|------------------|

|  |           |           |         |     |     |     |                          |  |  |  |                          |  |  |        |
|--|-----------|-----------|---------|-----|-----|-----|--------------------------|--|--|--|--------------------------|--|--|--------|
|  | 891.3447  | 891.3801  | 0.0354  | 40  | 162 | 169 | HTCNECGK                 |  |  |  |                          |  |  | Mascot |
|  | 907.4666  | 907.4323  | -0.0343 | -38 | 186 | 193 | SLDSKMAR                 |  |  |  |                          |  |  | Mascot |
|  | 908.3964  | 908.4072  | 0.0108  | 12  | 194 | 200 | KCPTCDK                  |  |  |  | Carbamidomethyl (C)[2,5] |  |  | Mascot |
|  | 996.4818  | 996.5723  | 0.0905  | 91  | 48  | 55  | LCENGYIK                 |  |  |  | Carbamidomethyl (C)[2]   |  |  | Mascot |
|  | 1157.5521 | 1157.6738 | 0.1217  | 105 | 264 | 273 | AHMQTHSAFK               |  |  |  |                          |  |  | Mascot |
|  | 1629.7261 | 1629.7004 | -0.0257 | -16 | 240 | 254 | SHTGEKPFACAHCGK          |  |  |  | Carbamidomethyl (C)[10]  |  |  | Mascot |
|  | 1629.7261 | 1629.7004 | -0.0257 | -16 | 240 | 254 | SHTGEKPFACAHCGK          |  |  |  | Carbamidomethyl (C)[10]  |  |  | Mascot |
|  | 2189.9968 | 2189.9678 | -0.029  | -13 | 240 | 259 | SHTGEKPFACAHCGKAF<br>ADR |  |  |  | Carbamidomethyl (C)[10]  |  |  | Mascot |
|  | 2189.9968 | 2189.9678 | -0.029  | -13 | 240 | 259 | SHTGEKPFACAHCGKAF<br>ADR |  |  |  | Carbamidomethyl (C)[10]  |  |  | Mascot |
|  | 2232.8369 | 2233.0288 | 0.1919  | 86  | 293 | 312 | HYESACFRGSGDEDESG<br>SEN |  |  |  | Carbamidomethyl (C)[6]   |  |  | Mascot |
|  | 2370.1528 | 2370.1721 | 0.0193  | 8   | 221 | 239 | CHVCSKAFSRPWLLQGH<br>MR  |  |  |  | Carbamidomethyl (C)[1,4] |  |  | Mascot |

41 mediator of RNA polymerase II transcription subunit 22 gi|50344944 16398.5 5.15 5 30 0  
[Danio rerio]

#### Peptide Information

| Calc. Mass | Obsrv. Mass | ± da    | ± ppm | Start Seq. | End Seq. | Sequence                    | Ion Score | C. I. | % Modification    | Rank | Result Type |
|------------|-------------|---------|-------|------------|----------|-----------------------------|-----------|-------|-------------------|------|-------------|
| 965.4244   | 965.4443    | 0.0199  | 21    | 107        | 114      | TLQEECDK                    |           |       |                   |      | Mascot      |
| 1093.5194  | 1093.5359   | 0.0165  | 15    | 107        | 115      | TLQEECDKK                   |           |       |                   |      | Mascot      |
| 1359.7413  | 1359.5563   | -0.185  | -136  | 65         | 77       | AANIVRAGESLMK               |           |       |                   |      | Mascot      |
| 1375.7362  | 1375.5514   | -0.1848 | -134  | 65         | 77       | AANIVRAGESLMK               |           |       | Oxidation (M)[12] |      | Mascot      |
| 1698.7653  | 1698.765    | -0.0003 | 0     | 51         | 64       | ATQAEQDHFEMHVR              |           |       |                   |      | Mascot      |
| 1714.7603  | 1714.7611   | 0.0008  | 0     | 51         | 64       | ATQAEQDHFEMHVR              |           |       | Oxidation (M)[11] |      | Mascot      |
| 2731.5029  | 2731.2441   | -0.2588 | -95   | 78         | 101      | LVSDLKQFLILNDFPSVN<br>EASLR |           |       |                   |      | Mascot      |
| 2731.5029  | 2731.2441   | -0.2588 | -95   | 78         | 101      | LVSDLKQFLILNDFPSVN<br>EASLR |           |       |                   |      | Mascot      |

42 transitional endoplasmic reticulum ATPase-like [Danio rerio] gi|90093334 89437.9 5.44 11 30 0

#### Peptide Information

| Calc. Mass | Obsrv. Mass | ± da    | ± ppm | Start Seq. | End Seq. | Sequence        | Ion Score | C. I. | % Modification   | Rank | Result Type |
|------------|-------------|---------|-------|------------|----------|-----------------|-----------|-------|------------------|------|-------------|
| 1183.6293  | 1183.5306   | -0.0987 | -83   | 505        | 514      | FLKFGMTPSR      |           |       |                  |      | Mascot      |
| 1194.5975  | 1194.553    | -0.0445 | -37   | 515        | 526      | GVLFYGPPEGCGK   |           |       |                  |      | Mascot      |
| 1199.6241  | 1199.5233   | -0.1008 | -84   | 505        | 514      | FLKFGMTPSR      |           |       | Oxidation (M)[6] |      | Mascot      |
| 1258.5883  | 1258.5682   | -0.0201 | -16   | 587        | 601      | ARGGGAGDAGGAADR |           |       |                  |      | Mascot      |
| 1492.7828  | 1492.7264   | -0.0564 | -38   | 98         | 111      | LGDVSIHPCPDVK   |           |       |                  |      | Mascot      |



|    |                        |           |         |      |             |     |                          |      |   |    |   |                         |  |  |  |  |        |
|----|------------------------|-----------|---------|------|-------------|-----|--------------------------|------|---|----|---|-------------------------|--|--|--|--|--------|
|    | 1492.7828              | 1492.7264 | -0.0564 | -38  | 98          | 111 | LGDISIHPCPDVK            |      |   |    |   |                         |  |  |  |  | Mascot |
|    | 1629.8054              | 1629.7004 | -0.105  | -64  | 756         | 768 | KYEMFAQTLQQSR            |      |   |    |   |                         |  |  |  |  | Mascot |
|    | 1629.8054              | 1629.7004 | -0.105  | -64  | 756         | 768 | KYEMFAQTLQQSR            |      |   |    |   |                         |  |  |  |  | Mascot |
|    | 1714.9884              | 1714.7611 | -0.2273 | -133 | 326         | 340 | IVSLLTLMDGLKQR           |      |   |    |   |                         |  |  |  |  | Mascot |
|    | 1909.8484              | 1909.9938 | 0.1454  | 76   | 720         | 735 | ETAMDDDDYPVPEIRK         |      |   |    |   | Oxidation (M)[4]        |  |  |  |  | Mascot |
|    | 1970.9615              | 1970.8958 | -0.0657 | -33  | 508         | 526 | FGMTPSRGVLFGPPGC<br>GK   |      |   |    |   |                         |  |  |  |  | Mascot |
|    | 2098.9895              | 2098.9607 | -0.0288 | -14  | 680         | 698 | ITEGFSGADLTEICQRAC<br>K  |      |   |    |   | Carbamidomethyl (C)[14] |  |  |  |  | Mascot |
|    | 2108.0845              | 2107.9185 | -0.166  | -79  | 570         | 588 | QAAPCILFFDELDSIAKAR      |      |   |    |   |                         |  |  |  |  | Mascot |
|    | 2190.0957              | 2189.9678 | -0.1279 | -58  | 28          | 47  | LIVDEATNEDNSIVCLSQV<br>K |      |   |    |   |                         |  |  |  |  | Mascot |
|    | 2190.0957              | 2189.9678 | -0.1279 | -58  | 28          | 47  | LIVDEATNEDNSIVCLSQV<br>K |      |   |    |   |                         |  |  |  |  | Mascot |
| 43 | tafazzin [Danio rerio] |           |         |      | gi 49227272 |     | 30524.4                  | 8.94 | 7 | 30 | 0 |                         |  |  |  |  |        |

#### Peptide Information

| Calc. Mass | Obsrv. Mass | ± da    | ± ppm | Start Seq. | End Seq. | Sequence                   | Ion Score | C. I. | % | Modification            | Rank | Result Type |
|------------|-------------|---------|-------|------------|----------|----------------------------|-----------|-------|---|-------------------------|------|-------------|
| 996.4818   | 996.5723    | 0.0905  | 91    | 131        | 138      | GMDFLER                    |           |       |   | Oxidation (M)[2]        |      | Mascot      |
| 1343.6445  | 1343.5637   | -0.0808 | -60   | 153        | 163      | VNMSGEFMRIK                |           |       |   | Oxidation (M)[3,8]      |      | Mascot      |
| 1343.6445  | 1343.5637   | -0.0808 | -60   | 153        | 163      | VNMSGEFMRIK                |           |       |   | Oxidation (M)[3,8]      |      | Mascot      |
| 1367.6412  | 1367.5828   | -0.0584 | -43   | 95         | 106      | WTPAASDICFTR               |           |       |   |                         |      | Mascot      |
| 1626.8097  | 1626.7129   | -0.0968 | -60   | 2          | 14       | PLEVTWPFQCPQR              |           |       |   | Carbamidomethyl (C)[11] |      | Mascot      |
| 1714.8646  | 1714.7611   | -0.1035 | -60   | 235        | 248      | TVTDYIQDEFRLK              |           |       |   |                         |      | Mascot      |
| 2229.1096  | 2229.0354   | -0.0742 | -33   | 1          | 18       | MPLEVTWPFQCPRLGW<br>R      |           |       |   | Oxidation (M)[1]        |      | Mascot      |
| 2229.1096  | 2229.0354   | -0.0742 | -33   | 1          | 18       | MPLEVTWPFQCPRLGW<br>R      |           |       |   | Oxidation (M)[1]        |      | Mascot      |
| 2747.3181  | 2747.2437   | -0.0744 | -27   | 139        | 161      | LNQGEWIHFPEGRVNMS<br>GEFMR |           |       |   |                         |      | Mascot      |
| 2763.313   | 2763.2476   | -0.0654 | -24   | 139        | 161      | LNQGEWIHFPEGRVNMS<br>GEFMR |           |       |   | Oxidation (M)[17]       |      | Mascot      |

|    |                             |  |  |  |              |  |         |      |   |    |   |    |   |
|----|-----------------------------|--|--|--|--------------|--|---------|------|---|----|---|----|---|
| 44 | transferrin-a [Danio rerio] |  |  |  | gi 220672954 |  | 73234.7 | 6.61 | 7 | 30 | 0 | 18 | 0 |
|----|-----------------------------|--|--|--|--------------|--|---------|------|---|----|---|----|---|

#### Peptide Information

| Calc. Mass | Obsrv. Mass | ± da    | ± ppm | Start Seq. | End Seq. | Sequence      | Ion Score | C. I. | % | Modification           | Rank | Result Type |
|------------|-------------|---------|-------|------------|----------|---------------|-----------|-------|---|------------------------|------|-------------|
| 1221.5793  | 1221.5453   | -0.034  | -28   | 246        | 255      | TCNFAREPAR    |           |       |   | Carbamidomethyl (C)[2] |      | Mascot      |
| 1221.5793  | 1221.5453   | -0.034  | -28   | 246        | 255      | TCNFAREPAR    | 18        | 0     |   | Carbamidomethyl (C)[2] |      | Mascot      |
| 1359.6586  | 1359.5563   | -0.1023 | -75   | 442        | 454      | SCHTGLGRSAGWK |           |       |   |                        |      | Mascot      |
| 1492.8005  | 1492.7264   | -0.0741 | -50   | 651        | 663      | TYKTSQNVPLVK  |           |       |   |                        |      | Mascot      |
| 1492.8005  | 1492.7264   | -0.0741 | -50   | 651        | 663      | TYKTSQNVPLVK  |           |       |   |                        |      | Mascot      |

|    |                                    |           |         |     |             |     |                             |      |   |    |                                            |        |   |
|----|------------------------------------|-----------|---------|-----|-------------|-----|-----------------------------|------|---|----|--------------------------------------------|--------|---|
|    | 1629.736                           | 1629.7004 | -0.0356 | -22 | 227         | 239 | QNYELLCMDGSRK               |      |   |    | Carbamidomethyl (C)[7], Oxidation (M)[8]   | Mascot |   |
|    | 1629.736                           | 1629.7004 | -0.0356 | -22 | 227         | 239 | QNYELLCMDGSRK               |      |   |    | Carbamidomethyl (C)[7], Oxidation (M)[8]   | Mascot |   |
|    | 2141.0002                          | 2141.0518 | 0.0516  | 24  | 654         | 673 | TSQNVPLVKACTFGNCI<br>SS     |      |   |    | Carbamidomethyl (C)[12]                    | Mascot |   |
|    | 2357.1223                          | 2357.124  | 0.0017  | 1   | 326         | 348 | DGNPSAPTSQTKLAMCTI<br>GHAEK |      |   |    |                                            | Mascot |   |
|    | 2370.084                           | 2370.1721 | 0.0881  | 37  | 551         | 570 | DLKSEDFELICNPDPDTT<br>MK    |      |   |    | Carbamidomethyl (C)[11], Oxidation (M)[19] | Mascot |   |
| 45 | TPA_exp: transferrin [Danio rerio] |           |         |     | gi 47264590 |     | 73483.9                     | 6.81 | 7 | 29 | 0                                          | 18     | 0 |

#### Peptide Information

|  | Calc. Mass | Obsrv. Mass | ± da    | ± ppm | Start Seq. | End Seq. | Sequence                    | Ion Score | C. I. | % | Modification                               | Rank | Result Type |
|--|------------|-------------|---------|-------|------------|----------|-----------------------------|-----------|-------|---|--------------------------------------------|------|-------------|
|  | 1221.5793  | 1221.5453   | -0.034  | -28   | 246        | 255      | TCNFAREPAR                  |           |       |   | Carbamidomethyl (C)[2]                     |      | Mascot      |
|  | 1221.5793  | 1221.5453   | -0.034  | -28   | 246        | 255      | TCNFAREPAR                  | 18        | 0     |   | Carbamidomethyl (C)[2]                     |      | Mascot      |
|  | 1359.6586  | 1359.5563   | -0.1023 | -75   | 442        | 454      | SCHTGLGRSAGWK               |           |       |   |                                            |      | Mascot      |
|  | 1492.8005  | 1492.7264   | -0.0741 | -50   | 653        | 665      | TYKTSQNVPLVK                |           |       |   |                                            |      | Mascot      |
|  | 1492.8005  | 1492.7264   | -0.0741 | -50   | 653        | 665      | TYKTSQNVPLVK                |           |       |   |                                            |      | Mascot      |
|  | 1629.736   | 1629.7004   | -0.0356 | -22   | 227        | 239      | QNYELLCMDGSRK               |           |       |   | Carbamidomethyl (C)[7], Oxidation (M)[8]   |      | Mascot      |
|  | 1629.736   | 1629.7004   | -0.0356 | -22   | 227        | 239      | QNYELLCMDGSRK               |           |       |   | Carbamidomethyl (C)[7], Oxidation (M)[8]   |      | Mascot      |
|  | 2141.0002  | 2141.0518   | 0.0516  | 24    | 656        | 675      | TSQNVPLVKACTFGNCI<br>SS     |           |       |   | Carbamidomethyl (C)[12]                    |      | Mascot      |
|  | 2357.1223  | 2357.124    | 0.0017  | 1     | 326        | 348      | DGNPSAPTSQTKLAMCTI<br>GHAEK |           |       |   |                                            |      | Mascot      |
|  | 2370.084   | 2370.1721   | 0.0881  | 37    | 553        | 572      | DLKSEDFELICNPDPDTT<br>MK    |           |       |   | Carbamidomethyl (C)[11], Oxidation (M)[19] |      | Mascot      |

|    |                               |  |  |  |             |  |         |      |   |    |   |    |   |
|----|-------------------------------|--|--|--|-------------|--|---------|------|---|----|---|----|---|
| 46 | serotransferrin [Danio rerio] |  |  |  | gi 62632717 |  | 56808.3 | 5.58 | 6 | 29 | 0 | 18 | 0 |
|----|-------------------------------|--|--|--|-------------|--|---------|------|---|----|---|----|---|

#### Peptide Information

|  | Calc. Mass | Obsrv. Mass | ± da    | ± ppm | Start Seq. | End Seq. | Sequence                    | Ion Score | C. I. | % | Modification                               | Rank | Result Type |
|--|------------|-------------|---------|-------|------------|----------|-----------------------------|-----------|-------|---|--------------------------------------------|------|-------------|
|  | 1221.5793  | 1221.5453   | -0.034  | -28   | 93         | 102      | TCNFAREPAR                  |           |       |   | Carbamidomethyl (C)[2]                     |      | Mascot      |
|  | 1221.5793  | 1221.5453   | -0.034  | -28   | 93         | 102      | TCNFAREPAR                  | 18        | 0     |   | Carbamidomethyl (C)[2]                     |      | Mascot      |
|  | 1359.6586  | 1359.5563   | -0.1023 | -75   | 289        | 301      | SCHTGLGRSAGWK               |           |       |   |                                            |      | Mascot      |
|  | 1492.8005  | 1492.7264   | -0.0741 | -50   | 498        | 510      | TYKTSQNVPLVK                |           |       |   |                                            |      | Mascot      |
|  | 1492.8005  | 1492.7264   | -0.0741 | -50   | 498        | 510      | TYKTSQNVPLVK                |           |       |   |                                            |      | Mascot      |
|  | 1629.736   | 1629.7004   | -0.0356 | -22   | 74         | 86       | QNYELLCMDGSRK               |           |       |   | Carbamidomethyl (C)[7], Oxidation (M)[8]   |      | Mascot      |
|  | 1629.736   | 1629.7004   | -0.0356 | -22   | 74         | 86       | QNYELLCMDGSRK               |           |       |   | Carbamidomethyl (C)[7], Oxidation (M)[8]   |      | Mascot      |
|  | 2357.1223  | 2357.124    | 0.0017  | 1     | 173        | 195      | DGNPSAPTSQTKLAMCTI<br>GHAEK |           |       |   |                                            |      | Mascot      |
|  | 2370.084   | 2370.1721   | 0.0881  | 37    | 398        | 417      | DLKSEDFELICNPDPDTT<br>MK    |           |       |   | Carbamidomethyl (C)[11], Oxidation (M)[19] |      | Mascot      |

|    |                                   |  |  |  |              |  |         |      |   |    |   |    |   |
|----|-----------------------------------|--|--|--|--------------|--|---------|------|---|----|---|----|---|
| 47 | DCN1-like protein 3 [Danio rerio] |  |  |  | gi 156739269 |  | 33276.1 | 4.93 | 5 | 29 | 0 | 13 | 0 |
|----|-----------------------------------|--|--|--|--------------|--|---------|------|---|----|---|----|---|

### Peptide Information

| Calc. Mass | Obsrv. Mass                                            | ± da    | ± ppm | Start Seq.  | End Seq. | Sequence                  | Ion Score | C. I. | % Modification         | Rank | Result Type |
|------------|--------------------------------------------------------|---------|-------|-------------|----------|---------------------------|-----------|-------|------------------------|------|-------------|
| 1118.6051  | 1118.6045                                              | -0.0006 | -1    | 43          | 53       | SSAEVIINGTK               |           |       |                        |      | Mascot      |
| 1118.6051  | 1118.6045                                              | -0.0006 | -1    | 43          | 53       | SSAEVIINGTK               | 13        | 0     |                        |      | Mascot      |
| 2166.0317  | 2165.895                                               | -0.1367 | -63   | 144         | 163      | EFVDGCKAIQADSIPGICS<br>R  |           |       | Carbamidomethyl (C)[6] |      | Mascot      |
| 2367.1875  | 2367.0222                                              | -0.1653 | -70   | 112         | 131      | FCNDLCVDPAEFKVLVLA<br>WK  |           |       | Carbamidomethyl (C)[2] |      | Mascot      |
| 2410.3857  | 2410.2312                                              | -0.1545 | -64   | 201         | 221      | SIAIALWRLVFTLDTTPVL<br>ER |           |       |                        |      | Mascot      |
| 2474.0671  | 2474.0852                                              | 0.0181  | 7     | 92          | 111      | MFLCYKDEHEDSILEEGM<br>ER  |           |       |                        |      | Mascot      |
| 48         | chloride intracellular channel protein 4 [Danio rerio] |         |       | gi 41393129 | 28352.6  | 5.71                      | 6         | 29    | 0                      |      |             |

### Peptide Information

| Calc. Mass | Obsrv. Mass | ± da    | ± ppm | Start Seq. | End Seq. | Sequence                      | Ion Score | C. I. | % Modification | Rank | Result Type |
|------------|-------------|---------|-------|------------|----------|-------------------------------|-----------|-------|----------------|------|-------------|
| 1042.5891  | 1042.557    | -0.0321 | -31   | 2          | 11       | SLSVPQNGLK                    |           |       |                |      | Mascot      |
| 1221.6361  | 1221.5453   | -0.0908 | -74   | 238        | 248      | EIEIAYADVAK                   |           |       |                |      | Mascot      |
| 1221.6361  | 1221.5453   | -0.0908 | -74   | 238        | 248      | EIEIAYADVAK                   |           |       |                |      | Mascot      |
| 1343.6549  | 1343.5637   | -0.0912 | -68   | 130        | 141      | NSKPDANEALER                  |           |       |                |      | Mascot      |
| 1343.6549  | 1343.5637   | -0.0912 | -68   | 130        | 141      | NSKPDANEALER                  |           |       |                |      | Mascot      |
| 1359.7155  | 1359.5563   | -0.1592 | -117  | 12         | 23       | GDNEPVIELFVK                  |           |       |                |      | Mascot      |
| 2211.0903  | 2211.0452   | -0.0451 | -20   | 110        | 129      | HPESNTAGMDIFAKFSAF<br>IK      |           |       |                |      | Mascot      |
| 2747.4626  | 2747.2437   | -0.2189 | -80   | 60         | 84       | RKPADLQNLAPGTHPPFI<br>TFNGEVK |           |       |                |      | Mascot      |

49 novel protein similar to vertebrate SLC3A1 solute carrier family 3 (cystine, dibasic and neutral am gi|220679491 74156.2 5.06 8 29 0

### Peptide Information

| Calc. Mass | Obsrv. Mass | ± da    | ± ppm | Start Seq. | End Seq. | Sequence           | Ion Score | C. I. | % Modification   | Rank | Result Type |
|------------|-------------|---------|-------|------------|----------|--------------------|-----------|-------|------------------|------|-------------|
| 1093.6404  | 1093.5359   | -0.1045 | -96   | 549        | 558      | GFLVVLNFGK         |           |       |                  |      | Mascot      |
| 1118.5072  | 1118.6045   | 0.0973  | 87    | 86         | 96       | DSNADGVGDLR        |           |       |                  |      | Mascot      |
| 1118.5072  | 1118.6045   | 0.0973  | 87    | 86         | 96       | DSNADGVGDLR        | 8         | 0     |                  |      | Mascot      |
| 1123.5677  | 1123.5106   | -0.0571 | -51   | 267        | 275      | HMLEATHLR          |           |       | Oxidation (M)[2] |      | Mascot      |
| 1194.5935  | 1194.553    | -0.0405 | -34   | 256        | 266      | GVDGFRMDAVK        |           |       |                  |      | Mascot      |
| 1367.6412  | 1367.5828   | -0.0584 | -43   | 343        | 353      | TMRYYGTTYAK        |           |       |                  |      | Mascot      |
| 2225.2151  | 2225.0618   | -0.1533 | -69   | 238        | 255      | NPLVLQEMTDIIHFWLKK |           |       |                  |      | Mascot      |
| 2357.113   | 2357.124    | 0.011   | 5     | 220        | 237      | QQCYFHQLKEQPDNLNY  |           |       |                  |      | Mascot      |

|                     |                                                                                                  |             |         |       |            |                        |                                |                |            |               |                                          |                 |                    |
|---------------------|--------------------------------------------------------------------------------------------------|-------------|---------|-------|------------|------------------------|--------------------------------|----------------|------------|---------------|------------------------------------------|-----------------|--------------------|
|                     | 2370.1533                                                                                        | 2370.1721   | 0.0188  | 8     | 3          | 23                     | R<br>VSSLPEESEYTQIKPYAG<br>MPK |                |            |               | Oxidation (M)[19]                        |                 | Mascot             |
| 50                  | PREDICTED: hypothetical protein LOC100535483 [Danio rerio]                                       |             |         |       |            | gi 326664199           | 24331.5                        | 8.85           | 1          |               | 18                                       | 0               |                    |
| Peptide Information |                                                                                                  |             |         |       |            |                        |                                |                |            |               |                                          |                 |                    |
|                     | Calc. Mass                                                                                       | Obsrv. Mass | ± da    | ± ppm | Start Seq. | End Seq.               | Sequence                       |                | Ion Score  | C. I. %       | Modification                             | Rank            | Result Type        |
|                     | 1118.635                                                                                         | 1118.6045   | -0.0305 | -27   | 134        | 143                    | GLKMSNVTLR                     |                | 18         | 0             |                                          | 3               | Mascot             |
| Gel Idx/Pos         |                                                                                                  | 184/H11     |         |       |            | Instr./Gel Origin      |                                | BA2060/110707A |            |               | Process Status                           |                 | Analysis Succeeded |
| Plate [#] Name      |                                                                                                  | [1] 31496   |         |       |            | Instrument Sample Name |                                |                |            |               | Spectra                                  |                 | 11                 |
| Rank                | Protein Name                                                                                     |             |         |       |            | Accession No.          | Protein MW                     | Protein PI     | Pep. Count | Protein Score | Protein Score C. I. %                    | Total Ion Score | Total Ion C. I. %  |
| 1                   | succinate dehydrogenase [ubiquinone] flavoprotein subunit, mitochondrial precursor [Danio rerio] |             |         |       |            | gi 41053873            | 72014.6                        | 6.2            | 20         | 1,190         | 100                                      | 1070            | 100                |
| Peptide Information |                                                                                                  |             |         |       |            |                        |                                |                |            |               |                                          |                 |                    |
|                     | Calc. Mass                                                                                       | Obsrv. Mass | ± da    | ± ppm | Start Seq. | End Seq.               | Sequence                       |                | Ion Score  | C. I. %       | Modification                             | Rank            | Result Type        |
|                     | 1045.6616                                                                                        | 1045.5433   | -0.1183 | -113  | 10         | 19                     | VLGTKILSSK                     |                |            |               |                                          |                 | Mascot             |
|                     | 1095.5259                                                                                        | 1095.5037   | -0.0222 | -20   | 118        | 125                    | WHFYDTVK                       |                |            |               |                                          |                 | Mascot             |
|                     | 1108.5746                                                                                        | 1108.5502   | -0.0244 | -22   | 248        | 258                    | NTVIATGGYGR                    |                |            |               |                                          |                 | Mascot             |
|                     | 1108.5746                                                                                        | 1108.5502   | -0.0244 | -22   | 248        | 258                    | NTVIATGGYGR                    |                | 82         | 100           |                                          |                 | Mascot             |
|                     | 1127.5745                                                                                        | 1127.5524   | -0.0221 | -20   | 613        | 620                    | KPFEQHWR                       |                | 51         | 99.81         |                                          |                 | Mascot             |
|                     | 1127.5745                                                                                        | 1127.5524   | -0.0221 | -20   | 613        | 620                    | KPFEQHWR                       |                |            |               |                                          |                 | Mascot             |
|                     | 1330.6597                                                                                        | 1330.6335   | -0.0262 | -20   | 310        | 322                    | GEGGILINSEGER                  |                |            |               |                                          |                 | Mascot             |
|                     | 1354.6709                                                                                        | 1354.6934   | 0.0225  | 17    | 498        | 509                    | YANGSTRTSEIR                   |                |            |               |                                          |                 | Mascot             |
|                     | 1354.7227                                                                                        | 1354.6934   | -0.0293 | -22   | 193        | 204                    | TGHSLLHTLYGR                   |                | 73         | 99.999        |                                          |                 | Mascot             |
|                     | 1473.8424                                                                                        | 1473.8102   | -0.0322 | -22   | 449        | 462                    | LGANSLDLVVFGR                  |                |            |               |                                          |                 | Mascot             |
|                     | 1473.8424                                                                                        | 1473.8102   | -0.0322 | -22   | 449        | 462                    | LGANSLDLVVFGR                  |                | 132        | 100           |                                          |                 | Mascot             |
|                     | 1557.7512                                                                                        | 1557.7168   | -0.0344 | -22   | 230        | 243                    | GVIALCMEDGSIHR                 |                |            |               | Carbamidomethyl (C)[6]                   |                 | Mascot             |
|                     | 1573.7461                                                                                        | 1573.7124   | -0.0337 | -21   | 230        | 243                    | GVIALCMEDGSIHR                 |                |            |               | Carbamidomethyl (C)[6], Oxidation (M)[7] |                 | Mascot             |
|                     | 1743.837                                                                                         | 1743.7939   | -0.0431 | -25   | 73         | 89                     | AAFGLSEAGFNTACVTK              |                |            |               | Carbamidomethyl (C)[14]                  |                 | Mascot             |
|                     | 1768.8752                                                                                        | 1768.832    | -0.0432 | -24   | 598        | 612                    | VDEYDYSKPLQGQVK                |                |            |               |                                          |                 | Mascot             |
|                     | 2040.0033                                                                                        | 2039.9558   | -0.0475 | -23   | 596        | 612                    | DRVDEYDYSKPLQGQVK              |                |            |               |                                          |                 | Mascot             |
|                     | 2110.1416                                                                                        | 2110.0537   | -0.0879 | -42   | 359        | 376                    | DHVHLQLHHLPPQQLAA<br>R         |                |            |               |                                          |                 | Mascot             |
|                     | 2247.9758                                                                                        | 2247.9194   | -0.0564 | -25   | 259        | 279                    | TFFSCTSAHTSTGDGNA              |                |            |               | Carbamidomethyl (C)[5]                   |                 | Mascot             |

|           |           |         |     |     |     |                                      |     |        |  |                                           |        |
|-----------|-----------|---------|-----|-----|-----|--------------------------------------|-----|--------|--|-------------------------------------------|--------|
| 2263.9707 | 2263.9163 | -0.0544 | -24 | 259 | 279 | MVTR<br>TFFSCTSAHTSTGDGNA<br>MVTR    |     |        |  | Carbamidomethyl (C)[5], Oxidation (M)[18] | Mascot |
| 2663.4277 | 2663.3643 | -0.0634 | -24 | 353 | 376 | GVGPDKDHVHLQLHHLP<br>PQQLAAR         |     |        |  |                                           | Mascot |
| 2663.4277 | 2663.3643 | -0.0634 | -24 | 353 | 376 | GVGPDKDHVHLQLHHLP<br>PQQLAAR         | 152 | 100    |  |                                           | Mascot |
| 2697.1892 | 2697.1252 | -0.064  | -24 | 423 | 448 | DGQDHVVPGLYACGEAG<br>CASVHGANR       |     |        |  | Carbamidomethyl (C)[13,18]                | Mascot |
| 2697.1892 | 2697.1252 | -0.064  | -24 | 423 | 448 | DGQDHVVPGLYACGEAG<br>CASVHGANR       | 143 | 100    |  | Carbamidomethyl (C)[13,18]                | Mascot |
| 2871.4556 | 2871.394  | -0.0616 | -21 | 634 | 659 | VTLEYRPVIDSSSLDAEDC<br>AAIPPAIR      | 73  | 99.999 |  | Carbamidomethyl (C)[18]                   | Mascot |
| 2871.4556 | 2871.394  | -0.0616 | -21 | 634 | 659 | VTLEYRPVIDSSSLDAEDC<br>AAIPPAIR      |     |        |  | Carbamidomethyl (C)[18]                   | Mascot |
| 2928.4485 | 2928.3816 | -0.0669 | -23 | 44  | 72  | ISDGVSNQYPVDHEFD<br>AVVVGAGGAGLR     | 215 | 100    |  |                                           | Mascot |
| 2928.4485 | 2928.3816 | -0.0669 | -23 | 44  | 72  | ISDGVSNQYPVDHEFD<br>AVVVGAGGAGLR     |     |        |  |                                           | Mascot |
| 3337.5325 | 3337.6738 | 0.1413  | 42  | 248 | 279 | NTVIATGGYGR<br>TFFSCTSAHTSTGDGNAMVTR |     |        |  | Carbamidomethyl (C)[16]                   | Mascot |
| 3366.5703 | 3366.4951 | -0.0752 | -22 | 280 | 309 | AGLPCQDLEFVQFHPTGI<br>YGAGCLITEGCR   |     |        |  | Carbamidomethyl (C)[5,23,29]              | Mascot |
| 3366.5703 | 3366.4951 | -0.0752 | -22 | 280 | 309 | AGLPCQDLEFVQFHPTGI<br>YGAGCLITEGCR   | 150 | 100    |  | Carbamidomethyl (C)[5,23,29]              | Mascot |

2 RecName: Full=Succinate dehydrogenase [ubiquinone] gi|205831554 72031.6 6.14 20 1,190 100 1070 100  
flavoprotein subunit, mitochondrial; AltName: Fu

#### Peptide Information

| Calc. Mass | Obsrv. Mass | ± da    | ± ppm | Start Seq. | End Seq. | Sequence          | Ion Score | C. I.  | % Modification                           | Rank | Result Type |
|------------|-------------|---------|-------|------------|----------|-------------------|-----------|--------|------------------------------------------|------|-------------|
| 1095.5259  | 1095.5037   | -0.0222 | -20   | 118        | 125      | WHFYDTVK          |           |        |                                          |      | Mascot      |
| 1108.5746  | 1108.5502   | -0.0244 | -22   | 248        | 258      | NTVIATGGYGR       |           |        |                                          |      | Mascot      |
| 1108.5746  | 1108.5502   | -0.0244 | -22   | 248        | 258      | NTVIATGGYGR       | 82        | 100    |                                          |      | Mascot      |
| 1118.6602  | 1118.634    | -0.0262 | -23   | 10         | 19       | VLGTKILSCK        |           |        | Carbamidomethyl (C)[9]                   |      | Mascot      |
| 1127.5745  | 1127.5524   | -0.0221 | -20   | 613        | 620      | KPFEQHWR          | 51        | 99.81  |                                          |      | Mascot      |
| 1127.5745  | 1127.5524   | -0.0221 | -20   | 613        | 620      | KPFEQHWR          |           |        |                                          |      | Mascot      |
| 1330.6597  | 1330.6335   | -0.0262 | -20   | 310        | 322      | GEGGILINSEGER     |           |        |                                          |      | Mascot      |
| 1354.6709  | 1354.6934   | 0.0225  | 17    | 498        | 509      | YANGSTRTSEIR      |           |        |                                          |      | Mascot      |
| 1354.7227  | 1354.6934   | -0.0293 | -22   | 193        | 204      | TGHSLHTLYGR       | 73        | 99.999 |                                          |      | Mascot      |
| 1473.8424  | 1473.8102   | -0.0322 | -22   | 449        | 462      | LGANSLDLVVFR      |           |        |                                          |      | Mascot      |
| 1473.8424  | 1473.8102   | -0.0322 | -22   | 449        | 462      | LGANSLDLVVFR      | 132       | 100    |                                          |      | Mascot      |
| 1557.7512  | 1557.7168   | -0.0344 | -22   | 230        | 243      | GVIALCMEDGSIHR    |           |        | Carbamidomethyl (C)[6]                   |      | Mascot      |
| 1573.7461  | 1573.7124   | -0.0337 | -21   | 230        | 243      | GVIALCMEDGSIHR    |           |        | Carbamidomethyl (C)[6], Oxidation (M)[7] |      | Mascot      |
| 1743.837   | 1743.7939   | -0.0431 | -25   | 73         | 89       | AAFGLSEAGFNTACVTK |           |        | Carbamidomethyl (C)[14]                  |      | Mascot      |
| 1768.8752  | 1768.832    | -0.0432 | -24   | 598        | 612      | VDEYDYSKPLQGQVK   |           |        |                                          |      | Mascot      |
| 2040.0033  | 2039.9558   | -0.0475 | -23   | 596        | 612      | DRVDEYDYSKPLQGQVK |           |        |                                          |      | Mascot      |

|   |                                                                             |           |         |     |     |             |                                    |         |     |        |     |     |     |     |  |  |  |                                           |        |
|---|-----------------------------------------------------------------------------|-----------|---------|-----|-----|-------------|------------------------------------|---------|-----|--------|-----|-----|-----|-----|--|--|--|-------------------------------------------|--------|
|   | 2110.1416                                                                   | 2110.0537 | -0.0879 | -42 | 359 | 376         | DHVHLQLHHLPPQQLAAR                 |         |     |        |     |     |     |     |  |  |  |                                           | Mascot |
|   | 2247.9758                                                                   | 2247.9194 | -0.0564 | -25 | 259 | 279         | TFFSCTSAHTSTGDGNA<br>MVTR          |         |     |        |     |     |     |     |  |  |  | Carbamidomethyl (C)[5]                    | Mascot |
|   | 2263.9707                                                                   | 2263.9163 | -0.0544 | -24 | 259 | 279         | TFFSCTSAHTSTGDGNA<br>MVTR          |         |     |        |     |     |     |     |  |  |  | Carbamidomethyl (C)[5], Oxidation (M)[18] | Mascot |
|   | 2663.4277                                                                   | 2663.3643 | -0.0634 | -24 | 353 | 376         | GVGPDKDHVHLQLHHLPPQLAAR            |         |     |        |     |     |     |     |  |  |  |                                           | Mascot |
|   | 2663.4277                                                                   | 2663.3643 | -0.0634 | -24 | 353 | 376         | GVGPDKDHVHLQLHHLPPQLAAR            | 152     |     | 100    |     |     |     |     |  |  |  |                                           | Mascot |
|   | 2697.1892                                                                   | 2697.1252 | -0.064  | -24 | 423 | 448         | DGQDHHVVPGLYACGEAG<br>CASVHGANR    |         |     |        |     |     |     |     |  |  |  | Carbamidomethyl (C)[13,18]                | Mascot |
|   | 2697.1892                                                                   | 2697.1252 | -0.064  | -24 | 423 | 448         | DGQDHHVVPGLYACGEAG<br>CASVHGANR    | 143     |     | 100    |     |     |     |     |  |  |  | Carbamidomethyl (C)[13,18]                | Mascot |
|   | 2871.4556                                                                   | 2871.394  | -0.0616 | -21 | 634 | 659         | VTLEYRPVIDSSSLDAEDCAAIPPAIR        | 73      |     | 99.999 |     |     |     |     |  |  |  | Carbamidomethyl (C)[18]                   | Mascot |
|   | 2871.4556                                                                   | 2871.394  | -0.0616 | -21 | 634 | 659         | VTLEYRPVIDSSSLDAEDCAAIPPAIR        |         |     |        |     |     |     |     |  |  |  | Carbamidomethyl (C)[18]                   | Mascot |
|   | 2928.4485                                                                   | 2928.3816 | -0.0669 | -23 | 44  | 72          | ISDGVSNQYPVVDHEFD<br>AVVVGAGGAGLR  | 215     |     | 100    |     |     |     |     |  |  |  |                                           | Mascot |
|   | 2928.4485                                                                   | 2928.3816 | -0.0669 | -23 | 44  | 72          | ISDGVSNQYPVVDHEFD<br>AVVVGAGGAGLR  |         |     |        |     |     |     |     |  |  |  |                                           | Mascot |
|   | 3337.5325                                                                   | 3337.6738 | 0.1413  | 42  | 248 | 279         | NTVIATGGYGRTFFSCTSAHTSTGDGNAMVTR   |         |     |        |     |     |     |     |  |  |  | Carbamidomethyl (C)[16]                   | Mascot |
|   | 3366.5703                                                                   | 3366.4951 | -0.0752 | -22 | 280 | 309         | AGLPCQDLEFVQFHPTGI<br>YGAGCLITEGCR |         |     |        |     |     |     |     |  |  |  | Carbamidomethyl (C)[5,23,29]              | Mascot |
|   | 3366.5703                                                                   | 3366.4951 | -0.0752 | -22 | 280 | 309         | AGLPCQDLEFVQFHPTGI<br>YGAGCLITEGCR | 150     |     | 100    |     |     |     |     |  |  |  | Carbamidomethyl (C)[5,23,29]              | Mascot |
| 3 | succinate dehydrogenase complex, subunit A, flavoprotein (Fp) [Danio rerio] |           |         |     |     | gi 37362284 |                                    | 72611.9 | 6.1 | 15     | 906 | 100 | 838 | 100 |  |  |  |                                           |        |

| Peptide Information |             |         |       |            |          |                          |           |       |        |                         |      |        |        |
|---------------------|-------------|---------|-------|------------|----------|--------------------------|-----------|-------|--------|-------------------------|------|--------|--------|
| Calc. Mass          | Obsrv. Mass | ± da    | ± ppm | Start Seq. | End Seq. | Sequence                 | Ion Score | C. I. | %      | Modification            | Rank | Result | Type   |
| 1095.5259           | 1095.5037   | -0.0222 | -20   | 118        | 125      | WHFYDTVK                 |           |       |        |                         |      |        | Mascot |
| 1118.6602           | 1118.634    | -0.0262 | -23   | 10         | 19       | VLGTKILSCK               |           |       |        | Carbamidomethyl (C)[9]  |      |        | Mascot |
| 1127.5745           | 1127.5524   | -0.0221 | -20   | 615        | 622      | KPFEQHWR                 | 51        |       | 99.81  |                         |      |        | Mascot |
| 1127.5745           | 1127.5524   | -0.0221 | -20   | 615        | 622      | KPFEQHWR                 |           |       |        |                         |      |        | Mascot |
| 1330.6597           | 1330.6335   | -0.0262 | -20   | 312        | 324      | GEGGILINSEGER            |           |       |        |                         |      |        | Mascot |
| 1354.6709           | 1354.6934   | 0.0225  | 17    | 500        | 511      | YANGSTRTSEIR             |           |       |        |                         |      |        | Mascot |
| 1354.7227           | 1354.6934   | -0.0293 | -22   | 193        | 204      | TGHSLLHTLYGR             | 73        |       | 99.999 |                         |      |        | Mascot |
| 1473.8424           | 1473.8102   | -0.0322 | -22   | 451        | 464      | LGANSLLDLVVFGR           |           |       |        |                         |      |        | Mascot |
| 1473.8424           | 1473.8102   | -0.0322 | -22   | 451        | 464      | LGANSLLDLVVFGR           | 132       |       | 100    |                         |      |        | Mascot |
| 1743.837            | 1743.7939   | -0.0431 | -25   | 73         | 89       | AAFGLSEAGFNTACVTK        |           |       |        | Carbamidomethyl (C)[14] |      |        | Mascot |
| 1768.8752           | 1768.832    | -0.0432 | -24   | 600        | 614      | VDEYDYSKPLQGQVK          |           |       |        |                         |      |        | Mascot |
| 2040.0033           | 2039.9558   | -0.0475 | -23   | 598        | 614      | DRVDEYDYSKPLQGQVK        |           |       |        |                         |      |        | Mascot |
| 2110.1416           | 2110.0537   | -0.0879 | -42   | 361        | 378      | DHVHLQLHHLPPQQLAAR       |           |       |        |                         |      |        | Mascot |
| 2663.4277           | 2663.3643   | -0.0634 | -24   | 355        | 378      | GVGPDKDHVHLQLHHLPPQQLAAR |           |       |        |                         |      |        | Mascot |

|   |                                  |           |         |     |             |     |                              |      |        |                            |        |
|---|----------------------------------|-----------|---------|-----|-------------|-----|------------------------------|------|--------|----------------------------|--------|
|   | 2663.4277                        | 2663.3643 | -0.0634 | -24 | 355         | 378 | GVGPDKDHVHLQLHHLPPQQLAAR     | 152  | 100    |                            | Mascot |
|   | 2697.1892                        | 2697.1252 | -0.064  | -24 | 425         | 450 | DGQDHHVVPGLYACGEAGCASVHGANR  |      |        | Carbamidomethyl (C)[13,18] | Mascot |
|   | 2697.1892                        | 2697.1252 | -0.064  | -24 | 425         | 450 | DGQDHHVVPGLYACGEAGCASVHGANR  | 143  | 100    | Carbamidomethyl (C)[13,18] | Mascot |
|   | 2871.4556                        | 2871.394  | -0.0616 | -21 | 636         | 661 | VTLEYRPPVIDSSSLDAEDCAAIPPAIR | 73   | 99.999 | Carbamidomethyl (C)[18]    | Mascot |
|   | 2871.4556                        | 2871.394  | -0.0616 | -21 | 636         | 661 | VTLEYRPPVIDSSSLDAEDCAAIPPAIR |      |        | Carbamidomethyl (C)[18]    | Mascot |
|   | 2928.4485                        | 2928.3816 | -0.0669 | -23 | 44          | 72  | ISDGVSNQYPVVDHEFDVVVGAGGAGLR | 215  | 100    |                            | Mascot |
|   | 2928.4485                        | 2928.3816 | -0.0669 | -23 | 44          | 72  | ISDGVSNQYPVVDHEFDVVVGAGGAGLR |      |        |                            | Mascot |
| 4 | Wu:fj82b07 protein [Danio rerio] |           |         |     | gi 58701969 |     | 62105.9                      | 6.04 | 10     | 48                         | 20.865 |

#### Peptide Information

| Calc. Mass | Obsrv. Mass | ± da    | ± ppm | Start Seq. | End Seq. | Sequence                       | Ion Score | C. I. | % | Modification                                 | Rank | Result Type |
|------------|-------------|---------|-------|------------|----------|--------------------------------|-----------|-------|---|----------------------------------------------|------|-------------|
| 996.5876   | 996.5761    | -0.0115 | -12   | 528        | 535      | LLGQFYKK                       |           |       |   |                                              |      | Mascot      |
| 1127.7035  | 1127.5524   | -0.1511 | -134  | 376        | 385      | ALEVLQLTLK                     | 11        | 0     |   |                                              |      | Mascot      |
| 1127.7035  | 1127.5524   | -0.1511 | -134  | 376        | 385      | ALEVLQLTLK                     |           |       |   |                                              |      | Mascot      |
| 1174.5851  | 1174.553    | -0.0321 | -27   | 224        | 232      | EVWQEQTVR                      |           |       |   |                                              |      | Mascot      |
| 1330.6862  | 1330.6335   | -0.0527 | -40   | 224        | 233      | EVWQEQTVR                      |           |       |   |                                              |      | Mascot      |
| 1720.8655  | 1720.9137   | 0.0482  | 28    | 112        | 125      | ALAVRLCQVLMDCR                 |           |       |   | Carbamidomethyl (C)[7,13], Oxidation (M)[11] |      | Mascot      |
| 2022.0742  | 2021.9862   | -0.088  | -44   | 334        | 349      | LLLFHVLEKHYGHMER               |           |       |   |                                              |      | Mascot      |
| 2211.1326  | 2211.053    | -0.0796 | -36   | 203        | 223      | LDLTGLVGSSPDECLPPSVVR          |           |       |   | Carbamidomethyl (C)[14]                      |      | Mascot      |
| 2680.3213  | 2680.2212   | -0.1001 | -37   | 252        | 275      | IVSPPSRGSNNEPDLLYTSSYLDR       |           |       |   |                                              |      | Mascot      |
| 2697.2283  | 2697.1252   | -0.1031 | -38   | 80         | 102      | THENCFLGCEAVDVLQDYLTQNK        |           |       |   | Carbamidomethyl (C)[5]                       |      | Mascot      |
| 2697.2283  | 2697.1252   | -0.1031 | -38   | 80         | 102      | THENCFLGCEAVDVLQDYLTQNK        |           |       |   | Carbamidomethyl (C)[5]                       |      | Mascot      |
| 3366.6997  | 3366.4951   | -0.2046 | -61   | 203        | 232      | LDLTGLVGSSPDECLPPSVVREVWQEQTVR |           |       |   | Carbamidomethyl (C)[14]                      |      | Mascot      |
| 3366.6997  | 3366.4951   | -0.2046 | -61   | 203        | 232      | LDLTGLVGSSPDECLPPSVVREVWQEQTVR |           |       |   | Carbamidomethyl (C)[14]                      |      | Mascot      |

5 zinc finger protein 432-like [Danio rerio] gi|71834484 50250.7 8.61 14 46 0 6 0

#### Peptide Information

| Calc. Mass | Obsrv. Mass | ± da    | ± ppm | Start Seq. | End Seq. | Sequence        | Ion Score | C. I. | % | Modification     | Rank | Result Type |
|------------|-------------|---------|-------|------------|----------|-----------------|-----------|-------|---|------------------|------|-------------|
| 987.4676   | 987.6115    | 0.1439  | 146   | 314        | 321      | ENLTSHMR        |           |       |   |                  |      | Mascot      |
| 1095.5112  | 1095.5037   | -0.0075 | -7    | 231        | 238      | DHLDRHMR        |           |       |   | Oxidation (M)[7] |      | Mascot      |
| 1564.7537  | 1564.8866   | 0.1329  | 85    | 309        | 321      | SFSQKENLTSHMR   |           |       |   |                  |      | Mascot      |
| 1638.725   | 1638.6833   | -0.0417 | -25   | 294        | 308      | VHTGEKPYSCTECGK |           |       |   |                  |      | Mascot      |

|   |                                                                         |           |         |      |     |              |                             |      |    |    |   |  |                                              |  |  |  |        |
|---|-------------------------------------------------------------------------|-----------|---------|------|-----|--------------|-----------------------------|------|----|----|---|--|----------------------------------------------|--|--|--|--------|
|   | 1720.829                                                                | 1720.9137 | 0.0847  | 49   | 422 | 436          | DLDVKFPQPTHEASH             |      |    |    |   |  |                                              |  |  |  | Mascot |
|   | 1768.7563                                                               | 1768.832  | 0.0757  | 43   | 378 | 392          | THTGERPYTCMQCGK             |      |    |    |   |  | Carbamidomethyl (C)[10]                      |  |  |  | Mascot |
|   | 2086.9104                                                               | 2086.842  | -0.0684 | -33  | 95  | 113          | VHMGHTGENLSTCDQC<br>GK      |      |    |    |   |  | Carbamidomethyl (C)[14]                      |  |  |  | Mascot |
|   | 2216.011                                                                | 2215.9321 | -0.0789 | -36  | 294 | 313          | VHTGEKPYSCTECGKSF<br>SQK    |      |    |    |   |  |                                              |  |  |  | Mascot |
|   | 2247.9844                                                               | 2247.9194 | -0.065  | -29  | 124 | 141          | HMKTHSGEKPFWCTECG<br>R      |      |    |    |   |  | Carbamidomethyl (C)[13,16]                   |  |  |  | Mascot |
|   | 2263.9792                                                               | 2263.9163 | -0.0629 | -28  | 124 | 141          | HMKTHSGEKPFWCTECG<br>R      |      |    |    |   |  | Carbamidomethyl (C)[13,16], Oxidation (M)[2] |  |  |  | Mascot |
|   | 2283.0393                                                               | 2283.125  | 0.0857  | 38   | 403 | 421          | HMKTHHTGTPKPFACDDV<br>ER    |      |    |    |   |  | Carbamidomethyl (C)[14], Oxidation (M)[2]    |  |  |  | Mascot |
|   | 2384.1299                                                               | 2383.8892 | -0.2407 | -101 | 406 | 426          | THHTGTGKPFACDDVERD<br>LDVK  |      |    |    |   |  |                                              |  |  |  | Mascot |
|   | 2559.1748                                                               | 2559.1748 | 0       | 0    | 91  | 113          | QSLKVHMGHTGENLSTC<br>DQCGK  | 6    |    | 0  |   |  | Carbamidomethyl (C)[21], Oxidation (M)[7]    |  |  |  | Mascot |
|   | 2559.1748                                                               | 2559.1748 | 0       | 0    | 91  | 113          | QSLKVHMGHTGENLSTC<br>DQCGK  |      |    |    |   |  | Carbamidomethyl (C)[18], Oxidation (M)[7]    |  |  |  | Mascot |
|   | 2680.1912                                                               | 2680.2212 | 0.03    | 11   | 95  | 118          | VHMGHTGENLSTCDQC<br>GKSFNK  |      |    |    |   |  | Carbamidomethyl (C)[14], Oxidation (M)[3]    |  |  |  | Mascot |
|   | 2853.2751                                                               | 2853.3992 | 0.1241  | 43   | 314 | 336          | ENLTSHMRIHTGEKPFAC<br>EYCEK |      |    |    |   |  | Carbamidomethyl (C)[18,21], Oxidation (M)[7] |  |  |  | Mascot |
| 6 | PREDICTED: gastrula zinc finger protein<br>XICGF57.1-like [Danio rerio] |           |         |      |     | gi 326667039 | 42016.4                     | 9.37 | 13 | 45 | 0 |  |                                              |  |  |  |        |

#### Peptide Information

| Calc. Mass | Obsrv. Mass | ± da    | ± ppm | Start Seq. | End Seq. | Sequence                     | Ion Score | C. I. | % | Modification                                 | Rank | Result Type |
|------------|-------------|---------|-------|------------|----------|------------------------------|-----------|-------|---|----------------------------------------------|------|-------------|
| 900.4282   | 900.4632    | 0.035   | 39    | 327        | 333      | THSREDR                      |           |       |   |                                              |      | Mascot      |
| 987.4676   | 987.6115    | 0.1439  | 146   | 95         | 102      | SNLDVHMR                     |           |       |   | Oxidation (M)[7]                             |      | Mascot      |
| 996.5446   | 996.5761    | 0.0315  | 32    | 67         | 74       | TSSHRRPR                     |           |       |   |                                              |      | Mascot      |
| 1174.4979  | 1174.553    | 0.0551  | 47    | 76         | 85       | SKSGCNFSCK                   |           |       |   | Carbamidomethyl (C)[5,9]                     |      | Mascot      |
| 1548.7588  | 1548.9131   | 0.1543  | 100   | 90         | 102      | SFSQKSNLDVHMR                |           |       |   |                                              |      | Mascot      |
| 1564.7537  | 1564.8866   | 0.1329  | 85    | 90         | 102      | SFSQKSNLDVHMR                |           |       |   | Oxidation (M)[12]                            |      | Mascot      |
| 1605.7015  | 1605.7881   | 0.0866  | 54    | 174        | 186      | SFYHAGHFAEHMR                |           |       |   | Oxidation (M)[12]                            |      | Mascot      |
| 1707.7941  | 1707.7482   | -0.0459 | -27   | 103        | 117      | THTGEKPFSCQKCGK              |           |       |   | Carbamidomethyl (C)[10]                      |      | Mascot      |
| 1720.8258  | 1720.9137   | 0.0879  | 51    | 159        | 173      | IHTGERPYTCQKCGK              |           |       |   |                                              |      | Mascot      |
| 1974.9087  | 1975.0669   | 0.1582  | 80    | 348        | 364      | SLNTHMKLHNGEESPQH            |           |       |   | Oxidation (M)[6]                             |      | Mascot      |
| 2211.0684  | 2211.053    | -0.0154 | -7    | 271        | 290      | IHTGEKPFACAQCGKSFT<br>TK     |           |       |   | Carbamidomethyl (C)[10]                      |      | Mascot      |
| 2536.1489  | 2536.1211   | -0.0278 | -11   | 295        | 317      | NHNMNGHTGTIVFTCDQC<br>GKSLTR |           |       |   | Oxidation (M)[3]                             |      | Mascot      |
| 2606.1909  | 2606.1165   | -0.0744 | -29   | 291        | 313      | TSLKNHNMNGHTGTIVFTC<br>DQCGK |           |       |   | Carbamidomethyl (C)[18,21]                   |      | Mascot      |
| 2853.3115  | 2853.3992   | 0.0877  | 31    | 235        | 257      | QDLYIHMRIHTGEKPYTC<br>TECGK  |           |       |   | Carbamidomethyl (C)[18,21], Oxidation (M)[7] |      | Mascot      |

7 PREDICTED: zinc finger protein 180-like [Danio rerio] gi|292613226 44120.8 9.2 12 43 0



| Peptide Information |                                              |         |       |             |          |                                              |           |       |                            |      |             |
|---------------------|----------------------------------------------|---------|-------|-------------|----------|----------------------------------------------|-----------|-------|----------------------------|------|-------------|
| Calc. Mass          | Obsrv. Mass                                  | ± da    | ± ppm | Start Seq.  | End Seq. | Sequence                                     | Ion Score | C. I. | % Modification             | Rank | Result Type |
| 1108.5382           | 1108.5502                                    | 0.012   | 11    | 374         | 383      | LHNGEQSPLN                                   |           |       |                            |      | Mascot      |
| 1108.5382           | 1108.5502                                    | 0.012   | 11    | 374         | 383      | LHNGEQSPLN                                   |           |       |                            |      | Mascot      |
| 1127.4642           | 1127.5524                                    | 0.0882  | 78    | 268         | 276      | ICTCTQCGK                                    |           |       | Carbamidomethyl (C)[2,4,7] |      | Mascot      |
| 1127.4642           | 1127.5524                                    | 0.0882  | 78    | 268         | 276      | ICTCTQCGK                                    |           |       | Carbamidomethyl (C)[2,4,7] |      | Mascot      |
| 1165.6259           | 1165.7202                                    | 0.0943  | 81    | 281         | 289      | KQSLHIHMR                                    |           |       | Oxidation (M)[8]           |      | Mascot      |
| 1174.4802           | 1174.553                                     | 0.0728  | 62    | 71          | 80       | CNFSCKQCGK                                   |           |       | Carbamidomethyl (C)[1]     |      | Mascot      |
| 1534.7794           | 1534.6222                                    | -0.1572 | -102  | 165         | 177      | SFKQNGTLTVHMR                                |           |       | Oxidation (M)[12]          |      | Mascot      |
| 1605.7512           | 1605.7881                                    | 0.0369  | 23    | 318         | 332      | THTGEKPFACVQCGK                              |           |       |                            |      | Mascot      |
| 1620.6749           | 1620.7225                                    | 0.0476  | 29    | 268         | 280      | ICTCTQCGKCFSR                                |           |       | Carbamidomethyl (C)[2,4,7] |      | Mascot      |
| 1720.8146           | 1720.9137                                    | 0.0991  | 58    | 234         | 248      | IHTGEKPYSCLCQCGK                             |           |       | Carbamidomethyl (C)[10]    |      | Mascot      |
| 1768.8488           | 1768.832                                     | -0.0168 | -9    | 6           | 20       | EESEDKIEDTFTVK                               |           |       |                            |      | Mascot      |
| 1974.9636           | 1975.0669                                    | 0.1033  | 52    | 77          | 93       | QCGKSFSQKPNLDVHMR                            |           |       |                            |      | Mascot      |
| 3337.4573           | 3337.6738                                    | 0.2165  | 65    | 178         | 205      | THTGERPYTCQCGKSF<br>YTSNFTQHMR               |           |       |                            |      | Mascot      |
| 3366.5103           | 3366.4951                                    | -0.0152 | -5    | 122         | 149      | IHTGERPYTCQCGQT<br>YHVGNF <sup>1</sup> AAHMR |           |       | Carbamidomethyl (C)[10,13] |      | Mascot      |
| 3366.5103           | 3366.4951                                    | -0.0152 | -5    | 122         | 149      | IHTGERPYTCQCGQT<br>YHVGNF <sup>1</sup> AAHMR |           |       | Carbamidomethyl (C)[10,13] |      | Mascot      |
| 8                   | synaptonemal complex protein 3 [Danio rerio] |         |       | gi 94536667 |          | 27983.3                                      | 8.55      | 8     | 42                         | 0    |             |

| Peptide Information |                         |         |       |             |          |                                            |           |       |                   |      |             |
|---------------------|-------------------------|---------|-------|-------------|----------|--------------------------------------------|-----------|-------|-------------------|------|-------------|
| Calc. Mass          | Obsrv. Mass             | ± da    | ± ppm | Start Seq.  | End Seq. | Sequence                                   | Ion Score | C. I. | % Modification    | Rank | Result Type |
| 850.4127            | 850.527                 | 0.1143  | 134   | 111         | 116      | LEQMWK                                     |           |       | Oxidation (M)[4]  |      | Mascot      |
| 1045.5049           | 1045.5433               | 0.0384  | 37    | 44          | 52       | DDETPIDK                                   |           |       |                   |      | Mascot      |
| 1605.7802           | 1605.7881               | 0.0079  | 5     | 111         | 122      | LEQMWK <sup>1</sup> TQQNQR                 |           |       | Oxidation (M)[4]  |      | Mascot      |
| 2021.8782           | 2021.9862               | 0.108   | 53    | 35          | 52       | ESGSD <sup>1</sup> EDTRDDETPIDK            |           |       |                   |      | Mascot      |
| 2233.0806           | 2233.0376               | -0.043  | -19   | 178         | 195      | TINDLHEQFVKNI <sup>1</sup> EEMEK           |           |       | Oxidation (M)[16] |      | Mascot      |
| 2264.1445           | 2263.9163               | -0.2282 | -101  | 14          | 33       | HTDGVVTDLKAFDFTVLE<br>EK                   |           |       |                   |      | Mascot      |
| 2536.1807           | 2536.1211               | -0.0596 | -23   | 189         | 209      | NIEEM <sup>1</sup> KSHEAFLQGTQ<br>MELR     |           |       | Oxidation (M)[5]  |      | Mascot      |
| 2871.4636           | 2871.394                | -0.0696 | -24   | 123         | 146      | QKLTQDHSQ <sup>1</sup> QVFSVLQQ<br>WESDVLK |           |       |                   |      | Mascot      |
| 2871.4636           | 2871.394                | -0.0696 | -24   | 123         | 146      | QKLTQDHSQ <sup>1</sup> QVFSVLQQ<br>WESDVLK |           |       |                   |      | Mascot      |
| 9                   | Zgc:55673 [Danio rerio] |         |       | gi 28278370 |          | 41830.1                                    | 9.58      | 9     | 41                | 0    |             |

| Peptide Information |             |      |       |       |     |          |     |       |                |      |             |
|---------------------|-------------|------|-------|-------|-----|----------|-----|-------|----------------|------|-------------|
| Calc. Mass          | Obsrv. Mass | ± da | ± ppm | Start | End | Sequence | Ion | C. I. | % Modification | Rank | Result Type |

|  |           |           |         | Seq. | Seq. | Score |                               |                  |        |
|--|-----------|-----------|---------|------|------|-------|-------------------------------|------------------|--------|
|  | 939.5158  | 939.5073  | -0.0085 | -9   | 351  | 358   | YLRAGGFR                      |                  | Mascot |
|  | 996.4996  | 996.5761  | 0.0765  | 77   | 2    | 11    | SSGTPYIGSK                    |                  | Mascot |
|  | 1127.5402 | 1127.5524 | 0.0122  | 11   | 1    | 11    | MSSGTPYIGSK                   |                  | Mascot |
|  | 1127.5402 | 1127.5524 | 0.0122  | 11   | 1    | 11    | MSSGTPYIGSK                   |                  | Mascot |
|  | 1190.6012 | 1190.5504 | -0.0508 | -43  | 194  | 205   | GDSSSAQQAVLK                  |                  | Mascot |
|  | 1557.7656 | 1557.7168 | -0.0488 | -31  | 318  | 330   | SFFDNISSELRSR                 |                  | Mascot |
|  | 1620.8856 | 1620.7225 | -0.1631 | -101 | 340  | 353   | LNVEFTGVPGRYLR                |                  | Mascot |
|  | 1768.9513 | 1768.832  | -0.1193 | -67  | 1    | 17    | MSSGTPYIGSKISLISK             |                  | Mascot |
|  | 2087.0542 | 2086.842  | -0.2122 | -102 | 22   | 40    | YEGILYTIDTDNSTVALAK           |                  | Mascot |
|  | 2853.416  | 2853.3992 | -0.0168 | -6   | 150  | 174   | GPMVEQAVQTVPAEKTQ<br>QQQQQQQK | Oxidation (M)[3] | Mascot |

10 PREDICTED: DEP domain-containing protein 7 [Danio rerio] gi|292628040 69437.4 5.37 9 40 0

#### Peptide Information

| Calc. Mass | Obsrv. Mass | ± da    | ± ppm | Start Seq. | End Seq. | Sequence                           | Ion Score | C. I. | % Modification                               | Rank | Result Type |
|------------|-------------|---------|-------|------------|----------|------------------------------------|-----------|-------|----------------------------------------------|------|-------------|
| 1127.7035  | 1127.5524   | -0.1511 | -134  | 424        | 433      | ALEVLQLTLK                         | 11        | 0     |                                              |      | Mascot      |
| 1127.7035  | 1127.5524   | -0.1511 | -134  | 424        | 433      | ALEVLQLTLK                         |           |       |                                              |      | Mascot      |
| 1174.5851  | 1174.553    | -0.0321 | -27   | 272        | 280      | EVWQEQTVR                          |           |       |                                              |      | Mascot      |
| 1330.6862  | 1330.6335   | -0.0527 | -40   | 272        | 281      | EVWQEQTVRR                         |           |       |                                              |      | Mascot      |
| 1720.8655  | 1720.9137   | 0.0482  | 28    | 160        | 173      | ALAVRLCQVLMDCR                     |           |       | Carbamidomethyl (C)[7,13], Oxidation (M)[11] |      | Mascot      |
| 2022.0742  | 2021.9862   | -0.088  | -44   | 382        | 397      | LLLFHVLEKHYGHMER                   |           |       |                                              |      | Mascot      |
| 2211.1326  | 2211.053    | -0.0796 | -36   | 251        | 271      | LDLTGLVGSSPDECLPPS<br>VVR          |           |       | Carbamidomethyl (C)[14]                      |      | Mascot      |
| 2680.3213  | 2680.2212   | -0.1001 | -37   | 300        | 323      | IVSPPSRGSNNPDLLYT<br>SSYLDR        |           |       |                                              |      | Mascot      |
| 2697.2283  | 2697.1252   | -0.1031 | -38   | 128        | 150      | THENCFLGCEAVDVLQD<br>YLTQNK        |           |       | Carbamidomethyl (C)[5]                       |      | Mascot      |
| 2697.2283  | 2697.1252   | -0.1031 | -38   | 128        | 150      | THENCFLGCEAVDVLQD<br>YLTQNK        |           |       | Carbamidomethyl (C)[5]                       |      | Mascot      |
| 3366.6997  | 3366.4951   | -0.2046 | -61   | 251        | 280      | LDLTGLVGSSPDECLPPS<br>VVREVWQEQTVR |           |       | Carbamidomethyl (C)[14]                      |      | Mascot      |
| 3366.6997  | 3366.4951   | -0.2046 | -61   | 251        | 280      | LDLTGLVGSSPDECLPPS<br>VVREVWQEQTVR |           |       | Carbamidomethyl (C)[14]                      |      | Mascot      |

11 PREDICTED: apolipoprotein B-100 [Danio rerio] gi|326675669 478034.2 5.42 30 38 0

#### Peptide Information

| Calc. Mass | Obsrv. Mass | ± da   | ± ppm | Start Seq. | End Seq. | Sequence | Ion Score | C. I. | % Modification | Rank | Result Type |
|------------|-------------|--------|-------|------------|----------|----------|-----------|-------|----------------|------|-------------|
| 900.4097   | 900.4632    | 0.0535 | 59    | 2163       | 2169     | AFDEQYK  |           |       |                |      | Mascot      |

|           |           |         |      |      |      |                                |                                            |        |
|-----------|-----------|---------|------|------|------|--------------------------------|--------------------------------------------|--------|
| 1045.5347 | 1045.5433 | 0.0086  | 8    | 931  | 939  | IVPSMVEDR                      |                                            | Mascot |
| 1051.5756 | 1051.6887 | 0.1131  | 108  | 3778 | 3785 | HDLRQNL                        |                                            | Mascot |
| 1095.481  | 1095.5037 | 0.0227  | 21   | 522  | 530  | LMEMSDSDVR                     |                                            | Mascot |
| 1118.6052 | 1118.634  | 0.0288  | 26   | 274  | 283  | QSLTLQDSVK                     |                                            | Mascot |
| 1127.4707 | 1127.5524 | 0.0817  | 72   | 522  | 530  | LMEMSDSDVR                     | 2 0 Oxidation (M)[2,4]                     | Mascot |
| 1127.4707 | 1127.5524 | 0.0817  | 72   | 522  | 530  | LMEMSDSDVR                     | Oxidation (M)[2,4]                         | Mascot |
| 1330.6936 | 1330.6335 | -0.0601 | -45  | 713  | 723  | WISPLNGERMK                    |                                            | Mascot |
| 1354.7114 | 1354.6934 | -0.018  | -13  | 1250 | 1260 | SDALLRYQFNK                    |                                            | Mascot |
| 1354.7114 | 1354.6934 | -0.018  | -13  | 1250 | 1260 | SDALLRYQFNK                    |                                            | Mascot |
| 1363.6998 | 1363.6482 | -0.0516 | -38  | 3206 | 3217 | RNMEASLTNLAK                   | Oxidation (M)[3]                           | Mascot |
| 1380.7369 | 1380.7235 | -0.0134 | -10  | 2448 | 2459 | NIKDVIDTTAYK                   |                                            | Mascot |
| 1473.693  | 1473.8102 | 0.1172  | 80   | 2425 | 2436 | EMQATVFDYLEK                   |                                            | Mascot |
| 1473.693  | 1473.8102 | 0.1172  | 80   | 2425 | 2436 | EMQATVFDYLEK                   |                                            | Mascot |
| 1534.7708 | 1534.6222 | -0.1486 | -97  | 1657 | 1671 | GSSQDNTIELSAKGK                |                                            | Mascot |
| 1548.6998 | 1548.9131 | 0.2133  | 138  | 733  | 744  | SMEEYISEFKNR                   | Oxidation (M)[2]                           | Mascot |
| 1557.7573 | 1557.7168 | -0.0405 | -26  | 2345 | 2357 | MMEIMDSIVSLLK                  | Oxidation (M)[1,2,5]                       | Mascot |
| 1620.7906 | 1620.7225 | -0.0681 | -42  | 3220 | 3232 | CPVLMMDLNQVLR                  | Carbamidomethyl (C)[1], Oxidation (M)[5,6] | Mascot |
| 1638.7832 | 1638.6833 | -0.0999 | -61  | 605  | 619  | AVQGDVSFPPMDFTK                |                                            | Mascot |
| 1652.8563 | 1652.8976 | 0.0413  | 25   | 3450 | 3464 | VEMSESVEGKVAFLK                |                                            | Mascot |
| 1707.9388 | 1707.7482 | -0.1906 | -112 | 1517 | 1531 | TNAQNDVLKHVVELK                |                                            | Mascot |
| 1768.8972 | 1768.832  | -0.0652 | -37  | 4149 | 4164 | VSGIYKEAGNLEVMMK               |                                            | Mascot |
| 1974.9478 | 1975.0669 | 0.1191  | 60   | 2612 | 2628 | QIEMPEVDPEAIFGDLR              | Oxidation (M)[4]                           | Mascot |
| 2110.0203 | 2110.0537 | 0.0334  | 16   | 1694 | 1712 | NTMNIGINKQGLSMSNTM<br>R        |                                            | Mascot |
| 2211.1113 | 2211.053  | -0.0583 | -26  | 770  | 788  | TSDLKHVTQYINLCAETF<br>K        |                                            | Mascot |
| 2216.0176 | 2215.9321 | -0.0855 | -39  | 1161 | 1178 | SDINSEVEKLFPNMEEYR             | Oxidation (M)[14]                          | Mascot |
| 2248.0994 | 2247.9194 | -0.18   | -80  | 798  | 815  | LISSLENEFFVHYMFLDK             | Oxidation (M)[14]                          | Mascot |
| 2264.0903 | 2263.9163 | -0.174  | -77  | 4112 | 4129 | SEEVFEDLMNYLKVYTQ<br>R         |                                            | Mascot |
| 2284.1416 | 2284.1194 | -0.0222 | -10  | 2731 | 2750 | SSLEFLDYTLDAMLQIEA<br>PK       |                                            | Mascot |
| 2559.1853 | 2559.1748 | -0.0105 | -4   | 2971 | 2993 | VSGSISNTCDFLAQPFV<br>TLDCR     | Carbamidomethyl (C)[9]                     | Mascot |
| 2559.1853 | 2559.1748 | -0.0105 | -4   | 2971 | 2993 | VSGSISNTCDFLAQPFV<br>TLDCR     | Carbamidomethyl (C)[9]                     | Mascot |
| 2697.3994 | 2697.1252 | -0.2742 | -102 | 2044 | 2066 | FESLQNYLNSLDLNLALIG<br>QFRNK   |                                            | Mascot |
| 2697.3994 | 2697.1252 | -0.2742 | -102 | 2044 | 2066 | FESLQNYLNSLDLNLALIG<br>QFRNK   |                                            | Mascot |
| 2853.3835 | 2853.3992 | 0.0157  | 6    | 3351 | 3377 | IYATMAYTSSNAASIASFS<br>TNGKQNV |                                            | Mascot |
| 2871.3286 | 2871.394  | 0.0654  | 23   | 3707 | 3732 | MASPIYNNTWTGNVENT<br>EAGTVCTLK | Carbamidomethyl (C)[23]                    | Mascot |
| 2871.3286 | 2871.394  | 0.0654  | 23   | 3707 | 3732 | MASPIYNNTWTGNVENT              | Carbamidomethyl (C)[23]                    | Mascot |

|                     |                                                       |             |         |       |            |              |                                                |           |       |                           |                   |             |
|---------------------|-------------------------------------------------------|-------------|---------|-------|------------|--------------|------------------------------------------------|-----------|-------|---------------------------|-------------------|-------------|
|                     | 3337.7654                                             | 3337.6738   | -0.0916 | -27   | 3516       | 3544         | EAGTVCTLK<br>LFENGVSFNIPQITFGVP<br>DLFKTIPQMIR |           |       |                           | Oxidation (M)[27] | Mascot      |
| 12                  | S-methyl-5'-thioadenosine phosphorylase [Danio rerio] |             |         |       |            | gi 41054629  | 30827.4                                        | 5.99      | 8     | 37                        | 0                 |             |
| Peptide Information |                                                       |             |         |       |            |              |                                                |           |       |                           |                   |             |
|                     | Calc. Mass                                            | Obsrv. Mass | ± da    | ± ppm | Start Seq. | End Seq.     | Sequence                                       | Ion Score | C. I. | % Modification            | Rank              | Result Type |
|                     | 1330.6572                                             | 1330.6335   | -0.0237 | -18   | 174        | 184          | FSSRAESLMFR                                    |           |       |                           |                   | Mascot      |
|                     | 1354.7939                                             | 1354.6934   | -0.1005 | -74   | 147        | 159          | EVLLEVAQGLGVK                                  |           |       |                           |                   | Mascot      |
|                     | 1354.7939                                             | 1354.6934   | -0.1005 | -74   | 147        | 159          | EVLLEVAQGLGVK                                  |           |       |                           |                   | Mascot      |
|                     | 1363.6344                                             | 1363.6482   | 0.0138  | 10    | 269        | 280          | SMSQSSVMLPKH                                   |           |       | Oxidation (M)[2,8]        |                   | Mascot      |
|                     | 1557.7625                                             | 1557.7168   | -0.0457 | -29   | 160        | 173          | CHTRGTMVTIEGPR                                 |           |       |                           |                   | Mascot      |
|                     | 1573.7573                                             | 1573.7124   | -0.0449 | -29   | 160        | 173          | CHTRGTMVTIEGPR                                 |           |       | Oxidation (M)[7]          |                   | Mascot      |
|                     | 1903.9                                                | 1903.8071   | -0.0929 | -49   | 80         | 96           | EEGCTHLLVTTACGSLR                              |           |       | Carbamidomethyl (C)[4,13] |                   | Mascot      |
|                     | 2087.0842                                             | 2086.842    | -0.2422 | -116  | 185        | 203          | QWGADVINTTVPEVVLAK                             |           |       | Oxidation (M)[9]          |                   | Mascot      |
|                     | 2224.9348                                             | 2225.0657   | 0.1309  | 59    | 204        | 222          | EAGLCYASIAMATDYDCWK                            |           |       | Carbamidomethyl (C)[5,17] |                   | Mascot      |
|                     | 2697.3511                                             | 2697.1252   | -0.2259 | -84   | 1          | 26           | MTSNSHVKIGIIGGSGLD<br>DPDILEGR                 |           |       | Oxidation (M)[1]          |                   | Mascot      |
|                     | 2697.3511                                             | 2697.1252   | -0.2259 | -84   | 1          | 26           | MTSNSHVKIGIIGGSGLD<br>DPDILEGR                 |           |       | Oxidation (M)[1]          |                   | Mascot      |
| 13                  | LOC100002738 protein [Danio rerio]                    |             |         |       |            | gi 134026300 | 92988.4                                        | 5.6       | 10    | 37                        | 0                 |             |
| Peptide Information |                                                       |             |         |       |            |              |                                                |           |       |                           |                   |             |
|                     | Calc. Mass                                            | Obsrv. Mass | ± da    | ± ppm | Start Seq. | End Seq.     | Sequence                                       | Ion Score | C. I. | % Modification            | Rank              | Result Type |
|                     | 842.4842                                              | 842.4929    | 0.0087  | 10    | 602        | 608          | IVDPSRR                                        |           |       |                           |                   | Mascot      |
|                     | 1127.5051                                             | 1127.5524   | 0.0473  | 42    | 614        | 622          | CHYEPHSVR                                      | 11        |       | 0                         |                   | Mascot      |
|                     | 1127.5051                                             | 1127.5524   | 0.0473  | 42    | 614        | 622          | CHYEPHSVR                                      |           |       |                           |                   | Mascot      |
|                     | 1190.5834                                             | 1190.5504   | -0.033  | -28   | 429        | 439          | CSVDRGDPITK                                    |           |       |                           |                   | Mascot      |
|                     | 1354.6685                                             | 1354.6934   | 0.0249  | 18    | 614        | 624          | CHYEPHSVRVK                                    |           |       |                           |                   | Mascot      |
|                     | 1354.6685                                             | 1354.6934   | 0.0249  | 18    | 614        | 624          | CHYEPHSVRVK                                    |           |       |                           |                   | Mascot      |
|                     | 1363.7004                                             | 1363.6482   | -0.0522 | -38   | 402        | 413          | IPADNPFVHEPK                                   |           |       |                           |                   | Mascot      |
|                     | 1548.7335                                             | 1548.9131   | 0.1796  | 116   | 225        | 238          | NPLAMVHANDGTHR                                 |           |       | Oxidation (M)[5]          |                   | Mascot      |
|                     | 2225.1641                                             | 2225.0657   | -0.0984 | -44   | 239        | 257          | FFVAEQVGLVWVYLPDQSK                            |           |       |                           |                   | Mascot      |
|                     | 2233.259                                              | 2233.0376   | -0.2214 | -99   | 625        | 644          | SNIIPFEPKETLIGVHIPTK                           |           |       |                           |                   | Mascot      |
|                     | 2559.3049                                             | 2559.1748   | -0.1301 | -51   | 672        | 694          | EEDGQITTTPTPTTPKP<br>VRTSR                     |           |       |                           |                   | Mascot      |
|                     | 2559.3049                                             | 2559.1748   | -0.1301 | -51   | 672        | 694          | EEDGQITTTPTPTTPKP<br>VRTSR                     |           |       |                           |                   | Mascot      |
|                     | 3338.5549                                             | 3338.6826   | 0.1277  | 38    | 1          | 28           | LHNFYFHVSEVGSQALS                              |           |       |                           |                   | Mascot      |

VMWYFCDVFGR

14 PREDICTED: zinc finger protein 135-like [Danio rerio] gi|326666826 49481.4 9.54 12 36 0

## Peptide Information

| Calc. Mass | Obsrv. Mass | ± da    | ± ppm | Start Seq. | End Seq. | Sequence                           | Ion Score | C. I. % | Modification               | Rank | Result Type |
|------------|-------------|---------|-------|------------|----------|------------------------------------|-----------|---------|----------------------------|------|-------------|
| 1174.5739  | 1174.553    | -0.0209 | -18   | 325        | 334      | SFSQSTYLNK                         |           |         |                            |      | Mascot      |
| 1548.77    | 1548.9131   | 0.1431  | 92    | 269        | 281      | SFNRSSSLNLHMR                      |           |         |                            |      | Mascot      |
| 1557.759   | 1557.7168   | -0.0422 | -27   | 45         | 57       | SFNQPSNLNLHMR                      |           |         |                            |      | Mascot      |
| 1564.7649  | 1564.8866   | 0.1217  | 78    | 269        | 281      | SFNRSSSLNLHMR                      |           |         | Oxidation (M)[12]          |      | Mascot      |
| 1573.754   | 1573.7124   | -0.0416 | -26   | 45         | 57       | SFNQPSNLNLHMR                      |           |         | Oxidation (M)[12]          |      | Mascot      |
| 1638.8057  | 1638.6833   | -0.1224 | -75   | 241        | 253      | SFNQLSYNLNLHMR                     |           |         | Oxidation (M)[12]          |      | Mascot      |
| 1743.8054  | 1743.7939   | -0.0115 | -7    | 170        | 184      | IHTGEKPFCTCTHCGR                   |           |         | Carbamidomethyl (C)[10]    |      | Mascot      |
| 2086.9731  | 2086.842    | -0.1311 | -63   | 1          | 17       | MIHTGEKPFCTCHQCGKR                 |           |         | Carbamidomethyl (C)[11,14] |      | Mascot      |
| 2211.0435  | 2211.053    | 0.0095  | 4     | 282        | 300      | IHTGEKPFCTCTQCGKSFN<br>R           |           |         | Carbamidomethyl (C)[10]    |      | Mascot      |
| 2248.0498  | 2247.9194   | -0.1304 | -58   | 170        | 188      | IHTGEKPFCTCTHGRSFN<br>R            |           |         | Carbamidomethyl (C)[10]    |      | Mascot      |
| 2871.3401  | 2871.394    | 0.0539  | 19    | 338        | 362      | IHTGEKPFCTCTQCEKSFN<br>QSSSLNK     |           |         | Carbamidomethyl (C)[10]    |      | Mascot      |
| 2871.3401  | 2871.394    | 0.0539  | 19    | 338        | 362      | IHTGEKPFCTCTQCEKSFN<br>QSSSLNK     |           |         | Carbamidomethyl (C)[10]    |      | Mascot      |
| 2928.3613  | 2928.3816   | 0.0203  | 7     | 338        | 362      | IHTGEKPFCTCTQCEKSFN<br>QSSSLNK     |           |         | Carbamidomethyl (C)[10,13] |      | Mascot      |
| 2928.3613  | 2928.3816   | 0.0203  | 7     | 338        | 362      | IHTGEKPFCTCTQCEKSFN<br>QSSSLNK     |           |         | Carbamidomethyl (C)[10,13] |      | Mascot      |
| 3337.6179  | 3337.6738   | 0.0559  | 17    | 157        | 184      | IFSNLFSFTIHMRIHTGEK<br>PFTCTHCGR   |           |         | Carbamidomethyl (C)[23]    |      | Mascot      |
| 3338.5979  | 3338.6826   | 0.0847  | 25    | 241        | 268      | SFNQLSYNLNLHMR<br>IHTGEKPFCTCTQCGR |           |         | Carbamidomethyl (C)[23]    |      | Mascot      |
| 3366.5676  | 3366.4951   | -0.0725 | -22   | 58         | 85       | IHTGEKPFCTCTQCGKNFI<br>HSSHLNEHMR  |           |         | Carbamidomethyl (C)[10,13] |      | Mascot      |
| 3366.5676  | 3366.4951   | -0.0725 | -22   | 58         | 85       | IHTGEKPFCTCTQCGKNFI<br>HSSHLNEHMR  |           |         | Carbamidomethyl (C)[10,13] |      | Mascot      |

15 Zgc:56530 [Danio rerio] gi|29124454 11140.5 5.91 5 36 0

## Peptide Information

| Calc. Mass | Obsrv. Mass | ± da    | ± ppm | Start Seq. | End Seq. | Sequence                | Ion Score | C. I. % | Modification            | Rank | Result Type |
|------------|-------------|---------|-------|------------|----------|-------------------------|-----------|---------|-------------------------|------|-------------|
| 1118.551   | 1118.634    | 0.083   | 74    | 2          | 12       | PLVCGGTSEAK             |           |         | Carbamidomethyl (C)[4]  |      | Mascot      |
| 1380.6134  | 1380.7235   | 0.1101  | 80    | 21         | 32       | ICDQMKADAEK             |           |         |                         |      | Mascot      |
| 1688.9006  | 1688.8339   | -0.0667 | -39   | 44         | 58       | SFKTQVVAGTNYFVK         |           |         |                         |      | Mascot      |
| 1707.7677  | 1707.7482   | -0.0195 | -11   | 13         | 26       | DANEEVQKICDQMK          |           |         | Carbamidomethyl (C)[10] |      | Mascot      |
| 1974.9436  | 1975.0669   | 0.1233  | 62    | 2          | 20       | PLVCGGTSEAKDANEEV<br>QK |           |         |                         |      | Mascot      |

16 PREDICTED: zinc finger protein 420 isoform 2 [Danio rerio] gi|326678086 70371 9.08 13 36 0

rerio]

Peptide Information

| Calc. Mass | Obsrv. Mass | $\pm$ da | $\pm$ ppm | Start Seq. | End Seq. | Sequence               | Ion Score | C. I. | % Modification           | Rank | Result Type |
|------------|-------------|----------|-----------|------------|----------|------------------------|-----------|-------|--------------------------|------|-------------|
| 842.5206   | 842.4929    | -0.0277  | -33       | 25         | 31       | QRQGLLK                |           |       |                          |      | Mascot      |
| 987.5621   | 987.6115    | 0.0494   | 50        | 497        | 505      | TFITAGHLK              |           |       |                          |      | Mascot      |
| 1045.536   | 1045.5433   | 0.0073   | 7         | 134        | 141      | FHCARNLK               |           |       | Carbamidomethyl (C)[3]   |      | Mascot      |
| 1108.5997  | 1108.5502   | -0.0495  | -45       | 357        | 366      | TFITAAELSR             |           |       |                          |      | Mascot      |
| 1108.5997  | 1108.5502   | -0.0495  | -45       | 357        | 366      | TFITAAELSR             |           |       |                          |      | Mascot      |
| 1190.4856  | 1190.5504   | 0.0648   | 54        | 488        | 496      | EFVCFECEK              |           |       | Carbamidomethyl (C)[4]   |      | Mascot      |
| 1534.757   | 1534.6222   | -0.1348  | -88       | 83         | 95       | IDHNFLETTAVK           |           |       | Oxidation (M)[7]         |      | Mascot      |
| 1743.833   | 1743.7939   | -0.0391  | -22       | 556        | 571      | VSSSLNSHMLTHTGEK       |           |       | Oxidation (M)[9]         |      | Mascot      |
| 2086.991   | 2086.842    | -0.149   | -71       | 367        | 384      | HQRIHTGEKPYTCTQCGK     |           |       |                          |      | Mascot      |
| 2110.0347  | 2110.0537   | 0.019    | 9         | 556        | 574      | VSSSLNSHMLTHTGEKTHK    |           |       | Oxidation (M)[9]         |      | Mascot      |
| 2211.0798  | 2211.053    | -0.0268  | -12       | 450        | 468      | IHLRVHTNEKPYSCPECK     |           |       |                          |      | Mascot      |
| 2216.0515  | 2215.9321   | -0.1194  | -54       | 488        | 505      | EFVCFECEKTFITAGHLK     |           |       | Carbamidomethyl (C)[4,7] |      | Mascot      |
| 2283.0579  | 2283.125    | 0.0671   | 29        | 227        | 245      | HQMIHTGEKPYKCSHCDLR    |           |       |                          |      | Mascot      |
| 2559.1677  | 2559.1748   | 0.0071   | 3         | 83         | 104      | IDHNFLETTAVKDFCTCTQCGK |           |       | Carbamidomethyl (C)[17]  |      | Mascot      |
| 2559.1677  | 2559.1748   | 0.0071   | 3         | 83         | 104      | IDHNFLETTAVKDFCTCTQCGK |           |       | Carbamidomethyl (C)[17]  |      | Mascot      |

17 ATP-binding cassette sub-family D member 3 [Danio rerio]

gi|47087309 74945 9.47 12 34 0

Peptide Information

| Calc. Mass | Obsrv. Mass | $\pm$ da | $\pm$ ppm | Start Seq. | End Seq. | Sequence             | Ion Score | C. I. | % Modification            | Rank | Result Type |
|------------|-------------|----------|-----------|------------|----------|----------------------|-----------|-------|---------------------------|------|-------------|
| 850.4716   | 850.527     | 0.0554   | 65        | 151        | 156      | LCFRVR               |           |       | Carbamidomethyl (C)[2]    |      | Mascot      |
| 987.5833   | 987.6115    | 0.0282   | 29        | 396        | 404      | VLKELNSGK            |           |       |                           |      | Mascot      |
| 1051.6411  | 1051.6887   | 0.0476   | 45        | 61         | 68       | LFFIRISR             |           |       |                           |      | Mascot      |
| 1095.5428  | 1095.5037   | -0.0391  | -36       | 399        | 407      | ELNSGKYER            |           |       |                           |      | Mascot      |
| 1118.6602  | 1118.634    | -0.0262  | -23       | 390        | 398      | ITELMRVLK            |           |       | Oxidation (M)[5]          |      | Mascot      |
| 1330.6381  | 1330.6335   | -0.0046  | -3        | 310        | 321      | FSMGMVDSIIAK         |           |       | Oxidation (M)[3,5]        |      | Mascot      |
| 1473.6328  | 1473.8102   | 0.1774   | 120       | 629        | 639      | HHEYLYHMDGR          |           |       | Oxidation (M)[8]          |      | Mascot      |
| 1473.6328  | 1473.8102   | 0.1774   | 120       | 629        | 639      | HHEYLYHMDGR          |           |       | Oxidation (M)[8]          |      | Mascot      |
| 1557.8325  | 1557.7168   | -0.1157  | -74       | 298        | 309      | LVDHLHNFIFFR         |           |       |                           |      | Mascot      |
| 2110.0168  | 2110.0537   | 0.0369   | 17        | 462        | 481      | SGTNVLVCGPNGCGKSSLFR |           |       | Carbamidomethyl (C)[8,13] |      | Mascot      |

|    |                                                 |           |         |     |              |     |                              |      |   |                        |   |  |        |
|----|-------------------------------------------------|-----------|---------|-----|--------------|-----|------------------------------|------|---|------------------------|---|--|--------|
|    | 2211.2283                                       | 2211.053  | -0.1753 | -79 | 482          | 501 | VLGELWPLFGGNLTKPE<br>RGK     |      |   |                        |   |  | Mascot |
|    | 2297.0723                                       | 2297.1318 | 0.0595  | 26  | 455          | 476 | DLCFEVKSGTNNLVCGP<br>NGCGK   |      |   | Carbamidomethyl (C)[3] |   |  | Mascot |
|    | 2853.4578                                       | 2853.3992 | -0.0586 | -21 | 298          | 321 | LVDHLHNFIFFRFSMGMV<br>DSIIAK |      |   | Oxidation (M)[15]      |   |  | Mascot |
| 18 | hypothetical protein LOC100003708 [Danio rerio] |           |         |     | gi 324120910 |     | 46837.6                      | 7.94 | 8 | 34                     | 0 |  |        |

#### Peptide Information

| Calc. Mass | Obsrv. Mass | ± da    | ± ppm | Start Seq. | End Seq. | Sequence                           | Ion Score | C. I. | % Modification          | Rank | Result Type |
|------------|-------------|---------|-------|------------|----------|------------------------------------|-----------|-------|-------------------------|------|-------------|
| 1095.5304  | 1095.5037   | -0.0267 | -24   | 352        | 359      | HHTRHHDR                           |           |       |                         |      | Mascot      |
| 1354.6658  | 1354.6934   | 0.0276  | 20    | 325        | 335      | AIMHSHHGHR                         |           |       | Oxidation (M)[3]        |      | Mascot      |
| 1354.6658  | 1354.6934   | 0.0276  | 20    | 325        | 335      | AIMHSHHGHR                         |           |       | Oxidation (M)[3]        |      | Mascot      |
| 1473.8358  | 1473.8102   | -0.0256 | -17   | 213        | 225      | LGLVMPGFLQRSR                      |           |       |                         |      | Mascot      |
| 1473.8358  | 1473.8102   | -0.0256 | -17   | 213        | 225      | LGLVMPGFLQRSR                      |           |       |                         |      | Mascot      |
| 1638.7871  | 1638.6833   | -0.1038 | -63   | 369        | 381      | HHHGHRPHHHGHR                      |           |       |                         |      | Mascot      |
| 2110.1226  | 2110.0537   | -0.0689 | -33   | 6          | 24       | AFAFLCLVSVGAQRTQ<br>SR             |           |       | Carbamidomethyl (C)[6]  |      | Mascot      |
| 2233.2261  | 2233.0376   | -0.1885 | -84   | 141        | 160      | SIKGVFEEEMRPLLSAS<br>VK            |           |       |                         |      | Mascot      |
| 2559.3374  | 2559.1748   | -0.1626 | -64   | 93         | 115      | LMSANEASVGSFIQTLT<br>YLKEK         |           |       | Oxidation (M)[2]        |      | Mascot      |
| 2559.3374  | 2559.1748   | -0.1626 | -64   | 93         | 115      | LMSANEASVGSFIQTLT<br>YLKEK         |           |       | Oxidation (M)[2]        |      | Mascot      |
| 3366.6531  | 3366.4951   | -0.158  | -47   | 286        | 316      | EVLQQGFGGIGVVLIDL<br>VFGNSMCPNMTQK |           |       | Carbamidomethyl (C)[25] |      | Mascot      |
| 3366.6531  | 3366.4951   | -0.158  | -47   | 286        | 316      | EVLQQGFGGIGVVLIDL<br>VFGNSMCPNMTQK |           |       | Carbamidomethyl (C)[25] |      | Mascot      |

19 Zgc:63504 protein [Danio rerio] gi|39644985 175143.5 5.66 19 34 0

#### Peptide Information

| Calc. Mass | Obsrv. Mass | ± da    | ± ppm | Start Seq. | End Seq. | Sequence       | Ion Score | C. I. | % Modification                           | Rank | Result Type |
|------------|-------------|---------|-------|------------|----------|----------------|-----------|-------|------------------------------------------|------|-------------|
| 842.409    | 842.4929    | 0.0839  | 100   | 991        | 996      | MYHVHR         |           |       |                                          |      | Mascot      |
| 900.5148   | 900.4632    | -0.0516 | -57   | 1007       | 1015     | IPGAKTADK      |           |       |                                          |      | Mascot      |
| 987.5833   | 987.6115    | 0.0282  | 29    | 644        | 652      | LQTNISALK      |           |       |                                          |      | Mascot      |
| 1165.5735  | 1165.7202   | 0.1467  | 126   | 718        | 727      | LFEEATDVNK     |           |       |                                          |      | Mascot      |
| 1174.6249  | 1174.553    | -0.0719 | -61   | 707        | 717      | ALEGIMEGAKR    |           |       |                                          |      | Mascot      |
| 1190.5221  | 1190.5504   | 0.0283  | 24    | 1459       | 1468     | EFMGLTDFCK     |           |       |                                          |      | Mascot      |
| 1557.8132  | 1557.7168   | -0.0964 | -62   | 181        | 193      | NNLANKPQDFQIR  |           |       |                                          |      | Mascot      |
| 1564.8304  | 1564.8866   | 0.0562  | 36    | 1318       | 1330     | KCPNFQGNVFLK   |           |       | Carbamidomethyl (C)[2]                   |      | Mascot      |
| 1573.8771  | 1573.7124   | -0.1647 | -105  | 728        | 740      | CLTIIEGWLEKLR  |           |       |                                          |      | Mascot      |
| 1620.8083  | 1620.7225   | -0.0858 | -53   | 1193       | 1206     | DEMLGRSTCVPLVK |           |       | Carbamidomethyl (C)[9], Oxidation (M)[3] |      | Mascot      |

|    |                                     |           |         |      |              |         |                                |   |                                           |        |    |   |
|----|-------------------------------------|-----------|---------|------|--------------|---------|--------------------------------|---|-------------------------------------------|--------|----|---|
|    | 1688.7506                           | 1688.8339 | 0.0833  | 49   | 1372         | 1386    | CDPYVTSEVAMSSK                 |   | Carbamidomethyl (C)[1], Oxidation (M)[12] | Mascot |    |   |
|    | 1720.9056                           | 1720.9137 | 0.0081  | 5    | 384          | 398     | NLVDPFVEAWFAGKK                |   |                                           | Mascot |    |   |
|    | 1743.9275                           | 1743.7939 | -0.1336 | -77  | 17           | 32      | LGSPDPIASLVFRDEK               |   |                                           | Mascot |    |   |
|    | 1975.0229                           | 1975.0669 | 0.044   | 22   | 527          | 544     | ADKSVEEISSDDILVVQK             |   |                                           | Mascot |    |   |
|    | 2039.9929                           | 2039.9558 | -0.0371 | -18  | 273          | 289     | LDIGYIYDEQAHCIMKK              |   |                                           | Mascot |    |   |
|    | 2225.0398                           | 2225.0657 | 0.0259  | 12   | 1288         | 1307    | MYQLAPVTSPCLVVECG<br>GER       |   | Carbamidomethyl (C)[11], Oxidation (M)[1] | Mascot |    |   |
|    | 2384.1938                           | 2383.8892 | -0.3046 | -128 | 326          | 347     | EQDSDKDDVESNLLLPA<br>GVALR     |   |                                           | Mascot |    |   |
|    | 2680.2407                           | 2680.2212 | -0.0195 | -7   | 358          | 382     | AEDIPQMDD SITQSLKEA<br>FGGEGNK |   |                                           | Mascot |    |   |
|    | 2871.4919                           | 2871.394  | -0.0979 | -34  | 1514         | 1538    | ELPDSVSQECVRIYVVQ<br>GIDLQPK   |   | Carbamidomethyl (C)[10]                   | Mascot |    |   |
|    | 2871.4919                           | 2871.394  | -0.0979 | -34  | 1514         | 1538    | ELPDSVSQECVRIYVVQ<br>GIDLQPK   |   | Carbamidomethyl (C)[10]                   | Mascot |    |   |
| 20 | PRKCA-binding protein [Danio rerio] |           |         |      | gi 116268065 | 45868.4 | 5.48                           | 7 | 33                                        | 0      | 16 | 0 |

#### Peptide Information

| Calc. Mass | Obsrv. Mass | ± da    | ± ppm | Start Seq. | End Seq. | Sequence          | Ion Score | C. I. | % Modification          | Rank | Result Type |
|------------|-------------|---------|-------|------------|----------|-------------------|-----------|-------|-------------------------|------|-------------|
| 987.504    | 987.6115    | 0.1075  | 109   | 165        | 172      | GLMEHTKR          |           |       | Oxidation (M)[3]        |      | Mascot      |
| 1045.571   | 1045.5433   | -0.0277 | -26   | 142        | 151      | AILCNDGLVK        |           |       |                         |      | Mascot      |
| 1127.6783  | 1127.5524   | -0.1259 | -112  | 242        | 251      | AIPDTKL TIR       | 16        | 0     |                         |      | Mascot      |
| 1127.6783  | 1127.5524   | -0.1259 | -112  | 242        | 251      | AIPDTKL TIR       |           |       |                         |      | Mascot      |
| 1473.6564  | 1473.8102   | 0.1538  | 104   | 389        | 401      | AQNQQQEENGAEK     |           |       |                         |      | Mascot      |
| 1473.6564  | 1473.8102   | 0.1538  | 104   | 389        | 401      | AQNQQQEENGAEK     |           |       |                         |      | Mascot      |
| 1534.6254  | 1534.6222   | -0.0032 | -2    | 2          | 13       | FTDMDYELEEDK      |           |       |                         |      | Mascot      |
| 1720.8534  | 1720.9137   | 0.0603  | 35    | 125        | 141      | LVENMSSGTADALGLSR |           |       |                         |      | Mascot      |
| 1768.8978  | 1768.832    | -0.0658 | -37   | 253        | 266      | YLDVKFGYLSYCLK    |           |       | Carbamidomethyl (C)[12] |      | Mascot      |

21 PREDICTED: collagen alpha-1(VI) chain [Danio rerio] gi|125829720 106609.7 5.87 12 33 0

#### Peptide Information

| Calc. Mass | Obsrv. Mass | ± da    | ± ppm | Start Seq. | End Seq. | Sequence                | Ion Score | C. I. | % Modification   | Rank | Result Type |
|------------|-------------|---------|-------|------------|----------|-------------------------|-----------|-------|------------------|------|-------------|
| 900.5148   | 900.4632    | -0.0516 | -57   | 132        | 139      | EGIAELLR                |           |       |                  |      | Mascot      |
| 939.4564   | 939.5073    | 0.0509  | 54    | 218        | 225      | STQMSTIR                |           |       | Oxidation (M)[4] |      | Mascot      |
| 1174.6367  | 1174.553    | -0.0837 | -71   | 971        | 979      | HLFKVPDYR               |           |       |                  |      | Mascot      |
| 1354.7617  | 1354.6934   | -0.0683 | -50   | 61         | 71       | TFTKLFIDELK             |           |       |                  |      | Mascot      |
| 1354.7617  | 1354.6934   | -0.0683 | -50   | 61         | 71       | TFTKLFIDELK             |           |       |                  |      | Mascot      |
| 1380.7555  | 1380.7235   | -0.032  | -23   | 621        | 631      | EFIVTIMDRLK             |           |       | Oxidation (M)[7] |      | Mascot      |
| 2021.9821  | 2021.9862   | 0.0041  | 2     | 164        | 182      | EPCGGIQEAANEARQHAI<br>K |           |       |                  |      | Mascot      |



|  |           |           |         |      |     |     |                                  |                                             |  |  |  |  |  |        |
|--|-----------|-----------|---------|------|-----|-----|----------------------------------|---------------------------------------------|--|--|--|--|--|--------|
|  | 2087.092  | 2086.842  | -0.25   | -120 | 975 | 992 | VPDYRSLVTGVFYQTVS<br>R           |                                             |  |  |  |  |  | Mascot |
|  | 2297.1785 | 2297.1318 | -0.0467 | -20  | 881 | 900 | FQNAGTQVTNALNFAIER<br>FR         |                                             |  |  |  |  |  | Mascot |
|  | 2663.2153 | 2663.3643 | 0.149   | 56   | 266 | 292 | GDFGAQGNPGDGPVG<br>YQGMKGDQGIK   | Oxidation (M)[20]                           |  |  |  |  |  | Mascot |
|  | 2663.2153 | 2663.3643 | 0.149   | 56   | 266 | 292 | GDFGAQGNPGDGPVG<br>YQGMKGDQGIK   | Oxidation (M)[20]                           |  |  |  |  |  | Mascot |
|  | 2697.3892 | 2697.1252 | -0.264  | -98  | 1   | 25  | MALNGYILTALCALWAGI<br>FAQDVSR    |                                             |  |  |  |  |  | Mascot |
|  | 2697.3892 | 2697.1252 | -0.264  | -98  | 1   | 25  | MALNGYILTALCALWAGI<br>FAQDVSR    |                                             |  |  |  |  |  | Mascot |
|  | 2871.2681 | 2871.394  | 0.1259  | 44   | 226 | 253 | SIHMICCSFDCIADGGPQ<br>GPPGDPGQR  |                                             |  |  |  |  |  | Mascot |
|  | 2871.2681 | 2871.394  | 0.1259  | 44   | 226 | 253 | SIHMICCSFDCIADGGPQ<br>GPPGDPGQR  |                                             |  |  |  |  |  | Mascot |
|  | 2928.2896 | 2928.3816 | 0.092   | 31   | 226 | 253 | SIHMICCSFDCIADGGPQ<br>GPPGDPGQR  | Carbamidomethyl (C)[7]                      |  |  |  |  |  | Mascot |
|  | 2928.2896 | 2928.3816 | 0.092   | 31   | 226 | 253 | SIHMICCSFDCIADGGPQ<br>GPPGDPGQR  | Carbamidomethyl (C)[7]                      |  |  |  |  |  | Mascot |
|  | 3338.5046 | 3338.6826 | 0.178   | 53   | 793 | 822 | KCPTYTCPISFNDNTDVL<br>MMDSSASVGA | Carbamidomethyl (C)[2,7], Oxidation (M)[20] |  |  |  |  |  | Mascot |

22 PREDICTED: hypothetical protein LOC100320667 [Danio rerio] gi|326678190 55450.3 5.16 9 33 0

#### Peptide Information

| Calc. Mass | Obsrv. Mass | ± da    | ± ppm | Start Seq. | End Seq. | Sequence                    | Ion Score | C. I. % | Modification                              | Rank | Result Type |
|------------|-------------|---------|-------|------------|----------|-----------------------------|-----------|---------|-------------------------------------------|------|-------------|
| 1534.8071  | 1534.6222   | -0.1849 | -120  | 304        | 317      | LDNKTGSLTITDTR              |           |         |                                           |      | Mascot      |
| 1548.8115  | 1548.9131   | 0.1016  | 66    | 145        | 159      | VLEENSVTLSSGVSK             |           |         |                                           |      | Mascot      |
| 1620.7963  | 1620.7225   | -0.0738 | -46   | 247        | 261      | EGDSVTLNSDLTELK             |           |         |                                           |      | Mascot      |
| 1768.8613  | 1768.832    | -0.0293 | -17   | 183        | 197      | QTNRFVFDVLDGR               |           |         |                                           |      | Mascot      |
| 2040.0496  | 2039.9558   | -0.0938 | -46   | 207        | 225      | KTGSLTITDIITENAGDYK         |           |         |                                           |      | Mascot      |
| 2225.063   | 2225.0657   | 0.0027  | 1     | 2          | 18       | FRHFQSCHLELFSELMK           |           |         | Carbamidomethyl (C)[7], Oxidation (M)[16] |      | Mascot      |
| 2283.0872  | 2283.125    | 0.0378  | 17    | 1          | 18       | MFRHFQSCHLELFSELM<br>K      |           |         |                                           |      | Mascot      |
| 2680.3577  | 2680.2212   | -0.1365 | -51   | 74         | 97       | ETVIAEINVTANRFVFD<br>VLDGR  |           |         |                                           |      | Mascot      |
| 2697.3374  | 2697.1252   | -0.2122 | -79   | 24         | 46       | LVLLCLCRLVGGFDDDY<br>QVQEGK |           |         | Carbamidomethyl (C)[5,7]                  |      | Mascot      |
| 2697.3374  | 2697.1252   | -0.2122 | -79   | 24         | 46       | LVLLCLCRLVGGFDDDY<br>QVQEGK |           |         | Carbamidomethyl (C)[5,7]                  |      | Mascot      |

23 novel protein [Danio rerio] gi|220679541 12846.6 6.84 5 33 0

#### Peptide Information

| Calc. Mass | Obsrv. Mass | ± da    | ± ppm | Start Seq. | End Seq. | Sequence         | Ion Score | C. I. % | Modification     | Rank | Result Type |
|------------|-------------|---------|-------|------------|----------|------------------|-----------|---------|------------------|------|-------------|
| 850.4338   | 850.527     | 0.0932  | 110   | 73         | 79       | TIDVMQK          |           |         | Oxidation (M)[5] |      | Mascot      |
| 1688.8602  | 1688.8339   | -0.0263 | -16   | 101        | 116      | TGLGSHVTDGFSIREL |           |         |                  |      | Mascot      |

|    |                                    |           |         |     |              |    |                               |      |   |    |   |                  |        |
|----|------------------------------------|-----------|---------|-----|--------------|----|-------------------------------|------|---|----|---|------------------|--------|
|    | 1768.8357                          | 1768.832  | -0.0037 | -2  | 82           | 96 | LMHSLSLSYMADTQR               |      |   |    |   | Oxidation (M)[2] | Mascot |
|    | 2022.026                           | 2021.9862 | -0.0398 | -20 | 80           | 96 | IRLMHSLSLSYMADTQR             |      |   |    |   |                  | Mascot |
|    | 2871.4961                          | 2871.394  | -0.1021 | -36 | 38           | 62 | ELKVPEFSALQSTFLEEA<br>NPMIHLK |      |   |    |   |                  | Mascot |
|    | 2871.4961                          | 2871.394  | -0.1021 | -36 | 38           | 62 | ELKVPEFSALQSTFLEEA<br>NPMIHLK |      |   |    |   |                  | Mascot |
| 24 | LSM14 homolog B-like [Danio rerio] |           |         |     | gi 239050742 |    | 41515                         | 9.51 | 8 | 33 | 0 |                  |        |

Peptide Information

| Calc. Mass | Obsrv. Mass | ± da    | ± ppm | Start Seq. | End Seq. | Sequence           | Ion Score | C. I. | % Modification | Rank | Result Type |
|------------|-------------|---------|-------|------------|----------|--------------------|-----------|-------|----------------|------|-------------|
| 939.5158   | 939.5073    | -0.0085 | -9    | 349        | 356      | YLRAGGFR           |           |       |                |      | Mascot      |
| 996.4996   | 996.5761    | 0.0765  | 77    | 2          | 11       | SSGTPYIGSK         |           |       |                |      | Mascot      |
| 1127.5402  | 1127.5524   | 0.0122  | 11    | 1          | 11       | MSSGTPYIGSK        |           |       |                |      | Mascot      |
| 1127.5402  | 1127.5524   | 0.0122  | 11    | 1          | 11       | MSSGTPYIGSK        |           |       |                |      | Mascot      |
| 1190.6012  | 1190.5504   | -0.0508 | -43   | 192        | 203      | GDSSSAQQAVLK       |           |       |                |      | Mascot      |
| 1557.7656  | 1557.7168   | -0.0488 | -31   | 316        | 328      | SFFDNISSELR        |           |       |                |      | Mascot      |
| 1620.8856  | 1620.7225   | -0.1631 | -101  | 338        | 351      | LNVTFTGVPGRYL      |           |       |                |      | Mascot      |
| 1768.9513  | 1768.832    | -0.1193 | -67   | 1          | 17       | MSSGTPYIGSKISLISK  |           |       |                |      | Mascot      |
| 2087.0542  | 2086.842    | -0.2122 | -102  | 22         | 40       | YEGILYITIDNSTVALAK |           |       |                |      | Mascot      |

|    |                                                    |  |  |  |             |  |         |     |   |    |   |  |  |
|----|----------------------------------------------------|--|--|--|-------------|--|---------|-----|---|----|---|--|--|
| 25 | F-actin-capping protein subunit beta [Danio rerio] |  |  |  | gi 41053959 |  | 30723.6 | 5.7 | 7 | 33 | 0 |  |  |
|----|----------------------------------------------------|--|--|--|-------------|--|---------|-----|---|----|---|--|--|

Peptide Information

| Calc. Mass | Obsrv. Mass | ± da    | ± ppm | Start Seq. | End Seq. | Sequence       | Ion Score | C. I. | % Modification                              | Rank | Result Type |
|------------|-------------|---------|-------|------------|----------|----------------|-----------|-------|---------------------------------------------|------|-------------|
| 1108.6473  | 1108.5502   | -0.0971 | -88   | 15         | 23       | RLPPQQIEK      |           |       |                                             |      | Mascot      |
| 1108.6473  | 1108.5502   | -0.0971 | -88   | 15         | 23       | RLPPQQIEK      |           |       |                                             |      | Mascot      |
| 1174.5198  | 1174.553    | 0.0332  | 28    | 58         | 66       | DYLLCDYNR      |           |       |                                             |      | Mascot      |
| 1534.6842  | 1534.6222   | -0.062  | -40   | 79         | 92       | YEPPIDDGAMPSAR |           |       | Oxidation (M)[10]                           |      | Mascot      |
| 1548.7145  | 1548.9131   | 0.1986  | 128   | 2          | 14       | NEQQLDCALDLMR  |           |       |                                             |      | Mascot      |
| 1557.7729  | 1557.7168   | -0.0561 | -36   | 54         | 66       | VVGKDYLLCDYNR  |           |       |                                             |      | Mascot      |
| 1564.7094  | 1564.8866   | 0.1772  | 113   | 2          | 14       | NEQQLDCALDLMR  |           |       | Oxidation (M)[12]                           |      | Mascot      |
| 1605.736   | 1605.7881   | 0.0521  | 32    | 2          | 14       | NEQQLDCALDLMR  |           |       | Carbamidomethyl (C)[7]                      |      | Mascot      |
| 1720.8105  | 1720.9137   | 0.1032  | 60    | 2          | 15       | NEQQLDCALDLMR  |           |       | Oxidation (M)[12]                           |      | Mascot      |
| 1768.7662  | 1768.832    | 0.0658  | 37    | 1          | 14       | MNEQQLDCALDLMR |           |       | Carbamidomethyl (C)[8], Oxidation (M)[1,13] |      | Mascot      |

|    |                                  |  |  |  |              |  |         |      |   |    |   |  |  |
|----|----------------------------------|--|--|--|--------------|--|---------|------|---|----|---|--|--|
| 26 | Zgc:171493 protein [Danio rerio] |  |  |  | gi 158253797 |  | 23832.2 | 8.19 | 7 | 32 | 0 |  |  |
|----|----------------------------------|--|--|--|--------------|--|---------|------|---|----|---|--|--|

Peptide Information

| Calc. Mass | Obsrv. Mass | ± da | ± ppm | Start Seq. | End Seq. | Sequence | Ion Score | C. I. | % Modification | Rank | Result Type |
|------------|-------------|------|-------|------------|----------|----------|-----------|-------|----------------|------|-------------|
|------------|-------------|------|-------|------------|----------|----------|-----------|-------|----------------|------|-------------|

|    |                          |           |         |     |             |     |                         |         |     |   |    |                  |  |  |  |  |        |
|----|--------------------------|-----------|---------|-----|-------------|-----|-------------------------|---------|-----|---|----|------------------|--|--|--|--|--------|
|    | 900.5009                 | 900.4632  | -0.0377 | -42 | 107         | 113 | LQERQAR                 |         |     |   |    |                  |  |  |  |  | Mascot |
|    | 987.5469                 | 987.6115  | 0.0646  | 65  | 2           | 10  | IPSSDSLRL               |         |     |   |    |                  |  |  |  |  | Mascot |
|    | 1118.5874                | 1118.634  | 0.0466  | 42  | 1           | 10  | MIPSSDSLRL              |         |     |   |    |                  |  |  |  |  | Mascot |
|    | 1473.7406                | 1473.8102 | 0.0696  | 47  | 197         | 209 | YSLVFGNCTIKTQ           |         |     |   |    |                  |  |  |  |  | Mascot |
|    | 1473.7406                | 1473.8102 | 0.0696  | 47  | 197         | 209 | YSLVFGNCTIKTQ           |         |     |   |    |                  |  |  |  |  | Mascot |
|    | 1557.7288                | 1557.7168 | -0.012  | -8  | 184         | 196 | SDFENKVMCDILK           |         |     |   |    | Oxidation (M)[8] |  |  |  |  | Mascot |
|    | 1564.8694                | 1564.8866 | 0.0172  | 11  | 94          | 106 | VDVIHLQEQLDKK           |         |     |   |    |                  |  |  |  |  | Mascot |
|    | 2283.1147                | 2283.125  | 0.0103  | 5   | 156         | 175 | MTIAAYQTLYESVAFGM<br>RK |         |     |   |    | Oxidation (M)[1] |  |  |  |  | Mascot |
| 27 | Zgc:110331 [Danio rerio] |           |         |     | gi 62202266 |     |                         | 17382.1 | 8.3 | 6 | 32 | 0                |  |  |  |  |        |

#### Peptide Information

|    | Calc. Mass                                                 | Obsrv. Mass | ± da    | ± ppm | Start Seq.   | End Seq. | Sequence                 | Ion Score | C. I. | % Modification                             | Rank | Result Type |
|----|------------------------------------------------------------|-------------|---------|-------|--------------|----------|--------------------------|-----------|-------|--------------------------------------------|------|-------------|
|    | 882.5294                                                   | 882.5476    | 0.0182  | 21    | 122          | 129      | ELSLPPVK                 |           |       |                                            |      | Mascot      |
|    | 900.4971                                                   | 900.4632    | -0.0339 | -38   | 9            | 16       | CAAPQILK                 |           |       | Carbamidomethyl (C)[1]                     |      | Mascot      |
|    | 1045.5636                                                  | 1045.5433   | -0.0203 | -19   | 42           | 51       | NVGSLDKNAK               |           |       |                                            |      | Mascot      |
|    | 1330.6494                                                  | 1330.6335   | -0.0159 | -12   | 130          | 141      | LHCSMLAEDAIK             |           |       |                                            |      | Mascot      |
|    | 1974.9735                                                  | 1975.0669   | 0.0934  | 47    | 49           | 68       | NAKNVGTGLVGAPACGD<br>VMK |           |       | Carbamidomethyl (C)[15], Oxidation (M)[19] |      | Mascot      |
|    | 2194.1611                                                  | 2194.0354   | -0.1257 | -57   | 122          | 141      | ELSLPPVKLHCSMLAEDA<br>IK |           |       |                                            |      | Mascot      |
| 28 | novel protein similar to vertebrate (PIWIL2) [Danio rerio] |             |         |       | gi 123232882 |          |                          | 22624.7   | 6.37  | 6                                          | 32   | 0           |

#### Peptide Information

|  | Calc. Mass | Obsrv. Mass | ± da    | ± ppm | Start Seq. | End Seq. | Sequence                    | Ion Score | C. I. | % Modification   | Rank | Result Type |
|--|------------|-------------|---------|-------|------------|----------|-----------------------------|-----------|-------|------------------|------|-------------|
|  | 1108.5092  | 1108.5502   | 0.041   | 37    | 88         | 97       | LPMEEGGFGR                  |           |       | Oxidation (M)[3] |      | Mascot      |
|  | 1108.5092  | 1108.5502   | 0.041   | 37    | 88         | 97       | LPMEEGGFGR                  |           |       | Oxidation (M)[3] |      | Mascot      |
|  | 1330.7477  | 1330.6335   | -0.1142 | -86   | 176        | 188      | GAAPVGVTFKDLR               |           |       |                  |      | Mascot      |
|  | 1620.889   | 1620.7225   | -0.1665 | -103  | 40         | 54       | GLIMPIDEPLPGRGR             |           |       |                  |      | Mascot      |
|  | 1743.8119  | 1743.7939   | -0.018  | -10   | 199        | 214      | DGVQQAIWQICSQNP             |           |       |                  |      | Mascot      |
|  | 2233.1646  | 2233.0376   | -0.127  | -57   | 149        | 171      | VGSPGTGSSLVSMFRGL<br>GIEPGK |           |       |                  |      | Mascot      |
|  | 2384.1477  | 2383.8892   | -0.2585 | -108  | 17         | 37       | APWQQSTEDQSQLLDQP<br>SLGR   |           |       |                  |      | Mascot      |

29 novel protein similar to H.sapien ARHGAP23, Rho GTPase activating protein 23 (ARHGAP23) [Danio rerio]

gi|220679183 43224.2 9.03 10 32 0

#### Peptide Information

|  | Calc. Mass | Obsrv. Mass | ± da | ± ppm | Start | End | Sequence | Ion | C. I. | % Modification | Rank | Result Type |
|--|------------|-------------|------|-------|-------|-----|----------|-----|-------|----------------|------|-------------|
|--|------------|-------------|------|-------|-------|-----|----------|-----|-------|----------------|------|-------------|

|  |           |           |         | Seq. | Seq. | Score |                      |  |                  |        |
|--|-----------|-----------|---------|------|------|-------|----------------------|--|------------------|--------|
|  | 939.5509  | 939.5073  | -0.0436 | -46  | 369  | 376   | ITETLILH             |  |                  | Mascot |
|  | 1095.4962 | 1095.5037 | 0.0075  | 7    | 89   | 96    | DDMLMWIR             |  | Oxidation (M)[3] | Mascot |
|  | 1127.5116 | 1127.5524 | 0.0408  | 36   | 282  | 290   | YNDFIDANR            |  |                  | Mascot |
|  | 1127.5116 | 1127.5524 | 0.0408  | 36   | 282  | 290   | YNDFIDANR            |  |                  | Mascot |
|  | 1174.599  | 1174.553  | -0.046  | -39  | 272  | 281   | LPEPLFTDDK           |  |                  | Mascot |
|  | 1638.9214 | 1638.6833 | -0.2381 | -145 | 257  | 270   | DLNVISSLLKSFFR       |  |                  | Mascot |
|  | 1652.941  | 1652.8976 | -0.0434 | -26  | 12   | 25    | VFSVLHSSLLFLYK       |  |                  | Mascot |
|  | 1720.8687 | 1720.9137 | 0.045   | 26   | 187  | 202   | TFGVRLEDCLPAASNK     |  |                  | Mascot |
|  | 1974.8936 | 1975.0669 | 0.1733  | 88   | 73   | 88    | LMTQDFCEYLLQAEDR     |  |                  | Mascot |
|  | 2211.1213 | 2211.053  | -0.0683 | -31  | 47   | 66    | DIQTISIQGCLIDIAYSETK |  |                  | Mascot |
|  | 2283.0928 | 2283.125  | 0.0322  | 14   | 272  | 290   | LPEPLFTDDKYNDFIDANR  |  |                  | Mascot |

30

TPA\_exp: transferrin [Danio rerio]

gi|47264590

73483.9

6.81

11

32

0

Peptide Information

| Calc. Mass | Obsrv. Mass | ± da    | ± ppm | Start Seq. | End Sequence Seq. | Ion Score                        | C. I. % | Modification | Rank                                     | Result Type |
|------------|-------------|---------|-------|------------|-------------------|----------------------------------|---------|--------------|------------------------------------------|-------------|
| 939.4604   | 939.5073    | 0.0469  | 50    | 646        | 652               | YIDMIER                          |         |              |                                          | Mascot      |
| 1108.6361  | 1108.5502   | -0.0859 | -77   | 306        | 314               | RTDSLILYK                        |         |              |                                          | Mascot      |
| 1108.6361  | 1108.5502   | -0.0859 | -77   | 306        | 314               | RTDSLILYK                        |         |              |                                          | Mascot      |
| 1127.4357  | 1127.5524   | 0.1167  | 104   | 121        | 129               | SSCHSCYQR                        | 8       | 0            | Carbamidomethyl (C)[6]                   | Mascot      |
| 1127.4357  | 1127.5524   | 0.1167  | 104   | 121        | 129               | SSCHSCYQR                        |         |              | Carbamidomethyl (C)[3]                   | Mascot      |
| 1363.5988  | 1363.6482   | 0.0494  | 36    | 196        | 207               | YFGDDGAFQCLK                     |         |              |                                          | Mascot      |
| 1380.7369  | 1380.7235   | -0.0134 | -10   | 597        | 609               | SAVVSFLSDIQSK                    |         |              |                                          | Mascot      |
| 1557.7366  | 1557.7168   | -0.0198 | -13   | 146        | 158               | ITWEGPNEMPVER                    |         |              |                                          | Mascot      |
| 1573.7314  | 1573.7124   | -0.019  | -12   | 146        | 158               | ITWEGPNEMPVER                    |         |              | Oxidation (M)[9]                         | Mascot      |
| 1638.7349  | 1638.6833   | -0.0516 | -31   | 360        | 373               | SCILEASVDDCIEK                   |         |              | Carbamidomethyl (C)[2,11]                | Mascot      |
| 1652.8279  | 1652.8976   | 0.0697  | 42    | 274        | 289               | QIPASDLFSSQAFGGK                 |         |              |                                          | Mascot      |
| 2297.0676  | 2297.1318   | 0.0642  | 28    | 553        | 572               | DLKSEDFELICNTPDITMK              |         |              |                                          | Mascot      |
| 2536.061   | 2536.1211   | 0.0601  | 24    | 467        | 489               | CTLDKFFSEGCAPGADPTSNMCK          |         |              | Carbamidomethyl (C)[1,11]                | Mascot      |
| 3338.5085  | 3338.6826   | 0.1741  | 52    | 395        | 427               | CGLVPVMAEQSNSQSCSSGSGGTASYAVAVVR |         |              | Carbamidomethyl (C)[1], Oxidation (M)[7] | Mascot      |

31

stromal interaction molecule 1 [Danio rerio]

gi|113677986

76089.1

5.98

10

32

0

Peptide Information

| Calc. Mass | Obsrv. Mass | ± da | ± ppm | Start Seq. | End Sequence Seq. | Ion Score | C. I. % | Modification | Rank | Result Type |
|------------|-------------|------|-------|------------|-------------------|-----------|---------|--------------|------|-------------|
|------------|-------------|------|-------|------------|-------------------|-----------|---------|--------------|------|-------------|

|  |           |           |         |      |     |     |                                  |  |  |                                              |  |  |        |
|--|-----------|-----------|---------|------|-----|-----|----------------------------------|--|--|----------------------------------------------|--|--|--------|
|  | 850.5032  | 850.527   | 0.0238  | 28   | 583 | 589 | KLYGIEK                          |  |  |                                              |  |  | Mascot |
|  | 882.425   | 882.5476  | 0.1226  | 139  | 230 | 236 | HSKDHMK                          |  |  |                                              |  |  | Mascot |
|  | 900.5513  | 900.4632  | -0.0881 | -98  | 636 | 643 | IPQISSKK                         |  |  |                                              |  |  | Mascot |
|  | 1095.627  | 1095.5037 | -0.1233 | -113 | 175 | 183 | ILDRSHVQK                        |  |  |                                              |  |  | Mascot |
|  | 1652.8285 | 1652.8976 | 0.0691  | 42   | 492 | 505 | QRHIDPQMALGSQR                   |  |  | Oxidation (M)[8]                             |  |  | Mascot |
|  | 2233.0806 | 2233.0376 | -0.043  | -19  | 45  | 63  | IDEPLCQDENAILSFEAIR              |  |  | Carbamidomethyl (C)[6]                       |  |  | Mascot |
|  | 2283.967  | 2284.1194 | 0.1524  | 67   | 68  | 87  | QMDDDDNGNVDVLETD<br>GFLR         |  |  | Oxidation (M)[2]                             |  |  | Mascot |
|  | 2559.1687 | 2559.1748 | 0.0061  | 2    | 99  | 119 | HNTFHGDDQFISVEDLW<br>NAWK        |  |  |                                              |  |  | Mascot |
|  | 2559.1687 | 2559.1748 | 0.0061  | 2    | 99  | 119 | HNTFHGDDQFISVEDLW<br>NAWK        |  |  |                                              |  |  | Mascot |
|  | 2663.3181 | 2663.3643 | 0.0462  | 17   | 2   | 24  | EFSGLVTFWIACICFLLQC<br>RADK      |  |  |                                              |  |  | Mascot |
|  | 2663.3181 | 2663.3643 | 0.0462  | 17   | 2   | 24  | EFSGLVTFWIACICFLLQC<br>RADK      |  |  |                                              |  |  | Mascot |
|  | 3337.6431 | 3337.6738 | 0.0307  | 9    | 202 | 229 | HNHLKDFMLVVSIVIGMG<br>GCWFAYIQNR |  |  | Carbamidomethyl (C)[20], Oxidation (M)[8,17] |  |  | Mascot |

32 PREDICTED: phospholipase DDHD1-like [Danio rerio] gi|326675812 90094.3 5.88 11 31 0

#### Peptide Information

| Calc. Mass | Obsrv. Mass | ± da    | ± ppm | Start Seq. | End Seq. | Sequence                     | Ion Score | C. I. | % Modification                            | Rank | Result Type |
|------------|-------------|---------|-------|------------|----------|------------------------------|-----------|-------|-------------------------------------------|------|-------------|
| 987.5833   | 987.6115    | 0.0282  | 29    | 673        | 683      | ASILGAASLGK                  |           |       |                                           |      | Mascot      |
| 1045.5135  | 1045.5433   | 0.0298  | 29    | 446        | 453      | LYSLFCSR                     |           |       | Carbamidomethyl (C)[6]                    |      | Mascot      |
| 1108.6361  | 1108.5502   | -0.0859 | -77   | 303        | 312      | TVTQKLGFSSK                  |           |       |                                           |      | Mascot      |
| 1108.6361  | 1108.5502   | -0.0859 | -77   | 303        | 312      | TVTQKLGFSSK                  |           |       |                                           |      | Mascot      |
| 1573.7955  | 1573.7124   | -0.0831 | -53   | 394        | 408      | LALDGDVTESITPDK              |           |       |                                           |      | Mascot      |
| 2021.9081  | 2021.9862   | 0.0781  | 39    | 641        | 660      | DTASDMENGSSPSTSPV<br>LAR     |           |       |                                           |      | Mascot      |
| 2087.0273  | 2086.842    | -0.1853 | -89   | 548        | 565      | VENFFCMGCPLAVFLALR           |           |       | Carbamidomethyl (C)[6]                    |      | Mascot      |
| 2194.0042  | 2194.0354   | 0.0312  | 14    | 641        | 661      | DTASDMENGSSPSTSPV<br>LARR    |           |       | Oxidation (M)[6]                          |      | Mascot      |
| 2211.0474  | 2211.053    | 0.0056  | 3     | 203        | 219      | ECYPVYWNQKERIPVMR            |           |       |                                           |      | Mascot      |
| 2233.1077  | 2233.0376   | -0.0701 | -31   | 566        | 585      | GIRPGNTGHQDHIMPKSI<br>CR     |           |       | Oxidation (M)[14]                         |      | Mascot      |
| 2284.0637  | 2284.1194   | 0.0557  | 24    | 203        | 219      | ECYPVYWNQKERIPVMR            |           |       | Carbamidomethyl (C)[2], Oxidation (M)[16] |      | Mascot      |
| 2606.1729  | 2606.1165   | -0.0564 | -22   | 18         | 39       | LSFGNRDWNDAFFSLCD<br>ESIGR   |           |       | Carbamidomethyl (C)[16]                   |      | Mascot      |
| 2871.3428  | 2871.394    | 0.0512  | 18    | 414        | 437      | DLLNSSAMDIMYYTSPLY<br>RDEITK |           |       | Oxidation (M)[8,11]                       |      | Mascot      |
| 2871.3428  | 2871.394    | 0.0512  | 18    | 414        | 437      | DLLNSSAMDIMYYTSPLY<br>RDEITK |           |       | Oxidation (M)[8,11]                       |      | Mascot      |

33 nitrogen fixation cluster-like [Danio rerio] gi|221307563 17420.2 8.83 6 31 0

#### Peptide Information

|                     |                                                                                                     | Calc. Mass | Obsrv. Mass | ± da    | ± ppm | Start Seq.   | End Seq. | Sequence                     | Ion Score | C. I. | %  | Modification                               | Rank | Result Type |
|---------------------|-----------------------------------------------------------------------------------------------------|------------|-------------|---------|-------|--------------|----------|------------------------------|-----------|-------|----|--------------------------------------------|------|-------------|
|                     |                                                                                                     | 882.5294   | 882.5476    | 0.0182  | 21    | 122          | 129      | ELSLPPVK                     |           |       |    |                                            |      | Mascot      |
|                     |                                                                                                     | 900.4971   | 900.4632    | -0.0339 | -38   | 9            | 16       | CAAPQILK                     |           |       |    | Carbamidomethyl (C)[1]                     |      | Mascot      |
|                     |                                                                                                     | 1045.5636  | 1045.5433   | -0.0203 | -19   | 42           | 51       | NVGSLDKNAK                   |           |       |    |                                            |      | Mascot      |
|                     |                                                                                                     | 1330.6494  | 1330.6335   | -0.0159 | -12   | 130          | 141      | LHCSMLAEDAIK                 |           |       |    |                                            |      | Mascot      |
|                     |                                                                                                     | 1974.9735  | 1975.0669   | 0.0934  | 47    | 49           | 68       | NAKNVGTGLVGAPACGD<br>VMK     |           |       |    | Carbamidomethyl (C)[15], Oxidation (M)[19] |      | Mascot      |
|                     |                                                                                                     | 2194.1611  | 2194.0354   | -0.1257 | -57   | 122          | 141      | ELSLPPVKLHCSMLAEDA<br>IK     |           |       |    |                                            |      | Mascot      |
| 34                  | novel protein similar to vertebrate golgi associated, gamma adaptin ear containing, ARF binding pro |            |             |         |       | gi 169158149 |          | 76674.1                      | 5.35      | 5     | 31 | 0                                          | 21   | 0           |
| Peptide Information |                                                                                                     |            |             |         |       |              |          |                              |           |       |    |                                            |      |             |
|                     |                                                                                                     | Calc. Mass | Obsrv. Mass | ± da    | ± ppm | Start Seq.   | End Seq. | Sequence                     | Ion Score | C. I. | %  | Modification                               | Rank | Result Type |
|                     |                                                                                                     | 842.5458   | 842.4929    | -0.0529 | -63   | 177          | 183      | RLAELLK                      |           |       |    |                                            |      | Mascot      |
|                     |                                                                                                     | 1127.6055  | 1127.5524   | -0.0531 | -47   | 41           | 50       | ELEGPQISVR                   | 21        |       | 0  |                                            |      | Mascot      |
|                     |                                                                                                     | 1127.6055  | 1127.5524   | -0.0531 | -47   | 41           | 50       | ELEGPQISVR                   |           |       |    |                                            |      | Mascot      |
|                     |                                                                                                     | 2384.2126  | 2383.8892   | -0.3234 | -136  | 296          | 318      | IVEGQTIVIDVPASTPSGC<br>INDR  |           |       |    |                                            |      | Mascot      |
|                     |                                                                                                     | 2559.1692  | 2559.1748   | 0.0056  | 2     | 265          | 288      | LATETEDDDSALGDILHA<br>SDDLRS |           |       |    |                                            |      | Mascot      |
|                     |                                                                                                     | 2559.2144  | 2559.1748   | -0.0396 | -15   | 2            | 24       | IMADPEGESLESWLNKAT<br>NPSNR  |           |       |    |                                            |      | Mascot      |
| 35                  | PREDICTED: hypothetical protein LOC100534893 [Danio rerio]                                          |            |             |         |       | gi 326669436 |          | 168844.3                     | 8.85      | 16    | 31 | 0                                          |      |             |
| Peptide Information |                                                                                                     |            |             |         |       |              |          |                              |           |       |    |                                            |      |             |
|                     |                                                                                                     | Calc. Mass | Obsrv. Mass | ± da    | ± ppm | Start Seq.   | End Seq. | Sequence                     | Ion Score | C. I. | %  | Modification                               | Rank | Result Type |
|                     |                                                                                                     | 842.4227   | 842.4929    | 0.0702  | 83    | 299          | 305      | ENRPNGR                      |           |       |    |                                            |      | Mascot      |
|                     |                                                                                                     | 1045.5411  | 1045.5433   | 0.0022  | 2     | 1154         | 1162     | DEVEIAEIK                    |           |       |    |                                            |      | Mascot      |
|                     |                                                                                                     | 1118.5688  | 1118.634    | 0.0652  | 58    | 929          | 940      | LTAGDPSAASK                  |           |       |    |                                            |      | Mascot      |
|                     |                                                                                                     | 1330.7438  | 1330.6335   | -0.1103 | -83   | 360          | 372      | AQGAQIASTIKSR                |           |       |    |                                            |      | Mascot      |
|                     |                                                                                                     | 1354.6208  | 1354.6934   | 0.0726  | 54    | 1430         | 1441     | GYQGFPCEANLR                 |           |       |    |                                            |      | Mascot      |
|                     |                                                                                                     | 1354.7325  | 1354.6934   | -0.0391 | -29   | 1466         | 1477     | TPETLQTTPRSK                 |           |       |    |                                            |      | Mascot      |
|                     |                                                                                                     | 1473.7908  | 1473.8102   | 0.0194  | 13    | 573          | 586      | NAQDAKIASVIESK               |           |       |    |                                            |      | Mascot      |
|                     |                                                                                                     | 1473.7908  | 1473.8102   | 0.0194  | 13    | 573          | 586      | NAQDAKIASVIESK               |           |       |    |                                            |      | Mascot      |
|                     |                                                                                                     | 1557.7444  | 1557.7168   | -0.0276 | -18   | 1234         | 1248     | GLSDAGGWGSKFYGR              |           |       |    |                                            |      | Mascot      |
|                     |                                                                                                     | 1573.8367  | 1573.7124   | -0.1243 | -79   | 1163         | 1177     | RSAGDEAQVCLAIK               |           |       |    |                                            |      | Mascot      |
|                     |                                                                                                     | 1605.7153  | 1605.7881   | 0.0728  | 45    | 825          | 837      | HADNKHVDFDDHR                |           |       |    |                                            |      | Mascot      |

|           |           |         |     |      |      |                                |                                           |  |  |  |  |  |        |
|-----------|-----------|---------|-----|------|------|--------------------------------|-------------------------------------------|--|--|--|--|--|--------|
| 1688.845  | 1688.8339 | -0.0111 | -7  | 467  | 481  | TDIKQTENPSVNTNK                |                                           |  |  |  |  |  | Mascot |
| 1720.8357 | 1720.9137 | 0.078   | 45  | 452  | 466  | VQDVPMTSSRNIMDK                |                                           |  |  |  |  |  | Mascot |
| 2110.0344 | 2110.0537 | 0.0193  | 9   | 846  | 865  | VKILPHSCGNDVNVDT<br>GER        |                                           |  |  |  |  |  | Mascot |
| 2536.1653 | 2536.1211 | -0.0442 | -17 | 523  | 545  | CASEELEISQSAKITSAM<br>EHGNK    | Carbamidomethyl (C)[1], Oxidation (M)[18] |  |  |  |  |  | Mascot |
| 2871.3232 | 2871.394  | 0.0708  | 25  | 307  | 331  | EEMVIESGTSVKETEVSQ<br>MVSETEQR | Oxidation (M)[3]                          |  |  |  |  |  | Mascot |
| 2871.3232 | 2871.394  | 0.0708  | 25  | 307  | 331  | EEMVIESGTSVKETEVSQ<br>MVSETEQR | Oxidation (M)[3]                          |  |  |  |  |  | Mascot |
| 2928.4646 | 2928.3816 | -0.083  | -28 | 1442 | 1465 | VFEQFQIQHQCNYFCGLL<br>NLRSLK   |                                           |  |  |  |  |  | Mascot |
| 2928.4646 | 2928.3816 | -0.083  | -28 | 1442 | 1465 | VFEQFQIQHQCNYFCGLL<br>NLRSLK   |                                           |  |  |  |  |  | Mascot |

36 PREDICTED: si:dkey-170m15.2 [Danio rerio] gi|292624792 132327.3 7.37 14 31 0

#### Peptide Information

| Calc. Mass | Obsrv. Mass | ± da    | ± ppm | Start Seq. | End Seq. | Sequence                             | Ion Score | C. I. % | Modification            | Rank | Result Type |
|------------|-------------|---------|-------|------------|----------|--------------------------------------|-----------|---------|-------------------------|------|-------------|
| 939.4968   | 939.5073    | 0.0105  | 11    | 75         | 83       | DCPLVAPPK                            |           |         |                         |      | Mascot      |
| 996.5182   | 996.5761    | 0.0579  | 58    | 75         | 83       | DCPLVAPPK                            |           |         | Carbamidomethyl (C)[2]  |      | Mascot      |
| 1045.516   | 1045.5433   | 0.0273  | 26    | 98         | 106      | QTNITDEPK                            |           |         |                         |      | Mascot      |
| 1095.5503  | 1095.5037   | -0.0466 | -43   | 1127       | 1135     | EAFQSCILK                            |           |         | Carbamidomethyl (C)[6]  |      | Mascot      |
| 1165.6034  | 1165.7202   | 0.1168  | 100   | 440        | 449      | FCEQAVTIVR                           |           |         |                         |      | Mascot      |
| 1548.7838  | 1548.9131   | 0.1293  | 83    | 1127       | 1139     | EAFQSCILKEQPR                        |           |         |                         |      | Mascot      |
| 1605.8053  | 1605.7881   | -0.0172 | -11   | 1127       | 1139     | EAFQSCILKEQPR                        |           |         | Carbamidomethyl (C)[6]  |      | Mascot      |
| 1638.7507  | 1638.6833   | -0.0674 | -41   | 847        | 860      | EGNDQHPTDTLPHK                       |           |         |                         |      | Mascot      |
| 1707.8846  | 1707.7482   | -0.1364 | -80   | 436        | 449      | ESLRFCEQAVTIVR                       |           |         | Carbamidomethyl (C)[6]  |      | Mascot      |
| 1974.9919  | 1975.0669   | 0.075   | 38    | 700        | 719      | GGYTFVAEAHTGDVPVIG<br>GK             |           |         |                         |      | Mascot      |
| 2039.9148  | 2039.9558   | 0.041   | 20    | 1142       | 1158     | MEEKPMETVEQVETESK                    |           |         | Oxidation (M)[1]        |      | Mascot      |
| 2264.208   | 2263.9163   | -0.2917 | -129  | 399        | 418      | HVLQVHTNASLAVHLHLC<br>SK             |           |         | Carbamidomethyl (C)[18] |      | Mascot      |
| 2283.1875  | 2283.125    | -0.0625 | -27   | 663        | 682      | MFSPIPVCILHVINNDTLE<br>K             |           |         |                         |      | Mascot      |
| 2536.1013  | 2536.1211   | 0.0198  | 8     | 605        | 626      | HMVTNGEGIAELYPCRE<br>DECNR           |           |         |                         |      | Mascot      |
| 2680.2454  | 2680.2212   | -0.0242 | -9    | 891        | 914      | NEMRVFGDILDGTSMPPV<br>GTDQQNR        |           |         |                         |      | Mascot      |
| 3275.7019  | 3275.4758   | -0.2261 | -69   | 274        | 305      | TSHFTNSISSRLSAAALS<br>YTVASTHSVAALPK |           |         |                         |      | Mascot      |

37 Ppp4r2a protein [Danio rerio] gi|156230689 49479.9 4.37 8 30 0

#### Peptide Information

| Calc. Mass | Obsrv. Mass | ± da | ± ppm | Start Seq. | End Seq. | Sequence | Ion Score | C. I. % | Modification | Rank | Result Type |
|------------|-------------|------|-------|------------|----------|----------|-----------|---------|--------------|------|-------------|
|------------|-------------|------|-------|------------|----------|----------|-----------|---------|--------------|------|-------------|

|    |                                                                      |           |         |     |     |     |                                     |          |      |    |    |   |                        |  |  |  |        |
|----|----------------------------------------------------------------------|-----------|---------|-----|-----|-----|-------------------------------------|----------|------|----|----|---|------------------------|--|--|--|--------|
|    | 850.4199                                                             | 850.527   | 0.1071  | 126 | 172 | 179 | KGSSCVNR                            |          |      |    |    |   |                        |  |  |  | Mascot |
|    | 1045.5598                                                            | 1045.5433 | -0.0165 | -16 | 134 | 142 | LCELLTEPK                           |          |      |    |    |   |                        |  |  |  | Mascot |
|    | 1174.6506                                                            | 1174.553  | -0.0976 | -83 | 77  | 85  | SYFLFKLEK                           |          |      |    |    |   |                        |  |  |  | Mascot |
|    | 1707.837                                                             | 1707.7482 | -0.0888 | -52 | 27  | 41  | HTSTMEIDTLLGAFR                     |          |      |    |    |   | Oxidation (M)[5]       |  |  |  | Mascot |
|    | 1743.8734                                                            | 1743.7939 | -0.0795 | -46 | 50  | 64  | ESCPILDQFLSHVAK                     |          |      |    |    |   | Carbamidomethyl (C)[3] |  |  |  | Mascot |
|    | 2211.075                                                             | 2211.053  | -0.022  | -10 | 27  | 45  | HTSTMEIDTLLGAFRDFE<br>K             |          |      |    |    |   |                        |  |  |  | Mascot |
|    | 2606.2014                                                            | 2606.1165 | -0.0849 | -33 | 92  | 114 | ASCPEQRGPANPNVEYI<br>PFEEMK         |          |      |    |    |   |                        |  |  |  | Mascot |
|    | 2663.2229                                                            | 2663.3643 | 0.1414  | 53  | 92  | 114 | ASCPEQRGPANPNVEYI<br>PFEEMK         |          |      |    |    |   | Carbamidomethyl (C)[3] |  |  |  | Mascot |
|    | 2663.2229                                                            | 2663.3643 | 0.1414  | 53  | 92  | 114 | ASCPEQRGPANPNVEYI<br>PFEEMK         |          |      |    |    |   | Carbamidomethyl (C)[3] |  |  |  | Mascot |
|    | 3338.6633                                                            | 3338.6826 | 0.0193  | 6   | 180 | 210 | MNGVMFPGNTSAFPDRN<br>VNGPGTPRPLNRPK |          |      |    |    |   |                        |  |  |  | Mascot |
| 38 | PREDICTED: interferon-induced very large GTPase 1-like [Danio rerio] |           |         |     |     |     | gi 326665761                        | 191677.2 | 6.42 | 17 | 30 | 0 |                        |  |  |  |        |

Peptide Information

| Calc. Mass | Obsrv. Mass | ± da    | ± ppm | Start Seq. | End Seq. | Sequence                      | Ion Score | C. I. | % Modification                            | Rank | Result | Type   |
|------------|-------------|---------|-------|------------|----------|-------------------------------|-----------|-------|-------------------------------------------|------|--------|--------|
| 842.473    | 842.4929    | 0.0199  | 24    | 920        | 927      | SIISHASK                      |           |       |                                           |      |        | Mascot |
| 1045.5887  | 1045.5433   | -0.0454 | -43   | 613        | 621      | QAELEKISK                     |           |       |                                           |      |        | Mascot |
| 1051.5419  | 1051.6887   | 0.1468  | 140   | 1623       | 1630     | NLEQKYEK                      |           |       |                                           |      |        | Mascot |
| 1108.5746  | 1108.5502   | -0.0244 | -22   | 1390       | 1398     | SFIRDEVSR                     |           |       |                                           |      |        | Mascot |
| 1108.5746  | 1108.5502   | -0.0244 | -22   | 1390       | 1398     | SFIRDEVSR                     |           |       |                                           |      |        | Mascot |
| 1118.4823  | 1118.634    | 0.1517  | 136   | 1020       | 1028     | NSMSEFFEK                     |           |       |                                           |      |        | Mascot |
| 1127.6532  | 1127.5524   | -0.1008 | -89   | 1060       | 1068     | KLNDILQQR                     | 4         |       | 0                                         |      |        | Mascot |
| 1127.6532  | 1127.5524   | -0.1008 | -89   | 1060       | 1068     | KLNDILQQR                     |           |       |                                           |      |        | Mascot |
| 1380.5332  | 1380.7235   | 0.1903  | 138   | 460        | 470      | VDEEDDEDCRR                   |           |       |                                           |      |        | Mascot |
| 2039.9895  | 2039.9558   | -0.0337 | -17   | 275        | 292      | AETPMVFFFRFGSVSSS<br>K        |           |       | Oxidation (M)[5]                          |      |        | Mascot |
| 2110.0459  | 2110.0537   | 0.0078  | 4     | 318        | 336      | SRVLMDGVEIAWF CPS<br>GK       |           |       | Oxidation (M)[5]                          |      |        | Mascot |
| 2194.0129  | 2194.0354   | 0.0225  | 10    | 198        | 216      | IDPMDVQMAVFHCADGF<br>LK       |           |       | Carbamidomethyl (C)[13]                   |      |        | Mascot |
| 2225.1033  | 2225.0657   | -0.0376 | -17   | 293        | 310      | SHLMNSLINEKHNTFFHR            |           |       |                                           |      |        | Mascot |
| 2264.1016  | 2263.9163   | -0.1853 | -82   | 829        | 848      | LYPSCVFVHQNVSDITAG<br>EK      |           |       | Carbamidomethyl (C)[5]                    |      |        | Mascot |
| 2536.2791  | 2536.1211   | -0.158  | -62   | 1255       | 1275     | YEFKNEFFVELVLSICNG<br>SIK     |           |       | Carbamidomethyl (C)[16]                   |      |        | Mascot |
| 2606.1333  | 2606.1165   | -0.0168 | -6    | 341        | 362      | FNNCVAF CNLHGDAGEH<br>EKQMK   |           |       | Carbamidomethyl (C)[4,8]                  |      |        | Mascot |
| 2871.3372  | 2871.394    | 0.0568  | 20    | 198        | 222      | IDPMDVQMAVFHCADGF<br>LKQMMVTK |           |       | Oxidation (M)[4]                          |      |        | Mascot |
| 2871.3372  | 2871.394    | 0.0568  | 20    | 198        | 222      | IDPMDVQMAVFHCADGF<br>LKQMMVTK |           |       | Oxidation (M)[4]                          |      |        | Mascot |
| 2928.3584  | 2928.3816   | 0.0232  | 8     | 198        | 222      | IDPMDVQMAVFHCADGF             |           |       | Carbamidomethyl (C)[13], Oxidation (M)[4] |      |        | Mascot |



|  |           |           |         |     |     |     |                                           |  |                                           |        |
|--|-----------|-----------|---------|-----|-----|-----|-------------------------------------------|--|-------------------------------------------|--------|
|  | 2928.3584 | 2928.3816 | 0.0232  | 8   | 198 | 222 | LKQMMVTK<br>IDPMDVQMAVFHCADGF<br>LKQMMVTK |  | Carbamidomethyl (C)[13], Oxidation (M)[4] | Mascot |
|  | 3337.7024 | 3337.6738 | -0.0286 | -9  | 387 | 414 | IIQELFTNPKPLICLFTEDD<br>SNIFELEER         |  |                                           | Mascot |
|  | 3366.6306 | 3366.4951 | -0.1355 | -40 | 128 | 155 | YTLQTVESCAEEELVPTF<br>LQKLLMMDYR          |  | Oxidation (M)[24]                         | Mascot |
|  | 3366.6306 | 3366.4951 | -0.1355 | -40 | 128 | 155 | YTLQTVESCAEEELVPTF<br>LQKLLMMDYR          |  | Oxidation (M)[24]                         | Mascot |

39 PREDICTED: coiled-coil domain-containing protein 42 like-2-like [Danio rerio] gi|326667730 29260.3 8.67 6 29 0

#### Peptide Information

| Calc. Mass | Obsrv. Mass | ± da    | ± ppm | Start Seq. | End Seq. | Sequence                       | Ion Score | C. I. % | Modification     | Rank | Result Type |
|------------|-------------|---------|-------|------------|----------|--------------------------------|-----------|---------|------------------|------|-------------|
| 1380.7556  | 1380.7235   | -0.0321 | -23   | 123        | 133      | TKLELMQYINK                    |           |         |                  |      | Mascot      |
| 1564.8304  | 1564.8866   | 0.0562  | 36    | 189        | 200      | NIYQMIITHYIR                   |           |         |                  |      | Mascot      |
| 1720.9315  | 1720.9137   | -0.0178 | -10   | 189        | 201      | NIYQMIITHYIRR                  |           |         |                  |      | Mascot      |
| 2022.0953  | 2021.9862   | -0.1091 | -54   | 185        | 200      | TTVRNIYQMIITHYIR               |           |         |                  |      | Mascot      |
| 2216.1492  | 2215.9321   | -0.2171 | -98   | 89         | 107      | FENPCQVIDRIQALQSINK            |           |         |                  |      | Mascot      |
| 2928.3542  | 2928.3816   | 0.0274  | 9     | 1          | 26       | MDNVFSGLVFGSTLMSF<br>SPYKENDAR |           |         | Oxidation (M)[1] |      | Mascot      |
| 2928.3542  | 2928.3816   | 0.0274  | 9     | 1          | 26       | MDNVFSGLVFGSTLMSF<br>SPYKENDAR |           |         | Oxidation (M)[1] |      | Mascot      |

40 Ppp4r2a protein [Danio rerio] gi|38173867 48758.5 4.37 8 29 0

#### Peptide Information

| Calc. Mass | Obsrv. Mass | ± da    | ± ppm | Start Seq. | End Seq. | Sequence                            | Ion Score | C. I. % | Modification           | Rank | Result Type |
|------------|-------------|---------|-------|------------|----------|-------------------------------------|-----------|---------|------------------------|------|-------------|
| 850.4199   | 850.527     | 0.1071  | 126   | 165        | 172      | KGSSCVNR                            |           |         |                        |      | Mascot      |
| 1045.5598  | 1045.5433   | -0.0165 | -16   | 127        | 135      | LCELLTEPK                           |           |         |                        |      | Mascot      |
| 1174.6506  | 1174.553    | -0.0976 | -83   | 70         | 78       | SYFLFKLEK                           |           |         |                        |      | Mascot      |
| 1707.837   | 1707.7482   | -0.0888 | -52   | 20         | 34       | HTSTMEIDTLLGAFR                     |           |         | Oxidation (M)[5]       |      | Mascot      |
| 1743.8734  | 1743.7939   | -0.0795 | -46   | 43         | 57       | ESCPILDQFLSHVAK                     |           |         | Carbamidomethyl (C)[3] |      | Mascot      |
| 2211.075   | 2211.053    | -0.022  | -10   | 20         | 38       | HTSTMEIDTLLGAFRDFE<br>K             |           |         |                        |      | Mascot      |
| 2606.2014  | 2606.1165   | -0.0849 | -33   | 85         | 107      | ASCPEQRGPANPNVEYI<br>PFEEMK         |           |         |                        |      | Mascot      |
| 2663.2229  | 2663.3643   | 0.1414  | 53    | 85         | 107      | ASCPEQRGPANPNVEYI<br>PFEEMK         |           |         | Carbamidomethyl (C)[3] |      | Mascot      |
| 2663.2229  | 2663.3643   | 0.1414  | 53    | 85         | 107      | ASCPEQRGPANPNVEYI<br>PFEEMK         |           |         | Carbamidomethyl (C)[3] |      | Mascot      |
| 3338.6633  | 3338.6826   | 0.0193  | 6     | 173        | 203      | MNGVMFPGNTSAFPDRN<br>VNGPGTPRPLNRPK |           |         |                        |      | Mascot      |

41 PREDICTED: patatin-like phospholipase domain-containing protein 4-like [Danio rerio] gi|326664037 11777 9.03 4 29 0

| Peptide Information |                                 |         |       |              |          |                                 |           |       |                                           |                  |
|---------------------|---------------------------------|---------|-------|--------------|----------|---------------------------------|-----------|-------|-------------------------------------------|------------------|
| Calc. Mass          | Obsrv. Mass                     | ± da    | ± ppm | Start Seq.   | End Seq. | Sequence                        | Ion Score | C. I. | % Modification                            | Rank Result Type |
| 1974.9987           | 1975.0669                       | 0.0682  | 35    | 37           | 57       | ACAGASAGALVAAMIITA<br>PDK       |           |       | Carbamidomethyl (C)[2], Oxidation (M)[14] | Mascot           |
| 2087.0378           | 2086.842                        | -0.1958 | -94   | 74           | 91       | SQRFGAVTPGYDFMLEL<br>R          |           |       |                                           | Mascot           |
| 2559.3884           | 2559.1748                       | -0.2136 | -83   | 31           | 57       | LLSSLKACAGASAGALVA<br>AMIITAPDK |           |       | Oxidation (M)[20]                         | Mascot           |
| 2559.3884           | 2559.1748                       | -0.2136 | -83   | 31           | 57       | LLSSLKACAGASAGALVA<br>AMIITAPDK |           |       | Oxidation (M)[20]                         | Mascot           |
| 2663.4741           | 2663.3643                       | -0.1098 | -41   | 1            | 26       | MVVNVSFAAAGFLGAYH<br>LGVAKALLK  |           |       | Oxidation (M)[1]                          | Mascot           |
| 2663.4741           | 2663.3643                       | -0.1098 | -41   | 1            | 26       | MVVNVSFAAAGFLGAYH<br>LGVAKALLK  |           |       | Oxidation (M)[1]                          | Mascot           |
| 42                  | Zgc:55395 protein [Danio rerio] |         |       | gi 159155715 |          | 38358.6                         | 8.55      | 8     | 29                                        | 0                |

| Peptide Information |                                                                |         |       |              |          |                           |           |       |                           |                  |
|---------------------|----------------------------------------------------------------|---------|-------|--------------|----------|---------------------------|-----------|-------|---------------------------|------------------|
| Calc. Mass          | Obsrv. Mass                                                    | ± da    | ± ppm | Start Seq.   | End Seq. | Sequence                  | Ion Score | C. I. | % Modification            | Rank Result Type |
| 882.577             | 882.5476                                                       | -0.0294 | -33   | 308          | 316      | GLPKLGIGK                 |           |       |                           | Mascot           |
| 1380.5704           | 1380.7235                                                      | 0.1531  | 111   | 1            | 11       | MPVQCSNCEQK               |           |       | Carbamidomethyl (C)[5,8]  | Mascot           |
| 1548.8632           | 1548.9131                                                      | 0.0499  | 32    | 83           | 96       | LLLLSVDEGITGYR            |           |       |                           | Mascot           |
| 1564.7272           | 1564.8866                                                      | 0.1594  | 102   | 191          | 206      | CTAISTSSEGDGAIPR          |           |       |                           | Mascot           |
| 1707.9752           | 1707.7482                                                      | -0.227  | -133  | 62           | 76       | DSTVLAHVIKLLNER           |           |       |                           | Mascot           |
| 1720.8282           | 1720.9137                                                      | 0.0855  | 50    | 190          | 206      | RCTAISTSSEGDGAIPR         |           |       |                           | Mascot           |
| 2110.1501           | 2110.0537                                                      | -0.0964 | -46   | 50           | 71       | GETVAIGASGGKSTVLA<br>HVIK |           |       |                           | Mascot           |
| 2248.106            | 2247.9194                                                      | -0.1866 | -83   | 191          | 211      | CTAISTSSEGDGAIPRCK<br>PLK |           |       | Carbamidomethyl (C)[1,17] | Mascot           |
| 43                  | PREDICTED: zinc finger protein 135-like, partial [Danio rerio] |         |       | gi 326668043 |          | 50492.5                   | 9.56      | 11    | 29                        | 0                |

| Peptide Information |             |         |       |            |          |                        |           |       |                          |                  |
|---------------------|-------------|---------|-------|------------|----------|------------------------|-----------|-------|--------------------------|------------------|
| Calc. Mass          | Obsrv. Mass | ± da    | ± ppm | Start Seq. | End Seq. | Sequence               | Ion Score | C. I. | % Modification           | Rank Result Type |
| 1330.5588           | 1330.6335   | 0.0747  | 56    | 402        | 412      | EKPFTCTCCGK            |           |       | Carbamidomethyl (C)[6,8] | Mascot           |
| 1557.759            | 1557.7168   | -0.0422 | -27   | 245        | 257      | SFNQPSNLNLHMR          |           |       |                          | Mascot           |
| 1573.754            | 1573.7124   | -0.0416 | -26   | 245        | 257      | SFNQPSNLNLHMR          |           |       | Oxidation (M)[12]        | Mascot           |
| 1688.7883           | 1688.8339   | 0.0456  | 27    | 202        | 216      | VHTGEKPFTCPQCGK        |           |       | Carbamidomethyl (C)[10]  | Mascot           |
| 1720.7604           | 1720.9137   | 0.1533  | 89    | 402        | 415      | EKPFTCTCCGKSFR         |           |       | Carbamidomethyl (C)[6,8] | Mascot           |
| 2039.979            | 2039.9558   | -0.0232 | -11   | 370        | 387      | IHTGEKPFTCTQCGKSFR     |           |       |                          | Mascot           |
| 2086.9731           | 2086.842    | -0.1311 | -63   | 227        | 244      | HMRIHTGEKPFTCNQCG<br>K |           |       |                          | Mascot           |

|           |           |         |     |     |     |                              |                                              |        |
|-----------|-----------|---------|-----|-----|-----|------------------------------|----------------------------------------------|--------|
| 2663.2122 | 2663.3643 | 0.1521  | 57  | 109 | 132 | SSSLNLHIMSHNGEKPFTCTQCGR     | Oxidation (M)[9]                             | Mascot |
| 2663.2122 | 2663.3643 | 0.1521  | 57  | 109 | 132 | SSSLNLHIMSHNGEKPFTCTQCGR     | Oxidation (M)[9]                             | Mascot |
| 2680.2542 | 2680.2212 | -0.033  | -12 | 87  | 108 | HMRIHTGEKPFTCTQCGTSFIR       | Carbamidomethyl (C)[13,16], Oxidation (M)[2] | Mascot |
| 2697.1714 | 2697.1252 | -0.0462 | -17 | 11  | 33  | KPFTCTQCGNSFNSSSHLNQHMR      | Carbamidomethyl (C)[5], Oxidation (M)[22]    | Mascot |
| 2697.1714 | 2697.1252 | -0.0462 | -17 | 11  | 33  | KPFTCTQCGNSFNSSSHLNQHMR      | Carbamidomethyl (C)[5], Oxidation (M)[22]    | Mascot |
| 3337.5525 | 3337.6738 | 0.1213  | 36  | 273 | 300 | NFIHSSHLNEHMRITGEEKPFTCTQCGR | Carbamidomethyl (C)[23]                      | Mascot |
| 3366.5676 | 3366.4951 | -0.0725 | -22 | 258 | 285 | IHTGEKPFTCTQCGKNFIHSSHLNEHMR | Carbamidomethyl (C)[10,13]                   | Mascot |
| 3366.5676 | 3366.4951 | -0.0725 | -22 | 258 | 285 | IHTGEKPFTCTQCGKNFIHSSHLNEHMR | Carbamidomethyl (C)[10,13]                   | Mascot |

44 Golgi associated, gamma adaptin ear containing, ARF binding protein 3 [Danio rerio] gi|190340128 76353 5.35 4 29 0 21 0

Peptide Information

| Calc. Mass | Obsrv. Mass | ± da    | ± ppm | Start Seq. | End Seq. | Sequence                 | Ion Score | C. I. % | Modification | Rank | Result Type |
|------------|-------------|---------|-------|------------|----------|--------------------------|-----------|---------|--------------|------|-------------|
| 842.5458   | 842.4929    | -0.0529 | -63   | 175        | 181      | RLAELLK                  |           |         |              |      | Mascot      |
| 1127.6055  | 1127.5524   | -0.0531 | -47   | 39         | 48       | ELEGPQISVR               | 21        | 0       |              |      | Mascot      |
| 1127.6055  | 1127.5524   | -0.0531 | -47   | 39         | 48       | ELEGPQISVR               |           |         |              |      | Mascot      |
| 2384.2126  | 2383.8892   | -0.3234 | -136  | 294        | 316      | IVEGQTIVIDVPASTPSGCINDR  |           |         |              |      | Mascot      |
| 2559.1692  | 2559.1748   | 0.0056  | 2     | 263        | 286      | LATETEDDDSALGDILHASDDLRS |           |         |              |      | Mascot      |
| 2559.1692  | 2559.1748   | 0.0056  | 2     | 263        | 286      | LATETEDDDSALGDILHASDDLRS |           |         |              |      | Mascot      |

45 novel protein [Danio rerio] gi|94733564 88236.8 8.75 10 29 0

Peptide Information

| Calc. Mass | Obsrv. Mass | ± da    | ± ppm | Start Seq. | End Seq. | Sequence             | Ion Score | C. I. % | Modification           | Rank | Result Type |
|------------|-------------|---------|-------|------------|----------|----------------------|-----------|---------|------------------------|------|-------------|
| 842.4842   | 842.4929    | 0.0087  | 10    | 556        | 562      | IVDPSRR              |           |         |                        |      | Mascot      |
| 900.4825   | 900.4632    | -0.0193 | -21   | 517        | 523      | LINSYYK              |           |         |                        |      | Mascot      |
| 1473.6501  | 1473.8102   | 0.1601  | 109   | 499        | 510      | WSYKEICMGNDK         |           |         |                        |      | Mascot      |
| 1473.6501  | 1473.8102   | 0.1601  | 109   | 499        | 510      | WSYKEICMGNDK         |           |         |                        |      | Mascot      |
| 1534.7179  | 1534.6222   | -0.0957 | -62   | 179        | 192      | NPVAMVHANDGTHR       |           |         | Oxidation (M)[5]       |      | Mascot      |
| 1620.8091  | 1620.7225   | -0.0866 | -53   | 511        | 523      | TCSFPLKINSYYK        |           |         | Carbamidomethyl (C)[2] |      | Mascot      |
| 2233.0151  | 2233.0376   | 0.0225  | 10    | 399        | 417      | MFCGDVGQNKYEVDLIEK   |           |         | Oxidation (M)[1]       |      | Mascot      |
| 2283.0222  | 2283.125    | 0.1028  | 45    | 43         | 61       | RFHHIMDYFDHTGFTACGK  |           |         |                        |      | Mascot      |
| 2559.1697  | 2559.1748   | 0.0051  | 2     | 44         | 64       | FHHIMDYFDHTGFTACGYIR |           |         |                        |      | Mascot      |
| 2559.1697  | 2559.1748   | 0.0051  | 2     | 44         | 64       | FHHIMDYFDHTGFTACGK   |           |         |                        |      | Mascot      |

[illegible]

|    |                                                                      |           |         |      |     |     |                                    |                                           |   |        |   |
|----|----------------------------------------------------------------------|-----------|---------|------|-----|-----|------------------------------------|-------------------------------------------|---|--------|---|
|    | 1363.7018                                                            | 1363.6482 | -0.0536 | -39  | 648 | 658 | QTWPHWKGPARG                       |                                           |   | Mascot |   |
|    | 1473.713                                                             | 1473.8102 | 0.0972  | 66   | 644 | 654 | MLCKQTWPHWK                        | Oxidation (M)[1]                          |   | Mascot |   |
|    | 1473.713                                                             | 1473.8102 | 0.0972  | 66   | 644 | 654 | MLCKQTWPHWK                        | Oxidation (M)[1]                          |   | Mascot |   |
|    | 1548.8679                                                            | 1548.9131 | 0.0452  | 29   | 747 | 759 | IRCSALVQSFIR                       | Carbamidomethyl (C)[3]                    |   | Mascot |   |
|    | 1557.8417                                                            | 1557.7168 | -0.1249 | -80  | 698 | 710 | RQCLEDLAALIQK                      | Carbamidomethyl (C)[3]                    |   | Mascot |   |
|    | 2194.0886                                                            | 2194.0354 | -0.0532 | -24  | 278 | 296 | LGNIEFKPESRVNGFDES<br>R            |                                           |   | Mascot |   |
|    | 2264.0876                                                            | 2263.9163 | -0.1713 | -76  | 776 | 794 | CEEAVTTISAYWHGTQV<br>RR            | Carbamidomethyl (C)[1]                    |   | Mascot |   |
|    | 2384.1716                                                            | 2383.8892 | -0.2824 | -118 | 496 | 515 | FLTDHSLPHNCFRIQHYA<br>GK           |                                           |   | Mascot |   |
|    | 2536.293                                                             | 2536.1211 | -0.1719 | -68  | 659 | 681 | EGVEVLSDLQVPAAEFK<br>YGRSK         |                                           |   | Mascot |   |
|    | 2853.3645                                                            | 2853.3992 | 0.0347  | 12   | 451 | 475 | NGILAMLDEECLRPGTVT<br>DETFLDK      | Carbamidomethyl (C)[11], Oxidation (M)[6] |   | Mascot |   |
|    | 3366.7058                                                            | 3366.4951 | -0.2107 | -63  | 5   | 34  | TSLLDNMIGVGDMVLLEP<br>LSEESFIENLKK | Oxidation (M)[7, 13]                      |   | Mascot |   |
|    | 3366.7058                                                            | 3366.4951 | -0.2107 | -63  | 5   | 34  | TSLLDNMIGVGDMVLLEP<br>LSEESFIENLKK | Oxidation (M)[7, 13]                      |   | Mascot |   |
| 48 | protein phosphatase 1 regulatory subunit 7 [Danio rerio]  gi82658210 |           |         |      |     |     | 39360.8                            | 4.94                                      | 1 | 19     | 0 |

### Peptide Information

| Calc. Mass | Obsrv. Mass | ± da    | ± ppm | Start Seq. | End Seq. | Sequence   | Ion Score | C. I. | % Modification | Rank | Result Type |
|------------|-------------|---------|-------|------------|----------|------------|-----------|-------|----------------|------|-------------|
| 1127.6969  | 1127.5524   | -0.1445 | -128  | 327        | 336      | KIMLALPSVR | 19        | 0     |                | 3    | Mascot      |

|    |                                                                   |              |          |      |   |    |   |
|----|-------------------------------------------------------------------|--------------|----------|------|---|----|---|
| 49 | PREDICTED: sushi, nidogen and EGF-like domains 1<br>[Danio rerio] | gi 326668662 | 146125.5 | 5.54 | 1 | 19 | 0 |
|----|-------------------------------------------------------------------|--------------|----------|------|---|----|---|

### Peptide Information

| Calc. Mass | Obsrv. Mass | $\pm$ da | $\pm$ ppm | Start Seq. | End Sequence  | Ion Score | C. I. % Modification     | Rank | Result Type |
|------------|-------------|----------|-----------|------------|---------------|-----------|--------------------------|------|-------------|
| 1127.5084  | 1127.5524   | 0.044    | 39        | 1270       | 1277 RCELYCQR | 19        | 0 Carbamidomethyl (C)[6] | 4    | Mascot      |

|    |                                    |              |          |      |   |    |   |
|----|------------------------------------|--------------|----------|------|---|----|---|
| 50 | exosome component 10 [Danio rerio] | qi 210147550 | 102307.6 | 8.64 | 1 | 17 | 0 |
|----|------------------------------------|--------------|----------|------|---|----|---|

### Peptide Information

| Calc. Mass | Obsrv. Mass | ± da    | ± ppm | Start Seq. | End Seq. | Sequence    | Ion Score | C. I. | % Modification | Rank | Result Type |
|------------|-------------|---------|-------|------------|----------|-------------|-----------|-------|----------------|------|-------------|
| 1108.6473  | 1108.5502   | -0.0971 | -88   | 645        | 655      | KSVHGLTAPAK | 17        | 0     |                | 2    | Mascot      |

|                       |           |                               |                |                       |                    |
|-----------------------|-----------|-------------------------------|----------------|-----------------------|--------------------|
| <b>Gel Idx/Pos</b>    | 185/H12   | <b>Instr./Gel Origin</b>      | BA2060/110707A | <b>Process Status</b> | Analysis Succeeded |
| <b>Plate [#] Name</b> | [1] 31496 | <b>Instrument Sample Name</b> |                | <b>Spectra</b>        | 11                 |

| Rank | Protein Name | Accession No. | Protein MW | Protein PI | Pep. Count | Protein Score | Protein Score C. I. % | Total Ion Score | Total Ion C. I. % |
|------|--------------|---------------|------------|------------|------------|---------------|-----------------------|-----------------|-------------------|
|------|--------------|---------------|------------|------------|------------|---------------|-----------------------|-----------------|-------------------|

| Peptide Information |             |         |       |            |          |                           |           |        |                         | Rank | Result Type |
|---------------------|-------------|---------|-------|------------|----------|---------------------------|-----------|--------|-------------------------|------|-------------|
| Calc. Mass          | Obsrv. Mass | ± da    | ± ppm | Start Seq. | End Seq. | Sequence                  | Ion Score | C. I.  | % Modification          |      |             |
| 803.3794            | 803.3616    | -0.0178 | -22   | 366        | 372      | GHSFEAR                   |           |        |                         |      | Mascot      |
| 902.4875            | 902.4664    | -0.0211 | -23   | 532        | 538      | LNVLQCR                   |           |        | Carbamidomethyl (C)[6]  |      | Mascot      |
| 973.5101            | 973.4905    | -0.0196 | -20   | 424        | 431      | LVVWGEDR                  |           |        |                         |      | Mascot      |
| 973.5101            | 973.4905    | -0.0196 | -20   | 424        | 431      | LVVWGEDR                  | 46        | 99.31  |                         |      | Mascot      |
| 1058.5887           | 1058.5662   | -0.0225 | -21   | 531        | 538      | RLNVLQCR                  |           |        | Carbamidomethyl (C)[7]  |      | Mascot      |
| 1082.5112           | 1082.4855   | -0.0257 | -24   | 62         | 71       | SVAVYSADAR                |           |        |                         |      | Mascot      |
| 1325.7423           | 1325.7146   | -0.0277 | -21   | 355        | 365      | LPLSQEQIELR               | 52        | 99.854 |                         |      | Mascot      |
| 1325.7423           | 1325.7146   | -0.0277 | -21   | 355        | 365      | LPLSQEQIELR               |           |        |                         |      | Mascot      |
| 1563.8376           | 1563.8031   | -0.0345 | -22   | 272        | 286      | IIEEAPGPGISPEVR           |           |        |                         |      | Mascot      |
| 1563.8376           | 1563.8031   | -0.0345 | -22   | 272        | 286      | IIEEAPGPGISPEVR           | 102       | 100    |                         |      | Mascot      |
| 1584.8744           | 1584.8403   | -0.0341 | -22   | 131        | 145      | QEGIIFIGPPSSAIR           | 130       | 100    |                         |      | Mascot      |
| 1584.8744           | 1584.8403   | -0.0341 | -22   | 131        | 145      | QEGIIFIGPPSSAIR           |           |        |                         |      | Mascot      |
| 1728.7823           | 1728.7454   | -0.0369 | -21   | 515        | 530      | EQTSDVFSPPASSNGR          |           |        |                         |      | Mascot      |
| 1844.8773           | 1844.8348   | -0.0425 | -23   | 204        | 219      | IAQSEAEFHEQLESAR          |           |        |                         |      | Mascot      |
| 1844.8773           | 1844.8348   | -0.0425 | -23   | 204        | 219      | IAQSEAEFHEQLESAR          | 119       | 100    |                         |      | Mascot      |
| 1881.0439           | 1880.9956   | -0.0483 | -26   | 349        | 365      | VAAGEKLPLSQEQIELR         |           |        |                         |      | Mascot      |
| 2000.9784           | 2000.9335   | -0.0449 | -22   | 204        | 220      | IAQSEAEFHEQLESARR         |           |        |                         |      | Mascot      |
| 2047.9468           | 2047.9043   | -0.0425 | -21   | 513        | 530      | YREQTSDVFSPPASSNGR        |           |        |                         |      | Mascot      |
| 2117.9807           | 2117.9324   | -0.0483 | -23   | 549        | 568      | VAVSITYNPDGTYSMETGGR      |           |        |                         |      | Mascot      |
| 2133.9756           | 2133.9275   | -0.0481 | -23   | 549        | 568      | VAVSITYNPDGTYSMETGGR      |           |        | Oxidation (M)[15]       |      | Mascot      |
| 2371.1353           | 2371.0811   | -0.0542 | -23   | 242        | 261      | HVEVQVFGDQYGDVYLFER       | 149       | 100    |                         |      | Mascot      |
| 2371.1353           | 2371.0811   | -0.0542 | -23   | 242        | 261      | HVEVQVFGDQYGDVYLFER       |           |        |                         |      | Mascot      |
| 2439.1357           | 2439.0789   | -0.0568 | -23   | 155        | 177      | HIMSAAGVPIIEGYHGDDQSDAR   |           |        |                         |      | Mascot      |
| 2455.1306           | 2455.083    | -0.0476 | -19   | 155        | 177      | HIMSAAGVPIIEGYHGDDQSDAR   |           |        | Oxidation (M)[3]        |      | Mascot      |
| 2580.3127           | 2580.2556   | -0.0571 | -22   | 327        | 348      | LQVEHPVSEMITGTDLVEWQLR    |           |        |                         |      | Mascot      |
| 2580.3127           | 2580.2556   | -0.0571 | -22   | 327        | 348      | LQVEHPVSEMITGTDLVEWQLR    | 112       | 100    |                         |      | Mascot      |
| 2596.3076           | 2596.2539   | -0.0537 | -21   | 327        | 348      | LQVEHPVSEMITGTDLVEWQLR    | 51        | 99.805 | Oxidation (M)[10]       |      | Mascot      |
| 2596.3076           | 2596.2539   | -0.0537 | -21   | 327        | 348      | LQVEHPVSEMITGTDLVEWQLR    |           |        | Oxidation (M)[10]       |      | Mascot      |
| 2657.1936           | 2657.1265   | -0.0671 | -25   | 107        | 130      | SSAQAVHPGYGFLSENT EFAEQCK |           |        | Carbamidomethyl (C)[23] |      | Mascot      |

|   |                                              |           |        |     |              |     |                                    |      |     |     |     |     |     |  |  |  |        |
|---|----------------------------------------------|-----------|--------|-----|--------------|-----|------------------------------------|------|-----|-----|-----|-----|-----|--|--|--|--------|
|   | 3218.5093                                    | 3218.5154 | 0.0061 | 2   | 539          | 568 | NMSLQLGDNKVAVSITYN<br>PDGTYSMETGGR |      |     |     |     |     |     |  |  |  | Mascot |
|   | 3218.5864                                    | 3218.5154 | -0.071 | -22 | 373          | 402 | IYAEDPNNNPLPGAGPLL<br>HLSTPPGDQNTR | 137  | 100 |     |     |     |     |  |  |  | Mascot |
| 2 | hypothetical protein LOC777632 [Danio rerio] |           |        |     | gi 118150458 |     | 77993.3                            | 6.12 | 18  | 943 | 100 | 847 | 100 |  |  |  |        |

| Peptide Information |             |         |       |            |          |                           |           |        |                   |                         |      |        |        |
|---------------------|-------------|---------|-------|------------|----------|---------------------------|-----------|--------|-------------------|-------------------------|------|--------|--------|
| Calc. Mass          | Obsrv. Mass | ± da    | ± ppm | Start Seq. | End Seq. | Sequence                  | Ion Score | C. I.  | %                 | Modification            | Rank | Result | Type   |
| 803.3794            | 803.3616    | -0.0178 | -22   | 366        | 372      | GHSFEAR                   |           |        |                   |                         |      |        | Mascot |
| 902.4875            | 902.4664    | -0.0211 | -23   | 532        | 538      | LNVLQCR                   |           |        |                   | Carbamidomethyl (C)[6]  |      |        | Mascot |
| 973.5101            | 973.4905    | -0.0196 | -20   | 424        | 431      | LVVWGEDR                  |           |        |                   |                         |      |        | Mascot |
| 973.5101            | 973.4905    | -0.0196 | -20   | 424        | 431      | LVVWGEDR                  | 46        | 99.31  |                   |                         |      |        | Mascot |
| 1058.5887           | 1058.5662   | -0.0225 | -21   | 531        | 538      | RLNVLQCR                  |           |        |                   | Carbamidomethyl (C)[7]  |      |        | Mascot |
| 1082.5112           | 1082.4855   | -0.0257 | -24   | 62         | 71       | SVAVYSADAR                |           |        |                   |                         |      |        | Mascot |
| 1325.7423           | 1325.7146   | -0.0277 | -21   | 355        | 365      | LPLSQEQIELR               | 52        | 99.854 |                   |                         |      |        | Mascot |
| 1325.7423           | 1325.7146   | -0.0277 | -21   | 355        | 365      | LPLSQEQIELR               |           |        |                   |                         |      |        | Mascot |
| 1563.8376           | 1563.8031   | -0.0345 | -22   | 272        | 286      | IIEEAPGPGISPEVR           |           |        |                   |                         |      |        | Mascot |
| 1563.8376           | 1563.8031   | -0.0345 | -22   | 272        | 286      | IIEEAPGPGISPEVR           | 102       | 100    |                   |                         |      |        | Mascot |
| 1584.8744           | 1584.8403   | -0.0341 | -22   | 131        | 145      | QEGIIFIGPPSSAIR           | 130       | 100    |                   |                         |      |        | Mascot |
| 1584.8744           | 1584.8403   | -0.0341 | -22   | 131        | 145      | QEGIIFIGPPSSAIR           |           |        |                   |                         |      |        | Mascot |
| 1728.7823           | 1728.7454   | -0.0369 | -21   | 515        | 530      | EQTSDVFSPFASSNGR          |           |        |                   |                         |      |        | Mascot |
| 1844.8773           | 1844.8348   | -0.0425 | -23   | 204        | 219      | IAQSEAEFHEQLESAR          |           |        |                   |                         |      |        | Mascot |
| 1844.8773           | 1844.8348   | -0.0425 | -23   | 204        | 219      | IAQSEAEFHEQLESAR          | 119       | 100    |                   |                         |      |        | Mascot |
| 1881.0439           | 1880.9956   | -0.0483 | -26   | 349        | 365      | VAAGEKLPLSQEQIELR         |           |        |                   |                         |      |        | Mascot |
| 2000.9784           | 2000.9335   | -0.0449 | -22   | 204        | 220      | IAQSEAEFHEQLESARR         |           |        |                   |                         |      |        | Mascot |
| 2047.9468           | 2047.9043   | -0.0425 | -21   | 513        | 530      | YREQTSDVFSPFASSNGR        |           |        |                   |                         |      |        | Mascot |
| 2371.1353           | 2371.0811   | -0.0542 | -23   | 242        | 261      | HVEVQVFGDQYGDAVYL FER     | 149       | 100    |                   |                         |      |        | Mascot |
| 2371.1353           | 2371.0811   | -0.0542 | -23   | 242        | 261      | HVEVQVFGDQYGDAVYL FER     |           |        |                   |                         |      |        | Mascot |
| 2439.1357           | 2439.0789   | -0.0568 | -23   | 155        | 177      | HIMSAAGVPIIEGYHGDD QSDAR  |           |        |                   |                         |      |        | Mascot |
| 2455.1306           | 2455.083    | -0.0476 | -19   | 155        | 177      | HIMSAAGVPIIEGYHGDD QSDAR  |           |        |                   | Oxidation (M)[3]        |      |        | Mascot |
| 2580.3127           | 2580.2556   | -0.0571 | -22   | 327        | 348      | LQVEHPVSEMITGTDLVE WQLR   |           |        |                   |                         |      |        | Mascot |
| 2580.3127           | 2580.2556   | -0.0571 | -22   | 327        | 348      | LQVEHPVSEMITGTDLVE WQLR   | 112       | 100    |                   |                         |      |        | Mascot |
| 2596.3076           | 2596.2539   | -0.0537 | -21   | 327        | 348      | LQVEHPVSEMITGTDLVE WQLR   | 51        | 99.805 | Oxidation (M)[10] |                         |      |        | Mascot |
| 2596.3076           | 2596.2539   | -0.0537 | -21   | 327        | 348      | LQVEHPVSEMITGTDLVE WQLR   |           |        |                   | Oxidation (M)[10]       |      |        | Mascot |
| 2657.1936           | 2657.1265   | -0.0671 | -25   | 107        | 130      | SSAQAVHPGYGFLSENT EFAEQCK |           |        |                   | Carbamidomethyl (C)[23] |      |        | Mascot |

|           |           |        |     |     |     |                                   |     |     |  |  |  |  |        |
|-----------|-----------|--------|-----|-----|-----|-----------------------------------|-----|-----|--|--|--|--|--------|
| 3218.5864 | 3218.5154 | -0.071 | -22 | 373 | 402 | YAEDPNNNFLPGAGPLL<br>HLSTPPGDQNTR | 137 | 100 |  |  |  |  | Mascot |
| 3218.5864 | 3218.5154 | -0.071 | -22 | 373 | 402 | YAEDPNNNFLPGAGPLL<br>HLSTPPGDQNTR |     |     |  |  |  |  | Mascot |

3 hypothetical protein LOC559969 [Danio rerio] gi|113678532 77970.3 6.17 20 828 100 710 100

#### Peptide Information

| Calc. Mass | Obsrv. Mass | ± da    | ± ppm | Start Seq. | End Seq. | Sequence                | Ion Score | C. I. % | Modification           | Rank | Result Type |
|------------|-------------|---------|-------|------------|----------|-------------------------|-----------|---------|------------------------|------|-------------|
| 803.3794   | 803.3616    | -0.0178 | -22   | 366        | 372      | GHSFEAR                 |           |         |                        |      | Mascot      |
| 902.4875   | 902.4664    | -0.0211 | -23   | 532        | 538      | LNVLQCR                 |           |         | Carbamidomethyl (C)[6] |      | Mascot      |
| 973.5101   | 973.4905    | -0.0196 | -20   | 424        | 431      | LVVWGEDR                |           |         |                        |      | Mascot      |
| 973.5101   | 973.4905    | -0.0196 | -20   | 424        | 431      | LVVWGEDR                | 46        | 99.31   |                        |      | Mascot      |
| 1058.5887  | 1058.5662   | -0.0225 | -21   | 531        | 538      | RLNVLQCR                |           |         | Carbamidomethyl (C)[7] |      | Mascot      |
| 1082.5112  | 1082.4855   | -0.0257 | -24   | 62         | 71       | SVAVYSADAR              |           |         |                        |      | Mascot      |
| 1325.7423  | 1325.7146   | -0.0277 | -21   | 355        | 365      | LPLSQEQIELR             | 52        | 99.854  |                        |      | Mascot      |
| 1325.7423  | 1325.7146   | -0.0277 | -21   | 355        | 365      | LPLSQEQIELR             |           |         |                        |      | Mascot      |
| 1563.8376  | 1563.8031   | -0.0345 | -22   | 272        | 286      | IIEEAPGPGISPEVR         |           |         |                        |      | Mascot      |
| 1563.8376  | 1563.8031   | -0.0345 | -22   | 272        | 286      | IIEEAPGPGISPEVR         | 102       | 100     |                        |      | Mascot      |
| 1584.8744  | 1584.8403   | -0.0341 | -22   | 131        | 145      | QEGIIFIGPPSSAIR         | 130       | 100     |                        |      | Mascot      |
| 1584.8744  | 1584.8403   | -0.0341 | -22   | 131        | 145      | QEGIIFIGPPSSAIR         |           |         |                        |      | Mascot      |
| 1728.7823  | 1728.7454   | -0.0369 | -21   | 515        | 530      | EQTSDVFSPPASSNGR        |           |         |                        |      | Mascot      |
| 1844.8773  | 1844.8348   | -0.0425 | -23   | 204        | 219      | IAQSEAEFHEQLESAR        |           |         |                        |      | Mascot      |
| 1844.8773  | 1844.8348   | -0.0425 | -23   | 204        | 219      | IAQSEAEFHEQLESAR        | 119       | 100     |                        |      | Mascot      |
| 1881.0439  | 1880.9956   | -0.0483 | -26   | 349        | 365      | VAAGEKLPLSQEQIELR       |           |         |                        |      | Mascot      |
| 2000.9784  | 2000.9335   | -0.0449 | -22   | 204        | 220      | IAQSEAEFHEQLESARR       |           |         |                        |      | Mascot      |
| 2047.9468  | 2047.9043   | -0.0425 | -21   | 513        | 530      | YREQTSDVFSPPASSNGR      |           |         |                        |      | Mascot      |
| 2117.9807  | 2117.9324   | -0.0483 | -23   | 549        | 568      | VAVSITYNPDGTYSMETGGR    |           |         |                        |      | Mascot      |
| 2133.9756  | 2133.9275   | -0.0481 | -23   | 549        | 568      | VAVSITYNPDGTYSMETGGR    |           |         | Oxidation (M)[15]      |      | Mascot      |
| 2371.1353  | 2371.0811   | -0.0542 | -23   | 242        | 261      | HVEVQVFGDQYGDVYLFER     | 149       | 100     |                        |      | Mascot      |
| 2371.1353  | 2371.0811   | -0.0542 | -23   | 242        | 261      | HVEVQVFGDQYGDVYLFER     |           |         |                        |      | Mascot      |
| 2439.1357  | 2439.0789   | -0.0568 | -23   | 155        | 177      | HIMSAAGVPIIEGYHGDDQSDAR |           |         |                        |      | Mascot      |
| 2455.1306  | 2455.083    | -0.0476 | -19   | 155        | 177      | HIMSAAGVPIIEGYHGDDQSDAR |           |         | Oxidation (M)[3]       |      | Mascot      |
| 2580.3127  | 2580.2556   | -0.0571 | -22   | 327        | 348      | LQVEHPVSEMITGTDLVEWQLR  |           |         |                        |      | Mascot      |
| 2580.3127  | 2580.2556   | -0.0571 | -22   | 327        | 348      | LQVEHPVSEMITGTDLVEWQLR  | 112       | 100     |                        |      | Mascot      |
| 2596.3076  | 2596.2539   | -0.0537 | -21   | 327        | 348      | LQVEHPVSEMITGTDLVEWQLR  | 51        | 99.805  | Oxidation (M)[10]      |      | Mascot      |



|   |                                                                                         |           |         |     |     |     |                                    |  |  |  |  |                         |               |
|---|-----------------------------------------------------------------------------------------|-----------|---------|-----|-----|-----|------------------------------------|--|--|--|--|-------------------------|---------------|
|   | 2596.3076                                                                               | 2596.2539 | -0.0537 | -21 | 327 | 348 | LQVEHPVSEMITGTDLVE<br>WQLR         |  |  |  |  | Oxidation (M)[10]       | Mascot        |
|   | 2657.1936                                                                               | 2657.1265 | -0.0671 | -25 | 107 | 130 | SSAQAVHPGYGFLSENT<br>EFAEQCK       |  |  |  |  | Carbamidomethyl (C)[23] | Mascot        |
|   | 3218.5093                                                                               | 3218.5154 | 0.0061  | 2   | 539 | 568 | NMSLQLGDNKVAVSITYN<br>PDGTYSMETGGR |  |  |  |  |                         | Mascot        |
|   | 3218.5093                                                                               | 3218.5154 | 0.0061  | 2   | 539 | 568 | NMSLQLGDNKVAVSITYN<br>PDGTYSMETGGR |  |  |  |  |                         | Mascot        |
|   | 3227.5869                                                                               | 3227.5264 | -0.0605 | -19 | 373 | 402 | IYAEDPNNFLPGAGPLL<br>HLSTPPGDHNTR  |  |  |  |  |                         | Mascot        |
| 4 | PREDICTED: serine/threonine-protein kinase pim-2-like gi 326675052 52407.5 9.24 10 43 0 |           |         |     |     |     |                                    |  |  |  |  |                         | [Danio rerio] |

#### Peptide Information

| Calc. Mass | Obsrv. Mass | ± da    | ± ppm | Start Seq. | End Seq. | Sequence                     | Ion Score | C. I. | % Modification                            | Rank | Result Type |
|------------|-------------|---------|-------|------------|----------|------------------------------|-----------|-------|-------------------------------------------|------|-------------|
| 864.4971   | 864.4924    | -0.0047 | -5    | 1          | 7        | MLRRTVK                      |           |       | Oxidation (M)[1]                          |      | Mascot      |
| 1325.6089  | 1325.7146   | 0.1057  | 80    | 159        | 170      | QAVFAAQTCQQR                 |           |       |                                           |      | Mascot      |
| 1325.6089  | 1325.7146   | 0.1057  | 80    | 159        | 170      | QAVFAAQTCQQR                 |           |       |                                           |      | Mascot      |
| 1347.7267  | 1347.6968   | -0.0299 | -22   | 143        | 154      | SYVGPIKEDAIR                 |           |       |                                           |      | Mascot      |
| 1563.8013  | 1563.8031   | 0.0018  | 1     | 299        | 312      | EDLSWTKNSTALAK               |           |       |                                           |      | Mascot      |
| 1563.8013  | 1563.8031   | 0.0018  | 1     | 299        | 312      | EDLSWTKNSTALAK               |           |       |                                           |      | Mascot      |
| 1567.7468  | 1567.8163   | 0.0695  | 44    | 159        | 171      | QAVFAAQTCQQRK                |           |       | Carbamidomethyl (C)[9,10]                 |      | Mascot      |
| 1844.8969  | 1844.8348   | -0.0621 | -34   | 155        | 170      | FIMKQAVFAAQTCQQR             |           |       |                                           |      | Mascot      |
| 1844.8969  | 1844.8348   | -0.0621 | -34   | 155        | 170      | FIMKQAVFAAQTCQQR             |           |       |                                           |      | Mascot      |
| 2192.9331  | 2193.052    | 0.1189  | 54    | 258        | 275      | IMTKDIEGLSEECDFMR            |           |       | Carbamidomethyl (C)[13], Oxidation (M)[2] |      | Mascot      |
| 2247.0928  | 2247.0203   | -0.0725 | -32   | 43         | 63       | KYEIGEELGEGGFTVYA<br>ATR     |           |       |                                           |      | Mascot      |
| 2283.2529  | 2283.1292   | -0.1237 | -54   | 8          | 27       | SSLPALHQPFKSQTMLQ<br>LK      |           |       | Oxidation (M)[16]                         |      | Mascot      |
| 2657.3328  | 2657.1265   | -0.2063 | -78   | 393        | 416      | KALCITADATHPMHSFFS<br>LLPSGR |           |       | Carbamidomethyl (C)[4]                    |      | Mascot      |

5 RNA 3'-terminal phosphate cyclase [Danio rerio] gi|41054721 38740.9 8.3 7 41 0 16 0

#### Peptide Information

| Calc. Mass | Obsrv. Mass | ± da    | ± ppm | Start Seq. | End Seq. | Sequence           | Ion Score | C. I. | % Modification          | Rank | Result Type |
|------------|-------------|---------|-------|------------|----------|--------------------|-----------|-------|-------------------------|------|-------------|
| 864.4244   | 864.4924    | 0.068   | 79    | 209        | 216      | DMSTAAIR           |           |       |                         |      | Mascot      |
| 1234.6572  | 1234.6538   | -0.0034 | -3    | 209        | 219      | DMSTAAIRTIR        |           |       |                         |      | Mascot      |
| 1347.73    | 1347.6968   | -0.0332 | -25   | 22         | 35       | VSAALSCIQGASIK     |           |       |                         |      | Mascot      |
| 1584.889   | 1584.8403   | -0.0487 | -31   | 272        | 285      | VGIEAAEMLLRNIR     | 16        | 0     |                         |      | Mascot      |
| 1584.889   | 1584.8403   | -0.0487 | -31   | 272        | 285      | VGIEAAEMLLRNIR     |           |       |                         |      | Mascot      |
| 2225.1536  | 2225.0662   | -0.0874 | -39   | 139        | 156      | VFKPIVERFGVQFDCDLR |           |       | Carbamidomethyl (C)[15] |      | Mascot      |
| 2225.1536  | 2225.0662   | -0.0874 | -39   | 139        | 156      | VFKPIVERFGVQFDCDLR |           |       | Carbamidomethyl (C)[15] |      | Mascot      |

|   |                                                |           |        |    |              |    |                             |      |   |    |   |    |                                          |        |
|---|------------------------------------------------|-----------|--------|----|--------------|----|-----------------------------|------|---|----|---|----|------------------------------------------|--------|
|   | 2232.9934                                      | 2233.0288 | 0.0354 | 16 | 1            | 21 | MAATTFEMDGSMVEGG<br>GQILR   |      |   |    |   |    | Oxidation (M)[1,8]                       | Mascot |
|   | 2367.0803                                      | 2367.2065 | 0.1262 | 53 | 61           | 83 | DMCNGNLEGATVGSSEI<br>TLTPGK |      |   |    |   |    | Carbamidomethyl (C)[3], Oxidation (M)[2] | Mascot |
| 6 | COMM domain-containing protein 1 [Danio rerio] |           |        |    | gi 113674991 |    | 21219.7                     | 5.48 | 4 | 40 | 0 | 23 | 0                                        |        |

#### Peptide Information

| Calc. Mass | Obsrv. Mass | ± da    | ± ppm | Start Seq. | End Seq. | Sequence                  | Ion Score | C. I. | % | Modification     | Rank | Result Type |
|------------|-------------|---------|-------|------------|----------|---------------------------|-----------|-------|---|------------------|------|-------------|
| 870.4614   | 870.5187    | 0.0573  | 66    | 48         | 54       | ALHDKMR                   |           |       |   |                  |      | Mascot      |
| 1844.8807  | 1844.8348   | -0.0459 | -25   | 174        | 189      | NMAELQESIDSIVHRS          |           |       |   | Oxidation (M)[2] |      | Mascot      |
| 1844.8807  | 1844.8348   | -0.0459 | -25   | 174        | 189      | NMAELQESIDSIVHRS          | 23        | 0     |   | Oxidation (M)[2] |      | Mascot      |
| 2211.0022  | 2211.0537   | 0.0515  | 23    | 35         | 52       | NELYAEMTEDEFRLHD<br>K     |           |       |   |                  |      | Mascot      |
| 2283.092   | 2283.1292   | 0.0372  | 16    | 59         | 79       | SIASADMDQAQLEAFLTA<br>QTR |           |       |   | Oxidation (M)[7] |      | Mascot      |

|   |                                      |  |  |  |              |  |         |      |    |    |   |  |  |
|---|--------------------------------------|--|--|--|--------------|--|---------|------|----|----|---|--|--|
| 7 | novel odorant receptor [Danio rerio] |  |  |  | gi 220679255 |  | 94990.8 | 8.66 | 13 | 40 | 0 |  |  |
|---|--------------------------------------|--|--|--|--------------|--|---------|------|----|----|---|--|--|

#### Peptide Information

| Calc. Mass | Obsrv. Mass | ± da    | ± ppm | Start Seq. | End Seq. | Sequence                           | Ion Score | C. I. | % | Modification            | Rank | Result Type |
|------------|-------------|---------|-------|------------|----------|------------------------------------|-----------|-------|---|-------------------------|------|-------------|
| 864.4243   | 864.4924    | 0.0681  | 79    | 25         | 33       | VSVGNASCK                          |           |       |   |                         |      | Mascot      |
| 973.4295   | 973.4905    | 0.061   | 63    | 114        | 121      | IYDTCSSK                           |           |       |   | Carbamidomethyl (C)[5]  |      | Mascot      |
| 973.4295   | 973.4905    | 0.061   | 63    | 114        | 121      | IYDTCSSK                           |           |       |   | Carbamidomethyl (C)[5]  |      | Mascot      |
| 1051.6219  | 1051.6892   | 0.0673  | 64    | 666        | 674      | TLLVLMAFK                          |           |       |   | Oxidation (M)[6]        |      | Mascot      |
| 1104.5031  | 1104.5543   | 0.0512  | 46    | 720        | 727      | NMKYYEEK                           |           |       |   |                         |      | Mascot      |
| 1213.5405  | 1213.5719   | 0.0314  | 26    | 244        | 253      | EGICVEYSEK                         |           |       |   | Carbamidomethyl (C)[4]  |      | Mascot      |
| 1434.8202  | 1434.7355   | -0.0847 | -59   | 101        | 113      | SESLPKLSLGYK                       |           |       |   |                         |      | Mascot      |
| 1567.869   | 1567.8163   | -0.0527 | -34   | 420        | 433      | DLLTQPQQVVDALK                     |           |       |   |                         |      | Mascot      |
| 1729.8359  | 1729.7338   | -0.1021 | -59   | 173        | 188      | IPVISHAASCECLSSR                   |           |       |   | Carbamidomethyl (C)[10] |      | Mascot      |
| 2048.1646  | 2047.9043   | -0.2603 | -127  | 666        | 684      | TLLVLMAFKATLPGSNIM<br>K            |           |       |   |                         |      | Mascot      |
| 2279.1853  | 2278.9968   | -0.1885 | -83   | 361        | 379      | NDSWVILNCSRYQDLLVL<br>K            |           |       |   |                         |      | Mascot      |
| 2283.2239  | 2283.1292   | -0.0947 | -41   | 824        | 842      | CYIILLKPEQNTKQYMLG<br>K            |           |       |   |                         |      | Mascot      |
| 2371.1809  | 2371.0811   | -0.0998 | -42   | 413        | 433      | EQEGCEKDLLTQPQQVV<br>DALK          |           |       |   |                         |      | Mascot      |
| 2371.1809  | 2371.0811   | -0.0998 | -42   | 413        | 433      | EQEGCEKDLLTQPQQVV<br>DALK          |           |       |   |                         |      | Mascot      |
| 3337.5483  | 3337.6785   | 0.1302  | 39    | 214        | 243      | HLGWSWVGAVNSDNDY<br>GNYGMAIFLNTAHK |           |       |   |                         |      | Mascot      |

|   |                                                                                                   |  |  |  |              |  |          |      |    |    |   |  |  |
|---|---------------------------------------------------------------------------------------------------|--|--|--|--------------|--|----------|------|----|----|---|--|--|
| 8 | novel protein similar to Janus kinase family (a protein tyrosine kinase, leukocyte) [Danio rerio] |  |  |  | gi 169145296 |  | 125997.7 | 6.83 | 15 | 40 | 0 |  |  |
|---|---------------------------------------------------------------------------------------------------|--|--|--|--------------|--|----------|------|----|----|---|--|--|

| Peptide Information                                                  |             |         |       |            |          |                      | Ion Score | C. I. | % Modification       | Rank | Result Type |
|----------------------------------------------------------------------|-------------|---------|-------|------------|----------|----------------------|-----------|-------|----------------------|------|-------------|
| Calc. Mass                                                           | Obsrv. Mass | ± da    | ± ppm | Start Seq. | End Seq. | Sequence             |           |       |                      |      |             |
| 803.437                                                              | 803.3616    | -0.0754 | -94   | 538        | 544      | GSKIDQR              |           |       |                      |      | Mascot      |
| 850.4603                                                             | 850.5243    | 0.064   | 75    | 399        | 405      | NGMFLLR              |           |       |                      |      | Mascot      |
| 856.3981                                                             | 856.5068    | 0.1087  | 127   | 882        | 889      | GICYSTGR             |           |       |                      |      | Mascot      |
| 864.4825                                                             | 864.4924    | 0.0099  | 11    | 959        | 966      | IADFGLTK             |           |       |                      |      | Mascot      |
| 1058.5629                                                            | 1058.5662   | 0.0033  | 3     | 115        | 123      | ASYRFSLSK            |           |       |                      |      | Mascot      |
| 1179.5277                                                            | 1179.5769   | 0.0492  | 42    | 806        | 814      | QQEDVFEER            |           |       |                      |      | Mascot      |
| 1316.6692                                                            | 1316.6663   | -0.0029 | -2    | 1088       | 1098     | DLIENSLDER           |           |       |                      |      | Mascot      |
| 1475.7094                                                            | 1475.7168   | 0.0074  | 5     | 308        | 319      | RLCQEQMPLER          |           |       | Oxidation (M)[7]     |      | Mascot      |
| 2001.0685                                                            | 2000.9335   | -0.135  | -67   | 666        | 684      | LSDPGVSMALLGKDVLDR   |           |       |                      |      | Mascot      |
| 2118.1416                                                            | 2117.9324   | -0.2092 | -99   | 597        | 614      | NIMVQEFVKHGALDLYLK   |           |       |                      |      | Mascot      |
| 2134.1365                                                            | 2133.9275   | -0.209  | -98   | 597        | 614      | NIMVQEFVKHGALDLYLK   |           |       | Oxidation (M)[3]     |      | Mascot      |
| 2193.1108                                                            | 2193.052    | -0.0588 | -27   | 658        | 678      | EGDSPFIKLSDPGVMSLLGK |           |       | Oxidation (M)[16]    |      | Mascot      |
| 2211.0791                                                            | 2211.0537   | -0.0254 | -11   | 290        | 307      | QEWQTFCDFPQIIDISIK   |           |       |                      |      | Mascot      |
| 2225.0115                                                            | 2225.0662   | 0.0547  | 25    | 564        | 582      | NCWESLFEAASLSMSQISHR |           |       | Oxidation (M)[13]    |      | Mascot      |
| 2225.0115                                                            | 2225.0662   | 0.0547  | 25    | 564        | 582      | NCWESLFEAASLSMSQISHR |           |       | Oxidation (M)[13]    |      | Mascot      |
| 2247.1333                                                            | 2247.0203   | -0.113  | -50   | 920        | 938      | LLLFASQICKGMEYLQSMR  |           |       | Oxidation (M)[12]    |      | Mascot      |
| 2263.1284                                                            | 2263.0032   | -0.1252 | -55   | 920        | 938      | LLLFASQICKGMEYLQSMR  |           |       | Oxidation (M)[12,18] |      | Mascot      |
| 2367.1802                                                            | 2367.2065   | 0.0263  | 11    | 290        | 308      | QEWQTFCDFPQIIDISIKR  |           |       |                      |      | Mascot      |
| BSD domain-containing protein 1 isoform 2 [Danio rerio] gi 147900977 |             |         |       |            |          |                      | 25132     | 4.28  | 7                    | 40   | 0           |

| Peptide Information |             |         |       |            |          |                              |           |       |                   |      |             |
|---------------------|-------------|---------|-------|------------|----------|------------------------------|-----------|-------|-------------------|------|-------------|
| Calc. Mass          | Obsrv. Mass | ± da    | ± ppm | Start Seq. | End Seq. | Sequence                     | Ion Score | C. I. | % Modification    | Rank | Result Type |
| 1213.6211           | 1213.5719   | -0.0492 | -41   | 24         | 33       | SAEAYEFIKR                   |           |       |                   |      | Mascot      |
| 1563.7068           | 1563.8031   | 0.0963  | 62    | 153        | 165      | EETAREDMAQDLR                |           |       |                   |      | Mascot      |
| 1563.7068           | 1563.8031   | 0.0963  | 62    | 153        | 165      | EETAREDMAQDLR                |           |       |                   |      | Mascot      |
| 1880.8984           | 1880.9956   | 0.0972  | 52    | 166        | 183      | VFELNSDSGKSTPSNNGK           |           |       |                   |      | Mascot      |
| 2000.8827           | 2000.9335   | 0.0508  | 25    | 197        | 213      | DFDLDMTEEEVQMALS             |           |       |                   |      | Mascot      |
| 2053.9495           | 2053.9241   | -0.0254 | -12   | 158        | 175      | EDMAQDLRVFELNSDSGK           |           |       |                   |      | Mascot      |
| 2439.1362           | 2439.0789   | -0.0573 | -23   | 2          | 23       | ADGEGGWGWLQSFQSVKDK          |           |       |                   |      | Mascot      |
| 3337.4246           | 3337.6785   | 0.2539  | 76    | 185        | 213      | GSSTDVSEDWEKDFDLDMTEEEVQMALS |           |       | Oxidation (M)[18] |      | Mascot      |

10 PREDICTED: LOW QUALITY PROTEIN: tyrosine-protein kinase JAK2 [Danio rerio] gi|326669956 130087.7 6.55 15 39 0

Peptide Information

| Calc. Mass | Obsrv. Mass | ± da    | ± ppm | Start Seq. | End Seq. | Sequence             | Ion Score | C. I. % | Modification         | Rank | Result Type |
|------------|-------------|---------|-------|------------|----------|----------------------|-----------|---------|----------------------|------|-------------|
| 803.437    | 803.3616    | -0.0754 | -94   | 538        | 544      | GSKIDQR              |           |         |                      |      | Mascot      |
| 850.4603   | 850.5243    | 0.064   | 75    | 399        | 405      | NGMFLLR              |           |         |                      |      | Mascot      |
| 856.3981   | 856.5068    | 0.1087  | 127   | 882        | 889      | GICYSTGR             |           |         |                      |      | Mascot      |
| 864.4825   | 864.4924    | 0.0099  | 11    | 959        | 966      | IADFGLTK             |           |         |                      |      | Mascot      |
| 1058.5629  | 1058.5662   | 0.0033  | 3     | 115        | 123      | ASYRFSLSK            |           |         |                      |      | Mascot      |
| 1179.5277  | 1179.5769   | 0.0492  | 42    | 806        | 814      | QQEDVFEER            |           |         |                      |      | Mascot      |
| 1316.6692  | 1316.6663   | -0.0029 | -2    | 1093       | 1103     | DLIENSLDER           |           |         |                      |      | Mascot      |
| 1475.7094  | 1475.7168   | 0.0074  | 5     | 308        | 319      | RLCQEQMPLGR          |           |         | Oxidation (M)[7]     |      | Mascot      |
| 2001.0685  | 2000.9335   | -0.135  | -67   | 666        | 684      | LSDPGVSMSELLGKDVVLDR |           |         |                      |      | Mascot      |
| 2118.1416  | 2117.9324   | -0.2092 | -99   | 597        | 614      | NIMVQEFVKHGALDLYLK   |           |         |                      |      | Mascot      |
| 2134.1365  | 2133.9275   | -0.209  | -98   | 597        | 614      | NIMVQEFVKHGALDLYLK   |           |         | Oxidation (M)[3]     |      | Mascot      |
| 2193.1108  | 2193.052    | -0.0588 | -27   | 658        | 678      | EGDSPFIKLSDPGVMSMLGK |           |         | Oxidation (M)[16]    |      | Mascot      |
| 2211.0791  | 2211.0537   | -0.0254 | -11   | 290        | 307      | QEWQTFCDFPQIIDISIK   |           |         |                      |      | Mascot      |
| 2225.0115  | 2225.0662   | 0.0547  | 25    | 564        | 582      | NCWESLFEAASLSMQISHR  |           |         | Oxidation (M)[13]    |      | Mascot      |
| 2225.0115  | 2225.0662   | 0.0547  | 25    | 564        | 582      | NCWESLFEAASLSMQISHR  |           |         | Oxidation (M)[13]    |      | Mascot      |
| 2247.1333  | 2247.0203   | -0.113  | -50   | 920        | 938      | LLLFASQICKGMEYLQSMR  |           |         | Oxidation (M)[12]    |      | Mascot      |
| 2263.1284  | 2263.0032   | -0.1252 | -55   | 920        | 938      | LLLFASQICKGMEYLQSMR  |           |         | Oxidation (M)[12,18] |      | Mascot      |
| 2367.1802  | 2367.2065   | 0.0263  | 11    | 290        | 308      | QEWQTFCDFPQIIDISIKR  |           |         |                      |      | Mascot      |

11 PREDICTED: paxillin-like [Danio rerio] gi|326669829 58290.7 5.95 10 37 0

Peptide Information

| Calc. Mass | Obsrv. Mass | ± da    | ± ppm | Start Seq. | End Seq. | Sequence              | Ion Score | C. I. % | Modification             | Rank | Result Type |
|------------|-------------|---------|-------|------------|----------|-----------------------|-----------|---------|--------------------------|------|-------------|
| 1584.7284  | 1584.8403   | 0.1119  | 71    | 244        | 256      | ELEELMACLSDFK         |           |         | Carbamidomethyl (C)[8]   |      | Mascot      |
| 1584.7284  | 1584.8403   | 0.1119  | 71    | 244        | 256      | ELEELMACLSDFK         |           |         | Carbamidomethyl (C)[8]   |      | Mascot      |
| 1729.7672  | 1729.7338   | -0.0334 | -19   | 516        | 529      | EQNDKPYCQGCFIK        |           |         | Carbamidomethyl (C)[8]   |      | Mascot      |
| 1880.9396  | 1880.9956   | 0.056   | 30    | 257        | 274      | VQSNIMAQKGKPGHQANK    |           |         | Oxidation (M)[6]         |      | Mascot      |
| 2118.041   | 2117.9324   | -0.1086 | -51   | 495        | 511      | FHPEHFVCAFLKQLNK      |           |         | Carbamidomethyl (C)[8]   |      | Mascot      |
| 2133.9558  | 2133.9275   | -0.0283 | -13   | 341        | 357      | EGQPYCERDYHHLFSPR     |           |         |                          |      | Mascot      |
| 2225.0657  | 2225.0662   | 0.0005  | 0     | 473        | 493      | GSLCSGCQKPTIGRCITAMGK |           |         | Carbamidomethyl (C)[4,7] |      | Mascot      |

|    |                                                          |           |         |     |              |         |                          |   |                                                |        |
|----|----------------------------------------------------------|-----------|---------|-----|--------------|---------|--------------------------|---|------------------------------------------------|--------|
|    | 2225.0657                                                | 2225.0662 | 0.0005  | 0   | 473          | 493     | GSLCSGCQKPITGRCITAMGK    |   | Carbamidomethyl (C)[4,7]                       | Mascot |
|    | 2263.0261                                                | 2263.0032 | -0.0229 | -10 | 86           | 105     | DSSPPASRTEEDHVYSFPNK     |   |                                                | Mascot |
|    | 2297.1118                                                | 2297.1343 | 0.0225  | 10  | 3            | 23      | FAFCTDALLADLESSTAHSK     |   | Carbamidomethyl (C)[4]                         | Mascot |
|    | 2298.082                                                 | 2298.1377 | 0.0557  | 24  | 473          | 493     | GSLCSGCQKPITGRCITAMGK    |   | Carbamidomethyl (C)[4,7,15], Oxidation (M)[19] | Mascot |
|    | 2367.27                                                  | 2367.2065 | -0.0635 | -27 | 275          | 296     | LDNMLGSLQSDLHKLGVQTVAK   |   |                                                | Mascot |
|    | 2657.262                                                 | 2657.1265 | -0.1355 | -51 | 244          | 266     | ELEELMACLSDFKVQSNIMAQ GK |   | Carbamidomethyl (C)[8], Oxidation (M)[6]       | Mascot |
| 12 | PREDICTED: collagen alpha-4(VI) chain-like [Danio rerio] |           |         |     | gi 326673140 | 38361.2 | 5.51                     | 9 | 37                                             | 0      |

#### Peptide Information

| Calc. Mass | Obsrv. Mass | ± da    | ± ppm | Start Seq. | End Seq. | Sequence                | Ion Score | C. I. % | Modification                              | Rank | Result Type |
|------------|-------------|---------|-------|------------|----------|-------------------------|-----------|---------|-------------------------------------------|------|-------------|
| 864.3879   | 864.4924    | 0.1045  | 121   | 340        | 346      | RAMQVDE                 |           |         | Oxidation (M)[3]                          |      | Mascot      |
| 870.4791   | 870.5187    | 0.0396  | 45    | 114        | 122      | GSSGIKGHK               |           |         |                                           |      | Mascot      |
| 1213.4871  | 1213.5719   | 0.0848  | 70    | 171        | 182      | KNCACCSGNGTR            |           |         |                                           |      | Mascot      |
| 1316.7169  | 1316.6663   | -0.0506 | -38   | 254        | 265      | QSLLEALNTTAR            |           |         |                                           |      | Mascot      |
| 1584.6451  | 1584.8403   | 0.1952  | 123   | 84         | 95       | MEEMDMDRLDQR            |           |         | Oxidation (M)[1]                          |      | Mascot      |
| 1584.6451  | 1584.8403   | 0.1952  | 123   | 84         | 95       | MEEMDMDRLDQR            |           |         | Oxidation (M)[1]                          |      | Mascot      |
| 1729.8789  | 1729.7338   | -0.1451 | -84   | 232        | 246      | VSVMSYSNESKTLIR         |           |         | Oxidation (M)[4]                          |      | Mascot      |
| 2047.9827  | 2047.9043   | -0.0784 | -38   | 153        | 170      | GVPGISPMPECDLVEYIR      |           |         | Carbamidomethyl (C)[11], Oxidation (M)[8] |      | Mascot      |
| 2118.1062  | 2117.9324   | -0.1738 | -82   | 120        | 140      | GHKGYQGRPGNAGRPGNPGIK   |           |         |                                           |      | Mascot      |
| 2371.1235  | 2371.0811   | -0.0424 | -18   | 210        | 231      | SAAYSLLLEDIFISDTNCPQGAR |           |         |                                           |      | Mascot      |
| 2371.1235  | 2371.0811   | -0.0424 | -18   | 210        | 231      | SAAYSLLLEDIFISDTNCPQGAR |           |         |                                           |      | Mascot      |

|                     |                                                |             |         |       |              |          |             |           |         |                  |                  |
|---------------------|------------------------------------------------|-------------|---------|-------|--------------|----------|-------------|-----------|---------|------------------|------------------|
| 13                  | DNA mismatch repair protein Msh3 [Danio rerio] |             |         |       | gi 157841276 | 121710.5 | 6.91        | 15        | 36      | 0                |                  |
| Peptide Information |                                                |             |         |       |              |          |             |           |         |                  |                  |
|                     | Calc. Mass                                     | Obsrv. Mass | ± da    | ± ppm | Start Seq.   | End Seq. | Sequence    | Ion Score | C. I. % | Modification     | Rank Result Type |
|                     | 842.4981                                       | 842.4913    | -0.0068 | -8    | 150          | 156      | EEPIKVK     |           |         |                  | Mascot           |
|                     | 870.4727                                       | 870.5187    | 0.046   | 53    | 1            | 7        | MHTAVRR     |           |         |                  | Mascot           |
|                     | 902.5458                                       | 902.4664    | -0.0794 | -88   | 1060         | 1066     | LVTQWKK     |           |         |                  | Mascot           |
|                     | 973.5465                                       | 973.4905    | -0.056  | -58   | 288          | 295      | QLHALYTK    |           |         |                  | Mascot           |
|                     | 973.5465                                       | 973.4905    | -0.056  | -58   | 288          | 295      | QLHALYTK    |           |         |                  | Mascot           |
|                     | 1106.5437                                      | 1106.5333   | -0.0104 | -9    | 55           | 65       | LSDGGASTDKR |           |         |                  | Mascot           |
|                     | 1179.5535                                      | 1179.5769   | 0.0234  | 20    | 895          | 905      | MGASDNISRRG |           |         | Oxidation (M)[1] | Mascot           |
|                     | 1234.5739                                      | 1234.6538   | 0.0799  | 65    | 157          | 166      | QEFSFSQYAK  |           |         |                  | Mascot           |

|  |           |           |         |     |      |      |                                    |                                              |  |  |  |  |        |
|--|-----------|-----------|---------|-----|------|------|------------------------------------|----------------------------------------------|--|--|--|--|--------|
|  | 1325.7899 | 1325.7146 | -0.0753 | -57 | 95   | 106  | VSISHATLTRLK                       |                                              |  |  |  |  | Mascot |
|  | 1325.7899 | 1325.7146 | -0.0753 | -57 | 95   | 106  | VSISHATLTRLK                       |                                              |  |  |  |  | Mascot |
|  | 1475.7562 | 1475.7168 | -0.0394 | -27 | 713  | 725  | NSMLSIVPADWVK                      | Oxidation (M)[3]                             |  |  |  |  | Mascot |
|  | 1728.8473 | 1728.7454 | -0.1019 | -59 | 672  | 685  | EEIESVLLDIMEHR                     | Oxidation (M)[11]                            |  |  |  |  | Mascot |
|  | 2001.1127 | 2000.9335 | -0.1792 | -90 | 1021 | 1038 | SYGLNVARLAEIPESILR                 |                                              |  |  |  |  | Mascot |
|  | 2263.1396 | 2263.0032 | -0.1364 | -60 | 778  | 797  | KAVCHLATMDCLFSLAQ<br>VAK           | Carbamidomethyl (C)[4,11]                    |  |  |  |  | Mascot |
|  | 2279.1345 | 2278.9968 | -0.1377 | -60 | 778  | 797  | KAVCHLATMDCLFSLAQ<br>VAK           | Carbamidomethyl (C)[4,11], Oxidation (M)[9]  |  |  |  |  | Mascot |
|  | 2297.1157 | 2297.1343 | 0.0186  | 8   | 415  | 433  | ESAMFEYPTALSIKDFYR                 | Oxidation (M)[4]                             |  |  |  |  | Mascot |
|  | 2439.1968 | 2439.0789 | -0.1179 | -48 | 340  | 361  | ELTVGMVVVQPSIGDVM<br>VDCFK         | Carbamidomethyl (C)[20], Oxidation (M)[6]    |  |  |  |  | Mascot |
|  | 2455.1917 | 2455.083  | -0.1087 | -44 | 340  | 361  | ELTVGMVVVQPSIGDVM<br>VDCFK         | Carbamidomethyl (C)[20], Oxidation (M)[6,17] |  |  |  |  | Mascot |
|  | 3218.7056 | 3218.5154 | -0.1902 | -59 | 926  | 955  | SLVILDELGRGTSTHDGIA<br>IAYATLESFIR |                                              |  |  |  |  | Mascot |
|  | 3218.7056 | 3218.5154 | -0.1902 | -59 | 926  | 955  | SLVILDELGRGTSTHDGIA<br>IAYATLESFIR |                                              |  |  |  |  | Mascot |

14 PREDICTED: microtubule-associated protein 6-like [Danio rerio] gi|292621423 42669 9.6 9 36 0

#### Peptide Information

| Calc. Mass | Obsrv. Mass | ± da    | ± ppm | Start Seq. | End Seq. | Sequence           | Ion Score | C. I. % | Modification           | Rank | Result Type |
|------------|-------------|---------|-------|------------|----------|--------------------|-----------|---------|------------------------|------|-------------|
| 864.421    | 864.4924    | 0.0714  | 83    | 113        | 119      | NQYQPSK            |           |         |                        |      | Mascot      |
| 973.5173   | 973.4905    | -0.0268 | -28   | 220        | 228      | RSAADALNR          |           |         |                        |      | Mascot      |
| 973.5173   | 973.4905    | -0.0268 | -28   | 220        | 228      | RSAADALNR          |           |         |                        |      | Mascot      |
| 1165.7052  | 1165.7196   | 0.0144  | 12    | 317        | 326      | HNLSLTKPKK         |           |         |                        |      | Mascot      |
| 1179.6368  | 1179.5769   | -0.0599 | -51   | 300        | 309      | IRSLYSEPSK         |           |         |                        |      | Mascot      |
| 1234.5984  | 1234.6538   | 0.0554  | 45    | 201        | 211      | EPVSEASKMEK        |           |         |                        |      | Mascot      |
| 1316.644   | 1316.6663   | 0.0223  | 17    | 282        | 293      | GEQAKPQTDDNK       |           |         |                        |      | Mascot      |
| 1563.7341  | 1563.8031   | 0.069   | 44    | 2          | 14       | AWPCITRACCINR      |           |         | Carbamidomethyl (C)[4] |      | Mascot      |
| 1563.7341  | 1563.8031   | 0.069   | 44    | 2          | 14       | AWPCITRACCINR      |           |         | Carbamidomethyl (C)[4] |      | Mascot      |
| 1584.7297  | 1584.8403   | 0.1106  | 70    | 9          | 21       | ACCINRFWSELDK      |           |         |                        |      | Mascot      |
| 1584.7297  | 1584.8403   | 0.1106  | 70    | 9          | 21       | ACCINRFWSELDK      |           |         |                        |      | Mascot      |
| 2001.0538  | 2000.9335   | -0.1203 | -60   | 264        | 281      | LLVGEKTNLETSYSATFK |           |         |                        |      | Mascot      |

15 PREDICTED: hypothetical protein LOC559994 [Danio rerio] gi|326677062 1030064.3 5.62 46 36 0

#### Peptide Information

| Calc. Mass | Obsrv. Mass | ± da | ± ppm | Start Seq. | End Seq. | Sequence | Ion Score | C. I. % | Modification | Rank | Result Type |
|------------|-------------|------|-------|------------|----------|----------|-----------|---------|--------------|------|-------------|
|------------|-------------|------|-------|------------|----------|----------|-----------|---------|--------------|------|-------------|

|           |           |         |     |      |      |                            |   |                                           |        |
|-----------|-----------|---------|-----|------|------|----------------------------|---|-------------------------------------------|--------|
| 850.5185  | 850.5243  | 0.0058  | 7   | 8569 | 8575 | IKPFAFK                    |   |                                           | Mascot |
| 856.5138  | 856.5068  | -0.007  | -8  | 1082 | 1089 | LGIIEPSK                   |   |                                           | Mascot |
| 864.4321  | 864.4924  | 0.0603  | 70  | 3272 | 3278 | EERAFIGR                   |   |                                           | Mascot |
| 870.5559  | 870.5187  | -0.0372 | -43 | 1536 | 1542 | ALLLWVR                    |   |                                           | Mascot |
| 882.4679  | 882.5473  | 0.0794  | 90  | 3102 | 3108 | NLHEELK                    |   |                                           | Mascot |
| 902.4512  | 902.4664  | 0.0152  | 17  | 4824 | 4831 | TVSISHCR                   |   |                                           | Mascot |
| 973.5312  | 973.4905  | -0.0407 | -42 | 3727 | 3735 | AKDAALEQK                  |   |                                           | Mascot |
| 973.5789  | 973.4905  | -0.0884 | -91 | 8219 | 8226 | IQSTQKIR                   | 1 | 0                                         | Mascot |
| 1045.5636 | 1045.5409 | -0.0227 | -22 | 8277 | 8285 | DLEVRSAQK                  |   |                                           | Mascot |
| 1058.584  | 1058.5662 | -0.0178 | -17 | 6340 | 6349 | AADLAVLTER                 |   |                                           | Mascot |
| 1082.5551 | 1082.4855 | -0.0696 | -64 | 8651 | 8659 | MQYISALEK                  |   |                                           | Mascot |
| 1179.5674 | 1179.5769 | 0.0095  | 8   | 2826 | 2835 | DMDLLSQSVR                 |   | Oxidation (M)[2]                          | Mascot |
| 1213.6648 | 1213.5719 | -0.0929 | -77 | 69   | 78   | IAELAQQERR                 |   |                                           | Mascot |
| 1234.6348 | 1234.6538 | 0.019   | 15  | 3360 | 3370 | EQCASLTELK                 |   |                                           | Mascot |
| 1316.6593 | 1316.6663 | 0.007   | 5   | 3905 | 3916 | ISHTSIYHGSSK               |   |                                           | Mascot |
| 1325.7899 | 1325.7146 | -0.0753 | -57 | 4060 | 4071 | AKTLQKPQNVAK               |   |                                           | Mascot |
| 1325.7899 | 1325.7146 | -0.0753 | -57 | 4060 | 4071 | AKTLQKPQNVAK               |   |                                           | Mascot |
| 1347.7123 | 1347.6968 | -0.0155 | -12 | 7311 | 7322 | LAMVMEKSGPLR               |   | Oxidation (M)[3]                          | Mascot |
| 1434.8467 | 1434.7355 | -0.1112 | -77 | 8569 | 8580 | IKPFAFKLLSDR               |   |                                           | Mascot |
| 1475.7522 | 1475.7168 | -0.0354 | -24 | 6801 | 6813 | QEAKILECSVAER              |   |                                           | Mascot |
| 1638.9438 | 1638.8247 | -0.1191 | -73 | 3297 | 3310 | HVLKEPTLPALQHR             |   |                                           | Mascot |
| 1648.7847 | 1648.7839 | -0.0008 | 0   | 7781 | 7796 | MPDTESAKPGKDSGTK           |   |                                           | Mascot |
| 1728.7395 | 1728.7454 | 0.0059  | 3   | 8383 | 8396 | IHDVEDQWQACGDR             |   | Carbamidomethyl (C)[11]                   | Mascot |
| 1729.869  | 1729.7338 | -0.1352 | -78 | 718  | 732  | SGNRFMLVVTDYATR            |   |                                           | Mascot |
| 2000.9818 | 2000.9335 | -0.0483 | -24 | 61   | 77   | MEAQEAQRIELAQQER           |   |                                           | Mascot |
| 2047.9866 | 2047.9043 | -0.0823 | -40 | 7014 | 7030 | DQTVHLSHHEEMSQLLK          |   | Oxidation (M)[12]                         | Mascot |
| 2054.0037 | 2053.9241 | -0.0796 | -39 | 7370 | 7387 | IAELEGEVQDLAEQQPER         |   |                                           | Mascot |
| 2118.0496 | 2117.9324 | -0.1172 | -55 | 3987 | 4005 | SSSSKTQEALQHNISEIM<br>K    |   |                                           | Mascot |
| 2134.0444 | 2133.9275 | -0.1169 | -55 | 3987 | 4005 | SSSSKTQEALQHNISEIM<br>K    |   | Oxidation (M)[18]                         | Mascot |
| 2193.0247 | 2193.052  | 0.0273  | 12  | 8962 | 8978 | DFEWTEEQQLHEGLYR           |   |                                           | Mascot |
| 2211.126  | 2211.0537 | -0.0723 | -33 | 8508 | 8526 | MSAAELQTTGVIYRLELC<br>R    |   | Carbamidomethyl (C)[18]                   | Mascot |
| 2224.9873 | 2225.0662 | 0.0789  | 35  | 4312 | 4333 | VTDAETSSQIGACAEDNE<br>SGIK |   |                                           | Mascot |
| 2224.9873 | 2225.0662 | 0.0789  | 35  | 4312 | 4333 | VTDAETSSQIGACAEDNE<br>SGIK |   |                                           | Mascot |
| 2233.0012 | 2233.0288 | 0.0276  | 12  | 8235 | 8252 | DSTELEEWMRCAHEQLQ<br>K     |   |                                           | Mascot |
| 2239.1262 | 2239.0825 | -0.0437 | -20 | 8399 | 8415 | LLRCIHSWISQHMEWVK          |   | Carbamidomethyl (C)[4], Oxidation (M)[13] | Mascot |

|           |           |         |      |      |      |                                   |                           |        |
|-----------|-----------|---------|------|------|------|-----------------------------------|---------------------------|--------|
| 2247.0305 | 2247.0203 | -0.0102 | -5   | 8357 | 8376 | RLEDESSGVHICALDSSE<br>LSR         | Carbamidomethyl (C)[11]   | Mascot |
| 2263.124  | 2263.0032 | -0.1208 | -53  | 150  | 168  | LEKLSDGDDVEHFLITFE<br>R           |                           | Mascot |
| 2283.1333 | 2283.1292 | -0.0041 | -2   | 7195 | 7214 | ESPQICQDLQSLLGHCRS<br>LR          |                           | Mascot |
| 2284.022  | 2284.1206 | 0.0986  | 43   | 3439 | 3458 | RVLDCDAPFESEADTL<br>MDR           |                           | Mascot |
| 2297.1455 | 2297.1343 | -0.0112 | -5   | 8621 | 8639 | VLLNQHWERLGELMNSS<br>DR           |                           | Mascot |
| 2298.2559 | 2298.1377 | -0.1182 | -51  | 8671 | 8691 | VMEASKLLIGMQMPQSA<br>PLIK         | Oxidation (M)[2]          | Mascot |
| 2300.0168 | 2300.126  | 0.1092  | 47   | 3439 | 3458 | RVLDCDAPFESEADTL<br>MDR           | Oxidation (M)[18]         | Mascot |
| 2367.1311 | 2367.2065 | 0.0754  | 32   | 1497 | 1520 | SSSLDSLSSLSDFSGSPA<br>SSPVPR      |                           | Mascot |
| 2439.1489 | 2439.0789 | -0.07   | -29  | 8630 | 8650 | LGELMNSSDREENTVEM<br>LISR         | Oxidation (M)[5]          | Mascot |
| 2455.1438 | 2455.083  | -0.0608 | -25  | 8630 | 8650 | LGELMNSSDREENTVEM<br>LISR         | Oxidation (M)[5,17]       | Mascot |
| 2532.1858 | 2532.2136 | 0.0278  | 11   | 8164 | 8183 | LHKILEDTCSQVWETEDC<br>LR          | Carbamidomethyl (C)[9,18] | Mascot |
| 2580.2974 | 2580.2556 | -0.0418 | -16  | 6048 | 6071 | AECITQTPTVIPSDLQLSH<br>AEAQK      |                           | Mascot |
| 2580.2974 | 2580.2556 | -0.0418 | -16  | 6048 | 6071 | AECITQTPTVIPSDLQLSH<br>AEAQK      |                           | Mascot |
| 2596.187  | 2596.2539 | 0.0669  | 26   | 4718 | 4742 | HTSAESSNEANALQNPP<br>NGGEDTKK     |                           | Mascot |
| 2596.2888 | 2596.2539 | -0.0349 | -13  | 6613 | 6634 | WVIEELLHSQESSAEEQN<br>VIQK        |                           | Mascot |
| 2657.3967 | 2657.1265 | -0.2702 | -102 | 570  | 592  | LPVNIVMQQEDASLVPI<br>LERAK        | Oxidation (M)[8]          | Mascot |
| 3227.575  | 3227.5264 | -0.0486 | -15  | 2132 | 2160 | AASLLEGRLAELENWSTE<br>AQEVCQHLSSR |                           | Mascot |

### Peptide Information



17 growth/differentiation factor 9 [Danio rerio] VKLR gi|59933270 48701.4 8.77 10 35 0

Peptide Information

| Calc. Mass | Obsrv. Mass | ± da    | ± ppm | Start Seq. | End Seq. | Sequence           | Ion Score | C. I. % | Modification                                | Rank | Result Type |
|------------|-------------|---------|-------|------------|----------|--------------------|-----------|---------|---------------------------------------------|------|-------------|
| 850.5032   | 850.5243    | 0.0211  | 25    | 324        | 330      | VSFKELK            |           |         |                                             |      | Mascot      |
| 1082.5122  | 1082.4855   | -0.0267 | -25   | 8          | 16       | CSALCYLPR          |           |         | Carbamidomethyl (C)[1]                      |      | Mascot      |
| 1993.9696  | 1993.9235   | -0.0461 | -23   | 1          | 16       | MATLFFKCSALCYLPR   |           |         | Carbamidomethyl (C)[8,12], Oxidation (M)[1] |      | Mascot      |
| 2047.9655  | 2047.9043   | -0.0612 | -30   | 116        | 131      | QNREFFMQDISYSLNR   |           |         |                                             |      | Mascot      |
| 2225.156   | 2225.0662   | -0.0898 | -40   | 246        | 264      | SPSLLLYLNDTSEVAYQR |           |         |                                             |      | Mascot      |
| 2225.156   | 2225.0662   | -0.0898 | -40   | 246        | 264      | SPSLLLYLNDTSEVAYQR |           |         |                                             |      | Mascot      |
| 2247.2285  | 2247.0203   | -0.2082 | -93   | 195        | 213      | WVEVDVTSFLHPLIAHK  |           |         |                                             |      | Mascot      |
| 2298.1118  | 2298.1377   | 0.0259  | 11    | 171        | 190      | DQMCSNHLGIQHSVPLL  |           |         | Oxidation (M)[3]                            |      | Mascot      |
| 2299.9885  | 2300.126    | 0.1375  | 60    | 306        | 323      | LVPMYEFTTDDCDLYDFR |           |         | Carbamidomethyl (C)[12]                     |      | Mascot      |
| 2657.2922  | 2657.1265   | -0.1657 | -62   | 168        | 190      | SSKMQMCSNHLGIQHSV  |           |         | Carbamidomethyl (C)[7], Oxidation (M)[6]    |      | Mascot      |
| 3227.5903  | 3227.5264   | -0.0639 | -20   | 141        | 167      | SVLLYSFDHNHLSPFSL  |           |         |                                             |      | Mascot      |
|            |             |         |       |            |          | CYLDMKEQK          |           |         |                                             |      |             |

18 nucleoside diphosphate-linked moiety X motif 6 [Danio rerio] gi|148237304 36698.5 7.22 8 35 0

Peptide Information

| Calc. Mass | Obsrv. Mass | ± da    | ± ppm | Start Seq. | End Seq. | Sequence          | Ion Score | C. I. % | Modification                               | Rank | Result Type |
|------------|-------------|---------|-------|------------|----------|-------------------|-----------|---------|--------------------------------------------|------|-------------|
| 850.4893   | 850.5243    | 0.035   | 41    | 243        | 249      | LQPLSHR           |           |         |                                            |      | Mascot      |
| 1325.6882  | 1325.7146   | 0.0264  | 20    | 59         | 70       | LCPPLLAGDVDR      |           |         | Carbamidomethyl (C)[2]                     |      | Mascot      |
| 1325.6882  | 1325.7146   | 0.0264  | 20    | 59         | 70       | LCPPLLAGDVDR      |           |         | Carbamidomethyl (C)[2]                     |      | Mascot      |
| 1584.7653  | 1584.8403   | 0.075   | 47    | 205        | 217      | EVFEETGVRSEFR     |           |         |                                            |      | Mascot      |
| 1584.7653  | 1584.8403   | 0.075   | 47    | 205        | 217      | EVFEETGVRSEFR     |           |         |                                            |      | Mascot      |
| 1728.7792  | 1728.7454   | -0.0338 | -20   | 43         | 58       | LVSAGSARFCSGCEER  |           |         | Carbamidomethyl (C)[10]                    |      | Mascot      |
| 1880.88    | 1880.9956   | 0.1156  | 61    | 78         | 93       | DFPPDISEEEFSDLLK  |           |         |                                            |      | Mascot      |
| 2000.9867  | 2000.9335   | -0.0532 | -27   | 2          | 19       | VLWIMSAGFCRVSSGLC |           |         | Oxidation (M)[5]                           |      | Mascot      |
| 2247.0435  | 2247.0203   | -0.0232 | -10   | 224        | 242      | QQHTHPGAFGMSDLYLI |           |         | Carbamidomethyl (C)[18], Oxidation (M)[11] |      | Mascot      |
| 2297.0735  | 2297.1343   | 0.0608  | 26    | 250        | 266      | IHICTHECLRCDWDLR  |           |         | Carbamidomethyl (C)[4,8,11]                |      | Mascot      |

19 transcription elongation factor B polypeptide 1 [Danio rerio] gi|73088652 12495 4.74 5 35 0

Peptide Information

|                     |                                                                   | Calc. Mass | Obsrv. Mass | ± da    | ± ppm | Start Seq. | End Sequence Seq.                      | Ion Score | C. I. | % Modification                               | Rank | Result Type |
|---------------------|-------------------------------------------------------------------|------------|-------------|---------|-------|------------|----------------------------------------|-----------|-------|----------------------------------------------|------|-------------|
|                     |                                                                   | 1325.6381  | 1325.7146   | 0.0765  | 58    | 73         | 82 VCMYFTYKVR                          |           |       | Oxidation (M)[3]                             |      | Mascot      |
|                     |                                                                   | 1325.6381  | 1325.7146   | 0.0765  | 58    | 73         | 82 VCMYFTYKVR                          |           |       | Oxidation (M)[3]                             |      | Mascot      |
|                     |                                                                   | 1563.6454  | 1563.8031   | 0.1577  | 101   | 7          | 20 TYGGCEGPDAMYVK                      |           |       | Carbamidomethyl (C)[5], Oxidation (M)[11]    |      | Mascot      |
|                     |                                                                   | 1563.6454  | 1563.8031   | 0.1577  | 101   | 7          | 20 TYGGCEGPDAMYVK                      |           |       | Carbamidomethyl (C)[5], Oxidation (M)[11]    |      | Mascot      |
|                     |                                                                   | 2118.0398  | 2117.9324   | -0.1074 | -51   | 64         | 80 EIPSHVLSKVCMYFTYK                   |           |       | Carbamidomethyl (C)[11], Oxidation (M)[12]   |      | Mascot      |
|                     |                                                                   | 2211.0134  | 2211.0537   | 0.0403  | 18    | 44         | 63 AMLSGPGQFAENETNEV<br>NFR            |           |       |                                              |      | Mascot      |
|                     |                                                                   | 2282.925   | 2283.1292   | 0.2042  | 89    | 1          | 20 MDSEEKTYGGCEGPDA<br>MYVK            |           |       | Carbamidomethyl (C)[11], Oxidation (M)[1]    |      | Mascot      |
| 20                  | PREDICTED: DNA mismatch repair protein Msh3-like<br>[Danio rerio] |            |             |         |       |            | gi 326668008                           | 121301.1  | 6.7   | 14                                           | 34   | 0           |
| Peptide Information |                                                                   |            |             |         |       |            |                                        |           |       |                                              |      |             |
|                     |                                                                   | Calc. Mass | Obsrv. Mass | ± da    | ± ppm | Start Seq. | End Sequence Seq.                      | Ion Score | C. I. | % Modification                               | Rank | Result Type |
|                     |                                                                   | 870.4727   | 870.5187    | 0.046   | 53    | 1          | 7 MHTAVRR                              |           |       |                                              |      | Mascot      |
|                     |                                                                   | 902.5458   | 902.4664    | -0.0794 | -88   | 1060       | 1066 LVTQWKK                           |           |       |                                              |      | Mascot      |
|                     |                                                                   | 973.5465   | 973.4905    | -0.056  | -58   | 288        | 295 QLHALYTK                           |           |       |                                              |      | Mascot      |
|                     |                                                                   | 973.5465   | 973.4905    | -0.056  | -58   | 288        | 295 QLHALYTK                           |           |       |                                              |      | Mascot      |
|                     |                                                                   | 1106.5437  | 1106.5333   | -0.0104 | -9    | 55         | 65 LSDGGASTDKR                         |           |       |                                              |      | Mascot      |
|                     |                                                                   | 1179.5535  | 1179.5769   | 0.0234  | 20    | 895        | 905 MGASDNISRGR                        |           |       | Oxidation (M)[1]                             |      | Mascot      |
|                     |                                                                   | 1234.5739  | 1234.6538   | 0.0799  | 65    | 157        | 166 QEFSFSQYAK                         |           |       |                                              |      | Mascot      |
|                     |                                                                   | 1325.7899  | 1325.7146   | -0.0753 | -57   | 95         | 106 VSISHATLTRLK                       |           |       |                                              |      | Mascot      |
|                     |                                                                   | 1325.7899  | 1325.7146   | -0.0753 | -57   | 95         | 106 VSISHATLTRLK                       |           |       |                                              |      | Mascot      |
|                     |                                                                   | 1475.7529  | 1475.7168   | -0.0361 | -24   | 155        | 166 IKQEFSFSQYAK                       |           |       |                                              |      | Mascot      |
|                     |                                                                   | 1728.8473  | 1728.7454   | -0.1019 | -59   | 672        | 685 EEIESVLLDIMEHR                     |           |       | Oxidation (M)[11]                            |      | Mascot      |
|                     |                                                                   | 2001.1127  | 2000.9335   | -0.1792 | -90   | 1021       | 1038 SYGLNVARLAEIPESILR                |           |       |                                              |      | Mascot      |
|                     |                                                                   | 2263.1396  | 2263.0032   | -0.1364 | -60   | 778        | 797 KAVCHLATMDCLFSLAQ<br>VAK           |           |       | Carbamidomethyl (C)[4,11]                    |      | Mascot      |
|                     |                                                                   | 2279.1345  | 2278.9968   | -0.1377 | -60   | 778        | 797 KAVCHLATMDCLFSLAQ<br>VAK           |           |       | Carbamidomethyl (C)[4,11], Oxidation (M)[9]  |      | Mascot      |
|                     |                                                                   | 2297.1157  | 2297.1343   | 0.0186  | 8     | 415        | 433 ESAMFEYPTALSIHKDFYR                |           |       | Oxidation (M)[4]                             |      | Mascot      |
|                     |                                                                   | 2439.1968  | 2439.0789   | -0.1179 | -48   | 340        | 361 ELTVGMVVVQPSIGDVM<br>VDCFK         |           |       | Carbamidomethyl (C)[20], Oxidation (M)[6]    |      | Mascot      |
|                     |                                                                   | 2455.1917  | 2455.083    | -0.1087 | -44   | 340        | 361 ELTVGMVVVQPSIGDVM<br>VDCFK         |           |       | Carbamidomethyl (C)[20], Oxidation (M)[6,17] |      | Mascot      |
|                     |                                                                   | 3218.7056  | 3218.5154   | -0.1902 | -59   | 926        | 955 SLVILDELGRGTSTHDGIA<br>IAYATLESFIR |           |       |                                              |      | Mascot      |
|                     |                                                                   | 3218.7056  | 3218.5154   | -0.1902 | -59   | 926        | 955 SLVILDELGRGTSTHDGIA<br>IAYATLESFIR |           |       |                                              |      | Mascot      |
| 21                  | MCM6 minichromosome maintenance deficient 6, like                 |            |             |         |       |            | gi 70887711                            | 93152.1   | 5.23  | 12                                           | 34   | 0           |

[Danio rerio]

Peptide Information

| Calc. Mass | Obsrv. Mass | $\pm$ da | $\pm$ ppm | Start Seq. | End Sequence Seq.            | Ion Score | C. I. % | Modification            | Rank | Result Type |
|------------|-------------|----------|-----------|------------|------------------------------|-----------|---------|-------------------------|------|-------------|
| 856.49     | 856.5068    | 0.0168   | 20        | 87         | 93 AVRHFAR                   |           |         |                         |      | Mascot      |
| 973.5789   | 973.4905    | -0.0884  | -91       | 117        | 124 IRELSTVR                 |           |         |                         |      | Mascot      |
| 973.5789   | 973.4905    | -0.0884  | -91       | 117        | 124 IRELSTVR                 |           |         |                         |      | Mascot      |
| 996.5261   | 996.5773    | 0.0512   | 51        | 194        | 201 FVDFQKGR                 |           |         |                         |      | Mascot      |
| 1165.6252  | 1165.7196   | 0.0944   | 81        | 747        | 755 SELINWYLK                |           |         |                         |      | Mascot      |
| 1234.7228  | 1234.6538   | -0.069   | -56       | 361        | 372 GILLMLFGGVAK             |           |         | Oxidation (M)[5]        |      | Mascot      |
| 1325.7899  | 1325.7146   | -0.0753  | -57       | 212        | 223 GSIPRSVEVILR             |           |         |                         |      | Mascot      |
| 1325.7899  | 1325.7146   | -0.0753  | -57       | 212        | 223 GSIPRSVEVILR             |           |         |                         |      | Mascot      |
| 1347.6508  | 1347.6968   | 0.046    | 34        | 512        | 523 QNVNMSAPIMSR             |           |         |                         |      | Mascot      |
| 1475.7502  | 1475.7168   | -0.0334  | -23       | 90         | 102 HFARDHGNIPPSK            |           |         |                         |      | Mascot      |
| 2211.1875  | 2211.0537   | -0.1338  | -61       | 361        | 381 GILLMLFGGVAKTTMEGT SLR   |           |         | Oxidation (M)[5]        |      | Mascot      |
| 2239.1096  | 2239.0825   | -0.0271  | -12       | 236        | 257 CDFTGTLVVVPDVSAMA LAGTR  |           |         | Oxidation (M)[16]       |      | Mascot      |
| 2297.1812  | 2297.1343   | -0.0469  | -20       | 575        | 593 QFQPKITVEAQEFVVDQY K     |           |         |                         |      | Mascot      |
| 2580.2949  | 2580.2556   | -0.0393  | -15       | 138        | 160 THPVHPELVSGTFLCLDC QSVIK |           |         | Carbamidomethyl (C)[15] |      | Mascot      |
| 2580.2949  | 2580.2556   | -0.0393  | -15       | 138        | 160 THPVHPELVSGTFLCLDC QSVIK |           |         | Carbamidomethyl (C)[15] |      | Mascot      |

22 Mbd1 protein [Danio rerio] gi|146187002 109196.7 5.19 13 34 0

Peptide Information

| Calc. Mass | Obsrv. Mass | $\pm$ da | $\pm$ ppm | Start Seq. | End Sequence Seq.         | Ion Score | C. I. % | Modification              | Rank | Result Type |
|------------|-------------|----------|-----------|------------|---------------------------|-----------|---------|---------------------------|------|-------------|
| 864.476    | 864.4924    | 0.0164   | 19        | 456        | 462 LFGVCIR               |           |         | Carbamidomethyl (C)[5]    |      | Mascot      |
| 902.4664   | 902.4664    | 0        | 0         | 494        | 500 KWVPCGR               |           |         | Carbamidomethyl (C)[5]    |      | Mascot      |
| 973.5135   | 973.4905    | -0.023   | -24       | 874        | 881 LQPLQCSK              |           |         | Carbamidomethyl (C)[6]    |      | Mascot      |
| 973.5135   | 973.4905    | -0.023   | -24       | 874        | 881 LQPLQCSK              |           |         | Carbamidomethyl (C)[6]    |      | Mascot      |
| 1045.5524  | 1045.5409   | -0.0115  | -11       | 70         | 78 KDEEAVVQK              |           |         |                           |      | Mascot      |
| 1165.5453  | 1165.7196   | 0.1743   | 150       | 971        | 979 CEKQCTLQR             |           |         | Carbamidomethyl (C)[1]    |      | Mascot      |
| 1563.5946  | 1563.8031   | 0.2085   | 133       | 626        | 639 TDCGTCDFCMDKPK        |           |         |                           |      | Mascot      |
| 1563.5946  | 1563.8031   | 0.2085   | 133       | 626        | 639 TDCGTCDFCMDKPK        |           |         |                           |      | Mascot      |
| 1728.9629  | 1728.7454   | -0.2175  | -126      | 921        | 936 LTSAAEIIALIEDLEK      |           |         |                           |      | Mascot      |
| 1880.8153  | 1880.9956   | 0.1803   | 96        | 463        | 477 CNKTYSYEEGQTLCK       |           |         | Carbamidomethyl (C)[1,14] |      | Mascot      |
| 1993.9574  | 1993.9235   | -0.0339  | -17       | 366        | 385 SDSADVQRPASSAGFAT AQK |           |         |                           |      | Mascot      |

|    |                                             |           |         |     |             |     |                            |                                           |   |    |   |  |        |
|----|---------------------------------------------|-----------|---------|-----|-------------|-----|----------------------------|-------------------------------------------|---|----|---|--|--------|
|    | 2000.9672                                   | 2000.9335 | -0.0337 | -17 | 789         | 807 | RPDVPPTTQFDSTGNPG<br>SK    |                                           |   |    |   |  | Mascot |
|    | 2053.8235                                   | 2053.9241 | 0.1006  | 49  | 626         | 643 | TDCGTCDFCMDKPKFGG<br>R     | Carbamidomethyl (C)[3], Oxidation (M)[10] |   |    |   |  | Mascot |
|    | 2296.9382                                   | 2297.1343 | 0.1961  | 85  | 695         | 712 | KMWGFEMSDDMPEQYM<br>QK     | Oxidation (M)[2]                          |   |    |   |  | Mascot |
|    | 2580.2949                                   | 2580.2556 | -0.0393 | -15 | 658         | 679 | EAMKHLLPMDEAELLAQ<br>GWLPR | Oxidation (M)[3,9]                        |   |    |   |  | Mascot |
|    | 2580.2949                                   | 2580.2556 | -0.0393 | -15 | 658         | 679 | EAMKHLLPMDEAELLAQ<br>GWLPR | Oxidation (M)[3,9]                        |   |    |   |  | Mascot |
| 23 | hypothetical protein FLJ22318 [Danio rerio] |           |         |     | gi 37595352 |     | 44472.4                    | 6.24                                      | 9 | 34 | 0 |  |        |

Peptide Information

| Calc. Mass | Obsrv. Mass | ± da    | ± ppm | Start Seq. | End Seq. | Sequence                            | Ion Score | C. I. % | Modification                               | Rank | Result Type |
|------------|-------------|---------|-------|------------|----------|-------------------------------------|-----------|---------|--------------------------------------------|------|-------------|
| 842.4366   | 842.4913    | 0.0547  | 65    | 80         | 87       | DIHGSVSK                            |           |         |                                            |      | Mascot      |
| 1045.4884  | 1045.5409   | 0.0525  | 50    | 306        | 314      | QCSGVWTHK                           |           |         |                                            |      | Mascot      |
| 1106.559   | 1106.5333   | -0.0257 | -23   | 209        | 217      | QQEALQYAR                           |           |         |                                            |      | Mascot      |
| 1567.6913  | 1567.8163   | 0.125   | 80    | 1          | 13       | MEQCACVERELEK                       |           |         |                                            |      | Mascot      |
| 1880.834   | 1880.9956   | 0.1616  | 86    | 371        | 386      | LKCPYCPMEQNPSDAK                    |           |         | Carbamidomethyl (C)[3]                     |      | Mascot      |
| 2133.908   | 2133.9275   | 0.0195  | 9     | 373        | 390      | CPYCPMEQNPSDAKQIY<br>F              |           |         |                                            |      | Mascot      |
| 2225.1165  | 2225.0662   | -0.0503 | -23   | 340        | 359      | QQTSESPPMKLICGHVI<br>SR             |           |         |                                            |      | Mascot      |
| 2225.1165  | 2225.0662   | -0.0503 | -23   | 340        | 359      | QQTSESPPMKLICGHVI<br>SR             |           |         |                                            |      | Mascot      |
| 2298.1328  | 2298.1377   | 0.0049  | 2     | 340        | 359      | QQTSESPPMKLICGHVI<br>SR             |           |         | Carbamidomethyl (C)[14], Oxidation (M)[10] |      | Mascot      |
| 2580.2256  | 2580.2556   | 0.03    | 12    | 43         | 65       | LLAYGVQDADLSVLHQT<br>MAQCCK         |           |         | Carbamidomethyl (C)[21], Oxidation (M)[18] |      | Mascot      |
| 2580.2256  | 2580.2556   | 0.03    | 12    | 43         | 65       | LLAYGVQDADLSVLHQT<br>MAQCCK         |           |         | Carbamidomethyl (C)[21], Oxidation (M)[18] |      | Mascot      |
| 3338.6252  | 3338.6836   | 0.0584  | 17    | 129        | 158      | QGMLSVAE DLCQSGVVI<br>DMSMKQPFLELNR |           |         |                                            |      | Mascot      |

|    |                                                                      |  |  |  |              |  |         |      |    |    |   |  |  |
|----|----------------------------------------------------------------------|--|--|--|--------------|--|---------|------|----|----|---|--|--|
| 24 | PREDICTED: gastrula zinc finger protein XICGF57.1-like [Danio rerio] |  |  |  | gi 326667403 |  | 40716.1 | 9.31 | 11 | 34 | 0 |  |  |
|----|----------------------------------------------------------------------|--|--|--|--------------|--|---------|------|----|----|---|--|--|

Peptide Information

| Calc. Mass | Obsrv. Mass | ± da    | ± ppm | Start Seq. | End Seq. | Sequence          | Ion Score | C. I. % | Modification               | Rank | Result Type |
|------------|-------------|---------|-------|------------|----------|-------------------|-----------|---------|----------------------------|------|-------------|
| 803.408    | 803.3616    | -0.0464 | -58   | 340        | 346      | TLSSHMK           |           |         |                            |      | Mascot      |
| 1347.6072  | 1347.6968   | 0.0896  | 66    | 76         | 86       | CFECEKVFQSK       |           |         |                            |      | Mascot      |
| 1567.8162  | 1567.8163   | 0.0001  | 0     | 250        | 262      | VFSHSLNLIHMR      |           |         |                            |      | Mascot      |
| 1729.8512  | 1729.7338   | -0.1174 | -68   | 325        | 338      | LFTCQQCGVSFRVK    |           |         | Carbamidomethyl (C)[4,7]   |      | Mascot      |
| 1844.8782  | 1844.8348   | -0.0434 | -24   | 123        | 137      | VHTVEKPFSCQQCPK   |           |         | Carbamidomethyl (C)[10,13] |      | Mascot      |
| 1844.8782  | 1844.8348   | -0.0434 | -24   | 123        | 137      | VHTVEKPFSCQQCPK   |           |         | Carbamidomethyl (C)[10,13] |      | Mascot      |
| 1880.9963  | 1880.9956   | -0.0007 | 0     | 19         | 34       | VKQEDPQEQTDL LLPK |           |         |                            |      | Mascot      |

|    |                                      |           |         |     |             |     |                                   |      |                            |        |   |
|----|--------------------------------------|-----------|---------|-----|-------------|-----|-----------------------------------|------|----------------------------|--------|---|
|    | 2225.0227                            | 2225.0662 | 0.0435  | 20  | 179         | 197 | VHTGEKPFTCQQCGTTF<br>AR           |      | Carbamidomethyl (C)[10,13] | Mascot |   |
|    | 2225.0227                            | 2225.0662 | 0.0435  | 20  | 179         | 197 | VHTGEKPFTCQQCGTTF<br>AR           |      | Carbamidomethyl (C)[10,13] | Mascot |   |
|    | 2279.0696                            | 2278.9968 | -0.0728 | -32 | 151         | 169 | VHTGEKPFSCQCPKTF<br>AR            |      | Carbamidomethyl (C)[10,13] | Mascot |   |
|    | 2300.0845                            | 2300.126  | 0.0415  | 18  | 231         | 249 | VHMRHSGEKPFTCQQC<br>GK            |      | Carbamidomethyl (C)[14,17] | Mascot |   |
|    | 2371.0198                            | 2371.0811 | 0.0613  | 26  | 91          | 110 | EHMLTHFTDGCFTCQLC<br>GRR          |      | Oxidation (M)[3]           | Mascot |   |
|    | 2371.0198                            | 2371.0811 | 0.0613  | 26  | 91          | 110 | EHMLTHFTDGCFTCQLC<br>GRR          |      | Oxidation (M)[3]           | Mascot |   |
|    | 3227.5659                            | 3227.5264 | -0.0395 | -12 | 235         | 262 | IHSGEKPFTCQQCGKVF<br>SHSLNLSNIHMR |      | Oxidation (M)[27]          | Mascot |   |
| 25 | protein RMD5 homolog B [Danio rerio] |           |         |     | gi 41152122 |     | 44610.5                           | 6.03 | 9                          | 34     | 0 |

Peptide Information

| Calc. Mass | Obsrv. Mass | ± da    | ± ppm | Start Seq. | End Seq. | Sequence                    | Ion Score | C. I. % | Modification                               | Rank | Result Type |
|------------|-------------|---------|-------|------------|----------|-----------------------------|-----------|---------|--------------------------------------------|------|-------------|
| 842.4366   | 842.4913    | 0.0547  | 65    | 80         | 87       | DIHGVSVK                    |           |         |                                            |      | Mascot      |
| 1045.4884  | 1045.5409   | 0.0525  | 50    | 307        | 315      | QCSGVWTHK                   |           |         |                                            |      | Mascot      |
| 1106.559   | 1106.5333   | -0.0257 | -23   | 210        | 218      | QQEALQYAR                   |           |         |                                            |      | Mascot      |
| 1567.6913  | 1567.8163   | 0.125   | 80    | 1          | 13       | MEQCACVERELEK               |           |         |                                            |      | Mascot      |
| 1880.834   | 1880.9956   | 0.1616  | 86    | 372        | 387      | LKCPYCPMEQNPSDAK            |           |         | Carbamidomethyl (C)[3]                     |      | Mascot      |
| 2054.0889  | 2053.9241   | -0.1648 | -80   | 166        | 182      | TQDLRPALEWAVTNRQR           |           |         |                                            |      | Mascot      |
| 2133.908   | 2133.9275   | 0.0195  | 9     | 374        | 391      | CPYCPMEQNPSDAKQIY<br>F      |           |         |                                            |      | Mascot      |
| 2225.1165  | 2225.0662   | -0.0503 | -23   | 341        | 360      | QQTSESNPPMKLICGHVI<br>SR    |           |         |                                            |      | Mascot      |
| 2225.1165  | 2225.0662   | -0.0503 | -23   | 341        | 360      | QQTSESNPPMKLICGHVI<br>SR    |           |         |                                            |      | Mascot      |
| 2298.1328  | 2298.1377   | 0.0049  | 2     | 341        | 360      | QQTSESNPPMKLICGHVI<br>SR    |           |         | Carbamidomethyl (C)[14], Oxidation (M)[10] |      | Mascot      |
| 2580.2256  | 2580.2556   | 0.03    | 12    | 43         | 65       | LLAYGVQDADLSVLHQT<br>MAQCCK |           |         | Carbamidomethyl (C)[21], Oxidation (M)[18] |      | Mascot      |
| 2580.2256  | 2580.2556   | 0.03    | 12    | 43         | 65       | LLAYGVQDADLSVLHQT<br>MAQCCK |           |         | Carbamidomethyl (C)[21], Oxidation (M)[18] |      | Mascot      |

|    |                                          |  |  |  |              |  |          |      |    |    |   |
|----|------------------------------------------|--|--|--|--------------|--|----------|------|----|----|---|
| 26 | CLIP-associating protein 1 [Danio rerio] |  |  |  | gi 169646251 |  | 168891.5 | 9.05 | 19 | 33 | 0 |
|----|------------------------------------------|--|--|--|--------------|--|----------|------|----|----|---|

Peptide Information

| Calc. Mass | Obsrv. Mass | ± da    | ± ppm | Start Seq. | End Seq. | Sequence  | Ion Score | C. I. % | Modification     | Rank | Result Type |
|------------|-------------|---------|-------|------------|----------|-----------|-----------|---------|------------------|------|-------------|
| 803.437    | 803.3616    | -0.0754 | -94   | 666        | 672      | VVSQSQR   |           |         |                  |      | Mascot      |
| 856.5502   | 856.5068    | -0.0434 | -51   | 1319       | 1326     | GALIELLK  |           |         |                  |      | Mascot      |
| 870.577    | 870.5187    | -0.0583 | -67   | 1365       | 1371     | VLKEILR   |           |         |                  |      | Mascot      |
| 1082.5551  | 1082.4855   | -0.0696 | -64   | 1379       | 1387     | NYAELTIMK |           |         |                  |      | Mascot      |
| 1104.5255  | 1104.5543   | 0.0288  | 26    | 894        | 902      | MFADPHSKR |           |         | Oxidation (M)[1] |      | Mascot      |

|           |           |         |     |      |      |                                     |  |  |                    |  |  |        |
|-----------|-----------|---------|-----|------|------|-------------------------------------|--|--|--------------------|--|--|--------|
| 1165.6801 | 1165.7196 | 0.0395  | 34  | 1355 | 1364 | DHTIRALALR                          |  |  |                    |  |  | Mascot |
| 1213.6648 | 1213.5719 | -0.0929 | -77 | 724  | 734  | ETSPNRLGIAR                         |  |  |                    |  |  | Mascot |
| 1325.524  | 1325.7146 | 0.1906  | 144 | 241  | 252  | NFDDSDSVDGGR                        |  |  |                    |  |  | Mascot |
| 1325.8151 | 1325.7146 | -0.1005 | -76 | 863  | 874  | KEGLLGQLNLLK                        |  |  |                    |  |  | Mascot |
| 1475.6802 | 1475.7168 | 0.0366  | 25  | 1330 | 1341 | EDSLAVWDEHFK                        |  |  |                    |  |  | Mascot |
| 1648.8007 | 1648.7839 | -0.0168 | -10 | 735  | 749  | SSRIPRPSMSQGCSR                     |  |  |                    |  |  | Mascot |
| 1728.9126 | 1728.7454 | -0.1672 | -97 | 788  | 804  | VLNTGTEVEAAVADALR                   |  |  |                    |  |  | Mascot |
| 2001.0222 | 2000.9335 | -0.0887 | -44 | 349  | 366  | SLLMAGATEHEGFIQQLR                  |  |  |                    |  |  | Mascot |
| 2053.9502 | 2053.9241 | -0.0261 | -13 | 1257 | 1274 | SREFAPYGYGDTITAYDK                  |  |  |                    |  |  | Mascot |
| 2225.207  | 2225.0662 | -0.1408 | -63 | 381  | 401  | SQVVREACITLGHLSLL<br>GNK            |  |  |                    |  |  | Mascot |
| 2225.207  | 2225.0662 | -0.1408 | -63 | 381  | 401  | SQVVREACITLGHLSLL<br>GNK            |  |  |                    |  |  | Mascot |
| 2284.0769 | 2284.1206 | 0.0437  | 19  | 1    | 19   | MEPNMEYCLTQVLQKDV<br>AR             |  |  | Oxidation (M)[1]   |  |  | Mascot |
| 2300.072  | 2300.126  | 0.054   | 23  | 1    | 19   | MEPNMEYCLTQVLQKDV<br>AR             |  |  | Oxidation (M)[1,5] |  |  | Mascot |
| 2371.1572 | 2371.0811 | -0.0761 | -32 | 118  | 137  | IMEQSATPQYIWRMLG<br>GFK             |  |  |                    |  |  | Mascot |
| 2371.1572 | 2371.0811 | -0.0761 | -32 | 118  | 137  | IMEQSATPQYIWRMLG<br>GFK             |  |  |                    |  |  | Mascot |
| 3218.4617 | 3218.5154 | 0.0537  | 17  | 37   | 65   | CQDLESDQTALDKMVDG<br>IATSWVNSSNFK   |  |  | Oxidation (M)[14]  |  |  | Mascot |
| 3218.4617 | 3218.5154 | 0.0537  | 17  | 37   | 65   | CQDLESDQTALDKMVDG<br>IATSWVNSSNFK   |  |  | Oxidation (M)[14]  |  |  | Mascot |
| 3338.7485 | 3338.6836 | -0.0649 | -19 | 50   | 80   | MVDGIATSWVNSSNFKL<br>ALLGMDLLSALVTR |  |  | Oxidation (M)[1]   |  |  | Mascot |

27 X-prolyl aminopeptidase (aminopeptidase P) 3, putative gil158253582 56493.5 7.08 9 33 0  
[Danio rerio]

#### Peptide Information

| Calc. Mass | Obsrv. Mass | ± da    | ± ppm | Start Seq. | End Seq. | Sequence                  | Ion Score | C. I. % | Modification                              | Rank | Result | Type |
|------------|-------------|---------|-------|------------|----------|---------------------------|-----------|---------|-------------------------------------------|------|--------|------|
| 803.2988   | 803.3616    | 0.0628  | 78    | 504        | 510      | TCAHAED                   |           |         | Carbamidomethyl (C)[2]                    |      | Mascot |      |
| 856.4015   | 856.5068    | 0.1053  | 123   | 268        | 274      | KTMAMSR                   |           |         | Oxidation (M)[3,5]                        |      | Mascot |      |
| 1179.6957  | 1179.5769   | -0.1188 | -101  | 235        | 244      | SLRPLTHSLR                |           |         |                                           |      | Mascot |      |
| 1584.6722  | 1584.8403   | 0.1681  | 106   | 19         | 31       | SYWSPGSVWCPCR             |           |         | Carbamidomethyl (C)[10]                   |      | Mascot |      |
| 1584.6722  | 1584.8403   | 0.1681  | 106   | 19         | 31       | SYWSPGSVWCPCR             |           |         | Carbamidomethyl (C)[10]                   |      | Mascot |      |
| 1638.9425  | 1638.8247   | -0.1178 | -72   | 188        | 202      | VHSTEELGVVLKSIK           |           |         |                                           |      | Mascot |      |
| 1993.9695  | 1993.9235   | -0.046  | -23   | 1          | 18       | MFHSSSGLLRAAVQCAS<br>R    |           |         | Carbamidomethyl (C)[15], Oxidation (M)[1] |      | Mascot |      |
| 2054.0586  | 2053.9241   | -0.1345 | -65   | 395        | 413      | QLKELGILPSHASDTDAM<br>K   |           |         |                                           |      | Mascot |      |
| 2371.0527  | 2371.0811   | 0.0284  | 12    | 11         | 31       | AAVQCASRSYWSPGSV<br>WCPCR |           |         | Carbamidomethyl (C)[5]                    |      | Mascot |      |
| 2371.0527  | 2371.0811   | 0.0284  | 12    | 11         | 31       | AAVQCASRSYWSPGSV<br>WCPCR |           |         | Carbamidomethyl (C)[5]                    |      | Mascot |      |
| 2439.0842  | 2439.0789   | -0.0053 | -2    | 324        | 345      | DGEMVLLDGGCEYFGYV         |           |         |                                           |      | Mascot |      |

|    |                                              |          |        |   |     |             |                                     |      |    |    |   |                  |        |
|----|----------------------------------------------|----------|--------|---|-----|-------------|-------------------------------------|------|----|----|---|------------------|--------|
|    | 2455.0791                                    | 2455.083 | 0.0039 | 2 | 324 | 345         | SDITR<br>DGEMVLLDGGCEYFGYV<br>SDITR |      |    |    |   | Oxidation (M)[4] | Mascot |
| 28 | SH3 domain-binding protein 4-A [Danio rerio] |          |        |   |     | gi 45387913 | 104947.5                            | 7.73 | 13 | 33 | 0 |                  |        |

| Peptide Information |             |         |       |            |          |                                     |           |       |   |                        |      |             |
|---------------------|-------------|---------|-------|------------|----------|-------------------------------------|-----------|-------|---|------------------------|------|-------------|
| Calc. Mass          | Obsrv. Mass | ± da    | ± ppm | Start Seq. | End Seq. | Sequence                            | Ion Score | C. I. | % | Modification           | Rank | Result Type |
| 842.5822            | 842.4913    | -0.0909 | -108  | 634        | 640      | LIKT VIR                            |           |       |   |                        |      | Mascot      |
| 850.4338            | 850.5243    | 0.0905  | 106   | 358        | 364      | LSNMEIK                             |           |       |   | Oxidation (M)[4]       |      | Mascot      |
| 870.4726            | 870.5187    | 0.0461  | 53    | 1          | 7        | MAAHRIR                             |           |       |   | Oxidation (M)[1]       |      | Mascot      |
| 973.5829            | 973.4905    | -0.0924 | -95   | 666        | 673      | LKGQLWTK                            |           |       |   |                        |      | Mascot      |
| 973.5829            | 973.4905    | -0.0924 | -95   | 666        | 673      | LKGQLWTK                            |           |       |   |                        |      | Mascot      |
| 1045.4796           | 1045.5409   | 0.0613  | 59    | 762        | 770      | AELDSEPER                           |           |       |   |                        |      | Mascot      |
| 1082.4493           | 1082.4855   | 0.0362  | 33    | 780        | 788      | EDCLNMETK                           |           |       |   |                        |      | Mascot      |
| 1434.7158           | 1434.7355   | 0.0197  | 14    | 885        | 896      | DVIHELHMG LDR                       |           |       |   |                        |      | Mascot      |
| 2118.1958           | 2117.9324   | -0.2634 | -124  | 607        | 624      | IILSPLAITTKYPQFQER                  |           |       |   |                        |      | Mascot      |
| 2284.2368           | 2284.1206   | -0.1162 | -51   | 463        | 484      | TVVAIFGHDCAPKTL LVS<br>EVGK         |           |       |   |                        |      | Mascot      |
| 2300.0686           | 2300.126    | 0.0574  | 25    | 568        | 587      | DDQDCILAQFCVQTPQP<br>PPK            |           |       |   | Carbamidomethyl (C)[5] |      | Mascot      |
| 3227.677            | 3227.5264   | -0.1506 | -47   | 907        | 936      | HLTGTLILVNC LDLLRSSA<br>FSPAPQDDFAI |           |       |   |                        |      | Mascot      |
| 3337.6052           | 3337.6785   | 0.0733  | 22    | 269        | 298      | LARSCHDLES LGQNPGW<br>GQTQPVETNIVCK |           |       |   | Carbamidomethyl (C)[5] |      | Mascot      |
| 3338.5496           | 3338.6836   | 0.134   | 40    | 856        | 884      | TGMVDSEAMWKPAYDFL<br>LTWAAQIGDSYR   |           |       |   | Oxidation (M)[3]       |      | Mascot      |

|    |                                                                      |  |  |  |  |              |         |      |    |    |   |  |
|----|----------------------------------------------------------------------|--|--|--|--|--------------|---------|------|----|----|---|--|
| 29 | PREDICTED: tripartite motif-containing protein 39-like [Danio rerio] |  |  |  |  | gi 326676388 | 71379.4 | 6.07 | 11 | 33 | 0 |  |
|----|----------------------------------------------------------------------|--|--|--|--|--------------|---------|------|----|----|---|--|

| Peptide Information |             |         |       |            |          |                          |           |       |   |                        |      |             |
|---------------------|-------------|---------|-------|------------|----------|--------------------------|-----------|-------|---|------------------------|------|-------------|
| Calc. Mass          | Obsrv. Mass | ± da    | ± ppm | Start Seq. | End Seq. | Sequence                 | Ion Score | C. I. | % | Modification           | Rank | Result Type |
| 803.4257            | 803.3616    | -0.0641 | -80   | 268        | 274      | AAEKQEK                  |           |       |   |                        |      | Mascot      |
| 850.4967            | 850.5243    | 0.0276  | 32    | 578        | 584      | FLRVMGK                  |           |       |   |                        |      | Mascot      |
| 1082.5009           | 1082.4855   | -0.0154 | -14   | 402        | 411      | FDTCPCLV LK              |           |       |   |                        |      | Mascot      |
| 1234.6427           | 1234.6538   | 0.0111  | 9     | 77         | 86       | ETFTQR PDLK              |           |       |   |                        |      | Mascot      |
| 1316.674            | 1316.6663   | -0.0077 | -6    | 17         | 27       | RNINEPMSLSR              |           |       |   |                        |      | Mascot      |
| 1584.7515           | 1584.8403   | 0.0888  | 56    | 503        | 516      | LFPYFGPCLNDGGK           |           |       |   | Carbamidomethyl (C)[8] |      | Mascot      |
| 1584.7515           | 1584.8403   | 0.0888  | 56    | 503        | 516      | LFPYFGPCLNDGGK           |           |       |   | Carbamidomethyl (C)[8] |      | Mascot      |
| 2133.8643           | 2133.9275   | 0.0632  | 30    | 58         | 76       | SCLNTCWNKTQT CSCP<br>NCK |           |       |   |                        |      | Mascot      |
| 2210.9595           | 2211.0537   | 0.0942  | 43    | 176        | 194      | DDQTGVCLYCSFTDHKN<br>HK  |           |       |   |                        |      | Mascot      |

|    |                                       |           |        |    |             |         |                               |   |    |                                           |  |  |        |
|----|---------------------------------------|-----------|--------|----|-------------|---------|-------------------------------|---|----|-------------------------------------------|--|--|--------|
|    | 2225.0247                             | 2225.0662 | 0.0415 | 19 | 250         | 267     | SIERCQTELLEMEEQQK             |   |    |                                           |  |  | Mascot |
|    | 2225.0247                             | 2225.0662 | 0.0415 | 19 | 250         | 267     | SIERCQTELLEMEEQQK             |   |    |                                           |  |  | Mascot |
|    | 2298.041                              | 2298.1377 | 0.0967 | 42 | 250         | 267     | SIERCQTELLEMEEQQK             |   |    | Carbamidomethyl (C)[5], Oxidation (M)[12] |  |  | Mascot |
|    | 2300.0469                             | 2300.126  | 0.0791 | 34 | 67          | 86      | TQTCSCPNCETFTQRPDLK           |   |    |                                           |  |  | Mascot |
|    | 3338.52                               | 3338.6836 | 0.1636 | 49 | 28          | 57      | VPLSEDLQCSICLEVFTDPVSTPCGHNFK |   |    | Carbamidomethyl (C)[9]                    |  |  | Mascot |
| 30 | BSD domain containing 1 [Danio rerio] |           |        |    | gi 51480446 | 45281.8 | 4.28                          | 8 | 33 | 0                                         |  |  |        |

Peptide Information

|  | Calc. Mass | Obsrv. Mass | ± da    | ± ppm | Start Seq. | End Seq. | Sequence                      | Ion Score | C. I. | % Modification    | Rank | Result Type |
|--|------------|-------------|---------|-------|------------|----------|-------------------------------|-----------|-------|-------------------|------|-------------|
|  | 1213.6211  | 1213.5719   | -0.0492 | -41   | 24         | 33       | SAEAYEFIKR                    |           |       |                   |      | Mascot      |
|  | 1563.7068  | 1563.8031   | 0.0963  | 62    | 336        | 348      | EETAREDMAQDLR                 |           |       |                   |      | Mascot      |
|  | 1563.7068  | 1563.8031   | 0.0963  | 62    | 336        | 348      | EETAREDMAQDLR                 |           |       |                   |      | Mascot      |
|  | 1880.8984  | 1880.9956   | 0.0972  | 52    | 349        | 366      | VFELNSDSGKSTPSNNGK            |           |       |                   |      | Mascot      |
|  | 2000.8827  | 2000.9335   | 0.0508  | 25    | 380        | 396      | DFDLMTEEEVQMALSK              |           |       |                   |      | Mascot      |
|  | 2053.9495  | 2053.9241   | -0.0254 | -12   | 341        | 358      | EDMAQDLRVFELNSDSGK            |           |       |                   |      | Mascot      |
|  | 2439.1362  | 2439.0789   | -0.0573 | -23   | 2          | 23       | ADGEGGWGGWLTQSFQSVKDK         |           |       |                   |      | Mascot      |
|  | 2657.3164  | 2657.1265   | -0.1899 | -71   | 318        | 340      | LSDTGLQETFPEERPVPREETAR       |           |       |                   |      | Mascot      |
|  | 3337.4246  | 3337.6785   | 0.2539  | 76    | 368        | 396      | GSSTDVSEDWEKDFDLDMTEEEVQMALSK |           |       | Oxidation (M)[18] |      | Mascot      |

|    |                                                         |  |  |  |              |         |      |   |    |   |  |  |  |
|----|---------------------------------------------------------|--|--|--|--------------|---------|------|---|----|---|--|--|--|
| 31 | pyruvate dehydrogenase kinase, isozyme 3b [Danio rerio] |  |  |  | gi 123702577 | 21003.7 | 8.49 | 7 | 33 | 0 |  |  |  |
|----|---------------------------------------------------------|--|--|--|--------------|---------|------|---|----|---|--|--|--|

Peptide Information

|  | Calc. Mass | Obsrv. Mass | ± da    | ± ppm | Start Seq. | End Seq. | Sequence            | Ion Score | C. I. | % Modification         | Rank | Result Type |
|--|------------|-------------|---------|-------|------------|----------|---------------------|-----------|-------|------------------------|------|-------------|
|  | 882.4468   | 882.5473    | 0.1005  | 114   | 30         | 36       | QFLDFGR             |           |       |                        |      | Mascot      |
|  | 1045.5499  | 1045.5409   | -0.009  | -9    | 43         | 50       | TSYMFLRK            |           |       |                        |      | Mascot      |
|  | 1165.6836  | 1165.7196   | 0.036   | 31    | 1          | 9        | MKLFICLLK           |           |       | Carbamidomethyl (C)[6] |      | Mascot      |
|  | 1325.6631  | 1325.7146   | 0.0515  | 39    | 162        | 172      | MLINQHSETPR         |           |       |                        |      | Mascot      |
|  | 1325.6631  | 1325.7146   | 0.0515  | 39    | 162        | 172      | MLINQHSETPR         |           |       |                        |      | Mascot      |
|  | 1648.7457  | 1648.7839   | 0.0382  | 23    | 37         | 49       | ENACEKTSYMFLR       |           |       | Carbamidomethyl (C)[4] |      | Mascot      |
|  | 1844.9436  | 1844.8348   | -0.1088 | -59   | 158        | 172      | ISFRMLINQHSETPR     |           |       | Oxidation (M)[5]       |      | Mascot      |
|  | 1844.9436  | 1844.8348   | -0.1088 | -59   | 158        | 172      | ISFRMLINQHSETPR     |           |       | Oxidation (M)[5]       |      | Mascot      |
|  | 2284.1641  | 2284.1206   | -0.0435 | -19   | 97         | 115      | SPEDPHTLNDFLEMLIKIR |           |       | Oxidation (M)[14]      |      | Mascot      |

|    |                                                            |  |  |  |             |       |      |   |    |   |  |  |  |
|----|------------------------------------------------------------|--|--|--|-------------|-------|------|---|----|---|--|--|--|
| 32 | adipocyte plasma membrane-associated protein [Danio rerio] |  |  |  | gi 47086817 | 46714 | 6.81 | 8 | 32 | 0 |  |  |  |
|----|------------------------------------------------------------|--|--|--|-------------|-------|------|---|----|---|--|--|--|



### Peptide Information

| Calc. Mass | Obsrv. Mass | ± da    | ± ppm | Start Seq. | End Seq. | Sequence                    | Ion Score | C. I. | % Modification          | Rank | Result Type |
|------------|-------------|---------|-------|------------|----------|-----------------------------|-----------|-------|-------------------------|------|-------------|
| 1234.5919  | 1234.6538   | 0.0619  | 50    | 247        | 256      | EVNVMMENLR                  |           |       |                         |      | Mascot      |
| 1563.8893  | 1563.8031   | -0.0862 | -55   | 347        | 359      | LFSQDTLLKFVPR               |           |       |                         |      | Mascot      |
| 1563.8893  | 1563.8031   | -0.0862 | -55   | 347        | 359      | LFSQDTLLKFVPR               |           |       |                         |      | Mascot      |
| 1638.7251  | 1638.8247   | 0.0996  | 61    | 224        | 237      | DFMHLIMEATADGR              |           |       | Oxidation (M)[3,7]      |      | Mascot      |
| 1648.854   | 1648.7839   | -0.0701 | -43   | 196        | 210      | LGFVNDLDVTQDGKK             |           |       |                         |      | Mascot      |
| 2118.1599  | 2117.9324   | -0.2275 | -107  | 123        | 142      | IEGRNIHVLATIGKPPCGS<br>R    |           |       |                         |      | Mascot      |
| 2225.1382  | 2225.0662   | -0.072  | -32   | 356        | 374      | FVPRYSLVVELQSDGTC<br>VR     |           |       | Carbamidomethyl (C)[17] |      | Mascot      |
| 2225.1382  | 2225.0662   | -0.072  | -32   | 356        | 374      | FVPRYSLVVELQSDGTC<br>VR     |           |       | Carbamidomethyl (C)[17] |      | Mascot      |
| 2247.1628  | 2247.0203   | -0.1425 | -63   | 11         | 28       | RLNRPHIITDETHEPQYK          |           |       |                         |      | Mascot      |
| 2580.2649  | 2580.2556   | -0.0093 | -4    | 257        | 279      | FPNGIQLFPDEESVLVAE<br>TTMAR |           |       | Oxidation (M)[21]       |      | Mascot      |
| 2580.2649  | 2580.2556   | -0.0093 | -4    | 257        | 279      | FPNGIQLFPDEESVLVAE<br>TTMAR |           |       | Oxidation (M)[21]       |      | Mascot      |

33 PREDICTED: zinc finger protein 567-like [Danio rerio] gi|326666771 48963.9 9.43 10 32 0

### Peptide Information

| Calc. Mass | Obsrv. Mass | ± da    | ± ppm | Start Seq. | End Seq. | Sequence                       | Ion Score | C. I. | % Modification                               | Rank | Result Type |
|------------|-------------|---------|-------|------------|----------|--------------------------------|-----------|-------|----------------------------------------------|------|-------------|
| 856.4457   | 856.5068    | 0.0611  | 71    | 147        | 153      | NLAVHMR                        |           |       | Oxidation (M)[6]                             |      | Mascot      |
| 1082.4796  | 1082.4855   | 0.0059  | 5     | 347        | 355      | HMQTHSGER                      |           |       |                                              |      | Mascot      |
| 1584.7839  | 1584.8403   | 0.0564  | 36    | 85         | 97       | SFSQKPNLDVYMR                  |           |       |                                              |      | Mascot      |
| 1584.7839  | 1584.8403   | 0.0564  | 36    | 85         | 97       | SFSQKPNLDVYMR                  |           |       |                                              |      | Mascot      |
| 1728.8738  | 1728.7454   | -0.1284 | -74   | 84         | 97       | KSFSQKPNLDVYMR                 |           |       | Oxidation (M)[13]                            |      | Mascot      |
| 2000.9355  | 2000.9335   | -0.002  | -1    | 172        | 187      | QNYNLEVHMRTHTGER               |           |       | Oxidation (M)[9]                             |      | Mascot      |
| 2284.085   | 2284.1206   | 0.0356  | 16    | 266        | 284      | IHTGEKPYCTECGKSFI<br>R         |           |       | Carbamidomethyl (C)[10,13]                   |      | Mascot      |
| 2367.1799  | 2367.2065   | 0.0266  | 11    | 377        | 397      | LHNSEQSPQHLGLVHTN<br>AEQK      |           |       |                                              |      | Mascot      |
| 2580.1462  | 2580.2556   | 0.1094  | 42    | 314        | 336      | LSLMNHMNGHTGTIVFTC<br>DQCGK    |           |       | Carbamidomethyl (C)[18], Oxidation (M)[4]    |      | Mascot      |
| 2580.1462  | 2580.2556   | 0.1094  | 42    | 314        | 336      | LSLMNHMNGHTGTIVFTC<br>DQCGK    |           |       | Carbamidomethyl (C)[18], Oxidation (M)[4]    |      | Mascot      |
| 2596.1411  | 2596.2539   | 0.1128  | 43    | 314        | 336      | LSLMNHMNGHTGTIVFTC<br>DQCGK    | 3         | 0     | Carbamidomethyl (C)[18], Oxidation (M)[4,7]  |      | Mascot      |
| 2596.1411  | 2596.2539   | 0.1128  | 43    | 314        | 336      | LSLMNHMNGHTGTIVFTC<br>DQCGK    |           |       | Carbamidomethyl (C)[18], Oxidation (M)[4,7]  |      | Mascot      |
| 2657.238   | 2657.1265   | -0.1115 | -42   | 147        | 168      | NLAVHMRVHTGEKPYSC<br>PQCEK     |           |       | Carbamidomethyl (C)[17,20], Oxidation (M)[6] |      | Mascot      |
| 3218.4463  | 3218.5154   | 0.0691  | 21    | 21         | 46       | QEDLQEQTDLMLLKEET<br>HQQNEVEEK |           |       | Oxidation (M)[11]                            |      | Mascot      |

|    |                                                            |           |        |    |    |              |                                |      |    |    |   |                   |        |
|----|------------------------------------------------------------|-----------|--------|----|----|--------------|--------------------------------|------|----|----|---|-------------------|--------|
|    | 3218.4463                                                  | 3218.5154 | 0.0691 | 21 | 21 | 46           | QEDLQEQTDLMLLKEET<br>HQQNEVEEK |      |    |    |   | Oxidation (M)[11] | Mascot |
| 34 | PREDICTED: hypothetical protein LOC100004944 [Danio rerio] |           |        |    |    | gi 125854141 | 69244.2                        | 6.33 | 10 | 32 | 0 |                   |        |

| Peptide Information |             |         |       |            |          |                  |           |       |   |                           |      |             |
|---------------------|-------------|---------|-------|------------|----------|------------------|-----------|-------|---|---------------------------|------|-------------|
| Calc. Mass          | Obsrv. Mass | ± da    | ± ppm | Start Seq. | End Seq. | Sequence         | Ion Score | C. I. | % | Modification              | Rank | Result Type |
| 1045.452            | 1045.5409   | 0.0889  | 85    | 472        | 479      | CHYSDHVK         |           |       |   | Carbamidomethyl (C)[1]    |      | Mascot      |
| 1316.6052           | 1316.6663   | 0.0611  | 46    | 472        | 482      | CHYSDHVKEAK      |           |       |   |                           |      | Mascot      |
| 1567.873            | 1567.8163   | -0.0567 | -36   | 259        | 272      | LIYITDAVQSLFGK   |           |       |   |                           |      | Mascot      |
| 1729.9265           | 1729.7338   | -0.1927 | -111  | 361        | 375      | MTQDVLQIQRELGA   |           |       |   |                           |      | Mascot      |
| 2048.1321           | 2047.9043   | -0.2278 | -111  | 343        | 360      | GMTGLTQFINNIKPR  |           |       |   | Oxidation (M)[2]          |      | Mascot      |
| 2211.1147           | 2211.0537   | -0.061  | -28   | 153        | 171      | TTLVNMVMNYMLGVE  |           |       |   |                           |      | Mascot      |
| 2239.2485           | 2239.0825   | -0.166  | -74   | 278        | 298      | IVLLFTHSDGFPPSN  |           |       |   |                           |      | Mascot      |
| 2283.2595           | 2283.1292   | -0.1303 | -57   | 544        | 563      | IALNTDSLNTLLHIDF |           |       |   |                           |      | Mascot      |
| 2367.2085           | 2367.2065   | -0.002  | -1    | 234        | 254      | IDDLTHEINAVCLVNK |           |       |   |                           |      | Mascot      |
| 2371.0627           | 2371.0811   | 0.0184  | 8     | 35         | 53       | ECLQQFWATTKTQDCP |           |       |   | Carbamidomethyl (C)[2,15] |      | Mascot      |
| 2371.0627           | 2371.0811   | 0.0184  | 8     | 35         | 53       | ECLQQFWATTKTQDCP |           |       |   | Carbamidomethyl (C)[2,15] |      | Mascot      |

|    |                                                                              |  |  |  |  |              |          |      |    |    |   |  |
|----|------------------------------------------------------------------------------|--|--|--|--|--------------|----------|------|----|----|---|--|
| 35 | PREDICTED: transposon TX1 uncharacterized 149 kDa protein-like [Danio rerio] |  |  |  |  | gi 326667829 | 148918.2 | 8.57 | 15 | 31 | 0 |  |
|----|------------------------------------------------------------------------------|--|--|--|--|--------------|----------|------|----|----|---|--|

| Peptide Information |             |         |       |            |          |                   |           |       |   |              |      |             |
|---------------------|-------------|---------|-------|------------|----------|-------------------|-----------|-------|---|--------------|------|-------------|
| Calc. Mass          | Obsrv. Mass | ± da    | ± ppm | Start Seq. | End Seq. | Sequence          | Ion Score | C. I. | % | Modification | Rank | Result Type |
| 850.5621            | 850.5243    | -0.0378 | -44   | 387        | 393      | RLIHALK           |           |       |   |              |      | Mascot      |
| 902.4941            | 902.4664    | -0.0277 | -31   | 517        | 524      | KGDLNDIK          |           |       |   |              |      | Mascot      |
| 1325.7463           | 1325.7146   | -0.0317 | -24   | 21         | 30       | YQIYEIIKQK        |           |       |   |              |      | Mascot      |
| 1325.7463           | 1325.7146   | -0.0317 | -24   | 21         | 30       | YQIYEIIKQK        |           |       |   |              |      | Mascot      |
| 1347.7452           | 1347.6968   | -0.0484 | -36   | 1214       | 1225     | CQLINFLLGQAK      |           |       |   |              |      | Mascot      |
| 1563.9409           | 1563.8031   | -0.1378 | -88   | 842        | 854      | LHWVPKAVLYLPK     |           |       |   |              |      | Mascot      |
| 1563.9409           | 1563.8031   | -0.1378 | -88   | 842        | 854      | LHWVPKAVLYLPK     |           |       |   |              |      | Mascot      |
| 1844.9865           | 1844.8348   | -0.1517 | -82   | 1015       | 1029     | LLEQWRASLTTEEIR   |           |       |   |              |      | Mascot      |
| 1845.0592           | 1844.8348   | -0.2244 | -122  | 344        | 360      | NILGKFLDTVTQGALV  |           |       |   |              |      | Mascot      |
| 1880.9653           | 1880.9956   | 0.0303  | 16    | 740        | 755      | WLNGEPNLPDGLLWTR  |           |       |   |              |      | Mascot      |
| 1993.9457           | 1993.9235   | -0.0222 | -11   | 449        | 466      | ALTLEEELQSMCEGK   |           |       |   |              |      | Mascot      |
| 2193.1697           | 2193.052    | -0.1177 | -54   | 296        | 314      | QLCQQYTLNVTGDILRS |           |       |   |              |      | Mascot      |

|    |                            |           |         |     |             |      |                                   |      |                                          |        |   |
|----|----------------------------|-----------|---------|-----|-------------|------|-----------------------------------|------|------------------------------------------|--------|---|
|    | 2239.1865                  | 2239.0825 | -0.104  | -46 | 654         | 673  | QGCALSGMLYVLAIEPFLIK              |      | Carbamidomethyl (C)[3], Oxidation (M)[8] | Mascot |   |
|    | 2298.1509                  | 2298.1377 | -0.0132 | -6  | 627         | 647  | ALYCDVESILKVNGDLCA<br>PFK         |      |                                          | Mascot |   |
|    | 2439.2917                  | 2439.0789 | -0.2128 | -87 | 760         | 781  | YLGVFLGNEAVVQKNFE<br>GVVEK        |      |                                          | Mascot |   |
|    | 2580.2002                  | 2580.2556 | 0.0554  | 21  | 220         | 241  | SCSICPVSFSDHSLQCVI<br>SQR         |      | Carbamidomethyl (C)[2,5,17]              | Mascot |   |
|    | 2580.2002                  | 2580.2556 | 0.0554  | 21  | 220         | 241  | SCSICPVSFSDHSLQCVI<br>SQR         |      | Carbamidomethyl (C)[2,5,17]              | Mascot |   |
|    | 3218.6602                  | 3218.5154 | -0.1448 | -45 | 1136        | 1164 | ILHGAVAVNAFISILNPDV<br>VHDCPFCLQR |      | Carbamidomethyl (C)[23]                  | Mascot |   |
|    | 3218.6602                  | 3218.5154 | -0.1448 | -45 | 1136        | 1164 | ILHGAVAVNAFISILNPDV<br>VHDCPFCLQR |      | Carbamidomethyl (C)[23]                  | Mascot |   |
| 36 | lactase-like [Danio rerio] |           |         |     | gi 57526567 |      | 63841.3                           | 7.96 | 10                                       | 31     | 0 |

Peptide Information

| Calc. Mass | Obsrv. Mass | ± da    | ± ppm | Start Seq. | End Seq. | Sequence                  | Ion Score | C. I. | % Modification                           | Rank | Result Type |
|------------|-------------|---------|-------|------------|----------|---------------------------|-----------|-------|------------------------------------------|------|-------------|
| 803.3893   | 803.3616    | -0.0277 | -34   | 277        | 283      | DIEAAER                   |           |       |                                          |      | Mascot      |
| 842.4954   | 842.4913    | -0.0041 | -5    | 2          | 8        | QRNGVLR                   |           |       |                                          |      | Mascot      |
| 882.4203   | 882.5473    | 0.127   | 144   | 126        | 132      | TDYINEK                   |           |       |                                          |      | Mascot      |
| 902.5206   | 902.4664    | -0.0542 | -60   | 484        | 490      | NKPRYPK                   |           |       |                                          |      | Mascot      |
| 973.5359   | 973.4905    | -0.0454 | -47   | 1          | 8        | MQRNGVLR                  |           |       |                                          |      | Mascot      |
| 973.5359   | 973.4905    | -0.0454 | -47   | 1          | 8        | MQRNGVLR                  |           |       |                                          |      | Mascot      |
| 1058.4935  | 1058.5662   | 0.0727  | 69    | 536        | 544      | SKEHADMPK                 |           |       | Oxidation (M)[7]                         |      | Mascot      |
| 1475.5422  | 1475.7168   | 0.1746  | 118   | 420        | 430      | MMCTDLCDEWR               |           |       | Carbamidomethyl (C)[3], Oxidation (M)[1] |      | Mascot      |
| 1993.9106  | 1993.9235   | 0.0129  | 6     | 133        | 148      | GIEHYDNMINMLLENR          |           |       | Oxidation (M)[8,11]                      |      | Mascot      |
| 2054.0413  | 2053.9241   | -0.1172 | -57   | 313        | 331      | SAQQGLSSSRLPAFNPH<br>EK   |           |       |                                          |      | Mascot      |
| 2247.071   | 2247.0203   | -0.0507 | -23   | 256        | 276      | GMVGISLSADWGPEVDV<br>TNQR |           |       | Oxidation (M)[2]                         |      | Mascot      |

37 PREDICTED: bromodomain adjacent to zinc finger domain protein 1A, partial [Danio rerio] gi|125841384 81560.8 6.03 12 31 0

Peptide Information

| Calc. Mass | Obsrv. Mass | ± da    | ± ppm | Start Seq. | End Seq. | Sequence      | Ion Score | C. I. | % Modification     | Rank | Result Type |
|------------|-------------|---------|-------|------------|----------|---------------|-----------|-------|--------------------|------|-------------|
| 803.4145   | 803.3616    | -0.0529 | -66   | 316        | 322      | DDLIEAK       |           |       |                    |      | Mascot      |
| 902.5669   | 902.4664    | -0.1005 | -111  | 604        | 611      | LLTLVSTR      |           |       |                    |      | Mascot      |
| 1045.3999  | 1045.5409   | 0.141   | 135   | 303        | 310      | EQMMSMEK      |           |       | Oxidation (M)[3,4] |      | Mascot      |
| 1106.4789  | 1106.5333   | 0.0544  | 49    | 36         | 43       | TYDEFFER      |           |       |                    |      | Mascot      |
| 1234.7782  | 1234.6538   | -0.1244 | -101  | 2          | 11       | PLLHKKPFVR    |           |       |                    |      | Mascot      |
| 1316.5796  | 1316.6663   | 0.0867  | 66    | 303        | 312      | EQMMSMEKFR    |           |       |                    |      | Mascot      |
| 1567.7461  | 1567.8163   | 0.0702  | 45    | 101        | 113      | LHEICDDVYAYVK |           |       |                    |      | Mascot      |

|           |           |         |     |     |     |                                   |   |   |  |                                          |        |
|-----------|-----------|---------|-----|-----|-----|-----------------------------------|---|---|--|------------------------------------------|--------|
| 1845.0084 | 1844.8348 | -0.1736 | -94 | 596 | 611 | ILHSMCGKLLTLVSTR                  |   |   |  | Carbamidomethyl (C)[6], Oxidation (M)[5] | Mascot |
| 1845.0084 | 1844.8348 | -0.1736 | -94 | 596 | 611 | ILHSMCGKLLTLVSTR                  | 2 | 0 |  | Carbamidomethyl (C)[6], Oxidation (M)[5] | Mascot |
| 1880.8517 | 1880.9956 | 0.1439  | 77  | 378 | 392 | LWSKPREDMCEDDLK                   |   |   |  | Oxidation (M)[9]                         | Mascot |
| 1993.9912 | 1993.9235 | -0.0677 | -34 | 535 | 552 | LHILSSGADCGFTNAKFR                |   |   |  | Carbamidomethyl (C)[10]                  | Mascot |
| 2283.1836 | 2283.1292 | -0.0544 | -24 | 195 | 215 | VQPVSPPEACEPVIVKVAQ<br>MSR        |   |   |  | Oxidation (M)[19]                        | Mascot |
| 3218.6958 | 3218.5154 | -0.1804 | -56 | 402 | 429 | TRLPPPELFGDALMVLEFL<br>HAFGELFDLK |   |   |  |                                          | Mascot |
| 3218.6958 | 3218.5154 | -0.1804 | -56 | 402 | 429 | TRLPPPELFGDALMVLEFL<br>HAFGELFDLK |   |   |  |                                          | Mascot |

38 PREDICTED: hypothetical protein LOC798191 [Danio rerio] gi|189522448 41942 8.11 8 31 0

Peptide Information

| Calc. Mass | Obsrv. Mass | ± da    | ± ppm | Start Seq. | End Seq. | Sequence                         | Ion Score | C. I. | % Modification                           | Rank | Result Type |
|------------|-------------|---------|-------|------------|----------|----------------------------------|-----------|-------|------------------------------------------|------|-------------|
| 864.4726   | 864.4924    | 0.0198  | 23    | 322        | 328      | FFGQPLR                          |           |       |                                          |      | Mascot      |
| 996.4489   | 996.5773    | 0.1284  | 129   | 213        | 221      | QSPSCTMVK                        |           |       | Oxidation (M)[7]                         |      | Mascot      |
| 1082.4797  | 1082.4855   | 0.0058  | 5     | 358        | 366      | CCPPAFYPK                        |           |       | Carbamidomethyl (C)[1]                   |      | Mascot      |
| 1316.6528  | 1316.6663   | 0.0135  | 10    | 124        | 134      | HSRCQPGQYIK                      |           |       |                                          |      | Mascot      |
| 1563.6825  | 1563.8031   | 0.1206  | 77    | 213        | 225      | QSPSCTMVKNHCR                    |           |       | Carbamidomethyl (C)[5], Oxidation (M)[7] |      | Mascot      |
| 1563.6825  | 1563.8031   | 0.1206  | 77    | 213        | 225      | QSPSCTMVKNHCR                    |           |       | Carbamidomethyl (C)[5], Oxidation (M)[7] |      | Mascot      |
| 2053.947   | 2053.9241   | -0.0229 | -11   | 97         | 114      | SSNTVCEPLAGFYCIHQK               |           |       | Carbamidomethyl (C)[6]                   |      | Mascot      |
| 2239.0635  | 2239.0825   | 0.019   | 8     | 97         | 115      | SSNTVCEPLAGFYCIHQK<br>K          |           |       | Carbamidomethyl (C)[6,14]                |      | Mascot      |
| 3337.4883  | 3337.6785   | 0.1902  | 57    | 50         | 78       | CTIDTVTTCVPCPLTYT<br>DEPNGLYTCFR |           |       | Carbamidomethyl (C)[1,9]                 |      | Mascot      |

39 Si:ch211-215a10.4 protein [Danio rerio] gi|126631961 20359.9 9.75 5 30 0

Peptide Information

| Calc. Mass | Obsrv. Mass | ± da    | ± ppm | Start Seq. | End Seq. | Sequence                            | Ion Score | C. I. | % Modification                             | Rank | Result Type |
|------------|-------------|---------|-------|------------|----------|-------------------------------------|-----------|-------|--------------------------------------------|------|-------------|
| 882.5519   | 882.5473    | -0.0046 | -5    | 5          | 11       | LRVELPR                             |           |       |                                            |      | Mascot      |
| 1567.8671  | 1567.8163   | -0.0508 | -32   | 85         | 97       | GLPFHSILVFFYK                       |           |       |                                            |      | Mascot      |
| 2367.1152  | 2367.2065   | 0.0913  | 39    | 101        | 120      | NHLYRITYDAFSTFYIGAD<br>GR           |           |       |                                            |      | Mascot      |
| 3337.7615  | 3337.6785   | -0.083  | -25   | 41         | 67       | VVYQLTLTLWKLMLFFYY<br>ADAQLEVLK     |           |       | Carbamidomethyl (C)[14], Oxidation (M)[13] |      | Mascot      |
| 3338.9343  | 3338.6836   | -0.2507 | -75   | 140        | 171      | VASMLGGALVALGIQEH<br>PALNLLPLLLSSLR |           |       | Oxidation (M)[4]                           |      | Mascot      |

40 PREDICTED: protein NLRC3-like [Danio rerio] gi|326667285 62976.7 6.15 9 30 0

Peptide Information

| Calc. Mass | Obsrv. Mass | ± da | ± ppm | Start | End | Sequence | Ion | C. I. | % Modification | Rank | Result Type |
|------------|-------------|------|-------|-------|-----|----------|-----|-------|----------------|------|-------------|
|------------|-------------|------|-------|-------|-----|----------|-----|-------|----------------|------|-------------|

|                     |                                                            |             |         |       |              |          |                              |           |       |    | Seq.                    |      | Seq.   |        | Score |  |  |  |        |  |
|---------------------|------------------------------------------------------------|-------------|---------|-------|--------------|----------|------------------------------|-----------|-------|----|-------------------------|------|--------|--------|-------|--|--|--|--------|--|
|                     | 864.3767                                                   | 864.4924    | 0.1157  | 134   | 363          | 370      | DCGIDVDK                     |           |       |    |                         |      |        |        |       |  |  |  | Mascot |  |
|                     | 902.44                                                     | 902.4664    | 0.0264  | 29    | 230          | 237      | IPADCIDR                     |           |       |    |                         |      |        |        |       |  |  |  | Mascot |  |
|                     | 973.5789                                                   | 973.4905    | -0.0884 | -91   | 528          | 536      | KSVTALQAR                    |           |       |    |                         |      |        |        |       |  |  |  | Mascot |  |
|                     | 973.5789                                                   | 973.4905    | -0.0884 | -91   | 528          | 536      | KSVTALQAR                    |           |       |    |                         |      |        |        |       |  |  |  | Mascot |  |
|                     | 1045.5272                                                  | 1045.5409   | 0.0137  | 13    | 423          | 431      | GLLTQQDDR                    |           |       |    |                         |      |        |        |       |  |  |  | Mascot |  |
|                     | 1234.7041                                                  | 1234.6538   | -0.0503 | -41   | 436          | 445      | EEIIAYIKQK                   |           |       |    |                         |      |        |        |       |  |  |  | Mascot |  |
|                     | 1434.6755                                                  | 1434.7355   | 0.06    | 42    | 371          | 383      | ASVYSGMCTQIFK                |           |       |    |                         |      |        |        |       |  |  |  | Mascot |  |
|                     | 2134.1326                                                  | 2133.9275   | -0.2051 | -96   | 1            | 17       | MEIYELLFIYQLKCSLK            |           |       |    |                         |      |        |        |       |  |  |  | Mascot |  |
|                     | 2298.1812                                                  | 2298.1377   | -0.0435 | -19   | 303          | 320      | TLTQMYTHFLRFQIQSR            |           |       |    |                         |      |        |        |       |  |  |  | Mascot |  |
|                     | 2580.2576                                                  | 2580.2556   | -0.002  | -1    | 39           | 60       | IYTDLYITQGASEQVNTE<br>HEIR   |           |       |    |                         |      |        |        |       |  |  |  | Mascot |  |
|                     | 2580.2576                                                  | 2580.2556   | -0.002  | -1    | 39           | 60       | IYTDLYITQGASEQVNTE<br>HEIR   |           |       |    |                         |      |        |        |       |  |  |  | Mascot |  |
| 41                  | PREDICTED: hypothetical protein LOC100001326 [Danio rerio] |             |         |       | gi 125846403 |          | 17013.6                      | 6.06      | 5     | 30 | 0                       |      |        |        |       |  |  |  |        |  |
| Peptide Information |                                                            |             |         |       |              |          |                              |           |       |    |                         |      |        |        |       |  |  |  |        |  |
|                     | Calc. Mass                                                 | Obsrv. Mass | ± da    | ± ppm | Start Seq.   | End Seq. | Sequence                     | Ion Score | C. I. | %  | Modification            | Rank | Result | Type   |       |  |  |  |        |  |
|                     | 1058.5339                                                  | 1058.5662   | 0.0323  | 31    | 128          | 136      | VCAFNYYTIK                   |           |       |    |                         |      |        | Mascot |       |  |  |  |        |  |
|                     | 1213.5956                                                  | 1213.5719   | -0.0237 | -20   | 142          | 152      | ACFIMNTVTVV                  |           |       |    | Oxidation (M)[5]        |      |        | Mascot |       |  |  |  |        |  |
|                     | 1584.8387                                                  | 1584.8403   | 0.0016  | 1     | 106          | 118      | CQIIANQLNRQAR                |           |       |    | Carbamidomethyl (C)[1]  |      |        | Mascot |       |  |  |  |        |  |
|                     | 1584.8387                                                  | 1584.8403   | 0.0016  | 1     | 106          | 118      | CQIIANQLNRQAR                |           |       |    | Carbamidomethyl (C)[1]  |      |        | Mascot |       |  |  |  |        |  |
|                     | 2054.0627                                                  | 2053.9241   | -0.1386 | -67   | 119          | 136      | ELAEPGTLKVCAFNYYTIK          |           |       |    | Carbamidomethyl (C)[11] |      |        | Mascot |       |  |  |  |        |  |
|                     | 2284.1416                                                  | 2284.1206   | -0.021  | -9    | 42           | 62       | QQVIEVSESESVQSPAL<br>NPR     |           |       |    |                         |      |        | Mascot |       |  |  |  |        |  |
| 42                  | estrogen receptor alpha long isoform [Danio rerio]         |             |         |       | gi 154850277 |          | 68248.4                      | 8.6       | 11    | 30 | 0                       |      |        |        |       |  |  |  |        |  |
| Peptide Information |                                                            |             |         |       |              |          |                              |           |       |    |                         |      |        |        |       |  |  |  |        |  |
|                     | Calc. Mass                                                 | Obsrv. Mass | ± da    | ± ppm | Start Seq.   | End Seq. | Sequence                     | Ion Score | C. I. | %  | Modification            | Rank | Result | Type   |       |  |  |  |        |  |
|                     | 902.469                                                    | 902.4664    | -0.0026 | -3    | 310          | 317      | TTGPQDKR                     |           |       |    |                         |      |        | Mascot |       |  |  |  |        |  |
|                     | 1104.4886                                                  | 1104.5543   | 0.0657  | 59    | 263          | 271      | KCYEVGMMK                    |           |       |    | Oxidation (M)[7]        |      |        | Mascot |       |  |  |  |        |  |
|                     | 1213.6398                                                  | 1213.5719   | -0.0679 | -56   | 373          | 382      | ELVHMIWAK                    |           |       |    | Oxidation (M)[5]        |      |        | Mascot |       |  |  |  |        |  |
|                     | 1316.7573                                                  | 1316.6663   | -0.091  | -69   | 422          | 432      | LIFAQDLILDR                  |           |       |    |                         |      |        | Mascot |       |  |  |  |        |  |
|                     | 1325.7399                                                  | 1325.7146   | -0.0253 | -19   | 373          | 383      | ELVHMIWAKK                   |           |       |    |                         |      |        | Mascot |       |  |  |  |        |  |
|                     | 1325.7399                                                  | 1325.7146   | -0.0253 | -19   | 373          | 383      | ELVHMIWAKK                   |           |       |    |                         |      |        | Mascot |       |  |  |  |        |  |
|                     | 2239.0667                                                  | 2239.0825   | 0.0158  | 7     | 2            | 24       | LAACVFPMVMSSGGQTSG<br>EAVGAR |           |       |    |                         |      |        | Mascot |       |  |  |  |        |  |

|  |           |           |         |     |     |     |                               |  |  |  |  |                                          |  |  |  |  |  |        |
|--|-----------|-----------|---------|-----|-----|-----|-------------------------------|--|--|--|--|------------------------------------------|--|--|--|--|--|--------|
|  | 2279.1377 | 2278.9968 | -0.1409 | -62 | 36  | 56  | EALEEPSSPPAAHKLSPM<br>YPK     |  |  |  |  |                                          |  |  |  |  |  | Mascot |
|  | 2371.0979 | 2371.0811 | -0.0168 | -7  | 433 | 454 | SEGECEVEGMAEIFDMLLA<br>TVAR   |  |  |  |  |                                          |  |  |  |  |  | Mascot |
|  | 2371.1091 | 2371.0811 | -0.028  | -12 | 353 | 372 | HSRPYTEITMMSLLTNMA<br>DK      |  |  |  |  | Oxidation (M)[10,11]                     |  |  |  |  |  | Mascot |
|  | 2439.2588 | 2439.0789 | -0.1799 | -74 | 554 | 574 | VPLYDLLLEMLDAQRFQS<br>SGK     |  |  |  |  | Oxidation (M)[10]                        |  |  |  |  |  | Mascot |
|  | 2580.2478 | 2580.2556 | 0.0078  | 3   | 2   | 26  | LAACVFPVMMSGGQTSG<br>EAVGARQR |  |  |  |  | Carbamidomethyl (C)[4]                   |  |  |  |  |  | Mascot |
|  | 2580.2478 | 2580.2556 | 0.0078  | 3   | 2   | 26  | LAACVFPVMMSGGQTSG<br>EAVGARQR |  |  |  |  | Carbamidomethyl (C)[4]                   |  |  |  |  |  | Mascot |
|  | 2596.2429 | 2596.2539 | 0.011   | 4   | 2   | 26  | LAACVFPVMMSGGQTSG<br>EAVGARQR |  |  |  |  | Carbamidomethyl (C)[4], Oxidation (M)[8] |  |  |  |  |  | Mascot |
|  | 2596.2429 | 2596.2539 | 0.011   | 4   | 2   | 26  | LAACVFPVMMSGGQTSG<br>EAVGARQR |  |  |  |  | Carbamidomethyl (C)[4], Oxidation (M)[8] |  |  |  |  |  | Mascot |

43 PREDICTED: interferon-induced very large GTPase 1-like [Danio rerio] gi|326676497 194760.8 7 13 30 0 24 6.699

Peptide Information

| Calc. Mass | Obsrv. Mass | ± da    | ± ppm | Start Seq. | End Seq. | Sequence                   | Ion Score | C. I. | % | Modification                             | Rank | Result Type |
|------------|-------------|---------|-------|------------|----------|----------------------------|-----------|-------|---|------------------------------------------|------|-------------|
| 864.4178   | 864.4924    | 0.0746  | 86    | 551        | 556      | EMCRLR                     |           |       |   | Carbamidomethyl (C)[3]                   |      | Mascot      |
| 1082.5841  | 1082.4855   | -0.0986 | -91   | 1097       | 1105     | EVQTDIIHK                  |           |       |   |                                          |      | Mascot      |
| 1106.5146  | 1106.5333   | 0.0187  | 17    | 1049       | 1058     | CEADNELGKK                 |           |       |   |                                          |      | Mascot      |
| 1234.5708  | 1234.6538   | 0.083   | 67    | 1011       | 1019     | KHMIDWCTK                  |           |       |   | Carbamidomethyl (C)[7], Oxidation (M)[3] |      | Mascot      |
| 1347.6539  | 1347.6968   | 0.0429  | 32    | 621        | 631      | QHLSSLDEQYK                |           |       |   |                                          |      | Mascot      |
| 1475.7522  | 1475.7168   | -0.0354 | -24   | 428        | 440      | LVLVCNTNDLESR              |           |       |   |                                          |      | Mascot      |
| 1584.8124  | 1584.8403   | 0.0279  | 18    | 588        | 602      | QVISLFISGLCCSSK            | 26        | 36.67 |   |                                          |      | Mascot      |
| 1584.8124  | 1584.8403   | 0.0279  | 18    | 588        | 602      | QVISLFISGLCCSSK            |           |       |   |                                          |      | Mascot      |
| 1648.8481  | 1648.7839   | -0.0642 | -39   | 958        | 971      | VPAQDFVAFIEWIR             |           |       |   |                                          |      | Mascot      |
| 2225.0828  | 2225.0662   | -0.0166 | -7    | 464        | 482      | MNDDDFVAKLQMTVDEIL<br>K    |           |       |   |                                          |      | Mascot      |
| 2225.0828  | 2225.0662   | -0.0166 | -7    | 464        | 482      | MNDDDFVAKLQMTVDEIL<br>K    |           |       |   |                                          |      | Mascot      |
| 2284.0913  | 2284.1206   | 0.0293  | 13    | 297        | 316      | DCSGENSIVQTDPLISF<br>VR    |           |       |   | Carbamidomethyl (C)[2]                   |      | Mascot      |
| 2297.0974  | 2297.1343   | 0.0369  | 16    | 156        | 174      | TNINMEYMLMELGLQSHL<br>K    |           |       |   | Oxidation (M)[5,8]                       |      | Mascot      |
| 2300.0759  | 2300.126    | 0.0501  | 22    | 356        | 375      | ICNGLVEMTWYLPCKE<br>TDK    |           |       |   |                                          |      | Mascot      |
| 2371.1672  | 2371.0811   | -0.0861 | -36   | 1199       | 1220     | EMLSTVTSLDQCGIGPFF<br>AVAK |           |       |   | Carbamidomethyl (C)[12]                  |      | Mascot      |
| 2371.1672  | 2371.0811   | -0.0861 | -36   | 1199       | 1220     | EMLSTVTSLDQCGIGPFF<br>AVAK |           |       |   | Carbamidomethyl (C)[12]                  |      | Mascot      |

44 talin-1 [Danio rerio] gi|57222259 270469.6 5.86 21 30 0

Peptide Information

| Calc. Mass | Obsrv. Mass | ± da | ± ppm | Start Seq. | End Seq. | Sequence | Ion Score | C. I. | % | Modification | Rank | Result Type |
|------------|-------------|------|-------|------------|----------|----------|-----------|-------|---|--------------|------|-------------|
|------------|-------------|------|-------|------------|----------|----------|-----------|-------|---|--------------|------|-------------|

|    |                                                                                  |           |         |     |             |      |                             |       |   |    |   |  |  |  |  |  |        |
|----|----------------------------------------------------------------------------------|-----------|---------|-----|-------------|------|-----------------------------|-------|---|----|---|--|--|--|--|--|--------|
|    | 803.4257                                                                         | 803.3616  | -0.0641 | -80 | 1944        | 1950 | ELIDSAR                     |       |   |    |   |  |  |  |  |  | Mascot |
|    | 856.408                                                                          | 856.5068  | 0.0988  | 115 | 1303        | 1310 | TISMSSSK                    |       |   |    |   |  |  |  |  |  | Mascot |
|    | 902.5053                                                                         | 902.4664  | -0.0389 | -43 | 2460        | 2467 | RASDNLVK                    |       |   |    |   |  |  |  |  |  | Mascot |
|    | 973.4883                                                                         | 973.4905  | 0.0022  | 2   | 1195        | 1203 | SVNCLPGQR                   |       |   |    |   |  |  |  |  |  | Mascot |
|    | 973.4883                                                                         | 973.4905  | 0.0022  | 2   | 1195        | 1203 | SVNCLPGQR                   |       |   |    |   |  |  |  |  |  | Mascot |
|    | 1082.4783                                                                        | 1082.4855 | 0.0072  | 7   | 1083        | 1092 | CSQDLGSSTK                  |       |   |    |   |  |  |  |  |  | Mascot |
|    | 1165.6576                                                                        | 1165.7196 | 0.062   | 53  | 1615        | 1625 | SLAVNPKDPPK                 |       |   |    |   |  |  |  |  |  | Mascot |
|    | 1179.5422                                                                        | 1179.5769 | 0.0347  | 29  | 2441        | 2450 | ADQDSQTMKR                  |       |   |    |   |  |  |  |  |  | Mascot |
|    | 1213.6171                                                                        | 1213.5719 | -0.0452 | -37 | 1133        | 1144 | GVAANTEDPLAR                |       |   |    |   |  |  |  |  |  | Mascot |
|    | 1234.5811                                                                        | 1234.6538 | 0.0727  | 59  | 1541        | 1551 | ALDGAFNQENR                 |       |   |    |   |  |  |  |  |  | Mascot |
|    | 1316.6804                                                                        | 1316.6663 | -0.0141 | -11 | 2193        | 2204 | QEDVIATANLSR                |       |   |    |   |  |  |  |  |  | Mascot |
|    | 1325.7787                                                                        | 1325.7146 | -0.0641 | -48 | 438         | 450  | VETGSVALPAIR                |       |   |    |   |  |  |  |  |  | Mascot |
|    | 1325.7787                                                                        | 1325.7146 | -0.0641 | -48 | 438         | 450  | VETGSVALPAIR                |       |   |    |   |  |  |  |  |  | Mascot |
|    | 1347.705                                                                         | 1347.6968 | -0.0082 | -6  | 896         | 908  | MATNAAQNAIKK                |       |   |    |   |  |  |  |  |  | Mascot |
|    | 1475.7886                                                                        | 1475.7168 | -0.0718 | -49 | 859         | 872  | LLADATARMVEAAK              |       |   |    |   |  |  |  |  |  | Mascot |
|    | 1638.8077                                                                        | 1638.8247 | 0.017   | 10  | 92          | 106  | MLDGTVKTMVDDSK              |       |   |    |   |  |  |  |  |  | Mascot |
|    | 2117.9768                                                                        | 2117.9324 | -0.0444 | -21 | 867         | 886  | MVEAAKGAAANPDSEEQ<br>QQK    |       |   |    |   |  |  |  |  |  | Mascot |
|    | 2211.1865                                                                        | 2211.0537 | -0.1328 | -60 | 2059        | 2080 | LGAASLGSEDPETQVVL<br>NAVK   |       |   |    |   |  |  |  |  |  | Mascot |
|    | 2225.1846                                                                        | 2225.0662 | -0.1184 | -53 | 718         | 738  | VVVAPTISSPVCQEQLIEA<br>GK   |       |   |    |   |  |  |  |  |  | Mascot |
|    | 2225.1846                                                                        | 2225.0662 | -0.1184 | -53 | 718         | 738  | VVVAPTISSPVCQEQLIEA<br>GK   |       |   |    |   |  |  |  |  |  | Mascot |
|    | 2233.0952                                                                        | 2233.0288 | -0.0664 | -30 | 1337        | 1357 | AVTDSINQLISMCTQQAP<br>GQK   |       |   |    |   |  |  |  |  |  | Mascot |
|    | 2263.1387                                                                        | 2263.0032 | -0.1355 | -60 | 1763        | 1783 | TLAESALQMLYTAKETGG<br>NHK   |       |   |    |   |  |  |  |  |  | Mascot |
|    | 2279.1335                                                                        | 2278.9968 | -0.1367 | -60 | 1763        | 1783 | TLAESALQMLYTAKETGG<br>NHK   |       |   |    |   |  |  |  |  |  | Mascot |
|    | 2371.0825                                                                        | 2371.0811 | -0.0014 | -1  | 1145        | 1166 | NAMLDCTGDVMDKSASL<br>IEETK  |       |   |    |   |  |  |  |  |  | Mascot |
|    | 2371.0825                                                                        | 2371.0811 | -0.0014 | -1  | 1145        | 1166 | NAMLDCTGDVMDKSASL<br>IEETK  |       |   |    |   |  |  |  |  |  | Mascot |
|    | 2532.1453                                                                        | 2532.2136 | 0.0683  | 27  | 2394        | 2418 | MVAAATNNLCEAANS<br>QGHASEEK |       |   |    |   |  |  |  |  |  | Mascot |
| 45 | ATP-dependent chromatin remodeling protein<br>SNF2-related protein [Danio rerio] |           |         |     | gi 21105437 |      | 7534.1                      | 10.57 | 4 | 30 | 0 |  |  |  |  |  |        |

Peptide Information

| Calc. Mass | Obsrv. Mass | ± da   | ± ppm | Start Seq. | End Seq. | Sequence   | Ion Score | C. I. % | Modification     | Rank | Result | Type |
|------------|-------------|--------|-------|------------|----------|------------|-----------|---------|------------------|------|--------|------|
| 864.4243   | 864.4924    | 0.0681 | 79    | 4          | 10       | TAMELQR    |           |         | Oxidation (M)[3] |      | Mascot |      |
| 973.4697   | 973.4905    | 0.0208 | 21    | 48         | 56       | KQDGTDPDGR |           |         |                  |      | Mascot |      |

|    |                                                                                                    |           |         |     |    |    |                    |          |      |    |    |                                           |  |  |  |  |        |
|----|----------------------------------------------------------------------------------------------------|-----------|---------|-----|----|----|--------------------|----------|------|----|----|-------------------------------------------|--|--|--|--|--------|
|    | 973.4697                                                                                           | 973.4905  | 0.0208  | 21  | 48 | 56 | KQDGTDPDGR         |          |      |    |    |                                           |  |  |  |  | Mascot |
|    | 1058.4973                                                                                          | 1058.5662 | 0.0689  | 65  | 49 | 58 | QDGTDPDGRGR        |          |      |    |    |                                           |  |  |  |  | Mascot |
|    | 2263.1057                                                                                          | 2263.0032 | -0.1025 | -45 | 12 | 29 | CNTLITLIERENMELEER |          |      |    |    | Carbamidomethyl (C)[1]                    |  |  |  |  | Mascot |
|    | 2279.1006                                                                                          | 2278.9968 | -0.1038 | -46 | 12 | 29 | CNTLITLIERENMELEER |          |      |    |    | Carbamidomethyl (C)[1], Oxidation (M)[13] |  |  |  |  | Mascot |
| 46 | novel protein similar to vertebrate cytoplasmic linker associated protein 1 (CLASP1) [Danio rerio] |           |         |     |    |    | gi 159569348       | 164674.4 | 8.99 | 17 | 30 | 0                                         |  |  |  |  |        |

#### Peptide Information

| Calc. Mass | Obsrv. Mass | ± da    | ± ppm | Start Seq. | End Seq. | Sequence                         | Ion Score | C. I. | % Modification                           | Rank | Result Type |
|------------|-------------|---------|-------|------------|----------|----------------------------------|-----------|-------|------------------------------------------|------|-------------|
| 856.5502   | 856.5068    | -0.0434 | -51   | 1277       | 1284     | GALIELLK                         |           |       |                                          |      | Mascot      |
| 870.577    | 870.5187    | -0.0583 | -67   | 1323       | 1329     | VLKEILR                          |           |       |                                          |      | Mascot      |
| 1082.5551  | 1082.4855   | -0.0696 | -64   | 1337       | 1345     | NYAELTIMK                        |           |       |                                          |      | Mascot      |
| 1165.6801  | 1165.7196   | 0.0395  | 34    | 1313       | 1322     | DHTIRALALR                       |           |       |                                          |      | Mascot      |
| 1325.524   | 1325.7146   | 0.1906  | 144   | 239        | 250      | NFDDSDVDGGR                      |           |       |                                          |      | Mascot      |
| 1325.8151  | 1325.7146   | -0.1005 | -76   | 855        | 866      | KEGLGLQNLLK                      |           |       |                                          |      | Mascot      |
| 1434.6715  | 1434.7355   | 0.064   | 45    | 1240       | 1251     | QDCGENKMVLPK                     |           |       | Carbamidomethyl (C)[3], Oxidation (M)[8] |      | Mascot      |
| 1475.6802  | 1475.7168   | 0.0366  | 25    | 1288       | 1299     | EDSLAVWDEHFK                     |           |       |                                          |      | Mascot      |
| 1648.8007  | 1648.7839   | -0.0168 | -10   | 727        | 741      | SSRIPRPSMSQGCSR                  |           |       |                                          |      | Mascot      |
| 1728.9126  | 1728.7454   | -0.1672 | -97   | 780        | 796      | VLNTGTVEEAAVADALR                |           |       |                                          |      | Mascot      |
| 2001.0222  | 2000.9335   | -0.0887 | -44   | 347        | 364      | SLLMAGATEHEGFIQQLR               |           |       |                                          |      | Mascot      |
| 2053.9502  | 2053.9241   | -0.0261 | -13   | 1202       | 1219     | SREFAPYGYGDTITAYDK               |           |       |                                          |      | Mascot      |
| 2225.207   | 2225.0662   | -0.1408 | -63   | 379        | 399      | SQVVREACITLGHLSLLGNK             |           |       |                                          |      | Mascot      |
| 2225.207   | 2225.0662   | -0.1408 | -63   | 379        | 399      | SQVVREACITLGHLSLLGNK             |           |       |                                          |      | Mascot      |
| 2284.0769  | 2284.1206   | 0.0437  | 19    | 1          | 19       | MEPNMEYCLTQVLQKDVAR              |           |       | Oxidation (M)[1]                         |      | Mascot      |
| 2300.072   | 2300.126    | 0.054   | 23    | 1          | 19       | MEPNMEYCLTQVLQKDVAR              |           |       | Oxidation (M)[1,5]                       |      | Mascot      |
| 2371.1572  | 2371.0811   | -0.0761 | -32   | 118        | 137      | IMEQSATPQYIWRMLG GFK             |           |       |                                          |      | Mascot      |
| 2371.1572  | 2371.0811   | -0.0761 | -32   | 118        | 137      | IMEQSATPQYIWRMLG GFK             |           |       |                                          |      | Mascot      |
| 3218.4617  | 3218.5154   | 0.0537  | 17    | 37         | 65       | CQDLESQTALDKMVDG IATSWVNSSNFK    |           |       | Oxidation (M)[14]                        |      | Mascot      |
| 3218.4617  | 3218.5154   | 0.0537  | 17    | 37         | 65       | CQDLESQTALDKMVDG IATSWVNSSNFK    |           |       | Oxidation (M)[14]                        |      | Mascot      |
| 3338.7485  | 3338.6836   | -0.0649 | -19   | 50         | 80       | MVDGIATSWVNSSNFKL ALLGMDLLSALVTR |           |       | Oxidation (M)[1]                         |      | Mascot      |

|    |                                                                                |  |  |  |  |  |              |          |      |    |    |   |    |   |  |  |  |
|----|--------------------------------------------------------------------------------|--|--|--|--|--|--------------|----------|------|----|----|---|----|---|--|--|--|
| 47 | PREDICTED: inositol 1,4,5-trisphosphate receptor type 2, partial [Danio rerio] |  |  |  |  |  | gi 326676026 | 226480.1 | 6.12 | 17 | 30 | 0 | 15 | 0 |  |  |  |
|----|--------------------------------------------------------------------------------|--|--|--|--|--|--------------|----------|------|----|----|---|----|---|--|--|--|

#### Peptide Information

| Calc. Mass | Obsrv. Mass | ± da | ± ppm | Start Seq. | End Seq. | Sequence | Ion Score | C. I. | % Modification | Rank | Result Type |
|------------|-------------|------|-------|------------|----------|----------|-----------|-------|----------------|------|-------------|
|------------|-------------|------|-------|------------|----------|----------|-----------|-------|----------------|------|-------------|



|    |                                                                      |              |           |         |      |      |      |                     |    |   |  |  |  |  |  |                                          |        |
|----|----------------------------------------------------------------------|--------------|-----------|---------|------|------|------|---------------------|----|---|--|--|--|--|--|------------------------------------------|--------|
|    |                                                                      | 803.4443     | 803.3616  | -0.0827 | -103 | 1188 | 1194 | LCSPAKK             |    |   |  |  |  |  |  | Carbamidomethyl (C)[2]                   | Mascot |
|    |                                                                      | 902.5557     | 902.4664  | -0.0893 | -99  | 1180 | 1187 | EILLSLSK            |    |   |  |  |  |  |  |                                          | Mascot |
|    |                                                                      | 973.5353     | 973.4905  | -0.0448 | -46  | 807  | 814  | LWTEIPSK            |    |   |  |  |  |  |  |                                          | Mascot |
|    |                                                                      | 973.5353     | 973.4905  | -0.0448 | -46  | 807  | 814  | LWTEIPSK            |    |   |  |  |  |  |  |                                          | Mascot |
|    |                                                                      | 1213.6113    | 1213.5719 | -0.0394 | -32  | 66   | 74   | YSAQRQFWK           |    |   |  |  |  |  |  |                                          | Mascot |
|    |                                                                      | 1234.5554    | 1234.6538 | 0.0984  | 80   | 422  | 431  | IGTCHMKEDK          |    |   |  |  |  |  |  | Carbamidomethyl (C)[4], Oxidation (M)[6] | Mascot |
|    |                                                                      | 1325.6154    | 1325.7146 | 0.0992  | 75   | 1675 | 1685 | EMFDEKGNALR         | 17 | 0 |  |  |  |  |  | Oxidation (M)[2]                         | Mascot |
|    |                                                                      | 1325.6163    | 1325.7146 | 0.0983  | 74   | 55   | 65   | DCLFKVCPMNR         |    |   |  |  |  |  |  |                                          | Mascot |
|    |                                                                      | 1434.6536    | 1434.7355 | 0.0819  | 57   | 815  | 825  | ISVNEYDYEFR         |    |   |  |  |  |  |  |                                          | Mascot |
|    |                                                                      | 1475.7498    | 1475.7168 | -0.033  | -22  | 556  | 566  | YMLQLCYRTLRL        |    |   |  |  |  |  |  | Oxidation (M)[2]                         | Mascot |
|    |                                                                      | 1584.8129    | 1584.8403 | 0.0274  | 17   | 236  | 249  | GGDVVRLFHAEQEK      |    |   |  |  |  |  |  |                                          | Mascot |
|    |                                                                      | 1584.8129    | 1584.8403 | 0.0274  | 17   | 236  | 249  | GGDVVRLFHAEQEK      |    |   |  |  |  |  |  |                                          | Mascot |
|    |                                                                      | 1648.7812    | 1648.7839 | 0.0027  | 2    | 1043 | 1057 | SPVDLDDEGGQTFLR     |    |   |  |  |  |  |  |                                          | Mascot |
|    |                                                                      | 1844.8969    | 1844.8348 | -0.0621 | -34  | 940  | 956  | GLMMPHCLPDAQPIHGK   |    |   |  |  |  |  |  |                                          | Mascot |
|    |                                                                      | 1844.8969    | 1844.8348 | -0.0621 | -34  | 940  | 956  | GLMMPHCLPDAQPIHGK   |    |   |  |  |  |  |  |                                          | Mascot |
|    |                                                                      | 2000.9423    | 2000.9335 | -0.0088 | -4   | 242  | 257  | LFHAEQEKFLTCDEYK    |    |   |  |  |  |  |  |                                          | Mascot |
|    |                                                                      | 2053.875     | 2053.9241 | 0.0491  | 24   | 768  | 784  | CMFDDCLPYNLRASFCR   |    |   |  |  |  |  |  |                                          | Mascot |
|    |                                                                      | 2224.9395    | 2225.0662 | 0.1267  | 57   | 768  | 784  | CMFDDCLPYNLRASFCR   |    |   |  |  |  |  |  | Carbamidomethyl (C)[1,6,16]              | Mascot |
|    |                                                                      | 2224.9395    | 2225.0662 | 0.1267  | 57   | 768  | 784  | CMFDDCLPYNLRASFCR   |    |   |  |  |  |  |  | Carbamidomethyl (C)[1,6,16]              | Mascot |
|    |                                                                      | 2247.1477    | 2247.0203 | -0.1274 | -57  | 726  | 743  | LDTDIITYRCQLNLFAK   |    |   |  |  |  |  |  | Carbamidomethyl (C)[11]                  | Mascot |
|    |                                                                      | 2367.0024    | 2367.2065 | 0.2041  | 86   | 1269 | 1287 | TMCYIFMNNYHLCNEISDR |    |   |  |  |  |  |  |                                          | Mascot |
|    |                                                                      | 2455.2107    | 2455.083  | -0.1277 | -52  | 1512 | 1531 | LYNCTWLNLSLQKTNIEGK |    |   |  |  |  |  |  | Carbamidomethyl (C)[4,18]                | Mascot |
| 48 | PREDICTED: tripartite motif-containing protein 35-like [Danio rerio] | gi 326678845 | 52995.6   | 8.51    | 10   | 30   | 0    |                     |    |   |  |  |  |  |  |                                          |        |

#### Peptide Information

| Calc. Mass | Obsrv. Mass | ± da    | ± ppm | Start Seq. | End Seq. | Sequence             | Ion Score | C. I. % | Modification                              | Rank | Result Type |
|------------|-------------|---------|-------|------------|----------|----------------------|-----------|---------|-------------------------------------------|------|-------------|
| 856.4523   | 856.5068    | 0.0545  | 64    | 111        | 117      | DSEKHLK              |           |         |                                           |      | Mascot      |
| 1045.5887  | 1045.5409   | -0.0478 | -46   | 131        | 139      | KEELNTALK            |           |         |                                           |      | Mascot      |
| 1082.4976  | 1082.4855   | -0.0121 | -11   | 33         | 40       | ECLQEFWK             |           |         |                                           |      | Mascot      |
| 1106.4718  | 1106.5333   | 0.0615  | 56    | 43         | 51       | NTQECPVCR            |           |         | Carbamidomethyl (C)[5]                    |      | Mascot      |
| 1347.6508  | 1347.6968   | 0.046   | 34    | 41         | 51       | IKNTQECPVCR          |           |         | Carbamidomethyl (C)[7]                    |      | Mascot      |
| 2211.1372  | 2211.0537   | -0.0835 | -38   | 52         | 71       | RPSMADPPVNLALKNLCESR |           |         |                                           |      | Mascot      |
| 2284.1536  | 2284.1206   | -0.033  | -14   | 52         | 71       | RPSMADPPVNLALKNLCESR |           |         | Carbamidomethyl (C)[17], Oxidation (M)[4] |      | Mascot      |

|    |                                       |           |         |     |     |             |                                   |      |                            |        |   |
|----|---------------------------------------|-----------|---------|-----|-----|-------------|-----------------------------------|------|----------------------------|--------|---|
|    | 2296.9922                             | 2297.1343 | 0.1421  | 62  | 1   | 19          | MASSAEYDYICPVCQDIF<br>K           |      | Carbamidomethyl (C)[11,14] | Mascot |   |
|    | 2455.1606                             | 2455.083  | -0.0776 | -32 | 20  | 40          | TPVILSCGHSFCKECLQE<br>FWK         |      |                            | Mascot |   |
|    | 2596.2793                             | 2596.2539 | -0.0254 | -10 | 43  | 65          | NTQECPVCRPPSMADPP<br>VNLALK       |      | Carbamidomethyl (C)[5]     | Mascot |   |
|    | 2596.2793                             | 2596.2539 | -0.0254 | -10 | 43  | 65          | NTQECPVCRPPSMADPP<br>VNLALK       |      | Carbamidomethyl (C)[5]     | Mascot |   |
|    | 3338.6572                             | 3338.6836 | 0.0264  | 8   | 281 | 309         | MQDIVQYTPVILNPNTAH<br>PELELSDDLTR |      | Oxidation (M)[1]           | Mascot |   |
| 49 | Arginyl-tRNA synthetase [Danio rerio] |           |         |     |     | gi 53734470 | 75716.9                           | 6.22 | 12                         | 30     | 0 |

Peptide Information

| Calc. Mass | Obsrv. Mass | ± da    | ± ppm | Start Seq. | End Seq. | Sequence            | Ion Score | C. I. % | Modification                                       | Rank | Result Type |
|------------|-------------|---------|-------|------------|----------|---------------------|-----------|---------|----------------------------------------------------|------|-------------|
| 973.4948   | 973.4905    | -0.0043 | -4    | 354        | 362      | GLVEVDEGR           |           |         |                                                    |      | Mascot      |
| 973.4948   | 973.4905    | -0.0043 | -4    | 354        | 362      | GLVEVDEGR           |           |         |                                                    |      | Mascot      |
| 1058.4313  | 1058.5662   | 0.1349  | 127   | 281        | 288      | FDEDEEFK            |           |         |                                                    |      | Mascot      |
| 1082.4969  | 1082.4855   | -0.0114 | -11   | 215        | 224      | STIIGDSMCR          |           |         |                                                    |      | Mascot      |
| 1316.7242  | 1316.6663   | -0.0579 | -44   | 463        | 473      | LMDLLEEGLKR         |           |         |                                                    |      | Mascot      |
| 1475.7675  | 1475.7168   | -0.0507 | -34   | 649        | 661      | GFDILGINPVQRM       |           |         | Oxidation (M)[13]                                  |      | Mascot      |
| 1584.838   | 1584.8403   | 0.0023  | 1     | 437        | 451      | VEHAGFGVVLGEDKK     |           |         |                                                    |      | Mascot      |
| 1584.838   | 1584.8403   | 0.0023  | 1     | 437        | 451      | VEHAGFGVVLGEDKK     |           |         |                                                    |      | Mascot      |
| 1638.7904  | 1638.8247   | 0.0343  | 21    | 1          | 14       | MGDPVTEYASRLQR      |           |         | Oxidation (M)[1]                                   |      | Mascot      |
| 1729.9384  | 1729.7338   | -0.2046 | -118  | 529        | 543      | GNTAAYLLYAFTRIR     |           |         |                                                    |      | Mascot      |
| 2047.7687  | 2047.9043   | 0.1356  | 66    | 111        | 127      | FGDYQCNSAMAMSQMMK   |           |         | Carbamidomethyl (C)[6], Oxidation (M)[10,12,15]    |      | Mascot      |
| 2054.0054  | 2053.9241   | -0.0813 | -40   | 631        | 648      | VNMWRMLLCEATAAVMAK  |           |         | Oxidation (M)[3]                                   |      | Mascot      |
| 2246.9006  | 2247.0203   | 0.1197  | 53    | 111        | 129      | FGDYQCNSAMAMSQMMKAK |           |         | Carbamidomethyl (C)[6], Oxidation (M)[10,12,15]    |      | Mascot      |
| 2262.8955  | 2263.0032   | 0.1077  | 48    | 111        | 129      | FGDYQCNSAMAMSQMMKAK |           |         | Carbamidomethyl (C)[6], Oxidation (M)[10,12,15,16] |      | Mascot      |
| 2284.0149  | 2284.1206   | 0.1057  | 46    | 335        | 353      | GESYYQDMMTAVVKEFEK  |           |         |                                                    |      | Mascot      |
| 2300.0098  | 2300.126    | 0.1162  | 51    | 335        | 353      | GESYYQDMMTAVVKEFEK  |           |         | Oxidation (M)[8]                                   |      | Mascot      |

|    |                                |  |  |  |  |              |          |      |   |    |        |
|----|--------------------------------|--|--|--|--|--------------|----------|------|---|----|--------|
| 50 | si:dkey-189g17.2 [Danio rerio] |  |  |  |  | gi 190570242 | 106521.3 | 5.47 | 1 | 26 | 41.033 |
|----|--------------------------------|--|--|--|--|--------------|----------|------|---|----|--------|

Peptide Information

| Calc. Mass | Obsrv. Mass | ± da    | ± ppm | Start Seq. | End Seq. | Sequence    | Ion Score | C. I. % | Modification | Rank | Result Type |
|------------|-------------|---------|-------|------------|----------|-------------|-----------|---------|--------------|------|-------------|
| 1325.7899  | 1325.7146   | -0.0753 | -57   | 914        | 924      | QRIVDALLELR | 26        | 41.033  |              | 2    | Mascot      |

|                |           |                        |                |                |                    |
|----------------|-----------|------------------------|----------------|----------------|--------------------|
| Gel Idx/Pos    | 186/H13   | Instr./Gel Origin      | BA2060/110707A | Process Status | Analysis Succeeded |
| Plate [#] Name | [1] 31496 | Instrument Sample Name |                | Spectra        | 11                 |

| Rank | Protein Name                                 | Accession No. | Protein MW | Protein PI | Pep. Count | Protein Score | Protein Score C. I. % | Total Ion Score | Total Ion C. I. % |
|------|----------------------------------------------|---------------|------------|------------|------------|---------------|-----------------------|-----------------|-------------------|
| 1    | hypothetical protein LOC559969 [Danio rerio] | gi 113678532  | 77970.3    | 6.17       | 12         | 419           | 100                   | 375             | 100               |

Peptide Information

| Calc. Mass | Obsrv. Mass | ± da    | ± ppm | Start Seq. | End Seq. | Sequence                        | Ion Score | C. I. % | Modification           | Rank | Result Type |
|------------|-------------|---------|-------|------------|----------|---------------------------------|-----------|---------|------------------------|------|-------------|
| 973.5101   | 973.4948    | -0.0153 | -16   | 424        | 431      | LVVWGEDR                        |           |         |                        |      | Mascot      |
| 973.5101   | 973.4948    | -0.0153 | -16   | 424        | 431      | LVVWGEDR                        | 23        | 0       |                        |      | Mascot      |
| 1058.5887  | 1058.5728   | -0.0159 | -15   | 531        | 538      | RLNVLQCR                        |           |         | Carbamidomethyl (C)[7] |      | Mascot      |
| 1325.7423  | 1325.719    | -0.0233 | -18   | 355        | 365      | LPLSQEQIELR                     | 39        | 96.544  |                        |      | Mascot      |
| 1325.7423  | 1325.719    | -0.0233 | -18   | 355        | 365      | LPLSQEQIELR                     |           |         |                        |      | Mascot      |
| 1563.8376  | 1563.8088   | -0.0288 | -18   | 272        | 286      | IIEEAPGPGISPEVR                 |           |         |                        |      | Mascot      |
| 1563.8376  | 1563.8088   | -0.0288 | -18   | 272        | 286      | IIEEAPGPGISPEVR                 | 68        | 99.996  |                        |      | Mascot      |
| 1584.8744  | 1584.8456   | -0.0288 | -18   | 131        | 145      | QEGIIFIGPPSSAIR                 | 51        | 99.799  |                        |      | Mascot      |
| 1584.8744  | 1584.8456   | -0.0288 | -18   | 131        | 145      | QEGIIFIGPPSSAIR                 |           |         |                        |      | Mascot      |
| 1773.968   | 1773.7863   | -0.1817 | -102  | 1          | 16       | MAAVFLKTHINGTINK                |           |         | Oxidation (M)[1]       |      | Mascot      |
| 1844.8773  | 1844.845    | -0.0323 | -18   | 204        | 219      | IAQSEAEFHEQLESAR                | 75        | 100     |                        |      | Mascot      |
| 1844.8773  | 1844.845    | -0.0323 | -18   | 204        | 219      | IAQSEAEFHEQLESAR                |           |         |                        |      | Mascot      |
| 1881.0439  | 1881.0011   | -0.0428 | -23   | 349        | 365      | VAAGEKLPLSQEQIELR               |           |         |                        |      | Mascot      |
| 2117.9807  | 2117.9473   | -0.0334 | -16   | 549        | 568      | VAVSITYNPDGTYSMETG GR           |           |         |                        |      | Mascot      |
| 2371.1353  | 2371.0925   | -0.0428 | -18   | 242        | 261      | HVEVQVFGDQYGDAVYL FER           |           |         |                        |      | Mascot      |
| 2371.1353  | 2371.0925   | -0.0428 | -18   | 242        | 261      | HVEVQVFGDQYGDAVYL FER           | 118       | 100     |                        |      | Mascot      |
| 2580.3127  | 2580.2661   | -0.0466 | -18   | 327        | 348      | LQVEHPVSEMITGTDLVE WQLR         |           |         |                        |      | Mascot      |
| 2596.3076  | 2596.2666   | -0.041  | -16   | 327        | 348      | LQVEHPVSEMITGTDLVE WQLR         |           |         | Oxidation (M)[10]      |      | Mascot      |
| 3227.5869  | 3227.5364   | -0.0505 | -16   | 373        | 402      | IYAEDPNNNFLPGAGPLL HLSTPPGDHNTR |           |         |                        |      | Mascot      |

|   |                                              |              |         |      |    |     |     |     |     |
|---|----------------------------------------------|--------------|---------|------|----|-----|-----|-----|-----|
| 2 | hypothetical protein LOC792190 [Danio rerio] | gi 224495957 | 78018.4 | 6.21 | 11 | 412 | 100 | 375 | 100 |
|---|----------------------------------------------|--------------|---------|------|----|-----|-----|-----|-----|

Peptide Information

| Calc. Mass | Obsrv. Mass | ± da    | ± ppm | Start Seq. | End Seq. | Sequence | Ion Score | C. I. % | Modification | Rank | Result Type |
|------------|-------------|---------|-------|------------|----------|----------|-----------|---------|--------------|------|-------------|
| 973.5101   | 973.4948    | -0.0153 | -16   | 424        | 431      | LVVWGEDR |           |         |              |      | Mascot      |
| 973.5101   | 973.4948    | -0.0153 | -16   | 424        | 431      | LVVWGEDR | 23        | 0       |              |      | Mascot      |

|   |                                              |           |         |      |              |     |                            |      |        |     |     |                        |        |
|---|----------------------------------------------|-----------|---------|------|--------------|-----|----------------------------|------|--------|-----|-----|------------------------|--------|
|   | 1058.5887                                    | 1058.5728 | -0.0159 | -15  | 531          | 538 | RLNVLQCR                   |      |        |     |     | Carbamidomethyl (C)[7] | Mascot |
|   | 1325.7423                                    | 1325.719  | -0.0233 | -18  | 355          | 365 | LPLSSEQIELR                | 39   | 96.544 |     |     |                        | Mascot |
|   | 1325.7423                                    | 1325.719  | -0.0233 | -18  | 355          | 365 | LPLSSEQIELR                |      |        |     |     |                        | Mascot |
|   | 1563.8376                                    | 1563.8088 | -0.0288 | -18  | 272          | 286 | IIEEAPGPGISPEVR            |      |        |     |     |                        | Mascot |
|   | 1563.8376                                    | 1563.8088 | -0.0288 | -18  | 272          | 286 | IIEEAPGPGISPEVR            | 68   | 99.996 |     |     |                        | Mascot |
|   | 1584.8744                                    | 1584.8456 | -0.0288 | -18  | 131          | 145 | QEGIIFIGPPSSAIR            | 51   | 99.799 |     |     |                        | Mascot |
|   | 1584.8744                                    | 1584.8456 | -0.0288 | -18  | 131          | 145 | QEGIIFIGPPSSAIR            |      |        |     |     |                        | Mascot |
|   | 1773.968                                     | 1773.7863 | -0.1817 | -102 | 1            | 16  | MAAVFLKTHINGTINK           |      |        |     |     | Oxidation (M)[1]       | Mascot |
|   | 1844.8773                                    | 1844.845  | -0.0323 | -18  | 204          | 219 | IAQSEAEFHEQLESAR           | 75   | 100    |     |     |                        | Mascot |
|   | 1844.8773                                    | 1844.845  | -0.0323 | -18  | 204          | 219 | IAQSEAEFHEQLESAR           |      |        |     |     |                        | Mascot |
|   | 1881.0439                                    | 1881.0011 | -0.0428 | -23  | 349          | 365 | VAAGEKLPLSSEQIELR          |      |        |     |     |                        | Mascot |
|   | 2117.9807                                    | 2117.9473 | -0.0334 | -16  | 549          | 568 | VAVSITYNPDGTYSMETG<br>GR   |      |        |     |     |                        | Mascot |
|   | 2371.1353                                    | 2371.0925 | -0.0428 | -18  | 242          | 261 | HVEVQVFGDQYGDVYL<br>FER    |      |        |     |     |                        | Mascot |
|   | 2371.1353                                    | 2371.0925 | -0.0428 | -18  | 242          | 261 | HVEVQVFGDQYGDVYL<br>FER    | 118  | 100    |     |     |                        | Mascot |
|   | 2580.3127                                    | 2580.2661 | -0.0466 | -18  | 327          | 348 | LQVEHPVSEMITGTDLVE<br>WQLR |      |        |     |     |                        | Mascot |
|   | 2596.3076                                    | 2596.2666 | -0.041  | -16  | 327          | 348 | LQVEHPVSEMITGTDLVE<br>WQLR |      |        |     |     | Oxidation (M)[10]      | Mascot |
| 3 | hypothetical protein LOC777632 [Danio rerio] |           |         |      | gi 118150458 |     | 77993.3                    | 6.12 | 10     | 406 | 100 | 375                    | 100    |

Peptide Information

| Calc. Mass | Obsrv. Mass | ± da    | ± ppm | Start Seq. | End Seq. | Sequence                | Ion Score | C. I.  | % | Modification           | Rank | Result Type |
|------------|-------------|---------|-------|------------|----------|-------------------------|-----------|--------|---|------------------------|------|-------------|
| 973.5101   | 973.4948    | -0.0153 | -16   | 424        | 431      | LVVWGEDR                |           |        |   |                        |      | Mascot      |
| 973.5101   | 973.4948    | -0.0153 | -16   | 424        | 431      | LVVWGEDR                | 23        | 0      |   |                        |      | Mascot      |
| 1058.5887  | 1058.5728   | -0.0159 | -15   | 531        | 538      | RLNVLQCR                |           |        |   | Carbamidomethyl (C)[7] |      | Mascot      |
| 1325.7423  | 1325.719    | -0.0233 | -18   | 355        | 365      | LPLSSEQIELR             | 39        | 96.544 |   |                        |      | Mascot      |
| 1325.7423  | 1325.719    | -0.0233 | -18   | 355        | 365      | LPLSSEQIELR             |           |        |   |                        |      | Mascot      |
| 1563.8376  | 1563.8088   | -0.0288 | -18   | 272        | 286      | IIEEAPGPGISPEVR         |           |        |   |                        |      | Mascot      |
| 1563.8376  | 1563.8088   | -0.0288 | -18   | 272        | 286      | IIEEAPGPGISPEVR         | 68        | 99.996 |   |                        |      | Mascot      |
| 1584.8744  | 1584.8456   | -0.0288 | -18   | 131        | 145      | QEGIIFIGPPSSAIR         | 51        | 99.799 |   |                        |      | Mascot      |
| 1584.8744  | 1584.8456   | -0.0288 | -18   | 131        | 145      | QEGIIFIGPPSSAIR         |           |        |   |                        |      | Mascot      |
| 1773.968   | 1773.7863   | -0.1817 | -102  | 1          | 16       | MAAVFLKTHINGTINK        |           |        |   | Oxidation (M)[1]       |      | Mascot      |
| 1844.8773  | 1844.845    | -0.0323 | -18   | 204        | 219      | IAQSEAEFHEQLESAR        | 75        | 100    |   |                        |      | Mascot      |
| 1844.8773  | 1844.845    | -0.0323 | -18   | 204        | 219      | IAQSEAEFHEQLESAR        |           |        |   |                        |      | Mascot      |
| 1881.0439  | 1881.0011   | -0.0428 | -23   | 349        | 365      | VAAGEKLPLSSEQIELR       |           |        |   |                        |      | Mascot      |
| 2371.1353  | 2371.0925   | -0.0428 | -18   | 242        | 261      | HVEVQVFGDQYGDVYL<br>FER |           |        |   |                        |      | Mascot      |
| 2371.1353  | 2371.0925   | -0.0428 | -18   | 242        | 261      | HVEVQVFGDQYGDVYL        | 118       | 100    |   |                        |      | Mascot      |

|   |                                              |           |         |     |             |     |                                  |                   |    |    |   |  |  |        |
|---|----------------------------------------------|-----------|---------|-----|-------------|-----|----------------------------------|-------------------|----|----|---|--|--|--------|
|   | 2580.3127                                    | 2580.2661 | -0.0466 | -18 | 327         | 348 | FER<br>LQVEHPVSEMITGDLVE<br>WQLR |                   |    |    |   |  |  | Mascot |
|   | 2596.3076                                    | 2596.2666 | -0.041  | -16 | 327         | 348 | LQVEHPVSEMITGDLVE<br>WQLR        | Oxidation (M)[10] |    |    |   |  |  | Mascot |
| 4 | SH3 domain-binding protein 4-A [Danio rerio] |           |         |     | gi 45387913 |     | 104947.5                         | 7.73              | 14 | 40 | 0 |  |  |        |

#### Peptide Information

| Calc. Mass | Obsrv. Mass | ± da    | ± ppm | Start Seq. | End Seq. | Sequence                           | Ion Score | C. I. % | Modification           | Rank | Result Type |
|------------|-------------|---------|-------|------------|----------|------------------------------------|-----------|---------|------------------------|------|-------------|
| 842.5822   | 842.495     | -0.0872 | -103  | 634        | 640      | LIKTVIR                            |           |         |                        |      | Mascot      |
| 850.4338   | 850.5255    | 0.0917  | 108   | 358        | 364      | LSNMEIK                            |           |         | Oxidation (M)[4]       |      | Mascot      |
| 870.4726   | 870.5257    | 0.0531  | 61    | 1          | 7        | MAHRIR                             |           |         | Oxidation (M)[1]       |      | Mascot      |
| 973.5829   | 973.4948    | -0.0881 | -90   | 666        | 673      | LKGQLWTK                           |           |         |                        |      | Mascot      |
| 973.5829   | 973.4948    | -0.0881 | -90   | 666        | 673      | LKGQLWTK                           |           |         |                        |      | Mascot      |
| 1045.4796  | 1045.5449   | 0.0653  | 62    | 762        | 770      | AELDSEPER                          |           |         |                        |      | Mascot      |
| 1434.7158  | 1434.745    | 0.0292  | 20    | 885        | 896      | DVIHELHMGDLR                       |           |         |                        |      | Mascot      |
| 1657.8651  | 1657.7596   | -0.1055 | -64   | 365        | 378      | SFITLEMKVSVMT                      |           |         | Oxidation (M)[7]       |      | Mascot      |
| 2118.1958  | 2117.9473   | -0.2485 | -117  | 607        | 624      | IILSPLAITTKYPQFQER                 |           |         |                        |      | Mascot      |
| 2230.2417  | 2230.1536   | -0.0881 | -40   | 813        | 831      | LIMDFVLLTTAVEVAPRW<br>R            |           |         |                        |      | Mascot      |
| 2284.2368  | 2284.1323   | -0.1045 | -46   | 463        | 484      | TVVAIFGHDCAPKTLVS<br>EVGK          |           |         |                        |      | Mascot      |
| 2300.0686  | 2300.1367   | 0.0681  | 30    | 568        | 587      | DDQDCILAQFCVQTPQP<br>PPK           |           |         | Carbamidomethyl (C)[5] |      | Mascot      |
| 3227.677   | 3227.5364   | -0.1406 | -44   | 907        | 936      | HLTGTLILVNCLDLLRSSA<br>FSPAPQDDFAI |           |         |                        |      | Mascot      |
| 3337.6052  | 3337.6936   | 0.0884  | 26    | 269        | 298      | LARSCHDLESLGQNPWG<br>GQTQPVETNIVCK |           |         | Carbamidomethyl (C)[5] |      | Mascot      |
| 3338.5496  | 3338.7061   | 0.1565  | 47    | 856        | 884      | TGMVDSEAMWKPAYDFL<br>LTWAAQIGDSYR  |           |         | Oxidation (M)[3]       |      | Mascot      |

|   |                                                                                         |  |  |  |              |  |         |      |    |    |   |  |  |
|---|-----------------------------------------------------------------------------------------|--|--|--|--------------|--|---------|------|----|----|---|--|--|
| 5 | PREDICTED: bromodomain adjacent to zinc finger domain protein 1A, partial [Danio rerio] |  |  |  | gi 125841384 |  | 81560.8 | 6.03 | 12 | 40 | 0 |  |  |
|---|-----------------------------------------------------------------------------------------|--|--|--|--------------|--|---------|------|----|----|---|--|--|

#### Peptide Information

| Calc. Mass | Obsrv. Mass | ± da    | ± ppm | Start Seq. | End Seq. | Sequence         | Ion Score | C. I. % | Modification       | Rank | Result Type |
|------------|-------------|---------|-------|------------|----------|------------------|-----------|---------|--------------------|------|-------------|
| 1045.3999  | 1045.5449   | 0.145   | 139   | 303        | 310      | EQMMSMEK         |           |         | Oxidation (M)[3,4] |      | Mascot      |
| 1106.4789  | 1106.5375   | 0.0586  | 53    | 36         | 43       | TYDEFFER         |           |         |                    |      | Mascot      |
| 1234.7782  | 1234.6344   | -0.1438 | -116  | 2          | 11       | PLLHKKPFVR       |           |         |                    |      | Mascot      |
| 1277.7939  | 1277.6868   | -0.1071 | -84   | 393        | 403      | ELPKPIPVKTR      |           |         |                    |      | Mascot      |
| 1316.5796  | 1316.6753   | 0.0957  | 73    | 303        | 312      | EQMMSMEKFR       |           |         |                    |      | Mascot      |
| 1633.8003  | 1633.802    | 0.0017  | 1     | 535        | 550      | LHILSSGADCGFTNAK |           |         |                    |      | Mascot      |
| 1657.7417  | 1657.7596   | 0.0179  | 11    | 298        | 310      | LMQKKEQMMSMEK    |           |         | Oxidation (M)[2]   |      | Mascot      |

|  |           |           |         |     |     |     |                                 |  |  |  |  |                                          |  |        |
|--|-----------|-----------|---------|-----|-----|-----|---------------------------------|--|--|--|--|------------------------------------------|--|--------|
|  | 1838.8741 | 1838.8802 | 0.0061  | 3   | 101 | 115 | LHEICDDVYAYVKDR                 |  |  |  |  |                                          |  | Mascot |
|  | 1845.0084 | 1844.845  | -0.1634 | -89 | 596 | 611 | ILHSMCGKLLTLVSTR                |  |  |  |  | Carbamidomethyl (C)[6], Oxidation (M)[5] |  | Mascot |
|  | 1845.0084 | 1844.845  | -0.1634 | -89 | 596 | 611 | ILHSMCGKLLTLVSTR                |  |  |  |  | Carbamidomethyl (C)[6], Oxidation (M)[5] |  | Mascot |
|  | 1864.8568 | 1864.9264 | 0.0696  | 37  | 378 | 392 | LWSKPREDMECDDLK                 |  |  |  |  |                                          |  | Mascot |
|  | 1880.8517 | 1881.0011 | 0.1494  | 79  | 378 | 392 | LWSKPREDMECDDLK                 |  |  |  |  | Oxidation (M)[9]                         |  | Mascot |
|  | 1993.9912 | 1993.9388 | -0.0524 | -26 | 535 | 552 | LHILSSGADCGFTNAKFR              |  |  |  |  | Carbamidomethyl (C)[10]                  |  | Mascot |
|  | 2283.1836 | 2283.1423 | -0.0413 | -18 | 195 | 215 | VQPVSPACEPVIVKVAQ               |  |  |  |  | Oxidation (M)[19]                        |  | Mascot |
|  | 2283.1836 | 2283.1423 | -0.0413 | -18 | 195 | 215 | MSR<br>VQPVSPACEPVIVKVAQ<br>MSR |  |  |  |  | Oxidation (M)[19]                        |  | Mascot |

6

MCM6 minichromosome maintenance deficient 6, like [Danio rerio]

gi|70887711

93152.1

5.23

13

39

0

Peptide Information

| Calc. Mass | Obsrv. Mass | ± da    | ± ppm | Start Seq. | End Seq. | Sequence                    | Ion Score | C. I. | % Modification          | Rank | Result Type |
|------------|-------------|---------|-------|------------|----------|-----------------------------|-----------|-------|-------------------------|------|-------------|
| 856.49     | 856.5079    | 0.0179  | 21    | 87         | 93       | AVRHFAR                     |           |       |                         |      | Mascot      |
| 973.5789   | 973.4948    | -0.0841 | -86   | 117        | 124      | IRELSTVR                    |           |       |                         |      | Mascot      |
| 973.5789   | 973.4948    | -0.0841 | -86   | 117        | 124      | IRELSTVR                    |           |       |                         |      | Mascot      |
| 996.5261   | 996.58      | 0.0539  | 54    | 194        | 201      | FVDFQKGR                    |           |       |                         |      | Mascot      |
| 996.5261   | 996.58      | 0.0539  | 54    | 194        | 201      | FVDFQKGR                    |           |       |                         |      | Mascot      |
| 1165.6252  | 1165.724    | 0.0988  | 85    | 747        | 755      | SELINWYLK                   |           |       |                         |      | Mascot      |
| 1165.6252  | 1165.724    | 0.0988  | 85    | 747        | 755      | SELINWYLK                   |           |       |                         |      | Mascot      |
| 1234.7228  | 1234.6344   | -0.0884 | -72   | 361        | 372      | GILLMLFGGVAK                |           |       | Oxidation (M)[5]        |      | Mascot      |
| 1277.6195  | 1277.6868   | 0.0673  | 53    | 321        | 330      | NQMTVLEWEK                  |           |       |                         |      | Mascot      |
| 1325.7899  | 1325.719    | -0.0709 | -53   | 212        | 223      | GSIPRSVEVILR                |           |       |                         |      | Mascot      |
| 1325.7899  | 1325.719    | -0.0709 | -53   | 212        | 223      | GSIPRSVEVILR                |           |       |                         |      | Mascot      |
| 1347.6508  | 1347.6898   | 0.039   | 29    | 512        | 523      | QNVNMSAPIMSR                |           |       |                         |      | Mascot      |
| 1475.7502  | 1475.7279   | -0.0223 | -15   | 90         | 102      | HFARDHGNIPPSK               |           |       |                         |      | Mascot      |
| 1707.8306  | 1707.7456   | -0.085  | -50   | 168        | 182      | YTQPTICKNPVCANR             |           |       |                         |      | Mascot      |
| 2211.1875  | 2211.0635   | -0.124  | -56   | 361        | 381      | GILLMLFGGVAKTTMEGT<br>SLR   |           |       | Oxidation (M)[5]        |      | Mascot      |
| 2297.1812  | 2297.1516   | -0.0296 | -13   | 575        | 593      | QFQPKITVEAQEFVVDQY<br>K     |           |       |                         |      | Mascot      |
| 2580.2949  | 2580.2661   | -0.0288 | -11   | 138        | 160      | THPVHPELVSGTFLCLDC<br>QSVIK |           |       | Carbamidomethyl (C)[15] |      | Mascot      |

7

Synbl protein [Danio rerio]

gi|141796272

31226.2

5.37

8

38

0

Peptide Information

| Calc. Mass | Obsrv. Mass | ± da | ± ppm | Start Seq. | End Seq. | Sequence | Ion Score | C. I. | % Modification | Rank | Result Type |
|------------|-------------|------|-------|------------|----------|----------|-----------|-------|----------------|------|-------------|
|------------|-------------|------|-------|------------|----------|----------|-----------|-------|----------------|------|-------------|

|   |                                                                           |           |         |      |     |              |                           |      |    |                        |   |  |        |
|---|---------------------------------------------------------------------------|-----------|---------|------|-----|--------------|---------------------------|------|----|------------------------|---|--|--------|
|   | 842.5709                                                                  | 842.495   | -0.0759 | -90  | 18  | 24           | VEKLLLK                   |      |    |                        |   |  | Mascot |
|   | 1045.6769                                                                 | 1045.5449 | -0.132  | -126 | 171 | 179          | LLFLLSALR                 |      |    |                        |   |  | Mascot |
|   | 1058.6503                                                                 | 1058.5728 | -0.0775 | -73  | 256 | 264          | LRLIAGIMR                 |      |    | Oxidation (M)[8]       |   |  | Mascot |
|   | 1328.7831                                                                 | 1328.7145 | -0.0686 | -52  | 46  | 56           | LCQGLLTVLRR               |      |    | Carbamidomethyl (C)[2] |   |  | Mascot |
|   | 1495.7937                                                                 | 1495.8158 | 0.0221  | 15   | 265 | 276          | HLLMLKTHTEEK              |      |    | Oxidation (M)[4]       |   |  | Mascot |
|   | 1563.7384                                                                 | 1563.8088 | 0.0704  | 45   | 2   | 16           | SLSDILSEIDGGDDK           |      |    |                        |   |  | Mascot |
|   | 1563.7384                                                                 | 1563.8088 | 0.0704  | 45   | 2   | 16           | SLSDILSEIDGGDDK           |      |    |                        |   |  | Mascot |
|   | 1838.8688                                                                 | 1838.8802 | 0.0114  | 6    | 1   | 17           | MSLSDILSEIDGGDDKK         |      |    | Oxidation (M)[1]       |   |  | Mascot |
|   | 2283.0193                                                                 | 2283.1423 | 0.123   | 54   | 98  | 118          | ICVAGHEGEPLLEAQSAE<br>EER |      |    |                        |   |  | Mascot |
|   | 2283.0193                                                                 | 2283.1423 | 0.123   | 54   | 98  | 118          | ICVAGHEGEPLLEAQSAE<br>EER |      |    |                        |   |  | Mascot |
| 8 | PREDICTED: chromodomain-helicase-DNA-binding protein 9-like [Danio rerio] |           |         |      |     | gi 326669481 | 278654.9                  | 8.67 | 23 | 38                     | 0 |  |        |

Peptide Information

| Calc. Mass | Obsrv. Mass | ± da    | ± ppm | Start Seq. | End Seq. | Sequence                   | Ion Score | C. I. % | Modification                               | Rank | Result Type |
|------------|-------------|---------|-------|------------|----------|----------------------------|-----------|---------|--------------------------------------------|------|-------------|
| 842.4665   | 842.495     | 0.0285  | 34    | 1477       | 1483     | AMARLHK                    |           |         | Oxidation (M)[2]                           |      | Mascot      |
| 870.5043   | 870.5257    | 0.0214  | 25    | 1807       | 1815     | NASVVPGVK                  |           |         |                                            |      | Mascot      |
| 1051.5604  | 1051.6952   | 0.1348  | 128   | 603        | 611      | NCKLLEGFK                  |           |         |                                            |      | Mascot      |
| 1104.5895  | 1104.561    | -0.0285 | -26   | 2345       | 2355     | SSALNLSLDGK                |           |         |                                            |      | Mascot      |
| 1106.5437  | 1106.5375   | -0.0062 | -6    | 2356       | 2365     | AERTEAQSSK                 |           |         |                                            |      | Mascot      |
| 1179.6481  | 1179.5756   | -0.0725 | -61   | 1046       | 1055     | KQTRPFSSTK                 |           |         |                                            |      | Mascot      |
| 1234.6249  | 1234.6344   | 0.0095  | 8     | 1294       | 1303     | ADPKLCFLDR                 |           |         | Carbamidomethyl (C)[6]                     |      | Mascot      |
| 1279.6021  | 1279.7494   | 0.1473  | 115   | 477        | 488      | NCILADEMGLGK               |           |         | Oxidation (M)[8]                           |      | Mascot      |
| 1320.5897  | 1320.5619   | -0.0278 | -21   | 1492       | 1501     | YLCAFIAMCR                 |           |         | Carbamidomethyl (C)[3,9], Oxidation (M)[8] |      | Mascot      |
| 1347.675   | 1347.6898   | 0.0148  | 11    | 1695       | 1706     | DDILKVGESER                |           |         |                                            |      | Mascot      |
| 1460.6959  | 1460.7313   | 0.0354  | 24    | 1492       | 1502     | YLCAFIAMCRR                |           |         | Carbamidomethyl (C)[3,9]                   |      | Mascot      |
| 1493.7668  | 1493.7123   | -0.0545 | -36   | 807        | 818      | CLDILEDYLIQR               |           |         |                                            |      | Mascot      |
| 1699.861   | 1699.9062   | 0.0452  | 27    | 2137       | 2151     | NPNKIDINSLTGEER            |           |         |                                            |      | Mascot      |
| 1773.9718  | 1773.7863   | -0.1855 | -105  | 1161       | 1176     | ELQNHGLGLSTPVPRGR          |           |         |                                            |      | Mascot      |
| 2211.0322  | 2211.0635   | 0.0313  | 14    | 1589       | 1606     | TDYHILRDPELCYMAAQR         |           |         | Oxidation (M)[14]                          |      | Mascot      |
| 2230.0715  | 2230.1536   | 0.0821  | 37    | 459        | 475      | DYQLEGVNWLLFNWYNR          |           |         |                                            |      | Mascot      |
| 2282.9988  | 2283.1423   | 0.1435  | 63    | 356        | 374      | AHFFAEDPFPNDYVEV<br>DR     |           |         |                                            |      | Mascot      |
| 2282.9988  | 2283.1423   | 0.1435  | 63    | 356        | 374      | AHFFAEDPFPNDYVEV<br>DR     |           |         |                                            |      | Mascot      |
| 2297.3015  | 2297.1516   | -0.1499 | -65   | 502        | 522      | TGIKGPFLIIAPLSTIANWE<br>R  |           |         |                                            |      | Mascot      |
| 2298.146   | 2298.1445   | -0.0015 | -1    | 1901       | 1922     | LLDNASTLPEDPSDSPQ<br>GSKVK |           |         |                                            |      | Mascot      |

|   |                                                                      |           |         |      |      |      |                                  |         |      |   |    |                                             |        |
|---|----------------------------------------------------------------------|-----------|---------|------|------|------|----------------------------------|---------|------|---|----|---------------------------------------------|--------|
|   | 2371.22                                                              | 2371.0925 | -0.1275 | -54  | 424  | 443  | LQAAKPHTNRMERPPAS<br>HWK         |         |      |   |    | Oxidation (M)[11]                           | Mascot |
|   | 2371.22                                                              | 2371.0925 | -0.1275 | -54  | 424  | 443  | LQAAKPHTNRMERPPAS<br>HWK         |         |      |   |    | Oxidation (M)[11]                           | Mascot |
|   | 2384.2014                                                            | 2383.9158 | -0.2856 | -120 | 1506 | 1527 | LPAIEGDMVDSSLAIQPIT<br>EER       |         |      |   |    |                                             | Mascot |
|   | 2705.2483                                                            | 2705.1128 | -0.1355 | -50  | 1262 | 1283 | SEMPAMWWDMLSDKCL<br>LLGVYK       |         |      |   |    | Carbamidomethyl (C)[15], Oxidation (M)[3,6] | Mascot |
|   | 3338.5801                                                            | 3338.7061 | 0.126   | 38   | 1548 | 1575 | HPQLYEHLALCQPGPDL<br>PVWWETGSHDR |         |      |   |    | Carbamidomethyl (C)[11]                     | Mascot |
| 9 | NADH dehydrogenase (ubiquinone) 1 alpha subcomplex, 12 [Danio rerio] |           |         |      |      |      | gi 74315939                      | 16958.4 | 9.39 | 6 | 36 | 0                                           |        |

#### Peptide Information

| Calc. Mass | Obsrv. Mass | ± da    | ± ppm | Start Seq. | End Seq. | Sequence                | Ion Score | C. I. | % Modification     | Rank | Result Type |
|------------|-------------|---------|-------|------------|----------|-------------------------|-----------|-------|--------------------|------|-------------|
| 882.4501   | 882.5508    | 0.1007  | 114   | 2          | 9        | AGYATLMR                |           |       |                    |      | Mascot      |
| 1045.4805  | 1045.5449   | 0.0644  | 62    | 1          | 9        | MAGYATLMR               |           |       | Oxidation (M)[1,8] |      | Mascot      |
| 1234.6215  | 1234.6344   | 0.0129  | 10    | 11         | 22       | FVGFTGHGGVK             |           |       |                    |      | Mascot      |
| 1460.7955  | 1460.7313   | -0.0642 | -44   | 31         | 44       | VQETKTGALIGTDK          |           |       |                    |      | Mascot      |
| 2117.9419  | 2117.9473   | 0.0054  | 3     | 90         | 107      | WLHCMTDDPPTTHPPEP<br>K  |           |       | Oxidation (M)[5]   |      | Mascot      |
| 2230.042   | 2230.1536   | 0.1116  | 50    | 90         | 108      | WLHCMTDDPPTTHPPEP<br>KK |           |       |                    |      | Mascot      |

|    |                                                                |  |  |  |  |  |              |       |     |   |    |   |  |
|----|----------------------------------------------------------------|--|--|--|--|--|--------------|-------|-----|---|----|---|--|
| 10 | PREDICTED: microtubule-associated protein 6-like [Danio rerio] |  |  |  |  |  | gi 292621423 | 42669 | 9.6 | 9 | 36 | 0 |  |
|----|----------------------------------------------------------------|--|--|--|--|--|--------------|-------|-----|---|----|---|--|

#### Peptide Information

| Calc. Mass | Obsrv. Mass | ± da    | ± ppm | Start Seq. | End Seq. | Sequence         | Ion Score | C. I. | % Modification         | Rank | Result Type |
|------------|-------------|---------|-------|------------|----------|------------------|-----------|-------|------------------------|------|-------------|
| 864.421    | 864.4794    | 0.0584  | 68    | 113        | 119      | NQYQPSK          |           |       |                        |      | Mascot      |
| 973.5173   | 973.4948    | -0.0225 | -23   | 220        | 228      | RSAADALNR        |           |       |                        |      | Mascot      |
| 973.5173   | 973.4948    | -0.0225 | -23   | 220        | 228      | RSAADALNR        |           |       |                        |      | Mascot      |
| 1165.7052  | 1165.724    | 0.0188  | 16    | 317        | 326      | HNLSLTKPKK       |           |       |                        |      | Mascot      |
| 1165.7052  | 1165.724    | 0.0188  | 16    | 317        | 326      | HNLSLTKPKK       |           |       |                        |      | Mascot      |
| 1179.6368  | 1179.5756   | -0.0612 | -52   | 300        | 309      | IRSLYSEPSK       |           |       |                        |      | Mascot      |
| 1234.5984  | 1234.6344   | 0.036   | 29    | 201        | 211      | EPVSEASKMEK      |           |       |                        |      | Mascot      |
| 1316.644   | 1316.6753   | 0.0313  | 24    | 282        | 293      | GEQAKPQTTDNK     |           |       |                        |      | Mascot      |
| 1563.7341  | 1563.8088   | 0.0747  | 48    | 2          | 14       | AWPCITRACCINR    |           |       | Carbamidomethyl (C)[4] |      | Mascot      |
| 1563.7341  | 1563.8088   | 0.0747  | 48    | 2          | 14       | AWPCITRACCINR    |           |       | Carbamidomethyl (C)[4] |      | Mascot      |
| 1584.7297  | 1584.8456   | 0.1159  | 73    | 9          | 21       | ACCINRFWSELDK    |           |       |                        |      | Mascot      |
| 1584.7297  | 1584.8456   | 0.1159  | 73    | 9          | 21       | ACCINRFWSELDK    |           |       |                        |      | Mascot      |
| 1657.8391  | 1657.7596   | -0.0795 | -48   | 352        | 367      | TSVSNQEPKPEGGVTK |           |       |                        |      | Mascot      |



11    ATPase, Ca++ transporting, plasma membrane 3a [Danio rerio]    gi|49903091    79409.9    5.25    13    36    0

Peptide Information

| Calc. Mass | Obsrv. Mass | ± da    | ± ppm | Start Seq. | End Seq. | Sequence                 | Ion Score | C. I. % | Modification               | Rank | Result Type |
|------------|-------------|---------|-------|------------|----------|--------------------------|-----------|---------|----------------------------|------|-------------|
| 864.4131   | 864.4794    | 0.0663  | 77    | 626        | 632      | DKDEMVK                  |           |         |                            |      | Mascot      |
| 882.4501   | 882.5508    | 0.1007  | 114   | 609        | 615      | CSFILSR                  |           |         | Carbamidomethyl (C)[1]     |      | Mascot      |
| 973.604    | 973.4948    | -0.1092 | -112  | 358        | 366      | SVLQGKLT                 |           |         |                            |      | Mascot      |
| 973.604    | 973.4948    | -0.1092 | -112  | 358        | 366      | SVLQGKLT                 |           |         |                            |      | Mascot      |
| 1165.6074  | 1165.724    | 0.1166  | 100   | 84         | 93       | VFGMNFIPK                |           |         | Oxidation (M)[4]           |      | Mascot      |
| 1165.6074  | 1165.724    | 0.1166  | 100   | 84         | 93       | VFGMNFIPK                |           |         | Oxidation (M)[4]           |      | Mascot      |
| 1277.7074  | 1277.6868   | -0.0206 | -16   | 83         | 93       | KVFGMNFIPK               |           |         |                            |      | Mascot      |
| 1347.6759  | 1347.6898   | 0.0139  | 10    | 633        | 644      | KVIEPMACDGLR             |           |         | Oxidation (M)[6]           |      | Mascot      |
| 1633.7924  | 1633.802    | 0.0096  | 6     | 322        | 335      | KQDEAVAMEMQPLK           |           |         | Oxidation (M)[8]           |      | Mascot      |
| 1699.8142  | 1699.9062   | 0.092   | 54    | 581        | 595      | KSMSTVIQMPDGSFR          |           |         | Oxidation (M)[3]           |      | Mascot      |
| 1993.8412  | 1993.9388   | 0.0976  | 49    | 457        | 474      | HLDACETMGNATAICSDK       |           |         | Carbamidomethyl (C)[5,15]  |      | Mascot      |
| 2118.0205  | 2117.9473   | -0.0732 | -35   | 254        | 273      | SIDKDPMLLSGTHVMEGSGK     |           |         | Oxidation (M)[7]           |      | Mascot      |
| 2211.2053  | 2211.0635   | -0.1418 | -64   | 200        | 220      | NSTVIQIPVAEMVVGDIQVK     |           |         |                            |      | Mascot      |
| 2596.3359  | 2596.2666   | -0.0693 | -27   | 508        | 531      | TLELISSAIAVNCAYTSKIMPADK |           |         | Carbamidomethyl (C)[13]    |      | Mascot      |
| 2705.2075  | 2705.1128   | -0.0947 | -35   | 451        | 474      | DNNLVRHLDACETMGNATAICSDK |           |         | Carbamidomethyl (C)[11,21] |      | Mascot      |

12    Arginyl-tRNA synthetase [Danio rerio]    gi|53734470    75716.9    6.22    13    36    0

Peptide Information

| Calc. Mass | Obsrv. Mass | ± da    | ± ppm | Start Seq. | End Seq. | Sequence        | Ion Score | C. I. % | Modification      | Rank | Result Type |
|------------|-------------|---------|-------|------------|----------|-----------------|-----------|---------|-------------------|------|-------------|
| 973.4948   | 973.4948    | 0       | 0     | 354        | 362      | GLVEVDEGR       |           |         |                   |      | Mascot      |
| 973.4948   | 973.4948    | 0       | 0     | 354        | 362      | GLVEVDEGR       | 2         | 0       |                   |      | Mascot      |
| 1058.4313  | 1058.5728   | 0.1415  | 134   | 281        | 288      | FDEDEEFK        |           |         |                   |      | Mascot      |
| 1316.7242  | 1316.6753   | -0.0489 | -37   | 463        | 473      | LMDLLEEGLKR     |           |         |                   |      | Mascot      |
| 1328.7321  | 1328.7145   | -0.0176 | -13   | 649        | 660      | GFDILGINPVQR    |           |         |                   |      | Mascot      |
| 1385.7463  | 1385.7235   | -0.0228 | -16   | 225        | 235      | LFEFLGYEVLR     |           |         |                   |      | Mascot      |
| 1460.7532  | 1460.7313   | -0.0219 | -15   | 529        | 541      | GNTAAYLLYAFTR   |           |         |                   |      | Mascot      |
| 1475.7675  | 1475.7279   | -0.0396 | -27   | 649        | 661      | GFDILGINPVQRM   |           |         | Oxidation (M)[13] |      | Mascot      |
| 1495.8267  | 1495.8158   | -0.0109 | -7    | 155        | 168      | TEIAGPGFINVHLK  |           |         |                   |      | Mascot      |
| 1584.838   | 1584.8456   | 0.0076  | 5     | 437        | 451      | VEHAGFGVVLGEDKK |           |         |                   |      | Mascot      |
| 1584.838   | 1584.8456   | 0.0076  | 5     | 437        | 451      | VEHAGFGVVLGEDKK |           |         |                   |      | Mascot      |

|    |                                         |           |        |    |     |             |                         |       |                                                    |    |        |
|----|-----------------------------------------|-----------|--------|----|-----|-------------|-------------------------|-------|----------------------------------------------------|----|--------|
|    | 1638.7904                               | 1638.8326 | 0.0422 | 26 | 1   | 14          | MGDPVTEYASRLQR          |       | Oxidation (M)[1]                                   |    | Mascot |
|    | 1699.8723                               | 1699.9062 | 0.0339 | 20 | 319 | 332         | EFQKVYNCLDISIK          |       |                                                    |    | Mascot |
|    | 2246.9006                               | 2247.063  | 0.1624 | 72 | 111 | 129         | FGDYQCNSAMAMSQMM<br>KAK |       | Carbamidomethyl (C)[6], Oxidation<br>(M)[10,12,15] |    | Mascot |
|    | 2284.0149                               | 2284.1323 | 0.1174 | 51 | 335 | 353         | GESYYQDMMTAVVKEFE<br>EK |       |                                                    |    | Mascot |
|    | 2300.0098                               | 2300.1367 | 0.1269 | 55 | 335 | 353         | GESYYQDMMTAVVKEFE<br>EK |       | Oxidation (M)[8]                                   |    | Mascot |
| 13 | 60S ribosomal protein L28 [Danio rerio] |           |        |    |     | gi 41055030 | 15629.8                 | 12.11 | 6                                                  | 35 | 0      |

Peptide Information

| Calc. Mass | Obsrv. Mass | ± da    | ± ppm | Start Seq. | End Seq. | Sequence                | Ion Score | C. I. | % Modification   | Rank | Result Type |
|------------|-------------|---------|-------|------------|----------|-------------------------|-----------|-------|------------------|------|-------------|
| 856.4787   | 856.5079    | 0.0292  | 34    | 41         | 47       | FNGLIHR                 |           |       |                  |      | Mascot      |
| 1051.5895  | 1051.6952   | 0.1057  | 101   | 13         | 21       | NSSSFLIKR               |           |       |                  |      | Mascot      |
| 1213.7375  | 1213.5818   | -0.1557 | -128  | 89         | 99       | ATLASVRNIIR             |           |       |                  |      | Mascot      |
| 1279.6753  | 1279.7494   | 0.0741  | 58    | 69         | 80       | SGQRKPATSYGK            |           |       |                  |      | Mascot      |
| 1639.0013  | 1638.8326   | -0.1687 | -103  | 114        | 128      | RVSAILSSQKPVVVR         |           |       |                  |      | Mascot      |
| 2230.1802  | 2230.1536   | -0.0266 | -12   | 2          | 20       | ASPHLQWMVIRNSSSFLI<br>K |           |       | Oxidation (M)[8] |      | Mascot      |

|    |                                                                                                           |  |  |  |  |              |         |      |    |    |   |
|----|-----------------------------------------------------------------------------------------------------------|--|--|--|--|--------------|---------|------|----|----|---|
| 14 | novel protein similar to human and mouse<br>myeloid/lymphoid or mixed-lineage leukemia 3 (MLL3)<br>[Danio |  |  |  |  | gi 157885936 | 82601.8 | 9.38 | 14 | 35 | 0 |
|----|-----------------------------------------------------------------------------------------------------------|--|--|--|--|--------------|---------|------|----|----|---|

Peptide Information

| Calc. Mass | Obsrv. Mass | ± da    | ± ppm | Start Seq. | End Seq. | Sequence         | Ion Score | C. I. | % Modification           | Rank | Result Type |
|------------|-------------|---------|-------|------------|----------|------------------|-----------|-------|--------------------------|------|-------------|
| 864.5189   | 864.4794    | -0.0395 | -46   | 636        | 642      | ELLYKAK          |           |       |                          |      | Mascot      |
| 870.4679   | 870.5257    | 0.0578  | 66    | 140        | 147      | SISEGHLK         |           |       |                          |      | Mascot      |
| 971.4879   | 971.525     | 0.0371  | 38    | 343        | 349      | CFSVFRR          |           |       | Carbamidomethyl (C)[1]   |      | Mascot      |
| 996.5948   | 996.58      | -0.0148 | -15   | 462        | 470      | VLGPVAERR        |           |       |                          |      | Mascot      |
| 996.5948   | 996.58      | -0.0148 | -15   | 462        | 470      | VLGPVAERR        |           |       |                          |      | Mascot      |
| 1045.6152  | 1045.5449   | -0.0703 | -67   | 602        | 611      | IQGLGLFAAR       |           |       |                          |      | Mascot      |
| 1106.5323  | 1106.5375   | 0.0052  | 5     | 35         | 43       | ITKDEEESR        |           |       |                          |      | Mascot      |
| 1325.6089  | 1325.719    | 0.1101  | 83    | 275        | 285      | GQTVVCAFCQR      |           |       | Carbamidomethyl (C)[6,9] |      | Mascot      |
| 1325.6089  | 1325.719    | 0.1101  | 83    | 275        | 285      | GQTVVCAFCQR      |           |       | Carbamidomethyl (C)[6,9] |      | Mascot      |
| 1460.6863  | 1460.7313   | 0.045   | 31    | 188        | 200      | VAPQSSESELEER    |           |       |                          |      | Mascot      |
| 1495.7257  | 1495.8158   | 0.0901  | 60    | 273        | 285      | QRGQTVVCAFCQR    |           |       |                          |      | Mascot      |
| 1584.776   | 1584.8456   | 0.0696  | 44    | 616        | 628      | QTMVIEYMGDILR    |           |       | Oxidation (M)[3]         |      | Mascot      |
| 1584.776   | 1584.8456   | 0.0696  | 44    | 616        | 628      | QTMVIEYMGDILR    |           |       | Oxidation (M)[3]         |      | Mascot      |
| 1707.8483  | 1707.7456   | -0.1027 | -60   | 499        | 513      | IAESLPGVEACSRYSR |           |       | Carbamidomethyl (C)[11]  |      | Mascot      |

|    |                                                               |           |         |    |     |     |                            |                         |      |   |    |   |  |        |
|----|---------------------------------------------------------------|-----------|---------|----|-----|-----|----------------------------|-------------------------|------|---|----|---|--|--------|
|    | 1880.9487                                                     | 1881.0011 | 0.0524  | 28 | 440 | 456 | VIEQGYEDLVLTDTSAK          |                         |      |   |    |   |  | Mascot |
|    | 2225.0112                                                     | 2225.0808 | 0.0696  | 31 | 668 | 686 | YINHSCSPNCVAEVVTFE<br>R    | Carbamidomethyl (C)[6]  |      |   |    |   |  | Mascot |
|    | 2225.0112                                                     | 2225.0808 | 0.0696  | 31 | 668 | 686 | YINHSCSPNCVAEVVTFE<br>R    | Carbamidomethyl (C)[6]  |      |   |    |   |  | Mascot |
|    | 2283.1562                                                     | 2283.1423 | -0.0139 | -6 | 328 | 348 | GAGAAAAGLHVEHQLRCF<br>SVFR | Carbamidomethyl (C)[16] |      |   |    |   |  | Mascot |
|    | 2283.1562                                                     | 2283.1423 | -0.0139 | -6 | 328 | 348 | GAGAAAAGLHVEHQLRCF<br>SVFR | Carbamidomethyl (C)[16] |      |   |    |   |  | Mascot |
| 15 | transcription elongation factor B polypeptide 1 [Danio rerio] |           |         |    |     |     | gi 73088652                | 12495                   | 4.74 | 5 | 35 | 0 |  |        |

Peptide Information

| Calc. Mass | Obsrv. Mass | ± da    | ± ppm | Start Seq. | End Seq. | Sequence                 | Ion Score | C. I. | % Modification                             | Rank | Result Type |
|------------|-------------|---------|-------|------------|----------|--------------------------|-----------|-------|--------------------------------------------|------|-------------|
| 1325.6381  | 1325.719    | 0.0809  | 61    | 73         | 82       | VCMYFTYKVR               |           |       | Oxidation (M)[3]                           |      | Mascot      |
| 1325.6381  | 1325.719    | 0.0809  | 61    | 73         | 82       | VCMYFTYKVR               |           |       | Oxidation (M)[3]                           |      | Mascot      |
| 1563.6454  | 1563.8088   | 0.1634  | 104   | 7          | 20       | TYGGCEGPDAMYVK           |           |       | Carbamidomethyl (C)[5], Oxidation (M)[11]  |      | Mascot      |
| 1563.6454  | 1563.8088   | 0.1634  | 104   | 7          | 20       | TYGGCEGPDAMYVK           |           |       | Carbamidomethyl (C)[5], Oxidation (M)[11]  |      | Mascot      |
| 2118.0398  | 2117.9473   | -0.0925 | -44   | 64         | 80       | EIPSHVLSKVCMYFTYK        |           |       | Carbamidomethyl (C)[11], Oxidation (M)[12] |      | Mascot      |
| 2211.0134  | 2211.0635   | 0.0501  | 23    | 44         | 63       | AMLSGPGQFAENETNEV<br>NFR |           |       |                                            |      | Mascot      |
| 2282.925   | 2283.1423   | 0.2173  | 95    | 1          | 20       | MDSEEKTYGGCEGPDA<br>MYVK |           |       | Carbamidomethyl (C)[11], Oxidation (M)[1]  |      | Mascot      |
| 2282.925   | 2283.1423   | 0.2173  | 95    | 1          | 20       | MDSEEKTYGGCEGPDA<br>MYVK |           |       | Carbamidomethyl (C)[11], Oxidation (M)[1]  |      | Mascot      |

|    |                                                 |  |  |  |  |  |              |          |      |    |    |   |  |  |
|----|-------------------------------------------------|--|--|--|--|--|--------------|----------|------|----|----|---|--|--|
| 16 | plasma membrane calcium ATPase 3a [Danio rerio] |  |  |  |  |  | gi 313482836 | 129460.6 | 5.41 | 16 | 34 | 0 |  |  |
|----|-------------------------------------------------|--|--|--|--|--|--------------|----------|------|----|----|---|--|--|

Peptide Information

| Calc. Mass | Obsrv. Mass | ± da    | ± ppm | Start Seq. | End Seq. | Sequence         | Ion Score | C. I. | % Modification                               | Rank | Result Type |
|------------|-------------|---------|-------|------------|----------|------------------|-----------|-------|----------------------------------------------|------|-------------|
| 864.4131   | 864.4794    | 0.0663  | 77    | 626        | 632      | DKDEMVK          |           |       |                                              |      | Mascot      |
| 882.4501   | 882.5508    | 0.1007  | 114   | 609        | 615      | CSFILSR          |           |       | Carbamidomethyl (C)[1]                       |      | Mascot      |
| 973.604    | 973.4948    | -0.1092 | -112  | 358        | 366      | SVLQGKLTk        |           |       |                                              |      | Mascot      |
| 973.604    | 973.4948    | -0.1092 | -112  | 358        | 366      | SVLQGKLTk        |           |       |                                              |      | Mascot      |
| 1165.6074  | 1165.724    | 0.1166  | 100   | 84         | 93       | VFGMNFIPPK       |           |       | Oxidation (M)[4]                             |      | Mascot      |
| 1165.6074  | 1165.724    | 0.1166  | 100   | 84         | 93       | VFGMNFIPPK       |           |       | Oxidation (M)[4]                             |      | Mascot      |
| 1277.7074  | 1277.6868   | -0.0206 | -16   | 83         | 93       | KVFGMNFIPPK      |           |       |                                              |      | Mascot      |
| 1320.6763  | 1320.5619   | -0.1144 | -87   | 917        | 927      | NNPLISRTMMK      |           |       | Oxidation (M)[9]                             |      | Mascot      |
| 1347.6759  | 1347.6898   | 0.0139  | 10    | 633        | 644      | KVIEPMACDGLR     |           |       | Oxidation (M)[6]                             |      | Mascot      |
| 1633.7924  | 1633.802    | 0.0096  | 6     | 322        | 335      | KQDEAVAMEMQPLK   |           |       | Oxidation (M)[8]                             |      | Mascot      |
| 1699.8142  | 1699.9062   | 0.092   | 54    | 581        | 595      | KSMSTVIQMPDGSFR  |           |       | Oxidation (M)[3]                             |      | Mascot      |
| 1864.8026  | 1864.9264   | 0.1238  | 66    | 719        | 734      | CGIIHPGDDFLCMEGK |           |       | Carbamidomethyl (C)[1,12], Oxidation (M)[13] |      | Mascot      |

|    |                              |           |         |     |             |     |                              |      |                            |        |   |
|----|------------------------------|-----------|---------|-----|-------------|-----|------------------------------|------|----------------------------|--------|---|
|    | 1993.8412                    | 1993.9388 | 0.0976  | 49  | 457         | 474 | HLDACETMGNATAICSDK           |      | Carbamidomethyl (C)[5,15]  | Mascot |   |
|    | 2118.0205                    | 2117.9473 | -0.0732 | -35 | 254         | 273 | SIDKDPMLLSGTHVMEG<br>SGK     |      | Oxidation (M)[7]           | Mascot |   |
|    | 2211.2053                    | 2211.0635 | -0.1418 | -64 | 200         | 220 | NSTVIQIPVAEMVVG DIA<br>QVK   |      |                            | Mascot |   |
|    | 2282.999                     | 2283.1423 | 0.1433  | 63  | 719         | 738 | CGIIHPGDDFLCMEGKDF<br>NR     |      | Oxidation (M)[13]          | Mascot |   |
|    | 2282.999                     | 2283.1423 | 0.1433  | 63  | 719         | 738 | CGIIHPGDDFLCMEGKDF<br>NR     |      | Oxidation (M)[13]          | Mascot |   |
|    | 2596.3359                    | 2596.2666 | -0.0693 | -27 | 508         | 531 | TLELISSAIVNCAYTSKI<br>MPADK  |      | Carbamidomethyl (C)[13]    | Mascot |   |
|    | 2705.2075                    | 2705.1128 | -0.0947 | -35 | 451         | 474 | DNNLVRHLDACETMGNA<br>TAICSDK |      | Carbamidomethyl (C)[11,21] | Mascot |   |
| 17 | Synembryn-like [Danio rerio] |           |         |     | gi 94574123 |     | 59482.8                      | 5.37 | 10                         | 34     | 0 |

Peptide Information

| Calc. Mass | Obsrv. Mass | ± da    | ± ppm | Start Seq. | End Seq. | Sequence                  | Ion Score | C. I. | % Modification         | Rank | Result Type |
|------------|-------------|---------|-------|------------|----------|---------------------------|-----------|-------|------------------------|------|-------------|
| 842.5709   | 842.495     | -0.0759 | -90   | 18         | 24       | VEKLLLK                   |           |       |                        |      | Mascot      |
| 1045.6769  | 1045.5449   | -0.132  | -126  | 171        | 179      | LLFLLSALR                 |           |       |                        |      | Mascot      |
| 1058.6503  | 1058.5728   | -0.0775 | -73   | 256        | 264      | LRLIAGIMR                 |           |       | Oxidation (M)[8]       |      | Mascot      |
| 1325.6921  | 1325.719    | 0.0269  | 20    | 399        | 410      | QGAAEFLFVLCK              |           |       |                        |      | Mascot      |
| 1325.6921  | 1325.719    | 0.0269  | 20    | 399        | 410      | QGAAEFLFVLCK              |           |       |                        |      | Mascot      |
| 1328.7831  | 1328.7145   | -0.0686 | -52   | 46         | 56       | LCQGLLTVLRR               |           |       | Carbamidomethyl (C)[2] |      | Mascot      |
| 1460.6396  | 1460.7313   | 0.0917  | 63    | 238        | 250      | ALFNLTMSDSCDK             |           |       | Oxidation (M)[7]       |      | Mascot      |
| 1563.7384  | 1563.8088   | 0.0704  | 45    | 2          | 16       | SLSDILSEIDGGDDK           |           |       |                        |      | Mascot      |
| 1563.7384  | 1563.8088   | 0.0704  | 45    | 2          | 16       | SLSDILSEIDGGDDK           |           |       |                        |      | Mascot      |
| 1838.8688  | 1838.8802   | 0.0114  | 6     | 1          | 17       | MSLSDILSEIDGGDDKK         |           |       | Oxidation (M)[1]       |      | Mascot      |
| 1865.0023  | 1864.9264   | -0.0759 | -41   | 313        | 328      | GKNMDTVQILLNFMK           |           |       |                        |      | Mascot      |
| 1880.9972  | 1881.0011   | 0.0039  | 2     | 313        | 328      | GKNMDTVQILLNFMK           |           |       | Oxidation (M)[4]       |      | Mascot      |
| 2283.0193  | 2283.1423   | 0.123   | 54    | 98         | 118      | ICVAGHEGEPLLEAQSAE<br>EER |           |       |                        |      | Mascot      |
| 2283.0193  | 2283.1423   | 0.123   | 54    | 98         | 118      | ICVAGHEGEPLLEAQSAE<br>EER |           |       |                        |      | Mascot      |

|    |                                                         |  |  |  |              |  |         |      |   |    |   |
|----|---------------------------------------------------------|--|--|--|--------------|--|---------|------|---|----|---|
| 18 | pyruvate dehydrogenase kinase, isozyme 3b [Danio rerio] |  |  |  | gi 123702577 |  | 21003.7 | 8.49 | 7 | 34 | 0 |
|----|---------------------------------------------------------|--|--|--|--------------|--|---------|------|---|----|---|

Peptide Information

| Calc. Mass | Obsrv. Mass | ± da   | ± ppm | Start Seq. | End Seq. | Sequence  | Ion Score | C. I. | % Modification         | Rank | Result Type |
|------------|-------------|--------|-------|------------|----------|-----------|-----------|-------|------------------------|------|-------------|
| 882.4468   | 882.5508    | 0.104  | 118   | 30         | 36       | QFLDFGR   |           |       |                        |      | Mascot      |
| 1045.5499  | 1045.5449   | -0.005 | -5    | 43         | 50       | TSYMFLRK  |           |       |                        |      | Mascot      |
| 1165.6836  | 1165.724    | 0.0404 | 35    | 1          | 9        | MKLFICLLK |           |       | Carbamidomethyl (C)[6] |      | Mascot      |

|           |           |         |     |     |     |                     |                        |        |
|-----------|-----------|---------|-----|-----|-----|---------------------|------------------------|--------|
| 1165.6836 | 1165.724  | 0.0404  | 35  | 1   | 9   | MKLFICLLK           | Carbamidomethyl (C)[6] | Mascot |
| 1325.6631 | 1325.719  | 0.0559  | 42  | 162 | 172 | MLINQHSETPR         |                        | Mascot |
| 1325.6631 | 1325.719  | 0.0559  | 42  | 162 | 172 | MLINQHSETPR         |                        | Mascot |
| 1838.8636 | 1838.8802 | 0.0166  | 9   | 162 | 176 | MLINQHSETPRNHVM     | Oxidation (M)[1,15]    | Mascot |
| 1844.9436 | 1844.845  | -0.0986 | -53 | 158 | 172 | ISFRMLINQHSETPR     | Oxidation (M)[5]       | Mascot |
| 1844.9436 | 1844.845  | -0.0986 | -53 | 158 | 172 | ISFRMLINQHSETPR     | Oxidation (M)[5]       | Mascot |
| 2284.1641 | 2284.1323 | -0.0318 | -14 | 97  | 115 | SPEDPHTLNDFLEMLIKIR | Oxidation (M)[14]      | Mascot |

### Peptide Information

|    |                                                                            |              |         |       |   |    |   |
|----|----------------------------------------------------------------------------|--------------|---------|-------|---|----|---|
| 20 | protein tyrosine phosphatase, receptor type, N polypeptide 2 [Danio rerio] | gi 126540834 | 32113.7 | 10.05 | 7 | 34 | 0 |
|----|----------------------------------------------------------------------------|--------------|---------|-------|---|----|---|

|    |                                                         |              |          |      |    |    |   |
|----|---------------------------------------------------------|--------------|----------|------|----|----|---|
| 21 | PREDICTED: hypothetical protein LOC569436 [Danio rerio] | gi 326678363 | 352771.2 | 7.92 | 27 | 34 | 0 |
|----|---------------------------------------------------------|--------------|----------|------|----|----|---|

# Peptide Information

| Calc. Mass | Obsrv. Mass | $\pm$ da | $\pm$ ppm | Start Seq. | End Seq. | Sequence              | Ion Score | C. I. % Modification                           | Rank | Result Type |
|------------|-------------|----------|-----------|------------|----------|-----------------------|-----------|------------------------------------------------|------|-------------|
| 842.4743   | 842.495     | 0.0207   | 25        | 2664       | 2669     | HFRINR                |           |                                                |      | Mascot      |
| 856.4311   | 856.5079    | 0.0768   | 90        | 1282       | 1287     | ENYFRK                |           |                                                |      | Mascot      |
| 864.4131   | 864.4794    | 0.0663   | 77        | 603        | 610      | LGAEMSEK              |           |                                                |      | Mascot      |
| 971.4904   | 971.525     | 0.0346   | 36        | 617        | 624      | QESPNLQR              |           |                                                |      | Mascot      |
| 973.5676   | 973.4948    | -0.0728  | -75       | 1952       | 1959     | LKELDLSR              |           |                                                |      | Mascot      |
| 973.5676   | 973.4948    | -0.0728  | -75       | 1952       | 1959     | LKELDLSR              |           |                                                |      | Mascot      |
| 1058.588   | 1058.5728   | -0.0152  | -14       | 312        | 320      | SFSYKVSLK             |           |                                                |      | Mascot      |
| 1179.6256  | 1179.5756   | -0.05    | -42       | 2297       | 2306     | LSELTDFNK             |           |                                                |      | Mascot      |
| 1320.6616  | 1320.5619   | -0.0997  | -75       | 3017       | 3027     | LHLYNCSITEK           |           |                                                |      | Mascot      |
| 1347.7454  | 1347.6898   | -0.0556  | -41       | 2092       | 2102     | HCKISTLTFLK           |           | Carbamidomethyl (C)[2]                         |      | Mascot      |
| 1475.647   | 1475.7279   | 0.0809   | 55        | 1333       | 1345     | RNNENNQADDASK         |           |                                                |      | Mascot      |
| 1495.7859  | 1495.8158   | 0.0299   | 20        | 1690       | 1702     | STMCKLEILGLSK         |           | Carbamidomethyl (C)[4], Oxidation (M)[3]       |      | Mascot      |
| 1584.7257  | 1584.8456   | 0.1199   | 76        | 1          | 13       | MHSAHQEEQKCIK         |           | Oxidation (M)[1]                               |      | Mascot      |
| 1584.7257  | 1584.8456   | 0.1199   | 76        | 1          | 13       | MHSAHQEEQKCIK         |           | Oxidation (M)[1]                               |      | Mascot      |
| 1699.9086  | 1699.9062   | -0.0024  | -1        | 2183       | 2197     | ELNLNNSRLDSGVR        |           |                                                |      | Mascot      |
| 1707.8007  | 1707.7456   | -0.0551  | -32       | 1474       | 1487     | KNVFMDESPELENR        |           |                                                |      | Mascot      |
| 1839.0586  | 1838.8802   | -0.1784  | -97       | 2648       | 2663     | LDLEKVNQLAVLLQDK      |           |                                                |      | Mascot      |
| 1881.0116  | 1881.0011   | -0.0105  | -6        | 2408       | 2423     | SIIPYLFEEQGKTSR       |           |                                                |      | Mascot      |
| 1993.9246  | 1993.9388   | 0.0142   | 7         | 1066       | 1082     | LLNDVYTDLYMTQCASK     |           | Oxidation (M)[11]                              |      | Mascot      |
| 2118.0713  | 2117.9473   | -0.124   | -59       | 1024       | 1041     | EDEVANALQDELVIYQR     |           |                                                |      | Mascot      |
| 2193.8933  | 2194.0452   | 0.1519   | 69        | 238        | 255      | HMCIHSGEKPYACDQCGK    |           | Carbamidomethyl (C)[3,13,16], Oxidation (M)[2] |      | Mascot      |
| 2224.9797  | 2225.0808   | 0.1011   | 45        | 321        | 339      | HHMSLNHEEKPYVCGQCGR   |           |                                                |      | Mascot      |
| 2224.9797  | 2225.0808   | 0.1011   | 45        | 321        | 339      | HHMSLNHEEKPYVCGQCGR   |           |                                                |      | Mascot      |
| 2232.8818  | 2233.0427   | 0.1609   | 72        | 181        | 199      | YHMKMHSDAFSCCEECGK    |           |                                                |      | Mascot      |
| 2265.9949  | 2266.0667   | 0.0718   | 32        | 131        | 149      | HCGNAQHICDLGKSFSFK    |           | Carbamidomethyl (C)[2,9,12]                    |      | Mascot      |
| 2283.2068  | 2283.1423   | -0.0645  | -28       | 1358       | 1375     | TLTQMYTHFLRFQILQSR    |           |                                                |      | Mascot      |
| 2283.2068  | 2283.1423   | -0.0645  | -28       | 1358       | 1375     | TLTQMYTHFLRFQILQSR    |           |                                                |      | Mascot      |
| 2297.144   | 2297.1516   | 0.0076   | 3         | 2728       | 2748     | LNLSDCSISEEGYKALASALR |           | Carbamidomethyl (C)[6]                         |      | Mascot      |
| 2297.9961  | 2298.1445   | 0.1484   | 65        | 321        | 339      | HHMSLNHEEKPYVCGQCGR   |           | Carbamidomethyl (C)[14], Oxidation (M)[3]      |      | Mascot      |
| 2371.1301  | 2371.0925   | -0.0376  | -16       | 2158       | 2178     | MNNCELTEKSCSVLATVLSK  |           | Carbamidomethyl (C)[4,11]                      |      | Mascot      |
| 2371.1301  | 2371.0925   | -0.0376  | -16       | 2158       | 2178     | MNNCELTEKSCSVLATVLSK  |           | Carbamidomethyl (C)[4,11]                      |      | Mascot      |
| 2705.1799  | 2705.1128   | -0.0671  | -25       | 233        | 255      | ASVNRHMCIHSGEKPYA     |           | Carbamidomethyl (C)[8,18,21]                   |      | Mascot      |

3227.69463227.5364-0.1582-4912121240

CDQCGK  
LPLNFDGNETWRDVSSP  
ASLDVLLTNLIK

Mascot

22PREDICTED: zinc finger protein 84-like [Danio rerio]gi|32666674348665.59.4113340

Peptide Information

| Calc. Mass | Obsrv. Mass | ± da    | ± ppm | Start Seq. | End Seq. | Sequence                    | Ion Score | C. I. % | Modification                              | Rank | Result Type |
|------------|-------------|---------|-------|------------|----------|-----------------------------|-----------|---------|-------------------------------------------|------|-------------|
| 856.4457   | 856.5079    | 0.0622  | 73    | 236        | 242      | NLAVHMR                     |           |         | Oxidation (M)[6]                          |      | Mascot      |
| 971.4727   | 971.525     | 0.0523  | 54    | 179        | 186      | SNLDVHMR                    |           |         |                                           |      | Mascot      |
| 1058.4393  | 1058.5728   | 0.1335  | 126   | 390        | 397      | FRCSECEK                    |           |         | Carbamidomethyl (C)[3]                    |      | Mascot      |
| 1234.5885  | 1234.6344   | 0.0459  | 37    | 243        | 253      | THTGEKPFSCCK                |           |         |                                           |      | Mascot      |
| 1279.6688  | 1279.7494   | 0.0806  | 63    | 97         | 106      | LDVHMRVHTR                  |           |         | Oxidation (M)[5]                          |      | Mascot      |
| 1347.5602  | 1347.6898   | 0.1296  | 96    | 221        | 232      | SCTCQCGKSF                  |           |         |                                           |      | Mascot      |
| 1460.8267  | 1460.7313   | -0.0954 | -65   | 263        | 274      | LNLIAHMRVHTR                |           |         |                                           |      | Mascot      |
| 1475.6609  | 1475.7279   | 0.067   | 45    | 35         | 46       | EQTNQQNEIDEK                |           |         |                                           |      | Mascot      |
| 1638.8057  | 1638.8326   | 0.0269  | 16    | 286        | 298      | SFGQKQDLYIHMR               |           |         | Oxidation (M)[12]                         |      | Mascot      |
| 1707.736   | 1707.7456   | 0.0096  | 6     | 215        | 229      | IHTGERSCTCQCGK              |           |         | Carbamidomethyl (C)[8]                    |      | Mascot      |
| 2300.0435  | 2300.1367   | 0.0932  | 41    | 327        | 346      | THTGEKPFACDQCGKSF<br>TTK    |           |         | Carbamidomethyl (C)[10,13]                |      | Mascot      |
| 2371.0806  | 2371.0925   | 0.0119  | 5     | 187        | 206      | VHTGEKPYTCEQCGKSF<br>SQK    |           |         | Carbamidomethyl (C)[10,13]                |      | Mascot      |
| 2371.0806  | 2371.0925   | 0.0119  | 5     | 187        | 206      | VHTGEKPYTCEQCGKSF<br>SQK    |           |         | Carbamidomethyl (C)[10,13]                |      | Mascot      |
| 2705.2229  | 2705.1128   | -0.1101 | -41   | 179        | 201      | SNLDVHMRVHTGEKPYT<br>CEQCGK |           |         | Carbamidomethyl (C)[18], Oxidation (M)[7] |      | Mascot      |

23PREDICTED: tRNA-dihydrouridine synthase 2-like [Danio rerio]gi|29262857456676.66.0411330

Peptide Information

| Calc. Mass | Obsrv. Mass | ± da    | ± ppm | Start Seq. | End Seq. | Sequence          | Ion Score | C. I. % | Modification        | Rank | Result Type |
|------------|-------------|---------|-------|------------|----------|-------------------|-----------|---------|---------------------|------|-------------|
| 842.473    | 842.495     | 0.022   | 26    | 436        | 443      | TLGLPEGR          |           |         |                     |      | Mascot      |
| 971.4801   | 971.525     | 0.0449  | 46    | 77         | 84       | VMFRTCSK          |           |         |                     |      | Mascot      |
| 1045.4628  | 1045.5449   | 0.0821  | 79    | 288        | 295      | YCLCQMLR          |           |         | Oxidation (M)[6]    |      | Mascot      |
| 1051.6007  | 1051.6952   | 0.0945  | 90    | 180        | 190      | TGVAIAIVHGR       |           |         |                     |      | Mascot      |
| 1058.5518  | 1058.5728   | 0.021   | 20    | 366        | 374      | DYPPQITPK         |           |         |                     |      | Mascot      |
| 1277.6041  | 1277.6868   | 0.0827  | 65    | 129        | 141      | GGMGSALLSDPEK     |           |         | Oxidation (M)[3]    |      | Mascot      |
| 1316.5908  | 1316.6753   | 0.0845  | 64    | 288        | 297      | YCLCQMLRDR        |           |         | Oxidation (M)[6]    |      | Mascot      |
| 1699.9346  | 1699.9062   | -0.0284 | -17   | 19         | 33       | NILAPMVRVGTLPMR   |           |         | Oxidation (M)[6,14] |      | Mascot      |
| 1773.851   | 1773.7863   | -0.0647 | -36   | 107        | 123      | LVENDVAADVNMGCPC  |           |         |                     |      | Mascot      |
| 2384.1484  | 2383.9158   | -0.2326 | -98   | 237        | 258      | ESTGASSVMLARAAMWN |           |         | Oxidation (M)[9]    |      | Mascot      |

|    |                                                                                                              |              |           |        |    |     |     |                                     |  |                                            |        |
|----|--------------------------------------------------------------------------------------------------------------|--------------|-----------|--------|----|-----|-----|-------------------------------------|--|--------------------------------------------|--------|
|    |                                                                                                              | 2580.2222    | 2580.2661 | 0.0439 | 17 | 306 | 327 | PSVFR<br>LHAAQTNQEICEVFGMTE<br>LFNK |  | Carbamidomethyl (C)[11]                    | Mascot |
|    |                                                                                                              | 2596.217     | 2596.2666 | 0.0496 | 19 | 306 | 327 | LHAAQTNQEICEVFGMTE<br>LFNK          |  | Carbamidomethyl (C)[11], Oxidation (M)[16] | Mascot |
| 24 | novel protein similar to MCM6 minichromosome maintenance deficient 6, mitotin ( <i>S. cerevisiae</i> ) (mcm6 | gi 169158286 | 93177.2   | 5.26   | 12 | 33  | 0   |                                     |  |                                            |        |

Peptide Information

| Calc. Mass | Obsrv. Mass | ± da    | ± ppm | Start Seq. | End Seq. | Sequence                    | Ion Score | C. I. | % Modification          | Rank | Result Type |
|------------|-------------|---------|-------|------------|----------|-----------------------------|-----------|-------|-------------------------|------|-------------|
| 856.49     | 856.5079    | 0.0179  | 21    | 87         | 93       | AVRHFAR                     |           |       |                         |      | Mascot      |
| 973.5789   | 973.4948    | -0.0841 | -86   | 117        | 124      | IRELSTVR                    |           |       |                         |      | Mascot      |
| 973.5789   | 973.4948    | -0.0841 | -86   | 117        | 124      | IRELSTVR                    |           |       |                         |      | Mascot      |
| 1165.6252  | 1165.724    | 0.0988  | 85    | 747        | 755      | SELINWYLK                   |           |       |                         |      | Mascot      |
| 1165.6252  | 1165.724    | 0.0988  | 85    | 747        | 755      | SELINWYLK                   |           |       |                         |      | Mascot      |
| 1234.7228  | 1234.6344   | -0.0884 | -72   | 361        | 372      | GILLMLFGGVAK                |           |       | Oxidation (M)[5]        |      | Mascot      |
| 1277.6195  | 1277.6868   | 0.0673  | 53    | 321        | 330      | NQMTVLEWEK                  |           |       |                         |      | Mascot      |
| 1325.7899  | 1325.719    | -0.0709 | -53   | 212        | 223      | GSIPRSVEVILR                |           |       |                         |      | Mascot      |
| 1325.7899  | 1325.719    | -0.0709 | -53   | 212        | 223      | GSIPRSVEVILR                |           |       |                         |      | Mascot      |
| 1347.6508  | 1347.6898   | 0.039   | 29    | 512        | 523      | QNVNMSAPIMSR                |           |       |                         |      | Mascot      |
| 1475.7502  | 1475.7279   | -0.0223 | -15   | 90         | 102      | HFARDHGNIPPSK               |           |       |                         |      | Mascot      |
| 1707.8306  | 1707.7456   | -0.085  | -50   | 168        | 182      | YTQPTICKNPVCANR             |           |       |                         |      | Mascot      |
| 2211.1875  | 2211.0635   | -0.124  | -56   | 361        | 381      | GILLMLFGGVAKTTMEGT<br>SLR   |           |       | Oxidation (M)[5]        |      | Mascot      |
| 2297.1812  | 2297.1516   | -0.0296 | -13   | 575        | 593      | QFQPKITVEAQEFVVDQY<br>K     |           |       |                         |      | Mascot      |
| 2580.2949  | 2580.2661   | -0.0288 | -11   | 138        | 160      | THPVHPELVSGTFLCLDC<br>QSVIK |           |       | Carbamidomethyl (C)[15] |      | Mascot      |

|    |                                                                              |              |          |      |    |    |   |  |  |  |  |
|----|------------------------------------------------------------------------------|--------------|----------|------|----|----|---|--|--|--|--|
| 25 | PREDICTED: transposon TX1 uncharacterized 149 kDa protein-like [Danio rerio] | gi 326674296 | 180436.7 | 7.83 | 20 | 33 | 0 |  |  |  |  |
|----|------------------------------------------------------------------------------|--------------|----------|------|----|----|---|--|--|--|--|

Peptide Information

| Calc. Mass | Obsrv. Mass | ± da    | ± ppm | Start Seq. | End Seq. | Sequence  | Ion Score | C. I. | % Modification   | Rank | Result Type |
|------------|-------------|---------|-------|------------|----------|-----------|-----------|-------|------------------|------|-------------|
| 850.4087   | 850.5255    | 0.1168  | 137   | 595        | 601      | DITQAMR   |           |       | Oxidation (M)[6] |      | Mascot      |
| 996.493    | 996.58      | 0.087   | 87    | 564        | 571      | KQCFSDLR  |           |       |                  |      | Mascot      |
| 996.493    | 996.58      | 0.087   | 87    | 564        | 571      | KQCFSDLR  |           |       |                  |      | Mascot      |
| 1045.5717  | 1045.5449   | -0.0268 | -26   | 662        | 669      | FFFSLEKK  |           |       |                  |      | Mascot      |
| 1058.6609  | 1058.5728   | -0.0881 | -83   | 1405       | 1413     | VLYKPPLTK |           |       |                  |      | Mascot      |
| 1104.5585  | 1104.561    | 0.0025  | 2     | 476        | 483      | QYTWLHTR  |           |       |                  |      | Mascot      |
| 1179.6455  | 1179.5756   | -0.0699 | -59   | 1218       | 1226     | VWRLFSLCR |           |       |                  |      | Mascot      |



|    |                                              |           |         |     |             |      |                                   |      |                                           |        |   |
|----|----------------------------------------------|-----------|---------|-----|-------------|------|-----------------------------------|------|-------------------------------------------|--------|---|
|    | 1320.5571                                    | 1320.5619 | 0.0048  | 4   | 87          | 97   | CFGCGQEGHLR                       |      | Carbamidomethyl (C)[1,4]                  | Mascot |   |
|    | 1325.6484                                    | 1325.719  | 0.0706  | 53  | 257         | 267  | NVQVVDFFSR                        |      |                                           | Mascot |   |
|    | 1325.6484                                    | 1325.719  | 0.0706  | 53  | 257         | 267  | NVQVVDFFSR                        |      |                                           | Mascot |   |
|    | 1460.7783                                    | 1460.7313 | -0.047  | -32 | 899         | 911  | TLESFGFGSKFIK                     |      |                                           | Mascot |   |
|    | 1475.71                                      | 1475.7279 | 0.0179  | 12  | 583         | 594  | LFCQQYAFNVSR                      |      |                                           | Mascot |   |
|    | 1495.6715                                    | 1495.8158 | 0.1443  | 96  | 551         | 561  | EVFCFFWDQFK                       |      |                                           | Mascot |   |
|    | 1638.7904                                    | 1638.8326 | 0.0422  | 26  | 648         | 661  | SRYQNLQMDAPSK                     |      |                                           | Mascot |   |
|    | 1657.9132                                    | 1657.7596 | -0.1536 | -93 | 926         | 941  | VNGGLSAPFNISRGIR                  |      |                                           | Mascot |   |
|    | 1707.775                                     | 1707.7456 | -0.0294 | -17 | 1357        | 1370 | DVNLTMMQGTKMYK                    |      | Oxidation (M)[6,7,12]                     | Mascot |   |
|    | 1838.8265                                    | 1838.8802 | 0.0537  | 29  | 71          | 86   | VDGYDYVVFASSETMR                  |      |                                           | Mascot |   |
|    | 1994.0642                                    | 1993.9388 | -0.1254 | -63 | 276         | 291  | IVFVFCYTLFLMGVIR                  |      | Carbamidomethyl (C)[6], Oxidation (M)[12] | Mascot |   |
|    | 2230.1299                                    | 2230.1536 | 0.0237  | 11  | 1202        | 1220 | NICLNGLPSFYCGLFKVW<br>R           |      |                                           | Mascot |   |
|    | 2297.25                                      | 2297.1516 | -0.0984 | -43 | 1422        | 1443 | ILHGIVAVNAFISVVNSSV<br>DDK        |      |                                           | Mascot |   |
|    | 2298.0818                                    | 2298.1445 | 0.0627  | 27  | 2           | 23   | AAAMETPASAFSGDAPF<br>ERLSR        |      | Oxidation (M)[4]                          | Mascot |   |
|    | 3227.645                                     | 3227.5364 | -0.1086 | -34 | 1422        | 1450 | ILHGIVAVNAFISVVNSSV<br>DDKICFCGHR |      | Carbamidomethyl (C)[23,26]                | Mascot |   |
| 26 | hypothetical protein LOC492329 [Danio rerio] |           |         |     | gi 55925514 |      | 119622.9                          | 8.99 | 15                                        | 33     | 0 |

Peptide Information

| Calc. Mass | Obsrv. Mass | ± da    | ± ppm | Start Seq. | End Seq. | Sequence                  | Ion Score | C. I. | % Modification                              | Rank | Result Type |
|------------|-------------|---------|-------|------------|----------|---------------------------|-----------|-------|---------------------------------------------|------|-------------|
| 842.4366   | 842.495     | 0.0584  | 69    | 90         | 96       | NTTLEHK                   |           |       |                                             |      | Mascot      |
| 1058.4645  | 1058.5728   | 0.1083  | 102   | 694        | 701      | KEACEMFK                  |           |       | Carbamidomethyl (C)[4], Oxidation (M)[6]    |      | Mascot      |
| 1325.6519  | 1325.719    | 0.0671  | 51    | 394        | 404      | CHPKEPTSLEK               |           |       | Carbamidomethyl (C)[1]                      |      | Mascot      |
| 1325.6519  | 1325.719    | 0.0671  | 51    | 394        | 404      | CHPKEPTSLEK               |           |       | Carbamidomethyl (C)[1]                      |      | Mascot      |
| 1434.7522  | 1434.745    | -0.0072 | -5    | 666        | 677      | KVSIANMLSWNR              |           |       | Oxidation (M)[7]                            |      | Mascot      |
| 1493.6941  | 1493.7123   | 0.0182  | 12    | 345        | 358      | NPSDYSPAGLECIK            |           |       |                                             |      | Mascot      |
| 1563.8376  | 1563.8088   | -0.0288 | -18   | 794        | 806      | ITQFILDQQDSKK             |           |       |                                             |      | Mascot      |
| 1563.8376  | 1563.8088   | -0.0288 | -18   | 793        | 805      | KITQFILDQQDSK             |           |       |                                             |      | Mascot      |
| 1633.8405  | 1633.802    | -0.0385 | -24   | 198        | 212      | GTSLHLPQSKASDHR           |           |       |                                             |      | Mascot      |
| 1657.7527  | 1657.7596   | 0.0069  | 4     | 639        | 653      | QPPPPDTSMTDWASK           |           |       |                                             |      | Mascot      |
| 1844.896   | 1844.845    | -0.051  | -28   | 542        | 558      | TNNNPSMAFTPLDIPGR         |           |       |                                             |      | Mascot      |
| 1844.896   | 1844.845    | -0.051  | -28   | 542        | 558      | TNNNPSMAFTPLDIPGR         |           |       |                                             |      | Mascot      |
| 1864.9875  | 1864.9264   | -0.0611 | -33   | 146        | 161      | QKPDIVSDINKDSLR           |           |       |                                             |      | Mascot      |
| 1880.8485  | 1881.0011   | 0.1526  | 81    | 1016       | 1031     | MDVNNLAMVMAPNCLR          |           |       | Carbamidomethyl (C)[14], Oxidation (M)[1,8] |      | Mascot      |
| 1993.9713  | 1993.9388   | -0.0325 | -16   | 816        | 833      | KQNSDEEAALPISTYAK         |           |       |                                             |      | Mascot      |
| 2225.1133  | 2225.0808   | -0.0325 | -15   | 753        | 773      | SLAAGWELMAVCLAFFA<br>PSPK |           |       | Oxidation (M)[9]                            |      | Mascot      |

|    |                             |           |         |     |             |     |                           |      |    |    |   |                         |        |
|----|-----------------------------|-----------|---------|-----|-------------|-----|---------------------------|------|----|----|---|-------------------------|--------|
|    | 2225.1133                   | 2225.0808 | -0.0325 | -15 | 753         | 773 | SLAAGWELMAVCLAFFA<br>PSPK |      |    |    |   | Oxidation (M)[9]        | Mascot |
|    | 2247.0354                   | 2247.063  | 0.0276  | 12  | 695         | 713 | EACEMFKLVQAYMGDRP<br>SR   |      |    |    |   | Oxidation (M)[5]        | Mascot |
|    | 2266.1399                   | 2266.0667 | -0.0732 | -32 | 753         | 773 | SLAAGWELMAVCLAFFA<br>PSPK |      |    |    |   | Carbamidomethyl (C)[12] | Mascot |
| 27 | novel protein [Danio rerio] |           |         |     | gi 94733078 |     | 59497.8                   | 5.33 | 10 | 33 | 0 |                         |        |

#### Peptide Information

| Calc. Mass | Obsrv. Mass | ± da    | ± ppm | Start Seq. | End Seq. | Sequence                   | Ion Score | C. I. | % Modification         | Rank | Result Type |
|------------|-------------|---------|-------|------------|----------|----------------------------|-----------|-------|------------------------|------|-------------|
| 842.5709   | 842.495     | -0.0759 | -90   | 18         | 24       | VEKLLLK                    |           |       |                        |      | Mascot      |
| 1045.6769  | 1045.5449   | -0.132  | -126  | 171        | 179      | LLFLLSALR                  |           |       |                        |      | Mascot      |
| 1058.6503  | 1058.5728   | -0.0775 | -73   | 256        | 264      | LRLIAGIMR                  |           |       | Oxidation (M)[8]       |      | Mascot      |
| 1325.6921  | 1325.719    | 0.0269  | 20    | 399        | 410      | QGAAEFLFVLCK               |           |       |                        |      | Mascot      |
| 1325.6921  | 1325.719    | 0.0269  | 20    | 399        | 410      | QGAAEFLFVLCK               |           |       |                        |      | Mascot      |
| 1328.7831  | 1328.7145   | -0.0686 | -52   | 46         | 56       | LCQGLLTVLRR                |           |       | Carbamidomethyl (C)[2] |      | Mascot      |
| 1460.6396  | 1460.7313   | 0.0917  | 63    | 238        | 250      | ALFNLTMSDSCDK              |           |       | Oxidation (M)[7]       |      | Mascot      |
| 1495.7937  | 1495.8158   | 0.0221  | 15    | 265        | 276      | HLLMLKTHTEEK               |           |       | Oxidation (M)[4]       |      | Mascot      |
| 1563.7384  | 1563.8088   | 0.0704  | 45    | 2          | 16       | SLSDILSEIDGGDDK            |           |       |                        |      | Mascot      |
| 1563.7384  | 1563.8088   | 0.0704  | 45    | 2          | 16       | SLSDILSEIDGGDDK            |           |       |                        |      | Mascot      |
| 1838.8688  | 1838.8802   | 0.0114  | 6     | 1          | 17       | MSLSDILSEIDGGDDKK          |           |       | Oxidation (M)[1]       |      | Mascot      |
| 2283.0193  | 2283.1423   | 0.123   | 54    | 98         | 118      | ICVAGHEGEPLLEEAQSAE<br>EER |           |       |                        |      | Mascot      |
| 2283.0193  | 2283.1423   | 0.123   | 54    | 98         | 118      | ICVAGHEGEPLLEEAQSAE<br>EER |           |       |                        |      | Mascot      |

28 RecName: Full=SH3 domain-binding protein 4-A gi|123888628 108383 7.89 14 33 0

#### Peptide Information

| Calc. Mass | Obsrv. Mass | ± da    | ± ppm | Start Seq. | End Seq. | Sequence           | Ion Score | C. I. | % Modification   | Rank | Result Type |
|------------|-------------|---------|-------|------------|----------|--------------------|-----------|-------|------------------|------|-------------|
| 842.5822   | 842.495     | -0.0872 | -103  | 663        | 669      | LIKTVIR            |           |       |                  |      | Mascot      |
| 850.4338   | 850.5255    | 0.0917  | 108   | 387        | 393      | LSNMEIK            |           |       | Oxidation (M)[4] |      | Mascot      |
| 870.4726   | 870.5257    | 0.0531  | 61    | 1          | 7        | MAAHRIR            |           |       | Oxidation (M)[1] |      | Mascot      |
| 973.5829   | 973.4948    | -0.0881 | -90   | 695        | 702      | LKGQLWTK           |           |       |                  |      | Mascot      |
| 973.5829   | 973.4948    | -0.0881 | -90   | 695        | 702      | LKGQLWTK           |           |       |                  |      | Mascot      |
| 1045.4796  | 1045.5449   | 0.0653  | 62    | 791        | 799      | AELDSEPER          |           |       |                  |      | Mascot      |
| 1434.7158  | 1434.745    | 0.0292  | 20    | 914        | 925      | DVIHELHMGDLR       |           |       |                  |      | Mascot      |
| 1657.8651  | 1657.7596   | -0.1055 | -64   | 394        | 407      | SFITLEMKVSVMTTR    |           |       | Oxidation (M)[7] |      | Mascot      |
| 2118.1958  | 2117.9473   | -0.2485 | -117  | 636        | 653      | IILSPLAITTKYPQFQER |           |       |                  |      | Mascot      |
| 2230.2417  | 2230.1536   | -0.0881 | -40   | 842        | 860      | LIMDFVLLTTAVEVAPRW |           |       |                  |      | Mascot      |

|    |                                    |           |         |     |              |     |                                     |      |   |    |   |    |                        |  |  |  |        |
|----|------------------------------------|-----------|---------|-----|--------------|-----|-------------------------------------|------|---|----|---|----|------------------------|--|--|--|--------|
|    | 2284.2368                          | 2284.1323 | -0.1045 | -46 | 492          | 513 | R<br>TVVAIFGHDCAPKTLVSEVGK          |      |   |    |   |    |                        |  |  |  | Mascot |
|    | 2300.0686                          | 2300.1367 | 0.0681  | 30  | 597          | 616 | DDQDCILAQFCVQTPQP<br>PPK            |      |   |    |   |    | Carbamidomethyl (C)[5] |  |  |  | Mascot |
|    | 3227.677                           | 3227.5364 | -0.1406 | -44 | 936          | 965 | HLTGTLLVNCDLLRSSA<br>FSPAPQDDFAI    |      |   |    |   |    |                        |  |  |  | Mascot |
|    | 3337.6052                          | 3337.6936 | 0.0884  | 26  | 298          | 327 | LARSCHDLES LGQNPWG<br>GQTQPVETNIVCK |      |   |    |   |    | Carbamidomethyl (C)[5] |  |  |  | Mascot |
|    | 3338.5496                          | 3338.7061 | 0.1565  | 47  | 885          | 913 | TGMVDSEAMWKPAYDFL<br>LTWAAQIGDSYR   |      |   |    |   |    | Oxidation (M)[3]       |  |  |  | Mascot |
| 29 | LOC100005466 protein [Danio rerio] |           |         |     | gi 141795779 |     | 69366.9                             | 9.49 | 9 | 33 | 0 | 12 | 0                      |  |  |  |        |

Peptide Information

| Calc. Mass | Obsrv. Mass | ± da    | ± ppm | Start Seq. | End Seq. | Sequence                   | Ion Score | C. I. | % Modification           | Rank | Result Type |
|------------|-------------|---------|-------|------------|----------|----------------------------|-----------|-------|--------------------------|------|-------------|
| 973.5214   | 973.4948    | -0.0266 | -27   | 31         | 38       | DKGITFHR                   |           |       |                          |      | Mascot      |
| 973.5214   | 973.4948    | -0.0266 | -27   | 31         | 38       | DKGITFHR                   | 12        | 0     |                          |      | Mascot      |
| 996.5836   | 996.58      | -0.0036 | -4    | 395        | 403      | TLASIHNLK                  |           |       |                          |      | Mascot      |
| 996.5836   | 996.58      | -0.0036 | -4    | 395        | 403      | TLASIHNLK                  |           |       |                          |      | Mascot      |
| 1385.63    | 1385.7235   | 0.0935  | 67    | 383        | 394      | NRNTFICTECGK               |           |       |                          |      | Mascot      |
| 1493.7971  | 1493.7123   | -0.0848 | -57   | 517        | 528      | HQRIHTGEKPYK               |           |       |                          |      | Mascot      |
| 1563.6025  | 1563.8088   | 0.2063  | 132   | 12         | 25       | MPDFCAAYGCSNER             |           |       |                          |      | Mascot      |
| 1563.6025  | 1563.8088   | 0.2063  | 132   | 12         | 25       | MPDFCAAYGCSNER             |           |       |                          |      | Mascot      |
| 2224.9788  | 2225.0808   | 0.102   | 46    | 601        | 619      | HTSAHEEKNCTHSLQFN<br>NA    |           |       | Carbamidomethyl (C)[10]  |      | Mascot      |
| 2224.9788  | 2225.0808   | 0.102   | 46    | 601        | 619      | HTSAHEEKNCTHSLQFN<br>NA    |           |       | Carbamidomethyl (C)[10]  |      | Mascot      |
| 2266.0479  | 2266.0667   | 0.0188  | 8     | 468        | 487      | EKPYSKSVCGKSFSQSS<br>SLK   |           |       | Carbamidomethyl (C)[6,9] |      | Mascot      |
| 2283.0105  | 2283.1423   | 0.1318  | 58    | 426        | 444      | QPSDHMQHMMTHTGEK<br>PYK    |           |       |                          |      | Mascot      |
| 2283.0105  | 2283.1423   | 0.1318  | 58    | 426        | 444      | QPSDHMQHMMTHTGEK<br>PYK    |           |       |                          |      | Mascot      |
| 2705.2017  | 2705.1128   | -0.0889 | -33   | 423        | 444      | SFRQPSDHMQHMMTHT<br>GEKPYK |           |       | Oxidation (M)[9,12]      |      | Mascot      |

30 PREDICTED: serine/threonine-protein kinase pim-2 [Danio rerio]

Peptide Information

| Calc. Mass | Obsrv. Mass | ± da    | ± ppm | Start Seq. | End Seq. | Sequence        | Ion Score | C. I. | % Modification                               | Rank | Result Type |
|------------|-------------|---------|-------|------------|----------|-----------------|-----------|-------|----------------------------------------------|------|-------------|
| 971.5421   | 971.525     | -0.0171 | -18   | 281        | 288      | GVFHRDIK        |           |       |                                              |      | Mascot      |
| 1277.6406  | 1277.6868   | 0.0462  | 36    | 118        | 128      | TDSPEKLLSCK     |           |       | Carbamidomethyl (C)[10]                      |      | Mascot      |
| 1584.7651  | 1584.8456   | 0.0805  | 51    | 164        | 178      | EIGEGGFGSVYEGKR |           |       |                                              |      | Mascot      |
| 1584.7651  | 1584.8456   | 0.0805  | 51    | 164        | 178      | EIGEGGFGSVYEGKR |           |       |                                              |      | Mascot      |
| 1657.7164  | 1657.7596   | 0.0432  | 26    | 266        | 279      | IMEQATTAGLMCCR  |           |       | Carbamidomethyl (C)[12,13], Oxidation (M)[2] |      | Mascot      |

|           |           |         |      |     |     |                             |  |                   |        |
|-----------|-----------|---------|------|-----|-----|-----------------------------|--|-------------------|--------|
| 1699.7747 | 1699.9062 | 0.1315  | 77   | 266 | 280 | IMEQATTAGLMCCRR             |  | Oxidation (M)[2]  | Mascot |
| 1844.8621 | 1844.845  | -0.0171 | -9   | 132 | 148 | SSSSSSQEDQTPVQIHK           |  |                   | Mascot |
| 1844.8621 | 1844.845  | -0.0171 | -9   | 132 | 148 | SSSSSSQEDQTPVQIHK           |  |                   | Mascot |
| 2300.3853 | 2300.1367 | -0.2486 | -108 | 198 | 218 | YINILPLEIGLLILAHRRGK        |  |                   | Mascot |
| 3337.5293 | 3337.6936 | 0.1643  | 49   | 52  | 78  | WESFEKPLSLYAEDDNQWMTFLCGQKR |  | Oxidation (M)[19] | Mascot |

31 novel protein similar to H.sapiens ATPase, Ca++ transporting, plasma membrane (zgc:92885) [Danio re

gi|169145692 138055 5.51 16 32 0

#### Peptide Information

| Calc. Mass | Obsrv. Mass | ± da    | ± ppm | Start Seq. | End Seq. | Sequence                 | Ion Score | C. I. % | Modification                                 | Rank | Result Type |
|------------|-------------|---------|-------|------------|----------|--------------------------|-----------|---------|----------------------------------------------|------|-------------|
| 864.4131   | 864.4794    | 0.0663  | 77    | 626        | 632      | DKDEMVK                  |           |         |                                              |      | Mascot      |
| 882.4501   | 882.5508    | 0.1007  | 114   | 609        | 615      | CSFILSR                  |           |         | Carbamidomethyl (C)[1]                       |      | Mascot      |
| 973.604    | 973.4948    | -0.1092 | -112  | 358        | 366      | SVLQGKLTk                |           |         |                                              |      | Mascot      |
| 973.604    | 973.4948    | -0.1092 | -112  | 358        | 366      | SVLQGKLTk                |           |         |                                              |      | Mascot      |
| 1165.6074  | 1165.724    | 0.1166  | 100   | 84         | 93       | VFGMNFIPPK               |           |         | Oxidation (M)[4]                             |      | Mascot      |
| 1165.6074  | 1165.724    | 0.1166  | 100   | 84         | 93       | VFGMNFIPPK               |           |         | Oxidation (M)[4]                             |      | Mascot      |
| 1277.7074  | 1277.6868   | -0.0206 | -16   | 83         | 93       | KVFGMNFIPPK              |           |         |                                              |      | Mascot      |
| 1320.6763  | 1320.5619   | -0.1144 | -87   | 917        | 927      | NNPLISRTMMK              |           |         | Oxidation (M)[9]                             |      | Mascot      |
| 1347.6759  | 1347.6898   | 0.0139  | 10    | 633        | 644      | KVIEPMACDGLR             |           |         | Oxidation (M)[6]                             |      | Mascot      |
| 1633.7924  | 1633.802    | 0.0096  | 6     | 322        | 335      | KQDEAVAMEMQPLK           |           |         | Oxidation (M)[8]                             |      | Mascot      |
| 1699.8142  | 1699.9062   | 0.092   | 54    | 581        | 595      | KSMSTVIQMPDGSFR          |           |         | Oxidation (M)[3]                             |      | Mascot      |
| 1864.8026  | 1864.9264   | 0.1238  | 66    | 719        | 734      | CGIIHPGDDFLCMEGK         |           |         | Carbamidomethyl (C)[1,12], Oxidation (M)[13] |      | Mascot      |
| 1993.8412  | 1993.9388   | 0.0976  | 49    | 457        | 474      | HLDACETMGNATAICSDK       |           |         | Carbamidomethyl (C)[5,15]                    |      | Mascot      |
| 2118.0205  | 2117.9473   | -0.0732 | -35   | 254        | 273      | SIDKDPMLLSGTHVMEGSGK     |           |         | Oxidation (M)[7]                             |      | Mascot      |
| 2211.2053  | 2211.0635   | -0.1418 | -64   | 200        | 220      | NSTVIQIPVAEMVVGDIQVK     |           |         |                                              |      | Mascot      |
| 2282.999   | 2283.1423   | 0.1433  | 63    | 719        | 738      | CGIIHPGDDFLCMEGKDFNR     |           |         | Oxidation (M)[13]                            |      | Mascot      |
| 2282.999   | 2283.1423   | 0.1433  | 63    | 719        | 738      | CGIIHPGDDFLCMEGKDFNR     |           |         | Oxidation (M)[13]                            |      | Mascot      |
| 2596.3359  | 2596.2666   | -0.0693 | -27   | 508        | 531      | TLELISSAIVNCAYTSKIMPADK  |           |         | Carbamidomethyl (C)[13]                      |      | Mascot      |
| 2705.2075  | 2705.1128   | -0.0947 | -35   | 451        | 474      | DNNLVRHLDACETMGNATAICSDK |           |         | Carbamidomethyl (C)[11,21]                   |      | Mascot      |

32 TCR-alpha V segment II-35 [Danio rerio]

gi|21322357 13424.7 5.37 5 32 0

#### Peptide Information

| Calc. Mass | Obsrv. Mass | ± da | ± ppm | Start Seq. | End Seq. | Sequence | Ion Score | C. I. % | Modification | Rank | Result Type |
|------------|-------------|------|-------|------------|----------|----------|-----------|---------|--------------|------|-------------|
|------------|-------------|------|-------|------------|----------|----------|-----------|---------|--------------|------|-------------|

|    |                             |           |         |     |              |    |                                   |      |   |                                           |   |  |        |
|----|-----------------------------|-----------|---------|-----|--------------|----|-----------------------------------|------|---|-------------------------------------------|---|--|--------|
|    | 1385.7134                   | 1385.7235 | 0.0101  | 7   | 65           | 77 | SPTFMLSFTVVGK                     |      |   |                                           |   |  | Mascot |
|    | 1994.0527                   | 1993.9388 | -0.1139 | -57 | 60           | 77 | QLPNRSPTFMLSFTVVGK                |      |   |                                           |   |  | Mascot |
|    | 2297.2395                   | 2297.1516 | -0.0879 | -38 | 2            | 20 | MEKLLIVALFITAQEFVCR               |      |   | Carbamidomethyl (C)[18], Oxidation (M)[1] |   |  | Mascot |
|    | 2371.2585                   | 2371.0925 | -0.166  | -70 | 1            | 20 | MMEKLLIVALFITAQEFVCR              |      |   | Oxidation (M)[1]                          |   |  | Mascot |
|    | 2371.2585                   | 2371.0925 | -0.166  | -70 | 1            | 20 | MMEKLLIVALFITAQEFVCR              |      |   | Oxidation (M)[1]                          |   |  | Mascot |
|    | 3338.5232                   | 3338.7061 | 0.1829  | 55  | 31           | 59 | EMTADKGDVTTLSCNYS<br>VTTTNAYLFWYK |      |   | Oxidation (M)[2]                          |   |  | Mascot |
| 33 | novel protein [Danio rerio] |           |         |     | gi 123231159 |    | 11826.2                           | 9.18 | 5 | 32                                        | 0 |  |        |

#### Peptide Information

| Calc. Mass | Obsrv. Mass | ± da    | ± ppm | Start Seq. | End Seq. | Sequence      | Ion Score | C. I. % | Modification           | Rank | Result Type |
|------------|-------------|---------|-------|------------|----------|---------------|-----------|---------|------------------------|------|-------------|
| 864.472    | 864.4794    | 0.0074  | 9     | 15         | 21       | RTSMLTR       |           |         |                        |      | Mascot      |
| 996.5182   | 996.58      | 0.0618  | 62    | 49         | 57       | DCPLVAPPK     |           |         | Carbamidomethyl (C)[2] |      | Mascot      |
| 996.5182   | 996.58      | 0.0618  | 62    | 49         | 57       | DCPLVAPPK     |           |         | Carbamidomethyl (C)[2] |      | Mascot      |
| 1045.516   | 1045.5449   | 0.0289  | 28    | 72         | 80       | QTNITDEPK     |           |         |                        |      | Mascot      |
| 1633.8076  | 1633.802    | -0.0056 | -3    | 1          | 14       | VVCASYQPLHLMK |           |         | Oxidation (M)[12]      |      | Mascot      |
| 1773.9138  | 1773.7863   | -0.1275 | -72   | 1          | 15       | VVCASYQPLHLMK |           |         |                        |      | Mascot      |

|    |                                                |  |  |  |              |  |         |      |    |    |   |  |  |
|----|------------------------------------------------|--|--|--|--------------|--|---------|------|----|----|---|--|--|
| 34 | Ewing tumor-associated antigen 1 [Danio rerio] |  |  |  | gi 162139038 |  | 71948.4 | 6.84 | 10 | 32 | 0 |  |  |
|----|------------------------------------------------|--|--|--|--------------|--|---------|------|----|----|---|--|--|

#### Peptide Information

| Calc. Mass | Obsrv. Mass | ± da    | ± ppm | Start Seq. | End Seq. | Sequence                 | Ion Score | C. I. % | Modification           | Rank | Result Type |
|------------|-------------|---------|-------|------------|----------|--------------------------|-----------|---------|------------------------|------|-------------|
| 973.4196   | 973.4948    | 0.0752  | 77    | 159        | 165      | QFDFNMR                  |           |         | Oxidation (M)[6]       |      | Mascot      |
| 973.4196   | 973.4948    | 0.0752  | 77    | 159        | 165      | QFDFNMR                  |           |         | Oxidation (M)[6]       |      | Mascot      |
| 996.5836   | 996.58      | -0.0036 | -4    | 28         | 37       | SPKAAAPLNK               |           |         |                        |      | Mascot      |
| 996.5836   | 996.58      | -0.0036 | -4    | 28         | 37       | SPKAAAPLNK               |           |         |                        |      | Mascot      |
| 1460.6951  | 1460.7313   | 0.0362  | 25    | 398        | 409      | LSELNNACHFQK             |           |         | Carbamidomethyl (C)[8] |      | Mascot      |
| 1475.7085  | 1475.7279   | 0.0194  | 13    | 2          | 14       | ESRGSQEENEIAK            |           |         |                        |      | Mascot      |
| 1584.8452  | 1584.8456   | 0.0004  | 0     | 91         | 105      | AANVRAVDISDIANR          |           |         |                        |      | Mascot      |
| 1584.8452  | 1584.8456   | 0.0004  | 0     | 91         | 105      | AANVRAVDISDIANR          |           |         |                        |      | Mascot      |
| 1880.9573  | 1881.0011   | 0.0438  | 23    | 575        | 591      | GVLAIVQSEARDTNHR         |           |         |                        |      | Mascot      |
| 1994.0526  | 1993.9388   | -0.1138 | -57   | 334        | 351      | TKVSQNNISQIQINGGLHR      |           |         |                        |      | Mascot      |
| 2194.1187  | 2194.0452   | -0.0735 | -33   | 391        | 409      | AQHVVQKLSELNNACHFQK      |           |         |                        |      | Mascot      |
| 2211.155   | 2211.0635   | -0.0915 | -41   | 413        | 432      | NAIKPSQSKPSSMHQNLSK      |           |         | Oxidation (M)[13]      |      | Mascot      |
| 2384.0354  | 2383.9158   | -0.1196 | -50   | 524        | 548      | AAGPGCNVSCDAARPSGSSNGAYK |           |         | Carbamidomethyl (C)[6] |      | Mascot      |

35 lactosylceramide alpha-2,3-sialyltransferase [Danio rerio] gi|117606180 41829.7 9.18 8 32 0 6 0

Peptide Information

| Calc. Mass | Obsrv. Mass | ± da    | ± ppm | Start Seq. | End Seq. | Sequence                | Ion Score | C. I. | % Modification         | Rank | Result Type |
|------------|-------------|---------|-------|------------|----------|-------------------------|-----------|-------|------------------------|------|-------------|
| 973.5101   | 973.4948    | -0.0153 | -16   | 226        | 233      | TPVSLWDR                |           |       |                        |      | Mascot      |
| 973.5101   | 973.4948    | -0.0153 | -16   | 226        | 233      | TPVSLWDR                | 6         | 0     |                        |      | Mascot      |
| 1058.6027  | 1058.5728   | -0.0299 | -28   | 140        | 150      | CVVVGNGGILK             |           |       |                        |      | Mascot      |
| 1563.7948  | 1563.8088   | 0.014   | 9     | 61         | 73       | EILDKECRPSFAR           |           |       |                        |      | Mascot      |
| 1563.7948  | 1563.8088   | 0.014   | 9     | 61         | 73       | EILDKECRPSFAR           |           |       |                        |      | Mascot      |
| 1633.8268  | 1633.802    | -0.0248 | -15   | 213        | 225      | SVDFHWLRAMISR           |           |       | Oxidation (M)[10]      |      | Mascot      |
| 1707.8927  | 1707.7456   | -0.1471 | -86   | 234        | 247      | LFFWQNVPMSPVPK          |           |       | Oxidation (M)[9]       |      | Mascot      |
| 1880.8881  | 1881.0011   | 0.113   | 60    | 346        | 364      | LVASGSITDLTGGIHCSF<br>C |           |       |                        |      | Mascot      |
| 1993.9939  | 1993.9388   | -0.0551 | -28   | 314        | 330      | EAPLHYDVSVPMTTILK       |           |       | Oxidation (M)[12]      |      | Mascot      |
| 2297.01    | 2297.1516   | 0.1416  | 62    | 187        | 205      | MSYPESCPKVWEDTPD<br>LK  |           |       | Carbamidomethyl (C)[7] |      | Mascot      |

36 Ssfa2 protein [Danio rerio] gi|115313851 31579.7 5.91 7 31 0

Peptide Information

| Calc. Mass | Obsrv. Mass | ± da    | ± ppm | Start Seq. | End Seq. | Sequence                 | Ion Score | C. I. | % Modification       | Rank | Result Type |
|------------|-------------|---------|-------|------------|----------|--------------------------|-----------|-------|----------------------|------|-------------|
| 1475.6907  | 1475.7279   | 0.0372  | 25    | 93         | 106      | GHSMESLSNSSALR           |           |       |                      |      | Mascot      |
| 1563.7319  | 1563.8088   | 0.0769  | 49    | 190        | 203      | MESNPTPTSLEVSR           |           |       | Oxidation (M)[1]     |      | Mascot      |
| 1563.7319  | 1563.8088   | 0.0769  | 49    | 190        | 203      | MESNPTPTSLEVSR           |           |       | Oxidation (M)[1]     |      | Mascot      |
| 1707.9136  | 1707.7456   | -0.168  | -98   | 230        | 244      | SRGNGDLQHLIQEIK          |           |       |                      |      | Mascot      |
| 2117.9504  | 2117.9473   | -0.0031 | -1    | 76         | 92       | NSSQQLGFYRHHMGMR         |           |       | Oxidation (M)[13,15] |      | Mascot      |
| 2247.0557  | 2247.063    | 0.0073  | 3     | 184        | 203      | DVSPERMESNPTPTSLE<br>VSR |           |       | Oxidation (M)[7]     |      | Mascot      |
| 2284.1501  | 2284.1323   | -0.0178 | -8    | 67         | 85       | LLSINEQMRNSSQQLGFY<br>R  |           |       |                      |      | Mascot      |
| 2297.2725  | 2297.1516   | -0.1209 | -53   | 253        | 273      | QEIVNELLAAVSPHRSP<br>L   |           |       |                      |      | Mascot      |
| 2300.1453  | 2300.1367   | -0.0086 | -4    | 67         | 85       | LLSINEQMRNSSQQLGFY<br>R  |           |       | Oxidation (M)[8]     |      | Mascot      |

37 PREDICTED: fragaceatoxin C [Danio rerio] gi|326665980 20858.2 6.31 6 31 0

Peptide Information

| Calc. Mass | Obsrv. Mass | ± da   | ± ppm | Start Seq. | End Seq. | Sequence | Ion Score | C. I. | % Modification         | Rank | Result Type |
|------------|-------------|--------|-------|------------|----------|----------|-----------|-------|------------------------|------|-------------|
| 971.4502   | 971.525     | 0.0748 | 77    | 56         | 63       | TEVCTFSK |           |       | Carbamidomethyl (C)[4] |      | Mascot      |

|                     |                                                  |             |         |       |            |                       |                     |           |       |                   |   |      |        |        |
|---------------------|--------------------------------------------------|-------------|---------|-------|------------|-----------------------|---------------------|-----------|-------|-------------------|---|------|--------|--------|
|                     | 1277.6527                                        | 1277.6868   | 0.0341  | 27    | 157        | 168                   | ATMCMPMGRAIVK       |           |       |                   |   |      |        | Mascot |
|                     | 1493.7021                                        | 1493.7123   | 0.0102  | 7     | 152        | 164                   | NLDIRATMCPMGR       |           |       | Oxidation (M)[8]  |   |      |        | Mascot |
|                     | 1699.8009                                        | 1699.9062   | 0.1053  | 62    | 126        | 138                   | EMYYQKNQHGFVR       |           |       |                   |   |      |        | Mascot |
|                     | 1864.8643                                        | 1864.9264   | 0.0621  | 33    | 169        | 184                   | VEVWDKLLSPMAQMDC    |           |       |                   |   |      |        | Mascot |
|                     | 1880.8591                                        | 1881.0011   | 0.142   | 75    | 169        | 184                   | VEVWDKLLSPMAQMDC    |           |       | Oxidation (M)[11] |   |      |        | Mascot |
|                     | 1993.9977                                        | 1993.9388   | -0.0589 | -30   | 64         | 82                    | SAAHATGSVGVLTYDLFER |           |       |                   |   |      |        | Mascot |
| 38                  | cytoplasmic dynein 1 heavy chain 1 [Danio rerio] |             |         |       |            | gi 112363126          | 532854.1            | 6.06      | 32    | 31                | 0 |      |        |        |
| Peptide Information |                                                  |             |         |       |            |                       |                     |           |       |                   |   |      |        |        |
|                     | Calc. Mass                                       | Obsrv. Mass | ± da    | ± ppm | Start Seq. | End Sequence Seq.     |                     | Ion Score | C. I. | % Modification    |   | Rank | Result | Type   |
|                     | 850.4087                                         | 850.5255    | 0.1168  | 137   | 59         | 65 SALEQMR            |                     |           |       | Oxidation (M)[6]  |   |      | Mascot |        |
|                     | 870.4389                                         | 870.5257    | 0.0868  | 100   | 656        | 662 QLTAYMK           |                     |           |       | Oxidation (M)[6]  |   |      | Mascot |        |
|                     | 971.5632                                         | 971.525     | -0.0382 | -39   | 283        | 290 ALNRIQEK          |                     |           |       |                   |   |      | Mascot |        |
|                     | 1045.5272                                        | 1045.5449   | 0.0177  | 17    | 2836       | 2843 LVEDEERR         |                     |           |       |                   |   |      | Mascot |        |
|                     | 1058.6278                                        | 1058.5728   | -0.055  | -52   | 1396       | 1404 VNMLVIELK        |                     |           |       |                   |   |      | Mascot |        |
|                     | 1104.5354                                        | 1104.561    | 0.0256  | 23    | 3429       | 3437 AEEVEQMIR        |                     |           |       |                   |   |      | Mascot |        |
|                     | 1106.5952                                        | 1106.5375   | -0.0577 | -52   | 2511       | 2519 AELGEYIRR        |                     |           |       |                   |   |      | Mascot |        |
|                     | 1165.6212                                        | 1165.724    | 0.1028  | 88    | 3438       | 3447 DLEASIARYK       |                     |           |       |                   |   |      | Mascot |        |
|                     | 1165.6212                                        | 1165.724    | 0.1028  | 88    | 3438       | 3447 DLEASIARYK       |                     |           |       |                   |   |      | Mascot |        |
|                     | 1179.5286                                        | 1179.5756   | 0.047   | 40    | 2442       | 2450 MEHIMDFTR        |                     |           |       |                   |   |      | Mascot |        |
|                     | 1213.6212                                        | 1213.5818   | -0.0394 | -32   | 3695       | 3704 ETFVNFTVTR       |                     |           |       |                   |   |      | Mascot |        |
|                     | 1277.6598                                        | 1277.6868   | 0.027   | 21    | 4143       | 4153 IFVFEPPPGMK      |                     |           |       | Oxidation (M)[10] |   |      | Mascot |        |
|                     | 1320.6793                                        | 1320.5619   | -0.1174 | -89   | 223        | 234 GEKPKVTDFGDK      |                     |           |       |                   |   |      | Mascot |        |
|                     | 1325.6736                                        | 1325.719    | 0.0454  | 34    | 835        | 845 LAETVFNFQEK       |                     |           |       |                   |   |      | Mascot |        |
|                     | 1325.6736                                        | 1325.719    | 0.0454  | 34    | 835        | 845 LAETVFNFQEK       |                     |           |       |                   |   |      | Mascot |        |
|                     | 1328.6917                                        | 1328.7145   | 0.0228  | 17    | 1242       | 1252 IVQEDRAVENR      |                     |           |       |                   |   |      | Mascot |        |
|                     | 1434.7886                                        | 1434.745    | -0.0436 | -30   | 2034       | 2045 LFRSLAMTKPDR     |                     |           |       |                   |   |      | Mascot |        |
|                     | 1475.6835                                        | 1475.7279   | 0.0444  | 30    | 3682       | 3694 DPTVEFPPDLCSR    |                     |           |       |                   |   |      | Mascot |        |
|                     | 1563.8264                                        | 1563.8088   | -0.0176 | -11   | 3448       | 3461 EEYAVLISEAQAIK   |                     |           |       |                   |   |      | Mascot |        |
|                     | 1563.8264                                        | 1563.8088   | -0.0176 | -11   | 3448       | 3461 EEYAVLISEAQAIK   |                     |           |       |                   |   |      | Mascot |        |
|                     | 1584.8704                                        | 1584.8456   | -0.0248 | -16   | 3847       | 3860 SVSDHTQRLSLITK   |                     |           |       |                   |   |      | Mascot |        |
|                     | 1584.8704                                        | 1584.8456   | -0.0248 | -16   | 3847       | 3860 SVSDHTQRLSLITK   |                     |           |       |                   |   |      | Mascot |        |
|                     | 1633.8326                                        | 1633.802    | -0.0306 | -19   | 3925       | 3939 GLTGEQAEAMVRLSR  |                     |           |       | Oxidation (M)[10] |   |      | Mascot |        |
|                     | 1707.7867                                        | 1707.7456   | -0.0411 | -24   | 4362       | 4376 QRSTSSSDAQPAWMR  |                     |           |       |                   |   |      | Mascot |        |
|                     | 1845.0215                                        | 1844.845    | -0.1765 | -96   | 3759       | 3774 ILDDDTIITTLENLKK |                     |           |       |                   |   |      | Mascot |        |
|                     | 1845.0215                                        | 1844.845    | -0.1765 | -96   | 3759       | 3774 ILDDDTIITTLENLKK |                     |           |       |                   |   |      | Mascot |        |

|           |           |         |      |      |      |                              |  |  |  |  |                   |  |        |
|-----------|-----------|---------|------|------|------|------------------------------|--|--|--|--|-------------------|--|--------|
| 2194.0828 | 2194.0452 | -0.0376 | -17  | 3174 | 3190 | HYLDFINHYANLFNEKR            |  |  |  |  |                   |  | Mascot |
| 2210.9944 | 2211.0635 | 0.0691  | 31   | 531  | 550  | EVDGLDVSKEGMEAWEA<br>AMK     |  |  |  |  | Oxidation (M)[12] |  | Mascot |
| 2230.1689 | 2230.1536 | -0.0153 | -7   | 2943 | 2961 | TTLSRFVAWMNGLSVYQI<br>K      |  |  |  |  | Oxidation (M)[10] |  | Mascot |
| 2233.0627 | 2233.0427 | -0.02   | -9   | 3561 | 3580 | WQANSLPADDLCTENAI<br>MLK     |  |  |  |  |                   |  | Mascot |
| 2247.1074 | 2247.063  | -0.0444 | -20  | 1020 | 1040 | NALTRMPDGPSALEEAY<br>NAVK    |  |  |  |  |                   |  | Mascot |
| 2266.1689 | 2266.0667 | -0.1022 | -45  | 3121 | 3139 | VPDYMPIVYDKLPQPPTH<br>R      |  |  |  |  |                   |  | Mascot |
| 2283.1624 | 2283.1423 | -0.0201 | -9   | 2004 | 2024 | QVKVSAEMAIFITMNPY<br>AGR     |  |  |  |  |                   |  | Mascot |
| 2283.1624 | 2283.1423 | -0.0201 | -9   | 2004 | 2024 | QVKVSAEMAIFITMNPY<br>AGR     |  |  |  |  |                   |  | Mascot |
| 2284.2561 | 2284.1323 | -0.1238 | -54  | 4504 | 4523 | NIHVNLGRLFVPEAYITAT<br>R     |  |  |  |  |                   |  | Mascot |
| 2371.218  | 2371.0925 | -0.1255 | -53  | 1629 | 1649 | FYFVGDEDLLEIGNSKNV<br>AK     |  |  |  |  |                   |  | Mascot |
| 2371.218  | 2371.0925 | -0.1255 | -53  | 1629 | 1649 | FYFVGDEDLLEIGNSKNV<br>AK     |  |  |  |  |                   |  | Mascot |
| 2384.2642 | 2383.9158 | -0.3484 | -146 | 2046 | 2066 | QLIAQVMLYSQGFRTAET<br>LAK    |  |  |  |  | Oxidation (M)[7]  |  | Mascot |
| 2580.3337 | 2580.2661 | -0.0676 | -26  | 1656 | 1679 | KMFAGVSSILLNEDNTEV<br>LGISSR |  |  |  |  |                   |  | Mascot |
| 2596.3286 | 2596.2666 | -0.062  | -24  | 1656 | 1679 | KMFAGVSSILLNEDNTEV<br>LGISSR |  |  |  |  | Oxidation (M)[2]  |  | Mascot |

39 Rho guanine exchange factor betaPix B [Danio rerio] gi|109745507 90350.1 8.42 11 31 0

#### Peptide Information

| Calc. Mass | Obsrv. Mass | ± da    | ± ppm | Start Seq. | End Seq. | Sequence                      | Ion Score | C. I. % | Modification              | Rank | Result Type |
|------------|-------------|---------|-------|------------|----------|-------------------------------|-----------|---------|---------------------------|------|-------------|
| 1104.6664  | 1104.561    | -0.1054 | -95   | 388        | 396      | LEKYPTLLK                     |           |         |                           |      | Mascot      |
| 1279.6715  | 1279.7494   | 0.0779  | 61    | 391        | 400      | YPTLLKEMER                    |           |         |                           |      | Mascot      |
| 1347.7631  | 1347.6898   | -0.0733 | -54   | 267        | 277      | ELQNLLSVYLR                   |           |         |                           |      | Mascot      |
| 1633.8102  | 1633.802    | -0.0082 | -5    | 154        | 168      | SLDMSSENSAPQVLVK              |           |         | Oxidation (M)[4]          |      | Mascot      |
| 1638.8711  | 1638.8326   | -0.0385 | -23   | 48         | 61       | LRPGSVHTIYQDPR                |           |         |                           |      | Mascot      |
| 1657.7891  | 1657.7596   | -0.0295 | -18   | 711        | 724      | KESGPHMLFPEEEK                |           |         |                           |      | Mascot      |
| 1844.9535  | 1844.845    | -0.1085 | -59   | 154        | 170      | SLDMSSENSAPQVLVKAR            |           |         |                           |      | Mascot      |
| 1844.9535  | 1844.845    | -0.1085 | -59   | 154        | 170      | SLDMSSENSAPQVLVKAR            |           |         |                           |      | Mascot      |
| 2283.1914  | 2283.1423   | -0.0491 | -22   | 317        | 336      | VSDSQQRIGGFFLSLLTQ<br>MR      |           |         |                           |      | Mascot      |
| 2283.1914  | 2283.1423   | -0.0491 | -22   | 317        | 336      | VSDSQQRIGGFFLSLLTQ<br>MR      |           |         |                           |      | Mascot      |
| 2297.0325  | 2297.1516   | 0.1191  | 52    | 397        | 414      | EMERHMEPLHPDYPDIQ<br>K        |           |         | Oxidation (M)[2,6]        |      | Mascot      |
| 2580.2505  | 2580.2661   | 0.0156  | 6     | 98         | 122      | VLNCLVALNKATSESGG<br>GSNSVCSR |           |         | Carbamidomethyl (C)[4,23] |      | Mascot      |
| 2596.25    | 2596.2666   | 0.0166  | 6     | 75         | 97       | GCALYHIEVFEANDLLQG<br>QNFSK   |           |         |                           |      | Mascot      |



40 PREDICTED: estrogen-related receptor gamma, partial [Danio rerio] gi|326675851 25552.3 5.28 6 30 0

Peptide Information

| Calc. Mass | Obsrv. Mass | ± da    | ± ppm | Start Seq. | End Seq. | Sequence                | Ion Score | C. I. % | Modification      | Rank | Result Type |
|------------|-------------|---------|-------|------------|----------|-------------------------|-----------|---------|-------------------|------|-------------|
| 1106.5994  | 1106.5375   | -0.0619 | -56   | 197        | 205      | AIQHFYSIK               |           |         |                   |      | Mascot      |
| 1325.8337  | 1325.719    | -0.1147 | -87   | 180        | 191      | AGKLLMTLPLLR            |           |         |                   |      | Mascot      |
| 1325.8337  | 1325.719    | -0.1147 | -87   | 180        | 191      | AGKLLMTLPLLR            |           |         |                   |      | Mascot      |
| 1563.9104  | 1563.8088   | -0.1016 | -65   | 1          | 14       | TKIVSHLLVAEPEK          |           |         |                   |      | Mascot      |
| 1563.9104  | 1563.8088   | -0.1016 | -65   | 1          | 14       | TKIVSHLLVAEPEK          |           |         |                   |      | Mascot      |
| 1707.7969  | 1707.7456   | -0.0513 | -30   | 15         | 29       | IYAMPDPTMPESDIK         |           |         |                   |      | Mascot      |
| 2300.2683  | 2300.1367   | -0.1316 | -57   | 30         | 50       | ALTTLCDLADRELVIIGWAK    |           |         |                   |      | Mascot      |
| 2705.156   | 2705.1128   | -0.0432 | -16   | 83         | 104      | SLPYEDELVYAEDYVMD EEHSR |           |         | Oxidation (M)[16] |      | Mascot      |

41 Baz1a protein [Danio rerio] gi|120538654 37393.3 9.36 8 30 0

Peptide Information

| Calc. Mass | Obsrv. Mass | ± da    | ± ppm | Start Seq. | End Seq. | Sequence                | Ion Score | C. I. % | Modification       | Rank | Result Type |
|------------|-------------|---------|-------|------------|----------|-------------------------|-----------|---------|--------------------|------|-------------|
| 1045.3999  | 1045.5449   | 0.145   | 139   | 303        | 310      | EQMMSMEK                |           |         | Oxidation (M)[3,4] |      | Mascot      |
| 1106.4789  | 1106.5375   | 0.0586  | 53    | 36         | 43       | TYDEFFER                |           |         |                    |      | Mascot      |
| 1234.7782  | 1234.6344   | -0.1438 | -116  | 2          | 11       | PLLHKKPFVR              |           |         |                    |      | Mascot      |
| 1316.5796  | 1316.6753   | 0.0957  | 73    | 303        | 312      | EQMMSMEKFR              |           |         |                    |      | Mascot      |
| 1657.7417  | 1657.7596   | 0.0179  | 11    | 298        | 310      | LMQQKEQMMSMEK           |           |         | Oxidation (M)[2]   |      | Mascot      |
| 1838.8741  | 1838.8802   | 0.0061  | 3     | 101        | 115      | LHEICDDVYAYVKDR         |           |         |                    |      | Mascot      |
| 2266.0518  | 2266.0667   | 0.0149  | 7     | 276        | 295      | GRGRPPNNASSTEMNYI EEK   |           |         | Oxidation (M)[14]  |      | Mascot      |
| 2283.1836  | 2283.1423   | -0.0413 | -18   | 195        | 215      | VQPVSPPEACEPVIVKVAQ MSR |           |         | Oxidation (M)[19]  |      | Mascot      |
| 2283.1836  | 2283.1423   | -0.0413 | -18   | 195        | 215      | VQPVSPPEACEPVIVKVAQ MSR |           |         | Oxidation (M)[19]  |      | Mascot      |

42 Tnfrsf1a protein [Danio rerio] gi|190336943 48606.4 5.31 9 30 0

Peptide Information

| Calc. Mass | Obsrv. Mass | ± da    | ± ppm | Start Seq. | End Seq. | Sequence       | Ion Score | C. I. % | Modification       | Rank | Result Type |
|------------|-------------|---------|-------|------------|----------|----------------|-----------|---------|--------------------|------|-------------|
| 856.4159   | 856.5079    | 0.092   | 107   | 329        | 335      | EDDPPRK        |           |         |                    |      | Mascot      |
| 971.4172   | 971.525     | 0.1078  | 111   | 1          | 8        | MDKSEAMK       |           |         | Oxidation (M)[1,7] |      | Mascot      |
| 1460.7491  | 1460.7313   | -0.0178 | -12   | 418        | 430      | YSAEHIASKAVER  |           |         |                    |      | Mascot      |
| 1475.6973  | 1475.7279   | 0.0306  | 21    | 214        | 226      | QQSETNGNLEE VK |           |         |                    |      | Mascot      |

|    |                                                                           |           |         |     |     |              |                           |      |                                             |        |   |
|----|---------------------------------------------------------------------------|-----------|---------|-----|-----|--------------|---------------------------|------|---------------------------------------------|--------|---|
|    | 2193.8782                                                                 | 2194.0452 | 0.167   | 76  | 121 | 139          | CDCKFGTFCLPDEPCEV<br>CK   |      | Carbamidomethyl (C)[1]                      | Mascot |   |
|    | 2211.0537                                                                 | 2211.0635 | 0.0098  | 4   | 310 | 328          | SSPPAQRPTDRDQTESW<br>PR   |      |                                             | Mascot |   |
|    | 2266.2515                                                                 | 2266.0667 | -0.1848 | -82 | 398 | 417          | EGLRANINTLLQALLDLD<br>QR  |      |                                             | Mascot |   |
|    | 2283.9038                                                                 | 2284.1323 | 0.2285  | 100 | 41  | 58           | QMTCLNHEYPHNGFCC<br>K     |      | Carbamidomethyl (C)[4,16], Oxidation (M)[2] | Mascot |   |
|    | 2596.0947                                                                 | 2596.2666 | 0.1719  | 66  | 38  | 58           | TARQMTCLENHEYPHNG<br>FCKK |      | Carbamidomethyl (C)[7,19]                   | Mascot |   |
| 43 | PREDICTED: zinc finger protein 64 homolog, isoforms 1 and 2 [Danio rerio] |           |         |     |     | gi 292627186 | 71408.1                   | 8.74 | 11                                          | 30     | 0 |

#### Peptide Information

|  | Calc. Mass | Obsrv. Mass | ± da    | ± ppm | Start Seq. | End Seq. | Sequence                    | Ion Score | C. I. % | Modification             | Rank | Result Type |
|--|------------|-------------|---------|-------|------------|----------|-----------------------------|-----------|---------|--------------------------|------|-------------|
|  | 971.4904   | 971.525     | 0.0346  | 36    | 394        | 401      | EDSLRSHK                    |           |         |                          |      | Mascot      |
|  | 973.4117   | 973.4948    | 0.0831  | 85    | 323        | 331      | CDLCSFASK                   |           |         |                          |      | Mascot      |
|  | 973.4117   | 973.4948    | 0.0831  | 85    | 323        | 331      | CDLCSFASK                   |           |         |                          |      | Mascot      |
|  | 1045.4077  | 1045.5449   | 0.1372  | 131   | 270        | 277      | CDFQCSTK                    |           |         | Carbamidomethyl (C)[1,5] |      | Mascot      |
|  | 1277.6783  | 1277.6868   | 0.0085  | 7     | 145        | 155      | LHTGEKPHKCK                 |           |         |                          |      | Mascot      |
|  | 1320.5204  | 1320.5619   | 0.0415  | 31    | 238        | 248      | CDLCDYRCAMK                 |           |         |                          |      | Mascot      |
|  | 1434.5632  | 1434.745    | 0.1818  | 127   | 238        | 248      | CDLCDYRCAMK                 |           |         | Carbamidomethyl (C)[1,4] |      | Mascot      |
|  | 1699.8003  | 1699.9062   | 0.1059  | 62    | 41         | 54       | QNCCQIPSTHISVR              |           |         | Carbamidomethyl (C)[3,4] |      | Mascot      |
|  | 2117.8474  | 2117.9473   | 0.0999  | 47    | 259        | 277      | HSASDSFHCSCDFQCS<br>TK      |           |         |                          |      | Mascot      |
|  | 2210.9263  | 2211.0635   | 0.1372  | 62    | 286        | 305      | QHQAQPLQCSECSYSC<br>SSK     |           |         |                          |      | Mascot      |
|  | 2233.0964  | 2233.0427   | -0.0537 | -24   | 182        | 200      | CQICPYASRNSSQLTVHL<br>R     |           |         | Carbamidomethyl (C)[1]   |      | Mascot      |
|  | 2283.0798  | 2283.1423   | 0.0625  | 27    | 173        | 190      | IHYDERPFKCQICPYASR          |           |         | Carbamidomethyl (C)[10]  |      | Mascot      |
|  | 2283.0798  | 2283.1423   | 0.0625  | 27    | 173        | 190      | IHYDERPFKCQICPYASR          |           |         | Carbamidomethyl (C)[10]  |      | Mascot      |
|  | 2580.1638  | 2580.2661   | 0.1023  | 40    | 286        | 309      | QHQAQPLQCSECSYSC<br>SSKGALK |           |         |                          |      | Mascot      |

44 Rars protein [Danio rerio] gi|182892034 75755 6.48 12 30 0

#### Peptide Information

|  | Calc. Mass | Obsrv. Mass | ± da    | ± ppm | Start Seq. | End Seq. | Sequence     | Ion Score | C. I. % | Modification | Rank | Result Type |
|--|------------|-------------|---------|-------|------------|----------|--------------|-----------|---------|--------------|------|-------------|
|  | 973.4948   | 973.4948    | 0       | 0     | 354        | 362      | GLVEVDEGR    |           |         |              |      | Mascot      |
|  | 973.4948   | 973.4948    | 0       | 0     | 354        | 362      | GLVEVDEGR    | 2         | 0       |              |      | Mascot      |
|  | 1058.4313  | 1058.5728   | 0.1415  | 134   | 281        | 288      | FDEDEEFK     |           |         |              |      | Mascot      |
|  | 1316.7242  | 1316.6753   | -0.0489 | -37   | 463        | 473      | LMDLLEELKLR  |           |         |              |      | Mascot      |
|  | 1328.7321  | 1328.7145   | -0.0176 | -13   | 649        | 660      | GFDILGINPVQR |           |         |              |      | Mascot      |

|    |                                                                                                         |           |         |     |     |     |                         |  |  |  |  |  |                                                    |  |  |  |        |
|----|---------------------------------------------------------------------------------------------------------|-----------|---------|-----|-----|-----|-------------------------|--|--|--|--|--|----------------------------------------------------|--|--|--|--------|
|    | 1385.7463                                                                                               | 1385.7235 | -0.0228 | -16 | 225 | 235 | LFEFLGYEVLRL            |  |  |  |  |  |                                                    |  |  |  | Mascot |
|    | 1460.7532                                                                                               | 1460.7313 | -0.0219 | -15 | 529 | 541 | GNTAAYLLYAFTR           |  |  |  |  |  |                                                    |  |  |  | Mascot |
|    | 1475.7675                                                                                               | 1475.7279 | -0.0396 | -27 | 649 | 661 | GFDILGINPVQRM           |  |  |  |  |  | Oxidation (M)[13]                                  |  |  |  | Mascot |
|    | 1495.8267                                                                                               | 1495.8158 | -0.0109 | -7  | 155 | 168 | TEIAGPGFINVHLK          |  |  |  |  |  |                                                    |  |  |  | Mascot |
|    | 1584.838                                                                                                | 1584.8456 | 0.0076  | 5   | 437 | 451 | VEHAGFGVVLGEDKK         |  |  |  |  |  |                                                    |  |  |  | Mascot |
|    | 1584.838                                                                                                | 1584.8456 | 0.0076  | 5   | 437 | 451 | VEHAGFGVVLGEDKK         |  |  |  |  |  |                                                    |  |  |  | Mascot |
|    | 1699.8723                                                                                               | 1699.9062 | 0.0339  | 20  | 319 | 332 | EFQKVYNCLDISIK          |  |  |  |  |  |                                                    |  |  |  | Mascot |
|    | 2246.9006                                                                                               | 2247.063  | 0.1624  | 72  | 111 | 129 | FGDYQCNSAMAMSQMM<br>KAK |  |  |  |  |  | Carbamidomethyl (C)[6], Oxidation<br>(M)[10,12,15] |  |  |  | Mascot |
|    | 2284.0149                                                                                               | 2284.1323 | 0.1174  | 51  | 335 | 353 | GESYYQDMMTAVVKEFE<br>EK |  |  |  |  |  |                                                    |  |  |  | Mascot |
|    | 2300.0098                                                                                               | 2300.1367 | 0.1269  | 55  | 335 | 353 | GESYYQDMMTAVVKEFE<br>EK |  |  |  |  |  | Oxidation (M)[8]                                   |  |  |  | Mascot |
| 45 | PREDICTED: serine/threonine-protein kinase pim-2-like gi 326675052 52407.5 9.24 8 30 0<br>[Danio rerio] |           |         |     |     |     |                         |  |  |  |  |  |                                                    |  |  |  |        |

Peptide Information

| Calc. Mass | Obsrv. Mass | ± da    | ± ppm | Start Seq. | End Seq. | Sequence                  | Ion Score | C. I. | % Modification                                     | Rank | Result Type |
|------------|-------------|---------|-------|------------|----------|---------------------------|-----------|-------|----------------------------------------------------|------|-------------|
| 864.4971   | 864.4794    | -0.0177 | -20   | 1          | 7        | MLRITTVK                  |           |       | Oxidation (M)[1]                                   |      | Mascot      |
| 1325.6089  | 1325.719    | 0.1101  | 83    | 159        | 170      | QAVFAAQTCQQR              |           |       |                                                    |      | Mascot      |
| 1325.6089  | 1325.719    | 0.1101  | 83    | 159        | 170      | QAVFAAQTCQQR              |           |       |                                                    |      | Mascot      |
| 1347.7267  | 1347.6898   | -0.0369 | -27   | 143        | 154      | SYVGPIKEDAIR              |           |       |                                                    |      | Mascot      |
| 1563.8013  | 1563.8088   | 0.0075  | 5     | 299        | 312      | EDLSWTKNSTALAK            |           |       |                                                    |      | Mascot      |
| 1563.8013  | 1563.8088   | 0.0075  | 5     | 299        | 312      | EDLSWTKNSTALAK            |           |       |                                                    |      | Mascot      |
| 1844.8969  | 1844.845    | -0.0519 | -28   | 155        | 170      | FIMKQAVFAAQTCQQR          |           |       |                                                    |      | Mascot      |
| 1844.8969  | 1844.845    | -0.0519 | -28   | 155        | 170      | FIMKQAVFAAQTCQQR          |           |       |                                                    |      | Mascot      |
| 2247.0928  | 2247.063    | -0.0298 | -13   | 43         | 63       | KYEIGEELGEGGFGTVYA<br>ATR |           |       |                                                    |      | Mascot      |
| 2265.9495  | 2266.0667   | 0.1172  | 52    | 258        | 275      | IMTKDIEGLSEECDFMR         |           |       | Carbamidomethyl (C)[13,14], Oxidation<br>(M)[2,17] |      | Mascot      |
| 2283.2529  | 2283.1423   | -0.1106 | -48   | 8          | 27       | SSILPALHQPFKSQTMLQ<br>LK  |           |       | Oxidation (M)[16]                                  |      | Mascot      |
| 2283.2529  | 2283.1423   | -0.1106 | -48   | 8          | 27       | SSILPALHQPFKSQTMLQ<br>LK  |           |       | Oxidation (M)[16]                                  |      | Mascot      |

46

novel protein (wu:fj53d02) [Danio rerio]

gi|122891311

95823.2

6.41

14

30

0

Peptide Information

| Calc. Mass | Obsrv. Mass | ± da    | ± ppm | Start Seq. | End Seq. | Sequence | Ion Score | C. I. | % Modification         | Rank | Result Type |
|------------|-------------|---------|-------|------------|----------|----------|-----------|-------|------------------------|------|-------------|
| 850.4781   | 850.5255    | 0.0474  | 56    | 635        | 641      | ARYLAEK  |           |       |                        |      | Mascot      |
| 971.6135   | 971.525     | -0.0885 | -91   | 318        | 325      | LIEKLEVK |           |       |                        |      | Mascot      |
| 973.4083   | 973.4948    | 0.0865  | 89    | 268        | 275      | YFDPSCGK |           |       | Carbamidomethyl (C)[6] |      | Mascot      |

|    |                                      |           |         |      |              |     |                            |      |    |    |                                             |  |  |  |  |  |        |
|----|--------------------------------------|-----------|---------|------|--------------|-----|----------------------------|------|----|----|---------------------------------------------|--|--|--|--|--|--------|
|    | 973.5002                             | 973.4948  | -0.0054 | -6   | 411          | 418 | GRFYAFGR                   |      |    |    |                                             |  |  |  |  |  | Mascot |
|    | 1234.6096                            | 1234.6344 | 0.0248  | 20   | 62           | 71  | DEQERCITIK                 |      |    |    |                                             |  |  |  |  |  | Mascot |
|    | 1316.7144                            | 1316.6753 | -0.0391 | -30  | 430          | 441 | VRIMGPNFTPGK               |      |    |    |                                             |  |  |  |  |  | Mascot |
|    | 1475.7896                            | 1475.7279 | -0.0617 | -42  | 151          | 162 | IKPVLMMNKMDR               |      |    |    |                                             |  |  |  |  |  | Mascot |
|    | 1493.6835                            | 1493.7123 | 0.0288  | 19   | 692          | 704 | EGALCEENMRAVR              |      |    |    | Oxidation (M)[9]                            |  |  |  |  |  | Mascot |
|    | 1699.7852                            | 1699.9062 | 0.121   | 71   | 390          | 403 | NCDPKAPLMMYISK             |      |    |    | Carbamidomethyl (C)[2], Oxidation (M)[9,10] |  |  |  |  |  | Mascot |
|    | 1707.8734                            | 1707.7456 | -0.1278 | -75  | 2            | 15  | VNFTVDQIREIMDK             |      |    |    |                                             |  |  |  |  |  | Mascot |
|    | 1773.9713                            | 1773.7863 | -0.185  | -104 | 145          | 159 | QAIAERIKPVLMMNK            |      |    |    | Oxidation (M)[12,13]                        |  |  |  |  |  | Mascot |
|    | 1838.9139                            | 1838.8802 | -0.0337 | -18  | 1            | 15  | MVNFTVDQIREIMDK            |      |    |    |                                             |  |  |  |  |  | Mascot |
|    | 2230.0154                            | 2230.1536 | 0.1382  | 62   | 370          | 389 | YRCELLYEGPGDDEAAM<br>GIK   |      |    |    |                                             |  |  |  |  |  | Mascot |
|    | 2371.1743                            | 2371.0925 | -0.0818 | -34  | 21           | 42  | NMSVIAHVDHGKSTLTDS<br>LVCK |      |    |    | Oxidation (M)[2]                            |  |  |  |  |  | Mascot |
|    | 2371.1743                            | 2371.0925 | -0.0818 | -34  | 21           | 42  | NMSVIAHVDHGKSTLTDS<br>LVCK |      |    |    | Oxidation (M)[2]                            |  |  |  |  |  | Mascot |
| 47 | PREDICTED: tankyrase-1 [Danio rerio] |           |         |      | gi 125847900 |     | 134832                     | 6.42 | 14 | 29 | 0                                           |  |  |  |  |  |        |

#### Peptide Information

| Calc. Mass | Obsrv. Mass | ± da    | ± ppm | Start Seq. | End Seq. | Sequence                      | Ion Score | C. I. | % Modification                           | Rank | Result Type |
|------------|-------------|---------|-------|------------|----------|-------------------------------|-----------|-------|------------------------------------------|------|-------------|
| 870.396    | 870.5257    | 0.1297  | 149   | 1173       | 1178     | QMLFCR                        |           |       | Carbamidomethyl (C)[5], Oxidation (M)[2] |      | Mascot      |
| 971.5883   | 971.525     | -0.0633 | -65   | 464        | 471      | QVTELLLR                      |           |       |                                          |      | Mascot      |
| 973.506    | 973.4948    | -0.0112 | -12   | 473        | 481      | GANVNEKNK                     |           |       |                                          |      | Mascot      |
| 973.506    | 973.4948    | -0.0112 | -12   | 473        | 481      | GANVNEKNK                     |           |       |                                          |      | Mascot      |
| 1058.584   | 1058.5728   | -0.0112 | -11   | 126        | 135      | LVDSVNVNAK                    |           |       |                                          |      | Mascot      |
| 1179.6805  | 1179.5756   | -0.1049 | -89   | 688        | 696      | YEICKLLLK                     |           |       | Carbamidomethyl (C)[4]                   |      | Mascot      |
| 1279.7004  | 1279.7494   | 0.049   | 38    | 494        | 504      | AHNDILEVLQK                   |           |       |                                          |      | Mascot      |
| 1493.7594  | 1493.7123   | -0.0471 | -32   | 572        | 584      | NSDVDYRLLEAAK                 |           |       |                                          |      | Mascot      |
| 1495.6958  | 1495.8158   | 0.12    | 80    | 110        | 122      | ELFEACRNGDVSR                 |           |       |                                          |      | Mascot      |
| 1584.8492  | 1584.8456   | -0.0036 | -2    | 962        | 974      | SLGLEHLRDIFER                 |           |       |                                          |      | Mascot      |
| 1584.8492  | 1584.8456   | -0.0036 | -2    | 962        | 974      | SLGLEHLRDIFER                 |           |       |                                          |      | Mascot      |
| 1633.8148  | 1633.802    | -0.0128 | -8    | 744        | 756      | VQKLCSELENINCR                |           |       | Carbamidomethyl (C)[5,12]                |      | Mascot      |
| 1773.7804  | 1773.7863   | 0.0059  | 3     | 1166       | 1178     | SCYICHRQMLFCR                 |           |       | Carbamidomethyl (C)[2,5]                 |      | Mascot      |
| 1838.849   | 1838.8802   | 0.0312  | 17    | 1146       | 1163     | SNQYVYGIGGGTGCP<br>THK        |           |       |                                          |      | Mascot      |
| 2118.0066  | 2117.9473   | -0.0593 | -28   | 585        | 603      | AGDLDTVKQLCSPQNVN<br>CR       |           |       | Carbamidomethyl (C)[11]                  |      | Mascot      |
| 2705.3723  | 2705.1128   | -0.2595 | -96   | 509        | 533      | MNAVDTLGQTALHRAAL<br>AGHLQTCR |           |       | Carbamidomethyl (C)[24]                  |      | Mascot      |

48 PREDICTED: zinc finger protein 629 [Danio rerio] gi|292614670 69451.9 9.49 1 12 0

#### Peptide Information

|  | Calc. Mass | Obsrv. Mass | ± da    | ± ppm | Start Seq. | End Sequence Seq. | Ion Score | C. I. % | Modification | Rank | Result Type |
|--|------------|-------------|---------|-------|------------|-------------------|-----------|---------|--------------|------|-------------|
|  | 973.5214   | 973.4948    | -0.0266 | -27   | 31         | 38 DKGITFHR       | 12        | 0       |              | 2    | Mascot      |

49 PREDICTED: inositol 1,4,5-trisphosphate receptor type 2, partial [Danio rerio] gi|326676026 226478.9 6.12 1 11 0

#### Peptide Information

|  | Calc. Mass | Obsrv. Mass | ± da   | ± ppm | Start Seq. | End Sequence Seq. | Ion Score | C. I. % | Modification     | Rank | Result Type |
|--|------------|-------------|--------|-------|------------|-------------------|-----------|---------|------------------|------|-------------|
|  | 1325.6154  | 1325.719    | 0.1036 | 78    | 1675       | 1685 EMFDEKGNALR  | 13        | 0       | Oxidation (M)[2] | 2    | Mascot      |

50 COMM domain-containing protein 1 [Danio rerio] gi|113674991 21219.7 5.48 1 11 0

#### Peptide Information

|  | Calc. Mass | Obsrv. Mass | ± da    | ± ppm | Start Seq. | End Sequence Seq.    | Ion Score | C. I. % | Modification     | Rank | Result Type |
|--|------------|-------------|---------|-------|------------|----------------------|-----------|---------|------------------|------|-------------|
|  | 1844.8807  | 1844.845    | -0.0357 | -19   | 174        | 189 NMAELQESIDSIVHRS | 11        | 0       | Oxidation (M)[2] | 2    | Mascot      |

|                |           |                        |                |                |                    |
|----------------|-----------|------------------------|----------------|----------------|--------------------|
| Gel Idx/Pos    | 187/H14   | Instr./Gel Origin      | BA2060/110707A | Process Status | Analysis Succeeded |
| Plate [#] Name | [1] 31496 | Instrument Sample Name |                | Spectra        | 11                 |

| Rank | Protein Name                | Accession No. | Protein MW | Protein PI | Pep. Count | Protein Score | Protein Score C. I. % | Total Ion Score | Total Ion C. I. % |
|------|-----------------------------|---------------|------------|------------|------------|---------------|-----------------------|-----------------|-------------------|
| 1    | transferrin-a [Danio rerio] | gi 220672954  | 73234.7    | 6.61       | 17         | 166           | 100                   | 103             | 100               |

#### Peptide Information

|  | Calc. Mass | Obsrv. Mass | ± da    | ± ppm | Start Seq. | End Sequence Seq.   | Ion Score | C. I. % | Modification              | Rank | Result Type |
|--|------------|-------------|---------|-------|------------|---------------------|-----------|---------|---------------------------|------|-------------|
|  | 1149.5898  | 1149.5762   | -0.0136 | -12   | 108        | 118 AGSGFNINELK     |           |         |                           |      | Mascot      |
|  | 1184.4572  | 1184.4415   | -0.0157 | -13   | 121        | 129 SSCHSCYQR       |           |         | Carbamidomethyl (C)[3,6]  |      | Mascot      |
|  | 1420.6201  | 1420.5984   | -0.0217 | -15   | 196        | 207 YFGDDGAFQCLK    |           |         | Carbamidomethyl (C)[10]   |      | Mascot      |
|  | 1485.6461  | 1485.6229   | -0.0232 | -16   | 227        | 238 QNYELLCMDGSR    |           |         | Carbamidomethyl (C)[7]    |      | Mascot      |
|  | 1557.7366  | 1557.7135   | -0.0231 | -15   | 146        | 158 ITWEGPNEMPVER   |           |         |                           |      | Mascot      |
|  | 1572.7792  | 1572.7548   | -0.0244 | -16   | 261        | 273 TDTDLQYVYDVLK   |           |         |                           |      | Mascot      |
|  | 1573.7314  | 1573.7151   | -0.0163 | -10   | 146        | 158 ITWEGPNEMPVER   |           |         | Oxidation (M)[9]          |      | Mascot      |
|  | 1573.7314  | 1573.7151   | -0.0163 | -10   | 146        | 158 ITWEGPNEMPVER   | 10        | 0       | Oxidation (M)[9]          |      | Mascot      |
|  | 1577.858   | 1577.8296   | -0.0284 | -18   | 577        | 590 CNLAQVPVHAVITR  |           |         | Carbamidomethyl (C)[1]    |      | Mascot      |
|  | 1638.7349  | 1638.8279   | 0.093   | 57    | 360        | 373 SCILEASVDDCIEK  |           |         | Carbamidomethyl (C)[2,11] |      | Mascot      |
|  | 1652.787   | 1652.8027   | 0.0157  | 9     | 359        | 373 KSCILEASVDDCIEK |           |         |                           |      | Mascot      |

|   |                             |           |         |     |              |     |                                       |      |    |     |     |    |                                              |  |  |  |        |
|---|-----------------------------|-----------|---------|-----|--------------|-----|---------------------------------------|------|----|-----|-----|----|----------------------------------------------|--|--|--|--------|
|   | 1752.8802                   | 1752.8513 | -0.0289 | -16 | 378          | 394 | EADFLAVDGGQVYIAGK                     |      |    |     |     |    |                                              |  |  |  | Mascot |
|   | 1912.9473                   | 1912.9166 | -0.0307 | -16 | 159          | 176 | AVSEFFSSSCVPGVSKP<br>K                |      |    |     |     |    | Carbamidomethyl (C)[10]                      |  |  |  | Mascot |
|   | 2028.9299                   | 2028.8933 | -0.0366 | -18 | 45           | 61  | AADIECHLQPTVIDCMR                     |      |    |     |     |    | Carbamidomethyl (C)[6,15]                    |  |  |  | Mascot |
|   | 2040.8756                   | 2040.8425 | -0.0331 | -16 | 504          | 520 | CKPSAEEQYYGYDGAFR                     |      |    |     |     |    | Carbamidomethyl (C)[1]                       |  |  |  | Mascot |
|   | 2040.8756                   | 2040.8425 | -0.0331 | -16 | 504          | 520 | CKPSAEEQYYGYDGAFR                     | 93   |    | 100 |     |    | Carbamidomethyl (C)[1]                       |  |  |  | Mascot |
|   | 2044.9249                   | 2044.9039 | -0.021  | -10 | 45           | 61  | AADIECHLQPTVIDCMR                     |      |    |     |     |    | Carbamidomethyl (C)[6,15], Oxidation (M)[16] |  |  |  | Mascot |
|   | 2179.9937                   | 2179.9604 | -0.0333 | -15 | 208          | 226 | NDNGQVAFVCHHAIPES<br>ER               |      |    |     |     |    | Carbamidomethyl (C)[10]                      |  |  |  | Mascot |
|   | 2300.1768                   | 2300.1436 | -0.0332 | -14 | 595          | 615 | SAVVSFLSDIQSKNNDLF<br>TSK             |      |    |     |     |    |                                              |  |  |  | Mascot |
|   | 3338.5085                   | 3338.7083 | 0.1998  | 60  | 395          | 427 | CGLVPVMAEQSNSQSCS<br>SGSGGTASYAVAVVR  |      |    |     |     |    | Carbamidomethyl (C)[1], Oxidation (M)[7]     |  |  |  | Mascot |
|   | 3459.8481                   | 3459.7966 | -0.0515 | -15 | 62           | 95  | SIAAGGTDIVTDGANVF<br>TGGLNNYLLRPPIAEK |      |    |     |     |    |                                              |  |  |  | Mascot |
| 2 | Transferrin-a [Danio rerio] |           |         |     | gi 112180541 |     | 56852.3                               | 5.58 | 12 | 135 | 100 | 93 | 100                                          |  |  |  |        |

Peptide Information

| Calc. Mass | Obsrv. Mass | ± da    | ± ppm | Start Seq. | End Seq. | Sequence                             | Ion Score | C. I. | %   | Modification                             | Rank | Result Type |
|------------|-------------|---------|-------|------------|----------|--------------------------------------|-----------|-------|-----|------------------------------------------|------|-------------|
| 1420.6201  | 1420.5984   | -0.0217 | -15   | 43         | 54       | YFGDDGAFQCLK                         |           |       |     | Carbamidomethyl (C)[10]                  |      | Mascot      |
| 1485.6461  | 1485.6229   | -0.0232 | -16   | 74         | 85       | QNYELLCMDGSR                         |           |       |     | Carbamidomethyl (C)[7]                   |      | Mascot      |
| 1572.7792  | 1572.7548   | -0.0244 | -16   | 108        | 120      | TDTDLQYVYDVLK                        |           |       |     |                                          |      | Mascot      |
| 1577.858   | 1577.8296   | -0.0284 | -18   | 424        | 437      | CNLAQVPVHAVITR                       |           |       |     | Carbamidomethyl (C)[1]                   |      | Mascot      |
| 1638.7349  | 1638.8279   | 0.093   | 57    | 207        | 220      | SCILEASVDDCIEK                       |           |       |     | Carbamidomethyl (C)[2,11]                |      | Mascot      |
| 1652.787   | 1652.8027   | 0.0157  | 9     | 206        | 220      | KSCILEASVDDCIEK                      |           |       |     |                                          |      | Mascot      |
| 1752.8802  | 1752.8513   | -0.0289 | -16   | 225        | 241      | EADFLAVDGGQVYIAGK                    |           |       |     |                                          |      | Mascot      |
| 1912.9473  | 1912.9166   | -0.0307 | -16   | 6          | 23       | AVSEFFSSSCVPGVSKP<br>K               |           |       |     | Carbamidomethyl (C)[10]                  |      | Mascot      |
| 2040.8756  | 2040.8425   | -0.0331 | -16   | 351        | 367      | CKPSAEEQYYGYDGAFR                    |           |       |     | Carbamidomethyl (C)[1]                   |      | Mascot      |
| 2040.8756  | 2040.8425   | -0.0331 | -16   | 351        | 367      | CKPSAEEQYYGYDGAFR                    | 93        |       | 100 | Carbamidomethyl (C)[1]                   |      | Mascot      |
| 2179.9937  | 2179.9604   | -0.0333 | -15   | 55         | 73       | NDNGQVAFVCHHAIPES<br>ER              |           |       |     | Carbamidomethyl (C)[10]                  |      | Mascot      |
| 2300.1768  | 2300.1436   | -0.0332 | -14   | 442        | 462      | SAVVSFLSDIQSKNNDLF<br>TSK            |           |       |     |                                          |      | Mascot      |
| 3338.5085  | 3338.7083   | 0.1998  | 60    | 242        | 274      | CGLVPVMAEQSNSQSCS<br>SGSGGTASYAVAVVR |           |       |     | Carbamidomethyl (C)[1], Oxidation (M)[7] |      | Mascot      |

|   |                             |  |  |  |              |  |         |      |    |     |     |    |     |  |  |  |  |
|---|-----------------------------|--|--|--|--------------|--|---------|------|----|-----|-----|----|-----|--|--|--|--|
| 3 | Transferrin-a [Danio rerio] |  |  |  | gi 159155968 |  | 56844.4 | 5.78 | 12 | 133 | 100 | 93 | 100 |  |  |  |  |
|---|-----------------------------|--|--|--|--------------|--|---------|------|----|-----|-----|----|-----|--|--|--|--|

Peptide Information

| Calc. Mass | Obsrv. Mass | ± da    | ± ppm | Start Seq. | End Seq. | Sequence     | Ion Score | C. I. | % | Modification            | Rank | Result Type |
|------------|-------------|---------|-------|------------|----------|--------------|-----------|-------|---|-------------------------|------|-------------|
| 1420.6201  | 1420.5984   | -0.0217 | -15   | 43         | 54       | YFGDDGAFQCLK |           |       |   | Carbamidomethyl (C)[10] |      | Mascot      |
| 1485.6461  | 1485.6229   | -0.0232 | -16   | 74         | 85       | QNYELLCMDGSR |           |       |   | Carbamidomethyl (C)[7]  |      | Mascot      |

|   |                                                                   |           |         |     |     |             |                           |      |     |     |     |    |        |                           |        |
|---|-------------------------------------------------------------------|-----------|---------|-----|-----|-------------|---------------------------|------|-----|-----|-----|----|--------|---------------------------|--------|
|   | 1572.7145                                                         | 1572.7548 | 0.0403  | 26  | 74  | 86          | QNYELLCMDGSRK             |      |     |     |     |    |        | Oxidation (M)[8]          | Mascot |
|   | 1577.858                                                          | 1577.8296 | -0.0284 | -18 | 424 | 437         | CNLAQVPVHAVITR            |      |     |     |     |    |        | Carbamidomethyl (C)[1]    | Mascot |
|   | 1638.7349                                                         | 1638.8279 | 0.093   | 57  | 207 | 220         | SCILEASVDDCIEK            |      |     |     |     |    |        | Carbamidomethyl (C)[2,11] | Mascot |
|   | 1652.787                                                          | 1652.8027 | 0.0157  | 9   | 206 | 220         | KSCILEASVDDCIEK           |      |     |     |     |    |        |                           | Mascot |
|   | 1752.8802                                                         | 1752.8513 | -0.0289 | -16 | 225 | 241         | EADFLAVDGGQVYIAGK         |      |     |     |     |    |        |                           | Mascot |
|   | 1912.9473                                                         | 1912.9166 | -0.0307 | -16 | 6   | 23          | AVSEFFSSSCVPGVSKP<br>K    |      |     |     |     |    |        | Carbamidomethyl (C)[10]   | Mascot |
|   | 2040.8756                                                         | 2040.8425 | -0.0331 | -16 | 351 | 367         | CKPSAEEQYYGYDGAFR         |      |     |     |     |    |        | Carbamidomethyl (C)[1]    | Mascot |
|   | 2040.8756                                                         | 2040.8425 | -0.0331 | -16 | 351 | 367         | CKPSAEEQYYGYDGAFR         | 93   | 100 |     |     |    |        | Carbamidomethyl (C)[1]    | Mascot |
|   | 2179.9937                                                         | 2179.9604 | -0.0333 | -15 | 55  | 73          | NDNGQVAFVCHHAIPES<br>ER   |      |     |     |     |    |        | Carbamidomethyl (C)[10]   | Mascot |
|   | 2246.9338                                                         | 2247.0632 | 0.1294  | 58  | 319 | 339         | FFSEGCAPGADPTSNMC<br>KPCK |      |     |     |     |    |        | Carbamidomethyl (C)[6]    | Mascot |
|   | 2300.1768                                                         | 2300.1436 | -0.0332 | -14 | 442 | 462         | SAVVSFLSDIQSKNNDLF<br>TSK |      |     |     |     |    |        |                           | Mascot |
| 4 | echinoderm microtubule-associated protein-like 2<br>[Danio rerio] |           |         |     |     | gi 71834606 | 88474.1                   | 6.51 | 17  | 118 | 100 | 59 | 99.973 |                           |        |

Peptide Information

| Calc. Mass | Obsrv. Mass | ± da    | ± ppm | Start Seq. | End Seq. | Sequence                      | Ion Score | C. I.  | % Modification          | Rank | Result | Type   |
|------------|-------------|---------|-------|------------|----------|-------------------------------|-----------|--------|-------------------------|------|--------|--------|
| 882.4791   | 882.5546    | 0.0755  | 86    | 39         | 45       | LSHLEQR                       |           |        |                         |      |        | Mascot |
| 1045.4467  | 1045.5497   | 0.103   | 99    | 150        | 160      | TTSSSSSTCGK                   |           |        |                         |      |        | Mascot |
| 1084.5575  | 1084.543    | -0.0145 | -13   | 213        | 220      | LQWVYGYR                      | 35        | 93.294 |                         |      |        | Mascot |
| 1084.5575  | 1084.543    | -0.0145 | -13   | 213        | 220      | LQWVYGYR                      |           |        |                         |      |        | Mascot |
| 1118.5841  | 1118.5657   | -0.0184 | -16   | 598        | 606      | WLVLDTDTR                     |           |        |                         |      |        | Mascot |
| 1216.611   | 1216.5925   | -0.0185 | -15   | 474        | 482      | VLLWDHDYR                     |           |        |                         |      |        | Mascot |
| 1344.7059  | 1344.6853   | -0.0206 | -15   | 474        | 483      | VLLWDHDYRK                    |           |        |                         |      |        | Mascot |
| 1441.7004  | 1441.679    | -0.0214 | -15   | 753        | 764      | VHLFSNPCSQPR                  |           |        | Carbamidomethyl (C)[8]  |      |        | Mascot |
| 1446.5953  | 1446.574    | -0.0213 | -15   | 167        | 178      | ECSFNADEGYVR                  |           |        | Carbamidomethyl (C)[2]  |      |        | Mascot |
| 1463.6835  | 1463.6587   | -0.0248 | -17   | 485        | 497      | SEMEVPEAFGPVR                 |           |        | Oxidation (M)[3]        |      |        | Mascot |
| 1591.7784  | 1591.7767   | -0.0017 | -1    | 484        | 497      | KSEMEVPEAFGPVR                |           |        | Oxidation (M)[4]        |      |        | Mascot |
| 1675.738   | 1675.7169   | -0.0211 | -13   | 165        | 178      | TKECSFNADEGYVR                |           |        | Carbamidomethyl (C)[4]  |      |        | Mascot |
| 1719.8701  | 1719.842    | -0.0281 | -16   | 383        | 397      | SHINFWTVEGSTLTK               |           |        |                         |      |        | Mascot |
| 1752.8949  | 1752.8513   | -0.0436 | -25   | 5          | 20       | VASCGNLYDTNTLLLR              |           |        |                         |      |        | Mascot |
| 1772.9363  | 1772.9076   | -0.0287 | -16   | 444        | 460      | VVSGAHEGGIFSLCVLK             |           |        | Carbamidomethyl (C)[14] |      |        | Mascot |
| 1993.8894  | 1993.9467   | 0.0573  | 29    | 167        | 182      | ECSFNADEGYVRMFLR              |           |        | Carbamidomethyl (C)[2]  |      |        | Mascot |
| 2185.1399  | 2185.105    | -0.0349 | -16   | 297        | 316      | VWDSVSLNTLHVIGAGVF<br>DR      | 24        | 5.268  |                         |      |        | Mascot |
| 2185.1399  | 2185.105    | -0.0349 | -16   | 297        | 316      | VWDSVSLNTLHVIGAGVF<br>DR      |           |        |                         |      |        | Mascot |
| 2808.2795  | 2808.3599   | 0.0804  | 29    | 326        | 350      | SNGGAHLCAVDDANDHI<br>LSVWDWQK |           |        | Carbamidomethyl (C)[8]  |      |        | Mascot |

5 TPA\_exp: transferrin [Danio rerio] gi|47264590 73483.9 6.81 16 65 98.593 10 0

Peptide Information

| Calc. Mass | Obsrv. Mass | ± da    | ± ppm | Start Seq. | End Seq. | Sequence                           | Ion Score | C. I. | % Modification                               | Rank | Result Type |
|------------|-------------|---------|-------|------------|----------|------------------------------------|-----------|-------|----------------------------------------------|------|-------------|
| 1149.5898  | 1149.5762   | -0.0136 | -12   | 108        | 118      | AGSGFNINELK                        |           |       |                                              |      | Mascot      |
| 1184.4572  | 1184.4415   | -0.0157 | -13   | 121        | 129      | SSCHSCYQR                          |           |       | Carbamidomethyl (C)[3,6]                     |      | Mascot      |
| 1420.6201  | 1420.5984   | -0.0217 | -15   | 196        | 207      | YFGDDGAFQCLK                       |           |       | Carbamidomethyl (C)[10]                      |      | Mascot      |
| 1485.6461  | 1485.6229   | -0.0232 | -16   | 227        | 238      | QNYELLCMDGSR                       |           |       | Carbamidomethyl (C)[7]                       |      | Mascot      |
| 1557.7366  | 1557.7135   | -0.0231 | -15   | 146        | 158      | ITWEGPNEMPVER                      |           |       |                                              |      | Mascot      |
| 1572.7792  | 1572.7548   | -0.0244 | -16   | 261        | 273      | TDTDLQYVYDVLK                      |           |       |                                              |      | Mascot      |
| 1573.7314  | 1573.7151   | -0.0163 | -10   | 146        | 158      | ITWEGPNEMPVER                      |           |       | Oxidation (M)[9]                             |      | Mascot      |
| 1573.7314  | 1573.7151   | -0.0163 | -10   | 146        | 158      | ITWEGPNEMPVER                      | 10        | 0     | Oxidation (M)[9]                             |      | Mascot      |
| 1577.858   | 1577.8296   | -0.0284 | -18   | 579        | 592      | CNLAQVPVHAVITR                     |           |       | Carbamidomethyl (C)[1]                       |      | Mascot      |
| 1638.7349  | 1638.8279   | 0.093   | 57    | 360        | 373      | SCILEASVDDCIEK                     |           |       | Carbamidomethyl (C)[2,11]                    |      | Mascot      |
| 1652.787   | 1652.8027   | 0.0157  | 9     | 359        | 373      | KSCILEASVDDCIEK                    |           |       |                                              |      | Mascot      |
| 1752.8802  | 1752.8513   | -0.0289 | -16   | 378        | 394      | EADFLAVDGGQVYIAGK                  |           |       |                                              |      | Mascot      |
| 1912.9473  | 1912.9166   | -0.0307 | -16   | 159        | 176      | AVSEFFSSSCVPGVSKPK                 |           |       | Carbamidomethyl (C)[10]                      |      | Mascot      |
| 2028.9299  | 2028.8933   | -0.0366 | -18   | 45         | 61       | AADIECHLQPTVIDCMR                  |           |       | Carbamidomethyl (C)[6,15]                    |      | Mascot      |
| 2044.9249  | 2044.9039   | -0.021  | -10   | 45         | 61       | AADIECHLQPTVIDCMR                  |           |       | Carbamidomethyl (C)[6,15], Oxidation (M)[16] |      | Mascot      |
| 2179.9937  | 2179.9604   | -0.0333 | -15   | 208        | 226      | NDNGQVAFVCHHAIPESER                |           |       | Carbamidomethyl (C)[10]                      |      | Mascot      |
| 2300.1768  | 2300.1436   | -0.0332 | -14   | 597        | 617      | SAVVSFLSDIQSKNNDLFTSK              |           |       |                                              |      | Mascot      |
| 3338.5085  | 3338.7083   | 0.1998  | 60    | 395        | 427      | CGLVPVMAEQSNSQSCSSGSGGTASYAVAVVR   |           |       | Carbamidomethyl (C)[1], Oxidation (M)[7]     |      | Mascot      |
| 3459.8481  | 3459.7966   | -0.0515 | -15   | 62         | 95       | SIAAGGTDIVTDGANVFTGGLNNYLLRPPIIAEK |           |       |                                              |      | Mascot      |

6 transferrin-a [Danio rerio] gi|220672955 31328.3 7.83 10 61 96.383 10 0

Peptide Information

| Calc. Mass | Obsrv. Mass | ± da    | ± ppm | Start Seq. | End Seq. | Sequence      | Ion Score | C. I. | % Modification           | Rank | Result Type |
|------------|-------------|---------|-------|------------|----------|---------------|-----------|-------|--------------------------|------|-------------|
| 1149.5898  | 1149.5762   | -0.0136 | -12   | 118        | 128      | AGSGFNINELK   |           |       |                          |      | Mascot      |
| 1184.4572  | 1184.4415   | -0.0157 | -13   | 131        | 139      | SSCHSCYQR     |           |       | Carbamidomethyl (C)[3,6] |      | Mascot      |
| 1420.6201  | 1420.5984   | -0.0217 | -15   | 206        | 217      | YFGDDGAFQCLK  |           |       | Carbamidomethyl (C)[10]  |      | Mascot      |
| 1485.6461  | 1485.6229   | -0.0232 | -16   | 237        | 248      | QNYELLCMDGSR  |           |       | Carbamidomethyl (C)[7]   |      | Mascot      |
| 1557.7366  | 1557.7135   | -0.0231 | -15   | 156        | 168      | ITWEGPNEMPVER |           |       |                          |      | Mascot      |
| 1572.7792  | 1572.7548   | -0.0244 | -16   | 271        | 283      | TDTDLQYVYDVLK |           |       |                          |      | Mascot      |
| 1573.7314  | 1573.7151   | -0.0163 | -10   | 156        | 168      | ITWEGPNEMPVER |           |       | Oxidation (M)[9]         |      | Mascot      |



|   |                                  |           |         |     |              |     |                                       |      |    |                                              |        |    |   |
|---|----------------------------------|-----------|---------|-----|--------------|-----|---------------------------------------|------|----|----------------------------------------------|--------|----|---|
|   | 1573.7314                        | 1573.7151 | -0.0163 | -10 | 156          | 168 | ITWEGPNEMPVER                         | 10   | 0  | Oxidation (M)[9]                             | Mascot |    |   |
|   | 1912.9473                        | 1912.9166 | -0.0307 | -16 | 169          | 186 | AVSEFFSSSCVPGVSKP<br>K                |      |    | Carbamidomethyl (C)[10]                      | Mascot |    |   |
|   | 2028.9299                        | 2028.8933 | -0.0366 | -18 | 55           | 71  | AADIECHLQPTVIDCMR                     |      |    | Carbamidomethyl (C)[6,15]                    | Mascot |    |   |
|   | 2044.9249                        | 2044.9039 | -0.021  | -10 | 55           | 71  | AADIECHLQPTVIDCMR                     |      |    | Carbamidomethyl (C)[6,15], Oxidation (M)[16] | Mascot |    |   |
|   | 2179.9937                        | 2179.9604 | -0.0333 | -15 | 218          | 236 | NDNGQVAFVCHHAIPES<br>ER               |      |    | Carbamidomethyl (C)[10]                      | Mascot |    |   |
|   | 3459.8481                        | 3459.7966 | -0.0515 | -15 | 72           | 105 | SIAAGGTDIVTDGANVF<br>TGGLNNYLLRPIIAEK |      |    |                                              | Mascot |    |   |
| 7 | mutant transferrin [Danio rerio] |           |         |     | gi 183583908 |     | 32529.2                               | 8.44 | 10 | 56                                           | 90.037 | 10 | 0 |

#### Peptide Information

|  | Calc. Mass | Obsrv. Mass | ± da    | ± ppm | Start Seq. | End Seq. | Sequence                              | Ion Score | C. I. | % Modification                               | Rank | Result | Type |
|--|------------|-------------|---------|-------|------------|----------|---------------------------------------|-----------|-------|----------------------------------------------|------|--------|------|
|  | 1149.5898  | 1149.5762   | -0.0136 | -12   | 108        | 118      | AGSGFNINELK                           |           |       |                                              |      | Mascot |      |
|  | 1184.4572  | 1184.4415   | -0.0157 | -13   | 121        | 129      | SSCHSCYQR                             |           |       | Carbamidomethyl (C)[3,6]                     |      | Mascot |      |
|  | 1420.6201  | 1420.5984   | -0.0217 | -15   | 196        | 207      | YFGDDGAFQCLK                          |           |       | Carbamidomethyl (C)[10]                      |      | Mascot |      |
|  | 1485.6461  | 1485.6229   | -0.0232 | -16   | 227        | 238      | QNYELLCMDGSR                          |           |       | Carbamidomethyl (C)[7]                       |      | Mascot |      |
|  | 1557.7366  | 1557.7135   | -0.0231 | -15   | 146        | 158      | ITWEGPNEMPVER                         |           |       |                                              |      | Mascot |      |
|  | 1572.7792  | 1572.7548   | -0.0244 | -16   | 261        | 273      | TDTDLQYVYDVLK                         |           |       |                                              |      | Mascot |      |
|  | 1573.7314  | 1573.7151   | -0.0163 | -10   | 146        | 158      | ITWEGPNEMPVER                         |           |       | Oxidation (M)[9]                             |      | Mascot |      |
|  | 1573.7314  | 1573.7151   | -0.0163 | -10   | 146        | 158      | ITWEGPNEMPVER                         | 10        | 0     | Oxidation (M)[9]                             |      | Mascot |      |
|  | 1912.9473  | 1912.9166   | -0.0307 | -16   | 159        | 176      | AVSEFFSSSCVPGVSKP<br>K                |           |       | Carbamidomethyl (C)[10]                      |      | Mascot |      |
|  | 2028.9299  | 2028.8933   | -0.0366 | -18   | 45         | 61       | AADIECHLQPTVIDCMR                     |           |       | Carbamidomethyl (C)[6,15]                    |      | Mascot |      |
|  | 2044.9249  | 2044.9039   | -0.021  | -10   | 45         | 61       | AADIECHLQPTVIDCMR                     |           |       | Carbamidomethyl (C)[6,15], Oxidation (M)[16] |      | Mascot |      |
|  | 2179.9937  | 2179.9604   | -0.0333 | -15   | 208        | 226      | NDNGQVAFVCHHAIPES<br>ER               |           |       | Carbamidomethyl (C)[10]                      |      | Mascot |      |
|  | 3459.8481  | 3459.7966   | -0.0515 | -15   | 62         | 95       | SIAAGGTDIVTDGANVF<br>TGGLNNYLLRPIIAEK |           |       |                                              |      | Mascot |      |

|   |                                                            |  |  |  |              |  |         |      |   |    |        |  |  |
|---|------------------------------------------------------------|--|--|--|--------------|--|---------|------|---|----|--------|--|--|
| 8 | PREDICTED: hypothetical protein LOC100537957 [Danio rerio] |  |  |  | gi 326680154 |  | 13500.6 | 8.77 | 8 | 50 | 53.402 |  |  |
|---|------------------------------------------------------------|--|--|--|--------------|--|---------|------|---|----|--------|--|--|

#### Peptide Information

|  | Calc. Mass | Obsrv. Mass | ± da    | ± ppm | Start Seq. | End Seq. | Sequence       | Ion Score | C. I. | % Modification   | Rank | Result | Type |
|--|------------|-------------|---------|-------|------------|----------|----------------|-----------|-------|------------------|------|--------|------|
|  | 1084.5634  | 1084.543    | -0.0204 | -19   | 5          | 14       | DQAEVNAIK      |           |       |                  |      | Mascot |      |
|  | 1084.5634  | 1084.543    | -0.0204 | -19   | 5          | 14       | DQAEVNAIK      |           |       |                  |      | Mascot |      |
|  | 1184.4976  | 1184.4415   | -0.0561 | -47   | 75         | 83       | AEMFHCQFR      |           |       | Oxidation (M)[3] |      | Mascot |      |
|  | 1441.6351  | 1441.679    | 0.0439  | 30    | 73         | 83       | EKAEMFHCQFR    |           |       | Oxidation (M)[5] |      | Mascot |      |
|  | 1475.7377  | 1475.7318   | -0.0059 | -4    | 35         | 48       | WLSISESGVSGPEK |           |       |                  |      | Mascot |      |
|  | 1557.709   | 1557.7135   | 0.0045  | 3     | 75         | 86       | AEMFHCQFRNFK   |           |       |                  |      | Mascot |      |

|   |                                                |           |        |     |    |             |                                    |      |   |    |                  |        |
|---|------------------------------------------------|-----------|--------|-----|----|-------------|------------------------------------|------|---|----|------------------|--------|
|   | 1573.7039                                      | 1573.7151 | 0.0112 | 7   | 75 | 86          | AEMFHCQFRNFK                       |      |   |    | Oxidation (M)[3] | Mascot |
|   | 1573.7891                                      | 1573.7151 | -0.074 | -47 | 1  | 14          | MVDKDAQAEVNAIPK                    |      |   |    | Oxidation (M)[1] | Mascot |
|   | 2225.0344                                      | 2225.085  | 0.0506 | 23  | 94 | 111         | NNWETIGHLWSNFGRCY<br>K             |      |   |    |                  | Mascot |
|   | 2225.0344                                      | 2225.085  | 0.0506 | 23  | 94 | 111         | NNWETIGHLWSNFGRCY<br>K             |      |   |    |                  | Mascot |
|   | 3459.7366                                      | 3459.7966 | 0.06   | 17  | 5  | 34          | DQAEVNAIPKVFNESDILL<br>CWYHVTQAVTR |      |   |    |                  | Mascot |
| 9 | IGF-IRa tyrosine kinase receptor [Danio rerio] |           |        |     |    | gi 20302782 | 14771.6                            | 8.66 | 7 | 46 | 0                |        |

#### Peptide Information

| Calc. Mass | Obsrv. Mass | ± da    | ± ppm | Start Seq. | End Seq. | Sequence                          | Ion Score | C. I. | % Modification       | Rank | Result Type |
|------------|-------------|---------|-------|------------|----------|-----------------------------------|-----------|-------|----------------------|------|-------------|
| 1084.6011  | 1084.543    | -0.0581 | -54   | 115        | 123      | FVHRDLAAR                         |           |       |                      |      | Mascot      |
| 1084.6011  | 1084.543    | -0.0581 | -54   | 115        | 123      | FVHRDLAAR                         |           |       |                      |      | Mascot      |
| 1485.7908  | 1485.6229   | -0.1679 | -113  | 82         | 95       | EQGSSSQSLPPLKK                    |           |       |                      |      | Mascot      |
| 1572.8228  | 1572.7548   | -0.068  | -43   | 80         | 94       | SKEQGSSSQSLPPLK                   |           |       |                      |      | Mascot      |
| 2040.9551  | 2040.8425   | -0.1126 | -55   | 96         | 114      | MIQMAGEIADGMAYLNA<br>NK           |           |       |                      |      | Mascot      |
| 2040.9551  | 2040.8425   | -0.1126 | -55   | 96         | 114      | MIQMAGEIADGMAYLNA<br>NK           |           |       |                      |      | Mascot      |
| 2185.0449  | 2185.105    | 0.0601  | 28    | 95         | 114      | KMIQMAGEIADGMAYLN<br>ANK          |           |       | Oxidation (M)[2]     |      | Mascot      |
| 2185.2083  | 2185.105    | -0.1033 | -47   | 49         | 68       | LLGVVSQGGPTLVIMELM<br>TR          |           |       |                      |      | Mascot      |
| 3338.717   | 3338.7083   | -0.0087 | -3    | 40         | 68       | EFNCHHVVRLLGVVSQG<br>QPTLVIMELMTR |           |       | Oxidation (M)[24,27] |      | Mascot      |

|    |                                                              |  |  |  |  |             |         |     |   |    |   |  |
|----|--------------------------------------------------------------|--|--|--|--|-------------|---------|-----|---|----|---|--|
| 10 | PREDICTED: homeobox protein Hox-C11a isoform 2 [Danio rerio] |  |  |  |  | gi 68437229 | 34998.9 | 9.1 | 9 | 43 | 0 |  |
|----|--------------------------------------------------------------|--|--|--|--|-------------|---------|-----|---|----|---|--|

#### Peptide Information

| Calc. Mass | Obsrv. Mass | ± da    | ± ppm | Start Seq. | End Seq. | Sequence          | Ion Score | C. I. | % Modification                                 | Rank | Result Type |
|------------|-------------|---------|-------|------------|----------|-------------------|-----------|-------|------------------------------------------------|------|-------------|
| 842.4114   | 842.4988    | 0.0874  | 104   | 226        | 233      | SGHSTTPR          |           |       |                                                |      | Mascot      |
| 1216.6208  | 1216.5925   | -0.0283 | -23   | 74         | 84       | DLPFELNPSGK       |           |       |                                                |      | Mascot      |
| 1320.6622  | 1320.6135   | -0.0487 | -37   | 252        | 261      | EFFFNVIYINK       |           |       |                                                |      | Mascot      |
| 1441.8485  | 1441.679    | -0.1695 | -118  | 265        | 276      | LQLSRILNLTDNR     |           |       |                                                |      | Mascot      |
| 1572.7223  | 1572.7548   | 0.0325  | 21    | 2          | 15       | FNSVNIIGNFCSQSR   |           |       |                                                |      | Mascot      |
| 1577.7998  | 1577.8296   | 0.0298  | 19    | 252        | 263      | EFFFNVIYINKEK     |           |       |                                                |      | Mascot      |
| 1675.861   | 1675.7169   | -0.1441 | -86   | 176        | 192      | GSSGKPESASQVSSVLR |           |       |                                                |      | Mascot      |
| 1719.7577  | 1719.842    | 0.0843  | 49    | 1          | 15       | MFNSVNIIGNFCSQSR  |           |       | Oxidation (M)[1]                               |      | Mascot      |
| 1772.7573  | 1772.9076   | 0.1503  | 85    | 104        | 118      | DCLPPSATMTMLMK    |           |       | Carbamidomethyl (C)[2], Oxidation (M)[9,12,14] |      | Mascot      |

|    |                                                                     |  |  |  |  |             |         |      |   |    |   |  |
|----|---------------------------------------------------------------------|--|--|--|--|-------------|---------|------|---|----|---|--|
| 11 | novel protein similar to vertebrate copine IV (CPNE4) [Danio rerio] |  |  |  |  | gi 94732437 | 25404.6 | 5.47 | 8 | 42 | 0 |  |
|----|---------------------------------------------------------------------|--|--|--|--|-------------|---------|------|---|----|---|--|

| Peptide Information |                                                     |         |       |            |             |                          |           |       |                                          |      |             |
|---------------------|-----------------------------------------------------|---------|-------|------------|-------------|--------------------------|-----------|-------|------------------------------------------|------|-------------|
| Calc. Mass          | Obsrv. Mass                                         | ± da    | ± ppm | Start Seq. | End Seq.    | Sequence                 | Ion Score | C. I. | % Modification                           | Rank | Result Type |
| 996.4819            | 996.5818                                            | 0.0999  | 100   | 66         | 74          | SCINPTFSK                |           |       |                                          |      | Mascot      |
| 996.4819            | 996.5818                                            | 0.0999  | 100   | 66         | 74          | SCINPTFSK                |           |       |                                          |      | Mascot      |
| 1441.7719           | 1441.679                                            | -0.0929 | -64   | 36         | 48          | DALSKPDPCVVIK            |           |       | Carbamidomethyl (C)[9]                   |      | Mascot      |
| 1475.6543           | 1475.7318                                           | 0.0775  | 53    | 209        | 221         | TSLNSLCSGDHER            |           |       | Carbamidomethyl (C)[7]                   |      | Mascot      |
| 1485.6903           | 1485.6229                                           | -0.0674 | -45   | 49         | 60          | MQSHGQWLEVDR             |           |       |                                          |      | Mascot      |
| 1772.896            | 1772.9076                                           | 0.0116  | 7     | 209        | 224         | TSLNSLCSGDHERILK         |           |       |                                          |      | Mascot      |
| 1913.016            | 1912.9166                                           | -0.0994 | -52   | 31         | 48          | GISDRDALSKPDPCVVIK       |           |       |                                          |      | Mascot      |
| 2023.9246           | 2023.8156                                           | -0.109  | -54   | 104        | 122         | EADCLGAMECTLGQIVS<br>QR  |           |       |                                          |      | Mascot      |
| 2023.9246           | 2023.8156                                           | -0.109  | -54   | 104        | 122         | EADCLGAMECTLGQIVS<br>QR  |           |       |                                          |      | Mascot      |
| 2225.0359           | 2225.085                                            | 0.0491  | 22    | 104        | 123         | EADCLGAMECTLGQIVS<br>QRK |           |       | Carbamidomethyl (C)[4], Oxidation (M)[8] |      | Mascot      |
| 2225.0359           | 2225.085                                            | 0.0491  | 22    | 104        | 123         | EADCLGAMECTLGQIVS<br>QRK |           |       | Carbamidomethyl (C)[4], Oxidation (M)[8] |      | Mascot      |
| 12                  | T-cell receptor alpha variable region [Danio rerio] |         |       |            | gi 11139444 | 6844.6                   | 9.67      | 5     | 42                                       | 0    |             |

| Peptide Information |                                                         |         |       |            |              |                 |           |       |                  |      |             |
|---------------------|---------------------------------------------------------|---------|-------|------------|--------------|-----------------|-----------|-------|------------------|------|-------------|
| Calc. Mass          | Obsrv. Mass                                             | ± da    | ± ppm | Start Seq. | End Seq.     | Sequence        | Ion Score | C. I. | % Modification   | Rank | Result Type |
| 1084.6262           | 1084.543                                                | -0.0832 | -77   | 30         | 38           | ERFHAALIK       |           |       |                  |      | Mascot      |
| 1084.6262           | 1084.543                                                | -0.0832 | -77   | 30         | 38           | ERFHAALIK       |           |       |                  |      | Mascot      |
| 1320.7092           | 1320.6135                                               | -0.0957 | -72   | 6          | 16           | INGVPRYMLNK     |           |       | Oxidation (M)[8] |      | Mascot      |
| 1420.6414           | 1420.5984                                               | -0.043  | -30   | 47         | 58           | DLRVSDSTVYYC    |           |       |                  |      | Mascot      |
| 1638.9941           | 1638.8279                                               | -0.1662 | -101  | 32         | 46           | FHAALIKTSVPLTIK |           |       |                  |      | Mascot      |
| 1752.8585           | 1752.8513                                               | -0.0072 | -4    | 12         | 26           | YMLNKITNTSGHTEK |           |       | Oxidation (M)[2] |      | Mascot      |
| 13                  | PREDICTED: hypothetical protein LOC325902 [Danio rerio] |         |       |            | gi 292621312 | 43251.8         | 5.91      | 9     | 39               | 0    |             |

| Peptide Information |             |         |       |            |          |              |           |       |                       |      |             |
|---------------------|-------------|---------|-------|------------|----------|--------------|-----------|-------|-----------------------|------|-------------|
| Calc. Mass          | Obsrv. Mass | ± da    | ± ppm | Start Seq. | End Seq. | Sequence     | Ion Score | C. I. | % Modification        | Rank | Result Type |
| 850.5145            | 850.5313    | 0.0168  | 20    | 77         | 83       | IKLASYSR     |           |       |                       |      | Mascot      |
| 1084.611            | 1084.543    | -0.068  | -63   | 2          | 10       | NLNEKKPNK    |           |       |                       |      | Mascot      |
| 1084.611            | 1084.543    | -0.068  | -63   | 2          | 10       | NLNEKKPNK    |           |       |                       |      | Mascot      |
| 1441.8022           | 1441.679    | -0.1232 | -85   | 55         | 66       | GIHFTVTQIRNR |           |       |                       |      | Mascot      |
| 1446.5632           | 1446.574    | 0.0108  | 7     | 256        | 267      | AFHCSMLGMMDR |           |       | Oxidation (M)[6,9,10] |      | Mascot      |

|  |           |           |         |     |     |     |                         |  |  |  |  |                    |        |
|--|-----------|-----------|---------|-----|-----|-----|-------------------------|--|--|--|--|--------------------|--------|
|  | 1493.7028 | 1493.7094 | 0.0066  | 4   | 97  | 107 | YFHMLDHMLVR             |  |  |  |  | Oxidation (M)[4,8] | Mascot |
|  | 1719.7854 | 1719.842  | 0.0566  | 33  | 200 | 215 | TEPPSLCTPNSTESTR        |  |  |  |  |                    | Mascot |
|  | 1772.9388 | 1772.9076 | -0.0312 | -18 | 354 | 370 | NKNASSPPSLEISLTK        |  |  |  |  |                    | Mascot |
|  | 2180.157  | 2179.9604 | -0.1966 | -90 | 268 | 285 | QIQVLEQLSNFTRNHQPK      |  |  |  |  |                    | Mascot |
|  | 2233.04   | 2233.0535 | 0.0135  | 6   | 335 | 353 | RSPSEPTIENEISQTMEE<br>R |  |  |  |  |                    | Mascot |

14 PREDICTED: disco-interacting protein 2 homolog C [Danio rerio] gi|189536803 170745 7.39 17 38 0

#### Peptide Information

| Calc. Mass | Obsrv. Mass | ± da    | ± ppm | Start Seq. | End Seq. | Sequence                            | Ion Score | C. I. % | Modification                                 | Rank | Result Type |
|------------|-------------|---------|-------|------------|----------|-------------------------------------|-----------|---------|----------------------------------------------|------|-------------|
| 882.4501   | 882.5546    | 0.1045  | 118   | 581        | 587      | VCQYK GK                            |           |         | Carbamidomethyl (C)[2]                       |      | Mascot      |
| 996.4852   | 996.5818    | 0.0966  | 97    | 1014       | 1021     | IATMLMER                            |           |         | Oxidation (M)[4,6]                           |      | Mascot      |
| 996.4852   | 996.5818    | 0.0966  | 97    | 1014       | 1021     | IATMLMER                            |           |         | Oxidation (M)[4,6]                           |      | Mascot      |
| 1045.5887  | 1045.5497   | -0.039  | -37   | 1242       | 1251     | GLGLQTESLK                          |           |         |                                              |      | Mascot      |
| 1084.615   | 1084.543    | -0.072  | -66   | 572        | 580      | VNPLSWIQK                           |           |         |                                              |      | Mascot      |
| 1084.615   | 1084.543    | -0.072  | -66   | 572        | 580      | VNPLSWIQK                           |           |         |                                              |      | Mascot      |
| 1165.567   | 1165.7288   | 0.1618  | 139   | 1166       | 1174     | LQCELYPSR                           |           |         | Carbamidomethyl (C)[3]                       |      | Mascot      |
| 1165.567   | 1165.7288   | 0.1618  | 139   | 1166       | 1174     | LQCELYPSR                           |           |         | Carbamidomethyl (C)[3]                       |      | Mascot      |
| 1184.5841  | 1184.4415   | -0.1426 | -120  | 374        | 383      | QEPMVRPGDR                          |           |         |                                              |      | Mascot      |
| 1316.6917  | 1316.6779   | -0.0138 | -10   | 605        | 615      | DQRDINLSSLR                         |           |         |                                              |      | Mascot      |
| 1441.8737  | 1441.679    | -0.1947 | -135  | 254        | 266      | VSAKIQQLVNTLK                       |           |         |                                              |      | Mascot      |
| 1485.806   | 1485.6229   | -0.1831 | -123  | 827        | 839      | IAVFSVTVLHDER                       |           |         |                                              |      | Mascot      |
| 1493.7781  | 1493.7094   | -0.0687 | -46   | 1163       | 1174     | SIKLQCELYPSR                        |           |         | Carbamidomethyl (C)[6]                       |      | Mascot      |
| 1772.886   | 1772.9076   | 0.0216  | 12    | 1285       | 1300     | DLGLHPRAVSTSFQGR                    |           |         | Carbamidomethyl (C)[15]                      |      | Mascot      |
| 2055.0903  | 2054.8594   | -0.2309 | -112  | 928        | 947      | QKQPEIGPASVMVGNLV<br>SGK            |           |         | Oxidation (M)[12]                            |      | Mascot      |
| 2185.1025  | 2185.105    | 0.0025  | 1     | 1074       | 1092     | MIVEVSRSAACVMTTQISK                 |           |         | Carbamidomethyl (C)[10], Oxidation (M)[1,12] |      | Mascot      |
| 2185.1025  | 2185.105    | 0.0025  | 1     | 1074       | 1092     | MIVEVSRSAACVMTTQISK                 |           |         | Carbamidomethyl (C)[10], Oxidation (M)[1,12] |      | Mascot      |
| 2211.1074  | 2211.0718   | -0.0356 | -16   | 676        | 695      | GVLSMQGLSYGVIRVDS<br>EER            |           |         | Oxidation (M)[5]                             |      | Mascot      |
| 2283.092   | 2283.144    | 0.052   | 23    | 236        | 257      | YGNAELMETGDGVPVSS<br>RVSAK          |           |         | Oxidation (M)[7]                             |      | Mascot      |
| 2283.092   | 2283.144    | 0.052   | 23    | 236        | 257      | YGNAELMETGDGVPVSS<br>RVSAK          |           |         | Oxidation (M)[7]                             |      | Mascot      |
| 2514.1792  | 2514.1936   | 0.0144  | 6     | 1536       | 1556     | MHLRDGFLADQLDPIYVA<br>YNM           |           |         | Oxidation (M)[1,21]                          |      | Mascot      |
| 3338.7341  | 3338.7083   | -0.0258 | -8    | 1121       | 1151     | KPPQLYKPSNPDTLAYLD<br>FSVSTTGMLAGVK |           |         |                                              |      | Mascot      |

15 methyltransferase-like protein 13 [Danio rerio] gi|217416336 75976.5 5.99 11 38 0

#### Peptide Information

|    |                                           | Calc. Mass | Obsrv. Mass | ± da    | ± ppm | Start Seq. | End Sequence Seq.                      | Ion Score | C. I. % | Modification                                    | Rank | Result Type |
|----|-------------------------------------------|------------|-------------|---------|-------|------------|----------------------------------------|-----------|---------|-------------------------------------------------|------|-------------|
|    |                                           | 864.4032   | 864.5068    | 0.1036  | 120   | 504        | 510 DFVPCAR                            |           |         | Carbamidomethyl (C)[5]                          |      | Mascot      |
|    |                                           | 1062.6306  | 1062.6775   | 0.0469  | 44    | 589        | 597 KVVYLLSPR                          |           |         |                                                 |      | Mascot      |
|    |                                           | 1165.6221  | 1165.7288   | 0.1067  | 92    | 598        | 607 GLFMLNLVCR                         |           |         |                                                 |      | Mascot      |
|    |                                           | 1165.6221  | 1165.7288   | 0.1067  | 92    | 598        | 607 GLFMLNLVCR                         |           |         |                                                 |      | Mascot      |
|    |                                           | 1485.796   | 1485.6229   | -0.1731 | -117  | 291        | 303 SNHFAIFVPQGR                       |           |         |                                                 |      | Mascot      |
|    |                                           | 1533.74    | 1533.8055   | 0.0655  | 43    | 630        | 643 GIEGEVNEVLLCCR                     |           |         |                                                 |      | Mascot      |
|    |                                           | 1573.8407  | 1573.7151   | -0.1256 | -80   | 153        | 165 YVCITLAQEHVIK                      |           |         | Carbamidomethyl (C)[3]                          |      | Mascot      |
|    |                                           | 1573.8407  | 1573.7151   | -0.1256 | -80   | 153        | 165 YVCITLAQEHVIK                      |           |         | Carbamidomethyl (C)[3]                          |      | Mascot      |
|    |                                           | 2040.9086  | 2040.8425   | -0.0661 | -32   | 7          | 22 TAEEFSSADYWERFFR                    |           |         |                                                 |      | Mascot      |
|    |                                           | 2040.9086  | 2040.8425   | -0.0661 | -32   | 7          | 22 TAEEFSSADYWERFFR                    |           |         |                                                 |      | Mascot      |
|    |                                           | 2180.0613  | 2179.9604   | -0.1009 | -46   | 569        | 588 DTTLGMSCPPPAFVETSL<br>LK           |           |         | Carbamidomethyl (C)[8], Oxidation (M)[6]        |      | Mascot      |
|    |                                           | 2283.1826  | 2283.144    | -0.0386 | -17   | 536        | 556 LKVTLDGDLHITTELESE<br>GER          |           |         |                                                 |      | Mascot      |
|    |                                           | 2283.1826  | 2283.144    | -0.0386 | -17   | 536        | 556 LKVTLDGDLHITTELESE<br>GER          |           |         |                                                 |      | Mascot      |
|    |                                           | 2300.1226  | 2300.1436   | 0.021   | 9     | 52         | 72 VLVVGCGNSELSEQLYD<br>VGYR           |           |         |                                                 |      | Mascot      |
|    |                                           | 3337.5254  | 3337.7178   | 0.1924  | 58    | 453        | 482 SVDRGFLCCTHHEVMVA<br>GLAMLGMDAINNK |           |         | Carbamidomethyl (C)[8], Oxidation (M)[15,21,24] |      | Mascot      |
| 16 | ras-related protein Rab-40C [Danio rerio] |            |             |         |       |            | gi 94536665                            | 31226.9   | 9.41    | 8                                               | 37   | 0           |

#### Peptide Information

|    |                                                       | Calc. Mass | Obsrv. Mass | ± da    | ± ppm | Start Seq. | End Sequence Seq.                      | Ion Score | C. I. % | Modification           | Rank | Result Type |
|----|-------------------------------------------------------|------------|-------------|---------|-------|------------|----------------------------------------|-----------|---------|------------------------|------|-------------|
|    |                                                       | 850.576    | 850.5313    | -0.0447 | -53   | 212        | 219 LPLPVAIK                           |           |         |                        |      | Mascot      |
|    |                                                       | 1084.5858  | 1084.543    | -0.0428 | -39   | 134        | 142 RQVPTEQAR                          |           |         |                        |      | Mascot      |
|    |                                                       | 1084.5858  | 1084.543    | -0.0428 | -39   | 134        | 142 RQVPTEQAR                          |           |         |                        |      | Mascot      |
|    |                                                       | 1149.615   | 1149.5762   | -0.0388 | -34   | 17         | 27 FLLVGDSVDVGK                        |           |         |                        |      | Mascot      |
|    |                                                       | 1279.6252  | 1279.7557   | 0.1305  | 102   | 76         | 85 FCTIFRSYSR                          |           |         |                        |      | Mascot      |
|    |                                                       | 1772.7335  | 1772.9076   | 0.1741  | 98    | 224        | 239 SFSMANGMNAVMMHGR                   |           |         | Oxidation (M)[4,8]     |      | Mascot      |
|    |                                                       | 2028.996   | 2028.8933   | -0.1027 | -51   | 65         | 81 LELWDTSGQGRFCTIFR                   |           |         |                        |      | Mascot      |
|    |                                                       | 2284.3462  | 2284.1384   | -0.2078 | -91   | 199        | 219 AIVSCTPVHLIDKLPLPVAI<br>K          |           |         | Carbamidomethyl (C)[5] |      | Mascot      |
|    |                                                       | 3459.6235  | 3459.7966   | 0.1731  | 50    | 143        | 172 AYAENKNGMTFFEVSPLC<br>NFNVIESFTLSR |           |         | Oxidation (M)[8]       |      | Mascot      |
| 17 | PREDICTED: zinc finger protein 658-like [Danio rerio] |            |             |         |       |            | gi 326666995                           | 54907.7   | 9.53    | 14                     | 37   | 0           |

#### Peptide Information

|  |  | Calc. Mass | Obsrv. Mass | ± da | ± ppm | Start Seq. | End Sequence Seq. | Ion Score | C. I. % | Modification | Rank | Result Type |
|--|--|------------|-------------|------|-------|------------|-------------------|-----------|---------|--------------|------|-------------|
|--|--|------------|-------------|------|-------|------------|-------------------|-----------|---------|--------------|------|-------------|

|           |                                   |         |     |              |     |                                  |      |   |    |   |                                                     |  |        |
|-----------|-----------------------------------|---------|-----|--------------|-----|----------------------------------|------|---|----|---|-----------------------------------------------------|--|--------|
| 1441.7183 | 1441.679                          | -0.0393 | -27 | 185          | 196 | SFTHKNTLDNHK                     |      |   |    |   |                                                     |  | Mascot |
| 1475.7139 | 1475.7318                         | 0.0179  | 12  | 157          | 168 | SFTHKSTFNNHR                     |      |   |    |   |                                                     |  | Mascot |
| 1533.6863 | 1533.8055                         | 0.1192  | 78  | 465          | 477 | SFSQSSSLNHHMR                    |      |   |    |   | Oxidation (M)[12]                                   |  | Mascot |
| 1549.6635 | 1549.8024                         | 0.1389  | 90  | 17           | 29  | SFSCSSHLNQHMR                    |      |   |    |   | Oxidation (M)[12]                                   |  | Mascot |
| 1557.7267 | 1557.7135                         | -0.0132 | -8  | 214          | 225 | FPYKSTFNNHMR                     |      |   |    |   | Oxidation (M)[11]                                   |  | Mascot |
| 1577.7198 | 1577.8296                         | 0.1098  | 70  | 226          | 240 | THTGEKPFACAQCGK                  |      |   |    |   |                                                     |  | Mascot |
| 1719.7611 | 1719.842                          | 0.0809  | 47  | 394          | 408 | IHTGEKPCTCTQCGK                  |      |   |    |   | Carbamidomethyl (C)[8,10]                           |  | Mascot |
| 1752.7792 | 1752.8513                         | 0.0721  | 41  | 198          | 212 | THTGEKPYRCTDCGK                  |      |   |    |   | Carbamidomethyl (C)[10]                             |  | Mascot |
| 2054.946  | 2054.8594                         | -0.0866 | -42 | 465          | 482 | SFSQSSSLNHHMRIHTG<br>E           |      |   |    |   |                                                     |  | Mascot |
| 2181.0579 | 2180.9521                         | -0.1058 | -49 | 86           | 105 | IHTGEKPFTCAQCGQSFA<br>KK         |      |   |    |   |                                                     |  | Mascot |
| 2211.0435 | 2211.0718                         | 0.0283  | 13  | 310          | 328 | IHTGEKPFTCTQCGKSFN<br>R          |      |   |    |   | Carbamidomethyl (C)[10]                             |  | Mascot |
| 2808.3191 | 2808.3599                         | 0.0408  | 15  | 30           | 54  | VHTGEKPFTCTQCGKSF<br>SQSSHLNK    |      |   |    |   | Carbamidomethyl (C)[10]                             |  | Mascot |
| 3337.4717 | 3337.7178                         | 0.2461  | 74  | 17           | 44  | SFSCSSHLNQHMRVHTG<br>EKPFTCTQCGK |      |   |    |   | Carbamidomethyl (C)[4,23,26], Oxidation<br>(M)[12]  |  | Mascot |
| 3338.4558 | 3338.7083                         | 0.2525  | 76  | 2            | 29  | SHTGEKPFLCTECGKSF<br>SCSSHLNQHMR |      |   |    |   | Carbamidomethyl (C)[10,13,19], Oxidation<br>(M)[27] |  | Mascot |
| 18        | PREDICTED: copine-4 [Danio rerio] |         |     | gi 326675160 |     | 19667.7                          | 5.46 | 7 | 37 | 0 |                                                     |  |        |

#### Peptide Information

|    | Calc. Mass                                            | Obsrv. Mass | ± da    | ± ppm | Start Seq. | End Seq.     | Sequence                 | Ion Score | C. I. | % Modification                           | Rank | Result Type |
|----|-------------------------------------------------------|-------------|---------|-------|------------|--------------|--------------------------|-----------|-------|------------------------------------------|------|-------------|
|    | 996.4819                                              | 996.5818    | 0.0999  | 100   | 66         | 74           | SCINPTFSK                |           |       |                                          |      | Mascot      |
|    | 996.4819                                              | 996.5818    | 0.0999  | 100   | 66         | 74           | SCINPTFSK                |           |       |                                          |      | Mascot      |
|    | 1441.7719                                             | 1441.679    | -0.0929 | -64   | 36         | 48           | DALSKPDPCVVIK            |           |       | Carbamidomethyl (C)[9]                   |      | Mascot      |
|    | 1485.6903                                             | 1485.6229   | -0.0674 | -45   | 49         | 60           | MQSHGQWLEVDR             |           |       |                                          |      | Mascot      |
|    | 1675.7454                                             | 1675.7169   | -0.0285 | -17   | 163        | 176          | LDDKNGCILTYGFC           |           |       | Carbamidomethyl (C)[7,14]                |      | Mascot      |
|    | 1913.016                                              | 1912.9166   | -0.0994 | -52   | 31         | 48           | GISDRDALSKPDPCVVIK       |           |       |                                          |      | Mascot      |
|    | 2023.9246                                             | 2023.8156   | -0.109  | -54   | 104        | 122          | EADCLGAMECTLGQIVS<br>QR  |           |       |                                          |      | Mascot      |
|    | 2023.9246                                             | 2023.8156   | -0.109  | -54   | 104        | 122          | EADCLGAMECTLGQIVS<br>QR  |           |       |                                          |      | Mascot      |
|    | 2225.0359                                             | 2225.085    | 0.0491  | 22    | 104        | 123          | EADCLGAMECTLGQIVS<br>QRK |           |       | Carbamidomethyl (C)[4], Oxidation (M)[8] |      | Mascot      |
|    | 2225.0359                                             | 2225.085    | 0.0491  | 22    | 104        | 123          | EADCLGAMECTLGQIVS<br>QRK |           |       | Carbamidomethyl (C)[4], Oxidation (M)[8] |      | Mascot      |
| 19 | PREDICTED: zinc finger protein 569-like [Danio rerio] |             |         |       |            | gi 326667380 | 66620.4                  | 9.28      | 16    | 36                                       | 0    |             |

#### Peptide Information

| Calc. Mass | Obsrv. Mass | ± da | ± ppm | Start Seq. | End Seq. | Sequence | Ion Score | C. I. | % Modification | Rank | Result Type |
|------------|-------------|------|-------|------------|----------|----------|-----------|-------|----------------|------|-------------|
|------------|-------------|------|-------|------------|----------|----------|-----------|-------|----------------|------|-------------|

|    |                                              |           |           |         |     |              |         |                            |    |                          |   |  |  |  |        |
|----|----------------------------------------------|-----------|-----------|---------|-----|--------------|---------|----------------------------|----|--------------------------|---|--|--|--|--------|
|    |                                              | 870.4614  | 870.531   | 0.0696  | 80  | 501          | 507     | SQVIHMR                    |    |                          |   |  |  |  | Mascot |
|    |                                              | 1045.5282 | 1045.5497 | 0.0215  | 21  | 558          | 566     | LHMAKQACK                  |    | Oxidation (M)[3]         |   |  |  |  | Mascot |
|    |                                              | 1084.572  | 1084.543  | -0.029  | -27 | 301          | 308     | YVCKHHLK                   |    | Carbamidomethyl (C)[3]   |   |  |  |  | Mascot |
|    |                                              | 1084.572  | 1084.543  | -0.029  | -27 | 301          | 308     | YVCKHHLK                   |    | Carbamidomethyl (C)[3]   |   |  |  |  | Mascot |
|    |                                              | 1320.6292 | 1320.6135 | -0.0157 | -12 | 567          | 578     | SGHNNNPQDLPK               |    |                          |   |  |  |  | Mascot |
|    |                                              | 1485.6903 | 1485.6229 | -0.0674 | -45 | 132          | 144     | SFSAKSGFNTHMR              |    | Oxidation (M)[12]        |   |  |  |  | Mascot |
|    |                                              | 1533.6838 | 1533.8055 | 0.1217  | 79  | 95           | 107     | HFPCHQC GKSF SR            |    |                          |   |  |  |  | Mascot |
|    |                                              | 1549.7474 | 1549.8024 | 0.055   | 35  | 383          | 395     | SCSHKHNLTVHMR              |    |                          |   |  |  |  | Mascot |
|    |                                              | 1572.8856 | 1572.7548 | -0.1308 | -83 | 272          | 285     | SFAQKSTLTAHIIR             |    |                          |   |  |  |  | Mascot |
|    |                                              | 1591.7268 | 1591.7767 | 0.0499  | 31  | 57           | 69      | ELNEIEEKDQCGK              |    | Carbamidomethyl (C)[11]  |   |  |  |  | Mascot |
|    |                                              | 1638.7655 | 1638.8279 | 0.0624  | 38  | 319          | 332     | YFICDQCGSSFKLK             |    |                          |   |  |  |  | Mascot |
|    |                                              | 1652.7632 | 1652.8027 | 0.0395  | 24  | 257          | 271     | VHTGEKPHTCQQCGK            |    |                          |   |  |  |  | Mascot |
|    |                                              | 1675.7203 | 1675.7169 | -0.0034 | -2  | 286          | 299     | HTGEKPFPCDQCEK             |    | Carbamidomethyl (C)[9]   |   |  |  |  | Mascot |
|    |                                              | 1719.7617 | 1719.842  | 0.0803  | 47  | 317          | 330     | HKYFICDQCGSSFK             |    | Carbamidomethyl (C)[6]   |   |  |  |  | Mascot |
|    |                                              | 1752.8083 | 1752.8513 | 0.043   | 25  | 319          | 332     | YFICDQCGSSFKLK             |    | Carbamidomethyl (C)[4,7] |   |  |  |  | Mascot |
|    |                                              | 2180.0237 | 2179.9604 | -0.0633 | -29 | 253          | 271     | SHFRVHTGEKPHTCQQC<br>GK    |    |                          |   |  |  |  | Mascot |
|    |                                              | 2180.9521 | 2180.9521 | 0       | 0   | 368          | 387     | VHTGEKPYSCTECGKSC<br>SHK   |    |                          |   |  |  |  | Mascot |
|    |                                              | 2501.0676 | 2501.21   | 0.1424  | 57  | 346          | 367     | SFICDQCGRNCISESGLE<br>SHMK |    | Carbamidomethyl (C)[4]   |   |  |  |  | Mascot |
| 20 | hypothetical protein LOC790927 [Danio rerio] |           |           |         |     | gi 121583715 | 57741.7 | 6.08                       | 11 | 36                       | 0 |  |  |  |        |

| Calc. Mass | Obsrv. Mass | ± da    | ± ppm | Start Seq. | End Seq. | Sequence             | Ion Score | C. I. | % Modification         | Rank | Result Type |
|------------|-------------|---------|-------|------------|----------|----------------------|-----------|-------|------------------------|------|-------------|
| 1045.5524  | 1045.5497   | -0.0027 | -3    | 212        | 219      | IEEEIERK             |           |       |                        |      | Mascot      |
| 1084.5316  | 1084.543    | 0.0114  | 11    | 230        | 238      | ETRSHPAMR            |           |       |                        |      | Mascot      |
| 1084.5316  | 1084.543    | 0.0114  | 11    | 230        | 238      | ETRSHPAMR            |           |       |                        |      | Mascot      |
| 1118.5212  | 1118.5657   | 0.0445  | 40    | 46         | 55       | DDVDGEIDLK           |           |       |                        |      | Mascot      |
| 1420.7036  | 1420.5984   | -0.1052 | -74   | 403        | 413      | LMDTQMEQLRR          |           |       |                        |      | Mascot      |
| 1463.7158  | 1463.6587   | -0.0571 | -39   | 416        | 427      | QDLQARLTDEMK         |           |       | Oxidation (M)[11]      |      | Mascot      |
| 1493.7385  | 1493.7094   | -0.0291 | -19   | 448        | 459      | SCCEMQVLLRVR         |           |       | Carbamidomethyl (C)[2] |      | Mascot      |
| 1912.9835  | 1912.9166   | -0.0669 | -35   | 130        | 147      | LRSQSEASSAIINSAHNK   |           |       |                        |      | Mascot      |
| 2024.0117  | 2023.8156   | -0.1961 | -97   | 372        | 388      | ELQALSERYSQQCVELK    |           |       |                        |      | Mascot      |
| 2024.0117  | 2023.8156   | -0.1961 | -97   | 372        | 388      | ELQALSERYSQQCVELK    |           |       |                        |      | Mascot      |
| 2185.0667  | 2185.105    | 0.0383  | 18    | 352        | 370      | ALDSHTLNKQQQDEVCS LR |           |       |                        |      | Mascot      |
| 2185.0667  | 2185.105    | 0.0383  | 18    | 352        | 370      | ALDSHTLNKQQQDEVCS LR |           |       |                        |      | Mascot      |
| 2211.0017  | 2211.0718   | 0.0701  | 32    | 395        | 412      | DDSDTQIRLMDTQMEQL    |           |       | Oxidation (M)[10]      |      | Mascot      |

|    |                                                                                           |           |         |     |     |              |                                 |      |   |    |   |  |        |
|----|-------------------------------------------------------------------------------------------|-----------|---------|-----|-----|--------------|---------------------------------|------|---|----|---|--|--------|
|    | 2514.2478                                                                                 | 2514.1936 | -0.0542 | -22 | 475 | 496          | R<br>NQLHFLTTEKSSVCVCVS<br>SYLR |      |   |    |   |  | Mascot |
| 21 | novel protein similar to H.sapiens OLFM1, olfactomedin 1 (OLFM1, zgc:92039) [Danio rerio] |           |         |     |     | gi 220676963 | 17247.8                         | 9.07 | 6 | 35 | 0 |  |        |

| Peptide Information |             |         |       |            |          |                       |           |       |   |                                           |      |             |
|---------------------|-------------|---------|-------|------------|----------|-----------------------|-----------|-------|---|-------------------------------------------|------|-------------|
| Calc. Mass          | Obsrv. Mass | ± da    | ± ppm | Start Seq. | End Seq. | Sequence              | Ion Score | C. I. | % | Modification                              | Rank | Result Type |
| 850.4781            | 850.5313    | 0.0532  | 63    | 131        | 137      | GLETKFR               |           |       |   |                                           |      | Mascot      |
| 864.4825            | 864.5068    | 0.0243  | 28    | 118        | 124      | DLQYVVVK              |           |       |   |                                           |      | Mascot      |
| 1652.8312           | 1652.8027   | -0.0285 | -17   | 118        | 130      | DLQYVVKMEDQLR         |           |       |   | Oxidation (M)[8]                          |      | Mascot      |
| 1675.8431           | 1675.7169   | -0.1262 | -75   | 101        | 114      | VQNMTQSIQVLDQR        |           |       |   | Oxidation (M)[4]                          |      | Mascot      |
| 2040.9082           | 2040.8425   | -0.0657 | -32   | 73         | 90       | CVCTTVAPQQTMCSDA<br>R |           |       |   | Carbamidomethyl (C)[1], Oxidation (M)[12] |      | Mascot      |
| 2040.9082           | 2040.8425   | -0.0657 | -32   | 73         | 90       | CVCTTVAPQQTMCSDA<br>R |           |       |   | Carbamidomethyl (C)[1], Oxidation (M)[12] |      | Mascot      |
| 2045.0557           | 2044.9039   | -0.1518 | -74   | 101        | 117      | VQNMTQSIQVLDQRTQR     |           |       |   |                                           |      | Mascot      |

|    |                                      |  |  |  |  |              |        |      |    |    |   |  |
|----|--------------------------------------|--|--|--|--|--------------|--------|------|----|----|---|--|
| 22 | PREDICTED: pericentrin [Danio rerio] |  |  |  |  | gi 326668478 | 491858 | 4.98 | 31 | 34 | 0 |  |
|----|--------------------------------------|--|--|--|--|--------------|--------|------|----|----|---|--|

| Peptide Information |             |         |       |            |          |               |           |       |   |                        |      |             |
|---------------------|-------------|---------|-------|------------|----------|---------------|-----------|-------|---|------------------------|------|-------------|
| Calc. Mass          | Obsrv. Mass | ± da    | ± ppm | Start Seq. | End Seq. | Sequence      | Ion Score | C. I. | % | Modification           | Rank | Result Type |
| 842.4995            | 842.4988    | -0.0007 | -1    | 15         | 21       | AKLAHFR       |           |       |   |                        |      | Mascot      |
| 850.4087            | 850.5313    | 0.1226  | 144   | 2129       | 2136     | TPSSMTAR      |           |       |   |                        |      | Mascot      |
| 882.5155            | 882.5546    | 0.0391  | 44    | 3606       | 3612     | SEIHKLR       |           |       |   |                        |      | Mascot      |
| 1045.4908           | 1045.5497   | 0.0589  | 56    | 1472       | 1480     | QAEAEVNER     |           |       |   |                        |      | Mascot      |
| 1084.6361           | 1084.543    | -0.0931 | -86   | 1333       | 1341     | EEIALLQLR     |           |       |   |                        |      | Mascot      |
| 1084.6361           | 1084.543    | -0.0931 | -86   | 1333       | 1341     | EEIALLQLR     |           |       |   |                        |      | Mascot      |
| 1118.551            | 1118.5657   | 0.0147  | 13    | 224        | 232      | EQECLAQK      |           |       |   | Carbamidomethyl (C)[4] |      | Mascot      |
| 1184.5178           | 1184.4415   | -0.0763 | -64   | 4217       | 4226     | SFSSTQDQER    |           |       |   |                        |      | Mascot      |
| 1316.6692           | 1316.6779   | 0.0087  | 7     | 2033       | 2045     | AEVSGLQGELEGK |           |       |   |                        |      | Mascot      |
| 1320.6365           | 1320.6135   | -0.023  | -17   | 1062       | 1072     | WAQESAMLQTR   |           |       |   |                        |      | Mascot      |
| 1344.7118           | 1344.6853   | -0.0265 | -20   | 3904       | 3914     | QLQQTLTDLER   |           |       |   |                        |      | Mascot      |
| 1475.7271           | 1475.7318   | 0.0047  | 3     | 2723       | 2734     | SLVERLQCDQER  |           |       |   |                        |      | Mascot      |
| 1485.7366           | 1485.6229   | -0.1137 | -77   | 2046       | 2058     | GAEMETLESLLHR |           |       |   |                        |      | Mascot      |
| 1533.7941           | 1533.8055   | 0.0114  | 7     | 2298       | 2310     | LAEELASARMQLK |           |       |   | Oxidation (M)[10]      |      | Mascot      |
| 1557.7213           | 1557.7135   | -0.0078 | -5    | 919        | 930      | QHEEEQKMLEEK  |           |       |   |                        |      | Mascot      |
| 1572.7435           | 1572.7548   | 0.0113  | 7     | 1515       | 1526     | EQLRQMEETHQK  |           |       |   | Oxidation (M)[6]       |      | Mascot      |
| 1573.7162           | 1573.7151   | -0.0011 | -1    | 919        | 930      | QHEEEQKMLEEK  |           |       |   | Oxidation (M)[8]       |      | Mascot      |



|    |                                                         |           |         |      |              |         |                            |                                           |        |   |
|----|---------------------------------------------------------|-----------|---------|------|--------------|---------|----------------------------|-------------------------------------------|--------|---|
|    | 1573.7162                                               | 1573.7151 | -0.0011 | -1   | 919          | 930     | QHEEEQKMLEEK               | Oxidation (M)[8]                          | Mascot |   |
|    | 1577.8281                                               | 1577.8296 | 0.0015  | 1    | 1139         | 1151    | IKTEFQSELNNVR              |                                           | Mascot |   |
|    | 1591.8915                                               | 1591.7767 | -0.1148 | -72  | 367          | 379     | LDNLVKELQNHRLR             |                                           | Mascot |   |
|    | 1638.881                                                | 1638.8279 | -0.0531 | -32  | 2528         | 2541    | TVTQLEQELQKGHK             |                                           | Mascot |   |
|    | 1652.7809                                               | 1652.8027 | 0.0218  | 13   | 1501         | 1514    | MHSEELEKAASQHR             |                                           | Mascot |   |
|    | 1719.8547                                               | 1719.842  | -0.0127 | -7   | 3592         | 3605    | TELQSSYKHQEELK             |                                           | Mascot |   |
|    | 1772.9402                                               | 1772.9076 | -0.0326 | -18  | 3094         | 3108    | DRALADLEIHNQHLK            |                                           | Mascot |   |
|    | 1993.9937                                               | 1993.9467 | -0.047  | -24  | 3014         | 3031    | ELHEQQEAAVAKQGEAQ<br>K     |                                           | Mascot |   |
|    | 2041.14                                                 | 2040.8425 | -0.2975 | -146 | 148          | 165     | NEIISQLSKNLQVALQSR         |                                           | Mascot |   |
|    | 2041.14                                                 | 2040.8425 | -0.2975 | -146 | 148          | 165     | NEIISQLSKNLQVALQSR         |                                           | Mascot |   |
|    | 2045.0648                                               | 2044.9039 | -0.1609 | -79  | 711          | 728     | TSIPSSTELLQELQEEK          |                                           | Mascot |   |
|    | 2180.1128                                               | 2179.9604 | -0.1524 | -70  | 1206         | 1224    | AVEELVACHKVALQEQQ<br>ER    |                                           | Mascot |   |
|    | 2181.0745                                               | 2180.9521 | -0.1224 | -56  | 1579         | 1596    | LEQAFLEVQKQLDMESE<br>K     | Oxidation (M)[14]                         | Mascot |   |
|    | 2184.9858                                               | 2185.105  | 0.1192  | 55   | 2116         | 2136    | LGSCVSGGQSEEKTPSS<br>MTAR  | Carbamidomethyl (C)[4], Oxidation (M)[18] | Mascot |   |
|    | 2184.9858                                               | 2185.105  | 0.1192  | 55   | 2116         | 2136    | LGSCVSGGQSEEKTPSS<br>MTAR  | Carbamidomethyl (C)[4], Oxidation (M)[18] | Mascot |   |
|    | 2247.1404                                               | 2247.0632 | -0.0772 | -34  | 3304         | 3321    | LELEENTERLDAHFVEYLR        |                                           | Mascot |   |
|    | 2284.1013                                               | 2284.1384 | 0.0371  | 16   | 3955         | 3974    | ENSEFSECLAALSEEKISL<br>K   | Carbamidomethyl (C)[8]                    | Mascot |   |
|    | 2300.0935                                               | 2300.1436 | 0.0501  | 22   | 3545         | 3563    | LQQEQTQSHDLRCSLEA<br>EK    | Carbamidomethyl (C)[13]                   | Mascot |   |
|    | 2501.2075                                               | 2501.21   | 0.0025  | 1    | 2956         | 2977    | LEELEEHVQADMVNLSAL<br>ETSK | Oxidation (M)[12]                         | Mascot |   |
| 23 | outer dense fiber of sperm tails 3-like 2 [Danio rerio] |           |         |      | gi 194578833 | 27402.8 | 10.1                       | 7                                         | 34     | 0 |

Peptide Information

| Calc. Mass | Obsrv. Mass | ± da    | ± ppm | Start Seq. | End Sequence Seq.          | Ion Score | C. I. % | Modification      | Rank | Result Type |
|------------|-------------|---------|-------|------------|----------------------------|-----------|---------|-------------------|------|-------------|
| 1084.5013  | 1084.543    | 0.0417  | 38    | 1          | 9 MTMSETEKK                |           |         |                   |      | Mascot      |
| 1084.5013  | 1084.543    | 0.0417  | 38    | 1          | 9 MTMSETEKK                |           |         |                   |      | Mascot      |
| 1279.6099  | 1279.7557   | 0.1458  | 114   | 167        | 178 CKSGGLAENWSK           |           |         |                   |      | Mascot      |
| 1533.7556  | 1533.8055   | 0.0499  | 33    | 76         | 89 FGRDGTPAYSLHGR          |           |         |                   |      | Mascot      |
| 1557.7703  | 1557.7135   | -0.0568 | -36   | 197        | 210 QPAFSMLGRHANGR         |           |         | Oxidation (M)[6]  |      | Mascot      |
| 1560.7904  | 1560.8088   | 0.0184  | 12    | 94         | 109 GGILSTPGPGTYSPEK       |           |         |                   |      | Mascot      |
| 1719.7867  | 1719.842    | 0.0553  | 32    | 79         | 93 DGTPAYSLHGRMENR         |           |         | Oxidation (M)[12] |      | Mascot      |
| 2055.0076  | 2054.8594   | -0.1482 | -72   | 110        | 127 ASLSSTHRKPPSYTMGY<br>R |           |         | Oxidation (M)[15] |      | Mascot      |

24 novel protein [Danio rerio] gi|94734532 73379.5 8.71 11 34 0

Peptide Information

| Calc. Mass | Obsrv. Mass | ± da | ± ppm | Start | End Sequence | Ion | C. I. % | Modification | Rank | Result Type |
|------------|-------------|------|-------|-------|--------------|-----|---------|--------------|------|-------------|
|------------|-------------|------|-------|-------|--------------|-----|---------|--------------|------|-------------|

|  |           |           | Seq.    |     | Seq. | Score |                                     |                                           |  |        |
|--|-----------|-----------|---------|-----|------|-------|-------------------------------------|-------------------------------------------|--|--------|
|  | 870.5267  | 870.531   | 0.0043  | 5   | 562  | 570   | RIAAGGVAR                           |                                           |  | Mascot |
|  | 1084.4979 | 1084.543  | 0.0451  | 42  | 402  | 410   | TAFLDTCEK                           | Carbamidomethyl (C)[7]                    |  | Mascot |
|  | 1084.4979 | 1084.543  | 0.0451  | 42  | 402  | 410   | TAFLDTCEK                           | Carbamidomethyl (C)[7]                    |  | Mascot |
|  | 1118.6066 | 1118.5657 | -0.0409 | -37 | 175  | 183   | SHHDQLLLR                           |                                           |  | Mascot |
|  | 1279.7382 | 1279.7557 | 0.0175  | 14  | 188  | 198   | LVGQHFRVAR                          |                                           |  | Mascot |
|  | 1316.6627 | 1316.6779 | 0.0152  | 12  | 274  | 286   | ASTEGMGGPLKPR                       | Oxidation (M)[6]                          |  | Mascot |
|  | 1320.7018 | 1320.6135 | -0.0883 | -67 | 574  | 585   | RIYVLGGENGSR                        |                                           |  | Mascot |
|  | 1475.7345 | 1475.7318 | -0.0027 | -2  | 144  | 155   | LQVMPLQDLCSR                        | Carbamidomethyl (C)[10], Oxidation (M)[4] |  | Mascot |
|  | 1557.7002 | 1557.7135 | 0.0133  | 9   | 311  | 323   | DFTVDCFDPRGTGK                      | Carbamidomethyl (C)[6]                    |  | Mascot |
|  | 1772.9146 | 1772.9076 | -0.007  | -4  | 327  | 344   | LAALGSLCPGCTAVGG<br>R               | Carbamidomethyl (C)[9,12]                 |  | Mascot |
|  | 2029.0382 | 2028.8933 | -0.1449 | -71 | 294  | 310   | IVCVDLKPREDESLQER                   |                                           |  | Mascot |
|  | 3338.678  | 3338.7083 | 0.0303  | 9   | 371  | 401   | WISRPLMAEPRAMLGLL<br>GCGGFLYALGGCNR | Oxidation (M)[7]                          |  | Mascot |

25 coiled-coil domain-containing protein 123, mitochondrial precursor [Danio rerio] gi|41053710 79256.9 5.96 11 34 0

#### Peptide Information

| Calc. Mass | Obsrv. Mass | ± da    | ± ppm | Start Seq. | End Seq. | Sequence                 | Ion Score | C. I. % | Modification           | Rank | Result | Type |
|------------|-------------|---------|-------|------------|----------|--------------------------|-----------|---------|------------------------|------|--------|------|
| 1118.5082  | 1118.5657   | 0.0575  | 51    | 304        | 312      | CLQQSQHMK                |           |         | Oxidation (M)[8]       |      | Mascot |      |
| 1216.6143  | 1216.5925   | -0.0218 | -18   | 1          | 10       | MSSKFNFSLR               |           |         |                        |      | Mascot |      |
| 1279.7269  | 1279.7557   | 0.0288  | 23    | 366        | 375      | YQARFRPLTK               |           |         |                        |      | Mascot |      |
| 1475.7522  | 1475.7318   | -0.0204 | -14   | 564        | 575      | VKTCEVEDLQVR             |           |         | Carbamidomethyl (C)[4] |      | Mascot |      |
| 1533.8192  | 1533.8055   | -0.0137 | -9    | 503        | 515      | VMLLEAEKQSLEK            |           |         | Oxidation (M)[2]       |      | Mascot |      |
| 1577.6901  | 1577.8296   | 0.1395  | 88    | 226        | 239      | SMASPELDDWSSPR           |           |         |                        |      | Mascot |      |
| 1638.8077  | 1638.8279   | 0.0202  | 12    | 654        | 667      | DQLMLMASTLEKDK           |           |         | Oxidation (M)[4]       |      | Mascot |      |
| 2211.0823  | 2211.0718   | -0.0105 | -5    | 340        | 358      | QQAQELVDENDGLKMTV<br>HR  |           |         |                        |      | Mascot |      |
| 2233.2188  | 2233.0535   | -0.1653 | -74   | 536        | 555      | LALEHSLSLAEHQVTDK<br>LK  |           |         |                        |      | Mascot |      |
| 2247.2092  | 2247.0632   | -0.146  | -65   | 534        | 553      | VRLALEHSLSLAEHQVT<br>DK  |           |         |                        |      | Mascot |      |
| 2501.1707  | 2501.21     | 0.0393  | 16    | 304        | 323      | CLQQSQHMKHLQQELCH<br>THR |           |         | Oxidation (M)[8]       |      | Mascot |      |

26 novel protein [Danio rerio] gi|220679558 45035 4.99 8 33 0

#### Peptide Information

| Calc. Mass | Obsrv. Mass | ± da   | ± ppm | Start Seq. | End Seq. | Sequence | Ion Score | C. I. % | Modification | Rank | Result | Type |
|------------|-------------|--------|-------|------------|----------|----------|-----------|---------|--------------|------|--------|------|
| 842.473    | 842.4988    | 0.0258 | 31    | 382        | 388      | DPKDVLR  |           |         |              |      | Mascot |      |

|    |                                 |           |         |     |              |     |                          |      |   |    |   |  |                          |  |  |  |        |
|----|---------------------------------|-----------|---------|-----|--------------|-----|--------------------------|------|---|----|---|--|--------------------------|--|--|--|--------|
|    | 882.4791                        | 882.5546  | 0.0755  | 86  | 1            | 7   | VSTYTRR                  |      |   |    |   |  |                          |  |  |  | Mascot |
|    | 1045.5889                       | 1045.5497 | -0.0392 | -37 | 54           | 62  | VIDTLESLR                |      |   |    |   |  |                          |  |  |  | Mascot |
|    | 1084.6401                       | 1084.543  | -0.0971 | -90 | 343          | 351 | VSLPWLLEK                |      |   |    |   |  |                          |  |  |  | Mascot |
|    | 1084.6401                       | 1084.543  | -0.0971 | -90 | 343          | 351 | VSLPWLLEK                |      |   |    |   |  |                          |  |  |  | Mascot |
|    | 1184.501                        | 1184.4415 | -0.0595 | -50 | 8            | 16  | CPGCQMIYR                |      |   |    |   |  | Carbamidomethyl (C)[1,4] |  |  |  | Mascot |
|    | 1772.7578                       | 1772.9076 | 0.1498  | 85  | 220          | 235 | DCNVDSNGSAFDMILR         |      |   |    |   |  | Oxidation (M)[13]        |  |  |  | Mascot |
|    | 2023.9971                       | 2023.8156 | -0.1815 | -90 | 108          | 126 | NGVFSTAASDLKEPPSEF<br>K  |      |   |    |   |  |                          |  |  |  | Mascot |
|    | 2023.9971                       | 2023.8156 | -0.1815 | -90 | 108          | 126 | NGVFSTAASDLKEPPSEF<br>K  |      |   |    |   |  |                          |  |  |  | Mascot |
|    | 2247.2205                       | 2247.0632 | -0.1573 | -70 | 43           | 62  | HSLQSHVGLSRVIDTLES<br>LR |      |   |    |   |  |                          |  |  |  | Mascot |
| 27 | si:ch1073-126c3.2 [Danio rerio] |           |         |     | gi 221307488 |     | 24754.2                  | 6.97 | 6 | 33 | 0 |  |                          |  |  |  |        |

#### Peptide Information

| Calc. Mass | Obsrv. Mass | ± da    | ± ppm | Start Seq. | End Seq. | Sequence                        | Ion Score | C. I. | % Modification                             | Rank | Result Type |
|------------|-------------|---------|-------|------------|----------|---------------------------------|-----------|-------|--------------------------------------------|------|-------------|
| 864.4243   | 864.5068    | 0.0825  | 95    | 1          | 8        | MESATIGR                        |           |       |                                            |      | Mascot      |
| 1638.8069  | 1638.8279   | 0.021   | 13    | 199        | 213      | SELAKVETTESSESTK                |           |       |                                            |      | Mascot      |
| 2054.9285  | 2054.8594   | -0.0691 | -34   | 114        | 130      | IYCKPMCNAGYDFNFLR               |           |       |                                            |      | Mascot      |
| 2184.9663  | 2185.105    | 0.1387  | 63    | 114        | 130      | IYCKPMCNAGYDFNFLR               |           |       | Carbamidomethyl (C)[3,7], Oxidation (M)[6] |      | Mascot      |
| 2184.9663  | 2185.105    | 0.1387  | 63    | 114        | 130      | IYCKPMCNAGYDFNFLR               |           |       | Carbamidomethyl (C)[3,7], Oxidation (M)[6] |      | Mascot      |
| 2211.0295  | 2211.0718   | 0.0423  | 19    | 114        | 131      | IYCKPMCNAGYDFNFLRR              |           |       |                                            |      | Mascot      |
| 2284.0459  | 2284.1384   | 0.0925  | 40    | 114        | 131      | IYCKPMCNAGYDFNFLRR              |           |       | Carbamidomethyl (C)[3], Oxidation (M)[6]   |      | Mascot      |
| 2298.0503  | 2298.1475   | 0.0972  | 42    | 112        | 130      | DKIYCKPMCNAGYDFNFL<br>R         |           |       |                                            |      | Mascot      |
| 2808.4785  | 2808.3599   | -0.1186 | -42   | 85         | 111      | AFQKLLPENCPAPAVPEN<br>GGLLCLSVK |           |       |                                            |      | Mascot      |

28 hypothetical protein LOC100191015 [Danio rerio] gi|209863095 44412.9 9.4 8 33 0

#### Peptide Information

| Calc. Mass | Obsrv. Mass | ± da    | ± ppm | Start Seq. | End Seq. | Sequence           | Ion Score | C. I. | % Modification                           | Rank | Result Type |
|------------|-------------|---------|-------|------------|----------|--------------------|-----------|-------|------------------------------------------|------|-------------|
| 996.5373   | 996.5818    | 0.0445  | 45    | 282        | 288      | QRIFNYR            |           |       |                                          |      | Mascot      |
| 996.5373   | 996.5818    | 0.0445  | 45    | 282        | 288      | QRIFNYR            |           |       |                                          |      | Mascot      |
| 1475.6802  | 1475.7318   | 0.0516  | 35    | 176        | 188      | APDNSGSLFYNYK      |           |       |                                          |      | Mascot      |
| 1493.8335  | 1493.7094   | -0.1241 | -83   | 22         | 33       | RSVWVHEILQAR       |           |       |                                          |      | Mascot      |
| 1752.9075  | 1752.8513   | -0.0562 | -32   | 267        | 281      | RDLMRPFPGHNLSGR    |           |       |                                          |      | Mascot      |
| 1993.9834  | 1993.9467   | -0.0367 | -18   | 309        | 326      | MYRGAIEISPANVDACVK |           |       | Carbamidomethyl (C)[16]                  |      | Mascot      |
| 2055.0183  | 2054.8594   | -0.1589 | -77   | 1          | 17       | MEDQVVACCVALLYLRR  |           |       | Carbamidomethyl (C)[8], Oxidation (M)[1] |      | Mascot      |
| 2211.1743  | 2211.0718   | -0.1025 | -46   | 294        | 311      | LIVENTFGILTAQWRMYR |           |       |                                          |      | Mascot      |

2514.2795 2514.1936 -0.0859 -34 337 361 STTSTRIPPLPSAADGDAA  
GLQEVTR Mascot

29 PREDICTED: zinc finger protein 567-like [Danio rerio] gi|189517588 45312.1 9.54 11 33 0

| Peptide Information |             |         |       |            |          |                                  |           |         |                            |      |             |
|---------------------|-------------|---------|-------|------------|----------|----------------------------------|-----------|---------|----------------------------|------|-------------|
| Calc. Mass          | Obsrv. Mass | ± da    | ± ppm | Start Seq. | End Seq. | Sequence                         | Ion Score | C. I. % | Modification               | Rank | Result Type |
| 1051.6119           | 1051.6962   | 0.0843  | 80    | 66         | 74       | KTSLHGRPR                        |           |         |                            |      | Mascot      |
| 1051.6119           | 1051.6962   | 0.0843  | 80    | 67         | 75       | TSLHGRPRK                        |           |         |                            |      | Mascot      |
| 1441.6879           | 1441.679    | -0.0089 | -6    | 1          | 12       | MAFIKEESEDVK                     |           |         | Oxidation (M)[1]           |      | Mascot      |
| 1572.7952           | 1572.7548   | -0.0404 | -26   | 146        | 158      | SFSQKPNLDIHMR                    |           |         |                            |      | Mascot      |
| 1577.7198           | 1577.8296   | 0.1098  | 70    | 299        | 313      | THTGEKPFACAQCGK                  |           |         |                            |      | Mascot      |
| 1719.8304           | 1719.842    | 0.0116  | 7     | 131        | 145      | IHTGEKPFSCQKCGK                  |           |         | Carbamidomethyl (C)[10]    |      | Mascot      |
| 2180.0586           | 2179.9604   | -0.0982 | -45   | 327        | 345      | VHTGTIVFTCDQCGKSLT<br>R          |           |         | Carbamidomethyl (C)[10,13] |      | Mascot      |
| 2185.0164           | 2185.105    | 0.0886  | 41    | 299        | 318      | THTGEKPFACAQCGKSF<br>STK         |           |         | Carbamidomethyl (C)[10]    |      | Mascot      |
| 2185.0164           | 2185.105    | 0.0886  | 41    | 299        | 318      | THTGEKPFACAQCGKSF<br>STK         |           |         | Carbamidomethyl (C)[10]    |      | Mascot      |
| 2233.031            | 2233.0535   | 0.0225  | 10    | 323        | 341      | NHMKVHTGTIVFTCDQC<br>GK          |           |         | Carbamidomethyl (C)[14,17] |      | Mascot      |
| 2300.0435           | 2300.1436   | 0.1001  | 44    | 159        | 178      | VHTGEKPYSCEQCGKSF<br>SQK         |           |         | Carbamidomethyl (C)[10]    |      | Mascot      |
| 3337.5146           | 3337.7178   | 0.2032  | 61    | 95         | 122      | SNLDVHMRVHTGEKPYT<br>CEQCAQSFSQK |           |         | Carbamidomethyl (C)[18,21] |      | Mascot      |

30 Zgc:101621 protein [Danio rerio] gi|160773250 15314.9 9.35 5 33 0

| Peptide Information |             |         |       |            |          |                                  |           |         |                                                |                  |
|---------------------|-------------|---------|-------|------------|----------|----------------------------------|-----------|---------|------------------------------------------------|------------------|
| Calc. Mass          | Obsrv. Mass | ± da    | ± ppm | Start Seq. | End Seq. | Sequence                         | Ion Score | C. I. % | Modification                                   | Rank Result Type |
| 1320.6793           | 1320.6135   | -0.0658 | -50   | 39         | 49       | LQEDGEQFVKK                      |           |         |                                                | Mascot           |
| 1577.8533           | 1577.8296   | -0.0237 | -15   | 12         | 27       | VQAVLTSASAGLEGFK                 |           |         |                                                | Mascot           |
| 2040.9287           | 2040.8425   | -0.0862 | -42   | 88         | 106      | ADCTIAMADSDLLDLMTG<br>K          |           |         | Carbamidomethyl (C)[3]                         | Mascot           |
| 2040.9287           | 2040.8425   | -0.0862 | -42   | 88         | 106      | ADCTIAMADSDLLDLMTG<br>K          |           |         | Carbamidomethyl (C)[3]                         | Mascot           |
| 2185.0186           | 2185.105    | 0.0864  | 40    | 87         | 106      | KADCTIAMADSDLLDLMT<br>GK         |           |         | Carbamidomethyl (C)[4], Oxidation (M)[8]       | Mascot           |
| 2185.0186           | 2185.105    | 0.0864  | 40    | 87         | 106      | KADCTIAMADSDLLDLMT<br>GK         |           |         | Carbamidomethyl (C)[4], Oxidation (M)[8]       | Mascot           |
| 3338.5046           | 3338.7083   | 0.2037  | 61    | 88         | 117      | ADCTIAMADSDLLDLMTG<br>KMNPQTAFQK |           |         | Carbamidomethyl (C)[3], Oxidation (M)[7,16,20] | Mascot           |

31 PREDICTED: outer dense fiber protein 2 [Danio rerio] gi|326677656 95646.7 6.54 13 33 0

| Peptide Information |             |      |       |            |          |          |           |         |              |                  |
|---------------------|-------------|------|-------|------------|----------|----------|-----------|---------|--------------|------------------|
| Calc. Mass          | Obsrv. Mass | ± da | ± ppm | Start Seq. | End Seq. | Sequence | Ion Score | C. I. % | Modification | Rank Result Type |

|    |                               |           |         |             |     |     |                                      |      |   |    |                        |        |
|----|-------------------------------|-----------|---------|-------------|-----|-----|--------------------------------------|------|---|----|------------------------|--------|
|    | 850.4338                      | 850.5313  | 0.0975  | 115         | 714 | 720 | ECSILTK                              |      |   |    | Carbamidomethyl (C)[2] | Mascot |
|    | 1051.6259                     | 1051.6962 | 0.0703  | 67          | 46  | 55  | TGLHPTAKVK                           |      |   |    |                        | Mascot |
|    | 1051.6259                     | 1051.6962 | 0.0703  | 67          | 46  | 55  | TGLHPTAKVK                           |      |   |    |                        | Mascot |
|    | 1062.5612                     | 1062.6775 | 0.1163  | 109         | 34  | 43  | CSPTKTAQVK                           |      |   |    |                        | Mascot |
|    | 1118.551                      | 1118.5657 | 0.0147  | 13          | 659 | 667 | NMLLQEENK                            |      |   |    |                        | Mascot |
|    | 1165.5881                     | 1165.7288 | 0.1407  | 121         | 247 | 257 | MSGSDSTLLVR                          |      |   |    |                        | Mascot |
|    | 1165.5881                     | 1165.7288 | 0.1407  | 121         | 247 | 257 | MSGSDSTLLVR                          |      |   |    |                        | Mascot |
|    | 1320.6139                     | 1320.6135 | -0.0004 | 0           | 788 | 798 | DRLEQSDSTNR                          |      |   |    |                        | Mascot |
|    | 1441.8009                     | 1441.679  | -0.1219 | -85         | 463 | 475 | GQLEVEIALLNSR                        |      |   |    |                        | Mascot |
|    | 1463.741                      | 1463.6587 | -0.0823 | -56         | 213 | 226 | KLLEAEMDSSAAAK                       |      |   |    |                        | Mascot |
|    | 1485.6849                     | 1485.6229 | -0.062  | -42         | 233 | 245 | ETVSQMSRSTSEK                        |      |   |    | Oxidation (M)[6]       | Mascot |
|    | 1573.8367                     | 1573.7151 | -0.1216 | -77         | 643 | 656 | IKAEQQGSLAEMLR                       |      |   |    |                        | Mascot |
|    | 1573.8367                     | 1573.7151 | -0.1216 | -77         | 643 | 656 | IKAEQQGSLAEMLR                       | 2    |   | 0  |                        | Mascot |
|    | 1591.822                      | 1591.7767 | -0.0453 | -28         | 227 | 240 | QVSALRETVSQMSR                       |      |   |    |                        | Mascot |
|    | 1752.9061                     | 1752.8513 | -0.0548 | -31         | 659 | 672 | NMLLQEENKQLQHK                       |      |   |    |                        | Mascot |
|    | 3459.7236                     | 3459.7966 | 0.073   | 21          | 423 | 454 | SEDTVGQLSGQLLEIEKQ<br>LAEAVTAAENWSSR |      |   |    |                        | Mascot |
| 32 | olfactomedin 1b [Danio rerio] |           |         | gi 51011063 |     |     | 14508.5                              | 8.86 | 6 | 32 | 0                      |        |

#### Peptide Information

|  | Calc. Mass | Obsrv. Mass | ± da    | ± ppm | Start Seq. | End Seq. | Sequence              | Ion Score | C. I. | % Modification                            | Rank | Result Type |
|--|------------|-------------|---------|-------|------------|----------|-----------------------|-----------|-------|-------------------------------------------|------|-------------|
|  | 850.4781   | 850.5313    | 0.0532  | 63    | 103        | 109      | GLETKFR               |           |       |                                           |      | Mascot      |
|  | 864.4825   | 864.5068    | 0.0243  | 28    | 90         | 96       | DLQYVVK               |           |       |                                           |      | Mascot      |
|  | 1652.8312  | 1652.8027   | -0.0285 | -17   | 90         | 102      | DLQYVVKMEDQLR         |           |       | Oxidation (M)[8]                          |      | Mascot      |
|  | 1675.8431  | 1675.7169   | -0.1262 | -75   | 73         | 86       | VQNMTQSIQVLDQR        |           |       | Oxidation (M)[4]                          |      | Mascot      |
|  | 2040.9082  | 2040.8425   | -0.0657 | -32   | 45         | 62       | CVCTTVAPQQTMCSDA<br>R |           |       | Carbamidomethyl (C)[1], Oxidation (M)[12] |      | Mascot      |
|  | 2040.9082  | 2040.8425   | -0.0657 | -32   | 45         | 62       | CVCTTVAPQQTMCSDA<br>R |           |       | Carbamidomethyl (C)[1], Oxidation (M)[12] |      | Mascot      |
|  | 2045.0557  | 2044.9039   | -0.1518 | -74   | 73         | 89       | VQNMTQSIQVLDQRTQR     |           |       |                                           |      | Mascot      |

33 lft81 protein [Danio rerio] gi|145337899 29908.3 5.76 8 32 0

#### Peptide Information

|  | Calc. Mass | Obsrv. Mass | ± da    | ± ppm | Start Seq. | End Seq. | Sequence | Ion Score | C. I. | % Modification | Rank | Result Type |
|--|------------|-------------|---------|-------|------------|----------|----------|-----------|-------|----------------|------|-------------|
|  | 870.5519   | 870.531     | -0.0209 | -24   | 200        | 206      | VLRQQVK  |           |       |                |      | Mascot      |
|  | 1045.5636  | 1045.5497   | -0.0139 | -13   | 14         | 21       | TEEILRER |           |       |                |      | Mascot      |

|           |           |         |     |     |     |                           |                        |        |
|-----------|-----------|---------|-----|-----|-----|---------------------------|------------------------|--------|
| 1184.5173 | 1184.4415 | -0.0758 | -64 | 65  | 74  | TLDDMSEMVK                | Oxidation (M)[5]       | Mascot |
| 1420.6307 | 1420.5984 | -0.0323 | -23 | 210 | 220 | ENQEPNMRQMK               | Oxidation (M)[7]       | Mascot |
| 1572.7177 | 1572.7548 | 0.0371  | 24  | 99  | 111 | QEHAELAPEYEK              |                        | Mascot |
| 1912.9399 | 1912.9166 | -0.0233 | -12 | 96  | 111 | ALRQEHAELAPEYEK           |                        | Mascot |
| 2225.0879 | 2225.085  | -0.0029 | -1  | 147 | 163 | YHHINCEREIIESQIQ          | Carbamidomethyl (C)[6] | Mascot |
| 2225.0879 | 2225.085  | -0.0029 | -1  | 147 | 163 | YHHINCEREIIESQIQ          | Carbamidomethyl (C)[6] | Mascot |
| 2283.1914 | 2283.144  | -0.0474 | -21 | 234 | 254 | QCYLKAQSQAPIGHVIQD<br>VGK |                        | Mascot |
| 2283.1914 | 2283.144  | -0.0474 | -21 | 234 | 254 | QCYLKAQSQAPIGHVIQD<br>VGK |                        | Mascot |

34 novel protein similar to H.sapiens OLFM1, olfactomedin 1 (OLFM1, zgc:92039) [Danio rerio] gi|220676962 55200.4 8.33 9 32 0

#### Peptide Information

| Calc. Mass | Obsrv. Mass | ± da    | ± ppm | Start Seq. | End Seq. | Sequence                 | Ion Score | C. I. % | Modification                              | Rank | Result Type |
|------------|-------------|---------|-------|------------|----------|--------------------------|-----------|---------|-------------------------------------------|------|-------------|
| 850.4781   | 850.5313    | 0.0532  | 63    | 131        | 137      | GLETKFR                  |           |         |                                           |      | Mascot      |
| 864.4825   | 864.5068    | 0.0243  | 28    | 118        | 124      | DLQYVVK                  |           |         |                                           |      | Mascot      |
| 996.5182   | 996.5818    | 0.0636  | 64    | 315        | 322      | FQSNMIK                  |           |         | Oxidation (M)[5]                          |      | Mascot      |
| 996.5182   | 996.5818    | 0.0636  | 64    | 315        | 322      | FQSNMIK                  |           |         | Oxidation (M)[5]                          |      | Mascot      |
| 1533.777   | 1533.8055   | 0.0285  | 19    | 315        | 326      | FQSNMIKFDK               |           |         | Oxidation (M)[5]                          |      | Mascot      |
| 1652.8312  | 1652.8027   | -0.0285 | -17   | 118        | 130      | DLQYVVKMEDQLR            |           |         | Oxidation (M)[8]                          |      | Mascot      |
| 1675.8431  | 1675.7169   | -0.1262 | -75   | 101        | 114      | VQNMTQSIQVLDQR           |           |         | Oxidation (M)[4]                          |      | Mascot      |
| 2040.9082  | 2040.8425   | -0.0657 | -32   | 73         | 90       | CVCTTVAPQQTMCSDA<br>R    |           |         | Carbamidomethyl (C)[1], Oxidation (M)[12] |      | Mascot      |
| 2040.9082  | 2040.8425   | -0.0657 | -32   | 73         | 90       | CVCTTVAPQQTMCSDA<br>R    |           |         | Carbamidomethyl (C)[1], Oxidation (M)[12] |      | Mascot      |
| 2045.0557  | 2044.9039   | -0.1518 | -74   | 101        | 117      | VQNMTQSIQVLDQRTQR        |           |         |                                           |      | Mascot      |
| 2284.0298  | 2284.1384   | 0.1086  | 48    | 241        | 261      | TGSRFGSWMTDPLAPE<br>GDTR |           |         | Oxidation (M)[10]                         |      | Mascot      |

35 LOC10002738 protein [Danio rerio] gi|134026300 92988.4 5.6 11 31 0

#### Peptide Information

| Calc. Mass | Obsrv. Mass | ± da   | ± ppm | Start Seq. | End Seq. | Sequence              | Ion Score | C. I. % | Modification           | Rank | Result Type |
|------------|-------------|--------|-------|------------|----------|-----------------------|-----------|---------|------------------------|------|-------------|
| 842.4842   | 842.4988    | 0.0146 | 17    | 602        | 608      | IVDPSRR               |           |         |                        |      | Mascot      |
| 1184.5265  | 1184.4415   | -0.085 | -72   | 614        | 622      | CHYEPHSVR             |           |         | Carbamidomethyl (C)[1] |      | Mascot      |
| 1560.9108  | 1560.8088   | -0.102 | -65   | 634        | 647      | ETLIGVHIPTKQPK        |           |         |                        |      | Mascot      |
| 1577.7642  | 1577.8296   | 0.0654 | 41    | 609        | 622      | APPGKCHYEPHSVR        |           |         |                        |      | Mascot      |
| 2185.0481  | 2185.105    | 0.0569 | 26    | 445        | 463      | IFCGDVGNKYEEVDIV<br>K |           |         |                        |      | Mascot      |
| 2185.0481  | 2185.105    | 0.0569 | 26    | 445        | 463      | IFCGDVGNKYEEVDIV<br>K |           |         |                        |      | Mascot      |

|           |                                   |         |     |              |     |                                  |      |    |    |                           |  |        |
|-----------|-----------------------------------|---------|-----|--------------|-----|----------------------------------|------|----|----|---------------------------|--|--------|
| 2225.1641 | 2225.085                          | -0.0791 | -36 | 239          | 257 | FFVAEQVGLVWVYLPDQ<br>SK          |      |    |    |                           |  | Mascot |
| 2225.1641 | 2225.085                          | -0.0791 | -36 | 239          | 257 | FFVAEQVGLVWVYLPDQ<br>SK          |      |    |    |                           |  | Mascot |
| 2233.259  | 2233.0535                         | -0.2055 | -92 | 625          | 644 | SNIIPFEPKETLIGVHIPTK             |      |    |    |                           |  | Mascot |
| 2247.1477 | 2247.0632                         | -0.0845 | -38 | 481          | 500 | KLCANSSLDDVLPYAYP<br>HK          |      |    |    |                           |  | Mascot |
| 2306.075  | 2306.1121                         | 0.0371  | 16  | 204          | 224 | TAADSEGCLQLCLEEVA<br>NGLR        |      |    |    | Carbamidomethyl (C)[8,12] |  | Mascot |
| 2808.3152 | 2808.3599                         | 0.0447  | 16  | 513          | 537 | GCENPNLNGLYIFGDFM<br>SGRLMSLK    |      |    |    | Oxidation (M)[17,22]      |  | Mascot |
| 3338.5549 | 3338.7083                         | 0.1534  | 46  | 1            | 28  | LHNFYFHVSEVGSQALS<br>VMWYFCDVFGR |      |    |    |                           |  | Mascot |
| 36        | PREDICTED: obscurin [Danio rerio] |         |     | gi 326669989 |     | 741504.6                         | 6.35 | 39 | 31 | 0                         |  |        |

Peptide Information

| Calc. Mass | Obsrv. Mass | ± da    | ± ppm | Start Seq. | End Sequence Seq. | Ion Score       | C. I. | % Modification   | Rank | Result Type |
|------------|-------------|---------|-------|------------|-------------------|-----------------|-------|------------------|------|-------------|
| 842.473    | 842.4988    | 0.0258  | 31    | 5613       | 5620              | DVAITAPR        |       |                  |      | Mascot      |
| 864.4573   | 864.5068    | 0.0495  | 57    | 5295       | 5301              | EVEFGKR         |       |                  |      | Mascot      |
| 870.577    | 870.531     | -0.046  | -53   | 1721       | 1727              | LELVIRK         |       |                  |      | Mascot      |
| 1045.5248  | 1045.5497   | 0.0249  | 24    | 1960       | 1968              | AGCPVEWRK       |       |                  |      | Mascot      |
| 1051.5895  | 1051.6962   | 0.1067  | 101   | 3572       | 3581              | SKAVPEAPPR      |       |                  |      | Mascot      |
| 1051.5895  | 1051.6962   | 0.1067  | 101   | 3574       | 3583              | AVPEAPPRSK      |       |                  |      | Mascot      |
| 1062.5248  | 1062.6775   | 0.1527  | 144   | 1791       | 1800              | GAEMLLAGER      |       | Oxidation (M)[4] |      | Mascot      |
| 1084.5382  | 1084.543    | 0.0048  | 4     | 4601       | 4609              | DEHSLIQSR       |       |                  |      | Mascot      |
| 1084.5997  | 1084.543    | -0.0567 | -52   | 2327       | 2336              | NNVTLLPGEK      |       |                  |      | Mascot      |
| 1118.5874  | 1118.5657   | -0.0217 | -19   | 791        | 800               | GIVVLECETR      |       |                  |      | Mascot      |
| 1149.5721  | 1149.5762   | 0.0041  | 4     | 6343       | 6351              | MTPYKPEQR       |       |                  |      | Mascot      |
| 1165.567   | 1165.7288   | 0.1618  | 139   | 6343       | 6351              | MTPYKPEQR       |       | Oxidation (M)[1] |      | Mascot      |
| 1165.567   | 1165.7288   | 0.1618  | 139   | 6343       | 6351              | MTPYKPEQR       |       | Oxidation (M)[1] |      | Mascot      |
| 1316.7936  | 1316.6779   | -0.1157 | -88   | 1391       | 1403              | ATIKIVGAPATFK   |       |                  |      | Mascot      |
| 1344.7668  | 1344.6853   | -0.0815 | -61   | 3951       | 3962              | TLTTIPVRGMQK    |       |                  |      | Mascot      |
| 1441.7621  | 1441.679    | -0.0831 | -58   | 5364       | 5375              | LACLLDFFSTRR    |       |                  |      | Mascot      |
| 1446.7709  | 1446.574    | -0.1969 | -136  | 2779       | 2790              | GMMLLRPGHKYK    |       | Oxidation (M)[2] |      | Mascot      |
| 1463.692   | 1463.6587   | -0.0333 | -23   | 4306       | 4318              | RHTITHNPDGGCR   |       |                  |      | Mascot      |
| 1475.7021  | 1475.7318   | 0.0297  | 20    | 4659       | 4671              | DIASFHECCILPK   |       |                  |      | Mascot      |
| 1485.7076  | 1485.6229   | -0.0847 | -57   | 3539       | 3551              | ICDLKCQDSGIYK   |       |                  |      | Mascot      |
| 1549.7891  | 1549.8024   | 0.0133  | 9     | 82         | 96                | AEGIETSAMLTVTAR |       |                  |      | Mascot      |
| 1560.7687  | 1560.8088   | 0.0401  | 26    | 3586       | 3599              | NIMDEALSGQVQKK  |       |                  |      | Mascot      |
| 1573.8068  | 1573.7151   | -0.0917 | -58   | 4376       | 4389              | TVVPTVNTEEEESLR |       |                  |      | Mascot      |
| 1573.8068  | 1573.7151   | -0.0917 | -58   | 4376       | 4389              | TVVPTVNTEEEESLR |       |                  |      | Mascot      |

|           |           |         |     |      |      |                                     |                              |        |
|-----------|-----------|---------|-----|------|------|-------------------------------------|------------------------------|--------|
| 1652.7948 | 1652.8027 | 0.0079  | 5   | 1702 | 1715 | GEEVLTPGEKYQMR                      | Oxidation (M)[13]            | Mascot |
| 1675.8398 | 1675.7169 | -0.1229 | -73 | 4575 | 4588 | TREIFSLAHESETR                      |                              | Mascot |
| 1719.7101 | 1719.842  | 0.1319  | 77  | 5445 | 5458 | ICDFGFCQEVDSRR                      | Carbamidomethyl (C)[2,7]     | Mascot |
| 1772.9153 | 1772.9076 | -0.0077 | -4  | 274  | 288  | WTLNGQILFPCPDIR                     |                              | Mascot |
| 1993.9899 | 1993.9467 | -0.0432 | -22 | 784  | 800  | DVFAEEKGIVVLECETR                   | Carbamidomethyl (C)[14]      | Mascot |
| 2024.0117 | 2023.8156 | -0.1961 | -97 | 1545 | 1563 | LAINNLVEGDAGNYTCKT<br>K             |                              | Mascot |
| 2024.0117 | 2023.8156 | -0.1961 | -97 | 1545 | 1563 | LAINNLVEGDAGNYTCKT<br>K             |                              | Mascot |
| 2040.9219 | 2040.8425 | -0.0794 | -39 | 113  | 129  | ESLTFICEVNWEDVDGK                   | Carbamidomethyl (C)[7]       | Mascot |
| 2040.9219 | 2040.8425 | -0.0794 | -39 | 113  | 129  | ESLTFICEVNWEDVDGK                   | Carbamidomethyl (C)[7]       | Mascot |
| 2045.0549 | 2044.9039 | -0.151  | -74 | 543  | 560  | DGEILNSTEKEYEILHVGK                 |                              | Mascot |
| 2181.0757 | 2180.9521 | -0.1236 | -57 | 5033 | 5051 | GQDVQFKCSTQSPFPFSI<br>R             | Carbamidomethyl (C)[8]       | Mascot |
| 2184.9424 | 2185.105  | 0.1626  | 74  | 1193 | 1212 | NPVPEDSGTYICVCEDQ<br>STK            |                              | Mascot |
| 2184.9424 | 2185.105  | 0.1626  | 74  | 1193 | 1212 | NPVPEDSGTYICVCEDQ<br>STK            |                              | Mascot |
| 2210.9956 | 2211.0718 | 0.0762  | 34  | 4509 | 4527 | ETFDIYVAKTDCHPMGG<br>NR             | Carbamidomethyl (C)[12]      | Mascot |
| 2247.2166 | 2247.0632 | -0.1534 | -68 | 62   | 81   | NHTLTLTRVTLADMGIISF<br>K            | Oxidation (M)[14]            | Mascot |
| 2284.0979 | 2284.1384 | 0.0405  | 18  | 3166 | 3184 | EKLLFFSEELQNQESEEG<br>K             |                              | Mascot |
| 2306.104  | 2306.1121 | 0.0081  | 4   | 1586 | 1607 | SQEVQEGNSVTLNCELS<br>KAGGR          |                              | Mascot |
| 2501.2085 | 2501.21   | 0.0015  | 1   | 2793 | 2814 | QDGCKMQLLILELSCQDS<br>GIYK          | Oxidation (M)[6]             | Mascot |
| 2808.3225 | 2808.3599 | 0.0374  | 13  | 1095 | 1118 | KSCISLAIHNVKPPDSGN<br>YTCICR        | Carbamidomethyl (C)[3,21,23] | Mascot |
| 3338.4536 | 3338.7083 | 0.2547  | 76  | 5965 | 5995 | SHHDAFVIAGSSGKTSAC<br>SLLQDSEDEDMER | Oxidation (M)[29]            | Mascot |
| 3459.521  | 3459.7966 | 0.2756  | 80  | 2430 | 2460 | QDGCELQLQINDLTSQD<br>SGAYRCCADGIETR | Carbamidomethyl (C)[4]       | Mascot |

37

PREDICTED: probable polyketide synthase 1 [Danio rerio]

gi|189536864

232039.4

6.77

19

31

0

| Peptide Information |             |         |       |            |          |            | C. I. % | Modification           | Rank | Result | Type |
|---------------------|-------------|---------|-------|------------|----------|------------|---------|------------------------|------|--------|------|
| Calc. Mass          | Obsrv. Mass | ± da    | ± ppm | Start Seq. | End Seq. | Sequence   |         |                        |      |        |      |
| 1045.571            | 1045.5497   | -0.0213 | -20   | 237        | 246      | GEGCGIVLLK |         | Carbamidomethyl (C)[4] |      | Mascot |      |
| 1051.5895           | 1051.6962   | 0.1067  | 101   | 1148       | 1156     | DGHVLIELR  |         |                        |      | Mascot |      |
| 1051.5895           | 1051.6962   | 0.1067  | 101   | 1148       | 1156     | DGHVLIELR  |         |                        |      | Mascot |      |
| 1149.635            | 1149.5762   | -0.0588 | -51   | 1666       | 1674     | WLKGMHLHK  |         |                        |      | Mascot |      |
| 1165.6299           | 1165.7288   | 0.0989  | 85    | 1666       | 1674     | WLKGMHLHK  |         | Oxidation (M)[5]       |      | Mascot |      |
| 1165.6299           | 1165.7288   | 0.0989  | 85    | 1666       | 1674     | WLKGMHLHK  |         | Oxidation (M)[5]       |      | Mascot |      |
| 1216.6685           | 1216.5925   | -0.076  | -62   | 777        | 786      | KPVEFEQAIR |         |                        |      | Mascot |      |



|           |                                                  |         |      |      |             |                                   |      |   |    |                                              |  |        |
|-----------|--------------------------------------------------|---------|------|------|-------------|-----------------------------------|------|---|----|----------------------------------------------|--|--------|
| 1316.7606 | 1316.6779                                        | -0.0827 | -63  | 237  | 249         | GEGCGIVLLKSLK                     |      |   |    |                                              |  | Mascot |
| 1420.7617 | 1420.5984                                        | -0.1633 | -115 | 1922 | 1933        | LGLLMNKDNFQK                      |      |   |    |                                              |  | Mascot |
| 1441.6495 | 1441.679                                         | 0.0295  | 20   | 762  | 773         | QGDFVNGEYWAR                      |      |   |    |                                              |  | Mascot |
| 1446.6868 | 1446.574                                         | -0.1128 | -78  | 1486 | 1497        | VGDHVICCYPVK                      |      |   |    | Carbamidomethyl (C)[7,8]                     |  | Mascot |
| 1533.7689 | 1533.8055                                        | 0.0366  | 24   | 1763 | 1778        | GGGCIATLSRSAPSEK                  |      |   |    |                                              |  | Mascot |
| 1573.8229 | 1573.7151                                        | -0.1078 | -68  | 1484 | 1497        | LKVGDHVICCYPVK                    |      |   |    |                                              |  | Mascot |
| 1573.8229 | 1573.7151                                        | -0.1078 | -68  | 1484 | 1497        | LKVGDHVICCYPVK                    |      |   |    |                                              |  | Mascot |
| 1577.9149 | 1577.8296                                        | -0.0853 | -54  | 496  | 510         | VFAASSLSELISLLK                   |      |   |    |                                              |  | Mascot |
| 1591.8816 | 1591.7767                                        | -0.1049 | -66  | 1157 | 1170        | DVRITFLGAHGHIR                    |      |   |    |                                              |  | Mascot |
| 1719.8445 | 1719.842                                         | -0.0025 | -1   | 1640 | 1653        | TCFQTLEMSKIFQK                    |      |   |    | Oxidation (M)[8]                             |  | Mascot |
| 1752.801  | 1752.8513                                        | 0.0503  | 29   | 907  | 921         | CNLSASTNSYLWEHK                   |      |   |    |                                              |  | Mascot |
| 1772.6964 | 1772.9076                                        | 0.2112  | 119  | 1133 | 1147        | QMSDYFEVCGCFTDK                   |      |   |    |                                              |  | Mascot |
| 2023.955  | 2023.8156                                        | -0.1394 | -69  | 526  | 542         | LVFVFCGNGVTYRGMCK                 |      |   |    | Carbamidomethyl (C)[6,16], Oxidation (M)[15] |  | Mascot |
| 2023.955  | 2023.8156                                        | -0.1394 | -69  | 526  | 542         | LVFVFCGNGVTYRGMCK                 |      |   |    | Carbamidomethyl (C)[6,16], Oxidation (M)[15] |  | Mascot |
| 2180.9724 | 2180.9521                                        | -0.0203 | -9   | 1998 | 2017        | NKDAEDSGISVQSSVDD<br>CVR          |      |   |    | Carbamidomethyl (C)[18]                      |  | Mascot |
| 2298.1797 | 2298.1475                                        | -0.0322 | -14  | 829  | 848         | DQQTMTFNTVSKLFELGV<br>NVK         |      |   |    |                                              |  | Mascot |
| 3338.7415 | 3338.7083                                        | -0.0332 | -10  | 2054 | 2082        | FFQEMGVNIPLVALLDPN<br>CTLLSLTEYLK |      |   |    | Carbamidomethyl (C)[19]                      |  | Mascot |
| 38        | tetratricopeptide repeat protein 5 [Danio rerio] |         |      |      | gi 62955285 | 49632.1                           | 6.49 | 9 | 31 | 0                                            |  |        |

#### Peptide Information

|    | Calc. Mass                                             | Obsrv. Mass | ± da    | ± ppm | Start Seq.   | End Seq. | Sequence             | Ion Score | C. I. | % Modification         | Rank | Result Type |
|----|--------------------------------------------------------|-------------|---------|-------|--------------|----------|----------------------|-----------|-------|------------------------|------|-------------|
|    | 864.4798                                               | 864.5068    | 0.027   | 31    | 399          | 405      | RHSVTHK              |           |       |                        |      | Mascot      |
|    | 1084.6262                                              | 1084.543    | -0.0832 | -77   | 71           | 79       | HSAQFLLLR            |           |       |                        |      | Mascot      |
|    | 1084.6262                                              | 1084.543    | -0.0832 | -77   | 71           | 79       | HSAQFLLLR            |           |       |                        |      | Mascot      |
|    | 1149.5205                                              | 1149.5762   | 0.0557  | 48    | 48           | 57       | QNDVAQEMAK           |           |       | Oxidation (M)[8]       |      | Mascot      |
|    | 1475.7522                                              | 1475.7318   | -0.0204 | -14   | 48           | 60       | QNDVAQEMAKTLK        |           |       |                        |      | Mascot      |
|    | 1549.6976                                              | 1549.8024   | 0.1048  | 68    | 2            | 15       | AEVDNDGEQKTTDK       |           |       |                        |      | Mascot      |
|    | 2023.9211                                              | 2023.8156   | -0.1055 | -52   | 82           | 99       | CLNVAPEFSQAAEECLSR   |           |       | Carbamidomethyl (C)[1] |      | Mascot      |
|    | 2023.9211                                              | 2023.8156   | -0.1055 | -52   | 82           | 99       | CLNVAPEFSQAAEECLSR   |           |       | Carbamidomethyl (C)[1] |      | Mascot      |
|    | 2029.0059                                              | 2028.8933   | -0.1126 | -55   | 429          | 446      | QVMKSQSAAFVYKPKSE    |           |       |                        |      | Mascot      |
|    | 2045.0007                                              | 2044.9039   | -0.0968 | -47   | 429          | 446      | QVMKSQSAAFVYKPKSE    |           |       | Oxidation (M)[3]       |      | Mascot      |
|    | 2180.0222                                              | 2179.9604   | -0.0618 | -28   | 80           | 99       | GRCLNVAPEFSQAAEECLSR |           |       |                        |      | Mascot      |
|    | 2247.1443                                              | 2247.0632   | -0.0811 | -36   | 103          | 121      | LEPGLVEGWNTLGEQYWKK  |           |       |                        |      | Mascot      |
| 39 | novel protein similar to H.sapiens OLFM1, olfactomedin |             |         |       | gi 220676964 |          | 52461.1              | 8.07      | 9     | 31                     | 0    |             |

1 (OLFM1, zgc:92039) [Danio rerio]

| Peptide Information |             |         |       |            |          |                           |           |         |                                           |      |             |
|---------------------|-------------|---------|-------|------------|----------|---------------------------|-----------|---------|-------------------------------------------|------|-------------|
| Calc. Mass          | Obsrv. Mass | ± da    | ± ppm | Start Seq. | End Seq. | Sequence                  | Ion Score | C. I. % | Modification                              | Rank | Result Type |
| 850.4781            | 850.5313    | 0.0532  | 63    | 103        | 109      | GLETKFR                   |           |         |                                           |      | Mascot      |
| 864.4825            | 864.5068    | 0.0243  | 28    | 90         | 96       | DLQYVVK                   |           |         |                                           |      | Mascot      |
| 996.5182            | 996.5818    | 0.0636  | 64    | 287        | 294      | FQSNMIIK                  |           |         | Oxidation (M)[5]                          |      | Mascot      |
| 996.5182            | 996.5818    | 0.0636  | 64    | 287        | 294      | FQSNMIIK                  |           |         | Oxidation (M)[5]                          |      | Mascot      |
| 1533.777            | 1533.8055   | 0.0285  | 19    | 287        | 298      | FQSNMIIKFDFK              |           |         | Oxidation (M)[5]                          |      | Mascot      |
| 1652.8312           | 1652.8027   | -0.0285 | -17   | 90         | 102      | DLQYVVKMEDQLR             |           |         | Oxidation (M)[8]                          |      | Mascot      |
| 1675.8431           | 1675.7169   | -0.1262 | -75   | 73         | 86       | VQNMTQSIQVLDQR            |           |         | Oxidation (M)[4]                          |      | Mascot      |
| 2040.9082           | 2040.8425   | -0.0657 | -32   | 45         | 62       | CVCTVVAPQQTMCSDA<br>R     |           |         | Carbamidomethyl (C)[1], Oxidation (M)[12] |      | Mascot      |
| 2040.9082           | 2040.8425   | -0.0657 | -32   | 45         | 62       | CVCTVVAPQQTMCSDA<br>R     |           |         | Carbamidomethyl (C)[1], Oxidation (M)[12] |      | Mascot      |
| 2045.0557           | 2044.9039   | -0.1518 | -74   | 73         | 89       | VQNMTQSIQVLDQRTQR         |           |         |                                           |      | Mascot      |
| 2284.0298           | 2284.1384   | 0.1086  | 48    | 213        | 233      | TSGSRFGSWMTDPLAPE<br>GDTR |           |         | Oxidation (M)[10]                         |      | Mascot      |
| Pbx2 [Danio rerio]  |             |         |       | gi 7861936 |          | 18895.6                   | 9.08      | 6       | 30                                        | 0    |             |

| Peptide Information |             |         |       |            |          |                          |           |         |                                           |      |             |
|---------------------|-------------|---------|-------|------------|----------|--------------------------|-----------|---------|-------------------------------------------|------|-------------|
| Calc. Mass          | Obsrv. Mass | ± da    | ± ppm | Start Seq. | End Seq. | Sequence                 | Ion Score | C. I. % | Modification                              | Rank | Result Type |
| 864.4686            | 864.5068    | 0.0382  | 44    | 153        | 159      | SRFLDAR                  |           |         |                                           |      | Mascot      |
| 1051.5782           | 1051.6962   | 0.118   | 112   | 133        | 141      | FSSIQTQLK                |           |         |                                           |      | Mascot      |
| 1051.5782           | 1051.6962   | 0.118   | 112   | 133        | 141      | FSSIQTQLK                |           |         |                                           |      | Mascot      |
| 1493.7563           | 1493.7094   | -0.0469 | -31   | 142        | 154      | QSTCEAVMILRSR            |           |         |                                           |      | Mascot      |
| 1572.7937           | 1572.7548   | -0.0389 | -25   | 33         | 47       | LDNMLLAEGVAGPEK          |           |         | Oxidation (M)[4]                          |      | Mascot      |
| 2054.927            | 2054.8594   | -0.0676 | -33   | 93         | 109      | YEQACSESTTHVMNLLR        |           |         | Carbamidomethyl (C)[5], Oxidation (M)[13] |      | Mascot      |
| 2283.1836           | 2283.144    | -0.0396 | -17   | 133        | 152      | FSSIQTQLKQSTCEAVMI<br>LR |           |         |                                           |      | Mascot      |
| 2283.1836           | 2283.144    | -0.0396 | -17   | 133        | 152      | FSSIQTQLKQSTCEAVMI<br>LR |           |         |                                           |      | Mascot      |

41 PREDICTED: zinc finger protein 850-like [Danio rerio] gi|326666761 93003 9.53 17 30 0

| Peptide Information |             |        |       |            |          |           |           |         |                        |      |             |
|---------------------|-------------|--------|-------|------------|----------|-----------|-----------|---------|------------------------|------|-------------|
| Calc. Mass          | Obsrv. Mass | ± da   | ± ppm | Start Seq. | End Seq. | Sequence  | Ion Score | C. I. % | Modification           | Rank | Result Type |
| 870.4719            | 870.531     | 0.0591 | 68    | 361        | 367      | LFTQFSK   |           |         |                        |      | Mascot      |
| 1045.4441           | 1045.5497   | 0.1056 | 101   | 407        | 415      | TFTCTQCGK |           |         | Carbamidomethyl (C)[4] |      | Mascot      |

|           |                               |         |      |              |     |                                  |                                                   |      |   |    |   |        |
|-----------|-------------------------------|---------|------|--------------|-----|----------------------------------|---------------------------------------------------|------|---|----|---|--------|
| 1084.5898 | 1084.543                      | -0.0468 | -43  | 429          | 437 | IHTGEKPFR                        |                                                   |      |   |    |   | Mascot |
| 1084.5898 | 1084.543                      | -0.0468 | -43  | 429          | 437 | IHTGEKPFR                        |                                                   |      |   |    |   | Mascot |
| 1149.6626 | 1149.5762                     | -0.0864 | -75  | 639          | 648 | TFITAAELKR                       |                                                   |      |   |    |   | Mascot |
| 1184.5476 | 1184.4415                     | -0.1061 | -90  | 73           | 83  | SACNFGSKQSR                      |                                                   |      |   |    |   | Mascot |
| 1216.5562 | 1216.5925                     | 0.0363  | 30   | 295          | 304 | KPHTCTQCGK                       | Carbamidomethyl (C)[5,8]                          |      |   |    |   | Mascot |
| 1420.7478 | 1420.5984                     | -0.1494 | -105 | 142          | 153 | ANLDVHMRVHTK                     |                                                   |      |   |    |   | Mascot |
| 1493.7166 | 1493.7094                     | -0.0072 | -5   | 500          | 512 | SFSQSSSLNLHMR                    |                                                   |      |   |    |   | Mascot |
| 1591.7355 | 1591.7767                     | 0.0412  | 26   | 686          | 698 | LFTCTQCGKSFSR                    | Carbamidomethyl (C)[4,7]                          |      |   |    |   | Mascot |
| 1638.8203 | 1638.8279                     | 0.0076  | 5    | 290          | 304 | IHTGKKPHTCTQCGK                  |                                                   |      |   |    |   | Mascot |
| 1719.769  | 1719.842                      | 0.073   | 42   | 262          | 276 | THTGDRSFICTHCGK                  | Carbamidomethyl (C)[10]                           |      |   |    |   | Mascot |
| 1752.8632 | 1752.8513                     | -0.0119 | -7   | 290          | 304 | IHTGKKPHTCTQCGK                  | Carbamidomethyl (C)[10,13]                        |      |   |    |   | Mascot |
| 2055.0188 | 2054.8594                     | -0.1594 | -78  | 310          | 326 | TSLDNHMRIHTGEKPYPYR              |                                                   |      |   |    |   | Mascot |
| 2184.9849 | 2185.105                      | 0.1201  | 55   | 342          | 360 | HHMRTHTGEKPFACTQC<br>GK          | Oxidation (M)[3]                                  |      |   |    |   | Mascot |
| 2184.9912 | 2185.105                      | 0.1138  | 52   | 745          | 763 | STQCGKSFSLSNFNPH<br>MR           | Carbamidomethyl (C)[4]                            |      |   |    |   | Mascot |
| 2283.0327 | 2283.144                      | 0.1113  | 49   | 342          | 360 | HHMRTHTGEKPFACTQC<br>GK          | Carbamidomethyl (C)[14,17]                        |      |   |    |   | Mascot |
| 2283.0327 | 2283.144                      | 0.1113  | 49   | 342          | 360 | HHMRTHTGEKPFACTQC<br>GK          | Carbamidomethyl (C)[14,17]                        |      |   |    |   | Mascot |
| 2808.2935 | 2808.3599                     | 0.0664  | 24   | 699          | 722 | LSSLNLHMMIHTGEKPFT<br>CSQCGK     | Carbamidomethyl (C)[19,22], Oxidation<br>(M)[8,9] |      |   |    |   | Mascot |
| 3337.52   | 3337.7178                     | 0.1978  | 59   | 193          | 220 | SFYHPGNFAVHMRIHTG<br>ERPYTQCGK   | Carbamidomethyl (C)[23], Oxidation (M)[12]        |      |   |    |   | Mascot |
| 3338.4268 | 3338.7083                     | 0.2815  | 84   | 444          | 471 | SFNCSSHLNEHMMIHTG<br>EKPFTCTQCGK | Carbamidomethyl (C)[4,23,26]                      |      |   |    |   | Mascot |
| 42        | Ppp4r2a protein [Danio rerio] |         |      | gi 156230689 |     |                                  | 49479.9                                           | 4.37 | 8 | 30 | 0 |        |

Peptide Information

|    | Calc. Mass                                                                                          | Obsrv. Mass | ± da    | ± ppm | Start Seq.   | End Sequence Seq.                    |         | Ion Score | C. I. % | Modification           | Rank | Result Type |
|----|-----------------------------------------------------------------------------------------------------|-------------|---------|-------|--------------|--------------------------------------|---------|-----------|---------|------------------------|------|-------------|
|    | 850.4199                                                                                            | 850.5313    | 0.1114  | 131   | 172          | 179 KGSSCVNR                         |         |           |         |                        |      | Mascot      |
|    | 1045.5598                                                                                           | 1045.5497   | -0.0101 | -10   | 134          | 142 LCELLTEPK                        |         |           |         |                        |      | Mascot      |
|    | 1184.6058                                                                                           | 1184.4415   | -0.1643 | -139  | 144          | 153 NYAGTDKFLR                       |         |           |         |                        |      | Mascot      |
|    | 1591.8591                                                                                           | 1591.7767   | -0.0824 | -52   | 120          | 133 IVNGYNGIPFTIQR                   |         |           |         |                        |      | Mascot      |
|    | 1772.7731                                                                                           | 1772.9076   | 0.1345  | 76    | 180          | 195 MNGVMFPGNTSAFPDR                 |         |           |         | Oxidation (M)[1,5]     |      | Mascot      |
|    | 2211.075                                                                                            | 2211.0718   | -0.0032 | -1    | 27           | 45 HTSTMEIDTLLGAFRDFE K              |         |           |         |                        |      | Mascot      |
|    | 2501.1118                                                                                           | 2501.21     | 0.0982  | 39    | 173          | 195 GSSCVNRMNGVMFPGN TSAFPDR         |         |           |         | Carbamidomethyl (C)[4] |      | Mascot      |
|    | 3338.6633                                                                                           | 3338.7083   | 0.045   | 13    | 180          | 210 MNGVMFPGNTSAFPDRN VNGPGTPRPLNRPK |         |           |         |                        |      | Mascot      |
| 43 | novel protein similar to H.sapiens C1orf57, chromosome 1 open reading frame 57 (C1orf57, zgc:92420) |             |         |       | gi 220672935 |                                      | 20390.7 | 9.12      | 6       | 30                     | 0    |             |

| Peptide Information |                                                                   |         |       |              |                             |           |       |                        |      |             |
|---------------------|-------------------------------------------------------------------|---------|-------|--------------|-----------------------------|-----------|-------|------------------------|------|-------------|
| Calc. Mass          | Obsrv. Mass                                                       | ± da    | ± ppm | Start Seq.   | End Sequence Seq.           | Ion Score | C. I. | % Modification         | Rank | Result Type |
| 1165.5922           | 1165.7288                                                         | 0.1366  | 117   | 103          | 112 QLFVMDEVGK              |           |       |                        |      | Mascot      |
| 1165.5922           | 1165.7288                                                         | 0.1366  | 117   | 103          | 112 QLFVMDEVGK              |           |       |                        |      | Mascot      |
| 1463.7601           | 1463.6587                                                         | -0.1014 | -69   | 45           | 58 VGFDVVTVSGDRGR           |           |       |                        |      | Mascot      |
| 1485.8246           | 1485.6229                                                         | -0.2017 | -136  | 1            | 14 MKHVFLTGVPGVGK           |           |       | Oxidation (M)[1]       |      | Mascot      |
| 1753.037            | 1752.8513                                                         | -0.1857 | -106  | 3            | 19 HVFLTGVPGVGKTTLVK        |           |       |                        |      | Mascot      |
| 2028.9364           | 2028.8933                                                         | -0.0431 | -21   | 95           | 112 NMQEGSGKQLFVMDEV<br>GK  |           |       | Oxidation (M)[2,13]    |      | Mascot      |
| 2247.0962           | 2247.0632                                                         | -0.033  | -15   | 20           | 39 KVCDTLSGLSVSGFYTEE<br>VR |           |       | Carbamidomethyl (C)[3] |      | Mascot      |
| 44                  | hypothetical protein LOC100145413 [Xenopus (Silurana) tropicalis] |         |       | gi 187607099 |                             | 39415.2   | 9.16  | 10                     | 30   | 0           |

| Peptide Information |                                              |         |       |              |                                  |           |       |                                                  |      |             |
|---------------------|----------------------------------------------|---------|-------|--------------|----------------------------------|-----------|-------|--------------------------------------------------|------|-------------|
| Calc. Mass          | Obsrv. Mass                                  | ± da    | ± ppm | Start Seq.   | End Sequence Seq.                | Ion Score | C. I. | % Modification                                   | Rank | Result Type |
| 1118.6429           | 1118.5657                                    | -0.0772 | -69   | 249          | 258 THQKIHAGVK                   |           |       |                                                  |      | Mascot      |
| 1344.5558           | 1344.6853                                    | 0.1295  | 96    | 229          | 239 EKPYSCECGK                   |           |       | Carbamidomethyl (C)[6,9]                         |      | Mascot      |
| 1446.6287           | 1446.574                                     | -0.0547 | -38   | 62           | 74 NCFTCSQCCKSLR                 |           |       |                                                  |      | Mascot      |
| 1533.7955           | 1533.8055                                    | 0.01    | 7     | 100          | 112 SFRTSSSLKPHMR                |           |       |                                                  |      | Mascot      |
| 1549.7904           | 1549.8024                                    | 0.012   | 8     | 100          | 112 SFRTSSSLKPHMR                |           |       | Oxidation (M)[12]                                |      | Mascot      |
| 1560.6715           | 1560.8088                                    | 0.1373  | 88    | 62           | 74 NCFTCSQCCKSLR                 |           |       | Carbamidomethyl (C)[2,5]                         |      | Mascot      |
| 1719.8284           | 1719.842                                     | 0.0136  | 8     | 30           | 43 QEETEEQTDLKEIK                |           |       |                                                  |      | Mascot      |
| 1752.8043           | 1752.8513                                    | 0.047   | 27    | 225          | 239 VHTKEKPYSCCECGK              |           |       | Carbamidomethyl (C)[10]                          |      | Mascot      |
| 2179.9392           | 2179.9604                                    | 0.0212  | 10    | 166          | 183 HMMIHTGEKPFCTCECG<br>K       |           |       | Carbamidomethyl (C)[13,16], Oxidation (M)[2]     |      | Mascot      |
| 2211.1702           | 2211.0718                                    | -0.0984 | -45   | 184          | 202 SFIQLSTLNLHMRIHAGE<br>K      |           |       | Oxidation (M)[12]                                |      | Mascot      |
| 2501.1548           | 2501.21                                      | 0.0552  | 22    | 113          | 134 IHTGEKPYTCTQCGKSFG<br>QSSK   |           |       | Carbamidomethyl (C)[10,13]                       |      | Mascot      |
| 2808.2056           | 2808.3599                                    | 0.1543  | 55    | 47           | 71 LGDTEGIISMQSGNKNCF<br>TCSQCGK |           |       | Carbamidomethyl (C)[17,20,23], Oxidation (M)[10] |      | Mascot      |
| 45                  | hypothetical protein LOC751722 [Danio rerio] |         |       | gi 113679753 |                                  | 31904.4   | 6.69  | 8                                                | 30   | 0           |

| Peptide Information |             |        |       |            |                   |           |       |                        |      |             |
|---------------------|-------------|--------|-------|------------|-------------------|-----------|-------|------------------------|------|-------------|
| Calc. Mass          | Obsrv. Mass | ± da   | ± ppm | Start Seq. | End Sequence Seq. | Ion Score | C. I. | % Modification         | Rank | Result Type |
| 870.577             | 870.531     | -0.046 | -53   | 190        | 197 NLLLKAAK      |           |       |                        |      | Mascot      |
| 1062.5248           | 1062.6775   | 0.1527 | 144   | 182        | 189 EQRLEMEK      |           |       |                        |      | Mascot      |
| 1216.5449           | 1216.5925   | 0.0476 | 39    | 219        | 228 HCADLLNMDK    |           |       | Carbamidomethyl (C)[2] |      | Mascot      |

|    |                             |           |         |     |             |     |                         |      |   |    |   |  |                        |  |  |  |        |
|----|-----------------------------|-----------|---------|-----|-------------|-----|-------------------------|------|---|----|---|--|------------------------|--|--|--|--------|
|    | 1279.6616                   | 1279.7557 | 0.0941  | 74  | 231         | 240 | NGNLMWLYLR              |      |   |    |   |  |                        |  |  |  | Mascot |
|    | 1557.7689                   | 1557.7135 | -0.0554 | -36 | 103         | 115 | ALISHSQQLMEER           |      |   |    |   |  | Oxidation (M)[10]      |  |  |  | Mascot |
|    | 1573.7097                   | 1573.7151 | 0.0054  | 3   | 216         | 228 | NDKHCADLLNMDK           |      |   |    |   |  | Carbamidomethyl (C)[5] |  |  |  | Mascot |
|    | 1573.7097                   | 1573.7151 | 0.0054  | 3   | 216         | 228 | NDKHCADLLNMDK           |      |   |    |   |  | Carbamidomethyl (C)[5] |  |  |  | Mascot |
|    | 1652.7875                   | 1652.8027 | 0.0152  | 9   | 117         | 129 | HLQQEQQDLEQEK           |      |   |    |   |  |                        |  |  |  | Mascot |
|    | 2225.1409                   | 2225.085  | -0.0559 | -25 | 74          | 92  | ETLTENQRTAAHLELELE<br>K |      |   |    |   |  |                        |  |  |  | Mascot |
|    | 2225.1409                   | 2225.085  | -0.0559 | -25 | 74          | 92  | ETLTENQRTAAHLELELE<br>K |      |   |    |   |  |                        |  |  |  | Mascot |
| 46 | novel protein [Danio rerio] |           |         |     | gi 94732554 |     | 10949.6                 | 4.74 | 4 | 30 | 0 |  |                        |  |  |  |        |

Peptide Information

| Calc. Mass | Obsrv. Mass | ± da    | ± ppm | Start Seq. | End Seq. | Sequence                          | Ion Score | C. I. | % Modification    | Rank | Result Type |
|------------|-------------|---------|-------|------------|----------|-----------------------------------|-----------|-------|-------------------|------|-------------|
| 850.4087   | 850.5313    | 0.1226  | 144   | 1          | 8        | MAALDASR                          |           |       | Oxidation (M)[1]  |      | Mascot      |
| 2029.0713  | 2028.8933   | -0.178  | -88   | 44         | 61       | LPVSVKINPDAYSQDNIR                |           |       |                   |      | Mascot      |
| 2045.0258  | 2044.9039   | -0.1219 | -60   | 9          | 27       | NVTEAEDAARLLSDAINS<br>R           |           |       |                   |      | Mascot      |
| 3338.7009  | 3338.7083   | 0.0074  | 2     | 64         | 93       | VGVADAESHHIPITVMV<br>PVYMTISELKEK |           |       | Oxidation (M)[17] |      | Mascot      |

|    |                                    |  |  |  |              |  |         |      |    |    |   |  |  |  |  |  |  |
|----|------------------------------------|--|--|--|--------------|--|---------|------|----|----|---|--|--|--|--|--|--|
| 47 | toll-like receptor 6 [Danio rerio] |  |  |  | gi 194578857 |  | 91036.5 | 6.38 | 11 | 30 | 0 |  |  |  |  |  |  |
|----|------------------------------------|--|--|--|--------------|--|---------|------|----|----|---|--|--|--|--|--|--|

Peptide Information

| Calc. Mass | Obsrv. Mass | ± da    | ± ppm | Start Seq. | End Seq. | Sequence                 | Ion Score | C. I. | % Modification                             | Rank | Result Type |
|------------|-------------|---------|-------|------------|----------|--------------------------|-----------|-------|--------------------------------------------|------|-------------|
| 850.4053   | 850.5313    | 0.126   | 148   | 65         | 71       | DFNTTPR                  |           |       |                                            |      | Mascot      |
| 1279.6245  | 1279.7557   | 0.1312  | 103   | 228        | 237      | MEVVQQMRSR               |           |       | Oxidation (M)[1]                           |      | Mascot      |
| 1320.6439  | 1320.6135   | -0.0304 | -23   | 749        | 758      | YYQLKTMMSR               |           |       |                                            |      | Mascot      |
| 1463.743   | 1463.6587   | -0.0843 | -58   | 640        | 651      | LHFHAFVSYSQK             |           |       |                                            |      | Mascot      |
| 1485.6726  | 1485.6229   | -0.0497 | -33   | 672        | 683      | MCHHERDFIPGK             |           |       | Oxidation (M)[1]                           |      | Mascot      |
| 1493.7767  | 1493.7094   | -0.0673 | -45   | 271        | 283      | ELSLTDLTITEMK            |           |       |                                            |      | Mascot      |
| 1560.7437  | 1560.8088   | 0.0651  | 42    | 131        | 144      | FSAMALGEEFSMLK           |           |       |                                            |      | Mascot      |
| 1577.7958  | 1577.8296   | 0.0338  | 21    | 760        | 772      | TYLEWPQEGAKQK            |           |       |                                            |      | Mascot      |
| 1652.9006  | 1652.8027   | -0.0979 | -59   | 534        | 548      | DFASLINAQGIKTFK          |           |       |                                            |      | Mascot      |
| 2024.0443  | 2023.8156   | -0.2287 | -113  | 326        | 344      | VSLTESPIIFMTCPGTISK      |           |       |                                            |      | Mascot      |
| 2024.0443  | 2023.8156   | -0.2287 | -113  | 326        | 344      | VSLTESPIIFMTCPGTISK      |           |       |                                            |      | Mascot      |
| 2225.1555  | 2225.085    | -0.0705 | -32   | 325        | 344      | KVSLTESPIIFMTCPGTIS<br>K |           |       | Carbamidomethyl (C)[14], Oxidation (M)[12] |      | Mascot      |
| 2225.1555  | 2225.085    | -0.0705 | -32   | 325        | 344      | KVSLTESPIIFMTCPGTIS<br>K |           |       | Carbamidomethyl (C)[14], Oxidation (M)[12] |      | Mascot      |

|    |                                     |  |  |  |              |  |          |     |   |    |   |  |  |  |  |  |  |
|----|-------------------------------------|--|--|--|--------------|--|----------|-----|---|----|---|--|--|--|--|--|--|
| 48 | disks large homolog 5 [Danio rerio] |  |  |  | gi 224496092 |  | 217705.3 | 6.7 | 1 | 21 | 0 |  |  |  |  |  |  |
|----|-------------------------------------|--|--|--|--------------|--|----------|-----|---|----|---|--|--|--|--|--|--|

| Peptide Information |                                                                      |         |       |            |                   |           |         |              |      |             |
|---------------------|----------------------------------------------------------------------|---------|-------|------------|-------------------|-----------|---------|--------------|------|-------------|
| Calc. Mass          | Obsrv. Mass                                                          | ± da    | ± ppm | Start Seq. | End Sequence Seq. | Ion Score | C. I. % | Modification | Rank | Result Type |
| 1084.6473           | 1084.543                                                             | -0.1043 | -96   | 327        | 335 QIDALLKQR     | 21        | 0       |              | 2    | Mascot      |
| 49                  | PREDICTED: Down syndrome cell adhesion molecule like 1 [Danio rerio] |         |       |            | gi 292621329      | 232717.7  | 8.83    | 1            | 13   | 0           |

| Peptide Information |                                                 |        |       |            |                   |           |         |              |      |             |
|---------------------|-------------------------------------------------|--------|-------|------------|-------------------|-----------|---------|--------------|------|-------------|
| Calc. Mass          | Obsrv. Mass                                     | ± da   | ± ppm | Start Seq. | End Sequence Seq. | Ion Score | C. I. % | Modification | Rank | Result Type |
| 1165.5782           | 1165.7288                                       | 0.1506 | 129   | 2          | 11 TVPRMGGYER     | 13        | 0       |              | 1    | Mascot      |
| 50                  | E3 ubiquitin-protein ligase NEDD4 [Danio rerio] |        |       |            | gi 77681805       | 105816.1  | 6.16    | 1            | 11   | 0           |

| Peptide Information |             |        |       |            |                   |           |         |              |      |             |
|---------------------|-------------|--------|-------|------------|-------------------|-----------|---------|--------------|------|-------------|
| Calc. Mass          | Obsrv. Mass | ± da   | ± ppm | Start Seq. | End Sequence Seq. | Ion Score | C. I. % | Modification | Rank | Result Type |
| 1165.7052           | 1165.7288   | 0.0236 | 20    | 543        | 552 LKKPAEIPNR    | 11        | 0       |              | 2    | Mascot      |

|                |           |                        |                |                |                    |
|----------------|-----------|------------------------|----------------|----------------|--------------------|
| Gel Idx/Pos    | 188/H15   | Instr./Gel Origin      | BA2060/110707A | Process Status | Analysis Succeeded |
| Plate [#] Name | [1] 31496 | Instrument Sample Name |                | Spectra        | 11                 |

| Rank | Protein Name                                                | Accession No. | Protein MW | Protein PI | Pep. Count | Protein Score | Protein Score C. I. % | Total Ion Score | Total Ion C. I. % |
|------|-------------------------------------------------------------|---------------|------------|------------|------------|---------------|-----------------------|-----------------|-------------------|
| 1    | bifunctional purine biosynthesis protein PURH [Danio rerio] | gi 195539484  | 64003.9    | 6.31       | 22         | 1,170         | 100                   | 1019            | 100               |

| Peptide Information |             |         |       |            |                   |           |         |                  |      |             |
|---------------------|-------------|---------|-------|------------|-------------------|-----------|---------|------------------|------|-------------|
| Calc. Mass          | Obsrv. Mass | ± da    | ± ppm | Start Seq. | End Sequence Seq. | Ion Score | C. I. % | Modification     | Rank | Result Type |
| 869.5203            | 869.5105    | -0.0098 | -11   | 199        | 206 GVSQPLR       |           |         |                  |      | Mascot      |
| 869.5203            | 869.5105    | -0.0098 | -11   | 199        | 206 GVSQPLR       | 38        | 95.43   |                  |      | Mascot      |
| 892.4886            | 892.4758    | -0.0128 | -14   | 14         | 21 TGLVEFAR       |           |         |                  |      | Mascot      |
| 892.4886            | 892.4758    | -0.0128 | -14   | 14         | 21 TGLVEFAR       | 33        | 84.938  |                  |      | Mascot      |
| 926.5822            | 926.5717    | -0.0105 | -11   | 379        | 386 VLFGLHLK      |           |         |                  |      | Mascot      |
| 960.4686            | 960.4583    | -0.0103 | -11   | 460        | 466 ADNWWLR       | 42        | 98.302  |                  |      | Mascot      |
| 960.4686            | 960.4583    | -0.0103 | -11   | 460        | 466 ADNWWLR       |           |         |                  |      | Mascot      |
| 1033.536            | 1033.5251   | -0.0109 | -11   | 467        | 475 HHPGVLSMR     |           |         |                  |      | Mascot      |
| 1049.5309           | 1049.5206   | -0.0103 | -10   | 467        | 475 HHPGVLSMR     |           |         | Oxidation (M)[8] |      | Mascot      |
| 1075.6146           | 1075.6029   | -0.0117 | -11   | 255        | 265 ALGLPAATSFK   |           |         |                  |      | Mascot      |

|           |           |         |     |     |     |                               |     |        |                                          |        |
|-----------|-----------|---------|-----|-----|-----|-------------------------------|-----|--------|------------------------------------------|--------|
| 1320.5889 | 1320.6573 | 0.0684  | 52  | 425 | 435 | YTQSNSVCYAK                   |     |        | Carbamidomethyl (C)[8]                   | Mascot |
| 1341.7749 | 1341.761  | -0.0139 | -10 | 66  | 78  | TLHPAVHGGILAR                 |     |        |                                          | Mascot |
| 1341.7749 | 1341.761  | -0.0139 | -10 | 66  | 78  | TLHPAVHGGILAR                 | 92  | 100    |                                          | Mascot |
| 1385.7131 | 1385.6997 | -0.0134 | -10 | 436 | 449 | DGQVIGIGAGQQSR                | 123 | 100    |                                          | Mascot |
| 1385.7131 | 1385.6997 | -0.0134 | -10 | 436 | 449 | DGQVIGIGAGQQSR                |     |        |                                          | Mascot |
| 1444.7332 | 1444.7188 | -0.0144 | -10 | 455 | 466 | LAGDKADNWWLR                  |     |        |                                          | Mascot |
| 1607.7733 | 1607.7588 | -0.0145 | -9  | 49  | 63  | DVSEITGFPEMLGGR               |     |        |                                          | Mascot |
| 1623.7683 | 1623.7515 | -0.0168 | -10 | 49  | 63  | DVSEITGFPEMLGGR               | 38  | 95.409 | Oxidation (M)[11]                        | Mascot |
| 1623.7683 | 1623.7515 | -0.0168 | -10 | 49  | 63  | DVSEITGFPEMLGGR               |     |        | Oxidation (M)[11]                        | Mascot |
| 1637.6636 | 1637.6448 | -0.0188 | -11 | 366 | 378 | MDPEYEPDEEEVR                 |     |        |                                          | Mascot |
| 1653.6584 | 1653.6389 | -0.0195 | -12 | 366 | 378 | MDPEYEPDEEEVR                 |     |        | Oxidation (M)[1]                         | Mascot |
| 1665.8152 | 1665.8595 | 0.0443  | 27  | 141 | 155 | VTVVCDPDYNVVAK                |     |        | Carbamidomethyl (C)[5]                   | Mascot |
| 1701.8582 | 1701.8429 | -0.0153 | -9  | 508 | 522 | GLFEEVPEPLSEVEK               |     |        |                                          | Mascot |
| 1710.8955 | 1710.8761 | -0.0194 | -11 | 572 | 586 | ACNELGITLVHTNIR               |     |        | Carbamidomethyl (C)[2]                   | Mascot |
| 1710.8955 | 1710.8761 | -0.0194 | -11 | 572 | 586 | ACNELGITLVHTNIR               | 102 | 100    | Carbamidomethyl (C)[2]                   | Mascot |
| 1809.7629 | 1809.7441 | -0.0188 | -10 | 156 | 170 | EMETSEIHDTTMETR               |     |        |                                          | Mascot |
| 1819.8708 | 1819.8468 | -0.024  | -13 | 335 | 351 | EVSDGIVAPGYEEDALR             |     |        |                                          | Mascot |
| 1819.8708 | 1819.8468 | -0.024  | -13 | 335 | 351 | EVSDGIVAPGYEEDALR             | 136 | 100    |                                          | Mascot |
| 1825.7579 | 1825.7393 | -0.0186 | -10 | 156 | 170 | EMETSEIHDTTMETR               |     |        | Oxidation (M)[2]                         | Mascot |
| 1829.9531 | 1829.9308 | -0.0223 | -12 | 508 | 523 | GLFEEVPEPLSEVEKK              |     |        |                                          | Mascot |
| 1833.9341 | 1833.9143 | -0.0198 | -11 | 266 | 284 | HVSPAGAAVGVP LSEDE<br>AK      |     |        |                                          | Mascot |
| 1841.7528 | 1841.7614 | 0.0086  | 5   | 156 | 170 | EMETSEIHDTTMETR               |     |        | Oxidation (M)[2,12]                      | Mascot |
| 2034.9192 | 2034.8927 | -0.0265 | -13 | 177 | 193 | AFTHTAQYDEAISDYFR             |     |        |                                          | Mascot |
| 2034.9192 | 2034.8927 | -0.0265 | -13 | 177 | 193 | AFTHTAQYDEAISDYFR             | 150 | 100    |                                          | Mascot |
| 2225.0764 | 2225.084  | 0.0076  | 3   | 285 | 304 | VCMVNDMLQDLT PLATA<br>YAR     |     |        |                                          | Mascot |
| 2298.0928 | 2298.0984 | 0.0056  | 2   | 285 | 304 | VCMVNDMLQDLT PLATA<br>YAR     |     |        | Carbamidomethyl (C)[2], Oxidation (M)[3] | Mascot |
| 2555.3562 | 2555.322  | -0.0342 | -13 | 108 | 132 | TVSSPGVTVEDAVEQIDI<br>GGVTLLR |     |        |                                          | Mascot |
| 2555.3562 | 2555.322  | -0.0342 | -13 | 108 | 132 | TVSSPGVTVEDAVEQIDI<br>GGVTLLR | 266 | 100    |                                          | Mascot |

2    PREDICTED: kinase suppressor of Ras 1 [Danio rerio]    gi|326674294    98801.7    8.24    17    50    56.512

| Peptide Information |             |         |       |            |                   | Ion Score | C. I. % Modification | Rank | Result Type |
|---------------------|-------------|---------|-------|------------|-------------------|-----------|----------------------|------|-------------|
| Calc. Mass          | Obsrv. Mass | ± da    | ± ppm | Start Seq. | End Sequence Seq. |           |                      |      |             |
| 842.3898            | 842.4998    | 0.11    | 131   | 368        | 374               | NMMFGVK   | Oxidation (M)[2]     |      | Mascot      |
| 850.5396            | 850.5322    | -0.0074 | -9    | 83         | 89                | LVKYISK   |                      |      | Mascot      |
| 892.4345            | 892.4758    | 0.0413  | 46    | 705        | 712               | GMGYLHAK  | Oxidation (M)[2]     |      | Mascot      |

|           |           |         |     |     |     |                      |                                          |        |
|-----------|-----------|---------|-----|-----|-----|----------------------|------------------------------------------|--------|
| 892.4345  | 892.4758  | 0.0413  | 46  | 705 | 712 | GMGYLHAK             | Oxidation (M)[2]                         | Mascot |
| 954.4899  | 954.4235  | -0.0664 | -70 | 367 | 374 | KNMMFGVK             |                                          | Mascot |
| 976.5057  | 976.4554  | -0.0503 | -52 | 583 | 591 | ASQTSVDLR            |                                          | Mascot |
| 982.4509  | 982.4392  | -0.0117 | -12 | 10  | 19  | GMETSSVSGK           |                                          | Mascot |
| 998.4458  | 998.4122  | -0.0336 | -34 | 10  | 19  | GMETSSVSGK           | Oxidation (M)[2]                         | Mascot |
| 1051.5571 | 1051.7004 | 0.1433  | 136 | 395 | 403 | ISFAQFPNK            |                                          | Mascot |
| 1073.494  | 1073.4951 | 0.0011  | 1   | 368 | 376 | NMMFGVKCK            | Oxidation (M)[2]                         | Mascot |
| 1075.521  | 1075.6029 | 0.0819  | 76  | 1   | 9   | MPLKPCQCR            |                                          | Mascot |
| 1102.6718 | 1102.6154 | -0.0564 | -51 | 50  | 59  | LIEISSSLK            |                                          | Mascot |
| 1118.5913 | 1118.6117 | 0.0204  | 18  | 310 | 319 | SKSQSQLANR           |                                          | Mascot |
| 1148.5374 | 1148.5958 | 0.0584  | 51  | 1   | 9   | MPLKPCQCR            | Carbamidomethyl (C)[6], Oxidation (M)[1] | Mascot |
| 1320.7423 | 1320.6573 | -0.085  | -64 | 395 | 405 | ISFAQFPNKIR          |                                          | Mascot |
| 1607.8944 | 1607.7588 | -0.1356 | -84 | 759 | 771 | GWYYLAPEIVRK         |                                          | Mascot |
| 1710.8553 | 1710.8761 | 0.0208  | 12  | 328 | 342 | MEYALSEGSPVLRK       |                                          | Mascot |
| 1710.8553 | 1710.8761 | 0.0208  | 12  | 328 | 342 | MEYALSEGSPVLRK       |                                          | Mascot |
| 2096.9507 | 2096.8096 | -0.1411 | -67 | 484 | 501 | GSADSRFHFPAAACYFQHR  |                                          | Mascot |
| 2225.1382 | 2225.084  | -0.0542 | -24 | 731 | 750 | VVITDFGLFGMSGVVQEDRR |                                          | Mascot |
| 2249.1265 | 2249.0305 | -0.096  | -43 | 133 | 152 | LSLDALLQMSSGQVEENMKR |                                          | Mascot |

3 PREDICTED: zinc finger protein 420 isoform 2 [Danio rerio] gi|326678086 70371 9.08 16 48 27.828

#### Peptide Information

| Calc. Mass | Obsrv. Mass | ± da    | ± ppm | Start Seq. | End Seq. | Sequence        | Ion Score | C. I. % Modification    | Rank | Result Type |
|------------|-------------|---------|-------|------------|----------|-----------------|-----------|-------------------------|------|-------------|
| 842.5206   | 842.4998    | -0.0208 | -25   | 25         | 31       | QRQGLLK         |           |                         |      | Mascot      |
| 864.4798   | 864.4897    | 0.0099  | 11    | 591        | 597      | HRSVHTK         |           |                         |      | Mascot      |
| 998.4407   | 998.4122    | -0.0285 | -29   | 292        | 300      | THRCGHCGK       |           |                         |      | Mascot      |
| 1045.536   | 1045.5522   | 0.0162  | 15    | 134        | 141      | FHCARNLK        |           | Carbamidomethyl (C)[3]  |      | Mascot      |
| 1073.5408  | 1073.4951   | -0.0457 | -43   | 598        | 606      | EKPPSCSLR       |           | Carbamidomethyl (C)[6]  |      | Mascot      |
| 1118.4645  | 1118.6117   | 0.1472  | 132   | 348        | 356      | GFVCFECEK       |           | Carbamidomethyl (C)[4]  |      | Mascot      |
| 1623.806   | 1623.7515   | -0.0545 | -34   | 105        | 117      | SFSQKYNLVHMR    |           |                         |      | Mascot      |
| 1623.806   | 1623.7515   | -0.0545 | -34   | 105        | 117      | SFSQKYNLVHMR    |           |                         |      | Mascot      |
| 1665.8087  | 1665.8595   | 0.0508  | 30    | 174        | 188      | VHTKEKPYSCSVCGK |           |                         |      | Mascot      |
| 1724.8247  | 1724.8828   | 0.0581  | 34    | 202        | 216      | IHTGVREFVCFECGK |           |                         |      | Mascot      |
| 1748.7731  | 1748.8676   | 0.0945  | 54    | 454        | 468      | VHTNEKPYSCPECGK |           | Carbamidomethyl (C)[10] |      | Mascot      |
| 1819.9358  | 1819.8468   | -0.089  | -49   | 44         | 58       | IKQEETEELIDVMVK |           | Oxidation (M)[13]       |      | Mascot      |



|   |                             |           |         |     |              |     |                     |      |                                               |    |        |
|---|-----------------------------|-----------|---------|-----|--------------|-----|---------------------|------|-----------------------------------------------|----|--------|
|   | 1819.9358                   | 1819.8468 | -0.089  | -49 | 44           | 58  | IKQEETEELIDVMVK     |      | Oxidation (M)[13]                             |    | Mascot |
|   | 1847.8527                   | 1847.8706 | 0.0179  | 10  | 454          | 469 | VHTNEKPYSCPECGKR    |      |                                               |    | Mascot |
|   | 2034.8579                   | 2034.8927 | 0.0348  | 17  | 118          | 133 | IHTGEQPYKCSHCDMR    |      | Carbamidomethyl (C)[10,13], Oxidation (M)[15] |    | Mascot |
|   | 2034.8579                   | 2034.8927 | 0.0348  | 17  | 118          | 133 | IHTGEQPYKCSHCDMR    |      | Carbamidomethyl (C)[10,13], Oxidation (M)[15] |    | Mascot |
|   | 2211.0798                   | 2211.0767 | -0.0031 | -1  | 450          | 468 | IHLRVHTNEKPYSCPECK  |      |                                               |    | Mascot |
|   | 2283.0579                   | 2283.1169 | 0.059   | 26  | 227          | 245 | HQMIHTGEKPYKCSHCDLR |      |                                               |    | Mascot |
|   | 2298.0906                   | 2298.0984 | 0.0078  | 3   | 478          | 496 | LHQHVHTGVREFVCFCEK  |      |                                               |    | Mascot |
| 4 | Synbl protein [Danio rerio] |           |         |     | gi 141796272 |     | 31226.2             | 5.37 | 9                                             | 48 | 24.426 |

Peptide Information

| Calc. Mass | Obsrv. Mass | ± da    | ± ppm | Start Seq. | End Seq. | Sequence               | Ion Score | C. I. % | Modification     | Rank | Result Type |
|------------|-------------|---------|-------|------------|----------|------------------------|-----------|---------|------------------|------|-------------|
| 842.5709   | 842.4998    | -0.0711 | -84   | 18         | 24       | VEKLLLK                |           |         |                  |      | Mascot      |
| 1045.6769  | 1045.5522   | -0.1247 | -119  | 171        | 179      | LLFLLSALR              |           |         |                  |      | Mascot      |
| 1131.619   | 1131.5668   | -0.0522 | -46   | 87         | 97       | EGMLTLAGLAR            |           |         |                  |      | Mascot      |
| 1541.901   | 1541.775    | -0.126  | -82   | 195        | 207      | LLTNVLERTLDVR          |           |         |                  |      | Mascot      |
| 1678.8138  | 1678.85     | 0.0362  | 22    | 57         | 71       | SDLPLCQSTCLETLR        |           |         |                  |      | Mascot      |
| 1710.7738  | 1710.8761   | 0.1023  | 60    | 1          | 16       | MSLSDILSEIDGGDDK       |           |         | Oxidation (M)[1] |      | Mascot      |
| 1710.7738  | 1710.8761   | 0.1023  | 60    | 1          | 16       | MSLSDILSEIDGGDDK       |           |         | Oxidation (M)[1] |      | Mascot      |
| 2034.9623  | 2034.8927   | -0.0696 | -34   | 238        | 255      | ALFNLTMSDPCDKDSLHK     |           |         |                  |      | Mascot      |
| 2034.9623  | 2034.8927   | -0.0696 | -34   | 238        | 255      | ALFNLTMSDPCDKDSLHK     |           |         |                  |      | Mascot      |
| 2249.0105  | 2249.0305   | 0.02    | 9     | 25         | 43       | YNTENSRTFAFDLEEERGA    |           |         |                  |      | Mascot      |
| 2283.0193  | 2283.1169   | 0.0976  | 43    | 98         | 118      | ICVAGHEGEPLLEEAQSAEEER |           |         |                  |      | Mascot      |

|   |                             |  |  |  |             |  |         |      |   |    |   |
|---|-----------------------------|--|--|--|-------------|--|---------|------|---|----|---|
| 5 | Synbl protein [Danio rerio] |  |  |  | gi 63101126 |  | 33515.4 | 5.82 | 9 | 46 | 0 |
|---|-----------------------------|--|--|--|-------------|--|---------|------|---|----|---|

Peptide Information

| Calc. Mass | Obsrv. Mass | ± da    | ± ppm | Start Seq. | End Seq. | Sequence          | Ion Score | C. I. % | Modification | Rank | Result Type |
|------------|-------------|---------|-------|------------|----------|-------------------|-----------|---------|--------------|------|-------------|
| 842.5709   | 842.4998    | -0.0711 | -84   | 41         | 47       | VEKLLLK           |           |         |              |      | Mascot      |
| 1045.6769  | 1045.5522   | -0.1247 | -119  | 194        | 202      | LLFLLSALR         |           |         |              |      | Mascot      |
| 1131.619   | 1131.5668   | -0.0522 | -46   | 110        | 120      | EGMLTLAGLAR       |           |         |              |      | Mascot      |
| 1444.6447  | 1444.7188   | 0.0741  | 51    | 261        | 273      | ALFNLTMSDSCDK     |           |         |              |      | Mascot      |
| 1541.901   | 1541.775    | -0.126  | -82   | 218        | 230      | LLTNVLERTLDVR     |           |         |              |      | Mascot      |
| 1678.8138  | 1678.85     | 0.0362  | 22    | 80         | 94       | SDLPLCQSTCLETLR   |           |         |              |      | Mascot      |
| 1841.9829  | 1841.7614   | -0.2215 | -120  | 1          | 17       | YSLLLCAEGLTVFLSGR |           |         |              |      | Mascot      |

|   |                                            |           |        |    |              |     |                            |      |    |    |   |  |  |  |  |  |        |
|---|--------------------------------------------|-----------|--------|----|--------------|-----|----------------------------|------|----|----|---|--|--|--|--|--|--------|
|   | 2249.0105                                  | 2249.0305 | 0.02   | 9  | 48           | 66  | YNTENSRTFAFDLEEEGA<br>R    |      |    |    |   |  |  |  |  |  | Mascot |
|   | 2283.0193                                  | 2283.1169 | 0.0976 | 43 | 121          | 141 | ICVAGHEGEPLLEEAQSAE<br>EER |      |    |    |   |  |  |  |  |  | Mascot |
| 6 | PREDICTED: myosin-9, partial [Danio rerio] |           |        |    | gi 326665652 |     | 196608.4                   | 5.46 | 21 | 45 | 0 |  |  |  |  |  |        |

Peptide Information

|  | Calc. Mass | Obsrv. Mass | ± da    | ± ppm | Start Seq. | End Sequence Seq.             | Ion Score | C. I. | % Modification          | Rank | Result Type |
|--|------------|-------------|---------|-------|------------|-------------------------------|-----------|-------|-------------------------|------|-------------|
|  | 892.4233   | 892.4758    | 0.0525  | 59    | 586        | 592 ADEWLMK                   |           |       |                         |      | Mascot      |
|  | 892.4808   | 892.4758    | -0.005  | -6    | 1617       | 1623 KMELDLK                  |           |       | Oxidation (M)[2]        |      | Mascot      |
|  | 960.493    | 960.4583    | -0.0347 | -36   | 697        | 705 CNGVLEGIR                 | 15        | 0     |                         |      | Mascot      |
|  | 960.493    | 960.4583    | -0.0347 | -36   | 697        | 705 CNGVLEGIR                 |           |       |                         |      | Mascot      |
|  | 1033.5571  | 1033.5251   | -0.032  | -31   | 1607       | 1615 QRTLAMAAR                |           |       | Oxidation (M)[6]        |      | Mascot      |
|  | 1045.5887  | 1045.5522   | -0.0365 | -35   | 1169       | 1177 ETEVAQLKK                |           |       |                         |      | Mascot      |
|  | 1051.5717  | 1051.7004   | 0.1287  | 122   | 818        | 826 NCAAYLKLR                 |           |       |                         |      | Mascot      |
|  | 1073.5197  | 1073.4951   | -0.0246 | -23   | 425        | 432 ATYERMFR                  |           |       |                         |      | Mascot      |
|  | 1075.608   | 1075.6029   | -0.0051 | -5    | 433        | 440 WLVMRINK                  |           |       | Oxidation (M)[4]        |      | Mascot      |
|  | 1118.5801  | 1118.6117   | 0.0316  | 28    | 1656       | 1664 ELEDTRLR                 |           |       |                         |      | Mascot      |
|  | 1131.6051  | 1131.5668   | -0.0383 | -34   | 805        | 813 RQQQLTAMR                 |           |       |                         |      | Mascot      |
|  | 1341.6644  | 1341.761    | 0.0966  | 72    | 1517       | 1528 DDVGKSVHDLEK             |           |       |                         |      | Mascot      |
|  | 1341.6644  | 1341.761    | 0.0966  | 72    | 1517       | 1528 DDVGKSVHDLEK             |           |       |                         |      | Mascot      |
|  | 1558.8588  | 1558.8331   | -0.0257 | -16   | 722        | 734 QRYEILTPNSIPK             |           |       |                         |      | Mascot      |
|  | 1623.744   | 1623.7515   | 0.0075  | 5     | 379        | 392 VCHLMGMNVTDFTR            | 3         | 0     |                         |      | Mascot      |
|  | 1623.744   | 1623.7515   | 0.0075  | 5     | 379        | 392 VCHLMGMNVTDFTR            |           |       |                         |      | Mascot      |
|  | 1637.8546  | 1637.6448   | -0.2098 | -128  | 709        | 721 QGFNRIVFQEFR              |           |       |                         |      | Mascot      |
|  | 1710.8302  | 1710.8761   | 0.0459  | 27    | 1561       | 1574 LEVNMQAMKAQYER           |           |       |                         |      | Mascot      |
|  | 1710.8302  | 1710.8761   | 0.0459  | 27    | 1561       | 1574 LEVNMQAMKAQYER           |           |       |                         |      | Mascot      |
|  | 1772.9442  | 1772.8203   | -0.1239 | -70   | 764        | 778 VFFRAGVLAHLEEEER          |           |       |                         |      | Mascot      |
|  | 1809.8339  | 1809.7441   | -0.0898 | -50   | 278        | 292 TFHMFYYMLTGVGDK           |           |       |                         |      | Mascot      |
|  | 1825.8287  | 1825.7393   | -0.0894 | -49   | 278        | 292 TFHMFYYMLTGVGDK           |           |       | Oxidation (M)[4]        |      | Mascot      |
|  | 1841.8237  | 1841.7614   | -0.0623 | -34   | 278        | 292 TFHMFYYMLTGVGDK           |           |       | Oxidation (M)[4,8]      |      | Mascot      |
|  | 1847.9935  | 1847.8706   | -0.1229 | -67   | 623        | 640 IVGLDKVAGMSELPGAFK        |           |       | Oxidation (M)[10]       |      | Mascot      |
|  | 2225.0979  | 2225.084    | -0.0139 | -6    | 1419       | 1436 TRLQQELDDMLVDQDHL<br>R   |           |       |                         |      | Mascot      |
|  | 2298.0806  | 2298.0984   | 0.0178  | 8     | 999        | 1017 LMEERIAEFTTNLAEEEE<br>K  |           |       | Oxidation (M)[2]        |      | Mascot      |
|  | 2299.9951  | 2300.115    | 0.1199  | 52    | 158        | 178 SMMQDREDQSILCTGES<br>GAGK |           |       | Carbamidomethyl (C)[13] |      | Mascot      |

|   |                                       |  |  |  |              |  |         |      |    |    |   |  |  |  |  |  |  |
|---|---------------------------------------|--|--|--|--------------|--|---------|------|----|----|---|--|--|--|--|--|--|
| 7 | zinc finger protein Eos [Danio rerio] |  |  |  | gi 294489252 |  | 53711.7 | 7.09 | 13 | 45 | 0 |  |  |  |  |  |  |
|---|---------------------------------------|--|--|--|--------------|--|---------|------|----|----|---|--|--|--|--|--|--|

| Peptide Information |                            |             |         |       |             |          |                              |           |       |                                             |      |             |   |
|---------------------|----------------------------|-------------|---------|-------|-------------|----------|------------------------------|-----------|-------|---------------------------------------------|------|-------------|---|
|                     | Calc. Mass                 | Obsrv. Mass | ± da    | ± ppm | Start Seq.  | End Seq. | Sequence                     | Ion Score | C. I. | % Modification                              | Rank | Result Type |   |
|                     | 882.4791                   | 882.5579    | 0.0788  | 89    | 196         | 203      | DALTGHLR                     |           |       |                                             |      | Mascot      |   |
|                     | 902.5417                   | 902.5221    | -0.0196 | -22   | 283         | 290      | LANSITKR                     |           |       |                                             |      | Mascot      |   |
|                     | 1033.5248                  | 1033.5251   | 0.0003  | 0     | 298         | 305      | FLGEKHMR                     |           |       | Oxidation (M)[7]                            |      | Mascot      |   |
|                     | 1403.5765                  | 1403.6858   | 0.1093  | 78    | 185         | 194      | CPFCNYACRR                   |           |       | Carbamidomethyl (C)[1,4,8]                  |      | Mascot      |   |
|                     | 1558.7642                  | 1558.8331   | 0.0689  | 44    | 417         | 430      | EAMQVVDGEGRPVR               |           |       | Oxidation (M)[3]                            |      | Mascot      |   |
|                     | 1623.7874                  | 1623.7515   | -0.0359 | -22   | 469         | 481      | SQDRYEFSSHIVR                |           |       |                                             |      | Mascot      |   |
|                     | 1623.7874                  | 1623.7515   | -0.0359 | -22   | 469         | 481      | SQDRYEFSSHIVR                |           |       |                                             |      | Mascot      |   |
|                     | 1724.7656                  | 1724.8828   | 0.1172  | 68    | 382         | 396      | HSPSHAKEMDIEGDR              |           |       | Oxidation (M)[9]                            |      | Mascot      |   |
|                     | 1833.8865                  | 1833.9143   | 0.0278  | 15    | 54          | 70       | VELYSDEEAGGAPLVER            |           |       |                                             |      | Mascot      |   |
|                     | 2034.9302                  | 2034.8927   | -0.0375 | -18   | 129         | 146      | CDICGMICIGPNVLMVHK           |           |       | Carbamidomethyl (C)[1], Oxidation (M)[6,15] |      | Mascot      |   |
|                     | 2034.9302                  | 2034.8927   | -0.0375 | -18   | 129         | 146      | CDICGMICIGPNVLMVHK           |           |       | Carbamidomethyl (C)[1], Oxidation (M)[6,15] |      | Mascot      |   |
|                     | 2097.0869                  | 2096.8096   | -0.2773 | -132  | 412         | 430      | SPLTREAMQVVDGEGRPVR          |           |       |                                             |      | Mascot      |   |
|                     | 2225.0657                  | 2225.084    | 0.0183  | 8     | 303         | 321      | HMRLNISEAPYDLDPNDK           |           |       |                                             |      | Mascot      |   |
|                     | 2283.0029                  | 2283.1169   | 0.114   | 50    | 148         | 167      | SHTGERPFQCNQCGASF TQK        |           |       | Carbamidomethyl (C)[10]                     |      | Mascot      |   |
|                     | 2555.1978                  | 2555.322    | 0.1242  | 49    | 100         | 126      | GQAGSGCGEMASSEPA SPGPIRLPNGK |           |       |                                             |      | Mascot      |   |
|                     | 2555.1978                  | 2555.322    | 0.1242  | 49    | 100         | 126      | GQAGSGCGEMASSEPA SPGPIRLPNGK |           |       |                                             |      | Mascot      |   |
| 8                   | calbindin 2a [Danio rerio] |             |         |       | gi 41152295 |          | 31105.5                      | 4.99      | 6     | 44                                          | 0    | 21          | 0 |

| Peptide Information |                                                                    |             |         |       |              |          |                            |           |       |                        |      |             |
|---------------------|--------------------------------------------------------------------|-------------|---------|-------|--------------|----------|----------------------------|-----------|-------|------------------------|------|-------------|
|                     | Calc. Mass                                                         | Obsrv. Mass | ± da    | ± ppm | Start Seq.   | End Seq. | Sequence                   | Ion Score | C. I. | % Modification         | Rank | Result Type |
|                     | 892.4556                                                           | 892.4758    | 0.0202  | 23    | 171          | 178      | LGLSEMAR                   |           |       | Oxidation (M)[6]       |      | Mascot      |
|                     | 892.4556                                                           | 892.4758    | 0.0202  | 23    | 171          | 178      | LGLSEMAR                   | 23        | 0     | Oxidation (M)[6]       |      | Mascot      |
|                     | 996.4454                                                           | 996.5897    | 0.1443  | 145   | 162          | 170      | MFDLNGDGK                  |           |       |                        |      | Mascot      |
|                     | 1118.5874                                                          | 1118.6117   | 0.0243  | 22    | 259          | 267      | SELEIVLCR                  |           |       | Carbamidomethyl (C)[8] |      | Mascot      |
|                     | 1320.5963                                                          | 1320.6573   | 0.061   | 46    | 68           | 77       | MTEFMQKFDK                 |           |       | Oxidation (M)[1]       |      | Mascot      |
|                     | 1809.8694                                                          | 1809.7441   | -0.1253 | -69   | 195          | 209      | LSAEQFNAIFTYYDK            |           |       |                        |      | Mascot      |
|                     | 2555.3293                                                          | 2555.322    | -0.0073 | -3    | 5            | 26       | GQQPPYLHLAELTASQFL<br>DIWK |           |       |                        |      | Mascot      |
|                     | 2555.3293                                                          | 2555.322    | -0.0073 | -3    | 5            | 26       | GQQPPYLHLAELTASQFL<br>DIWK |           |       |                        |      | Mascot      |
| 9                   | PREDICTED: LOW QUALITY PROTEIN: ryanodine receptor 2 [Danio rerio] |             |         |       | gj 189530774 |          | 552356.6                   | 5.83      | 32    | 44                     | 0    |             |

Peptide Information

| Calc. Mass | Obsrv. Mass | $\pm$ da | $\pm$ ppm | Start Seq. | End Seq. | Sequence          | Ion Score | C. I. % | Modification                              | Rank | Result Type |
|------------|-------------|----------|-----------|------------|----------|-------------------|-----------|---------|-------------------------------------------|------|-------------|
| 869.4111   | 869.5105    | 0.0994   | 114       | 1354       | 1360     | DELNNHK           |           |         |                                           |      | Mascot      |
| 869.4111   | 869.5105    | 0.0994   | 114       | 1354       | 1360     | DELNNHK           |           |         |                                           |      | Mascot      |
| 892.529    | 892.4758    | -0.0532  | -60       | 1525       | 1532     | LFPVFAK           |           |         |                                           |      | Mascot      |
| 892.529    | 892.4758    | -0.0532  | -60       | 1525       | 1532     | LFPVFAK           | 10        | 0       |                                           |      | Mascot      |
| 902.5557   | 902.5221    | -0.0336  | -37       | 590        | 597      | TIISLLDK          |           |         |                                           |      | Mascot      |
| 954.4526   | 954.4235    | -0.0291  | -30       | 659        | 666      | DDSAQYKK          |           |         |                                           |      | Mascot      |
| 960.4203   | 960.4583    | 0.038    | 40        | 2667       | 2674     | HSVMDSER          |           |         |                                           |      | Mascot      |
| 960.4203   | 960.4583    | 0.038    | 40        | 2667       | 2674     | HSVMDSER          |           |         |                                           |      | Mascot      |
| 976.4152   | 976.4554    | 0.0402   | 41        | 2667       | 2674     | HSVMDSER          |           |         | Oxidation (M)[4]                          |      | Mascot      |
| 996.5624   | 996.5897    | 0.0273   | 27        | 3510       | 3516     | LEIYFRR           |           |         |                                           |      | Mascot      |
| 1045.5459  | 1045.5522   | 0.0063   | 6         | 75         | 83       | ALQEMLANR         |           |         |                                           |      | Mascot      |
| 1049.5626  | 1049.5206   | -0.042   | -40       | 4247       | 4255     | LTDLFGDLR         |           |         |                                           |      | Mascot      |
| 1051.5604  | 1051.7004   | 0.14     | 133       | 2440       | 2448     | AAMVFLDR          |           |         | Oxidation (M)[3]                          |      | Mascot      |
| 1073.5006  | 1073.4951   | -0.0055  | -5        | 2977       | 2985     | EMVTSLFCK         |           |         | Oxidation (M)[2]                          |      | Mascot      |
| 1131.467   | 1131.5668   | 0.0998   | 88        | 23         | 32       | CCSSGPHQQK        |           |         | Carbamidomethyl (C)[1]                    |      | Mascot      |
| 1165.567   | 1165.7366   | 0.1696   | 146       | 33         | 43       | LCLAAEGFGER       |           |         |                                           |      | Mascot      |
| 1320.6517  | 1320.6573   | 0.0056   | 4         | 2130       | 2139     | VFYQHPNLMR        |           |         | Oxidation (M)[9]                          |      | Mascot      |
| 1341.6038  | 1341.761    | 0.1572   | 117       | 3404       | 3414     | MNKGGVFCQER       |           |         | Carbamidomethyl (C)[8], Oxidation (M)[1]  |      | Mascot      |
| 1341.6403  | 1341.761    | 0.1207   | 90        | 4175       | 4185     | MTRDLNCFSVR       |           |         |                                           |      | Mascot      |
| 1385.6478  | 1385.6997   | 0.0519   | 37        | 1585       | 1596     | VPDHTQSVEMSR      |           |         |                                           |      | Mascot      |
| 1385.6478  | 1385.6997   | 0.0519   | 37        | 1585       | 1596     | VPDHTQSVEMSR      |           |         |                                           |      | Mascot      |
| 1403.6663  | 1403.6858   | 0.0195   | 14        | 1349       | 1360     | YAGSRDELNNHK      |           |         |                                           |      | Mascot      |
| 1444.7253  | 1444.7188   | -0.0065  | -4        | 4570       | 4582     | VMAKYGELYGSAR     |           |         |                                           |      | Mascot      |
| 1558.7496  | 1558.8331   | 0.0835   | 54        | 3571       | 3583     | VWLKAENDSPEDR     |           |         |                                           |      | Mascot      |
| 1607.7218  | 1607.7588   | 0.037    | 23        | 4790       | 4802     | DQQEQVKEDMETK     |           |         |                                           |      | Mascot      |
| 1619.7854  | 1619.8684   | 0.083    | 51        | 2162       | 2174     | EIIFPKMVAHCCR     |           |         | Carbamidomethyl (C)[11], Oxidation (M)[7] |      | Mascot      |
| 1623.7167  | 1623.7515   | 0.0348   | 21        | 4790       | 4802     | DQQEQVKEDMETK     |           |         | Oxidation (M)[10]                         |      | Mascot      |
| 1623.7167  | 1623.7515   | 0.0348   | 21        | 4790       | 4802     | DQQEQVKEDMETK     |           |         | Oxidation (M)[10]                         |      | Mascot      |
| 1653.6544  | 1653.6389   | -0.0155  | -9        | 3636       | 3649     | SCQSEEEQDEGLK     |           |         | Carbamidomethyl (C)[2]                    |      | Mascot      |
| 1665.7788  | 1665.8595   | 0.0807   | 48        | 1          | 14       | MDIGEAEDEIQFLR    |           |         |                                           |      | Mascot      |
| 1678.7708  | 1678.85     | 0.0792   | 47        | 4844       | 4857     | DVTEHTGQESYVWK    |           |         |                                           |      | Mascot      |
| 1772.7948  | 1772.8203   | 0.0255   | 14        | 515        | 529      | EAGECWEGVLNAFYK   |           |         | Carbamidomethyl (C)[5]                    |      | Mascot      |
| 1841.8521  | 1841.7614   | -0.0907  | -49       | 3089       | 3105     | QSGAGLILDEVQSCCYR |           |         |                                           |      | Mascot      |
| 1847.8998  | 1847.8706   | -0.0292  | -16       | 604        | 620      | ILDVLCSLCVCHMAVR  |           |         | Oxidation (M)[14]                         |      | Mascot      |

|           |           |         |     |      |      |                            |  |  |  |                         |  |        |
|-----------|-----------|---------|-----|------|------|----------------------------|--|--|--|-------------------------|--|--------|
| 2211.1018 | 2211.0767 | -0.0251 | -11 | 601  | 620  | NHKILDVLCSLCVCHGMA<br>VR   |  |  |  |                         |  | Mascot |
| 2233.0884 | 2233.0576 | -0.0308 | -14 | 1898 | 1917 | VEAVISFSGDFVGHQLQED<br>QR  |  |  |  |                         |  | Mascot |
| 2249.2024 | 2249.0305 | -0.1719 | -76 | 2517 | 2538 | SGPVDELLQGVYSLSKA<br>SGLTK |  |  |  |                         |  | Mascot |
| 2283.2324 | 2283.1169 | -0.1155 | -51 | 3360 | 3378 | LFSLVAEVFIFWAKSHNF<br>K    |  |  |  |                         |  | Mascot |
| 2300.2068 | 2300.115  | -0.0918 | -40 | 3106 | 3125 | ILSSLYILGTCSGSFIERQ<br>R   |  |  |  | Carbamidomethyl (C)[11] |  | Mascot |

10 RecName: Full=Tudor domain-containing protein 7B gi|334351210 121757 8.62 15 43 0

#### Peptide Information

| Calc. Mass | Obsrv. Mass | ± da    | ± ppm | Start Seq. | End Seq. | Sequence                     | Ion Score | C. I. | % Modification          | Rank | Result Type |
|------------|-------------|---------|-------|------------|----------|------------------------------|-----------|-------|-------------------------|------|-------------|
| 864.4495   | 864.4897    | 0.0402  | 47    | 939        | 945      | MEEKALK                      |           |       | Oxidation (M)[1]        |      | Mascot      |
| 892.4774   | 892.4758    | -0.0016 | -2    | 544        | 550      | LFELNEK                      |           |       |                         |      | Mascot      |
| 892.4774   | 892.4758    | -0.0016 | -2    | 544        | 550      | LFELNEK                      |           |       |                         |      | Mascot      |
| 998.4901   | 998.4122    | -0.0779 | -78   | 876        | 885      | STPAGSPPER                   |           |       |                         |      | Mascot      |
| 1118.635   | 1118.6117   | -0.0233 | -21   | 10         | 19       | MVRAVLQSSK                   |           |       |                         |      | Mascot      |
| 1148.6198  | 1148.5958   | -0.024  | -21   | 33         | 42       | DLTGELIPYK                   |           |       |                         |      | Mascot      |
| 1320.665   | 1320.6573   | -0.0077 | -6    | 516        | 527      | AQVCEVMADKVK                 |           |       |                         |      | Mascot      |
| 1403.626   | 1403.6858   | 0.0598  | 43    | 477        | 486      | LEDEMREFYR                   |           |       | Oxidation (M)[5]        |      | Mascot      |
| 1619.8639  | 1619.8684   | 0.0045  | 3     | 563        | 577      | LAGLESFSQEQAVALK             |           |       |                         |      | Mascot      |
| 1710.873   | 1710.8761   | 0.0031  | 2     | 1053       | 1066     | KVMIYLVDTSQEER               |           |       |                         |      | Mascot      |
| 1710.873   | 1710.8761   | 0.0031  | 2     | 1053       | 1066     | KVMIYLVDTSQEER               |           |       |                         |      | Mascot      |
| 1809.9745  | 1809.7441   | -0.2304 | -127  | 967        | 983      | GVLTNGLVSVFQLDYGK            |           |       |                         |      | Mascot      |
| 1842.0331  | 1841.7614   | -0.2717 | -148  | 837        | 854      | GPLKSLNPVTATQTSSLK           |           |       |                         |      | Mascot      |
| 2225.1013  | 2225.084    | -0.0173 | -8    | 925        | 942      | LVVLMGEMILHYNKMEEK           |           |       | Oxidation (M)[5,8,15]   |      | Mascot      |
| 2249.1482  | 2249.0305   | -0.1177 | -52   | 445        | 464      | VEYPSVLVVDASDTNCVI<br>LR     |           |       | Carbamidomethyl (C)[16] |      | Mascot      |
| 2283.0308  | 2283.1169   | 0.0861  | 38    | 1067       | 1085     | DIWLHDIMAEFTDEMTKT<br>A      |           |       | Oxidation (M)[8]        |      | Mascot      |
| 2555.2769  | 2555.322    | 0.0451  | 18    | 492        | 515      | MALRSPSPGQLTAVGAE<br>EEDDIIR |           |       |                         |      | Mascot      |
| 2555.2769  | 2555.322    | 0.0451  | 18    | 492        | 515      | MALRSPSPGQLTAVGAE<br>EEDDIIR | 3         |       | 0                       |      | Mascot      |

11 Transferrin receptor 1a [Danio rerio] gi|190337022 84943 6.38 10 43 0

#### Peptide Information

| Calc. Mass | Obsrv. Mass | ± da   | ± ppm | Start Seq. | End Seq. | Sequence | Ion Score | C. I. | % Modification | Rank | Result Type |
|------------|-------------|--------|-------|------------|----------|----------|-----------|-------|----------------|------|-------------|
| 842.4842   | 842.4998    | 0.0156 | 19    | 66         | 72       | LNQRSPK  |           |       |                |      | Mascot      |
| 856.4747   | 856.5146    | 0.0399 | 47    | 344        | 351      | LGGRNSPR |           |       |                |      | Mascot      |

|           |           |         |     |     |     |                            |    |   |                   |        |
|-----------|-----------|---------|-----|-----|-----|----------------------------|----|---|-------------------|--------|
| 960.5472  | 960.4583  | -0.0889 | -93 | 662 | 671 | AASAL TSAIR                | 15 | 0 |                   | Mascot |
| 960.5472  | 960.4583  | -0.0889 | -93 | 662 | 671 | AASAL TSAIR                |    |   |                   | Mascot |
| 976.4634  | 976.4554  | -0.008  | -8  | 409 | 417 | DAWGPGFAR                  |    |   |                   | Mascot |
| 1045.5935 | 1045.5522 | -0.0413 | -39 | 683 | 690 | IINN RIMR                  |    |   | Oxidation (M)[7]  | Mascot |
| 1049.5156 | 1049.5206 | 0.005   | 5   | 634 | 642 | VESRQMSGR                  |    |   |                   | Mascot |
| 1403.7529 | 1403.6858 | -0.0671 | -48 | 691 | 703 | VEGSLSPYVSPR               |    |   |                   | Mascot |
| 1607.8462 | 1607.7588 | -0.0874 | -54 | 431 | 444 | TITDMIKNDGFKPK             |    |   |                   | Mascot |
| 1623.8411 | 1623.7515 | -0.0896 | -55 | 431 | 444 | TITDMIKNDGFKPK             |    |   | Oxidation (M)[5]  | Mascot |
| 1623.8411 | 1623.7515 | -0.0896 | -55 | 431 | 444 | TITDMIKNDGFKPK             |    |   | Oxidation (M)[5]  | Mascot |
| 1819.9734 | 1819.8468 | -0.1266 | -70 | 688 | 703 | IMRVEGSLSPYVSPR            |    |   | Oxidation (M)[2]  | Mascot |
| 1819.9734 | 1819.8468 | -0.1266 | -70 | 688 | 703 | IMRVEGSLSPYVSPR            |    |   | Oxidation (M)[2]  | Mascot |
| 2283.0339 | 2283.1169 | 0.083   | 36  | 662 | 682 | AASAL TSAIRNSDLDDME<br>QCR |    |   | Oxidation (M)[17] | Mascot |

12 Zgc:152741 protein [Danio rerio] gi|66267405 41026.8 5.7 5 42 0 26 24.512

#### Peptide Information

| Calc. Mass | Obsrv. Mass | ± da    | ± ppm | Start Seq. | End Seq. | Sequence       | Ion Score | C. I.  | % Modification         | Rank | Result Type |
|------------|-------------|---------|-------|------------|----------|----------------|-----------|--------|------------------------|------|-------------|
| 869.5315   | 869.5105    | -0.021  | -24   | 319        | 326      | GASIRIPR       |           |        |                        |      | Mascot      |
| 869.5315   | 869.5105    | -0.021  | -24   | 319        | 326      | GASIRIPR       | 26        | 24.512 |                        |      | Mascot      |
| 976.5071   | 976.4554    | -0.0517 | -53   | 279        | 285      | RHEEHIR        |           |        |                        |      | Mascot      |
| 1049.472   | 1049.5206   | 0.0486  | 46    | 173        | 180      | DIVDCHYK       |           |        | Carbamidomethyl (C)[5] |      | Mascot      |
| 1558.6954  | 1558.8331   | 0.1377  | 88    | 327        | 339      | QVGQEKCGYFEDR  |           |        |                        |      | Mascot      |
| 1653.833   | 1653.6389   | -0.1941 | -117  | 262        | 275      | EEEGIEHIEKAIEK |           |        |                        |      | Mascot      |

13 PREDICTED: zinc-binding protein A33-like [Danio rerio] gi|292610346 58802.6 7.49 10 42 0

#### Peptide Information

| Calc. Mass | Obsrv. Mass | ± da    | ± ppm | Start Seq. | End Seq. | Sequence      | Ion Score | C. I. | % Modification         | Rank | Result Type |
|------------|-------------|---------|-------|------------|----------|---------------|-----------|-------|------------------------|------|-------------|
| 869.4951   | 869.5105    | 0.0154  | 18    | 398        | 404      | RNPEVVR       |           |       |                        |      | Mascot      |
| 869.4951   | 869.5105    | 0.0154  | 18    | 398        | 404      | RNPEVVR       | 15        | 0     |                        |      | Mascot      |
| 892.5137   | 892.4758    | -0.0379 | -42   | 173        | 179      | IKVEFEK       |           |       |                        |      | Mascot      |
| 892.5137   | 892.4758    | -0.0379 | -42   | 173        | 179      | IKVEFEK       |           |       |                        |      | Mascot      |
| 960.4277   | 960.4583    | 0.0306  | 32    | 473        | 479      | KMSFMER       |           |       | Oxidation (M)[2,5]     |      | Mascot      |
| 960.4277   | 960.4583    | 0.0306  | 32    | 473        | 479      | KMSFMER       |           |       | Oxidation (M)[2,5]     |      | Mascot      |
| 1341.6984  | 1341.761    | 0.0626  | 47    | 350        | 360      | HWSLGVCLLELK  |           |       | Carbamidomethyl (C)[7] |      | Mascot      |
| 1341.6984  | 1341.761    | 0.0626  | 47    | 350        | 360      | HWSLGVCLLELK  |           |       | Carbamidomethyl (C)[7] |      | Mascot      |
| 1403.6559  | 1403.6858   | 0.0299  | 21    | 18         | 30       | DPVLLGCGHSFCR |           |       |                        |      | Mascot      |

|    |                                                                  |           |        |    |     |     |                         |          |     |                              |    |   |        |
|----|------------------------------------------------------------------|-----------|--------|----|-----|-----|-------------------------|----------|-----|------------------------------|----|---|--------|
|    | 1558.7206                                                        | 1558.8331 | 0.1125 | 72 | 423 | 436 | VSFFDASCDAVIER          |          |     |                              |    |   | Mascot |
|    | 1772.783                                                         | 1772.8203 | 0.0373 | 21 | 2   | 17  | SLEDDLSCAVCTDVFR        |          |     |                              |    |   | Mascot |
|    | 1829.8044                                                        | 1829.9308 | 0.1264 | 69 | 2   | 17  | SLEDDLSCAVCTDVFR        |          |     | Carbamidomethyl (C)[8]       |    |   | Mascot |
|    | 2225.0259                                                        | 2225.084  | 0.0581 | 26 | 95  | 111 | IELFCQNDEQLLCARCR       |          |     | Carbamidomethyl (C)[5,13,16] |    |   | Mascot |
|    | 2233.0085                                                        | 2233.0576 | 0.0491 | 22 | 380 | 397 | ERYMYHLMTAEGCEINIK      |          |     | Oxidation (M)[4,8]           |    |   | Mascot |
|    | 2282.9851                                                        | 2283.1169 | 0.1318 | 58 | 31  | 49  | QCIYDHWSSSGTRNCPIC<br>R |          |     | Carbamidomethyl (C)[2]       |    |   | Mascot |
| 14 | PREDICTED: rapamycin-insensitive companion of mTOR [Danio rerio] |           |        |    |     |     | gi 189533864            | 193500.8 | 8.2 | 18                           | 41 | 0 |        |

#### Peptide Information

| Calc. Mass | Obsrv. Mass | ± da    | ± ppm | Start Seq. | End Seq. | Sequence                  | Ion Score | C. I. | % Modification           | Rank | Result Type |
|------------|-------------|---------|-------|------------|----------|---------------------------|-----------|-------|--------------------------|------|-------------|
| 864.5189   | 864.4897    | -0.0292 | -34   | 1102       | 1109     | FLISLSGK                  |           |       |                          |      | Mascot      |
| 892.492    | 892.4758    | -0.0162 | -18   | 286        | 293      | MSIVASLR                  |           |       | Oxidation (M)[1]         |      | Mascot      |
| 892.492    | 892.4758    | -0.0162 | -18   | 286        | 293      | MSIVASLR                  | 5         | 0     | Oxidation (M)[1]         |      | Mascot      |
| 954.5002   | 954.4235    | -0.0767 | -80   | 534        | 541      | DSQILNHK                  |           |       |                          |      | Mascot      |
| 1045.5887  | 1045.5522   | -0.0365 | -35   | 1652       | 1661     | GNETGLLLTIK               |           |       |                          |      | Mascot      |
| 1049.5599  | 1049.5206   | -0.0393 | -37   | 509        | 516      | DQHLPQR                   |           |       |                          |      | Mascot      |
| 1051.5782  | 1051.7004   | 0.1222  | 116   | 822        | 830      | GYVSKQLEK                 |           |       |                          |      | Mascot      |
| 1385.7134  | 1385.6997   | -0.0137 | -10   | 326        | 336      | GLLEVMYEIFR               |           |       | Oxidation (M)[6]         |      | Mascot      |
| 1385.7134  | 1385.6997   | -0.0137 | -10   | 326        | 336      | GLLEVMYEIFR               |           |       | Oxidation (M)[6]         |      | Mascot      |
| 1541.8145  | 1541.775    | -0.0395 | -26   | 325        | 336      | RGLEVMYEIFR               |           |       | Oxidation (M)[7]         |      | Mascot      |
| 1558.7344  | 1558.8331   | 0.0987  | 63    | 19         | 32       | NDSGEENVPLDLTR            |           |       |                          |      | Mascot      |
| 1623.8635  | 1623.7515   | -0.112  | -69   | 1621       | 1634     | NIPEDAPACRVLLR            |           |       | Carbamidomethyl (C)[9]   |      | Mascot      |
| 1623.8635  | 1623.7515   | -0.112  | -69   | 1621       | 1634     | NIPEDAPACRVLLR            |           |       | Carbamidomethyl (C)[9]   |      | Mascot      |
| 1653.8629  | 1653.6389   | -0.224  | -135  | 720        | 734      | ILTAATDNCRLYATK           |           |       |                          |      | Mascot      |
| 1710.8744  | 1710.8761   | 0.0017  | 1     | 980        | 994      | QGCEVLKLHGWDVAVR          |           |       |                          |      | Mascot      |
| 1710.8843  | 1710.8761   | -0.0082 | -5    | 720        | 734      | ILTAATDNCRLYATK           |           |       | Carbamidomethyl (C)[9]   |      | Mascot      |
| 1819.8629  | 1819.8468   | -0.0161 | -9    | 765        | 781      | AVSVEALDILDEACEDK         |           |       |                          |      | Mascot      |
| 1819.8629  | 1819.8468   | -0.0161 | -9    | 765        | 781      | AVSVEALDILDEACEDK         |           |       |                          |      | Mascot      |
| 2034.99    | 2034.8927   | -0.0973 | -48   | 763        | 781      | SKAVSVEALDILDEACED<br>K   |           |       |                          |      | Mascot      |
| 2035.0826  | 2034.8927   | -0.1899 | -93   | 286        | 303      | MSIVASLRSWGIIINLCK        |           |       | Carbamidomethyl (C)[17]  |      | Mascot      |
| 2249.1003  | 2249.0305   | -0.0698 | -31   | 1181       | 1200     | TLDTQDSTSSIGEVEVRL<br>NR  |           |       |                          |      | Mascot      |
| 2283.22    | 2283.1169   | -0.1031 | -45   | 186        | 205      | ACIAIICELALENPEIVAKR      |           |       | Carbamidomethyl (C)[2,7] |      | Mascot      |
| 2298.2312  | 2298.0984   | -0.1328 | -58   | 1358       | 1378     | LQQQRIHPSLSHSEALAS<br>PAK |           |       |                          |      | Mascot      |

|    |                                              |  |  |  |  |  |             |          |      |    |    |   |  |
|----|----------------------------------------------|--|--|--|--|--|-------------|----------|------|----|----|---|--|
| 15 | PREDICTED: protein QN1 homolog [Danio rerio] |  |  |  |  |  | gi 68385147 | 155728.8 | 5.89 | 17 | 40 | 0 |  |
|----|----------------------------------------------|--|--|--|--|--|-------------|----------|------|----|----|---|--|

| Peptide Information |                                  |         |       |              |          |                           |           |       |                        |      |             |
|---------------------|----------------------------------|---------|-------|--------------|----------|---------------------------|-----------|-------|------------------------|------|-------------|
| Calc. Mass          | Obsrv. Mass                      | ± da    | ± ppm | Start Seq.   | End Seq. | Sequence                  | Ion Score | C. I. | % Modification         | Rank | Result Type |
| 850.5145            | 850.5322                         | 0.0177  | 21    | 81           | 87       | SFLKSLR                   |           |       |                        |      | Mascot      |
| 856.4821            | 856.5146                         | 0.0325  | 38    | 1            | 7        | MAHRLTK                   |           |       |                        |      | Mascot      |
| 902.5053            | 902.5221                         | 0.0168  | 19    | 595          | 601      | ERELSLR                   |           |       |                        |      | Mascot      |
| 926.44              | 926.5717                         | 0.1317  | 142   | 1285         | 1291     | IQSMEFR                   |           |       | Oxidation (M)[4]       |      | Mascot      |
| 990.4785            | 990.4245                         | -0.054  | -55   | 713          | 720      | MNTNNIQR                  |           |       |                        |      | Mascot      |
| 1049.599            | 1049.5206                        | -0.0784 | -75   | 702          | 710      | LLTELSFAR                 |           |       |                        |      | Mascot      |
| 1131.619            | 1131.5668                        | -0.0522 | -46   | 777          | 786      | DLAKVQAVCK                |           |       | Carbamidomethyl (C)[9] |      | Mascot      |
| 1320.7271           | 1320.6573                        | -0.0698 | -53   | 702          | 712      | LLTELSFARDR               |           |       |                        |      | Mascot      |
| 1444.7002           | 1444.7188                        | 0.0186  | 13    | 1285         | 1295     | IQSMEFRYSQR               |           |       |                        |      | Mascot      |
| 1710.9133           | 1710.8761                        | -0.0372 | -22   | 166          | 180      | INREQELSAPTSPLR           |           |       |                        |      | Mascot      |
| 1710.9133           | 1710.8761                        | -0.0372 | -22   | 166          | 180      | INREQELSAPTSPLR           |           |       |                        |      | Mascot      |
| 1748.9766           | 1748.8676                        | -0.109  | -62   | 1161         | 1176     | VSLQAAVTHAQNQLLR          |           |       |                        |      | Mascot      |
| 1809.8549           | 1809.7441                        | -0.1108 | -61   | 1084         | 1099     | TMLSGPSHERPNNEPK          |           |       | Oxidation (M)[2]       |      | Mascot      |
| 1819.8239           | 1819.8468                        | 0.0229  | 13    | 296          | 313      | QISGSAGVCEDGQVEAG<br>R    |           |       | Carbamidomethyl (C)[9] |      | Mascot      |
| 1819.8239           | 1819.8468                        | 0.0229  | 13    | 296          | 313      | QISGSAGVCEDGQVEAG<br>R    |           |       | Carbamidomethyl (C)[9] |      | Mascot      |
| 1829.979            | 1829.9308                        | -0.0482 | -26   | 1337         | 1351     | MELDSILDVLRELQR           |           |       |                        |      | Mascot      |
| 1847.8625           | 1847.8706                        | 0.0081  | 4     | 570          | 586      | GMQEKMDGGPELASLER         |           |       |                        |      | Mascot      |
| 1863.8575           | 1863.8599                        | 0.0024  | 1     | 570          | 586      | GMQEKMDGGPELASLER         |           |       | Oxidation (M)[2]       |      | Mascot      |
| 2225.123            | 2225.084                         | -0.039  | -18   | 423          | 441      | RLMQEQDTSSQEPPPLK<br>PK   |           |       | Oxidation (M)[3]       |      | Mascot      |
| 2555.2559           | 2555.322                         | 0.0661  | 26    | 690          | 710      | QNEEALFMENQRLLTELS<br>FAR |           |       | Oxidation (M)[8]       |      | Mascot      |
| 2555.2559           | 2555.322                         | 0.0661  | 26    | 690          | 710      | QNEEALFMENQRLLTELS<br>FAR |           |       | Oxidation (M)[8]       |      | Mascot      |
| 16                  | Zgc:103631 protein [Danio rerio] |         |       | gi 158253732 |          | 37789.7                   | 8.19      | 9     | 40                     | 0    |             |

| Peptide Information |             |          |           |            |          |           |           |       |                        |      |             |  |  |
|---------------------|-------------|----------|-----------|------------|----------|-----------|-----------|-------|------------------------|------|-------------|--|--|
| Calc. Mass          | Obsrv. Mass | $\pm$ da | $\pm$ ppm | Start Seq. | End Seq. | Sequence  | Ion Score | C. I. | % Modification         | Rank | Result Type |  |  |
| 864.4066            | 864.4897    | 0.0831   | 96        | 100        | 107      | CLQAGMNK  |           |       |                        |      | Mascot      |  |  |
| 869.4259            | 869.5105    | 0.0846   | 97        | 337        | 343      | LLCDMFK   |           |       |                        |      | Mascot      |  |  |
| 869.4259            | 869.5105    | 0.0846   | 97        | 337        | 343      | LLCDMFK   |           |       |                        |      | Mascot      |  |  |
| 926.4474            | 926.5717    | 0.1243   | 134       | 337        | 343      | LLCDMFK   |           |       | Carbamidomethyl (C)[3] |      | Mascot      |  |  |
| 960.5546            | 960.4583    | -0.0963  | -100      | 32         | 40       | VLNTGLLCK |           |       |                        |      | Mascot      |  |  |
| 960.5546            | 960.4583    | -0.0963  | -100      | 32         | 40       | VLNTGLLCK |           |       |                        |      | Mascot      |  |  |
| 990.4924            | 990.4245    | -0.0679  | -69       | 328        | 336      | TIGNTPMEK |           |       |                        |      | Mascot      |  |  |



|           |           |         |     |     |     |                   |                        |        |
|-----------|-----------|---------|-----|-----|-----|-------------------|------------------------|--------|
| 1049.5231 | 1049.5206 | -0.0025 | -2  | 99  | 107 | KCLQAGMNK         | Carbamidomethyl (C)[2] | Mascot |
| 1131.5892 | 1131.5668 | -0.0224 | -20 | 124 | 133 | LDALDVKDK         |                        | Mascot |
| 1403.6368 | 1403.6858 | 0.049   | 35  | 182 | 194 | FMASLMTAETCAK     |                        | Mascot |
| 1558.6876 | 1558.8331 | 0.1455  | 93  | 1   | 14  | MSMVPFSSPTSSR     | Oxidation (M)[1]       | Mascot |
| 1833.9453 | 1833.9143 | -0.031  | -17 | 227 | 243 | GSPSASDVRVLQEVFSR |                        | Mascot |

17 RecName: Full=Probable tRNA  
threonylcarbamoyladenosine biosynthesis protein  
osgepl1; AltName: Full=

gi|160013234 43929.2 8.7 9 39 0

#### Peptide Information

| Calc. Mass | Obsrv. Mass | ± da    | ± ppm | Start Seq. | End Seq. | Sequence                | Ion Score | C. I. % | Modification            | Rank | Result Type |
|------------|-------------|---------|-------|------------|----------|-------------------------|-----------|---------|-------------------------|------|-------------|
| 1073.6313  | 1073.4951   | -0.1362 | -127  | 246        | 255      | TQITGAINKK              |           |         |                         |      | Mascot      |
| 1148.5881  | 1148.5958   | 0.0077  | 7     | 2          | 11       | FQSCLPGALR              |           |         | Carbamidomethyl (C)[4]  |      | Mascot      |
| 1607.8112  | 1607.7588   | -0.0524 | -33   | 2          | 15       | FQSCLPGALRSWSR          |           |         |                         |      | Mascot      |
| 1619.85    | 1619.8684   | 0.0184  | 11    | 272        | 287      | DIAAASQHTVASHLAK        |           |         |                         |      | Mascot      |
| 1623.835   | 1623.7515   | -0.0835 | -51   | 12         | 25       | SWSRGVFSTSTRPR          |           |         |                         |      | Mascot      |
| 1623.835   | 1623.7515   | -0.0835 | -51   | 12         | 25       | SWSRGVFSTSTRPR          |           |         |                         |      | Mascot      |
| 1678.9197  | 1678.85     | -0.0697 | -42   | 327        | 342      | IITDATGLHLLCPPSK        |           |         |                         |      | Mascot      |
| 1809.8687  | 1809.7441   | -0.1246 | -69   | 256        | 271      | EKEEGVEAGQFLSCVK        |           |         | Carbamidomethyl (C)[14] |      | Mascot      |
| 1825.8359  | 1825.7393   | -0.0966 | -53   | 343        | 358      | FCTDNGVMIWNGIER         |           |         |                         |      | Mascot      |
| 1841.8309  | 1841.7614   | -0.0695 | -38   | 343        | 358      | FCTDNGVMIWNGIER         |           |         | Oxidation (M)[8]        |      | Mascot      |
| 2249.0964  | 2249.0305   | -0.0659 | -29   | 26         | 47       | LVLGIETSCDETGA AVLDETGR |           |         |                         |      | Mascot      |

18 afadin- and alpha-actinin-binding protein [Danio rerio] gi|41387198 66121.4 6.93 13 39 0 4 0

#### Peptide Information

| Calc. Mass | Obsrv. Mass | ± da    | ± ppm | Start Seq. | End Seq. | Sequence  | Ion Score | C. I. % | Modification     | Rank | Result Type |
|------------|-------------|---------|-------|------------|----------|-----------|-----------|---------|------------------|------|-------------|
| 850.4165   | 850.5322    | 0.1157  | 136   | 432        | 437      | NFERER    |           |         |                  |      | Mascot      |
| 960.5109   | 960.4583    | -0.0526 | -55   | 323        | 330      | EQLTNSIR  |           |         |                  |      | Mascot      |
| 960.5109   | 960.4583    | -0.0526 | -55   | 323        | 330      | EQLTNSIR  |           |         |                  |      | Mascot      |
| 976.4945   | 976.4554    | -0.0391 | -40   | 162        | 169      | SEKEEVQK  |           |         |                  |      | Mascot      |
| 990.5288   | 990.4245    | -0.1043 | -105  | 199        | 206      | LNQLLMDK  |           |         | Oxidation (M)[6] |      | Mascot      |
| 1033.4871  | 1033.5251   | 0.038   | 37    | 1          | 9        | MPDPTLDTK |           |         | Oxidation (M)[1] |      | Mascot      |
| 1049.5739  | 1049.5206   | -0.0533 | -51   | 438        | 446      | KNFTEAAIR |           |         |                  |      | Mascot      |
| 1131.6442  | 1131.5668   | -0.0774 | -68   | 273        | 282      | KDMIALSPK |           |         | Oxidation (M)[3] |      | Mascot      |
| 1148.5914  | 1148.5958   | 0.0044  | 4     | 373        | 381      | MRLELQQCK |           |         |                  |      | Mascot      |

|    |                                                             |             |           |         |     |     |     |                       |   |   |  |                         |        |
|----|-------------------------------------------------------------|-------------|-----------|---------|-----|-----|-----|-----------------------|---|---|--|-------------------------|--------|
|    |                                                             | 1341.6389   | 1341.761  | 0.1221  | 91  | 256 | 266 | SLMMENSELKK           |   |   |  | Oxidation (M)[3,4]      | Mascot |
|    |                                                             | 1341.6389   | 1341.761  | 0.1221  | 91  | 256 | 266 | SLMMENSELKK           |   |   |  | Oxidation (M)[3,4]      | Mascot |
|    |                                                             | 1403.7125   | 1403.6858 | -0.0267 | -19 | 343 | 355 | LDSQASLVASQER         |   |   |  |                         | Mascot |
|    |                                                             | 1558.8695   | 1558.8331 | -0.0364 | -23 | 274 | 287 | DMAILSPKKPCVK         |   |   |  | Oxidation (M)[2]        | Mascot |
|    |                                                             | 1623.8336   | 1623.7515 | -0.0821 | -51 | 211 | 225 | LSIEVSNYVGRSDGK       |   |   |  |                         | Mascot |
|    |                                                             | 1623.8336   | 1623.7515 | -0.0821 | -51 | 211 | 225 | LSIEVSNYVGRSDGK       |   |   |  |                         | Mascot |
|    |                                                             | 2555.0322   | 2555.322  | 0.2898  | 113 | 288 | 311 | AELADDSEAGSECEDEAGSSR |   |   |  | Carbamidomethyl (C)[15] | Mascot |
|    |                                                             | 2555.0322   | 2555.322  | 0.2898  | 113 | 288 | 311 | AELADDSEAGSECEDEAGSSR | 4 | 0 |  | Carbamidomethyl (C)[15] | Mascot |
| 19 | N(6)-adenine-specific DNA methyltransferase 2 [Danio rerio] | gi 46309537 | 18902.4   | 5.21    | 5   | 38  | 0   |                       |   |   |  |                         |        |

#### Peptide Information

| Calc. Mass | Obsrv. Mass | ± da    | ± ppm | Start Seq. | End Seq. | Sequence             | Ion Score | C. I. | % Modification         | Rank | Result Type |
|------------|-------------|---------|-------|------------|----------|----------------------|-----------|-------|------------------------|------|-------------|
| 869.4008   | 869.5105    | 0.1097  | 126   | 139        | 145      | MCSFLPR              |           |       | Oxidation (M)[1]       |      | Mascot      |
| 869.4008   | 869.5105    | 0.1097  | 126   | 139        | 145      | MCSFLPR              | 9         | 0     | Oxidation (M)[1]       |      | Mascot      |
| 1033.4408  | 1033.5251   | 0.0843  | 82    | 156        | 163      | CYVNYESR             |           |       |                        |      | Mascot      |
| 1403.6624  | 1403.6858   | 0.0234  | 17    | 156        | 166      | CYVNYESRLLS          |           |       | Carbamidomethyl (C)[1] |      | Mascot      |
| 1637.6901  | 1637.6448   | -0.0453 | -28   | 1          | 13       | MSQFWYSEETASR        |           |       | Oxidation (M)[1]       |      | Mascot      |
| 2225.2031  | 2225.084    | -0.1191 | -54   | 119        | 138      | ILLCTGAIMEEHAGKLLDLK |           |       | Carbamidomethyl (C)[4] |      | Mascot      |

20 transferrin receptor 1a [Danio rerio] gi|57770576 84944.1 6.38 9 38 0

#### Peptide Information

| Calc. Mass | Obsrv. Mass | ± da    | ± ppm | Start Seq. | End Seq. | Sequence         | Ion Score | C. I. | % Modification   | Rank | Result Type |
|------------|-------------|---------|-------|------------|----------|------------------|-----------|-------|------------------|------|-------------|
| 842.4842   | 842.4998    | 0.0156  | 19    | 66         | 72       | LNQRSPK          |           |       |                  |      | Mascot      |
| 960.5472   | 960.4583    | -0.0889 | -93   | 662        | 671      | AASALTSAIR       | 15        | 0     |                  |      | Mascot      |
| 960.5472   | 960.4583    | -0.0889 | -93   | 662        | 671      | AASALTSAIR       |           |       |                  |      | Mascot      |
| 976.4634   | 976.4554    | -0.008  | -8    | 409        | 417      | DAWGPGFAR        |           |       |                  |      | Mascot      |
| 1045.5935  | 1045.5522   | -0.0413 | -39   | 683        | 690      | IINNRMIR         |           |       | Oxidation (M)[7] |      | Mascot      |
| 1049.5156  | 1049.5206   | 0.005   | 5     | 634        | 642      | VESRQMSGR        |           |       |                  |      | Mascot      |
| 1403.7529  | 1403.6858   | -0.0671 | -48   | 691        | 703      | VEGSLLSPYVSPR    |           |       |                  |      | Mascot      |
| 1607.8462  | 1607.7588   | -0.0874 | -54   | 431        | 444      | TITDMIKNDGFKPK   |           |       |                  |      | Mascot      |
| 1623.8411  | 1623.7515   | -0.0896 | -55   | 431        | 444      | TITDMIKNDGFKPK   |           |       | Oxidation (M)[5] |      | Mascot      |
| 1623.8411  | 1623.7515   | -0.0896 | -55   | 431        | 444      | TITDMIKNDGFKPK   |           |       | Oxidation (M)[5] |      | Mascot      |
| 1819.9734  | 1819.8468   | -0.1266 | -70   | 688        | 703      | IMRVEGSLLSPYVSPR |           |       | Oxidation (M)[2] |      | Mascot      |
| 1819.9734  | 1819.8468   | -0.1266 | -70   | 688        | 703      | IMRVEGSLLSPYVSPR |           |       | Oxidation (M)[2] |      | Mascot      |

|                     |                                              |             |         |       |              |                             |                           |      |           |        |                              |    |                  |
|---------------------|----------------------------------------------|-------------|---------|-------|--------------|-----------------------------|---------------------------|------|-----------|--------|------------------------------|----|------------------|
|                     | 2283.0339                                    | 2283.1169   | 0.083   | 36    | 662          | 682                         | AASALTSAIRNSDLDDME<br>QCR |      |           |        | Oxidation (M)[17]            |    | Mascot           |
| 21                  | glutamine synthetase [Danio rerio]           |             |         |       | gi 115430097 |                             | 41664.2                   | 5.85 | 4         | 37     | 0                            | 26 | 24.512           |
| Peptide Information |                                              |             |         |       |              |                             |                           |      |           |        |                              |    |                  |
|                     | Calc. Mass                                   | Obsrv. Mass | ± da    | ± ppm | Start Seq.   | End Sequence Seq.           |                           |      | Ion Score | C. I.  | % Modification               |    | Rank Result Type |
|                     | 869.5315                                     | 869.5105    | -0.021  | -24   | 325          | 332 GASIRIPR                |                           |      |           |        |                              |    | Mascot           |
|                     | 869.5315                                     | 869.5105    | -0.021  | -24   | 325          | 332 GASIRIPR                |                           | 26   |           | 24.512 |                              |    | Mascot           |
|                     | 976.5071                                     | 976.4554    | -0.0517 | -53   | 285          | 291 RHEEHIR                 |                           |      |           |        |                              |    | Mascot           |
|                     | 1049.472                                     | 1049.5206   | 0.0486  | 46    | 179          | 186 DIVDCHYK                |                           |      |           |        | Carbamidomethyl (C)[5]       |    | Mascot           |
|                     | 1558.6954                                    | 1558.8331   | 0.1377  | 88    | 333          | 345 QVGQEKCGYFEDR           |                           |      |           |        |                              |    | Mascot           |
| 22                  | hypothetical protein LOC553197 [Danio rerio] |             |         |       | gi 66392211  |                             | 58633.7                   | 7.78 | 9         | 37     | 0                            |    |                  |
| Peptide Information |                                              |             |         |       |              |                             |                           |      |           |        |                              |    |                  |
|                     | Calc. Mass                                   | Obsrv. Mass | ± da    | ± ppm | Start Seq.   | End Sequence Seq.           |                           |      | Ion Score | C. I.  | % Modification               |    | Rank Result Type |
|                     | 869.4951                                     | 869.5105    | 0.0154  | 18    | 398          | 404 RNPEVVR                 |                           |      |           |        |                              |    | Mascot           |
|                     | 869.4951                                     | 869.5105    | 0.0154  | 18    | 398          | 404 RNPEVVR                 |                           | 15   |           | 0      |                              |    | Mascot           |
|                     | 892.5137                                     | 892.4758    | -0.0379 | -42   | 173          | 179 IKVEFEK                 |                           |      |           |        |                              |    | Mascot           |
|                     | 892.5137                                     | 892.4758    | -0.0379 | -42   | 173          | 179 IKVEFEK                 |                           |      |           |        |                              |    | Mascot           |
|                     | 960.4277                                     | 960.4583    | 0.0306  | 32    | 473          | 479 KMSFMER                 |                           |      |           |        | Oxidation (M)[2,5]           |    | Mascot           |
|                     | 960.4277                                     | 960.4583    | 0.0306  | 32    | 473          | 479 KMSFMER                 |                           |      |           |        | Oxidation (M)[2,5]           |    | Mascot           |
|                     | 1341.6984                                    | 1341.761    | 0.0626  | 47    | 350          | 360 HWSLGVLCLELK            |                           |      |           |        | Carbamidomethyl (C)[7]       |    | Mascot           |
|                     | 1341.6984                                    | 1341.761    | 0.0626  | 47    | 350          | 360 HWSLGVLCLELK            |                           |      |           |        | Carbamidomethyl (C)[7]       |    | Mascot           |
|                     | 1403.6559                                    | 1403.6858   | 0.0299  | 21    | 18           | 30 DPVLLGCGHSFCR            |                           |      |           |        |                              |    | Mascot           |
|                     | 1558.7128                                    | 1558.8331   | 0.1203  | 77    | 405          | 417 VKLDYVCDDTMEK           |                           |      |           |        |                              |    | Mascot           |
|                     | 1772.783                                     | 1772.8203   | 0.0373  | 21    | 2            | 17 SLEDDLSCAVCTDVFR         |                           |      |           |        |                              |    | Mascot           |
|                     | 1829.8044                                    | 1829.9308   | 0.1264  | 69    | 2            | 17 SLEDDLSCAVCTDVFR         |                           |      |           |        | Carbamidomethyl (C)[8]       |    | Mascot           |
|                     | 2225.0259                                    | 2225.084    | 0.0581  | 26    | 95           | 111 IELFCQNDEQLLCARCR       |                           |      |           |        | Carbamidomethyl (C)[5,13,16] |    | Mascot           |
|                     | 2282.9851                                    | 2283.1169   | 0.1318  | 58    | 31           | 49 QCIDYDHWSSSGTRNCPIC<br>R |                           |      |           |        | Carbamidomethyl (C)[2]       |    | Mascot           |
| 23                  | PREDICTED: protein NLRC3-like [Danio rerio]  |             |         |       | gi 326667475 |                             | 86681.6                   | 6.22 | 12        | 37     | 0                            |    |                  |
| Peptide Information |                                              |             |         |       |              |                             |                           |      |           |        |                              |    |                  |
|                     | Calc. Mass                                   | Obsrv. Mass | ± da    | ± ppm | Start Seq.   | End Sequence Seq.           |                           |      | Ion Score | C. I.  | % Modification               |    | Rank Result Type |
|                     | 892.4193                                     | 892.4758    | 0.0565  | 63    | 740          | 746 SDECLIR                 |                           |      |           |        | Carbamidomethyl (C)[4]       |    | Mascot           |
|                     | 892.4193                                     | 892.4758    | 0.0565  | 63    | 740          | 746 SDECLIR                 |                           |      |           |        | Carbamidomethyl (C)[4]       |    | Mascot           |

|  |           |           |         |      |     |     |                    |  |  |  |  |  |                         |  |  |  |  |        |
|--|-----------|-----------|---------|------|-----|-----|--------------------|--|--|--|--|--|-------------------------|--|--|--|--|--------|
|  | 902.44    | 902.5221  | 0.0821  | 91   | 395 | 402 | IPADCIDR           |  |  |  |  |  |                         |  |  |  |  | Mascot |
|  | 960.5472  | 960.4583  | -0.0889 | -93  | 45  | 53  | TPSSVKSVR          |  |  |  |  |  |                         |  |  |  |  | Mascot |
|  | 960.5472  | 960.4583  | -0.0889 | -93  | 45  | 53  | TPSSVKSVR          |  |  |  |  |  |                         |  |  |  |  | Mascot |
|  | 990.5366  | 990.4245  | -0.1121 | -113 | 520 | 527 | LAFQQLDR           |  |  |  |  |  |                         |  |  |  |  | Mascot |
|  | 1045.5272 | 1045.5522 | 0.025   | 24   | 645 | 653 | GLLTQQDDR          |  |  |  |  |  |                         |  |  |  |  | Mascot |
|  | 1320.614  | 1320.6573 | 0.0433  | 33   | 69  | 80  | SMGYPPDLSEK        |  |  |  |  |  |                         |  |  |  |  | Mascot |
|  | 1341.6685 | 1341.761  | 0.0925  | 69   | 528 | 538 | NNVIFYESDLK        |  |  |  |  |  |                         |  |  |  |  | Mascot |
|  | 1341.6685 | 1341.761  | 0.0925  | 69   | 528 | 538 | NNVIFYESDLK        |  |  |  |  |  |                         |  |  |  |  | Mascot |
|  | 1678.7742 | 1678.85   | 0.0758  | 45   | 66  | 80  | SDRSMGYPPDLSEK     |  |  |  |  |  |                         |  |  |  |  | Mascot |
|  | 1710.8486 | 1710.8761 | 0.0275  | 16   | 285 | 298 | ENQDISFTFPLPFR     |  |  |  |  |  |                         |  |  |  |  | Mascot |
|  | 1710.8486 | 1710.8761 | 0.0275  | 16   | 285 | 298 | ENQDISFTFPLPFR     |  |  |  |  |  |                         |  |  |  |  | Mascot |
|  | 1724.9039 | 1724.8828 | -0.0211 | -12  | 332 | 345 | FKVLFILDGLDECR     |  |  |  |  |  | Carbamidomethyl (C)[13] |  |  |  |  | Mascot |
|  | 2211.2092 | 2211.0767 | -0.1325 | -60  | 143 | 161 | SIITEAALDTLFFLREMK |  |  |  |  |  |                         |  |  |  |  | Mascot |
|  | 2298.1812 | 2298.0984 | -0.0828 | -36  | 479 | 496 | TLTQMYTHFLRFQIQSR  |  |  |  |  |  |                         |  |  |  |  | Mascot |

24    PREDICTED: retrotransposable element Tf2 155 kDa    gi|326674161    152950.2    9.44    16    37    0  
protein type 1-like [Danio rerio]

| Peptide Information |             |         |       |            |          |                 | Ion Score | C. I. % Modification   | Rank | Result Type |
|---------------------|-------------|---------|-------|------------|----------|-----------------|-----------|------------------------|------|-------------|
| Calc. Mass          | Obsrv. Mass | ± da    | ± ppm | Start Seq. | End Seq. | Sequence        |           |                        |      |             |
| 882.4567            | 882.5579    | 0.1012  | 115   | 183        | 190      | SVADYSIK        |           |                        |      | Mascot      |
| 960.5472            | 960.4583    | -0.0889 | -93   | 285        | 292      | SRLSLQEK        |           |                        |      | Mascot      |
| 960.5472            | 960.4583    | -0.0889 | -93   | 285        | 292      | SRLSLQEK        |           |                        |      | Mascot      |
| 982.4886            | 982.4392    | -0.0494 | -50   | 1012       | 1020     | VACHPGVSR       |           | Carbamidomethyl (C)[3] |      | Mascot      |
| 998.5305            | 998.4122    | -0.1183 | -118  | 605        | 613      | LQGASFFTK       |           |                        |      | Mascot      |
| 1118.6125           | 1118.6117   | -0.0008 | -1    | 327        | 336      | LLMGEISLDK      |           |                        |      | Mascot      |
| 1131.6091           | 1131.5668   | -0.0423 | -37   | 618        | 626      | NAYHLVRMK       |           |                        |      | Mascot      |
| 1341.6104           | 1341.761    | 0.1506  | 112   | 471        | 482      | SAVSCSVFQEER    |           |                        |      | Mascot      |
| 1341.6104           | 1341.761    | 0.1506  | 112   | 471        | 482      | SAVSCSVFQEER    |           |                        |      | Mascot      |
| 1385.7939           | 1385.6997   | -0.0942 | -68   | 1099       | 1110     | FSKATHFIPLPK    |           |                        |      | Mascot      |
| 1385.7939           | 1385.6997   | -0.0942 | -68   | 1099       | 1110     | FSKATHFIPLPK    |           |                        |      | Mascot      |
| 1403.6334           | 1403.6858   | 0.0524  | 37    | 144        | 155      | LPCCSSFDFLSK    |           | Carbamidomethyl (C)[3] |      | Mascot      |
| 1607.7859           | 1607.7588   | -0.0271 | -17   | 1006       | 1020     | WGHSSKVACHPGVSR |           |                        |      | Mascot      |
| 1623.7935           | 1623.7515   | -0.042  | -26   | 483        | 496      | MDLSNPSEYLDLK   |           |                        |      | Mascot      |
| 1623.7935           | 1623.7515   | -0.042  | -26   | 483        | 496      | MDLSNPSEYLDLK   |           |                        |      | Mascot      |
| 1653.7876           | 1653.6389   | -0.1487 | -90   | 83         | 97       | LPPPTCYAGEPHLCR |           |                        |      | Mascot      |
| 1665.8516           | 1665.8595   | 0.0079  | 5     | 530        | 543      | LYLSIPEREAMEK   |           |                        |      | Mascot      |

|           |           |         |      |     |     |                    |                        |        |
|-----------|-----------|---------|------|-----|-----|--------------------|------------------------|--------|
| 1710.8091 | 1710.8761 | 0.067   | 39   | 83  | 97  | LPPPTCYAGEPHLCR    | Carbamidomethyl (C)[6] | Mascot |
| 1710.8091 | 1710.8761 | 0.067   | 39   | 83  | 97  | LPPPTCYAGEPHLCR    | Carbamidomethyl (C)[6] | Mascot |
| 1829.85   | 1829.9308 | 0.0808  | 44   | 840 | 855 | AASDDRIHPCAFFSHR   |                        | Mascot |
| 1847.9609 | 1847.8706 | -0.0903 | -49  | 935 | 950 | NIKPDALSRLFDSSER   |                        | Mascot |
| 1864.0902 | 1863.8599 | -0.2303 | -124 | 393 | 410 | ALSGLSLPTITHSTKPIK |                        | Mascot |

25 PREDICTED: myosin-10-like [Danio rerio] gi|292622124 232610.3 5.52 17 37 0

#### Peptide Information

| Calc. Mass | Obsrv. Mass | ± da    | ± ppm | Start Seq. | End Seq. | Sequence                  | Ion Score | C. I. % | Modification                              | Rank | Result Type |
|------------|-------------|---------|-------|------------|----------|---------------------------|-----------|---------|-------------------------------------------|------|-------------|
| 864.4321   | 864.4897    | 0.0576  | 67    | 1663       | 1669     | GREEAFR                   |           |         |                                           |      | Mascot      |
| 902.524    | 902.5221    | -0.0019 | -2    | 1862       | 1869     | AMANKLVR                  |           |         |                                           |      | Mascot      |
| 960.493    | 960.4583    | -0.0347 | -36   | 725        | 733      | CNGVLEGIR                 | 15        | 0       |                                           |      | Mascot      |
| 960.493    | 960.4583    | -0.0347 | -36   | 725        | 733      | CNGVLEGIR                 |           |         |                                           |      | Mascot      |
| 976.5032   | 976.4554    | -0.0478 | -49   | 86         | 93       | MNPPRFSK                  |           |         |                                           |      | Mascot      |
| 1045.5272  | 1045.5522   | 0.025   | 24    | 1515       | 1523     | ALQEATEQR                 |           |         |                                           |      | Mascot      |
| 1051.5717  | 1051.7004   | 0.1287  | 122   | 846        | 854      | NCAAYLKLR                 |           |         |                                           |      | Mascot      |
| 1075.6194  | 1075.6029   | -0.0165 | -15   | 583        | 590      | FMRPRQLK                  |           |         |                                           |      | Mascot      |
| 1148.5979  | 1148.5958   | -0.0021 | -2    | 1825       | 1835     | LSEMEGAVK GK              |           |         |                                           |      | Mascot      |
| 1403.6947  | 1403.6858   | -0.0089 | -6    | 1877       | 1887     | EVL MQVEDERR              |           |         |                                           |      | Mascot      |
| 1619.8024  | 1619.8684   | 0.066   | 41    | 568        | 582      | SFVDKLSAEQGSHSK           |           |         |                                           |      | Mascot      |
| 1623.7795  | 1623.7515   | -0.028  | -17   | 1477       | 1490     | FDQCLAE EKAVSAR           | 4         | 0       | Carbamidomethyl (C)[4]                    |      | Mascot      |
| 1623.7795  | 1623.7515   | -0.028  | -17   | 1477       | 1490     | FDQCLAE EKAVSAR           |           |         | Carbamidomethyl (C)[4]                    |      | Mascot      |
| 1748.8483  | 1748.8676   | 0.0193  | 11    | 1451       | 1464     | EEIEDMTIALQRER            |           |         | Oxidation (M)[6]                          |      | Mascot      |
| 1772.9442  | 1772.8203   | -0.1239 | -70   | 792        | 806      | VFFRAGVLAHLEEEER          |           |         |                                           |      | Mascot      |
| 1819.8304  | 1819.8468   | 0.0164  | 9     | 59         | 74       | EERGDEVEVELTDSGR          |           |         |                                           |      | Mascot      |
| 1819.8304  | 1819.8468   | 0.0164  | 9     | 59         | 74       | EERGDEVEVELTDSGR          |           |         |                                           |      | Mascot      |
| 2225.0173  | 2225.084    | 0.0667  | 30    | 171        | 191      | SMLQDREDQSILCTGES<br>GAGK |           |         |                                           |      | Mascot      |
| 2249.2512  | 2249.0305   | -0.2207 | -98   | 198        | 218      | VIQYLAHVASSHKSGTLG<br>RPK |           |         |                                           |      | Mascot      |
| 2298.0337  | 2298.0984   | 0.0647  | 28    | 171        | 191      | SMLQDREDQSILCTGES<br>GAGK |           |         | Carbamidomethyl (C)[13], Oxidation (M)[2] |      | Mascot      |
| 2300.1008  | 2300.115    | 0.0142  | 6     | 94         | 113      | VEDMADLTCLNEASVLH<br>NLR  |           |         | Carbamidomethyl (C)[9]                    |      | Mascot      |

26 novel protein [Danio rerio] gi|123230013 19821.7 8.29 6 36 0

#### Peptide Information

| Calc. Mass | Obsrv. Mass | ± da | ± ppm | Start Seq. | End Seq. | Sequence | Ion Score | C. I. % | Modification | Rank | Result Type |
|------------|-------------|------|-------|------------|----------|----------|-----------|---------|--------------|------|-------------|
|------------|-------------|------|-------|------------|----------|----------|-----------|---------|--------------|------|-------------|

|    |                                                            |           |         |      |     |     |                       |         |     |   |    |   |    |                                          |  |  |  |        |        |
|----|------------------------------------------------------------|-----------|---------|------|-----|-----|-----------------------|---------|-----|---|----|---|----|------------------------------------------|--|--|--|--------|--------|
|    | 1102.6102                                                  | 1102.6154 | 0.0052  | 5    | 60  | 70  | AGTDIDAALKK           |         |     |   |    |   |    |                                          |  |  |  |        | Mascot |
|    | 1541.9414                                                  | 1541.775  | -0.1664 | -108 | 161 | 174 | TIANLPIIGTFLIR        |         |     |   |    |   |    |                                          |  |  |  |        | Mascot |
|    | 1748.7982                                                  | 1748.8676 | 0.0694  | 40   | 105 | 118 | MNTLTVDCLFFDTR        |         |     |   |    |   |    | Carbamidomethyl (C)[8], Oxidation (M)[1] |  |  |  | Mascot |        |
|    | 1825.8823                                                  | 1825.7393 | -0.143  | -78  | 122 | 137 | CNINDEALDKIVTCFK      |         |     |   |    |   |    |                                          |  |  |  | Mascot |        |
|    | 1847.8778                                                  | 1847.8706 | -0.0072 | -4   | 104 | 118 | RMNTLTVDCLFFDTR       |         |     |   |    |   |    | Oxidation (M)[2]                         |  |  |  | Mascot |        |
|    | 2555.4531                                                  | 2555.322  | -0.1311 | -51  | 132 | 153 | IVTCFKHQIANLPIIGTFLIR |         |     |   |    |   |    | Carbamidomethyl (C)[4]                   |  |  |  | Mascot |        |
|    | 2555.4531                                                  | 2555.322  | -0.1311 | -51  | 132 | 153 | IVTCFKHQIANLPIIGTFLIR |         |     |   |    |   |    | Carbamidomethyl (C)[4]                   |  |  |  | Mascot |        |
| 27 | PREDICTED: phosphatase and actin regulator 2 [Danio rerio] |           |         |      |     |     |                       |         |     |   |    |   |    |                                          |  |  |  |        |        |
|    |                                                            |           |         |      |     |     | gi 125833212          | 58430.7 | 7.1 | 8 | 36 | 0 | 10 | 0                                        |  |  |  |        |        |

#### Peptide Information

| Calc. Mass | Obsrv. Mass | ± da    | ± ppm | Start Seq. | End Seq. | Sequence           | Ion Score | C. I. | % | Modification     | Rank | Result Type |
|------------|-------------|---------|-------|------------|----------|--------------------|-----------|-------|---|------------------|------|-------------|
| 990.4486   | 990.4245    | -0.0241 | -24   | 295        | 303      | DAGKEEGER          |           |       |   |                  |      | Mascot      |
| 1148.6157  | 1148.5958   | -0.0199 | -17   | 217        | 226      | KELTTSVNEK         |           |       |   |                  |      | Mascot      |
| 1385.7495  | 1385.6997   | -0.0498 | -36   | 190        | 201      | TEPSRSQRPLSK       |           |       |   |                  |      | Mascot      |
| 1385.7495  | 1385.6997   | -0.0498 | -36   | 190        | 201      | TEPSRSQRPLSK       |           |       |   |                  |      | Mascot      |
| 1403.8409  | 1403.6858   | -0.1551 | -110  | 43         | 54       | LSSLGKIFKPWK       |           |       |   |                  |      | Mascot      |
| 1665.7537  | 1665.8595   | 0.1058  | 64    | 504        | 516      | EMEVHEESKQFTR      |           |       |   | Oxidation (M)[2] |      | Mascot      |
| 1710.9061  | 1710.8761   | -0.03   | -18   | 459        | 472      | ILRFNEYVEVTEAK     |           |       |   |                  |      | Mascot      |
| 1710.9061  | 1710.8761   | -0.03   | -18   | 459        | 472      | ILRFNEYVEVTEAK     |           |       |   |                  |      | Mascot      |
| 1819.8855  | 1819.8468   | -0.0387 | -21   | 21         | 38       | SSLANCDVVGSSQSPQLK |           |       |   |                  |      | Mascot      |
| 1819.8855  | 1819.8468   | -0.0387 | -21   | 21         | 38       | SSLANCDVVGSSQSPQLK | 10        |       | 0 |                  |      | Mascot      |
| 1829.8472  | 1829.9308   | 0.0836  | 46    | 156        | 174      | GSSQASGQSSSQTSSTSK |           |       |   |                  |      | Mascot      |

28 Flk1b [Danio rerio] gi|56548636 51362.5 6.09 5 36 0 28 55.754

#### Peptide Information

| Calc. Mass | Obsrv. Mass | ± da    | ± ppm | Start Seq. | End Seq. | Sequence     | Ion Score | C. I. | % | Modification           | Rank | Result Type |
|------------|-------------|---------|-------|------------|----------|--------------|-----------|-------|---|------------------------|------|-------------|
| 869.5203   | 869.5105    | -0.0098 | -11   | 388        | 395      | GDARLPLK     |           |       |   |                        |      | Mascot      |
| 869.5203   | 869.5105    | -0.0098 | -11   | 388        | 395      | GDARLPLK     | 17        |       | 0 |                        |      | Mascot      |
| 892.4523   | 892.4758    | 0.0235  | 26    | 381        | 387      | DPDYVRK      |           |       |   |                        |      | Mascot      |
| 892.4523   | 892.4758    | 0.0235  | 26    | 381        | 387      | DPDYVRK      |           |       |   |                        |      | Mascot      |
| 926.4399   | 926.5717    | 0.1318  | 142   | 340        | 347      | GMEFLASR     |           |       |   | Oxidation (M)[2]       |      | Mascot      |
| 1051.5453  | 1051.7004   | 0.1551  | 147   | 182        | 191      | ATTCTTVAVK   |           |       |   | Carbamidomethyl (C)[4] |      | Mascot      |
| 1341.6644  | 1341.761    | 0.0966  | 72    | 192        | 203      | XLKEGATSSEYR | 11        |       | 0 |                        |      | Mascot      |

|    |                                        |              |         |      |    |    |   |
|----|----------------------------------------|--------------|---------|------|----|----|---|
| 29 | PREDICTED: gelsolin-like [Danio rerio] | gi 326668568 | 79933.9 | 6.95 | 10 | 35 | 0 |
|----|----------------------------------------|--------------|---------|------|----|----|---|

### Peptide Information

| Calc. Mass | Obsrv. Mass | ± da    | ± ppm | Start Seq. | End Seq. | Sequence                 | Ion Score | C. I. % | Modification           | Rank | Result Type |
|------------|-------------|---------|-------|------------|----------|--------------------------|-----------|---------|------------------------|------|-------------|
| 869.4363   | 869.5105    | 0.0742  | 85    | 593        | 599      | KDYQTSK                  |           |         |                        |      | Mascot      |
| 869.4363   | 869.5105    | 0.0742  | 85    | 593        | 599      | KDYQTSK                  |           |         |                        |      | Mascot      |
| 892.4808   | 892.4758    | -0.005  | -6    | 21         | 27       | IEKMDLK                  |           |         | Oxidation (M)[4]       |      | Mascot      |
| 892.4808   | 892.4758    | -0.005  | -6    | 21         | 27       | IEKMDLK                  | 6         | 0       | Oxidation (M)[4]       |      | Mascot      |
| 998.5417   | 998.4122    | -0.1295 | -130  | 13         | 20       | EPGLQIWR                 |           |         |                        |      | Mascot      |
| 1148.5042  | 1148.5958   | 0.0916  | 80    | 707        | 715      | MWDTDPLDR                |           |         |                        |      | Mascot      |
| 1701.8629  | 1701.8429   | -0.02   | -12   | 470        | 484      | VTQGQEPAHMLSLFK          |           |         | Oxidation (M)[11]      |      | Mascot      |
| 1772.9078  | 1772.8203   | -0.0875 | -49   | 6          | 20       | EFQNAGKEPGLQIWR          |           |         |                        |      | Mascot      |
| 2233.1533  | 2233.0576   | -0.0957 | -43   | 522        | 541      | AVEVEPCASKLNTNDVFV LK    |           |         | Carbamidomethyl (C)[7] |      | Mascot      |
| 2283.0823  | 2283.1169   | 0.0346  | 15    | 111        | 131      | YKQGGVSSGFNHVVSNE MNTK   |           |         |                        |      | Mascot      |
| 2298.199   | 2298.0984   | -0.1006 | -44   | 532        | 550      | LNTNDVFVLKFPEGMFL WK     |           |         |                        |      | Mascot      |
| 2555.1694  | 2555.322    | 0.1526  | 60    | 144        | 166      | ATEVNMSWASFNHGDCF ILDLGK |           |         |                        |      | Mascot      |
| 2555.1694  | 2555.322    | 0.1526  | 60    | 144        | 166      | ATEVNMSWASFNHGDCF ILDLGK |           |         |                        |      | Mascot      |

|    |                             |             |         |      |    |    |   |
|----|-----------------------------|-------------|---------|------|----|----|---|
| 30 | cullin 1-like [Danio rerio] | gi 47087291 | 89546.8 | 8.18 | 14 | 35 | 0 |
|----|-----------------------------|-------------|---------|------|----|----|---|

### Peptide Information

| Calc. Mass | Obsrv. Mass | ± da    | ± ppm | Start Seq. | End Seq. | Sequence        | Ion Score | C. I. % | Modification           | Rank | Result Type |
|------------|-------------|---------|-------|------------|----------|-----------------|-----------|---------|------------------------|------|-------------|
| 864.4825   | 864.4897    | 0.0072  | 8     | 220        | 227      | GPTLSVYK        |           |         |                        |      | Mascot      |
| 882.4501   | 882.5579    | 0.1078  | 122   | 320        | 326      | MYNLVSR         |           |         |                        |      | Mascot      |
| 982.572    | 982.4392    | -0.1328 | -135  | 669        | 676      | LFLGYKNK        |           |         |                        |      | Mascot      |
| 996.6564   | 996.5897    | -0.0667 | -67   | 707        | 715      | LLIQAAIVR       |           |         |                        |      | Mascot      |
| 1051.5531  | 1051.7004   | 0.1473  | 140   | 26         | 34       | SGIQQVYTR       |           |         |                        |      | Mascot      |
| 1073.6201  | 1073.4951   | -0.125  | -116  | 327        | 336      | ITDGLGELKK      |           |         |                        |      | Mascot      |
| 1131.6442  | 1131.5668   | -0.0774 | -68   | 749        | 757      | KCIDILIEK       |           |         | Carbamidomethyl (C)[2] |      | Mascot      |
| 1341.8099  | 1341.761    | -0.0489 | -36   | 176        | 187      | QVTNAVLKLVEK    |           |         |                        |      | Mascot      |
| 1341.8099  | 1341.761    | -0.0489 | -36   | 176        | 187      | QVTNAVLKLVEK    |           |         |                        |      | Mascot      |
| 1385.6709  | 1385.6997   | 0.0288  | 21    | 564        | 575      | FTAFYGSRHSGR    |           |         |                        |      | Mascot      |
| 1385.6709  | 1385.6997   | 0.0288  | 21    | 564        | 575      | FTAFYGSRHSGR    |           |         |                        |      | Mascot      |
| 1607.8462  | 1607.7588   | -0.0874 | -54   | 416        | 429      | SPELLARYCDSLLK  |           |         |                        |      | Mascot      |
| 1711.0728  | 1710.8761   | -0.1967 | -115  | 631        | 645      | TDILVQVLQILLKSK |           |         |                        |      | Mascot      |

|                     |                                            |            |             |         |       |            |              |                          |      |           |       |   |                         |   |      |        |        |
|---------------------|--------------------------------------------|------------|-------------|---------|-------|------------|--------------|--------------------------|------|-----------|-------|---|-------------------------|---|------|--------|--------|
|                     |                                            | 1711.0728  | 1710.8761   | -0.1967 | -115  | 631        | 645          | TDILVQVLQILLKSK          |      |           |       |   |                         |   |      |        | Mascot |
|                     |                                            | 1772.9653  | 1772.8203   | -0.145  | -82   | 337        | 352          | LLESHIHNQGLAAIEK         |      |           |       |   |                         |   |      |        | Mascot |
|                     |                                            | 1833.9857  | 1833.9143   | -0.0714 | -39   | 73         | 89           | TPTPGGAQFVGLLEYKR        |      |           |       |   |                         |   |      |        | Mascot |
|                     |                                            | 2283.1423  | 2283.1169   | -0.0254 | -11   | 96         | 115          | SYLTNLLKDGEDLMDESV<br>LK |      |           |       |   |                         |   |      |        | Mascot |
| 31                  | calbindin 2 [Danio rerio]                  |            |             |         |       |            | gi 239596164 | 15235.8                  | 5.73 | 3         | 35    | 0 | 23                      | 0 |      |        |        |
| Peptide Information |                                            |            |             |         |       |            |              |                          |      |           |       |   |                         |   |      |        |        |
|                     |                                            | Calc. Mass | Obsrv. Mass | ± da    | ± ppm | Start Seq. | End Seq.     | Sequence                 |      | Ion Score | C. I. | % | Modification            |   | Rank | Result | Type   |
|                     |                                            | 892.4556   | 892.4758    | 0.0202  | 23    | 32         | 39           | LGLSEMAR                 |      |           |       |   | Oxidation (M)[6]        |   |      | Mascot |        |
|                     |                                            | 892.4556   | 892.4758    | 0.0202  | 23    | 32         | 39           | LGLSEMAR                 |      | 23        |       | 0 | Oxidation (M)[6]        |   |      | Mascot |        |
|                     |                                            | 996.4454   | 996.5897    | 0.1443  | 145   | 23         | 31           | MFDLNGDGK                |      |           |       |   |                         |   |      | Mascot |        |
|                     |                                            | 1829.8665  | 1829.9308   | 0.0643  | 35    | 71         | 86           | DGNGYIDEHELDALLR         |      |           |       |   |                         |   |      | Mascot |        |
| 32                  | PREDICTED: vigilin isoform 2 [Danio rerio] |            |             |         |       |            | gi 292619547 | 142099.2                 | 6.53 | 14        | 34    | 0 | 12                      | 0 |      |        |        |
| Peptide Information |                                            |            |             |         |       |            |              |                          |      |           |       |   |                         |   |      |        |        |
|                     |                                            | Calc. Mass | Obsrv. Mass | ± da    | ± ppm | Start Seq. | End Seq.     | Sequence                 |      | Ion Score | C. I. | % | Modification            |   | Rank | Result | Type   |
|                     |                                            | 882.4679   | 882.5579    | 0.09    | 102   | 899        | 905          | EHEVQIK                  |      |           |       |   |                         |   |      | Mascot |        |
|                     |                                            | 960.5988   | 960.4583    | -0.1405 | -146  | 1220       | 1228         | ALAKGFVVR                |      |           |       |   |                         |   |      | Mascot |        |
|                     |                                            | 960.5988   | 960.4583    | -0.1405 | -146  | 1220       | 1228         | ALAKGFVVR                |      |           |       |   |                         |   |      | Mascot |        |
|                     |                                            | 976.488    | 976.4554    | -0.0326 | -33   | 950        | 957          | AEKCELAR                 |      |           |       |   | Carbamidomethyl (C)[4]  |   |      | Mascot |        |
|                     |                                            | 990.5214   | 990.4245    | -0.0969 | -98   | 604        | 611          | IREETNTK                 |      |           |       |   |                         |   |      | Mascot |        |
|                     |                                            | 1045.5095  | 1045.5522   | 0.0427  | 41    | 848        | 857          | GPRECVDAAK               |      |           |       |   |                         |   |      | Mascot |        |
|                     |                                            | 1075.5994  | 1075.6029   | 0.0035  | 3     | 195        | 204          | ITGTKEGIEK               |      |           |       |   |                         |   |      | Mascot |        |
|                     |                                            | 1102.531   | 1102.6154   | 0.0844  | 77    | 848        | 857          | GPRECVDAAK               |      |           |       |   | Carbamidomethyl (C)[5]  |   |      | Mascot |        |
|                     |                                            | 1131.6051  | 1131.5668   | -0.0383 | -34   | 890        | 898          | GCRIQQITR                |      |           |       |   | Carbamidomethyl (C)[2]  |   |      | Mascot |        |
|                     |                                            | 1148.598   | 1148.5958   | -0.0022 | -2    | 119        | 129          | DQGLSIMVTGK              |      |           |       |   |                         |   |      | Mascot |        |
|                     |                                            | 1623.8013  | 1623.7515   | -0.0498 | -31   | 822        | 836          | ELAAEYGGVAVSFPR          |      | 12        |       | 0 |                         |   |      | Mascot |        |
|                     |                                            | 1623.8013  | 1623.7515   | -0.0498 | -31   | 822        | 836          | ELAAEYGGVAVSFPR          |      |           |       |   |                         |   |      | Mascot |        |
|                     |                                            | 1637.8606  | 1637.6448   | -0.2158 | -132  | 205        | 218          | ARHEIQLISAEQDK           |      |           |       |   |                         |   |      | Mascot |        |
|                     |                                            | 1665.7496  | 1665.8595   | 0.1099  | 66    | 1208       | 1223         | TMGTGGNDEDNRALAK         |      |           |       |   | Oxidation (M)[2]        |   |      | Mascot |        |
|                     |                                            | 1701.921   | 1701.8429   | -0.0781 | -46   | 534        | 547          | FPEVIIIFPDQQQK           |      |           |       |   |                         |   |      | Mascot |        |
|                     |                                            | 1724.933   | 1724.8828   | -0.0502 | -29   | 70         | 84           | ASVITQVFHVPLEER          |      |           |       |   |                         |   |      | Mascot |        |
|                     |                                            | 2298.0376  | 2298.0984   | 0.0608  | 26    | 88         | 107          | DNSQFGEGEEAKVCLDI<br>MQK |      |           |       |   | Carbamidomethyl (C)[14] |   |      | Mascot |        |
| 33                  | PREDICTED: neurobeachin-like [Danio rerio] |            |             |         |       |            | gi 189528934 | 320583.8                 | 5.86 | 13        | 34    | 0 | 23                      | 0 |      |        |        |



### Peptide Information

| Calc. Mass | Obsrv. Mass | $\pm$ da | $\pm$ ppm | Start Seq. | End Seq. | Sequence        | Ion Score | C. I. | % Modification           | Rank | Result Type |
|------------|-------------|----------|-----------|------------|----------|-----------------|-----------|-------|--------------------------|------|-------------|
| 856.4046   | 856.5146    | 0.11     | 128       | 2640       | 2647     | VYSSDTGK        |           |       |                          |      | Mascot      |
| 960.5009   | 960.4583    | -0.0426  | -44       | 329        | 335      | WRNSEIR         | 23        | 0     |                          |      | Mascot      |
| 960.5009   | 960.4583    | -0.0426  | -44       | 329        | 335      | WRNSEIR         |           |       |                          |      | Mascot      |
| 976.5066   | 976.4554    | -0.0512  | -52       | 1445       | 1452     | LVCCVAVR        |           |       | Carbamidomethyl (C)[3,4] |      | Mascot      |
| 982.5064   | 982.4392    | -0.0672  | -68       | 1925       | 1932     | QRAEDVHK        |           |       |                          |      | Mascot      |
| 1320.6754  | 1320.6573   | -0.0181  | -14       | 1663       | 1675     | TASSISSINQANK   |           |       |                          |      | Mascot      |
| 1444.7754  | 1444.7188   | -0.0566  | -39       | 142        | 154      | NLQTSSEVGLIQR   |           |       |                          |      | Mascot      |
| 1541.8395  | 1541.775    | -0.0645  | -42       | 1250       | 1263     | KIQTATTQSLHGR   |           |       |                          |      | Mascot      |
| 1558.7834  | 1558.8331   | 0.0497   | 32        | 2143       | 2154     | WMFSEIRAVFTR    |           |       | Oxidation (M)[2]         |      | Mascot      |
| 1623.8523  | 1623.7515   | -0.1008  | -62       | 2737       | 2751     | EGPCLVHTITGDLLR | 3         | 0     |                          |      | Mascot      |
| 1623.8523  | 1623.7515   | -0.1008  | -62       | 2737       | 2751     | EGPCLVHTITGDLLR |           |       |                          |      | Mascot      |
| 1637.7743  | 1637.6448   | -0.1295  | -79       | 1445       | 1458     | LVCCVAVRNCLECR  |           |       | Carbamidomethyl (C)[3]   |      | Mascot      |
| 1724.894   | 1724.8828   | -0.0112  | -6        | 316        | 328      | KWYMVSIYHIYNR   |           |       | Oxidation (M)[4]         |      | Mascot      |
| 1825.7819  | 1825.7393   | -0.0426  | -23       | 1712       | 1726     | EAQAMMPMQFHSFDR |           |       |                          |      | Mascot      |
| 1829.8759  | 1829.9308   | 0.0549   | 30        | 243        | 256      | WPYQNGFTLNTWFR  |           |       |                          |      | Mascot      |
| 1841.7767  | 1841.7614   | -0.0153  | -8        | 1712       | 1726     | EAQAMMPMQFHSFDR |           |       | Oxidation (M)[5]         |      | Mascot      |

34

PREDICTED: myosin heavy chain, fast skeletal muscle-like [Danio rerio]

gi|326678010

161130.5

6.2

16

34

0

### Peptide Information

| Calc. Mass | Obsrv. Mass | $\pm$ da | $\pm$ ppm | Start Seq. | End Seq. | Sequence        | Ion Score | C. I. | % Modification         | Rank | Result Type |
|------------|-------------|----------|-----------|------------|----------|-----------------|-----------|-------|------------------------|------|-------------|
| 856.4886   | 856.5146    | 0.026    | 30        | 206        | 213      | KQEPVAGK        |           |       |                        |      | Mascot      |
| 864.4495   | 864.4897    | 0.0402   | 47        | 862        | 868      | MKEDLTK         |           |       |                        |      | Mascot      |
| 926.5053   | 926.5717    | 0.0664   | 72        | 972        | 979      | HATENKVK        |           |       |                        |      | Mascot      |
| 960.4818   | 960.4583    | -0.0235  | -24       | 675        | 682      | CLIPNESK        |           |       | Carbamidomethyl (C)[1] |      | Mascot      |
| 960.493    | 960.4583    | -0.0347  | -36       | 698        | 706      | CNGVLEGIR       | 15        | 0     |                        |      | Mascot      |
| 1341.6025  | 1341.761    | 0.1585   | 118       | 845        | 856      | SAETEKEMAAMK    |           |       | Oxidation (M)[8]       |      | Mascot      |
| 1341.6025  | 1341.761    | 0.1585   | 118       | 845        | 856      | SAETEKEMAAMK    |           |       | Oxidation (M)[8]       |      | Mascot      |
| 1385.6115  | 1385.6997   | 0.0882   | 64        | 1375       | 1385     | VQHEMEEAQER     |           |       |                        |      | Mascot      |
| 1385.6115  | 1385.6997   | 0.0882   | 64        | 1375       | 1385     | VQHEMEEAQER     |           |       |                        |      | Mascot      |
| 1558.7933  | 1558.8331   | 0.0398   | 26        | 191        | 205      | VIQYFATVGAMSGAK |           |       | Oxidation (M)[11]      |      | Mascot      |
| 1607.858   | 1607.7588   | -0.0992  | -62       | 130        | 143      | WLPVYDAVVVAGYR  |           |       |                        |      | Mascot      |
| 1665.7637  | 1665.8595   | 0.0958   | 58        | 980        | 994      | NLTEEMASQDESIK  |           |       |                        |      | Mascot      |



| Peptide Information |                              |         |       |             |          |                        |           |        |                         |                  |
|---------------------|------------------------------|---------|-------|-------------|----------|------------------------|-----------|--------|-------------------------|------------------|
| Calc. Mass          | Obsrv. Mass                  | ± da    | ± ppm | Start Seq.  | End Seq. | Sequence               | Ion Score | C. I.  | % Modification          | Rank Result Type |
| 869.5315            | 869.5105                     | -0.021  | -24   | 320         | 327      | GASIRIPR               |           |        |                         | Mascot           |
| 869.5315            | 869.5105                     | -0.021  | -24   | 320         | 327      | GASIRIPR               | 26        | 24.512 |                         | Mascot           |
| 1444.7577           | 1444.7188                    | -0.0389 | -27   | 1           | 14       | MATSASSHLNKGIK         |           |        |                         | Mascot           |
| 2097.0256           | 2096.8096                    | -0.216  | -103  | 26          | 43       | VQAMYIWIDGTGEGLRC<br>K |           |        | Carbamidomethyl (C)[17] | Mascot           |
| 38                  | truncated RAF1 [Danio rerio] |         |       | gi 41224402 |          | 32290.4                | 9.5       | 8      | 33                      | 0                |

| Peptide Information |                                  |         |       |             |          |                         |           |       |                          |                  |
|---------------------|----------------------------------|---------|-------|-------------|----------|-------------------------|-----------|-------|--------------------------|------------------|
| Calc. Mass          | Obsrv. Mass                      | ± da    | ± ppm | Start Seq.  | End Seq. | Sequence                | Ion Score | C. I. | % Modification           | Rank Result Type |
| 882.4791            | 882.5579                         | 0.0788  | 89    | 215         | 222      | IPSSSVHR                |           |       |                          | Mascot           |
| 892.4669            | 892.4758                         | 0.0089  | 10    | 208         | 214      | MRESLTR                 |           |       |                          | Mascot           |
| 892.4669            | 892.4758                         | 0.0089  | 10    | 208         | 214      | MRESLTR                 |           |       |                          | Mascot           |
| 902.4148            | 902.5221                         | 0.1073  | 119   | 33          | 40       | SPAPCQSR                |           |       | Carbamidomethyl (C)[5]   | Mascot           |
| 982.4435            | 982.4392                         | -0.0043 | -4    | 41          | 49       | SSDDSKTSR               |           |       |                          | Mascot           |
| 1045.452            | 1045.5522                        | 0.1002  | 96    | 165         | 172      | FHEHCSTK                |           |       | Carbamidomethyl (C)[5]   | Mascot           |
| 1118.5411           | 1118.6117                        | 0.0706  | 63    | 1           | 9        | MEQLQGAWR               |           |       |                          | Mascot           |
| 1841.8785           | 1841.7614                        | -0.1171 | -64   | 83          | 99       | GLQPECCAVFSLHPGQR       |           |       |                          | Mascot           |
| 2097.0481           | 2096.8096                        | -0.2385 | -114  | 81          | 99       | VRGLQPECCAVFSLHPG<br>QR |           |       |                          | Mascot           |
| 2211.0908           | 2211.0767                        | -0.0141 | -6    | 81          | 99       | VRGLQPECCAVFSLHPG<br>QR |           |       | Carbamidomethyl (C)[8,9] | Mascot           |
| 39                  | Wu:fj64b09 protein [Danio rerio] |         |       | gi 32766289 |          | 81939.8                 | 6.7       | 6     | 33                       | 0 28 49.432      |

| Peptide Information |             |         |       |            |          |           |           |        |                        |                  |
|---------------------|-------------|---------|-------|------------|----------|-----------|-----------|--------|------------------------|------------------|
| Calc. Mass          | Obsrv. Mass | ± da    | ± ppm | Start Seq. | End Seq. | Sequence  | Ion Score | C. I.  | % Modification         | Rank Result Type |
| 869.4297            | 869.5105    | 0.0808  | 93    | 54         | 60       | NYKVCSR   |           |        |                        | Mascot           |
| 869.4297            | 869.5105    | 0.0808  | 93    | 54         | 60       | NYKVCSR   |           |        |                        | Mascot           |
| 882.4501            | 882.5579    | 0.1078  | 122   | 312        | 318      | LKDFTCR   |           |        |                        | Mascot           |
| 892.4556            | 892.4758    | 0.0202  | 23    | 565        | 572      | VLGTEMAR  |           |        | Oxidation (M)[6]       | Mascot           |
| 892.4556            | 892.4758    | 0.0202  | 23    | 565        | 572      | VLGTEMAR  | 28        | 49.432 | Oxidation (M)[6]       | Mascot           |
| 926.4512            | 926.5717    | 0.1205  | 130   | 54         | 60       | NYKVCSR   |           |        | Carbamidomethyl (C)[5] | Mascot           |
| 1045.6041           | 1045.5522   | -0.0519 | -50   | 377        | 385      | ITTLYGHIK |           |        |                        | Mascot           |
| 1131.5575           | 1131.5668   | 0.0093  | 8     | 38         | 46       | CNRPDLQTK |           |        | Carbamidomethyl (C)[1] | Mascot           |

|                     |                                                            |             |         |       |            |                      |               |      |           |       |                        |                  |
|---------------------|------------------------------------------------------------|-------------|---------|-------|------------|----------------------|---------------|------|-----------|-------|------------------------|------------------|
|                     | 1665.7723                                                  | 1665.8595   | 0.0872  | 52    | 61         | 74                   | HFETSMICQSAVK |      |           |       | Carbamidomethyl (C)[8] | Mascot           |
| 40                  | PREDICTED: hypothetical protein LOC100536945 [Danio rerio] |             |         |       |            | gj 326665516         | 19714         | 5.96 | 4         | 33    | 0                      |                  |
| Peptide Information |                                                            |             |         |       |            |                      |               |      |           |       |                        |                  |
|                     | Calc. Mass                                                 | Obsrv. Mass | ± da    | ± ppm | Start Seq. | End Sequence Seq.    |               |      | Ion Score | C. I. | % Modification         | Rank Result Type |
|                     | 856.4159                                                   | 856.5146    | 0.0987  | 115   | 25         | 32 SHDSPSVK          |               |      |           |       |                        | Mascot           |
|                     | 960.5261                                                   | 960.4583    | -0.0678 | -71   | 2          | 9 TWLTGNIR           |               | 13   |           | 0     |                        | Mascot           |
|                     | 960.5261                                                   | 960.4583    | -0.0678 | -71   | 2          | 9 TWLTGNIR           |               |      |           |       |                        | Mascot           |
|                     | 1385.6842                                                  | 1385.6997   | 0.0155  | 11    | 21         | 32 ELMRSHDSPSVK      |               |      |           |       |                        | Mascot           |
|                     | 1385.6842                                                  | 1385.6997   | 0.0155  | 11    | 21         | 32 ELMRSHDSPSVK      |               |      |           |       |                        | Mascot           |
|                     | 1637.7887                                                  | 1637.6448   | -0.1439 | -88   | 1          | 13 MTWLTGNIRENMR     |               |      |           |       | Oxidation (M)[1]       | Mascot           |
|                     | 1653.7836                                                  | 1653.6389   | -0.1447 | -87   | 1          | 13 MTWLTGNIRENMR     |               |      |           |       | Oxidation (M)[1,12]    | Mascot           |
| 41                  | photoreceptor-specific nuclear receptor [Danio rerio]      |             |         |       |            | gj 55925261          | 46425.1       | 7.1  | 9         | 33    | 0                      |                  |
| Peptide Information |                                                            |             |         |       |            |                      |               |      |           |       |                        |                  |
|                     | Calc. Mass                                                 | Obsrv. Mass | ± da    | ± ppm | Start Seq. | End Sequence Seq.    |               |      | Ion Score | C. I. | % Modification         | Rank Result Type |
|                     | 864.4066                                                   | 864.4897    | 0.0831  | 96    | 100        | 107 CLQAGMNK         |               |      |           |       |                        | Mascot           |
|                     | 869.4259                                                   | 869.5105    | 0.0846  | 97    | 412        | 418 LLCDFMK          |               |      |           |       |                        | Mascot           |
|                     | 869.4259                                                   | 869.5105    | 0.0846  | 97    | 412        | 418 LLCDFMK          |               |      |           |       |                        | Mascot           |
|                     | 926.4474                                                   | 926.5717    | 0.1243  | 134   | 412        | 418 LLCDFMK          |               |      |           |       | Carbamidomethyl (C)[3] | Mascot           |
|                     | 960.5546                                                   | 960.4583    | -0.0963 | -100  | 32         | 40 VLNTGLLCK         |               |      |           |       |                        | Mascot           |
|                     | 960.5546                                                   | 960.4583    | -0.0963 | -100  | 32         | 40 VLNTGLLCK         |               |      |           |       |                        | Mascot           |
|                     | 990.4924                                                   | 990.4245    | -0.0679 | -69   | 403        | 411 TIGNTPMEK        |               |      |           |       |                        | Mascot           |
|                     | 1049.5231                                                  | 1049.5206   | -0.0025 | -2    | 99         | 107 KCLQAGMNK        |               |      |           |       | Carbamidomethyl (C)[2] | Mascot           |
|                     | 1131.5892                                                  | 1131.5668   | -0.0224 | -20   | 124        | 133 LDALDVDDKDK      |               |      |           |       |                        | Mascot           |
|                     | 1403.6368                                                  | 1403.6858   | 0.049   | 35    | 182        | 194 FMASLMTAETCAK    |               |      |           |       |                        | Mascot           |
|                     | 1558.6876                                                  | 1558.8331   | 0.1455  | 93    | 1          | 14 MSMVPFSSPTESSR    |               |      |           |       | Oxidation (M)[1]       | Mascot           |
|                     | 1833.9453                                                  | 1833.9143   | -0.031  | -17   | 302        | 318 GSPSASDVRLQEVFSR |               |      |           |       |                        | Mascot           |
| 42                  | keratin 18 [Danio rerio]                                   |             |         |       |            | gj 29335504          | 41247.4       | 5.07 | 9         | 32    | 0                      |                  |
| Peptide Information |                                                            |             |         |       |            |                      |               |      |           |       |                        |                  |
|                     | Calc. Mass                                                 | Obsrv. Mass | ± da    | ± ppm | Start Seq. | End Sequence Seq.    |               |      | Ion Score | C. I. | % Modification         | Rank Result Type |
|                     | 864.4461                                                   | 864.4897    | 0.0436  | 50    | 315        | 322 LLDGGDFK         |               |      |           |       |                        | Mascot           |
|                     | 882.4753                                                   | 882.5579    | 0.0826  | 94    | 188        | 194 YEKMALK          |               |      |           |       |                        | Mascot           |

|           |           |         |     |     |     |                  |        |
|-----------|-----------|---------|-----|-----|-----|------------------|--------|
| 902.4941  | 902.5221  | 0.028   | 31  | 32  | 39  | ILEQANSK         | Mascot |
| 996.4996  | 996.5897  | 0.0901  | 90  | 100 | 107 | YESELSIR         | Mascot |
| 1045.4697 | 1045.5522 | 0.0825  | 79  | 52  | 60  | GPDVHDYSR        | Mascot |
| 1073.5474 | 1073.4951 | -0.0523 | -49 | 323 | 331 | LQDALEEQK        | Mascot |
| 1385.7998 | 1385.6997 | -0.1001 | -72 | 32  | 43  | ILEQANSKLELK     | Mascot |
| 1385.7998 | 1385.6997 | -0.1001 | -72 | 32  | 43  | ILEQANSKLELK     | Mascot |
| 1558.8323 | 1558.8331 | 0.0008  | 1   | 234 | 246 | QIQTLEIELESQK    | Mascot |
| 1829.9868 | 1829.9308 | -0.056  | -31 | 82  | 97  | LVLQIDNARLAADDFR | Mascot |

### Peptide Information

|    |                                                        |              |         |      |   |    |   |
|----|--------------------------------------------------------|--------------|---------|------|---|----|---|
| 44 | O-sialoglycoprotein endopeptidase-like 1 [Danio rerio] | gi 169145701 | 44028.3 | 8.83 | 8 | 32 | 0 |
|----|--------------------------------------------------------|--------------|---------|------|---|----|---|

45 TPA\_exp: glutamine synthetase [Danio rerio] ETGR gi|30141105 41549.8 5.57 2 32 0 26 24.512

Peptide Information

| Calc. Mass | Obsrv. Mass | ± da    | ± ppm | Start Seq. | End Seq. | Sequence | Ion Score | C. I. | % Modification | Rank | Result Type |
|------------|-------------|---------|-------|------------|----------|----------|-----------|-------|----------------|------|-------------|
| 869.5315   | 869.5105    | -0.021  | -24   | 320        | 327      | GASIRIPR |           |       |                |      | Mascot      |
| 869.5315   | 869.5105    | -0.021  | -24   | 320        | 327      | GASIRIPR | 26        |       | 24.512         |      | Mascot      |
| 902.5378   | 902.5221    | -0.0157 | -17   | 96         | 103      | LVLCEVVK |           |       |                |      | Mascot      |

46 PREDICTED: BAH and coiled-coil domain-containing protein 1-like [Danio rerio] gi|326672508 287695.1 8.4 1 31 78.429

Peptide Information

| Calc. Mass | Obsrv. Mass | ± da   | ± ppm | Start Seq. | End Seq. | Sequence | Ion Score | C. I. | % Modification | Rank | Result Type |
|------------|-------------|--------|-------|------------|----------|----------|-----------|-------|----------------|------|-------------|
| 892.4634   | 892.4758    | 0.0124 | 14    | 866        | 872      | DRVEFAR  | 31        |       | 78.429         | 2    | Mascot      |

47 PREDICTED: hypothetical protein LOC402835 [Danio rerio] gi|326671330 402017.2 4.54 1 28 49.432

Peptide Information

| Calc. Mass | Obsrv. Mass | ± da   | ± ppm | Start Seq. | End Seq. | Sequence | Ion Score | C. I.  | % Modification   | Rank | Result Type |
|------------|-------------|--------|-------|------------|----------|----------|-----------|--------|------------------|------|-------------|
| 892.4556   | 892.4758    | 0.0202 | 23    | 565        | 572      | VLGTEMAR | 28        | 49.432 | Oxidation (M)[6] | 3    | Mascot      |

48 nuclear respiratory factor 1 [Danio rerio] gi|18859135 53552 5.02 1 26 23.814

Peptide Information

| Calc. Mass | Obsrv. Mass | ± da    | ± ppm | Start Seq. | End Seq. | Sequence | Ion Score | C. I. | % Modification | Rank | Result Type |
|------------|-------------|---------|-------|------------|----------|----------|-----------|-------|----------------|------|-------------|
| 960.5261   | 960.4583    | -0.0678 | -71   | 257        | 264      | VSWTQALR | 26        |       | 23.814         | 2    | Mascot      |

49 novel protein similar to vertebrate scavenger receptor protein [Danio rerio] gi|56208005 121130 4.56 1 24 0

Peptide Information

| Calc. Mass | Obsrv. Mass | ± da    | ± ppm | Start Seq. | End Seq. | Sequence  | Ion Score | C. I. | % Modification         | Rank | Result Type |
|------------|-------------|---------|-------|------------|----------|-----------|-----------|-------|------------------------|------|-------------|
| 960.493    | 960.4583    | -0.0347 | -36   | 725        | 733      | DAGVICGLR | 24        | 0     | Carbamidomethyl (C)[6] | 3    | Mascot      |

50 PREDICTED: death-associated protein kinase 2 [Danio rerio] gi|326676536 41405.2 6.4 1 23 0

Peptide Information

| Calc. Mass | Obsrv. Mass | ± da    | ± ppm | Start Seq. | End Sequence Seq. | Ion Score | C. I. % | Modification | Rank | Result Type |
|------------|-------------|---------|-------|------------|-------------------|-----------|---------|--------------|------|-------------|
| 960.4744   | 960.4583    | -0.0161 | -17   | 329        | 336 GTEQQELR      | 23        | 0       |              | 4    | Mascot      |

|                       |           |                               |                |                       |                    |
|-----------------------|-----------|-------------------------------|----------------|-----------------------|--------------------|
| <b>Gel Idx/Pos</b>    | 189/H16   | <b>Instr./Gel Origin</b>      | BA2060/110707A | <b>Process Status</b> | Analysis Succeeded |
| <b>Plate [#] Name</b> | [1] 31496 | <b>Instrument Sample Name</b> |                | <b>Spectra</b>        | 11                 |

| Rank | Protein Name                            | Accession No. | Protein MW | Protein PI | Pep. Count | Protein Score | Protein Score C. I. % | Total Ion Score | Total Ion C. I. % |
|------|-----------------------------------------|---------------|------------|------------|------------|---------------|-----------------------|-----------------|-------------------|
| 1    | novel protein (zgc:85809) [Danio rerio] | gi 148725394  | 69172      | 6.25       | 12         | 448           | 100                   | 402             | 100               |

#### Peptide Information

| Calc. Mass | Obsrv. Mass | ± da    | ± ppm | Start Seq. | End Sequence Seq.              | Ion Score | C. I. % | Modification     | Rank | Result Type |
|------------|-------------|---------|-------|------------|--------------------------------|-----------|---------|------------------|------|-------------|
| 870.4389   | 870.5333    | 0.0944  | 108   | 519        | 525 KMGEVYK                    |           |         | Oxidation (M)[2] |      | Mascot      |
| 908.5352   | 908.5312    | -0.004  | -4    | 566        | 572 FTRPLFK                    |           |         |                  |      | Mascot      |
| 1102.6289  | 1102.6257   | -0.0032 | -3    | 165        | 174 ELVALMSALR                 |           |         |                  |      | Mascot      |
| 1118.6238  | 1118.6157   | -0.0081 | -7    | 165        | 174 ELVALMSALR                 |           |         | Oxidation (M)[6] |      | Mascot      |
| 1320.6696  | 1320.6624   | -0.0072 | -5    | 154        | 164 HTYYAQVSVPR                | 89        | 100     |                  |      | Mascot      |
| 1320.6696  | 1320.6624   | -0.0072 | -5    | 154        | 164 HTYYAQVSVPR                |           |         |                  |      | Mascot      |
| 1354.7365  | 1354.7288   | -0.0077 | -6    | 545        | 556 AQWEEAVPLALK               |           |         |                  |      | Mascot      |
| 1541.7859  | 1541.7784   | -0.0075 | -5    | 20         | 31 HLNLIYHVD FDR               |           |         |                  |      | Mascot      |
| 1541.7859  | 1541.7784   | -0.0075 | -5    | 20         | 31 HLNLIYHVD FDR               | 84        | 100     |                  |      | Mascot      |
| 1558.8475  | 1558.8386   | -0.0089 | -6    | 83         | 96 GSPLEITLPFELSR              | 98        | 100     |                  |      | Mascot      |
| 1558.8475  | 1558.8386   | -0.0089 | -6    | 83         | 96 GSPLEITLPFELSR              |           |         |                  |      | Mascot      |
| 1834.0109  | 1833.9923   | -0.0186 | -10   | 81         | 96 FKGSPL EITLPFELSR           |           |         |                  |      | Mascot      |
| 2194.1853  | 2194.1262   | -0.0591 | -27   | 38         | 57 VALTVEVLEDKFSSLTLD SK       |           |         |                  |      | Mascot      |
| 2217.0513  | 2217.0422   | -0.0091 | -4    | 310        | 326 TWEHFWLN EGH TVYIER        |           |         |                  |      | Mascot      |
| 2362.2261  | 2362.209    | -0.0171 | -7    | 288        | 309 SLAGVIAHEISHWTG NLVTNR     | 130       | 100     |                  |      | Mascot      |
| 2362.2261  | 2362.209    | -0.0171 | -7    | 288        | 309 SLAGVIAHEISHWTG NLVTNR     |           |         |                  |      | Mascot      |
| 2811.4563  | 2811.4519   | -0.0044 | -2    | 97         | 121 GQHVIVEIEYETSPTAT ALQWLTPK |           |         |                  |      | Mascot      |

|   |                                         |             |       |      |    |     |     |     |     |
|---|-----------------------------------------|-------------|-------|------|----|-----|-----|-----|-----|
| 2 | leukotriene A-4 hydrolase [Danio rerio] | gi 47086915 | 69145 | 6.17 | 11 | 443 | 100 | 402 | 100 |
|---|-----------------------------------------|-------------|-------|------|----|-----|-----|-----|-----|

#### Peptide Information

| Calc. Mass | Obsrv. Mass | ± da   | ± ppm | Start Seq. | End Sequence Seq. | Ion Score | C. I. % | Modification     | Rank | Result Type |
|------------|-------------|--------|-------|------------|-------------------|-----------|---------|------------------|------|-------------|
| 870.4389   | 870.5333    | 0.0944 | 108   | 519        | 525 KMGEVYK       |           |         | Oxidation (M)[2] |      | Mascot      |

|   |                                         |           |         |     |             |     |                            |      |     |     |     |     |                  |  |  |  |  |        |
|---|-----------------------------------------|-----------|---------|-----|-------------|-----|----------------------------|------|-----|-----|-----|-----|------------------|--|--|--|--|--------|
|   | 1102.6289                               | 1102.6257 | -0.0032 | -3  | 165         | 174 | ELVALMSALR                 |      |     |     |     |     |                  |  |  |  |  | Mascot |
|   | 1118.6238                               | 1118.6157 | -0.0081 | -7  | 165         | 174 | ELVALMSALR                 |      |     |     |     |     | Oxidation (M)[6] |  |  |  |  | Mascot |
|   | 1320.6696                               | 1320.6624 | -0.0072 | -5  | 154         | 164 | HTYYAQVSVPR                | 89   | 100 |     |     |     |                  |  |  |  |  | Mascot |
|   | 1320.6696                               | 1320.6624 | -0.0072 | -5  | 154         | 164 | HTYYAQVSVPR                |      |     |     |     |     |                  |  |  |  |  | Mascot |
|   | 1354.7365                               | 1354.7288 | -0.0077 | -6  | 545         | 556 | AQWEEAVPLALK               |      |     |     |     |     |                  |  |  |  |  | Mascot |
|   | 1541.7859                               | 1541.7784 | -0.0075 | -5  | 20          | 31  | HLNLIYHVD FDR              |      |     |     |     |     |                  |  |  |  |  | Mascot |
|   | 1541.7859                               | 1541.7784 | -0.0075 | -5  | 20          | 31  | HLNLIYHVD FDR              | 84   | 100 |     |     |     |                  |  |  |  |  | Mascot |
|   | 1558.8475                               | 1558.8386 | -0.0089 | -6  | 83          | 96  | GSPLEITLPFELSR             | 98   | 100 |     |     |     |                  |  |  |  |  | Mascot |
|   | 1558.8475                               | 1558.8386 | -0.0089 | -6  | 83          | 96  | GSPLEITLPFELSR             |      |     |     |     |     |                  |  |  |  |  | Mascot |
|   | 1834.0109                               | 1833.9923 | -0.0186 | -10 | 81          | 96  | FKGSPLEITLPFELSR           |      |     |     |     |     |                  |  |  |  |  | Mascot |
|   | 2194.1853                               | 2194.1262 | -0.0591 | -27 | 38          | 57  | VALTVEVLEDKFSSLTLD SK      |      |     |     |     |     |                  |  |  |  |  | Mascot |
|   | 2217.0513                               | 2217.0422 | -0.0091 | -4  | 310         | 326 | TWEHFVLNEGHTVYIER          |      |     |     |     |     |                  |  |  |  |  | Mascot |
|   | 2362.2261                               | 2362.209  | -0.0171 | -7  | 288         | 309 | SLAGVIAHEISHSWTGNL VTNR    | 130  | 100 |     |     |     |                  |  |  |  |  | Mascot |
|   | 2362.2261                               | 2362.209  | -0.0171 | -7  | 288         | 309 | SLAGVIAHEISHSWTGNL VTNR    |      |     |     |     |     |                  |  |  |  |  | Mascot |
|   | 2811.4563                               | 2811.4519 | -0.0044 | -2  | 97          | 121 | GQHVIVEIEYETSPTATAL QWLTPK |      |     |     |     |     |                  |  |  |  |  | Mascot |
| 3 | novel protein (zgc:85809) [Danio rerio] |           |         |     | gi 55962574 |     | 22856.7                    | 8.76 | 7   | 312 | 100 | 272 | 100              |  |  |  |  |        |

| Peptide Information |             |         |       |            |          |                            |           |       |   |                  |      |        |        |  |  |  |  |  |
|---------------------|-------------|---------|-------|------------|----------|----------------------------|-----------|-------|---|------------------|------|--------|--------|--|--|--|--|--|
| Calc. Mass          | Obsrv. Mass | ± da    | ± ppm | Start Seq. | End Seq. | Sequence                   | Ion Score | C. I. | % | Modification     | Rank | Result | Type   |  |  |  |  |  |
| 1102.6289           | 1102.6257   | -0.0032 | -3    | 165        | 174      | ELVALMSALR                 |           |       |   |                  |      |        | Mascot |  |  |  |  |  |
| 1118.6238           | 1118.6157   | -0.0081 | -7    | 165        | 174      | ELVALMSALR                 |           |       |   | Oxidation (M)[6] |      |        | Mascot |  |  |  |  |  |
| 1320.6696           | 1320.6624   | -0.0072 | -5    | 154        | 164      | HTYYAQVSVPR                | 89        | 100   |   |                  |      |        | Mascot |  |  |  |  |  |
| 1320.6696           | 1320.6624   | -0.0072 | -5    | 154        | 164      | HTYYAQVSVPR                |           |       |   |                  |      |        | Mascot |  |  |  |  |  |
| 1541.7859           | 1541.7784   | -0.0075 | -5    | 20         | 31       | HLNLIYHVD FDR              |           |       |   |                  |      |        | Mascot |  |  |  |  |  |
| 1541.7859           | 1541.7784   | -0.0075 | -5    | 20         | 31       | HLNLIYHVD FDR              | 84        | 100   |   |                  |      |        | Mascot |  |  |  |  |  |
| 1558.8475           | 1558.8386   | -0.0089 | -6    | 83         | 96       | GSPLEITLPFELSR             | 98        | 100   |   |                  |      |        | Mascot |  |  |  |  |  |
| 1558.8475           | 1558.8386   | -0.0089 | -6    | 83         | 96       | GSPLEITLPFELSR             |           |       |   |                  |      |        | Mascot |  |  |  |  |  |
| 1834.0109           | 1833.9923   | -0.0186 | -10   | 81         | 96       | FKGSPLEITLPFELSR           |           |       |   |                  |      |        | Mascot |  |  |  |  |  |
| 2194.1853           | 2194.1262   | -0.0591 | -27   | 38         | 57       | VALTVEVLEDKFSSLTLD SK      |           |       |   |                  |      |        | Mascot |  |  |  |  |  |
| 2811.4563           | 2811.4519   | -0.0044 | -2    | 97         | 121      | GQHVIVEIEYETSPTATAL QWLTPK |           |       |   |                  |      |        | Mascot |  |  |  |  |  |

|                     |                                                                                                  |             |      |       |              |              |     |           |       |     |              |     |  |  |  |      |             |
|---------------------|--------------------------------------------------------------------------------------------------|-------------|------|-------|--------------|--------------|-----|-----------|-------|-----|--------------|-----|--|--|--|------|-------------|
| 4                   | 5-aminoimidazole-4-carboxamide ribonucleotide formyltransferase/IMP cyclohydrolase [Danio rerio] |             |      |       | gj 122891203 | 64016.9      | 6.2 | 19        | 286   | 100 | 173          | 100 |  |  |  |      |             |
| Peptide Information |                                                                                                  |             |      |       |              |              |     |           |       |     |              |     |  |  |  |      |             |
|                     | Calc. Mass                                                                                       | Obsrv. Mass | ± da | ± ppm | Start Seq.   | End Sequence |     | Ion Score | C. I. | %   | Modification |     |  |  |  | Rank | Result Type |



|   |                                                             |           |         |     |              |         |                               |     |        |     |                                            |        |
|---|-------------------------------------------------------------|-----------|---------|-----|--------------|---------|-------------------------------|-----|--------|-----|--------------------------------------------|--------|
|   | 869.5203                                                    | 869.5234  | 0.0031  | 4   | 199          | 206     | GVSQPLR                       |     |        |     |                                            | Mascot |
|   | 892.4886                                                    | 892.4858  | -0.0028 | -3  | 14           | 21      | TGLVEFAR                      |     |        |     |                                            | Mascot |
|   | 926.5822                                                    | 926.5747  | -0.0075 | -8  | 379          | 386     | VLFGLHLK                      |     |        |     |                                            | Mascot |
|   | 960.4686                                                    | 960.4664  | -0.0022 | -2  | 460          | 466     | ADNWWLR                       |     |        |     |                                            | Mascot |
|   | 960.4686                                                    | 960.4664  | -0.0022 | -2  | 460          | 466     | ADNWWLR                       | 43  | 98.536 |     |                                            | Mascot |
|   | 1075.6146                                                   | 1075.6244 | 0.0098  | 9   | 255          | 265     | ALGLPAATSFK                   |     |        |     |                                            | Mascot |
|   | 1320.5889                                                   | 1320.6624 | 0.0735  | 56  | 425          | 435     | YTQSNSVCYAK                   |     |        |     | Carbamidomethyl (C)[8]                     | Mascot |
|   | 1320.5889                                                   | 1320.6624 | 0.0735  | 56  | 425          | 435     | YTQSNSVCYAK                   |     |        |     | Carbamidomethyl (C)[8]                     | Mascot |
|   | 1341.7749                                                   | 1341.7687 | -0.0062 | -5  | 66           | 78      | TLHPAVHGGILAR                 |     |        |     |                                            | Mascot |
|   | 1385.7131                                                   | 1385.7086 | -0.0045 | -3  | 436          | 449     | DGQVIGIGAGQQSR                |     |        |     |                                            | Mascot |
|   | 1607.7733                                                   | 1607.7671 | -0.0062 | -4  | 49           | 63      | DVSEITGFPEMLGGR               |     |        |     |                                            | Mascot |
|   | 1623.7683                                                   | 1623.7631 | -0.0052 | -3  | 49           | 63      | DVSEITGFPEMLGGR               |     |        |     | Oxidation (M)[11]                          | Mascot |
|   | 1637.6636                                                   | 1637.6639 | 0.0003  | 0   | 366          | 378     | MDPEYEPDEEEVR                 |     |        |     |                                            | Mascot |
|   | 1653.6584                                                   | 1653.6521 | -0.0063 | -4  | 366          | 378     | MDPEYEPDEEEVR                 |     |        |     | Oxidation (M)[1]                           | Mascot |
|   | 1665.8152                                                   | 1665.8523 | 0.0371  | 22  | 141          | 155     | VTVVCDPSDYNVVAK               |     |        |     | Carbamidomethyl (C)[5]                     | Mascot |
|   | 1710.8955                                                   | 1710.8851 | -0.0104 | -6  | 572          | 586     | ACNELGITLVHTNIR               |     |        |     | Carbamidomethyl (C)[2]                     | Mascot |
|   | 1819.8708                                                   | 1819.86   | -0.0108 | -6  | 335          | 351     | EVSDGIVAPGYEEDALR             |     |        |     |                                            | Mascot |
|   | 1829.9531                                                   | 1829.9438 | -0.0093 | -5  | 508          | 523     | GLFEEVPEPLSEVEKK              |     |        |     |                                            | Mascot |
|   | 1833.9341                                                   | 1833.9923 | 0.0582  | 32  | 266          | 284     | HVSPAGAAVGVP LSEDE<br>AK      |     |        |     |                                            | Mascot |
|   | 2034.9192                                                   | 2034.9102 | -0.009  | -4  | 177          | 193     | AFTHTAQYDEAISDYFR             |     |        |     |                                            | Mascot |
|   | 2034.9192                                                   | 2034.9102 | -0.009  | -4  | 177          | 193     | AFTHTAQYDEAISDYFR             | 132 | 100    |     |                                            | Mascot |
|   | 2225.0764                                                   | 2225.1055 | 0.0291  | 13  | 285          | 304     | VCMVNDMLQDLT PLATA<br>YAR     |     |        |     |                                            | Mascot |
|   | 2225.0764                                                   | 2225.1055 | 0.0291  | 13  | 285          | 304     | VCMVNDMLQDLT PLATA<br>YAR     |     |        |     |                                            | Mascot |
|   | 2237.1846                                                   | 2237.0667 | -0.1179 | -53 | 1            | 21      | MASEIALSVSDKTGLVE<br>FAR      |     |        |     |                                            | Mascot |
|   | 2298.0928                                                   | 2298.1726 | 0.0798  | 35  | 285          | 304     | VCMVNDMLQDLT PLATA<br>YAR     |     |        |     | Carbamidomethyl (C)[2], Oxidation (M)[3]   | Mascot |
|   | 2314.0876                                                   | 2314.1418 | 0.0542  | 23  | 285          | 304     | VCMVNDMLQDLT PLATA<br>YAR     |     |        |     | Carbamidomethyl (C)[2], Oxidation (M)[3,7] | Mascot |
|   | 2555.3562                                                   | 2555.3406 | -0.0156 | -6  | 108          | 132     | TVSSPGVTVEDAVEQIDI<br>GGVTLLR |     |        |     |                                            | Mascot |
| 5 | bifunctional purine biosynthesis protein PURH [Danio rerio] |           |         |     | gi 195539484 | 64003.9 | 6.31                          | 19  | 285    | 100 | 173                                        | 100    |

### Peptide Information

|          |          |         |    |     |     |          |        |
|----------|----------|---------|----|-----|-----|----------|--------|
| 869.5203 | 869.5234 | 0.0031  | 4  | 199 | 206 | GVSQPLPR | Mascot |
| 892.4886 | 892.4858 | -0.0028 | -3 | 14  | 21  | TGLVEFAR | Mascot |

|           |           |         |     |     |     |                               |     |        |  |  |                                            |  |        |
|-----------|-----------|---------|-----|-----|-----|-------------------------------|-----|--------|--|--|--------------------------------------------|--|--------|
| 926.5822  | 926.5747  | -0.0075 | -8  | 379 | 386 | VLFGLHLK                      |     |        |  |  |                                            |  | Mascot |
| 960.4686  | 960.4664  | -0.0022 | -2  | 460 | 466 | ADNWWLR                       |     |        |  |  |                                            |  | Mascot |
| 960.4686  | 960.4664  | -0.0022 | -2  | 460 | 466 | ADNWWLR                       | 43  | 98.536 |  |  |                                            |  | Mascot |
| 1075.6146 | 1075.6244 | 0.0098  | 9   | 255 | 265 | ALGLPAATSFK                   |     |        |  |  |                                            |  | Mascot |
| 1320.5889 | 1320.6624 | 0.0735  | 56  | 425 | 435 | YTQSNSVCYAK                   |     |        |  |  | Carbamidomethyl (C)[8]                     |  | Mascot |
| 1320.5889 | 1320.6624 | 0.0735  | 56  | 425 | 435 | YTQSNSVCYAK                   |     |        |  |  | Carbamidomethyl (C)[8]                     |  | Mascot |
| 1341.7749 | 1341.7687 | -0.0062 | -5  | 66  | 78  | TLHPAVHGGILAR                 |     |        |  |  |                                            |  | Mascot |
| 1385.7131 | 1385.7086 | -0.0045 | -3  | 436 | 449 | DGQVIGIGAGQQSR                |     |        |  |  |                                            |  | Mascot |
| 1607.7733 | 1607.7671 | -0.0062 | -4  | 49  | 63  | DVSEITGFPEMLGGR               |     |        |  |  |                                            |  | Mascot |
| 1623.7683 | 1623.7631 | -0.0052 | -3  | 49  | 63  | DVSEITGFPEMLGGR               |     |        |  |  | Oxidation (M)[11]                          |  | Mascot |
| 1637.6636 | 1637.6639 | 0.0003  | 0   | 366 | 378 | MDPEYEPDEEEVR                 |     |        |  |  |                                            |  | Mascot |
| 1653.6584 | 1653.6521 | -0.0063 | -4  | 366 | 378 | MDPEYEPDEEEVR                 |     |        |  |  | Oxidation (M)[1]                           |  | Mascot |
| 1665.8152 | 1665.8523 | 0.0371  | 22  | 141 | 155 | VTVVCDPSPDYNVVAK              |     |        |  |  | Carbamidomethyl (C)[5]                     |  | Mascot |
| 1710.8955 | 1710.8851 | -0.0104 | -6  | 572 | 586 | ACNELGITLVHTNIR               |     |        |  |  | Carbamidomethyl (C)[2]                     |  | Mascot |
| 1819.8708 | 1819.86   | -0.0108 | -6  | 335 | 351 | EVSDGIVAPGYEEDALR             |     |        |  |  |                                            |  | Mascot |
| 1829.9531 | 1829.9438 | -0.0093 | -5  | 508 | 523 | GLFEEVPEPLSEVEKK              |     |        |  |  |                                            |  | Mascot |
| 1833.9341 | 1833.9923 | 0.0582  | 32  | 266 | 284 | HVSPAGAAVGVPLSEDE<br>AK       |     |        |  |  |                                            |  | Mascot |
| 2034.9192 | 2034.9102 | -0.009  | -4  | 177 | 193 | AFTHTAQYDEAISDYFR             |     |        |  |  |                                            |  | Mascot |
| 2034.9192 | 2034.9102 | -0.009  | -4  | 177 | 193 | AFTHTAQYDEAISDYFR             | 132 | 100    |  |  |                                            |  | Mascot |
| 2225.0764 | 2225.1055 | 0.0291  | 13  | 285 | 304 | VCMVNDMLQDLTPLATA<br>YAR      |     |        |  |  |                                            |  | Mascot |
| 2225.0764 | 2225.1055 | 0.0291  | 13  | 285 | 304 | VCMVNDMLQDLTPLATA<br>YAR      |     |        |  |  |                                            |  | Mascot |
| 2237.1846 | 2237.0667 | -0.1179 | -53 | 1   | 21  | MASEIALLSVSDKTGLVE<br>FAR     |     |        |  |  |                                            |  | Mascot |
| 2298.0928 | 2298.1726 | 0.0798  | 35  | 285 | 304 | VCMVNDMLQDLTPLATA<br>YAR      |     |        |  |  | Carbamidomethyl (C)[2], Oxidation (M)[3]   |  | Mascot |
| 2314.0876 | 2314.1418 | 0.0542  | 23  | 285 | 304 | VCMVNDMLQDLTPLATA<br>YAR      |     |        |  |  | Carbamidomethyl (C)[2], Oxidation (M)[3,7] |  | Mascot |
| 2555.3562 | 2555.3406 | -0.0156 | -6  | 108 | 132 | TVSSPGVTVEDAVEQIDI<br>GGVTLLR |     |        |  |  |                                            |  | Mascot |

6 PREDICTED: 39S ribosomal protein L2, mitochondrial isoform 2 [Danio rerio] gi|326673218 31482.8 11.12 7 42 0

#### Peptide Information

| Calc. Mass | Obsrv. Mass | ± da    | ± ppm | Start Seq. | End Seq. | Sequence      | Ion Score | C. I. | % Modification | Rank | Result Type |
|------------|-------------|---------|-------|------------|----------|---------------|-----------|-------|----------------|------|-------------|
| 960.5294   | 960.4664    | -0.063  | -66   | 194        | 203      | AAGTCGVLLR    |           |       |                |      | Mascot      |
| 960.5294   | 960.4664    | -0.063  | -66   | 194        | 203      | AAGTCGVLLR    | 10        | 0     |                |      | Mascot      |
| 1128.6272  | 1128.6136   | -0.0136 | -12   | 250        | 259      | WLGIRPSSGR    |           |       |                |      | Mascot      |
| 1341.8101  | 1341.7687   | -0.0414 | -31   | 204        | 216      | KVSGTAIIQLPSK |           |       |                |      | Mascot      |

|           |           |         |      |     |     |                              |  |  |  |                        |  |        |
|-----------|-----------|---------|------|-----|-----|------------------------------|--|--|--|------------------------|--|--------|
| 1653.874  | 1653.6521 | -0.2219 | -134 | 217 | 231 | HQIQVLETCVATVGR              |  |  |  |                        |  | Mascot |
| 1710.8955 | 1710.8851 | -0.0104 | -6   | 217 | 231 | HQIQVLETCVATVGR              |  |  |  | Carbamidomethyl (C)[9] |  | Mascot |
| 2034.9735 | 2034.9102 | -0.0633 | -31  | 135 | 152 | WIIASQNMEAGDLIQSCR           |  |  |  |                        |  | Mascot |
| 2034.9735 | 2034.9102 | -0.0633 | -31  | 135 | 152 | WIIASQNMEAGDLIQSCR           |  |  |  |                        |  | Mascot |
| 2115.1743 | 2115.0486 | -0.1257 | -59  | 271 | 289 | IRPLPAMKSYINLPTASAR          |  |  |  | Oxidation (M)[7]       |  | Mascot |
| 2362.1753 | 2362.209  | 0.0337  | 14   | 12  | 35  | ALCLSGSRTWAGPSAAA<br>SALVGCR |  |  |  | Carbamidomethyl (C)[3] |  | Mascot |
| 2362.1753 | 2362.209  | 0.0337  | 14   | 12  | 35  | ALCLSGSRTWAGPSAAA<br>SALVGCR |  |  |  | Carbamidomethyl (C)[3] |  | Mascot |

7 PREDICTED: beta-1,3-galactosyl-O-glycosyl-glycoprotein  
beta-1,6-N-acetylglucosaminyltransferase-lik  
gi|292628442 49526.7 7.14 11 42 0

#### Peptide Information

| Calc. Mass | Obsrv. Mass | ± da    | ± ppm | Start Seq. | End Seq. | Sequence                  | Ion Score | C. I. | % Modification         | Rank | Result Type |
|------------|-------------|---------|-------|------------|----------|---------------------------|-----------|-------|------------------------|------|-------------|
| 856.4675   | 856.5259    | 0.0584  | 68    | 414        | 420      | YKAVYGR                   |           |       |                        |      | Mascot      |
| 869.4008   | 869.5234    | 0.1226  | 141   | 407        | 413      | CMEAFRLR                  |           |       |                        |      | Mascot      |
| 960.5374   | 960.4664    | -0.071  | -74   | 388        | 395      | QHHLLANK                  |           |       |                        |      | Mascot      |
| 960.5374   | 960.4664    | -0.071  | -74   | 388        | 395      | QHHLLANK                  |           |       |                        |      | Mascot      |
| 1118.6165  | 1118.6157   | -0.0008 | -1    | 221        | 230      | TNAETVRSLK                |           |       |                        |      | Mascot      |
| 1541.7668  | 1541.7784   | 0.0116  | 8     | 208        | 220      | YLLNTCGTDFPIK             |           |       | Carbamidomethyl (C)[6] |      | Mascot      |
| 1541.7668  | 1541.7784   | 0.0116  | 8     | 208        | 220      | YLLNTCGTDFPIK             |           |       | Carbamidomethyl (C)[6] |      | Mascot      |
| 1637.8315  | 1637.6639   | -0.1676 | -102  | 336        | 349      | YEQSDMNIAIARLVK           |           |       |                        |      | Mascot      |
| 1653.8264  | 1653.6521   | -0.1743 | -105  | 336        | 349      | YEQSDMNIAIARLVK           |           |       | Oxidation (M)[6]       |      | Mascot      |
| 1665.8608  | 1665.8523   | -0.0085 | -5    | 250        | 262      | WQFHHNITNTVIR             |           |       |                        |      | Mascot      |
| 2230.1108  | 2230.1941   | 0.0833  | 37    | 189        | 207      | VQADVNCMQDLLKSPVQ<br>WR   |           |       |                        |      | Mascot      |
| 2233.1621  | 2233.0708   | -0.0913 | -41   | 135        | 153      | LLRAIYAPQNVYCVHVDM<br>K   |           |       |                        |      | Mascot      |
| 2238.1375  | 2238.0618   | -0.0757 | -34   | 202        | 220      | SPVQWRYLLNTCGTDFPI<br>K   |           |       |                        |      | Mascot      |
| 2299.1538  | 2299.1731   | 0.0193  | 8     | 267        | 287      | KSPPPINTSMFSGNAYFV<br>VSR |           |       |                        |      | Mascot      |

8 PREDICTED: zinc finger protein 420 isoform 2 [Danio rerio]  
gi|326678086 70371 9.08 15 38 0

#### Peptide Information

| Calc. Mass | Obsrv. Mass | ± da    | ± ppm | Start Seq. | End Seq. | Sequence | Ion Score | C. I. | % Modification         | Rank | Result Type |
|------------|-------------|---------|-------|------------|----------|----------|-----------|-------|------------------------|------|-------------|
| 842.5206   | 842.5072    | -0.0134 | -16   | 25         | 31       | QRQGILLK |           |       |                        |      | Mascot      |
| 864.4798   | 864.5098    | 0.03    | 35    | 591        | 597      | HRSVHTK  |           |       |                        |      | Mascot      |
| 1045.536   | 1045.5601   | 0.0241  | 23    | 134        | 141      | FHCARNLK |           |       | Carbamidomethyl (C)[3] |      | Mascot      |

|           |           |         |     |     |     |                     |                                               |        |
|-----------|-----------|---------|-----|-----|-----|---------------------|-----------------------------------------------|--------|
| 1118.4645 | 1118.6157 | 0.1512  | 135 | 348 | 356 | GFVCFECEK           | Carbamidomethyl (C)[4]                        | Mascot |
| 1623.806  | 1623.7631 | -0.0429 | -26 | 105 | 117 | SFSQKYNLNVHMR       |                                               | Mascot |
| 1665.8087 | 1665.8523 | 0.0436  | 26  | 174 | 188 | VHTKEKPYSCSVCGK     |                                               | Mascot |
| 1819.9358 | 1819.86   | -0.0758 | -42 | 44  | 58  | IKQEETEELIDVMVK     | Oxidation (M)[13]                             | Mascot |
| 2034.8579 | 2034.9102 | 0.0523  | 26  | 118 | 133 | IHTGEQPYKCSHCDMR    | Carbamidomethyl (C)[10,13], Oxidation (M)[15] | Mascot |
| 2034.8579 | 2034.9102 | 0.0523  | 26  | 118 | 133 | IHTGEQPYKCSHCDMR    | Carbamidomethyl (C)[10,13], Oxidation (M)[15] | Mascot |
| 2211.0798 | 2211.0938 | 0.014   | 6   | 450 | 468 | IHLRVHTNEKPYSCPECGK |                                               | Mascot |
| 2221.0139 | 2221.0764 | 0.0625  | 28  | 239 | 257 | CSHCDLRFSGHGLTVHER  |                                               | Mascot |
| 2223.9646 | 2224.0549 | 0.0903  | 41  | 318 | 337 | EKPYSCEGSSFTQQSSLR  |                                               | Mascot |
| 2230.0605 | 2230.1941 | 0.1336  | 60  | 276 | 294 | CSSHLNEHMIHTGEKTHR  |                                               | Mascot |
| 2255.0696 | 2255.0515 | -0.0181 | -8  | 273 | 291 | SFKCSSHLNEHMIHTGEK  | Carbamidomethyl (C)[4]                        | Mascot |
| 2283.0579 | 2283.166  | 0.1081  | 47  | 227 | 245 | HQMIHTGEKPYKCSHCDLR |                                               | Mascot |
| 2283.0579 | 2283.166  | 0.1081  | 47  | 227 | 245 | HQMIHTGEKPYKCSHCDLR |                                               | Mascot |
| 2298.0906 | 2298.1726 | 0.082   | 36  | 478 | 496 | LHQHVHTGVREFVCFECEK |                                               | Mascot |
| 2299.053  | 2299.1731 | 0.1201  | 52  | 227 | 245 | HQMIHTGEKPYKCSHCDLR | Oxidation (M)[3]                              | Mascot |

9 Zgc:110114 protein [Danio rerio] gi|63101268 70288.7 6.5 11 38 0

#### Peptide Information

| Calc. Mass | Obsrv. Mass | ± da    | ± ppm | Start Seq. | End Seq. | Sequence               | Ion Score | C. I. % | Modification                              | Rank | Result Type |
|------------|-------------|---------|-------|------------|----------|------------------------|-----------|---------|-------------------------------------------|------|-------------|
| 869.4661   | 869.5234    | 0.0573  | 66    | 76         | 82       | LSKHCPK                |           |         | Carbamidomethyl (C)[5]                    |      | Mascot      |
| 892.4457   | 892.4858    | 0.0401  | 45    | 191        | 197      | HIPNMHK                |           |         | Oxidation (M)[5]                          |      | Mascot      |
| 1541.7289  | 1541.7784   | 0.0495  | 32    | 483        | 497      | EVSSSTSSSSETVVR        |           |         |                                           |      | Mascot      |
| 1541.7289  | 1541.7784   | 0.0495  | 32    | 483        | 497      | EVSSSTSSSSETVVR        |           |         |                                           |      | Mascot      |
| 1607.7516  | 1607.7671   | 0.0155  | 10    | 500        | 513      | GQSIECLPQTTMAR         |           |         | Carbamidomethyl (C)[6], Oxidation (M)[12] |      | Mascot      |
| 1665.7939  | 1665.8523   | 0.0584  | 35    | 360        | 376      | ASGSSAGSTSRPNPFSR      |           |         |                                           |      | Mascot      |
| 1829.9102  | 1829.9438   | 0.0336  | 18    | 198        | 213      | EQFACTASEAQLKYIK       |           |         |                                           |      | Mascot      |
| 2224.2163  | 2224.0549   | -0.1614 | -73   | 259        | 277      | QLLYDFPWTNVGKLVFVGK    |           |         |                                           |      | Mascot      |
| 2229.9966  | 2230.1941   | 0.1975  | 89    | 408        | 429      | THSSSNTSHASTHTSGIESSSK |           |         |                                           |      | Mascot      |
| 2283.1008  | 2283.166    | 0.0652  | 29    | 191        | 210      | HIPNMHKEQFACTASEAQLK   |           |         |                                           |      | Mascot      |
| 2283.1008  | 2283.166    | 0.0652  | 29    | 191        | 210      | HIPNMHKEQFACTASEAQLK   |           |         |                                           |      | Mascot      |
| 2299.0957  | 2299.1731   | 0.0774  | 34    | 191        | 210      | HIPNMHKEQFACTASEAQLK   |           |         | Oxidation (M)[5]                          |      | Mascot      |
| 2362.2256  | 2362.209    | -0.0166 | -7    | 16         | 35       | RCVCFVLPNDETLNVIVSVK   |           |         | Carbamidomethyl (C)[2,4]                  |      | Mascot      |

|    |                                              |           |         |    |             |     |                            |      |    |    |   |                          |        |
|----|----------------------------------------------|-----------|---------|----|-------------|-----|----------------------------|------|----|----|---|--------------------------|--------|
|    | 2362.2256                                    | 2362.209  | -0.0166 | -7 | 16          | 35  | RCVCFVFLPNDETINVIVS<br>VK  |      |    |    |   | Carbamidomethyl (C)[2,4] | Mascot |
|    | 2555.1467                                    | 2555.3406 | 0.1939  | 76 | 337         | 357 | QYRESYIGDALEADMHDH<br>LEQR |      |    |    |   | Oxidation (M)[15]        | Mascot |
| 10 | SH3 domain-binding protein 4-A [Danio rerio] |           |         |    | gi 45387913 |     | 104947.5                   | 7.73 | 13 | 38 | 0 |                          |        |

#### Peptide Information

| Calc. Mass | Obsrv. Mass | ± da    | ± ppm | Start Seq. | End Seq. | Sequence                           | Ion Score | C. I. | % Modification            | Rank | Result Type |
|------------|-------------|---------|-------|------------|----------|------------------------------------|-----------|-------|---------------------------|------|-------------|
| 842.5822   | 842.5072    | -0.075  | -89   | 634        | 640      | LIKTVIR                            |           |       |                           |      | Mascot      |
| 850.4338   | 850.5395    | 0.1057  | 124   | 358        | 364      | LSNMEIK                            |           |       | Oxidation (M)[4]          |      | Mascot      |
| 850.4338   | 850.5395    | 0.1057  | 124   | 358        | 364      | LSNMEIK                            |           |       | Oxidation (M)[4]          |      | Mascot      |
| 870.4726   | 870.5333    | 0.0607  | 70    | 1          | 7        | MAHRIR                             |           |       | Oxidation (M)[1]          |      | Mascot      |
| 1045.4796  | 1045.5601   | 0.0805  | 77    | 762        | 770      | AELDSEPER                          |           |       |                           |      | Mascot      |
| 1075.651   | 1075.6244   | -0.0266 | -25   | 446        | 455      | KVTGLGYGPK                         |           |       |                           |      | Mascot      |
| 1623.7723  | 1623.7631   | -0.0092 | -6    | 66         | 79       | DYCPSSFITLKFSK                     |           |       |                           |      | Mascot      |
| 1946.9316  | 1946.9719   | 0.0403  | 21    | 101        | 116      | EMGYIPSTYVQPINYR                   |           |       | Oxidation (M)[2]          |      | Mascot      |
| 2230.2417  | 2230.1941   | -0.0476 | -21   | 813        | 831      | LIMDFVLLTTAVEVAPRW<br>R            |           |       |                           |      | Mascot      |
| 2284.2368  | 2284.1619   | -0.0749 | -33   | 463        | 484      | TVVAIFGHDCAPKTLVS<br>EVGK          |           |       |                           |      | Mascot      |
| 2300.0686  | 2300.1689   | 0.1003  | 44    | 568        | 587      | DDQDCILAQFCVQTPQP<br>PPK           |           |       | Carbamidomethyl (C)[5]    |      | Mascot      |
| 2811.3804  | 2811.4519   | 0.0715  | 25    | 564        | 587      | VQVKDDQDCILAQFCVQ<br>TPQPPPK       |           |       | Carbamidomethyl (C)[9,15] |      | Mascot      |
| 3337.6052  | 3337.7546   | 0.1494  | 45    | 269        | 298      | LARSCHDLESLGQNPWG<br>GQTQPVETNIVCK |           |       | Carbamidomethyl (C)[5]    |      | Mascot      |
| 3338.5496  | 3338.7439   | 0.1943  | 58    | 856        | 884      | TGMVDSEAMWKPAYDFL<br>LTWAAQIGDSYR  |           |       | Oxidation (M)[3]          |      | Mascot      |

|    |                                                               |  |  |  |              |  |          |      |    |    |   |  |  |
|----|---------------------------------------------------------------|--|--|--|--------------|--|----------|------|----|----|---|--|--|
| 11 | StAR-related lipid transfer domain containing 8 [Danio rerio] |  |  |  | gi 187608279 |  | 120586.8 | 8.23 | 14 | 36 | 0 |  |  |
|----|---------------------------------------------------------------|--|--|--|--------------|--|----------|------|----|----|---|--|--|

#### Peptide Information

| Calc. Mass | Obsrv. Mass | ± da    | ± ppm | Start Seq. | End Seq. | Sequence      | Ion Score | C. I. | % Modification | Rank | Result Type |
|------------|-------------|---------|-------|------------|----------|---------------|-----------|-------|----------------|------|-------------|
| 842.557    | 842.5072    | -0.0498 | -59   | 24         | 30       | ALTLLRR       |           |       |                |      | Mascot      |
| 864.4461   | 864.5098    | 0.0637  | 74    | 616        | 622      | VPDYKDK       |           |       |                |      | Mascot      |
| 892.3981   | 892.4858    | 0.0877  | 98    | 44         | 50       | DACEWLR       |           |       |                |      | Mascot      |
| 937.5213   | 937.4719    | -0.0494 | -53   | 800        | 808      | KGGAKPDHK     |           |       |                |      | Mascot      |
| 996.5043   | 996.5922    | 0.0879  | 88    | 906        | 914      | KVGDGHPMR     |           |       |                |      | Mascot      |
| 996.5043   | 996.5922    | 0.0879  | 88    | 906        | 914      | KVGDGHPMR     |           |       |                |      | Mascot      |
| 1279.6827  | 1279.7686   | 0.0859  | 67    | 653        | 663      | SQCLEKVGIFR   |           |       |                |      | Mascot      |
| 1341.6481  | 1341.7687   | 0.1206  | 90    | 299        | 309      | DPSWRAHTICR   |           |       |                |      | Mascot      |
| 1385.6444  | 1385.7086   | 0.0642  | 46    | 404        | 416      | SGSQDFLSGFGQR |           |       |                |      | Mascot      |

|    |                                                   |           |         |     |              |          |                           |    |    |   |   |   |                        |  |  |  |  |  |        |
|----|---------------------------------------------------|-----------|---------|-----|--------------|----------|---------------------------|----|----|---|---|---|------------------------|--|--|--|--|--|--------|
|    | 1541.7455                                         | 1541.7784 | 0.0329  | 21  | 404          | 417      | SGSQDFLSGFGQRR            |    |    |   |   |   |                        |  |  |  |  |  | Mascot |
|    | 1541.7455                                         | 1541.7784 | 0.0329  | 21  | 404          | 417      | SGSQDFLSGFGQRR            |    |    |   |   |   |                        |  |  |  |  |  | Mascot |
|    | 1665.7198                                         | 1665.8523 | 0.1325  | 80  | 220          | 235      | DENDDTGSSSSLPSVR          |    |    |   |   |   |                        |  |  |  |  |  | Mascot |
|    | 1830.0596                                         | 1829.9438 | -0.1158 | -63 | 572          | 587      | QSA AQLNLLQKFSLLR         |    |    |   |   |   |                        |  |  |  |  |  | Mascot |
|    | 2194.0818                                         | 2194.1262 | 0.0444  | 20  | 92           | 110      | LTTLNKCAAMSLEVFHQC<br>K   |    |    |   |   |   | Carbamidomethyl (C)[7] |  |  |  |  |  | Mascot |
|    | 2297.1553                                         | 2297.1833 | 0.028   | 12  | 988          | 1009     | GVCVLVSSSDHDNVQL<br>EAGLR |    |    |   |   |   |                        |  |  |  |  |  | Mascot |
|    | 2362.0659                                         | 2362.209  | 0.1431  | 61  | 809          | 829      | DLSENMAATHCLSHMITE<br>CKK |    |    |   |   |   |                        |  |  |  |  |  | Mascot |
|    | 2362.0659                                         | 2362.209  | 0.1431  | 61  | 809          | 829      | DLSENMAATHCLSHMITE<br>CKK |    |    |   |   |   |                        |  |  |  |  |  | Mascot |
| 12 | PREDICTED: GAS2-like protein 2-like [Danio rerio] |           |         |     | gi 326668195 | 100432.5 | 9.58                      | 13 | 36 | 0 | 3 | 0 |                        |  |  |  |  |  |        |

#### Peptide Information

| Calc. Mass | Obsrv. Mass | ± da    | ± ppm | Start Seq. | End Seq. | Sequence                           | Ion Score | C. I. | % Modification          | Rank | Result Type |
|------------|-------------|---------|-------|------------|----------|------------------------------------|-----------|-------|-------------------------|------|-------------|
| 856.3981   | 856.5259    | 0.1278  | 149   | 657        | 663      | IPSDHCK                            |           |       | Carbamidomethyl (C)[6]  |      | Mascot      |
| 937.5577   | 937.4719    | -0.0858 | -92   | 871        | 878      | SHVPITRK                           |           |       |                         |      | Mascot      |
| 996.5883   | 996.5922    | 0.0039  | 4     | 808        | 815      | LRPCVRPR                           |           |       |                         |      | Mascot      |
| 996.5883   | 996.5922    | 0.0039  | 4     | 808        | 815      | LRPCVRPR                           |           |       |                         |      | Mascot      |
| 1045.5636  | 1045.5601   | -0.0035 | -3    | 668        | 677      | SASLDRA TP K                       |           |       |                         |      | Mascot      |
| 1623.8489  | 1623.7631   | -0.0858 | -53   | 430        | 443      | NLGQTWT K SQFVSK                   |           |       |                         |      | Mascot      |
| 1653.7399  | 1653.6521   | -0.0878 | -53   | 324        | 337      | SSCSPDPEHQPTRR                     |           |       | Carbamidomethyl (C)[3]  |      | Mascot      |
| 2115.1477  | 2115.0486   | -0.0991 | -47   | 183        | 200      | SLINIQLNDEM VQLLISR                |           |       | Oxidation (M)[11]       |      | Mascot      |
| 2194.0266  | 2194.1262   | 0.0996  | 45    | 349        | 367      | ERPGTPQMFTCPDSKDS<br>LK            |           |       | Carbamidomethyl (C)[11] |      | Mascot      |
| 2255.0298  | 2255.0515   | 0.0217  | 10    | 239        | 257      | VGGGWD TLEHYLDKHDP<br>CR           |           |       | Carbamidomethyl (C)[18] |      | Mascot      |
| 2283.1248  | 2283.166    | 0.0412  | 18    | 112        | 130      | KEMSI PDVLMFETDDLVL<br>R           |           |       | Oxidation (M)[3,10]     |      | Mascot      |
| 2283.1248  | 2283.166    | 0.0412  | 18    | 113        | 131      | EMSI PDVLMFETDDLVL<br>K            |           |       | Oxidation (M)[2,9]      |      | Mascot      |
| 2362.303   | 2362.209    | -0.094  | -40   | 502        | 522      | TFSPFKGLIGAILEAQFN<br>R            | 3         | 0     |                         |      | Mascot      |
| 2362.303   | 2362.209    | -0.094  | -40   | 502        | 522      | TFSPFKGLIGAILEAQFN<br>R            |           |       |                         |      | Mascot      |
| 3338.6616  | 3338.7439   | 0.0823  | 25    | 183        | 211      | SLINIQLNDEM VQLLISRC<br>SCPSQFPMVK |           |       | Oxidation (M)[11,27]    |      | Mascot      |

13 PREDICTED: hypothetical protein LOC100536945 [Danio rerio]

#### Peptide Information

| Calc. Mass | Obsrv. Mass | ± da | ± ppm | Start Seq. | End Seq. | Sequence | Ion Score | C. I. | % Modification | Rank | Result Type |
|------------|-------------|------|-------|------------|----------|----------|-----------|-------|----------------|------|-------------|
| 856.4159   | 856.5259    | 0.11 | 128   | 25         | 32       | SHDSPSVK |           |       |                |      | Mascot      |

|  |           |           |         |     |    |    |               |    |   |                     |  |        |
|--|-----------|-----------|---------|-----|----|----|---------------|----|---|---------------------|--|--------|
|  | 960.5261  | 960.4664  | -0.0597 | -62 | 2  | 9  | TWLTGNIR      |    |   |                     |  | Mascot |
|  | 960.5261  | 960.4664  | -0.0597 | -62 | 2  | 9  | TWLTGNIR      | 16 | 0 |                     |  | Mascot |
|  | 1385.6842 | 1385.7086 | 0.0244  | 18  | 21 | 32 | ELMRSHDSPSVK  |    |   |                     |  | Mascot |
|  | 1637.7887 | 1637.6639 | -0.1248 | -76 | 1  | 13 | MTWLTGNIRENMR |    |   | Oxidation (M)[1]    |  | Mascot |
|  | 1653.7836 | 1653.6521 | -0.1315 | -80 | 1  | 13 | MTWLTGNIRENMR |    |   | Oxidation (M)[1,12] |  | Mascot |

14 PREDICTED: rapamycin-insensitive companion of mTOR, partial [Danio rerio] gi|326667603 180801.9 7.89 17 35 0

#### Peptide Information

| Calc. Mass | Obsrv. Mass | ± da    | ± ppm | Start Seq. | End Seq. | Sequence                        | Ion Score | C. I. | % Modification                                 | Rank | Result Type |
|------------|-------------|---------|-------|------------|----------|---------------------------------|-----------|-------|------------------------------------------------|------|-------------|
| 870.4832   | 870.5333    | 0.0501  | 58    | 493        | 499      | WPNVNLK                         |           |       |                                                |      | Mascot      |
| 1051.5782  | 1051.708    | 0.1298  | 123   | 758        | 766      | GYVSKQLEK                       |           |       |                                                |      | Mascot      |
| 1075.4836  | 1075.6244   | 0.1408  | 131   | 1512       | 1521     | AISEDPACR                       |           |       | Carbamidomethyl (C)[9]                         |      | Mascot      |
| 1354.5978  | 1354.7288   | 0.131   | 97    | 459        | 469      | DTEALMMNLR                      |           |       | Oxidation (M)[7,8]                             |      | Mascot      |
| 1541.7312  | 1541.7784   | 0.0472  | 31    | 1049       | 1060     | TPDELRLMHCNR                    |           |       | Carbamidomethyl (C)[10]                        |      | Mascot      |
| 1541.7312  | 1541.7784   | 0.0472  | 31    | 1049       | 1060     | TPDELRLMHCNR                    |           |       | Carbamidomethyl (C)[10]                        |      | Mascot      |
| 1558.7249  | 1558.8386   | 0.1137  | 73    | 615        | 628      | CGVFQCLLNLC SMK                 |           |       |                                                |      | Mascot      |
| 1558.7249  | 1558.8386   | 0.1137  | 73    | 615        | 628      | CGVFQCLLNLC SMK                 |           |       |                                                |      | Mascot      |
| 1607.6794  | 1607.7671   | 0.0877  | 55    | 1378       | 1391     | FNFGESDGFLESCR                  |           |       |                                                |      | Mascot      |
| 1637.7878  | 1637.6639   | -0.1239 | -76   | 199        | 212      | HNPETA E A Q I K E D R          |           |       |                                                |      | Mascot      |
| 1653.8629  | 1653.6521   | -0.2108 | -127  | 656        | 670      | ILTAATDNCRLYATK                 |           |       |                                                |      | Mascot      |
| 1710.8843  | 1710.8851   | 0.0008  | 0     | 656        | 670      | ILTAATDNCRLYATK                 |           |       | Carbamidomethyl (C)[9]                         |      | Mascot      |
| 2211.1987  | 2211.0938   | -0.1049 | -47   | 121        | 140      | ACIAIICELALKNPEVVAQ R           |           |       | Carbamidomethyl (C)[2]                         |      | Mascot      |
| 2224.0583  | 2224.0549   | -0.0034 | -2    | 1164       | 1184     | EPAMDTDCASLNTVVSA RTVK          |           |       | Oxidation (M)[4]                               |      | Mascot      |
| 2230.1318  | 2230.1941   | 0.0623  | 28    | 239        | 259      | SGNSGVQSLIGLLCIPNM DVR          |           |       | Carbamidomethyl (C)[14]                        |      | Mascot      |
| 2247.0461  | 2247.0908   | 0.0447  | 20    | 611        | 628      | MLEKCGVFQCLLNLC SM K            |           |       | Carbamidomethyl (C)[5,10,15], Oxidation (M)[1] |      | Mascot      |
| 2298.2312  | 2298.1726   | -0.0586 | -25   | 1254       | 1274     | LQQQRIHPSLSHSEALAS PAK          |           |       |                                                |      | Mascot      |
| 2362.1418  | 2362.209    | 0.0672  | 28    | 1223       | 1243     | SPSVATIKSLVDCSYMYT SPR          |           |       | Carbamidomethyl (C)[13]                        |      | Mascot      |
| 2362.1418  | 2362.209    | 0.0672  | 28    | 1223       | 1243     | SPSVATIKSLVDCSYMYT SPR          |           |       | Carbamidomethyl (C)[13]                        |      | Mascot      |
| 2555.3464  | 2555.3406   | -0.0058 | -2    | 1301       | 1323     | ALSFASLDKEDLLSPINHS TLQR        |           |       |                                                |      | Mascot      |
| 3337.5789  | 3337.7546   | 0.1757  | 53    | 1329       | 1358     | SMVSSATFGCSEDIYGLA LPLDINNMFQIK |           |       | Carbamidomethyl (C)[10], Oxidation (M)[2]      |      | Mascot      |

15 cysteinyl-tRNA synthetase, cytoplasmic [Danio rerio] gi|169646833 93752.3 6.07 12 35 0

#### Peptide Information

|    | Calc. Mass                      | Obsrv. Mass | ± da    | ± ppm | Start Seq.   | End Sequence Seq.             | Ion Score | C. I. % | Modification           | Rank | Result Type |
|----|---------------------------------|-------------|---------|-------|--------------|-------------------------------|-----------|---------|------------------------|------|-------------|
|    | 882.5155                        | 882.5638    | 0.0483  | 55    | 612          | 619 SAKLPPNR                  |           |         |                        |      | Mascot      |
|    | 1075.6146                       | 1075.6244   | 0.0098  | 9     | 116          | 124 TKEVFVPQK                 |           |         |                        |      | Mascot      |
|    | 1128.6259                       | 1128.6136   | -0.0123 | -11   | 260          | 269 QAQVLLEEAK                |           |         |                        |      | Mascot      |
|    | 1558.7278                       | 1558.8386   | 0.1108  | 71    | 577          | 590 TSVHGALCDNIDTR            |           |         | Carbamidomethyl (C)[8] |      | Mascot      |
|    | 1558.8622                       | 1558.8386   | -0.0236 | -15   | 684          | 696 KVTELLQLCDQLR             |           |         |                        |      | Mascot      |
|    | 1637.817                        | 1637.6639   | -0.1531 | -93   | 92           | 106 VQPPWSPPEGTDISK           |           |         |                        |      | Mascot      |
|    | 1665.9098                       | 1665.8523   | -0.0575 | -35   | 319          | 332 VSEYVPEIVEFVKK            |           |         |                        |      | Mascot      |
|    | 2225.0505                       | 2225.1055   | 0.055   | 25    | 165          | 182 YDVFYCMNITDIDDKIIK        |           |         | Oxidation (M)[7]       |      | Mascot      |
|    | 2225.0505                       | 2225.1055   | 0.055   | 25    | 165          | 182 YDVFYCMNITDIDDKIIK        |           |         | Oxidation (M)[7]       |      | Mascot      |
|    | 2230.0591                       | 2230.1941   | 0.135   | 61    | 591          | 610 SALEEMRALVGQSNTYM AAR     |           |         | Oxidation (M)[6,17]    |      | Mascot      |
|    | 2299.1499                       | 2299.1731   | 0.0232  | 10    | 70           | 90 HIAFLKPQANDQSPECST KGK     |           |         |                        |      | Mascot      |
|    | 2362.2874                       | 2362.209    | -0.0784 | -33   | 615          | 634 LPPNRMMLLSIALYLTDM LK     |           |         | Oxidation (M)[6,18]    |      | Mascot      |
|    | 2362.2874                       | 2362.209    | -0.0784 | -33   | 615          | 634 LPPNRMMLLSIALYLTDM LK     |           |         | Oxidation (M)[6,18]    |      | Mascot      |
|    | 2555.3496                       | 2555.3406   | -0.009  | -4    | 228          | 251 QMLERLDSAVDAALGPL QVAVQSK |           |         | Oxidation (M)[2]       |      | Mascot      |
| 16 | ZAR1-like protein [Danio rerio] |             |         |       | gi 313661374 |                               | 36462.9   | 9.07    | 7                      | 35   | 0           |

Peptide Information

|  | Calc. Mass | Obsrv. Mass | ± da    | ± ppm | Start Seq. | End Sequence Seq.          | Ion Score | C. I. % | Modification                | Rank | Result Type |
|--|------------|-------------|---------|-------|------------|----------------------------|-----------|---------|-----------------------------|------|-------------|
|  | 960.4533   | 960.4664    | 0.0131  | 14    | 105        | 112 GDKWDSRP               |           |         |                             |      | Mascot      |
|  | 960.4533   | 960.4664    | 0.0131  | 14    | 105        | 112 GDKWDSRP               | 12        | 0       |                             |      | Mascot      |
|  | 1637.7556  | 1637.6639   | -0.0917 | -56   | 259        | 271 VESIQCQVCKAR           |           |         | Carbamidomethyl (C)[6,9,10] |      | Mascot      |
|  | 1653.8748  | 1653.6521   | -0.2227 | -135  | 134        | 147 FSRPVAIYSPVFDR         |           |         |                             |      | Mascot      |
|  | 1665.8192  | 1665.8523   | 0.0331  | 20    | 299        | 312 GLSCDTIYSFKYIV         |           |         | Carbamidomethyl (C)[4]      |      | Mascot      |
|  | 2237.0549  | 2237.0667   | 0.0118  | 5     | 35         | 53 KGNNFYIAPDAPDYFDVY K    |           |         |                             |      | Mascot      |
|  | 2246.8401  | 2247.0908   | 0.2507  | 112   | 170        | 188 TDSETEDEDDDEFCKPD EK   |           |         |                             |      | Mascot      |
|  | 2299.0449  | 2299.1731   | 0.1282  | 56    | 250        | 269 CQAGLNIPYRVESIQCQV CCK |           |         | Carbamidomethyl (C)[1]      |      | Mascot      |

17 PREDICTED: MAX gene-associated protein-like [Danio rerio] gi|326677444 30618 6.1 8 35 0

Peptide Information

|  | Calc. Mass | Obsrv. Mass | ± da    | ± ppm | Start Seq. | End Sequence Seq. | Ion Score | C. I. % | Modification | Rank | Result Type |
|--|------------|-------------|---------|-------|------------|-------------------|-----------|---------|--------------|------|-------------|
|  | 856.5614   | 856.5259    | -0.0355 | -41   | 236        | 242 LIQNKLK       |           |         |              |      | Mascot      |



|  |           |           |         |     |     |     |                        |  |  |  |  |                                           |  |  |  |  |        |
|--|-----------|-----------|---------|-----|-----|-----|------------------------|--|--|--|--|-------------------------------------------|--|--|--|--|--------|
|  | 960.4203  | 960.4664  | 0.0461  | 48  | 150 | 157 | LTHDSCER               |  |  |  |  |                                           |  |  |  |  | Mascot |
|  | 960.4203  | 960.4664  | 0.0461  | 48  | 150 | 157 | LTHDSCER               |  |  |  |  |                                           |  |  |  |  | Mascot |
|  | 1075.4634 | 1075.6244 | 0.161   | 150 | 73  | 80  | MFPCCRFR               |  |  |  |  | Oxidation (M)[1]                          |  |  |  |  | Mascot |
|  | 1279.7482 | 1279.7686 | 0.0204  | 16  | 243 | 254 | LALTPARTHTAK           |  |  |  |  |                                           |  |  |  |  | Mascot |
|  | 1320.6405 | 1320.6624 | 0.0219  | 17  | 189 | 199 | SPNVHMFTHPK            |  |  |  |  | Oxidation (M)[6]                          |  |  |  |  | Mascot |
|  | 1320.698  | 1320.6624 | -0.0356 | -27 | 172 | 183 | LYVAPVSACLER           |  |  |  |  |                                           |  |  |  |  | Mascot |
|  | 2114.9634 | 2115.0486 | 0.0852  | 40  | 218 | 235 | IDCNPFMALFREDETSAR     |  |  |  |  |                                           |  |  |  |  | Mascot |
|  | 2194.0491 | 2194.1262 | 0.0771  | 35  | 150 | 167 | LTHDSCEREGVLLQPMH<br>R |  |  |  |  | Carbamidomethyl (C)[6], Oxidation (M)[16] |  |  |  |  | Mascot |

18 PREDICTED: hypothetical protein LOC798582 [Danio rerio] gi|125831442 154710.2 6.38 15 35 0

#### Peptide Information

| Calc. Mass | Obsrv. Mass | ± da    | ± ppm | Start Seq. | End Seq. | Sequence                     | Ion Score | C. I. | % Modification                               | Rank | Result Type |
|------------|-------------|---------|-------|------------|----------|------------------------------|-----------|-------|----------------------------------------------|------|-------------|
| 842.4478   | 842.5072    | 0.0594  | 71    | 242        | 250      | KSPPGGGSR                    |           |       |                                              |      | Mascot      |
| 870.5519   | 870.5333    | -0.0186 | -21   | 1252       | 1258     | DVVRLLR                      |           |       |                                              |      | Mascot      |
| 892.4523   | 892.4858    | 0.0335  | 38    | 296        | 302      | ESNKWTK                      |           |       |                                              |      | Mascot      |
| 960.5546   | 960.4664    | -0.0882 | -92   | 924        | 932      | LITKACSPK                    |           |       |                                              |      | Mascot      |
| 960.5546   | 960.4664    | -0.0882 | -92   | 924        | 932      | LITKACSPK                    | 4         |       | 0                                            |      | Mascot      |
| 1082.5299  | 1082.6895   | 0.1596  | 147   | 76         | 85       | MQQGAIFSGK                   |           |       | Oxidation (M)[1]                             |      | Mascot      |
| 1320.5435  | 1320.6624   | 0.1189  | 90    | 1378       | 1386     | KFCWFCCGR                    |           |       | Carbamidomethyl (C)[3,4,7]                   |      | Mascot      |
| 1320.5435  | 1320.6624   | 0.1189  | 90    | 1378       | 1386     | KFCWFCCGR                    |           |       | Carbamidomethyl (C)[3,4,7]                   |      | Mascot      |
| 1653.8555  | 1653.6521   | -0.2034 | -123  | 858        | 871      | HSDAIISQLEKER                |           |       |                                              |      | Mascot      |
| 1833.9705  | 1833.9923   | 0.0218  | 12    | 279        | 294      | TLEDTQQFLERAVGVK             |           |       |                                              |      | Mascot      |
| 1946.9786  | 1946.9719   | -0.0067 | -3    | 870        | 886      | ERMMSAPVQETVRPTK             |           |       |                                              |      | Mascot      |
| 2194.0208  | 2194.1262   | 0.1054  | 48    | 1390       | 1407     | NQEDWIGHGQRHLMEAT<br>R       |           |       | Oxidation (M)[14]                            |      | Mascot      |
| 2237.0222  | 2237.0667   | 0.0445  | 20    | 76         | 95       | MQQGAIFSGKILSFCCSE<br>CK     |           |       | Carbamidomethyl (C)[15]                      |      | Mascot      |
| 2247.0498  | 2247.0908   | 0.041   | 18    | 490        | 509      | SNGRSSPPPHMSFLYP<br>SEK      |           |       |                                              |      | Mascot      |
| 2255.0869  | 2255.0515   | -0.0354 | -16   | 349        | 368      | ISIPPNCCTTQVMGFKMVD<br>GK    |           |       | Carbamidomethyl (C)[7], Oxidation (M)[12,16] |      | Mascot      |
| 2298.1472  | 2298.1726   | 0.0254  | 11    | 973        | 994      | GEASVQTAQSGNRYFVN<br>ASALK   |           |       |                                              |      | Mascot      |
| 2362.2361  | 2362.209    | -0.0271 | -11   | 830        | 853      | KPEGPAVANENTAPSLN<br>NAAVLGK |           |       |                                              |      | Mascot      |
| 2362.2361  | 2362.209    | -0.0271 | -11   | 830        | 853      | KPEGPAVANENTAPSLN<br>NAAVLGK |           |       |                                              |      | Mascot      |

19 nucleoside diphosphate-linked moiety X motif 6 [Danio rerio] gi|148237304 36698.5 7.22 8 34 0

#### Peptide Information

| Calc. Mass | Obsrv. Mass | $\pm$ da | $\pm$ ppm | Start Seq. | End Seq. | Sequence                 | Ion Score | C. I. | % Modification                               | Rank | Result Type |
|------------|-------------|----------|-----------|------------|----------|--------------------------|-----------|-------|----------------------------------------------|------|-------------|
| 850.4893   | 850.5395    | 0.0502   | 59        | 243        | 249      | LQPLSHR                  |           |       |                                              |      | Mascot      |
| 850.4893   | 850.5395    | 0.0502   | 59        | 243        | 249      | LQPLSHR                  |           |       |                                              |      | Mascot      |
| 1354.6975  | 1354.7288   | 0.0313   | 23        | 94         | 104      | VSLHQWRSEGR              |           |       |                                              |      | Mascot      |
| 1558.7794  | 1558.8386   | 0.0592   | 38        | 13         | 26       | VSSGLCRVSSGFFR           |           |       | Carbamidomethyl (C)[6]                       |      | Mascot      |
| 1558.7794  | 1558.8386   | 0.0592   | 38        | 13         | 26       | VSSGLCRVSSGFFR           |           |       | Carbamidomethyl (C)[6]                       |      | Mascot      |
| 2115.0295  | 2115.0486   | 0.0191   | 9         | 2          | 19       | VLWIMSAGFCRVSSGLC<br>R   |           |       | Carbamidomethyl (C)[10,17], Oxidation (M)[5] |      | Mascot      |
| 2230.0752  | 2230.1941   | 0.1189   | 53        | 1          | 19       | MVLWIMSAGFCRVSSGL<br>CR  |           |       | Carbamidomethyl (C)[11,18]                   |      | Mascot      |
| 2237.0146  | 2237.0667   | 0.0521   | 23        | 51         | 70       | FCSGCEERLCPELLAGD<br>VDR |           |       | Carbamidomethyl (C)[2]                       |      | Mascot      |
| 2247.0435  | 2247.0908   | 0.0473   | 21        | 224        | 242      | QQHTHPGAFGMSDLYLI<br>CR  |           |       | Carbamidomethyl (C)[18], Oxidation (M)[11]   |      | Mascot      |
| 2297.0735  | 2297.1833   | 0.1098   | 48        | 250        | 266      | IHICTHECLRCDWDLR         |           |       | Carbamidomethyl (C)[4,8,11]                  |      | Mascot      |

20 novel protein similar to vertebrate actin filament associated protein 1-like 1 (AFAP1L1, zgc:114084

gi|220679093 84272.2 8.16 11 34 0

#### Peptide Information

| Calc. Mass | Obsrv. Mass | $\pm$ da | $\pm$ ppm | Start Seq. | End Seq. | Sequence                  | Ion Score | C. I. | % Modification         | Rank | Result Type |
|------------|-------------|----------|-----------|------------|----------|---------------------------|-----------|-------|------------------------|------|-------------|
| 850.5145   | 850.5395    | 0.025    | 29        | 383        | 389      | IISFSKR                   |           |       |                        |      | Mascot      |
| 850.5145   | 850.5395    | 0.025    | 29        | 383        | 389      | IISFSKR                   |           |       |                        |      | Mascot      |
| 892.4787   | 892.4858    | 0.0071   | 8         | 226        | 232      | RFGQWAK                   |           |       |                        |      | Mascot      |
| 960.4169   | 960.4664    | 0.0495   | 52        | 399        | 406      | SSFHDHPR                  |           |       |                        |      | Mascot      |
| 960.5658   | 960.4664    | -0.0994  | -103      | 36         | 43       | MAVKNLLR                  |           |       | Oxidation (M)[1]       |      | Mascot      |
| 996.4819   | 996.5922    | 0.1103   | 111       | 133        | 140      | MPEYITSR                  |           |       |                        |      | Mascot      |
| 996.4819   | 996.5922    | 0.1103   | 111       | 133        | 140      | MPEYITSR                  |           |       |                        |      | Mascot      |
| 1128.6483  | 1128.6136   | -0.0347  | -31       | 233        | 241      | QLTVIRENR                 |           |       |                        |      | Mascot      |
| 1833.9791  | 1833.9923   | 0.0132   | 7         | 450        | 466      | GCEVVPGLGPKHPFALR         |           |       | Carbamidomethyl (C)[2] |      | Mascot      |
| 2225.0979  | 2225.1055   | 0.0076   | 3         | 681        | 701      | SLAGGEMEAPTESKPAH<br>KTQR |           |       |                        |      | Mascot      |
| 2225.0979  | 2225.1055   | 0.0076   | 3         | 681        | 701      | SLAGGEMEAPTESKPAH<br>KTQR |           |       |                        |      | Mascot      |
| 2237.9512  | 2238.0618   | 0.1106   | 49        | 702        | 720      | TEAQYMESFLPVNCASE<br>MR   |           |       | Oxidation (M)[6,18]    |      | Mascot      |
| 2247.1975  | 2247.0908   | -0.1067  | -47       | 2          | 20       | EINSKPMELLVTELNML<br>K    |           |       | Oxidation (M)[7,16]    |      | Mascot      |
| 2362.2429  | 2362.209    | -0.0339  | -14       | 1          | 20       | MEINSKPMELLVTELNML<br>LK  |           |       | Oxidation (M)[1]       |      | Mascot      |
| 2362.2429  | 2362.209    | -0.0339  | -14       | 1          | 20       | MEINSKPMELLVTELNML<br>LK  |           |       | Oxidation (M)[1]       |      | Mascot      |

21 TBC1 domain family member 7 [Danio rerio]

gi|41152120 33966.3 6.35 8 34 0

| Peptide Information |                                                                                                      |             |         |       |              |                            |           |                                            |                  |
|---------------------|------------------------------------------------------------------------------------------------------|-------------|---------|-------|--------------|----------------------------|-----------|--------------------------------------------|------------------|
|                     | Calc. Mass                                                                                           | Obsrv. Mass | ± da    | ± ppm | Start Seq.   | End Sequence Seq.          | Ion Score | C. I. % Modification                       | Rank Result Type |
|                     | 882.4832                                                                                             | 882.5638    | 0.0806  | 91    | 279          | 285 AIDLWHK                |           |                                            | Mascot           |
|                     | 1118.5337                                                                                            | 1118.6157   | 0.082   | 73    | 2            | 10 ADDPQRNFR               |           |                                            | Mascot           |
|                     | 1385.6995                                                                                            | 1385.7086   | 0.0091  | 7     | 111          | 121 MFQLENHTLPR            |           |                                            | Mascot           |
|                     | 1541.8005                                                                                            | 1541.7784   | -0.0221 | -14   | 111          | 122 MFQLENHTLPRR           |           |                                            | Mascot           |
|                     | 1541.8005                                                                                            | 1541.7784   | -0.0221 | -14   | 111          | 122 MFQLENHTLPRR           |           |                                            | Mascot           |
|                     | 1623.7729                                                                                            | 1623.7631   | -0.0098 | -6    | 210          | 223 RCFAGCLPESSLQR         |           | Carbamidomethyl (C)[2]                     | Mascot           |
|                     | 1829.9366                                                                                            | 1829.9438   | 0.0072  | 4     | 42           | 56 LSTFSQRFPLPSMYR         |           |                                            | Mascot           |
|                     | 2217.0427                                                                                            | 2217.0422   | -0.0005 | 0     | 79           | 96 QYRVDQFEDVSCALTVM R     |           | Carbamidomethyl (C)[12]                    | Mascot           |
|                     | 2233.0376                                                                                            | 2233.0708   | 0.0332  | 15    | 79           | 96 QYRVDQFEDVSCALTVM R     |           | Carbamidomethyl (C)[12], Oxidation (M)[17] | Mascot           |
|                     | 2255.3196                                                                                            | 2255.0515   | -0.2681 | -119  | 228          | 248 VISGSKILVFVAVEILLSH K  |           |                                            | Mascot           |
| 22                  | novel protein similar to vertebrate actin filament associated protein 1-like 1 (AFAP1L1, zgc:114084) |             |         |       | gij220678265 |                            | 84328.3   | 8.16                                       | 11 34 0          |
| Peptide Information |                                                                                                      |             |         |       |              |                            |           |                                            |                  |
|                     | Calc. Mass                                                                                           | Obsrv. Mass | ± da    | ± ppm | Start Seq.   | End Sequence Seq.          | Ion Score | C. I. % Modification                       | Rank Result Type |
|                     | 850.5145                                                                                             | 850.5395    | 0.025   | 29    | 383          | 389 IISFSKR                |           |                                            | Mascot           |
|                     | 850.5145                                                                                             | 850.5395    | 0.025   | 29    | 383          | 389 IISFSKR                |           |                                            | Mascot           |
|                     | 892.4787                                                                                             | 892.4858    | 0.0071  | 8     | 226          | 232 RFGQWAK                |           |                                            | Mascot           |
|                     | 960.4169                                                                                             | 960.4664    | 0.0495  | 52    | 399          | 406 SSFDHDPR               |           |                                            | Mascot           |
|                     | 960.5658                                                                                             | 960.4664    | -0.0994 | -103  | 36           | 43 MAVKNLLR                |           | Oxidation (M)[1]                           | Mascot           |
|                     | 996.4819                                                                                             | 996.5922    | 0.1103  | 111   | 133          | 140 MPEYITSR               |           |                                            | Mascot           |
|                     | 996.4819                                                                                             | 996.5922    | 0.1103  | 111   | 133          | 140 MPEYITSR               |           |                                            | Mascot           |
|                     | 1128.6483                                                                                            | 1128.6136   | -0.0347 | -31   | 233          | 241 QLTVIRENR              |           |                                            | Mascot           |
|                     | 1833.9791                                                                                            | 1833.9923   | 0.0132  | 7     | 450          | 466 GCEVVPGLGPKHPFALR      |           | Carbamidomethyl (C)[2]                     | Mascot           |
|                     | 2225.0979                                                                                            | 2225.1055   | 0.0076  | 3     | 681          | 701 SLAGGEMEAPTESKPAH KTQR |           |                                            | Mascot           |
|                     | 2225.0979                                                                                            | 2225.1055   | 0.0076  | 3     | 681          | 701 SLAGGEMEAPTESKPAH KTQR |           |                                            | Mascot           |
|                     | 2238.1362                                                                                            | 2238.0618   | -0.0744 | -33   | 250          | 269 DQSPYTDIPLSLCSVIYVP K  |           |                                            | Mascot           |
|                     | 2247.1975                                                                                            | 2247.0908   | -0.1067 | -47   | 2            | 20 EINSKPMELLVTELNMLL K    |           | Oxidation (M)[7,16]                        | Mascot           |
|                     | 2362.2429                                                                                            | 2362.209    | -0.0339 | -14   | 1            | 20 MEINSKPMELLVTELNML LK   |           | Oxidation (M)[1]                           | Mascot           |
|                     | 2362.2429                                                                                            | 2362.209    | -0.0339 | -14   | 1            | 20 MEINSKPMELLVTELNML LK   |           | Oxidation (M)[1]                           | Mascot           |
| 23                  | PREDICTED: amine sulfotransferase [Danio rerio]                                                      |             |         |       | gij68372820  |                            | 34418.6   | 8.81                                       | 7 33 0           |

Peptide Information

| Calc. Mass | Obsrv. Mass | ± da   | ± ppm | Start Seq. | End Seq. | Sequence                         | Ion Score | C. I. | % Modification    | Rank | Result Type |
|------------|-------------|--------|-------|------------|----------|----------------------------------|-----------|-------|-------------------|------|-------------|
| 882.4355   | 882.5638    | 0.1283 | 145   | 171        | 176      | EWYKEK                           |           |       |                   |      | Mascot      |
| 900.4897   | 900.5101    | 0.0204 | 23    | 207        | 215      | NLDAAAVAR                        |           |       |                   |      | Mascot      |
| 1128.6047  | 1128.6136   | 0.0089 | 8     | 4          | 12       | VNNYLSKYK                        |           |       |                   |      | Mascot      |
| 2211.0288  | 2211.0938   | 0.065  | 29    | 70         | 86       | YPNNLEQMPWLEYREGR                |           |       | Oxidation (M)[8]  |      | Mascot      |
| 2223.9863  | 2224.0549   | 0.0686 | 31    | 257        | 274      | NTFTVSQSEMFDQIFEER               |           |       | Oxidation (M)[10] |      | Mascot      |
| 2362.1958  | 2362.209    | 0.0132 | 6     | 47         | 67       | SGTIWVQNIINLVCEDSLT<br>EK        |           |       |                   |      | Mascot      |
| 2362.1958  | 2362.209    | 0.0132 | 6     | 47         | 67       | SGTIWVQNIINLVCEDSLT<br>EK        |           |       |                   |      | Mascot      |
| 3337.5588  | 3337.7546   | 0.1958 | 59    | 147        | 174      | SFEDFLQQYLAGNVGGS<br>SWFDHVKEWYK |           |       |                   |      | Mascot      |

24 PREDICTED: rapamycin-insensitive companion of mTOR [Danio rerio] gi|189533864 193500.8 8.2 18 33 0

Peptide Information

| Calc. Mass | Obsrv. Mass | ± da    | ± ppm | Start Seq. | End Seq. | Sequence                  | Ion Score | C. I. | % Modification          | Rank | Result Type |
|------------|-------------|---------|-------|------------|----------|---------------------------|-----------|-------|-------------------------|------|-------------|
| 864.5189   | 864.5098    | -0.0091 | -11   | 1102       | 1109     | FLISLSGK                  |           |       |                         |      | Mascot      |
| 892.492    | 892.4858    | -0.0062 | -7    | 286        | 293      | MSIVASLR                  |           |       | Oxidation (M)[1]        |      | Mascot      |
| 1045.5887  | 1045.5601   | -0.0286 | -27   | 1652       | 1661     | GNETGLLLTIK               |           |       |                         |      | Mascot      |
| 1051.5782  | 1051.708    | 0.1298  | 123   | 822        | 830      | GYVSKQLEK                 |           |       |                         |      | Mascot      |
| 1354.5978  | 1354.7288   | 0.131   | 97    | 523        | 533      | DTEEALMMNLR               |           |       | Oxidation (M)[7,8]      |      | Mascot      |
| 1385.7134  | 1385.7086   | -0.0048 | -3    | 326        | 336      | GLLEVMEYIFR               |           |       | Oxidation (M)[6]        |      | Mascot      |
| 1541.8145  | 1541.7784   | -0.0361 | -23   | 325        | 336      | RGLLEVMEYIFR              |           |       | Oxidation (M)[7]        |      | Mascot      |
| 1541.8145  | 1541.7784   | -0.0361 | -23   | 325        | 336      | RGLLEVMEYIFR              |           |       | Oxidation (M)[7]        |      | Mascot      |
| 1558.7344  | 1558.8386   | 0.1042  | 67    | 19         | 32       | NDSGEENVPLDLTR            |           |       |                         |      | Mascot      |
| 1558.7344  | 1558.8386   | 0.1042  | 67    | 19         | 32       | NDSGEENVPLDLTR            |           |       |                         |      | Mascot      |
| 1623.8635  | 1623.7631   | -0.1004 | -62   | 1621       | 1634     | NIPEDAPACRVLLR            |           |       | Carbamidomethyl (C)[9]  |      | Mascot      |
| 1653.8629  | 1653.6521   | -0.2108 | -127  | 720        | 734      | ILTAATDNCRLYATK           |           |       |                         |      | Mascot      |
| 1710.8843  | 1710.8851   | 0.0008  | 0     | 720        | 734      | ILTAATDNCRLYATK           |           |       | Carbamidomethyl (C)[9]  |      | Mascot      |
| 1819.8629  | 1819.86     | -0.0029 | -2    | 765        | 781      | AVSVEALDILDEACEDK         |           |       |                         |      | Mascot      |
| 2034.99    | 2034.9102   | -0.0798 | -39   | 763        | 781      | SKAVSVEALDILDEACED<br>K   |           |       |                         |      | Mascot      |
| 2035.0826  | 2034.9102   | -0.1724 | -85   | 286        | 303      | MSIVASLRWSGGIINLCK        |           |       | Carbamidomethyl (C)[17] |      | Mascot      |
| 2217.1365  | 2217.0422   | -0.0943 | -43   | 304        | 324      | SGNSGIQSLIGLLCIPNME<br>VR |           |       | Oxidation (M)[18]       |      | Mascot      |
| 2224.2019  | 2224.0549   | -0.147  | -66   | 223        | 241      | INEALMTTILHLLNHPHTR       |           |       |                         |      | Mascot      |
| 2237.9866  | 2238.0618   | 0.0752  | 34    | 1046       | 1064     | HNSESDSIQPTMYILDDE        |           |       | Oxidation (M)[12]       |      | Mascot      |

[illegible]

|    |                          |           |         |      |             |      |                                   |     |   |    |   |                                                  |  |  |  |  |        |
|----|--------------------------|-----------|---------|------|-------------|------|-----------------------------------|-----|---|----|---|--------------------------------------------------|--|--|--|--|--------|
|    | 900.5373                 | 900.5101  | -0.0272 | -30  | 136         | 143  | NITRGAIR                          |     |   |    |   |                                                  |  |  |  |  | Mascot |
|    | 908.4359                 | 908.5312  | 0.0953  | 105  | 1255        | 1262 | EDLEAGFK                          |     |   |    |   |                                                  |  |  |  |  | Mascot |
|    | 937.4594                 | 937.4719  | 0.0125  | 13   | 985         | 991  | EKITMCR                           |     |   |    |   | Carbamidomethyl (C)[6]                           |  |  |  |  | Mascot |
|    | 1320.7158                | 1320.6624 | -0.0534 | -40  | 378         | 389  | SSHTLTSLSLFLK                     |     |   |    |   |                                                  |  |  |  |  | Mascot |
|    | 1320.7158                | 1320.6624 | -0.0534 | -40  | 378         | 389  | SSHTLTSLSLFLK                     |     |   |    |   |                                                  |  |  |  |  | Mascot |
|    | 1341.6177                | 1341.7687 | 0.151   | 113  | 1127        | 1137 | NCMVAEDFIVK                       |     |   |    |   | Carbamidomethyl (C)[2], Oxidation (M)[3]         |  |  |  |  | Mascot |
|    | 1385.6842                | 1385.7086 | 0.0244  | 18   | 1368        | 1380 | NERALPLPQSSAC                     |     |   |    |   |                                                  |  |  |  |  | Mascot |
|    | 1541.7377                | 1541.7784 | 0.0407  | 26   | 858         | 870  | LGTEPEKHECVSR                     |     |   |    |   | Carbamidomethyl (C)[10]                          |  |  |  |  | Mascot |
|    | 1541.7377                | 1541.7784 | 0.0407  | 26   | 858         | 870  | LGTEPEKHECVSR                     |     |   |    |   | Carbamidomethyl (C)[10]                          |  |  |  |  | Mascot |
|    | 1653.8918                | 1653.6521 | -0.2397 | -145 | 1018        | 1032 | VAIKTVNESASLHER                   |     |   |    |   |                                                  |  |  |  |  | Mascot |
|    | 1833.9263                | 1833.9923 | 0.066   | 36   | 321         | 337  | ICDEKVIDSVDAQSLK                  |     |   |    |   |                                                  |  |  |  |  | Mascot |
|    | 2114.9487                | 2115.0486 | 0.0999  | 47   | 1138        | 1154 | IGDFGMTRDIYETDYR                  |     |   |    |   |                                                  |  |  |  |  | Mascot |
|    | 2210.8821                | 2211.0938 | 0.2117  | 96   | 300         | 320  | DESHGVSVSMLCTACDG<br>PCDK         |     |   |    |   | Carbamidomethyl (C)[12]                          |  |  |  |  | Mascot |
|    | 2217.0349                | 2217.0422 | 0.0073  | 3    | 1098        | 1117 | KMIQMAGEIADGMAYLN<br>ANK          |     |   |    |   | Oxidation (M)[2,5,13]                            |  |  |  |  | Mascot |
|    | 2283.8984                | 2284.1619 | 0.2635  | 115  | 300         | 320  | DESHGVSVSMLCTACDG<br>PCDK         |     |   |    |   | Carbamidomethyl (C)[12,15], Oxidation<br>(M)[10] |  |  |  |  | Mascot |
|    | 2298.189                 | 2298.1726 | -0.0164 | -7   | 710         | 728  | AFENFLHNAIFTRPPDR<br>R            |     |   |    |   |                                                  |  |  |  |  | Mascot |
|    | 2298.957                 | 2299.1731 | 0.2161  | 94   | 175         | 195  | QSKECGNVCPGIMEDNS<br>QCTR         |     |   |    |   |                                                  |  |  |  |  | Mascot |
|    | 2362.1899                | 2362.209  | 0.0191  | 8    | 839         | 857  | WPEPDKPNGLIMLYEIQY<br>R           |     |   |    |   |                                                  |  |  |  |  | Mascot |
|    | 2362.1899                | 2362.209  | 0.0191  | 8    | 839         | 857  | WPEPDKPNGLIMLYEIQY<br>R           |     |   |    |   |                                                  |  |  |  |  | Mascot |
|    | 3338.717                 | 3338.7439 | 0.0269  | 8    | 1044        | 1072 | EFNCHHVVRLLGVVSQG<br>QPTLVIMELMTR |     |   |    |   | Oxidation (M)[24,27]                             |  |  |  |  | Mascot |
| 28 | Zgc:110331 [Danio rerio] |           |         |      | gil62202266 |      | 17382.1                           | 8.3 | 6 | 32 | 0 |                                                  |  |  |  |  |        |

#### Peptide Information

| Calc. Mass | Obsrv. Mass | ± da    | ± ppm | Start Seq. | End Sequence | Ion Score                 | C. I. % | Modification           | Rank | Result Type |
|------------|-------------|---------|-------|------------|--------------|---------------------------|---------|------------------------|------|-------------|
| 882.5294   | 882.5638    | 0.0344  | 39    | 122        | 129          | ELSLPPVK                  |         |                        |      | Mascot      |
| 900.4971   | 900.5101    | 0.013   | 14    | 9          | 16           | CAAPQILK                  |         | Carbamidomethyl (C)[1] |      | Mascot      |
| 1045.5636  | 1045.5601   | -0.0035 | -3    | 42         | 51           | NVGSLDKNAK                |         |                        |      | Mascot      |
| 1128.5432  | 1128.6136   | 0.0704  | 62    | 33         | 41           | VVDHYENPR                 |         |                        |      | Mascot      |
| 2194.1611  | 2194.1262   | -0.0349 | -16   | 122        | 141          | ELSLPPVKLHCSMLAEDA<br>IK  |         |                        |      | Mascot      |
| 2247.1113  | 2247.0908   | -0.0205 | -9    | 84         | 104          | FKTFGCGSAIASSSLATE<br>WVK |         | Carbamidomethyl (C)[6] |      | Mascot      |

29 PREDICTED: zinc-binding protein A33-like [Danio rerio] gil292610346 58802.6 7.49 11 32 0

#### Peptide Information

| Calc. Mass | Obsrv. Mass | ± da | ± ppm | Start | End Sequence | Ion | C. I. % | Modification | Rank | Result Type |
|------------|-------------|------|-------|-------|--------------|-----|---------|--------------|------|-------------|
|------------|-------------|------|-------|-------|--------------|-----|---------|--------------|------|-------------|

|    |                                              |           |         | Seq. | Seq.         | Score |                            |      |                              |    |        |
|----|----------------------------------------------|-----------|---------|------|--------------|-------|----------------------------|------|------------------------------|----|--------|
|    | 869.4951                                     | 869.5234  | 0.0283  | 33   | 398          | 404   | RNPEVVR                    |      |                              |    | Mascot |
|    | 892.5137                                     | 892.4858  | -0.0279 | -31  | 173          | 179   | IKVEFEK                    |      |                              |    | Mascot |
|    | 960.4277                                     | 960.4664  | 0.0387  | 40   | 473          | 479   | KMSFMER                    |      | Oxidation (M)[2,5]           |    | Mascot |
|    | 960.4277                                     | 960.4664  | 0.0387  | 40   | 473          | 479   | KMSFMER                    |      | Oxidation (M)[2,5]           |    | Mascot |
|    | 1341.6984                                    | 1341.7687 | 0.0703  | 52   | 350          | 360   | HWSLGVCCLELK               |      | Carbamidomethyl (C)[7]       |    | Mascot |
|    | 1558.7128                                    | 1558.8386 | 0.1258  | 81   | 405          | 417   | VKLDYVCDDTMEK              |      |                              |    | Mascot |
|    | 1558.7206                                    | 1558.8386 | 0.118   | 76   | 423          | 436   | VSFFDASCDAVIER             |      |                              |    | Mascot |
|    | 1829.8044                                    | 1829.9438 | 0.1394  | 76   | 2            | 17    | SLEDDLSCAVCTDVFR           |      | Carbamidomethyl (C)[8]       |    | Mascot |
|    | 2217.0137                                    | 2217.0422 | 0.0285  | 13   | 380          | 397   | ERYMYHLMTAEGCEINIK         |      | Oxidation (M)[4]             |    | Mascot |
|    | 2225.0259                                    | 2225.1055 | 0.0796  | 36   | 95           | 111   | IELFCQNDEQLLCARCR          |      | Carbamidomethyl (C)[5,13,16] |    | Mascot |
|    | 2225.0259                                    | 2225.1055 | 0.0796  | 36   | 95           | 111   | IELFCQNDEQLLCARCR          |      | Carbamidomethyl (C)[5,13,16] |    | Mascot |
|    | 2233.0085                                    | 2233.0708 | 0.0623  | 28   | 380          | 397   | ERYMYHLMTAEGCEINIK         |      | Oxidation (M)[4,8]           |    | Mascot |
|    | 2247.0928                                    | 2247.0908 | -0.002  | -1   | 327          | 347   | VVLGSVGYS DGDHTWEI<br>EVGK |      |                              |    | Mascot |
|    | 2282.9851                                    | 2283.166  | 0.1809  | 79   | 31           | 49    | QCIYDHWSSSGTRNCPIC<br>R    |      | Carbamidomethyl (C)[2]       |    | Mascot |
|    | 2282.9851                                    | 2283.166  | 0.1809  | 79   | 31           | 49    | QCIYDHWSSSGTRNCPIC<br>R    |      | Carbamidomethyl (C)[2]       |    | Mascot |
| 30 | RecName: Full=SH3 domain-binding protein 4-A |           |         |      | gi 123888628 |       | 108383                     | 7.89 | 13                           | 32 | 0      |

#### Peptide Information

| Calc. Mass | Obsrv. Mass | ± da    | ± ppm | Start Seq. | End Sequence Seq. | Ion Score                          | C. I. % | Modification              | Rank | Result Type |
|------------|-------------|---------|-------|------------|-------------------|------------------------------------|---------|---------------------------|------|-------------|
| 842.5822   | 842.5072    | -0.075  | -89   | 663        | 669               | LIKT VIR                           |         |                           |      | Mascot      |
| 850.4338   | 850.5395    | 0.1057  | 124   | 387        | 393               | LSNMEIK                            |         | Oxidation (M)[4]          |      | Mascot      |
| 850.4338   | 850.5395    | 0.1057  | 124   | 387        | 393               | LSNMEIK                            |         | Oxidation (M)[4]          |      | Mascot      |
| 870.4726   | 870.5333    | 0.0607  | 70    | 1          | 7                 | MAAHRIR                            |         | Oxidation (M)[1]          |      | Mascot      |
| 1045.4796  | 1045.5601   | 0.0805  | 77    | 791        | 799               | AELDSEPER                          |         |                           |      | Mascot      |
| 1075.651   | 1075.6244   | -0.0266 | -25   | 475        | 484               | KVT LGLY GPK                       |         |                           |      | Mascot      |
| 1623.7723  | 1623.7631   | -0.0092 | -6    | 66         | 79                | DYCPSSFTTLKFSK                     |         |                           |      | Mascot      |
| 1946.9316  | 1946.9719   | 0.0403  | 21    | 101        | 116               | EMGYIPSTYVQPINYR                   |         | Oxidation (M)[2]          |      | Mascot      |
| 2230.2417  | 2230.1941   | -0.0476 | -21   | 842        | 860               | LIMDFVLLTTAVEVAPRW<br>R            |         |                           |      | Mascot      |
| 2284.2368  | 2284.1619   | -0.0749 | -33   | 492        | 513               | TVVAIFGHDCAPKTL LVS<br>EVGK        |         |                           |      | Mascot      |
| 2300.0686  | 2300.1689   | 0.1003  | 44    | 597        | 616               | DDQDCILAQFCVQTPQP<br>PPK           |         | Carbamidomethyl (C)[5]    |      | Mascot      |
| 2811.3804  | 2811.4519   | 0.0715  | 25    | 593        | 616               | VQVKDDQDCILAQFCVQ<br>TPQPPPK       |         | Carbamidomethyl (C)[9,15] |      | Mascot      |
| 3337.6052  | 3337.7546   | 0.1494  | 45    | 298        | 327               | LARSCHDLESLGQNPGW<br>GQTQPVETNIVCK |         | Carbamidomethyl (C)[5]    |      | Mascot      |
| 3338.5496  | 3338.7439   | 0.1943  | 58    | 885        | 913               | TGMVDSEAMWKPAYDFL                  |         | Oxidation (M)[3]          |      | Mascot      |

31    LTWAAQIGDSYR  
 PREDICTED: histone acetyltransferase KAT2A [Danio rerio]    gi|189516875    90565.6    9.09    12    32    0

Peptide Information

| Calc. Mass | Obsrv. Mass | ± da    | ± ppm | Start Seq. | End Seq. | Sequence                           | Ion Score | C. I. % | Modification                             | Rank | Result Type |
|------------|-------------|---------|-------|------------|----------|------------------------------------|-----------|---------|------------------------------------------|------|-------------|
| 864.476    | 864.5098    | 0.0338  | 39    | 517        | 524      | VIGGICFR                           |           |         |                                          |      | Mascot      |
| 937.485    | 937.4719    | -0.0131 | -14   | 85         | 93       | NPNPPTAAR                          |           |         |                                          |      | Mascot      |
| 960.5373   | 960.4664    | -0.0709 | -74   | 52         | 59       | AQVRSFPR                           |           |         |                                          |      | Mascot      |
| 960.5373   | 960.4664    | -0.0709 | -74   | 52         | 59       | AQVRSFPR                           |           |         |                                          |      | Mascot      |
| 1102.4987  | 1102.6257   | 0.127   | 115   | 271        | 279      | YETCQVFGR                          |           |         |                                          |      | Mascot      |
| 1118.5437  | 1118.6157   | 0.072   | 64    | 445        | 453      | DETARLEER                          |           |         |                                          |      | Mascot      |
| 1341.6321  | 1341.7687   | 0.1366  | 102   | 718        | 728      | SEAPDYEVIR                         |           |         |                                          |      | Mascot      |
| 1607.835   | 1607.7671   | -0.0679 | -42   | 684        | 696      | ELKDPDLLYNMLK                      |           |         | Oxidation (M)[11]                        |      | Mascot      |
| 1947.0078  | 1946.9719   | -0.0359 | -18   | 132        | 148      | LLGMVVDVENLFMSVHK                  |           |         | Oxidation (M)[4]                         |      | Mascot      |
| 2233.1194  | 2233.0708   | -0.0486 | -22   | 368        | 391      | GSSASALGVTGLDVASS<br>EPTIGEK       |           |         |                                          |      | Mascot      |
| 2284.1323  | 2284.1619   | 0.0296  | 13    | 563        | 581      | HGILYFLTYADEYAIGYFK                |           |         |                                          |      | Mascot      |
| 2362.1721  | 2362.209    | 0.0369  | 16    | 220        | 237      | MFLCLNYWKLETPSQF<br>R              |           |         | Carbamidomethyl (C)[5], Oxidation (M)[1] |      | Mascot      |
| 2362.1721  | 2362.209    | 0.0369  | 16    | 220        | 237      | MFLCLNYWKLETPSQF<br>R              |           |         | Carbamidomethyl (C)[5], Oxidation (M)[1] |      | Mascot      |
| 3337.6416  | 3337.7546   | 0.113   | 34    | 517        | 546      | VIGGICFRMFPTQGFTEIV<br>FCAVTSNEQVK |           |         | Oxidation (M)[9]                         |      | Mascot      |

32    Cars protein [Danio rerio]    gi|28856175    73800.2    5.84    11    32    0

Peptide Information

| Calc. Mass | Obsrv. Mass | ± da    | ± ppm | Start Seq. | End Seq. | Sequence                 | Ion Score | C. I. % | Modification           | Rank | Result Type |
|------------|-------------|---------|-------|------------|----------|--------------------------|-----------|---------|------------------------|------|-------------|
| 882.5155   | 882.5638    | 0.0483  | 55    | 533        | 540      | SAKLPPNR                 |           |         |                        |      | Mascot      |
| 1075.6146  | 1075.6244   | 0.0098  | 9     | 37         | 45       | TKEVFVPQK                |           |         |                        |      | Mascot      |
| 1128.6259  | 1128.6136   | -0.0123 | -11   | 181        | 190      | QAQVLLEEAK               |           |         |                        |      | Mascot      |
| 1558.7278  | 1558.8386   | 0.1108  | 71    | 498        | 511      | TSVHGALCDNIDTR           |           |         | Carbamidomethyl (C)[8] |      | Mascot      |
| 1558.8622  | 1558.8386   | -0.0236 | -15   | 605        | 617      | KVTELLQLCDQLR            |           |         |                        |      | Mascot      |
| 1637.817   | 1637.6639   | -0.1531 | -93   | 13         | 27       | VQPPWSPPEGTDISK          |           |         |                        |      | Mascot      |
| 1665.9098  | 1665.8523   | -0.0575 | -35   | 240        | 253      | VSEYVPEIVEFVKK           |           |         |                        |      | Mascot      |
| 2225.0505  | 2225.1055   | 0.055   | 25    | 86         | 103      | YDVFCMNITDIDDKIHK        |           |         | Oxidation (M)[7]       |      | Mascot      |
| 2225.0505  | 2225.1055   | 0.055   | 25    | 86         | 103      | YDVFCMNITDIDDKIHK        |           |         | Oxidation (M)[7]       |      | Mascot      |
| 2230.0591  | 2230.1941   | 0.135   | 61    | 512        | 531      | SALEEMRALVGQSNTYM<br>AAR |           |         | Oxidation (M)[6, 17]   |      | Mascot      |
| 2362.2874  | 2362.209    | -0.0784 | -33   | 536        | 555      | LPPNRMLLSIALYLTDM        |           |         | Oxidation (M)[6, 18]   |      | Mascot      |



|    |                                                      |           |         |     |              |     |                                 |      |    |    |   |  |                     |        |
|----|------------------------------------------------------|-----------|---------|-----|--------------|-----|---------------------------------|------|----|----|---|--|---------------------|--------|
|    | 2362.2874                                            | 2362.209  | -0.0784 | -33 | 536          | 555 | LK<br>LPPNRMLLQSIALLYLTDM<br>LK |      |    |    |   |  | Oxidation (M)[6,18] | Mascot |
|    | 2555.3496                                            | 2555.3406 | -0.009  | -4  | 149          | 172 | QMLERLDSAVDAALGPL<br>QVAVQSK    |      |    |    |   |  | Oxidation (M)[2]    | Mascot |
| 33 | insulin-like growth factor 1b receptor [Danio rerio] |           |         |     | gi 169145927 |     | 155839.9                        | 5.87 | 16 | 32 | 0 |  |                     |        |

#### Peptide Information

| Calc. Mass | Obsrv. Mass | ± da    | ± ppm | Start Seq. | End Seq. | Sequence                          | Ion Score | C. I. % | Modification                                  | Rank | Result Type |
|------------|-------------|---------|-------|------------|----------|-----------------------------------|-----------|---------|-----------------------------------------------|------|-------------|
| 900.5373   | 900.5101    | -0.0272 | -30   | 136        | 143      | NITRGAIR                          |           |         |                                               |      | Mascot      |
| 908.4359   | 908.5312    | 0.0953  | 105   | 1255       | 1262     | EDLEAGFK                          |           |         |                                               |      | Mascot      |
| 937.4594   | 937.4719    | 0.0125  | 13    | 985        | 991      | EKITMCR                           |           |         | Carbamidomethyl (C)[6]                        |      | Mascot      |
| 1320.7158  | 1320.6624   | -0.0534 | -40   | 378        | 389      | SSHTLTSLSFLK                      |           |         |                                               |      | Mascot      |
| 1320.7158  | 1320.6624   | -0.0534 | -40   | 378        | 389      | SSHTLTSLSFLK                      |           |         |                                               |      | Mascot      |
| 1341.6177  | 1341.7687   | 0.151   | 113   | 1127       | 1137     | NCMVAEDFIVK                       |           |         | Carbamidomethyl (C)[2], Oxidation (M)[3]      |      | Mascot      |
| 1385.6842  | 1385.7086   | 0.0244  | 18    | 1368       | 1380     | NERALPLQSSAC                      |           |         |                                               |      | Mascot      |
| 1541.7377  | 1541.7784   | 0.0407  | 26    | 858        | 870      | LGTEPEKHECVSR                     |           |         | Carbamidomethyl (C)[10]                       |      | Mascot      |
| 1541.7377  | 1541.7784   | 0.0407  | 26    | 858        | 870      | LGTEPEKHECVSR                     |           |         | Carbamidomethyl (C)[10]                       |      | Mascot      |
| 1653.8918  | 1653.6521   | -0.2397 | -145  | 1018       | 1032     | VAIKTVNESASLHER                   |           |         |                                               |      | Mascot      |
| 1833.9263  | 1833.9923   | 0.066   | 36    | 321        | 337      | ICDEKVIDSVDAQSLK                  |           |         |                                               |      | Mascot      |
| 2114.9487  | 2115.0486   | 0.0999  | 47    | 1138       | 1154     | IGDFGMTRDIYETDYR                  |           |         |                                               |      | Mascot      |
| 2210.8821  | 2211.0938   | 0.2117  | 96    | 300        | 320      | DESHGVSVSMLCTACDG<br>PCDK         |           |         | Carbamidomethyl (C)[12]                       |      | Mascot      |
| 2217.0349  | 2217.0422   | 0.0073  | 3     | 1098       | 1117     | KMIQMAGEIADGMAYLN<br>ANK          |           |         | Oxidation (M)[2,5,13]                         |      | Mascot      |
| 2283.8984  | 2284.1619   | 0.2635  | 115   | 300        | 320      | DESHGVSVSMLCTACDG<br>PCDK         |           |         | Carbamidomethyl (C)[12,15], Oxidation (M)[10] |      | Mascot      |
| 2298.189   | 2298.1726   | -0.0164 | -7    | 710        | 728      | AFENFLHNAIFTRPPDR<br>R            |           |         |                                               |      | Mascot      |
| 2298.957   | 2299.1731   | 0.2161  | 94    | 175        | 195      | QSKECGNVCPGIMEDNS<br>QCTR         |           |         |                                               |      | Mascot      |
| 2362.1899  | 2362.209    | 0.0191  | 8     | 839        | 857      | WPEPDKPNGLIMLYEIQY<br>R           |           |         |                                               |      | Mascot      |
| 2362.1899  | 2362.209    | 0.0191  | 8     | 839        | 857      | WPEPDKPNGLIMLYEIQY<br>R           |           |         |                                               |      | Mascot      |
| 3338.717   | 3338.7439   | 0.0269  | 8     | 1044       | 1072     | EFNCHHVVRLLGVVSQG<br>QPTLVIMELMTR |           |         | Oxidation (M)[24,27]                          |      | Mascot      |

|    |                                                                |  |  |  |              |  |          |      |    |    |   |  |  |
|----|----------------------------------------------------------------|--|--|--|--------------|--|----------|------|----|----|---|--|--|
| 34 | structural maintenance of chromosomes protein 1A [Danio rerio] |  |  |  | gi 239052720 |  | 143054.8 | 6.64 | 15 | 32 | 0 |  |  |
|----|----------------------------------------------------------------|--|--|--|--------------|--|----------|------|----|----|---|--|--|

#### Peptide Information

| Calc. Mass | Obsrv. Mass | ± da   | ± ppm | Start Seq. | End Seq. | Sequence | Ion Score | C. I. % | Modification | Rank | Result Type |
|------------|-------------|--------|-------|------------|----------|----------|-----------|---------|--------------|------|-------------|
| 882.4389   | 882.5638    | 0.1249 | 142   | 555        | 561      | DCIQYIK  |           |         |              |      | Mascot      |
| 892.4491   | 892.4858    | 0.0367 | 41    | 269        | 275      | ELGRMMR  |           |         |              |      | Mascot      |

|           |           |         |      |     |     |                                  |   |   |  |                                          |        |
|-----------|-----------|---------|------|-----|-----|----------------------------------|---|---|--|------------------------------------------|--------|
| 908.444   | 908.5312  | 0.0872  | 96   | 269 | 275 | ELGRMMR                          |   |   |  | Oxidation (M)[5]                         | Mascot |
| 926.4876  | 926.5747  | 0.0871  | 94   | 927 | 934 | HNLLQACK                         |   |   |  |                                          | Mascot |
| 960.4632  | 960.4664  | 0.0032  | 3    | 331 | 338 | ADIEELDR                         |   |   |  |                                          | Mascot |
| 960.4632  | 960.4664  | 0.0032  | 3    | 331 | 338 | ADIEELDR                         | 9 | 0 |  |                                          | Mascot |
| 1045.5272 | 1045.5601 | 0.0329  | 31   | 427 | 434 | EIEENQKR                         |   |   |  |                                          | Mascot |
| 1082.5476 | 1082.6895 | 0.1419  | 131  | 97  | 106 | AIIGSSSEYR                       |   |   |  |                                          | Mascot |
| 1279.6537 | 1279.7686 | 0.1149  | 90   | 835 | 844 | VMMWEQTVKK                       |   |   |  |                                          | Mascot |
| 1341.6692 | 1341.7687 | 0.0995  | 74   | 924 | 934 | SDRHNLLQACK                      |   |   |  | Carbamidomethyl (C)[10]                  | Mascot |
| 1541.7927 | 1541.7784 | -0.0143 | -9   | 927 | 939 | HNLLQACKMQDIK                    |   |   |  |                                          | Mascot |
| 1541.7927 | 1541.7784 | -0.0143 | -9   | 927 | 939 | HNLLQACKMQDIK                    |   |   |  |                                          | Mascot |
| 1623.8748 | 1623.7631 | -0.1117 | -69  | 700 | 713 | QVQSQAHLQMLRK                    |   |   |  |                                          | Mascot |
| 1653.8668 | 1653.6521 | -0.2147 | -130 | 132 | 146 | NFLVFQGAVESIAMK                  |   |   |  |                                          | Mascot |
| 2216.8933 | 2217.0422 | 0.1489  | 67   | 78  | 96  | AFVSMVYCEDNGEECTF<br>TR          |   |   |  | Oxidation (M)[5]                         | Mascot |
| 2224.0483 | 2224.0549 | 0.0066  | 3    | 607 | 626 | KALQYACGNALVCENVE<br>DAR         |   |   |  | Carbamidomethyl (C)[7]                   | Mascot |
| 2255.1699 | 2255.0515 | -0.1184 | -53  | 862 | 880 | IIDETMAQLQDLKNQHLLT<br>K         |   |   |  | Oxidation (M)[6]                         | Mascot |
| 3337.4446 | 3337.7546 | 0.31    | 93   | 78  | 106 | AFVSMVYCEDNGEECTF<br>TRAIGSSSEYR |   |   |  | Carbamidomethyl (C)[8], Oxidation (M)[5] | Mascot |

35

PREDICTED: hypothetical protein LOC569436 [Danio rerio]

gi|326678363

352771.2

7.92

28

32

0

Peptide Information

| Calc. Mass | Obsrv. Mass | ± da    | ± ppm | Start Seq. | End Seq. | Sequence    | Ion Score | C. I. | % Modification           | Rank | Result Type |
|------------|-------------|---------|-------|------------|----------|-------------|-----------|-------|--------------------------|------|-------------|
| 842.4743   | 842.5072    | 0.0329  | 39    | 2664       | 2669     | HFRINR      |           |       |                          |      | Mascot      |
| 856.4311   | 856.5259    | 0.0948  | 111   | 1282       | 1287     | ENYFRK      |           |       |                          |      | Mascot      |
| 864.4131   | 864.5098    | 0.0967  | 112   | 603        | 610      | LGAEMSEK    |           |       |                          |      | Mascot      |
| 869.4661   | 869.5234    | 0.0573  | 66    | 368        | 374      | EKPHKCK     |           |       |                          |      | Mascot      |
| 900.5624   | 900.5101    | -0.0523 | -58   | 2956       | 2962     | LETLRLR     |           |       |                          |      | Mascot      |
| 908.5273   | 908.5312    | 0.0039  | 4     | 1516       | 1523     | FLLGMSLK    |           |       |                          |      | Mascot      |
| 926.4875   | 926.5747    | 0.0872  | 94    | 368        | 374      | EKPHKCK     |           |       | Carbamidomethyl (C)[6]   |      | Mascot      |
| 937.3978   | 937.4719    | 0.0741  | 79    | 401        | 407      | CEQCGKR     |           |       | Carbamidomethyl (C)[1,4] |      | Mascot      |
| 960.4819   | 960.4664    | -0.0155 | -16   | 412        | 419      | STLIDHMK    |           |       | Oxidation (M)[7]         |      | Mascot      |
| 960.4819   | 960.4664    | -0.0155 | -16   | 412        | 419      | STLIDHMK    |           |       | Oxidation (M)[7]         |      | Mascot      |
| 1075.5742  | 1075.6244   | 0.0502  | 47    | 2075       | 2083     | QLRDTTVDK   |           |       |                          |      | Mascot      |
| 1082.6569  | 1082.6895   | 0.0326  | 30    | 2288       | 2296     | NPLLQKELK   |           |       |                          |      | Mascot      |
| 1320.6616  | 1320.6624   | 0.0008  | 1     | 3017       | 3027     | LHLYNCSITEK |           |       |                          |      | Mascot      |
| 1320.6616  | 1320.6624   | 0.0008  | 1     | 3017       | 3027     | LHLYNCSITEK |           |       |                          |      | Mascot      |



|    |                                                      |           |         |      |              |     |                           |      |    |    |   |  |                   |  |  |  |        |
|----|------------------------------------------------------|-----------|---------|------|--------------|-----|---------------------------|------|----|----|---|--|-------------------|--|--|--|--------|
|    | 1711.0728                                            | 1710.8851 | -0.1877 | -110 | 631          | 645 | TDILVQVLQILLKSK           |      |    |    |   |  |                   |  |  |  | Mascot |
|    | 1833.9857                                            | 1833.9923 | 0.0066  | 4    | 73           | 89  | TPTPGGAQFVGLELYKR         |      |    |    |   |  |                   |  |  |  | Mascot |
|    | 2221.0693                                            | 2221.0764 | 0.0071  | 3    | 434          | 452 | NPEEAELEDTLNQVMVV<br>FK   |      |    |    |   |  | Oxidation (M)[15] |  |  |  | Mascot |
|    | 2247.075                                             | 2247.0908 | 0.0158  | 7    | 375          | 395 | YNALVMSAFNNDAGFVA<br>ALDK |      |    |    |   |  | Oxidation (M)[6]  |  |  |  | Mascot |
|    | 2283.1423                                            | 2283.166  | 0.0237  | 10   | 96           | 115 | SYLTNLLKDGEDLMDESV<br>LK  | 1    |    |    | 0 |  |                   |  |  |  | Mascot |
|    | 2283.1423                                            | 2283.166  | 0.0237  | 10   | 96           | 115 | SYLTNLLKDGEDLMDESV<br>LK  |      |    |    |   |  |                   |  |  |  | Mascot |
|    | 2299.1375                                            | 2299.1731 | 0.0356  | 15   | 96           | 115 | SYLTNLLKDGEDLMDESV<br>LK  |      |    |    |   |  | Oxidation (M)[14] |  |  |  | Mascot |
| 37 | PREDICTED: ribonuclease inhibitor-like [Danio rerio] |           |         |      | gi 326678374 |     | 93203.1                   | 5.41 | 11 | 32 | 0 |  |                   |  |  |  |        |

#### Peptide Information

|  | Calc. Mass | Obsrv. Mass | ± da    | ± ppm | Start Seq. | End Seq. | Sequence                            | Ion Score | C. I. | % | Modification                               | Rank | Result Type |
|--|------------|-------------|---------|-------|------------|----------|-------------------------------------|-----------|-------|---|--------------------------------------------|------|-------------|
|  | 869.4661   | 869.5234    | 0.0573  | 66    | 1          | 9        | MPAGPAGIR                           |           |       |   |                                            |      | Mascot      |
|  | 1320.6803  | 1320.6624   | -0.0179 | -14   | 68         | 78       | HCTLNTLMFLK                         |           |       |   |                                            |      | Mascot      |
|  | 1320.6803  | 1320.6624   | -0.0179 | -14   | 68         | 78       | HCTLNTLMFLK                         |           |       |   |                                            |      | Mascot      |
|  | 1653.8914  | 1653.6521   | -0.2393 | -145  | 447        | 462      | SCSVLATCLSSKTILK                    |           |       |   |                                            |      | Mascot      |
|  | 1710.9128  | 1710.8851   | -0.0277 | -16   | 447        | 462      | SCSVLATCLSSKTILK                    |           |       |   | Carbamidomethyl (C)[2]                     |      | Mascot      |
|  | 2034.9987  | 2034.9102   | -0.0885 | -43   | 495        | 513      | LLCPAAEEGCQFVTGVV<br>GK             |           |       |   | Carbamidomethyl (C)[3,10]                  |      | Mascot      |
|  | 2034.9987  | 2034.9102   | -0.0885 | -43   | 495        | 513      | LLCPAAEEGCQFVTGVV<br>GK             |           |       |   | Carbamidomethyl (C)[3,10]                  |      | Mascot      |
|  | 2217.0017  | 2217.0422   | 0.0405  | 18    | 778        | 798      | LRLSCCEMTDEACSAVA<br>SALK           |           |       |   | Oxidation (M)[8]                           |      | Mascot      |
|  | 2225.094   | 2225.1055   | 0.0115  | 5     | 814        | 832      | LENSGVKNLSDLLMYPQ<br>CK             |           |       |   | Carbamidomethyl (C)[18], Oxidation (M)[14] |      | Mascot      |
|  | 2225.094   | 2225.1055   | 0.0115  | 5     | 814        | 832      | LENSGVKNLSDLLMYPQ<br>CK             |           |       |   | Carbamidomethyl (C)[18], Oxidation (M)[14] |      | Mascot      |
|  | 2297.0562  | 2297.1833   | 0.1271  | 55    | 571        | 591      | SDSSLKELDMSNNNLQD<br>SGVK           |           |       |   | Oxidation (M)[10]                          |      | Mascot      |
|  | 2298.1316  | 2298.1726   | 0.041   | 18    | 268        | 290      | GCGLTEESCSALATVLKS<br>NSSLK         |           |       |   |                                            |      | Mascot      |
|  | 2300.093   | 2300.1689   | 0.0759  | 33    | 438        | 458      | LNNCELTEKSCSVLATCL<br>SSK           |           |       |   | Carbamidomethyl (C)[4]                     |      | Mascot      |
|  | 2811.5112  | 2811.4519   | -0.0593 | -21   | 323        | 347      | FLSNFADEVQCQFVTGVV<br>GKNLLLLK      |           |       |   | Carbamidomethyl (C)[10]                    |      | Mascot      |
|  | 3338.6758  | 3338.7439   | 0.0681  | 20    | 197        | 227      | MNQTKSLLTSPQFLSPAA<br>EEACQFVTGVVGK |           |       |   | Carbamidomethyl (C)[22]                    |      | Mascot      |

38 Jag2 protein [Danio rerio] gi|112418665 15637.6 6.08 1 32 0 27 48.285

#### Peptide Information

|  | Calc. Mass | Obsrv. Mass | ± da    | ± ppm | Start Seq. | End Seq. | Sequence | Ion Score | C. I. | %      | Modification | Rank | Result Type |
|--|------------|-------------|---------|-------|------------|----------|----------|-----------|-------|--------|--------------|------|-------------|
|  | 960.5196   | 960.4664    | -0.0532 | -55   | 2          | 8        | WNCIRIR  |           |       |        |              |      | Mascot      |
|  | 960.5196   | 960.4664    | -0.0532 | -55   | 2          | 8        | WNCIRIR  | 27        |       | 48.285 |              |      | Mascot      |

39 novel protein [Danio rerio] gi|126632667 13693 7.88 5 32 0

Peptide Information

| Calc. Mass | Obsrv. Mass | ± da   | ± ppm | Start Seq. | End Seq. | Sequence                  | Ion Score | C. I. | % Modification             | Rank | Result Type |
|------------|-------------|--------|-------|------------|----------|---------------------------|-----------|-------|----------------------------|------|-------------|
| 937.4407   | 937.4719    | 0.0312 | 33    | 54         | 62       | AEGTSKNCK                 |           |       |                            |      | Mascot      |
| 1045.5524  | 1045.5601   | 0.0077 | 7     | 44         | 53       | AGETIDAIQK                |           |       |                            |      | Mascot      |
| 1165.6688  | 1165.7391   | 0.0703 | 60    | 119        | 128      | SQLHNITKKP                |           |       |                            |      | Mascot      |
| 2254.9551  | 2255.0515   | 0.0964 | 43    | 23         | 43       | SENAKCEADEENAAMLG<br>NTNK |           |       | Oxidation (M)[15]          |      | Mascot      |
| 2314.1067  | 2314.1418   | 0.0351 | 15    | 1          | 19       | FLHLQIQAIQEPTGDCC<br>R    |           |       | Carbamidomethyl (C)[17,18] |      | Mascot      |

40 Transferrin receptor 1a [Danio rerio] gi|190337022 84943 6.38 8 31 0

Peptide Information

| Calc. Mass | Obsrv. Mass | ± da    | ± ppm | Start Seq. | End Seq. | Sequence                  | Ion Score | C. I. | % Modification    | Rank | Result Type |
|------------|-------------|---------|-------|------------|----------|---------------------------|-----------|-------|-------------------|------|-------------|
| 842.4842   | 842.5072    | 0.023   | 27    | 66         | 72       | LNQRSPK                   |           |       |                   |      | Mascot      |
| 856.4747   | 856.5259    | 0.0512  | 60    | 344        | 351      | LGGRNSPR                  |           |       |                   |      | Mascot      |
| 960.5472   | 960.4664    | -0.0808 | -84   | 662        | 671      | AASALTSAIR                |           |       |                   |      | Mascot      |
| 960.5472   | 960.4664    | -0.0808 | -84   | 662        | 671      | AASALTSAIR                | 14        | 0     |                   |      | Mascot      |
| 1045.5935  | 1045.5601   | -0.0334 | -32   | 683        | 690      | IINNRIMR                  |           |       | Oxidation (M)[7]  |      | Mascot      |
| 1279.6165  | 1279.7686   | 0.1521  | 119   | 731        | 742      | GGLESADIDQFK              |           |       |                   |      | Mascot      |
| 1607.8462  | 1607.7671   | -0.0791 | -49   | 431        | 444      | TITDMIKNDGFKPK            |           |       |                   |      | Mascot      |
| 1623.8411  | 1623.7631   | -0.078  | -48   | 431        | 444      | TITDMIKNDGFKPK            |           |       | Oxidation (M)[5]  |      | Mascot      |
| 1819.9734  | 1819.86     | -0.1134 | -62   | 688        | 703      | IMRVEGSLSPYVSPR           |           |       | Oxidation (M)[2]  |      | Mascot      |
| 2283.0339  | 2283.166    | 0.1321  | 58    | 662        | 682      | AASALTSAIRNSDLDDME<br>QCR |           |       | Oxidation (M)[17] |      | Mascot      |
| 2283.0339  | 2283.166    | 0.1321  | 58    | 662        | 682      | AASALTSAIRNSDLDDME<br>QCR |           |       | Oxidation (M)[17] |      | Mascot      |

41 nitrogen fixation cluster-like [Danio rerio] gi|221307563 17420.2 8.83 6 31 0

Peptide Information

| Calc. Mass | Obsrv. Mass | ± da    | ± ppm | Start Seq. | End Seq. | Sequence                 | Ion Score | C. I. | % Modification         | Rank | Result Type |
|------------|-------------|---------|-------|------------|----------|--------------------------|-----------|-------|------------------------|------|-------------|
| 882.5294   | 882.5638    | 0.0344  | 39    | 122        | 129      | ELSLPPVK                 |           |       |                        |      | Mascot      |
| 900.4971   | 900.5101    | 0.013   | 14    | 9          | 16       | CAAPQILK                 |           |       | Carbamidomethyl (C)[1] |      | Mascot      |
| 1045.5636  | 1045.5601   | -0.0035 | -3    | 42         | 51       | NVGSLDKNAK               |           |       |                        |      | Mascot      |
| 1128.5432  | 1128.6136   | 0.0704  | 62    | 33         | 41       | VVDHYENPR                |           |       |                        |      | Mascot      |
| 2194.1611  | 2194.1262   | -0.0349 | -16   | 122        | 141      | ELSLPPVKLHCSMLAEDA<br>IK |           |       |                        |      | Mascot      |

|    |                                                                               |           |         |    |             |         |                           |    |    |   |  |                        |        |
|----|-------------------------------------------------------------------------------|-----------|---------|----|-------------|---------|---------------------------|----|----|---|--|------------------------|--------|
|    | 2247.1113                                                                     | 2247.0908 | -0.0205 | -9 | 84          | 104     | FKTFGCGSAIASSSLATE<br>WVK |    |    |   |  | Carbamidomethyl (C)[6] | Mascot |
| 42 | NADH-ubiquinone oxidoreductase 75 kDa subunit,<br>mitochondrial [Danio rerio] |           |         |    | gi 56090150 | 79382.4 | 5.82                      | 11 | 31 | 0 |  |                        |        |

| Peptide Information |             |         |       |            |          |                                    |           |       |   |                        |      |             |
|---------------------|-------------|---------|-------|------------|----------|------------------------------------|-----------|-------|---|------------------------|------|-------------|
| Calc. Mass          | Obsrv. Mass | ± da    | ± ppm | Start Seq. | End Seq. | Sequence                           | Ion Score | C. I. | % | Modification           | Rank | Result Type |
| 842.5093            | 842.5072    | -0.0021 | -2    | 330        | 338      | VAGALQGVK                          |           |       |   |                        |      | Mascot      |
| 850.5257            | 850.5395    | 0.0138  | 16    | 516        | 522      | VLNVLHR                            |           |       |   |                        |      | Mascot      |
| 850.5257            | 850.5395    | 0.0138  | 16    | 516        | 522      | VLNVLHR                            |           |       |   |                        |      | Mascot      |
| 1128.6306           | 1128.6136   | -0.017  | -15   | 304        | 312      | QRLTQPMVR                          |           |       |   |                        |      | Mascot      |
| 1320.7747           | 1320.6624   | -0.1123 | -85   | 4          | 16       | LPAVSRALAAHSK                      |           |       |   |                        |      | Mascot      |
| 1320.7747           | 1320.6624   | -0.1123 | -85   | 4          | 16       | LPAVSRALAAHSK                      |           |       |   |                        |      | Mascot      |
| 1341.6436           | 1341.7687   | 0.1251  | 93    | 175        | 185      | TIMTRCIQCTR                        |           |       |   | Oxidation (M)[3]       |      | Mascot      |
| 1354.6307           | 1354.7288   | 0.0981  | 72    | 205        | 216      | GNDMQIGTYVEK                       |           |       |   |                        |      | Mascot      |
| 1710.9246           | 1710.8851   | -0.0395 | -23   | 10         | 26       | ALAAHSKGSIAATTNNVR                 |           |       |   |                        |      | Mascot      |
| 1819.8564           | 1819.86     | 0.0036  | 2     | 714        | 731      | CVKAVTEGAAAVDEPSIC                 |           |       |   | Carbamidomethyl (C)[1] |      | Mascot      |
| 1946.8987           | 1946.9719   | 0.0732  | 38    | 697        | 713      | DFYMTDPISRASPTMAK                  |           |       |   | Oxidation (M)[4]       |      | Mascot      |
| 2555.3748           | 2555.3406   | -0.0342 | -13   | 339        | 364      | GSEIGAIAGGMVDAEALV<br>ALKDLLNK     |           |       |   |                        |      | Mascot      |
| 2811.5283           | 2811.4519   | -0.0764 | -27   | 330        | 359      | VAGALQGVKGSEIGAIAG<br>GMVDAEALVALK |           |       |   | Oxidation (M)[20]      |      | Mascot      |

|    |                      |  |  |  |              |         |      |   |    |   |  |  |
|----|----------------------|--|--|--|--------------|---------|------|---|----|---|--|--|
| 43 | kazrin [Danio rerio] |  |  |  | gi 121583740 | 48879.4 | 6.17 | 9 | 31 | 0 |  |  |
|----|----------------------|--|--|--|--------------|---------|------|---|----|---|--|--|

| Peptide Information |             |         |       |            |          |                            |           |       |   |                        |      |             |
|---------------------|-------------|---------|-------|------------|----------|----------------------------|-----------|-------|---|------------------------|------|-------------|
| Calc. Mass          | Obsrv. Mass | ± da    | ± ppm | Start Seq. | End Seq. | Sequence                   | Ion Score | C. I. | % | Modification           | Rank | Result Type |
| 850.4265            | 850.5395    | 0.113   | 133   | 28         | 35       | SELSATSR                   |           |       |   |                        |      | Mascot      |
| 850.4451            | 850.5395    | 0.0944  | 111   | 390        | 397      | MSLGSLSR                   |           |       |   |                        |      | Mascot      |
| 856.4094            | 856.5259    | 0.1165  | 136   | 333        | 339      | ISPCHSR                    |           |       |   | Carbamidomethyl (C)[4] |      | Mascot      |
| 960.4645            | 960.4664    | 0.0019  | 2     | 205        | 211      | NYDQHRK                    |           |       |   |                        |      | Mascot      |
| 960.4645            | 960.4664    | 0.0019  | 2     | 205        | 211      | NYDQHRK                    |           |       |   |                        |      | Mascot      |
| 996.4852            | 996.5922    | 0.107   | 107   | 120        | 127      | QMKDMLSK                   |           |       |   | Oxidation (M)[2]       |      | Mascot      |
| 996.4852            | 996.5922    | 0.107   | 107   | 120        | 127      | QMKDMLSK                   |           |       |   | Oxidation (M)[2]       |      | Mascot      |
| 1118.5623           | 1118.6157   | 0.0534  | 48    | 162        | 171      | EALQAMKGDR                 |           |       |   |                        |      | Mascot      |
| 1819.9219           | 1819.86     | -0.0619 | -34   | 240        | 255      | EATEQATVLRSQIDMK           |           |       |   |                        |      | Mascot      |
| 2283.0781           | 2283.166    | 0.0879  | 39    | 333        | 354      | ISPCHSRQPSIISDASAAD<br>GDR |           |       |   |                        |      | Mascot      |
| 2283.0781           | 2283.166    | 0.0879  | 39    | 333        | 354      | ISPCHSRQPSIISDASAAD<br>GDR |           |       |   |                        |      | Mascot      |

2298.2161 2298.1726 -0.0435 -19 7 27 QLAQRIDGAIQSASQEV  
NLR Mascot

44 novel protein similar to vertebrate fuse-binding  
protein-interacting repressor (SIAHBP1) [Danio rer  
gi|169154385 17912.1 6.73 5 31 0

Peptide Information

| Calc. Mass | Obsrv. Mass | ± da   | ± ppm | Start Seq. | End Seq. | Sequence                           | Ion Score | C. I. % | Modification                             | Rank | Result Type |
|------------|-------------|--------|-------|------------|----------|------------------------------------|-----------|---------|------------------------------------------|------|-------------|
| 850.4273   | 850.5395    | 0.1122 | 132   | 88         | 94       | ALAIMCR                            |           |         | Carbamidomethyl (C)[6], Oxidation (M)[5] |      | Mascot      |
| 850.4273   | 850.5395    | 0.1122 | 132   | 88         | 94       | ALAIMCR                            |           |         | Carbamidomethyl (C)[6], Oxidation (M)[5] |      | Mascot      |
| 1075.5935  | 1075.6244   | 0.0309 | 29    | 111        | 120      | QAFAPFGPIK                         |           |         |                                          |      | Mascot      |
| 1118.5922  | 1118.6157   | 0.0235 | 21    | 86         | 94       | QRALAIMCR                          |           |         | Carbamidomethyl (C)[8]                   |      | Mascot      |
| 2811.4192  | 2811.4519   | 0.0327 | 12    | 2          | 27       | MENGQSTASKLGLPPLT<br>PEQQEALQK     |           |         | Oxidation (M)[1]                         |      | Mascot      |
| 3337.6343  | 3337.7546   | 0.1203 | 36    | 133        | 162      | HKGFAFVEYEVPEAAQL<br>ALEQMNSVMLGGR |           |         | Oxidation (M)[22]                        |      | Mascot      |

45 insulin-like growth factor 1 receptor [Danio rerio] gi|22036200 48992.8 4.96 8 30 0

Peptide Information

| Calc. Mass | Obsrv. Mass | ± da    | ± ppm | Start Seq. | End Seq. | Sequence                          | Ion Score | C. I. % | Modification                             | Rank | Result Type |
|------------|-------------|---------|-------|------------|----------|-----------------------------------|-----------|---------|------------------------------------------|------|-------------|
| 908.4359   | 908.5312    | 0.0953  | 105   | 314        | 321      | EDLEAGFK                          |           |         |                                          |      | Mascot      |
| 937.4594   | 937.4719    | 0.0125  | 13    | 44         | 50       | EKITMCR                           |           |         | Carbamidomethyl (C)[6]                   |      | Mascot      |
| 1341.6177  | 1341.7687   | 0.151   | 113   | 186        | 196      | NCMVAEDFIVK                       |           |         | Carbamidomethyl (C)[2], Oxidation (M)[3] |      | Mascot      |
| 1385.6842  | 1385.7086   | 0.0244  | 18    | 427        | 439      | NERALPLQSSAC                      |           |         |                                          |      | Mascot      |
| 1653.8918  | 1653.6521   | -0.2397 | -145  | 77         | 91       | VAIKTVNESASLHER                   |           |         |                                          |      | Mascot      |
| 2114.9487  | 2115.0486   | 0.0999  | 47    | 197        | 213      | IGDFGMTRDIYETDYR                  |           |         |                                          |      | Mascot      |
| 2217.0349  | 2217.0422   | 0.0073  | 3     | 157        | 176      | KMIQMAGEIADGMAYLN<br>ANK          |           |         | Oxidation (M)[2,5,13]                    |      | Mascot      |
| 3338.717   | 3338.7439   | 0.0269  | 8     | 103        | 131      | EFNCHHVVRLLGVVSQG<br>QPTLVIMELMTR |           |         | Oxidation (M)[24,27]                     |      | Mascot      |

46 PREDICTED: apolipoprotein B-100 [Danio rerio] gi|326675669 478034.2 5.42 28 30 0

Peptide Information

| Calc. Mass | Obsrv. Mass | ± da    | ± ppm | Start Seq. | End Seq. | Sequence   | Ion Score | C. I. % | Modification     | Rank | Result Type |
|------------|-------------|---------|-------|------------|----------|------------|-----------|---------|------------------|------|-------------|
| 864.3879   | 864.5098    | 0.1219  | 141   | 2950       | 2956     | AQMEDVR    |           |         | Oxidation (M)[3] |      | Mascot      |
| 892.496    | 892.4858    | -0.0102 | -11   | 1783       | 1789     | LKMEPFK    |           |         |                  |      | Mascot      |
| 900.4097   | 900.5101    | 0.1004  | 112   | 2163       | 2169     | AFDEQYK    |           |         |                  |      | Mascot      |
| 908.4909   | 908.5312    | 0.0403  | 44    | 1783       | 1789     | LKMEPFK    |           |         | Oxidation (M)[3] |      | Mascot      |
| 937.4447   | 937.4719    | 0.0272  | 29    | 4167       | 4173     | EWMKEAK    |           |         | Oxidation (M)[3] |      | Mascot      |
| 1045.5823  | 1045.5601   | -0.0222 | -21   | 2442       | 2450     | IAEVCARNIK |           |         |                  |      | Mascot      |

|    |                                 |           |         |     |             |         |                                   |                        |        |   |
|----|---------------------------------|-----------|---------|-----|-------------|---------|-----------------------------------|------------------------|--------|---|
|    | 1051.5756                       | 1051.708  | 0.1324  | 126 | 3778        | 3785    | HDLRQNLK                          |                        | Mascot |   |
|    | 1075.651                        | 1075.6244 | -0.0266 | -25 | 3465        | 3473    | SIKLPPVYQK                        |                        | Mascot |   |
|    | 1082.6932                       | 1082.6895 | -0.0037 | -3  | 2996        | 3005    | GNSKIILPLK                        |                        | Mascot |   |
|    | 1102.6038                       | 1102.6257 | 0.0219  | 20  | 2442        | 2450    | IAEVCNRNIK                        | Carbamidomethyl (C)[5] | Mascot |   |
|    | 1118.6052                       | 1118.6157 | 0.0105  | 9   | 274         | 283     | QSLTLQDSVK                        |                        | Mascot |   |
|    | 1341.7737                       | 1341.7687 | -0.005  | -4  | 2463        | 2473    | LKIQDIIEDVR                       |                        | Mascot |   |
|    | 1354.7114                       | 1354.7288 | 0.0174  | 13  | 1250        | 1260    | SDALLRYQFNK                       |                        | Mascot |   |
|    | 1385.7899                       | 1385.7086 | -0.0813 | -59 | 336         | 347     | ASLFHKLVSER                       |                        | Mascot |   |
|    | 1541.7806                       | 1541.7784 | -0.0022 | -1  | 442         | 455     | QLPQQDQTSTPEVK                    |                        | Mascot |   |
|    | 1541.7806                       | 1541.7784 | -0.0022 | -1  | 442         | 455     | QLPQQDQTSTPEVK                    |                        | Mascot |   |
|    | 1558.7781                       | 1558.8386 | 0.0605  | 39  | 2957        | 2970    | MEIEISHSADLIGK                    | Oxidation (M)[1]       | Mascot |   |
|    | 1558.7781                       | 1558.8386 | 0.0605  | 39  | 2957        | 2970    | MEIEISHSADLIGK                    | Oxidation (M)[1]       | Mascot |   |
|    | 1665.8737                       | 1665.8523 | -0.0214 | -13 | 2345        | 2358    | MMEIMDSIVSLLKR                    |                        | Mascot |   |
|    | 1710.8037                       | 1710.8851 | 0.0814  | 48  | 348         | 363     | GLKNETLSGADEMMK                   | Oxidation (M)[14]      | Mascot |   |
|    | 1819.8722                       | 1819.86   | -0.0122 | -7  | 1957        | 1971    | LNNHAYNQDVNIYNK                   |                        | Mascot |   |
|    | 1829.9799                       | 1829.9438 | -0.0361 | -20 | 3218        | 3232    | IKCPVLMDLNQVLR                    | Carbamidomethyl (C)[3] | Mascot |   |
|    | 2034.9991                       | 2034.9102 | -0.0889 | -44 | 1955        | 1971    | SKLNNHAYNQDVNIYNK                 |                        | Mascot |   |
|    | 2034.9991                       | 2034.9102 | -0.0889 | -44 | 1955        | 1971    | SKLNNHAYNQDVNIYNK                 |                        | Mascot |   |
|    | 2114.96                         | 2115.0486 | 0.0886  | 42  | 3987        | 4003    | FFSSANEFIRYESNMR                  | Oxidation (M)[16]      | Mascot |   |
|    | 2211.1113                       | 2211.0938 | -0.0175 | -8  | 770         | 788     | TSDLKHVTQYINLCATF<br>K            |                        | Mascot |   |
|    | 2230.1172                       | 2230.1941 | 0.0769  | 34  | 2610        | 2628    | VRQIEMPEVDPEAIFGDL<br>R           | Oxidation (M)[6]       | Mascot |   |
|    | 2284.1416                       | 2284.1619 | 0.0203  | 9   | 2731        | 2750    | SSLEFLDYTLDAMLQIEA<br>PK          |                        | Mascot |   |
|    | 2299.1572                       | 2299.1731 | 0.0159  | 7   | 1720        | 1738    | SECMQTLNITLWTLAFRS<br>K           | Carbamidomethyl (C)[3] | Mascot |   |
|    | 2300.1367                       | 2300.1689 | 0.0322  | 14  | 2731        | 2750    | SSLEFLDYTLDAMLQIEA<br>PK          | Oxidation (M)[13]      | Mascot |   |
|    | 2314.1504                       | 2314.1418 | -0.0086 | -4  | 1718        | 1736    | MRSECMQTLNITLWTLAF<br>R           |                        | Mascot |   |
|    | 2362.0989                       | 2362.209  | 0.1101  | 47  | 940         | 959     | IDSTECNRIFPGMNYCTIL<br>R          | Oxidation (M)[13]      | Mascot |   |
|    | 2362.0989                       | 2362.209  | 0.1101  | 47  | 940         | 959     | IDSTECNRIFPGMNYCTIL<br>R          | Oxidation (M)[13]      | Mascot |   |
|    | 2811.4348                       | 2811.4519 | 0.0171  | 6   | 4203        | 4226    | LNDLLMAVESYIDSLFKS<br>YLAFMK      |                        | Mascot |   |
|    | 3337.7654                       | 3337.7546 | -0.0108 | -3  | 3516        | 3544    | LFENGVSFNIPQITFGVP<br>DLFKTIPQMIR | Oxidation (M)[27]      | Mascot |   |
| 47 | LOC562123 protein [Danio rerio] |           |         |     | gij81097651 | 53882.6 | 6.12                              | 9                      | 30     | 0 |

### Peptide Information

| Calc. Mass | Obsrv. Mass | ± da | ± ppm | Start Seq. | End Seq. | Sequence | Ion Score | C. I. % | Modification | Rank | Result Type |
|------------|-------------|------|-------|------------|----------|----------|-----------|---------|--------------|------|-------------|
|------------|-------------|------|-------|------------|----------|----------|-----------|---------|--------------|------|-------------|



|  |           |           |         |     |     |     |                          |  |  |  |  |  |                           |  |  |  |        |
|--|-----------|-----------|---------|-----|-----|-----|--------------------------|--|--|--|--|--|---------------------------|--|--|--|--------|
|  | 937.5214  | 937.4719  | -0.0495 | -53 | 312 | 319 | AVQLDHVR                 |  |  |  |  |  |                           |  |  |  | Mascot |
|  | 1118.559  | 1118.6157 | 0.0567  | 51  | 12  | 21  | ASEPPQQHPK               |  |  |  |  |  |                           |  |  |  | Mascot |
|  | 1320.6715 | 1320.6624 | -0.0091 | -7  | 320 | 331 | TVVVDEADTMLK             |  |  |  |  |  |                           |  |  |  | Mascot |
|  | 1320.6715 | 1320.6624 | -0.0091 | -7  | 320 | 331 | TVVVDEADTMLK             |  |  |  |  |  |                           |  |  |  | Mascot |
|  | 1354.5613 | 1354.7288 | 0.1675  | 124 | 92  | 102 | TDNDICSLECK              |  |  |  |  |  | Carbamidomethyl (C)[6,10] |  |  |  | Mascot |
|  | 1946.8669 | 1946.9719 | 0.105   | 54  | 67  | 83  | SQRWPEPGEPCVMCG<br>R     |  |  |  |  |  | Oxidation (M)[14]         |  |  |  | Mascot |
|  | 2035.0342 | 2034.9102 | -0.124  | -61 | 137 | 153 | QDAFISELTEEQIERVK        |  |  |  |  |  |                           |  |  |  | Mascot |
|  | 2035.0342 | 2034.9102 | -0.124  | -61 | 137 | 153 | QDAFISELTEEQIERVK        |  |  |  |  |  |                           |  |  |  | Mascot |
|  | 2224.1543 | 2224.0549 | -0.0994 | -45 | 382 | 400 | NQPCANIRQIVLWVEEPS<br>K  |  |  |  |  |  |                           |  |  |  | Mascot |
|  | 2225.1169 | 2225.1055 | -0.0114 | -5  | 429 | 447 | QAEKHTTHTQHLPHTTT<br>R   |  |  |  |  |  |                           |  |  |  | Mascot |
|  | 2225.1169 | 2225.1055 | -0.0114 | -5  | 429 | 447 | QAEKHTTHTQHLPHTTT<br>R   |  |  |  |  |  |                           |  |  |  | Mascot |
|  | 2255.1699 | 2255.0515 | -0.1184 | -53 | 312 | 331 | AVQLDHRVTVVVDEADT<br>MLK |  |  |  |  |  | Oxidation (M)[18]         |  |  |  | Mascot |

48 dehydrogenase/reductase SDR family member 1 [Danio rerio] gi|50345068

33868.3 8.39 7 30 0

#### Peptide Information

| Calc. Mass | Obsrv. Mass | ± da    | ± ppm | Start Seq. | End Seq. | Sequence                     | Ion Score | C. I. | % | Modification                             | Rank | Result Type |
|------------|-------------|---------|-------|------------|----------|------------------------------|-----------|-------|---|------------------------------------------|------|-------------|
| 1075.5815  | 1075.6244   | 0.0429  | 40    | 232        | 240      | CIVELAKDK                    |           |       |   | Carbamidomethyl (C)[1]                   |      | Mascot      |
| 1320.6399  | 1320.6624   | 0.0225  | 17    | 53         | 65       | GGRCLPVVCDSSK                |           |       |   |                                          |      | Mascot      |
| 1320.6399  | 1320.6624   | 0.0225  | 17    | 53         | 65       | GGRCLPVVCDSSK                |           |       |   |                                          |      | Mascot      |
| 1607.8032  | 1607.7671   | -0.0361 | -22   | 1          | 15       | MALSGWICVVTGASR              |           |       |   | Carbamidomethyl (C)[8]                   |      | Mascot      |
| 1623.7981  | 1623.7631   | -0.035  | -22   | 1          | 15       | MALSGWICVVTGASR              |           |       |   | Carbamidomethyl (C)[8], Oxidation (M)[1] |      | Mascot      |
| 1819.9912  | 1819.86     | -0.1312 | -72   | 20         | 37       | GIALQLSEAGATVYITGR           |           |       |   |                                          |      | Mascot      |
| 1829.9003  | 1829.9438   | 0.0435  | 24    | 155        | 170      | YLFNVPYGVGKAACDR             |           |       |   | Carbamidomethyl (C)[14]                  |      | Mascot      |
| 2230.2078  | 2230.1941   | -0.0137 | -6    | 84         | 104      | LDILVNNAYAGVQAILDN<br>VSK    |           |       |   |                                          |      | Mascot      |
| 2555.4053  | 2555.3406   | -0.0647 | -25   | 142        | 165      | GLIVVISMGGRLRYLFNV<br>PYGVGK |           |       |   | Oxidation (M)[9]                         |      | Mascot      |

49 SH3-domain GRB2-like 3 [Danio rerio]

gi|28278936 43568.5 8.64 4 30 0 20 0

#### Peptide Information

| Calc. Mass | Obsrv. Mass | ± da    | ± ppm | Start Seq. | End Seq. | Sequence                 | Ion Score | C. I. | % | Modification | Rank | Result Type |
|------------|-------------|---------|-------|------------|----------|--------------------------|-----------|-------|---|--------------|------|-------------|
| 856.4886   | 856.5259    | 0.0373  | 44    | 39         | 45       | KTEITHK                  |           |       |   |              |      | Mascot      |
| 960.5359   | 960.4664    | -0.0695 | -72   | 176        | 184      | GKIADSEIK                |           |       |   |              |      | Mascot      |
| 960.5359   | 960.4664    | -0.0695 | -72   | 176        | 184      | GKIADSEIK                | 20        |       | 0 |              |      | Mascot      |
| 2284.3064  | 2284.1619   | -0.1445 | -63   | 46         | 65       | LILDIVPKTIGYLQPNPAY<br>R |           |       |   |              |      | Mascot      |

|  |  |           |          |         |     |     |     |                          |  |  |  |  |  |  |  |  |  |  |  |  |  |  |  |  |  |  |  |  |  |  |  |  |  |  |  |  |  |  |  |  |  |  |  |  |  |  |  |  |  |  |  |  |  |  |  |  |  |  |  |  |  |  |  |  |  |  |  |  |  |  |  |  |  |  |  |  |  |  |  |  |  |  |  |  |  |  |  |  |  |  |  |  |  |  |  |  |  |  |  |  |  |  |  |  |  |  |  |  |  |  |  |  |  |  |  |  |  |  |  |  |  |  |  |  |  |  |  |  |  |  |  |  |  |  |  |  |  |  |  |  |  |  |  |  |  |  |  |  |  |  |  |  |  |  |  |  |  |  |  |  |  |  |  |  |  |  |  |  |  |  |  |  |  |  |  |  |  |  |  |  |  |  |  |  |  |  |  |  |  |  |  |  |  |  |  |  |  |  |  |  |  |  |  |  |  |  |  |  |  |  |  |  |  |  |  |  |  |  |  |  |  |  |  |  |  |  |  |  |  |  |  |  |  |  |  |  |  |  |  |  |  |  |  |  |  |  |  |  |  |  |  |  |  |  |  |  |  |  |  |  |  |  |  |  |  |  |  |  |  |  |  |  |  |  |  |  |  |  |  |  |  |  |  |  |  |  |  |  |  |  |  |  |  |  |  |  |  |  |  |  |  |  |  |  |  |  |  |  |  |  |  |  |  |  |  |  |  |  |  |  |  |  |  |  |  |  |  |  |  |  |  |  |  |  |  |  |  |  |  |  |  |  |  |  |  |  |  |  |  |  |  |  |  |  |  |  |  |  |  |  |  |  |  |  |  |  |  |  |  |  |  |  |  |  |  |  |  |  |  |  |  |  |  |  |  |  |  |  |  |  |  |  |  |  |  |  |  |  |  |  |  |  |  |  |  |  |  |  |  |  |  |  |  |  |  |  |  |  |  |  |  |  |  |  |  |  |  |  |  |  |  |  |  |  |  |  |  |  |  |  |  |  |  |  |  |  |  |  |  |  |  |  |  |  |  |  |  |  |  |  |  |  |  |  |  |  |  |  |  |  |  |  |  |  |  |  |  |  |  |  |  |  |  |  |  |  |  |  |  |  |  |  |  |  |  |  |  |  |  |  |  |  |  |  |  |  |  |  |  |  |  |  |  |  |  |  |  |  |  |  |  |  |  |  |  |  |  |  |  |  |  |  |  |  |  |  |  |  |  |  |  |  |  |  |  |  |  |  |  |  |  |  |  |  |  |  |  |  |  |  |  |  |  |  |  |  |  |  |  |  |  |  |  |  |  |  |  |  |  |  |  |  |  |  |  |  |  |  |  |  |  |  |  |  |  |  |  |  |  |  |  |  |  |  |  |  |  |  |  |  |  |  |  |  |  |  |  |  |  |  |  |  |  |  |  |  |  |  |  |  |  |  |  |  |  |  |  |  |  |  |  |  |  |  |  |  |  |  |  |  |  |  |  |  |  |  |  |  |  |  |  |  |  |  |  |  |  |  |  |  |  |  |  |  |  |  |  |  |  |  |  |  |  |  |  |  |  |  |  |  |  |  |  |  |  |  |  |  |  |  |  |  |  |  |  |  |  |  |  |  |  |  |  |  |  |  |  |  |  |  |  |  |  |  |  |  |  |  |  |  |  |  |  |  |  |  |  |  |  |  |  |  |  |  |  |  |  |  |  |  |  |  |  |  |  |  |  |  |  |  |  |  |  |  |  |  |  |  |  |  |  |  |  |  |  |  |  |  |  |  |  |  |  |  |  |  |  |  |  |  |  |  |  |  |  |  |  |  |  |  |  |  |  |  |  |  |  |  |  |  |  |  |  |  |  |  |  |  |  |  |  |  |  |  |  |  |  |  |  |  |  |  |  |  |  |  |  |  |  |  |  |  |  |  |  |  |  |  |  |  |  |  |  |  |  |  |  |  |  |  |  |  |  |  |  |  |  |  |  |  |  |  |  |  |  |  |  |  |  |  |  |  |  |  |  |  |  |  |  |  |  |  |  |  |  |  |  |  |  |  |  |  |  |  |  |  |  |  |  |  |  |  |  |  |  |  |  |  |  |  |  |  |  |  |  |  |  |  |  |  |  |  |  |  |  |  |  |  |  |  |  |  |  |  |  |  |  |  |  |  |  |  |  |  |  |  |  |  |  |  |  |  |  |  |  |  |  |  |  |  |  |  |  |  |  |  |  |  |  |  |  |  |  |  |  |  |  |  |  |  |  |  |  |  |  |  |  |  |  |  |  |  |  |  |  |  |  |  |  |  |  |  |  |  |  |  |  |  |  |  |  |  |  |  |  |  |  |  |  |  |  |  |  |  |  |  |  |  |  |  |  |  |  |  |  |  |  |  |  |  |  |  |  |  |  |  |  |  |  |  |  |  |  |  |  |  |  |  |  |  |  |  |  |  |  |  |  |  |  |  |  |  |  |  |  |  |  |  |  |  |  |  |  |  |  |  |  |  |  |  |  |  |  |  |  |  |  |  |  |  |  |  |  |  |  |  |  |  |  |  |  |  |  |  |  |  |  |  |  |  |  |  |  |  |  |  |  |  |  |  |  |  |  |  |  |  |  |  |  |  |  |  |  |  |  |  |  |  |  |  |  |  |  |  |  |  |  |  |  |  |  |  |  |  |  |  |  |  |  |  |  |  |  |  |  |  |  |  |  |  |  |  |  |  |  |  |  |  |  |  |  |  |  |  |  |  |  |  |  |  |  |  |  |  |  |  |  |  |  |  |  |  |  |  |  |  |  |  |  |  |  |  |  |  |  |  |  |  |  |  |  |  |  |  |  |  |  |  |  |  |  |  |  |  |  |  |  |  |  |  |  |  |  |  |  |  |  |  |  |  |  |  |  |  |  |  |  |  |  |  |  |  |  |  |  |  |  |  |  |  |  |  |  |  |  |  |  |  |  |  |  |  |  |  |  |  |  |  |  |  |  |  |  |  |  |  |  |  |  |  |  |  |  |  |  |  |  |  |  |  |  |  |  |  |  |  |  |  |  |  |  |  |  |  |  |  |  |  |  |  |  |  |  |  |  |  |  |  |  |  |  |  |    |
|--|--|-----------|----------|---------|-----|-----|-----|--------------------------|--|--|--|--|--|--|--|--|--|--|--|--|--|--|--|--|--|--|--|--|--|--|--|--|--|--|--|--|--|--|--|--|--|--|--|--|--|--|--|--|--|--|--|--|--|--|--|--|--|--|--|--|--|--|--|--|--|--|--|--|--|--|--|--|--|--|--|--|--|--|--|--|--|--|--|--|--|--|--|--|--|--|--|--|--|--|--|--|--|--|--|--|--|--|--|--|--|--|--|--|--|--|--|--|--|--|--|--|--|--|--|--|--|--|--|--|--|--|--|--|--|--|--|--|--|--|--|--|--|--|--|--|--|--|--|--|--|--|--|--|--|--|--|--|--|--|--|--|--|--|--|--|--|--|--|--|--|--|--|--|--|--|--|--|--|--|--|--|--|--|--|--|--|--|--|--|--|--|--|--|--|--|--|--|--|--|--|--|--|--|--|--|--|--|--|--|--|--|--|--|--|--|--|--|--|--|--|--|--|--|--|--|--|--|--|--|--|--|--|--|--|--|--|--|--|--|--|--|--|--|--|--|--|--|--|--|--|--|--|--|--|--|--|--|--|--|--|--|--|--|--|--|--|--|--|--|--|--|--|--|--|--|--|--|--|--|--|--|--|--|--|--|--|--|--|--|--|--|--|--|--|--|--|--|--|--|--|--|--|--|--|--|--|--|--|--|--|--|--|--|--|--|--|--|--|--|--|--|--|--|--|--|--|--|--|--|--|--|--|--|--|--|--|--|--|--|--|--|--|--|--|--|--|--|--|--|--|--|--|--|--|--|--|--|--|--|--|--|--|--|--|--|--|--|--|--|--|--|--|--|--|--|--|--|--|--|--|--|--|--|--|--|--|--|--|--|--|--|--|--|--|--|--|--|--|--|--|--|--|--|--|--|--|--|--|--|--|--|--|--|--|--|--|--|--|--|--|--|--|--|--|--|--|--|--|--|--|--|--|--|--|--|--|--|--|--|--|--|--|--|--|--|--|--|--|--|--|--|--|--|--|--|--|--|--|--|--|--|--|--|--|--|--|--|--|--|--|--|--|--|--|--|--|--|--|--|--|--|--|--|--|--|--|--|--|--|--|--|--|--|--|--|--|--|--|--|--|--|--|--|--|--|--|--|--|--|--|--|--|--|--|--|--|--|--|--|--|--|--|--|--|--|--|--|--|--|--|--|--|--|--|--|--|--|--|--|--|--|--|--|--|--|--|--|--|--|--|--|--|--|--|--|--|--|--|--|--|--|--|--|--|--|--|--|--|--|--|--|--|--|--|--|--|--|--|--|--|--|--|--|--|--|--|--|--|--|--|--|--|--|--|--|--|--|--|--|--|--|--|--|--|--|--|--|--|--|--|--|--|--|--|--|--|--|--|--|--|--|--|--|--|--|--|--|--|--|--|--|--|--|--|--|--|--|--|--|--|--|--|--|--|--|--|--|--|--|--|--|--|--|--|--|--|--|--|--|--|--|--|--|--|--|--|--|--|--|--|--|--|--|--|--|--|--|--|--|--|--|--|--|--|--|--|--|--|--|--|--|--|--|--|--|--|--|--|--|--|--|--|--|--|--|--|--|--|--|--|--|--|--|--|--|--|--|--|--|--|--|--|--|--|--|--|--|--|--|--|--|--|--|--|--|--|--|--|--|--|--|--|--|--|--|--|--|--|--|--|--|--|--|--|--|--|--|--|--|--|--|--|--|--|--|--|--|--|--|--|--|--|--|--|--|--|--|--|--|--|--|--|--|--|--|--|--|--|--|--|--|--|--|--|--|--|--|--|--|--|--|--|--|--|--|--|--|--|--|--|--|--|--|--|--|--|--|--|--|--|--|--|--|--|--|--|--|--|--|--|--|--|--|--|--|--|--|--|--|--|--|--|--|--|--|--|--|--|--|--|--|--|--|--|--|--|--|--|--|--|--|--|--|--|--|--|--|--|--|--|--|--|--|--|--|--|--|--|--|--|--|--|--|--|--|--|--|--|--|--|--|--|--|--|--|--|--|--|--|--|--|--|--|--|--|--|--|--|--|--|--|--|--|--|--|--|--|--|--|--|--|--|--|--|--|--|--|--|--|--|--|--|--|--|--|--|--|--|--|--|--|--|--|--|--|--|--|--|--|--|--|--|--|--|--|--|--|--|--|--|--|--|--|--|--|--|--|--|--|--|--|--|--|--|--|--|--|--|--|--|--|--|--|--|--|--|--|--|--|--|--|--|--|--|--|--|--|--|--|--|--|--|--|--|--|--|--|--|--|--|--|--|--|--|--|--|--|--|--|--|--|--|--|--|--|--|--|--|--|--|--|--|--|--|--|--|--|--|--|--|--|--|--|--|--|--|--|--|--|--|--|--|--|--|--|--|--|--|--|--|--|--|--|--|--|--|--|--|--|--|--|--|--|--|--|--|--|--|--|--|--|--|--|--|--|--|--|--|--|--|--|--|--|--|--|--|--|--|--|--|--|--|--|--|--|--|--|--|--|--|--|--|--|--|--|--|--|--|--|--|--|--|--|--|--|--|--|--|--|--|--|--|--|--|--|--|--|--|--|--|--|--|--|--|--|--|--|--|--|--|--|--|--|--|--|--|--|--|--|--|--|--|--|--|--|--|--|--|--|--|--|--|--|--|--|--|--|--|--|--|--|--|--|--|--|--|--|--|--|--|--|--|--|--|--|--|--|--|--|--|--|--|--|--|--|--|--|--|--|--|--|--|--|--|--|--|--|--|--|--|--|--|--|--|--|--|--|--|--|--|--|--|--|--|--|--|--|--|--|--|--|--|--|--|--|--|--|--|--|--|--|--|--|--|--|--|--|--|--|--|--|--|--|--|--|--|--|--|--|--|--|--|--|--|--|--|--|--|--|--|--|--|--|--|--|--|--|--|--|--|--|--|--|--|--|--|--|--|--|--|--|--|--|--|--|--|--|--|--|--|--|--|--|--|--|--|--|--|--|--|--|--|--|--|--|--|--|--|--|--|--|--|--|--|--|--|--|--|--|--|--|--|--|--|--|--|--|--|--|--|--|--|--|--|--|--|--|--|--|--|--|--|--|--|--|--|--|----|
|  |  | 2362.2625 | 2362.209 | -0.0535 | -23 | 208 | 227 | DVQRLQHLSGLLEAVIDY<br>HR |  |  |  |  |  |  |  |  |  |  |  |  |  |  |  |  |  |  |  |  |  |  |  |  |  |  |  |  |  |  |  |  |  |  |  |  |  |  |  |  |  |  |  |  |  |  |  |  |  |  |  |  |  |  |  |  |  |  |  |  |  |  |  |  |  |  |  |  |  |  |  |  |  |  |  |  |  |  |  |  |  |  |  |  |  |  |  |  |  |  |  |  |  |  |  |  |  |  |  |  |  |  |  |  |  |  |  |  |  |  |  |  |  |  |  |  |  |  |  |  |  |  |  |  |  |  |  |  |  |  |  |  |  |  |  |  |  |  |  |  |  |  |  |  |  |  |  |  |  |  |  |  |  |  |  |  |  |  |  |  |  |  |  |  |  |  |  |  |  |  |  |  |  |  |  |  |  |  |  |  |  |  |  |  |  |  |  |  |  |  |  |  |  |  |  |  |  |  |  |  |  |  |  |  |  |  |  |  |  |  |  |  |  |  |  |  |  |  |  |  |  |  |  |  |  |  |  |  |  |  |  |  |  |  |  |  |  |  |  |  |  |  |  |  |  |  |  |  |  |  |  |  |  |  |  |  |  |  |  |  |  |  |  |  |  |  |  |  |  |  |  |  |  |  |  |  |  |  |  |  |  |  |  |  |  |  |  |  |  |  |  |  |  |  |  |  |  |  |  |  |  |  |  |  |  |  |  |  |  |  |  |  |  |  |  |  |  |  |  |  |  |  |  |  |  |  |  |  |  |  |  |  |  |  |  |  |  |  |  |  |  |  |  |  |  |  |  |  |  |  |  |  |  |  |  |  |  |  |  |  |  |  |  |  |  |  |  |  |  |  |  |  |  |  |  |  |  |  |  |  |  |  |  |  |  |  |  |  |  |  |  |  |  |  |  |  |  |  |  |  |  |  |  |  |  |  |  |  |  |  |  |  |  |  |  |  |  |  |  |  |  |  |  |  |  |  |  |  |  |  |  |  |  |  |  |  |  |  |  |  |  |  |  |  |  |  |  |  |  |  |  |  |  |  |  |  |  |  |  |  |  |  |  |  |  |  |  |  |  |  |  |  |  |  |  |  |  |  |  |  |  |  |  |  |  |  |  |  |  |  |  |  |  |  |  |  |  |  |  |  |  |  |  |  |  |  |  |  |  |  |  |  |  |  |  |  |  |  |  |  |  |  |  |  |  |  |  |  |  |  |  |  |  |  |  |  |  |  |  |  |  |  |  |  |  |  |  |  |  |  |  |  |  |  |  |  |  |  |  |  |  |  |  |  |  |  |  |  |  |  |  |  |  |  |  |  |  |  |  |  |  |  |  |  |  |  |  |  |  |  |  |  |  |  |  |  |  |  |  |  |  |  |  |  |  |  |  |  |  |  |  |  |  |  |  |  |  |  |  |  |  |  |  |  |  |  |  |  |  |  |  |  |  |  |  |  |  |  |  |  |  |  |  |  |  |  |  |  |  |  |  |  |  |  |  |  |  |  |  |  |  |  |  |  |  |  |  |  |  |  |  |  |  |  |  |  |  |  |  |  |  |  |  |  |  |  |  |  |  |  |  |  |  |  |  |  |  |  |  |  |  |  |  |  |  |  |  |  |  |  |  |  |  |  |  |  |  |  |  |  |  |  |  |  |  |  |  |  |  |  |  |  |  |  |  |  |  |  |  |  |  |  |  |  |  |  |  |  |  |  |  |  |  |  |  |  |  |  |  |  |  |  |  |  |  |  |  |  |  |  |  |  |  |  |  |  |  |  |  |  |  |  |  |  |  |  |  |  |  |  |  |  |  |  |  |  |  |  |  |  |  |  |  |  |  |  |  |  |  |  |  |  |  |  |  |  |  |  |  |  |  |  |  |  |  |  |  |  |  |  |  |  |  |  |  |  |  |  |  |  |  |  |  |  |  |  |  |  |  |  |  |  |  |  |  |  |  |  |  |  |  |  |  |  |  |  |  |  |  |  |  |  |  |  |  |  |  |  |  |  |  |  |  |  |  |  |  |  |  |  |  |  |  |  |  |  |  |  |  |  |  |  |  |  |  |  |  |  |  |  |  |  |  |  |  |  |  |  |  |  |  |  |  |  |  |  |  |  |  |  |  |  |  |  |  |  |  |  |  |  |  |  |  |  |  |  |  |  |  |  |  |  |  |  |  |  |  |  |  |  |  |  |  |  |  |  |  |  |  |  |  |  |  |  |  |  |  |  |  |  |  |  |  |  |  |  |  |  |  |  |  |  |  |  |  |  |  |  |  |  |  |  |  |  |  |  |  |  |  |  |  |  |  |  |  |  |  |  |  |  |  |  |  |  |  |  |  |  |  |  |  |  |  |  |  |  |  |  |  |  |  |  |  |  |  |  |  |  |  |  |  |  |  |  |  |  |  |  |  |  |  |  |  |  |  |  |  |  |  |  |  |  |  |  |  |  |  |  |  |  |  |  |  |  |  |  |  |  |  |  |  |  |  |  |  |  |  |  |  |  |  |  |  |  |  |  |  |  |  |  |  |  |  |  |  |  |  |  |  |  |  |  |  |  |  |  |  |  |  |  |  |  |  |  |  |  |  |  |  |  |  |  |  |  |  |  |  |  |  |  |  |  |  |  |  |  |  |  |  |  |  |  |  |  |  |  |  |  |  |  |  |  |  |  |  |  |  |  |  |  |  |  |  |  |  |  |  |  |  |  |  |  |  |  |  |  |  |  |  |  |  |  |  |  |  |  |  |  |  |  |  |  |  |  |  |  |  |  |  |  |  |  |  |  |  |  |  |  |  |  |  |  |  |  |  |  |  |  |  |  |  |  |  |  |  |  |  |  |  |  |  |  |  |  |  |  |  |  |  |  |  |  |  |  |  |  |  |  |  |  |  |  |  |  |  |  |  |  |  |  |  |  |  |  |  |  |  |  |  |  |  |  |  |  |  |  |  |  |  |  |  |  |  |  |  |  |  |  |  |  |  |  |  |  |  |  |  |  |  |  |  |  |  |  |  |  |  |  |  |  |  |  |  |  |  |  |  |  |  |  |  |  |  |  |  |  |  |  |  |  |  |  |  |  | </ |
|--|--|-----------|----------|---------|-----|-----|-----|--------------------------|--|--|--|--|--|--|--|--|--|--|--|--|--|--|--|--|--|--|--|--|--|--|--|--|--|--|--|--|--|--|--|--|--|--|--|--|--|--|--|--|--|--|--|--|--|--|--|--|--|--|--|--|--|--|--|--|--|--|--|--|--|--|--|--|--|--|--|--|--|--|--|--|--|--|--|--|--|--|--|--|--|--|--|--|--|--|--|--|--|--|--|--|--|--|--|--|--|--|--|--|--|--|--|--|--|--|--|--|--|--|--|--|--|--|--|--|--|--|--|--|--|--|--|--|--|--|--|--|--|--|--|--|--|--|--|--|--|--|--|--|--|--|--|--|--|--|--|--|--|--|--|--|--|--|--|--|--|--|--|--|--|--|--|--|--|--|--|--|--|--|--|--|--|--|--|--|--|--|--|--|--|--|--|--|--|--|--|--|--|--|--|--|--|--|--|--|--|--|--|--|--|--|--|--|--|--|--|--|--|--|--|--|--|--|--|--|--|--|--|--|--|--|--|--|--|--|--|--|--|--|--|--|--|--|--|--|--|--|--|--|--|--|--|--|--|--|--|--|--|--|--|--|--|--|--|--|--|--|--|--|--|--|--|--|--|--|--|--|--|--|--|--|--|--|--|--|--|--|--|--|--|--|--|--|--|--|--|--|--|--|--|--|--|--|--|--|--|--|--|--|--|--|--|--|--|--|--|--|--|--|--|--|--|--|--|--|--|--|--|--|--|--|--|--|--|--|--|--|--|--|--|--|--|--|--|--|--|--|--|--|--|--|--|--|--|--|--|--|--|--|--|--|--|--|--|--|--|--|--|--|--|--|--|--|--|--|--|--|--|--|--|--|--|--|--|--|--|--|--|--|--|--|--|--|--|--|--|--|--|--|--|--|--|--|--|--|--|--|--|--|--|--|--|--|--|--|--|--|--|--|--|--|--|--|--|--|--|--|--|--|--|--|--|--|--|--|--|--|--|--|--|--|--|--|--|--|--|--|--|--|--|--|--|--|--|--|--|--|--|--|--|--|--|--|--|--|--|--|--|--|--|--|--|--|--|--|--|--|--|--|--|--|--|--|--|--|--|--|--|--|--|--|--|--|--|--|--|--|--|--|--|--|--|--|--|--|--|--|--|--|--|--|--|--|--|--|--|--|--|--|--|--|--|--|--|--|--|--|--|--|--|--|--|--|--|--|--|--|--|--|--|--|--|--|--|--|--|--|--|--|--|--|--|--|--|--|--|--|--|--|--|--|--|--|--|--|--|--|--|--|--|--|--|--|--|--|--|--|--|--|--|--|--|--|--|--|--|--|--|--|--|--|--|--|--|--|--|--|--|--|--|--|--|--|--|--|--|--|--|--|--|--|--|--|--|--|--|--|--|--|--|--|--|--|--|--|--|--|--|--|--|--|--|--|--|--|--|--|--|--|--|--|--|--|--|--|--|--|--|--|--|--|--|--|--|--|--|--|--|--|--|--|--|--|--|--|--|--|--|--|--|--|--|--|--|--|--|--|--|--|--|--|--|--|--|--|--|--|--|--|--|--|--|--|--|--|--|--|--|--|--|--|--|--|--|--|--|--|--|--|--|--|--|--|--|--|--|--|--|--|--|--|--|--|--|--|--|--|--|--|--|--|--|--|--|--|--|--|--|--|--|--|--|--|--|--|--|--|--|--|--|--|--|--|--|--|--|--|--|--|--|--|--|--|--|--|--|--|--|--|--|--|--|--|--|--|--|--|--|--|--|--|--|--|--|--|--|--|--|--|--|--|--|--|--|--|--|--|--|--|--|--|--|--|--|--|--|--|--|--|--|--|--|--|--|--|--|--|--|--|--|--|--|--|--|--|--|--|--|--|--|--|--|--|--|--|--|--|--|--|--|--|--|--|--|--|--|--|--|--|--|--|--|--|--|--|--|--|--|--|--|--|--|--|--|--|--|--|--|--|--|--|--|--|--|--|--|--|--|--|--|--|--|--|--|--|--|--|--|--|--|--|--|--|--|--|--|--|--|--|--|--|--|--|--|--|--|--|--|--|--|--|--|--|--|--|--|--|--|--|--|--|--|--|--|--|--|--|--|--|--|--|--|--|--|--|--|--|--|--|--|--|--|--|--|--|--|--|--|--|--|--|--|--|--|--|--|--|--|--|--|--|--|--|--|--|--|--|--|--|--|--|--|--|--|--|--|--|--|--|--|--|--|--|--|--|--|--|--|--|--|--|--|--|--|--|--|--|--|--|--|--|--|--|--|--|--|--|--|--|--|--|--|--|--|--|--|--|--|--|--|--|--|--|--|--|--|--|--|--|--|--|--|--|--|--|--|--|--|--|--|--|--|--|--|--|--|--|--|--|--|--|--|--|--|--|--|--|--|--|--|--|--|--|--|--|--|--|--|--|--|--|--|--|--|--|--|--|--|--|--|--|--|--|--|--|--|--|--|--|--|--|--|--|--|--|--|--|--|--|--|--|--|--|--|--|--|--|--|--|--|--|--|--|--|--|--|--|--|--|--|--|--|--|--|--|--|--|--|--|--|--|--|--|--|--|--|--|--|--|--|--|--|--|--|--|--|--|--|--|--|--|--|--|--|--|--|--|--|--|--|--|--|--|--|--|--|--|--|--|--|--|--|--|--|--|--|--|--|--|--|--|--|--|--|--|--|--|--|--|--|--|--|--|--|--|--|--|--|--|--|--|--|--|--|--|--|--|--|--|--|--|--|--|--|--|--|--|--|--|--|--|--|--|--|--|--|--|--|--|--|--|--|--|--|--|--|--|--|--|--|--|--|--|--|--|--|--|--|--|--|--|--|--|--|--|--|--|--|--|--|--|--|--|--|--|--|--|--|--|--|--|--|--|--|--|--|--|--|--|--|--|--|--|--|--|--|--|--|--|--|--|--|--|--|--|--|--|--|--|--|--|--|--|--|--|--|--|--|--|--|--|--|--|--|--|--|--|--|--|--|--|--|--|--|--|--|--|--|--|--|--|--|--|--|--|--|--|--|--|--|--|--|--|--|--|--|--|--|--|--|--|--|--|--|--|--|--|--|--|--|--|--|--|----|

|           |           |         |     |     |     |                            |     |        |  |                                              |        |
|-----------|-----------|---------|-----|-----|-----|----------------------------|-----|--------|--|----------------------------------------------|--------|
| 1999.943  | 1999.9437 | 0.0007  | 0   | 442 | 459 | AIPTCTVFYPSDGVSTER         |     |        |  | Carbamidomethyl (C)[5]                       | Mascot |
| 2114.1855 | 2114.187  | 0.0015  | 1   | 534 | 553 | VIDPFTIKPLDASTIVASAR       | 145 | 100    |  |                                              | Mascot |
| 2114.1855 | 2114.187  | 0.0015  | 1   | 534 | 553 | VIDPFTIKPLDASTIVASAR       |     |        |  |                                              | Mascot |
| 2175.1404 | 2175.1401 | -0.0003 | 0   | 568 | 589 | EGGLGEAVLSAVGEEPGLVVHR     | 208 | 100    |  |                                              | Mascot |
| 2175.1404 | 2175.1401 | -0.0003 | 0   | 568 | 589 | EGGLGEAVLSAVGEEPGLVVHR     |     |        |  |                                              | Mascot |
| 2294.1663 | 2294.1646 | -0.0017 | -1  | 475 | 494 | TSRPDTAVIYNPEEKFEIGK       |     |        |  |                                              | Mascot |
| 2294.1663 | 2294.1646 | -0.0017 | -1  | 475 | 494 | TSRPDTAVIYNPEEKFEIGK       | 29  | 65.921 |  |                                              | Mascot |
| 2432.1406 | 2432.1375 | -0.0031 | -1  | 362 | 382 | YIECFIAEQNMVSVAIGCATR      |     |        |  | Carbamidomethyl (C)[4,18]                    | Mascot |
| 2432.1406 | 2432.1375 | -0.0031 | -1  | 362 | 382 | YIECFIAEQNMVSVAIGCATR      | 181 | 100    |  | Carbamidomethyl (C)[4,18]                    | Mascot |
| 2448.1355 | 2448.1428 | 0.0073  | 3   | 362 | 382 | YIECFIAEQNMVSVAIGCATR      |     |        |  | Carbamidomethyl (C)[4,18], Oxidation (M)[11] | Mascot |
| 2457.3096 | 2457.3127 | 0.0031  | 1   | 504 | 527 | DQVTVIGAGVTLHEALAAHDQLAK   |     |        |  |                                              | Mascot |
| 2457.3096 | 2457.3127 | 0.0031  | 1   | 504 | 527 | DQVTVIGAGVTLHEALAAHDQLAK   | 133 | 100    |  |                                              | Mascot |
| 2515.2319 | 2515.2405 | 0.0086  | 3   | 114 | 139 | LAFVDVATGSLGQGLGACGMAYTGK  |     |        |  | Carbamidomethyl (C)[19]                      | Mascot |
| 2590.3398 | 2590.2161 | -0.1237 | -48 | 294 | 317 | EDAPPADLSPIHLLTAPEYKLGDK   |     |        |  |                                              | Mascot |
| 3000.2307 | 3000.2456 | 0.0149  | 5   | 148 | 173 | VYCMLGDGECSEGSVWEAMAFASHYK |     |        |  | Carbamidomethyl (C)[3,10], Oxidation (M)[4]  | Mascot |

2     transketolase-like protein 2 [Danio rerio]     gi|186288308     67795.3     6.81     21     1,350     100     1209     100

Peptide Information

| Calc. Mass | Obsrv. Mass | ± da    | ± ppm | Start Seq. | End Seq. | Sequence          | Ion Score | C. I. % | Modification      | Rank | Result Type |
|------------|-------------|---------|-------|------------|----------|-------------------|-----------|---------|-------------------|------|-------------|
| 901.5101   | 901.5057    | -0.0044 | -5    | 93         | 100      | ASDLLNLR          |           |         |                   |      | Mascot      |
| 1044.4932  | 1044.4929   | -0.0003 | 0     | 226        | 234      | AMWHAEGVK         |           |         | Oxidation (M)[2]  |      | Mascot      |
| 1103.5731  | 1103.5682   | -0.0049 | -4    | 559        | 567      | VITVEDHYK         |           |         |                   |      | Mascot      |
| 1354.7689  | 1354.7678   | -0.0011 | -1    | 174        | 185      | LDNLVAILDVNR      |           |         |                   |      | Mascot      |
| 1354.7689  | 1354.7678   | -0.0011 | -1    | 174        | 185      | LDNLVAILDVNR      | 108       | 100     |                   |      | Mascot      |
| 1436.738   | 1436.7465   | 0.0085  | 6     | 101        | 113      | KIDSDLEGHPTPK     |           |         |                   |      | Mascot      |
| 1488.7845  | 1488.7856   | 0.0011  | 1     | 385        | 398      | TVSFASTFAAFLAR    | 120       | 100     |                   |      | Mascot      |
| 1488.7845  | 1488.7856   | 0.0011  | 1     | 385        | 398      | TVSFASTFAAFLAR    |           |         |                   |      | Mascot      |
| 1719.8547  | 1719.8544   | -0.0003 | 0     | 475        | 489      | TSRPDTAVIYNPEEK   |           |         |                   |      | Mascot      |
| 1719.8547  | 1719.8544   | -0.0003 | 0     | 475        | 489      | TSRPDTAVIYNPEEK   | 65        | 99.992  |                   |      | Mascot      |
| 1736.8887  | 1736.8861   | -0.0026 | -1    | 598        | 613      | SGKPQELLDMFGISAK  |           |         | Oxidation (M)[10] |      | Mascot      |
| 1751.817   | 1751.814    | -0.003  | -2    | 252        | 266      | GIEDQDNWHGKMPMK   |           |         |                   |      | Mascot      |
| 1767.8119  | 1767.8112   | -0.0007 | 0     | 252        | 266      | GIEDQDNWHGKMPMK   |           |         | Oxidation (M)[13] |      | Mascot      |
| 1893.9817  | 1893.9828   | 0.0011  | 1     | 186        | 202      | LGQSEPAPLQHNVNVYK |           |         |                   |      | Mascot      |

|           |           |         |     |     |     |                                |     |        |                                              |        |
|-----------|-----------|---------|-----|-----|-----|--------------------------------|-----|--------|----------------------------------------------|--------|
| 1893.9817 | 1893.9828 | 0.0011  | 1   | 186 | 202 | LGQSEPAPLQHNVNQYK              | 97  | 100    |                                              | Mascot |
| 1901.9908 | 1901.9904 | -0.0004 | 0   | 75  | 92  | GHAAPILYAAWAEAGYIK             |     |        |                                              | Mascot |
| 1999.943  | 1999.9437 | 0.0007  | 0   | 442 | 459 | AIPTCTVFYPSDGVSTER             | 127 | 100    | Carbamidomethyl (C)[5]                       | Mascot |
| 1999.943  | 1999.9437 | 0.0007  | 0   | 442 | 459 | AIPTCTVFYPSDGVSTER             |     |        | Carbamidomethyl (C)[5]                       | Mascot |
| 2114.1855 | 2114.187  | 0.0015  | 1   | 534 | 553 | VIDPFTIKPLDASTIVASA<br>R       | 145 | 100    |                                              | Mascot |
| 2114.1855 | 2114.187  | 0.0015  | 1   | 534 | 553 | VIDPFTIKPLDASTIVASA<br>R       |     |        |                                              | Mascot |
| 2175.1404 | 2175.1401 | -0.0003 | 0   | 568 | 589 | EGGLGEAVLSAVGEEPGI<br>VVHR     | 208 | 100    |                                              | Mascot |
| 2175.1404 | 2175.1401 | -0.0003 | 0   | 568 | 589 | EGGLGEAVLSAVGEEPGI<br>VVHR     |     |        |                                              | Mascot |
| 2294.1663 | 2294.1646 | -0.0017 | -1  | 475 | 494 | TSRPDTAVIYNPEEKFEIG<br>K       |     |        |                                              | Mascot |
| 2294.1663 | 2294.1646 | -0.0017 | -1  | 475 | 494 | TSRPDTAVIYNPEEKFEIG<br>K       | 29  | 65.921 |                                              | Mascot |
| 2432.1406 | 2432.1375 | -0.0031 | -1  | 362 | 382 | YIECFIAEQNMVSAIGCA<br>TR       |     |        | Carbamidomethyl (C)[4,18]                    | Mascot |
| 2432.1406 | 2432.1375 | -0.0031 | -1  | 362 | 382 | YIECFIAEQNMVSAIGCA<br>TR       | 181 | 100    | Carbamidomethyl (C)[4,18]                    | Mascot |
| 2448.1355 | 2448.1428 | 0.0073  | 3   | 362 | 382 | YIECFIAEQNMVSAIGCA<br>TR       |     |        | Carbamidomethyl (C)[4,18], Oxidation (M)[11] | Mascot |
| 2457.3096 | 2457.3127 | 0.0031  | 1   | 504 | 527 | DQVTVIGAGVTLHEALAA<br>HDQLAK   |     |        |                                              | Mascot |
| 2457.3096 | 2457.3127 | 0.0031  | 1   | 504 | 527 | DQVTVIGAGVTLHEALAA<br>HDQLAK   | 133 | 100    |                                              | Mascot |
| 2489.0747 | 2489.0876 | 0.0129  | 5   | 205 | 225 | CEAFGFNTYVVDGHDVE<br>ELCK      |     |        | Carbamidomethyl (C)[1,20]                    | Mascot |
| 2515.2319 | 2515.2405 | 0.0086  | 3   | 114 | 139 | LAFVDVATGSLGQGLGA<br>ACGMAYTGK |     |        | Carbamidomethyl (C)[19]                      | Mascot |
| 2590.3398 | 2590.2161 | -0.1237 | -48 | 294 | 317 | EDAPPADLSPIHLLTAPE<br>YKLGDK   |     |        |                                              | Mascot |
| 3000.2307 | 3000.2456 | 0.0149  | 5   | 148 | 173 | YVCMLGDGECSEGSVW<br>EAMAFASHYK |     |        | Carbamidomethyl (C)[3,10], Oxidation (M)[4]  | Mascot |

3

transketolase [Danio rerio]

gi|31872040

67811.3

6.81

20

1,210

100

1082

100

| Peptide Information |             |         |       |            |          |                 |           |         |                  |                  |
|---------------------|-------------|---------|-------|------------|----------|-----------------|-----------|---------|------------------|------------------|
| Calc. Mass          | Obsrv. Mass | ± da    | ± ppm | Start Seq. | End Seq. | Sequence        | Ion Score | C. I. % | Modification     | Rank Result Type |
| 901.5101            | 901.5057    | -0.0044 | -5    | 93         | 100      | ASDLLNLR        |           |         |                  | Mascot           |
| 1044.4932           | 1044.4929   | -0.0003 | 0     | 226        | 234      | AMWHAEGVK       |           |         | Oxidation (M)[2] | Mascot           |
| 1103.5731           | 1103.5682   | -0.0049 | -4    | 559        | 567      | VITVEDHYK       |           |         |                  | Mascot           |
| 1354.7689           | 1354.7678   | -0.0011 | -1    | 174        | 185      | LDNLVAILDVNR    |           |         |                  | Mascot           |
| 1354.7689           | 1354.7678   | -0.0011 | -1    | 174        | 185      | LDNLVAILDVNR    | 108       | 100     |                  | Mascot           |
| 1436.738            | 1436.7465   | 0.0085  | 6     | 101        | 113      | KIDSDLEGHPTPK   |           |         |                  | Mascot           |
| 1488.7845           | 1488.7856   | 0.0011  | 1     | 385        | 398      | TVSFASTFAAFLAR  | 120       | 100     |                  | Mascot           |
| 1488.7845           | 1488.7856   | 0.0011  | 1     | 385        | 398      | TVSFASTFAAFLAR  |           |         |                  | Mascot           |
| 1719.8547           | 1719.8544   | -0.0003 | 0     | 475        | 489      | TSRPDTAVIYNPEEK |           |         |                  | Mascot           |

|   |                                                                  |           |         |     |     |     |                                |      |        |                                              |        |                                               |
|---|------------------------------------------------------------------|-----------|---------|-----|-----|-----|--------------------------------|------|--------|----------------------------------------------|--------|-----------------------------------------------|
|   | 1719.8547                                                        | 1719.8544 | -0.0003 | 0   | 475 | 489 | TSRPDTAVIYNPEEK                | 65   | 99.992 |                                              | Mascot |                                               |
|   | 1736.8887                                                        | 1736.8861 | -0.0026 | -1  | 598 | 613 | SGKPQELLDMFGISAK               |      |        | Oxidation (M)[10]                            | Mascot |                                               |
|   | 1751.817                                                         | 1751.814  | -0.003  | -2  | 252 | 266 | GIEDQDNWHGKPMMPK               |      |        |                                              | Mascot |                                               |
|   | 1767.8119                                                        | 1767.8112 | -0.0007 | 0   | 252 | 266 | GIEDQDNWHGKPMMPK               |      |        | Oxidation (M)[13]                            | Mascot |                                               |
|   | 1893.9817                                                        | 1893.9828 | 0.0011  | 1   | 186 | 202 | LGQSEPAPLQHNVNVYK              |      |        |                                              | Mascot |                                               |
|   | 1893.9817                                                        | 1893.9828 | 0.0011  | 1   | 186 | 202 | LGQSEPAPLQHNVNVYK              | 97   | 100    |                                              | Mascot |                                               |
|   | 1901.9908                                                        | 1901.9904 | -0.0004 | 0   | 75  | 92  | GHAAPILYAAWAEAGYIK             |      |        |                                              | Mascot |                                               |
|   | 2114.1855                                                        | 2114.187  | 0.0015  | 1   | 534 | 553 | VIDPFTIKPLDASTIVASAR           | 145  | 100    |                                              | Mascot |                                               |
|   | 2114.1855                                                        | 2114.187  | 0.0015  | 1   | 534 | 553 | VIDPFTIKPLDASTIVASAR           |      |        |                                              | Mascot |                                               |
|   | 2175.1404                                                        | 2175.1401 | -0.0003 | 0   | 568 | 589 | EGGLGEAVLSAVGEEPGI<br>VVHR     | 208  | 100    |                                              | Mascot |                                               |
|   | 2175.1404                                                        | 2175.1401 | -0.0003 | 0   | 568 | 589 | EGGLGEAVLSAVGEEPGI<br>VVHR     |      |        |                                              | Mascot |                                               |
|   | 2294.1663                                                        | 2294.1646 | -0.0017 | -1  | 475 | 494 | TSRPDTAVIYNPEEKFEIGK           |      |        |                                              | Mascot |                                               |
|   | 2294.1663                                                        | 2294.1646 | -0.0017 | -1  | 475 | 494 | TSRPDTAVIYNPEEKFEIGK           | 29   | 65.921 |                                              | Mascot |                                               |
|   | 2432.1406                                                        | 2432.1375 | -0.0031 | -1  | 362 | 382 | YIECFIAEQNMVSVAIGCATR          |      |        | Carbamidomethyl (C)[4,18]                    | Mascot |                                               |
|   | 2432.1406                                                        | 2432.1375 | -0.0031 | -1  | 362 | 382 | YIECFIAEQNMVSVAIGCATR          | 181  | 100    | Carbamidomethyl (C)[4,18]                    | Mascot |                                               |
|   | 2448.1355                                                        | 2448.1428 | 0.0073  | 3   | 362 | 382 | YIECFIAEQNMVSVAIGCATR          |      |        | Carbamidomethyl (C)[4,18], Oxidation (M)[11] | Mascot |                                               |
|   | 2457.3096                                                        | 2457.3127 | 0.0031  | 1   | 504 | 527 | DQVTVIGAGVTLHEALAA<br>HDQLAK   |      |        |                                              | Mascot |                                               |
|   | 2457.3096                                                        | 2457.3127 | 0.0031  | 1   | 504 | 527 | DQVTVIGAGVTLHEALAA<br>HDQLAK   | 133  | 100    |                                              | Mascot |                                               |
|   | 2489.0747                                                        | 2489.0876 | 0.0129  | 5   | 205 | 225 | CEAFGFNTYVVDGHDVE<br>ELCK      |      |        | Carbamidomethyl (C)[1,20]                    | Mascot |                                               |
|   | 2515.2319                                                        | 2515.2405 | 0.0086  | 3   | 114 | 139 | LAFVDVATGSLGQGLGA<br>ACGMAYTGK |      |        | Carbamidomethyl (C)[19]                      | Mascot |                                               |
|   | 2590.3398                                                        | 2590.2161 | -0.1237 | -48 | 294 | 317 | EDAPPADLSPIHLLTAPE<br>YKLGDK   |      |        |                                              | Mascot |                                               |
|   | 3000.2307                                                        | 3000.2456 | 0.0149  | 5   | 148 | 173 | VYCMLGDGECSEGSVW<br>EAMAFASHYK |      |        | Carbamidomethyl (C)[3,10], Oxidation (M)[4]  | Mascot |                                               |
| 4 | PREDICTED: calcium/calmodulin-dependent 3',5'-cyclic g 326681376 |           |         |     |     |     | 45655.3                        | 5.68 | 11     | 50                                           | 53.402 | nucleotide phosphodiesterase 1C-like, partial |

Peptide Information

| Calc. Mass | Obsrv. Mass | ± da    | ± ppm | Start Seq. | End Seq. | Sequence         | Ion Score | C. I. % | Modification           | Rank | Result Type |
|------------|-------------|---------|-------|------------|----------|------------------|-----------|---------|------------------------|------|-------------|
| 856.5515   | 856.5234    | -0.0281 | -33   | 27         | 32       | IWLRLR           |           |         |                        |      | Mascot      |
| 864.4429   | 864.4704    | 0.0275  | 32    | 104        | 110      | QMGLMLR          |           |         | Oxidation (M)[2]       |      | Mascot      |
| 901.5651   | 901.5057    | -0.0594 | -66   | 33         | 40       | GLLRCLVK         |           |         |                        |      | Mascot      |
| 1045.5823  | 1045.562    | -0.0203 | -19   | 37         | 44       | CLVKQLER         |           |         | Carbamidomethyl (C)[1] |      | Mascot      |
| 1062.5691  | 1062.6919   | 0.1228  | 116   | 112        | 119      | TEEKPRFR         |           |         |                        |      | Mascot      |
| 1908.9185  | 1908.9324   | 0.0139  | 7     | 2          | 17       | ESPTREIEEFENTSLK |           |         |                        |      | Mascot      |

|   |                                                  |           |         |     |     |             |                             |      |   |    |                         |  |  |  |  |        |
|---|--------------------------------------------------|-----------|---------|-----|-----|-------------|-----------------------------|------|---|----|-------------------------|--|--|--|--|--------|
|   | 1923.9368                                        | 1923.9685 | 0.0317  | 16  | 299 | 314         | LLQDDDEMILYNLSK             |      |   |    |                         |  |  |  |  | Mascot |
|   | 2283.2634                                        | 2283.1833 | -0.0801 | -35 | 193 | 213         | FKIPVSALVSFVEALEVG<br>YSK   |      |   |    |                         |  |  |  |  | Mascot |
|   | 2306.134                                         | 2306.1567 | 0.0227  | 10  | 322 | 341         | ALVVEMVLATDMSCHFQ<br>QVK    |      |   |    | Carbamidomethyl (C)[14] |  |  |  |  | Mascot |
|   | 2489.2002                                        | 2489.0876 | -0.1126 | -45 | 73  | 94          | RLVDTEDELSDIQSDSVP<br>SEVR  |      |   |    |                         |  |  |  |  | Mascot |
|   | 2590.2644                                        | 2590.2161 | -0.0483 | -19 | 276 | 298         | SDAAILYNDRSVLESHHV<br>SASYR |      |   |    |                         |  |  |  |  | Mascot |
| 5 | purine nucleoside phosphorylase 5b [Danio rerio] |           |         |     |     | gi 52219108 | 32118.2                     | 6.31 | 9 | 45 | 0                       |  |  |  |  |        |

#### Peptide Information

|  | Calc. Mass | Obsrv. Mass | ± da    | ± ppm | Start Seq. | End Seq. | Sequence                   | Ion Score | C. I. | % Modification                           | Rank | Result Type |
|--|------------|-------------|---------|-------|------------|----------|----------------------------|-----------|-------|------------------------------------------|------|-------------|
|  | 1151.5118  | 1151.6196   | 0.1078  | 94    | 79         | 88       | GKPCVCMQGR                 |           |       | Carbamidomethyl (C)[4], Oxidation (M)[7] |      | Mascot      |
|  | 1736.752   | 1736.8861   | 0.1341  | 77    | 159        | 172      | FGVRFPMSDAYDR              |           |       | Carbamidomethyl (C)[7], Oxidation (M)[8] |      | Mascot      |
|  | 1893.986   | 1893.9828   | -0.0032 | -2    | 72         | 88       | LVFGTLKGKPCVCMQGR          |           |       | Carbamidomethyl (C)[11]                  |      | Mascot      |
|  | 1894.0577  | 1893.9828   | -0.0749 | -40   | 25         | 44       | APERPLVGIVCGSGLGGL<br>AK   |           |       |                                          |      | Mascot      |
|  | 1999.9429  | 1999.9437   | 0.0008  | 0     | 193        | 211      | DGVYSVLGGPSFETIAEC<br>R    |           |       |                                          |      | Mascot      |
|  | 1999.9429  | 1999.9437   | 0.0008  | 0     | 193        | 211      | DGVYSVLGGPSFETIAEC<br>R    |           |       |                                          |      | Mascot      |
|  | 2113.9795  | 2114.187    | 0.2075  | 98    | 163        | 179      | FPCMSDAYDRDLQQLVR          |           |       | Carbamidomethyl (C)[3]                   |      | Mascot      |
|  | 2113.9795  | 2114.187    | 0.2075  | 98    | 163        | 179      | FPCMSDAYDRDLQQLVR          |           |       | Carbamidomethyl (C)[3]                   |      | Mascot      |
|  | 2207.1377  | 2207.1174   | -0.0203 | -9    | 109        | 129      | LMGVETVILTNAAGGLNQ<br>DFK  |           |       | Oxidation (M)[2]                         |      | Mascot      |
|  | 2293.2444  | 2293.0771   | -0.1673 | -73   | 212        | 233      | ALRQLGADAVGMSTVHE<br>VIVAR |           |       |                                          |      | Mascot      |
|  | 2479.0969  | 2479.2808   | 0.1839  | 74    | 2          | 23       | TPDSATGYSYEECTATA<br>DWLLK |           |       | Carbamidomethyl (C)[13]                  |      | Mascot      |

6 novel protein [Danio rerio] gi|148725299 82126.8 6.15 13 45 0

#### Peptide Information

|  | Calc. Mass | Obsrv. Mass | ± da    | ± ppm | Start Seq. | End Seq. | Sequence                | Ion Score | C. I. | % Modification         | Rank | Result Type |
|--|------------|-------------|---------|-------|------------|----------|-------------------------|-----------|-------|------------------------|------|-------------|
|  | 901.4737   | 901.5057    | 0.032   | 35    | 75         | 81       | ILQEENR                 |           |       |                        |      | Mascot      |
|  | 959.4614   | 959.5134    | 0.052   | 54    | 347        | 354      | IPADCIDR                |           |       | Carbamidomethyl (C)[5] |      | Mascot      |
|  | 1045.5272  | 1045.562    | 0.0348  | 33    | 600        | 608      | GLLTQQDDR               |           |       |                        |      | Mascot      |
|  | 1062.5803  | 1062.6919   | 0.1116  | 105   | 442        | 449      | FQIQQSRR                |           |       |                        |      | Mascot      |
|  | 1210.6791  | 1210.5983   | -0.0808 | -67   | 382        | 391      | EIIDHIKQSK              |           |       |                        |      | Mascot      |
|  | 1436.7631  | 1436.7465   | -0.0166 | -12   | 609        | 620      | DQSKEEIIAYIK            |           |       |                        |      | Mascot      |
|  | 2114.0876  | 2114.187    | 0.0994  | 47    | 566        | 584      | AAVDKALESENGHLDLYL<br>R |           |       |                        |      | Mascot      |
|  | 2114.0876  | 2114.187    | 0.0994  | 47    | 566        | 584      | AAVDKALESENGHLDLYL<br>R |           |       |                        |      | Mascot      |
|  | 2136.072   | 2136.1672   | 0.0952  | 45    | 43         | 60       | HKSFTDNLQSIFQNLESK      |           |       |                        |      | Mascot      |

|           |           |         |     |     |     |                           |  |  |  |                         |  |  |        |
|-----------|-----------|---------|-----|-----|-----|---------------------------|--|--|--|-------------------------|--|--|--------|
| 2211.2092 | 2211.1079 | -0.1013 | -46 | 93  | 111 | SIITEAALDLTLFFFLREMK      |  |  |  |                         |  |  | Mascot |
| 2294.0864 | 2294.1646 | 0.0782  | 34  | 491 | 511 | DCGIDVYKASVYSGMCT<br>QILK |  |  |  |                         |  |  | Mascot |
| 2294.0864 | 2294.1646 | 0.0782  | 34  | 491 | 511 | DCGIDVYKASVYSGMCT<br>QILK |  |  |  |                         |  |  | Mascot |
| 2298.1812 | 2298.1887 | 0.0075  | 3   | 431 | 448 | TLTQMYTHFLRFQIQQSR        |  |  |  |                         |  |  | Mascot |
| 2306.1008 | 2306.1567 | 0.0559  | 24  | 480 | 498 | NNLIFYESDLKDCGIDVY<br>K   |  |  |  | Carbamidomethyl (C)[13] |  |  | Mascot |
| 2341.2188 | 2341.1233 | -0.0955 | -41 | 472 | 490 | LAFQQLERNLIFYESDL<br>K    |  |  |  |                         |  |  | Mascot |

7 hypothetical protein LOC799147 [Danio rerio] gi|130487208 15157.6 7.64 6 43 0

#### Peptide Information

| Calc. Mass | Obsrv. Mass | ± da    | ± ppm | Start Seq. | End Seq. | Sequence                         | Ion Score | C. I. % | Modification            | Rank | Result Type |
|------------|-------------|---------|-------|------------|----------|----------------------------------|-----------|---------|-------------------------|------|-------------|
| 842.477    | 842.5089    | 0.0319  | 38    | 124        | 130      | KGSLFYK                          |           |         |                         |      | Mascot      |
| 959.4879   | 959.5134    | 0.0255  | 27    | 1          | 8        | MAAFNHLR                         |           |         |                         |      | Mascot      |
| 2197.0991  | 2197.1208   | 0.0217  | 10    | 104        | 123      | LGTCTKTVEYGLSSVTCH<br>LK         |           |         | Carbamidomethyl (C)[4]  |      | Mascot      |
| 2207.2104  | 2207.1174   | -0.093  | -42   | 9          | 29       | LVSLAVLMLASQLDFASA<br>SVR        |           |         | Oxidation (M)[8]        |      | Mascot      |
| 2225.0081  | 2225.1235   | 0.1154  | 52    | 68         | 86       | DNANPVWSAEFNPCK<br>SK            |           |         | Carbamidomethyl (C)[16] |      | Mascot      |
| 3000.645   | 3000.2456   | -0.3994 | -133  | 2          | 29       | AAFNHLRLVSLAVLMLAS<br>QLDFASASVR |           |         |                         |      | Mascot      |

8 lghmbp2l protein [Danio rerio] gi|215539488 110340.2 9 14 40 0

#### Peptide Information

| Calc. Mass | Obsrv. Mass | ± da    | ± ppm | Start Seq. | End Seq. | Sequence                     | Ion Score | C. I. % | Modification               | Rank | Result Type |
|------------|-------------|---------|-------|------------|----------|------------------------------|-----------|---------|----------------------------|------|-------------|
| 882.4389   | 882.5677    | 0.1288  | 146   | 393        | 400      | CILAGDYK                     |           |         |                            |      | Mascot      |
| 901.5464   | 901.5057    | -0.0407 | -45   | 850        | 857      | SQSVKKPK                     |           |         |                            |      | Mascot      |
| 996.4818   | 996.5963    | 0.1145  | 115   | 893        | 901      | AESVCGFVK                    |           |         | Carbamidomethyl (C)[5]     |      | Mascot      |
| 1210.5773  | 1210.5983   | 0.021   | 17    | 297        | 306      | DMDKAFNEIK                   |           |         |                            |      | Mascot      |
| 1436.7743  | 1436.7465   | -0.0278 | -19   | 944        | 957      | ISKEGVLYAGSGQK               |           |         |                            |      | Mascot      |
| 1767.8879  | 1767.8112   | -0.0767 | -43   | 904        | 918      | ASVLTGLQLCIYCNR              |           |         | Carbamidomethyl (C)[10,13] |      | Mascot      |
| 1901.9425  | 1901.9904   | 0.0479  | 25    | 129        | 144      | DGLYNLMKLANDVTYR             |           |         | Oxidation (M)[7]           |      | Mascot      |
| 1915.9364  | 1915.9589   | 0.0225  | 12    | 236        | 252      | VLCCAPSNVAVDNLVER            |           |         | Carbamidomethyl (C)[3,4]   |      | Mascot      |
| 2114.1096  | 2114.187    | 0.0774  | 37    | 236        | 255      | VLCCAPSNVAVDNLVERL<br>AK     |           |         |                            |      | Mascot      |
| 2114.1096  | 2114.187    | 0.0774  | 37    | 236        | 255      | VLCCAPSNVAVDNLVERL<br>AK     |           |         |                            |      | Mascot      |
| 2136.051   | 2136.1672   | 0.1162  | 54    | 41         | 59       | GVCLMKLQIGSQHTGMY<br>GR      |           |         | Carbamidomethyl (C)[3]     |      | Mascot      |
| 2489.3721  | 2489.0876   | -0.2845 | -114  | 508        | 531      | GNQGEVDIVALHIKALTE<br>AGVQVK |           |         |                            |      | Mascot      |

|           |           |         |    |     |     |                                        |        |
|-----------|-----------|---------|----|-----|-----|----------------------------------------|--------|
| 2515.167  | 2515.2405 | 0.0735  | 29 | 631 | 651 | HGELRTAFEYLEDCAVQ<br>NYTR              | Mascot |
| 2590.2375 | 2590.2161 | -0.0214 | -8 | 484 | 507 | IPLLLVDTAGCGLNEMEN<br>TDEQSK           | Mascot |
| 3338.6208 | 3338.7615 | 0.1407  | 42 | 868 | 901 | AGATDIAAAANGDDDFD<br>ALINAVVKAESVCGFVK | Mascot |

9 RecName: Full=Eukaryotic translation initiation factor 3 subunit D; Short=eIF3d; AltName: Full=Euka gi|82187444 64049.5 6.06 11 39 0

#### Peptide Information

| Calc. Mass | Obsrv. Mass | ± da    | ± ppm | Start Seq. | End Seq. | Sequence                    | Ion Score | C. I. % | Modification            | Rank | Result Type |
|------------|-------------|---------|-------|------------|----------|-----------------------------|-----------|---------|-------------------------|------|-------------|
| 856.3981   | 856.5234    | 0.1253  | 146   | 333        | 339      | MGGERYK                     |           |         | Oxidation (M)[1]        |      | Mascot      |
| 901.5352   | 901.5057    | -0.0295 | -33   | 421        | 429      | GAVLATELK                   |           |         |                         |      | Mascot      |
| 1103.6459  | 1103.5682   | -0.0777 | -70   | 509        | 517      | YLILKDPNK                   |           |         |                         |      | Mascot      |
| 1112.5082  | 1112.5077   | -0.0005 | 0     | 27         | 35       | DMPYQPFISK                  |           |         |                         |      | Mascot      |
| 1354.6273  | 1354.7678   | 0.1405  | 104   | 42         | 53       | VADWTGATYQDK                |           |         |                         |      | Mascot      |
| 1354.6273  | 1354.7678   | 0.1405  | 104   | 42         | 53       | VADWTGATYQDK                |           |         |                         |      | Mascot      |
| 1707.9098  | 1707.776    | -0.1338 | -78   | 113        | 127      | TLTQFNMQTLPSAK              |           |         |                         |      | Mascot      |
| 2233.1143  | 2233.0842   | -0.0301 | -13   | 438        | 457      | WTCCAILAGSEYLKGYV<br>SR     |           |         |                         |      | Mascot      |
| 2306.1023  | 2306.1567   | 0.0544  | 24    | 4          | 24       | FHAPVIQDNPSGWGPCA<br>VPEK   |           |         | Carbamidomethyl (C)[16] |      | Mascot      |
| 2448.2129  | 2448.1428   | -0.0701 | -29   | 2          | 24       | AKFHAPVIQDNPSGWGP<br>CAVPEK |           |         |                         |      | Mascot      |
| 2457.0408  | 2457.3127   | 0.2719  | 111   | 187        | 207      | YMDVADPLDIECCGALEH<br>YDK   |           |         | Carbamidomethyl (C)[12] |      | Mascot      |
| 2457.2297  | 2457.3127   | 0.083   | 34    | 241        | 263      | LAKTQGNVFATDAILATL<br>MCCTR |           |         | Oxidation (M)[19]       |      | Mascot      |

10 eukaryotic translation initiation factor 3, subunit 7 zeta [Danio rerio] gi|123230120 63850.4 6.06 11 38 0

#### Peptide Information

| Calc. Mass | Obsrv. Mass | ± da    | ± ppm | Start Seq. | End Seq. | Sequence                | Ion Score | C. I. % | Modification            | Rank | Result Type |
|------------|-------------|---------|-------|------------|----------|-------------------------|-----------|---------|-------------------------|------|-------------|
| 856.3981   | 856.5234    | 0.1253  | 146   | 331        | 337      | MGGERYK                 |           |         | Oxidation (M)[1]        |      | Mascot      |
| 901.5352   | 901.5057    | -0.0295 | -33   | 419        | 427      | GAVLATELK               |           |         |                         |      | Mascot      |
| 1103.6459  | 1103.5682   | -0.0777 | -70   | 507        | 515      | YLILKDPNK               |           |         |                         |      | Mascot      |
| 1112.5082  | 1112.5077   | -0.0005 | 0     | 27         | 35       | DMPYQPFISK              |           |         |                         |      | Mascot      |
| 1354.6273  | 1354.7678   | 0.1405  | 104   | 42         | 53       | VADWTGATYQDK            |           |         |                         |      | Mascot      |
| 1354.6273  | 1354.7678   | 0.1405  | 104   | 42         | 53       | VADWTGATYQDK            |           |         |                         |      | Mascot      |
| 1707.9098  | 1707.776    | -0.1338 | -78   | 113        | 127      | TLTQFNMQTLPSAK          |           |         |                         |      | Mascot      |
| 2233.1143  | 2233.0842   | -0.0301 | -13   | 436        | 455      | WTCCAILAGSEYLKGYV<br>SR |           |         |                         |      | Mascot      |
| 2306.1023  | 2306.1567   | 0.0544  | 24    | 4          | 24       | FHAPVIQDNPSGWGPCA       |           |         | Carbamidomethyl (C)[16] |      | Mascot      |



|  |           |           |         |     |     |     |                                     |                         |  |  |  |  |  |        |
|--|-----------|-----------|---------|-----|-----|-----|-------------------------------------|-------------------------|--|--|--|--|--|--------|
|  | 2448.2129 | 2448.1428 | -0.0701 | -29 | 2   | 24  | VPEK<br>AKFHAPVIQDNPSGWGP<br>CAVPEK |                         |  |  |  |  |  | Mascot |
|  | 2457.0408 | 2457.3127 | 0.2719  | 111 | 185 | 205 | YMDVADPLDIECCGALEH<br>YDK           | Carbamidomethyl (C)[12] |  |  |  |  |  | Mascot |
|  | 2457.2297 | 2457.3127 | 0.083   | 34  | 239 | 261 | LAKTQGNVFATDAILATL<br>MCCTR         | Oxidation (M)[19]       |  |  |  |  |  | Mascot |

11 PREDICTED: UDP-GlcNAc:betaGal  
beta-1,3-N-acetylglucosaminyltransferase 2 [Danio  
rerio] gi|125843963 48322.6 8.69 10 38 0

#### Peptide Information

| Calc. Mass | Obsrv. Mass | ± da    | ± ppm | Start Seq. | End Seq. | Sequence                  | Ion Score | C. I. % | Modification           | Rank | Result Type |
|------------|-------------|---------|-------|------------|----------|---------------------------|-----------|---------|------------------------|------|-------------|
| 864.411    | 864.4704    | 0.0594  | 69    | 84         | 90       | NGAFWNR                   |           |         |                        |      | Mascot      |
| 1044.6047  | 1044.4929   | -0.1118 | -107  | 37         | 46       | ITSVTASIPR                |           |         |                        |      | Mascot      |
| 1103.5215  | 1103.5682   | 0.0467  | 42    | 210        | 219      | SSLDDPNLDK                |           |         |                        |      | Mascot      |
| 1165.5847  | 1165.7476   | 0.1629  | 140   | 193        | 202      | EGEYDGLKVR                |           |         |                        |      | Mascot      |
| 1179.5753  | 1179.6022   | 0.0269  | 23    | 378        | 386      | TFDIREQDR                 |           |         |                        |      | Mascot      |
| 1354.6168  | 1354.7678   | 0.151   | 111   | 383        | 393      | EQDRENPCVHK               |           |         |                        |      | Mascot      |
| 1354.6168  | 1354.7678   | 0.151   | 111   | 383        | 393      | EQDRENPCVHK               |           |         |                        |      | Mascot      |
| 1436.6879  | 1436.7465   | 0.0586  | 41    | 112        | 123      | FHCSPESFELLK              |           |         |                        |      | Mascot      |
| 1736.8763  | 1736.8861   | 0.0098  | 6     | 253        | 266      | WMLGHCPRVSFIFK            |           |         | Oxidation (M)[2]       |      | Mascot      |
| 1751.9486  | 1751.814    | -0.1346 | -77   | 387        | 400      | ENPCVHKHLLLVHR            |           |         | Carbamidomethyl (C)[4] |      | Mascot      |
| 2457.3323  | 2457.3127   | -0.0196 | -8    | 5          | 25       | YMKFLIVALASSLCFILFY<br>SK |           |         |                        |      | Mascot      |
| 2457.3323  | 2457.3127   | -0.0196 | -8    | 5          | 25       | YMKFLIVALASSLCFILFY<br>SK |           |         |                        |      | Mascot      |

12 PREDICTED: protein NLRC3 isoform 1 [Danio rerio] gi|326667049 94863 6.12 13 37 0

#### Peptide Information

| Calc. Mass | Obsrv. Mass | ± da    | ± ppm | Start Seq. | End Seq. | Sequence                | Ion Score | C. I. % | Modification           | Rank | Result Type |
|------------|-------------|---------|-------|------------|----------|-------------------------|-----------|---------|------------------------|------|-------------|
| 901.4737   | 901.5057    | 0.032   | 35    | 135        | 141      | ILQEENR                 |           |         |                        |      | Mascot      |
| 959.4614   | 959.5134    | 0.052   | 54    | 407        | 414      | IPADCIDR                |           |         | Carbamidomethyl (C)[5] |      | Mascot      |
| 1045.5272  | 1045.562    | 0.0348  | 33    | 660        | 668      | GLLTQQDDR               |           |         |                        |      | Mascot      |
| 1062.5803  | 1062.6919   | 0.1116  | 105   | 502        | 509      | FQIQQSRR                |           |         |                        |      | Mascot      |
| 1210.6791  | 1210.5983   | -0.0808 | -67   | 442        | 451      | EIIDHIKQSK              |           |         |                        |      | Mascot      |
| 1436.7631  | 1436.7465   | -0.0166 | -12   | 669        | 680      | DQSKEEIIAYIK            |           |         |                        |      | Mascot      |
| 2114.0876  | 2114.187    | 0.0994  | 47    | 626        | 644      | AAVDKALESENGHLDLYL<br>R |           |         |                        |      | Mascot      |
| 2114.0876  | 2114.187    | 0.0994  | 47    | 626        | 644      | AAVDKALESENGHLDLYL<br>R |           |         |                        |      | Mascot      |
| 2136.072   | 2136.1672   | 0.0952  | 45    | 103        | 120      | HKSFTDNLQSIFQNLESK      |           |         |                        |      | Mascot      |

|           |           |         |     |     |     |                           |  |  |  |                         |  |  |        |
|-----------|-----------|---------|-----|-----|-----|---------------------------|--|--|--|-------------------------|--|--|--------|
| 2211.2092 | 2211.1079 | -0.1013 | -46 | 153 | 171 | SIITEAALDLTLFFFLREMK      |  |  |  |                         |  |  | Mascot |
| 2294.0864 | 2294.1646 | 0.0782  | 34  | 551 | 571 | DCGIDVYKASVYSGMCT<br>QILK |  |  |  |                         |  |  | Mascot |
| 2294.0864 | 2294.1646 | 0.0782  | 34  | 551 | 571 | DCGIDVYKASVYSGMCT<br>QILK |  |  |  |                         |  |  | Mascot |
| 2298.1812 | 2298.1887 | 0.0075  | 3   | 491 | 508 | TLTQMYTHFLRFQIQQSR        |  |  |  |                         |  |  | Mascot |
| 2306.1008 | 2306.1567 | 0.0559  | 24  | 540 | 558 | NNLIFYESDLKDCGIDVY<br>K   |  |  |  | Carbamidomethyl (C)[13] |  |  | Mascot |
| 2341.2188 | 2341.1233 | -0.0955 | -41 | 532 | 550 | LAFQQLERNLIFYESDL<br>K    |  |  |  |                         |  |  | Mascot |

13 protein BTG3 [Danio rerio] gi|55925203 18115.1 5.85 6 36 0

#### Peptide Information

| Calc. Mass | Obsrv. Mass | ± da    | ± ppm | Start Seq. | End Seq. | Sequence                   | Ion Score | C. I. % | Modification               | Rank | Result Type |
|------------|-------------|---------|-------|------------|----------|----------------------------|-----------|---------|----------------------------|------|-------------|
| 901.5353   | 901.5057    | -0.0296 | -33   | 34         | 41       | LTVALQEK                   |           |         |                            |      | Mascot      |
| 1112.504   | 1112.5077   | 0.0037  | 3     | 75         | 84       | ACAESGVQYK                 |           |         | Carbamidomethyl (C)[2]     |      | Mascot      |
| 2096.978   | 2097.0769   | 0.0989  | 47    | 91         | 108      | ELTLWVDPGEVCCRYGE<br>K     |           |         |                            |      | Mascot      |
| 2211.0208  | 2211.1079   | 0.0871  | 39    | 91         | 108      | ELTLWVDPGEVCCRYGE<br>K     |           |         | Carbamidomethyl (C)[12,13] |      | Mascot      |
| 2224.9412  | 2225.1235   | 0.1823  | 82    | 139        | 158      | VTSDYHSGSSSDEDSML<br>VHR   |           |         | Oxidation (M)[16]          |      | Mascot      |
| 2300.1414  | 2300.1807   | 0.0393  | 17    | 85         | 104      | DLGLPKELTLWVDPGEV<br>CCR   |           |         | Carbamidomethyl (C)[18]    |      | Mascot      |
| 2457.0688  | 2457.3127   | 0.2439  | 99    | 109        | 130      | NHGFTVATFSSEDDDDK<br>EDVTK |           |         |                            |      | Mascot      |
| 2457.0688  | 2457.3127   | 0.2439  | 99    | 109        | 130      | NHGFTVATFSSEDDDDK<br>EDVTK |           |         |                            |      | Mascot      |

14 SH3 domain-binding protein 4-A [Danio rerio] gi|45387913 104947.5 7.73 13 35 0

#### Peptide Information

| Calc. Mass | Obsrv. Mass | ± da    | ± ppm | Start Seq. | End Seq. | Sequence                  | Ion Score | C. I. % | Modification                                 | Rank | Result Type |
|------------|-------------|---------|-------|------------|----------|---------------------------|-----------|---------|----------------------------------------------|------|-------------|
| 842.5822   | 842.5089    | -0.0733 | -87   | 634        | 640      | LIKTVIR                   |           |         |                                              |      | Mascot      |
| 850.4338   | 850.5435    | 0.1097  | 129   | 358        | 364      | LSNMEIK                   |           |         | Oxidation (M)[4]                             |      | Mascot      |
| 870.4726   | 870.54      | 0.0674  | 77    | 1          | 7        | MAHRIR                    |           |         | Oxidation (M)[1]                             |      | Mascot      |
| 1045.4796  | 1045.562    | 0.0824  | 79    | 762        | 770      | AELDSEPER                 |           |         |                                              |      | Mascot      |
| 1210.679   | 1210.5983   | -0.0807 | -67   | 832        | 842      | DLAEKLAHVSK               |           |         |                                              |      | Mascot      |
| 1488.9624  | 1488.7856   | -0.1768 | -119  | 684        | 697      | IGLVHVKNVLVLGK            |           |         |                                              |      | Mascot      |
| 1488.9624  | 1488.7856   | -0.1768 | -119  | 684        | 697      | IGLVHVKNVLVLGK            |           |         |                                              |      | Mascot      |
| 1767.8074  | 1767.8112   | 0.0038  | 2     | 379        | 394      | TESPMAEIVCVRSDCK          |           |         |                                              |      | Mascot      |
| 2097.0137  | 2097.0769   | 0.0632  | 30    | 373        | 390      | VSMTRTESPMAEIVCVR         |           |         | Carbamidomethyl (C)[16], Oxidation (M)[4,11] |      | Mascot      |
| 2284.2368  | 2284.1746   | -0.0622 | -27   | 463        | 484      | TVVAIFGHDCAPKTLVS<br>EVGK |           |         |                                              |      | Mascot      |

|    |                                                         |           |         |     |     |             |                                      |       |                         |        |   |
|----|---------------------------------------------------------|-----------|---------|-----|-----|-------------|--------------------------------------|-------|-------------------------|--------|---|
|    | 2300.0686                                               | 2300.1807 | 0.1121  | 49  | 568 | 587         | DDQDCILAQFCVQTPQP<br>PPK             |       | Carbamidomethyl (C)[5]  | Mascot |   |
|    | 2341.2583                                               | 2341.1233 | -0.135  | -58 | 463 | 484         | TVVAIFGHDCAPKTLVLS<br>EVGK           |       | Carbamidomethyl (C)[10] | Mascot |   |
|    | 3000.4343                                               | 3000.2456 | -0.1887 | -63 | 500 | 524         | HQFVLSRPQDLQIGMYS<br>NMSNYEVK        |       | Oxidation (M)[15]       | Mascot |   |
|    | 3337.6052                                               | 3337.7454 | 0.1402  | 42  | 269 | 298         | LARSCHDLES LGQNP GW<br>GQTQPVETNIVCK |       | Carbamidomethyl (C)[5]  | Mascot |   |
|    | 3338.5496                                               | 3338.7615 | 0.2119  | 63  | 856 | 884         | TGMVDSEAMWKPAYDFL<br>LTWAAQIGDSYR    |       | Oxidation (M)[3]        | Mascot |   |
| 15 | PREDICTED: hypothetical protein LOC565734 [Danio rerio] |           |         |     |     | gi 68402113 | 30582.9                              | 10.05 | 7                       | 35     | 0 |

#### Peptide Information

| Calc. Mass | Obsrv. Mass | ± da    | ± ppm | Start Seq. | End Seq. | Sequence                       | Ion Score | C. I. | % Modification         | Rank | Result Type |
|------------|-------------|---------|-------|------------|----------|--------------------------------|-----------|-------|------------------------|------|-------------|
| 1165.6324  | 1165.7476   | 0.1152  | 99    | 118        | 128      | VSPNATHA QIK                   |           |       |                        |      | Mascot      |
| 1436.7943  | 1436.7465   | -0.0478 | -33   | 80         | 91       | HWCLLLRPV GSR                  |           |       |                        |      | Mascot      |
| 1475.7634  | 1475.7533   | -0.0101 | -7    | 1          | 14       | MAEVTG SVRNAV NK               |           |       |                        |      | Mascot      |
| 1902.0093  | 1901.9904   | -0.0189 | -10   | 20         | 36       | TLLSLHHHPHGPV VDSR             |           |       |                        |      | Mascot      |
| 2284.0571  | 2284.1746   | 0.1175  | 51    | 41         | 60       | KSNVCVHWCAADC VWA<br>LHNK      |           |       |                        |      | Mascot      |
| 2341.0786  | 2341.1233   | 0.0447  | 19    | 41         | 60       | KSNVCVHWCAADC VWA<br>LHNK      |           |       | Carbamidomethyl (C)[5] |      | Mascot      |
| 2448.3259  | 2448.1428   | -0.1831 | -75   | 15         | 36       | LSAFKTL LSLHHHPHGPV<br>VDSR    |           |       |                        |      | Mascot      |
| 2479.5107  | 2479.2808   | -0.2299 | -93   | 246        | 269      | EQITGVSVILL LLLGGV IIN<br>SLKS |           |       |                        |      | Mascot      |

16 PREDICTED: protein NLRC3 isoform 2 [Danio rerio] gi|326667051 87403.4 6.43 12 35 0

#### Peptide Information

| Calc. Mass | Obsrv. Mass | ± da    | ± ppm | Start Seq. | End Seq. | Sequence                  | Ion Score | C. I. | % Modification         | Rank | Result Type |
|------------|-------------|---------|-------|------------|----------|---------------------------|-----------|-------|------------------------|------|-------------|
| 901.4737   | 901.5057    | 0.032   | 35    | 126        | 132      | ILQEENR                   |           |       |                        |      | Mascot      |
| 959.4614   | 959.5134    | 0.052   | 54    | 398        | 405      | IPADCIDR                  |           |       | Carbamidomethyl (C)[5] |      | Mascot      |
| 1045.5272  | 1045.562    | 0.0348  | 33    | 651        | 659      | GLLTQQDDR                 |           |       |                        |      | Mascot      |
| 1062.5803  | 1062.6919   | 0.1116  | 105   | 493        | 500      | FQIQQSRR                  |           |       |                        |      | Mascot      |
| 1210.6791  | 1210.5983   | -0.0808 | -67   | 433        | 442      | EIIDHIKQSK                |           |       |                        |      | Mascot      |
| 1436.7631  | 1436.7465   | -0.0166 | -12   | 660        | 671      | DQSKEEIIAYIK              |           |       |                        |      | Mascot      |
| 2114.0876  | 2114.187    | 0.0994  | 47    | 617        | 635      | AAVDKALESENGHLDLYL<br>R   |           |       |                        |      | Mascot      |
| 2114.0876  | 2114.187    | 0.0994  | 47    | 617        | 635      | AAVDKALESENGHLDLYL<br>R   |           |       |                        |      | Mascot      |
| 2211.2092  | 2211.1079   | -0.1013 | -46   | 144        | 162      | SIITEAALDLTLFFLREMK       |           |       |                        |      | Mascot      |
| 2294.0864  | 2294.1646   | 0.0782  | 34    | 542        | 562      | DCGIDVYKASVYSGMCT<br>QILK |           |       |                        |      | Mascot      |
| 2294.0864  | 2294.1646   | 0.0782  | 34    | 542        | 562      | DCGIDVYKASVYSGMCT         |           |       |                        |      | Mascot      |

|                     |                                                 | 2298.1812  | 2298.1887   | 0.0075  | 3     | 482        | 499          | QILK<br>TLTQMYTHFLRFQIQSR    |                         |       |    |                                                 |      |        |      | Mascot |
|---------------------|-------------------------------------------------|------------|-------------|---------|-------|------------|--------------|------------------------------|-------------------------|-------|----|-------------------------------------------------|------|--------|------|--------|
|                     |                                                 | 2306.1008  | 2306.1567   | 0.0559  | 24    | 531        | 549          | NNLIFYESDLKDCGIDVY<br>K      | Carbamidomethyl (C)[13] |       |    |                                                 |      |        |      | Mascot |
|                     |                                                 | 2341.2188  | 2341.1233   | -0.0955 | -41   | 523        | 541          | LAFQQLERNNLIFYESDL<br>K      |                         |       |    |                                                 |      |        |      | Mascot |
| 17                  | hypothetical protein LOC100170820 [Danio rerio] |            |             |         |       |            | gi 194578801 | 15546.9                      | 9.84                    | 7     | 35 | 0                                               |      |        |      |        |
| Peptide Information |                                                 |            |             |         |       |            |              |                              |                         |       |    |                                                 |      |        |      |        |
|                     |                                                 | Calc. Mass | Obsrv. Mass | ± da    | ± ppm | Start Seq. | End Seq.     | Sequence                     | Ion Score               | C. I. | %  | Modification                                    | Rank | Result | Type |        |
|                     |                                                 | 870.4614   | 870.54      | 0.0786  | 90    | 55         | 61           | RNPPCVK                      |                         |       |    | Carbamidomethyl (C)[5]                          |      | Mascot |      |        |
|                     |                                                 | 1151.6089  | 1151.6196   | 0.0107  | 9     | 105        | 114          | MNSTLSTLLR                   |                         |       |    | Oxidation (M)[1]                                |      | Mascot |      |        |
|                     |                                                 | 1179.5796  | 1179.6022   | 0.0226  | 19    | 2          | 10           | QLNQKMMMR                    |                         |       |    |                                                 |      | Mascot |      |        |
|                     |                                                 | 2136.0427  | 2136.1672   | 0.1245  | 58    | 7          | 24           | MMMLRLAAIIVMSVMIMK           |                         |       |    | Oxidation (M)[1,2,3,12,15,17]                   |      | Mascot |      |        |
|                     |                                                 | 2193.1553  | 2193.1125   | -0.0428 | -20   | 11         | 30           | LAAIIVMSVMIMKTNGQ<br>NR      |                         |       |    | Oxidation (M)[8,11]                             |      | Mascot |      |        |
|                     |                                                 | 2294.1982  | 2294.1646   | -0.0336 | -15   | 85         | 104          | IQELIISMEKMNSTVSTPL<br>K     |                         |       |    | Oxidation (M)[8,11]                             |      | Mascot |      |        |
|                     |                                                 | 2294.1982  | 2294.1646   | -0.0336 | -15   | 85         | 104          | IQELIISMEKMNSTVSTPL<br>K     |                         |       |    | Oxidation (M)[8,11]                             |      | Mascot |      |        |
|                     |                                                 | 2457.2024  | 2457.3127   | 0.1103  | 45    | 115        | 138          | INSTISTALQMNSTLSTPL<br>STSSS |                         |       |    | Oxidation (M)[11]                               |      | Mascot |      |        |
|                     |                                                 | 2457.2024  | 2457.3127   | 0.1103  | 45    | 115        | 138          | INSTISTALQMNSTLSTPL<br>STSSS |                         |       |    | Oxidation (M)[11]                               |      | Mascot |      |        |
| 18                  | hypothetical protein LOC567306 [Danio rerio]    |            |             |         |       |            | gi 148540014 | 33418.2                      | 5.53                    | 9     | 35 | 0                                               |      |        |      |        |
| Peptide Information |                                                 |            |             |         |       |            |              |                              |                         |       |    |                                                 |      |        |      |        |
|                     |                                                 | Calc. Mass | Obsrv. Mass | ± da    | ± ppm | Start Seq. | End Seq.     | Sequence                     | Ion Score               | C. I. | %  | Modification                                    | Rank | Result | Type |        |
|                     |                                                 | 1112.5524  | 1112.5077   | -0.0447 | -40   | 200        | 208          | YGAKDHFFK                    |                         |       |    |                                                 |      | Mascot |      |        |
|                     |                                                 | 1179.5385  | 1179.6022   | 0.0637  | 54    | 9          | 19           | EAMAIMAEADK                  |                         |       |    |                                                 |      | Mascot |      |        |
|                     |                                                 | 1436.676   | 1436.7465   | 0.0705  | 49    | 7          | 19           | EKEAMAIMAEADK                |                         |       |    |                                                 |      | Mascot |      |        |
|                     |                                                 | 1542.7223  | 1542.8818   | 0.1595  | 103   | 141        | 153          | AIAHYEQAADYYK                |                         |       |    |                                                 |      | Mascot |      |        |
|                     |                                                 | 1908.8289  | 1908.9324   | 0.1035  | 54    | 38         | 53           | VEEACDMYVRAANMFK             |                         |       |    | Oxidation (M)[7,14]                             |      | Mascot |      |        |
|                     |                                                 | 2000.0171  | 1999.9437   | -0.0734 | -37   | 57         | 74           | NWNAAGDAFCKAALLHL<br>K       |                         |       |    | Carbamidomethyl (C)[10]                         |      | Mascot |      |        |
|                     |                                                 | 2000.0171  | 1999.9437   | -0.0734 | -37   | 57         | 74           | NWNAAGDAFCKAALLHL<br>K       |                         |       |    | Carbamidomethyl (C)[10]                         |      | Mascot |      |        |
|                     |                                                 | 2157.0571  | 2157.1226   | 0.0655  | 30    | 246        | 264          | KLLDAHDEQNIDAYADAV<br>R      |                         |       |    |                                                 |      | Mascot |      |        |
|                     |                                                 | 2306.1025  | 2306.1567   | 0.0542  | 24    | 209        | 227          | AALCHFCVDMLNCR LAV<br>QK     |                         |       |    | Carbamidomethyl (C)[4,7,13]                     |      | Mascot |      |        |
|                     |                                                 | 2457.0718  | 2457.3127   | 0.2409  | 98    | 204        | 222          | DHFFKAALCHFCVDMLN<br>CR      |                         |       |    | Carbamidomethyl (C)[9,12,18], Oxidation (M)[15] |      | Mascot |      |        |
|                     |                                                 | 2457.0718  | 2457.3127   | 0.2409  | 98    | 204        | 222          | DHFFKAALCHFCVDMLN<br>CR      |                         |       |    | Carbamidomethyl (C)[9,12,18], Oxidation (M)[15] |      | Mascot |      |        |
| 19                  | DNA-binding protein SMUBP-2 [Danio rerio]       |            |             |         |       |            | gi 120952590 | 110816.5                     | 8.97                    | 13    | 35 | 0                                               |      |        |      |        |

### Peptide Information

| Calc. Mass | Obsrv. Mass | $\pm$ da | $\pm$ ppm | Start Seq. | End Seq. | Sequence                           | Ion Score | C. I. % | Modification               | Rank | Result Type |
|------------|-------------|----------|-----------|------------|----------|------------------------------------|-----------|---------|----------------------------|------|-------------|
| 882.4389   | 882.5677    | 0.1288   | 146       | 393        | 400      | CILAGDYK                           |           |         |                            |      | Mascot      |
| 996.4818   | 996.5963    | 0.1145   | 115       | 897        | 905      | AESVCGFVK                          |           |         | Carbamidomethyl (C)[5]     |      | Mascot      |
| 1210.5773  | 1210.5983   | 0.021    | 17        | 297        | 306      | DMDKAFNEIK                         |           |         |                            |      | Mascot      |
| 1436.7743  | 1436.7465   | -0.0278  | -19       | 948        | 961      | ISKEGVLYAGSGQK                     |           |         |                            |      | Mascot      |
| 1767.8879  | 1767.8112   | -0.0767  | -43       | 908        | 922      | ASVLTGLQLCIYCNR                    |           |         | Carbamidomethyl (C)[10,13] |      | Mascot      |
| 1901.9425  | 1901.9904   | 0.0479   | 25        | 129        | 144      | DGLYNLMKLANDVTYR                   |           |         | Oxidation (M)[7]           |      | Mascot      |
| 1915.9364  | 1915.9589   | 0.0225   | 12        | 236        | 252      | VLCCAPSNVAVDNLVER                  |           |         | Carbamidomethyl (C)[3,4]   |      | Mascot      |
| 2114.1096  | 2114.187    | 0.0774   | 37        | 236        | 255      | VLCCAPSNVAVDNLVERLAK               |           |         |                            |      | Mascot      |
| 2114.1096  | 2114.187    | 0.0774   | 37        | 236        | 255      | VLCCAPSNVAVDNLVERLAK               |           |         |                            |      | Mascot      |
| 2136.051   | 2136.1672   | 0.1162   | 54        | 41         | 59       | GVCLMKLQIGSQHTGMYGR                |           |         | Carbamidomethyl (C)[3]     |      | Mascot      |
| 2489.3721  | 2489.0876   | -0.2845  | -114      | 508        | 531      | GNQGEVDIVALHIKALTEAGVQVK           |           |         |                            |      | Mascot      |
| 2515.167   | 2515.2405   | 0.0735   | 29        | 631        | 651      | HGELRTAFEYLEDCAVQNYTR              |           |         |                            |      | Mascot      |
| 2590.2375  | 2590.2161   | -0.0214  | -8        | 484        | 507      | IPLLLVDTAGCGLNEMENTDEQSK           |           |         |                            |      | Mascot      |
| 3338.6208  | 3338.7615   | 0.1407   | 42        | 872        | 905      | AGATDIAAAANGDDDFDALINAVVKAESVCGFVK |           |         |                            |      | Mascot      |

20 PREDICTED: diacylglycerol kinase beta-like, partial [Danio rerio] gi|326674321 85995.9 6.78 12 34 0

### Peptide Information

| Calc. Mass | Obsrv. Mass | $\pm$ da | $\pm$ ppm | Start Seq. | End Seq. | Sequence              | Ion Score | C. I. % | Modification            | Rank | Result Type |
|------------|-------------|----------|-----------|------------|----------|-----------------------|-----------|---------|-------------------------|------|-------------|
| 842.4229   | 842.5089    | 0.086    | 102       | 153        | 158      | LEFMFR                |           |         |                         |      | Mascot      |
| 864.4032   | 864.4704    | 0.0672   | 78        | 455        | 462      | SGPMPGYR              |           |         |                         |      | Mascot      |
| 901.5353   | 901.5057    | -0.0296  | -33       | 678        | 685      | KTTIVDPK              |           |         |                         |      | Mascot      |
| 1045.4264  | 1045.562    | 0.1356   | 130       | 270        | 278      | QGLCCSFCK             |           |         | Carbamidomethyl (C)[4]  |      | Mascot      |
| 1112.6497  | 1112.5077   | -0.142   | -128      | 112        | 121      | LIKGSCPPLK            |           |         | Carbamidomethyl (C)[6]  |      | Mascot      |
| 1210.5455  | 1210.5983   | 0.0528   | 44        | 455        | 465      | SGPMPGYRSCR           |           |         |                         |      | Mascot      |
| 1707.8007  | 1707.776    | -0.0247  | -14       | 534        | 547      | DVQDSSEVMLDRWK        |           |         |                         |      | Mascot      |
| 2157.0005  | 2157.1226   | 0.1221   | 57        | 302        | 319      | KNTEIMHHFWVEGNCPSK    |           |         |                         |      | Mascot      |
| 2283.2488  | 2283.1833   | -0.0655  | -29       | 115        | 135      | GSCPPLKVTSQSRPLSTVQLK |           |         | Carbamidomethyl (C)[3]  |      | Mascot      |
| 2284.0591  | 2284.1746   | 0.1155   | 51        | 153        | 171      | LEFMFRLYDTDGNGFLDSK   |           |         | Oxidation (M)[4]        |      | Mascot      |
| 2432.0581  | 2432.1375   | 0.0794   | 33        | 303        | 322      | NTEIMHHFWVEGNCPSKCDK  |           |         | Carbamidomethyl (C)[14] |      | Mascot      |

|  |           |           |         |    |     |     |                           |  |                                           |        |
|--|-----------|-----------|---------|----|-----|-----|---------------------------|--|-------------------------------------------|--------|
|  | 2432.0581 | 2432.1375 | 0.0794  | 33 | 303 | 322 | NTEIMHHFWVEGNCPSK<br>CDK  |  | Carbamidomethyl (C)[14]                   | Mascot |
|  | 2448.053  | 2448.1428 | 0.0898  | 37 | 303 | 322 | NTEIMHHFWVEGNCPSK<br>CDK  |  | Carbamidomethyl (C)[14], Oxidation (M)[5] | Mascot |
|  | 2479.3022 | 2479.2808 | -0.0214 | -9 | 248 | 269 | LKHFSKPAYCNLCNMLI<br>GLGK |  | Oxidation (M)[16]                         | Mascot |
|  | 2489.0796 | 2489.0876 | 0.008   | 3  | 303 | 322 | NTEIMHHFWVEGNCPSK<br>CDK  |  | Carbamidomethyl (C)[14,18]                | Mascot |

21 PREDICTED: tetratricopeptide repeat protein 37-like  
[Danio rerio] gi|292614103 173677.3 6.37 17 34 0

#### Peptide Information

| Calc. Mass | Obsrv. Mass | $\pm$ da | $\pm$ ppm | Start Seq. | End Seq. | Sequence                             | Ion Score | C. I. % | Modification                               | Rank | Result Type |
|------------|-------------|----------|-----------|------------|----------|--------------------------------------|-----------|---------|--------------------------------------------|------|-------------|
| 856.402    | 856.5234    | 0.1214   | 142       | 1242       | 1248     | HSGEDRR                              |           |         |                                            |      | Mascot      |
| 864.4825   | 864.4704    | -0.0121  | -14       | 21         | 27       | EFKEALK                              |           |         |                                            |      | Mascot      |
| 870.5519   | 870.54      | -0.0119  | -14       | 295        | 302      | NIGLGLKR                             |           |         |                                            |      | Mascot      |
| 1103.5592  | 1103.5682   | 0.009    | 8         | 992        | 1000     | KQATEAYHR                            |           |         |                                            |      | Mascot      |
| 1436.7896  | 1436.7465   | -0.0431  | -30       | 479        | 491      | AAKLDPYLGSVFR                        |           |         |                                            |      | Mascot      |
| 1475.6761  | 1475.7533   | 0.0772   | 52        | 1024       | 1036     | ALSDDGQWEEAVR                        |           |         |                                            |      | Mascot      |
| 1736.9734  | 1736.8861   | -0.0873  | -50       | 305        | 319      | FSIIGWYNLALAQLK                      |           |         |                                            |      | Mascot      |
| 1901.9459  | 1901.9904   | 0.0445   | 23        | 728        | 745      | AKVLVPGALCGMDPSDQ<br>K               |           |         | Carbamidomethyl (C)[10], Oxidation (M)[12] |      | Mascot      |
| 1908.8834  | 1908.9324   | 0.049    | 26        | 1020       | 1036     | GYGRALSDDGQWEEAV<br>R                |           |         |                                            |      | Mascot      |
| 2000.0885  | 1999.9437   | -0.1448  | -72       | 1445       | 1463     | LSLLALTPCLAGVGVS DW<br>K             |           |         | Carbamidomethyl (C)[9]                     |      | Mascot      |
| 2000.0885  | 1999.9437   | -0.1448  | -72       | 1445       | 1463     | LSLLALTPCLAGVGVS DW<br>K             |           |         | Carbamidomethyl (C)[9]                     |      | Mascot      |
| 2157.145   | 2157.1226   | -0.0224  | -10       | 264        | 282      | RLELDPNNSYAHFGLGI<br>K               |           |         |                                            |      | Mascot      |
| 2193.1218  | 2193.1125   | -0.0093  | -4        | 664        | 684      | GLGECLLAKSALDDYL<br>DGR              |           |         |                                            |      | Mascot      |
| 2294.269   | 2294.1646   | -0.1044  | -46       | 1083       | 1103     | AYILTALALIQHKLGSMDH<br>AK            |           |         |                                            |      | Mascot      |
| 2294.269   | 2294.1646   | -0.1044  | -46       | 1083       | 1103     | AYILTALALIQHKLGSMDH<br>AK            |           |         |                                            |      | Mascot      |
| 2306.1379  | 2306.1567   | 0.0188   | 8         | 702        | 721      | QRPDLSCLWKLGDSC T<br>ASR             |           |         | Carbamidomethyl (C)[7]                     |      | Mascot      |
| 2489.2751  | 2489.0876   | -0.1875  | -75       | 1158       | 1180     | CLLTCTLLALQGNFSGVH<br>REASR          |           |         |                                            |      | Mascot      |
| 3000.5095  | 3000.2456   | -0.2639  | -88       | 940        | 966      | SNRDS ELYLYNIVQMNAV<br>SAAQVALSK     |           |         | Oxidation (M)[15]                          |      | Mascot      |
| 3337.738   | 3337.7454   | 0.0074   | 2         | 1114       | 1145     | EPVQESLQCLCALGLVH<br>GDVTLASATVTELLK |           |         |                                            |      | Mascot      |

22 PREDICTED: dyslexia-associated protein  
KIAA0319-like [Danio rerio] gi|326675082 112852.8 5 13 34 0

#### Peptide Information

| Calc. Mass | Obsrv. Mass | $\pm$ da | $\pm$ ppm | Start Seq. | End Seq. | Sequence | Ion Score | C. I. % | Modification | Rank | Result Type |
|------------|-------------|----------|-----------|------------|----------|----------|-----------|---------|--------------|------|-------------|
|------------|-------------|----------|-----------|------------|----------|----------|-----------|---------|--------------|------|-------------|

|           |           |         |     |     |     |                                   |                                          |        |
|-----------|-----------|---------|-----|-----|-----|-----------------------------------|------------------------------------------|--------|
| 864.4243  | 864.4704  | 0.0461  | 53  | 534 | 540 | VTMQDVR                           | Oxidation (M)[3]                         | Mascot |
| 959.5156  | 959.5134  | -0.0022 | -2  | 150 | 157 | RAEDIDLK                          |                                          | Mascot |
| 1542.6741 | 1542.8818 | 0.2077  | 135 | 951 | 962 | YTILDNMDEQER                      | Oxidation (M)[7]                         | Mascot |
| 1707.7288 | 1707.776  | 0.0472  | 28  | 885 | 898 | SCSCDPLWMENPIR                    | Carbamidomethyl (C)[2]                   | Mascot |
| 1720.0004 | 1719.8544 | -0.146  | -85 | 798 | 813 | QLAALLHVLDSDIALK                  |                                          | Mascot |
| 1720.0004 | 1719.8544 | -0.146  | -85 | 798 | 813 | QLAALLHVLDSDIALK                  |                                          | Mascot |
| 1736.8499 | 1736.8861 | 0.0362  | 21  | 616 | 630 | YQWDVMSGPPGLKMK                   |                                          | Mascot |
| 1751.9802 | 1751.814  | -0.1662 | -95 | 827 | 843 | FSVQGPDLIPGPKLAR                  |                                          | Mascot |
| 1923.8146 | 1923.9685 | 0.1539  | 80  | 58  | 72  | CYVLSQCQTENCQPK                   | Carbamidomethyl (C)[1,6,12]              | Mascot |
| 2097.126  | 2097.0769 | -0.0491 | -23 | 292 | 311 | ALTVSIEGPVEAMLQN<br>TVK           |                                          | Mascot |
| 2432.2766 | 2432.1375 | -0.1391 | -57 | 651 | 673 | LTVVDEQGETDSAVLSIT<br>VKEAK       |                                          | Mascot |
| 2432.2766 | 2432.1375 | -0.1391 | -57 | 651 | 673 | LTVVDEQGETDSAVLSIT<br>VKEAK       |                                          | Mascot |
| 2448.2881 | 2448.1428 | -0.1453 | -59 | 365 | 387 | VIVKAHQAYGEGSVDLTV<br>HPAEK       |                                          | Mascot |
| 2515.1592 | 2515.2405 | 0.0813  | 32  | 1   | 22  | MISGQCWQAATYSESVV<br>SPELR        | Carbamidomethyl (C)[6], Oxidation (M)[1] | Mascot |
| 3338.4485 | 3338.7615 | 0.313   | 94  | 29  | 57  | VPDVSSLAQCAGACCDL<br>PGCDLAWFFEHR | Carbamidomethyl (C)[10,14,15,20]         | Mascot |

23 PREDICTED: NACHT, LRR and PYD domains-containing protein 12 [Danio rerio] gi|292621731 149261.8 5.29 15 33 0

#### Peptide Information

| Calc. Mass | Obsrv. Mass | ± da    | ± ppm | Start Seq. | End Seq. | Sequence                   | Ion Score | C. I. % | Modification              | Rank | Result Type |
|------------|-------------|---------|-------|------------|----------|----------------------------|-----------|---------|---------------------------|------|-------------|
| 842.4114   | 842.5089    | 0.0975  | 116   | 1214       | 1220     | SNSEHLR                    |           |         |                           |      | Mascot      |
| 864.5777   | 864.4704    | -0.1073 | -124  | 133        | 139      | KILVVHR                    |           |         |                           |      | Mascot      |
| 870.5593   | 870.54      | -0.0193 | -22   | 1011       | 1017     | KLLPMIR                    |           |         |                           |      | Mascot      |
| 901.5829   | 901.5057    | -0.0772 | -86   | 507        | 514      | AIRTVLTK                   |           |         |                           |      | Mascot      |
| 959.5156   | 959.5134    | -0.0022 | -2    | 872        | 880      | AVNEALQSK                  |           |         |                           |      | Mascot      |
| 1436.7744  | 1436.7465   | -0.0279 | -19   | 913        | 924      | SIQNNKTVEYIK               |           |         |                           |      | Mascot      |
| 1488.7289  | 1488.7856   | 0.0567  | 38    | 375        | 388      | SGDTKSDLSSVHQQ             |           |         |                           |      | Mascot      |
| 1488.7289  | 1488.7856   | 0.0567  | 38    | 375        | 388      | SGDTKSDLSSVHQQ             |           |         |                           |      | Mascot      |
| 1916.0157  | 1915.9589   | -0.0568 | -30   | 1115       | 1132     | LGDSVTLLSAVLEDPRCK         |           |         |                           |      | Mascot      |
| 2175.0896  | 2175.1401   | 0.0505  | 23    | 1250       | 1270     | LGLSNCGLTDEGCAALAL<br>ALR  |           |         | Carbamidomethyl (C)[6,13] |      | Mascot      |
| 2175.0896  | 2175.1401   | 0.0505  | 23    | 1250       | 1270     | LGLSNCGLTDEGCAALAL<br>ALR  |           |         | Carbamidomethyl (C)[6,13] |      | Mascot      |
| 2225.2839  | 2225.1235   | -0.1604 | -72   | 890        | 908      | FLLGLSVESHQILLQRLM<br>K    |           |         |                           |      | Mascot      |
| 2284.0181  | 2284.1746   | 0.1565  | 69    | 380        | 400      | SDLSSVHQQKSTESESSC<br>VSMR |           |         |                           |      | Mascot      |
| 2300.0129  | 2300.1807   | 0.1678  | 73    | 380        | 400      | SDLSSVHQQKSTESESSC         |           |         | Oxidation (M)[20]         |      | Mascot      |

|    |                                                                  |           |         |     |     |             |                                    |                         |   |    |   |  |        |
|----|------------------------------------------------------------------|-----------|---------|-----|-----|-------------|------------------------------------|-------------------------|---|----|---|--|--------|
|    | 2341.0396                                                        | 2341.1233 | 0.0837  | 36  | 380 | 400         | VSMR<br>SDLSSVHQKSTESSESSC<br>VSMR | Carbamidomethyl (C)[17] |   |    |   |  | Mascot |
|    | 2448.2002                                                        | 2448.1428 | -0.0574 | -23 | 414 | 435         | SGDTETDLSHEALNTRFS<br>NLLK         |                         |   |    |   |  | Mascot |
|    | 2460.2954                                                        | 2460.1133 | -0.1821 | -74 | 537 | 556         | ENQDVQLIFPLPFREINL<br>MK           | Oxidation (M)[19]       |   |    |   |  | Mascot |
|    | 2479.0752                                                        | 2479.2808 | 0.2056  | 83  | 277 | 297         | KDFCSADQEELLETLDNY<br>SCR          |                         |   |    |   |  | Mascot |
|    | 3338.6072                                                        | 3338.7615 | 0.1543  | 46  | 780 | 809         | ECGIDVAEALVYSGLCTQ<br>IFREEFGLYQGK |                         |   |    |   |  | Mascot |
| 24 | immunoglobulin heavy chain variable segment 9-2<br>[Danio rerio] |           |         |     |     | gi 56207380 | 12773.2                            | 7.57                    | 5 | 33 | 0 |  |        |

#### Peptide Information

| Calc. Mass | Obsrv. Mass | ± da    | ± ppm | Start Seq. | End Seq. | Sequence                | Ion Score | C. I. % | Modification      | Rank | Result Type |
|------------|-------------|---------|-------|------------|----------|-------------------------|-----------|---------|-------------------|------|-------------|
| 1112.5847  | 1112.5077   | -0.077  | -69   | 28         | 38       | SVNVAPGGFHK             |           |         |                   |      | Mascot      |
| 1751.8163  | 1751.814    | -0.0023 | -1    | 63         | 76       | GLEWIIYYSDSDK           |           |         |                   |      | Mascot      |
| 2097.0435  | 2097.0769   | 0.0334  | 16    | 86         | 103      | FTASKDSSNLYLHMNQL<br>K  |           |         |                   |      | Mascot      |
| 2225.03    | 2225.1235   | 0.0935  | 42    | 39         | 57       | LSCACSGFTLRSTNMYWI<br>R |           |         | Oxidation (M)[15] |      | Mascot      |
| 2233.0811  | 2233.0842   | 0.0031  | 1     | 58         | 76       | QAPGKGLEWIIYYSDSD<br>K  |           |         |                   |      | Mascot      |

|    |                                                                    |  |  |  |  |              |         |      |    |    |   |  |  |
|----|--------------------------------------------------------------------|--|--|--|--|--------------|---------|------|----|----|---|--|--|
| 25 | procollagen-lysine,2-oxoglutarate 5-dioxygenase 3<br>[Danio rerio] |  |  |  |  | gi 113195568 | 84856.6 | 6.17 | 11 | 32 | 0 |  |  |
|----|--------------------------------------------------------------------|--|--|--|--|--------------|---------|------|----|----|---|--|--|

#### Peptide Information

| Calc. Mass | Obsrv. Mass | ± da    | ± ppm | Start Seq. | End Seq. | Sequence                 | Ion Score | C. I. % | Modification                              | Rank | Result Type |
|------------|-------------|---------|-------|------------|----------|--------------------------|-----------|---------|-------------------------------------------|------|-------------|
| 901.5213   | 901.5057    | -0.0156 | -17   | 72         | 80       | TVGGGQKVR                |           |         |                                           |      | Mascot      |
| 996.4852   | 996.5963    | 0.1111  | 111   | 364        | 372      | TMAVEACKK                |           |         | Oxidation (M)[2]                          |      | Mascot      |
| 1044.5697  | 1044.4929   | -0.0768 | -74   | 341        | 349      | HRSLFTGAR                |           |         |                                           |      | Mascot      |
| 1436.738   | 1436.7465   | 0.0085  | 6     | 432        | 443      | AEDYIDIVQSKR             |           |         |                                           |      | Mascot      |
| 1475.673   | 1475.7533   | 0.0803  | 54    | 359        | 371      | HDQARTMAVEACK            |           |         | Oxidation (M)[7]                          |      | Mascot      |
| 1902.0331  | 1901.9904   | -0.0427 | -22   | 205        | 221      | SQIFQNLNGAIEEVVLK        |           |         |                                           |      | Mascot      |
| 2097.0222  | 2097.0769   | 0.0547  | 26    | 125        | 142      | VVFSAEGFCWPDQRLAS<br>K   |           |         | Carbamidomethyl (C)[9]                    |      | Mascot      |
| 2136.2283  | 2136.1672   | -0.0611 | -29   | 1          | 19       | MTPVPVILTVILAVIQPCR      |           |         | Carbamidomethyl (C)[18], Oxidation (M)[1] |      | Mascot      |
| 2225.0344  | 2225.1235   | 0.0891  | 40    | 121        | 138      | FSHRVVFSAEGFCWPDQ<br>R   |           |         | Carbamidomethyl (C)[13]                   |      | Mascot      |
| 2232.9973  | 2233.0842   | 0.0869  | 39    | 467        | 486      | LAASVLYQQEGMDPDMS<br>FCK |           |         |                                           |      | Mascot      |
| 2306.239   | 2306.1567   | -0.0823 | -36   | 205        | 224      | SQIFQNLNGAIEEVVLKFE<br>K |           |         |                                           |      | Mascot      |

|    |                                                                         |  |  |  |  |              |         |      |   |    |   |  |  |
|----|-------------------------------------------------------------------------|--|--|--|--|--------------|---------|------|---|----|---|--|--|
| 26 | PREDICTED: gastrula zinc finger protein<br>XICGF57.1-like [Danio rerio] |  |  |  |  | gi 326667410 | 37299.3 | 9.21 | 9 | 32 | 0 |  |  |
|----|-------------------------------------------------------------------------|--|--|--|--|--------------|---------|------|---|----|---|--|--|



| Peptide Information |                                                                  |             |          |           |              |                           |           |                                              |                  |
|---------------------|------------------------------------------------------------------|-------------|----------|-----------|--------------|---------------------------|-----------|----------------------------------------------|------------------|
|                     | Calc. Mass                                                       | Obsrv. Mass | $\pm$ da | $\pm$ ppm | Start Seq.   | End Sequence Seq.         | Ion Score | C. I. % Modification                         | Rank Result Type |
|                     | 959.5091                                                         | 959.5134    | 0.0043   | 4         | 313          | 320 KTLSSHMR              |           |                                              | Mascot           |
|                     | 1354.6532                                                        | 1354.7678   | 0.1146   | 85        | 314          | 325 TLSSHMRVHASE          |           |                                              | Mascot           |
|                     | 1354.6532                                                        | 1354.7678   | 0.1146   | 85        | 314          | 325 TLSSHMRVHASE          |           |                                              | Mascot           |
|                     | 1488.7991                                                        | 1488.7856   | -0.0135  | -9        | 140          | 152 SFVQQGV LKAHMK        |           | Oxidation (M)[12]                            | Mascot           |
|                     | 1488.7991                                                        | 1488.7856   | -0.0135  | -9        | 140          | 152 SFVQQGV LKAHMK        |           | Oxidation (M)[12]                            | Mascot           |
|                     | 1542.8573                                                        | 1542.8818   | 0.0245   | 16        | 196          | 208 SFVQQG L LKVHMR       |           |                                              | Mascot           |
|                     | 1707.7577                                                        | 1707.776    | 0.0183   | 11        | 265          | 279 THTGEKPFSCQQCGK       |           | Carbamidomethyl (C)[10]                      | Mascot           |
|                     | 2097.0005                                                        | 2097.0769   | 0.0764   | 36        | 293          | 310 VHTGEKLF TCQQCGVSF R  |           | Carbamidomethyl (C)[10]                      | Mascot           |
|                     | 2196.9988                                                        | 2197.1208   | 0.122    | 56        | 65           | 83 IHMTVHTGEKPFSCHECP K   |           | Oxidation (M)[3]                             | Mascot           |
|                     | 2284.042                                                         | 2284.1746   | 0.1326   | 58        | 149          | 167 AHMKTHTGEKPYICHEC GK  |           | Carbamidomethyl (C)[14,17]                   | Mascot           |
|                     | 2300.0369                                                        | 2300.1807   | 0.1438   | 63        | 149          | 167 AHMKTHTGEKPYICHEC GK  |           | Carbamidomethyl (C)[14,17], Oxidation (M)[3] | Mascot           |
|                     | 2479.2043                                                        | 2479.2808   | 0.0765   | 31        | 63           | 83 LKIHMTVHTGEKPFSCHEC PK |           | Carbamidomethyl (C)[16]                      | Mascot           |
| 27                  | PREDICTED: hypothetical protein LOC795590, partial [Danio rerio] |             |          |           | gi 326667578 | 34784.3                   | 5.29      | 7                                            | 32 0             |

| Peptide Information |                                                                                |             |          |           |              |                             |           |                      |                  |
|---------------------|--------------------------------------------------------------------------------|-------------|----------|-----------|--------------|-----------------------------|-----------|----------------------|------------------|
|                     | Calc. Mass                                                                     | Obsrv. Mass | $\pm$ da | $\pm$ ppm | Start Seq.   | End Sequence Seq.           | Ion Score | C. I. % Modification | Rank Result Type |
|                     | 842.4842                                                                       | 842.5089    | 0.0247   | 29        | 129          | 135 LNQALQR                 |           |                      | Mascot           |
|                     | 996.5359                                                                       | 996.5963    | 0.0604   | 61        | 307          | 316 VLPPADAKDA              |           |                      | Mascot           |
|                     | 1767.8153                                                                      | 1767.8112   | -0.0041  | -2        | 8            | 23 LSEAQTQVSGWMGSMR         |           |                      | Mascot           |
|                     | 1923.9164                                                                      | 1923.9685   | 0.0521   | 27        | 8            | 24 LSEAQTQVSGWMGSMR R       |           |                      | Mascot           |
|                     | 2197.0842                                                                      | 2197.1208   | 0.0366   | 17        | 273          | 294 RSAALDSDAQAEATPP SVPSR  |           |                      | Mascot           |
|                     | 2460.1646                                                                      | 2460.1133   | -0.0513  | -21       | 2            | 23 QFLGSKLSEAQTQVSGW MGSMR  |           | Oxidation (M)[18,21] | Mascot           |
|                     | 2479.1558                                                                      | 2479.2808   | 0.125    | 50        | 202          | 224 AALPALTEGTPDWRFC DSTDAK |           |                      | Mascot           |
| 28                  | PREDICTED: NACTH, LRR and PYD domains-containing protein 12-like [Danio rerio] |             |          |           | gi 292610042 | 103784.1                    | 7.26      | 13                   | 32 0             |

| Peptide Information |            |             |          |           |            |                   |           |                      |                  |
|---------------------|------------|-------------|----------|-----------|------------|-------------------|-----------|----------------------|------------------|
|                     | Calc. Mass | Obsrv. Mass | $\pm$ da | $\pm$ ppm | Start Seq. | End Sequence Seq. | Ion Score | C. I. % Modification | Rank Result Type |
|                     | 870.577    | 870.54      | -0.037   | -43       | 660        | 666 LEKLVLR       |           |                      | Mascot           |

|    |                                             |           |         |     |             |     |                            |      |   |                          |   |  |        |
|----|---------------------------------------------|-----------|---------|-----|-------------|-----|----------------------------|------|---|--------------------------|---|--|--------|
|    | 901.5829                                    | 901.5057  | -0.0772 | -86 | 92          | 99  | AIRTVLTK                   |      |   |                          |   |  | Mascot |
|    | 1044.5836                                   | 1044.4929 | -0.0907 | -87 | 865         | 872 | ELNLKWNK                   |      |   |                          |   |  | Mascot |
|    | 1179.6732                                   | 1179.6022 | -0.071  | -60 | 263         | 272 | LADEIIQHLK                 |      |   |                          |   |  | Mascot |
|    | 1475.8719                                   | 1475.7533 | -0.1186 | -80 | 903         | 915 | SEVSVIVLLEFIK              |      |   |                          |   |  | Mascot |
|    | 1719.8507                                   | 1719.8544 | 0.0037  | 2   | 742         | 756 | SNSSNLRELELSENK            |      |   |                          |   |  | Mascot |
|    | 1719.8507                                   | 1719.8544 | 0.0037  | 2   | 684         | 698 | SNSSNLRELELSENK            |      |   |                          |   |  | Mascot |
|    | 1751.8236                                   | 1751.814  | -0.0096 | -5  | 667         | 683 | CCGVSVEGCAALASVLR          |      |   | Carbamidomethyl (C)[1,2] |   |  | Mascot |
|    | 2211.1047                                   | 2211.1079 | 0.0032  | 1   | 721         | 741 | LWLGYCGVSDKGCAALA<br>SALR  |      |   | Carbamidomethyl (C)[6]   |   |  | Mascot |
|    | 2233.1614                                   | 2233.0842 | -0.0772 | -35 | 663         | 683 | LVLRCGVSVEGCAALA<br>SVLR   |      |   | Carbamidomethyl (C)[5,6] |   |  | Mascot |
|    | 2460.2954                                   | 2460.1133 | -0.1821 | -74 | 122         | 141 | ENQDVQLIFLPPFREINL<br>MK   |      |   | Oxidation (M)[19]        |   |  | Mascot |
|    | 2479.3037                                   | 2479.2808 | -0.0229 | -9  | 474         | 495 | SNQTLLKNLLTQVGNISY<br>SEEK |      |   |                          |   |  | Mascot |
|    | 2489.2969                                   | 2489.0876 | -0.2093 | -84 | 309         | 328 | TLTEMYTHFLIIQTSIRHE<br>R   |      |   |                          |   |  | Mascot |
|    | 2515.2246                                   | 2515.2405 | 0.0159  | 6   | 70          | 91  | STTEDTPIQCRDIFTALPG<br>QHK |      |   | Carbamidomethyl (C)[10]  |   |  | Mascot |
| 29 | immunoglobulin mu heavy chain [Danio rerio] |           |         |     | gi 51559357 |     | 23906.6                    | 8.05 | 6 | 31                       | 0 |  |        |

#### Peptide Information

| Calc. Mass | Obsrv. Mass | ± da    | ± ppm | Start Seq. | End Seq. | Sequence                | Ion Score | C. I. | % Modification    | Rank | Result Type |
|------------|-------------|---------|-------|------------|----------|-------------------------|-----------|-------|-------------------|------|-------------|
| 864.4097   | 864.4704    | 0.0607  | 70    | 209        | 215      | SDWIDTK                 |           |       |                   |      | Mascot      |
| 1112.5847  | 1112.5077   | -0.077  | -69   | 28         | 38       | SVNVAPGGFHK             |           |       |                   |      | Mascot      |
| 1751.8163  | 1751.814    | -0.0023 | -1    | 63         | 76       | GLEWIIYYSDSDK           |           |       |                   |      | Mascot      |
| 2097.0435  | 2097.0769   | 0.0334  | 16    | 86         | 103      | FTASKDSSNLYLHMNQL<br>K  |           |       |                   |      | Mascot      |
| 2225.03    | 2225.1235   | 0.0935  | 42    | 39         | 57       | LSCACSGFTLRSTNMYWI<br>R |           |       | Oxidation (M)[15] |      | Mascot      |
| 2233.0811  | 2233.0842   | 0.0031  | 1     | 58         | 76       | QAPGKGLEWIIYYSDSD<br>K  |           |       |                   |      | Mascot      |

30 novel protein [Danio rerio] gi|220679564 9886.7 8.37 5 31 0

#### Peptide Information

| Calc. Mass | Obsrv. Mass | ± da   | ± ppm | Start Seq. | End Seq. | Sequence                   | Ion Score | C. I. | % Modification                             | Rank | Result Type |
|------------|-------------|--------|-------|------------|----------|----------------------------|-----------|-------|--------------------------------------------|------|-------------|
| 864.4218   | 864.4704    | 0.0486 | 56    | 33         | 38       | WLMVCR                     |           |       | Carbamidomethyl (C)[5]                     |      | Mascot      |
| 1103.5632  | 1103.5682   | 0.005  | 5     | 70         | 78       | TAHANWYLK                  |           |       |                                            |      | Mascot      |
| 1736.8207  | 1736.8861   | 0.0654 | 38    | 24         | 38       | SAVPGSSDRWLMVCR            |           |       | Carbamidomethyl (C)[14], Oxidation (M)[12] |      | Mascot      |
| 2456.99    | 2457.3127   | 0.3227 | 131   | 2          | 23       | IPEYSMSSAASSDMCPY<br>MPVCR |           |       | Oxidation (M)[6,14]                        |      | Mascot      |
| 2456.99    | 2457.3127   | 0.3227 | 131   | 2          | 23       | IPEYSMSSAASSDMCPY<br>MPVCR |           |       | Oxidation (M)[6,14]                        |      | Mascot      |
| 3338.4255  | 3338.7615   | 0.336  | 101   | 2          | 32       | IPEYSMSSAASSDMCPY          |           |       | Carbamidomethyl (C)[15]                    |      | Mascot      |

31 replication factor C subunit 2 [Danio rerio] MPVCRSAVPGSSDR gi|61651808 38999 6.07 8 31 0

Peptide Information

| Calc. Mass | Obsrv. Mass | ± da    | ± ppm | Start Seq. | End Seq. | Sequence              | Ion Score | C. I. % | Modification            | Rank | Result Type |
|------------|-------------|---------|-------|------------|----------|-----------------------|-----------|---------|-------------------------|------|-------------|
| 996.5294   | 996.5963    | 0.0669  | 67    | 180        | 187      | CAVLRYSK              |           |         | Carbamidomethyl (C)[1]  |      | Mascot      |
| 1736.8557  | 1736.8861   | 0.0304  | 18    | 190        | 203      | DEQIMMRLTEVVEK        |           |         | Oxidation (M)[5]        |      | Mascot      |
| 1893.8469  | 1893.9828   | 0.1359  | 72    | 260        | 275      | SMLEHCNVANIDEAYK      |           |         | Carbamidomethyl (C)[6]  |      | Mascot      |
| 1893.8469  | 1893.9828   | 0.1359  | 72    | 260        | 275      | SMLEHCNVANIDEAYK      |           |         | Carbamidomethyl (C)[6]  |      | Mascot      |
| 2114.0911  | 2114.187    | 0.0959  | 45    | 87         | 106      | ALLGPAMKDAVLELNASNDR  |           |         | Oxidation (M)[7]        |      | Mascot      |
| 2114.0911  | 2114.187    | 0.0959  | 45    | 87         | 106      | ALLGPAMKDAVLELNASNDR  |           |         | Oxidation (M)[7]        |      | Mascot      |
| 2157.1631  | 2157.1226   | -0.0405 | -19   | 322        | 341      | VAEGVNSLLQMAGLLGR     |           |         | Carbamidomethyl (C)[19] |      | Mascot      |
| 2175.1404  | 2175.1401   | -0.0003 | 0     | 42         | 60       | LNEIVGNEETVSRLEVFA    |           |         |                         |      | Mascot      |
| 2175.1404  | 2175.1401   | -0.0003 | 0     | 42         | 60       | LNEIVGNEETVSRLEVFA    |           |         |                         |      | Mascot      |
| 2341.1816  | 2341.1233   | -0.0583 | -25   | 130        | 150      | HKIIILDEADSMTDGAQQALR |           |         | Oxidation (M)[12]       |      | Mascot      |
| 2460.1824  | 2460.1133   | -0.0691 | -28   | 204        | 225      | ENLHVTNDGLEAIFTAQGDMR |           |         | Oxidation (M)[21]       |      | Mascot      |

32 novel protein with a Viral A-type inclusion protein repeat domain [Danio rerio] gi|169146304 27380.3 5.44 7 31 0

Peptide Information

| Calc. Mass | Obsrv. Mass | ± da    | ± ppm | Start Seq. | End Seq. | Sequence            | Ion Score | C. I. % | Modification           | Rank | Result Type |
|------------|-------------|---------|-------|------------|----------|---------------------|-----------|---------|------------------------|------|-------------|
| 901.4988   | 901.5057    | 0.0069  | 8     | 182        | 189      | AVEEVVQK            |           |         |                        |      | Mascot      |
| 1044.5796  | 1044.4929   | -0.0867 | -83   | 14         | 22       | AELRAELSR           |           |         |                        |      | Mascot      |
| 1103.515   | 1103.5682   | 0.0532  | 48    | 224        | 233      | QCHSLKTATD          |           |         |                        |      | Mascot      |
| 1488.7329  | 1488.7856   | 0.0527  | 35    | 2          | 13       | ESELLIGWQEER        |           |         |                        |      | Mascot      |
| 1488.7805  | 1488.7856   | 0.0051  | 3     | 198        | 210      | EVLTYGIGKEHSR       |           |         |                        |      | Mascot      |
| 1915.929   | 1915.9589   | 0.0299  | 16    | 101        | 116      | CQALEQQAVGEERELR    |           |         | Carbamidomethyl (C)[1] |      | Mascot      |
| 2157.1509  | 2157.1226   | -0.0283 | -13   | 137        | 155      | LEEEQQRSLGLSEVSALLR |           |         |                        |      | Mascot      |

33 PREDICTED: Kv channel-interacting protein 4-like [Danio rerio] gi|326663989 23863.6 4.71 6 31 0

Peptide Information

| Calc. Mass | Obsrv. Mass | ± da   | ± ppm | Start Seq. | End Seq. | Sequence | Ion Score | C. I. % | Modification | Rank | Result Type |
|------------|-------------|--------|-------|------------|----------|----------|-----------|---------|--------------|------|-------------|
| 850.5257   | 850.5435    | 0.0178 | 21    | 148        | 154      | SIHPRLK  |           |         |              |      | Mascot      |

|           |                                                                               |         |     |     |     |                    |  |  |  |                         |  |  |        |
|-----------|-------------------------------------------------------------------------------|---------|-----|-----|-----|--------------------|--|--|--|-------------------------|--|--|--------|
| 1062.5942 | 1062.6919                                                                     | 0.0977  | 92  | 36  | 43  | QELQLLYR           |  |  |  |                         |  |  | Mascot |
| 1915.9214 | 1915.9589                                                                     | 0.0375  | 20  | 132 | 147 | EEMLDIMKSIYDLMGK   |  |  |  |                         |  |  | Mascot |
| 2113.9268 | 2114.187                                                                      | 0.2602  | 123 | 2   | 18  | RLNTYNEDEEQESTTER  |  |  |  |                         |  |  | Mascot |
| 2114.0049 | 2114.187                                                                      | 0.1821  | 86  | 19  | 35  | YHPENLEQLQSQTHFSR  |  |  |  |                         |  |  | Mascot |
| 2294.1697 | 2294.1646                                                                     | -0.0051 | -2  | 88  | 107 | DKNGSLSFEEVLCDLSVL |  |  |  | Carbamidomethyl (C)[13] |  |  | Mascot |
| 2294.1697 | 2294.1646                                                                     | -0.0051 | -2  | 88  | 107 | DKNGSLSFEEVLCDLSVL |  |  |  | Carbamidomethyl (C)[13] |  |  | Mascot |
| 34        | RecName: Full=SH3 domain-binding protein 4-A gi 123888628 108383 7.89 13 30 0 |         |     |     |     |                    |  |  |  |                         |  |  |        |

#### Peptide Information

| Calc. Mass | Obsrv. Mass | ± da    | ± ppm | Start Seq. | End Seq. | Sequence              | Ion Score | C. I. % | Modification                                 | Rank | Result Type |
|------------|-------------|---------|-------|------------|----------|-----------------------|-----------|---------|----------------------------------------------|------|-------------|
| 842.5822   | 842.5089    | -0.0733 | -87   | 663        | 669      | LIKTVIR               |           |         |                                              |      | Mascot      |
| 850.4338   | 850.5435    | 0.1097  | 129   | 387        | 393      | LSNMEIK               |           |         | Oxidation (M)[4]                             |      | Mascot      |
| 870.4726   | 870.54      | 0.0674  | 77    | 1          | 7        | MAHRIR                |           |         | Oxidation (M)[1]                             |      | Mascot      |
| 1045.4796  | 1045.562    | 0.0824  | 79    | 791        | 799      | AELDSEPER             |           |         |                                              |      | Mascot      |
| 1210.679   | 1210.5983   | -0.0807 | -67   | 861        | 871      | DLAEKLAHVSK           |           |         |                                              |      | Mascot      |
| 1488.9624  | 1488.7856   | -0.1768 | -119  | 713        | 726      | IGLVHVKNVLVLGK        |           |         |                                              |      | Mascot      |
| 1488.9624  | 1488.7856   | -0.1768 | -119  | 713        | 726      | IGLVHVKNVLVLGK        |           |         |                                              |      | Mascot      |
| 1767.8074  | 1767.8112   | 0.0038  | 2     | 408        | 423      | TESPMAEIVCVRSDCK      |           |         |                                              |      | Mascot      |
| 2097.0137  | 2097.0769   | 0.0632  | 30    | 402        | 419      | VSMTRTESPMAEIVCVR     |           |         | Carbamidomethyl (C)[16], Oxidation (M)[4,11] |      | Mascot      |
| 2284.2368  | 2284.1746   | -0.0622 | -27   | 492        | 513      | TVVAIFGHDCAPKTLVSEVGK |           |         |                                              |      | Mascot      |
| 2300.0686  | 2300.1807   | 0.1121  | 49    | 597        | 616      | DDQDCILAFQCVQTPQP     |           |         | Carbamidomethyl (C)[5]                       |      | Mascot      |
| 2341.2583  | 2341.1233   | -0.135  | -58   | 492        | 513      | TVVAIFGHDCAPKTLVSEVGK |           |         | Carbamidomethyl (C)[10]                      |      | Mascot      |
| 3000.4343  | 3000.2456   | -0.1887 | -63   | 529        | 553      | HQFVLSRPQDLQIGMYS     |           |         | Oxidation (M)[15]                            |      | Mascot      |
| 3337.6052  | 3337.7454   | 0.1402  | 42    | 298        | 327      | LARSCHDLESLGQNPWG     |           |         | Carbamidomethyl (C)[5]                       |      | Mascot      |
| 3338.5496  | 3338.7615   | 0.2119  | 63    | 885        | 913      | GQTQPVETNIVCK         |           |         | Oxidation (M)[3]                             |      | Mascot      |
|            |             |         |       |            |          | TGMVDSEAMWKPAYDFL     |           |         |                                              |      |             |
|            |             |         |       |            |          | LTWAAQIGDSYR          |           |         |                                              |      |             |

35 stromal interaction molecule 1b [Danio rerio] gi|321400099 72493.8 6.03 11 30 0

#### Peptide Information

| Calc. Mass | Obsrv. Mass | ± da   | ± ppm | Start Seq. | End Seq. | Sequence  | Ion Score | C. I. % | Modification     | Rank | Result Type |
|------------|-------------|--------|-------|------------|----------|-----------|-----------|---------|------------------|------|-------------|
| 842.4076   | 842.5089    | 0.1013 | 120   | 555        | 561      | KSFGMEK   |           |         | Oxidation (M)[5] |      | Mascot      |
| 901.4849   | 901.5057    | 0.0208 | 23    | 289        | 295      | EEAQRLR   |           |         |                  |      | Mascot      |
| 959.4801   | 959.5134    | 0.0333 | 35    | 233        | 240      | DHMGKMIK  |           |         |                  |      | Mascot      |
| 1051.5643  | 1051.7111   | 0.1468 | 140   | 175        | 183      | IPDRSHAQK |           |         |                  |      | Mascot      |

|    |                                 |           |        |      |              |     |                                |     |   |    |   |                  |        |
|----|---------------------------------|-----------|--------|------|--------------|-----|--------------------------------|-----|---|----|---|------------------|--------|
|    | 1062.536                        | 1062.6919 | 0.1559 | 147  | 274          | 281 | VNLEREMR                       |     |   |    |   | Oxidation (M)[7] | Mascot |
|    | 1179.5674                       | 1179.6022 | 0.0348 | 30   | 279          | 288 | EMRSEIEAAK                     |     |   |    |   | Oxidation (M)[2] | Mascot |
|    | 1751.942                        | 1751.814  | -0.128 | -73  | 9            | 21  | HFIYITWLGFLWR                  |     |   |    |   |                  | Mascot |
|    | 2196.9487                       | 2197.1208 | 0.1721 | 78   | 608          | 629 | SLVDEDNGSTGEDTEGS<br>GSGRK     |     |   |    |   |                  | Mascot |
|    | 2224.9548                       | 2225.1235 | 0.1687 | 76   | 607          | 628 | RSLVDEDNGSTGEDTEG<br>SGSGR     |     |   |    |   |                  | Mascot |
|    | 2341.011                        | 2341.1233 | 0.1123 | 48   | 508          | 528 | DLNRSESDSSLSMSQYG<br>DGHR      |     |   |    |   |                  | Mascot |
|    | 3000.5586                       | 3000.2456 | -0.313 | -104 | 207          | 232 | DLMLVVSIIIGVGGCWFA<br>YIQNRNYR |     |   |    |   |                  | Mascot |
| 36 | LOC565764 protein [Danio rerio] |           |        |      | gi 112418812 |     | 25782.2                        | 5.2 | 6 | 30 | 0 |                  |        |

Peptide Information

| Calc. Mass | Obsrv. Mass | ± da    | ± ppm | Start Seq. | End Seq. | Sequence          | Ion Score | C. I. | % Modification         | Rank | Result Type |
|------------|-------------|---------|-------|------------|----------|-------------------|-----------|-------|------------------------|------|-------------|
| 864.4355   | 864.4704    | 0.0349  | 40    | 77         | 83       | RSMDSIR           |           |       |                        |      | Mascot      |
| 882.4389   | 882.5677    | 0.1288  | 146   | 11         | 17       | LEAMFQK           |           |       | Oxidation (M)[4]       |      | Mascot      |
| 901.4988   | 901.5057    | 0.0069  | 8     | 222        | 230      | GLVSLLAND         |           |       |                        |      | Mascot      |
| 1112.5293  | 1112.5077   | -0.0216 | -19   | 2          | 10       | LFNMETVDK         |           |       | Oxidation (M)[4]       |      | Mascot      |
| 1767.8694  | 1767.8112   | -0.0582 | -33   | 61         | 76       | HAALCAQVEEIAAEQK  |           |       | Carbamidomethyl (C)[5] |      | Mascot      |
| 1923.9705  | 1923.9685   | -0.002  | -1    | 61         | 77       | HAALCAQVEEIAAEQKR |           |       | Carbamidomethyl (C)[5] |      | Mascot      |

|    |                            |  |  |  |             |  |         |      |   |    |   |  |  |
|----|----------------------------|--|--|--|-------------|--|---------|------|---|----|---|--|--|
| 37 | Syf2 protein [Danio rerio] |  |  |  | gi 60688494 |  | 28206.2 | 7.68 | 6 | 30 | 0 |  |  |
|----|----------------------------|--|--|--|-------------|--|---------|------|---|----|---|--|--|

Peptide Information

| Calc. Mass | Obsrv. Mass | ± da    | ± ppm | Start Seq. | End Seq. | Sequence                    | Ion Score | C. I. | % Modification         | Rank | Result Type |
|------------|-------------|---------|-------|------------|----------|-----------------------------|-----------|-------|------------------------|------|-------------|
| 870.4468   | 870.54      | 0.0932  | 107   | 217        | 223      | AERFYGK                     |           |       |                        |      | Mascot      |
| 1436.6686  | 1436.7465   | 0.0779  | 54    | 172        | 183      | DSINRMVDDVEK                |           |       | Oxidation (M)[6]       |      | Mascot      |
| 1736.8888  | 1736.8861   | -0.0027 | -2    | 133        | 146      | LTKQIKPDMEYNEK              |           |       |                        |      | Mascot      |
| 1999.8992  | 1999.9437   | 0.0445  | 22    | 196        | 212      | AYNDDADIDYINERNAK           |           |       |                        |      | Mascot      |
| 1999.8992  | 1999.9437   | 0.0445  | 22    | 196        | 212      | AYNDDADIDYINERNAK           |           |       |                        |      | Mascot      |
| 2197.042   | 2197.1208   | 0.0788  | 36    | 114        | 132      | NPDPGFSGYAEALRQY<br>QR      |           |       |                        |      | Mascot      |
| 2590.1514  | 2590.2161   | 0.0647  | 25    | 149        | 171      | EDCGEDFHPTSNLSIYGT<br>HVPSK |           |       | Carbamidomethyl (C)[3] |      | Mascot      |

|    |                                           |  |  |  |              |  |          |      |    |    |   |  |  |
|----|-------------------------------------------|--|--|--|--------------|--|----------|------|----|----|---|--|--|
| 38 | PREDICTED: si:dkey-170m15.2 [Danio rerio] |  |  |  | gi 292624792 |  | 132327.3 | 7.37 | 14 | 30 | 0 |  |  |
|----|-------------------------------------------|--|--|--|--------------|--|----------|------|----|----|---|--|--|

Peptide Information

| Calc. Mass | Obsrv. Mass | ± da    | ± ppm | Start Seq. | End Seq. | Sequence | Ion Score | C. I. | % Modification | Rank | Result Type |
|------------|-------------|---------|-------|------------|----------|----------|-----------|-------|----------------|------|-------------|
| 864.472    | 864.4704    | -0.0016 | -2    | 41         | 47       | RTSMLTR  |           |       |                |      | Mascot      |

|           |           |         |     |      |      |                              |                        |        |
|-----------|-----------|---------|-----|------|------|------------------------------|------------------------|--------|
| 996.5182  | 996.5963  | 0.0781  | 78  | 75   | 83   | DCPLVAPPK                    | Carbamidomethyl (C)[2] | Mascot |
| 1045.516  | 1045.562  | 0.046   | 44  | 98   | 106  | QTNITDEPK                    |                        | Mascot |
| 1103.6167 | 1103.5682 | -0.0485 | -44 | 1159 | 1168 | TTVVQQSGRK                   |                        | Mascot |
| 1165.6034 | 1165.7476 | 0.1442  | 124 | 440  | 449  | FCEQAVTIVR                   |                        | Mascot |
| 1707.8846 | 1707.776  | -0.1086 | -64 | 436  | 449  | ESLRFCEQAVTIVR               | Carbamidomethyl (C)[6] | Mascot |
| 1751.8157 | 1751.814  | -0.0017 | -1  | 583  | 597  | TLQEMWASVESDVEK              |                        | Mascot |
| 1767.8105 | 1767.8112 | 0.0007  | 0   | 583  | 597  | TLQEMWASVESDVEK              | Oxidation (M)[5]       | Mascot |
| 1908.7925 | 1908.9324 | 0.1399  | 73  | 1104 | 1119 | QMETCIGFQDTMDAYR             |                        | Mascot |
| 2096.8835 | 2097.0769 | 0.1934  | 92  | 1103 | 1119 | RQMETCIGFQDTMDAYR            | Oxidation (M)[3,13]    | Mascot |
| 2196.9358 | 2197.1208 | 0.185   | 84  | 1104 | 1121 | QMETCIGFQDTMDAYRQ<br>K       | Oxidation (M)[2,12]    | Mascot |
| 2207.1865 | 2207.1174 | -0.0691 | -31 | 399  | 418  | HVLQVHTNASLAVHLHLC<br>SK     |                        | Mascot |
| 2283.1875 | 2283.1833 | -0.0042 | -2  | 663  | 682  | MFSPIPVCILHVINNDTLE<br>K     |                        | Mascot |
| 2460.281  | 2460.1133 | -0.1677 | -68 | 107  | 127  | EPPVQKPEQFIEVSSPFI<br>NFK    |                        | Mascot |
| 2489.2605 | 2489.0876 | -0.1729 | -69 | 804  | 827  | GHVIIPVYCFLASNGSSV<br>AQAEAR |                        | Mascot |

39 follistatin-like 1b [Danio rerio] gi|88900441 35185.6 5.16 8 30 0

#### Peptide Information

| Calc. Mass | Obsrv. Mass | ± da    | ± ppm | Start Seq. | End Seq. | Sequence                       | Ion Score | C. I. % | Modification              | Rank | Result Type |
|------------|-------------|---------|-------|------------|----------|--------------------------------|-----------|---------|---------------------------|------|-------------|
| 870.4315   | 870.54      | 0.1085  | 125   | 296        | 302      | HQETVEK                        |           |         |                           |      | Mascot      |
| 1210.5455  | 1210.5983   | 0.0528  | 44    | 29         | 39       | VCANVFCGAGR                    |           |         | Carbamidomethyl (C)[2,7]  |      | Mascot      |
| 1908.9419  | 1908.9324   | -0.0095 | -5    | 81         | 98       | DACLTGLKIQVAHDGHCK             |           |         |                           |      | Mascot      |
| 2196.9392  | 2197.1208   | 0.1816  | 83    | 40         | 58       | ECAVNEKGEPSCLCIEQC<br>K        |           |         | Carbamidomethyl (C)[2,12] |      | Mascot      |
| 2225.0947  | 2225.1235   | 0.0288  | 13    | 212        | 230      | LSFDEFLNCLKPGFSPPE<br>K        |           |         | Carbamidomethyl (C)[9]    |      | Mascot      |
| 2299.9661  | 2300.1807   | 0.2146  | 93    | 270        | 288      | TPVFDTEGDQEMTEEEW<br>TR        |           |         |                           |      | Mascot      |
| 2460.0288  | 2460.1133   | 0.0845  | 34    | 231        | 251      | KCALEDETYEDGAETQV<br>ECNR      |           |         | Carbamidomethyl (C)[2]    |      | Mascot      |
| 3000.4424  | 3000.2456   | -0.1968 | -66   | 1          | 26       | MMFRCLPVFFLLAVVCC<br>HAEQEAQSK |           |         |                           |      | Mascot      |

40 PREDICTED: transposon TX1 uncharacterized 149 kDa gi|326664772 131122 9.55 15 29 0  
protein-like [Danio rerio]

#### Peptide Information

| Calc. Mass | Obsrv. Mass | ± da   | ± ppm | Start Seq. | End Seq. | Sequence  | Ion Score | C. I. % | Modification           | Rank | Result Type |
|------------|-------------|--------|-------|------------|----------|-----------|-----------|---------|------------------------|------|-------------|
| 1045.5499  | 1045.562    | 0.0121 | 12    | 913        | 921      | CPVAFNLPK |           |         | Carbamidomethyl (C)[1] |      | Mascot      |
| 1051.5935  | 1051.7111   | 0.1176 | 112   | 824        | 831      | FFLLNLER  |           |         |                        |      | Mascot      |

|    |                                                           |           |         |     |      |              |                          |      |   |                                             |   |  |        |
|----|-----------------------------------------------------------|-----------|---------|-----|------|--------------|--------------------------|------|---|---------------------------------------------|---|--|--------|
|    | 1062.667                                                  | 1062.6919 | 0.0249  | 23  | 537  | 545          | LFTKILATR                |      |   |                                             |   |  | Mascot |
|    | 1103.5448                                                 | 1103.5682 | 0.0234  | 21  | 1002 | 1011         | AVMHSRGMAK               |      |   | Oxidation (M)[3]                            |   |  | Mascot |
|    | 1475.8251                                                 | 1475.7533 | -0.0718 | -49 | 168  | 180          | LDKTSVLLQGMVR            |      |   | Oxidation (M)[11]                           |   |  | Mascot |
|    | 1488.639                                                  | 1488.7856 | 0.1466  | 98  | 195  | 207          | EEGFTWFSGDGTR            |      |   |                                             |   |  | Mascot |
|    | 1488.8573                                                 | 1488.7856 | -0.0717 | -48 | 602  | 613          | ISHQFLFKVLEK             |      |   |                                             |   |  | Mascot |
|    | 1736.8734                                                 | 1736.8861 | 0.0127  | 7   | 343  | 357          | EVKNEMSVLSEIQSK          |      |   | Oxidation (M)[6]                            |   |  | Mascot |
|    | 1751.7871                                                 | 1751.814  | 0.0269  | 15  | 766  | 782          | FDEEGGGGGNWTDLLG<br>K    |      |   |                                             |   |  | Mascot |
|    | 2097.1086                                                 | 2097.0769 | -0.0317 | -15 | 957  | 975          | EQVSRVPGLTLGEAQQA<br>WK  |      |   |                                             |   |  | Mascot |
|    | 2193.177                                                  | 2193.1125 | -0.0645 | -29 | 1    | 19           | MSFTHILLMALTISTINVR      |      |   | Oxidation (M)[1,9]                          |   |  | Mascot |
|    | 2207.0366                                                 | 2207.1174 | 0.0808  | 37  | 1008 | 1027         | GMAKTSICPRPGCSSPE<br>TVR |      |   | Carbamidomethyl (C)[8,13], Oxidation (M)[2] |   |  | Mascot |
|    | 2225.051                                                  | 2225.1235 | 0.0725  | 33  | 546  | 565          | MSMVLEDVIHPDQACAV<br>PGR |      |   | Carbamidomethyl (C)[15]                     |   |  | Mascot |
|    | 2300.1445                                                 | 2300.1807 | 0.0362  | 16  | 327  | 345          | YFNLLNEGLDFNDEIKEV<br>K  |      |   |                                             |   |  | Mascot |
|    | 2341.1821                                                 | 2341.1233 | -0.0588 | -25 | 324  | 342          | LQRYFNLLNEGLDFNDEI<br>K  |      |   |                                             |   |  | Mascot |
| 41 | PREDICTED: collagen alpha-1(XXI) chain-like [Danio rerio] |           |         |     |      | gi 292629362 | 17314.5                  | 9.43 | 5 | 29                                          | 0 |  |        |

#### Peptide Information

| Calc. Mass | Obsrv. Mass | ± da    | ± ppm | Start Seq. | End Seq. | Sequence                     | Ion Score | C. I. | % Modification             | Rank | Result Type |
|------------|-------------|---------|-------|------------|----------|------------------------------|-----------|-------|----------------------------|------|-------------|
| 1112.4248  | 1112.5077   | 0.0829  | 75    | 32         | 39       | SCEHCYTR                     |           |       | Carbamidomethyl (C)[2,5]   |      | Mascot      |
| 1165.651   | 1165.7476   | 0.0966  | 83    | 71         | 82       | GLPGRPGVPGMK                 |           |       |                            |      | Mascot      |
| 2300.2468  | 2300.1807   | -0.0661 | -29   | 12         | 31       | DILRSEIPALLSSQHSQH<br>R      |           |       |                            |      | Mascot      |
| 2460.0676  | 2460.1133   | 0.0457  | 19    | 138        | 160      | GQSGEPGQPGVCHPAM<br>CYGAMIR  |           |       | Carbamidomethyl (C)[12,17] |      | Mascot      |
| 2515.1716  | 2515.2405   | 0.0689  | 27    | 32         | 55       | SCEHCYTRVGPPGPVGT<br>PGPHGPR |           |       | Carbamidomethyl (C)[2]     |      | Mascot      |

42 zinc finger CCHC domain-containing protein 9 [Danio rerio] gi|38198649 28388.1 9.59 7 29 0

#### Peptide Information

| Calc. Mass | Obsrv. Mass | ± da    | ± ppm | Start Seq. | End Seq. | Sequence                 | Ion Score | C. I. | % Modification            | Rank | Result Type |
|------------|-------------|---------|-------|------------|----------|--------------------------|-----------|-------|---------------------------|------|-------------|
| 1103.4431  | 1103.5682   | 0.1251  | 113   | 113        | 121      | SNMICFNCR                |           |       | Oxidation (M)[3]          |      | Mascot      |
| 1475.6478  | 1475.7533   | 0.1055  | 71    | 147        | 158      | CGSTEHEIQRCR             |           |       | Carbamidomethyl (C)[1]    |      | Mascot      |
| 1751.7952  | 1751.814    | 0.0188  | 11    | 142        | 156      | GICYRCGSTEHEIQR          |           |       |                           |      | Mascot      |
| 1915.9984  | 1915.9589   | -0.0395 | -21   | 228        | 244      | LSNRISADHEDVHVPVK        |           |       |                           |      | Mascot      |
| 2196.9397  | 2197.1208   | 0.1811  | 82    | 122        | 141      | KPGHGLADCPEANNDEE<br>MGR |           |       | Carbamidomethyl (C)[9]    |      | Mascot      |
| 3000.3687  | 3000.2456   | -0.1231 | -41   | 202        | 227      | VCGSVEHFQKDCPEHQN        |           |       | Carbamidomethyl (C)[2,12] |      | Mascot      |

3338.3862    3338.7615    0.3753    112    113    141    STNSITLGR  
 SNMICFNCRKPGHGLAD  
 CPEANNDEEMGR  
 Carbamidomethyl (C)[5,8], Oxidation (M)[3]    Mascot  
 43    novel protein similar to vertebrate complement component (3d/Epstein Barr virus) receptor 2 (CR2) [    gi|157885951    53513.7    6.77    10    29    0

Peptide Information

| Calc. Mass | Obsrv. Mass | ± da    | ± ppm | Start Seq. | End Seq. | Sequence                        | Ion Score | C. I. | % Modification                                 | Rank | Result Type |
|------------|-------------|---------|-------|------------|----------|---------------------------------|-----------|-------|------------------------------------------------|------|-------------|
| 856.5039   | 856.5234    | 0.0195  | 23    | 441        | 447      | KIFSPHK                         |           |       |                                                |      | Mascot      |
| 996.5407   | 996.5963    | 0.0556  | 56    | 94         | 102      | LRHGVCSPK                       |           |       |                                                |      | Mascot      |
| 1179.496   | 1179.6022   | 0.1062  | 90    | 147        | 156      | TCRDGGWDNR                      |           |       |                                                |      | Mascot      |
| 1210.6136  | 1210.5983   | -0.0153 | -13   | 256        | 266      | ITFSCIGDGLK                     |           |       | Carbamidomethyl (C)[5]                         |      | Mascot      |
| 2207.0298  | 2207.1174   | 0.0876  | 40    | 269        | 287      | GQREITCQSNQWSSPF<br>PK          |           |       | Carbamidomethyl (C)[7]                         |      | Mascot      |
| 2224.9883  | 2225.1235   | 0.1352  | 61    | 224        | 242      | CVEATCPLNTTMEDLNIE<br>R         |           |       | Carbamidomethyl (C)[1], Oxidation (M)[12]      |      | Mascot      |
| 2341.0652  | 2341.1233   | 0.0581  | 25    | 203        | 223      | LEGESEITCQINGEWSSS<br>FPK       |           |       |                                                |      | Mascot      |
| 2448.0771  | 2448.1428   | 0.0657  | 27    | 60         | 81       | DSYNPGDTIDFTCQHGFT<br>SSKK      |           |       |                                                |      | Mascot      |
| 2460.0046  | 2460.1133   | 0.1087  | 44    | 131        | 149      | YICNEGYQMMTQTDTRT<br>CR         |           |       | Carbamidomethyl (C)[3,18], Oxidation (M)[9,10] |      | Mascot      |
| 3000.3899  | 3000.2456   | -0.1443 | -48   | 407        | 433      | NGEWTGNIYCLNPCSVT<br>LDTMNEKGIK |           |       |                                                |      | Mascot      |

44    guanine nucleotide binding protein (G protein), beta polypeptide 1, like [Danio rerio]    gi|47087315    37279    5.6    7    29    0

Peptide Information

| Calc. Mass | Obsrv. Mass | ± da    | ± ppm | Start Seq. | End Seq. | Sequence                    | Ion Score | C. I. | % Modification                            | Rank | Result Type |
|------------|-------------|---------|-------|------------|----------|-----------------------------|-----------|-------|-------------------------------------------|------|-------------|
| 1751.8315  | 1751.814    | -0.0175 | -10   | 135        | 150      | VSRELAGHTGYLSCCR            |           |       |                                           |      | Mascot      |
| 1908.9636  | 1908.9324   | -0.0312 | -16   | 198        | 214      | LFVSGACDASAKLWDIR           |           |       | Carbamidomethyl (C)[7]                    |      | Mascot      |
| 1915.9542  | 1915.9589   | 0.0047  | 2     | 24         | 42       | ACADATLSQITANIDPVG<br>R     |           |       |                                           |      | Mascot      |
| 2157.032   | 2157.1226   | 0.0906  | 42    | 284        | 301      | LLLAGYDDFNCNVWDTL<br>K      |           |       | Carbamidomethyl (C)[11]                   |      | Mascot      |
| 2432.1108  | 2432.1375   | 0.0267  | 11    | 315        | 337      | VSCLGVTDDGMAVATGS<br>WDSFLK |           |       | Carbamidomethyl (C)[3], Oxidation (M)[11] |      | Mascot      |
| 2432.1108  | 2432.1375   | 0.0267  | 11    | 315        | 337      | VSCLGVTDDGMAVATGS<br>WDSFLK |           |       | Carbamidomethyl (C)[3], Oxidation (M)[11] |      | Mascot      |
| 2457.1868  | 2457.3127   | 0.1259  | 51    | 281        | 301      | SGRLLLAGYDDFNCNVW<br>DTLK   |           |       | Carbamidomethyl (C)[14]                   |      | Mascot      |
| 2457.1868  | 2457.3127   | 0.1259  | 51    | 281        | 301      | SGRLLLAGYDDFNCNVW<br>DTLK   |           |       | Carbamidomethyl (C)[14]                   |      | Mascot      |
| 2460.2334  | 2460.1133   | -0.1201 | -49   | 24         | 46       | ACADATLSQITANIDPVG<br>RIQMR |           |       | Oxidation (M)[22]                         |      | Mascot      |

45    novel protein similar to vertebrate protein kinase C, theta (PRKCQ) [Danio rerio]    gi|55962227    81064.5    7.59    12    29    0



| Peptide Information |                                                                                                            |             |         |       |              |                                     |           |         |                                              |                  |   |
|---------------------|------------------------------------------------------------------------------------------------------------|-------------|---------|-------|--------------|-------------------------------------|-----------|---------|----------------------------------------------|------------------|---|
|                     | Calc. Mass                                                                                                 | Obsrv. Mass | ± da    | ± ppm | Start Seq.   | End Sequence Seq.                   | Ion Score | C. I. % | Modification                                 | Rank Result Type |   |
|                     | 850.4781                                                                                                   | 850.5435    | 0.0654  | 77    | 31           | 37 GQVYKQK                          |           |         |                                              | Mascot           |   |
|                     | 856.5362                                                                                                   | 856.5234    | -0.0128 | -15   | 623          | 630 LGVKGNIR                        |           |         |                                              | Mascot           |   |
|                     | 901.4737                                                                                                   | 901.5057    | 0.032   | 35    | 529          | 536 ENIGEAR                         |           |         |                                              | Mascot           |   |
|                     | 1045.5459                                                                                                  | 1045.562    | 0.0161  | 15    | 272          | 281 VANLCGVNQK                      |           |         |                                              | Mascot           |   |
|                     | 1751.9227                                                                                                  | 1751.814    | -0.1087 | -62   | 372          | 385 EHHKFTIDSFILHK                  |           |         |                                              | Mascot           |   |
|                     | 2113.9199                                                                                                  | 2114.187    | 0.2671  | 126   | 415          | 431 DVVLMDDDVECTMVERR               |           |         | Carbamidomethyl (C)[11], Oxidation (M)[5,13] | Mascot           |   |
|                     | 2113.9607                                                                                                  | 2114.187    | 0.2263  | 107   | 658          | 675 SANDCSNFDKEFINEKPR              |           |         |                                              | Mascot           |   |
|                     | 2157.0334                                                                                                  | 2157.1226   | 0.0892  | 41    | 38           | 55 RPTMYPPWSSTFDAHVH<br>K           |           |         |                                              | Mascot           |   |
|                     | 2192.9602                                                                                                  | 2193.1125   | 0.1523  | 69    | 154          | 172 CHEFTATFFPQPTFCSVC<br>K         |           |         |                                              | Mascot           |   |
|                     | 2197.2161                                                                                                  | 2197.1208   | -0.0953 | -43   | 92           | 109 LEIWVELKPKGRLLMEAR              |           |         | Oxidation (M)[15]                            | Mascot           |   |
|                     | 2284.0989                                                                                                  | 2284.1746   | 0.0757  | 33    | 537          | 556 TCTFCGTPDYIAPELLGQ<br>K         |           |         | Carbamidomethyl (C)[2,5]                     | Mascot           |   |
|                     | 3337.5266                                                                                                  | 3337.7454   | 0.2188  | 66    | 154          | 180 CHEFTATFFPQPTFCSVC<br>KEFVWGLNK |           |         | Carbamidomethyl (C)[1,15,18]                 | Mascot           |   |
| 46                  | novel protein similar to vertebrate<br>N-ethylmaleimide-sensitive factor attachment protein,<br>alpha (NA) |             |         |       | gi 123233194 |                                     | 33390.2   | 5.53    | 8                                            | 28               | 0 |

| Peptide Information |                          |         |       |              |          |                     |           |         |                                                  |      |             |
|---------------------|--------------------------|---------|-------|--------------|----------|---------------------|-----------|---------|--------------------------------------------------|------|-------------|
| Calc. Mass          | Obsrv. Mass              | ± da    | ± ppm | Start Seq.   | End Seq. | Sequence            | Ion Score | C. I. % | Modification                                     | Rank | Result Type |
| 1112.5524           | 1112.5077                | -0.0447 | -40   | 200          | 208      | YGAKDHFFK           |           |         |                                                  |      | Mascot      |
| 1179.5385           | 1179.6022                | 0.0637  | 54    | 9            | 19       | EAMAIMAEADK         |           |         |                                                  |      | Mascot      |
| 1436.676            | 1436.7465                | 0.0705  | 49    | 7            | 19       | EKEAMAIMAEADK       |           |         |                                                  |      | Mascot      |
| 1542.7223           | 1542.8818                | 0.1595  | 103   | 141          | 153      | AIAHYEQAADYYK       |           |         |                                                  |      | Mascot      |
| 1908.8289           | 1908.9324                | 0.1035  | 54    | 38           | 53       | VEEACDMYVRAANMFK    |           |         | Oxidation (M)[7, 14]                             |      | Mascot      |
| 2000.0171           | 1999.9437                | -0.0734 | -37   | 57           | 74       | NWNAAGDAFCKAALLHLK  |           |         | Carbamidomethyl (C)[10]                          |      | Mascot      |
| 2000.0171           | 1999.9437                | -0.0734 | -37   | 57           | 74       | NWNAAGDAFCKAALLHLK  |           |         | Carbamidomethyl (C)[10]                          |      | Mascot      |
| 2157.0571           | 2157.1226                | 0.0655  | 30    | 246          | 264      | KLLDAHDEQNIDAYADAVR |           |         |                                                  |      | Mascot      |
| 2294.0911           | 2294.1646                | 0.0735  | 32    | 209          | 227      | AALCHFCVDMLNCKLAVQK |           |         | Carbamidomethyl (C)[4, 7, 13], Oxidation (M)[10] |      | Mascot      |
| 2294.0911           | 2294.1646                | 0.0735  | 32    | 209          | 227      | AALCHFCVDMLNCKLAVQK |           |         | Carbamidomethyl (C)[4, 7, 13], Oxidation (M)[10] |      | Mascot      |
| 47                  | plexin b2b [Danio rerio] |         |       | gi 309243104 |          | 203041.6            | 6.62      | 17      | 28                                               | 0    |             |

| Peptide Information |             |      |       |       |              |     |         |              |                  |
|---------------------|-------------|------|-------|-------|--------------|-----|---------|--------------|------------------|
| Calc. Mass          | Obsrv. Mass | ± da | ± ppm | Start | End Sequence | Ion | C. I. % | Modification | Rank Result Type |

|                     |                                                                   |             |         |       |              |          |                                  |         |           |       |    | Seq.                                          | Seq. | Score  |      |  |        |  |
|---------------------|-------------------------------------------------------------------|-------------|---------|-------|--------------|----------|----------------------------------|---------|-----------|-------|----|-----------------------------------------------|------|--------|------|--|--------|--|
|                     | 850.4206                                                          | 850.5435    | 0.1229  | 145   | 213          | 218      | YLHDFR                           |         |           |       |    |                                               |      |        |      |  | Mascot |  |
|                     | 870.4791                                                          | 870.54      | 0.0609  | 70    | 1699         | 1705     | TEHKLSR                          |         |           |       |    |                                               |      |        |      |  | Mascot |  |
|                     | 996.522                                                           | 996.5963    | 0.0743  | 75    | 369          | 376      | HDKDIVNR                         |         |           |       |    |                                               |      |        |      |  | Mascot |  |
|                     | 1044.5684                                                         | 1044.4929   | -0.0755 | -72   | 890          | 899      | SGVVEIEVGR                       |         |           |       |    |                                               |      |        |      |  | Mascot |  |
|                     | 1051.5717                                                         | 1051.7111   | 0.1394  | 133   | 479          | 487      | VPVQACHLK                        |         |           |       |    |                                               |      |        |      |  | Mascot |  |
|                     | 1103.5626                                                         | 1103.5682   | 0.0056  | 5     | 857          | 866      | NITVAGVNCR                       |         |           |       |    |                                               |      |        |      |  | Mascot |  |
|                     | 1436.6144                                                         | 1436.7465   | 0.1321  | 92    | 783          | 794      | EDCSLCKNADPK                     |         |           |       |    |                                               |      |        |      |  | Mascot |  |
|                     | 1542.8196                                                         | 1542.8818   | 0.0622  | 40    | 1585         | 1597     | SMTKAITEIYLTR                    |         |           |       |    |                                               |      |        |      |  | Mascot |  |
|                     | 1719.8041                                                         | 1719.8544   | 0.0503  | 29    | 72           | 87       | DAKGCTPPVSTCQDLK                 |         |           |       |    |                                               |      |        |      |  | Mascot |  |
|                     | 1719.8041                                                         | 1719.8544   | 0.0503  | 29    | 72           | 87       | DAKGCTPPVSTCQDLK                 |         |           |       |    |                                               |      |        |      |  | Mascot |  |
|                     | 1901.8889                                                         | 1901.9904   | 0.1015  | 53    | 1000         | 1016     | AAFQFSNNPSVSDHQPR                |         |           |       |    |                                               |      |        |      |  | Mascot |  |
|                     | 1908.9056                                                         | 1908.9324   | 0.0268  | 14    | 1374         | 1388     | MLSNWMSICLYQYLK                  |         |           |       |    |                                               |      |        |      |  | Mascot |  |
|                     | 2136.1235                                                         | 2136.1672   | 0.0437  | 20    | 908          | 925      | TVQFTYRDPVPLSVFPNR               |         |           |       |    |                                               |      |        |      |  | Mascot |  |
|                     | 2192.991                                                          | 2193.1125   | 0.1215  | 55    | 75           | 94       | GCTPPVSTCQDLKDTNN<br>TNK         |         |           |       |    |                                               |      |        |      |  | Mascot |  |
|                     | 2300.0752                                                         | 2300.1807   | 0.1055  | 46    | 286          | 305      | ELAQVMTDSGEYGTIKE<br>WDK         |         |           |       |    |                                               |      |        |      |  | Mascot |  |
|                     | 2460.2036                                                         | 2460.1133   | -0.0903 | -37   | 306          | 328      | VLFFVASSEEGATESALC<br>MYPLK      |         |           |       |    |                                               |      |        |      |  | Mascot |  |
|                     | 2590.1946                                                         | 2590.2161   | 0.0215  | 8     | 767          | 789      | IDSSLNVTLYNCSLGRED<br>CSLCK      |         |           |       |    |                                               |      |        |      |  | Mascot |  |
|                     | 3337.5974                                                         | 3337.7454   | 0.148   | 44    | 1086         | 1113     | TFVQLDNLQMELTPFAYY<br>PNPTFDELSK |         |           |       |    |                                               |      |        |      |  | Mascot |  |
| 48                  | Mios protein [Danio rerio]                                        |             |         |       | gi 45767831  |          |                                  | 26550.6 | 8.45      | 8     | 28 | 0                                             |      |        |      |  |        |  |
| Peptide Information |                                                                   |             |         |       |              |          |                                  |         |           |       |    |                                               |      |        |      |  |        |  |
|                     | Calc. Mass                                                        | Obsrv. Mass | ± da    | ± ppm | Start Seq.   | End Seq. | Sequence                         |         | Ion Score | C. I. | %  | Modification                                  | Rank | Result | Type |  |        |  |
|                     | 1151.5295                                                         | 1151.6196   | 0.0901  | 78    | 137          | 146      | SKVTSCPGCR                       |         |           |       |    | Carbamidomethyl (C)[6,9]                      |      | Mascot |      |  |        |  |
|                     | 1210.5674                                                         | 1210.5983   | 0.0309  | 26    | 60           | 68       | VQCWIENYR                        |         |           |       |    |                                               |      | Mascot |      |  |        |  |
|                     | 1436.5603                                                         | 1436.7465   | 0.1862  | 130   | 212          | 224      | DHSECPVSACTCK                    |         |           |       |    | Carbamidomethyl (C)[5]                        |      | Mascot |      |  |        |  |
|                     | 1736.783                                                          | 1736.8861   | 0.1031  | 59    | 225          | 240      | CMQLDTTGNLVPSDSV                 |         |           |       |    | Carbamidomethyl (C)[1]                        |      | Mascot |      |  |        |  |
|                     | 2136.0444                                                         | 2136.1672   | 0.1228  | 57    | 60           | 75       | VQCWIENYRNLLDAWR                 |         |           |       |    | Carbamidomethyl (C)[3]                        |      | Mascot |      |  |        |  |
|                     | 2156.9265                                                         | 2157.1226   | 0.1961  | 91    | 152          | 171      | CALCLMNMGTPVSSCPG<br>TGK         |         |           |       |    | Carbamidomethyl (C)[1,4,15], Oxidation (M)[6] |      | Mascot |      |  |        |  |
|                     | 2197.0779                                                         | 2197.1208   | 0.0429  | 20    | 90           | 109      | LDPSSKPLAQVFVSCNFC<br>GK         |         |           |       |    | Carbamidomethyl (C)[15]                       |      | Mascot |      |  |        |  |
|                     | 2225.094                                                          | 2225.1235   | 0.0295  | 13    | 36           | 56       | TGDVQTASFCLKGSPG<br>EVLK         |         |           |       |    | Carbamidomethyl (C)[10]                       |      | Mascot |      |  |        |  |
| 49                  | fizzy/cell division cycle 20 related 1 (Drosophila) [Danio rerio] |             |         |       | gi 169146644 |          |                                  | 9957.9  | 9.25      | 4     | 28 | 0                                             |      |        |      |  |        |  |

| Peptide Information |                                                       |             |         |       |            |                        |                           |                |            |                    |                       |                 |                   |
|---------------------|-------------------------------------------------------|-------------|---------|-------|------------|------------------------|---------------------------|----------------|------------|--------------------|-----------------------|-----------------|-------------------|
| Calc. Mass          |                                                       | Obsrv. Mass | ± da    | ± ppm | Start Seq. | End Seq.               | Sequence                  | Ion Score      | C. I. %    | Modification       | Rank Result Type      |                 |                   |
| 1112.479            |                                                       | 1112.5077   | 0.0287  | 26    | 1          | 8                      | MDQDYERR                  |                |            |                    | Mascot                |                 |                   |
| 1488.7112           |                                                       | 1488.7856   | 0.0744  | 50    | 12         | 24                     | QINVQNDNTSPMK             |                |            |                    | Mascot                |                 |                   |
| 1488.7112           |                                                       | 1488.7856   | 0.0744  | 50    | 12         | 24                     | QINVQNDNTSPMK             |                |            |                    | Mascot                |                 |                   |
| 1999.9733           |                                                       | 1999.9437   | -0.0296 | -15   | 55         | 71                     | AGANWSINFHRINENEK         |                |            |                    | Mascot                |                 |                   |
| 1999.9733           |                                                       | 1999.9437   | -0.0296 | -15   | 55         | 71                     | AGANWSINFHRINENEK         |                |            |                    | Mascot                |                 |                   |
| 2207.1377           |                                                       | 2207.1174   | -0.0203 | -9    | 25         | 45                     | AKDVICHLTPTPESPLSS<br>PSK |                |            |                    | Mascot                |                 |                   |
| 50                  | PREDICTED: zinc finger protein 217-like [Danio rerio] |             |         |       |            | gi 326679281           | 105874.2                  | 9.01           | 1          | 15                 | 0                     |                 |                   |
| Peptide Information |                                                       |             |         |       |            |                        |                           |                |            |                    |                       |                 |                   |
| Calc. Mass          |                                                       | Obsrv. Mass | ± da    | ± ppm | Start Seq. | End Seq.               | Sequence                  | Ion Score      | C. I. %    | Modification       | Rank Result Type      |                 |                   |
| 1354.7438           |                                                       | 1354.7678   | 0.024   | 18    | 741        | 752                    | GRELDATNLLPR              | 15             | 0          |                    | 3 Mascot              |                 |                   |
| Gel Idx/Pos         |                                                       | 191/H18     |         |       |            | Instr./Gel Origin      |                           | BA2060/110707A |            | Process Status     |                       |                 |                   |
| Plate [#] Name      |                                                       | [1] 31496   |         |       |            | Instrument Sample Name |                           |                |            | Spectra            |                       |                 |                   |
|                     |                                                       |             |         |       |            |                        |                           |                |            | Analysis Succeeded |                       |                 |                   |
|                     |                                                       |             |         |       |            |                        |                           |                |            | 11                 |                       |                 |                   |
| Rank                | Protein Name                                          |             |         |       |            | Accession No.          | Protein MW                | Protein PI     | Pep. Count | Protein Score      | Protein Score C. I. % | Total Ion Score | Total Ion C. I. % |
| 1                   | Tkt protein [Danio rerio]                             |             |         |       |            | gi 182890016           | 67962.5                   | 6.79           | 25         | 1,310              | 100                   | 1117            | 100               |
| Peptide Information |                                                       |             |         |       |            |                        |                           |                |            |                    |                       |                 |                   |
| Calc. Mass          |                                                       | Obsrv. Mass | ± da    | ± ppm | Start Seq. | End Seq.               | Sequence                  | Ion Score      | C. I. %    | Modification       | Rank                  | Result Type     |                   |
| 864.421             |                                                       | 864.4503    | 0.0293  | 34    | 57         | 63                     | YKADDPR                   |                |            |                    |                       | Mascot          |                   |
| 959.5156            |                                                       | 959.5182    | 0.0026  | 3     | 93         | 100                    | ESDLLNLR                  |                |            |                    |                       | Mascot          |                   |
| 1076.4717           |                                                       | 1076.4761   | 0.0044  | 4     | 347        | 355                    | NSTFADMFK                 |                |            | Oxidation (M)[7]   |                       | Mascot          |                   |
| 1103.5731           |                                                       | 1103.575    | 0.0019  | 2     | 559        | 567                    | VITVEDHYK                 |                |            |                    |                       | Mascot          |                   |
| 1112.5081           |                                                       | 1112.5112   | 0.0031  | 3     | 226        | 234                    | YMWEAEGVK                 |                |            |                    |                       | Mascot          |                   |
| 1128.5031           |                                                       | 1128.5063   | 0.0032  | 3     | 226        | 234                    | YMWEAEGVK                 |                |            | Oxidation (M)[2]   |                       | Mascot          |                   |
| 1354.7689           |                                                       | 1354.7754   | 0.0065  | 5     | 174        | 185                    | LDNLVAILDVNR              | 111            | 100        |                    |                       | Mascot          |                   |
| 1354.7689           |                                                       | 1354.7754   | 0.0065  | 5     | 174        | 185                    | LDNLVAILDVNR              |                |            |                    |                       | Mascot          |                   |
| 1436.738            |                                                       | 1436.7466   | 0.0086  | 6     | 101        | 113                    | KIDSDLEGHPTPK             |                |            |                    |                       | Mascot          |                   |
| 1488.7845           |                                                       | 1488.7906   | 0.0061  | 4     | 385        | 398                    | TVSFASTFAAFLAR            | 118            | 100        |                    |                       | Mascot          |                   |
| 1488.7845           |                                                       | 1488.7906   | 0.0061  | 4     | 385        | 398                    | TVSFASTFAAFLAR            |                |            |                    |                       | Mascot          |                   |
| 1719.8547           |                                                       | 1719.859    | 0.0043  | 3     | 475        | 489                    | TSRPDTAVIYNPEEK           |                |            |                    |                       | Mascot          |                   |

|           |           |        |    |     |     |                                               |     |        |                                                    |        |
|-----------|-----------|--------|----|-----|-----|-----------------------------------------------|-----|--------|----------------------------------------------------|--------|
| 1719.8547 | 1719.859  | 0.0043 | 3  | 475 | 489 | TSRPDTAVIYNPEEK                               | 59  | 99.97  |                                                    | Mascot |
| 1736.8887 | 1736.8944 | 0.0057 | 3  | 598 | 613 | SGKPQELLDMPGISAK                              |     |        | Oxidation (M)[10]                                  | Mascot |
| 1751.817  | 1751.8234 | 0.0064 | 4  | 252 | 266 | GIEDQDNWHGKMPK                                |     |        |                                                    | Mascot |
| 1767.8119 | 1767.8188 | 0.0069 | 4  | 252 | 266 | GIEDQDNWHGKMPK                                |     |        | Oxidation (M)[13]                                  | Mascot |
| 1893.9817 | 1893.9885 | 0.0068 | 4  | 186 | 202 | LGQSEPAPLQHNVNYYK                             |     |        |                                                    | Mascot |
| 1893.9817 | 1893.9885 | 0.0068 | 4  | 186 | 202 | LGQSEPAPLQHNVNYYK                             | 95  | 100    |                                                    | Mascot |
| 1901.9908 | 1901.9963 | 0.0055 | 3  | 75  | 92  | GHAAPILYAAWAEAGYIK                            |     |        |                                                    | Mascot |
| 1999.943  | 1999.9485 | 0.0055 | 3  | 442 | 459 | AIPTCTVFYPSDGVSTER                            |     |        | Carbamidomethyl (C)[5]                             | Mascot |
| 1999.943  | 1999.9485 | 0.0055 | 3  | 442 | 459 | AIPTCTVFYPSDGVSTER                            | 135 | 100    | Carbamidomethyl (C)[5]                             | Mascot |
| 2114.1855 | 2114.1943 | 0.0088 | 4  | 534 | 553 | VIDPFTIKPLDASTIVASA<br>R                      | 148 | 100    |                                                    | Mascot |
| 2114.1855 | 2114.1943 | 0.0088 | 4  | 534 | 553 | VIDPFTIKPLDASTIVASA<br>R                      |     |        |                                                    | Mascot |
| 2175.1404 | 2175.1472 | 0.0068 | 3  | 568 | 589 | EGGLGEAVLSAVGEEPGI<br>VVHR                    | 216 | 100    |                                                    | Mascot |
| 2175.1404 | 2175.1472 | 0.0068 | 3  | 568 | 589 | EGGLGEAVLSAVGEEPGI<br>VVHR                    |     |        |                                                    | Mascot |
| 2294.1663 | 2294.1719 | 0.0056 | 2  | 475 | 494 | TSRPDTAVIYNPEEKFEIG<br>K                      |     |        |                                                    | Mascot |
| 2294.1663 | 2294.1719 | 0.0056 | 2  | 475 | 494 | TSRPDTAVIYNPEEKFEIG<br>K                      | 52  | 99.858 |                                                    | Mascot |
| 2432.1406 | 2432.1443 | 0.0037 | 2  | 362 | 382 | YIECFIAEQNMVSAIGCA<br>TR                      |     |        | Carbamidomethyl (C)[4,18]                          | Mascot |
| 2432.1406 | 2432.1443 | 0.0037 | 2  | 362 | 382 | YIECFIAEQNMVSAIGCA<br>TR                      | 182 | 100    | Carbamidomethyl (C)[4,18]                          | Mascot |
| 2448.1355 | 2448.1497 | 0.0142 | 6  | 362 | 382 | YIECFIAEQNMVSAIGCA<br>TR                      |     |        | Carbamidomethyl (C)[4,18], Oxidation (M)[11]       | Mascot |
| 2448.1355 | 2448.1497 | 0.0142 | 6  | 362 | 382 | YIECFIAEQNMVSAIGCA<br>TR                      | 50  | 99.764 | Carbamidomethyl (C)[4,18], Oxidation (M)[11]       | Mascot |
| 2457.3096 | 2457.3203 | 0.0107 | 4  | 504 | 527 | DQVTVIGAGVTLHEALAA<br>HDQLAK                  |     |        |                                                    | Mascot |
| 2459.1006 | 2459.1106 | 0.01   | 4  | 205 | 225 | CVAFGFNTYVVDGHDVE<br>ELCK                     |     |        | Carbamidomethyl (C)[1,20]                          | Mascot |
| 2515.2319 | 2515.2476 | 0.0157 | 6  | 114 | 139 | LAFVDVATGSLGQGLGA<br>ACGMAYTGK                |     |        | Carbamidomethyl (C)[19]                            | Mascot |
| 2531.2268 | 2531.2427 | 0.0159 | 6  | 114 | 139 | LAFVDVATGSLGQGLGA<br>ACGMAYTGK                |     |        | Carbamidomethyl (C)[19], Oxidation (M)[21]         | Mascot |
| 2984.2358 | 2984.2456 | 0.0098 | 3  | 148 | 173 | VYCMLGDGECSEGSVW<br>EAMAFASHYK                |     |        | Carbamidomethyl (C)[3,10]                          | Mascot |
| 3000.2307 | 3000.2488 | 0.0181 | 6  | 148 | 173 | VYCMLGDGECSEGSVW<br>EAMAFASHYK                |     |        | Carbamidomethyl (C)[3,10], Oxidation (M)[4]        | Mascot |
| 3103.6423 | 3103.6494 | 0.0071 | 2  | 267 | 293 | DRAEELINDLLSQIQSPN<br>KPLYPQPPK               |     |        |                                                    | Mascot |
| 3287.4158 | 3287.4243 | 0.0085 | 3  | 28  | 56  | QTCASNSGHPTSCCSAA<br>ELMSVLFFHTMR             |     |        | Carbamidomethyl (C)[3,13,14]                       | Mascot |
| 3303.4109 | 3303.4224 | 0.0115 | 3  | 28  | 56  | QTCASNSGHPTSCCSAA<br>ELMSVLFFHTMR             |     |        | Carbamidomethyl (C)[3,13,14], Oxidation (M)[20]    | Mascot |
| 3319.4058 | 3319.4426 | 0.0368 | 11 | 28  | 56  | QTCASNSGHPTSCCSAA<br>ELMSVLFFHTMR             |     |        | Carbamidomethyl (C)[3,13,14], Oxidation (M)[20,28] | Mascot |
| 3891.8132 | 3891.8274 | 0.0142 | 4  | 405 | 441 | MAAISQSNVNLVGSCHG<br>VSIGEDGPSQMALEDLA<br>MFR |     |        | Carbamidomethyl (C)[16]                            | Mascot |
| 3907.8081 | 3907.8484 | 0.0403 | 10 | 405 | 441 | MAAISQSNVNLVGSCHG<br>VSIGEDGPSQMALEDLA        |     |        | Carbamidomethyl (C)[16], Oxidation (M)[1]          | Mascot |

2

transketolase-like protein 2 [Danio rerio]

MFR

gi|186288308

67795.3

6.81

23

1,280

100

1114

100

| Peptide Information |             |         |       |            |          |                          |           |        |                                              | Rank | Result Type |
|---------------------|-------------|---------|-------|------------|----------|--------------------------|-----------|--------|----------------------------------------------|------|-------------|
| Calc. Mass          | Obsrv. Mass | ± da    | ± ppm | Start Seq. | End Seq. | Sequence                 | Ion Score | C. I.  | % Modification                               |      |             |
| 901.5101            | 901.5096    | -0.0005 | -1    | 93         | 100      | ASDLLNLR                 |           |        |                                              |      | Mascot      |
| 1076.4717           | 1076.4761   | 0.0044  | 4     | 347        | 355      | NSTFADMFK                |           |        | Oxidation (M)[7]                             |      | Mascot      |
| 1103.5731           | 1103.575    | 0.0019  | 2     | 559        | 567      | VITVEDHYK                |           |        |                                              |      | Mascot      |
| 1354.7689           | 1354.7754   | 0.0065  | 5     | 174        | 185      | LDNLVAILDVNR             | 111       | 100    |                                              |      | Mascot      |
| 1354.7689           | 1354.7754   | 0.0065  | 5     | 174        | 185      | LDNLVAILDVNR             |           |        |                                              |      | Mascot      |
| 1436.738            | 1436.7466   | 0.0086  | 6     | 101        | 113      | KIDSDLEGHPTPK            |           |        |                                              |      | Mascot      |
| 1488.7845           | 1488.7906   | 0.0061  | 4     | 385        | 398      | TVSFASTFAAFLAR           | 118       | 100    |                                              |      | Mascot      |
| 1488.7845           | 1488.7906   | 0.0061  | 4     | 385        | 398      | TVSFASTFAAFLAR           |           |        |                                              |      | Mascot      |
| 1719.8547           | 1719.859    | 0.0043  | 3     | 475        | 489      | TSRPDTAVIYNPEEK          |           |        |                                              |      | Mascot      |
| 1719.8547           | 1719.859    | 0.0043  | 3     | 475        | 489      | TSRPDTAVIYNPEEK          | 59        | 99.97  |                                              |      | Mascot      |
| 1736.8887           | 1736.8944   | 0.0057  | 3     | 598        | 613      | SGKPQELDMFGISAK          |           |        | Oxidation (M)[10]                            |      | Mascot      |
| 1751.817            | 1751.8234   | 0.0064  | 4     | 252        | 266      | GIEDQDNWHGKMPK           |           |        |                                              |      | Mascot      |
| 1767.8119           | 1767.8188   | 0.0069  | 4     | 252        | 266      | GIEDQDNWHGKMPK           |           |        | Oxidation (M)[13]                            |      | Mascot      |
| 1893.9817           | 1893.9885   | 0.0068  | 4     | 186        | 202      | LGQSEPAPLQHNVNVYK        |           |        |                                              |      | Mascot      |
| 1893.9817           | 1893.9885   | 0.0068  | 4     | 186        | 202      | LGQSEPAPLQHNVNVYK        | 95        | 100    |                                              |      | Mascot      |
| 1901.9908           | 1901.9963   | 0.0055  | 3     | 75         | 92       | GHAAPILYAAWAEAGYIK       |           |        |                                              |      | Mascot      |
| 1999.943            | 1999.9485   | 0.0055  | 3     | 442        | 459      | AIPTCTVFYPSDGVSTER       |           |        | Carbamidomethyl (C)[5]                       |      | Mascot      |
| 1999.943            | 1999.9485   | 0.0055  | 3     | 442        | 459      | AIPTCTVFYPSDGVSTER       | 135       | 100    | Carbamidomethyl (C)[5]                       |      | Mascot      |
| 2114.1855           | 2114.1943   | 0.0088  | 4     | 534        | 553      | VIDPFTIKPLDASTIVASAR     | 148       | 100    |                                              |      | Mascot      |
| 2114.1855           | 2114.1943   | 0.0088  | 4     | 534        | 553      | VIDPFTIKPLDASTIVASAR     |           |        |                                              |      | Mascot      |
| 2175.1404           | 2175.1472   | 0.0068  | 3     | 568        | 589      | EGGLGEAVLSAVGEEPGI VVHR  | 216       | 100    |                                              |      | Mascot      |
| 2175.1404           | 2175.1472   | 0.0068  | 3     | 568        | 589      | EGGLGEAVLSAVGEEPGI VVHR  |           |        |                                              |      | Mascot      |
| 2294.1663           | 2294.1719   | 0.0056  | 2     | 475        | 494      | TSRPDTAVIYNPEEKFEIGK     |           |        |                                              |      | Mascot      |
| 2294.1663           | 2294.1719   | 0.0056  | 2     | 475        | 494      | TSRPDTAVIYNPEEKFEIGK     | 52        | 99.858 |                                              |      | Mascot      |
| 2432.1406           | 2432.1443   | 0.0037  | 2     | 362        | 382      | YIECFIAEQNMVSVAIGCATR    |           |        | Carbamidomethyl (C)[4,18]                    |      | Mascot      |
| 2432.1406           | 2432.1443   | 0.0037  | 2     | 362        | 382      | YIECFIAEQNMVSVAIGCATR    | 182       | 100    | Carbamidomethyl (C)[4,18]                    |      | Mascot      |
| 2448.1355           | 2448.1497   | 0.0142  | 6     | 362        | 382      | YIECFIAEQNMVSVAIGCATR    |           |        | Carbamidomethyl (C)[4,18], Oxidation (M)[11] |      | Mascot      |
| 2448.1355           | 2448.1497   | 0.0142  | 6     | 362        | 382      | YIECFIAEQNMVSVAIGCATR    | 50        | 99.764 | Carbamidomethyl (C)[4,18], Oxidation (M)[11] |      | Mascot      |
| 2457.3096           | 2457.3203   | 0.0107  | 4     | 504        | 527      | DQVTVIGAGVTLHEALAAHDQLAK |           |        |                                              |      | Mascot      |

|           |           |        |    |     |     |                                               |                                                    |        |
|-----------|-----------|--------|----|-----|-----|-----------------------------------------------|----------------------------------------------------|--------|
| 2489.0747 | 2489.0869 | 0.0122 | 5  | 205 | 225 | CEAFGFNTYVVDGHDVE<br>ELCK                     | Carbamidomethyl (C)[1,20]                          | Mascot |
| 2515.2319 | 2515.2476 | 0.0157 | 6  | 114 | 139 | LAFVDVATGSLGQGLGA<br>ACGMAYTGK                | Carbamidomethyl (C)[19]                            | Mascot |
| 2531.2268 | 2531.2427 | 0.0159 | 6  | 114 | 139 | LAFVDVATGSLGQGLGA<br>ACGMAYTGK                | Carbamidomethyl (C)[19], Oxidation (M)[21]         | Mascot |
| 2984.2358 | 2984.2456 | 0.0098 | 3  | 148 | 173 | VYCMLGDGECSEGSVW<br>EAMAFASHYK                | Carbamidomethyl (C)[3,10]                          | Mascot |
| 3000.2307 | 3000.2488 | 0.0181 | 6  | 148 | 173 | VYCMLGDGECSEGSVW<br>EAMAFASHYK                | Carbamidomethyl (C)[3,10], Oxidation (M)[4]        | Mascot |
| 3103.6423 | 3103.6494 | 0.0071 | 2  | 267 | 293 | DRAEELINDLLSQIQSPN<br>KPLYPQPPK               |                                                    | Mascot |
| 3287.4158 | 3287.4243 | 0.0085 | 3  | 28  | 56  | QTCASNSGHPTSCCSAA<br>ELMSVLFFHTMR             | Carbamidomethyl (C)[3,13,14]                       | Mascot |
| 3303.4109 | 3303.4224 | 0.0115 | 3  | 28  | 56  | QTCASNSGHPTSCCSAA<br>ELMSVLFFHTMR             | Carbamidomethyl (C)[3,13,14], Oxidation (M)[20]    | Mascot |
| 3319.4058 | 3319.4426 | 0.0368 | 11 | 28  | 56  | QTCASNSGHPTSCCSAA<br>ELMSVLFFHTMR             | Carbamidomethyl (C)[3,13,14], Oxidation (M)[20,28] | Mascot |
| 3891.8132 | 3891.8274 | 0.0142 | 4  | 405 | 441 | MAAISQSNVNLVGSHCG<br>VSIGEDGPSQMALEDLA<br>MFR | Carbamidomethyl (C)[16]                            | Mascot |
| 3907.8081 | 3907.8484 | 0.0403 | 10 | 405 | 441 | MAAISQSNVNLVGSHCG<br>VSIGEDGPSQMALEDLA<br>MFR | Carbamidomethyl (C)[16], Oxidation (M)[1]          | Mascot |

3 transketolase [Danio rerio] gi|31872040 67811.3 6.81 22 1,140 100 978 100

#### Peptide Information

| Calc. Mass | Obsrv. Mass | ± da    | ± ppm | Start Seq. | End Seq. | Sequence             | Ion Score | C. I. % | Modification      | Rank | Result Type |
|------------|-------------|---------|-------|------------|----------|----------------------|-----------|---------|-------------------|------|-------------|
| 901.5101   | 901.5096    | -0.0005 | -1    | 93         | 100      | ASDLLNLR             |           |         |                   |      | Mascot      |
| 1076.4717  | 1076.4761   | 0.0044  | 4     | 347        | 355      | NSTFADMFK            |           |         | Oxidation (M)[7]  |      | Mascot      |
| 1103.5731  | 1103.575    | 0.0019  | 2     | 559        | 567      | VITVEDHYK            |           |         |                   |      | Mascot      |
| 1354.7689  | 1354.7754   | 0.0065  | 5     | 174        | 185      | LDNLVAILDVNR         | 111       | 100     |                   |      | Mascot      |
| 1354.7689  | 1354.7754   | 0.0065  | 5     | 174        | 185      | LDNLVAILDVNR         |           |         |                   |      | Mascot      |
| 1436.738   | 1436.7466   | 0.0086  | 6     | 101        | 113      | KIDSDLEGHPTPK        |           |         |                   |      | Mascot      |
| 1488.7845  | 1488.7906   | 0.0061  | 4     | 385        | 398      | TVSFASTFAAFLAR       | 118       | 100     |                   |      | Mascot      |
| 1488.7845  | 1488.7906   | 0.0061  | 4     | 385        | 398      | TVSFASTFAAFLAR       |           |         |                   |      | Mascot      |
| 1719.8547  | 1719.859    | 0.0043  | 3     | 475        | 489      | TSRPDTAVIYNPEEK      |           |         |                   |      | Mascot      |
| 1719.8547  | 1719.859    | 0.0043  | 3     | 475        | 489      | TSRPDTAVIYNPEEK      | 59        | 99.97   |                   |      | Mascot      |
| 1736.8887  | 1736.8944   | 0.0057  | 3     | 598        | 613      | SGKPQELLDMFGISAK     |           |         | Oxidation (M)[10] |      | Mascot      |
| 1751.817   | 1751.8234   | 0.0064  | 4     | 252        | 266      | GIEDQDNWHGKPMMPK     |           |         |                   |      | Mascot      |
| 1767.8119  | 1767.8188   | 0.0069  | 4     | 252        | 266      | GIEDQDNWHGKPMMPK     |           |         | Oxidation (M)[13] |      | Mascot      |
| 1893.9817  | 1893.9885   | 0.0068  | 4     | 186        | 202      | LGQSEPAPLQHNVNVYK    |           |         |                   |      | Mascot      |
| 1893.9817  | 1893.9885   | 0.0068  | 4     | 186        | 202      | LGQSEPAPLQHNVNVYK    | 95        | 100     |                   |      | Mascot      |
| 1901.9908  | 1901.9963   | 0.0055  | 3     | 75         | 92       | GHAAPILYAAWAEAGYIK   |           |         |                   |      | Mascot      |
| 2114.1855  | 2114.1943   | 0.0088  | 4     | 534        | 553      | VIDPFTIKPLDASTIVASAR | 148       | 100     |                   |      | Mascot      |

|           |                                                                           |        |    |     |              |                                               |      |        |                                                    |   |  |  |        |
|-----------|---------------------------------------------------------------------------|--------|----|-----|--------------|-----------------------------------------------|------|--------|----------------------------------------------------|---|--|--|--------|
| 2114.1855 | 2114.1943                                                                 | 0.0088 | 4  | 534 | 553          | VIDPFTIKPLDASTIVASAR                          |      |        |                                                    |   |  |  | Mascot |
| 2175.1404 | 2175.1472                                                                 | 0.0068 | 3  | 568 | 589          | EGGLGEAVLSAVGEEPGI<br>VVHR                    | 216  | 100    |                                                    |   |  |  | Mascot |
| 2175.1404 | 2175.1472                                                                 | 0.0068 | 3  | 568 | 589          | EGGLGEAVLSAVGEEPGI<br>VVHR                    |      |        |                                                    |   |  |  | Mascot |
| 2294.1663 | 2294.1719                                                                 | 0.0056 | 2  | 475 | 494          | TSRPDTAVIYNPEEKFEIG<br>K                      |      |        |                                                    |   |  |  | Mascot |
| 2294.1663 | 2294.1719                                                                 | 0.0056 | 2  | 475 | 494          | TSRPDTAVIYNPEEKFEIG<br>K                      | 52   | 99.858 |                                                    |   |  |  | Mascot |
| 2432.1406 | 2432.1443                                                                 | 0.0037 | 2  | 362 | 382          | YIECFIAEQNMVSVAIGCA<br>TR                     |      |        | Carbamidomethyl (C)[4,18]                          |   |  |  | Mascot |
| 2432.1406 | 2432.1443                                                                 | 0.0037 | 2  | 362 | 382          | YIECFIAEQNMVSVAIGCA<br>TR                     | 182  | 100    | Carbamidomethyl (C)[4,18]                          |   |  |  | Mascot |
| 2448.1355 | 2448.1497                                                                 | 0.0142 | 6  | 362 | 382          | YIECFIAEQNMVSVAIGCA<br>TR                     |      |        | Carbamidomethyl (C)[4,18], Oxidation (M)[11]       |   |  |  | Mascot |
| 2448.1355 | 2448.1497                                                                 | 0.0142 | 6  | 362 | 382          | YIECFIAEQNMVSVAIGCA<br>TR                     | 50   | 99.764 | Carbamidomethyl (C)[4,18], Oxidation (M)[11]       |   |  |  | Mascot |
| 2457.3096 | 2457.3203                                                                 | 0.0107 | 4  | 504 | 527          | DQVTVIGAGVTLHEALAA<br>HDQLAK                  |      |        |                                                    |   |  |  | Mascot |
| 2489.0747 | 2489.0869                                                                 | 0.0122 | 5  | 205 | 225          | CEAFGFNTYVVDGHDVE<br>ELCK                     |      |        | Carbamidomethyl (C)[1,20]                          |   |  |  | Mascot |
| 2515.2319 | 2515.2476                                                                 | 0.0157 | 6  | 114 | 139          | LAFVDVATGSLGQGLGA<br>ACGMAYTGK                |      |        | Carbamidomethyl (C)[19]                            |   |  |  | Mascot |
| 2531.2268 | 2531.2427                                                                 | 0.0159 | 6  | 114 | 139          | LAFVDVATGSLGQGLGA<br>ACGMAYTGK                |      |        | Carbamidomethyl (C)[19], Oxidation (M)[21]         |   |  |  | Mascot |
| 2984.2358 | 2984.2456                                                                 | 0.0098 | 3  | 148 | 173          | VYCMLGDGECSEGSVW<br>EAMAFASHYK                |      |        | Carbamidomethyl (C)[3,10]                          |   |  |  | Mascot |
| 3000.2307 | 3000.2488                                                                 | 0.0181 | 6  | 148 | 173          | VYCMLGDGECSEGSVW<br>EAMAFASHYK                |      |        | Carbamidomethyl (C)[3,10], Oxidation (M)[4]        |   |  |  | Mascot |
| 3103.6423 | 3103.6494                                                                 | 0.0071 | 2  | 267 | 293          | DRAEELINDLLSQIQSPN<br>KPLYPQPPK               |      |        |                                                    |   |  |  | Mascot |
| 3287.4158 | 3287.4243                                                                 | 0.0085 | 3  | 28  | 56           | QTCASNSGHPTSCCSAA<br>ELMSVLFFHTMR             |      |        | Carbamidomethyl (C)[3,13,14]                       |   |  |  | Mascot |
| 3303.4109 | 3303.4224                                                                 | 0.0115 | 3  | 28  | 56           | QTCASNSGHPTSCCSAA<br>ELMSVLFFHTMR             |      |        | Carbamidomethyl (C)[3,13,14], Oxidation (M)[20]    |   |  |  | Mascot |
| 3319.4058 | 3319.4426                                                                 | 0.0368 | 11 | 28  | 56           | QTCASNSGHPTSCCSAA<br>ELMSVLFFHTMR             |      |        | Carbamidomethyl (C)[3,13,14], Oxidation (M)[20,28] |   |  |  | Mascot |
| 3891.8132 | 3891.8274                                                                 | 0.0142 | 4  | 405 | 441          | MAAISQSNVNLVGSCHG<br>VSIGEDGPSQMALEDLA<br>MFR |      |        | Carbamidomethyl (C)[16]                            |   |  |  | Mascot |
| 3907.8081 | 3907.8484                                                                 | 0.0403 | 10 | 405 | 441          | MAAISQSNVNLVGSCHG<br>VSIGEDGPSQMALEDLA<br>MFR |      |        | Carbamidomethyl (C)[16], Oxidation (M)[1]          |   |  |  | Mascot |
| 4         | PREDICTED: NACHT, LRR and PYD domains-containing protein 12 [Danio rerio] |        |    |     | gi 292621731 | 149261.8                                      | 5.29 | 15     | 36                                                 | 0 |  |  |        |

#### Peptide Information

| Calc. Mass | Obsrv. Mass | ± da    | ± ppm | Start Seq. | End Seq. | Sequence  | Ion Score | C. I. % | Modification | Rank | Result Type |
|------------|-------------|---------|-------|------------|----------|-----------|-----------|---------|--------------|------|-------------|
| 842.4114   | 842.5123    | 0.1009  | 120   | 1214       | 1220     | SNSEHLR   |           |         |              |      | Mascot      |
| 864.5777   | 864.4503    | -0.1274 | -147  | 133        | 139      | KILVVHR   |           |         |              |      | Mascot      |
| 901.5829   | 901.5096    | -0.0733 | -81   | 507        | 514      | AIRTVLTK  |           |         |              |      | Mascot      |
| 959.5156   | 959.5182    | 0.0026  | 3     | 872        | 880      | AVNEALQSK |           |         |              |      | Mascot      |
| 1076.5007  | 1076.4761   | -0.0246 | -23   | 741        | 748      | HQKDYEEK  |           |         |              |      | Mascot      |

|           |           |         |     |      |      |                                |                                            |  |  |  |        |
|-----------|-----------|---------|-----|------|------|--------------------------------|--------------------------------------------|--|--|--|--------|
| 1436.7744 | 1436.7466 | -0.0278 | -19 | 913  | 924  | SIQNNKTVEYIK                   |                                            |  |  |  | Mascot |
| 1488.7289 | 1488.7906 | 0.0617  | 41  | 375  | 388  | SGDTKSDLSSVHQK                 |                                            |  |  |  | Mascot |
| 1488.7289 | 1488.7906 | 0.0617  | 41  | 375  | 388  | SGDTKSDLSSVHQK                 |                                            |  |  |  | Mascot |
| 1916.0157 | 1915.9642 | -0.0515 | -27 | 1115 | 1132 | LGDSVTLLSAVLEDPRCK             |                                            |  |  |  | Mascot |
| 2175.0896 | 2175.1472 | 0.0576  | 26  | 1250 | 1270 | LGLSNCGLTDEGCAALALALR          | Carbamidomethyl (C)[6,13]                  |  |  |  | Mascot |
| 2175.0896 | 2175.1472 | 0.0576  | 26  | 1250 | 1270 | LGLSNCGLTDEGCAALALALR          | Carbamidomethyl (C)[6,13]                  |  |  |  | Mascot |
| 2225.2839 | 2225.126  | -0.1579 | -71 | 890  | 908  | FLLGLSVESHQILLQRLMK            |                                            |  |  |  | Mascot |
| 2284.0181 | 2284.1846 | 0.1665  | 73  | 380  | 400  | SDLSSVHQKSTESESSCVSMR          |                                            |  |  |  | Mascot |
| 2341.0396 | 2341.1333 | 0.0937  | 40  | 380  | 400  | SDLSSVHQKSTESESSCVSMR          | Carbamidomethyl (C)[17]                    |  |  |  | Mascot |
| 2357.0344 | 2357.1387 | 0.1043  | 44  | 380  | 400  | SDLSSVHQKSTESESSCVSMR          | Carbamidomethyl (C)[17], Oxidation (M)[20] |  |  |  | Mascot |
| 2448.2002 | 2448.1497 | -0.0505 | -21 | 414  | 435  | SGDTETDLSHEALNTFRSNLLK         |                                            |  |  |  | Mascot |
| 2448.2002 | 2448.1497 | -0.0505 | -21 | 414  | 435  | SGDTETDLSHEALNTFRSNLLK         |                                            |  |  |  | Mascot |
| 2459.2744 | 2459.1106 | -0.1638 | -67 | 1247 | 1270 | LERLGLSNCGLTDEGCAALALALR       |                                            |  |  |  | Mascot |
| 2479.0752 | 2479.3013 | 0.2261  | 91  | 277  | 297  | KDFCSADQEELLETLTDNYSCR         |                                            |  |  |  | Mascot |
| 3338.6072 | 3338.7676 | 0.1604  | 48  | 780  | 809  | ECGIDVAEALVYSGLCTQIFREEFGLYQGK |                                            |  |  |  | Mascot |

5 vitellogenin 2 isoform 2 [Danio rerio] gi|160333705 93050.4 8.22 12 35 0

Peptide Information

| Calc. Mass | Obsrv. Mass | ± da    | ± ppm | Start Seq. | End Seq. | Sequence                   | Ion Score | C. I. % | Modification               | Rank | Result Type |
|------------|-------------|---------|-------|------------|----------|----------------------------|-----------|---------|----------------------------|------|-------------|
| 850.4702   | 850.5433    | 0.0731  | 86    | 750        | 756      | MKLESVK                    |           |         | Oxidation (M)[1]           |      | Mascot      |
| 864.3945   | 864.4503    | 0.0558  | 65    | 612        | 618      | KDEESEK                    |           |         |                            |      | Mascot      |
| 1112.5769  | 1112.5112   | -0.0657 | -59   | 322        | 330      | TLTKMEAFR                  |           |         | Oxidation (M)[5]           |      | Mascot      |
| 1909.1117  | 1908.9408   | -0.1709 | -90   | 251        | 269      | TTASALPIGVQVDAILALR        |           |         |                            |      | Mascot      |
| 1951.9187  | 1951.9611   | 0.0424  | 22    | 692        | 708      | IQVADWMKGQTCGLCGK          |           |         | Carbamidomethyl (C)[12,15] |      | Mascot      |
| 2233.2446  | 2233.0996   | -0.145  | -65   | 171        | 191      | IATIPALREVVMLGYGSMIAK      |           |         |                            |      | Mascot      |
| 2294.3706  | 2294.1719   | -0.1987 | -87   | 278        | 297      | LVQPVALQLVLERALHPELR       |           |         |                            |      | Mascot      |
| 2294.3706  | 2294.1719   | -0.1987 | -87   | 278        | 297      | LVQPVALQLVLERALHPELR       |           |         |                            |      | Mascot      |
| 2298.1655  | 2298.1902   | 0.0247  | 11    | 298        | 318      | MVACILLFETKPSVAAMSSSR      |           |         | Carbamidomethyl (C)[4]     |      | Mascot      |
| 2457.3235  | 2457.3203   | -0.0032 | -1    | 619        | 640      | THLNVKLVDIDIDLYTLGTDAK     |           |         |                            |      | Mascot      |
| 2479.2974  | 2479.3013   | 0.0039  | 2     | 1          | 22       | MMEATQSLVFVEFEKAPVVPVK     |           |         |                            |      | Mascot      |
| 3000.4878  | 3000.2488   | -0.239  | -80   | 586        | 611      | NEMPISCYQVLAQDCTSELKVFALLK |           |         | Carbamidomethyl (C)[7]     |      | Mascot      |
| 3891.77    | 3891.8274   | 0.0574  | 15    | 715        | 749      | QEYTTSPGYLLESSVSFA         |           |         |                            |      | Mascot      |



6 protein BTG3 [Danio rerio] HSWVLPAESCRNASQCR gi|55925203 18115.1 5.85 6 34 0

Peptide Information

| Calc. Mass | Obsrv. Mass | ± da    | ± ppm | Start Seq. | End Seq. | Sequence              | Ion Score | C. I. % | Modification               | Rank | Result Type |
|------------|-------------|---------|-------|------------|----------|-----------------------|-----------|---------|----------------------------|------|-------------|
| 901.5353   | 901.5096    | -0.0257 | -29   | 34         | 41       | LTVALQEK              |           |         |                            |      | Mascot      |
| 1112.504   | 1112.5112   | 0.0072  | 6     | 75         | 84       | ACAESGVQYK            |           |         | Carbamidomethyl (C)[2]     |      | Mascot      |
| 2211.0208  | 2211.1123   | 0.0915  | 41    | 91         | 108      | ELTLWVDPGEVCCRYGEK    |           |         | Carbamidomethyl (C)[12,13] |      | Mascot      |
| 2224.9412  | 2225.126    | 0.1848  | 83    | 139        | 158      | VTSDYHSGSSSDEDSMLVHR  |           |         | Oxidation (M)[16]          |      | Mascot      |
| 2357.1628  | 2357.1387   | -0.0241 | -10   | 85         | 104      | DLGLPKELTLWVDPGEVCCR  |           |         | Carbamidomethyl (C)[18,19] |      | Mascot      |
| 2457.0688  | 2457.3203   | 0.2515  | 102   | 109        | 130      | NHGFTVATFSEDDDDKEDVTK |           |         |                            |      | Mascot      |

7 Ighmbp2l protein [Danio rerio] gi|215539488 110340.2 9 13 34 0

Peptide Information

| Calc. Mass | Obsrv. Mass | ± da    | ± ppm | Start Seq. | End Seq. | Sequence                            | Ion Score | C. I. % | Modification               | Rank | Result Type |
|------------|-------------|---------|-------|------------|----------|-------------------------------------|-----------|---------|----------------------------|------|-------------|
| 882.4389   | 882.5708    | 0.1319  | 149   | 393        | 400      | CILAGDYK                            |           |         |                            |      | Mascot      |
| 901.5464   | 901.5096    | -0.0368 | -41   | 850        | 857      | SQSVKKPK                            |           |         |                            |      | Mascot      |
| 996.4818   | 996.6025    | 0.1207  | 121   | 893        | 901      | AESVCGFVK                           |           |         | Carbamidomethyl (C)[5]     |      | Mascot      |
| 1210.5773  | 1210.6035   | 0.0262  | 22    | 297        | 306      | DMDKAFNEIK                          |           |         |                            |      | Mascot      |
| 1436.7743  | 1436.7466   | -0.0277 | -19   | 944        | 957      | ISKEGVLYAGSGQK                      |           |         |                            |      | Mascot      |
| 1767.8879  | 1767.8188   | -0.0691 | -39   | 904        | 918      | ASVLTGLQLCIYCNR                     |           |         | Carbamidomethyl (C)[10,13] |      | Mascot      |
| 1901.9425  | 1901.9963   | 0.0538  | 28    | 129        | 144      | DGLYNLMKLANDVTYR                    |           |         | Oxidation (M)[7]           |      | Mascot      |
| 1915.9364  | 1915.9642   | 0.0278  | 15    | 236        | 252      | VLCCAPSNVAVDNLVER                   |           |         | Carbamidomethyl (C)[3,4]   |      | Mascot      |
| 2114.1096  | 2114.1943   | 0.0847  | 40    | 236        | 255      | VLCCAPSNVAVDNLVERLAK                |           |         |                            |      | Mascot      |
| 2114.1096  | 2114.1943   | 0.0847  | 40    | 236        | 255      | VLCCAPSNVAVDNLVERLAK                |           |         |                            |      | Mascot      |
| 2136.051   | 2136.1777   | 0.1267  | 59    | 41         | 59       | GVCLMKLQIGSQHTGMYGR                 |           |         | Carbamidomethyl (C)[3]     |      | Mascot      |
| 2489.3721  | 2489.0869   | -0.2852 | -115  | 508        | 531      | GNQGEVDIVALHIKALTEAGVQVK            |           |         |                            |      | Mascot      |
| 2515.167   | 2515.2476   | 0.0806  | 32    | 631        | 651      | HGELRTAFEYLEDCAVQNYTR               |           |         |                            |      | Mascot      |
| 3338.6208  | 3338.7676   | 0.1468  | 44    | 868        | 901      | AGATDIAAAANGDDDDFDALINAVVKAESVCGFVK |           |         |                            |      | Mascot      |

8 hypothetical protein LOC799147 [Danio rerio] gi|130487208 15157.6 7.64 5 33 0

Peptide Information

| Calc. Mass | Obsrv. Mass | ± da | ± ppm | Start Seq. | End Seq. | Sequence | Ion Score | C. I. % | Modification | Rank | Result Type |
|------------|-------------|------|-------|------------|----------|----------|-----------|---------|--------------|------|-------------|
|------------|-------------|------|-------|------------|----------|----------|-----------|---------|--------------|------|-------------|

|   |                                 |           |         |      |              |     |                                  |      |   |                         |   |  |        |
|---|---------------------------------|-----------|---------|------|--------------|-----|----------------------------------|------|---|-------------------------|---|--|--------|
|   | 842.477                         | 842.5123  | 0.0353  | 42   | 124          | 130 | KGSLFYK                          |      |   |                         |   |  | Mascot |
|   | 959.4879                        | 959.5182  | 0.0303  | 32   | 1            | 8   | MAAFNHRLR                        |      |   |                         |   |  | Mascot |
|   | 2197.0991                       | 2197.1292 | 0.0301  | 14   | 104          | 123 | LGCTCTKTEYGLSSVTCH<br>LK         |      |   | Carbamidomethyl (C)[4]  |   |  | Mascot |
|   | 2225.0081                       | 2225.126  | 0.1179  | 53   | 68           | 86  | DNANPVWSAEFNPNC<br>SK            |      |   | Carbamidomethyl (C)[16] |   |  | Mascot |
|   | 3000.645                        | 3000.2488 | -0.3962 | -132 | 2            | 29  | AAFNHLRLVSLAVLMLAS<br>QLDFASASVR |      |   |                         |   |  | Mascot |
| 9 | si:ch1073-126c3.2 [Danio rerio] |           |         |      | gi 221307488 |     | 24754.2                          | 6.97 | 6 | 32                      | 0 |  |        |

#### Peptide Information

|  | Calc. Mass | Obsrv. Mass | ± da    | ± ppm | Start Seq. | End Seq. | Sequence                    | Ion Score | C. I. | % Modification                             | Rank | Result Type |
|--|------------|-------------|---------|-------|------------|----------|-----------------------------|-----------|-------|--------------------------------------------|------|-------------|
|  | 864.4243   | 864.4503    | 0.026   | 30    | 1          | 8        | MESATIGR                    |           |       |                                            |      | Mascot      |
|  | 1128.5242  | 1128.5063   | -0.0179 | -16   | 134        | 143      | LFEECSTATK                  |           |       |                                            |      | Mascot      |
|  | 1951.9277  | 1951.9611   | 0.0334  | 17    | 204        | 221      | VETTESESTKLLCGNINN          |           |       |                                            |      | Mascot      |
|  | 2211.0295  | 2211.1123   | 0.0828  | 37    | 114        | 131      | IYCKPMCNAGYDFNFLRR          |           |       |                                            |      | Mascot      |
|  | 2284.0459  | 2284.1846   | 0.1387  | 61    | 114        | 131      | IYCKPMCNAGYDFNFLRR          |           |       | Carbamidomethyl (C)[3], Oxidation (M)[6]   |      | Mascot      |
|  | 2298.0503  | 2298.1902   | 0.1399  | 61    | 112        | 130      | DKIYCKPMCNAGYDFNFL<br>R     |           |       |                                            |      | Mascot      |
|  | 2341.0674  | 2341.1333   | 0.0659  | 28    | 114        | 131      | IYCKPMCNAGYDFNFLRR          |           |       | Carbamidomethyl (C)[3,7], Oxidation (M)[6] |      | Mascot      |
|  | 2448.2625  | 2448.1497   | -0.1128 | -46   | 89         | 111      | LLPENCPAPAVPENGGLL<br>CLSVK |           |       | Carbamidomethyl (C)[6,19]                  |      | Mascot      |
|  | 2448.2625  | 2448.1497   | -0.1128 | -46   | 89         | 111      | LLPENCPAPAVPENGGLL<br>CLSVK |           |       | Carbamidomethyl (C)[6,19]                  |      | Mascot      |

10 stromal interaction molecule 1b [Danio rerio] gi|321400099 72493.8 6.03 10 32 0

#### Peptide Information

|  | Calc. Mass | Obsrv. Mass | ± da    | ± ppm | Start Seq. | End Seq. | Sequence                   | Ion Score | C. I. | % Modification    | Rank | Result Type |
|--|------------|-------------|---------|-------|------------|----------|----------------------------|-----------|-------|-------------------|------|-------------|
|  | 842.4076   | 842.5123    | 0.1047  | 124   | 555        | 561      | KSFGMEK                    |           |       | Oxidation (M)[5]  |      | Mascot      |
|  | 901.4849   | 901.5096    | 0.0247  | 27    | 289        | 295      | EEAQRLR                    |           |       |                   |      | Mascot      |
|  | 959.4801   | 959.5182    | 0.0381  | 40    | 233        | 240      | DHMGKMIK                   |           |       |                   |      | Mascot      |
|  | 1051.5643  | 1051.7158   | 0.1515  | 144   | 175        | 183      | IPDRSHAQK                  |           |       |                   |      | Mascot      |
|  | 1128.6735  | 1128.5063   | -0.1672 | -148  | 408        | 418      | KALGEVTAALR                |           |       |                   |      | Mascot      |
|  | 1751.942   | 1751.8234   | -0.1186 | -68   | 9          | 21       | HFIYITWLGFLWR              |           |       |                   |      | Mascot      |
|  | 2196.9487  | 2197.1292   | 0.1805  | 82    | 608        | 629      | SLVDEDNGSTGEDTEGS<br>GSGRK |           |       |                   |      | Mascot      |
|  | 2224.9548  | 2225.126    | 0.1712  | 77    | 607        | 628      | RSLVDEDNGSTGEDTEG<br>SGSGR |           |       |                   |      | Mascot      |
|  | 2341.011   | 2341.1333   | 0.1223  | 52    | 508        | 528      | DLNRSESDSSLSMSQYG<br>DGHK  |           |       |                   |      | Mascot      |
|  | 2357.0059  | 2357.1387   | 0.1328  | 56    | 508        | 528      | DLNRSESDSSLSMSQYG<br>DGHK  |           |       | Oxidation (M)[13] |      | Mascot      |
|  | 3000.5586  | 3000.2488   | -0.3098 | -103  | 207        | 232      | DLMLVVSIIGVGGCWFA          |           |       |                   |      | Mascot      |

11 novel protein [Danio rerio] YIQNRNYR gi|148725299 82126.8 6.15 11 31 0

Peptide Information

| Calc. Mass | Obsrv. Mass | ± da    | ± ppm | Start Seq. | End Seq. | Sequence               | Ion Score | C. I. % | Modification           | Rank | Result Type |
|------------|-------------|---------|-------|------------|----------|------------------------|-----------|---------|------------------------|------|-------------|
| 901.4737   | 901.5096    | 0.0359  | 40    | 75         | 81       | ILQEENR                |           |         |                        |      | Mascot      |
| 959.4614   | 959.5182    | 0.0568  | 59    | 347        | 354      | IPADCIDR               |           |         | Carbamidomethyl (C)[5] |      | Mascot      |
| 1045.5272  | 1045.5662   | 0.039   | 37    | 600        | 608      | GLLTQQDDR              |           |         |                        |      | Mascot      |
| 1210.6791  | 1210.6035   | -0.0756 | -62   | 382        | 391      | EIIDHIKQSK             |           |         |                        |      | Mascot      |
| 1436.7631  | 1436.7466   | -0.0165 | -11   | 609        | 620      | DQSKEEIIAYIK           |           |         |                        |      | Mascot      |
| 2114.0876  | 2114.1943   | 0.1067  | 50    | 566        | 584      | AAVDKALESENGHLDLYL R   |           |         |                        |      | Mascot      |
| 2114.0876  | 2114.1943   | 0.1067  | 50    | 566        | 584      | AAVDKALESENGHLDLYL R   |           |         |                        |      | Mascot      |
| 2136.072   | 2136.1777   | 0.1057  | 49    | 43         | 60       | HKSFTDNLQSIFQNLESK     |           |         |                        |      | Mascot      |
| 2211.2092  | 2211.1123   | -0.0969 | -44   | 93         | 111      | SIITEAALDLTLFFLREMK    |           |         |                        |      | Mascot      |
| 2294.0864  | 2294.1719   | 0.0855  | 37    | 491        | 511      | DCGIDVYKASVYSGMCT QILK |           |         |                        |      | Mascot      |
| 2294.0864  | 2294.1719   | 0.0855  | 37    | 491        | 511      | DCGIDVYKASVYSGMCT QILK |           |         |                        |      | Mascot      |
| 2298.1812  | 2298.1902   | 0.009   | 4     | 431        | 448      | TLTQMYTHFLRFQIQSR      |           |         |                        |      | Mascot      |
| 2341.2188  | 2341.1333   | -0.0855 | -37   | 472        | 490      | LAFQQLERNLIFYESDL K    |           |         |                        |      | Mascot      |

12 ryanodine receptor 1 [Danio rerio] gi|156523287 574386.1 5.03 30 31 0

Peptide Information

| Calc. Mass | Obsrv. Mass | ± da    | ± ppm | Start Seq. | End Seq. | Sequence        | Ion Score | C. I. % | Modification           | Rank | Result Type |
|------------|-------------|---------|-------|------------|----------|-----------------|-----------|---------|------------------------|------|-------------|
| 842.4155   | 842.5123    | 0.0968  | 115   | 313        | 319      | QSAFSFR         |           |         |                        |      | Mascot      |
| 864.4495   | 864.4503    | 0.0008  | 1     | 4197       | 4204     | IEIMGASK        |           |         | Oxidation (M)[4]       |      | Mascot      |
| 901.4962   | 901.5096    | 0.0134  | 15    | 2264       | 2270     | ISRQNQR         |           |         |                        |      | Mascot      |
| 1045.5425  | 1045.5662   | 0.0237  | 23    | 2665       | 2672     | LLTNHYER        |           |         |                        |      | Mascot      |
| 1051.5605  | 1051.7158   | 0.1553  | 148   | 2522       | 2530     | ASMLVFLDR       |           |         |                        |      | Mascot      |
| 1076.5106  | 1076.4761   | -0.0345 | -32   | 1861       | 1869     | EEGEEVKEK       |           |         |                        |      | Mascot      |
| 1112.5768  | 1112.5112   | -0.0656 | -59   | 3966       | 3975     | NFSKAMTVAK      |           |         | Oxidation (M)[6]       |      | Mascot      |
| 1128.5432  | 1128.5063   | -0.0369 | -33   | 4766       | 4774     | YGDIYGRER       |           |         |                        |      | Mascot      |
| 1354.6606  | 1354.7754   | 0.1148  | 85    | 2458       | 2469     | CAPEMHLIQAGK    |           |         | Carbamidomethyl (C)[1] |      | Mascot      |
| 1354.6606  | 1354.7754   | 0.1148  | 85    | 2458       | 2469     | CAPEMHLIQAGK    |           |         | Carbamidomethyl (C)[1] |      | Mascot      |
| 1436.5884  | 1436.7466   | 0.1582  | 110   | 3500       | 3514     | AGDGEGGGSDDDRDK |           |         |                        |      | Mascot      |
| 1488.7904  | 1488.7906   | 0.0002  | 0     | 164        | 177      | VGDDLILVSVSSER  | 7         |         | 0                      |      | Mascot      |

|           |           |         |      |      |      |                                     |                                                   |        |
|-----------|-----------|---------|------|------|------|-------------------------------------|---------------------------------------------------|--------|
| 1488.7904 | 1488.7906 | 0.0002  | 0    | 164  | 177  | VGDDLILVSVSSER                      |                                                   | Mascot |
| 1542.8573 | 1542.8898 | 0.0325  | 21   | 2635 | 2646 | YLRPSMLQHLLR                        | Oxidation (M)[6]                                  | Mascot |
| 1719.8768 | 1719.859  | -0.0178 | -10  | 2620 | 2634 | AQRDVIEDCLMSLVK                     |                                                   | Mascot |
| 1719.8768 | 1719.859  | -0.0178 | -10  | 2620 | 2634 | AQRDVIEDCLMSLVK                     |                                                   | Mascot |
| 1751.7554 | 1751.8234 | 0.068   | 39   | 2424 | 2437 | RFMFGGEDQHEENR                      |                                                   | Mascot |
| 1767.7504 | 1767.8188 | 0.0684  | 39   | 2424 | 2437 | RFMFGGEDQHEENR                      | Oxidation (M)[3]                                  | Mascot |
| 1893.8977 | 1893.9885 | 0.0908  | 48   | 2793 | 2808 | IQNNWTYGEVLDENAK                    |                                                   | Mascot |
| 1893.8977 | 1893.9885 | 0.0908  | 48   | 2793 | 2808 | IQNNWTYGEVLDENAK                    |                                                   | Mascot |
| 1923.9932 | 1923.9712 | -0.022  | -11  | 3649 | 3664 | AVVACFRMTPLYNIPR                    | Carbamidomethyl (C)[5], Oxidation (M)[8]          | Mascot |
| 1952.0092 | 1951.9611 | -0.0481 | -25  | 2598 | 2613 | AIMIDSM LHTIYRLSR                   | Oxidation (M)[3,7]                                | Mascot |
| 1999.8783 | 1999.9485 | 0.0702  | 35   | 379  | 395  | VMLHQEGHMDDALTCSR                   | Carbamidomethyl (C)[15]                           | Mascot |
| 1999.8783 | 1999.9485 | 0.0702  | 35   | 379  | 395  | VMLHQEGHMDDALTCSR                   | Carbamidomethyl (C)[15]                           | Mascot |
| 2136.0793 | 2136.1777 | 0.0984  | 46   | 958  | 976  | TYVMSSGYKPAPLDLNH<br>VK             | Oxidation (M)[4]                                  | Mascot |
| 2156.873  | 2157.1394 | 0.2664  | 124  | 4915 | 4931 | CDDMMTCYLFHMYGVGR                   | Carbamidomethyl (C)[1], Oxidation (M)[4]          | Mascot |
| 2175.1743 | 2175.1472 | -0.0271 | -12  | 2140 | 2157 | LMFSLLHRQYDALGELIR                  |                                                   | Mascot |
| 2175.1743 | 2175.1472 | -0.0271 | -12  | 2140 | 2157 | LMFSLLHRQYDALGELIR                  |                                                   | Mascot |
| 2283.2205 | 2283.1875 | -0.033  | -14  | 3415 | 3433 | DEFAVLCRDLYALYPLLIR                 |                                                   | Mascot |
| 2432.1206 | 2432.1443 | 0.0237  | 10   | 1938 | 1958 | EEEEEAPEEGLLQMKMP<br>ESVK           |                                                   | Mascot |
| 2432.1206 | 2432.1443 | 0.0237  | 10   | 1938 | 1958 | EEEEEAPEEGLLQMKMP<br>ESVK           |                                                   | Mascot |
| 2442.3213 | 2442.083  | -0.2383 | -98  | 1292 | 1313 | LSMPVEFH LTFKVPAGTT<br>PLTR         |                                                   | Mascot |
| 2448.1155 | 2448.1497 | 0.0342  | 14   | 1938 | 1958 | EEEEEAPEEGLLQMKMP<br>ESVK           | Oxidation (M)[14]                                 | Mascot |
| 2448.1155 | 2448.1497 | 0.0342  | 14   | 1938 | 1958 | EEEEEAPEEGLLQMKMP<br>ESVK           | Oxidation (M)[14]                                 | Mascot |
| 2459.1086 | 2459.1106 | 0.002   | 1    | 1959 | 1976 | LQMCTLLQYFCDCELRH<br>R              | Carbamidomethyl (C)[4,11,13], Oxidation<br>(M)[3] | Mascot |
| 2489.3042 | 2489.0869 | -0.2173 | -87  | 2575 | 2597 | YLCSAVLPLLT KCAPLFA<br>GTDHR        |                                                   | Mascot |
| 2531.3113 | 2531.2427 | -0.0686 | -27  | 977  | 998  | LTPNQNLVEKLAENGH<br>NWWAR           |                                                   | Mascot |
| 3103.3625 | 3103.6494 | 0.2869  | 92   | 379  | 405  | VMLHQEGHMDDALTCSR<br>SQTEESQAAR     | Carbamidomethyl (C)[15], Oxidation (M)[2]         | Mascot |
| 3287.8501 | 3287.4243 | -0.4258 | -130 | 2481 | 2511 | SLVPIEDLVGVISLPVQIP<br>TFGKDGQIVEPK |                                                   | Mascot |
| 3337.5386 | 3337.7583 | 0.2197  | 66   | 3311 | 3340 | GPENFPEQEGCLCTDVT<br>SEQLNQLLGSIMK  | Carbamidomethyl (C)[11]                           | Mascot |

### Peptide Information

|    |                                                                      |           |        |     |    |              |                                     |      |   |    |   |  |                                            |  |  |        |
|----|----------------------------------------------------------------------|-----------|--------|-----|----|--------------|-------------------------------------|------|---|----|---|--|--------------------------------------------|--|--|--------|
|    | 1103.5632                                                            | 1103.575  | 0.0118 | 11  | 70 | 78           | TAHANWYLK                           |      |   |    |   |  |                                            |  |  | Mascot |
|    | 1736.8207                                                            | 1736.8944 | 0.0737 | 42  | 24 | 38           | SAVPGSSDRWLMVCR                     |      |   |    |   |  | Carbamidomethyl (C)[14], Oxidation (M)[12] |  |  | Mascot |
|    | 2456.99                                                              | 2457.3203 | 0.3303 | 134 | 2  | 23           | IPEYSMSSAASSDMCPY<br>MPVCR          |      |   |    |   |  | Oxidation (M)[6,14]                        |  |  | Mascot |
|    | 3338.4255                                                            | 3338.7676 | 0.3421 | 102 | 2  | 32           | IPEYSMSSAASSDMCPY<br>MPVCRSAVPGSSDR |      |   |    |   |  | Carbamidomethyl (C)[15]                    |  |  | Mascot |
| 14 | PREDICTED: hypothetical protein LOC100535442 isoform 2 [Danio rerio] |           |        |     |    | gi 326668097 | 11743                               | 9.12 | 5 | 31 | 0 |  |                                            |  |  |        |

#### Peptide Information

| Calc. Mass | Obsrv. Mass | ± da    | ± ppm | Start Seq. | End Seq. | Sequence        | Ion Score | C. I. | % | Modification              | Rank | Result Type |
|------------|-------------|---------|-------|------------|----------|-----------------|-----------|-------|---|---------------------------|------|-------------|
| 901.5101   | 901.5096    | -0.0005 | -1    | 31         | 38       | TNDLLAVR        |           |       |   |                           |      | Mascot      |
| 1128.6483  | 1128.5063   | -0.142  | -126  | 29         | 38       | ARTNDLLAVR      |           |       |   |                           |      | Mascot      |
| 1436.7493  | 1436.7466   | -0.0027 | -2    | 18         | 30       | LHTETPTDPAKAR   |           |       |   |                           |      | Mascot      |
| 1488.7589  | 1488.7906   | 0.0317  | 21    | 91         | 103      | LTNTCFVITFVCK   |           |       |   |                           |      | Mascot      |
| 1488.7589  | 1488.7906   | 0.0317  | 21    | 91         | 103      | LTNTCFVITFVCK   |           |       |   |                           |      | Mascot      |
| 1893.9601  | 1893.9885   | 0.0284  | 15    | 91         | 105      | LTNTCFVITFVCKYK |           |       |   | Carbamidomethyl (C)[5,12] |      | Mascot      |
| 1893.9601  | 1893.9885   | 0.0284  | 15    | 91         | 105      | LTNTCFVITFVCKYK |           |       |   | Carbamidomethyl (C)[5,12] |      | Mascot      |

|    |                                         |  |  |  |  |             |         |      |   |    |   |   |   |
|----|-----------------------------------------|--|--|--|--|-------------|---------|------|---|----|---|---|---|
| 15 | novel protein (zgc:77021) [Danio rerio] |  |  |  |  | gi 94732505 | 46122.4 | 8.52 | 7 | 31 | 0 | 9 | 0 |
|----|-----------------------------------------|--|--|--|--|-------------|---------|------|---|----|---|---|---|

#### Peptide Information

| Calc. Mass | Obsrv. Mass | ± da    | ± ppm | Start Seq. | End Seq. | Sequence                    | Ion Score | C. I. | % | Modification                              | Rank | Result Type |
|------------|-------------|---------|-------|------------|----------|-----------------------------|-----------|-------|---|-------------------------------------------|------|-------------|
| 882.4753   | 882.5708    | 0.0955  | 108   | 107        | 114      | GYMLSIK                     |           |       |   |                                           |      | Mascot      |
| 901.5141   | 901.5096    | -0.0045 | -5    | 365        | 373      | ALVPPGYGK                   |           |       |   |                                           |      | Mascot      |
| 1488.7839  | 1488.7906   | 0.0067  | 5     | 374        | 386      | KPLRSNSLSMPK                | 9         | 0     |   | Oxidation (M)[11]                         |      | Mascot      |
| 1488.7839  | 1488.7906   | 0.0067  | 5     | 374        | 386      | KPLRSNSLSMPK                |           |       |   | Oxidation (M)[11]                         |      | Mascot      |
| 1901.9326  | 1901.9963   | 0.0637  | 33    | 10         | 25       | GRAQLPPCYHEGFLEK            |           |       |   | Carbamidomethyl (C)[8]                    |      | Mascot      |
| 1951.9258  | 1951.9611   | 0.0353  | 18    | 36         | 52       | LWTSLCGDSLFFFNSSK           |           |       |   |                                           |      | Mascot      |
| 2459.0239  | 2459.1106   | 0.0867  | 35    | 344        | 363      | HLPYQYSMPQETNTSSD<br>CER    |           |       |   | Carbamidomethyl (C)[18], Oxidation (M)[8] |      | Mascot      |
| 2515.4316  | 2515.2476   | -0.184  | -73   | 115        | 137      | LSVPVSLNLLPGQIHAMK<br>EVIEK |           |       |   |                                           |      | Mascot      |
| 2531.4265  | 2531.2427   | -0.1838 | -73   | 115        | 137      | LSVPVSLNLLPGQIHAMK<br>EVIEK |           |       |   | Oxidation (M)[17]                         |      | Mascot      |

|    |                                                                                                     |  |  |  |  |             |         |      |   |    |   |  |  |
|----|-----------------------------------------------------------------------------------------------------|--|--|--|--|-------------|---------|------|---|----|---|--|--|
| 16 | RecName: Full=Eukaryotic translation initiation factor 3 subunit D; Short=elF3d; AltName: Full=Euka |  |  |  |  | gi 82187444 | 64049.5 | 6.06 | 9 | 30 | 0 |  |  |
|----|-----------------------------------------------------------------------------------------------------|--|--|--|--|-------------|---------|------|---|----|---|--|--|

#### Peptide Information

| Calc. Mass | Obsrv. Mass | ± da | ± ppm | Start Seq. | End Seq. | Sequence | Ion Score | C. I. | % | Modification | Rank | Result Type |
|------------|-------------|------|-------|------------|----------|----------|-----------|-------|---|--------------|------|-------------|
|------------|-------------|------|-------|------------|----------|----------|-----------|-------|---|--------------|------|-------------|

|    |                                                     |           |         |     |     |              |                                        |      |    |                                            |   |  |        |
|----|-----------------------------------------------------|-----------|---------|-----|-----|--------------|----------------------------------------|------|----|--------------------------------------------|---|--|--------|
|    | 901.5352                                            | 901.5096  | -0.0256 | -28 | 421 | 429          | GAVLATELK                              |      |    |                                            |   |  | Mascot |
|    | 1103.6459                                           | 1103.575  | -0.0709 | -64 | 509 | 517          | YLILKDPNK                              |      |    |                                            |   |  | Mascot |
|    | 1112.5082                                           | 1112.5112 | 0.003   | 3   | 27  | 35           | DMPYQPFISK                             |      |    |                                            |   |  | Mascot |
|    | 1128.5031                                           | 1128.5063 | 0.0032  | 3   | 27  | 35           | DMPYQPFISK                             |      |    | Oxidation (M)[2]                           |   |  | Mascot |
|    | 1354.6273                                           | 1354.7754 | 0.1481  | 109 | 42  | 53           | VADWTGATYQDK                           |      |    |                                            |   |  | Mascot |
|    | 1354.6273                                           | 1354.7754 | 0.1481  | 109 | 42  | 53           | VADWTGATYQDK                           |      |    |                                            |   |  | Mascot |
|    | 2233.1143                                           | 2233.0996 | -0.0147 | -7  | 438 | 457          | WTCCAILAGSEYKLGYV<br>SR                |      |    |                                            |   |  | Mascot |
|    | 2400.0193                                           | 2400.1211 | 0.1018  | 42  | 187 | 207          | YMDVADPLDIECCGALEH<br>YDK              |      |    |                                            |   |  | Mascot |
|    | 2448.2129                                           | 2448.1497 | -0.0632 | -26 | 2   | 24           | AKFHAPVIQDNPSGWGP<br>CAVPEK            |      |    |                                            |   |  | Mascot |
|    | 2448.2129                                           | 2448.1497 | -0.0632 | -26 | 2   | 24           | AKFHAPVIQDNPSGWGP<br>CAVPEK            |      |    |                                            |   |  | Mascot |
|    | 2457.2297                                           | 2457.3203 | 0.0906  | 37  | 241 | 263          | LAKTQGNVFATDAILATL<br>MCCTR            |      |    | Oxidation (M)[19]                          |   |  | Mascot |
|    | 3287.6033                                           | 3287.4243 | -0.179  | -54 | 368 | 397          | LGEDIDLIVRCEHDGVM<br>T<br>GANGEVSFINVK |      |    | Carbamidomethyl (C)[11]                    |   |  | Mascot |
|    | 3303.5984                                           | 3303.4224 | -0.176  | -53 | 368 | 397          | LGEDIDLIVRCEHDGVM<br>T<br>GANGEVSFINVK |      |    | Carbamidomethyl (C)[11], Oxidation (M)[17] |   |  | Mascot |
| 17 | novel NACHT domain containing protein [Danio rerio] |           |         |     |     | gi 169158295 | 75440.9                                | 5.59 | 10 | 30                                         | 0 |  |        |

Peptide Information

| Calc. Mass | Obsrv. Mass | ± da    | ± ppm | Start Seq. | End Seq. | Sequence                              | Ion Score | C. I. | % Modification            | Rank | Result Type |
|------------|-------------|---------|-------|------------|----------|---------------------------------------|-----------|-------|---------------------------|------|-------------|
| 901.4737   | 901.5096    | 0.0359  | 40    | 48         | 54       | ILQEENR                               |           |       |                           |      | Mascot      |
| 959.4614   | 959.5182    | 0.0568  | 59    | 320        | 327      | IPADCIDR                              |           |       | Carbamidomethyl (C)[5]    |      | Mascot      |
| 1045.5272  | 1045.5662   | 0.039   | 37    | 570        | 578      | GLLTQQDDR                             |           |       |                           |      | Mascot      |
| 1210.6062  | 1210.6035   | -0.0027 | -2    | 393        | 403      | AHAETLQESPK                           |           |       |                           |      | Mascot      |
| 1436.7631  | 1436.7466   | -0.0165 | -11   | 579        | 590      | DQSKEEIIAYIK                          |           |       |                           |      | Mascot      |
| 2136.072   | 2136.1777   | 0.1057  | 49    | 16         | 33       | HKSFTDNLQSIFQNLESK                    |           |       |                           |      | Mascot      |
| 2211.2092  | 2211.1123   | -0.0969 | -44   | 66         | 84       | SIITEAALDLTLFFLREMK                   |           |       |                           |      | Mascot      |
| 2298.1812  | 2298.1902   | 0.009   | 4     | 404        | 421      | TLTQMYTHFLRFQIQSR                     |           |       |                           |      | Mascot      |
| 2442.1138  | 2442.083    | -0.0308 | -13   | 464        | 484      | DCGIDVYKASVYSGMCT<br>QIFK             |           |       | Carbamidomethyl (C)[2,16] |      | Mascot      |
| 3908.0125  | 3907.8484   | -0.1641 | -42   | 485        | 517      | EETGIILGTMYCFLHLSIQ<br>EFIAALYQHLILDR |           |       | Carbamidomethyl (C)[12]   |      | Mascot      |

18 PREDICTED: diacylglycerol kinase beta-like, partial [Danio rerio]

Peptide Information

| Calc. Mass | Obsrv. Mass | ± da   | ± ppm | Start Seq. | End Seq. | Sequence | Ion Score | C. I. | % Modification | Rank | Result Type |
|------------|-------------|--------|-------|------------|----------|----------|-----------|-------|----------------|------|-------------|
| 842.4229   | 842.5123    | 0.0894 | 106   | 153        | 158      | LEFMFR   |           |       |                |      | Mascot      |
| 864.4032   | 864.4503    | 0.0471 | 54    | 455        | 462      | SGPMPGYR |           |       |                |      | Mascot      |

|    |                                 |           |         |      |              |     |                           |                                           |   |    |   |  |        |
|----|---------------------------------|-----------|---------|------|--------------|-----|---------------------------|-------------------------------------------|---|----|---|--|--------|
|    | 901.5353                        | 901.5096  | -0.0257 | -29  | 678          | 685 | KTTIVDPK                  |                                           |   |    |   |  | Mascot |
|    | 1045.4264                       | 1045.5662 | 0.1398  | 134  | 270          | 278 | QGLCCSFCK                 | Carbamidomethyl (C)[4]                    |   |    |   |  | Mascot |
|    | 1112.6497                       | 1112.5112 | -0.1385 | -124 | 112          | 121 | LIKGSPPPLK                | Carbamidomethyl (C)[6]                    |   |    |   |  | Mascot |
|    | 1210.5455                       | 1210.6035 | 0.058   | 48   | 455          | 465 | SGPMPGYRSCR               |                                           |   |    |   |  | Mascot |
|    | 2157.0005                       | 2157.1394 | 0.1389  | 64   | 302          | 319 | KNTEIMHHFWVEGNCPK         |                                           |   |    |   |  | Mascot |
|    | 2283.2488                       | 2283.1875 | -0.0613 | -27  | 115          | 135 | GSCPPLKVTSQSRPLSTV<br>QLK | Carbamidomethyl (C)[3]                    |   |    |   |  | Mascot |
|    | 2284.0591                       | 2284.1846 | 0.1255  | 55   | 153          | 171 | LEFMFRLYDTDGNGFLD<br>SK   | Oxidation (M)[4]                          |   |    |   |  | Mascot |
|    | 2432.0581                       | 2432.1443 | 0.0862  | 35   | 303          | 322 | NTEIMHHFWVEGNCPK<br>CDK   | Carbamidomethyl (C)[14]                   |   |    |   |  | Mascot |
|    | 2432.0581                       | 2432.1443 | 0.0862  | 35   | 303          | 322 | NTEIMHHFWVEGNCPK<br>CDK   | Carbamidomethyl (C)[14]                   |   |    |   |  | Mascot |
|    | 2448.053                        | 2448.1497 | 0.0967  | 40   | 303          | 322 | NTEIMHHFWVEGNCPK<br>CDK   | Carbamidomethyl (C)[14], Oxidation (M)[5] |   |    |   |  | Mascot |
|    | 2448.053                        | 2448.1497 | 0.0967  | 40   | 303          | 322 | NTEIMHHFWVEGNCPK<br>CDK   | Carbamidomethyl (C)[14], Oxidation (M)[5] |   |    |   |  | Mascot |
|    | 2479.3022                       | 2479.3013 | -0.0009 | 0    | 248          | 269 | LKHFSKPAYCNLCNMLI<br>GLGK | Oxidation (M)[16]                         |   |    |   |  | Mascot |
|    | 2489.0796                       | 2489.0869 | 0.0073  | 3    | 303          | 322 | NTEIMHHFWVEGNCPK<br>CDK   | Carbamidomethyl (C)[14,18]                |   |    |   |  | Mascot |
| 19 | LOC565764 protein [Danio rerio] |           |         |      | gi 112418812 |     | 25782.2                   | 5.2                                       | 6 | 30 | 0 |  |        |

#### Peptide Information

| Calc. Mass | Obsrv. Mass | ± da    | ± ppm | Start Seq. | End Seq. | Sequence          | Ion Score | C. I. | % Modification         | Rank | Result Type |
|------------|-------------|---------|-------|------------|----------|-------------------|-----------|-------|------------------------|------|-------------|
| 864.4355   | 864.4503    | 0.0148  | 17    | 77         | 83       | RSMDSIR           |           |       |                        |      | Mascot      |
| 882.4389   | 882.5708    | 0.1319  | 149   | 11         | 17       | LEAMFQK           |           |       | Oxidation (M)[4]       |      | Mascot      |
| 901.4988   | 901.5096    | 0.0108  | 12    | 222        | 230      | GLVSLLAND         |           |       |                        |      | Mascot      |
| 1112.5293  | 1112.5112   | -0.0181 | -16   | 2          | 10       | LFNMETVDK         |           |       | Oxidation (M)[4]       |      | Mascot      |
| 1767.8694  | 1767.8188   | -0.0506 | -29   | 61         | 76       | HAALCAQVEEIAAEQK  |           |       | Carbamidomethyl (C)[5] |      | Mascot      |
| 1923.9705  | 1923.9712   | 0.0007  | 0     | 61         | 77       | HAALCAQVEEIAAEQKR |           |       | Carbamidomethyl (C)[5] |      | Mascot      |

20 PREDICTED: HEAT repeat-containing protein 1-like [Danio rerio] gi|189525800 241986.3 5.96 20 30 0

#### Peptide Information

| Calc. Mass | Obsrv. Mass | ± da    | ± ppm | Start Seq. | End Seq. | Sequence  | Ion Score | C. I. | % Modification         | Rank | Result Type |
|------------|-------------|---------|-------|------------|----------|-----------|-----------|-------|------------------------|------|-------------|
| 842.557    | 842.5123    | -0.0447 | -53   | 1792       | 1798     | LTLLARR   |           |       |                        |      | Mascot      |
| 901.5101   | 901.5096    | -0.0005 | -1    | 1942       | 1949     | LADRIADK  |           |       |                        |      | Mascot      |
| 959.4363   | 959.5182    | 0.0819  | 85    | 209        | 216      | DGNCPQLR  |           |       | Carbamidomethyl (C)[4] |      | Mascot      |
| 996.4567   | 996.6025    | 0.1458  | 146   | 1853       | 1860     | EHISHMDK  |           |       |                        |      | Mascot      |
| 1076.5768  | 1076.4761   | -0.1007 | -94   | 1618       | 1626     | KAMELLNNK |           |       | Oxidation (M)[3]       |      | Mascot      |

|           |           |         |     |      |      |                                     |  |  |  |                                                  |  |        |
|-----------|-----------|---------|-----|------|------|-------------------------------------|--|--|--|--------------------------------------------------|--|--------|
| 1103.5878 | 1103.575  | -0.0128 | -12 | 1799 | 1808 | LTSCPQLSVR                          |  |  |  |                                                  |  | Mascot |
| 1128.5684 | 1128.5063 | -0.0621 | -55 | 977  | 985  | FYEEAVSRK                           |  |  |  |                                                  |  | Mascot |
| 1736.9073 | 1736.8944 | -0.0129 | -7  | 1591 | 1605 | VNALLPMDTFITVMR                     |  |  |  | Oxidation (M)[7]                                 |  | Mascot |
| 1908.9768 | 1908.9408 | -0.036  | -19 | 1712 | 1729 | NVMGSALLCVAEVTSTLK                  |  |  |  | Carbamidomethyl (C)[9], Oxidation (M)[3]         |  | Mascot |
| 2114.1362 | 2114.1943 | 0.0581  | 27  | 2054 | 2072 | SRITTHLVPCIAQFAVAM<br>R             |  |  |  |                                                  |  | Mascot |
| 2114.1362 | 2114.1943 | 0.0581  | 27  | 2054 | 2072 | SRITTHLVPCIAQFAVAM<br>R             |  |  |  |                                                  |  | Mascot |
| 2136.1104 | 2136.1777 | 0.0673  | 32  | 647  | 666  | TSESDLLGVANEMLTITLI<br>K            |  |  |  |                                                  |  | Mascot |
| 2225.0286 | 2225.126  | 0.0974  | 44  | 254  | 273  | SNLSDYTAATYMIVCQMA<br>VK            |  |  |  | Oxidation (M)[12]                                |  | Mascot |
| 2233.2219 | 2233.0996 | -0.1223 | -55 | 1799 | 1819 | LTSCPQLSVRLASLSSTL<br>ATK           |  |  |  | Carbamidomethyl (C)[4]                           |  | Mascot |
| 2283.1294 | 2283.1875 | 0.0581  | 25  | 1824 | 1843 | VLIPTITKCYCSMVDAQQ<br>NR            |  |  |  |                                                  |  | Mascot |
| 2298.0452 | 2298.1902 | 0.145   | 63  | 254  | 273  | SNLSDYTAATYMIVCQMA<br>VK            |  |  |  | Carbamidomethyl (C)[15], Oxidation<br>(M)[12,17] |  | Mascot |
| 2442.2043 | 2442.083  | -0.1213 | -50 | 991  | 1012 | LASVEQLLQCLQSPFCPS<br>YTSK          |  |  |  |                                                  |  | Mascot |
| 2448.386  | 2448.1497 | -0.2363 | -97 | 881  | 903  | VSAILQTQALYVGKAFLS<br>SQPVK         |  |  |  |                                                  |  | Mascot |
| 2448.386  | 2448.1497 | -0.2363 | -97 | 881  | 903  | VSAILQTQALYVGKAFLS<br>SQPVK         |  |  |  |                                                  |  | Mascot |
| 2459.2791 | 2459.1106 | -0.1685 | -69 | 1510 | 1531 | HFKFISIFMAQLLASDGF<br>VGK           |  |  |  | Oxidation (M)[10]                                |  | Mascot |
| 2531.1873 | 2531.2427 | 0.0554  | 22  | 1832 | 1852 | CYCSMVDAQQNRLSSLM<br>NILK           |  |  |  | Carbamidomethyl (C)[1,3]                         |  | Mascot |
| 3000.5134 | 3000.2488 | -0.2646 | -88 | 209  | 235  | DGNCPQLRVIFSFYASTI<br>VSALDAVEK     |  |  |  | Carbamidomethyl (C)[4]                           |  | Mascot |
| 3303.6599 | 3303.4224 | -0.2375 | -72 | 1136 | 1166 | SPACAQSINSVFETIAVD<br>CELVANELIPADK |  |  |  | Carbamidomethyl (C)[4]                           |  | Mascot |

21 PREDICTED: interferon-induced protein 44-like [Danio rerio] gi|189514429 38705.9 5.26 5 29 0

#### Peptide Information

| Calc. Mass | Obsrv. Mass | ± da    | ± ppm | Start Seq. | End Seq. | Sequence                             | Ion Score | C. I. | % Modification | Rank | Result Type |
|------------|-------------|---------|-------|------------|----------|--------------------------------------|-----------|-------|----------------|------|-------------|
| 1045.6074  | 1045.5662   | -0.0412 | -39   | 214        | 223      | GIAQVVMTK                            |           |       |                |      | Mascot      |
| 1354.8052  | 1354.7754   | -0.0298 | -22   | 60         | 73       | DIKVLVAGQVGAGK                       | 5         |       | 0              |      | Mascot      |
| 1354.8052  | 1354.7754   | -0.0298 | -22   | 60         | 73       | DIKVLVAGQVGAGK                       |           |       |                |      | Mascot      |
| 1488.8455  | 1488.7906   | -0.0549 | -37   | 210        | 223      | ISDKGIAQVVMTK                        | 6         |       | 0              |      | Mascot      |
| 1488.8455  | 1488.7906   | -0.0549 | -37   | 210        | 223      | ISDKGIAQVVMTK                        |           |       |                |      | Mascot      |
| 2157.0234  | 2157.1394   | 0.116   | 54    | 308        | 325      | NYNEIDTDDVDVLILK                     |           |       |                |      | Mascot      |
| 3319.6514  | 3319.4426   | -0.2088 | -63   | 126        | 156      | DIMGLEAEALLGSQTDDII<br>NAVFGHVKGDKYK |           |       |                |      | Mascot      |

22 PREDICTED: calcium/calmodulin-dependent 3',5'-cyclic nucleotide phosphodiesterase 1C-like, partial gi|326681376 45655.3 5.68 8 29 0

#### Peptide Information



|  | Calc. Mass | Obsrv. Mass | ± da    | ± ppm | Start Seq. | End Seq. | Sequence                   | Ion Score | C. I. | % Modification         | Rank | Result Type |
|--|------------|-------------|---------|-------|------------|----------|----------------------------|-----------|-------|------------------------|------|-------------|
|  | 864.4429   | 864.4503    | 0.0074  | 9     | 104        | 110      | QMGLMLR                    |           |       | Oxidation (M)[2]       |      | Mascot      |
|  | 901.5651   | 901.5096    | -0.0555 | -62   | 33         | 40       | GLLRCLVK                   |           |       |                        |      | Mascot      |
|  | 1045.5823  | 1045.5662   | -0.0161 | -15   | 37         | 44       | CLVKQLER                   |           |       | Carbamidomethyl (C)[1] |      | Mascot      |
|  | 1908.9185  | 1908.9408   | 0.0223  | 12    | 2          | 17       | ESPTREIEEFENTSLK           |           |       |                        |      | Mascot      |
|  | 1923.9368  | 1923.9712   | 0.0344  | 18    | 299        | 314      | LLQDDDEMNILYNLSK           |           |       |                        |      | Mascot      |
|  | 2283.2634  | 2283.1875   | -0.0759 | -33   | 193        | 213      | FKIPVSALVSFVEALEVG<br>YSK  |           |       |                        |      | Mascot      |
|  | 2459.2144  | 2459.1106   | -0.1038 | -42   | 374        | 392      | TWDLHHRWTSLLEEFFL<br>Q     |           |       |                        |      | Mascot      |
|  | 2489.2002  | 2489.0869   | -0.1133 | -46   | 73         | 94       | RLVDTEDELSDIQSDSVP<br>SEVR |           |       |                        |      | Mascot      |

23 eukaryotic translation initiation factor 3, subunit 7 zeta [Danio rerio] gi|123230120 63850.4 6.06 9 29 0

#### Peptide Information

|  | Calc. Mass | Obsrv. Mass | ± da    | ± ppm | Start Seq. | End Seq. | Sequence                               | Ion Score | C. I. | % Modification                             | Rank | Result Type |
|--|------------|-------------|---------|-------|------------|----------|----------------------------------------|-----------|-------|--------------------------------------------|------|-------------|
|  | 901.5352   | 901.5096    | -0.0256 | -28   | 419        | 427      | GAVLATELK                              |           |       |                                            |      | Mascot      |
|  | 1103.6459  | 1103.575    | -0.0709 | -64   | 507        | 515      | YLILKDPNK                              |           |       |                                            |      | Mascot      |
|  | 1112.5082  | 1112.5112   | 0.003   | 3     | 27         | 35       | DMPYQPFSK                              |           |       |                                            |      | Mascot      |
|  | 1128.5031  | 1128.5063   | 0.0032  | 3     | 27         | 35       | DMPYQPFSK                              |           |       | Oxidation (M)[2]                           |      | Mascot      |
|  | 1354.6273  | 1354.7754   | 0.1481  | 109   | 42         | 53       | VADWTGATYQDK                           |           |       |                                            |      | Mascot      |
|  | 1354.6273  | 1354.7754   | 0.1481  | 109   | 42         | 53       | VADWTGATYQDK                           |           |       |                                            |      | Mascot      |
|  | 2233.1143  | 2233.0996   | -0.0147 | -7    | 436        | 455      | WTCCAILAGSEYKLGYV<br>SR                |           |       |                                            |      | Mascot      |
|  | 2400.0193  | 2400.1211   | 0.1018  | 42    | 185        | 205      | YMDVADPLDIECCGALEH<br>YDK              |           |       |                                            |      | Mascot      |
|  | 2448.2129  | 2448.1497   | -0.0632 | -26   | 2          | 24       | AKFHAPVIQDNPSGWGP<br>CAVPEK            |           |       |                                            |      | Mascot      |
|  | 2448.2129  | 2448.1497   | -0.0632 | -26   | 2          | 24       | AKFHAPVIQDNPSGWGP<br>CAVPEK            |           |       |                                            |      | Mascot      |
|  | 2457.2297  | 2457.3203   | 0.0906  | 37    | 239        | 261      | LAKTQGNVFATDAILATL<br>MCCTR            |           |       | Oxidation (M)[19]                          |      | Mascot      |
|  | 3287.6033  | 3287.4243   | -0.179  | -54   | 366        | 395      | LGEDIDLIVRCEHDGVM<br>T<br>GANGEVSFINVK |           |       | Carbamidomethyl (C)[11]                    |      | Mascot      |
|  | 3303.5984  | 3303.4224   | -0.176  | -53   | 366        | 395      | LGEDIDLIVRCEHDGVM<br>T<br>GANGEVSFINVK |           |       | Carbamidomethyl (C)[11], Oxidation (M)[17] |      | Mascot      |

24 guanine nucleotide binding protein (G protein), beta polypeptide 1, like [Danio rerio] gi|47087315 37279 5.6 7 29 0

#### Peptide Information

|  | Calc. Mass | Obsrv. Mass | ± da | ± ppm | Start Seq. | End Seq. | Sequence | Ion Score | C. I. | % Modification | Rank | Result Type |
|--|------------|-------------|------|-------|------------|----------|----------|-----------|-------|----------------|------|-------------|
|--|------------|-------------|------|-------|------------|----------|----------|-----------|-------|----------------|------|-------------|

|    |                                                                                                   |           |         |     |     |     |                             |  |  |                                           |  |  |  |        |
|----|---------------------------------------------------------------------------------------------------|-----------|---------|-----|-----|-----|-----------------------------|--|--|-------------------------------------------|--|--|--|--------|
|    | 1751.8315                                                                                         | 1751.8234 | -0.0081 | -5  | 135 | 150 | VSRELAGHTGYLSCCR            |  |  |                                           |  |  |  | Mascot |
|    | 1908.9636                                                                                         | 1908.9408 | -0.0228 | -12 | 198 | 214 | LFVSGACDASAKLWDIR           |  |  | Carbamidomethyl (C)[7]                    |  |  |  | Mascot |
|    | 1915.9542                                                                                         | 1915.9642 | 0.01    | 5   | 24  | 42  | ACADATLSQITANIDPVG<br>R     |  |  |                                           |  |  |  | Mascot |
|    | 2157.032                                                                                          | 2157.1394 | 0.1074  | 50  | 284 | 301 | LLLAGYDDFNCNVWDTL<br>K      |  |  | Carbamidomethyl (C)[11]                   |  |  |  | Mascot |
|    | 2400.1653                                                                                         | 2400.1211 | -0.0442 | -18 | 281 | 301 | SGRLLLAGYDDFNCNVW<br>DTLK   |  |  |                                           |  |  |  | Mascot |
|    | 2432.1108                                                                                         | 2432.1443 | 0.0335  | 14  | 315 | 337 | VSCLGVTDDGMAVATGS<br>WDSFLK |  |  | Carbamidomethyl (C)[3], Oxidation (M)[11] |  |  |  | Mascot |
|    | 2432.1108                                                                                         | 2432.1443 | 0.0335  | 14  | 315 | 337 | VSCLGVTDDGMAVATGS<br>WDSFLK |  |  | Carbamidomethyl (C)[3], Oxidation (M)[11] |  |  |  | Mascot |
|    | 2442.1758                                                                                         | 2442.083  | -0.0928 | -38 | 284 | 304 | LLLAGYDDFNCNVWDTL<br>KADR   |  |  |                                           |  |  |  | Mascot |
|    | 2457.1868                                                                                         | 2457.3203 | 0.1335  | 54  | 281 | 301 | SGRLLLAGYDDFNCNVW<br>DTLK   |  |  | Carbamidomethyl (C)[14]                   |  |  |  | Mascot |
| 25 | RecName: Full=Hematopoietic SH2 domain-containing protein homolog gi 82178338 41293.7 6.57 7 29 0 |           |         |     |     |     |                             |  |  |                                           |  |  |  |        |

### Peptide Information

| Calc. Mass | Obsrv. Mass | ± da    | ± ppm | Start Seq. | End Seq. | Sequence                   | Ion Score | C. I. | % Modification         | Rank | Result Type |
|------------|-------------|---------|-------|------------|----------|----------------------------|-----------|-------|------------------------|------|-------------|
| 1354.671   | 1354.7754   | 0.1044  | 77    | 257        | 268      | QQITPNTPNEGR               |           |       |                        |      | Mascot      |
| 1354.671   | 1354.7754   | 0.1044  | 77    | 257        | 268      | QQITPNTPNEGR               |           |       |                        |      | Mascot      |
| 1719.8846  | 1719.859    | -0.0256 | -15   | 219        | 233      | TPAEETPPQLPPMR             |           |       |                        |      | Mascot      |
| 1719.8846  | 1719.859    | -0.0256 | -15   | 219        | 233      | TPAEETPPQLPPMR             |           |       |                        |      | Mascot      |
| 1999.9802  | 1999.9485   | -0.0317 | -16   | 43         | 59       | AAEEMLMCKPAGYFLIR          |           |       | Carbamidomethyl (C)[8] |      | Mascot      |
| 1999.9802  | 1999.9485   | -0.0317 | -16   | 43         | 59       | AAEEMLMCKPAGYFLIR          |           |       | Carbamidomethyl (C)[8] |      | Mascot      |
| 2284.1907  | 2284.1846   | -0.0061 | -3    | 23         | 42       | SCILENGVVEWFGHIS<br>RK     |           |       |                        |      | Mascot      |
| 2341.2122  | 2341.1333   | -0.0789 | -34   | 23         | 42       | SCILENGVVEWFGHIS<br>RK     |           |       | Carbamidomethyl (C)[2] |      | Mascot      |
| 2400.1255  | 2400.1211   | -0.0044 | -2    | 2          | 22       | AVPLPNDSSNAAFSWFT<br>EYQR  |           |       |                        |      | Mascot      |
| 2448.1985  | 2448.1497   | -0.0488 | -20   | 77         | 96       | CRHFMINVLPDNQFMIVG<br>EK   |           |       | Carbamidomethyl (C)[1] |      | Mascot      |
| 2448.1985  | 2448.1497   | -0.0488 | -20   | 77         | 96       | CRHFMINVLPDNQFMIVG<br>EK   |           |       | Carbamidomethyl (C)[1] |      | Mascot      |
| 2531.166   | 2531.2427   | 0.0767  | 30    | 1          | 22       | MAVPLPNDSSNAAFSWF<br>TEYQR |           |       |                        |      | Mascot      |

26 DNA-binding protein SMUBP-2 [Danio rerio] gi|120952590 110816.5 8.97 12 29 0

### Peptide Information

| Calc. Mass | Obsrv. Mass | ± da   | ± ppm | Start Seq. | End Seq. | Sequence   | Ion Score | C. I. | % Modification         | Rank | Result Type |
|------------|-------------|--------|-------|------------|----------|------------|-----------|-------|------------------------|------|-------------|
| 882.4389   | 882.5708    | 0.1319 | 149   | 393        | 400      | CILAGDYK   |           |       |                        |      | Mascot      |
| 996.4818   | 996.6025    | 0.1207 | 121   | 897        | 905      | AESVCGFVK  |           |       | Carbamidomethyl (C)[5] |      | Mascot      |
| 1210.5773  | 1210.6035   | 0.0262 | 22    | 297        | 306      | DMDKAFNEIK |           |       |                        |      | Mascot      |

|           |                                       |         |      |     |             |                                     |                            |   |    |   |  |  |        |
|-----------|---------------------------------------|---------|------|-----|-------------|-------------------------------------|----------------------------|---|----|---|--|--|--------|
| 1436.7743 | 1436.7466                             | -0.0277 | -19  | 948 | 961         | ISKEGVLYAGSGQK                      |                            |   |    |   |  |  | Mascot |
| 1767.8879 | 1767.8188                             | -0.0691 | -39  | 908 | 922         | ASVLTGLQLCIYCNR                     | Carbamidomethyl (C)[10,13] |   |    |   |  |  | Mascot |
| 1901.9425 | 1901.9963                             | 0.0538  | 28   | 129 | 144         | DGLYNLMKLANDVTYR                    | Oxidation (M)[7]           |   |    |   |  |  | Mascot |
| 1915.9364 | 1915.9642                             | 0.0278  | 15   | 236 | 252         | VLCCAPSNVAVDNLVER                   | Carbamidomethyl (C)[3,4]   |   |    |   |  |  | Mascot |
| 2114.1096 | 2114.1943                             | 0.0847  | 40   | 236 | 255         | VLCCAPSNVAVDNLVERLAK                |                            |   |    |   |  |  | Mascot |
| 2114.1096 | 2114.1943                             | 0.0847  | 40   | 236 | 255         | VLCCAPSNVAVDNLVERLAK                |                            |   |    |   |  |  | Mascot |
| 2136.051  | 2136.1777                             | 0.1267  | 59   | 41  | 59          | GVCLMKLQIGSQHTGMYGR                 | Carbamidomethyl (C)[3]     |   |    |   |  |  | Mascot |
| 2489.3721 | 2489.0869                             | -0.2852 | -115 | 508 | 531         | GNQGEVDIVALHIKALTEAGVQVK            |                            |   |    |   |  |  | Mascot |
| 2515.167  | 2515.2476                             | 0.0806  | 32   | 631 | 651         | HGELRTAFEYLEDCAVQNYTR               |                            |   |    |   |  |  | Mascot |
| 3338.6208 | 3338.7676                             | 0.1468  | 44   | 872 | 905         | AGATDIAAAANGDDDDFDALINAVVKAESVCGFVK |                            |   |    |   |  |  | Mascot |
| 27        | ornithine decarboxylase [Danio rerio] |         |      |     | gi 18859145 | 50756.2                             | 5.08                       | 8 | 29 | 0 |  |  |        |

#### Peptide Information

| Calc. Mass | Obsrv. Mass | ± da    | ± ppm | Start Seq. | End Seq. | Sequence                           | Ion Score | C. I. | % Modification                              | Rank | Result Type |
|------------|-------------|---------|-------|------------|----------|------------------------------------|-----------|-------|---------------------------------------------|------|-------------|
| 842.5458   | 842.5123    | -0.0335 | -40   | 179        | 185      | LLLERAK                            |           |       |                                             |      | Mascot      |
| 1767.8945  | 1767.8188   | -0.0757 | -43   | 75         | 92       | AVVTTLASLGAGFDCASK                 |           |       | Carbamidomethyl (C)[15]                     |      | Mascot      |
| 2196.9561  | 2197.1292   | 0.1731  | 79    | 295        | 313      | VIMKEQSASDEEEDVSNDR                |           |       | Oxidation (M)[3]                            |      | Mascot      |
| 2357.1665  | 2357.1387   | -0.0278 | -12   | 423        | 445      | AQGIPALPLEEPSAGNVP SHCGR           |           |       | Carbamidomethyl (C)[21]                     |      | Mascot      |
| 2400.1282  | 2400.1211   | -0.0071 | -3    | 70         | 92       | CNDSRAVVTTLASLGAGFDCASK            |           |       | Carbamidomethyl (C)[1,20]                   |      | Mascot      |
| 2431.999   | 2432.1443   | 0.1453  | 60    | 1          | 21       | MTACTGSDFDFAFLEEGFCAR              |           |       | Carbamidomethyl (C)[4,19]                   |      | Mascot      |
| 2431.999   | 2432.1443   | 0.1453  | 60    | 1          | 21       | MTACTGSDFDFAFLEEGFCAR              |           |       | Carbamidomethyl (C)[4,19]                   |      | Mascot      |
| 2447.9941  | 2448.1497   | 0.1556  | 64    | 1          | 21       | MTACTGSDFDFAFLEEGFCAR              |           |       | Carbamidomethyl (C)[4,19], Oxidation (M)[1] |      | Mascot      |
| 2447.9941  | 2448.1497   | 0.1556  | 64    | 1          | 21       | MTACTGSDFDFAFLEEGFCAR              |           |       | Carbamidomethyl (C)[4,19], Oxidation (M)[1] |      | Mascot      |
| 3103.3481  | 3103.6494   | 0.3013  | 97    | 1          | 27       | MTACTGSDFDFAFLEEGFCARDIVEQK        |           |       | Carbamidomethyl (C)[4], Oxidation (M)[1]    |      | Mascot      |
| 3319.7202  | 3319.4426   | -0.2776 | -84   | 75         | 107      | AVVTTLASLGAGFDCASKTEIQIVQSVGVDPSPR |           |       |                                             |      | Mascot      |

28 olfactory receptor [Danio rerio] gi|7211675 18109.8 9.4 5 28 0

#### Peptide Information

| Calc. Mass | Obsrv. Mass | ± da    | ± ppm | Start Seq. | End Seq. | Sequence       | Ion Score | C. I. | % Modification   | Rank | Result Type |
|------------|-------------|---------|-------|------------|----------|----------------|-----------|-------|------------------|------|-------------|
| 901.4448   | 901.5096    | 0.0648  | 72    | 9          | 15       | YTIMTR         |           |       | Oxidation (M)[5] |      | Mascot      |
| 1076.5735  | 1076.4761   | -0.0974 | -90   | 140        | 148      | VSKFDPEVR      |           |       |                  |      | Mascot      |
| 1751.9296  | 1751.8234   | -0.1062 | -61   | 1          | 15       | VAICNPLRYTIMTR |           |       |                  |      | Mascot      |

|    |                                                      |           |         |     |             |     |                                   |      |   |    |   |    |                           |        |
|----|------------------------------------------------------|-----------|---------|-----|-------------|-----|-----------------------------------|------|---|----|---|----|---------------------------|--------|
|    | 1767.9244                                            | 1767.8188 | -0.1056 | -60 | 1           | 15  | VAICNPLRYTTIMTR                   |      |   |    |   |    | Oxidation (M)[13]         | Mascot |
|    | 2135.967                                             | 2136.1777 | 0.2107  | 99  | 53          | 71  | HMFCDHSSVLTACVDTT<br>R            |      |   |    |   |    |                           | Mascot |
|    | 3337.7476                                            | 3337.7583 | 0.0107  | 3   | 111         | 139 | LKAGATCVSHLIVVLISYC<br>SAFFVYISYR |      |   |    |   |    | Carbamidomethyl (C)[7,19] | Mascot |
| 29 | tudur and KH domain-containing protein [Danio rerio] |           |         |     | gi 62122909 |     | 63641                             | 4.89 | 7 | 28 | 0 | 12 | 0                         |        |

#### Peptide Information

| Calc. Mass | Obsrv. Mass | ± da    | ± ppm | Start Seq. | End Seq. | Sequence                   | Ion Score | C. I. | % Modification         | Rank | Result Type |
|------------|-------------|---------|-------|------------|----------|----------------------------|-----------|-------|------------------------|------|-------------|
| 864.3482   | 864.4503    | 0.1021  | 118   | 525        | 531      | GDWDESR                    |           |       |                        |      | Mascot      |
| 959.5156   | 959.5182    | 0.0026  | 3     | 223        | 230      | VIENTETVR                  |           |       |                        |      | Mascot      |
| 1112.5344  | 1112.5112   | -0.0232 | -21   | 387        | 395      | DHGTWNRAR                  |           |       |                        |      | Mascot      |
| 1436.7124  | 1436.7466   | 0.0342  | 24    | 211        | 222      | EIQSAKEMIMEK               |           |       |                        |      | Mascot      |
| 1488.8533  | 1488.7906   | -0.0627 | -42   | 85         | 97       | ISVPLDVYRSIAR              | 12        |       | 0                      |      | Mascot      |
| 1488.8533  | 1488.7906   | -0.0627 | -42   | 85         | 97       | ISVPLDVYRSIAR              |           |       |                        |      | Mascot      |
| 1736.8557  | 1736.8944   | 0.0387  | 22    | 217        | 230      | EMIMEKVIENTETVR            |           |       | Oxidation (M)[2]       |      | Mascot      |
| 2459.064   | 2459.1106   | 0.0466  | 19    | 510        | 531      | LGHAVSCEDEGNLGRGD<br>WDESR |           |       | Carbamidomethyl (C)[7] |      | Mascot      |

|    |                                                         |  |  |  |             |  |         |       |   |    |   |  |  |
|----|---------------------------------------------------------|--|--|--|-------------|--|---------|-------|---|----|---|--|--|
| 30 | PREDICTED: hypothetical protein LOC565734 [Danio rerio] |  |  |  | gi 68402113 |  | 30582.9 | 10.05 | 6 | 28 | 0 |  |  |
|----|---------------------------------------------------------|--|--|--|-------------|--|---------|-------|---|----|---|--|--|

#### Peptide Information

| Calc. Mass | Obsrv. Mass | ± da    | ± ppm | Start Seq. | End Seq. | Sequence                    | Ion Score | C. I. | % Modification         | Rank | Result Type |
|------------|-------------|---------|-------|------------|----------|-----------------------------|-----------|-------|------------------------|------|-------------|
| 1165.6324  | 1165.7515   | 0.1191  | 102   | 118        | 128      | VSPNATHAQIK                 |           |       |                        |      | Mascot      |
| 1436.7943  | 1436.7466   | -0.0477 | -33   | 80         | 91       | HWCLLLRPVGSR                |           |       |                        |      | Mascot      |
| 1902.0093  | 1901.9963   | -0.013  | -7    | 20         | 36       | TLLSLHHHPHGPVDSR            |           |       |                        |      | Mascot      |
| 2284.0571  | 2284.1846   | 0.1275  | 56    | 41         | 60       | KSNVCVHWCAADCVWA<br>LHNK    |           |       |                        |      | Mascot      |
| 2341.0786  | 2341.1333   | 0.0547  | 23    | 41         | 60       | KSNVCVHWCAADCVWA<br>LHNK    |           |       | Carbamidomethyl (C)[5] |      | Mascot      |
| 2448.3259  | 2448.1497   | -0.1762 | -72   | 15         | 36       | LSAFKTLLSLHHHPHGPV<br>VDSR  |           |       |                        |      | Mascot      |
| 2448.3259  | 2448.1497   | -0.1762 | -72   | 15         | 36       | LSAFKTLLSLHHHPHGPV<br>VDSR  |           |       |                        |      | Mascot      |
| 2479.5107  | 2479.3013   | -0.2094 | -84   | 246        | 269      | EQITGVSVILLLLGGVIIN<br>SLKS |           |       |                        |      | Mascot      |

|    |                                        |  |  |  |              |  |          |      |    |    |   |  |  |
|----|----------------------------------------|--|--|--|--------------|--|----------|------|----|----|---|--|--|
| 31 | complement component c3b [Danio rerio] |  |  |  | gi 220673392 |  | 182155.7 | 6.42 | 16 | 28 | 0 |  |  |
|----|----------------------------------------|--|--|--|--------------|--|----------|------|----|----|---|--|--|

#### Peptide Information

| Calc. Mass | Obsrv. Mass | ± da   | ± ppm | Start Seq. | End Seq. | Sequence | Ion Score | C. I. | % Modification | Rank | Result Type |
|------------|-------------|--------|-------|------------|----------|----------|-----------|-------|----------------|------|-------------|
| 864.3998   | 864.4503    | 0.0505 | 58    | 1457       | 1462     | YYHPER   |           |       |                |      | Mascot      |

|           |           |         |      |      |      |                                     |  |  |  |                         |  |  |        |
|-----------|-----------|---------|------|------|------|-------------------------------------|--|--|--|-------------------------|--|--|--------|
| 901.5352  | 901.5096  | -0.0256 | -28  | 1556 | 1564 | VSLGLVEGK                           |  |  |  |                         |  |  | Mascot |
| 1045.4796 | 1045.5662 | 0.0866  | 83   | 1535 | 1544 | EGTDPDVQGK                          |  |  |  |                         |  |  | Mascot |
| 1112.5443 | 1112.5112 | -0.0331 | -30  | 1488 | 1496 | KNHVNESER                           |  |  |  |                         |  |  | Mascot |
| 1128.6259 | 1128.5063 | -0.1196 | -106 | 912  | 921  | TEKLELNPGK                          |  |  |  |                         |  |  | Mascot |
| 1210.6613 | 1210.6035 | -0.0578 | -48  | 630  | 640  | TVPECPAPLKR                         |  |  |  |                         |  |  | Mascot |
| 1436.7025 | 1436.7466 | 0.0441  | 31   | 37   | 48   | NFPAKNVEMMQK                        |  |  |  |                         |  |  | Mascot |
| 1908.854  | 1908.9408 | 0.0868  | 45   | 1610 | 1627 | YIGMTAVENMFTTGGCLT                  |  |  |  |                         |  |  | Mascot |
| 1915.9661 | 1915.9642 | -0.0019 | -1   | 1079 | 1094 | QLPDGSFKEDKPVYHR                    |  |  |  |                         |  |  | Mascot |
| 2283.1504 | 2283.1875 | 0.0371  | 16   | 1149 | 1170 | LTNPYAAALTSYALANADSLDK              |  |  |  |                         |  |  | Mascot |
| 2357.2029 | 2357.1387 | -0.0642 | -27  | 1535 | 1555 | EGTDPDVQGKVKPFLARPSCR               |  |  |  | Carbamidomethyl (C)[20] |  |  | Mascot |
| 2448.0984 | 2448.1497 | 0.0513  | 21   | 606  | 629  | DSMGVFS DAGLIFESNTAGGTDR            |  |  |  |                         |  |  | Mascot |
| 2448.0984 | 2448.1497 | 0.0513  | 21   | 606  | 629  | DSMGVFS DAGLIFESNTAGGTDR            |  |  |  |                         |  |  | Mascot |
| 2457.2178 | 2457.3203 | 0.1025  | 42   | 302  | 323  | SIYVSVNLLTESGSEMVEAEKR              |  |  |  | Oxidation (M)[16]       |  |  | Mascot |
| 2515.3113 | 2515.2476 | -0.0637 | -25  | 863  | 885  | DSSVAVSFVIVPMTLESQHIEVK             |  |  |  |                         |  |  | Mascot |
| 2531.3062 | 2531.2427 | -0.0635 | -25  | 863  | 885  | DSSVAVSFVIVPMTLESQHIEVK             |  |  |  | Oxidation (M)[13]       |  |  | Mascot |
| 3000.4924 | 3000.2488 | -0.2436 | -81  | 1428 | 1453 | MHKTFNVGLLQPASVTIYEYSPDAR           |  |  |  |                         |  |  | Mascot |
| 3891.9255 | 3891.8274 | -0.0981 | -25  | 1087 | 1121 | EDKPVYHREIMGGIEGQNTDVSLTAFVLIAMQEGK |  |  |  | Oxidation (M)[11]       |  |  | Mascot |
| 3907.9204 | 3907.8484 | -0.072  | -18  | 1087 | 1121 | EDKPVYHREIMGGIEGQNTDVSLTAFVLIAMQEGK |  |  |  | Oxidation (M)[11,31]    |  |  | Mascot |

32

PREDICTED: NACHT, LRR and PYD domains-containing protein 14-like [Danio rerio]

gi|326678388

102092.3

5.48

11

28

0

| Peptide Information |             |         |       |            |                   |                     |       |                |                        |             |  |        |
|---------------------|-------------|---------|-------|------------|-------------------|---------------------|-------|----------------|------------------------|-------------|--|--------|
| Calc. Mass          | Obsrv. Mass | ± da    | ± ppm | Start Seq. | End Sequence Seq. | Ion Score           | C. I. | % Modification | Rank                   | Result Type |  |        |
| 842.5458            | 842.5123    | -0.0335 | -40   | 835        | 841               | LNTLILR             |       |                |                        |             |  | Mascot |
| 1210.7089           | 1210.6035   | -0.1054 | -87   | 832        | 841               | HCKLNTLILR          |       |                |                        |             |  | Mascot |
| 1542.8024           | 1542.8898   | 0.0874  | 57    | 181        | 193               | HLFEASAQDKQIR       |       |                |                        |             |  | Mascot |
| 1736.9006           | 1736.8944   | -0.0062 | -4    | 221        | 234               | ENQEISFIFLPFR       |       |                |                        |             |  | Mascot |
| 1893.8357           | 1893.9885   | 0.1528  | 81    | 497        | 512               | ASDYSGMCTQIFKEEK    |       |                | Carbamidomethyl (C)[8] |             |  | Mascot |
| 1893.8357           | 1893.9885   | 0.1528  | 81    | 497        | 512               | ASDYSGMCTQIFKEEK    |       |                | Carbamidomethyl (C)[8] |             |  | Mascot |
| 1999.9794           | 1999.9485   | -0.0309 | -15   | 121        | 138               | YQCVFEGIAQQGDSTLLK  |       |                |                        |             |  | Mascot |
| 1999.9794           | 1999.9485   | -0.0309 | -15   | 121        | 138               | YQCVFEGIAQQGDSTLLK  |       |                |                        |             |  | Mascot |
| 2114.0876           | 2114.1943   | 0.1067  | 50    | 568        | 586               | TAVDKALES DNGLDLFLR |       |                |                        |             |  | Mascot |
| 2114.0876           | 2114.1943   | 0.1067  | 50    | 568        | 586               | TAVDKALES DNGLDLFLR |       |                |                        |             |  | Mascot |

|    |                                                                               |           |         |     |     |              |                                 |     |   |    |                                             |  |  |        |
|----|-------------------------------------------------------------------------------|-----------|---------|-----|-----|--------------|---------------------------------|-----|---|----|---------------------------------------------|--|--|--------|
|    | 2197.1169                                                                     | 2197.1292 | 0.0123  | 6   | 723 | 743          | ALLSDCSISEEGYKALAS<br>ALR       |     |   |    |                                             |  |  | Mascot |
|    | 2298.1812                                                                     | 2298.1902 | 0.009   | 4   | 429 | 446          | TLTQMYTHFLRFQIQQSR              |     |   |    |                                             |  |  | Mascot |
|    | 2400.179                                                                      | 2400.1211 | -0.0579 | -24 | 612 | 631          | VDQQQAHNQDSKEEIVQ<br>YIK        |     |   |    |                                             |  |  | Mascot |
|    | 3303.7202                                                                     | 3303.4224 | -0.2978 | -90 | 376 | 402          | SLFIMCHIPVFCWISATVL<br>QNILQEKR |     |   |    | Carbamidomethyl (C)[6,12]                   |  |  | Mascot |
|    | 3319.7151                                                                     | 3319.4426 | -0.2725 | -82 | 376 | 402          | SLFIMCHIPVFCWISATVL<br>QNILQEKR |     |   |    | Carbamidomethyl (C)[6,12], Oxidation (M)[5] |  |  | Mascot |
| 33 | ATPase, H <sup>+</sup> transporting, lysosomal V1 subunit B2<br>[Danio rerio] |           |         |     |     | gi 133777410 | 56441.8                         | 5.5 | 8 | 28 | 0                                           |  |  |        |

#### Peptide Information

| Calc. Mass | Obsrv. Mass | ± da    | ± ppm | Start Seq. | End Seq. | Sequence                       | Ion Score | C. I. | % Modification          | Rank | Result Type |
|------------|-------------|---------|-------|------------|----------|--------------------------------|-----------|-------|-------------------------|------|-------------|
| 842.4478   | 842.5123    | 0.0645  | 77    | 314        | 320      | EEVPGRR                        |           |       |                         |      | Mascot      |
| 901.5101   | 901.5096    | -0.0005 | -1    | 29         | 36       | ENVLAVTR                       |           |       |                         |      | Mascot      |
| 1751.8962  | 1751.8234   | -0.0728 | -42   | 494        | 508      | IPQSTLAEFYPRDSK                |           |       |                         |      | Mascot      |
| 2197.0383  | 2197.1292   | 0.0909  | 41    | 321        | 339      | GFPGYMYTDLATIERAG<br>R         |           |       | Oxidation (M)[6]        |      | Mascot      |
| 2341.1162  | 2341.1333   | 0.0171  | 7     | 109        | 129      | TTCEFTGDILRTPVSEDM<br>LGR      |           |       |                         |      | Mascot      |
| 2357.1111  | 2357.1387   | 0.0276  | 12    | 109        | 129      | TTCEFTGDILRTPVSEDM<br>LGR      |           |       | Oxidation (M)[18]       |      | Mascot      |
| 2400.1687  | 2400.1211   | -0.0476 | -20   | 141        | 162      | GPAVLAEDYLDIMGQPIN<br>PQCR     |           |       |                         |      | Mascot      |
| 2457.1899  | 2457.3203   | 0.1304  | 53    | 141        | 162      | GPAVLAEDYLDIMGQPIN<br>PQCR     |           |       | Carbamidomethyl (C)[21] |      | Mascot      |
| 2531.3286  | 2531.2427   | -0.0859 | -34   | 291        | 313      | HVLVILTMSSYAEALRE<br>VSAAR     |           |       |                         |      | Mascot      |
| 3000.335   | 3000.2488   | -0.0862 | -29   | 245        | 270      | SDFEENGSMDNVCLFLN<br>LANDPTIER |           |       | Carbamidomethyl (C)[13] |      | Mascot      |

34 hypothetical protein LOC570464 [Danio rerio] gi|139948991 19666.3 6.08 5 28 0

#### Peptide Information

| Calc. Mass | Obsrv. Mass | ± da    | ± ppm | Start Seq. | End Seq. | Sequence               | Ion Score | C. I. | % Modification                               | Rank | Result Type |
|------------|-------------|---------|-------|------------|----------|------------------------|-----------|-------|----------------------------------------------|------|-------------|
| 1045.4697  | 1045.5662   | 0.0965  | 92    | 96         | 104      | DVEFDHAGR              |           |       |                                              |      | Mascot      |
| 1128.5208  | 1128.5063   | -0.0145 | -13   | 78         | 87       | AESFPSEYAK             |           |       |                                              |      | Mascot      |
| 1916.0431  | 1915.9642   | -0.0789 | -41   | 2          | 17       | MQRCCAIFLLHLIGK        |           |       | Carbamidomethyl (C)[4]                       |      | Mascot      |
| 2136.0947  | 2136.1777   | 0.083   | 39    | 1          | 17       | MMQRCCAIFLLHLIGK       |           |       | Carbamidomethyl (C)[5,6], Oxidation (M)[1,2] |      | Mascot      |
| 2284.2297  | 2284.1846   | -0.0451 | -20   | 105        | 123      | YTCFFPELNVEKLVLLV<br>K |           |       |                                              |      | Mascot      |
| 2341.2512  | 2341.1333   | -0.1179 | -50   | 105        | 123      | YTCFFPELNVEKLVLLV<br>K |           |       | Carbamidomethyl (C)[3]                       |      | Mascot      |

35 calcium-binding mitochondrial carrier protein  
SCaMC-2-B [Danio rerio] gi|229608957 52678 8.35 8 28 0

| Peptide Information |                                                 |         |       |              |          |                                               |           |         |                                            |      |             |
|---------------------|-------------------------------------------------|---------|-------|--------------|----------|-----------------------------------------------|-----------|---------|--------------------------------------------|------|-------------|
| Calc. Mass          | Obsrv. Mass                                     | ± da    | ± ppm | Start Seq.   | End Seq. | Sequence                                      | Ion Score | C. I. % | Modification                               | Rank | Result Type |
| 850.4702            | 850.5433                                        | 0.0731  | 86    | 122          | 128      | ILKSMDK                                       |           |         | Oxidation (M)[5]                           |      | Mascot      |
| 1045.5023           | 1045.5662                                       | 0.0639  | 61    | 261          | 268      | FMAYEQIK                                      |           |         | Oxidation (M)[2]                           |      | Mascot      |
| 1542.8486           | 1542.8898                                       | 0.0412  | 27    | 270          | 283      | LIGSNQETLGILER                                |           |         |                                            |      | Mascot      |
| 1999.8636           | 1999.9485                                       | 0.0849  | 42    | 125          | 140      | SMDKNGTMTIDWNEW                               |           |         | Oxidation (M)[2]                           |      | Mascot      |
| 1999.8636           | 1999.9485                                       | 0.0849  | 42    | 125          | 140      | SMDKNGTMTIDWNEW                               |           |         | Oxidation (M)[2]                           |      | Mascot      |
| 2114.0117           | 2114.1943                                       | 0.1826  | 86    | 221          | 240      | SNSMGIAGGFTQMIREG<br>GLR                      |           |         | Oxidation (M)[4,13]                        |      | Mascot      |
| 2114.0117           | 2114.1943                                       | 0.1826  | 86    | 221          | 240      | SNSMGIAGGFTQMIREG<br>GLR                      |           |         | Oxidation (M)[4,13]                        |      | Mascot      |
| 2232.9683           | 2233.0996                                       | 0.1313  | 59    | 405          | 424      | MQAQASQEGSPQMTMS<br>GLFR                      |           |         | Oxidation (M)[1,13,15]                     |      | Mascot      |
| 2442.1323           | 2442.083                                        | -0.0493 | -20   | 403          | 424      | TRMQAQASQEGSPQMT<br>MSGFLR                    |           |         |                                            |      | Mascot      |
| 3891.9077           | 3891.8274                                       | -0.0803 | -21   | 368          | 404      | FATDSADPGVFVLLACGT<br>MSSTCGQLASYPLALVR<br>TR |           |         | Carbamidomethyl (C)[16], Oxidation (M)[19] |      | Mascot      |
| 36                  | hypothetical protein LOC100007529 [Danio rerio] |         |       | gi 164414401 |          | 18354.1                                       | 6.11      | 5       | 27                                         | 0    |             |

| Peptide Information |                                 |             |           |         |            |          |          |                            |         |              |                           |             |
|---------------------|---------------------------------|-------------|-----------|---------|------------|----------|----------|----------------------------|---------|--------------|---------------------------|-------------|
|                     | Calc. Mass                      | Obsrv. Mass | ± da      | ± ppm   | Start Seq. | End Seq. | Sequence | Ion Score                  | C. I. % | Modification | Rank                      | Result Type |
| 37                  | Zgc:65788 protein [Danio rerio] |             |           |         |            |          |          |                            |         |              |                           |             |
|                     |                                 | 882.4944    | 882.5708  | 0.0764  | 87         | 45       | 51       | LISAHWR                    |         |              |                           | Mascot      |
|                     |                                 | 1952.0747   | 1951.9611 | -0.1136 | -58        | 147      | 163      | IVSQVLACFFAVILLCV          |         |              | Carbamidomethyl (C)[8,16] | Mascot      |
|                     |                                 | 2284.0378   | 2284.1846 | 0.1468  | 64         | 23       | 42       | TFEGFIGGSALFPCYYDP<br>SR   |         |              | Carbamidomethyl (C)[14]   | Mascot      |
|                     |                                 | 2442.2888   | 2442.083  | -0.2058 | -84        | 45       | 65       | LISAHWRLNDSLNVYDIL<br>SGR  |         |              |                           | Mascot      |
|                     |                                 | 2479.2722   | 2479.3013 | 0.0291  | 12         | 1        | 22       | MFRSGFLICFLISLSSEAS<br>VQK |         |              | Oxidation (M)[1]          | Mascot      |
|                     |                                 |             |           |         |            |          |          |                            |         |              |                           |             |
|                     |                                 |             |           |         |            |          |          |                            |         |              |                           |             |
|                     |                                 |             |           |         |            |          |          |                            |         |              |                           |             |
|                     |                                 |             |           |         |            |          |          |                            |         |              |                           |             |
|                     |                                 |             |           |         |            |          |          |                            |         |              |                           |             |
|                     |                                 |             |           |         |            |          |          |                            |         |              |                           |             |
|                     |                                 |             |           |         |            |          |          |                            |         |              |                           |             |
|                     |                                 |             |           |         |            |          |          |                            |         |              |                           |             |
|                     |                                 |             |           |         |            |          |          |                            |         |              |                           |             |
|                     |                                 |             |           |         |            |          |          |                            |         |              |                           |             |
|                     |                                 |             |           |         |            |          |          |                            |         |              |                           |             |
|                     |                                 |             |           |         |            |          |          |                            |         |              |                           |             |
|                     |                                 |             |           |         |            |          |          |                            |         |              |                           |             |
|                     |                                 |             |           |         |            |          |          |                            |         |              |                           |             |
|                     |                                 |             |           |         |            |          |          |                            |         |              |                           |             |
|                     |                                 |             |           |         |            |          |          |                            |         |              |                           |             |
|                     |                                 |             |           |         |            |          |          |                            |         |              |                           |             |
|                     |                                 |             |           |         |            |          |          |                            |         |              |                           |             |
|                     |                                 |             |           |         |            |          |          |                            |         |              |                           |             |
|                     |                                 |             |           |         |            |          |          |                            |         |              |                           |             |
|                     |                                 |             |           |         |            |          |          |                            |         |              |                           |             |
|                     |                                 |             |           |         |            |          |          |                            |         |              |                           |             |
|                     |                                 |             |           |         |            |          |          |                            |         |              |                           |             |
|                     |                                 |             |           |         |            |          |          |                            |         |              |                           |             |
|                     |                                 |             |           |         |            |          |          |                            |         |              |                           |             |
|                     |                                 |             |           |         |            |          |          |                            |         |              |                           |             |
|                     |                                 |             |           |         |            |          |          |                            |         |              |                           |             |
|                     |                                 |             |           |         |            |          |          |                            |         |              |                           |             |
|                     |                                 |             |           |         |            |          |          |                            |         |              |                           |             |
|                     |                                 |             |           |         |            |          |          |                            |         |              |                           |             |
|                     |                                 |             |           |         |            |          |          |                            |         |              |                           |             |
|                     |                                 |             |           |         |            |          |          |                            |         |              |                           |             |
|                     |                                 |             |           |         |            |          |          |                            |         |              |                           |             |
|                     |                                 |             |           |         |            |          |          |                            |         |              |                           |             |
|                     |                                 |             |           |         |            |          |          |                            |         |              |                           |             |
|                     |                                 |             |           |         |            |          |          |                            |         |              |                           |             |
|                     |                                 |             |           |         |            |          |          |                            |         |              |                           |             |
|                     |                                 |             |           |         |            |          |          |                            |         |              |                           |             |
|                     |                                 |             |           |         |            |          |          |                            |         |              |                           |             |
|                     |                                 |             |           |         |            |          |          |                            |         |              |                           |             |
|                     |                                 |             |           |         |            |          |          |                            |         |              |                           |             |
|                     |                                 |             |           |         |            |          |          |                            |         |              |                           |             |
|                     |                                 |             |           |         |            |          |          |                            |         |              |                           |             |
|                     |                                 |             |           |         |            |          |          |                            |         |              |                           |             |
|                     |                                 |             |           |         |            |          |          |                            |         |              |                           |             |
|                     |                                 |             |           |         |            |          |          |                            |         |              |                           |             |
|                     |                                 |             |           |         |            |          |          |                            |         |              |                           |             |
|                     |                                 |             |           |         |            |          |          |                            |         |              |                           |             |
|                     |                                 |             |           |         |            |          |          |                            |         |              |                           |             |
|                     |                                 |             |           |         |            |          |          |                            |         |              |                           |             |
|                     |                                 |             |           |         |            |          |          |                            |         |              |                           |             |
|                     |                                 |             |           |         |            |          |          |                            |         |              |                           |             |
|                     |                                 |             |           |         |            |          |          |                            |         |              |                           |             |
|                     |                                 |             |           |         |            |          |          |                            |         |              |                           |             |
|                     |                                 |             |           |         |            |          |          |                            |         |              |                           |             |
|                     |                                 |             |           |         |            |          |          |                            |         |              |                           |             |
|                     |                                 |             |           |         |            |          |          |                            |         |              |                           |             |
|                     |                                 |             |           |         |            |          |          |                            |         |              |                           |             |
|                     |                                 |             |           |         |            |          |          |                            |         |              |                           |             |
|                     |                                 |             |           |         |            |          |          |                            |         |              |                           |             |
|                     |                                 |             |           |         |            |          |          |                            |         |              |                           |             |
|                     |                                 |             |           |         |            |          |          |                            |         |              |                           |             |
|                     |                                 |             |           |         |            |          |          |                            |         |              |                           |             |
|                     |                                 |             |           |         |            |          |          |                            |         |              |                           |             |
|                     |                                 |             |           |         |            |          |          |                            |         |              |                           |             |
|                     |                                 |             |           |         |            |          |          |                            |         |              |                           |             |
|                     |                                 |             |           |         |            |          |          |                            |         |              |                           |             |
|                     |                                 |             |           |         |            |          |          |                            |         |              |                           |             |
|                     |                                 |             |           |         |            |          |          |                            |         |              |                           |             |
|                     |                                 |             |           |         |            |          |          |                            |         |              |                           |             |
|                     |                                 |             |           |         |            |          |          |                            |         |              |                           |             |
|                     |                                 |             |           |         |            |          |          |                            |         |              |                           |             |
|                     |                                 |             |           |         |            |          |          |                            |         |              |                           |             |
|                     |                                 |             |           |         |            |          |          |                            |         |              |                           |             |
|                     |                                 |             |           |         |            |          |          |                            |         |              |                           |             |
|                     |                                 |             |           |         |            |          |          |                            |         |              |                           |             |
|                     |                                 |             |           |         |            |          |          |                            |         |              |                           |             |
|                     |                                 |             |           |         |            |          |          |                            |         |              |                           |             |
|                     |                                 |             |           |         |            |          |          |                            |         |              |                           |             |
|                     |                                 |             |           |         |            |          |          |                            |         |              |                           |             |
|                     |                                 |             |           |         |            |          |          |                            |         |              |                           |             |
|                     |                                 |             |           |         |            |          |          |                            |         |              |                           |             |
|                     |                                 |             |           |         |            |          |          |                            |         |              |                           |             |
|                     |                                 |             |           |         |            |          |          |                            |         |              |                           |             |
|                     |                                 |             |           |         |            |          |          |                            |         |              |                           |             |
|                     |                                 |             |           |         |            |          |          |                            |         |              |                           |             |
|                     |                                 |             |           |         |            |          |          |                            |         |              |                           |             |
|                     |                                 |             |           |         |            |          |          |                            |         |              |                           |             |
|                     |                                 |             |           |         |            |          |          |                            |         |              |                           |             |
|                     |                                 |             |           |         |            |          |          |                            |         |              |                           |             |
|                     |                                 |             |           |         |            |          |          |                            |         |              |                           |             |
|                     | </                              |             |           |         |            |          |          |                            |         |              |                           |             |

| Peptide Information |             |         |       |            |          |                                |           |         |                           |      |             |
|---------------------|-------------|---------|-------|------------|----------|--------------------------------|-----------|---------|---------------------------|------|-------------|
| Calc. Mass          | Obsrv. Mass | ± da    | ± ppm | Start Seq. | End Seq. | Sequence                       | Ion Score | C. I. % | Modification              | Rank | Result Type |
| 864.3491            | 864.4503    | 0.1012  | 117   | 495        | 500      | CCNWPK                         |           |         | Carbamidomethyl (C)[1,2]  |      | Mascot      |
| 959.5672            | 959.5182    | -0.049  | -51   | 395        | 402      | YPLIGQLR                       |           |         |                           |      | Mascot      |
| 1045.6074           | 1045.5662   | -0.0412 | -39   | 198        | 208      | LMLTAAVAAGK                    |           |         |                           |      | Mascot      |
| 1112.6058           | 1112.5112   | -0.0946 | -85   | 272        | 281      | DQGAPVEKLR                     |           |         |                           |      | Mascot      |
| 1436.666            | 1436.7466   | 0.0806  | 56    | 483        | 494      | CPAKTVFDPNCK                   |           |         | Carbamidomethyl (C)[1,11] |      | Mascot      |
| 2442.2371           | 2442.083    | -0.1541 | -63   | 290        | 315      | TFRLSSAVSGVGAPASG<br>AASAGTYTR |           |         |                           |      | Mascot      |
| 2489.1077           | 2489.0869   | -0.0208 | -8    | 251        | 271      | GSGDIGDKIYYNTDFAMT             |           |         | Oxidation (M)[17]         |      | Mascot      |

|    |                                                         |           |        |    |    |              |                                       |      |    |    |   |  |  |  |        |
|----|---------------------------------------------------------|-----------|--------|----|----|--------------|---------------------------------------|------|----|----|---|--|--|--|--------|
|    | 3103.5007                                               | 3103.6494 | 0.1487 | 48 | 86 | 111          | YWR<br>LTTYEWNDETLYQSFNG<br>LKQSNPNLK |      |    |    |   |  |  |  | Mascot |
| 38 | PREDICTED: hypothetical protein LOC799338 [Danio rerio] |           |        |    |    | gi 326667977 | 158597.6                              | 6.54 | 15 | 27 | 0 |  |  |  |        |

| Peptide Information |             |         |       |            |          |                                        |           |       |   |                         |      |        |      |  |
|---------------------|-------------|---------|-------|------------|----------|----------------------------------------|-----------|-------|---|-------------------------|------|--------|------|--|
| Calc. Mass          | Obsrv. Mass | ± da    | ± ppm | Start Seq. | End Seq. | Sequence                               | Ion Score | C. I. | % | Modification            | Rank | Result | Type |  |
| 1076.5154           | 1076.4761   | -0.0393 | -37   | 1357       | 1365     | SKMSDSHLR                              |           |       |   | Oxidation (M)[3]        |      | Mascot |      |  |
| 1112.5558           | 1112.5112   | -0.0446 | -40   | 1321       | 1329     | FPEMRSAK                               |           |       |   |                         |      | Mascot |      |  |
| 1128.5507           | 1128.5063   | -0.0444 | -39   | 1321       | 1329     | FPEMRSAK                               |           |       |   | Oxidation (M)[4]        |      | Mascot |      |  |
| 1165.5922           | 1165.7515   | 0.1593  | 137   | 1081       | 1090     | FDDVMKPKVAK                            |           |       |   | Oxidation (M)[5]        |      | Mascot |      |  |
| 1210.5707           | 1210.6035   | 0.0328  | 27    | 926        | 935      | QEFMNVCLAR                             |           |       |   |                         |      | Mascot |      |  |
| 1354.6605           | 1354.7754   | 0.1149  | 85    | 925        | 935      | KQEFMNVCLAR                            |           |       |   | Oxidation (M)[5]        |      | Mascot |      |  |
| 1354.6605           | 1354.7754   | 0.1149  | 85    | 925        | 935      | KQEFMNVCLAR                            |           |       |   | Oxidation (M)[5]        |      | Mascot |      |  |
| 1751.7793           | 1751.8234   | 0.0441  | 25    | 376        | 390      | AFLDDENQEDLMPAK                        |           |       |   | Oxidation (M)[12]       |      | Mascot |      |  |
| 1767.8629           | 1767.8188   | -0.0441 | -25   | 926        | 940      | QEFMNVCLARNTVAR                        |           |       |   | Oxidation (M)[4]        |      | Mascot |      |  |
| 1893.9263           | 1893.9885   | 0.0622  | 33    | 331        | 346      | LKVTFQDDQEDLMPAK                       |           |       |   | Oxidation (M)[13]       |      | Mascot |      |  |
| 1893.9263           | 1893.9885   | 0.0622  | 33    | 79         | 94       | LKVTFQDDQEDLMPAK                       |           |       |   | Oxidation (M)[13]       |      | Mascot |      |  |
| 1923.8389           | 1923.9712   | 0.1323  | 69    | 292        | 307      | AFQDDEDQEDLMPAKR                       |           |       |   | Oxidation (M)[12]       |      | Mascot |      |  |
| 2197.1545           | 2197.1292   | -0.0253 | -12   | 636        | 655      | VCGIRPVHFALEENVTSV<br>AR               |           |       |   |                         |      | Mascot |      |  |
| 2294.0103           | 2294.1719   | 0.1616  | 70    | 264        | 283      | RKPSQFPDDNEEPSTSS<br>GCR               |           |       |   | Carbamidomethyl (C)[19] |      | Mascot |      |  |
| 2294.0103           | 2294.1719   | 0.1616  | 70    | 264        | 283      | RKPSQFPDDNEEPSTSS<br>GCR               |           |       |   | Carbamidomethyl (C)[19] |      | Mascot |      |  |
| 2340.9456           | 2341.1333   | 0.1877  | 80    | 179        | 199      | RCEPSQFPDDNEEPSTS<br>SGCR              |           |       |   |                         |      | Mascot |      |  |
| 2489.2095           | 2489.0869   | -0.1226 | -49   | 1111       | 1130     | DIQAEYGDLIYNDVRWL<br>SR                |           |       |   |                         |      | Mascot |      |  |
| 3000.3589           | 3000.2488   | -0.1101 | -37   | 601        | 626      | LIDFGCSEYCQGHKPHA<br>GFDQIYCR          |           |       |   |                         |      | Mascot |      |  |
| 3891.8601           | 3891.8274   | -0.0327 | -8    | 1268       | 1301     | DMLLFSSPLSADPDNAPP<br>RLQLELIELQCDYECR |           |       |   |                         |      | Mascot |      |  |
| 3907.855            | 3907.8484   | -0.0066 | -2    | 1268       | 1301     | DMLLFSSPLSADPDNAPP<br>RLQLELIELQCDYECR |           |       |   | Oxidation (M)[2]        |      | Mascot |      |  |

|    |                                                                                                     |  |  |  |  |             |         |      |   |    |   |  |  |  |
|----|-----------------------------------------------------------------------------------------------------|--|--|--|--|-------------|---------|------|---|----|---|--|--|--|
| 39 | novel protein similar to vertebrate aggrecan 1 (chondroitin sulfate proteoglycan 1, large aggregati |  |  |  |  | gi 94732656 | 18946.2 | 8.77 | 5 | 27 | 0 |  |  |  |
|----|-----------------------------------------------------------------------------------------------------|--|--|--|--|-------------|---------|------|---|----|---|--|--|--|

| Peptide Information |             |        |       |            |          |             |           |       |   |              |      |        |      |  |
|---------------------|-------------|--------|-------|------------|----------|-------------|-----------|-------|---|--------------|------|--------|------|--|
| Calc. Mass          | Obsrv. Mass | ± da   | ± ppm | Start Seq. | End Seq. | Sequence    | Ion Score | C. I. | % | Modification | Rank | Result | Type |  |
| 959.5097            | 959.5182    | 0.0085 | 9     | 102        | 109      | AHLAAWK     |           |       |   |              |      | Mascot |      |  |
| 1436.6879           | 1436.7466   | 0.0587 | 41    | 91         | 101      | YDVYCYVDKLR |           |       |   |              |      | Mascot |      |  |



|           |           |         |     |     |     |                                 |  |  |  |  |  |  |        |
|-----------|-----------|---------|-----|-----|-----|---------------------------------|--|--|--|--|--|--|--------|
| 1542.6788 | 1542.8898 | 0.211   | 137 | 67  | 80  | HQCSGDMEQVPGVR                  |  |  |  |  |  |  | Mascot |
| 2298.1514 | 2298.1902 | 0.0388  | 17  | 141 | 161 | TGVHTVYLFPNQTGSPD<br>LHSK       |  |  |  |  |  |  | Mascot |
| 2984.4431 | 2984.2456 | -0.1975 | -66 | 134 | 161 | QQCGGGRTGVHTVYLP<br>NQTGSPDLHSK |  |  |  |  |  |  | Mascot |

40 PREDICTED: paired box protein Pax-6-like [Danio rerio] gi|326680199 30178.1 9.33 6 27 0

#### Peptide Information

| Calc. Mass | Obsrv. Mass | ± da    | ± ppm | Start Seq. | End Seq. | Sequence                           | Ion Score | C. I. | % Modification         | Rank | Result Type |
|------------|-------------|---------|-------|------------|----------|------------------------------------|-----------|-------|------------------------|------|-------------|
| 996.5472   | 996.6025    | 0.0553  | 55    | 64         | 72       | ILQTHADAK                          |           |       |                        |      | Mascot      |
| 1542.7039  | 1542.8898   | 0.1859  | 121   | 168        | 180      | QQMGADGMYEKLK                      |           |       | Oxidation (M)[3]       |      | Mascot      |
| 1736.8239  | 1736.8944   | 0.0705  | 41    | 212        | 227      | TNNINSGPPSSFSTWK                   |           |       |                        |      | Mascot      |
| 1915.8524  | 1915.9642   | 0.1118  | 58    | 162        | 178      | NLASEKQQMGADGMYE<br>K              |           |       | Oxidation (M)[9]       |      | Mascot      |
| 2175.071   | 2175.1472   | 0.0762  | 35    | 139        | 158      | LLSEGVCTNDNIPSVSIN<br>R            |           |       | Carbamidomethyl (C)[7] |      | Mascot      |
| 2175.071   | 2175.1472   | 0.0762  | 35    | 139        | 158      | LLSEGVCTNDNIPSVSIN<br>R            |           |       | Carbamidomethyl (C)[7] |      | Mascot      |
| 3287.5649  | 3287.4243   | -0.1406 | -43   | 181        | 210      | MLNGQTGTWGTRPGWY<br>PGTSVPGQPNQVER |           |       | Oxidation (M)[1]       |      | Mascot      |

41 novel protein [Danio rerio] gi|94732798 158511.5 5.14 13 27 0

#### Peptide Information

| Calc. Mass | Obsrv. Mass | ± da    | ± ppm | Start Seq. | End Seq. | Sequence                            | Ion Score | C. I. | % Modification                             | Rank | Result Type |
|------------|-------------|---------|-------|------------|----------|-------------------------------------|-----------|-------|--------------------------------------------|------|-------------|
| 864.4607   | 864.4503    | -0.0104 | -12   | 959        | 966      | QSSALKCK                            |           |       |                                            |      | Mascot      |
| 901.5618   | 901.5096    | -0.0522 | -58   | 1381       | 1387     | KVVLWTR                             |           |       |                                            |      | Mascot      |
| 1488.8016  | 1488.7906   | -0.011  | -7    | 951        | 964      | AGQEQLTKQSSALK                      |           |       |                                            |      | Mascot      |
| 1488.8016  | 1488.7906   | -0.011  | -7    | 951        | 964      | AGQEQLTKQSSALK                      |           |       |                                            |      | Mascot      |
| 1719.8894  | 1719.859    | -0.0304 | -18   | 611        | 624      | HLRGTLHPLQMTCT                      |           |       | Carbamidomethyl (C)[13]                    |      | Mascot      |
| 1719.8894  | 1719.859    | -0.0304 | -18   | 611        | 624      | HLRGTLHPLQMTCT                      |           |       | Carbamidomethyl (C)[13]                    |      | Mascot      |
| 1736.8384  | 1736.8944   | 0.056   | 32    | 1202       | 1216     | ECGLLAEQQAERSR                      |           |       |                                            |      | Mascot      |
| 1751.9473  | 1751.8234   | -0.1239 | -71   | 433        | 449      | ALLESKGVSVPPACQQR                   |           |       |                                            |      | Mascot      |
| 1767.8409  | 1767.8188   | -0.0221 | -13   | 1106       | 1120     | KTVLHNDASDHDPYR                     |           |       |                                            |      | Mascot      |
| 2136.1018  | 2136.1777   | 0.0759  | 36    | 595        | 613      | GPFTSAEDCLVVLGHKHL<br>R             |           |       | Carbamidomethyl (C)[9]                     |      | Mascot      |
| 2459.0991  | 2459.1106   | 0.0115  | 5     | 1348       | 1371     | DSEASLGDSQQSLFNAT<br>GSSVCAK        |           |       | Carbamidomethyl (C)[22]                    |      | Mascot      |
| 3103.5774  | 3103.6494   | 0.072   | 23    | 56         | 82       | QHNLTSA NVRSIIHEVITN<br>EHVAMMK     |           |       | Oxidation (M)[25,26]                       |      | Mascot      |
| 3303.4583  | 3303.4224   | -0.0359 | -11   | 664        | 694      | TYNQASGNPQTTEATDP<br>AGPGPHFCFPPGMR |           |       | Carbamidomethyl (C)[25]                    |      | Mascot      |
| 3319.4531  | 3319.4426   | -0.0105 | -3    | 664        | 694      | TYNQASGNPQTTEATDP<br>AGPGPHFCFPPGMR |           |       | Carbamidomethyl (C)[25], Oxidation (M)[30] |      | Mascot      |
| 3338.636   | 3338.7676   | 0.1316  | 39    | 519        | 548      | AEHGFFTSIFNACNLQGA                  |           |       | Carbamidomethyl (C)[13]                    |      | Mascot      |

|                     |                                                            |            |             |         |       |            |              |                                                              |      |           |       |                        |  |      |             |
|---------------------|------------------------------------------------------------|------------|-------------|---------|-------|------------|--------------|--------------------------------------------------------------|------|-----------|-------|------------------------|--|------|-------------|
|                     |                                                            | 3891.78    | 3891.8274   | 0.0474  | 12    | 232        | 267          | VSLLEELDQSLK<br>LHAVDEELAFGTDCMDS<br>YQSLGGASGEESLISFRT<br>R |      |           |       |                        |  |      | Mascot      |
|                     |                                                            | 3907.7749  | 3907.8484   | 0.0735  | 19    | 232        | 267          | LHAVDEELAFGTDCMDS<br>YQSLGGASGEESLISFRT<br>R                 |      |           |       | Oxidation (M)[15]      |  |      | Mascot      |
| 42                  | Max protein [Danio rerio]                                  |            |             |         |       |            | gi 214997    | 17750.8                                                      | 6.66 | 4         | 26    | 0                      |  |      |             |
| Peptide Information |                                                            |            |             |         |       |            |              |                                                              |      |           |       |                        |  |      |             |
|                     |                                                            | Calc. Mass | Obsrv. Mass | ± da    | ± ppm | Start Seq. | End Seq.     | Sequence                                                     |      | Ion Score | C. I. | % Modification         |  | Rank | Result Type |
|                     |                                                            | 1103.5817  | 1103.575    | -0.0067 | -6    | 16         | 24           | RAHHNALER                                                    |      |           |       |                        |  |      | Mascot      |
|                     |                                                            | 1354.755   | 1354.7754   | 0.0204  | 15    | 86         | 96           | RQNALLEQQVR                                                  |      | 6         |       | 0                      |  |      | Mascot      |
|                     |                                                            | 1354.755   | 1354.7754   | 0.0204  | 15    | 86         | 96           | RQNALLEQQVR                                                  |      |           |       |                        |  |      | Mascot      |
|                     |                                                            | 2283.9595  | 2284.1846   | 0.2251  | 99    | 124        | 146          | GQAVSAFDGGSDSSSGS<br>EPEEQR                                  |      |           |       |                        |  |      | Mascot      |
|                     |                                                            | 2489.2153  | 2489.0869   | -0.1284 | -52   | 101        | 123          | VKGTTQLQANYSSSDSS<br>LYTNPK                                  |      |           |       |                        |  |      | Mascot      |
| 43                  | PREDICTED: hypothetical protein LOC100537950 [Danio rerio] |            |             |         |       |            | gi 326676836 | 45410.9                                                      | 5.02 | 7         | 26    | 0                      |  |      |             |
| Peptide Information |                                                            |            |             |         |       |            |              |                                                              |      |           |       |                        |  |      |             |
|                     |                                                            | Calc. Mass | Obsrv. Mass | ± da    | ± ppm | Start Seq. | End Seq.     | Sequence                                                     |      | Ion Score | C. I. | % Modification         |  | Rank | Result Type |
|                     |                                                            | 864.5301   | 864.4503    | -0.0798 | -92   | 352        | 358          | LFLRSTK                                                      |      |           |       |                        |  |      | Mascot      |
|                     |                                                            | 1901.8584  | 1901.9963   | 0.1379  | 73    | 192        | 209          | QEEENRPNVSDAANGD<br>K                                        |      |           |       |                        |  |      | Mascot      |
|                     |                                                            | 2136.2461  | 2136.1777   | -0.0684 | -32   | 71         | 90           | GIILEGLVTPVPLSLPSK<br>R                                      |      |           |       | Oxidation (M)[12]      |  |      | Mascot      |
|                     |                                                            | 2225.1487  | 2225.126    | -0.0227 | -10   | 362        | 380          | GVLVNEYFPDVEQFVDK<br>VK                                      |      |           |       |                        |  |      | Mascot      |
|                     |                                                            | 2442.335   | 2442.083    | -0.252  | -103  | 90         | 111          | RVTLSNVPPFISDEVLTK<br>ALSR                                   |      |           |       |                        |  |      | Mascot      |
|                     |                                                            | 2457.1423  | 2457.3203   | 0.178   | 72    | 187        | 209          | ICPNKQEEENRPNVSD<br>AANGDK                                   |      |           |       |                        |  |      | Mascot      |
|                     |                                                            | 3338.4224  | 3338.7676   | 0.3452  | 103   | 314        | 343          | VDMEDELESESDSELSD<br>SSLTLSQSEFSSR                           |      |           |       |                        |  |      | Mascot      |
| 44                  | HEAT repeat-containing protein 1 [Danio rerio]             |            |             |         |       |            | gi 41054019  | 241895.3                                                     | 5.94 | 19        | 26    | 0                      |  |      |             |
| Peptide Information |                                                            |            |             |         |       |            |              |                                                              |      |           |       |                        |  |      |             |
|                     |                                                            | Calc. Mass | Obsrv. Mass | ± da    | ± ppm | Start Seq. | End Seq.     | Sequence                                                     |      | Ion Score | C. I. | % Modification         |  | Rank | Result Type |
|                     |                                                            | 842.557    | 842.5123    | -0.0447 | -53   | 1792       | 1798         | LTLLARR                                                      |      |           |       |                        |  |      | Mascot      |
|                     |                                                            | 901.5101   | 901.5096    | -0.0005 | -1    | 1942       | 1949         | LADRIADK                                                     |      |           |       |                        |  |      | Mascot      |
|                     |                                                            | 959.4363   | 959.5182    | 0.0819  | 85    | 209        | 216          | DGNCPQLR                                                     |      |           |       | Carbamidomethyl (C)[4] |  |      | Mascot      |
|                     |                                                            | 996.4567   | 996.6025    | 0.1458  | 146   | 1853       | 1860         | EHISHMDK                                                     |      |           |       |                        |  |      | Mascot      |

|           |           |         |     |      |      |                                     |                                                  |        |
|-----------|-----------|---------|-----|------|------|-------------------------------------|--------------------------------------------------|--------|
| 1076.5768 | 1076.4761 | -0.1007 | -94 | 1618 | 1626 | KAMELLNNK                           | Oxidation (M)[3]                                 | Mascot |
| 1103.5878 | 1103.575  | -0.0128 | -12 | 1799 | 1808 | LTSCPQLSVR                          |                                                  | Mascot |
| 1128.5684 | 1128.5063 | -0.0621 | -55 | 977  | 985  | FYEEAVSRK                           |                                                  | Mascot |
| 1736.9073 | 1736.8944 | -0.0129 | -7  | 1591 | 1605 | VNALLPMDTFITVMR                     | Oxidation (M)[7]                                 | Mascot |
| 1908.9768 | 1908.9408 | -0.036  | -19 | 1712 | 1729 | NVMGSALLCVAEVTSTLK                  | Carbamidomethyl (C)[9], Oxidation (M)[3]         | Mascot |
| 2114.1362 | 2114.1943 | 0.0581  | 27  | 2054 | 2072 | SRITTHLVPCIAQFAVAM<br>R             |                                                  | Mascot |
| 2114.1362 | 2114.1943 | 0.0581  | 27  | 2054 | 2072 | SRITTHLVPCIAQFAVAM<br>R             |                                                  | Mascot |
| 2136.1104 | 2136.1777 | 0.0673  | 32  | 647  | 666  | TSESDLLGVANEMLTTTLI<br>K            |                                                  | Mascot |
| 2225.0286 | 2225.126  | 0.0974  | 44  | 254  | 273  | SNLSDYTAATYMIVCQMA<br>VK            | Oxidation (M)[12]                                | Mascot |
| 2233.2219 | 2233.0996 | -0.1223 | -55 | 1799 | 1819 | LTSCPQLSVRLASLSSTL<br>ATK           | Carbamidomethyl (C)[4]                           | Mascot |
| 2283.1294 | 2283.1875 | 0.0581  | 25  | 1824 | 1843 | VLIPTITKCYCSMVDAQQ<br>NR            |                                                  | Mascot |
| 2298.0452 | 2298.1902 | 0.145   | 63  | 254  | 273  | SNLSDYTAATYMIVCQMA<br>VK            | Carbamidomethyl (C)[15], Oxidation<br>(M)[12,17] | Mascot |
| 2442.2043 | 2442.083  | -0.1213 | -50 | 991  | 1012 | LASVEQLLQCLQSPFCPS<br>YTSK          |                                                  | Mascot |
| 2448.386  | 2448.1497 | -0.2363 | -97 | 881  | 903  | VSAILQTQALYVGKAFLS<br>SQPVK         |                                                  | Mascot |
| 2448.386  | 2448.1497 | -0.2363 | -97 | 881  | 903  | VSAILQTQALYVGKAFLS<br>SQPVK         |                                                  | Mascot |
| 2459.155  | 2459.1106 | -0.0444 | -18 | 1832 | 1852 | CYCSMVDAQQNRLSPLM<br>NILK           | Oxidation (M)[5,17]                              | Mascot |
| 3000.5134 | 3000.2488 | -0.2646 | -88 | 209  | 235  | DGNCPQLRVIFSFYASTI<br>VSALDAVEK     | Carbamidomethyl (C)[4]                           | Mascot |
| 3303.6599 | 3303.4224 | -0.2375 | -72 | 1136 | 1166 | SPACAQSINSVFKTIAVD<br>CELVANELIPADK | Carbamidomethyl (C)[4]                           | Mascot |

45

PREDICTED: hypothetical protein LOC100538187 [Danio rerio]

gi|326671902

13561.6

8.77

5

26

0

Peptide Information

| Calc. Mass | Obsrv. Mass | ± da   | ± ppm | Start Seq. | End Seq. | Sequence                               | Ion Score | C. I. | % Modification                                     | Rank | Result Type |
|------------|-------------|--------|-------|------------|----------|----------------------------------------|-----------|-------|----------------------------------------------------|------|-------------|
| 901.46     | 901.5096    | 0.0496 | 55    | 84         | 90       | NFKYVCK                                |           |       |                                                    |      | Mascot      |
| 1488.7474  | 1488.7906   | 0.0432 | 29    | 1          | 13       | MVDKDQAEVNAIR                          |           |       |                                                    |      | Mascot      |
| 1488.7474  | 1488.7906   | 0.0432 | 29    | 1          | 13       | MVDKDQAEVNAIR                          |           |       |                                                    |      | Mascot      |
| 1901.8376  | 1901.9963   | 0.1587 | 83    | 53         | 67       | AHIIQFMSEMKCCSK                        |           |       | Carbamidomethyl (C)[12,13], Oxidation<br>(M)[7,10] |      | Mascot      |
| 2225.0344  | 2225.126    | 0.0916 | 41    | 94         | 111      | NNWETIGHLWSNFGRCY<br>K                 |           |       |                                                    |      | Mascot      |
| 3907.9324  | 3907.8484   | -0.084 | -21   | 15         | 48       | VFNESDILLCWYHVTQAV<br>TRWLSISESGVSGPEK |           |       | Carbamidomethyl (C)[10]                            |      | Mascot      |

46

novel protein similar to human BAP28 [Danio rerio]

gi|33284848

143432.7

7.69

15

26

0

Peptide Information

| Calc. Mass | Obsrv. Mass | ± da | ± ppm | Start | End | Sequence | Ion | C. I. | % Modification | Rank | Result Type |
|------------|-------------|------|-------|-------|-----|----------|-----|-------|----------------|------|-------------|
|------------|-------------|------|-------|-------|-----|----------|-----|-------|----------------|------|-------------|

|    |                                                 |           |         |     | Seq.         | Seq. | Score                               |      |                                          |        |   |
|----|-------------------------------------------------|-----------|---------|-----|--------------|------|-------------------------------------|------|------------------------------------------|--------|---|
|    | 842.557                                         | 842.5123  | -0.0447 | -53 | 991          | 997  | LTLLARR                             |      |                                          | Mascot |   |
|    | 901.5101                                        | 901.5096  | -0.0005 | -1  | 1141         | 1148 | LADRIADK                            |      |                                          | Mascot |   |
|    | 996.4567                                        | 996.6025  | 0.1458  | 146 | 1052         | 1059 | EHISHMDK                            |      |                                          | Mascot |   |
|    | 1076.5768                                       | 1076.4761 | -0.1007 | -94 | 817          | 825  | KAMELLNNK                           |      | Oxidation (M)[3]                         | Mascot |   |
|    | 1103.5878                                       | 1103.575  | -0.0128 | -12 | 998          | 1007 | LTSCPQLSVR                          |      |                                          | Mascot |   |
|    | 1128.5684                                       | 1128.5063 | -0.0621 | -55 | 176          | 184  | FYEEAVSRK                           |      |                                          | Mascot |   |
|    | 1736.9073                                       | 1736.8944 | -0.0129 | -7  | 790          | 804  | VNALLPMDTFITVMR                     |      | Oxidation (M)[7]                         | Mascot |   |
|    | 1908.9768                                       | 1908.9408 | -0.036  | -19 | 911          | 928  | NVMGSALLCVAEVTSTLK                  |      | Carbamidomethyl (C)[9], Oxidation (M)[3] | Mascot |   |
|    | 2114.1362                                       | 2114.1943 | 0.0581  | 27  | 1231         | 1249 | SRITTHLVPCIAQFAVAM<br>R             |      |                                          | Mascot |   |
|    | 2114.1362                                       | 2114.1943 | 0.0581  | 27  | 1231         | 1249 | SRITTHLVPCIAQFAVAM<br>R             |      |                                          | Mascot |   |
|    | 2233.2219                                       | 2233.0996 | -0.1223 | -55 | 998          | 1018 | LTSCPQLSVRLASLSSTL<br>ATK           |      | Carbamidomethyl (C)[4]                   | Mascot |   |
|    | 2283.1294                                       | 2283.1875 | 0.0581  | 25  | 1023         | 1042 | VLIPTITKCYCSMVDAQQ<br>NR            |      |                                          | Mascot |   |
|    | 2442.2043                                       | 2442.083  | -0.1213 | -50 | 190          | 211  | LASVEQLLQCLQSPFCPS<br>YTSK          |      |                                          | Mascot |   |
|    | 2448.386                                        | 2448.1497 | -0.2363 | -97 | 80           | 102  | VSAILQTQALYVGKAFLS<br>SQPVK         |      |                                          | Mascot |   |
|    | 2448.386                                        | 2448.1497 | -0.2363 | -97 | 80           | 102  | VSAILQTQALYVGKAFLS<br>SQPVK         |      |                                          | Mascot |   |
|    | 2459.155                                        | 2459.1106 | -0.0444 | -18 | 1031         | 1051 | CYCSMVDAQQNRLSPLM<br>NILK           |      | Oxidation (M)[5,17]                      | Mascot |   |
|    | 3303.6599                                       | 3303.4224 | -0.2375 | -72 | 335          | 365  | SPACAQSINSVFKTIAVD<br>CELVANELIPADK |      | Carbamidomethyl (C)[4]                   | Mascot |   |
| 47 | hypothetical protein LOC100137109 [Danio rerio] |           |         |     | gi 167963466 |      | 21724.1                             | 5.82 | 5                                        | 26     | 0 |

#### Peptide Information

|  | Calc. Mass | Obsrv. Mass | ± da    | ± ppm | Start Seq. | End Seq. | Sequence                   | Ion Score | C. I. % | Modification          | Rank | Result Type |
|--|------------|-------------|---------|-------|------------|----------|----------------------------|-----------|---------|-----------------------|------|-------------|
|  | 882.4389   | 882.5708    | 0.1319  | 149   | 1          | 8        | MGSPFSLK                   |           |         | Oxidation (M)[1]      |      | Mascot      |
|  | 1103.6055  | 1103.575    | -0.0305 | -28   | 175        | 184      | TSESLNVVVR                 |           |         |                       |      | Mascot      |
|  | 2197.1282  | 2197.1292   | 0.001   | 0     | 1          | 21       | MGSPFSLKNITSGIVSS<br>AQR   |           |         | Oxidation (M)[1]      |      | Mascot      |
|  | 2384.2385  | 2384.1057   | -0.1328 | -56   | 103        | 122      | YIGVMMLTLTPSIIDELRM<br>R   |           |         | Oxidation (M)[5,6]    |      | Mascot      |
|  | 2400.2334  | 2400.1211   | -0.1123 | -47   | 103        | 122      | YIGVMMLTLTPSIIDELRM<br>R   |           |         | Oxidation (M)[5,6,19] |      | Mascot      |
|  | 2479.2786  | 2479.3013   | 0.0227  | 9     | 163        | 184      | VNTSEEIYNAVRTSESLN<br>VVVR |           |         |                       |      | Mascot      |

48 PREDICTED: protein NLRC3 isoform 1 [Danio rerio] gi|326667049 94863 6.12 11 26 0

#### Peptide Information

|  | Calc. Mass | Obsrv. Mass | ± da | ± ppm | Start Seq. | End Seq. | Sequence | Ion Score | C. I. % | Modification | Rank | Result Type |
|--|------------|-------------|------|-------|------------|----------|----------|-----------|---------|--------------|------|-------------|
|--|------------|-------------|------|-------|------------|----------|----------|-----------|---------|--------------|------|-------------|

|    |                                                             |           |         |     |     |              |                           |     |   |    |   |  |                        |  |  |  |        |
|----|-------------------------------------------------------------|-----------|---------|-----|-----|--------------|---------------------------|-----|---|----|---|--|------------------------|--|--|--|--------|
|    | 901.4737                                                    | 901.5096  | 0.0359  | 40  | 135 | 141          | ILQEENR                   |     |   |    |   |  |                        |  |  |  | Mascot |
|    | 959.4614                                                    | 959.5182  | 0.0568  | 59  | 407 | 414          | IPADCIDR                  |     |   |    |   |  | Carbamidomethyl (C)[5] |  |  |  | Mascot |
|    | 1045.5272                                                   | 1045.5662 | 0.039   | 37  | 660 | 668          | GLLTQQDDR                 |     |   |    |   |  |                        |  |  |  | Mascot |
|    | 1210.6791                                                   | 1210.6035 | -0.0756 | -62 | 442 | 451          | EIIDHIKQSK                |     |   |    |   |  |                        |  |  |  | Mascot |
|    | 1436.7631                                                   | 1436.7466 | -0.0165 | -11 | 669 | 680          | DQSKEEIIAYIK              |     |   |    |   |  |                        |  |  |  | Mascot |
|    | 2114.0876                                                   | 2114.1943 | 0.1067  | 50  | 626 | 644          | AAVDKALESENGHLDLYL<br>R   |     |   |    |   |  |                        |  |  |  | Mascot |
|    | 2114.0876                                                   | 2114.1943 | 0.1067  | 50  | 626 | 644          | AAVDKALESENGHLDLYL<br>R   |     |   |    |   |  |                        |  |  |  | Mascot |
|    | 2136.072                                                    | 2136.1777 | 0.1057  | 49  | 103 | 120          | HKSFTDNLQSIFQNLESK        |     |   |    |   |  |                        |  |  |  | Mascot |
|    | 2211.2092                                                   | 2211.1123 | -0.0969 | -44 | 153 | 171          | SIITEAALDLTLFFLREMK       |     |   |    |   |  |                        |  |  |  | Mascot |
|    | 2294.0864                                                   | 2294.1719 | 0.0855  | 37  | 551 | 571          | DCGIDVYKASVYSGMCT<br>QILK |     |   |    |   |  |                        |  |  |  | Mascot |
|    | 2294.0864                                                   | 2294.1719 | 0.0855  | 37  | 551 | 571          | DCGIDVYKASVYSGMCT<br>QILK |     |   |    |   |  |                        |  |  |  | Mascot |
|    | 2298.1812                                                   | 2298.1902 | 0.009   | 4   | 491 | 508          | TLTQMYTHFLRFQIQSR         |     |   |    |   |  |                        |  |  |  | Mascot |
|    | 2341.2188                                                   | 2341.1333 | -0.0855 | -37 | 532 | 550          | LAFQQLERNLIFYESDL<br>K    |     |   |    |   |  |                        |  |  |  | Mascot |
| 49 | PREDICTED: ryanodine receptor 2-like, partial [Danio rerio] |           |         |     |     | gi 326672665 | 23609.3                   | 4.4 | 5 | 26 | 0 |  |                        |  |  |  |        |

#### Peptide Information

| Calc. Mass | Obsrv. Mass | ± da   | ± ppm | Start Seq. | End Seq. | Sequence                        | Ion Score | C. I. | % Modification                                        | Rank | Result Type |
|------------|-------------|--------|-------|------------|----------|---------------------------------|-----------|-------|-------------------------------------------------------|------|-------------|
| 1719.7406  | 1719.859    | 0.1184 | 69    | 182        | 194      | CWEFFPAGDCFRK                   |           |       | Carbamidomethyl (C)[1,10]                             |      | Mascot      |
| 1719.7406  | 1719.859    | 0.1184 | 69    | 182        | 194      | CWEFFPAGDCFRK                   |           |       | Carbamidomethyl (C)[1,10]                             |      | Mascot      |
| 2156.873   | 2157.1394   | 0.2664 | 124   | 40         | 56       | CDDMLTCYMFHMYGVGR               |           |       | Carbamidomethyl (C)[1], Oxidation (M)[4]              |      | Mascot      |
| 2224.9993  | 2225.126    | 0.1267 | 57    | 57         | 77       | AGGGIGDQIEDPAGDEY<br>EIYR       |           |       |                                                       |      | Mascot      |
| 2432.0459  | 2432.1443   | 0.0984 | 40    | 163        | 181      | DETEHTGQESYVWKMY<br>QER         |           |       | Oxidation (M)[15]                                     |      | Mascot      |
| 2432.0459  | 2432.1443   | 0.0984 | 40    | 163        | 181      | DETEHTGQESYVWKMY<br>QER         |           |       | Oxidation (M)[15]                                     |      | Mascot      |
| 3337.292   | 3337.7583   | 0.4663 | 140   | 30         | 56       | SEDGESPDMLKDDMLTC<br>YMFHMYGVGR |           |       | Carbamidomethyl (C)[11,17], Oxidation (M)[9,14,19,22] |      | Mascot      |

|                     |                                         |             |  |        |              |            |          |              |           |                          |  |      |             |  |  |  |  |
|---------------------|-----------------------------------------|-------------|--|--------|--------------|------------|----------|--------------|-----------|--------------------------|--|------|-------------|--|--|--|--|
| 50                  | PREDICTED: formin-like 2b [Danio rerio] |             |  |        | gi 326668505 | 125459.5   | 6.66     | 1            | 16        | 0                        |  |      |             |  |  |  |  |
| Peptide Information |                                         |             |  |        |              |            |          |              |           |                          |  |      |             |  |  |  |  |
| Calc. Mass          |                                         | Obsrv. Mass |  | ± da   | ± ppm        | Start Seq. | End Seq. | Sequence     | Ion Score | C. I. % Modification     |  | Rank | Result Type |  |  |  |  |
| 1488.712            |                                         | 1488.7906   |  | 0.0786 | 53           | 218        | 229      | KDDVHVCIMCLR | 16        | 0 Carbamidomethyl (C)[7] |  | 2    | Mascot      |  |  |  |  |

|                |           |                        |                |                |                    |
|----------------|-----------|------------------------|----------------|----------------|--------------------|
| Gel Idx/Pos    | 192/H19   | Instr./Gel Origin      | BA2060/110707A | Process Status | Analysis Succeeded |
| Plate [#] Name | [1] 31496 | Instrument Sample Name |                | Spectra        | 11                 |

| Rank | Protein Name                               | Accession No. | Protein MW | Protein PI | Pep. Count | Protein Score | Protein Score C. I. % | Total Ion Score | Total Ion C. I. % |
|------|--------------------------------------------|---------------|------------|------------|------------|---------------|-----------------------|-----------------|-------------------|
| 1    | transketolase-like protein 2 [Danio rerio] | gi 186288308  | 67795.3    | 6.81       | 21         | 1,350         | 100                   | 1208            | 100               |

Peptide Information

| Calc. Mass | Obsrv. Mass | ± da   | ± ppm | Start Seq. | End Seq. | Sequence                | Ion Score | C. I. % | Modification           | Rank | Result Type |
|------------|-------------|--------|-------|------------|----------|-------------------------|-----------|---------|------------------------|------|-------------|
| 901.5101   | 901.5135    | 0.0034 | 4     | 93         | 100      | ASDLLNLR                | 54        | 99.889  |                        |      | Mascot      |
| 901.5101   | 901.5135    | 0.0034 | 4     | 93         | 100      | ASDLLNLR                |           |         |                        |      | Mascot      |
| 1028.4982  | 1028.5013   | 0.0031 | 3     | 226        | 234      | AMWHAEGVK               |           |         |                        |      | Mascot      |
| 1060.4768  | 1060.4849   | 0.0081 | 8     | 347        | 355      | NSTFADMFK               |           |         |                        |      | Mascot      |
| 1076.4717  | 1076.4808   | 0.0091 | 8     | 347        | 355      | NSTFADMFK               |           |         | Oxidation (M)[7]       |      | Mascot      |
| 1103.5731  | 1103.5774   | 0.0043 | 4     | 559        | 567      | VITVEDHYK               |           |         |                        |      | Mascot      |
| 1354.7689  | 1354.7772   | 0.0083 | 6     | 174        | 185      | LDNLVAILDVNR            | 108       | 100     |                        |      | Mascot      |
| 1354.7689  | 1354.7772   | 0.0083 | 6     | 174        | 185      | LDNLVAILDVNR            |           |         |                        |      | Mascot      |
| 1436.738   | 1436.7474   | 0.0094 | 7     | 101        | 113      | KIDSDLEGHPTPK           |           |         |                        |      | Mascot      |
| 1488.7845  | 1488.793    | 0.0085 | 6     | 385        | 398      | TVSFASTFAAFLAR          |           |         |                        |      | Mascot      |
| 1488.7845  | 1488.793    | 0.0085 | 6     | 385        | 398      | TVSFASTFAAFLAR          | 123       | 100     |                        |      | Mascot      |
| 1719.8547  | 1719.8651   | 0.0104 | 6     | 475        | 489      | TSRPDTAVIYNPEEK         |           |         |                        |      | Mascot      |
| 1719.8547  | 1719.8651   | 0.0104 | 6     | 475        | 489      | TSRPDTAVIYNPEEK         | 67        | 99.994  |                        |      | Mascot      |
| 1736.8887  | 1736.8948   | 0.0061 | 4     | 598        | 613      | SGKPQELLDMFGISAK        |           |         | Oxidation (M)[10]      |      | Mascot      |
| 1751.817   | 1751.8267   | 0.0097 | 6     | 252        | 266      | GIEDQDNWHGKMPK          |           |         |                        |      | Mascot      |
| 1767.8119  | 1767.8225   | 0.0106 | 6     | 252        | 266      | GIEDQDNWHGKMPK          |           |         | Oxidation (M)[13]      |      | Mascot      |
| 1893.9817  | 1893.9919   | 0.0102 | 5     | 186        | 202      | LGQSEPAPLQHN NVYK       | 83        | 100     |                        |      | Mascot      |
| 1893.9817  | 1893.9919   | 0.0102 | 5     | 186        | 202      | LGQSEPAPLQHN NVYK       |           |         |                        |      | Mascot      |
| 1901.9908  | 1902.0004   | 0.0096 | 5     | 75         | 92       | GHAAPILYAAWAEAGYIK      |           |         |                        |      | Mascot      |
| 1999.943   | 1999.9546   | 0.0116 | 6     | 442        | 459      | AIPTCTVFYPSDGVSTER      | 138       | 100     | Carbamidomethyl (C)[5] |      | Mascot      |
| 1999.943   | 1999.9546   | 0.0116 | 6     | 442        | 459      | AIPTCTVFYPSDGVSTER      |           |         | Carbamidomethyl (C)[5] |      | Mascot      |
| 2114.1855  | 2114.1997   | 0.0142 | 7     | 534        | 553      | VIDPFTIKPLDASTIVASAR    |           |         |                        |      | Mascot      |
| 2114.1855  | 2114.1997   | 0.0142 | 7     | 534        | 553      | VIDPFTIKPLDASTIVASAR    | 138       | 100     |                        |      | Mascot      |
| 2175.1404  | 2175.1536   | 0.0132 | 6     | 568        | 589      | EGGLGEAVLSAVGEEPGI VVHR | 222       | 100     |                        |      | Mascot      |
| 2175.1404  | 2175.1536   | 0.0132 | 6     | 568        | 589      | EGGLGEAVLSAVGEEPGI VVHR |           |         |                        |      | Mascot      |
| 2294.1663  | 2294.178    | 0.0117 | 5     | 475        | 494      | TSRPDTAVIYNPEEKFEIGK    |           |         |                        |      | Mascot      |

|   |                           |           |        |    |              |         |                                 |     |       |                                              |        |     |
|---|---------------------------|-----------|--------|----|--------------|---------|---------------------------------|-----|-------|----------------------------------------------|--------|-----|
|   | 2432.1406                 | 2432.1536 | 0.013  | 5  | 362          | 382     | YIECFIAEQNMVSVAIGCA<br>TR       | 160 | 100   | Carbamidomethyl (C)[4,18]                    | Mascot |     |
|   | 2432.1406                 | 2432.1536 | 0.013  | 5  | 362          | 382     | YIECFIAEQNMVSVAIGCA<br>TR       |     |       | Carbamidomethyl (C)[4,18]                    | Mascot |     |
|   | 2448.1355                 | 2448.1565 | 0.021  | 9  | 362          | 382     | YIECFIAEQNMVSVAIGCA<br>TR       |     |       | Carbamidomethyl (C)[4,18], Oxidation (M)[11] | Mascot |     |
|   | 2457.3096                 | 2457.3267 | 0.0171 | 7  | 504          | 527     | DQVTVIGAGVTLHEALAA<br>HDQLAK    | 120 | 100   |                                              | Mascot |     |
|   | 2457.3096                 | 2457.3267 | 0.0171 | 7  | 504          | 527     | DQVTVIGAGVTLHEALAA<br>HDQLAK    |     |       |                                              | Mascot |     |
|   | 2489.0747                 | 2489.1013 | 0.0266 | 11 | 205          | 225     | CEAFGFNTYVVDGHDVE<br>ELCK       |     |       | Carbamidomethyl (C)[1,20]                    | Mascot |     |
|   | 2515.2319                 | 2515.2617 | 0.0298 | 12 | 114          | 139     | LAFVDVATGSLGQGLGA<br>ACGMAYTGK  |     |       | Carbamidomethyl (C)[19]                      | Mascot |     |
|   | 2531.2268                 | 2531.2527 | 0.0259 | 10 | 114          | 139     | LAFVDVATGSLGQGLGA<br>ACGMAYTGK  |     |       | Carbamidomethyl (C)[19], Oxidation (M)[21]   | Mascot |     |
|   | 3103.6423                 | 3103.6582 | 0.0159 | 5  | 267          | 293     | DRAEELINDLLSQIQSPN<br>KPLYPQPPK |     |       |                                              | Mascot |     |
| 2 | Tkt protein [Danio rerio] |           |        |    | gi 182890016 | 67962.5 | 6.79                            | 22  | 1,310 | 100                                          | 1158   | 100 |

### Peptide Information

| Calc. Mass | Obsrv. Mass | ± da    | ± ppm | Start Seq. | End Seq. | Sequence           | Ion Score | C. I.  | % Modification    | Rank | Result Type |
|------------|-------------|---------|-------|------------|----------|--------------------|-----------|--------|-------------------|------|-------------|
| 864.421    | 864.4554    | 0.0344  | 40    | 57         | 63       | YKADDPR            |           |        |                   |      | Mascot      |
| 959.5156   | 959.5181    | 0.0025  | 3     | 93         | 100      | ESDLLNLR           |           |        |                   |      | Mascot      |
| 1060.4768  | 1060.4849   | 0.0081  | 8     | 347        | 355      | NSTFADMFK          |           |        |                   |      | Mascot      |
| 1076.4717  | 1076.4808   | 0.0091  | 8     | 347        | 355      | NSTFADMFK          |           |        | Oxidation (M)[7]  |      | Mascot      |
| 1103.5731  | 1103.5774   | 0.0043  | 4     | 559        | 567      | VITVEDHYK          |           |        |                   |      | Mascot      |
| 1112.5081  | 1112.5123   | 0.0042  | 4     | 226        | 234      | YMWEAEGVK          |           |        |                   |      | Mascot      |
| 1128.5031  | 1128.5116   | 0.0085  | 8     | 226        | 234      | YMWEAEGVK          |           |        | Oxidation (M)[2]  |      | Mascot      |
| 1354.7689  | 1354.7772   | 0.0083  | 6     | 174        | 185      | LDNLVAILDVNR       | 108       | 100    |                   |      | Mascot      |
| 1354.7689  | 1354.7772   | 0.0083  | 6     | 174        | 185      | LDNLVAILDVNR       |           |        |                   |      | Mascot      |
| 1436.738   | 1436.7474   | 0.0094  | 7     | 101        | 113      | KIDSDLEGHPTPK      |           |        |                   |      | Mascot      |
| 1488.7845  | 1488.793    | 0.0085  | 6     | 385        | 398      | TVSFASTFAAFLAR     |           |        |                   |      | Mascot      |
| 1488.7845  | 1488.793    | 0.0085  | 6     | 385        | 398      | TVSFASTFAAFLAR     | 123       | 100    |                   |      | Mascot      |
| 1719.8547  | 1719.8651   | 0.0104  | 6     | 475        | 489      | TSRPDTAVIYNPEEK    |           |        |                   |      | Mascot      |
| 1719.8547  | 1719.8651   | 0.0104  | 6     | 475        | 489      | TSRPDTAVIYNPEEK    | 67        | 99.994 |                   |      | Mascot      |
| 1736.8887  | 1736.8948   | 0.0061  | 4     | 598        | 613      | SGKPQELLDMFGISAK   |           |        | Oxidation (M)[10] |      | Mascot      |
| 1751.817   | 1751.8267   | 0.0097  | 6     | 252        | 266      | GIEDQDNWHGKMPK     |           |        |                   |      | Mascot      |
| 1767.8119  | 1767.8225   | 0.0106  | 6     | 252        | 266      | GIEDQDNWHGKMPK     |           |        | Oxidation (M)[13] |      | Mascot      |
| 1893.9817  | 1893.9919   | 0.0102  | 5     | 186        | 202      | LGQSEPAPLQHNVNVYK  | 83        | 100    |                   |      | Mascot      |
| 1893.9817  | 1893.9919   | 0.0102  | 5     | 186        | 202      | LGQSEPAPLQHNVNVYK  |           |        |                   |      | Mascot      |
| 1901.9908  | 1902.0004   | 0.0096  | 5     | 75         | 92       | GHAAPILYAAWAEAGYIK |           |        |                   |      | Mascot      |
| 1994.0415  | 1993.9897   | -0.0518 | -26   | 226        | 243      | YMWEAEGVKGKPTAIVA  |           |        | Oxidation (M)[2]  |      | Mascot      |

|           |           |        |    |     |     |                                 |     |     |                                              |        |
|-----------|-----------|--------|----|-----|-----|---------------------------------|-----|-----|----------------------------------------------|--------|
| 1999.943  | 1999.9546 | 0.0116 | 6  | 442 | 459 | K<br>AIPCTVFYPSDGVSTER          | 138 | 100 | Carbamidomethyl (C)[5]                       | Mascot |
| 1999.943  | 1999.9546 | 0.0116 | 6  | 442 | 459 | AIPCTVFYPSDGVSTER               |     |     | Carbamidomethyl (C)[5]                       | Mascot |
| 2114.1855 | 2114.1997 | 0.0142 | 7  | 534 | 553 | VIDPFTIKPLDASTIVASA<br>R        |     |     |                                              | Mascot |
| 2114.1855 | 2114.1997 | 0.0142 | 7  | 534 | 553 | VIDPFTIKPLDASTIVASA<br>R        | 138 | 100 |                                              | Mascot |
| 2175.1404 | 2175.1536 | 0.0132 | 6  | 568 | 589 | EGGLGEAVLSAVGEEP<br>GVVHR       | 222 | 100 |                                              | Mascot |
| 2175.1404 | 2175.1536 | 0.0132 | 6  | 568 | 589 | EGGLGEAVLSAVGEEP<br>GVVHR       |     |     |                                              | Mascot |
| 2294.1663 | 2294.178  | 0.0117 | 5  | 475 | 494 | TSRPDTAVIYNPEEK<br>FEIGK        |     |     |                                              | Mascot |
| 2432.1406 | 2432.1536 | 0.013  | 5  | 362 | 382 | YIECFIAEQNMVSVAIG<br>CASTR      | 160 | 100 | Carbamidomethyl (C)[4,18]                    | Mascot |
| 2432.1406 | 2432.1536 | 0.013  | 5  | 362 | 382 | YIECFIAEQNMVSVAIG<br>CASTR      |     |     | Carbamidomethyl (C)[4,18]                    | Mascot |
| 2448.1355 | 2448.1565 | 0.021  | 9  | 362 | 382 | YIECFIAEQNMVSVAIG<br>CASTR      |     |     | Carbamidomethyl (C)[4,18], Oxidation (M)[11] | Mascot |
| 2457.3096 | 2457.3267 | 0.0171 | 7  | 504 | 527 | DQVTVIGAGVTLHEAL<br>AAHDQLAK    | 120 | 100 |                                              | Mascot |
| 2457.3096 | 2457.3267 | 0.0171 | 7  | 504 | 527 | DQVTVIGAGVTLHEAL<br>AAHDQLAK    |     |     |                                              | Mascot |
| 2515.2319 | 2515.2617 | 0.0298 | 12 | 114 | 139 | LAFVDVATGSLGQGLG<br>AACGMAYTGK  |     |     | Carbamidomethyl (C)[19]                      | Mascot |
| 2531.2268 | 2531.2527 | 0.0259 | 10 | 114 | 139 | LAFVDVATGSLGQGLG<br>AACGMAYTGK  |     |     | Carbamidomethyl (C)[19], Oxidation (M)[21]   | Mascot |
| 3103.6423 | 3103.6582 | 0.0159 | 5  | 267 | 293 | DRAEELINDLLSQIQSP<br>NKPLYPQPPK |     |     |                                              | Mascot |

3

transketolase [Danio rerio]

gi|31872040

67811.3

6.81

20

1,200

100

1070

100

| Peptide Information |             |        |       |            |          |                  |           |        |                   |                  |
|---------------------|-------------|--------|-------|------------|----------|------------------|-----------|--------|-------------------|------------------|
| Calc. Mass          | Obsrv. Mass | ± da   | ± ppm | Start Seq. | End Seq. | Sequence         | Ion Score | C. I.  | % Modification    | Rank Result Type |
| 901.5101            | 901.5135    | 0.0034 | 4     | 93         | 100      | ASDLLNLR         | 54        | 99.889 |                   | Mascot           |
| 901.5101            | 901.5135    | 0.0034 | 4     | 93         | 100      | ASDLLNLR         |           |        |                   | Mascot           |
| 1028.4982           | 1028.5013   | 0.0031 | 3     | 226        | 234      | AMWHAEGVK        |           |        |                   | Mascot           |
| 1060.4768           | 1060.4849   | 0.0081 | 8     | 347        | 355      | NSTFADMFK        |           |        |                   | Mascot           |
| 1076.4717           | 1076.4808   | 0.0091 | 8     | 347        | 355      | NSTFADMFK        |           |        | Oxidation (M)[7]  | Mascot           |
| 1103.5731           | 1103.5774   | 0.0043 | 4     | 559        | 567      | VITVEDHYK        |           |        |                   | Mascot           |
| 1354.7689           | 1354.7772   | 0.0083 | 6     | 174        | 185      | LDNLVAILDVNR     | 108       | 100    |                   | Mascot           |
| 1354.7689           | 1354.7772   | 0.0083 | 6     | 174        | 185      | LDNLVAILDVNR     |           |        |                   | Mascot           |
| 1436.738            | 1436.7474   | 0.0094 | 7     | 101        | 113      | KIDSDLEGHPTPK    |           |        |                   | Mascot           |
| 1488.7845           | 1488.793    | 0.0085 | 6     | 385        | 398      | TVSFASTFAAFLAR   |           |        |                   | Mascot           |
| 1488.7845           | 1488.793    | 0.0085 | 6     | 385        | 398      | TVSFASTFAAFLAR   | 123       | 100    |                   | Mascot           |
| 1719.8547           | 1719.8651   | 0.0104 | 6     | 475        | 489      | TSRPDTAVIYNPEEK  |           |        |                   | Mascot           |
| 1719.8547           | 1719.8651   | 0.0104 | 6     | 475        | 489      | TSRPDTAVIYNPEEK  | 67        | 99.994 |                   | Mascot           |
| 1736.8887           | 1736.8948   | 0.0061 | 4     | 598        | 613      | SGKPQELLDMFGISAK |           |        | Oxidation (M)[10] | Mascot           |



|           |           |        |    |     |     |                                 |     |     |                                              |                   |  |        |
|-----------|-----------|--------|----|-----|-----|---------------------------------|-----|-----|----------------------------------------------|-------------------|--|--------|
| 1751.817  | 1751.8267 | 0.0097 | 6  | 252 | 266 | GIEDQDNWHGKMPK                  |     |     |                                              |                   |  | Mascot |
| 1767.8119 | 1767.8225 | 0.0106 | 6  | 252 | 266 | GIEDQDNWHGKMPK                  |     |     |                                              | Oxidation (M)[13] |  | Mascot |
| 1893.9817 | 1893.9919 | 0.0102 | 5  | 186 | 202 | LGQSEPAPLQHNVNVYK               | 83  | 100 |                                              |                   |  | Mascot |
| 1893.9817 | 1893.9919 | 0.0102 | 5  | 186 | 202 | LGQSEPAPLQHNVNVYK               |     |     |                                              |                   |  | Mascot |
| 1901.9908 | 1902.0004 | 0.0096 | 5  | 75  | 92  | GHAAPILYAAWAEAGYIK              |     |     |                                              |                   |  | Mascot |
| 2114.1855 | 2114.1997 | 0.0142 | 7  | 534 | 553 | VIDPFTIKPLDASTIVASAR            |     |     |                                              |                   |  | Mascot |
| 2114.1855 | 2114.1997 | 0.0142 | 7  | 534 | 553 | VIDPFTIKPLDASTIVASAR            | 138 | 100 |                                              |                   |  | Mascot |
| 2175.1404 | 2175.1536 | 0.0132 | 6  | 568 | 589 | EGGLGEAVLSAVGEEPGI<br>VVHR      | 222 | 100 |                                              |                   |  | Mascot |
| 2175.1404 | 2175.1536 | 0.0132 | 6  | 568 | 589 | EGGLGEAVLSAVGEEPGI<br>VVHR      |     |     |                                              |                   |  | Mascot |
| 2294.1663 | 2294.178  | 0.0117 | 5  | 475 | 494 | TSRPDTAVIYNPEEKFEIGK            |     |     |                                              |                   |  | Mascot |
| 2432.1406 | 2432.1536 | 0.013  | 5  | 362 | 382 | YIECFIAEQNMVSVAIGCATR           | 160 | 100 | Carbamidomethyl (C)[4,18]                    |                   |  | Mascot |
| 2432.1406 | 2432.1536 | 0.013  | 5  | 362 | 382 | YIECFIAEQNMVSVAIGCATR           |     |     | Carbamidomethyl (C)[4,18]                    |                   |  | Mascot |
| 2448.1355 | 2448.1565 | 0.021  | 9  | 362 | 382 | YIECFIAEQNMVSVAIGCATR           |     |     | Carbamidomethyl (C)[4,18], Oxidation (M)[11] |                   |  | Mascot |
| 2457.3096 | 2457.3267 | 0.0171 | 7  | 504 | 527 | DQVTVIGAGVTLHEALAA<br>HDQLAK    | 120 | 100 |                                              |                   |  | Mascot |
| 2457.3096 | 2457.3267 | 0.0171 | 7  | 504 | 527 | DQVTVIGAGVTLHEALAA<br>HDQLAK    |     |     |                                              |                   |  | Mascot |
| 2489.0747 | 2489.1013 | 0.0266 | 11 | 205 | 225 | CEAFGFNTYVVDGHDVE<br>ELCK       |     |     | Carbamidomethyl (C)[1,20]                    |                   |  | Mascot |
| 2515.2319 | 2515.2617 | 0.0298 | 12 | 114 | 139 | LAFVDVATGSLGQGLGA<br>ACGMAYTGK  |     |     | Carbamidomethyl (C)[19]                      |                   |  | Mascot |
| 2531.2268 | 2531.2527 | 0.0259 | 10 | 114 | 139 | LAFVDVATGSLGQGLGA<br>ACGMAYTGK  |     |     | Carbamidomethyl (C)[19], Oxidation (M)[21]   |                   |  | Mascot |
| 3103.6423 | 3103.6582 | 0.0159 | 5  | 267 | 293 | DRAEELINDLLSQIQSPN<br>KPLYPQPPK |     |     |                                              |                   |  | Mascot |

4 novel protein similar to vertebrate pim oncogene family [Danio rerio] gi|55962882 32334.2 8.77 8 53 79.659

#### Peptide Information

| Calc. Mass | Obsrv. Mass | ± da    | ± ppm | Start Seq. | End Seq. | Sequence           | Ion Score | C. I. % | Modification                              | Rank | Result Type |
|------------|-------------|---------|-------|------------|----------|--------------------|-----------|---------|-------------------------------------------|------|-------------|
| 901.5464   | 901.5135    | -0.0329 | -36   | 49         | 56       | IVDSKALR           | 15        | 0       |                                           |      | Mascot      |
| 901.5464   | 901.5135    | -0.0329 | -36   | 49         | 56       | IVDSKALR           |           |         |                                           |      | Mascot      |
| 959.5342   | 959.5181    | -0.0161 | -17   | 106        | 113      | LIPSMNLR           |           |         | Oxidation (M)[5]                          |      | Mascot      |
| 1342.7729  | 1342.6414   | -0.1315 | -98   | 83         | 93       | VKQIAELLDWK        |           |         |                                           |      | Mascot      |
| 1365.7446  | 1365.6426   | -0.102  | -75   | 168        | 179      | LIDFGCSVLLTK       |           |         | Carbamidomethyl (C)[6]                    |      | Mascot      |
| 1475.8217  | 1475.7635   | -0.0582 | -39   | 94         | 105      | VEAERYIIVVER       |           |         |                                           |      | Mascot      |
| 1707.8127  | 1707.7886   | -0.0241 | -14   | 131        | 145      | IMFNVTIAAHTCCQR    |           |         |                                           |      | Mascot      |
| 1908.9241  | 1908.9456   | 0.0215  | 11    | 130        | 145      | KIMFNVTIAAHTCCQR   |           |         | Carbamidomethyl (C)[13], Oxidation (M)[3] |      | Mascot      |
| 2432.3376  | 2432.1536   | -0.184  | -76   | 202        | 222      | YHGEPATVWSLGILQFLL |           |         |                                           |      | Mascot      |

|   |                                                                       |           |        |     |     |             |                                  |      |   |    |        |  |  |  |  |        |  |
|---|-----------------------------------------------------------------------|-----------|--------|-----|-----|-------------|----------------------------------|------|---|----|--------|--|--|--|--|--------|--|
|   | 2432.3376                                                             | 2432.1536 | -0.184 | -76 | 202 | 222         | LFK<br>YHGEPATVWSLGILQFLL<br>LFK |      |   |    |        |  |  |  |  | Mascot |  |
| 5 | novel protein similar to vertebrate pim oncogene family [Danio rerio] |           |        |     |     | gi 55962348 | 32151.9                          | 6.97 | 8 | 53 | 79.185 |  |  |  |  |        |  |

Peptide Information

| Calc. Mass | Obsrv. Mass | ± da    | ± ppm | Start Seq. | End Seq. | Sequence                  | Ion Score | C. I. | % Modification                            | Rank | Result Type |
|------------|-------------|---------|-------|------------|----------|---------------------------|-----------|-------|-------------------------------------------|------|-------------|
| 901.5464   | 901.5135    | -0.0329 | -36   | 49         | 56       | IVDSKALR                  | 15        | 0     |                                           |      | Mascot      |
| 901.5464   | 901.5135    | -0.0329 | -36   | 49         | 56       | IVDSKALR                  |           |       |                                           |      | Mascot      |
| 959.5342   | 959.5181    | -0.0161 | -17   | 106        | 113      | LIPSMNLR                  |           |       | Oxidation (M)[5]                          |      | Mascot      |
| 1342.7729  | 1342.6414   | -0.1315 | -98   | 83         | 93       | VKQIAELLDWK               |           |       |                                           |      | Mascot      |
| 1365.7446  | 1365.6426   | -0.102  | -75   | 168        | 179      | LIDFGCSVLLTK              |           |       | Carbamidomethyl (C)[6]                    |      | Mascot      |
| 1475.8217  | 1475.7635   | -0.0582 | -39   | 94         | 105      | VEAERYIIVVER              |           |       |                                           |      | Mascot      |
| 1707.8127  | 1707.7886   | -0.0241 | -14   | 131        | 145      | IMFNVITIAHTCCQR           |           |       |                                           |      | Mascot      |
| 1908.9241  | 1908.9456   | 0.0215  | 11    | 130        | 145      | KIMFNVITIAHTCCQR          |           |       | Carbamidomethyl (C)[13], Oxidation (M)[3] |      | Mascot      |
| 2432.3376  | 2432.1536   | -0.184  | -76   | 202        | 222      | YHGEPATVWSLGILQFLL<br>LFK |           |       |                                           |      | Mascot      |
| 2432.3376  | 2432.1536   | -0.184  | -76   | 202        | 222      | YHGEPATVWSLGILQFLL<br>LFK |           |       |                                           |      | Mascot      |

|   |                                        |  |  |  |  |             |       |      |   |    |        |    |        |  |  |  |
|---|----------------------------------------|--|--|--|--|-------------|-------|------|---|----|--------|----|--------|--|--|--|
| 6 | Si:dkey-180p18.9 protein [Danio rerio] |  |  |  |  | gi 63101286 | 38863 | 6.56 | 6 | 50 | 59.415 | 28 | 54.216 |  |  |  |
|---|----------------------------------------|--|--|--|--|-------------|-------|------|---|----|--------|----|--------|--|--|--|

Peptide Information

| Calc. Mass | Obsrv. Mass | ± da    | ± ppm | Start Seq. | End Seq. | Sequence                    | Ion Score | C. I.  | % Modification         | Rank | Result Type |
|------------|-------------|---------|-------|------------|----------|-----------------------------|-----------|--------|------------------------|------|-------------|
| 850.4781   | 850.5455    | 0.0674  | 79    | 318        | 324      | TILSFNR                     |           |        |                        |      | Mascot      |
| 901.5465   | 901.5135    | -0.033  | -37   | 274        | 281      | TTAQVLIR                    | 28        | 54.216 |                        |      | Mascot      |
| 901.5465   | 901.5135    | -0.033  | -37   | 274        | 281      | TTAQVLIR                    |           |        |                        |      | Mascot      |
| 1028.4805  | 1028.5013   | 0.0208  | 20    | 328        | 336      | ACPMHWGVK                   |           |        |                        |      | Mascot      |
| 1112.631   | 1112.5123   | -0.1187 | -107  | 53         | 63       | SPPGKVTEAVK                 |           |        |                        |      | Mascot      |
| 1179.6078  | 1179.6071   | -0.0007 | -1    | 11         | 21       | FCTEPGSVVLK                 |           |        |                        |      | Mascot      |
| 2531.2883  | 2531.2527   | -0.0356 | -14   | 11         | 33       | FCTEPGSVVLKSSVLNLS<br>FTMSK |           |        | Carbamidomethyl (C)[2] |      | Mascot      |

|   |                                              |  |  |  |  |             |         |      |    |    |       |  |  |  |  |  |
|---|----------------------------------------------|--|--|--|--|-------------|---------|------|----|----|-------|--|--|--|--|--|
| 7 | hypothetical protein LOC553738 [Danio rerio] |  |  |  |  | gi 66472320 | 27546.3 | 9.57 | 11 | 46 | 0.375 |  |  |  |  |  |
|---|----------------------------------------------|--|--|--|--|-------------|---------|------|----|----|-------|--|--|--|--|--|

Peptide Information

| Calc. Mass | Obsrv. Mass | ± da   | ± ppm | Start Seq. | End Seq. | Sequence   | Ion Score | C. I. | % Modification | Rank | Result Type |
|------------|-------------|--------|-------|------------|----------|------------|-----------|-------|----------------|------|-------------|
| 1128.4561  | 1128.5116   | 0.0555 | 49    | 132        | 141      | CDQCGQTFAR |           |       |                |      | Mascot      |
| 1165.6212  | 1165.7528   | 0.1316 | 113   | 194        | 203      | TFVTADDLKR |           |       |                |      | Mascot      |

|   |                                               |           |         |     |             |         |                         |   |                               |        |
|---|-----------------------------------------------|-----------|---------|-----|-------------|---------|-------------------------|---|-------------------------------|--------|
|   | 1179.615                                      | 1179.6071 | -0.0079 | -7  | 166         | 175     | SCTRQSSLIK              |   | Carbamidomethyl (C)[2]        | Mascot |
|   | 1365.6501                                     | 1365.6426 | -0.0075 | -5  | 13          | 25      | TGEKPITCTQCGK           |   |                               | Mascot |
|   | 1736.7843                                     | 1736.8948 | 0.1105  | 64  | 151         | 165     | VHTNERPYSCSVCGK         |   | Carbamidomethyl (C)[10]       | Mascot |
|   | 1751.8601                                     | 1751.8267 | -0.0334 | -19 | 10          | 25      | MVRTGEKPITCTQCGK        |   |                               | Mascot |
|   | 1767.855                                      | 1767.8225 | -0.0325 | -18 | 10          | 25      | MVRTGEKPITCTQCGK        |   | Oxidation (M)[1]              | Mascot |
|   | 1862.7982                                     | 1863.073  | 0.2748  | 148 | 207         | 221     | IHTGEKPYMCSHCDK         |   | Carbamidomethyl (C)[10,13]    | Mascot |
|   | 2113.9568                                     | 2114.1997 | 0.2429  | 115 | 185         | 202     | EHVCFECEKTFVTADDLK      |   |                               | Mascot |
|   | 2113.9568                                     | 2114.1997 | 0.2429  | 115 | 185         | 202     | EHVCFECEKTFVTADDLK      |   |                               | Mascot |
|   | 2233.0752                                     | 2233.105  | 0.0298  | 13  | 147         | 165     | FHLRVHTNERPYSCSVC<br>GK |   |                               | Mascot |
|   | 2284.0168                                     | 2284.1877 | 0.1709  | 75  | 204         | 221     | HQRIHTGEKPYMCSHCD<br>K  |   | Carbamidomethyl (C)[13,16]    | Mascot |
|   | 2298.0171                                     | 2298.198  | 0.1809  | 79  | 151         | 169     | VHTNERPYSCSVCGKSC<br>TR |   | Carbamidomethyl (C)[10,13,17] | Mascot |
| 8 | cutC copper transporter homolog [Danio rerio] |           |         |     | gi 54400594 | 27229.9 | 5.63                    | 6 | 46                            | 0      |

#### Peptide Information

| Calc. Mass | Obsrv. Mass | ± da    | ± ppm | Start Seq. | End Seq. | Sequence                   | Ion Score | C. I. | % Modification                              | Rank | Result Type |
|------------|-------------|---------|-------|------------|----------|----------------------------|-----------|-------|---------------------------------------------|------|-------------|
| 870.4138   | 870.5441    | 0.1303  | 150   | 209        | 215      | DSSMKFR                    |           |       |                                             |      | Mascot      |
| 901.5464   | 901.5135    | -0.0329 | -36   | 234        | 241      | VADVTKIR                   | 16        | 0     |                                             |      | Mascot      |
| 901.5464   | 901.5135    | -0.0329 | -36   | 234        | 241      | VADVTKIR                   |           |       |                                             |      | Mascot      |
| 1028.6099  | 1028.5013   | -0.1086 | -106  | 242        | 251      | ALNAIAKNTL                 |           |       |                                             |      | Mascot      |
| 2294.064   | 2294.178    | 0.114   | 50    | 2          | 22       | SDGLLMEVCVDSVESAIN<br>AER  |           |       | Carbamidomethyl (C)[9]                      |      | Mascot      |
| 2384.0779  | 2384.0769   | -0.001  | 0     | 1          | 22       | MSDGLLMEVCVDSVESAI<br>NAER |           |       | Oxidation (M)[1]                            |      | Mascot      |
| 2457.0942  | 2457.3267   | 0.2325  | 95    | 1          | 22       | MSDGLLMEVCVDSVESAI<br>NAER |           |       | Carbamidomethyl (C)[10], Oxidation (M)[1,7] |      | Mascot      |
| 2457.0942  | 2457.3267   | 0.2325  | 95    | 1          | 22       | MSDGLLMEVCVDSVESAI<br>NAER |           |       | Carbamidomethyl (C)[10], Oxidation (M)[1,7] |      | Mascot      |
| 2489.2744  | 2489.1013   | -0.1731 | -70   | 126        | 147      | AFDMVHDPLVALETLSL<br>GFER  |           |       | Oxidation (M)[4]                            |      | Mascot      |

|   |                                                           |  |  |  |              |         |      |   |    |   |    |        |
|---|-----------------------------------------------------------|--|--|--|--------------|---------|------|---|----|---|----|--------|
| 9 | PREDICTED: polyphosphoinositide phosphatase [Danio rerio] |  |  |  | gi 326681249 | 37784.5 | 8.99 | 3 | 45 | 0 | 37 | 94.223 |
|---|-----------------------------------------------------------|--|--|--|--------------|---------|------|---|----|---|----|--------|

#### Peptide Information

| Calc. Mass | Obsrv. Mass | ± da    | ± ppm | Start Seq. | End Seq. | Sequence    | Ion Score | C. I.  | % Modification         | Rank | Result Type |
|------------|-------------|---------|-------|------------|----------|-------------|-----------|--------|------------------------|------|-------------|
| 850.457    | 850.5455    | 0.0885  | 104   | 293        | 298      | YVWNLNR     |           |        |                        |      | Mascot      |
| 901.4559   | 901.5135    | 0.0576  | 64    | 109        | 115      | CLPENLR     | 37        | 94.223 | Carbamidomethyl (C)[1] |      | Mascot      |
| 901.4559   | 901.5135    | 0.0576  | 64    | 109        | 115      | CLPENLR     |           |        | Carbamidomethyl (C)[1] |      | Mascot      |
| 1342.6862  | 1342.6414   | -0.0448 | -33   | 211        | 221      | VTHPDEARYVR |           |        |                        |      | Mascot      |

|    |                            |  |  |  |             |         |      |   |    |   |
|----|----------------------------|--|--|--|-------------|---------|------|---|----|---|
| 10 | protein BTG3 [Danio rerio] |  |  |  | gi 55925203 | 18115.1 | 5.85 | 7 | 45 | 0 |
|----|----------------------------|--|--|--|-------------|---------|------|---|----|---|

| Peptide Information |                                                           |             |         |       |               |                             |         |           |         |                                            |      |             |
|---------------------|-----------------------------------------------------------|-------------|---------|-------|---------------|-----------------------------|---------|-----------|---------|--------------------------------------------|------|-------------|
|                     | Calc. Mass                                                | Obsrv. Mass | ± da    | ± ppm | Start Seq.    | End Sequence Seq.           |         | Ion Score | C. I. % | Modification                               | Rank | Result Type |
|                     | 901.5353                                                  | 901.5135    | -0.0218 | -24   | 34            | 41 LTVALQEK                 |         |           |         |                                            |      | Mascot      |
|                     | 901.5353                                                  | 901.5135    | -0.0218 | -24   | 34            | 41 LTVALQEK                 |         |           |         |                                            |      | Mascot      |
|                     | 1112.504                                                  | 1112.5123   | 0.0083  | 7     | 75            | 84 ACAESGVQYK               |         |           |         | Carbamidomethyl (C)[2]                     |      | Mascot      |
|                     | 1735.8683                                                 | 1735.8551   | -0.0132 | -8    | 75            | 90 ACAESGVQYKDLGLPK         |         |           |         | Carbamidomethyl (C)[2]                     |      | Mascot      |
|                     | 2211.0208                                                 | 2211.1179   | 0.0971  | 44    | 91            | 108 ELTLWVDPGEVCCRYGE K     |         |           |         | Carbamidomethyl (C)[12,13]                 |      | Mascot      |
|                     | 2224.9412                                                 | 2225.1333   | 0.1921  | 86    | 139           | 158 VTSDYHSGSSSDEDSML VHR   |         |           |         | Oxidation (M)[16]                          |      | Mascot      |
|                     | 2357.1628                                                 | 2357.1431   | -0.0197 | -8    | 85            | 104 DLGLPKELTLWVDPGEV CCR   |         |           |         | Carbamidomethyl (C)[18,19]                 |      | Mascot      |
|                     | 2457.0688                                                 | 2457.3267   | 0.2579  | 105   | 109           | 130 NHGFTVATFSSEDDDDK EDVTK |         |           |         |                                            |      | Mascot      |
|                     | 2457.0688                                                 | 2457.3267   | 0.2579  | 105   | 109           | 130 NHGFTVATFSSEDDDDK EDVTK |         |           |         |                                            |      | Mascot      |
| 11                  | isobutyryl-CoA dehydrogenase, mitochondrial [Danio rerio] |             |         |       | gij 41055941  |                             | 45197.7 | 8.33      | 6       | 45                                         | 0    |             |
| Peptide Information |                                                           |             |         |       |               |                             |         |           |         |                                            |      |             |
|                     | Calc. Mass                                                | Obsrv. Mass | ± da    | ± ppm | Start Seq.    | End Sequence Seq.           |         | Ion Score | C. I. % | Modification                               | Rank | Result Type |
|                     | 901.54                                                    | 901.5135    | -0.0265 | -29   | 1             | 8 MAARALIR                  |         | 27        | 52.278  |                                            |      | Mascot      |
|                     | 901.54                                                    | 901.5135    | -0.0265 | -29   | 1             | 8 MAARALIR                  |         |           |         |                                            |      | Mascot      |
|                     | 1103.548                                                  | 1103.5774   | 0.0294  | 27    | 182           | 191 GDHYILNGSK              |         |           |         |                                            |      | Mascot      |
|                     | 1354.6671                                                 | 1354.7772   | 0.1101  | 81    | 261           | 273 LGTEGGQGFSIAMK          |         |           |         | Oxidation (M)[12]                          |      | Mascot      |
|                     | 1354.6671                                                 | 1354.7772   | 0.1101  | 81    | 261           | 273 LGTEGGQGFSIAMK          |         |           |         | Oxidation (M)[12]                          |      | Mascot      |
|                     | 1862.8411                                                 | 1863.073    | 0.2319  | 124   | 192           | 208 AFISGGGDTDVYVVMCR       |         |           |         | Carbamidomethyl (C)[16], Oxidation (M)[15] |      | Mascot      |
|                     | 1908.9596                                                 | 1908.9456   | -0.014  | -7    | 261           | 279 LGTEGGQGFSIAMKGLNG GR   |         |           |         | Oxidation (M)[12]                          |      | Mascot      |
|                     | 1924.0432                                                 | 1923.98     | -0.0632 | -33   | 280           | 298 INIASC SLGAAHASVLLAR    |         |           |         | Carbamidomethyl (C)[6]                     |      | Mascot      |
| 12                  | Ewing tumor-associated antigen 1 [Danio rerio]            |             |         |       | gij 162139038 |                             | 71948.4 | 6.84      | 12      | 43                                         | 0    |             |
| Peptide Information |                                                           |             |         |       |               |                             |         |           |         |                                            |      |             |
|                     | Calc. Mass                                                | Obsrv. Mass | ± da    | ± ppm | Start Seq.    | End Sequence Seq.           |         | Ion Score | C. I. % | Modification                               | Rank | Result Type |
|                     | 996.5836                                                  | 996.6034    | 0.0198  | 20    | 28            | 37 SPKAAAPLNK               |         |           |         |                                            |      | Mascot      |
|                     | 1103.5327                                                 | 1103.5774   | 0.0447  | 41    | 5             | 14 GSQEQNEIAK               |         |           |         |                                            |      | Mascot      |
|                     | 1210.7054                                                 | 1210.6071   | -0.0983 | -81   | 592           | 601 FKKPHGELVR              |         |           |         |                                            |      | Mascot      |
|                     | 1475.7085                                                 | 1475.7635   | 0.055   | 37    | 2             | 14 ESRGSQEQNEIAK            |         |           |         |                                            |      | Mascot      |

|  |           |           |         |     |     |     |                               |  |  |  |  |                         |  |  |  |  |        |
|--|-----------|-----------|---------|-----|-----|-----|-------------------------------|--|--|--|--|-------------------------|--|--|--|--|--------|
|  | 1488.7917 | 1488.793  | 0.0013  | 1   | 38  | 50  | NTAEFKTPTRPAR                 |  |  |  |  |                         |  |  |  |  | Mascot |
|  | 1488.7917 | 1488.793  | 0.0013  | 1   | 38  | 50  | NTAEFKTPTRPAR                 |  |  |  |  |                         |  |  |  |  | Mascot |
|  | 1862.9071 | 1863.073  | 0.1659  | 89  | 489 | 505 | SFATSENAVFAHPYPPK             |  |  |  |  |                         |  |  |  |  | Mascot |
|  | 1880.9573 | 1880.9967 | 0.0394  | 21  | 575 | 591 | GVLAVIQSEARDTDNHR             |  |  |  |  |                         |  |  |  |  | Mascot |
|  | 1994.0526 | 1993.9897 | -0.0629 | -32 | 334 | 351 | TKVSQLNNSIQINGGLHR            |  |  |  |  |                         |  |  |  |  | Mascot |
|  | 2197.1216 | 2197.137  | 0.0154  | 7   | 314 | 333 | NAVSVMTNKPCEAKNVG<br>LHK      |  |  |  |  | Carbamidomethyl (C)[11] |  |  |  |  | Mascot |
|  | 2211.155  | 2211.1179 | -0.0371 | -17 | 413 | 432 | NAIKPSQSKPSSMHQNLI<br>SK      |  |  |  |  | Oxidation (M)[13]       |  |  |  |  | Mascot |
|  | 2384.0354 | 2384.0769 | 0.0415  | 17  | 524 | 548 | AAGPGCNVSCDAARPSG<br>SSSNGAYK |  |  |  |  | Carbamidomethyl (C)[6]  |  |  |  |  | Mascot |
|  | 2479.3198 | 2479.3062 | -0.0136 | -5  | 413 | 434 | NAIKPSQSKPSSMHQNLI<br>SKQR    |  |  |  |  |                         |  |  |  |  | Mascot |

13 PREDICTED: UDP-GlcNAc:betaGal  
beta-1,3-N-acetylglucosaminyltransferase 2 [Danio  
rerio] gi|125843963 48322.6 8.69 10 41 0

#### Peptide Information

| Calc. Mass | Obsrv. Mass | ± da    | ± ppm | Start Seq. | End Seq. | Sequence                  | Ion Score | C. I. | % | Modification           | Rank | Result Type |
|------------|-------------|---------|-------|------------|----------|---------------------------|-----------|-------|---|------------------------|------|-------------|
| 864.411    | 864.4554    | 0.0444  | 51    | 84         | 90       | NGAFWNR                   |           |       |   |                        |      | Mascot      |
| 1028.3846  | 1028.5013   | 0.1167  | 113   | 412        | 420      | SMHSSMLTC                 |           |       |   | Oxidation (M)[2,6]     |      | Mascot      |
| 1103.5215  | 1103.5774   | 0.0559  | 51    | 210        | 219      | SSLDDPNLDK                |           |       |   |                        |      | Mascot      |
| 1165.5847  | 1165.7528   | 0.1681  | 144   | 193        | 202      | EGEYDGLKVR                |           |       |   |                        |      | Mascot      |
| 1179.5753  | 1179.6071   | 0.0318  | 27    | 378        | 386      | TFDIREQDR                 |           |       |   |                        |      | Mascot      |
| 1354.6168  | 1354.7772   | 0.1604  | 118   | 383        | 393      | EQDRENPCVHK               |           |       |   |                        |      | Mascot      |
| 1354.6168  | 1354.7772   | 0.1604  | 118   | 383        | 393      | EQDRENPCVHK               |           |       |   |                        |      | Mascot      |
| 1436.6879  | 1436.7474   | 0.0595  | 41    | 112        | 123      | FHCSPESFELLK              |           |       |   |                        |      | Mascot      |
| 1736.8763  | 1736.8948   | 0.0185  | 11    | 253        | 266      | WMLGHCPRVSFIFK            |           |       |   | Oxidation (M)[2]       |      | Mascot      |
| 1751.9486  | 1751.8267   | -0.1219 | -70   | 387        | 400      | ENPCVHKHLLLVHR            |           |       |   | Carbamidomethyl (C)[4] |      | Mascot      |
| 2457.3323  | 2457.3267   | -0.0056 | -2    | 5          | 25       | YMKFLIVALASSLCFILFY<br>SK |           |       |   |                        |      | Mascot      |
| 2457.3323  | 2457.3267   | -0.0056 | -2    | 5          | 25       | YMKFLIVALASSLCFILFY<br>SK |           |       |   |                        |      | Mascot      |

14 Si:dkey-180p18.9 protein [Danio rerio] gi|50604191 36662.8 6.44 4 40 0 28 54.216

#### Peptide Information

| Calc. Mass | Obsrv. Mass | ± da   | ± ppm | Start Seq. | End Seq. | Sequence  | Ion Score | C. I.  | % | Modification | Rank | Result Type |
|------------|-------------|--------|-------|------------|----------|-----------|-----------|--------|---|--------------|------|-------------|
| 850.4781   | 850.5455    | 0.0674 | 79    | 299        | 305      | TILSFNR   |           |        |   |              |      | Mascot      |
| 901.5465   | 901.5135    | -0.033 | -37   | 255        | 262      | TTAQVLIR  | 28        | 54.216 |   |              |      | Mascot      |
| 901.5465   | 901.5135    | -0.033 | -37   | 255        | 262      | TTAQVLIR  |           |        |   |              |      | Mascot      |
| 1028.4805  | 1028.5013   | 0.0208 | 20    | 309        | 317      | ACPMHWGVK |           |        |   |              |      | Mascot      |

Mascot

|    |                                                                         |              |          |      |    |    |   |    |       |
|----|-------------------------------------------------------------------------|--------------|----------|------|----|----|---|----|-------|
| 15 | novel protein similar to vertebrate stabilin 2 (STAB2)<br>[Danio rerio] | gi 148725539 | 264800.5 | 6.26 | 16 | 40 | 0 | 30 | 73.04 |
|----|-------------------------------------------------------------------------|--------------|----------|------|----|----|---|----|-------|

### Peptide Information

| Calc. Mass | Obsrv. Mass | ± da    | ± ppm | Start Seq. | End Sequence Seq.           | Ion Score | C. I. % Modification                          | Rank | Result Type |
|------------|-------------|---------|-------|------------|-----------------------------|-----------|-----------------------------------------------|------|-------------|
| 901.5464   | 901.5135    | -0.0329 | -36   | 1587       | 1594 ASIDLVKR               | 30        | 73.04                                         |      | Mascot      |
| 901.5464   | 901.5135    | -0.0329 | -36   | 1587       | 1594 ASIDLVKR               |           |                                               |      | Mascot      |
| 1045.5789  | 1045.5679   | -0.011  | -11   | 1756       | 1763 YHILRDTK               |           |                                               |      | Mascot      |
| 1103.472   | 1103.5774   | 0.1054  | 96    | 1437       | 1447 NGGCSAHAVCK            |           | Carbamidomethyl (C)[4]                        |      | Mascot      |
| 1179.6117  | 1179.6071   | -0.0046 | -4    | 1557       | 1565 NRIYELDTR              |           |                                               |      | Mascot      |
| 1210.5885  | 1210.6071   | 0.0186  | 15    | 1837       | 1846 QTIDFTVACR             |           | Carbamidomethyl (C)[9]                        |      | Mascot      |
| 1342.6942  | 1342.6414   | -0.0528 | -39   | 2435       | 2444 TKPFQFHYFK             |           |                                               |      | Mascot      |
| 1354.6783  | 1354.7772   | 0.0989  | 73    | 1259       | 1270 CDKATSILFSGR           |           | Carbamidomethyl (C)[1]                        |      | Mascot      |
| 1354.6783  | 1354.7772   | 0.0989  | 73    | 1259       | 1270 CDKATSILFSGR           |           | Carbamidomethyl (C)[1]                        |      | Mascot      |
| 1475.7059  | 1475.7635   | 0.0576  | 39    | 2208       | 2221 CGSGHVGIVDYGVR         |           | Carbamidomethyl (C)[1]                        |      | Mascot      |
| 1488.6896  | 1488.793    | 0.1034  | 69    | 662        | 674 YMAPCVSCTLISK           |           | Carbamidomethyl (C)[5], Oxidation (M)[2]      |      | Mascot      |
| 1488.6896  | 1488.793    | 0.1034  | 69    | 662        | 674 YMAPCVSCTLISK           |           | Carbamidomethyl (C)[5], Oxidation (M)[2]      |      | Mascot      |
| 1542.6675  | 1542.8931   | 0.2256  | 146   | 147        | 159 TDLYGPTCSNVCR           |           | Carbamidomethyl (C)[8,12]                     |      | Mascot      |
| 1736.9065  | 1736.8948   | -0.0117 | -7    | 1081       | 1097 TLPVYSTNDTTIVAGGK      |           |                                               |      | Mascot      |
| 2114.0732  | 2114.1997   | 0.1265  | 60    | 695        | 714 KQLGLSLPSIGCSHCND TK    |           |                                               |      | Mascot      |
| 2114.0732  | 2114.1997   | 0.1265  | 60    | 695        | 714 KQLGLSLPSIGCSHCND TK    |           |                                               |      | Mascot      |
| 2156.9595  | 2157.1462   | 0.1867  | 87    | 1271       | 1288 CMDCFQTIINPCPSGTTK     |           | Carbamidomethyl (C)[1,4,12]                   |      | Mascot      |
| 2196.9504  | 2197.137    | 0.1866  | 85    | 267        | 287 VCMPIDPCQTNLGNCTS GSTR  |           |                                               |      | Mascot      |
| 2284.0486  | 2284.1877   | 0.1391  | 61    | 1511       | 1528 NCELINLCKEGSHLYYDR     |           | Carbamidomethyl (C)[2,8]                      |      | Mascot      |
| 2384.0098  | 2384.0769   | 0.0671  | 28    | 267        | 287 VCMPIDPCQTNLGNCTS GSTR  |           | Carbamidomethyl (C)[2,8,15], Oxidation (M)[3] |      | Mascot      |
| 2531.3525  | 2531.2527   | -0.0998 | -39   | 494        | 516 LMDAVPSTVISEKEESLL ELSK |           |                                               |      | Mascot      |

|    |                                                                                |             |         |      |   |    |   |    |        |
|----|--------------------------------------------------------------------------------|-------------|---------|------|---|----|---|----|--------|
| 16 | novel protein similar to vertebrate aldo-keto reductase family 1 [Danio rerio] | gi 56207864 | 38502.8 | 6.73 | 4 | 40 | 0 | 28 | 54.216 |
|----|--------------------------------------------------------------------------------|-------------|---------|------|---|----|---|----|--------|

### Peptide Information

| Calc. Mass | Obsrv. Mass | $\pm$ da | $\pm$ ppm | Start Seq. | End Seq. | Sequence | Ion Score | C. I.  | % Modification | Rank | Result Type |
|------------|-------------|----------|-----------|------------|----------|----------|-----------|--------|----------------|------|-------------|
| 850.4781   | 850.5455    | 0.0674   | 79        | 316        | 322      | TILSFNR  |           |        |                |      | Mascot      |
| 901.5465   | 901.5135    | -0.033   | -37       | 272        | 279      | TTAQVLIR | 28        | 54.216 |                |      | Mascot      |

|  |           |           |         |      |     |     |             |  |  |  |  |  |  |  |  |  |        |
|--|-----------|-----------|---------|------|-----|-----|-------------|--|--|--|--|--|--|--|--|--|--------|
|  | 901.5465  | 901.5135  | -0.033  | -37  | 272 | 279 | TTAQVLIR    |  |  |  |  |  |  |  |  |  | Mascot |
|  | 1028.4805 | 1028.5013 | 0.0208  | 20   | 326 | 334 | ACPMHWGVK   |  |  |  |  |  |  |  |  |  | Mascot |
|  | 1112.631  | 1112.5123 | -0.1187 | -107 | 51  | 61  | SPPGKVTEAVK |  |  |  |  |  |  |  |  |  | Mascot |

17 PREDICTED: diacylglycerol kinase beta-like, partial [Danio rerio] gi|326674321 85995.9 6.78 13 39 0

#### Peptide Information

| Calc. Mass | Obsrv. Mass | ± da    | ± ppm | Start Seq. | End Seq. | Sequence           | Ion Score | C. I. | % Modification                            | Rank | Result Type |
|------------|-------------|---------|-------|------------|----------|--------------------|-----------|-------|-------------------------------------------|------|-------------|
| 842.4229   | 842.5153    | 0.0924  | 110   | 153        | 158      | LEFMFR             |           |       |                                           |      | Mascot      |
| 864.4032   | 864.4554    | 0.0522  | 60    | 455        | 462      | SGPMPGYR           |           |       |                                           |      | Mascot      |
| 901.5353   | 901.5135    | -0.0218 | -24   | 678        | 685      | KTTIVDPK           |           |       |                                           |      | Mascot      |
| 901.5353   | 901.5135    | -0.0218 | -24   | 678        | 685      | KTTIVDPK           |           |       |                                           |      | Mascot      |
| 1045.4264  | 1045.5679   | 0.1415  | 135   | 270        | 278      | QGLCCSFCK          |           |       | Carbamidomethyl (C)[4]                    |      | Mascot      |
| 1112.6497  | 1112.5123   | -0.1374 | -123  | 112        | 121      | LIKGSCPPLK         |           |       | Carbamidomethyl (C)[6]                    |      | Mascot      |
| 1210.5455  | 1210.6071   | 0.0616  | 51    | 455        | 465      | SGPMPGYRSCR        |           |       |                                           |      | Mascot      |
| 1707.8007  | 1707.7886   | -0.0121 | -7    | 534        | 547      | DVQDSSEVMLDRWK     |           |       |                                           |      | Mascot      |
| 2157.0005  | 2157.1462   | 0.1457  | 68    | 302        | 319      | KNTEIMHHFWVEGNCPK  |           |       |                                           |      | Mascot      |
| 2283.2488  | 2283.1914   | -0.0574 | -25   | 115        | 135      | GSCPPLKVTSQSRPLSTV |           |       | Carbamidomethyl (C)[3]                    |      | Mascot      |
| 2284.0591  | 2284.1877   | 0.1286  | 56    | 153        | 171      | LEFMFRLYDTDGNGFLD  |           |       | Oxidation (M)[4]                          |      | Mascot      |
| 2432.0581  | 2432.1536   | 0.0955  | 39    | 303        | 322      | NTEIMHHFWVEGNCPK   |           |       | Carbamidomethyl (C)[14]                   |      | Mascot      |
| 2432.0581  | 2432.1536   | 0.0955  | 39    | 303        | 322      | CDK                |           |       | Carbamidomethyl (C)[14]                   |      | Mascot      |
| 2448.053   | 2448.1565   | 0.1035  | 42    | 303        | 322      | NTEIMHHFWVEGNCPK   |           |       | Carbamidomethyl (C)[14], Oxidation (M)[5] |      | Mascot      |
| 2479.3022  | 2479.3062   | 0.004   | 2     | 248        | 269      | LKHFSKPAYCNLCNMLI  |           |       | Oxidation (M)[16]                         |      | Mascot      |
| 2488.1682  | 2488.1079   | -0.0603 | -24   | 329        | 348      | GLGK               |           |       | Carbamidomethyl (C)[1,10,13]              |      | Mascot      |
| 2489.0796  | 2489.1013   | 0.0217  | 9     | 303        | 322      | CYQGLTGLHCVWCQITL  |           |       | Carbamidomethyl (C)[14,18]                |      | Mascot      |
|            |             |         |       |            |          | HNK                |           |       |                                           |      |             |
|            |             |         |       |            |          | NTEIMHHFWVEGNCPK   |           |       |                                           |      |             |
|            |             |         |       |            |          | CDK                |           |       |                                           |      |             |

18 PREDICTED: uncharacterized protein C11orf95 homolog [Danio rerio] gi|326669276 70864.2 5.62 11 38 0

#### Peptide Information

| Calc. Mass | Obsrv. Mass | ± da    | ± ppm | Start Seq. | End Seq. | Sequence    | Ion Score | C. I. | % Modification         | Rank | Result Type |
|------------|-------------|---------|-------|------------|----------|-------------|-----------|-------|------------------------|------|-------------|
| 1045.4619  | 1045.5679   | 0.106   | 101   | 1          | 9        | MDEAESVHK   |           |       |                        |      | Mascot      |
| 1112.5232  | 1112.5123   | -0.0109 | -10   | 167        | 175      | SGWENHLNR   |           |       |                        |      | Mascot      |
| 1365.5272  | 1365.6426   | 0.1154  | 85    | 530        | 539      | MDFLMDYDCR  |           |       | Carbamidomethyl (C)[9] |      | Mascot      |
| 1436.6007  | 1436.7474   | 0.1467  | 102   | 530        | 540      | MDFLMDYDCRK |           |       |                        |      | Mascot      |

|    |                                                 |           |         |     |              |     |                           |      |   |    |                                          |    |        |  |        |
|----|-------------------------------------------------|-----------|---------|-----|--------------|-----|---------------------------|------|---|----|------------------------------------------|----|--------|--|--------|
|    | 1475.7166                                       | 1475.7635 | 0.0469  | 32  | 151          | 162 | HPYSLWLTESDK              |      |   |    |                                          |    |        |  | Mascot |
|    | 1751.8494                                       | 1751.8267 | -0.0227 | -13 | 431          | 445 | KHIQECHPETSSLSR           |      |   |    |                                          |    |        |  | Mascot |
|    | 1862.8185                                       | 1863.073  | 0.2545  | 137 | 1            | 16  | MDEAESVHKAQTESR           |      |   |    | Oxidation (M)[1]                         |    |        |  | Mascot |
|    | 2114.0222                                       | 2114.1997 | 0.1775  | 84  | 291          | 308 | SHMLELHPNSLLYSAAEEK       |      |   |    | Oxidation (M)[3]                         |    |        |  | Mascot |
|    | 2114.0222                                       | 2114.1997 | 0.1775  | 84  | 291          | 308 | SHMLELHPNSLLYSAAEEK       |      |   |    | Oxidation (M)[3]                         |    |        |  | Mascot |
|    | 2175.1697                                       | 2175.1536 | -0.0161 | -7  | 541          | 561 | HGLICMVCGATLATLKVS<br>TIK |      |   |    | Oxidation (M)[6]                         |    |        |  | Mascot |
|    | 2175.1697                                       | 2175.1536 | -0.0161 | -7  | 541          | 561 | HGLICMVCGATLATLKVS<br>TIK |      |   |    | Oxidation (M)[6]                         |    |        |  | Mascot |
|    | 2197.1001                                       | 2197.137  | 0.0369  | 17  | 272          | 290 | LVCMVCSCLPSLHLDHI<br>K    |      |   |    | Carbamidomethyl (C)[3], Oxidation (M)[4] |    |        |  | Mascot |
|    | 2298.1687                                       | 2298.198  | 0.0293  | 13  | 124          | 144 | QGMICMVCSSSLATLKLS<br>TIK |      |   |    | Carbamidomethyl (C)[5,8]                 |    |        |  | Mascot |
| 19 | hypothetical protein LOC100142653 [Danio rerio] |           |         |     | gi 169790892 |     | 51963.8                   | 6.07 | 2 | 38 | 0                                        | 38 | 96.076 |  |        |

#### Peptide Information

| Calc. Mass | Obsrv. Mass | ± da    | ± ppm | Start Seq. | End Seq. | Sequence                    | Ion Score | C. I.  | % | Modification | Rank | Result Type |
|------------|-------------|---------|-------|------------|----------|-----------------------------|-----------|--------|---|--------------|------|-------------|
| 901.5101   | 901.5135    | 0.0034  | 4     | 350        | 357      | SDVILQAR                    | 38        | 96.076 |   |              |      | Mascot      |
| 901.5101   | 901.5135    | 0.0034  | 4     | 350        | 357      | SDVILQAR                    |           |        |   |              |      | Mascot      |
| 2294.2463  | 2294.178    | -0.0683 | -30   | 350        | 371      | SDVILQARGSSSTVLLADG<br>NHLK |           |        |   |              |      | Mascot      |

20 novel protein containing an EMI domain [Danio rerio] gi|148725612 46007.5 9.47 3 38 0 31 78.486

#### Peptide Information

| Calc. Mass | Obsrv. Mass | ± da    | ± ppm | Start Seq. | End Seq. | Sequence        | Ion Score | C. I.  | % | Modification           | Rank | Result Type |
|------------|-------------|---------|-------|------------|----------|-----------------|-----------|--------|---|------------------------|------|-------------|
| 842.4188   | 842.5153    | 0.0965  | 115   | 425        | 431      | AKMSSFR         |           |        |   | Oxidation (M)[3]       |      | Mascot      |
| 901.456    | 901.5135    | 0.0575  | 64    | 9          | 15       | CLQIPDR         | 31        | 78.486 |   | Carbamidomethyl (C)[1] |      | Mascot      |
| 901.456    | 901.5135    | 0.0575  | 64    | 9          | 15       | CLQIPDR         |           |        |   | Carbamidomethyl (C)[1] |      | Mascot      |
| 1342.6709  | 1342.6414   | -0.0295 | -22   | 220        | 234      | GDVGTRGPSGAPGSK |           |        |   |                        |      | Mascot      |

21 PREDICTED: hypothetical protein LOC100003636 [Danio rerio] gi|292612849 55164.8 4.93 4 38 0 28 59.847

#### Peptide Information

| Calc. Mass | Obsrv. Mass | ± da    | ± ppm | Start Seq. | End Seq. | Sequence           | Ion Score | C. I.  | % | Modification | Rank | Result Type |
|------------|-------------|---------|-------|------------|----------|--------------------|-----------|--------|---|--------------|------|-------------|
| 901.5213   | 901.5135    | -0.0078 | -9    | 34         | 41       | AEVRSALR           | 28        | 59.847 |   |              |      | Mascot      |
| 901.5213   | 901.5135    | -0.0078 | -9    | 34         | 41       | AEVRSALR           |           |        |   |              |      | Mascot      |
| 1028.516   | 1028.5013   | -0.0147 | -14   | 109        | 115      | EYYERLR            |           |        |   |              |      | Mascot      |
| 1365.6182  | 1365.6426   | 0.0244  | 18    | 104        | 113      | HESPREYER          |           |        |   |              |      | Mascot      |
| 2531.271   | 2531.2527   | -0.0183 | -7    | 147        | 167      | QQLALFNIEKIWAMSEPD |           |        |   |              |      | Mascot      |



22    PREDICTED: hypothetical protein LOC100331078    QNR  
 [Danio rerio]    gi|326668546    57666.5    8.69    11    37    0

Peptide Information

| Calc. Mass | Obsrv. Mass | ± da    | ± ppm | Start Seq. | End Seq. | Sequence                | Ion Score | C. I. % | Modification                               | Rank | Result Type |
|------------|-------------|---------|-------|------------|----------|-------------------------|-----------|---------|--------------------------------------------|------|-------------|
| 959.5342   | 959.5181    | -0.0161 | -17   | 46         | 54       | DLIGCIIGR               |           |         |                                            |      | Mascot      |
| 1179.5211  | 1179.6071   | 0.086   | 73    | 389        | 398      | QMNWSGANQK              |           |         | Oxidation (M)[2]                           |      | Mascot      |
| 1210.7153  | 1210.6071   | -0.1082 | -89   | 5          | 15       | HSGVVTLIKEK             |           |         |                                            |      | Mascot      |
| 1365.7485  | 1365.6426   | -0.1059 | -78   | 35         | 45       | RIEDDLHQVLK             |           |         |                                            |      | Mascot      |
| 1719.8469  | 1719.8651   | 0.0182  | 11    | 465        | 479      | KENGGDILELLELMK         |           |         | Oxidation (M)[14]                          |      | Mascot      |
| 1719.8469  | 1719.8651   | 0.0182  | 11    | 465        | 479      | KENGGDILELLELMK         |           |         | Oxidation (M)[14]                          |      | Mascot      |
| 1736.8319  | 1736.8948   | 0.0629  | 36    | 14         | 28       | EKAPNAVGTCHMLHR         |           |         | Carbamidomethyl (C)[11], Oxidation (M)[12] |      | Mascot      |
| 1901.9347  | 1902.0004   | 0.0657  | 35    | 281        | 296      | TYCNSSCLSLLELIK         |           |         | Carbamidomethyl (C)[3,7]                   |      | Mascot      |
| 1993.943   | 1993.9897   | 0.0467  | 23    | 64         | 82       | QMSGAIKIANAMEGSSDR      |           |         |                                            |      | Mascot      |
| 2196.9939  | 2197.137    | 0.1431  | 65    | 261        | 280      | SSTPRNIYSPCSSAVGDQDR    |           |         | Carbamidomethyl (C)[11]                    |      | Mascot      |
| 2384.2788  | 2384.0769   | -0.2019 | -85   | 132        | 154      | ICSSSSLTLPRLIGCIIGHQGTK |           |         |                                            |      | Mascot      |
| 2488.1694  | 2488.1079   | -0.0615 | -25   | 466        | 487      | ENGGDILELLELMKQVGMEHSK  |           |         | Oxidation (M)[13]                          |      | Mascot      |

23    PREDICTED: pericentrin [Danio rerio]    gi|326668478    491858    4.98    29    36    0

Peptide Information

| Calc. Mass | Obsrv. Mass | ± da    | ± ppm | Start Seq. | End Seq. | Sequence   | Ion Score | C. I. % | Modification     | Rank | Result Type |
|------------|-------------|---------|-------|------------|----------|------------|-----------|---------|------------------|------|-------------|
| 842.4995   | 842.5153    | 0.0158  | 19    | 15         | 21       | AKLAHFR    |           |         |                  |      | Mascot      |
| 864.3581   | 864.4554    | 0.0973  | 113   | 1982       | 1988     | EESDQEK    |           |         |                  |      | Mascot      |
| 882.5155   | 882.5723    | 0.0568  | 64    | 3606       | 3612     | SEIHKLR    |           |         |                  |      | Mascot      |
| 901.5101   | 901.5135    | 0.0034  | 4     | 1827       | 1833     | KEEQVIR    | 19        | 0       |                  |      | Mascot      |
| 901.5101   | 901.5135    | 0.0034  | 4     | 1827       | 1833     | KEEQVIR    |           |         |                  |      | Mascot      |
| 959.4904   | 959.5181    | 0.0277  | 29    | 3810       | 3816     | EQEEIRR    |           |         |                  |      | Mascot      |
| 1028.4604  | 1028.5013   | 0.0409  | 40    | 891        | 898      | AELEYMEK   |           |         | Oxidation (M)[6] |      | Mascot      |
| 1045.4908  | 1045.5679   | 0.0771  | 74    | 1472       | 1480     | QAEAEVNER  |           |         |                  |      | Mascot      |
| 1060.5634  | 1060.4849   | -0.0785 | -74   | 1834       | 1842     | DELRSELAKE |           |         |                  |      | Mascot      |
| 1076.5331  | 1076.4808   | -0.0523 | -49   | 1285       | 1293     | SSRVDDIER  |           |         |                  |      | Mascot      |
| 1103.5878  | 1103.5774   | -0.0104 | -9    | 1192       | 1200     | ELKQALMDR  |           |         |                  |      | Mascot      |
| 1112.5847  | 1112.5123   | -0.0724 | -65   | 1318       | 1325     | TYFEQRLR   |           |         |                  |      | Mascot      |
| 1128.5392  | 1128.5116   | -0.0276 | -24   | 3753       | 3762     | QESASAHDRK |           |         |                  |      | Mascot      |

|    |                                              |           |         |     |              |      |                             |      |                        |    |        |    |        |
|----|----------------------------------------------|-----------|---------|-----|--------------|------|-----------------------------|------|------------------------|----|--------|----|--------|
|    | 1179.5674                                    | 1179.6071 | 0.0397  | 34  | 1115         | 1124 | TSVEQLQSQCK                 |      | Carbamidomethyl (C)[9] |    | Mascot |    |        |
|    | 1210.5698                                    | 1210.6071 | 0.0373  | 31  | 1540         | 1549 | NRASEEFTEK                  |      |                        |    | Mascot |    |        |
|    | 1342.6671                                    | 1342.6414 | -0.0257 | -19 | 3003         | 3013 | QEMTSKTNYIK                 |      |                        |    | Mascot |    |        |
|    | 1475.7522                                    | 1475.7635 | 0.0113  | 8   | 3623         | 3635 | QTCLQAVEKEQAK               |      |                        |    | Mascot |    |        |
|    | 1488.838                                     | 1488.793  | -0.045  | -30 | 1488         | 1500 | VTQLESRLSQLSK               |      |                        |    | Mascot |    |        |
|    | 1488.838                                     | 1488.793  | -0.045  | -30 | 1488         | 1500 | VTQLESRLSQLSK               |      |                        |    | Mascot |    |        |
|    | 1719.8547                                    | 1719.8651 | 0.0104  | 6   | 3592         | 3605 | TELQSSYKHQEELK              |      |                        |    | Mascot |    |        |
|    | 1719.8547                                    | 1719.8651 | 0.0104  | 6   | 3592         | 3605 | TELQSSYKHQEELK              |      |                        |    | Mascot |    |        |
|    | 1767.8503                                    | 1767.8225 | -0.0278 | -16 | 828          | 842  | LTCLKENLTSMEEEEK            |      |                        |    | Mascot |    |        |
|    | 1993.9937                                    | 1993.9897 | -0.004  | -2  | 3014         | 3031 | ELHEQQEAAVAKQGEAQ<br>K      |      |                        |    | Mascot |    |        |
|    | 1999.9791                                    | 1999.9546 | -0.0245 | -12 | 1463         | 1480 | LQSAQEAAARQAEAEVNE<br>R     |      |                        |    | Mascot |    |        |
|    | 1999.9791                                    | 1999.9546 | -0.0245 | -12 | 1463         | 1480 | LQSAQEAAARQAEAEVNE<br>R     |      |                        |    | Mascot |    |        |
|    | 2157.0969                                    | 2157.1462 | 0.0493  | 23  | 3936         | 3954 | HTNISQDSSTPSLIERLM<br>K     |      |                        |    | Mascot |    |        |
|    | 2175.1438                                    | 2175.1536 | 0.0098  | 5   | 2014         | 2032 | MSQLTAQLQLD TVVSQ<br>LR     |      | Oxidation (M)[1]       |    | Mascot |    |        |
|    | 2175.1438                                    | 2175.1536 | 0.0098  | 5   | 2014         | 2032 | MSQLTAQLQLD TVVSQ<br>LR     |      | Oxidation (M)[1]       |    | Mascot |    |        |
|    | 2197.052                                     | 2197.137  | 0.085   | 39  | 1307         | 1323 | EQNEVELENLRTYFEQR           |      |                        |    | Mascot |    |        |
|    | 2284.1013                                    | 2284.1877 | 0.0864  | 38  | 3955         | 3974 | ENSEFSECLAALSEEKISL<br>K    |      | Carbamidomethyl (C)[8] |    | Mascot |    |        |
|    | 2357.1255                                    | 2357.1431 | 0.0176  | 7   | 392          | 410  | YEADISNYDLRLQTLKEE<br>R     |      |                        |    | Mascot |    |        |
|    | 2457.1133                                    | 2457.3267 | 0.2134  | 87  | 3525         | 3544 | EQGMETQHQ LHSDVKEL<br>EMR   |      | Oxidation (M)[4,19]    |    | Mascot |    |        |
|    | 2457.1133                                    | 2457.3267 | 0.2134  | 87  | 3525         | 3544 | EQGMETQHQ LHSDVKEL<br>EMR   |      | Oxidation (M)[4,19]    |    | Mascot |    |        |
|    | 2488.3042                                    | 2488.1079 | -0.1963 | -79 | 3152         | 3174 | FLEGLSQDPSLSASLSSP<br>EVLRR |      |                        |    | Mascot |    |        |
|    | 2515.282                                     | 2515.2617 | -0.0203 | -8  | 1026         | 1047 | LSLTNLHTAQLELSQSNM<br>QKDK  |      | Oxidation (M)[18]      |    | Mascot |    |        |
| 24 | hypothetical protein LOC553452 [Danio rerio] |           |         |     | gi 116235416 |      | 35430.1                     | 6.02 | 3                      | 36 | 0      | 28 | 54.216 |

Peptide Information

| Calc. Mass | Obsrv. Mass | ± da   | ± ppm | Start Seq. | End Seq. | Sequence  | Ion Score | C. I.  | % Modification | Rank | Result Type |
|------------|-------------|--------|-------|------------|----------|-----------|-----------|--------|----------------|------|-------------|
| 850.4781   | 850.5455    | 0.0674 | 79    | 288        | 294      | TILSFNR   |           |        |                |      | Mascot      |
| 901.5465   | 901.5135    | -0.033 | -37   | 244        | 251      | TTAQVLIR  | 28        | 54.216 |                |      | Mascot      |
| 901.5465   | 901.5135    | -0.033 | -37   | 244        | 251      | TTAQVLIR  |           |        |                |      | Mascot      |
| 1028.4805  | 1028.5013   | 0.0208 | 20    | 298        | 306      | ACPMHWGVK |           |        |                |      | Mascot      |

25 PREDICTED: hypothetical protein LOC100006878 [Danio rerio]

gi|292628291 6219.4 9.11 4 36 0

Peptide Information

|    |                                                         | Calc. Mass | Obsrv. Mass | ± da    | ± ppm | Start Seq. | End Sequence Seq.          | Ion Score | C. I. | % Modification   | Rank | Result Type |
|----|---------------------------------------------------------|------------|-------------|---------|-------|------------|----------------------------|-----------|-------|------------------|------|-------------|
|    |                                                         | 1365.6388  | 1365.6426   | 0.0038  | 3     | 1          | 13 MGVLVSCEEAPSK           |           |       | Oxidation (M)[1] |      | Mascot      |
|    |                                                         | 1736.0105  | 1735.8551   | -0.1554 | -90   | 30         | 45 QGLPLALTHLVGFLEK        |           |       |                  |      | Mascot      |
|    |                                                         | 2294.3052  | 2294.178    | -0.1272 | -55   | 25         | 45 TGLMRQGLPLALTHLVGFLEK   |           |       |                  |      | Mascot      |
|    |                                                         | 2471.2783  | 2471.1096   | -0.1687 | -68   | 1          | 23 MGVLVSCEEAPSKVFGVPLSHLR |           |       | Oxidation (M)[1] |      | Mascot      |
| 26 | PREDICTED: hypothetical protein LOC565734 [Danio rerio] |            |             |         |       |            | gi 68402113                | 30582.9   | 10.05 | 7                | 35   | 0           |

Peptide Information

|    |                                                                               | Calc. Mass | Obsrv. Mass | ± da    | ± ppm | Start Seq. | End Sequence Seq.           | Ion Score | C. I. | % Modification | Rank | Result Type |
|----|-------------------------------------------------------------------------------|------------|-------------|---------|-------|------------|-----------------------------|-----------|-------|----------------|------|-------------|
|    |                                                                               | 1165.6324  | 1165.7528   | 0.1204  | 103   | 118        | 128 VSPNATHAIIK             |           |       |                |      | Mascot      |
|    |                                                                               | 1436.7943  | 1436.7474   | -0.0469 | -33   | 80         | 91 HWCLLLRPVGSR             |           |       |                |      | Mascot      |
|    |                                                                               | 1475.7634  | 1475.7635   | 0.0001  | 0     | 1          | 14 MAEVTGSRNAVINK           |           |       |                |      | Mascot      |
|    |                                                                               | 1902.0093  | 1902.0004   | -0.0089 | -5    | 20         | 36 TLLSLHHHPHGPVDSR         |           |       |                |      | Mascot      |
|    |                                                                               | 2284.0571  | 2284.1877   | 0.1306  | 57    | 41         | 60 KSNVCVHWCAADCVWALHNK     |           |       |                |      | Mascot      |
|    |                                                                               | 2448.3259  | 2448.1565   | -0.1694 | -69   | 15         | 36 LSAFKTLLSLHHHPHGPVDSR    |           |       |                |      | Mascot      |
|    |                                                                               | 2479.5107  | 2479.3062   | -0.2045 | -82   | 246        | 269 EQITGVSVILLLLLGVIINSLKS |           |       |                |      | Mascot      |
| 27 | NADH dehydrogenase (ubiquinone) 1, alpha/beta subcomplex 1-like [Danio rerio] |            |             |         |       |            | gi 51010919                 | 17698.1   | 6.16  | 2              | 34   | 0           |

Peptide Information

|    |                                                                      | Calc. Mass | Obsrv. Mass | ± da    | ± ppm | Start Seq. | End Sequence Seq.    | Ion Score | C. I.  | % Modification | Rank | Result Type |
|----|----------------------------------------------------------------------|------------|-------------|---------|-------|------------|----------------------|-----------|--------|----------------|------|-------------|
|    |                                                                      | 901.54     | 901.5135    | -0.0265 | -29   | 1          | 8 MAARILAR           | 26        | 30.222 |                |      | Mascot      |
|    |                                                                      | 901.54     | 901.5135    | -0.0265 | -29   | 1          | 8 MAARILAR           |           |        |                |      | Mascot      |
|    |                                                                      | 1893.9817  | 1893.9919   | 0.0102  | 5     | 49         | 65 SSLAQVSGSSLQIFQWR |           |        |                |      | Mascot      |
|    |                                                                      | 1893.9817  | 1893.9919   | 0.0102  | 5     | 49         | 65 SSLAQVSGSSLQIFQWR |           |        |                |      | Mascot      |
| 28 | PREDICTED: hypothetical protein LOC100535442 isoform 2 [Danio rerio] |            |             |         |       |            | gi 326668097         | 11743     | 9.12   | 5              | 34   | 0           |

Peptide Information

|  |  | Calc. Mass | Obsrv. Mass | ± da   | ± ppm | Start Seq. | End Sequence Seq. | Ion Score | C. I. | % Modification | Rank | Result Type |
|--|--|------------|-------------|--------|-------|------------|-------------------|-----------|-------|----------------|------|-------------|
|  |  | 901.5101   | 901.5135    | 0.0034 | 4     | 31         | 38 TNDLLAVR       | 3         | 0     |                |      | Mascot      |
|  |  | 901.5101   | 901.5135    | 0.0034 | 4     | 31         | 38 TNDLLAVR       |           |       |                |      | Mascot      |

|    |                                                                                                     |           |         |      |    |     |                 |         |      |    |    |                           |  |  |  |  |        |
|----|-----------------------------------------------------------------------------------------------------|-----------|---------|------|----|-----|-----------------|---------|------|----|----|---------------------------|--|--|--|--|--------|
|    | 1128.6483                                                                                           | 1128.5116 | -0.1367 | -121 | 29 | 38  | ARTNDLLAVR      |         |      |    |    |                           |  |  |  |  | Mascot |
|    | 1436.7493                                                                                           | 1436.7474 | -0.0019 | -1   | 18 | 30  | LHTETPTDPAKAR   |         |      |    |    |                           |  |  |  |  | Mascot |
|    | 1488.7589                                                                                           | 1488.793  | 0.0341  | 23   | 91 | 103 | LTNTCFVITFVCK   |         |      |    |    |                           |  |  |  |  | Mascot |
|    | 1488.7589                                                                                           | 1488.793  | 0.0341  | 23   | 91 | 103 | LTNTCFVITFVCK   |         |      |    |    |                           |  |  |  |  | Mascot |
|    | 1893.9601                                                                                           | 1893.9919 | 0.0318  | 17   | 91 | 105 | LTNTCFVITFVCKYK |         |      |    |    | Carbamidomethyl (C)[5,12] |  |  |  |  | Mascot |
|    | 1893.9601                                                                                           | 1893.9919 | 0.0318  | 17   | 91 | 105 | LTNTCFVITFVCKYK |         |      |    |    | Carbamidomethyl (C)[5,12] |  |  |  |  | Mascot |
| 29 | novel protein similar to human and mouse myeloid/lymphoid or mixed-lineage leukemia 3 (MLL3) [Danio |           |         |      |    |     | gi 157885936    | 82601.8 | 9.38 | 14 | 34 | 0                         |  |  |  |  |        |

#### Peptide Information

| Calc. Mass | Obsrv. Mass | ± da    | ± ppm | Start Seq. | End Seq. | Sequence           | Ion Score | C. I. | % Modification           | Rank | Result Type |
|------------|-------------|---------|-------|------------|----------|--------------------|-----------|-------|--------------------------|------|-------------|
| 864.5189   | 864.4554    | -0.0635 | -73   | 636        | 642      | ELLYKAK            |           |       |                          |      | Mascot      |
| 870.4679   | 870.5441    | 0.0762  | 88    | 140        | 147      | SISEGHLK           |           |       |                          |      | Mascot      |
| 901.4308   | 901.5135    | 0.0827  | 92    | 286        | 294      | LGATSGCHR          |           |       |                          |      | Mascot      |
| 901.4308   | 901.5135    | 0.0827  | 92    | 286        | 294      | LGATSGCHR          |           |       |                          |      | Mascot      |
| 996.5948   | 996.6034    | 0.0086  | 9     | 462        | 470      | VLGPVAERR          |           |       |                          |      | Mascot      |
| 1045.6152  | 1045.5679   | -0.0473 | -45   | 602        | 611      | IQGLGLFAAR         |           |       |                          |      | Mascot      |
| 1060.4452  | 1060.4849   | 0.0397  | 37    | 17         | 24       | QQWCQHCK           |           |       |                          |      | Mascot      |
| 1210.6538  | 1210.6071   | -0.0467 | -39   | 359        | 369      | QLAAAVQQPER        |           |       |                          |      | Mascot      |
| 1707.8483  | 1707.7886   | -0.0597 | -35   | 499        | 513      | IAESLPGVEACSRYSR   |           |       | Carbamidomethyl (C)[11]  |      | Mascot      |
| 1751.8724  | 1751.8267   | -0.0457 | -26   | 156        | 169      | LHSHLEDKQWHHGK     |           |       |                          |      | Mascot      |
| 1880.9487  | 1880.9967   | 0.048   | 26    | 440        | 456      | VIEQGYEDLVLTDTSAK  |           |       |                          |      | Mascot      |
| 1915.7554  | 1915.9689   | 0.2135  | 111   | 220        | 236      | CCFCQQIGDGMTDGPARR |           |       | Carbamidomethyl (C)[1,2] |      | Mascot      |
| 2225.0112  | 2225.1333   | 0.1221  | 55    | 668        | 686      | YINHSCSPNCVAEIVTFE |           |       | Carbamidomethyl (C)[6]   |      | Mascot      |
| 2283.1562  | 2283.1914   | 0.0352  | 15    | 328        | 348      | GAGAAAGLHVEHQLRCF  |           |       | Carbamidomethyl (C)[16]  |      | Mascot      |
| 2294.0554  | 2294.178    | 0.1226  | 53    | 297        | 315      | CLNIYHFTCALQAGCTFF |           |       | Carbamidomethyl (C)[1,9] |      | Mascot      |

|    |                                                                       |  |  |  |  |  |             |         |      |   |    |   |  |  |  |  |  |
|----|-----------------------------------------------------------------------|--|--|--|--|--|-------------|---------|------|---|----|---|--|--|--|--|--|
| 30 | novel protein similar to vertebrate pim oncogene family [Danio rerio] |  |  |  |  |  | gi 55962880 | 28662.1 | 6.36 | 7 | 34 | 0 |  |  |  |  |  |
|----|-----------------------------------------------------------------------|--|--|--|--|--|-------------|---------|------|---|----|---|--|--|--|--|--|

#### Peptide Information

| Calc. Mass | Obsrv. Mass | ± da    | ± ppm | Start Seq. | End Seq. | Sequence     | Ion Score | C. I. | % Modification         | Rank | Result Type |
|------------|-------------|---------|-------|------------|----------|--------------|-----------|-------|------------------------|------|-------------|
| 959.5342   | 959.5181    | -0.0161 | -17   | 106        | 113      | LIPSMNLR     |           |       | Oxidation (M)[5]       |      | Mascot      |
| 1342.7729  | 1342.6414   | -0.1315 | -98   | 83         | 93       | VKQIAELLDWK  |           |       |                        |      | Mascot      |
| 1365.7446  | 1365.6426   | -0.102  | -75   | 168        | 179      | LIDFGCSVLLTK |           |       | Carbamidomethyl (C)[6] |      | Mascot      |
| 1475.8217  | 1475.7635   | -0.0582 | -39   | 94         | 105      | VEAERYIIVVER |           |       |                        |      | Mascot      |

|    |                                                  |           |         |     |              |          |                          |    |    |   |  |  |  |  |  |                                           |        |
|----|--------------------------------------------------|-----------|---------|-----|--------------|----------|--------------------------|----|----|---|--|--|--|--|--|-------------------------------------------|--------|
|    | 1707.8127                                        | 1707.7886 | -0.0241 | -14 | 131          | 145      | IMFNVTTIAHTCCQR          |    |    |   |  |  |  |  |  |                                           | Mascot |
|    | 1908.9241                                        | 1908.9456 | 0.0215  | 11  | 130          | 145      | KIMFNVTTIAHTCCQR         |    |    |   |  |  |  |  |  | Carbamidomethyl (C)[13], Oxidation (M)[3] | Mascot |
|    | 2432.3376                                        | 2432.1536 | -0.184  | -76 | 202          | 222      | YHGEPATVWSLGILQFL<br>LFK |    |    |   |  |  |  |  |  |                                           | Mascot |
|    | 2432.3376                                        | 2432.1536 | -0.184  | -76 | 202          | 222      | YHGEPATVWSLGILQFL<br>LFK |    |    |   |  |  |  |  |  |                                           | Mascot |
| 31 | cytoplasmic dynein 1 heavy chain 1 [Danio rerio] |           |         |     | gi 112363126 | 532854.1 | 6.06                     | 32 | 33 | 0 |  |  |  |  |  |                                           |        |

#### Peptide Information

|  | Calc. Mass | Obsrv. Mass | ± da    | ± ppm | Start Seq. | End Seq. | Sequence                 | Ion Score | C. I. % | Modification            | Rank | Result Type |
|--|------------|-------------|---------|-------|------------|----------|--------------------------|-----------|---------|-------------------------|------|-------------|
|  | 870.4389   | 870.5441    | 0.1052  | 121   | 656        | 662      | QLTAYMK                  |           |         | Oxidation (M)[6]        |      | Mascot      |
|  | 959.5342   | 959.5181    | -0.0161 | -17   | 990        | 997      | MNLSLPR                  |           |         | Oxidation (M)[1]        |      | Mascot      |
|  | 1028.5735  | 1028.5013   | -0.0722 | -70   | 2025       | 2033     | SNLPDNLKK                |           |         |                         |      | Mascot      |
|  | 1045.5272  | 1045.5679   | 0.0407  | 39    | 2836       | 2843     | LVEDEERR                 |           |         |                         |      | Mascot      |
|  | 1060.5455  | 1060.4849   | -0.0606 | -57   | 4292       | 4300     | DIKMPDGIR                |           |         | Oxidation (M)[4]        |      | Mascot      |
|  | 1076.5153  | 1076.4808   | -0.0345 | -32   | 4563       | 4572     | LQGATCANNK               |           |         | Carbamidomethyl (C)[6]  |      | Mascot      |
|  | 1165.6212  | 1165.7528   | 0.1316  | 113   | 3438       | 3447     | DLEASIARYK               |           |         |                         |      | Mascot      |
|  | 1179.6368  | 1179.6071   | -0.0297 | -25   | 2551       | 2560     | VPQIEVETHK               |           |         |                         |      | Mascot      |
|  | 1342.7147  | 1342.6414   | -0.0733 | -55   | 1497       | 1508     | VKEHINSVSAMK             |           |         |                         |      | Mascot      |
|  | 1365.7412  | 1365.6426   | -0.0986 | -72   | 1099       | 1110     | KEFGPVIIDYGK             |           |         |                         |      | Mascot      |
|  | 1475.6835  | 1475.7635   | 0.08    | 54    | 3682       | 3694     | DPTVEFPPDLCSR            |           |         |                         |      | Mascot      |
|  | 1542.9154  | 1542.8931   | -0.0223 | -14   | 754        | 766      | WLSFRVPLAIVNK            |           |         |                         |      | Mascot      |
|  | 1707.7894  | 1707.7886   | -0.0008 | 0     | 1025       | 1040     | MPDGPSALEEAYNAVK         |           |         | Oxidation (M)[1]        |      | Mascot      |
|  | 1862.9656  | 1863.073    | 0.1074  | 58    | 4143       | 4158     | IFVFEPGPMKANMLR          |           |         | Oxidation (M)[10]       |      | Mascot      |
|  | 1894.032   | 1893.9919   | -0.0401 | -21   | 2417       | 2434     | DAAAVLQPYFTSTGLVIK       |           |         |                         |      | Mascot      |
|  | 1894.032   | 1893.9919   | -0.0401 | -21   | 2417       | 2434     | DAAAVLQPYFTSTGLVIK       |           |         |                         |      | Mascot      |
|  | 1908.9813  | 1908.9456   | -0.0357 | -19   | 664        | 680      | VEDVLGKGWENHVEGLK        |           |         |                         |      | Mascot      |
|  | 1915.9153  | 1915.9689   | 0.0536  | 28    | 2435       | 2450     | ALEHASKMEHIMDFTR         |           |         |                         |      | Mascot      |
|  | 2113.9429  | 2114.1997   | 0.2568  | 121   | 1130       | 1147     | FGQMLGNNMQDFHSQIS<br>K   |           |         | Oxidation (M)[4,9]      |      | Mascot      |
|  | 2113.9429  | 2114.1997   | 0.2568  | 121   | 1130       | 1147     | FGQMLGNNMQDFHSQIS<br>K   |           |         | Oxidation (M)[4,9]      |      | Mascot      |
|  | 2157.145   | 2157.1462   | 0.0012  | 1     | 767        | 785      | AHQANQLYPFAISLIESVR      |           |         |                         |      | Mascot      |
|  | 2175.1365  | 2175.1536   | 0.0171  | 8     | 3318       | 3336     | LALESICLLLGEETNDWK<br>K  |           |         |                         |      | Mascot      |
|  | 2175.1365  | 2175.1536   | 0.0171  | 8     | 3318       | 3336     | LALESICLLLGEETNDWK<br>K  |           |         |                         |      | Mascot      |
|  | 2197.1287  | 2197.137    | 0.0083  | 4     | 828        | 845      | LDPYVQRLAETVFNQFEK       |           |         |                         |      | Mascot      |
|  | 2210.9944  | 2211.1179   | 0.1235  | 56    | 531        | 550      | EVDGLDVSKEGMEAWEA<br>AMK |           |         | Oxidation (M)[12]       |      | Mascot      |
|  | 2233.0952  | 2233.105    | 0.0098  | 4     | 4421       | 4439     | MLQDVRQDLTDVVQVCE        |           |         | Carbamidomethyl (C)[16] |      | Mascot      |

|    |                                                     |            |             |         |       |            |               |                             |                    |       |                        |   |      |             |        |
|----|-----------------------------------------------------|------------|-------------|---------|-------|------------|---------------|-----------------------------|--------------------|-------|------------------------|---|------|-------------|--------|
|    |                                                     | 2283.1624  | 2283.1914   | 0.029   | 13    | 2004       | 2024          | GK<br>QVKVSAEMAIFITMNPGR    |                    |       |                        |   |      |             | Mascot |
|    |                                                     | 2284.2561  | 2284.1877   | -0.0684 | -30   | 4504       | 4523          | R<br>NIHVNLRGLFVPEAYITAT    |                    |       |                        |   |      |             | Mascot |
|    |                                                     | 2294.1824  | 2294.178    | -0.0044 | -2    | 4092       | 4110          | LEK<br>WVMLENVHLAPGWLMQ     |                    |       |                        |   |      |             | Mascot |
|    |                                                     | 2357.0762  | 2357.1431   | 0.0669  | 28    | 1130       | 1149          | KSR<br>FGQMLGNMQDFHSQIS     | Oxidation (M)[4,9] |       |                        |   |      |             | Mascot |
|    |                                                     | 2384.2642  | 2384.0769   | -0.1873 | -79   | 2046       | 2066          | LAK<br>QLIAQVMLYSQGFRTAET   | Oxidation (M)[7]   |       |                        |   |      |             | Mascot |
|    |                                                     | 2432.2917  | 2432.1536   | -0.1381 | -57   | 3448       | 3470          | VEAK<br>EEYAVLISEAQAIKADLAA |                    |       |                        |   |      |             | Mascot |
|    |                                                     | 2432.2917  | 2432.1536   | -0.1381 | -57   | 3448       | 3470          | VEAK<br>EEYAVLISEAQAIKADLAA |                    |       |                        |   |      |             | Mascot |
|    |                                                     | 2488.2349  | 2488.1079   | -0.127  | -51   | 3705       | 3726          | DVDEK<br>SSLQSQCCLNEVLKAERP |                    |       |                        |   |      |             | Mascot |
|    |                                                     | 2515.1533  | 2515.2617   | 0.1084  | 43    | 1052       | 1070          | NR<br>VWLQYQCLWDMQPENIY     | Oxidation (M)[11]  |       |                        |   |      |             | Mascot |
|    |                                                     | 2531.2888  | 2531.2527   | -0.0361 | -14   | 261        | 282           | NLER<br>LDRDPASGTALQEISFWL  |                    |       |                        |   |      |             | Mascot |
| 32 | Zgc:152851 protein [Danio rerio]                    |            |             |         |       |            | gij 27503941  | 44653.3                     | 8.79               | 1     | 33                     | 0 | 33   | 87.79       |        |
|    | Peptide Information                                 |            |             |         |       |            |               |                             |                    |       |                        |   |      |             |        |
|    |                                                     | Calc. Mass | Obsrv. Mass | ± da    | ± ppm | Start Seq. | End Seq.      | Sequence                    | Ion Score          | C. I. | % Modification         |   | Rank | Result Type |        |
|    |                                                     | 901.4923   | 901.5135    | 0.0212  | 24    | 38         | 46            | ACVLPGSVR                   | 33                 | 87.79 |                        |   |      | Mascot      |        |
|    |                                                     | 901.4923   | 901.5135    | 0.0212  | 24    | 38         | 46            | ACVLPGSVR                   |                    |       |                        |   |      | Mascot      |        |
| 33 | complement component 3-like isoform 1 [Danio rerio] |            |             |         |       |            | gij 153792045 | 188748                      | 7.66               | 17    | 33                     | 0 |      |             |        |
|    | Peptide Information                                 |            |             |         |       |            |               |                             |                    |       |                        |   |      |             |        |
|    |                                                     | Calc. Mass | Obsrv. Mass | ± da    | ± ppm | Start Seq. | End Seq.      | Sequence                    | Ion Score          | C. I. | % Modification         |   | Rank | Result Type |        |
|    |                                                     | 842.5206   | 842.5153    | -0.0053 | -6    | 516        | 523           | GKIIQAGR                    |                    |       |                        |   |      | Mascot      |        |
|    |                                                     | 1128.532   | 1128.5116   | -0.0204 | -18   | 1058       | 1066          | GYENQLNYK                   |                    |       |                        |   |      | Mascot      |        |
|    |                                                     | 1210.6578  | 1210.6071   | -0.0507 | -42   | 127        | 136           | LVAQFSNIYR                  |                    |       |                        |   |      | Mascot      |        |
|    |                                                     | 1365.6515  | 1365.6426   | -0.0089 | -7    | 1607       | 1617          | MFLSHASCRTTR                |                    |       | Carbamidomethyl (C)[8] |   |      | Mascot      |        |
|    |                                                     | 1475.7965  | 1475.7635   | -0.033  | -22   | 1457       | 1468          | EAEIISFRLNQR                |                    |       |                        |   |      | Mascot      |        |
|    |                                                     | 1542.7546  | 1542.8931   | 0.1385  | 90    | 169        | 181           | AFVSDLEFRSSER               |                    |       |                        |   |      | Mascot      |        |
|    |                                                     | 1719.9349  | 1719.8651   | -0.0698 | -41   | 363        | 377           | IVNSPYMLTIKDTPK             |                    |       |                        |   |      | Mascot      |        |
|    |                                                     | 1719.9349  | 1719.8651   | -0.0698 | -41   | 363        | 377           | IVNSPYMLTIKDTPK             |                    |       |                        |   |      | Mascot      |        |
|    |                                                     | 1735.9299  | 1735.8551   | -0.0748 | -43   | 363        | 377           | IVNSPYMLTIKDTPK             |                    |       | Oxidation (M)[7]       |   |      | Mascot      |        |
|    |                                                     | 1736.9581  | 1736.8948   | -0.0633 | -36   | 285        | 300           | GVAYVLFGEINGEKK             |                    |       |                        |   |      | Mascot      |        |
|    |                                                     | 1908.9714  | 1908.9456   | -0.0258 | -14   | 1310       | 1325          | SDVRWTFNPNLAYVAR            |                    |       |                        |   |      | Mascot      |        |
|    |                                                     | 1951.7653  | 1951.9689   | 0.2036  | 104   | 1515       | 1532          | GK<br>CSQGDCCKVMKEDSASF     |                    |       | Carbamidomethyl (C)[1] |   |      | Mascot      |        |

|           |           |         |     |      |      |                                  |  |  |  |                         |  |  |        |
|-----------|-----------|---------|-----|------|------|----------------------------------|--|--|--|-------------------------|--|--|--------|
| 2000.0851 | 1999.9546 | -0.1305 | -65 | 1471 | 1487 | VGLLQPSTVKVYQYYNK                |  |  |  |                         |  |  | Mascot |
| 2000.0851 | 1999.9546 | -0.1305 | -65 | 1471 | 1487 | VGLLQPSTVKVYQYYNK                |  |  |  |                         |  |  | Mascot |
| 2175.1738 | 2175.1536 | -0.0202 | -9  | 1    | 19   | MLLQLLLWATLLCQICDG<br>K          |  |  |  |                         |  |  | Mascot |
| 2175.1738 | 2175.1536 | -0.0202 | -9  | 1    | 19   | MLLQLLLWATLLCQICDG<br>K          |  |  |  |                         |  |  | Mascot |
| 2233.1533 | 2233.105  | -0.0483 | -22 | 911  | 932  | TGELPLQVTAVAASFMS<br>QDAVK       |  |  |  |                         |  |  | Mascot |
| 2448.0442 | 2448.1565 | 0.1123  | 46  | 650  | 673  | DNMGVFS DAGLMFHSST<br>GGSTDSK    |  |  |  |                         |  |  | Mascot |
| 2489.2881 | 2489.1013 | -0.1868 | -75 | 980  | 1002 | SVPETFVNVRGDLLADSI<br>DNSIK      |  |  |  |                         |  |  | Mascot |
| 2531.3542 | 2531.2527 | -0.1015 | -40 | 277  | 299  | YLYGAQVKGVAYVLFIE<br>INGEK       |  |  |  |                         |  |  | Mascot |
| 3103.6091 | 3103.6582 | 0.0491  | 16  | 1146 | 1173 | ASLTAFVLIALAEAQDKVT<br>CQDQEVNIR |  |  |  | Carbamidomethyl (C)[20] |  |  | Mascot |

34 UBX domain-containing protein 8 [Danio rerio] gi|66773122 31217 7.64 4 33 0

#### Peptide Information

| Calc. Mass | Obsrv. Mass | ± da    | ± ppm | Start Seq. | End Seq. | Sequence           | Ion Score | C. I. % | Modification           | Rank | Result Type |
|------------|-------------|---------|-------|------------|----------|--------------------|-----------|---------|------------------------|------|-------------|
| 901.5101   | 901.5135    | 0.0034  | 4     | 76         | 82       | LKEEQVR            | 22        | 0       |                        |      | Mascot      |
| 901.5101   | 901.5135    | 0.0034  | 4     | 76         | 82       | LKEEQVR            |           |         |                        |      | Mascot      |
| 1767.8079  | 1767.8225   | 0.0146  | 8     | 139        | 154      | ICHAVDVDESPNQGAR   |           |         | Carbamidomethyl (C)[2] |      | Mascot      |
| 1908.92    | 1908.9456   | 0.0256  | 13    | 225        | 240      | TGYPPALYTLMSYPR    |           |         | Oxidation (M)[12]      |      | Mascot      |
| 1924.0386  | 1923.98     | -0.0586 | -30   | 177        | 194      | RVIVLPDEPSVDTEGAVK |           |         |                        |      | Mascot      |

35 vitellogenin 2 isoform 2 [Danio rerio] gi|160333705 93050.4 8.22 12 33 0

#### Peptide Information

| Calc. Mass | Obsrv. Mass | ± da    | ± ppm | Start Seq. | End Seq. | Sequence                  | Ion Score | C. I. % | Modification               | Rank | Result Type |
|------------|-------------|---------|-------|------------|----------|---------------------------|-----------|---------|----------------------------|------|-------------|
| 850.4702   | 850.5455    | 0.0753  | 89    | 750        | 756      | MKLESVK                   |           |         | Oxidation (M)[1]           |      | Mascot      |
| 864.3945   | 864.4554    | 0.0609  | 70    | 612        | 618      | KDEESEK                   |           |         |                            |      | Mascot      |
| 1112.5769  | 1112.5123   | -0.0646 | -58   | 322        | 330      | TLTKMEAFR                 |           |         | Oxidation (M)[5]           |      | Mascot      |
| 1365.6831  | 1365.6426   | -0.0405 | -30   | 428        | 439      | VTSKVTWGAECK              |           |         | Carbamidomethyl (C)[11]    |      | Mascot      |
| 1736.0356  | 1735.8551   | -0.1805 | -104  | 110        | 125      | WLLDTLPAVATPVVLK          |           |         |                            |      | Mascot      |
| 1909.1117  | 1908.9456   | -0.1661 | -87   | 251        | 269      | TTASALPIGVQVDAILALR       |           |         |                            |      | Mascot      |
| 1951.9187  | 1951.9689   | 0.0502  | 26    | 692        | 708      | IQVADWMKGQTCGLCGK         |           |         | Carbamidomethyl (C)[12,15] |      | Mascot      |
| 2233.2446  | 2233.105    | -0.1396 | -63   | 171        | 191      | IATIPALREVVMLGYGSMI<br>AK |           |         |                            |      | Mascot      |
| 2294.3706  | 2294.178    | -0.1926 | -84   | 278        | 297      | LVQPVALQLVLERALHPE<br>LR  |           |         |                            |      | Mascot      |
| 2298.1655  | 2298.198    | 0.0325  | 14    | 298        | 318      | MVACILLFETKPSVAAMS<br>SSR |           |         | Carbamidomethyl (C)[4]     |      | Mascot      |
| 2457.3235  | 2457.3267   | 0.0032  | 1     | 619        | 640      | THLNVKLVDIDIDLYTLGT       |           |         |                            |      | Mascot      |

|    |                                          |           |        |   |              |     |                                   |       |   |    |   |  |  |  |  |        |
|----|------------------------------------------|-----------|--------|---|--------------|-----|-----------------------------------|-------|---|----|---|--|--|--|--|--------|
|    | 2457.3235                                | 2457.3267 | 0.0032 | 1 | 619          | 640 | DAK<br>THLNVKLVDIDIDLYTLGT<br>DAK |       |   |    |   |  |  |  |  | Mascot |
|    | 2479.2974                                | 2479.3062 | 0.0088 | 4 | 1            | 22  | MMEATQSLVFVEFEKAP<br>VVPVK        |       |   |    |   |  |  |  |  | Mascot |
| 36 | serine/threonine kinase 33 [Danio rerio] |           |        |   | gi 220678423 |     | 8056.3                            | 10.88 | 4 | 32 | 0 |  |  |  |  |        |

#### Peptide Information

| Calc. Mass | Obsrv. Mass | ± da    | ± ppm | Start Seq. | End Seq. | Sequence                | Ion Score | C. I. | % Modification | Rank | Result Type |
|------------|-------------|---------|-------|------------|----------|-------------------------|-----------|-------|----------------|------|-------------|
| 864.4421   | 864.4554    | 0.0133  | 15    | 16         | 23       | ETSTAVTR                |           |       |                |      | Mascot      |
| 901.4387   | 901.5135    | 0.0748  | 83    | 24         | 30       | TNHHHQK                 |           |       |                |      | Mascot      |
| 901.4387   | 901.5135    | 0.0748  | 83    | 24         | 30       | TNHHHQK                 |           |       |                |      | Mascot      |
| 1342.6863  | 1342.6414   | -0.0449 | -33   | 31         | 42       | HPLQHPTQAGEK            |           |       |                |      | Mascot      |
| 2225.1072  | 2225.1333   | 0.0261  | 12    | 24         | 42       | TNHHHQKHPLQHPTQAG<br>EK |           |       |                |      | Mascot      |

|    |                                                            |  |  |  |              |  |         |      |    |    |   |  |  |  |  |  |
|----|------------------------------------------------------------|--|--|--|--------------|--|---------|------|----|----|---|--|--|--|--|--|
| 37 | PREDICTED: b-cell lymphoma/leukemia 11B-like [Danio rerio] |  |  |  | gi 326676947 |  | 84089.7 | 6.78 | 11 | 32 | 0 |  |  |  |  |  |
|----|------------------------------------------------------------|--|--|--|--------------|--|---------|------|----|----|---|--|--|--|--|--|

#### Peptide Information

| Calc. Mass | Obsrv. Mass | ± da    | ± ppm | Start Seq. | End Seq. | Sequence                          | Ion Score | C. I. | % Modification           | Rank | Result Type |
|------------|-------------|---------|-------|------------|----------|-----------------------------------|-----------|-------|--------------------------|------|-------------|
| 842.4227   | 842.5153    | 0.0926  | 110   | 463        | 469      | NRENGPR                           |           |       |                          |      | Mascot      |
| 1112.6245  | 1112.5123   | -0.1122 | -101  | 99         | 108      | LTPARGICPK                        |           |       | Carbamidomethyl (C)[8]   |      | Mascot      |
| 1436.6184  | 1436.7474   | 0.129   | 90    | 666        | 677      | SDTCEYCGKVFK                      |           |       | Carbamidomethyl (C)[4]   |      | Mascot      |
| 1488.8209  | 1488.793    | -0.0279 | -19   | 213        | 226      | LPSTPPFVSPPPPR                    |           |       |                          |      | Mascot      |
| 1488.8209  | 1488.793    | -0.0279 | -19   | 213        | 226      | LPSTPPFVSPPPPR                    |           |       |                          |      | Mascot      |
| 1707.8007  | 1707.7886   | -0.0121 | -7    | 623        | 639      | FSTPPGEILEGGGMSGR                 |           |       | Oxidation (M)[14]        |      | Mascot      |
| 1719.9058  | 1719.8651   | -0.0407 | -24   | 541        | 557      | KPMPISSSSLSGSSAKR                 |           |       |                          |      | Mascot      |
| 1719.9058  | 1719.8651   | -0.0407 | -24   | 541        | 557      | KPMPISSSSLSGSSAKR                 | 3         | 0     |                          |      | Mascot      |
| 1735.9008  | 1735.8551   | -0.0457 | -26   | 541        | 557      | KPMPISSSSLSGSSAKR                 |           |       | Oxidation (M)[3]         |      | Mascot      |
| 1862.8193  | 1863.073    | 0.2537  | 136   | 697        | 712      | CDLCSYACAQSSKLTR                  |           |       | Carbamidomethyl (C)[1,4] |      | Mascot      |
| 2294.0767  | 2294.178    | 0.1013  | 44    | 727        | 745      | CDICHMPFSVYSTLEKHV<br>K           |           |       | Carbamidomethyl (C)[1]   |      | Mascot      |
| 2384.1848  | 2384.0769   | -0.1079 | -45   | 232        | 252      | LGPEEMGLLSQHPSAFE<br>RVMR         |           |       |                          |      | Mascot      |
| 2515.1023  | 2515.2617   | 0.1594  | 63    | 359        | 380      | SHTGERPYKCHLCDHAC<br>SQASK        |           |       | Carbamidomethyl (C)[10]  |      | Mascot      |
| 3103.6067  | 3103.6582   | 0.0515  | 17    | 149        | 177      | IYLDTHPTSCSLTPRMAL<br>PPPLGADALPR |           |       |                          |      | Mascot      |

|    |                                                                                                     |  |  |  |             |  |         |      |    |    |   |  |  |  |  |  |
|----|-----------------------------------------------------------------------------------------------------|--|--|--|-------------|--|---------|------|----|----|---|--|--|--|--|--|
| 38 | novel protein similar to vertebrate Rho guanine nucleotide exchange factor (GEF) 3 (ARHGEF3) [Danio |  |  |  | gi 56207664 |  | 62009.9 | 8.98 | 10 | 32 | 0 |  |  |  |  |  |
|----|-----------------------------------------------------------------------------------------------------|--|--|--|-------------|--|---------|------|----|----|---|--|--|--|--|--|

#### Peptide Information



|  | Calc. Mass | Obsrv. Mass | ± da    | ± ppm | Start Seq. | End Sequence Seq.         | Ion Score | C. I. % | Modification                               | Rank | Result Type |
|--|------------|-------------|---------|-------|------------|---------------------------|-----------|---------|--------------------------------------------|------|-------------|
|  | 1045.5095  | 1045.5679   | 0.0584  | 56    | 323        | 330 DPRIEQCK              |           |         | Carbamidomethyl (C)[7]                     |      | Mascot      |
|  | 1060.5356  | 1060.4849   | -0.0507 | -48   | 435        | 442 QQWLNCLR              |           |         |                                            |      | Mascot      |
|  | 1165.6099  | 1165.7528   | 0.1429  | 123   | 314        | 322 LEYLEDKQK             |           |         |                                            |      | Mascot      |
|  | 1488.7878  | 1488.793    | 0.0052  | 3     | 2          | 14 VAYDEPCVVPIKR          |           |         |                                            |      | Mascot      |
|  | 1488.7878  | 1488.793    | 0.0052  | 3     | 2          | 14 VAYDEPCVVPIKR          |           |         |                                            |      | Mascot      |
|  | 1736.8999  | 1736.8948   | -0.0051 | -3    | 210        | 225 AYCSNQLAAKALLDQK      |           |         |                                            |      | Mascot      |
|  | 1893.9058  | 1893.9919   | 0.0861  | 45    | 435        | 449 QQWLNCLRNAMSTQK       |           |         | Carbamidomethyl (C)[6], Oxidation (M)[11]  |      | Mascot      |
|  | 1893.9058  | 1893.9919   | 0.0861  | 45    | 435        | 449 QQWLNCLRNAMSTQK       |           |         | Carbamidomethyl (C)[6], Oxidation (M)[11]  |      | Mascot      |
|  | 2175.0486  | 2175.1536   | 0.105   | 48    | 450        | 469 DLTLSENEPLTTPATDVC AK |           |         | Carbamidomethyl (C)[18]                    |      | Mascot      |
|  | 2175.0486  | 2175.1536   | 0.105   | 48    | 450        | 469 DLTLSENEPLTTPATDVC AK |           |         | Carbamidomethyl (C)[18]                    |      | Mascot      |
|  | 2224.9954  | 2225.1333   | 0.1379  | 62    | 303        | 320 GESECQYYIDKLEYLEDK    |           |         |                                            |      | Mascot      |
|  | 2233.1345  | 2233.105    | -0.0295 | -13   | 121        | 139 QEAFELSRGEQDLIEDLK    |           |         |                                            |      | Mascot      |
|  | 2284.0002  | 2284.1877   | 0.1875  | 82    | 471        | 490 RSSSVSTVIQMDMDEN CPR  |           |         |                                            |      | Mascot      |
|  | 2357.0166  | 2357.1431   | 0.1265  | 54    | 471        | 490 RSSSVSTVIQMDMDEN CPR  |           |         | Carbamidomethyl (C)[18], Oxidation (M)[11] |      | Mascot      |

39

DNA mismatch repair protein Msh3 [Danio rerio]

gi|157841276

121710.5

6.91

10

32

0

Peptide Information

|  | Calc. Mass | Obsrv. Mass | ± da    | ± ppm | Start Seq. | End Sequence Seq.           | Ion Score | C. I. % | Modification                              | Rank | Result Type |
|--|------------|-------------|---------|-------|------------|-----------------------------|-----------|---------|-------------------------------------------|------|-------------|
|  | 842.4981   | 842.5153    | 0.0172  | 20    | 150        | 156 EEPIKVK                 |           |         |                                           |      | Mascot      |
|  | 870.577    | 870.5441    | -0.0329 | -38   | 687        | 693 EVRLLLK                 |           |         |                                           |      | Mascot      |
|  | 901.5101   | 901.5135    | 0.0034  | 4     | 545        | 552 SVIDIQAR                | 17        | 0       |                                           |      | Mascot      |
|  | 901.5101   | 901.5135    | 0.0034  | 4     | 545        | 552 SVIDIQAR                |           |         |                                           |      | Mascot      |
|  | 1076.5669  | 1076.4808   | -0.0861 | -80   | 583        | 591 GLCSIYHKR               |           |         |                                           |      | Mascot      |
|  | 1179.5535  | 1179.6071   | 0.0536  | 45    | 895        | 905 MGASDNISRGR             |           |         | Oxidation (M)[1]                          |      | Mascot      |
|  | 1210.6613  | 1210.6071   | -0.0542 | -45   | 477        | 486 ILLCSSSFKR              |           |         | Carbamidomethyl (C)[4]                    |      | Mascot      |
|  | 1475.7562  | 1475.7635   | 0.0073  | 5     | 713        | 725 NSMLSIVPADWVK           |           |         | Oxidation (M)[3]                          |      | Mascot      |
|  | 1707.7828  | 1707.7886   | 0.0058  | 3     | 201        | 214 QHVDTVLCVECGYK          |           |         | Carbamidomethyl (C)[8,11]                 |      | Mascot      |
|  | 1901.9565  | 1902.0004   | 0.0439  | 23    | 186        | 200 TIYTPLEEQYMEIKK         |           |         | Oxidation (M)[11]                         |      | Mascot      |
|  | 2432.1431  | 2432.1536   | 0.0105  | 4     | 904        | 925 GRSTFMEELLETSVDLAC ATSR |           |         | Oxidation (M)[6]                          |      | Mascot      |
|  | 2432.1431  | 2432.1536   | 0.0105  | 4     | 904        | 925 GRSTFMEELLETSVDLAC ATSR |           |         | Oxidation (M)[6]                          |      | Mascot      |
|  | 2489.1646  | 2489.1013   | -0.0633 | -25   | 904        | 925 GRSTFMEELLETSVDLAC ATSR |           |         | Carbamidomethyl (C)[18], Oxidation (M)[6] |      | Mascot      |

40

novel protein (zgc:101790) [Danio rerio]

gi|148726473

30484.8

7.21

1

32

0

32

84.343

| Peptide Information |                                                                           |             |         |       |              |          |                         |           |         |                                            |                  |
|---------------------|---------------------------------------------------------------------------|-------------|---------|-------|--------------|----------|-------------------------|-----------|---------|--------------------------------------------|------------------|
|                     | Calc. Mass                                                                | Obsrv. Mass | ± da    | ± ppm | Start Seq.   | End Seq. | Sequence                | Ion Score | C. I. % | Modification                               | Rank Result Type |
|                     | 901.5464                                                                  | 901.5135    | -0.0329 | -36   | 176          | 183      | TGEIVKVR                | 32        | 84.343  |                                            | Mascot           |
|                     | 901.5464                                                                  | 901.5135    | -0.0329 | -36   | 176          | 183      | TGEIVKVR                |           |         |                                            | Mascot           |
| 41                  | PREDICTED: NACHT, LRR and PYD domains-containing protein 12 [Danio rerio] |             |         |       | gi 292621731 | 149261.8 | 5.29                    | 15        | 32      | 0                                          |                  |
| Peptide Information |                                                                           |             |         |       |              |          |                         |           |         |                                            |                  |
|                     | Calc. Mass                                                                | Obsrv. Mass | ± da    | ± ppm | Start Seq.   | End Seq. | Sequence                | Ion Score | C. I. % | Modification                               | Rank Result Type |
|                     | 842.4114                                                                  | 842.5153    | 0.1039  | 123   | 1214         | 1220     | SNSEHLR                 |           |         |                                            | Mascot           |
|                     | 864.5777                                                                  | 864.4554    | -0.1223 | -141  | 133          | 139      | KILVVHR                 |           |         |                                            | Mascot           |
|                     | 870.5593                                                                  | 870.5441    | -0.0152 | -17   | 1011         | 1017     | KLLPMIR                 |           |         |                                            | Mascot           |
|                     | 901.5829                                                                  | 901.5135    | -0.0694 | -77   | 507          | 514      | AIRTVLTK                |           |         |                                            | Mascot           |
|                     | 901.5829                                                                  | 901.5135    | -0.0694 | -77   | 507          | 514      | AIRTVLTK                |           |         |                                            | Mascot           |
|                     | 959.5156                                                                  | 959.5181    | 0.0025  | 3     | 872          | 880      | AVNEALQSK               |           |         |                                            | Mascot           |
|                     | 1076.5007                                                                 | 1076.4808   | -0.0199 | -18   | 741          | 748      | HQKDYEEK                |           |         |                                            | Mascot           |
|                     | 1436.7744                                                                 | 1436.7474   | -0.027  | -19   | 913          | 924      | SIQNNKTVEYIK            |           |         |                                            | Mascot           |
|                     | 1488.7289                                                                 | 1488.793    | 0.0641  | 43    | 375          | 388      | SGDTKSDLSSVHQQ          |           |         |                                            | Mascot           |
|                     | 1488.7289                                                                 | 1488.793    | 0.0641  | 43    | 375          | 388      | SGDTKSDLSSVHQQ          |           |         |                                            | Mascot           |
|                     | 1880.884                                                                  | 1880.9967   | 0.1127  | 60    | 1081         | 1099     | LSNCGLTDEGCSALASAL R    |           |         |                                            | Mascot           |
|                     | 1916.0157                                                                 | 1915.9689   | -0.0468 | -24   | 1115         | 1132     | LGDSVTLLSAVLEDPRCK      |           |         |                                            | Mascot           |
|                     | 2175.0896                                                                 | 2175.1536   | 0.064   | 29    | 1250         | 1270     | LGLSNCGLTDEGCAALAL ALR  |           |         | Carbamidomethyl (C)[6,13]                  | Mascot           |
|                     | 2175.0896                                                                 | 2175.1536   | 0.064   | 29    | 1250         | 1270     | LGLSNCGLTDEGCAALAL ALR  |           |         | Carbamidomethyl (C)[6,13]                  | Mascot           |
|                     | 2225.2839                                                                 | 2225.1333   | -0.1506 | -68   | 890          | 908      | FLLGLSVESHQILLQRLM K    |           |         |                                            | Mascot           |
|                     | 2284.0181                                                                 | 2284.1877   | 0.1696  | 74    | 380          | 400      | SDLSSVHQQKSTESESSC VSMR |           |         |                                            | Mascot           |
|                     | 2357.0344                                                                 | 2357.1431   | 0.1087  | 46    | 380          | 400      | SDLSSVHQQKSTESESSC VSMR |           |         | Carbamidomethyl (C)[17], Oxidation (M)[20] | Mascot           |
|                     | 2448.2002                                                                 | 2448.1565   | -0.0437 | -18   | 414          | 435      | SGDTETDLSHEALNTFRS NLLK |           |         |                                            | Mascot           |
|                     | 2479.0752                                                                 | 2479.3062   | 0.231   | 93    | 277          | 297      | KDFCSADQEELLETLDNY SCR  |           |         |                                            | Mascot           |
| 42                  | novel protein [Danio rerio]                                               |             |         |       | gi 169146110 | 25865.2  | 5.07                    | 7         | 32      | 0                                          |                  |
| Peptide Information |                                                                           |             |         |       |              |          |                         |           |         |                                            |                  |
|                     | Calc. Mass                                                                | Obsrv. Mass | ± da    | ± ppm | Start Seq.   | End Seq. | Sequence                | Ion Score | C. I. % | Modification                               | Rank Result Type |

|    |                                 |           |         |      |     |              |                             |         |      |   |    |   |                    |  |  |  |        |
|----|---------------------------------|-----------|---------|------|-----|--------------|-----------------------------|---------|------|---|----|---|--------------------|--|--|--|--------|
|    | 1045.5411                       | 1045.5679 | 0.0268  | 26   | 99  | 107          | VIADLEEEK                   |         |      |   |    |   |                    |  |  |  | Mascot |
|    | 1076.5331                       | 1076.4808 | -0.0523 | -49  | 207 | 215          | GELESERTR                   |         |      |   |    |   |                    |  |  |  | Mascot |
|    | 1112.6786                       | 1112.5123 | -0.1663 | -149 | 85  | 94           | LLKQLAAAEER                 |         |      |   |    |   |                    |  |  |  | Mascot |
|    | 1179.5319                       | 1179.6071 | 0.0752  | 64   | 73  | 82           | LVMAHCTNMK                  |         |      |   |    |   | Oxidation (M)[3,9] |  |  |  | Mascot |
|    | 1436.6694                       | 1436.7474 | 0.078   | 54   | 73  | 84           | LVMAHCTNMKEK                |         |      |   |    |   | Oxidation (M)[3,9] |  |  |  | Mascot |
|    | 1707.749                        | 1707.7886 | 0.0396  | 23   | 111 | 126          | AQDAAAGDDITDMLER            |         |      |   |    |   | Oxidation (M)[13]  |  |  |  | Mascot |
|    | 2432.2515                       | 2432.1536 | -0.0979 | -40  | 150 | 172          | SVLSSQAVEDLAEQQQL<br>SSTLAK |         |      |   |    |   |                    |  |  |  | Mascot |
|    | 2432.2515                       | 2432.1536 | -0.0979 | -40  | 150 | 172          | SVLSSQAVEDLAEQQQL<br>SSTLAK |         |      |   |    |   |                    |  |  |  | Mascot |
| 43 | si:ch1073-126c3.2 [Danio rerio] |           |         |      |     | gi 221307488 |                             | 24754.2 | 6.97 | 6 | 32 | 0 |                    |  |  |  |        |

#### Peptide Information

| Calc. Mass | Obsrv. Mass | ± da    | ± ppm | Start Seq. | End Seq. | Sequence                    | Ion Score | C. I. | % Modification                           | Rank | Result Type |
|------------|-------------|---------|-------|------------|----------|-----------------------------|-----------|-------|------------------------------------------|------|-------------|
| 864.4243   | 864.4554    | 0.0311  | 36    | 1          | 8        | MESATIGR                    |           |       |                                          |      | Mascot      |
| 1128.5242  | 1128.5116   | -0.0126 | -11   | 134        | 143      | LFEECSTATK                  |           |       |                                          |      | Mascot      |
| 1951.9277  | 1951.9689   | 0.0412  | 21    | 204        | 221      | VETTESESTKLLCGNINN          |           |       |                                          |      | Mascot      |
| 2211.0295  | 2211.1179   | 0.0884  | 40    | 114        | 131      | IYCKPMCNAGYDFNFLRR          |           |       |                                          |      | Mascot      |
| 2284.0459  | 2284.1877   | 0.1418  | 62    | 114        | 131      | IYCKPMCNAGYDFNFLRR          |           |       | Carbamidomethyl (C)[3], Oxidation (M)[6] |      | Mascot      |
| 2298.0503  | 2298.198    | 0.1477  | 64    | 112        | 130      | DKIYCKPMCNAGYDFNFL<br>R     |           |       |                                          |      | Mascot      |
| 2448.2625  | 2448.1565   | -0.106  | -43   | 89         | 111      | LLPENCPAPAVPENGGLL<br>CLSVK |           |       | Carbamidomethyl (C)[6,19]                |      | Mascot      |

44 PREDICTED: DNA mismatch repair protein Msh3-like [Danio rerio]

#### Peptide Information

| Calc. Mass | Obsrv. Mass | ± da    | ± ppm | Start Seq. | End Seq. | Sequence                    | Ion Score | C. I. | % Modification            | Rank | Result Type |
|------------|-------------|---------|-------|------------|----------|-----------------------------|-----------|-------|---------------------------|------|-------------|
| 870.577    | 870.5441    | -0.0329 | -38   | 687        | 693      | EVRLLLK                     |           |       |                           |      | Mascot      |
| 901.5101   | 901.5135    | 0.0034  | 4     | 545        | 552      | SVIDIQAR                    | 17        | 0     |                           |      | Mascot      |
| 901.5101   | 901.5135    | 0.0034  | 4     | 545        | 552      | SVIDIQAR                    |           |       |                           |      | Mascot      |
| 1179.5535  | 1179.6071   | 0.0536  | 45    | 895        | 905      | MGASDNISRGR                 |           |       | Oxidation (M)[1]          |      | Mascot      |
| 1210.6613  | 1210.6071   | -0.0542 | -45   | 477        | 486      | ILLCSSSFKR                  |           |       | Carbamidomethyl (C)[4]    |      | Mascot      |
| 1475.7529  | 1475.7635   | 0.0106  | 7     | 155        | 166      | IKQEFSFSQYAK                |           |       |                           |      | Mascot      |
| 1707.7828  | 1707.7886   | 0.0058  | 3     | 201        | 214      | QHVDTVLCVECGYK              |           |       | Carbamidomethyl (C)[8,11] |      | Mascot      |
| 1862.9099  | 1863.073    | 0.1631  | 88    | 486        | 502      | RLSSDSDHMLLSAATMK           |           |       |                           |      | Mascot      |
| 1901.9565  | 1902.0004   | 0.0439  | 23    | 186        | 200      | TIYTPLEEQYMEIKK             |           |       | Oxidation (M)[11]         |      | Mascot      |
| 2432.1431  | 2432.1536   | 0.0105  | 4     | 904        | 925      | GRSTFMEELLETSVDVLAC<br>ATSR |           |       | Oxidation (M)[6]          |      | Mascot      |

|    |                                              |           |         |     |              |     |                            |      |                                           |        |   |
|----|----------------------------------------------|-----------|---------|-----|--------------|-----|----------------------------|------|-------------------------------------------|--------|---|
|    | 2432.1431                                    | 2432.1536 | 0.0105  | 4   | 904          | 925 | GRSTFMEELLETSVDLAC<br>ATSR |      | Oxidation (M)[6]                          | Mascot |   |
|    | 2489.1646                                    | 2489.1013 | -0.0633 | -25 | 904          | 925 | GRSTFMEELLETSVDLAC<br>ATSR |      | Carbamidomethyl (C)[18], Oxidation (M)[6] | Mascot |   |
| 45 | nitrogen fixation cluster-like [Danio rerio] |           |         |     | gi 221307563 |     | 17420.2                    | 8.83 | 6                                         | 32     | 0 |

Peptide Information

| Calc. Mass | Obsrv. Mass | ± da    | ± ppm | Start Seq. | End Seq. | Sequence                  | Ion Score | C. I. | % Modification         | Rank | Result Type |
|------------|-------------|---------|-------|------------|----------|---------------------------|-----------|-------|------------------------|------|-------------|
| 882.5294   | 882.5723    | 0.0429  | 49    | 122        | 129      | ELSLPPVK                  |           |       |                        |      | Mascot      |
| 1028.5922  | 1028.5013   | -0.0909 | -88   | 8          | 16       | KCAAPQILK                 |           |       | Carbamidomethyl (C)[2] |      | Mascot      |
| 1045.5636  | 1045.5679   | 0.0043  | 4     | 42         | 51       | NVGSLDKNAK                |           |       |                        |      | Mascot      |
| 1128.5432  | 1128.5116   | -0.0316 | -28   | 33         | 41       | VVDHYENPR                 |           |       |                        |      | Mascot      |
| 1901.9572  | 1902.0004   | 0.0432  | 23    | 49         | 68       | NAKNVGTGLVGAPACGD<br>VMK  |           |       |                        |      | Mascot      |
| 2157.0645  | 2157.1462   | 0.0817  | 38    | 86         | 106      | TFGCGSAIASSSLATEWV<br>KGK |           |       | Carbamidomethyl (C)[4] |      | Mascot      |

|    |                                                        |  |  |  |             |  |       |      |   |    |   |
|----|--------------------------------------------------------|--|--|--|-------------|--|-------|------|---|----|---|
| 46 | chloride intracellular channel protein 3 [Danio rerio] |  |  |  | gi 41054774 |  | 27155 | 6.95 | 7 | 32 | 0 |
|----|--------------------------------------------------------|--|--|--|-------------|--|-------|------|---|----|---|

Peptide Information

| Calc. Mass | Obsrv. Mass | ± da    | ± ppm | Start Seq. | End Seq. | Sequence                   | Ion Score | C. I. | % Modification             | Rank | Result Type |
|------------|-------------|---------|-------|------------|----------|----------------------------|-----------|-------|----------------------------|------|-------------|
| 842.4011   | 842.5153    | 0.1142  | 136   | 95         | 100      | LCCRYK                     |           |       | Carbamidomethyl (C)[2]     |      | Mascot      |
| 882.5117   | 882.5723    | 0.0606  | 69    | 132        | 138      | FLKSLMK                    |           |       | Oxidation (M)[6]           |      | Mascot      |
| 1365.7446  | 1365.6426   | -0.102  | -75   | 1          | 12       | MAEAAKIELFVK               |           |       | Oxidation (M)[1]           |      | Mascot      |
| 1436.7994  | 1436.7474   | -0.052  | -36   | 223        | 235      | DKEILLAYSSVAK              |           |       |                            |      | Mascot      |
| 1488.7151  | 1488.793    | 0.0779  | 52    | 213        | 224      | EDVFHLTCPKDK               |           |       | Carbamidomethyl (C)[8]     |      | Mascot      |
| 1488.7151  | 1488.793    | 0.0779  | 52    | 213        | 224      | EDVFHLTCPKDK               |           |       | Carbamidomethyl (C)[8]     |      | Mascot      |
| 2471.1328  | 2471.1096   | -0.0232 | -9    | 7          | 28       | IELFVKASDDGESVGNCP<br>FCQR |           |       | Carbamidomethyl (C)[17]    |      | Mascot      |
| 2479.1995  | 2479.3062   | 0.1067  | 43    | 79         | 98       | IEEFLEDTLAPPQYPKLC<br>CR   |           |       | Carbamidomethyl (C)[18,19] |      | Mascot      |

|    |                                                                                 |  |  |  |              |  |         |      |   |    |   |
|----|---------------------------------------------------------------------------------|--|--|--|--------------|--|---------|------|---|----|---|
| 47 | novel protein with a Viral A-type inclusion protein repeat domain [Danio rerio] |  |  |  | gi 169146304 |  | 27380.3 | 5.44 | 7 | 32 | 0 |
|----|---------------------------------------------------------------------------------|--|--|--|--------------|--|---------|------|---|----|---|

Peptide Information

| Calc. Mass | Obsrv. Mass | ± da    | ± ppm | Start Seq. | End Seq. | Sequence   | Ion Score | C. I. | % Modification | Rank | Result Type |
|------------|-------------|---------|-------|------------|----------|------------|-----------|-------|----------------|------|-------------|
| 901.4988   | 901.5135    | 0.0147  | 16    | 182        | 189      | AVEEVVQK   |           |       |                |      | Mascot      |
| 901.4988   | 901.5135    | 0.0147  | 16    | 182        | 189      | AVEEVVQK   |           |       |                |      | Mascot      |
| 1060.527   | 1060.4849   | -0.0421 | -40   | 23         | 31       | LQDELAESR  |           |       |                |      | Mascot      |
| 1103.515   | 1103.5774   | 0.0624  | 57    | 224        | 233      | QCHSLKTATD |           |       |                |      | Mascot      |



|           |           |        |    |      |      |                  |     |                        |                          |
|-----------|-----------|--------|----|------|------|------------------|-----|------------------------|--------------------------|
| 888.5301  | 888.538   | 0.0079 | 9  | 425  | 432  | FATIPALR         |     |                        | Mascot                   |
| 888.5301  | 888.538   | 0.0079 | 9  | 425  | 432  | FATIPALR         | 44  | 98.855                 | Mascot                   |
| 918.4965  | 918.5496  | 0.0531 | 58 | 1319 | 1326 | IPEITMSK         |     |                        | Mascot                   |
| 926.5417  | 926.5511  | 0.0094 | 10 | 505  | 513  | TAANALPIR        |     |                        | Mascot                   |
| 1023.5105 | 1023.5204 | 0.0099 | 10 | 195  | 203  | DVGLAYTER        | 79  | 100                    | Mascot                   |
| 1023.5105 | 1023.5204 | 0.0099 | 10 | 195  | 203  | DVGLAYTER        |     |                        | Mascot                   |
| 1097.6677 | 1097.6796 | 0.0119 | 11 | 514  | 523  | VQVDAILALR       |     |                        | Mascot                   |
| 1097.6677 | 1097.6796 | 0.0119 | 11 | 514  | 523  | VQVDAILALR       | 98  | 100                    | Mascot                   |
| 1115.6935 | 1115.7063 | 0.0128 | 11 | 333  | 341  | FVQLVQLLR        | 71  | 99.998                 | Mascot                   |
| 1115.6935 | 1115.7063 | 0.0128 | 11 | 333  | 341  | FVQLVQLLR        |     |                        | Mascot                   |
| 1121.599  | 1121.6111 | 0.0121 | 11 | 348  | 356  | IEAIWSQFK        |     |                        | Mascot                   |
| 1177.6462 | 1177.6561 | 0.0099 | 8  | 260  | 269  | QTLAFVEIEK       |     |                        | Mascot                   |
| 1215.6005 | 1215.616  | 0.0155 | 13 | 164  | 173  | THYVINEDPK       |     |                        | Mascot                   |
| 1226.6991 | 1226.71   | 0.0109 | 9  | 472  | 482  | NDIPEITLALK      |     |                        | Mascot                   |
| 1238.7831 | 1238.7933 | 0.0102 | 8  | 135  | 145  | GILNILQLNLK      |     |                        | Mascot                   |
| 1259.5797 | 1259.5946 | 0.0149 | 12 | 182  | 191  | SKDLSHCQER       |     | Carbamidomethyl (C)[7] | Mascot                   |
| 1379.7603 | 1379.7687 | 0.0084 | 6  | 433  | 445  | EVVMLGYGSLIAK    |     |                        | Mascot                   |
| 1382.7889 | 1382.7999 | 0.011  | 8  | 303  | 315  | ISDAPAQIVEVLK    |     |                        | Mascot                   |
| 1395.7551 | 1395.7643 | 0.0092 | 7  | 433  | 445  | EVVMLGYGSLIAK    |     | Oxidation (M)[4]       | Mascot                   |
| 1463.8944 | 1463.91   | 0.0156 | 11 | 532  | 544  | LVQPVALQLVLDR    | 84  | 100                    | Mascot                   |
| 1463.8944 | 1463.91   | 0.0156 | 11 | 532  | 544  | LVQPVALQLVLDR    |     |                        | Mascot                   |
| 1622.8536 | 1622.8712 | 0.0176 | 11 | 668  | 683  | AYLAGAAADVIEFGVR | 151 | 100                    | Mascot                   |
| 1622.8536 | 1622.8712 | 0.0176 | 11 | 668  | 683  | AYLAGAAADVIEFGVR |     |                        | Mascot                   |
| 1644.717  | 1644.8524 | 0.1354 | 82 | 1142 | 1157 | DTSSGSAAASFEQMQK |     |                        | Mascot                   |
| 1666.8767 | 1666.894  | 0.0173 | 10 | 483  | 498  | VMGNAGHPSSLKPIMK |     |                        | Mascot                   |
| 1682.8717 | 1682.8958 | 0.0241 | 14 | 483  | 498  | VMGNAGHPSSLKPIMK |     | Oxidation (M)[2]       | Mascot                   |
| 1695.8999 | 1695.9147 | 0.0148 | 9  | 119  | 134  | VFAPAGVSPTVMNLHR |     |                        | Mascot                   |
| 1699.9377 | 1699.9528 | 0.0151 | 9  | 34   | 49   | YEALLLGGLPQEGLAR |     |                        | Mascot                   |
| 1699.9377 | 1699.9528 | 0.0151 | 9  | 34   | 49   | YEALLLGGLPQEGLAR | 89  | 100                    | Mascot                   |
| 1706.025  | 1706.0416 | 0.0166 | 10 | 364  | 379  | WLLDALPAVGTPVLIK |     |                        | Mascot                   |
| 1711.8948 | 1711.912  | 0.0172 | 10 | 119  | 134  | VFAPAGVSPTVMNLHR | 4   | 0                      | Oxidation (M)[12] Mascot |
| 1711.8948 | 1711.912  | 0.0172 | 10 | 119  | 134  | VFAPAGVSPTVMNLHR |     |                        | Oxidation (M)[12] Mascot |
| 1796.9078 | 1796.9176 | 0.0098 | 5  | 1279 | 1293 | HILTAAYDTGFRFER  |     |                        | Mascot                   |
| 1812.8877 | 1812.9053 | 0.0176 | 10 | 72   | 86   | LMDPLLYEYAGTWPK  |     |                        | Oxidation (M)[2] Mascot  |
| 1843.9159 | 1843.9298 | 0.0139 | 8  | 577  | 592  | IEPNMHVASFAYSHIK |     |                        | Mascot                   |
| 1859.9109 | 1859.9304 | 0.0195 | 10 | 577  | 592  | IEPNMHVASFAYSHIK |     |                        | Oxidation (M)[5] Mascot  |

|   |                                                                         |           |        |    |     |     |                                |      |     |     |     |     |     |                                           |        |
|---|-------------------------------------------------------------------------|-----------|--------|----|-----|-----|--------------------------------|------|-----|-----|-----|-----|-----|-------------------------------------------|--------|
|   | 1954.8745                                                               | 1954.8923 | 0.0178 | 9  | 147 | 163 | TQNIYEMQEAGAQQGVCR             |      |     |     |     |     |     | Carbamidomethyl (C)[16]                   | Mascot |
|   | 1954.8745                                                               | 1954.8923 | 0.0178 | 9  | 147 | 163 | TQNIYEMQEAGAQQGVCR             | 146  | 100 |     |     |     |     | Carbamidomethyl (C)[16]                   | Mascot |
|   | 1970.8695                                                               | 1970.8909 | 0.0214 | 11 | 147 | 163 | TQNIYEMQEAGAQQGVCR             |      |     |     |     |     |     | Carbamidomethyl (C)[16], Oxidation (M)[7] | Mascot |
|   | 2082.9695                                                               | 2082.9944 | 0.0249 | 12 | 146 | 163 | KTQNIYEMQEAGAQQGVC<br>R        |      |     |     |     |     |     | Carbamidomethyl (C)[17]                   | Mascot |
|   | 2326.2                                                                  | 2326.2205 | 0.0205 | 9  | 283 | 302 | GSLQYEFATEILQTPIQLM<br>K       |      |     |     |     |     |     | Oxidation (M)[19]                         | Mascot |
|   | 2938.5164                                                               | 2938.5325 | 0.0161 | 5  | 446 | 471 | YCVAVPTCPAELLRPIHEI<br>ATEAISK |      |     |     |     |     |     | Carbamidomethyl (C)[2,8]                  | Mascot |
| 2 | novel protein similar to vitellogenin 1 (vg1) [Danio rerio] gi 94733731 |           |        |    |     |     | 149169.2                       | 8.84 | 25  | 882 | 100 | 774 | 100 |                                           |        |

### Peptide Information

| Calc. Mass | Obsrv. Mass | ± da   | ± ppm | Start Seq. | End Seq. | Sequence         | Ion Score | C. I.  | % Modification         | Rank | Result Type |
|------------|-------------|--------|-------|------------|----------|------------------|-----------|--------|------------------------|------|-------------|
| 821.4628   | 821.4716    | 0.0088 | 11    | 549        | 555      | ALHPEVR          |           |        |                        |      | Mascot      |
| 821.4628   | 821.4716    | 0.0088 | 11    | 549        | 555      | ALHPEVR          | 58        | 99.958 |                        |      | Mascot      |
| 874.5145   | 874.5159    | 0.0014 | 2     | 429        | 436      | FASIPALR         |           |        |                        |      | Mascot      |
| 918.4965   | 918.5496    | 0.0531 | 58    | 1321       | 1328     | IPEITMSK         |           |        |                        |      | Mascot      |
| 1023.5105  | 1023.5204   | 0.0099 | 10    | 199        | 207      | DVGLAYTER        | 79        | 100    |                        |      | Mascot      |
| 1023.5105  | 1023.5204   | 0.0099 | 10    | 199        | 207      | DVGLAYTER        |           |        |                        |      | Mascot      |
| 1097.6677  | 1097.6796   | 0.0119 | 11    | 518        | 527      | VQVDAILALR       |           |        |                        |      | Mascot      |
| 1097.6677  | 1097.6796   | 0.0119 | 11    | 518        | 527      | VQVDAILALR       | 98        | 100    |                        |      | Mascot      |
| 1115.6935  | 1115.7063   | 0.0128 | 11    | 337        | 345      | FVQLVQLLR        | 71        | 99.998 |                        |      | Mascot      |
| 1115.6935  | 1115.7063   | 0.0128 | 11    | 337        | 345      | FVQLVQLLR        |           |        |                        |      | Mascot      |
| 1121.599   | 1121.6111   | 0.0121 | 11    | 352        | 360      | IEAIWSQFK        |           |        |                        |      | Mascot      |
| 1177.6462  | 1177.6561   | 0.0099 | 8     | 264        | 273      | QTLAFVEIEK       |           |        |                        |      | Mascot      |
| 1215.6005  | 1215.616    | 0.0155 | 13    | 168        | 177      | THYVINEDPK       |           |        |                        |      | Mascot      |
| 1226.6991  | 1226.71     | 0.0109 | 9     | 476        | 486      | NDIPEITLALK      |           |        |                        |      | Mascot      |
| 1238.7831  | 1238.7933   | 0.0102 | 8     | 139        | 149      | GILNILQLNLK      |           |        |                        |      | Mascot      |
| 1259.5797  | 1259.5946   | 0.0149 | 12    | 186        | 195      | SKDLSHCQER       |           |        | Carbamidomethyl (C)[7] |      | Mascot      |
| 1379.7603  | 1379.7687   | 0.0084 | 6     | 437        | 449      | EVVMLGYGSLIAK    |           |        |                        |      | Mascot      |
| 1395.7551  | 1395.7643   | 0.0092 | 7     | 437        | 449      | EVVMLGYGSLIAK    |           |        | Oxidation (M)[4]       |      | Mascot      |
| 1463.8944  | 1463.91     | 0.0156 | 11    | 536        | 548      | LVQPVALQLVLDR    | 84        | 100    |                        |      | Mascot      |
| 1463.8944  | 1463.91     | 0.0156 | 11    | 536        | 548      | LVQPVALQLVLDR    |           |        |                        |      | Mascot      |
| 1622.8536  | 1622.8712   | 0.0176 | 11    | 672        | 687      | AYLAGAAADVIEFGVR | 151       | 100    |                        |      | Mascot      |
| 1622.8536  | 1622.8712   | 0.0176 | 11    | 672        | 687      | AYLAGAAADVIEFGVR |           |        |                        |      | Mascot      |
| 1644.717   | 1644.8524   | 0.1354 | 82    | 1144       | 1159     | DTSSGSAAASFEQMQK |           |        |                        |      | Mascot      |
| 1648.821   | 1648.8413   | 0.0203 | 12    | 1201       | 1215     | VQLIASSIAENDNMK  |           |        | Oxidation (M)[14]      |      | Mascot      |
| 1666.8767  | 1666.894    | 0.0173 | 10    | 487        | 502      | VMGNAGHPSSLKPIMK |           |        |                        |      | Mascot      |

|                     |                              |             |        |       |            |                   |                               |           |        |                |     |                                           |                  |        |
|---------------------|------------------------------|-------------|--------|-------|------------|-------------------|-------------------------------|-----------|--------|----------------|-----|-------------------------------------------|------------------|--------|
|                     | 1682.8717                    | 1682.8958   | 0.0241 | 14    | 487        | 502               | VMGNAGHPSSLKPIMK              |           |        |                |     |                                           | Oxidation (M)[2] | Mascot |
|                     | 1699.9377                    | 1699.9528   | 0.0151 | 9     | 38         | 53                | YEALLLGGLPQEGLAR              |           |        |                |     |                                           |                  | Mascot |
|                     | 1699.9377                    | 1699.9528   | 0.0151 | 9     | 38         | 53                | YEALLLGGLPQEGLAR              | 89        | 100    |                |     |                                           |                  | Mascot |
|                     | 1706.025                     | 1706.0416   | 0.0166 | 10    | 368        | 383               | WLLDALPAVGTPVLIK              |           |        |                |     |                                           |                  | Mascot |
|                     | 1721.9043                    | 1721.9209   | 0.0166 | 10    | 123        | 138               | VFAPAGVSPTVMNLYR              |           |        |                |     |                                           |                  | Mascot |
|                     | 1737.8992                    | 1737.9172   | 0.018  | 10    | 123        | 138               | VFAPAGVSPTVMNLYR              |           |        |                |     | Oxidation (M)[12]                         | Mascot           |        |
|                     | 1824.8989                    | 1824.9142   | 0.0153 | 8     | 76         | 90                | LMDPLLYEYAGTWPR               |           |        |                |     |                                           |                  | Mascot |
|                     | 1840.8938                    | 1840.9137   | 0.0199 | 11    | 76         | 90                | LMDPLLYEYAGTWPR               |           |        |                |     | Oxidation (M)[2]                          | Mascot           |        |
|                     | 1954.8745                    | 1954.8923   | 0.0178 | 9     | 151        | 167               | TQNIYEMQEAGAQQVCR             |           |        |                |     | Carbamidomethyl (C)[16]                   | Mascot           |        |
|                     | 1954.8745                    | 1954.8923   | 0.0178 | 9     | 151        | 167               | TQNIYEMQEAGAQQVCR             | 146       | 100    |                |     | Carbamidomethyl (C)[16]                   | Mascot           |        |
|                     | 1970.8695                    | 1970.8909   | 0.0214 | 11    | 151        | 167               | TQNIYEMQEAGAQQVCR             |           |        |                |     | Carbamidomethyl (C)[16], Oxidation (M)[7] | Mascot           |        |
|                     | 2082.9695                    | 2082.9944   | 0.0249 | 12    | 150        | 167               | KTQNIYEMQEAGAQQVC<br>R        |           |        |                |     | Carbamidomethyl (C)[17]                   | Mascot           |        |
|                     | 2914.4912                    | 2914.5107   | 0.0195 | 7     | 450        | 475               | HCTAVPTCPAELLRIPEI<br>ATEAISK |           |        |                |     | Carbamidomethyl (C)[2,8]                  | Mascot           |        |
| 3                   | vitellogenin 5 [Danio rerio] |             |        |       |            | gi 68448530       | 148868                        | 8.77      | 25     | 881            | 100 | 774                                       | 100              |        |
| Peptide Information |                              |             |        |       |            |                   |                               |           |        |                |     |                                           |                  |        |
|                     | Calc. Mass                   | Obsrv. Mass | ± da   | ± ppm | Start Seq. | End Sequence Seq. |                               | Ion Score | C. I.  | % Modification |     | Rank                                      | Result Type      |        |
|                     | 821.4628                     | 821.4716    | 0.0088 | 11    | 545        | 551               | ALHPEVR                       |           |        |                |     |                                           | Mascot           |        |
|                     | 821.4628                     | 821.4716    | 0.0088 | 11    | 545        | 551               | ALHPEVR                       | 58        | 99.958 |                |     |                                           | Mascot           |        |
|                     | 874.5145                     | 874.5159    | 0.0014 | 2     | 425        | 432               | FASIPALR                      |           |        |                |     |                                           | Mascot           |        |
|                     | 918.4965                     | 918.5496    | 0.0531 | 58    | 1319       | 1326              | IPEITMSK                      |           |        |                |     |                                           | Mascot           |        |
|                     | 1023.5105                    | 1023.5204   | 0.0099 | 10    | 195        | 203               | DVGLAYTER                     | 79        | 100    |                |     |                                           | Mascot           |        |
|                     | 1023.5105                    | 1023.5204   | 0.0099 | 10    | 195        | 203               | DVGLAYTER                     |           |        |                |     |                                           | Mascot           |        |
|                     | 1097.6677                    | 1097.6796   | 0.0119 | 11    | 514        | 523               | VQVDAILALR                    |           |        |                |     |                                           | Mascot           |        |
|                     | 1097.6677                    | 1097.6796   | 0.0119 | 11    | 514        | 523               | VQVDAILALR                    | 98        | 100    |                |     |                                           | Mascot           |        |
|                     | 1115.6935                    | 1115.7063   | 0.0128 | 11    | 333        | 341               | FVQLVQLLR                     | 71        | 99.998 |                |     |                                           | Mascot           |        |
|                     | 1115.6935                    | 1115.7063   | 0.0128 | 11    | 333        | 341               | FVQLVQLLR                     |           |        |                |     |                                           | Mascot           |        |
|                     | 1121.599                     | 1121.6111   | 0.0121 | 11    | 348        | 356               | IEAIWSQFK                     |           |        |                |     |                                           | Mascot           |        |
|                     | 1177.6462                    | 1177.6561   | 0.0099 | 8     | 260        | 269               | QTLAFVEIEK                    |           |        |                |     |                                           | Mascot           |        |
|                     | 1215.6005                    | 1215.616    | 0.0155 | 13    | 164        | 173               | THYVINEDPK                    |           |        |                |     |                                           | Mascot           |        |
|                     | 1226.6991                    | 1226.71     | 0.0109 | 9     | 472        | 482               | NDIPEITLALK                   |           |        |                |     |                                           | Mascot           |        |
|                     | 1238.7831                    | 1238.7933   | 0.0102 | 8     | 135        | 145               | GILNILQLNLK                   |           |        |                |     |                                           | Mascot           |        |
|                     | 1259.5797                    | 1259.5946   | 0.0149 | 12    | 182        | 191               | SKDLSHCQER                    |           |        |                |     | Carbamidomethyl (C)[7]                    | Mascot           |        |
|                     | 1379.7603                    | 1379.7687   | 0.0084 | 6     | 433        | 445               | EVVMLGYGSLIAK                 |           |        |                |     |                                           | Mascot           |        |
|                     | 1395.7551                    | 1395.7643   | 0.0092 | 7     | 433        | 445               | EVVMLGYGSLIAK                 |           |        |                |     | Oxidation (M)[4]                          | Mascot           |        |
|                     | 1463.8944                    | 1463.91     | 0.0156 | 11    | 532        | 544               | LVQPVALQLVLDR                 | 84        | 100    |                |     |                                           | Mascot           |        |



|   |                              |           |           |         |     |              |          |                               |     |                                           |                         |     |        |
|---|------------------------------|-----------|-----------|---------|-----|--------------|----------|-------------------------------|-----|-------------------------------------------|-------------------------|-----|--------|
|   |                              | 1463.8944 | 1463.91   | 0.0156  | 11  | 532          | 544      | LVQPVALQLVLDR                 |     |                                           |                         |     | Mascot |
|   |                              | 1622.8536 | 1622.8712 | 0.0176  | 11  | 668          | 683      | AYLAGAAADVIEFGVR              | 151 | 100                                       |                         |     | Mascot |
|   |                              | 1622.8536 | 1622.8712 | 0.0176  | 11  | 668          | 683      | AYLAGAAADVIEFGVR              |     |                                           |                         |     | Mascot |
|   |                              | 1644.717  | 1644.8524 | 0.1354  | 82  | 1142         | 1157     | DTSSGSAAAQFEQMVK              |     |                                           |                         |     | Mascot |
|   |                              | 1648.821  | 1648.8413 | 0.0203  | 12  | 1199         | 1213     | VQLIASSIAENDNMK               |     | Oxidation (M)[14]                         |                         |     | Mascot |
|   |                              | 1666.8767 | 1666.894  | 0.0173  | 10  | 483          | 498      | VMGNAGHPSSLKPIMK              |     |                                           |                         |     | Mascot |
|   |                              | 1682.8717 | 1682.8958 | 0.0241  | 14  | 483          | 498      | VMGNAGHPSSLKPIMK              |     | Oxidation (M)[2]                          |                         |     | Mascot |
|   |                              | 1699.9377 | 1699.9528 | 0.0151  | 9   | 34           | 49       | YEALLGGLPQEGLAR               |     |                                           |                         |     | Mascot |
|   |                              | 1699.9377 | 1699.9528 | 0.0151  | 9   | 34           | 49       | YEALLGGLPQEGLAR               | 89  | 100                                       |                         |     | Mascot |
|   |                              | 1706.025  | 1706.0416 | 0.0166  | 10  | 364          | 379      | WLLDALPAVGTPVLIK              |     |                                           |                         |     | Mascot |
|   |                              | 1737.9568 | 1737.9172 | -0.0396 | -23 | 746          | 761      | SIIEEAIPMTGPKPR               |     |                                           |                         |     | Mascot |
|   |                              | 1824.8989 | 1824.9142 | 0.0153  | 8   | 72           | 86       | LMDPLLYEYAGTWPR               |     |                                           |                         |     | Mascot |
|   |                              | 1840.8938 | 1840.9137 | 0.0199  | 11  | 72           | 86       | LMDPLLYEYAGTWPR               |     | Oxidation (M)[2]                          |                         |     | Mascot |
|   |                              | 1954.8745 | 1954.8923 | 0.0178  | 9   | 147          | 163      | TQNIYEMQEAGAQQVCR             |     | Carbamidomethyl (C)[16]                   |                         |     | Mascot |
|   |                              | 1954.8745 | 1954.8923 | 0.0178  | 9   | 147          | 163      | TQNIYEMQEAGAQQVCR             | 146 | 100                                       | Carbamidomethyl (C)[16] |     | Mascot |
|   |                              | 1970.8695 | 1970.8909 | 0.0214  | 11  | 147          | 163      | TQNIYEMQEAGAQQVCR             |     | Carbamidomethyl (C)[16], Oxidation (M)[7] |                         |     | Mascot |
|   |                              | 2082.9695 | 2082.9944 | 0.0249  | 12  | 146          | 163      | KTQNIYEMQEAGAQQVC<br>R        |     | Carbamidomethyl (C)[17]                   |                         |     | Mascot |
|   |                              | 2914.4912 | 2914.5107 | 0.0195  | 7   | 446          | 471      | HCTAVPTCPAELLRIPEI<br>ATEAISK |     | Carbamidomethyl (C)[2,8]                  |                         |     | Mascot |
| 4 | vitellogenin 1 [Danio rerio] |           |           |         |     | gi 166795887 | 149452.5 | 8.68                          | 30  | 747                                       | 100                     | 590 | 100    |

### Peptide Information

| Calc. Mass | Obsrv. Mass | ± da   | ± ppm | Start Seq. | End Seq. | Sequence   | Ion Score | C. I.  | % Modification | Rank | Result Type |
|------------|-------------|--------|-------|------------|----------|------------|-----------|--------|----------------|------|-------------|
| 821.4628   | 821.4716    | 0.0088 | 11    | 545        | 551      | ALHPEVR    |           |        |                |      | Mascot      |
| 821.4628   | 821.4716    | 0.0088 | 11    | 545        | 551      | ALHPEVR    | 58        | 99.958 |                |      | Mascot      |
| 874.4669   | 874.5159    | 0.049  | 56    | 87         | 94       | DPFVPATK   |           |        |                |      | Mascot      |
| 888.5301   | 888.538     | 0.0079 | 9     | 425        | 432      | FATIPALR   |           |        |                |      | Mascot      |
| 888.5301   | 888.538     | 0.0079 | 9     | 425        | 432      | FATIPALR   | 44        | 98.855 |                |      | Mascot      |
| 918.4965   | 918.5496    | 0.0531 | 58    | 1319       | 1326     | IPEITMSK   |           |        |                |      | Mascot      |
| 926.5417   | 926.5511    | 0.0094 | 10    | 505        | 513      | TAANALPIR  |           |        |                |      | Mascot      |
| 1097.6677  | 1097.6796   | 0.0119 | 11    | 514        | 523      | VQVDAILALR |           |        |                |      | Mascot      |
| 1097.6677  | 1097.6796   | 0.0119 | 11    | 514        | 523      | VQVDAILALR | 98        | 100    |                |      | Mascot      |
| 1115.6935  | 1115.7063   | 0.0128 | 11    | 333        | 341      | FVQLVQLLR  | 71        | 99.998 |                |      | Mascot      |
| 1115.6935  | 1115.7063   | 0.0128 | 11    | 333        | 341      | FVQLVQLLR  |           |        |                |      | Mascot      |
| 1121.599   | 1121.6111   | 0.0121 | 11    | 348        | 356      | IEAIWSQFK  |           |        |                |      | Mascot      |
| 1177.6462  | 1177.6561   | 0.0099 | 8     | 260        | 269      | QTLAFVEIEK |           |        |                |      | Mascot      |

|   |                              |           |         |     |             |          |                                 |     |     |                                           |     |        |
|---|------------------------------|-----------|---------|-----|-------------|----------|---------------------------------|-----|-----|-------------------------------------------|-----|--------|
|   | 1215.6005                    | 1215.616  | 0.0155  | 13  | 164         | 173      | THYVINEDPK                      |     |     |                                           |     | Mascot |
|   | 1226.6991                    | 1226.71   | 0.0109  | 9   | 472         | 482      | NDIPEITLALK                     |     |     |                                           |     | Mascot |
|   | 1238.7831                    | 1238.7933 | 0.0102  | 8   | 135         | 145      | GILNILQLNLK                     |     |     |                                           |     | Mascot |
|   | 1259.5797                    | 1259.5946 | 0.0149  | 12  | 182         | 191      | SKDLSHCQER                      |     |     | Carbamidomethyl (C)[7]                    |     | Mascot |
|   | 1379.7603                    | 1379.7687 | 0.0084  | 6   | 433         | 445      | EVVMLGYGSLIAK                   |     |     |                                           |     | Mascot |
|   | 1382.7889                    | 1382.7999 | 0.011   | 8   | 303         | 315      | ISDAPAQIVEVLK                   |     |     |                                           |     | Mascot |
|   | 1395.7551                    | 1395.7643 | 0.0092  | 7   | 433         | 445      | EVVMLGYGSLIAK                   |     |     | Oxidation (M)[4]                          |     | Mascot |
|   | 1463.8944                    | 1463.91   | 0.0156  | 11  | 532         | 544      | LVQPVALQLVLDR                   | 84  | 100 |                                           |     | Mascot |
|   | 1463.8944                    | 1463.91   | 0.0156  | 11  | 532         | 544      | LVQPVALQLVLDR                   |     |     |                                           |     | Mascot |
|   | 1638.8485                    | 1638.8628 | 0.0143  | 9   | 668         | 683      | TYLAGAAADVVEFGVR                |     |     |                                           |     | Mascot |
|   | 1644.717                     | 1644.8524 | 0.1354  | 82  | 1142        | 1157     | DTSSGSAAAQFEQMQR                |     |     |                                           |     | Mascot |
|   | 1652.6665                    | 1652.8809 | 0.2144  | 130 | 1098        | 1114     | SSSSSSQSSSSSMSSSR               |     |     |                                           |     | Mascot |
|   | 1666.8767                    | 1666.894  | 0.0173  | 10  | 483         | 498      | VMGNAGHPSSLKPIMK                |     |     |                                           |     | Mascot |
|   | 1682.8717                    | 1682.8958 | 0.0241  | 14  | 483         | 498      | VMGNAGHPSSLKPIMK                |     |     | Oxidation (M)[2]                          |     | Mascot |
|   | 1695.8999                    | 1695.9147 | 0.0148  | 9   | 119         | 134      | VFAPAGVSPTVMNLHR                |     |     |                                           |     | Mascot |
|   | 1699.9377                    | 1699.9528 | 0.0151  | 9   | 34          | 49       | YEALLLGGLPQEGLAR                |     |     |                                           |     | Mascot |
|   | 1699.9377                    | 1699.9528 | 0.0151  | 9   | 34          | 49       | YEALLLGGLPQEGLAR                | 89  | 100 |                                           |     | Mascot |
|   | 1706.025                     | 1706.0416 | 0.0166  | 10  | 364         | 379      | WLLDALPAVGTPVIHK                |     |     |                                           |     | Mascot |
|   | 1711.8948                    | 1711.912  | 0.0172  | 10  | 119         | 134      | VFAPAGVSPTVMNLHR                | 4   | 0   | Oxidation (M)[12]                         |     | Mascot |
|   | 1711.8948                    | 1711.912  | 0.0172  | 10  | 119         | 134      | VFAPAGVSPTVMNLHR                |     |     | Oxidation (M)[12]                         |     | Mascot |
|   | 1796.9078                    | 1796.9176 | 0.0098  | 5   | 1279        | 1293     | HILTAAYDTGFRFER                 |     |     |                                           |     | Mascot |
|   | 1812.8877                    | 1812.9053 | 0.0176  | 10  | 72          | 86       | LMDPLLYEYAGTWPK                 |     |     | Oxidation (M)[2]                          |     | Mascot |
|   | 1954.8745                    | 1954.8923 | 0.0178  | 9   | 147         | 163      | TQNIYEMQEAGAQQGVCR              |     |     | Carbamidomethyl (C)[16]                   |     | Mascot |
|   | 1954.8745                    | 1954.8923 | 0.0178  | 9   | 147         | 163      | TQNIYEMQEAGAQQGVCR              | 146 | 100 | Carbamidomethyl (C)[16]                   |     | Mascot |
|   | 1970.8695                    | 1970.8909 | 0.0214  | 11  | 147         | 163      | TQNIYEMQEAGAQQGVCR              |     |     | Carbamidomethyl (C)[16], Oxidation (M)[7] |     | Mascot |
|   | 2082.9695                    | 2082.9944 | 0.0249  | 12  | 146         | 163      | KTQNIYEMQEAGAQQVC<br>R          |     |     | Carbamidomethyl (C)[17]                   |     | Mascot |
|   | 2233.2009                    | 2233.1025 | -0.0984 | -44 | 593         | 614      | SLTRITAPDMAYVAGAAAN<br>VAIK     |     |     |                                           |     | Mascot |
|   | 2326.2                       | 2326.2205 | 0.0205  | 9   | 283         | 302      | GSLQYEFATEILQTPIQLM<br>K        |     |     | Oxidation (M)[19]                         |     | Mascot |
|   | 2938.5164                    | 2938.5325 | 0.0161  | 5   | 446         | 471      | YCVAVPTCPAELLRIPIHEI<br>ATEAISK |     |     | Carbamidomethyl (C)[2,8]                  |     | Mascot |
| 5 | vitellogenin 1 [Danio rerio] |           |         |     | gi 21391472 | 127954.2 | 8.69                            | 22  | 678 | 100                                       | 585 | 100    |

### Peptide Information

| Calc. Mass | Obsrv. Mass | ± da   | ± ppm | Start Seq. | End Seq. | Sequence | Ion Score | C. I. % | Modification | Rank | Result Type |
|------------|-------------|--------|-------|------------|----------|----------|-----------|---------|--------------|------|-------------|
| 821.4628   | 821.4716    | 0.0088 | 11    | 354        | 360      | ALHPEVR  |           |         |              |      | Mascot      |
| 821.4628   | 821.4716    | 0.0088 | 11    | 354        | 360      | ALHPEVR  | 58        | 99.958  |              |      | Mascot      |

|   |                            |           |        |    |              |          |                                |     |                          |     |        |     |
|---|----------------------------|-----------|--------|----|--------------|----------|--------------------------------|-----|--------------------------|-----|--------|-----|
|   | 888.5301                   | 888.538   | 0.0079 | 9  | 234          | 241      | FATIPALR                       |     |                          |     | Mascot |     |
|   | 888.5301                   | 888.538   | 0.0079 | 9  | 234          | 241      | FATIPALR                       | 44  | 98.855                   |     | Mascot |     |
|   | 918.4965                   | 918.5496  | 0.0531 | 58 | 1126         | 1133     | IPEITMSK                       |     |                          |     | Mascot |     |
|   | 926.5417                   | 926.5511  | 0.0094 | 10 | 314          | 322      | TAANALPIR                      |     |                          |     | Mascot |     |
|   | 1023.5105                  | 1023.5204 | 0.0099 | 10 | 4            | 12       | DVGLAYTER                      | 79  | 100                      |     | Mascot |     |
|   | 1023.5105                  | 1023.5204 | 0.0099 | 10 | 4            | 12       | DVGLAYTER                      |     |                          |     | Mascot |     |
|   | 1097.6677                  | 1097.6796 | 0.0119 | 11 | 323          | 332      | VQVDAILALR                     |     |                          |     | Mascot |     |
|   | 1097.6677                  | 1097.6796 | 0.0119 | 11 | 323          | 332      | VQVDAILALR                     | 98  | 100                      |     | Mascot |     |
|   | 1115.6935                  | 1115.7063 | 0.0128 | 11 | 142          | 150      | FVQLVQLLR                      | 71  | 99.998                   |     | Mascot |     |
|   | 1115.6935                  | 1115.7063 | 0.0128 | 11 | 142          | 150      | FVQLVQLLR                      |     |                          |     | Mascot |     |
|   | 1121.599                   | 1121.6111 | 0.0121 | 11 | 157          | 165      | IEAIWSQFK                      |     |                          |     | Mascot |     |
|   | 1177.6462                  | 1177.6561 | 0.0099 | 8  | 69           | 78       | QTLAFVEIEK                     |     |                          |     | Mascot |     |
|   | 1226.6991                  | 1226.71   | 0.0109 | 9  | 281          | 291      | NDIPEITLALK                    |     |                          |     | Mascot |     |
|   | 1379.7603                  | 1379.7687 | 0.0084 | 6  | 242          | 254      | EVVMLGYGSLIAK                  |     |                          |     | Mascot |     |
|   | 1382.7889                  | 1382.7999 | 0.011  | 8  | 112          | 124      | ISDAPAQIVEVLK                  |     |                          |     | Mascot |     |
|   | 1395.7551                  | 1395.7643 | 0.0092 | 7  | 242          | 254      | EVVMLGYGSLIAK                  |     | Oxidation (M)[4]         |     | Mascot |     |
|   | 1463.8944                  | 1463.91   | 0.0156 | 11 | 341          | 353      | LVPVALQLVLDR                   | 84  | 100                      |     | Mascot |     |
|   | 1463.8944                  | 1463.91   | 0.0156 | 11 | 341          | 353      | LVPVALQLVLDR                   |     |                          |     | Mascot |     |
|   | 1622.8536                  | 1622.8712 | 0.0176 | 11 | 477          | 492      | AYLAGAAADVIEFGVR               | 151 | 100                      |     | Mascot |     |
|   | 1622.8536                  | 1622.8712 | 0.0176 | 11 | 477          | 492      | AYLAGAAADVIEFGVR               |     |                          |     | Mascot |     |
|   | 1644.717                   | 1644.8524 | 0.1354 | 82 | 949          | 964      | DTSSGSAAASFEQMqK               |     |                          |     | Mascot |     |
|   | 1666.8767                  | 1666.894  | 0.0173 | 10 | 292          | 307      | VMGNAGHPSSLKPIMK               |     |                          |     | Mascot |     |
|   | 1682.8717                  | 1682.8958 | 0.0241 | 14 | 292          | 307      | VMGNAGHPSSLKPIMK               |     | Oxidation (M)[2]         |     | Mascot |     |
|   | 1699.9047                  | 1699.9528 | 0.0481 | 28 | 406          | 423      | iTAPDMASVAGAANVAIK             |     |                          |     | Mascot |     |
|   | 1699.9047                  | 1699.9528 | 0.0481 | 28 | 406          | 423      | iTAPDMASVAGAANVAIK             |     |                          |     | Mascot |     |
|   | 1706.025                   | 1706.0416 | 0.0166 | 10 | 173          | 188      | WLLDALPAVGTPVIlK               |     |                          |     | Mascot |     |
|   | 1796.9078                  | 1796.9176 | 0.0098 | 5  | 1086         | 1100     | HILTAAYDTGFRFER                |     |                          |     | Mascot |     |
|   | 1843.9159                  | 1843.9298 | 0.0139 | 8  | 386          | 401      | IEPNMHVASFAYSHIK               |     |                          |     | Mascot |     |
|   | 1859.9109                  | 1859.9304 | 0.0195 | 10 | 386          | 401      | IEPNMHVASFAYSHIK               |     | Oxidation (M)[5]         |     | Mascot |     |
|   | 2326.2                     | 2326.2205 | 0.0205 | 9  | 92           | 111      | GSLQYEFATEILQTPIQLM<br>K       |     | Oxidation (M)[19]        |     | Mascot |     |
|   | 2938.5164                  | 2938.5325 | 0.0161 | 5  | 255          | 280      | YCVAVPTCPAELLRPIHEI<br>ATEAISK |     | Carbamidomethyl (C)[2,8] |     | Mascot |     |
| 6 | Vtg1 protein [Danio rerio] |           |        |    | gi 145337918 | 116565.5 | 9.07                           | 19  | 581                      | 100 | 506    | 100 |

### Peptide Information

| Calc. Mass | Obsrv. Mass | ± da   | ± ppm | Start Seq. | End Seq. | Sequence | Ion Score | C. I. % | Modification | Rank | Result Type |
|------------|-------------|--------|-------|------------|----------|----------|-----------|---------|--------------|------|-------------|
| 821.4628   | 821.4716    | 0.0088 | 11    | 251        | 257      | ALHPEVR  |           |         |              |      | Mascot      |

|           |           |        |    |      |      |                                |     |        |                          |        |
|-----------|-----------|--------|----|------|------|--------------------------------|-----|--------|--------------------------|--------|
| 821.4628  | 821.4716  | 0.0088 | 11 | 251  | 257  | ALHPEVR                        | 58  | 99.958 |                          | Mascot |
| 888.5301  | 888.538   | 0.0079 | 9  | 131  | 138  | FATIPALR                       |     |        |                          | Mascot |
| 888.5301  | 888.538   | 0.0079 | 9  | 131  | 138  | FATIPALR                       | 44  | 98.855 |                          | Mascot |
| 918.4965  | 918.5496  | 0.0531 | 58 | 1025 | 1032 | IPEITMSK                       |     |        |                          | Mascot |
| 926.5417  | 926.5511  | 0.0094 | 10 | 211  | 219  | TAANALPIR                      |     |        |                          | Mascot |
| 1097.6677 | 1097.6796 | 0.0119 | 11 | 220  | 229  | VQVDAILALR                     |     |        |                          | Mascot |
| 1097.6677 | 1097.6796 | 0.0119 | 11 | 220  | 229  | VQVDAILALR                     | 98  | 100    |                          | Mascot |
| 1115.6935 | 1115.7063 | 0.0128 | 11 | 39   | 47   | FVQLVQLLR                      | 71  | 99.998 |                          | Mascot |
| 1115.6935 | 1115.7063 | 0.0128 | 11 | 39   | 47   | FVQLVQLLR                      |     |        |                          | Mascot |
| 1121.599  | 1121.6111 | 0.0121 | 11 | 54   | 62   | IEAIWSQFK                      |     |        |                          | Mascot |
| 1226.6991 | 1226.71   | 0.0109 | 9  | 178  | 188  | NDIPEITLALK                    |     |        |                          | Mascot |
| 1379.7603 | 1379.7687 | 0.0084 | 6  | 139  | 151  | EVVMLGYGSLIAK                  |     |        |                          | Mascot |
| 1382.7889 | 1382.7999 | 0.011  | 8  | 9    | 21   | ISDAPAQIVEVLK                  |     |        |                          | Mascot |
| 1395.7551 | 1395.7643 | 0.0092 | 7  | 139  | 151  | EVVMLGYGSLIAK                  |     |        | Oxidation (M)[4]         | Mascot |
| 1463.8944 | 1463.91   | 0.0156 | 11 | 238  | 250  | LVQPVALQLVLDR                  | 84  | 100    |                          | Mascot |
| 1463.8944 | 1463.91   | 0.0156 | 11 | 238  | 250  | LVQPVALQLVLDR                  |     |        |                          | Mascot |
| 1622.8536 | 1622.8712 | 0.0176 | 11 | 374  | 389  | AYLAGAAADVIEFGVR               | 151 | 100    |                          | Mascot |
| 1622.8536 | 1622.8712 | 0.0176 | 11 | 374  | 389  | AYLAGAAADVIEFGVR               |     |        |                          | Mascot |
| 1644.717  | 1644.8524 | 0.1354 | 82 | 848  | 863  | DTSSGSAASFEQMQK                |     |        |                          | Mascot |
| 1666.8767 | 1666.894  | 0.0173 | 10 | 189  | 204  | VMGNAGHPSSLKPIMK               |     |        |                          | Mascot |
| 1682.8717 | 1682.8958 | 0.0241 | 14 | 189  | 204  | VMGNAGHPSSLKPIMK               |     |        | Oxidation (M)[2]         | Mascot |
| 1699.9047 | 1699.9528 | 0.0481 | 28 | 303  | 320  | ITAPDMASVAGAAANVAIK            |     |        |                          | Mascot |
| 1699.9047 | 1699.9528 | 0.0481 | 28 | 303  | 320  | ITAPDMASVAGAAANVAIK            |     |        |                          | Mascot |
| 1706.025  | 1706.0416 | 0.0166 | 10 | 70   | 85   | WLLDALPAVGTPVVIK               |     |        |                          | Mascot |
| 1796.9078 | 1796.9176 | 0.0098 | 5  | 985  | 999  | HILTAAYDTGFRFER                |     |        |                          | Mascot |
| 1843.9159 | 1843.9298 | 0.0139 | 8  | 283  | 298  | IEPNMHVASFAYSHIK               |     |        |                          | Mascot |
| 1859.9109 | 1859.9304 | 0.0195 | 10 | 283  | 298  | IEPNMHVASFAYSHIK               |     |        | Oxidation (M)[5]         | Mascot |
| 2938.5164 | 2938.5325 | 0.0161 | 5  | 152  | 177  | YCVAVPTCPAELLRPIHEI<br>ATEAISK |     |        | Carbamidomethyl (C)[2,8] | Mascot |

7
novel protein similar to vitellogenin 1 (vg1) [Danio rerio]
gi|94733734
149808.5
8.83
23
571
100
478
100

| Peptide Information |             |        |       |            |          |          |           |        |                | Rank | Result Type |
|---------------------|-------------|--------|-------|------------|----------|----------|-----------|--------|----------------|------|-------------|
| Calc. Mass          | Obsrv. Mass | ± da   | ± ppm | Start Seq. | End Seq. | Sequence | Ion Score | C. I.  | % Modification |      |             |
| 821.4628            | 821.4716    | 0.0088 | 11    | 549        | 555      | ALHPEVR  |           |        |                |      | Mascot      |
| 821.4628            | 821.4716    | 0.0088 | 11    | 549        | 555      | ALHPEVR  | 58        | 99.958 |                |      | Mascot      |
| 918.4965            | 918.5496    | 0.0531 | 58    | 1326       | 1333     | IPEITMSK |           |        |                |      | Mascot      |

|           |           |         |     |      |      |                             |    |        |                         |        |
|-----------|-----------|---------|-----|------|------|-----------------------------|----|--------|-------------------------|--------|
| 1023.5105 | 1023.5204 | 0.0099  | 10  | 199  | 207  | DVGLAYTER                   | 79 | 100    |                         | Mascot |
| 1023.5105 | 1023.5204 | 0.0099  | 10  | 199  | 207  | DVGLAYTER                   |    |        |                         | Mascot |
| 1097.6677 | 1097.6796 | 0.0119  | 11  | 518  | 527  | VQVDAILALR                  |    |        |                         | Mascot |
| 1097.6677 | 1097.6796 | 0.0119  | 11  | 518  | 527  | VQVDAILALR                  | 98 | 100    |                         | Mascot |
| 1115.6935 | 1115.7063 | 0.0128  | 11  | 337  | 345  | FVQLVQLLR                   | 71 | 99.998 |                         | Mascot |
| 1115.6935 | 1115.7063 | 0.0128  | 11  | 337  | 345  | FVQLVQLLR                   |    |        |                         | Mascot |
| 1121.599  | 1121.6111 | 0.0121  | 11  | 352  | 360  | IEAIWSQFK                   |    |        |                         | Mascot |
| 1177.6462 | 1177.6561 | 0.0099  | 8   | 264  | 273  | QTLAFVEIEK                  |    |        |                         | Mascot |
| 1215.6005 | 1215.616  | 0.0155  | 13  | 168  | 177  | THYVINEDPK                  |    |        |                         | Mascot |
| 1226.6991 | 1226.71   | 0.0109  | 9   | 476  | 486  | NDIPEITLALK                 |    |        |                         | Mascot |
| 1238.7831 | 1238.7933 | 0.0102  | 8   | 139  | 149  | GILNILQLNLK                 |    |        |                         | Mascot |
| 1259.5797 | 1259.5946 | 0.0149  | 12  | 186  | 195  | SKDLSHCQER                  |    |        | Carbamidomethyl (C)[7]  | Mascot |
| 1379.7603 | 1379.7687 | 0.0084  | 6   | 437  | 449  | EVVMLGYGSLIAK               |    |        |                         | Mascot |
| 1395.7551 | 1395.7643 | 0.0092  | 7   | 437  | 449  | EVVMLGYGSLIAK               |    |        | Oxidation (M)[4]        | Mascot |
| 1463.8944 | 1463.91   | 0.0156  | 11  | 536  | 548  | LVQPVALQLVLDR               | 84 | 100    |                         | Mascot |
| 1463.8944 | 1463.91   | 0.0156  | 11  | 536  | 548  | LVQPVALQLVLDR               |    |        |                         | Mascot |
| 1638.8485 | 1638.8628 | 0.0143  | 9   | 672  | 687  | TYLAGAAADVVEFGVR            |    |        |                         | Mascot |
| 1644.717  | 1644.8524 | 0.1354  | 82  | 1149 | 1164 | DTSSGSAASFEQMQK             |    |        |                         | Mascot |
| 1648.821  | 1648.8413 | 0.0203  | 12  | 1206 | 1220 | VQLIASSIAENDNMK             |    |        | Oxidation (M)[14]       | Mascot |
| 1666.8767 | 1666.894  | 0.0173  | 10  | 487  | 502  | VMGNAGHPSSLKPIMK            |    |        |                         | Mascot |
| 1682.8717 | 1682.8958 | 0.0241  | 14  | 487  | 502  | VMGNAGHPSSLKPIMK            |    |        | Oxidation (M)[2]        | Mascot |
| 1695.8999 | 1695.9147 | 0.0148  | 9   | 123  | 138  | VFAPAGVSPTVMNLHR            |    |        |                         | Mascot |
| 1699.9377 | 1699.9528 | 0.0151  | 9   | 38   | 53   | YEALLLGGLPQEGLAR            |    |        |                         | Mascot |
| 1699.9377 | 1699.9528 | 0.0151  | 9   | 38   | 53   | YEALLLGGLPQEGLAR            | 89 | 100    |                         | Mascot |
| 1706.025  | 1706.0416 | 0.0166  | 10  | 368  | 383  | WLLDALPAVGTPVLIK            |    |        |                         | Mascot |
| 1711.8948 | 1711.912  | 0.0172  | 10  | 123  | 138  | VFAPAGVSPTVMNLHR            | 4  | 0      | Oxidation (M)[12]       | Mascot |
| 1711.8948 | 1711.912  | 0.0172  | 10  | 123  | 138  | VFAPAGVSPTVMNLHR            |    |        | Oxidation (M)[12]       | Mascot |
| 1796.8928 | 1796.9176 | 0.0248  | 14  | 76   | 90   | LMDPLLYEYAGTWPK             |    |        |                         | Mascot |
| 1812.8877 | 1812.9053 | 0.0176  | 10  | 76   | 90   | LMDPLLYEYAGTWPK             |    |        | Oxidation (M)[2]        | Mascot |
| 1936.9181 | 1936.937  | 0.0189  | 10  | 151  | 167  | TQNIYELQEAGAQQVCR           |    |        | Carbamidomethyl (C)[16] | Mascot |
| 2233.2009 | 2233.1025 | -0.0984 | -44 | 597  | 618  | SLTRITAPDMAYVAGAAAN<br>VAIK |    |        |                         | Mascot |

8

vitellogenin 6 [Danio rerio]

gi|303227889

150936.1

8.84

23

570

100

478

100

| Peptide Information |             |        |       |            |                   |           |       |                |                  |
|---------------------|-------------|--------|-------|------------|-------------------|-----------|-------|----------------|------------------|
| Calc. Mass          | Obsrv. Mass | ± da   | ± ppm | Start Seq. | End Sequence Seq. | Ion Score | C. I. | % Modification | Rank Result Type |
| 821.4628            | 821.4716    | 0.0088 | 11    | 556        | 562               | ALHPEVR   |       |                | Mascot           |

|   |                                              |           |         |     |              |      |                             |      |        |                         |        |     |     |
|---|----------------------------------------------|-----------|---------|-----|--------------|------|-----------------------------|------|--------|-------------------------|--------|-----|-----|
|   | 821.4628                                     | 821.4716  | 0.0088  | 11  | 556          | 562  | ALHPEVR                     | 58   | 99.958 |                         | Mascot |     |     |
|   | 918.4965                                     | 918.5496  | 0.0531  | 58  | 1337         | 1344 | IPEITMSK                    |      |        |                         | Mascot |     |     |
|   | 1023.5105                                    | 1023.5204 | 0.0099  | 10  | 206          | 214  | DVGLAYTER                   | 79   | 100    |                         | Mascot |     |     |
|   | 1023.5105                                    | 1023.5204 | 0.0099  | 10  | 206          | 214  | DVGLAYTER                   |      |        |                         | Mascot |     |     |
|   | 1097.6677                                    | 1097.6796 | 0.0119  | 11  | 525          | 534  | VQVDAILALR                  |      |        |                         | Mascot |     |     |
|   | 1097.6677                                    | 1097.6796 | 0.0119  | 11  | 525          | 534  | VQVDAILALR                  | 98   | 100    |                         | Mascot |     |     |
|   | 1115.6935                                    | 1115.7063 | 0.0128  | 11  | 344          | 352  | FVQLVQLLR                   | 71   | 99.998 |                         | Mascot |     |     |
|   | 1115.6935                                    | 1115.7063 | 0.0128  | 11  | 344          | 352  | FVQLVQLLR                   |      |        |                         | Mascot |     |     |
|   | 1121.599                                     | 1121.6111 | 0.0121  | 11  | 359          | 367  | IEAIWSQFK                   |      |        |                         | Mascot |     |     |
|   | 1177.6462                                    | 1177.6561 | 0.0099  | 8   | 271          | 280  | QTLAFVEIEK                  |      |        |                         | Mascot |     |     |
|   | 1215.6005                                    | 1215.616  | 0.0155  | 13  | 175          | 184  | THYVINEDPK                  |      |        |                         | Mascot |     |     |
|   | 1226.6991                                    | 1226.71   | 0.0109  | 9   | 483          | 493  | NDIPEITLALK                 |      |        |                         | Mascot |     |     |
|   | 1238.7831                                    | 1238.7933 | 0.0102  | 8   | 146          | 156  | GILNILQLNLK                 |      |        |                         | Mascot |     |     |
|   | 1259.5797                                    | 1259.5946 | 0.0149  | 12  | 193          | 202  | SKDLSHCQER                  |      |        | Carbamidomethyl (C)[7]  | Mascot |     |     |
|   | 1379.7603                                    | 1379.7687 | 0.0084  | 6   | 444          | 456  | EVVMLGYGSLIAK               |      |        |                         | Mascot |     |     |
|   | 1395.7551                                    | 1395.7643 | 0.0092  | 7   | 444          | 456  | EVVMLGYGSLIAK               |      |        | Oxidation (M)[4]        | Mascot |     |     |
|   | 1463.8944                                    | 1463.91   | 0.0156  | 11  | 543          | 555  | LVQPVALQLVLDR               | 84   | 100    |                         | Mascot |     |     |
|   | 1463.8944                                    | 1463.91   | 0.0156  | 11  | 543          | 555  | LVQPVALQLVLDR               |      |        |                         | Mascot |     |     |
|   | 1638.8485                                    | 1638.8628 | 0.0143  | 9   | 679          | 694  | TYLAGAAADVVEFGVR            |      |        |                         | Mascot |     |     |
|   | 1644.717                                     | 1644.8524 | 0.1354  | 82  | 1160         | 1175 | DTSSGSAAASFEQMVK            |      |        |                         | Mascot |     |     |
|   | 1648.821                                     | 1648.8413 | 0.0203  | 12  | 1217         | 1231 | VQLIASSIAENDNMK             |      |        | Oxidation (M)[14]       | Mascot |     |     |
|   | 1666.8767                                    | 1666.894  | 0.0173  | 10  | 494          | 509  | VMGNAGHPSSLKPIMK            |      |        |                         | Mascot |     |     |
|   | 1682.8717                                    | 1682.8958 | 0.0241  | 14  | 494          | 509  | VMGNAGHPSSLKPIMK            |      |        | Oxidation (M)[2]        | Mascot |     |     |
|   | 1695.8999                                    | 1695.9147 | 0.0148  | 9   | 130          | 145  | VFAPAGVSPTVMNLHR            |      |        |                         | Mascot |     |     |
|   | 1699.9377                                    | 1699.9528 | 0.0151  | 9   | 45           | 60   | YEALLLGGLPQEGLAR            |      |        |                         | Mascot |     |     |
|   | 1699.9377                                    | 1699.9528 | 0.0151  | 9   | 45           | 60   | YEALLLGGLPQEGLAR            | 89   | 100    |                         | Mascot |     |     |
|   | 1706.025                                     | 1706.0416 | 0.0166  | 10  | 375          | 390  | WLLDALPAVGTPVLIK            |      |        |                         | Mascot |     |     |
|   | 1711.8948                                    | 1711.912  | 0.0172  | 10  | 130          | 145  | VFAPAGVSPTVMNLHR            | 4    | 0      | Oxidation (M)[12]       | Mascot |     |     |
|   | 1711.8948                                    | 1711.912  | 0.0172  | 10  | 130          | 145  | VFAPAGVSPTVMNLHR            |      |        | Oxidation (M)[12]       | Mascot |     |     |
|   | 1796.8928                                    | 1796.9176 | 0.0248  | 14  | 83           | 97   | LMDPLLYEYAGTWPK             |      |        |                         | Mascot |     |     |
|   | 1812.8877                                    | 1812.9053 | 0.0176  | 10  | 83           | 97   | LMDPLLYEYAGTWPK             |      |        | Oxidation (M)[2]        | Mascot |     |     |
|   | 1936.9181                                    | 1936.937  | 0.0189  | 10  | 158          | 174  | TQNIYELQEAGAQQVCR           |      |        | Carbamidomethyl (C)[16] | Mascot |     |     |
|   | 2233.2009                                    | 2233.1025 | -0.0984 | -44 | 604          | 625  | SLTRITAPDMAYVAGAAAN<br>VAIK |      |        |                         | Mascot |     |     |
| 9 | hypothetical protein LOC678536 [Danio rerio] |           |         |     | gi 160420306 |      | 148750.2                    | 8.89 | 27     | 513                     | 100    | 393 | 100 |

Peptide Information

| Calc. Mass | Obsrv. Mass | ± da | ± ppm | Start | End | Sequence | Ion | C. I. | % Modification | Rank | Result Type |
|------------|-------------|------|-------|-------|-----|----------|-----|-------|----------------|------|-------------|
|------------|-------------|------|-------|-------|-----|----------|-----|-------|----------------|------|-------------|

|           |           |         | Seq. | Seq. | Score |                    |        |
|-----------|-----------|---------|------|------|-------|--------------------|--------|
| 821.4628  | 821.4716  | 0.0088  | 11   | 545  | 551   | ALHPEVR            | Mascot |
| 821.4628  | 821.4716  | 0.0088  | 11   | 545  | 551   | ALHPEVR            | Mascot |
| 918.4778  | 918.5496  | 0.0718  | 78   | 1059 | 1066  | EILDTEAK           | Mascot |
| 1023.5105 | 1023.5204 | 0.0099  | 10   | 195  | 203   | DVGLAYTER          | Mascot |
| 1023.5105 | 1023.5204 | 0.0099  | 10   | 195  | 203   | DVGLAYTER          | Mascot |
| 1045.5465 | 1045.5737 | 0.0272  | 26   | 1346 | 1353  | DFLSWIHK           | Mascot |
| 1097.6677 | 1097.6796 | 0.0119  | 11   | 514  | 523   | VQVDAILALR         | Mascot |
| 1097.6677 | 1097.6796 | 0.0119  | 11   | 514  | 523   | VQVDAILALR         | Mascot |
| 1115.6935 | 1115.7063 | 0.0128  | 11   | 333  | 341   | FVQLVQLLR          | Mascot |
| 1115.6935 | 1115.7063 | 0.0128  | 11   | 333  | 341   | FVQLVQLLR          | Mascot |
| 1121.599  | 1121.6111 | 0.0121  | 11   | 348  | 356   | IEAIWSQFK          | Mascot |
| 1177.6462 | 1177.6561 | 0.0099  | 8    | 260  | 269   | QTLAFVEIEK         | Mascot |
| 1215.6005 | 1215.616  | 0.0155  | 13   | 164  | 173   | THYVINEDPK         | Mascot |
| 1226.6991 | 1226.71   | 0.0109  | 9    | 472  | 482   | NDIPEITLALK        | Mascot |
| 1238.7831 | 1238.7933 | 0.0102  | 8    | 135  | 145   | GILNILQLNLK        | Mascot |
| 1259.5797 | 1259.5946 | 0.0149  | 12   | 182  | 191   | SKDLSHCQER         | Mascot |
| 1379.7351 | 1379.7687 | 0.0336  | 24   | 433  | 445   | EVAMLGYSLIAR       | Mascot |
| 1382.7889 | 1382.7999 | 0.011   | 8    | 303  | 315   | ISDAPAQIVEVLK      | Mascot |
| 1395.7301 | 1395.7643 | 0.0342  | 25   | 192  | 203   | IMKDVGLAYTER       | Mascot |
| 1477.91   | 1477.9259 | 0.0159  | 11   | 532  | 544   | LVQPIALQLVLDR      | Mascot |
| 1644.717  | 1644.8524 | 0.1354  | 82   | 1140 | 1155  | DTSSGSAAASFEQMQK   | Mascot |
| 1648.821  | 1648.8413 | 0.0203  | 12   | 1197 | 1211  | VQLIASSIAENDNMK    | Mascot |
| 1666.8767 | 1666.894  | 0.0173  | 10   | 483  | 498   | VMGNAGHPSSLKPIMK   | Mascot |
| 1682.8717 | 1682.8958 | 0.0241  | 14   | 483  | 498   | VMGNAGHPSSLKPIMK   | Mascot |
| 1695.8999 | 1695.9147 | 0.0148  | 9    | 119  | 134   | VFAPAGVSPVMNLHR    | Mascot |
| 1699.9377 | 1699.9528 | 0.0151  | 9    | 34   | 49    | YEALLGGLPQEGLAR    | Mascot |
| 1699.9524 | 1699.9528 | 0.0004  | 0    | 1310 | 1324  | SLNVIARIPETMSR     | Mascot |
| 1706.025  | 1706.0416 | 0.0166  | 10   | 364  | 379   | WLLDALPAVGTPVLIK   | Mascot |
| 1711.8948 | 1711.912  | 0.0172  | 10   | 119  | 134   | VFAPAGVSPVMNLHR    | Mascot |
| 1711.8948 | 1711.912  | 0.0172  | 10   | 119  | 134   | VFAPAGVSPVMNLHR    | Mascot |
| 1796.8928 | 1796.9176 | 0.0248  | 14   | 72   | 86    | LMDPLLYEYAGTWPK    | Mascot |
| 1812.8877 | 1812.9053 | 0.0176  | 10   | 72   | 86    | LMDPLLYEYAGTWPK    | Mascot |
| 1936.9181 | 1936.937  | 0.0189  | 10   | 147  | 163   | TQNIYELQEAGAQQGVC  | Mascot |
| 2233.2009 | 2233.1025 | -0.0984 | -44  | 593  | 614   | SLTRITAPDMAYVAGAA  | Mascot |
|           |           |         |      |      |       | VAIK               |        |
| 2326.2    | 2326.2205 | 0.0205  | 9    | 283  | 302   | GSLQYEFATEILQTPILM | Mascot |

10 novel protein similar to vitellogenin 1 (vg1) [Danio rerio] gi|94732723 K 147084.2 8.73 24 410 100 314 100

Peptide Information

| Calc. Mass | Obsrv. Mass | ± da   | ± ppm | Start Seq. | End Seq. | Sequence         | Ion Score | C. I. % | Modification           | Rank | Result Type |
|------------|-------------|--------|-------|------------|----------|------------------|-----------|---------|------------------------|------|-------------|
| 821.4628   | 821.4716    | 0.0088 | 11    | 545        | 551      | ALHPEVR          |           |         |                        |      | Mascot      |
| 821.4628   | 821.4716    | 0.0088 | 11    | 545        | 551      | ALHPEVR          | 58        | 99.958  |                        |      | Mascot      |
| 874.4669   | 874.5159    | 0.049  | 56    | 87         | 94       | DPFVPATK         |           |         |                        |      | Mascot      |
| 918.5407   | 918.5496    | 0.0089 | 10    | 425        | 432      | FTTIPALR         |           |         |                        |      | Mascot      |
| 1097.6677  | 1097.6796   | 0.0119 | 11    | 514        | 523      | VQVDAILALR       |           |         |                        |      | Mascot      |
| 1097.6677  | 1097.6796   | 0.0119 | 11    | 514        | 523      | VQVDAILALR       | 98        | 100     |                        |      | Mascot      |
| 1115.6935  | 1115.7063   | 0.0128 | 11    | 333        | 341      | FVQLVQLLR        | 71        | 99.998  |                        |      | Mascot      |
| 1115.6935  | 1115.7063   | 0.0128 | 11    | 333        | 341      | FVQLVQLLR        |           |         |                        |      | Mascot      |
| 1177.6462  | 1177.6561   | 0.0099 | 8     | 260        | 269      | QTLAFVEIEK       |           |         |                        |      | Mascot      |
| 1215.6005  | 1215.616    | 0.0155 | 13    | 164        | 173      | THYVINEDPK       |           |         |                        |      | Mascot      |
| 1226.6991  | 1226.71     | 0.0109 | 9     | 472        | 482      | NDIPEITLALK      |           |         |                        |      | Mascot      |
| 1238.7831  | 1238.7933   | 0.0102 | 8     | 135        | 145      | GILNILQLNLK      |           |         |                        |      | Mascot      |
| 1259.5797  | 1259.5946   | 0.0149 | 12    | 182        | 191      | SKDLSHCQER       |           |         | Carbamidomethyl (C)[7] |      | Mascot      |
| 1379.7603  | 1379.7687   | 0.0084 | 6     | 433        | 445      | EVVMLGYGSLIAK    |           |         |                        |      | Mascot      |
| 1395.7551  | 1395.7643   | 0.0092 | 7     | 433        | 445      | EVVMLGYGSLIAK    |           |         | Oxidation (M)[4]       |      | Mascot      |
| 1477.91    | 1477.9259   | 0.0159 | 11    | 532        | 544      | LVQPIALQLVLDR    |           |         |                        |      | Mascot      |
| 1622.7743  | 1622.8712   | 0.0969 | 60    | 981        | 994      | GCVEVHSYNAAFIR   |           |         | Carbamidomethyl (C)[2] |      | Mascot      |
| 1622.7743  | 1622.8712   | 0.0969 | 60    | 981        | 994      | GCVEVHSYNAAFIR   |           |         | Carbamidomethyl (C)[2] |      | Mascot      |
| 1644.717   | 1644.8524   | 0.1354 | 82    | 1123       | 1138     | DTSSGSAAASFEQMQK |           |         |                        |      | Mascot      |
| 1652.8643  | 1652.8809   | 0.0166 | 10    | 668        | 683      | TYLAGAAADVIEFGVR |           |         |                        |      | Mascot      |
| 1666.8767  | 1666.894    | 0.0173 | 10    | 483        | 498      | VMGNAGHPSSLKPIMK |           |         |                        |      | Mascot      |
| 1682.8717  | 1682.8958   | 0.0241 | 14    | 483        | 498      | VMGNAGHPSSLKPIMK |           |         | Oxidation (M)[2]       |      | Mascot      |
| 1699.9377  | 1699.9528   | 0.0151 | 9     | 34         | 49       | YEALLGGLPQEGLAR  |           |         |                        |      | Mascot      |
| 1699.9377  | 1699.9528   | 0.0151 | 9     | 34         | 49       | YEALLGGLPQEGLAR  | 89        | 100     |                        |      | Mascot      |
| 1706.025   | 1706.0416   | 0.0166 | 10    | 364        | 379      | WLLDALPAVGTPVLIK |           |         |                        |      | Mascot      |
| 1721.9043  | 1721.9209   | 0.0166 | 10    | 119        | 134      | VFAPAGVSPTVMNLYR |           |         |                        |      | Mascot      |
| 1737.8992  | 1737.9172   | 0.018  | 10    | 119        | 134      | VFAPAGVSPTVMNLYR |           |         | Oxidation (M)[12]      |      | Mascot      |
| 1796.8928  | 1796.9176   | 0.0248 | 14    | 72         | 86       | LMDPLLYEYAGTWPK  |           |         |                        |      | Mascot      |
| 1812.8877  | 1812.9053   | 0.0176 | 10    | 72         | 86       | LMDPLLYEYAGTWPK  |           |         | Oxidation (M)[2]       |      | Mascot      |
| 1843.9159  | 1843.9298   | 0.0139 | 8     | 577        | 592      | IEPNMHVASFAYSHIK |           |         |                        |      | Mascot      |
| 1859.9109  | 1859.9304   | 0.0195 | 10    | 577        | 592      | IEPNMHVASFAYSHIK |           |         | Oxidation (M)[5]       |      | Mascot      |



|    |                              |           |        |    |              |     |                          |      |    |     |                            |        |     |
|----|------------------------------|-----------|--------|----|--------------|-----|--------------------------|------|----|-----|----------------------------|--------|-----|
|    | 1886.7894                    | 1886.811  | 0.0216 | 11 | 195          | 210 | DVGLAYTESPECTER          |      |    |     | Carbamidomethyl (C)[10,13] | Mascot |     |
|    | 1936.9181                    | 1936.937  | 0.0189 | 10 | 147          | 163 | TQNIYELQEAGAQQVCR        |      |    |     | Carbamidomethyl (C)[16]    | Mascot |     |
|    | 2326.2                       | 2326.2205 | 0.0205 | 9  | 283          | 302 | GSLQYEFATEILQTPIQLM<br>K |      |    |     | Oxidation (M)[19]          | Mascot |     |
| 11 | vitellogenin 7 [Danio rerio] |           |        |    | gi 156713467 |     | 148739.2                 | 8.76 | 21 | 385 | 100                        | 314    | 100 |

| Peptide Information |             |        |       |            |          |                  |           |        |   |                            |      |        |        |
|---------------------|-------------|--------|-------|------------|----------|------------------|-----------|--------|---|----------------------------|------|--------|--------|
| Calc. Mass          | Obsrv. Mass | ± da   | ± ppm | Start Seq. | End Seq. | Sequence         | Ion Score | C. I.  | % | Modification               | Rank | Result | Type   |
| 821.4628            | 821.4716    | 0.0088 | 11    | 545        | 551      | ALHPEVR          |           |        |   |                            |      |        | Mascot |
| 821.4628            | 821.4716    | 0.0088 | 11    | 545        | 551      | ALHPEVR          | 58        | 99.958 |   |                            |      |        | Mascot |
| 874.4669            | 874.5159    | 0.049  | 56    | 87         | 94       | DPFVPATK         |           |        |   |                            |      |        | Mascot |
| 918.5407            | 918.5496    | 0.0089 | 10    | 425        | 432      | FTTIPALR         |           |        |   |                            |      |        | Mascot |
| 1097.6677           | 1097.6796   | 0.0119 | 11    | 514        | 523      | VQVDAILALR       |           |        |   |                            |      |        | Mascot |
| 1097.6677           | 1097.6796   | 0.0119 | 11    | 514        | 523      | VQVDAILALR       | 98        | 100    |   |                            |      |        | Mascot |
| 1115.6935           | 1115.7063   | 0.0128 | 11    | 333        | 341      | FVQLVQLLR        | 71        | 99.998 |   |                            |      |        | Mascot |
| 1115.6935           | 1115.7063   | 0.0128 | 11    | 333        | 341      | FVQLVQLLR        |           |        |   |                            |      |        | Mascot |
| 1177.6462           | 1177.6561   | 0.0099 | 8     | 260        | 269      | QTLAFVEIEK       |           |        |   |                            |      |        | Mascot |
| 1215.6005           | 1215.616    | 0.0155 | 13    | 164        | 173      | THYVINEDPK       |           |        |   |                            |      |        | Mascot |
| 1226.6991           | 1226.71     | 0.0109 | 9     | 472        | 482      | NDIPEITLALK      |           |        |   |                            |      |        | Mascot |
| 1238.7831           | 1238.7933   | 0.0102 | 8     | 135        | 145      | GILNILQLNLK      |           |        |   |                            |      |        | Mascot |
| 1259.5797           | 1259.5946   | 0.0149 | 12    | 182        | 191      | SKDLSHCQER       |           |        |   | Carbamidomethyl (C)[7]     |      |        | Mascot |
| 1379.7603           | 1379.7687   | 0.0084 | 6     | 433        | 445      | EVVMLGYGSLIAK    |           |        |   |                            |      |        | Mascot |
| 1395.7551           | 1395.7643   | 0.0092 | 7     | 433        | 445      | EVVMLGYGSLIAK    |           |        |   | Oxidation (M)[4]           |      |        | Mascot |
| 1477.91             | 1477.9259   | 0.0159 | 11    | 532        | 544      | LVQPIALQLVLDR    |           |        |   |                            |      |        | Mascot |
| 1652.8643           | 1652.8809   | 0.0166 | 10    | 668        | 683      | TYLAGAAADVIEFGVR |           |        |   |                            |      |        | Mascot |
| 1666.8767           | 1666.894    | 0.0173 | 10    | 483        | 498      | VMGNAGHPSSLKPIMK |           |        |   |                            |      |        | Mascot |
| 1682.8717           | 1682.8958   | 0.0241 | 14    | 483        | 498      | VMGNAGHPSSLKPIMK |           |        |   | Oxidation (M)[2]           |      |        | Mascot |
| 1699.9377           | 1699.9528   | 0.0151 | 9     | 34         | 49       | YEALLGGLPQEGLAR  |           |        |   |                            |      |        | Mascot |
| 1699.9377           | 1699.9528   | 0.0151 | 9     | 34         | 49       | YEALLGGLPQEGLAR  | 89        | 100    |   |                            |      |        | Mascot |
| 1706.025            | 1706.0416   | 0.0166 | 10    | 364        | 379      | WLLDALPAVGTPVLIK |           |        |   |                            |      |        | Mascot |
| 1721.9043           | 1721.9209   | 0.0166 | 10    | 119        | 134      | VFAPAGVSPTVMNLYR |           |        |   |                            |      |        | Mascot |
| 1737.8992           | 1737.9172   | 0.018  | 10    | 119        | 134      | VFAPAGVSPTVMNLYR |           |        |   | Oxidation (M)[12]          |      |        | Mascot |
| 1796.8928           | 1796.9176   | 0.0248 | 14    | 72         | 86       | LMDPLLYEYAGTWPK  |           |        |   |                            |      |        | Mascot |
| 1812.8877           | 1812.9053   | 0.0176 | 10    | 72         | 86       | LMDPLLYEYAGTWPK  |           |        |   | Oxidation (M)[2]           |      |        | Mascot |
| 1843.9159           | 1843.9298   | 0.0139 | 8     | 577        | 592      | IEPNMHVASFAYSHIK |           |        |   |                            |      |        | Mascot |
| 1859.9109           | 1859.9304   | 0.0195 | 10    | 577        | 592      | IEPNMHVASFAYSHIK |           |        |   | Oxidation (M)[5]           |      |        | Mascot |
| 1886.7894           | 1886.811    | 0.0216 | 11    | 195        | 210      | DVGLAYTESPECTER  |           |        |   | Carbamidomethyl (C)[10,13] |      |        | Mascot |

|                     |                                  |             |         |       |            |                                |                          |      |           |                   |                   |        |                  |
|---------------------|----------------------------------|-------------|---------|-------|------------|--------------------------------|--------------------------|------|-----------|-------------------|-------------------|--------|------------------|
|                     | 2326.2                           | 2326.2205   | 0.0205  | 9     | 283        | 302                            | GSLQYEFATEILQTPIQLM<br>K |      |           |                   | Oxidation (M)[19] | Mascot |                  |
| 12                  | Zgc:136383 protein [Danio rerio] |             |         |       |            | gi 159155252                   | 123957.1                 | 8.78 | 19        | 294               | 100               | 227    | 100              |
| Peptide Information |                                  |             |         |       |            |                                |                          |      |           |                   |                   |        |                  |
|                     | Calc. Mass                       | Obsrv. Mass | ± da    | ± ppm | Start Seq. | End Sequence Seq.              |                          |      | Ion Score | C. I.             | % Modification    |        | Rank Result Type |
|                     | 821.4628                         | 821.4716    | 0.0088  | 11    | 322        | 328 ALHPEVR                    |                          |      |           |                   |                   |        | Mascot           |
|                     | 821.4628                         | 821.4716    | 0.0088  | 11    | 322        | 328 ALHPEVR                    |                          | 58   | 99.958    |                   |                   |        | Mascot           |
|                     | 918.4778                         | 918.5496    | 0.0718  | 78    | 836        | 843 EILDTEAK                   |                          |      |           |                   |                   |        | Mascot           |
|                     | 1045.5465                        | 1045.5737   | 0.0272  | 26    | 1123       | 1130 DFLSWIHK                  |                          |      |           |                   |                   |        | Mascot           |
|                     | 1097.6677                        | 1097.6796   | 0.0119  | 11    | 291        | 300 VQVDAILALR                 |                          |      |           |                   |                   |        | Mascot           |
|                     | 1097.6677                        | 1097.6796   | 0.0119  | 11    | 291        | 300 VQVDAILALR                 |                          | 98   | 100       |                   |                   |        | Mascot           |
|                     | 1115.6935                        | 1115.7063   | 0.0128  | 11    | 110        | 118 FVQLVQLLR                  |                          | 71   | 99.998    |                   |                   |        | Mascot           |
|                     | 1115.6935                        | 1115.7063   | 0.0128  | 11    | 110        | 118 FVQLVQLLR                  |                          |      |           |                   |                   |        | Mascot           |
|                     | 1121.599                         | 1121.6111   | 0.0121  | 11    | 125        | 133 IEAIWSQFK                  |                          |      |           |                   |                   |        | Mascot           |
|                     | 1177.6462                        | 1177.6561   | 0.0099  | 8     | 37         | 46 QTLAFVEIEK                  |                          |      |           |                   |                   |        | Mascot           |
|                     | 1238.7355                        | 1238.7933   | 0.0578  | 47    | 249        | 259 NDIPEIILALK                |                          |      |           |                   |                   |        | Mascot           |
|                     | 1379.7351                        | 1379.7687   | 0.0336  | 24    | 210        | 222 EVAMLGYGSLIAR              |                          |      |           |                   |                   |        | Mascot           |
|                     | 1382.7889                        | 1382.7999   | 0.011   | 8     | 80         | 92 ISDAPAQIVEVLK               |                          |      |           |                   |                   |        | Mascot           |
|                     | 1395.73                          | 1395.7643   | 0.0343  | 25    | 210        | 222 EVAMLGYGSLIAR              |                          |      |           | Oxidation (M)[4]  |                   |        | Mascot           |
|                     | 1477.91                          | 1477.9259   | 0.0159  | 11    | 309        | 321 LVQPIALQLVLDR              |                          |      |           |                   |                   |        | Mascot           |
|                     | 1644.717                         | 1644.8524   | 0.1354  | 82    | 917        | 932 DTSSGSAAASFEQMQK           |                          |      |           |                   |                   |        | Mascot           |
|                     | 1648.821                         | 1648.8413   | 0.0203  | 12    | 974        | 988 VQLIASSIAENDNMK            |                          |      |           | Oxidation (M)[14] |                   |        | Mascot           |
|                     | 1666.8767                        | 1666.894    | 0.0173  | 10    | 260        | 275 VMGNAGHPSSLKPIMK           |                          |      |           |                   |                   |        | Mascot           |
|                     | 1682.8717                        | 1682.8958   | 0.0241  | 14    | 260        | 275 VMGNAGHPSSLKPIMK           |                          |      |           | Oxidation (M)[2]  |                   |        | Mascot           |
|                     | 1699.9524                        | 1699.9528   | 0.0004  | 0     | 1087       | 1101 SLNVIARIPETMSR            |                          |      |           |                   |                   |        | Mascot           |
|                     | 1699.9524                        | 1699.9528   | 0.0004  | 0     | 1087       | 1101 SLNVIARIPETMSR            |                          |      |           |                   |                   |        | Mascot           |
|                     | 1706.025                         | 1706.0416   | 0.0166  | 10    | 141        | 156 WLLDALPAVGTPVLIK           |                          |      |           |                   |                   |        | Mascot           |
|                     | 1721.9618                        | 1721.9209   | -0.0409 | -24   | 523        | 538 TIIEEAIPMVAGPKPR           |                          |      |           |                   |                   |        | Mascot           |
|                     | 1737.9568                        | 1737.9172   | -0.0396 | -23   | 523        | 538 TIIEEAIPMVAGPKPR           |                          |      |           | Oxidation (M)[9]  |                   |        | Mascot           |
|                     | 2233.2009                        | 2233.1025   | -0.0984 | -44   | 370        | 391 SLTRITAPDMAYVAGAAN<br>VAIK |                          |      |           |                   |                   |        | Mascot           |
|                     | 2326.2                           | 2326.2205   | 0.0205  | 9     | 60         | 79 GSLQYEFATEILQTPIQLM<br>K    |                          |      |           | Oxidation (M)[19] |                   |        | Mascot           |
| 13                  | Vtg1 protein [Danio rerio]       |             |         |       |            | gi 63100501                    | 36409.1                  | 9.23 | 5         | 162               | 100               | 146    | 100              |
| Peptide Information |                                  |             |         |       |            |                                |                          |      |           |                   |                   |        |                  |
|                     | Calc. Mass                       | Obsrv. Mass | ± da    | ± ppm | Start Seq. | End Sequence Seq.              |                          |      | Ion Score | C. I.             | % Modification    |        | Rank Result Type |

|    |                              |           |        |    |     |     |                    |         |   |     |     |                                           |                         |     |  |  |        |
|----|------------------------------|-----------|--------|----|-----|-----|--------------------|---------|---|-----|-----|-------------------------------------------|-------------------------|-----|--|--|--------|
|    | 918.4965                     | 918.5496  | 0.0531 | 58 | 279 | 286 | IPEITMSK           |         |   |     |     |                                           |                         |     |  |  | Mascot |
|    | 1215.6005                    | 1215.616  | 0.0155 | 13 | 71  | 80  | THYVINEDPK         |         |   |     |     |                                           |                         |     |  |  | Mascot |
|    | 1644.717                     | 1644.8524 | 0.1354 | 82 | 102 | 117 | DTSSGSAAASFEQMQK   |         |   |     |     |                                           |                         |     |  |  | Mascot |
|    | 1796.9078                    | 1796.9176 | 0.0098 | 5  | 239 | 253 | HILTAAYDTGFRFER    |         |   |     |     |                                           |                         |     |  |  | Mascot |
|    | 1954.8745                    | 1954.8923 | 0.0178 | 9  | 54  | 70  | TQNIYEMQEAGAQQGVCR |         |   |     |     |                                           | Carbamidomethyl (C)[16] |     |  |  | Mascot |
|    | 1954.8745                    | 1954.8923 | 0.0178 | 9  | 54  | 70  | TQNIYEMQEAGAQQGVCR | 146     |   | 100 |     | Carbamidomethyl (C)[16]                   |                         |     |  |  | Mascot |
|    | 1970.8695                    | 1970.8909 | 0.0214 | 11 | 54  | 70  | TQNIYEMQEAGAQQGVCR |         |   |     |     | Carbamidomethyl (C)[16], Oxidation (M)[7] |                         |     |  |  | Mascot |
| 14 | vitellogenin 1 [Danio rerio] |           |        |    |     |     | gi 21391474        | 21118.2 | 9 | 7   | 137 | 100                                       | 89                      | 100 |  |  |        |

#### Peptide Information

| Calc. Mass | Obsrv. Mass | ± da   | ± ppm | Start Seq. | End Seq. | Sequence           | Ion Score | C. I. | %   | Modification            | Rank | Result | Type   |
|------------|-------------|--------|-------|------------|----------|--------------------|-----------|-------|-----|-------------------------|------|--------|--------|
| 1215.6005  | 1215.616    | 0.0155 | 13    | 164        | 173      | THYVINEDPK         |           |       |     |                         |      |        | Mascot |
| 1238.7831  | 1238.7933   | 0.0102 | 8     | 135        | 145      | GILNQLQLNK         |           |       |     |                         |      |        | Mascot |
| 1259.5797  | 1259.5946   | 0.0149 | 12    | 182        | 191      | SKDLSHCQER         |           |       |     | Carbamidomethyl (C)[7]  |      |        | Mascot |
| 1695.8999  | 1695.9147   | 0.0148 | 9     | 119        | 134      | VFAPAGVSPTVMNLHR   |           |       |     |                         |      |        | Mascot |
| 1699.9377  | 1699.9528   | 0.0151 | 9     | 34         | 49       | YEALLLGGLPQEGRLAR  |           |       |     |                         |      |        | Mascot |
| 1699.9377  | 1699.9528   | 0.0151 | 9     | 34         | 49       | YEALLLGGLPQEGRLAR  | 89        |       | 100 |                         |      |        | Mascot |
| 1711.8948  | 1711.912    | 0.0172 | 10    | 119        | 134      | VFAPAGVSPTVMNLHR   | 4         |       | 0   | Oxidation (M)[12]       |      |        | Mascot |
| 1711.8948  | 1711.912    | 0.0172 | 10    | 119        | 134      | VFAPAGVSPTVMNLHR   |           |       |     | Oxidation (M)[12]       |      |        | Mascot |
| 1796.8928  | 1796.9176   | 0.0248 | 14    | 72         | 86       | LMDPLLYEYAGTWPK    |           |       |     |                         |      |        | Mascot |
| 1812.8877  | 1812.9053   | 0.0176 | 10    | 72         | 86       | LMDPLLYEYAGTWPK    |           |       |     | Oxidation (M)[2]        |      |        | Mascot |
| 1936.9181  | 1936.937    | 0.0189 | 10    | 147        | 163      | TQNIYELQEAGAQQGVCR |           |       |     | Carbamidomethyl (C)[16] |      |        | Mascot |

15 vitellogenin 2 isoform 1 [Danio rerio] gi|113678458 179782.8 8.7 15 129 100 98 100

#### Peptide Information

| Calc. Mass | Obsrv. Mass | ± da   | ± ppm | Start Seq. | End Seq. | Sequence    | Ion Score | C. I. | %   | Modification | Rank | Result | Type   |
|------------|-------------|--------|-------|------------|----------|-------------|-----------|-------|-----|--------------|------|--------|--------|
| 1055.552   | 1055.5625   | 0.0105 | 10    | 20         | 28       | LVPEFAHDK   |           |       |     |              |      |        | Mascot |
| 1097.6677  | 1097.6796   | 0.0119 | 11    | 514        | 523      | VQVDAILALR  |           |       |     |              |      |        | Mascot |
| 1097.6677  | 1097.6796   | 0.0119 | 11    | 514        | 523      | VQVDAILALR  | 98        |       | 100 |              |      |        | Mascot |
| 1115.6055  | 1115.7063   | 0.1008 | 90    | 1557       | 1566     | QVILNGQESK  | 7         |       | 0   |              |      |        | Mascot |
| 1115.6055  | 1115.7063   | 0.1008 | 90    | 1557       | 1566     | QVILNGQESK  |           |       |     |              |      |        | Mascot |
| 1149.6779  | 1149.6906   | 0.0127 | 11    | 333        | 341      | FVQLVQFLR   |           |       |     |              |      |        | Mascot |
| 1177.606   | 1177.6561   | 0.0501 | 43    | 1146       | 1156     | STGSSLEQIQK |           |       |     |              |      |        | Mascot |
| 1226.6991  | 1226.71     | 0.0109 | 9     | 472        | 482      | NDIPEITLALK |           |       |     |              |      |        | Mascot |

|    |                                                     |           |         |     |      |      |                                |         |     |    |     |     |    |                          |  |  |        |
|----|-----------------------------------------------------|-----------|---------|-----|------|------|--------------------------------|---------|-----|----|-----|-----|----|--------------------------|--|--|--------|
|    | 1477.91                                             | 1477.9259 | 0.0159  | 11  | 532  | 544  | LVQPVALQLVLER                  |         |     |    |     |     |    |                          |  |  | Mascot |
|    | 1648.9203                                           | 1648.8413 | -0.079  | -48 | 483  | 498  | VLGNAGHPSSLKPIMK               |         |     |    |     |     |    |                          |  |  | Mascot |
|    | 1666.8799                                           | 1666.894  | 0.0141  | 8   | 668  | 683  | AYLAGAATDVIEFGLR               |         |     |    |     |     |    |                          |  |  | Mascot |
|    | 1682.8384                                           | 1682.8958 | 0.0574  | 34  | 1198 | 1212 | VQFIASSIAENDNFK                |         |     |    |     |     |    |                          |  |  | Mascot |
|    | 1689.9323                                           | 1689.9437 | 0.0114  | 7   | 119  | 134  | VFAPAGVSPSVLNLYR               |         |     |    |     |     |    |                          |  |  | Mascot |
|    | 1737.699                                            | 1737.9172 | 0.2182  | 126 | 1616 | 1631 | ETTDHVACRTEQCA                 |         |     |    |     |     |    |                          |  |  | Mascot |
|    | 1955.0232                                           | 1954.8923 | -0.1309 | -67 | 1016 | 1033 | AEGPAVEKLEFEVQVGP<br>R         |         |     |    |     |     |    |                          |  |  | Mascot |
|    | 1955.0232                                           | 1954.8923 | -0.1309 | -67 | 1016 | 1033 | AEGPAVEKLEFEVQVGP<br>R         |         |     |    |     |     |    |                          |  |  | Mascot |
|    | 2233.2446                                           | 2233.1025 | -0.1421 | -64 | 425  | 445  | IATIPALREVVMLGYGSMI<br>AK      |         |     |    |     |     |    |                          |  |  | Mascot |
|    | 2938.5164                                           | 2938.5325 | 0.0161  | 5   | 446  | 471  | YCVAVPTCPAELLRPIHEI<br>ATEAISK |         |     |    |     |     |    | Carbamidomethyl (C)[2,8] |  |  | Mascot |
| 16 | PREDICTED: vitellogenin-like, partial [Danio rerio] |           |         |     |      |      | gi 326681170                   | 93358.3 | 9.2 | 10 | 122 | 100 | 98 | 100                      |  |  |        |

#### Peptide Information

| Calc. Mass | Obsrv. Mass | ± da    | ± ppm | Start Seq. | End Seq. | Sequence                       | Ion Score | C. I. | %   | Modification             | Rank | Result | Type   |
|------------|-------------|---------|-------|------------|----------|--------------------------------|-----------|-------|-----|--------------------------|------|--------|--------|
| 1055.552   | 1055.5625   | 0.0105  | 10    | 20         | 28       | LVPEFAHDK                      |           |       |     |                          |      |        | Mascot |
| 1097.6677  | 1097.6796   | 0.0119  | 11    | 514        | 523      | VQVDAILALR                     |           |       |     |                          |      |        | Mascot |
| 1097.6677  | 1097.6796   | 0.0119  | 11    | 514        | 523      | VQVDAILALR                     | 98        |       | 100 |                          |      |        | Mascot |
| 1149.6779  | 1149.6906   | 0.0127  | 11    | 333        | 341      | FVQLVQFLR                      |           |       |     |                          |      |        | Mascot |
| 1226.6991  | 1226.71     | 0.0109  | 9     | 472        | 482      | NDIPEITLALK                    |           |       |     |                          |      |        | Mascot |
| 1477.91    | 1477.9259   | 0.0159  | 11    | 532        | 544      | LVQPVALQLVLER                  |           |       |     |                          |      |        | Mascot |
| 1648.9203  | 1648.8413   | -0.079  | -48   | 483        | 498      | VLGNAGHPSSLKPIMK               |           |       |     |                          |      |        | Mascot |
| 1666.8799  | 1666.894    | 0.0141  | 8     | 668        | 683      | AYLAGAATDVIEFGLR               |           |       |     |                          |      |        | Mascot |
| 1689.9323  | 1689.9437   | 0.0114  | 7     | 119        | 134      | VFAPAGVSPSVLNLYR               |           |       |     |                          |      |        | Mascot |
| 2233.2446  | 2233.1025   | -0.1421 | -64   | 425        | 445      | IATIPALREVVMLGYGSMI<br>AK      |           |       |     |                          |      |        | Mascot |
| 2938.5164  | 2938.5325   | 0.0161  | 5     | 446        | 471      | YCVAVPTCPAELLRPIHEI<br>ATEAISK |           |       |     | Carbamidomethyl (C)[2,8] |      |        | Mascot |

17 Unknown (protein for MGC:174137) [Danio rerio] gi|152012733 17051.5 7.71 3 103 100 89 100

#### Peptide Information

| Calc. Mass | Obsrv. Mass | ± da   | ± ppm | Start Seq. | End Seq. | Sequence        | Ion Score | C. I. | %   | Modification     | Rank | Result | Type   |
|------------|-------------|--------|-------|------------|----------|-----------------|-----------|-------|-----|------------------|------|--------|--------|
| 874.4669   | 874.5159    | 0.049  | 56    | 87         | 94       | DPFVPATK        |           |       |     |                  |      |        | Mascot |
| 1699.9377  | 1699.9528   | 0.0151 | 9     | 34         | 49       | YEALLGGLPQEGLAR |           |       |     |                  |      |        | Mascot |
| 1699.9377  | 1699.9528   | 0.0151 | 9     | 34         | 49       | YEALLGGLPQEGLAR | 89        |       | 100 |                  |      |        | Mascot |
| 1796.8928  | 1796.9176   | 0.0248 | 14    | 72         | 86       | LMDPLLYEYAGTWPK |           |       |     |                  |      |        | Mascot |
| 1812.8877  | 1812.9053   | 0.0176 | 10    | 72         | 86       | LMDPLLYEYAGTWPK |           |       |     | Oxidation (M)[2] |      |        | Mascot |

18 novel protein similar to vitellogenin 1 (vg1) [Danio rerio] gi|94732724 24001.7 5.6 5 95 99.999 71 99.998

Peptide Information

| Calc. Mass | Obsrv. Mass | ± da    | ± ppm | Start Seq. | End Sequence Seq.      | Ion Score | C. I. % | Modification      | Rank | Result Type |
|------------|-------------|---------|-------|------------|------------------------|-----------|---------|-------------------|------|-------------|
| 1115.6935  | 1115.7063   | 0.0128  | 11    | 128        | 136 FVQLVQLLR          | 71        | 99.998  |                   |      | Mascot      |
| 1115.6935  | 1115.7063   | 0.0128  | 11    | 128        | 136 FVQLVQLLR          |           |         |                   |      | Mascot      |
| 1177.6462  | 1177.6561   | 0.0099  | 8     | 55         | 64 QTLAFVEIEK          |           |         |                   |      | Mascot      |
| 1706.025   | 1706.0416   | 0.0166  | 10    | 159        | 174 WLLDALPAVGTPVLIK   |           |         |                   |      | Mascot      |
| 1796.9581  | 1796.9176   | -0.0405 | -23   | 137        | 151 LSTLDKFEAIWAQFK    |           |         |                   |      | Mascot      |
| 2326.2     | 2326.2205   | 0.0205  | 9     | 78         | 97 GSLQYEFATEILQTPQLMK |           |         | Oxidation (M)[19] |      | Mascot      |

19 novel protein similar to vitellogenin 1 (vg1) [Danio rerio] gi|94732726 166271.1 8.99 14 61 96.299 19 0

Peptide Information

| Calc. Mass | Obsrv. Mass | ± da    | ± ppm | Start Seq. | End Sequence Seq.      | Ion Score | C. I. % | Modification             | Rank | Result Type |
|------------|-------------|---------|-------|------------|------------------------|-----------|---------|--------------------------|------|-------------|
| 821.3788   | 821.4716    | 0.0928  | 113   | 1476       | 1482 SDWQASK           |           |         |                          |      | Mascot      |
| 821.3788   | 821.4716    | 0.0928  | 113   | 1476       | 1482 SDWQASK           | 4         | 0       |                          |      | Mascot      |
| 918.5267   | 918.5496    | 0.0229  | 25    | 329        | 335 TRPNFRK            |           |         |                          |      | Mascot      |
| 926.473    | 926.5511    | 0.0781  | 84    | 1          | 7 PQTYVYR              |           |         |                          |      | Mascot      |
| 1023.5356  | 1023.5204   | -0.0152 | -15   | 168        | 176 DVGLSYLEK          | 19        | 0       |                          |      | Mascot      |
| 1023.5356  | 1023.5204   | -0.0152 | -15   | 168        | 176 DVGLSYLEK          |           |         |                          |      | Mascot      |
| 1115.6306  | 1115.7063   | 0.0757  | 68    | 656        | 665 TDGIQEVLLK         | 14        | 0       |                          |      | Mascot      |
| 1115.6306  | 1115.7063   | 0.0757  | 68    | 656        | 665 TDGIQEVLLK         |           |         |                          |      | Mascot      |
| 1137.6813  | 1137.6852   | 0.0039  | 3     | 841        | 850 GKIHTLMPLK         |           |         |                          |      | Mascot      |
| 1149.5754  | 1149.6906   | 0.1152  | 100   | 177        | 185 CIECQKQIK          |           |         | Carbamidomethyl (C)[1]   |      | Mascot      |
| 1177.6688  | 1177.6561   | -0.0127 | -11   | 455        | 466 VLGNAAHPASIK       |           |         |                          |      | Mascot      |
| 1395.7552  | 1395.7643   | 0.0091  | 7     | 165        | 176 IMKDVGLSYLEK       |           |         |                          |      | Mascot      |
| 1638.7865  | 1638.8628   | 0.0763  | 47    | 418        | 431 YCSGALECPVELLK     |           |         | Carbamidomethyl (C)[2,8] |      | Mascot      |
| 1666.8325  | 1666.894    | 0.0615  | 37    | 1137       | 1151 MCADAVLMSKQTIK    |           |         | Carbamidomethyl (C)[2]   |      | Mascot      |
| 1682.9587  | 1682.8958   | -0.0629 | -37   | 455        | 470 VLGNAAHPASIKYITK   |           |         |                          |      | Mascot      |
| 1840.9679  | 1840.9137   | -0.0542 | -29   | 471        | 485 FLPIFGTHIHQFPMR    |           |         |                          |      | Mascot      |
| 2233.2161  | 2233.1025   | -0.1136 | -51   | 296        | 313 EVHEDVPLKYIHLIQLMR |           |         |                          |      | Mascot      |

20 PREDICTED: vitellogenin-1 [Danio rerio] gi|326678656 171273.8 8.99 12 53 78.7 19 0

Peptide Information

| Calc. Mass | Obsrv. Mass | ± da | ± ppm | Start | End Sequence | Ion | C. I. % | Modification | Rank | Result Type |
|------------|-------------|------|-------|-------|--------------|-----|---------|--------------|------|-------------|
|------------|-------------|------|-------|-------|--------------|-----|---------|--------------|------|-------------|

|    |                                                                        |           |         | Seq. | Seq.         | Score    |                    |    |                          |        |
|----|------------------------------------------------------------------------|-----------|---------|------|--------------|----------|--------------------|----|--------------------------|--------|
|    | 821.3788                                                               | 821.4716  | 0.0928  | 113  | 1522         | 1528     | SDWQASK            |    | Mascot                   |        |
|    | 821.3788                                                               | 821.4716  | 0.0928  | 113  | 1522         | 1528     | SDWQASK            | 4  | 0                        | Mascot |
|    | 918.5267                                                               | 918.5496  | 0.0229  | 25   | 355          | 361      | TRPNFRK            |    |                          | Mascot |
|    | 1023.5356                                                              | 1023.5204 | -0.0152 | -15  | 194          | 202      | DVGLSYLEK          | 19 | 0                        | Mascot |
|    | 1023.5356                                                              | 1023.5204 | -0.0152 | -15  | 194          | 202      | DVGLSYLEK          |    |                          | Mascot |
|    | 1115.6306                                                              | 1115.7063 | 0.0757  | 68   | 682          | 691      | TDGIQEVLLK         | 14 | 0                        | Mascot |
|    | 1115.6306                                                              | 1115.7063 | 0.0757  | 68   | 682          | 691      | TDGIQEVLLK         |    |                          | Mascot |
|    | 1137.6813                                                              | 1137.6852 | 0.0039  | 3    | 867          | 876      | GKIHTLMPLK         |    |                          | Mascot |
|    | 1149.5754                                                              | 1149.6906 | 0.1152  | 100  | 203          | 211      | CIECQQKIK          |    | Carbamidomethyl (C)[1]   | Mascot |
|    | 1177.6688                                                              | 1177.6561 | -0.0127 | -11  | 481          | 492      | VLGNAAHPASIK       |    |                          | Mascot |
|    | 1395.7552                                                              | 1395.7643 | 0.0091  | 7    | 191          | 202      | IMKDVGLSYLEK       |    |                          | Mascot |
|    | 1638.7865                                                              | 1638.8628 | 0.0763  | 47   | 444          | 457      | YCSGALECPVELLK     |    | Carbamidomethyl (C)[2,8] | Mascot |
|    | 1682.9587                                                              | 1682.8958 | -0.0629 | -37  | 481          | 496      | VLGNAAHPASIKYITK   |    |                          | Mascot |
|    | 1840.9679                                                              | 1840.9137 | -0.0542 | -29  | 497          | 511      | FLPIFGTHIHQFPMR    |    |                          | Mascot |
|    | 2233.2161                                                              | 2233.1025 | -0.1136 | -51  | 322          | 339      | EVHEDVPLKYIHLIQLMR |    |                          | Mascot |
| 21 | signal-induced proliferation-associated 1-like protein 1 [Danio rerio] |           |         |      | gi 113462023 | 187789.3 | 8.87               | 21 | 48                       | 24.426 |

#### Peptide Information

| Calc. Mass | Obsrv. Mass | ± da    | ± ppm | Start Seq. | End Seq. | Sequence         | Ion Score | C. I. % | Modification      | Rank | Result Type |
|------------|-------------|---------|-------|------------|----------|------------------|-----------|---------|-------------------|------|-------------|
| 856.5363   | 856.5385    | 0.0022  | 3     | 1676       | 1682     | LQAQIKR          |           |         |                   |      | Mascot      |
| 874.4893   | 874.5159    | 0.0266  | 30    | 1160       | 1166     | SGKWLQR          |           |         |                   |      | Mascot      |
| 1055.5956  | 1055.5625   | -0.0331 | -31   | 1526       | 1535     | SPTTRGAPLR       |           |         |                   |      | Mascot      |
| 1177.592   | 1177.6561   | 0.0641  | 54    | 1472       | 1483     | LSSSGPSSSGRR     |           |         |                   |      | Mascot      |
| 1215.6997  | 1215.616    | -0.0837 | -69   | 793        | 802      | FPFISLAHQR       |           |         |                   |      | Mascot      |
| 1238.6376  | 1238.7933   | 0.1557  | 126   | 781        | 792      | HVTSTPIDPSGK     |           |         |                   |      | Mascot      |
| 1379.743   | 1379.7687   | 0.0257  | 19    | 1390       | 1401     | QGATSKYLIGWR     |           |         |                   |      | Mascot      |
| 1477.7355  | 1477.9259   | 0.1904  | 129   | 864        | 877      | DVIGWTLGSPASMK   |           |         | Oxidation (M)[13] |      | Mascot      |
| 1647.7981  | 1647.9065   | 0.1084  | 66    | 999        | 1012     | GCESELHRMPVVEYK  |           |         |                   |      | Mascot      |
| 1652.781   | 1652.8809   | 0.0999  | 60    | 1346       | 1361     | HSVSPAVMSSSHSSPR |           |         |                   |      | Mascot      |
| 1666.8258  | 1666.894    | 0.0682  | 41    | 268        | 282      | SDDLGPMPKPVWCQK  |           |         |                   |      | Mascot      |
| 1682.8245  | 1682.8958   | 0.0713  | 42    | 1167       | 1181     | EEAVASRPAGQEWK   |           |         |                   |      | Mascot      |
| 1721.8817  | 1721.9209   | 0.0392  | 23    | 1402       | 1417     | KPGSTINSVDFGDKR  |           |         |                   |      | Mascot      |
| 1737.9659  | 1737.9172   | -0.0487 | -28   | 688        | 701      | NIRSHFQHVVVVR    |           |         |                   |      | Mascot      |
| 1812.8915  | 1812.9053   | 0.0138  | 8     | 440        | 454      | SNILEHVDLGAYYYR  |           |         |                   |      | Mascot      |

|    |                                                 |           |         |     |             |      |                              |      |   |    |   |    |                   |  |  |        |
|----|-------------------------------------------------|-----------|---------|-----|-------------|------|------------------------------|------|---|----|---|----|-------------------|--|--|--------|
|    | 1844.0198                                       | 1843.9298 | -0.09   | -49 | 1652        | 1667 | VSQLEALVKMLQEDLK             |      |   |    |   |    |                   |  |  | Mascot |
|    | 1860.0146                                       | 1859.9304 | -0.0842 | -45 | 1652        | 1667 | VSQLEALVKMLQEDLK             |      |   |    |   |    | Oxidation (M)[10] |  |  | Mascot |
|    | 1886.9388                                       | 1886.811  | -0.1278 | -68 | 1143        | 1159 | SMPEGDLHTTGTLSSRR            |      |   |    |   |    | Oxidation (M)[2]  |  |  | Mascot |
|    | 1970.9965                                       | 1970.8909 | -0.1056 | -54 | 1141        | 1158 | QKSMPEGDLHTTGTLSS<br>R       |      |   |    |   |    |                   |  |  | Mascot |
|    | 2225.0364                                       | 2225.1382 | 0.1018  | 46  | 1545        | 1564 | MHGDLSASDTSLADLHD<br>RQR     |      |   |    |   |    |                   |  |  | Mascot |
|    | 2233.1709                                       | 2233.1025 | -0.0684 | -31 | 1639        | 1660 | LSPSEGPSSYGKVSQLEALVK        |      |   |    |   |    |                   |  |  | Mascot |
|    | 2938.459                                        | 2938.5325 | 0.0735  | 25  | 640         | 663  | DYEIMFHVSTMLPYTPNN<br>KQQLLR |      |   |    |   |    |                   |  |  | Mascot |
| 22 | HORMA domain-containing protein 1 [Danio rerio] |           |         |     | gi 50539782 |      | 41017.5                      | 6.07 | 4 | 45 | 0 | 36 | 91.951            |  |  |        |

#### Peptide Information

| Calc. Mass | Obsrv. Mass | ± da   | ± ppm | Start Seq. | End Seq. | Sequence           | Ion Score | C. I.  | % Modification                            | Rank | Result Type |
|------------|-------------|--------|-------|------------|----------|--------------------|-----------|--------|-------------------------------------------|------|-------------|
| 821.4549   | 821.4716    | 0.0167 | 20    | 148        | 154      | SSMLLVLR           |           |        | Oxidation (M)[3]                          |      | Mascot      |
| 821.4549   | 821.4716    | 0.0167 | 20    | 148        | 154      | SSMLLVLR           | 36        | 91.951 | Oxidation (M)[3]                          |      | Mascot      |
| 1055.4608  | 1055.5625   | 0.1017 | 96    | 1          | 8        | MTCEQKSR           |           |        | Carbamidomethyl (C)[3], Oxidation (M)[1]  |      | Mascot      |
| 1638.7574  | 1638.8628   | 0.1054 | 64    | 133        | 147      | NGQSLTKMACDNTQK    |           |        |                                           |      | Mascot      |
| 1695.7789  | 1695.9147   | 0.1358 | 80    | 133        | 147      | NGQSLTKMACDNTQK    |           |        | Carbamidomethyl (C)[10]                   |      | Mascot      |
| 1711.7738  | 1711.912    | 0.1382 | 81    | 133        | 147      | NGQSLTKMACDNTQK    |           |        | Carbamidomethyl (C)[10], Oxidation (M)[8] |      | Mascot      |
| 1711.7738  | 1711.912    | 0.1382 | 81    | 133        | 147      | NGQSLTKMACDNTQK    |           |        | Carbamidomethyl (C)[10], Oxidation (M)[8] |      | Mascot      |
| 2225.1094  | 2225.1382   | 0.0288 | 13    | 92         | 109      | YLRMVLLSIYCDPDNPQK |           |        | Carbamidomethyl (C)[11]                   |      | Mascot      |

|    |                       |  |  |  |              |  |           |      |    |    |   |   |   |  |  |  |
|----|-----------------------|--|--|--|--------------|--|-----------|------|----|----|---|---|---|--|--|--|
| 23 | titin a [Danio rerio] |  |  |  | gi 110005909 |  | 3646149.2 | 6.18 | 70 | 44 | 0 | 8 | 0 |  |  |  |
|----|-----------------------|--|--|--|--------------|--|-----------|------|----|----|---|---|---|--|--|--|

#### Peptide Information

| Calc. Mass | Obsrv. Mass | ± da    | ± ppm | Start Seq. | End Seq. | Sequence | Ion Score | C. I. | % Modification   | Rank | Result Type |
|------------|-------------|---------|-------|------------|----------|----------|-----------|-------|------------------|------|-------------|
| 821.4185   | 821.4716    | 0.0531  | 65    | 11267      | 11273    | LTVEGMR  | 3         | 0     | Oxidation (M)[6] |      | Mascot      |
| 821.4767   | 821.4716    | -0.0051 | -6    | 9353       | 9359     | EVFLSVK  |           |       |                  |      | Mascot      |
| 842.5094   | 842.5182    | 0.0088  | 10    | 15232      | 15239    | LSIPGVTR |           |       |                  |      | Mascot      |
| 856.4886   | 856.5385    | 0.0499  | 58    | 7306       | 7312     | LTLQEPR  |           |       |                  |      | Mascot      |
| 870.493    | 870.5502    | 0.0572  | 66    | 8546       | 8553     | TDIPLPSK |           |       |                  |      | Mascot      |
| 874.4992   | 874.5159    | 0.0167  | 19    | 22772      | 22779    | VSVVDVTR |           |       |                  |      | Mascot      |
| 882.4679   | 882.5753    | 0.1074  | 122   | 2876       | 2882     | YKVSTER  |           |       |                  |      | Mascot      |
| 888.4785   | 888.538     | 0.0595  | 67    | 9303       | 9309     | EKDLDLR  |           |       |                  |      | Mascot      |
| 888.5036   | 888.538     | 0.0344  | 39    | 31597      | 31603    | IIEEEKK  |           |       |                  |      | Mascot      |
| 918.5077   | 918.5496    | 0.0419  | 46    | 22434      | 22441    | VTGLLEMR |           |       |                  |      | Mascot      |
| 926.5345   | 926.5511    | 0.0166  | 18    | 9484       | 9490     | YEIVFKK  |           |       |                  |      | Mascot      |

|           |           |         |     |       |       |                  |                   |                    |                         |
|-----------|-----------|---------|-----|-------|-------|------------------|-------------------|--------------------|-------------------------|
| 1023.4775 | 1023.5204 | 0.0429  | 42  | 29814 | 29822 | AMATSEER         | 13                | 0 Oxidation (M)[2] | Mascot                  |
| 1023.5217 | 1023.5204 | -0.0013 | -1  | 7354  | 7362  | DIRTGGNYK        |                   |                    | Mascot                  |
| 1045.5347 | 1045.5737 | 0.039   | 37  | 7144  | 7153  | CQIGGTPEIK       |                   |                    | Mascot                  |
| 1055.552  | 1055.5625 | 0.0105  | 10  | 1809  | 1816  | EELLHWTk         |                   |                    | Mascot                  |
| 1097.6313 | 1097.6796 | 0.0483  | 44  | 11318 | 11327 | TVLTHVDGKK       |                   |                    | Mascot                  |
| 1097.679  | 1097.6796 | 0.0006  | 1   | 19211 | 19219 | RPVIDRTIK        |                   |                    | Mascot                  |
| 1115.6418 | 1115.7063 | 0.0645  | 58  | 2929  | 2937  | EITVLEKQR        |                   |                    | Mascot                  |
| 1115.6418 | 1115.7063 | 0.0645  | 58  | 2929  | 2937  | EITVLEKQR        |                   |                    | Mascot                  |
| 1121.6313 | 1121.6111 | -0.0202 | -18 | 16022 | 16030 | ITNYVVEKR        |                   |                    | Mascot                  |
| 1137.5834 | 1137.6852 | 0.1018  | 89  | 29617 | 29625 | NPVTMTRYR        |                   |                    | Mascot                  |
| 1149.6626 | 1149.6906 | 0.028   | 24  | 23110 | 23118 | ILIQDTRYK        |                   |                    | Mascot                  |
| 1177.6497 | 1177.6561 | 0.0064  | 5   | 7707  | 7716  | ETTVMVKLK        |                   |                    | Mascot                  |
| 1214.6627 | 1214.6653 | 0.0026  | 2   | 3752  | 3762  | SPEVTEIQIAK      |                   |                    | Mascot                  |
| 1215.6514 | 1215.616  | -0.0354 | -29 | 19309 | 19319 | CNVPKNLQATK      |                   |                    | Mascot                  |
| 1226.635  | 1226.71   | 0.075   | 61  | 19949 | 19958 | LEHPGKTWMK       |                   |                    | Mascot                  |
| 1238.6449 | 1238.7933 | 0.1484  | 120 | 21716 | 21726 | ITGYIVEMQGK      |                   |                    | Mascot                  |
| 1259.6266 | 1259.5946 | -0.032  | -25 | 19551 | 19562 | ASEQPGPVAEFK     |                   |                    | Mascot                  |
| 1379.7417 | 1379.7687 | 0.027   | 20  | 26957 | 26968 | NTEYSTTLIIPK     |                   |                    | Mascot                  |
| 1382.6924 | 1382.7999 | 0.1075  | 78  | 14817 | 14827 | DWSRATERPHK      |                   |                    | Mascot                  |
| 1395.705  | 1395.7643 | 0.0593  | 42  | 24878 | 24889 | LAFTSITNNCVR     |                   |                    | Carbamidomethyl (C)[10] |
| 1463.8944 | 1463.91   | 0.0156  | 11  | 123   | 136   | LDVRVTGIPAPVVK   | Mascot            |                    |                         |
| 1463.8944 | 1463.91   | 0.0156  | 11  | 123   | 136   | LDVRVTGIPAPVVK   | Mascot            |                    |                         |
| 1477.8624 | 1477.9259 | 0.0635  | 43  | 32284 | 32297 | SPEPLVKSPVPSLK   | Mascot            |                    |                         |
| 1555.775  | 1555.7659 | -0.0091 | -6  | 25283 | 25295 | VTGLEEGLQYQYR    | Mascot            |                    |                         |
| 1622.6752 | 1622.8712 | 0.196   | 121 | 3468  | 3481  | KDYEGEYSCTASNR   | Mascot            |                    |                         |
| 1622.8271 | 1622.8712 | 0.0441  | 27  | 30745 | 30759 | QTVELDVADVDPPIK  | Mascot            |                    |                         |
| 1638.9061 | 1638.8628 | -0.0433 | -26 | 7730  | 7743  | DIDIVELLRNVDPK   | Mascot            |                    |                         |
| 1644.8374 | 1644.8524 | 0.015   | 9   | 507   | 520   | HQEMPLATKQQVTSK  | Oxidation (M)[4]  | Mascot             |                         |
| 1647.7869 | 1647.9065 | 0.1196  | 73  | 22715 | 22728 | VYSAVTTCNKMTWK   | Oxidation (M)[11] | Mascot             |                         |
| 1648.8176 | 1648.8413 | 0.0237  | 14  | 3971  | 3985  | FSSEKPSPEKADAQK  | Mascot            |                    |                         |
| 1652.8239 | 1652.8809 | 0.057   | 34  | 17318 | 17333 | ETWGGVSSGSTSTRLK | Mascot            |                    |                         |
| 1666.8945 | 1666.894  | -0.0005 | 0   | 8731  | 8744  | IPKQDISQTKPHMK   | Oxidation (M)[13] | Mascot             |                         |
| 1682.8418 | 1682.8958 | 0.054   | 32  | 21716 | 21730 | ITGYIVEMQGKNSDK  |                   | Mascot             |                         |
| 1689.9242 | 1689.9437 | 0.0195  | 12  | 207   | 221   | TIISASQISQTRQTR  |                   | Mascot             |                         |
| 1695.8912 | 1695.9147 | 0.0235  | 14  | 22230 | 22244 | NTDFTTTLVKEAIR   |                   | Mascot             |                         |
| 1699.8538 | 1699.9528 | 0.099   | 58  | 1945  | 1959  | QVVSFTQTLEDAYAK  |                   | Mascot             |                         |





|           |           |         |     |       |       |                 |    |   |                         |        |
|-----------|-----------|---------|-----|-------|-------|-----------------|----|---|-------------------------|--------|
| 842.5094  | 842.5182  | 0.0088  | 10  | 15232 | 15239 | LSIPGVTR        |    |   |                         | Mascot |
| 856.4886  | 856.5385  | 0.0499  | 58  | 7306  | 7312  | LTQLEPR         |    |   |                         | Mascot |
| 870.4203  | 870.5502  | 0.1299  | 149 | 6908  | 6915  | LSDSGTYK        |    |   |                         | Mascot |
| 874.4992  | 874.5159  | 0.0167  | 19  | 22772 | 22779 | VSVVDVTR        |    |   |                         | Mascot |
| 882.4679  | 882.5753  | 0.1074  | 122 | 2876  | 2882  | YKVSTER         |    |   |                         | Mascot |
| 888.4785  | 888.538   | 0.0595  | 67  | 9303  | 9309  | EKDLDLR         |    |   |                         | Mascot |
| 888.5036  | 888.538   | 0.0344  | 39  | 31597 | 31603 | IIEEEEKK        |    |   |                         | Mascot |
| 918.5077  | 918.5496  | 0.0419  | 46  | 22434 | 22441 | VTGLLEMR        |    |   |                         | Mascot |
| 926.5345  | 926.5511  | 0.0166  | 18  | 9484  | 9490  | YEIVFKK         |    |   |                         | Mascot |
| 1023.4775 | 1023.5204 | 0.0429  | 42  | 29814 | 29822 | AMATSEER        | 13 | 0 | Oxidation (M)[2]        | Mascot |
| 1023.5217 | 1023.5204 | -0.0013 | -1  | 7354  | 7362  | DIRTGGNYK       |    |   |                         | Mascot |
| 1045.5347 | 1045.5737 | 0.039   | 37  | 7144  | 7153  | CQIGGTPEIK      |    |   |                         | Mascot |
| 1055.552  | 1055.5625 | 0.0105  | 10  | 1809  | 1816  | EELLHWTk        |    |   |                         | Mascot |
| 1097.6313 | 1097.6796 | 0.0483  | 44  | 11318 | 11327 | TVLTHVDGKK      |    |   |                         | Mascot |
| 1097.679  | 1097.6796 | 0.0006  | 1   | 19211 | 19219 | RPVIDRTIK       |    |   |                         | Mascot |
| 1115.6418 | 1115.7063 | 0.0645  | 58  | 2929  | 2937  | EITVLEKQR       |    |   |                         | Mascot |
| 1115.6418 | 1115.7063 | 0.0645  | 58  | 2929  | 2937  | EITVLEKQR       |    |   |                         | Mascot |
| 1121.6313 | 1121.6111 | -0.0202 | -18 | 16022 | 16030 | ITNYVVEKR       |    |   |                         | Mascot |
| 1137.5834 | 1137.6852 | 0.1018  | 89  | 29617 | 29625 | NPVTMTRYR       |    |   |                         | Mascot |
| 1149.6626 | 1149.6906 | 0.028   | 24  | 23110 | 23118 | ILIQDTRYK       |    |   |                         | Mascot |
| 1177.6497 | 1177.6561 | 0.0064  | 5   | 7707  | 7716  | ETTVEMVKLK      |    |   |                         | Mascot |
| 1214.6627 | 1214.6653 | 0.0026  | 2   | 3752  | 3762  | SPEVTEIQIAK     |    |   |                         | Mascot |
| 1215.6514 | 1215.616  | -0.0354 | -29 | 19309 | 19319 | CNVPKNLQATK     |    |   |                         | Mascot |
| 1226.635  | 1226.71   | 0.075   | 61  | 19949 | 19958 | LEHPGKTWMK      |    |   |                         | Mascot |
| 1238.6449 | 1238.7933 | 0.1484  | 120 | 21716 | 21726 | ITGYIVEMQ GK    |    |   |                         | Mascot |
| 1259.6266 | 1259.5946 | -0.032  | -25 | 19551 | 19562 | ASEQPGPVAEFK    |    |   |                         | Mascot |
| 1379.7417 | 1379.7687 | 0.027   | 20  | 26957 | 26968 | NTEYSTTLIIPK    |    |   |                         | Mascot |
| 1382.6924 | 1382.7999 | 0.1075  | 78  | 14817 | 14827 | DWSRATERPHK     |    |   |                         | Mascot |
| 1395.705  | 1395.7643 | 0.0593  | 42  | 24878 | 24889 | LAFTSITNNCVR    |    |   | Carbamidomethyl (C)[10] | Mascot |
| 1463.8944 | 1463.91   | 0.0156  | 11  | 123   | 136   | LDVRVTGIPAPVVK  |    |   |                         | Mascot |
| 1463.8944 | 1463.91   | 0.0156  | 11  | 123   | 136   | LDVRVTGIPAPVVK  |    |   |                         | Mascot |
| 1477.8624 | 1477.9259 | 0.0635  | 43  | 32284 | 32297 | SPEPLVKSPVPSLK  |    |   |                         | Mascot |
| 1555.775  | 1555.7659 | -0.0091 | -6  | 25283 | 25295 | VTGLEEGLQYQYR   |    |   |                         | Mascot |
| 1622.6752 | 1622.8712 | 0.196   | 121 | 3468  | 3481  | KDYEGEYSCTASNR  |    |   |                         | Mascot |
| 1622.8271 | 1622.8712 | 0.0441  | 27  | 30745 | 30759 | QTVELDVADVDP PK |    |   |                         | Mascot |
| 1638.9061 | 1638.8628 | -0.0433 | -26 | 7730  | 7743  | DIDIVELLRNVD PK |    |   |                         | Mascot |

|           |           |         |     |       |       |                            |                                          |        |
|-----------|-----------|---------|-----|-------|-------|----------------------------|------------------------------------------|--------|
| 1644.8374 | 1644.8524 | 0.015   | 9   | 507   | 520   | HQEMLATKQQVTSK             | Oxidation (M)[4]                         | Mascot |
| 1647.7869 | 1647.9065 | 0.1196  | 73  | 22715 | 22728 | VYSAVTTCKNMTWK             | Oxidation (M)[11]                        | Mascot |
| 1648.8806 | 1648.8413 | -0.0393 | -24 | 1364  | 1377  | NSDIISPHKYPHIK             |                                          | Mascot |
| 1652.849  | 1652.8809 | 0.0319  | 19  | 8755  | 8768  | TEEKETFSVQVVTR             |                                          | Mascot |
| 1666.8945 | 1666.894  | -0.0005 | 0   | 8731  | 8744  | IPKQDISQTKPHMK             | Oxidation (M)[13]                        | Mascot |
| 1682.8418 | 1682.8958 | 0.054   | 32  | 21716 | 21730 | ITGYIVEMQGKNSDK            |                                          | Mascot |
| 1689.9242 | 1689.9437 | 0.0195  | 12  | 207   | 221   | TIISASQISQTRQTR            |                                          | Mascot |
| 1695.8912 | 1695.9147 | 0.0235  | 14  | 22230 | 22244 | NTDFTTTLSVKEAIR            |                                          | Mascot |
| 1699.8538 | 1699.9528 | 0.099   | 58  | 1945  | 1959  | QVVSFTQTLEDAYAK            |                                          | Mascot |
| 1699.8538 | 1699.9528 | 0.099   | 58  | 1945  | 1959  | QVVSFTQTLEDAYAK            |                                          | Mascot |
| 1705.9958 | 1706.0416 | 0.0458  | 27  | 8433  | 8448  | EPSKKPGAPLLATQR            |                                          | Mascot |
| 1711.7843 | 1711.912  | 0.1277  | 75  | 9785  | 9799  | EASLSADKDQEMFPK            | Oxidation (M)[12]                        | Mascot |
| 1711.8861 | 1711.912  | 0.0259  | 15  | 32021 | 32035 | RDEEAPTQIVPDITK            |                                          | Mascot |
| 1721.9332 | 1721.9209 | -0.0123 | -7  | 10053 | 10067 | AVAFAPKEHLEERPK            |                                          | Mascot |
| 1737.917  | 1737.9172 | 0.0002  | 0   | 19341 | 19356 | IGFGEPSEVPEKHLAK           |                                          | Mascot |
| 1796.8094 | 1796.9176 | 0.1082  | 60  | 18756 | 18771 | HPFDPPSEPLNCCVNK           |                                          | Mascot |
| 1812.9126 | 1812.9053 | -0.0073 | -4  | 21602 | 21618 | DSVSLIWDPPVIDGGSR          |                                          | Mascot |
| 1824.9602 | 1824.9142 | -0.046  | -25 | 29529 | 29544 | LVEGTEYVFRVAATNR           |                                          | Mascot |
| 1840.9301 | 1840.9137 | -0.0164 | -9  | 20615 | 20631 | DTATLAWTKPKHDGGSR          |                                          | Mascot |
| 1843.9331 | 1843.9298 | -0.0033 | -2  | 2604  | 2619  | NQELKPSANVQIMSER           |                                          | Mascot |
| 1859.928  | 1859.9304 | 0.0024  | 1   | 2604  | 2619  | NQELKPSANVQIMSER           | Oxidation (M)[13]                        | Mascot |
| 1886.9857 | 1886.811  | -0.1747 | -93 | 19335 | 19352 | VSAVNKIGFGEPSEVPEK         |                                          | Mascot |
| 1906.9504 | 1906.8885 | -0.0619 | -32 | 20182 | 20200 | VSAVNQYGTGDTVQSGP<br>VK    |                                          | Mascot |
| 1936.9611 | 1936.937  | -0.0241 | -12 | 25798 | 25815 | IGPSESPETDPQVAKER          |                                          | Mascot |
| 1954.9691 | 1954.8923 | -0.0768 | -39 | 11453 | 11469 | VVRPMYGVELFGETAR           | Oxidation (M)[5]                         | Mascot |
| 1954.9691 | 1954.8923 | -0.0768 | -39 | 11453 | 11469 | VVRPMYGVELFGETAR           | Oxidation (M)[5]                         | Mascot |
| 1970.877  | 1970.8909 | 0.0139  | 7   | 16626 | 16641 | DLWMPVTESCTRTSCK           | Carbamidomethyl (C)[10, 15]              | Mascot |
| 2083.0276 | 2082.9944 | -0.0332 | -16 | 13143 | 13161 | WTFGENALTAGDRVSMV<br>TK    |                                          | Mascot |
| 2141.9907 | 2142.2322 | 0.2415  | 113 | 15348 | 15366 | AENKYGISEACETEEVEI<br>K    |                                          | Mascot |
| 2211.1438 | 2211.125  | -0.0188 | -9  | 6982  | 7001  | SCEIALRGDTAILELHNID<br>K   |                                          | Mascot |
| 2225.1382 | 2225.1382 | 0       | 0   | 29539 | 29559 | VAATNRFGIGGFLQSEVV<br>ECK  |                                          | Mascot |
| 2232.9575 | 2233.1025 | 0.145   | 65  | 1525  | 1542  | MINEFGYCSLDYEVAYS          | Carbamidomethyl (C)[8], Oxidation (M)[1] | Mascot |
| 2283.1899 | 2283.198  | 0.0081  | 4   | 3763  | 3783  | EHPSQVMSALTESVTPLT<br>IVK  | Oxidation (M)[7]                         | Mascot |
| 2284.1819 | 2284.1936 | 0.0117  | 5   | 21598 | 21618 | EITKDSVSLIWDPPVIDGG<br>SR  |                                          | Mascot |
| 2326.1421 | 2326.2205 | 0.0784  | 34  | 16860 | 16881 | AVNAAGESEPAYVPEPV<br>RAQDR |                                          | Mascot |

|    |                                                                                                   |              |             |         |       |            |          |                                  |           |        |                                           |  |  |      |             |
|----|---------------------------------------------------------------------------------------------------|--------------|-------------|---------|-------|------------|----------|----------------------------------|-----------|--------|-------------------------------------------|--|--|------|-------------|
|    |                                                                                                   | 2914.4026    | 2914.5107   | 0.1081  | 37    | 3207       | 3233     | VDGETEVM DYSSKFPPQ<br>ATSSPLTSIK |           |        |                                           |  |  |      | Mascot      |
|    |                                                                                                   | 2938.4502    | 2938.5325   | 0.0823  | 28    | 4621       | 4647     | IQNLEVN VGSSAKFECEI<br>EEAPGVTFK |           |        |                                           |  |  |      | Mascot      |
| 25 | RecName: Full=HORMA domain-containing protein 1                                                   | gi 145558933 | 40949.4     | 5.97    | 3     | 44         | 0        | 36                               | 91.951    |        |                                           |  |  |      |             |
|    | Peptide Information                                                                               |              |             |         |       |            |          |                                  |           |        |                                           |  |  |      |             |
|    |                                                                                                   | Calc. Mass   | Obsrv. Mass | ± da    | ± ppm | Start Seq. | End Seq. | Sequence                         | Ion Score | C. I.  | % Modification                            |  |  | Rank | Result Type |
|    |                                                                                                   | 821.4549     | 821.4716    | 0.0167  | 20    | 148        | 154      | SSMLLVLR                         |           |        | Oxidation (M)[3]                          |  |  |      | Mascot      |
|    |                                                                                                   | 821.4549     | 821.4716    | 0.0167  | 20    | 148        | 154      | SSMLLVLR                         | 36        | 91.951 | Oxidation (M)[3]                          |  |  |      | Mascot      |
|    |                                                                                                   | 1638.7574    | 1638.8628   | 0.1054  | 64    | 133        | 147      | NGQSLTKMACDNTQK                  |           |        |                                           |  |  |      | Mascot      |
|    |                                                                                                   | 1695.7789    | 1695.9147   | 0.1358  | 80    | 133        | 147      | NGQSLTKMACDNTQK                  |           |        | Carbamidomethyl (C)[10]                   |  |  |      | Mascot      |
|    |                                                                                                   | 1711.7738    | 1711.912    | 0.1382  | 81    | 133        | 147      | NGQSLTKMACDNTQK                  |           |        | Carbamidomethyl (C)[10], Oxidation (M)[8] |  |  |      | Mascot      |
|    |                                                                                                   | 1711.7738    | 1711.912    | 0.1382  | 81    | 133        | 147      | NGQSLTKMACDNTQK                  |           |        | Carbamidomethyl (C)[10], Oxidation (M)[8] |  |  |      | Mascot      |
|    |                                                                                                   | 2225.1094    | 2225.1382   | 0.0288  | 13    | 92         | 109      | YLRMVLLSIYC DPNPQK               |           |        | Carbamidomethyl (C)[11]                   |  |  |      | Mascot      |
| 26 | PREDICTED: hypothetical protein LOC100004944 [Danio rerio]                                        | gi 125854141 | 69244.2     | 6.33    | 12    | 44         | 0        |                                  |           |        |                                           |  |  |      |             |
|    | Peptide Information                                                                               |              |             |         |       |            |          |                                  |           |        |                                           |  |  |      |             |
|    |                                                                                                   | Calc. Mass   | Obsrv. Mass | ± da    | ± ppm | Start Seq. | End Seq. | Sequence                         | Ion Score | C. I.  | % Modification                            |  |  | Rank | Result Type |
|    |                                                                                                   | 874.4265     | 874.5159    | 0.0894  | 102   | 526        | 532      | ENENQLK                          |           |        |                                           |  |  |      | Mascot      |
|    |                                                                                                   | 1023.533     | 1023.5204   | -0.0126 | -12   | 133        | 140      | RDENKPHK                         |           |        |                                           |  |  |      | Mascot      |
|    |                                                                                                   | 1023.533     | 1023.5204   | -0.0126 | -12   | 133        | 140      | RDENKPHK                         |           |        |                                           |  |  |      | Mascot      |
|    |                                                                                                   | 1045.452     | 1045.5737   | 0.1217  | 116   | 472        | 479      | CHYS DHVK                        |           |        | Carbamidomethyl (C)[1]                    |  |  |      | Mascot      |
|    |                                                                                                   | 1259.6525    | 1259.5946   | -0.0579 | -46   | 299        | 309      | EAIKCALNGR                       |           |        | Carbamidomethyl (C)[6]                    |  |  |      | Mascot      |
|    |                                                                                                   | 1622.8207    | 1622.8712   | 0.0505  | 31    | 220        | 233      | GIDFDIDIGMRLNK                   |           |        | Oxidation (M)[10]                         |  |  |      | Mascot      |
|    |                                                                                                   | 1622.8207    | 1622.8712   | 0.0505  | 31    | 220        | 233      | GIDFDIDIGMRLNK                   |           |        | Oxidation (M)[10]                         |  |  |      | Mascot      |
|    |                                                                                                   | 1666.8395    | 1666.894    | 0.0545  | 33    | 391        | 404      | HELKQAQDALQEEK                   |           |        |                                           |  |  |      | Mascot      |
|    |                                                                                                   | 1689.9105    | 1689.9437   | 0.0332  | 20    | 343        | 357      | GMTGLTQFINNIKPR                  |           |        |                                           |  |  |      | Mascot      |
|    |                                                                                                   | 1705.9054    | 1706.0416   | 0.1362  | 80    | 343        | 357      | GMTGLTQFINNIKPR                  |           |        | Oxidation (M)[2]                          |  |  |      | Mascot      |
|    |                                                                                                   | 1737.8258    | 1737.9172   | 0.0914  | 53    | 2          | 17       | ASKNSSLESLS CPVCR                |           |        | Carbamidomethyl (C)[12]                   |  |  |      | Mascot      |
|    |                                                                                                   | 1796.9211    | 1796.9176   | -0.0035 | -2    | 234        | 249      | IDDLTHEINAVCLVNK                 |           |        |                                           |  |  |      | Mascot      |
|    |                                                                                                   | 1859.7906    | 1859.9304   | 0.1398  | 75    | 457        | 471      | CTVMKDYHCTVCTNK                  |           |        | Carbamidomethyl (C)[1,9]                  |  |  |      | Mascot      |
|    |                                                                                                   | 2211.1147    | 2211.125    | 0.0103  | 5     | 153        | 171      | TTLNVNMVNYMLGVERE<br>DK          |           |        |                                           |  |  |      | Mascot      |
|    |                                                                                                   | 2283.2595    | 2283.198    | -0.0615 | -27   | 544        | 563      | IALNTDSLNTLLHIDFLIEK             |           |        |                                           |  |  |      | Mascot      |
| 27 | novel protein similar to human ankyrin repeat and MYND domain containing 1 (ANKMY1) [Danio rerio] | gi 148725364 | 49558.8     | 7.96    | 10    | 44         | 0        |                                  |           |        |                                           |  |  |      |             |

| Peptide Information |                             |        |       |              |          |                           |           |         |                                              |      |        |      |        |
|---------------------|-----------------------------|--------|-------|--------------|----------|---------------------------|-----------|---------|----------------------------------------------|------|--------|------|--------|
| Calc. Mass          | Obsrv. Mass                 | ± da   | ± ppm | Start Seq.   | End Seq. | Sequence                  | Ion Score | C. I. % | Modification                                 | Rank | Result | Type |        |
| 918.454             | 918.5496                    | 0.0956 | 104   | 380          | 386      | GRSWEQR                   |           |         |                                              |      | Mascot |      |        |
| 1055.5415           | 1055.5625                   | 0.021  | 20    | 127          | 135      | TALHVACQR                 |           |         | Carbamidomethyl (C)[7]                       |      | Mascot |      |        |
| 1137.615            | 1137.6852                   | 0.0702 | 62    | 49           | 58       | TDIPLPPEQK                |           |         |                                              |      | Mascot |      |        |
| 1382.7247           | 1382.7999                   | 0.0752 | 54    | 401          | 412      | SNSGRIEPNRPR              |           |         |                                              |      | Mascot |      |        |
| 1622.7335           | 1622.8712                   | 0.1377 | 85    | 227          | 241      | AGADVLMPVMVCDGR           |           |         | Carbamidomethyl (C)[12], Oxidation (M)[7,10] |      | Mascot |      |        |
| 1622.7335           | 1622.8712                   | 0.1377 | 85    | 227          | 241      | AGADVLMPVMVCDGR           |           |         | Carbamidomethyl (C)[12], Oxidation (M)[7,10] |      | Mascot |      |        |
| 1647.8547           | 1647.9065                   | 0.0518 | 31    | 321          | 336      | SAVTSSLLNSPESISR          |           |         |                                              |      | Mascot |      |        |
| 1648.6301           | 1648.8413                   | 0.2112 | 128   | 368          | 379      | CHEVYYCSNTR               |           |         | Carbamidomethyl (C)[1,7,11]                  |      | Mascot |      |        |
| 1689.8234           | 1689.9437                   | 0.1203 | 71    | 227          | 242      | AGADVLMPVMVCDGRR          |           |         |                                              |      | Mascot |      |        |
| 1705.8182           | 1706.0416                   | 0.2234 | 131   | 227          | 242      | AGADVLMPVMVCDGRR          |           |         | Oxidation (M)[7]                             |      | Mascot |      |        |
| 1721.8131           | 1721.9209                   | 0.1078 | 63    | 227          | 242      | AGADVLMPVMVCDGRR          |           |         | Oxidation (M)[7,10]                          |      | Mascot |      |        |
| 1937.016            | 1936.937                    | -0.079 | -41   | 42           | 58       | LLECGARTDIPLPPEQK         |           |         | Carbamidomethyl (C)[4]                       |      | Mascot |      |        |
| 2211.0745           | 2211.125                    | 0.0505 | 23    | 321          | 341      | SAVTSSLLNSPESISRMS<br>CNK |           |         |                                              |      | Mascot |      |        |
| 2284.0908           | 2284.1936                   | 0.1028 | 45    | 321          | 341      | SAVTSSLLNSPESISRMS<br>CNK |           |         | Carbamidomethyl (C)[19], Oxidation (M)[17]   |      | Mascot |      |        |
| 28                  | novel protein [Danio rerio] |        |       | gi 126540716 |          |                           | 8191      | 6.01    | 2                                            | 43   | 0      | 30   | 72.092 |

| Peptide Information |                               |             |         |       |              |          |                   |           |         |              |      |             |
|---------------------|-------------------------------|-------------|---------|-------|--------------|----------|-------------------|-----------|---------|--------------|------|-------------|
|                     | Calc. Mass                    | Obsrv. Mass | ± da    | ± ppm | Start Seq.   | End Seq. | Sequence          | Ion Score | C. I. % | Modification | Rank | Result Type |
|                     | 1097.679                      | 1097.6796   | 0.0006  | 1     | 2            | 11       | PSRVSVAILR        |           |         |              |      | Mascot      |
|                     | 1097.679                      | 1097.6796   | 0.0006  | 1     | 2            | 11       | PSRVSVAILR        | 30        | 72.092  |              |      | Mascot      |
|                     | 1906.9446                     | 1906.8885   | -0.0561 | -29   | 55           | 71       | VNGEGKFISYALSHHFT |           |         |              |      | Mascot      |
| 29                  | Sipa1l1 protein [Danio rerio] |             |         |       | gi 190340108 |          |                   | 188873.8  | 8.64    | 20           | 42   | 0           |

| Peptide Information |             |         |       |            |          |              |           |                      |  |        |
|---------------------|-------------|---------|-------|------------|----------|--------------|-----------|----------------------|--|--------|
| Calc. Mass          | Obsrv. Mass | ± da    | ± ppm | Start Seq. | End Seq. | Sequence     | Ion Score | C. I. % Modification |  |        |
| 856.5363            | 856.5385    | 0.0022  | 3     | 1703       | 1709     | LQAQIKR      |           |                      |  | Mascot |
| 1055.5956           | 1055.5625   | -0.0331 | -31   | 1553       | 1562     | SPTTRGAPLR   |           |                      |  | Mascot |
| 1177.592            | 1177.6561   | 0.0641  | 54    | 1499       | 1510     | LSSSGPSSSGRR |           |                      |  | Mascot |
| 1215.6997           | 1215.616    | -0.0837 | -69   | 794        | 803      | FPFISLAHQR   |           |                      |  | Mascot |
| 1238.6376           | 1238.7933   | 0.1557  | 126   | 782        | 793      | HVTSTPIDPSGK |           |                      |  | Mascot |
| 1379.743            | 1379.7687   | 0.0257  | 19    | 1417       | 1428     | QGATSKYLIGWR |           |                      |  | Mascot |

|           |           |         |     |      |      |                              |                   |        |
|-----------|-----------|---------|-----|------|------|------------------------------|-------------------|--------|
| 1477.7355 | 1477.9259 | 0.1904  | 129 | 865  | 878  | DVIGWTLGSPASMK               | Oxidation (M)[13] | Mascot |
| 1647.7981 | 1647.9065 | 0.1084  | 66  | 1000 | 1013 | GCSELHRMPVVEYK               |                   | Mascot |
| 1652.781  | 1652.8809 | 0.0999  | 60  | 1373 | 1388 | HSVSPAVMSSSHSSPR             |                   | Mascot |
| 1666.8258 | 1666.894  | 0.0682  | 41  | 269  | 283  | SDDLGPMPKPWVCQK              |                   | Mascot |
| 1682.7803 | 1682.8958 | 0.1155  | 69  | 891  | 904  | SMNNNTEDFREVVK               |                   | Mascot |
| 1699.8134 | 1699.9528 | 0.1394  | 82  | 1179 | 1194 | VEDSSDRPPSDAPVTK             |                   | Mascot |
| 1699.8134 | 1699.9528 | 0.1394  | 82  | 1179 | 1194 | VEDSSDRPPSDAPVTK             |                   | Mascot |
| 1721.8817 | 1721.9209 | 0.0392  | 23  | 1429 | 1444 | KPGSTINSVDFGTRK              |                   | Mascot |
| 1737.9659 | 1737.9172 | -0.0487 | -28 | 689  | 702  | NIRSHFQHFVVVR                |                   | Mascot |
| 1812.8915 | 1812.9053 | 0.0138  | 8   | 441  | 455  | SNILEHVDLGAYYYR              |                   | Mascot |
| 1840.7654 | 1840.9137 | 0.1483  | 81  | 1356 | 1372 | DGSTYSLSDMASYSSNR            |                   | Mascot |
| 1844.0198 | 1843.9298 | -0.09   | -49 | 1679 | 1694 | VSQLEALVKMLQEDLK             |                   | Mascot |
| 1860.0146 | 1859.9304 | -0.0842 | -45 | 1679 | 1694 | VSQLEALVKMLQEDLK             | Oxidation (M)[10] | Mascot |
| 2225.0364 | 2225.1382 | 0.1018  | 46  | 1572 | 1591 | MHGDLSASDTSLADLHD<br>RQR     |                   | Mascot |
| 2233.1709 | 2233.1025 | -0.0684 | -31 | 1666 | 1687 | LSPSEGPSSYGKVSQLEALVK        |                   | Mascot |
| 2938.459  | 2938.5325 | 0.0735  | 25  | 641  | 664  | DYEIMFHVSTMLPYTPNN<br>KQQLLR |                   | Mascot |

30    PREDICTED: zinc finger protein 836-like [Danio rerio]    gi|292610335    57699.7    8.44    13    42    0

| Peptide Information |             |        |       |            |          |                  | Ion Score | C. I. % | Modification                              | Rank             | Result Type            |        |
|---------------------|-------------|--------|-------|------------|----------|------------------|-----------|---------|-------------------------------------------|------------------|------------------------|--------|
| Calc. Mass          | Obsrv. Mass | ± da   | ± ppm | Start Seq. | End Seq. | Sequence         |           |         |                                           |                  |                        |        |
| 856.4497            | 856.5385    | 0.0888 | 104   | 218        | 223      | VFFCKR           | 14        | 0       | Carbamidomethyl (C)[4]                    |                  | Mascot                 |        |
| 1023.5179           | 1023.5204   | 0.0025 | 2     | 224        | 232      | CDISFPTLK        |           |         |                                           | Mascot           |                        |        |
| 1023.5179           | 1023.5204   | 0.0025 | 2     | 224        | 232      | CDISFPTLK        |           |         |                                           | Mascot           |                        |        |
| 1055.5012           | 1055.5625   | 0.0613 | 58    | 189        | 197      | TTFPCKQCK        |           |         |                                           | Mascot           |                        |        |
| 1115.6418           | 1115.7063   | 0.0645 | 58    | 38         | 47       | EVASLEAKLR       |           |         |                                           | Mascot           |                        |        |
| 1115.6418           | 1115.7063   | 0.0645 | 58    | 38         | 47       | EVASLEAKLR       |           |         |                                           | Mascot           |                        |        |
| 1121.4536           | 1121.6111   | 0.1575 | 140   | 357        | 365      | MHQCLQCDK        |           |         |                                           | Oxidation (M)[1] |                        | Mascot |
| 1177.6398           | 1177.6561   | 0.0163 | 14    | 185        | 194      | QKPKTTFPCK       |           |         |                                           |                  |                        | Mascot |
| 1215.5687           | 1215.616    | 0.0473 | 39    | 314        | 323      | DGSHFKTHMR       |           |         |                                           |                  |                        | Mascot |
| 1379.5718           | 1379.7687   | 0.1969 | 143   | 272        | 282      | EKPFHCSECDK      |           |         |                                           |                  | Carbamidomethyl (C)[6] |        |
| 1644.71             | 1644.8524   | 0.1424 | 87    | 1          | 14       | MLSMEVQVDVSCCK   |           |         | Carbamidomethyl (C)[12], Oxidation (M)[1] |                  | Mascot                 |        |
| 1699.7714           | 1699.9528   | 0.1814 | 107   | 352        | 365      | IHSEKMHQCLQCDK   |           |         |                                           |                  | Mascot                 |        |
| 1699.7714           | 1699.9528   | 0.1814 | 107   | 352        | 365      | IHSEKMHQCLQCDK   |           |         |                                           |                  | Mascot                 |        |
| 1737.8137           | 1737.9172   | 0.1035 | 60    | 173        | 188      | DSSDEETASTSKQKPK |           |         |                                           |                  | Mascot                 |        |
| 1824.8995           | 1824.9142   | 0.0147 | 8     | 296        | 310      | IHTGERPYKCPHCVK  |           |         | Carbamidomethyl (C)[10]                   |                  | Mascot                 |        |

|    |                                                                         |          |        |     |              |         |                  |   |    |   |    |                        |        |
|----|-------------------------------------------------------------------------|----------|--------|-----|--------------|---------|------------------|---|----|---|----|------------------------|--------|
|    | 1936.7137                                                               | 1936.937 | 0.2233 | 115 | 157          | 172     | DDHCDDDDFIPSDENK |   |    |   |    | Carbamidomethyl (C)[4] | Mascot |
| 31 | PREDICTED: galactose-3-O-sulfotransferase 2-like, partial [Danio rerio] |          |        |     | gi 326674388 | 68895.3 | 9.51             | 5 | 40 | 0 | 30 | 73.348                 |        |

| Peptide Information |             |         |       |            |                       |  |           |       |        |                        |      |             |
|---------------------|-------------|---------|-------|------------|-----------------------|--|-----------|-------|--------|------------------------|------|-------------|
| Calc. Mass          | Obsrv. Mass | ± da    | ± ppm | Start Seq. | End Sequence Seq.     |  | Ion Score | C. I. | %      | Modification           | Rank | Result Type |
| 821.4151            | 821.4716    | 0.0565  | 69    | 262        | 268 FSSPEVR           |  |           |       |        |                        |      | Mascot      |
| 821.4151            | 821.4716    | 0.0565  | 69    | 262        | 268 FSSPEVR           |  | 30        |       | 73.348 |                        |      | Mascot      |
| 870.5195            | 870.5502    | 0.0307  | 35    | 191        | 197 NHIVFLK           |  |           |       |        |                        |      | Mascot      |
| 1121.5408           | 1121.6111   | 0.0703  | 63    | 19         | 28 TASPWTTCVR         |  |           |       |        |                        |      | Mascot      |
| 1638.7089           | 1638.8628   | 0.1539  | 94    | 121        | 135 EEEGTDQNNLSSTK    |  |           |       |        |                        |      | Mascot      |
| 1971.0116           | 1970.8909   | -0.1207 | -61   | 181        | 197 ADNSVTCQPKNHIVFLK |  |           |       |        | Carbamidomethyl (C)[7] |      | Mascot      |

|    |                                    |  |  |  |              |          |      |    |    |   |  |  |
|----|------------------------------------|--|--|--|--------------|----------|------|----|----|---|--|--|
| 32 | PREDICTED: myosin-Ie [Danio rerio] |  |  |  | gi 326669395 | 126893.9 | 9.25 | 15 | 40 | 0 |  |  |
|----|------------------------------------|--|--|--|--------------|----------|------|----|----|---|--|--|

| Peptide Information |             |         |       |            |                              |  |           |       |   |                        |      |             |
|---------------------|-------------|---------|-------|------------|------------------------------|--|-----------|-------|---|------------------------|------|-------------|
| Calc. Mass          | Obsrv. Mass | ± da    | ± ppm | Start Seq. | End Sequence Seq.            |  | Ion Score | C. I. | % | Modification           | Rank | Result Type |
| 856.4423            | 856.5385    | 0.0962  | 112   | 621        | 627 AGYAYRR                  |  |           |       |   |                        |      | Mascot      |
| 874.4741            | 874.5159    | 0.0418  | 48    | 556        | 564 GRPTTAGSK                |  |           |       |   |                        |      | Mascot      |
| 1023.4965           | 1023.5204   | 0.0239  | 23    | 164        | 172 NNNSSRFGK                |  |           |       |   |                        |      | Mascot      |
| 1023.4965           | 1023.5204   | 0.0239  | 23    | 164        | 172 NNNSSRFGK                |  |           |       |   |                        |      | Mascot      |
| 1097.6062           | 1097.6796   | 0.0734  | 67    | 353        | 362 DALSKALHSR               |  |           |       |   |                        |      | Mascot      |
| 1097.6062           | 1097.6796   | 0.0734  | 67    | 353        | 362 DALSKALHSR               |  | 6         |       | 0 |                        |      | Mascot      |
| 1115.6531           | 1115.7063   | 0.0532  | 48    | 556        | 566 GRPTTAGSKIK              |  | 2         |       | 0 |                        |      | Mascot      |
| 1115.6531           | 1115.7063   | 0.0532  | 48    | 556        | 566 GRPTTAGSKIK              |  |           |       |   |                        |      | Mascot      |
| 1177.5518           | 1177.6561   | 0.1043  | 89    | 474        | 484 GEGADQTMLQK              |  |           |       |   |                        |      | Mascot      |
| 1238.7256           | 1238.7933   | 0.0677  | 55    | 632        | 641 FLNRYAILTK               |  |           |       |   |                        |      | Mascot      |
| 1259.6842           | 1259.5946   | -0.0896 | -71   | 720        | 730 EEASDLLLNKK              |  |           |       |   |                        |      | Mascot      |
| 1689.8806           | 1689.9437   | 0.0631  | 37    | 680        | 693 APESLFLLEETRER           |  |           |       |   |                        |      | Mascot      |
| 1711.8201           | 1711.912    | 0.0919  | 54    | 5          | 17 GHYRYHWQSHNVK             |  |           |       |   |                        |      | Mascot      |
| 1711.8201           | 1711.912    | 0.0919  | 54    | 5          | 17 GHYRYHWQSHNVK             |  |           |       |   |                        |      | Mascot      |
| 1824.916            | 1824.9142   | -0.0018 | -1    | 715        | 729 YVQMREEASDLLLNK          |  |           |       |   | Oxidation (M)[4]       |      | Mascot      |
| 1859.9255           | 1859.9304   | 0.0049  | 3     | 579        | 593 CTPHYIRCIPNETK           |  |           |       |   | Carbamidomethyl (C)[1] |      | Mascot      |
| 2142.0393           | 2142.2322   | 0.1929  | 90    | 454        | 473 INPPGIMSILDDVCATMHAK     |  |           |       |   | Oxidation (M)[7]       |      | Mascot      |
| 2284.0366           | 2284.1936   | 0.157   | 69    | 98         | 118 NMMIDRENQCVIISGESGAGK    |  |           |       |   | Oxidation (M)[2,3]     |      | Mascot      |
| 2938.3589           | 2938.5325   | 0.1736  | 59    | 487        | 510 MQINNHEHFNSWNQGFIIHHYAGK |  |           |       |   | Oxidation (M)[1]       |      | Mascot      |

33 striated muscle preferentially expressed protein kinase g|55741920 333474.3 8.12 15 40 0 30 72.11  
[Danio rerio]

Peptide Information

| Calc. Mass | Obsrv. Mass | ± da    | ± ppm | Start Seq. | End Sequence Seq.     | Ion Score | C. I. % | Modification           | Rank | Result Type |
|------------|-------------|---------|-------|------------|-----------------------|-----------|---------|------------------------|------|-------------|
| 842.4189   | 842.5182    | 0.0993  | 118   | 887        | 892 KMTQYR            |           |         | Oxidation (M)[2]       |      | Mascot      |
| 874.5032   | 874.5159    | 0.0127  | 15    | 863        | 870 VTGLPYPK          |           |         |                        |      | Mascot      |
| 1055.5303  | 1055.5625   | 0.0322  | 31    | 1709       | 1717 AVSMELPHR        |           |         | Oxidation (M)[4]       |      | Mascot      |
| 1097.6313  | 1097.6796   | 0.0483  | 44    | 2194       | 2203 INDSPVLALR       |           |         |                        |      | Mascot      |
| 1097.6313  | 1097.6796   | 0.0483  | 44    | 2194       | 2203 INDSPVLALR       | 33        | 84.908  |                        |      | Mascot      |
| 1226.6527  | 1226.71     | 0.0573  | 47    | 1260       | 1270 EIGRGAFSYVK      |           |         |                        |      | Mascot      |
| 1238.6449  | 1238.7933   | 0.1484  | 120   | 2445       | 2454 VPCTYTIEKK       |           |         | Carbamidomethyl (C)[3] |      | Mascot      |
| 1259.7544  | 1259.5946   | -0.1598 | -127  | 950        | 959 MILLSWKPK         |           |         | Oxidation (M)[1]       |      | Mascot      |
| 1382.6984  | 1382.7999   | 0.1015  | 73    | 1729       | 1739 EDYALKDLMR       |           |         | Oxidation (M)[10]      |      | Mascot      |
| 1644.9279  | 1644.8524   | -0.0755 | -46   | 1341       | 1354 RTTILESEVQSIIR   |           |         |                        |      | Mascot      |
| 1647.8676  | 1647.9065   | 0.0389  | 24    | 2914       | 2926 ILNSYPWCRPTIK    |           |         | Carbamidomethyl (C)[8] |      | Mascot      |
| 1695.9138  | 1695.9147   | 0.0009  | 1     | 2707       | 2720 MFIAKIIPYDQQT    |           |         |                        |      | Mascot      |
| 1699.9298  | 1699.9528   | 0.023   | 14    | 698        | 712 EELICTANLLVIPS    |           |         | Carbamidomethyl (C)[5] |      | Mascot      |
| 1699.9298  | 1699.9528   | 0.023   | 14    | 698        | 712 EELICTANLLVIPS    |           |         | Carbamidomethyl (C)[5] |      | Mascot      |
| 1705.9343  | 1706.0416   | 0.1073  | 63    | 173        | 189 ALGSRAPGLQEPLSPGR |           |         |                        |      | Mascot      |
| 1711.9087  | 1711.912    | 0.0033  | 2     | 2707       | 2720 MFIAKIIPYDQQT    |           |         | Oxidation (M)[1]       |      | Mascot      |
| 1711.9087  | 1711.912    | 0.0033  | 2     | 2707       | 2720 MFIAKIIPYDQQT    |           |         | Oxidation (M)[1]       |      | Mascot      |
| 1859.9255  | 1859.9304   | 0.0049  | 3     | 2735       | 2749 CERIMALHEAYITPR  |           |         | Carbamidomethyl (C)[1] |      | Mascot      |
| 1906.8521  | 1906.8885   | 0.0364  | 19    | 1907       | 1922 VEEMKEQDSVPENMNK |           |         |                        |      | Mascot      |

34 PREDICTED: zinc finger protein 845-like isoform 1  
[Danio rerio]

g|326664549 110747.2 8.71 14 40 0

Peptide Information

| Calc. Mass | Obsrv. Mass | ± da    | ± ppm | Start Seq. | End Sequence Seq. | Ion Score | C. I. % | Modification           | Rank | Result Type |
|------------|-------------|---------|-------|------------|-------------------|-----------|---------|------------------------|------|-------------|
| 1055.5554  | 1055.5625   | 0.0071  | 7     | 384        | 392 GFSTKMQLK     |           |         | Oxidation (M)[6]       |      | Mascot      |
| 1115.6418  | 1115.7063   | 0.0645  | 58    | 39         | 48 EVASLEAKLR     | 14        | 0       |                        |      | Mascot      |
| 1115.6418  | 1115.7063   | 0.0645  | 58    | 39         | 48 EVASLEAKLR     |           |         |                        |      | Mascot      |
| 1121.552   | 1121.6111   | 0.0591  | 53    | 905        | 913 CFSRPEAVR     |           |         | Carbamidomethyl (C)[1] |      | Mascot      |
| 1149.6163  | 1149.6906   | 0.0743  | 65    | 585        | 592 YYLLRHER      |           |         |                        |      | Mascot      |
| 1214.635   | 1214.6653   | 0.0303  | 25    | 267        | 276 CFGTKYNLLR    |           |         |                        |      | Mascot      |
| 1215.7069  | 1215.616    | -0.0909 | -75   | 821        | 830 HEIVHRGIVR    |           |         |                        |      | Mascot      |



|    |                                                                      |           |         |     |     |              |                              |      |    |    |   |   |   |  |  |  |                                           |        |
|----|----------------------------------------------------------------------|-----------|---------|-----|-----|--------------|------------------------------|------|----|----|---|---|---|--|--|--|-------------------------------------------|--------|
|    | 1644.71                                                              | 1644.8524 | 0.1424  | 87  | 2   | 15           | MLSMEVQVDVSCCK               |      |    |    |   |   |   |  |  |  | Carbamidomethyl (C)[12], Oxidation (M)[1] | Mascot |
|    | 1682.9185                                                            | 1682.8958 | -0.0227 | -13 | 214 | 229          | QQPTGKSSSGKPQKPK             |      |    |    |   |   |   |  |  |  |                                           | Mascot |
|    | 1711.8328                                                            | 1711.912  | 0.0792  | 46  | 773 | 787          | QALQCSYCPKLLCNK              | 7    |    | 0  |   |   |   |  |  |  |                                           | Mascot |
|    | 1711.8328                                                            | 1711.912  | 0.0792  | 46  | 773 | 787          | QALQCSYCPKLLCNK              |      |    |    |   |   |   |  |  |  |                                           | Mascot |
|    | 1737.7683                                                            | 1737.9172 | 0.1489  | 86  | 593 | 607          | THTGEKPYQCSQCQK              |      |    |    |   |   |   |  |  |  |                                           | Mascot |
|    | 2225.0227                                                            | 2225.1382 | 0.1155  | 52  | 729 | 747          | THEIHTGEKPYQCSHCN<br>K       |      |    |    |   |   |   |  |  |  |                                           | Mascot |
|    | 2284.0386                                                            | 2284.1936 | 0.155   | 68  | 919 | 937          | HTGEKPYHCSLCSERFS<br>FR      |      |    |    |   |   |   |  |  |  |                                           | Mascot |
|    | 2326.0273                                                            | 2326.2205 | 0.1932  | 83  | 313 | 332          | THTGARPYQCSHCQKSF<br>CSK     |      |    |    |   |   |   |  |  |  | Carbamidomethyl (C)[10]                   | Mascot |
|    | 2938.2627                                                            | 2938.5325 | 0.2698  | 92  | 285 | 308          | TDDVERPYQCSHCQKCF<br>VESYLCK |      |    |    |   |   |   |  |  |  | Carbamidomethyl (C)[10]                   | Mascot |
| 35 | novel protein similar to H.sapiens TTN, titin (TTN)<br>[Danio rerio] |           |         |     |     | gi 169154588 | 2451841.5                    | 6.24 | 66 | 40 | 0 | 9 | 0 |  |  |  |                                           |        |

Peptide Information

| Calc. Mass | Obsrv. Mass | ± da    | ± ppm | Start Seq. | End Seq. | Sequence    | Ion Score | C. I. | % Modification         | Rank | Result Type |
|------------|-------------|---------|-------|------------|----------|-------------|-----------|-------|------------------------|------|-------------|
| 821.4185   | 821.4716    | 0.0531  | 65    | 504        | 510      | LTVEGMR     | 3         | 0     | Oxidation (M)[6]       |      | Mascot      |
| 821.4515   | 821.4716    | 0.0201  | 24    | 17148      | 17153    | QYILER      |           |       |                        |      | Mascot      |
| 842.5094   | 842.5182    | 0.0088  | 10    | 4439       | 4446     | LSIPGVTR    |           |       |                        |      | Mascot      |
| 856.4634   | 856.5385    | 0.0751  | 88    | 1798       | 1804     | EIREGPR     |           |       |                        |      | Mascot      |
| 874.4992   | 874.5159    | 0.0167  | 19    | 12103      | 12110    | VSVVDVTR    |           |       |                        |      | Mascot      |
| 888.4461   | 888.538     | 0.0919  | 103   | 3978       | 3985     | FSPSPSEPK   |           |       |                        |      | Mascot      |
| 888.5036   | 888.538     | 0.0344  | 39    | 20928      | 20934    | IIIEEEKK    |           |       |                        |      | Mascot      |
| 918.5077   | 918.5496    | 0.0419  | 46    | 11765      | 11772    | VTGLLEMR    |           |       |                        |      | Mascot      |
| 926.4842   | 926.5511    | 0.0669  | 72    | 8026       | 8032     | EYGFVR      |           |       |                        |      | Mascot      |
| 1023.4775  | 1023.5204   | 0.0429  | 42    | 19145      | 19153    | AMATSEER    | 13        | 0     | Oxidation (M)[2]       |      | Mascot      |
| 1023.4775  | 1023.5204   | 0.0429  | 42    | 19145      | 19153    | AMATSEER    |           |       | Oxidation (M)[2]       |      | Mascot      |
| 1045.6404  | 1045.5737   | -0.0667 | -64   | 5457       | 5466     | GTFKVVPLK   |           |       |                        |      | Mascot      |
| 1055.5078  | 1055.5625   | 0.0547  | 52    | 1356       | 1364     | YEMISEGVK   |           |       |                        |      | Mascot      |
| 1097.6313  | 1097.6796   | 0.0483  | 44    | 555        | 564      | TVLTHVDGKK  |           |       |                        |      | Mascot      |
| 1097.679   | 1097.6796   | 0.0006  | 1     | 8507       | 8515     | RPVIDRTIK   |           |       |                        |      | Mascot      |
| 1115.5513  | 1115.7063   | 0.155   | 139   | 3967       | 3977     | VCAENIAGPGK |           |       | Carbamidomethyl (C)[2] |      | Mascot      |
| 1115.6418  | 1115.7063   | 0.0645  | 58    | 10041      | 10051    | TVVAKAGDNLK |           |       |                        |      | Mascot      |
| 1121.6313  | 1121.6111   | -0.0202 | -18   | 5229       | 5237     | ITNYVVEKR   |           |       |                        |      | Mascot      |
| 1137.5834  | 1137.6852   | 0.1018  | 89    | 18948      | 18956    | NPVTMTRYR   |           |       |                        |      | Mascot      |
| 1149.6626  | 1149.6906   | 0.028   | 24    | 12441      | 12449    | ILIQDTRYK   |           |       |                        |      | Mascot      |
| 1177.6913  | 1177.6561   | -0.0352 | -30   | 17168      | 17176    | RPITELRHR   |           |       |                        |      | Mascot      |

|           |           |         |     |       |       |                         |                         |        |
|-----------|-----------|---------|-----|-------|-------|-------------------------|-------------------------|--------|
| 1214.5293 | 1214.6653 | 0.136   | 112 | 1267  | 1276  | YDMVADGCKR              | Carbamidomethyl (C)[8]  | Mascot |
| 1215.6514 | 1215.616  | -0.0354 | -29 | 8605  | 8615  | CNVPKNLQATK             |                         | Mascot |
| 1226.635  | 1226.71   | 0.075   | 61  | 9280  | 9289  | LEHPGKTWMK              |                         | Mascot |
| 1238.6449 | 1238.7933 | 0.1484  | 120 | 11047 | 11057 | ITGYIVEMQGK             |                         | Mascot |
| 1259.6266 | 1259.5946 | -0.032  | -25 | 8847  | 8858  | ASEQPGPVAEFK            |                         | Mascot |
| 1379.7417 | 1379.7687 | 0.027   | 20  | 16288 | 16299 | NTEYSTTLIIPK            |                         | Mascot |
| 1382.6924 | 1382.7999 | 0.1075  | 78  | 4024  | 4034  | DWSRATERPHK             |                         | Mascot |
| 1395.705  | 1395.7643 | 0.0593  | 42  | 14209 | 14220 | LAFTSITNNCVR            | Carbamidomethyl (C)[10] | Mascot |
| 1463.8767 | 1463.91   | 0.0333  | 23  | 6495  | 6508  | LPALMRGLPVPTAK          |                         | Mascot |
| 1463.8767 | 1463.91   | 0.0333  | 23  | 6495  | 6508  | LPALMRGLPVPTAK          |                         | Mascot |
| 1477.8624 | 1477.9259 | 0.0635  | 43  | 21615 | 21628 | SPEPLVKSPVPSLK          |                         | Mascot |
| 1555.775  | 1555.7659 | -0.0091 | -6  | 14614 | 14626 | VTGLEEGLQYQYR           |                         | Mascot |
| 1622.8271 | 1622.8712 | 0.0441  | 27  | 20076 | 20090 | QTVELDVADVDPDPK         |                         | Mascot |
| 1622.97   | 1622.8712 | -0.0988 | -61 | 192   | 206   | QIAGKVQVNVIGLQR         |                         | Mascot |
| 1644.8115 | 1644.8524 | 0.0409  | 25  | 7755  | 7769  | SYLATDPKSEPDPK          |                         | Mascot |
| 1647.7869 | 1647.9065 | 0.1196  | 73  | 12046 | 12059 | VYSAVTTCKNMTWK          | Oxidation (M)[11]       | Mascot |
| 1648.6432 | 1648.8413 | 0.1981  | 120 | 1372  | 1385  | SVFDDEAEYECDA           |                         | Mascot |
| 1652.8239 | 1652.8809 | 0.057   | 34  | 6614  | 6629  | ETWGGVSSGSTSTRLK        |                         | Mascot |
| 1666.8317 | 1666.894  | 0.0623  | 37  | 6244  | 6258  | AEIETSGTTTKLEMR         |                         | Mascot |
| 1682.8418 | 1682.8958 | 0.054   | 32  | 11047 | 11061 | ITGYIVEMQGNKSDK         |                         | Mascot |
| 1689.8441 | 1689.9437 | 0.0996  | 59  | 5104  | 5119  | EALGAEGFDVNIVAR         |                         | Mascot |
| 1695.8912 | 1695.9147 | 0.0235  | 14  | 11561 | 11575 | NTDFTTTLVKEAIR          |                         | Mascot |
| 1699.7731 | 1699.9528 | 0.1797  | 106 | 4559  | 4573  | YGISEACETEEVEIK         |                         | Mascot |
| 1699.8108 | 1699.9528 | 0.142   | 84  | 4604  | 4618  | DSGGSMITGYWLEKR         | Oxidation (M)[4]        | Mascot |
| 1711.8134 | 1711.912  | 0.0986  | 58  | 2692  | 2707  | DDTATYIIEAVNSSGR        |                         | Mascot |
| 1711.8861 | 1711.912  | 0.0259  | 15  | 21352 | 21366 | RDEEAPTQIVPDITK         |                         | Mascot |
| 1721.8817 | 1721.9209 | 0.0392  | 23  | 14822 | 14837 | DSGQYVLTQNVAGTR         |                         | Mascot |
| 1737.917  | 1737.9172 | 0.0002  | 0   | 8637  | 8652  | IGFGEPSEVPEKHLAK        |                         | Mascot |
| 1796.8094 | 1796.9176 | 0.1082  | 60  | 8052  | 8067  | HPFDPPSEPLNCCVNK        |                         | Mascot |
| 1812.9126 | 1812.9053 | -0.0073 | -4  | 10933 | 10949 | DSVSLIWDPPVIDGGS        |                         | Mascot |
| 1824.9602 | 1824.9142 | -0.046  | -25 | 18860 | 18875 | LVEGTEYVFRVAATNR        |                         | Mascot |
| 1840.9301 | 1840.9137 | -0.0164 | -9  | 9946  | 9962  | DTATLAWTKPKHGGSR        | Oxidation (M)[4]        | Mascot |
| 1843.9371 | 1843.9298 | -0.0073 | -4  | 910   | 925   | VVHMSDGKIHTLSFK         |                         | Mascot |
| 1859.9021 | 1859.9304 | 0.0283  | 15  | 18050 | 18065 | ELDPGEKYSLYTSTR         |                         | Mascot |
| 1886.9857 | 1886.811  | -0.1747 | -93 | 8631  | 8648  | VSAVNKIGFGEPSEVPEK      |                         | Mascot |
| 1906.9504 | 1906.8885 | -0.0619 | -32 | 9513  | 9531  | VSAVNQYGTGDTVQSGP<br>VK |                         | Mascot |
| 1936.9611 | 1936.937  | -0.0241 | -12 | 15129 | 15146 | IGPSESPETDPQVAKER       |                         | Mascot |

|           |           |         |     |       |       |                               |                            |        |
|-----------|-----------|---------|-----|-------|-------|-------------------------------|----------------------------|--------|
| 1954.9691 | 1954.8923 | -0.0768 | -39 | 690   | 706   | VVRPMYGVELFDGETAR             | Oxidation (M)[5]           | Mascot |
| 1954.9691 | 1954.8923 | -0.0768 | -39 | 690   | 706   | VVRPMYGVELFDGETAR             | Oxidation (M)[5]           | Mascot |
| 1970.877  | 1970.8909 | 0.0139  | 7   | 5938  | 5953  | DLWMPVTESCTRTSCK              | Carbamidomethyl (C)[10,15] | Mascot |
| 2083.0276 | 2082.9944 | -0.0332 | -16 | 2364  | 2382  | WTFGENALTAGDRVSMV<br>TK       |                            | Mascot |
| 2141.9907 | 2142.2322 | 0.2415  | 113 | 4555  | 4573  | AENKYGISEACETEEVEI<br>K       |                            | Mascot |
| 2211.0713 | 2211.125  | 0.0537  | 24  | 19288 | 19307 | TPLCPPEPPSFPEIMDV<br>TK       | Oxidation (M)[16]          | Mascot |
| 2225.1382 | 2225.1382 | 0       | 0   | 18870 | 18890 | VAATNRFGIGGFLQSEVV<br>ECK     |                            | Mascot |
| 2283.1511 | 2283.198  | 0.0469  | 21  | 4790  | 4809  | IFMDISADELLCVRAGTPF<br>K      | Carbamidomethyl (C)[12]    | Mascot |
| 2284.1819 | 2284.1936 | 0.0117  | 5   | 10929 | 10949 | EITKDSVSLIWDPPVIDGG<br>SR     |                            | Mascot |
| 2326.1421 | 2326.2205 | 0.0784  | 34  | 6172  | 6193  | AVNAAGESEPAYVPEPV<br>RAQDR    |                            | Mascot |
| 2938.4402 | 2938.5325 | 0.0923  | 31  | 5908  | 5933  | NYMVISWNPLDDGGAII<br>SNYIVEKR | Oxidation (M)[3]           | Mascot |

36

novel protein similar to vertebrate transmembrane protein 16H (TMEM16H) [Danio rerio]

gi|169158193

112029.6

5.99

10

40

0

26

27.601

Peptide Information

| Calc. Mass | Obsrv. Mass | $\pm$ da | $\pm$ ppm | Start Seq. | End Seq. | Sequence                 | Ion Score | C. I.  | % | Modification      | Rank | Result Type |
|------------|-------------|----------|-----------|------------|----------|--------------------------|-----------|--------|---|-------------------|------|-------------|
| 856.49     | 856.5385    | 0.0485   | 57        | 12         | 18       | GRLFHAR                  |           |        |   |                   |      | Mascot      |
| 1115.6782  | 1115.7063   | 0.0281   | 25        | 2          | 11       | SSAVLEKLLR               | 26        | 27.601 |   |                   |      | Mascot      |
| 1115.6782  | 1115.7063   | 0.0281   | 25        | 2          | 11       | SSAVLEKLLR               |           |        |   |                   |      | Mascot      |
| 1121.4891  | 1121.6111   | 0.122    | 109       | 614        | 624      | AAGGENNTMEK              |           |        |   |                   |      | Mascot      |
| 1137.7354  | 1137.6852   | -0.0502  | -44       | 878        | 887      | LKQIIPLQGK               |           |        |   |                   |      | Mascot      |
| 1149.6626  | 1149.6906   | 0.028    | 24        | 520        | 529      | SLISSYRVPK               |           |        |   |                   |      | Mascot      |
| 1463.8654  | 1463.91     | 0.0446   | 30        | 437        | 448      | LKEMLATLLIFR             |           |        |   | Oxidation (M)[4]  |      | Mascot      |
| 1463.8654  | 1463.91     | 0.0446   | 30        | 437        | 448      | LKEMLATLLIFR             |           |        |   | Oxidation (M)[4]  |      | Mascot      |
| 1555.7903  | 1555.7659   | -0.0244  | -16       | 456        | 467      | EVLQPYLYEHKK             |           |        |   |                   |      | Mascot      |
| 1666.921   | 1666.894    | -0.027   | -16       | 174        | 186      | RVILQMFPPLHEQR           |           |        |   |                   |      | Mascot      |
| 1682.9159  | 1682.8958   | -0.0201  | -12       | 174        | 186      | RVILQMFPPLHEQR           |           |        |   | Oxidation (M)[6]  |      | Mascot      |
| 1906.9514  | 1906.8885   | -0.0629  | -33       | 187        | 202      | ILNQLMTSWVQAVCER         |           |        |   | Oxidation (M)[6]  |      | Mascot      |
| 2283.1477  | 2283.198    | 0.0503   | 22        | 769        | 788      | YVIHVAIPDVPNWWADEM<br>AK |           |        |   | Oxidation (M)[18] |      | Mascot      |

37

PREDICTED: hypothetical protein LOC562947 [Danio rerio]

gi|292610701

116105.4

5.91

10

39

0

26

27.601

Peptide Information

| Calc. Mass | Obsrv. Mass | $\pm$ da | $\pm$ ppm | Start Seq. | End Seq. | Sequence | Ion Score | C. I. | % | Modification | Rank | Result Type |
|------------|-------------|----------|-----------|------------|----------|----------|-----------|-------|---|--------------|------|-------------|
|------------|-------------|----------|-----------|------------|----------|----------|-----------|-------|---|--------------|------|-------------|

|    |                                                                                                    |           |         |     |     |     |                          |          |        |    |    |                   |  |  |  |  |        |
|----|----------------------------------------------------------------------------------------------------|-----------|---------|-----|-----|-----|--------------------------|----------|--------|----|----|-------------------|--|--|--|--|--------|
|    | 856.49                                                                                             | 856.5385  | 0.0485  | 57  | 12  | 18  | GRLFHAR                  |          |        |    |    |                   |  |  |  |  | Mascot |
|    | 1115.6782                                                                                          | 1115.7063 | 0.0281  | 25  | 2   | 11  | SSAVLEKLLR               | 26       | 27.601 |    |    |                   |  |  |  |  | Mascot |
|    | 1115.6782                                                                                          | 1115.7063 | 0.0281  | 25  | 2   | 11  | SSAVLEKLLR               |          |        |    |    |                   |  |  |  |  | Mascot |
|    | 1121.4891                                                                                          | 1121.6111 | 0.122   | 109 | 614 | 624 | AAGGENNTEK               |          |        |    |    |                   |  |  |  |  | Mascot |
|    | 1137.7354                                                                                          | 1137.6852 | -0.0502 | -44 | 878 | 887 | LKQIPLQK                 |          |        |    |    |                   |  |  |  |  | Mascot |
|    | 1149.6626                                                                                          | 1149.6906 | 0.028   | 24  | 520 | 529 | SLISSYRVPK               |          |        |    |    |                   |  |  |  |  | Mascot |
|    | 1463.8654                                                                                          | 1463.91   | 0.0446  | 30  | 437 | 448 | LKEMLATLLIFR             |          |        |    |    | Oxidation (M)[4]  |  |  |  |  | Mascot |
|    | 1463.8654                                                                                          | 1463.91   | 0.0446  | 30  | 437 | 448 | LKEMLATLLIFR             |          |        |    |    | Oxidation (M)[4]  |  |  |  |  | Mascot |
|    | 1555.7903                                                                                          | 1555.7659 | -0.0244 | -16 | 456 | 467 | EVLQPYLYEHK              |          |        |    |    |                   |  |  |  |  | Mascot |
|    | 1666.921                                                                                           | 1666.894  | -0.027  | -16 | 174 | 186 | RVILQMFPLHEQR            |          |        |    |    |                   |  |  |  |  | Mascot |
|    | 1682.9159                                                                                          | 1682.8958 | -0.0201 | -12 | 174 | 186 | RVILQMFPLHEQR            |          |        |    |    | Oxidation (M)[6]  |  |  |  |  | Mascot |
|    | 1906.9514                                                                                          | 1906.8885 | -0.0629 | -33 | 187 | 202 | ILNQLMTSWVQAVCER         |          |        |    |    | Oxidation (M)[6]  |  |  |  |  | Mascot |
|    | 2283.1477                                                                                          | 2283.198  | 0.0503  | 22  | 769 | 788 | YVIHVAIPDVPNWWADEM<br>AK |          |        |    |    | Oxidation (M)[18] |  |  |  |  | Mascot |
| 38 | novel protein similar to vertebrate cytoplasmic linker associated protein 1 (CLASP1) [Danio rerio] |           |         |     |     |     | gi 159569348             | 164674.4 | 8.99   | 18 | 38 | 0                 |  |  |  |  |        |

#### Peptide Information

| Calc. Mass | Obsrv. Mass | ± da    | ± ppm | Start Seq. | End Seq. | Sequence              | Ion Score | C. I. % | Modification                              | Rank | Result Type |
|------------|-------------|---------|-------|------------|----------|-----------------------|-----------|---------|-------------------------------------------|------|-------------|
| 856.5502   | 856.5385    | -0.0117 | -14   | 1277       | 1284     | GALIELLK              |           |         |                                           |      | Mascot      |
| 870.577    | 870.5502    | -0.0268 | -31   | 1323       | 1329     | VLKEILR               |           |         |                                           |      | Mascot      |
| 874.5257   | 874.5159    | -0.0098 | -11   | 1057       | 1063     | LLHNHLK               |           |         |                                           |      | Mascot      |
| 1177.5696  | 1177.6561   | 0.0865  | 73    | 596        | 607      | SDIDVNAASSAK          |           |         |                                           |      | Mascot      |
| 1226.7831  | 1226.71     | -0.0731 | -60   | 1277       | 1287     | GALIELLKITR           |           |         |                                           |      | Mascot      |
| 1238.7467  | 1238.7933   | 0.0466  | 38    | 480        | 490      | HVAVLTETIKK           |           |         |                                           |      | Mascot      |
| 1382.7175  | 1382.7999   | 0.0824  | 60    | 333        | 343      | QDWEHRVTALK           |           |         |                                           |      | Mascot      |
| 1622.8649  | 1622.8712   | 0.0063  | 4     | 216        | 228      | LNIVFSRFDEVQR         |           |         |                                           |      | Mascot      |
| 1622.8649  | 1622.8712   | 0.0063  | 4     | 216        | 228      | LNIVFSRFDEVQR         |           |         |                                           |      | Mascot      |
| 1648.8007  | 1648.8413   | 0.0406  | 25    | 727        | 741      | SSRIPRPSMSQGCSR       |           |         |                                           |      | Mascot      |
| 1695.8081  | 1695.9147   | 0.1066  | 63    | 2          | 15       | EPNMEYCLTQVLQK        |           |         |                                           |      | Mascot      |
| 1699.7599  | 1699.9528   | 0.1929  | 113   | 266        | 282      | GGSMGSMRRPSSASGS<br>R |           |         | Oxidation (M)[4,7]                        |      | Mascot      |
| 1699.7599  | 1699.9528   | 0.1929  | 113   | 266        | 282      | GGSMGSMRRPSSASGS<br>R |           |         | Oxidation (M)[4,7]                        |      | Mascot      |
| 1705.8715  | 1706.0416   | 0.1701  | 100   | 552        | 567      | SSSSSQESLNRPLSVK      |           |         |                                           |      | Mascot      |
| 1711.803   | 1711.912    | 0.109   | 64    | 2          | 15       | EPNMEYCLTQVLQK        |           |         | Oxidation (M)[4]                          |      | Mascot      |
| 1711.803   | 1711.912    | 0.109   | 64    | 2          | 15       | EPNMEYCLTQVLQK        |           |         | Oxidation (M)[4]                          |      | Mascot      |
| 1721.817   | 1721.9209   | 0.1039  | 60    | 727        | 741      | SSRIPRPSMSQGCSR       |           |         | Carbamidomethyl (C)[13], Oxidation (M)[9] |      | Mascot      |

|    |                                                                                             |           |         |      |      |      |                          |          |      |    |    |   |                         |   |  |  |  |        |
|----|---------------------------------------------------------------------------------------------|-----------|---------|------|------|------|--------------------------|----------|------|----|----|---|-------------------------|---|--|--|--|--------|
|    | 1737.8265                                                                                   | 1737.9172 | 0.0907  | 52   | 118  | 131  | IMEQSATPQYIWDR           |          |      |    |    |   |                         |   |  |  |  | Mascot |
|    | 1843.7915                                                                                   | 1843.9298 | 0.1383  | 75   | 1224 | 1238 | EAVFDDDDVEQFRDCR         |          |      |    |    |   |                         |   |  |  |  | Mascot |
|    | 1887.0017                                                                                   | 1886.811  | -0.1907 | -101 | 763  | 779  | FGLIHQARISASVNAMR        |          |      |    |    |   | Oxidation (M)[16]       |   |  |  |  | Mascot |
|    | 2083.0125                                                                                   | 2082.9944 | -0.0181 | -9   | 1360 | 1379 | AAEEAASTLAGSIHPEQC<br>IK |          |      |    |    |   | Carbamidomethyl (C)[18] |   |  |  |  | Mascot |
|    | 2225.207                                                                                    | 2225.1382 | -0.0688 | -31  | 379  | 399  | SQVVREACITLGHLSLL<br>GNK |          |      |    |    |   |                         |   |  |  |  | Mascot |
|    | 2284.0769                                                                                   | 2284.1936 | 0.1167  | 51   | 1    | 19   | MEPNMEYCLTQVLQKDV<br>AR  |          |      |    |    |   | Oxidation (M)[1]        |   |  |  |  | Mascot |
| 39 | PREDICTED: eukaryotic translation initiation factor 2-alpha kinase 4, partial [Danio rerio] |           |         |      |      |      | gi 326681092             | 170018.8 | 6.07 | 12 | 38 | 0 | 3                       | 0 |  |  |  |        |

#### Peptide Information

|  | Calc. Mass | Obsrv. Mass | ± da    | ± ppm | Start Seq. | End Seq. | Sequence                 | Ion Score | C. I. | % Modification                            | Rank | Result Type |
|--|------------|-------------|---------|-------|------------|----------|--------------------------|-----------|-------|-------------------------------------------|------|-------------|
|  | 856.4886   | 856.5385    | 0.0499  | 58    | 537        | 544      | IQVNPASK                 |           |       |                                           |      | Mascot      |
|  | 874.4992   | 874.5159    | 0.0167  | 19    | 551        | 558      | GEVTLLSR                 |           |       |                                           |      | Mascot      |
|  | 1115.6782  | 1115.7063   | 0.0281  | 25    | 549        | 558      | IKGEVTLLSR               | 16        | 0     |                                           |      | Mascot      |
|  | 1115.6782  | 1115.7063   | 0.0281  | 25    | 549        | 558      | IKGEVTLLSR               |           |       |                                           |      | Mascot      |
|  | 1214.674   | 1214.6653   | -0.0087 | -7    | 17         | 26       | QEKLNVLELNK              |           |       |                                           |      | Mascot      |
|  | 1259.6014  | 1259.5946   | -0.0068 | -5    | 370        | 379      | EDIFEQSHVR               |           |       |                                           |      | Mascot      |
|  | 1648.767   | 1648.8413   | 0.0743  | 45    | 1133       | 1147     | LTHASNILCDAMSEK          |           |       | Oxidation (M)[12]                         |      | Mascot      |
|  | 1689.7935  | 1689.9437   | 0.1502  | 89    | 1133       | 1147     | LTHASNILCDAMSEK          |           |       | Carbamidomethyl (C)[9]                    |      | Mascot      |
|  | 1699.8901  | 1699.9528   | 0.0627  | 37    | 413        | 427      | EYPLTVPDTLPADLR          |           |       |                                           |      | Mascot      |
|  | 1699.8901  | 1699.9528   | 0.0627  | 37    | 413        | 427      | EYPLTVPDTLPADLR          | 3         | 0     |                                           |      | Mascot      |
|  | 1705.7883  | 1706.0416   | 0.2533  | 148   | 1133       | 1147     | LTHASNILCDAMSEK          |           |       | Carbamidomethyl (C)[9], Oxidation (M)[12] |      | Mascot      |
|  | 1711.8907  | 1711.912    | 0.0213  | 12    | 339        | 354      | HLSASCVLLDARGDVR         | 3         | 0     |                                           |      | Mascot      |
|  | 1711.8907  | 1711.912    | 0.0213  | 12    | 339        | 354      | HLSASCVLLDARGDVR         |           |       |                                           |      | Mascot      |
|  | 1721.8552  | 1721.9209   | 0.0657  | 38    | 136        | 152      | QTSVSSGSPVDSSEVKK        |           |       |                                           |      | Mascot      |
|  | 1825.0065  | 1824.9142   | -0.0923 | -51   | 1275       | 1294     | GPTVSGVVPSAVGASLA<br>LDK |           |       |                                           |      | Mascot      |
|  | 1843.9219  | 1843.9298   | 0.0079  | 4     | 88         | 102      | LEEQMONEILAEIQR          |           |       |                                           |      | Mascot      |
|  | 1859.9167  | 1859.9304   | 0.0137  | 7     | 88         | 102      | LEEQMONEILAEIQR          |           |       | Oxidation (M)[5]                          |      | Mascot      |
|  | 2326.2415  | 2326.2205   | -0.021  | -9    | 319        | 338      | HTQQLLSALHYLHTNSVV<br>HK |           |       |                                           |      | Mascot      |

40 Golgb1 protein [Danio rerio] gi|141796874 53722.5 5.1 11 38 0

#### Peptide Information

|  | Calc. Mass | Obsrv. Mass | ± da   | ± ppm | Start Seq. | End Seq. | Sequence | Ion Score | C. I. | % Modification | Rank | Result Type |
|--|------------|-------------|--------|-------|------------|----------|----------|-----------|-------|----------------|------|-------------|
|  | 874.4265   | 874.5159    | 0.0894 | 102   | 191        | 198      | DQAVNEAK |           |       |                |      | Mascot      |

|           |           |         |     |     |     |                  |  |  |  |                        |  |        |
|-----------|-----------|---------|-----|-----|-----|------------------|--|--|--|------------------------|--|--------|
| 918.4713  | 918.5496  | 0.0783  | 85  | 287 | 293 | QELEMLR          |  |  |  |                        |  | Mascot |
| 926.4689  | 926.5511  | 0.0822  | 89  | 118 | 125 | ETQAVHNK         |  |  |  |                        |  | Mascot |
| 1023.5152 | 1023.5204 | 0.0052  | 5   | 439 | 446 | VAFCSRQR         |  |  |  | Carbamidomethyl (C)[4] |  | Mascot |
| 1023.5152 | 1023.5204 | 0.0052  | 5   | 439 | 446 | VAFCSRQR         |  |  |  | Carbamidomethyl (C)[4] |  | Mascot |
| 1214.6639 | 1214.6653 | 0.0014  | 1   | 129 | 138 | ELRWEGGVLR       |  |  |  |                        |  | Mascot |
| 1259.6589 | 1259.5946 | -0.0643 | -51 | 374 | 383 | LDEESLR          |  |  |  |                        |  | Mascot |
| 1463.7094 | 1463.91   | 0.2006  | 137 | 239 | 249 | ERMLEQMQR        |  |  |  | Oxidation (M)[3]       |  | Mascot |
| 1463.7094 | 1463.91   | 0.2006  | 137 | 239 | 249 | ERMLEQMQR        |  |  |  | Oxidation (M)[3]       |  | Mascot |
| 1555.8439 | 1555.7659 | -0.078  | -50 | 382 | 394 | LRIEEQLIAEDR     |  |  |  |                        |  | Mascot |
| 1622.8608 | 1622.8712 | 0.0104  | 6   | 26  | 39  | DSQHKQILAAQVER   |  |  |  |                        |  | Mascot |
| 1622.8608 | 1622.8712 | 0.0104  | 6   | 26  | 39  | DSQHKQILAAQVER   |  |  |  |                        |  | Mascot |
| 1647.8081 | 1647.9065 | 0.0984  | 60  | 154 | 166 | DLLMMEQLLEER     |  |  |  |                        |  | Mascot |
| 2083.0566 | 2082.9944 | -0.0622 | -30 | 48  | 65  | EDLVNHIQAFKDIQGR |  |  |  |                        |  | Mascot |

41 Rbm34 protein [Danio rerio] gi|159155220 45856.6 10.19 10 38 0

#### Peptide Information

| Calc. Mass | Obsrv. Mass | $\pm$ da | $\pm$ ppm | Start Seq. | End Seq. | Sequence                 | Ion Score | C. I. | % Modification | Rank | Result Type |
|------------|-------------|----------|-----------|------------|----------|--------------------------|-----------|-------|----------------|------|-------------|
| 821.4767   | 821.4716    | -0.0051  | -6        | 163        | 169      | DLLSVFK                  |           |       |                |      | Mascot      |
| 821.4767   | 821.4716    | -0.0051  | -6        | 163        | 169      | DLLSVFK                  |           |       |                |      | Mascot      |
| 842.473    | 842.5182    | 0.0452   | 54        | 74         | 80       | DPVQKQK                  |           |       |                |      | Mascot      |
| 1055.5592  | 1055.5625   | 0.0033   | 3         | 238        | 246      | VDRVSQHSK                |           |       |                |      | Mascot      |
| 1121.5447  | 1121.6111   | 0.0664   | 59        | 355        | 363      | QEFRNNTGR                |           |       |                |      | Mascot      |
| 1149.6375  | 1149.6906   | 0.0531   | 46        | 171        | 180      | SGVIESVRFR               |           |       |                |      | Mascot      |
| 1379.7351  | 1379.7687   | 0.0336   | 24        | 149        | 161      | TVFVGNLPSSCKK            |           |       |                |      | Mascot      |
| 1647.7456  | 1647.9065   | 0.1609   | 98        | 97         | 112      | ESALQNADEEGQASAK         |           |       |                |      | Mascot      |
| 1666.9374  | 1666.894    | -0.0434  | -26       | 56         | 71       | IEPKVTPAVSDNAVVK         |           |       |                |      | Mascot      |
| 1711.7882  | 1711.912    | 0.1238   | 72        | 119        | 133      | ADGGEEEEERPTKHK          |           |       |                |      | Mascot      |
| 1711.7882  | 1711.912    | 0.1238   | 72        | 119        | 133      | ADGGEEEEERPTKHK          |           |       |                |      | Mascot      |
| 2283.1501  | 2283.198    | 0.0479   | 21        | 205        | 224      | QNINAYIVFKEEESATDAL<br>K |           |       |                |      | Mascot      |

42 PREDICTED: G protein-activated inward rectifier potassium channel 4-like [Danio rerio] gi|292623912 48753.5 5.51 9 37 0

#### Peptide Information

| Calc. Mass | Obsrv. Mass | $\pm$ da | $\pm$ ppm | Start Seq. | End Seq. | Sequence | Ion Score | C. I. | % Modification | Rank | Result Type |
|------------|-------------|----------|-----------|------------|----------|----------|-----------|-------|----------------|------|-------------|
| 821.4628   | 821.4716    | 0.0088   | 11        | 52         | 57       | QRYVQK   |           |       |                |      | Mascot      |



|    |                                 |            |             |         |       |              |                   |                                |           |                         |                         |      |             |
|----|---------------------------------|------------|-------------|---------|-------|--------------|-------------------|--------------------------------|-----------|-------------------------|-------------------------|------|-------------|
|    |                                 | 1379.6848  | 1379.7687   | 0.0839  | 61    | 230          | 240               | ICARELYGNQR                    |           | Carbamidomethyl (C)[2]  | Mascot                  |      |             |
|    |                                 | 1477.738   | 1477.9259   | 0.1879  | 127   | 1389         | 1401              | ELLTETSVQQDSK                  |           |                         | Mascot                  |      |             |
|    |                                 | 1638.7792  | 1638.8628   | 0.0836  | 51    | 404          | 417               | VTDSDYEA VCKVPR                |           | Carbamidomethyl (C)[10] | Mascot                  |      |             |
|    |                                 | 1647.7656  | 1647.9065   | 0.1409  | 86    | 522          | 535               | SCEYHPLQSQRGSR                 |           |                         | Mascot                  |      |             |
|    |                                 | 1652.8602  | 1652.8809   | 0.0207  | 13    | 96           | 109               | QQETGHIQEILQTK                 |           |                         | Mascot                  |      |             |
|    |                                 | 1666.8871  | 1666.894    | 0.0069  | 4     | 785          | 799               | HNQDLLTALESARAK                |           |                         | Mascot                  |      |             |
|    |                                 | 1711.8254  | 1711.912    | 0.0866  | 51    | 1600         | 1614              | GMCHILTQH LGD TTK              |           | Carbamidomethyl (C)[3]  | Mascot                  |      |             |
|    |                                 | 1711.8254  | 1711.912    | 0.0866  | 51    | 1600         | 1614              | GMCHILTQH LGD TTK              |           | Carbamidomethyl (C)[3]  | Mascot                  |      |             |
|    |                                 | 1936.9697  | 1936.937    | -0.0327 | -17   | 1            | 16                | MFNGYRTISQHLNDLK               |           |                         | Mascot                  |      |             |
|    |                                 | 1970.9712  | 1970.8909   | -0.0803 | -41   | 1234         | 1251              | TAQSLVSLQSCDQH QGL<br>R        |           |                         | Mascot                  |      |             |
|    |                                 | 2326.1707  | 2326.2205   | 0.0498  | 21    | 1252         | 1273              | GCQDAVAEGPGLAEV KQ<br>LVEQK    |           | Carbamidomethyl (C)[2]  | Mascot                  |      |             |
|    |                                 | 2938.3635  | 2938.5325   | 0.169   | 58    | 1622         | 1646              | SNDIDYYMGQSFRDQLS<br>QSI SLAQR |           | Oxidation (M)[8]        | Mascot                  |      |             |
| 45 | PREDICTED: ninein [Danio rerio] |            |             |         |       | gi 326673087 | 160970.7          | 4.92                           | 15        | 37                      | 0                       |      |             |
|    | Peptide Information             |            |             |         |       |              |                   |                                |           |                         |                         |      |             |
|    |                                 | Calc. Mass | Obsrv. Mass | ± da    | ± ppm | Start Seq.   | End Sequence Seq. |                                | Ion Score | C. I. %                 | Modification            | Rank | Result Type |
|    |                                 | 821.3709   | 821.4716    | 0.1007  | 123   | 612          | 618               | AMVDEEK                        |           |                         |                         |      | Mascot      |
|    |                                 | 821.3709   | 821.4716    | 0.1007  | 123   | 612          | 618               | AMVDEEK                        | 12        | 0                       |                         |      | Mascot      |
|    |                                 | 888.5148   | 888.538     | 0.0232  | 26    | 1077         | 1083              | TEKELLR                        |           |                         |                         |      | Mascot      |
|    |                                 | 888.5148   | 888.538     | 0.0232  | 26    | 1077         | 1083              | TEKELLR                        |           |                         |                         |      | Mascot      |
|    |                                 | 1214.7103  | 1214.6653   | -0.045  | -37   | 1286         | 1295              | EVEITLRNLK                     |           |                         |                         |      | Mascot      |
|    |                                 | 1226.6198  | 1226.71     | 0.0902  | 74    | 366          | 375               | HLLECVDLER                     |           |                         |                         |      | Mascot      |
|    |                                 | 1259.6128  | 1259.5946   | -0.0182 | -14   | 840          | 848               | LRQQWDEER                      |           |                         |                         |      | Mascot      |
|    |                                 | 1382.7208  | 1382.7999   | 0.0791  | 57    | 366          | 376               | HLLECVDLERR                    |           |                         |                         |      | Mascot      |
|    |                                 | 1463.6907  | 1463.91     | 0.2193  | 150   | 964          | 975               | TDIAEQRSEVCR                   |           |                         | Carbamidomethyl (C)[11] |      | Mascot      |
|    |                                 | 1463.6907  | 1463.91     | 0.2193  | 150   | 964          | 975               | TDIAEQRSEVCR                   |           |                         | Carbamidomethyl (C)[11] |      | Mascot      |
|    |                                 | 1555.6805  | 1555.7659   | 0.0854  | 55    | 534          | 545               | SYEEQCRELQDR                   |           |                         |                         |      | Mascot      |
|    |                                 | 1666.8065  | 1666.894    | 0.0875  | 52    | 1182         | 1195              | RQMNELSSELQTSK                 |           |                         | Oxidation (M)[3]        |      | Mascot      |
|    |                                 | 1682.8279  | 1682.8958   | 0.0679  | 40    | 895          | 908               | QHKEALQACLEQER                 |           |                         |                         |      | Mascot      |
|    |                                 | 1695.8846  | 1695.9147   | 0.0301  | 18    | 362          | 375               | AEIRHLLCVDLER                  |           |                         |                         |      | Mascot      |
|    |                                 | 1859.947   | 1859.9304   | -0.0166 | -9    | 1048         | 1064              | HALQEVIRQHDGSANGK              |           |                         |                         |      | Mascot      |
|    |                                 | 1936.9585  | 1936.937    | -0.0215 | -11   | 1158         | 1174              | VWAELSGLMEAEH HSLK             |           |                         |                         |      | Mascot      |
|    |                                 | 2142.0461  | 2142.2322   | 0.1861  | 87    | 289          | 308               | VFSDLDDGSGHAPVETLL<br>NR       |           |                         |                         |      | Mascot      |
|    |                                 | 2284.1616  | 2284.1936   | 0.032   | 14    | 849          | 867               | ASMENKHHALLLQHLQE<br>ER        |           |                         |                         |      | Mascot      |
| 46 | Synembryn-like [Danio rerio]    |            |             |         |       | gi 94574123  | 59482.8           | 5.37                           | 8         | 36                      | 0                       |      |             |



| Peptide Information |                                              |             |         |       |              |                                |         |           |         |                         |                  |
|---------------------|----------------------------------------------|-------------|---------|-------|--------------|--------------------------------|---------|-----------|---------|-------------------------|------------------|
|                     | Calc. Mass                                   | Obsrv. Mass | ± da    | ± ppm | Start Seq.   | End Sequence Seq.              |         | Ion Score | C. I. % | Modification            | Rank Result Type |
|                     | 842.5709                                     | 842.5182    | -0.0527 | -63   | 18           | 24 VEKLLLK                     |         |           |         |                         | Mascot           |
|                     | 1045.6769                                    | 1045.5737   | -0.1032 | -99   | 171          | 179 LLFLLSALR                  |         |           |         |                         | Mascot           |
|                     | 1115.6605                                    | 1115.7063   | 0.0458  | 41    | 46           | 55 LCQGLLTVLR                  |         | 13        | 0       |                         | Mascot           |
|                     | 1115.6605                                    | 1115.7063   | 0.0458  | 41    | 46           | 55 LCQGLLTVLR                  |         |           |         |                         | Mascot           |
|                     | 1214.7037                                    | 1214.6653   | -0.0384 | -32   | 503          | 512 ELIRPMGVRK                 |         |           |         | Oxidation (M)[6]        | Mascot           |
|                     | 1382.7136                                    | 1382.7999   | 0.0863  | 62    | 399          | 410 QGAAEFLFVLCK               |         |           |         | Carbamidomethyl (C)[11] | Mascot           |
|                     | 1695.8809                                    | 1695.9147   | 0.0338  | 20    | 315          | 328 NMDTVQILLNFMIIK            |         |           |         | Oxidation (M)[2]        | Mascot           |
|                     | 1711.8757                                    | 1711.912    | 0.0363  | 21    | 315          | 328 NMDTVQILLNFMIIK            |         |           |         | Oxidation (M)[2,12]     | Mascot           |
|                     | 1711.8757                                    | 1711.912    | 0.0363  | 21    | 315          | 328 NMDTVQILLNFMIIK            |         |           |         | Oxidation (M)[2,12]     | Mascot           |
|                     | 1954.9539                                    | 1954.8923   | -0.0616 | -32   | 486          | 501 EYEAQRLVSMIDELSR           |         |           |         | Oxidation (M)[10]       | Mascot           |
|                     | 1954.9539                                    | 1954.8923   | -0.0616 | -32   | 486          | 501 EYEAQRLVSMIDELSR           |         |           |         | Oxidation (M)[10]       | Mascot           |
|                     | 2283.0193                                    | 2283.198    | 0.1787  | 78    | 98           | 118 ICVAGHEGEPLLEEAQSAE<br>EER |         |           |         |                         | Mascot           |
| 47                  | Zgc:172007 protein [Danio rerio]             |             |         |       | gj 161611828 |                                | 57368.6 | 8.44      | 12      | 36                      | 0                |
| Peptide Information |                                              |             |         |       |              |                                |         |           |         |                         |                  |
|                     | Calc. Mass                                   | Obsrv. Mass | ± da    | ± ppm | Start Seq.   | End Sequence Seq.              |         | Ion Score | C. I. % | Modification            | Rank Result Type |
|                     | 856.4497                                     | 856.5385    | 0.0888  | 104   | 215          | 220 VFFCKR                     |         |           |         | Carbamidomethyl (C)[4]  | Mascot           |
|                     | 1023.5179                                    | 1023.5204   | 0.0025  | 2     | 221          | 229 CDISFPTLK                  |         |           |         |                         | Mascot           |
|                     | 1023.5179                                    | 1023.5204   | 0.0025  | 2     | 221          | 229 CDISFPTLK                  |         |           |         |                         | Mascot           |
|                     | 1055.5012                                    | 1055.5625   | 0.0613  | 58    | 186          | 194 TTFPCKQCK                  |         |           |         |                         | Mascot           |
|                     | 1115.6418                                    | 1115.7063   | 0.0645  | 58    | 35           | 44 EVASLEAKLR                  |         | 14        | 0       |                         | Mascot           |
|                     | 1115.6418                                    | 1115.7063   | 0.0645  | 58    | 35           | 44 EVASLEAKLR                  |         |           |         |                         | Mascot           |
|                     | 1121.4536                                    | 1121.6111   | 0.1575  | 140   | 354          | 362 MHQCLQCDK                  |         |           |         | Oxidation (M)[1]        | Mascot           |
|                     | 1177.6398                                    | 1177.6561   | 0.0163  | 14    | 182          | 191 QKPKTTFPCK                 |         |           |         |                         | Mascot           |
|                     | 1215.5687                                    | 1215.616    | 0.0473  | 39    | 311          | 320 DGSHFKTHMR                 |         |           |         |                         | Mascot           |
|                     | 1379.5718                                    | 1379.7687   | 0.1969  | 143   | 269          | 279 EKPFFHCSECDK               |         |           |         | Carbamidomethyl (C)[6]  | Mascot           |
|                     | 1699.7714                                    | 1699.9528   | 0.1814  | 107   | 349          | 362 IHSEKMHQCLQCDK             |         |           |         |                         | Mascot           |
|                     | 1699.7714                                    | 1699.9528   | 0.1814  | 107   | 349          | 362 IHSEKMHQCLQCDK             |         |           |         |                         | Mascot           |
|                     | 1737.8137                                    | 1737.9172   | 0.1035  | 60    | 170          | 185 DSSDEETASTSKQKPK           |         |           |         |                         | Mascot           |
|                     | 1824.8995                                    | 1824.9142   | 0.0147  | 8     | 293          | 307 IHTGERPYKCPHCVK            |         |           |         | Carbamidomethyl (C)[10] | Mascot           |
|                     | 1936.7137                                    | 1936.937    | 0.2233  | 115   | 154          | 169 DDHCDDDDFIPSDENK           |         |           |         | Carbamidomethyl (C)[4]  | Mascot           |
| 48                  | hypothetical protein LOC557841 [Danio rerio] |             |         |       | gj 165972361 |                                | 51603.4 | 6.11      | 7       | 36                      | 0 28 54.634      |

| Peptide Information |             |        |       |            |                     |           |         |                            |                  |
|---------------------|-------------|--------|-------|------------|---------------------|-----------|---------|----------------------------|------------------|
| Calc. Mass          | Obsrv. Mass | ± da   | ± ppm | Start Seq. | End Sequence Seq.   | Ion Score | C. I. % | Modification               | Rank Result Type |
| 870.4427            | 870.5502    | 0.1075 | 124   | 114        | 120 DSEKHVR         |           |         |                            | Mascot           |
| 1023.4927           | 1023.5204   | 0.0277 | 27    | 67         | 74 NLCELFER         |           |         |                            | Mascot           |
| 1023.4927           | 1023.5204   | 0.0277 | 27    | 67         | 74 NLCELFER         |           |         |                            | Mascot           |
| 1097.5837           | 1097.6796   | 0.0959 | 87    | 57         | 66 DDPPSNLVLK       |           |         |                            | Mascot           |
| 1097.5837           | 1097.6796   | 0.0959 | 87    | 57         | 66 DDPPSNLVLK       | 28        | 54.634  |                            | Mascot           |
| 1395.6838           | 1395.7643   | 0.0805 | 58    | 33         | 42 ECIQQFWRTK       |           |         | Carbamidomethyl (C)[2]     | Mascot           |
| 1555.6953           | 1555.7659   | 0.0706 | 45    | 8          | 19 EISCPICCEIFK     |           |         | Carbamidomethyl (C)[4,7,8] | Mascot           |
| 1695.7742           | 1695.9147   | 0.1405 | 83    | 185        | 198 DEEEIAMTSLREEK  |           |         | Oxidation (M)[7]           | Mascot           |
| 1737.8485           | 1737.9172   | 0.0687 | 40    | 99         | 113 LFCLEDKQPACLVCR |           |         |                            | Mascot           |

49

SPEG complex locus [Danio rerio]

gi|123295462

333650.8

8.15

1

30

72.11

| Peptide Information |             |        |       |            |                   |           |         |              |                  |
|---------------------|-------------|--------|-------|------------|-------------------|-----------|---------|--------------|------------------|
| Calc. Mass          | Obsrv. Mass | ± da   | ± ppm | Start Seq. | End Sequence Seq. | Ion Score | C. I. % | Modification | Rank Result Type |
| 1097.6313           | 1097.6796   | 0.0483 | 44    | 2193       | 2202 INDSPVLALR   | 33        | 84.908  |              | 2 Mascot         |

50

PREDICTED: hypothetical protein LOC568908 [Danio rerio]

gi|326666001

246789.2

9.26

1

30

70.844

| Peptide Information |             |        |       |            |                   |           |         |              |                  |
|---------------------|-------------|--------|-------|------------|-------------------|-----------|---------|--------------|------------------|
| Calc. Mass          | Obsrv. Mass | ± da   | ± ppm | Start Seq. | End Sequence Seq. | Ion Score | C. I. % | Modification | Rank Result Type |
| 1097.679            | 1097.6796   | 0.0006 | 1     | 720        | 729 RLSTPAIALR    | 30        | 70.844  |              | 4 Mascot         |

| Gel Idx/Pos    | 194/H21   | Instr./Gel Origin      | BA2060/110707A | Process Status | Analysis Succeeded |
|----------------|-----------|------------------------|----------------|----------------|--------------------|
| Plate [#] Name | [1] 31496 | Instrument Sample Name |                | Spectra        | 11                 |

| Rank | Protein Name               | Accession No. | Protein MW | Protein PI | Pep. Count | Protein Score | Protein Score C. I. % | Total Ion Score | Total Ion C. I. % |
|------|----------------------------|---------------|------------|------------|------------|---------------|-----------------------|-----------------|-------------------|
| 1    | Krt4 protein [Danio rerio] | gi 161612220  | 53979.9    | 5.34       | 22         | 897           | 100                   | 745             | 100               |

| Peptide Information |             |        |       |            |                   |           |         |              |                  |
|---------------------|-------------|--------|-------|------------|-------------------|-----------|---------|--------------|------------------|
| Calc. Mass          | Obsrv. Mass | ± da   | ± ppm | Start Seq. | End Sequence Seq. | Ion Score | C. I. % | Modification | Rank Result Type |
| 827.4297            | 827.4365    | 0.0068 | 8     | 125        | 131 FASFIDK       |           |         |              | Mascot           |
| 915.4893            | 915.4971    | 0.0078 | 9     | 328        | 335 AEIAELNR      |           |         |              | Mascot           |



|                            |           |           | Seq.    |             | Seq. |         | Score                 |     |        |                  |                  |     |        |
|----------------------------|-----------|-----------|---------|-------------|------|---------|-----------------------|-----|--------|------------------|------------------|-----|--------|
|                            | 915.4893  | 915.4971  | 0.0078  | 9           | 329  | 336     | AEIAELNR              |     |        |                  |                  |     | Mascot |
|                            | 950.4941  | 950.501   | 0.0069  | 7           | 250  | 257     | AVYEAE LR             |     |        |                  |                  |     | Mascot |
|                            | 983.4468  | 983.4488  | 0.002   | 2           | 300  | 307     | AEAESWYK              |     |        |                  |                  |     | Mascot |
|                            | 987.5105  | 987.5178  | 0.0073  | 7           | 379  | 386     | ELEEALQR              |     |        |                  |                  |     | Mascot |
|                            | 1079.5116 | 1079.5217 | 0.0101  | 9           | 289  | 297     | AQYEDIANR             |     |        |                  |                  |     | Mascot |
|                            | 1226.5801 | 1226.5912 | 0.0111  | 9           | 298  | 307     | SRAEAESWYK            |     |        |                  |                  |     | Mascot |
|                            | 1248.6833 | 1248.6927 | 0.0094  | 8           | 211  | 221     | ASVENEFVLLK           |     |        |                  |                  |     | Mascot |
|                            | 1256.6957 | 1256.7084 | 0.0127  | 10          | 377  | 386     | IRELEEALQR            | 47  | 99.402 |                  |                  |     | Mascot |
|                            | 1256.6957 | 1256.7084 | 0.0127  | 10          | 377  | 386     | IRELEEALQR            |     |        |                  |                  |     | Mascot |
|                            | 1277.71   | 1277.7234 | 0.0134  | 10          | 406  | 416     | LALDIEIATYR           | 73  | 99.999 |                  |                  |     | Mascot |
|                            | 1277.71   | 1277.7234 | 0.0134  | 10          | 406  | 416     | LALDIEIATYR           |     |        |                  |                  |     | Mascot |
|                            | 1361.673  | 1361.6848 | 0.0118  | 9           | 277  | 288     | NLDMSIVA E VR         |     |        |                  |                  |     | Mascot |
|                            | 1362.7013 | 1362.7101 | 0.0088  | 6           | 147  | 157     | WSLLQEQT T TR         |     |        |                  |                  |     | Mascot |
|                            | 1362.7013 | 1362.7101 | 0.0088  | 6           | 147  | 157     | WSLLQEQT T TR         | 71  | 99.998 |                  |                  |     | Mascot |
|                            | 1377.6678 | 1377.684  | 0.0162  | 12          | 277  | 288     | NLDMSIVA E VR         |     |        |                  | Oxidation (M)[4] |     | Mascot |
|                            | 1432.743  | 1432.7574 | 0.0144  | 10          | 238  | 249     | VDALQDEINFLR          |     |        |                  |                  |     | Mascot |
|                            | 1432.743  | 1432.7574 | 0.0144  | 10          | 238  | 249     | VDALQDEINFLR          | 118 | 100    |                  |                  |     | Mascot |
|                            | 1443.7074 | 1443.7195 | 0.0121  | 8           | 353  | 365     | ANLEAQIAEAEER         |     |        |                  |                  |     | Mascot |
|                            | 1443.7074 | 1443.7195 | 0.0121  | 8           | 353  | 365     | ANLEAQIAEAEER         | 93  | 100    |                  |                  |     | Mascot |
|                            | 1695.8258 | 1695.8291 | 0.0033  | 2           | 223  | 237     | DVDAAYM NKVELEAK      |     |        |                  |                  |     | Mascot |
|                            | 1743.837  | 1743.854  | 0.017   | 10          | 158  | 172     | SNIDAMFEAYISNLR       | 130 | 100    |                  |                  |     | Mascot |
|                            | 1743.837  | 1743.854  | 0.017   | 10          | 158  | 172     | SNIDAMFEAYISNLR       |     |        |                  |                  |     | Mascot |
|                            | 1759.8319 | 1759.8502 | 0.0183  | 10          | 158  | 172     | SNIDAMFEAYISNLR       |     |        |                  | Oxidation (M)[6] |     | Mascot |
|                            | 1759.8319 | 1759.8502 | 0.0183  | 10          | 158  | 172     | SNIDAMFEAYISNLR       | 68  | 99.996 | Oxidation (M)[6] |                  |     | Mascot |
|                            | 1846.7913 | 1846.8077 | 0.0164  | 9           | 310  | 325     | FEEMQSTAGQYGDDL R     |     |        |                  |                  |     | Mascot |
|                            | 1862.7861 | 1862.8049 | 0.0188  | 10          | 310  | 325     | FEEMQSTAGQYGDDL R     |     |        |                  | Oxidation (M)[4] |     | Mascot |
|                            | 1899.9381 | 1899.957  | 0.0189  | 10          | 158  | 173     | SNIDAMFEAYISNLR R     |     |        |                  |                  |     | Mascot |
|                            | 2041.0559 | 2041.0757 | 0.0198  | 10          | 353  | 371     | ANLEAQIAEAEER GELAV K | 131 | 100    |                  |                  |     | Mascot |
|                            | 2041.0559 | 2041.0757 | 0.0198  | 10          | 353  | 371     | ANLEAQIAEAEER GELAV K |     |        |                  |                  |     | Mascot |
|                            | 2102.1128 | 2101.9373 | -0.1755 | -83         | 232  | 249     | VELEAKVDALQDEINFLR    |     |        |                  |                  |     | Mascot |
|                            | 2102.9448 | 2102.957  | 0.0122  | 6           | 308  | 325     | QKFEEMQSTAGQYGDDL R   |     |        |                  |                  |     | Mascot |
|                            | 2118.9397 | 2118.9619 | 0.0222  | 10          | 308  | 325     | QKFEEMQSTAGQYGDDL R   |     |        |                  | Oxidation (M)[6] |     | Mascot |
|                            | 2118.9397 | 2118.9619 | 0.0222  | 10          | 308  | 325     | QKFEEMQSTAGQYGDDL R   | 84  | 100    | Oxidation (M)[6] |                  |     | Mascot |
| Krt5 protein [Danio rerio] |           |           |         | gi 39645432 |      | 57792.3 | 5.27                  | 18  | 509    | 100              | 419              | 100 |        |

| Peptide Information |                         |                                             |           |         |            |          |                          |           |        |                |      |                   |        |                  |        |  |  |  |
|---------------------|-------------------------|---------------------------------------------|-----------|---------|------------|----------|--------------------------|-----------|--------|----------------|------|-------------------|--------|------------------|--------|--|--|--|
| Calc. Mass          |                         | Obsrv. Mass                                 | ± da      | ± ppm   | Start Seq. | End Seq. | Sequence                 | Ion Score | C. I.  | % Modification | Rank | Result Type       |        |                  |        |  |  |  |
| 4                   | keratin 5 [Danio rerio] | 827.4297                                    | 827.4365  | 0.0068  | 8          | 155      | 161 FASFIDK              | 73        | 99.999 |                |      | Mascot            |        |                  |        |  |  |  |
|                     |                         | 983.4468                                    | 983.4488  | 0.002   | 2          | 329      | 336 AEAESWYK             |           |        |                |      | Mascot            |        |                  |        |  |  |  |
|                     |                         | 1006.5203                                   | 1006.527  | 0.0067  | 7          | 279      | 286 AIFEEELR             |           |        |                |      | Mascot            |        |                  |        |  |  |  |
|                     |                         | 1079.5116                                   | 1079.5217 | 0.0101  | 9          | 318      | 326 AQYEDIANR            |           |        |                |      | Mascot            |        |                  |        |  |  |  |
|                     |                         | 1200.6583                                   | 1200.6678 | 0.0095  | 8          | 406      | 415 IKDLEDALQR           |           |        |                |      | Mascot            |        |                  |        |  |  |  |
|                     |                         | 1226.5801                                   | 1226.5912 | 0.0111  | 9          | 327      | 336 SRAEAESWYK           |           |        |                |      | Mascot            |        |                  |        |  |  |  |
|                     |                         | 1248.6252                                   | 1248.6927 | 0.0675  | 54         | 203      | 213 QLDGLGNEKMK          |           |        |                |      | Oxidation (M)[10] | Mascot |                  |        |  |  |  |
|                     |                         | 1277.71                                     | 1277.7234 | 0.0134  | 10         | 435      | 445 LALDIEIATYR          |           |        |                |      | Mascot            |        |                  |        |  |  |  |
|                     |                         | 1277.71                                     | 1277.7234 | 0.0134  | 10         | 435      | 445 LALDIEIATYR          |           |        |                |      | Mascot            |        |                  |        |  |  |  |
|                     |                         | 1345.678                                    | 1345.6891 | 0.0111  | 8          | 306      | 317 NLDMDAIVAEVR         |           |        |                |      | Mascot            |        |                  |        |  |  |  |
|                     |                         | 1361.673                                    | 1361.6848 | 0.0118  | 9          | 306      | 317 NLDMDAIVAEVR         |           |        |                |      | Oxidation (M)[4]  | Mascot |                  |        |  |  |  |
|                     |                         | 1362.7013                                   | 1362.7101 | 0.0088  | 6          | 176      | 186 WSLLEQQTTR           |           |        |                |      | Mascot            |        |                  |        |  |  |  |
|                     |                         | 1362.7013                                   | 1362.7101 | 0.0088  | 6          | 176      | 186 WSLLEQQTTR           |           |        |                |      | 71                | 99.998 | Mascot           |        |  |  |  |
|                     |                         | 1385.6365                                   | 1385.7264 | 0.0899  | 65         | 337      | 348 QKFEEMQSSAGK         |           |        |                |      | Oxidation (M)[6]  | Mascot |                  |        |  |  |  |
|                     |                         | 1443.7074                                   | 1443.7195 | 0.0121  | 8          | 382      | 394 ANLEAQIAEAEER        |           |        |                |      | Mascot            |        |                  |        |  |  |  |
|                     |                         | 1443.7074                                   | 1443.7195 | 0.0121  | 8          | 382      | 394 ANLEAQIAEAEER        |           |        |                |      | 93                | 100    | Mascot           |        |  |  |  |
|                     |                         | 1448.738                                    | 1448.7517 | 0.0137  | 9          | 267      | 278 VDSLQDEINFLR         |           |        |                |      | Mascot            |        |                  |        |  |  |  |
|                     |                         | 1476.8057                                   | 1476.7306 | -0.0751 | -51        | 164      | 175 FLEQQNKVLETK         |           |        |                |      | Mascot            |        |                  |        |  |  |  |
|                     |                         | 1695.8258                                   | 1695.8291 | 0.0033  | 2          | 252      | 266 DVDAAYMNKVELEAK      |           |        |                |      | Mascot            |        |                  |        |  |  |  |
|                     |                         | 1727.8422                                   | 1727.8553 | 0.0131  | 8          | 187      | 201 SNIDAMFEAYIANLR      |           |        |                |      | Mascot            |        |                  |        |  |  |  |
|                     |                         | 1743.837                                    | 1743.854  | 0.017   | 10         | 187      | 201 SNIDAMFEAYIANLR      |           |        |                |      | 51                | 99.766 | Oxidation (M)[6] | Mascot |  |  |  |
|                     |                         | 1743.837                                    | 1743.854  | 0.017   | 10         | 187      | 201 SNIDAMFEAYIANLR      |           |        |                |      | Oxidation (M)[6]  | Mascot |                  |        |  |  |  |
|                     |                         | 1899.9381                                   | 1899.957  | 0.0189  | 10         | 187      | 202 SNIDAMFEAYIANLRR     |           |        |                |      | Oxidation (M)[6]  | Mascot |                  |        |  |  |  |
|                     |                         | 2041.0559                                   | 2041.0757 | 0.0198  | 10         | 382      | 400 ANLEAQIAEAEERGELAV K |           |        |                |      | 131               | 100    | Mascot           |        |  |  |  |
|                     |                         | 2041.0559                                   | 2041.0757 | 0.0198  | 10         | 382      | 400 ANLEAQIAEAEERGELAV K |           |        |                |      | Mascot            |        |                  |        |  |  |  |
|                     |                         | gi 18858425 58550.6 5.34 17 500 100 419 100 |           |         |            |          |                          |           |        |                |      |                   |        |                  |        |  |  |  |

| Peptide Information |             |        |       |            |                   |           |                      |  |  |                  |
|---------------------|-------------|--------|-------|------------|-------------------|-----------|----------------------|--|--|------------------|
| Calc. Mass          | Obsrv. Mass | ± da   | ± ppm | Start Seq. | End Sequence Seq. | Ion Score | C. I. % Modification |  |  | Rank Result Type |
| 827.4297            | 827.4365    | 0.0068 | 8     | 165        | 171 FASFIDK       |           |                      |  |  | Mascot           |
| 983.4468            | 983.4488    | 0.002  | 2     | 339        | 346 AEAESWYK      |           |                      |  |  | Mascot           |
| 1006.5203           | 1006.527    | 0.0067 | 7     | 289        | 296 AIFEEELR      |           |                      |  |  | Mascot           |

|           |           |         |     |     |     |                         |     |        |  |  |                   |        |
|-----------|-----------|---------|-----|-----|-----|-------------------------|-----|--------|--|--|-------------------|--------|
| 1079.5116 | 1079.5217 | 0.0101  | 9   | 328 | 336 | QYQYEDIANR              |     |        |  |  |                   | Mascot |
| 1226.5801 | 1226.5912 | 0.0111  | 9   | 337 | 346 | SRAEAESWYK              |     |        |  |  |                   | Mascot |
| 1248.6252 | 1248.6927 | 0.0675  | 54  | 213 | 223 | QLDGLGNEKMK             |     |        |  |  | Oxidation (M)[10] | Mascot |
| 1277.71   | 1277.7234 | 0.0134  | 10  | 445 | 455 | LALDIEIATYR             | 73  | 99.999 |  |  |                   | Mascot |
| 1277.71   | 1277.7234 | 0.0134  | 10  | 445 | 455 | LALDIEIATYR             |     |        |  |  |                   | Mascot |
| 1345.678  | 1345.6891 | 0.0111  | 8   | 316 | 327 | NLDMDAIVAEVR            |     |        |  |  |                   | Mascot |
| 1361.673  | 1361.6848 | 0.0118  | 9   | 316 | 327 | NLDMDAIVAEVR            |     |        |  |  | Oxidation (M)[4]  | Mascot |
| 1362.7013 | 1362.7101 | 0.0088  | 6   | 186 | 196 | WSLLQEQTTR              |     |        |  |  |                   | Mascot |
| 1362.7013 | 1362.7101 | 0.0088  | 6   | 186 | 196 | WSLLQEQTTR              | 71  | 99.998 |  |  |                   | Mascot |
| 1385.6365 | 1385.7264 | 0.0899  | 65  | 347 | 358 | QKFEEMQSSAGK            |     |        |  |  | Oxidation (M)[6]  | Mascot |
| 1443.7074 | 1443.7195 | 0.0121  | 8   | 392 | 404 | ANLEAQIAEAEER           |     |        |  |  |                   | Mascot |
| 1443.7074 | 1443.7195 | 0.0121  | 8   | 392 | 404 | ANLEAQIAEAEER           | 93  | 100    |  |  |                   | Mascot |
| 1448.738  | 1448.7517 | 0.0137  | 9   | 277 | 288 | VDSLQDEINFLR            |     |        |  |  |                   | Mascot |
| 1476.8057 | 1476.7306 | -0.0751 | -51 | 174 | 185 | FLEQQNKVLETK            |     |        |  |  |                   | Mascot |
| 1695.8258 | 1695.8291 | 0.0033  | 2   | 262 | 276 | DVDAAYMKNKVELEAK        |     |        |  |  |                   | Mascot |
| 1727.8422 | 1727.8553 | 0.0131  | 8   | 197 | 211 | SNIDAMFEAYIANLR         |     |        |  |  |                   | Mascot |
| 1743.837  | 1743.854  | 0.017   | 10  | 197 | 211 | SNIDAMFEAYIANLR         | 51  | 99.766 |  |  | Oxidation (M)[6]  | Mascot |
| 1743.837  | 1743.854  | 0.017   | 10  | 197 | 211 | SNIDAMFEAYIANLR         |     |        |  |  | Oxidation (M)[6]  | Mascot |
| 1899.9381 | 1899.957  | 0.0189  | 10  | 197 | 212 | SNIDAMFEAYIANLRR        |     |        |  |  | Oxidation (M)[6]  | Mascot |
| 2041.0559 | 2041.0757 | 0.0198  | 10  | 392 | 410 | ANLEAQIAEAEERGELAV<br>K | 131 | 100    |  |  |                   | Mascot |
| 2041.0559 | 2041.0757 | 0.0198  | 10  | 392 | 410 | ANLEAQIAEAEERGELAV<br>K |     |        |  |  |                   | Mascot |

|   |                                               |           |         |     |             |     |                     |      |        |     |     |                        |        |
|---|-----------------------------------------------|-----------|---------|-----|-------------|-----|---------------------|------|--------|-----|-----|------------------------|--------|
|   | 1361.673                                      | 1361.6848 | 0.0118  | 9   | 256         | 267 | NLDMDAIVAEVR        |      |        |     |     | Oxidation (M)[4]       | Mascot |
|   | 1381.6667                                     | 1381.6779 | 0.0112  | 8   | 190         | 200 | TECENEFLIK          |      |        |     |     | Carbamidomethyl (C)[3] | Mascot |
|   | 1449.7584                                     | 1449.7637 | 0.0053  | 4   | 217         | 228 | LESLTDEINFLR        |      |        |     |     |                        | Mascot |
|   | 1486.7133                                     | 1486.728  | 0.0147  | 10  | 332         | 344 | ANLENQIAEAEER       |      |        |     |     |                        | Mascot |
|   | 1727.8422                                     | 1727.8553 | 0.0131  | 8   | 137         | 151 | SNIDAMFEAYIANLR     |      |        |     |     |                        | Mascot |
|   | 1743.837                                      | 1743.854  | 0.017   | 10  | 137         | 151 | SNIDAMFEAYIANLR     | 51   | 99.766 |     |     | Oxidation (M)[6]       | Mascot |
|   | 1743.837                                      | 1743.854  | 0.017   | 10  | 137         | 151 | SNIDAMFEAYIANLR     |      |        |     |     | Oxidation (M)[6]       | Mascot |
|   | 1899.9381                                     | 1899.957  | 0.0189  | 10  | 137         | 152 | SNIDAMFEAYIANLRR    |      |        |     |     | Oxidation (M)[6]       | Mascot |
|   | 2018.1644                                     | 2018.1835 | 0.0191  | 9   | 74          | 91  | SLAPLNLEIDPNIQIVR   |      |        |     |     |                        | Mascot |
|   | 2119.1282                                     | 2118.9619 | -0.1663 | -78 | 211         | 228 | VELEAKLESLTDEINFLR  |      |        |     |     |                        | Mascot |
|   | 2119.1282                                     | 2118.9619 | -0.1663 | -78 | 211         | 228 | VELEAKLESLTDEINFLR  | 3    | 0      |     |     |                        | Mascot |
|   | 2146.0193                                     | 2146.041  | 0.0217  | 10  | 332         | 350 | ANLENQIAEAEERGEMAVR |      |        |     |     | Oxidation (M)[16]      | Mascot |
| 6 | keratin, type II cytoskeletal 8 [Danio rerio] |           |         |     | gi 41056085 |     | 57723.4             | 5.15 | 17     | 204 | 100 | 124                    | 100    |

### Peptide Information

| Calc. Mass | Obsrv. Mass | ± da    | ± ppm | Start Seq. | End Seq. | Sequence           | Ion Score | C. I. % | Modification           | Rank | Result | Type   |
|------------|-------------|---------|-------|------------|----------|--------------------|-----------|---------|------------------------|------|--------|--------|
| 827.4297   | 827.4365    | 0.0068  | 8     | 126        | 132      | FASFDK             |           |         |                        |      |        | Mascot |
| 1063.5419  | 1063.5519   | 0.01    | 9     | 250        | 257      | QIFEEEIR           |           |         |                        |      |        | Mascot |
| 1079.5116  | 1079.5217   | 0.0101  | 9     | 289        | 297      | AQYEDIANR          |           |         |                        |      |        | Mascot |
| 1200.6583  | 1200.6678   | 0.0095  | 8     | 377        | 386      | IKDLEDALQR         |           |         |                        |      |        | Mascot |
| 1248.6252  | 1248.6927   | 0.0675  | 54    | 174        | 184      | QLDSLGNCKMK        |           |         |                        |      |        | Mascot |
| 1270.5885  | 1270.7366   | 0.1481  | 117   | 298        | 307      | SRAEAEWYK          |           |         |                        |      |        | Mascot |
| 1277.71    | 1277.7234   | 0.0134  | 10    | 406        | 416      | LALDIEIATYR        | 73        | 99.999  |                        |      |        | Mascot |
| 1277.71    | 1277.7234   | 0.0134  | 10    | 406        | 416      | LALDIEIATYR        |           |         |                        |      |        | Mascot |
| 1317.691   | 1317.7031   | 0.0121  | 9     | 147        | 157      | WSLLQNTATR         |           |         |                        |      |        | Mascot |
| 1345.678   | 1345.6891   | 0.0111  | 8     | 277        | 288      | NLDMDAIVAEVR       |           |         |                        |      |        | Mascot |
| 1361.673   | 1361.6848   | 0.0118  | 9     | 277        | 288      | NLDMDAIVAEVR       |           |         | Oxidation (M)[4]       |      |        | Mascot |
| 1381.6667  | 1381.6779   | 0.0112  | 8     | 211        | 221      | TECENEFLIK         |           |         | Carbamidomethyl (C)[3] |      |        | Mascot |
| 1449.7584  | 1449.7637   | 0.0053  | 4     | 238        | 249      | LESLTDEINFLR       |           |         |                        |      |        | Mascot |
| 1486.7133  | 1486.728    | 0.0147  | 10    | 353        | 365      | ANLENQIAEAEER      |           |         |                        |      |        | Mascot |
| 1727.8422  | 1727.8553   | 0.0131  | 8     | 158        | 172      | SNIDAMFEAYIANLR    |           |         |                        |      |        | Mascot |
| 1743.837   | 1743.854    | 0.017   | 10    | 158        | 172      | SNIDAMFEAYIANLR    | 51        | 99.766  | Oxidation (M)[6]       |      |        | Mascot |
| 1743.837   | 1743.854    | 0.017   | 10    | 158        | 172      | SNIDAMFEAYIANLR    |           |         | Oxidation (M)[6]       |      |        | Mascot |
| 1899.9381  | 1899.957    | 0.0189  | 10    | 158        | 173      | SNIDAMFEAYIANLRR   |           |         | Oxidation (M)[6]       |      |        | Mascot |
| 2018.1644  | 2018.1835   | 0.0191  | 9     | 95         | 112      | SLAPLNLEIDPNIQIVR  |           |         |                        |      |        | Mascot |
| 2119.1282  | 2118.9619   | -0.1663 | -78   | 232        | 249      | VELEAKLESLTDEINFLR |           |         |                        |      |        | Mascot |

|   |                         |           |         |     |              |     |                         |     |    |                   |     |     |        |
|---|-------------------------|-----------|---------|-----|--------------|-----|-------------------------|-----|----|-------------------|-----|-----|--------|
|   | 2119.1282               | 2118.9619 | -0.1663 | -78 | 232          | 249 | VELEAKLESLTDEINFLR      | 3   | 0  |                   |     |     | Mascot |
|   | 2146.0193               | 2146.041  | 0.0217  | 10  | 353          | 371 | ANLENQIAEAEERGEMA<br>VR |     |    | Oxidation (M)[16] |     |     | Mascot |
| 7 | Keratin 8 [Danio rerio] |           |         |     | gi 159155987 |     | 57624.4                 | 5.1 | 16 | 197               | 100 | 124 | 100    |

Peptide Information

| Calc. Mass | Obsrv. Mass | ± da    | ± ppm | Start Seq. | End Seq. | Sequence                | Ion Score | C. I.  | % Modification         | Rank | Result Type |
|------------|-------------|---------|-------|------------|----------|-------------------------|-----------|--------|------------------------|------|-------------|
| 827.4297   | 827.4365    | 0.0068  | 8     | 126        | 132      | FASFDK                  |           |        |                        |      | Mascot      |
| 1063.5419  | 1063.5519   | 0.01    | 9     | 250        | 257      | QIFEEEIR                |           |        |                        |      | Mascot      |
| 1079.5116  | 1079.5217   | 0.0101  | 9     | 289        | 297      | AQYEDIANR               |           |        |                        |      | Mascot      |
| 1200.6583  | 1200.6678   | 0.0095  | 8     | 377        | 386      | IKDLEDALQR              |           |        |                        |      | Mascot      |
| 1248.6252  | 1248.6927   | 0.0675  | 54    | 174        | 184      | QLDSLGNCKMK             |           |        |                        |      | Mascot      |
| 1270.5885  | 1270.7366   | 0.1481  | 117   | 298        | 307      | SRAEAEMWYK              |           |        |                        |      | Mascot      |
| 1277.71    | 1277.7234   | 0.0134  | 10    | 406        | 416      | LALDIEIATYR             | 73        | 99.999 |                        |      | Mascot      |
| 1277.71    | 1277.7234   | 0.0134  | 10    | 406        | 416      | LALDIEIATYR             |           |        |                        |      | Mascot      |
| 1317.691   | 1317.7031   | 0.0121  | 9     | 147        | 157      | WSLLQNQTATR             |           |        |                        |      | Mascot      |
| 1381.6667  | 1381.6779   | 0.0112  | 8     | 211        | 221      | TECENEFLIK              |           |        | Carbamidomethyl (C)[3] |      | Mascot      |
| 1449.7584  | 1449.7637   | 0.0053  | 4     | 238        | 249      | LESLTDEINFLR            |           |        |                        |      | Mascot      |
| 1486.7133  | 1486.728    | 0.0147  | 10    | 353        | 365      | ANLENQIAEAEER           |           |        |                        |      | Mascot      |
| 1727.8422  | 1727.8553   | 0.0131  | 8     | 158        | 172      | SNIDAMFEAYIANLR         |           |        |                        |      | Mascot      |
| 1743.837   | 1743.854    | 0.017   | 10    | 158        | 172      | SNIDAMFEAYIANLR         | 51        | 99.766 | Oxidation (M)[6]       |      | Mascot      |
| 1743.837   | 1743.854    | 0.017   | 10    | 158        | 172      | SNIDAMFEAYIANLR         |           |        | Oxidation (M)[6]       |      | Mascot      |
| 1899.9381  | 1899.957    | 0.0189  | 10    | 158        | 173      | SNIDAMFEAYIANLRR        |           |        | Oxidation (M)[6]       |      | Mascot      |
| 2018.1644  | 2018.1835   | 0.0191  | 9     | 95         | 112      | SLLAPLNLEIDPNIQIVR      |           |        |                        |      | Mascot      |
| 2119.1282  | 2118.9619   | -0.1663 | -78   | 232        | 249      | VELEAKLESLTDEINFLR      |           |        |                        |      | Mascot      |
| 2119.1282  | 2118.9619   | -0.1663 | -78   | 232        | 249      | VELEAKLESLTDEINFLR      | 3         | 0      |                        |      | Mascot      |
| 2146.0193  | 2146.041    | 0.0217  | 10    | 353        | 371      | ANLENQIAEAEERGEMA<br>VR |           |        | Oxidation (M)[16]      |      | Mascot      |

|   |                                               |  |  |  |             |  |         |      |   |     |     |     |     |
|---|-----------------------------------------------|--|--|--|-------------|--|---------|------|---|-----|-----|-----|-----|
| 8 | glial fibrillary acidic protein [Danio rerio] |  |  |  | gi 20977259 |  | 42127.4 | 5.03 | 7 | 128 | 100 | 108 | 100 |
|---|-----------------------------------------------|--|--|--|-------------|--|---------|------|---|-----|-----|-----|-----|

Peptide Information

| Calc. Mass | Obsrv. Mass | ± da   | ± ppm | Start Seq. | End Seq. | Sequence     | Ion Score | C. I.  | % Modification | Rank | Result Type |
|------------|-------------|--------|-------|------------|----------|--------------|-----------|--------|----------------|------|-------------|
| 850.4265   | 850.5497    | 0.1232 | 145   | 351        | 357      | ESTTERK      |           |        |                |      | Mascot      |
| 1277.71    | 1277.7234   | 0.0134 | 10    | 285        | 295      | LALDIEIATYR  | 73        | 99.999 |                |      | Mascot      |
| 1277.71    | 1277.7234   | 0.0134 | 10    | 285        | 295      | LALDIEIATYR  |           |        |                |      | Mascot      |
| 1308.6543  | 1308.6664   | 0.0121 | 9     | 187        | 198      | SKFADLTDAANR |           |        |                |      | Mascot      |



|   |                                                       |           |         |     |             |     |                 |      |        |     |     |     |                  |  |  |        |
|---|-------------------------------------------------------|-----------|---------|-----|-------------|-----|-----------------|------|--------|-----|-----|-----|------------------|--|--|--------|
|   | 1377.6857                                             | 1377.684  | -0.0017 | -1  | 345         | 356 | DGEIIKESTTER    |      |        |     |     |     |                  |  |  | Mascot |
|   | 1387.7726                                             | 1387.6953 | -0.0773 | -56 | 24          | 35  | MLVAELNQLRGK    |      |        |     |     |     | Oxidation (M)[1] |  |  | Mascot |
|   | 1432.7682                                             | 1432.7574 | -0.0108 | -8  | 118         | 129 | IEALQDEINFLK    |      |        |     |     |     |                  |  |  | Mascot |
|   | 1432.7682                                             | 1432.7574 | -0.0108 | -8  | 118         | 129 | IEALQDEINFLK    | 34   | 89.818 |     |     |     |                  |  |  | Mascot |
|   | 1688.816                                              | 1688.9028 | 0.0868  | 51  | 319         | 333 | DTSMDTKLTPEAHVK |      |        |     |     |     | Oxidation (M)[4] |  |  | Mascot |
| 9 | class III intermediate filament protein [Danio rerio] |           |         |     | gi 38374177 |     | 51255           | 5.28 | 7      | 127 | 100 | 108 | 100              |  |  |        |

#### Peptide Information

| Calc. Mass | Obsrv. Mass | ± da    | ± ppm | Start Seq. | End Seq. | Sequence       | Ion Score | C. I.  | % Modification         | Rank | Result Type |
|------------|-------------|---------|-------|------------|----------|----------------|-----------|--------|------------------------|------|-------------|
| 850.4265   | 850.5497    | 0.1232  | 145   | 435        | 441      | ESTTERK        |           |        |                        |      | Mascot      |
| 1277.71    | 1277.7234   | 0.0134  | 10    | 369        | 379      | LALDIEIATYR    | 73        | 99.999 |                        |      | Mascot      |
| 1277.71    | 1277.7234   | 0.0134  | 10    | 369        | 379      | LALDIEIATYR    |           |        |                        |      | Mascot      |
| 1308.6543  | 1308.6664   | 0.0121  | 9     | 271        | 282      | SKFADLTDAANR   |           |        |                        |      | Mascot      |
| 1377.6857  | 1377.684    | -0.0017 | -1    | 429        | 440      | DGEIIKESTTER   |           |        |                        |      | Mascot      |
| 1387.7726  | 1387.6953   | -0.0773 | -56   | 108        | 119      | MLVAELNQLRGK   |           |        | Oxidation (M)[1]       |      | Mascot      |
| 1432.7682  | 1432.7574   | -0.0108 | -8    | 202        | 213      | IEALQDEINFLK   |           |        |                        |      | Mascot      |
| 1432.7682  | 1432.7574   | -0.0108 | -8    | 202        | 213      | IEALQDEINFLK   | 34        | 89.818 |                        |      | Mascot      |
| 1688.8749  | 1688.9028   | 0.0279  | 17    | 299        | 312      | RQIQGLTCDLESRL |           |        | Carbamidomethyl (C)[8] |      | Mascot      |

|    |                            |  |  |  |              |  |       |      |   |     |     |     |     |  |  |  |
|----|----------------------------|--|--|--|--------------|--|-------|------|---|-----|-----|-----|-----|--|--|--|
| 10 | Gfap protein [Danio rerio] |  |  |  | gi 124504410 |  | 51101 | 5.34 | 7 | 126 | 100 | 108 | 100 |  |  |  |
|----|----------------------------|--|--|--|--------------|--|-------|------|---|-----|-----|-----|-----|--|--|--|

#### Peptide Information

| Calc. Mass | Obsrv. Mass | ± da    | ± ppm | Start Seq. | End Seq. | Sequence       | Ion Score | C. I.  | % Modification         | Rank | Result Type |
|------------|-------------|---------|-------|------------|----------|----------------|-----------|--------|------------------------|------|-------------|
| 850.4265   | 850.5497    | 0.1232  | 145   | 434        | 440      | ESTTERK        |           |        |                        |      | Mascot      |
| 1277.71    | 1277.7234   | 0.0134  | 10    | 368        | 378      | LALDIEIATYR    | 73        | 99.999 |                        |      | Mascot      |
| 1277.71    | 1277.7234   | 0.0134  | 10    | 368        | 378      | LALDIEIATYR    |           |        |                        |      | Mascot      |
| 1308.6543  | 1308.6664   | 0.0121  | 9     | 270        | 281      | SKFADLTDAANR   |           |        |                        |      | Mascot      |
| 1377.6857  | 1377.684    | -0.0017 | -1    | 428        | 439      | DGEIIKESTTER   |           |        |                        |      | Mascot      |
| 1387.7726  | 1387.6953   | -0.0773 | -56   | 107        | 118      | MLVAELNQLRGK   |           |        | Oxidation (M)[1]       |      | Mascot      |
| 1432.7682  | 1432.7574   | -0.0108 | -8    | 201        | 212      | IEALQDEINFLK   |           |        |                        |      | Mascot      |
| 1432.7682  | 1432.7574   | -0.0108 | -8    | 201        | 212      | IEALQDEINFLK   | 34        | 89.818 |                        |      | Mascot      |
| 1688.8749  | 1688.9028   | 0.0279  | 17    | 298        | 311      | RQIQGLTCDLESRL |           |        | Carbamidomethyl (C)[8] |      | Mascot      |

|    |                          |  |  |  |              |  |       |      |   |    |       |    |        |  |  |  |
|----|--------------------------|--|--|--|--------------|--|-------|------|---|----|-------|----|--------|--|--|--|
| 11 | Zgc:158846 [Danio rerio] |  |  |  | gi 158253572 |  | 55223 | 5.44 | 6 | 86 | 99.99 | 73 | 99.999 |  |  |  |
|----|--------------------------|--|--|--|--------------|--|-------|------|---|----|-------|----|--------|--|--|--|

#### Peptide Information

| Calc. Mass | Obsrv. Mass | ± da | ± ppm | Start Seq. | End Seq. | Sequence | Ion Score | C. I. | % Modification | Rank | Result Type |
|------------|-------------|------|-------|------------|----------|----------|-----------|-------|----------------|------|-------------|
|------------|-------------|------|-------|------------|----------|----------|-----------|-------|----------------|------|-------------|

|                     |                                                                  |            |             |         |       |            |                   |                          |         |        |           |        |                        |    |        |      |             |
|---------------------|------------------------------------------------------------------|------------|-------------|---------|-------|------------|-------------------|--------------------------|---------|--------|-----------|--------|------------------------|----|--------|------|-------------|
|                     |                                                                  | 827.4297   | 827.4365    | 0.0068  | 8     | 87         | 93                | FASFDK                   |         |        |           |        |                        |    |        |      | Mascot      |
|                     |                                                                  | 996.5472   | 996.6054    | 0.0582  | 58    | 421        | 429               | DIHNTGLVK                |         |        |           |        |                        |    |        |      | Mascot      |
|                     |                                                                  | 1124.5793  | 1124.6771   | 0.0978  | 87    | 437        | 448               | GGSSSSLTTVTK             |         |        |           |        |                        |    |        |      | Mascot      |
|                     |                                                                  | 1277.71    | 1277.7234   | 0.0134  | 10    | 367        | 377               | LALDIEIATYR              | 73      | 99.999 |           |        |                        |    |        |      | Mascot      |
|                     |                                                                  | 1277.71    | 1277.7234   | 0.0134  | 10    | 367        | 377               | LALDIEIATYR              |         |        |           |        |                        |    |        |      | Mascot      |
|                     |                                                                  | 1394.7162  | 1394.7837   | 0.0675  | 48    | 172        | 183               | SDSDNEFVLLKK             |         |        |           |        |                        |    |        |      | Mascot      |
|                     |                                                                  | 2434.123   | 2434.1011   | -0.0219 | -9    | 261        | 280               | AEAESWYQQKYEEMQLT<br>ATK |         |        |           |        |                        |    |        |      | Mascot      |
| 12                  | glial fibrillary acidic protein [Danio rerio]                    |            |             |         |       |            | gi 239596173      |                          | 19203.6 | 4.89   | 3         | 85     | 99.986                 | 73 | 99.999 |      |             |
| Peptide Information |                                                                  |            |             |         |       |            |                   |                          |         |        |           |        |                        |    |        |      |             |
|                     |                                                                  | Calc. Mass | Obsrv. Mass | ± da    | ± ppm | Start Seq. | End Sequence Seq. |                          |         |        | Ion Score | C. I.  | % Modification         |    |        | Rank | Result Type |
|                     |                                                                  | 1277.71    | 1277.7234   | 0.0134  | 10    | 110        | 120               | LALDIEIATYR              |         |        | 73        | 99.999 |                        |    |        |      | Mascot      |
|                     |                                                                  | 1277.71    | 1277.7234   | 0.0134  | 10    | 110        | 120               | LALDIEIATYR              |         |        |           |        |                        |    |        |      | Mascot      |
|                     |                                                                  | 1308.6543  | 1308.6664   | 0.0121  | 9     | 12         | 23                | SKFADLTDAANR             |         |        |           |        |                        |    |        |      | Mascot      |
|                     |                                                                  | 1688.8749  | 1688.9028   | 0.0279  | 17    | 40         | 53                | RQIQGLTCDLESLR           |         |        |           |        | Carbamidomethyl (C)[8] |    |        |      | Mascot      |
| 13                  | novel protein similar to vertebrate keratin family [Danio rerio] |            |             |         |       |            | gi 157885973      |                          | 46874.6 | 5.23   | 2         | 79     | 99.943                 | 73 | 99.999 |      |             |
| Peptide Information |                                                                  |            |             |         |       |            |                   |                          |         |        |           |        |                        |    |        |      |             |
|                     |                                                                  | Calc. Mass | Obsrv. Mass | ± da    | ± ppm | Start Seq. | End Sequence Seq. |                          |         |        | Ion Score | C. I.  | % Modification         |    |        | Rank | Result Type |
|                     |                                                                  | 1256.5793  | 1256.7084   | 0.1291  | 103   | 286        | 295               | EEAESWYKSK               |         |        |           |        |                        |    |        |      | Mascot      |
|                     |                                                                  | 1256.5793  | 1256.7084   | 0.1291  | 103   | 286        | 295               | EEAESWYKSK               |         |        |           |        |                        |    |        |      | Mascot      |
|                     |                                                                  | 1277.71    | 1277.7234   | 0.0134  | 10    | 392        | 402               | LALDIEIATYR              |         |        | 73        | 99.999 |                        |    |        |      | Mascot      |
|                     |                                                                  | 1277.71    | 1277.7234   | 0.0134  | 10    | 392        | 402               | LALDIEIATYR              |         |        |           |        |                        |    |        |      | Mascot      |
| 14                  | keratin type II, tail domain [Danio rerio]                       |            |             |         |       |            | gi 4107170        |                          | 10583.9 | 8.29   | 1         | 78     | 99.931                 | 73 | 99.999 |      |             |
| Peptide Information |                                                                  |            |             |         |       |            |                   |                          |         |        |           |        |                        |    |        |      |             |
|                     |                                                                  | Calc. Mass | Obsrv. Mass | ± da    | ± ppm | Start Seq. | End Sequence Seq. |                          |         |        | Ion Score | C. I.  | % Modification         |    |        | Rank | Result Type |
|                     |                                                                  | 1277.71    | 1277.7234   | 0.0134  | 10    | 4          | 14                | LALDIEIATYR              |         |        | 73        | 99.999 |                        |    |        |      | Mascot      |
|                     |                                                                  | 1277.71    | 1277.7234   | 0.0134  | 10    | 4          | 14                | LALDIEIATYR              |         |        |           |        |                        |    |        |      | Mascot      |
| 15                  | PREDICTED: keratin, type II cytoskeletal 8 [Danio rerio]         |            |             |         |       |            | gi 125849603      |                          | 49959.2 | 5.46   | 2         | 73     | 99.797                 | 73 | 99.999 |      |             |
| Peptide Information |                                                                  |            |             |         |       |            |                   |                          |         |        |           |        |                        |    |        |      |             |
|                     |                                                                  | Calc. Mass | Obsrv. Mass | ± da    | ± ppm | Start      | End Sequence      |                          |         |        | Ion       | C. I.  | % Modification         |    |        | Rank | Result Type |

|                     |                                                         |             |         |       |            |              |                  |         |           |        |    | Seq.              |      | Seq.   |      | Score  |  |  |  |        |  |
|---------------------|---------------------------------------------------------|-------------|---------|-------|------------|--------------|------------------|---------|-----------|--------|----|-------------------|------|--------|------|--------|--|--|--|--------|--|
|                     | 1256.5793                                               | 1256.7084   | 0.1291  | 103   | 264        | 273          | EEAESWYKSK       |         |           |        |    |                   |      |        |      |        |  |  |  | Mascot |  |
|                     | 1256.5793                                               | 1256.7084   | 0.1291  | 103   | 264        | 273          | EEAESWYKSK       |         |           |        |    |                   |      |        |      |        |  |  |  | Mascot |  |
|                     | 1277.71                                                 | 1277.7234   | 0.0134  | 10    | 370        | 380          | LALDIEIATYR      |         | 73        | 99.999 |    |                   |      |        |      |        |  |  |  | Mascot |  |
|                     | 1277.71                                                 | 1277.7234   | 0.0134  | 10    | 370        | 380          | LALDIEIATYR      |         |           |        |    |                   |      |        |      |        |  |  |  | Mascot |  |
| 16                  | tropomyosin alpha-3 chain isoform 2 [Danio rerio]       |             |         |       |            | gi 41393141  |                  | 28826.9 | 4.76      | 9      | 46 | 0                 |      |        |      |        |  |  |  |        |  |
| Peptide Information |                                                         |             |         |       |            |              |                  |         |           |        |    |                   |      |        |      |        |  |  |  |        |  |
| Calc. Mass          |                                                         | Obsrv. Mass | ± da    | ± ppm | Start Seq. | End Seq.     | Sequence         |         | Ion Score | C. I.  | %  | Modification      | Rank | Result | Type |        |  |  |  |        |  |
|                     | 950.4247                                                | 950.501     | 0.0763  | 80    | 156        | 162          | QMEEELR          |         |           |        |    | Oxidation (M)[2]  |      |        |      | Mascot |  |  |  |        |  |
|                     | 983.5156                                                | 983.4488    | -0.0668 | -68   | 147        | 155          | AELAESHVK        |         |           |        |    |                   |      |        |      | Mascot |  |  |  |        |  |
|                     | 1248.6365                                               | 1248.6927   | 0.0562  | 45    | 1          | 12           | MAGSNSIDAVKR     |         |           |        |    |                   |      |        |      | Mascot |  |  |  |        |  |
|                     | 1308.6178                                               | 1308.6664   | 0.0486  | 37    | 198        | 208          | EAETRAEFAER      |         |           |        |    |                   |      |        |      | Mascot |  |  |  |        |  |
|                     | 1443.8053                                               | 1443.7195   | -0.0858 | -59   | 70         | 82           | LATALQKLEEA EK   |         |           |        |    |                   |      |        |      | Mascot |  |  |  |        |  |
|                     | 1443.8053                                               | 1443.7195   | -0.0858 | -59   | 70         | 82           | LATALQKLEEA EK   |         |           |        |    |                   |      |        |      | Mascot |  |  |  |        |  |
|                     | 1476.6813                                               | 1476.7306   | 0.0493  | 33    | 77         | 89           | LEEA EKA ADESER  |         |           |        |    |                   |      |        |      | Mascot |  |  |  |        |  |
|                     | 1688.849                                                | 1688.9028   | 0.0538  | 32    | 234        | 248          | IHATLDQTLSELNSF  |         |           |        |    |                   |      |        |      | Mascot |  |  |  |        |  |
|                     | 1727.8922                                               | 1727.8553   | -0.0369 | -21   | 56         | 69           | IQLVEEELDRAQER   |         |           |        |    |                   |      |        |      | Mascot |  |  |  |        |  |
|                     | 1914.9225                                               | 1914.9497   | 0.0272  | 14    | 147        | 162          | AELAESHVKQMEEELR |         |           |        |    | Oxidation (M)[11] |      |        |      | Mascot |  |  |  |        |  |
| 17                  | PREDICTED: hypothetical protein LOC565819 [Danio rerio] |             |         |       |            | gi 189531659 |                  | 67893.7 | 9.41      | 12     | 46 | 0                 |      |        |      |        |  |  |  |        |  |
| Peptide Information |                                                         |             |         |       |            |              |                  |         |           |        |    |                   |      |        |      |        |  |  |  |        |  |
| Calc. Mass          |                                                         | Obsrv. Mass | ± da    | ± ppm | Start Seq. | End Seq.     | Sequence         |         | Ion Score | C. I.  | %  | Modification      | Rank | Result | Type |        |  |  |  |        |  |
|                     | 1006.4985                                               | 1006.527    | 0.0285  | 28    | 134        | 141          | ERMSQVEK         |         |           |        |    |                   |      |        |      | Mascot |  |  |  |        |  |
|                     | 1079.5731                                               | 1079.5217   | -0.0514 | -48   | 38         | 46           | TLEAYQNLK        |         |           |        |    |                   |      |        |      | Mascot |  |  |  |        |  |
|                     | 1226.5648                                               | 1226.5912   | 0.0264  | 22    | 487        | 496          | YNTITDSEQR       |         |           |        |    |                   |      |        |      | Mascot |  |  |  |        |  |
|                     | 1256.6732                                               | 1256.7084   | 0.0352  | 28    | 231        | 242          | ADLSPVLDEVAK     |         |           |        |    |                   |      |        |      | Mascot |  |  |  |        |  |
|                     | 1256.6732                                               | 1256.7084   | 0.0352  | 28    | 231        | 242          | ADLSPVLDEVAK     |         |           |        |    |                   |      |        |      | Mascot |  |  |  |        |  |
|                     | 1277.6055                                               | 1277.7234   | 0.1179  | 92    | 6          | 16           | QEHRYGLSCGK      |         |           |        |    |                   |      |        |      | Mascot |  |  |  |        |  |
|                     | 1277.6055                                               | 1277.7234   | 0.1179  | 92    | 6          | 16           | QEHRYGLSCGK      |         |           |        |    |                   |      |        |      | Mascot |  |  |  |        |  |
|                     | 1345.6707                                               | 1345.6891   | 0.0184  | 14    | 108        | 119          | DRLEGQGS IQDK    |         |           |        |    |                   |      |        |      | Mascot |  |  |  |        |  |
|                     | 1394.6733                                               | 1394.7837   | 0.1104  | 79    | 136        | 146          | MSQVEKDIWSR      |         |           |        |    | Oxidation (M)[1]  |      |        |      | Mascot |  |  |  |        |  |
|                     | 1448.7592                                               | 1448.7517   | -0.0075 | -5    | 283        | 296          | LQPLSSSSSSSQLK   |         |           |        |    |                   |      |        |      | Mascot |  |  |  |        |  |
|                     | 1688.9303                                               | 1688.9028   | -0.0275 | -16   | 187        | 201          | NGGPSLVTHRPLRER  |         |           |        |    |                   |      |        |      | Mascot |  |  |  |        |  |

|    |                                               |           |         |     |              |     |                         |      |    |    |   |                   |  |  |  |  |        |
|----|-----------------------------------------------|-----------|---------|-----|--------------|-----|-------------------------|------|----|----|---|-------------------|--|--|--|--|--------|
|    | 1846.9215                                     | 1846.8077 | -0.1138 | -62 | 307          | 324 | TSGDSPSQLSPVKTPSM<br>K  |      |    |    |   |                   |  |  |  |  | Mascot |
|    | 1862.9164                                     | 1862.8049 | -0.1115 | -60 | 307          | 324 | TSGDSPSQLSPVKTPSM<br>K  |      |    |    |   | Oxidation (M)[17] |  |  |  |  | Mascot |
|    | 2041.0964                                     | 2041.0757 | -0.0207 | -10 | 576          | 593 | LSHIKGLILDYDQTQLPS      |      |    |    |   |                   |  |  |  |  | Mascot |
|    | 2041.0964                                     | 2041.0757 | -0.0207 | -10 | 576          | 593 | LSHIKGLILDYDQTQLPS      |      |    |    |   |                   |  |  |  |  | Mascot |
|    | 2119.0601                                     | 2118.9619 | -0.0982 | -46 | 320          | 338 | TPSMKRPVPSDHPESQT<br>PK |      |    |    |   |                   |  |  |  |  | Mascot |
|    | 2119.0601                                     | 2118.9619 | -0.0982 | -46 | 320          | 338 | TPSMKRPVPSDHPESQT<br>PK |      |    |    |   |                   |  |  |  |  | Mascot |
| 18 | WD repeat-containing protein 74 [Danio rerio] |           |         |     | gi 115497604 |     | 41314.9                 | 6.76 | 10 | 43 | 0 |                   |  |  |  |  |        |

#### Peptide Information

|  | Calc. Mass | Obsrv. Mass | ± da    | ± ppm | Start Seq. | End Seq. | Sequence               | Ion Score | C. I. | % | Modification           | Rank | Result | Type |
|--|------------|-------------|---------|-------|------------|----------|------------------------|-----------|-------|---|------------------------|------|--------|------|
|  | 1063.5061  | 1063.5519   | 0.0458  | 43    | 131        | 138      | MRQNQSQR               |           |       |   | Oxidation (M)[1]       |      | Mascot |      |
|  | 1270.5997  | 1270.7366   | 0.1369  | 108   | 167        | 176      | NVAHDWLEMR             |           |       |   |                        |      | Mascot |      |
|  | 1317.691   | 1317.7031   | 0.0121  | 9     | 202        | 212      | VRVYDPSTPQR            |           |       |   |                        |      | Mascot |      |
|  | 1387.744   | 1387.6953   | -0.0487 | -35   | 139        | 151      | HHVATGGKENPLK          |           |       |   |                        |      | Mascot |      |
|  | 1432.6914  | 1432.7574   | 0.066   | 46    | 353        | 367      | AAEKDEAAVTGADGK        |           |       |   |                        |      | Mascot |      |
|  | 1432.6914  | 1432.7574   | 0.066   | 46    | 353        | 367      | AAEKDEAAVTGADGK        |           |       |   |                        |      | Mascot |      |
|  | 1448.7605  | 1448.7517   | -0.0088 | -6    | 290        | 301      | VHSLEDRSLQHK           |           |       |   |                        |      | Mascot |      |
|  | 1695.8007  | 1695.8291   | 0.0284  | 17    | 74         | 89       | GIFTATKECGDPSQ GK      |           |       |   | Carbamidomethyl (C)[9] |      | Mascot |      |
|  | 1846.9697  | 1846.8077   | -0.162  | -88   | 177        | 192      | VPVWVRDISFIADSDK       |           |       |   |                        |      | Mascot |      |
|  | 2005.0786  | 2005.0021   | -0.0765 | -38   | 2          | 20       | AAKSQICSIWLGSETGILK    |           |       |   |                        |      | Mascot |      |
|  | 2282.9968  | 2283.1985   | 0.2017  | 88    | 332        | 350      | AEEEDEVDNMETVTEK<br>TK |           |       |   |                        |      | Mascot |      |

|    |                                |  |  |  |             |  |         |      |   |    |   |    |        |  |  |  |  |
|----|--------------------------------|--|--|--|-------------|--|---------|------|---|----|---|----|--------|--|--|--|--|
| 19 | Si:ch211-20b12.1 [Danio rerio] |  |  |  | gi 67678177 |  | 55996.8 | 8.09 | 3 | 42 | 0 | 35 | 91.374 |  |  |  |  |
|----|--------------------------------|--|--|--|-------------|--|---------|------|---|----|---|----|--------|--|--|--|--|

#### Peptide Information

|  | Calc. Mass | Obsrv. Mass | ± da    | ± ppm | Start Seq. | End Seq. | Sequence   | Ion Score | C. I.  | % | Modification           | Rank | Result | Type |
|--|------------|-------------|---------|-------|------------|----------|------------|-----------|--------|---|------------------------|------|--------|------|
|  | 827.4522   | 827.4365    | -0.0157 | -19   | 393        | 399      | SPIAFHR    |           |        |   |                        |      | Mascot |      |
|  | 983.5533   | 983.4488    | -0.1045 | -106  | 392        | 399      | RSPIAFHR   |           |        |   |                        |      | Mascot |      |
|  | 1277.6307  | 1277.7234   | 0.0927  | 73    | 436        | 445      | CHDIIISTYR | 35        | 91.374 |   | Carbamidomethyl (C)[1] |      | Mascot |      |
|  | 1277.6307  | 1277.7234   | 0.0927  | 73    | 436        | 445      | CHDIIISTYR |           |        |   | Carbamidomethyl (C)[1] |      | Mascot |      |

|    |                             |  |  |  |              |  |         |      |   |    |   |  |  |  |  |  |  |
|----|-----------------------------|--|--|--|--------------|--|---------|------|---|----|---|--|--|--|--|--|--|
| 20 | lft81 protein [Danio rerio] |  |  |  | gi 145337899 |  | 29908.3 | 5.76 | 9 | 39 | 0 |  |  |  |  |  |  |
|----|-----------------------------|--|--|--|--------------|--|---------|------|---|----|---|--|--|--|--|--|--|

#### Peptide Information

|  | Calc. Mass | Obsrv. Mass | ± da | ± ppm | Start Seq. | End Seq. | Sequence | Ion Score | C. I. | % | Modification | Rank | Result | Type |
|--|------------|-------------|------|-------|------------|----------|----------|-----------|-------|---|--------------|------|--------|------|
|--|------------|-------------|------|-------|------------|----------|----------|-----------|-------|---|--------------|------|--------|------|

|           |           |        |     |     |     |                           |  |  |                        |  |  |        |
|-----------|-----------|--------|-----|-----|-----|---------------------------|--|--|------------------------|--|--|--------|
| 1045.5636 | 1045.5718 | 0.0082 | 8   | 14  | 21  | TEEILRER                  |  |  |                        |  |  | Mascot |
| 1063.5339 | 1063.5519 | 0.018  | 17  | 224 | 232 | DLETLLECK                 |  |  |                        |  |  | Mascot |
| 1200.5123 | 1200.6678 | 0.1555 | 130 | 65  | 74  | TLDDMSEMVK                |  |  | Oxidation (M)[5,8]     |  |  | Mascot |
| 1248.6504 | 1248.6927 | 0.0423 | 34  | 224 | 233 | DLETLLECKK                |  |  | Carbamidomethyl (C)[8] |  |  | Mascot |
| 1381.645  | 1381.6779 | 0.0329 | 24  | 63  | 74  | GRTLDDMSEMVK              |  |  |                        |  |  | Mascot |
| 1448.6976 | 1448.7517 | 0.0541 | 37  | 135 | 146 | TLREETAQEEESR             |  |  |                        |  |  | Mascot |
| 1727.8018 | 1727.8553 | 0.0535 | 31  | 113 | 128 | AQYETCAAGLESNRSK          |  |  |                        |  |  | Mascot |
| 2225.0879 | 2225.1394 | 0.0515 | 23  | 147 | 163 | YHHINCEREIIESQIQR         |  |  | Carbamidomethyl (C)[6] |  |  | Mascot |
| 2283.1914 | 2283.1985 | 0.0071 | 3   | 234 | 254 | QCYLKAQSQAPIGHVIQD<br>VGK |  |  |                        |  |  | Mascot |

21 PREDICTED: probable ATP-dependent RNA helicase YTHDC2-like [Danio rerio] gi|326667516 148100.7 8.32 19 39 0

#### Peptide Information

| Calc. Mass | Obsrv. Mass | ± da    | ± ppm | Start Seq. | End Seq. | Sequence                 | Ion Score | C. I. % | Modification                             | Rank | Result Type |
|------------|-------------|---------|-------|------------|----------|--------------------------|-----------|---------|------------------------------------------|------|-------------|
| 842.4553   | 842.5168    | 0.0615  | 73    | 743        | 749      | HAVQMLK                  |           |         | Oxidation (M)[5]                         |      | Mascot      |
| 915.5258   | 915.4971    | -0.0287 | -31   | 259        | 266      | LESRVSPK                 |           |         |                                          |      | Mascot      |
| 950.4359   | 950.501     | 0.0651  | 68    | 86         | 93       | KDGMEAQR                 |           |         | Oxidation (M)[4]                         |      | Mascot      |
| 983.4462   | 983.4488    | 0.0026  | 3     | 1256       | 1264     | MTSAVSSER                |           |         | Oxidation (M)[1]                         |      | Mascot      |
| 987.5217   | 987.5178    | -0.0039 | -4    | 1208       | 1215     | NIELSQQR                 |           |         |                                          |      | Mascot      |
| 1045.5823  | 1045.5718   | -0.0105 | -10   | 106        | 114      | ALVQSLMQR                |           |         |                                          |      | Mascot      |
| 1079.6095  | 1079.5217   | -0.0878 | -81   | 62         | 71       | LAQSLGYISK               |           |         |                                          |      | Mascot      |
| 1200.6848  | 1200.6678   | -0.017  | -14   | 150        | 160      | LSHGIPQVPPR              |           |         |                                          |      | Mascot      |
| 1248.6331  | 1248.6927   | 0.0596  | 48    | 161        | 171      | RSSAPELDAFR              |           |         |                                          |      | Mascot      |
| 1317.5232  | 1317.7031   | 0.1799  | 137   | 94         | 105      | SSMSCSLSPSCR             |           |         | Carbamidomethyl (C)[5], Oxidation (M)[3] |      | Mascot      |
| 1381.7396  | 1381.6779   | -0.0617 | -45   | 303        | 314      | DGLTDFLLTKMK             |           |         |                                          |      | Mascot      |
| 1385.6915  | 1385.7264   | 0.0349  | 25    | 706        | 716      | MPLQELCLHTK              |           |         | Carbamidomethyl (C)[7], Oxidation (M)[1] |      | Mascot      |
| 1743.9388  | 1743.854    | -0.0848 | -49   | 1045       | 1059     | LDPETAELVFGLRQR          |           |         |                                          |      | Mascot      |
| 1743.9388  | 1743.854    | -0.0848 | -49   | 1045       | 1059     | LDPETAELVFGLRQR          |           |         |                                          |      | Mascot      |
| 1900.0538  | 1899.957    | -0.0968 | -51   | 173        | 188      | ALPVYELQEIIQSIR          |           |         |                                          |      | Mascot      |
| 2086.075   | 2085.9387   | -0.1363 | -65   | 496        | 514      | GFVSHTEQLLNMGANINI<br>K  |           |         |                                          |      | Mascot      |
| 2102.0698  | 2101.9373   | -0.1325 | -63   | 496        | 514      | GFVSHTEQLLNMGANINI<br>K  |           |         | Oxidation (M)[12]                        |      | Mascot      |
| 2119.0566  | 2118.9619   | -0.0947 | -45   | 44         | 61       | ELDFPSSLTNSERAFIHR       |           |         |                                          |      | Mascot      |
| 2119.0566  | 2118.9619   | -0.0947 | -45   | 44         | 61       | ELDFPSSLTNSERAFIHR       |           |         |                                          |      | Mascot      |
| 2145.8779  | 2146.041    | 0.1631  | 76    | 87         | 105      | DGMEAQRSSMSCSLSPS<br>CR  |           |         | Carbamidomethyl (C)[12,18]               |      | Mascot      |
| 2233.2195  | 2233.1072   | -0.1123 | -50   | 320        | 339      | MPNLRLVLSSAALDVSLF<br>MR |           |         |                                          |      | Mascot      |

|    |                                                            |           |        |     |     |              |                        |      |    |    |   |  |                            |        |
|----|------------------------------------------------------------|-----------|--------|-----|-----|--------------|------------------------|------|----|----|---|--|----------------------------|--------|
|    | 2283.9604                                                  | 2284.1965 | 0.2361 | 103 | 381 | 398          | EAQKEESQQCSLSEWCE<br>R |      |    |    |   |  | Carbamidomethyl (C)[10,16] | Mascot |
| 22 | CDK5 regulatory subunit-associated protein 1 [Danio rerio] |           |        |     |     | gi 160333602 | 65811.6                | 9.24 | 13 | 38 | 0 |  |                            |        |

Peptide Information

| Calc. Mass | Obsrv. Mass | ± da    | ± ppm | Start Seq. | End Seq. | Sequence           | Ion Score | C. I. | % Modification                           | Rank | Result Type |
|------------|-------------|---------|-------|------------|----------|--------------------|-----------|-------|------------------------------------------|------|-------------|
| 987.4022   | 987.5178    | 0.1156  | 117   | 303        | 310      | MQFSCSER           |           |       |                                          |      | Mascot      |
| 996.5295   | 996.6054    | 0.0759  | 76    | 1          | 8        | MNRISTFK           |           |       |                                          |      | Mascot      |
| 1051.6007  | 1051.7223   | 0.1216  | 116   | 204        | 213      | LLSLAHGGQR         |           |       |                                          |      | Mascot      |
| 1317.7021  | 1317.7031   | 0.001   | 1     | 374        | 385      | HLHLPVQSGSSR       |           |       |                                          |      | Mascot      |
| 1345.7507  | 1345.6891   | -0.0616 | -46   | 127        | 138      | ADVLLVTCSIR        |           |       | Carbamidomethyl (C)[9]                   |      | Mascot      |
| 1362.7627  | 1362.7101   | -0.0526 | -39   | 476        | 486      | LEELISVFREK        |           |       |                                          |      | Mascot      |
| 1362.7627  | 1362.7101   | -0.0526 | -39   | 476        | 486      | LEELISVFREK        |           |       |                                          |      | Mascot      |
| 1432.704   | 1432.7574   | 0.0534  | 37    | 563        | 575      | GHALNHSPNDRK       |           |       |                                          |      | Mascot      |
| 1432.704   | 1432.7574   | 0.0534  | 37    | 563        | 575      | GHALNHSPNDRK       |           |       |                                          |      | Mascot      |
| 1476.8057  | 1476.7306   | -0.0751 | -51   | 397        | 408      | EAYLELVENIRK       |           |       |                                          |      | Mascot      |
| 1695.8445  | 1695.8291   | -0.0154 | -9    | 538        | 552      | TQMACITPGDYVLVK    |           |       | Carbamidomethyl (C)[5]                   |      | Mascot      |
| 1743.7902  | 1743.854    | 0.0638  | 37    | 303        | 316      | MQFSCSERNTQLSR     | 2         | 0     | Carbamidomethyl (C)[5]                   |      | Mascot      |
| 1743.7902  | 1743.854    | 0.0638  | 37    | 303        | 316      | MQFSCSERNTQLSR     |           |       | Carbamidomethyl (C)[5]                   |      | Mascot      |
| 1759.785   | 1759.8502   | 0.0652  | 37    | 303        | 316      | MQFSCSERNTQLSR     |           |       | Carbamidomethyl (C)[5], Oxidation (M)[1] |      | Mascot      |
| 1759.785   | 1759.8502   | 0.0652  | 37    | 303        | 316      | MQFSCSERNTQLSR     |           |       | Carbamidomethyl (C)[5], Oxidation (M)[1] |      | Mascot      |
| 1846.8468  | 1846.8077   | -0.0391 | -21   | 440        | 454      | EVGYNIGFFTYSMR     |           |       | Oxidation (M)[14]                        |      | Mascot      |
| 1862.9653  | 1862.8049   | -0.1604 | -86   | 369        | 385      | SNICKHLHLPVQSGSSR  |           |       |                                          |      | Mascot      |
| 2017.9535  | 2018.1835   | 0.23    | 114   | 50         | 67       | SKLTNGPSFQDFIMSSDK |           |       | Oxidation (M)[14]                        |      | Mascot      |

|    |                                                            |  |  |  |  |              |       |      |    |    |   |  |  |
|----|------------------------------------------------------------|--|--|--|--|--------------|-------|------|----|----|---|--|--|
| 23 | PREDICTED: zinc finger protein 420 isoform 2 [Danio rerio] |  |  |  |  | gi 326678086 | 70371 | 9.08 | 14 | 38 | 0 |  |  |
|----|------------------------------------------------------------|--|--|--|--|--------------|-------|------|----|----|---|--|--|

Peptide Information

| Calc. Mass | Obsrv. Mass | ± da    | ± ppm | Start Seq. | End Seq. | Sequence    | Ion Score | C. I. | % Modification                           | Rank | Result Type |
|------------|-------------|---------|-------|------------|----------|-------------|-----------|-------|------------------------------------------|------|-------------|
| 842.5206   | 842.5168    | -0.0038 | -5    | 25         | 31       | QRQGLLK     |           |       |                                          |      | Mascot      |
| 950.3706   | 950.501     | 0.1304  | 137   | 36         | 43       | MSDPEPCR    |           |       | Oxidation (M)[1]                         |      | Mascot      |
| 987.5621   | 987.5178    | -0.0443 | -45   | 497        | 505      | TFITAGHLK   |           |       |                                          |      | Mascot      |
| 1045.536   | 1045.5718   | 0.0358  | 34    | 134        | 141      | FHCARNLK    |           |       | Carbamidomethyl (C)[3]                   |      | Mascot      |
| 1200.5387  | 1200.6678   | 0.1291  | 108   | 178        | 188      | EKPYSCSVCGK |           |       |                                          |      | Mascot      |
| 1248.5712  | 1248.6927   | 0.1215  | 97    | 36         | 45       | MSDPEPCR    |           |       | Carbamidomethyl (C)[7], Oxidation (M)[1] |      | Mascot      |
| 1270.5667  | 1270.7366   | 0.1699  | 134   | 575        | 584      | CDQCGKSFLR  |           |       | Carbamidomethyl (C)[1,4]                 |      | Mascot      |

|    |                              |           |         |     |             |     |                         |      |   |    |                            |  |  |        |
|----|------------------------------|-----------|---------|-----|-------------|-----|-------------------------|------|---|----|----------------------------|--|--|--------|
|    | 1727.8381                    | 1727.8553 | 0.0172  | 10  | 556         | 571 | VSSSLNSHMLTHTGEK        |      |   |    |                            |  |  | Mascot |
|    | 1743.833                     | 1743.854  | 0.021   | 12  | 556         | 571 | VSSSLNSHMLTHTGEK        |      |   |    | Oxidation (M)[9]           |  |  | Mascot |
|    | 1743.9144                    | 1743.854  | -0.0604 | -35 | 295         | 309 | CGHCGKTFLRPAVLK         |      |   |    | Carbamidomethyl (C)[1,4]   |  |  | Mascot |
|    | 1759.9412                    | 1759.8502 | -0.091  | -52 | 81          | 95  | IKIDHNFLMETTAVK         |      |   |    |                            |  |  | Mascot |
|    | 1759.9412                    | 1759.8502 | -0.091  | -52 | 81          | 95  | IKIDHNFLMETTAVK         |      |   |    |                            |  |  | Mascot |
|    | 2004.9531                    | 2005.0021 | 0.049   | 24  | 538         | 555 | VHTGEKPFACHTCGKSF<br>R  |      |   |    |                            |  |  | Mascot |
|    | 2102.0085                    | 2101.9373 | -0.0712 | -34 | 488         | 505 | EFVCFECEKTFITAGHLK      |      |   |    |                            |  |  | Mascot |
|    | 2118.9958                    | 2118.9619 | -0.0339 | -16 | 538         | 555 | VHTGEKPFACHTCGKSF<br>R  |      |   |    | Carbamidomethyl (C)[10,13] |  |  | Mascot |
|    | 2118.9958                    | 2118.9619 | -0.0339 | -16 | 538         | 555 | VHTGEKPFACHTCGKSF<br>R  |      |   |    | Carbamidomethyl (C)[10,13] |  |  | Mascot |
|    | 2211.0798                    | 2211.1282 | 0.0484  | 22  | 450         | 468 | IHLRVHTNEKPYSCECG<br>K  |      |   |    |                            |  |  | Mascot |
|    | 2211.0798                    | 2211.1282 | 0.0484  | 22  | 450         | 468 | IHLRVHTNEKPYSCECG<br>K  |      |   |    |                            |  |  | Mascot |
|    | 2283.0579                    | 2283.1985 | 0.1406  | 62  | 227         | 245 | HQMIHTGEKPYKCSHCD<br>LR |      |   |    |                            |  |  | Mascot |
| 24 | Anxa1c protein [Danio rerio] |           |         |     | gi 79153964 |     | 31472.1                 | 5.92 | 8 | 38 | 0                          |  |  |        |

Peptide Information

| Calc. Mass | Obsrv. Mass | ± da    | ± ppm | Start Seq. | End Seq. | Sequence                | Ion Score | C. I. | % Modification   | Rank | Result Type |
|------------|-------------|---------|-------|------------|----------|-------------------------|-----------|-------|------------------|------|-------------|
| 827.3967   | 827.4365    | 0.0398  | 48    | 249        | 254      | IMQEYK                  |           |       | Oxidation (M)[2] |      | Mascot      |
| 983.4978   | 983.4488    | -0.049  | -50   | 249        | 255      | IMQEYKR                 |           |       | Oxidation (M)[2] |      | Mascot      |
| 1006.4952  | 1006.527    | 0.0318  | 32    | 143        | 151      | ALFEAGENR               |           |       |                  |      | Mascot      |
| 1361.6292  | 1361.6848   | 0.0556  | 41    | 127        | 138      | SEDRNIDDAQAK            |           |       |                  |      | Mascot      |
| 1385.8362  | 1385.7264   | -0.1098 | -79   | 237        | 248      | IIVSRSEIDLLK            |           |       |                  |      | Mascot      |
| 1759.9701  | 1759.8502   | -0.1199 | -68   | 77         | 93       | AAYQQSAGKPLADALKK       |           |       |                  |      | Mascot      |
| 1759.9701  | 1759.8502   | -0.1199 | -68   | 77         | 93       | AAYQQSAGKPLADALKK       |           |       |                  |      | Mascot      |
| 1900.0637  | 1899.957    | -0.1067 | -56   | 49         | 66       | AIETKGVDEATIIEVLAK      |           |       |                  |      | Mascot      |
| 2102.0144  | 2101.9373   | -0.0771 | -37   | 189        | 207      | DLEGELSGHLEDCLMTLV<br>K |           |       |                  |      | Mascot      |

|    |                          |  |  |  |              |  |       |      |    |    |   |  |  |  |
|----|--------------------------|--|--|--|--------------|--|-------|------|----|----|---|--|--|--|
| 25 | zgc:101901 [Danio rerio] |  |  |  | gi 157676757 |  | 62740 | 8.22 | 10 | 36 | 0 |  |  |  |
|----|--------------------------|--|--|--|--------------|--|-------|------|----|----|---|--|--|--|

Peptide Information

| Calc. Mass | Obsrv. Mass | ± da    | ± ppm | Start Seq. | End Seq. | Sequence      | Ion Score | C. I. | % Modification     | Rank | Result Type |
|------------|-------------|---------|-------|------------|----------|---------------|-----------|-------|--------------------|------|-------------|
| 950.4611   | 950.501     | 0.0399  | 42    | 221        | 229      | GSQVTSMPK     |           |       | Oxidation (M)[7]   |      | Mascot      |
| 1308.5923  | 1308.6664   | 0.0741  | 57    | 132        | 142      | MNNNEMVSIPK   |           |       | Oxidation (M)[1,6] |      | Mascot      |
| 1317.7261  | 1317.7031   | -0.023  | -17   | 392        | 404      | SLPTGTSVITVDK |           |       |                    |      | Mascot      |
| 1381.707   | 1381.6779   | -0.0291 | -21   | 292        | 304      | SDIPINGPPTNTR |           |       |                    |      | Mascot      |

|    |                                                                  |           |         |     |     |     |                        |   |  |   |              |         |      |   |    |                         |        |
|----|------------------------------------------------------------------|-----------|---------|-----|-----|-----|------------------------|---|--|---|--------------|---------|------|---|----|-------------------------|--------|
|    | 1387.61                                                          | 1387.6953 | 0.0853  | 61  | 32  | 42  | YNHQFVDCAYK            |   |  |   |              |         |      |   |    |                         | Mascot |
|    | 1449.7189                                                        | 1449.7637 | 0.0448  | 31  | 221 | 233 | GSQVTSMPKLNCK          |   |  |   |              |         |      |   |    | Carbamidomethyl (C)[12] | Mascot |
|    | 1727.7904                                                        | 1727.8553 | 0.0649  | 38  | 321 | 336 | KEEGNYTCSAVNDIGK       |   |  |   |              |         |      |   |    |                         | Mascot |
|    | 2005.0422                                                        | 2005.0021 | -0.0401 | -20 | 230 | 247 | LNCKAPSVSITYQPNIEK     |   |  |   |              |         |      |   |    |                         | Mascot |
|    | 2102.0959                                                        | 2101.9373 | -0.1586 | -75 | 5   | 24  | YLM LIALGTALIGNAHCCPK  |   |  |   |              |         |      |   |    |                         | Mascot |
|    | 2211.1868                                                        | 2211.1282 | -0.0586 | -27 | 43  | 64  | DLVEVPVGLPSNASTLSLSANK | 2 |  | 0 |              |         |      |   |    |                         | Mascot |
|    | 2211.1868                                                        | 2211.1282 | -0.0586 | -27 | 43  | 64  | DLVEVPVGLPSNASTLSLSANK |   |  |   |              |         |      |   |    |                         | Mascot |
| 26 | novel protein similar to vertebrate kinesin family [Danio rerio] |           |         |     |     |     |                        |   |  |   | gi 123208287 | 41525.2 | 6.07 | 9 | 36 | 0                       |        |

#### Peptide Information

| Calc. Mass | Obsrv. Mass | ± da    | ± ppm | Start Seq. | End Seq. | Sequence            | Ion Score | C. I. | % Modification         | Rank | Result Type |
|------------|-------------|---------|-------|------------|----------|---------------------|-----------|-------|------------------------|------|-------------|
| 842.5709   | 842.5168    | -0.0541 | -64   | 359        | 365      | EVILK LK            |           |       |                        |      | Mascot      |
| 850.4716   | 850.5497    | 0.0781  | 92    | 19         | 24       | IRVFCR              |           |       | Carbamidomethyl (C)[5] |      | Mascot      |
| 1200.6106  | 1200.6678   | 0.0572  | 48    | 364        | 374      | LKSGQPVEEDV         |           |       |                        |      | Mascot      |
| 1248.6946  | 1248.6927   | -0.0019 | -2    | 176        | 187      | KGLVFAQGAETK        |           |       |                        |      | Mascot      |
| 1317.7572  | 1317.7031   | -0.0541 | -41   | 21         | 30       | VFCRIRPLTR          |           |       | Carbamidomethyl (C)[3] |      | Mascot      |
| 1443.7373  | 1443.7195   | -0.0178 | -12   | 207        | 219      | HIAATKMNVESRR       |           |       |                        |      | Mascot      |
| 1443.7373  | 1443.7195   | -0.0178 | -12   | 207        | 219      | HIAATKMNVESRR       |           |       |                        |      | Mascot      |
| 1688.7623  | 1688.9028   | 0.1405  | 83    | 1          | 15       | DPEEEVLQHGGGHER     |           |       |                        |      | Mascot      |
| 2040.9735  | 2041.0757   | 0.1022  | 50    | 138        | 153      | FEFKVSAYMLELYNDR    |           |       | Oxidation (M)[9]       |      | Mascot      |
| 2040.9735  | 2041.0757   | 0.1022  | 50    | 138        | 153      | FEFKVSAYMLELYNDR    |           |       | Oxidation (M)[9]       |      | Mascot      |
| 2102.0586  | 2101.9373   | -0.1213 | -58   | 37         | 55       | GHITVACLDDYSVILETPR |           |       |                        |      | Mascot      |

27 Si:dkeyp-95d10.1 protein [Danio rerio] gi|81097645 20309.2 7.37 6 36 0

#### Peptide Information

| Calc. Mass | Obsrv. Mass | ± da    | ± ppm | Start Seq. | End Seq. | Sequence       | Ion Score | C. I. | % Modification         | Rank | Result Type |
|------------|-------------|---------|-------|------------|----------|----------------|-----------|-------|------------------------|------|-------------|
| 983.5156   | 983.4488    | -0.0668 | -68   | 140        | 148      | HLSGEEAIK      |           |       |                        |      | Mascot      |
| 1226.6488  | 1226.5912   | -0.0576 | -47   | 138        | 148      | SRHLSGEEAIK    |           |       |                        |      | Mascot      |
| 1256.6377  | 1256.7084   | 0.0707  | 56    | 127        | 137      | TGTMLACYLVK    |           |       | Carbamidomethyl (C)[7] |      | Mascot      |
| 1256.6377  | 1256.7084   | 0.0707  | 56    | 127        | 137      | TGTMLACYLVK    |           |       | Carbamidomethyl (C)[7] |      | Mascot      |
| 1381.7434  | 1381.6779   | -0.0655 | -47   | 140        | 151      | HLSGEEAIKEIR   |           |       |                        |      | Mascot      |
| 1432.8522  | 1432.7574   | -0.0948 | -66   | 97         | 108      | SQILRFLSIVEK   |           |       |                        |      | Mascot      |
| 1432.8522  | 1432.7574   | -0.0948 | -66   | 97         | 108      | SQILRFLSIVEK   |           |       |                        |      | Mascot      |
| 1443.6658  | 1443.7195   | 0.0537  | 37    | 113        | 126      | GEGVAVHCAHGHGR |           |       | Carbamidomethyl (C)[8] |      | Mascot      |



1443.6658 1443.7195 0.0537 37 113 126 GEGVAVHCAHGHGR Carbamidomethyl (C)[8] Mascot

28 PREDICTED: eukaryotic translation initiation factor 5B gi|326664222 137612.9 5.61 15 35 0  
[Danio rerio]

Peptide Information

| Calc. Mass | Obsrv. Mass | ± da    | ± ppm | Start Seq. | End Seq. | Sequence                  | Ion Score | C. I. % | Modification           | Rank | Result Type |
|------------|-------------|---------|-------|------------|----------|---------------------------|-----------|---------|------------------------|------|-------------|
| 842.4842   | 842.5168    | 0.0326  | 39    | 345        | 352      | GPNKATVR                  |           |         |                        |      | Mascot      |
| 915.5509   | 915.4971    | -0.0538 | -59   | 942        | 949      | ILGKDLEK                  |           |         |                        |      | Mascot      |
| 950.4247   | 950.501     | 0.0763  | 80    | 361        | 367      | MKEEEER                   |           |         |                        |      | Mascot      |
| 987.5105   | 987.5178    | 0.0073  | 7     | 379        | 386      | LEELEAQR                  |           |         |                        |      | Mascot      |
| 1079.5327  | 1079.5217   | -0.011  | -10   | 580        | 589      | ESSNKTTANK                |           |         |                        |      | Mascot      |
| 1226.674   | 1226.5912   | -0.0828 | -67   | 435        | 446      | ALQAQGVVEPSK              |           |         |                        |      | Mascot      |
| 1256.6416  | 1256.7084   | 0.0668  | 53    | 931        | 941      | HKEVCTAQGVK               |           |         | Carbamidomethyl (C)[5] |      | Mascot      |
| 1256.6416  | 1256.7084   | 0.0668  | 53    | 931        | 941      | HKEVCTAQGVK               |           |         | Carbamidomethyl (C)[5] |      | Mascot      |
| 1345.7507  | 1345.6891   | -0.0616 | -46   | 933        | 945      | EVCTAQGVKILGK             |           |         |                        |      | Mascot      |
| 1377.7274  | 1377.684    | -0.0434 | -32   | 1198       | 1208     | QSIDALKNWFR               |           |         |                        |      | Mascot      |
| 1394.746   | 1394.7837   | 0.0377  | 27    | 640        | 653      | APVVCVLGHVDTGK            |           |         |                        |      | Mascot      |
| 1727.9326  | 1727.8553   | -0.0773 | -45   | 1140       | 1155     | GFVDIGIVTSIEVNHK          |           |         |                        |      | Mascot      |
| 1915       | 1914.9497   | -0.0503 | -26   | 1065       | 1080     | IFSAEIIYHLFDAFTK          |           |         |                        |      | Mascot      |
| 2102.0247  | 2101.9373   | -0.0874 | -42   | 47         | 67       | DELDALAAIEGAGAGKE<br>QSK  |           |         |                        |      | Mascot      |
| 2118.9309  | 2118.9619   | 0.031   | 15    | 303        | 323      | AASLDLDGADVQGEESA<br>EGDK |           |         |                        |      | Mascot      |
| 2118.9309  | 2118.9619   | 0.031   | 15    | 303        | 323      | AASLDLDGADVQGEESA<br>EGDK |           |         |                        |      | Mascot      |
| 2268.9636  | 2269.0652   | 0.1016  | 45    | 505        | 524      | AEAALDDWEAMASDEEK<br>EMK  |           |         |                        |      | Mascot      |

29 coiled-coil domain-containing protein 123, mitochondrial precursor gi|41053710 79256.9 5.96 11 35 0  
[Danio rerio]

Peptide Information

| Calc. Mass | Obsrv. Mass | ± da    | ± ppm | Start Seq. | End Seq. | Sequence        | Ion Score | C. I. % | Modification           | Rank | Result Type |
|------------|-------------|---------|-------|------------|----------|-----------------|-----------|---------|------------------------|------|-------------|
| 1124.6534  | 1124.6771   | 0.0237  | 21    | 69         | 78       | TVAIPSPRQR      |           |         |                        |      | Mascot      |
| 1248.5889  | 1248.6927   | 0.1038  | 83    | 566        | 575      | TCEVEDLQVR      |           |         | Carbamidomethyl (C)[2] |      | Mascot      |
| 1317.5488  | 1317.7031   | 0.1543  | 117   | 77         | 87       | QRSYSESDCSR     |           |         |                        |      | Mascot      |
| 1443.7438  | 1443.7195   | -0.0243 | -17   | 430        | 441      | VRAEEVIQENK     |           |         |                        |      | Mascot      |
| 1443.7438  | 1443.7195   | -0.0243 | -17   | 430        | 441      | VRAEEVIQENK     |           |         |                        |      | Mascot      |
| 1448.7162  | 1448.7517   | 0.0355  | 25    | 420        | 431      | SCEEELQSLRVR    |           |         |                        |      | Mascot      |
| 1728.0013  | 1727.8553   | -0.146  | -84   | 668        | 683      | QGVLTRIESTVNLGK |           |         |                        |      | Mascot      |

|           |           |         |     |     |     |                          |                        |        |
|-----------|-----------|---------|-----|-----|-----|--------------------------|------------------------|--------|
| 1743.8456 | 1743.854  | 0.0084  | 5   | 313 | 325 | HLQQELCHTHRER            | Carbamidomethyl (C)[7] | Mascot |
| 1743.8456 | 1743.854  | 0.0084  | 5   | 313 | 325 | HLQQELCHTHRER            | Carbamidomethyl (C)[7] | Mascot |
| 2103.1121 | 2102.957  | -0.1551 | -74 | 399 | 416 | YLSPLLLAYEDHLNAKDK       |                        | Mascot |
| 2146.0808 | 2146.041  | -0.0398 | -19 | 566 | 583 | TCEVEDLQVRLSALEVER       | Carbamidomethyl (C)[2] | Mascot |
| 2211.0823 | 2211.1282 | 0.0459  | 21  | 340 | 358 | QQAQELVDENDGLKMTV<br>HR  |                        | Mascot |
| 2211.0823 | 2211.1282 | 0.0459  | 21  | 340 | 358 | QQAQELVDENDGLKMTV<br>HR  |                        | Mascot |
| 2233.2188 | 2233.1072 | -0.1116 | -50 | 536 | 555 | LALEHSLSLAEHQTVTDK<br>LK |                        | Mascot |

30 PREDICTED: transient receptor potential cation channel subfamily M member 4-like [Danio rerio] gi|326666046 137203 6.89 10 34 0 21 0

Peptide Information

| Calc. Mass | Obsrv. Mass | ± da    | ± ppm | Start Seq. | End Seq. | Sequence                    | Ion Score | C. I. | % Modification                           | Rank | Result Type |
|------------|-------------|---------|-------|------------|----------|-----------------------------|-----------|-------|------------------------------------------|------|-------------|
| 827.4556   | 827.4365    | -0.0191 | -23   | 591        | 597      | AMKHAVNK                    |           |       |                                          |      | Mascot      |
| 950.4677   | 950.501     | 0.0333  | 35    | 657        | 664      | LETETETK                    |           |       |                                          |      | Mascot      |
| 1165.7667  | 1165.7545   | -0.0122 | -10   | 910        | 920      | QLGPKIIIVGK                 |           |       |                                          |      | Mascot      |
| 1200.6372  | 1200.6678   | 0.0306  | 25    | 21         | 30       | AQKDQSWIPK                  |           |       |                                          |      | Mascot      |
| 1317.6758  | 1317.7031   | 0.0273  | 21    | 541        | 553      | SQATNLTTPSAAR               |           |       |                                          |      | Mascot      |
| 1370.6304  | 1370.6625   | 0.0321  | 23    | 184        | 196      | HHCAMASSLSQAK               |           |       |                                          |      | Mascot      |
| 1432.7828  | 1432.7574   | -0.0254 | -18   | 1141       | 1152     | VDSVLKQMVEIR                |           |       | Oxidation (M)[8]                         |      | Mascot      |
| 1432.7828  | 1432.7574   | -0.0254 | -18   | 1141       | 1152     | VDSVLKQMVEIR                | 21        | 0     | Oxidation (M)[8]                         |      | Mascot      |
| 1443.6467  | 1443.7195   | 0.0728  | 50    | 184        | 196      | HHCAMASSLSQAK               |           |       | Carbamidomethyl (C)[3], Oxidation (M)[5] |      | Mascot      |
| 1443.6467  | 1443.7195   | 0.0728  | 50    | 184        | 196      | HHCAMASSLSQAK               |           |       | Carbamidomethyl (C)[3], Oxidation (M)[5] |      | Mascot      |
| 1899.9712  | 1899.957    | -0.0142 | -7    | 441        | 456      | VDIAKTELFNGDVHWR            |           |       |                                          |      | Mascot      |
| 2145.9724  | 2146.041    | 0.0686  | 32    | 78         | 97       | DTSDYPTDAFGQLEFVG<br>AGR    |           |       |                                          |      | Mascot      |
| 2434.0366  | 2434.1011   | 0.0645  | 26    | 35         | 57       | RVCTTFVEDSCSNGALC<br>QCGGAR |           |       | Carbamidomethyl (C)[3]                   |      | Mascot      |

31 LOC561115 protein [Danio rerio] gi|124481604 94397 5.22 12 34 0

Peptide Information

| Calc. Mass | Obsrv. Mass | ± da    | ± ppm | Start Seq. | End Seq. | Sequence    | Ion Score | C. I. | % Modification | Rank | Result Type |
|------------|-------------|---------|-------|------------|----------|-------------|-----------|-------|----------------|------|-------------|
| 996.5108   | 996.6054    | 0.0946  | 95    | 149        | 157      | AVEENAHVK   |           |       |                |      | Mascot      |
| 1200.6218  | 1200.6678   | 0.046   | 38    | 396        | 406      | KVASEEDPGIR |           |       |                |      | Mascot      |
| 1256.5793  | 1256.7084   | 0.1291  | 103   | 670        | 679      | QLEDYNFAEK  |           |       |                |      | Mascot      |
| 1256.5793  | 1256.7084   | 0.1291  | 103   | 670        | 679      | QLEDYNFAEK  |           |       |                |      | Mascot      |
| 1361.692   | 1361.6848   | -0.0072 | -5    | 513        | 523      | NTLLINHHDER |           |       |                |      | Mascot      |

|  |           |           |         |     |     |     |                          |  |  |  |  |                        |        |
|--|-----------|-----------|---------|-----|-----|-----|--------------------------|--|--|--|--|------------------------|--------|
|  | 1377.6216 | 1377.684  | 0.0624  | 45  | 548 | 558 | Q SHEWTSLSMR             |  |  |  |  | Oxidation (M)[9]       | Mascot |
|  | 1443.662  | 1443.7195 | 0.0575  | 40  | 354 | 364 | RQYCHYLSSMR              |  |  |  |  |                        | Mascot |
|  | 1443.662  | 1443.7195 | 0.0575  | 40  | 354 | 364 | RQYCHYLSSMR              |  |  |  |  |                        | Mascot |
|  | 1914.8949 | 1914.9497 | 0.0548  | 29  | 707 | 722 | ENAVYVICHNPMSQQR         |  |  |  |  | Carbamidomethyl (C)[8] | Mascot |
|  | 2040.9297 | 2041.0757 | 0.146   | 72  | 25  | 41  | SWETSLSAAVFEENEWR        |  |  |  |  |                        | Mascot |
|  | 2040.9297 | 2041.0757 | 0.146   | 72  | 25  | 41  | SWETSLSAAVFEENEWR        |  |  |  |  |                        | Mascot |
|  | 2211.0872 | 2211.1282 | 0.041   | 19  | 355 | 373 | QYCHYLSSMR LIQVPAAC K    |  |  |  |  |                        | Mascot |
|  | 2211.0872 | 2211.1282 | 0.041   | 19  | 355 | 373 | QYCHYLSSMR LIQVPAAC K    |  |  |  |  |                        | Mascot |
|  | 2233.031  | 2233.1072 | 0.0762  | 34  | 707 | 725 | ENAVYVICHNPMSQQR SCK     |  |  |  |  | Carbamidomethyl (C)[8] | Mascot |
|  | 2269.1531 | 2269.0652 | -0.0879 | -39 | 374 | 394 | SGSPIQQSR PQSSTE VV QTPR |  |  |  |  |                        | Mascot |
|  | 2284.1714 | 2284.1965 | 0.0251  | 11  | 52  | 71  | AEDEQLIGSLVQAVQQP MRR    |  |  |  |  | Oxidation (M)[18]      | Mascot |

32

39S ribosomal protein L30, mitochondrial [Danio rerio]

gi|66472758

17600.6

10.15

6

34

0

Peptide Information

| Calc. Mass | Obsrv. Mass | ± da    | ± ppm | Start Seq. | End Seq. | Sequence              | Ion Score | C. I. | % Modification          | Rank | Result Type |
|------------|-------------|---------|-------|------------|----------|-----------------------|-----------|-------|-------------------------|------|-------------|
| 996.6564   | 996.6054    | -0.051  | -51   | 142        | 149      | RLLKPLEK              |           |       |                         |      | Mascot      |
| 1006.5468  | 1006.527    | -0.0198 | -20   | 71         | 77       | RPYWEKK               |           |       |                         |      | Mascot      |
| 1270.6572  | 1270.7366   | 0.0794  | 62    | 81         | 91       | SLGLMKSHEPR           |           |       | Oxidation (M)[5]        |      | Mascot      |
| 1846.9558  | 1846.8077   | -0.1481 | -80   | 49         | 64       | YGGDPEQPHKLHIVTR      |           |       |                         |      | Mascot      |
| 2102.0083  | 2101.9373   | -0.071  | -34   | 117        | 135      | LPHGLPAEEDMANTHLN SR  |           |       |                         |      | Mascot      |
| 2146.1284  | 2146.041    | -0.0874 | -41   | 7          | 26       | ALLTSASNVSKNLTQVSP CR |           |       | Carbamidomethyl (C)[19] |      | Mascot      |

33

novel protein similar to elongation factor RNA polymerase II (ell) [Danio rerio]

gi|122890999

34843

9.64

8

34

0

Peptide Information

| Calc. Mass | Obsrv. Mass | ± da    | ± ppm | Start Seq. | End Seq. | Sequence      | Ion Score | C. I. | % Modification   | Rank | Result Type |
|------------|-------------|---------|-------|------------|----------|---------------|-----------|-------|------------------|------|-------------|
| 1006.4985  | 1006.527    | 0.0285  | 28    | 134        | 141      | ERMSQVEK      |           |       |                  |      | Mascot      |
| 1079.5731  | 1079.5217   | -0.0514 | -48   | 38         | 46       | TLEAYQNLK     |           |       |                  |      | Mascot      |
| 1256.6732  | 1256.7084   | 0.0352  | 28    | 231        | 242      | ADLSPVLDEVAK  |           |       |                  |      | Mascot      |
| 1256.6732  | 1256.7084   | 0.0352  | 28    | 231        | 242      | ADLSPVLDEVAK  |           |       |                  |      | Mascot      |
| 1277.6055  | 1277.7234   | 0.1179  | 92    | 6          | 16       | QEHR YGLSCGK  |           |       |                  |      | Mascot      |
| 1277.6055  | 1277.7234   | 0.1179  | 92    | 6          | 16       | QEHR YGLSCGK  |           |       |                  |      | Mascot      |
| 1345.6707  | 1345.6891   | 0.0184  | 14    | 108        | 119      | DRLEGQGS IQDK |           |       |                  |      | Mascot      |
| 1394.6733  | 1394.7837   | 0.1104  | 79    | 136        | 146      | MSQVEKDIWSR   |           |       | Oxidation (M)[1] |      | Mascot      |

|    |                                                                                       |             |       |      |   |    |   |
|----|---------------------------------------------------------------------------------------|-------------|-------|------|---|----|---|
| 36 | novel protein similar to human and mouse ring finger protein 30 (RNF30) [Danio rerio] | gi 56207578 | 13788 | 5.17 | 6 | 33 | 0 |
|----|---------------------------------------------------------------------------------------|-------------|-------|------|---|----|---|

| Peptide Information |                              |         |       |             |          |                     |           |       |                                                  |                  |
|---------------------|------------------------------|---------|-------|-------------|----------|---------------------|-----------|-------|--------------------------------------------------|------------------|
| Calc. Mass          | Obsrv. Mass                  | ± da    | ± ppm | Start Seq.  | End Seq. | Sequence            | Ion Score | C. I. | % Modification                                   | Rank Result Type |
| 1124.6171           | 1124.6771                    | 0.06    | 53    | 56          | 64       | RQIQHISDK           |           |       |                                                  | Mascot           |
| 1308.6477           | 1308.6664                    | 0.0187  | 14    | 100         | 110      | RHGDHLEMSVK         |           |       |                                                  | Mascot           |
| 1362.6458           | 1362.7101                    | 0.0643  | 47    | 111         | 122      | LVETAIQSMEEP        |           |       | Oxidation (M)[9]                                 | Mascot           |
| 1362.6458           | 1362.7101                    | 0.0643  | 47    | 111         | 122      | LVETAIQSMEEP        |           |       | Oxidation (M)[9]                                 | Mascot           |
| 1448.6686           | 1448.7517                    | 0.0831  | 57    | 78          | 89       | ELIETVGCEQDR        |           |       | Carbamidomethyl (C)[8]                           | Mascot           |
| 1914.9043           | 1914.9497                    | 0.0454  | 24    | 2           | 19       | CTVDTICPSVICSVSMLK  |           |       | Oxidation (M)[16]                                | Mascot           |
| 2085.9688           | 2085.9387                    | -0.0301 | -14   | 2           | 19       | CTVDTICPSVICSVSMLK  |           |       | Carbamidomethyl (C)[1,7,12], Oxidation (M)[16]   | Mascot           |
| 2102.9663           | 2102.957                     | -0.0093 | -4    | 1           | 19       | MCTVDTICPSVICSVSMLK |           |       | Carbamidomethyl (C)[2], Oxidation (M)[1]         | Mascot           |
| 2118.9612           | 2118.9619                    | 0.0007  | 0     | 1           | 19       | MCTVDTICPSVICSVSMLK |           |       | Carbamidomethyl (C)[2], Oxidation (M)[1,17]      | Mascot           |
| 2118.9612           | 2118.9619                    | 0.0007  | 0     | 1           | 19       | MCTVDTICPSVICSVSMLK |           |       | Carbamidomethyl (C)[2], Oxidation (M)[1,17]      | Mascot           |
| 2233.0042           | 2233.1072                    | 0.103   | 46    | 1           | 19       | MCTVDTICPSVICSVSMLK |           |       | Carbamidomethyl (C)[2,8,13], Oxidation (M)[1,17] | Mascot           |
| 37                  | Npepps protein [Danio rerio] |         |       | gi 33585611 |          | 19640.3             | 8.56      | 6     | 33                                               | 0                |

| Peptide Information |                        |         |       |             |          |                    |           |       |                |                  |
|---------------------|------------------------|---------|-------|-------------|----------|--------------------|-----------|-------|----------------|------------------|
| Calc. Mass          | Obsrv. Mass            | ± da    | ± ppm | Start Seq.  | End Seq. | Sequence           | Ion Score | C. I. | % Modification | Rank Result Type |
| 1248.5637           | 1248.6927              | 0.129   | 103   | 26          | 35       | QADMQEEKNR         |           |       |                | Mascot           |
| 1362.8103           | 1362.7101              | -0.1002 | -74   | 39          | 51       | VLGAIPAPDLIQR      |           |       |                | Mascot           |
| 1362.8103           | 1362.7101              | -0.1002 | -74   | 39          | 51       | VLGAIPAPDLIQR      |           |       |                | Mascot           |
| 1394.8154           | 1394.7837              | -0.0317 | -23   | 99          | 110      | YQGGLISRLIK        |           |       |                | Mascot           |
| 1432.8409           | 1432.7574              | -0.0835 | -58   | 108         | 120      | LIKLTVDGFAIDK      |           |       |                | Mascot           |
| 1432.8409           | 1432.7574              | -0.0835 | -58   | 108         | 120      | LIKLTVDGFAIDK      |           |       |                | Mascot           |
| 1486.7285           | 1486.728               | -0.0005 | 0     | 158         | 169      | DADDIHQYLLQR       |           |       |                | Mascot           |
| 2103.0837           | 2102.957               | -0.1267 | -60   | 140         | 157      | TVQQCCENILLNAAWLKR |           |       |                | Mascot           |
| 38                  | cyclin-F [Danio rerio] |         |       | gi 46309465 |          | 84852.2            | 5.63      | 12    | 33             | 0                |

| Peptide Information |             |         |       |            |          |            |           |       |                        |                  |
|---------------------|-------------|---------|-------|------------|----------|------------|-----------|-------|------------------------|------------------|
| Calc. Mass          | Obsrv. Mass | ± da    | ± ppm | Start Seq. | End Seq. | Sequence   | Ion Score | C. I. | % Modification         | Rank Result Type |
| 915.4101            | 915.4971    | 0.087   | 95    | 576        | 583      | ADSMQAHR   |           |       |                        | Mascot           |
| 950.4399            | 950.501     | 0.0611  | 64    | 495        | 502      | CFGQDVPK   |           |       | Carbamidomethyl (C)[1] | Mascot           |
| 1006.5502           | 1006.527    | -0.0232 | -23   | 13         | 20       | CFSLPVRK   |           |       | Carbamidomethyl (C)[1] | Mascot           |
| 1079.5084           | 1079.5217   | 0.0133  | 12    | 123        | 132      | ADLCGRMASR |           |       |                        | Mascot           |

|    |                            |           |         |     |             |     |                          |      |   |    |   |  |                                          |  |  |  |        |
|----|----------------------------|-----------|---------|-----|-------------|-----|--------------------------|------|---|----|---|--|------------------------------------------|--|--|--|--------|
|    | 1124.6534                  | 1124.6771 | 0.0237  | 21  | 506         | 515 | HVSLTGVKQR               |      |   |    |   |  |                                          |  |  |  | Mascot |
|    | 1256.6238                  | 1256.7084 | 0.0846  | 67  | 240         | 248 | YLQCMRTLRL               |      |   |    |   |  | Carbamidomethyl (C)[4], Oxidation (M)[5] |  |  |  | Mascot |
|    | 1256.6238                  | 1256.7084 | 0.0846  | 67  | 240         | 248 | YLQCMRTLRL               |      |   |    |   |  | Carbamidomethyl (C)[4], Oxidation (M)[5] |  |  |  | Mascot |
|    | 1308.6405                  | 1308.6664 | 0.0259  | 20  | 254         | 264 | GCWEAQLAFVK              |      |   |    |   |  | Carbamidomethyl (C)[2]                   |  |  |  | Mascot |
|    | 1317.658                   | 1317.7031 | 0.0451  | 34  | 172         | 183 | LQAECQTSPGRK             |      |   |    |   |  |                                          |  |  |  | Mascot |
|    | 1846.97                    | 1846.8077 | -0.1623 | -88 | 349         | 364 | AQLQLLGIACMVICTR         |      |   |    |   |  | Carbamidomethyl (C)[10,14]               |  |  |  | Mascot |
|    | 1862.9065                  | 1862.8049 | -0.1016 | -55 | 324         | 339 | DFSSQVLHVTISCVDR         |      |   |    |   |  | Carbamidomethyl (C)[13]                  |  |  |  | Mascot |
|    | 2283.1689                  | 2283.1985 | 0.0296  | 13  | 184         | 202 | GTLLYCLARVLQLFDDEE<br>K  |      |   |    |   |  | Carbamidomethyl (C)[6]                   |  |  |  | Mascot |
|    | 2283.9778                  | 2284.1965 | 0.2187  | 96  | 628         | 647 | DGEISTMEVQMELPLDC<br>ADR |      |   |    |   |  | Oxidation (M)[7,11]                      |  |  |  | Mascot |
| 39 | protein BTG3 [Danio rerio] |           |         |     | gi 55925203 |     | 18115.1                  | 5.85 | 6 | 32 | 0 |  |                                          |  |  |  |        |

#### Peptide Information

| Calc. Mass | Obsrv. Mass | ± da   | ± ppm | Start Seq. | End Seq. | Sequence                 | Ion Score | C. I. | % | Modification               | Rank | Result Type |
|------------|-------------|--------|-------|------------|----------|--------------------------|-----------|-------|---|----------------------------|------|-------------|
| 950.4988   | 950.501     | 0.0022 | 2     | 54         | 61       | GQAFCIR                  |           |       |   |                            |      | Mascot      |
| 1200.5432  | 1200.6678   | 0.1246 | 104   | 44         | 53       | GHWYPDNPSK               |           |       |   |                            |      | Mascot      |
| 1248.6583  | 1248.6927   | 0.0344 | 28    | 65         | 74       | FQKEDAELLR               |           |       |   |                            |      | Mascot      |
| 1759.83    | 1759.8502   | 0.0202 | 11    | 44         | 58       | GHWYPDNPSKGQAFR          |           |       |   |                            |      | Mascot      |
| 1759.83    | 1759.8502   | 0.0202 | 11    | 44         | 58       | GHWYPDNPSKGQAFR          | 4         |       | 0 |                            |      | Mascot      |
| 2211.0208  | 2211.1282   | 0.1074 | 49    | 91         | 108      | ELTLWVDPGEVCCRYGE<br>K   |           |       |   | Carbamidomethyl (C)[12,13] |      | Mascot      |
| 2211.0208  | 2211.1282   | 0.1074 | 49    | 91         | 108      | ELTLWVDPGEVCCRYGE<br>K   |           |       |   | Carbamidomethyl (C)[12,13] |      | Mascot      |
| 2224.9412  | 2225.1394   | 0.1982 | 89    | 139        | 158      | VTSDYHSGSSSDEDSML<br>VHR |           |       |   | Oxidation (M)[16]          |      | Mascot      |

40 PREDICTED: high affinity cGMP-specific 3',5'-cyclic phosphodiesterase 9A-like [Danio rerio]

#### Peptide Information

| Calc. Mass | Obsrv. Mass | ± da    | ± ppm | Start Seq. | End Seq. | Sequence     | Ion Score | C. I. | % | Modification           | Rank | Result Type |
|------------|-------------|---------|-------|------------|----------|--------------|-----------|-------|---|------------------------|------|-------------|
| 987.4135   | 987.5178    | 0.1043  | 106   | 29         | 36       | HCSPCDIR     |           |       |   | Carbamidomethyl (C)[2] |      | Mascot      |
| 1045.5312  | 1045.5718   | 0.0406  | 39    | 368        | 376      | HGEILDSFK    |           |       |   |                        |      | Mascot      |
| 1270.5767  | 1270.7366   | 0.1599  | 126   | 148        | 158      | LKDEMTSGSMR  |           |       |   | Oxidation (M)[5]       |      | Mascot      |
| 1362.5955  | 1362.7101   | 0.1146  | 84    | 78         | 89       | VMSHSTNQGECK |           |       |   | Oxidation (M)[2]       |      | Mascot      |
| 1362.7198  | 1362.7101   | -0.0097 | -7    | 227        | 237      | EFNMNPITLKR  |           |       |   |                        |      | Mascot      |
| 1377.6678  | 1377.684    | 0.0162  | 12    | 495        | 506      | QIEDAMSEAQKK |           |       |   |                        |      | Mascot      |
| 1381.7209  | 1381.6779   | -0.043  | -31   | 186        | 197      | YTLSQETIDALK |           |       |   |                        |      | Mascot      |
| 1486.7684  | 1486.728    | -0.0404 | -27   | 459        | 470      | FVLIPMFETVMK |           |       |   | Oxidation (M)[6,11]    |      | Mascot      |

|    |                                                                                 |           |         |     |     |         |                         |    |    |   |                        |        |
|----|---------------------------------------------------------------------------------|-----------|---------|-----|-----|---------|-------------------------|----|----|---|------------------------|--------|
|    | 1862.8337                                                                       | 1862.8049 | -0.0288 | -15 | 377 | 391     | QKVDNFDCTNEEHVK         |    |    |   | Carbamidomethyl (C)[8] | Mascot |
|    | 1915.1045                                                                       | 1914.9497 | -0.1548 | -81 | 351 | 367     | QIRQAII TLILATDMAK      |    |    |   | Oxidation (M)[15]      | Mascot |
|    | 2004.9761                                                                       | 2005.0021 | 0.026   | 13  | 2   | 20      | GSSSSSYTPKTIYLDVDG<br>K |    |    |   |                        | Mascot |
| 41 | PREDICTED: MAGUK p55 subfamily member 6 isoform gi 326674868<br>1 [Danio rerio] |           |         |     |     | 60958.3 | 6.56                    | 10 | 32 | 0 |                        |        |

#### Peptide Information

| Calc. Mass | Obsrv. Mass | ± da    | ± ppm | Start Seq. | End Seq. | Sequence                 | Ion Score | C. I. | % Modification     | Rank | Result Type |
|------------|-------------|---------|-------|------------|----------|--------------------------|-----------|-------|--------------------|------|-------------|
| 915.4642   | 915.4971    | 0.0329  | 36    | 380        | 386      | RPRDDEK                  |           |       |                    |      | Mascot      |
| 950.4611   | 950.501     | 0.0399  | 42    | 200        | 208      | DCNGSITLK                |           |       |                    |      | Mascot      |
| 987.5217   | 987.5178    | -0.0039 | -4    | 181        | 189      | EVNGREVGK                |           |       |                    |      | Mascot      |
| 1370.5927  | 1370.6625   | 0.0698  | 51    | 397        | 407      | EEMEMDIKASR              |           |       | Oxidation (M)[3,5] |      | Mascot      |
| 1385.6954  | 1385.7264   | 0.031   | 22    | 423        | 434      | MDSIHEVVRAGR             |           |       | Oxidation (M)[1]   |      | Mascot      |
| 1449.7253  | 1449.7637   | 0.0384  | 26    | 293        | 307      | DLDGSGILCGTLTGK          |           |       |                    |      | Mascot      |
| 2005.0382  | 2005.0021   | -0.0361 | -18   | 2          | 20       | TVSNAKSGTAMQQVLDN<br>LK  |           |       |                    |      | Mascot      |
| 2211.083   | 2211.1282   | 0.0452  | 20    | 502        | 519      | RAYNHYFDLTIVNDNLDK       |           |       |                    |      | Mascot      |
| 2211.083   | 2211.1282   | 0.0452  | 20    | 502        | 519      | RAYNHYFDLTIVNDNLDK       |           |       |                    |      | Mascot      |
| 2225.1746  | 2225.1394   | -0.0352 | -16   | 30         | 48       | DIDLIFLRGIMESPIAHER      |           |       |                    |      | Mascot      |
| 2283.1729  | 2283.1985   | 0.0256  | 11    | 450        | 469      | TSEFMPFVVFIAAPELDTL<br>R |           |       |                    |      | Mascot      |

42 hypothetical protein LOC450015 [Danio rerio] gi|54400574 36312.7 5.75 7 31 0

#### Peptide Information

| Calc. Mass | Obsrv. Mass | ± da   | ± ppm | Start Seq. | End Seq. | Sequence          | Ion Score | C. I. | % Modification | Rank | Result Type |
|------------|-------------|--------|-------|------------|----------|-------------------|-----------|-------|----------------|------|-------------|
| 827.4045   | 827.4365    | 0.032  | 39    | 258        | 263      | FNQQYK            |           |       |                |      | Mascot      |
| 842.4366   | 842.5168    | 0.0802 | 95    | 148        | 155      | TVTEAGHK          |           |       |                |      | Mascot      |
| 915.4907   | 915.4971    | 0.0064 | 7     | 281        | 287      | FVHSRNR           |           |       |                |      | Mascot      |
| 983.5018   | 983.4488    | -0.053 | -54   | 250        | 257      | MFGPFKEK          |           |       |                |      | Mascot      |
| 1277.6848  | 1277.7234   | 0.0386 | 30    | 288        | 299      | VGLSFSLGINDR      |           |       |                |      | Mascot      |
| 1277.6848  | 1277.7234   | 0.0386 | 30    | 288        | 299      | VGLSFSLGINDR      |           |       |                |      | Mascot      |
| 1345.6495  | 1345.6891   | 0.0396 | 29    | 70         | 80       | SRIDYYNGTTR       |           |       |                |      | Mascot      |
| 1743.8483  | 1743.854    | 0.0057 | 3     | 140        | 155      | GAQCEVWKT VTEAGHK |           |       |                |      | Mascot      |
| 1743.8483  | 1743.854    | 0.0057 | 3     | 140        | 155      | GAQCEVWKT VTEAGHK |           |       |                |      | Mascot      |

43 novel protein similar to vertebrate breast cancer anti-estrogen resistance 3 (BCAR3) [Danio rerio] gi|169158144 84068.2 8.52 12 31 0

| Peptide Information |                                          |             |         |       |              |                      |           |                      |                        |    |                  |
|---------------------|------------------------------------------|-------------|---------|-------|--------------|----------------------|-----------|----------------------|------------------------|----|------------------|
|                     | Calc. Mass                               | Obsrv. Mass | ± da    | ± ppm | Start Seq.   | End Sequence Seq.    | Ion Score | C. I. % Modification |                        |    | Rank Result Type |
|                     | 882.5083                                 | 882.5741    | 0.0658  | 75    | 607          | 613 SLKPFYK          |           |                      |                        |    | Mascot           |
|                     | 1045.5524                                | 1045.5718   | 0.0194  | 19    | 45           | 52 RELEELK           |           |                      |                        |    | Mascot           |
|                     | 1051.5895                                | 1051.7223   | 0.1328  | 126   | 22           | 31 SSVIGAKFSR        |           |                      |                        |    | Mascot           |
|                     | 1079.6068                                | 1079.5217   | -0.0851 | -79   | 665          | 674 HLEGARAVAR       |           |                      |                        |    | Mascot           |
|                     | 1256.5325                                | 1256.7084   | 0.1759  | 140   | 675          | 685 NADTYTCNAQR      |           |                      |                        |    | Mascot           |
|                     | 1256.5325                                | 1256.7084   | 0.1759  | 140   | 675          | 685 NADTYTCNAQR      |           |                      |                        |    | Mascot           |
|                     | 1294.6439                                | 1294.7118   | 0.0679  | 52    | 60           | 70 SHAWYHGAIPR       |           |                      |                        |    | Mascot           |
|                     | 1317.7083                                | 1317.7031   | -0.0052 | -4    | 452          | 462 ENKPLEMTVLK      |           |                      | Oxidation (M)[7]       |    | Mascot           |
|                     | 1361.6592                                | 1361.6848   | 0.0256  | 19    | 10           | 21 TITAALCCFYQK      |           |                      |                        |    | Mascot           |
|                     | 1381.6528                                | 1381.6779   | 0.0251  | 18    | 374          | 385 MNSLQANGYVER     |           |                      |                        |    | Mascot           |
|                     | 1449.861                                 | 1449.7637   | -0.0973 | -67   | 317          | 329 VPTVRVPCIPALK    |           |                      | Carbamidomethyl (C)[8] |    | Mascot           |
|                     | 1476.7627                                | 1476.7306   | -0.0321 | -22   | 288          | 300 RMAFDLTPGEAIR    |           |                      |                        |    | Mascot           |
|                     | 2018.002                                 | 2018.1835   | 0.1815  | 90    | 5            | 21 CNILRTITAALCCFYQK |           |                      | Carbamidomethyl (C)[1] |    | Mascot           |
| 44                  | PREDICTED: neurabin-1-like [Danio rerio] |             |         |       | gi 326670455 |                      | 143069.6  | 4.9                  | 1                      | 26 | 28.083           |

| Peptide Information |                                                              |             |        |       |              |                   |           |                      |                   |    |                  |
|---------------------|--------------------------------------------------------------|-------------|--------|-------|--------------|-------------------|-----------|----------------------|-------------------|----|------------------|
|                     | Calc. Mass                                                   | Obsrv. Mass | ± da   | ± ppm | Start Seq.   | End Sequence Seq. | Ion Score | C. I. % Modification |                   |    | Rank Result Type |
|                     | 1362.614                                                     | 1362.7101   | 0.0961 | 71    | 371          | 383 EQCLDPAGAGMVR | 26        | 28.083               | Oxidation (M)[11] |    | 2 Mascot         |
| 45                  | PREDICTED: insulin receptor substrate 1-B-like [Danio rerio] |             |        |       | gi 326674337 |                   | 118937.4  | 8.49                 | 1                 | 22 | 0                |

| Peptide Information |                                                   |             |         |       |              |                      |           |                      |                   |    |                  |
|---------------------|---------------------------------------------------|-------------|---------|-------|--------------|----------------------|-----------|----------------------|-------------------|----|------------------|
|                     | Calc. Mass                                        | Obsrv. Mass | ± da    | ± ppm | Start Seq.   | End Sequence Seq.    | Ion Score | C. I. % Modification |                   |    | Rank Result Type |
|                     | 1743.9421                                         | 1743.854    | -0.0881 | -51   | 179          | 194 LNSDAAAVVLQLMNIR | 22        | 0                    | Oxidation (M)[13] |    | 3 Mascot         |
| 46                  | cell adhesion molecule 1a isoform 2 [Danio rerio] |             |         |       | gi 158538876 |                      | 48182.2   | 4.82                 | 1                 | 17 | 0                |

| Peptide Information |                                                                       |             |        |       |              |                   |           |                      |   |    |                  |
|---------------------|-----------------------------------------------------------------------|-------------|--------|-------|--------------|-------------------|-----------|----------------------|---|----|------------------|
|                     | Calc. Mass                                                            | Obsrv. Mass | ± da   | ± ppm | Start Seq.   | End Sequence Seq. | Ion Score | C. I. % Modification |   |    | Rank Result Type |
|                     | 1362.6859                                                             | 1362.7101   | 0.0242 | 18    | 107          | 119 VSLSNVLSDEGR  | 17        | 0                    |   |    | 3 Mascot         |
| 47                  | PREDICTED: PH and SEC7 domain-containing protein 4-like [Danio rerio] |             |        |       | gi 326668322 |                   | 90694.7   | 4.54                 | 1 | 17 | 0                |



| Peptide Information |                                                                                                          |        |       |            |                     |           |                      |   |    |                  |
|---------------------|----------------------------------------------------------------------------------------------------------|--------|-------|------------|---------------------|-----------|----------------------|---|----|------------------|
| Calc. Mass          | Obsrv. Mass                                                                                              | ± da   | ± ppm | Start Seq. | End Sequence Seq.   | Ion Score | C. I. % Modification |   |    | Rank Result Type |
| 1743.833            | 1743.854                                                                                                 | 0.021  | 12    | 504        | 518 SLMPETDREQDGPLR | 10        | 0                    |   |    | 8 Mascot         |
| 1759.828            | 1759.8502                                                                                                | 0.0222 | 13    | 504        | 518 SLMPETDREQDGPLR | 17        | 0 Oxidation (M)[3]   |   |    | 2 Mascot         |
| 48                  | novel protein similar to vertebrate spectrin repeat containing, nuclear envelope 2 (SYNE2) [Danio rerio] |        |       |            | gi 56207727         | 115485.2  | 5.17                 | 1 | 16 | 0                |

| Peptide Information |                                         |        |       |            |                   |           |                      |   |    |                  |
|---------------------|-----------------------------------------|--------|-------|------------|-------------------|-----------|----------------------|---|----|------------------|
| Calc. Mass          | Obsrv. Mass                             | ± da   | ± ppm | Start Seq. | End Sequence Seq. | Ion Score | C. I. % Modification |   |    | Rank Result Type |
| 1256.6705           | 1256.7084                               | 0.0379 | 30    | 229        | 238 RLAEQQDLQR    | 16        | 0                    |   |    | 2 Mascot         |
| 49                  | calcium-binding protein 1 [Danio rerio] |        |       |            | gi 50539888       | 19114.3   | 4.69                 | 1 | 16 | 0                |

| Peptide Information |                                              |        |       |            |                   |           |                      |   |    |                  |
|---------------------|----------------------------------------------|--------|-------|------------|-------------------|-----------|----------------------|---|----|------------------|
| Calc. Mass          | Obsrv. Mass                                  | ± da   | ± ppm | Start Seq. | End Sequence Seq. | Ion Score | C. I. % Modification |   |    | Rank Result Type |
| 1432.6737           | 1432.7574                                    | 0.0837 | 58    | 18         | 28 ELRPEEMDELRL   | 16        | 0 Oxidation (M)[7]   |   |    | 4 Mascot         |
| 50                  | hypothetical protein LOC556137 [Danio rerio] |        |       |            | gi 113677313      | 19802     | 5.55                 | 1 | 15 | 0                |

| Peptide Information |             |        |       |            |                   |           |                          |  |  |                  |
|---------------------|-------------|--------|-------|------------|-------------------|-----------|--------------------------|--|--|------------------|
| Calc. Mass          | Obsrv. Mass | ± da   | ± ppm | Start Seq. | End Sequence Seq. | Ion Score | C. I. % Modification     |  |  | Rank Result Type |
| 1759.811            | 1759.8502   | 0.0392 | 22    | 2          | 16 LLDYCCRCGTALIR | 15        | 0 Carbamidomethyl (C)[5] |  |  | 3 Mascot         |

| Gel Idx/Pos    | 195/H22   | Instr./Gel Origin      | BA2060/110707A |  |  |  |  | Process Status | Analysis Succeeded |  |
|----------------|-----------|------------------------|----------------|--|--|--|--|----------------|--------------------|--|
| Plate [#] Name | [1] 31496 | Instrument Sample Name |                |  |  |  |  | Spectra        | 11                 |  |

| Rank | Protein Name                            | Accession No. | Protein MW | Protein PI | Pep. Count | Protein Score | Protein Score C. I. % | Total Ion Score | Total Ion C. I. % |
|------|-----------------------------------------|---------------|------------|------------|------------|---------------|-----------------------|-----------------|-------------------|
| 1    | aldehyde dehydrogenase 2b [Danio rerio] | gi 51571951   | 56513.4    | 6.06       | 24         | 706           | 100                   | 520             | 100               |

| Peptide Information |             |        |       |            |                   |                        |                      |  |  |                  |
|---------------------|-------------|--------|-------|------------|-------------------|------------------------|----------------------|--|--|------------------|
| Calc. Mass          | Obsrv. Mass | ± da   | ± ppm | Start Seq. | End Sequence Seq. | Ion Score              | C. I. % Modification |  |  | Rank Result Type |
| 876.4243            | 876.4282    | 0.0039 | 4     | 107        | 113 LADCIER       | Carbamidomethyl (C)[4] |                      |  |  | Mascot           |
| 974.5152            | 974.5182    | 0.003  | 3     | 428        | 435 SLEEVIER      |                        |                      |  |  | Mascot           |
| 1030.5428           | 1030.5532   | 0.0104 | 10    | 455        | 463 ANYISHGLR     | 55                     | 99.909               |  |  | Mascot           |
| 1030.5428           | 1030.5532   | 0.0104 | 10    | 455        | 463 ANYISHGLR     |                        |                      |  |  | Mascot           |



| Calc. Mass | Obsrv. Mass | $\pm$ da | $\pm$ ppm | Start Seq. | End Sequence Seq.            | Ion Score | C. I. % | Modification                             | Rank | Result Type |
|------------|-------------|----------|-----------|------------|------------------------------|-----------|---------|------------------------------------------|------|-------------|
| 876.4243   | 876.4282    | 0.0039   | 4         | 73         | 79 LADCIER                   |           |         | Carbamidomethyl (C)[4]                   |      | Mascot      |
| 974.5152   | 974.5182    | 0.003    | 3         | 394        | 401 SLEEVIER                 |           |         |                                          |      | Mascot      |
| 1030.5428  | 1030.5532   | 0.0104   | 10        | 421        | 429 ANYISHGLR                | 55        | 99.909  |                                          |      | Mascot      |
| 1030.5428  | 1030.5532   | 0.0104   | 10        | 421        | 429 ANYISHGLR                |           |         |                                          |      | Mascot      |
| 1051.6146  | 1051.7194   | 0.1048   | 100       | 334        | 343 KVLGYISSGK               |           |         |                                          |      | Mascot      |
| 1132.5238  | 1132.5328   | 0.009    | 8         | 349        | 359 LMC GGAPAAER             |           |         | Carbamidomethyl (C)[3]                   |      | Mascot      |
| 1148.5187  | 1148.5253   | 0.0066   | 6         | 349        | 359 LMC GGAPAAER             |           |         | Carbamidomethyl (C)[3], Oxidation (M)[2] |      | Mascot      |
| 1403.7603  | 1403.7678   | 0.0075   | 5         | 380        | 391 EEIFGPVMQILK             |           |         |                                          |      | Mascot      |
| 1403.7603  | 1403.7678   | 0.0075   | 5         | 380        | 391 EEIFGPVMQILK             | 67        | 99.994  |                                          |      | Mascot      |
| 1419.7552  | 1419.7617   | 0.0065   | 5         | 380        | 391 EEIFGPVMQILK             |           |         | Oxidation (M)[8]                         |      | Mascot      |
| 1419.7552  | 1419.7617   | 0.0065   | 5         | 380        | 391 EEIFGPVMQILK             | 44        | 98.843  | Oxidation (M)[8]                         |      | Mascot      |
| 1460.6984  | 1460.6359   | -0.0625  | -43       | 345        | 359 EGAKLMCGGAPAAER          |           |         |                                          |      | Mascot      |
| 1470.7627  | 1470.7699   | 0.0072   | 5         | 360        | 372 GYFIQPTVFGDVK            |           |         |                                          |      | Mascot      |
| 1473.6797  | 1473.6864   | 0.0067   | 5         | 113        | 124 YYAGWADKWEGK             |           |         |                                          |      | Mascot      |
| 1473.6797  | 1473.6864   | 0.0067   | 5         | 113        | 124 YYAGWADKWEGK             | 44        | 99.001  |                                          |      | Mascot      |
| 1497.7584  | 1497.7661   | 0.0077   | 5         | 407        | 420 YGLAGAVFTQDIDK           |           |         |                                          |      | Mascot      |
| 1515.8312  | 1515.7649   | -0.0663  | -44       | 67         | 79 GLLLSRLADCIER             |           |         | Carbamidomethyl (C)[10]                  |      | Mascot      |
| 1600.8441  | 1600.8541   | 0.01     | 6         | 223        | 237 VAFTGSTDVGH LIQR         | 123       | 100     |                                          |      | Mascot      |
| 1600.8441  | 1600.8541   | 0.01     | 6         | 223        | 237 VAFTGSTDVGH LIQR         |           |         |                                          |      | Mascot      |
| 1619.7522  | 1619.7637   | 0.0115   | 7         | 125        | 137 TIPIDGNYFCYTR            | 101       | 100     | Carbamidomethyl (C)[10]                  |      | Mascot      |
| 1619.7522  | 1619.7637   | 0.0115   | 7         | 125        | 137 TIPIDGNYFCYTR            |           |         | Carbamidomethyl (C)[10]                  |      | Mascot      |
| 1661.7363  | 1661.7477   | 0.0114   | 7         | 458        | 471 EMGEYGLENYTEVK           |           |         |                                          |      | Mascot      |
| 1677.7312  | 1677.7407   | 0.0095   | 6         | 458        | 471 EMGEYGLENYTEVK           |           |         | Oxidation (M)[2]                         |      | Mascot      |
| 1761.833   | 1761.8429   | 0.0099   | 6         | 290        | 303 TFVQESIYDEFVER           | 125       | 100     |                                          |      | Mascot      |
| 1761.833   | 1761.8429   | 0.0099   | 6         | 290        | 303 TFVQESIYDEFVER           |           |         |                                          |      | Mascot      |
| 1831.0575  | 1831.0667   | 0.0092   | 5         | 175        | 191 VAEQTPLTALYIASLIK        |           |         |                                          |      | Mascot      |
| 2233.0771  | 2233.0981   | 0.021    | 9         | 290        | 307 TFVQESIYDEFVERSVR        |           |         |                                          |      | Mascot      |
| 2273.127   | 2273.1455   | 0.0185   | 8         | 360        | 379 GYFIQPTVFGDVKDDMTI AR    |           |         |                                          |      | Mascot      |
| 2289.1221  | 2289.1477   | 0.0256   | 11        | 360        | 379 GYFIQPTVFGDVKDDMTI AR    |           |         | Oxidation (M)[16]                        |      | Mascot      |
| 2289.1221  | 2289.1477   | 0.0256   | 11        | 360        | 379 GYFIQPTVFGDVKDDMTI AR    | 4         | 0       | Oxidation (M)[16]                        |      | Mascot      |
| 2448.1804  | 2448.2031   | 0.0227   | 9         | 430        | 451 AGTVWINCYNVFGVQAP FGGYK  |           |         | Carbamidomethyl (C)[8]                   |      | Mascot      |
| 2490.1782  | 2490.2053   | 0.0271   | 11        | 312        | 333 IVGDPFDLNTEQGPQVN EDQFK  |           |         |                                          |      | Mascot      |
| 2509.2834  | 2509.3057   | 0.0223   | 9         | 407        | 429 YGLAGAVFTQDIDKANYI SHGLR |           |         |                                          |      | Mascot      |

|   |                              |           |        |    |             |     |                                |      |    |     |     |     |     |                         |  |  |  |        |
|---|------------------------------|-----------|--------|----|-------------|-----|--------------------------------|------|----|-----|-----|-----|-----|-------------------------|--|--|--|--------|
|   | 2618.2732                    | 2618.304  | 0.0308 | 12 | 312         | 334 | IVGDPFDLNTQGPQVN<br>EDQFKK     |      |    |     |     |     |     |                         |  |  |  | Mascot |
|   | 2798.3665                    | 2798.3958 | 0.0293 | 10 | 18          | 43  | TFPTINPATGEIICHVAEG<br>DKADVDK |      |    |     |     |     |     | Carbamidomethyl (C)[14] |  |  |  | Mascot |
| 3 | Aldh2b protein [Danio rerio] |           |        |    | gi 94574478 |     | 56422.4                        | 6.35 | 23 | 694 | 100 | 520 | 100 |                         |  |  |  |        |

Peptide Information

| Calc. Mass | Obsrv. Mass | ± da    | ± ppm | Start Seq. | End Seq. | Sequence                 | Ion Score | C. I.  | % | Modification                             | Rank | Result | Type |
|------------|-------------|---------|-------|------------|----------|--------------------------|-----------|--------|---|------------------------------------------|------|--------|------|
| 876.4243   | 876.4282    | 0.0039  | 4     | 107        | 113      | LADCIER                  |           |        |   | Carbamidomethyl (C)[4]                   |      | Mascot |      |
| 974.5152   | 974.5182    | 0.003   | 3     | 428        | 435      | SLEEVIER                 |           |        |   |                                          |      | Mascot |      |
| 1030.5428  | 1030.5532   | 0.0104  | 10    | 455        | 463      | ANYISHGLR                | 55        | 99.909 |   |                                          |      | Mascot |      |
| 1030.5428  | 1030.5532   | 0.0104  | 10    | 455        | 463      | ANYISHGLR                |           |        |   |                                          |      | Mascot |      |
| 1051.6146  | 1051.7194   | 0.1048  | 100   | 368        | 377      | KVLGYISSGK               |           |        |   |                                          |      | Mascot |      |
| 1132.5238  | 1132.5328   | 0.009   | 8     | 383        | 393      | LMCGGAPAAER              |           |        |   | Carbamidomethyl (C)[3]                   |      | Mascot |      |
| 1148.5187  | 1148.5253   | 0.0066  | 6     | 383        | 393      | LMCGGAPAAER              |           |        |   | Carbamidomethyl (C)[3], Oxidation (M)[2] |      | Mascot |      |
| 1403.7603  | 1403.7678   | 0.0075  | 5     | 414        | 425      | EEIFGPVMQILK             |           |        |   |                                          |      | Mascot |      |
| 1403.7603  | 1403.7678   | 0.0075  | 5     | 414        | 425      | EEIFGPVMQILK             | 67        | 99.994 |   |                                          |      | Mascot |      |
| 1419.7552  | 1419.7617   | 0.0065  | 5     | 414        | 425      | EEIFGPVMQILK             |           |        |   | Oxidation (M)[8]                         |      | Mascot |      |
| 1419.7552  | 1419.7617   | 0.0065  | 5     | 414        | 425      | EEIFGPVMQILK             | 44        | 98.843 |   | Oxidation (M)[8]                         |      | Mascot |      |
| 1460.6984  | 1460.6359   | -0.0625 | -43   | 379        | 393      | EGAKLMCGGAPAAER          |           |        |   |                                          |      | Mascot |      |
| 1470.7627  | 1470.7699   | 0.0072  | 5     | 394        | 406      | GYFIQPTVFGDVK            |           |        |   |                                          |      | Mascot |      |
| 1473.6797  | 1473.6864   | 0.0067  | 5     | 147        | 158      | YYAGWADKWEGK             |           |        |   |                                          |      | Mascot |      |
| 1473.6797  | 1473.6864   | 0.0067  | 5     | 147        | 158      | YYAGWADKWEGK             | 44        | 99.001 |   |                                          |      | Mascot |      |
| 1515.8312  | 1515.7649   | -0.0663 | -44   | 101        | 113      | GLLLSRLADCIER            |           |        |   | Carbamidomethyl (C)[10]                  |      | Mascot |      |
| 1572.7805  | 1572.7897   | 0.0092  | 6     | 38         | 50       | IFINNEWHDAVSK            |           |        |   |                                          |      | Mascot |      |
| 1600.8441  | 1600.8541   | 0.01    | 6     | 257        | 271      | VAFTGSTDVGHLIQR          | 123       | 100    |   |                                          |      | Mascot |      |
| 1600.8441  | 1600.8541   | 0.01    | 6     | 257        | 271      | VAFTGSTDVGHLIQR          |           |        |   |                                          |      | Mascot |      |
| 1619.7522  | 1619.7637   | 0.0115  | 7     | 159        | 171      | TIPIDGNYFCYTR            | 101       | 100    |   | Carbamidomethyl (C)[10]                  |      | Mascot |      |
| 1619.7522  | 1619.7637   | 0.0115  | 7     | 159        | 171      | TIPIDGNYFCYTR            |           |        |   | Carbamidomethyl (C)[10]                  |      | Mascot |      |
| 1661.7363  | 1661.7477   | 0.0114  | 7     | 492        | 505      | EMGEYGLENYTEVK           |           |        |   |                                          |      | Mascot |      |
| 1677.7312  | 1677.7407   | 0.0095  | 6     | 492        | 505      | EMGEYGLENYTEVK           |           |        |   | Oxidation (M)[2]                         |      | Mascot |      |
| 1761.833   | 1761.8429   | 0.0099  | 6     | 324        | 337      | TFVQESIYDEFVER           | 125       | 100    |   |                                          |      | Mascot |      |
| 1761.833   | 1761.8429   | 0.0099  | 6     | 324        | 337      | TFVQESIYDEFVER           |           |        |   |                                          |      | Mascot |      |
| 1831.0575  | 1831.0667   | 0.0092  | 5     | 209        | 225      | VAEQTPLTALYIASLIK        |           |        |   |                                          |      | Mascot |      |
| 2012.0083  | 2011.9922   | -0.0161 | -8    | 436        | 454      | ANDSKYGLAGAVFTQNID<br>K  |           |        |   |                                          |      | Mascot |      |
| 2233.0771  | 2233.0981   | 0.021   | 9     | 324        | 341      | TFVQESIYDEFVERSVR        |           |        |   |                                          |      | Mascot |      |
| 2273.127   | 2273.1455   | 0.0185  | 8     | 394        | 413      | GYFIQPTVFGDVKDDMTI<br>AR |           |        |   |                                          |      | Mascot |      |

|   |                                                                   |           |        |    |     |              |                                |      |    |     |     |                         |        |
|---|-------------------------------------------------------------------|-----------|--------|----|-----|--------------|--------------------------------|------|----|-----|-----|-------------------------|--------|
|   | 2289.1221                                                         | 2289.1477 | 0.0256 | 11 | 394 | 413          | GYFIQPTVFGDVKDDMTI<br>AR       |      |    |     |     | Oxidation (M)[16]       | Mascot |
|   | 2289.1221                                                         | 2289.1477 | 0.0256 | 11 | 394 | 413          | GYFIQPTVFGDVKDDMTI<br>AR       | 4    | 0  |     |     | Oxidation (M)[16]       | Mascot |
|   | 2448.1804                                                         | 2448.2031 | 0.0227 | 9  | 464 | 485          | AGTVWVWVFGVQAP<br>FGGYK        |      |    |     |     | Carbamidomethyl (C)[8]  | Mascot |
|   | 2490.1782                                                         | 2490.2053 | 0.0271 | 11 | 346 | 367          | IVGDPFDLNTQGPQVN<br>EDQFK      |      |    |     |     |                         | Mascot |
|   | 2618.2732                                                         | 2618.304  | 0.0308 | 12 | 346 | 368          | IVGDPFDLNTQGPQVN<br>EDQFKK     |      |    |     |     |                         | Mascot |
|   | 2798.3665                                                         | 2798.3958 | 0.0293 | 10 | 52  | 77           | TFPTINPATGEIICHVAEG<br>DKADVVK |      |    |     |     | Carbamidomethyl (C)[14] | Mascot |
| 4 | PREDICTED: aldehyde dehydrogenase, mitochondrial<br>[Danio rerio] |           |        |    |     | gi 292614411 | 56442.4                        | 5.82 | 24 | 583 | 100 | 397                     | 100    |

#### Peptide Information

| Calc. Mass | Obsrv. Mass | ± da    | ± ppm | Start Seq. | End Seq. | Sequence        | Ion Score | C. I.  | % | Modification                             | Rank | Result Type |
|------------|-------------|---------|-------|------------|----------|-----------------|-----------|--------|---|------------------------------------------|------|-------------|
| 876.4243   | 876.4282    | 0.0039  | 4     | 107        | 113      | LADCIER         |           |        |   | Carbamidomethyl (C)[4]                   |      | Mascot      |
| 974.5152   | 974.5182    | 0.003   | 3     | 428        | 435      | SLEEVIER        |           |        |   |                                          |      | Mascot      |
| 1030.5428  | 1030.5532   | 0.0104  | 10    | 455        | 463      | ANYISHGLR       | 55        | 99.909 |   |                                          |      | Mascot      |
| 1030.5428  | 1030.5532   | 0.0104  | 10    | 455        | 463      | ANYISHGLR       |           |        |   |                                          |      | Mascot      |
| 1051.6146  | 1051.7194   | 0.1048  | 100   | 368        | 377      | KVLGYISSGK      |           |        |   |                                          |      | Mascot      |
| 1132.5238  | 1132.5328   | 0.009   | 8     | 383        | 393      | LMCGGAPAAER     |           |        |   | Carbamidomethyl (C)[3]                   |      | Mascot      |
| 1148.5187  | 1148.5253   | 0.0066  | 6     | 383        | 393      | LMCGGAPAAER     |           |        |   | Carbamidomethyl (C)[3], Oxidation (M)[2] |      | Mascot      |
| 1403.7603  | 1403.7678   | 0.0075  | 5     | 414        | 425      | EEIFGPVMQILK    |           |        |   |                                          |      | Mascot      |
| 1403.7603  | 1403.7678   | 0.0075  | 5     | 414        | 425      | EEIFGPVMQILK    | 67        | 99.994 |   |                                          |      | Mascot      |
| 1419.7552  | 1419.7617   | 0.0065  | 5     | 414        | 425      | EEIFGPVMQILK    |           |        |   | Oxidation (M)[8]                         |      | Mascot      |
| 1419.7552  | 1419.7617   | 0.0065  | 5     | 414        | 425      | EEIFGPVMQILK    | 44        | 98.843 |   | Oxidation (M)[8]                         |      | Mascot      |
| 1460.6984  | 1460.6359   | -0.0625 | -43   | 379        | 393      | EGAKLMCGGAPAAER |           |        |   |                                          |      | Mascot      |
| 1470.7627  | 1470.7699   | 0.0072  | 5     | 394        | 406      | GYFIQPTVFGDVK   |           |        |   |                                          |      | Mascot      |
| 1473.6797  | 1473.6864   | 0.0067  | 5     | 147        | 158      | YYAGWADKWEGK    |           |        |   |                                          |      | Mascot      |
| 1473.6797  | 1473.6864   | 0.0067  | 5     | 147        | 158      | YYAGWADKWEGK    | 44        | 99.001 |   |                                          |      | Mascot      |
| 1497.7584  | 1497.7661   | 0.0077  | 5     | 441        | 454      | YGLAGAVFTQDIDK  |           |        |   |                                          |      | Mascot      |
| 1515.8312  | 1515.7649   | -0.0663 | -44   | 101        | 113      | GLLLSRLADCIER   |           |        |   | Carbamidomethyl (C)[10]                  |      | Mascot      |
| 1572.7805  | 1572.7897   | 0.0092  | 6     | 38         | 50       | IFINNEWHDAVSK   |           |        |   |                                          |      | Mascot      |
| 1619.7522  | 1619.7637   | 0.0115  | 7     | 159        | 171      | TIPIDGNYFCYTR   | 101       | 100    |   | Carbamidomethyl (C)[10]                  |      | Mascot      |
| 1619.7522  | 1619.7637   | 0.0115  | 7     | 159        | 171      | TIPIDGNYFCYTR   |           |        |   | Carbamidomethyl (C)[10]                  |      | Mascot      |
| 1661.7363  | 1661.7477   | 0.0114  | 7     | 492        | 505      | EMGEYGLENYTEVK  |           |        |   |                                          |      | Mascot      |
| 1677.7312  | 1677.7407   | 0.0095  | 6     | 492        | 505      | EMGEYGLENYTEVK  |           |        |   | Oxidation (M)[2]                         |      | Mascot      |
| 1761.833   | 1761.8429   | 0.0099  | 6     | 324        | 337      | TFVQESIYDEFVER  | 125       | 100    |   |                                          |      | Mascot      |
| 1761.833   | 1761.8429   | 0.0099  | 6     | 324        | 337      | TFVQESIYDEFVER  |           |        |   |                                          |      | Mascot      |

|   |                                                                                |           |        |    |     |     |                                |         |      |    |     |                   |                         |     |  |  |        |
|---|--------------------------------------------------------------------------------|-----------|--------|----|-----|-----|--------------------------------|---------|------|----|-----|-------------------|-------------------------|-----|--|--|--------|
|   | 1831.0575                                                                      | 1831.0667 | 0.0092 | 5  | 209 | 225 | VAEQTPLTALYIASLIK              |         |      |    |     |                   |                         |     |  |  | Mascot |
|   | 2233.0771                                                                      | 2233.0981 | 0.021  | 9  | 324 | 341 | TFVQESIYDEFVERSVR              |         |      |    |     |                   |                         |     |  |  | Mascot |
|   | 2273.127                                                                       | 2273.1455 | 0.0185 | 8  | 394 | 413 | GYFIQPTVFGDVKDDMTI<br>AR       |         |      |    |     |                   |                         |     |  |  | Mascot |
|   | 2289.1221                                                                      | 2289.1477 | 0.0256 | 11 | 394 | 413 | GYFIQPTVFGDVKDDMTI<br>AR       |         |      |    |     |                   | Oxidation (M)[16]       |     |  |  | Mascot |
|   | 2289.1221                                                                      | 2289.1477 | 0.0256 | 11 | 394 | 413 | GYFIQPTVFGDVKDDMTI<br>AR       | 4       |      | 0  |     | Oxidation (M)[16] |                         |     |  |  | Mascot |
|   | 2331.1938                                                                      | 2331.2095 | 0.0157 | 7  | 257 | 279 | VAFTGSTDVGHLIQQASS<br>ASNLK    |         |      |    |     |                   |                         |     |  |  | Mascot |
|   | 2448.1804                                                                      | 2448.2031 | 0.0227 | 9  | 464 | 485 | AGTVWINCYNVFGVQAP<br>FGGYK     |         |      |    |     |                   | Carbamidomethyl (C)[8]  |     |  |  | Mascot |
|   | 2490.1782                                                                      | 2490.2053 | 0.0271 | 11 | 346 | 367 | IVGDPFDLNTQGPQVN<br>EDQFK      |         |      |    |     |                   |                         |     |  |  | Mascot |
|   | 2509.2834                                                                      | 2509.3057 | 0.0223 | 9  | 441 | 463 | YGLAGAVFTQDIDKANYI<br>SHGLR    |         |      |    |     |                   |                         |     |  |  | Mascot |
|   | 2618.2732                                                                      | 2618.304  | 0.0308 | 12 | 346 | 368 | IVGDPFDLNTQGPQVN<br>EDQFKK     |         |      |    |     |                   |                         |     |  |  | Mascot |
|   | 2798.3665                                                                      | 2798.3958 | 0.0293 | 10 | 52  | 77  | TFPTINPATGEIICHVAEG<br>DKADVVK |         |      |    |     |                   | Carbamidomethyl (C)[14] |     |  |  | Mascot |
| 5 | novel protein similar to aldehyde dehydrogenase 2, like (aldh2l) [Danio rerio] |           |        |    |     |     |                                |         |      |    |     |                   |                         |     |  |  |        |
|   |                                                                                |           |        |    |     |     | gi 122891034                   | 56503.5 | 5.82 | 22 | 557 | 100               | 397                     | 100 |  |  |        |

### Peptide Information

| Calc. Mass | Obsrv. Mass | ± da    | ± ppm | Start Seq. | End Seq. | Sequence        | Ion Score | C. I.  | % Modification                           | Rank | Result Type |
|------------|-------------|---------|-------|------------|----------|-----------------|-----------|--------|------------------------------------------|------|-------------|
| 876.4243   | 876.4282    | 0.0039  | 4     | 107        | 113      | LADCIER         |           |        | Carbamidomethyl (C)[4]                   |      | Mascot      |
| 974.5152   | 974.5182    | 0.003   | 3     | 428        | 435      | SLEEVIER        |           |        |                                          |      | Mascot      |
| 1030.5428  | 1030.5532   | 0.0104  | 10    | 455        | 463      | ANYISHGLR       | 55        | 99.909 |                                          |      | Mascot      |
| 1030.5428  | 1030.5532   | 0.0104  | 10    | 455        | 463      | ANYISHGLR       |           |        |                                          |      | Mascot      |
| 1051.6146  | 1051.7194   | 0.1048  | 100   | 368        | 377      | KVLGYISSGK      |           |        |                                          |      | Mascot      |
| 1132.5238  | 1132.5328   | 0.009   | 8     | 383        | 393      | LMCGGAPAAER     |           |        | Carbamidomethyl (C)[3]                   |      | Mascot      |
| 1148.5187  | 1148.5253   | 0.0066  | 6     | 383        | 393      | LMCGGAPAAER     |           |        | Carbamidomethyl (C)[3], Oxidation (M)[2] |      | Mascot      |
| 1403.7603  | 1403.7678   | 0.0075  | 5     | 414        | 425      | EEIFGPVMQILK    |           |        |                                          |      | Mascot      |
| 1403.7603  | 1403.7678   | 0.0075  | 5     | 414        | 425      | EEIFGPVMQILK    | 67        | 99.994 |                                          |      | Mascot      |
| 1419.7552  | 1419.7617   | 0.0065  | 5     | 414        | 425      | EEIFGPVMQILK    |           |        | Oxidation (M)[8]                         |      | Mascot      |
| 1419.7552  | 1419.7617   | 0.0065  | 5     | 414        | 425      | EEIFGPVMQILK    | 44        | 98.843 | Oxidation (M)[8]                         |      | Mascot      |
| 1460.6984  | 1460.6359   | -0.0625 | -43   | 379        | 393      | EGAKLMCGGAPAAER |           |        |                                          |      | Mascot      |
| 1470.7627  | 1470.7699   | 0.0072  | 5     | 394        | 406      | GYFIQPTVFGDVK   |           |        |                                          |      | Mascot      |
| 1473.6797  | 1473.6864   | 0.0067  | 5     | 147        | 158      | YYAGWADKWEGK    |           |        |                                          |      | Mascot      |
| 1473.6797  | 1473.6864   | 0.0067  | 5     | 147        | 158      | YYAGWADKWEGK    | 44        | 99.001 |                                          |      | Mascot      |
| 1497.7584  | 1497.7661   | 0.0077  | 5     | 441        | 454      | YGLAGAVFTQDIDK  |           |        |                                          |      | Mascot      |
| 1515.8312  | 1515.7649   | -0.0663 | -44   | 101        | 113      | GLLLSRLADCIER   |           |        | Carbamidomethyl (C)[10]                  |      | Mascot      |
| 1572.7805  | 1572.7897   | 0.0092  | 6     | 38         | 50       | IFINNEWHDAVSK   |           |        |                                          |      | Mascot      |

|   |                                                  |           |         |    |             |     |                                |      |     |                         |        |     |     |
|---|--------------------------------------------------|-----------|---------|----|-------------|-----|--------------------------------|------|-----|-------------------------|--------|-----|-----|
|   | 1619.7522                                        | 1619.7637 | 0.0115  | 7  | 159         | 171 | TIPIDGNYFCYTR                  | 101  | 100 | Carbamidomethyl (C)[10] | Mascot |     |     |
|   | 1619.7522                                        | 1619.7637 | 0.0115  | 7  | 159         | 171 | TIPIDGNYFCYTR                  |      |     | Carbamidomethyl (C)[10] | Mascot |     |     |
|   | 1761.833                                         | 1761.8429 | 0.0099  | 6  | 324         | 337 | TFVQESIYDEFVER                 | 125  | 100 |                         | Mascot |     |     |
|   | 1761.833                                         | 1761.8429 | 0.0099  | 6  | 324         | 337 | TFVQESIYDEFVER                 |      |     |                         | Mascot |     |     |
|   | 1831.0575                                        | 1831.0667 | 0.0092  | 5  | 209         | 225 | VAEQTPLTALYIASLIK              |      |     |                         | Mascot |     |     |
|   | 2170.1025                                        | 2170.0898 | -0.0127 | -6 | 486         | 505 | ASGIGRELGEYGLDIYTE<br>VK       |      |     |                         | Mascot |     |     |
|   | 2233.0771                                        | 2233.0981 | 0.021   | 9  | 324         | 341 | TFVQESIYDEFVERSVR              |      |     |                         | Mascot |     |     |
|   | 2273.127                                         | 2273.1455 | 0.0185  | 8  | 394         | 413 | GYFIQPTVFGDVKDDMTI<br>AR       |      |     |                         | Mascot |     |     |
|   | 2289.1221                                        | 2289.1477 | 0.0256  | 11 | 394         | 413 | GYFIQPTVFGDVKDDMTI<br>AR       |      |     | Oxidation (M)[16]       | Mascot |     |     |
|   | 2289.1221                                        | 2289.1477 | 0.0256  | 11 | 394         | 413 | GYFIQPTVFGDVKDDMTI<br>AR       | 4    | 0   | Oxidation (M)[16]       | Mascot |     |     |
|   | 2331.1938                                        | 2331.2095 | 0.0157  | 7  | 257         | 279 | VAFTGSTDVGHLIQQASS<br>ASNLK    |      |     |                         | Mascot |     |     |
|   | 2448.1804                                        | 2448.2031 | 0.0227  | 9  | 464         | 485 | AGTVWINCYNVFGVQAP<br>FGGYK     |      |     | Carbamidomethyl (C)[8]  | Mascot |     |     |
|   | 2509.2834                                        | 2509.3057 | 0.0223  | 9  | 441         | 463 | YGLAGAVFTQDIDKANYI<br>SHGLR    |      |     |                         | Mascot |     |     |
|   | 2798.3665                                        | 2798.3958 | 0.0293  | 10 | 52          | 77  | TFPTINPATAEVICHVAEG<br>DKADVCK |      |     | Carbamidomethyl (C)[14] | Mascot |     |     |
| 6 | aldehyde dehydrogenase 2 precursor [Danio rerio] |           |         |    | gi 20339358 |     | 56526.6                        | 6.05 | 20  | 527                     | 100    | 392 | 100 |

Peptide Information

| Calc. Mass | Obsrv. Mass | ± da    | ± ppm | Start Seq. | End Seq. | Sequence        | Ion Score | C. I. % | Modification                             | Rank | Result | Type |
|------------|-------------|---------|-------|------------|----------|-----------------|-----------|---------|------------------------------------------|------|--------|------|
| 864.4243   | 864.5198    | 0.0955  | 110   | 407        | 413      | DDMKIAR         |           |         | Oxidation (M)[3]                         |      | Mascot |      |
| 876.4243   | 876.4282    | 0.0039  | 4     | 107        | 113      | LADCIER         |           |         | Carbamidomethyl (C)[4]                   |      | Mascot |      |
| 974.5152   | 974.5182    | 0.003   | 3     | 428        | 435      | SLEEVIER        |           |         |                                          |      | Mascot |      |
| 1030.5428  | 1030.5532   | 0.0104  | 10    | 455        | 463      | ANYISHGLR       | 55        | 99.909  |                                          |      | Mascot |      |
| 1030.5428  | 1030.5532   | 0.0104  | 10    | 455        | 463      | ANYISHGLR       |           |         |                                          |      | Mascot |      |
| 1051.6146  | 1051.7194   | 0.1048  | 100   | 368        | 377      | KVLGYISSGK      |           |         |                                          |      | Mascot |      |
| 1132.5238  | 1132.5328   | 0.009   | 8     | 383        | 393      | LMCGGAPAAER     |           |         | Carbamidomethyl (C)[3]                   |      | Mascot |      |
| 1148.5187  | 1148.5253   | 0.0066  | 6     | 383        | 393      | LMCGGAPAAER     |           |         | Carbamidomethyl (C)[3], Oxidation (M)[2] |      | Mascot |      |
| 1403.7603  | 1403.7678   | 0.0075  | 5     | 414        | 425      | EEIFGPVMQILK    |           |         |                                          |      | Mascot |      |
| 1403.7603  | 1403.7678   | 0.0075  | 5     | 414        | 425      | EEIFGPVMQILK    | 67        | 99.994  |                                          |      | Mascot |      |
| 1419.7552  | 1419.7617   | 0.0065  | 5     | 414        | 425      | EEIFGPVMQILK    |           |         | Oxidation (M)[8]                         |      | Mascot |      |
| 1419.7552  | 1419.7617   | 0.0065  | 5     | 414        | 425      | EEIFGPVMQILK    | 44        | 98.843  | Oxidation (M)[8]                         |      | Mascot |      |
| 1454.7903  | 1454.741    | -0.0493 | -34   | 4          | 15       | AVFSRTPQVFR     |           |         |                                          |      | Mascot |      |
| 1460.6984  | 1460.6359   | -0.0625 | -43   | 379        | 393      | EGAKLMCGGAPAAER |           |         |                                          |      | Mascot |      |
| 1470.7627  | 1470.7699   | 0.0072  | 5     | 394        | 406      | GYFIQPTVFGDVK   |           |         |                                          |      | Mascot |      |
| 1473.6797  | 1473.6864   | 0.0067  | 5     | 147        | 158      | YYAGWADKWEGK    |           |         |                                          |      | Mascot |      |

|   |                                                  |           |         |    |             |     |                                |      |        |                         |        |     |     |
|---|--------------------------------------------------|-----------|---------|----|-------------|-----|--------------------------------|------|--------|-------------------------|--------|-----|-----|
|   | 1473.6797                                        | 1473.6864 | 0.0067  | 5  | 147         | 158 | YYAGWADKWEGK                   | 44   | 99.001 |                         | Mascot |     |     |
|   | 1572.7805                                        | 1572.7897 | 0.0092  | 6  | 38          | 50  | IFINNEWHDAVSK                  |      |        |                         | Mascot |     |     |
|   | 1619.7522                                        | 1619.7637 | 0.0115  | 7  | 159         | 171 | TIPIDGNYFCYTR                  | 101  | 100    | Carbamidomethyl (C)[10] | Mascot |     |     |
|   | 1619.7522                                        | 1619.7637 | 0.0115  | 7  | 159         | 171 | TIPIDGNYFCYTR                  |      |        | Carbamidomethyl (C)[10] | Mascot |     |     |
|   | 1761.833                                         | 1761.8429 | 0.0099  | 6  | 324         | 337 | TFVQESIYDEFVER                 | 125  | 100    |                         | Mascot |     |     |
|   | 1761.833                                         | 1761.8429 | 0.0099  | 6  | 324         | 337 | TFVQESIYDEFVER                 |      |        |                         | Mascot |     |     |
|   | 1831.0575                                        | 1831.0667 | 0.0092  | 5  | 209         | 225 | VAEQTPLTALYIASLIK              |      |        |                         | Mascot |     |     |
|   | 2170.1025                                        | 2170.0898 | -0.0127 | -6 | 486         | 505 | ASGIGRELGEYGLDIYTE<br>VK       |      |        |                         | Mascot |     |     |
|   | 2233.0771                                        | 2233.0981 | 0.021   | 9  | 324         | 341 | TFVQESIYDEFVERSVR              |      |        |                         | Mascot |     |     |
|   | 2331.1938                                        | 2331.2095 | 0.0157  | 7  | 257         | 279 | VAFTGSTDVGHLIQQASS<br>ASNLK    |      |        |                         | Mascot |     |     |
|   | 2448.1804                                        | 2448.2031 | 0.0227  | 9  | 464         | 485 | AGTVWINCYNVFGVQAP<br>FGGYK     |      |        | Carbamidomethyl (C)[8]  | Mascot |     |     |
|   | 2798.3665                                        | 2798.3958 | 0.0293  | 10 | 52          | 77  | TFPTINPATAEVICHVAEG<br>DKADVVK |      |        | Carbamidomethyl (C)[14] | Mascot |     |     |
| 7 | aldehyde dehydrogenase 2 precursor [Danio rerio] |           |         |    | gi 41053732 |     | 56529.6                        | 5.93 | 19     | 523                     | 100    | 397 | 100 |

### Peptide Information

| Calc. Mass | Obsrv. Mass | ± da    | ± ppm | Start Seq. | End Seq. | Sequence        | Ion Score | C. I.  | % Modification                           | Rank | Result Type |
|------------|-------------|---------|-------|------------|----------|-----------------|-----------|--------|------------------------------------------|------|-------------|
| 876.4243   | 876.4282    | 0.0039  | 4     | 107        | 113      | LADCIER         |           |        | Carbamidomethyl (C)[4]                   |      | Mascot      |
| 974.5152   | 974.5182    | 0.003   | 3     | 428        | 435      | SLEEVIER        |           |        |                                          |      | Mascot      |
| 1030.5428  | 1030.5532   | 0.0104  | 10    | 455        | 463      | ANYISHGLR       | 55        | 99.909 |                                          |      | Mascot      |
| 1030.5428  | 1030.5532   | 0.0104  | 10    | 455        | 463      | ANYISHGLR       |           |        |                                          |      | Mascot      |
| 1051.6146  | 1051.7194   | 0.1048  | 100   | 368        | 377      | KVLGYISSGK      |           |        |                                          |      | Mascot      |
| 1132.5238  | 1132.5328   | 0.009   | 8     | 383        | 393      | LMCGGAPAAER     |           |        | Carbamidomethyl (C)[3]                   |      | Mascot      |
| 1148.5187  | 1148.5253   | 0.0066  | 6     | 383        | 393      | LMCGGAPAAER     |           |        | Carbamidomethyl (C)[3], Oxidation (M)[2] |      | Mascot      |
| 1403.7603  | 1403.7678   | 0.0075  | 5     | 414        | 425      | EEIFGPVMQILK    |           |        |                                          |      | Mascot      |
| 1403.7603  | 1403.7678   | 0.0075  | 5     | 414        | 425      | EEIFGPVMQILK    | 67        | 99.994 |                                          |      | Mascot      |
| 1419.7552  | 1419.7617   | 0.0065  | 5     | 414        | 425      | EEIFGPVMQILK    |           |        | Oxidation (M)[8]                         |      | Mascot      |
| 1419.7552  | 1419.7617   | 0.0065  | 5     | 414        | 425      | EEIFGPVMQILK    | 44        | 98.843 | Oxidation (M)[8]                         |      | Mascot      |
| 1460.6984  | 1460.6359   | -0.0625 | -43   | 379        | 393      | EGAKLMCGGAPAAER |           |        |                                          |      | Mascot      |
| 1470.7627  | 1470.7699   | 0.0072  | 5     | 394        | 406      | GYFIQPTVFGDVK   |           |        |                                          |      | Mascot      |
| 1473.6797  | 1473.6864   | 0.0067  | 5     | 147        | 158      | YYAGWADKWEGK    |           |        |                                          |      | Mascot      |
| 1473.6797  | 1473.6864   | 0.0067  | 5     | 147        | 158      | YYAGWADKWEGK    | 44        | 99.001 |                                          |      | Mascot      |
| 1572.7805  | 1572.7897   | 0.0092  | 6     | 38         | 50       | IFINNEWHDAVSK   |           |        |                                          |      | Mascot      |
| 1619.7522  | 1619.7637   | 0.0115  | 7     | 159        | 171      | TIPIDGNYFCYTR   | 101       | 100    | Carbamidomethyl (C)[10]                  |      | Mascot      |
| 1619.7522  | 1619.7637   | 0.0115  | 7     | 159        | 171      | TIPIDGNYFCYTR   |           |        | Carbamidomethyl (C)[10]                  |      | Mascot      |
| 1761.833   | 1761.8429   | 0.0099  | 6     | 324        | 337      | TFVQESIYDEFVER  | 125       | 100    |                                          |      | Mascot      |



|   |                                                                              |           |         |    |     |              |                                |      |    |     |     |     |                         |  |  |  |  |        |
|---|------------------------------------------------------------------------------|-----------|---------|----|-----|--------------|--------------------------------|------|----|-----|-----|-----|-------------------------|--|--|--|--|--------|
|   | 1761.833                                                                     | 1761.8429 | 0.0099  | 6  | 324 | 337          | TFVQESIYDEFVER                 |      |    |     |     |     |                         |  |  |  |  | Mascot |
|   | 1831.0575                                                                    | 1831.0667 | 0.0092  | 5  | 209 | 225          | VAEQTPLTALYIASLIK              |      |    |     |     |     |                         |  |  |  |  | Mascot |
|   | 2170.1025                                                                    | 2170.0898 | -0.0127 | -6 | 486 | 505          | ASGIGRELGEYGLDIYTE<br>VK       |      |    |     |     |     |                         |  |  |  |  | Mascot |
|   | 2233.0771                                                                    | 2233.0981 | 0.021   | 9  | 324 | 341          | TFVQESIYDEFVERSVR              |      |    |     |     |     |                         |  |  |  |  | Mascot |
|   | 2273.127                                                                     | 2273.1455 | 0.0185  | 8  | 394 | 413          | GYFIQPTVFGDVKDDMTI<br>AR       |      |    |     |     |     |                         |  |  |  |  | Mascot |
|   | 2289.1221                                                                    | 2289.1477 | 0.0256  | 11 | 394 | 413          | GYFIQPTVFGDVKDDMTI<br>AR       |      |    |     |     |     | Oxidation (M)[16]       |  |  |  |  | Mascot |
|   | 2289.1221                                                                    | 2289.1477 | 0.0256  | 11 | 394 | 413          | GYFIQPTVFGDVKDDMTI<br>AR       | 4    |    |     |     |     | 0 Oxidation (M)[16]     |  |  |  |  | Mascot |
|   | 2331.1938                                                                    | 2331.2095 | 0.0157  | 7  | 257 | 279          | VAFTGSTDVGHLIQQASS<br>ASNLK    |      |    |     |     |     |                         |  |  |  |  | Mascot |
|   | 2448.1804                                                                    | 2448.2031 | 0.0227  | 9  | 464 | 485          | AGTVWINCYNVFGVQAP<br>FGGYK     |      |    |     |     |     | Carbamidomethyl (C)[8]  |  |  |  |  | Mascot |
|   | 2798.3665                                                                    | 2798.3958 | 0.0293  | 10 | 52  | 77           | TFPTINPATAEVICHVAEG<br>DKADVDK |      |    |     |     |     | Carbamidomethyl (C)[14] |  |  |  |  | Mascot |
| 8 | PREDICTED: aldehyde dehydrogenase, mitochondrial-like, partial [Danio rerio] |           |         |    |     | gi 326681302 | 31349.7                        | 5.28 | 17 | 517 | 100 | 374 | 100                     |  |  |  |  |        |

Peptide Information

| Calc. Mass | Obsrv. Mass | ± da    | ± ppm | Start Seq. | End Seq. | Sequence          | Ion Score | C. I.  | % Modification                           | Rank | Result Type |
|------------|-------------|---------|-------|------------|----------|-------------------|-----------|--------|------------------------------------------|------|-------------|
| 974.5152   | 974.5182    | 0.003   | 3     | 202        | 209      | SLEEVIER          |           |        |                                          |      | Mascot      |
| 1030.5428  | 1030.5532   | 0.0104  | 10    | 229        | 237      | ANYISHGLR         | 55        | 99.909 |                                          |      | Mascot      |
| 1030.5428  | 1030.5532   | 0.0104  | 10    | 229        | 237      | ANYISHGLR         |           |        |                                          |      | Mascot      |
| 1051.6146  | 1051.7194   | 0.1048  | 100   | 142        | 151      | KVLGYISSGK        |           |        |                                          |      | Mascot      |
| 1132.5238  | 1132.5328   | 0.009   | 8     | 157        | 167      | LMCGGAPAAER       |           |        | Carbamidomethyl (C)[3]                   |      | Mascot      |
| 1148.5187  | 1148.5253   | 0.0066  | 6     | 157        | 167      | LMCGGAPAAER       |           |        | Carbamidomethyl (C)[3], Oxidation (M)[2] |      | Mascot      |
| 1403.7603  | 1403.7678   | 0.0075  | 5     | 188        | 199      | EEIFGPVMQILK      |           |        |                                          |      | Mascot      |
| 1403.7603  | 1403.7678   | 0.0075  | 5     | 188        | 199      | EEIFGPVMQILK      | 67        | 99.994 |                                          |      | Mascot      |
| 1419.7552  | 1419.7617   | 0.0065  | 5     | 188        | 199      | EEIFGPVMQILK      |           |        | Oxidation (M)[8]                         |      | Mascot      |
| 1419.7552  | 1419.7617   | 0.0065  | 5     | 188        | 199      | EEIFGPVMQILK      | 44        | 98.843 | Oxidation (M)[8]                         |      | Mascot      |
| 1460.6984  | 1460.6359   | -0.0625 | -43   | 153        | 167      | EGAKLMCGGAPAAER   |           |        |                                          |      | Mascot      |
| 1470.7627  | 1470.7699   | 0.0072  | 5     | 168        | 180      | GYFIQPTVFGDVK     |           |        |                                          |      | Mascot      |
| 1497.7584  | 1497.7661   | 0.0077  | 5     | 215        | 228      | YGLAGAVFTQDIDK    |           |        |                                          |      | Mascot      |
| 1600.8441  | 1600.8541   | 0.01    | 6     | 31         | 45       | VAFTGSTDVGHLIQR   | 123       | 100    |                                          |      | Mascot      |
| 1600.8441  | 1600.8541   | 0.01    | 6     | 31         | 45       | VAFTGSTDVGHLIQR   |           |        |                                          |      | Mascot      |
| 1661.7363  | 1661.7477   | 0.0114  | 7     | 266        | 279      | EMGEYGLENYTEVK    |           |        |                                          |      | Mascot      |
| 1677.7312  | 1677.7407   | 0.0095  | 6     | 266        | 279      | EMGEYGLENYTEVK    |           |        | Oxidation (M)[2]                         |      | Mascot      |
| 1761.833   | 1761.8429   | 0.0099  | 6     | 98         | 111      | TFVQESIYDEFVER    | 125       | 100    |                                          |      | Mascot      |
| 1761.833   | 1761.8429   | 0.0099  | 6     | 98         | 111      | TFVQESIYDEFVER    |           |        |                                          |      | Mascot      |
| 2233.0771  | 2233.0981   | 0.021   | 9     | 98         | 115      | TFVQESIYDEFVERSVR |           |        |                                          |      | Mascot      |



|    |                                        |           |         |     |              |     |                      |                                            |    |        |   |
|----|----------------------------------------|-----------|---------|-----|--------------|-----|----------------------|--------------------------------------------|----|--------|---|
|    | 974.5417                               | 974.5182  | -0.0235 | -24 | 25           | 32  | TQIGYHKK             |                                            |    | Mascot |   |
|    | 1045.5636                              | 1045.5658 | 0.0022  | 2   | 42           | 51  | NVGSLDKNAK           |                                            |    | Mascot |   |
|    | 1256.6382                              | 1256.7491 | 0.1109  | 88  | 32           | 41  | KVVDHYENPR           |                                            |    | Mascot |   |
|    | 1403.6658                              | 1403.7678 | 0.102   | 73  | 130          | 141 | LHC\$MLAEDIAIK       | Carbamidomethyl (C)[3], Oxidation (M)[5]   |    | Mascot |   |
|    | 1403.6658                              | 1403.7678 | 0.102   | 73  | 130          | 141 | LHC\$MLAEDIAIK       | Carbamidomethyl (C)[3], Oxidation (M)[5]   |    | Mascot |   |
|    | 1528.7238                              | 1528.7517 | 0.0279  | 18  | 151          | 164 | QE\$EPVEETAVARN      |                                            |    | Mascot |   |
|    | 1661.7985                              | 1661.7477 | -0.0508 | -31 | 52           | 68  | NVG\$TGLVGAPAC\$DVMK | Carbamidomethyl (C)[12], Oxidation (M)[16] |    | Mascot |   |
| 11 | PREDICTED: complement C3 [Danio rerio] |           |         |     | gi 326664394 |     | 182595               | 6.23                                       | 19 | 44     | 0 |

| Calc. Mass | Obsrv. Mass | ± da    | ± ppm | Start Seq. | End Sequence                              | Ion Score | C. I. % Modification                       | Rank | Result Type |
|------------|-------------|---------|-------|------------|-------------------------------------------|-----------|--------------------------------------------|------|-------------|
| 835.4923   | 835.476     | -0.0163 | -20   | 810        | 816 SLFIDLK                               |           |                                            |      | Mascot      |
| 850.4668   | 850.5481    | 0.0813  | 96    | 1149       | 1156 AVSFLEGK                             |           |                                            |      | Mascot      |
| 882.4679   | 882.5712    | 0.1033  | 117   | 1021       | 1028 DEAIGHIK                             |           |                                            |      | Mascot      |
| 1148.6674  | 1148.5253   | -0.1421 | -124  | 50         | 59 NAFEVKITVK                             |           |                                            |      | Mascot      |
| 1256.613   | 1256.7491   | 0.1361  | 108   | 1029       | 1038 TGYNRQQAYR                           |           |                                            |      | Mascot      |
| 1403.7028  | 1403.7678   | 0.065   | 46    | 1362       | 1372 LTMDFFYKNPK                          |           |                                            |      | Mascot      |
| 1403.7028  | 1403.7678   | 0.065   | 46    | 1362       | 1372 LTMDFFYKNPK                          |           |                                            |      | Mascot      |
| 1419.6978  | 1419.7617   | 0.0639  | 45    | 1362       | 1372 LTMDFFYKNPK                          |           | Oxidation (M)[3]                           |      | Mascot      |
| 1419.6978  | 1419.7617   | 0.0639  | 45    | 1362       | 1372 LTMDFFYKNPK                          |           | Oxidation (M)[3]                           |      | Mascot      |
| 1448.8472  | 1448.9344   | 0.0872  | 60    | 1414       | 1426 ALSDRGSLILYLK                        |           |                                            |      | Mascot      |
| 1454.6224  | 1454.741    | 0.1186  | 82    | 711        | 721 AFLHCCDEMKK                           |           | Carbamidomethyl (C)[5,6], Oxidation (M)[9] |      | Mascot      |
| 1470.889   | 1470.7699   | -0.1191 | -81   | 289        | 302 IQILKGVGTAE LTK                       |           |                                            |      | Mascot      |
| 1473.7445  | 1473.6864   | -0.0581 | -39   | 1021       | 1033 DEAIGHIKTGYNR                        |           |                                            |      | Mascot      |
| 1473.8312  | 1473.6864   | -0.1448 | -98   | 596        | 607 LTQTKIWDVIEK                          |           |                                            |      | Mascot      |
| 1492.681   | 1492.7563   | 0.0753  | 50    | 1511       | 1523 ACESGMDYVYKVK                        |           |                                            |      | Mascot      |
| 1600.8363  | 1600.8541   | 0.0178  | 11    | 1133       | 1147 ELCGAIVGSLPESIR                      |           | Carbamidomethyl (C)[3]                     |      | Mascot      |
| 1600.8363  | 1600.8541   | 0.0178  | 11    | 1133       | 1147 ELCGAIVGSLPESIR                      |           | Carbamidomethyl (C)[3]                     |      | Mascot      |
| 1677.7611  | 1677.7407   | -0.0204 | -12   | 1508       | 1521 NIKACESGMDYVYK                       |           | Carbamidomethyl (C)[5]                     |      | Mascot      |
| 1857.9381  | 1857.8822   | -0.0559 | -30   | 209        | 224 FANTPQKTFTAEFEVK                      |           |                                            |      | Mascot      |
| 1916.7605  | 1916.9781   | 0.2176  | 114   | 1484       | 1499 GDMCQCAEENCSLQKK                     |           | Carbamidomethyl (C)[4,6], Oxidation (M)[3] |      | Mascot      |
| 2430.0596  | 2430.2925   | 0.2329  | 96    | 699        | 720 ATYIGDGPECVKAFLHCC DEMK               |           |                                            |      | Mascot      |
| 2538.2466  | 2538.2896   | 0.043   | 17    | 1524       | 1545 VKDMELAADADIYQMEV EQVLK              |           |                                            |      | Mascot      |
| 3969.0461  | 3968.8386   | -0.2075 | -52   | 774        | 809 AMYLKDSITTWQVLAVS MSPTLGICVAEPEEIVVFK |           |                                            |      | Mascot      |

| Peptide Information |                                |         |       |              |          |                     |           |        |                                           |                  |
|---------------------|--------------------------------|---------|-------|--------------|----------|---------------------|-----------|--------|-------------------------------------------|------------------|
| Calc. Mass          | Obsrv. Mass                    | ± da    | ± ppm | Start Seq.   | End Seq. | Sequence            | Ion Score | C. I.  | % Modification                            | Rank Result Type |
| 1460.709            | 1460.6359                      | -0.0731 | -50   | 71           | 83       | GATSYADQMFLK        |           |        | Oxidation (M)[9]                          | Mascot           |
| 1515.7491           | 1515.7649                      | 0.0158  | 10    | 262          | 272      | FWQHHYLNKDK         |           |        |                                           | Mascot           |
| 1600.8152           | 1600.8541                      | 0.0389  | 24    | 71           | 84       | GATSYADQMFLKLR      | 25        | 12.827 |                                           | Mascot           |
| 1600.8152           | 1600.8541                      | 0.0389  | 24    | 71           | 84       | GATSYADQMFLKLR      |           |        |                                           | Mascot           |
| 1830.8798           | 1831.0667                      | 0.1869  | 102   | 173          | 188      | VVEVLSECCLLSYMAR    |           |        | Oxidation (M)[14]                         | Mascot           |
| 1917.0084           | 1916.9781                      | -0.0303 | -16   | 84           | 100      | RGLLEHILFCIIDSGCK   |           |        |                                           | Mascot           |
| 2273.0464           | 2273.1455                      | 0.0991  | 44    | 301          | 319      | TSPCAIISYIDEPYMELDR |           |        | Carbamidomethyl (C)[4]                    | Mascot           |
| 2289.0413           | 2289.1477                      | 0.1064  | 46    | 301          | 319      | TSPCAIISYIDEPYMELDR |           |        | Carbamidomethyl (C)[4], Oxidation (M)[15] | Mascot           |
| 2289.0413           | 2289.1477                      | 0.1064  | 46    | 301          | 319      | TSPCAIISYIDEPYMELDR |           |        | Carbamidomethyl (C)[4], Oxidation (M)[15] | Mascot           |
| 13                  | Trpc4apa protein [Danio rerio] |         |       | gi 157278955 |          | 36793.8             | 5.75      | 6      | 43                                        | 0 25 12.827      |

| Peptide Information |                                       |         |       |              |          |                     |           |        |                                           |                  |
|---------------------|---------------------------------------|---------|-------|--------------|----------|---------------------|-----------|--------|-------------------------------------------|------------------|
| Calc. Mass          | Obsrv. Mass                           | ± da    | ± ppm | Start Seq.   | End Seq. | Sequence            | Ion Score | C. I.  | % Modification                            | Rank Result Type |
| 1460.709            | 1460.6359                             | -0.0731 | -50   | 65           | 77       | GATSYADQMFLK        |           |        | Oxidation (M)[9]                          | Mascot           |
| 1515.7491           | 1515.7649                             | 0.0158  | 10    | 256          | 266      | FWQHHYLNKDK         |           |        |                                           | Mascot           |
| 1600.8152           | 1600.8541                             | 0.0389  | 24    | 65           | 78       | GATSYADQMFLKLR      | 25        | 12.827 |                                           | Mascot           |
| 1600.8152           | 1600.8541                             | 0.0389  | 24    | 65           | 78       | GATSYADQMFLKLR      |           |        |                                           | Mascot           |
| 1830.8798           | 1831.0667                             | 0.1869  | 102   | 167          | 182      | VVEVLSECCLLSYMAR    |           |        | Oxidation (M)[14]                         | Mascot           |
| 1917.0084           | 1916.9781                             | -0.0303 | -16   | 78           | 94       | RGLLEHILFCIIDSGCK   |           |        |                                           | Mascot           |
| 2273.0464           | 2273.1455                             | 0.0991  | 44    | 295          | 313      | TSPCAIISYIDEPYMELDR |           |        | Carbamidomethyl (C)[4]                    | Mascot           |
| 2289.0413           | 2289.1477                             | 0.1064  | 46    | 295          | 313      | TSPCAIISYIDEPYMELDR |           |        | Carbamidomethyl (C)[4], Oxidation (M)[15] | Mascot           |
| 2289.0413           | 2289.1477                             | 0.1064  | 46    | 295          | 313      | TSPCAIISYIDEPYMELDR |           |        | Carbamidomethyl (C)[4], Oxidation (M)[15] | Mascot           |
| 14                  | novel protein (sb:cb26) [Danio rerio] |         |       | gi 220673387 |          | 183117.1            | 6.17      | 19     | 41                                        | 0                |

| Peptide Information |             |         |       |            |          |            |           |       |                |                  |
|---------------------|-------------|---------|-------|------------|----------|------------|-----------|-------|----------------|------------------|
| Calc. Mass          | Obsrv. Mass | ± da    | ± ppm | Start Seq. | End Seq. | Sequence   | Ion Score | C. I. | % Modification | Rank Result Type |
| 835.4923            | 835.476     | -0.0163 | -20   | 815        | 821      | SLFIDLK    |           |       |                | Mascot           |
| 850.4668            | 850.5481    | 0.0813  | 96    | 1154       | 1161     | AVSFLEGK   |           |       |                | Mascot           |
| 882.4679            | 882.5712    | 0.1033  | 117   | 1026       | 1033     | DEAIGHIK   |           |       |                | Mascot           |
| 1148.6674           | 1148.5253   | -0.1421 | -124  | 50         | 59       | NAFEVKITVK |           |       |                | Mascot           |
| 1256.613            | 1256.7491   | 0.1361  | 108   | 1034       | 1043     | TGYNRQQAYR |           |       |                | Mascot           |

|           |           |         |     |      |      |                                          |  |  |  |                                            |  |        |
|-----------|-----------|---------|-----|------|------|------------------------------------------|--|--|--|--------------------------------------------|--|--------|
| 1403.7028 | 1403.7678 | 0.065   | 46  | 1367 | 1377 | LTMDFFYKNPK                              |  |  |  |                                            |  | Mascot |
| 1403.7028 | 1403.7678 | 0.065   | 46  | 1367 | 1377 | LTMDFFYKNPK                              |  |  |  |                                            |  | Mascot |
| 1419.6978 | 1419.7617 | 0.0639  | 45  | 1367 | 1377 | LTMDFFYKNPK                              |  |  |  | Oxidation (M)[3]                           |  | Mascot |
| 1419.6978 | 1419.7617 | 0.0639  | 45  | 1367 | 1377 | LTMDFFYKNPK                              |  |  |  | Oxidation (M)[3]                           |  | Mascot |
| 1448.8472 | 1448.9344 | 0.0872  | 60  | 1419 | 1431 | ALSDRGSLLYLK                             |  |  |  |                                            |  | Mascot |
| 1454.6224 | 1454.741  | 0.1186  | 82  | 711  | 721  | AF LHCCDEM KK                            |  |  |  | Carbamidomethyl (C)[5,6], Oxidation (M)[9] |  | Mascot |
| 1470.889  | 1470.7699 | -0.1191 | -81 | 289  | 302  | IQILKGVGTAE LTK                          |  |  |  |                                            |  | Mascot |
| 1473.7445 | 1473.6864 | -0.0581 | -39 | 1026 | 1038 | DEAIGHIKTGYNR                            |  |  |  |                                            |  | Mascot |
| 1473.8312 | 1473.6864 | -0.1448 | -98 | 596  | 607  | LTQTKIWDVIEK                             |  |  |  |                                            |  | Mascot |
| 1492.681  | 1492.7563 | 0.0753  | 50  | 1516 | 1528 | ACESGMDYVYKVK                            |  |  |  |                                            |  | Mascot |
| 1600.8363 | 1600.8541 | 0.0178  | 11  | 1138 | 1152 | ELCGAIVGSLPESIR                          |  |  |  | Carbamidomethyl (C)[3]                     |  | Mascot |
| 1600.8363 | 1600.8541 | 0.0178  | 11  | 1138 | 1152 | ELCGAIVGSLPESIR                          |  |  |  | Carbamidomethyl (C)[3]                     |  | Mascot |
| 1677.7611 | 1677.7407 | -0.0204 | -12 | 1513 | 1526 | NIKACESGMDYVYK                           |  |  |  | Carbamidomethyl (C)[5]                     |  | Mascot |
| 1857.9381 | 1857.8822 | -0.0559 | -30 | 209  | 224  | FANTPQKTFTAEFEVK                         |  |  |  |                                            |  | Mascot |
| 1916.7605 | 1916.9781 | 0.2176  | 114 | 1489 | 1504 | GD MCQCAEENC SLQKK                       |  |  |  | Carbamidomethyl (C)[4,6], Oxidation (M)[3] |  | Mascot |
| 2430.0596 | 2430.2925 | 0.2329  | 96  | 699  | 720  | ATYIGDGPECVKAFLHCC<br>DEMK               |  |  |  |                                            |  | Mascot |
| 2538.2466 | 2538.2896 | 0.043   | 17  | 1529 | 1550 | VKDMELAADADIYQMEV<br>EQVLK               |  |  |  |                                            |  | Mascot |
| 3969.0461 | 3968.8386 | -0.2075 | -52 | 779  | 814  | AMYLKDSITTWQVLAVS<br>MSPTLGICVAEPEEIVVFK |  |  |  |                                            |  | Mascot |

15

glycerol-3-phosphate dehydrogenase 1 (soluble) [Danio rerio]

gi|47550789

38154.7

6.71

9

41

0

| Peptide Information |             |         |       |            |          |                             |           |       |                         |      |             |
|---------------------|-------------|---------|-------|------------|----------|-----------------------------|-----------|-------|-------------------------|------|-------------|
| Calc. Mass          | Obsrv. Mass | ± da    | ± ppm | Start Seq. | End Seq. | Sequence                    | Ion Score | C. I. | % Modification          | Rank | Result Type |
| 1460.6184           | 1460.6359   | 0.0175  | 12    | 38         | 48       | MWVYEEMIDGR                 |           |       | Oxidation (M)[1,7]      |      | Mascot      |
| 1528.6948           | 1528.7517   | 0.0569  | 37    | 161        | 175      | FCETTIGATNEASGK             |           |       |                         |      | Mascot      |
| 1572.7185           | 1572.7897   | 0.0712  | 45    | 38         | 49       | MWVYEEMIDGRK                |           |       | Oxidation (M)[1]        |      | Mascot      |
| 1783.9436           | 1783.834    | -0.1096 | -61   | 121        | 137      | GIDEGPDGLTLISDIIR           |           |       |                         |      | Mascot      |
| 1916.9421           | 1916.9781   | 0.036   | 19    | 161        | 178      | FCETTIGATNEASGKLFK          |           |       |                         |      | Mascot      |
| 2011.9541           | 2011.9922   | 0.0381  | 19    | 205        | 224      | NIVAVGAGFC DGLGFGD<br>NTK   |           |       | Carbamidomethyl (C)[10] |      | Mascot      |
| 2158.0347           | 2158.064    | 0.0293  | 14    | 32         | 48       | FEPLVKMWVYEEMIDGR           |           |       | Oxidation (M)[7]        |      | Mascot      |
| 2233.1089           | 2233.0981   | -0.0108 | -5    | 140        | 160      | LEIEVCVLMGANIASEVA<br>DEK   |           |       |                         |      | Mascot      |
| 2448.2361           | 2448.2031   | -0.033  | -13   | 138        | 160      | AKLEIEVCVLMGANIASE<br>VADEK |           |       | Oxidation (M)[11]       |      | Mascot      |

16

PREDICTED: hypothetical protein LOC100537298 [Danio rerio]

gi|326667816

6120

8.38

6

40

0

Peptide Information

|    | Calc. Mass                              | Obsrv. Mass | ± da    | ± ppm | Start Seq.   | End Sequence Seq.         | Ion Score | C. I. % | Modification                             | Rank | Result Type |
|----|-----------------------------------------|-------------|---------|-------|--------------|---------------------------|-----------|---------|------------------------------------------|------|-------------|
|    | 1165.5895                               | 1165.7506   | 0.1611  | 138   | 10           | 18 CLRVNYGQR              |           |         | Carbamidomethyl (C)[1]                   |      | Mascot      |
|    | 1165.5895                               | 1165.7506   | 0.1611  | 138   | 10           | 18 CLRVNYGQR              |           |         | Carbamidomethyl (C)[1]                   |      | Mascot      |
|    | 1470.7191                               | 1470.7699   | 0.0508  | 35    | 1            | 12 MAESSIFTRCLR           |           |         | Carbamidomethyl (C)[10]                  |      | Mascot      |
|    | 1619.7776                               | 1619.7637   | -0.0139 | -9    | 38           | 51 VLSCMHLPTCAIMK         |           |         | Carbamidomethyl (C)[4], Oxidation (M)[5] |      | Mascot      |
|    | 1619.7776                               | 1619.7637   | -0.0139 | -9    | 38           | 51 VLSCMHLPTCAIMK         |           |         | Carbamidomethyl (C)[4], Oxidation (M)[5] |      | Mascot      |
|    | 1916.9829                               | 1916.9781   | -0.0048 | -3    | 38           | 54 VLSCMHLPTCAIMKVT       |           |         | Carbamidomethyl (C)[4]                   |      | Mascot      |
|    | 2011.8848                               | 2011.9922   | 0.1074  | 53    | 19           | 36 CANDCPDVLNTAEQSL<br>R  |           |         |                                          |      | Mascot      |
|    | 2225.0073                               | 2225.1384   | 0.1311  | 59    | 19           | 37 CANDCPDVLNTAEQSL<br>RR |           |         | Carbamidomethyl (C)[1]                   |      | Mascot      |
|    | 2225.0073                               | 2225.1384   | 0.1311  | 59    | 19           | 37 CANDCPDVLNTAEQSL<br>RR |           |         | Carbamidomethyl (C)[1]                   |      | Mascot      |
| 17 | novel zinc finger protein [Danio rerio] |             |         |       | gi 130496620 |                           | 52184.8   | 6.71    | 13                                       | 40   | 0           |

Peptide Information

|  | Calc. Mass | Obsrv. Mass | ± da    | ± ppm | Start Seq. | End Sequence Seq.             | Ion Score | C. I. % | Modification              | Rank | Result Type |
|--|------------|-------------|---------|-------|------------|-------------------------------|-----------|---------|---------------------------|------|-------------|
|  | 835.4341   | 835.476     | 0.0419  | 50    | 141        | 147 SLQEKCK                   |           |         |                           |      | Mascot      |
|  | 974.491    | 974.5182    | 0.0272  | 28    | 104        | 111 QPVCLVCR                  |           |         | Carbamidomethyl (C)[4]    |      | Mascot      |
|  | 996.4818   | 996.6027    | 0.1209  | 121   | 67         | 74 NVCESFLK                   |           |         | Carbamidomethyl (C)[3]    |      | Mascot      |
|  | 1045.5887  | 1045.5658   | -0.0229 | -22   | 132        | 140 KEELNTALK                 |           |         |                           |      | Mascot      |
|  | 1165.6285  | 1165.7506   | 0.1221  | 105   | 95         | 103 LKLFCELEK                 |           |         | Carbamidomethyl (C)[5]    |      | Mascot      |
|  | 1165.6285  | 1165.7506   | 0.1221  | 105   | 95         | 103 LKLFCELEK                 |           |         | Carbamidomethyl (C)[5]    |      | Mascot      |
|  | 1454.746   | 1454.741    | -0.005  | -3    | 438        | 450 CFPSFRILASSVQ             |           |         |                           |      | Mascot      |
|  | 1473.7961  | 1473.6864   | -0.1097 | -74   | 176        | 186 QQFEKLHQFLR               |           |         |                           |      | Mascot      |
|  | 1473.7961  | 1473.6864   | -0.1097 | -74   | 176        | 186 QQFEKLHQFLR               |           |         |                           |      | Mascot      |
|  | 1478.713   | 1478.7196   | 0.0066  | 4     | 20         | 32 TPVLLSCSHSFCCK             |           |         | Carbamidomethyl (C)[7]    |      | Mascot      |
|  | 1492.6584  | 1492.7563   | 0.0979  | 66    | 81         | 94 SSGSEEICSLHSEK             |           |         |                           |      | Mascot      |
|  | 1619.8248  | 1619.7637   | -0.0611 | -38   | 159        | 172 TAQHIKAQAEHTER            |           |         |                           |      | Mascot      |
|  | 1619.8248  | 1619.7637   | -0.0611 | -38   | 159        | 172 TAQHIKAQAEHTER            |           |         |                           |      | Mascot      |
|  | 1831.0337  | 1831.0667   | 0.033   | 18    | 116        | 131 HLKHTFRPISEVAPAK          |           |         |                           |      | Mascot      |
|  | 2283.1345  | 2283.2026   | 0.0681  | 30    | 420        | 437 HLHTYTTFTHTLYPFRR         |           |         |                           |      | Mascot      |
|  | 2798.3462  | 2798.3958   | 0.0496  | 18    | 20         | 42 TPVLLSCSHSFCCKELQ<br>FWISK |           |         | Carbamidomethyl (C)[7,12] |      | Mascot      |

18 PREDICTED: hypothetical protein LOC797100 [Danio rerio]

gi|326681404 37240.7 5.09 7 39 0

Peptide Information

|  | Calc. Mass | Obsrv. Mass | ± da | ± ppm | Start | End Sequence | Ion | C. I. % | Modification | Rank | Result Type |
|--|------------|-------------|------|-------|-------|--------------|-----|---------|--------------|------|-------------|
|--|------------|-------------|------|-------|-------|--------------|-----|---------|--------------|------|-------------|

|    |                                                       |           | Seq.    |     | Seq.         | Score   |                     |                                                   |    |        |
|----|-------------------------------------------------------|-----------|---------|-----|--------------|---------|---------------------|---------------------------------------------------|----|--------|
|    | 835.4164                                              | 835.476   | 0.0596  | 71  | 257          | 263     | LICEMAR             |                                                   |    | Mascot |
|    | 974.5087                                              | 974.5182  | 0.0095  | 10  | 227          | 234     | EGQVCLIR            | Carbamidomethyl (C)[5]                            |    | Mascot |
|    | 1030.6003                                             | 1030.5532 | -0.0471 | -46 | 99           | 107     | GSRTDLLLR           |                                                   |    | Mascot |
|    | 1030.6003                                             | 1030.5532 | -0.0471 | -46 | 99           | 107     | GSRTDLLLR           |                                                   |    | Mascot |
|    | 1136.5074                                             | 1136.5818 | 0.0744  | 65  | 89           | 98      | LCQECGLDAK          | Carbamidomethyl (C)[2]                            |    | Mascot |
|    | 1419.675                                              | 1419.7617 | 0.0867  | 61  | 125          | 137     | IWAASENPSSTEK       |                                                   |    | Mascot |
|    | 1419.675                                              | 1419.7617 | 0.0867  | 61  | 125          | 137     | IWAASENPSSTEK       | 8                                                 | 0  | Mascot |
|    | 1830.9708                                             | 1831.0667 | 0.0959  | 52  | 282          | 298     | ETPNNIVNGLP VHADLK  |                                                   |    | Mascot |
|    | 2169.9219                                             | 2170.0898 | 0.1679  | 77  | 245          | 263     | DMDSHIGNACMKLICEMAR | Oxidation (M)[2, 11]                              |    | Mascot |
|    | 2210.9482                                             | 2211.1226 | 0.1744  | 79  | 245          | 263     | DMDSHIGNACMKLICEMAR | Carbamidomethyl (C)[10], Oxidation (M)[2]         |    | Mascot |
|    | 2283.9646                                             | 2284.1956 | 0.231   | 101 | 245          | 263     | DMDSHIGNACMKLICEMAR | Carbamidomethyl (C)[10, 15], Oxidation (M)[2, 11] |    | Mascot |
| 19 | IgLON family member 5 [Xenopus (Silurana) tropicalis] |           |         |     | gi 187608728 | 26279.4 | 8.49                | 7                                                 | 38 | 0      |

#### Peptide Information

| Calc. Mass | Obsrv. Mass | ± da    | ± ppm | Start Seq. | End Seq. | Sequence                | Ion Score | C. I. | % Modification          | Rank | Result | Type |
|------------|-------------|---------|-------|------------|----------|-------------------------|-----------|-------|-------------------------|------|--------|------|
| 1473.6328  | 1473.6864   | 0.0536  | 36    | 181        | 192      | HFGNYTCFASNR            |           |       | Carbamidomethyl (C)[7]  |      | Mascot |      |
| 1473.6328  | 1473.6864   | 0.0536  | 36    | 181        | 192      | HFGNYTCFASNR            |           |       | Carbamidomethyl (C)[7]  |      | Mascot |      |
| 1600.7061  | 1600.8541   | 0.148   | 92    | 2          | 15       | VADEGPYTCSFQAR          |           |       | Carbamidomethyl (C)[9]  |      | Mascot |      |
| 1600.7061  | 1600.8541   | 0.148   | 92    | 2          | 15       | VADEGPYTCSFQAR          |           |       | Carbamidomethyl (C)[9]  |      | Mascot |      |
| 1853.0063  | 1853.015    | 0.0087  | 5     | 219        | 235      | LSGVGLWFCLSI SVLMK      |           |       |                         |      | Mascot |      |
| 2170.0168  | 2170.0898   | 0.073   | 34    | 1          | 19       | MVADEGPYTCSFQARNKPR     |           |       |                         |      | Mascot |      |
| 2284.2368  | 2284.1956   | -0.0412 | -18   | 109        | 129      | VTVNYPPITDVK NMPAQVGK   |           |       |                         |      | Mascot |      |
| 2331.126   | 2331.2095   | 0.0835  | 36    | 130        | 149      | TAILRCEAMAVPTASFEWYR    |           |       | Oxidation (M)[9]        |      | Mascot |      |
| 2719.3296  | 2719.3252   | -0.0044 | -2    | 170        | 192      | SLLLFTNVTEKHFGNYTCFASNR |           |       | Carbamidomethyl (C)[18] |      | Mascot |      |

20 matrin 3-like [Danio rerio] gi|328447229 129210.8 4.95 15 38 0

#### Peptide Information

| Calc. Mass | Obsrv. Mass | ± da    | ± ppm | Start Seq. | End Seq. | Sequence   | Ion Score | C. I. | % Modification         | Rank | Result | Type |
|------------|-------------|---------|-------|------------|----------|------------|-----------|-------|------------------------|------|--------|------|
| 876.4971   | 876.4282    | -0.0689 | -79   | 419        | 425      | ELMAIRK    |           |       | Oxidation (M)[3]       |      | Mascot |      |
| 1045.5095  | 1045.5658   | 0.0563  | 54    | 68         | 77       | AGSHISNTMK |           |       |                        |      | Mascot |      |
| 1051.5935  | 1051.7194   | 0.1259  | 120   | 847        | 856      | IGPFFGSAKK |           |       |                        |      | Mascot |      |
| 1148.6278  | 1148.5253   | -0.1025 | -89   | 507        | 515      | LIRMNLCTK  |           |       | Carbamidomethyl (C)[7] |      | Mascot |      |

|           |           |         |      |      |      |                                                |  |  |  |  |  |  |                                            |  |  |  |        |
|-----------|-----------|---------|------|------|------|------------------------------------------------|--|--|--|--|--|--|--------------------------------------------|--|--|--|--------|
| 1393.6992 | 1393.7159 | 0.0167  | 12   | 1    | 12   | MSQKLTSDDLQK                                   |  |  |  |  |  |  |                                            |  |  |  | Mascot |
| 1409.6941 | 1409.7487 | 0.0546  | 39   | 1    | 12   | MSQKLTSDDLQK                                   |  |  |  |  |  |  | Oxidation (M)[1]                           |  |  |  | Mascot |
| 1454.7961 | 1454.741  | -0.0551 | -38  | 302  | 316  | SDGLLGAAPIGSLQR                                |  |  |  |  |  |  |                                            |  |  |  | Mascot |
| 1473.6283 | 1473.6864 | 0.0581  | 39   | 898  | 908  | MRNECFIEMER                                    |  |  |  |  |  |  | Oxidation (M)[1]                           |  |  |  | Mascot |
| 1473.6903 | 1473.6864 | -0.0039 | -3   | 1125 | 1136 | KIHCSQAHYDK                                    |  |  |  |  |  |  | Carbamidomethyl (C)[4]                     |  |  |  | Mascot |
| 1572.7917 | 1572.7897 | -0.002  | -1   | 834  | 846  | VYHSHTYATIQR                                   |  |  |  |  |  |  |                                            |  |  |  | Mascot |
| 1661.9485 | 1661.7477 | -0.2008 | -121 | 438  | 451  | RIVSQVVFNSLPR                                  |  |  |  |  |  |  |                                            |  |  |  | Mascot |
| 2211.1047 | 2211.1226 | 0.0179  | 8    | 814  | 833  | AMVNFYSGNVLPSCGK<br>PVR                        |  |  |  |  |  |  | Carbamidomethyl (C)[15], Oxidation (M)[2]  |  |  |  | Mascot |
| 2233.0894 | 2233.0981 | 0.0087  | 4    | 272  | 289  | RLLQMYPDWDPQMPSS<br>R                          |  |  |  |  |  |  |                                            |  |  |  | Mascot |
| 2509.0315 | 2509.3057 | 0.2742  | 109  | 900  | 920  | NECFIEMERGEDAEQMA<br>EAYK                      |  |  |  |  |  |  | Oxidation (M)[7]                           |  |  |  | Mascot |
| 3337.5754 | 3337.7844 | 0.209   | 63   | 1083 | 1111 | LEPSTATLESYDPNPVVG<br>VEFVKMGYYCR              |  |  |  |  |  |  | Carbamidomethyl (C)[28], Oxidation (M)[24] |  |  |  | Mascot |
| 3968.8137 | 3968.8386 | 0.0249  | 6    | 19   | 58   | GLLAAATLNFSMGETHS<br>DHFGSSQSRGGMSGL<br>GGVDGK |  |  |  |  |  |  | Oxidation (M)[13]                          |  |  |  | Mascot |

21 solute carrier family 25, member 32a [Danio rerio] gi|41053768 36048.6 9.25 7 37 0 10 0

#### Peptide Information

| Calc. Mass | Obsrv. Mass | ± da    | ± ppm | Start Seq. | End Seq. | Sequence                 | Ion Score | C. I. | % Modification      | Rank | Result Type |
|------------|-------------|---------|-------|------------|----------|--------------------------|-----------|-------|---------------------|------|-------------|
| 864.4318   | 864.5198    | 0.088   | 102   | 177        | 184      | GMMDALVK                 |           |       |                     |      | Mascot      |
| 1403.7642  | 1403.7678   | 0.0036  | 3     | 162        | 173      | LVLQYNADPSRK             |           |       |                     |      | Mascot      |
| 1403.7642  | 1403.7678   | 0.0036  | 3     | 162        | 173      | LVLQYNADPSRK             |           |       |                     |      | Mascot      |
| 1473.796   | 1473.6864   | -0.1096 | -74   | 185        | 196      | IYRHEGIPGLYR             |           |       |                     |      | Mascot      |
| 1473.796   | 1473.6864   | -0.1096 | -74   | 185        | 196      | IYRHEGIPGLYR             |           |       |                     |      | Mascot      |
| 1572.7441  | 1572.7897   | 0.0456  | 29    | 280        | 292      | RTWSNEGVEGFYK            |           |       |                     |      | Mascot      |
| 1619.6685  | 1619.7637   | 0.0952  | 59    | 72         | 84       | MRPQYDGMLDCMK            | 10        | 0     | Oxidation (M)[1,12] |      | Mascot      |
| 1619.6685  | 1619.7637   | 0.0952  | 59    | 72         | 84       | MRPQYDGMLDCMK            |           |       | Oxidation (M)[1,8]  |      | Mascot      |
| 1853.0432  | 1853.015    | -0.0282 | -15   | 248        | 263      | IFAVAVTYPYQVVRAR         |           |       |                     |      | Mascot      |
| 2283.1226  | 2283.2026   | 0.08    | 35    | 281        | 300      | TWSNEGVEGFYKGMVP<br>NLVR |           |       |                     |      | Mascot      |

22 catenin alpha-2 [Danio rerio] gi|226823293 95796.2 5.71 12 37 0 12 0

#### Peptide Information

| Calc. Mass | Obsrv. Mass | ± da    | ± ppm | Start Seq. | End Seq. | Sequence   | Ion Score | C. I. | % Modification | Rank | Result Type |
|------------|-------------|---------|-------|------------|----------|------------|-----------|-------|----------------|------|-------------|
| 835.4091   | 835.476     | 0.0669  | 80    | 98         | 104      | KQGDTMR    |           |       |                |      | Mascot      |
| 974.5087   | 974.5182    | 0.0095  | 10    | 291        | 299      | IVAECNAVR  |           |       |                |      | Mascot      |
| 1030.6143  | 1030.5532   | -0.0611 | -59   | 2          | 11       | TSATSPILLK |           |       |                |      | Mascot      |



|           |                                                                 |         |     |     |     |                           |          |      |    |                                            |   |  |        |
|-----------|-----------------------------------------------------------------|---------|-----|-----|-----|---------------------------|----------|------|----|--------------------------------------------|---|--|--------|
| 1030.6143 | 1030.5532                                                       | -0.0611 | -59 | 2   | 11  | TSATSPILLK                |          |      |    |                                            |   |  | Mascot |
| 1045.571  | 1045.5658                                                       | -0.0052 | -5  | 536 | 544 | LLSETVMPR                 |          |      |    |                                            |   |  | Mascot |
| 1132.5779 | 1132.5328                                                       | -0.0451 | -40 | 164 | 174 | DEMAAARGALK               |          |      |    |                                            |   |  | Mascot |
| 1148.5729 | 1148.5253                                                       | -0.0476 | -41 | 164 | 174 | DEMAAARGALK               |          |      |    | Oxidation (M)[3]                           |   |  | Mascot |
| 1419.6104 | 1419.7617                                                       | 0.1513  | 107 | 159 | 170 | DPQCRDEMAAAR              |          |      |    | Carbamidomethyl (C)[4]                     |   |  | Mascot |
| 1419.6104 | 1419.7617                                                       | 0.1513  | 107 | 159 | 170 | DPQCRDEMAAAR              | 12       | 0    |    | Carbamidomethyl (C)[4]                     |   |  | Mascot |
| 1619.8032 | 1619.7637                                                       | -0.0395 | -24 | 742 | 754 | IALLYCHQLNICK             |          |      |    | Carbamidomethyl (C)[5,11]                  |   |  | Mascot |
| 1619.8032 | 1619.7637                                                       | -0.0395 | -24 | 742 | 754 | IALLYCHQLNICK             |          |      |    | Carbamidomethyl (C)[5,11]                  |   |  | Mascot |
| 1661.7733 | 1661.7477                                                       | -0.0256 | -15 | 718 | 732 | LARAVADQCPDSACK           |          |      |    | Carbamidomethyl (C)[9,14]                  |   |  | Mascot |
| 1783.7015 | 1783.834                                                        | 0.1325  | 74  | 677 | 690 | QMCMMEMTDFTFTR            |          |      |    | Oxidation (M)[2]                           |   |  | Mascot |
| 1852.8857 | 1853.015                                                        | 0.1293  | 70  | 300 | 315 | QALQDLLSEYMNNTGR          |          |      |    |                                            |   |  | Mascot |
| 2211.0381 | 2211.1226                                                       | 0.0845  | 38  | 267 | 287 | LESIISGAALMADSSCTR<br>DDR |          |      |    |                                            |   |  | Mascot |
| 2273.1553 | 2273.1455                                                       | -0.0098 | -4  | 484 | 504 | CVIALQEGDVDTLDRTAG<br>AIR |          |      |    | Carbamidomethyl (C)[1]                     |   |  | Mascot |
| 2284.0544 | 2284.1956                                                       | 0.1412  | 62  | 267 | 287 | LESIISGAALMADSSCTR<br>DDR |          |      |    | Carbamidomethyl (C)[16], Oxidation (M)[11] |   |  | Mascot |
| 23        | novel protein similar to human matrin 3 (MATR3) [Danio girerio] |         |     |     |     | 157888662                 | 127451.9 | 4.93 | 14 | 36                                         | 0 |  |        |

Peptide Information

| Calc. Mass | Obsrv. Mass | ± da    | ± ppm | Start Seq. | End Seq. | Sequence                          | Ion Score | C. I. | % Modification                             | Rank | Result Type |
|------------|-------------|---------|-------|------------|----------|-----------------------------------|-----------|-------|--------------------------------------------|------|-------------|
| 876.4971   | 876.4282    | -0.0689 | -79   | 419        | 425      | ELMAIRK                           |           |       | Oxidation (M)[3]                           |      | Mascot      |
| 1045.5095  | 1045.5658   | 0.0563  | 54    | 68         | 77       | AGSHISNTMK                        |           |       |                                            |      | Mascot      |
| 1148.6278  | 1148.5253   | -0.1025 | -89   | 507        | 515      | LIRMNLCTK                         |           |       | Carbamidomethyl (C)[7]                     |      | Mascot      |
| 1393.6992  | 1393.7159   | 0.0167  | 12    | 1          | 12       | MSQKLTSDDLQK                      |           |       |                                            |      | Mascot      |
| 1409.6941  | 1409.7487   | 0.0546  | 39    | 1          | 12       | MSQKLTSDDLQK                      |           |       | Oxidation (M)[1]                           |      | Mascot      |
| 1454.7961  | 1454.741    | -0.0551 | -38   | 302        | 316      | SDGLLGAAPIGSLQR                   |           |       |                                            |      | Mascot      |
| 1473.6283  | 1473.6864   | 0.0581  | 39    | 882        | 892      | MRNECFIEMER                       |           |       | Oxidation (M)[1]                           |      | Mascot      |
| 1473.6903  | 1473.6864   | -0.0039 | -3    | 1109       | 1120     | KIHCSQAHYDK                       |           |       | Carbamidomethyl (C)[4]                     |      | Mascot      |
| 1619.7925  | 1619.7637   | -0.0288 | -18   | 834        | 847      | VYHSHTYATIQSGR                    |           |       |                                            |      | Mascot      |
| 1619.7925  | 1619.7637   | -0.0288 | -18   | 834        | 847      | VYHSHTYATIQSGR                    |           |       |                                            |      | Mascot      |
| 1661.9485  | 1661.7477   | -0.2008 | -121  | 438        | 451      | RIVSQVFFSNLPR                     |           |       |                                            |      | Mascot      |
| 2211.1047  | 2211.1226   | 0.0179  | 8     | 814        | 833      | AMVNFYSGNVLPSVCGK<br>PVR          |           |       | Carbamidomethyl (C)[15], Oxidation (M)[2]  |      | Mascot      |
| 2233.0894  | 2233.0981   | 0.0087  | 4     | 272        | 289      | RLLQMYPDWDPMPPSS<br>R             |           |       |                                            |      | Mascot      |
| 2509.0315  | 2509.3057   | 0.2742  | 109   | 884        | 904      | NECFIEMERGEDAEQMA<br>EAYK         |           |       | Oxidation (M)[7]                           |      | Mascot      |
| 3337.5754  | 3337.7844   | 0.209   | 63    | 1067       | 1095     | LEPSTATLESYDPNPVVG<br>VEFVKMGYYCR |           |       | Carbamidomethyl (C)[28], Oxidation (M)[24] |      | Mascot      |
| 3968.8137  | 3968.8386   | 0.0249  | 6     | 19         | 58       | GLLAAETLNFSMGETHS                 |           |       | Oxidation (M)[13]                          |      | Mascot      |

|                     |                                                                   | DHFGSSSQSRGGMSGL<br>GGVDGK |         |       |            |          |                                     |           |        |   |                                          |      |             |
|---------------------|-------------------------------------------------------------------|----------------------------|---------|-------|------------|----------|-------------------------------------|-----------|--------|---|------------------------------------------|------|-------------|
| 24                  | complement component C3A [Danio rerio]                            | gi 2935365                 | 6910.4  | 9.23  | 4          | 36       | 0                                   |           |        |   |                                          |      |             |
| Peptide Information |                                                                   |                            |         |       |            |          |                                     |           |        |   |                                          |      |             |
| Calc. Mass          |                                                                   | Obsrv. Mass                | ± da    | ± ppm | Start Seq. | End Seq. | Sequence                            | Ion Score | C. I.  | % | Modification                             | Rank | Result Type |
| 882.4679            |                                                                   | 882.5712                   | 0.1033  | 117   | 27         | 34       | DEAIGHIK                            |           |        |   |                                          |      | Mascot      |
| 1256.613            |                                                                   | 1256.7491                  | 0.1361  | 108   | 35         | 44       | TGYNRQQAYR                          |           |        |   |                                          |      | Mascot      |
| 1473.7445           |                                                                   | 1473.6864                  | -0.0581 | -39   | 27         | 39       | DEAIGHIKTGYNR                       |           |        |   |                                          |      | Mascot      |
| 1473.7445           |                                                                   | 1473.6864                  | -0.0581 | -39   | 27         | 39       | DEAIGHIKTGYNR                       |           |        |   |                                          |      | Mascot      |
| 2798.3528           |                                                                   | 2798.3958                  | 0.043   | 15    | 1          | 24       | FMTLPVIATHYLDSTNQW<br>EAIGMK        |           |        |   | Oxidation (M)[2,23]                      |      | Mascot      |
| 25                  | PREDICTED: hypothetical protein LOC324021 [Danio rerio]           | gi 326681253               | 22209.7 | 5.13  | 2          | 36       | 0                                   | 27        | 44.616 |   |                                          |      |             |
| Peptide Information |                                                                   |                            |         |       |            |          |                                     |           |        |   |                                          |      |             |
| Calc. Mass          |                                                                   | Obsrv. Mass                | ± da    | ± ppm | Start Seq. | End Seq. | Sequence                            | Ion Score | C. I.  | % | Modification                             | Rank | Result Type |
| 1761.6448           |                                                                   | 1761.8429                  | 0.1981  | 112   | 1          | 16       | MHCCGSLYEGCSGGER                    | 27        | 44.616 |   | Carbamidomethyl (C)[3], Oxidation (M)[1] |      | Mascot      |
| 1761.6448           |                                                                   | 1761.8429                  | 0.1981  | 112   | 1          | 16       | MHCCGSLYEGCSGGER                    |           |        |   | Carbamidomethyl (C)[3], Oxidation (M)[1] |      | Mascot      |
| 3337.3911           |                                                                   | 3337.7844                  | 0.3933  | 118   | 1          | 31       | MHCCGSLYEGCSGGER<br>SVSISMASFQHSSSR |           |        |   | Carbamidomethyl (C)[3]                   |      | Mascot      |
| 26                  | PREDICTED: diacylglycerol kinase beta-like, partial [Danio rerio] | gi 326674321               | 85995.9 | 6.78  | 12         | 35       | 0                                   |           |        |   |                                          |      |             |
| Peptide Information |                                                                   |                            |         |       |            |          |                                     |           |        |   |                                          |      |             |
| Calc. Mass          |                                                                   | Obsrv. Mass                | ± da    | ± ppm | Start Seq. | End Seq. | Sequence                            | Ion Score | C. I.  | % | Modification                             | Rank | Result Type |
| 835.4672            |                                                                   | 835.476                    | 0.0088  | 11    | 448        | 454      | QVYNLAK                             |           |        |   |                                          |      | Mascot      |
| 842.4229            |                                                                   | 842.5167                   | 0.0938  | 111   | 153        | 158      | LEFMFR                              |           |        |   |                                          |      | Mascot      |
| 864.4032            |                                                                   | 864.5198                   | 0.1166  | 135   | 455        | 462      | SGPMPGYR                            |           |        |   |                                          |      | Mascot      |
| 1045.4264           |                                                                   | 1045.5658                  | 0.1394  | 133   | 270        | 278      | QGLCCSFCK                           |           |        |   | Carbamidomethyl (C)[4]                   |      | Mascot      |
| 1148.5404           |                                                                   | 1148.5253                  | -0.0151 | -13   | 463        | 471      | SCRTVEYYK                           |           |        |   |                                          |      | Mascot      |
| 1393.6265           |                                                                   | 1393.7159                  | 0.0894  | 64    | 534        | 545      | DVQDSSEVMLDR                        |           |        |   |                                          |      | Mascot      |
| 1409.6213           |                                                                   | 1409.7487                  | 0.1274  | 90    | 534        | 545      | DVQDSSEVMLDR                        |           |        |   | Oxidation (M)[9]                         |      | Mascot      |
| 1661.7192           |                                                                   | 1661.7477                  | 0.0285  | 17    | 349        | 363      | CASHVKPECDGSLR                      |           |        |   | Carbamidomethyl (C)[1]                   |      | Mascot      |
| 1830.8083           |                                                                   | 1831.0667                  | 0.2584  | 141   | 270        | 284      | QGLCCSFCKYTVHER                     |           |        |   | Carbamidomethyl (C)[4]                   |      | Mascot      |
| 2011.9463           |                                                                   | 2011.9922                  | 0.0459  | 23    | 136        | 152      | DMICYLSLLEGGRPEDK                   |           |        |   | Carbamidomethyl (C)[4], Oxidation (M)[2] |      | Mascot      |
| 2283.2488           |                                                                   | 2283.2026                  | -0.0462 | -20   | 115        | 135      | GSCPPLKVTSQSRPLSTV<br>QLK           |           |        |   | Carbamidomethyl (C)[3]                   |      | Mascot      |

|    |                                         |           |        |    |             |     |                          |      |   |    |   |                                           |        |
|----|-----------------------------------------|-----------|--------|----|-------------|-----|--------------------------|------|---|----|---|-------------------------------------------|--------|
|    | 2284.0591                               | 2284.1956 | 0.1365 | 60 | 153         | 171 | LEFMFRLYDTDGNGLD<br>SK   |      |   |    |   | Oxidation (M)[4]                          | Mascot |
|    | 2448.053                                | 2448.2031 | 0.1501 | 61 | 303         | 322 | NTEIMHHFWVEGNCPSK<br>CDK |      |   |    |   | Carbamidomethyl (C)[14], Oxidation (M)[5] | Mascot |
| 27 | threonine synthase-like 2 [Danio rerio] |           |        |    | gi 83025070 |     | 53047                    | 6.03 | 9 | 35 | 0 |                                           |        |

#### Peptide Information

| Calc. Mass | Obsrv. Mass | ± da    | ± ppm | Start Seq. | End Seq. | Sequence                   | Ion Score | C. I. | % Modification             | Rank | Result Type |
|------------|-------------|---------|-------|------------|----------|----------------------------|-----------|-------|----------------------------|------|-------------|
| 842.3937   | 842.5167    | 0.123   | 146   | 2          | 7        | RYCSTR                     |           |       | Carbamidomethyl (C)[3]     |      | Mascot      |
| 876.4686   | 876.4282    | -0.0404 | -46   | 423        | 429      | FQQAQVR                    |           |       |                            |      | Mascot      |
| 1030.4808  | 1030.5532   | 0.0724  | 70    | 413        | 422      | CCIATASPHK                 |           |       |                            |      | Mascot      |
| 1030.4808  | 1030.5532   | 0.0724  | 70    | 413        | 422      | CCIATASPHK                 |           |       |                            |      | Mascot      |
| 1393.678   | 1393.7159   | 0.0379  | 27    | 340        | 350      | SLMEEFQKTHK                |           |       | Oxidation (M)[3]           |      | Mascot      |
| 1409.6115  | 1409.7487   | 0.1372  | 97    | 455        | 465      | CSDDWEETLRR                |           |       |                            |      | Mascot      |
| 1783.7626  | 1783.834    | 0.0714  | 40    | 450        | 464      | CADLKCSDDWEETLR            |           |       |                            |      | Mascot      |
| 2225.2024  | 2225.1384   | -0.064  | -29   | 430        | 449      | AGLTLELPESLQVLDQLE<br>TR   |           |       |                            |      | Mascot      |
| 2225.2024  | 2225.1384   | -0.064  | -29   | 430        | 449      | AGLTLELPESLQVLDQLE<br>TR   |           |       |                            |      | Mascot      |
| 2273.1304  | 2273.1455   | 0.0151  | 7     | 53         | 70       | QLLCEVCELFPEQEIPIR         |           |       | Carbamidomethyl (C)[4,7]   |      | Mascot      |
| 2538.2087  | 2538.2896   | 0.0809  | 32    | 401        | 422      | HYQSPVRPGESRCCIAT<br>ASPHK |           |       | Carbamidomethyl (C)[13,14] |      | Mascot      |

|    |                                                                      |  |  |  |              |  |         |      |    |    |   |  |  |
|----|----------------------------------------------------------------------|--|--|--|--------------|--|---------|------|----|----|---|--|--|
| 28 | PREDICTED: tripartite motif-containing protein 35-like [Danio rerio] |  |  |  | gi 326678855 |  | 52250.8 | 6.48 | 12 | 34 | 0 |  |  |
|----|----------------------------------------------------------------------|--|--|--|--------------|--|---------|------|----|----|---|--|--|

#### Peptide Information

| Calc. Mass | Obsrv. Mass | ± da    | ± ppm | Start Seq. | End Seq. | Sequence       | Ion Score | C. I. | % Modification         | Rank | Result Type |
|------------|-------------|---------|-------|------------|----------|----------------|-----------|-------|------------------------|------|-------------|
| 835.4341   | 835.476     | 0.0419  | 50    | 141        | 147      | SLQEKCK        |           |       |                        |      | Mascot      |
| 974.491    | 974.5182    | 0.0272  | 28    | 104        | 111      | QPVCLVCR       |           |       | Carbamidomethyl (C)[4] |      | Mascot      |
| 996.4818   | 996.6027    | 0.1209  | 121   | 67         | 74       | NVCESFLK       |           |       | Carbamidomethyl (C)[3] |      | Mascot      |
| 1045.5887  | 1045.5658   | -0.0229 | -22   | 132        | 140      | KEELNTALK      |           |       |                        |      | Mascot      |
| 1165.6285  | 1165.7506   | 0.1221  | 105   | 95         | 103      | LKLFCELDK      |           |       | Carbamidomethyl (C)[5] |      | Mascot      |
| 1165.6285  | 1165.7506   | 0.1221  | 105   | 95         | 103      | LKLFCELDK      |           |       | Carbamidomethyl (C)[5] |      | Mascot      |
| 1470.6715  | 1470.7699   | 0.0984  | 67    | 330        | 343      | CLCVLGSEGFNSGK |           |       | Carbamidomethyl (C)[1] |      | Mascot      |
| 1473.7961  | 1473.6864   | -0.1097 | -74   | 176        | 186      | QQFEKLHQFLR    |           |       |                        |      | Mascot      |
| 1473.7961  | 1473.6864   | -0.1097 | -74   | 176        | 186      | QQFEKLHQFLR    |           |       |                        |      | Mascot      |
| 1478.713   | 1478.7196   | 0.0066  | 4     | 20         | 32       | TPVLLSCSHSFCK  |           |       | Carbamidomethyl (C)[7] |      | Mascot      |
| 1492.6584  | 1492.7563   | 0.0979  | 66    | 81         | 94       | SSGSEEICSLHSEK |           |       |                        |      | Mascot      |
| 1619.8248  | 1619.7637   | -0.0611 | -38   | 159        | 172      | TAQHIKAQAEHTER |           |       |                        |      | Mascot      |

|    |                                            |           |         |     |              |     |                             |      |   |    |   |                            |  |        |
|----|--------------------------------------------|-----------|---------|-----|--------------|-----|-----------------------------|------|---|----|---|----------------------------|--|--------|
|    | 1619.8248                                  | 1619.7637 | -0.0611 | -38 | 159          | 172 | TAQHIKAQAEHTER              |      |   |    |   |                            |  | Mascot |
|    | 2282.9534                                  | 2283.2026 | 0.2492  | 109 | 369          | 386 | GWGFFNSDVWCVCYGW<br>SR      |      |   |    |   | Carbamidomethyl (C)[11,13] |  | Mascot |
|    | 2798.3462                                  | 2798.3958 | 0.0496  | 18  | 20           | 42  | TPVLLSCSHSFCKECLQQ<br>FWISK |      |   |    |   | Carbamidomethyl (C)[7,12]  |  | Mascot |
| 29 | TPA: erythropoietin receptor [Danio rerio] |           |         |     | gi 159885707 |     | 56496.1                     | 5.22 | 9 | 34 | 0 |                            |  |        |

#### Peptide Information

|  | Calc. Mass | Obsrv. Mass | ± da    | ± ppm | Start Seq. | End Seq. | Sequence                      | Ion Score | C. I. | % Modification         | Rank | Result Type |
|--|------------|-------------|---------|-------|------------|----------|-------------------------------|-----------|-------|------------------------|------|-------------|
|  | 850.4933   | 850.5481    | 0.0548  | 64    | 193        | 198      | YKVWVR                        |           |       |                        |      | Mascot      |
|  | 996.4567   | 996.6027    | 0.146   | 147   | 107        | 114      | DGQMLYNR                      |           |       |                        |      | Mascot      |
|  | 1030.5276  | 1030.5532   | 0.0256  | 25    | 325        | 332      | LVRDEDQR                      |           |       |                        |      | Mascot      |
|  | 1030.5276  | 1030.5532   | 0.0256  | 25    | 325        | 332      | LVRDEDQR                      |           |       |                        |      | Mascot      |
|  | 1132.4768  | 1132.5328   | 0.056   | 49    | 40         | 47       | DFTCFWEK                      |           |       | Carbamidomethyl (C)[4] |      | Mascot      |
|  | 1136.504   | 1136.5818   | 0.0778  | 68    | 163        | 172      | YAVEDSHMGK                    |           |       |                        |      | Mascot      |
|  | 1152.499   | 1152.5769   | 0.0779  | 68    | 163        | 172      | YAVEDSHMGK                    |           |       | Oxidation (M)[8]       |      | Mascot      |
|  | 1460.7897  | 1460.6359   | -0.1538 | -105  | 259        | 270      | KLWPDIPTEHK                   |           |       |                        |      | Mascot      |
|  | 1492.804   | 1492.7563   | -0.0477 | -32   | 173        | 185      | VEETKASTMLVLR                 |           |       | Oxidation (M)[9]       |      | Mascot      |
|  | 2011.9542  | 2011.9922   | 0.038   | 19    | 333        | 349      | SDSGLTEPPHWLMEQLR             |           |       | Oxidation (M)[13]      |      | Mascot      |
|  | 2618.0842  | 2618.304    | 0.2198  | 84    | 440        | 464      | GPGYAYMAVADSGVSM<br>DYSPMSSSR |           |       | Oxidation (M)[7,16]    |      | Mascot      |

|    |                              |  |  |  |             |  |       |       |   |    |   |  |  |  |
|----|------------------------------|--|--|--|-------------|--|-------|-------|---|----|---|--|--|--|
| 30 | Shadoo protein [Danio rerio] |  |  |  | gi 37359664 |  | 13918 | 10.51 | 5 | 34 | 0 |  |  |  |
|----|------------------------------|--|--|--|-------------|--|-------|-------|---|----|---|--|--|--|

#### Peptide Information

|  | Calc. Mass | Obsrv. Mass | ± da    | ± ppm | Start Seq. | End Seq. | Sequence                      | Ion Score | C. I. | % Modification                            | Rank | Result Type |
|--|------------|-------------|---------|-------|------------|----------|-------------------------------|-----------|-------|-------------------------------------------|------|-------------|
|  | 1030.5024  | 1030.5532   | 0.0508  | 49    | 79         | 86       | RPDDRSEK                      | 3         | 0     |                                           |      | Mascot      |
|  | 1030.5024  | 1030.5532   | 0.0508  | 49    | 79         | 86       | RPDDRSEK                      |           |       |                                           |      | Mascot      |
|  | 1165.6     | 1165.7506   | 0.1506  | 129   | 95         | 103      | TNWELYLAR                     |           |       |                                           |      | Mascot      |
|  | 1165.6     | 1165.7506   | 0.1506  | 129   | 95         | 103      | TNWELYLAR                     |           |       |                                           |      | Mascot      |
|  | 1830.9645  | 1831.0667   | 0.1022  | 56    | 117        | 132      | LSALLLPINYYMHFAP              |           |       |                                           |      | Mascot      |
|  | 2490.2263  | 2490.2053   | -0.021  | -8    | 4          | 25       | AVATCCIFLLLSAFLCDQV<br>MSK    |           |       | Carbamidomethyl (C)[5,6]                  |      | Mascot      |
|  | 2719.3438  | 2719.3252   | -0.0186 | -7    | 4          | 28       | AVATCCIFLLLSAFLCDQV<br>MSKGGK |           |       | Carbamidomethyl (C)[5], Oxidation (M)[20] |      | Mascot      |

|    |                                                      |  |  |  |              |  |         |      |    |    |   |  |  |  |
|----|------------------------------------------------------|--|--|--|--------------|--|---------|------|----|----|---|--|--|--|
| 31 | PREDICTED: zinc finger protein 91-like [Danio rerio] |  |  |  | gi 326670221 |  | 74732.2 | 9.59 | 13 | 34 | 0 |  |  |  |
|----|------------------------------------------------------|--|--|--|--------------|--|---------|------|----|----|---|--|--|--|

#### Peptide Information

|  | Calc. Mass | Obsrv. Mass | ± da | ± ppm | Start Seq. | End Seq. | Sequence | Ion Score | C. I. | % Modification | Rank | Result Type |
|--|------------|-------------|------|-------|------------|----------|----------|-----------|-------|----------------|------|-------------|
|--|------------|-------------|------|-------|------------|----------|----------|-----------|-------|----------------|------|-------------|

|    |                                                                                    |           |         |     |              |     |                                  |      |    |                                                    |   |  |        |
|----|------------------------------------------------------------------------------------|-----------|---------|-----|--------------|-----|----------------------------------|------|----|----------------------------------------------------|---|--|--------|
|    | 1136.5154                                                                          | 1136.5818 | 0.0664  | 58  | 74           | 83  | SFNCSSHLNK                       |      |    |                                                    |   |  | Mascot |
|    | 1409.6743                                                                          | 1409.7487 | 0.0744  | 53  | 270          | 281 | SFSCLSHLNHHK                     |      |    |                                                    |   |  | Mascot |
|    | 1454.6879                                                                          | 1454.741  | 0.0531  | 37  | 567          | 578 | EKPFTCTQCGKR                     |      |    | Carbamidomethyl (C)[6]                             |   |  | Mascot |
|    | 1478.7421                                                                          | 1478.7196 | -0.0225 | -15 | 242          | 254 | SFSLSSSLNIHMR                    |      |    |                                                    |   |  | Mascot |
|    | 1515.7411                                                                          | 1515.7649 | 0.0238  | 16  | 382          | 394 | SFSHSSSLNRHTR                    |      |    |                                                    |   |  | Mascot |
|    | 1600.7649                                                                          | 1600.8541 | 0.0892  | 56  | 102          | 114 | SFSQLSNLHQHMR                    |      |    | Oxidation (M)[12]                                  |   |  | Mascot |
|    | 1600.7649                                                                          | 1600.8541 | 0.0892  | 56  | 102          | 114 | SFSQLSNLHQHMR                    |      |    | Oxidation (M)[12]                                  |   |  | Mascot |
|    | 1619.7668                                                                          | 1619.7637 | -0.0031 | -2  | 255          | 269 | IHTGEKPFACTQCGK                  |      |    |                                                    |   |  | Mascot |
|    | 1619.7668                                                                          | 1619.7637 | -0.0031 | -2  | 255          | 269 | IHTGEKPFACTQCGK                  |      |    |                                                    |   |  | Mascot |
|    | 1661.8138                                                                          | 1661.7477 | -0.0661 | -40 | 59           | 73  | IHTGEKPFICTQCGK                  |      |    |                                                    |   |  | Mascot |
|    | 1761.8159                                                                          | 1761.8429 | 0.027   | 15  | 367          | 381 | IHTGEKPFACTQCGR                  |      |    | Carbamidomethyl (C)[10,13]                         |   |  | Mascot |
|    | 1761.8523                                                                          | 1761.8429 | -0.0094 | -5  | 619          | 633 | IHTGEKPFRECTQCGK                 |      |    | Carbamidomethyl (C)[10]                            |   |  | Mascot |
|    | 1783.7811                                                                          | 1783.834  | 0.0529  | 30  | 2            | 17  | MSHTGEKPFLCTECGK                 |      |    | Oxidation (M)[1]                                   |   |  | Mascot |
|    | 2158.0103                                                                          | 2158.064  | 0.0537  | 25  | 364          | 381 | HMKIHTGEKPFACTQCG<br>R           |      |    | Carbamidomethyl (C)[13,16]                         |   |  | Mascot |
|    | 3337.4717                                                                          | 3337.7844 | 0.3127  | 94  | 18           | 45  | SFSCSSHLNQHMRVHTG<br>EKPFTCTQCGK |      |    | Carbamidomethyl (C)[4,23,26], Oxidation<br>(M)[12] |   |  | Mascot |
| 32 | PREDICTED: transformation/transcription<br>domain-associated protein [Danio rerio] |           |         |     | gi 326672350 |     | 433471.2                         | 8.52 | 28 | 34                                                 | 0 |  |        |

Peptide Information

| Calc. Mass | Obsrv. Mass | ± da    | ± ppm | Start Seq. | End Seq. | Sequence       | Ion Score | C. I. | % Modification   | Rank | Result Type |
|------------|-------------|---------|-------|------------|----------|----------------|-----------|-------|------------------|------|-------------|
| 882.5155   | 882.5712    | 0.0557  | 63    | 2182       | 2189     | AVHSLLSR       |           |       |                  |      | Mascot      |
| 1030.6044  | 1030.5532   | -0.0512 | -50   | 2608       | 2615     | LWKILSDR       |           |       |                  |      | Mascot      |
| 1030.6044  | 1030.5532   | -0.0512 | -50   | 2608       | 2615     | LWKILSDR       |           |       |                  |      | Mascot      |
| 1045.5095  | 1045.5658   | 0.0563  | 54    | 3604       | 3612     | EVQGNMVPR      |           |       | Oxidation (M)[6] |      | Mascot      |
| 1132.553   | 1132.5328   | -0.0202 | -18   | 1696       | 1704     | FLCNMTFLK      |           |       | Oxidation (M)[5] |      | Mascot      |
| 1136.5253  | 1136.5818   | 0.0565  | 50    | 2020       | 2030     | GMSVDSAQDVK    |           |       |                  |      | Mascot      |
| 1152.5295  | 1152.5769   | 0.0474  | 41    | 3815       | 3823     | MDPAWHPWL      |           |       |                  |      | Mascot      |
| 1165.5817  | 1165.7506   | 0.1689  | 145   | 606        | 615      | VANCQTVRMK     |           |       | Oxidation (M)[9] |      | Mascot      |
| 1165.5817  | 1165.7506   | 0.1689  | 145   | 606        | 615      | VANCQTVRMK     |           |       | Oxidation (M)[9] |      | Mascot      |
| 1256.6018  | 1256.7491   | 0.1473  | 117   | 941        | 950      | SANTEPYRR      |           |       |                  |      | Mascot      |
| 1393.6991  | 1393.7159   | 0.0168  | 12    | 728        | 740      | IVNSSMELAQSAK  |           |       | Oxidation (M)[6] |      | Mascot      |
| 1409.7648  | 1409.7487   | -0.0161 | -11   | 2032       | 2045     | FRTAAGAVGTVFGR |           |       |                  |      | Mascot      |
| 1419.7527  | 1419.7617   | 0.009   | 6     | 1832       | 1843     | LMTFAWPCLLPK   |           |       |                  |      | Mascot      |
| 1419.7527  | 1419.7617   | 0.009   | 6     | 1832       | 1843     | LMTFAWPCLLPK   |           |       |                  |      | Mascot      |
| 1448.8293  | 1448.9344   | 0.1051  | 73    | 1147       | 1159     | LGGVVSIFLMER   |           |       |                  |      | Mascot      |
| 1470.6967  | 1470.7699   | 0.0732  | 50    | 958        | 970      | CFLVAMTSLEDNK  |           |       |                  |      | Mascot      |

|           |           |         |      |      |      |                         |  |  |  |                                              |  |        |
|-----------|-----------|---------|------|------|------|-------------------------|--|--|--|----------------------------------------------|--|--------|
| 1473.8365 | 1473.6864 | -0.1501 | -102 | 2600 | 2610 | TWVQLFPRLWK             |  |  |  |                                              |  | Mascot |
| 1473.8365 | 1473.6864 | -0.1501 | -102 | 2600 | 2610 | TWVQLFPRLWK             |  |  |  |                                              |  | Mascot |
| 1492.769  | 1492.7563 | -0.0127 | -9   | 1832 | 1843 | LMTFAWPCLLPK            |  |  |  | Carbamidomethyl (C)[8], Oxidation (M)[2]     |  | Mascot |
| 1515.7988 | 1515.7649 | -0.0339 | -22  | 3099 | 3112 | AFSAAVQMHDVLVK          |  |  |  |                                              |  | Mascot |
| 1600.8689 | 1600.8541 | -0.0148 | -9   | 2365 | 2377 | SILLVKMMTYIEK           |  |  |  | Oxidation (M)[7,8]                           |  | Mascot |
| 1600.8689 | 1600.8541 | -0.0148 | -9   | 2365 | 2377 | SILLVKMMTYIEK           |  |  |  | Oxidation (M)[7,8]                           |  | Mascot |
| 1619.7893 | 1619.7637 | -0.0256 | -16  | 1950 | 1962 | HHLVQHMISAMQR           |  |  |  | Oxidation (M)[7,11]                          |  | Mascot |
| 1619.7893 | 1619.7637 | -0.0256 | -16  | 1950 | 1962 | HHLVQHMISAMQR           |  |  |  | Oxidation (M)[7,11]                          |  | Mascot |
| 1661.7839 | 1661.7477 | -0.0362 | -22  | 3311 | 3326 | CYSVAFEKSGAVSDAK        |  |  |  |                                              |  | Mascot |
| 2158.0486 | 2158.064  | 0.0154  | 7    | 931  | 949  | AIETALDCLKSANTEPYR      |  |  |  |                                              |  | Mascot |
| 2170.1655 | 2170.0898 | -0.0757 | -35  | 1678 | 1695 | NYSEIELLFQLLRAFTGR      |  |  |  |                                              |  | Mascot |
| 2211.0977 | 2211.1226 | 0.0249  | 11   | 619  | 637  | EVLEHFAGVFTMMNPLTFK     |  |  |  |                                              |  | Mascot |
| 2273.1707 | 2273.1455 | -0.0252 | -11  | 3778 | 3798 | AVTAIMTRLHNLAQFEGG      |  |  |  |                                              |  | Mascot |
| 2283.0981 | 2283.2026 | 0.1045  | 46   | 3617 | 3634 | EWALHTFPNATDYWTFRK      |  |  |  |                                              |  | Mascot |
| 2284.1384 | 2284.1956 | 0.0572  | 25   | 1175 | 1196 | ALLFVMMDLTGEVSNGA       |  |  |  | Oxidation (M)[6]                             |  | Mascot |
| 2289.1655 | 2289.1477 | -0.0178 | -8   | 3778 | 3798 | AVTAIMTRLHNLAQFEGG      |  |  |  | Oxidation (M)[6]                             |  | Mascot |
| 2289.1655 | 2289.1477 | -0.0178 | -8   | 3778 | 3798 | AVTAIMTRLHNLAQFEGG      |  |  |  | Oxidation (M)[6]                             |  | Mascot |
| 2331.2715 | 2331.2095 | -0.062  | -27  | 3635 | 3654 | MFTIQLALIGLAEFMLHLNR    |  |  |  |                                              |  | Mascot |
| 2448.238  | 2448.2031 | -0.0349 | -14  | 2103 | 2122 | TALRPDMWPSSSELKLQWF     |  |  |  |                                              |  | Mascot |
| 2470.2798 | 2470.1809 | -0.0989 | -40  | 3273 | 3293 | ELHPTLLSSLEGIVDQMV      |  |  |  |                                              |  | Mascot |
| 2798.3481 | 2798.3958 | 0.0477  | 17   | 1075 | 1098 | GMDPLVLIDAIACMAYEEKELCK |  |  |  | Carbamidomethyl (C)[14,23], Oxidation (M)[2] |  | Mascot |

33 MAWD binding protein-like [Danio rerio] gi|57524661 31690.2 5.89 7 33 0

#### Peptide Information

| Calc. Mass | Obsrv. Mass | ± da    | ± ppm | Start Seq. | End Sequence Seq. | Ion Score           | C. I. % | Modification | Rank                    | Result Type |
|------------|-------------|---------|-------|------------|-------------------|---------------------|---------|--------------|-------------------------|-------------|
| 864.4308   | 864.5198    | 0.089   | 103   | 186        | 193               | SETTGEIK            |         |              |                         | Mascot      |
| 1419.7729  | 1419.7617   | -0.0112 | -8    | 173        | 185               | FTSLSPVAEDLLK       |         |              |                         | Mascot      |
| 1419.7729  | 1419.7617   | -0.0112 | -8    | 173        | 185               | FTSLSPVAEDLLK       | 3       | 0            |                         | Mascot      |
| 1478.7242  | 1478.7196   | -0.0046 | -3    | 159        | 170               | WLMIRLADSCDR        |         |              |                         | Mascot      |
| 1916.9786  | 1916.9781   | -0.0005 | 0     | 141        | 158               | AVVGDLPIDVCYSPALR   |         |              |                         | Mascot      |
| 2283.1768  | 2283.2026   | 0.0258  | 11    | 194        | 214               | SVIVTIKGNAPNAQPGYDF |         |              |                         | Mascot      |
| 2470.2646  | 2470.1809   | -0.0837 | -34   | 14         | 35                | VPFKGNPAAVCLLENELQ  |         |              | Carbamidomethyl (C)[11] | Mascot      |
| 2509.1777  | 2509.3057   | 0.128   | 51    | 113        | 133               | QHEDSIIMDFPLNTPQPQ  |         |              |                         | Mascot      |

34      PREDICTED: voltage-dependent calcium channel  
gamma-3 subunit-like [Danio rerio]      DQR  
gi|68360472      34310.1      9.42      4      33      0      23      0

Peptide Information

| Calc. Mass | Obsrv. Mass | ± da    | ± ppm | Start Seq. | End Seq. | Sequence                  | Ion Score | C. I. | % Modification         | Rank | Result Type |
|------------|-------------|---------|-------|------------|----------|---------------------------|-----------|-------|------------------------|------|-------------|
| 1132.5779  | 1132.5328   | -0.0451 | -40   | 275        | 285      | AAMGALLNSER               |           |       |                        |      | Mascot      |
| 1148.5729  | 1148.5253   | -0.0476 | -41   | 275        | 285      | AAMGALLNSER               |           |       | Oxidation (M)[3]       |      | Mascot      |
| 1419.6533  | 1419.7617   | 0.1084  | 76    | 239        | 252      | SSEPASRDASPMGK            |           |       |                        |      | Mascot      |
| 1419.6533  | 1419.7617   | 0.1084  | 76    | 239        | 252      | SSEPASRDASPMGK            | 23        | 0     |                        |      | Mascot      |
| 1473.6647  | 1473.6864   | 0.0217  | 15    | 66         | 78       | TCCLEGTFRGVCK             |           |       | Carbamidomethyl (C)[2] |      | Mascot      |
| 1473.6647  | 1473.6864   | 0.0217  | 15    | 66         | 78       | TCCLEGTFRGVCK             |           |       | Carbamidomethyl (C)[2] |      | Mascot      |
| 2538.1782  | 2538.2896   | 0.1114  | 44    | 79         | 99       | KIDHFPEDADYEQDAAEY<br>LLR |           |       |                        |      | Mascot      |

35      serpin peptidase inhibitor, clade B (ovalbumin), member 1, like 3 [Danio rerio]      gi|41053961      42585.3      5.18      8      33      0

Peptide Information

| Calc. Mass | Obsrv. Mass | ± da    | ± ppm | Start Seq. | End Seq. | Sequence                          | Ion Score | C. I. | % Modification          | Rank | Result Type |
|------------|-------------|---------|-------|------------|----------|-----------------------------------|-----------|-------|-------------------------|------|-------------|
| 876.4608   | 876.4282    | -0.0326 | -37   | 74         | 80       | LLTEMNR                           |           |       |                         |      | Mascot      |
| 1165.6979  | 1165.7506   | 0.0527  | 45    | 160        | 169      | LVLVNAVYFK                        |           |       |                         |      | Mascot      |
| 1165.6979  | 1165.7506   | 0.0527  | 45    | 160        | 169      | LVLVNAVYFK                        |           |       |                         |      | Mascot      |
| 1419.7478  | 1419.7617   | 0.0139  | 10    | 250        | 261      | ALTLETLDWTR                       |           |       |                         |      | Mascot      |
| 1419.7478  | 1419.7617   | 0.0139  | 10    | 250        | 261      | ALTLETLDWTR                       |           |       |                         |      | Mascot      |
| 1478.7283  | 1478.7196   | -0.0087 | -6    | 353        | 364      | FCADHPFLMLIR                      |           |       | Oxidation (M)[9]        |      | Mascot      |
| 1600.7502  | 1600.8541   | 0.1039  | 65    | 176        | 187      | FLEEHTHEQQFR                      |           |       |                         |      | Mascot      |
| 1600.7502  | 1600.8541   | 0.1039  | 65    | 176        | 187      | FLEEHTHEQQFR                      |           |       |                         |      | Mascot      |
| 2448.1248  | 2448.2031   | 0.0783  | 32    | 52         | 73       | DQMSQTLHFDGAESQIH<br>AGFTK        |           |       |                         |      | Mascot      |
| 2618.3799  | 2618.304    | -0.0759 | -29   | 203        | 225      | GRFPLAFIPDVNCQILELP<br>YAGK       |           |       | Carbamidomethyl (C)[13] |      | Mascot      |
| 3337.5576  | 3337.7844   | 0.2268  | 68    | 52         | 80       | DQMSQTLHFDGAESQIH<br>AGFTKLLTEMNR |           |       | Oxidation (M)[3,27]     |      | Mascot      |

36      Mediator of cell motility 1 [Danio rerio]      gi|160774203      33443.4      6.35      7      33      0

Peptide Information

| Calc. Mass | Obsrv. Mass | ± da    | ± ppm | Start Seq. | End Seq. | Sequence  | Ion Score | C. I. | % Modification         | Rank | Result Type |
|------------|-------------|---------|-------|------------|----------|-----------|-----------|-------|------------------------|------|-------------|
| 996.4536   | 996.6027    | 0.1491  | 150   | 1          | 8        | MSNRMVCR  |           |       |                        |      | Mascot      |
| 1148.5629  | 1148.5253   | -0.0376 | -33   | 238        | 246      | KYHNTICGR |           |       | Carbamidomethyl (C)[7] |      | Mascot      |

|    |                                                                                    |           |         |      |     |              |                                               |      |    |    |                  |  |  |  |  |  |        |
|----|------------------------------------------------------------------------------------|-----------|---------|------|-----|--------------|-----------------------------------------------|------|----|----|------------------|--|--|--|--|--|--------|
|    | 1473.8788                                                                          | 1473.6864 | -0.1924 | -131 | 247 | 260          | HPIGVLLNAVAELK                                |      |    |    |                  |  |  |  |  |  | Mascot |
|    | 1473.8788                                                                          | 1473.6864 | -0.1924 | -131 | 247 | 260          | HPIGVLLNAVAELK                                |      |    |    |                  |  |  |  |  |  | Mascot |
|    | 2210.9592                                                                          | 2211.1226 | 0.1634  | 74   | 262 | 280          | NGIDMNFSFLNYAQSSQ<br>CR                       |      |    |    | Oxidation (M)[5] |  |  |  |  |  | Mascot |
|    | 2284.1716                                                                          | 2284.1956 | 0.024   | 11   | 219 | 238          | MGMGIIEQLDPISFSNYLK<br>K                      |      |    |    |                  |  |  |  |  |  | Mascot |
|    | 2509.1519                                                                          | 2509.3057 | 0.1538  | 61   | 199 | 218          | YTTYDESQGEIYRSIEHL<br>DK                      |      |    |    |                  |  |  |  |  |  | Mascot |
|    | 3968.7966                                                                          | 3968.8386 | 0.042   | 11   | 262 | 297          | NGIDMNFSFLNYAQSSQ<br>CRNWSDDSSVSYAAGALI<br>VH |      |    |    | Oxidation (M)[5] |  |  |  |  |  | Mascot |
| 37 | PREDICTED: retrotransposable element Tf2 155 kDa protein type 1-like [Danio rerio] |           |         |      |     | gi 326673646 | 147767                                        | 9.63 | 15 | 33 | 0                |  |  |  |  |  |        |

#### Peptide Information

| Calc. Mass | Obsrv. Mass | ± da    | ± ppm | Start Seq. | End Seq. | Sequence                        | Ion Score | C. I. | % Modification           | Rank | Result Type |
|------------|-------------|---------|-------|------------|----------|---------------------------------|-----------|-------|--------------------------|------|-------------|
| 864.421    | 864.5198    | 0.0988  | 114   | 74         | 81       | TAGFSEPR                        |           |       |                          |      | Mascot      |
| 996.5043   | 996.6027    | 0.0984  | 99    | 903        | 911      | LACHPGVSR                       |           |       | Carbamidomethyl (C)[3]   |      | Mascot      |
| 1030.5714  | 1030.5532   | -0.0182 | -18   | 1189       | 1197     | TVCNKLAPK                       |           |       | Carbamidomethyl (C)[3]   |      | Mascot      |
| 1030.5714  | 1030.5532   | -0.0182 | -18   | 1189       | 1197     | TVCNKLAPK                       |           |       | Carbamidomethyl (C)[3]   |      | Mascot      |
| 1256.7684  | 1256.7491   | -0.0193 | -15   | 1149       | 1159     | QTLLQVGLRTK                     |           |       |                          |      | Mascot      |
| 1403.6953  | 1403.7678   | 0.0725  | 52    | 814        | 825      | FDFSISYRPGSK                    |           |       |                          |      | Mascot      |
| 1403.6953  | 1403.7678   | 0.0725  | 52    | 814        | 825      | FDFSISYRPGSK                    |           |       |                          |      | Mascot      |
| 1454.713   | 1454.741    | 0.028   | 19    | 931        | 943      | NFVLACSVCAVSK                   |           |       | Carbamidomethyl (C)[6,9] |      | Mascot      |
| 1492.7518  | 1492.7563   | 0.0045  | 3     | 920        | 930      | FWWPVMARDIR                     |           |       | Oxidation (M)[6]         |      | Mascot      |
| 1572.8744  | 1572.7897   | -0.0847 | -54   | 884        | 896      | LFVPEELRSDVIR                   |           |       |                          |      | Mascot      |
| 1677.7499  | 1677.7407   | -0.0092 | -5    | 143        | 157      | LPCCSSFDTFSTELK                 |           |       |                          |      | Mascot      |
| 1831.084   | 1831.0667   | -0.0173 | -9    | 1198       | 1214     | FIGPFSVTKIISPAVR                |           |       |                          |      | Mascot      |
| 1853.0028  | 1853.015    | 0.0122  | 7     | 1002       | 1018     | LPSARETAAVIDHVFR                |           |       |                          |      | Mascot      |
| 2157.9988  | 2158.064    | 0.0652  | 30    | 1272       | 1289     | GRGFQYLVDWEGYGPE<br>ER          |           |       |                          |      | Mascot      |
| 2448.2253  | 2448.2031   | -0.0222 | -9    | 317        | 340      | SQSPTQAIDSGAEGNFID<br>SALVK     |           |       |                          |      | Mascot      |
| 2618.3684  | 2618.304    | -0.0644 | -25   | 1007       | 1030     | ETAAAVIDHVFRIHGLPTD<br>VVSDR    |           |       |                          |      | Mascot      |
| 2798.3486  | 2798.3958   | 0.0472  | 17    | 259        | 285      | SPFPAVTVVPGQEATPLA<br>DPEGMQMGR |           |       | Oxidation (M)[23]        |      | Mascot      |

38 Erythropoietin receptor [Danio rerio] gi|190337418 57852.8 5.53 9 32 0

#### Peptide Information

| Calc. Mass | Obsrv. Mass | ± da   | ± ppm | Start Seq. | End Seq. | Sequence | Ion Score | C. I. | % Modification | Rank | Result Type |
|------------|-------------|--------|-------|------------|----------|----------|-----------|-------|----------------|------|-------------|
| 850.4933   | 850.5481    | 0.0548 | 64    | 204        | 209      | YKVVWR   |           |       |                |      | Mascot      |



|    |                                                         |           |         |      |              |         |                               |   |    |   |  |                        |  |  |  |  |        |
|----|---------------------------------------------------------|-----------|---------|------|--------------|---------|-------------------------------|---|----|---|--|------------------------|--|--|--|--|--------|
|    | 996.4567                                                | 996.6027  | 0.146   | 147  | 118          | 125     | DGQMLYNR                      |   |    |   |  |                        |  |  |  |  | Mascot |
|    | 1030.5276                                               | 1030.5532 | 0.0256  | 25   | 336          | 343     | LVRDEDQR                      |   |    |   |  |                        |  |  |  |  | Mascot |
|    | 1030.5276                                               | 1030.5532 | 0.0256  | 25   | 336          | 343     | LVRDEDQR                      |   |    |   |  |                        |  |  |  |  | Mascot |
|    | 1132.4768                                               | 1132.5328 | 0.056   | 49   | 51           | 58      | DFTCFWEK                      |   |    |   |  | Carbamidomethyl (C)[4] |  |  |  |  | Mascot |
|    | 1136.504                                                | 1136.5818 | 0.0778  | 68   | 174          | 183     | YAVEDSHMGK                    |   |    |   |  |                        |  |  |  |  | Mascot |
|    | 1152.499                                                | 1152.5769 | 0.0779  | 68   | 174          | 183     | YAVEDSHMGK                    |   |    |   |  | Oxidation (M)[8]       |  |  |  |  | Mascot |
|    | 1460.7897                                               | 1460.6359 | -0.1538 | -105 | 270          | 281     | KLWPDIPTPEHK                  |   |    |   |  |                        |  |  |  |  | Mascot |
|    | 1492.804                                                | 1492.7563 | -0.0477 | -32  | 184          | 196     | VEETKASTMLVLR                 |   |    |   |  | Oxidation (M)[9]       |  |  |  |  | Mascot |
|    | 2011.9542                                               | 2011.9922 | 0.038   | 19   | 344          | 360     | SDSGLTEPPHWLMEQLR             |   |    |   |  | Oxidation (M)[13]      |  |  |  |  | Mascot |
|    | 2618.0842                                               | 2618.304  | 0.2198  | 84   | 451          | 475     | GPGYAYMAVADSGVSM<br>DYSPMSSSR |   |    |   |  | Oxidation (M)[7,16]    |  |  |  |  | Mascot |
| 39 | PREDICTED: transmembrane protein 136-like [Danio rerio] |           |         |      | gi 125837712 | 27021.8 | 8.05                          | 6 | 32 | 0 |  |                        |  |  |  |  |        |

#### Peptide Information

| Calc. Mass | Obsrv. Mass | $\pm$ da | $\pm$ ppm | Start Seq. | End Seq. | Sequence                                     | Ion Score | C. I. | % Modification                            | Rank | Result Type |
|------------|-------------|----------|-----------|------------|----------|----------------------------------------------|-----------|-------|-------------------------------------------|------|-------------|
| 996.4719   | 996.6027    | 0.1308   | 131       | 218        | 224      | YQVWMNR                                      |           |       |                                           |      | Mascot      |
| 1030.5581  | 1030.5532   | -0.0049  | -5        | 143        | 150      | WFLKHSGR                                     |           |       |                                           |      | Mascot      |
| 1030.5581  | 1030.5532   | -0.0049  | -5        | 143        | 150      | WFLKHSGR                                     |           |       |                                           |      | Mascot      |
| 1393.6926  | 1393.7159   | 0.0233   | 17        | 227        | 238      | MMAEVNGLNVKR                                 |           |       | Oxidation (M)[1,2]                        |      | Mascot      |
| 1470.7556  | 1470.7699   | 0.0143   | 10        | 225        | 237      | HKMMAEVNGLNVK                                |           |       |                                           |      | Mascot      |
| 2448.2883  | 2448.2031   | -0.0852  | -35       | 151        | 171      | YDSILGDVVDILFVALFVF<br>MR                    |           |       | Oxidation (M)[20]                         |      | Mascot      |
| 3968.8665  | 3968.8386   | -0.0279  | -7        | 1          | 36       | MSPLVLGVGVCLAGWIAL<br>YALLCYTNGSCGYEWNC<br>R |           |       | Carbamidomethyl (C)[11], Oxidation (M)[1] |      | Mascot      |

40 Retinal pigment epithelium-specific protein b [Danio rerio] gi|62132948 34488.1 6.37 7 32 0

#### Peptide Information

| Calc. Mass | Obsrv. Mass | $\pm$ da | $\pm$ ppm | Start Seq. | End Seq. | Sequence                      | Ion Score | C. I. | % Modification   | Rank | Result Type |
|------------|-------------|----------|-----------|------------|----------|-------------------------------|-----------|-------|------------------|------|-------------|
| 835.3944   | 835.476     | 0.0816   | 98        | 299        | 305      | YINNPSQ                       |           |       |                  |      | Mascot      |
| 850.4417   | 850.5481    | 0.1064   | 125       | 70         | 76       | FDLKDGR                       |           |       |                  |      | Mascot      |
| 864.4131   | 864.5198    | 0.1067   | 123       | 217        | 224      | SDPLAMSK                      |           |       | Oxidation (M)[6] |      | Mascot      |
| 1152.6082  | 1152.5769   | -0.0313  | -27       | 199        | 208      | NMSLAYNIVK                    |           |       |                  |      | Mascot      |
| 1460.7314  | 1460.6359   | -0.0955  | -65       | 1          | 13       | MVSRLEHPAGGYK                 |           |       | Oxidation (M)[1] |      | Mascot      |
| 2170.0847  | 2170.0898   | 0.0051   | 2         | 14         | 33       | KVFESCEELAEPIAHVS<br>GK       |           |       |                  |      | Mascot      |
| 2798.3606  | 2798.3958   | 0.0352   | 13        | 45         | 69       | MGPGLFEIGDEPFNHLFD<br>GQALIHK |           |       | Oxidation (M)[1] |      | Mascot      |

41 novel protein similar to tyrosine hydroxylase (th) [Danio rerio] gi|56207960 54280 5.7 9 32 0

Peptide Information

| Calc. Mass | Obsrv. Mass | ± da    | ± ppm | Start Seq. | End Seq. | Sequence               | Ion Score | C. I. % | Modification            | Rank | Result Type |
|------------|-------------|---------|-------|------------|----------|------------------------|-----------|---------|-------------------------|------|-------------|
| 842.5206   | 842.5167    | -0.0039 | -5    | 468        | 475      | ALGRLGQK               |           |         |                         |      | Mascot      |
| 1030.5463  | 1030.5532   | 0.0069  | 7     | 451        | 459      | IQNALGQMR              |           |         |                         |      | Mascot      |
| 1030.5463  | 1030.5532   | 0.0069  | 7     | 451        | 459      | IQNALGQMR              |           |         |                         |      | Mascot      |
| 1256.6521  | 1256.7491   | 0.097   | 77    | 74         | 84       | AGKVFETFETK            |           |         |                         |      | Mascot      |
| 1403.7212  | 1403.7678   | 0.0466  | 33    | 214        | 225      | TLRSLYPSHACR           |           |         |                         |      | Mascot      |
| 1403.7212  | 1403.7678   | 0.0466  | 33    | 214        | 225      | TLRSLYPSHACR           |           |         |                         |      | Mascot      |
| 1460.7427  | 1460.6359   | -0.1068 | -73   | 214        | 225      | TLRSLYPSHACR           |           |         | Carbamidomethyl (C)[11] |      | Mascot      |
| 1473.6791  | 1473.6864   | 0.0073  | 5     | 98         | 109      | RSSGEDLEFFMR           |           |         |                         |      | Mascot      |
| 1473.6791  | 1473.6864   | 0.0073  | 5     | 98         | 109      | RSSGEDLEFFMR           |           |         |                         |      | Mascot      |
| 1478.7096  | 1478.7196   | 0.01    | 7     | 179        | 190      | RGFISEMAFNKY           |           |         | Oxidation (M)[7]        |      | Mascot      |
| 1600.8363  | 1600.8541   | 0.0178  | 11    | 145        | 158      | KISDLDTCNHLITK         |           |         |                         |      | Mascot      |
| 1600.8363  | 1600.8541   | 0.0178  | 11    | 145        | 158      | KISDLDTCNHLITK         |           |         |                         |      | Mascot      |
| 1852.9221  | 1853.015    | 0.0929  | 50    | 1          | 17       | FSMKSDSIAQNVPLSGR      |           |         | Oxidation (M)[3]        |      | Mascot      |
| 2283.979   | 2284.1956   | 0.2166  | 95    | 159        | 177      | YDPDLQDHPGFSDSEY<br>RK |           |         |                         |      | Mascot      |

42 PREDICTED: zinc finger protein 729 [Danio rerio] gi|326668180 104096.8 9.15 18 32 0

Peptide Information

| Calc. Mass | Obsrv. Mass | ± da    | ± ppm | Start Seq. | End Seq. | Sequence        | Ion Score | C. I. % | Modification             | Rank | Result Type |
|------------|-------------|---------|-------|------------|----------|-----------------|-----------|---------|--------------------------|------|-------------|
| 1030.5568  | 1030.5532   | -0.0036 | -3    | 91         | 99       | SFAYKSSLK       | 6         | 0       |                          |      | Mascot      |
| 1030.5568  | 1030.5532   | -0.0036 | -3    | 91         | 99       | SFAYKSSLK       |           |         |                          |      | Mascot      |
| 1045.5387  | 1045.5658   | 0.0271  | 26    | 511        | 519      | CYSTALFLK       |           |         |                          |      | Mascot      |
| 1136.5339  | 1136.5818   | 0.0479  | 42    | 44         | 52       | SVACFHCKK       |           |         | Carbamidomethyl (C)[4,7] |      | Mascot      |
| 1148.6721  | 1148.5253   | -0.1468 | -128  | 212        | 220      | IHMLIHTRK       |           |         |                          |      | Mascot      |
| 1403.6082  | 1403.7678   | 0.1596  | 114   | 253        | 263      | CEECGKFFAQK     |           |         | Carbamidomethyl (C)[1,4] |      | Mascot      |
| 1403.6082  | 1403.7678   | 0.1596  | 114   | 253        | 263      | CEECGKFFAQK     |           |         | Carbamidomethyl (C)[1,4] |      | Mascot      |
| 1470.7457  | 1470.7699   | 0.0242  | 16    | 54         | 65       | FTCKAHLQVHMR    |           |         |                          |      | Mascot      |
| 1497.6614  | 1497.7661   | 0.1047  | 70    | 111        | 123      | HTCDQCGKSFPFK   |           |         |                          |      | Mascot      |
| 1619.7246  | 1619.7637   | 0.0391  | 24    | 631        | 642      | CFTFTHCWKSFR    |           |         | Carbamidomethyl (C)[1]   |      | Mascot      |
| 1619.7246  | 1619.7637   | 0.0391  | 24    | 631        | 642      | CFTFTHCWKSFR    |           |         | Carbamidomethyl (C)[1]   |      | Mascot      |
| 1761.7795  | 1761.8429   | 0.0634  | 36    | 799        | 813      | CSHCDTSFSQIQHLR | 1         | 0       |                          |      | Mascot      |

|  |           |           |        |     |     |     |                           |                                              |  |  |  |  |  |        |
|--|-----------|-----------|--------|-----|-----|-----|---------------------------|----------------------------------------------|--|--|--|--|--|--------|
|  | 1761.7795 | 1761.8429 | 0.0634 | 36  | 799 | 813 | CSHCDTSFSQIQHLR           |                                              |  |  |  |  |  | Mascot |
|  | 1852.807  | 1853.015  | 0.208  | 112 | 613 | 627 | IQNHHHDEGEHDQTR           |                                              |  |  |  |  |  | Mascot |
|  | 1916.9244 | 1916.9781 | 0.0537 | 28  | 387 | 403 | EVKPYTCDQCGKGFTLK         |                                              |  |  |  |  |  | Mascot |
|  | 2170.0281 | 2170.0898 | 0.0617 | 28  | 674 | 692 | EHTRIHTGEKPFACAQCG<br>K   | Carbamidomethyl (C)[14]                      |  |  |  |  |  | Mascot |
|  | 2233.031  | 2233.0981 | 0.0671 | 30  | 184 | 202 | IHMLIHTGEKPECDQCG<br>K    | Carbamidomethyl (C)[14]                      |  |  |  |  |  | Mascot |
|  | 2284.0459 | 2284.1956 | 0.1497 | 66  | 799 | 817 | CSHCDTSFSQIQHLRTHQ<br>R   |                                              |  |  |  |  |  | Mascot |
|  | 2289.105  | 2289.1477 | 0.0427 | 19  | 156 | 174 | IHMLIHTGEKPHKCDQCG<br>K   | Carbamidomethyl (C)[14,17]                   |  |  |  |  |  | Mascot |
|  | 2289.105  | 2289.1477 | 0.0427 | 19  | 156 | 174 | IHMLIHTGEKPHKCDQCG<br>K   | Carbamidomethyl (C)[14,17]                   |  |  |  |  |  | Mascot |
|  | 2430.1111 | 2430.2925 | 0.1814 | 75  | 694 | 714 | FGCSSNLKQHMMTHTGE<br>KPHK | Oxidation (M)[11,12]                         |  |  |  |  |  | Mascot |
|  | 2719.2749 | 2719.3252 | 0.0503 | 18  | 180 | 202 | GEVKIHMLIHTGEKPECDQCGK    | Carbamidomethyl (C)[18,21], Oxidation (M)[7] |  |  |  |  |  | Mascot |
|  | 2798.2695 | 2798.3958 | 0.1263 | 45  | 124 | 146 | VYLEQHMLIHTGETLHECDQCGK   | Carbamidomethyl (C)[18,21]                   |  |  |  |  |  | Mascot |

43 calcium-binding mitochondrial carrier protein  
SCaMC-2-A [Danio rerio] gi|47086085 52424 8.79 9 32 0

#### Peptide Information

| Calc. Mass | Obsrv. Mass | $\pm$ da | $\pm$ ppm | Start Seq. | End Seq. | Sequence                     | Ion Score | C. I. | % Modification                           | Rank | Result Type |
|------------|-------------|----------|-----------|------------|----------|------------------------------|-----------|-------|------------------------------------------|------|-------------|
| 842.4981   | 842.5167    | 0.0186   | 22        | 253        | 260      | IAPETALK                     |           |       |                                          |      | Mascot      |
| 876.4244   | 876.4282    | 0.0038   | 4         | 202        | 209      | TCTAPLDR                     |           |       |                                          |      | Mascot      |
| 1045.5023  | 1045.5658   | 0.0635   | 61        | 261        | 268      | FMAYEQIK                     |           |       | Oxidation (M)[2]                         |      | Mascot      |
| 1256.6238  | 1256.7491   | 0.1253   | 100       | 212        | 222      | VLMQVHGCQGK                  |           |       | Carbamidomethyl (C)[8]                   |      | Mascot      |
| 1497.8029  | 1497.7661   | -0.0368  | -25       | 210        | 222      | LKVLMQVHGCQGK                |           |       | Carbamidomethyl (C)[10]                  |      | Mascot      |
| 1515.7039  | 1515.7649   | 0.061    | 40        | 223        | 235      | SMCLMSGLTQMIK                |           |       | Carbamidomethyl (C)[3], Oxidation (M)[2] |      | Mascot      |
| 1852.9877  | 1853.015    | 0.0273   | 15        | 253        | 268      | IAPETALKFMAYEQIK             |           |       |                                          |      | Mascot      |
| 2430.3755  | 2430.2925   | -0.083   | -34       | 446        | 467      | VIPAVSISYVVYEHKSTL<br>GVR    |           |       |                                          |      | Mascot      |
| 2618.2622  | 2618.304    | 0.0418   | 16        | 405        | 428      | MQAQASVEGSSQVSMT<br>GLFKQIMK |           |       | Oxidation (M)[1,15]                      |      | Mascot      |

44 Zgc:103710 protein [Danio rerio] gi|115291999 35746.4 5.67 7 32 0

#### Peptide Information

| Calc. Mass | Obsrv. Mass | $\pm$ da | $\pm$ ppm | Start Seq. | End Seq. | Sequence      | Ion Score | C. I. | % Modification   | Rank | Result Type |
|------------|-------------|----------|-----------|------------|----------|---------------|-----------|-------|------------------|------|-------------|
| 835.4308   | 835.476     | 0.0452   | 54        | 210        | 216      | FTNTPQK       |           |       |                  |      | Mascot      |
| 850.4338   | 850.5481    | 0.1143   | 134       | 66         | 72       | NLEIMSK       |           |       | Oxidation (M)[5] |      | Mascot      |
| 1473.7559  | 1473.6864   | -0.0695  | -47       | 193        | 205      | YMVPQPASPGIWK |           |       |                  |      | Mascot      |
| 1473.7559  | 1473.6864   | -0.0695  | -47       | 193        | 205      | YMVPQPASPGIWK |           |       |                  |      | Mascot      |

|  |           |           |         |     |     |     |                              |  |  |  |  |                  |        |
|--|-----------|-----------|---------|-----|-----|-----|------------------------------|--|--|--|--|------------------|--------|
|  | 1761.8993 | 1761.8429 | -0.0564 | -32 | 190 | 205 | SGKYMVPQPASPGIWK             |  |  |  |  | Oxidation (M)[5] | Mascot |
|  | 1761.8993 | 1761.8429 | -0.0564 | -32 | 190 | 205 | SGKYMVPQPASPGIWK             |  |  |  |  | Oxidation (M)[5] | Mascot |
|  | 1916.96   | 1916.9781 | 0.0181  | 9   | 304 | 320 | QTILQTFPDISQPSVEN            |  |  |  |  |                  | Mascot |
|  | 2490.1619 | 2490.2053 | 0.0434  | 17  | 258 | 279 | Y LHGNNVNGHAFVVFGV<br>MEDDR  |  |  |  |  |                  | Mascot |
|  | 2618.2568 | 2618.304  | 0.0472  | 18  | 258 | 280 | Y LHGNNVNGHAFVVFGV<br>MEDDRK |  |  |  |  |                  | Mascot |

45 PREDICTED: hypothetical protein LOC100535704 [Danio rerio] gi|326676179 16043 4.68 1 32 0 27 47.714

#### Peptide Information

| Calc. Mass | Obsrv. Mass | ± da    | ± ppm | Start Seq. | End Seq. | Sequence    | Ion Score | C. I. % | Modification | Rank | Result Type |
|------------|-------------|---------|-------|------------|----------|-------------|-----------|---------|--------------|------|-------------|
| 1403.8257  | 1403.7678   | -0.0579 | -41   | 113        | 123      | EIIYLDRQILK |           |         |              |      | Mascot      |
| 1403.8257  | 1403.7678   | -0.0579 | -41   | 113        | 123      | EIIYLDRQILK | 27        | 47.714  |              |      | Mascot      |

46 complement component 3-like isoform 1 [Danio rerio] gi|153792045 188748 7.66 17 32 0

#### Peptide Information

| Calc. Mass | Obsrv. Mass | ± da    | ± ppm | Start Seq. | End Seq. | Sequence                         | Ion Score | C. I. % | Modification               | Rank | Result Type |
|------------|-------------|---------|-------|------------|----------|----------------------------------|-----------|---------|----------------------------|------|-------------|
| 842.5206   | 842.5167    | -0.0039 | -5    | 516        | 523      | GKIIQAGR                         |           |         |                            |      | Mascot      |
| 1132.568   | 1132.5328   | -0.0352 | -31   | 27         | 35       | RTVWGPNMNR                       |           |         | Oxidation (M)[8]           |      | Mascot      |
| 1256.627   | 1256.7491   | 0.1221  | 97    | 1058       | 1067     | GYENQLNYKK                       |           |         |                            |      | Mascot      |
| 1478.5991  | 1478.7196   | 0.1205  | 81    | 694        | 704      | DQLEYDYMEEK                      |           |         | Oxidation (M)[8]           |      | Mascot      |
| 1515.8451  | 1515.7649   | -0.0802 | -53   | 862        | 875      | STPSVNVVMVILEK                   |           |         |                            |      | Mascot      |
| 1600.8845  | 1600.8541   | -0.0304 | -19   | 124        | 136      | YVKLVAQFSNIYR                    |           |         |                            |      | Mascot      |
| 1600.8845  | 1600.8541   | -0.0304 | -19   | 124        | 136      | YVKLVAQFSNIYR                    |           |         |                            |      | Mascot      |
| 1661.9696  | 1661.7477   | -0.2219 | -134  | 61         | 75       | QNILVEGHNLAKVVK                  |           |         |                            |      | Mascot      |
| 1853.0167  | 1853.015    | -0.0017 | -1    | 269        | 284      | LEVEITARYLYGAQVK                 |           |         |                            |      | Mascot      |
| 2012.0658  | 2011.9922   | -0.0736 | -37   | 259        | 276      | TSHLSLDAEKLEVEITAR               |           |         |                            |      | Mascot      |
| 2158.1763  | 2158.064    | -0.1123 | -52   | 2          | 19       | LLQLLLWATLLCQICDGK               |           |         | Carbamidomethyl (C)[12,15] |      | Mascot      |
| 2233.1533  | 2233.0981   | -0.0552 | -25   | 911        | 932      | TGELPLQVTAVAASF<br>MGQDAVK       |           |         |                            |      | Mascot      |
| 2289.2168  | 2289.1477   | -0.0691 | -30   | 1          | 19       | MLLQLLLWATLLCQICDG<br>K          |           |         | Carbamidomethyl (C)[13,16] |      | Mascot      |
| 2289.2168  | 2289.1477   | -0.0691 | -30   | 1          | 19       | MLLQLLLWATLLCQICDG<br>K          |           |         | Carbamidomethyl (C)[13,16] |      | Mascot      |
| 2331.2588  | 2331.2095   | -0.0493 | -21   | 855        | 875      | NSTLEVRSTPSVNV<br>MVI LEK        |           |         | Oxidation (M)[16]          |      | Mascot      |
| 2448.0442  | 2448.2031   | 0.1589  | 65    | 650        | 673      | DNMGVFS<br>DAGLMFHSST<br>GGSTDSK |           |         |                            |      | Mascot      |
| 2470.2581  | 2470.1809   | -0.0772 | -31   | 1190       | 1212     | LTRPYTAAIACYALAV<br>SN NACVK     |           |         | Carbamidomethyl (C)[11]    |      | Mascot      |
| 2618.46    | 2618.304    | -0.156  | -60   | 406        | 428      | VTFLKRPISVHSGTINI<br>HIN         |           |         | Oxidation (M)[21]          |      | Mascot      |

|    |                                                               |           |         |     |              |         |                                    |    |    |   |  |  |  |        |
|----|---------------------------------------------------------------|-----------|---------|-----|--------------|---------|------------------------------------|----|----|---|--|--|--|--------|
|    | 2798.4797                                                     | 2798.3958 | -0.0839 | -30 | 1571         | 1593    | MPK<br>VKLISISQSHYYQYEMEIV<br>QVIK |    |    |   |  |  |  | Mascot |
| 47 | PREDICTED: transcriptional repressor NF-X1-like [Danio rerio] |           |         |     | gi 326669534 | 93150.5 | 8.23                               | 17 | 31 | 0 |  |  |  |        |

| Peptide Information |             |         |       |            |          |                       |           |       |                                               |      |        |      |  |
|---------------------|-------------|---------|-------|------------|----------|-----------------------|-----------|-------|-----------------------------------------------|------|--------|------|--|
| Calc. Mass          | Obsrv. Mass | ± da    | ± ppm | Start Seq. | End Seq. | Sequence              | Ion Score | C. I. | % Modification                                | Rank | Result | Type |  |
| 842.4301            | 842.5167    | 0.0866  | 103   | 442        | 448      | LSCGLHR               |           |       | Carbamidomethyl (C)[3]                        |      | Mascot |      |  |
| 882.4614            | 882.5712    | 0.1098  | 124   | 552        | 559      | LLPCGSHR              |           |       |                                               |      | Mascot |      |  |
| 1148.5074           | 1148.5253   | 0.0179  | 16    | 336        | 346      | ACTDPIPCGK            |           |       | Carbamidomethyl (C)[2]                        |      | Mascot |      |  |
| 1393.5544           | 1393.7159   | 0.1615  | 116   | 156        | 168      | TEIPHSCGDMCGK         |           |       | Oxidation (M)[10]                             |      | Mascot |      |  |
| 1403.7311           | 1403.7678   | 0.0367  | 26    | 785        | 798      | SACPNTSLAALISR        |           |       |                                               |      | Mascot |      |  |
| 1403.7311           | 1403.7678   | 0.0367  | 26    | 785        | 798      | SACPNTSLAALISR        |           |       |                                               |      | Mascot |      |  |
| 1409.6035           | 1409.7487   | 0.1452  | 103   | 667        | 678      | LECDQECATLER          |           |       |                                               |      | Mascot |      |  |
| 1460.7526           | 1460.6359   | -0.1167 | -80   | 785        | 798      | SACPNTSLAALISR        |           |       | Carbamidomethyl (C)[3]                        |      | Mascot |      |  |
| 1478.7454           | 1478.7196   | -0.0258 | -17   | 312        | 325      | LVRSCSCGQTPLSK        |           |       |                                               |      | Mascot |      |  |
| 1497.6638           | 1497.7661   | 0.1023  | 68    | 620        | 633      | ETVPCADAASSYQR        |           |       |                                               |      | Mascot |      |  |
| 1572.6884           | 1572.7897   | 0.1013  | 64    | 8          | 21       | GAEEEGERPEEANR        |           |       |                                               |      | Mascot |      |  |
| 1619.6975           | 1619.7637   | 0.0662  | 41    | 156        | 169      | TEIPHSCGDMCGKK        |           |       | Carbamidomethyl (C)[7,11]                     |      | Mascot |      |  |
| 1619.6975           | 1619.7637   | 0.0662  | 41    | 156        | 169      | TEIPHSCGDMCGKK        |           |       | Carbamidomethyl (C)[7,11]                     |      | Mascot |      |  |
| 1761.7175           | 1761.8429   | 0.1254  | 71    | 420        | 433      | HKCGELCCVDMEHK        |           |       | Carbamidomethyl (C)[3,7], Oxidation (M)[11]   |      | Mascot |      |  |
| 1761.7175           | 1761.8429   | 0.1254  | 71    | 420        | 433      | HKCGELCCVDMEHK        |           |       | Carbamidomethyl (C)[3,7], Oxidation (M)[11]   |      | Mascot |      |  |
| 1783.76             | 1783.834    | 0.074   | 41    | 270        | 285      | KFDGSGYFSCCKPCGK      |           |       | Carbamidomethyl (C)[10]                       |      | Mascot |      |  |
| 1857.8226           | 1857.8822   | 0.0596  | 32    | 434        | 448      | CSMICGYKLSCGLHR       |           |       | Carbamidomethyl (C)[1,5,11], Oxidation (M)[3] |      | Mascot |      |  |
| 2169.8933           | 2170.0898   | 0.1965  | 91    | 294        | 311      | CQQSCHPGECQPCPLSPK    |           |       | Carbamidomethyl (C)[1,5,10,13]                |      | Mascot |      |  |
| 2272.9771           | 2273.1455   | 0.1684  | 74    | 391        | 409      | EVPCAAIQTEEDMVFTCEK   |           |       | Carbamidomethyl (C)[4,17], Oxidation (M)[13]  |      | Mascot |      |  |
| 2283.8704           | 2284.1956   | 0.3252  | 142   | 422        | 441      | CGELCCVDMEHKCSMICGYK  |           |       | Oxidation (M)[9,15]                           |      | Mascot |      |  |
| 2538.1467           | 2538.2896   | 0.1429  | 56    | 294        | 314      | CQQSCHPGECQPCPLSPKLVR |           |       | Carbamidomethyl (C)[1,5,10,13]                |      | Mascot |      |  |

|    |                                                                               |  |  |  |              |          |      |    |    |   |  |  |  |
|----|-------------------------------------------------------------------------------|--|--|--|--------------|----------|------|----|----|---|--|--|--|
| 48 | novel protein similar to vertebrate complement component 3 (C3) [Danio rerio] |  |  |  | gi 169153736 | 187400.5 | 8.04 | 17 | 31 | 0 |  |  |  |
|----|-------------------------------------------------------------------------------|--|--|--|--------------|----------|------|----|----|---|--|--|--|

| Peptide Information |             |         |       |            |          |          |           |       |                |      |        |      |  |
|---------------------|-------------|---------|-------|------------|----------|----------|-----------|-------|----------------|------|--------|------|--|
| Calc. Mass          | Obsrv. Mass | ± da    | ± ppm | Start Seq. | End Seq. | Sequence | Ion Score | C. I. | % Modification | Rank | Result | Type |  |
| 835.4494            | 835.476     | 0.0266  | 32    | 140        | 146      | VMPVSFR  |           |       |                |      | Mascot |      |  |
| 842.5206            | 842.5167    | -0.0039 | -5    | 516        | 523      | GKIIQAGR |           |       |                |      | Mascot |      |  |

|  |           |           |         |      |      |      |                               |  |  |  |  |  |                         |  |  |  |  |  |        |
|--|-----------|-----------|---------|------|------|------|-------------------------------|--|--|--|--|--|-------------------------|--|--|--|--|--|--------|
|  | 1132.6361 | 1132.5328 | -0.1033 | -91  | 431  | 440  | IPYGNSQILK                    |  |  |  |  |  |                         |  |  |  |  |  | Mascot |
|  | 1256.627  | 1256.7491 | 0.1221  | 97   | 1068 | 1077 | GYENQLNYKK                    |  |  |  |  |  |                         |  |  |  |  |  | Mascot |
|  | 1515.8451 | 1515.7649 | -0.0802 | -53  | 862  | 875  | STPSVNVVMVILEK                |  |  |  |  |  |                         |  |  |  |  |  | Mascot |
|  | 1528.739  | 1528.7517 | 0.0127  | 8    | 169  | 181  | GFVSDLEFRSSER                 |  |  |  |  |  |                         |  |  |  |  |  | Mascot |
|  | 1600.8845 | 1600.8541 | -0.0304 | -19  | 124  | 136  | YVKLVAQFSNIYR                 |  |  |  |  |  |                         |  |  |  |  |  | Mascot |
|  | 1600.8845 | 1600.8541 | -0.0304 | -19  | 124  | 136  | YVKLVAQFSNIYR                 |  |  |  |  |  |                         |  |  |  |  |  | Mascot |
|  | 1661.9696 | 1661.7477 | -0.2219 | -134 | 61   | 75   | QNILVEGHNLAKVVK               |  |  |  |  |  |                         |  |  |  |  |  | Mascot |
|  | 1853.0167 | 1853.015  | -0.0017 | -1   | 269  | 284  | LEVEITARYLYGAQVK              |  |  |  |  |  |                         |  |  |  |  |  | Mascot |
|  | 2012.0658 | 2011.9922 | -0.0736 | -37  | 259  | 276  | TSHLSLDAEKLEVEITAR            |  |  |  |  |  |                         |  |  |  |  |  | Mascot |
|  | 2158.1914 | 2158.064  | -0.1274 | -59  | 411  | 429  | RPISVHSGTINIHNMPKK            |  |  |  |  |  | Oxidation (M)[16]       |  |  |  |  |  | Mascot |
|  | 2233.1533 | 2233.0981 | -0.0552 | -25  | 911  | 932  | TGELPLQVTAVAASFMG<br>QDAVK    |  |  |  |  |  |                         |  |  |  |  |  | Mascot |
|  | 2331.2588 | 2331.2095 | -0.0493 | -21  | 855  | 875  | NSTLEVRSTPSVNVVMV<br>LEK      |  |  |  |  |  | Oxidation (M)[16]       |  |  |  |  |  | Mascot |
|  | 2448.0442 | 2448.2031 | 0.1589  | 65   | 650  | 673  | DNMGVFS DAGLMFHSST<br>GGSTDSK |  |  |  |  |  |                         |  |  |  |  |  | Mascot |
|  | 2470.2581 | 2470.1809 | -0.0772 | -31  | 1200 | 1222 | LTRPYTAAIACYALAVSN<br>NACVK   |  |  |  |  |  | Carbamidomethyl (C)[11] |  |  |  |  |  | Mascot |
|  | 2618.46   | 2618.304  | -0.156  | -60  | 406  | 428  | VTFLKRPISVHSGTINIHN<br>MPK    |  |  |  |  |  | Oxidation (M)[21]       |  |  |  |  |  | Mascot |
|  | 2798.4797 | 2798.3958 | -0.0839 | -30  | 1559 | 1581 | VKLISISQSHYYQYEMEIV<br>QVIK   |  |  |  |  |  |                         |  |  |  |  |  | Mascot |

49

PREDICTED: phospholipase C-like 2, partial [Danio rerio]

gi|292630098

111384

5.95

1

21

0

Peptide Information

| Calc. Mass | Obsrv. Mass | ± da    | ± ppm | Start Seq. | End Seq. | Sequence      | Ion Score | C. I. % | Modification | Rank | Result Type |
|------------|-------------|---------|-------|------------|----------|---------------|-----------|---------|--------------|------|-------------|
| 1403.829   | 1403.7678   | -0.0612 | -44   | 248        | 260      | KSISLCTAVQLIK | 23        | 0       |              | 3    | Mascot      |

50

PREDICTED: serine/threonine-protein kinase pim-3-like [Danio rerio]

gi|292621981

33318.9

6.25

1

18

0

Peptide Information

| Calc. Mass | Obsrv. Mass | ± da    | ± ppm | Start Seq. | End Seq. | Sequence       | Ion Score | C. I. % | Modification | Rank | Result Type |
|------------|-------------|---------|-------|------------|----------|----------------|-----------|---------|--------------|------|-------------|
| 1419.7703  | 1419.7617   | -0.0086 | -6    | 160        | 173      | GGSLGETVARGLFR | 18        | 0       |              | 3    | Mascot      |

|                       |           |                               |                |                       |                    |
|-----------------------|-----------|-------------------------------|----------------|-----------------------|--------------------|
| <b>Gel Idx/Pos</b>    | 196/H23   | <b>Instr./Gel Origin</b>      | BA2060/110707A | <b>Process Status</b> | Analysis Succeeded |
| <b>Plate [#] Name</b> | [1] 31496 | <b>Instrument Sample Name</b> |                | <b>Spectra</b>        | 11                 |

| Rank | Protein Name                                               | Accession No. | Protein MW | Protein PI | Pep. Count | Protein Score | Protein Score C. I. % | Total Ion Score | Total Ion C. I. % |
|------|------------------------------------------------------------|---------------|------------|------------|------------|---------------|-----------------------|-----------------|-------------------|
| 1    | alpha-aminoadipic semialdehyde dehydrogenase [Danio rerio] | gi 47086597   | 55568.2    | 5.94       | 18         | 443           | 100                   | 328             | 100               |

| Peptide Information |             |          |           |            |          |                                              |           |        |   |                         |                  |
|---------------------|-------------|----------|-----------|------------|----------|----------------------------------------------|-----------|--------|---|-------------------------|------------------|
| Calc. Mass          | Obsrv. Mass | $\pm$ da | $\pm$ ppm | Start Seq. | End Seq. | Sequence                                     | Ion Score | C. I.  | % | Modification            | Rank Result Type |
| 942.5479            | 942.5549    | 0.007    | 7         | 88         | 95       | QIGEARLR                                     |           |        |   |                         | Mascot           |
| 982.5356            | 982.5555    | 0.0199   | 20        | 73         | 81       | VWADVPAPK                                    |           |        |   |                         | Mascot           |
| 1107.5286           | 1107.5391   | 0.0105   | 9         | 253        | 261      | QVAMMVQER                                    |           |        |   | Oxidation (M)[4]        | Mascot           |
| 1123.5234           | 1123.5309   | 0.0075   | 7         | 253        | 261      | QVAMMVQER                                    |           |        |   | Oxidation (M)[4,5]      | Mascot           |
| 1230.6729           | 1230.6799   | 0.007    | 6         | 501        | 511      | DLPLAQGIKFE                                  |           |        |   |                         | Mascot           |
| 1402.7689           | 1402.7797   | 0.0108   | 8         | 239        | 252      | VGLLSFTGSTHVGK                               |           |        |   |                         | Mascot           |
| 1460.6512           | 1460.64     | -0.0112  | -8        | 473        | 486      | HTGGGREGSGSDSWK                              |           |        |   |                         | Mascot           |
| 1509.8015           | 1509.7767   | -0.0248  | -16       | 97         | 110      | IKALGSLMSLEMGK                               |           |        |   | Oxidation (M)[8,12]     | Mascot           |
| 1523.7588           | 1523.7728   | 0.014    | 9         | 54         | 66       | QATIAEYEETIQK                                |           |        |   |                         | Mascot           |
| 1560.838            | 1560.8516   | 0.0136   | 9         | 348        | 361      | QAVQQYLAAIEQAK                               | 82        | 100    |   |                         | Mascot           |
| 1560.838            | 1560.8516   | 0.0136   | 9         | 348        | 361      | QAVQQYLAAIEQAK                               |           |        |   |                         | Mascot           |
| 1582.7019           | 1582.8284   | 0.1265   | 80        | 412        | 424      | TEEEAFSWNNEVK                                |           |        |   |                         | Mascot           |
| 1706.853            | 1706.8643   | 0.0113   | 7         | 308        | 321      | LMLHESIHDDEVVER                              |           |        |   |                         | Mascot           |
| 1718.9113           | 1718.9227   | 0.0114   | 7         | 2          | 15       | STLLINQPEYNWLK                               | 69        | 99.997 |   |                         | Mascot           |
| 1718.9113           | 1718.9227   | 0.0114   | 7         | 2          | 15       | STLLINQPEYNWLK                               |           |        |   |                         | Mascot           |
| 1722.8479           | 1722.8663   | 0.0184   | 11        | 308        | 321      | LMLHESIHDDEVVER                              |           |        |   | Oxidation (M)[2]        | Mascot           |
| 1857.8654           | 1857.8779   | 0.0125   | 7         | 410        | 424      | FKTEEEAFSWNNEVK                              | 91        | 100    |   |                         | Mascot           |
| 1857.8654           | 1857.8779   | 0.0125   | 7         | 410        | 424      | FKTEEEAFSWNNEVK                              |           |        |   |                         | Mascot           |
| 1862.9541           | 1862.9628   | 0.0087   | 5         | 307        | 321      | RLMLHESIHDDEVVER                             |           |        |   |                         | Mascot           |
| 1878.949            | 1878.9661   | 0.0171   | 9         | 307        | 321      | RLMLHESIHDDEVVER                             |           |        |   | Oxidation (M)[3]        | Mascot           |
| 1923.96             | 1923.9751   | 0.0151   | 8         | 331        | 347      | IGDPWDPNTLYGPLHTK                            | 86        | 100    |   |                         | Mascot           |
| 1923.96             | 1923.9751   | 0.0151   | 8         | 331        | 347      | IGDPWDPNTLYGPLHTK                            |           |        |   |                         | Mascot           |
| 2506.1877           | 2506.2161   | 0.0284   | 11        | 447        | 472      | GSDCGIVNVNIPTSGAEI<br>GGAFGGEK               |           |        |   | Carbamidomethyl (C)[4]  | Mascot           |
| 3355.4556           | 3355.4919   | 0.0363   | 11        | 21         | 51       | EDNDGVYNGSWGQGGE<br>VVTSYCPANNEPIAR          |           |        |   | Carbamidomethyl (C)[22] | Mascot           |
| 3895.7827           | 3895.8374   | 0.0547   | 14        | 16         | 51       | ELGLKEDNDGVYNGSW<br>GGQGEVVTSYCPANNEP<br>IAR |           |        |   | Carbamidomethyl (C)[27] | Mascot           |

2    PREDICTED: alpha-(1,3)-fucosyltransferase-like [Danio gii|292612044  
erio]

| Peptide Information |             |          |           |            |          |          |           |       |   |              |                  |
|---------------------|-------------|----------|-----------|------------|----------|----------|-----------|-------|---|--------------|------------------|
| Calc. Mass          | Obsrv. Mass | $\pm$ da | $\pm$ ppm | Start Seq. | End Seq. | Sequence | Ion Score | C. I. | % | Modification | Rank Result Type |
| 850.4451            | 850.5497    | 0.1046   | 123       | 231        | 237      | ETLTRCK  |           |       |   |              | Mascot           |

|   |                                |           |         |     |             |     |                          |      |    |                        |   |  |        |
|---|--------------------------------|-----------|---------|-----|-------------|-----|--------------------------|------|----|------------------------|---|--|--------|
|   | 982.5138                       | 982.5555  | 0.0417  | 42  | 336         | 343 | ACQYIRTK                 |      |    |                        |   |  | Mascot |
|   | 1169.5619                      | 1169.6438 | 0.0819  | 70  | 70          | 79  | KFDLNSCSAK               |      |    | Carbamidomethyl (C)[7] |   |  | Mascot |
|   | 1185.6738                      | 1185.6406 | -0.0332 | -28 | 209         | 218 | KHIDIYALGR               |      |    |                        |   |  | Mascot |
|   | 1303.61                        | 1303.772  | 0.162   | 124 | 325         | 335 | LVSYPEEHACR              |      |    |                        |   |  | Mascot |
|   | 1582.8071                      | 1582.8284 | 0.0213  | 13  | 223         | 235 | QLSDTQYKETLTR            |      |    |                        |   |  | Mascot |
|   | 1761.874                       | 1761.8502 | -0.0238 | -14 | 184         | 197 | DKLVCWIVSNWNER           |      |    |                        |   |  | Mascot |
|   | 2284.2739                      | 2284.1958 | -0.0781 | -34 | 51          | 69  | EKPLENSTILLIWIWPF GK     |      |    |                        |   |  | Mascot |
|   | 2284.2739                      | 2284.1958 | -0.0781 | -34 | 51          | 69  | EKPLENSTILLIWIWPF GK     |      |    |                        |   |  | Mascot |
|   | 2297.0762                      | 2297.2095 | 0.1333  | 58  | 238         | 255 | FYLSFENTNLHYDYITEK       |      |    |                        |   |  | Mascot |
|   | 2528.1802                      | 2528.1924 | 0.0122  | 5   | 236         | 255 | CKFYLSFENTNLHYDYIT<br>EK |      |    |                        |   |  | Mascot |
| 3 | Sb:cb283 protein [Danio rerio] |           |         |     | gi 81097694 |     | 57058.3                  | 8.43 | 12 | 44                     | 0 |  |        |

#### Peptide Information

|  | Calc. Mass | Obsrv. Mass | ± da    | ± ppm | Start Seq. | End Seq. | Sequence                  | Ion Score | C. I. | % Modification                                | Rank | Result Type |
|--|------------|-------------|---------|-------|------------|----------|---------------------------|-----------|-------|-----------------------------------------------|------|-------------|
|  | 1062.5691  | 1062.6975   | 0.1284  | 121   | 101        | 110      | FRDAAANGIK                |           |       |                                               |      | Mascot      |
|  | 1107.5728  | 1107.5391   | -0.0337 | -30   | 1          | 9        | GLLDFCRAR                 |           |       | Carbamidomethyl (C)[6]                        |      | Mascot      |
|  | 1123.5167  | 1123.5309   | 0.0142  | 13    | 438        | 445      | REDYEFHK                  |           |       |                                               |      | Mascot      |
|  | 1169.6201  | 1169.6438   | 0.0237  | 20    | 207        | 216      | VAEYVQSVFK                |           |       |                                               |      | Mascot      |
|  | 1279.6437  | 1279.7867   | 0.143   | 112   | 244        | 254      | CANAVPRHQAR               |           |       | Carbamidomethyl (C)[1]                        |      | Mascot      |
|  | 1582.724   | 1582.8284   | 0.1044  | 66    | 54         | 67       | APLQDYSADVCCIK            |           |       | Carbamidomethyl (C)[11]                       |      | Mascot      |
|  | 1619.9227  | 1619.7642   | -0.1585 | -98   | 68         | 82       | DEVVLRVPGLPGNR            |           |       |                                               |      | Mascot      |
|  | 1761.9493  | 1761.8502   | -0.0991 | -56   | 423        | 438      | AGEVLGDLFEVSTIRR          |           |       |                                               |      | Mascot      |
|  | 1903.9265  | 1903.9333   | 0.0068  | 4     | 234        | 250      | EYPCLAAVNRCANAVPR         |           |       | Carbamidomethyl (C)[4]                        |      | Mascot      |
|  | 2025.9116  | 2025.9406   | 0.029   | 14    | 83         | 99       | LVCSCTGPVNRDYDDVR         |           |       | Carbamidomethyl (C)[3,5]                      |      | Mascot      |
|  | 2211.0276  | 2211.1243   | 0.0967  | 44    | 354        | 373      | VGNTDAEGRMVMVDLLC<br>EMK  |           |       |                                               |      | Mascot      |
|  | 2211.0276  | 2211.1243   | 0.0967  | 44    | 354        | 373      | VGNTDAEGRMVMVDLLC<br>EMK  |           |       |                                               |      | Mascot      |
|  | 2283.2642  | 2283.2009   | -0.0633 | -28   | 112        | 132      | ALKAGLQRPLLVCPPNSS<br>YAK |           |       | Carbamidomethyl (C)[13]                       |      | Mascot      |
|  | 2284.0439  | 2284.1958   | 0.1519  | 67    | 354        | 373      | VGNTDAEGRMVMVDLLC<br>EMK  |           |       | Carbamidomethyl (C)[17], Oxidation (M)[10]    |      | Mascot      |
|  | 2284.0439  | 2284.1958   | 0.1519  | 67    | 354        | 373      | VGNTDAEGRMVMVDLLC<br>EMK  |           |       | Carbamidomethyl (C)[17], Oxidation (M)[10]    |      | Mascot      |
|  | 2300.0388  | 2300.1975   | 0.1587  | 69    | 354        | 373      | VGNTDAEGRMVMVDLLC<br>EMK  |           |       | Carbamidomethyl (C)[17], Oxidation (M)[10,12] |      | Mascot      |

4 hypothetical protein LOC767682 [Danio rerio] gi|115495185 55486.4 7.89 11 41 0

#### Peptide Information

|  | Calc. Mass | Obsrv. Mass | ± da | ± ppm | Start Seq. | End Seq. | Sequence | Ion Score | C. I. | % Modification | Rank | Result Type |
|--|------------|-------------|------|-------|------------|----------|----------|-----------|-------|----------------|------|-------------|
|--|------------|-------------|------|-------|------------|----------|----------|-----------|-------|----------------|------|-------------|



|   |                                                                                         |           |         |     |     |     |                           |  |  |  |  |                                                  |  |  |  |  |        |
|---|-----------------------------------------------------------------------------------------|-----------|---------|-----|-----|-----|---------------------------|--|--|--|--|--------------------------------------------------|--|--|--|--|--------|
|   | 1062.5691                                                                               | 1062.6975 | 0.1284  | 121 | 88  | 97  | FRDAAANGIK                |  |  |  |  |                                                  |  |  |  |  | Mascot |
|   | 1123.5167                                                                               | 1123.5309 | 0.0142  | 13  | 425 | 432 | REDYEFHK                  |  |  |  |  |                                                  |  |  |  |  | Mascot |
|   | 1169.6201                                                                               | 1169.6438 | 0.0237  | 20  | 194 | 203 | VAEYVQSVFK                |  |  |  |  |                                                  |  |  |  |  | Mascot |
|   | 1279.6437                                                                               | 1279.7867 | 0.143   | 112 | 231 | 241 | CANAVPRHQAR               |  |  |  |  | Carbamidomethyl (C)[1]                           |  |  |  |  | Mascot |
|   | 1582.724                                                                                | 1582.8284 | 0.1044  | 66  | 41  | 54  | APLQDYSAVDCCIK            |  |  |  |  | Carbamidomethyl (C)[11]                          |  |  |  |  | Mascot |
|   | 1619.9227                                                                               | 1619.7642 | -0.1585 | -98 | 55  | 69  | DEVVVLRLVPLPGNR           |  |  |  |  |                                                  |  |  |  |  | Mascot |
|   | 1761.9493                                                                               | 1761.8502 | -0.0991 | -56 | 410 | 425 | AGEVLGDLFEVSTIRR          |  |  |  |  |                                                  |  |  |  |  | Mascot |
|   | 1903.9265                                                                               | 1903.9333 | 0.0068  | 4   | 221 | 237 | EYPCLAAVNRCANAVPR         |  |  |  |  | Carbamidomethyl (C)[4]                           |  |  |  |  | Mascot |
|   | 2025.9116                                                                               | 2025.9406 | 0.029   | 14  | 70  | 86  | LVCSCTGPVNRDYDDVR         |  |  |  |  | Carbamidomethyl (C)[3,5]                         |  |  |  |  | Mascot |
|   | 2211.0276                                                                               | 2211.1243 | 0.0967  | 44  | 341 | 360 | VGNTDAEGRMVMVDLLC<br>EMK  |  |  |  |  |                                                  |  |  |  |  | Mascot |
|   | 2211.0276                                                                               | 2211.1243 | 0.0967  | 44  | 341 | 360 | VGNTDAEGRMVMVDLLC<br>EMK  |  |  |  |  |                                                  |  |  |  |  | Mascot |
|   | 2283.2642                                                                               | 2283.2009 | -0.0633 | -28 | 99  | 119 | ALKAGLQRPLLVCPPNSS<br>YAK |  |  |  |  | Carbamidomethyl (C)[13]                          |  |  |  |  | Mascot |
|   | 2284.0439                                                                               | 2284.1958 | 0.1519  | 67  | 341 | 360 | VGNTDAEGRMVMVDLLC<br>EMK  |  |  |  |  | Carbamidomethyl (C)[17], Oxidation (M)[10]       |  |  |  |  | Mascot |
|   | 2284.0439                                                                               | 2284.1958 | 0.1519  | 67  | 341 | 360 | VGNTDAEGRMVMVDLLC<br>EMK  |  |  |  |  | Carbamidomethyl (C)[17], Oxidation (M)[10]       |  |  |  |  | Mascot |
|   | 2300.0388                                                                               | 2300.1975 | 0.1587  | 69  | 341 | 360 | VGNTDAEGRMVMVDLLC<br>EMK  |  |  |  |  | Carbamidomethyl (C)[17], Oxidation<br>(M)[10,12] |  |  |  |  | Mascot |
| 5 | PREDICTED: zinc finger protein 271-like [Danio rerio] gi 326666948 40261.5 9.08 11 39 0 |           |         |     |     |     |                           |  |  |  |  |                                                  |  |  |  |  |        |

#### Peptide Information

|  | Calc. Mass | Obsrv. Mass | ± da   | ± ppm | Start Seq. | End Seq. | Sequence            | Ion Score | C. I. | % Modification                | Rank | Result Type |
|--|------------|-------------|--------|-------|------------|----------|---------------------|-----------|-------|-------------------------------|------|-------------|
|  | 996.4641   | 996.6023    | 0.1382 | 139   | 233        | 241      | LFTCPQCGK           |           |       |                               |      | Mascot      |
|  | 996.4641   | 996.6023    | 0.1382 | 139   | 233        | 241      | LFTCPQCGK           |           |       |                               |      | Mascot      |
|  | 1185.5358  | 1185.6406   | 0.1048 | 88    | 298        | 307      | NFYCSSHLSK          |           |       |                               |      | Mascot      |
|  | 1230.5063  | 1230.6799   | 0.1736 | 141   | 64         | 73       | NCFICTQCGK          |           |       | Carbamidomethyl (C)[2,5]      |      | Mascot      |
|  | 1574.7493  | 1574.7871   | 0.0378 | 24    | 270        | 282      | SFSQSSHLNKHMR       |           |       | Oxidation (M)[12]             |      | Mascot      |
|  | 1706.7988  | 1706.8643   | 0.0655 | 38    | 314        | 328      | IHTGEKPFCTQCGK      |           |       | Carbamidomethyl (C)[10]       |      | Mascot      |
|  | 1718.8352  | 1718.9227   | 0.0875 | 51    | 227        | 241      | IHTGEKLFTCPQCGK     |           |       | Carbamidomethyl (C)[10]       |      | Mascot      |
|  | 1718.8352  | 1718.9227   | 0.0875 | 51    | 227        | 241      | IHTGEKLFTCPQCGK     |           |       | Carbamidomethyl (C)[10]       |      | Mascot      |
|  | 1722.7938  | 1722.8663   | 0.0725 | 42    | 115        | 129      | IHTGEKPYTCTQCGK     |           |       | Carbamidomethyl (C)[10]       |      | Mascot      |
|  | 1862.8015  | 1862.9628   | 0.1613 | 87    | 64         | 78       | NCFICTQCGKSLSCK     |           |       | Carbamidomethyl (C)[2,5,8,14] |      | Mascot      |
|  | 2193.9912  | 2194.1267   | 0.1355 | 62    | 83         | 101      | IHMMIHTGEKPFCTQCGK  |           |       | Oxidation (M)[3,4]            |      | Mascot      |
|  | 2211.0723  | 2211.1243   | 0.052  | 24    | 214        | 232      | SFSLSSNLNHHMRIHTGEK |           |       | Oxidation (M)[12]             |      | Mascot      |
|  | 2211.0723  | 2211.1243   | 0.052  | 24    | 214        | 232      | SFSLSSNLNHHMRIHTGEK |           |       | Oxidation (M)[12]             |      | Mascot      |
|  | 2247.0776  | 2247.1389   | 0.0613 | 27    | 21         | 38       | QEDLQEQTIELIENKWSK  |           |       |                               |      | Mascot      |

6    aldehyde dehydrogenase 2 precursor [Danio rerio]    gi|20339358    56526.6    6.05    10    38    0

Peptide Information

| Calc. Mass | Obsrv. Mass | ± da    | ± ppm | Start Seq. | End Seq. | Sequence                   | Ion Score | C. I. | % Modification          | Rank | Result Type |
|------------|-------------|---------|-------|------------|----------|----------------------------|-----------|-------|-------------------------|------|-------------|
| 848.51     | 848.5325    | 0.0225  | 27    | 2          | 8        | LRAVFSR                    |           |       |                         |      | Mascot      |
| 864.4243   | 864.5179    | 0.0936  | 108   | 407        | 413      | DDMKIAR                    |           |       | Oxidation (M)[3]        |      | Mascot      |
| 1051.6146  | 1051.7208   | 0.1062  | 101   | 368        | 377      | KVLGYISSGK                 |           |       |                         |      | Mascot      |
| 1402.6572  | 1402.7797   | 0.1225  | 87    | 144        | 154      | CLRYAGWADK                 |           |       | Carbamidomethyl (C)[1]  |      | Mascot      |
| 1460.6984  | 1460.64     | -0.0584 | -40   | 379        | 393      | EGAKLMCGAPAAER             |           |       |                         |      | Mascot      |
| 1619.7522  | 1619.7642   | 0.012   | 7     | 159        | 171      | TIPIDGNYFCYTR              |           |       | Carbamidomethyl (C)[10] |      | Mascot      |
| 1761.833   | 1761.8502   | 0.0172  | 10    | 324        | 337      | TFVQESIYDEFVER             |           |       |                         |      | Mascot      |
| 2026.0239  | 2025.9406   | -0.0833 | -41   | 436        | 454      | ANDSKYGLAAVFTQNIDK         |           |       |                         |      | Mascot      |
| 2233.0771  | 2233.1045   | 0.0274  | 12    | 324        | 341      | TFVQESIYDEFVERSVR          |           |       |                         |      | Mascot      |
| 2741.345   | 2741.3174   | -0.0276 | -10   | 52         | 77       | TFPTINPATAEVICHVAEGDKADVVK |           |       |                         |      | Mascot      |

7    LOC561115 protein [Danio rerio]    gi|124481604    94397    5.22    13    36    0

Peptide Information

| Calc. Mass | Obsrv. Mass | ± da    | ± ppm | Start Seq. | End Seq. | Sequence            | Ion Score | C. I. | % Modification    | Rank | Result Type |
|------------|-------------|---------|-------|------------|----------|---------------------|-----------|-------|-------------------|------|-------------|
| 942.5441   | 942.5549    | 0.0108  | 11    | 365        | 373      | LIQVPAACK           |           |       |                   |      | Mascot      |
| 996.5108   | 996.6023    | 0.0915  | 92    | 149        | 157      | AVEENAHVK           |           |       |                   |      | Mascot      |
| 996.5108   | 996.6023    | 0.0915  | 92    | 149        | 157      | AVEENAHVK           |           |       |                   |      | Mascot      |
| 1106.5299  | 1106.5522   | 0.0223  | 20    | 760        | 767      | WQMEQEKK            |           |       |                   |      | Mascot      |
| 1523.7371  | 1523.7728   | 0.0357  | 23    | 497        | 510      | DLGMKDSSISTNQK      |           |       |                   |      | Mascot      |
| 1560.9108  | 1560.8516   | -0.0592 | -38   | 130        | 142      | FQLLIKNTDVTR        |           |       |                   |      | Mascot      |
| 1560.9108  | 1560.8516   | -0.0592 | -38   | 130        | 142      | FQLLIKNTDVTR        |           |       |                   |      | Mascot      |
| 1718.7902  | 1718.9227   | 0.1325  | 77    | 407        | 421      | QEPDSPVLSTEVDNR     |           |       | Oxidation (M)[14] |      | Mascot      |
| 1718.7902  | 1718.9227   | 0.1325  | 77    | 407        | 421      | QEPDSPVLSTEVDNR     |           |       | Oxidation (M)[14] |      | Mascot      |
| 1722.9061  | 1722.8663   | -0.0398 | -23   | 71         | 84       | RLFSVLSWEDTLEK      |           |       |                   |      | Mascot      |
| 1740.8877  | 1740.9028   | 0.0151  | 9     | 96         | 110      | TKDVPMFFEVTEVAK     |           |       |                   |      | Mascot      |
| 1857.8734  | 1857.8779   | 0.0045  | 2     | 707        | 722      | ENAVYVICHNPMSPQR    |           |       |                   |      | Mascot      |
| 1857.8734  | 1857.8779   | 0.0045  | 2     | 707        | 722      | ENAVYVICHNPMSPQR    |           |       |                   |      | Mascot      |
| 2040.9297  | 2040.9497   | 0.02    | 10    | 25         | 41       | SWETSLSAVFEENEWR    |           |       |                   |      | Mascot      |
| 2211.0872  | 2211.1243   | 0.0371  | 17    | 355        | 373      | QYCHYLSSMRLIQVPAACK |           |       |                   |      | Mascot      |
| 2211.0872  | 2211.1243   | 0.0371  | 17    | 355        | 373      | QYCHYLSSMRLIQVPAACK |           |       |                   |      | Mascot      |

|   |                                                                                |           |        |    |     |              |                          |     |                        |    |        |
|---|--------------------------------------------------------------------------------|-----------|--------|----|-----|--------------|--------------------------|-----|------------------------|----|--------|
|   | 2233.031                                                                       | 2233.1045 | 0.0735 | 33 | 707 | 725          | ENAVYVICHNPMSQRS<br>CK   |     | Carbamidomethyl (C)[8] |    | Mascot |
|   | 2284.1714                                                                      | 2284.1958 | 0.0244 | 11 | 52  | 71           | AEDEQLIGSLVQAVQQP<br>MRR |     | Oxidation (M)[18]      |    | Mascot |
|   | 2284.1714                                                                      | 2284.1958 | 0.0244 | 11 | 52  | 71           | AEDEQLIGSLVQAVQQP<br>MRR |     | Oxidation (M)[18]      |    | Mascot |
| 8 | PREDICTED: zinc finger and BTB domain-containing protein 17-like [Danio rerio] |           |        |    |     | gi 326679165 | 95241.3                  | 5.8 | 13                     | 36 | 0      |

#### Peptide Information

| Calc. Mass | Obsrv. Mass | ± da    | ± ppm | Start Seq. | End Seq. | Sequence                 | Ion Score | C. I. % | Modification                  | Rank | Result Type |
|------------|-------------|---------|-------|------------|----------|--------------------------|-----------|---------|-------------------------------|------|-------------|
| 864.4825   | 864.5179    | 0.0354  | 41    | 51         | 57       | TLFLDQK                  |           |         |                               |      | Mascot      |
| 942.4275   | 942.5549    | 0.1274  | 135   | 849        | 856      | VHSESQQQ                 |           |         |                               |      | Mascot      |
| 1045.5425  | 1045.5698   | 0.0273  | 26    | 531        | 540      | AFADPGALQR               |           |         |                               |      | Mascot      |
| 1107.5277  | 1107.5391   | 0.0114  | 10    | 201        | 210      | SESEAERATK               |           |         |                               |      | Mascot      |
| 1123.5565  | 1123.5309   | -0.0256 | -23   | 447        | 456      | AFSDPTAKMR               |           |         |                               |      | Mascot      |
| 1169.4939  | 1169.6438   | 0.1499  | 128   | 466        | 474      | GHKCQHCDK                |           |         | Carbamidomethyl (C)[4,7]      |      | Mascot      |
| 1460.6863  | 1460.64     | -0.0463 | -32   | 666        | 678      | RLVVAEDDDGEDK            |           |         |                               |      | Mascot      |
| 1523.7787  | 1523.7728   | -0.0059 | -4    | 37         | 50       | AHKAVLAACSSYFR           |           |         |                               |      | Mascot      |
| 1543.7234  | 1543.8207   | 0.0973  | 63    | 163        | 176      | TEETHEAVSNVAEK           |           |         |                               |      | Mascot      |
| 1862.8635  | 1862.9628   | 0.0993  | 53    | 348        | 362      | IHTGEKPFTCRDCNK          |           |         | Carbamidomethyl (C)[10,13]    |      | Mascot      |
| 2194.0579  | 2194.1267   | 0.0688  | 31    | 513        | 530      | HLRVHSGEKPFCMHCR         |           |         | Oxidation (M)[14]             |      | Mascot      |
| 2247.0103  | 2247.1389   | 0.1286  | 57    | 372        | 390      | AHEKTHSPVKPYCCSTC<br>GK  |           |         | Carbamidomethyl (C)[13,14,17] |      | Mascot      |
| 2298.0012  | 2298.2048   | 0.2036  | 89    | 748        | 767      | VQEADPNTQILYACDSC<br>GEK |           |         | Carbamidomethyl (C)[14,17]    |      | Mascot      |

9 mitogen-activated protein kinase 1 [Danio rerio] gi|40254655 42048.5 6.32 8 35 0

#### Peptide Information

| Calc. Mass | Obsrv. Mass | ± da    | ± ppm | Start Seq. | End Seq. | Sequence                     | Ion Score | C. I. % | Modification                              | Rank | Result Type |
|------------|-------------|---------|-------|------------|----------|------------------------------|-----------|---------|-------------------------------------------|------|-------------|
| 864.4362   | 864.5179    | 0.0817  | 95    | 363        | 369      | FQPGYRP                      |           |         |                                           |      | Mascot      |
| 1107.5681  | 1107.5391   | -0.029  | -26   | 354        | 362      | ELIFEETAR                    |           |         |                                           |      | Mascot      |
| 1303.7732  | 1303.772    | -0.0012 | -1    | 271        | 281      | NYLLSLPLRSK                  |           |         |                                           |      | Mascot      |
| 1523.7675  | 1523.7728   | 0.0053  | 3     | 201        | 212      | WYRAPEIMLSNK                 |           |         | Oxidation (M)[8]                          |      | Mascot      |
| 1878.928   | 1878.9661   | 0.0381  | 20    | 65         | 79       | ISPFEHQTYCQRTLRL             |           |         |                                           |      | Mascot      |
| 2040.9767  | 2040.9497   | -0.027  | -13   | 2          | 24       | ATAAVSAPAGGPNPGS<br>GAEMVR   |           |         | Oxidation (M)[21]                         |      | Mascot      |
| 2246.9844  | 2247.1389   | 0.1545  | 69    | 34         | 54       | YSNLSYIGGGAYGMVCS<br>AYDR    |           |         |                                           |      | Mascot      |
| 2719.3945  | 2719.3137   | -0.0808 | -30   | 217        | 240      | SIDIWSVGCILAEMLSNR<br>PIFPGK |           |         | Carbamidomethyl (C)[9], Oxidation (M)[14] |      | Mascot      |
| 2719.3945  | 2719.3137   | -0.0808 | -30   | 217        | 240      | SIDIWSVGCILAEMLSNR           |           |         | Carbamidomethyl (C)[9], Oxidation (M)[14] |      | Mascot      |

10      PREDICTED: layilin [Danio rerio]      PIFPGK  
gi|326668116      39321.9      5.6      8      34      0

Peptide Information

| Calc. Mass | Obsrv. Mass | ± da    | ± ppm | Start Seq. | End Seq. | Sequence                                  | Ion Score | C. I. % | Modification           | Rank | Result Type |
|------------|-------------|---------|-------|------------|----------|-------------------------------------------|-----------|---------|------------------------|------|-------------|
| 982.4662   | 982.5555    | 0.0893  | 91    | 10         | 17       | GTEKPCYK                                  |           |         | Carbamidomethyl (C)[6] |      | Mascot      |
| 1156.5602  | 1156.6102   | 0.05    | 43    | 1          | 9        | MFSQQICKR                                 |           |         | Oxidation (M)[1]       |      | Mascot      |
| 1509.6467  | 1509.7767   | 0.13    | 86    | 92         | 103      | YYWMDGSPATFR                              |           |         | Oxidation (M)[4]       |      | Mascot      |
| 1619.7958  | 1619.7642   | -0.0316 | -20   | 252        | 265      | CNSPSPDVYNVIRR                            |           |         |                        |      | Mascot      |
| 1706.8442  | 1706.8643   | 0.0201  | 12    | 39         | 54       | SDGGDLLSIESKTEQK                          |           |         |                        |      | Mascot      |
| 1722.8882  | 1722.8663   | -0.0219 | -13   | 265        | 279      | RQHESDLAGTRPDIK                           |           |         |                        |      | Mascot      |
| 2719.1187  | 2719.3137   | 0.195   | 72    | 81         | 103      | GYEENGNCSSKYWMD<br>GSPATFR                |           |         | Carbamidomethyl (C)[8] |      | Mascot      |
| 2719.1187  | 2719.3137   | 0.195   | 72    | 81         | 103      | GYEENGNCSSKYWMD<br>GSPATFR                |           |         | Carbamidomethyl (C)[8] |      | Mascot      |
| 3897.2576  | 3896.8367   | -0.4209 | -108  | 190        | 226      | TVVSGLPDNALNIAYIVLP<br>TIPLLLLLVVATGVFCFK |           |         |                        |      | Mascot      |

11      novel protein [Danio rerio]      gi|148725296      79374.4      6.72      11      33      0

Peptide Information

| Calc. Mass | Obsrv. Mass | ± da    | ± ppm | Start Seq. | End Seq. | Sequence                   | Ion Score | C. I. % | Modification                              | Rank | Result Type |
|------------|-------------|---------|-------|------------|----------|----------------------------|-----------|---------|-------------------------------------------|------|-------------|
| 848.477    | 848.5325    | 0.0555  | 65    | 506        | 512      | MRLIGSR                    |           |         | Oxidation (M)[1]                          |      | Mascot      |
| 864.4937   | 864.5179    | 0.0242  | 28    | 433        | 439      | EVFRVSK                    |           |         |                                           |      | Mascot      |
| 982.4992   | 982.5555    | 0.0563  | 57    | 534        | 541      | GYIIPNQK                   |           |         |                                           |      | Mascot      |
| 1156.6685  | 1156.6102   | -0.0583 | -50   | 349        | 359      | EILTAARPGTK                |           |         |                                           |      | Mascot      |
| 1165.6034  | 1165.756    | 0.1526  | 131   | 225        | 234      | FCEQAVTIVR                 |           |         |                                           |      | Mascot      |
| 1165.6034  | 1165.756    | 0.1526  | 131   | 225        | 234      | FCEQAVTIVR                 |           |         |                                           |      | Mascot      |
| 1460.7566  | 1460.64     | -0.1166 | -80   | 331        | 343      | EMQAAIVLQAGWK              |           |         | Oxidation (M)[2]                          |      | Mascot      |
| 1722.8778  | 1722.8663   | -0.0115 | -7    | 221        | 234      | ACLRFCQAVTIVR              |           |         | Carbamidomethyl (C)[2,6]                  |      | Mascot      |
| 1862.8523  | 1862.9628   | 0.1105  | 59    | 389        | 404      | HMVNTNGEGIAELYPCR          |           |         | Carbamidomethyl (C)[15], Oxidation (M)[2] |      | Mascot      |
| 1878.9708  | 1878.9661   | -0.0047 | -3    | 140        | 156      | ESSTRPGSLTAKPFSWK          |           |         |                                           |      | Mascot      |
| 2283.1875  | 2283.2009   | 0.0134  | 6     | 447        | 466      | MFSPIPVCILHVINNDTLE<br>K   |           |         |                                           |      | Mascot      |
| 2528.2812  | 2528.1924   | -0.0888 | -35   | 367        | 388      | TLQEMWASVESDVEKHA<br>VSLLR |           |         |                                           |      | Mascot      |

12      Sb:cb283 protein [Danio rerio]      gi|45709356      55978.7      8.16      10      33      0

Peptide Information

| Calc. Mass | Obsrv. Mass | ± da | ± ppm | Start Seq. | End Seq. | Sequence | Ion Score | C. I. % | Modification | Rank | Result Type |
|------------|-------------|------|-------|------------|----------|----------|-----------|---------|--------------|------|-------------|
|------------|-------------|------|-------|------------|----------|----------|-----------|---------|--------------|------|-------------|

|    |                                                 |           |         |     |     |             |                          |                                               |   |    |   |  |        |
|----|-------------------------------------------------|-----------|---------|-----|-----|-------------|--------------------------|-----------------------------------------------|---|----|---|--|--------|
|    | 1062.5691                                       | 1062.6975 | 0.1284  | 121 | 92  | 101         | FRDAAANGIK               |                                               |   |    |   |  | Mascot |
|    | 1123.5167                                       | 1123.5309 | 0.0142  | 13  | 429 | 436         | REDYEFHK                 |                                               |   |    |   |  | Mascot |
|    | 1169.6201                                       | 1169.6438 | 0.0237  | 20  | 198 | 207         | VAEYVQSVFK               |                                               |   |    |   |  | Mascot |
|    | 1279.6437                                       | 1279.7867 | 0.143   | 112 | 235 | 245         | CANAVPRHQAR              | Carbamidomethyl (C)[1]                        |   |    |   |  | Mascot |
|    | 1582.724                                        | 1582.8284 | 0.1044  | 66  | 45  | 58          | APLQDYSAVDCCIK           | Carbamidomethyl (C)[11]                       |   |    |   |  | Mascot |
|    | 1619.9227                                       | 1619.7642 | -0.1585 | -98 | 59  | 73          | DEVVVLRLVPLPGNR          |                                               |   |    |   |  | Mascot |
|    | 1761.9493                                       | 1761.8502 | -0.0991 | -56 | 414 | 429         | AGEVLGDLFEVSTIRR         |                                               |   |    |   |  | Mascot |
|    | 1903.9265                                       | 1903.9333 | 0.0068  | 4   | 225 | 241         | EYPCLAAVNRCANAVPR        | Carbamidomethyl (C)[4]                        |   |    |   |  | Mascot |
|    | 2025.9116                                       | 2025.9406 | 0.029   | 14  | 74  | 90          | LVCSTGPVNRDYDDVR         | Carbamidomethyl (C)[3,5]                      |   |    |   |  | Mascot |
|    | 2211.0276                                       | 2211.1243 | 0.0967  | 44  | 345 | 364         | VGNTDAEGRMVMVDLLC<br>EMK |                                               |   |    |   |  | Mascot |
|    | 2211.0276                                       | 2211.1243 | 0.0967  | 44  | 345 | 364         | VGNTDAEGRMVMVDLLC<br>EMK |                                               |   |    |   |  | Mascot |
|    | 2284.0439                                       | 2284.1958 | 0.1519  | 67  | 345 | 364         | VGNTDAEGRMVMVDLLC<br>EMK | Carbamidomethyl (C)[17], Oxidation (M)[10]    |   |    |   |  | Mascot |
|    | 2284.0439                                       | 2284.1958 | 0.1519  | 67  | 345 | 364         | VGNTDAEGRMVMVDLLC<br>EMK | Carbamidomethyl (C)[17], Oxidation (M)[10]    |   |    |   |  | Mascot |
|    | 2300.0388                                       | 2300.1975 | 0.1587  | 69  | 345 | 364         | VGNTDAEGRMVMVDLLC<br>EMK | Carbamidomethyl (C)[17], Oxidation (M)[10,12] |   |    |   |  | Mascot |
| 13 | shadow of prion protein precursor [Danio rerio] |           |         |     |     | gi 99028940 | 13848.9                  | 10.26                                         | 5 | 33 | 0 |  |        |

#### Peptide Information

|  | Calc. Mass | Obsrv. Mass | ± da    | ± ppm | Start Seq. | End Sequence Seq.                | Ion Score | C. I. % | Modification                                | Rank | Result Type |
|--|------------|-------------|---------|-------|------------|----------------------------------|-----------|---------|---------------------------------------------|------|-------------|
|  | 1165.6     | 1165.756    | 0.156   | 134   | 95         | 103 TNWELYLAR                    |           |         |                                             |      | Mascot      |
|  | 1165.6     | 1165.756    | 0.156   | 134   | 95         | 103 TNWELYLAR                    |           |         |                                             |      | Mascot      |
|  | 1862.9543  | 1862.9628   | 0.0085  | 5     | 117        | 132 LSALLLPINYYMMHFAP            |           |         | Oxidation (M)[11,12]                        |      | Mascot      |
|  | 2506.2212  | 2506.2161   | -0.0051 | -2    | 4          | 25 AVATCCIFLLLSAFLCDQV<br>MSK    |           |         | Carbamidomethyl (C)[5,6], Oxidation (M)[20] |      | Mascot      |
|  | 2719.3438  | 2719.3137   | -0.0301 | -11   | 4          | 28 AVATCCIFLLLSAFLCDQV<br>MSKGGR |           |         | Carbamidomethyl (C)[5], Oxidation (M)[20]   |      | Mascot      |
|  | 2719.3438  | 2719.3137   | -0.0301 | -11   | 2          | 25 NRAVATCCIFLLLSAFLCD<br>QVMSK  |           |         | Carbamidomethyl (C)[7], Oxidation (M)[22]   |      | Mascot      |

14 PREDICTED: glycerophosphodiester phosphodiesterase domain-containing protein 1-like [Danio rerio]

#### Peptide Information

|  | Calc. Mass | Obsrv. Mass | ± da    | ± ppm | Start Seq. | End Sequence Seq.  | Ion Score | C. I. % | Modification          | Rank | Result Type |
|--|------------|-------------|---------|-------|------------|--------------------|-----------|---------|-----------------------|------|-------------|
|  | 1230.7568  | 1230.6799   | -0.0769 | -62   | 133        | 142 RFVLLENVLK     |           |         |                       |      | Mascot      |
|  | 1279.7521  | 1279.7867   | 0.0346  | 27    | 249        | 258 NRFVVYLLQK     |           |         |                       |      | Mascot      |
|  | 1460.7216  | 1460.64     | -0.0816 | -56   | 37         | 47 LEFYCRHISHR     |           |         |                       |      | Mascot      |
|  | 1706.7448  | 1706.8643   | 0.1195  | 70    | 193        | 205 QNPSPMPYMFTMRR |           |         | Oxidation (M)[5,8,11] |      | Mascot      |

|           |           |         |     |     |     |                                        |  |  |                         |  |  |        |
|-----------|-----------|---------|-----|-----|-----|----------------------------------------|--|--|-------------------------|--|--|--------|
| 1740.8989 | 1740.9028 | 0.0039  | 2   | 235 | 248 | IINRTYIPEEAYMK                         |  |  |                         |  |  | Mascot |
| 1862.842  | 1862.9628 | 0.1208  | 65  | 190 | 204 | CLKQNPSMPYMTMR                         |  |  | Oxidation (M)[8]        |  |  | Mascot |
| 1878.8369 | 1878.9661 | 0.1292  | 69  | 190 | 204 | CLKQNPSMPYMTMR                         |  |  | Oxidation (M)[8,11]     |  |  | Mascot |
| 1903.8685 | 1903.9333 | 0.0648  | 34  | 190 | 204 | CLKQNPSMPYMTMR                         |  |  | Carbamidomethyl (C)[1]  |  |  | Mascot |
| 2297.1052 | 2297.2095 | 0.1043  | 45  | 174 | 192 | EHITVWASEEHEVMAKC<br>LK                |  |  | Carbamidomethyl (C)[17] |  |  | Mascot |
| 2506.3447 | 2506.2161 | -0.1286 | -51 | 134 | 154 | FVLLENVLKNFPNMPMTL<br>EIK              |  |  | Oxidation (M)[14]       |  |  | Mascot |
| 3897.1646 | 3896.8367 | -0.3279 | -84 | 1   | 33  | MDTVSWVLLLCCLAVLFYV<br>VCSLFLLRYPLILHK |  |  | Oxidation (M)[1]        |  |  | Mascot |

15 Shadoo protein [Danio rerio] gi|37359664 13918 10.51 5 33 0

#### Peptide Information

| Calc. Mass | Obsrv. Mass | ± da    | ± ppm | Start Seq. | End Seq. | Sequence                      | Ion Score | C. I. % | Modification                                | Rank | Result Type |
|------------|-------------|---------|-------|------------|----------|-------------------------------|-----------|---------|---------------------------------------------|------|-------------|
| 1165.6     | 1165.756    | 0.156   | 134   | 95         | 103      | TNWELYLAR                     |           |         |                                             |      | Mascot      |
| 1165.6     | 1165.756    | 0.156   | 134   | 95         | 103      | TNWELYLAR                     |           |         |                                             |      | Mascot      |
| 1862.9543  | 1862.9628   | 0.0085  | 5     | 117        | 132      | LSALLLPINYYMMHFAP             |           |         | Oxidation (M)[11,12]                        |      | Mascot      |
| 2506.2212  | 2506.2161   | -0.0051 | -2    | 4          | 25       | AVATCCIFLLLSAFLCDQV<br>MSK    |           |         | Carbamidomethyl (C)[5,6], Oxidation (M)[20] |      | Mascot      |
| 2719.3438  | 2719.3137   | -0.0301 | -11   | 4          | 28       | AVATCCIFLLLSAFLCDQV<br>MSKGGR |           |         | Carbamidomethyl (C)[5], Oxidation (M)[20]   |      | Mascot      |
| 2719.3438  | 2719.3137   | -0.0301 | -11   | 2          | 25       | NRAVATCCIFLLLSAFLCD<br>QVMSK  |           |         | Carbamidomethyl (C)[7], Oxidation (M)[22]   |      | Mascot      |

16 PREDICTED: transformation/transcription domain-associated protein [Danio rerio] gi|326672350 433471.2 8.52 28 32 0

#### Peptide Information

| Calc. Mass | Obsrv. Mass | ± da    | ± ppm | Start Seq. | End Seq. | Sequence      | Ion Score | C. I. % | Modification       | Rank | Result Type |
|------------|-------------|---------|-------|------------|----------|---------------|-----------|---------|--------------------|------|-------------|
| 848.4083   | 848.5325    | 0.1242  | 146   | 3257       | 3263     | ATAPMWR       |           |         | Oxidation (M)[5]   |      | Mascot      |
| 882.5155   | 882.5728    | 0.0573  | 65    | 2182       | 2189     | AVHSLLSR      |           |         |                    |      | Mascot      |
| 1045.5095  | 1045.5698   | 0.0603  | 58    | 3604       | 3612     | EVQGNMVPR     |           |         | Oxidation (M)[6]   |      | Mascot      |
| 1106.5952  | 1106.5522   | -0.043  | -39   | 2034       | 2045     | TAAGAVGTVFGR  |           |         |                    |      | Mascot      |
| 1165.5817  | 1165.756    | 0.1743  | 150   | 606        | 615      | VANCQTVRMK    |           |         | Oxidation (M)[9]   |      | Mascot      |
| 1165.5817  | 1165.756    | 0.1743  | 150   | 606        | 615      | VANCQTVRMK    |           |         | Oxidation (M)[9]   |      | Mascot      |
| 1169.6677  | 1169.6438   | -0.0239 | -20   | 3327       | 3336     | ITPHTLNFVK    |           |         |                    |      | Mascot      |
| 1185.5061  | 1185.6406   | 0.1345  | 113   | 2167       | 2178     | GIAACMTCGNTK  |           |         | Oxidation (M)[6]   |      | Mascot      |
| 1303.6641  | 1303.772    | 0.1079  | 83    | 3368       | 3379     | AQATAQDPVFQK  |           |         |                    |      | Mascot      |
| 1402.7623  | 1402.7797   | 0.0174  | 12    | 108        | 119      | SHAKNILSVMFR  |           |         |                    |      | Mascot      |
| 1448.8293  | 1448.9343   | 0.105   | 72    | 1147       | 1159     | LGGVVSIFLIMER |           |         |                    |      | Mascot      |
| 1509.7076  | 1509.7767   | 0.0691  | 46    | 1311       | 1322     | LFTMDLNVMEHK  |           |         | Oxidation (M)[4,9] |      | Mascot      |

|    |                            |           |         |     |              |      |                                   |      |                                              |        |   |
|----|----------------------------|-----------|---------|-----|--------------|------|-----------------------------------|------|----------------------------------------------|--------|---|
|    | 1543.8124                  | 1543.8207 | 0.0083  | 5   | 1666         | 1677 | LLAFCLLSYCKR                      |      | Carbamidomethyl (C)[5,10]                    | Mascot |   |
|    | 1560.8455                  | 1560.8516 | 0.0061  | 4   | 793          | 805  | DLFVELCLTVPVR                     |      | Carbamidomethyl (C)[7]                       | Mascot |   |
|    | 1560.8455                  | 1560.8516 | 0.0061  | 4   | 793          | 805  | DLFVELCLTVPVR                     |      | Carbamidomethyl (C)[7]                       | Mascot |   |
|    | 1619.7893                  | 1619.7642 | -0.0251 | -15 | 1950         | 1962 | HHLVQHMISAMQR                     |      | Oxidation (M)[7,11]                          | Mascot |   |
|    | 1707.0164                  | 1706.8643 | -0.1521 | -89 | 330          | 344  | ELLIAAKHILTTDLR                   |      |                                              | Mascot |   |
|    | 1718.8054                  | 1718.9227 | 0.1173  | 68  | 3311         | 3326 | CYSVAFEKSGAVSDAK                  |      | Carbamidomethyl (C)[1]                       | Mascot |   |
|    | 1718.8054                  | 1718.9227 | 0.1173  | 68  | 3311         | 3326 | CYSVAFEKSGAVSDAK                  |      | Carbamidomethyl (C)[1]                       | Mascot |   |
|    | 1722.903                   | 1722.8663 | -0.0367 | -21 | 3039         | 3053 | QQVKCYLQLAGVMGK                   |      | Carbamidomethyl (C)[5]                       | Mascot |   |
|    | 1903.8928                  | 1903.9333 | 0.0405  | 21  | 3489         | 3504 | IYPYLVMNDACTESR                   |      | Oxidation (M)[7]                             | Mascot |   |
|    | 1924.0031                  | 1923.9751 | -0.028  | -15 | 541          | 557  | TLVCGVKITITWGITSCK                |      | Carbamidomethyl (C)[4,16]                    | Mascot |   |
|    | 1924.0031                  | 1923.9751 | -0.028  | -15 | 541          | 557  | TLVCGVKITITWGITSCK                |      | Carbamidomethyl (C)[4,16]                    | Mascot |   |
|    | 2009.8903                  | 2010.0215 | 0.1312  | 65  | 1382         | 1400 | ALNSTNSELQEAGEACM<br>GK           |      | Carbamidomethyl (C)[16]                      | Mascot |   |
|    | 2025.8851                  | 2025.9406 | 0.0555  | 27  | 1382         | 1400 | ALNSTNSELQEAGEACM<br>GK           |      | Carbamidomethyl (C)[16], Oxidation (M)[17]   | Mascot |   |
|    | 2211.0977                  | 2211.1243 | 0.0266  | 12  | 619          | 637  | EVLEHFAGVFTMMNPLTF<br>K           |      |                                              | Mascot |   |
|    | 2211.0977                  | 2211.1243 | 0.0266  | 12  | 619          | 637  | EVLEHFAGVFTMMNPLTF<br>K           |      |                                              | Mascot |   |
|    | 2230.0769                  | 2230.2168 | 0.1399  | 63  | 1323         | 1341 | VFYTELLNLCEAEDAALM<br>K           |      | Carbamidomethyl (C)[10]                      | Mascot |   |
|    | 2283.0981                  | 2283.2009 | 0.1028  | 45  | 3617         | 3634 | EWALHTFPNATDYWTFR<br>K            |      |                                              | Mascot |   |
|    | 2284.0908                  | 2284.1958 | 0.105   | 46  | 1075         | 1094 | GMDPLVLIDAIACMAYEE<br>K           |      | Carbamidomethyl (C)[14], Oxidation (M)[2,15] | Mascot |   |
|    | 2284.1384                  | 2284.1958 | 0.0574  | 25  | 1175         | 1196 | ALLFVMMDLTGEVSNGA<br>VAMAK        |      | Oxidation (M)[6]                             | Mascot |   |
|    | 2297.0537                  | 2297.2095 | 0.1558  | 68  | 1696         | 1713 | FLCNMTFLKEYMEEIIPK                |      | Oxidation (M)[5,12]                          | Mascot |   |
|    | 2300.1335                  | 2300.1975 | 0.064   | 28  | 1175         | 1196 | ALLFVMMDLTGEVSNGA<br>VAMAK        |      | Oxidation (M)[6,7]                           | Mascot |   |
|    | 2741.3269                  | 2741.3174 | -0.0095 | -3  | 1075         | 1098 | GMDPLVLIDAIACMAYEE<br>KELCK       |      | Carbamidomethyl (C)[14], Oxidation (M)[2]    | Mascot |   |
|    | 3355.6641                  | 3355.4919 | -0.1722 | -51 | 3099         | 3127 | AFSAAVQMHDVLVKAWA<br>MWGDYLENIFVK |      | Oxidation (M)[8]                             | Mascot |   |
| 17 | MOV10-like 1 [Danio rerio] |           |         |     | gi 116268043 |      | 122527.1                          | 5.89 | 14                                           | 32     | 0 |

Peptide Information

| Calc. Mass | Obsrv. Mass | ± da    | ± ppm | Start Seq. | End Seq. | Sequence       | Ion Score | C. I. % | Modification                             | Rank | Result | Type |
|------------|-------------|---------|-------|------------|----------|----------------|-----------|---------|------------------------------------------|------|--------|------|
| 1045.5021  | 1045.5698   | 0.0677  | 65    | 19         | 26       | RAQEEEQR       |           |         |                                          |      | Mascot |      |
| 1106.6204  | 1106.5522   | -0.0682 | -62   | 493        | 502      | EFSLTGAILR     |           |         |                                          |      | Mascot |      |
| 1230.5419  | 1230.6799   | 0.138   | 112   | 327        | 338      | CEDGGTEAPPVR   |           |         |                                          |      | Mascot |      |
| 1460.847   | 1460.64     | -0.207  | -142  | 855        | 868      | LASVFGLGVSLLR  |           |         |                                          |      | Mascot |      |
| 1560.6824  | 1560.8516   | 0.1692  | 108   | 352        | 365      | MCVCVCCTAKTLGR |           |         | Carbamidomethyl (C)[2], Oxidation (M)[1] |      | Mascot |      |
| 1560.6824  | 1560.8516   | 0.1692  | 108   | 352        | 365      | MCVCVCCTAKTLGR |           |         | Carbamidomethyl (C)[2], Oxidation (M)[1] |      | Mascot |      |

|    |                        |           |         |     |             |      |                               |      |                                           |        |   |
|----|------------------------|-----------|---------|-----|-------------|------|-------------------------------|------|-------------------------------------------|--------|---|
|    | 1582.8158              | 1582.8284 | 0.0126  | 8   | 907         | 919  | LFYAGELCVRAQR                 |      | Carbamidomethyl (C)[8]                    | Mascot |   |
|    | 1718.8795              | 1718.9227 | 0.0432  | 25  | 935         | 949  | GFPLIFHGVRGSEMR               |      | Oxidation (M)[14]                         | Mascot |   |
|    | 1718.8795              | 1718.9227 | 0.0432  | 25  | 935         | 949  | GFPLIFHGVRGSEMR               |      | Oxidation (M)[14]                         | Mascot |   |
|    | 1862.8378              | 1862.9628 | 0.125   | 67  | 1078        | 1092 | EPCFSALLQYSYDNR               |      | Carbamidomethyl (C)[3]                    | Mascot |   |
|    | 1923.8535              | 1923.9751 | 0.1216  | 63  | 755         | 770  | VNATCRPEESMSEELR              |      | Carbamidomethyl (C)[5], Oxidation (M)[11] | Mascot |   |
|    | 1923.8535              | 1923.9751 | 0.1216  | 63  | 755         | 770  | VNATCRPEESMSEELR              |      | Carbamidomethyl (C)[5], Oxidation (M)[11] | Mascot |   |
|    | 2233.1807              | 2233.1045 | -0.0762 | -34 | 1           | 18   | MVSVVQCLMSRLLWPLWR            |      | Oxidation (M)[1]                          | Mascot |   |
|    | 2247.239               | 2247.1389 | -0.1001 | -45 | 705         | 723  | TITLIEAILQVHHRISCSR           |      | Carbamidomethyl (C)[17]                   | Mascot |   |
|    | 2283.1624              | 2283.2009 | 0.0385  | 17  | 869         | 889  | LMGNSLYACGERGFNPLLVTK         |      |                                           | Mascot |   |
|    | 2719.2202              | 2719.3137 | 0.0935  | 34  | 339         | 361  | MLEEPLDIHPGQKMCVCVCCTAK       |      | Carbamidomethyl (C)[15,17,19]             | Mascot |   |
|    | 2719.2202              | 2719.3137 | 0.0935  | 34  | 339         | 361  | MLEEPLDIHPGQKMCVCVCCTAK       |      | Carbamidomethyl (C)[15,17,19]             | Mascot |   |
|    | 3338.7551              | 3338.7876 | 0.0325  | 10  | 528         | 557  | VVLKKPCSGGVVIEIAYVTEISDEDVSLR |      | Carbamidomethyl (C)[7]                    | Mascot |   |
| 18 | muskelin [Danio rerio] |           |         |     | gi 47086651 |      | 84322.2                       | 5.91 | 12                                        | 32     | 0 |

#### Peptide Information

| Calc. Mass | Obsrv. Mass | ± da    | ± ppm | Start Seq. | End Seq. | Sequence                 | Ion Score | C. I. % | Modification            | Rank | Result Type |
|------------|-------------|---------|-------|------------|----------|--------------------------|-----------|---------|-------------------------|------|-------------|
| 850.4781   | 850.5497    | 0.0716  | 84    | 333        | 339      | QIYTLGR                  |           |         |                         |      | Mascot      |
| 942.5189   | 942.5549    | 0.036   | 38    | 73         | 80       | THVCNLKK                 |           |         |                         |      | Mascot      |
| 1106.5048  | 1106.5522   | 0.0474  | 43    | 301        | 309      | ENQWACISR                |           |         |                         |      | Mascot      |
| 1230.587   | 1230.6799   | 0.0929  | 75    | 451        | 460      | IGHCMLFHTR               |           |         | Oxidation (M)[5]        |      | Mascot      |
| 1460.6774  | 1460.64     | -0.0374 | -26   | 113        | 123      | HKIDEQMFPCR              |           |         | Carbamidomethyl (C)[10] |      | Mascot      |
| 1582.6699  | 1582.8284   | 0.1585  | 100   | 380        | 392      | LVFDHQMCMDEK             |           |         |                         |      | Mascot      |
| 1722.8446  | 1722.8663   | 0.0217  | 13    | 180        | 193      | QHNYTEAFESLQKK           |           |         |                         |      | Mascot      |
| 1740.8221  | 1740.9028   | 0.0807  | 46    | 564        | 578      | ENPTKALQEEEP CPR         |           |         |                         |      | Mascot      |
| 2194.2278  | 2194.1267   | -0.1011 | -46   | 196        | 213      | IALEHPMLTHLHERLVLR       |           |         | Oxidation (M)[7]        |      | Mascot      |
| 2225.0947  | 2225.1379   | 0.0432  | 19    | 702        | 720      | TQLFDTLVNFFPDNMTTP<br>K  |           |         |                         |      | Mascot      |
| 2225.0947  | 2225.1379   | 0.0432  | 19    | 702        | 720      | TQLFDTLVNFFPDNMTTP<br>K  |           |         |                         |      | Mascot      |
| 2233.0408  | 2233.1045   | 0.0637  | 29    | 682        | 701      | SSSDFIPLGFSDVDQTYA<br>QR |           |         |                         |      | Mascot      |
| 2298.1626  | 2298.2048   | 0.0422  | 18    | 226        | 244      | AVRDGLFNQYISQQDYK<br>PR  |           |         |                         |      | Mascot      |

19 Si:rp71-61h23.4 protein [Danio rerio] gi|33991821 45666.6 5.53 8 32 0

#### Peptide Information

| Calc. Mass | Obsrv. Mass | ± da | ± ppm | Start Seq. | End Seq. | Sequence | Ion Score | C. I. % | Modification | Rank | Result Type |
|------------|-------------|------|-------|------------|----------|----------|-----------|---------|--------------|------|-------------|
|------------|-------------|------|-------|------------|----------|----------|-----------|---------|--------------|------|-------------|



|  |           |           |         |     |     |     |                                    |  |  |  |  |  |  |        |
|--|-----------|-----------|---------|-----|-----|-----|------------------------------------|--|--|--|--|--|--|--------|
|  | 1106.551  | 1106.5522 | 0.0012  | 1   | 9   | 18  | MADNVKTAEK                         |  |  |  |  |  |  | Mascot |
|  | 1123.4935 | 1123.5309 | 0.0374  | 33  | 314 | 322 | DKEQEMESK                          |  |  |  |  |  |  | Mascot |
|  | 1156.6797 | 1156.6102 | -0.0695 | -60 | 234 | 243 | ALEQSLLRAR                         |  |  |  |  |  |  | Mascot |
|  | 1185.611  | 1185.6406 | 0.0296  | 25  | 293 | 302 | EGQPKELQEK                         |  |  |  |  |  |  | Mascot |
|  | 1303.6562 | 1303.772  | 0.1158  | 89  | 138 | 150 | DAVVGAVMEGVEK                      |  |  |  |  |  |  | Mascot |
|  | 1560.8049 | 1560.8516 | 0.0467  | 30  | 138 | 152 | DAVVGAVMEGVEKTR                    |  |  |  |  |  |  | Mascot |
|  | 1560.8049 | 1560.8516 | 0.0467  | 30  | 138 | 152 | DAVVGAVMEGVEKTR                    |  |  |  |  |  |  | Mascot |
|  | 2271.1614 | 2271.1245 | -0.0369 | -16 | 196 | 216 | ELAALAEPRPGEEEGFIV<br>STR          |  |  |  |  |  |  | Mascot |
|  | 3355.7573 | 3355.4919 | -0.2654 | -79 | 393 | 422 | QSLDGVVEYLLNNTPLN<br>WLVGPFAPQITEK |  |  |  |  |  |  | Mascot |

20 PREDICTED: hypothetical protein LOC100329705 gi|326676237 8666.2 4.61 4 31 0  
[Danio rerio]

#### Peptide Information

| Calc. Mass | Obsrv. Mass | ± da   | ± ppm | Start Seq. | End Seq. | Sequence              | Ion Score | C. I. | % Modification | Rank | Result Type |
|------------|-------------|--------|-------|------------|----------|-----------------------|-----------|-------|----------------|------|-------------|
| 1279.647   | 1279.7867   | 0.1397 | 109   | 20         | 29       | YFVYFAKEGR            |           |       |                |      | Mascot      |
| 1402.696   | 1402.7797   | 0.0837 | 60    | 47         | 58       | NVSFVKSYSSER          |           |       |                |      | Mascot      |
| 2009.8374  | 2010.0215   | 0.1841 | 92    | 59         | 74       | CELWEENGFYSAWVN       |           |       |                |      | Mascot      |
| 2719.1406  | 2719.3137   | 0.1731 | 64    | 53         | 74       | SYSSERCELWEENGFYSAWVN |           |       |                |      | Mascot      |
| 2719.1406  | 2719.3137   | 0.1731 | 64    | 53         | 74       | SYSSERCELWEENGFYSAWVN |           |       |                |      | Mascot      |

21 PREDICTED: solute carrier family 12 member 6-like, gi|326668968 26763.8 8.83 6 31 0  
partial [Danio rerio]

#### Peptide Information

| Calc. Mass | Obsrv. Mass | ± da   | ± ppm | Start Seq. | End Seq. | Sequence                 | Ion Score | C. I. | % Modification                            | Rank | Result Type |
|------------|-------------|--------|-------|------------|----------|--------------------------|-----------|-------|-------------------------------------------|------|-------------|
| 850.4781   | 850.5497    | 0.0716 | 84    | 133        | 139      | TFINTVR                  |           |       |                                           |      | Mascot      |
| 942.4825   | 942.5549    | 0.0724 | 77    | 74         | 80       | HLMEKER                  |           |       |                                           |      | Mascot      |
| 1402.7623  | 1402.7797   | 0.0174 | 12    | 83         | 94       | GFVQCIVAQKPR             |           |       | Carbamidomethyl (C)[5]                    |      | Mascot      |
| 1718.8458  | 1718.9227   | 0.0769 | 45    | 29         | 42       | YIEYHGYVTMTTLK           |           |       |                                           |      | Mascot      |
| 1718.8458  | 1718.9227   | 0.0769 | 45    | 29         | 42       | YIEYHGYVTMTTLK           |           |       |                                           |      | Mascot      |
| 2211.3223  | 2211.1243   | -0.198 | -90   | 133        | 152      | TFINTVRVTTTAHLALLVL<br>K |           |       |                                           |      | Mascot      |
| 2211.3223  | 2211.1243   | -0.198 | -90   | 133        | 152      | TFINTVRVTTTAHLALLVL<br>K |           |       |                                           |      | Mascot      |
| 2230.0664  | 2230.2168   | 0.1504 | 67    | 197        | 215      | CALRIFTVAQMEDNSIQM<br>K  |           |       | Oxidation (M)[11,18]                      |      | Mascot      |
| 2271.093   | 2271.1245   | 0.0315 | 14    | 197        | 215      | CALRIFTVAQMEDNSIQM<br>K  |           |       | Carbamidomethyl (C)[1], Oxidation (M)[11] |      | Mascot      |

22 RecName: Full=Contactin-1a; AltName: gi|55976512 114263.1 6.25 12 30 0

Full=F3/F11/contactin; AltName: Full=Neural cell recognition m

| Peptide Information                  |             |         |       |              |          |                                                |           |         |                         |      |             |
|--------------------------------------|-------------|---------|-------|--------------|----------|------------------------------------------------|-----------|---------|-------------------------|------|-------------|
| Calc. Mass                           | Obsrv. Mass | ± da    | ± ppm | Start Seq.   | End Seq. | Sequence                                       | Ion Score | C. I. % | Modification            | Rank | Result Type |
| 1045.5173                            | 1045.5698   | 0.0525  | 50    | 562          | 569      | DAQHYQRK                                       |           |         |                         |      | Mascot      |
| 1062.5513                            | 1062.6975   | 0.1462  | 138   | 442          | 449      | VVFECRPR                                       |           |         | Carbamidomethyl (C)[5]  |      | Mascot      |
| 1106.5323                            | 1106.5522   | 0.0199  | 18    | 625          | 634      | VDEVTSDSVR                                     |           |         |                         |      | Mascot      |
| 1107.6885                            | 1107.5391   | -0.1494 | -135  | 285          | 294      | KLDGVLPLLR                                     |           |         |                         |      | Mascot      |
| 1303.6827                            | 1303.772    | 0.0893  | 68    | 2            | 12       | IPEAFQPRAMK                                    |           |         | Oxidation (M)[10]       |      | Mascot      |
| 2224.9749                            | 2225.1379   | 0.163   | 73    | 388          | 406      | FSRLGFEDSGMYQCAE<br>NR                         |           |         | Oxidation (M)[11]       |      | Mascot      |
| 2225.1772                            | 2225.1379   | -0.0393 | -18   | 695          | 716      | VIATNTLTGTGPPSESPK<br>TTTR                     |           |         |                         |      | Mascot      |
| 2230.0305                            | 2230.2168   | 0.1863  | 84    | 114          | 134      | SKHAGNYTCVASNQYGS<br>VTSR                      |           |         |                         |      | Mascot      |
| 2283.092                             | 2283.2009   | 0.1089  | 48    | 594          | 614      | YSCTAQTVPDNTTASAE<br>VVR                       |           |         | Carbamidomethyl (C)[3]  |      | Mascot      |
| 2284.2131                            | 2284.1958   | -0.0173 | -8    | 442          | 460      | VVFECRPRAAPRPNITW<br>SK                        |           |         | Carbamidomethyl (C)[5]  |      | Mascot      |
| 2284.2131                            | 2284.1958   | -0.0173 | -8    | 442          | 460      | VVFECRPRAAPRPNITW<br>SK                        |           |         | Carbamidomethyl (C)[5]  |      | Mascot      |
| 3338.7102                            | 3338.7876   | 0.0774  | 23    | 256          | 284      | SPDSWALLGQNVTLCE<br>FALGNPIPIQIRWR             |           |         | Carbamidomethyl (C)[16] |      | Mascot      |
| 3897.1306                            | 3896.8367   | -0.2939 | -75   | 994          | 1032     | AHSEGGDGAVAQVRITG<br>SAPAPALASALLLPLLW<br>TLML |           |         | Oxidation (M)[38]       |      | Mascot      |
| PREDICTED: leiomodin-3 [Danio rerio] |             |         |       | gi 326679036 |          | 76410.3                                        | 4.83      | 11      | 30                      | 0    |             |

| Peptide Information |             |          |           |            |          |                |           |                        |                  |
|---------------------|-------------|----------|-----------|------------|----------|----------------|-----------|------------------------|------------------|
| Calc. Mass          | Obsrv. Mass | $\pm$ da | $\pm$ ppm | Start Seq. | End Seq. | Sequence       | Ion Score | C. I. % Modification   | Rank Result Type |
| 942.5302            | 942.5549    | 0.0247   | 26        | 101        | 108      | VPVGMRQR       |           |                        | Mascot           |
| 982.5316            | 982.5555    | 0.0239   | 24        | 639        | 646      | DHLLSEIR       |           |                        | Mascot           |
| 1045.4731           | 1045.5698   | 0.0967   | 92        | 52         | 60       | DASHEMTVR      |           |                        | Mascot           |
| 1062.5977           | 1062.6975   | 0.0998   | 94        | 453        | 461      | MVVTNLLTR      |           | Oxidation (M)[1]       | Mascot           |
| 1303.6252           | 1303.772    | 0.1468   | 113       | 442        | 452      | MGYHFELPGPR    |           |                        | Mascot           |
| 1523.7522           | 1523.7728   | 0.0206   | 14        | 402        | 413      | CLQFNETLTELR   |           | Carbamidomethyl (C)[1] | Mascot           |
| 1560.8527           | 1560.8516   | -0.0011  | -1        | 453        | 465      | MVVTNLLTRNLDR  |           | Oxidation (M)[1]       | Mascot           |
| 1560.8527           | 1560.8516   | -0.0011  | -1        | 453        | 465      | MVVTNLLTRNLDR  |           | Oxidation (M)[1]       | Mascot           |
| 1574.6904           | 1574.7871   | 0.0967   | 61        | 573        | 584      | DPLLEWNQCDE    |           | Carbamidomethyl (C)[9] | Mascot           |
| 1619.6854           | 1619.7642   | 0.0788   | 49        | 1          | 13       | MSERTEQESYTDK  |           | Oxidation (M)[1]       | Mascot           |
| 1903.9629           | 1903.9333   | -0.0296  | -16       | 419        | 434      | HMLGHHAEVSRLLK |           | Oxidation (M)[2]       | Mascot           |

|    |                                                                                                     |           |       |    |              |    |                          |      |    |    |                  |        |
|----|-----------------------------------------------------------------------------------------------------|-----------|-------|----|--------------|----|--------------------------|------|----|----|------------------|--------|
|    | 2284.1238                                                                                           | 2284.1958 | 0.072 | 32 | 30           | 49 | QLQSEMDDIAPDERVPV<br>GLR |      |    |    | Oxidation (M)[6] | Mascot |
|    | 2284.1238                                                                                           | 2284.1958 | 0.072 | 32 | 30           | 49 | QLQSEMDDIAPDERVPV<br>GLR |      |    |    | Oxidation (M)[6] | Mascot |
| 24 | novel protein similar to vertebrate inositol polyphosphate-5-phosphatase, 72 kDa (INPP5E, zgc:16561 |           |       |    | gi 220673191 |    | 66013.6                  | 8.76 | 10 | 30 | 0                |        |

#### Peptide Information

| Calc. Mass | Obsrv. Mass | ± da    | ± ppm | Start Seq. | End Seq. | Sequence                  | Ion Score | C. I. | % Modification   | Rank | Result Type |
|------------|-------------|---------|-------|------------|----------|---------------------------|-----------|-------|------------------|------|-------------|
| 1106.6317  | 1106.5522   | -0.0795 | -72   | 550        | 558      | SLYLEGIRR                 |           |       |                  |      | Mascot      |
| 1107.5792  | 1107.5391   | -0.0401 | -36   | 31         | 39       | NLSFDEKVR                 |           |       |                  |      | Mascot      |
| 1123.5491  | 1123.5309   | -0.0182 | -16   | 487        | 495      | QRTPSYTDR                 |           |       |                  |      | Mascot      |
| 1402.7802  | 1402.7797   | -0.0005 | 0     | 193        | 204      | STYSVLNPIRPR              |           |       |                  |      | Mascot      |
| 1740.7891  | 1740.9028   | 0.1137  | 65    | 568        | 583      | EAVMKNQNNSTVCSIS          |           |       | Oxidation (M)[4] |      | Mascot      |
| 1761.8113  | 1761.8502   | 0.0389  | 22    | 474        | 488      | FDIGCDVYDTTQQR            |           |       |                  |      | Mascot      |
| 2194.2026  | 2194.1267   | -0.0759 | -35   | 519        | 537      | TSDHRPVIGMFQVKLRP<br>GR   |           |       |                  |      | Mascot      |
| 2283.1443  | 2283.2009   | 0.0566  | 25    | 454        | 473      | EGSIFKGFQEASIHFPPT<br>YK  |           |       |                  |      | Mascot      |
| 2284.0874  | 2284.1958   | 0.1084  | 47    | 92         | 112      | IRTGSLSETDVSPHDLCD<br>PNK |           |       |                  |      | Mascot      |
| 2284.0874  | 2284.1958   | 0.1084  | 47    | 92         | 112      | IRTGSLSETDVSPHDLCD<br>PNK |           |       |                  |      | Mascot      |
| 2300.0459  | 2300.1975   | 0.1516  | 66    | 94         | 114      | TGSLSETDVSPHDLCDP<br>NKER |           |       |                  |      | Mascot      |

|    |                                  |  |  |  |              |  |         |      |   |    |   |  |
|----|----------------------------------|--|--|--|--------------|--|---------|------|---|----|---|--|
| 25 | Zgc:165612 protein [Danio rerio] |  |  |  | gi 152012517 |  | 46099.5 | 8.16 | 8 | 30 | 0 |  |
|----|----------------------------------|--|--|--|--------------|--|---------|------|---|----|---|--|

#### Peptide Information

| Calc. Mass | Obsrv. Mass | ± da    | ± ppm | Start Seq. | End Seq. | Sequence                     | Ion Score | C. I. | % Modification   | Rank | Result Type |
|------------|-------------|---------|-------|------------|----------|------------------------------|-----------|-------|------------------|------|-------------|
| 1106.6317  | 1106.5522   | -0.0795 | -72   | 370        | 378      | SLYLEGIRR                    |           |       |                  |      | Mascot      |
| 1123.5491  | 1123.5309   | -0.0182 | -16   | 307        | 315      | QRTPSYTDR                    |           |       |                  |      | Mascot      |
| 1402.7802  | 1402.7797   | -0.0005 | 0     | 13         | 24       | STYSVLNPIRPR                 |           |       |                  |      | Mascot      |
| 1740.7891  | 1740.9028   | 0.1137  | 65    | 388        | 403      | EAVMKNQNNSTVCSIS             |           |       | Oxidation (M)[4] |      | Mascot      |
| 1761.8113  | 1761.8502   | 0.0389  | 22    | 294        | 308      | FDIGCDVYDTTQQR               |           |       |                  |      | Mascot      |
| 2194.2026  | 2194.1267   | -0.0759 | -35   | 339        | 357      | TSDHRPVIGMFQVKLRP<br>GR      |           |       |                  |      | Mascot      |
| 2283.1443  | 2283.2009   | 0.0566  | 25    | 274        | 293      | EGSIFKGFQEASIHFPPT<br>YK     |           |       |                  |      | Mascot      |
| 2719.3655  | 2719.3137   | -0.0518 | -19   | 1          | 24       | MVSDNTSVHSMKSTYSV<br>LNPIRPR |           |       |                  |      | Mascot      |
| 2719.3655  | 2719.3137   | -0.0518 | -19   | 1          | 24       | MVSDNTSVHSMKSTYSV<br>LNPIRPR |           |       |                  |      | Mascot      |

|    |                                                            |  |  |  |              |  |        |      |   |    |   |  |
|----|------------------------------------------------------------|--|--|--|--------------|--|--------|------|---|----|---|--|
| 26 | PREDICTED: hypothetical protein LOC100332625 [Danio rerio] |  |  |  | gi 292619215 |  | 9203.5 | 8.69 | 4 | 30 | 0 |  |
|----|------------------------------------------------------------|--|--|--|--------------|--|--------|------|---|----|---|--|

| Peptide Information |                                                       |             |         |       |            |              |                      |           |         |                                             |                  |
|---------------------|-------------------------------------------------------|-------------|---------|-------|------------|--------------|----------------------|-----------|---------|---------------------------------------------|------------------|
|                     | Calc. Mass                                            | Obsrv. Mass | ± da    | ± ppm | Start Seq. | End Seq.     | Sequence             | Ion Score | C. I. % | Modification                                | Rank Result Type |
|                     | 1862.7811                                             | 1862.9628   | 0.1817  | 98    | 2          | 15           | TGWNCWFEYCMLPR       |           |         | Carbamidomethyl (C)[5]                      | Mascot           |
|                     | 1878.776                                              | 1878.9661   | 0.1901  | 101   | 2          | 15           | TGWNCWFEYCMLPR       |           |         | Carbamidomethyl (C)[5], Oxidation (M)[11]   | Mascot           |
|                     | 2009.8165                                             | 2010.0215   | 0.205   | 102   | 1          | 15           | MTGWNCWFEYCMLPR      |           |         | Carbamidomethyl (C)[6], Oxidation (M)[1]    | Mascot           |
|                     | 2025.8114                                             | 2025.9406   | 0.1292  | 64    | 1          | 15           | MTGWNCWFEYCMLPR      |           |         | Carbamidomethyl (C)[6], Oxidation (M)[1,12] | Mascot           |
|                     | 2193.9741                                             | 2194.1267   | 0.1526  | 70    | 1          | 17           | MTGWNCWFEYCMLPRLK    |           |         | Oxidation (M)[1]                            | Mascot           |
|                     | 2233.1208                                             | 2233.1045   | -0.0163 | -7    | 18         | 37           | FKPSMSDLSLTFPYAVNTSK |           |         |                                             | Mascot           |
| 27                  | PREDICTED: zinc finger protein 850-like [Danio rerio] |             |         |       |            | gi 326667171 | 77347.8              | 9.3       | 13      | 30                                          | 0                |

| Peptide Information |                             |         |       |             |          |                              |           |         |                                             |                  |
|---------------------|-----------------------------|---------|-------|-------------|----------|------------------------------|-----------|---------|---------------------------------------------|------------------|
| Calc. Mass          | Obsrv. Mass                 | ± da    | ± ppm | Start Seq.  | End Seq. | Sequence                     | Ion Score | C. I. % | Modification                                | Rank Result Type |
| 1230.5063           | 1230.6799                   | 0.1736  | 141   | 64          | 73       | NCFICTQCGK                   |           |         | Carbamidomethyl (C)[2,5]                    | Mascot           |
| 1509.7114           | 1509.7767                   | 0.0653  | 43    | 550         | 562      | SFSQSSSLNLHMR                |           |         | Oxidation (M)[12]                           | Mascot           |
| 1560.6971           | 1560.8516                   | 0.1545  | 99    | 354         | 366      | SFSQSSNLNHHMR                |           |         | Oxidation (M)[12]                           | Mascot           |
| 1560.6971           | 1560.8516                   | 0.1545  | 99    | 354         | 366      | SFSQSSNLNHHMR                |           |         | Oxidation (M)[12]                           | Mascot           |
| 1574.7493           | 1574.7871                   | 0.0378  | 24    | 242         | 254      | SFSQSSHLNKHMR                |           |         | Oxidation (M)[12]                           | Mascot           |
| 1619.7383           | 1619.7642                   | 0.0259  | 16    | 522         | 534      | SFSQSPYLNHHR                 |           |         | Oxidation (M)[12]                           | Mascot           |
| 1706.7988           | 1706.8643                   | 0.0655  | 38    | 563         | 577      | IHTGEKPFTCTQCGK              |           |         | Carbamidomethyl (C)[10]                     | Mascot           |
| 1718.7988           | 1718.9227                   | 0.1239  | 72    | 255         | 269      | IHTGEKPYTCPQCGK              |           |         | Carbamidomethyl (C)[10]                     | Mascot           |
| 1718.7988           | 1718.9227                   | 0.1239  | 72    | 255         | 269      | IHTGEKPYTCPQCGK              |           |         | Carbamidomethyl (C)[10]                     | Mascot           |
| 1722.8302           | 1722.8663                   | 0.0361  | 21    | 451         | 465      | IHTGEKLTCTQCGK               |           |         | Carbamidomethyl (C)[10]                     | Mascot           |
| 1862.8015           | 1862.9628                   | 0.1613  | 87    | 64          | 78       | NCFICTQCGKSLSCK              |           |         | Carbamidomethyl (C)[2,5,8,14]               | Mascot           |
| 1923.8584           | 1923.9751                   | 0.1167  | 61    | 616         | 630      | HMMIHTGEKEFMCLK              |           |         | Carbamidomethyl (C)[13], Oxidation (M)[2,3] | Mascot           |
| 1923.8584           | 1923.9751                   | 0.1167  | 61    | 616         | 630      | HMMIHTGEKEFMCLK              |           |         | Carbamidomethyl (C)[13], Oxidation (M)[2,3] | Mascot           |
| 2193.9912           | 2194.1267                   | 0.1355  | 62    | 83          | 101      | IHMMIHTGEKPFTCTQCGK          |           |         | Oxidation (M)[3,4]                          | Mascot           |
| 2247.0776           | 2247.1389                   | 0.0613  | 27    | 21          | 38       | QEDLQEQTELIEENKWSK           |           |         |                                             | Mascot           |
| 3355.5154           | 3355.4919                   | -0.0235 | -7    | 283         | 310      | IHTGEKPFTSNQCGKNFYCSSNLNQHMR |           |         | Carbamidomethyl (C)[13,19]                  | Mascot           |
| 28                  | novel protein [Danio rerio] |         |       | gi 94734127 |          | 8833.8                       | 12.02     | 4       | 30                                          | 0                |

| Peptide Information |             |      |       |            |          |          |           |         |              |                  |
|---------------------|-------------|------|-------|------------|----------|----------|-----------|---------|--------------|------------------|
| Calc. Mass          | Obsrv. Mass | ± da | ± ppm | Start Seq. | End Seq. | Sequence | Ion Score | C. I. % | Modification | Rank Result Type |

|  |           |           |         |     |    |    |                      |  |  |  |  |  |  |        |
|--|-----------|-----------|---------|-----|----|----|----------------------|--|--|--|--|--|--|--------|
|  | 942.5254  | 942.5549  | 0.0295  | 31  | 9  | 18 | SPAAPVSVSK           |  |  |  |  |  |  | Mascot |
|  | 1045.5272 | 1045.5698 | 0.0426  | 41  | 52 | 62 | SPGASQNGSLK          |  |  |  |  |  |  | Mascot |
|  | 1740.8987 | 1740.9028 | 0.0041  | 2   | 52 | 69 | SPGASQNGSLKSPGQGLR   |  |  |  |  |  |  | Mascot |
|  | 1923.9956 | 1923.9751 | -0.0205 | -11 | 20 | 39 | APSTPPISKPTLCSSPAGGR |  |  |  |  |  |  | Mascot |
|  | 1923.9956 | 1923.9751 | -0.0205 | -11 | 20 | 39 | APSTPPISKPTLCSSPAGGR |  |  |  |  |  |  | Mascot |

29 PREDICTED: protein-glutamine gamma-glutamyltransferase 2-like [Danio rerio] gi|326668941 74951.8 5.69 10 30 0

#### Peptide Information

| Calc. Mass | Obsrv. Mass | ± da    | ± ppm | Start Seq. | End Seq. | Sequence                 | Ion Score | C. I. % | Modification                                 | Rank | Result Type |
|------------|-------------|---------|-------|------------|----------|--------------------------|-----------|---------|----------------------------------------------|------|-------------|
| 1045.5425  | 1045.5698   | 0.0273  | 26    | 437        | 445      | AVYTEAVHR                |           |         |                                              |      | Mascot      |
| 1156.6758  | 1156.6102   | -0.0656 | -57   | 177        | 186      | LLDLNPKCLK               |           |         |                                              |      | Mascot      |
| 1230.6188  | 1230.6799   | 0.0611  | 50    | 647        | 657      | LMATFNSATFK              |           |         |                                              |      | Mascot      |
| 1574.8132  | 1574.7871   | -0.0261 | -17   | 616        | 630      | STEKSSTVQLGPGQR          |           |         |                                              |      | Mascot      |
| 1582.8013  | 1582.8284   | 0.0271  | 17    | 524        | 537      | ALSFTLPYSAYGHR           |           |         |                                              |      | Mascot      |
| 1862.875   | 1862.9628   | 0.0878  | 47    | 255        | 270      | YGQCWVFAAVMCTVLR         |           |         | Oxidation (M)[11]                            |      | Mascot      |
| 1878.9095  | 1878.9661   | 0.0566  | 30    | 483        | 499      | GSRAQCVCVNISAQVMR        |           |         | Carbamidomethyl (C)[6]                       |      | Mascot      |
| 1903.9015  | 1903.9333   | 0.0318  | 17    | 255        | 270      | YGQCWVFAAVMCTVLR         |           |         | Carbamidomethyl (C)[4]                       |      | Mascot      |
| 2211.0017  | 2211.1243   | 0.1226  | 55    | 2          | 22       | CSSSSSNTPDQGVRVDLECVK    |           |         |                                              |      | Mascot      |
| 2211.0017  | 2211.1243   | 0.1226  | 55    | 2          | 22       | CSSSSSNTPDQGVRVDLECVK    |           |         |                                              |      | Mascot      |
| 2528.2424  | 2528.1924   | -0.05   | -20   | 524        | 545      | ALSFTLPYSAYGHRMLENNCIK   |           |         |                                              |      | Mascot      |
| 2719.2798  | 2719.3137   | 0.0339  | 12    | 255        | 277      | YGQCWVFAAVMCTVLRLCLGIPCR |           |         | Carbamidomethyl (C)[4,12], Oxidation (M)[11] |      | Mascot      |
| 2719.2798  | 2719.3137   | 0.0339  | 12    | 255        | 277      | YGQCWVFAAVMCTVLRLCLGIPCR |           |         | Carbamidomethyl (C)[4,12], Oxidation (M)[11] |      | Mascot      |

30 Wu:fd12d03 protein [Danio rerio] gi|67678171 54699.2 5.26 8 30 0

#### Peptide Information

| Calc. Mass | Obsrv. Mass | ± da    | ± ppm | Start Seq. | End Seq. | Sequence         | Ion Score | C. I. % | Modification | Rank | Result Type |
|------------|-------------|---------|-------|------------|----------|------------------|-----------|---------|--------------|------|-------------|
| 1156.6547  | 1156.6102   | -0.0445 | -38   | 33         | 41       | VMIYRFVTK        |           |         |              |      | Mascot      |
| 1165.6211  | 1165.756    | 0.1349  | 116   | 38         | 47       | FVTKASVEER       |           |         |              |      | Mascot      |
| 1165.6211  | 1165.756    | 0.1349  | 116   | 38         | 47       | FVTKASVEER       |           |         |              |      | Mascot      |
| 1169.6273  | 1169.6438   | 0.0165  | 14    | 395        | 406      | RAAAIAAGEDPK     |           |         |              |      | Mascot      |
| 1230.6298  | 1230.6799   | 0.0501  | 41    | 245        | 255      | SEAANSRRPSR      |           |         |              |      | Mascot      |
| 1862.8137  | 1862.9628   | 0.1491  | 80    | 150        | 164      | DEDEEEEDVDREIIK  |           |         |              |      | Mascot      |
| 1924.0062  | 1923.9751   | -0.0311 | -16   | 77         | 92       | QELDDILKFGTEQLFK |           |         |              |      | Mascot      |

|    |                                                 |           |         |     |     |              |                                            |      |    |    |   |  |  |  |  |  |        |
|----|-------------------------------------------------|-----------|---------|-----|-----|--------------|--------------------------------------------|------|----|----|---|--|--|--|--|--|--------|
|    | 1924.0062                                       | 1923.9751 | -0.0311 | -16 | 77  | 92           | QELDDILKFGTEQLFK                           |      |    |    |   |  |  |  |  |  | Mascot |
|    | 2225.0569                                       | 2225.1379 | 0.081   | 36  | 407 | 428          | TPSTGTPADTQPNTAP<br>EDLSK                  |      |    |    |   |  |  |  |  |  | Mascot |
|    | 2225.0569                                       | 2225.1379 | 0.081   | 36  | 407 | 428          | TPSTGTPADTQPNTAP<br>EDLSK                  |      |    |    |   |  |  |  |  |  | Mascot |
|    | 3896.5146                                       | 3896.8367 | 0.3221  | 83  | 218 | 251          | DWQDDQSDNQSDYSVA<br>SEEGDEDFDERSEAANS<br>R |      |    |    |   |  |  |  |  |  | Mascot |
| 31 | methyltransferase-like protein 13 [Danio rerio] |           |         |     |     | gi 217416336 | 75976.5                                    | 5.99 | 10 | 30 | 0 |  |  |  |  |  |        |

#### Peptide Information

| Calc. Mass | Obsrv. Mass | ± da    | ± ppm | Start Seq. | End Seq. | Sequence                           | Ion Score | C. I. % | Modification                                    | Rank | Result Type |
|------------|-------------|---------|-------|------------|----------|------------------------------------|-----------|---------|-------------------------------------------------|------|-------------|
| 864.4032   | 864.5179    | 0.1147  | 133   | 504        | 510      | DFVPCAR                            |           |         | Carbamidomethyl (C)[5]                          |      | Mascot      |
| 942.5406   | 942.5549    | 0.0143  | 15    | 166        | 173      | LAVEHFVK                           |           |         |                                                 |      | Mascot      |
| 1062.6306  | 1062.6975   | 0.0669  | 63    | 589        | 597      | KVYSLSPR                           |           |         |                                                 |      | Mascot      |
| 1165.6221  | 1165.756    | 0.1339  | 115   | 598        | 607      | GLFMLNLVCR                         |           |         |                                                 |      | Mascot      |
| 1165.6221  | 1165.756    | 0.1339  | 115   | 598        | 607      | GLFMLNLVCR                         |           |         |                                                 |      | Mascot      |
| 1402.726   | 1402.7797   | 0.0537  | 38    | 240        | 250      | ERQAYNLMLHK                        |           |         |                                                 |      | Mascot      |
| 1543.8689  | 1543.8207   | -0.0482 | -31   | 228        | 241      | LASVEELLSAVKER                     |           |         |                                                 |      | Mascot      |
| 2040.9086  | 2040.9497   | 0.0411  | 20    | 7          | 22       | TAEEFSSADYWERFFR                   |           |         |                                                 |      | Mascot      |
| 2283.1826  | 2283.2009   | 0.0183  | 8     | 536        | 556      | LKVTLDGDLHITTESE<br>GER            |           |         |                                                 |      | Mascot      |
| 2300.1226  | 2300.1975   | 0.0749  | 33    | 52         | 72       | VLVVGCGNSEQLYD<br>VGYR             |           |         |                                                 |      | Mascot      |
| 3337.5254  | 3337.8066   | 0.2812  | 84    | 453        | 482      | SVDRGFLCCTHHEVMVA<br>GLAMLGMDAINNK |           |         | Carbamidomethyl (C)[8], Oxidation (M)[15,21,24] |      | Mascot      |

|    |                                                     |  |  |  |  |              |        |      |    |    |   |  |  |  |  |  |  |
|----|-----------------------------------------------------|--|--|--|--|--------------|--------|------|----|----|---|--|--|--|--|--|--|
| 32 | PREDICTED: nucleoporin NUP188 homolog [Danio rerio] |  |  |  |  | gi 189533646 | 194083 | 6.04 | 17 | 30 | 0 |  |  |  |  |  |  |
|----|-----------------------------------------------------|--|--|--|--|--------------|--------|------|----|----|---|--|--|--|--|--|--|

#### Peptide Information

| Calc. Mass | Obsrv. Mass | ± da    | ± ppm | Start Seq. | End Seq. | Sequence        | Ion Score | C. I. % | Modification                               | Rank | Result Type |
|------------|-------------|---------|-------|------------|----------|-----------------|-----------|---------|--------------------------------------------|------|-------------|
| 1156.5931  | 1156.6102   | 0.0171  | 15    | 1493       | 1501     | MLHHYLQAK       |           |         | Oxidation (M)[1]                           |      | Mascot      |
| 1230.6875  | 1230.6799   | -0.0076 | -6    | 1535       | 1545     | ALQAVQCSLLK     |           |         | Carbamidomethyl (C)[7]                     |      | Mascot      |
| 1460.5927  | 1460.64     | 0.0473  | 32    | 1          | 12       | MADSEMCRSSR     |           |         | Carbamidomethyl (C)[7], Oxidation (M)[1,6] |      | Mascot      |
| 1509.7961  | 1509.7767   | -0.0194 | -13   | 860        | 871      | YIYHKHDPALPR    |           |         |                                            |      | Mascot      |
| 1523.7522  | 1523.7728   | 0.0206  | 14    | 1098       | 1110     | SLSESQMLISAWR   |           |         | Oxidation (M)[7]                           |      | Mascot      |
| 1560.9467  | 1560.8516   | -0.0951 | -61   | 1157       | 1170     | LGSMVTLTLLILLK  |           |         | Oxidation (M)[4]                           |      | Mascot      |
| 1560.9467  | 1560.8516   | -0.0951 | -61   | 1157       | 1170     | LGSMVTLTLLILLK  |           |         | Oxidation (M)[4]                           |      | Mascot      |
| 1582.9414  | 1582.8284   | -0.113  | -71   | 442        | 456      | TGPLLQLLTALLSDK |           |         |                                            |      | Mascot      |
| 1619.9401  | 1619.7642   | -0.1759 | -109  | 1395       | 1408     | LSLSLMESLLKTLR  |           |         | Oxidation (M)[6]                           |      | Mascot      |

|           |           |         |      |      |      |                                                 |  |  |  |                           |  |        |
|-----------|-----------|---------|------|------|------|-------------------------------------------------|--|--|--|---------------------------|--|--------|
| 1707.0415 | 1706.8643 | -0.1772 | -104 | 1308 | 1323 | LPVLPSVLSALELSLR                                |  |  |  |                           |  | Mascot |
| 1740.8875 | 1740.9028 | 0.0153  | 9    | 22   | 36   | SALREPAQIEDELNR                                 |  |  |  |                           |  | Mascot |
| 1862.9105 | 1862.9628 | 0.0523  | 28   | 123  | 136  | IADYYEERLCVLR                                   |  |  |  | Carbamidomethyl (C)[11]   |  | Mascot |
| 1903.9794 | 1903.9333 | -0.0461 | -24  | 1529 | 1545 | EEAESKALQAVQCSSLK                               |  |  |  | Carbamidomethyl (C)[13]   |  | Mascot |
| 2010.1633 | 2010.0215 | -0.1418 | -71  | 680  | 697  | GEYSVTIAFLRLVTTLVK                              |  |  |  |                           |  | Mascot |
| 2230.071  | 2230.2168 | 0.1458  | 65   | 469  | 486  | MSFYTEAYKHRPNDVISR                              |  |  |  | Oxidation (M)[1]          |  | Mascot |
| 2247.1128 | 2247.1389 | 0.0261  | 12   | 137  | 153  | CVLHLLTYFQDERHPYR                               |  |  |  | Carbamidomethyl (C)[1]    |  | Mascot |
| 2271.1221 | 2271.1245 | 0.0024  | 1    | 1275 | 1293 | DQQDSVCVLALHLSKEL<br>CR                         |  |  |  | Carbamidomethyl (C)[7,18] |  | Mascot |
| 3896.0486 | 3895.8374 | -0.2112 | -54  | 1344 | 1382 | TPQGAAAVAGAGVIQSIC<br>LPLLSVYEGPANGANQA<br>FVRK |  |  |  | Carbamidomethyl (C)[18]   |  | Mascot |

33 novel protein similar to H.sapiens LAYN, layilin (LAYN) [Danio rerio] gi|148725485 38956.8 5.61 7 30 0

#### Peptide Information

| Calc. Mass | Obsrv. Mass | ± da    | ± ppm | Start Seq. | End Seq. | Sequence                                 | Ion Score | C. I. % | Modification           | Rank | Result Type |
|------------|-------------|---------|-------|------------|----------|------------------------------------------|-----------|---------|------------------------|------|-------------|
| 982.4662   | 982.5555    | 0.0893  | 91    | 7          | 14       | GTEKPCYK                                 |           |         | Carbamidomethyl (C)[6] |      | Mascot      |
| 1509.6467  | 1509.7767   | 0.13    | 86    | 89         | 100      | YYWMDGSPATFR                             |           |         | Oxidation (M)[4]       |      | Mascot      |
| 1619.7958  | 1619.7642   | -0.0316 | -20   | 249        | 262      | CNSPSPDVYNVIRR                           |           |         |                        |      | Mascot      |
| 1706.8442  | 1706.8643   | 0.0201  | 12    | 36         | 51       | SDGGDLLSIESKTEQK                         |           |         |                        |      | Mascot      |
| 1722.8882  | 1722.8663   | -0.0219 | -13   | 262        | 276      | RQHESDLAGTRPDIK                          |           |         |                        |      | Mascot      |
| 2719.1187  | 2719.3137   | 0.195   | 72    | 78         | 100      | GYEENGNCSSKYYWMD<br>GSPATFR              |           |         | Carbamidomethyl (C)[8] |      | Mascot      |
| 2719.1187  | 2719.3137   | 0.195   | 72    | 78         | 100      | GYEENGNCSSKYYWMD<br>GSPATFR              |           |         | Carbamidomethyl (C)[8] |      | Mascot      |
| 3897.2576  | 3896.8367   | -0.4209 | -108  | 187        | 223      | TVVSGLPDNALNIAYIVLP<br>TIPLLLLIVATGVFCFK |           |         |                        |      | Mascot      |

34 PREDICTED: heat-stable enterotoxin receptor-like [Danio rerio] gi|326665604 115779.3 7.15 12 29 0

#### Peptide Information

| Calc. Mass | Obsrv. Mass | ± da    | ± ppm | Start Seq. | End Seq. | Sequence       | Ion Score | C. I. % | Modification     | Rank | Result Type |
|------------|-------------|---------|-------|------------|----------|----------------|-----------|---------|------------------|------|-------------|
| 850.4781   | 850.5497    | 0.0716  | 84    | 921        | 927      | RGETFLK        |           |         |                  |      | Mascot      |
| 1051.5935  | 1051.7208   | 0.1273  | 121   | 629        | 636      | LYLVQYPR       |           |         |                  |      | Mascot      |
| 1165.6212  | 1165.756    | 0.1348  | 116   | 504        | 513      | GSLRYVLDDK     |           |         |                  |      | Mascot      |
| 1165.6212  | 1165.756    | 0.1348  | 116   | 504        | 513      | GSLRYVLDDK     |           |         |                  |      | Mascot      |
| 1460.6863  | 1460.64     | -0.0463 | -32   | 49         | 61       | DVVETAVEDQNNK  |           |         |                  |      | Mascot      |
| 1523.8904  | 1523.7728   | -0.1176 | -77   | 899        | 911      | IHVSESTIKILQR  |           |         |                  |      | Mascot      |
| 1706.7731  | 1706.8643   | 0.0912  | 53    | 514        | 527      | ISYPDASFMDLEFR |           |         | Oxidation (M)[9] |      | Mascot      |

|           |           |         |     |     |     |                                        |                                          |        |
|-----------|-----------|---------|-----|-----|-----|----------------------------------------|------------------------------------------|--------|
| 1857.9388 | 1857.8779 | -0.0609 | -33 | 537 | 553 | GMSYLHSSNVGVHGRLK                      | Oxidation (M)[2]                         | Mascot |
| 1857.9388 | 1857.8779 | -0.0609 | -33 | 537 | 553 | GMSYLHSSNVGVHGRLK                      | Oxidation (M)[2]                         | Mascot |
| 1878.9596 | 1878.9661 | 0.0065  | 3   | 316 | 331 | DLNLSVVYTTGSYKYR                       |                                          | Mascot |
| 1903.8789 | 1903.9333 | 0.0544  | 29  | 874 | 889 | MPRYCLFGDTVNTASR                       | Carbamidomethyl (C)[5], Oxidation (M)[1] | Mascot |
| 1923.9904 | 1923.9751 | -0.0153 | -8  | 162 | 176 | KIAEFFFHFWHTSVK                        |                                          | Mascot |
| 1923.9904 | 1923.9751 | -0.0153 | -8  | 162 | 176 | KIAEFFFHFWHTSVK                        |                                          | Mascot |
| 2719.4976 | 2719.3137 | -0.1839 | -68 | 848 | 873 | HLPGIPLWIRIGIHSGPCA<br>AGVVGNK         | Carbamidomethyl (C)[18]                  | Mascot |
| 2719.4976 | 2719.3137 | -0.1839 | -68 | 848 | 873 | HLPGIPLWIRIGIHSGPCA<br>AGVVGNK         | Carbamidomethyl (C)[18]                  | Mascot |
| 3896.0632 | 3895.8374 | -0.2258 | -58 | 629 | 662 | LYLVQYPRGPNVFRPDL<br>SFEGVGETEAEFLVLIK |                                          | Mascot |

35 PREDICTED: probable serine/threonine-protein kinase  
kinX-like [Danio rerio] gi|326667489 12182.4 4.79 5 29 0

#### Peptide Information

| Calc. Mass | Obsrv. Mass | ± da   | ± ppm | Start Seq. | End Seq. | Sequence                      | Ion Score | C. I. % | Modification               | Rank | Result Type |
|------------|-------------|--------|-------|------------|----------|-------------------------------|-----------|---------|----------------------------|------|-------------|
| 1106.496   | 1106.5522   | 0.0562 | 51    | 85         | 95       | AAQSDAVIDSDK                  |           |         |                            |      | Mascot      |
| 1303.729   | 1303.772    | 0.043  | 33    | 67         | 78       | VDAVVKMDSVLK                  |           |         |                            |      | Mascot      |
| 1402.7365  | 1402.7797   | 0.0432 | 31    | 96         | 108      | FAGVSTLAFTFNK                 |           |         |                            |      | Mascot      |
| 1862.7825  | 1862.9628   | 0.1803 | 97    | 1          | 18       | MDEGAMMGVGGAMMGAV<br>LK       |           |         | Oxidation (M)[1,6,7,12]    |      | Mascot      |
| 1878.7773  | 1878.9661   | 0.1888 | 100   | 1          | 18       | MDEGAMMGVGGAMMGAV<br>LK       |           |         | Oxidation (M)[1,6,7,12,13] |      | Mascot      |
| 2506.1189  | 2506.2161   | 0.0972 | 39    | 1          | 24       | MDEGAMMGVGGAMMGAV<br>LKMDAVVK |           |         | Oxidation (M)[1,6,7,12]    |      | Mascot      |

36 PREDICTED: zinc finger and SCAN domain-containing  
protein 2-like [Danio rerio] gi|326680717 88496.4 9.79 13 29 0

#### Peptide Information

| Calc. Mass | Obsrv. Mass | ± da    | ± ppm | Start Seq. | End Seq. | Sequence         | Ion Score | C. I. % | Modification            | Rank | Result Type |
|------------|-------------|---------|-------|------------|----------|------------------|-----------|---------|-------------------------|------|-------------|
| 842.5094   | 842.5154    | 0.006   | 7     | 335        | 341      | ESRLIPK          |           |         |                         |      | Mascot      |
| 996.5724   | 996.6023    | 0.0299  | 30    | 575        | 583      | SFIKSSSLK        |           |         |                         |      | Mascot      |
| 996.6564   | 996.6023    | -0.0541 | -54   | 338        | 346      | LIPKASLVR        |           |         |                         |      | Mascot      |
| 1169.6499  | 1169.6438   | -0.0061 | -5    | 233        | 242      | IKAFLGYMAR       |           |         |                         |      | Mascot      |
| 1185.6449  | 1185.6406   | -0.0043 | -4    | 233        | 242      | IKAFLGYMAR       |           |         | Oxidation (M)[8]        |      | Mascot      |
| 1460.6951  | 1460.64     | -0.0551 | -38   | 15         | 26       | VQQEYVMPSAHR     |           |         | Oxidation (M)[7]        |      | Mascot      |
| 1706.7988  | 1706.8643   | 0.0655  | 38    | 672        | 686      | IHTGEKPFCTQCGK   |           |         | Carbamidomethyl (C)[10] |      | Mascot      |
| 1718.8352  | 1718.9227   | 0.0875  | 51    | 504        | 518      | IHTGEKPFCTQCGK   |           |         | Carbamidomethyl (C)[10] |      | Mascot      |
| 1718.8352  | 1718.9227   | 0.0875  | 51    | 504        | 518      | IHTGEKPFCTQCGK   |           |         | Carbamidomethyl (C)[10] |      | Mascot      |
| 1740.949   | 1740.9028   | -0.0462 | -27   | 354        | 369      | KIPALLDSLESNPSTR |           |         |                         |      | Mascot      |



|    |                                                                                    |           |         |     |              |     |                                  |      |                            |        |   |   |   |
|----|------------------------------------------------------------------------------------|-----------|---------|-----|--------------|-----|----------------------------------|------|----------------------------|--------|---|---|---|
|    | 1761.8411                                                                          | 1761.8502 | 0.0091  | 5   | 756          | 770 | IHTGEKPFVCTQCGK                  |      | Carbamidomethyl (C)[10,13] | Mascot |   |   |   |
|    | 1862.9442                                                                          | 1862.9628 | 0.0186  | 10  | 155          | 172 | ASGGFGTHCLPVGPGRP<br>R           |      | Carbamidomethyl (C)[9]     | Mascot |   |   |   |
|    | 2211.1516                                                                          | 2211.1243 | -0.0273 | -12 | 355          | 373 | IPALLDSLESNPSTRQQW<br>R          |      |                            | Mascot |   |   |   |
|    | 2211.1516                                                                          | 2211.1243 | -0.0273 | -12 | 355          | 373 | IPALLDSLESNPSTRQQW<br>R          |      |                            | Mascot |   |   |   |
|    | 2230.0679                                                                          | 2230.2168 | 0.1489  | 67  | 584          | 602 | LHMRIHTGDKPFTCTQC<br>GK          |      | Carbamidomethyl (C)[14]    | Mascot |   |   |   |
|    | 3337.541                                                                           | 3337.8066 | 0.2656  | 80  | 687          | 714 | SFSCSSHLNHHIRIHTGE<br>KPFTCPQCEK |      | Carbamidomethyl (C)[4,23]  | Mascot |   |   |   |
| 37 | PREDICTED: ATP-binding cassette sub-family B member 7, mitochondrial [Danio rerio] |           |         |     | gi 125834513 |     | 82250.8                          | 9.26 | 10                         | 29     | 0 | 6 | 0 |

#### Peptide Information

| Calc. Mass | Obsrv. Mass | ± da    | ± ppm | Start Seq. | End Seq. | Sequence                           | Ion Score | C. I. | % Modification    | Rank | Result Type |
|------------|-------------|---------|-------|------------|----------|------------------------------------|-----------|-------|-------------------|------|-------------|
| 842.5458   | 842.5154    | -0.0304 | -36   | 19         | 25       | LSLLLQR                            |           |       |                   |      | Mascot      |
| 850.576    | 850.5497    | -0.0263 | -31   | 2          | 9        | APLLVPLK                           |           |       |                   |      | Mascot      |
| 1107.5792  | 1107.5391   | -0.0401 | -36   | 192        | 201      | TGSALFNELR                         |           |       |                   |      | Mascot      |
| 1165.5848  | 1165.756    | 0.1712  | 147   | 47         | 56       | NTYLLSDPSR                         |           |       |                   |      | Mascot      |
| 1165.5848  | 1165.756    | 0.1712  | 147   | 47         | 56       | NTYLLSDPSR                         |           |       |                   |      | Mascot      |
| 1460.6951  | 1460.64     | -0.0551 | -38   | 585        | 596      | MPHKYDTQVGER                       |           |       |                   |      | Mascot      |
| 1543.8777  | 1543.8207   | -0.057  | -37   | 575        | 588      | LAGIHDAILKMPHK                     |           |       |                   |      | Mascot      |
| 2194.1477  | 2194.1267   | -0.021  | -10   | 111        | 128      | ILGAMFTYVWPKDRPDL<br>R             |           |       | Oxidation (M)[5]  |      | Mascot      |
| 2211.0425  | 2211.1243   | 0.0818  | 37    | 47         | 65       | NTYLLSDPSRESSTWAN<br>NR            |           |       |                   |      | Mascot      |
| 2211.0425  | 2211.1243   | 0.0818  | 37    | 47         | 65       | NTYLLSDPSRESSTWAN<br>NR            | 6         |       | 0                 |      | Mascot      |
| 2283.2554  | 2283.2009   | -0.0545 | -24   | 658        | 678      | LSTIVDADEIIVLNQGKVA<br>ER          |           |       |                   |      | Mascot      |
| 3338.7817  | 3338.7876   | 0.0059  | 2     | 250        | 279      | GISFVLSALVFNLGPTLFE<br>MMLVSGILYYK |           |       | Oxidation (M)[20] |      | Mascot      |

38 72 kDa inositol polyphosphate 5-phosphatase [Danio rerio]

gi|320091327 71875.5 8.03 10 29 0

#### Peptide Information

| Calc. Mass | Obsrv. Mass | ± da    | ± ppm | Start Seq. | End Seq. | Sequence         | Ion Score | C. I. | % Modification   | Rank | Result Type |
|------------|-------------|---------|-------|------------|----------|------------------|-----------|-------|------------------|------|-------------|
| 1106.6317  | 1106.5522   | -0.0795 | -72   | 602        | 610      | SLYLEGIRR        |           |       |                  |      | Mascot      |
| 1107.5792  | 1107.5391   | -0.0401 | -36   | 83         | 91       | NLSFDEKVR        |           |       |                  |      | Mascot      |
| 1123.5491  | 1123.5309   | -0.0182 | -16   | 539        | 547      | QRTPSYTDR        |           |       |                  |      | Mascot      |
| 1402.7802  | 1402.7797   | -0.0005 | 0     | 245        | 256      | STYSVLNPIRPR     |           |       |                  |      | Mascot      |
| 1740.7891  | 1740.9028   | 0.1137  | 65    | 620        | 635      | EAVMKNQNNSTVCSIS |           |       | Oxidation (M)[4] |      | Mascot      |

|  |  |           |           |        |    |     |     |                |  |  |  |  |  |  |  |  |  |  |  |  |  |  |  |  |  |  |  |  |  |  |  |  |  |  |  |  |  |  |  |  |  |  |  |  |  |  |  |  |  |  |  |  |  |  |  |  |  |  |  |  |  |  |  |  |  |  |  |  |  |  |  |  |  |  |  |  |  |  |  |  |  |  |  |  |  |  |  |  |  |  |  |  |  |  |  |  |  |  |  |  |  |  |  |  |  |  |  |  |  |  |  |  |  |  |  |  |  |  |  |  |  |  |  |  |  |  |  |  |  |  |  |  |  |  |  |  |  |  |  |  |  |  |  |  |  |  |  |  |  |  |  |  |  |  |  |  |  |  |  |  |  |  |  |  |  |  |  |  |  |  |  |  |  |  |  |  |  |  |  |  |  |  |  |  |  |  |  |  |  |  |  |  |  |  |  |  |  |  |  |  |  |  |  |  |  |  |  |  |  |  |  |  |  |  |  |  |  |  |  |  |  |  |  |  |  |  |  |  |  |  |  |  |  |  |  |  |  |  |  |  |  |  |  |  |  |  |  |  |  |  |  |  |  |  |  |  |  |  |  |  |  |  |  |  |  |  |  |  |  |  |  |  |  |  |  |  |  |  |  |  |  |  |  |  |  |  |  |  |  |  |  |  |  |  |  |  |  |  |  |  |  |  |  |  |  |  |  |  |  |  |  |  |  |  |  |  |  |  |  |  |  |  |  |  |  |  |  |  |  |  |  |  |  |  |  |  |  |  |  |  |  |  |  |  |  |  |  |  |  |  |  |  |  |  |  |  |  |  |  |  |  |  |  |  |  |  |  |  |  |  |  |  |  |  |  |  |  |  |  |  |  |  |  |  |  |  |  |  |  |  |  |  |  |  |  |  |  |  |  |  |  |  |  |  |  |  |  |  |  |  |  |  |  |  |  |  |  |  |  |  |  |  |  |  |  |  |  |  |  |  |  |  |  |  |  |  |  |  |  |  |  |  |  |  |  |  |  |  |  |  |  |  |  |  |  |  |  |  |  |  |  |  |  |  |  |  |  |  |  |  |  |  |  |  |  |  |  |  |  |  |  |  |  |  |  |  |  |  |  |  |  |  |  |  |  |  |  |  |  |  |  |  |  |  |  |  |  |  |  |  |  |  |  |  |  |  |  |  |  |  |  |  |  |  |  |  |  |  |  |  |  |  |  |  |  |  |  |  |  |  |  |  |  |  |  |  |  |  |  |  |  |  |  |  |  |  |  |  |  |  |  |  |  |  |  |  |  |  |  |  |  |  |  |  |  |  |  |  |  |  |  |  |  |  |  |  |  |  |  |  |  |  |  |  |  |  |  |  |  |  |  |  |  |  |  |  |  |  |  |  |  |  |  |  |  |  |  |  |  |  |  |  |  |  |  |  |  |  |  |  |  |  |  |  |  |  |  |  |  |  |  |  |  |  |  |  |  |  |  |  |  |  |  |  |  |  |  |  |  |  |  |  |  |  |  |  |  |  |  |  |  |  |  |  |  |  |  |  |  |  |  |  |  |  |  |  |  |  |  |  |  |  |  |  |  |  |  |  |  |  |  |  |  |  |  |  |  |  |  |  |  |  |  |  |  |  |  |  |  |  |  |  |  |  |  |  |  |  |  |  |  |  |  |  |  |  |  |  |  |  |  |  |  |  |  |  |  |  |  |  |  |  |  |  |  |  |  |  |  |  |  |  |  |  |  |  |  |  |  |  |  |  |  |  |  |  |  |  |  |  |  |  |  |  |  |  |  |  |  |  |  |  |  |  |  |  |  |  |  |  |  |  |  |  |  |  |  |  |  |  |  |  |  |  |  |  |  |  |  |  |  |  |  |  |  |  |  |  |  |  |  |  |  |  |  |  |  |  |  |  |  |  |  |  |  |  |  |  |  |  |  |  |  |  |  |  |  |  |  |  |  |  |  |  |  |  |  |  |  |  |  |  |  |  |  |  |  |  |  |  |  |  |  |  |  |  |  |  |  |  |  |  |  |  |  |  |  |  |  |  |  |  |  |  |  |  |  |  |  |  |  |  |  |  |  |  |  |  |  |  |  |  |  |  |  |  |  |  |  |  |  |  |  |  |  |  |  |  |  |  |  |  |  |  |  |  |  |  |  |  |  |  |  |  |  |  |  |  |  |  |  |  |  |  |  |  |  |  |  |  |  |  |  |  |  |  |  |  |  |  |  |  |  |  |  |  |  |  |  |  |  |  |  |  |  |  |  |  |  |  |  |  |  |  |  |  |  |  |  |  |  |  |  |  |  |  |  |  |  |  |  |  |  |  |  |  |  |  |  |  |  |  |  |  |  |  |  |  |  |  |  |  |  |  |  |  |  |  |  |  |  |  |  |  |  |  |  |  |  |  |  |  |  |  |  |  |  |  |  |  |  |  |  |  |  |  |  |  |  |  |  |  |  |  |  |  |  |  |  |  |  |  |  |  |  |  |  |  |  |  |  |  |  |  |  |  |  |  |  |  |  |  |  |  |  |  |  |  |  |  |  |  |  |  |  |  |  |  |  |  |  |  |  |  |  |  |  |  |  |  |  |  |  |  |  |  |  |  |  |  |  |  |  |  |  |  |  |  |  |  |  |  |  |  |  |  |  |  |  |  |  |  |  |  |  |  |  |  |  |  |  |  |  |  |  |  |  |  |  |  |  |  |  |  |  |  |  |  |  |  |  |  |  |  |  |  |  |  |  |  |  |  |  |  |  |  |  |  |  |  |  |  |  |  |  |  |  |  |  |  |  |  |  |  |  |  |  |  |  |  |  |  |  |  |  |  |  |  |  |  |  |  |  |  |  |  |  |  |  |  |  |  |  |  |  |  |  |  |  |  |  |  |  |  |  |  |  |  |  |  |  |  |  |  |  |  |  |  |  |  |  |  |  |  |  |  |  |  |  |  |  |  |  |  |  |  |  |  |  |  |  |  |  |  |  |  |  |  |  |  |  |  |  |  |  |  |  |  |  |  |  |  |  |  |  |  |  |  |  |  |  |  |  |  |  |  |  |  |  |  |  |  |  |  |  |  |  |  |  |  |
|--|--|-----------|-----------|--------|----|-----|-----|----------------|--|--|--|--|--|--|--|--|--|--|--|--|--|--|--|--|--|--|--|--|--|--|--|--|--|--|--|--|--|--|--|--|--|--|--|--|--|--|--|--|--|--|--|--|--|--|--|--|--|--|--|--|--|--|--|--|--|--|--|--|--|--|--|--|--|--|--|--|--|--|--|--|--|--|--|--|--|--|--|--|--|--|--|--|--|--|--|--|--|--|--|--|--|--|--|--|--|--|--|--|--|--|--|--|--|--|--|--|--|--|--|--|--|--|--|--|--|--|--|--|--|--|--|--|--|--|--|--|--|--|--|--|--|--|--|--|--|--|--|--|--|--|--|--|--|--|--|--|--|--|--|--|--|--|--|--|--|--|--|--|--|--|--|--|--|--|--|--|--|--|--|--|--|--|--|--|--|--|--|--|--|--|--|--|--|--|--|--|--|--|--|--|--|--|--|--|--|--|--|--|--|--|--|--|--|--|--|--|--|--|--|--|--|--|--|--|--|--|--|--|--|--|--|--|--|--|--|--|--|--|--|--|--|--|--|--|--|--|--|--|--|--|--|--|--|--|--|--|--|--|--|--|--|--|--|--|--|--|--|--|--|--|--|--|--|--|--|--|--|--|--|--|--|--|--|--|--|--|--|--|--|--|--|--|--|--|--|--|--|--|--|--|--|--|--|--|--|--|--|--|--|--|--|--|--|--|--|--|--|--|--|--|--|--|--|--|--|--|--|--|--|--|--|--|--|--|--|--|--|--|--|--|--|--|--|--|--|--|--|--|--|--|--|--|--|--|--|--|--|--|--|--|--|--|--|--|--|--|--|--|--|--|--|--|--|--|--|--|--|--|--|--|--|--|--|--|--|--|--|--|--|--|--|--|--|--|--|--|--|--|--|--|--|--|--|--|--|--|--|--|--|--|--|--|--|--|--|--|--|--|--|--|--|--|--|--|--|--|--|--|--|--|--|--|--|--|--|--|--|--|--|--|--|--|--|--|--|--|--|--|--|--|--|--|--|--|--|--|--|--|--|--|--|--|--|--|--|--|--|--|--|--|--|--|--|--|--|--|--|--|--|--|--|--|--|--|--|--|--|--|--|--|--|--|--|--|--|--|--|--|--|--|--|--|--|--|--|--|--|--|--|--|--|--|--|--|--|--|--|--|--|--|--|--|--|--|--|--|--|--|--|--|--|--|--|--|--|--|--|--|--|--|--|--|--|--|--|--|--|--|--|--|--|--|--|--|--|--|--|--|--|--|--|--|--|--|--|--|--|--|--|--|--|--|--|--|--|--|--|--|--|--|--|--|--|--|--|--|--|--|--|--|--|--|--|--|--|--|--|--|--|--|--|--|--|--|--|--|--|--|--|--|--|--|--|--|--|--|--|--|--|--|--|--|--|--|--|--|--|--|--|--|--|--|--|--|--|--|--|--|--|--|--|--|--|--|--|--|--|--|--|--|--|--|--|--|--|--|--|--|--|--|--|--|--|--|--|--|--|--|--|--|--|--|--|--|--|--|--|--|--|--|--|--|--|--|--|--|--|--|--|--|--|--|--|--|--|--|--|--|--|--|--|--|--|--|--|--|--|--|--|--|--|--|--|--|--|--|--|--|--|--|--|--|--|--|--|--|--|--|--|--|--|--|--|--|--|--|--|--|--|--|--|--|--|--|--|--|--|--|--|--|--|--|--|--|--|--|--|--|--|--|--|--|--|--|--|--|--|--|--|--|--|--|--|--|--|--|--|--|--|--|--|--|--|--|--|--|--|--|--|--|--|--|--|--|--|--|--|--|--|--|--|--|--|--|--|--|--|--|--|--|--|--|--|--|--|--|--|--|--|--|--|--|--|--|--|--|--|--|--|--|--|--|--|--|--|--|--|--|--|--|--|--|--|--|--|--|--|--|--|--|--|--|--|--|--|--|--|--|--|--|--|--|--|--|--|--|--|--|--|--|--|--|--|--|--|--|--|--|--|--|--|--|--|--|--|--|--|--|--|--|--|--|--|--|--|--|--|--|--|--|--|--|--|--|--|--|--|--|--|--|--|--|--|--|--|--|--|--|--|--|--|--|--|--|--|--|--|--|--|--|--|--|--|--|--|--|--|--|--|--|--|--|--|--|--|--|--|--|--|--|--|--|--|--|--|--|--|--|--|--|--|--|--|--|--|--|--|--|--|--|--|--|--|--|--|--|--|--|--|--|--|--|--|--|--|--|--|--|--|--|--|--|--|--|--|--|--|--|--|--|--|--|--|--|--|--|--|--|--|--|--|--|--|--|--|--|--|--|--|--|--|--|--|--|--|--|--|--|--|--|--|--|--|--|--|--|--|--|--|--|--|--|--|--|--|--|--|--|--|--|--|--|--|--|--|--|--|--|--|--|--|--|--|--|--|--|--|--|--|--|--|--|--|--|--|--|--|--|--|--|--|--|--|--|--|--|--|--|--|--|--|--|--|--|--|--|--|--|--|--|--|--|--|--|--|--|--|--|--|--|--|--|--|--|--|--|--|--|--|--|--|--|--|--|--|--|--|--|--|--|--|--|--|--|--|--|--|--|--|--|--|--|--|--|--|--|--|--|--|--|--|--|--|--|--|--|--|--|--|--|--|--|--|--|--|--|--|--|--|--|--|--|--|--|--|--|--|--|--|--|--|--|--|--|--|--|--|--|--|--|--|--|--|--|--|--|--|--|--|--|--|--|--|--|--|--|--|--|--|--|--|--|--|--|--|--|--|--|--|--|--|--|--|--|--|--|--|--|--|--|--|--|--|--|--|--|--|--|--|--|--|--|--|--|--|--|--|--|--|--|--|--|--|--|--|--|--|--|--|--|--|--|--|--|--|--|--|--|--|--|--|--|--|--|--|--|--|--|--|--|--|--|--|--|--|--|--|--|--|--|--|--|--|--|--|--|--|--|--|--|--|--|--|--|--|--|--|--|--|--|--|--|--|--|--|--|--|--|--|--|--|--|--|--|--|--|--|--|--|--|--|--|--|--|--|--|--|--|--|--|--|--|--|--|--|--|--|--|--|--|--|--|--|--|--|--|--|--|--|--|
|  |  | 1761.8113 | 1761.8502 | 0.0389 | 22 | 526 | 540 | FDIGCDVYDTTKQR |  |  |  |  |  |  |  |  |  |  |  |  |  |  |  |  |  |  |  |  |  |  |  |  |  |  |  |  |  |  |  |  |  |  |  |  |  |  |  |  |  |  |  |  |  |  |  |  |  |  |  |  |  |  |  |  |  |  |  |  |  |  |  |  |  |  |  |  |  |  |  |  |  |  |  |  |  |  |  |  |  |  |  |  |  |  |  |  |  |  |  |  |  |  |  |  |  |  |  |  |  |  |  |  |  |  |  |  |  |  |  |  |  |  |  |  |  |  |  |  |  |  |  |  |  |  |  |  |  |  |  |  |  |  |  |  |  |  |  |  |  |  |  |  |  |  |  |  |  |  |  |  |  |  |  |  |  |  |  |  |  |  |  |  |  |  |  |  |  |  |  |  |  |  |  |  |  |  |  |  |  |  |  |  |  |  |  |  |  |  |  |  |  |  |  |  |  |  |  |  |  |  |  |  |  |  |  |  |  |  |  |  |  |  |  |  |  |  |  |  |  |  |  |  |  |  |  |  |  |  |  |  |  |  |  |  |  |  |  |  |  |  |  |  |  |  |  |  |  |  |  |  |  |  |  |  |  |  |  |  |  |  |  |  |  |  |  |  |  |  |  |  |  |  |  |  |  |  |  |  |  |  |  |  |  |  |  |  |  |  |  |  |  |  |  |  |  |  |  |  |  |  |  |  |  |  |  |  |  |  |  |  |  |  |  |  |  |  |  |  |  |  |  |  |  |  |  |  |  |  |  |  |  |  |  |  |  |  |  |  |  |  |  |  |  |  |  |  |  |  |  |  |  |  |  |  |  |  |  |  |  |  |  |  |  |  |  |  |  |  |  |  |  |  |  |  |  |  |  |  |  |  |  |  |  |  |  |  |  |  |  |  |  |  |  |  |  |  |  |  |  |  |  |  |  |  |  |  |  |  |  |  |  |  |  |  |  |  |  |  |  |  |  |  |  |  |  |  |  |  |  |  |  |  |  |  |  |  |  |  |  |  |  |  |  |  |  |  |  |  |  |  |  |  |  |  |  |  |  |  |  |  |  |  |  |  |  |  |  |  |  |  |  |  |  |  |  |  |  |  |  |  |  |  |  |  |  |  |  |  |  |  |  |  |  |  |  |  |  |  |  |  |  |  |  |  |  |  |  |  |  |  |  |  |  |  |  |  |  |  |  |  |  |  |  |  |  |  |  |  |  |  |  |  |  |  |  |  |  |  |  |  |  |  |  |  |  |  |  |  |  |  |  |  |  |  |  |  |  |  |  |  |  |  |  |  |  |  |  |  |  |  |  |  |  |  |  |  |  |  |  |  |  |  |  |  |  |  |  |  |  |  |  |  |  |  |  |  |  |  |  |  |  |  |  |  |  |  |  |  |  |  |  |  |  |  |  |  |  |  |  |  |  |  |  |  |  |  |  |  |  |  |  |  |  |  |  |  |  |  |  |  |  |  |  |  |  |  |  |  |  |  |  |  |  |  |  |  |  |  |  |  |  |  |  |  |  |  |  |  |  |  |  |  |  |  |  |  |  |  |  |  |  |  |  |  |  |  |  |  |  |  |  |  |  |  |  |  |  |  |  |  |  |  |  |  |  |  |  |  |  |  |  |  |  |  |  |  |  |  |  |  |  |  |  |  |  |  |  |  |  |  |  |  |  |  |  |  |  |  |  |  |  |  |  |  |  |  |  |  |  |  |  |  |  |  |  |  |  |  |  |  |  |  |  |  |  |  |  |  |  |  |  |  |  |  |  |  |  |  |  |  |  |  |  |  |  |  |  |  |  |  |  |  |  |  |  |  |  |  |  |  |  |  |  |  |  |  |  |  |  |  |  |  |  |  |  |  |  |  |  |  |  |  |  |  |  |  |  |  |  |  |  |  |  |  |  |  |  |  |  |  |  |  |  |  |  |  |  |  |  |  |  |  |  |  |  |  |  |  |  |  |  |  |  |  |  |  |  |  |  |  |  |  |  |  |  |  |  |  |  |  |  |  |  |  |  |  |  |  |  |  |  |  |  |  |  |  |  |  |  |  |  |  |  |  |  |  |  |  |  |  |  |  |  |  |  |  |  |  |  |  |  |  |  |  |  |  |  |  |  |  |  |  |  |  |  |  |  |  |  |  |  |  |  |  |  |  |  |  |  |  |  |  |  |  |  |  |  |  |  |  |  |  |  |  |  |  |  |  |  |  |  |  |  |  |  |  |  |  |  |  |  |  |  |  |  |  |  |  |  |  |  |  |  |  |  |  |  |  |  |  |  |  |  |  |  |  |  |  |  |  |  |  |  |  |  |  |  |  |  |  |  |  |  |  |  |  |  |  |  |  |  |  |  |  |  |  |  |  |  |  |  |  |  |  |  |  |  |  |  |  |  |  |  |  |  |  |  |  |  |  |  |  |  |  |  |  |  |  |  |  |  |  |  |  |  |  |  |  |  |  |  |  |  |  |  |  |  |  |  |  |  |  |  |  |  |  |  |  |  |  |  |  |  |  |  |  |  |  |  |  |  |  |  |  |  |  |  |  |  |  |  |  |  |  |  |  |  |  |  |  |  |  |  |  |  |  |  |  |  |  |  |  |  |  |  |  |  |  |  |  |  |  |  |  |  |  |  |  |  |  |  |  |  |  |  |  |  |  |  |  |  |  |  |  |  |  |  |  |  |  |  |  |  |  |  |  |  |  |  |  |  |  |  |  |  |  |  |  |  |  |  |  |  |  |  |  |  |  |  |  |  |  |  |  |  |  |  |  |  |  |  |  |  |  |  |  |  |  |  |  |  |  |  |  |  |  |  |  |  |  |  |  |  |  |  |  |  |  |  |  |  |  |  |  |  |  |  |  |  |  |  |  |  |  |  |  |  |  |  |  |  |  |  |  |  |  |  |  |  |  |  |  |  |  |  |  |  |  |  |  |  |  |  |  |  |  |  |  |  |  |  |  |  |  |  |  |  |  |  |  |  |  |  |  |  |  |  |  |  |  |  |  |  |  |  |  |  |  |  |  |  |  |  |  |  |  |  |  |  |  |  |  |  |  |  |  |  |  |  |  |
|--|--|-----------|-----------|--------|----|-----|-----|----------------|--|--|--|--|--|--|--|--|--|--|--|--|--|--|--|--|--|--|--|--|--|--|--|--|--|--|--|--|--|--|--|--|--|--|--|--|--|--|--|--|--|--|--|--|--|--|--|--|--|--|--|--|--|--|--|--|--|--|--|--|--|--|--|--|--|--|--|--|--|--|--|--|--|--|--|--|--|--|--|--|--|--|--|--|--|--|--|--|--|--|--|--|--|--|--|--|--|--|--|--|--|--|--|--|--|--|--|--|--|--|--|--|--|--|--|--|--|--|--|--|--|--|--|--|--|--|--|--|--|--|--|--|--|--|--|--|--|--|--|--|--|--|--|--|--|--|--|--|--|--|--|--|--|--|--|--|--|--|--|--|--|--|--|--|--|--|--|--|--|--|--|--|--|--|--|--|--|--|--|--|--|--|--|--|--|--|--|--|--|--|--|--|--|--|--|--|--|--|--|--|--|--|--|--|--|--|--|--|--|--|--|--|--|--|--|--|--|--|--|--|--|--|--|--|--|--|--|--|--|--|--|--|--|--|--|--|--|--|--|--|--|--|--|--|--|--|--|--|--|--|--|--|--|--|--|--|--|--|--|--|--|--|--|--|--|--|--|--|--|--|--|--|--|--|--|--|--|--|--|--|--|--|--|--|--|--|--|--|--|--|--|--|--|--|--|--|--|--|--|--|--|--|--|--|--|--|--|--|--|--|--|--|--|--|--|--|--|--|--|--|--|--|--|--|--|--|--|--|--|--|--|--|--|--|--|--|--|--|--|--|--|--|--|--|--|--|--|--|--|--|--|--|--|--|--|--|--|--|--|--|--|--|--|--|--|--|--|--|--|--|--|--|--|--|--|--|--|--|--|--|--|--|--|--|--|--|--|--|--|--|--|--|--|--|--|--|--|--|--|--|--|--|--|--|--|--|--|--|--|--|--|--|--|--|--|--|--|--|--|--|--|--|--|--|--|--|--|--|--|--|--|--|--|--|--|--|--|--|--|--|--|--|--|--|--|--|--|--|--|--|--|--|--|--|--|--|--|--|--|--|--|--|--|--|--|--|--|--|--|--|--|--|--|--|--|--|--|--|--|--|--|--|--|--|--|--|--|--|--|--|--|--|--|--|--|--|--|--|--|--|--|--|--|--|--|--|--|--|--|--|--|--|--|--|--|--|--|--|--|--|--|--|--|--|--|--|--|--|--|--|--|--|--|--|--|--|--|--|--|--|--|--|--|--|--|--|--|--|--|--|--|--|--|--|--|--|--|--|--|--|--|--|--|--|--|--|--|--|--|--|--|--|--|--|--|--|--|--|--|--|--|--|--|--|--|--|--|--|--|--|--|--|--|--|--|--|--|--|--|--|--|--|--|--|--|--|--|--|--|--|--|--|--|--|--|--|--|--|--|--|--|--|--|--|--|--|--|--|--|--|--|--|--|--|--|--|--|--|--|--|--|--|--|--|--|--|--|--|--|--|--|--|--|--|--|--|--|--|--|--|--|--|--|--|--|--|--|--|--|--|--|--|--|--|--|--|--|--|--|--|--|--|--|--|--|--|--|--|--|--|--|--|--|--|--|--|--|--|--|--|--|--|--|--|--|--|--|--|--|--|--|--|--|--|--|--|--|--|--|--|--|--|--|--|--|--|--|--|--|--|--|--|--|--|--|--|--|--|--|--|--|--|--|--|--|--|--|--|--|--|--|--|--|--|--|--|--|--|--|--|--|--|--|--|--|--|--|--|--|--|--|--|--|--|--|--|--|--|--|--|--|--|--|--|--|--|--|--|--|--|--|--|--|--|--|--|--|--|--|--|--|--|--|--|--|--|--|--|--|--|--|--|--|--|--|--|--|--|--|--|--|--|--|--|--|--|--|--|--|--|--|--|--|--|--|--|--|--|--|--|--|--|--|--|--|--|--|--|--|--|--|--|--|--|--|--|--|--|--|--|--|--|--|--|--|--|--|--|--|--|--|--|--|--|--|--|--|--|--|--|--|--|--|--|--|--|--|--|--|--|--|--|--|--|--|--|--|--|--|--|--|--|--|--|--|--|--|--|--|--|--|--|--|--|--|--|--|--|--|--|--|--|--|--|--|--|--|--|--|--|--|--|--|--|--|--|--|--|--|--|--|--|--|--|--|--|--|--|--|--|--|--|--|--|--|--|--|--|--|--|--|--|--|--|--|--|--|--|--|--|--|--|--|--|--|--|--|--|--|--|--|--|--|--|--|--|--|--|--|--|--|--|--|--|--|--|--|--|--|--|--|--|--|--|--|--|--|--|--|--|--|--|--|--|--|--|--|--|--|--|--|--|--|--|--|--|--|--|--|--|--|--|--|--|--|--|--|--|--|--|--|--|--|--|--|--|--|--|--|--|--|--|--|--|--|--|--|--|--|--|--|--|--|--|--|--|--|--|--|--|--|--|--|--|--|--|--|--|--|--|--|--|--|--|--|--|--|--|--|--|--|--|--|--|--|--|--|--|--|--|--|--|--|--|--|--|--|--|--|--|--|--|--|--|--|--|--|--|--|--|--|--|--|--|--|--|--|--|--|--|--|--|--|--|--|--|--|--|--|--|--|--|--|--|--|--|--|--|--|--|--|--|--|--|--|--|--|--|--|--|--|--|--|--|--|--|--|--|--|--|--|--|--|--|--|--|--|--|--|--|--|--|--|--|--|--|--|--|--|--|--|--|--|--|--|--|--|--|--|--|--|--|--|--|--|--|--|--|--|--|--|--|--|--|--|--|--|--|--|--|--|--|--|--|--|--|--|--|--|--|--|--|--|--|--|--|--|--|--|--|--|--|--|--|--|--|--|--|--|--|--|--|--|--|--|--|--|--|--|--|--|--|--|--|--|--|--|--|--|--|--|--|--|--|--|--|--|--|--|--|--|--|--|--|--|--|--|--|--|--|--|--|--|--|--|--|--|--|--|--|--|--|--|--|--|--|--|--|--|--|--|--|--|--|--|--|--|--|--|--|--|--|--|--|--|--|--|--|--|--|--|--|--|--|--|--|--|--|--|--|--|--|--|--|--|--|--|--|--|--|--|--|

# Peptide Information

| Calc. Mass | Obsrv. Mass | $\pm$ da | $\pm$ ppm | Start Seq. | End Seq. | Sequence        | Ion Score | C. I. % Modification   | Rank | Result Type |
|------------|-------------|----------|-----------|------------|----------|-----------------|-----------|------------------------|------|-------------|
| 842.4478   | 842.5154    | 0.0676   | 80        | 14643      | 14649    | RDLPEGR         |           |                        |      | Mascot      |
| 848.4876   | 848.5325    | 0.0449   | 53        | 14548      | 14554    | TSILWTK         |           |                        |      | Mascot      |
| 850.4668   | 850.5497    | 0.0829   | 97        | 11818      | 11824    | FTVENLK         |           |                        |      | Mascot      |
| 864.5189   | 864.5179    | -0.001   | -1        | 1322       | 1328     | KYEIIAK         |           |                        |      | Mascot      |
| 882.4791   | 882.5728    | 0.0937   | 106       | 7328       | 7334     | KEEHAIR         |           |                        |      | Mascot      |
| 942.573    | 942.5549    | -0.0181  | -19       | 8640       | 8647     | DRQGIIK         |           |                        |      | Mascot      |
| 982.5468   | 982.5555    | 0.0087   | 9         | 7963       | 7969     | EYIFRVR         |           |                        |      | Mascot      |
| 996.5359   | 996.6023    | 0.0664   | 67        | 3662       | 3669     | LSYEQTKK        |           |                        |      | Mascot      |
| 996.5359   | 996.6023    | 0.0664   | 67        | 3662       | 3669     | LSYEQTKK        |           |                        |      | Mascot      |
| 1051.6146  | 1051.7208   | 0.1062   | 101       | 10946      | 10955    | VSEKPLPPGK      |           |                        |      | Mascot      |
| 1062.6055  | 1062.6975   | 0.092    | 87        | 12317      | 12325    | IIAQNRYGK       |           |                        |      | Mascot      |
| 1106.6317  | 1106.5522   | -0.0795  | -72       | 14635      | 14643    | VTGYIIERR       |           |                        |      | Mascot      |
| 1107.5292  | 1107.5391   | 0.0099   | 9         | 20800      | 20808    | HFVPFSDMK       |           |                        |      | Mascot      |
| 1123.524   | 1123.5309   | 0.0069   | 6         | 20800      | 20808    | HFVPFSDMK       |           | Oxidation (M)[8]       |      | Mascot      |
| 1156.5858  | 1156.6102   | 0.0244   | 21        | 1768       | 1776     | EGPRYHLER       |           |                        |      | Mascot      |
| 1165.6212  | 1165.756    | 0.1348   | 116       | 422        | 431      | QAKFESTINK      |           |                        |      | Mascot      |
| 1165.6324  | 1165.756    | 0.1236   | 106       | 5141       | 5149     | ITNYTIERR       |           |                        |      | Mascot      |
| 1169.6525  | 1169.6438   | -0.0087  | -7        | 2630       | 2639     | ADLVLKPEER      |           |                        |      | Mascot      |
| 1185.6626  | 1185.6406   | -0.022   | -19       | 17301      | 17311    | GKPIPTASWTK     |           |                        |      | Mascot      |
| 1230.6841  | 1230.6799   | -0.0042  | -3        | 18967      | 18977    | GKPTPTSKWTK     |           |                        |      | Mascot      |
| 1279.7844  | 1279.7867   | 0.0023   | 2         | 4556       | 4567     | VNRAPVTKPAVK    |           |                        |      | Mascot      |
| 1303.7844  | 1303.772    | -0.0124  | -10       | 14040      | 14051    | AGGSLRLFITIR    |           |                        |      | Mascot      |
| 1402.5977  | 1402.7797   | 0.182    | 130       | 648        | 660      | DKGVYVCDGTDK    |           |                        |      | Mascot      |
| 1448.7267  | 1448.9343   | 0.2076   | 143       | 17957      | 17969    | AEYTPPKAELDSK   |           |                        |      | Mascot      |
| 1460.6396  | 1460.64     | 0.0004   | 0         | 16170      | 16182    | GDPMEMEEPVQAK   |           |                        |      | Mascot      |
| 1509.8536  | 1509.7767   | -0.0769  | -51       | 14847      | 14859    | LAWTLVHGEVKTR   |           |                        |      | Mascot      |
| 1523.8502  | 1523.7728   | -0.0774  | -51       | 8687       | 8700     | VLDTPGPPLNLMIK  |           | Oxidation (M)[12]      |      | Mascot      |
| 1543.834   | 1543.8207   | -0.0133  | -9        | 14505      | 14519    | QPGPPSTPRVAHATK |           |                        |      | Mascot      |
| 1560.8843  | 1560.8516   | -0.0327  | -21       | 21524      | 21538    | DISASADTIVKLTVK |           |                        |      | Mascot      |
| 1560.8843  | 1560.8516   | -0.0327  | -21       | 21524      | 21538    | DISASADTIVKLTVK |           |                        |      | Mascot      |
| 1574.8424  | 1574.7871   | -0.0553  | -35       | 14114      | 14127    | VLDTPSPQKFEVK   |           |                        |      | Mascot      |
| 1582.8145  | 1582.8284   | 0.0139   | 9         | 18471      | 18485    | ITGYIIEACKAGTDK |           |                        |      | Mascot      |
| 1706.8265  | 1706.8643   | 0.0378   | 22        | 555        | 569      | EVSLDDTCQIKAEAK |           | Carbamidomethyl (C)[8] |      | Mascot      |

|           |           |         |     |       |       |                                    |                         |        |
|-----------|-----------|---------|-----|-------|-------|------------------------------------|-------------------------|--------|
| 1718.8894 | 1718.9227 | 0.0333  | 19  | 1060  | 1073  | EEGTKHMLILYNVR                     | Oxidation (M)[7]        | Mascot |
| 1718.8894 | 1718.9227 | 0.0333  | 19  | 1060  | 1073  | EEGTKHMLILYNVR                     | Oxidation (M)[7]        | Mascot |
| 1722.7712 | 1722.8663 | 0.0951  | 55  | 18717 | 18731 | YGTGEYLQSEVVMCK                    | Oxidation (M)[13]       | Mascot |
| 1740.9102 | 1740.9028 | -0.0074 | -4  | 7820  | 7835  | VEALVSGKPAPACQWK                   | Carbamidomethyl (C)[13] | Mascot |
| 1761.9104 | 1761.8502 | -0.0602 | -34 | 11999 | 12013 | TFAAVVTNCHKLSWK                    | Carbamidomethyl (C)[9]  | Mascot |
| 1857.9415 | 1857.8779 | -0.0636 | -34 | 10380 | 10396 | LEADVAGQPLPSMVWTK                  | Oxidation (M)[13]       | Mascot |
| 1857.9415 | 1857.8779 | -0.0636 | -34 | 10380 | 10396 | LEADVAGQPLPSMVWTK                  | Oxidation (M)[13]       | Mascot |
| 1862.9283 | 1862.9628 | 0.0345  | 19  | 6540  | 6556  | KPWEPWSVVSSGSTSTK                  |                         | Mascot |
| 1878.9443 | 1878.9661 | 0.0218  | 12  | 4049  | 4065  | DGAEPDKEHVIEAEIK                   |                         | Mascot |
| 1903.9396 | 1903.9333 | -0.0063 | -3  | 21786 | 21802 | NVYTLEIHNATIEDSGK                  |                         | Mascot |
| 1924.0386 | 1923.9751 | -0.0635 | -33 | 5606  | 5622  | INVPDRPEELEVTAITK                  |                         | Mascot |
| 1924.0386 | 1923.9751 | -0.0635 | -33 | 5606  | 5622  | INVPDRPEELEVTAITK                  |                         | Mascot |
| 2010.0138 | 2010.0215 | 0.0077  | 4   | 5634  | 5652  | NDGGSEVTSYILEARTIG<br>K            |                         | Mascot |
| 2026.0928 | 2025.9406 | -0.1522 | -75 | 2640  | 2658  | ITIDTKPGHSTLSIANTR                 |                         | Mascot |
| 2040.9985 | 2040.9497 | -0.0488 | -24 | 3146  | 3162  | YRVTDVDEGTEVQFQVR                  |                         | Mascot |
| 2194.1389 | 2194.1267 | -0.0122 | -6  | 2918  | 2935  | IESYIIEHQKTGTTEWVR                 |                         | Mascot |
| 2211.1147 | 2211.1243 | 0.0096  | 4   | 15930 | 15948 | VVWSVISEAMESRMVTV<br>QK            | Oxidation (M)[10,14]    | Mascot |
| 2211.1147 | 2211.1243 | 0.0096  | 4   | 15930 | 15948 | VVWSVISEAMESRMVTV<br>QK            | Oxidation (M)[10,14]    | Mascot |
| 2230.0808 | 2230.2168 | 0.136   | 61  | 9022  | 9041  | DSITNMWVTVSSSVTNS<br>FR            |                         | Mascot |
| 2233.0076 | 2233.1045 | 0.0969  | 43  | 13895 | 13914 | VSAENETGVGECSDL<br>FYR             | Carbamidomethyl (C)[12] | Mascot |
| 2271.2019 | 2271.1245 | -0.0774 | -34 | 17420 | 17439 | STQTSRLRVADLLEGVPYF<br>FK          |                         | Mascot |
| 2283.0269 | 2283.2009 | 0.174   | 76  | 1430  | 1450  | MDDAGEYHCKLPASETT<br>GTLK          | Oxidation (M)[1]        | Mascot |
| 2284.0583 | 2284.1958 | 0.1375  | 60  | 9228  | 9248  | ANTVNVVIDCAYTVADLQE<br>GCK         | Carbamidomethyl (C)[9]  | Mascot |
| 2284.0583 | 2284.1958 | 0.1375  | 60  | 9228  | 9248  | ANTVNVVIDCAYTVADLQE<br>GCK         | Carbamidomethyl (C)[9]  | Mascot |
| 2297.2095 | 2297.2095 | 0       | 0   | 17558 | 17578 | EPRIEPTADLSGITNQLVT<br>SR          |                         | Mascot |
| 2298.2703 | 2298.2048 | -0.0655 | -28 | 9621  | 9641  | DTSVPLRITEFVVPNLEA<br>GLK          |                         | Mascot |
| 2300.1616 | 2300.1975 | 0.0359  | 16  | 11905 | 11925 | ESAQIETSSSYTSLVIDKV<br>SR          |                         | Mascot |
| 2506.3774 | 2506.2161 | -0.1613 | -64 | 9978  | 10000 | AGENIKVEVPVSGRPKPT<br>VSWQK        |                         | Mascot |
| 2528.2258 | 2528.1924 | -0.0334 | -13 | 140   | 161   | NLEEEETSVLKGQPMYLT<br>CELSK        | Oxidation (M)[14]       | Mascot |
| 2719.3474 | 2719.3137 | -0.0337 | -12 | 16737 | 16760 | INGLIEGLAYEFRVYAQN<br>DAGYSR       |                         | Mascot |
| 2719.3474 | 2719.3137 | -0.0337 | -12 | 16737 | 16760 | INGLIEGLAYEFRVYAQN<br>DAGYSR       |                         | Mascot |
| 2741.3337 | 2741.3174 | -0.0163 | -6  | 2209  | 2233  | DSVQLSWETPISNGGSMI<br>TGYIEK       | Oxidation (M)[17]       | Mascot |
| 3337.5527 | 3337.8066 | 0.2539  | 76  | 11839 | 11869 | LGVGEHADVAGPICPED<br>KTEEPDLIDAEFR |                         | Mascot |

|    |                                         |           |         |     |             |       |                                           |      |                         |    |        |
|----|-----------------------------------------|-----------|---------|-----|-------------|-------|-------------------------------------------|------|-------------------------|----|--------|
|    | 3338.5608                               | 3338.7876 | 0.2268  | 68  | 15242       | 15269 | AWVCVSSNCHSLTYKVE<br>DLQEGAIYYFR          |      | Carbamidomethyl (C)[4]  |    | Mascot |
|    | 3355.5786                               | 3355.4919 | -0.0867 | -26 | 17909       | 17937 | CNYTNVTDNFTITALGE<br>GEEYEFRVIK           |      | Carbamidomethyl (C)[1]  |    | Mascot |
|    | 3896.0361                               | 3895.8374 | -0.1987 | -51 | 13297       | 13333 | DDLGGKYAVTATNSVCAIT<br>EDINIVILDKPGPTGPIK |      | Carbamidomethyl (C)[15] |    | Mascot |
| 42 | retinoid x receptor, beta [Danio rerio] |           |         |     | gi 94733756 |       | 53341.7                                   | 8.14 | 9                       | 29 | 0      |

#### Peptide Information

| Calc. Mass | Obsrv. Mass | ± da    | ± ppm | Start Seq. | End Seq. | Sequence               | Ion Score | C. I. | % Modification                           | Rank | Result Type |
|------------|-------------|---------|-------|------------|----------|------------------------|-----------|-------|------------------------------------------|------|-------------|
| 848.4294   | 848.5325    | 0.1031  | 122   | 182        | 188      | DCLVDKR                |           |       |                                          |      | Mascot      |
| 982.463    | 982.5555    | 0.0925  | 94    | 201        | 208      | CLAMGMKR               |           |       | Carbamidomethyl (C)[1], Oxidation (M)[4] |      | Mascot      |
| 1106.5146  | 1106.5522   | 0.0376  | 34    | 179        | 187      | DNKDCLVDK              |           |       | Carbamidomethyl (C)[5]                   |      | Mascot      |
| 1156.564   | 1156.6102   | 0.0462  | 40    | 12         | 21       | ARLHNMGDSR             |           |       |                                          |      | Mascot      |
| 1303.5808  | 1303.772    | 0.1912  | 147   | 14         | 24       | LHNMGDSRDSR            |           |       | Oxidation (M)[4]                         |      | Mascot      |
| 1460.709   | 1460.64     | -0.069  | -47   | 419        | 430      | EKVYASLEAYCK           |           |       | Carbamidomethyl (C)[11]                  |      | Mascot      |
| 1543.8325  | 1543.8207   | -0.0118 | -8    | 407        | 420      | GLSSPSEVELLREK         |           |       |                                          |      | Mascot      |
| 1718.7261  | 1718.9227   | 0.1966  | 114   | 148        | 162      | SSGKHYGVYSCEGCK        |           |       | Carbamidomethyl (C)[11,14]               |      | Mascot      |
| 1718.7261  | 1718.9227   | 0.1966  | 114   | 148        | 162      | SSGKHYGVYSCEGCK        |           |       | Carbamidomethyl (C)[11,14]               |      | Mascot      |
| 1923.8124  | 1923.9751   | 0.1627  | 85    | 230        | 247      | DGEVESSSAANEEMPVE<br>K |           |       | Oxidation (M)[14]                        |      | Mascot      |
| 1923.8124  | 1923.9751   | 0.1627  | 85    | 230        | 247      | DGEVESSSAANEEMPVE<br>K |           |       | Oxidation (M)[14]                        |      | Mascot      |

|    |                                                                                |  |  |  |              |  |          |      |    |    |   |
|----|--------------------------------------------------------------------------------|--|--|--|--------------|--|----------|------|----|----|---|
| 43 | PREDICTED: chromodomain-helicase-DNA-binding protein 4 isoform 1 [Danio rerio] |  |  |  | gi 292622418 |  | 221223.8 | 5.72 | 17 | 29 | 0 |
|----|--------------------------------------------------------------------------------|--|--|--|--------------|--|----------|------|----|----|---|

#### Peptide Information

| Calc. Mass | Obsrv. Mass | ± da    | ± ppm | Start Seq. | End Seq. | Sequence        | Ion Score | C. I. | % Modification   | Rank | Result Type |
|------------|-------------|---------|-------|------------|----------|-----------------|-----------|-------|------------------|------|-------------|
| 942.5441   | 942.5549    | 0.0108  | 11    | 501        | 509      | CLSPPLK GK      |           |       |                  |      | Mascot      |
| 1045.516   | 1045.5698   | 0.0538  | 51    | 1701       | 1710     | DGVKPEDSAK      |           |       |                  |      | Mascot      |
| 1062.5942  | 1062.6975   | 0.1033  | 97    | 1815       | 1823     | GNFLEIKNK       |           |       |                  |      | Mascot      |
| 1107.6594  | 1107.5391   | -0.1203 | -109  | 1058       | 1067     | ASGKLMLLFK      |           |       |                  |      | Mascot      |
| 1123.6544  | 1123.5309   | -0.1235 | -110  | 1058       | 1067     | ASGKLMLLFK      |           |       | Oxidation (M)[6] |      | Mascot      |
| 1156.6547  | 1156.6102   | -0.0445 | -38   | 1179       | 1187     | VMIYRFVTK       |           |       |                  |      | Mascot      |
| 1165.6211  | 1165.756    | 0.1349  | 116   | 1184       | 1193     | FVTKASVEER      |           |       |                  |      | Mascot      |
| 1165.6211  | 1165.756    | 0.1349  | 116   | 1184       | 1193     | FVTKASVEER      |           |       |                  |      | Mascot      |
| 1169.6273  | 1169.6438   | 0.0165  | 14    | 1541       | 1552     | RAAAIAAGEDPK    |           |       |                  |      | Mascot      |
| 1230.6298  | 1230.6799   | 0.0501  | 41    | 1391       | 1401     | SEAANSRRPSR     |           |       |                  |      | Mascot      |
| 1582.8005  | 1582.8284   | 0.0279  | 18    | 1881       | 1895     | ESMSGNKPANAVLHK |           |       |                  |      | Mascot      |

|           |           |         |     |      |      |                                            |  |  |  |                           |  |        |
|-----------|-----------|---------|-----|------|------|--------------------------------------------|--|--|--|---------------------------|--|--------|
| 1761.9857 | 1761.8502 | -0.1355 | -77 | 706  | 721  | KTERPPANPVVDPTIK                           |  |  |  |                           |  | Mascot |
| 1862.8564 | 1862.9628 | 0.1064  | 57  | 1028 | 1044 | CCNHPYLFPTAATEAPK                          |  |  |  |                           |  | Mascot |
| 1923.9558 | 1923.9751 | 0.0193  | 10  | 824  | 839  | AVIRENEFTFEDNAIR                           |  |  |  |                           |  | Mascot |
| 1923.9558 | 1923.9751 | 0.0193  | 10  | 824  | 839  | AVIRENEFTFEDNAIR                           |  |  |  |                           |  | Mascot |
| 2225.0569 | 2225.1379 | 0.081   | 36  | 1553 | 1574 | TPSTGTPADTQPNTAP<br>EDLSK                  |  |  |  |                           |  | Mascot |
| 2225.0569 | 2225.1379 | 0.081   | 36  | 1553 | 1574 | TPSTGTPADTQPNTAP<br>EDLSK                  |  |  |  |                           |  | Mascot |
| 2229.9822 | 2230.2168 | 0.2346  | 105 | 155  | 172  | DIDYTFTQEDYNSLTNYK                         |  |  |  |                           |  | Mascot |
| 2528.1082 | 2528.1924 | 0.0842  | 33  | 409  | 429  | APEGTWSCPHCEKEGIQ<br>WEAR                  |  |  |  | Carbamidomethyl (C)[8,11] |  | Mascot |
| 3895.5496 | 3895.8374 | 0.2878  | 74  | 362  | 395  | KMDEDADGYETDHQDYC<br>EVCQQGGEIILCDTCPR     |  |  |  | Oxidation (M)[2]          |  | Mascot |
| 3896.5146 | 3896.8367 | 0.3221  | 83  | 1364 | 1397 | DWQDDQSDNQSDYSVA<br>SEEGDEDFDERSEAANS<br>R |  |  |  |                           |  | Mascot |

44 BMP and activin membrane-bound inhibitor homolog [Danio rerio] gi|18858339 28492 7.2 7 28 0

#### Peptide Information

| Calc. Mass | Obsrv. Mass | ± da    | ± ppm | Start Seq. | End Seq. | Sequence                    | Ion Score | C. I. % | Modification                 | Rank | Result Type |
|------------|-------------|---------|-------|------------|----------|-----------------------------|-----------|---------|------------------------------|------|-------------|
| 1045.5538  | 1045.5698   | 0.016   | 15    | 104        | 112      | GLHDLTHPR                   |           |         |                              |      | Mascot      |
| 1878.71    | 1878.9661   | 0.2561  | 136   | 27         | 42       | CYCDAPHCVATGYMCK            |           |         | Carbamidomethyl (C)[1,3]     |      | Mascot      |
| 2194.2014  | 2194.1267   | -0.0747 | -34   | 4          | 22       | LVSLWFQLELCAMAVLLT<br>K     |           |         | Oxidation (M)[13]            |      | Mascot      |
| 2230.0835  | 2230.2168   | 0.1333  | 60    | 179        | 196      | QQMLSR LHYSFHGHHA<br>K      |           |         | Oxidation (M)[3]             |      | Mascot      |
| 2300.4866  | 2300.1975   | -0.2891 | -126  | 143        | 165      | AAVIAVPIAGGLILVLLIML<br>ALR |           |         |                              |      | Mascot      |
| 2506.356   | 2506.2161   | -0.1399 | -56   | 2          | 22       | DRLVSLWFQLELCAMAV<br>LLTK   |           |         | Carbamidomethyl (C)[13]      |      | Mascot      |
| 2719.2129  | 2719.3137   | 0.1008  | 37    | 203        | 225      | LDLECMVPVTGHENCCL<br>GCDKLR |           |         | Carbamidomethyl (C)[5,15,16] |      | Mascot      |
| 2719.2129  | 2719.3137   | 0.1008  | 37    | 203        | 225      | LDLECMVPVTGHENCCL<br>GCDKLR |           |         | Carbamidomethyl (C)[5,15,16] |      | Mascot      |

45 GDP dissociation inhibitor 2 [Danio rerio] gi|37362224 50554.7 5.6 8 28 0

#### Peptide Information

| Calc. Mass | Obsrv. Mass | ± da    | ± ppm | Start Seq. | End Seq. | Sequence                | Ion Score | C. I. % | Modification            | Rank | Result Type |
|------------|-------------|---------|-------|------------|----------|-------------------------|-----------|---------|-------------------------|------|-------------|
| 1169.6565  | 1169.6438   | -0.0127 | -11   | 104        | 113      | VIEGSFVYKK              |           |         |                         |      | Mascot      |
| 1740.9717  | 1740.9028   | -0.0689 | -40   | 90         | 103      | MLLITQVTRYLDFK          |           |         |                         |      | Mascot      |
| 1903.8015  | 1903.9333   | 0.1318  | 69    | 403        | 418      | SYDATTHFETTCDDIK        |           |         | Carbamidomethyl (C)[12] |      | Mascot      |
| 2010.01    | 2010.0215   | 0.0115  | 6     | 119        | 137      | VPSTETEALASSLMGLFE<br>K |           |         |                         |      | Mascot      |
| 2026.0049  | 2025.9406   | -0.0643 | -32   | 119        | 137      | VPSTETEALASSLMGLFE<br>K |           |         | Oxidation (M)[14]       |      | Mascot      |

|    |                                                                      |           |         |     |              |     |                                         |      |    |    |   |  |                        |  |  |  |        |
|----|----------------------------------------------------------------------|-----------|---------|-----|--------------|-----|-----------------------------------------|------|----|----|---|--|------------------------|--|--|--|--------|
|    | 2247.0928                                                            | 2247.1389 | 0.0461  | 21  | 36           | 55  | NSYYGGESASITPLEDLF<br>KR                |      |    |    |   |  |                        |  |  |  | Mascot |
|    | 2300.1411                                                            | 2300.1975 | 0.0564  | 25  | 310          | 329 | NTSDANSCQIIIPQNQVN<br>RK                |      |    |    |   |  | Carbamidomethyl (C)[8] |  |  |  | Mascot |
|    | 2528.2014                                                            | 2528.1924 | -0.009  | -4  | 143          | 164 | FLVFFVANFDENDPKTME<br>GVDPK             |      |    |    |   |  | Oxidation (M)[16]      |  |  |  | Mascot |
|    | 3896.8833                                                            | 3896.8367 | -0.0466 | -12 | 330          | 364 | HDIYVCMISYAHNVAAQG<br>KYIAIVSTTVETNDPEK |      |    |    |   |  | Oxidation (M)[7]       |  |  |  | Mascot |
| 46 | hypothetical protein LOC100145413 [Xenopus<br>(Silurana) tropicalis] |           |         |     | gi 187607099 |     | 39415.2                                 | 9.16 | 10 | 28 | 0 |  |                        |  |  |  |        |

#### Peptide Information

| Calc. Mass | Obsrv. Mass | ± da    | ± ppm | Start Seq. | End Seq. | Sequence                | Ion Score | C. I. % | Modification             | Rank | Result Type |
|------------|-------------|---------|-------|------------|----------|-------------------------|-----------|---------|--------------------------|------|-------------|
| 848.5239   | 848.5325    | 0.0086  | 10    | 325        | 332      | FTLLGGLK                |           |         |                          |      | Mascot      |
| 942.5367   | 942.5549    | 0.0182  | 19    | 245        | 252      | TSLKTHQK                |           |         |                          |      | Mascot      |
| 1230.5129  | 1230.6799   | 0.167   | 136   | 229        | 239      | EKPYSCECGK              |           |         |                          |      | Mascot      |
| 1460.6951  | 1460.64     | -0.0551 | -38   | 278        | 289      | QQMNHTGEKPYK            |           |         |                          |      | Mascot      |
| 1560.6715  | 1560.8516   | 0.1801  | 115   | 62         | 74       | NCFTCSQCGKSLR           |           |         | Carbamidomethyl (C)[2,5] |      | Mascot      |
| 1560.6715  | 1560.8516   | 0.1801  | 115   | 62         | 74       | NCFTCSQCGKSLR           |           |         | Carbamidomethyl (C)[2,5] |      | Mascot      |
| 1706.7988  | 1706.8643   | 0.0655  | 38    | 141        | 155      | IHTGEKPFCTCTQCGK        |           |         | Carbamidomethyl (C)[10]  |      | Mascot      |
| 1722.7938  | 1722.8663   | 0.0725  | 42    | 113        | 127      | IHTGEKPYTCTQCGK         |           |         | Carbamidomethyl (C)[10]  |      | Mascot      |
| 1761.8887  | 1761.8502   | -0.0385 | -22   | 290        | 304      | CSHCNNRFSLLGILK         |           |         | Carbamidomethyl (C)[1]   |      | Mascot      |
| 2194.0559  | 2194.1267   | 0.0708  | 32    | 259        | 276      | EYLCFECGKTFITEVGLK      |           |         | Carbamidomethyl (C)[4,7] |      | Mascot      |
| 2211.1702  | 2211.1243   | -0.0459 | -21   | 184        | 202      | SFIQLSTLNLHMRIHAGE<br>K |           |         | Oxidation (M)[12]        |      | Mascot      |
| 2211.1702  | 2211.1243   | -0.0459 | -21   | 184        | 202      | SFIQLSTLNLHMRIHAGE<br>K |           |         | Oxidation (M)[12]        |      | Mascot      |

47 Mitogen-activated protein kinase 1 [Danio rerio] gi|41351062 42120.5 6.19 7 28 0

#### Peptide Information

| Calc. Mass | Obsrv. Mass | ± da    | ± ppm | Start Seq. | End Seq. | Sequence                     | Ion Score | C. I. % | Modification                              | Rank | Result Type |
|------------|-------------|---------|-------|------------|----------|------------------------------|-----------|---------|-------------------------------------------|------|-------------|
| 864.4362   | 864.5179    | 0.0817  | 95    | 363        | 369      | FQPGYRP                      |           |         |                                           |      | Mascot      |
| 1107.5681  | 1107.5391   | -0.029  | -26   | 354        | 362      | ELIFEETAR                    |           |         |                                           |      | Mascot      |
| 1303.7732  | 1303.772    | -0.0012 | -1    | 271        | 281      | NYLLSLPLRSK                  |           |         |                                           |      | Mascot      |
| 1523.7675  | 1523.7728   | 0.0053  | 3     | 201        | 212      | WYRAPEIMLNSK                 |           |         | Oxidation (M)[8]                          |      | Mascot      |
| 1878.928   | 1878.9661   | 0.0381  | 20    | 65         | 79       | ISPFEHQTYCQRTLRL             |           |         |                                           |      | Mascot      |
| 2040.9767  | 2040.9497   | -0.027  | -13   | 2          | 24       | ATAAVSAPAGGPNPGS<br>GAEMVR   |           |         | Oxidation (M)[21]                         |      | Mascot      |
| 2719.3945  | 2719.3137   | -0.0808 | -30   | 217        | 240      | SIDIWSVGCILAEMLSNR<br>PIFPGK |           |         | Carbamidomethyl (C)[9], Oxidation (M)[14] |      | Mascot      |
| 2719.3945  | 2719.3137   | -0.0808 | -30   | 217        | 240      | SIDIWSVGCILAEMLSNR<br>PIFPGK |           |         | Carbamidomethyl (C)[9], Oxidation (M)[14] |      | Mascot      |

Peptide Information

| Calc. Mass | Obsrv. Mass | ± da    | ± ppm | Start Seq. | End Seq. | Sequence        | Ion Score | C. I. % | Modification      | Rank | Result Type |
|------------|-------------|---------|-------|------------|----------|-----------------|-----------|---------|-------------------|------|-------------|
| 842.4478   | 842.5154    | 0.0676  | 80    | 14721      | 14727    | RDLPEGR         |           |         |                   |      | Mascot      |
| 848.4876   | 848.5325    | 0.0449  | 53    | 14626      | 14632    | TSILWTK         |           |         |                   |      | Mascot      |
| 850.4668   | 850.5497    | 0.0829  | 97    | 11896      | 11902    | FTVENLK         |           |         |                   |      | Mascot      |
| 864.5189   | 864.5179    | -0.001  | -1    | 1400       | 1406     | KYEIIAK         |           |         |                   |      | Mascot      |
| 882.4791   | 882.5728    | 0.0937  | 106   | 7406       | 7412     | KEEHAIR         |           |         |                   |      | Mascot      |
| 942.573    | 942.5549    | -0.0181 | -19   | 8718       | 8725     | DRQGIIK         |           |         |                   |      | Mascot      |
| 982.5468   | 982.5555    | 0.0087  | 9     | 8041       | 8047     | EYIFRVR         |           |         |                   |      | Mascot      |
| 996.5359   | 996.6023    | 0.0664  | 67    | 3740       | 3747     | LSYEQTKK        |           |         |                   |      | Mascot      |
| 996.5359   | 996.6023    | 0.0664  | 67    | 3740       | 3747     | LSYEQTKK        |           |         |                   |      | Mascot      |
| 1051.6146  | 1051.7208   | 0.1062  | 101   | 11024      | 11033    | VSEKPLPPGK      |           |         |                   |      | Mascot      |
| 1062.6055  | 1062.6975   | 0.092   | 87    | 12395      | 12403    | IIAQNRYGK       |           |         |                   |      | Mascot      |
| 1106.6317  | 1106.5522   | -0.0795 | -72   | 14713      | 14721    | VTGYIIERR       |           |         |                   |      | Mascot      |
| 1107.5292  | 1107.5391   | 0.0099  | 9     | 20972      | 20980    | HFVPFSDMK       |           |         |                   |      | Mascot      |
| 1123.524   | 1123.5309   | 0.0069  | 6     | 20972      | 20980    | HFVPFSDMK       |           |         | Oxidation (M)[8]  |      | Mascot      |
| 1156.5858  | 1156.6102   | 0.0244  | 21    | 1846       | 1854     | EGPRYHLER       |           |         |                   |      | Mascot      |
| 1165.6212  | 1165.756    | 0.1348  | 116   | 500        | 509      | QAKFESTINK      |           |         |                   |      | Mascot      |
| 1165.6324  | 1165.756    | 0.1236  | 106   | 5219       | 5227     | ITNYTIERR       |           |         |                   |      | Mascot      |
| 1169.6525  | 1169.6438   | -0.0087 | -7    | 2708       | 2717     | ADLVLKPEER      |           |         |                   |      | Mascot      |
| 1185.6626  | 1185.6406   | -0.022  | -19   | 17379      | 17389    | GKPIPTASWTK     |           |         |                   |      | Mascot      |
| 1230.6841  | 1230.6799   | -0.0042 | -3    | 19139      | 19149    | GKPTPTSKWTK     |           |         |                   |      | Mascot      |
| 1279.7844  | 1279.7867   | 0.0023  | 2     | 4634       | 4645     | VNRAPVTKPAVK    |           |         |                   |      | Mascot      |
| 1303.7844  | 1303.772    | -0.0124 | -10   | 14118      | 14129    | AGGSLRLFITIR    |           |         |                   |      | Mascot      |
| 1402.5977  | 1402.7797   | 0.182   | 130   | 726        | 738      | DKGVYVCDGTDK    |           |         |                   |      | Mascot      |
| 1448.7267  | 1448.9343   | 0.2076  | 143   | 18035      | 18047    | AEYTPPKAELDSK   |           |         |                   |      | Mascot      |
| 1460.6396  | 1460.64     | 0.0004  | 0     | 16248      | 16260    | GDPMEMEEPVQAK   |           |         |                   |      | Mascot      |
| 1509.8536  | 1509.7767   | -0.0769 | -51   | 14925      | 14937    | LAWTLVHGEVKTR   |           |         |                   |      | Mascot      |
| 1523.8502  | 1523.7728   | -0.0774 | -51   | 8765       | 8778     | VLDTPGPPLNLMIK  |           |         | Oxidation (M)[12] |      | Mascot      |
| 1543.834   | 1543.8207   | -0.0133 | -9    | 14583      | 14597    | QPGPPSTPRVAHATK |           |         |                   |      | Mascot      |
| 1560.8843  | 1560.8516   | -0.0327 | -21   | 21696      | 21710    | DISASADTIVKLTVK |           |         |                   |      | Mascot      |
| 1560.8843  | 1560.8516   | -0.0327 | -21   | 21696      | 21710    | DISASADTIVKLTVK |           |         |                   |      | Mascot      |
| 1574.8424  | 1574.7871   | -0.0553 | -35   | 14192      | 14205    | VLDTPSSPQKFEVK  |           |         |                   |      | Mascot      |
| 1582.8145  | 1582.8284   | 0.0139  | 9     | 18643      | 18657    | ITGYIIEACKAGTDK |           |         |                   |      | Mascot      |



|           |           |         |     |       |       |                           |                         |        |
|-----------|-----------|---------|-----|-------|-------|---------------------------|-------------------------|--------|
| 1706.8265 | 1706.8643 | 0.0378  | 22  | 633   | 647   | EVSLDDTCQIKAEAK           | Carbamidomethyl (C)[8]  | Mascot |
| 1718.8894 | 1718.9227 | 0.0333  | 19  | 1138  | 1151  | EEGTKHMLILYNVR            | Oxidation (M)[7]        | Mascot |
| 1718.8894 | 1718.9227 | 0.0333  | 19  | 1138  | 1151  | EEGTKHMLILYNVR            | Oxidation (M)[7]        | Mascot |
| 1722.7712 | 1722.8663 | 0.0951  | 55  | 18889 | 18903 | YGTGEYLQSEVVMCK           | Oxidation (M)[13]       | Mascot |
| 1740.9102 | 1740.9028 | -0.0074 | -4  | 7898  | 7913  | VEALVSGKPAPACQWK          | Carbamidomethyl (C)[13] | Mascot |
| 1761.9104 | 1761.8502 | -0.0602 | -34 | 12077 | 12091 | TFAAVVTNCHKLSWK           | Carbamidomethyl (C)[9]  | Mascot |
| 1857.9415 | 1857.8779 | -0.0636 | -34 | 10458 | 10474 | LEADVAGQPLPSMVWTK         | Oxidation (M)[13]       | Mascot |
| 1857.9415 | 1857.8779 | -0.0636 | -34 | 10458 | 10474 | LEADVAGQPLPSMVWTK         | Oxidation (M)[13]       | Mascot |
| 1862.9283 | 1862.9628 | 0.0345  | 19  | 6618  | 6634  | KPWEPWSVSSGSTSTK          |                         | Mascot |
| 1878.9443 | 1878.9661 | 0.0218  | 12  | 4127  | 4143  | DGAEPDKEHVIEAEIK          |                         | Mascot |
| 1903.9396 | 1903.9333 | -0.0063 | -3  | 21958 | 21974 | NVYTLEIHNATIEDSGK         |                         | Mascot |
| 1924.0386 | 1923.9751 | -0.0635 | -33 | 5684  | 5700  | INVPDRPEELEVTAITK         |                         | Mascot |
| 1924.0386 | 1923.9751 | -0.0635 | -33 | 5684  | 5700  | INVPDRPEELEVTAITK         |                         | Mascot |
| 2010.0953 | 2010.0215 | -0.0738 | -37 | 7896  | 7913  | LRVEALVSGKPAPACQWK        | Carbamidomethyl (C)[15] | Mascot |
| 2026.0928 | 2025.9406 | -0.1522 | -75 | 2718  | 2736  | ITIDTKPGHSTLSIANTR        |                         | Mascot |
| 2040.9985 | 2040.9497 | -0.0488 | -24 | 3224  | 3240  | YRVTDVDEGTEVQFQVR         |                         | Mascot |
| 2194.1389 | 2194.1267 | -0.0122 | -6  | 2996  | 3013  | IESYIIEIQLKTGTEEWVR       |                         | Mascot |
| 2211.1147 | 2211.1243 | 0.0096  | 4   | 16008 | 16026 | VVWSVISEAMESRMVTVQK       | Oxidation (M)[10,14]    | Mascot |
| 2211.1147 | 2211.1243 | 0.0096  | 4   | 16008 | 16026 | VVWSVISEAMESRMVTVQK       | Oxidation (M)[10,14]    | Mascot |
| 2230.0808 | 2230.2168 | 0.136   | 61  | 9100  | 9119  | DSITNMWVTVSSSVVTNSFR      |                         | Mascot |
| 2233.0076 | 2233.1045 | 0.0969  | 43  | 13973 | 13992 | VSAENETGVGECSDLSLFYR      | Carbamidomethyl (C)[12] | Mascot |
| 2271.2019 | 2271.1245 | -0.0774 | -34 | 17498 | 17517 | STQTSLRVADLLEGVPYFFK      |                         | Mascot |
| 2283.0269 | 2283.2009 | 0.174   | 76  | 1508  | 1528  | MDDAGEYHCKLPASETTGLK      | Oxidation (M)[1]        | Mascot |
| 2284.0583 | 2284.1958 | 0.1375  | 60  | 9306  | 9326  | ANTVNVIDCAYTVADLQEGCK     | Carbamidomethyl (C)[9]  | Mascot |
| 2284.0583 | 2284.1958 | 0.1375  | 60  | 9306  | 9326  | ANTVNVIDCAYTVADLQEGCK     | Carbamidomethyl (C)[9]  | Mascot |
| 2297.2095 | 2297.2095 | 0       | 0   | 17636 | 17656 | EPRIEPTADLSGITNQLVTSR     |                         | Mascot |
| 2298.2703 | 2298.2048 | -0.0655 | -28 | 9699  | 9719  | DTSVPLRITEFVVPNLEAGLK     |                         | Mascot |
| 2300.1616 | 2300.1975 | 0.0359  | 16  | 11983 | 12003 | ESAQIETSSSYTSLVIDKVSRL    |                         | Mascot |
| 2506.3774 | 2506.2161 | -0.1613 | -64 | 10056 | 10078 | AGENIKVEVPVSGRPKPTVSWQK   |                         | Mascot |
| 2528.2258 | 2528.1924 | -0.0334 | -13 | 218   | 239   | NLEEETSVLKGQPMYLTCELSK    | Oxidation (M)[14]       | Mascot |
| 2719.3474 | 2719.3137 | -0.0337 | -12 | 16815 | 16838 | INGLIEGLAYEFRVYAQNDAGYSR  |                         | Mascot |
| 2719.3474 | 2719.3137 | -0.0337 | -12 | 16815 | 16838 | INGLIEGLAYEFRVYAQNDAGYSR  |                         | Mascot |
| 2741.3337 | 2741.3174 | -0.0163 | -6  | 2287  | 2311  | DSVQLSWETPISNGGSMITGYIIEK | Oxidation (M)[17]       | Mascot |

|  |           |           |         |     |       |       |                                         |  |  |  |  |  |                         |  |  |  |        |
|--|-----------|-----------|---------|-----|-------|-------|-----------------------------------------|--|--|--|--|--|-------------------------|--|--|--|--------|
|  | 3337.5527 | 3337.8066 | 0.2539  | 76  | 11917 | 11947 | LGVGEHADVAGPICPED<br>KTEEPDLIDAEFR      |  |  |  |  |  |                         |  |  |  | Mascot |
|  | 3338.5608 | 3338.7876 | 0.2268  | 68  | 15320 | 15347 | AWVCVSSNCHSLTYKVE<br>DLQEGAIYYFR        |  |  |  |  |  | Carbamidomethyl (C)[4]  |  |  |  | Mascot |
|  | 3355.5786 | 3355.4919 | -0.0867 | -26 | 17987 | 18015 | CNYTNTVTDNFTITALGE<br>GEEYEFRVIK        |  |  |  |  |  | Carbamidomethyl (C)[1]  |  |  |  | Mascot |
|  | 3896.0361 | 3895.8374 | -0.1987 | -51 | 13375 | 13411 | DDLGYAVTATNSVCAIT<br>EDINIVILDKPGPTGPIK |  |  |  |  |  | Carbamidomethyl (C)[15] |  |  |  | Mascot |

49 eukaryotic translation initiation factor 4 gamma, 2 [Danio rerio] gi|126567349 16939.9 6.67 5 28 0

#### Peptide Information

| Calc. Mass | Obsrv. Mass | ± da    | ± ppm | Start Seq. | End Seq. | Sequence                    | Ion Score | C. I. % | Modification           | Rank | Result Type |
|------------|-------------|---------|-------|------------|----------|-----------------------------|-----------|---------|------------------------|------|-------------|
| 1574.89    | 1574.7871   | -0.1029 | -65   | 12         | 26       | TQTPPLGQPPQLGLK             |           |         |                        |      | Mascot      |
| 1619.8058  | 1619.7642   | -0.0416 | -26   | 91         | 103      | IILCSLERTDEDR               |           |         | Carbamidomethyl (C)[4] |      | Mascot      |
| 1722.9749  | 1722.8663   | -0.1086 | -63   | 27         | 41       | TNPPLIQEKPKTK               |           |         |                        |      | Mascot      |
| 2225.1118  | 2225.1379   | 0.0261  | 12    | 48         | 65       | EELLKMTENIVTEYLNNR          |           |         | Oxidation (M)[6]       |      | Mascot      |
| 2225.1118  | 2225.1379   | 0.0261  | 12    | 48         | 65       | EELLKMTENIVTEYLNNR          |           |         | Oxidation (M)[6]       |      | Mascot      |
| 2719.3218  | 2719.3137   | -0.0081 | -3    | 115        | 138      | TEGFITGEHFMQALLNV<br>LDQCPK |           |         |                        |      | Mascot      |
| 2719.3218  | 2719.3137   | -0.0081 | -3    | 115        | 138      | TEGFITGEHFMQALLNV<br>LDQCPK |           |         |                        |      | Mascot      |

50 PREDICTED: CUB and sushi domain-containing protein gi|326680801 153090 6.1 1 11 0  
1-like, partial [Danio rerio]

#### Peptide Information

| Calc. Mass | Obsrv. Mass | ± da   | ± ppm | Start Seq. | End Seq. | Sequence                  | Ion Score | C. I. % | Modification           | Rank | Result Type |
|------------|-------------|--------|-------|------------|----------|---------------------------|-----------|---------|------------------------|------|-------------|
| 2210.9878  | 2211.1243   | 0.1365 | 62    | 1048       | 1068     | CLSISCGDPGTPPFAQM<br>SSQK | 11        | 0       | Carbamidomethyl (C)[1] | 1    | Mascot      |

|                       |           |                               |                |                       |                    |
|-----------------------|-----------|-------------------------------|----------------|-----------------------|--------------------|
| <b>Gel Idx/Pos</b>    | 197/H24   | <b>Instr./Gel Origin</b>      | BA2060/110707A | <b>Process Status</b> | Analysis Succeeded |
| <b>Plate [#] Name</b> | [1] 31496 | <b>Instrument Sample Name</b> |                | <b>Spectra</b>        | 11                 |

| Rank | Protein Name                                | Accession No. | Protein MW | Protein PI | Pep. Count | Protein Score | Protein Score C. I. % | Total Ion Score | Total Ion C. I. % |
|------|---------------------------------------------|---------------|------------|------------|------------|---------------|-----------------------|-----------------|-------------------|
| 1    | glucose phosphate isomerase a [Danio rerio] | gi 21426835   | 62045.2    | 6.45       | 7          | 174           | 100                   | 154             | 100               |

#### Peptide Information

| Calc. Mass | Obsrv. Mass | ± da   | ± ppm | Start Seq. | End Seq. | Sequence        | Ion Score | C. I. % | Modification | Rank | Result Type |
|------------|-------------|--------|-------|------------|----------|-----------------|-----------|---------|--------------|------|-------------|
| 836.426    | 836.4321    | 0.0061 | 7     | 89         | 95       | INFTEGR         |           |         |              |      | Mascot      |
| 1683.8185  | 1683.8304   | 0.0119 | 7     | 211        | 225      | TFTTQETITNAETAR |           |         |              |      | Mascot      |
| 1683.8185  | 1683.8304   | 0.0119 | 7     | 211        | 225      | TFTTQETITNAETAR | 76        | 100     |              |      | Mascot      |

|   |                                             |           |         |     |             |     |                         |      |   |     |     |     |                     |  |  |  |        |
|---|---------------------------------------------|-----------|---------|-----|-------------|-----|-------------------------|------|---|-----|-----|-----|---------------------|--|--|--|--------|
|   | 1721.9077                                   | 1721.9189 | 0.0112  | 7   | 423         | 437 | ILMANFLAQTEALMR         |      |   |     |     |     |                     |  |  |  | Mascot |
|   | 1737.9026                                   | 1737.9163 | 0.0137  | 8   | 423         | 437 | ILMANFLAQTEALMR         |      |   |     |     |     | Oxidation (M)[3]    |  |  |  | Mascot |
|   | 1753.8976                                   | 1753.9025 | 0.0049  | 3   | 423         | 437 | ILMANFLAQTEALMR         |      |   |     |     |     | Oxidation (M)[3,14] |  |  |  | Mascot |
|   | 1916.0752                                   | 1916.0876 | 0.0124  | 6   | 400         | 416 | LIPADFLIPASQHPPIR       | 78   |   | 100 |     |     |                     |  |  |  | Mascot |
|   | 1916.0752                                   | 1916.0876 | 0.0124  | 6   | 400         | 416 | LIPADFLIPASQHPPIR       |      |   |     |     |     |                     |  |  |  | Mascot |
|   | 1945.9225                                   | 1945.9434 | 0.0209  | 11  | 176         | 193 | GGPNVWFVSNIDGTHMA<br>K  |      |   |     |     |     | Oxidation (M)[16]   |  |  |  | Mascot |
|   | 2239.1653                                   | 2239.1309 | -0.0344 | -15 | 96          | 115 | AVLHTALWNRNTPIMVD<br>GK |      |   |     |     |     | Oxidation (M)[16]   |  |  |  | Mascot |
|   | 2336.0076                                   | 2336.0356 | 0.028   | 12  | 254         | 272 | EFGIDTNMFEFWDWVG<br>GR  |      |   |     |     |     | Oxidation (M)[9]    |  |  |  | Mascot |
| 2 | Glucose phosphate isomerase a [Danio rerio] |           |         |     | gi 53734472 |     | 62003.2                 | 6.45 | 7 | 174 | 100 | 154 | 100                 |  |  |  |        |

Peptide Information

| Calc. Mass | Obsrv. Mass | ± da   | ± ppm | Start Seq. | End Seq. | Sequence               | Ion Score | C. I. | %   | Modification        | Rank | Result | Type   |
|------------|-------------|--------|-------|------------|----------|------------------------|-----------|-------|-----|---------------------|------|--------|--------|
| 836.426    | 836.4321    | 0.0061 | 7     | 89         | 95       | INFTEGR                |           |       |     |                     |      |        | Mascot |
| 880.5363   | 880.5409    | 0.0046 | 5     | 96         | 103      | AVLHTALR               |           |       |     |                     |      |        | Mascot |
| 1683.8185  | 1683.8304   | 0.0119 | 7     | 211        | 225      | TFTTQETITNAETAR        |           |       |     |                     |      |        | Mascot |
| 1683.8185  | 1683.8304   | 0.0119 | 7     | 211        | 225      | TFTTQETITNAETAR        | 76        |       | 100 |                     |      |        | Mascot |
| 1721.9077  | 1721.9189   | 0.0112 | 7     | 423        | 437      | ILMANFLAQTEALMR        |           |       |     |                     |      |        | Mascot |
| 1737.9026  | 1737.9163   | 0.0137 | 8     | 423        | 437      | ILMANFLAQTEALMR        |           |       |     | Oxidation (M)[3]    |      |        | Mascot |
| 1753.8976  | 1753.9025   | 0.0049 | 3     | 423        | 437      | ILMANFLAQTEALMR        |           |       |     | Oxidation (M)[3,14] |      |        | Mascot |
| 1916.0752  | 1916.0876   | 0.0124 | 6     | 400        | 416      | LIPADFLIPASQHPPIR      | 78        |       | 100 |                     |      |        | Mascot |
| 1916.0752  | 1916.0876   | 0.0124 | 6     | 400        | 416      | LIPADFLIPASQHPPIR      |           |       |     |                     |      |        | Mascot |
| 1945.9225  | 1945.9434   | 0.0209 | 11    | 176        | 193      | GGPNVWFVSNIDGTHMA<br>K |           |       |     | Oxidation (M)[16]   |      |        | Mascot |
| 2336.0076  | 2336.0356   | 0.028  | 12    | 254        | 272      | EFGIDTNMFEFWDWVG<br>GR |           |       |     | Oxidation (M)[9]    |      |        | Mascot |

|   |                                            |  |  |  |             |  |         |      |   |     |     |    |     |  |  |  |  |
|---|--------------------------------------------|--|--|--|-------------|--|---------|------|---|-----|-----|----|-----|--|--|--|--|
| 3 | 3-oxoacid CoA transferase 1a [Danio rerio] |  |  |  | gi 55925442 |  | 57166.6 | 8.46 | 6 | 101 | 100 | 87 | 100 |  |  |  |  |
|---|--------------------------------------------|--|--|--|-------------|--|---------|------|---|-----|-----|----|-----|--|--|--|--|

Peptide Information

| Calc. Mass | Obsrv. Mass | ± da   | ± ppm | Start Seq. | End Seq. | Sequence                  | Ion Score | C. I. | %   | Modification     | Rank | Result | Type   |
|------------|-------------|--------|-------|------------|----------|---------------------------|-----------|-------|-----|------------------|------|--------|--------|
| 836.397    | 836.4321    | 0.0351 | 42    | 203        | 208      | HYIMEK                    |           |       |     | Oxidation (M)[4] |      |        | Mascot |
| 862.4451   | 862.4844    | 0.0393 | 46    | 10         | 16       | AENMLIR                   |           |       |     | Oxidation (M)[4] |      |        | Mascot |
| 1659.7683  | 1659.7808   | 0.0125 | 8     | 118        | 131      | MISSYVGENVEFER            |           |       |     |                  |      |        | Mascot |
| 1675.7632  | 1675.7771   | 0.0139 | 8     | 118        | 131      | MISSYVGENVEFER            |           |       |     | Oxidation (M)[1] |      |        | Mascot |
| 2132.1345  | 2132.1519   | 0.0174 | 8     | 91         | 111      | SLTAVSNNAGVDDFGLG<br>LLLR | 87        |       | 100 |                  |      |        | Mascot |
| 2132.1345  | 2132.1519   | 0.0174 | 8     | 91         | 111      | SLTAVSNNAGVDDFGLG<br>LLLR |           |       |     |                  |      |        | Mascot |

|   |                                |           |           |         |    |     |             |                            |         |      |   |                   |        |    |        |  |        |
|---|--------------------------------|-----------|-----------|---------|----|-----|-------------|----------------------------|---------|------|---|-------------------|--------|----|--------|--|--------|
|   |                                | 2233.1345 | 2233.1318 | -0.0027 | -1 | 132 | 151         | QYLSGELEVELTPQGTLA<br>ER   |         |      |   |                   |        |    |        |  | Mascot |
|   |                                | 2405.1692 | 2405.1887 | 0.0195  | 8  | 376 | 397         | ETVTILPGAAYFSSDESF<br>AMIR |         |      |   |                   |        |    |        |  | Mascot |
|   |                                | 2421.1643 | 2421.23   | 0.0657  | 27 | 376 | 397         | ETVTILPGAAYFSSDESF<br>AMIR |         |      |   | Oxidation (M)[20] |        |    |        |  | Mascot |
| 4 | Aldh9a1a protein [Danio rerio] |           |           |         |    |     | gi 44890712 |                            | 55267.9 | 6.18 | 6 | 58                | 92.615 | 50 | 99.767 |  |        |

Peptide Information

| Calc. Mass | Obsrv. Mass | ± da    | ± ppm | Start Seq. | End Seq. | Sequence                | Ion Score | C. I. | %      | Modification           | Rank | Result Type |
|------------|-------------|---------|-------|------------|----------|-------------------------|-----------|-------|--------|------------------------|------|-------------|
| 1109.5044  | 1109.5015   | -0.0029 | -3    | 79         | 87       | WSQLSGMER               |           |       |        | Oxidation (M)[7]       |      | Mascot      |
| 1146.5691  | 1146.5758   | 0.0067  | 6     | 24         | 33       | EPLNFWGGAR              |           |       |        |                        |      | Mascot      |
| 1146.5691  | 1146.5758   | 0.0067  | 6     | 24         | 33       | EPLNFWGGAR              | 50        |       | 99.767 |                        |      | Mascot      |
| 1341.7018  | 1341.7393   | 0.0375  | 28    | 341        | 352      | MGALISKPHMEK            |           |       |        |                        |      | Mascot      |
| 1374.6682  | 1374.6765   | 0.0083  | 6     | 328        | 340      | AISVGDPLCEGTR           |           |       |        | Carbamidomethyl (C)[9] |      | Mascot      |
| 1555.7863  | 1555.7894   | 0.0031  | 2     | 426        | 440      | ANNTTFGLASGVFTR         |           |       |        |                        |      | Mascot      |
| 1984.9037  | 1985.0155   | 0.1118  | 56    | 289        | 307      | GALMANFLTQGEVCCNG<br>TR |           |       |        |                        |      | Mascot      |

|   |                                                                 |  |  |  |  |  |              |  |         |     |   |    |        |    |        |  |  |
|---|-----------------------------------------------------------------|--|--|--|--|--|--------------|--|---------|-----|---|----|--------|----|--------|--|--|
| 5 | aldehyde dehydrogenase 9 family, member A1 like 1 [Danio rerio] |  |  |  |  |  | gi 169158310 |  | 27261.8 | 6.9 | 2 | 57 | 90.486 | 50 | 99.767 |  |  |
|---|-----------------------------------------------------------------|--|--|--|--|--|--------------|--|---------|-----|---|----|--------|----|--------|--|--|

Peptide Information

| Calc. Mass | Obsrv. Mass | ± da    | ± ppm | Start Seq. | End Seq. | Sequence   | Ion Score | C. I. | %      | Modification     | Rank | Result Type |
|------------|-------------|---------|-------|------------|----------|------------|-----------|-------|--------|------------------|------|-------------|
| 1109.5044  | 1109.5015   | -0.0029 | -3    | 79         | 87       | WSQLSGMER  |           |       |        | Oxidation (M)[7] |      | Mascot      |
| 1146.5691  | 1146.5758   | 0.0067  | 6     | 24         | 33       | EPLNFWGGAR |           |       |        |                  |      | Mascot      |
| 1146.5691  | 1146.5758   | 0.0067  | 6     | 24         | 33       | EPLNFWGGAR | 50        |       | 99.767 |                  |      | Mascot      |

|   |                                              |  |  |  |  |  |             |  |         |      |    |    |        |  |  |  |  |
|---|----------------------------------------------|--|--|--|--|--|-------------|--|---------|------|----|----|--------|--|--|--|--|
| 6 | pyruvate kinase isozymes M1/M2 [Danio rerio] |  |  |  |  |  | gi 40786398 |  | 58020.6 | 6.54 | 13 | 51 | 64.652 |  |  |  |  |
|---|----------------------------------------------|--|--|--|--|--|-------------|--|---------|------|----|----|--------|--|--|--|--|

Peptide Information

| Calc. Mass | Obsrv. Mass | ± da    | ± ppm | Start Seq. | End Seq. | Sequence        | Ion Score | C. I. | % | Modification     | Rank | Result Type |
|------------|-------------|---------|-------|------------|----------|-----------------|-----------|-------|---|------------------|------|-------------|
| 862.4781   | 862.4844    | 0.0063  | 7     | 394        | 400      | QLFEGLR         |           |       |   |                  |      | Mascot      |
| 996.4818   | 996.5987    | 0.1169  | 117   | 491        | 499      | VNFAMDVGK       |           |       |   | Oxidation (M)[5] |      | Mascot      |
| 1109.5811  | 1109.5015   | -0.0796 | -72   | 272        | 280      | LENHEGVRR       |           |       |   |                  |      | Mascot      |
| 1173.6837  | 1173.5945   | -0.0892 | -76   | 164        | 174      | NITKVVEVGSK     |           |       |   |                  |      | Mascot      |
| 1179.6289  | 1179.6072   | -0.0217 | -18   | 58         | 67       | SVDTLKEMIK      |           |       |   | Oxidation (M)[8] |      | Mascot      |
| 1179.6289  | 1179.6072   | -0.0217 | -18   | 58         | 67       | SVDTLKEMIK      |           |       |   | Oxidation (M)[8] |      | Mascot      |
| 1683.7716  | 1683.8304   | 0.0588  | 35    | 281        | 295      | FDEIMEASDGIMVAR |           |       |   |                  |      | Mascot      |
| 1683.7716  | 1683.8304   | 0.0588  | 35    | 281        | 295      | FDEIMEASDGIMVAR |           |       |   |                  |      | Mascot      |

|   |                    |           |         |     |            |     |                         |      |   |                        |       |   |   |        |
|---|--------------------|-----------|---------|-----|------------|-----|-------------------------|------|---|------------------------|-------|---|---|--------|
|   | 1874.9507          | 1874.9788 | 0.0281  | 15  | 385        | 400 | EAEAATFHRQLFEGLR        |      |   |                        |       |   |   | Mascot |
|   | 1946.0375          | 1945.9434 | -0.0941 | -48 | 45         | 63  | NTGIICTIGPASRSVDTLK     |      |   |                        |       |   |   | Mascot |
|   | 2211.1003          | 2211.1235 | 0.0232  | 10  | 318        | 337 | CNKAGKPIICATQMLESMLK    |      |   | Oxidation (M)[14,18]   |       |   |   | Mascot |
|   | 2243.041           | 2243.0886 | 0.0476  | 21  | 75         | 93  | MNFSHGSHEYHGKETIKNVR    |      |   |                        |       |   |   | Mascot |
|   | 2366.1921          | 2366.2    | 0.0079  | 3   | 506        | 527 | AGDVVIVLTGWRPGSGYTNTMR  |      |   | Oxidation (M)[21]      |       |   |   | Mascot |
|   | 2509.239           | 2509.2688 | 0.0298  | 12  | 94         | 116 | EACASFEPGSIQYRPVGIALDTK |      |   | Carbamidomethyl (C)[3] |       |   |   | Mascot |
|   | 2570.2197          | 2570.2471 | 0.0274  | 11  | 469        | 490 | GIFPIYYNSPSNDVWAEDVDLR  |      |   |                        |       |   |   | Mascot |
| 7 | Pbx2 [Danio rerio] |           |         |     | qi 7861936 |     | 18895.6                 | 9.08 | 7 | 47                     | 9.141 | 6 | 0 |        |

| Calc. Mass | Obsrv. Mass | ± da    | ± ppm | Start Seq. | End Seq. | Sequence                 | Ion Score | C. I. % | Modification           | Rank | Result Type |
|------------|-------------|---------|-------|------------|----------|--------------------------|-----------|---------|------------------------|------|-------------|
| 864.4686   | 864.4989    | 0.0303  | 35    | 153        | 159      | SRFLDAR                  |           |         |                        |      | Mascot      |
| 937.4771   | 937.477     | -0.0001 | 0     | 11         | 18       | EKTGLSMR                 |           |         | Oxidation (M)[7]       |      | Mascot      |
| 1146.579   | 1146.5758   | -0.0032 | -3    | 84         | 92       | NIYHTELEK                |           |         |                        |      | Mascot      |
| 1146.579   | 1146.5758   | -0.0032 | -3    | 84         | 92       | NIYHTELEK                |           |         |                        |      | Mascot      |
| 1179.6442  | 1179.6072   | -0.037  | -31   | 1          | 10       | ALFSVLCEIK               |           |         | Carbamidomethyl (C)[7] |      | Mascot      |
| 1179.6732  | 1179.6072   | -0.066  | -56   | 132        | 141      | KFSSIQTQLK               | 8         | 0       |                        |      | Mascot      |
| 1493.7563  | 1493.7396   | -0.0167 | -11   | 142        | 154      | QSTCEAVMILRSR            |           |         |                        |      | Mascot      |
| 1493.7563  | 1493.7396   | -0.0167 | -11   | 142        | 154      | QSTCEAVMILRSR            |           |         |                        |      | Mascot      |
| 1550.7777  | 1550.9001   | 0.1224  | 79    | 142        | 154      | QSTCEAVMILRSR            |           |         | Carbamidomethyl (C)[4] |      | Mascot      |
| 2283.1836  | 2283.2      | 0.0164  | 7     | 133        | 152      | FSSIQTQLKQSTCEAVMI<br>LR |           |         |                        |      | Mascot      |
| 2299.1785  | 2299.2102   | 0.0317  | 14    | 133        | 152      | FSSIQTQLKQSTCEAVMI<br>LR |           |         | Oxidation (M)[17]      |      | Mascot      |

| Calc. Mass | Obsrv. Mass | ± da    | ± ppm | Start Seq. | End Seq. | Sequence        | Ion Score | C. I. % | Modification | Rank | Result Type |
|------------|-------------|---------|-------|------------|----------|-----------------|-----------|---------|--------------|------|-------------|
| 862.4377   | 862.4844    | 0.0467  | 54    | 121        | 127      | SDLESRR         |           |         |              |      | Mascot      |
| 1045.5425  | 1045.5679   | 0.0254  | 24    | 70         | 77       | SITRSYYR        |           |         |              |      | Mascot      |
| 1146.6552  | 1146.5758   | -0.0794 | -69   | 47         | 56       | MITIDGKQIK      |           |         |              |      | Mascot      |
| 1146.6552  | 1146.5758   | -0.0794 | -69   | 47         | 56       | MITIDGKQIK      |           |         |              |      | Mascot      |
| 1475.8329  | 1475.7656   | -0.0673 | -46   | 78         | 91       | GAAGALLVYDITRR  |           |         |              |      | Mascot      |
| 1550.7598  | 1550.9001   | 0.1403  | 90    | 57         | 69       | LQIWDTAGQESFR   |           |         |              |      | Mascot      |
| 1874.9144  | 1874.9788   | 0.0644  | 34    | 91         | 105      | RDTFNHLTTWLEDAR |           |         |              |      | Mascot      |

|   |                            |           |           |        |     |     |     |                       |         |      |    |    |   |  |  |                     |  |        |
|---|----------------------------|-----------|-----------|--------|-----|-----|-----|-----------------------|---------|------|----|----|---|--|--|---------------------|--|--------|
| 9 | Gcat protein [Danio rerio] | 2284.2256 | 2284.1936 | -0.032 | -14 | 9   | 29  | YIIIGDGTGVGKSCLLQFTDK |         |      |    |    |   |  |  |                     |  | Mascot |
|   |                            | 2284.2256 | 2284.1936 | -0.032 | -14 | 9   | 29  | YIIIGDGTGVGKSCLLQFTDK |         |      |    |    |   |  |  |                     |  | Mascot |
|   |                            | 2405.1548 | 2405.1887 | 0.0339 | 14  | 106 | 126 | QHSNSNMVIMLIGNKSDL    |         |      |    |    |   |  |  | Oxidation (M)[7,10] |  | Mascot |
|   |                            |           |           |        |     |     |     | gi 33604132           | 46995.1 | 7.24 | 10 | 44 | 0 |  |  |                     |  |        |

### Peptide Information

| Calc. Mass | Obsrv. Mass | ± da    | ± ppm | Start Seq. | End Seq. | Sequence                    | Ion Score | C. I. % | Modification            | Rank | Result Type |
|------------|-------------|---------|-------|------------|----------|-----------------------------|-----------|---------|-------------------------|------|-------------|
| 1259.5573  | 1259.6206   | 0.0633  | 50    | 195        | 204      | HMDLNDLEEK                  |           |         | Oxidation (M)[2]        |      | Mascot      |
| 1434.7006  | 1434.777    | 0.0764  | 53    | 260        | 272      | GRGTDELLGVMDR               |           |         | Oxidation (M)[11]       |      | Mascot      |
| 1550.7156  | 1550.9001   | 0.1845  | 119   | 193        | 204      | YKHMDLNDLEEK                |           |         | Oxidation (M)[4]        |      | Mascot      |
| 1705.9231  | 1705.9196   | -0.0035 | -2    | 104        | 120      | AGVEALQKYGAGLSSVR           |           |         |                         |      | Mascot      |
| 1753.9014  | 1753.9025   | 0.0011  | 1     | 66         | 81       | VITSKQGPICVDGSR             |           |         | Carbamidomethyl (C)[11] |      | Mascot      |
| 1838.9355  | 1838.9199   | -0.0156 | -8    | 405        | 420      | IRVQISAHTDEDIDR             |           |         |                         |      | Mascot      |
| 1874.9891  | 1874.9788   | -0.0103 | -5    | 326        | 343      | AVELLASNEIAQSMAAK           |           |         | Oxidation (M)[15]       |      | Mascot      |
| 2132.1421  | 2132.1519   | 0.0098  | 5     | 213        | 232      | LRLVVTDGVSMDGDVA<br>PLK     |           |         |                         |      | Mascot      |
| 2132.1421  | 2132.1519   | 0.0098  | 5     | 213        | 232      | LRLVVTDGVSMDGDVA<br>PLK     |           |         |                         |      | Mascot      |
| 2283.198   | 2283.2      | 0.002   | 1     | 35         | 56       | AFAPAAPQAVQSVLEAEL<br>DSIR  |           |         |                         |      | Mascot      |
| 2284.2771  | 2284.1936   | -0.0835 | -37   | 283        | 305      | ALGGAAGGYTVGPTALIE<br>LLRQR |           |         |                         |      | Mascot      |
| 2284.2771  | 2284.1936   | -0.0835 | -37   | 283        | 305      | ALGGAAGGYTVGPTALIE<br>LLRQR |           |         |                         |      | Mascot      |

### Peptide Information

| Calc. Mass | Obsrv. Mass | ± da    | ± ppm | Start Seq. | End Seq. | Sequence       | Ion Score | C. I. | % Modification   | Rank | Result Type |
|------------|-------------|---------|-------|------------|----------|----------------|-----------|-------|------------------|------|-------------|
| 862.4152   | 862.4844    | 0.0692  | 80    | 2129       | 2136     | AVEDEATK       |           |       |                  |      | Mascot      |
| 1109.5442  | 1109.5015   | -0.0427 | -38   | 2206       | 2215     | AVADMLRSCK     |           |       | Oxidation (M)[5] |      | Mascot      |
| 1165.6576  | 1165.7488   | 0.0912  | 78    | 1615       | 1625     | SLAVNPKDPPK    |           |       |                  |      | Mascot      |
| 1179.5422  | 1179.6072   | 0.065   | 55    | 2441       | 2450     | ADQDSQTMKR     | 11        | 0     |                  |      | Mascot      |
| 1179.5422  | 1179.6072   | 0.065   | 55    | 2441       | 2450     | ADQDSQTMKR     |           |       |                  |      | Mascot      |
| 1234.5811  | 1234.6877   | 0.1066  | 86    | 1541       | 1551     | ALDGAFNQENR    |           |       |                  |      | Mascot      |
| 1320.7271  | 1320.6046   | -0.1225 | -93   | 424        | 434      | KSTVLQQQFNK    |           |       |                  |      | Mascot      |
| 1456.8369  | 1456.7791   | -0.0578 | -40   | 825        | 838      | ILAQATSDLVNAIK |           |       |                  |      | Mascot      |
| 1475.7886  | 1475.7656   | -0.023  | -16   | 859        | 872      | LLADATARMVEAAK |           |       | Oxidation (M)[9] |      | Mascot      |
| 1493.7628  | 1493.7396   | -0.0232 | -16   | 1601       | 1614     | AMLESSTGLIQTAR |           |       | Oxidation (M)[2] |      | Mascot      |

|           |           |         |     |      |      |                         |                          |        |
|-----------|-----------|---------|-----|------|------|-------------------------|--------------------------|--------|
| 1493.7628 | 1493.7396 | -0.0232 | -16 | 1601 | 1614 | AMLESSTGLIQTAR          | Oxidation (M)[2]         | Mascot |
| 1555.8036 | 1555.7894 | -0.0142 | -9  | 1763 | 1776 | TLAESALQMLYTAK          | Oxidation (M)[9]         | Mascot |
| 1675.8003 | 1675.7771 | -0.0232 | -14 | 1497 | 1511 | HTSALCNACRLASSK         | Carbamidomethyl (C)[6,9] | Mascot |
| 1705.752  | 1705.9196 | 0.1676  | 98  | 1897 | 1912 | CAAMTAENDEIGSHIK        | Oxidation (M)[4]         | Mascot |
| 1737.8477 | 1737.9163 | 0.0686  | 39  | 2472 | 2487 | AAFEAQDDQAVMVKSK        |                          | Mascot |
| 1753.8425 | 1753.9025 | 0.06    | 34  | 2472 | 2487 | AAFEAQDDQAVMVKSK        | Oxidation (M)[12]        | Mascot |
| 1874.8735 | 1874.9788 | 0.1053  | 56  | 1897 | 1913 | CAAMTAENDEIGSHIKK       | Carbamidomethyl (C)[1]   | Mascot |
| 1945.976  | 1945.9434 | -0.0326 | -17 | 889  | 907  | EAAEGLRMATNAAQNAIK      | Oxidation (M)[8]         | Mascot |
| 1946.931  | 1946.9777 | 0.0467  | 24  | 1037 | 1054 | AQEACGPLEIDNALTMR       | Oxidation (M)[16]        | Mascot |
| 2096.054  | 2096.0415 | -0.0125 | -6  | 1292 | 1310 | EDQQTQVVTLNLTISMSSSK    |                          | Mascot |
| 2211.1865 | 2211.1235 | -0.063  | -28 | 2059 | 2080 | LGAASLGSEDPETQVVLI      |                          | Mascot |
| 2225.1846 | 2225.1387 | -0.0459 | -21 | 718  | 738  | VVVAPTISSPVCQEQLIEAGK   | Carbamidomethyl (C)[12]  | Mascot |
| 2225.1846 | 2225.1387 | -0.0459 | -21 | 718  | 738  | VVVAPTISSPVCQEQLIEAGK   | Carbamidomethyl (C)[12]  | Mascot |
| 2233.0952 | 2233.1318 | 0.0366  | 16  | 1337 | 1357 | AVTDSINQLISMCTQQAPGQK   |                          | Mascot |
| 2243.145  | 2243.0886 | -0.0564 | -25 | 1727 | 1747 | VSQMVSYFEPLIMAAIGT      |                          | Mascot |
| 2570.2742 | 2570.2471 | -0.0271 | -11 | 8    | 30   | IGVGNVVKTMQFEPSTVVYDACR | Carbamidomethyl (C)[22]  | Mascot |

11 PREDICTED: dynein heavy chain 7, axonemal [Danio rerio]

gi|189523512 455205.4 5.74 32 41 0

#### Peptide Information

| Calc. Mass | Obsrv. Mass | ± da    | ± ppm | Start Seq. | End Seq. | Sequence      | Ion Score | C. I. % | Modification           | Rank | Result Type |
|------------|-------------|---------|-------|------------|----------|---------------|-----------|---------|------------------------|------|-------------|
| 836.4512   | 836.4321    | -0.0191 | -23   | 2554       | 2560     | YEVGLQK       |           |         |                        |      | Mascot      |
| 850.5032   | 850.546     | 0.0428  | 50    | 772        | 778      | GLYKLEK       |           |         |                        |      | Mascot      |
| 864.4858   | 864.4989    | 0.0131  | 15    | 2545       | 2551     | TEVMKLEK      |           |         | Oxidation (M)[4]       |      | Mascot      |
| 937.456    | 937.477     | 0.021   | 22    | 983        | 989      | TWRDTMK       |           |         |                        |      | Mascot      |
| 1146.5361  | 1146.5758   | 0.0397  | 35    | 629        | 637      | MPSIFDQHR     |           |         | Oxidation (M)[1]       |      | Mascot      |
| 1146.5361  | 1146.5758   | 0.0397  | 35    | 629        | 637      | MPSIFDQHR     |           |         | Oxidation (M)[1]       |      | Mascot      |
| 1173.6409  | 1173.5945   | -0.0464 | -40   | 3980       | 3990     | RGVALLCQLNS   |           |         |                        |      | Mascot      |
| 1179.6592  | 1179.6072   | -0.052  | -44   | 2301       | 2313     | GHALLVGVGGSGR |           |         |                        |      | Mascot      |
| 1179.6592  | 1179.6072   | -0.052  | -44   | 2301       | 2313     | GHALLVGVGGSGR |           |         |                        |      | Mascot      |
| 1259.6664  | 1259.6206   | -0.0458 | -36   | 1588       | 1599     | VLAAALNDICEK  |           |         |                        |      | Mascot      |
| 1320.6464  | 1320.6046   | -0.0418 | -32   | 1842       | 1853     | EMLVGGLSEETR  |           |         |                        |      | Mascot      |
| 1326.7164  | 1326.723    | 0.0066  | 5     | 1856       | 1867     | HGILEHVEPPAK  |           |         |                        |      | Mascot      |
| 1374.8038  | 1374.6765   | -0.1273 | -93   | 3342       | 3352     | LGQFQRMLIIR   |           |         |                        |      | Mascot      |
| 1434.7198  | 1434.777    | 0.0572  | 40    | 127        | 136      | DILRYCYYIR    |           |         | Carbamidomethyl (C)[6] |      | Mascot      |

|           |           |         |     |      |      |                            |                                          |  |  |  |  |  |        |
|-----------|-----------|---------|-----|------|------|----------------------------|------------------------------------------|--|--|--|--|--|--------|
| 1456.8369 | 1456.7791 | -0.0578 | -40 | 3214 | 3225 | SDLLEERLQILK               |                                          |  |  |  |  |  | Mascot |
| 1630.7893 | 1630.8175 | 0.0282  | 17  | 3937 | 3949 | QCYISPVYKTSER              | Carbamidomethyl (C)[2]                   |  |  |  |  |  | Mascot |
| 1659.9026 | 1659.7808 | -0.1218 | -73 | 937  | 949  | LLLLQEIMDEWLK              | Oxidation (M)[8]                         |  |  |  |  |  | Mascot |
| 1721.7529 | 1721.9189 | 0.166   | 96  | 2031 | 2042 | QWLDHWNWYDMK               |                                          |  |  |  |  |  | Mascot |
| 1737.7479 | 1737.9163 | 0.1684  | 97  | 2031 | 2042 | QWLDHWNWYDMK               | Oxidation (M)[11]                        |  |  |  |  |  | Mascot |
| 1753.9921 | 1753.9025 | -0.0896 | -51 | 3244 | 3258 | DKLLFSFCLTVNLLK            |                                          |  |  |  |  |  | Mascot |
| 1838.9105 | 1838.9199 | 0.0094  | 5   | 3931 | 3945 | QDIPERQCYISPVYK            |                                          |  |  |  |  |  | Mascot |
| 1945.9187 | 1945.9434 | 0.0247  | 13  | 875  | 890  | MVSEWAGMEFTLLPYR           | Oxidation (M)[1]                         |  |  |  |  |  | Mascot |
| 1947.0884 | 1946.9777 | -0.1107 | -57 | 3246 | 3261 | LLFSFCLTVNLLKHNK           | Carbamidomethyl (C)[6]                   |  |  |  |  |  | Mascot |
| 1994.1433 | 1993.9888 | -0.1545 | -77 | 1930 | 1948 | LLITHQKPTVFGPTGTG<br>K     |                                          |  |  |  |  |  | Mascot |
| 1994.1433 | 1993.9888 | -0.1545 | -77 | 1930 | 1948 | LLITHQKPTVFGPTGTG<br>K     |                                          |  |  |  |  |  | Mascot |
| 2101.1189 | 2101.1472 | 0.0283  | 13  | 1280 | 1301 | TLFGALHLHLGGAPEGPA<br>GTGK |                                          |  |  |  |  |  | Mascot |
| 2131.9885 | 2132.1519 | 0.1634  | 77  | 2588 | 2605 | EVEEMMVVIQHESEEVS<br>K     |                                          |  |  |  |  |  | Mascot |
| 2132.1631 | 2132.1519 | -0.0112 | -5  | 3778 | 3797 | GLVVMSSAELEEVVSSILK<br>GR  | Oxidation (M)[5]                         |  |  |  |  |  | Mascot |
| 2210.8865 | 2211.1235 | 0.237   | 107 | 3601 | 3618 | YMTGECNYGGRVTDWD<br>DR     | Carbamidomethyl (C)[6], Oxidation (M)[2] |  |  |  |  |  | Mascot |
| 2225.0154 | 2225.1387 | 0.1233  | 55  | 3226 | 3243 | DHFTYSLYCNVCRSLFEK         |                                          |  |  |  |  |  | Mascot |
| 2225.0154 | 2225.1387 | 0.1233  | 55  | 3226 | 3243 | DHFTYSLYCNVCRSLFEK         |                                          |  |  |  |  |  | Mascot |
| 2243.1377 | 2243.0886 | -0.0491 | -22 | 3664 | 3684 | TLPLNPSPEIFGMNANAD<br>ITK  |                                          |  |  |  |  |  | Mascot |
| 2283.2383 | 2283.2    | -0.0383 | -17 | 3806 | 3825 | SYPSLKPLGGYISDFLER<br>LK   |                                          |  |  |  |  |  | Mascot |
| 2284.1025 | 2284.1936 | 0.0911  | 40  | 3024 | 3044 | QGGSVCIIRLGDSTIEYAP<br>DFR |                                          |  |  |  |  |  | Mascot |
| 2284.1025 | 2284.1936 | 0.0911  | 40  | 3024 | 3044 | QGGSVCIIRLGDSTIEYAP<br>DFR |                                          |  |  |  |  |  | Mascot |
| 2299.2439 | 2299.2102 | -0.0337 | -15 | 2152 | 2172 | VIQGICLSRPETADDLTAI<br>KR  |                                          |  |  |  |  |  | Mascot |
| 2366.196  | 2366.2    | 0.004   | 2   | 3270 | 3291 | FLLTGGVGLDNPHSNPC<br>TWLPK |                                          |  |  |  |  |  | Mascot |
| 2421.147  | 2421.23   | 0.083   | 34  | 704  | 723  | GINQEEEAFDWPVSQYP<br>QRK   |                                          |  |  |  |  |  | Mascot |

12 RecName: Full=Protein groucho-1 gi|3122951 57324.2 6.9 10 39 0

Peptide Information

| Calc. Mass | Obsrv. Mass | ± da    | ± ppm | Start Seq. | End Seq. | Sequence                 | Ion Score | C. I. % Modification   | Rank | Result Type |
|------------|-------------|---------|-------|------------|----------|--------------------------|-----------|------------------------|------|-------------|
| 862.3802   | 862.4844    | 0.1042  | 121   | 77         | 83       | DHPHNDK                  |           |                        |      | Mascot      |
| 1045.5459  | 1045.5679   | 0.022   | 21    | 300        | 308      | SCKLLPDGR                |           | Carbamidomethyl (C)[2] |      | Mascot      |
| 1555.6792  | 1555.7894   | 0.1102  | 71    | 503        | 517      | ESSSVLSCDISADDK          |           |                        |      | Mascot      |
| 1874.9091  | 1874.9788   | 0.0697  | 37    | 55         | 74       | KDAPNSPASVASSGSTP<br>SSK |           |                        |      | Mascot      |
| 1945.9462  | 1945.9434   | -0.0028 | -1    | 56         | 76       | DAPNSPASVASSGSTPS        |           |                        |      | Mascot      |



|    |                                  |           |         |     |     |              |                                       |      |    |    |   |  |                        |  |  |  |        |
|----|----------------------------------|-----------|---------|-----|-----|--------------|---------------------------------------|------|----|----|---|--|------------------------|--|--|--|--------|
|    | 2112.9404                        | 2113.1917 | 0.2513  | 119 | 376 | 395          | SKAK<br>QFQGHTDGASCIDISHDG<br>PK      |      |    |    |   |  |                        |  |  |  | Mascot |
|    | 2239.1499                        | 2239.1309 | -0.019  | -8  | 242 | 262          | QINTLSHGVEVCAVTISN<br>PTR             |      |    |    |   |  |                        |  |  |  | Mascot |
|    | 2336.1526                        | 2336.0356 | -0.117  | -50 | 457 | 476          | YQLHLHESCVLSLK SAYC<br>GK             |      |    |    |   |  | Carbamidomethyl (C)[9] |  |  |  | Mascot |
|    | 2570.4187                        | 2570.2471 | -0.1716 | -67 | 309 | 332          | TLIAGGEVSTLTWDLAS<br>QTPRIK           |      |    |    |   |  |                        |  |  |  | Mascot |
|    | 3337.7434                        | 3337.8074 | 0.064   | 19  | 98  | 130          | NDAPTPGTSNTPLRLPR<br>PGKPPGMEALTAPALR |      |    |    |   |  |                        |  |  |  | Mascot |
| 13 | Zgc:162848 protein [Danio rerio] |           |         |     |     | gi 141795670 | 51350.1                               | 5.88 | 10 | 39 | 0 |  |                        |  |  |  |        |

#### Peptide Information

| Calc. Mass | Obsrv. Mass | ± da    | ± ppm | Start Seq. | End Seq. | Sequence                   | Ion Score | C. I. | % | Modification                             | Rank | Result Type |
|------------|-------------|---------|-------|------------|----------|----------------------------|-----------|-------|---|------------------------------------------|------|-------------|
| 864.4573   | 864.4989    | 0.0416  | 48    | 264        | 270      | FTVDNLR                    |           |       |   |                                          |      | Mascot      |
| 1045.5411  | 1045.5679   | 0.0268  | 26    | 174        | 182      | DAVEEELLK                  |           |       |   |                                          |      | Mascot      |
| 1146.6187  | 1146.5758   | -0.0429 | -37   | 414        | 423      | LNLEKDIACK                 |           |       |   |                                          |      | Mascot      |
| 1146.6187  | 1146.5758   | -0.0429 | -37   | 414        | 423      | LNLEKDIACK                 |           |       |   |                                          |      | Mascot      |
| 1259.6954  | 1259.6206   | -0.0748 | -59   | 87         | 98       | ALKAETDAATLR               |           |       |   |                                          |      | Mascot      |
| 1320.6147  | 1320.6046   | -0.0101 | -8    | 365        | 374      | TLRPNMEQCR                 |           |       |   | Carbamidomethyl (C)[9], Oxidation (M)[6] |      | Mascot      |
| 1475.7812  | 1475.7656   | -0.0156 | -11   | 128        | 140      | LSAETDLQISSRR              |           |       |   |                                          |      | Mascot      |
| 1555.7356  | 1555.7894   | 0.0538  | 35    | 307        | 319      | AFTQRCVEMSQAK              |           |       |   | Carbamidomethyl (C)[6]                   |      | Mascot      |
| 1630.8759  | 1630.8175   | -0.0584 | -36   | 285        | 298      | LTERVLQGTTEDLR             |           |       |   |                                          |      | Mascot      |
| 2283.0823  | 2283.2      | 0.1177  | 52    | 245        | 263      | HPSSAVLQDQVCDEEVW<br>RK    |           |       |   | Carbamidomethyl (C)[12]                  |      | Mascot      |
| 2405.238   | 2405.1887   | -0.0493 | -20   | 142        | 163      | LEKALDATEIPFAIATDNL<br>TCR |           |       |   |                                          |      | Mascot      |

|    |                                                 |  |  |  |  |             |         |      |   |    |   |    |   |
|----|-------------------------------------------------|--|--|--|--|-------------|---------|------|---|----|---|----|---|
| 14 | T-complex protein 1 subunit delta [Danio rerio] |  |  |  |  | gi 41053686 | 56937.3 | 6.38 | 8 | 38 | 0 | 17 | 0 |
|----|-------------------------------------------------|--|--|--|--|-------------|---------|------|---|----|---|----|---|

#### Peptide Information

| Calc. Mass | Obsrv. Mass | ± da    | ± ppm | Start Seq. | End Seq. | Sequence          | Ion Score | C. I. | % | Modification              | Rank | Result Type |
|------------|-------------|---------|-------|------------|----------|-------------------|-----------|-------|---|---------------------------|------|-------------|
| 862.5253   | 862.4844    | -0.0409 | -47   | 314        | 320      | MKIMVIK           |           |       |   |                           |      | Mascot      |
| 1045.6074  | 1045.5679   | -0.0395 | -38   | 287        | 296      | AGCTVLLIQK        |           |       |   |                           |      | Mascot      |
| 1173.666   | 1173.5945   | -0.0715 | -61   | 367        | 378      | LVKITGCASPGK      |           |       |   |                           |      | Mascot      |
| 1456.7794  | 1456.7791   | -0.0003 | 0     | 301        | 313      | DALSDLALHFLNK     |           |       |   |                           |      | Mascot      |
| 1550.89    | 1550.9001   | 0.0101  | 7     | 414        | 429      | ALIAGGGAPEIELALR  |           |       |   |                           |      | Mascot      |
| 1683.9032  | 1683.8304   | -0.0728 | -43   | 398        | 411      | SIHDALCVIRCLVK    |           |       |   | Carbamidomethyl (C)[7,11] |      | Mascot      |
| 1683.9032  | 1683.8304   | -0.0728 | -43   | 398        | 411      | SIHDALCVIRCLVK    |           |       |   | Carbamidomethyl (C)[7,11] |      | Mascot      |
| 1800.0112  | 1799.9769   | -0.0343 | -19   | 138        | 154      | GVEVLTSISTPLLLSDR | 17        |       | 0 |                           |      | Mascot      |
| 1800.0112  | 1799.9769   | -0.0343 | -19   | 138        | 154      | GVEVLTSISTPLLLSDR |           |       |   |                           |      | Mascot      |

|    |                                            |           |        |   |              |     |                   |      |    |    |   |                         |        |
|----|--------------------------------------------|-----------|--------|---|--------------|-----|-------------------|------|----|----|---|-------------------------|--------|
|    | 1945.9258                                  | 1945.9434 | 0.0176 | 9 | 430          | 446 | LAEYARSLGGMEAYCVR |      |    |    |   | Carbamidomethyl (C)[15] | Mascot |
| 15 | glucocorticoid receptor beta [Danio rerio] |           |        |   | gi 151177061 |     | 80782             | 6.02 | 12 | 38 | 0 |                         |        |

Peptide Information

| Calc. Mass | Obsrv. Mass | ± da    | ± ppm | Start Seq. | End Seq. | Sequence                            | Ion Score | C. I. | % Modification          | Rank | Result Type |
|------------|-------------|---------|-------|------------|----------|-------------------------------------|-----------|-------|-------------------------|------|-------------|
| 864.4608   | 864.4989    | 0.0381  | 44    | 528        | 534      | LMTTLNR                             |           |       | Oxidation (M)[2]        |      | Mascot      |
| 1045.5941  | 1045.5679   | -0.0262 | -25   | 546        | 554      | WAKALPGFR                           |           |       |                         |      | Mascot      |
| 1146.5936  | 1146.5758   | -0.0178 | -16   | 427        | 435      | NDCIIDKIR                           |           |       | Carbamidomethyl (C)[3]  |      | Mascot      |
| 1146.5936  | 1146.5758   | -0.0178 | -16   | 427        | 435      | NDCIIDKIR                           |           |       | Carbamidomethyl (C)[3]  |      | Mascot      |
| 1493.7594  | 1493.7396   | -0.0198 | -13   | 647        | 659      | DGLKSQSVFDEL                        |           |       |                         |      | Mascot      |
| 1493.7594  | 1493.7396   | -0.0198 | -13   | 647        | 659      | DGLKSQSVFDEL                        |           |       |                         |      | Mascot      |
| 1630.7866  | 1630.8175   | 0.0309  | 19    | 413        | 426      | RAVEGQHNYLCAGR                      |           |       | Carbamidomethyl (C)[11] |      | Mascot      |
| 1799.9935  | 1799.9769   | -0.0166 | -9    | 256        | 271      | VEKDSIIQLCTPGVIK                    |           |       | Carbamidomethyl (C)[10] |      | Mascot      |
| 1799.9935  | 1799.9769   | -0.0166 | -9    | 256        | 271      | VEKDSIIQLCTPGVIK                    |           |       | Carbamidomethyl (C)[10] |      | Mascot      |
| 2132.0012  | 2132.1519   | 0.1507  | 71    | 339        | 358      | SQGFGNVSGMQQRASL<br>CFSK            |           |       |                         |      | Mascot      |
| 2132.0012  | 2132.1519   | 0.1507  | 71    | 339        | 358      | SQGFGNVSGMQQRASL<br>CFSK            |           |       |                         |      | Mascot      |
| 2233.0002  | 2233.1318   | 0.1316  | 59    | 359        | 380      | NFSSSPYSRPEDSTATSS<br>AGGK          |           |       |                         |      | Mascot      |
| 2284.0979  | 2284.1936   | 0.0957  | 42    | 507        | 527      | AIEPDTLYAGYDSTIPDTS<br>VR           |           |       |                         |      | Mascot      |
| 2284.0979  | 2284.1936   | 0.0957  | 42    | 507        | 527      | AIEPDTLYAGYDSTIPDTS<br>VR           |           |       |                         |      | Mascot      |
| 2405.0061  | 2405.1887   | 0.1826  | 76    | 386        | 408      | ICLVCSDEASGCHYGVLTCGSK              |           |       | Carbamidomethyl (C)[2]  |      | Mascot      |
| 2872.2554  | 2872.4038   | 0.1484  | 52    | 381        | 408      | TGTHKICLVCSDEASGCHYGVLTCGSK         |           |       |                         |      | Mascot      |
| 3337.6377  | 3337.8074   | 0.1697  | 51    | 708        | 737      | KPCLSLQLQSPSELGCLL<br>PLDGCQFQRQFSN |           |       | Carbamidomethyl (C)[3]  |      | Mascot      |

|    |                             |  |  |  |              |  |         |      |   |    |   |  |  |
|----|-----------------------------|--|--|--|--------------|--|---------|------|---|----|---|--|--|
| 16 | Nr3c1 protein [Danio rerio] |  |  |  | gi 112180673 |  | 50378.4 | 5.06 | 9 | 36 | 0 |  |  |
|----|-----------------------------|--|--|--|--------------|--|---------|------|---|----|---|--|--|

Peptide Information

| Calc. Mass | Obsrv. Mass | ± da    | ± ppm | Start Seq. | End Seq. | Sequence         | Ion Score | C. I. | % Modification          | Rank | Result Type |
|------------|-------------|---------|-------|------------|----------|------------------|-----------|-------|-------------------------|------|-------------|
| 1045.5272  | 1045.5679   | 0.0407  | 39    | 2          | 11       | DQGGLENGKK       |           |       |                         |      | Mascot      |
| 1146.5936  | 1146.5758   | -0.0178 | -16   | 427        | 435      | NDCIIDKIR        |           |       | Carbamidomethyl (C)[3]  |      | Mascot      |
| 1146.5936  | 1146.5758   | -0.0178 | -16   | 427        | 435      | NDCIIDKIR        |           |       | Carbamidomethyl (C)[3]  |      | Mascot      |
| 1555.71    | 1555.7894   | 0.0794  | 51    | 446        | 459      | KCLMAGMNLEGNMK   |           |       | Oxidation (M)[4]        |      | Mascot      |
| 1630.7866  | 1630.8175   | 0.0309  | 19    | 413        | 426      | RAVEGQHNYLCAGR   |           |       | Carbamidomethyl (C)[11] |      | Mascot      |
| 1799.9935  | 1799.9769   | -0.0166 | -9    | 256        | 271      | VEKDSIIQLCTPGVIK |           |       | Carbamidomethyl (C)[10] |      | Mascot      |
| 1799.9935  | 1799.9769   | -0.0166 | -9    | 256        | 271      | VEKDSIIQLCTPGVIK |           |       | Carbamidomethyl (C)[10] |      | Mascot      |

|    |                                                                                              |           |        |    |     |     |                             |      |   |                        |   |  |        |
|----|----------------------------------------------------------------------------------------------|-----------|--------|----|-----|-----|-----------------------------|------|---|------------------------|---|--|--------|
|    | 2132.0012                                                                                    | 2132.1519 | 0.1507 | 71 | 339 | 358 | SQGFGNVSGMQQRASL<br>CFSK    |      |   |                        |   |  | Mascot |
|    | 2132.0012                                                                                    | 2132.1519 | 0.1507 | 71 | 339 | 358 | SQGFGNVSGMQQRASL<br>CFSK    |      |   |                        |   |  | Mascot |
|    | 2233.0002                                                                                    | 2233.1318 | 0.1316 | 59 | 359 | 380 | NFSSSPYSRPEDSTATSS<br>AGGK  |      |   |                        |   |  | Mascot |
|    | 2405.0061                                                                                    | 2405.1887 | 0.1826 | 76 | 386 | 408 | ICLVCSDEASGCHYGVLTCGSK      |      |   | Carbamidomethyl (C)[2] |   |  | Mascot |
|    | 2872.2554                                                                                    | 2872.4038 | 0.1484 | 52 | 381 | 408 | TGTHKICLVCSDEASGCHYGVLTCGSK |      |   |                        |   |  | Mascot |
| 17 | novel protein similar to vertebrate hect domain and RLD gi 220672977 3 (HERC3) [Danio rerio] |           |        |    |     |     |                             |      |   |                        |   |  |        |
|    |                                                                                              |           |        |    |     |     | 37519.2                     | 8.94 | 8 | 36                     | 0 |  |        |

#### Peptide Information

| Calc. Mass | Obsrv. Mass | ± da    | ± ppm | Start Seq. | End Seq. | Sequence                           | Ion Score | C. I. | % Modification                             | Rank | Result Type |
|------------|-------------|---------|-------|------------|----------|------------------------------------|-----------|-------|--------------------------------------------|------|-------------|
| 842.5569   | 842.514     | -0.0429 | -51   | 55         | 61       | VSVLRRLR                           |           |       |                                            |      | Mascot      |
| 864.4131   | 864.4989    | 0.0858  | 99    | 106        | 113      | STECSPK                            |           |       |                                            |      | Mascot      |
| 1259.7469  | 1259.6206   | -0.1263 | -100  | 212        | 222      | FVPTVNSLKR                         |           |       |                                            |      | Mascot      |
| 1721.8778  | 1721.9189   | 0.0411  | 24    | 83         | 99       | LIVCGEYGAVLLDDGGK                  |           |       |                                            |      | Mascot      |
| 1799.9109  | 1799.9769   | 0.066   | 37    | 35         | 51       | SAVQDMSAGKSFVGFIR                  |           |       |                                            |      | Mascot      |
| 1799.9109  | 1799.9769   | 0.066   | 37    | 35         | 51       | SAVQDMSAGKSFVGFIR                  |           |       |                                            |      | Mascot      |
| 1985.0233  | 1985.0155   | -0.0078 | -4    | 277        | 295      | VSQVTCGRNHTLVSTASPK                |           |       |                                            |      | Mascot      |
| 2421.2766  | 2421.23     | -0.0466 | -19   | 83         | 105      | LIVCGEYGAVLLDDGGKV<br>LIMDK        |           |       |                                            |      | Mascot      |
| 3337.6304  | 3337.8074   | 0.177   | 53    | 285        | 315      | NHTLVSTASPKLIYSFGC<br>GMQQLGNGEQVK |           |       | Carbamidomethyl (C)[18], Oxidation (M)[20] |      | Mascot      |

18 novel tub family member protein [Danio rerio] gi|94734500 20384.7 8.44 6 35 0

#### Peptide Information

| Calc. Mass | Obsrv. Mass | ± da    | ± ppm | Start Seq. | End Seq. | Sequence                  | Ion Score | C. I. | % Modification   | Rank | Result Type |
|------------|-------------|---------|-------|------------|----------|---------------------------|-----------|-------|------------------|------|-------------|
| 862.4814   | 862.4844    | 0.003   | 3     | 165        | 171      | KQMKPSK                   |           |       | Oxidation (M)[3] |      | Mascot      |
| 1234.5433  | 1234.6877   | 0.1444  | 117   | 141        | 151      | KPESESEDEGK               |           |       |                  |      | Mascot      |
| 1259.6477  | 1259.6206   | -0.0271 | -22   | 90         | 100      | AALVEENEKK                |           |       |                  |      | Mascot      |
| 1705.7511  | 1705.9196   | 0.1685  | 99    | 56         | 71       | HSTTSLDLDGQADEK           |           |       |                  |      | Mascot      |
| 1985.0801  | 1985.0155   | -0.0646 | -33   | 30         | 47       | TEEASEEIAQTVPIIKK         |           |       |                  |      | Mascot      |
| 2299.0571  | 2299.2102   | 0.1531  | 67    | 120        | 140      | TGEQSSVQTDSVVDFSIN<br>EEK |           |       |                  |      | Mascot      |

19 Zgc:161981 [Danio rerio] gi|134026282 48921.5 6.76 9 35 0

#### Peptide Information

| Calc. Mass | Obsrv. Mass | ± da | ± ppm | Start Seq. | End Seq. | Sequence | Ion Score | C. I. | % Modification | Rank | Result Type |
|------------|-------------|------|-------|------------|----------|----------|-----------|-------|----------------|------|-------------|
|------------|-------------|------|-------|------------|----------|----------|-----------|-------|----------------|------|-------------|

|    |                                                                       |           |         |     |              |     |                           |      |   |    |   |                        |  |  |  |  |        |
|----|-----------------------------------------------------------------------|-----------|---------|-----|--------------|-----|---------------------------|------|---|----|---|------------------------|--|--|--|--|--------|
|    | 880.4886                                                              | 880.5409  | 0.0523  | 59  | 245          | 252 | AHVPESLK                  |      |   |    |   |                        |  |  |  |  | Mascot |
|    | 1165.6034                                                             | 1165.7488 | 0.1454  | 125 | 1            | 10  | MSLVDFLQGR                |      |   |    |   |                        |  |  |  |  | Mascot |
|    | 1193.6313                                                             | 1193.6188 | -0.0125 | -10 | 219          | 227 | WLDNYQKVK                 |      |   |    |   |                        |  |  |  |  | Mascot |
|    | 1320.6001                                                             | 1320.6046 | 0.0045  | 3   | 61           | 70  | QCLQDIDSWR                |      |   |    |   | Carbamidomethyl (C)[2] |  |  |  |  | Mascot |
|    | 1456.8634                                                             | 1456.7791 | -0.0843 | -58 | 167          | 178 | DLLVVPLQRFTR              |      |   |    |   |                        |  |  |  |  | Mascot |
|    | 1493.7239                                                             | 1493.7396 | 0.0157  | 11  | 114          | 126 | KAFSESICHCLQK             |      |   |    |   |                        |  |  |  |  | Mascot |
|    | 1493.7239                                                             | 1493.7396 | 0.0157  | 11  | 114          | 126 | KAFSESICHCLQK             |      |   |    |   |                        |  |  |  |  | Mascot |
|    | 1550.8649                                                             | 1550.9001 | 0.0352  | 23  | 394          | 407 | AVSSLLKQDSLHPR            |      |   |    |   |                        |  |  |  |  | Mascot |
|    | 2283.9646                                                             | 2284.1936 | 0.229   | 100 | 95           | 113 | EMWTDPDSCSTQSLHDL<br>FR   |      |   |    |   | Oxidation (M)[2]       |  |  |  |  | Mascot |
|    | 2283.9646                                                             | 2284.1936 | 0.229   | 100 | 95           | 113 | EMWTDPDSCSTQSLHDL<br>FR   |      |   |    |   | Oxidation (M)[2]       |  |  |  |  | Mascot |
|    | 2509.4612                                                             | 2509.2688 | -0.1924 | -77 | 253          | 274 | HLLKPVTLENLVINRSLH<br>DGK |      |   |    |   |                        |  |  |  |  | Mascot |
| 20 | pleckstrin homology domain-containing family G member 7 [Danio rerio] |           |         |     | gi 113681918 |     | 49035.5                   | 6.76 | 9 | 35 | 0 |                        |  |  |  |  |        |

#### Peptide Information

| Calc. Mass | Obsrv. Mass | ± da    | ± ppm | Start Seq. | End Seq. | Sequence                  | Ion Score | C. I. | % Modification         | Rank | Result Type |
|------------|-------------|---------|-------|------------|----------|---------------------------|-----------|-------|------------------------|------|-------------|
| 880.4886   | 880.5409    | 0.0523  | 59    | 245        | 252      | AHVPESLK                  |           |       |                        |      | Mascot      |
| 1165.6034  | 1165.7488   | 0.1454  | 125   | 1          | 10       | MSLVDFLQGR                |           |       |                        |      | Mascot      |
| 1193.6313  | 1193.6188   | -0.0125 | -10   | 219        | 227      | WLDNYQKVK                 |           |       |                        |      | Mascot      |
| 1320.6001  | 1320.6046   | 0.0045  | 3     | 61         | 70       | QCLQDIDSWR                |           |       | Carbamidomethyl (C)[2] |      | Mascot      |
| 1456.8634  | 1456.7791   | -0.0843 | -58   | 167        | 178      | DLLVVPLQRFTR              |           |       |                        |      | Mascot      |
| 1493.7239  | 1493.7396   | 0.0157  | 11    | 114        | 126      | KAFSESICHCLQK             |           |       |                        |      | Mascot      |
| 1493.7239  | 1493.7396   | 0.0157  | 11    | 114        | 126      | KAFSESICHCLQK             |           |       |                        |      | Mascot      |
| 1550.8649  | 1550.9001   | 0.0352  | 23    | 395        | 408      | AVSSLLKQDSLHPR            |           |       |                        |      | Mascot      |
| 2283.9646  | 2284.1936   | 0.229   | 100   | 95         | 113      | EMWTDPDSCSTQSLHDL<br>FR   |           |       | Oxidation (M)[2]       |      | Mascot      |
| 2283.9646  | 2284.1936   | 0.229   | 100   | 95         | 113      | EMWTDPDSCSTQSLHDL<br>FR   |           |       | Oxidation (M)[2]       |      | Mascot      |
| 2509.4612  | 2509.2688   | -0.1924 | -77   | 253        | 274      | HLLKPVTLENLVINRSLH<br>DGK |           |       |                        |      | Mascot      |

21 CTTNBP2 N-terminal-like protein [Danio rerio] gi|116517238 65830.4 6.2 10 35 0

#### Peptide Information

| Calc. Mass | Obsrv. Mass | ± da   | ± ppm | Start Seq. | End Seq. | Sequence   | Ion Score | C. I. | % Modification   | Rank | Result Type |
|------------|-------------|--------|-------|------------|----------|------------|-----------|-------|------------------|------|-------------|
| 937.4659   | 937.477     | 0.0111 | 12    | 1          | 8        | MNVETLSK   |           |       | Oxidation (M)[1] |      | Mascot      |
| 996.5836   | 996.5987    | 0.0151 | 15    | 520        | 529      | SPGILSPGIR |           |       |                  |      | Mascot      |
| 1045.5411  | 1045.5679   | 0.0268 | 26    | 130        | 138      | VIADLEEEK  |           |       |                  |      | Mascot      |

|           |           |         |      |     |     |                           |                                            |        |
|-----------|-----------|---------|------|-----|-----|---------------------------|--------------------------------------------|--------|
| 1179.5319 | 1179.6072 | 0.0753  | 64   | 104 | 113 | LVMAHCTNMK                | Oxidation (M)[3,9]                         | Mascot |
| 1179.5319 | 1179.6072 | 0.0753  | 64   | 104 | 113 | LVMAHCTNMK                | Oxidation (M)[3,9]                         | Mascot |
| 1320.5663 | 1320.6046 | 0.0383  | 29   | 79  | 90  | DSELSQAQDDGR              |                                            | Mascot |
| 1493.6909 | 1493.7396 | 0.0487  | 33   | 104 | 115 | LVMAHCTNMKEK              | Carbamidomethyl (C)[6], Oxidation (M)[3,9] | Mascot |
| 1493.6909 | 1493.7396 | 0.0487  | 33   | 104 | 115 | LVMAHCTNMKEK              | Carbamidomethyl (C)[6], Oxidation (M)[3,9] | Mascot |
| 1659.9905 | 1659.7808 | -0.2097 | -126 | 520 | 535 | SPGILSPGIRSPIIPR          |                                            | Mascot |
| 1712.929  | 1712.8773 | -0.0517 | -30  | 162 | 175 | LLQQLESERAQLER            |                                            | Mascot |
| 1994.1029 | 1993.9888 | -0.1141 | -57  | 509 | 529 | NLAAASSPTGKSPGILSP<br>GIR |                                            | Mascot |
| 1994.1029 | 1993.9888 | -0.1141 | -57  | 509 | 529 | NLAAASSPTGKSPGILSP<br>GIR |                                            | Mascot |
| 2132.1345 | 2132.1519 | 0.0174  | 8    | 312 | 332 | IPHKATSGITPPVSQVEA<br>DGK |                                            | Mascot |
| 2132.1345 | 2132.1519 | 0.0174  | 8    | 312 | 332 | IPHKATSGITPPVSQVEA<br>DGK |                                            | Mascot |

22 novel protein (zgc:92693) [Danio rerio] gi|94733673 22312.9 9.64 6 34 0

#### Peptide Information

| Calc. Mass | Obsrv. Mass | ± da    | ± ppm | Start Seq. | End Seq. | Sequence                        | Ion Score | C. I. % | Modification                                  | Rank | Result Type |
|------------|-------------|---------|-------|------------|----------|---------------------------------|-----------|---------|-----------------------------------------------|------|-------------|
| 836.4161   | 836.4321    | 0.016   | 19    | 154        | 159      | RFGDWR                          |           |         |                                               |      | Mascot      |
| 1259.5759  | 1259.6206   | 0.0447  | 35    | 51         | 62       | CYMQTASIGASK                    |           |         |                                               |      | Mascot      |
| 1374.6913  | 1374.6765   | -0.0148 | -11   | 33         | 44       | LSGSYAHQGLWR                    |           |         |                                               |      | Mascot      |
| 1984.9619  | 1985.0155   | 0.0536  | 27    | 51         | 68       | CYMQTASIGASKYPLSHK              |           |         |                                               |      | Mascot      |
| 2100.9741  | 2101.1472   | 0.1731  | 82    | 33         | 50       | LSGSYAHQGLWRYCMA<br>NK          |           |         | Oxidation (M)[15]                             |      | Mascot      |
| 3337.5493  | 3337.8074   | 0.2581  | 77    | 160        | 186      | FSWSYILGWVAMLMTFF<br>AGIFYMCAHR |           |         | Carbamidomethyl (C)[24], Oxidation (M)[12,14] |      | Mascot      |

23 glucocorticoid receptor [Danio rerio] gi|99028943 81868.7 6.07 11 34 0

#### Peptide Information

| Calc. Mass | Obsrv. Mass | ± da    | ± ppm | Start Seq. | End Seq. | Sequence         | Ion Score | C. I. % | Modification            | Rank | Result Type |
|------------|-------------|---------|-------|------------|----------|------------------|-----------|---------|-------------------------|------|-------------|
| 864.4608   | 864.4989    | 0.0381  | 44    | 528        | 534      | LMTTLNR          |           |         | Oxidation (M)[2]        |      | Mascot      |
| 1045.5941  | 1045.5679   | -0.0262 | -25   | 546        | 554      | WAKALPGFR        |           |         |                         |      | Mascot      |
| 1146.5936  | 1146.5758   | -0.0178 | -16   | 427        | 435      | NDCIIDKIR        |           |         | Carbamidomethyl (C)[3]  |      | Mascot      |
| 1146.5936  | 1146.5758   | -0.0178 | -16   | 427        | 435      | NDCIIDKIR        |           |         | Carbamidomethyl (C)[3]  |      | Mascot      |
| 1493.7594  | 1493.7396   | -0.0198 | -13   | 647        | 659      | DGLKSQSVFDELRL   |           |         |                         |      | Mascot      |
| 1493.7594  | 1493.7396   | -0.0198 | -13   | 647        | 659      | DGLKSQSVFDELRL   |           |         |                         |      | Mascot      |
| 1630.7866  | 1630.8175   | 0.0309  | 19    | 413        | 426      | RAVEGQHNYLCAGR   |           |         | Carbamidomethyl (C)[11] |      | Mascot      |
| 1799.9935  | 1799.9769   | -0.0166 | -9    | 256        | 271      | VEKDSIIQLCTPGVIK |           |         | Carbamidomethyl (C)[10] |      | Mascot      |

|           |           |         |    |     |     |                             |                         |        |
|-----------|-----------|---------|----|-----|-----|-----------------------------|-------------------------|--------|
| 1799.9935 | 1799.9769 | -0.0166 | -9 | 256 | 271 | VEKDSIIQLCTPGVIK            | Carbamidomethyl (C)[10] | Mascot |
| 2132.0012 | 2132.1519 | 0.1507  | 71 | 339 | 358 | SQGFGNVSGMQQRASL<br>CFSK    |                         | Mascot |
| 2132.0012 | 2132.1519 | 0.1507  | 71 | 339 | 358 | SQGFGNVSGMQQRASL<br>CFSK    |                         | Mascot |
| 2233.0002 | 2233.1318 | 0.1316  | 59 | 359 | 380 | NFSSSPYSRPEDSTATSS<br>AGGK  |                         | Mascot |
| 2284.0979 | 2284.1936 | 0.0957  | 42 | 507 | 527 | AIEPDTLYAGYDSTIPDTS<br>VR   |                         | Mascot |
| 2284.0979 | 2284.1936 | 0.0957  | 42 | 507 | 527 | AIEPDTLYAGYDSTIPDTS<br>VR   |                         | Mascot |
| 2405.0061 | 2405.1887 | 0.1826  | 76 | 386 | 408 | ICLVCSDEASGCHYGVLTCGSK      | Carbamidomethyl (C)[2]  | Mascot |
| 2872.2554 | 2872.4038 | 0.1484  | 52 | 381 | 408 | TGTHKICLVCSDEASGCHYGVLTCGSK |                         | Mascot |

24 2-amino-3-ketobutyrate coenzyme A ligase, mitochondrial [Danio rerio] gi|289191367 46423.8 7.59 9 33 0

#### Peptide Information

| Calc. Mass | Obsrv. Mass | ± da    | ± ppm | Start Seq. | End Seq. | Sequence                   | Ion Score | C. I. % | Modification            | Rank | Result Type |
|------------|-------------|---------|-------|------------|----------|----------------------------|-----------|---------|-------------------------|------|-------------|
| 1259.5573  | 1259.6206   | 0.0633  | 50    | 190        | 199      | HMDLNDLEEK                 |           |         | Oxidation (M)[2]        |      | Mascot      |
| 1434.7006  | 1434.777    | 0.0764  | 53    | 255        | 267      | GRGTDELLGVMDR              |           |         | Oxidation (M)[11]       |      | Mascot      |
| 1550.7156  | 1550.9001   | 0.1845  | 119   | 188        | 199      | YKHMDLNDLEEK               |           |         | Oxidation (M)[4]        |      | Mascot      |
| 1705.9231  | 1705.9196   | -0.0035 | -2    | 99         | 115      | AGVEALQKYGAGLSSVR          |           |         |                         |      | Mascot      |
| 1753.9014  | 1753.9025   | 0.0011  | 1     | 61         | 76       | VITSKQGPICVDGSR            |           |         | Carbamidomethyl (C)[11] |      | Mascot      |
| 1838.9355  | 1838.9199   | -0.0156 | -8    | 400        | 415      | IRVQISAHTDEDIDR            |           |         |                         |      | Mascot      |
| 1874.9891  | 1874.9788   | -0.0103 | -5    | 321        | 338      | AVELLASNEIAQSMAAK          |           |         | Oxidation (M)[15]       |      | Mascot      |
| 2132.1421  | 2132.1519   | 0.0098  | 5     | 208        | 227      | LRLVVTDGVFMSMDGDVA<br>PLK  |           |         |                         |      | Mascot      |
| 2132.1421  | 2132.1519   | 0.0098  | 5     | 208        | 227      | LRLVVTDGVFMSMDGDVA<br>PLK  |           |         |                         |      | Mascot      |
| 2283.198   | 2283.2      | 0.002   | 1     | 30         | 51       | AFAPAAPQAVQSVLEAEL<br>DSIR |           |         |                         |      | Mascot      |

25 PREDICTED: oxysterol-binding protein 2 [Danio rerio] gi|125828542 84475.7 5.89 11 33 0

#### Peptide Information

| Calc. Mass | Obsrv. Mass | ± da    | ± ppm | Start Seq. | End Seq. | Sequence         | Ion Score | C. I. % | Modification | Rank | Result Type |
|------------|-------------|---------|-------|------------|----------|------------------|-----------|---------|--------------|------|-------------|
| 1045.5525  | 1045.5679   | 0.0154  | 15    | 178        | 187      | APTDGTDKLLK      |           |         |              |      | Mascot      |
| 1341.8464  | 1341.7393   | -0.1071 | -80   | 136        | 148      | ALIQQALKTLVSK    |           |         |              |      | Mascot      |
| 1374.6318  | 1374.6765   | 0.0447  | 33    | 590        | 603      | IIESSHACGGSEGK   |           |         |              |      | Mascot      |
| 1434.7145  | 1434.777    | 0.0625  | 44    | 149        | 161      | LEDLSTCNELIGK    |           |         |              |      | Mascot      |
| 1630.7853  | 1630.8175   | 0.0322  | 20    | 590        | 605      | IIESSHACGGSEGKQK |           |         |              |      | Mascot      |
| 1683.9614  | 1683.8304   | -0.131  | -78   | 486        | 500      | GKYISIMPLGNIHLK  |           |         |              |      | Mascot      |

|  |           |           |         |     |     |     |                              |  |  |  |  |                        |  |  |  |        |
|--|-----------|-----------|---------|-----|-----|-----|------------------------------|--|--|--|--|------------------------|--|--|--|--------|
|  | 1683.9614 | 1683.8304 | -0.131  | -78 | 486 | 500 | GKYISIMPLGNIHLK              |  |  |  |  |                        |  |  |  | Mascot |
|  | 1994.0818 | 1993.9888 | -0.093  | -47 | 525 | 541 | LWIDQSGDIIIVNHRSK            |  |  |  |  |                        |  |  |  | Mascot |
|  | 1994.0818 | 1993.9888 | -0.093  | -47 | 525 | 541 | LWIDQSGDIIIVNHRSK            |  |  |  |  |                        |  |  |  | Mascot |
|  | 2225.1343 | 2225.1387 | 0.0044  | 2   | 149 | 168 | LEDLSTCNELIGKHGAAL<br>QR     |  |  |  |  | Carbamidomethyl (C)[7] |  |  |  | Mascot |
|  | 2225.1343 | 2225.1387 | 0.0044  | 2   | 149 | 168 | LEDLSTCNELIGKHGAAL<br>QR     |  |  |  |  | Carbamidomethyl (C)[7] |  |  |  | Mascot |
|  | 2299.0222 | 2299.2102 | 0.188   | 82  | 712 | 731 | TDLETGESSFMYKGGYW<br>EAK     |  |  |  |  |                        |  |  |  | Mascot |
|  | 2421.1567 | 2421.23   | 0.0733  | 30  | 562 | 584 | VTGVVTDGEGSAHYILSG<br>TWDEK  |  |  |  |  |                        |  |  |  | Mascot |
|  | 2872.4514 | 2872.4038 | -0.0476 | -17 | 426 | 449 | IGKPFNPLLGETYELDRL<br>EEYGYR |  |  |  |  |                        |  |  |  | Mascot |

26

novel protein similar to H.sapiens LYST, lysosomal trafficking regulator (LYST) [Danio rerio]

gi|220675907

58282.5

6.38

9

33

0

Peptide Information

| Calc. Mass | Obsrv. Mass | ± da    | ± ppm | Start Seq. | End Seq. | Sequence                  | Ion Score | C. I. % | Modification           | Rank | Result Type |
|------------|-------------|---------|-------|------------|----------|---------------------------|-----------|---------|------------------------|------|-------------|
| 1045.5863  | 1045.5679   | -0.0184 | -18   | 308        | 316      | CIVGYHILK                 |           |         |                        |      | Mascot      |
| 1193.5177  | 1193.6188   | 0.1011  | 85    | 1          | 10       | ICIDPNDEMK                |           |         | Oxidation (M)[9]       |      | Mascot      |
| 1234.5442  | 1234.6877   | 0.1435  | 116   | 1          | 10       | ICIDPNDEMK                |           |         | Carbamidomethyl (C)[2] |      | Mascot      |
| 1456.7729  | 1456.7791   | 0.0062  | 4     | 404        | 415      | FLLACQVLQEHR              |           |         |                        |      | Mascot      |
| 1683.7941  | 1683.8304   | 0.0363  | 22    | 487        | 501      | VQSMMYLRHSSSGGK           |           |         | Oxidation (M)[4]       |      | Mascot      |
| 1683.7941  | 1683.8304   | 0.0363  | 22    | 487        | 501      | VQSMMYLRHSSSGGK           |           |         | Oxidation (M)[4]       |      | Mascot      |
| 1753.9078  | 1753.9025   | -0.0053 | -3    | 11         | 28       | AGLLAQAESGDEVIPAGR        |           |         |                        |      | Mascot      |
| 1799.9075  | 1799.9769   | 0.0694  | 39    | 29         | 43       | WQHLALTYTQQPEGK           |           |         |                        |      | Mascot      |
| 1799.9075  | 1799.9769   | 0.0694  | 39    | 29         | 43       | WQHLALTYTQQPEGK           |           |         |                        |      | Mascot      |
| 2225.1052  | 2225.1387   | 0.0335  | 15    | 148        | 165      | YVTQEGQLQCEQIRELLMR       |           |         | Oxidation (M)[17]      |      | Mascot      |
| 2225.1052  | 2225.1387   | 0.0335  | 15    | 148        | 165      | YVTQEGQLQCEQIRELLMR       |           |         | Oxidation (M)[17]      |      | Mascot      |
| 2284.2847  | 2284.1936   | -0.0911 | -40   | 365        | 384      | AQCGVWETLLTALEILIRV<br>R  |           |         |                        |      | Mascot      |
| 2284.2847  | 2284.1936   | -0.0911 | -40   | 365        | 384      | AQCGVWETLLTALEILIRV<br>R  |           |         |                        |      | Mascot      |
| 2366.0288  | 2366.2      | 0.1712  | 72    | 81         | 101      | TYCMLGHYQHSAAEQAS<br>PSAR |           |         |                        |      | Mascot      |

27

Pkm2a protein [Danio rerio]

gi|45501385

58075.7

6.36

10

33

0

Peptide Information

| Calc. Mass | Obsrv. Mass | ± da    | ± ppm | Start Seq. | End Seq. | Sequence    | Ion Score | C. I. % | Modification     | Rank | Result Type |
|------------|-------------|---------|-------|------------|----------|-------------|-----------|---------|------------------|------|-------------|
| 996.4818   | 996.5987    | 0.1169  | 117   | 491        | 499      | VNFAMDVGK   |           |         | Oxidation (M)[5] |      | Mascot      |
| 1109.5811  | 1109.5015   | -0.0796 | -72   | 272        | 280      | LENHEGVRR   |           |         |                  |      | Mascot      |
| 1173.6837  | 1173.5945   | -0.0892 | -76   | 164        | 174      | NITKVVEVGSK |           |         |                  |      | Mascot      |

|    |                            |           |         |     |             |     |                            |      |   |    |   |                       |        |
|----|----------------------------|-----------|---------|-----|-------------|-----|----------------------------|------|---|----|---|-----------------------|--------|
|    | 1179.6289                  | 1179.6072 | -0.0217 | -18 | 58          | 67  | SVDTLKEMIK                 |      |   |    |   | Oxidation (M)[8]      | Mascot |
|    | 1179.6289                  | 1179.6072 | -0.0217 | -18 | 58          | 67  | SVDTLKEMIK                 |      |   |    |   | Oxidation (M)[8]      | Mascot |
|    | 1683.7716                  | 1683.8304 | 0.0588  | 35  | 281         | 295 | FDEIMEASDGIMVAR            |      |   |    |   |                       | Mascot |
|    | 1683.7716                  | 1683.8304 | 0.0588  | 35  | 281         | 295 | FDEIMEASDGIMVAR            |      |   |    |   |                       | Mascot |
|    | 1946.0375                  | 1945.9434 | -0.0941 | -48 | 45          | 63  | NTGIICTIGPASRSVDTLK        |      |   |    |   |                       | Mascot |
|    | 2211.1003                  | 2211.1235 | 0.0232  | 10  | 318         | 337 | CNKAGKPIICATQMLES<br>MIK   |      |   |    |   | Oxidation (M)[14, 18] | Mascot |
|    | 2243.041                   | 2243.0886 | 0.0476  | 21  | 75          | 93  | MNFSGHSHEYHGETIK<br>NVR    |      |   |    |   |                       | Mascot |
|    | 2366.1921                  | 2366.2    | 0.0079  | 3   | 506         | 527 | AGDVVIVLTGWRPGSGY<br>TNTMR |      |   |    |   | Oxidation (M)[21]     | Mascot |
|    | 2570.2197                  | 2570.2471 | 0.0274  | 11  | 469         | 490 | GIFPIYYNSPSNDVWAED<br>VDLR |      |   |    |   |                       | Mascot |
| 28 | Cct4 protein [Danio rerio] |           |         |     | gi 40807135 |     | 56956.3                    | 6.58 | 7 | 33 | 0 | 17                    | 0      |

#### Peptide Information

| Calc. Mass | Obsrv. Mass | ± da    | ± ppm | Start Seq. | End Seq. | Sequence          | Ion Score | C. I. | % Modification          | Rank | Result Type |
|------------|-------------|---------|-------|------------|----------|-------------------|-----------|-------|-------------------------|------|-------------|
| 862.5253   | 862.4844    | -0.0409 | -47   | 314        | 320      | MKIMVIK           |           |       |                         |      | Mascot      |
| 1045.6074  | 1045.5679   | -0.0395 | -38   | 287        | 296      | AGCTVLLIQK        |           |       |                         |      | Mascot      |
| 1173.666   | 1173.5945   | -0.0715 | -61   | 367        | 378      | LVKITGCASPGK      |           |       |                         |      | Mascot      |
| 1456.7794  | 1456.7791   | -0.0003 | 0     | 301        | 313      | DALSDLALHFLNK     |           |       |                         |      | Mascot      |
| 1550.89    | 1550.9001   | 0.0101  | 7     | 414        | 429      | ALIAGGGAPEIELALR  |           |       |                         |      | Mascot      |
| 1800.0112  | 1799.9769   | -0.0343 | -19   | 138        | 154      | GVEVLTSISTPLLLSDR | 17        | 0     |                         |      | Mascot      |
| 1800.0112  | 1799.9769   | -0.0343 | -19   | 138        | 154      | GVEVLTSISTPLLLSDR |           |       |                         |      | Mascot      |
| 1945.9258  | 1945.9434   | 0.0176  | 9     | 430        | 446      | LAEYARSLGGMEAYCVR |           |       | Carbamidomethyl (C)[15] |      | Mascot      |

29 PREDICTED: gastrula zinc finger protein XICGF57.1-like [Danio rerio]

gi|326667353 26141.3 9.52 8 33 0

#### Peptide Information

| Calc. Mass | Obsrv. Mass | ± da    | ± ppm | Start Seq. | End Seq. | Sequence         | Ion Score | C. I. | % Modification          | Rank | Result Type |
|------------|-------------|---------|-------|------------|----------|------------------|-----------|-------|-------------------------|------|-------------|
| 1146.5724  | 1146.5758   | 0.0034  | 3     | 74         | 83       | SFNCLAHLNK       |           |       |                         |      | Mascot      |
| 1146.5724  | 1146.5758   | 0.0034  | 3     | 74         | 83       | SFNCLAHLNK       |           |       |                         |      | Mascot      |
| 1493.7166  | 1493.7396   | 0.023   | 15    | 186        | 198      | SFSQSSSLNLHMR    |           |       |                         |      | Mascot      |
| 1493.7166  | 1493.7396   | 0.023   | 15    | 186        | 198      | SFSQSSSLNLHMR    |           |       |                         |      | Mascot      |
| 1555.6741  | 1555.7894   | 0.1153  | 74    | 130        | 142      | SFSCSSDINRHMR    |           |       | Oxidation (M)[12]       |      | Mascot      |
| 1675.8472  | 1675.7771   | -0.0701 | -42   | 199        | 213      | IHTGEKPITCTQYQK  |           |       |                         |      | Mascot      |
| 1993.9404  | 1993.9888   | 0.0484  | 24    | 1          | 17       | MRIHTGEKPFCTQCGK |           |       | Carbamidomethyl (C)[12] |      | Mascot      |
| 1993.9404  | 1993.9888   | 0.0484  | 24    | 1          | 17       | MRIHTGEKPFCTQCGK |           |       | Carbamidomethyl (C)[12] |      | Mascot      |



|    |                                          |           |        |    |              |     |                         |                                              |   |    |   |  |        |
|----|------------------------------------------|-----------|--------|----|--------------|-----|-------------------------|----------------------------------------------|---|----|---|--|--------|
|    | 2112.9888                                | 2113.1917 | 0.2029 | 96 | 84           | 101 | HMRIHTGEKPWTCTQCG<br>K  |                                              |   |    |   |  | Mascot |
|    | 2211.0435                                | 2211.1235 | 0.08   | 36 | 3            | 21  | IHTGEKPFCTQCGKSFN<br>R  | Carbamidomethyl (C)[10]                      |   |    |   |  | Mascot |
|    | 2243.0266                                | 2243.0886 | 0.062  | 28 | 84           | 101 | HMRIHTGEKPWTCTQCG<br>K  | Carbamidomethyl (C)[13,16], Oxidation (M)[2] |   |    |   |  | Mascot |
|    | 2284.0532                                | 2284.1936 | 0.1404 | 61 | 111          | 129 | HHMRIHTGEKPFCTQCG<br>GK | Carbamidomethyl (C)[14], Oxidation (M)[3]    |   |    |   |  | Mascot |
|    | 2284.0532                                | 2284.1936 | 0.1404 | 61 | 111          | 129 | HHMRIHTGEKPFCTQCG<br>GK | Carbamidomethyl (C)[14], Oxidation (M)[3]    |   |    |   |  | Mascot |
| 30 | hippocalcin-like protein 4 [Danio rerio] |           |        |    | gi 167963532 |     | 22084.8                 | 4.91                                         | 7 | 32 | 0 |  |        |

Peptide Information

| Calc. Mass | Obsrv. Mass | ± da    | ± ppm | Start Seq. | End Seq. | Sequence           | Ion Score | C. I. % | Modification      | Rank | Result Type |
|------------|-------------|---------|-------|------------|----------|--------------------|-----------|---------|-------------------|------|-------------|
| 836.4875   | 836.4321    | -0.0554 | -66   | 151        | 157      | VDKIFSK            |           |         |                   |      | Mascot      |
| 1475.6649  | 1475.7656   | 0.1007  | 68    | 161        | 172      | DHNDEISLEEFK       |           |         |                   |      | Mascot      |
| 1630.7854  | 1630.8175   | 0.0321  | 20    | 140        | 153      | MNEDGLTPQQRVDK     |           |         |                   |      | Mascot      |
| 1705.85    | 1705.9196   | 0.0696  | 41    | 177        | 191      | SDPSIVLLQLCDMQK    |           |         | Oxidation (M)[13] |      | Mascot      |
| 1874.8766  | 1874.9788   | 0.1022  | 55    | 161        | 176      | DHNDEISLEEFKEAAK   |           |         |                   |      | Mascot      |
| 1915.9583  | 1916.0876   | 0.1293  | 67    | 84         | 100      | EFICALSITSRGSFEQK  |           |         |                   |      | Mascot      |
| 1915.9583  | 1916.0876   | 0.1293  | 67    | 84         | 100      | EFICALSITSRGSFEQK  |           |         |                   |      | Mascot      |
| 2096.0369  | 2096.0415   | 0.0046  | 2     | 37         | 54       | DCPSGILNLEEFQQLYVK |           |         |                   |      | Mascot      |

|    |                                 |  |  |  |              |  |         |      |   |    |   |  |  |
|----|---------------------------------|--|--|--|--------------|--|---------|------|---|----|---|--|--|
| 31 | LOC559407 protein [Danio rerio] |  |  |  | gi 108742068 |  | 52727.9 | 5.76 | 9 | 32 | 0 |  |  |
|----|---------------------------------|--|--|--|--------------|--|---------|------|---|----|---|--|--|

Peptide Information

| Calc. Mass | Obsrv. Mass | ± da    | ± ppm | Start Seq. | End Seq. | Sequence                   | Ion Score | C. I. % | Modification                             | Rank | Result Type |
|------------|-------------|---------|-------|------------|----------|----------------------------|-----------|---------|------------------------------------------|------|-------------|
| 864.4573   | 864.4989    | 0.0416  | 48    | 276        | 282      | FTVDNLR                    |           |         |                                          |      | Mascot      |
| 1045.5411  | 1045.5679   | 0.0268  | 26    | 186        | 194      | DAVEEELLK                  |           |         |                                          |      | Mascot      |
| 1146.6187  | 1146.5758   | -0.0429 | -37   | 426        | 435      | LNLEKDIACK                 |           |         |                                          |      | Mascot      |
| 1146.6187  | 1146.5758   | -0.0429 | -37   | 426        | 435      | LNLEKDIACK                 |           |         |                                          |      | Mascot      |
| 1259.6954  | 1259.6206   | -0.0748 | -59   | 99         | 110      | ALKAETDAATLR               |           |         |                                          |      | Mascot      |
| 1320.6147  | 1320.6046   | -0.0101 | -8    | 377        | 386      | TLRPNMEQCR                 |           |         | Carbamidomethyl (C)[9], Oxidation (M)[6] |      | Mascot      |
| 1475.7812  | 1475.7656   | -0.0156 | -11   | 140        | 152      | LSAETDLQISSRR              |           |         |                                          |      | Mascot      |
| 1555.7356  | 1555.7894   | 0.0538  | 35    | 319        | 331      | AFTQRCVEMSQAK              |           |         | Carbamidomethyl (C)[6]                   |      | Mascot      |
| 2283.0823  | 2283.2      | 0.1177  | 52    | 257        | 275      | HPSSAVLQDQVCDEEVW<br>RK    |           |         | Carbamidomethyl (C)[12]                  |      | Mascot      |
| 2405.238   | 2405.1887   | -0.0493 | -20   | 154        | 175      | LEKALDATEIPFAIATDNL<br>TCR |           |         |                                          |      | Mascot      |

|    |                                                  |  |  |  |              |  |        |      |    |    |   |  |  |
|----|--------------------------------------------------|--|--|--|--------------|--|--------|------|----|----|---|--|--|
| 32 | dedicator of cytokinesis protein 5 [Danio rerio] |  |  |  | gi 158517919 |  | 214626 | 6.83 | 20 | 32 | 0 |  |  |
|----|--------------------------------------------------|--|--|--|--------------|--|--------|------|----|----|---|--|--|

Peptide Information

|  | Calc. Mass | Obsrv. Mass | $\pm$ da | $\pm$ ppm | Start Seq. | End Sequence Seq.           | Ion Score | C. I. % | Modification           | Rank | Result Type |
|--|------------|-------------|----------|-----------|------------|-----------------------------|-----------|---------|------------------------|------|-------------|
|  | 836.4004   | 836.4321    | 0.0317   | 38        | 303        | 309 VGCMELK                 |           |         | Carbamidomethyl (C)[3] |      | Mascot      |
|  | 880.4271   | 880.5409    | 0.1138   | 129       | 1576       | 1582 NPDHLER                |           |         |                        |      | Mascot      |
|  | 937.4084   | 937.477     | 0.0686   | 73        | 262        | 269 WDSTGMPK                |           |         | Oxidation (M)[6]       |      | Mascot      |
|  | 1045.5724  | 1045.5679   | -0.0045  | -4        | 525        | 532 CHLRLTFR                |           |         |                        |      | Mascot      |
|  | 1109.533   | 1109.5015   | -0.0315  | -28       | 303        | 312 VGCMELKEGK              |           |         | Oxidation (M)[4]       |      | Mascot      |
|  | 1146.655   | 1146.5758   | -0.0792  | -69       | 1314       | 1323 AIEMAKQLVK             |           |         | Oxidation (M)[4]       |      | Mascot      |
|  | 1146.655   | 1146.5758   | -0.0792  | -69       | 1314       | 1323 AIEMAKQLVK             |           |         | Oxidation (M)[4]       |      | Mascot      |
|  | 1165.6     | 1165.7488   | 0.1488   | 128       | 722        | 731 HFSATLAYQK              |           |         |                        |      | Mascot      |
|  | 1374.6794  | 1374.6765   | -0.0029  | -2        | 1526       | 1537 LSNLVQQQACDR           |           |         |                        |      | Mascot      |
|  | 1434.7838  | 1434.777    | -0.0068  | -5        | 829        | 841 VFDAVELSVQLSK           |           |         |                        |      | Mascot      |
|  | 1456.827   | 1456.7791   | -0.0479  | -33       | 1843       | 1855 VENKPPPPPPKTR          |           |         |                        |      | Mascot      |
|  | 1475.6471  | 1475.7656   | 0.1185   | 80        | 1856       | 1867 KSMFPTYESNQK           |           |         | Oxidation (M)[3]       |      | Mascot      |
|  | 1630.7893  | 1630.8175   | 0.0282   | 17        | 116        | 128 NVQQMAYSLIEYR           |           |         | Oxidation (M)[5]       |      | Mascot      |
|  | 1705.8287  | 1705.9196   | 0.0909   | 53        | 1218       | 1231 MSCTVNLLNFYKEK         |           |         | Oxidation (M)[1]       |      | Mascot      |
|  | 1721.9506  | 1721.9189   | -0.0317  | -18       | 1633       | 1647 LYGVITLPCSLTEKK        |           |         | Carbamidomethyl (C)[9] |      | Mascot      |
|  | 1737.8993  | 1737.9163   | 0.017    | 10        | 842        | 855 FIESIPDFQMVRQK          |           |         |                        |      | Mascot      |
|  | 1753.8942  | 1753.9025   | 0.0083   | 5         | 842        | 855 FIESIPDFQMVRQK          |           |         | Oxidation (M)[10]      |      | Mascot      |
|  | 1800.0629  | 1799.9769   | -0.086   | -48       | 813        | 828 GAILKYLPTIINDLQK        |           |         |                        |      | Mascot      |
|  | 1800.0629  | 1799.9769   | -0.086   | -48       | 813        | 828 GAILKYLPTIINDLQK        |           |         |                        |      | Mascot      |
|  | 1874.8378  | 1874.9788   | 0.141    | 75        | 962        | 976 QMEDAHYAQYINTFK         |           |         | Oxidation (M)[2]       |      | Mascot      |
|  | 2131.9866  | 2132.1519   | 0.1653   | 78        | 962        | 978 QMEDAHYAQYINTFKTR       |           |         | Oxidation (M)[2]       |      | Mascot      |
|  | 2131.9866  | 2132.1519   | 0.1653   | 78        | 962        | 978 QMEDAHYAQYINTFKTR       |           |         | Oxidation (M)[2]       |      | Mascot      |
|  | 2243.0801  | 2243.0886   | 0.0085   | 4         | 251        | 269 SEFISENFLVRWDSTGMP<br>K |           |         |                        |      | Mascot      |
|  | 2283.3799  | 2283.2      | -0.1799  | -79       | 1583       | 1602 IEVLKHLIALQIPLLDEGIR   |           |         |                        |      | Mascot      |

33 Gcat protein [Danio rerio] gi|45709109 49581.6 8.43 9 32 0

Peptide Information

|  | Calc. Mass | Obsrv. Mass | $\pm$ da | $\pm$ ppm | Start Seq. | End Sequence Seq.     | Ion Score | C. I. % | Modification            | Rank | Result Type |
|--|------------|-------------|----------|-----------|------------|-----------------------|-----------|---------|-------------------------|------|-------------|
|  | 1259.5573  | 1259.6206   | 0.0633   | 50        | 217        | 226 HMDLNDLEEK        |           |         | Oxidation (M)[2]        |      | Mascot      |
|  | 1434.7006  | 1434.777    | 0.0764   | 53        | 282        | 294 GRGTDELLGVMDR     |           |         | Oxidation (M)[11]       |      | Mascot      |
|  | 1550.7156  | 1550.9001   | 0.1845   | 119       | 215        | 226 YKHMDLNDLEEK      |           |         | Oxidation (M)[4]        |      | Mascot      |
|  | 1705.9231  | 1705.9196   | -0.0035  | -2        | 126        | 142 AGVEALQKYGAGLSSVR |           |         |                         |      | Mascot      |
|  | 1753.9014  | 1753.9025   | 0.0011   | 1         | 88         | 103 VITSKQGPHICVDGSR  |           |         | Carbamidomethyl (C)[11] |      | Mascot      |

|    |                                                    |           |         |    |              |     |                            |      |    |                   |   |  |        |
|----|----------------------------------------------------|-----------|---------|----|--------------|-----|----------------------------|------|----|-------------------|---|--|--------|
|    | 1838.9355                                          | 1838.9199 | -0.0156 | -8 | 427          | 442 | IRVQISAAHTDEDIDR           |      |    |                   |   |  | Mascot |
|    | 1874.9891                                          | 1874.9788 | -0.0103 | -5 | 348          | 365 | AVELLASNEIAQSMAAK          |      |    | Oxidation (M)[15] |   |  | Mascot |
|    | 2132.1421                                          | 2132.1519 | 0.0098  | 5  | 235          | 254 | LRLVVTDGVFSDGDVA<br>PLK    |      |    |                   |   |  | Mascot |
|    | 2132.1421                                          | 2132.1519 | 0.0098  | 5  | 235          | 254 | LRLVVTDGVFSDGDVA<br>PLK    |      |    |                   |   |  | Mascot |
|    | 2283.198                                           | 2283.2    | 0.002   | 1  | 57           | 78  | AFAPAAPQAVQSVLEAEL<br>DSIR |      |    |                   |   |  | Mascot |
| 34 | PREDICTED: fer-1-like protein 6-like [Danio rerio] |           |         |    | gi 326670557 |     | 203004.8                   | 5.74 | 18 | 32                | 0 |  |        |

#### Peptide Information

|  | Calc. Mass | Obsrv. Mass | ± da    | ± ppm | Start Seq. | End Seq. | Sequence                        | Ion Score | C. I. | % Modification                           | Rank | Result Type |
|--|------------|-------------|---------|-------|------------|----------|---------------------------------|-----------|-------|------------------------------------------|------|-------------|
|  | 1173.6483  | 1173.5945   | -0.0538 | -46   | 160        | 169      | LSVMHSKIMK                      |           |       |                                          |      | Mascot      |
|  | 1193.6195  | 1193.6188   | -0.0007 | -1    | 270        | 280      | INSSIMANVTK                     |           |       | Oxidation (M)[6]                         |      | Mascot      |
|  | 1320.6431  | 1320.6046   | -0.0385 | -29   | 729        | 739      | DLLFSESPEQR                     |           |       |                                          |      | Mascot      |
|  | 1326.6722  | 1326.723    | 0.0508  | 38    | 210        | 221      | GYLKCDISVSGK                    |           |       | Carbamidomethyl (C)[5]                   |      | Mascot      |
|  | 1434.7231  | 1434.777    | 0.0539  | 38    | 324        | 334      | EMFPPLCQRLK                     |           |       | Carbamidomethyl (C)[7], Oxidation (M)[2] |      | Mascot      |
|  | 1555.7878  | 1555.7894   | 0.0016  | 1     | 1759       | 1770     | CFHFLIWGNYYK                    |           |       |                                          |      | Mascot      |
|  | 1675.8398  | 1675.7771   | -0.0627 | -37   | 543        | 557      | STTTPERPIFGDAQR                 |           |       |                                          |      | Mascot      |
|  | 1712.9694  | 1712.8773   | -0.0921 | -54   | 1062       | 1077     | STLVGSHVINNLALFK                |           |       |                                          |      | Mascot      |
|  | 1753.8578  | 1753.9025   | 0.0447  | 25    | 767        | 781      | LDVFLWLGTCAESSR                 |           |       | Carbamidomethyl (C)[10]                  |      | Mascot      |
|  | 1838.9041  | 1838.9199   | 0.0158  | 9     | 610        | 624      | MLSPEAWSLMHHVLR                 |           |       | Oxidation (M)[1,10]                      |      | Mascot      |
|  | 1874.8597  | 1874.9788   | 0.1191  | 64    | 1448       | 1464     | VFMGKTVFPDEGSVCCR               |           |       |                                          |      | Mascot      |
|  | 1993.925   | 1993.9888   | 0.0638  | 32    | 1150       | 1166     | RTTADESADNVIDWWSK               |           |       |                                          |      | Mascot      |
|  | 1993.925   | 1993.9888   | 0.0638  | 32    | 1150       | 1166     | RTTADESADNVIDWWSK               |           |       |                                          |      | Mascot      |
|  | 2113.0864  | 2113.1917   | 0.1053  | 50    | 1343       | 1360     | QLNPVFGRSFEFQATFP<br>K          |           |       |                                          |      | Mascot      |
|  | 2211.1147  | 2211.1235   | 0.0088  | 4     | 1679       | 1696     | MEMLTELTENISIFQQKR              |           |       |                                          |      | Mascot      |
|  | 2225.1196  | 2225.1387   | 0.0191  | 9     | 1713       | 1732     | VEAEFHLVTAEAEKNPV<br>GR         |           |       |                                          |      | Mascot      |
|  | 2225.1196  | 2225.1387   | 0.0191  | 9     | 1713       | 1732     | VEAEFHLVTAEAEKNPV<br>GR         |           |       |                                          |      | Mascot      |
|  | 2233.1455  | 2233.1318   | -0.0137 | -6    | 522        | 542      | KLEDVSVTAPLLDTTATM<br>PCK       |           |       |                                          |      | Mascot      |
|  | 2239.1262  | 2239.1309   | 0.0047  | 2     | 610        | 627      | MLSPEAWSLMHHVLR<br>REF          |           |       |                                          |      | Mascot      |
|  | 2243.1045  | 2243.0886   | -0.0159 | -7    | 1679       | 1696     | MEMLTELTENISIFQQKR              |           |       | Oxidation (M)[1,3]                       |      | Mascot      |
|  | 3337.5144  | 3337.8074   | 0.293   | 88    | 1577       | 1605     | GWLKGLEDGQETDVHY<br>NSLTGEGNFWR |           |       |                                          |      | Mascot      |

35 Myosin binding protein C, cardiac [Danio rerio] gi|120537567 57882.1 5 9 32 0

#### Peptide Information

|  | Calc. Mass | Obsrv. Mass | ± da | ± ppm | Start Seq. | End Seq. | Sequence | Ion Score | C. I. | % Modification | Rank | Result Type |
|--|------------|-------------|------|-------|------------|----------|----------|-----------|-------|----------------|------|-------------|
|--|------------|-------------|------|-------|------------|----------|----------|-----------|-------|----------------|------|-------------|



38 Zgc:162025 protein [Danio rerio] gi|112418929 25037.3 5.9 6 30 0

Peptide Information

| Calc. Mass | Obsrv. Mass | ± da    | ± ppm | Start Seq. | End Seq. | Sequence                 | Ion Score | C. I. % | Modification      | Rank | Result Type |
|------------|-------------|---------|-------|------------|----------|--------------------------|-----------|---------|-------------------|------|-------------|
| 1326.6094  | 1326.723    | 0.1136  | 86    | 165        | 175      | EETEDVTVMK               |           |         | Oxidation (M)[10] |      | Mascot      |
| 1434.7263  | 1434.777    | 0.0507  | 35    | 16         | 27       | EAVWSFKPEDVK             |           |         |                   |      | Mascot      |
| 1675.9054  | 1675.7771   | -0.1283 | -77   | 14         | 27       | LKEAVWSFKPEDVK           |           |         |                   |      | Mascot      |
| 1683.749   | 1683.8304   | 0.0814  | 48    | 1          | 15       | MSESSSEDENTARLK          |           |         |                   |      | Mascot      |
| 1683.749   | 1683.8304   | 0.0814  | 48    | 1          | 15       | MSESSSEDENTARLK          |           |         |                   |      | Mascot      |
| 2112.9436  | 2113.1917   | 0.2481  | 117   | 120        | 137      | RPVPSSSDSDSEMEMRF<br>R   |           |         |                   |      | Mascot      |
| 2239.0374  | 2239.1309   | 0.0935  | 42    | 41         | 60       | ADVSKHEHDGNELGTTT<br>EFR |           |         |                   |      | Mascot      |

39 novel protein [Danio rerio] gi|94732304 88794 4.88 11 30 0

Peptide Information

| Calc. Mass | Obsrv. Mass | ± da    | ± ppm | Start Seq. | End Seq. | Sequence                | Ion Score | C. I. % | Modification                              | Rank | Result Type |
|------------|-------------|---------|-------|------------|----------|-------------------------|-----------|---------|-------------------------------------------|------|-------------|
| 1173.7605  | 1173.5945   | -0.166  | -141  | 217        | 226      | YPLLLKSVLK              |           |         |                                           |      | Mascot      |
| 1259.7391  | 1259.6206   | -0.1185 | -94   | 310        | 320      | QLLLEGALKMK             |           |         | Oxidation (M)[10]                         |      | Mascot      |
| 1683.7689  | 1683.8304   | 0.0615  | 37    | 605        | 619      | RNDFSGMAQVVAGCR         |           |         | Carbamidomethyl (C)[14], Oxidation (M)[7] |      | Mascot      |
| 1683.7689  | 1683.8304   | 0.0615  | 37    | 605        | 619      | RNDFSGMAQVVAGCR         |           |         | Carbamidomethyl (C)[14], Oxidation (M)[7] |      | Mascot      |
| 1705.9153  | 1705.9196   | 0.0043  | 3     | 768        | 783      | IRATMVLNSTLTASEV        |           |         |                                           |      | Mascot      |
| 1721.9102  | 1721.9189   | 0.0087  | 5     | 768        | 783      | IRATMVLNSTLTASEV        |           |         | Oxidation (M)[5]                          |      | Mascot      |
| 1915.8711  | 1916.0876   | 0.2165  | 113   | 240        | 256      | MVAAVECFINSVDSQMR       |           |         | Oxidation (M)[1]                          |      | Mascot      |
| 1915.8711  | 1916.0876   | 0.2165  | 113   | 240        | 256      | MVAAVECFINSVDSQMR       |           |         | Oxidation (M)[1]                          |      | Mascot      |
| 2112.9912  | 2113.1917   | 0.2005  | 95    | 606        | 624      | NDFSGMAQVVAGCRSQT<br>LR |           |         | Carbamidomethyl (C)[13], Oxidation (M)[6] |      | Mascot      |
| 2132.1096  | 2132.1519   | 0.0423  | 20    | 5          | 22       | VEQLQSKLYSYTMFGLP<br>K  |           |         |                                           |      | Mascot      |
| 2132.1096  | 2132.1519   | 0.0423  | 20    | 5          | 22       | VEQLQSKLYSYTMFGLP<br>K  |           |         |                                           |      | Mascot      |
| 2225.0259  | 2225.1387   | 0.1128  | 51    | 240        | 258      | MVAAVECFINSVDSQMR<br>HR |           |         | Oxidation (M)[1,16]                       |      | Mascot      |
| 2225.0259  | 2225.1387   | 0.1128  | 51    | 240        | 258      | MVAAVECFINSVDSQMR<br>HR |           |         | Oxidation (M)[1,16]                       |      | Mascot      |
| 2239.1077  | 2239.1309   | 0.0232  | 10    | 139        | 157      | RTMLNPTELHQGFSTFG<br>FR |           |         |                                           |      | Mascot      |
| 2242.9309  | 2243.0886   | 0.1577  | 70    | 164        | 180      | YCMEEEGCMEYMRTLLK       |           |         | Carbamidomethyl (C)[2,8]                  |      | Mascot      |
| 2284.1853  | 2284.1936   | 0.0083  | 4     | 645        | 664      | SEDDLQCLTDPLLRPT<br>GK  |           |         | Carbamidomethyl (C)[8]                    |      | Mascot      |
| 2284.1853  | 2284.1936   | 0.0083  | 4     | 645        | 664      | SEDDLQCLTDPLLRPT<br>GK  |           |         | Carbamidomethyl (C)[8]                    |      | Mascot      |

40 PREDICTED: hypothetical protein LOC798392 [Danio gi|326679009 92940.9 8.11 11 30 0

rerio]

| Peptide Information                     |             |         |       |              |          |                             |           |         |                                          |                  |
|-----------------------------------------|-------------|---------|-------|--------------|----------|-----------------------------|-----------|---------|------------------------------------------|------------------|
| Calc. Mass                              | Obsrv. Mass | ± da    | ± ppm | Start Seq.   | End Seq. | Sequence                    | Ion Score | C. I. % | Modification                             | Rank Result Type |
| 862.4451                                | 862.4844    | 0.0393  | 46    | 816          | 823      | ATAAQCLK                    |           |         | Carbamidomethyl (C)[6]                   | Mascot           |
| 1146.6854                               | 1146.5758   | -0.1096 | -96   | 261          | 270      | VRRPPTAPR                   |           |         |                                          | Mascot           |
| 1146.6854                               | 1146.5758   | -0.1096 | -96   | 261          | 270      | VRRPPTAPR                   |           |         |                                          | Mascot           |
| 1320.6001                               | 1320.6046   | 0.0045  | 3     | 145          | 154      | NPEEQCQLFR                  |           |         | Carbamidomethyl (C)[6]                   | Mascot           |
| 1341.6508                               | 1341.7393   | 0.0885  | 66    | 669          | 680      | IADLGSSCWVYK                |           |         |                                          | Mascot           |
| 1493.7053                               | 1493.7396   | 0.0343  | 23    | 38           | 49       | FQVLMEAQQEDR                |           |         |                                          | Mascot           |
| 1493.7053                               | 1493.7396   | 0.0343  | 23    | 38           | 49       | FQVLMEAQQEDR                |           |         |                                          | Mascot           |
| 1683.9176                               | 1683.8304   | -0.0872 | -52   | 353          | 368      | VPATPTIAPGRDGLYR            |           |         |                                          | Mascot           |
| 1683.9176                               | 1683.8304   | -0.0872 | -52   | 353          | 368      | VPATPTIAPGRDGLYR            |           |         |                                          | Mascot           |
| 1838.8425                               | 1838.9199   | 0.0774  | 42    | 325          | 340      | SGPMHWRCGHEDSVLK            |           |         |                                          | Mascot           |
| 1874.8629                               | 1874.9788   | 0.1159  | 62    | 77           | 92       | MAPHDDPEAFDLFEK             |           |         |                                          | Mascot           |
| 1945.8427                               | 1945.9434   | 0.1007  | 52    | 564          | 580      | CWQMCFGNPGLSLSCV<br>K       |           |         | Carbamidomethyl (C)[1], Oxidation (M)[4] | Mascot           |
| 2131.9541                               | 2132.1519   | 0.1978  | 93    | 449          | 466      | DYCYGGYHPVQVGDIFN<br>K      |           |         | Carbamidomethyl (C)[3]                   | Mascot           |
| 2131.9541                               | 2132.1519   | 0.1978  | 93    | 449          | 466      | DYCYGGYHPVQVGDIFN<br>K      |           |         | Carbamidomethyl (C)[3]                   | Mascot           |
| 2284.135                                | 2284.1936   | 0.0586  | 26    | 385          | 407      | EGGGCRADPIIKPGGAST<br>AELER |           |         |                                          | Mascot           |
| 2284.135                                | 2284.1936   | 0.0586  | 26    | 385          | 407      | EGGGCRADPIIKPGGAST<br>AELER |           |         |                                          | Mascot           |
| Si:ch211-173p18.1 protein [Danio rerio] |             |         |       | gi 213625968 |          | 147548.4                    | 6.23      | 16      | 30                                       | 0                |

| Peptide Information |             |         |       |            |                    |           |         |                          |                  |
|---------------------|-------------|---------|-------|------------|--------------------|-----------|---------|--------------------------|------------------|
| Calc. Mass          | Obsrv. Mass | ± da    | ± ppm | Start Seq. | End Sequence Seq.  | Ion Score | C. I. % | Modification             | Rank Result Type |
| 836.4546            | 836.4321    | -0.0225 | -27   | 644        | 650 KMTETVK        |           |         |                          | Mascot           |
| 862.4417            | 862.4844    | 0.0427  | 50    | 292        | 299 AGTTFTHK       |           |         |                          | Mascot           |
| 864.3854            | 864.4989    | 0.1135  | 131   | 246        | 251 CHFCLK         |           |         | Carbamidomethyl (C)[1,4] | Mascot           |
| 937.5175            | 937.477     | -0.0405 | -43   | 278        | 285 CISLLNFK       |           |         |                          | Mascot           |
| 1193.6447           | 1193.6188   | -0.0259 | -22   | 1050       | 1059 SMTLKEDLLK    |           |         | Oxidation (M)[2]         | Mascot           |
| 1456.8304           | 1456.7791   | -0.0513 | -35   | 772        | 784 NKALLCKPLSQNK  |           |         |                          | Mascot           |
| 1493.6981           | 1493.7396   | 0.0415  | 28    | 1106       | 1117 MENIFADVFTYK  |           |         | Oxidation (M)[1]         | Mascot           |
| 1493.6981           | 1493.7396   | 0.0415  | 28    | 1106       | 1117 MENIFADVFTYK  |           |         | Oxidation (M)[1]         | Mascot           |
| 1659.8232           | 1659.7808   | -0.0424 | -26   | 272        | 285 EFCSQKCISLLNFK |           |         |                          | Mascot           |
| 1712.7117           | 1712.8773   | 0.1656  | 97    | 526        | 539 MYAFCGTACVEEFK |           |         | Carbamidomethyl (C)[5,9] | Mascot           |

|    |                                              |           |        |     |              |      |                             |     |                                           |        |   |
|----|----------------------------------------------|-----------|--------|-----|--------------|------|-----------------------------|-----|-------------------------------------------|--------|---|
|    | 1799.78                                      | 1799.9769 | 0.1969 | 109 | 525          | 539  | KMYAFCGTACVEEFK             |     | Carbamidomethyl (C)[6], Oxidation (M)[2]  | Mascot |   |
|    | 1799.78                                      | 1799.9769 | 0.1969 | 109 | 525          | 539  | KMYAFCGTACVEEFK             |     | Carbamidomethyl (C)[6], Oxidation (M)[2]  | Mascot |   |
|    | 1915.9562                                    | 1916.0876 | 0.1314 | 69  | 1019         | 1033 | LQHEYGVTAWRDWVR             |     |                                           | Mascot |   |
|    | 1915.9562                                    | 1916.0876 | 0.1314 | 69  | 1019         | 1033 | LQHEYGVTAWRDWVR             |     |                                           | Mascot |   |
|    | 1945.9067                                    | 1945.9434 | 0.0367 | 19  | 1055         | 1071 | EDLLKCCTAEISYGLCK           |     | Carbamidomethyl (C)[6]                    | Mascot |   |
|    | 2225.0576                                    | 2225.1387 | 0.0811 | 36  | 258          | 277  | DVISAPVDMAGNLKEFCS QK       |     | Carbamidomethyl (C)[17], Oxidation (M)[9] | Mascot |   |
|    | 2225.0576                                    | 2225.1387 | 0.0811 | 36  | 258          | 277  | DVISAPVDMAGNLKEFCS QK       |     | Carbamidomethyl (C)[17], Oxidation (M)[9] | Mascot |   |
|    | 2283.0752                                    | 2283.2    | 0.1248 | 55  | 220          | 240  | GCPKLFCSPPQCLCSNSN VVVK     |     | Carbamidomethyl (C)[2]                    | Mascot |   |
|    | 2366.1672                                    | 2366.2    | 0.0328 | 14  | 504          | 523  | IPCSQCLNSFFHKPELLD FK       |     |                                           | Mascot |   |
|    | 2872.3313                                    | 2872.4038 | 0.0725 | 25  | 1276         | 1301 | SCVPNSPMWFSISALSD EALNSMLTR |     | Oxidation (M)[8]                          | Mascot |   |
| 42 | hypothetical protein LOC571775 [Danio rerio] |           |        |     | gi 148238042 |      | 26922.4                     | 7.7 | 6                                         | 30     | 0 |

#### Peptide Information

| Calc. Mass | Obsrv. Mass | ± da    | ± ppm | Start Seq. | End Seq. | Sequence              | Ion Score | C. I. % | Modification      | Rank | Result Type |
|------------|-------------|---------|-------|------------|----------|-----------------------|-----------|---------|-------------------|------|-------------|
| 1326.6094  | 1326.723    | 0.1136  | 86    | 165        | 175      | EETEDVTVMK            |           |         | Oxidation (M)[10] |      | Mascot      |
| 1434.7263  | 1434.777    | 0.0507  | 35    | 16         | 27       | EAVWSFKPEDVK          |           |         |                   |      | Mascot      |
| 1675.9054  | 1675.7771   | -0.1283 | -77   | 14         | 27       | LKEAVWSFKPEDVK        |           |         |                   |      | Mascot      |
| 1683.749   | 1683.8304   | 0.0814  | 48    | 1          | 15       | MSESSSEDENTARLK       |           |         |                   |      | Mascot      |
| 1683.749   | 1683.8304   | 0.0814  | 48    | 1          | 15       | MSESSSEDENTARLK       |           |         |                   |      | Mascot      |
| 2112.9436  | 2113.1917   | 0.2481  | 117   | 120        | 137      | RPVPSSSDSDSEMEMRF R   |           |         |                   |      | Mascot      |
| 2239.0374  | 2239.1309   | 0.0935  | 42    | 41         | 60       | ADVSKHEHDGNELGTTT EFR |           |         |                   |      | Mascot      |

43 LOC402845 protein [Danio rerio] gi|31807448 34364.9 9.2 7 30 0

#### Peptide Information

| Calc. Mass | Obsrv. Mass | ± da   | ± ppm | Start Seq. | End Seq. | Sequence               | Ion Score | C. I. % | Modification                                | Rank | Result Type |
|------------|-------------|--------|-------|------------|----------|------------------------|-----------|---------|---------------------------------------------|------|-------------|
| 1146.532   | 1146.5758   | 0.0438 | 38    | 91         | 99       | LNLCDNQNR              |           |         | Carbamidomethyl (C)[4]                      |      | Mascot      |
| 1146.532   | 1146.5758   | 0.0438 | 38    | 91         | 99       | LNLCDNQNR              |           |         | Carbamidomethyl (C)[4]                      |      | Mascot      |
| 1434.7694  | 1434.777    | 0.0076 | 5     | 296        | 307      | DGIKMVCIEK             |           |         | Carbamidomethyl (C)[8], Oxidation (M)[6]    |      | Mascot      |
| 1456.7655  | 1456.7791   | 0.0136 | 9     | 257        | 269      | RALQSPSHFTANK          |           |         |                                             |      | Mascot      |
| 1721.8495  | 1721.9189   | 0.0694 | 40    | 199        | 214      | SALMIAACNGQISMVR       |           |         | Carbamidomethyl (C)[8]                      |      | Mascot      |
| 1737.8445  | 1737.9163   | 0.0718 | 41    | 199        | 214      | SALMIAACNGQISMVR       |           |         | Carbamidomethyl (C)[8], Oxidation (M)[4]    |      | Mascot      |
| 1753.8394  | 1753.9025   | 0.0631 | 36    | 199        | 214      | SALMIAACNGQISMVR       |           |         | Carbamidomethyl (C)[8], Oxidation (M)[4,14] |      | Mascot      |
| 2113.0295  | 2113.1917   | 0.1622 | 77    | 12         | 32       | GSPSASETASVLSASYDV KEK |           |         |                                             |      | Mascot      |

|    |                                                                                         |           |         |     |     |     |                              |      |    |    |   |                  |        |
|----|-----------------------------------------------------------------------------------------|-----------|---------|-----|-----|-----|------------------------------|------|----|----|---|------------------|--------|
|    | 2336.1267                                                                               | 2336.0356 | -0.0911 | -39 | 194 | 214 | NQEQRSALMIAACNGQIS<br>MVR    |      |    |    |   | Oxidation (M)[9] | Mascot |
|    | 2570.2664                                                                               | 2570.2471 | -0.0193 | -8  | 163 | 185 | DGNTPLMLALMENHADMD<br>TELLLK |      |    |    |   |                  | Mascot |
| 44 | novel protein similar to spectrin, beta, erythrocytic (sptb) gi 122890739 [Danio rerio] |           |         |     |     |     | 160909.8                     | 6.13 | 15 | 30 | 0 |                  |        |

Peptide Information

| Calc. Mass | Obsrv. Mass | ± da    | ± ppm | Start Seq. | End Seq. | Sequence                    | Ion Score | C. I. | % Modification        | Rank | Result Type |
|------------|-------------|---------|-------|------------|----------|-----------------------------|-----------|-------|-----------------------|------|-------------|
| 996.522    | 996.5987    | 0.0767  | 77    | 17         | 24       | DEAQLHR                     |           |       |                       |      | Mascot      |
| 1109.6023  | 1109.5015   | -0.1008 | -91   | 706        | 714      | LEYVMAKQK                   |           |       |                       |      | Mascot      |
| 1173.5834  | 1173.5945   | 0.0111  | 9     | 29         | 38       | HQAFMAELAR                  |           |       |                       |      | Mascot      |
| 1179.5284  | 1179.6072   | 0.0788  | 67    | 680        | 689      | NFVHCVEMGK                  |           |       | Oxidation (M)[8]      |      | Mascot      |
| 1179.5284  | 1179.6072   | 0.0788  | 67    | 680        | 689      | NFVHCVEMGK                  |           |       | Oxidation (M)[8]      |      | Mascot      |
| 1320.6576  | 1320.6046   | -0.053  | -40   | 465        | 476      | AVGQKQMDSVNK                |           |       | Oxidation (M)[7]      |      | Mascot      |
| 1550.7897  | 1550.9001   | 0.1104  | 71    | 974        | 986      | ADCFQPKINHIHK               |           |       |                       |      | Mascot      |
| 1630.8031  | 1630.8175   | 0.0144  | 9     | 759        | 773      | EAGGGTDEVEELIRR             |           |       |                       |      | Mascot      |
| 1675.8431  | 1675.7771   | -0.066  | -39   | 1118       | 1131     | RSTMAEIVEQVQER              |           |       |                       |      | Mascot      |
| 1721.9043  | 1721.9189   | 0.0146  | 8     | 1217       | 1231     | SPNSKSWVNLFCVLK             |           |       |                       |      | Mascot      |
| 1753.8901  | 1753.9025   | 0.0124  | 7     | 373        | 387      | RMLELGHPDSEQITK             |           |       |                       |      | Mascot      |
| 1874.9429  | 1874.9788   | 0.0359  | 19    | 593        | 608      | ADAILSREQEVMQAWK            |           |       |                       |      | Mascot      |
| 1915.9719  | 1916.0876   | 0.1157  | 60    | 329        | 345      | LQVLNEEKGNDEASTLR           |           |       |                       |      | Mascot      |
| 1915.9719  | 1916.0876   | 0.1157  | 60    | 329        | 345      | LQVLNEEKGNDEASTLR           |           |       |                       |      | Mascot      |
| 2282.9727  | 2283.2      | 0.2273  | 100   | 477        | 496      | MVNEMIDCSHSDAATIAE<br>WK    |           |       | Oxidation (M)[1,5]    |      | Mascot      |
| 2283.9678  | 2284.1936   | 0.2258  | 99    | 636        | 655      | ELSMWMDGIMGQIGPND<br>DAR    |           |       | Oxidation (M)[4,6,10] |      | Mascot      |
| 2283.9678  | 2284.1936   | 0.2258  | 99    | 636        | 655      | ELSMWMDGIMGQIGPND<br>DAR    |           |       | Oxidation (M)[4,6,10] |      | Mascot      |
| 2421.1426  | 2421.23     | 0.0874  | 36    | 814        | 836      | QMFPLSCLVPSSSSSSS<br>SSSLFR |           |       |                       |      | Mascot      |

45 Zgc:162025 protein [Danio rerio] gi|159155250 27178.6 8.59 6 30 0

Peptide Information

| Calc. Mass | Obsrv. Mass | ± da    | ± ppm | Start Seq. | End Seq. | Sequence        | Ion Score | C. I. | % Modification    | Rank | Result Type |
|------------|-------------|---------|-------|------------|----------|-----------------|-----------|-------|-------------------|------|-------------|
| 1326.6094  | 1326.723    | 0.1136  | 86    | 165        | 175      | EETEDVTKMK      |           |       | Oxidation (M)[10] |      | Mascot      |
| 1434.7263  | 1434.777    | 0.0507  | 35    | 16         | 27       | EAVWSFKPEDVK    |           |       |                   |      | Mascot      |
| 1675.9054  | 1675.7771   | -0.1283 | -77   | 14         | 27       | LKEAVWSFKPEDVK  |           |       |                   |      | Mascot      |
| 1683.749   | 1683.8304   | 0.0814  | 48    | 1          | 15       | MSESSSEDENTARLK |           |       |                   |      | Mascot      |
| 1683.749   | 1683.8304   | 0.0814  | 48    | 1          | 15       | MSESSSEDENTARLK |           |       |                   |      | Mascot      |



|    |                             |           |        |     |              |     |                          |     |   |    |   |  |  |  |  |  |        |
|----|-----------------------------|-----------|--------|-----|--------------|-----|--------------------------|-----|---|----|---|--|--|--|--|--|--------|
|    | 2112.9436                   | 2113.1917 | 0.2481 | 117 | 120          | 137 | RPVPSSSDSDSEMEMRF<br>R   |     |   |    |   |  |  |  |  |  | Mascot |
|    | 2239.0374                   | 2239.1309 | 0.0935 | 42  | 41           | 60  | ADVSKHEHDGNELGTTT<br>EFR |     |   |    |   |  |  |  |  |  | Mascot |
| 46 | novel protein [Danio rerio] |           |        |     | gi 169146109 |     | 64501.6                  | 6.3 | 9 | 29 | 0 |  |  |  |  |  |        |

Peptide Information

| Calc. Mass | Obsrv. Mass | ± da    | ± ppm | Start Seq. | End Seq. | Sequence                  | Ion Score | C. I. | % | Modification                               | Rank | Result | Type   |
|------------|-------------|---------|-------|------------|----------|---------------------------|-----------|-------|---|--------------------------------------------|------|--------|--------|
| 996.5836   | 996.5987    | 0.0151  | 15    | 508        | 517      | SPGILSPGIR                |           |       |   |                                            |      |        | Mascot |
| 1045.5411  | 1045.5679   | 0.0268  | 26    | 118        | 126      | VIADLEEEK                 |           |       |   |                                            |      |        | Mascot |
| 1179.5319  | 1179.6072   | 0.0753  | 64    | 92         | 101      | LVMAHCTNMK                |           |       |   | Oxidation (M)[3,9]                         |      |        | Mascot |
| 1179.5319  | 1179.6072   | 0.0753  | 64    | 92         | 101      | LVMAHCTNMK                |           |       |   | Oxidation (M)[3,9]                         |      |        | Mascot |
| 1320.5663  | 1320.6046   | 0.0383  | 29    | 67         | 78       | DSELSQAQDDGR              |           |       |   |                                            |      |        | Mascot |
| 1493.6909  | 1493.7396   | 0.0487  | 33    | 92         | 103      | LVMAHCTNMKEK              |           |       |   | Carbamidomethyl (C)[6], Oxidation (M)[3,9] |      |        | Mascot |
| 1493.6909  | 1493.7396   | 0.0487  | 33    | 92         | 103      | LVMAHCTNMKEK              |           |       |   | Carbamidomethyl (C)[6], Oxidation (M)[3,9] |      |        | Mascot |
| 1659.9905  | 1659.7808   | -0.2097 | -126  | 508        | 523      | SPGILSPGIRSPIIPR          |           |       |   |                                            |      |        | Mascot |
| 1712.929   | 1712.8773   | -0.0517 | -30   | 150        | 163      | LLQQLESERAQLER            |           |       |   |                                            |      |        | Mascot |
| 1994.1029  | 1993.9888   | -0.1141 | -57   | 497        | 517      | NLAAASSPTGKSPGILSP<br>GIR |           |       |   |                                            |      |        | Mascot |
| 1994.1029  | 1993.9888   | -0.1141 | -57   | 497        | 517      | NLAAASSPTGKSPGILSP<br>GIR |           |       |   |                                            |      |        | Mascot |
| 2132.1345  | 2132.1519   | 0.0174  | 8     | 300        | 320      | IPHKATSGITPPVSQVEA<br>DGK |           |       |   |                                            |      |        | Mascot |
| 2132.1345  | 2132.1519   | 0.0174  | 8     | 300        | 320      | IPHKATSGITPPVSQVEA<br>DGK |           |       |   |                                            |      |        | Mascot |

|    |                                                 |  |  |  |             |  |         |      |   |    |   |  |  |  |  |  |  |
|----|-------------------------------------------------|--|--|--|-------------|--|---------|------|---|----|---|--|--|--|--|--|--|
| 47 | secreted frizzled-related protein [Danio rerio] |  |  |  | gi 38198627 |  | 32225.2 | 8.77 | 1 | 16 | 0 |  |  |  |  |  |  |
|----|-------------------------------------------------|--|--|--|-------------|--|---------|------|---|----|---|--|--|--|--|--|--|

Peptide Information

| Calc. Mass | Obsrv. Mass | ± da   | ± ppm | Start Seq. | End Seq. | Sequence   | Ion Score | C. I. | % | Modification     | Rank | Result | Type   |
|------------|-------------|--------|-------|------------|----------|------------|-----------|-------|---|------------------|------|--------|--------|
| 1179.5206  | 1179.6072   | 0.0866 | 73    | 155        | 164      | VCPPCEMEKK | 16        | 0     |   | Oxidation (M)[7] | 1    |        | Mascot |

|    |                          |  |  |  |             |  |         |      |   |    |   |  |  |  |  |  |  |
|----|--------------------------|--|--|--|-------------|--|---------|------|---|----|---|--|--|--|--|--|--|
| 48 | Zgc:136688 [Danio rerio] |  |  |  | gi 49902960 |  | 48277.1 | 6.22 | 1 | 13 | 0 |  |  |  |  |  |  |
|----|--------------------------|--|--|--|-------------|--|---------|------|---|----|---|--|--|--|--|--|--|

Peptide Information

| Calc. Mass | Obsrv. Mass | ± da   | ± ppm | Start Seq. | End Seq. | Sequence  | Ion Score | C. I. | % | Modification           | Rank | Result | Type   |
|------------|-------------|--------|-------|------------|----------|-----------|-----------|-------|---|------------------------|------|--------|--------|
| 1179.5609  | 1179.6072   | 0.0463 | 39    | 155        | 163      | KMQEQLCSR | 13        | 0     |   | Carbamidomethyl (C)[7] | 2    |        | Mascot |

|    |                                                 |  |  |  |              |  |         |      |   |    |   |  |  |  |  |  |  |
|----|-------------------------------------------------|--|--|--|--------------|--|---------|------|---|----|---|--|--|--|--|--|--|
| 49 | PREDICTED: potassium channel SKOR [Danio rerio] |  |  |  | gi 326672803 |  | 52150.7 | 8.43 | 1 | 12 | 0 |  |  |  |  |  |  |
|----|-------------------------------------------------|--|--|--|--------------|--|---------|------|---|----|---|--|--|--|--|--|--|

Peptide Information

| Calc. Mass | Obsrv. Mass | ± da | ± ppm | Start Seq. | End Seq. | Sequence | Ion Score | C. I. | % | Modification | Rank | Result | Type |
|------------|-------------|------|-------|------------|----------|----------|-----------|-------|---|--------------|------|--------|------|
|------------|-------------|------|-------|------------|----------|----------|-----------|-------|---|--------------|------|--------|------|

|    |                                                                       |              |           |         |    |    |    |            |    |   |  |  |   |        |
|----|-----------------------------------------------------------------------|--------------|-----------|---------|----|----|----|------------|----|---|--|--|---|--------|
|    |                                                                       | 1179.6117    | 1179.6072 | -0.0045 | -4 | 81 | 90 | STSHSYLTRK | 12 | 0 |  |  | 3 | Mascot |
| 50 | PREDICTED: short transient receptor potential channel 4 [Danio rerio] | gi 189528938 | 105113.9  | 6.26    | 1  |    |    |            | 11 | 0 |  |  |   |        |

Peptide Information

| Calc. Mass | Obsrv. Mass | ± da    | ± ppm | Start Seq. | End Seq. | Sequence  | Ion Score | C. I. % | Modification | Rank | Result Type |
|------------|-------------|---------|-------|------------|----------|-----------|-----------|---------|--------------|------|-------------|
| 1146.6517  | 1146.5758   | -0.0759 | -66   | 264        | 272      | ELELILNFR | 11        | 0       |              | 2    | Mascot      |

|                |           |                        |                |                |                    |
|----------------|-----------|------------------------|----------------|----------------|--------------------|
| Gel Idx/Pos    | 201/11    | Instr./Gel Origin      | BA2060/110707A | Process Status | Analysis Succeeded |
| Plate [#] Name | [1] 31496 | Instrument Sample Name |                | Spectra        | 11                 |

| Rank | Protein Name               | Accession No. | Protein MW | Protein PI | Pep. Count | Protein Score | Protein Score C. I. % | Total Ion Score | Total Ion C. I. % |
|------|----------------------------|---------------|------------|------------|------------|---------------|-----------------------|-----------------|-------------------|
| 1    | Krt4 protein [Danio rerio] | gi 44890667   | 53993.9    | 5.34       | 26         | 980           | 100                   | 767             | 100               |

Peptide Information

| Calc. Mass | Obsrv. Mass | ± da   | ± ppm | Start Seq. | End Seq. | Sequence     | Ion Score | C. I. % | Modification     | Rank | Result Type |
|------------|-------------|--------|-------|------------|----------|--------------|-----------|---------|------------------|------|-------------|
| 827.4297   | 827.4323    | 0.0026 | 3     | 125        | 131      | FASFIDK      |           |         |                  |      | Mascot      |
| 882.4349   | 882.4437    | 0.0088 | 10    | 33         | 40       | MSSVTSVR     |           |         | Oxidation (M)[1] |      | Mascot      |
| 915.4893   | 915.495     | 0.0057 | 6     | 328        | 335      | AEIAELNR     |           |         |                  |      | Mascot      |
| 932.4683   | 932.4755    | 0.0072 | 8     | 417        | 424      | LLEGEESR     |           |         |                  |      | Mascot      |
| 950.4941   | 950.4991    | 0.005  | 5     | 249        | 256      | AVYEAE LR    |           |         |                  |      | Mascot      |
| 983.4468   | 983.4511    | 0.0043 | 4     | 299        | 306      | AEAESWYK     |           |         |                  |      | Mascot      |
| 987.5105   | 987.5144    | 0.0039 | 4     | 378        | 385      | ELEEALQR     |           |         |                  |      | Mascot      |
| 1079.5116  | 1079.5193   | 0.0077 | 7     | 288        | 296      | AQYEDIANR    |           |         |                  |      | Mascot      |
| 1127.5691  | 1127.5769   | 0.0078 | 7     | 5          | 15       | SITYSSGGSIR  |           |         |                  |      | Mascot      |
| 1226.5801  | 1226.5881   | 0.008  | 7     | 297        | 306      | SRAEAESWYK   |           |         |                  |      | Mascot      |
| 1248.6833  | 1248.6918   | 0.0085 | 7     | 210        | 220      | ASVENEFVLLK  |           |         |                  |      | Mascot      |
| 1256.6957  | 1256.7061   | 0.0104 | 8     | 376        | 385      | IRELEEALQR   |           |         |                  |      | Mascot      |
| 1256.6957  | 1256.7061   | 0.0104 | 8     | 376        | 385      | IRELEEALQR   | 46        | 99.218  |                  |      | Mascot      |
| 1277.71    | 1277.7207   | 0.0107 | 8     | 405        | 415      | LALDIEIATYR  |           |         |                  |      | Mascot      |
| 1277.71    | 1277.7207   | 0.0107 | 8     | 405        | 415      | LALDIEIATYR  | 91        | 100     |                  |      | Mascot      |
| 1351.6158  | 1351.6682   | 0.0524 | 39    | 264        | 275      | DTSVVVEMDNSR |           |         |                  |      | Mascot      |
| 1361.673   | 1361.6829   | 0.0099 | 7     | 276        | 287      | NLDMSIVA EVR |           |         |                  |      | Mascot      |
| 1362.7013  | 1362.7084   | 0.0071 | 5     | 146        | 156      | WSLLQEQTTR   |           |         |                  |      | Mascot      |

|           |           |         |     |     |     |                    |     |        |                  |        |
|-----------|-----------|---------|-----|-----|-----|--------------------|-----|--------|------------------|--------|
| 1362.7013 | 1362.7084 | 0.0071  | 5   | 146 | 156 | WSLLQEQTTR         | 70  | 99.997 |                  | Mascot |
| 1377.6678 | 1377.6808 | 0.013   | 9   | 276 | 287 | NLDMDSIVAEVR       |     |        | Oxidation (M)[4] | Mascot |
| 1432.743  | 1432.7548 | 0.0118  | 8   | 237 | 248 | VDALQDEINFLR       | 119 | 100    |                  | Mascot |
| 1432.743  | 1432.7548 | 0.0118  | 8   | 237 | 248 | VDALQDEINFLR       |     |        |                  | Mascot |
| 1443.7074 | 1443.7177 | 0.0103  | 7   | 352 | 364 | ANLEAQIAEAEER      | 69  | 99.996 |                  | Mascot |
| 1443.7074 | 1443.7177 | 0.0103  | 7   | 352 | 364 | ANLEAQIAEAEER      |     |        |                  | Mascot |
| 1615.7711 | 1615.7828 | 0.0117  | 7   | 17  | 32  | GYTSQSAYAVPAGSTR   |     |        |                  | Mascot |
| 1743.837  | 1743.8589 | 0.0219  | 13  | 157 | 171 | SNIDAMFEAYISNLR    | 98  | 100    |                  | Mascot |
| 1743.866  | 1743.8589 | -0.0071 | -4  | 16  | 32  | KGYTSQSAYAVPAGSTR  |     |        |                  | Mascot |
| 1759.8319 | 1759.8466 | 0.0147  | 8   | 157 | 171 | SNIDAMFEAYISNLR    | 86  | 100    | Oxidation (M)[6] | Mascot |
| 1759.8319 | 1759.8466 | 0.0147  | 8   | 157 | 171 | SNIDAMFEAYISNLR    |     |        | Oxidation (M)[6] | Mascot |
| 1846.7913 | 1846.8083 | 0.017   | 9   | 309 | 324 | FEEMQSTAGQYGDDL    |     |        |                  | Mascot |
| 1862.7861 | 1862.7999 | 0.0138  | 7   | 309 | 324 | FEEMQSTAGQYGDDL    |     |        | Oxidation (M)[4] | Mascot |
| 1899.9381 | 1899.9529 | 0.0148  | 8   | 157 | 172 | SNIDAMFEAYISNLR    |     |        |                  | Mascot |
| 1915.933  | 1915.9495 | 0.0165  | 9   | 157 | 172 | SNIDAMFEAYISNLR    |     |        | Oxidation (M)[6] | Mascot |
| 2041.0559 | 2041.0748 | 0.0189  | 9   | 352 | 370 | ANLEAQIAEAEERGELAV |     |        |                  | Mascot |
| 2041.0559 | 2041.0748 | 0.0189  | 9   | 352 | 370 | ANLEAQIAEAEERGELAV | 120 | 100    |                  | Mascot |
| 2102.1128 | 2101.939  | -0.1738 | -83 | 231 | 248 | VELEAKVDALQDEINFLR |     |        |                  | Mascot |
| 2102.9448 | 2102.9561 | 0.0113  | 5   | 307 | 324 | QKFEEMQSTAGQYGDDL  | 156 | 100    |                  | Mascot |
| 2102.9448 | 2102.9561 | 0.0113  | 5   | 307 | 324 | QKFEEMQSTAGQYGDDL  |     |        |                  | Mascot |
| 2118.9397 | 2118.9597 | 0.02    | 9   | 307 | 324 | QKFEEMQSTAGQYGDDL  | 93  | 100    | Oxidation (M)[6] | Mascot |
| 2118.9397 | 2118.9597 | 0.02    | 9   | 307 | 324 | QKFEEMQSTAGQYGDDL  |     |        | Oxidation (M)[6] | Mascot |

2 Krt4 protein [Danio rerio] gi|161612220 53979.9 5.34 25 964 100 767 100

#### Peptide Information

| Calc. Mass | Obsrv. Mass | ± da   | ± ppm | Start Seq. | End Seq. | Sequence   | Ion Score | C. I. | % Modification   | Rank | Result Type |
|------------|-------------|--------|-------|------------|----------|------------|-----------|-------|------------------|------|-------------|
| 827.4297   | 827.4323    | 0.0026 | 3     | 125        | 131      | FASFDK     |           |       |                  |      | Mascot      |
| 882.4349   | 882.4437    | 0.0088 | 10    | 33         | 40       | MSSVTSVR   |           |       | Oxidation (M)[1] |      | Mascot      |
| 915.4893   | 915.495     | 0.0057 | 6     | 328        | 335      | AEIAELNR   |           |       |                  |      | Mascot      |
| 932.4683   | 932.4755    | 0.0072 | 8     | 417        | 424      | LLEGEESR   |           |       |                  |      | Mascot      |
| 950.4941   | 950.4991    | 0.005  | 5     | 249        | 256      | AVYEAELR   |           |       |                  |      | Mascot      |
| 983.4468   | 983.4511    | 0.0043 | 4     | 299        | 306      | AEAESWYK   |           |       |                  |      | Mascot      |
| 987.5105   | 987.5144    | 0.0039 | 4     | 378        | 385      | ELEEALQR   |           |       |                  |      | Mascot      |
| 1079.5116  | 1079.5193   | 0.0077 | 7     | 288        | 296      | AQYEDIANR  |           |       |                  |      | Mascot      |
| 1226.5801  | 1226.5881   | 0.008  | 7     | 297        | 306      | SRAEAESWYK |           |       |                  |      | Mascot      |

|   |                         |             |       |      |    |     |     |     |     |
|---|-------------------------|-------------|-------|------|----|-----|-----|-----|-----|
| 3 | keratin 4 [Danio rerio] | gi 18858947 | 54242 | 5.42 | 23 | 935 | 100 | 768 | 100 |
|---|-------------------------|-------------|-------|------|----|-----|-----|-----|-----|

| Calc. Mass | Obsrv. Mass | ± da | ± ppm | Start Seq. | End Sequence Seq. | Ion Score | C. I. % | Modification | Rank | Result Type |
|------------|-------------|------|-------|------------|-------------------|-----------|---------|--------------|------|-------------|
|------------|-------------|------|-------|------------|-------------------|-----------|---------|--------------|------|-------------|

|           |           |         |     |     |     |                         |     |        |                  |        |
|-----------|-----------|---------|-----|-----|-----|-------------------------|-----|--------|------------------|--------|
| 882.4349  | 882.4437  | 0.0088  | 10  | 33  | 40  | MSSVTSVR                |     |        | Oxidation (M)[1] | Mascot |
| 915.4893  | 915.495   | 0.0057  | 6   | 329 | 336 | AEIAELNR                |     |        |                  | Mascot |
| 932.4683  | 932.4755  | 0.0072  | 8   | 418 | 425 | LLEGEESR                |     |        |                  | Mascot |
| 950.4941  | 950.4991  | 0.005   | 5   | 250 | 257 | AVYEAELR                |     |        |                  | Mascot |
| 983.4468  | 983.4511  | 0.0043  | 4   | 300 | 307 | AEAESWYK                |     |        |                  | Mascot |
| 987.5105  | 987.5144  | 0.0039  | 4   | 379 | 386 | ELEEALQR                |     |        |                  | Mascot |
| 1079.5116 | 1079.5193 | 0.0077  | 7   | 289 | 297 | AQYEDIANR               |     |        |                  | Mascot |
| 1226.5801 | 1226.5881 | 0.008   | 7   | 298 | 307 | SRAEAESWYK              |     |        |                  | Mascot |
| 1248.6833 | 1248.6918 | 0.0085  | 7   | 211 | 221 | ASVENEFVLLK             |     |        |                  | Mascot |
| 1256.6957 | 1256.7061 | 0.0104  | 8   | 377 | 386 | IRELEEALQR              |     |        |                  | Mascot |
| 1256.6957 | 1256.7061 | 0.0104  | 8   | 377 | 386 | IRELEEALQR              | 46  | 99.218 |                  | Mascot |
| 1277.71   | 1277.7207 | 0.0107  | 8   | 406 | 416 | LALDIEIATYR             |     |        |                  | Mascot |
| 1277.71   | 1277.7207 | 0.0107  | 8   | 406 | 416 | LALDIEIATYR             | 91  | 100    |                  | Mascot |
| 1351.6158 | 1351.6682 | 0.0524  | 39  | 265 | 276 | DTSVVVEMDNSR            |     |        |                  | Mascot |
| 1361.673  | 1361.6829 | 0.0099  | 7   | 277 | 288 | NLDMDSIVAEVR            |     |        |                  | Mascot |
| 1362.7013 | 1362.7084 | 0.0071  | 5   | 147 | 157 | WSLLQEQTTR              |     |        |                  | Mascot |
| 1362.7013 | 1362.7084 | 0.0071  | 5   | 147 | 157 | WSLLQEQTTR              | 70  | 99.997 |                  | Mascot |
| 1377.6678 | 1377.6808 | 0.013   | 9   | 277 | 288 | NLDMDSIVAEVR            |     |        | Oxidation (M)[4] | Mascot |
| 1432.743  | 1432.7548 | 0.0118  | 8   | 238 | 249 | VDALQDEINFLR            | 119 | 100    |                  | Mascot |
| 1432.743  | 1432.7548 | 0.0118  | 8   | 238 | 249 | VDALQDEINFLR            |     |        |                  | Mascot |
| 1443.7074 | 1443.7177 | 0.0103  | 7   | 353 | 365 | ANLEAQIAEAEER           | 69  | 99.996 |                  | Mascot |
| 1443.7074 | 1443.7177 | 0.0103  | 7   | 353 | 365 | ANLEAQIAEAEER           |     |        |                  | Mascot |
| 1615.7711 | 1615.7828 | 0.0117  | 7   | 17  | 32  | GYTSQSAYAVPAGSTR        |     |        |                  | Mascot |
| 1743.837  | 1743.8589 | 0.0219  | 13  | 158 | 172 | SNIDAMFEAYISNLR         |     |        |                  | Mascot |
| 1743.837  | 1743.8589 | 0.0219  | 13  | 158 | 172 | SNIDAMFEAYISNLR         | 98  | 100    |                  | Mascot |
| 1759.8319 | 1759.8466 | 0.0147  | 8   | 158 | 172 | SNIDAMFEAYISNLR         | 86  | 100    | Oxidation (M)[6] | Mascot |
| 1759.8319 | 1759.8466 | 0.0147  | 8   | 158 | 172 | SNIDAMFEAYISNLR         |     |        | Oxidation (M)[6] | Mascot |
| 1846.7913 | 1846.8083 | 0.017   | 9   | 310 | 325 | FEEMQSTAGQYGDDL         |     |        |                  | Mascot |
| 1862.7861 | 1862.7999 | 0.0138  | 7   | 310 | 325 | FEEMQSTAGQYGDDL         |     |        | Oxidation (M)[4] | Mascot |
| 1899.9381 | 1899.9529 | 0.0148  | 8   | 158 | 173 | SNIDAMFEAYISNLR         |     |        |                  | Mascot |
| 1915.933  | 1915.9495 | 0.0165  | 9   | 158 | 173 | SNIDAMFEAYISNLR         |     |        | Oxidation (M)[6] | Mascot |
| 2041.0559 | 2041.0748 | 0.0189  | 9   | 353 | 371 | ANLEAQIAEAEERGELAV<br>K |     |        |                  | Mascot |
| 2041.0559 | 2041.0748 | 0.0189  | 9   | 353 | 371 | ANLEAQIAEAEERGELAV<br>K | 120 | 100    |                  | Mascot |
| 2102.1128 | 2101.939  | -0.1738 | -83 | 232 | 249 | VELEAKVDALQDEINFLR      |     |        |                  | Mascot |
| 2102.9448 | 2102.9561 | 0.0113  | 5   | 308 | 325 | QKFEEMQSTAGQYGDDL<br>R  | 156 | 100    |                  | Mascot |
| 2102.9448 | 2102.9561 | 0.0113  | 5   | 308 | 325 | QKFEEMQSTAGQYGDDL<br>R  |     |        |                  | Mascot |

|   |                            |           |      |   |             |     |                        |      |     |                  |     |        |     |
|---|----------------------------|-----------|------|---|-------------|-----|------------------------|------|-----|------------------|-----|--------|-----|
|   | 2118.9397                  | 2118.9597 | 0.02 | 9 | 308         | 325 | QKFEEMQSTAGQYGDDL<br>R | 93   | 100 | Oxidation (M)[6] |     | Mascot |     |
|   | 2118.9397                  | 2118.9597 | 0.02 | 9 | 308         | 325 | QKFEEMQSTAGQYGDDL<br>R |      |     | Oxidation (M)[6] |     | Mascot |     |
| 4 | Krt5 protein [Danio rerio] |           |      |   | gi 39645432 |     | 57792.3                | 5.27 | 15  | 452              | 100 | 380    | 100 |

Peptide Information

| Calc. Mass | Obsrv. Mass | ± da   | ± ppm | Start Seq. | End Seq. | Sequence                | Ion Score | C. I.  | % Modification     | Rank | Result Type |
|------------|-------------|--------|-------|------------|----------|-------------------------|-----------|--------|--------------------|------|-------------|
| 827.4297   | 827.4323    | 0.0026 | 3     | 155        | 161      | FASFDK                  |           |        |                    |      | Mascot      |
| 932.4683   | 932.4755    | 0.0072 | 8     | 447        | 454      | LLEGEESR                |           |        |                    |      | Mascot      |
| 983.4468   | 983.4511    | 0.0043 | 4     | 329        | 336      | AEAESWYK                |           |        |                    |      | Mascot      |
| 1079.5116  | 1079.5193   | 0.0077 | 7     | 318        | 326      | AQYEDIANR               |           |        |                    |      | Mascot      |
| 1226.5801  | 1226.5881   | 0.008  | 7     | 327        | 336      | SRAEAESWYK              |           |        |                    |      | Mascot      |
| 1248.6252  | 1248.6918   | 0.0666 | 53    | 203        | 213      | QLDGLGNEKMK             |           |        | Oxidation (M)[10]  |      | Mascot      |
| 1256.5179  | 1256.7061   | 0.1882 | 150   | 1          | 14       | MSGGMGGGMGGGIR          |           |        | Oxidation (M)[1,5] |      | Mascot      |
| 1256.5179  | 1256.7061   | 0.1882 | 150   | 1          | 14       | MSGGMGGGMGGGIR          |           |        | Oxidation (M)[1,5] |      | Mascot      |
| 1277.71    | 1277.7207   | 0.0107 | 8     | 435        | 445      | LALDIEIATYR             |           |        |                    |      | Mascot      |
| 1277.71    | 1277.7207   | 0.0107 | 8     | 435        | 445      | LALDIEIATYR             | 91        | 100    |                    |      | Mascot      |
| 1345.678   | 1345.6833   | 0.0053 | 4     | 306        | 317      | NLDMDAIVAEVR            |           |        |                    |      | Mascot      |
| 1351.6158  | 1351.6682   | 0.0524 | 39    | 294        | 305      | DTSVVVEMDNSR            |           |        |                    |      | Mascot      |
| 1361.673   | 1361.6829   | 0.0099 | 7     | 306        | 317      | NLDMDAIVAEVR            |           |        | Oxidation (M)[4]   |      | Mascot      |
| 1362.7013  | 1362.7084   | 0.0071 | 5     | 176        | 186      | WSLLQEQTTR              |           |        |                    |      | Mascot      |
| 1362.7013  | 1362.7084   | 0.0071 | 5     | 176        | 186      | WSLLQEQTTR              | 70        | 99.997 |                    |      | Mascot      |
| 1443.7074  | 1443.7177   | 0.0103 | 7     | 382        | 394      | ANLEAQIAEAEER           | 69        | 99.996 |                    |      | Mascot      |
| 1443.7074  | 1443.7177   | 0.0103 | 7     | 382        | 394      | ANLEAQIAEAEER           |           |        |                    |      | Mascot      |
| 1727.8422  | 1727.8539   | 0.0117 | 7     | 187        | 201      | SNIDAMFEAYIANLR         |           |        |                    |      | Mascot      |
| 1743.837   | 1743.8589   | 0.0219 | 13    | 187        | 201      | SNIDAMFEAYIANLR         |           |        | Oxidation (M)[6]   |      | Mascot      |
| 1743.837   | 1743.8589   | 0.0219 | 13    | 187        | 201      | SNIDAMFEAYIANLR         | 30        | 74.803 | Oxidation (M)[6]   |      | Mascot      |
| 1899.9381  | 1899.9529   | 0.0148 | 8     | 187        | 202      | SNIDAMFEAYIANLRR        |           |        | Oxidation (M)[6]   |      | Mascot      |
| 2041.0559  | 2041.0748   | 0.0189 | 9     | 382        | 400      | ANLEAQIAEAEERGELAV<br>K |           |        |                    |      | Mascot      |
| 2041.0559  | 2041.0748   | 0.0189 | 9     | 382        | 400      | ANLEAQIAEAEERGELAV<br>K | 120       | 100    |                    |      | Mascot      |

|   |                         |  |  |  |             |  |         |      |    |     |     |     |     |
|---|-------------------------|--|--|--|-------------|--|---------|------|----|-----|-----|-----|-----|
| 5 | keratin 5 [Danio rerio] |  |  |  | gi 18858425 |  | 58550.6 | 5.34 | 14 | 438 | 100 | 380 | 100 |
|---|-------------------------|--|--|--|-------------|--|---------|------|----|-----|-----|-----|-----|

Peptide Information

| Calc. Mass | Obsrv. Mass | ± da   | ± ppm | Start Seq. | End Seq. | Sequence | Ion Score | C. I. | % Modification | Rank | Result Type |
|------------|-------------|--------|-------|------------|----------|----------|-----------|-------|----------------|------|-------------|
| 827.4297   | 827.4323    | 0.0026 | 3     | 165        | 171      | FASFDK   |           |       |                |      | Mascot      |

|           |           |        |    |     |     |                         |  |     |  |        |  |  |  |  |  |  |                   |        |
|-----------|-----------|--------|----|-----|-----|-------------------------|--|-----|--|--------|--|--|--|--|--|--|-------------------|--------|
| 932.4683  | 932.4755  | 0.0072 | 8  | 457 | 464 | LLEGEESR                |  |     |  |        |  |  |  |  |  |  |                   | Mascot |
| 983.4468  | 983.4511  | 0.0043 | 4  | 339 | 346 | AEAESWYK                |  |     |  |        |  |  |  |  |  |  |                   | Mascot |
| 1079.5116 | 1079.5193 | 0.0077 | 7  | 328 | 336 | AQYEDIANR               |  |     |  |        |  |  |  |  |  |  |                   | Mascot |
| 1226.5801 | 1226.5881 | 0.008  | 7  | 337 | 346 | SRAEAESWYK              |  |     |  |        |  |  |  |  |  |  |                   | Mascot |
| 1248.6252 | 1248.6918 | 0.0666 | 53 | 213 | 223 | QLDGLGNEKMK             |  |     |  |        |  |  |  |  |  |  | Oxidation (M)[10] | Mascot |
| 1277.71   | 1277.7207 | 0.0107 | 8  | 445 | 455 | LALDIEIATYR             |  |     |  |        |  |  |  |  |  |  |                   | Mascot |
| 1277.71   | 1277.7207 | 0.0107 | 8  | 445 | 455 | LALDIEIATYR             |  | 91  |  | 100    |  |  |  |  |  |  |                   | Mascot |
| 1345.678  | 1345.6833 | 0.0053 | 4  | 316 | 327 | NLDMDAIVAEVR            |  |     |  |        |  |  |  |  |  |  |                   | Mascot |
| 1351.6158 | 1351.6682 | 0.0524 | 39 | 304 | 315 | DTSVVVEMDNSR            |  |     |  |        |  |  |  |  |  |  |                   | Mascot |
| 1361.673  | 1361.6829 | 0.0099 | 7  | 316 | 327 | NLDMDAIVAEVR            |  |     |  |        |  |  |  |  |  |  | Oxidation (M)[4]  | Mascot |
| 1362.7013 | 1362.7084 | 0.0071 | 5  | 186 | 196 | WSLLQEQTTR              |  |     |  |        |  |  |  |  |  |  |                   | Mascot |
| 1362.7013 | 1362.7084 | 0.0071 | 5  | 186 | 196 | WSLLQEQTTR              |  | 70  |  | 99.997 |  |  |  |  |  |  |                   | Mascot |
| 1443.7074 | 1443.7177 | 0.0103 | 7  | 392 | 404 | ANLEAQIAEAEER           |  | 69  |  | 99.996 |  |  |  |  |  |  |                   | Mascot |
| 1443.7074 | 1443.7177 | 0.0103 | 7  | 392 | 404 | ANLEAQIAEAEER           |  |     |  |        |  |  |  |  |  |  |                   | Mascot |
| 1727.8422 | 1727.8539 | 0.0117 | 7  | 197 | 211 | SNIDAMFEAYIANLR         |  |     |  |        |  |  |  |  |  |  |                   | Mascot |
| 1743.837  | 1743.8589 | 0.0219 | 13 | 197 | 211 | SNIDAMFEAYIANLR         |  |     |  |        |  |  |  |  |  |  | Oxidation (M)[6]  | Mascot |
| 1743.837  | 1743.8589 | 0.0219 | 13 | 197 | 211 | SNIDAMFEAYIANLR         |  | 30  |  | 74.803 |  |  |  |  |  |  | Oxidation (M)[6]  | Mascot |
| 1899.9381 | 1899.9529 | 0.0148 | 8  | 197 | 212 | SNIDAMFEAYIANLRR        |  |     |  |        |  |  |  |  |  |  | Oxidation (M)[6]  | Mascot |
| 2041.0559 | 2041.0748 | 0.0189 | 9  | 392 | 410 | ANLEAQIAEAEERGELAV<br>K |  |     |  |        |  |  |  |  |  |  |                   | Mascot |
| 2041.0559 | 2041.0748 | 0.0189 | 9  | 392 | 410 | ANLEAQIAEAEERGELAV<br>K |  | 120 |  | 100    |  |  |  |  |  |  |                   | Mascot |

6 keratin 8 [Danio rerio] gi|29335502 55516.4 5.01 14 187 100 129 100

| Peptide Information |             |        |       |            |                   |           |       |   |                  |      |        |        |  |
|---------------------|-------------|--------|-------|------------|-------------------|-----------|-------|---|------------------|------|--------|--------|--|
| Calc. Mass          | Obsrv. Mass | ± da   | ± ppm | Start Seq. | End Sequence Seq. | Ion Score | C. I. | % | Modification     | Rank | Result | Type   |  |
| 827.4297            | 827.4323    | 0.0026 | 3     | 105        | 111 FASFDK        |           |       |   |                  |      |        | Mascot |  |
| 1063.5419           | 1063.5499   | 0.008  | 8     | 229        | 236 QIFEEEIR      |           |       |   |                  |      |        | Mascot |  |
| 1079.5116           | 1079.5193   | 0.0077 | 7     | 268        | 276 AQYEDIANR     |           |       |   |                  |      |        | Mascot |  |
| 1248.6252           | 1248.6918   | 0.0666 | 53    | 153        | 163 QLDSLGNCKMK   |           |       |   |                  |      |        | Mascot |  |
| 1277.71             | 1277.7207   | 0.0107 | 8     | 385        | 395 LALDIEIATYR   |           |       |   |                  |      |        | Mascot |  |
| 1277.71             | 1277.7207   | 0.0107 | 8     | 385        | 395 LALDIEIATYR   |           | 91    |   | 100              |      |        | Mascot |  |
| 1317.691            | 1317.6998   | 0.0088 | 7     | 126        | 136 WSLLQNQTATR   |           |       |   |                  |      |        | Mascot |  |
| 1345.678            | 1345.6833   | 0.0053 | 4     | 256        | 267 NLDMDAIVAEVR  |           |       |   |                  |      |        | Mascot |  |
| 1351.6158           | 1351.6682   | 0.0524 | 39    | 244        | 255 DTSVVVEMDNSR  |           |       |   |                  |      |        | Mascot |  |
| 1361.673            | 1361.6829   | 0.0099 | 7     | 256        | 267 NLDMDAIVAEVR  |           |       |   | Oxidation (M)[4] |      |        | Mascot |  |
| 1449.7584           | 1449.765    | 0.0066 | 5     | 217        | 228 LESLTDEINFLR  |           |       |   |                  |      |        | Mascot |  |
| 1475.7635           | 1475.7642   | 0.0007 | 0     | 308        | 319 TEIADLNRMQIR  |           |       |   | Oxidation (M)[9] |      |        | Mascot |  |

|           |           |         |     |     |     |                     |    |        |                  |  |  |  |                  |  |  |  |        |
|-----------|-----------|---------|-----|-----|-----|---------------------|----|--------|------------------|--|--|--|------------------|--|--|--|--------|
| 1727.8422 | 1727.8539 | 0.0117  | 7   | 137 | 151 | SNIDAMFEAYIANLR     |    |        |                  |  |  |  |                  |  |  |  | Mascot |
| 1743.837  | 1743.8589 | 0.0219  | 13  | 137 | 151 | SNIDAMFEAYIANLR     |    |        |                  |  |  |  | Oxidation (M)[6] |  |  |  | Mascot |
| 1743.837  | 1743.8589 | 0.0219  | 13  | 137 | 151 | SNIDAMFEAYIANLR     | 30 | 74.803 | Oxidation (M)[6] |  |  |  |                  |  |  |  | Mascot |
| 1899.9381 | 1899.9529 | 0.0148  | 8   | 137 | 152 | SNIDAMFEAYIANLRR    |    |        | Oxidation (M)[6] |  |  |  |                  |  |  |  | Mascot |
| 2018.1644 | 2018.1805 | 0.0161  | 8   | 74  | 91  | SL LAPLNLEIDPNIQIVR |    |        |                  |  |  |  |                  |  |  |  | Mascot |
| 2119.1282 | 2118.9597 | -0.1685 | -80 | 211 | 228 | VELEAKLES LTDEINFLR | 8  | 0      |                  |  |  |  |                  |  |  |  | Mascot |
| 2119.1282 | 2118.9597 | -0.1685 | -80 | 211 | 228 | VELEAKLES LTDEINFLR |    |        |                  |  |  |  |                  |  |  |  | Mascot |

7 keratin, type II cytoskeletal 8 [Danio rerio] gi|41056085 57723.4 5.15 14 183 100 129 100

Peptide Information

| Calc. Mass | Obsrv. Mass | ± da    | ± ppm | Start Seq. | End Seq. | Sequence            | Ion Score | C. I.  | % Modification   | Rank | Result Type |
|------------|-------------|---------|-------|------------|----------|---------------------|-----------|--------|------------------|------|-------------|
| 827.4297   | 827.4323    | 0.0026  | 3     | 126        | 132      | FAS FIDK            |           |        |                  |      | Mascot      |
| 1063.5419  | 1063.5499   | 0.008   | 8     | 250        | 257      | QIFEE EIR           |           |        |                  |      | Mascot      |
| 1079.5116  | 1079.5193   | 0.0077  | 7     | 289        | 297      | AQYED IANR          |           |        |                  |      | Mascot      |
| 1248.6252  | 1248.6918   | 0.0666  | 53    | 174        | 184      | QLDSL GNDKMK        |           |        |                  |      | Mascot      |
| 1277.71    | 1277.7207   | 0.0107  | 8     | 406        | 416      | LALDIEI ATYR        |           |        |                  |      | Mascot      |
| 1277.71    | 1277.7207   | 0.0107  | 8     | 406        | 416      | LALDIEI ATYR        | 91        | 100    |                  |      | Mascot      |
| 1317.691   | 1317.6998   | 0.0088  | 7     | 147        | 157      | WSLLQ NQTATR        |           |        |                  |      | Mascot      |
| 1345.678   | 1345.6833   | 0.0053  | 4     | 277        | 288      | NLDMDAIVAEVR        |           |        |                  |      | Mascot      |
| 1351.6158  | 1351.6682   | 0.0524  | 39    | 265        | 276      | DTSVV VEMDNSR       |           |        |                  |      | Mascot      |
| 1361.673   | 1361.6829   | 0.0099  | 7     | 277        | 288      | NLDMDAIVAEVR        |           |        | Oxidation (M)[4] |      | Mascot      |
| 1449.7584  | 1449.765    | 0.0066  | 5     | 238        | 249      | LESLTDEINFLR        |           |        |                  |      | Mascot      |
| 1475.7635  | 1475.7642   | 0.0007  | 0     | 329        | 340      | TEIADLN RMIQR       |           |        | Oxidation (M)[9] |      | Mascot      |
| 1727.8422  | 1727.8539   | 0.0117  | 7     | 158        | 172      | SNIDAMFEAYIANLR     |           |        |                  |      | Mascot      |
| 1743.837   | 1743.8589   | 0.0219  | 13    | 158        | 172      | SNIDAMFEAYIANLR     |           |        | Oxidation (M)[6] |      | Mascot      |
| 1743.837   | 1743.8589   | 0.0219  | 13    | 158        | 172      | SNIDAMFEAYIANLR     | 30        | 74.803 | Oxidation (M)[6] |      | Mascot      |
| 1899.9381  | 1899.9529   | 0.0148  | 8     | 158        | 173      | SNIDAMFEAYIANLRR    |           |        | Oxidation (M)[6] |      | Mascot      |
| 2018.1644  | 2018.1805   | 0.0161  | 8     | 95         | 112      | SL LAPLNLEIDPNIQIVR |           |        |                  |      | Mascot      |
| 2119.1282  | 2118.9597   | -0.1685 | -80   | 232        | 249      | VELEAKLES LTDEINFLR | 8         | 0      |                  |      | Mascot      |
| 2119.1282  | 2118.9597   | -0.1685 | -80   | 232        | 249      | VELEAKLES LTDEINFLR |           |        |                  |      | Mascot      |

8 Keratin 8 [Danio rerio] gi|159155987 57624.4 5.1 12 170 100 129 100

Peptide Information

| Calc. Mass | Obsrv. Mass | ± da   | ± ppm | Start Seq. | End Seq. | Sequence | Ion Score | C. I. | % Modification | Rank | Result Type |
|------------|-------------|--------|-------|------------|----------|----------|-----------|-------|----------------|------|-------------|
| 827.4297   | 827.4323    | 0.0026 | 3     | 126        | 132      | FAS FIDK |           |       |                |      | Mascot      |



|  |           |           |         |     |     |     |                    |    |        |                  |  |  |                  |  |  |  |        |
|--|-----------|-----------|---------|-----|-----|-----|--------------------|----|--------|------------------|--|--|------------------|--|--|--|--------|
|  | 1063.5419 | 1063.5499 | 0.008   | 8   | 250 | 257 | QIFEEEIR           |    |        |                  |  |  |                  |  |  |  | Mascot |
|  | 1079.5116 | 1079.5193 | 0.0077  | 7   | 289 | 297 | AQYEDIANR          |    |        |                  |  |  |                  |  |  |  | Mascot |
|  | 1248.6252 | 1248.6918 | 0.0666  | 53  | 174 | 184 | QLDSLGNCKMK        |    |        |                  |  |  |                  |  |  |  | Mascot |
|  | 1277.71   | 1277.7207 | 0.0107  | 8   | 406 | 416 | LALDIEIATYR        |    |        |                  |  |  |                  |  |  |  | Mascot |
|  | 1277.71   | 1277.7207 | 0.0107  | 8   | 406 | 416 | LALDIEIATYR        | 91 | 100    |                  |  |  |                  |  |  |  | Mascot |
|  | 1317.691  | 1317.6998 | 0.0088  | 7   | 147 | 157 | WSLLQNQTATR        |    |        |                  |  |  |                  |  |  |  | Mascot |
|  | 1449.7584 | 1449.765  | 0.0066  | 5   | 238 | 249 | LESLTDEINFLR       |    |        |                  |  |  |                  |  |  |  | Mascot |
|  | 1475.7635 | 1475.7642 | 0.0007  | 0   | 329 | 340 | TEIADLNRMQIR       |    |        |                  |  |  | Oxidation (M)[9] |  |  |  | Mascot |
|  | 1727.8422 | 1727.8539 | 0.0117  | 7   | 158 | 172 | SNIDAMFEAYIANLR    |    |        |                  |  |  |                  |  |  |  | Mascot |
|  | 1743.837  | 1743.8589 | 0.0219  | 13  | 158 | 172 | SNIDAMFEAYIANLR    |    |        |                  |  |  | Oxidation (M)[6] |  |  |  | Mascot |
|  | 1743.837  | 1743.8589 | 0.0219  | 13  | 158 | 172 | SNIDAMFEAYIANLR    | 30 | 74.803 | Oxidation (M)[6] |  |  |                  |  |  |  | Mascot |
|  | 1899.9381 | 1899.9529 | 0.0148  | 8   | 158 | 173 | SNIDAMFEAYIANLRR   |    |        |                  |  |  | Oxidation (M)[6] |  |  |  | Mascot |
|  | 2018.1644 | 2018.1805 | 0.0161  | 8   | 95  | 112 | SLLAPLNLEIDPNIQIVR |    |        |                  |  |  |                  |  |  |  | Mascot |
|  | 2119.1282 | 2118.9597 | -0.1685 | -80 | 232 | 249 | VELEAKLESLTDEINFLR | 8  | 0      |                  |  |  |                  |  |  |  | Mascot |
|  | 2119.1282 | 2118.9597 | -0.1685 | -80 | 232 | 249 | VELEAKLESLTDEINFLR |    |        |                  |  |  |                  |  |  |  | Mascot |

9 glial fibrillary acidic protein [Danio rerio] gi|20977259 42127.4 5.03 8 152 100 124 100

#### Peptide Information

| Calc. Mass | Obsrv. Mass | ± da    | ± ppm | Start Seq. | End Sequence Seq. | Ion Score                    | C. I. % | Modification | Rank             | Result Type |
|------------|-------------|---------|-------|------------|-------------------|------------------------------|---------|--------------|------------------|-------------|
| 850.4265   | 850.5464    | 0.1199  | 141   | 351        | 357               | ESTTERK                      |         |              |                  | Mascot      |
| 932.4683   | 932.4755    | 0.0072  | 8     | 297        | 304               | LLEGEESR                     |         |              |                  | Mascot      |
| 1130.5437  | 1130.601    | 0.0573  | 51    | 102        | 111               | QDVDEAALNR                   |         |              |                  | Mascot      |
| 1277.71    | 1277.7207   | 0.0107  | 8     | 285        | 295               | LALDIEIATYR                  |         |              |                  | Mascot      |
| 1277.71    | 1277.7207   | 0.0107  | 8     | 285        | 295               | LALDIEIATYR                  | 91      | 100          |                  | Mascot      |
| 1308.6543  | 1308.6646   | 0.0103  | 8     | 187        | 198               | SKFADLTDAANR                 |         |              |                  | Mascot      |
| 1377.6857  | 1377.6808   | -0.0049 | -4    | 345        | 356               | DGEIIEKSTTER                 |         |              |                  | Mascot      |
| 1432.7682  | 1432.7548   | -0.0134 | -9    | 118        | 129               | IEALQDEINFLK                 | 33      | 87.487       |                  | Mascot      |
| 1432.7682  | 1432.7548   | -0.0134 | -9    | 118        | 129               | IEALQDEINFLK                 |         |              |                  | Mascot      |
| 2872.4734  | 2872.4285   | -0.0449 | -16   | 138        | 161               | ELHEQLMAQQVHVDLDV<br>SKPRLDR |         |              | Oxidation (M)[7] | Mascot      |

10 class III intermediate filament protein [Danio rerio] gi|38374177 51255 5.28 8 148 100 124 100

#### Peptide Information

| Calc. Mass | Obsrv. Mass | ± da   | ± ppm | Start Seq. | End Sequence Seq. | Ion Score | C. I. % | Modification | Rank | Result Type |
|------------|-------------|--------|-------|------------|-------------------|-----------|---------|--------------|------|-------------|
| 850.4265   | 850.5464    | 0.1199 | 141   | 435        | 441               | ESTTERK   |         |              |      | Mascot      |
| 932.4683   | 932.4755    | 0.0072 | 8     | 381        | 388               | LLEGEESR  |         |              |      | Mascot      |

|           |           |         |    |     |     |               |    |        |  |  |  |  |  |  |  |        |
|-----------|-----------|---------|----|-----|-----|---------------|----|--------|--|--|--|--|--|--|--|--------|
| 1130.5437 | 1130.601  | 0.0573  | 51 | 186 | 195 | QDVDEAALNR    |    |        |  |  |  |  |  |  |  | Mascot |
| 1277.71   | 1277.7207 | 0.0107  | 8  | 369 | 379 | LALDIEIATYR   |    |        |  |  |  |  |  |  |  | Mascot |
| 1277.71   | 1277.7207 | 0.0107  | 8  | 369 | 379 | LALDIEIATYR   | 91 | 100    |  |  |  |  |  |  |  | Mascot |
| 1308.6543 | 1308.6646 | 0.0103  | 8  | 271 | 282 | SKFADLTDAANR  |    |        |  |  |  |  |  |  |  | Mascot |
| 1377.6857 | 1377.6808 | -0.0049 | -4 | 429 | 440 | DGEIIKESTTER  |    |        |  |  |  |  |  |  |  | Mascot |
| 1432.7682 | 1432.7548 | -0.0134 | -9 | 202 | 213 | IEALQDEINFLK  | 33 | 87.487 |  |  |  |  |  |  |  | Mascot |
| 1432.7682 | 1432.7548 | -0.0134 | -9 | 202 | 213 | IEALQDEINFLK  |    |        |  |  |  |  |  |  |  | Mascot |
| 1475.7522 | 1475.7642 | 0.012   | 8  | 300 | 312 | QIQGLTCDLESLR |    |        |  |  |  |  |  |  |  | Mascot |

11 Gfap protein [Danio rerio] gi|46329793 51087 5.34 8 147 100 124 100

#### Peptide Information

| Calc. Mass | Obsrv. Mass | $\pm$ da | $\pm$ ppm | Start Seq. | End Seq. | Sequence      | Ion Score | C. I.  | % Modification | Rank | Result Type |
|------------|-------------|----------|-----------|------------|----------|---------------|-----------|--------|----------------|------|-------------|
| 850.4265   | 850.5464    | 0.1199   | 141       | 434        | 440      | ESTTERK       |           |        |                |      | Mascot      |
| 932.4683   | 932.4755    | 0.0072   | 8         | 380        | 387      | LLEGEESR      |           |        |                |      | Mascot      |
| 1130.5437  | 1130.601    | 0.0573   | 51        | 185        | 194      | QDVDEAALNR    |           |        |                |      | Mascot      |
| 1277.71    | 1277.7207   | 0.0107   | 8         | 368        | 378      | LALDIEIATYR   |           |        |                |      | Mascot      |
| 1277.71    | 1277.7207   | 0.0107   | 8         | 368        | 378      | LALDIEIATYR   | 91        | 100    |                |      | Mascot      |
| 1308.6543  | 1308.6646   | 0.0103   | 8         | 270        | 281      | SKFADLTDAANR  |           |        |                |      | Mascot      |
| 1377.6857  | 1377.6808   | -0.0049  | -4        | 428        | 439      | DGEIIKESTTER  |           |        |                |      | Mascot      |
| 1432.7682  | 1432.7548   | -0.0134  | -9        | 201        | 212      | IEALQDEINFLK  | 33        | 87.487 |                |      | Mascot      |
| 1432.7682  | 1432.7548   | -0.0134  | -9        | 201        | 212      | IEALQDEINFLK  |           |        |                |      | Mascot      |
| 1475.7522  | 1475.7642   | 0.012    | 8         | 299        | 311      | QIQGLTCDLESLR |           |        |                |      | Mascot      |

12 glial fibrillary acidic protein [Danio rerio] gi|66393075 51190 5.34 8 146 100 124 100

#### Peptide Information

| Calc. Mass | Obsrv. Mass | $\pm$ da | $\pm$ ppm | Start Seq. | End Seq. | Sequence     | Ion Score | C. I.  | % Modification | Rank | Result Type |
|------------|-------------|----------|-----------|------------|----------|--------------|-----------|--------|----------------|------|-------------|
| 850.4265   | 850.5464    | 0.1199   | 141       | 435        | 441      | ESTTERK      |           |        |                |      | Mascot      |
| 932.4683   | 932.4755    | 0.0072   | 8         | 381        | 388      | LLEGEESR     |           |        |                |      | Mascot      |
| 1130.5437  | 1130.601    | 0.0573   | 51        | 186        | 195      | QDVDEAALNR   |           |        |                |      | Mascot      |
| 1277.71    | 1277.7207   | 0.0107   | 8         | 369        | 379      | LALDIEIATYR  |           |        |                |      | Mascot      |
| 1277.71    | 1277.7207   | 0.0107   | 8         | 369        | 379      | LALDIEIATYR  | 91        | 100    |                |      | Mascot      |
| 1308.6543  | 1308.6646   | 0.0103   | 8         | 271        | 282      | SKFADLTDAANR |           |        |                |      | Mascot      |
| 1377.6857  | 1377.6808   | -0.0049  | -4        | 429        | 440      | DGEIIKESTTER |           |        |                |      | Mascot      |
| 1432.7682  | 1432.7548   | -0.0134  | -9        | 202        | 213      | IEALQDEINFLK | 33        | 87.487 |                |      | Mascot      |
| 1432.7682  | 1432.7548   | -0.0134  | -9        | 202        | 213      | IEALQDEINFLK |           |        |                |      | Mascot      |

|    |                                                                  |             |           |       |            |                                    |         |               |           |       |                   |    |     |                  |        |
|----|------------------------------------------------------------------|-------------|-----------|-------|------------|------------------------------------|---------|---------------|-----------|-------|-------------------|----|-----|------------------|--------|
|    |                                                                  | 1475.7522   | 1475.7642 | 0.012 | 8          | 300                                | 312     | QIQGLTCDLESLR |           |       |                   |    |     |                  | Mascot |
| 13 | glial fibrillary acidic protein [Danio rerio]                    |             |           |       |            | gi 239596173                       | 19203.6 | 4.89          | 4         | 107   | 100               | 91 | 100 |                  |        |
|    | Peptide Information                                              |             |           |       |            |                                    |         |               |           |       |                   |    |     |                  |        |
|    | Calc. Mass                                                       | Obsrv. Mass | ± da      | ± ppm | Start Seq. | End Sequence Seq.                  |         |               | Ion Score | C. I. | % Modification    |    |     | Rank Result Type |        |
|    | 932.4683                                                         | 932.4755    | 0.0072    | 8     | 122        | 129 LLEGEESR                       |         |               |           |       |                   |    |     | Mascot           |        |
|    | 1277.71                                                          | 1277.7207   | 0.0107    | 8     | 110        | 120 LALDIEIATYR                    |         |               |           |       |                   |    |     | Mascot           |        |
|    | 1277.71                                                          | 1277.7207   | 0.0107    | 8     | 110        | 120 LALDIEIATYR                    |         |               | 91        | 100   |                   |    |     | Mascot           |        |
|    | 1308.6543                                                        | 1308.6646   | 0.0103    | 8     | 12         | 23 SKFADLTDAANR                    |         |               |           |       |                   |    |     | Mascot           |        |
|    | 1475.7522                                                        | 1475.7642   | 0.012     | 8     | 41         | 53 QIQGLTCDLESLR                   |         |               |           |       |                   |    |     | Mascot           |        |
| 14 | keratin type II, tail domain [Danio rerio]                       |             |           |       |            | gi 4107170                         | 10583.9 | 8.29          | 2         | 101   | 100               | 91 | 100 |                  |        |
|    | Peptide Information                                              |             |           |       |            |                                    |         |               |           |       |                   |    |     |                  |        |
|    | Calc. Mass                                                       | Obsrv. Mass | ± da      | ± ppm | Start Seq. | End Sequence Seq.                  |         |               | Ion Score | C. I. | % Modification    |    |     | Rank Result Type |        |
|    | 932.4683                                                         | 932.4755    | 0.0072    | 8     | 16         | 23 LLEGEESR                        |         |               |           |       |                   |    |     | Mascot           |        |
|    | 1277.71                                                          | 1277.7207   | 0.0107    | 8     | 4          | 14 LALDIEIATYR                     |         |               |           |       |                   |    |     | Mascot           |        |
|    | 1277.71                                                          | 1277.7207   | 0.0107    | 8     | 4          | 14 LALDIEIATYR                     |         |               | 91        | 100   |                   |    |     | Mascot           |        |
| 15 | novel protein similar to vertebrate keratin family [Danio rerio] |             |           |       |            | gi 157885973                       | 46874.6 | 5.23          | 3         | 99    | 100               | 91 | 100 |                  |        |
|    | Peptide Information                                              |             |           |       |            |                                    |         |               |           |       |                   |    |     |                  |        |
|    | Calc. Mass                                                       | Obsrv. Mass | ± da      | ± ppm | Start Seq. | End Sequence Seq.                  |         |               | Ion Score | C. I. | % Modification    |    |     | Rank Result Type |        |
|    | 1256.5793                                                        | 1256.7061   | 0.1268    | 101   | 286        | 295 EEAESWYKSK                     |         |               |           |       |                   |    |     | Mascot           |        |
|    | 1256.5793                                                        | 1256.7061   | 0.1268    | 101   | 286        | 295 EEAESWYKSK                     |         |               |           |       |                   |    |     | Mascot           |        |
|    | 1277.71                                                          | 1277.7207   | 0.0107    | 8     | 392        | 402 LALDIEIATYR                    |         |               |           |       |                   |    |     | Mascot           |        |
|    | 1277.71                                                          | 1277.7207   | 0.0107    | 8     | 392        | 402 LALDIEIATYR                    |         |               | 91        | 100   |                   |    |     | Mascot           |        |
|    | 3048.5466                                                        | 3048.4551   | -0.0915   | -30   | 1          | 28 CSGLPTGSHPKPPQLCT<br>TFVIMSLRSK |         |               |           |       | Oxidation (M)[23] |    |     | Mascot           |        |
| 16 | Zgc:158846 [Danio rerio]                                         |             |           |       |            | gi 158253572                       | 55223   | 5.44          | 5         | 98    | 100               | 91 | 100 |                  |        |
|    | Peptide Information                                              |             |           |       |            |                                    |         |               |           |       |                   |    |     |                  |        |
|    | Calc. Mass                                                       | Obsrv. Mass | ± da      | ± ppm | Start Seq. | End Sequence Seq.                  |         |               | Ion Score | C. I. | % Modification    |    |     | Rank Result Type |        |
|    | 827.4297                                                         | 827.4323    | 0.0026    | 3     | 87         | 93 FASFIDK                         |         |               |           |       |                   |    |     | Mascot           |        |
|    | 932.4683                                                         | 932.4755    | 0.0072    | 8     | 379        | 386 LLEGEESR                       |         |               |           |       |                   |    |     | Mascot           |        |

|  |           |           |        |    |     |     |              |    |     |  |  |  |  |  |  |  |        |
|--|-----------|-----------|--------|----|-----|-----|--------------|----|-----|--|--|--|--|--|--|--|--------|
|  | 996.5472  | 996.603   | 0.0558 | 56 | 421 | 429 | DIHNTGLVK    |    |     |  |  |  |  |  |  |  | Mascot |
|  | 1277.71   | 1277.7207 | 0.0107 | 8  | 367 | 377 | LALDIEIATYR  |    |     |  |  |  |  |  |  |  | Mascot |
|  | 1277.71   | 1277.7207 | 0.0107 | 8  | 367 | 377 | LALDIEIATYR  | 91 | 100 |  |  |  |  |  |  |  | Mascot |
|  | 1351.6158 | 1351.6682 | 0.0524 | 39 | 226 | 237 | DTSVVVEMDNSR |    |     |  |  |  |  |  |  |  | Mascot |

17 PREDICTED: keratin, type II cytoskeletal 8 [Danio rerio] gi|125849603 49959.2 5.46 2 91 99.996 91 100

#### Peptide Information

| Calc. Mass | Obsrv. Mass | ± da   | ± ppm | Start Seq. | End Seq. | Sequence    | Ion Score | C. I. | % Modification | Rank | Result Type |
|------------|-------------|--------|-------|------------|----------|-------------|-----------|-------|----------------|------|-------------|
| 1256.5793  | 1256.7061   | 0.1268 | 101   | 264        | 273      | EEAESWYKSK  |           |       |                |      | Mascot      |
| 1256.5793  | 1256.7061   | 0.1268 | 101   | 264        | 273      | EEAESWYKSK  |           |       |                |      | Mascot      |
| 1277.71    | 1277.7207   | 0.0107 | 8     | 370        | 380      | LALDIEIATYR |           |       |                |      | Mascot      |
| 1277.71    | 1277.7207   | 0.0107 | 8     | 370        | 380      | LALDIEIATYR | 91        | 100   |                |      | Mascot      |

18 novel protein (wu:fj53d02) [Danio rerio] gi|122891311 95823.2 6.41 16 48 32.645

#### Peptide Information

| Calc. Mass | Obsrv. Mass | ± da    | ± ppm | Start Seq. | End Seq. | Sequence            | Ion Score | C. I. | % Modification         | Rank | Result Type |
|------------|-------------|---------|-------|------------|----------|---------------------|-----------|-------|------------------------|------|-------------|
| 850.4781   | 850.5464    | 0.0683  | 80    | 635        | 641      | ARYLAEK             |           |       |                        |      | Mascot      |
| 1063.5782  | 1063.5499   | -0.0283 | -27   | 671        | 679      | GVQYLNEIK           |           |       |                        |      | Mascot      |
| 1234.6096  | 1234.6895   | 0.0799  | 65    | 62         | 71       | DEQERCITIK          |           |       |                        |      | Mascot      |
| 1248.7133  | 1248.6918   | -0.0215 | -17   | 499        | 509      | VMKFVSVPVVR         |           |       |                        |      | Mascot      |
| 1308.6583  | 1308.6646   | 0.0063  | 5     | 680        | 691      | DSVVAGFWATK         |           |       |                        |      | Mascot      |
| 1317.7524  | 1317.6998   | -0.0526 | -40   | 731        | 742      | VLYASVLTQPR         |           |       |                        |      | Mascot      |
| 1351.7579  | 1351.6682   | -0.0897 | -66   | 510        | 522      | VAVEAKNPADLPK       |           |       |                        |      | Mascot      |
| 1377.7848  | 1377.6808   | -0.104  | -75   | 419        | 431      | VFSGIVSTGQKVR       |           |       |                        |      | Mascot      |
| 1475.7896  | 1475.7642   | -0.0254 | -17   | 151        | 162      | IKPVLMMNKMDR        |           |       |                        |      | Mascot      |
| 1493.6835  | 1493.7441   | 0.0606  | 41    | 692        | 704      | EGALCEENMRAVR       |           |       | Oxidation (M)[9]       |      | Mascot      |
| 1707.8734  | 1707.7872   | -0.0862 | -50   | 2          | 15       | VNFTVDQIREIMDK      |           |       |                        |      | Mascot      |
| 1759.8875  | 1759.8466   | -0.0409 | -23   | 705        | 719      | FDIHDVTLHADAIHR     |           |       |                        |      | Mascot      |
| 1759.8875  | 1759.8466   | -0.0409 | -23   | 705        | 719      | FDIHDVTLHADAIHR     |           |       |                        |      | Mascot      |
| 1847.0248  | 1846.8083   | -0.2165 | -117  | 288        | 302      | LPRTFCQLVDPIFK      |           |       | Carbamidomethyl (C)[6] |      | Mascot      |
| 1863.0004  | 1862.7999   | -0.2005 | -108  | 33         | 50       | STLTDSLVCKAGIIASAR  |           |       | Carbamidomethyl (C)[9] |      | Mascot      |
| 2086.094   | 2085.9387   | -0.1553 | -74   | 702        | 719      | AVRFDIHDVTLHADAIHR  |           |       |                        |      | Mascot      |
| 2103.0579  | 2102.9561   | -0.1018 | -48   | 652        | 670      | IWCFGPDGTGPNILVDITK |           |       | Carbamidomethyl (C)[3] |      | Mascot      |
| 2103.0579  | 2102.9561   | -0.1018 | -48   | 652        | 670      | IWCFGPDGTGPNILVDITK |           |       | Carbamidomethyl (C)[3] |      | Mascot      |

19 Si:ch211-20b12.1 [Danio rerio] gi|67678177 55996.8 8.09 4 44 0 35 91.223

| Peptide Information |                                                            |             |         |       |              |                   |           |        |                        |                  |
|---------------------|------------------------------------------------------------|-------------|---------|-------|--------------|-------------------|-----------|--------|------------------------|------------------|
|                     | Calc. Mass                                                 | Obsrv. Mass | ± da    | ± ppm | Start Seq.   | End Sequence Seq. | Ion Score | C. I.  | % Modification         | Rank Result Type |
|                     | 827.4522                                                   | 827.4323    | -0.0199 | -24   | 393          | 399 SPIAFHR       |           |        |                        | Mascot           |
|                     | 937.4989                                                   | 937.4605    | -0.0384 | -41   | 304          | 311 ADTDIFKK      |           |        |                        | Mascot           |
|                     | 983.5533                                                   | 983.4511    | -0.1022 | -104  | 392          | 399 RSPIAFHR      |           |        |                        | Mascot           |
|                     | 1277.6307                                                  | 1277.7207   | 0.09    | 70    | 436          | 445 CHDIIIISTYR   |           |        | Carbamidomethyl (C)[1] | Mascot           |
|                     | 1277.6307                                                  | 1277.7207   | 0.09    | 70    | 436          | 445 CHDIIIISTYR   | 35        | 91.223 | Carbamidomethyl (C)[1] | Mascot           |
| 20                  | CDK5 regulatory subunit-associated protein 1 [Danio rerio] |             |         |       | gi 160333602 | 65811.6           | 9.24      | 14     | 42                     | 0                |

| Peptide Information |                    |             |         |       |            |                       |           |       |                                          |                  |
|---------------------|--------------------|-------------|---------|-------|------------|-----------------------|-----------|-------|------------------------------------------|------------------|
|                     | Calc. Mass         | Obsrv. Mass | ± da    | ± ppm | Start Seq. | End Sequence Seq.     | Ion Score | C. I. | % Modification                           | Rank Result Type |
|                     | 937.4043           | 937.4605    | 0.0562  | 60    | 510        | 517 SSEELCGR          |           |       | Carbamidomethyl (C)[6]                   | Mascot           |
|                     | 987.4022           | 987.5144    | 0.1122  | 114   | 303        | 310 MQFSCSER          |           |       |                                          | Mascot           |
|                     | 996.5295           | 996.603     | 0.0735  | 74    | 1          | 8 MNRISTFK            |           |       |                                          | Mascot           |
|                     | 1051.6007          | 1051.7209   | 0.1202  | 114   | 204        | 213 LLSLAHGGQR        |           |       |                                          | Mascot           |
|                     | 1317.7021          | 1317.6998   | -0.0023 | -2    | 374        | 385 HLHLPVQSGSSR      |           |       |                                          | Mascot           |
|                     | 1345.7507          | 1345.6833   | -0.0674 | -50   | 127        | 138 ADVVLLVTC SIR     |           |       | Carbamidomethyl (C)[9]                   | Mascot           |
|                     | 1362.7627          | 1362.7084   | -0.0543 | -40   | 476        | 486 LEELISVFREK       |           |       |                                          | Mascot           |
|                     | 1362.7627          | 1362.7084   | -0.0543 | -40   | 476        | 486 LEELISVFREK       |           |       |                                          | Mascot           |
|                     | 1432.704           | 1432.7548   | 0.0508  | 35    | 563        | 575 GHALNHSSPNDRK     |           |       |                                          | Mascot           |
|                     | 1432.704           | 1432.7548   | 0.0508  | 35    | 563        | 575 GHALNHSSPNDRK     |           |       |                                          | Mascot           |
|                     | 1638.823           | 1638.869    | 0.046   | 28    | 538        | 552 TQMACITPGDYVLVK   |           |       |                                          | Mascot           |
|                     | 1743.7902          | 1743.8589   | 0.0687  | 39    | 303        | 316 MQFSCSERNTQLSR    |           |       | Carbamidomethyl (C)[5]                   | Mascot           |
|                     | 1743.7902          | 1743.8589   | 0.0687  | 39    | 303        | 316 MQFSCSERNTQLSR    |           |       | Carbamidomethyl (C)[5]                   | Mascot           |
|                     | 1759.785           | 1759.8466   | 0.0616  | 35    | 303        | 316 MQFSCSERNTQLSR    |           |       | Carbamidomethyl (C)[5], Oxidation (M)[1] | Mascot           |
|                     | 1759.785           | 1759.8466   | 0.0616  | 35    | 303        | 316 MQFSCSERNTQLSR    |           |       | Carbamidomethyl (C)[5], Oxidation (M)[1] | Mascot           |
|                     | 1846.8468          | 1846.8083   | -0.0385 | -21   | 440        | 454 EVGYNIGFFFTYSMR   |           |       | Oxidation (M)[14]                        | Mascot           |
|                     | 1862.9653          | 1862.7999   | -0.1654 | -89   | 369        | 385 SNICKHLHLPVQSGSSR |           |       |                                          | Mascot           |
|                     | 1958.9469          | 1959.0012   | 0.0543  | 28    | 440        | 455 EVGYNIGFFFTYSMRK  |           |       |                                          | Mascot           |
|                     | 2017.9535          | 2018.1805   | 0.227   | 112   | 50         | 67 SKLTNGPSFQDFIMSSDK |           |       | Oxidation (M)[14]                        | Mascot           |
| 21                  | Pbx2 [Danio rerio] |             |         |       | gi 7861936 | 18895.6               | 9.08      | 7     | 40                                       | 0                |

| Peptide Information |            |             |      |       |            |                   |           |       |                |                  |
|---------------------|------------|-------------|------|-------|------------|-------------------|-----------|-------|----------------|------------------|
|                     | Calc. Mass | Obsrv. Mass | ± da | ± ppm | Start Seq. | End Sequence Seq. | Ion Score | C. I. | % Modification | Rank Result Type |

|  |           |           |         |      |     |     |                          |  |  |  |  |                        |        |
|--|-----------|-----------|---------|------|-----|-----|--------------------------|--|--|--|--|------------------------|--------|
|  | 937.4771  | 937.4605  | -0.0166 | -18  | 11  | 18  | EKTGLSMR                 |  |  |  |  | Oxidation (M)[7]       | Mascot |
|  | 983.5818  | 983.4511  | -0.1307 | -133 | 125 | 132 | MVALIHRK                 |  |  |  |  | Oxidation (M)[1]       | Mascot |
|  | 1051.5782 | 1051.7209 | 0.1427  | 136  | 133 | 141 | FSSIQTQLK                |  |  |  |  |                        | Mascot |
|  | 1179.6442 | 1179.6095 | -0.0347 | -29  | 1   | 10  | ALFSVLCEIK               |  |  |  |  | Carbamidomethyl (C)[7] | Mascot |
|  | 1493.7563 | 1493.7441 | -0.0122 | -8   | 142 | 154 | QSTCEAVMILRSR            |  |  |  |  |                        | Mascot |
|  | 1743.9388 | 1743.8589 | -0.0799 | -46  | 79  | 92  | LSQIRNIYHTELEK           |  |  |  |  |                        | Mascot |
|  | 1743.9388 | 1743.8589 | -0.0799 | -46  | 79  | 92  | LSQIRNIYHTELEK           |  |  |  |  |                        | Mascot |
|  | 2283.1836 | 2283.2048 | 0.0212  | 9    | 133 | 152 | FSSIQTQLKQSTCEAVMI<br>LR |  |  |  |  |                        | Mascot |

22 coiled-coil domain-containing protein 123, mitochondrial precursor [Danio rerio] gi|41053710 79256.9 5.96 12 39 0

#### Peptide Information

| Calc. Mass | Obsrv. Mass | ± da    | ± ppm | Start Seq. | End Seq. | Sequence                 | Ion Score | C. I. % | Modification           | Rank | Result Type |
|------------|-------------|---------|-------|------------|----------|--------------------------|-----------|---------|------------------------|------|-------------|
| 932.5121   | 932.4755    | -0.0366 | -39   | 503        | 510      | VMLLEAEK                 |           |         |                        |      | Mascot      |
| 1248.5889  | 1248.6918   | 0.1029  | 82    | 566        | 575      | TCEVEDLQVR               |           |         | Carbamidomethyl (C)[2] |      | Mascot      |
| 1317.5488  | 1317.6998   | 0.151   | 115   | 77         | 87       | QRSYSESDCSR              |           |         |                        |      | Mascot      |
| 1443.7438  | 1443.7177   | -0.0261 | -18   | 430        | 441      | VRAEEVIQENEK             |           |         |                        |      | Mascot      |
| 1443.7438  | 1443.7177   | -0.0261 | -18   | 430        | 441      | VRAEEVIQENEK             |           |         |                        |      | Mascot      |
| 1475.7522  | 1475.7642   | 0.012   | 8     | 564        | 575      | VKTCEVEDLQVR             |           |         | Carbamidomethyl (C)[4] |      | Mascot      |
| 1638.8077  | 1638.869    | 0.0613  | 37    | 654        | 667      | DQLMLMASTLEKDK           |           |         | Oxidation (M)[4]       |      | Mascot      |
| 1728.0013  | 1727.8539   | -0.1474 | -85   | 668        | 683      | QGVLTRIESTVNLGK          |           |         |                        |      | Mascot      |
| 1743.8456  | 1743.8589   | 0.0133  | 8     | 313        | 325      | HLQQELCHTHRER            |           |         | Carbamidomethyl (C)[7] |      | Mascot      |
| 1743.8456  | 1743.8589   | 0.0133  | 8     | 313        | 325      | HLQQELCHTHRER            |           |         | Carbamidomethyl (C)[7] |      | Mascot      |
| 2103.1121  | 2102.9561   | -0.156  | -74   | 399        | 416      | YLSPLLLAYEDHLSNAKDK      |           |         |                        |      | Mascot      |
| 2103.1121  | 2102.9561   | -0.156  | -74   | 399        | 416      | YLSPLLLAYEDHLSNAKDK      |           |         |                        |      | Mascot      |
| 2211.0823  | 2211.1233   | 0.041   | 19    | 340        | 358      | QQAQELVDENDGLKMTV<br>HR  |           |         |                        |      | Mascot      |
| 2233.2188  | 2233.1069   | -0.1119 | -50   | 536        | 555      | LALHSLSLAHQVTVDK<br>LK   |           |         |                        |      | Mascot      |
| 2501.1707  | 2501.2778   | 0.1071  | 43    | 304        | 323      | CLQQSQHMKHLQQELCH<br>THR |           |         | Oxidation (M)[8]       |      | Mascot      |

23 PREDICTED: elongation factor 2 [Danio rerio] gi|326667940 100398.6 6.99 15 39 0

#### Peptide Information

| Calc. Mass | Obsrv. Mass | ± da    | ± ppm | Start Seq. | End Seq. | Sequence  | Ion Score | C. I. % | Modification | Rank | Result Type |
|------------|-------------|---------|-------|------------|----------|-----------|-----------|---------|--------------|------|-------------|
| 850.4781   | 850.5464    | 0.0683  | 80    | 675        | 681      | ARYLAEK   |           |         |              |      | Mascot      |
| 1063.5782  | 1063.5499   | -0.0283 | -27   | 711        | 719      | GVQYLNEIK |           |         |              |      | Mascot      |

|           |           |         |      |     |     |                     |  |  |                        |  |  |        |
|-----------|-----------|---------|------|-----|-----|---------------------|--|--|------------------------|--|--|--------|
| 1234.6096 | 1234.6895 | 0.0799  | 65   | 102 | 111 | DEQERCITIK          |  |  |                        |  |  | Mascot |
| 1248.7133 | 1248.6918 | -0.0215 | -17  | 539 | 549 | VMKFSVSPVVR         |  |  |                        |  |  | Mascot |
| 1308.6583 | 1308.6646 | 0.0063  | 5    | 720 | 731 | DSVVAGFQWATK        |  |  |                        |  |  | Mascot |
| 1317.7524 | 1317.6998 | -0.0526 | -40  | 771 | 782 | VLYASVLTQPR         |  |  |                        |  |  | Mascot |
| 1351.7579 | 1351.6682 | -0.0897 | -66  | 550 | 562 | VAVEAKNPADLPK       |  |  |                        |  |  | Mascot |
| 1377.7848 | 1377.6808 | -0.104  | -75  | 459 | 471 | VFSGIVSTGQKVR       |  |  |                        |  |  | Mascot |
| 1475.7896 | 1475.7642 | -0.0254 | -17  | 191 | 202 | IKPVLMMNKMDR        |  |  |                        |  |  | Mascot |
| 1493.6835 | 1493.7441 | 0.0606  | 41   | 732 | 744 | EGALCEENMRAVR       |  |  | Oxidation (M)[9]       |  |  | Mascot |
| 1759.8875 | 1759.8466 | -0.0409 | -23  | 745 | 759 | FDIHDVTLHADAIHR     |  |  |                        |  |  | Mascot |
| 1759.8875 | 1759.8466 | -0.0409 | -23  | 745 | 759 | FDIHDVTLHADAIHR     |  |  |                        |  |  | Mascot |
| 1847.0248 | 1846.8083 | -0.2165 | -117 | 328 | 342 | LPRTFCQLVLDPIFK     |  |  | Carbamidomethyl (C)[6] |  |  | Mascot |
| 1863.0004 | 1862.7999 | -0.2005 | -108 | 73  | 90  | STLTDSLVKAGIASAR    |  |  | Carbamidomethyl (C)[9] |  |  | Mascot |
| 2086.094  | 2085.9387 | -0.1553 | -74  | 742 | 759 | AVRFDIHDVTLHADAIHR  |  |  |                        |  |  | Mascot |
| 2103.0579 | 2102.9561 | -0.1018 | -48  | 692 | 710 | IWCFGPDGTGPNILVDITK |  |  | Carbamidomethyl (C)[3] |  |  | Mascot |
| 2103.0579 | 2102.9561 | -0.1018 | -48  | 692 | 710 | IWCFGPDGTGPNILVDITK |  |  | Carbamidomethyl (C)[3] |  |  | Mascot |

24 PREDICTED: hypothetical protein LOC100006440 [Danio rerio] gi|326674941 150465.1 5.04 17 39 0

#### Peptide Information

| Calc. Mass | Obsrv. Mass | ± da    | ± ppm | Start Seq. | End Seq. | Sequence                | Ion Score | C. I. % | Modification            | Rank | Result Type |
|------------|-------------|---------|-------|------------|----------|-------------------------|-----------|---------|-------------------------|------|-------------|
| 850.4338   | 850.5464    | 0.1126  | 132   | 923        | 930      | EIAVCTSK                |           |         |                         |      | Mascot      |
| 932.4406   | 932.4755    | 0.0349  | 37    | 1352       | 1358     | NHNCFLK                 |           |         | Carbamidomethyl (C)[4]  |      | Mascot      |
| 937.5175   | 937.4605    | -0.057  | -61   | 714        | 721      | GVQMFLVK                |           |         | Oxidation (M)[4]        |      | Mascot      |
| 950.5781   | 950.4991    | -0.079  | -83   | 273        | 280      | KPKAHIEK                |           |         |                         |      | Mascot      |
| 1045.5023  | 1045.5696   | 0.0673  | 64    | 234        | 242      | DVVFTCYAK               |           |         |                         |      | Mascot      |
| 1063.563   | 1063.5499   | -0.0131 | -12   | 681        | 691      | VISAGTSSDVK             |           |         |                         |      | Mascot      |
| 1130.5687  | 1130.601    | 0.0323  | 29    | 506        | 514      | QEEEEVLVR               |           |         |                         |      | Mascot      |
| 1226.6085  | 1226.5881   | -0.0204 | -17   | 1099       | 1108     | ENFVEKMVSK              |           |         | Oxidation (M)[7]        |      | Mascot      |
| 1317.6328  | 1317.6998   | 0.067   | 51    | 1043       | 1053     | RVQDGCQALDR             |           |         | Carbamidomethyl (C)[6]  |      | Mascot      |
| 1638.8003  | 1638.869    | 0.0687  | 42    | 676        | 691      | MDNSKVISAGTSSDVK        |           |         |                         |      | Mascot      |
| 1829.797   | 1829.8422   | 0.0452  | 25    | 792        | 807      | EHTGPSSGIEECIEIR        |           |         | Carbamidomethyl (C)[12] |      | Mascot      |
| 1863.0197  | 1862.7999   | -0.2198 | -118  | 946        | 962      | YVGIIHAMGTLKFPSTK       |           |         |                         |      | Mascot      |
| 1915.8798  | 1915.9495   | 0.0697  | 36    | 1343       | 1358     | CCVYLCISRNHNCFLK        |           |         |                         |      | Mascot      |
| 2017.9712  | 2018.1805   | 0.2093  | 104   | 316        | 333      | VATDWDIETEVGEIVGER      |           |         |                         |      | Mascot      |
| 2040.9915  | 2041.0748   | 0.0833  | 41    | 971        | 989      | VPLISDAMSASRFCELAC<br>K |           |         |                         |      | Mascot      |
| 2040.9915  | 2041.0748   | 0.0833  | 41    | 971        | 989      | VPLISDAMSASRFCELAC      |           |         |                         |      | Mascot      |

|    |                             |           |         |     |              |     |                              |      |   |    |   |  |                         |        |
|----|-----------------------------|-----------|---------|-----|--------------|-----|------------------------------|------|---|----|---|--|-------------------------|--------|
|    | 2086.0232                   | 2085.9387 | -0.0845 | -41 | 139          | 157 | K<br>AAPCKPEEAVSSKETPQ<br>TR |      |   |    |   |  | Carbamidomethyl (C)[4]  | Mascot |
|    | 2233.1169                   | 2233.1069 | -0.01   | -4  | 334          | 355 | LSFPALSPSPSLTLASNC<br>ADGK   |      |   |    |   |  | Carbamidomethyl (C)[18] | Mascot |
| 25 | novel protein [Danio rerio] |           |         |     | gi 126632590 |     | 18984.4                      | 8.81 | 7 | 39 | 0 |  |                         |        |

#### Peptide Information

|  | Calc. Mass | Obsrv. Mass | ± da    | ± ppm | Start Seq. | End Seq. | Sequence                          | Ion Score | C. I. | % | Modification            | Rank | Result Type |
|--|------------|-------------|---------|-------|------------|----------|-----------------------------------|-----------|-------|---|-------------------------|------|-------------|
|  | 827.3208   | 827.4323    | 0.1115  | 135   | 154        | 160      | MGCCEIR                           |           |       |   | Oxidation (M)[1]        |      | Mascot      |
|  | 882.4944   | 882.4437    | -0.0507 | -57   | 72         | 78       | LISAHWR                           |           |       |   |                         |      | Mascot      |
|  | 882.4944   | 882.572     | 0.0776  | 88    | 72         | 78       | LISAHWR                           |           |       |   |                         |      | Mascot      |
|  | 1248.5453  | 1248.6918   | 0.1465  | 117   | 106        | 115      | TETFPTDYMK                        |           |       |   | Oxidation (M)[9]        |      | Mascot      |
|  | 1449.7307  | 1449.765    | 0.0343  | 24    | 5          | 16       | ISCFVQLNFHNK                      |           |       |   |                         |      | Mascot      |
|  | 2086.0889  | 2085.9387   | -0.1502 | -72   | 31         | 49       | SGFLICFLISLSSEASVQK               |           |       |   | Carbamidomethyl (C)[6]  |      | Mascot      |
|  | 2284.0378  | 2284.1978   | 0.16    | 70    | 50         | 69       | TFEGFIGGSALFPCYYDP<br>SR          |           |       |   | Carbamidomethyl (C)[14] |      | Mascot      |
|  | 3048.4111  | 3048.4551   | 0.044   | 14    | 124        | 151      | GLTWSVDVGAYCCSISDV<br>NSLQCTTLQVK |           |       |   | Carbamidomethyl (C)[11] |      | Mascot      |

|    |                                  |  |  |  |              |  |         |      |    |    |   |  |  |
|----|----------------------------------|--|--|--|--------------|--|---------|------|----|----|---|--|--|
| 26 | Zgc:153569 protein [Danio rerio] |  |  |  | gi 171846383 |  | 59551.2 | 7.18 | 13 | 38 | 0 |  |  |
|----|----------------------------------|--|--|--|--------------|--|---------|------|----|----|---|--|--|

#### Peptide Information

|  | Calc. Mass | Obsrv. Mass | ± da    | ± ppm | Start Seq. | End Seq. | Sequence          | Ion Score | C. I. | % | Modification           | Rank | Result Type |
|--|------------|-------------|---------|-------|------------|----------|-------------------|-----------|-------|---|------------------------|------|-------------|
|  | 850.4669   | 850.5464    | 0.0795  | 93    | 326        | 332      | LIAQDYK           |           |       |   |                        |      | Mascot      |
|  | 983.4688   | 983.4511    | -0.0177 | -18   | 198        | 205      | LICGFMDK          |           |       |   | Carbamidomethyl (C)[3] |      | Mascot      |
|  | 1127.5626  | 1127.5769   | 0.0143  | 13    | 249        | 257      | AHQIKDQCK         |           |       |   | Carbamidomethyl (C)[8] |      | Mascot      |
|  | 1234.5773  | 1234.6895   | 0.1122  | 91    | 188        | 197      | MTSIVFSDYR        |           |       |   | Oxidation (M)[1]       |      | Mascot      |
|  | 1256.6715  | 1256.7061   | 0.0346  | 28    | 427        | 436      | TLHCLMRVAR        |           |       |   | Carbamidomethyl (C)[4] |      | Mascot      |
|  | 1256.6715  | 1256.7061   | 0.0346  | 28    | 427        | 436      | TLHCLMRVAR        |           |       |   | Carbamidomethyl (C)[4] |      | Mascot      |
|  | 1308.6113  | 1308.6646   | 0.0533  | 41    | 412        | 423      | GEIEAHCSGLHR      |           |       |   |                        |      | Mascot      |
|  | 1493.7278  | 1493.7441   | 0.0163  | 11    | 412        | 424      | GEIEAHCSGLHRK     |           |       |   | Carbamidomethyl (C)[7] |      | Mascot      |
|  | 1743.7789  | 1743.8589   | 0.08    | 46    | 380        | 394      | TVSGDCQAEMLDYRR   |           |       |   |                        |      | Mascot      |
|  | 1743.7789  | 1743.8589   | 0.08    | 46    | 380        | 394      | TVSGDCQAEMLDYRR   |           |       |   |                        |      | Mascot      |
|  | 1759.7738  | 1759.8466   | 0.0728  | 41    | 380        | 394      | TVSGDCQAEMLDYRR   | 4         | 0     |   | Oxidation (M)[10]      |      | Mascot      |
|  | 1759.7738  | 1759.8466   | 0.0728  | 41    | 380        | 394      | TVSGDCQAEMLDYRR   |           |       |   | Oxidation (M)[10]      |      | Mascot      |
|  | 1830.0054  | 1829.8422   | -0.1632 | -89   | 364        | 379      | LSYLLLCLESAVHRGR  |           |       |   |                        |      | Mascot      |
|  | 1899.9442  | 1899.9529   | 0.0087  | 5     | 137        | 153      | FESVALEVCTSTMLELK |           |       |   |                        |      | Mascot      |
|  | 1915.9391  | 1915.9495   | 0.0104  | 5     | 137        | 153      | FESVALEVCTSTMLELK |           |       |   | Oxidation (M)[13]      |      | Mascot      |
|  | 1993.9583  | 1993.9924   | 0.0341  | 17    | 163        | 179      | GYLMSCLVDHRANITER |           |       |   | Oxidation (M)[4]       |      | Mascot      |



|    |                                              |           |         |     |             |     |                    |      |   |    |                         |        |
|----|----------------------------------------------|-----------|---------|-----|-------------|-----|--------------------|------|---|----|-------------------------|--------|
|    | 2086.0386                                    | 2085.9387 | -0.0999 | -48 | 95          | 111 | HTWTNNLSVLECLQDKK  |      |   |    | Carbamidomethyl (C)[12] | Mascot |
|    | 2233.0925                                    | 2233.1069 | 0.0144  | 6   | 394         | 411 | RMLMEDFSLSPEIVLHCR |      |   |    | Carbamidomethyl (C)[17] | Mascot |
| 27 | hypothetical protein LOC450015 [Danio rerio] |           |         |     | gi 54400574 |     | 36312.7            | 5.75 | 8 | 38 | 0                       |        |

Peptide Information

| Calc. Mass | Obsrv. Mass | ± da    | ± ppm | Start Seq. | End Seq. | Sequence         | Ion Score | C. I. | % Modification | Rank | Result Type |
|------------|-------------|---------|-------|------------|----------|------------------|-----------|-------|----------------|------|-------------|
| 827.4045   | 827.4323    | 0.0278  | 34    | 258        | 263      | FNQQYK           |           |       |                |      | Mascot      |
| 842.4366   | 842.5138    | 0.0772  | 92    | 148        | 155      | TVTEAGHK         |           |       |                |      | Mascot      |
| 915.4907   | 915.495     | 0.0043  | 5     | 281        | 287      | FVHSRNR          |           |       |                |      | Mascot      |
| 983.5018   | 983.4511    | -0.0507 | -52   | 250        | 257      | MFGPFKEK         |           |       |                |      | Mascot      |
| 1127.6571  | 1127.5769   | -0.0802 | -71   | 272        | 280      | EIIFVHTLR        |           |       |                |      | Mascot      |
| 1277.6848  | 1277.7207   | 0.0359  | 28    | 288        | 299      | VGLSFSLGINDR     |           |       |                |      | Mascot      |
| 1277.6848  | 1277.7207   | 0.0359  | 28    | 288        | 299      | VGLSFSLGINDR     |           |       |                |      | Mascot      |
| 1345.6495  | 1345.6833   | 0.0338  | 25    | 70         | 80       | SRIDYYNGTTR      |           |       |                |      | Mascot      |
| 1743.8483  | 1743.8589   | 0.0106  | 6     | 140        | 155      | GAQCEVWKTVTEAGHK |           |       |                |      | Mascot      |
| 1743.8483  | 1743.8589   | 0.0106  | 6     | 140        | 155      | GAQCEVWKTVTEAGHK |           |       |                |      | Mascot      |

|    |                                                            |  |  |  |              |  |         |      |   |    |   |  |
|----|------------------------------------------------------------|--|--|--|--------------|--|---------|------|---|----|---|--|
| 28 | PREDICTED: hypothetical protein LOC100002352 [Danio rerio] |  |  |  | gi 326667104 |  | 28311.2 | 4.72 | 8 | 37 | 0 |  |
|----|------------------------------------------------------------|--|--|--|--------------|--|---------|------|---|----|---|--|

Peptide Information

| Calc. Mass | Obsrv. Mass | ± da    | ± ppm | Start Seq. | End Seq. | Sequence            | Ion Score | C. I. | % Modification                                  | Rank | Result Type |
|------------|-------------|---------|-------|------------|----------|---------------------|-----------|-------|-------------------------------------------------|------|-------------|
| 1079.486   | 1079.5193   | 0.0333  | 31    | 28         | 37       | LCQECGLDAK          |           |       |                                                 |      | Mascot      |
| 1277.6704  | 1277.7207   | 0.0503  | 39    | 179        | 189      | LICEMARQIGK         |           |       | Oxidation (M)[5]                                |      | Mascot      |
| 1277.6704  | 1277.7207   | 0.0503  | 39    | 179        | 189      | LICEMARQIGK         |           |       | Oxidation (M)[5]                                |      | Mascot      |
| 1377.5708  | 1377.6808   | 0.11    | 80    | 167        | 178      | DMNSHIGNACMK        |           |       | Carbamidomethyl (C)[10]                         |      | Mascot      |
| 1475.7887  | 1475.7642   | -0.0245 | -17   | 41         | 52       | TDLLRLSEEMR         |           |       |                                                 |      | Mascot      |
| 1493.6835  | 1493.7441   | 0.0606  | 41    | 28         | 40       | LCQECGLDAKGSR       |           |       | Carbamidomethyl (C)[2,5]                        |      | Mascot      |
| 1899.8074  | 1899.9529   | 0.1455  | 77    | 237        | 252      | FVVCENCLPSGSWDMV    |           |       | Carbamidomethyl (C)[4,7]                        |      | Mascot      |
| 1915.8022  | 1915.9495   | 0.1473  | 77    | 237        | 252      | FVVCENCLPSGSWDMV    |           |       | Carbamidomethyl (C)[4,7], Oxidation (M)[15]     |      | Mascot      |
| 2018.0229  | 2018.1805   | 0.1576  | 78    | 123        | 138      | DWDPLQEKLDDYVLDR    |           |       |                                                 |      | Mascot      |
| 2282.9807  | 2283.2048   | 0.2241  | 98    | 167        | 185      | DMNSHIGNACMKLICEMAR |           |       | Carbamidomethyl (C)[10,15], Oxidation (M)[2,11] |      | Mascot      |

|    |                                              |  |  |  |              |  |         |      |    |    |   |  |
|----|----------------------------------------------|--|--|--|--------------|--|---------|------|----|----|---|--|
| 29 | hypothetical protein LOC751680 [Danio rerio] |  |  |  | gi 113679132 |  | 59375.2 | 7.18 | 13 | 36 | 0 |  |
|----|----------------------------------------------|--|--|--|--------------|--|---------|------|----|----|---|--|

Peptide Information

| Calc. Mass | Obsrv. Mass | ± da | ± ppm | Start Seq. | End Seq. | Sequence | Ion Score | C. I. | % Modification | Rank | Result Type |
|------------|-------------|------|-------|------------|----------|----------|-----------|-------|----------------|------|-------------|
|------------|-------------|------|-------|------------|----------|----------|-----------|-------|----------------|------|-------------|

|    |                                                                                                     |           |         |     |     |     |                    |         |      |    |    |   |  |  |  |  |        |
|----|-----------------------------------------------------------------------------------------------------|-----------|---------|-----|-----|-----|--------------------|---------|------|----|----|---|--|--|--|--|--------|
|    | 850.4669                                                                                            | 850.5464  | 0.0795  | 93  | 324 | 330 | LIAQDYK            |         |      |    |    |   |  |  |  |  | Mascot |
|    | 983.4688                                                                                            | 983.4511  | -0.0177 | -18 | 196 | 203 | LICGFMDK           |         |      |    |    |   |  |  |  |  | Mascot |
|    | 1127.5626                                                                                           | 1127.5769 | 0.0143  | 13  | 247 | 255 | AHQIKDQCK          |         |      |    |    |   |  |  |  |  | Mascot |
|    | 1234.5773                                                                                           | 1234.6895 | 0.1122  | 91  | 186 | 195 | MTSIVFSDYR         |         |      |    |    |   |  |  |  |  | Mascot |
|    | 1256.6715                                                                                           | 1256.7061 | 0.0346  | 28  | 425 | 434 | TLHCLMRVAR         |         |      |    |    |   |  |  |  |  | Mascot |
|    | 1256.6715                                                                                           | 1256.7061 | 0.0346  | 28  | 425 | 434 | TLHCLMRVAR         |         |      |    |    |   |  |  |  |  | Mascot |
|    | 1308.6113                                                                                           | 1308.6646 | 0.0533  | 41  | 410 | 421 | GEIEAHCSGLHR       |         |      |    |    |   |  |  |  |  | Mascot |
|    | 1493.7278                                                                                           | 1493.7441 | 0.0163  | 11  | 410 | 422 | GEIEAHCSGLHRK      |         |      |    |    |   |  |  |  |  | Mascot |
|    | 1743.7789                                                                                           | 1743.8589 | 0.08    | 46  | 378 | 392 | TVSGDCQAEMLDYRR    |         |      |    |    |   |  |  |  |  | Mascot |
|    | 1743.7789                                                                                           | 1743.8589 | 0.08    | 46  | 378 | 392 | TVSGDCQAEMLDYRR    |         |      |    |    |   |  |  |  |  | Mascot |
|    | 1759.7738                                                                                           | 1759.8466 | 0.0728  | 41  | 378 | 392 | TVSGDCQAEMLDYRR    |         | 4    | 0  |    |   |  |  |  |  | Mascot |
|    | 1759.7738                                                                                           | 1759.8466 | 0.0728  | 41  | 378 | 392 | TVSGDCQAEMLDYRR    |         |      |    |    |   |  |  |  |  | Mascot |
|    | 1830.0054                                                                                           | 1829.8422 | -0.1632 | -89 | 362 | 377 | LSYLLLCLESAVHRGR   |         |      |    |    |   |  |  |  |  | Mascot |
|    | 1899.9442                                                                                           | 1899.9529 | 0.0087  | 5   | 135 | 151 | FESVALEVCTSTMLELK  |         |      |    |    |   |  |  |  |  | Mascot |
|    | 1915.9391                                                                                           | 1915.9495 | 0.0104  | 5   | 135 | 151 | FESVALEVCTSTMLELK  |         |      |    |    |   |  |  |  |  | Mascot |
|    | 1993.9583                                                                                           | 1993.9924 | 0.0341  | 17  | 161 | 177 | GYLMSCLVDHRANITER  |         |      |    |    |   |  |  |  |  | Mascot |
|    | 2086.0386                                                                                           | 2085.9387 | -0.0999 | -48 | 93  | 109 | HTWTNNLSVLECLQDKK  |         |      |    |    |   |  |  |  |  | Mascot |
|    | 2233.0925                                                                                           | 2233.1069 | 0.0144  | 6   | 392 | 409 | RMLMEDFSLSPEIVLHCR |         |      |    |    |   |  |  |  |  | Mascot |
| 30 | novel protein similar to vertebrate discoidin domain receptor family, member 2 (DDR2) [Danio rerio] |           |         |     |     |     | gi 148725482       | 93333.9 | 5.15 | 13 | 36 | 0 |  |  |  |  |        |

#### Peptide Information

|  | Calc. Mass | Obsrv. Mass | ± da    | ± ppm | Start Seq. | End Sequence Seq. | Ion Score                 | C. I. % | Modification                              | Rank | Result Type |
|--|------------|-------------|---------|-------|------------|-------------------|---------------------------|---------|-------------------------------------------|------|-------------|
|  | 850.4451   | 850.5464    | 0.1013  | 119   | 405        | 411               | MIEKASR                   |         | Oxidation (M)[1]                          |      | Mascot      |
|  | 996.5948   | 996.603     | 0.0082  | 8     | 599        | 606               | LRDPNIIR                  |         |                                           |      | Mascot      |
|  | 1127.5592  | 1127.5769   | 0.0177  | 16    | 706        | 714               | GDYYRIQGR                 |         |                                           |      | Mascot      |
|  | 1234.6282  | 1234.6895   | 0.0613  | 50    | 683        | 693               | NCLVGMNNIIK               |         | Oxidation (M)[6]                          |      | Mascot      |
|  | 1317.619   | 1317.6998   | 0.0808  | 61    | 277        | 286               | MFRQAVCSFR                |         | Carbamidomethyl (C)[7], Oxidation (M)[1]  |      | Mascot      |
|  | 1377.687   | 1377.6808   | -0.0062 | -5    | 358        | 369               | RNQAPVDDPTHK              |         |                                           |      | Mascot      |
|  | 1829.8231  | 1829.8422   | 0.0191  | 10    | 560        | 575               | DHCDDICVDPMLVAVK          |         | Carbamidomethyl (C)[3]                    |      | Mascot      |
|  | 1862.9647  | 1862.7999   | -0.1648 | -88   | 449        | 464               | IFPLGSDYQEPSQLLR          |         |                                           |      | Mascot      |
|  | 2018.0665  | 2018.1805   | 0.114   | 56    | 109        | 126               | QGRQIIEGNSNAYDIVLK        |         |                                           |      | Mascot      |
|  | 2086.0105  | 2085.9387   | -0.0718 | -34   | 136        | 152               | FVRFPVTDPSMIVCMR          |         | Carbamidomethyl (C)[15]                   |      | Mascot      |
|  | 2102.0054  | 2101.939    | -0.0664 | -32   | 136        | 152               | FVRFPVTDPSMIVCMR          |         | Carbamidomethyl (C)[15], Oxidation (M)[5] |      | Mascot      |
|  | 2284.1753  | 2284.1978   | 0.0225  | 10    | 509        | 529               | VTVVNMPLSPGRDGALE<br>EFPR |         |                                           |      | Mascot      |

|    |                                       |           |        |    |             |     |                             |      |                           |        |   |
|----|---------------------------------------|-----------|--------|----|-------------|-----|-----------------------------|------|---------------------------|--------|---|
|    | 2501.0781                             | 2501.2778 | 0.1997 | 80 | 538         | 559 | LGEGQFGEVHLCEAEGM<br>QEFMK  |      | Oxidation (M)[17,21]      | Mascot |   |
|    | 2872.3765                             | 2872.4285 | 0.052  | 18 | 779         | 801 | QVYLLRPACCPESLYSLM<br>LNCWR |      | Carbamidomethyl (C)[9,10] | Mascot |   |
| 31 | Si:dkey-21n12.1 protein [Danio rerio] |           |        |    | gi 33416381 |     | 52010.8                     | 5.01 | 9                         | 35     | 0 |

#### Peptide Information

|  | Calc. Mass | Obsrv. Mass | ± da    | ± ppm | Start Seq. | End Sequence Seq. | Ion Score                | C. I. % | Modification              | Rank | Result Type |
|--|------------|-------------|---------|-------|------------|-------------------|--------------------------|---------|---------------------------|------|-------------|
|  | 882.3621   | 882.4437    | 0.0816  | 92    | 328        | 334               | MDTNETR                  |         | Oxidation (M)[1]          |      | Mascot      |
|  | 932.4796   | 932.4755    | -0.0041 | -4    | 319        | 326               | TKDAQVDR                 |         |                           |      | Mascot      |
|  | 1127.5691  | 1127.5769   | 0.0078  | 7     | 188        | 196               | EELQKHSEK                |         |                           |      | Mascot      |
|  | 1226.5721  | 1226.5881   | 0.016   | 13    | 13         | 22                | GYQELTVECK               |         | Carbamidomethyl (C)[9]    |      | Mascot      |
|  | 1345.5688  | 1345.6833   | 0.1145  | 85    | 281        | 292               | TCFDDSRSSAEK             |         |                           |      | Mascot      |
|  | 1993.927   | 1993.9924   | 0.0654  | 33    | 373        | 390               | TPDSEVVTENMGITIEDIK      |         | Oxidation (M)[11]         |      | Mascot      |
|  | 2101.9883  | 2101.939    | -0.0493 | -23   | 197        | 216               | ANGSDVIAGSIKEEPQDD<br>EK |         |                           |      | Mascot      |
|  | 2102.9885  | 2102.9561   | -0.0324 | -15   | 23         | 39                | TGILKYLCECQFDDNVK        |         | Carbamidomethyl (C)[8,10] |      | Mascot      |
|  | 2102.9885  | 2102.9561   | -0.0324 | -15   | 23         | 39                | TGILKYLCECQFDDNVK        |         | Carbamidomethyl (C)[8,10] |      | Mascot      |
|  | 2118.833   | 2118.9597   | 0.1267  | 60    | 121        | 139               | EQEEGSSNNSPNPDDDEE<br>NK |         |                           |      | Mascot      |
|  | 2118.833   | 2118.9597   | 0.1267  | 60    | 121        | 139               | EQEEGSSNNSPNPDDDEE<br>NK |         |                           |      | Mascot      |

|    |                        |  |  |  |             |  |         |      |    |    |   |
|----|------------------------|--|--|--|-------------|--|---------|------|----|----|---|
| 32 | cyclin-F [Danio rerio] |  |  |  | gi 46309465 |  | 84852.2 | 5.63 | 13 | 35 | 0 |
|----|------------------------|--|--|--|-------------|--|---------|------|----|----|---|

#### Peptide Information

|  | Calc. Mass | Obsrv. Mass | ± da    | ± ppm | Start Seq. | End Sequence Seq. | Ion Score               | C. I. % | Modification                             | Rank | Result Type |
|--|------------|-------------|---------|-------|------------|-------------------|-------------------------|---------|------------------------------------------|------|-------------|
|  | 915.4101   | 915.495     | 0.0849  | 93    | 576        | 583               | ADSMQAHHR               |         |                                          |      | Mascot      |
|  | 950.4399   | 950.4991    | 0.0592  | 62    | 495        | 502               | CFGQDVPK                |         | Carbamidomethyl (C)[1]                   |      | Mascot      |
|  | 1079.5084  | 1079.5193   | 0.0109  | 10    | 123        | 132               | ADLCGRMASR              |         |                                          |      | Mascot      |
|  | 1234.6426  | 1234.6895   | 0.0469  | 38    | 93         | 104               | AAEKGNFEAAVK            |         |                                          |      | Mascot      |
|  | 1256.6238  | 1256.7061   | 0.0823  | 65    | 240        | 248               | YLQCMRTLRL              |         | Carbamidomethyl (C)[4], Oxidation (M)[5] |      | Mascot      |
|  | 1256.6238  | 1256.7061   | 0.0823  | 65    | 240        | 248               | YLQCMRTLRL              |         | Carbamidomethyl (C)[4], Oxidation (M)[5] |      | Mascot      |
|  | 1308.6405  | 1308.6646   | 0.0241  | 18    | 254        | 264               | GCWEAQLAFVK             |         | Carbamidomethyl (C)[2]                   |      | Mascot      |
|  | 1317.658   | 1317.6998   | 0.0418  | 32    | 172        | 183               | LQAECQTSPGRK            |         |                                          |      | Mascot      |
|  | 1846.97    | 1846.8083   | -0.1617 | -88   | 349        | 364               | AQLQLLGIACMVICTR        |         | Carbamidomethyl (C)[10,14]               |      | Mascot      |
|  | 1862.9065  | 1862.7999   | -0.1066 | -57   | 324        | 339               | DFSSQVLHVTISCVDR        |         | Carbamidomethyl (C)[13]                  |      | Mascot      |
|  | 1915.9701  | 1915.9495   | -0.0206 | -11   | 81         | 96                | WPAPDTVWLFERAAEK        |         |                                          |      | Mascot      |
|  | 1994.0228  | 1993.9924   | -0.0304 | -15   | 105        | 122               | LGIAYLYNEGPLLSEEGR      |         |                                          |      | Mascot      |
|  | 2283.1689  | 2283.2048   | 0.0359  | 16    | 184        | 202               | GTLLYCLARVLQLFDDEE<br>K |         | Carbamidomethyl (C)[6]                   |      | Mascot      |

|                     |                                                                 |             |         |       |              |                               |                          |      |           |       |   |                                            |                  |
|---------------------|-----------------------------------------------------------------|-------------|---------|-------|--------------|-------------------------------|--------------------------|------|-----------|-------|---|--------------------------------------------|------------------|
|                     | 2283.9778                                                       | 2284.1978   | 0.22    | 96    | 628          | 647                           | DGEISTMEVQMELPLDC<br>ADR |      |           |       |   | Oxidation (M)[7,11]                        | Mascot           |
| 33                  | JAZF zinc finger 1b [Danio rerio]                               |             |         |       | gi 56693332  |                               | 13215.8                  | 6.96 | 5         | 34    | 0 |                                            |                  |
| Peptide Information |                                                                 |             |         |       |              |                               |                          |      |           |       |   |                                            |                  |
|                     | Calc. Mass                                                      | Obsrv. Mass | ± da    | ± ppm | Start Seq.   | End Sequence Seq.             |                          |      | Ion Score | C. I. | % | Modification                               | Rank Result Type |
|                     | 827.3716                                                        | 827.4323    | 0.0607  | 73    | 64           | 70 FMTDAAR                    |                          |      |           |       |   | Oxidation (M)[2]                           | Mascot           |
|                     | 983.4727                                                        | 983.4511    | -0.0216 | -22   | 64           | 71 FMTDAARR                   |                          |      |           |       |   | Oxidation (M)[2]                           | Mascot           |
|                     | 1179.6401                                                       | 1179.6095   | -0.0306 | -26   | 84           | 94 LSLSLMGSLSR                |                          |      |           |       |   | Oxidation (M)[6]                           | Mascot           |
|                     | 1615.92                                                         | 1615.7828   | -0.1372 | -85   | 80           | 94 VQPKLSLSLMGSLSR            |                          |      |           |       |   |                                            | Mascot           |
|                     | 1959.0692                                                       | 1959.0012   | -0.068  | -35   | 84           | 102 LSLSLMGSLSRSSVATPP<br>R   |                          |      |           |       |   |                                            | Mascot           |
| 34                  | Kv channel interacting protein 1 b [Danio rerio]                |             |         |       | gi 56693340  |                               | 24973                    | 5.1  | 7         | 34    | 0 |                                            |                  |
| Peptide Information |                                                                 |             |         |       |              |                               |                          |      |           |       |   |                                            |                  |
|                     | Calc. Mass                                                      | Obsrv. Mass | ± da    | ± ppm | Start Seq.   | End Sequence Seq.             |                          |      | Ion Score | C. I. | % | Modification                               | Rank Result Type |
|                     | 996.5109                                                        | 996.603     | 0.0921  | 92    | 14           | 21 QVSYRTDK                   |                          |      |           |       |   |                                            | Mascot           |
|                     | 1063.5208                                                       | 1063.5499   | 0.0291  | 27    | 172          | 180 AHVDAFFEK                 |                          |      |           |       |   |                                            | Mascot           |
|                     | 1130.4857                                                       | 1130.601    | 0.1153  | 102   | 207          | 215 SMQLFENVN                 |                          |      |           |       |   | Oxidation (M)[2,9]                         | Mascot           |
|                     | 1351.7256                                                       | 1351.6682   | -0.0574 | -42   | 160          | 171 YTYPALKGDVPK              |                          |      |           |       |   |                                            | Mascot           |
|                     | 1915.8962                                                       | 1915.9495   | 0.0533  | 28    | 144          | 159 EEMTEIVRAIDMMGK           |                          |      |           |       |   |                                            | Mascot           |
|                     | 2041.0358                                                       | 2041.0748   | 0.039   | 19    | 1            | 18 MGVLGTFSMHTKQVSY<br>R      |                          |      |           |       |   |                                            | Mascot           |
|                     | 2041.0358                                                       | 2041.0748   | 0.039   | 19    | 1            | 18 MGVLGTFSMHTKQVSY<br>R      |                          |      |           |       |   |                                            | Mascot           |
|                     | 2501.0994                                                       | 2501.2778   | 0.1784  | 71    | 186          | 206 DGVVTLEEFVLACQEDE<br>NMMR |                          |      |           |       |   | Carbamidomethyl (C)[13], Oxidation (M)[19] | Mascot           |
| 35                  | PREDICTED: discoidin domain-containing receptor 2 [Danio rerio] |             |         |       | gi 326664709 |                               | 95172.7                  | 5.15 | 13        | 34    | 0 |                                            |                  |
| Peptide Information |                                                                 |             |         |       |              |                               |                          |      |           |       |   |                                            |                  |
|                     | Calc. Mass                                                      | Obsrv. Mass | ± da    | ± ppm | Start Seq.   | End Sequence Seq.             |                          |      | Ion Score | C. I. | % | Modification                               | Rank Result Type |
|                     | 850.4451                                                        | 850.5464    | 0.1013  | 119   | 421          | 427 MIEKASR                   |                          |      |           |       |   | Oxidation (M)[1]                           | Mascot           |
|                     | 996.5948                                                        | 996.603     | 0.0082  | 8     | 615          | 622 LRDPNIIR                  |                          |      |           |       |   |                                            | Mascot           |
|                     | 1127.5592                                                       | 1127.5769   | 0.0177  | 16    | 722          | 730 GDYYRIQGR                 |                          |      |           |       |   |                                            | Mascot           |
|                     | 1234.6282                                                       | 1234.6895   | 0.0613  | 50    | 699          | 709 NCLVGMNNIIK               |                          |      |           |       |   | Oxidation (M)[6]                           | Mascot           |
|                     | 1317.619                                                        | 1317.6998   | 0.0808  | 61    | 293          | 302 MFRQAVCSFR                |                          |      |           |       |   | Carbamidomethyl (C)[7], Oxidation (M)[1]   | Mascot           |
|                     | 1377.687                                                        | 1377.6808   | -0.0062 | -5    | 374          | 385 RNQAPVDDPTHK              |                          |      |           |       |   |                                            | Mascot           |
|                     | 1829.8231                                                       | 1829.8422   | 0.0191  | 10    | 576          | 591 DHCDDICVDPLMLVAVK         |                          |      |           |       |   | Carbamidomethyl (C)[3]                     | Mascot           |

|    |                                               |           |         |     |             |     |                             |      |    |    |   |                                           |  |  |  |  |        |
|----|-----------------------------------------------|-----------|---------|-----|-------------|-----|-----------------------------|------|----|----|---|-------------------------------------------|--|--|--|--|--------|
|    | 1862.9647                                     | 1862.7999 | -0.1648 | -88 | 465         | 480 | IFPLGSDYQEPSQLLR            |      |    |    |   |                                           |  |  |  |  | Mascot |
|    | 2018.0665                                     | 2018.1805 | 0.114   | 56  | 132         | 149 | QGRQIIEGNSNAYDIVLK          |      |    |    |   |                                           |  |  |  |  | Mascot |
|    | 2086.0105                                     | 2085.9387 | -0.0718 | -34 | 159         | 175 | FVRFMPTDPSMIVCMR            |      |    |    |   | Carbamidomethyl (C)[15]                   |  |  |  |  | Mascot |
|    | 2102.0054                                     | 2101.939  | -0.0664 | -32 | 159         | 175 | FVRFMPTDPSMIVCMR            |      |    |    |   | Carbamidomethyl (C)[15], Oxidation (M)[5] |  |  |  |  | Mascot |
|    | 2284.1753                                     | 2284.1978 | 0.0225  | 10  | 525         | 545 | VTVMNPLSPGRDGALE<br>EFPR    |      |    |    |   |                                           |  |  |  |  | Mascot |
|    | 2501.0781                                     | 2501.2778 | 0.1997  | 80  | 554         | 575 | LGEGQFGEVHLCEAEGM<br>QEFMK  |      |    |    |   | Oxidation (M)[17,21]                      |  |  |  |  | Mascot |
|    | 2872.3765                                     | 2872.4285 | 0.052   | 18  | 795         | 817 | QVYLLRPACCPESLYSLM<br>LNCWR |      |    |    |   | Carbamidomethyl (C)[9,10]                 |  |  |  |  | Mascot |
| 36 | growth/differentiation factor 9 [Danio rerio] |           |         |     | gi 59933270 |     | 48701.4                     | 8.77 | 10 | 34 | 0 |                                           |  |  |  |  |        |

#### Peptide Information

| Calc. Mass | Obsrv. Mass | ± da    | ± ppm | Start Seq. | End Seq. | Sequence                         | Ion Score | C. I. % | Modification                                 | Rank | Result Type |
|------------|-------------|---------|-------|------------|----------|----------------------------------|-----------|---------|----------------------------------------------|------|-------------|
| 850.5032   | 850.5464    | 0.0432  | 51    | 324        | 330      | VSFKELK                          |           |         |                                              |      | Mascot      |
| 882.3873   | 882.4437    | 0.0564  | 64    | 298        | 305      | SSETSMPK                         |           |         | Oxidation (M)[6]                             |      | Mascot      |
| 1248.6696  | 1248.6918   | 0.0222  | 18    | 282        | 291      | STLWELTSRR                       |           |         |                                              |      | Mascot      |
| 1345.6495  | 1345.6833   | 0.0338  | 25    | 94         | 105      | SPEASHLYNTAR                     |           |         |                                              |      | Mascot      |
| 1846.9342  | 1846.8083   | -0.1259 | -68   | 2          | 16       | ATLFFKCSALCYLPR                  |           |         | Carbamidomethyl (C)[7,11]                    |      | Mascot      |
| 1993.9696  | 1993.9924   | 0.0228  | 11    | 1          | 16       | MATLFFKCSALCYLPR                 |           |         | Carbamidomethyl (C)[8,12], Oxidation (M)[1]  |      | Mascot      |
| 2119.1335  | 2118.9597   | -0.1738 | -82   | 195        | 212      | WVEVDVTSFLHPLIAHK                |           |         |                                              |      | Mascot      |
| 2119.1335  | 2118.9597   | -0.1738 | -82   | 195        | 212      | WVEVDVTSFLHPLIAHK                |           |         |                                              |      | Mascot      |
| 2225.156   | 2225.1423   | -0.0137 | -6    | 246        | 264      | SPSLLLYLNDTSEVAYQR<br>R          |           |         |                                              |      | Mascot      |
| 2584.2759  | 2584.23     | -0.0459 | -18   | 168        | 190      | SSKQMCNSNHLGIQHSV<br>PLLSFR      |           |         |                                              |      | Mascot      |
| 3048.3833  | 3048.4551   | 0.0718  | 24    | 348        | 373      | GSCP RN VGFMYGSPMH<br>TMVQNLIYEK |           |         | Carbamidomethyl (C)[3], Oxidation (M)[10,15] |      | Mascot      |

37 dual specificity protein phosphatase CDC14B [Danio rerio] gi|41055744 45462.1 9.39 9 33 0

#### Peptide Information

| Calc. Mass | Obsrv. Mass | ± da    | ± ppm | Start Seq. | End Seq. | Sequence    | Ion Score | C. I. % | Modification           | Rank | Result Type |
|------------|-------------|---------|-------|------------|----------|-------------|-----------|---------|------------------------|------|-------------|
| 932.448    | 932.4755    | 0.0275  | 29    | 2          | 8        | LYRFCCK     |           |         |                        |      | Mascot      |
| 1063.4885  | 1063.5499   | 0.0614  | 58    | 1          | 8        | MLYRFCCK    |           |         |                        |      | Mascot      |
| 1079.4835  | 1079.5193   | 0.0358  | 33    | 1          | 8        | MLYRFCCK    |           |         | Oxidation (M)[1]       |      | Mascot      |
| 1130.5994  | 1130.601    | 0.0016  | 1     | 129        | 138      | FLAFSSPHPK  |           |         |                        |      | Mascot      |
| 1256.6377  | 1256.7061   | 0.0684  | 54    | 226        | 236      | TGTLIGCYLMK |           |         | Carbamidomethyl (C)[7] |      | Mascot      |
| 1256.6377  | 1256.7061   | 0.0684  | 54    | 226        | 236      | TGTLIGCYLMK |           |         | Carbamidomethyl (C)[7] |      | Mascot      |
| 1308.7747  | 1308.6646   | -0.1101 | -84   | 160        | 170      | HNVTTIIRLNK |           |         |                        |      | Mascot      |

|    |                                          |           |         |     |              |     |                            |      |    |    |   |                                             |   |  |  |  |        |
|----|------------------------------------------|-----------|---------|-----|--------------|-----|----------------------------|------|----|----|---|---------------------------------------------|---|--|--|--|--------|
|    | 1345.6707                                | 1345.6833 | 0.0126  | 9   | 281          | 292 | QKINEQENGSAK               |      |    |    |   |                                             |   |  |  |  | Mascot |
|    | 1959.0393                                | 1959.0012 | -0.0381 | -19 | 293          | 312 | TAVAGILSGVEDISINGTN<br>K   |      |    |    |   |                                             |   |  |  |  | Mascot |
|    | 1994.0164                                | 1993.9924 | -0.024  | -12 | 34           | 51  | QANAAYLIGSYAVMHLQK         |      |    |    |   | Oxidation (M)[14]                           |   |  |  |  | Mascot |
|    | 2584.2104                                | 2584.23   | 0.0196  | 8   | 72           | 93  | DASFGACMYNLNILDCLR<br>AVHK |      |    |    |   | Carbamidomethyl (C)[7,16], Oxidation (M)[8] |   |  |  |  | Mascot |
| 38 | PREDICTED: protein FAM178A [Danio rerio] |           |         |     | gi 326672896 |     | 105060                     | 4.82 | 10 | 33 | 0 | 11                                          | 0 |  |  |  |        |

#### Peptide Information

| Calc. Mass | Obsrv. Mass | ± da    | ± ppm | Start Seq. | End Seq. | Sequence                       | Ion Score | C. I. | % Modification                            | Rank | Result Type |
|------------|-------------|---------|-------|------------|----------|--------------------------------|-----------|-------|-------------------------------------------|------|-------------|
| 842.4002   | 842.5138    | 0.1136  | 135   | 239        | 246      | VEGSGEHK                       |           |       |                                           |      | Mascot      |
| 915.541    | 915.495     | -0.046  | -50   | 746        | 752      | WQVLLTR                        |           |       |                                           |      | Mascot      |
| 983.5883   | 983.4511    | -0.1372 | -139  | 619        | 627      | HLSVSIISK                      |           |       |                                           |      | Mascot      |
| 1130.6429  | 1130.601    | -0.0419 | -37   | 125        | 134      | APPSQPHLRK                     |           |       |                                           |      | Mascot      |
| 1256.7321  | 1256.7061   | -0.026  | -21   | 602        | 612      | RIVSILPESSR                    |           |       |                                           |      | Mascot      |
| 1256.7321  | 1256.7061   | -0.026  | -21   | 602        | 612      | RIVSILPESSR                    | 11        | 0     |                                           |      | Mascot      |
| 1638.8633  | 1638.869    | 0.0057  | 3     | 412        | 426      | ISMTSVHPNPIISSR                |           |       |                                           |      | Mascot      |
| 1727.823   | 1727.8539   | 0.0309  | 18    | 919        | 933      | DTLEMKDGMLLDAFI                |           |       | Oxidation (M)[5]                          |      | Mascot      |
| 1743.818   | 1743.8589   | 0.0409  | 23    | 919        | 933      | DTLEMKDGMLLDAFI                |           |       | Oxidation (M)[5,9]                        |      | Mascot      |
| 1743.9124  | 1743.8589   | -0.0535 | -31   | 31         | 47       | VDIQATSSSSILNSPPK              |           |       |                                           |      | Mascot      |
| 1915.8556  | 1915.9495   | 0.0939  | 49    | 253        | 268      | DPLDIELGDDWDDELRL              |           |       |                                           |      | Mascot      |
| 2872.3127  | 2872.4285   | 0.1158  | 40    | 135        | 160      | VSPKSSMTFDSIETHFTP<br>DNCASVAK |           |       | Carbamidomethyl (C)[21], Oxidation (M)[7] |      | Mascot      |

|    |                             |  |  |  |             |  |         |     |   |    |   |  |  |  |  |  |  |
|----|-----------------------------|--|--|--|-------------|--|---------|-----|---|----|---|--|--|--|--|--|--|
| 39 | novel protein [Danio rerio] |  |  |  | gi 94734348 |  | 21299.6 | 5.2 | 6 | 33 | 0 |  |  |  |  |  |  |
|----|-----------------------------|--|--|--|-------------|--|---------|-----|---|----|---|--|--|--|--|--|--|

#### Peptide Information

| Calc. Mass | Obsrv. Mass | ± da    | ± ppm | Start Seq. | End Seq. | Sequence        | Ion Score | C. I. | % Modification         | Rank | Result Type |
|------------|-------------|---------|-------|------------|----------|-----------------|-----------|-------|------------------------|------|-------------|
| 950.5128   | 950.4991    | -0.0137 | -14   | 123        | 130      | MFIGNQLK        |           |       |                        |      | Mascot      |
| 1234.5433  | 1234.6895   | 0.1462  | 118   | 112        | 122      | QDEAADTLEDK     |           |       |                        |      | Mascot      |
| 1248.7384  | 1248.6918   | -0.0466 | -37   | 49         | 58       | NLLEIFKMLK      |           |       |                        |      | Mascot      |
| 1449.8497  | 1449.765    | -0.0847 | -58   | 56         | 67       | MLKNQIITFLTK    |           |       |                        |      | Mascot      |
| 1638.7163  | 1638.869    | 0.1527  | 93    | 109        | 122      | EMKQDEAADTLEDK  |           |       | Oxidation (M)[2]       |      | Mascot      |
| 1899.9884  | 1899.9529   | -0.0355 | -19   | 93         | 108      | CTITEAALDLTYFLR |           |       | Carbamidomethyl (C)[1] |      | Mascot      |

|    |                                              |  |  |  |              |  |         |      |    |    |   |  |  |  |  |  |  |
|----|----------------------------------------------|--|--|--|--------------|--|---------|------|----|----|---|--|--|--|--|--|--|
| 40 | hypothetical protein LOC569044 [Danio rerio] |  |  |  | gi 139949249 |  | 71104.8 | 5.81 | 10 | 33 | 0 |  |  |  |  |  |  |
|----|----------------------------------------------|--|--|--|--------------|--|---------|------|----|----|---|--|--|--|--|--|--|

#### Peptide Information

| Calc. Mass | Obsrv. Mass | ± da | ± ppm | Start Seq. | End Seq. | Sequence | Ion Score | C. I. | % Modification | Rank | Result Type |
|------------|-------------|------|-------|------------|----------|----------|-----------|-------|----------------|------|-------------|
|------------|-------------|------|-------|------------|----------|----------|-----------|-------|----------------|------|-------------|

|    |                                                                                                |           |         |      |     |     |                           |        |      |   |    |   |                        |   |  |  |        |
|----|------------------------------------------------------------------------------------------------|-----------|---------|------|-----|-----|---------------------------|--------|------|---|----|---|------------------------|---|--|--|--------|
|    | 850.4781                                                                                       | 850.5464  | 0.0683  | 80   | 465 | 471 | AIDTRFK                   |        |      |   |    |   |                        |   |  |  | Mascot |
|    | 1063.524                                                                                       | 1063.5499 | 0.0259  | 24   | 566 | 574 | CLNEFPGVK                 |        |      |   |    |   | Carbamidomethyl (C)[1] |   |  |  | Mascot |
|    | 1256.6844                                                                                      | 1256.7061 | 0.0217  | 17   | 314 | 326 | DLAEAVTKGPAGK             |        |      |   |    |   |                        |   |  |  | Mascot |
|    | 1256.6844                                                                                      | 1256.7061 | 0.0217  | 17   | 314 | 326 | DLAEAVTKGPAGK             |        |      |   |    |   |                        |   |  |  | Mascot |
|    | 1277.6783                                                                                      | 1277.7207 | 0.0424  | 33   | 147 | 157 | RVMSPNFVTR                |        |      |   |    |   |                        |   |  |  | Mascot |
|    | 1277.6783                                                                                      | 1277.7207 | 0.0424  | 33   | 147 | 157 | RVMSPNFVTR                |        |      |   |    |   |                        |   |  |  | Mascot |
|    | 1345.6967                                                                                      | 1345.6833 | -0.0134 | -10  | 26  | 37  | NITVQC�LCLPK              |        |      |   |    |   |                        |   |  |  | Mascot |
|    | 1362.7086                                                                                      | 1362.7084 | -0.0002 | 0    | 563 | 574 | DLKCLNEFPGVK              |        |      |   |    |   |                        |   |  |  | Mascot |
|    | 1362.7086                                                                                      | 1362.7084 | -0.0002 | 0    | 563 | 574 | DLKCLNEFPGVK              |        |      |   |    |   |                        |   |  |  | Mascot |
|    | 1615.8407                                                                                      | 1615.7828 | -0.0579 | -36  | 24  | 37  | GRNITVQC�LCLPK            |        |      |   |    |   | Carbamidomethyl (C)[8] |   |  |  | Mascot |
|    | 1744.0553                                                                                      | 1743.8589 | -0.1964 | -113 | 429 | 443 | CFLGIVIPTLLTLKR           |        |      |   |    |   | Carbamidomethyl (C)[1] |   |  |  | Mascot |
|    | 1744.0553                                                                                      | 1743.8589 | -0.1964 | -113 | 429 | 443 | CFLGIVIPTLLTLKR           |        |      |   |    |   | Carbamidomethyl (C)[1] |   |  |  | Mascot |
|    | 1899.8496                                                                                      | 1899.9529 | 0.1033  | 54   | 342 | 359 | AESSMETAVAMESIANM<br>K    |        |      |   |    |   |                        |   |  |  | Mascot |
|    | 1915.8446                                                                                      | 1915.9495 | 0.1049  | 55   | 342 | 359 | AESSMETAVAMESIANM<br>K    |        |      |   |    |   | Oxidation (M)[5]       |   |  |  | Mascot |
|    | 2283.1472                                                                                      | 2283.2048 | 0.0576  | 25   | 209 | 229 | SAALACTRIPSNYTCETII<br>AK |        |      |   |    |   | Carbamidomethyl (C)[6] |   |  |  | Mascot |
| 41 | PREDICTED: transient receptor potential cation channel subfamily M member 4-like [Danio rerio] |           |         |      |     |     | gi 326666046              | 137203 | 6.89 | 8 | 33 | 0 | 23                     | 0 |  |  |        |

#### Peptide Information

|  | Calc. Mass | Obsrv. Mass | ± da    | ± ppm | Start Seq. | End Seq. | Sequence                      | Ion Score | C. I. | % Modification                           | Rank | Result Type |
|--|------------|-------------|---------|-------|------------|----------|-------------------------------|-----------|-------|------------------------------------------|------|-------------|
|  | 827.4556   | 827.4323    | -0.0233 | -28   | 591        | 597      | AMKHAVNK                      |           |       |                                          |      | Mascot      |
|  | 950.4677   | 950.4991    | 0.0314  | 33    | 657        | 664      | LETETETK                      |           |       |                                          |      | Mascot      |
|  | 1165.7667  | 1165.7522   | -0.0145 | -12   | 910        | 920      | QLGPKIIVGK                    |           |       |                                          |      | Mascot      |
|  | 1317.6758  | 1317.6998   | 0.024   | 18    | 541        | 553      | SQATNLTPSAAR                  |           |       |                                          |      | Mascot      |
|  | 1432.7828  | 1432.7548   | -0.028  | -20   | 1141       | 1152     | VDSVLKQMVEIR                  | 23        | 0     | Oxidation (M)[8]                         |      | Mascot      |
|  | 1432.7828  | 1432.7548   | -0.028  | -20   | 1141       | 1152     | VDSVLKQMVEIR                  |           |       | Oxidation (M)[8]                         |      | Mascot      |
|  | 1443.6467  | 1443.7177   | 0.071   | 49    | 184        | 196      | HHCAMASSLSQAK                 |           |       | Carbamidomethyl (C)[3], Oxidation (M)[5] |      | Mascot      |
|  | 1443.6467  | 1443.7177   | 0.071   | 49    | 184        | 196      | HHCAMASSLSQAK                 |           |       | Carbamidomethyl (C)[3], Oxidation (M)[5] |      | Mascot      |
|  | 1899.9712  | 1899.9529   | -0.0183 | -10   | 441        | 456      | VDIAKTELFNGDVHWR              |           |       |                                          |      | Mascot      |
|  | 2584.3301  | 2584.23     | -0.1001 | -39   | 152        | 176      | QGLVHAAQSTGAWIMTS<br>GLKEGVSR |           |       |                                          |      | Mascot      |

42 PREDICTED: PDZ domain-containing protein 8-like [Danio rerio] gi|189530829 125112.9 5.87 10 32 0 17 0

#### Peptide Information

|  | Calc. Mass | Obsrv. Mass | ± da | ± ppm | Start Seq. | End Seq. | Sequence | Ion Score | C. I. | % Modification | Rank | Result Type |
|--|------------|-------------|------|-------|------------|----------|----------|-----------|-------|----------------|------|-------------|
|--|------------|-------------|------|-------|------------|----------|----------|-----------|-------|----------------|------|-------------|

|    |                          |           |         |     |             |     |                      |      |   |    |                          |  |        |
|----|--------------------------|-----------|---------|-----|-------------|-----|----------------------|------|---|----|--------------------------|--|--------|
|    | 827.4661                 | 827.4323  | -0.0338 | -41 | 170         | 176 | SAYLFVK              |      |   |    |                          |  | Mascot |
|    | 842.4188                 | 842.5138  | 0.095   | 113 | 720         | 726 | LCAPEPR              |      |   |    | Carbamidomethyl (C)[2]   |  | Mascot |
|    | 996.5724                 | 996.603   | 0.0306  | 31  | 522         | 530 | ESPKPPTLK            |      |   |    |                          |  | Mascot |
|    | 1045.4908                | 1045.5696 | 0.0788  | 75  | 587         | 596 | TQPNTGNGEK           |      |   |    |                          |  | Mascot |
|    | 1130.5801                | 1130.601  | 0.0209  | 18  | 985         | 994 | GLPTDERSQK           |      |   |    |                          |  | Mascot |
|    | 1351.7482                | 1351.6682 | -0.08   | -59 | 79          | 89  | DTPVVRHWITK          |      |   |    |                          |  | Mascot |
|    | 1829.8949                | 1829.8422 | -0.0527 | -29 | 910         | 927 | LAEQVADMGSGVVEPSK    |      |   |    | Oxidation (M)[8]         |  | Mascot |
|    | 1846.8687                | 1846.8083 | -0.0604 | -33 | 857         | 871 | CLLEHPYCVAASDRR      |      |   |    | Carbamidomethyl (C)[1,8] |  | Mascot |
|    | 2041.0382                | 2041.0748 | 0.0366  | 18  | 908         | 927 | ARLAEQVADMGSGVVEPSPK |      |   |    |                          |  | Mascot |
|    | 2041.0382                | 2041.0748 | 0.0366  | 18  | 908         | 927 | ARLAEQVADMGSGVVEPSPK | 17   |   | 0  |                          |  | Mascot |
|    | 2284.2158                | 2284.1978 | -0.018  | -8  | 60          | 78  | AETCDFLNAILFLFRELR   |      |   |    |                          |  | Mascot |
| 43 | annexin A4 [Danio rerio] |           |         |     | gi 32401412 |     | 35611.3              | 6.07 | 9 | 32 | 0                        |  |        |

#### Peptide Information

| Calc. Mass | Obsrv. Mass | ± da    | ± ppm | Start Seq. | End Seq. | Sequence             | Ion Score | C. I. | % Modification                            | Rank | Result Type |
|------------|-------------|---------|-------|------------|----------|----------------------|-----------|-------|-------------------------------------------|------|-------------|
| 950.5491   | 950.4991    | -0.05   | -53   | 195        | 202      | FLTVLCVR             |           |       |                                           |      | Mascot      |
| 1063.5339  | 1063.5499   | 0.016   | 15    | 278        | 286      | AEIDMLDIK            |           |       | Oxidation (M)[5]                          |      | Mascot      |
| 1079.5632  | 1079.5193   | -0.0439 | -41   | 247        | 255      | NKPAFFAER            |           |       |                                           |      | Mascot      |
| 1277.7146  | 1277.7207   | 0.0061  | 5     | 195        | 204      | FLTVLCVRNR           |           |       | Carbamidomethyl (C)[6]                    |      | Mascot      |
| 1277.7146  | 1277.7207   | 0.0061  | 5     | 195        | 204      | FLTVLCVRNR           |           |       | Carbamidomethyl (C)[6]                    |      | Mascot      |
| 1351.6959  | 1351.6682   | -0.0277 | -20   | 60         | 71       | LSVGKELMDCLK         |           |       | Oxidation (M)[8]                          |      | Mascot      |
| 1493.7992  | 1493.7441   | -0.0551 | -37   | 259        | 272      | SMKGLGTTDSVLIR       |           |       | Oxidation (M)[2]                          |      | Mascot      |
| 1846.7582  | 1846.8083   | 0.0501  | 27    | 137        | 152      | SLEDDICGDTSGMFQR     |           |       | Carbamidomethyl (C)[7], Oxidation (M)[13] |      | Mascot      |
| 2102.0911  | 2101.939    | -0.1521 | -72   | 99         | 118      | NAIKGAGTEEACLIDILASR |           |       | Carbamidomethyl (C)[12]                   |      | Mascot      |
| 2282.9653  | 2283.2048   | 0.2395  | 105   | 133        | 152      | EHDKSLEDDICGDTSGMFQR |           |       |                                           |      | Mascot      |

44 novel protein [Danio rerio] gi|94733484 114560.5 5.78 13 32 0

#### Peptide Information

| Calc. Mass | Obsrv. Mass | ± da    | ± ppm | Start Seq. | End Seq. | Sequence   | Ion Score | C. I. | % Modification | Rank | Result Type |
|------------|-------------|---------|-------|------------|----------|------------|-----------|-------|----------------|------|-------------|
| 1063.6047  | 1063.5499   | -0.0548 | -52   | 1031       | 1038     | RFIFPQQK   |           |       |                |      | Mascot      |
| 1234.6538  | 1234.6895   | 0.0357  | 29    | 350        | 359      | DKLTAQQFQR |           |       |                |      | Mascot      |
| 1277.7252  | 1277.7207   | -0.0045 | -4    | 1032       | 1041     | FIFPQQKLEK |           |       |                |      | Mascot      |
| 1277.7252  | 1277.7207   | -0.0045 | -4    | 1032       | 1041     | FIFPQQKLEK |           |       |                |      | Mascot      |



|    |                                      |           |         |      |             |     |                                  |      |   |                   |   |  |        |
|----|--------------------------------------|-----------|---------|------|-------------|-----|----------------------------------|------|---|-------------------|---|--|--------|
|    | 1308.6907                            | 1308.6646 | -0.0261 | -20  | 752         | 763 | SQIPSQPLSHSK                     |      |   |                   |   |  | Mascot |
|    | 1317.8477                            | 1317.6998 | -0.1479 | -112 | 970         | 981 | RAAVHVIALVLR                     |      |   |                   |   |  | Mascot |
|    | 1362.7119                            | 1362.7084 | -0.0035 | -3   | 530         | 541 | VQCLVQLLGDMK                     |      |   | Oxidation (M)[11] |   |  | Mascot |
|    | 1362.7119                            | 1362.7084 | -0.0035 | -3   | 530         | 541 | VQCLVQLLGDMK                     |      |   | Oxidation (M)[11] |   |  | Mascot |
|    | 1377.6791                            | 1377.6808 | 0.0017  | 1    | 928         | 940 | ASSLSNLGELCQR                    |      |   |                   |   |  | Mascot |
|    | 1707.9541                            | 1707.7872 | -0.1669 | -98  | 702         | 717 | ATIATHGAYHPKTVLK                 |      |   |                   |   |  | Mascot |
|    | 1830.0516                            | 1829.8422 | -0.2094 | -114 | 417         | 434 | ICVVGNSTSNVLLKALAK               |      |   |                   |   |  | Mascot |
|    | 1899.7921                            | 1899.9529 | 0.1608  | 85   | 785         | 801 | AFSECMLEACDPDVPTR                |      |   | Oxidation (M)[6]  |   |  | Mascot |
|    | 1959.0142                            | 1959.0012 | -0.013  | -7   | 1           | 19  | GQLSDGQTTEAALLSAL<br>QR          |      |   |                   |   |  | Mascot |
|    | 1994.2048                            | 1993.9924 | -0.2124 | -107 | 237         | 254 | VYQPIVIKELLVLQGGPK               |      |   |                   |   |  | Mascot |
|    | 3048.5254                            | 3048.4551 | -0.0703 | -23  | 189         | 216 | HLGDIMAALCQLAYRPQ<br>RPDGDGAKSHK |      |   |                   |   |  | Mascot |
| 45 | casein kinase 1-alphaL [Danio rerio] |           |         |      | gi 21591725 |     | 40471.7                          | 9.54 | 9 | 32                | 0 |  |        |

#### Peptide Information

| Calc. Mass | Obsrv. Mass | ± da    | ± ppm | Start Seq. | End Seq. | Sequence         | Ion Score | C. I. | % Modification                           | Rank | Result Type |
|------------|-------------|---------|-------|------------|----------|------------------|-----------|-------|------------------------------------------|------|-------------|
| 1045.5459  | 1045.5696   | 0.0237  | 23    | 153        | 161      | CLESPVGKR        |           |       | Carbamidomethyl (C)[1]                   |      | Mascot      |
| 1179.5748  | 1179.6095   | 0.0347  | 29    | 269        | 278      | MSTPVEVLCK       |           |       | Carbamidomethyl (C)[9], Oxidation (M)[1] |      | Mascot      |
| 1234.6534  | 1234.6895   | 0.0361  | 29    | 268        | 278      | KMSTPVEVLCK      |           |       |                                          |      | Mascot      |
| 1377.7229  | 1377.6808   | -0.0421 | -31   | 112        | 123      | TVLMLADQMISR     |           |       |                                          |      | Mascot      |
| 1449.6355  | 1449.765    | 0.1295  | 89    | 296        | 306      | FEEAPDYMRL       |           |       | Oxidation (M)[8]                         |      | Mascot      |
| 1475.7675  | 1475.7642   | -0.0033 | -2    | 136        | 148      | DIKPDNFLMGIGR    |           |       |                                          |      | Mascot      |
| 1759.8472  | 1759.8466   | -0.0006 | 0     | 293        | 306      | GLRFEEAPDYMRL    | 3         | 0     |                                          |      | Mascot      |
| 1759.8472  | 1759.8466   | -0.0006 | 0     | 293        | 306      | GLRFEEAPDYMRL    |           |       |                                          |      | Mascot      |
| 1993.9476  | 1993.9924   | 0.0448  | 22    | 296        | 310      | FEEAPDYMRLQLFR   |           |       | Oxidation (M)[8]                         |      | Mascot      |
| 2040.9153  | 2041.0748   | 0.1595  | 78    | 229        | 244      | RDDMESLGYVLMYFNR |           |       | Oxidation (M)[4,12]                      |      | Mascot      |
| 2040.9153  | 2041.0748   | 0.1595  | 78    | 229        | 244      | RDDMESLGYVLMYFNR |           |       | Oxidation (M)[4,12]                      |      | Mascot      |

|    |                                                              |  |  |  |              |  |          |      |   |    |   |  |  |
|----|--------------------------------------------------------------|--|--|--|--------------|--|----------|------|---|----|---|--|--|
| 46 | PREDICTED: insulin receptor substrate 1-B-like [Danio rerio] |  |  |  | gi 326674337 |  | 118937.4 | 8.49 | 1 | 24 | 0 |  |  |
|----|--------------------------------------------------------------|--|--|--|--------------|--|----------|------|---|----|---|--|--|

#### Peptide Information

| Calc. Mass | Obsrv. Mass | ± da    | ± ppm | Start Seq. | End Seq. | Sequence         | Ion Score | C. I. | % Modification    | Rank | Result Type |
|------------|-------------|---------|-------|------------|----------|------------------|-----------|-------|-------------------|------|-------------|
| 1743.9421  | 1743.8589   | -0.0832 | -48   | 179        | 194      | LNSDAAAVVLQLMNIR | 24        | 0     | Oxidation (M)[13] | 4    | Mascot      |

|    |                                          |  |  |  |              |  |          |     |   |    |   |  |  |
|----|------------------------------------------|--|--|--|--------------|--|----------|-----|---|----|---|--|--|
| 47 | PREDICTED: neurabin-1-like [Danio rerio] |  |  |  | gi 326670455 |  | 143069.6 | 4.9 | 1 | 17 | 0 |  |  |
|----|------------------------------------------|--|--|--|--------------|--|----------|-----|---|----|---|--|--|

#### Peptide Information

| Calc. Mass | Obsrv. Mass | ± da | ± ppm | Start | End | Sequence | Ion | C. I. | % Modification | Rank | Result Type |
|------------|-------------|------|-------|-------|-----|----------|-----|-------|----------------|------|-------------|
|------------|-------------|------|-------|-------|-----|----------|-----|-------|----------------|------|-------------|

|    |                                              |           |        | Seq. | Seq.         | Score |               |    |    |                   |          |
|----|----------------------------------------------|-----------|--------|------|--------------|-------|---------------|----|----|-------------------|----------|
|    | 1362.614                                     | 1362.7084 | 0.0944 | 69   | 371          | 383   | EQCLDPAGAGMVR | 17 | 0  | Oxidation (M)[11] | 2 Mascot |
| 48 | hypothetical protein LOC556137 [Danio rerio] |           |        |      | gi 113677313 | 19802 | 5.55          | 1  | 16 | 0                 |          |

Peptide Information

|    | Calc. Mass                              | Obsrv. Mass | ± da   | ± ppm | Start Seq.  | End Sequence |                | Ion Score | C. I. % | Modification           | Rank | Result Type |
|----|-----------------------------------------|-------------|--------|-------|-------------|--------------|----------------|-----------|---------|------------------------|------|-------------|
|    | 1759.811                                | 1759.8466   | 0.0356 | 20    | 2           | 16           | LLDYCCRCCTALIR | 16        | 0       | Carbamidomethyl (C)[5] | 2    | Mascot      |
| 49 | calcium-binding protein 1 [Danio rerio] |             |        |       | gi 50539888 |              | 19114.3        | 4.69      | 1       | 15                     | 0    |             |

Peptide Information

|    | Calc. Mass                                              | Obsrv. Mass | ± da   | ± ppm | Start Seq.   | End Sequence    |      | Ion Score | C. I. % | Modification     | Rank | Result Type |
|----|---------------------------------------------------------|-------------|--------|-------|--------------|-----------------|------|-----------|---------|------------------|------|-------------|
|    | 1432.6737                                               | 1432.7548   | 0.0811 | 57    | 18           | 28 ELRPEEMDELIR |      | 15        | 0       | Oxidation (M)[7] | 4    | Mascot      |
| 50 | leucine-rich repeat-containing protein 61 [Danio rerio] |             |        |       | gi 112363130 | 29557.2         | 6.14 | 1         | 15      | 0                |      |             |

Peptide Information

|  | Calc. Mass | Obsrv. Mass | ± da    | ± ppm | Start Seq. | End Seq. | Sequence    | Ion Score | C. I. % | Modification | Rank | Result Type |
|--|------------|-------------|---------|-------|------------|----------|-------------|-----------|---------|--------------|------|-------------|
|  | 1256.7433  | 1256.7061   | -0.0372 | -30   | 75         | 85       | RLLSLNLSANR | 15        | 0       |              | 2    | Mascot      |

|                |           |                        |                |                |                    |
|----------------|-----------|------------------------|----------------|----------------|--------------------|
| Gel Idx/Pos    | 202/I2    | Instr./Gel Origin      | BA2060/110707A | Process Status | Analysis Succeeded |
| Plate [#] Name | [1] 31496 | Instrument Sample Name |                | Spectra        | 11                 |

| Rank | Protein Name            | Accession No. | Protein MW | Protein PI | Pep. Count | Protein Score | Protein Score C. I. % | Total Ion Score | Total Ion C. I. % |
|------|-------------------------|---------------|------------|------------|------------|---------------|-----------------------|-----------------|-------------------|
| 1    | keratin 8 [Danio rerio] | gi 29335502   | 55516.4    | 5.01       | 20         | 645           | 100                   | 527             | 100               |

Peptide Information

|  | Calc. Mass | Obsrv. Mass | ± da   | ± ppm | Start Seq. | End Seq. | Sequence    | Ion Score | C. I. % | Modification | Rank | Result Type |
|--|------------|-------------|--------|-------|------------|----------|-------------|-----------|---------|--------------|------|-------------|
|  | 827.4297   | 827.4326    | 0.0029 | 4     | 105        | 111      | FASFDK      |           |         |              |      | Mascot      |
|  | 839.4005   | 839.4035    | 0.003  | 4     | 22         | 29       | SSYGGVNR    |           |         |              |      | Mascot      |
|  | 931.4843   | 931.4857    | 0.0014 | 2     | 308        | 315      | TEIADLNR    |           |         |              |      | Mascot      |
|  | 1063.5419  | 1063.5461   | 0.0042 | 4     | 229        | 236      | QIFEEEIR    |           |         |              |      | Mascot      |
|  | 1079.5116  | 1079.5172   | 0.0056 | 5     | 268        | 276      | AQYEDIANR   |           |         |              |      | Mascot      |
|  | 1200.6583  | 1200.6636   | 0.0053 | 4     | 356        | 365      | IKDLEDALQR  |           |         |              |      | Mascot      |
|  | 1248.6252  | 1248.6893   | 0.0641 | 51    | 153        | 163      | QLDSLGNCKMK |           |         |              |      | Mascot      |

|   |                                               |           |         |     |            |         |                         |     |                        |                  |     |        |
|---|-----------------------------------------------|-----------|---------|-----|------------|---------|-------------------------|-----|------------------------|------------------|-----|--------|
|   | 1270.5885                                     | 1270.5956 | 0.0071  | 6   | 277        | 286     | SRAEAEMWYK              |     |                        |                  |     | Mascot |
|   | 1277.71                                       | 1277.7164 | 0.0064  | 5   | 385        | 395     | LALDIEIATYR             | 93  | 100                    |                  |     | Mascot |
|   | 1277.71                                       | 1277.7164 | 0.0064  | 5   | 385        | 395     | LALDIEIATYR             |     |                        |                  |     | Mascot |
|   | 1286.5834                                     | 1286.5896 | 0.0062  | 5   | 277        | 286     | SRAEAEMWYK              |     | Oxidation (M)[7]       |                  |     | Mascot |
|   | 1317.691                                      | 1317.6975 | 0.0065  | 5   | 126        | 136     | WSLLQNQTATR             |     |                        |                  |     | Mascot |
|   | 1317.691                                      | 1317.6975 | 0.0065  | 5   | 126        | 136     | WSLLQNQTATR             | 86  | 100                    |                  |     | Mascot |
|   | 1345.678                                      | 1345.6841 | 0.0061  | 5   | 256        | 267     | NLDMDAIVAEVR            |     |                        |                  |     | Mascot |
|   | 1361.673                                      | 1361.6798 | 0.0068  | 5   | 256        | 267     | NLDMDAIVAEVR            |     | Oxidation (M)[4]       |                  |     | Mascot |
|   | 1381.6667                                     | 1381.6721 | 0.0054  | 4   | 190        | 200     | TECENEFLIK              |     | Carbamidomethyl (C)[3] |                  |     | Mascot |
|   | 1449.7584                                     | 1449.7642 | 0.0058  | 4   | 217        | 228     | LESLTDEINFLR            |     |                        |                  |     | Mascot |
|   | 1449.7584                                     | 1449.7642 | 0.0058  | 4   | 217        | 228     | LESLTDEINFLR            | 82  | 100                    |                  |     | Mascot |
|   | 1486.7133                                     | 1486.72   | 0.0067  | 5   | 332        | 344     | ANLENQIAEAEER           |     |                        |                  |     | Mascot |
|   | 1519.6846                                     | 1519.6925 | 0.0079  | 5   | 2          | 15      | NFSSLSYSGPSMSR          |     |                        |                  |     | Mascot |
|   | 1535.6794                                     | 1535.6902 | 0.0108  | 7   | 2          | 15      | NFSSLSYSGPSMSR          |     | Oxidation (M)[12]      |                  |     | Mascot |
|   | 1727.8422                                     | 1727.851  | 0.0088  | 5   | 137        | 151     | SNIDAMFEAYIANLR         |     |                        |                  |     | Mascot |
|   | 1727.8422                                     | 1727.851  | 0.0088  | 5   | 137        | 151     | SNIDAMFEAYIANLR         | 122 | 100                    |                  |     | Mascot |
|   | 1743.837                                      | 1743.8464 | 0.0094  | 5   | 137        | 151     | SNIDAMFEAYIANLR         | 80  | 100                    | Oxidation (M)[6] |     | Mascot |
|   | 1743.837                                      | 1743.8464 | 0.0094  | 5   | 137        | 151     | SNIDAMFEAYIANLR         |     | Oxidation (M)[6]       |                  |     | Mascot |
|   | 1899.9381                                     | 1899.9476 | 0.0095  | 5   | 137        | 152     | SNIDAMFEAYIANLRR        |     | Oxidation (M)[6]       |                  |     | Mascot |
|   | 2018.1644                                     | 2018.1779 | 0.0135  | 7   | 74         | 91      | SLLAPLNLEIDPNIQIVR      | 144 | 100                    |                  |     | Mascot |
|   | 2018.1644                                     | 2018.1779 | 0.0135  | 7   | 74         | 91      | SLLAPLNLEIDPNIQIVR      |     |                        |                  |     | Mascot |
|   | 2119.1282                                     | 2118.957  | -0.1712 | -81 | 211        | 228     | VELEAKLES LTDEINFLR     |     |                        |                  |     | Mascot |
|   | 2130.0244                                     | 2130.0393 | 0.0149  | 7   | 332        | 350     | ANLENQIAEAEERGEMA<br>VR |     |                        |                  |     | Mascot |
|   | 2146.0193                                     | 2146.0376 | 0.0183  | 9   | 332        | 350     | ANLENQIAEAEERGEMA<br>VR |     | Oxidation (M)[16]      |                  |     | Mascot |
| 2 | keratin, type II cytoskeletal 8 [Danio rerio] |           |         |     | g 41056085 | 57723.4 | 5.15                    | 20  | 642                    | 100              | 527 | 100    |

### Peptide Information

| Calc. Mass | Obsrv. Mass | ± da   | ± ppm | Start Seq. | End Seq. | Sequence    | Ion Score | C. I. | % Modification | Rank | Result Type |
|------------|-------------|--------|-------|------------|----------|-------------|-----------|-------|----------------|------|-------------|
| 827.4297   | 827.4326    | 0.0029 | 4     | 126        | 132      | FASFIDK     |           |       |                |      | Mascot      |
| 839.4005   | 839.4035    | 0.003  | 4     | 43         | 50       | SSYGGVNR    |           |       |                |      | Mascot      |
| 931.4843   | 931.4857    | 0.0014 | 2     | 329        | 336      | TEIADLNR    |           |       |                |      | Mascot      |
| 1063.5419  | 1063.5461   | 0.0042 | 4     | 250        | 257      | QIFEEEIR    |           |       |                |      | Mascot      |
| 1079.5116  | 1079.5172   | 0.0056 | 5     | 289        | 297      | AQYEDIANR   |           |       |                |      | Mascot      |
| 1200.6583  | 1200.6636   | 0.0053 | 4     | 377        | 386      | IKDLEDALQR  |           |       |                |      | Mascot      |
| 1248.6252  | 1248.6893   | 0.0641 | 51    | 174        | 184      | QLDSLGNCKMK |           |       |                |      | Mascot      |

|           |           |         |     |     |     |                     |     |     |                        |        |
|-----------|-----------|---------|-----|-----|-----|---------------------|-----|-----|------------------------|--------|
| 1270.5885 | 1270.5956 | 0.0071  | 6   | 298 | 307 | SRAEAEMWYK          |     |     |                        | Mascot |
| 1277.71   | 1277.7164 | 0.0064  | 5   | 406 | 416 | LALDIEIATYR         | 93  | 100 |                        | Mascot |
| 1277.71   | 1277.7164 | 0.0064  | 5   | 406 | 416 | LALDIEIATYR         |     |     |                        | Mascot |
| 1286.5834 | 1286.5896 | 0.0062  | 5   | 298 | 307 | SRAEAEMWYK          |     |     | Oxidation (M)[7]       | Mascot |
| 1317.691  | 1317.6975 | 0.0065  | 5   | 147 | 157 | WSLLQNQTATR         |     |     |                        | Mascot |
| 1317.691  | 1317.6975 | 0.0065  | 5   | 147 | 157 | WSLLQNQTATR         | 86  | 100 |                        | Mascot |
| 1345.678  | 1345.6841 | 0.0061  | 5   | 277 | 288 | NLDMDAIVAEVR        |     |     |                        | Mascot |
| 1361.673  | 1361.6798 | 0.0068  | 5   | 277 | 288 | NLDMDAIVAEVR        |     |     | Oxidation (M)[4]       | Mascot |
| 1381.6667 | 1381.6721 | 0.0054  | 4   | 211 | 221 | TECENEFVLIK         |     |     | Carbamidomethyl (C)[3] | Mascot |
| 1449.7584 | 1449.7642 | 0.0058  | 4   | 238 | 249 | LESLTDEINFLR        |     |     |                        | Mascot |
| 1449.7584 | 1449.7642 | 0.0058  | 4   | 238 | 249 | LESLTDEINFLR        | 82  | 100 |                        | Mascot |
| 1486.7133 | 1486.72   | 0.0067  | 5   | 353 | 365 | ANLENQIAEAEER       |     |     |                        | Mascot |
| 1519.6846 | 1519.6925 | 0.0079  | 5   | 23  | 36  | NFSSLSYSGPSMSR      |     |     |                        | Mascot |
| 1535.6794 | 1535.6902 | 0.0108  | 7   | 23  | 36  | NFSSLSYSGPSMSR      |     |     | Oxidation (M)[12]      | Mascot |
| 1727.8422 | 1727.851  | 0.0088  | 5   | 158 | 172 | SNIDAMFEAYIANLR     |     |     |                        | Mascot |
| 1727.8422 | 1727.851  | 0.0088  | 5   | 158 | 172 | SNIDAMFEAYIANLR     | 122 | 100 |                        | Mascot |
| 1743.837  | 1743.8464 | 0.0094  | 5   | 158 | 172 | SNIDAMFEAYIANLR     | 80  | 100 | Oxidation (M)[6]       | Mascot |
| 1743.837  | 1743.8464 | 0.0094  | 5   | 158 | 172 | SNIDAMFEAYIANLR     |     |     | Oxidation (M)[6]       | Mascot |
| 1899.9381 | 1899.9476 | 0.0095  | 5   | 158 | 173 | SNIDAMFEAYIANLRR    |     |     | Oxidation (M)[6]       | Mascot |
| 2018.1644 | 2018.1779 | 0.0135  | 7   | 95  | 112 | SLLAPLNLEIDPNIQIVR  | 144 | 100 |                        | Mascot |
| 2018.1644 | 2018.1779 | 0.0135  | 7   | 95  | 112 | SLLAPLNLEIDPNIQIVR  |     |     |                        | Mascot |
| 2119.1282 | 2118.957  | -0.1712 | -81 | 232 | 249 | VELEAKLESLTDEINFLR  |     |     |                        | Mascot |
| 2130.0244 | 2130.0393 | 0.0149  | 7   | 353 | 371 | ANLENQIAEAEERGEMAVR |     |     |                        | Mascot |
| 2146.0193 | 2146.0376 | 0.0183  | 9   | 353 | 371 | ANLENQIAEAEERGEMAVR |     |     | Oxidation (M)[16]      | Mascot |

### Peptide Information

|           |           |         |     |     |     |                         |     |     |                        |        |
|-----------|-----------|---------|-----|-----|-----|-------------------------|-----|-----|------------------------|--------|
| 1277.71   | 1277.7164 | 0.0064  | 5   | 406 | 416 | LALDIEIATYR             | 93  | 100 |                        | Mascot |
| 1277.71   | 1277.7164 | 0.0064  | 5   | 406 | 416 | LALDIEIATYR             |     |     |                        | Mascot |
| 1286.5834 | 1286.5896 | 0.0062  | 5   | 298 | 307 | SRAEAEMWYK              |     |     | Oxidation (M)[7]       | Mascot |
| 1317.691  | 1317.6975 | 0.0065  | 5   | 147 | 157 | WSLLQNQTATR             |     |     |                        | Mascot |
| 1317.691  | 1317.6975 | 0.0065  | 5   | 147 | 157 | WSLLQNQTATR             | 86  | 100 |                        | Mascot |
| 1381.6667 | 1381.6721 | 0.0054  | 4   | 211 | 221 | TECENEFLIK              |     |     | Carbamidomethyl (C)[3] | Mascot |
| 1449.7584 | 1449.7642 | 0.0058  | 4   | 238 | 249 | LESLTDEINFLR            |     |     |                        | Mascot |
| 1449.7584 | 1449.7642 | 0.0058  | 4   | 238 | 249 | LESLTDEINFLR            | 82  | 100 |                        | Mascot |
| 1486.7133 | 1486.72   | 0.0067  | 5   | 353 | 365 | ANLENQIAEAEER           |     |     |                        | Mascot |
| 1519.6846 | 1519.6925 | 0.0079  | 5   | 23  | 36  | NFSSLSYSGPSMSR          |     |     |                        | Mascot |
| 1535.6794 | 1535.6902 | 0.0108  | 7   | 23  | 36  | NFSSLSYSGPSMSR          |     |     | Oxidation (M)[12]      | Mascot |
| 1727.8422 | 1727.851  | 0.0088  | 5   | 158 | 172 | SNIDAMFEAYIANLR         |     |     |                        | Mascot |
| 1727.8422 | 1727.851  | 0.0088  | 5   | 158 | 172 | SNIDAMFEAYIANLR         | 122 | 100 |                        | Mascot |
| 1743.837  | 1743.8464 | 0.0094  | 5   | 158 | 172 | SNIDAMFEAYIANLR         | 80  | 100 | Oxidation (M)[6]       | Mascot |
| 1743.837  | 1743.8464 | 0.0094  | 5   | 158 | 172 | SNIDAMFEAYIANLR         |     |     | Oxidation (M)[6]       | Mascot |
| 1899.9381 | 1899.9476 | 0.0095  | 5   | 158 | 173 | SNIDAMFEAYIANLRR        |     |     | Oxidation (M)[6]       | Mascot |
| 2018.1644 | 2018.1779 | 0.0135  | 7   | 95  | 112 | SLLAPLNLEIDPNIQIVR      | 144 | 100 |                        | Mascot |
| 2018.1644 | 2018.1779 | 0.0135  | 7   | 95  | 112 | SLLAPLNLEIDPNIQIVR      |     |     |                        | Mascot |
| 2119.1282 | 2118.957  | -0.1712 | -81 | 232 | 249 | VELEAKLESLTDEINFLR      |     |     |                        | Mascot |
| 2130.0244 | 2130.0393 | 0.0149  | 7   | 353 | 371 | ANLENQIAEAEERGEMA<br>VR |     |     |                        | Mascot |
| 2146.0193 | 2146.0376 | 0.0183  | 9   | 353 | 371 | ANLENQIAEAEERGEMA<br>VR |     |     | Oxidation (M)[16]      | Mascot |

4 Krt4 protein [Danio rerio] gi|161612220 53979.9 5.34 18 599 100 495 100

Peptide Information

| Calc. Mass | Obsrv. Mass | ± da   | ± ppm | Start Seq. | End Seq. | Sequence     | Ion Score | C. I. | % Modification | Rank | Result Type |
|------------|-------------|--------|-------|------------|----------|--------------|-----------|-------|----------------|------|-------------|
| 827.4297   | 827.4326    | 0.0029 | 4     | 125        | 131      | FASFIDK      |           |       |                |      | Mascot      |
| 915.4893   | 915.4935    | 0.0042 | 5     | 328        | 335      | AEIAELNR     |           |       |                |      | Mascot      |
| 950.4941   | 950.4966    | 0.0025 | 3     | 249        | 256      | AVYEAELR     |           |       |                |      | Mascot      |
| 1079.5116  | 1079.5172   | 0.0056 | 5     | 288        | 296      | AQYEDIANR    |           |       |                |      | Mascot      |
| 1226.5801  | 1226.5848   | 0.0047 | 4     | 297        | 306      | SRAEAESWYK   |           |       |                |      | Mascot      |
| 1248.6833  | 1248.6893   | 0.006  | 5     | 210        | 220      | ASVENEFVLLK  |           |       |                |      | Mascot      |
| 1256.6957  | 1256.7025   | 0.0068 | 5     | 376        | 385      | IRELEELQR    |           |       |                |      | Mascot      |
| 1277.71    | 1277.7164   | 0.0064 | 5     | 405        | 415      | LALDIEIATYR  | 93        | 100   |                |      | Mascot      |
| 1277.71    | 1277.7164   | 0.0064 | 5     | 405        | 415      | LALDIEIATYR  |           |       |                |      | Mascot      |
| 1361.673   | 1361.6798   | 0.0068 | 5     | 276        | 287      | NLDMDSIVAEVR |           |       |                |      | Mascot      |

|           |           |         |     |     |     |                         |     |        |                  |  |  |  |  |  |  |  |  |  |        |
|-----------|-----------|---------|-----|-----|-----|-------------------------|-----|--------|------------------|--|--|--|--|--|--|--|--|--|--------|
| 1362.7013 | 1362.7037 | 0.0024  | 2   | 146 | 156 | WSLLQEQTTR              |     |        |                  |  |  |  |  |  |  |  |  |  | Mascot |
| 1362.7013 | 1362.7037 | 0.0024  | 2   | 146 | 156 | WSLLQEQTTR              | 65  | 99.992 |                  |  |  |  |  |  |  |  |  |  | Mascot |
| 1377.6678 | 1377.6768 | 0.009   | 7   | 276 | 287 | NLDMSIVAEVR             |     |        |                  |  |  |  |  |  |  |  |  |  | Mascot |
| 1432.743  | 1432.7495 | 0.0065  | 5   | 237 | 248 | VDALQDEINFLR            |     |        |                  |  |  |  |  |  |  |  |  |  | Mascot |
| 1432.743  | 1432.7495 | 0.0065  | 5   | 237 | 248 | VDALQDEINFLR            | 110 | 100    |                  |  |  |  |  |  |  |  |  |  | Mascot |
| 1443.7074 | 1443.7144 | 0.007   | 5   | 352 | 364 | ANLEAQIAEAEER           |     |        |                  |  |  |  |  |  |  |  |  |  | Mascot |
| 1743.837  | 1743.8464 | 0.0094  | 5   | 157 | 171 | SNIDAMFEAYISNLR         | 119 | 100    |                  |  |  |  |  |  |  |  |  |  | Mascot |
| 1743.837  | 1743.8464 | 0.0094  | 5   | 157 | 171 | SNIDAMFEAYISNLR         |     |        |                  |  |  |  |  |  |  |  |  |  | Mascot |
| 1759.8319 | 1759.8414 | 0.0095  | 5   | 157 | 171 | SNIDAMFEAYISNLR         | 78  | 100    | Oxidation (M)[6] |  |  |  |  |  |  |  |  |  | Mascot |
| 1759.8319 | 1759.8414 | 0.0095  | 5   | 157 | 171 | SNIDAMFEAYISNLR         |     |        | Oxidation (M)[6] |  |  |  |  |  |  |  |  |  | Mascot |
| 1846.7913 | 1846.8007 | 0.0094  | 5   | 309 | 324 | FEEMQSTAGQYGDDL         |     |        |                  |  |  |  |  |  |  |  |  |  | Mascot |
| 1862.7861 | 1862.7971 | 0.011   | 6   | 309 | 324 | FEEMQSTAGQYGDDL         |     |        | Oxidation (M)[4] |  |  |  |  |  |  |  |  |  | Mascot |
| 1899.9381 | 1899.9476 | 0.0095  | 5   | 157 | 172 | SNIDAMFEAYISNLR         |     |        |                  |  |  |  |  |  |  |  |  |  | Mascot |
| 2041.0559 | 2041.0684 | 0.0125  | 6   | 352 | 370 | ANLEAQIAEAEERGELAV<br>K | 109 | 100    |                  |  |  |  |  |  |  |  |  |  | Mascot |
| 2041.0559 | 2041.0684 | 0.0125  | 6   | 352 | 370 | ANLEAQIAEAEERGELAV<br>K |     |        |                  |  |  |  |  |  |  |  |  |  | Mascot |
| 2102.1128 | 2101.9287 | -0.1841 | -88 | 231 | 248 | VELEAKVDALQDEINFLR      |     |        |                  |  |  |  |  |  |  |  |  |  | Mascot |
| 2102.9448 | 2102.9509 | 0.0061  | 3   | 307 | 324 | QKFEEMQSTAGQYGDDL<br>R  |     |        |                  |  |  |  |  |  |  |  |  |  | Mascot |
| 2118.9397 | 2118.957  | 0.0173  | 8   | 307 | 324 | QKFEEMQSTAGQYGDDL<br>R  |     |        | Oxidation (M)[6] |  |  |  |  |  |  |  |  |  | Mascot |

5

keratin 4 [Danio rerio]

gi|18858947

54242

5.42

17

590

100

497

100

| Peptide Information |             |        |       |            |          |              |           |         |                  |      |             |
|---------------------|-------------|--------|-------|------------|----------|--------------|-----------|---------|------------------|------|-------------|
| Calc. Mass          | Obsrv. Mass | ± da   | ± ppm | Start Seq. | End Seq. | Sequence     | Ion Score | C. I. % | Modification     | Rank | Result Type |
| 915.4893            | 915.4935    | 0.0042 | 5     | 329        | 336      | AEIAELNR     |           |         |                  |      | Mascot      |
| 950.4941            | 950.4966    | 0.0025 | 3     | 250        | 257      | AVYEAELR     |           |         |                  |      | Mascot      |
| 1079.5116           | 1079.5172   | 0.0056 | 5     | 289        | 297      | AQYEDIANR    |           |         |                  |      | Mascot      |
| 1226.5801           | 1226.5848   | 0.0047 | 4     | 298        | 307      | SRAEAESWYK   |           |         |                  |      | Mascot      |
| 1248.6833           | 1248.6893   | 0.006  | 5     | 211        | 221      | ASVENEFLVLLK |           |         |                  |      | Mascot      |
| 1256.6957           | 1256.7025   | 0.0068 | 5     | 377        | 386      | IRELEEALQR   |           |         |                  |      | Mascot      |
| 1277.71             | 1277.7164   | 0.0064 | 5     | 406        | 416      | LALDIEIATYR  | 93        | 100     |                  |      | Mascot      |
| 1277.71             | 1277.7164   | 0.0064 | 5     | 406        | 416      | LALDIEIATYR  |           |         |                  |      | Mascot      |
| 1361.673            | 1361.6798   | 0.0068 | 5     | 277        | 288      | NLDMSIVAEVR  |           |         |                  |      | Mascot      |
| 1362.7013           | 1362.7037   | 0.0024 | 2     | 147        | 157      | WSLLQEQTTR   |           |         |                  |      | Mascot      |
| 1362.7013           | 1362.7037   | 0.0024 | 2     | 147        | 157      | WSLLQEQTTR   | 65        | 99.992  |                  |      | Mascot      |
| 1377.6678           | 1377.6768   | 0.009  | 7     | 277        | 288      | NLDMSIVAEVR  |           |         | Oxidation (M)[4] |      | Mascot      |
| 1432.743            | 1432.7495   | 0.0065 | 5     | 238        | 249      | VDALQDEINFLR |           |         |                  |      | Mascot      |

|           |           |         |     |     |     |                         |     |     |                  |        |
|-----------|-----------|---------|-----|-----|-----|-------------------------|-----|-----|------------------|--------|
| 1432.743  | 1432.7495 | 0.0065  | 5   | 238 | 249 | VDALQDEINFLR            | 110 | 100 |                  | Mascot |
| 1443.7074 | 1443.7144 | 0.007   | 5   | 353 | 365 | ANLEAQIAEAEER           |     |     |                  | Mascot |
| 1743.837  | 1743.8464 | 0.0094  | 5   | 158 | 172 | SNIDAMFEAYISNLR         | 119 | 100 |                  | Mascot |
| 1743.837  | 1743.8464 | 0.0094  | 5   | 158 | 172 | SNIDAMFEAYISNLR         |     |     |                  | Mascot |
| 1759.8319 | 1759.8414 | 0.0095  | 5   | 158 | 172 | SNIDAMFEAYISNLR         | 78  | 100 | Oxidation (M)[6] | Mascot |
| 1759.8319 | 1759.8414 | 0.0095  | 5   | 158 | 172 | SNIDAMFEAYISNLR         |     |     | Oxidation (M)[6] | Mascot |
| 1846.7913 | 1846.8007 | 0.0094  | 5   | 310 | 325 | FEEMQSTAGQYGDDL         |     |     |                  | Mascot |
| 1862.7861 | 1862.7971 | 0.011   | 6   | 310 | 325 | FEEMQSTAGQYGDDL         |     |     | Oxidation (M)[4] | Mascot |
| 1899.9381 | 1899.9476 | 0.0095  | 5   | 158 | 173 | SNIDAMFEAYISNLR         |     |     |                  | Mascot |
| 2041.0559 | 2041.0684 | 0.0125  | 6   | 353 | 371 | ANLEAQIAEAEERGELAV<br>K | 109 | 100 |                  | Mascot |
| 2041.0559 | 2041.0684 | 0.0125  | 6   | 353 | 371 | ANLEAQIAEAEERGELAV<br>K |     |     |                  | Mascot |
| 2102.1128 | 2101.9287 | -0.1841 | -88 | 232 | 249 | VELEAKVDALQDEINFLR      |     |     |                  | Mascot |
| 2102.9448 | 2102.9509 | 0.0061  | 3   | 308 | 325 | QKFEEMQSTAGQYGDDL<br>R  |     |     |                  | Mascot |
| 2118.9397 | 2118.957  | 0.0173  | 8   | 308 | 325 | QKFEEMQSTAGQYGDDL<br>R  |     |     | Oxidation (M)[6] | Mascot |

6 Krt5 protein [Danio rerio] gi|39645432 57792.3 5.27 13 446 100 389 100

#### Peptide Information

| Calc. Mass | Obsrv. Mass | ± da   | ± ppm | Start Seq. | End Seq. | Sequence        | Ion Score | C. I. % | Modification       | Rank | Result | Type |
|------------|-------------|--------|-------|------------|----------|-----------------|-----------|---------|--------------------|------|--------|------|
| 827.4297   | 827.4326    | 0.0029 | 4     | 155        | 161      | FASFDK          |           |         |                    |      | Mascot |      |
| 1079.5116  | 1079.5172   | 0.0056 | 5     | 318        | 326      | AQYEDIANR       |           |         |                    |      | Mascot |      |
| 1200.6583  | 1200.6636   | 0.0053 | 4     | 406        | 415      | IKDLEDALQR      |           |         |                    |      | Mascot |      |
| 1226.5801  | 1226.5848   | 0.0047 | 4     | 327        | 336      | SRAEAEESWYK     |           |         |                    |      | Mascot |      |
| 1248.6252  | 1248.6893   | 0.0641 | 51    | 203        | 213      | QLDGLGNEKMK     |           |         | Oxidation (M)[10]  |      | Mascot |      |
| 1256.5179  | 1256.7025   | 0.1846 | 147   | 1          | 14       | MSGGMGGGMGGGIR  |           |         | Oxidation (M)[1,5] |      | Mascot |      |
| 1277.71    | 1277.7164   | 0.0064 | 5     | 435        | 445      | LALDIEIATYR     | 93        | 100     |                    |      | Mascot |      |
| 1277.71    | 1277.7164   | 0.0064 | 5     | 435        | 445      | LALDIEIATYR     |           |         |                    |      | Mascot |      |
| 1345.678   | 1345.6841   | 0.0061 | 5     | 306        | 317      | NLDMDAIVAEVR    |           |         |                    |      | Mascot |      |
| 1361.673   | 1361.6798   | 0.0068 | 5     | 306        | 317      | NLDMDAIVAEVR    |           |         | Oxidation (M)[4]   |      | Mascot |      |
| 1362.7013  | 1362.7037   | 0.0024 | 2     | 176        | 186      | WSLLQEQTTR      |           |         |                    |      | Mascot |      |
| 1362.7013  | 1362.7037   | 0.0024 | 2     | 176        | 186      | WSLLQEQTTR      | 65        | 99.992  |                    |      | Mascot |      |
| 1443.7074  | 1443.7144   | 0.007  | 5     | 382        | 394      | ANLEAQIAEAEER   |           |         |                    |      | Mascot |      |
| 1727.8422  | 1727.851    | 0.0088 | 5     | 187        | 201      | SNIDAMFEAYIANLR |           |         |                    |      | Mascot |      |
| 1727.8422  | 1727.851    | 0.0088 | 5     | 187        | 201      | SNIDAMFEAYIANLR | 122       | 100     |                    |      | Mascot |      |
| 1743.837   | 1743.8464   | 0.0094 | 5     | 187        | 201      | SNIDAMFEAYIANLR | 80        | 100     | Oxidation (M)[6]   |      | Mascot |      |
| 1743.837   | 1743.8464   | 0.0094 | 5     | 187        | 201      | SNIDAMFEAYIANLR |           |         | Oxidation (M)[6]   |      | Mascot |      |

|   |                         |           |        |   |             |     |                         |      |     |     |     |                  |     |        |
|---|-------------------------|-----------|--------|---|-------------|-----|-------------------------|------|-----|-----|-----|------------------|-----|--------|
|   | 1899.9381               | 1899.9476 | 0.0095 | 5 | 187         | 202 | SNIDAMFEAYIANLRR        |      |     |     |     | Oxidation (M)[6] |     | Mascot |
|   | 2041.0559               | 2041.0684 | 0.0125 | 6 | 382         | 400 | ANLEAQIAEAEERGELAV<br>K | 109  | 100 |     |     |                  |     | Mascot |
|   | 2041.0559               | 2041.0684 | 0.0125 | 6 | 382         | 400 | ANLEAQIAEAEERGELAV<br>K |      |     |     |     |                  |     | Mascot |
| 7 | keratin 5 [Danio rerio] |           |        |   | gi 18858425 |     | 58550.6                 | 5.34 | 11  | 427 | 100 | 389              | 100 |        |

#### Peptide Information

|  | Calc. Mass | Obsrv. Mass | ± da   | ± ppm | Start Seq. | End Seq. | Sequence                | Ion Score | C. I.  | % | Modification      | Rank | Result Type |
|--|------------|-------------|--------|-------|------------|----------|-------------------------|-----------|--------|---|-------------------|------|-------------|
|  | 827.4297   | 827.4326    | 0.0029 | 4     | 165        | 171      | FASFDK                  |           |        |   |                   |      | Mascot      |
|  | 1079.5116  | 1079.5172   | 0.0056 | 5     | 328        | 336      | AQYEDIANR               |           |        |   |                   |      | Mascot      |
|  | 1226.5801  | 1226.5848   | 0.0047 | 4     | 337        | 346      | SRAEAEESWYK             |           |        |   |                   |      | Mascot      |
|  | 1248.6252  | 1248.6893   | 0.0641 | 51    | 213        | 223      | QLDGLGNEKMK             |           |        |   | Oxidation (M)[10] |      | Mascot      |
|  | 1277.71    | 1277.7164   | 0.0064 | 5     | 445        | 455      | LALDIEIATYR             | 93        | 100    |   |                   |      | Mascot      |
|  | 1277.71    | 1277.7164   | 0.0064 | 5     | 445        | 455      | LALDIEIATYR             |           |        |   |                   |      | Mascot      |
|  | 1345.678   | 1345.6841   | 0.0061 | 5     | 316        | 327      | NLDMDAIVAEVR            |           |        |   |                   |      | Mascot      |
|  | 1361.673   | 1361.6798   | 0.0068 | 5     | 316        | 327      | NLDMDAIVAEVR            |           |        |   | Oxidation (M)[4]  |      | Mascot      |
|  | 1362.7013  | 1362.7037   | 0.0024 | 2     | 186        | 196      | WSLLQEQTTR              |           |        |   |                   |      | Mascot      |
|  | 1362.7013  | 1362.7037   | 0.0024 | 2     | 186        | 196      | WSLLQEQTTR              | 65        | 99.992 |   |                   |      | Mascot      |
|  | 1443.7074  | 1443.7144   | 0.007  | 5     | 392        | 404      | ANLEAQIAEAEER           |           |        |   |                   |      | Mascot      |
|  | 1727.8422  | 1727.851    | 0.0088 | 5     | 197        | 211      | SNIDAMFEAYIANLR         |           |        |   |                   |      | Mascot      |
|  | 1727.8422  | 1727.851    | 0.0088 | 5     | 197        | 211      | SNIDAMFEAYIANLR         | 122       | 100    |   |                   |      | Mascot      |
|  | 1743.837   | 1743.8464   | 0.0094 | 5     | 197        | 211      | SNIDAMFEAYIANLR         | 80        | 100    |   | Oxidation (M)[6]  |      | Mascot      |
|  | 1743.837   | 1743.8464   | 0.0094 | 5     | 197        | 211      | SNIDAMFEAYIANLR         |           |        |   | Oxidation (M)[6]  |      | Mascot      |
|  | 1899.9381  | 1899.9476   | 0.0095 | 5     | 197        | 212      | SNIDAMFEAYIANLRR        |           |        |   | Oxidation (M)[6]  |      | Mascot      |
|  | 2041.0559  | 2041.0684   | 0.0125 | 6     | 392        | 410      | ANLEAQIAEAEERGELAV<br>K | 109       | 100    |   |                   |      | Mascot      |
|  | 2041.0559  | 2041.0684   | 0.0125 | 6     | 392        | 410      | ANLEAQIAEAEERGELAV<br>K |           |        |   |                   |      | Mascot      |

|   |                                               |  |  |  |             |  |         |      |   |     |     |     |     |  |
|---|-----------------------------------------------|--|--|--|-------------|--|---------|------|---|-----|-----|-----|-----|--|
| 8 | glial fibrillary acidic protein [Danio rerio] |  |  |  | gi 20977259 |  | 42127.4 | 5.03 | 7 | 144 | 100 | 125 | 100 |  |
|---|-----------------------------------------------|--|--|--|-------------|--|---------|------|---|-----|-----|-----|-----|--|

#### Peptide Information

|  | Calc. Mass | Obsrv. Mass | ± da    | ± ppm | Start Seq. | End Seq. | Sequence    | Ion Score | C. I. | % | Modification | Rank | Result Type |
|--|------------|-------------|---------|-------|------------|----------|-------------|-----------|-------|---|--------------|------|-------------|
|  | 1130.5437  | 1130.6      | 0.0563  | 50    | 102        | 111      | QDVDEAALNR  |           |       |   |              |      | Mascot      |
|  | 1159.6793  | 1159.6343   | -0.045  | -39   | 335        | 344      | SIVVRTVETR  |           |       |   |              |      | Mascot      |
|  | 1229.6597  | 1229.6046   | -0.0551 | -45   | 81         | 90       | QRLQDETALR  |           |       |   |              |      | Mascot      |
|  | 1277.71    | 1277.7164   | 0.0064  | 5     | 285        | 295      | LALDIEIATYR | 93        | 100   |   |              |      | Mascot      |
|  | 1277.71    | 1277.7164   | 0.0064  | 5     | 285        | 295      | LALDIEIATYR |           |       |   |              |      | Mascot      |



|           |           |         |     |     |     |              |    |                  |
|-----------|-----------|---------|-----|-----|-----|--------------|----|------------------|
| 1308.6543 | 1308.6627 | 0.0084  | 6   | 187 | 198 | SKFADLTDAANR |    | Mascot           |
| 1377.6857 | 1377.6768 | -0.0089 | -6  | 345 | 356 | DGEIIKESTTER |    | Mascot           |
| 1432.7682 | 1432.7495 | -0.0187 | -13 | 118 | 129 | IEALQDEINFLK |    | Mascot           |
| 1432.7682 | 1432.7495 | -0.0187 | -13 | 118 | 129 | IEALQDEINFLK | 31 | 79.505<br>Mascot |

|   |                            |             |       |      |   |     |     |     |     |
|---|----------------------------|-------------|-------|------|---|-----|-----|-----|-----|
| 9 | Gfap protein [Danio rerio] | qi 46329793 | 51087 | 5.34 | 7 | 143 | 100 | 125 | 100 |
|---|----------------------------|-------------|-------|------|---|-----|-----|-----|-----|

### Peptide Information

| Calc. Mass | Obsrv. Mass | ± da    | ± ppm | Start Seq. | End Sequence Seq. | Ion Score | C. I. % | Modification | Rank | Result Type |
|------------|-------------|---------|-------|------------|-------------------|-----------|---------|--------------|------|-------------|
| 1130.5437  | 1130.6      | 0.0563  | 50    | 185        | 194 QDVDEAALNR    |           |         |              |      | Mascot      |
| 1159.6793  | 1159.6343   | -0.045  | -39   | 418        | 427 SIVVRTVETR    |           |         |              |      | Mascot      |
| 1229.6597  | 1229.6046   | -0.0551 | -45   | 164        | 173 QRLQDETALR    |           |         |              |      | Mascot      |
| 1277.71    | 1277.7164   | 0.0064  | 5     | 368        | 378 LALDIEIATYR   | 93        | 100     |              |      | Mascot      |
| 1277.71    | 1277.7164   | 0.0064  | 5     | 368        | 378 LALDIEIATYR   |           |         |              |      | Mascot      |
| 1308.6543  | 1308.6627   | 0.0084  | 6     | 270        | 281 SKFADLTDAANR  |           |         |              |      | Mascot      |
| 1377.6857  | 1377.6768   | -0.0089 | -6    | 428        | 439 DGEIIKESTTER  |           |         |              |      | Mascot      |
| 1432.7682  | 1432.7495   | -0.0187 | -13   | 201        | 212 IEALQDEINFLK  |           |         |              |      | Mascot      |
| 1432.7682  | 1432.7495   | -0.0187 | -13   | 201        | 212 IEALQDEINFLK  | 31        | 79.505  |              |      | Mascot      |

|    |                                               |             |       |      |   |     |     |     |     |
|----|-----------------------------------------------|-------------|-------|------|---|-----|-----|-----|-----|
| 10 | glial fibrillary acidic protein [Danio rerio] | gi166393075 | 51190 | 5.34 | 7 | 142 | 100 | 125 | 100 |
|----|-----------------------------------------------|-------------|-------|------|---|-----|-----|-----|-----|

### Peptide Information

| Calc. Mass | Obsrv. Mass | ± da    | ± ppm | Start Seq. | End Seq. | Sequence     | Ion Score | C. I.  | % Modification | Rank | Result Type |
|------------|-------------|---------|-------|------------|----------|--------------|-----------|--------|----------------|------|-------------|
| 1130.5437  | 1130.6      | 0.0563  | 50    | 186        | 195      | QDVDEAALNR   |           |        |                |      | Mascot      |
| 1159.6793  | 1159.6343   | -0.045  | -39   | 419        | 428      | SIVVRTVETR   |           |        |                |      | Mascot      |
| 1229.6597  | 1229.6046   | -0.0551 | -45   | 165        | 174      | QRLQDETALR   |           |        |                |      | Mascot      |
| 1277.71    | 1277.7164   | 0.0064  | 5     | 369        | 379      | LALDIEIATYR  | 93        | 100    |                |      | Mascot      |
| 1277.71    | 1277.7164   | 0.0064  | 5     | 369        | 379      | LALDIEIATYR  |           |        |                |      | Mascot      |
| 1308.6543  | 1308.6627   | 0.0084  | 6     | 271        | 282      | SKFADLTDAANR |           |        |                |      | Mascot      |
| 1377.6857  | 1377.6768   | -0.0089 | -6    | 429        | 440      | DGEIIKESTTER |           |        |                |      | Mascot      |
| 1432.7682  | 1432.7495   | -0.0187 | -13   | 202        | 213      | IEALQDEINFLK |           |        |                |      | Mascot      |
| 1432.7682  | 1432.7495   | -0.0187 | -13   | 202        | 213      | IEALQDEINFLK | 31        | 79.505 |                |      | Mascot      |

|    |                          |              |       |      |   |     |     |    |     |
|----|--------------------------|--------------|-------|------|---|-----|-----|----|-----|
| 11 | Zgc:158846 [Danio rerio] | qi 158253572 | 55223 | 5.44 | 4 | 102 | 100 | 93 | 100 |
|----|--------------------------|--------------|-------|------|---|-----|-----|----|-----|

### Peptide Information

| Calc. Mass | Obsrv. Mass | ± da | ± ppm | Start Seq. | End Sequence | Ion Score | C. I. % | Modification | Rank | Result Type |
|------------|-------------|------|-------|------------|--------------|-----------|---------|--------------|------|-------------|
|------------|-------------|------|-------|------------|--------------|-----------|---------|--------------|------|-------------|

|    |                                               |           |        |    |              |     |             |      |     |     |     |    |                  |  |  |  |        |
|----|-----------------------------------------------|-----------|--------|----|--------------|-----|-------------|------|-----|-----|-----|----|------------------|--|--|--|--------|
|    | 827.4297                                      | 827.4326  | 0.0029 | 4  | 87           | 93  | FASFDK      |      |     |     |     |    |                  |  |  |  | Mascot |
|    | 1159.6066                                     | 1159.6343 | 0.0277 | 24 | 134          | 143 | RQLDSLGNK   |      |     |     |     |    |                  |  |  |  | Mascot |
|    | 1229.5718                                     | 1229.6046 | 0.0328 | 27 | 271          | 280 | YEEMQLTATK  |      |     |     |     |    | Oxidation (M)[4] |  |  |  | Mascot |
|    | 1277.71                                       | 1277.7164 | 0.0064 | 5  | 367          | 377 | LALDIEIATYR | 93   | 100 |     |     |    |                  |  |  |  | Mascot |
|    | 1277.71                                       | 1277.7164 | 0.0064 | 5  | 367          | 377 | LALDIEIATYR |      |     |     |     |    |                  |  |  |  | Mascot |
| 12 | glial fibrillary acidic protein [Danio rerio] |           |        |    | gi 239596173 |     | 19203.6     | 4.89 | 2   | 101 | 100 | 93 | 100              |  |  |  |        |

#### Peptide Information

| Calc. Mass | Obsrv. Mass | ± da   | ± ppm | Start Seq. | End Seq. | Sequence     | Ion Score | C. I. | % Modification | Rank | Result Type |
|------------|-------------|--------|-------|------------|----------|--------------|-----------|-------|----------------|------|-------------|
| 1277.71    | 1277.7164   | 0.0064 | 5     | 110        | 120      | LALDIEIATYR  | 93        | 100   |                |      | Mascot      |
| 1277.71    | 1277.7164   | 0.0064 | 5     | 110        | 120      | LALDIEIATYR  |           |       |                |      | Mascot      |
| 1308.6543  | 1308.6627   | 0.0084 | 6     | 12         | 23       | SKFADLTDAANR |           |       |                |      | Mascot      |

|    |                                                                  |  |  |  |              |  |         |      |   |     |     |    |     |  |  |  |  |
|----|------------------------------------------------------------------|--|--|--|--------------|--|---------|------|---|-----|-----|----|-----|--|--|--|--|
| 13 | novel protein similar to vertebrate keratin family [Danio rerio] |  |  |  | gi 157885973 |  | 46874.6 | 5.23 | 3 | 101 | 100 | 93 | 100 |  |  |  |  |
|----|------------------------------------------------------------------|--|--|--|--------------|--|---------|------|---|-----|-----|----|-----|--|--|--|--|

#### Peptide Information

| Calc. Mass | Obsrv. Mass | ± da    | ± ppm | Start Seq. | End Seq. | Sequence    | Ion Score | C. I. | % Modification | Rank | Result Type |
|------------|-------------|---------|-------|------------|----------|-------------|-----------|-------|----------------|------|-------------|
| 931.5206   | 931.4857    | -0.0349 | -37   | 169        | 176      | TKLDGELR    |           |       |                |      | Mascot      |
| 1256.5793  | 1256.7025   | 0.1232  | 98    | 286        | 295      | EEAESWYKSK  |           |       |                |      | Mascot      |
| 1277.71    | 1277.7164   | 0.0064  | 5     | 392        | 402      | LALDIEIATYR | 93        | 100   |                |      | Mascot      |
| 1277.71    | 1277.7164   | 0.0064  | 5     | 392        | 402      | LALDIEIATYR |           |       |                |      | Mascot      |

|    |                                                          |  |  |  |              |  |         |      |   |     |     |    |     |  |  |  |  |
|----|----------------------------------------------------------|--|--|--|--------------|--|---------|------|---|-----|-----|----|-----|--|--|--|--|
| 14 | PREDICTED: keratin, type II cytoskeletal 8 [Danio rerio] |  |  |  | gi 125849603 |  | 49959.2 | 5.46 | 3 | 100 | 100 | 93 | 100 |  |  |  |  |
|----|----------------------------------------------------------|--|--|--|--------------|--|---------|------|---|-----|-----|----|-----|--|--|--|--|

#### Peptide Information

| Calc. Mass | Obsrv. Mass | ± da    | ± ppm | Start Seq. | End Seq. | Sequence    | Ion Score | C. I. | % Modification | Rank | Result Type |
|------------|-------------|---------|-------|------------|----------|-------------|-----------|-------|----------------|------|-------------|
| 931.5206   | 931.4857    | -0.0349 | -37   | 147        | 154      | TKLDGELR    |           |       |                |      | Mascot      |
| 1256.5793  | 1256.7025   | 0.1232  | 98    | 264        | 273      | EEAESWYKSK  |           |       |                |      | Mascot      |
| 1277.71    | 1277.7164   | 0.0064  | 5     | 370        | 380      | LALDIEIATYR | 93        | 100   |                |      | Mascot      |
| 1277.71    | 1277.7164   | 0.0064  | 5     | 370        | 380      | LALDIEIATYR |           |       |                |      | Mascot      |

|    |                                            |  |  |  |            |  |         |      |   |    |     |    |     |  |  |  |  |
|----|--------------------------------------------|--|--|--|------------|--|---------|------|---|----|-----|----|-----|--|--|--|--|
| 15 | keratin type II, tail domain [Danio rerio] |  |  |  | gi 4107170 |  | 10583.9 | 8.29 | 1 | 98 | 100 | 93 | 100 |  |  |  |  |
|----|--------------------------------------------|--|--|--|------------|--|---------|------|---|----|-----|----|-----|--|--|--|--|

#### Peptide Information

| Calc. Mass | Obsrv. Mass | ± da   | ± ppm | Start Seq. | End Seq. | Sequence    | Ion Score | C. I. | % Modification | Rank | Result Type |
|------------|-------------|--------|-------|------------|----------|-------------|-----------|-------|----------------|------|-------------|
| 1277.71    | 1277.7164   | 0.0064 | 5     | 4          | 14       | LALDIEIATYR | 93        | 100   |                |      | Mascot      |

|    |                                          |           |        |   |              |         |             |        |    |        |
|----|------------------------------------------|-----------|--------|---|--------------|---------|-------------|--------|----|--------|
|    | 1277.71                                  | 1277.7164 | 0.0064 | 5 | 4            | 14      | LALDIEIATYR | Mascot |    |        |
| 16 | novel protein (wu:fj53d02) [Danio rerio] |           |        |   | gijl22891311 | 95823.2 | 6.41        | 16     | 48 | 34.178 |

### Peptide Information

| Calc. Mass | Obsrv. Mass | ± da    | ± ppm | Start Seq. | End Sequence Seq. | Ion Score                    | C. I. % Modification   | Rank | Result Type |
|------------|-------------|---------|-------|------------|-------------------|------------------------------|------------------------|------|-------------|
| 1053.5687  | 1053.615    | 0.0463  | 44    | 245        | 254               | GDLPPAERAK                   |                        |      | Mascot      |
| 1063.5782  | 1063.5461   | -0.0321 | -30   | 671        | 679               | GVQYLNEIK                    |                        |      | Mascot      |
| 1077.5398  | 1077.5367   | -0.0031 | -3    | 432        | 441               | IMGPNFTPGK                   | Oxidation (M)[2]       |      | Mascot      |
| 1159.6205  | 1159.6343   | 0.0138  | 12    | 322        | 331               | LEVKLD AEDK                  |                        |      | Mascot      |
| 1248.7133  | 1248.6893   | -0.024  | -19   | 499        | 509               | VMKFSVSPVVR                  |                        |      | Mascot      |
| 1308.6583  | 1308.6627   | 0.0044  | 3     | 680        | 691               | DSVVAGFQWATK                 |                        |      | Mascot      |
| 1317.7524  | 1317.6975   | -0.0549 | -42   | 731        | 742               | VLYASVLT AQPR                |                        |      | Mascot      |
| 1317.7524  | 1317.6975   | -0.0549 | -42   | 731        | 742               | VLYASVLT AQPR                |                        |      | Mascot      |
| 1377.7848  | 1377.6768   | -0.108  | -78   | 419        | 431               | VFSGIVSTGQKVR                |                        |      | Mascot      |
| 1515.6936  | 1515.7621   | 0.0685  | 45    | 263        | 275               | LWGDKYFDPSCGK                |                        |      | Mascot      |
| 1519.7614  | 1519.6925   | -0.0689 | -45   | 227        | 239               | QFAEMYVAKFAAK                | Oxidation (M)[5]       |      | Mascot      |
| 1759.8875  | 1759.8414   | -0.0461 | -26   | 705        | 719               | FDIHDVTLHADAIHR              |                        |      | Mascot      |
| 1759.8875  | 1759.8414   | -0.0461 | -26   | 705        | 719               | FDIHDVTLHADAIHR              |                        |      | Mascot      |
| 1847.0248  | 1846.8007   | -0.2241 | -121  | 288        | 302               | LPRTFCQLVLDPIFK              | Carbamidomethyl (C)[6] |      | Mascot      |
| 1863.0004  | 1862.7971   | -0.2033 | -109  | 33         | 50                | STLTDSLVC KAGIIASAR          | Carbamidomethyl (C)[9] |      | Mascot      |
| 2086.094   | 2085.9326   | -0.1614 | -77   | 702        | 719               | AVRFDIHDVTLHADAIHR           |                        |      | Mascot      |
| 2103.0579  | 2102.9509   | -0.107  | -51   | 652        | 670               | IWCFGPDGTGPNILVDITK          | Carbamidomethyl (C)[3] |      | Mascot      |
| 2784.5342  | 2784.3499   | -0.1843 | -66   | 345        | 369               | RWLPGADALLQMITHLP<br>SPVTAQR |                        |      | Mascot      |

|    |                             |              |         |      |   |    |   |
|----|-----------------------------|--------------|---------|------|---|----|---|
| 17 | novel protein [Danio rerio] | gi 126632590 | 18984.4 | 8.81 | 8 | 46 | 0 |
|----|-----------------------------|--------------|---------|------|---|----|---|

### Peptide Information

| Calc. Mass | Obsrv. Mass | ± da    | ± ppm | Start Seq. | End Seq. | Sequence            | Ion Score | C. I. % | Modification                             | Rank | Result Type |
|------------|-------------|---------|-------|------------|----------|---------------------|-----------|---------|------------------------------------------|------|-------------|
| 827.3208   | 827.4326    | 0.1118  | 135   | 154        | 160      | MGCCEIR             |           |         | Oxidation (M)[1]                         |      | Mascot      |
| 882.4944   | 882.5697    | 0.0753  | 85    | 72         | 78       | LISAHWR             |           |         |                                          |      | Mascot      |
| 1053.4639  | 1053.615    | 0.1511  | 143   | 152        | 160      | GKMGCCEIR           |           |         | Carbamidomethyl (C)[5]                   |      | Mascot      |
| 1248.5453  | 1248.6893   | 0.144   | 115   | 106        | 115      | TETFPTDYMK          |           |         | Oxidation (M)[9]                         |      | Mascot      |
| 1449.7307  | 1449.7642   | 0.0335  | 23    | 5          | 16       | ISCFVQLNFHNK        |           |         |                                          |      | Mascot      |
| 1449.7307  | 1449.7642   | 0.0335  | 23    | 5          | 16       | ISCFVQLNFHNK        |           |         |                                          |      | Mascot      |
| 1519.616   | 1519.6925   | 0.0765  | 50    | 154        | 166      | MGCCEIRYGCSPK       |           |         | Carbamidomethyl (C)[3], Oxidation (M)[1] |      | Mascot      |
| 2086.0889  | 2085.9326   | -0.1563 | -75   | 31         | 49       | SGFLICFLISLSSEASVQK |           |         | Carbamidomethyl (C)[6]                   |      | Mascot      |

|    |                             |           |        |    |    |              |                          |      |    |    |   |                         |        |
|----|-----------------------------|-----------|--------|----|----|--------------|--------------------------|------|----|----|---|-------------------------|--------|
|    | 2284.0378                   | 2284.1909 | 0.1531 | 67 | 50 | 69           | TFEGFIGGSALFPCYYDP<br>SR |      |    |    |   | Carbamidomethyl (C)[14] | Mascot |
| 18 | lft81 protein [Danio rerio] |           |        |    |    | gi 145337899 | 29908.3                  | 5.76 | 10 | 45 | 0 |                         |        |

Peptide Information

| Calc. Mass | Obsrv. Mass | ± da    | ± ppm | Start Seq. | End Seq. | Sequence                  | Ion Score | C. I. | % | Modification           | Rank | Result Type |
|------------|-------------|---------|-------|------------|----------|---------------------------|-----------|-------|---|------------------------|------|-------------|
| 839.4443   | 839.4035    | -0.0408 | -49   | 233        | 238      | KQCYLK                    |           |       |   | Carbamidomethyl (C)[3] |      | Mascot      |
| 1045.5636  | 1045.5657   | 0.0021  | 2     | 14         | 21       | TEEILRER                  |           |       |   |                        |      | Mascot      |
| 1063.5339  | 1063.5461   | 0.0122  | 11    | 224        | 232      | DLETLLECK                 |           |       |   |                        |      | Mascot      |
| 1143.6481  | 1143.6404   | -0.0077 | -7    | 129        | 137      | LEQEVRTLRL                |           |       |   |                        |      | Mascot      |
| 1200.5123  | 1200.6636   | 0.1513  | 126   | 65         | 74       | TLDDMSEMVK                |           |       |   | Oxidation (M)[5,8]     |      | Mascot      |
| 1248.6504  | 1248.6893   | 0.0389  | 31    | 224        | 233      | DLETLLECKK                |           |       |   | Carbamidomethyl (C)[8] |      | Mascot      |
| 1381.645   | 1381.6721   | 0.0271  | 20    | 63         | 74       | GRTLDDMSEMVK              |           |       |   |                        |      | Mascot      |
| 1727.8018  | 1727.851    | 0.0492  | 28    | 113        | 128      | AQYETCAAGLESNRSK          |           |       |   |                        |      | Mascot      |
| 1727.8018  | 1727.851    | 0.0492  | 28    | 113        | 128      | AQYETCAAGLESNRSK          |           |       |   |                        |      | Mascot      |
| 2225.0879  | 2225.134    | 0.0461  | 21    | 147        | 163      | YHHINCEREIIESQIQR         |           |       |   | Carbamidomethyl (C)[6] |      | Mascot      |
| 2283.1914  | 2283.1965   | 0.0051  | 2     | 234        | 254      | QCYLKAQSQAPIGHVIQD<br>VGK |           |       |   |                        |      | Mascot      |

|    |                                                            |  |  |  |  |              |         |      |    |    |   |  |
|----|------------------------------------------------------------|--|--|--|--|--------------|---------|------|----|----|---|--|
| 19 | zinc finger CCHC domain-containing protein 4 [Danio rerio] |  |  |  |  | gi 165972451 | 55854.5 | 8.91 | 14 | 45 | 0 |  |
|----|------------------------------------------------------------|--|--|--|--|--------------|---------|------|----|----|---|--|

Peptide Information

| Calc. Mass | Obsrv. Mass | ± da    | ± ppm | Start Seq. | End Seq. | Sequence      | Ion Score | C. I. | % | Modification                             | Rank | Result Type |
|------------|-------------|---------|-------|------------|----------|---------------|-----------|-------|---|------------------------------------------|------|-------------|
| 915.508    | 915.4935    | -0.0145 | -16   | 186        | 193      | LLCVGTPR      |           |       |   | Carbamidomethyl (C)[3]                   |      | Mascot      |
| 1039.6082  | 1039.597    | -0.0112 | -11   | 194        | 201      | LHEMIKIR      |           |       |   |                                          |      | Mascot      |
| 1046.5775  | 1046.5219   | -0.0556 | -53   | 73         | 81       | ISEARMLAR     |           |       |   |                                          |      | Mascot      |
| 1229.5038  | 1229.6046   | 0.1008  | 82    | 433        | 443      | QTGCFNCGSQK   |           |       |   | Carbamidomethyl (C)[4]                   |      | Mascot      |
| 1248.5248  | 1248.6893   | 0.1645  | 132   | 51         | 60       | FYACSACRDR    |           |       |   | Carbamidomethyl (C)[4]                   |      | Mascot      |
| 1286.5251  | 1286.5896   | 0.0645  | 50    | 433        | 443      | QTGCFNCGSQK   |           |       |   | Carbamidomethyl (C)[4,7]                 |      | Mascot      |
| 1308.6035  | 1308.6627   | 0.0592  | 45    | 78         | 88       | MLAREEQNCSK   |           |       |   |                                          |      | Mascot      |
| 1362.5421  | 1362.7037   | 0.1616  | 119   | 384        | 394      | HCPKCDMCPSK   |           |       |   | Carbamidomethyl (C)[2,5]                 |      | Mascot      |
| 1362.5421  | 1362.7037   | 0.1616  | 119   | 384        | 394      | HCPKCDMCPSK   |           |       |   | Carbamidomethyl (C)[2,5]                 |      | Mascot      |
| 1381.6199  | 1381.6721   | 0.0522  | 38    | 78         | 88       | MLAREEQNCSK   |           |       |   | Carbamidomethyl (C)[9], Oxidation (M)[1] |      | Mascot      |
| 1449.7736  | 1449.7642   | -0.0094 | -6    | 101        | 112      | FLEFASLPLEQR  |           |       |   |                                          |      | Mascot      |
| 1449.7736  | 1449.7642   | -0.0094 | -6    | 101        | 112      | FLEFASLPLEQR  |           |       |   |                                          |      | Mascot      |
| 1486.8376  | 1486.72     | -0.1176 | -79   | 346        | 358      | QSPVRLFTNLSPK |           |       |   |                                          |      | Mascot      |
| 1515.7114  | 1515.7621   | 0.0507  | 33    | 249        | 261      | FFQGFLQEEGGEK |           |       |   |                                          |      | Mascot      |

|    |                                                                                  |           |         |     |     |              |                        |   |    |                            |   |  |        |
|----|----------------------------------------------------------------------------------|-----------|---------|-----|-----|--------------|------------------------|---|----|----------------------------|---|--|--------|
|    | 1636.8628                                                                        | 1636.8402 | -0.0226 | -14 | 25  | 39           | TAPRCPHGPALLFEK        |   |    |                            |   |  | Mascot |
|    | 1846.7893                                                                        | 1846.8007 | 0.0114  | 6   | 401 | 414          | HCDECGRCVKPSWR         |   |    | Carbamidomethyl (C)[2,5,8] |   |  | Mascot |
|    | 1958.8701                                                                        | 1958.9938 | 0.1237  | 63  | 62  | 77           | DCNFFQWADEKISEAR       |   |    |                            |   |  | Mascot |
|    | 2040.8368                                                                        | 2041.0684 | 0.2316  | 113 | 415 | 432          | HCSSCGRCALPDHPCGQ<br>R |   |    | Carbamidomethyl (C)[2,5]   |   |  | Mascot |
|    | 2040.8368                                                                        | 2041.0684 | 0.2316  | 113 | 415 | 432          | HCSSCGRCALPDHPCGQ<br>R |   |    | Carbamidomethyl (C)[2,5]   |   |  | Mascot |
| 20 | PREDICTED: POZ-, AT hook-, and zinc<br>finger-containing protein 1 [Danio rerio] |           |         |     |     | gi 125819039 | 68926.4                | 7 | 13 | 43                         | 0 |  |        |

#### Peptide Information

|  | Calc. Mass | Obsrv. Mass | ± da    | ± ppm | Start Seq. | End Seq. | Sequence                      | Ion Score | C. I. | % Modification                              | Rank | Result Type |
|--|------------|-------------|---------|-------|------------|----------|-------------------------------|-----------|-------|---------------------------------------------|------|-------------|
|  | 950.5179   | 950.4966    | -0.0213 | -22   | 563        | 569      | HHHRVHK                       |           |       |                                             |      | Mascot      |
|  | 1039.4625  | 1039.597    | 0.1345  | 129   | 428        | 436      | SHLACHEDK                     |           |       |                                             |      | Mascot      |
|  | 1045.516   | 1045.5657   | 0.0497  | 48    | 535        | 543      | NIPTTDQEK                     |           |       |                                             |      | Mascot      |
|  | 1063.5103  | 1063.5461   | 0.0358  | 34    | 365        | 372      | DRMSYHVR                      |           |       |                                             |      | Mascot      |
|  | 1079.5051  | 1079.5172   | 0.0121  | 11    | 365        | 372      | DRMSYHVR                      |           |       | Oxidation (M)[3]                            |      | Mascot      |
|  | 1200.5929  | 1200.6636   | 0.0707  | 59    | 79         | 88       | ELEMHTISPK                    |           |       | Oxidation (M)[4]                            |      | Mascot      |
|  | 1245.5139  | 1245.6001   | 0.0862  | 69    | 545        | 555      | FACGECGQAFR                   |           |       | Carbamidomethyl (C)[3]                      |      | Mascot      |
|  | 1270.5667  | 1270.5956   | 0.0289  | 23    | 413        | 423      | CQICNASFATR                   |           |       | Carbamidomethyl (C)[1]                      |      | Mascot      |
|  | 1308.6477  | 1308.6627   | 0.015   | 11    | 426        | 436      | LRSHLACHEDK                   |           |       |                                             |      | Mascot      |
|  | 1317.7083  | 1317.6975   | -0.0108 | -8    | 123        | 133      | SVIEICQEVK                    |           |       | Carbamidomethyl (C)[6]                      |      | Mascot      |
|  | 1317.7083  | 1317.6975   | -0.0108 | -8    | 123        | 133      | SVIEICQEVK                    |           |       | Carbamidomethyl (C)[6]                      |      | Mascot      |
|  | 1743.7689  | 1743.8464   | 0.0775  | 44    | 457        | 471      | KHSEGPHNYCGICNK               |           |       | Carbamidomethyl (C)[10]                     |      | Mascot      |
|  | 1743.7689  | 1743.8464   | 0.0775  | 44    | 457        | 471      | KHSEGPHNYCGICNK               |           |       | Carbamidomethyl (C)[10]                     |      | Mascot      |
|  | 2086.0535  | 2085.9326   | -0.1209 | -58   | 106        | 122      | LECFPELMTAAKFLLMR             |           |       | Carbamidomethyl (C)[3], Oxidation (M)[8]    |      | Mascot      |
|  | 2102.0483  | 2101.9287   | -0.1196 | -57   | 106        | 122      | LECFPELMTAAKFLLMR             |           |       | Carbamidomethyl (C)[3], Oxidation (M)[8,16] |      | Mascot      |
|  | 2102.9778  | 2102.9509   | -0.0269 | -13   | 2          | 18       | ERTEQPWNSSYTYQVSK             |           |       |                                             |      | Mascot      |
|  | 2798.1919  | 2798.3623   | 0.1704  | 61    | 54         | 78       | AVLAACSEYFESVFSCQT<br>EDDGQGK |           |       | Carbamidomethyl (C)[6,16]                   |      | Mascot      |

|    |                                                            |  |  |  |  |              |       |      |    |    |   |  |
|----|------------------------------------------------------------|--|--|--|--|--------------|-------|------|----|----|---|--|
| 21 | PREDICTED: zinc finger protein 420 isoform 2 [Danio rerio] |  |  |  |  | gi 326678086 | 70371 | 9.08 | 16 | 42 | 0 |  |
|----|------------------------------------------------------------|--|--|--|--|--------------|-------|------|----|----|---|--|

#### Peptide Information

|  | Calc. Mass | Obsrv. Mass | ± da    | ± ppm | Start Seq. | End Seq. | Sequence | Ion Score | C. I. | % Modification         | Rank | Result Type |
|--|------------|-------------|---------|-------|------------|----------|----------|-----------|-------|------------------------|------|-------------|
|  | 842.5206   | 842.5137    | -0.0069 | -8    | 25         | 31       | QRQGLLK  |           |       |                        |      | Mascot      |
|  | 950.3706   | 950.4966    | 0.126   | 133   | 36         | 43       | MSDPEPCR |           |       | Oxidation (M)[1]       |      | Mascot      |
|  | 1045.536   | 1045.5657   | 0.0297  | 28    | 134        | 141      | FHCARNLK |           |       | Carbamidomethyl (C)[3] |      | Mascot      |

|    |                                |           |         |     |             |     |                         |      |   |    |   |    |                                          |  |  |  |  |        |
|----|--------------------------------|-----------|---------|-----|-------------|-----|-------------------------|------|---|----|---|----|------------------------------------------|--|--|--|--|--------|
|    | 1046.52                        | 1046.5219 | 0.0019  | 2   | 110         | 117 | YNLNVHMR                |      |   |    |   |    |                                          |  |  |  |  | Mascot |
|    | 1200.5387                      | 1200.6636 | 0.1249  | 104 | 178         | 188 | EKPYSVCSVCGK            |      |   |    |   |    |                                          |  |  |  |  | Mascot |
|    | 1245.6924                      | 1245.6001 | -0.0923 | -74 | 338         | 347 | RHQIHTAVR               |      |   |    |   |    |                                          |  |  |  |  | Mascot |
|    | 1248.5712                      | 1248.6893 | 0.1181  | 95  | 36          | 45  | MSDPEPCRIK              |      |   |    |   |    | Carbamidomethyl (C)[7], Oxidation (M)[1] |  |  |  |  | Mascot |
|    | 1270.5667                      | 1270.5956 | 0.0289  | 23  | 575         | 584 | CDQCGKSFLR              |      |   |    |   |    | Carbamidomethyl (C)[1,4]                 |  |  |  |  | Mascot |
|    | 1636.7094                      | 1636.8402 | 0.1308  | 80  | 96          | 109 | DFTCTQCQKSFQK           |      |   |    |   |    | Carbamidomethyl (C)[4]                   |  |  |  |  | Mascot |
|    | 1727.8381                      | 1727.851  | 0.0129  | 7   | 556         | 571 | VSSSLNSHMLTHTGEK        |      |   |    |   |    |                                          |  |  |  |  | Mascot |
|    | 1727.8381                      | 1727.851  | 0.0129  | 7   | 556         | 571 | VSSSLNSHMLTHTGEK        |      |   |    |   |    |                                          |  |  |  |  | Mascot |
|    | 1743.833                       | 1743.8464 | 0.0134  | 8   | 556         | 571 | VSSSLNSHMLTHTGEK        |      |   |    |   |    | Oxidation (M)[9]                         |  |  |  |  | Mascot |
|    | 1743.9144                      | 1743.8464 | -0.068  | -39 | 295         | 309 | CGHCGKTFLRPAVLK         |      |   |    |   |    | Carbamidomethyl (C)[1,4]                 |  |  |  |  | Mascot |
|    | 1759.9412                      | 1759.8414 | -0.0998 | -57 | 81          | 95  | IKIDHNFLMETTAVK         |      |   |    |   |    |                                          |  |  |  |  | Mascot |
|    | 1759.9412                      | 1759.8414 | -0.0998 | -57 | 81          | 95  | IKIDHNFLMETTAVK         |      |   |    |   |    |                                          |  |  |  |  | Mascot |
|    | 2102.0085                      | 2101.9287 | -0.0798 | -38 | 488         | 505 | EFVCFECEKTFITAGHLK      |      |   |    |   |    |                                          |  |  |  |  | Mascot |
|    | 2118.9958                      | 2118.957  | -0.0388 | -18 | 538         | 555 | VHTGEKPFACHTCGKSF<br>R  |      |   |    |   |    | Carbamidomethyl (C)[10,13]               |  |  |  |  | Mascot |
|    | 2211.0798                      | 2211.1204 | 0.0406  | 18  | 450         | 468 | IHLRVHTNEKPYSCPECG<br>K |      |   |    |   |    |                                          |  |  |  |  | Mascot |
|    | 2283.0579                      | 2283.1965 | 0.1386  | 61  | 227         | 245 | HQMIHTGEKPYKSHCD<br>LR  |      |   |    |   |    |                                          |  |  |  |  | Mascot |
| 22 | Si:ch211-20b12.1 [Danio rerio] |           |         |     | gi 67678177 |     | 55996.8                 | 8.09 | 5 | 41 | 0 | 35 | 91.377                                   |  |  |  |  |        |

Peptide Information

| Calc. Mass | Obsrv. Mass | ± da    | ± ppm | Start Seq. | End Seq. | Sequence   | Ion Score | C. I.  | % Modification         | Rank | Result Type |
|------------|-------------|---------|-------|------------|----------|------------|-----------|--------|------------------------|------|-------------|
| 827.4522   | 827.4326    | -0.0196 | -24   | 393        | 399      | SPIAFHR    |           |        |                        |      | Mascot      |
| 931.5095   | 931.4857    | -0.0238 | -26   | 88         | 96       | IDTAPSLSK  |           |        |                        |      | Mascot      |
| 937.4989   | 937.4602    | -0.0387 | -41   | 304        | 311      | ADTDIFKK   |           |        |                        |      | Mascot      |
| 1229.5541  | 1229.6046   | 0.0505  | 41    | 244        | 253      | TEDMALMQYK |           |        |                        |      | Mascot      |
| 1245.549   | 1245.6001   | 0.0511  | 41    | 244        | 253      | TEDMALMQYK |           |        | Oxidation (M)[4]       |      | Mascot      |
| 1277.6307  | 1277.7164   | 0.0857  | 67    | 436        | 445      | CHDIIISTYR | 35        | 91.377 | Carbamidomethyl (C)[1] |      | Mascot      |
| 1277.6307  | 1277.7164   | 0.0857  | 67    | 436        | 445      | CHDIIISTYR |           |        | Carbamidomethyl (C)[1] |      | Mascot      |

23 Zgc:153569 protein [Danio rerio] gi|171846383 59551.2 7.18 13 41 0

Peptide Information

| Calc. Mass | Obsrv. Mass | ± da    | ± ppm | Start Seq. | End Seq. | Sequence  | Ion Score | C. I. | % Modification                           | Rank | Result Type |
|------------|-------------|---------|-------|------------|----------|-----------|-----------|-------|------------------------------------------|------|-------------|
| 931.5319   | 931.4857    | -0.0462 | -50   | 318        | 325      | NALTTRQK  |           |       |                                          |      | Mascot      |
| 1077.5358  | 1077.5367   | 0.0009  | 1     | 86         | 94       | DDVTRLCAK |           |       | Carbamidomethyl (C)[7]                   |      | Mascot      |
| 1143.5874  | 1143.6404   | 0.053   | 46    | 425        | 433      | GRTLHCLMR |           |       | Carbamidomethyl (C)[6]                   |      | Mascot      |
| 1159.5823  | 1159.6343   | 0.052   | 45    | 425        | 433      | GRTLHCLMR |           |       | Carbamidomethyl (C)[6], Oxidation (M)[8] |      | Mascot      |

|    |                                   |           |         |     |             |     |                           |      |    |    |   |                   |                         |  |  |  |        |
|----|-----------------------------------|-----------|---------|-----|-------------|-----|---------------------------|------|----|----|---|-------------------|-------------------------|--|--|--|--------|
|    | 1229.5289                         | 1229.6046 | 0.0757  | 62  | 308         | 317 | FEEAMSEKCR                |      |    |    |   |                   |                         |  |  |  | Mascot |
|    | 1245.5238                         | 1245.6001 | 0.0763  | 61  | 308         | 317 | FEEAMSEKCR                |      |    |    |   |                   | Oxidation (M)[5]        |  |  |  | Mascot |
|    | 1256.6715                         | 1256.7025 | 0.031   | 25  | 427         | 436 | TLHCLMRVAR                |      |    |    |   |                   | Carbamidomethyl (C)[4]  |  |  |  | Mascot |
|    | 1286.5504                         | 1286.5896 | 0.0392  | 30  | 308         | 317 | FEEAMSEKCR                |      |    |    |   |                   | Carbamidomethyl (C)[9]  |  |  |  | Mascot |
|    | 1308.6113                         | 1308.6627 | 0.0514  | 39  | 412         | 423 | GEIEAHCSGLHR              |      |    |    |   |                   |                         |  |  |  | Mascot |
|    | 1535.7457                         | 1535.6902 | -0.0555 | -36 | 161         | 173 | GKGYLMSCLVDHR             |      |    |    |   |                   | Carbamidomethyl (C)[8]  |  |  |  | Mascot |
|    | 1636.7668                         | 1636.8402 | 0.0734  | 45  | 470         | 484 | ALNEACESVIQTACK           |      |    |    |   |                   | Carbamidomethyl (C)[6]  |  |  |  | Mascot |
|    | 1743.7789                         | 1743.8464 | 0.0675  | 39  | 380         | 394 | TVSGDCQAEMLDYRR           | 3    |    | 0  |   |                   |                         |  |  |  | Mascot |
|    | 1743.7789                         | 1743.8464 | 0.0675  | 39  | 380         | 394 | TVSGDCQAEMLDYRR           |      |    |    |   |                   |                         |  |  |  | Mascot |
|    | 1759.7738                         | 1759.8414 | 0.0676  | 38  | 380         | 394 | TVSGDCQAEMLDYRR           | 4    |    | 0  |   | Oxidation (M)[10] |                         |  |  |  | Mascot |
|    | 1759.7738                         | 1759.8414 | 0.0676  | 38  | 380         | 394 | TVSGDCQAEMLDYRR           |      |    |    |   | Oxidation (M)[10] |                         |  |  |  | Mascot |
|    | 1830.0054                         | 1829.8363 | -0.1691 | -92 | 364         | 379 | LSYLLLCLESAVHRGR          |      |    |    |   |                   |                         |  |  |  | Mascot |
|    | 1899.9442                         | 1899.9476 | 0.0034  | 2   | 137         | 153 | FESVALEVCTSTMLELK         |      |    |    |   |                   |                         |  |  |  | Mascot |
|    | 2086.0386                         | 2085.9326 | -0.106  | -51 | 95          | 111 | HTWTNNLSVLECLQDKK         |      |    |    |   |                   | Carbamidomethyl (C)[12] |  |  |  | Mascot |
|    | 2798.4202                         | 2798.3623 | -0.0579 | -21 | 129         | 153 | LNLTTDPKFESVALEVCTSTMLELK |      |    |    |   |                   | Oxidation (M)[21]       |  |  |  | Mascot |
| 24 | epoxide hydrolase 2 [Danio rerio] |           |         |     | gi 56693357 |     | 61852.6                   | 6.11 | 11 | 39 | 0 |                   |                         |  |  |  |        |

Peptide Information

| Calc. Mass | Obsrv. Mass | ± da    | ± ppm | Start Seq. | End Seq. | Sequence               | Ion Score | C. I. | % Modification          | Rank | Result Type |
|------------|-------------|---------|-------|------------|----------|------------------------|-----------|-------|-------------------------|------|-------------|
| 931.493    | 931.4857    | -0.0073 | -8    | 475        | 481      | WMVSRPR                |           |       |                         |      | Mascot      |
| 1130.6251  | 1130.6      | -0.0251 | -22   | 475        | 483      | WMVSRPRAK              |           |       |                         |      | Mascot      |
| 1286.7136  | 1286.5896   | -0.124  | -96   | 190        | 202      | AAEGLGIMAVQVK          |           |       |                         |      | Mascot      |
| 1443.8425  | 1443.7144   | -0.1281 | -89   | 482        | 495      | AKILMPALMVTAGK         |           |       |                         |      | Mascot      |
| 1486.7246  | 1486.72     | -0.0046 | -3    | 403        | 416      | LMFISSSDTGGFPK         |           |       |                         |      | Mascot      |
| 1696.8727  | 1696.8417   | -0.031  | -18   | 97         | 111      | VEFNMTFLDAAAVLR        |           |       |                         |      | Mascot      |
| 1759.8584  | 1759.8414   | -0.017  | -10   | 151        | 165      | SCHAGVRIPEPDFFK        |           |       | Carbamidomethyl (C)[2]  |      | Mascot      |
| 1759.8584  | 1759.8414   | -0.017  | -10   | 151        | 165      | SCHAGVRIPEPDFFK        |           |       | Carbamidomethyl (C)[2]  |      | Mascot      |
| 1862.9357  | 1862.7971   | -0.1386 | -74   | 400        | 416      | TFKLMFISSSDTGGFPK      |           |       |                         |      | Mascot      |
| 2086.001   | 2085.9326   | -0.0684 | -33   | 214        | 232      | LTGIEVTSDLQPPSCDPEK    |           |       | Carbamidomethyl (C)[15] |      | Mascot      |
| 2225.113   | 2225.134    | 0.021   | 9     | 417        | 438      | LSPAGVCQRGGLFVGSPDDPPR |           |       |                         |      | Mascot      |
| 2284.2004  | 2284.1909   | -0.0095 | -4    | 496        | 516      | DPVLLPAFATGMENLIPNLSR  |           |       | Oxidation (M)[12]       |      | Mascot      |

25 Osbp1a protein [Danio rerio] gi|190338207 110421.6 5.77 14 39 0

Peptide Information

| Calc. Mass | Obsrv. Mass | ± da | ± ppm | Start | End | Sequence | Ion | C. I. | % Modification | Rank | Result Type |
|------------|-------------|------|-------|-------|-----|----------|-----|-------|----------------|------|-------------|
|------------|-------------|------|-------|-------|-----|----------|-----|-------|----------------|------|-------------|

|    |                                              |           | Seq.    |     | Seq.         |     | Score                        |      |                                           |        |   |
|----|----------------------------------------------|-----------|---------|-----|--------------|-----|------------------------------|------|-------------------------------------------|--------|---|
|    | 937.4481                                     | 937.4602  | 0.0121  | 13  | 572          | 579 | CIGMELSK                     |      | Carbamidomethyl (C)[1]                    | Mascot |   |
|    | 1046.4612                                    | 1046.5219 | 0.0607  | 58  | 298          | 305 | DNCYFTVK                     |      | Carbamidomethyl (C)[3]                    | Mascot |   |
|    | 1200.579                                     | 1200.6636 | 0.0846  | 70  | 370          | 379 | AESCHQRLEK                   |      |                                           | Mascot |   |
|    | 1245.5933                                    | 1245.6001 | 0.0068  | 5   | 296          | 305 | AKDNCYFTVK                   |      | Carbamidomethyl (C)[5]                    | Mascot |   |
|    | 1277.6525                                    | 1277.7164 | 0.0639  | 50  | 695          | 705 | FWGKSVEAEPK                  |      |                                           | Mascot |   |
|    | 1277.6525                                    | 1277.7164 | 0.0639  | 50  | 695          | 705 | FWGKSVEAEPK                  |      |                                           | Mascot |   |
|    | 1308.6735                                    | 1308.6627 | -0.0108 | -8  | 682          | 692 | NFVFHGSYIPK                  |      |                                           | Mascot |   |
|    | 1443.7842                                    | 1443.7144 | -0.0698 | -48 | 768          | 779 | ELHKVEGYILDK                 |      |                                           | Mascot |   |
|    | 1486.7003                                    | 1486.72   | 0.0197  | 13  | 755          | 767 | CCLNFKPCGLFGK                |      | Carbamidomethyl (C)[1]                    | Mascot |   |
|    | 1535.7046                                    | 1535.6902 | -0.0144 | -9  | 1            | 12  | MEELDPEEQFLR                 |      |                                           | Mascot |   |
|    | 1829.9183                                    | 1829.8363 | -0.082  | -45 | 282          | 297 | QGCKPLTQAHCMIAK              |      | Carbamidomethyl (C)[3], Oxidation (M)[12] | Mascot |   |
|    | 1958.9285                                    | 1958.9938 | 0.0653  | 33  | 751          | 767 | TGEKCCLNFKPCGLFGK            |      | Carbamidomethyl (C)[5,6]                  | Mascot |   |
|    | 2086.1138                                    | 2085.9326 | -0.1812 | -87 | 142          | 160 | LEEQLLEAAREGAVSTLT<br>R      |      |                                           | Mascot |   |
|    | 2211.0664                                    | 2211.1204 | 0.054   | 24  | 44           | 62  | SKSNHGWTPHLACYFG<br>HR       |      |                                           | Mascot |   |
|    | 2798.429                                     | 2798.3623 | -0.0667 | -24 | 572          | 595 | CIGMELSKITMPVIFNEPL<br>SFLQR |      | Oxidation (M)[4,11]                       | Mascot |   |
| 26 | hypothetical protein LOC751680 [Danio rerio] |           |         |     | gi 113679132 |     | 59375.2                      | 7.18 | 13                                        | 39     | 0 |

#### Peptide Information

| Calc. Mass | Obsrv. Mass | ± da    | ± ppm | Start Seq. | End Sequence Seq. | Ion Score       | C. I. % | Modification                             | Rank              | Result Type |
|------------|-------------|---------|-------|------------|-------------------|-----------------|---------|------------------------------------------|-------------------|-------------|
| 931.5319   | 931.4857    | -0.0462 | -50   | 316        | 323               | NALTTRQK        |         |                                          |                   | Mascot      |
| 1077.5358  | 1077.5367   | 0.0009  | 1     | 84         | 92                | DDVTRLCAK       |         | Carbamidomethyl (C)[7]                   |                   | Mascot      |
| 1143.5874  | 1143.6404   | 0.053   | 46    | 423        | 431               | GRTLHCLMR       |         | Carbamidomethyl (C)[6]                   |                   | Mascot      |
| 1159.5823  | 1159.6343   | 0.052   | 45    | 423        | 431               | GRTLHCLMR       |         | Carbamidomethyl (C)[6], Oxidation (M)[8] |                   | Mascot      |
| 1229.5289  | 1229.6046   | 0.0757  | 62    | 306        | 315               | FEEAMSEKCR      |         |                                          |                   | Mascot      |
| 1245.5238  | 1245.6001   | 0.0763  | 61    | 306        | 315               | FEEAMSEKCR      |         | Oxidation (M)[5]                         |                   | Mascot      |
| 1256.6715  | 1256.7025   | 0.031   | 25    | 425        | 434               | TLHCLMRVAR      |         | Carbamidomethyl (C)[4]                   |                   | Mascot      |
| 1286.5504  | 1286.5896   | 0.0392  | 30    | 306        | 315               | FEEAMSEKCR      |         | Carbamidomethyl (C)[9]                   |                   | Mascot      |
| 1308.6113  | 1308.6627   | 0.0514  | 39    | 410        | 421               | GEIEAHCSSLHR    |         |                                          |                   | Mascot      |
| 1535.7457  | 1535.6902   | -0.0555 | -36   | 159        | 171               | GKGYLMSCLVDHR   |         | Carbamidomethyl (C)[8]                   |                   | Mascot      |
| 1636.7668  | 1636.8402   | 0.0734  | 45    | 468        | 482               | ALNEACESVIQTACK |         | Carbamidomethyl (C)[6]                   |                   | Mascot      |
| 1743.7789  | 1743.8464   | 0.0675  | 39    | 378        | 392               | TVSGDCQAEMLDYRR | 3       | 0                                        |                   | Mascot      |
| 1743.7789  | 1743.8464   | 0.0675  | 39    | 378        | 392               | TVSGDCQAEMLDYRR |         |                                          |                   | Mascot      |
| 1759.7738  | 1759.8414   | 0.0676  | 38    | 378        | 392               | TVSGDCQAEMLDYRR | 4       | 0                                        | Oxidation (M)[10] | Mascot      |
| 1759.7738  | 1759.8414   | 0.0676  | 38    | 378        | 392               | TVSGDCQAEMLDYRR |         |                                          | Oxidation (M)[10] | Mascot      |



|    |                                                       |           |         |     |              |     |                           |       |   |    |   |                         |  |  |  |  |        |
|----|-------------------------------------------------------|-----------|---------|-----|--------------|-----|---------------------------|-------|---|----|---|-------------------------|--|--|--|--|--------|
|    | 1830.0054                                             | 1829.8363 | -0.1691 | -92 | 362          | 377 | LSYLLLCLESAVHRGR          |       |   |    |   |                         |  |  |  |  | Mascot |
|    | 1899.9442                                             | 1899.9476 | 0.0034  | 2   | 135          | 151 | FESVALEVCTSTMLELK         |       |   |    |   |                         |  |  |  |  | Mascot |
|    | 2086.0386                                             | 2085.9326 | -0.106  | -51 | 93           | 109 | HTWTNNLSVLECLQDKK         |       |   |    |   | Carbamidomethyl (C)[12] |  |  |  |  | Mascot |
|    | 2798.4202                                             | 2798.3623 | -0.0579 | -21 | 127          | 151 | LNLTTDPKFESVALEVCTSTMLELK |       |   |    |   | Oxidation (M)[21]       |  |  |  |  | Mascot |
| 27 | splicing factor, arginine/serine-rich 3 [Danio rerio] |           |         |     | gi 148726274 |     | 14283.2                   | 10.12 | 7 | 38 | 0 |                         |  |  |  |  |        |

#### Peptide Information

|  | Calc. Mass | Obsrv. Mass | ± da    | ± ppm | Start Seq. | End Seq. | Sequence          | Ion Score | C. I. | % Modification           | Rank | Result Type |
|--|------------|-------------|---------|-------|------------|----------|-------------------|-----------|-------|--------------------------|------|-------------|
|  | 827.4482   | 827.4326    | -0.0156 | -19   | 107        | 113      | SSPPQRR           |           |       |                          |      | Mascot      |
|  | 1130.6163  | 1130.6      | -0.0163 | -14   | 75         | 84       | VRVELSNGEK        |           |       |                          |      | Mascot      |
|  | 1143.5034  | 1143.6404   | 0.137   | 120   | 2          | 10       | HRDCPLDCK         |           |       | Carbamidomethyl (C)[4]   |      | Mascot      |
|  | 1200.5248  | 1200.6636   | 0.1388  | 116   | 2          | 10       | HRDCPLDCK         |           |       | Carbamidomethyl (C)[4,8] |      | Mascot      |
|  | 1245.7235  | 1245.6001   | -0.1234 | -99   | 114        | 124      | RVTTMPLLTTL       |           |       |                          |      | Mascot      |
|  | 1248.6331  | 1248.6893   | 0.0562  | 45    | 11         | 22       | VYVGNLGNNGNK      |           |       |                          |      | Mascot      |
|  | 1317.6393  | 1317.6975   | 0.0582  | 44    | 57         | 68       | DATDAVRELDGR      |           |       |                          |      | Mascot      |
|  | 1317.6393  | 1317.6975   | 0.0582  | 44    | 57         | 68       | DATDAVRELDGR      |           |       |                          |      | Mascot      |
|  | 1862.9354  | 1862.7971   | -0.1383 | -74   | 11         | 27       | VYVGNLGNNGNKSELER |           |       |                          |      | Mascot      |

|    |                                                    |  |  |  |              |  |         |      |   |    |   |  |  |  |  |  |  |
|----|----------------------------------------------------|--|--|--|--------------|--|---------|------|---|----|---|--|--|--|--|--|--|
| 28 | PREDICTED: tubulin beta-2 chain-like [Danio rerio] |  |  |  | gi 326664656 |  | 46950.6 | 4.83 | 9 | 38 | 0 |  |  |  |  |  |  |
|----|----------------------------------------------------|--|--|--|--------------|--|---------|------|---|----|---|--|--|--|--|--|--|

#### Peptide Information

|  | Calc. Mass | Obsrv. Mass | ± da   | ± ppm | Start Seq. | End Seq. | Sequence                   | Ion Score | C. I. | % Modification   | Rank | Result Type |
|--|------------|-------------|--------|-------|------------|----------|----------------------------|-----------|-------|------------------|------|-------------|
|  | 1053.6091  | 1053.615    | 0.0059 | 6     | 277        | 285      | YLTVAIFR                   |           |       |                  |      | Mascot      |
|  | 1077.5323  | 1077.5367   | 0.0044 | 4     | 122        | 129      | IREEYPDR                   |           |       |                  |      | Mascot      |
|  | 1130.5953  | 1130.6      | 0.0047 | 4     | 209        | 218      | FPGQLNADLR                 |           |       |                  |      | Mascot      |
|  | 1143.6343  | 1143.6404   | 0.0061 | 5     | 220        | 229      | LAVNMVPFPR                 |           |       |                  |      | Mascot      |
|  | 1159.6292  | 1159.6343   | 0.0051 | 4     | 220        | 229      | LAVNMVPFPR                 |           |       | Oxidation (M)[5] |      | Mascot      |
|  | 1229.5983  | 1229.6046   | 0.0063 | 5     | 348        | 357      | ISEQFTAMFR                 |           |       |                  |      | Mascot      |
|  | 1245.5933  | 1245.6001   | 0.0068 | 5     | 348        | 357      | ISEQFTAMFR                 |           |       | Oxidation (M)[8] |      | Mascot      |
|  | 1636.8304  | 1636.8402   | 0.0098 | 6     | 230        | 243      | LHFFMPGFAPLTSR             |           |       | Oxidation (M)[5] |      | Mascot      |
|  | 1696.8329  | 1696.8417   | 0.0088 | 5     | 304        | 317      | NSSYFVEWIPNNVK             |           |       |                  |      | Mascot      |
|  | 1958.9817  | 1958.9938   | 0.0121 | 6     | 71         | 88       | GHYTEGAELVDSVLDVVR         |           |       |                  |      | Mascot      |
|  | 2798.3433  | 2798.3623   | 0.019  | 7     | 45         | 70       | SGPFGQIFRPDNFVFGQSGAGNNWAK |           |       |                  |      | Mascot      |

|    |                                                       |  |  |  |              |  |         |      |    |    |   |  |  |  |  |  |  |
|----|-------------------------------------------------------|--|--|--|--------------|--|---------|------|----|----|---|--|--|--|--|--|--|
| 29 | PREDICTED: zinc finger protein 135-like [Danio rerio] |  |  |  | gi 326667222 |  | 36676.8 | 9.61 | 10 | 38 | 0 |  |  |  |  |  |  |
|----|-------------------------------------------------------|--|--|--|--------------|--|---------|------|----|----|---|--|--|--|--|--|--|

| Peptide Information |                                  |          |           |              |          |                    |           |       |                                           |      |             |  |  |
|---------------------|----------------------------------|----------|-----------|--------------|----------|--------------------|-----------|-------|-------------------------------------------|------|-------------|--|--|
| Calc. Mass          | Obsrv. Mass                      | $\pm$ da | $\pm$ ppm | Start Seq.   | End Seq. | Sequence           | Ion Score | C. I. | % Modification                            | Rank | Result Type |  |  |
| 1046.5153           | 1046.5219                        | 0.0066   | 6         | 220          | 228      | SFSQSSYLK          |           |       |                                           |      | Mascot      |  |  |
| 1053.5142           | 1053.615                         | 0.1008   | 96        | 1            | 9        | MLMTDCVLK          |           |       |                                           |      | Mascot      |  |  |
| 1063.6259           | 1063.5461                        | -0.0798  | -75       | 276          | 284      | RFTQLGTLK          |           |       |                                           |      | Mascot      |  |  |
| 1143.5099           | 1143.6404                        | 0.1305   | 114       | 164          | 173      | SFNCSSSLNK         |           |       | Carbamidomethyl (C)[4]                    |      | Mascot      |  |  |
| 1226.5657           | 1226.5848                        | 0.0191   | 16        | 210          | 219      | KPFTCTQCGK         |           |       | Carbamidomethyl (C)[5,8]                  |      | Mascot      |  |  |
| 1229.5177           | 1229.6046                        | 0.0869   | 71        | 239          | 247      | EYVCLECEK          |           |       | Carbamidomethyl (C)[4,7]                  |      | Mascot      |  |  |
| 1308.6837           | 1308.6627                        | -0.021   | -16       | 1            | 11       | MLMTDCVLKVR        |           |       |                                           |      | Mascot      |  |  |
| 1381.7001           | 1381.6721                        | -0.028   | -20       | 1            | 11       | MLMTDCVLKVR        |           |       | Carbamidomethyl (C)[6], Oxidation (M)[1]  |      | Mascot      |  |  |
| 1759.8254           | 1759.8414                        | 0.016    | 9         | 121          | 135      | IHTGEKPFTCPQCGK    |           |       | Carbamidomethyl (C)[10,13]                |      | Mascot      |  |  |
| 1759.8254           | 1759.8414                        | 0.016    | 9         | 121          | 135      | IHTGEKPFTCPQCGK    |           |       | Carbamidomethyl (C)[10,13]                |      | Mascot      |  |  |
| 2017.976            | 2018.1779                        | 0.2019   | 100       | 192          | 209      | SFSQSSSLNQHIMIHTGK |           |       | Oxidation (M)[13]                         |      | Mascot      |  |  |
| 2017.976            | 2018.1779                        | 0.2019   | 100       | 192          | 209      | SFSQSSSLNQHIMIHTGK |           |       | Oxidation (M)[13]                         |      | Mascot      |  |  |
| 2102.9932           | 2102.9509                        | -0.0423  | -20       | 62           | 79       | HMKIHTGEKPFTCTQCGK |           |       | Carbamidomethyl (C)[13]                   |      | Mascot      |  |  |
| 2118.988            | 2118.957                         | -0.031   | -15       | 62           | 79       | HMKIHTGEKPFTCTQCGK |           |       | Carbamidomethyl (C)[13], Oxidation (M)[2] |      | Mascot      |  |  |
| 30                  | Zgc:161969 protein [Danio rerio] |          |           | gi 115527819 |          |                    | 79975.3   | 6.86  | 12                                        | 37   | 0           |  |  |

| Peptide Information |             |          |           |            |          |                 |           |       |                                           |      |             |  |  |
|---------------------|-------------|----------|-----------|------------|----------|-----------------|-----------|-------|-------------------------------------------|------|-------------|--|--|
| Calc. Mass          | Obsrv. Mass | $\pm$ da | $\pm$ ppm | Start Seq. | End Seq. | Sequence        | Ion Score | C. I. | % Modification                            | Rank | Result Type |  |  |
| 1063.524            | 1063.5461   | 0.0221   | 21        | 643        | 651      | CLNEFPGVK       |           |       | Carbamidomethyl (C)[1]                    |      | Mascot      |  |  |
| 1256.6844           | 1256.7025   | 0.0181   | 14        | 391        | 403      | DLAEAVTKGPAGK   |           |       |                                           |      | Mascot      |  |  |
| 1277.6783           | 1277.7164   | 0.0381   | 30        | 224        | 234      | RVMSPNFVTR      |           |       |                                           |      | Mascot      |  |  |
| 1277.6783           | 1277.7164   | 0.0381   | 30        | 224        | 234      | RVMSPNFVTR      |           |       |                                           |      | Mascot      |  |  |
| 1345.6967           | 1345.6841   | -0.0126  | -9        | 16         | 27       | NITVQC�LCLPK    |           |       |                                           |      | Mascot      |  |  |
| 1362.7086           | 1362.7037   | -0.0049  | -4        | 640        | 651      | DLKCLNEFPGVK    |           |       |                                           |      | Mascot      |  |  |
| 1362.7086           | 1362.7037   | -0.0049  | -4        | 640        | 651      | DLKCLNEFPGVK    |           |       |                                           |      | Mascot      |  |  |
| 1381.639            | 1381.6721   | 0.0331   | 24        | 111        | 122      | SGNTSNMQHHLR    |           |       |                                           |      | Mascot      |  |  |
| 1432.6572           | 1432.7495   | 0.0923   | 64        | 44         | 54       | HLECHSPHLMR     |           |       | Carbamidomethyl (C)[4], Oxidation (M)[10] |      | Mascot      |  |  |
| 1432.6572           | 1432.7495   | 0.0923   | 64        | 44         | 54       | HLECHSPHLMR     |           |       | Carbamidomethyl (C)[4], Oxidation (M)[10] |      | Mascot      |  |  |
| 1519.7386           | 1519.6925   | -0.0461  | -30       | 307        | 319      | IQETHSSFNIESK   |           |       |                                           |      | Mascot      |  |  |
| 1636.8217           | 1636.8402   | 0.0185   | 11        | 625        | 638      | EAAEEVWLYLQGTK  |           |       |                                           |      | Mascot      |  |  |
| 1744.0553           | 1743.8464   | -0.2089  | -120      | 506        | 520      | CFLGIVIPTLLTLKR |           |       | Carbamidomethyl (C)[1]                    |      | Mascot      |  |  |
| 1744.0553           | 1743.8464   | -0.2089  | -120      | 506        | 520      | CFLGIVIPTLLTLKR |           |       | Carbamidomethyl (C)[1]                    |      | Mascot      |  |  |

|    |                                      |           |           |        |    |              |          |                           |    |    |                        |    |   |        |
|----|--------------------------------------|-----------|-----------|--------|----|--------------|----------|---------------------------|----|----|------------------------|----|---|--------|
|    |                                      | 1899.8496 | 1899.9476 | 0.098  | 52 | 419          | 436      | AESSMETAVAMESIANM<br>K    |    |    |                        |    |   | Mascot |
|    |                                      | 2283.1472 | 2283.1965 | 0.0493 | 22 | 286          | 306      | SAALACTRIPSNYTCETII<br>AK |    |    | Carbamidomethyl (C)[6] |    |   | Mascot |
| 31 | hydrocephalus inducing [Danio rerio] |           |           |        |    | gj 319996627 | 534681.1 | 5.75                      | 29 | 37 | 0                      | 12 | 0 |        |

|    |                                                       |           |         |     |      |              |                                |      |   |    |   |                                           |        |
|----|-------------------------------------------------------|-----------|---------|-----|------|--------------|--------------------------------|------|---|----|---|-------------------------------------------|--------|
|    | 2085.9668                                             | 2085.9326 | -0.0342 | -16 | 2479 | 2495         | CYQLHCKGICTYPSISR              |      |   |    |   | Carbamidomethyl (C)[1,6]                  | Mascot |
|    | 2103.0466                                             | 2102.9509 | -0.0957 | -46 | 2517 | 2534         | TYVIQSDLYEFGPLLCGK             |      |   |    |   | Carbamidomethyl (C)[16]                   | Mascot |
|    | 2146.0889                                             | 2146.0376 | -0.0513 | -24 | 3506 | 3523         | GTVKLEYSWQILMETYG<br>K         |      |   |    |   |                                           | Mascot |
|    | 2784.377                                              | 2784.3499 | -0.0271 | -10 | 3960 | 3985         | IKNGPIFCCALMGSAVAP<br>DLEFSSLK |      |   |    |   | Carbamidomethyl (C)[8], Oxidation (M)[12] | Mascot |
|    | 2798.3289                                             | 2798.3623 | 0.0334  | 12  | 3608 | 3630         | DNQSPEFTVHGRCLLPY<br>CHFHLK    |      |   |    |   | Carbamidomethyl (C)[13]                   | Mascot |
| 32 | PREDICTED: tubulin beta chain isoform 1 [Danio rerio] |           |         |     |      | gi 326666192 | 49614.9                        | 4.81 | 9 | 37 | 0 |                                           |        |

#### Peptide Information

|  | Calc. Mass | Obsrv. Mass | ± da   | ± ppm | Start Seq. | End Seq. | Sequence                       | Ion Score | C. I. | % Modification   | Rank | Result Type |
|--|------------|-------------|--------|-------|------------|----------|--------------------------------|-----------|-------|------------------|------|-------------|
|  | 1039.5935  | 1039.597    | 0.0035 | 3     | 310        | 318      | YLTVAAVFR                      |           |       |                  |      | Mascot      |
|  | 1077.5323  | 1077.5367   | 0.0044 | 4     | 155        | 162      | IREEYPDR                       |           |       |                  |      | Mascot      |
|  | 1130.5953  | 1130.6      | 0.0047 | 4     | 242        | 251      | FPGQLNADLR                     |           |       |                  |      | Mascot      |
|  | 1143.6343  | 1143.6404   | 0.0061 | 5     | 253        | 262      | LAVNMVPFPR                     |           |       |                  |      | Mascot      |
|  | 1159.6292  | 1159.6343   | 0.0051 | 4     | 253        | 262      | LAVNMVPFPR                     |           |       | Oxidation (M)[5] |      | Mascot      |
|  | 1229.5983  | 1229.6046   | 0.0063 | 5     | 381        | 390      | ISEQFTAMFR                     |           |       |                  |      | Mascot      |
|  | 1245.5933  | 1245.6001   | 0.0068 | 5     | 381        | 390      | ISEQFTAMFR                     |           |       | Oxidation (M)[8] |      | Mascot      |
|  | 1636.8304  | 1636.8402   | 0.0098 | 6     | 263        | 276      | LHFFMPGFAPLTSR                 |           |       | Oxidation (M)[5] |      | Mascot      |
|  | 1696.8329  | 1696.8417   | 0.0088 | 5     | 337        | 350      | NSSYFVEWIPNNVK                 |           |       |                  |      | Mascot      |
|  | 1958.9817  | 1958.9938   | 0.0121 | 6     | 104        | 121      | GHYTEGAELVDSVLDVV<br>R         |           |       |                  |      | Mascot      |
|  | 2798.3433  | 2798.3623   | 0.019  | 7     | 78         | 103      | SGPFGQIFRPDNFVFGQ<br>SGAGNNWAK |           |       |                  |      | Mascot      |

33 tubulin, beta, 2 [Danio rerio] gi|37681963 49754 4.85 9 37 0

#### Peptide Information

|  | Calc. Mass | Obsrv. Mass | ± da   | ± ppm | Start Seq. | End Seq. | Sequence               | Ion Score | C. I. | % Modification   | Rank | Result Type |
|--|------------|-------------|--------|-------|------------|----------|------------------------|-----------|-------|------------------|------|-------------|
|  | 1039.5935  | 1039.597    | 0.0035 | 3     | 310        | 318      | YLTVAAVFR              |           |       |                  |      | Mascot      |
|  | 1077.5323  | 1077.5367   | 0.0044 | 4     | 155        | 162      | IREEYPDR               |           |       |                  |      | Mascot      |
|  | 1130.5953  | 1130.6      | 0.0047 | 4     | 242        | 251      | FPGQLNADLR             |           |       |                  |      | Mascot      |
|  | 1143.6343  | 1143.6404   | 0.0061 | 5     | 253        | 262      | LAVNMVPFPR             |           |       |                  |      | Mascot      |
|  | 1159.6292  | 1159.6343   | 0.0051 | 4     | 253        | 262      | LAVNMVPFPR             |           |       | Oxidation (M)[5] |      | Mascot      |
|  | 1229.5983  | 1229.6046   | 0.0063 | 5     | 381        | 390      | ISEQFTAMFR             |           |       |                  |      | Mascot      |
|  | 1245.5933  | 1245.6001   | 0.0068 | 5     | 381        | 390      | ISEQFTAMFR             |           |       | Oxidation (M)[8] |      | Mascot      |
|  | 1636.8304  | 1636.8402   | 0.0098 | 6     | 263        | 276      | LHFFMPGFAPLTSR         |           |       | Oxidation (M)[5] |      | Mascot      |
|  | 1696.8329  | 1696.8417   | 0.0088 | 5     | 337        | 350      | NSSYFVEWIPNNVK         |           |       |                  |      | Mascot      |
|  | 1958.9817  | 1958.9938   | 0.0121 | 6     | 104        | 121      | GHYTEGAELVDSVLDVV<br>R |           |       |                  |      | Mascot      |

|    |                                |           |       |   |             |       |                                |   |    |   |  |  |        |
|----|--------------------------------|-----------|-------|---|-------------|-------|--------------------------------|---|----|---|--|--|--------|
|    | 2798.3433                      | 2798.3623 | 0.019 | 7 | 78          | 103   | SGPFGQIFRPDNFVFGQ<br>SGAGNNWAK |   |    |   |  |  | Mascot |
| 34 | tubulin, beta 2B [Danio rerio] |           |       |   | gi 47087299 | 49769 | 4.79                           | 9 | 37 | 0 |  |  |        |

Peptide Information

| Calc. Mass | Obsrv. Mass | ± da   | ± ppm | Start Seq. | End Seq. | Sequence                       | Ion Score | C. I. | % Modification   | Rank | Result Type |
|------------|-------------|--------|-------|------------|----------|--------------------------------|-----------|-------|------------------|------|-------------|
| 1039.5935  | 1039.597    | 0.0035 | 3     | 310        | 318      | YLTVAAVFR                      |           |       |                  |      | Mascot      |
| 1077.5323  | 1077.5367   | 0.0044 | 4     | 155        | 162      | IREEYPDR                       |           |       |                  |      | Mascot      |
| 1130.5953  | 1130.6      | 0.0047 | 4     | 242        | 251      | FPGQLNADLR                     |           |       |                  |      | Mascot      |
| 1143.6343  | 1143.6404   | 0.0061 | 5     | 253        | 262      | LAVNMVPFPR                     |           |       |                  |      | Mascot      |
| 1159.6292  | 1159.6343   | 0.0051 | 4     | 253        | 262      | LAVNMVPFPR                     |           |       | Oxidation (M)[5] |      | Mascot      |
| 1229.5983  | 1229.6046   | 0.0063 | 5     | 381        | 390      | ISEQFTAMFR                     |           |       |                  |      | Mascot      |
| 1245.5933  | 1245.6001   | 0.0068 | 5     | 381        | 390      | ISEQFTAMFR                     |           |       | Oxidation (M)[8] |      | Mascot      |
| 1636.8304  | 1636.8402   | 0.0098 | 6     | 263        | 276      | LHFFMPGFAPLTSR                 |           |       | Oxidation (M)[5] |      | Mascot      |
| 1696.8329  | 1696.8417   | 0.0088 | 5     | 337        | 350      | NSSYFVEWIPNNVK                 |           |       |                  |      | Mascot      |
| 1958.9817  | 1958.9938   | 0.0121 | 6     | 104        | 121      | GHYTEGAELVDSVLDVV<br>R         |           |       |                  |      | Mascot      |
| 2784.3276  | 2784.3499   | 0.0223 | 8     | 78         | 103      | SGPFGQVFRPDNFVFGQ<br>SGAGNNWAK |           |       |                  |      | Mascot      |

|    |                                              |  |  |  |             |         |     |   |    |   |  |  |
|----|----------------------------------------------|--|--|--|-------------|---------|-----|---|----|---|--|--|
| 35 | hypothetical protein LOC641565 [Danio rerio] |  |  |  | gi 83025072 | 50237.2 | 4.8 | 9 | 37 | 0 |  |  |
|----|----------------------------------------------|--|--|--|-------------|---------|-----|---|----|---|--|--|

Peptide Information

| Calc. Mass | Obsrv. Mass | ± da   | ± ppm | Start Seq. | End Seq. | Sequence                       | Ion Score | C. I. | % Modification   | Rank | Result Type |
|------------|-------------|--------|-------|------------|----------|--------------------------------|-----------|-------|------------------|------|-------------|
| 1053.6091  | 1053.615    | 0.0059 | 6     | 310        | 318      | YLTVAIFR                       |           |       |                  |      | Mascot      |
| 1077.5323  | 1077.5367   | 0.0044 | 4     | 155        | 162      | IREEYPDR                       |           |       |                  |      | Mascot      |
| 1130.5953  | 1130.6      | 0.0047 | 4     | 242        | 251      | FPGQLNADLR                     |           |       |                  |      | Mascot      |
| 1143.6343  | 1143.6404   | 0.0061 | 5     | 253        | 262      | LAVNMVPFPR                     |           |       |                  |      | Mascot      |
| 1159.6292  | 1159.6343   | 0.0051 | 4     | 253        | 262      | LAVNMVPFPR                     |           |       | Oxidation (M)[5] |      | Mascot      |
| 1229.5983  | 1229.6046   | 0.0063 | 5     | 381        | 390      | ISEQFTAMFR                     |           |       |                  |      | Mascot      |
| 1245.5933  | 1245.6001   | 0.0068 | 5     | 381        | 390      | ISEQFTAMFR                     |           |       | Oxidation (M)[8] |      | Mascot      |
| 1345.6271  | 1345.6841   | 0.057  | 42    | 47         | 58       | IDVYYNEASSGK                   |           |       |                  |      | Mascot      |
| 1696.8329  | 1696.8417   | 0.0088 | 5     | 337        | 350      | NSSYFVEWIPNNVK                 |           |       |                  |      | Mascot      |
| 1958.9817  | 1958.9938   | 0.0121 | 6     | 104        | 121      | GHYTEGAELVDSVLDVV<br>R         |           |       |                  |      | Mascot      |
| 2798.3103  | 2798.3623   | 0.052  | 19    | 78         | 103      | SGPMGQIFRPDNFVFGQ<br>SGAGNNWAK |           |       | Oxidation (M)[4] |      | Mascot      |

|    |                                              |  |  |  |              |          |      |    |    |   |  |  |
|----|----------------------------------------------|--|--|--|--------------|----------|------|----|----|---|--|--|
| 36 | PREDICTED: elongation factor 2 [Danio rerio] |  |  |  | gi 326667940 | 100398.6 | 6.99 | 16 | 37 | 0 |  |  |
|----|----------------------------------------------|--|--|--|--------------|----------|------|----|----|---|--|--|

Peptide Information

|    | Calc. Mass                                        | Obsrv. Mass | ± da    | ± ppm | Start Seq.  | End Sequence Seq.                | Ion Score | C. I. % Modification   | Rank | Result Type |
|----|---------------------------------------------------|-------------|---------|-------|-------------|----------------------------------|-----------|------------------------|------|-------------|
|    | 1053.5687                                         | 1053.615    | 0.0463  | 44    | 285         | 294 GDLPPAERAK                   |           |                        |      | Mascot      |
|    | 1063.5782                                         | 1063.5461   | -0.0321 | -30   | 711         | 719 GVQYLNEIK                    |           |                        |      | Mascot      |
|    | 1077.5398                                         | 1077.5367   | -0.0031 | -3    | 472         | 481 IMGPNFTPGK                   |           | Oxidation (M)[2]       |      | Mascot      |
|    | 1159.6205                                         | 1159.6343   | 0.0138  | 12    | 362         | 371 LEVKLDAEDK                   |           |                        |      | Mascot      |
|    | 1248.7133                                         | 1248.6893   | -0.024  | -19   | 539         | 549 VMKFVSVPVVR                  |           |                        |      | Mascot      |
|    | 1308.6583                                         | 1308.6627   | 0.0044  | 3     | 720         | 731 DSVVAGFQWATK                 |           |                        |      | Mascot      |
|    | 1317.7524                                         | 1317.6975   | -0.0549 | -42   | 771         | 782 VLYASVLTAQPR                 |           |                        |      | Mascot      |
|    | 1317.7524                                         | 1317.6975   | -0.0549 | -42   | 771         | 782 VLYASVLTAQPR                 |           |                        |      | Mascot      |
|    | 1377.7848                                         | 1377.6768   | -0.108  | -78   | 459         | 471 VFSGIVSTGQKVR                |           |                        |      | Mascot      |
|    | 1515.6936                                         | 1515.7621   | 0.0685  | 45    | 303         | 315 LWGDKYFDPSCGK                |           |                        |      | Mascot      |
|    | 1519.7614                                         | 1519.6925   | -0.0689 | -45   | 267         | 279 QFAEMYVAKFAAK                |           | Oxidation (M)[5]       |      | Mascot      |
|    | 1759.8875                                         | 1759.8414   | -0.0461 | -26   | 745         | 759 FDIHDVTLHADAIHR              |           |                        |      | Mascot      |
|    | 1759.8875                                         | 1759.8414   | -0.0461 | -26   | 745         | 759 FDIHDVTLHADAIHR              |           |                        |      | Mascot      |
|    | 1847.0248                                         | 1846.8007   | -0.2241 | -121  | 328         | 342 LPRTFCQLVLDPIFK              |           | Carbamidomethyl (C)[6] |      | Mascot      |
|    | 1863.0004                                         | 1862.7971   | -0.2033 | -109  | 73          | 90 STLTDSLVCAGIIASAR             |           | Carbamidomethyl (C)[9] |      | Mascot      |
|    | 2086.094                                          | 2085.9326   | -0.1614 | -77   | 742         | 759 AVRFDIHDVTLHADAIHR           |           |                        |      | Mascot      |
|    | 2103.0579                                         | 2102.9509   | -0.107  | -51   | 692         | 710 IWCFCGPDGTGNILVDITK          |           | Carbamidomethyl (C)[3] |      | Mascot      |
|    | 2784.5342                                         | 2784.3499   | -0.1843 | -66   | 385         | 409 RWLPAGDALLQMITHLP<br>SPVTAQR |           |                        |      | Mascot      |
| 37 | alpha-dystrobrevin splice variant 1 [Danio rerio] |             |         |       | gi 95108258 | 80399.1                          | 6.59      | 12                     | 37   | 0           |

#### Peptide Information

|  | Calc. Mass | Obsrv. Mass | ± da    | ± ppm | Start Seq. | End Sequence Seq.     | Ion Score | C. I. % Modification                        | Rank | Result Type |
|--|------------|-------------|---------|-------|------------|-----------------------|-----------|---------------------------------------------|------|-------------|
|  | 931.4843   | 931.4857    | 0.0014  | 2     | 516        | 522 KEELEQR           |           |                                             |      | Mascot      |
|  | 937.4697   | 937.4602    | -0.0095 | -10   | 663        | 672 SSSRSGAASK        |           |                                             |      | Mascot      |
|  | 1053.4742  | 1053.615    | 0.1408  | 134   | 8          | 16 NSSTMADRR          |           | Oxidation (M)[5]                            |      | Mascot      |
|  | 1077.547   | 1077.5367   | -0.0103 | -10   | 523        | 531 MSALQESRR         |           |                                             |      | Mascot      |
|  | 1226.5874  | 1226.5848   | -0.0026 | -2    | 288        | 297 EYMSWKSPAK        |           |                                             |      | Mascot      |
|  | 1270.7114  | 1270.5956   | -0.1158 | -91   | 474        | 483 NKEILQEIQR        |           |                                             |      | Mascot      |
|  | 1449.7804  | 1449.7642   | -0.0162 | -11   | 134        | 147 MALATLCGGKILDK    |           | Oxidation (M)[1]                            |      | Mascot      |
|  | 1449.7804  | 1449.7642   | -0.0162 | -11   | 134        | 147 MALATLCGGKILDK    |           | Oxidation (M)[1]                            |      | Mascot      |
|  | 1829.9321  | 1829.8363   | -0.0958 | -52   | 127        | 143 ISAFVMKMALATLCGGK |           | Carbamidomethyl (C)[14], Oxidation (M)[6,8] |      | Mascot      |
|  | 2017.9865  | 2018.1779   | 0.1914  | 95    | 673        | 689 LEPGDFYGHEDLEKQLK |           |                                             |      | Mascot      |
|  | 2017.9865  | 2018.1779   | 0.1914  | 95    | 673        | 689 LEPGDFYGHEDLEKQLK |           |                                             |      | Mascot      |

|    |                                |           |         |    |             |     |                             |      |                        |        |   |
|----|--------------------------------|-----------|---------|----|-------------|-----|-----------------------------|------|------------------------|--------|---|
|    | 2041.0687                      | 2041.0684 | -0.0003 | 0  | 48          | 63  | CNLHLVDIWNIIIVFR            |      | Carbamidomethyl (C)[1] | Mascot |   |
|    | 2041.0687                      | 2041.0684 | -0.0003 | 0  | 48          | 63  | CNLHLVDIWNIIIVFR            |      | Carbamidomethyl (C)[1] | Mascot |   |
|    | 2284.0549                      | 2284.1909 | 0.136   | 60 | 306         | 326 | SLSCAASREPAYPQFSD<br>TPEK   |      |                        | Mascot |   |
|    | 2798.3494                      | 2798.3623 | 0.0129  | 5  | 150         | 172 | YIFSQISDPNGLMIYSQFD<br>QFLR |      | Oxidation (M)[13]      | Mascot |   |
| 38 | tubulin, beta, 2 [Danio rerio] |           |         |    | gi 82658236 |     | 49684.9                     | 4.81 | 9                      | 36     | 0 |

Peptide Information

| Calc. Mass | Obsrv. Mass | ± da    | ± ppm | Start Seq. | End Seq. | Sequence                       | Ion Score | C. I. | % Modification   | Rank | Result Type |
|------------|-------------|---------|-------|------------|----------|--------------------------------|-----------|-------|------------------|------|-------------|
| 1053.6091  | 1053.615    | 0.0059  | 6     | 310        | 318      | YLTVAIFR                       |           |       |                  |      | Mascot      |
| 1077.5323  | 1077.5367   | 0.0044  | 4     | 155        | 162      | IREEYPDR                       |           |       |                  |      | Mascot      |
| 1130.5953  | 1130.6      | 0.0047  | 4     | 242        | 251      | FPGQLNADLR                     |           |       |                  |      | Mascot      |
| 1143.6343  | 1143.6404   | 0.0061  | 5     | 253        | 262      | LAVNMVPFPR                     |           |       |                  |      | Mascot      |
| 1159.6292  | 1159.6343   | 0.0051  | 4     | 253        | 262      | LAVNMVPFPR                     |           |       | Oxidation (M)[5] |      | Mascot      |
| 1636.8304  | 1636.8402   | 0.0098  | 6     | 263        | 276      | LHFFMPGFAPLTSR                 |           |       | Oxidation (M)[5] |      | Mascot      |
| 1696.8329  | 1696.8417   | 0.0088  | 5     | 337        | 350      | NSSYFVEWIPNNVK                 |           |       |                  |      | Mascot      |
| 1829.918   | 1829.8363   | -0.0817 | -45   | 47         | 62       | INVYYNEASGGKYVPR               |           |       |                  |      | Mascot      |
| 1958.9817  | 1958.9938   | 0.0121  | 6     | 104        | 121      | GHYTEGAELVDSVLDVV<br>R         |           |       |                  |      | Mascot      |
| 2784.3276  | 2784.3499   | 0.0223  | 8     | 78         | 103      | SGPFGQVFRPDNFVFGQ<br>SGAGNNWAK |           |       |                  |      | Mascot      |

|    |                               |  |  |  |             |  |         |      |   |    |   |
|----|-------------------------------|--|--|--|-------------|--|---------|------|---|----|---|
| 39 | tubulin, beta 2 [Danio rerio] |  |  |  | gi 66773102 |  | 50534.3 | 4.76 | 9 | 36 | 0 |
|----|-------------------------------|--|--|--|-------------|--|---------|------|---|----|---|

Peptide Information

| Calc. Mass | Obsrv. Mass | ± da   | ± ppm | Start Seq. | End Seq. | Sequence                       | Ion Score | C. I. | % Modification   | Rank | Result Type |
|------------|-------------|--------|-------|------------|----------|--------------------------------|-----------|-------|------------------|------|-------------|
| 1053.6091  | 1053.615    | 0.0059 | 6     | 310        | 318      | YLTVAIFR                       |           |       |                  |      | Mascot      |
| 1077.5323  | 1077.5367   | 0.0044 | 4     | 155        | 162      | IREEYPDR                       |           |       |                  |      | Mascot      |
| 1130.5953  | 1130.6      | 0.0047 | 4     | 242        | 251      | FPGQLNADLR                     |           |       |                  |      | Mascot      |
| 1143.6343  | 1143.6404   | 0.0061 | 5     | 253        | 262      | LAVNMVPFPR                     |           |       |                  |      | Mascot      |
| 1159.6292  | 1159.6343   | 0.0051 | 4     | 253        | 262      | LAVNMVPFPR                     |           |       | Oxidation (M)[5] |      | Mascot      |
| 1229.5983  | 1229.6046   | 0.0063 | 5     | 381        | 390      | ISEQFTAMFR                     |           |       |                  |      | Mascot      |
| 1245.5933  | 1245.6001   | 0.0068 | 5     | 381        | 390      | ISEQFTAMFR                     |           |       | Oxidation (M)[8] |      | Mascot      |
| 1636.8304  | 1636.8402   | 0.0098 | 6     | 263        | 276      | LHFFMPGFAPLTSR                 |           |       | Oxidation (M)[5] |      | Mascot      |
| 1696.8329  | 1696.8417   | 0.0088 | 5     | 337        | 350      | NSSYFVEWIPNNVK                 |           |       |                  |      | Mascot      |
| 1958.9817  | 1958.9938   | 0.0121 | 6     | 104        | 121      | GHYTEGAELVDSVLDVV<br>R         |           |       |                  |      | Mascot      |
| 2798.3433  | 2798.3623   | 0.019  | 7     | 78         | 103      | SGPFGQIFRPDNFVFGQ<br>SGAGNNWAK |           |       |                  |      | Mascot      |

|    |                                                |  |  |  |             |  |         |      |   |    |   |
|----|------------------------------------------------|--|--|--|-------------|--|---------|------|---|----|---|
| 40 | BCL2/adenovirus E1B 19 kDa protein-interacting |  |  |  | gi 59276024 |  | 20264.1 | 6.67 | 6 | 36 | 0 |
|----|------------------------------------------------|--|--|--|-------------|--|---------|------|---|----|---|

protein 3 [Danio rerio]

Peptide Information

| Calc. Mass | Obsrv. Mass | ± da    | ± ppm | Start Seq. | End Seq. | Sequence                        | Ion Score | C. I. % | Modification | Rank | Result Type |
|------------|-------------|---------|-------|------------|----------|---------------------------------|-----------|---------|--------------|------|-------------|
| 937.4883   | 937.4602    | -0.0281 | -30   | 142        | 149      | RSSTLSMR                        |           |         |              |      | Mascot      |
| 1039.6047  | 1039.597    | -0.0077 | -7    | 134        | 141      | EFLLRHPK                        |           |         |              |      | Mascot      |
| 1256.6052  | 1256.7025   | 0.0973  | 77    | 50         | 60       | MLLDAQHESGR                     |           |         |              |      | Mascot      |
| 1449.675   | 1449.7642   | 0.0892  | 62    | 61         | 74       | SSSRGSLPCDSPTR                  |           |         |              |      | Mascot      |
| 1449.675   | 1449.7642   | 0.0892  | 62    | 61         | 74       | SSSRGSLPCDSPTR                  |           |         |              |      | Mascot      |
| 2211.0618  | 2211.1204   | 0.0586  | 27    | 116        | 133      | NADWIWDWSSRPENLPP<br>K          |           |         |              |      | Mascot      |
| 2784.6062  | 2784.3499   | -0.2563 | -92   | 157        | 183      | GGIFSAEFLKVFLPSLVLS<br>HILAVGLG |           |         |              |      | Mascot      |

41 PREDICTED: insulin receptor substrate 1-B-like [Danio rerio] gi|326674337 118937.4 8.49 1 26 27.948

Peptide Information

| Calc. Mass | Obsrv. Mass | ± da    | ± ppm | Start Seq. | End Seq. | Sequence         | Ion Score | C. I. % | Modification      | Rank | Result Type |
|------------|-------------|---------|-------|------------|----------|------------------|-----------|---------|-------------------|------|-------------|
| 1727.9473  | 1727.851    | -0.0963 | -56   | 179        | 194      | LNSDAAAVVLQLMNIR | 18        | 0       |                   | 3    | Mascot      |
| 1743.9421  | 1743.8464   | -0.0957 | -55   | 179        | 194      | LNSDAAAVVLQLMNIR | 26        | 27.948  | Oxidation (M)[13] | 3    | Mascot      |

42 PREDICTED: dynein heavy chain 3, axonemal [Danio rerio] gi|326679902 436827.7 5.36 1 23 0

Peptide Information

| Calc. Mass | Obsrv. Mass | ± da    | ± ppm | Start Seq. | End Seq. | Sequence       | Ion Score | C. I. % | Modification     | Rank | Result Type |
|------------|-------------|---------|-------|------------|----------|----------------|-----------|---------|------------------|------|-------------|
| 1743.8622  | 1743.8464   | -0.0158 | -9    | 3580       | 3593     | YPLLYEESMNTVLR | 23        | 0       | Oxidation (M)[9] | 4    | Mascot      |

43 PREDICTED: vitamin K-dependent protein C [Danio rerio] gi|292610484 47922.1 6.13 1 21 0

Peptide Information

| Calc. Mass | Obsrv. Mass | ± da   | ± ppm | Start Seq. | End Seq. | Sequence      | Ion Score | C. I. % | Modification           | Rank | Result Type |
|------------|-------------|--------|-------|------------|----------|---------------|-----------|---------|------------------------|------|-------------|
| 1449.6573  | 1449.7642   | 0.1069 | 74    | 165        | 177      | CTPKNDASCGQIR | 21        | 0       | Carbamidomethyl (C)[9] | 2    | Mascot      |

44 junctophilin-2 [Danio rerio] gi|148238064 84360.5 9.08 1 18 0

Peptide Information

| Calc. Mass | Obsrv. Mass | ± da | ± ppm | Start Seq. | End Seq. | Sequence | Ion Score | C. I. % | Modification | Rank | Result Type |
|------------|-------------|------|-------|------------|----------|----------|-----------|---------|--------------|------|-------------|
|------------|-------------|------|-------|------------|----------|----------|-----------|---------|--------------|------|-------------|



|                     |                                                                                                                                  |             |         |       |            |          |                  |           |       |                   |      |             |
|---------------------|----------------------------------------------------------------------------------------------------------------------------------|-------------|---------|-------|------------|----------|------------------|-----------|-------|-------------------|------|-------------|
|                     | 1727.8898                                                                                                                        | 1727.851    | -0.0388 | -22   | 145        | 160      | QSVPYGMAAVVHSPLR | 18        | 0     | Oxidation (M)[7]  | 2    | Mascot      |
| 45                  | PREDICTED: serine/threonine-protein kinase D1 [Danio rerio] gi 125842293 98792.8 6.29 1 18 0                                     |             |         |       |            |          |                  |           |       |                   |      |             |
| Peptide Information |                                                                                                                                  |             |         |       |            |          |                  |           |       |                   |      |             |
|                     | Calc. Mass                                                                                                                       | Obsrv. Mass | ± da    | ± ppm | Start Seq. | End Seq. | Sequence         | Ion Score | C. I. | % Modification    | Rank | Result Type |
|                     | 1759.9225                                                                                                                        | 1759.8414   | -0.0811 | -46   | 30         | 45       | EPVLLDSGEFSLAQVR | 18        | 0     |                   | 2    | Mascot      |
| 46                  | PREDICTED: transient receptor potential cation channel subfamily M member 4-like [Danio rerio] gi 326666046 137203.1 6.89 1 17 0 |             |         |       |            |          |                  |           |       |                   |      |             |
| Peptide Information |                                                                                                                                  |             |         |       |            |          |                  |           |       |                   |      |             |
|                     | Calc. Mass                                                                                                                       | Obsrv. Mass | ± da    | ± ppm | Start Seq. | End Seq. | Sequence         | Ion Score | C. I. | % Modification    | Rank | Result Type |
|                     | 1432.7828                                                                                                                        | 1432.7495   | -0.0333 | -23   | 1141       | 1152     | VDSVLKQMVEIR     | 17        | 0     | Oxidation (M)[8]  | 3    | Mascot      |
| 47                  | PREDICTED: PH and SEC7 domain-containing protein 4-like [Danio rerio] gi 326668322 90694.7 4.54 1 16 0                           |             |         |       |            |          |                  |           |       |                   |      |             |
| Peptide Information |                                                                                                                                  |             |         |       |            |          |                  |           |       |                   |      |             |
|                     | Calc. Mass                                                                                                                       | Obsrv. Mass | ± da    | ± ppm | Start Seq. | End Seq. | Sequence         | Ion Score | C. I. | % Modification    | Rank | Result Type |
|                     | 1759.828                                                                                                                         | 1759.8414   | 0.0134  | 8     | 504        | 518      | SLMPETDREQDGPLR  | 16        | 0     | Oxidation (M)[3]  | 3    | Mascot      |
| 48                  | cell adhesion molecule 1a isoform 2 [Danio rerio] gi 158538876 48182.2 4.82 1 16 0                                               |             |         |       |            |          |                  |           |       |                   |      |             |
| Peptide Information |                                                                                                                                  |             |         |       |            |          |                  |           |       |                   |      |             |
|                     | Calc. Mass                                                                                                                       | Obsrv. Mass | ± da    | ± ppm | Start Seq. | End Seq. | Sequence         | Ion Score | C. I. | % Modification    | Rank | Result Type |
|                     | 1362.6859                                                                                                                        | 1362.7037   | 0.0178  | 13    | 107        | 119      | VLSNVLSLDEGR     | 16        | 0     |                   | 2    | Mascot      |
| 49                  | PREDICTED: neurabin-1-like [Danio rerio] gi 326670455 143069.6 4.9 1 16 0                                                        |             |         |       |            |          |                  |           |       |                   |      |             |
| Peptide Information |                                                                                                                                  |             |         |       |            |          |                  |           |       |                   |      |             |
|                     | Calc. Mass                                                                                                                       | Obsrv. Mass | ± da    | ± ppm | Start Seq. | End Seq. | Sequence         | Ion Score | C. I. | % Modification    | Rank | Result Type |
|                     | 1362.614                                                                                                                         | 1362.7037   | 0.0897  | 66    | 371        | 383      | EQCLDPAGAGMVR    | 16        | 0     | Oxidation (M)[11] | 3    | Mascot      |
| 50                  | calcium-binding protein 1 [Danio rerio] gi 50539888 19114.3 4.69 1 15 0                                                          |             |         |       |            |          |                  |           |       |                   |      |             |
| Peptide Information |                                                                                                                                  |             |         |       |            |          |                  |           |       |                   |      |             |
|                     | Calc. Mass                                                                                                                       | Obsrv. Mass | ± da    | ± ppm | Start Seq. | End Seq. | Sequence         | Ion Score | C. I. | % Modification    | Rank | Result Type |

|                                                                     |                                                    |                                 |            |            |            |                   |                       |                    |                   |                  |
|---------------------------------------------------------------------|----------------------------------------------------|---------------------------------|------------|------------|------------|-------------------|-----------------------|--------------------|-------------------|------------------|
| 1432.67371432.74950.0758531828ELRPEEMDELR150Oxidation (M)[7]4Mascot |                                                    |                                 |            |            |            |                   |                       |                    |                   |                  |
| Gel Idx/Pos203/I3                                                   |                                                    | Instr./Gel OriginBA2060/110707A |            |            |            | Process Status    |                       | Analysis Succeeded |                   |                  |
| Plate [#] Name[1] 31496                                             |                                                    | Instrument Sample Name          |            |            |            | Spectra           |                       | 11                 |                   |                  |
| Rank                                                                | Protein Name                                       | Accession No.                   | Protein MW | Protein PI | Pep. Count | Protein Score     | Protein Score C. I. % | Total Ion Score    | Total Ion C. I. % |                  |
| 1                                                                   | type I cytokeratin, enveloping layer [Danio rerio] | gi 18858519                     | 46655.7    | 5.13       | 25         | 659               | 100                   | 424                | 100               |                  |
| Peptide Information                                                 |                                                    |                                 |            |            |            |                   |                       |                    |                   |                  |
|                                                                     | Calc. Mass                                         | Obsrv. Mass                     | ± da       | ± ppm      | Start Seq. | End Sequence Seq. | Ion Score             | C. I. %            | Modification      | Rank Result Type |
|                                                                     | 803.4369                                           | 803.4349                        | -0.002     | -2         | 17         | 25 LSVGGGASR      |                       |                    |                   | Mascot           |
|                                                                     | 807.3995                                           | 807.3972                        | -0.0023    | -3         | 162        | 168 LAADDFR       | 51                    | 99.763             |                   | Mascot           |
|                                                                     | 807.3995                                           | 807.3972                        | -0.0023    | -3         | 162        | 168 LAADDFR       |                       |                    |                   | Mascot           |
|                                                                     | 961.5312                                           | 961.5276                        | -0.0036    | -4         | 296        | 303 SEITEVKR      |                       |                    |                   | Mascot           |
|                                                                     | 1062.4998                                          | 1062.4989                       | -0.0009    | -1         | 84         | 92 ATMQNLNDR      |                       |                    |                   | Mascot           |
|                                                                     | 1077.5609                                          | 1077.5587                       | -0.0022    | -2         | 191        | 199 VLDELTMTTR    |                       |                    |                   | Mascot           |
|                                                                     | 1078.4946                                          | 1078.4987                       | 0.0041     | 4          | 84         | 92 ATMQNLNDR      |                       |                    | Oxidation (M)[3]  | Mascot           |
|                                                                     | 1093.5558                                          | 1093.5375                       | -0.0183    | -17        | 191        | 199 VLDELTMTTR    |                       |                    | Oxidation (M)[7]  | Mascot           |
|                                                                     | 1123.5419                                          | 1123.5376                       | -0.0043    | -4         | 268        | 276 DLESWFQAK     |                       |                    |                   | Mascot           |
|                                                                     | 1123.5419                                          | 1123.5376                       | -0.0043    | -4         | 268        | 276 DLESWFQAK     | 56                    | 99.933             |                   | Mascot           |
|                                                                     | 1153.5558                                          | 1153.5552                       | -0.0006    | -1         | 375        | 383 LEMEIAEYR     |                       |                    |                   | Mascot           |
|                                                                     | 1169.5507                                          | 1169.6106                       | 0.0599     | 51         | 375        | 383 LEMEIAEYR     | 2                     | 0                  | Oxidation (M)[3]  | Mascot           |
|                                                                     | 1169.5507                                          | 1169.6106                       | 0.0599     | 51         | 375        | 383 LEMEIAEYR     |                       |                    | Oxidation (M)[3]  | Mascot           |
|                                                                     | 1181.5909                                          | 1181.5896                       | -0.0013    | -1         | 219        | 228 NHEEELLAAR    |                       |                    |                   | Mascot           |
|                                                                     | 1181.5909                                          | 1181.5896                       | -0.0013    | -1         | 219        | 228 NHEEELLAAR    | 83                    | 100                |                   | Mascot           |
|                                                                     | 1186.6426                                          | 1186.6426                       | 0          | 0          | 179        | 189 QSVEADIVGLR   |                       |                    |                   | Mascot           |
|                                                                     | 1194.5861                                          | 1194.5858                       | -0.0003    | 0          | 31         | 44 AGSVYGGAGGSGVR | 81                    | 100                |                   | Mascot           |
|                                                                     | 1194.5861                                          | 1194.5858                       | -0.0003    | 0          | 31         | 44 AGSVYGGAGGSGVR |                       |                    |                   | Mascot           |
|                                                                     | 1221.6508                                          | 1221.6406                       | -0.0102    | -8         | 190        | 199 KVLDELTMTTR   |                       |                    | Oxidation (M)[8]  | Mascot           |
|                                                                     | 1268.6304                                          | 1268.6301                       | -0.0003    | 0          | 169        | 178 VKYENELSMR    |                       |                    |                   | Mascot           |
|                                                                     | 1284.6252                                          | 1284.6288                       | 0.0036     | 3          | 169        | 178 VKYENELSMR    |                       |                    | Oxidation (M)[9]  | Mascot           |
|                                                                     | 1309.6569                                          | 1309.6708                       | 0.0139     | 11         | 375        | 384 LEMEIAEYRR    |                       |                    |                   | Mascot           |
|                                                                     | 1314.7375                                          | 1314.7371                       | -0.0004    | 0          | 179        | 190 QSVEADIVGLRK  |                       |                    |                   | Mascot           |
|                                                                     | 1325.6517                                          | 1325.6486                       | -0.0031    | -2         | 375        | 384 LEMEIAEYRR    |                       |                    | Oxidation (M)[3]  | Mascot           |
|                                                                     | 1332.6754                                          | 1332.676                        | 0.0006     | 0          | 320        | 332 ASLEGLTADTQAR |                       |                    |                   | Mascot           |
|                                                                     | 1410.7046                                          | 1410.705                        | 0.0004     | 0          | 373        | 383 TRLEMEIAEYR   | 60                    | 99.974             |                   | Mascot           |

|           |           |         |    |     |     |                                     |    |     |                             |
|-----------|-----------|---------|----|-----|-----|-------------------------------------|----|-----|-----------------------------|
| 1410.7046 | 1410.705  | 0.0004  | 0  | 373 | 383 | TRLEMEIAEYR                         |    |     | Mascot                      |
| 1414.8151 | 1414.8127 | -0.0024 | -2 | 402 | 414 | KVVTIVEEVVDGK                       |    |     | Mascot                      |
| 1420.7278 | 1420.7269 | -0.0009 | -1 | 283 | 295 | EVAVSTETLQTSR                       |    |     | Mascot                      |
| 1426.6995 | 1426.6992 | -0.0003 | 0  | 373 | 383 | TRLEMEIAEYR                         | 23 | 0   | Oxidation (M)[5]<br>Mascot  |
| 1426.6995 | 1426.6992 | -0.0003 | 0  | 373 | 383 | TRLEMEIAEYR                         |    |     | Oxidation (M)[5]<br>Mascot  |
| 1465.7356 | 1465.7278 | -0.0078 | -5 | 361 | 372 | QGQEYQMLLDIK                        |    |     | Mascot                      |
| 1481.7305 | 1481.7289 | -0.0016 | -1 | 361 | 372 | QGQEYQMLLDIK                        |    |     | Oxidation (M)[7]<br>Mascot  |
| 1708.8064 | 1708.8055 | -0.0009 | -1 | 128 | 142 | DYSAYYATISDLQAK                     | 93 | 100 | Mascot                      |
| 1708.8064 | 1708.8055 | -0.0009 | -1 | 128 | 142 | DYSAYYATISDLQAK                     |    |     | Mascot                      |
| 1847.9783 | 1847.9757 | -0.0026 | -1 | 304 | 319 | TLQSLEIELQSLSMK                     |    |     | Mascot                      |
| 1863.9731 | 1863.9728 | -0.0003 | 0  | 304 | 319 | TLQSLEIELQSLSMK                     |    |     | Oxidation (M)[15]<br>Mascot |
| 2117.1741 | 2117.1763 | 0.0022  | 1  | 200 | 217 | SDLELQIEGLKEELIFLK                  |    |     | Mascot                      |
| 2260.0762 | 2260.0803 | 0.0041  | 2  | 229 | 249 | TQMSGQVNVEVDAAPQE<br>DLTK           |    |     | Mascot                      |
| 2276.071  | 2276.0759 | 0.0049  | 2  | 229 | 249 | TQMSGQVNVEVDAAPQE<br>DLTK           |    |     | Oxidation (M)[3]<br>Mascot  |
| 2774.3818 | 2774.3843 | 0.0025  | 1  | 333 | 355 | YTNMLNGYQFQVSSLEE<br>QLIQLR         |    |     | Mascot                      |
| 2790.3767 | 2790.3848 | 0.0081  | 3  | 333 | 355 | YTNMLNGYQFQVSSLEE<br>QLIQLR         |    |     | Oxidation (M)[4]<br>Mascot  |
| 2844.3069 | 2844.3252 | 0.0183  | 6  | 53  | 83  | SYSAGGGAGFGGGAGA<br>GFNLSDAIDVPTNEK |    |     | Mascot                      |

### Peptide Information

|           |           |         |    |     |     |                                     |    |        |                   |        |
|-----------|-----------|---------|----|-----|-----|-------------------------------------|----|--------|-------------------|--------|
| 1181.5909 | 1181.5896 | -0.0013 | -1 | 219 | 228 | NHEEELLAAR                          | 83 | 100    |                   | Mascot |
| 1186.6426 | 1186.6426 | 0       | 0  | 179 | 189 | QSVEADIVGLR                         |    |        |                   | Mascot |
| 1194.5861 | 1194.5858 | -0.0003 | 0  | 31  | 44  | AGSVYGGAGGSGVR                      | 81 | 100    |                   | Mascot |
| 1194.5861 | 1194.5858 | -0.0003 | 0  | 31  | 44  | AGSVYGGAGGSGVR                      |    |        |                   | Mascot |
| 1221.6508 | 1221.6406 | -0.0102 | -8 | 190 | 199 | KVLDELTMTTR                         |    |        | Oxidation (M)[8]  | Mascot |
| 1282.646  | 1282.645  | -0.001  | -1 | 169 | 178 | VKYENELTMR                          |    |        |                   | Mascot |
| 1298.6409 | 1298.6567 | 0.0158  | 12 | 169 | 178 | VKYENELTMR                          |    |        | Oxidation (M)[9]  | Mascot |
| 1309.6569 | 1309.6708 | 0.0139  | 11 | 375 | 384 | LEMEIAEYRR                          |    |        |                   | Mascot |
| 1314.7375 | 1314.7371 | -0.0004 | 0  | 179 | 190 | QSVEADIVGLRK                        |    |        |                   | Mascot |
| 1325.6517 | 1325.6486 | -0.0031 | -2 | 375 | 384 | LEMEIAEYRR                          |    |        | Oxidation (M)[3]  | Mascot |
| 1332.6754 | 1332.676  | 0.0006  | 0  | 320 | 332 | ASLEGLADTQAR                        |    |        |                   | Mascot |
| 1410.7046 | 1410.705  | 0.0004  | 0  | 373 | 383 | TRLEMEIAEYR                         | 60 | 99.974 |                   | Mascot |
| 1410.7046 | 1410.705  | 0.0004  | 0  | 373 | 383 | TRLEMEIAEYR                         |    |        |                   | Mascot |
| 1414.8151 | 1414.8127 | -0.0024 | -2 | 402 | 414 | KVVTIVEEVVDGK                       |    |        |                   | Mascot |
| 1420.7278 | 1420.7269 | -0.0009 | -1 | 283 | 295 | EVAVSTETLQTSR                       |    |        |                   | Mascot |
| 1426.6995 | 1426.6992 | -0.0003 | 0  | 373 | 383 | TRLEMEIAEYR                         | 23 | 0      | Oxidation (M)[5]  | Mascot |
| 1426.6995 | 1426.6992 | -0.0003 | 0  | 373 | 383 | TRLEMEIAEYR                         |    |        | Oxidation (M)[5]  | Mascot |
| 1465.7356 | 1465.7278 | -0.0078 | -5 | 361 | 372 | QGQEYQMLLDIK                        |    |        |                   | Mascot |
| 1481.7305 | 1481.7289 | -0.0016 | -1 | 361 | 372 | QGQEYQMLLDIK                        |    |        | Oxidation (M)[7]  | Mascot |
| 1708.8064 | 1708.8055 | -0.0009 | -1 | 128 | 142 | DYSAYYATISDLQAK                     | 93 | 100    |                   | Mascot |
| 1708.8064 | 1708.8055 | -0.0009 | -1 | 128 | 142 | DYSAYYATISDLQAK                     |    |        |                   | Mascot |
| 1847.9783 | 1847.9757 | -0.0026 | -1 | 304 | 319 | TLQSLEIELQSLSMK                     |    |        |                   | Mascot |
| 1863.9731 | 1863.9728 | -0.0003 | 0  | 304 | 319 | TLQSLEIELQSLSMK                     |    |        | Oxidation (M)[15] | Mascot |
| 2117.1741 | 2117.1763 | 0.0022  | 1  | 200 | 217 | SDLELQIEGLKEELIFLK                  |    |        |                   | Mascot |
| 2260.0762 | 2260.0803 | 0.0041  | 2  | 229 | 249 | TQMSGQVNVVEVDAAPQE<br>DLTK          |    |        |                   | Mascot |
| 2276.071  | 2276.0759 | 0.0049  | 2  | 229 | 249 | TQMSGQVNVVEVDAAPQE<br>DLTK          |    |        | Oxidation (M)[3]  | Mascot |
| 2774.3818 | 2774.3843 | 0.0025  | 1  | 333 | 355 | YTNMLNGYQFQVSSLEE<br>QLIQLR         |    |        |                   | Mascot |
| 2790.3767 | 2790.3848 | 0.0081  | 3  | 333 | 355 | YTNMLNGYQFQVSSLEE<br>QLIQLR         |    |        | Oxidation (M)[4]  | Mascot |
| 2818.2913 | 2818.3137 | 0.0224  | 8  | 53  | 83  | SFSAGGGAGFGGGAGA<br>GFNLSDAIDVSTNEK |    |        |                   | Mascot |

3

type I cytokeratin, enveloping layer [Danio rerio]

gi|94732411

40437.7

5.15

23

642

100

424

100

| Peptide Information |             |         |       |            |                   |           | Ion Score | C. I. % Modification | Rank | Result Type |
|---------------------|-------------|---------|-------|------------|-------------------|-----------|-----------|----------------------|------|-------------|
| Calc. Mass          | Obsrv. Mass | ± da    | ± ppm | Start Seq. | End Sequence Seq. |           |           |                      |      |             |
| 803.4369            | 803.4349    | -0.002  | -2    | 17         | 25                | LSVGGGASR |           |                      |      | Mascot      |
| 807.3995            | 807.3972    | -0.0023 | -3    | 100        | 106               | LAADDFR   | 51        | 99.763               |      | Mascot      |

|           |           |         |     |     |     |                            |    |        |                   |        |
|-----------|-----------|---------|-----|-----|-----|----------------------------|----|--------|-------------------|--------|
| 807.3995  | 807.3972  | -0.0023 | -3  | 100 | 106 | LAADDFR                    |    |        |                   | Mascot |
| 961.5312  | 961.5276  | -0.0036 | -4  | 234 | 241 | SEITEVKR                   |    |        |                   | Mascot |
| 1077.5609 | 1077.5587 | -0.0022 | -2  | 129 | 137 | VLDELTMTTR                 |    |        |                   | Mascot |
| 1093.5558 | 1093.5375 | -0.0183 | -17 | 129 | 137 | VLDELTMTTR                 |    |        | Oxidation (M)[7]  | Mascot |
| 1123.5419 | 1123.5376 | -0.0043 | -4  | 206 | 214 | DLESWFQAK                  |    |        |                   | Mascot |
| 1123.5419 | 1123.5376 | -0.0043 | -4  | 206 | 214 | DLESWFQAK                  | 56 | 99.933 |                   | Mascot |
| 1153.5558 | 1153.5552 | -0.0006 | -1  | 313 | 321 | LEMEIAEYR                  |    |        |                   | Mascot |
| 1169.5507 | 1169.6106 | 0.0599  | 51  | 313 | 321 | LEMEIAEYR                  | 2  | 0      | Oxidation (M)[3]  | Mascot |
| 1169.5507 | 1169.6106 | 0.0599  | 51  | 313 | 321 | LEMEIAEYR                  |    |        | Oxidation (M)[3]  | Mascot |
| 1181.5909 | 1181.5896 | -0.0013 | -1  | 157 | 166 | NHEEELLAAR                 |    |        |                   | Mascot |
| 1181.5909 | 1181.5896 | -0.0013 | -1  | 157 | 166 | NHEEELLAAR                 | 83 | 100    |                   | Mascot |
| 1186.6426 | 1186.6426 | 0       | 0   | 117 | 127 | QSVEADIVGLR                |    |        |                   | Mascot |
| 1194.5861 | 1194.5858 | -0.0003 | 0   | 31  | 44  | AGSVYGGAGGSGVR             | 81 | 100    |                   | Mascot |
| 1194.5861 | 1194.5858 | -0.0003 | 0   | 31  | 44  | AGSVYGGAGGSGVR             |    |        |                   | Mascot |
| 1221.6508 | 1221.6406 | -0.0102 | -8  | 128 | 137 | KVLDELTMTTR                |    |        | Oxidation (M)[8]  | Mascot |
| 1268.6304 | 1268.6301 | -0.0003 | 0   | 107 | 116 | VKYENELSMR                 |    |        |                   | Mascot |
| 1284.6252 | 1284.6288 | 0.0036  | 3   | 107 | 116 | VKYENELSMR                 |    |        | Oxidation (M)[9]  | Mascot |
| 1309.6569 | 1309.6708 | 0.0139  | 11  | 313 | 322 | LEMEIAEYRR                 |    |        |                   | Mascot |
| 1314.7375 | 1314.7371 | -0.0004 | 0   | 117 | 128 | QSVEADIVGLRK               |    |        |                   | Mascot |
| 1325.6517 | 1325.6486 | -0.0031 | -2  | 313 | 322 | LEMEIAEYRR                 |    |        | Oxidation (M)[3]  | Mascot |
| 1332.6754 | 1332.676  | 0.0006  | 0   | 258 | 270 | ASLEGLTADTQAR              |    |        |                   | Mascot |
| 1410.7046 | 1410.705  | 0.0004  | 0   | 311 | 321 | TRLEMEIAEYR                | 60 | 99.974 |                   | Mascot |
| 1410.7046 | 1410.705  | 0.0004  | 0   | 311 | 321 | TRLEMEIAEYR                |    |        |                   | Mascot |
| 1414.8151 | 1414.8127 | -0.0024 | -2  | 340 | 352 | KVVTIVEEVVDGK              |    |        |                   | Mascot |
| 1420.7278 | 1420.7269 | -0.0009 | -1  | 221 | 233 | EVAVSTETLQTSR              |    |        |                   | Mascot |
| 1426.6995 | 1426.6992 | -0.0003 | 0   | 311 | 321 | TRLEMEIAEYR                | 23 | 0      | Oxidation (M)[5]  | Mascot |
| 1426.6995 | 1426.6992 | -0.0003 | 0   | 311 | 321 | TRLEMEIAEYR                |    |        | Oxidation (M)[5]  | Mascot |
| 1465.7356 | 1465.7278 | -0.0078 | -5  | 299 | 310 | QGQEYQMLLDIK               |    |        |                   | Mascot |
| 1481.7305 | 1481.7289 | -0.0016 | -1  | 299 | 310 | QGQEYQMLLDIK               |    |        | Oxidation (M)[7]  | Mascot |
| 1708.8064 | 1708.8055 | -0.0009 | -1  | 66  | 80  | DYSAYYATISDLQAK            | 93 | 100    |                   | Mascot |
| 1708.8064 | 1708.8055 | -0.0009 | -1  | 66  | 80  | DYSAYYATISDLQAK            |    |        |                   | Mascot |
| 1847.9783 | 1847.9757 | -0.0026 | -1  | 242 | 257 | TLQSLEIELQSLSMK            |    |        |                   | Mascot |
| 1863.9731 | 1863.9728 | -0.0003 | 0   | 242 | 257 | TLQSLEIELQSLSMK            |    |        | Oxidation (M)[15] | Mascot |
| 2117.1741 | 2117.1763 | 0.0022  | 1   | 138 | 155 | SDLELQIEGLKEELIFLK         |    |        |                   | Mascot |
| 2260.0762 | 2260.0803 | 0.0041  | 2   | 167 | 187 | TQMSGQVNVVEVDAAPQE<br>DLTK |    |        |                   | Mascot |
| 2276.071  | 2276.0759 | 0.0049  | 2   | 167 | 187 | TQMSGQVNVVEVDAAPQE<br>DLTK |    |        | Oxidation (M)[3]  | Mascot |

|   |                                                 |           |        |   |              |     |                             |      |    |     |     |     |                  |  |  |  |        |
|---|-------------------------------------------------|-----------|--------|---|--------------|-----|-----------------------------|------|----|-----|-----|-----|------------------|--|--|--|--------|
|   | 2774.3818                                       | 2774.3843 | 0.0025 | 1 | 271          | 293 | YTNMLNGYQFQVSSLEE<br>QLIQLR |      |    |     |     |     |                  |  |  |  | Mascot |
|   | 2790.3767                                       | 2790.3848 | 0.0081 | 3 | 271          | 293 | YTNMLNGYQFQVSSLEE<br>QLIQLR |      |    |     |     |     | Oxidation (M)[4] |  |  |  | Mascot |
| 4 | hypothetical protein LOC100034647 [Danio rerio] |           |        |   | gi 131888757 |     | 46317.3                     | 5.36 | 12 | 386 | 100 | 317 | 100              |  |  |  |        |

#### Peptide Information

| Calc. Mass | Obsrv. Mass | ± da    | ± ppm | Start Seq. | End Seq. | Sequence        | Ion Score | C. I.  | % Modification   | Rank | Result Type |
|------------|-------------|---------|-------|------------|----------|-----------------|-----------|--------|------------------|------|-------------|
| 1062.4998  | 1062.4989   | -0.0009 | -1    | 75         | 83       | ATMQNLNDR       |           |        |                  |      | Mascot      |
| 1077.5609  | 1077.5587   | -0.0022 | -2    | 182        | 190      | VLDELTMTTR      |           |        |                  |      | Mascot      |
| 1078.4946  | 1078.4987   | 0.0041  | 4     | 75         | 83       | ATMQNLNDR       |           |        | Oxidation (M)[3] |      | Mascot      |
| 1093.5558  | 1093.5375   | -0.0183 | -17   | 182        | 190      | VLDELTMTTR      |           |        | Oxidation (M)[7] |      | Mascot      |
| 1153.5558  | 1153.5552   | -0.0006 | -1    | 366        | 374      | LEMEIAEYR       |           |        |                  |      | Mascot      |
| 1169.5507  | 1169.6106   | 0.0599  | 51    | 366        | 374      | LEMEIAEYR       | 2         | 0      | Oxidation (M)[3] |      | Mascot      |
| 1169.5507  | 1169.6106   | 0.0599  | 51    | 366        | 374      | LEMEIAEYR       |           |        | Oxidation (M)[3] |      | Mascot      |
| 1181.5909  | 1181.5896   | -0.0013 | -1    | 210        | 219      | NHEEELLAAR      |           |        |                  |      | Mascot      |
| 1181.5909  | 1181.5896   | -0.0013 | -1    | 210        | 219      | NHEEELLAAR      | 83        | 100    |                  |      | Mascot      |
| 1194.5861  | 1194.5858   | -0.0003 | 0     | 22         | 35       | AGSVYGGAGGSGVR  | 81        | 100    |                  |      | Mascot      |
| 1194.5861  | 1194.5858   | -0.0003 | 0     | 22         | 35       | AGSVYGGAGGSGVR  |           |        |                  |      | Mascot      |
| 1221.6508  | 1221.6406   | -0.0102 | -8    | 181        | 190      | KVLDELTMTTR     |           |        | Oxidation (M)[8] |      | Mascot      |
| 1309.6569  | 1309.6708   | 0.0139  | 11    | 366        | 375      | LEMEIAEYRR      |           |        |                  |      | Mascot      |
| 1325.6517  | 1325.6486   | -0.0031 | -2    | 366        | 375      | LEMEIAEYRR      |           |        | Oxidation (M)[3] |      | Mascot      |
| 1332.6754  | 1332.676    | 0.0006  | 0     | 311        | 323      | ASLEGLADTQAR    |           |        |                  |      | Mascot      |
| 1410.7046  | 1410.705    | 0.0004  | 0     | 364        | 374      | TRLEMEIAEYR     | 60        | 99.974 |                  |      | Mascot      |
| 1410.7046  | 1410.705    | 0.0004  | 0     | 364        | 374      | TRLEMEIAEYR     |           |        |                  |      | Mascot      |
| 1414.8151  | 1414.8127   | -0.0024 | -2    | 396        | 408      | KVVTIVEEVVDGK   |           |        |                  |      | Mascot      |
| 1426.6995  | 1426.6992   | -0.0003 | 0     | 364        | 374      | TRLEMEIAEYR     | 23        | 0      | Oxidation (M)[5] |      | Mascot      |
| 1426.6995  | 1426.6992   | -0.0003 | 0     | 364        | 374      | TRLEMEIAEYR     |           |        | Oxidation (M)[5] |      | Mascot      |
| 1481.7329  | 1481.7289   | -0.004  | -3    | 376        | 390      | LLDGEATSVSTSSSK |           |        |                  |      | Mascot      |
| 1708.8064  | 1708.8055   | -0.0009 | -1    | 119        | 133      | DYSAYYATISDLQAK | 93        | 100    |                  |      | Mascot      |
| 1708.8064  | 1708.8055   | -0.0009 | -1    | 119        | 133      | DYSAYYATISDLQAK |           |        |                  |      | Mascot      |

|   |                                  |  |  |  |              |  |         |      |    |     |     |     |     |  |  |  |  |
|---|----------------------------------|--|--|--|--------------|--|---------|------|----|-----|-----|-----|-----|--|--|--|--|
| 5 | Zgc:109868 protein [Danio rerio] |  |  |  | gi 120537710 |  | 47066.8 | 5.25 | 15 | 287 | 100 | 192 | 100 |  |  |  |  |
|---|----------------------------------|--|--|--|--------------|--|---------|------|----|-----|-----|-----|-----|--|--|--|--|

#### Peptide Information

| Calc. Mass | Obsrv. Mass | ± da    | ± ppm | Start Seq. | End Seq. | Sequence | Ion Score | C. I.  | % Modification | Rank | Result Type |
|------------|-------------|---------|-------|------------|----------|----------|-----------|--------|----------------|------|-------------|
| 807.3995   | 807.3972    | -0.0023 | -3    | 158        | 164      | LAADDFR  | 51        | 99.763 |                |      | Mascot      |
| 807.3995   | 807.3972    | -0.0023 | -3    | 158        | 164      | LAADDFR  |           |        |                |      | Mascot      |

|           |           |         |     |     |     |                            |    |                   |                            |
|-----------|-----------|---------|-----|-----|-----|----------------------------|----|-------------------|----------------------------|
| 961.5312  | 961.5276  | -0.0036 | -4  | 292 | 299 | SEITEVKR                   |    |                   | Mascot                     |
| 1062.4998 | 1062.4989 | -0.0009 | -1  | 80  | 88  | ATMQNLNDR                  |    |                   | Mascot                     |
| 1077.5609 | 1077.5587 | -0.0022 | -2  | 187 | 195 | VDELTMTR                   |    |                   | Mascot                     |
| 1078.4946 | 1078.4987 | 0.0041  | 4   | 80  | 88  | ATMQNLNDR                  |    | Oxidation (M)[3]  | Mascot                     |
| 1093.5558 | 1093.5375 | -0.0183 | -17 | 187 | 195 | VDELTMTR                   |    | Oxidation (M)[7]  | Mascot                     |
| 1153.5558 | 1153.5552 | -0.0006 | -1  | 371 | 379 | LEMEIAEYR                  |    |                   | Mascot                     |
| 1169.5507 | 1169.6106 | 0.0599  | 51  | 371 | 379 | LEMEIAEYR                  | 2  | 0                 | Oxidation (M)[3]<br>Mascot |
| 1169.5507 | 1169.6106 | 0.0599  | 51  | 371 | 379 | LEMEIAEYR                  |    |                   | Oxidation (M)[3]<br>Mascot |
| 1194.5861 | 1194.5858 | -0.0003 | 0   | 32  | 45  | AGSVYGGAGGSGVR             | 81 | 100               | Mascot                     |
| 1194.5861 | 1194.5858 | -0.0003 | 0   | 32  | 45  | AGSVYGGAGGSGVR             |    |                   | Mascot                     |
| 1268.6304 | 1268.6301 | -0.0003 | 0   | 165 | 174 | VKYENELSMR                 |    |                   | Mascot                     |
| 1284.6252 | 1284.6288 | 0.0036  | 3   | 165 | 174 | VKYENELSMR                 |    | Oxidation (M)[9]  | Mascot                     |
| 1309.6569 | 1309.6708 | 0.0139  | 11  | 371 | 380 | LEMEIAEYRR                 |    |                   | Mascot                     |
| 1314.7124 | 1314.7371 | 0.0247  | 19  | 175 | 186 | QSVEADIAGLRR               |    |                   | Mascot                     |
| 1325.6517 | 1325.6486 | -0.0031 | -2  | 371 | 380 | LEMEIAEYRR                 |    | Oxidation (M)[3]  | Mascot                     |
| 1332.6754 | 1332.676  | 0.0006  | 0   | 316 | 328 | ASLEGTLADTQAR              |    |                   | Mascot                     |
| 1410.7046 | 1410.705  | 0.0004  | 0   | 369 | 379 | TRLEMEIAEYR                | 60 | 99.974            | Mascot                     |
| 1410.7046 | 1410.705  | 0.0004  | 0   | 369 | 379 | TRLEMEIAEYR                |    |                   | Mascot                     |
| 1414.8151 | 1414.8127 | -0.0024 | -2  | 400 | 412 | KVVTIVEEVVDGK              |    |                   | Mascot                     |
| 1426.6995 | 1426.6992 | -0.0003 | 0   | 369 | 379 | TRLEMEIAEYR                | 23 | 0                 | Oxidation (M)[5]<br>Mascot |
| 1426.6995 | 1426.6992 | -0.0003 | 0   | 369 | 379 | TRLEMEIAEYR                |    |                   | Oxidation (M)[5]<br>Mascot |
| 1432.7642 | 1432.7358 | -0.0284 | -20 | 279 | 291 | EVAVSTETLQISR              |    |                   | Mascot                     |
| 1847.9783 | 1847.9757 | -0.0026 | -1  | 300 | 315 | TLQSLEIELQSLSMK            |    |                   | Mascot                     |
| 1863.9731 | 1863.9728 | -0.0003 | 0   | 300 | 315 | TLQSLEIELQSLSMK            |    | Oxidation (M)[15] | Mascot                     |
| 2260.0762 | 2260.0803 | 0.0041  | 2   | 225 | 245 | AQMTGQVNVEVDAAPQE<br>DI TK |    | Oxidation (M)[3]  | Mascot                     |

### Peptide Information

|           |           |         |     |     |     |                   |    |        |  |  |  |                   |        |
|-----------|-----------|---------|-----|-----|-----|-------------------|----|--------|--|--|--|-------------------|--------|
| 1093.5558 | 1093.5375 | -0.0183 | -17 | 188 | 196 | VLDELTMTTR        |    |        |  |  |  | Oxidation (M)[7]  | Mascot |
| 1153.5558 | 1153.5552 | -0.0006 | -1  | 372 | 380 | LEMEIAEYR         |    |        |  |  |  |                   | Mascot |
| 1169.5507 | 1169.6106 | 0.0599  | 51  | 372 | 380 | LEMEIAEYR         | 2  | 0      |  |  |  | Oxidation (M)[3]  | Mascot |
| 1169.5507 | 1169.6106 | 0.0599  | 51  | 372 | 380 | LEMEIAEYR         |    |        |  |  |  | Oxidation (M)[3]  | Mascot |
| 1194.5861 | 1194.5858 | -0.0003 | 0   | 33  | 46  | AGSVYGGAGGSGVR    | 81 | 100    |  |  |  |                   | Mascot |
| 1194.5861 | 1194.5858 | -0.0003 | 0   | 33  | 46  | AGSVYGGAGGSGVR    |    |        |  |  |  |                   | Mascot |
| 1268.6304 | 1268.6301 | -0.0003 | 0   | 166 | 175 | VKYENELSMR        |    |        |  |  |  |                   | Mascot |
| 1284.6252 | 1284.6288 | 0.0036  | 3   | 166 | 175 | VKYENELSMR        |    |        |  |  |  | Oxidation (M)[9]  | Mascot |
| 1309.6569 | 1309.6708 | 0.0139  | 11  | 372 | 381 | LEMEIAEYRR        |    |        |  |  |  |                   | Mascot |
| 1314.7124 | 1314.7371 | 0.0247  | 19  | 176 | 187 | QSVEADIAGLRR      |    |        |  |  |  |                   | Mascot |
| 1325.6517 | 1325.6486 | -0.0031 | -2  | 372 | 381 | LEMEIAEYRR        |    |        |  |  |  | Oxidation (M)[3]  | Mascot |
| 1332.6754 | 1332.676  | 0.0006  | 0   | 317 | 329 | ASLEGLTADTQAR     |    |        |  |  |  |                   | Mascot |
| 1410.7046 | 1410.705  | 0.0004  | 0   | 370 | 380 | TRLEMEIAEYR       | 60 | 99.974 |  |  |  |                   | Mascot |
| 1410.7046 | 1410.705  | 0.0004  | 0   | 370 | 380 | TRLEMEIAEYR       |    |        |  |  |  |                   | Mascot |
| 1414.8151 | 1414.8127 | -0.0024 | -2  | 401 | 413 | KVVTIVEEVVDGK     |    |        |  |  |  |                   | Mascot |
| 1426.6995 | 1426.6992 | -0.0003 | 0   | 370 | 380 | TRLEMEIAEYR       | 23 | 0      |  |  |  | Oxidation (M)[5]  | Mascot |
| 1426.6995 | 1426.6992 | -0.0003 | 0   | 370 | 380 | TRLEMEIAEYR       |    |        |  |  |  | Oxidation (M)[5]  | Mascot |
| 1432.7642 | 1432.7358 | -0.0284 | -20 | 280 | 292 | EVAVSTETLQISR     |    |        |  |  |  |                   | Mascot |
| 1847.9783 | 1847.9757 | -0.0026 | -1  | 301 | 316 | TLQSLEIELQSLSMK   |    |        |  |  |  |                   | Mascot |
| 1863.9731 | 1863.9728 | -0.0003 | 0   | 301 | 316 | TLQSLEIELQSLSMK   |    |        |  |  |  | Oxidation (M)[15] | Mascot |
| 2260.0762 | 2260.0803 | 0.0041  | 2   | 226 | 246 | AQMTGQVNVEVDAAPQE |    |        |  |  |  | Oxidation (M)[3]  | Mascot |

7

novel protein similar to type I cyto

keratin, enveloping

layer [Danio rerio]

gi|94732405

43116.8

5.22

14

281

100

192

100

Peptide Information

| Calc. Mass | Obsrv. Mass | $\pm$ da | $\pm$ ppm | Start Seq. | End Seq. | Sequence   | Ion Score | C. I.  | % Modification   | Rank | Result Type |
|------------|-------------|----------|-----------|------------|----------|------------|-----------|--------|------------------|------|-------------|
| 807.3995   | 807.3972    | -0.0023  | -3        | 160        | 166      | LAADDFR    | 51        | 99.763 |                  |      | Mascot      |
| 807.3995   | 807.3972    | -0.0023  | -3        | 160        | 166      | LAADDFR    |           |        |                  |      | Mascot      |
| 961.5312   | 961.5276    | -0.0036  | -4        | 294        | 301      | SEITEVKR   |           |        |                  |      | Mascot      |
| 1062.4998  | 1062.4989   | -0.0009  | -1        | 82         | 90       | ATMQNLNDR  |           |        |                  |      | Mascot      |
| 1077.5609  | 1077.5587   | -0.0022  | -2        | 189        | 197      | VLDELTMTTR |           |        |                  |      | Mascot      |
| 1078.4946  | 1078.4987   | 0.0041   | 4         | 82         | 90       | ATMQNLNDR  |           |        | Oxidation (M)[3] |      | Mascot      |
| 1093.5558  | 1093.5375   | -0.0183  | -17       | 189        | 197      | VLDELTMTTR |           |        | Oxidation (M)[7] |      | Mascot      |
| 1153.5558  | 1153.5552   | -0.0006  | -1        | 373        | 381      | LEMEIAEYR  |           |        |                  |      | Mascot      |
| 1169.5507  | 1169.6106   | 0.0599   | 51        | 373        | 381      | LEMEIAEYR  | 2         | 0      | Oxidation (M)[3] |      | Mascot      |
| 1169.5507  | 1169.6106   | 0.0599   | 51        | 373        | 381      | LEMEIAEYR  |           |        | Oxidation (M)[3] |      | Mascot      |



|   |                          |           |         |     |             |     |                           |      |        |                   |     |     |        |
|---|--------------------------|-----------|---------|-----|-------------|-----|---------------------------|------|--------|-------------------|-----|-----|--------|
|   | 1194.5861                | 1194.5858 | -0.0003 | 0   | 34          | 47  | AGSVYGGAGGSGVR            | 81   | 100    |                   |     |     | Mascot |
|   | 1194.5861                | 1194.5858 | -0.0003 | 0   | 34          | 47  | AGSVYGGAGGSGVR            |      |        |                   |     |     | Mascot |
|   | 1268.6304                | 1268.6301 | -0.0003 | 0   | 167         | 176 | VKYENELSMR                |      |        |                   |     |     | Mascot |
|   | 1284.6252                | 1284.6288 | 0.0036  | 3   | 167         | 176 | VKYENELSMR                |      |        | Oxidation (M)[9]  |     |     | Mascot |
|   | 1309.6569                | 1309.6708 | 0.0139  | 11  | 373         | 382 | LEMEIAEYRR                |      |        |                   |     |     | Mascot |
|   | 1314.7124                | 1314.7371 | 0.0247  | 19  | 177         | 188 | QSVEADIAGLRR              |      |        |                   |     |     | Mascot |
|   | 1325.6517                | 1325.6486 | -0.0031 | -2  | 373         | 382 | LEMEIAEYRR                |      |        | Oxidation (M)[3]  |     |     | Mascot |
|   | 1332.6754                | 1332.676  | 0.0006  | 0   | 318         | 330 | ASLEGTLDATQAR             |      |        |                   |     |     | Mascot |
|   | 1410.7046                | 1410.705  | 0.0004  | 0   | 371         | 381 | TRLEMEIAEYR               | 60   | 99.974 |                   |     |     | Mascot |
|   | 1410.7046                | 1410.705  | 0.0004  | 0   | 371         | 381 | TRLEMEIAEYR               |      |        |                   |     |     | Mascot |
|   | 1426.6995                | 1426.6992 | -0.0003 | 0   | 371         | 381 | TRLEMEIAEYR               | 23   | 0      | Oxidation (M)[5]  |     |     | Mascot |
|   | 1426.6995                | 1426.6992 | -0.0003 | 0   | 371         | 381 | TRLEMEIAEYR               |      |        | Oxidation (M)[5]  |     |     | Mascot |
|   | 1432.7642                | 1432.7358 | -0.0284 | -20 | 281         | 293 | EVAVSTETLQISR             |      |        |                   |     |     | Mascot |
|   | 1847.9783                | 1847.9757 | -0.0026 | -1  | 302         | 317 | TLQSLEIELQSQLSMK          |      |        |                   |     |     | Mascot |
|   | 1863.9731                | 1863.9728 | -0.0003 | 0   | 302         | 317 | TLQSLEIELQSQLSMK          |      |        | Oxidation (M)[15] |     |     | Mascot |
|   | 2260.0762                | 2260.0803 | 0.0041  | 2   | 227         | 247 | AQMTGQVNVEVDAAPQE<br>DLTK |      |        | Oxidation (M)[3]  |     |     | Mascot |
| 8 | Zgc:109868 [Danio rerio] |           |         |     | gi 92097956 |     | 47235.8                   | 5.25 | 14     | 277               | 100 | 192 | 100    |

Peptide Information

| Calc. Mass | Obsrv. Mass | ± da    | ± ppm | Start Seq. | End Seq. | Sequence       | Ion Score | C. I.  | % Modification   | Rank | Result Type |
|------------|-------------|---------|-------|------------|----------|----------------|-----------|--------|------------------|------|-------------|
| 807.3995   | 807.3972    | -0.0023 | -3    | 160        | 166      | LAADDFR        | 51        | 99.763 |                  |      | Mascot      |
| 807.3995   | 807.3972    | -0.0023 | -3    | 160        | 166      | LAADDFR        |           |        |                  |      | Mascot      |
| 961.5312   | 961.5276    | -0.0036 | -4    | 294        | 301      | SEITEVKR       |           |        |                  |      | Mascot      |
| 1062.4998  | 1062.4989   | -0.0009 | -1    | 82         | 90       | ATMQNLNDR      |           |        |                  |      | Mascot      |
| 1077.5609  | 1077.5587   | -0.0022 | -2    | 189        | 197      | VLDELTMTTR     |           |        |                  |      | Mascot      |
| 1078.4946  | 1078.4987   | 0.0041  | 4     | 82         | 90       | ATMQNLNDR      |           |        | Oxidation (M)[3] |      | Mascot      |
| 1093.5558  | 1093.5375   | -0.0183 | -17   | 189        | 197      | VLDELTMTTR     |           |        | Oxidation (M)[7] |      | Mascot      |
| 1153.5558  | 1153.5552   | -0.0006 | -1    | 373        | 381      | LEMEIAEYR      |           |        |                  |      | Mascot      |
| 1169.5507  | 1169.6106   | 0.0599  | 51    | 373        | 381      | LEMEIAEYR      | 2         | 0      | Oxidation (M)[3] |      | Mascot      |
| 1169.5507  | 1169.6106   | 0.0599  | 51    | 373        | 381      | LEMEIAEYR      |           |        | Oxidation (M)[3] |      | Mascot      |
| 1194.5861  | 1194.5858   | -0.0003 | 0     | 34         | 47       | AGSVYGGAGGSGVR | 81        | 100    |                  |      | Mascot      |
| 1194.5861  | 1194.5858   | -0.0003 | 0     | 34         | 47       | AGSVYGGAGGSGVR |           |        |                  |      | Mascot      |
| 1268.6304  | 1268.6301   | -0.0003 | 0     | 167        | 176      | VKYENELSMR     |           |        |                  |      | Mascot      |
| 1284.6252  | 1284.6288   | 0.0036  | 3     | 167        | 176      | VKYENELSMR     |           |        | Oxidation (M)[9] |      | Mascot      |
| 1309.6569  | 1309.6708   | 0.0139  | 11    | 373        | 382      | LEMEIAEYRR     |           |        |                  |      | Mascot      |
| 1314.7124  | 1314.7371   | 0.0247  | 19    | 177        | 188      | QSVEADIAGLRR   |           |        |                  |      | Mascot      |

|           |           |         |     |     |     |                            |    |        |                   |  |  |  |  |                  |        |
|-----------|-----------|---------|-----|-----|-----|----------------------------|----|--------|-------------------|--|--|--|--|------------------|--------|
| 1325.6517 | 1325.6486 | -0.0031 | -2  | 373 | 382 | LEMEIAEYRR                 |    |        |                   |  |  |  |  | Oxidation (M)[3] | Mascot |
| 1332.6754 | 1332.676  | 0.0006  | 0   | 318 | 330 | ASLEGLADTQAR               |    |        |                   |  |  |  |  |                  | Mascot |
| 1410.7046 | 1410.705  | 0.0004  | 0   | 371 | 381 | TRLEMEIAEYR                | 60 | 99.974 |                   |  |  |  |  |                  | Mascot |
| 1410.7046 | 1410.705  | 0.0004  | 0   | 371 | 381 | TRLEMEIAEYR                |    |        |                   |  |  |  |  |                  | Mascot |
| 1426.6995 | 1426.6992 | -0.0003 | 0   | 371 | 381 | TRLEMEIAEYR                | 23 | 0      | Oxidation (M)[5]  |  |  |  |  |                  | Mascot |
| 1426.6995 | 1426.6992 | -0.0003 | 0   | 371 | 381 | TRLEMEIAEYR                |    |        | Oxidation (M)[5]  |  |  |  |  |                  | Mascot |
| 1432.7642 | 1432.7358 | -0.0284 | -20 | 281 | 293 | EVAVSTETLQISR              |    |        |                   |  |  |  |  |                  | Mascot |
| 1847.9783 | 1847.9757 | -0.0026 | -1  | 302 | 317 | TLQSLEIELQSQLSMK           |    |        |                   |  |  |  |  |                  | Mascot |
| 1863.9731 | 1863.9728 | -0.0003 | 0   | 302 | 317 | TLQSLEIELQSQLSMK           |    |        | Oxidation (M)[15] |  |  |  |  |                  | Mascot |
| 2260.0762 | 2260.0803 | 0.0041  | 2   | 227 | 247 | AQMTGQVNVVEVDAAPQE<br>DLTK |    |        | Oxidation (M)[3]  |  |  |  |  |                  | Mascot |

9 novel protein similar to type I cytokeratin, enveloping layer [Danio rerio] gi|94732413 49661.4 5.31 12 254 100 194 100

### Peptide Information

| Calc. Mass | Obsrv. Mass | $\pm$ da | $\pm$ ppm | Start Seq. | End Seq. | Sequence     | Ion Score | C. I.  | %                | Modification     | Rank | Result | Type |
|------------|-------------|----------|-----------|------------|----------|--------------|-----------|--------|------------------|------------------|------|--------|------|
| 807.3995   | 807.3972    | -0.0023  | -3        | 183        | 189      | LAADDFR      | 51        | 99.763 |                  |                  |      | Mascot |      |
| 807.3995   | 807.3972    | -0.0023  | -3        | 183        | 189      | LAADDFR      |           |        |                  |                  |      | Mascot |      |
| 1062.4998  | 1062.4989   | -0.0009  | -1        | 105        | 113      | ATMQNLNDR    |           |        |                  |                  |      | Mascot |      |
| 1077.5609  | 1077.5587   | -0.0022  | -2        | 212        | 220      | VLDELTMTTR   |           |        |                  |                  |      | Mascot |      |
| 1078.4946  | 1078.4987   | 0.0041   | 4         | 105        | 113      | ATMQNLNDR    |           |        |                  | Oxidation (M)[3] |      | Mascot |      |
| 1093.5558  | 1093.5375   | -0.0183  | -17       | 212        | 220      | VLDELTMTTR   |           |        |                  | Oxidation (M)[7] |      | Mascot |      |
| 1153.5558  | 1153.5552   | -0.0006  | -1        | 396        | 404      | LEMEIAEYR    |           |        |                  |                  |      | Mascot |      |
| 1169.5507  | 1169.6106   | 0.0599   | 51        | 396        | 404      | LEMEIAEYR    | 2         | 0      | Oxidation (M)[3] |                  |      | Mascot |      |
| 1169.5507  | 1169.6106   | 0.0599   | 51        | 396        | 404      | LEMEIAEYR    |           |        |                  | Oxidation (M)[3] |      | Mascot |      |
| 1181.5909  | 1181.5896   | -0.0013  | -1        | 240        | 249      | NHEEELLAAR   |           |        |                  |                  |      | Mascot |      |
| 1181.5909  | 1181.5896   | -0.0013  | -1        | 240        | 249      | NHEEELLAAR   | 83        | 100    |                  |                  |      | Mascot |      |
| 1221.6508  | 1221.6406   | -0.0102  | -8        | 211        | 220      | KVLDELTMTTR  |           |        |                  | Oxidation (M)[8] |      | Mascot |      |
| 1268.6304  | 1268.6301   | -0.0003  | 0         | 190        | 199      | VKYENELSMR   |           |        |                  |                  |      | Mascot |      |
| 1284.6252  | 1284.6288   | 0.0036   | 3         | 190        | 199      | VKYENELSMR   |           |        |                  | Oxidation (M)[9] |      | Mascot |      |
| 1309.6569  | 1309.6708   | 0.0139   | 11        | 396        | 405      | LEMEIAEYRR   |           |        |                  |                  |      | Mascot |      |
| 1325.6517  | 1325.6486   | -0.0031  | -2        | 396        | 405      | LEMEIAEYRR   |           |        |                  | Oxidation (M)[3] |      | Mascot |      |
| 1332.6754  | 1332.676    | 0.0006   | 0         | 341        | 353      | ASLEGLADTQAR |           |        |                  |                  |      | Mascot |      |
| 1410.7046  | 1410.705    | 0.0004   | 0         | 394        | 404      | TRLEMEIAEYR  | 60        | 99.974 |                  |                  |      | Mascot |      |
| 1410.7046  | 1410.705    | 0.0004   | 0         | 394        | 404      | TRLEMEIAEYR  |           |        |                  |                  |      | Mascot |      |
| 1426.6995  | 1426.6992   | -0.0003  | 0         | 394        | 404      | TRLEMEIAEYR  | 23        | 0      | Oxidation (M)[5] |                  |      | Mascot |      |
| 1426.6995  | 1426.6992   | -0.0003  | 0         | 394        | 404      | TRLEMEIAEYR  |           |        |                  | Oxidation (M)[5] |      | Mascot |      |

|    |                                                    |           |         |    |             |     |                  |     |    |     |     |     |                  |  |  |  |        |
|----|----------------------------------------------------|-----------|---------|----|-------------|-----|------------------|-----|----|-----|-----|-----|------------------|--|--|--|--------|
|    | 1465.7356                                          | 1465.7278 | -0.0078 | -5 | 382         | 393 | QGQEYQMLLDIK     |     |    |     |     |     |                  |  |  |  | Mascot |
|    | 1481.7305                                          | 1481.7289 | -0.0016 | -1 | 382         | 393 | QGQEYQMLLDIK     |     |    |     |     |     | Oxidation (M)[7] |  |  |  | Mascot |
|    | 1847.8922                                          | 1847.9757 | 0.0835  | 45 | 289         | 303 | DLEHWFQSKSESLENK |     |    |     |     |     |                  |  |  |  | Mascot |
| 10 | type I cytokeratin, enveloping layer [Danio rerio] |           |         |    | gi 94732407 |     | 24286.5          | 4.8 | 12 | 217 | 100 | 117 | 100              |  |  |  |        |

Peptide Information

| Calc. Mass | Obsrv. Mass | ± da    | ± ppm | Start Seq. | End Seq. | Sequence                    | Ion Score | C. I.  | % Modification    | Rank | Result Type |
|------------|-------------|---------|-------|------------|----------|-----------------------------|-----------|--------|-------------------|------|-------------|
| 961.5312   | 961.5276    | -0.0036 | -4    | 84         | 91       | SEITEVKR                    |           |        |                   |      | Mascot      |
| 1123.5419  | 1123.5376   | -0.0043 | -4    | 56         | 64       | DLESWFQAK                   |           |        |                   |      | Mascot      |
| 1123.5419  | 1123.5376   | -0.0043 | -4    | 56         | 64       | DLESWFQAK                   | 56        | 99.933 |                   |      | Mascot      |
| 1153.5558  | 1153.5552   | -0.0006 | -1    | 163        | 171      | LEMEIAEYR                   |           |        |                   |      | Mascot      |
| 1169.5507  | 1169.6106   | 0.0599  | 51    | 163        | 171      | LEMEIAEYR                   | 2         | 0      | Oxidation (M)[3]  |      | Mascot      |
| 1169.5507  | 1169.6106   | 0.0599  | 51    | 163        | 171      | LEMEIAEYR                   |           |        | Oxidation (M)[3]  |      | Mascot      |
| 1309.6569  | 1309.6708   | 0.0139  | 11    | 163        | 172      | LEMEIAEYRR                  |           |        |                   |      | Mascot      |
| 1325.6517  | 1325.6486   | -0.0031 | -2    | 163        | 172      | LEMEIAEYRR                  |           |        | Oxidation (M)[3]  |      | Mascot      |
| 1332.6754  | 1332.676    | 0.0006  | 0     | 108        | 120      | ASLEGLADTQAR                |           |        |                   |      | Mascot      |
| 1410.7046  | 1410.705    | 0.0004  | 0     | 161        | 171      | TRLEMEIAEYR                 | 60        | 99.974 |                   |      | Mascot      |
| 1410.7046  | 1410.705    | 0.0004  | 0     | 161        | 171      | TRLEMEIAEYR                 |           |        |                   |      | Mascot      |
| 1414.8151  | 1414.8127   | -0.0024 | -2    | 190        | 202      | KVVTIVEEVVDGK               |           |        |                   |      | Mascot      |
| 1420.7278  | 1420.7269   | -0.0009 | -1    | 71         | 83       | EVAVSTETLQTSR               |           |        |                   |      | Mascot      |
| 1426.6995  | 1426.6992   | -0.0003 | 0     | 161        | 171      | TRLEMEIAEYR                 | 23        | 0      | Oxidation (M)[5]  |      | Mascot      |
| 1426.6995  | 1426.6992   | -0.0003 | 0     | 161        | 171      | TRLEMEIAEYR                 |           |        | Oxidation (M)[5]  |      | Mascot      |
| 1465.7356  | 1465.7278   | -0.0078 | -5    | 149        | 160      | QGQEYQMLLDIK                |           |        |                   |      | Mascot      |
| 1481.7305  | 1481.7289   | -0.0016 | -1    | 149        | 160      | QGQEYQMLLDIK                |           |        | Oxidation (M)[7]  |      | Mascot      |
| 1847.9783  | 1847.9757   | -0.0026 | -1    | 92         | 107      | TLQSLEIELQSLSMK             |           |        |                   |      | Mascot      |
| 1863.9731  | 1863.9728   | -0.0003 | 0     | 92         | 107      | TLQSLEIELQSLSMK             |           |        | Oxidation (M)[15] |      | Mascot      |
| 2260.0762  | 2260.0803   | 0.0041  | 2     | 17         | 37       | TQMSGQVNVEVDAAPQE<br>DLTK   |           |        |                   |      | Mascot      |
| 2276.071   | 2276.0759   | 0.0049  | 2     | 17         | 37       | TQMSGQVNVEVDAAPQE<br>DLTK   |           |        | Oxidation (M)[3]  |      | Mascot      |
| 2774.3818  | 2774.3843   | 0.0025  | 1     | 121        | 143      | YTNMLNGYQFQVSSLEE<br>QLIQLR |           |        |                   |      | Mascot      |
| 2790.3767  | 2790.3848   | 0.0081  | 3     | 121        | 143      | YTNMLNGYQFQVSSLEE<br>QLIQLR |           |        | Oxidation (M)[4]  |      | Mascot      |

|    |                                  |  |  |  |             |  |         |      |    |     |     |     |     |  |  |  |  |
|----|----------------------------------|--|--|--|-------------|--|---------|------|----|-----|-----|-----|-----|--|--|--|--|
| 11 | type I cytokeratin [Danio rerio] |  |  |  | gi 18858423 |  | 46692.5 | 5.38 | 15 | 198 | 100 | 111 | 100 |  |  |  |  |
|----|----------------------------------|--|--|--|-------------|--|---------|------|----|-----|-----|-----|-----|--|--|--|--|

Peptide Information

| Calc. Mass | Obsrv. Mass | ± da | ± ppm | Start Seq. | End Seq. | Sequence | Ion Score | C. I. | % Modification | Rank | Result Type |
|------------|-------------|------|-------|------------|----------|----------|-----------|-------|----------------|------|-------------|
|------------|-------------|------|-------|------------|----------|----------|-----------|-------|----------------|------|-------------|

|    |                                 |           |         |    |             |     |                            |      |        |                  |     |    |        |        |
|----|---------------------------------|-----------|---------|----|-------------|-----|----------------------------|------|--------|------------------|-----|----|--------|--------|
|    | 807.3995                        | 807.3972  | -0.0023 | -3 | 158         | 164 | LAADDFR                    | 51   | 99.763 |                  |     |    |        | Mascot |
|    | 807.3995                        | 807.3972  | -0.0023 | -3 | 158         | 164 | LAADDFR                    |      |        |                  |     |    |        | Mascot |
|    | 1062.4998                       | 1062.4989 | -0.0009 | -1 | 80          | 88  | ATMQNLNDR                  |      |        |                  |     |    |        | Mascot |
|    | 1077.5609                       | 1077.5587 | -0.0022 | -2 | 187         | 195 | VLDELTMTTR                 |      |        |                  |     |    |        | Mascot |
|    | 1078.4946                       | 1078.4987 | 0.0041  | 4  | 80          | 88  | ATMQNLNDR                  |      |        | Oxidation (M)[3] |     |    |        | Mascot |
|    | 1093.5312                       | 1093.5375 | 0.0063  | 6  | 264         | 272 | DLEGWFQAK                  |      |        |                  |     |    |        | Mascot |
|    | 1153.5558                       | 1153.5552 | -0.0006 | -1 | 371         | 379 | LEMEIAEYR                  |      |        |                  |     |    |        | Mascot |
|    | 1169.5507                       | 1169.6106 | 0.0599  | 51 | 371         | 379 | LEMEIAEYR                  | 2    | 0      | Oxidation (M)[3] |     |    |        | Mascot |
|    | 1169.5507                       | 1169.6106 | 0.0599  | 51 | 371         | 379 | LEMEIAEYR                  |      |        | Oxidation (M)[3] |     |    |        | Mascot |
|    | 1221.6262                       | 1221.6406 | 0.0144  | 12 | 263         | 272 | KDLEGWFQAK                 |      |        |                  |     |    |        | Mascot |
|    | 1268.6304                       | 1268.6301 | -0.0003 | 0  | 165         | 174 | VKYENELSMR                 |      |        |                  |     |    |        | Mascot |
|    | 1284.6252                       | 1284.6288 | 0.0036  | 3  | 165         | 174 | VKYENELSMR                 |      |        | Oxidation (M)[9] |     |    |        | Mascot |
|    | 1309.6569                       | 1309.6708 | 0.0139  | 11 | 371         | 380 | LEMEIAEYRR                 |      |        |                  |     |    |        | Mascot |
|    | 1314.7124                       | 1314.7371 | 0.0247  | 19 | 175         | 186 | QSVEADIAGLRR               |      |        |                  |     |    |        | Mascot |
|    | 1325.6517                       | 1325.6486 | -0.0031 | -2 | 371         | 380 | LEMEIAEYRR                 |      |        | Oxidation (M)[3] |     |    |        | Mascot |
|    | 1332.6754                       | 1332.676  | 0.0006  | 0  | 316         | 328 | ASLEGTLDATQAR              |      |        |                  |     |    |        | Mascot |
|    | 1410.7046                       | 1410.705  | 0.0004  | 0  | 369         | 379 | TRLEMEIAEYR                | 60   | 99.974 |                  |     |    |        | Mascot |
|    | 1410.7046                       | 1410.705  | 0.0004  | 0  | 369         | 379 | TRLEMEIAEYR                |      |        |                  |     |    |        | Mascot |
|    | 1414.8151                       | 1414.8127 | -0.0024 | -2 | 398         | 410 | KVVTIVEEVVDGK              |      |        |                  |     |    |        | Mascot |
|    | 1420.7278                       | 1420.7269 | -0.0009 | -1 | 279         | 291 | EVAVSTETLQTSR              |      |        |                  |     |    |        | Mascot |
|    | 1426.6995                       | 1426.6992 | -0.0003 | 0  | 369         | 379 | TRLEMEIAEYR                | 23   | 0      | Oxidation (M)[5] |     |    |        | Mascot |
|    | 1426.6995                       | 1426.6992 | -0.0003 | 0  | 369         | 379 | TRLEMEIAEYR                |      |        | Oxidation (M)[5] |     |    |        | Mascot |
|    | 1465.7356                       | 1465.7278 | -0.0078 | -5 | 357         | 368 | QGQEYQMLLDIK               |      |        |                  |     |    |        | Mascot |
|    | 1481.7305                       | 1481.7289 | -0.0016 | -1 | 357         | 368 | QGQEYQMLLDIK               |      |        | Oxidation (M)[7] |     |    |        | Mascot |
|    | 2260.0762                       | 2260.0803 | 0.0041  | 2  | 225         | 245 | AQMTGQVNVVEVDAAPQE<br>DLTK |      |        | Oxidation (M)[3] |     |    |        | Mascot |
| 12 | type I keratin E7 [Danio rerio] |           |         |    | gi 50539834 |     | 49754.6                    | 5.42 | 11     | 108              | 100 | 60 | 99.974 |        |

#### Peptide Information

| Calc. Mass | Obsrv. Mass | ± da    | ± ppm | Start Seq. | End Seq. | Sequence   | Ion Score | C. I. % | Modification     | Rank | Result Type |
|------------|-------------|---------|-------|------------|----------|------------|-----------|---------|------------------|------|-------------|
| 972.4131   | 972.4105    | -0.0026 | -3    | 265        | 271      | EMEAWEYK   |           |         | Oxidation (M)[2] |      | Mascot      |
| 1078.6255  | 1078.4987   | -0.1268 | -118  | 90         | 98       | LASYLEKVR  |           |         |                  |      | Mascot      |
| 1123.5854  | 1123.5376   | -0.0478 | -43   | 215        | 224      | NHAEELAALR |           |         |                  |      | Mascot      |
| 1123.5854  | 1123.5376   | -0.0478 | -43   | 215        | 224      | NHAEELAALR |           |         |                  |      | Mascot      |
| 1153.5558  | 1153.5552   | -0.0006 | -1    | 372        | 380      | LEMEIAEYR  |           |         |                  |      | Mascot      |
| 1169.5507  | 1169.6106   | 0.0599  | 51    | 372        | 380      | LEMEIAEYR  | 2         | 0       | Oxidation (M)[3] |      | Mascot      |

|           |           |         |     |     |     |                             |    |        |  |  |  |                  |        |
|-----------|-----------|---------|-----|-----|-----|-----------------------------|----|--------|--|--|--|------------------|--------|
| 1169.5507 | 1169.6106 | 0.0599  | 51  | 372 | 380 | LEMEIAEYR                   |    |        |  |  |  | Oxidation (M)[3] | Mascot |
| 1186.5521 | 1186.6426 | 0.0905  | 76  | 1   | 10  | MSQVTQSFSR                  |    |        |  |  |  | Oxidation (M)[1] | Mascot |
| 1298.6521 | 1298.6567 | 0.0046  | 4   | 1   | 11  | MSQVTQSFSRK                 |    |        |  |  |  |                  | Mascot |
| 1309.6569 | 1309.6708 | 0.0139  | 11  | 372 | 381 | LEMEIAEYRR                  |    |        |  |  |  |                  | Mascot |
| 1314.6471 | 1314.7371 | 0.09    | 68  | 1   | 11  | MSQVTQSFSRK                 |    |        |  |  |  | Oxidation (M)[1] | Mascot |
| 1325.6517 | 1325.6486 | -0.0031 | -2  | 372 | 381 | LEMEIAEYRR                  |    |        |  |  |  | Oxidation (M)[3] | Mascot |
| 1410.7046 | 1410.705  | 0.0004  | 0   | 370 | 380 | TRLEMEIAEYR                 | 60 | 99.974 |  |  |  |                  | Mascot |
| 1410.7046 | 1410.705  | 0.0004  | 0   | 370 | 380 | TRLEMEIAEYR                 |    |        |  |  |  |                  | Mascot |
| 1420.8046 | 1420.7269 | -0.0777 | -55 | 358 | 369 | QASEYKLLLDIK                |    |        |  |  |  |                  | Mascot |
| 1426.6995 | 1426.6992 | -0.0003 | 0   | 370 | 380 | TRLEMEIAEYR                 | 23 | 0      |  |  |  | Oxidation (M)[5] | Mascot |
| 1426.6995 | 1426.6992 | -0.0003 | 0   | 370 | 380 | TRLEMEIAEYR                 |    |        |  |  |  | Oxidation (M)[5] | Mascot |
| 2144.2688 | 2144.1345 | -0.1343 | -63 | 391 | 410 | QTIKVVVEVAPPKDPVV<br>TK     |    |        |  |  |  |                  | Mascot |
| 2260.0007 | 2260.0803 | 0.0796  | 35  | 58  | 80  | GGFDMSSALAGGDNGF<br>GMVVNEK |    |        |  |  |  |                  | Mascot |
| 2275.9956 | 2276.0759 | 0.0803  | 35  | 58  | 80  | GGFDMSSALAGGDNGF<br>GMVVNEK |    |        |  |  |  | Oxidation (M)[5] | Mascot |

13 type I keratin E7-like [Danio rerio] gi|316659401 43783.1 4.97 10 105 100 60 99.974

#### Peptide Information

| Calc. Mass | Obsrv. Mass | $\pm$ da | $\pm$ ppm | Start Seq. | End Seq. | Sequence     | Ion Score | C. I.  | % Modification   | Rank | Result Type |
|------------|-------------|----------|-----------|------------|----------|--------------|-----------|--------|------------------|------|-------------|
| 972.4131   | 972.4105    | -0.0026  | -3        | 244        | 250      | EMEAWYK      |           |        | Oxidation (M)[2] |      | Mascot      |
| 1078.6255  | 1078.4987   | -0.1268  | -118      | 69         | 77       | LASYLEKVR    |           |        |                  |      | Mascot      |
| 1123.5854  | 1123.5376   | -0.0478  | -43       | 194        | 203      | NHAEELAALR   |           |        |                  |      | Mascot      |
| 1123.5854  | 1123.5376   | -0.0478  | -43       | 194        | 203      | NHAEELAALR   |           |        |                  |      | Mascot      |
| 1153.5558  | 1153.5552   | -0.0006  | -1        | 351        | 359      | LEMEIAEYR    |           |        |                  |      | Mascot      |
| 1169.5507  | 1169.6106   | 0.0599   | 51        | 351        | 359      | LEMEIAEYR    | 2         | 0      | Oxidation (M)[3] |      | Mascot      |
| 1169.5507  | 1169.6106   | 0.0599   | 51        | 351        | 359      | LEMEIAEYR    |           |        | Oxidation (M)[3] |      | Mascot      |
| 1186.5521  | 1186.6426   | 0.0905   | 76        | 1          | 10       | MSQVTQSFSR   |           |        | Oxidation (M)[1] |      | Mascot      |
| 1298.6521  | 1298.6567   | 0.0046   | 4         | 1          | 11       | MSQVTQSFSRK  |           |        |                  |      | Mascot      |
| 1309.6569  | 1309.6708   | 0.0139   | 11        | 351        | 360      | LEMEIAEYRR   |           |        |                  |      | Mascot      |
| 1314.6471  | 1314.7371   | 0.09     | 68        | 1          | 11       | MSQVTQSFSRK  |           |        | Oxidation (M)[1] |      | Mascot      |
| 1325.6517  | 1325.6486   | -0.0031  | -2        | 351        | 360      | LEMEIAEYRR   |           |        | Oxidation (M)[3] |      | Mascot      |
| 1410.7046  | 1410.705    | 0.0004   | 0         | 349        | 359      | TRLEMEIAEYR  | 60        | 99.974 |                  |      | Mascot      |
| 1410.7046  | 1410.705    | 0.0004   | 0         | 349        | 359      | TRLEMEIAEYR  |           |        |                  |      | Mascot      |
| 1420.8046  | 1420.7269   | -0.0777  | -55       | 337        | 348      | QASEYKLLLDIK |           |        |                  |      | Mascot      |
| 1426.6995  | 1426.6992   | -0.0003  | 0         | 349        | 359      | TRLEMEIAEYR  | 23        | 0      | Oxidation (M)[5] |      | Mascot      |
| 1426.6995  | 1426.6992   | -0.0003  | 0         | 349        | 359      | TRLEMEIAEYR  |           |        | Oxidation (M)[5] |      | Mascot      |

1464.8421464.7013-0.1407-96370383QTVKVVVEVVAPPQAMascot

14si:dkeyp-113d7.4 [Danio rerio]gi|16723479649903.84.9491001006099.974

Peptide Information

| Calc. Mass | Obsrv. Mass | ± da    | ± ppm | Start Seq. | End Seq. | Sequence                   | Ion Score | C. I.  | % Modification   | Rank | Result Type |
|------------|-------------|---------|-------|------------|----------|----------------------------|-----------|--------|------------------|------|-------------|
| 1093.6099  | 1093.5375   | -0.0724 | -66   | 463        | 473      | VVSSSSTSLVK                |           |        |                  |      | Mascot      |
| 1153.5558  | 1153.5552   | -0.0006 | -1    | 409        | 417      | LEMEIAEYR                  |           |        |                  |      | Mascot      |
| 1169.5507  | 1169.6106   | 0.0599  | 51    | 409        | 417      | LEMEIAEYR                  | 2         | 0      | Oxidation (M)[3] |      | Mascot      |
| 1169.5507  | 1169.6106   | 0.0599  | 51    | 409        | 417      | LEMEIAEYR                  |           |        | Oxidation (M)[3] |      | Mascot      |
| 1194.5861  | 1194.5858   | -0.0003 | 0     | 37         | 50       | SGSVYGGAGGAGVR             |           |        |                  |      | Mascot      |
| 1194.5861  | 1194.5858   | -0.0003 | 0     | 37         | 50       | SGSVYGGAGGAGVR             |           |        |                  |      | Mascot      |
| 1282.646   | 1282.645    | -0.001  | -1    | 203        | 212      | IKYENELSMR                 |           |        |                  |      | Mascot      |
| 1298.6409  | 1298.6567   | 0.0158  | 12    | 203        | 212      | IKYENELSMR                 |           |        | Oxidation (M)[9] |      | Mascot      |
| 1309.6569  | 1309.6708   | 0.0139  | 11    | 409        | 418      | LEMEIAEYRR                 |           |        |                  |      | Mascot      |
| 1325.6517  | 1325.6486   | -0.0031 | -2    | 409        | 418      | LEMEIAEYRR                 |           |        | Oxidation (M)[3] |      | Mascot      |
| 1410.7046  | 1410.705    | 0.0004  | 0     | 407        | 417      | TRLEMEIAEYR                | 60        | 99.974 |                  |      | Mascot      |
| 1410.7046  | 1410.705    | 0.0004  | 0     | 407        | 417      | TRLEMEIAEYR                |           |        |                  |      | Mascot      |
| 1426.6995  | 1426.6992   | -0.0003 | 0     | 407        | 417      | TRLEMEIAEYR                | 23        | 0      | Oxidation (M)[5] |      | Mascot      |
| 1426.6995  | 1426.6992   | -0.0003 | 0     | 407        | 417      | TRLEMEIAEYR                |           |        | Oxidation (M)[5] |      | Mascot      |
| 1464.6787  | 1464.7013   | 0.0226  | 15    | 1          | 14       | MATTFSSGSFVSSR             |           |        |                  |      | Mascot      |
| 1465.7356  | 1465.7278   | -0.0078 | -5    | 395        | 406      | QGQEYQMLLDIK               |           |        |                  |      | Mascot      |
| 1481.7305  | 1481.7289   | -0.0016 | -1    | 395        | 406      | QGQEYQMLLDIK               |           |        | Oxidation (M)[7] |      | Mascot      |
| 2330.2019  | 2330.0193   | -0.1826 | -78   | 213        | 234      | QSVEADIAGLKNVLSDLN<br>MGQK |           |        |                  |      | Mascot      |

15type I keratin [Danio rerio]gi|573381611569.64.8851001006099.974

Peptide Information

| Calc. Mass | Obsrv. Mass | ± da    | ± ppm | Start Seq. | End Seq. | Sequence      | Ion Score | C. I.  | % Modification   | Rank | Result Type |
|------------|-------------|---------|-------|------------|----------|---------------|-----------|--------|------------------|------|-------------|
| 1153.5558  | 1153.5552   | -0.0006 | -1    | 64         | 72       | LEMEIAEYR     |           |        |                  |      | Mascot      |
| 1169.5507  | 1169.6106   | 0.0599  | 51    | 64         | 72       | LEMEIAEYR     | 2         | 0      | Oxidation (M)[3] |      | Mascot      |
| 1169.5507  | 1169.6106   | 0.0599  | 51    | 64         | 72       | LEMEIAEYR     |           |        | Oxidation (M)[3] |      | Mascot      |
| 1309.6569  | 1309.6708   | 0.0139  | 11    | 64         | 73       | LEMEIAEYRR    |           |        |                  |      | Mascot      |
| 1325.6517  | 1325.6486   | -0.0031 | -2    | 64         | 73       | LEMEIAEYRR    |           |        | Oxidation (M)[3] |      | Mascot      |
| 1332.6754  | 1332.676    | 0.0006  | 0     | 9          | 21       | ASLEGLTADTQAR |           |        |                  |      | Mascot      |
| 1410.7046  | 1410.705    | 0.0004  | 0     | 62         | 72       | TRLEMEIAEYR   | 60        | 99.974 |                  |      | Mascot      |
| 1410.7046  | 1410.705    | 0.0004  | 0     | 62         | 72       | TRLEMEIAEYR   |           |        |                  |      | Mascot      |

|           |           |         |    |    |    |              |    |   |                  |        |
|-----------|-----------|---------|----|----|----|--------------|----|---|------------------|--------|
| 1426.6995 | 1426.6992 | -0.0003 | 0  | 62 | 72 | TRLEMEIAEYR  | 23 | 0 | Oxidation (M)[5] | Mascot |
| 1426.6995 | 1426.6992 | -0.0003 | 0  | 62 | 72 | TRLEMEIAEYR  |    |   | Oxidation (M)[5] | Mascot |
| 1465.7356 | 1465.7278 | -0.0078 | -5 | 50 | 61 | QGQEYQMLLDIK |    |   |                  | Mascot |
| 1481.7305 | 1481.7289 | -0.0016 | -1 | 50 | 61 | QGQEYQMLLDIK |    |   | Oxidation (M)[7] | Mascot |

16 Si:dkeyp-113d7.4 protein [Danio rerio] gi|94574324 51552.7 5 8 92 99.997 60 99.974

#### Peptide Information

| Calc. Mass | Obsrv. Mass | ± da    | ± ppm | Start Seq. | End Seq. | Sequence                | Ion Score | C. I.  | % Modification   | Rank | Result Type |
|------------|-------------|---------|-------|------------|----------|-------------------------|-----------|--------|------------------|------|-------------|
| 1093.6099  | 1093.5375   | -0.0724 | -66   | 478        | 488      | VVSSSSTSLVK             |           |        |                  |      | Mascot      |
| 1153.5558  | 1153.5552   | -0.0006 | -1    | 424        | 432      | LEMEIAEYR               |           |        |                  |      | Mascot      |
| 1169.5507  | 1169.6106   | 0.0599  | 51    | 424        | 432      | LEMEIAEYR               | 2         | 0      | Oxidation (M)[3] |      | Mascot      |
| 1169.5507  | 1169.6106   | 0.0599  | 51    | 424        | 432      | LEMEIAEYR               |           |        | Oxidation (M)[3] |      | Mascot      |
| 1194.5861  | 1194.5858   | -0.0003 | 0     | 52         | 65       | SGSVYGGAGGAGVR          |           |        |                  |      | Mascot      |
| 1194.5861  | 1194.5858   | -0.0003 | 0     | 52         | 65       | SGSVYGGAGGAGVR          |           |        |                  |      | Mascot      |
| 1282.646   | 1282.645    | -0.001  | -1    | 218        | 227      | IKYENELSMR              |           |        |                  |      | Mascot      |
| 1298.6409  | 1298.6567   | 0.0158  | 12    | 218        | 227      | IKYENELSMR              |           |        | Oxidation (M)[9] |      | Mascot      |
| 1309.6569  | 1309.6708   | 0.0139  | 11    | 424        | 433      | LEMEIAEYRR              |           |        |                  |      | Mascot      |
| 1325.6517  | 1325.6486   | -0.0031 | -2    | 424        | 433      | LEMEIAEYRR              |           |        | Oxidation (M)[3] |      | Mascot      |
| 1410.7046  | 1410.705    | 0.0004  | 0     | 422        | 432      | TRLEMEIAEYR             | 60        | 99.974 |                  |      | Mascot      |
| 1410.7046  | 1410.705    | 0.0004  | 0     | 422        | 432      | TRLEMEIAEYR             |           |        |                  |      | Mascot      |
| 1426.6995  | 1426.6992   | -0.0003 | 0     | 422        | 432      | TRLEMEIAEYR             | 23        | 0      | Oxidation (M)[5] |      | Mascot      |
| 1426.6995  | 1426.6992   | -0.0003 | 0     | 422        | 432      | TRLEMEIAEYR             |           |        | Oxidation (M)[5] |      | Mascot      |
| 1465.7356  | 1465.7278   | -0.0078 | -5    | 410        | 421      | QGQEYQMLLDIK            |           |        |                  |      | Mascot      |
| 1481.7305  | 1481.7289   | -0.0016 | -1    | 410        | 421      | QGQEYQMLLDIK            |           |        | Oxidation (M)[7] |      | Mascot      |
| 2330.2019  | 2330.0193   | -0.1826 | -78   | 228        | 249      | QSVEADIAGLKNVLSDLN MGQK |           |        |                  |      | Mascot      |

17 Si:dkeyp-113d7.4 protein [Danio rerio] gi|62203256 51673.7 5.05 8 92 99.997 60 99.974

#### Peptide Information

| Calc. Mass | Obsrv. Mass | ± da    | ± ppm | Start Seq. | End Seq. | Sequence       | Ion Score | C. I. | % Modification   | Rank | Result Type |
|------------|-------------|---------|-------|------------|----------|----------------|-----------|-------|------------------|------|-------------|
| 1078.6255  | 1078.4987   | -0.1268 | -118  | 140        | 148      | LASYLEKVR      |           |       |                  |      | Mascot      |
| 1093.6099  | 1093.5375   | -0.0724 | -66   | 478        | 488      | VVSSSSTSLVK    |           |       |                  |      | Mascot      |
| 1153.5558  | 1153.5552   | -0.0006 | -1    | 424        | 432      | LEMEIAEYR      |           |       |                  |      | Mascot      |
| 1169.5507  | 1169.6106   | 0.0599  | 51    | 424        | 432      | LEMEIAEYR      | 2         | 0     | Oxidation (M)[3] |      | Mascot      |
| 1169.5507  | 1169.6106   | 0.0599  | 51    | 424        | 432      | LEMEIAEYR      |           |       | Oxidation (M)[3] |      | Mascot      |
| 1194.5861  | 1194.5858   | -0.0003 | 0     | 52         | 65       | SGSVYGGAGGAGVR |           |       |                  |      | Mascot      |

|           |           |         |    |     |     |                |    |        |                  |                  |  |  |        |
|-----------|-----------|---------|----|-----|-----|----------------|----|--------|------------------|------------------|--|--|--------|
| 1194.5861 | 1194.5858 | -0.0003 | 0  | 52  | 65  | SGSVYGGAGGAGVR |    |        |                  |                  |  |  | Mascot |
| 1282.646  | 1282.645  | -0.001  | -1 | 218 | 227 | IKYENELSMR     |    |        |                  |                  |  |  | Mascot |
| 1298.6409 | 1298.6567 | 0.0158  | 12 | 218 | 227 | IKYENELSMR     |    |        |                  | Oxidation (M)[9] |  |  | Mascot |
| 1309.6569 | 1309.6708 | 0.0139  | 11 | 424 | 433 | LEMEIAEYRR     |    |        |                  |                  |  |  | Mascot |
| 1325.6517 | 1325.6486 | -0.0031 | -2 | 424 | 433 | LEMEIAEYRR     |    |        |                  | Oxidation (M)[3] |  |  | Mascot |
| 1410.7046 | 1410.705  | 0.0004  | 0  | 422 | 432 | TRLEMEIAEYR    | 60 | 99.974 |                  |                  |  |  | Mascot |
| 1410.7046 | 1410.705  | 0.0004  | 0  | 422 | 432 | TRLEMEIAEYR    |    |        |                  |                  |  |  | Mascot |
| 1426.6995 | 1426.6992 | -0.0003 | 0  | 422 | 432 | TRLEMEIAEYR    | 23 | 0      | Oxidation (M)[5] |                  |  |  | Mascot |
| 1426.6995 | 1426.6992 | -0.0003 | 0  | 422 | 432 | TRLEMEIAEYR    |    |        |                  | Oxidation (M)[5] |  |  | Mascot |
| 1465.7356 | 1465.7278 | -0.0078 | -5 | 410 | 421 | QGQEYQMLLDIK   |    |        |                  |                  |  |  | Mascot |
| 1481.7305 | 1481.7289 | -0.0016 | -1 | 410 | 421 | QGQEYQMLLDIK   |    |        |                  | Oxidation (M)[7] |  |  | Mascot |

18 novel protein similar to vertebrate keratin type I family [Danio rerio] gi|94732967 45812.2 5.08 8 88 99.992 60 99.974

#### Peptide Information

| Calc. Mass | Obsrv. Mass | ± da    | ± ppm | Start Seq. | End Seq. | Sequence       | Ion Score | C. I.  | % Modification   | Rank | Result Type |
|------------|-------------|---------|-------|------------|----------|----------------|-----------|--------|------------------|------|-------------|
| 972.4131   | 972.4105    | -0.0026 | -3    | 262        | 268      | EMEAWEYK       |           |        | Oxidation (M)[2] |      | Mascot      |
| 1078.6255  | 1078.4987   | -0.1268 | -118  | 87         | 95       | LASYLEKVR      |           |        |                  |      | Mascot      |
| 1123.5854  | 1123.5376   | -0.0478 | -43   | 212        | 221      | NHAEELAALR     |           |        |                  |      | Mascot      |
| 1123.5854  | 1123.5376   | -0.0478 | -43   | 212        | 221      | NHAEELAALR     |           |        |                  |      | Mascot      |
| 1153.5558  | 1153.5552   | -0.0006 | -1    | 369        | 377      | LEMEIAEYR      |           |        |                  |      | Mascot      |
| 1169.5507  | 1169.6106   | 0.0599  | 51    | 369        | 377      | LEMEIAEYR      | 2         | 0      | Oxidation (M)[3] |      | Mascot      |
| 1169.5507  | 1169.6106   | 0.0599  | 51    | 369        | 377      | LEMEIAEYR      |           |        | Oxidation (M)[3] |      | Mascot      |
| 1309.6569  | 1309.6708   | 0.0139  | 11    | 369        | 378      | LEMEIAEYRR     |           |        |                  |      | Mascot      |
| 1325.6517  | 1325.6486   | -0.0031 | -2    | 369        | 378      | LEMEIAEYRR     |           |        | Oxidation (M)[3] |      | Mascot      |
| 1410.7046  | 1410.705    | 0.0004  | 0     | 367        | 377      | TRLEMEIAEYR    | 60        | 99.974 |                  |      | Mascot      |
| 1410.7046  | 1410.705    | 0.0004  | 0     | 367        | 377      | TRLEMEIAEYR    |           |        |                  |      | Mascot      |
| 1420.8046  | 1420.7269   | -0.0777 | -55   | 355        | 366      | QASEYKLLLDIK   |           |        |                  |      | Mascot      |
| 1426.6995  | 1426.6992   | -0.0003 | 0     | 367        | 377      | TRLEMEIAEYR    | 23        | 0      | Oxidation (M)[5] |      | Mascot      |
| 1426.6995  | 1426.6992   | -0.0003 | 0     | 367        | 377      | TRLEMEIAEYR    |           |        | Oxidation (M)[5] |      | Mascot      |
| 1464.842   | 1464.7013   | -0.1407 | -96   | 388        | 401      | QTVKVVVEVAPPQA |           |        |                  |      | Mascot      |

19 keratin 15 [Danio rerio] gi|47087241 49093.4 5.13 7 87 99.991 60 99.974

#### Peptide Information

| Calc. Mass | Obsrv. Mass | ± da    | ± ppm | Start Seq. | End Seq. | Sequence  | Ion Score | C. I. | % Modification | Rank | Result Type |
|------------|-------------|---------|-------|------------|----------|-----------|-----------|-------|----------------|------|-------------|
| 1062.4998  | 1062.4989   | -0.0009 | -1    | 109        | 117      | ATMQNLNDR |           |       |                |      | Mascot      |



|    |                          |           |         |     |              |     |               |      |        |    |                  |        |        |
|----|--------------------------|-----------|---------|-----|--------------|-----|---------------|------|--------|----|------------------|--------|--------|
|    | 1078.4946                | 1078.4987 | 0.0041  | 4   | 109          | 117 | ATMQNLNDR     |      |        |    | Oxidation (M)[3] | Mascot |        |
|    | 1153.5558                | 1153.5552 | -0.0006 | -1  | 400          | 408 | LEMEIAEYR     |      |        |    |                  | Mascot |        |
|    | 1169.5507                | 1169.6106 | 0.0599  | 51  | 400          | 408 | LEMEIAEYR     | 2    | 0      |    | Oxidation (M)[3] | Mascot |        |
|    | 1169.5507                | 1169.6106 | 0.0599  | 51  | 400          | 408 | LEMEIAEYR     |      |        |    | Oxidation (M)[3] | Mascot |        |
|    | 1284.6252                | 1284.6288 | 0.0036  | 3   | 194          | 203 | TKYENELTMR    |      |        |    |                  | Mascot |        |
|    | 1309.6569                | 1309.6708 | 0.0139  | 11  | 400          | 409 | LEMEIAEYRR    |      |        |    |                  | Mascot |        |
|    | 1325.6517                | 1325.6486 | -0.0031 | -2  | 400          | 409 | LEMEIAEYRR    |      |        |    | Oxidation (M)[3] | Mascot |        |
|    | 1362.7111                | 1362.6974 | -0.0137 | -10 | 308          | 320 | EVAASTETIQVSK |      |        |    |                  | Mascot |        |
|    | 1410.7046                | 1410.705  | 0.0004  | 0   | 398          | 408 | TRLEMEIAEYR   | 60   | 99.974 |    |                  | Mascot |        |
|    | 1410.7046                | 1410.705  | 0.0004  | 0   | 398          | 408 | TRLEMEIAEYR   |      |        |    |                  | Mascot |        |
|    | 1426.6995                | 1426.6992 | -0.0003 | 0   | 398          | 408 | TRLEMEIAEYR   | 23   | 0      |    | Oxidation (M)[5] | Mascot |        |
|    | 1426.6995                | 1426.6992 | -0.0003 | 0   | 398          | 408 | TRLEMEIAEYR   |      |        |    | Oxidation (M)[5] | Mascot |        |
|    | 1465.772                 | 1465.7278 | -0.0442 | -30 | 386          | 397 | QGQEYKMLLDIK  |      |        |    |                  | Mascot |        |
|    | 1481.7668                | 1481.7289 | -0.0379 | -26 | 386          | 397 | QGQEYKMLLDIK  |      |        |    | Oxidation (M)[7] | Mascot |        |
| 20 | keratin 15 [Danio rerio] |           |         |     | gi 169158744 |     | 48848.4       | 5.13 | 7      | 87 | 99.99            | 60     | 99.974 |

### Peptide Information

|  | Calc. Mass | Obsrv. Mass | ± da    | ± ppm | Start Seq. | End Sequence Seq. | Ion Score | C. I.  | % Modification   | Rank | Result Type |
|--|------------|-------------|---------|-------|------------|-------------------|-----------|--------|------------------|------|-------------|
|  | 1093.6099  | 1093.5375   | -0.0724 | -66   | 478        | 488 VVSSSTSLVK    |           |        |                  |      | Mascot      |
|  | 1153.5558  | 1153.5552   | -0.0006 | -1    | 424        | 432 LEMEIAEYR     |           |        |                  |      | Mascot      |
|  | 1169.5507  | 1169.6106   | 0.0599  | 51    | 424        | 432 LEMEIAEYR     | 2         | 0      | Oxidation (M)[3] |      | Mascot      |
|  | 1169.5507  | 1169.6106   | 0.0599  | 51    | 424        | 432 LEMEIAEYR     |           |        | Oxidation (M)[3] |      | Mascot      |
|  | 1194.5861  | 1194.5858   | -0.0003 | 0     | 52         | 65 SGSVYGGAGGAGVR |           |        |                  |      | Mascot      |
|  | 1194.5861  | 1194.5858   | -0.0003 | 0     | 52         | 65 SGSVYGGAGGAGVR |           |        |                  |      | Mascot      |
|  | 1282.646   | 1282.645    | -0.001  | -1    | 218        | 227 IKYENELSMR    |           |        |                  |      | Mascot      |
|  | 1298.6409  | 1298.6567   | 0.0158  | 12    | 218        | 227 IKYENELSMR    |           |        | Oxidation (M)[9] |      | Mascot      |
|  | 1309.6569  | 1309.6708   | 0.0139  | 11    | 424        | 433 LEMEIAEYRR    |           |        |                  |      | Mascot      |
|  | 1325.6517  | 1325.6486   | -0.0031 | -2    | 424        | 433 LEMEIAEYRR    |           |        | Oxidation (M)[3] |      | Mascot      |
|  | 1410.7046  | 1410.705    | 0.0004  | 0     | 422        | 432 TRLEMEIAEYR   | 60        | 99.974 |                  |      | Mascot      |
|  | 1410.7046  | 1410.705    | 0.0004  | 0     | 422        | 432 TRLEMEIAEYR   |           |        |                  |      | Mascot      |
|  | 1426.6995  | 1426.6992   | -0.0003 | 0     | 422        | 432 TRLEMEIAEYR   | 23        | 0      | Oxidation (M)[5] |      | Mascot      |
|  | 1426.6995  | 1426.6992   | -0.0003 | 0     | 422        | 432 TRLEMEIAEYR   |           |        | Oxidation (M)[5] |      | Mascot      |
|  | 1465.7356  | 1465.7278   | -0.0078 | -5    | 410        | 421 QGQEYQMLLDIK  |           |        |                  |      | Mascot      |
|  | 1481.7305  | 1481.7289   | -0.0016 | -1    | 410        | 421 QGQEYQMLLDIK  |           |        | Oxidation (M)[7] |      | Mascot      |

22 hypothetical protein LOC436665 [Danio rerio] gi|50539844 47819.6 5.77 8 69 99.413 49 99.651

Peptide Information

|  | Calc. Mass | Obsrv. Mass | ± da    | ± ppm | Start Seq. | End Sequence Seq.      | Ion Score | C. I.  | % Modification           | Rank | Result Type |
|--|------------|-------------|---------|-------|------------|------------------------|-----------|--------|--------------------------|------|-------------|
|  | 807.3995   | 807.3972    | -0.0023 | -3    | 172        | 178 LAADDFR            | 51        | 99.763 |                          |      | Mascot      |
|  | 807.3995   | 807.3972    | -0.0023 | -3    | 172        | 178 LAADDFR            |           |        |                          |      | Mascot      |
|  | 1078.6255  | 1078.4987   | -0.1268 | -118  | 103        | 111 LASYIEKVR          |           |        |                          |      | Mascot      |
|  | 1332.6001  | 1332.676    | 0.0759  | 57    | 37         | 50 AYSITGCGFGGSR       |           |        |                          |      | Mascot      |
|  | 1410.6464  | 1410.705    | 0.0586  | 42    | 2          | 14 SCSLRTSSCQGPK       |           |        | Carbamidomethyl (C)[2]   |      | Mascot      |
|  | 1410.6464  | 1410.705    | 0.0586  | 42    | 2          | 14 SCSLRTSSCQGPK       |           |        | Carbamidomethyl (C)[2]   |      | Mascot      |
|  | 1448.7162  | 1448.7032   | -0.013  | -9    | 331        | 343 CALEASLRETEAR      |           |        |                          |      | Mascot      |
|  | 1863.9554  | 1863.9728   | 0.0174  | 9     | 315        | 330 TLQCLEIELQSQLSMK   |           |        |                          |      | Mascot      |
|  | 1914.92    | 1914.9323   | 0.0123  | 6     | 59         | 75 VGCYPDLLCKISGGYGR   |           |        | Carbamidomethyl (C)[3,9] |      | Mascot      |
|  | 2245.103   | 2245.2681   | 0.1651  | 74    | 181        | 199 YEHEIAVRQCVEDIANLR |           |        |                          |      | Mascot      |

23 keratin 18 [Danio rerio] gi|29335504 41247.4 5.07 6 68 99.261 51 99.763

Peptide Information

|  | Calc. Mass | Obsrv. Mass | ± da | ± ppm | Start | End Sequence | Ion | C. I. | % Modification | Rank | Result Type |
|--|------------|-------------|------|-------|-------|--------------|-----|-------|----------------|------|-------------|
|--|------------|-------------|------|-------|-------|--------------|-----|-------|----------------|------|-------------|

|  |           |           |         | Seq. | Seq. | Score                           |    |        |  |  |  |  |        |
|--|-----------|-----------|---------|------|------|---------------------------------|----|--------|--|--|--|--|--------|
|  | 807.3995  | 807.3972  | -0.0023 | -3   | 91   | 97 LAADDFR                      | 51 | 99.763 |  |  |  |  | Mascot |
|  | 807.3995  | 807.3972  | -0.0023 | -3   | 91   | 97 LAADDFR                      |    |        |  |  |  |  | Mascot |
|  | 882.4753  | 882.5669  | 0.0916  | 104  | 188  | 194 YEKMALK                     |    |        |  |  |  |  | Mascot |
|  | 1078.6255 | 1078.4987 | -0.1268 | -118 | 23   | 31 LASYLEKVR                    |    |        |  |  |  |  | Mascot |
|  | 1221.6586 | 1221.6406 | -0.018  | -15  | 305  | 314 LEAEIATYRR                  |    |        |  |  |  |  | Mascot |
|  | 1464.7111 | 1464.7013 | -0.0098 | -7   | 250  | 262 GSLEGLTRDTEMR               |    |        |  |  |  |  | Mascot |
|  | 2761.4441 | 2761.3696 | -0.0745 | -27  | 263  | 285 YNMEIENLNTIILQLEAEL<br>TQLR |    |        |  |  |  |  | Mascot |

24 RecName: Full=Keratin, type I cytoskeletal 18; gi|148886613 48601.1 5.53 6 67 99.132 51 99.763  
AltName: Full=Cytokeratin-18; Short=CK-18; AltName:

Peptide Information

| Calc. Mass | Obsrv. Mass | ± da    | ± ppm | Start Seq. | End Sequence Seq.               | Ion Score | C. I. % | Modification | Rank | Result Type |
|------------|-------------|---------|-------|------------|---------------------------------|-----------|---------|--------------|------|-------------|
| 807.3995   | 807.3972    | -0.0023 | -3    | 163        | 169 LAADDFR                     | 51        | 99.763  |              |      | Mascot      |
| 807.3995   | 807.3972    | -0.0023 | -3    | 163        | 169 LAADDFR                     |           |         |              |      | Mascot      |
| 882.4753   | 882.5669    | 0.0916  | 104   | 260        | 266 YEKMALK                     |           |         |              |      | Mascot      |
| 1078.6255  | 1078.4987   | -0.1268 | -118  | 95         | 103 LASYLEKVR                   |           |         |              |      | Mascot      |
| 1221.6586  | 1221.6406   | -0.018  | -15   | 377        | 386 LEAEIATYRR                  |           |         |              |      | Mascot      |
| 1464.7111  | 1464.7013   | -0.0098 | -7    | 322        | 334 GSLEGLTRDTEMR               |           |         |              |      | Mascot      |
| 2761.4441  | 2761.3696   | -0.0745 | -27   | 335        | 357 YNMEIENLNTIILQLEAEL<br>TQLR |           |         |              |      | Mascot      |

25 hypothetical protein LOC768289 [Danio rerio] gi|116875789 47729.2 6.11 5 65 98.526 51 99.763

Peptide Information

| Calc. Mass | Obsrv. Mass | ± da    | ± ppm | Start Seq. | End Sequence Seq. | Ion Score | C. I. % | Modification     | Rank | Result Type |
|------------|-------------|---------|-------|------------|-------------------|-----------|---------|------------------|------|-------------|
| 807.3995   | 807.3972    | -0.0023 | -3    | 176        | 182 LAADDFR       | 51        | 99.763  |                  |      | Mascot      |
| 807.3995   | 807.3972    | -0.0023 | -3    | 176        | 182 LAADDFR       |           |         |                  |      | Mascot      |
| 1062.4998  | 1062.4989   | -0.0009 | -1    | 98         | 106 ATMQNLNDR     |           |         |                  |      | Mascot      |
| 1078.4946  | 1078.4987   | 0.0041  | 4     | 98         | 106 ATMQNLNDR     |           |         | Oxidation (M)[3] |      | Mascot      |
| 1362.7991  | 1362.6974   | -0.1017 | -75   | 378        | 388 DYILLLDIKTR   |           |         |                  |      | Mascot      |
| 1410.7621  | 1410.705    | -0.0571 | -40   | 15         | 27 SMTSGSIITKTLR  |           |         | Oxidation (M)[2] |      | Mascot      |
| 1410.7621  | 1410.705    | -0.0571 | -40   | 15         | 27 SMTSGSIITKTLR  |           |         | Oxidation (M)[2] |      | Mascot      |
| 1420.7529  | 1420.7269   | -0.026  | -18   | 297        | 309 EVAISTETIQTTK |           |         |                  |      | Mascot      |

26 hypothetical protein LOC678611 [Danio rerio] gi|94536645 50899.8 8.17 3 58 92.783 51 99.763

Peptide Information

|    | Calc. Mass                                              | Obsrv. Mass | ± da    | ± ppm | Start Seq. | End Sequence Seq. | Ion Score | C. I. % | Modification     | Rank      | Result Type |
|----|---------------------------------------------------------|-------------|---------|-------|------------|-------------------|-----------|---------|------------------|-----------|-------------|
|    | 807.3995                                                | 807.3972    | -0.0023 | -3    | 180        | 186 LAADDFR       | 51        | 99.763  |                  |           | Mascot      |
|    | 807.3995                                                | 807.3972    | -0.0023 | -3    | 180        | 186 LAADDFR       |           |         |                  |           | Mascot      |
|    | 1062.4998                                               | 1062.4989   | -0.0009 | -1    | 102        | 110 ATMQNLNDR     |           |         |                  |           | Mascot      |
|    | 1078.4946                                               | 1078.4987   | 0.0041  | 4     | 102        | 110 ATMQNLNDR     |           |         | Oxidation (M)[3] |           | Mascot      |
|    | 1093.5425                                               | 1093.5375   | -0.005  | -5    | 285        | 292 REQEAWFK      |           |         |                  |           | Mascot      |
| 27 | PREDICTED: hypothetical protein LOC556118 [Danio rerio] |             |         |       |            | gi 326671688      | 82934.8   | 5.43    | 10               | 55 86.248 | 51 99.763   |

#### Peptide Information

|    | Calc. Mass                                   | Obsrv. Mass | ± da    | ± ppm | Start Seq. | End Sequence Seq.             | Ion Score | C. I. % | Modification                              | Rank      | Result Type |
|----|----------------------------------------------|-------------|---------|-------|------------|-------------------------------|-----------|---------|-------------------------------------------|-----------|-------------|
|    | 807.3995                                     | 807.3972    | -0.0023 | -3    | 509        | 515 LAADDFR                   | 51        | 99.763  |                                           |           | Mascot      |
|    | 807.3995                                     | 807.3972    | -0.0023 | -3    | 509        | 515 LAADDFR                   |           |         |                                           |           | Mascot      |
|    | 1062.4998                                    | 1062.4989   | -0.0009 | -1    | 431        | 439 ATMQNLNDR                 |           |         |                                           |           | Mascot      |
|    | 1078.4946                                    | 1078.4987   | 0.0041  | 4     | 431        | 439 ATMQNLNDR                 |           |         | Oxidation (M)[3]                          |           | Mascot      |
|    | 1221.6329                                    | 1221.6406   | 0.0077  | 6     | 537        | 546 CILDKTCLAK                |           |         | Carbamidomethyl (C)[1,7]                  |           | Mascot      |
|    | 1314.7739                                    | 1314.7371   | -0.0368 | -28   | 492        | 503 DATITNGKILLR              |           |         |                                           |           | Mascot      |
|    | 1448.705                                     | 1448.7032   | -0.0018 | -1    | 668        | 680 GALECSLLETEAR             |           |         | Carbamidomethyl (C)[5]                    |           | Mascot      |
|    | 1863.8752                                    | 1863.9728   | 0.0976  | 52    | 732        | 749 CLEENQASQSSQSVSPS V       |           |         |                                           |           | Mascot      |
|    | 2260.1025                                    | 2260.0803   | -0.0222 | -10   | 518        | 536 YENELSIHQCVKADIDNL R      |           |         |                                           |           | Mascot      |
|    | 2276.062                                     | 2276.0759   | 0.0139  | 6     | 381        | 400 TRISSCSYRPNTCSPCPL YK     |           |         |                                           |           | Mascot      |
|    | 2745.3123                                    | 2745.3684   | 0.0561  | 20    | 681        | 703 YSTMLAGYQKHINAYEAE LCQVR  |           |         | Carbamidomethyl (C)[20]                   |           | Mascot      |
|    | 2761.3071                                    | 2761.3696   | 0.0625  | 23    | 681        | 703 YSTMLAGYQKHINAYEAE LCQVR  |           |         | Carbamidomethyl (C)[20], Oxidation (M)[4] |           | Mascot      |
|    | 2844.2646                                    | 2844.3252   | 0.0606  | 21    | 82         | 105 HCYSTCPEICPKPSSFTC PKTCLK |           |         | Carbamidomethyl (C)[2,6,10]               |           | Mascot      |
| 28 | hypothetical protein LOC559906 [Danio rerio] |             |         |       |            | gi 198282017                  | 48541.8   | 5.61    | 4                                         | 54 83.466 | 51 99.763   |

#### Peptide Information

|  | Calc. Mass | Obsrv. Mass | ± da    | ± ppm | Start Seq. | End Sequence Seq. | Ion Score | C. I. % | Modification     | Rank | Result Type |
|--|------------|-------------|---------|-------|------------|-------------------|-----------|---------|------------------|------|-------------|
|  | 807.3995   | 807.3972    | -0.0023 | -3    | 151        | 157 LAADDFR       | 51        | 99.763  |                  |      | Mascot      |
|  | 807.3995   | 807.3972    | -0.0023 | -3    | 151        | 157 LAADDFR       |           |         |                  |      | Mascot      |
|  | 882.4349   | 882.5669    | 0.132   | 150   | 1          | 8 MSSSLSVR        |           |         | Oxidation (M)[1] |      | Mascot      |
|  | 1062.5499  | 1062.4989   | -0.051  | -48   | 142        | 150 IMLEIDNAK     |           |         | Oxidation (M)[2] |      | Mascot      |
|  | 1268.6594  | 1268.6301   | -0.0293 | -23   | 182        | 192 SDHDQIIATLR   |           |         |                  |      | Mascot      |

29    PREDICTED: dystonin [Danio rerio]                      gi|326672751                      766703.7    5.12    43    52    74.975

Peptide Information

| Calc. Mass | Obsrv. Mass | ± da    | ± ppm | Start Seq. | End Seq. | Sequence        | Ion Score | C. I. % Modification   | Rank | Result Type |
|------------|-------------|---------|-------|------------|----------|-----------------|-----------|------------------------|------|-------------|
| 803.4621   | 803.4349    | -0.0272 | -34   | 6111       | 6118     | TGSVQALK        |           |                        |      | Mascot      |
| 842.5168   | 842.5081    | -0.0087 | -10   | 1683       | 1689     | LCLLPVK         |           | Carbamidomethyl (C)[2] |      | Mascot      |
| 940.4482   | 940.4208    | -0.0274 | -29   | 3787       | 3795     | HPSGNDSVK       |           |                        |      | Mascot      |
| 961.4771   | 961.5276    | 0.0505  | 53    | 4395       | 4402     | DHMSISKK        |           | Oxidation (M)[3]       |      | Mascot      |
| 972.5513   | 972.4105    | -0.1408 | -145  | 2134       | 2141     | DYAIHLLK        |           |                        |      | Mascot      |
| 1062.5149  | 1062.4989   | -0.016  | -15   | 1272       | 1279     | MFKTHNER        |           |                        |      | Mascot      |
| 1077.5358  | 1077.5587   | 0.0229  | 21    | 2270       | 2279     | CILSVNDASR      |           |                        |      | Mascot      |
| 1078.5099  | 1078.4987   | -0.0112 | -10   | 1272       | 1279     | MFKTHNER        |           | Oxidation (M)[1]       |      | Mascot      |
| 1093.6476  | 1093.5375   | -0.1101 | -101  | 3972       | 3981     | HALIERAVGK      |           |                        |      | Mascot      |
| 1153.5042  | 1153.5552   | 0.051   | 44    | 4403       | 4413     | VDDACSSLESK     |           |                        |      | Mascot      |
| 1169.6776  | 1169.6106   | -0.067  | -57   | 2558       | 2567     | DPDILLDLKK      |           |                        |      | Mascot      |
| 1169.6776  | 1169.6106   | -0.067  | -57   | 2558       | 2567     | DPDILLDLKK      |           |                        |      | Mascot      |
| 1181.5619  | 1181.5896   | 0.0277  | 23    | 1561       | 1570     | SQLVDDAMFR      |           |                        |      | Mascot      |
| 1181.6095  | 1181.5896   | -0.0199 | -17   | 3385       | 3395     | FANLCKSVSGR     |           |                        |      | Mascot      |
| 1186.5343  | 1186.6426   | 0.1083  | 91    | 2085       | 2094     | AMHTVNPECK      |           | Carbamidomethyl (C)[9] |      | Mascot      |
| 1216.6532  | 1216.5681   | -0.0851 | -70   | 778        | 787      | EEVIRSVQEK      |           |                        |      | Mascot      |
| 1221.611   | 1221.6406   | 0.0296  | 24    | 4310       | 4319     | EFNDLQKEAK      |           |                        |      | Mascot      |
| 1284.5632  | 1284.6288   | 0.0656  | 51    | 1431       | 1441     | AQMSMEEMVTK     |           |                        |      | Mascot      |
| 1309.6609  | 1309.6708   | 0.0099  | 8     | 390        | 399      | MLEIWIEFGR      |           | Oxidation (M)[1]       |      | Mascot      |
| 1314.6246  | 1314.7371   | 0.1125  | 86    | 6303       | 6313     | DPMPQELEEVEK    |           |                        |      | Mascot      |
| 1332.6576  | 1332.676    | 0.0184  | 14    | 449        | 461      | DCAAGEDKLALAR   |           |                        |      | Mascot      |
| 1362.6899  | 1362.6974   | 0.0075  | 6     | 3660       | 3671     | TVNDLLDAWTSK    |           |                        |      | Mascot      |
| 1410.6028  | 1410.705    | 0.1022  | 72    | 3041       | 3052     | ENGNMPEFTPMK    |           | Oxidation (M)[5]       |      | Mascot      |
| 1410.7046  | 1410.705    | 0.0004  | 0     | 3593       | 3604     | MKNISDNFNALK    |           | Oxidation (M)[1]       |      | Mascot      |
| 1426.5977  | 1426.6992   | 0.1015  | 71    | 3041       | 3052     | ENGNMPEFTPMK    |           | Oxidation (M)[5,11]    |      | Mascot      |
| 1426.7761  | 1426.6992   | -0.0769 | -54   | 5698       | 5709     | GLQNKLENLNQR    |           |                        |      | Mascot      |
| 1432.7179  | 1432.7358   | 0.0179  | 12    | 3207       | 3218     | QRSFSEDVISHK    |           |                        |      | Mascot      |
| 1448.6573  | 1448.7032   | 0.0459  | 32    | 4943       | 4955     | YSEINTMSSSVSK   |           | Oxidation (M)[7]       |      | Mascot      |
| 1464.8169  | 1464.7013   | -0.1156 | -79   | 907        | 919      | NPENPIRTSIPVK   |           |                        |      | Mascot      |
| 1465.738   | 1465.7278   | -0.0102 | -7    | 3928       | 3942     | LTEAAASITSSASEK |           |                        |      | Mascot      |
| 1481.7781  | 1481.7289   | -0.0492 | -33   | 4800       | 4812     | VLYQAMSLGQSLR   |           | Oxidation (M)[6]       |      | Mascot      |
| 1566.8638  | 1566.8074   | -0.0564 | -36   | 509        | 521      | FYLADQLVQRVSK   |           |                        |      | Mascot      |

|    |                                                                             |           |         |     |              |      |                               |       |                                               |        |   |
|----|-----------------------------------------------------------------------------|-----------|---------|-----|--------------|------|-------------------------------|-------|-----------------------------------------------|--------|---|
|    | 1582.6472                                                                   | 1582.801  | 0.1538  | 97  | 5683         | 5697 | AGCDLMESSEAGEEAR              |       | Carbamidomethyl (C)[3]                        | Mascot |   |
|    | 1847.9895                                                                   | 1847.9757 | -0.0138 | -7  | 1443         | 1458 | EQIGEALRTTQLMLTK              |       | Oxidation (M)[13]                             | Mascot |   |
|    | 1914.9152                                                                   | 1914.9323 | 0.0171  | 9   | 4599         | 4615 | GTSTKNLDHDLLEEVNSR            |       |                                               | Mascot |   |
|    | 1956.9636                                                                   | 1957.0431 | 0.0795  | 41  | 3838         | 3853 | WKHMLAQIDAGWEEVK              |       | Oxidation (M)[4]                              | Mascot |   |
|    | 2117.0178                                                                   | 2117.1763 | 0.1585  | 75  | 863          | 880  | SSSLHRLLEDLIQESMDEK           |       |                                               | Mascot |   |
|    | 2211.1301                                                                   | 2211.1069 | -0.0232 | -10 | 6571         | 6590 | STVMVRVGGGWALDE<br>FLVK       |       | Oxidation (M)[4]                              | Mascot |   |
|    | 2245.1204                                                                   | 2245.2681 | 0.1477  | 66  | 6225         | 6245 | ATSMGEAILSICHPDSITTI<br>K     |       | Carbamidomethyl (C)[12]                       | Mascot |   |
|    | 2330.1003                                                                   | 2330.0193 | -0.081  | -35 | 2505         | 2524 | SYLNELIQMKMDGASLDE<br>TR      |       | Oxidation (M)[9]                              | Mascot |   |
|    | 2409.1021                                                                   | 2409.2058 | 0.1037  | 43  | 2270         | 2290 | CILSVNDASRLGMLDDEE<br>AER     |       | Carbamidomethyl (C)[1], Oxidation (M)[13]     | Mascot |   |
|    | 2745.4451                                                                   | 2745.3684 | -0.0767 | -28 | 1778         | 1802 | ARLTVDEAVQCGLISSSS<br>ALLVLER |       | Carbamidomethyl (C)[11]                       | Mascot |   |
|    | 2761.4229                                                                   | 2761.3696 | -0.0533 | -19 | 5370         | 5392 | AVQDKLDQMVFLWTDIQ<br>ALLEER   |       |                                               | Mascot |   |
|    | 2774.4604                                                                   | 2774.3843 | -0.0761 | -27 | 1780         | 1804 | LTVDEAVQCGLISSSSAL<br>LVLERQK |       | Carbamidomethyl (C)[9]                        | Mascot |   |
|    | 2775.2158                                                                   | 2775.375  | 0.1592  | 57  | 1048         | 1071 | DSESEVFTMADCAQLE<br>KEVLACK   |       | Carbamidomethyl (C)[13,23]                    | Mascot |   |
|    | 2775.2158                                                                   | 2775.375  | 0.1592  | 57  | 1048         | 1071 | DSESEVFTMADCAQLE<br>KEVLACK   |       | Carbamidomethyl (C)[13,23]                    | Mascot |   |
|    | 2790.4026                                                                   | 2790.3848 | -0.0178 | -6  | 5396         | 5418 | LLDVMDLAEKFWCDHCA<br>LIVTIK   |       | Carbamidomethyl (C)[13,16]                    | Mascot |   |
|    | 2791.2107                                                                   | 2791.3799 | 0.1692  | 61  | 1048         | 1071 | DSESEVFTMADCAQLE<br>KEVLACK   |       | Carbamidomethyl (C)[13,23], Oxidation (M)[10] | Mascot |   |
|    | 2791.2107                                                                   | 2791.3799 | 0.1692  | 61  | 1048         | 1071 | DSESEVFTMADCAQLE<br>KEVLACK   |       | Carbamidomethyl (C)[13,23], Oxidation (M)[10] | Mascot |   |
| 30 | novel protein containing tubulin-binding domains (zgc:103474) [Danio rerio] |           |         |     | gi 169158330 |      | 41021.7                       | 10.38 | 10                                            | 44     | 0 |

#### Peptide Information

| Calc. Mass | Obsrv. Mass | ± da    | ± ppm | Start Seq. | End Seq. | Sequence           | Ion Score | C. I. % | Modification            | Rank | Result Type |
|------------|-------------|---------|-------|------------|----------|--------------------|-----------|---------|-------------------------|------|-------------|
| 842.4227   | 842.5081    | 0.0854  | 101   | 228        | 234      | TDHRTGR            |           |         |                         |      | Mascot      |
| 1093.4943  | 1093.5375   | 0.0432  | 40    | 118        | 127      | SDIQTCSPSR         |           |         |                         |      | Mascot      |
| 1169.6538  | 1169.6106   | -0.0432 | -37   | 159        | 168      | LPFSVARHSR         |           |         |                         |      | Mascot      |
| 1169.6538  | 1169.6106   | -0.0432 | -37   | 159        | 168      | LPFSVARHSR         |           |         |                         |      | Mascot      |
| 1221.5892  | 1221.6406   | 0.0514  | 42    | 118        | 128      | SDIQTCSPSRK        |           |         |                         |      | Mascot      |
| 1297.7587  | 1297.709    | -0.0497 | -38   | 183        | 194      | SSLPRPASILTR       |           |         |                         |      | Mascot      |
| 1332.6251  | 1332.676    | 0.0509  | 38    | 235        | 247      | SHSATGTESGRSR      |           |         |                         |      | Mascot      |
| 1410.7172  | 1410.705    | -0.0122 | -9    | 137        | 148      | HRPRTQHHACVK       |           |         |                         |      | Mascot      |
| 1410.7172  | 1410.705    | -0.0122 | -9    | 137        | 148      | HRPRTQHHACVK       |           |         |                         |      | Mascot      |
| 1566.8182  | 1566.8074   | -0.0108 | -7    | 137        | 149      | HRPRTQHHACVKR      |           |         |                         |      | Mascot      |
| 1914.9702  | 1914.9323   | -0.0379 | -20   | 354        | 370      | IDLSHVTSKCGSLDNIR  |           |         | Carbamidomethyl (C)[10] |      | Mascot      |
| 2774.3162  | 2774.3843   | 0.0681  | 25    | 248        | 275      | SARSGTSTPHTPGSTAIT |           |         |                         |      | Mascot      |

|    |                                              |              |         |      |    |    |   |
|----|----------------------------------------------|--------------|---------|------|----|----|---|
| 31 | hypothetical protein LOC569254 [Danio rerio] | gi 165972439 | 55925.1 | 6.95 | 11 | 44 | 0 |
|----|----------------------------------------------|--------------|---------|------|----|----|---|

| Calc. Mass | Obsrv. Mass | ± da    | ± ppm | Start Seq. | End Seq. | Sequence                  | Ion Score | C. I. % | Modification                             | Rank | Result Type |
|------------|-------------|---------|-------|------------|----------|---------------------------|-----------|---------|------------------------------------------|------|-------------|
| 807.3665   | 807.3972    | 0.0307  | 38    | 333        | 338      | QLMDER                    |           |         | Oxidation (M)[3]                         |      | Mascot      |
| 807.4215   | 807.3972    | -0.0243 | -30   | 466        | 471      | LMEMKR                    |           |         |                                          |      | Mascot      |
| 961.5499   | 961.5276    | -0.0223 | -23   | 228        | 235      | LLQATCKK                  |           |         | Carbamidomethyl (C)[6]                   |      | Mascot      |
| 1153.5485  | 1153.5552   | 0.0067  | 6     | 389        | 398      | SFAELTDQSR                |           |         |                                          |      | Mascot      |
| 1298.7289  | 1298.6567   | -0.0722 | -56   | 67         | 77       | LASVVFYCLRK               |           |         |                                          |      | Mascot      |
| 1414.7471  | 1414.8127   | 0.0656  | 46    | 144        | 155      | QQLSPSKPITCR              |           |         | Carbamidomethyl (C)[11]                  |      | Mascot      |
| 1481.6941  | 1481.7289   | 0.0348  | 23    | 422        | 435      | SVYTDDCLGPGNLK            |           |         |                                          |      | Mascot      |
| 2260.1001  | 2260.0803   | -0.0198 | -9    | 1          | 18       | MLCSDQNFDIAQVIRFFR        |           |         | Carbamidomethyl (C)[3]                   |      | Mascot      |
| 2276.095   | 2276.0759   | -0.0191 | -8    | 1          | 18       | MLCSDQNFDIAQVIRFFR        |           |         | Carbamidomethyl (C)[3], Oxidation (M)[1] |      | Mascot      |
| 2330.2073  | 2330.0193   | -0.188  | -81   | 136        | 155      | WLAHYSSKQQLSPSKPITCR      |           |         |                                          |      | Mascot      |
| 2409.1907  | 2409.2058   | 0.0151  | 6     | 236        | 255      | FYQFCSEQGIALSKQNFTLK      |           |         | Carbamidomethyl (C)[5]                   |      | Mascot      |
| 2727.4426  | 2727.3708   | -0.0718 | -26   | 111        | 135      | VPVYGMKLPTGFQLIGQVGLSDYTK |           |         | Oxidation (M)[6]                         |      | Mascot      |

|    |                                                                                                  |              |       |      |   |    |   |
|----|--------------------------------------------------------------------------------------------------|--------------|-------|------|---|----|---|
| 32 | ELAV (embryonic lethal, abnormal vision, <i>Drosophila</i> )-like 4 (Hu antigen D) [Danio rerio] | gi 159571092 | 16088 | 6.26 | 6 | 42 | 0 |
|----|--------------------------------------------------------------------------------------------------|--------------|-------|------|---|----|---|

| Calc. Mass | Obsrv. Mass | ± da   | ± ppm | Start Seq. | End Seq. | Sequence                        | Ion Score | C. I. % | Modification            | Rank | Result Type |
|------------|-------------|--------|-------|------------|----------|---------------------------------|-----------|---------|-------------------------|------|-------------|
| 1194.5573  | 1194.5858   | 0.0285 | 24    | 2          | 11       | VMGSTETQWR                      |           |         |                         |      | Mascot      |
| 1194.5573  | 1194.5858   | 0.0285 | 24    | 2          | 11       | VMGSTETQWR                      |           |         |                         |      | Mascot      |
| 1325.5977  | 1325.6486   | 0.0509 | 38    | 1          | 11       | MVMGSTETQWR                     |           |         |                         |      | Mascot      |
| 1414.7649  | 1414.8127   | 0.0478 | 34    | 128        | 140      | DAEKAINTLNGLR                   |           |         |                         |      | Mascot      |
| 1426.6882  | 1426.6992   | 0.011  | 8     | 93         | 105      | SLFGSIGEIESCK                   |           |         | Carbamidomethyl (C)[12] |      | Mascot      |
| 1426.6882  | 1426.6992   | 0.011  | 8     | 93         | 105      | SLFGSIGEIESCK                   |           |         | Carbamidomethyl (C)[12] |      | Mascot      |
| 2774.2832  | 2774.3843   | 0.1011 | 36    | 32         | 58       | MIISNMEPQVTNGPNSAT<br>ANGPSSNSR |           |         |                         |      | Mascot      |
| 2790.3337  | 2790.3848   | 0.0511 | 18    | 1          | 24       | MVMGSTETQWRQADLP<br>QLQGWAEEK   |           |         |                         |      | Mascot      |

|    |                                                                     |             |          |      |    |    |   |
|----|---------------------------------------------------------------------|-------------|----------|------|----|----|---|
| 33 | myeloid/lymphoid or mixed-lineage leukemia protein<br>[Danio rerio] | gi 86129850 | 127802.9 | 8.91 | 20 | 41 | 0 |
|----|---------------------------------------------------------------------|-------------|----------|------|----|----|---|

| Calc. Mass | Obsrv. Mass | ± da | ± ppm | Start Seq. | End Sequence | Ion Score | C. I. % | Modification | Rank | Result Type |
|------------|-------------|------|-------|------------|--------------|-----------|---------|--------------|------|-------------|
|------------|-------------|------|-------|------------|--------------|-----------|---------|--------------|------|-------------|

|           |           |         |     |      |      |                             |  |  |                          |  |        |
|-----------|-----------|---------|-----|------|------|-----------------------------|--|--|--------------------------|--|--------|
| 803.4144  | 803.4349  | 0.0205  | 26  | 1114 | 1120 | LGEEEDIK                    |  |  |                          |  | Mascot |
| 807.4392  | 807.3972  | -0.042  | -52 | 459  | 465  | KANSMLK                     |  |  | Oxidation (M)[5]         |  | Mascot |
| 807.4392  | 807.3972  | -0.042  | -52 | 459  | 465  | KANSMLK                     |  |  | Oxidation (M)[5]         |  | Mascot |
| 961.4594  | 961.5276  | 0.0682  | 71  | 276  | 284  | GNLCPLCNK                   |  |  |                          |  | Mascot |
| 1077.5609 | 1077.5587 | -0.0022 | -2  | 202  | 210  | TKQLECDK                    |  |  |                          |  | Mascot |
| 1093.5646 | 1093.5375 | -0.0271 | -25 | 234  | 242  | VWVCTKCVR                   |  |  |                          |  | Mascot |
| 1169.5771 | 1169.6106 | 0.0335  | 29  | 755  | 764  | LFPVGYQCSR                  |  |  |                          |  | Mascot |
| 1169.5771 | 1169.6106 | 0.0335  | 29  | 755  | 764  | LFPVGYQCSR                  |  |  |                          |  | Mascot |
| 1194.5077 | 1194.5858 | 0.0781  | 65  | 189  | 197  | CRFCHVCGR                   |  |  | Carbamidomethyl (C)[1,4] |  | Mascot |
| 1194.7028 | 1194.5858 | -0.117  | -98 | 64   | 73   | CVQPLKPKPK                  |  |  | Carbamidomethyl (C)[1]   |  | Mascot |
| 1221.5714 | 1221.6406 | 0.0692  | 57  | 204  | 212  | QLLECDKCR                   |  |  | Carbamidomethyl (C)[5,8] |  | Mascot |
| 1297.6721 | 1297.709  | 0.0369  | 28  | 754  | 764  | KLFPVGYQCSR                 |  |  |                          |  | Mascot |
| 1298.6448 | 1298.6567 | 0.0119  | 9   | 894  | 905  | HSTSSISAQQPR                |  |  |                          |  | Mascot |
| 1426.726  | 1426.6992 | -0.0268 | -19 | 683  | 693  | VYCQHHKDLVK                 |  |  | Carbamidomethyl (C)[3]   |  | Mascot |
| 1426.726  | 1426.6992 | -0.0268 | -19 | 683  | 693  | VYCQHHKDLVK                 |  |  | Carbamidomethyl (C)[3]   |  | Mascot |
| 1582.8986 | 1582.801  | -0.0976 | -62 | 782  | 795  | ILVCRPPLSETLNK              |  |  |                          |  | Mascot |
| 1708.7992 | 1708.8055 | 0.0063  | 4   | 1056 | 1071 | ANPNKEGNMTSMAALK            |  |  | Oxidation (M)[9,12]      |  | Mascot |
| 1708.7992 | 1708.8055 | 0.0063  | 4   | 1056 | 1071 | ANPNKEGNMTSMAALK            |  |  | Oxidation (M)[9,12]      |  | Mascot |
| 1863.9559 | 1863.9728 | 0.0169  | 9   | 443  | 459  | IIQTAFNSDGGQLESRK           |  |  |                          |  | Mascot |
| 1957.0978 | 1957.0431 | -0.0547 | -28 | 356  | 372  | QVLTALFNSRTSTHLLR           |  |  |                          |  | Mascot |
| 2116.8845 | 2117.1763 | 0.2918  | 138 | 583  | 600  | QCALCLNYGDEKTNDGGR          |  |  | Carbamidomethyl (C)[2,5] |  | Mascot |
| 2245.0627 | 2245.2681 | 0.2054  | 91  | 1033 | 1053 | DNDLPAGATFMSSHPLA<br>MLPK   |  |  | Oxidation (M)[11,18]     |  | Mascot |
| 2275.9761 | 2276.0759 | 0.0998  | 44  | 254  | 272  | AWDAQWSDHDFSLCHDC<br>AKR    |  |  |                          |  | Mascot |
| 2330.1597 | 2330.0193 | -0.1404 | -60 | 1091 | 1113 | SHDYASGPAAVVAMKPL<br>WSSGAK |  |  |                          |  | Mascot |

34 PREDICTED: suppressor of IKBKE 1-like [Danio rerio] gi|125852483 24679.3 5.47 8 41 0

#### Peptide Information

| Calc. Mass | Obsrv. Mass | ± da    | ± ppm | Start Seq. | End Sequence Seq. | Ion Score  | C. I. % Modification   | Rank | Result Type |
|------------|-------------|---------|-------|------------|-------------------|------------|------------------------|------|-------------|
| 972.4996   | 972.4105    | -0.0891 | -92   | 45         | 53                | EVGNTLPDK  |                        |      | Mascot      |
| 1123.5057  | 1123.5376   | 0.0319  | 28    | 145        | 153               | ICEMGQVMR  | Carbamidomethyl (C)[2] |      | Mascot      |
| 1123.5057  | 1123.5376   | 0.0319  | 28    | 145        | 153               | ICEMGQVMR  | Carbamidomethyl (C)[2] |      | Mascot      |
| 1169.5187  | 1169.6106   | 0.0919  | 79    | 111        | 119               | QMLQMMMEK  |                        |      | Mascot      |
| 1169.5187  | 1169.6106   | 0.0919  | 79    | 111        | 119               | QMLQMMMEK  |                        |      | Mascot      |
| 1297.6135  | 1297.709    | 0.0955  | 74    | 111        | 120               | QMLQMMMEKK |                        |      | Mascot      |



|           |           |         |     |     |     |                             |                                          |        |
|-----------|-----------|---------|-----|-----|-----|-----------------------------|------------------------------------------|--------|
| 1465.7137 | 1465.7278 | 0.0141  | 10  | 1   | 13  | MSCSLEKVLGDAR               | Carbamidomethyl (C)[3]                   | Mascot |
| 1481.7086 | 1481.7289 | 0.0203  | 14  | 1   | 13  | MSCSLEKVLGDAR               | Carbamidomethyl (C)[3], Oxidation (M)[1] | Mascot |
| 1708.7418 | 1708.8055 | 0.0637  | 37  | 154 | 167 | QAVQMDDQHYCSVK              | Carbamidomethyl (C)[11]                  | Mascot |
| 1708.7418 | 1708.8055 | 0.0637  | 37  | 154 | 167 | QAVQMDDQHYCSVK              | Carbamidomethyl (C)[11]                  | Mascot |
| 2330.1848 | 2330.0193 | -0.1655 | -71 | 89  | 107 | ELWLSLEEHQYALEIMG<br>R      |                                          | Mascot |
| 2727.4536 | 2727.3708 | -0.0828 | -30 | 121 | 144 | ELDTKPVLSLHQNHAKV<br>QSQLGR |                                          | Mascot |

35 PREDICTED: CUB domain-containing protein 1-like [Danio rerio] gi|326676403 23295.4 6.58 7 41 0

#### Peptide Information

| Calc. Mass | Obsrv. Mass | ± da    | ± ppm | Start Seq. | End Seq. | Sequence                      | Ion Score | C. I. | % Modification               | Rank | Result Type |
|------------|-------------|---------|-------|------------|----------|-------------------------------|-----------|-------|------------------------------|------|-------------|
| 882.4355   | 882.5669    | 0.1314  | 149   | 118        | 124      | SFTWDVK                       |           |       |                              |      | Mascot      |
| 1077.5952  | 1077.5587   | -0.0365 | -34   | 180        | 187      | IQVWYRGR                      |           |       |                              |      | Mascot      |
| 1194.5935  | 1194.5858   | -0.0077 | -6    | 163        | 173      | TGPISIGSFCR                   |           |       | Carbamidomethyl (C)[10]      |      | Mascot      |
| 1194.5935  | 1194.5858   | -0.0077 | -6    | 163        | 173      | TGPISIGSFCR                   |           |       | Carbamidomethyl (C)[10]      |      | Mascot      |
| 1362.6504  | 1362.6974   | 0.047   | 34    | 41         | 52       | KPGQGLDCTVCK                  |           |       | Carbamidomethyl (C)[8,11]    |      | Mascot      |
| 1420.7219  | 1420.7269   | 0.005   | 4     | 118        | 129      | SFTWDVKVHSSK                  |           |       |                              |      | Mascot      |
| 1956.9572  | 1957.0431   | 0.0859  | 44    | 125        | 141      | VHSSKMFHLDFPAPGMR             |           |       |                              |      | Mascot      |
| 2828.2244  | 2828.332    | 0.1076  | 38    | 41         | 65       | KPGQGLDCTVCKNEDSS<br>QSCDSSLR |           |       | Carbamidomethyl (C)[8,11,20] |      | Mascot      |

36 proteasome 26S non-ATPase subunit 13 [Danio rerio] gi|239596181 30992.1 5.93 8 40 0

#### Peptide Information

| Calc. Mass | Obsrv. Mass | ± da    | ± ppm | Start Seq. | End Seq. | Sequence                     | Ion Score | C. I. | % Modification          | Rank | Result Type |
|------------|-------------|---------|-------|------------|----------|------------------------------|-----------|-------|-------------------------|------|-------------|
| 882.4389   | 882.5669    | 0.128   | 145   | 90         | 97       | YLGCVEAK                     |           |       |                         |      | Mascot      |
| 1153.5935  | 1153.5552   | -0.0383 | -33   | 242        | 250      | VHMTWVQPR                    |           |       |                         |      | Mascot      |
| 1169.5885  | 1169.6106   | 0.0221  | 19    | 242        | 250      | VHMTWVQPR                    |           |       | Oxidation (M)[3]        |      | Mascot      |
| 1169.5885  | 1169.6106   | 0.0221  | 19    | 242        | 250      | VHMTWVQPR                    |           |       | Oxidation (M)[3]        |      | Mascot      |
| 1297.6833  | 1297.709    | 0.0257  | 20    | 241        | 250      | KVHMTWVQPR                   |           |       | Oxidation (M)[4]        |      | Mascot      |
| 1332.7191  | 1332.676    | -0.0431 | -32   | 15         | 26       | VKASDEAVILCK                 |           |       | Carbamidomethyl (C)[11] |      | Mascot      |
| 1362.7627  | 1362.6974   | -0.0653 | -48   | 1          | 12       | PNTAITFLEKTK                 |           |       |                         |      | Mascot      |
| 1410.6471  | 1410.705    | 0.0579  | 41    | 262        | 272      | DRLDFWCGDVK                  |           |       | Carbamidomethyl (C)[7]  |      | Mascot      |
| 1410.6471  | 1410.705    | 0.0579  | 41    | 262        | 272      | DRLDFWCGDVK                  |           |       | Carbamidomethyl (C)[7]  |      | Mascot      |
| 1414.7974  | 1414.8127   | 0.0153  | 11    | 213        | 224      | IQVNEVELLMK                  |           |       |                         |      | Mascot      |
| 2745.4854  | 2745.3684   | -0.117  | -43   | 201        | 224      | QLSFQEIAQSAKIQVNEV<br>ELLVMK |           |       |                         |      | Mascot      |
| 2761.4805  | 2761.3696   | -0.1109 | -40   | 201        | 224      | QLSFQEIAQSAKIQVNEV           |           |       | Oxidation (M)[23]       |      | Mascot      |

37    novel protein [Danio rerio]    ELLVMK  
 gi|122890854    40988.8    5.14    5    39    0    26    23.912

Peptide Information

| Calc. Mass | Obsrv. Mass | ± da    | ± ppm | Start Seq. | End Seq. | Sequence                     | Ion Score | C. I.  | % Modification          | Rank | Result Type |
|------------|-------------|---------|-------|------------|----------|------------------------------|-----------|--------|-------------------------|------|-------------|
| 807.3665   | 807.3972    | 0.0307  | 38    | 47         | 53       | SPAETMR                      | 26        | 23.912 | Oxidation (M)[6]        |      | Mascot      |
| 807.3665   | 807.3972    | 0.0307  | 38    | 47         | 53       | SPAETMR                      |           |        | Oxidation (M)[6]        |      | Mascot      |
| 1314.6259  | 1314.7371   | 0.1112  | 85    | 156        | 166      | YGNLTGFCLNR                  |           |        | Carbamidomethyl (C)[8]  |      | Mascot      |
| 1481.6139  | 1481.7289   | 0.115   | 78    | 350        | 363      | HAVEEQADGQPDGE               |           |        |                         |      | Mascot      |
| 1863.8679  | 1863.9728   | 0.1049  | 56    | 239        | 256      | ESKDNGQTTKPSTDGNG<br>K       |           |        |                         |      | Mascot      |
| 2761.4011  | 2761.3696   | -0.0315 | -11   | 47         | 71       | SPAETMRELISNLSLCV<br>PFGGLVR |           |        | Carbamidomethyl (C)[17] |      | Mascot      |

38    PREDICTED: retrotransposable element Tf2 155 kDa  
 protein type 1-like [Danio rerio]

gi|326664766    171739.7    7.54    17    39    0

Peptide Information

| Calc. Mass | Obsrv. Mass | ± da    | ± ppm | Start Seq. | End Seq. | Sequence                   | Ion Score | C. I. | % Modification                               | Rank | Result Type |
|------------|-------------|---------|-------|------------|----------|----------------------------|-----------|-------|----------------------------------------------|------|-------------|
| 803.4522   | 803.4349    | -0.0173 | -22   | 1192       | 1197     | SWINRK                     |           |       |                                              |      | Mascot      |
| 807.4359   | 807.3972    | -0.0387 | -48   | 705        | 710      | NLEYIR                     |           |       |                                              |      | Mascot      |
| 807.4359   | 807.3972    | -0.0387 | -48   | 705        | 710      | NLEYIR                     |           |       |                                              |      | Mascot      |
| 940.3685   | 940.4208    | 0.0523  | 56    | 851        | 858      | CSPCQMSK                   |           |       | Carbamidomethyl (C)[1]                       |      | Mascot      |
| 961.5023   | 961.5276    | 0.0253  | 26    | 917        | 925      | LPTAMETAK                  |           |       |                                              |      | Mascot      |
| 1093.5465  | 1093.5375   | -0.009  | -8    | 835        | 842      | YWWPSINK                   |           |       |                                              |      | Mascot      |
| 1153.5856  | 1153.5552   | -0.0304 | -26   | 20         | 28       | CKGFLQCK                   |           |       | Carbamidomethyl (C)[1,8]                     |      | Mascot      |
| 1194.6266  | 1194.5858   | -0.0408 | -34   | 695        | 704      | HPFTVITDHK                 |           |       |                                              |      | Mascot      |
| 1194.6266  | 1194.5858   | -0.0408 | -34   | 695        | 704      | HPFTVITDHK                 |           |       |                                              |      | Mascot      |
| 1221.6198  | 1221.6406   | 0.0208  | 17    | 652        | 661      | LHPCAFYSRK                 |           |       |                                              |      | Mascot      |
| 1298.5504  | 1298.6567   | 0.1063  | 82    | 377        | 387      | DGSLCPCIDYR                |           |       | Carbamidomethyl (C)[5]                       |      | Mascot      |
| 1309.6569  | 1309.6708   | 0.0139  | 11    | 1          | 12       | MTSGARLAFPDK               |           |       | Oxidation (M)[1]                             |      | Mascot      |
| 1362.8354  | 1362.6974   | -0.138  | -101  | 1305       | 1317     | SKVAFVITLLSGK              |           |       |                                              |      | Mascot      |
| 1426.6454  | 1426.6992   | 0.0538  | 38    | 376        | 387      | KDGLCPCIDYR                | 4         | 0     | Carbamidomethyl (C)[8]                       |      | Mascot      |
| 1426.6848  | 1426.6992   | 0.0144  | 10    | 934        | 945      | YYGLPEDIVSDR               |           |       |                                              |      | Mascot      |
| 1956.8976  | 1957.0431   | 0.1455  | 74    | 843        | 858      | DVINFINKCSPCQMSK           |           |       | Carbamidomethyl (C)[9,12], Oxidation (M)[14] |      | Mascot      |
| 2260.0464  | 2260.0803   | 0.0339  | 15    | 1054       | 1072     | NCEEVWNAATHLSHAV<br>WR     |           |       |                                              |      | Mascot      |
| 2745.2949  | 2745.3684   | 0.0735  | 27    | 982        | 1003     | LNQEIGRFLHTYCHSNQN<br>EWAK |           |       | Carbamidomethyl (C)[13]                      |      | Mascot      |
| 2775.3923  | 2775.375    | -0.0173 | -6    | 45         | 70       | IAFVCSLLTGKALDWATA         |           |       |                                              |      | Mascot      |

2775.3923

2775.375

-0.0173

-6

45

FDHPEGGR

IAFVCSLLTGKALDWATA

FDHPEGGR

70

Mascot

39

v-raf-1 murine leukemia viral oncogene homolog 1a [Danio rerio]

gi|289449304

70289

9.46

11

38

0

| Peptide Information |             |         |       |            |          |                           |           |         |                          |                  |
|---------------------|-------------|---------|-------|------------|----------|---------------------------|-----------|---------|--------------------------|------------------|
| Calc. Mass          | Obsrv. Mass | ± da    | ± ppm | Start Seq. | End Seq. | Sequence                  | Ion Score | C. I. % | Modification             | Rank Result Type |
| 882.4791            | 882.5669    | 0.0878  | 99    | 215        | 222      | IPSSSVHR                  |           |         |                          | Mascot           |
| 1078.5714           | 1078.4987   | -0.0727 | -67   | 534        | 542      | DQIIFMVGR                 |           |         |                          | Mascot           |
| 1362.6471           | 1362.6974   | 0.0503  | 37    | 430        | 441      | QTAQGMDYLHAK              |           |         |                          | Mascot           |
| 1464.6383           | 1464.7013   | 0.063   | 43    | 33         | 46       | SPAPCQSRSSDDSK            |           |         |                          | Mascot           |
| 1566.8171           | 1566.8074   | -0.0097 | -6    | 381        | 393      | HVNILLFMGYMTK             |           |         |                          | Mascot           |
| 1582.812            | 1582.801    | -0.011  | -7    | 381        | 393      | HVNILLFMGYMTK             |           |         | Oxidation (M)[8]         | Mascot           |
| 1915.0396           | 1914.9323   | -0.1073 | -56   | 2          | 18       | EQLQGAWRTVTNGLLTK         |           |         |                          | Mascot           |
| 2144.0249           | 2144.1345   | 0.1096  | 51    | 607        | 626      | ASQSEDISSCTLTSMKLPVF      |           |         |                          | Mascot           |
| 2211.0908           | 2211.1069   | 0.0161  | 7     | 81         | 99       | VRGLQPECCAVFSLHPGQR       |           |         | Carbamidomethyl (C)[8,9] | Mascot           |
| 2775.5403           | 2775.375    | -0.1653 | -60   | 571        | 594      | SKDERPLFPQILSSIELLQHSLPK  |           |         |                          | Mascot           |
| 2775.5403           | 2775.375    | -0.1653 | -60   | 571        | 594      | SKDERPLFPQILSSIELLQHSLPK  |           |         |                          | Mascot           |
| 2828.4148           | 2828.332    | -0.0828 | -29   | 473        | 497      | ARWSGSQQVEQPSGSILWMAPEVIR |           |         | Oxidation (M)[19]        | Mascot           |
| 2866.5542           | 2866.2932   | -0.261  | -91   | 53         | 77       | VFLPNQQRTVVNVRPGMTLHSLIK  |           |         | Oxidation (M)[17]        | Mascot           |

40

hypothetical protein LOC777712 [Danio rerio]

gi|118150536

102799.2

5.2

8

38

0

24

0

| Peptide Information |             |         |       |            |          |                                |           |         |                         |      |             |
|---------------------|-------------|---------|-------|------------|----------|--------------------------------|-----------|---------|-------------------------|------|-------------|
| Calc. Mass          | Obsrv. Mass | ± da    | ± ppm | Start Seq. | End Seq. | Sequence                       | Ion Score | C. I. % | Modification            | Rank | Result Type |
| 807.3665            | 807.3972    | 0.0307  | 38    | 598        | 604      | SPAETMR                        | 26        | 23.912  | Oxidation (M)[6]        |      | Mascot      |
| 807.3917            | 807.3972    | 0.0055  | 7     | 378        | 384      | DADIMVK                        |           |         | Oxidation (M)[5]        |      | Mascot      |
| 1169.6599           | 1169.6106   | -0.0493 | -42   | 397        | 406      | SIKVTMSYIK                     |           |         |                         |      | Mascot      |
| 1169.6599           | 1169.6106   | -0.0493 | -42   | 397        | 406      | SIKVTMSYIK                     |           |         |                         |      | Mascot      |
| 1314.6259           | 1314.7371   | 0.1112  | 85    | 707        | 717      | YGNLTGFCLNR                    |           |         | Carbamidomethyl (C)[8]  |      | Mascot      |
| 1481.6139           | 1481.7289   | 0.115   | 78    | 901        | 914      | HAVEEQADGQPDGE                 |           |         |                         |      | Mascot      |
| 1708.8727           | 1708.8055   | -0.0672 | -39   | 364        | 377      | FLDGKALIEMVDWR                 |           |         | Oxidation (M)[10]       |      | Mascot      |
| 1708.8727           | 1708.8055   | -0.0672 | -39   | 364        | 377      | FLDGKALIEMVDWR                 |           |         | Oxidation (M)[10]       |      | Mascot      |
| 1863.8679           | 1863.9728   | 0.1049  | 56    | 790        | 807      | ESKDNGQTTKPSTDGNGK             |           |         |                         |      | Mascot      |
| 2761.4011           | 2761.3696   | -0.0315 | -11   | 598        | 622      | SPAETMRELISNLSDL CV<br>PFGGLVR |           |         | Carbamidomethyl (C)[17] |      | Mascot      |

41 CTAGE family, member 5 [Danio rerio] gi|41053471 77796.7 5.5 10 36 0 15 0

Peptide Information

| Calc. Mass | Obsrv. Mass | ± da    | ± ppm | Start Seq. | End Seq. | Sequence                  | Ion Score | C. I. | % Modification               | Rank | Result Type |
|------------|-------------|---------|-------|------------|----------|---------------------------|-----------|-------|------------------------------|------|-------------|
| 940.4734   | 940.4208    | -0.0526 | -56   | 264        | 271      | EDLHEGIK                  |           |       |                              |      | Mascot      |
| 1123.5187  | 1123.5376   | 0.0189  | 17    | 157        | 165      | LSELEEEMK                 |           |       | Oxidation (M)[8]             |      | Mascot      |
| 1123.5187  | 1123.5376   | 0.0189  | 17    | 157        | 165      | LSELEEEMK                 |           |       | Oxidation (M)[8]             |      | Mascot      |
| 1181.6174  | 1181.5896   | -0.0278 | -24   | 375        | 384      | KAHDNWLAAR                |           |       |                              |      | Mascot      |
| 1181.6174  | 1181.5896   | -0.0278 | -24   | 375        | 384      | KAHDNWLAAR                | 15        | 0     |                              |      | Mascot      |
| 1216.5878  | 1216.5681   | -0.0197 | -16   | 134        | 143      | EEHTMLLESK                |           |       |                              |      | Mascot      |
| 1282.6711  | 1282.645    | -0.0261 | -20   | 13         | 23       | CKVLETFSEVK               |           |       |                              |      | Mascot      |
| 1309.4969  | 1309.6708   | 0.1739  | 133   | 170        | 181      | SHAGMMEDCANK              |           |       | Oxidation (M)[5]             |      | Mascot      |
| 1325.4918  | 1325.6486   | 0.1568  | 118   | 170        | 181      | SHAGMMEDCANK              |           |       | Oxidation (M)[5,6]           |      | Mascot      |
| 1420.6849  | 1420.7269   | 0.042   | 30    | 29         | 41       | LESTLQNNGMSAR             |           |       |                              |      | Mascot      |
| 1956.8794  | 1957.0431   | 0.1637  | 84    | 487        | 504      | SGPHSDSGSLSPSWDRE<br>R    |           |       |                              |      | Mascot      |
| 2144.1079  | 2144.1345   | 0.0266  | 12    | 624        | 643      | GPHVLPGMGRGPLPPG<br>MFPR  |           |       |                              |      | Mascot      |
| 2260.0632  | 2260.0803   | 0.0171  | 8     | 584        | 604      | MGPLPPPGPPLMSMPPP<br>MDPR |           |       | Oxidation (M)[1, 12, 14]     |      | Mascot      |
| 2276.0581  | 2276.0759   | 0.0178  | 8     | 584        | 604      | MGPLPPPGPPLMSMPPP<br>MDPR |           |       | Oxidation (M)[1, 12, 14, 18] |      | Mascot      |

42 novel protein containing tubulin-binding domains (zgc:103474) [Danio rerio]

gi|169158329 64444.3 8.39 11 35 0

Peptide Information

| Calc. Mass | Obsrv. Mass | ± da    | ± ppm | Start Seq. | End Seq. | Sequence          | Ion Score | C. I. | % Modification          | Rank | Result Type |
|------------|-------------|---------|-------|------------|----------|-------------------|-----------|-------|-------------------------|------|-------------|
| 807.4359   | 807.3972    | -0.0387 | -48   | 493        | 498      | LDFREK            |           |       |                         |      | Mascot      |
| 807.4359   | 807.3972    | -0.0387 | -48   | 493        | 498      | LDFREK            |           |       |                         |      | Mascot      |
| 972.5234   | 972.4105    | -0.1129 | -116  | 479        | 487      | HRPGGGHVR         |           |       |                         |      | Mascot      |
| 1093.4943  | 1093.5375   | 0.0432  | 40    | 245        | 254      | SDIQTCSPSR        |           |       |                         |      | Mascot      |
| 1169.6538  | 1169.6106   | -0.0432 | -37   | 286        | 295      | LPFSVARHSR        |           |       |                         |      | Mascot      |
| 1169.6538  | 1169.6106   | -0.0432 | -37   | 286        | 295      | LPFSVARHSR        |           |       |                         |      | Mascot      |
| 1221.5892  | 1221.6406   | 0.0514  | 42    | 245        | 255      | SDIQTCSPSRK       |           |       |                         |      | Mascot      |
| 1297.7587  | 1297.709    | -0.0497 | -38   | 310        | 321      | SSLPRPASILTR      |           |       |                         |      | Mascot      |
| 1410.7172  | 1410.705    | -0.0122 | -9    | 264        | 275      | HRPTQHHACVK       |           |       |                         |      | Mascot      |
| 1410.7172  | 1410.705    | -0.0122 | -9    | 264        | 275      | HRPTQHHACVK       |           |       |                         |      | Mascot      |
| 1566.8182  | 1566.8074   | -0.0108 | -7    | 264        | 276      | HRPTQHHACVKR      |           |       |                         |      | Mascot      |
| 1914.9702  | 1914.9323   | -0.0379 | -20   | 462        | 478      | IDLSHVTSKCGSLDNIR |           |       | Carbamidomethyl (C)[10] |      | Mascot      |

|    |                                                                       |           |        |    |     |              |                                  |      |    |    |   |  |        |
|----|-----------------------------------------------------------------------|-----------|--------|----|-----|--------------|----------------------------------|------|----|----|---|--|--------|
|    | 2245.157                                                              | 2245.2681 | 0.1111 | 49 | 535 | 556          | VDHGAEIVETLGLSGGT<br>SPHR        |      |    |    |   |  | Mascot |
|    | 2774.3162                                                             | 2774.3843 | 0.0681 | 25 | 356 | 383          | SARSGTSTPHTPGSTAIT<br>PGTPPSYSCR |      |    |    |   |  | Mascot |
| 43 | PREDICTED: inositol 1,4,5-trisphosphate receptor type 1 [Danio rerio] |           |        |    |     |              |                                  |      |    |    |   |  |        |
|    |                                                                       |           |        |    |     | gi 326671949 | 313404                           | 5.75 | 23 | 35 | 0 |  |        |

#### Peptide Information

| Calc. Mass | Obsrv. Mass | ± da    | ± ppm | Start Seq. | End Seq. | Sequence                      | Ion Score | C. I. % | Modification                                | Rank | Result Type |
|------------|-------------|---------|-------|------------|----------|-------------------------------|-----------|---------|---------------------------------------------|------|-------------|
| 803.3967   | 803.4349    | 0.0382  | 48    | 1411       | 1417     | DCIPEVK                       |           |         |                                             |      | Mascot      |
| 972.4971   | 972.4105    | -0.0866 | -89   | 1853       | 1859     | VFYERMK                       |           |         |                                             |      | Mascot      |
| 1077.4781  | 1077.5587   | 0.0806  | 75    | 250        | 257      | FLTCDEHR                      |           |         | Carbamidomethyl (C)[4]                      |      | Mascot      |
| 1078.564   | 1078.4987   | -0.0653 | -61   | 1593       | 1600     | DYRNIER                       |           |         |                                             |      | Mascot      |
| 1093.5525  | 1093.5375   | -0.015  | -14   | 2466       | 2474     | DDFILTVDR                     |           |         |                                             |      | Mascot      |
| 1153.5492  | 1153.5552   | 0.006   | 5     | 2487       | 2497     | MGEFLAGAVCR                   |           |         |                                             |      | Mascot      |
| 1169.5442  | 1169.6106   | 0.0664  | 57    | 2487       | 2497     | MGEFLAGAVCR                   |           |         | Oxidation (M)[1]                            |      | Mascot      |
| 1169.5442  | 1169.6106   | 0.0664  | 57    | 2487       | 2497     | MGEFLAGAVCR                   |           |         | Oxidation (M)[1]                            |      | Mascot      |
| 1186.5773  | 1186.6426   | 0.0653  | 55    | 793        | 802      | DPQEQVMPVK                    |           |         | Oxidation (M)[7]                            |      | Mascot      |
| 1216.6168  | 1216.5681   | -0.0487 | -40   | 714        | 724      | ELAQDAKEGQK                   |           |         |                                             |      | Mascot      |
| 1282.6976  | 1282.645    | -0.0526 | -41   | 2367       | 2377     | VIFLMSFVGNR                   |           |         |                                             |      | Mascot      |
| 1284.7383  | 1284.6288   | -0.1095 | -85   | 1730       | 1740     | SEALRQVLVNR                   |           |         |                                             |      | Mascot      |
| 1297.6392  | 1297.709    | 0.0698  | 54    | 2487       | 2498     | MGEFLAGAVCRK                  |           |         | Oxidation (M)[1]                            |      | Mascot      |
| 1298.6925  | 1298.6567   | -0.0358 | -28   | 2367       | 2377     | VIFLMSFVGNR                   |           |         | Oxidation (M)[5]                            |      | Mascot      |
| 1309.6667  | 1309.6708   | 0.0041  | 3     | 2696       | 2706     | SLQEKLESTMK                   |           |         | Oxidation (M)[10]                           |      | Mascot      |
| 1314.6702  | 1314.7371   | 0.0669  | 51    | 1741       | 1751     | YYGNFKPGGRR                   |           |         |                                             |      | Mascot      |
| 1414.7358  | 1414.8127   | 0.0769  | 54    | 1394       | 1405     | CNSLLPLDDIVR                  |           |         | Carbamidomethyl (C)[1]                      |      | Mascot      |
| 1448.7704  | 1448.7032   | -0.0672 | -46   | 1867       | 1880     | ATVTVNTSDLGSKR                |           |         |                                             |      | Mascot      |
| 1481.7634  | 1481.7289   | -0.0345 | -23   | 1120       | 1131     | SNVEKSELWVYK                  |           |         |                                             |      | Mascot      |
| 1914.777   | 1914.9323   | 0.1553  | 81    | 1133       | 1151     | QGDEGMDGGDGLPAES<br>DHK       |           |         |                                             |      | Mascot      |
| 2260.1311  | 2260.0803   | -0.0508 | -22   | 1947       | 1965     | NQDENEMSVIITIMQPILR           |           |         | Oxidation (M)[7]                            |      | Mascot      |
| 2276.126   | 2276.0759   | -0.0501 | -22   | 1947       | 1965     | NQDENEMSVIITIMQPILR           |           |         | Oxidation (M)[7,14]                         |      | Mascot      |
| 2330.2449  | 2330.0193   | -0.2256 | -97   | 1898       | 1918     | DVAVITEEVREQLLEAST<br>VTK     |           |         |                                             |      | Mascot      |
| 2774.3198  | 2774.3843   | 0.0645  | 23    | 1363       | 1386     | MDENSPLMYHIHLVELLA<br>VCTEGK  |           |         | Oxidation (M)[1,8]                          |      | Mascot      |
| 2775.2004  | 2775.375    | 0.1746  | 63    | 2499       | 2523     | EENCSTETMMDAVGVQS<br>SALVIEDK |           |         | Carbamidomethyl (C)[4], Oxidation (M)[9,10] |      | Mascot      |
| 2775.2004  | 2775.375    | 0.1746  | 63    | 2499       | 2523     | EENCSTETMMDAVGVQS<br>SALVIEDK |           |         | Carbamidomethyl (C)[4], Oxidation (M)[9,10] |      | Mascot      |
| 2790.4243  | 2790.3848   | -0.0395 | -14   | 583        | 606      | FMQKQIGYDVLAEEDITA<br>LLHNNR  |           |         |                                             |      | Mascot      |

|                     |                                                                         |             |         |       |              |          |                                 |           |       |    |                                           |      |        |        |  |  |        |
|---------------------|-------------------------------------------------------------------------|-------------|---------|-------|--------------|----------|---------------------------------|-----------|-------|----|-------------------------------------------|------|--------|--------|--|--|--------|
|                     | 2866.4517                                                               | 2866.2932   | -0.1585 | -55   | 1770         | 1795     | TPAVISEGLWSRGELSLA<br>EVQCHLDR  |           |       |    |                                           |      |        |        |  |  | Mascot |
| 44                  | envelope protein [Danio rerio]                                          |             |         |       | gi 21070180  |          | 71243.1                         | 8.23      | 12    | 35 | 0                                         |      |        |        |  |  |        |
| Peptide Information |                                                                         |             |         |       |              |          |                                 |           |       |    |                                           |      |        |        |  |  |        |
|                     | Calc. Mass                                                              | Obsrv. Mass | ± da    | ± ppm | Start Seq.   | End Seq. | Sequence                        | Ion Score | C. I. | %  | Modification                              | Rank | Result | Type   |  |  |        |
|                     | 803.4006                                                                | 803.4349    | 0.0343  | 43    | 125          | 131      | ADSIQNR                         |           |       |    |                                           |      |        | Mascot |  |  |        |
|                     | 807.3882                                                                | 807.3972    | 0.009   | 11    | 427          | 433      | GVPDEYK                         |           |       |    |                                           |      |        | Mascot |  |  |        |
|                     | 807.3882                                                                | 807.3972    | 0.009   | 11    | 427          | 433      | GVPDEYK                         |           |       |    |                                           |      |        | Mascot |  |  |        |
|                     | 1062.5426                                                               | 1062.4989   | -0.0437 | -41   | 550          | 560      | ASSGIENAVSK                     |           |       |    |                                           |      |        | Mascot |  |  |        |
|                     | 1153.5485                                                               | 1153.5552   | 0.0067  | 6     | 404          | 413      | SVNSDFDLTR                      |           |       |    |                                           |      |        | Mascot |  |  |        |
|                     | 1186.6434                                                               | 1186.6426   | -0.0008 | -1    | 382          | 392      | VAVPMVMIGNR                     |           |       |    |                                           |      |        | Mascot |  |  |        |
|                     | 1298.5874                                                               | 1298.6567   | 0.0693  | 53    | 561          | 570      | WLSDMFGEWK                      |           |       |    |                                           |      |        | Mascot |  |  |        |
|                     | 1309.6495                                                               | 1309.6708   | 0.0213  | 16    | 403          | 413      | RSVNSDFDLTR                     |           |       |    |                                           |      |        | Mascot |  |  |        |
|                     | 1314.5823                                                               | 1314.7371   | 0.1548  | 118   | 561          | 570      | WLSDMFGEWK                      |           |       |    | Oxidation (M)[5]                          |      |        | Mascot |  |  |        |
|                     | 1465.6848                                                               | 1465.7278   | 0.043   | 29    | 369          | 381      | IEPTMEGVCAMIR                   |           |       |    | Oxidation (M)[5]                          |      |        | Mascot |  |  |        |
|                     | 1481.6797                                                               | 1481.7289   | 0.0492  | 33    | 369          | 381      | IEPTMEGVCAMIR                   |           |       |    | Oxidation (M)[5,11]                       |      |        | Mascot |  |  |        |
|                     | 1914.8182                                                               | 1914.9323   | 0.1141  | 60    | 56           | 71       | DGMWQFDLCQVIDCGK                |           |       |    | Carbamidomethyl (C)[9]                    |      |        | Mascot |  |  |        |
|                     | 2260.0022                                                               | 2260.0803   | 0.0781  | 35    | 335          | 353      | EWCGQMIQEGHDKLGG<br>WGR         |           |       |    | Carbamidomethyl (C)[3], Oxidation (M)[6]  |      |        | Mascot |  |  |        |
|                     | 2409.1899                                                               | 2409.2058   | 0.0159  | 7     | 286          | 308      | NCTALSNLYPPAGNKSS<br>MGVALK     |           |       |    | Carbamidomethyl (C)[2], Oxidation (M)[18] |      |        | Mascot |  |  |        |
|                     | 2774.2251                                                               | 2774.3843   | 0.1592  | 57    | 510          | 536      | GGVCSMFLDTCCTIIPNN<br>TAPDGSVSR |           |       |    | Oxidation (M)[6]                          |      |        | Mascot |  |  |        |
| 45                  | PREDICTED: gastrula zinc finger protein<br>XICGF57.1-like [Danio rerio] |             |         |       | gi 326680865 |          | 30821.8                         | 9.88      | 10    | 35 | 0                                         |      |        |        |  |  |        |
| Peptide Information |                                                                         |             |         |       |              |          |                                 |           |       |    |                                           |      |        |        |  |  |        |
|                     | Calc. Mass                                                              | Obsrv. Mass | ± da    | ± ppm | Start Seq.   | End Seq. | Sequence                        | Ion Score | C. I. | %  | Modification                              | Rank | Result | Type   |  |  |        |
|                     | 972.4025                                                                | 972.4105    | 0.008   | 8     | 12           | 19       | FTCTQCGR                        |           |       |    | Carbamidomethyl (C)[3]                    |      |        | Mascot |  |  |        |
|                     | 1153.5959                                                               | 1153.5552   | -0.0407 | -35   | 104          | 113      | SFNRSSTLNK                      |           |       |    |                                           |      |        | Mascot |  |  |        |
|                     | 1181.6022                                                               | 1181.5896   | -0.0126 | -11   | 244          | 253      | SFRQSSSLNR                      |           |       |    |                                           |      |        | Mascot |  |  |        |
|                     | 1181.6022                                                               | 1181.5896   | -0.0126 | -11   | 244          | 253      | SFRQSSSLNR                      | 1         |       | 0  |                                           |      |        | Mascot |  |  |        |
|                     | 1298.5868                                                               | 1298.6567   | 0.0699  | 54    | 177          | 187      | EKPFTCTQCGK                     |           |       |    | Carbamidomethyl (C)[6]                    |      |        | Mascot |  |  |        |
|                     | 1362.6041                                                               | 1362.6974   | 0.0933  | 68    | 12           | 23       | FTCTQCGRSFR                     |           |       |    |                                           |      |        | Mascot |  |  |        |
|                     | 2211.0432                                                               | 2211.1069   | 0.0637  | 29    | 33           | 51       | IHTGEKPFTCTQCGKSFG<br>R         |           |       |    | Carbamidomethyl (C)[10,13]                |      |        | Mascot |  |  |        |
|                     | 2260.0784                                                               | 2260.0803   | 0.0019  | 1     | 29           | 47       | IHMRIHTGEKPFTCTQCG<br>K         |           |       |    | Carbamidomethyl (C)[14], Oxidation (M)[3] |      |        | Mascot |  |  |        |
|                     | 2276.0442                                                               | 2276.0759   | 0.0317  | 14    | 57           | 75       | IHMMIHTGEKPFTCTQCG<br>K         |           |       |    | Carbamidomethyl (C)[14,17]                |      |        | Mascot |  |  |        |

|    |                                                                                       |           |        |    |              |     |                           |      |    |    |   |  |                                              |        |
|----|---------------------------------------------------------------------------------------|-----------|--------|----|--------------|-----|---------------------------|------|----|----|---|--|----------------------------------------------|--------|
|    | 2727.2986                                                                             | 2727.3708 | 0.0722 | 26 | 53           | 75  | GHLKIHMMIHTGEKPFTCTQCGK   |      |    |    |   |  | Carbamidomethyl (C)[18,21], Oxidation (M)[7] | Mascot |
|    | 2791.3179                                                                             | 2791.3799 | 0.062  | 22 | 145          | 169 | IHTGEKPFTCTQCGKSFSQSSYLNK |      |    |    |   |  |                                              | Mascot |
|    | 2791.3179                                                                             | 2791.3799 | 0.062  | 22 | 145          | 169 | IHTGEKPFTCTQCGKSFSQSSYLNK |      |    |    |   |  |                                              | Mascot |
| 46 | PREDICTED: dual specificity tyrosine-phosphorylation-regulated kinase 4 [Danio rerio] |           |        |    | gi 189537435 |     | 72212.8                   | 8.96 | 11 | 34 | 0 |  |                                              |        |

#### Peptide Information

| Calc. Mass | Obsrv. Mass | ± da    | ± ppm | Start Seq. | End Seq. | Sequence                 | Ion Score | C. I. | % Modification         | Rank | Result Type |
|------------|-------------|---------|-------|------------|----------|--------------------------|-----------|-------|------------------------|------|-------------|
| 842.5206   | 842.5081    | -0.0125 | -15   | 259        | 265      | ILDAVRR                  |           |       |                        |      | Mascot      |
| 961.4811   | 961.5276    | 0.0465  | 48    | 488        | 495      | CLVWDPTK                 |           |       |                        |      | Mascot      |
| 1093.5598  | 1093.5375   | -0.0223 | -20   | 1          | 9        | MPYDLVLK                 |           |       |                        |      | Mascot      |
| 1181.5619  | 1181.5896   | 0.0277  | 23    | 44         | 53       | IGPNCTYTQK               |           |       | Carbamidomethyl (C)[5] |      | Mascot      |
| 1181.5619  | 1181.5896   | 0.0277  | 23    | 44         | 53       | IGPNCTYTQK               |           |       | Carbamidomethyl (C)[5] |      | Mascot      |
| 1186.6071  | 1186.6426   | 0.0355  | 30    | 325        | 333      | CLQMLHKEK                |           |       | Carbamidomethyl (C)[1] |      | Mascot      |
| 1194.5459  | 1194.5858   | 0.0399  | 33    | 15         | 24       | SDMFPEINNK               |           |       |                        |      | Mascot      |
| 1194.5459  | 1194.5858   | 0.0399  | 33    | 15         | 24       | SDMFPEINNK               |           |       |                        |      | Mascot      |
| 1221.6738  | 1221.6406   | -0.0332 | -27   | 249        | 258      | FHHQALVELK               |           |       |                        |      | Mascot      |
| 1464.6866  | 1464.7013   | 0.0147  | 10    | 152        | 162      | HFQNQLTEYER              |           |       |                        |      | Mascot      |
| 1481.6737  | 1481.7289   | 0.0552  | 37    | 267        | 278      | DRDNCHNVIHMK             |           |       |                        |      | Mascot      |
| 2330.0652  | 2330.0193   | -0.0459 | -20   | 497        | 515      | MTPDEAMQHEWITEGRLNR      |           |       | Oxidation (M)[1]       |      | Mascot      |
| 2409.3169  | 2409.2058   | -0.1111 | -46   | 54         | 77       | CGTGVGTLPQLEAPVKQVLVTNGK |           |       |                        |      | Mascot      |

|    |                                                                      |  |  |  |              |  |         |     |    |    |   |  |  |
|----|----------------------------------------------------------------------|--|--|--|--------------|--|---------|-----|----|----|---|--|--|
| 47 | PREDICTED: gastrula zinc finger protein XICGF57.1-like [Danio rerio] |  |  |  | gi 326666728 |  | 33351.9 | 9.4 | 10 | 34 | 0 |  |  |
|----|----------------------------------------------------------------------|--|--|--|--------------|--|---------|-----|----|----|---|--|--|

#### Peptide Information

| Calc. Mass | Obsrv. Mass | ± da    | ± ppm | Start Seq. | End Seq. | Sequence           | Ion Score | C. I. | % Modification                            | Rank | Result Type |
|------------|-------------|---------|-------|------------|----------|--------------------|-----------|-------|-------------------------------------------|------|-------------|
| 972.4025   | 972.4105    | 0.008   | 8     | 33         | 40       | FTCTQCGR           |           |       | Carbamidomethyl (C)[3]                    |      | Mascot      |
| 1153.5959  | 1153.5552   | -0.0407 | -35   | 125        | 134      | SFNRSSLNKL         |           |       |                                           |      | Mascot      |
| 1181.6022  | 1181.5896   | -0.0126 | -11   | 265        | 274      | SFRQSSSLNR         |           |       |                                           |      | Mascot      |
| 1181.6022  | 1181.5896   | -0.0126 | -11   | 265        | 274      | SFRQSSSLNR         | 1         | 0     |                                           |      | Mascot      |
| 1298.5868  | 1298.6567   | 0.0699  | 54    | 198        | 208      | EKPFTCTQCGK        |           |       | Carbamidomethyl (C)[6]                    |      | Mascot      |
| 1362.6041  | 1362.6974   | 0.0933  | 68    | 33         | 44       | FTCTQCGRSFGR       |           |       |                                           |      | Mascot      |
| 2211.0432  | 2211.1069   | 0.0637  | 29    | 54         | 72       | IHTGEKPFTCTQCGKSFG |           |       | Carbamidomethyl (C)[10,13]                |      | Mascot      |
| 2260.0784  | 2260.0803   | 0.0019  | 1     | 50         | 68       | IHMRIHTGEKPFTCTQCG |           |       | Carbamidomethyl (C)[14], Oxidation (M)[3] |      | Mascot      |

|  |           |           |        |    |     |     |                           |  |                                              |        |
|--|-----------|-----------|--------|----|-----|-----|---------------------------|--|----------------------------------------------|--------|
|  | 2276.0442 | 2276.0759 | 0.0317 | 14 | 78  | 96  | IHMMIHTGEKPFTCTQCGK       |  | Carbamidomethyl (C)[14,17]                   | Mascot |
|  | 2727.2986 | 2727.3708 | 0.0722 | 26 | 74  | 96  | GHLKIHMHIHTGEKPFTCTQCGK   |  | Carbamidomethyl (C)[18,21], Oxidation (M)[7] | Mascot |
|  | 2791.3179 | 2791.3799 | 0.062  | 22 | 166 | 190 | IHTGEKPFTCTQCGKSFSQSSYLNK |  |                                              | Mascot |
|  | 2791.3179 | 2791.3799 | 0.062  | 22 | 166 | 190 | IHTGEKPFTCTQCGKSFSQSSYLNK |  |                                              | Mascot |

48 PREDICTED: sickle tail protein homolog [Danio rerio] gi|292610753 206402.5 8.61 1 26 24.087

#### Peptide Information

| Calc. Mass | Obsrv. Mass | ± da    | ± ppm | Start Seq. | End Seq. | Sequence      | Ion Score | C. I. % | Modification | Rank | Result Type |
|------------|-------------|---------|-------|------------|----------|---------------|-----------|---------|--------------|------|-------------|
| 1426.7438  | 1426.6992   | -0.0446 | -31   | 1098       | 1110     | RFYPSATGLTTGR | 26        | 24.087  |              | 1    | Mascot      |

49 methyltransferase-like protein 6 [Danio rerio] gi|156255178 33114.8 6.9 1 23 0

#### Peptide Information

| Calc. Mass | Obsrv. Mass | ± da    | ± ppm | Start Seq. | End Seq. | Sequence | Ion Score | C. I. % | Modification | Rank | Result Type |
|------------|-------------|---------|-------|------------|----------|----------|-----------|---------|--------------|------|-------------|
| 807.461    | 807.3972    | -0.0638 | -79   | 41         | 47       | VLVSDFK  | 23        | 0       |              | 3    | Mascot      |

50 PREDICTED: protein NLRC3 [Danio rerio] gi|189518407 86113.2 5.96 1 20 0

#### Peptide Information

| Calc. Mass | Obsrv. Mass | ± da    | ± ppm | Start Seq. | End Seq. | Sequence | Ion Score | C. I. % | Modification     | Rank | Result Type |
|------------|-------------|---------|-------|------------|----------|----------|-----------|---------|------------------|------|-------------|
| 807.4028   | 807.3972    | -0.0056 | -7    | 672        | 678      | SDVALMR  | 20        | 0       | Oxidation (M)[6] | 4    | Mascot      |

|                |           |                        |                |                |                    |
|----------------|-----------|------------------------|----------------|----------------|--------------------|
| Gel Idx/Pos    | 204/I4    | Instr./Gel Origin      | BA2060/110707A | Process Status | Analysis Succeeded |
| Plate [#] Name | [1] 31496 | Instrument Sample Name |                | Spectra        | 11                 |

| Rank | Protein Name                                                           | Accession No. | Protein MW | Protein PI | Pep. Count | Protein Score | Protein Score C. I. % | Total Ion Score | Total Ion C. I. % |
|------|------------------------------------------------------------------------|---------------|------------|------------|------------|---------------|-----------------------|-----------------|-------------------|
| 1    | type I cytoke <span>...</span> keratin, enveloping layer [Danio rerio] | gi 18858519   | 46655.7    | 5.13       | 22         | 379           | 100                   | 198             | 100               |

#### Peptide Information

| Calc. Mass | Obsrv. Mass | ± da    | ± ppm | Start Seq. | End Seq. | Sequence   | Ion Score | C. I. % | Modification | Rank | Result Type |
|------------|-------------|---------|-------|------------|----------|------------|-----------|---------|--------------|------|-------------|
| 803.4369   | 803.4296    | -0.0073 | -9    | 17         | 25       | LSVGGGASR  |           |         |              |      | Mascot      |
| 807.3995   | 807.3951    | -0.0044 | -5    | 162        | 168      | LAADDFR    |           |         |              |      | Mascot      |
| 1062.4998  | 1062.4937   | -0.0061 | -6    | 84         | 92       | ATMQNLNDR  |           |         |              |      | Mascot      |
| 1077.5609  | 1077.5499   | -0.011  | -10   | 191        | 199      | VLDELTMTTR |           |         |              |      | Mascot      |



|   |                                                    |           |         |      |     |             |                         |      |        |     |     |     |     |  |  |  |                   |  |        |
|---|----------------------------------------------------|-----------|---------|------|-----|-------------|-------------------------|------|--------|-----|-----|-----|-----|--|--|--|-------------------|--|--------|
|   | 1078.4946                                          | 1078.4968 | 0.0022  | 2    | 84  | 92          | ATMQNLNDR               |      |        |     |     |     |     |  |  |  | Oxidation (M)[3]  |  | Mascot |
|   | 1093.5558                                          | 1093.5265 | -0.0293 | -27  | 191 | 199         | VLDELTMTTR              | 1    | 0      |     |     |     |     |  |  |  | Oxidation (M)[7]  |  | Mascot |
|   | 1093.5558                                          | 1093.5265 | -0.0293 | -27  | 191 | 199         | VLDELTMTTR              |      |        |     |     |     |     |  |  |  | Oxidation (M)[7]  |  | Mascot |
|   | 1153.5558                                          | 1153.5513 | -0.0045 | -4   | 375 | 383         | LEMEIAEYR               |      |        |     |     |     |     |  |  |  |                   |  | Mascot |
|   | 1169.5507                                          | 1169.6079 | 0.0572  | 49   | 375 | 383         | LEMEIAEYR               |      |        |     |     |     |     |  |  |  | Oxidation (M)[3]  |  | Mascot |
|   | 1181.5909                                          | 1181.5851 | -0.0058 | -5   | 219 | 228         | NHEEELLAAR              |      |        |     |     |     |     |  |  |  |                   |  | Mascot |
|   | 1186.6426                                          | 1186.6383 | -0.0043 | -4   | 179 | 189         | QSVEADIVGLR             | 74   | 99.999 |     |     |     |     |  |  |  |                   |  | Mascot |
|   | 1186.6426                                          | 1186.6383 | -0.0043 | -4   | 179 | 189         | QSVEADIVGLR             |      |        |     |     |     |     |  |  |  |                   |  | Mascot |
|   | 1194.5861                                          | 1194.5823 | -0.0038 | -3   | 31  | 44          | AGSVYGGAGGSGVR          |      |        |     |     |     |     |  |  |  |                   |  | Mascot |
|   | 1194.5861                                          | 1194.5823 | -0.0038 | -3   | 31  | 44          | AGSVYGGAGGSGVR          | 79   | 100    |     |     |     |     |  |  |  |                   |  | Mascot |
|   | 1221.6508                                          | 1221.475  | -0.1758 | -144 | 190 | 199         | KVLDELTMTTR             |      |        |     |     |     |     |  |  |  | Oxidation (M)[8]  |  | Mascot |
|   | 1221.6508                                          | 1221.475  | -0.1758 | -144 | 190 | 199         | KVLDELTMTTR             |      |        |     |     |     |     |  |  |  | Oxidation (M)[8]  |  | Mascot |
|   | 1268.6304                                          | 1268.6265 | -0.0039 | -3   | 169 | 178         | VKYENELSMR              |      |        |     |     |     |     |  |  |  |                   |  | Mascot |
|   | 1284.6252                                          | 1284.6198 | -0.0054 | -4   | 169 | 178         | VKYENELSMR              |      |        |     |     |     |     |  |  |  | Oxidation (M)[9]  |  | Mascot |
|   | 1309.6569                                          | 1309.6635 | 0.0066  | 5    | 375 | 384         | LEMEIAEYRR              |      |        |     |     |     |     |  |  |  |                   |  | Mascot |
|   | 1314.7375                                          | 1314.7285 | -0.009  | -7   | 179 | 190         | QSVEADIVGLRK            |      |        |     |     |     |     |  |  |  |                   |  | Mascot |
|   | 1325.6517                                          | 1325.6202 | -0.0315 | -24  | 375 | 384         | LEMEIAEYRR              |      |        |     |     |     |     |  |  |  | Oxidation (M)[3]  |  | Mascot |
|   | 1332.6754                                          | 1332.6663 | -0.0091 | -7   | 320 | 332         | ASLEGLTADTQAR           |      |        |     |     |     |     |  |  |  |                   |  | Mascot |
|   | 1410.7046                                          | 1410.7004 | -0.0042 | -3   | 373 | 383         | TRLEMEIAEYR             | 45   | 99.112 |     |     |     |     |  |  |  |                   |  | Mascot |
|   | 1410.7046                                          | 1410.7004 | -0.0042 | -3   | 373 | 383         | TRLEMEIAEYR             |      |        |     |     |     |     |  |  |  |                   |  | Mascot |
|   | 1414.8151                                          | 1414.8075 | -0.0076 | -5   | 402 | 414         | KVVTIVEEVVDGK           |      |        |     |     |     |     |  |  |  |                   |  | Mascot |
|   | 1420.7278                                          | 1420.7194 | -0.0084 | -6   | 283 | 295         | EVAVSTETLQTSR           |      |        |     |     |     |     |  |  |  |                   |  | Mascot |
|   | 1426.6995                                          | 1426.6937 | -0.0058 | -4   | 373 | 383         | TRLEMEIAEYR             |      |        |     |     |     |     |  |  |  | Oxidation (M)[5]  |  | Mascot |
|   | 1426.6995                                          | 1426.6937 | -0.0058 | -4   | 373 | 383         | TRLEMEIAEYR             | 24   | 0      |     |     |     |     |  |  |  | Oxidation (M)[5]  |  | Mascot |
|   | 1465.7356                                          | 1465.7231 | -0.0125 | -9   | 361 | 372         | QGQEYQMLLDIK            |      |        |     |     |     |     |  |  |  |                   |  | Mascot |
|   | 1481.7305                                          | 1481.72   | -0.0105 | -7   | 361 | 372         | QGQEYQMLLDIK            |      |        |     |     |     |     |  |  |  | Oxidation (M)[7]  |  | Mascot |
|   | 1708.8064                                          | 1708.7949 | -0.0115 | -7   | 128 | 142         | DYSAYYATISDLQAK         |      |        |     |     |     |     |  |  |  |                   |  | Mascot |
|   | 1863.9731                                          | 1863.9349 | -0.0382 | -20  | 304 | 319         | TLQSLEIELQSLSMK         |      |        |     |     |     |     |  |  |  | Oxidation (M)[15] |  | Mascot |
|   | 1961.0801                                          | 1960.9036 | -0.1765 | -90  | 403 | 421         | VVTIVEEVVDGKVVSSSS<br>K |      |        |     |     |     |     |  |  |  |                   |  | Mascot |
|   | 2117.1741                                          | 2117.155  | -0.0191 | -9   | 200 | 217         | SDLELQIEGLKEELIFLK      |      |        |     |     |     |     |  |  |  |                   |  | Mascot |
|   | 2225.0867                                          | 2225.1045 | 0.0178  | 8    | 171 | 189         | YENELSMRQSVEADIVGL<br>R |      |        |     |     |     |     |  |  |  | Oxidation (M)[7]  |  | Mascot |
| 2 | type I cytokeratin, enveloping layer [Danio rerio] |           |         |      |     | gi 94732411 | 40437.7                 | 5.15 | 21     | 378 | 100 | 198 | 100 |  |  |  |                   |  |        |

Peptide Information

| Calc. Mass | Obsrv. Mass | ± da    | ± ppm | Start Seq. | End Seq. | Sequence  | Ion Score | C. I. % | Modification | Rank | Result | Type   |
|------------|-------------|---------|-------|------------|----------|-----------|-----------|---------|--------------|------|--------|--------|
| 803.4369   | 803.4296    | -0.0073 | -9    | 17         | 25       | LSVGGGASR |           |         |              |      |        | Mascot |

|   |                                                          |           |           |         |      |               |     |                         |      |        |                   |     |     |        |
|---|----------------------------------------------------------|-----------|-----------|---------|------|---------------|-----|-------------------------|------|--------|-------------------|-----|-----|--------|
|   |                                                          | 807.3995  | 807.3951  | -0.0044 | -5   | 100           | 106 | LAADDFR                 |      |        |                   |     |     | Mascot |
|   |                                                          | 1077.5609 | 1077.5499 | -0.011  | -10  | 129           | 137 | VLDELTMTR               |      |        |                   |     |     | Mascot |
|   |                                                          | 1093.5558 | 1093.5265 | -0.0293 | -27  | 129           | 137 | VLDELTMTR               | 1    | 0      | Oxidation (M)[7]  |     |     | Mascot |
|   |                                                          | 1093.5558 | 1093.5265 | -0.0293 | -27  | 129           | 137 | VLDELTMTR               |      |        | Oxidation (M)[7]  |     |     | Mascot |
|   |                                                          | 1153.5558 | 1153.5513 | -0.0045 | -4   | 313           | 321 | LEMEIAEYR               |      |        |                   |     |     | Mascot |
|   |                                                          | 1169.5507 | 1169.6079 | 0.0572  | 49   | 313           | 321 | LEMEIAEYR               |      |        | Oxidation (M)[3]  |     |     | Mascot |
|   |                                                          | 1181.5909 | 1181.5851 | -0.0058 | -5   | 157           | 166 | NHEEEELLAAR             |      |        |                   |     |     | Mascot |
|   |                                                          | 1186.6426 | 1186.6383 | -0.0043 | -4   | 117           | 127 | QSVEADIVGLR             | 74   | 99.999 |                   |     |     | Mascot |
|   |                                                          | 1186.6426 | 1186.6383 | -0.0043 | -4   | 117           | 127 | QSVEADIVGLR             |      |        |                   |     |     | Mascot |
|   |                                                          | 1194.5861 | 1194.5823 | -0.0038 | -3   | 31            | 44  | AGSVYGGAGGSGVR          |      |        |                   |     |     | Mascot |
|   |                                                          | 1194.5861 | 1194.5823 | -0.0038 | -3   | 31            | 44  | AGSVYGGAGGSGVR          | 79   | 100    |                   |     |     | Mascot |
|   |                                                          | 1221.6508 | 1221.475  | -0.1758 | -144 | 128           | 137 | KVLDELTMTTR             |      |        | Oxidation (M)[8]  |     |     | Mascot |
|   |                                                          | 1221.6508 | 1221.475  | -0.1758 | -144 | 128           | 137 | KVLDELTMTTR             |      |        | Oxidation (M)[8]  |     |     | Mascot |
|   |                                                          | 1268.6304 | 1268.6265 | -0.0039 | -3   | 107           | 116 | VKYENELSMR              |      |        |                   |     |     | Mascot |
|   |                                                          | 1284.6252 | 1284.6198 | -0.0054 | -4   | 107           | 116 | VKYENELSMR              |      |        | Oxidation (M)[9]  |     |     | Mascot |
|   |                                                          | 1309.6569 | 1309.6635 | 0.0066  | 5    | 313           | 322 | LEMEIAEYRR              |      |        |                   |     |     | Mascot |
|   |                                                          | 1314.7375 | 1314.7285 | -0.009  | -7   | 117           | 128 | QSVEADIVGLRK            |      |        |                   |     |     | Mascot |
|   |                                                          | 1325.6517 | 1325.6202 | -0.0315 | -24  | 313           | 322 | LEMEIAEYRR              |      |        | Oxidation (M)[3]  |     |     | Mascot |
|   |                                                          | 1332.6754 | 1332.6663 | -0.0091 | -7   | 258           | 270 | ASLEGTLADTQAR           |      |        |                   |     |     | Mascot |
|   |                                                          | 1410.7046 | 1410.7004 | -0.0042 | -3   | 311           | 321 | TRLEMEIAEYR             | 45   | 99.112 |                   |     |     | Mascot |
|   |                                                          | 1410.7046 | 1410.7004 | -0.0042 | -3   | 311           | 321 | TRLEMEIAEYR             |      |        |                   |     |     | Mascot |
|   |                                                          | 1414.8151 | 1414.8075 | -0.0076 | -5   | 340           | 352 | KVVTIVEEVVDGK           |      |        |                   |     |     | Mascot |
|   |                                                          | 1420.7278 | 1420.7194 | -0.0084 | -6   | 221           | 233 | EVAVSTETLQTSR           |      |        |                   |     |     | Mascot |
|   |                                                          | 1426.6995 | 1426.6937 | -0.0058 | -4   | 311           | 321 | TRLEMEIAEYR             |      |        | Oxidation (M)[5]  |     |     | Mascot |
|   |                                                          | 1426.6995 | 1426.6937 | -0.0058 | -4   | 311           | 321 | TRLEMEIAEYR             | 24   | 0      | Oxidation (M)[5]  |     |     | Mascot |
|   |                                                          | 1465.7356 | 1465.7231 | -0.0125 | -9   | 299           | 310 | QGQEYQMLLDIK            |      |        |                   |     |     | Mascot |
|   |                                                          | 1481.7305 | 1481.72   | -0.0105 | -7   | 299           | 310 | QGQEYQMLLDIK            |      |        | Oxidation (M)[7]  |     |     | Mascot |
|   |                                                          | 1708.8064 | 1708.7949 | -0.0115 | -7   | 66            | 80  | DYSAYYATISDLQAK         |      |        |                   |     |     | Mascot |
|   |                                                          | 1863.9731 | 1863.9349 | -0.0382 | -20  | 242           | 257 | TLQSLEIELQSQLSMK        |      |        | Oxidation (M)[15] |     |     | Mascot |
|   |                                                          | 1961.0801 | 1960.9036 | -0.1765 | -90  | 341           | 359 | VVTIVEEVVDGKVSSSS<br>K  |      |        |                   |     |     | Mascot |
|   |                                                          | 2117.1741 | 2117.155  | -0.0191 | -9   | 138           | 155 | SDLELQIEGLKEELIFLK      |      |        |                   |     |     | Mascot |
|   |                                                          | 2225.0867 | 2225.1045 | 0.0178  | 8    | 109           | 127 | YENELSMRQSVEADIVGL<br>R |      |        | Oxidation (M)[7]  |     |     | Mascot |
| 3 | type I cytokeratin, enveloping layer, like [Danio rerio] |           |           |         |      | gil 130504059 |     | 46617.6                 | 5.13 | 21     | 366               | 100 | 198 | 100    |

### Peptide Information

| Calc. Mass | Obsrv. Mass | ± da | ± ppm | Start Seq. | End Sequence | Ion Score | C. I. % | Modification | Rank | Result Type |
|------------|-------------|------|-------|------------|--------------|-----------|---------|--------------|------|-------------|
|------------|-------------|------|-------|------------|--------------|-----------|---------|--------------|------|-------------|

|   |                                                 |           |         |      |     |              |                                     |      |    |        |     |     |                   |  |  |  |  |        |
|---|-------------------------------------------------|-----------|---------|------|-----|--------------|-------------------------------------|------|----|--------|-----|-----|-------------------|--|--|--|--|--------|
|   | 807.3995                                        | 807.3951  | -0.0044 | -5   | 162 | 168          | LAADDFR                             |      |    |        |     |     |                   |  |  |  |  | Mascot |
|   | 1062.4998                                       | 1062.4937 | -0.0061 | -6   | 84  | 92           | ATMQNLNDR                           |      |    |        |     |     |                   |  |  |  |  | Mascot |
|   | 1077.5609                                       | 1077.5499 | -0.011  | -10  | 191 | 199          | VLDELTMTTR                          |      |    |        |     |     |                   |  |  |  |  | Mascot |
|   | 1078.4946                                       | 1078.4968 | 0.0022  | 2    | 84  | 92           | ATMQNLNDR                           |      |    |        |     |     | Oxidation (M)[3]  |  |  |  |  | Mascot |
|   | 1093.5558                                       | 1093.5265 | -0.0293 | -27  | 191 | 199          | VLDELTMTTR                          | 1    |    | 0      |     |     | Oxidation (M)[7]  |  |  |  |  | Mascot |
|   | 1093.5558                                       | 1093.5265 | -0.0293 | -27  | 191 | 199          | VLDELTMTTR                          |      |    |        |     |     | Oxidation (M)[7]  |  |  |  |  | Mascot |
|   | 1153.5558                                       | 1153.5513 | -0.0045 | -4   | 375 | 383          | LEMEIAEYR                           |      |    |        |     |     |                   |  |  |  |  | Mascot |
|   | 1169.5507                                       | 1169.6079 | 0.0572  | 49   | 375 | 383          | LEMEIAEYR                           |      |    |        |     |     | Oxidation (M)[3]  |  |  |  |  | Mascot |
|   | 1181.5909                                       | 1181.5851 | -0.0058 | -5   | 219 | 228          | NHEEELLAAR                          |      |    |        |     |     |                   |  |  |  |  | Mascot |
|   | 1186.6426                                       | 1186.6383 | -0.0043 | -4   | 179 | 189          | QSVEADIVGLR                         | 74   |    | 99.999 |     |     |                   |  |  |  |  | Mascot |
|   | 1186.6426                                       | 1186.6383 | -0.0043 | -4   | 179 | 189          | QSVEADIVGLR                         |      |    |        |     |     |                   |  |  |  |  | Mascot |
|   | 1194.5861                                       | 1194.5823 | -0.0038 | -3   | 31  | 44           | AGSVYGGAGGSGVR                      |      |    |        |     |     |                   |  |  |  |  | Mascot |
|   | 1194.5861                                       | 1194.5823 | -0.0038 | -3   | 31  | 44           | AGSVYGGAGGSGVR                      | 79   |    | 100    |     |     |                   |  |  |  |  | Mascot |
|   | 1221.6508                                       | 1221.475  | -0.1758 | -144 | 190 | 199          | KVLDELTMTTR                         |      |    |        |     |     | Oxidation (M)[8]  |  |  |  |  | Mascot |
|   | 1221.6508                                       | 1221.475  | -0.1758 | -144 | 190 | 199          | KVLDELTMTTR                         |      |    |        |     |     | Oxidation (M)[8]  |  |  |  |  | Mascot |
|   | 1309.6569                                       | 1309.6635 | 0.0066  | 5    | 375 | 384          | LEMEIAEYRR                          |      |    |        |     |     |                   |  |  |  |  | Mascot |
|   | 1314.7375                                       | 1314.7285 | -0.009  | -7   | 179 | 190          | QSVEADIVGLRK                        |      |    |        |     |     |                   |  |  |  |  | Mascot |
|   | 1325.6517                                       | 1325.6202 | -0.0315 | -24  | 375 | 384          | LEMEIAEYRR                          |      |    |        |     |     | Oxidation (M)[3]  |  |  |  |  | Mascot |
|   | 1332.6754                                       | 1332.6663 | -0.0091 | -7   | 320 | 332          | ASLEGLADTQAR                        |      |    |        |     |     |                   |  |  |  |  | Mascot |
|   | 1410.7046                                       | 1410.7004 | -0.0042 | -3   | 373 | 383          | TRLEMEIAEYR                         | 45   |    | 99.112 |     |     |                   |  |  |  |  | Mascot |
|   | 1410.7046                                       | 1410.7004 | -0.0042 | -3   | 373 | 383          | TRLEMEIAEYR                         |      |    |        |     |     |                   |  |  |  |  | Mascot |
|   | 1414.8151                                       | 1414.8075 | -0.0076 | -5   | 402 | 414          | KVVTIVEEVVDGK                       |      |    |        |     |     |                   |  |  |  |  | Mascot |
|   | 1420.7278                                       | 1420.7194 | -0.0084 | -6   | 283 | 295          | EVAVSTETLQTSR                       |      |    |        |     |     |                   |  |  |  |  | Mascot |
|   | 1426.6995                                       | 1426.6937 | -0.0058 | -4   | 373 | 383          | TRLEMEIAEYR                         |      |    |        |     |     | Oxidation (M)[5]  |  |  |  |  | Mascot |
|   | 1426.6995                                       | 1426.6937 | -0.0058 | -4   | 373 | 383          | TRLEMEIAEYR                         | 24   |    | 0      |     |     | Oxidation (M)[5]  |  |  |  |  | Mascot |
|   | 1465.7356                                       | 1465.7231 | -0.0125 | -9   | 361 | 372          | QGQEYQMLLDIK                        |      |    |        |     |     |                   |  |  |  |  | Mascot |
|   | 1481.7305                                       | 1481.72   | -0.0105 | -7   | 361 | 372          | QGQEYQMLLDIK                        |      |    |        |     |     | Oxidation (M)[7]  |  |  |  |  | Mascot |
|   | 1708.8064                                       | 1708.7949 | -0.0115 | -7   | 128 | 142          | DYSAYYATISDLQAK                     |      |    |        |     |     |                   |  |  |  |  | Mascot |
|   | 1711.8345                                       | 1711.7893 | -0.0452 | -26  | 385 | 401          | LLDGEATSVSTSSSTTR                   |      |    |        |     |     |                   |  |  |  |  | Mascot |
|   | 1863.9731                                       | 1863.9349 | -0.0382 | -20  | 304 | 319          | TLQSLEIELQSQLSMK                    |      |    |        |     |     | Oxidation (M)[15] |  |  |  |  | Mascot |
|   | 1961.0801                                       | 1960.9036 | -0.1765 | -90  | 403 | 421          | VVTIVEEVVDGKVSSSS<br>K              |      |    |        |     |     |                   |  |  |  |  | Mascot |
|   | 2117.1741                                       | 2117.155  | -0.0191 | -9   | 200 | 217          | SDLELQIEGLKEELIFLK                  |      |    |        |     |     |                   |  |  |  |  | Mascot |
|   | 2818.2913                                       | 2818.2898 | -0.0015 | -1   | 53  | 83           | SFSAGGGAGFGGGAGA<br>GFNLSDAIDVSTNEK |      |    |        |     |     |                   |  |  |  |  | Mascot |
| 4 | hypothetical protein LOC100034647 [Danio rerio] |           |         |      |     | gi 131888757 | 46317.3                             | 5.36 | 15 | 298    | 100 | 198 | 100               |  |  |  |  |        |

| Peptide Information                                                   |             |         |       |             |                                    |           |         |                  |      |             |     |
|-----------------------------------------------------------------------|-------------|---------|-------|-------------|------------------------------------|-----------|---------|------------------|------|-------------|-----|
| Calc. Mass                                                            | Obsrv. Mass | ± da    | ± ppm | Start Seq.  | End Sequence Seq.                  | Ion Score | C. I. % | Modification     | Rank | Result Type |     |
| 1062.4998                                                             | 1062.4937   | -0.0061 | -6    | 75          | 83 ATMQNLNDR                       |           |         |                  |      | Mascot      |     |
| 1077.5609                                                             | 1077.5499   | -0.011  | -10   | 182         | 190 VLDELTMTTR                     |           |         |                  |      | Mascot      |     |
| 1078.4946                                                             | 1078.4968   | 0.0022  | 2     | 75          | 83 ATMQNLNDR                       |           |         | Oxidation (M)[3] |      | Mascot      |     |
| 1093.5558                                                             | 1093.5265   | -0.0293 | -27   | 182         | 190 VLDELTMTTR                     | 1         | 0       | Oxidation (M)[7] |      | Mascot      |     |
| 1093.5558                                                             | 1093.5265   | -0.0293 | -27   | 182         | 190 VLDELTMTTR                     |           |         | Oxidation (M)[7] |      | Mascot      |     |
| 1153.5558                                                             | 1153.5513   | -0.0045 | -4    | 366         | 374 LEMEIAEYR                      |           |         |                  |      | Mascot      |     |
| 1169.5507                                                             | 1169.6079   | 0.0572  | 49    | 366         | 374 LEMEIAEYR                      |           |         | Oxidation (M)[3] |      | Mascot      |     |
| 1181.5909                                                             | 1181.5851   | -0.0058 | -5    | 210         | 219 NHEEELLAAR                     |           |         |                  |      | Mascot      |     |
| 1194.5861                                                             | 1194.5823   | -0.0038 | -3    | 22          | 35 AGSVYGGAGGSGVR                  |           |         |                  |      | Mascot      |     |
| 1194.5861                                                             | 1194.5823   | -0.0038 | -3    | 22          | 35 AGSVYGGAGGSGVR                  | 79        | 100     |                  |      | Mascot      |     |
| 1221.6508                                                             | 1221.475    | -0.1758 | -144  | 181         | 190 KVLDELTMTTR                    |           |         | Oxidation (M)[8] |      | Mascot      |     |
| 1221.6508                                                             | 1221.475    | -0.1758 | -144  | 181         | 190 KVLDELTMTTR                    |           |         | Oxidation (M)[8] |      | Mascot      |     |
| 1309.6569                                                             | 1309.6635   | 0.0066  | 5     | 366         | 375 LEMEIAEYRR                     |           |         |                  |      | Mascot      |     |
| 1325.6517                                                             | 1325.6202   | -0.0315 | -24   | 366         | 375 LEMEIAEYRR                     |           |         | Oxidation (M)[3] |      | Mascot      |     |
| 1332.6754                                                             | 1332.6663   | -0.0091 | -7    | 311         | 323 ASLEGTLDATQAR                  |           |         |                  |      | Mascot      |     |
| 1410.7046                                                             | 1410.7004   | -0.0042 | -3    | 364         | 374 TRLEMEIAEYR                    | 45        | 99.112  |                  |      | Mascot      |     |
| 1410.7046                                                             | 1410.7004   | -0.0042 | -3    | 364         | 374 TRLEMEIAEYR                    |           |         |                  |      | Mascot      |     |
| 1414.8151                                                             | 1414.8075   | -0.0076 | -5    | 396         | 408 KVVTVIEEVVDGK                  |           |         |                  |      | Mascot      |     |
| 1426.6995                                                             | 1426.6937   | -0.0058 | -4    | 364         | 374 TRLEMEIAEYR                    |           |         | Oxidation (M)[5] |      | Mascot      |     |
| 1426.6995                                                             | 1426.6937   | -0.0058 | -4    | 364         | 374 TRLEMEIAEYR                    | 24        | 0       | Oxidation (M)[5] |      | Mascot      |     |
| 1481.7329                                                             | 1481.72     | -0.0129 | -9    | 376         | 390 LLDGEATSVSTSSSK                |           |         |                  |      | Mascot      |     |
| 1708.8064                                                             | 1708.7949   | -0.0115 | -7    | 119         | 133 DYSAYYATISDLQAK                |           |         |                  |      | Mascot      |     |
| 1961.0801                                                             | 1960.9036   | -0.1765 | -90   | 397         | 415 VVTIVEEVVDGKVSSSSK             |           |         |                  |      | Mascot      |     |
| 2230.0657                                                             | 2230.0625   | -0.0032 | -1    | 220         | 240 TQMGGQVNVVEVDAAPQEDLTK         |           |         |                  |      | Mascot      |     |
| 2246.0605                                                             | 2246.0596   | -0.0009 | 0     | 220         | 240 TQMGGQVNVVEVDAAPQEDLTK         |           |         | Oxidation (M)[3] |      | Mascot      |     |
| 2246.0605                                                             | 2246.0596   | -0.0009 | 0     | 220         | 240 TQMGGQVNVVEVDAAPQEDLTK         | 74        | 99.999  | Oxidation (M)[3] |      | Mascot      |     |
| 2778.2236                                                             | 2778.3147   | 0.0911  | 33    | 44          | 74 SYSAGGGAGFGGGAGAGFNLSDGIDSSANEK |           |         |                  |      | Mascot      |     |
| eukaryotic translation initiation factor 4A, isoform 1A [Danio rerio] |             |         |       | gi 38198643 | 46223.7                            | 5.26      | 5       | 271              | 100  | 257         | 100 |

| Peptide Information |             |      |       |            |                   |           |                      |  |  |                  |
|---------------------|-------------|------|-------|------------|-------------------|-----------|----------------------|--|--|------------------|
| Calc. Mass          | Obsrv. Mass | ± da | ± ppm | Start Seq. | End Sequence Seq. | Ion Score | C. I. % Modification |  |  | Rank Result Type |

|   |                                                                       |           |         |     |     |     |                          |         |      |     |     |     |                  |     |  |  |        |
|---|-----------------------------------------------------------------------|-----------|---------|-----|-----|-----|--------------------------|---------|------|-----|-----|-----|------------------|-----|--|--|--------|
|   | 1453.6628                                                             | 1453.66   | -0.0028 | -2  | 29  | 40  | EIVDSFDDMNLR             |         |      |     |     |     |                  |     |  |  | Mascot |
|   | 1469.6577                                                             | 1469.65   | -0.0077 | -5  | 29  | 40  | EIVDSFDDMNLR             |         |      |     |     |     | Oxidation (M)[9] |     |  |  | Mascot |
|   | 1515.7842                                                             | 1515.7654 | -0.0188 | -12 | 191 | 202 | GFKDQIYEIFQK             |         |      |     |     |     |                  |     |  |  | Mascot |
|   | 1558.87                                                               | 1558.8654 | -0.0046 | -3  | 147 | 161 | LQADVP HIVVGT PGR        |         |      |     |     |     |                  |     |  |  | Mascot |
|   | 1827.9387                                                             | 1827.928  | -0.0107 | -6  | 46  | 61  | GIYAYGF EKPSAIQQR        |         | 123  | 100 |     |     |                  |     |  |  | Mascot |
|   | 1827.9387                                                             | 1827.928  | -0.0107 | -6  | 46  | 61  | GIYAYGF EKPSAIQQR        |         |      |     |     |     |                  |     |  |  | Mascot |
|   | 2144.1345                                                             | 2144.1218 | -0.0127 | -6  | 335 | 353 | GIDVQQVSLVIN YDLPTN<br>R |         | 134  | 100 |     |     |                  |     |  |  | Mascot |
|   | 2144.1345                                                             | 2144.1218 | -0.0127 | -6  | 335 | 353 | GIDVQQVSLVIN YDLPTN<br>R |         |      |     |     |     |                  |     |  |  | Mascot |
| 6 | eukaryotic translation initiation factor 4A, isoform 1B [Danio rerio] |           |         |     |     |     | gi 41393175              | 46093.6 | 5.19 | 4   | 267 | 100 | 257              | 100 |  |  |        |

#### Peptide Information

| Calc. Mass | Obsrv. Mass | ± da    | ± ppm | Start Seq. | End Seq. | Sequence                 | Ion Score | C. I. | % Modification | Rank | Result Type |
|------------|-------------|---------|-------|------------|----------|--------------------------|-----------|-------|----------------|------|-------------|
| 1181.5367  | 1181.5851   | 0.0484  | 41    | 1          | 10       | MSADYEGRPR               |           |       |                |      | Mascot      |
| 1515.7842  | 1515.7654   | -0.0188 | -12   | 191        | 202      | GFKDQIYEIFQK             |           |       |                |      | Mascot      |
| 1827.9387  | 1827.928    | -0.0107 | -6    | 46         | 61       | GIYAYGF EKPSAIQQR        | 123       | 100   |                |      | Mascot      |
| 1827.9387  | 1827.928    | -0.0107 | -6    | 46         | 61       | GIYAYGF EKPSAIQQR        |           |       |                |      | Mascot      |
| 2144.1345  | 2144.1218   | -0.0127 | -6    | 335        | 353      | GIDVQQVSLVIN YDLPTN<br>R | 134       | 100   |                |      | Mascot      |
| 2144.1345  | 2144.1218   | -0.0127 | -6    | 335        | 353      | GIDVQQVSLVIN YDLPTN<br>R |           |       |                |      | Mascot      |

|   |                               |  |  |  |  |  |              |         |      |   |     |     |     |     |  |  |  |
|---|-------------------------------|--|--|--|--|--|--------------|---------|------|---|-----|-----|-----|-----|--|--|--|
| 7 | Eif4a1b protein [Danio rerio] |  |  |  |  |  | gi 157422943 | 48799.3 | 7.66 | 3 | 264 | 100 | 257 | 100 |  |  |  |
|---|-------------------------------|--|--|--|--|--|--------------|---------|------|---|-----|-----|-----|-----|--|--|--|

#### Peptide Information

| Calc. Mass | Obsrv. Mass | ± da    | ± ppm | Start Seq. | End Seq. | Sequence                 | Ion Score | C. I. | % Modification | Rank | Result Type |
|------------|-------------|---------|-------|------------|----------|--------------------------|-----------|-------|----------------|------|-------------|
| 1515.7842  | 1515.7654   | -0.0188 | -12   | 214        | 225      | GFKDQIYEIFQK             |           |       |                |      | Mascot      |
| 1827.9387  | 1827.928    | -0.0107 | -6    | 69         | 84       | GIYAYGF EKPSAIQQR        | 123       | 100   |                |      | Mascot      |
| 1827.9387  | 1827.928    | -0.0107 | -6    | 69         | 84       | GIYAYGF EKPSAIQQR        |           |       |                |      | Mascot      |
| 2144.1345  | 2144.1218   | -0.0127 | -6    | 358        | 376      | GIDVQQVSLVIN YDLPTN<br>R | 134       | 100   |                |      | Mascot      |
| 2144.1345  | 2144.1218   | -0.0127 | -6    | 358        | 376      | GIDVQQVSLVIN YDLPTN<br>R |           |       |                |      | Mascot      |

|   |                                  |  |  |  |  |  |             |         |      |    |     |     |    |     |  |  |  |
|---|----------------------------------|--|--|--|--|--|-------------|---------|------|----|-----|-----|----|-----|--|--|--|
| 8 | type I cytokeratin [Danio rerio] |  |  |  |  |  | gi 18858423 | 46692.5 | 5.38 | 17 | 207 | 100 | 94 | 100 |  |  |  |
|---|----------------------------------|--|--|--|--|--|-------------|---------|------|----|-----|-----|----|-----|--|--|--|

#### Peptide Information

| Calc. Mass | Obsrv. Mass | ± da    | ± ppm | Start Seq. | End Seq. | Sequence | Ion Score | C. I. | % Modification | Rank | Result Type |
|------------|-------------|---------|-------|------------|----------|----------|-----------|-------|----------------|------|-------------|
| 807.3995   | 807.3951    | -0.0044 | -5    | 158        | 164      | LAADDFR  |           |       |                |      | Mascot      |

|   |                                  |           |         |      |              |     |                    |         |        |    |     |     |     |     |  |  |  |  |        |
|---|----------------------------------|-----------|---------|------|--------------|-----|--------------------|---------|--------|----|-----|-----|-----|-----|--|--|--|--|--------|
|   | 975.5469                         | 975.5408  | -0.0061 | -6   | 292          | 299 | SEITELKR           |         |        |    |     |     |     |     |  |  |  |  | Mascot |
|   | 1062.4998                        | 1062.4937 | -0.0061 | -6   | 80           | 88  | ATMQNLNDR          |         |        |    |     |     |     |     |  |  |  |  | Mascot |
|   | 1077.5609                        | 1077.5499 | -0.011  | -10  | 187          | 195 | VLDELTMTTR         |         |        |    |     |     |     |     |  |  |  |  | Mascot |
|   | 1078.4946                        | 1078.4968 | 0.0022  | 2    | 80           | 88  | ATMQNLNDR          |         |        |    |     |     |     |     |  |  |  |  | Mascot |
|   | 1093.5312                        | 1093.5265 | -0.0047 | -4   | 264          | 272 | DLEGWFQAK          | 51      | 99.786 |    |     |     |     |     |  |  |  |  | Mascot |
|   | 1093.5312                        | 1093.5265 | -0.0047 | -4   | 264          | 272 | DLEGWFQAK          |         |        |    |     |     |     |     |  |  |  |  | Mascot |
|   | 1153.5558                        | 1153.5513 | -0.0045 | -4   | 371          | 379 | LEMEIAEYR          |         |        |    |     |     |     |     |  |  |  |  | Mascot |
|   | 1169.5507                        | 1169.6079 | 0.0572  | 49   | 371          | 379 | LEMEIAEYR          |         |        |    |     |     |     |     |  |  |  |  | Mascot |
|   | 1221.6262                        | 1221.475  | -0.1512 | -124 | 263          | 272 | KDLEGWFQAK         |         |        |    |     |     |     |     |  |  |  |  | Mascot |
|   | 1221.6262                        | 1221.475  | -0.1512 | -124 | 263          | 272 | KDLEGWFQAK         | 9       | 0      |    |     |     |     |     |  |  |  |  | Mascot |
|   | 1268.6304                        | 1268.6265 | -0.0039 | -3   | 165          | 174 | VKYENELSMR         |         |        |    |     |     |     |     |  |  |  |  | Mascot |
|   | 1284.6252                        | 1284.6198 | -0.0054 | -4   | 165          | 174 | VKYENELSMR         |         |        |    |     |     |     |     |  |  |  |  | Mascot |
|   | 1309.6569                        | 1309.6635 | 0.0066  | 5    | 371          | 380 | LEMEIAEYRR         |         |        |    |     |     |     |     |  |  |  |  | Mascot |
|   | 1314.7124                        | 1314.7285 | 0.0161  | 12   | 175          | 186 | QSVEADIAGLRR       |         |        |    |     |     |     |     |  |  |  |  | Mascot |
|   | 1325.6517                        | 1325.6202 | -0.0315 | -24  | 371          | 380 | LEMEIAEYRR         |         |        |    |     |     |     |     |  |  |  |  | Mascot |
|   | 1332.6754                        | 1332.6663 | -0.0091 | -7   | 316          | 328 | ASLEGLTADTQAR      |         |        |    |     |     |     |     |  |  |  |  | Mascot |
|   | 1410.7046                        | 1410.7004 | -0.0042 | -3   | 369          | 379 | TRLEMEIAEYR        | 45      | 99.112 |    |     |     |     |     |  |  |  |  | Mascot |
|   | 1410.7046                        | 1410.7004 | -0.0042 | -3   | 369          | 379 | TRLEMEIAEYR        |         |        |    |     |     |     |     |  |  |  |  | Mascot |
|   | 1414.8151                        | 1414.8075 | -0.0076 | -5   | 398          | 410 | KVVTIVEEVVDGK      |         |        |    |     |     |     |     |  |  |  |  | Mascot |
|   | 1420.7278                        | 1420.7194 | -0.0084 | -6   | 279          | 291 | EVAVSTETLQTSR      |         |        |    |     |     |     |     |  |  |  |  | Mascot |
|   | 1426.6995                        | 1426.6937 | -0.0058 | -4   | 369          | 379 | TRLEMEIAEYR        |         |        |    |     |     |     |     |  |  |  |  | Mascot |
|   | 1426.6995                        | 1426.6937 | -0.0058 | -4   | 369          | 379 | TRLEMEIAEYR        | 24      | 0      |    |     |     |     |     |  |  |  |  | Mascot |
|   | 1465.7356                        | 1465.7231 | -0.0125 | -9   | 357          | 368 | QGQEYQMLLDIK       |         |        |    |     |     |     |     |  |  |  |  | Mascot |
|   | 1481.7305                        | 1481.72   | -0.0105 | -7   | 357          | 368 | QGQEYQMLLDIK       |         |        |    |     |     |     |     |  |  |  |  | Mascot |
|   | 1711.8345                        | 1711.7893 | -0.0452 | -26  | 381          | 397 | LLDGEASSVTSSSTTR   |         |        |    |     |     |     |     |  |  |  |  | Mascot |
|   | 1961.0801                        | 1960.9036 | -0.1765 | -90  | 399          | 417 | VVTIVEEVVDGKVSSSSK |         |        |    |     |     |     |     |  |  |  |  | Mascot |
| 9 | Zgc:109868 protein [Danio rerio] |           |         |      | gil120537710 |     |                    | 47066.8 | 5.25   | 12 | 188 | 100 | 124 | 100 |  |  |  |  |        |

Peptide Information

| Calc. Mass | Obsrv. Mass | ± da    | ± ppm | Start Seq. | End Sequence Seq. | Ion Score  | C. I. % | Modification | Rank | Result Type |
|------------|-------------|---------|-------|------------|-------------------|------------|---------|--------------|------|-------------|
| 807.3995   | 807.3951    | -0.0044 | -5    | 158        | 164               | LAADDFR    |         |              |      | Mascot      |
| 1062.4998  | 1062.4937   | -0.0061 | -6    | 80         | 88                | ATMQNLNDR  |         |              |      | Mascot      |
| 1077.5609  | 1077.5499   | -0.011  | -10   | 187        | 195               | VLDELTMTTR |         |              |      | Mascot      |
| 1078.4946  | 1078.4968   | 0.0022  | 2     | 80         | 88                | ATMQNLNDR  |         |              |      | Mascot      |
| 1093.5558  | 1093.5265   | -0.0293 | -27   | 187        | 195               | VLDELTMTTR | 1       | 0            |      | Mascot      |
| 1093.5558  | 1093.5265   | -0.0293 | -27   | 187        | 195               | VLDELTMTTR |         |              |      | Mascot      |

|           |                                |         |     |             |     |                  |         |      |        |     |     |     |                   |  |  |  |        |
|-----------|--------------------------------|---------|-----|-------------|-----|------------------|---------|------|--------|-----|-----|-----|-------------------|--|--|--|--------|
| 1153.5558 | 1153.5513                      | -0.0045 | -4  | 371         | 379 | LEMEIAEYR        |         |      |        |     |     |     |                   |  |  |  | Mascot |
| 1169.5507 | 1169.6079                      | 0.0572  | 49  | 371         | 379 | LEMEIAEYR        |         |      |        |     |     |     | Oxidation (M)[3]  |  |  |  | Mascot |
| 1194.5861 | 1194.5823                      | -0.0038 | -3  | 32          | 45  | AGSVYGGAGGSGVR   |         |      |        |     |     |     |                   |  |  |  | Mascot |
| 1194.5861 | 1194.5823                      | -0.0038 | -3  | 32          | 45  | AGSVYGGAGGSGVR   | 79      |      | 100    |     |     |     |                   |  |  |  | Mascot |
| 1268.6304 | 1268.6265                      | -0.0039 | -3  | 165         | 174 | VKYENELSMR       |         |      |        |     |     |     |                   |  |  |  | Mascot |
| 1284.6252 | 1284.6198                      | -0.0054 | -4  | 165         | 174 | VKYENELSMR       |         |      |        |     |     |     | Oxidation (M)[9]  |  |  |  | Mascot |
| 1309.6569 | 1309.6635                      | 0.0066  | 5   | 371         | 380 | LEMEIAEYRR       |         |      |        |     |     |     |                   |  |  |  | Mascot |
| 1314.7124 | 1314.7285                      | 0.0161  | 12  | 175         | 186 | QSVEADIAGLRR     |         |      |        |     |     |     |                   |  |  |  | Mascot |
| 1325.6517 | 1325.6202                      | -0.0315 | -24 | 371         | 380 | LEMEIAEYRR       |         |      |        |     |     |     | Oxidation (M)[3]  |  |  |  | Mascot |
| 1332.6754 | 1332.6663                      | -0.0091 | -7  | 316         | 328 | ASLEGLTADTQAR    |         |      |        |     |     |     |                   |  |  |  | Mascot |
| 1410.7046 | 1410.7004                      | -0.0042 | -3  | 369         | 379 | TRLEMEIAEYR      | 45      |      | 99.112 |     |     |     |                   |  |  |  | Mascot |
| 1410.7046 | 1410.7004                      | -0.0042 | -3  | 369         | 379 | TRLEMEIAEYR      |         |      |        |     |     |     |                   |  |  |  | Mascot |
| 1414.8151 | 1414.8075                      | -0.0076 | -5  | 400         | 412 | KVVTIVEEVVDGK    |         |      |        |     |     |     |                   |  |  |  | Mascot |
| 1426.6995 | 1426.6937                      | -0.0058 | -4  | 369         | 379 | TRLEMEIAEYR      |         |      |        |     |     |     | Oxidation (M)[5]  |  |  |  | Mascot |
| 1426.6995 | 1426.6937                      | -0.0058 | -4  | 369         | 379 | TRLEMEIAEYR      | 24      |      | 0      |     |     |     | Oxidation (M)[5]  |  |  |  | Mascot |
| 1863.9731 | 1863.9349                      | -0.0382 | -20 | 300         | 315 | TLQSLEIELQSQLSMK |         |      |        |     |     |     | Oxidation (M)[15] |  |  |  | Mascot |
| 10        | cytokeratin-like [Danio rerio] |         |     | gi 62955621 |     |                  | 47177.9 | 5.31 | 12     | 187 | 100 | 124 | 100               |  |  |  |        |

Peptide Information

| Calc. Mass | Obsrv. Mass | ± da    | ± ppm | Start Seq. | End Seq. | Sequence       | Ion Score | C. I. | % Modification     | Rank | Result Type |
|------------|-------------|---------|-------|------------|----------|----------------|-----------|-------|--------------------|------|-------------|
| 807.3995   | 807.3951    | -0.0044 | -5    | 159        | 165      | LAADDFR        |           |       |                    |      | Mascot      |
| 1062.4998  | 1062.4937   | -0.0061 | -6    | 81         | 89       | ATMQNLNDR      |           |       |                    |      | Mascot      |
| 1077.5609  | 1077.5499   | -0.011  | -10   | 188        | 196      | VLDELTMTTR     |           |       |                    |      | Mascot      |
| 1078.4946  | 1078.4968   | 0.0022  | 2     | 81         | 89       | ATMQNLNDR      |           |       | Oxidation (M)[3]   |      | Mascot      |
| 1093.5558  | 1093.5265   | -0.0293 | -27   | 188        | 196      | VLDELTMTTR     | 1         |       | 0 Oxidation (M)[7] |      | Mascot      |
| 1093.5558  | 1093.5265   | -0.0293 | -27   | 188        | 196      | VLDELTMTTR     |           |       | Oxidation (M)[7]   |      | Mascot      |
| 1153.5558  | 1153.5513   | -0.0045 | -4    | 372        | 380      | LEMEIAEYR      |           |       |                    |      | Mascot      |
| 1169.5507  | 1169.6079   | 0.0572  | 49    | 372        | 380      | LEMEIAEYR      |           |       | Oxidation (M)[3]   |      | Mascot      |
| 1194.5861  | 1194.5823   | -0.0038 | -3    | 33         | 46       | AGSVYGGAGGSGVR |           |       |                    |      | Mascot      |
| 1194.5861  | 1194.5823   | -0.0038 | -3    | 33         | 46       | AGSVYGGAGGSGVR | 79        |       | 100                |      | Mascot      |
| 1268.6304  | 1268.6265   | -0.0039 | -3    | 166        | 175      | VKYENELSMR     |           |       |                    |      | Mascot      |
| 1284.6252  | 1284.6198   | -0.0054 | -4    | 166        | 175      | VKYENELSMR     |           |       | Oxidation (M)[9]   |      | Mascot      |
| 1309.6569  | 1309.6635   | 0.0066  | 5     | 372        | 381      | LEMEIAEYRR     |           |       |                    |      | Mascot      |
| 1314.7124  | 1314.7285   | 0.0161  | 12    | 176        | 187      | QSVEADIAGLRR   |           |       |                    |      | Mascot      |
| 1325.6517  | 1325.6202   | -0.0315 | -24   | 372        | 381      | LEMEIAEYRR     |           |       | Oxidation (M)[3]   |      | Mascot      |
| 1332.6754  | 1332.6663   | -0.0091 | -7    | 317        | 329      | ASLEGLTADTQAR  |           |       |                    |      | Mascot      |

|    |                                         |           |         |     |     |     |                  |         |        |                   |     |     |     |        |
|----|-----------------------------------------|-----------|---------|-----|-----|-----|------------------|---------|--------|-------------------|-----|-----|-----|--------|
|    | 1410.7046                               | 1410.7004 | -0.0042 | -3  | 370 | 380 | TRLEMEIAEYR      | 45      | 99.112 |                   |     |     |     | Mascot |
|    | 1410.7046                               | 1410.7004 | -0.0042 | -3  | 370 | 380 | TRLEMEIAEYR      |         |        |                   |     |     |     | Mascot |
|    | 1414.8151                               | 1414.8075 | -0.0076 | -5  | 401 | 413 | KVVTIVEEVVDGK    |         |        |                   |     |     |     | Mascot |
|    | 1426.6995                               | 1426.6937 | -0.0058 | -4  | 370 | 380 | TRLEMEIAEYR      |         |        | Oxidation (M)[5]  |     |     |     | Mascot |
|    | 1426.6995                               | 1426.6937 | -0.0058 | -4  | 370 | 380 | TRLEMEIAEYR      | 24      | 0      | Oxidation (M)[5]  |     |     |     | Mascot |
|    | 1863.9731                               | 1863.9349 | -0.0382 | -20 | 301 | 316 | TLQSLEIELQSQLSMK |         |        | Oxidation (M)[15] |     |     |     | Mascot |
| 11 | novel protein similar to type I cyto    |           |         |     |     |     | gi 94732405      | 43116.8 | 5.22   | 11                | 182 | 100 | 124 | 100    |
|    | keratin, enveloping layer [Danio rerio] |           |         |     |     |     |                  |         |        |                   |     |     |     |        |

Peptide Information

|  | Calc. Mass | Obsrv. Mass | ± da    | ± ppm | Start Seq. | End Seq. | Sequence         | Ion Score | C. I.  | % | Modification      | Rank | Result | Type   |
|--|------------|-------------|---------|-------|------------|----------|------------------|-----------|--------|---|-------------------|------|--------|--------|
|  | 807.3995   | 807.3951    | -0.0044 | -5    | 160        | 166      | LAADDFR          |           |        |   |                   |      |        | Mascot |
|  | 1062.4998  | 1062.4937   | -0.0061 | -6    | 82         | 90       | ATMQNLNDR        |           |        |   |                   |      |        | Mascot |
|  | 1077.5609  | 1077.5499   | -0.011  | -10   | 189        | 197      | VLDELTMTTR       |           |        |   |                   |      |        | Mascot |
|  | 1078.4946  | 1078.4968   | 0.0022  | 2     | 82         | 90       | ATMQNLNDR        |           |        |   | Oxidation (M)[3]  |      |        | Mascot |
|  | 1093.5558  | 1093.5265   | -0.0293 | -27   | 189        | 197      | VLDELTMTTR       | 1         | 0      |   | Oxidation (M)[7]  |      |        | Mascot |
|  | 1093.5558  | 1093.5265   | -0.0293 | -27   | 189        | 197      | VLDELTMTTR       |           |        |   | Oxidation (M)[7]  |      |        | Mascot |
|  | 1153.5558  | 1153.5513   | -0.0045 | -4    | 373        | 381      | LEMEIAEYR        |           |        |   |                   |      |        | Mascot |
|  | 1169.5507  | 1169.6079   | 0.0572  | 49    | 373        | 381      | LEMEIAEYR        |           |        |   | Oxidation (M)[3]  |      |        | Mascot |
|  | 1194.5861  | 1194.5823   | -0.0038 | -3    | 34         | 47       | AGSVYGGAGGSGVR   |           |        |   |                   |      |        | Mascot |
|  | 1194.5861  | 1194.5823   | -0.0038 | -3    | 34         | 47       | AGSVYGGAGGSGVR   | 79        | 100    |   |                   |      |        | Mascot |
|  | 1268.6304  | 1268.6265   | -0.0039 | -3    | 167        | 176      | VKYENELSMR       |           |        |   |                   |      |        | Mascot |
|  | 1284.6252  | 1284.6198   | -0.0054 | -4    | 167        | 176      | VKYENELSMR       |           |        |   | Oxidation (M)[9]  |      |        | Mascot |
|  | 1309.6569  | 1309.6635   | 0.0066  | 5     | 373        | 382      | LEMEIAEYRR       |           |        |   |                   |      |        | Mascot |
|  | 1314.7124  | 1314.7285   | 0.0161  | 12    | 177        | 188      | QSVEADIAGLRR     |           |        |   |                   |      |        | Mascot |
|  | 1325.6517  | 1325.6202   | -0.0315 | -24   | 373        | 382      | LEMEIAEYRR       |           |        |   | Oxidation (M)[3]  |      |        | Mascot |
|  | 1332.6754  | 1332.6663   | -0.0091 | -7    | 318        | 330      | ASLEGLTADTQAR    |           |        |   |                   |      |        | Mascot |
|  | 1410.7046  | 1410.7004   | -0.0042 | -3    | 371        | 381      | TRLEMEIAEYR      | 45        | 99.112 |   |                   |      |        | Mascot |
|  | 1410.7046  | 1410.7004   | -0.0042 | -3    | 371        | 381      | TRLEMEIAEYR      |           |        |   |                   |      |        | Mascot |
|  | 1426.6995  | 1426.6937   | -0.0058 | -4    | 371        | 381      | TRLEMEIAEYR      |           |        |   | Oxidation (M)[5]  |      |        | Mascot |
|  | 1426.6995  | 1426.6937   | -0.0058 | -4    | 371        | 381      | TRLEMEIAEYR      | 24        | 0      |   | Oxidation (M)[5]  |      |        | Mascot |
|  | 1863.9731  | 1863.9349   | -0.0382 | -20   | 302        | 317      | TLQSLEIELQSQLSMK |           |        |   | Oxidation (M)[15] |      |        | Mascot |

|    |                          |  |  |  |  |  |             |         |      |    |     |     |     |     |
|----|--------------------------|--|--|--|--|--|-------------|---------|------|----|-----|-----|-----|-----|
| 12 | Zgc:109868 [Danio rerio] |  |  |  |  |  | gi 92097956 | 47235.8 | 5.25 | 11 | 179 | 100 | 124 | 100 |
|----|--------------------------|--|--|--|--|--|-------------|---------|------|----|-----|-----|-----|-----|

Peptide Information

|  | Calc. Mass | Obsrv. Mass | ± da | ± ppm | Start Seq. | End Seq. | Sequence | Ion Score | C. I. | % | Modification | Rank | Result | Type |
|--|------------|-------------|------|-------|------------|----------|----------|-----------|-------|---|--------------|------|--------|------|
|--|------------|-------------|------|-------|------------|----------|----------|-----------|-------|---|--------------|------|--------|------|



|                     |                                                        |            |             |         |       |            |                   |                              |           |       |        |              |                   |     |  |      |        |        |
|---------------------|--------------------------------------------------------|------------|-------------|---------|-------|------------|-------------------|------------------------------|-----------|-------|--------|--------------|-------------------|-----|--|------|--------|--------|
|                     |                                                        | 807.3995   | 807.3951    | -0.0044 | -5    | 160        | 166               | LAADDFR                      |           |       |        |              |                   |     |  |      |        | Mascot |
|                     |                                                        | 1062.4998  | 1062.4937   | -0.0061 | -6    | 82         | 90                | ATMQNLNDR                    |           |       |        |              |                   |     |  |      |        | Mascot |
|                     |                                                        | 1077.5609  | 1077.5499   | -0.011  | -10   | 189        | 197               | VLDELTMTTR                   |           |       |        |              |                   |     |  |      |        | Mascot |
|                     |                                                        | 1078.4946  | 1078.4968   | 0.0022  | 2     | 82         | 90                | ATMQNLNDR                    |           |       |        |              | Oxidation (M)[3]  |     |  |      |        | Mascot |
|                     |                                                        | 1093.5558  | 1093.5265   | -0.0293 | -27   | 189        | 197               | VLDELTMTTR                   | 1         |       | 0      |              | Oxidation (M)[7]  |     |  |      |        | Mascot |
|                     |                                                        | 1093.5558  | 1093.5265   | -0.0293 | -27   | 189        | 197               | VLDELTMTTR                   |           |       |        |              | Oxidation (M)[7]  |     |  |      |        | Mascot |
|                     |                                                        | 1153.5558  | 1153.5513   | -0.0045 | -4    | 373        | 381               | LEMEIAEYR                    |           |       |        |              |                   |     |  |      |        | Mascot |
|                     |                                                        | 1169.5507  | 1169.6079   | 0.0572  | 49    | 373        | 381               | LEMEIAEYR                    |           |       |        |              | Oxidation (M)[3]  |     |  |      |        | Mascot |
|                     |                                                        | 1194.5861  | 1194.5823   | -0.0038 | -3    | 34         | 47                | AGSVYGGAGGSGVR               |           |       |        |              |                   |     |  |      |        | Mascot |
|                     |                                                        | 1194.5861  | 1194.5823   | -0.0038 | -3    | 34         | 47                | AGSVYGGAGGSGVR               | 79        |       | 100    |              |                   |     |  |      |        | Mascot |
|                     |                                                        | 1268.6304  | 1268.6265   | -0.0039 | -3    | 167        | 176               | VKYENELSMR                   |           |       |        |              |                   |     |  |      |        | Mascot |
|                     |                                                        | 1284.6252  | 1284.6198   | -0.0054 | -4    | 167        | 176               | VKYENELSMR                   |           |       |        |              | Oxidation (M)[9]  |     |  |      |        | Mascot |
|                     |                                                        | 1309.6569  | 1309.6635   | 0.0066  | 5     | 373        | 382               | LEMEIAEYRR                   |           |       |        |              |                   |     |  |      |        | Mascot |
|                     |                                                        | 1314.7124  | 1314.7285   | 0.0161  | 12    | 177        | 188               | QSVEADIAGLRR                 |           |       |        |              |                   |     |  |      |        | Mascot |
|                     |                                                        | 1325.6517  | 1325.6202   | -0.0315 | -24   | 373        | 382               | LEMEIAEYRR                   |           |       |        |              | Oxidation (M)[3]  |     |  |      |        | Mascot |
|                     |                                                        | 1332.6754  | 1332.6663   | -0.0091 | -7    | 318        | 330               | ASLEGLTADTQAR                |           |       |        |              |                   |     |  |      |        | Mascot |
|                     |                                                        | 1410.7046  | 1410.7004   | -0.0042 | -3    | 371        | 381               | TRLEMEIAEYR                  | 45        |       | 99.112 |              |                   |     |  |      |        | Mascot |
|                     |                                                        | 1410.7046  | 1410.7004   | -0.0042 | -3    | 371        | 381               | TRLEMEIAEYR                  |           |       |        |              |                   |     |  |      |        | Mascot |
|                     |                                                        | 1426.6995  | 1426.6937   | -0.0058 | -4    | 371        | 381               | TRLEMEIAEYR                  |           |       |        |              | Oxidation (M)[5]  |     |  |      |        | Mascot |
|                     |                                                        | 1426.6995  | 1426.6937   | -0.0058 | -4    | 371        | 381               | TRLEMEIAEYR                  | 24        |       | 0      |              | Oxidation (M)[5]  |     |  |      |        | Mascot |
|                     |                                                        | 1863.9731  | 1863.9349   | -0.0382 | -20   | 302        | 317               | TLQSLIEIQLSQLSMK             |           |       |        |              | Oxidation (M)[15] |     |  |      |        | Mascot |
| 13                  | eukaryotic initiation factor 4A-III [Danio rerio]      |            |             |         |       |            | gi 41055130       | 46438                        | 6.3       | 7     | 142    | 100          | 123               | 100 |  |      |        |        |
| Peptide Information |                                                        |            |             |         |       |            |                   |                              |           |       |        |              |                   |     |  |      |        |        |
|                     |                                                        | Calc. Mass | Obsrv. Mass | ± da    | ± ppm | Start Seq. | End Sequence Seq. |                              | Ion Score | C. I. | %      | Modification |                   |     |  | Rank | Result | Type   |
|                     |                                                        | 975.5984   | 975.5408    | -0.0576 | -59   | 369        | 377               | KGVAINFVK                    |           |       |        |              |                   |     |  |      |        | Mascot |
|                     |                                                        | 1122.5712  | 1122.588    | 0.0168  | 15    | 12         | 20                | ILKEEDMTK                    |           |       |        |              | Oxidation (M)[7]  |     |  |      |        | Mascot |
|                     |                                                        | 1332.7709  | 1332.6663   | -0.1046 | -78   | 227        | 237               | FMTDPIRILVK                  |           |       |        |              |                   |     |  |      |        | Mascot |
|                     |                                                        | 1469.7495  | 1469.65     | -0.0995 | -68   | 148        | 161               | LDYGGHVAGTPGR                |           |       |        |              |                   |     |  |      |        | Mascot |
|                     |                                                        | 1827.9387  | 1827.928    | -0.0107 | -6    | 47         | 62                | GIYAYGFEEKPSAIQQR            | 123       |       | 100    |              |                   |     |  |      |        | Mascot |
|                     |                                                        | 1827.9387  | 1827.928    | -0.0107 | -6    | 47         | 62                | GIYAYGFEEKPSAIQQR            |           |       |        |              |                   |     |  |      |        | Mascot |
|                     |                                                        | 1852.9183  | 1852.9144   | -0.0039 | -2    | 178        | 193               | MLVLDEADEMLNKGFK             |           |       |        |              |                   |     |  |      |        | Mascot |
|                     |                                                        | 1868.9132  | 1868.9138   | 0.0006  | 0     | 178        | 193               | MLVLDEADEMLNKGFK             |           |       |        |              | Oxidation (M)[1]  |     |  |      |        | Mascot |
|                     |                                                        | 2794.3789  | 2794.3076   | -0.0713 | -26   | 260        | 283               | FDTLCDLYDTLTITQAVIF<br>CNTKR |           |       |        |              |                   |     |  |      |        | Mascot |
| 14                  | eukaryotic translation initiation factor 4A, isoform 2 |            |             |         |       |            | gi 47087433       | 32405.7                      | 6.04      | 2     | 140    | 100          | 134               | 100 |  |      |        |        |

[Danio rerio]

Peptide Information

| Calc. Mass | Obsrv. Mass | ± da    | ± ppm | Start Seq. | End Seq. | Sequence               | Ion Score | C. I. | % | Modification | Rank | Result | Type |
|------------|-------------|---------|-------|------------|----------|------------------------|-----------|-------|---|--------------|------|--------|------|
| 1515.7842  | 1515.7654   | -0.0188 | -12   | 65         | 76       | GFKDQIYEIFQK           |           |       |   |              |      | Mascot |      |
| 2144.1345  | 2144.1218   | -0.0127 | -6    | 209        | 227      | GIDVQQVSLVINYLPTN      | 134       | 100   |   |              |      | Mascot |      |
| 2144.1345  | 2144.1218   | -0.0127 | -6    | 209        | 227      | R<br>GIDVQQVSLVINYLPTN |           |       |   |              |      | Mascot |      |

15 novel protein similar to type I cytokeratin, enveloping layer [Danio rerio] gi|94732413 49661.4 5.31 13 115 100 45 99.112

Peptide Information

| Calc. Mass | Obsrv. Mass | ± da    | ± ppm | Start Seq. | End Seq. | Sequence     | Ion Score | C. I.  | % | Modification     | Rank | Result | Type |
|------------|-------------|---------|-------|------------|----------|--------------|-----------|--------|---|------------------|------|--------|------|
| 807.3995   | 807.3951    | -0.0044 | -5    | 183        | 189      | LAADDFR      |           |        |   |                  |      | Mascot |      |
| 975.5469   | 975.5408    | -0.0061 | -6    | 317        | 324      | SEITELKR     |           |        |   |                  |      | Mascot |      |
| 1062.4998  | 1062.4937   | -0.0061 | -6    | 105        | 113      | ATMQNLNDR    |           |        |   |                  |      | Mascot |      |
| 1077.5609  | 1077.5499   | -0.011  | -10   | 212        | 220      | VLDELTMTTR   |           |        |   |                  |      | Mascot |      |
| 1078.4946  | 1078.4968   | 0.0022  | 2     | 105        | 113      | ATMQNLNDR    |           |        |   | Oxidation (M)[3] |      | Mascot |      |
| 1093.5558  | 1093.5265   | -0.0293 | -27   | 212        | 220      | VLDELTMTTR   | 1         | 0      |   | Oxidation (M)[7] |      | Mascot |      |
| 1093.5558  | 1093.5265   | -0.0293 | -27   | 212        | 220      | VLDELTMTTR   |           |        |   | Oxidation (M)[7] |      | Mascot |      |
| 1153.5558  | 1153.5513   | -0.0045 | -4    | 396        | 404      | LEMEIAEYR    |           |        |   |                  |      | Mascot |      |
| 1169.5507  | 1169.6079   | 0.0572  | 49    | 396        | 404      | LEMEIAEYR    |           |        |   | Oxidation (M)[3] |      | Mascot |      |
| 1181.5909  | 1181.5851   | -0.0058 | -5    | 240        | 249      | NHEEELLAAR   |           |        |   |                  |      | Mascot |      |
| 1221.6508  | 1221.475    | -0.1758 | -144  | 211        | 220      | KVLDELTMTTR  |           |        |   | Oxidation (M)[8] |      | Mascot |      |
| 1221.6508  | 1221.475    | -0.1758 | -144  | 211        | 220      | KVLDELTMTTR  |           |        |   | Oxidation (M)[8] |      | Mascot |      |
| 1268.6304  | 1268.6265   | -0.0039 | -3    | 190        | 199      | VKYENELSMR   |           |        |   |                  |      | Mascot |      |
| 1284.6252  | 1284.6198   | -0.0054 | -4    | 190        | 199      | VKYENELSMR   |           |        |   | Oxidation (M)[9] |      | Mascot |      |
| 1309.6569  | 1309.6635   | 0.0066  | 5     | 396        | 405      | LEMEIAEYRR   |           |        |   |                  |      | Mascot |      |
| 1325.6517  | 1325.6202   | -0.0315 | -24   | 396        | 405      | LEMEIAEYRR   |           |        |   | Oxidation (M)[3] |      | Mascot |      |
| 1332.6754  | 1332.6663   | -0.0091 | -7    | 341        | 353      | ASLEGLADTQAR |           |        |   |                  |      | Mascot |      |
| 1410.7046  | 1410.7004   | -0.0042 | -3    | 394        | 404      | TRLEMEIAEYR  | 45        | 99.112 |   |                  |      | Mascot |      |
| 1410.7046  | 1410.7004   | -0.0042 | -3    | 394        | 404      | TRLEMEIAEYR  |           |        |   |                  |      | Mascot |      |
| 1426.6995  | 1426.6937   | -0.0058 | -4    | 394        | 404      | TRLEMEIAEYR  |           |        |   | Oxidation (M)[5] |      | Mascot |      |
| 1426.6995  | 1426.6937   | -0.0058 | -4    | 394        | 404      | TRLEMEIAEYR  | 24        | 0      |   | Oxidation (M)[5] |      | Mascot |      |
| 1465.7356  | 1465.7231   | -0.0125 | -9    | 382        | 393      | QGQEYQMLLDIK |           |        |   |                  |      | Mascot |      |
| 1481.7305  | 1481.72     | -0.0105 | -7    | 382        | 393      | QGQEYQMLLDIK |           |        |   | Oxidation (M)[7] |      | Mascot |      |

|    |                                                    |           |        |    |             |     |                              |     |   |     |     |    |                        |  |        |
|----|----------------------------------------------------|-----------|--------|----|-------------|-----|------------------------------|-----|---|-----|-----|----|------------------------|--|--------|
|    | 2763.2358                                          | 2763.3052 | 0.0694 | 25 | 354         | 376 | YGNMLNGYQM QVGNME<br>EQLMQLR |     |   |     |     |    | Oxidation (M)[4]       |  | Mascot |
|    | 2779.2307                                          | 2779.3013 | 0.0706 | 25 | 354         | 376 | YGNMLNGYQM QVGNME<br>EQLMQLR |     |   |     |     |    | Oxidation (M)[4,10]    |  | Mascot |
|    | 2795.2256                                          | 2795.3018 | 0.0762 | 27 | 354         | 376 | YGNMLNGYQM QVGNME<br>EQLMQLR |     |   |     |     |    | Oxidation (M)[4,10,15] |  | Mascot |
| 16 | type I cytokeratin, enveloping layer [Danio rerio] |           |        |    | gi 94732407 |     | 24286.5                      | 4.8 | 9 | 106 | 100 | 45 | 99.112                 |  |        |

Peptide Information

|  | Calc. Mass | Obsrv. Mass | ± da    | ± ppm | Start Seq. | End Seq. | Sequence               | Ion Score | C. I.  | % | Modification      | Rank | Result | Type |
|--|------------|-------------|---------|-------|------------|----------|------------------------|-----------|--------|---|-------------------|------|--------|------|
|  | 1153.5558  | 1153.5513   | -0.0045 | -4    | 163        | 171      | LEMEIAEYR              |           |        |   |                   |      | Mascot |      |
|  | 1169.5507  | 1169.6079   | 0.0572  | 49    | 163        | 171      | LEMEIAEYR              |           |        |   | Oxidation (M)[3]  |      | Mascot |      |
|  | 1309.6569  | 1309.6635   | 0.0066  | 5     | 163        | 172      | LEMEIAEYRR             |           |        |   |                   |      | Mascot |      |
|  | 1325.6517  | 1325.6202   | -0.0315 | -24   | 163        | 172      | LEMEIAEYRR             |           |        |   | Oxidation (M)[3]  |      | Mascot |      |
|  | 1332.6754  | 1332.6663   | -0.0091 | -7    | 108        | 120      | ASLEGLADTQAR           |           |        |   |                   |      | Mascot |      |
|  | 1410.7046  | 1410.7004   | -0.0042 | -3    | 161        | 171      | TRLEMEIAEYR            | 45        | 99.112 |   |                   |      | Mascot |      |
|  | 1410.7046  | 1410.7004   | -0.0042 | -3    | 161        | 171      | TRLEMEIAEYR            |           |        |   |                   |      | Mascot |      |
|  | 1414.8151  | 1414.8075   | -0.0076 | -5    | 190        | 202      | KVVTIVEEVVDGK          |           |        |   |                   |      | Mascot |      |
|  | 1420.7278  | 1420.7194   | -0.0084 | -6    | 71         | 83       | EVAVSTETLQTSR          |           |        |   |                   |      | Mascot |      |
|  | 1426.6995  | 1426.6937   | -0.0058 | -4    | 161        | 171      | TRLEMEIAEYR            |           |        |   | Oxidation (M)[5]  |      | Mascot |      |
|  | 1426.6995  | 1426.6937   | -0.0058 | -4    | 161        | 171      | TRLEMEIAEYR            | 24        |        | 0 | Oxidation (M)[5]  |      | Mascot |      |
|  | 1465.7356  | 1465.7231   | -0.0125 | -9    | 149        | 160      | QGQEYQMLLDIK           |           |        |   |                   |      | Mascot |      |
|  | 1481.7305  | 1481.72     | -0.0105 | -7    | 149        | 160      | QGQEYQMLLDIK           |           |        |   | Oxidation (M)[7]  |      | Mascot |      |
|  | 1863.9731  | 1863.9349   | -0.0382 | -20   | 92         | 107      | TLQSLEIELQSLSMK        |           |        |   | Oxidation (M)[15] |      | Mascot |      |
|  | 1961.0801  | 1960.9036   | -0.1765 | -90   | 191        | 209      | VVTIVEEVVDGKVSSSS<br>K |           |        |   |                   |      | Mascot |      |

|    |                              |  |  |  |            |  |         |      |   |    |        |    |        |  |  |
|----|------------------------------|--|--|--|------------|--|---------|------|---|----|--------|----|--------|--|--|
| 17 | type I keratin [Danio rerio] |  |  |  | gi 5733816 |  | 11569.6 | 4.88 | 6 | 94 | 99.998 | 45 | 99.112 |  |  |
|----|------------------------------|--|--|--|------------|--|---------|------|---|----|--------|----|--------|--|--|

Peptide Information

|  | Calc. Mass | Obsrv. Mass | ± da    | ± ppm | Start Seq. | End Seq. | Sequence     | Ion Score | C. I.  | % | Modification     | Rank | Result | Type |
|--|------------|-------------|---------|-------|------------|----------|--------------|-----------|--------|---|------------------|------|--------|------|
|  | 1153.5558  | 1153.5513   | -0.0045 | -4    | 64         | 72       | LEMEIAEYR    |           |        |   |                  |      | Mascot |      |
|  | 1169.5507  | 1169.6079   | 0.0572  | 49    | 64         | 72       | LEMEIAEYR    |           |        |   | Oxidation (M)[3] |      | Mascot |      |
|  | 1309.6569  | 1309.6635   | 0.0066  | 5     | 64         | 73       | LEMEIAEYRR   |           |        |   |                  |      | Mascot |      |
|  | 1325.6517  | 1325.6202   | -0.0315 | -24   | 64         | 73       | LEMEIAEYRR   |           |        |   | Oxidation (M)[3] |      | Mascot |      |
|  | 1332.6754  | 1332.6663   | -0.0091 | -7    | 9          | 21       | ASLEGLADTQAR |           |        |   |                  |      | Mascot |      |
|  | 1410.7046  | 1410.7004   | -0.0042 | -3    | 62         | 72       | TRLEMEIAEYR  | 45        | 99.112 |   |                  |      | Mascot |      |
|  | 1410.7046  | 1410.7004   | -0.0042 | -3    | 62         | 72       | TRLEMEIAEYR  |           |        |   |                  |      | Mascot |      |
|  | 1426.6995  | 1426.6937   | -0.0058 | -4    | 62         | 72       | TRLEMEIAEYR  |           |        |   | Oxidation (M)[5] |      | Mascot |      |

|    |                                                                           |           |         |    |             |    |                              |      |   |                        |        |    |        |
|----|---------------------------------------------------------------------------|-----------|---------|----|-------------|----|------------------------------|------|---|------------------------|--------|----|--------|
|    | 1426.6995                                                                 | 1426.6937 | -0.0058 | -4 | 62          | 72 | TRLEMEIAEYR                  | 24   | 0 | Oxidation (M)[5]       | Mascot |    |        |
|    | 1465.7356                                                                 | 1465.7231 | -0.0125 | -9 | 50          | 61 | QQQEYQMLLDIK                 |      |   |                        | Mascot |    |        |
|    | 1481.7305                                                                 | 1481.72   | -0.0105 | -7 | 50          | 61 | QQQEYQMLLDIK                 |      |   | Oxidation (M)[7]       | Mascot |    |        |
|    | 2763.2358                                                                 | 2763.3052 | 0.0694  | 25 | 22          | 44 | YGNMLNGYQM QVGNME<br>EQLMQLR |      |   | Oxidation (M)[4]       | Mascot |    |        |
|    | 2779.2307                                                                 | 2779.3013 | 0.0706  | 25 | 22          | 44 | YGNMLNGYQM QVGNME<br>EQLMQLR |      |   | Oxidation (M)[4,10]    | Mascot |    |        |
|    | 2795.2256                                                                 | 2795.3018 | 0.0762  | 27 | 22          | 44 | YGNMLNGYQM QVGNME<br>EQLMQLR |      |   | Oxidation (M)[4,10,15] | Mascot |    |        |
| 18 | 2-oxoisovalerate dehydrogenase subunit alpha, mitochondrial [Danio rerio] |           |         |    | gi 66773104 |    | 50747                        | 6.37 | 7 | 83                     | 99.978 | 59 | 99.967 |

Peptide Information

| Calc. Mass | Obsrv. Mass | ± da    | ± ppm | Start Seq. | End Seq. | Sequence                 | Ion Score | C. I.  | % | Modification            | Rank | Result | Type |
|------------|-------------|---------|-------|------------|----------|--------------------------|-----------|--------|---|-------------------------|------|--------|------|
| 1062.5037  | 1062.4937   | -0.01   | -9    | 191        | 199      | QMPVHYGSK                |           |        |   | Oxidation (M)[2]        |      | Mascot |      |
| 1122.5975  | 1122.588    | -0.0095 | -8    | 389        | 397      | KLVMEAFER                |           |        |   |                         |      | Mascot |      |
| 1221.4807  | 1221.475    | -0.0057 | -5    | 373        | 381      | DWWGEDEER                |           |        |   |                         |      | Mascot |      |
| 1221.4807  | 1221.475    | -0.0057 | -5    | 373        | 381      | DWWGEDEER                | 59        | 99.967 |   |                         |      | Mascot |      |
| 1852.9261  | 1852.9144   | -0.0117 | -6    | 318        | 333      | AVAENQPFLIEAMTYR         |           |        |   |                         |      | Mascot |      |
| 1868.9137  | 1868.9138   | 0.0001  | 0     | 299        | 315      | VDGNDVFAVYNATKEAR        |           |        |   |                         |      | Mascot |      |
| 2233.0991  | 2233.071    | -0.0281 | -13   | 101        | 118      | ETVLNIFYQKMTLLNTMD<br>R  |           |        |   | Oxidation (M)[10]       |      | Mascot |      |
| 2246.0256  | 2246.0596   | 0.034   | 15    | 169        | 188      | GFPLDLFMAQCYANADD<br>LGK |           |        |   | Carbamidomethyl (C)[11] |      | Mascot |      |
| 2246.0256  | 2246.0596   | 0.034   | 15    | 169        | 188      | GFPLDLFMAQCYANADD<br>LGK |           |        |   | Carbamidomethyl (C)[11] |      | Mascot |      |

|    |                                      |  |  |  |  |              |         |      |   |    |        |    |        |
|----|--------------------------------------|--|--|--|--|--------------|---------|------|---|----|--------|----|--------|
| 19 | type I keratin E7-like [Danio rerio] |  |  |  |  | gi 316659401 | 43783.1 | 4.97 | 8 | 73 | 99.792 | 45 | 99.112 |
|----|--------------------------------------|--|--|--|--|--------------|---------|------|---|----|--------|----|--------|

Peptide Information

| Calc. Mass | Obsrv. Mass | ± da    | ± ppm | Start Seq. | End Seq. | Sequence    | Ion Score | C. I.  | % | Modification     | Rank | Result | Type |
|------------|-------------|---------|-------|------------|----------|-------------|-----------|--------|---|------------------|------|--------|------|
| 1078.6255  | 1078.4968   | -0.1287 | -119  | 69         | 77       | LASYLEKVR   |           |        |   |                  |      | Mascot |      |
| 1153.5558  | 1153.5513   | -0.0045 | -4    | 351        | 359      | LEMEIAEYR   |           |        |   |                  |      | Mascot |      |
| 1169.5507  | 1169.6079   | 0.0572  | 49    | 351        | 359      | LEMEIAEYR   |           |        |   | Oxidation (M)[3] |      | Mascot |      |
| 1186.5521  | 1186.6383   | 0.0862  | 73    | 1          | 10       | MSQVTQSFSR  |           |        |   | Oxidation (M)[1] |      | Mascot |      |
| 1186.5521  | 1186.6383   | 0.0862  | 73    | 1          | 10       | MSQVTQSFSR  |           |        |   | Oxidation (M)[1] |      | Mascot |      |
| 1309.6569  | 1309.6635   | 0.0066  | 5     | 351        | 360      | LEMEIAEYRR  |           |        |   |                  |      | Mascot |      |
| 1314.6471  | 1314.7285   | 0.0814  | 62    | 1          | 11       | MSQVTQSFSRK |           |        |   | Oxidation (M)[1] |      | Mascot |      |
| 1325.6517  | 1325.6202   | -0.0315 | -24   | 351        | 360      | LEMEIAEYRR  |           |        |   | Oxidation (M)[3] |      | Mascot |      |
| 1410.7046  | 1410.7004   | -0.0042 | -3    | 349        | 359      | TRLEMEIAEYR | 45        | 99.112 |   |                  |      | Mascot |      |
| 1410.7046  | 1410.7004   | -0.0042 | -3    | 349        | 359      | TRLEMEIAEYR |           |        |   |                  |      | Mascot |      |

|           |           |         |      |     |     |                 |    |                    |        |
|-----------|-----------|---------|------|-----|-----|-----------------|----|--------------------|--------|
| 1420.8046 | 1420.7194 | -0.0852 | -60  | 337 | 348 | QASEYKLLLDIK    |    |                    | Mascot |
| 1426.6995 | 1426.6937 | -0.0058 | -4   | 349 | 359 | TRLEMEIAEYR     |    | Oxidation (M)[5]   | Mascot |
| 1426.6995 | 1426.6937 | -0.0058 | -4   | 349 | 359 | TRLEMEIAEYR     | 24 | 0 Oxidation (M)[5] | Mascot |
| 1464.842  | 1464.6938 | -0.1482 | -101 | 370 | 383 | QTVKVVVEVVAPPQA |    |                    | Mascot |

### Peptide Information

|    |                                        |             |         |      |   |    |        |    |        |
|----|----------------------------------------|-------------|---------|------|---|----|--------|----|--------|
| 21 | Si:dkeyp-113d7.4 protein [Danio rerio] | gi 62203256 | 51673.7 | 5.05 | 7 | 70 | 99.512 | 45 | 99.112 |
|----|----------------------------------------|-------------|---------|------|---|----|--------|----|--------|

| Calc. Mass | Obsrv. Mass | ± da    | ± ppm | Start Seq. | End Seq. | Sequence       | Ion Score | C. I. | % Modification   | Rank | Result Type |
|------------|-------------|---------|-------|------------|----------|----------------|-----------|-------|------------------|------|-------------|
| 1078.6255  | 1078.4968   | -0.1287 | -119  | 140        | 148      | LASYLEKVR      |           |       |                  |      | Mascot      |
| 1093.6099  | 1093.5265   | -0.0834 | -76   | 478        | 488      | VVSSSSTSLVK    | 1         | 0     |                  |      | Mascot      |
| 1093.6099  | 1093.5265   | -0.0834 | -76   | 478        | 488      | VVSSSSTSLVK    |           |       |                  |      | Mascot      |
| 1153.5558  | 1153.5513   | -0.0045 | -4    | 424        | 432      | LEMEIAEYR      |           |       |                  |      | Mascot      |
| 1169.5507  | 1169.6079   | 0.0572  | 49    | 424        | 432      | LEMEIAEYR      |           |       | Oxidation (M)[3] |      | Mascot      |
| 1194.5861  | 1194.5823   | -0.0038 | -3    | 52         | 65       | SGSVYGGAGGAGVR |           |       |                  |      | Mascot      |
| 1194.5861  | 1194.5823   | -0.0038 | -3    | 52         | 65       | SGSVYGGAGGAGVR |           |       |                  |      | Mascot      |
| 1309.6569  | 1309.6635   | 0.0066  | 5     | 424        | 433      | LEMEIAEYRR     |           |       |                  |      | Mascot      |

|    |                                 |           |         |     |             |     |              |      |        |    |      |    |                  |  |        |
|----|---------------------------------|-----------|---------|-----|-------------|-----|--------------|------|--------|----|------|----|------------------|--|--------|
|    | 1325.6517                       | 1325.6202 | -0.0315 | -24 | 424         | 433 | LEMEIAEYRR   |      |        |    |      |    | Oxidation (M)[3] |  | Mascot |
|    | 1410.7046                       | 1410.7004 | -0.0042 | -3  | 422         | 432 | TRLEMEIAEYR  | 45   | 99.112 |    |      |    |                  |  | Mascot |
|    | 1410.7046                       | 1410.7004 | -0.0042 | -3  | 422         | 432 | TRLEMEIAEYR  |      |        |    |      |    |                  |  | Mascot |
|    | 1426.6995                       | 1426.6937 | -0.0058 | -4  | 422         | 432 | TRLEMEIAEYR  |      |        |    |      |    | Oxidation (M)[5] |  | Mascot |
|    | 1426.6995                       | 1426.6937 | -0.0058 | -4  | 422         | 432 | TRLEMEIAEYR  | 24   | 0      |    |      |    | Oxidation (M)[5] |  | Mascot |
|    | 1465.7356                       | 1465.7231 | -0.0125 | -9  | 410         | 421 | QGQEYQMLLDIK |      |        |    |      |    |                  |  | Mascot |
|    | 1481.7305                       | 1481.72   | -0.0105 | -7  | 410         | 421 | QGQEYQMLLDIK |      |        |    |      |    | Oxidation (M)[7] |  | Mascot |
| 22 | type I keratin E7 [Danio rerio] |           |         |     | gi 50539834 |     | 49754.6      | 5.42 | 8      | 69 | 99.4 | 45 | 99.112           |  |        |

Peptide Information

| Calc. Mass | Obsrv. Mass | ± da    | ± ppm | Start Seq. | End Seq. | Sequence                 | Ion Score | C. I.  | % | Modification     | Rank | Result Type |
|------------|-------------|---------|-------|------------|----------|--------------------------|-----------|--------|---|------------------|------|-------------|
| 1078.6255  | 1078.4968   | -0.1287 | -119  | 90         | 98       | LASYLEKVR                |           |        |   |                  |      | Mascot      |
| 1153.5558  | 1153.5513   | -0.0045 | -4    | 372        | 380      | LEMEIAEYR                |           |        |   |                  |      | Mascot      |
| 1169.5507  | 1169.6079   | 0.0572  | 49    | 372        | 380      | LEMEIAEYR                |           |        |   | Oxidation (M)[3] |      | Mascot      |
| 1186.5521  | 1186.6383   | 0.0862  | 73    | 1          | 10       | MSQVTQSFSR               |           |        |   | Oxidation (M)[1] |      | Mascot      |
| 1186.5521  | 1186.6383   | 0.0862  | 73    | 1          | 10       | MSQVTQSFSR               |           |        |   | Oxidation (M)[1] |      | Mascot      |
| 1309.6569  | 1309.6635   | 0.0066  | 5     | 372        | 381      | LEMEIAEYRR               |           |        |   |                  |      | Mascot      |
| 1314.6471  | 1314.7285   | 0.0814  | 62    | 1          | 11       | MSQVTQSFSRK              |           |        |   | Oxidation (M)[1] |      | Mascot      |
| 1325.6517  | 1325.6202   | -0.0315 | -24   | 372        | 381      | LEMEIAEYRR               |           |        |   | Oxidation (M)[3] |      | Mascot      |
| 1410.7046  | 1410.7004   | -0.0042 | -3    | 370        | 380      | TRLEMEIAEYR              | 45        | 99.112 |   |                  |      | Mascot      |
| 1410.7046  | 1410.7004   | -0.0042 | -3    | 370        | 380      | TRLEMEIAEYR              |           |        |   |                  |      | Mascot      |
| 1420.8046  | 1420.7194   | -0.0852 | -60   | 358        | 369      | QASEYKLLLDIK             |           |        |   |                  |      | Mascot      |
| 1426.6995  | 1426.6937   | -0.0058 | -4    | 370        | 380      | TRLEMEIAEYR              |           |        |   | Oxidation (M)[5] |      | Mascot      |
| 1426.6995  | 1426.6937   | -0.0058 | -4    | 370        | 380      | TRLEMEIAEYR              | 24        | 0      |   | Oxidation (M)[5] |      | Mascot      |
| 2144.2688  | 2144.1218   | -0.147  | -69   | 391        | 410      | QTIKVVVEVVAPPKDPVV<br>TK |           |        |   |                  |      | Mascot      |
| 2144.2688  | 2144.1218   | -0.147  | -69   | 391        | 410      | QTIKVVVEVVAPPKDPVV<br>TK |           |        |   |                  |      | Mascot      |

|    |                                                                         |  |  |  |             |  |         |      |   |    |        |    |        |  |  |
|----|-------------------------------------------------------------------------|--|--|--|-------------|--|---------|------|---|----|--------|----|--------|--|--|
| 23 | novel protein similar to vertebrate keratin type I family [Danio rerio] |  |  |  | gi 94732967 |  | 45812.2 | 5.08 | 7 | 66 | 98.957 | 45 | 99.112 |  |  |
|----|-------------------------------------------------------------------------|--|--|--|-------------|--|---------|------|---|----|--------|----|--------|--|--|

Peptide Information

| Calc. Mass | Obsrv. Mass | ± da    | ± ppm | Start Seq. | End Seq. | Sequence   | Ion Score | C. I. | % | Modification     | Rank | Result Type |
|------------|-------------|---------|-------|------------|----------|------------|-----------|-------|---|------------------|------|-------------|
| 1078.6255  | 1078.4968   | -0.1287 | -119  | 87         | 95       | LASYLEKVR  |           |       |   |                  |      | Mascot      |
| 1153.5558  | 1153.5513   | -0.0045 | -4    | 369        | 377      | LEMEIAEYR  |           |       |   |                  |      | Mascot      |
| 1169.5507  | 1169.6079   | 0.0572  | 49    | 369        | 377      | LEMEIAEYR  |           |       |   | Oxidation (M)[3] |      | Mascot      |
| 1309.6569  | 1309.6635   | 0.0066  | 5     | 369        | 378      | LEMEIAEYRR |           |       |   |                  |      | Mascot      |

|    |                                        |           |         |      |     |              |                         |    |        |                   |        |    |        |
|----|----------------------------------------|-----------|---------|------|-----|--------------|-------------------------|----|--------|-------------------|--------|----|--------|
|    | 1325.6517                              | 1325.6202 | -0.0315 | -24  | 369 | 378          | LEMEIAEYRR              |    |        | Oxidation (M)[3]  | Mascot |    |        |
|    | 1410.7046                              | 1410.7004 | -0.0042 | -3   | 367 | 377          | TRLEMEIAEYR             | 45 | 99.112 |                   | Mascot |    |        |
|    | 1410.7046                              | 1410.7004 | -0.0042 | -3   | 367 | 377          | TRLEMEIAEYR             |    |        |                   | Mascot |    |        |
|    | 1420.8046                              | 1420.7194 | -0.0852 | -60  | 355 | 366          | QASEYKLLLDIK            |    |        |                   | Mascot |    |        |
|    | 1426.6995                              | 1426.6937 | -0.0058 | -4   | 367 | 377          | TRLEMEIAEYR             |    |        | Oxidation (M)[5]  | Mascot |    |        |
|    | 1426.6995                              | 1426.6937 | -0.0058 | -4   | 367 | 377          | TRLEMEIAEYR             | 24 | 0      | Oxidation (M)[5]  | Mascot |    |        |
|    | 1464.842                               | 1464.6938 | -0.1482 | -101 | 388 | 401          | QTVKVVEVVAPPQA          |    |        |                   | Mascot |    |        |
|    | 2230.0227                              | 2230.0625 | 0.0398  | 18   | 9   | 28           | CPTRAETETMSQVTQS<br>FSR |    |        |                   | Mascot |    |        |
|    | 2246.0176                              | 2246.0596 | 0.042   | 19   | 9   | 28           | CPTRAETETMSQVTQS<br>FSR |    |        | Oxidation (M)[11] | Mascot |    |        |
|    | 2246.0176                              | 2246.0596 | 0.042   | 19   | 9   | 28           | CPTRAETETMSQVTQS<br>FSR |    |        | Oxidation (M)[11] | Mascot |    |        |
| 24 | Si:dkeyp-113d7.4 protein [Danio rerio] |           |         |      |     | gi 126632119 | 51495.6                 | 5  | 6      | 64                | 98.308 | 45 | 99.112 |

|           |           |         |     |     |     |             |    |        |  |  |  |                  |        |
|-----------|-----------|---------|-----|-----|-----|-------------|----|--------|--|--|--|------------------|--------|
| 1169.5507 | 1169.6079 | 0.0572  | 49  | 400 | 408 | LEMEIAEYR   |    |        |  |  |  | Oxidation (M)[3] | Mascot |
| 1284.6252 | 1284.6198 | -0.0054 | -4  | 194 | 203 | TKYENELTMR  |    |        |  |  |  |                  | Mascot |
| 1309.6569 | 1309.6635 | 0.0066  | 5   | 400 | 409 | LEMEIAEYRR  |    |        |  |  |  |                  | Mascot |
| 1325.6517 | 1325.6202 | -0.0315 | -24 | 400 | 409 | LEMEIAEYRR  |    |        |  |  |  | Oxidation (M)[3] | Mascot |
| 1410.7046 | 1410.7004 | -0.0042 | -3  | 398 | 408 | TRLEMEIAEYR | 45 | 99.112 |  |  |  |                  | Mascot |
| 1410.7046 | 1410.7004 | -0.0042 | -3  | 398 | 408 | TRLEMEIAEYR |    |        |  |  |  |                  | Mascot |
| 1426.6995 | 1426.6937 | -0.0058 | -4  | 398 | 408 | TRLEMEIAEYR |    |        |  |  |  | Oxidation (M)[5] | Mascot |
| 1426.6995 | 1426.6937 | -0.0058 | -4  | 398 | 408 | TRLEMEIAEYR | 24 | 0      |  |  |  | Oxidation (M)[5] | Mascot |
| 1465.772  | 1465.7231 | -0.0489 | -33 | 386 | 397 | QGQYKMLLDIK |    |        |  |  |  |                  | Mascot |
| 1481.7668 | 1481.72   | -0.0468 | -32 | 386 | 397 | QGQYKMLLDIK |    |        |  |  |  | Oxidation (M)[7] | Mascot |

26 keratin 15 [Danio rerio] gi|169158744 48848.4 5.13 6 63 97.61 45 99.112

#### Peptide Information

| Calc. Mass | Obsrv. Mass | ± da    | ± ppm | Start Seq. | End Seq. | Sequence    | Ion Score | C. I.  | % Modification   | Rank | Result Type |
|------------|-------------|---------|-------|------------|----------|-------------|-----------|--------|------------------|------|-------------|
| 1062.4998  | 1062.4937   | -0.0061 | -6    | 109        | 117      | ATMQNLNDR   |           |        |                  |      | Mascot      |
| 1078.4946  | 1078.4968   | 0.0022  | 2     | 109        | 117      | ATMQNLNDR   |           |        | Oxidation (M)[3] |      | Mascot      |
| 1153.5558  | 1153.5513   | -0.0045 | -4    | 400        | 408      | LEMEIAEYR   |           |        |                  |      | Mascot      |
| 1169.5507  | 1169.6079   | 0.0572  | 49    | 400        | 408      | LEMEIAEYR   |           |        | Oxidation (M)[3] |      | Mascot      |
| 1284.6252  | 1284.6198   | -0.0054 | -4    | 194        | 203      | TKYENELTMR  |           |        |                  |      | Mascot      |
| 1309.6569  | 1309.6635   | 0.0066  | 5     | 400        | 409      | LEMEIAEYRR  |           |        |                  |      | Mascot      |
| 1325.6517  | 1325.6202   | -0.0315 | -24   | 400        | 409      | LEMEIAEYRR  |           |        | Oxidation (M)[3] |      | Mascot      |
| 1410.7046  | 1410.7004   | -0.0042 | -3    | 398        | 408      | TRLEMEIAEYR | 45        | 99.112 |                  |      | Mascot      |
| 1410.7046  | 1410.7004   | -0.0042 | -3    | 398        | 408      | TRLEMEIAEYR |           |        |                  |      | Mascot      |
| 1426.6995  | 1426.6937   | -0.0058 | -4    | 398        | 408      | TRLEMEIAEYR |           |        | Oxidation (M)[5] |      | Mascot      |
| 1426.6995  | 1426.6937   | -0.0058 | -4    | 398        | 408      | TRLEMEIAEYR | 24        | 0      | Oxidation (M)[5] |      | Mascot      |
| 1465.772   | 1465.7231   | -0.0489 | -33   | 386        | 397      | QGQYKMLLDIK |           |        |                  |      | Mascot      |
| 1481.7668  | 1481.72     | -0.0468 | -32   | 386        | 397      | QGQYKMLLDIK |           |        | Oxidation (M)[7] |      | Mascot      |

27 ribosomal protein S6 kinase alpha-3 [Danio rerio] gi|131888399 81017.4 6.9 13 46 0

#### Peptide Information

| Calc. Mass | Obsrv. Mass | ± da    | ± ppm | Start Seq. | End Seq. | Sequence    | Ion Score | C. I. | % Modification   | Rank | Result Type |
|------------|-------------|---------|-------|------------|----------|-------------|-----------|-------|------------------|------|-------------|
| 1093.6     | 1093.5265   | -0.0735 | -67   | 151        | 160      | GGDLFTRLISK |           |       |                  |      | Mascot      |
| 1093.6     | 1093.5265   | -0.0735 | -67   | 151        | 160      | GGDLFTRLISK |           |       |                  |      | Mascot      |
| 1165.698   | 1165.738    | 0.04    | 34    | 142        | 150      | LYLILDFLR   |           |       |                  |      | Mascot      |
| 1181.6268  | 1181.5851   | -0.0417 | -35   | 274        | 283      | ETMTMILKAK  |           |       | Oxidation (M)[3] |      | Mascot      |



|    |                                                        |           |           |         |     |              |     |                           |      |   |                         |   |    |        |        |
|----|--------------------------------------------------------|-----------|-----------|---------|-----|--------------|-----|---------------------------|------|---|-------------------------|---|----|--------|--------|
|    |                                                        | 1194.663  | 1194.5823 | -0.0807 | -68 | 2            | 11  | PLAQLVDPWR                |      |   |                         |   |    |        | Mascot |
|    |                                                        | 1194.663  | 1194.5823 | -0.0807 | -68 | 2            | 11  | PLAQLVDPWR                |      |   |                         |   |    |        | Mascot |
|    |                                                        | 1268.6191 | 1268.6265 | 0.0074  | 6   | 425          | 436 | EDIGIGAYSICK              |      |   |                         |   |    |        | Mascot |
|    |                                                        | 1294.6031 | 1294.5891 | -0.014  | -11 | 704          | 713 | TDFHCLMSRK                |      |   | Carbamidomethyl (C)[5]  |   |    |        | Mascot |
|    |                                                        | 1325.6405 | 1325.6202 | -0.0203 | -15 | 425          | 436 | EDIGIGAYSICK              |      |   | Carbamidomethyl (C)[11] |   |    |        | Mascot |
|    |                                                        | 1450.7914 | 1450.6841 | -0.1073 | -74 | 495          | 507 | TVAYLHAQGVVHR             |      |   |                         |   |    |        | Mascot |
|    |                                                        | 1453.7985 | 1453.66   | -0.1385 | -95 | 1            | 12  | MPLAQLVDPWRK              |      |   |                         |   |    |        | Mascot |
|    |                                                        | 1469.7933 | 1469.65   | -0.1433 | -97 | 1            | 12  | MPLAQLVDPWRK              |      |   | Oxidation (M)[1]        |   |    |        | Mascot |
|    |                                                        | 1481.7417 | 1481.72   | -0.0217 | -15 | 425          | 437 | EDIGIGAYSICKR             |      |   | Carbamidomethyl (C)[11] |   |    |        | Mascot |
|    |                                                        | 1708.8938 | 1708.7949 | -0.0989 | -58 | 87           | 102 | TTGPDAGQLYAMKVLK          |      |   | Oxidation (M)[12]       |   |    |        | Mascot |
|    |                                                        | 1957.0801 | 1957.0361 | -0.044  | -22 | 628          | 644 | MLHVDPHQRLTAAQVLK         |      |   |                         |   |    |        | Mascot |
|    |                                                        | 1957.0801 | 1957.0361 | -0.044  | -22 | 628          | 644 | MLHVDPHQRLTAAQVLK         |      |   |                         |   |    |        | Mascot |
|    |                                                        | 2246.1299 | 2246.0596 | -0.0703 | -31 | 508          | 527 | DLKPSNILYVDESGNPESIR      |      |   |                         |   |    |        | Mascot |
|    |                                                        | 2246.1299 | 2246.0596 | -0.0703 | -31 | 508          | 527 | DLKPSNILYVDESGNPESIR      |      |   |                         |   |    |        | Mascot |
|    |                                                        | 2778.4316 | 2778.3147 | -0.1169 | -42 | 536          | 560 | QLRAENGLLMTPCYTANFVAPEVLK |      |   |                         |   |    |        | Mascot |
|    |                                                        | 2794.4265 | 2794.3076 | -0.1189 | -43 | 536          | 560 | QLRAENGLLMTPCYTANFVAPEVLK |      |   | Oxidation (M)[10]       |   |    |        | Mascot |
| 28 | coiled-coil domain-containing protein 46 [Danio rerio] |           |           |         |     | gi 149773535 |     | 79141.3                   | 6.63 | 4 | 45                      | 0 | 38 | 95.628 |        |

### Peptide Information

| Calc. Mass | Obsrv. Mass | ± da    | ± ppm | Start Seq. | End Sequence     | Ion Score | C. I. % Modification | Rank | Result Type |
|------------|-------------|---------|-------|------------|------------------|-----------|----------------------|------|-------------|
| 1045.5524  | 1045.5558   | 0.0034  | 3     | 269        | 277 KNGEIDELK    |           |                      |      | Mascot      |
| 1186.6613  | 1186.6383   | -0.023  | -19   | 605        | 614 QQLMELGVLR   | 38        | 95.628               |      | Mascot      |
| 1186.6613  | 1186.6383   | -0.023  | -19   | 605        | 614 QQLMELGVLR   |           |                      |      | Mascot      |
| 1314.7562  | 1314.7285   | -0.0277 | -21   | 604        | 614 KQQLMELGVLR  |           |                      |      | Mascot      |
| 1410.7699  | 1410.7004   | -0.0695 | -49   | 531        | 542 KLQTLQTHNAEK |           |                      |      | Mascot      |
| 1410.7699  | 1410.7004   | -0.0695 | -49   | 531        | 542 KLQTLQTHNAEK |           |                      |      | Mascot      |

29 Rbm34 protein [Danio rerio]

### Peptide Information

| Calc. Mass | Obsrv. Mass | ± da    | ± ppm | Start Seq. | End Seq. | Sequence       | Ion Score | C. I. | % Modification | Rank | Result Type |
|------------|-------------|---------|-------|------------|----------|----------------|-----------|-------|----------------|------|-------------|
| 842.473    | 842.5051    | 0.0321  | 38    | 74         | 80       | DPVQKQK        |           |       |                |      | Mascot      |
| 1093.5636  | 1093.5265   | -0.0371 | -34   | 135        | 143      | TVKFNAEER      | 12        | 0     |                |      | Mascot      |
| 1093.5636  | 1093.5265   | -0.0371 | -34   | 135        | 143      | TVKFNAEER      |           |       |                |      | Mascot      |
| 1414.79    | 1414.8075   | 0.0175  | 12    | 60         | 73       | VTPAVSDNAVVKSK |           |       |                |      | Mascot      |

|           |           |         |     |     |     |                          |                         |        |
|-----------|-----------|---------|-----|-----|-----|--------------------------|-------------------------|--------|
| 1464.7627 | 1464.6938 | -0.0689 | -47 | 148 | 160 | RTVFVGNLPSSCK            | Carbamidomethyl (C)[12] | Mascot |
| 1474.7761 | 1474.7805 | 0.0044  | 3   | 369 | 381 | NPRNKPTQASSFK            |                         | Mascot |
| 1711.7882 | 1711.7893 | 0.0011  | 1   | 119 | 133 | ADGEEEEERPTKHK           |                         | Mascot |
| 1960.9777 | 1960.9036 | -0.0741 | -38 | 225 | 240 | WNGHEIQAGFYIRVDR         |                         | Mascot |
| 2283.1501 | 2283.1641 | 0.014   | 6   | 205 | 224 | QNINAYIVFKEEESATDAL<br>K |                         | Mascot |

30 LOC560618 protein [Danio rerio] gi|183985554 36438.9 5.69 9 41 0

#### Peptide Information

| Calc. Mass | Obsrv. Mass | ± da    | ± ppm | Start Seq. | End Seq. | Sequence                     | Ion Score | C. I. % | Modification             | Rank | Result Type |
|------------|-------------|---------|-------|------------|----------|------------------------------|-----------|---------|--------------------------|------|-------------|
| 1165.6113  | 1165.738    | 0.1267  | 109   | 173        | 182      | LPSHWSSVPR                   |           |         |                          |      | Mascot      |
| 1186.5996  | 1186.6383   | 0.0387  | 33    | 100        | 110      | VKVNPNCGNGK                  |           |         | Carbamidomethyl (C)[7]   |      | Mascot      |
| 1186.5996  | 1186.6383   | 0.0387  | 33    | 100        | 110      | VKVNPNCGNGK                  |           |         | Carbamidomethyl (C)[7]   |      | Mascot      |
| 1194.6589  | 1194.5823   | -0.0766 | -64   | 155        | 166      | SSVAPTAGVHLR                 |           |         |                          |      | Mascot      |
| 1194.6589  | 1194.5823   | -0.0766 | -64   | 155        | 166      | SSVAPTAGVHLR                 |           |         |                          |      | Mascot      |
| 1325.7212  | 1325.6202   | -0.101  | -76   | 89         | 99       | WIDEQIAVVPR                  |           |         |                          |      | Mascot      |
| 1410.574   | 1410.7004   | 0.1264  | 90    | 1          | 11       | RVCMGMMMMIK                  |           |         | Oxidation (M)[4,6,7,8,9] |      | Mascot      |
| 1410.574   | 1410.7004   | 0.1264  | 90    | 1          | 11       | RVCMGMMMMIK                  |           |         | Oxidation (M)[4,6,7,8,9] |      | Mascot      |
| 1426.7358  | 1426.6937   | -0.0421 | -30   | 59         | 71       | DLCEHLGLTIANK                |           |         |                          |      | Mascot      |
| 1426.7358  | 1426.6937   | -0.0421 | -30   | 59         | 71       | DLCEHLGLTIANK                |           |         |                          |      | Mascot      |
| 1711.8544  | 1711.7893   | -0.0651 | -38   | 72         | 86       | AQLAEAQKHGLETGR              |           |         | Carbamidomethyl (C)[14]  |      | Mascot      |
| 2284.0884  | 2284.1616   | 0.0732  | 32    | 12         | 31       | MVLFSGMFMSGLAFDMQ<br>LVK     |           |         | Oxidation (M)[1,7]       |      | Mascot      |
| 2763.3699  | 2763.3052   | -0.0647 | -23   | 118        | 141      | AVPSKLFDFVCFNVTDFE<br>TQASIK |           |         | Carbamidomethyl (C)[11]  |      | Mascot      |

31 PREDICTED: sickle tail protein homolog [Danio rerio] gi|292610753 206402.5 8.61 10 39 0 30 72.607

#### Peptide Information

| Calc. Mass | Obsrv. Mass | ± da    | ± ppm | Start Seq. | End Seq. | Sequence        | Ion Score | C. I. % | Modification            | Rank | Result Type |
|------------|-------------|---------|-------|------------|----------|-----------------|-----------|---------|-------------------------|------|-------------|
| 803.4005   | 803.4296    | 0.0291  | 36    | 35         | 42       | AGSEGNLR        |           |         |                         |      | Mascot      |
| 842.473    | 842.5051    | 0.0321  | 38    | 384        | 391      | LSSVPPSR        |           |         |                         |      | Mascot      |
| 1294.675   | 1294.5891   | -0.0859 | -66   | 865        | 876      | ESPTPQPRSPAK    |           |         |                         |      | Mascot      |
| 1426.7438  | 1426.6937   | -0.0501 | -35   | 1098       | 1110     | RFYPSATGLTTGR   |           |         |                         |      | Mascot      |
| 1426.7438  | 1426.6937   | -0.0501 | -35   | 1098       | 1110     | RFYPSATGLTTGR   | 30        | 72.607  |                         |      | Mascot      |
| 1450.6703  | 1450.6841   | 0.0138  | 10    | 524        | 536      | DSNGAMEVNSRVRR  |           |         | Oxidation (M)[6]        |      | Mascot      |
| 1481.7078  | 1481.72     | 0.0122  | 8     | 1668       | 1681     | SISENQTTASQSTK  |           |         |                         |      | Mascot      |
| 1708.9125  | 1708.7949   | -0.1176 | -69   | 1169       | 1182     | IMAEQLQVFQKCTIK |           |         | Carbamidomethyl (C)[11] |      | Mascot      |

|           |           |         |     |      |      |                           |                    |        |
|-----------|-----------|---------|-----|------|------|---------------------------|--------------------|--------|
| 1852.7841 | 1852.9144 | 0.1303  | 70  | 272  | 285  | DDMRNMYELTDVR             | Oxidation (M)[3,6] | Mascot |
| 2230.1477 | 2230.0625 | -0.0852 | -38 | 893  | 913  | VQTVPSNAHHPSPLTPT<br>HGR  |                    | Mascot |
| 2283.2092 | 2283.1641 | -0.0451 | -20 | 1337 | 1357 | LEQQILHTHLPVSQASAA<br>PDK |                    | Mascot |

32 guanine nucleotide-binding protein subunit beta-5 [Danio rerio] gi|41152187 43411.8 5.76 9 39 0

#### Peptide Information

| Calc. Mass | Obsrv. Mass | ± da    | ± ppm | Start Seq. | End Seq. | Sequence                  | Ion Score | C. I. % | Modification            | Rank | Result Type |
|------------|-------------|---------|-------|------------|----------|---------------------------|-----------|---------|-------------------------|------|-------------|
| 1153.5745  | 1153.5513   | -0.0232 | -20   | 87         | 96       | MEALGQFVMK                |           |         |                         |      | Mascot      |
| 1169.5693  | 1169.6079   | 0.0386  | 33    | 87         | 96       | MEALGQFVMK                |           |         | Oxidation (M)[1]        |      | Mascot      |
| 1181.587   | 1181.5851   | -0.0019 | -2    | 171        | 180      | CSVYPLSLDK                |           |         | Carbamidomethyl (C)[1]  |      | Mascot      |
| 1268.5585  | 1268.6265   | 0.068   | 54    | 108        | 117      | VLCMDWCRDK                |           |         |                         |      | Mascot      |
| 1284.5533  | 1284.6198   | 0.0665  | 52    | 108        | 117      | VLCMDWCRDK                |           |         | Oxidation (M)[4]        |      | Mascot      |
| 1309.6787  | 1309.6635   | -0.0152 | -12   | 129        | 139      | VIVWDAYTTNK               |           |         |                         |      | Mascot      |
| 1325.58    | 1325.6202   | 0.0402  | 30    | 108        | 117      | VLCMDWCRDK                |           |         | Carbamidomethyl (C)[3]  |      | Mascot      |
| 1410.7231  | 1410.7004   | -0.0227 | -16   | 87         | 98       | MEALGQFVMKTR              |           |         |                         |      | Mascot      |
| 1410.7231  | 1410.7004   | -0.0227 | -16   | 87         | 98       | MEALGQFVMKTR              |           |         |                         |      | Mascot      |
| 1426.7181  | 1426.6937   | -0.0244 | -17   | 87         | 98       | MEALGQFVMKTR              |           |         | Oxidation (M)[1]        |      | Mascot      |
| 1426.7181  | 1426.6937   | -0.0244 | -17   | 87         | 98       | MEALGQFVMKTR              |           |         | Oxidation (M)[1]        |      | Mascot      |
| 1442.713   | 1442.6952   | -0.0178 | -12   | 87         | 98       | MEALGQFVMKTR              |           |         | Oxidation (M)[1,9]      |      | Mascot      |
| 1469.7971  | 1469.65     | -0.1471 | -100  | 357        | 369      | GTRVAILFGHENR             |           |         |                         |      | Mascot      |
| 1960.9255  | 1960.9036   | -0.0219 | -11   | 189        | 205      | KSVAMHTNYLSSCSFTK         |           |         | Carbamidomethyl (C)[13] |      | Mascot      |
| 2211.1292  | 2211.0935   | -0.0357 | -16   | 120        | 139      | IVSSSQDGKVIVWDAYTT<br>NK  |           |         |                         |      | Mascot      |
| 2283.0498  | 2283.1641   | 0.1143  | 50    | 375        | 395      | VSPDGTAFCSGSWDNTL<br>RIWA |           |         |                         |      | Mascot      |

33 novel protein containing EGF-like domains [Danio rerio] gi|169145912 26733.7 8.19 8 38 0

#### Peptide Information

| Calc. Mass | Obsrv. Mass | ± da    | ± ppm | Start Seq. | End Seq. | Sequence               | Ion Score | C. I. % | Modification             | Rank | Result Type |
|------------|-------------|---------|-------|------------|----------|------------------------|-----------|---------|--------------------------|------|-------------|
| 1309.5889  | 1309.6635   | 0.0746  | 57    | 56         | 67       | LVCNHHCQNGGK           |           |         |                          |      | Mascot      |
| 1469.7351  | 1469.65     | -0.0851 | -58   | 29         | 42       | SILPCLHGGTCVGR         |           |         | Carbamidomethyl (C)[5]   |      | Mascot      |
| 1474.7141  | 1474.7805   | 0.0664  | 45    | 210        | 221      | GTICQIPICEQR           |           |         | Carbamidomethyl (C)[4,9] |      | Mascot      |
| 1481.597   | 1481.72     | 0.123   | 83    | 164        | 177      | CIGPDVCDCASGWR         |           |         |                          |      | Mascot      |
| 1515.6355  | 1515.7654   | 0.1299  | 86    | 43         | 55       | DTCSCPYGFGPR           |           |         | Carbamidomethyl (C)[3,5] |      | Mascot      |
| 1956.8407  | 1957.0361   | 0.1954  | 100   | 117        | 134      | CQNAVCNPPCKNGGHC<br>VR |           |         | Carbamidomethyl (C)[1]   |      | Mascot      |

|    |                                              |           |        |     |             |     |                                |      |                        |    |        |
|----|----------------------------------------------|-----------|--------|-----|-------------|-----|--------------------------------|------|------------------------|----|--------|
|    | 1956.8407                                    | 1957.0361 | 0.1954 | 100 | 117         | 134 | CQNAVCNPPCKNGGHC<br>VR         |      | Carbamidomethyl (C)[1] |    | Mascot |
|    | 2232.9915                                    | 2233.071  | 0.0795 | 36  | 228         | 247 | CVRPNVCACRSGYMGTL<br>CSR       |      | Carbamidomethyl (C)[1] |    | Mascot |
|    | 2795.2883                                    | 2795.3018 | 0.0135 | 5   | 29          | 55  | SILPCLHGGTCVGRDTC<br>CPYGFVGPR |      |                        |    | Mascot |
| 34 | myotubularin-related protein 8 [Danio rerio] |           |        |     | gi 41055311 |     | 72276.9                        | 6.32 | 11                     | 38 | 0      |

#### Peptide Information

| Calc. Mass | Obsrv. Mass | ± da    | ± ppm | Start Seq. | End Seq. | Sequence                      | Ion Score | C. I. | % Modification            | Rank | Result Type |
|------------|-------------|---------|-------|------------|----------|-------------------------------|-----------|-------|---------------------------|------|-------------|
| 807.3366   | 807.3951    | 0.0585  | 72    | 626        | 632      | EEVQESS                       |           |       |                           |      | Mascot      |
| 1078.5739  | 1078.4968   | -0.0771 | -71   | 170        | 181      | SASVATVTGSAK                  |           |       |                           |      | Mascot      |
| 1153.5922  | 1153.5513   | -0.0409 | -35   | 315        | 325      | SVMDAGVFLAK                   |           |       | Oxidation (M)[3]          |      | Mascot      |
| 1332.7423  | 1332.6663   | -0.076  | -57   | 186        | 196      | GRLPVLSYYHK                   |           |       |                           |      | Mascot      |
| 1426.6445  | 1426.6937   | 0.0492  | 34    | 601        | 613      | EEPAANEHDLSSK                 |           |       |                           |      | Mascot      |
| 1426.845   | 1426.6937   | -0.1513 | -106  | 61         | 73       | LLLTASGCPLLR                  |           |       | Carbamidomethyl (C)[8]    |      | Mascot      |
| 1465.7753  | 1465.7231   | -0.0522 | -36   | 281        | 293      | SSLQKLLEVCSMK                 |           |       |                           |      | Mascot      |
| 1481.7701  | 1481.72     | -0.0501 | -34   | 281        | 293      | SSLQKLLEVCSMK                 |           |       | Oxidation (M)[12]         |      | Mascot      |
| 1515.8352  | 1515.7654   | -0.0698 | -46   | 312        | 325      | HIKSVMDAGVFLAK                |           |       |                           |      | Mascot      |
| 2143.999   | 2144.1218   | 0.1228  | 57    | 614        | 632      | DKPVSVETEHSKEEVQE<br>SS       |           |       |                           |      | Mascot      |
| 2143.999   | 2144.1218   | 0.1228  | 57    | 614        | 632      | DKPVSVETEHSKEEVQE<br>SS       |           |       |                           |      | Mascot      |
| 2246.0076  | 2246.0596   | 0.052   | 23    | 326        | 344      | AVCEERASVLVHCSDGW<br>DR       |           |       | Carbamidomethyl (C)[3,13] |      | Mascot      |
| 2246.0076  | 2246.0596   | 0.052   | 23    | 326        | 344      | AVCEERASVLVHCSDGW<br>DR       |           |       | Carbamidomethyl (C)[3,13] |      | Mascot      |
| 2763.3066  | 2763.3052   | -0.0014 | -1    | 601        | 625      | EEPAANEHDLSSKDKPV<br>SVETEHSK |           |       |                           |      | Mascot      |

|    |                                                                                                     |  |  |  |             |  |         |      |   |    |   |
|----|-----------------------------------------------------------------------------------------------------|--|--|--|-------------|--|---------|------|---|----|---|
| 35 | protein kinase, cAMP-dependent, regulatory, type I, alpha (tissue specific extinguisher 1) a [Danio |  |  |  | gi 58000450 |  | 43083.8 | 5.34 | 9 | 37 | 0 |
|----|-----------------------------------------------------------------------------------------------------|--|--|--|-------------|--|---------|------|---|----|---|

#### Peptide Information

| Calc. Mass | Obsrv. Mass | ± da    | ± ppm | Start Seq. | End Seq. | Sequence           | Ion Score | C. I. | % Modification   | Rank | Result Type |
|------------|-------------|---------|-------|------------|----------|--------------------|-----------|-------|------------------|------|-------------|
| 1062.4812  | 1062.4937   | 0.0125  | 12    | 243        | 250      | MYEEFLSK           |           |       | Oxidation (M)[1] |      | Mascot      |
| 1169.4917  | 1169.6079   | 0.1162  | 99    | 2          | 12       | ASSSTSSEER         |           |       |                  |      | Mascot      |
| 1294.5909  | 1294.5891   | -0.0018 | -1    | 305        | 315      | SENEEFVEVGR        |           |       |                  |      | Mascot      |
| 1442.7023  | 1442.6952   | -0.0071 | -5    | 133        | 144      | NVLFAHLDNDR        |           |       |                  |      | Mascot      |
| 1450.692   | 1450.6841   | -0.0079 | -5    | 304        | 315      | RSENEEFVEVGR       |           |       |                  |      | Mascot      |
| 1474.79    | 1474.7805   | -0.0095 | -6    | 251        | 262      | VSILES�DKWER       |           |       |                  |      | Mascot      |
| 1863.9335  | 1863.9349   | 0.0014  | 1     | 263        | 279      | LTVADALETVQFEDGQK  |           |       |                  |      | Mascot      |
| 1960.9135  | 1960.9036   | -0.0099 | -5    | 96         | 113      | GAISAEVYTEEDATSYVR |           |       |                  |      | Mascot      |

|                     |                                                                |             |         |       |              |                                  |                         |           |       |                                            |    |      |             |        |
|---------------------|----------------------------------------------------------------|-------------|---------|-------|--------------|----------------------------------|-------------------------|-----------|-------|--------------------------------------------|----|------|-------------|--------|
|                     | 2117.0144                                                      | 2117.155    | 0.1406  | 66    | 95           | 113                              | RGAISAEVYTEEDATSYV<br>R |           |       |                                            |    |      |             | Mascot |
| 36                  | laminin subunit beta-4 precursor [Danio rerio]                 |             |         |       | gi 27545303  | 203418.8                         | 5.19                    | 15        | 37    | 0                                          | 23 | 0    |             |        |
| Peptide Information |                                                                |             |         |       |              |                                  |                         |           |       |                                            |    |      |             |        |
|                     | Calc. Mass                                                     | Obsrv. Mass | ± da    | ± ppm | Start Seq.   | End Sequence Seq.                |                         | Ion Score | C. I. | % Modification                             |    | Rank | Result Type |        |
|                     | 1093.4401                                                      | 1093.5265   | 0.0864  | 79    | 441          | 450 DDPSGCQLCR                   |                         | 23        | 0     |                                            |    |      | Mascot      |        |
|                     | 1093.4401                                                      | 1093.5265   | 0.0864  | 79    | 441          | 450 DDPSGCQLCR                   |                         |           |       |                                            |    |      | Mascot      |        |
|                     | 1314.5426                                                      | 1314.7285   | 0.1859  | 141   | 333          | 342 RCNCHSHSEK                   |                         |           |       | Carbamidomethyl (C)[2,4]                   |    |      | Mascot      |        |
|                     | 1450.5938                                                      | 1450.6841   | 0.0903  | 62    | 1064         | 1077 DGDACDPVTGECLR              |                         |           |       |                                            |    |      | Mascot      |        |
|                     | 1464.657                                                       | 1464.6938   | 0.0368  | 25    | 1523         | 1534 DQAENMMDKINR                |                         |           |       |                                            |    |      | Mascot      |        |
|                     | 1465.8121                                                      | 1465.7231   | -0.089  | -61   | 1678         | 1689 LKNIEDHLNLTR                |                         |           |       |                                            |    |      | Mascot      |        |
|                     | 1469.7134                                                      | 1469.65     | -0.0634 | -43   | 254          | 264 YYYALYEMVVR                  |                         |           |       |                                            |    |      | Mascot      |        |
|                     | 1474.7933                                                      | 1474.7805   | -0.0128 | -9    | 1759         | 1771 LKNITMEAENLAK               |                         |           |       |                                            |    |      | Mascot      |        |
|                     | 1515.7008                                                      | 1515.7654   | 0.0646  | 43    | 1092         | 1104 RGYYGNALAQDCK               |                         |           |       | Carbamidomethyl (C)[12]                    |    |      | Mascot      |        |
|                     | 1708.7722                                                      | 1708.7949   | 0.0227  | 13    | 934          | 946 CYPGYYGFPLCRR                |                         |           |       | Carbamidomethyl (C)[1,11]                  |    |      | Mascot      |        |
|                     | 1711.6733                                                      | 1711.7893   | 0.116   | 68    | 297          | 310 CVCQHNTAGYNCEER              |                         |           |       | Carbamidomethyl (C)[1,3]                   |    |      | Mascot      |        |
|                     | 1956.865                                                       | 1957.0361   | 0.1711  | 87    | 350          | 368 YLATGGVSGGVCDDECRN<br>NR     |                         |           |       |                                            |    |      | Mascot      |        |
|                     | 1957.0428                                                      | 1957.0361   | -0.0067 | -3    | 695          | 711 FTVSNIPATLDYVVVVR            |                         |           |       |                                            |    |      | Mascot      |        |
|                     | 2283.0203                                                      | 2283.1641   | 0.1438  | 63    | 21           | 41 LQDECVGNSCYPNLGDL<br>MVGR     |                         |           |       |                                            |    |      | Mascot      |        |
|                     | 2283.9937                                                      | 2284.1616   | 0.1679  | 74    | 511          | 530 TECSSVDGQCKCRPNMV<br>GQK     |                         |           |       | Carbamidomethyl (C)[3,10]                  |    |      | Mascot      |        |
|                     | 2763.377                                                       | 2763.3052   | -0.0718 | -26   | 753          | 776 TATLDLPVCLSDGNQYH<br>VDITFRK |                         |           |       | Carbamidomethyl (C)[9]                     |    |      | Mascot      |        |
| 37                  | PREDICTED: disco-interacting protein 2 homolog C [Danio rerio] |             |         |       | gi 189536803 | 170745                           | 7.39                    | 17        | 37    | 0                                          |    |      |             |        |
| Peptide Information |                                                                |             |         |       |              |                                  |                         |           |       |                                            |    |      |             |        |
|                     | Calc. Mass                                                     | Obsrv. Mass | ± da    | ± ppm | Start Seq.   | End Sequence Seq.                |                         | Ion Score | C. I. | % Modification                             |    | Rank | Result Type |        |
|                     | 807.4471                                                       | 807.3951    | -0.052  | -64   | 1285         | 1291 DLGLHPR                     |                         |           |       |                                            |    |      | Mascot      |        |
|                     | 882.4501                                                       | 882.5634    | 0.1133  | 128   | 581          | 587 VCQYKGK                      |                         |           |       | Carbamidomethyl (C)[2]                     |    |      | Mascot      |        |
|                     | 1045.5887                                                      | 1045.5558   | -0.0329 | -31   | 1242         | 1251 GLGLQTESLK                  |                         |           |       |                                            |    |      | Mascot      |        |
|                     | 1078.5011                                                      | 1078.4968   | -0.0043 | -4    | 1424         | 1433 TELTDASGER                  |                         |           |       |                                            |    |      | Mascot      |        |
|                     | 1122.6194                                                      | 1122.588    | -0.0314 | -28   | 466          | 474 LLWVFVESK                    |                         |           |       |                                            |    |      | Mascot      |        |
|                     | 1165.567                                                       | 1165.738    | 0.171   | 147   | 1166         | 1174 LQCELYPSR                   |                         |           |       | Carbamidomethyl (C)[3]                     |    |      | Mascot      |        |
|                     | 1268.551                                                       | 1268.6265   | 0.0755  | 60    | 1152         | 1162 MSHTATSFAFCR                |                         |           |       | Carbamidomethyl (C)[10]                    |    |      | Mascot      |        |
|                     | 1284.546                                                       | 1284.6198   | 0.0738  | 57    | 1152         | 1162 MSHTATSFAFCR                |                         |           |       | Carbamidomethyl (C)[10], Oxidation (M)[11] |    |      | Mascot      |        |

|           |           |         |      |      |      |                                  |  |  |  |                                              |  |        |
|-----------|-----------|---------|------|------|------|----------------------------------|--|--|--|----------------------------------------------|--|--------|
| 1442.7638 | 1442.6952 | -0.0686 | -48  | 1454 | 1465 | YHPIDIETSVIR                     |  |  |  |                                              |  | Mascot |
| 1469.8145 | 1469.65   | -0.1645 | -112 | 996  | 1009 | GAVLSSLTCLQLHK                   |  |  |  |                                              |  | Mascot |
| 1708.9336 | 1708.7949 | -0.1387 | -81  | 1081 | 1095 | SACVMTTQISKLLK                   |  |  |  | Carbamidomethyl (C)[3], Oxidation (M)[5]     |  | Mascot |
| 1852.9585 | 1852.9144 | -0.0441 | -24  | 1332 | 1348 | LVERGSPHSLPLMESGK                |  |  |  | Oxidation (M)[13]                            |  | Mascot |
| 1960.8997 | 1960.9036 | 0.0039  | 2    | 1540 | 1556 | DGFLADQLDPIYVAYNM                |  |  |  | Oxidation (M)[17]                            |  | Mascot |
| 2211.1074 | 2211.0935 | -0.0139 | -6   | 676  | 695  | GVLSMQGLSYGVIRVDS<br>EER         |  |  |  | Oxidation (M)[5]                             |  | Mascot |
| 2246.1057 | 2246.0596 | -0.0461 | -21  | 1434 | 1453 | HDALYVVGALDEAMELR<br>GMR         |  |  |  |                                              |  | Mascot |
| 2246.1057 | 2246.0596 | -0.0461 | -21  | 1434 | 1453 | HDALYVVGALDEAMELR<br>GMR         |  |  |  |                                              |  | Mascot |
| 2283.092  | 2283.1641 | 0.0721  | 32   | 236  | 257  | YGNAELMETGDGVPVSS<br>RVSAK       |  |  |  | Oxidation (M)[7]                             |  | Mascot |
| 2778.5044 | 2778.3147 | -0.1897 | -68  | 775  | 802  | TGLLGFIGPGGLVFISGK<br>MDGLMVVSGR |  |  |  |                                              |  | Mascot |
| 2794.4993 | 2794.3076 | -0.1917 | -69  | 775  | 802  | TGLLGFIGPGGLVFISGK<br>MDGLMVVSGR |  |  |  | Oxidation (M)[19]                            |  | Mascot |
| 2818.229  | 2818.2898 | 0.0608  | 22   | 727  | 752  | TDEIGELCVCSIATGMSY<br>YGLSGMTK   |  |  |  | Carbamidomethyl (C)[8], Oxidation (M)[16,24] |  | Mascot |

38 RecName: Full=Dual specificity protein kinase Ttk;  
AltName: Full=Mitotic checkpoint serine/threonin gi|146336816 109942.2 7.36 14 36 0

#### Peptide Information

| Calc. Mass | Obsrv. Mass | ± da    | ± ppm | Start Seq. | End Seq. | Sequence                 | Ion Score | C. I. % | Modification            | Rank | Result | Type |
|------------|-------------|---------|-------|------------|----------|--------------------------|-----------|---------|-------------------------|------|--------|------|
| 1077.5609  | 1077.5499   | -0.011  | -10   | 966        | 974      | KLDVSECVK                |           |         | Carbamidomethyl (C)[7]  |      | Mascot |      |
| 1122.6339  | 1122.588    | -0.0459 | -41   | 95         | 103      | MLVRFAELK                |           |         | Oxidation (M)[1]        |      | Mascot |      |
| 1314.6875  | 1314.7285   | 0.041   | 31    | 383        | 393      | LLDCYSKV FAR             |           |         |                         |      | Mascot |      |
| 1325.5759  | 1325.6202   | 0.0443  | 33    | 953        | 965      | AASNLAMMCNSGR            |           |         |                         |      | Mascot |      |
| 1414.7074  | 1414.8075   | 0.1001  | 71    | 370        | 382      | RADPHSDAAFLSK            |           |         |                         |      | Mascot |      |
| 1426.7689  | 1426.6937   | -0.0752 | -53   | 587        | 599      | QPNPNSFVTPVVK            |           |         |                         |      | Mascot |      |
| 1426.7689  | 1426.6937   | -0.0752 | -53   | 587        | 599      | QPNPNSFVTPVVK            |           |         |                         |      | Mascot |      |
| 1453.6709  | 1453.66     | -0.0109 | -7    | 953        | 966      | AASNLAMMCNSGRK           |           |         |                         |      | Mascot |      |
| 1469.6658  | 1469.65     | -0.0158 | -11   | 953        | 966      | AASNLAMMCNSGRK           |           |         | Oxidation (M)[7]        |      | Mascot |      |
| 1474.7623  | 1474.7805   | 0.0182  | 12    | 390        | 401      | VFARFPLAEHCK             |           |         | Carbamidomethyl (C)[11] |      | Mascot |      |
| 1708.8112  | 1708.7949   | -0.0163 | -10   | 394        | 407      | FPLAEHCKTESYAR           |           |         | Carbamidomethyl (C)[7]  |      | Mascot |      |
| 1710.8657  | 1710.7849   | -0.0808 | -47   | 319        | 333      | EDIEEGHTITALLNR          |           |         |                         |      | Mascot |      |
| 1853.0603  | 1852.9144   | -0.1459 | -79   | 465        | 481      | ALSSNARPIELLQTAIR        |           |         |                         |      | Mascot |      |
| 1863.8979  | 1863.9349   | 0.037   | 20    | 70         | 85       | LMDSYTRVFSSMPLGK         |           |         | Oxidation (M)[2,12]     |      | Mascot |      |
| 1868.9589  | 1868.9138   | -0.0451 | -24   | 754        | 768      | AYWRNMLEAVHTIHK          |           |         |                         |      | Mascot |      |
| 2232.9827  | 2233.071    | 0.0883  | 40    | 417        | 436      | GIEDPEDAADDFSIARSH<br>CK |           |         | Carbamidomethyl (C)[19] |      | Mascot |      |

39 dual specificity protein kinase Ttk [Danio rerio] gi|28077097 110018.2 7.35 14 35 0

| Peptide Information |                                 |             |         |       |              |          |                      |           |         |                         |                  |
|---------------------|---------------------------------|-------------|---------|-------|--------------|----------|----------------------|-----------|---------|-------------------------|------------------|
|                     | Calc. Mass                      | Obsrv. Mass | ± da    | ± ppm | Start Seq.   | End Seq. | Sequence             | Ion Score | C. I. % | Modification            | Rank Result Type |
|                     | 1077.5609                       | 1077.5499   | -0.011  | -10   | 967          | 975      | KLDVSECVK            |           |         | Carbamidomethyl (C)[7]  | Mascot           |
|                     | 1122.6339                       | 1122.588    | -0.0459 | -41   | 95           | 103      | MLVRFAELK            |           |         | Oxidation (M)[1]        | Mascot           |
|                     | 1314.6875                       | 1314.7285   | 0.041   | 31    | 384          | 394      | LLDCYSKVFAR          |           |         |                         | Mascot           |
|                     | 1325.5759                       | 1325.6202   | 0.0443  | 33    | 954          | 966      | AASNLAMMCNSGR        |           |         |                         | Mascot           |
|                     | 1414.7074                       | 1414.8075   | 0.1001  | 71    | 371          | 383      | RADPHSDAAFLSK        |           |         |                         | Mascot           |
|                     | 1426.7689                       | 1426.6937   | -0.0752 | -53   | 588          | 600      | QPNPNSFVTPVVK        |           |         |                         | Mascot           |
|                     | 1426.7689                       | 1426.6937   | -0.0752 | -53   | 588          | 600      | QPNPNSFVTPVVK        |           |         |                         | Mascot           |
|                     | 1453.6709                       | 1453.66     | -0.0109 | -7    | 954          | 967      | AASNLAMMCNSGRK       |           |         |                         | Mascot           |
|                     | 1469.6658                       | 1469.65     | -0.0158 | -11   | 954          | 967      | AASNLAMMCNSGRK       |           |         | Oxidation (M)[7]        | Mascot           |
|                     | 1474.7623                       | 1474.7805   | 0.0182  | 12    | 391          | 402      | VFARFPLAEHCK         |           |         | Carbamidomethyl (C)[11] | Mascot           |
|                     | 1708.8112                       | 1708.7949   | -0.0163 | -10   | 395          | 408      | FPLAEHCKTESYAR       |           |         | Carbamidomethyl (C)[7]  | Mascot           |
|                     | 1710.8657                       | 1710.7849   | -0.0808 | -47   | 320          | 334      | EDIEEGHTITALLNR      |           |         |                         | Mascot           |
|                     | 1853.0603                       | 1852.9144   | -0.1459 | -79   | 466          | 482      | ALSSNARPIELLQTAIR    |           |         |                         | Mascot           |
|                     | 1863.8979                       | 1863.9349   | 0.037   | 20    | 70           | 85       | LMDSYTRVFSSMPLGK     |           |         | Oxidation (M)[2,12]     | Mascot           |
|                     | 1868.9589                       | 1868.9138   | -0.0451 | -24   | 755          | 769      | AYWRNMLEAVHTIHK      |           |         |                         | Mascot           |
|                     | 2232.9827                       | 2233.071    | 0.0883  | 40    | 418          | 437      | GIEDPEDAADDFSIARSHCK |           |         | Carbamidomethyl (C)[19] | Mascot           |
| 40                  | LOC563247 protein [Danio rerio] |             |         |       | gi 111306566 |          | 35064.7              | 9.75      | 9       | 35                      | 0                |

| Peptide Information |                                                |             |         |       |              |                   |        |           |         |                        |                  |
|---------------------|------------------------------------------------|-------------|---------|-------|--------------|-------------------|--------|-----------|---------|------------------------|------------------|
|                     | Calc. Mass                                     | Obsrv. Mass | ± da    | ± ppm | Start Seq.   | End Sequence Seq. |        | Ion Score | C. I. % | Modification           | Rank Result Type |
|                     | 1045.6152                                      | 1045.5558   | -0.0594 | -57   | 148          | 156 FRLPSQIGK     |        |           |         |                        | Mascot           |
|                     | 1077.4452                                      | 1077.5499   | 0.1047  | 97    | 3            | 11 HTCSMETPR      |        |           |         | Oxidation (M)[5]       | Mascot           |
|                     | 1186.6677                                      | 1186.6383   | -0.0294 | -25   | 163          | 173 KAPLSVDLESK   |        |           |         |                        | Mascot           |
|                     | 1186.6677                                      | 1186.6383   | -0.0294 | -25   | 163          | 173 KAPLSVDLESK   |        |           |         |                        | Mascot           |
|                     | 1268.6633                                      | 1268.6265   | -0.0368 | -29   | 122          | 131 TEYKPFQAKR    |        |           |         |                        | Mascot           |
|                     | 1284.5889                                      | 1284.6198   | 0.0309  | 24    | 75           | 85 TESGDVCLFTR    |        |           |         | Carbamidomethyl (C)[7] | Mascot           |
|                     | 1314.6899                                      | 1314.7285   | 0.0386  | 29    | 279          | 290 TENTEAPKPVTK  |        |           |         |                        | Mascot           |
|                     | 1420.601                                       | 1420.7194   | 0.1184  | 83    | 86           | 97 DEPNMTAEQTER   |        |           |         |                        | Mascot           |
|                     | 1442.7849                                      | 1442.6952   | -0.0897 | -62   | 278          | 290 KTENTEAPKPVTK |        |           |         |                        | Mascot           |
|                     | 1474.7802                                      | 1474.7805   | 0.0003  | 0     | 150          | 161 LPSQIGKHFIYER |        |           |         |                        | Mascot           |
| 41                  | triple functional domain protein [Danio rerio] |             |         |       | gi 157074231 |                   | 348904 | 6.09      | 24      | 35                     | 0                |

Peptide Information

|    | Calc. Mass                                   | Obsrv. Mass | ± da    | ± ppm | Start Seq.  | End Sequence Seq.              | Ion Score | C. I. % | Modification                                | Rank | Result Type |
|----|----------------------------------------------|-------------|---------|-------|-------------|--------------------------------|-----------|---------|---------------------------------------------|------|-------------|
|    | 807.4028                                     | 807.3951    | -0.0077 | -10   | 1013        | 1018 MEDRLK                    |           |         | Oxidation (M)[1]                            |      | Mascot      |
|    | 1077.58                                      | 1077.5499   | -0.0301 | -28   | 1220        | 1229 GHSHAAEIKK                |           |         |                                             |      | Mascot      |
|    | 1122.5394                                    | 1122.588    | 0.0486  | 43    | 2688        | 2696 GECVTLRCK                 |           |         | Carbamidomethyl (C)[3,8]                    |      | Mascot      |
|    | 1153.5345                                    | 1153.5513   | 0.0168  | 15    | 2504        | 2513 HSTHSKADADR               |           |         |                                             |      | Mascot      |
|    | 1165.7013                                    | 1165.738    | 0.0367  | 31    | 2114        | 2122 IMKYQLLLK                 |           |         | Oxidation (M)[2]                            |      | Mascot      |
|    | 1169.6346                                    | 1169.6079   | -0.0267 | -23   | 256         | 265 MIEEHAALKK                 |           |         |                                             |      | Mascot      |
|    | 1181.5177                                    | 1181.5851   | 0.0674  | 57    | 1448        | 1457 ELLTCCEEGK                |           |         | Carbamidomethyl (C)[5]                      |      | Mascot      |
|    | 1186.6538                                    | 1186.6383   | -0.0155 | -13   | 1688        | 1697 RGQTVEVLER                |           |         |                                             |      | Mascot      |
|    | 1186.6691                                    | 1186.6383   | -0.0308 | -26   | 83          | 93 RGGPVLTFPSR                 |           |         |                                             |      | Mascot      |
|    | 1194.5531                                    | 1194.5823   | 0.0292  | 24    | 3046        | 3055 RSAECIDTSR                |           |         | Carbamidomethyl (C)[5]                      |      | Mascot      |
|    | 1194.5531                                    | 1194.5823   | 0.0292  | 24    | 3046        | 3055 RSAECIDTSR                | 5         | 0       | Carbamidomethyl (C)[5]                      |      | Mascot      |
|    | 1221.5543                                    | 1221.475    | -0.0793 | -65   | 362         | 370 MFDWIMHNK                  |           |         |                                             |      | Mascot      |
|    | 1221.5543                                    | 1221.475    | -0.0793 | -65   | 362         | 370 MFDWIMHNK                  |           |         |                                             |      | Mascot      |
|    | 1268.5438                                    | 1268.6265   | 0.0827  | 65    | 1390        | 1398 FQMYVNYCK                 |           |         | Carbamidomethyl (C)[8], Oxidation (M)[3]    |      | Mascot      |
|    | 1284.5242                                    | 1284.6198   | 0.0956  | 74    | 2151        | 2160 RCNDMMNVGR                |           |         | Carbamidomethyl (C)[2], Oxidation (M)[5,6]  |      | Mascot      |
|    | 1453.7244                                    | 1453.66     | -0.0644 | -44   | 1304        | 1315 DFIMAELIQTEK              |           |         | Oxidation (M)[4]                            |      | Mascot      |
|    | 1474.7577                                    | 1474.7805   | 0.0228  | 15    | 692         | 702 ELWTWLEELQK                |           |         |                                             |      | Mascot      |
|    | 1582.7791                                    | 1582.7954   | 0.0163  | 10    | 3014        | 3026 DFMCLLLRMEPSK             |           |         |                                             |      | Mascot      |
|    | 1708.64                                      | 1708.7949   | 0.1549  | 91    | 464         | 476 CDQYMSNVDSWCK              |           |         | Carbamidomethyl (C)[1,12], Oxidation (M)[5] |      | Mascot      |
|    | 1710.8744                                    | 1710.7849   | -0.0895 | -52   | 3027        | 3040 RPPATSCLQEPWLR            |           |         | Carbamidomethyl (C)[7]                      |      | Mascot      |
|    | 1852.9512                                    | 1852.9144   | -0.0368 | -20   | 270         | 285 APVEEVDNEGQRLLQR           |           |         |                                             |      | Mascot      |
|    | 1960.932                                     | 1960.9036   | -0.0284 | -14   | 1547        | 1564 LFTSELGVTEHVEGDPCK        |           |         |                                             |      | Mascot      |
|    | 2233.0806                                    | 2233.071    | -0.0096 | -4    | 1545        | 1564 SKLFTSELGVTEHVEGDPCK      |           |         | Carbamidomethyl (C)[19]                     |      | Mascot      |
|    | 2283.1372                                    | 2283.1641   | 0.0269  | 12    | 3022        | 3040 MEPSKRPPATSCLQEPWLR       |           |         | Carbamidomethyl (C)[12]                     |      | Mascot      |
|    | 2763.4207                                    | 2763.3052   | -0.1155 | -42   | 107         | 131 LIAYLAGIPSEDVCKHGFTVIVDMR  |           |         | Oxidation (M)[24]                           |      | Mascot      |
|    | 2818.2117                                    | 2818.2898   | 0.0781  | 28    | 1047        | 1072 EEDWCGGADKLGPNCESDHVTMISK |           |         |                                             |      | Mascot      |
| 42 | hypothetical protein LOC567341 [Danio rerio] |             |         |       | gi 70887749 |                                | 23088.8   | 5.53    | 7                                           | 35   | 0           |

Peptide Information

|  | Calc. Mass | Obsrv. Mass | ± da    | ± ppm | Start Seq. | End Sequence Seq. | Ion Score | C. I. % | Modification | Rank | Result Type |
|--|------------|-------------|---------|-------|------------|-------------------|-----------|---------|--------------|------|-------------|
|  | 1078.568   | 1078.4968   | -0.0712 | -66   | 41         | 48 RPSYLEWK       |           |         |              |      | Mascot      |
|  | 1122.5472  | 1122.588    | 0.0408  | 36    | 143        | 151 VEQTCHLHR     |           |         |              |      | Mascot      |
|  | 1309.7335  | 1309.6635   | -0.07   | -53   | 71         | 82 DAGLKPRATPQR   |           |         |              |      | Mascot      |



|    |                                                  |           |         |     |             |     |                          |      |   |    |   |                        |        |
|----|--------------------------------------------------|-----------|---------|-----|-------------|-----|--------------------------|------|---|----|---|------------------------|--------|
|    | 1420.7478                                        | 1420.7194 | -0.0284 | -20 | 141         | 151 | LKVEQTCHLHR              |      |   |    |   | Carbamidomethyl (C)[7] | Mascot |
|    | 1515.806                                         | 1515.7654 | -0.0406 | -27 | 122         | 133 | IQDQQLARQLMR             |      |   |    |   | Oxidation (M)[11]      | Mascot |
|    | 1708.817                                         | 1708.7949 | -0.0221 | -13 | 83          | 98  | TIEDSQMTAGNLISR          |      |   |    |   | Oxidation (M)[7]       | Mascot |
|    | 2246.1194                                        | 2246.0596 | -0.0598 | -27 | 78          | 98  | ATPQRTIEDSQMTAGN<br>LISR |      |   |    |   |                        | Mascot |
|    | 2246.1194                                        | 2246.0596 | -0.0598 | -27 | 78          | 98  | ATPQRTIEDSQMTAGN<br>LISR |      |   |    |   |                        | Mascot |
| 43 | serine/threonine-protein kinase 12 [Danio rerio] |           |         |     | gi 47086895 |     | 36923.1                  | 9.15 | 8 | 35 | 0 |                        |        |

#### Peptide Information

|  | Calc. Mass | Obsrv. Mass | ± da    | ± ppm | Start Seq. | End Seq. | Sequence                    | Ion Score | C. I. | % Modification         | Rank | Result Type |
|--|------------|-------------|---------|-------|------------|----------|-----------------------------|-----------|-------|------------------------|------|-------------|
|  | 1153.567   | 1153.5513   | -0.0157 | -14   | 136        | 144      | GEMYKELQR                   |           |       |                        |      | Mascot      |
|  | 1169.5619  | 1169.6079   | 0.046   | 39    | 136        | 144      | GEMYKELQR                   |           |       | Oxidation (M)[3]       |      | Mascot      |
|  | 1221.5933  | 1221.475    | -0.1183 | -97   | 310        | 320      | VLPPVCSSEPH                 |           |       | Carbamidomethyl (C)[6] |      | Mascot      |
|  | 1221.5933  | 1221.475    | -0.1183 | -97   | 310        | 320      | VLPPVCSSEPH                 |           |       | Carbamidomethyl (C)[6] |      | Mascot      |
|  | 1309.7223  | 1309.6635   | -0.0588 | -45   | 11         | 23       | VQQTSPAGVGPLR               |           |       |                        |      | Mascot      |
|  | 1558.8588  | 1558.8654   | 0.0066  | 4     | 264        | 277      | VDLQFPKLVSEGAR              |           |       |                        |      | Mascot      |
|  | 1582.7278  | 1582.7954   | 0.0676  | 43    | 24         | 38       | VEMNPDTHAVSGPGR             |           |       | Oxidation (M)[3]       |      | Mascot      |
|  | 1711.9027  | 1711.7893   | -0.1134 | -66   | 192        | 206      | IADFGWSVHAPSLRR             |           |       |                        |      | Mascot      |
|  | 2246.0105  | 2246.0596   | 0.0491  | 22    | 153        | 171      | TATYMEEVSDALQYCHE<br>KK     |           |       |                        |      | Mascot      |
|  | 2246.0105  | 2246.0596   | 0.0491  | 22    | 153        | 171      | TATYMEEVSDALQYCHE<br>KK     |           |       |                        |      | Mascot      |
|  | 2779.1975  | 2779.3013   | 0.1038  | 37    | 148        | 170      | FDDQRTATYMEEVSDAL<br>QYCHEK |           |       |                        |      | Mascot      |
|  | 2795.1924  | 2795.3018   | 0.1094  | 39    | 148        | 170      | FDDQRTATYMEEVSDAL<br>QYCHEK |           |       | Oxidation (M)[10]      |      | Mascot      |

44 PREDICTED: lymphatic vessel endothelial hyaluronidase 1 [Danio rerio] gi|189522073 36715.9 5.51 8 35 0

#### Peptide Information

|  | Calc. Mass | Obsrv. Mass | ± da    | ± ppm | Start Seq. | End Seq. | Sequence     | Ion Score | C. I. | % Modification                               | Rank | Result Type |
|--|------------|-------------|---------|-------|------------|----------|--------------|-----------|-------|----------------------------------------------|------|-------------|
|  | 1165.6113  | 1165.738    | 0.1267  | 109   | 176        | 185      | LPSHWSSVPR   |           |       |                                              |      | Mascot      |
|  | 1186.5996  | 1186.6383   | 0.0387  | 33    | 103        | 113      | VKVNPNCGNGK  |           |       | Carbamidomethyl (C)[7]                       |      | Mascot      |
|  | 1186.5996  | 1186.6383   | 0.0387  | 33    | 103        | 113      | VKVNPNCGNGK  |           |       | Carbamidomethyl (C)[7]                       |      | Mascot      |
|  | 1194.6589  | 1194.5823   | -0.0766 | -64   | 158        | 169      | SSVAPTAGVHLR |           |       |                                              |      | Mascot      |
|  | 1194.6589  | 1194.5823   | -0.0766 | -64   | 158        | 169      | SSVAPTAGVHLR |           |       |                                              |      | Mascot      |
|  | 1314.7164  | 1314.7285   | 0.0121  | 9     | 114        | 125      | TGVVVWRADPSK |           |       |                                              |      | Mascot      |
|  | 1410.545   | 1410.7004   | 0.1554  | 110   | 4          | 14       | VCMGMMMMMIK  |           |       | Carbamidomethyl (C)[2], Oxidation (M)[3,5,6] |      | Mascot      |
|  | 1410.545   | 1410.7004   | 0.1554  | 110   | 4          | 14       | VCMGMMMMMIK  |           |       | Carbamidomethyl (C)[2], Oxidation (M)[3,5,6] |      | Mascot      |

|    |                                                            |           |         |     |     |     |                          |         |      |   |    |   |    |                                                  |        |
|----|------------------------------------------------------------|-----------|---------|-----|-----|-----|--------------------------|---------|------|---|----|---|----|--------------------------------------------------|--------|
|    | 1426.54                                                    | 1426.6937 | 0.1537  | 108 | 4   | 14  | VCMGMMMMMIK              |         |      |   |    |   |    | Carbamidomethyl (C)[2], Oxidation (M)[3,5,6,7]   | Mascot |
|    | 1426.7358                                                  | 1426.6937 | -0.0421 | -30 | 62  | 74  | DLCEHLGLTIANK            |         |      |   |    |   |    |                                                  | Mascot |
|    | 1442.5349                                                  | 1442.6952 | 0.1603  | 111 | 4   | 14  | VCMGMMMMMIK              |         |      |   |    |   |    | Carbamidomethyl (C)[2], Oxidation (M)[3,5,6,7,8] | Mascot |
|    | 1711.8544                                                  | 1711.7893 | -0.0651 | -38 | 75  | 89  | AQLAEAQKHGLETCT          |         |      |   |    |   |    | Carbamidomethyl (C)[14]                          | Mascot |
|    | 2794.3027                                                  | 2794.3076 | 0.0049  | 2   | 121 | 144 | ADPSKQFDVFCFNVDTFETQASIK |         |      |   |    |   |    | Carbamidomethyl (C)[11]                          | Mascot |
| 45 | erythrocyte band 7 integral membrane protein [Danio rerio] |           |         |     |     |     | gi 18859437              | 31584.7 | 5.33 | 3 | 35 | 0 | 25 | 10.742                                           |        |

#### Peptide Information

| Calc. Mass | Obsrv. Mass | ± da    | ± ppm | Start Seq. | End Seq. | Sequence                  | Ion Score | C. I.  | % Modification   | Rank | Result Type |
|------------|-------------|---------|-------|------------|----------|---------------------------|-----------|--------|------------------|------|-------------|
| 1221.5529  | 1221.475    | -0.0779 | -64   | 6          | 15       | ETAAMREEER                |           |        |                  |      | Mascot      |
| 1221.5529  | 1221.475    | -0.0779 | -64   | 6          | 15       | ETAAMREEER                | 25        | 10.742 |                  |      | Mascot      |
| 1558.7748  | 1558.8654   | 0.0906  | 58    | 114        | 127      | DSVTVSVDGVVYYR            |           |        |                  |      | Mascot      |
| 2762.2573  | 2762.323    | 0.0657  | 24    | 170        | 193      | EEIAHSMQSTLDDATDDWGIVKVER |           |        | Oxidation (M)[7] |      | Mascot      |

46 PREDICTED: desmoplakin, partial [Danio rerio] gi|326677406 251614.7 5.73 20 34 0

#### Peptide Information

| Calc. Mass | Obsrv. Mass | ± da    | ± ppm | Start Seq. | End Seq. | Sequence        | Ion Score | C. I. | % Modification         | Rank | Result Type |
|------------|-------------|---------|-------|------------|----------|-----------------|-----------|-------|------------------------|------|-------------|
| 807.4359   | 807.3951    | -0.0408 | -51   | 226        | 232      | GEFVSLR         |           |       |                        |      | Mascot      |
| 1078.5527  | 1078.4968   | -0.0559 | -52   | 1731       | 1739     | IDVDVAYQR       |           |       |                        |      | Mascot      |
| 1093.5194  | 1093.5265   | 0.0071  | 6     | 459        | 468      | DGETCISAIK      |           |       | Carbamidomethyl (C)[5] |      | Mascot      |
| 1093.5194  | 1093.5265   | 0.0071  | 6     | 459        | 468      | DGETCISAIK      |           |       | Carbamidomethyl (C)[5] |      | Mascot      |
| 1153.6398  | 1153.5513   | -0.0885 | -77   | 316        | 324      | YQKVLLSMR       |           |       | Oxidation (M)[8]       |      | Mascot      |
| 1165.6285  | 1165.738    | 0.1095  | 94    | 1337       | 1346     | VIFEQLMTGK      |           |       |                        |      | Mascot      |
| 1181.5541  | 1181.5851   | 0.031   | 26    | 285        | 294      | DMMKAEDVVK      |           |       | Oxidation (M)[2]       |      | Mascot      |
| 1194.5784  | 1194.5823   | 0.0039  | 3     | 1278       | 1287     | TEMQALRDSK      |           |       | Oxidation (M)[3]       |      | Mascot      |
| 1194.5784  | 1194.5823   | 0.0039  | 3     | 1278       | 1287     | TEMQALRDSK      |           |       | Oxidation (M)[3]       |      | Mascot      |
| 1221.6144  | 1221.475    | -0.1394 | -114  | 667        | 676      | MELEKTVSER      |           |       |                        |      | Mascot      |
| 1221.6144  | 1221.475    | -0.1394 | -114  | 667        | 676      | MELEKTVSER      |           |       |                        |      | Mascot      |
| 1268.7321  | 1268.6265   | -0.1056 | -83   | 1362       | 1376     | GTGAIAGLAAGPKGK |           |       |                        |      | Mascot      |
| 1314.7562  | 1314.7285   | -0.0277 | -21   | 173        | 183      | MLNELNALRLK     |           |       |                        |      | Mascot      |
| 1332.639   | 1332.6663   | 0.0273  | 20    | 6          | 17       | GDEGILKDNSER    |           |       |                        |      | Mascot      |
| 1410.7509  | 1410.7004   | -0.0505 | -36   | 1942       | 1954     | TETIKSISSMSVK   |           |       |                        |      | Mascot      |
| 1410.7509  | 1410.7004   | -0.0505 | -36   | 1942       | 1954     | TETIKSISSMSVK   |           |       |                        |      | Mascot      |

|  |           |           |         |     |      |      |                              |  |  |                     |  |  |  |        |
|--|-----------|-----------|---------|-----|------|------|------------------------------|--|--|---------------------|--|--|--|--------|
|  | 1426.7285 | 1426.6937 | -0.0348 | -24 | 1583 | 1594 | EGKITSQEIEHR                 |  |  |                     |  |  |  | Mascot |
|  | 1426.7285 | 1426.6937 | -0.0348 | -24 | 1583 | 1594 | EGKITSQEIEHR                 |  |  |                     |  |  |  | Mascot |
|  | 1453.7104 | 1453.66   | -0.0504 | -35 | 250  | 261  | YLSGQLDIMNQR                 |  |  | Oxidation (M)[9]    |  |  |  | Mascot |
|  | 1515.8053 | 1515.7654 | -0.0399 | -26 | 519  | 531  | SSDYKLLLASQK                 |  |  |                     |  |  |  | Mascot |
|  | 1710.7826 | 1710.7849 | 0.0023  | 1   | 2095 | 2108 | SLEEALQMGWLDMR               |  |  | Oxidation (M)[8,13] |  |  |  | Mascot |
|  | 1956.8636 | 1957.0361 | 0.1725  | 88  | 1041 | 1058 | SMEEEKSCALNVSSGETE<br>R      |  |  |                     |  |  |  | Mascot |
|  | 1956.9919 | 1957.0361 | 0.0442  | 23  | 1999 | 2017 | LLEAQAQTGGIVSPDNGR<br>R      |  |  |                     |  |  |  | Mascot |
|  | 2144.0078 | 2144.1218 | 0.114   | 53  | 399  | 416  | RYMQSSSQLSGWIDETQ<br>K       |  |  |                     |  |  |  | Mascot |
|  | 2144.0078 | 2144.1218 | 0.114   | 53  | 399  | 416  | RYMQSSSQLSGWIDETQ<br>K       |  |  |                     |  |  |  | Mascot |
|  | 2762.3413 | 2762.323  | -0.0183 | -7  | 417  | 440  | QIDSQHSVKMEDSAAYT<br>QLLNQQK |  |  |                     |  |  |  | Mascot |
|  | 2778.3362 | 2778.3147 | -0.0215 | -8  | 417  | 440  | QIDSQHSVKMEDSAAYT<br>QLLNQQK |  |  | Oxidation (M)[10]   |  |  |  | Mascot |

47 PREDICTED: band 4.1-like protein 2-like, partial [Danio rerio] gi|326676922 65324.6 5.24 1 25 17.082

Peptide Information

| Calc. Mass | Obsrv. Mass | ± da    | ± ppm | Start Seq. | End Seq. | Sequence   | Ion Score | C. I. % | Modification | Rank | Result Type |
|------------|-------------|---------|-------|------------|----------|------------|-----------|---------|--------------|------|-------------|
| 1221.5481  | 1221.475    | -0.0731 | -60   | 127        | 136      | SVKEEDEEEK | 25        | 17.082  |              | 2    | Mascot      |

48 stomatin [Danio rerio] gi|123233002 6957.7 5.25 1 25 10.742

Peptide Information

| Calc. Mass | Obsrv. Mass | ± da    | ± ppm | Start Seq. | End Seq. | Sequence   | Ion Score | C. I. % | Modification | Rank | Result Type |
|------------|-------------|---------|-------|------------|----------|------------|-----------|---------|--------------|------|-------------|
| 1221.5529  | 1221.475    | -0.0779 | -64   | 6          | 15       | ETAAMREEER | 25        | 10.742  |              | 3    | Mascot      |

49 Unknown (protein for IMAGE:8129958) [Danio rerio] gi|112418958 20963.9 8.4 1 25 6.535

Peptide Information

| Calc. Mass | Obsrv. Mass | ± da    | ± ppm | Start Seq. | End Seq. | Sequence   | Ion Score | C. I. % | Modification | Rank | Result Type |
|------------|-------------|---------|-------|------------|----------|------------|-----------|---------|--------------|------|-------------|
| 1186.6538  | 1186.6383   | -0.0155 | -13   | 165        | 174      | QDADITVRLR | 25        | 6.535   |              | 3    | Mascot      |

50 PREDICTED: hypothetical protein LOC100331676 [Danio rerio] gi|292611776 26950 4.93 1 24 0

Peptide Information

| Calc. Mass | Obsrv. Mass | ± da   | ± ppm | Start Seq. | End Seq. | Sequence   | Ion Score | C. I. % | Modification | Rank | Result Type |
|------------|-------------|--------|-------|------------|----------|------------|-----------|---------|--------------|------|-------------|
| 1186.6613  | 1186.6383   | -0.023 | -19   | 62         | 72       | KMLAESAIPR | 24        | 0       |              | 4    | Mascot      |

|                       |           |                               |                |  |  |  |                       |                    |  |
|-----------------------|-----------|-------------------------------|----------------|--|--|--|-----------------------|--------------------|--|
| <b>Gel Idx/Pos</b>    | 205/I5    | <b>Instr./Gel Origin</b>      | BA2060/110707A |  |  |  | <b>Process Status</b> | Analysis Succeeded |  |
| <b>Plate [#] Name</b> | [1] 31496 | <b>Instrument Sample Name</b> |                |  |  |  | <b>Spectra</b>        | 11                 |  |

| Rank | Protein Name                                    | Accession No. | Protein MW | Protein PI | Pep. Count | Protein Score | Protein Score C. I. % | Total Ion Score | Total Ion C. I. % |
|------|-------------------------------------------------|---------------|------------|------------|------------|---------------|-----------------------|-----------------|-------------------|
| 1    | hypothetical protein LOC100034647 [Danio rerio] | gi 131888757  | 46317.3    | 5.36       | 25         | 783           | 100                   | 547             | 100               |

| Peptide Information |             |         |       |            |          |                |           |         |                  | Rank | Result Type |
|---------------------|-------------|---------|-------|------------|----------|----------------|-----------|---------|------------------|------|-------------|
| Calc. Mass          | Obsrv. Mass | ± da    | ± ppm | Start Seq. | End Seq. | Sequence       | Ion Score | C. I. % | Modification     |      |             |
| 1009.5312           | 1009.5175   | -0.0137 | -14   | 287        | 294      | SEFTELKR       |           |         |                  |      | Mascot      |
| 1026.4309           | 1026.417    | -0.0139 | -14   | 162        | 169      | FDNEQSMR       |           |         |                  |      | Mascot      |
| 1062.4998           | 1062.4854   | -0.0144 | -14   | 75         | 83       | ATMQNLNDR      |           |         |                  |      | Mascot      |
| 1077.5609           | 1077.5387   | -0.0222 | -21   | 182        | 190      | VLDELTMTTR     |           |         |                  |      | Mascot      |
| 1078.4946           | 1078.4958   | 0.0012  | 1     | 75         | 83       | ATMQNLNDR      |           |         | Oxidation (M)[3] |      | Mascot      |
| 1093.5558           | 1093.5406   | -0.0152 | -14   | 182        | 190      | VLDELTMTTR     |           |         | Oxidation (M)[7] |      | Mascot      |
| 1153.5558           | 1153.5413   | -0.0145 | -13   | 366        | 374      | LEMEIAEYR      |           |         |                  |      | Mascot      |
| 1167.6117           | 1167.598    | -0.0137 | -12   | 170        | 180      | HAVEADISGLR    | 70        | 99.997  |                  |      | Mascot      |
| 1167.6117           | 1167.598    | -0.0137 | -12   | 170        | 180      | HAVEADISGLR    |           |         |                  |      | Mascot      |
| 1181.5909           | 1181.5778   | -0.0131 | -11   | 210        | 219      | NHEEELLAAR     | 82        | 100     |                  |      | Mascot      |
| 1181.5909           | 1181.5778   | -0.0131 | -11   | 210        | 219      | NHEEELLAAR     |           |         |                  |      | Mascot      |
| 1194.5861           | 1194.5714   | -0.0147 | -12   | 22         | 35       | AGSVYGGAGGSGVR | 103       | 100     |                  |      | Mascot      |
| 1194.5861           | 1194.5714   | -0.0147 | -12   | 22         | 35       | AGSVYGGAGGSGVR |           |         |                  |      | Mascot      |
| 1214.5476           | 1214.5306   | -0.017  | -14   | 259        | 267      | DFEQWFQSK      | 59        | 99.962  |                  |      | Mascot      |
| 1214.5476           | 1214.5306   | -0.017  | -14   | 259        | 267      | DFEQWFQSK      |           |         |                  |      | Mascot      |
| 1253.5942           | 1253.5792   | -0.015  | -12   | 160        | 169      | VKFDNEQSMR     |           |         |                  |      | Mascot      |
| 1269.5892           | 1269.5741   | -0.0151 | -12   | 160        | 169      | VKFDNEQSMR     |           |         | Oxidation (M)[9] |      | Mascot      |
| 1295.7067           | 1295.6909   | -0.0158 | -12   | 170        | 181      | HAVEADISGLRK   |           |         |                  |      | Mascot      |
| 1309.6569           | 1309.6586   | 0.0017  | 1     | 366        | 375      | LEMEIAEYRR     |           |         |                  |      | Mascot      |
| 1325.6517           | 1325.6294   | -0.0223 | -17   | 366        | 375      | LEMEIAEYRR     |           |         | Oxidation (M)[3] |      | Mascot      |
| 1332.6754           | 1332.6588   | -0.0166 | -12   | 311        | 323      | ASLEGLTADTQAR  |           |         |                  |      | Mascot      |
| 1378.6809           | 1378.6663   | -0.0146 | -11   | 274        | 286      | EVAASTETLQSSR  |           |         |                  |      | Mascot      |
| 1410.7046           | 1410.688    | -0.0166 | -12   | 364        | 374      | TRLEMEIAEYR    |           |         |                  |      | Mascot      |
| 1410.7046           | 1410.688    | -0.0166 | -12   | 364        | 374      | TRLEMEIAEYR    | 51        | 99.762  |                  |      | Mascot      |
| 1414.7788           | 1414.7891   | 0.0103  | 7     | 93         | 104      | ILEKENADLELK   |           |         |                  |      | Mascot      |
| 1426.6995           | 1426.6827   | -0.0168 | -12   | 364        | 374      | TRLEMEIAEYR    | 18        | 0       | Oxidation (M)[5] |      | Mascot      |
| 1426.6995           | 1426.6827   | -0.0168 | -12   | 364        | 374      | TRLEMEIAEYR    |           |         | Oxidation (M)[5] |      | Mascot      |

|           |           |         |     |     |     |                                     |     |        |                  |  |  |  |                   |  |  |  |        |
|-----------|-----------|---------|-----|-----|-----|-------------------------------------|-----|--------|------------------|--|--|--|-------------------|--|--|--|--------|
| 1516.6843 | 1516.7217 | 0.0374  | 25  | 2   | 16  | MSSSSIRMSSGGSSR                     |     |        |                  |  |  |  |                   |  |  |  | Mascot |
| 1564.8152 | 1564.787  | -0.0282 | -18 | 352 | 363 | QRQEYQMLLDIK                        | 21  | 0      |                  |  |  |  |                   |  |  |  | Mascot |
| 1564.8152 | 1564.787  | -0.0282 | -18 | 352 | 363 | QRQEYQMLLDIK                        |     |        |                  |  |  |  |                   |  |  |  | Mascot |
| 1580.8101 | 1580.7896 | -0.0205 | -13 | 352 | 363 | QRQEYQMLLDIK                        |     |        |                  |  |  |  | Oxidation (M)[7]  |  |  |  | Mascot |
| 1580.8101 | 1580.7896 | -0.0205 | -13 | 352 | 363 | QRQEYQMLLDIK                        | 28  | 56.629 | Oxidation (M)[7] |  |  |  |                   |  |  |  | Mascot |
| 1708.8064 | 1708.7849 | -0.0215 | -13 | 119 | 133 | DYSAYYATISDLQAK                     |     |        |                  |  |  |  |                   |  |  |  | Mascot |
| 1846.9943 | 1846.9727 | -0.0216 | -12 | 295 | 310 | TLQSLQIELQSQLSMK                    |     |        |                  |  |  |  |                   |  |  |  | Mascot |
| 1862.9893 | 1862.9655 | -0.0238 | -13 | 295 | 310 | TLQSLQIELQSQLSMK                    |     |        |                  |  |  |  | Oxidation (M)[15] |  |  |  | Mascot |
| 2020.0974 | 2020.073  | -0.0244 | -12 | 134 | 152 | ILHATGVNAGIYLHIDNAK                 | 153 | 100    |                  |  |  |  |                   |  |  |  | Mascot |
| 2020.0974 | 2020.073  | -0.0244 | -12 | 134 | 152 | ILHATGVNAGIYLHIDNAK                 |     |        |                  |  |  |  |                   |  |  |  | Mascot |
| 2121.1147 | 2121.092  | -0.0227 | -11 | 191 | 208 | SDLEMQIEGLKEELVFLK                  |     |        |                  |  |  |  |                   |  |  |  | Mascot |
| 2137.1096 | 2137.0896 | -0.02   | -9  | 191 | 208 | SDLEMQIEGLKEELVFLK                  |     |        |                  |  |  |  | Oxidation (M)[5]  |  |  |  | Mascot |
| 2230.0657 | 2230.0452 | -0.0205 | -9  | 220 | 240 | TQMGGQVNVVEVDAAPQ<br>EDLTK          |     |        |                  |  |  |  |                   |  |  |  | Mascot |
| 2246.0605 | 2246.0422 | -0.0183 | -8  | 220 | 240 | TQMGGQVNVVEVDAAPQ<br>EDLTK          |     |        |                  |  |  |  | Oxidation (M)[3]  |  |  |  | Mascot |
| 2675.3608 | 2675.3347 | -0.0261 | -10 | 324 | 346 | YANMLNGYQLQVGSLEE<br>QLVHLR         |     |        |                  |  |  |  |                   |  |  |  | Mascot |
| 2691.356  | 2691.3345 | -0.0215 | -8  | 324 | 346 | YANMLNGYQLQVGSLEE<br>QLVHLR         |     |        |                  |  |  |  | Oxidation (M)[4]  |  |  |  | Mascot |
| 2778.2236 | 2778.2092 | -0.0144 | -5  | 44  | 74  | SYSAGGGAGFGGGAGA<br>GFNLSDGIDSSANEK |     |        |                  |  |  |  |                   |  |  |  | Mascot |

2 Type I cytokeratin, enveloping layer [Danio rerio] gi|41388915 46524.6 5.13 13 311 100 236 100

#### Peptide Information

| Calc. Mass | Obsrv. Mass | ± da    | ± ppm | Start Seq. | End Seq. | Sequence       | Ion Score | C. I. % | Modification     | Rank | Result Type |
|------------|-------------|---------|-------|------------|----------|----------------|-----------|---------|------------------|------|-------------|
| 1062.4998  | 1062.4854   | -0.0144 | -14   | 83         | 91       | ATMQNLNDR      |           |         |                  |      | Mascot      |
| 1077.5609  | 1077.5387   | -0.0222 | -21   | 190        | 198      | VLDELTMTTR     |           |         |                  |      | Mascot      |
| 1078.4946  | 1078.4958   | 0.0012  | 1     | 83         | 91       | ATMQNLNDR      |           |         | Oxidation (M)[3] |      | Mascot      |
| 1093.5558  | 1093.5406   | -0.0152 | -14   | 190        | 198      | VLDELTMTTR     |           |         | Oxidation (M)[7] |      | Mascot      |
| 1153.5558  | 1153.5413   | -0.0145 | -13   | 374        | 382      | LEMEIAEYR      |           |         |                  |      | Mascot      |
| 1181.5909  | 1181.5778   | -0.0131 | -11   | 218        | 227      | NHEEELLAAR     | 82        | 100     |                  |      | Mascot      |
| 1181.5909  | 1181.5778   | -0.0131 | -11   | 218        | 227      | NHEEELLAAR     |           |         |                  |      | Mascot      |
| 1194.5861  | 1194.5714   | -0.0147 | -12   | 30         | 43       | AGSVYGGAGGSGVR | 103       | 100     |                  |      | Mascot      |
| 1194.5861  | 1194.5714   | -0.0147 | -12   | 30         | 43       | AGSVYGGAGGSGVR |           |         |                  |      | Mascot      |
| 1309.6569  | 1309.6586   | 0.0017  | 1     | 374        | 383      | LEMEIAEYRR     |           |         |                  |      | Mascot      |
| 1325.6517  | 1325.6294   | -0.0223 | -17   | 374        | 383      | LEMEIAEYRR     |           |         | Oxidation (M)[3] |      | Mascot      |
| 1332.6754  | 1332.6588   | -0.0166 | -12   | 319        | 331      | ASLEGLTADTQAR  |           |         |                  |      | Mascot      |
| 1410.7046  | 1410.688    | -0.0166 | -12   | 372        | 382      | TRLEMEIAEYR    |           |         |                  |      | Mascot      |
| 1410.7046  | 1410.688    | -0.0166 | -12   | 372        | 382      | TRLEMEIAEYR    | 51        | 99.762  |                  |      | Mascot      |

|   |                                                    |            |             |         |       |             |                             |                         |      |           |                   |                   |     |     |      |             |
|---|----------------------------------------------------|------------|-------------|---------|-------|-------------|-----------------------------|-------------------------|------|-----------|-------------------|-------------------|-----|-----|------|-------------|
|   |                                                    | 1414.8151  | 1414.7891   | -0.026  | -18   | 401         | 413                         | KVVTIVEEVVDGK           |      |           |                   |                   |     |     |      | Mascot      |
|   |                                                    | 1426.6995  | 1426.6827   | -0.0168 | -12   | 372         | 382                         | TRLEMEIAEYR             | 18   | 0         | Oxidation (M)[5]  |                   |     |     |      | Mascot      |
|   |                                                    | 1426.6995  | 1426.6827   | -0.0168 | -12   | 372         | 382                         | TRLEMEIAEYR             |      |           | Oxidation (M)[5]  |                   |     |     |      | Mascot      |
|   |                                                    | 1516.6843  | 1516.7217   | 0.0374  | 25    | 1           | 15                          | MSSSSIRMSSGGSSR         |      |           |                   |                   |     |     |      | Mascot      |
|   |                                                    | 1708.8064  | 1708.7849   | -0.0215 | -13   | 127         | 141                         | DYSAYYATISDLQAK         |      |           |                   |                   |     |     |      | Mascot      |
|   |                                                    | 2020.0743  | 2020.073    | -0.0013 | -1    | 302         | 318                         | RTLQSLEIELSQLSMK        |      |           | Oxidation (M)[16] |                   |     |     |      | Mascot      |
|   |                                                    | 2020.0743  | 2020.073    | -0.0013 | -1    | 302         | 318                         | RTLQSLEIELSQLSMK        |      |           | Oxidation (M)[16] |                   |     |     |      | Mascot      |
|   |                                                    | 2225.0867  | 2225.0935   | 0.0068  | 3     | 170         | 188                         | YENELSMRQSVEADIVGL<br>R |      |           | Oxidation (M)[7]  |                   |     |     |      | Mascot      |
| 3 | type I cytokeratin, enveloping layer [Danio rerio] |            |             |         |       | gi 18858519 |                             | 46655.7                 | 5.13 | 13        | 310               | 100               | 236 | 100 |      |             |
|   | Peptide Information                                |            |             |         |       |             |                             |                         |      |           |                   |                   |     |     |      |             |
|   |                                                    | Calc. Mass | Obsrv. Mass | ± da    | ± ppm | Start Seq.  | End Sequence Seq.           |                         |      | Ion Score | C. I.             | % Modification    |     |     | Rank | Result Type |
|   |                                                    | 1062.4998  | 1062.4854   | -0.0144 | -14   | 84          | 92 ATMQNLNDR                |                         |      |           |                   |                   |     |     |      | Mascot      |
|   |                                                    | 1077.5609  | 1077.5387   | -0.0222 | -21   | 191         | 199 VLDELTMTNR              |                         |      |           |                   |                   |     |     |      | Mascot      |
|   |                                                    | 1078.4946  | 1078.4958   | 0.0012  | 1     | 84          | 92 ATMQNLNDR                |                         |      |           |                   | Oxidation (M)[3]  |     |     |      | Mascot      |
|   |                                                    | 1093.5558  | 1093.5406   | -0.0152 | -14   | 191         | 199 VLDELTMTNR              |                         |      |           |                   | Oxidation (M)[7]  |     |     |      | Mascot      |
|   |                                                    | 1153.5558  | 1153.5413   | -0.0145 | -13   | 375         | 383 LEMEIAEYR               |                         |      |           |                   |                   |     |     |      | Mascot      |
|   |                                                    | 1181.5909  | 1181.5778   | -0.0131 | -11   | 219         | 228 NHEEEELLAAR             | 82                      |      | 100       |                   |                   |     |     |      | Mascot      |
|   |                                                    | 1181.5909  | 1181.5778   | -0.0131 | -11   | 219         | 228 NHEEEELLAAR             |                         |      |           |                   |                   |     |     |      | Mascot      |
|   |                                                    | 1194.5861  | 1194.5714   | -0.0147 | -12   | 31          | 44 AGSVYGGAGGSGVR           | 103                     |      | 100       |                   |                   |     |     |      | Mascot      |
|   |                                                    | 1194.5861  | 1194.5714   | -0.0147 | -12   | 31          | 44 AGSVYGGAGGSGVR           |                         |      |           |                   |                   |     |     |      | Mascot      |
|   |                                                    | 1309.6569  | 1309.6586   | 0.0017  | 1     | 375         | 384 LEMEIAEYRR              |                         |      |           |                   |                   |     |     |      | Mascot      |
|   |                                                    | 1325.6517  | 1325.6294   | -0.0223 | -17   | 375         | 384 LEMEIAEYRR              |                         |      |           |                   | Oxidation (M)[3]  |     |     |      | Mascot      |
|   |                                                    | 1332.6754  | 1332.6588   | -0.0166 | -12   | 320         | 332 ASLEGTLADTQAR           |                         |      |           |                   |                   |     |     |      | Mascot      |
|   |                                                    | 1410.7046  | 1410.688    | -0.0166 | -12   | 373         | 383 TRLEMEIAEYR             |                         |      |           |                   |                   |     |     |      | Mascot      |
|   |                                                    | 1410.7046  | 1410.688    | -0.0166 | -12   | 373         | 383 TRLEMEIAEYR             | 51                      |      | 99.762    |                   |                   |     |     |      | Mascot      |
|   |                                                    | 1414.8151  | 1414.7891   | -0.026  | -18   | 402         | 414 KVVTIVEEVVDGK           |                         |      |           |                   |                   |     |     |      | Mascot      |
|   |                                                    | 1426.6995  | 1426.6827   | -0.0168 | -12   | 373         | 383 TRLEMEIAEYR             | 18                      |      | 0         | Oxidation (M)[5]  |                   |     |     |      | Mascot      |
|   |                                                    | 1426.6995  | 1426.6827   | -0.0168 | -12   | 373         | 383 TRLEMEIAEYR             |                         |      |           |                   | Oxidation (M)[5]  |     |     |      | Mascot      |
|   |                                                    | 1516.6843  | 1516.7217   | 0.0374  | 25    | 2           | 16 MSSSSIRMSSGGSSR          |                         |      |           |                   |                   |     |     |      | Mascot      |
|   |                                                    | 1708.8064  | 1708.7849   | -0.0215 | -13   | 128         | 142 DYSAYYATISDLQAK         |                         |      |           |                   |                   |     |     |      | Mascot      |
|   |                                                    | 2020.0743  | 2020.073    | -0.0013 | -1    | 303         | 319 RTLQSLEIELSQLSMK        |                         |      |           |                   | Oxidation (M)[16] |     |     |      | Mascot      |
|   |                                                    | 2020.0743  | 2020.073    | -0.0013 | -1    | 303         | 319 RTLQSLEIELSQLSMK        |                         |      |           |                   | Oxidation (M)[16] |     |     |      | Mascot      |
|   |                                                    | 2225.0867  | 2225.0935   | 0.0068  | 3     | 171         | 189 YENELSMRQSVEADIVGL<br>R |                         |      |           |                   | Oxidation (M)[7]  |     |     |      | Mascot      |
| 4 | type I cytokeratin, enveloping layer [Danio rerio] |            |             |         |       | gi 94732411 |                             | 40437.7                 | 5.15 | 12        | 307               | 100               | 236 | 100 |      |             |

| Peptide Information |                                                          |         |       |              |                          |           |        |                   |      |             |     |
|---------------------|----------------------------------------------------------|---------|-------|--------------|--------------------------|-----------|--------|-------------------|------|-------------|-----|
| Calc. Mass          | Obsrv. Mass                                              | ± da    | ± ppm | Start Seq.   | End Sequence Seq.        | Ion Score | C. I.  | % Modification    | Rank | Result Type |     |
| 1077.5609           | 1077.5387                                                | -0.0222 | -21   | 129          | 137 VLDELTMTTR           |           |        |                   |      | Mascot      |     |
| 1093.5558           | 1093.5406                                                | -0.0152 | -14   | 129          | 137 VLDELTMTTR           |           |        | Oxidation (M)[7]  |      | Mascot      |     |
| 1153.5558           | 1153.5413                                                | -0.0145 | -13   | 313          | 321 LEMEIAEYR            |           |        |                   |      | Mascot      |     |
| 1181.5909           | 1181.5778                                                | -0.0131 | -11   | 157          | 166 NHEEELLAAR           | 82        | 100    |                   |      | Mascot      |     |
| 1181.5909           | 1181.5778                                                | -0.0131 | -11   | 157          | 166 NHEEELLAAR           |           |        |                   |      | Mascot      |     |
| 1194.5861           | 1194.5714                                                | -0.0147 | -12   | 31           | 44 AGSVYGGAGGSGVR        | 103       | 100    |                   |      | Mascot      |     |
| 1194.5861           | 1194.5714                                                | -0.0147 | -12   | 31           | 44 AGSVYGGAGGSGVR        |           |        |                   |      | Mascot      |     |
| 1309.6569           | 1309.6586                                                | 0.0017  | 1     | 313          | 322 LEMEIAEYRR           |           |        |                   |      | Mascot      |     |
| 1325.6517           | 1325.6294                                                | -0.0223 | -17   | 313          | 322 LEMEIAEYRR           |           |        | Oxidation (M)[3]  |      | Mascot      |     |
| 1332.6754           | 1332.6588                                                | -0.0166 | -12   | 258          | 270 ASLEGLTADTQAR        |           |        |                   |      | Mascot      |     |
| 1410.7046           | 1410.688                                                 | -0.0166 | -12   | 311          | 321 TRLEMEIAEYR          |           |        |                   |      | Mascot      |     |
| 1410.7046           | 1410.688                                                 | -0.0166 | -12   | 311          | 321 TRLEMEIAEYR          | 51        | 99.762 |                   |      | Mascot      |     |
| 1414.8151           | 1414.7891                                                | -0.026  | -18   | 340          | 352 KVVTVIEEVVDGK        |           |        |                   |      | Mascot      |     |
| 1426.6995           | 1426.6827                                                | -0.0168 | -12   | 311          | 321 TRLEMEIAEYR          | 18        | 0      | Oxidation (M)[5]  |      | Mascot      |     |
| 1426.6995           | 1426.6827                                                | -0.0168 | -12   | 311          | 321 TRLEMEIAEYR          |           |        | Oxidation (M)[5]  |      | Mascot      |     |
| 1516.6843           | 1516.7217                                                | 0.0374  | 25    | 2            | 16 MSSSSIRMSSGGSSR       |           |        |                   |      | Mascot      |     |
| 1708.8064           | 1708.7849                                                | -0.0215 | -13   | 66           | 80 DYSAYYATISDLQAK       |           |        |                   |      | Mascot      |     |
| 2020.0743           | 2020.073                                                 | -0.0013 | -1    | 241          | 257 RTLQSLIEIQSQLSMK     |           |        | Oxidation (M)[16] |      | Mascot      |     |
| 2020.0743           | 2020.073                                                 | -0.0013 | -1    | 241          | 257 RTLQSLIEIQSQLSMK     |           |        | Oxidation (M)[16] |      | Mascot      |     |
| 2225.0867           | 2225.0935                                                | 0.0068  | 3     | 109          | 127 YENELSMRQSV EADIVGLR |           |        | Oxidation (M)[7]  |      | Mascot      |     |
| 5                   | type I cytokeratin, enveloping layer, like [Danio rerio] |         |       | gi 130504059 | 46617.6                  | 5.13      | 12     | 301               | 100  | 236         | 100 |

| Peptide Information |             |          |           |            |                   |           |       |                  |      |             |
|---------------------|-------------|----------|-----------|------------|-------------------|-----------|-------|------------------|------|-------------|
| Calc. Mass          | Obsrv. Mass | $\pm$ da | $\pm$ ppm | Start Seq. | End Sequence Seq. | Ion Score | C. I. | % Modification   | Rank | Result Type |
| 1062.4998           | 1062.4854   | -0.0144  | -14       | 84         | 92 ATMQNLNDR      |           |       |                  |      | Mascot      |
| 1077.5609           | 1077.5387   | -0.0222  | -21       | 191        | 199 VLDELTMTTR    |           |       |                  |      | Mascot      |
| 1078.4946           | 1078.4958   | 0.0012   | 1         | 84         | 92 ATMQNLNDR      |           |       | Oxidation (M)[3] |      | Mascot      |
| 1093.5558           | 1093.5406   | -0.0152  | -14       | 191        | 199 VLDELTMTTR    |           |       | Oxidation (M)[7] |      | Mascot      |
| 1153.5558           | 1153.5413   | -0.0145  | -13       | 375        | 383 LEMEIAEYR     |           |       |                  |      | Mascot      |
| 1181.5909           | 1181.5778   | -0.0131  | -11       | 219        | 228 NHEEELLAAR    | 82        | 100   |                  |      | Mascot      |
| 1181.5909           | 1181.5778   | -0.0131  | -11       | 219        | 228 NHEEELLAAR    |           |       |                  |      | Mascot      |
| 1194.5861           | 1194.5714   | -0.0147  | -12       | 31         | 44 AGSVYGGAGGSGVR | 103       | 100   |                  |      | Mascot      |

|           |           |         |     |     |     |                   |    |        |                   |  |  |                  |  |  |  |        |
|-----------|-----------|---------|-----|-----|-----|-------------------|----|--------|-------------------|--|--|------------------|--|--|--|--------|
| 1194.5861 | 1194.5714 | -0.0147 | -12 | 31  | 44  | AGSVYGGAGGSGVR    |    |        |                   |  |  |                  |  |  |  | Mascot |
| 1309.6569 | 1309.6586 | 0.0017  | 1   | 375 | 384 | LEMEIAEYRR        |    |        |                   |  |  |                  |  |  |  | Mascot |
| 1325.6517 | 1325.6294 | -0.0223 | -17 | 375 | 384 | LEMEIAEYRR        |    |        |                   |  |  | Oxidation (M)[3] |  |  |  | Mascot |
| 1332.6754 | 1332.6588 | -0.0166 | -12 | 320 | 332 | ASLEGLADTQAR      |    |        |                   |  |  |                  |  |  |  | Mascot |
| 1410.7046 | 1410.688  | -0.0166 | -12 | 373 | 383 | TRLEMEIAEYR       |    |        |                   |  |  |                  |  |  |  | Mascot |
| 1410.7046 | 1410.688  | -0.0166 | -12 | 373 | 383 | TRLEMEIAEYR       | 51 | 99.762 |                   |  |  |                  |  |  |  | Mascot |
| 1414.8151 | 1414.7891 | -0.026  | -18 | 402 | 414 | KVVTIVEEVVDGK     |    |        |                   |  |  |                  |  |  |  | Mascot |
| 1426.6995 | 1426.6827 | -0.0168 | -12 | 373 | 383 | TRLEMEIAEYR       | 18 | 0      | Oxidation (M)[5]  |  |  |                  |  |  |  | Mascot |
| 1426.6995 | 1426.6827 | -0.0168 | -12 | 373 | 383 | TRLEMEIAEYR       |    |        | Oxidation (M)[5]  |  |  |                  |  |  |  | Mascot |
| 1516.6843 | 1516.7217 | 0.0374  | 25  | 2   | 16  | MSSSSIRMSSGGSSR   |    |        |                   |  |  |                  |  |  |  | Mascot |
| 1708.8064 | 1708.7849 | -0.0215 | -13 | 128 | 142 | DYSAYYATISDLQAK   |    |        |                   |  |  |                  |  |  |  | Mascot |
| 2020.0743 | 2020.073  | -0.0013 | -1  | 303 | 319 | RTLQSLEIELQSQLSMK |    |        | Oxidation (M)[16] |  |  |                  |  |  |  | Mascot |
| 2020.0743 | 2020.073  | -0.0013 | -1  | 303 | 319 | RTLQSLEIELQSQLSMK |    |        | Oxidation (M)[16] |  |  |                  |  |  |  | Mascot |

6

Zgc:109868 protein [Danio rerio]

gi|120537710

47066.8

5.25

11

209

100

154

100

Peptide Information

| Calc. Mass | Obsrv. Mass | ± da    | ± ppm | Start Seq. | End Sequence Seq. | Ion Score                   | C. I. % | Modification      | Rank             | Result Type |
|------------|-------------|---------|-------|------------|-------------------|-----------------------------|---------|-------------------|------------------|-------------|
| 1062.4998  | 1062.4854   | -0.0144 | -14   | 80         | 88                | ATMQNLNDR                   |         |                   |                  | Mascot      |
| 1077.5609  | 1077.5387   | -0.0222 | -21   | 187        | 195               | VLDELTMTTR                  |         |                   |                  | Mascot      |
| 1078.4946  | 1078.4958   | 0.0012  | 1     | 80         | 88                | ATMQNLNDR                   |         | Oxidation (M)[3]  |                  | Mascot      |
| 1093.5558  | 1093.5406   | -0.0152 | -14   | 187        | 195               | VLDELTMTTR                  |         | Oxidation (M)[7]  |                  | Mascot      |
| 1153.5558  | 1153.5413   | -0.0145 | -13   | 371        | 379               | LEMEIAEYR                   |         |                   |                  | Mascot      |
| 1194.5861  | 1194.5714   | -0.0147 | -12   | 32         | 45                | AGSVYGGAGGSGVR              | 103     | 100               |                  | Mascot      |
| 1194.5861  | 1194.5714   | -0.0147 | -12   | 32         | 45                | AGSVYGGAGGSGVR              |         |                   |                  | Mascot      |
| 1309.6569  | 1309.6586   | 0.0017  | 1     | 371        | 380               | LEMEIAEYRR                  |         |                   |                  | Mascot      |
| 1325.6517  | 1325.6294   | -0.0223 | -17   | 371        | 380               | LEMEIAEYRR                  |         | Oxidation (M)[3]  |                  | Mascot      |
| 1332.6754  | 1332.6588   | -0.0166 | -12   | 316        | 328               | ASLEGLADTQAR                |         |                   |                  | Mascot      |
| 1410.7046  | 1410.688    | -0.0166 | -12   | 369        | 379               | TRLEMEIAEYR                 |         |                   |                  | Mascot      |
| 1410.7046  | 1410.688    | -0.0166 | -12   | 369        | 379               | TRLEMEIAEYR                 | 51      | 99.762            |                  | Mascot      |
| 1414.8151  | 1414.7891   | -0.026  | -18   | 400        | 412               | KVVTIVEEVVDGK               |         |                   |                  | Mascot      |
| 1426.6995  | 1426.6827   | -0.0168 | -12   | 369        | 379               | TRLEMEIAEYR                 | 18      | 0                 | Oxidation (M)[5] | Mascot      |
| 1426.6995  | 1426.6827   | -0.0168 | -12   | 369        | 379               | TRLEMEIAEYR                 |         | Oxidation (M)[5]  |                  | Mascot      |
| 2020.0743  | 2020.073    | -0.0013 | -1    | 299        | 315               | RTLQSLEIELQSQLSMK           |         | Oxidation (M)[16] |                  | Mascot      |
| 2020.0743  | 2020.073    | -0.0013 | -1    | 299        | 315               | RTLQSLEIELQSQLSMK           |         | Oxidation (M)[16] |                  | Mascot      |
| 2676.3337  | 2676.3235   | -0.0102 | -4    | 329        | 351               | YAAMLSGYQFQVSSLEE<br>QLVQLR |         | Oxidation (M)[4]  |                  | Mascot      |
| 2773.4268  | 2773.4209   | -0.0059 | -2    | 139        | 164               | IQHATGLNGGIYLSIDNAK         |         |                   |                  | Mascot      |



7 novel protein similar to type I cytoke... LAADDFR  
 layer [Danio rerio] gi|94732405 43116.8 5.22 10 204 100 154 100

| Peptide Information |             |         |       |            |          |                                |           |        |                   |                  |
|---------------------|-------------|---------|-------|------------|----------|--------------------------------|-----------|--------|-------------------|------------------|
| Calc. Mass          | Obsrv. Mass | ± da    | ± ppm | Start Seq. | End Seq. | Sequence                       | Ion Score | C. I.  | % Modification    | Rank Result Type |
| 1062.4998           | 1062.4854   | -0.0144 | -14   | 82         | 90       | ATMQNLNDR                      |           |        |                   | Mascot           |
| 1077.5609           | 1077.5387   | -0.0222 | -21   | 189        | 197      | VLDELTMTTR                     |           |        |                   | Mascot           |
| 1078.4946           | 1078.4958   | 0.0012  | 1     | 82         | 90       | ATMQNLNDR                      |           |        | Oxidation (M)[3]  | Mascot           |
| 1093.5558           | 1093.5406   | -0.0152 | -14   | 189        | 197      | VLDELTMTTR                     |           |        | Oxidation (M)[7]  | Mascot           |
| 1153.5558           | 1153.5413   | -0.0145 | -13   | 373        | 381      | LEMEIAEYR                      |           |        |                   | Mascot           |
| 1194.5861           | 1194.5714   | -0.0147 | -12   | 34         | 47       | AGSVYGGAGGSGVR                 | 103       | 100    |                   | Mascot           |
| 1194.5861           | 1194.5714   | -0.0147 | -12   | 34         | 47       | AGSVYGGAGGSGVR                 |           |        |                   | Mascot           |
| 1309.6569           | 1309.6586   | 0.0017  | 1     | 373        | 382      | LEMEIAEYRR                     |           |        |                   | Mascot           |
| 1325.6517           | 1325.6294   | -0.0223 | -17   | 373        | 382      | LEMEIAEYRR                     |           |        | Oxidation (M)[3]  | Mascot           |
| 1332.6754           | 1332.6588   | -0.0166 | -12   | 318        | 330      | ASLEGTLADTQAR                  |           |        |                   | Mascot           |
| 1410.7046           | 1410.688    | -0.0166 | -12   | 371        | 381      | TRLEMEIAEYR                    |           |        |                   | Mascot           |
| 1410.7046           | 1410.688    | -0.0166 | -12   | 371        | 381      | TRLEMEIAEYR                    | 51        | 99.762 |                   | Mascot           |
| 1426.6995           | 1426.6827   | -0.0168 | -12   | 371        | 381      | TRLEMEIAEYR                    | 18        | 0      | Oxidation (M)[5]  | Mascot           |
| 1426.6995           | 1426.6827   | -0.0168 | -12   | 371        | 381      | TRLEMEIAEYR                    |           |        | Oxidation (M)[5]  | Mascot           |
| 2020.0743           | 2020.073    | -0.0013 | -1    | 301        | 317      | RTLQSLEIELQSQLSMK              |           |        | Oxidation (M)[16] | Mascot           |
| 2020.0743           | 2020.073    | -0.0013 | -1    | 301        | 317      | RTLQSLEIELQSQLSMK              |           |        | Oxidation (M)[16] | Mascot           |
| 2676.3337           | 2676.3235   | -0.0102 | -4    | 331        | 353      | YAAMLSGYQFQVSSLEE<br>QLVQLR    |           |        | Oxidation (M)[4]  | Mascot           |
| 2773.4268           | 2773.4209   | -0.0059 | -2    | 141        | 166      | IQHATGLNGGIYLSIDNAK<br>LAADDFR |           |        |                   | Mascot           |

8 Zgc:109868 [Danio rerio] gi|92097956 47235.8 5.25 10 201 100 154 100

| Peptide Information |             |         |       |            |          |                |           |       |                  |                  |
|---------------------|-------------|---------|-------|------------|----------|----------------|-----------|-------|------------------|------------------|
| Calc. Mass          | Obsrv. Mass | ± da    | ± ppm | Start Seq. | End Seq. | Sequence       | Ion Score | C. I. | % Modification   | Rank Result Type |
| 1062.4998           | 1062.4854   | -0.0144 | -14   | 82         | 90       | ATMQNLNDR      |           |       |                  | Mascot           |
| 1077.5609           | 1077.5387   | -0.0222 | -21   | 189        | 197      | VLDELTMTTR     |           |       |                  | Mascot           |
| 1078.4946           | 1078.4958   | 0.0012  | 1     | 82         | 90       | ATMQNLNDR      |           |       | Oxidation (M)[3] | Mascot           |
| 1093.5558           | 1093.5406   | -0.0152 | -14   | 189        | 197      | VLDELTMTTR     |           |       | Oxidation (M)[7] | Mascot           |
| 1153.5558           | 1153.5413   | -0.0145 | -13   | 373        | 381      | LEMEIAEYR      |           |       |                  | Mascot           |
| 1194.5861           | 1194.5714   | -0.0147 | -12   | 34         | 47       | AGSVYGGAGGSGVR | 103       | 100   |                  | Mascot           |
| 1194.5861           | 1194.5714   | -0.0147 | -12   | 34         | 47       | AGSVYGGAGGSGVR |           |       |                  | Mascot           |

|   |                                |           |         |     |             |     |                                |      |    |        |                   |     |                  |  |  |        |
|---|--------------------------------|-----------|---------|-----|-------------|-----|--------------------------------|------|----|--------|-------------------|-----|------------------|--|--|--------|
|   | 1309.6569                      | 1309.6586 | 0.0017  | 1   | 373         | 382 | LEMEIAEYRR                     |      |    |        |                   |     |                  |  |  | Mascot |
|   | 1325.6517                      | 1325.6294 | -0.0223 | -17 | 373         | 382 | LEMEIAEYRR                     |      |    |        |                   |     | Oxidation (M)[3] |  |  | Mascot |
|   | 1332.6754                      | 1332.6588 | -0.0166 | -12 | 318         | 330 | ASLEGLADTQAR                   |      |    |        |                   |     |                  |  |  | Mascot |
|   | 1410.7046                      | 1410.688  | -0.0166 | -12 | 371         | 381 | TRLEMEIAEYR                    |      |    |        |                   |     |                  |  |  | Mascot |
|   | 1410.7046                      | 1410.688  | -0.0166 | -12 | 371         | 381 | TRLEMEIAEYR                    | 51   |    | 99.762 |                   |     |                  |  |  | Mascot |
|   | 1426.6995                      | 1426.6827 | -0.0168 | -12 | 371         | 381 | TRLEMEIAEYR                    | 18   |    | 0      | Oxidation (M)[5]  |     |                  |  |  | Mascot |
|   | 1426.6995                      | 1426.6827 | -0.0168 | -12 | 371         | 381 | TRLEMEIAEYR                    |      |    |        | Oxidation (M)[5]  |     |                  |  |  | Mascot |
|   | 2020.0743                      | 2020.073  | -0.0013 | -1  | 301         | 317 | RTLQSLEIELQSQLSMK              |      |    |        | Oxidation (M)[16] |     |                  |  |  | Mascot |
|   | 2020.0743                      | 2020.073  | -0.0013 | -1  | 301         | 317 | RTLQSLEIELQSQLSMK              |      |    |        | Oxidation (M)[16] |     |                  |  |  | Mascot |
|   | 2676.3337                      | 2676.3235 | -0.0102 | -4  | 331         | 353 | YAAMLSGYQFQVSSLEE<br>QLVQLR    |      |    |        | Oxidation (M)[4]  |     |                  |  |  | Mascot |
|   | 2773.4268                      | 2773.4209 | -0.0059 | -2  | 141         | 166 | IQHATGLNGGIYLSIDNAK<br>LAADDFR |      |    |        |                   |     |                  |  |  | Mascot |
| 9 | cytokeratin-like [Danio rerio] |           |         |     | gi 62955621 |     | 47177.9                        | 5.31 | 10 | 199    | 100               | 154 | 100              |  |  |        |

Peptide Information

|    | Calc. Mass                                                                  | Obsrv. Mass | ± da    | ± ppm | Start Seq.  | End Seq. | Sequence                       | Ion Score | C. I. | %      | Modification      | Rank | Result | Type   |
|----|-----------------------------------------------------------------------------|-------------|---------|-------|-------------|----------|--------------------------------|-----------|-------|--------|-------------------|------|--------|--------|
|    | 1062.4998                                                                   | 1062.4854   | -0.0144 | -14   | 81          | 89       | ATMQNLNDR                      |           |       |        |                   |      |        | Mascot |
|    | 1077.5609                                                                   | 1077.5387   | -0.0222 | -21   | 188         | 196      | VLDELTMTTR                     |           |       |        |                   |      |        | Mascot |
|    | 1078.4946                                                                   | 1078.4958   | 0.0012  | 1     | 81          | 89       | ATMQNLNDR                      |           |       |        | Oxidation (M)[3]  |      |        | Mascot |
|    | 1093.5558                                                                   | 1093.5406   | -0.0152 | -14   | 188         | 196      | VLDELTMTTR                     |           |       |        | Oxidation (M)[7]  |      |        | Mascot |
|    | 1153.5558                                                                   | 1153.5413   | -0.0145 | -13   | 372         | 380      | LEMEIAEYR                      |           |       |        |                   |      |        | Mascot |
|    | 1194.5861                                                                   | 1194.5714   | -0.0147 | -12   | 33          | 46       | AGSVYGGAGGSGVR                 | 103       |       | 100    |                   |      |        | Mascot |
|    | 1194.5861                                                                   | 1194.5714   | -0.0147 | -12   | 33          | 46       | AGSVYGGAGGSGVR                 |           |       |        |                   |      |        | Mascot |
|    | 1309.6569                                                                   | 1309.6586   | 0.0017  | 1     | 372         | 381      | LEMEIAEYRR                     |           |       |        |                   |      |        | Mascot |
|    | 1325.6517                                                                   | 1325.6294   | -0.0223 | -17   | 372         | 381      | LEMEIAEYRR                     |           |       |        | Oxidation (M)[3]  |      |        | Mascot |
|    | 1332.6754                                                                   | 1332.6588   | -0.0166 | -12   | 317         | 329      | ASLEGLADTQAR                   |           |       |        |                   |      |        | Mascot |
|    | 1410.7046                                                                   | 1410.688    | -0.0166 | -12   | 370         | 380      | TRLEMEIAEYR                    |           |       |        |                   |      |        | Mascot |
|    | 1410.7046                                                                   | 1410.688    | -0.0166 | -12   | 370         | 380      | TRLEMEIAEYR                    | 51        |       | 99.762 |                   |      |        | Mascot |
|    | 1414.8151                                                                   | 1414.7891   | -0.026  | -18   | 401         | 413      | KVVTIVEEVVDGK                  |           |       |        |                   |      |        | Mascot |
|    | 1426.6995                                                                   | 1426.6827   | -0.0168 | -12   | 370         | 380      | TRLEMEIAEYR                    | 18        |       | 0      | Oxidation (M)[5]  |      |        | Mascot |
|    | 1426.6995                                                                   | 1426.6827   | -0.0168 | -12   | 370         | 380      | TRLEMEIAEYR                    |           |       |        | Oxidation (M)[5]  |      |        | Mascot |
|    | 2020.0743                                                                   | 2020.073    | -0.0013 | -1    | 300         | 316      | RTLQSLEIELQSQLSMK              |           |       |        | Oxidation (M)[16] |      |        | Mascot |
|    | 2020.0743                                                                   | 2020.073    | -0.0013 | -1    | 300         | 316      | RTLQSLEIELQSQLSMK              |           |       |        | Oxidation (M)[16] |      |        | Mascot |
|    | 2773.4268                                                                   | 2773.4209   | -0.0059 | -2    | 140         | 165      | IQHATGLNGGIYLSIDNAK<br>LAADDFR |           |       |        |                   |      |        | Mascot |
| 10 | novel protein similar to type I cytokeratin, enveloping layer [Danio rerio] |             |         |       | gi 94732413 |          | 49661.4                        | 5.31      | 7     | 155    | 100               | 133  | 100    |        |

### Peptide Information

| Calc. Mass | Obsrv. Mass | ± da    | ± ppm | Start Seq. | End Seq. | Sequence      | Ion Score | C. I.  | % Modification   | Rank | Result Type |
|------------|-------------|---------|-------|------------|----------|---------------|-----------|--------|------------------|------|-------------|
| 1062.4998  | 1062.4854   | -0.0144 | -14   | 105        | 113      | ATMQNLNDR     |           |        |                  |      | Mascot      |
| 1077.5609  | 1077.5387   | -0.0222 | -21   | 212        | 220      | VLDELTMTTR    |           |        |                  |      | Mascot      |
| 1078.4946  | 1078.4958   | 0.0012  | 1     | 105        | 113      | ATMQNLNDR     |           |        | Oxidation (M)[3] |      | Mascot      |
| 1093.5558  | 1093.5406   | -0.0152 | -14   | 212        | 220      | VLDELTMTTR    |           |        | Oxidation (M)[7] |      | Mascot      |
| 1153.5558  | 1153.5413   | -0.0145 | -13   | 396        | 404      | LEMEIAEYR     |           |        |                  |      | Mascot      |
| 1181.5909  | 1181.5778   | -0.0131 | -11   | 240        | 249      | NHEEELLAAR    | 82        | 100    |                  |      | Mascot      |
| 1181.5909  | 1181.5778   | -0.0131 | -11   | 240        | 249      | NHEEELLAAR    |           |        |                  |      | Mascot      |
| 1309.6569  | 1309.6586   | 0.0017  | 1     | 396        | 405      | LEMEIAEYRR    |           |        |                  |      | Mascot      |
| 1325.6517  | 1325.6294   | -0.0223 | -17   | 396        | 405      | LEMEIAEYRR    |           |        | Oxidation (M)[3] |      | Mascot      |
| 1332.6754  | 1332.6588   | -0.0166 | -12   | 341        | 353      | ASLEGLTADTQAR |           |        |                  |      | Mascot      |
| 1410.7046  | 1410.688    | -0.0166 | -12   | 394        | 404      | TRLEMEIAEYR   |           |        |                  |      | Mascot      |
| 1410.7046  | 1410.688    | -0.0166 | -12   | 394        | 404      | TRLEMEIAEYR   | 51        | 99.762 |                  |      | Mascot      |
| 1426.6995  | 1426.6827   | -0.0168 | -12   | 394        | 404      | TRLEMEIAEYR   | 18        | 0      | Oxidation (M)[5] |      | Mascot      |
| 1426.6995  | 1426.6827   | -0.0168 | -12   | 394        | 404      | TRLEMEIAEYR   |           |        | Oxidation (M)[5] |      | Mascot      |

11 type I cytokeratin [Danio rerio] gi|18858423 46692.5 5.38 10 93 99.998 51 99.762

### Peptide Information

| Calc. Mass | Obsrv. Mass | ± da    | ± ppm | Start Seq. | End Seq. | Sequence                       | Ion Score | C. I.  | % Modification         | Rank | Result Type |
|------------|-------------|---------|-------|------------|----------|--------------------------------|-----------|--------|------------------------|------|-------------|
| 1062.4998  | 1062.4854   | -0.0144 | -14   | 80         | 88       | ATMQNLNDR                      |           |        |                        |      | Mascot      |
| 1077.5609  | 1077.5387   | -0.0222 | -21   | 187        | 195      | VLDELTMTTR                     |           |        |                        |      | Mascot      |
| 1078.4946  | 1078.4958   | 0.0012  | 1     | 80         | 88       | ATMQNLNDR                      |           |        | Oxidation (M)[3]       |      | Mascot      |
| 1093.5312  | 1093.5406   | 0.0094  | 9     | 264        | 272      | DLEGWFQAK                      |           |        |                        |      | Mascot      |
| 1153.5558  | 1153.5413   | -0.0145 | -13   | 371        | 379      | LEMEIAEYR                      |           |        |                        |      | Mascot      |
| 1309.6569  | 1309.6586   | 0.0017  | 1     | 371        | 380      | LEMEIAEYRR                     |           |        |                        |      | Mascot      |
| 1325.6517  | 1325.6294   | -0.0223 | -17   | 371        | 380      | LEMEIAEYRR                     |           |        | Oxidation (M)[3]       |      | Mascot      |
| 1332.6754  | 1332.6588   | -0.0166 | -12   | 316        | 328      | ASLEGLTADTQAR                  |           |        |                        |      | Mascot      |
| 1410.7046  | 1410.688    | -0.0166 | -12   | 369        | 379      | TRLEMEIAEYR                    |           |        |                        |      | Mascot      |
| 1410.7046  | 1410.688    | -0.0166 | -12   | 369        | 379      | TRLEMEIAEYR                    | 51        | 99.762 |                        |      | Mascot      |
| 1414.8151  | 1414.7891   | -0.026  | -18   | 398        | 410      | KVVTIVEEVVDGK                  |           |        |                        |      | Mascot      |
| 1426.6995  | 1426.6827   | -0.0168 | -12   | 369        | 379      | TRLEMEIAEYR                    | 18        | 0      | Oxidation (M)[5]       |      | Mascot      |
| 1426.6995  | 1426.6827   | -0.0168 | -12   | 369        | 379      | TRLEMEIAEYR                    |           |        | Oxidation (M)[5]       |      | Mascot      |
| 2595.0803  | 2595.313    | 0.2327  | 90    | 1          | 26       | MMSCSSTHTYMSSGGSS<br>RVSGGGAGR |           |        | Carbamidomethyl (C)[4] |      | Mascot      |
| 2773.4268  | 2773.4209   | -0.0059 | -2    | 139        | 164      | IQHATGLNGGIYLSIDNAK            |           |        |                        |      | Mascot      |

12 type I cytokeratin, enveloping layer [Danio rerio] LAADDFR gi|94732407 24286.5 4.8 6 83 99.979 51 99.762

Peptide Information

| Calc. Mass | Obsrv. Mass | ± da    | ± ppm | Start Seq. | End Seq. | Sequence         | Ion Score | C. I.  | % Modification    | Rank | Result Type |
|------------|-------------|---------|-------|------------|----------|------------------|-----------|--------|-------------------|------|-------------|
| 1153.5558  | 1153.5413   | -0.0145 | -13   | 163        | 171      | LEMEIAEYR        |           |        |                   |      | Mascot      |
| 1309.6569  | 1309.6586   | 0.0017  | 1     | 163        | 172      | LEMEIAEYRR       |           |        |                   |      | Mascot      |
| 1325.6517  | 1325.6294   | -0.0223 | -17   | 163        | 172      | LEMEIAEYRR       |           |        | Oxidation (M)[3]  |      | Mascot      |
| 1332.6754  | 1332.6588   | -0.0166 | -12   | 108        | 120      | ASLEGLTADTQAR    |           |        |                   |      | Mascot      |
| 1410.7046  | 1410.688    | -0.0166 | -12   | 161        | 171      | TRLEMEIAEYR      |           |        |                   |      | Mascot      |
| 1410.7046  | 1410.688    | -0.0166 | -12   | 161        | 171      | TRLEMEIAEYR      | 51        | 99.762 |                   |      | Mascot      |
| 1414.8151  | 1414.7891   | -0.026  | -18   | 190        | 202      | KVVTIVEEVVDGK    |           |        |                   |      | Mascot      |
| 1426.6995  | 1426.6827   | -0.0168 | -12   | 161        | 171      | TRLEMEIAEYR      | 18        | 0      | Oxidation (M)[5]  |      | Mascot      |
| 1426.6995  | 1426.6827   | -0.0168 | -12   | 161        | 171      | TRLEMEIAEYR      |           |        | Oxidation (M)[5]  |      | Mascot      |
| 2020.0743  | 2020.073    | -0.0013 | -1    | 91         | 107      | RTLQSLIELQSQLSMK |           |        | Oxidation (M)[16] |      | Mascot      |
| 2020.0743  | 2020.073    | -0.0013 | -1    | 91         | 107      | RTLQSLIELQSQLSMK |           |        | Oxidation (M)[16] |      | Mascot      |

13 type I keratin [Danio rerio] gi|5733816 11569.6 4.88 4 77 99.917 51 99.762

Peptide Information

| Calc. Mass | Obsrv. Mass | ± da    | ± ppm | Start Seq. | End Seq. | Sequence      | Ion Score | C. I.  | % Modification   | Rank | Result Type |
|------------|-------------|---------|-------|------------|----------|---------------|-----------|--------|------------------|------|-------------|
| 1153.5558  | 1153.5413   | -0.0145 | -13   | 64         | 72       | LEMEIAEYR     |           |        |                  |      | Mascot      |
| 1309.6569  | 1309.6586   | 0.0017  | 1     | 64         | 73       | LEMEIAEYRR    |           |        |                  |      | Mascot      |
| 1325.6517  | 1325.6294   | -0.0223 | -17   | 64         | 73       | LEMEIAEYRR    |           |        | Oxidation (M)[3] |      | Mascot      |
| 1332.6754  | 1332.6588   | -0.0166 | -12   | 9          | 21       | ASLEGLTADTQAR |           |        |                  |      | Mascot      |
| 1410.7046  | 1410.688    | -0.0166 | -12   | 62         | 72       | TRLEMEIAEYR   |           |        |                  |      | Mascot      |
| 1410.7046  | 1410.688    | -0.0166 | -12   | 62         | 72       | TRLEMEIAEYR   | 51        | 99.762 |                  |      | Mascot      |
| 1426.6995  | 1426.6827   | -0.0168 | -12   | 62         | 72       | TRLEMEIAEYR   | 18        | 0      | Oxidation (M)[5] |      | Mascot      |
| 1426.6995  | 1426.6827   | -0.0168 | -12   | 62         | 72       | TRLEMEIAEYR   |           |        | Oxidation (M)[5] |      | Mascot      |

14 type I keratin E7-like [Danio rerio] gi|316659401 43783.1 4.97 7 73 99.797 51 99.762

Peptide Information

| Calc. Mass | Obsrv. Mass | ± da    | ± ppm | Start Seq. | End Seq. | Sequence    | Ion Score | C. I. | % Modification | Rank | Result Type |
|------------|-------------|---------|-------|------------|----------|-------------|-----------|-------|----------------|------|-------------|
| 1078.6255  | 1078.4958   | -0.1297 | -120  | 69         | 77       | LASYLEKVR   |           |       |                |      | Mascot      |
| 1153.5558  | 1153.5413   | -0.0145 | -13   | 351        | 359      | LEMEIAEYR   |           |       |                |      | Mascot      |
| 1167.6117  | 1167.598    | -0.0137 | -12   | 2          | 11       | SQVTQSF SRK |           |       |                |      | Mascot      |

|    |                                                                         |           |         |     |     |             |                    |      |                  |                  |        |    |        |
|----|-------------------------------------------------------------------------|-----------|---------|-----|-----|-------------|--------------------|------|------------------|------------------|--------|----|--------|
|    | 1167.6117                                                               | 1167.598  | -0.0137 | -12 | 2   | 11          | SQVTQSFSRK         |      |                  |                  |        |    | Mascot |
|    | 1214.6488                                                               | 1214.5306 | -0.1182 | -97 | 360 | 369         | RLLDGEDIQR         |      |                  |                  |        |    | Mascot |
|    | 1214.6488                                                               | 1214.5306 | -0.1182 | -97 | 360 | 369         | RLLDGEDIQR         |      |                  |                  |        |    | Mascot |
|    | 1309.6569                                                               | 1309.6586 | 0.0017  | 1   | 351 | 360         | LEMEIAEYRR         |      |                  |                  |        |    | Mascot |
|    | 1325.6517                                                               | 1325.6294 | -0.0223 | -17 | 351 | 360         | LEMEIAEYRR         |      | Oxidation (M)[3] |                  |        |    | Mascot |
|    | 1410.7046                                                               | 1410.688  | -0.0166 | -12 | 349 | 359         | TRLEMEIAEYR        |      |                  |                  |        |    | Mascot |
|    | 1410.7046                                                               | 1410.688  | -0.0166 | -12 | 349 | 359         | TRLEMEIAEYR        | 51   | 99.762           |                  |        |    | Mascot |
|    | 1426.6995                                                               | 1426.6827 | -0.0168 | -12 | 349 | 359         | TRLEMEIAEYR        | 18   | 0                | Oxidation (M)[5] |        |    | Mascot |
|    | 1426.6995                                                               | 1426.6827 | -0.0168 | -12 | 349 | 359         | TRLEMEIAEYR        |      |                  | Oxidation (M)[5] |        |    | Mascot |
|    | 2137.1096                                                               | 2137.0896 | -0.02   | -9  | 175 | 192         | SDLEMQIEGLKEELVYLK |      |                  |                  |        |    | Mascot |
| 15 | novel protein similar to vertebrate keratin type I family [Danio rerio] |           |         |     |     | gi 94732967 | 45812.2            | 5.08 | 7                | 72               | 99.713 | 51 | 99.762 |

| Peptide Information |             |         |       |            |          |             |           |         |              |  | Rank   | Result Type |
|---------------------|-------------|---------|-------|------------|----------|-------------|-----------|---------|--------------|--|--------|-------------|
| Calc. Mass          | Obsrv. Mass | ± da    | ± ppm | Start Seq. | End Seq. | Sequence    | Ion Score | C. I. % | Modification |  |        |             |
| 1078.6255           | 1078.4958   | -0.1297 | -120  | 140        | 148      | LASYLEKVR   |           |         |              |  | Mascot |             |
| 1093.6099           | 1093.5406   | -0.0693 | -63   | 478        | 488      | VVSSSSTSLVK |           |         |              |  | Mascot |             |
| 1153.5558           | 1153.5413   | -0.0145 | -13   | 424        | 432      | LEMEIAEYR   |           |         |              |  | Mascot |             |

|    |                                 |           |         |     |             |     |                |      |        |                  |        |                  |        |  |  |  |        |
|----|---------------------------------|-----------|---------|-----|-------------|-----|----------------|------|--------|------------------|--------|------------------|--------|--|--|--|--------|
|    | 1194.5861                       | 1194.5714 | -0.0147 | -12 | 52          | 65  | SGSVYGGAGGAGVR |      |        |                  |        |                  |        |  |  |  | Mascot |
|    | 1194.5861                       | 1194.5714 | -0.0147 | -12 | 52          | 65  | SGSVYGGAGGAGVR |      |        |                  |        |                  |        |  |  |  | Mascot |
|    | 1309.6569                       | 1309.6586 | 0.0017  | 1   | 424         | 433 | LEMEIAEYRR     |      |        |                  |        |                  |        |  |  |  | Mascot |
|    | 1325.6517                       | 1325.6294 | -0.0223 | -17 | 424         | 433 | LEMEIAEYRR     |      |        |                  |        | Oxidation (M)[3] |        |  |  |  | Mascot |
|    | 1410.7046                       | 1410.688  | -0.0166 | -12 | 422         | 432 | TRLEMEIAEYR    |      |        |                  |        |                  |        |  |  |  | Mascot |
|    | 1410.7046                       | 1410.688  | -0.0166 | -12 | 422         | 432 | TRLEMEIAEYR    | 51   | 99.762 |                  |        |                  |        |  |  |  | Mascot |
|    | 1426.6995                       | 1426.6827 | -0.0168 | -12 | 422         | 432 | TRLEMEIAEYR    | 18   | 0      | Oxidation (M)[5] |        |                  |        |  |  |  | Mascot |
|    | 1426.6995                       | 1426.6827 | -0.0168 | -12 | 422         | 432 | TRLEMEIAEYR    |      |        | Oxidation (M)[5] |        |                  |        |  |  |  | Mascot |
| 17 | type I keratin E7 [Danio rerio] |           |         |     | gi 50539834 |     | 49754.6        | 5.42 | 7      | 67               | 99.132 | 51               | 99.762 |  |  |  |        |

Peptide Information

| Calc. Mass | Obsrv. Mass | ± da    | ± ppm | Start Seq. | End Seq. | Sequence           | Ion Score | C. I.  | % Modification   | Rank | Result Type |
|------------|-------------|---------|-------|------------|----------|--------------------|-----------|--------|------------------|------|-------------|
| 1078.6255  | 1078.4958   | -0.1297 | -120  | 90         | 98       | LASYLEKVR          |           |        |                  |      | Mascot      |
| 1153.5558  | 1153.5413   | -0.0145 | -13   | 372        | 380      | LEMEIAEYR          |           |        |                  |      | Mascot      |
| 1167.6117  | 1167.598    | -0.0137 | -12   | 2          | 11       | SQVTQSFSRK         |           |        |                  |      | Mascot      |
| 1167.6117  | 1167.598    | -0.0137 | -12   | 2          | 11       | SQVTQSFSRK         |           |        |                  |      | Mascot      |
| 1214.6488  | 1214.5306   | -0.1182 | -97   | 381        | 390      | RLLDGEDIQR         |           |        |                  |      | Mascot      |
| 1214.6488  | 1214.5306   | -0.1182 | -97   | 381        | 390      | RLLDGEDIQR         |           |        |                  |      | Mascot      |
| 1309.6569  | 1309.6586   | 0.0017  | 1     | 372        | 381      | LEMEIAEYRR         |           |        |                  |      | Mascot      |
| 1325.6517  | 1325.6294   | -0.0223 | -17   | 372        | 381      | LEMEIAEYRR         |           |        | Oxidation (M)[3] |      | Mascot      |
| 1410.7046  | 1410.688    | -0.0166 | -12   | 370        | 380      | TRLEMEIAEYR        |           |        |                  |      | Mascot      |
| 1410.7046  | 1410.688    | -0.0166 | -12   | 370        | 380      | TRLEMEIAEYR        | 51        | 99.762 |                  |      | Mascot      |
| 1426.6995  | 1426.6827   | -0.0168 | -12   | 370        | 380      | TRLEMEIAEYR        | 18        | 0      | Oxidation (M)[5] |      | Mascot      |
| 1426.6995  | 1426.6827   | -0.0168 | -12   | 370        | 380      | TRLEMEIAEYR        |           |        | Oxidation (M)[5] |      | Mascot      |
| 2137.1096  | 2137.0896   | -0.02   | -9    | 196        | 213      | SDLEMQIEGLKEELVYLK |           |        |                  |      | Mascot      |

18 keratin 15 [Danio rerio] gi|169158744 48848.4 5.13 5 64 98.347 51 99.762

Peptide Information

| Calc. Mass | Obsrv. Mass | ± da    | ± ppm | Start Seq. | End Seq. | Sequence    | Ion Score | C. I. | % Modification   | Rank | Result Type |
|------------|-------------|---------|-------|------------|----------|-------------|-----------|-------|------------------|------|-------------|
| 1062.4998  | 1062.4854   | -0.0144 | -14   | 109        | 117      | ATMQNLNDR   |           |       |                  |      | Mascot      |
| 1078.4946  | 1078.4958   | 0.0012  | 1     | 109        | 117      | ATMQNLNDR   |           |       | Oxidation (M)[3] |      | Mascot      |
| 1153.5558  | 1153.5413   | -0.0145 | -13   | 400        | 408      | LEMEIAEYR   |           |       |                  |      | Mascot      |
| 1309.6569  | 1309.6586   | 0.0017  | 1     | 400        | 409      | LEMEIAEYRR  |           |       |                  |      | Mascot      |
| 1325.6517  | 1325.6294   | -0.0223 | -17   | 400        | 409      | LEMEIAEYRR  |           |       | Oxidation (M)[3] |      | Mascot      |
| 1410.7046  | 1410.688    | -0.0166 | -12   | 398        | 408      | TRLEMEIAEYR |           |       |                  |      | Mascot      |

|  |           |           |         |     |     |     |                  |    |        |                  |        |
|--|-----------|-----------|---------|-----|-----|-----|------------------|----|--------|------------------|--------|
|  | 1410.7046 | 1410.688  | -0.0166 | -12 | 398 | 408 | TRLEMEIAEYR      | 51 | 99.762 |                  | Mascot |
|  | 1426.6995 | 1426.6827 | -0.0168 | -12 | 398 | 408 | TRLEMEIAEYR      | 18 | 0      | Oxidation (M)[5] | Mascot |
|  | 1426.6995 | 1426.6827 | -0.0168 | -12 | 398 | 408 | TRLEMEIAEYR      |    |        | Oxidation (M)[5] | Mascot |
|  | 1541.7488 | 1541.6721 | -0.0767 | -50 | 41  | 56  | ISSMRAGSVYGGAGGR |    |        | Oxidation (M)[4] | Mascot |

19 si:dkeyp-113d7.4 [Danio rerio] gi|167234796 49903.8 4.94 5 64 98.145 51 99.762

Peptide Information

| Calc. Mass | Obsrv. Mass | ± da    | ± ppm | Start Seq. | End Seq. | Sequence       | Ion Score | C. I.  | % Modification   | Rank | Result Type |
|------------|-------------|---------|-------|------------|----------|----------------|-----------|--------|------------------|------|-------------|
| 1093.6099  | 1093.5406   | -0.0693 | -63   | 463        | 473      | VVSSSSTSLVK    |           |        |                  |      | Mascot      |
| 1153.5558  | 1153.5413   | -0.0145 | -13   | 409        | 417      | LEMEIAEYR      |           |        |                  |      | Mascot      |
| 1194.5861  | 1194.5714   | -0.0147 | -12   | 37         | 50       | SGSVYGGAGGAGVR |           |        |                  |      | Mascot      |
| 1194.5861  | 1194.5714   | -0.0147 | -12   | 37         | 50       | SGSVYGGAGGAGVR |           |        |                  |      | Mascot      |
| 1309.6569  | 1309.6586   | 0.0017  | 1     | 409        | 418      | LEMEIAEYRR     |           |        |                  |      | Mascot      |
| 1325.6517  | 1325.6294   | -0.0223 | -17   | 409        | 418      | LEMEIAEYRR     |           |        | Oxidation (M)[3] |      | Mascot      |
| 1410.7046  | 1410.688    | -0.0166 | -12   | 407        | 417      | TRLEMEIAEYR    |           |        |                  |      | Mascot      |
| 1410.7046  | 1410.688    | -0.0166 | -12   | 407        | 417      | TRLEMEIAEYR    | 51        | 99.762 |                  |      | Mascot      |
| 1426.6995  | 1426.6827   | -0.0168 | -12   | 407        | 417      | TRLEMEIAEYR    | 18        | 0      | Oxidation (M)[5] |      | Mascot      |
| 1426.6995  | 1426.6827   | -0.0168 | -12   | 407        | 417      | TRLEMEIAEYR    |           |        | Oxidation (M)[5] |      | Mascot      |

20 Si:dkeyp-113d7.4 protein [Danio rerio] gi|126632119 51495.6 5 5 63 97.966 51 99.762

Peptide Information

| Calc. Mass | Obsrv. Mass | ± da    | ± ppm | Start Seq. | End Seq. | Sequence       | Ion Score | C. I.  | % Modification   | Rank | Result Type |
|------------|-------------|---------|-------|------------|----------|----------------|-----------|--------|------------------|------|-------------|
| 1093.6099  | 1093.5406   | -0.0693 | -63   | 478        | 488      | VVSSSSTSLVK    |           |        |                  |      | Mascot      |
| 1153.5558  | 1153.5413   | -0.0145 | -13   | 424        | 432      | LEMEIAEYR      |           |        |                  |      | Mascot      |
| 1194.5861  | 1194.5714   | -0.0147 | -12   | 52         | 65       | SGSVYGGAGGAGVR |           |        |                  |      | Mascot      |
| 1194.5861  | 1194.5714   | -0.0147 | -12   | 52         | 65       | SGSVYGGAGGAGVR |           |        |                  |      | Mascot      |
| 1309.6569  | 1309.6586   | 0.0017  | 1     | 424        | 433      | LEMEIAEYRR     |           |        |                  |      | Mascot      |
| 1325.6517  | 1325.6294   | -0.0223 | -17   | 424        | 433      | LEMEIAEYRR     |           |        | Oxidation (M)[3] |      | Mascot      |
| 1410.7046  | 1410.688    | -0.0166 | -12   | 422        | 432      | TRLEMEIAEYR    |           |        |                  |      | Mascot      |
| 1410.7046  | 1410.688    | -0.0166 | -12   | 422        | 432      | TRLEMEIAEYR    | 51        | 99.762 |                  |      | Mascot      |
| 1426.6995  | 1426.6827   | -0.0168 | -12   | 422        | 432      | TRLEMEIAEYR    | 18        | 0      | Oxidation (M)[5] |      | Mascot      |
| 1426.6995  | 1426.6827   | -0.0168 | -12   | 422        | 432      | TRLEMEIAEYR    |           |        | Oxidation (M)[5] |      | Mascot      |

21 insulin receptor a [Danio rerio] gi|218082480 153164.5 6.26 23 62 97.256

Peptide Information

|    | Calc. Mass               | Obsrv. Mass | ± da    | ± ppm | Start Seq.  | End Sequence Seq.               | Ion Score | C. I. % | Modification                             | Rank      | Result Type |
|----|--------------------------|-------------|---------|-------|-------------|---------------------------------|-----------|---------|------------------------------------------|-----------|-------------|
|    | 1026.4375                | 1026.417    | -0.0205 | -20   | 708         | 715 EAEET EYR                   |           |         |                                          |           | Mascot      |
|    | 1050.5248                | 1050.4922   | -0.0326 | -31   | 456         | 464 RMEEVTGTK                   |           |         |                                          |           | Mascot      |
|    | 1153.4799                | 1153.5413   | 0.0614  | 53    | 695         | 703 CCACP KTEK                  |           |         | Carbamidomethyl (C)[1,2,4]               |           | Mascot      |
|    | 1167.6368                | 1167.598    | -0.0388 | -33   | 490         | 499 FTRISTLSDK                  |           |         |                                          |           | Mascot      |
|    | 1167.6368                | 1167.598    | -0.0388 | -33   | 490         | 499 FTRISTLSDK                  |           |         |                                          |           | Mascot      |
|    | 1214.6489                | 1214.5306   | -0.1183 | -97   | 514         | 523 DLLGFMVLYK                  |           |         | Oxidation (M)[6]                         |           | Mascot      |
|    | 1214.66                  | 1214.5306   | -0.1294 | -107  | 31          | 40 DIRNNVTNLR                   |           |         |                                          |           | Mascot      |
|    | 1295.597                 | 1295.6909   | 0.0939  | 72    | 1135        | 1145 NCMVAEDLTVK                |           |         | Carbamidomethyl (C)[2], Oxidation (M)[3] |           | Mascot      |
|    | 1365.6321                | 1365.6913   | 0.0592  | 43    | 1154        | 1163 DIYETDYRK                  |           |         |                                          |           | Mascot      |
|    | 1378.5371                | 1378.6663   | 0.1292  | 94    | 205         | 215 YCQRMCPSSCK                 |           |         | Carbamidomethyl (C)[2], Oxidation (M)[5] |           | Mascot      |
|    | 1410.7964                | 1410.688    | -0.1084 | -77   | 892         | 903 VVHPGNYTVRIR                |           |         |                                          |           | Mascot      |
|    | 1410.7964                | 1410.688    | -0.1084 | -77   | 890         | 901 LRVVHPGNYTVR                |           |         |                                          |           | Mascot      |
|    | 1515.8312                | 1515.7354   | -0.0958 | -63   | 347         | 360 GCTVINGSLVINIR              |           |         | Carbamidomethyl (C)[2]                   |           | Mascot      |
|    | 1541.6875                | 1541.6721   | -0.0154 | -10   | 271         | 283 CVSFSFCQELHNK               |           |         |                                          |           | Mascot      |
|    | 1708.8184                | 1708.7849   | -0.0335 | -20   | 866         | 879 RLGDEELHHCVSR               |           |         | Carbamidomethyl (C)[11]                  |           | Mascot      |
|    | 1790.8159                | 1790.87     | 0.0541  | 30    | 169         | 184 NDRECGDICPGTVLGK            |           |         | Carbamidomethyl (C)[5,9]                 |           | Mascot      |
|    | 1846.8186                | 1846.9727   | 0.1541  | 83    | 1236        | 1249 LHNLMQMCWHYNPK             |           |         | Oxidation (M)[5,7]                       |           | Mascot      |
|    | 1852.8341                | 1852.8485   | 0.0144  | 8     | 470         | 486 NDIVSKTNGDQASCESK           |           |         | Carbamidomethyl (C)[14]                  |           | Mascot      |
|    | 1862.9827                | 1862.9655   | -0.0172 | -9    | 329         | 346 VCMGLKTVDSVTAAQAL R         |           |         |                                          |           | Mascot      |
|    | 1940.8894                | 1940.8831   | -0.0063 | -3    | 268         | 283 GWRCVSFSFCQELHNK            |           |         |                                          |           | Mascot      |
|    | 2230.0552                | 2230.0452   | -0.01   | -4    | 1106        | 1125 EMIQMAAEIADGMAYLNA KK      |           |         | Oxidation (M)[2,5]                       |           | Mascot      |
|    | 2246.05                  | 2246.0422   | -0.0078 | -3    | 1106        | 1125 EMIQMAAEIADGMAYLNA KK      |           |         | Oxidation (M)[2,5,13]                    |           | Mascot      |
|    | 2676.3894                | 2676.3235   | -0.0659 | -25   | 560         | 581 EHEPGYLIFLPKPWTQYA IMVK     |           |         | Oxidation (M)[20]                        |           | Mascot      |
|    | 2691.0837                | 2691.3345   | 0.2508  | 93    | 218         | 242 ACTKDNQCCHDQCLGG CLEPHSSNK  |           |         |                                          |           | Mascot      |
|    | 2773.3569                | 2773.4209   | 0.064   | 23    | 5           | 30 TLIVLVASVYTVCNCCQQT NGEICSSK |           |         |                                          |           | Mascot      |
| 22 | keratin 15 [Danio rerio] |             |         |       | gi 47087241 |                                 | 49093.4   | 5.13    | 4                                        | 60 95.941 | 51 99.762   |

Peptide Information

|  | Calc. Mass | Obsrv. Mass | ± da    | ± ppm | Start Seq. | End Sequence Seq. | Ion Score | C. I. % | Modification     | Rank | Result Type |
|--|------------|-------------|---------|-------|------------|-------------------|-----------|---------|------------------|------|-------------|
|  | 1062.4998  | 1062.4854   | -0.0144 | -14   | 109        | 117 ATMQNLNDR     |           |         |                  |      | Mascot      |
|  | 1078.4946  | 1078.4958   | 0.0012  | 1     | 109        | 117 ATMQNLNDR     |           |         | Oxidation (M)[3] |      | Mascot      |
|  | 1153.5558  | 1153.5413   | -0.0145 | -13   | 400        | 408 LEMEIAEYR     |           |         |                  |      | Mascot      |



|    |                                                                                         |           |         |     |     |             |             |      |        |                  |                  |  |  |        |
|----|-----------------------------------------------------------------------------------------|-----------|---------|-----|-----|-------------|-------------|------|--------|------------------|------------------|--|--|--------|
|    | 1309.6569                                                                               | 1309.6586 | 0.0017  | 1   | 400 | 409         | LEMEIAEYRR  |      |        |                  |                  |  |  | Mascot |
|    | 1325.6517                                                                               | 1325.6294 | -0.0223 | -17 | 400 | 409         | LEMEIAEYRR  |      |        |                  | Oxidation (M)[3] |  |  | Mascot |
|    | 1410.7046                                                                               | 1410.688  | -0.0166 | -12 | 398 | 408         | TRLEMEIAEYR |      |        |                  |                  |  |  | Mascot |
|    | 1410.7046                                                                               | 1410.688  | -0.0166 | -12 | 398 | 408         | TRLEMEIAEYR | 51   | 99.762 |                  |                  |  |  | Mascot |
|    | 1426.6995                                                                               | 1426.6827 | -0.0168 | -12 | 398 | 408         | TRLEMEIAEYR | 18   | 0      | Oxidation (M)[5] |                  |  |  | Mascot |
|    | 1426.6995                                                                               | 1426.6827 | -0.0168 | -12 | 398 | 408         | TRLEMEIAEYR |      |        | Oxidation (M)[5] |                  |  |  | Mascot |
| 23 | [3-methyl-2-oxobutanoate dehydrogenase [lipoamide]] kinase, mitochondrial [Danio rerio] |           |         |     |     | gi 47085777 | 46895       | 9.08 | 11     | 51               | 62.986           |  |  |        |

#### Peptide Information

| Calc. Mass | Obsrv. Mass | ± da    | ± ppm | Start Seq. | End Sequence Seq.              | Ion Score | C. I. | % Modification         | Rank | Result Type |
|------------|-------------|---------|-------|------------|--------------------------------|-----------|-------|------------------------|------|-------------|
| 948.4567   | 948.5493    | 0.0926  | 98    | 2          | 10 ELLGSGGCR                   |           |       | Carbamidomethyl (C)[8] |      | Mascot      |
| 1093.6     | 1093.5406   | -0.0594 | -54   | 325        | 335 GGGIPHSILDK                |           |       |                        |      | Mascot      |
| 1167.6005  | 1167.598    | -0.0025 | -2    | 196        | 205 NFLDTTLTSR                 |           |       |                        |      | Mascot      |
| 1167.6005  | 1167.598    | -0.0025 | -2    | 196        | 205 NFLDTTLTSR                 |           |       |                        |      | Mascot      |
| 1181.6235  | 1181.5778   | -0.0457 | -39   | 78         | 88 LTPATMLYAGK                 |           |       | Oxidation (M)[6]       |      | Mascot      |
| 1181.6235  | 1181.5778   | -0.0457 | -39   | 78         | 88 LTPATMLYAGK                 |           |       | Oxidation (M)[6]       |      | Mascot      |
| 1253.6194  | 1253.5792   | -0.0402 | -32   | 172        | 182 DVVTMLAEGFR                |           |       | Oxidation (M)[5]       |      | Mascot      |
| 1269.6984  | 1269.5741   | -0.1243 | -98   | 186        | 195 KHILDEMLVR                 |           |       | Oxidation (M)[7]       |      | Mascot      |
| 1516.7074  | 1516.7217   | 0.0143  | 9     | 248        | 259 RLCEHQYGNSPR               |           |       | Carbamidomethyl (C)[3] |      | Mascot      |
| 1564.8441  | 1564.787    | -0.0571 | -36   | 321        | 335 ISDRGGGIPHSILDK            |           |       |                        |      | Mascot      |
| 1564.8441  | 1564.787    | -0.0571 | -36   | 321        | 335 ISDRGGGIPHSILDK            |           |       |                        |      | Mascot      |
| 1708.7959  | 1708.7849   | -0.011  | -6    | 38         | 52 FRSTSSMSSYSELAR             |           |       |                        |      | Mascot      |
| 2019.8977  | 2020.073    | 0.1753  | 87    | 336        | 352 VMHYHFSTAEQSAQDPR          |           |       | Oxidation (M)[2]       |      | Mascot      |
| 2019.8977  | 2020.073    | 0.1753  | 87    | 336        | 352 VMHYHFSTAEQSAQDPR          |           |       | Oxidation (M)[2]       |      | Mascot      |
| 2676.3337  | 2676.3235   | -0.0102 | -4    | 382        | 406 AYAAYLGGSLAIQSMQGI GTDVYLR |           |       |                        |      | Mascot      |
| 2692.3286  | 2692.3264   | -0.0022 | -1    | 382        | 406 AYAAYLGGSLAIQSMQGI GTDVYLR |           |       | Oxidation (M)[15]      |      | Mascot      |
| 2692.3286  | 2692.3264   | -0.0022 | -1    | 382        | 406 AYAAYLGGSLAIQSMQGI GTDVYLR |           |       | Oxidation (M)[15]      |      | Mascot      |

|    |                                                                  |  |  |  |  |              |         |      |    |    |   |  |  |  |
|----|------------------------------------------------------------------|--|--|--|--|--------------|---------|------|----|----|---|--|--|--|
| 24 | branched chain alpha-ketoacid dehydrogenase kinase [Danio rerio] |  |  |  |  | gi 169146285 | 47850.5 | 9.35 | 10 | 45 | 0 |  |  |  |
|----|------------------------------------------------------------------|--|--|--|--|--------------|---------|------|----|----|---|--|--|--|

#### Peptide Information

| Calc. Mass | Obsrv. Mass | ± da    | ± ppm | Start Seq. | End Sequence Seq. | Ion Score | C. I. | % Modification | Rank | Result Type |
|------------|-------------|---------|-------|------------|-------------------|-----------|-------|----------------|------|-------------|
| 1093.6     | 1093.5406   | -0.0594 | -54   | 334        | 344 GGGIPHSILDK   |           |       |                |      | Mascot      |
| 1167.6005  | 1167.598    | -0.0025 | -2    | 205        | 214 NFLDTTLTSR    |           |       |                |      | Mascot      |

|    |                                                                                                                  |           |         |     |     |          |                                |    |                        |   |  |        |
|----|------------------------------------------------------------------------------------------------------------------|-----------|---------|-----|-----|----------|--------------------------------|----|------------------------|---|--|--------|
|    | 1167.6005                                                                                                        | 1167.598  | -0.0025 | -2  | 205 | 214      | NFLDTTTLTSR                    |    |                        |   |  | Mascot |
|    | 1181.6235                                                                                                        | 1181.5778 | -0.0457 | -39 | 87  | 97       | LTPATMLYAGK                    |    | Oxidation (M)[6]       |   |  | Mascot |
|    | 1181.6235                                                                                                        | 1181.5778 | -0.0457 | -39 | 87  | 97       | LTPATMLYAGK                    |    | Oxidation (M)[6]       |   |  | Mascot |
|    | 1253.6194                                                                                                        | 1253.5792 | -0.0402 | -32 | 181 | 191      | DVVTMLAEGFR                    |    | Oxidation (M)[5]       |   |  | Mascot |
|    | 1269.6984                                                                                                        | 1269.5741 | -0.1243 | -98 | 195 | 204      | KHILDEMLVR                     |    | Oxidation (M)[7]       |   |  | Mascot |
|    | 1516.7074                                                                                                        | 1516.7217 | 0.0143  | 9   | 257 | 268      | RLCEHQYGNSPR                   |    | Carbamidomethyl (C)[3] |   |  | Mascot |
|    | 1564.8441                                                                                                        | 1564.787  | -0.0571 | -36 | 330 | 344      | ISDRGGGIPHSILDK                |    |                        |   |  | Mascot |
|    | 1564.8441                                                                                                        | 1564.787  | -0.0571 | -36 | 330 | 344      | ISDRGGGIPHSILDK                |    |                        |   |  | Mascot |
|    | 1708.7959                                                                                                        | 1708.7849 | -0.011  | -6  | 47  | 61       | FRSTSSMSSYSELAR                |    |                        |   |  | Mascot |
|    | 2019.8977                                                                                                        | 2020.073  | 0.1753  | 87  | 345 | 361      | VMHYHFSTAEQSAQDPR              |    | Oxidation (M)[2]       |   |  | Mascot |
|    | 2019.8977                                                                                                        | 2020.073  | 0.1753  | 87  | 345 | 361      | VMHYHFSTAEQSAQDPR              |    | Oxidation (M)[2]       |   |  | Mascot |
|    | 2676.3337                                                                                                        | 2676.3235 | -0.0102 | -4  | 391 | 415      | AYA EYLGGSLAIQSMQGI<br>GTDVYLR |    |                        |   |  | Mascot |
|    | 2692.3286                                                                                                        | 2692.3264 | -0.0022 | -1  | 391 | 415      | AYA EYLGGSLAIQSMQGI<br>GTDVYLR |    | Oxidation (M)[15]      |   |  | Mascot |
|    | 2692.3286                                                                                                        | 2692.3264 | -0.0022 | -1  | 391 | 415      | AYA EYLGGSLAIQSMQGI<br>GTDVYLR |    | Oxidation (M)[15]      |   |  | Mascot |
| 25 | novel protein similar to vertebrate v-erb-a erythroblastic leukemia viral oncogene homolog 4 (avian gij220678884 |           |         |     |     | 145569.3 | 7.52                           | 19 | 41                     | 0 |  |        |

| Peptide Information |             |         |       |            |          |                  |           |       |                        |      |             |  |
|---------------------|-------------|---------|-------|------------|----------|------------------|-----------|-------|------------------------|------|-------------|--|
| Calc. Mass          | Obsrv. Mass | ± da    | ± ppm | Start Seq. | End Seq. | Sequence         | Ion Score | C. I. | % Modification         | Rank | Result Type |  |
| 948.4355            | 948.5493    | 0.1138  | 120   | 347        | 354      | GDMFHGIR         |           |       | Oxidation (M)[3]       |      | Mascot      |  |
| 1050.6167           | 1050.4922   | -0.1245 | -119  | 845        | 853      | LVHRDLAAR        |           |       |                        |      | Mascot      |  |
| 1077.6415           | 1077.5387   | -0.1028 | -95   | 45         | 53       | NLSFLKSIR        |           |       |                        |      | Mascot      |  |
| 1078.5527           | 1078.4958   | -0.0569 | -53   | 990        | 998      | YLVIQGDDR        |           |       |                        |      | Mascot      |  |
| 1181.562            | 1181.5778   | 0.0158  | 13    | 1045       | 1054     | TTMDASWTLR       |           |       |                        |      | Mascot      |  |
| 1181.562            | 1181.5778   | 0.0158  | 13    | 1045       | 1054     | TTMDASWTLR       |           |       |                        |      | Mascot      |  |
| 1214.6415           | 1214.5306   | -0.1109 | -91   | 741        | 751      | GIWVPEGETVK      |           |       |                        |      | Mascot      |  |
| 1214.6415           | 1214.5306   | -0.1109 | -91   | 741        | 751      | GIWVPEGETVK      |           |       |                        |      | Mascot      |  |
| 1236.6082           | 1236.5139   | -0.0943 | -76   | 255        | 264      | YTYGAFCVKK       |           |       | Carbamidomethyl (C)[7] |      | Mascot      |  |
| 1365.6039           | 1365.6913   | 0.0874  | 64    | 962        | 972      | CWMIDADSRPR      |           |       | Oxidation (M)[3]       |      | Mascot      |  |
| 1378.6395           | 1378.6663   | 0.0268  | 19    | 892        | 901      | WMALECIHYR       |           |       | Carbamidomethyl (C)[6] |      | Mascot      |  |
| 1410.7111           | 1410.688    | -0.0231 | -16   | 8          | 19       | LSTLSDLDQQYK     |           |       |                        |      | Mascot      |  |
| 1410.7111           | 1410.688    | -0.0231 | -16   | 8          | 19       | LSTLSDLDQQYK     |           |       |                        |      | Mascot      |  |
| 1580.6064           | 1580.7896   | 0.1832  | 116   | 1106       | 1120     | QQPMSGSGDDCDGQR  |           |       |                        |      | Mascot      |  |
| 1580.6064           | 1580.7896   | 0.1832  | 116   | 1106       | 1120     | QQPMSGSGDDCDGQR  |           |       |                        |      | Mascot      |  |
| 1708.7014           | 1708.7849   | 0.0835  | 49    | 1105       | 1120     | KQQPMSGSGDDCDGQR |           |       |                        |      | Mascot      |  |
| 1790.8903           | 1790.87     | -0.0203 | -11   | 888        | 901      | MPIKWMALECIHYR   |           |       |                        |      | Mascot      |  |

|    |                                              |           |         |    |              |     |                            |      |                                           |        |   |
|----|----------------------------------------------|-----------|---------|----|--------------|-----|----------------------------|------|-------------------------------------------|--------|---|
|    | 1862.8635                                    | 1862.9655 | 0.102   | 55 | 534          | 551 | AGEKGLTCHGPGPDHCV<br>K     |      | Carbamidomethyl (C)[8]                    | Mascot |   |
|    | 2020.0316                                    | 2020.073  | 0.0414  | 20 | 945          | 961 | LPQPPICTIDVYMVMVK          |      | Carbamidomethyl (C)[7], Oxidation (M)[13] | Mascot |   |
|    | 2020.0316                                    | 2020.073  | 0.0414  | 20 | 945          | 961 | LPQPPICTIDVYMVMVK          |      | Carbamidomethyl (C)[7], Oxidation (M)[13] | Mascot |   |
|    | 2232.9204                                    | 2233.054  | 0.1336  | 60 | 517          | 537 | EFANGSVCVECDSQCEK<br>AGEK  |      |                                           | Mascot |   |
|    | 2246.0466                                    | 2246.0422 | -0.0044 | -2 | 24           | 42  | FYENCEVVMGNLEITSIE<br>R    |      |                                           | Mascot |   |
|    | 2328.0049                                    | 2328.1199 | 0.115   | 49 | 285          | 304 | MEVEENQTKMCIPCTDIC<br>PK   |      | Oxidation (M)[1]                          | Mascot |   |
|    | 2676.0627                                    | 2676.3235 | 0.2608  | 97 | 183          | 204 | TVCAEQCDGRFCGPYVS<br>NCCHR |      | Carbamidomethyl (C)[3,7,11,19]            | Mascot |   |
| 26 | hypothetical protein LOC751722 [Danio rerio] |           |         |    | gi 113679753 |     | 31904.4                    | 6.69 | 9                                         | 40     | 0 |

#### Peptide Information

| Calc. Mass | Obsrv. Mass | ± da    | ± ppm | Start Seq. | End Seq. | Sequence                | Ion Score | C. I. | % Modification   | Rank | Result Type |
|------------|-------------|---------|-------|------------|----------|-------------------------|-----------|-------|------------------|------|-------------|
| 948.4744   | 948.5493    | 0.0749  | 79    | 260        | 269      | KASQNSGGIS              |           |       |                  |      | Mascot      |
| 1062.5248  | 1062.4854   | -0.0394 | -37   | 182        | 189      | EQRLEMEK                |           |       |                  |      | Mascot      |
| 1078.5198  | 1078.4958   | -0.024  | -22   | 182        | 189      | EQRLEMEK                |           |       | Oxidation (M)[6] |      | Mascot      |
| 1253.6736  | 1253.5792   | -0.0944 | -75   | 82         | 92       | TAAHLELELEK             |           |       |                  |      | Mascot      |
| 1295.6565  | 1295.6909   | 0.0344  | 27    | 231        | 240      | NGNLMWLYLR              |           |       | Oxidation (M)[5] |      | Mascot      |
| 1309.6495  | 1309.6586   | 0.0091  | 7     | 72         | 81       | YRETLTENQR              |           |       |                  |      | Mascot      |
| 1410.6859  | 1410.688    | 0.0021  | 1     | 55         | 66       | NKYDSDVAEITR            |           |       |                  |      | Mascot      |
| 1410.6859  | 1410.688    | 0.0021  | 1     | 55         | 66       | NKYDSDVAEITR            |           |       |                  |      | Mascot      |
| 1516.6882  | 1516.7217   | 0.0335  | 22    | 216        | 228      | NDKHCADLLNMDK           |           |       |                  |      | Mascot      |
| 1541.774   | 1541.6721   | -0.1019 | -66   | 103        | 115      | ALISHSQQLMEEER          |           |       |                  |      | Mascot      |
| 2225.1409  | 2225.0935   | -0.0474 | -21   | 74         | 92       | ETLTENQRTAAHLELELE<br>K |           |       |                  |      | Mascot      |

27 PREDICTED: hypothetical protein LOC557000 [Danio rerio] gi|326679023 172102.9 9.31 20 40 0

#### Peptide Information

| Calc. Mass | Obsrv. Mass | ± da    | ± ppm | Start Seq. | End Seq. | Sequence    | Ion Score | C. I. | % Modification   | Rank | Result Type |
|------------|-------------|---------|-------|------------|----------|-------------|-----------|-------|------------------|------|-------------|
| 996.5182   | 996.5841    | 0.0659  | 66    | 44         | 51       | QFMAKLDK    |           |       | Oxidation (M)[3] |      | Mascot      |
| 1050.5327  | 1050.4922   | -0.0405 | -39   | 1179       | 1187     | TSPASFERR   |           |       |                  |      | Mascot      |
| 1062.5135  | 1062.4854   | -0.0281 | -26   | 547        | 555      | VVEMVQDDK   |           |       |                  |      | Mascot      |
| 1078.5085  | 1078.4958   | -0.0127 | -12   | 547        | 555      | VVEMVQDDK   |           |       | Oxidation (M)[4] |      | Mascot      |
| 1153.6576  | 1153.5413   | -0.1163 | -101  | 565        | 575      | GVVPDSQPVKK |           |       |                  |      | Mascot      |
| 1181.5837  | 1181.5778   | -0.0059 | -5    | 872        | 882      | ATFPPADSTFK |           |       |                  |      | Mascot      |
| 1181.5837  | 1181.5778   | -0.0059 | -5    | 872        | 882      | ATFPPADSTFK |           |       |                  |      | Mascot      |

|    |                                              |           |         |      |              |      |                             |      |    |    |   |                                                  |  |  |  |  |        |
|----|----------------------------------------------|-----------|---------|------|--------------|------|-----------------------------|------|----|----|---|--------------------------------------------------|--|--|--|--|--------|
|    | 1229.5103                                    | 1229.5663 | 0.056   | 46   | 245          | 254  | DSEFETDCRK                  |      |    |    |   |                                                  |  |  |  |  | Mascot |
|    | 1269.574                                     | 1269.5741 | 0.0001  | 0    | 750          | 762  | SCGSSSTEKNAAK               |      |    |    |   |                                                  |  |  |  |  | Mascot |
|    | 1295.6412                                    | 1295.6909 | 0.0497  | 38   | 1            | 11   | MAPLQDHQVEK                 |      |    |    |   |                                                  |  |  |  |  | Mascot |
|    | 1332.6174                                    | 1332.6588 | 0.0414  | 31   | 1386         | 1396 | MMDLYTSQSLK                 |      |    |    |   | Oxidation (M)[1]                                 |  |  |  |  | Mascot |
|    | 1410.7158                                    | 1410.688  | -0.0278 | -20  | 1397         | 1408 | TLQQHMSSVHVK                |      |    |    |   | Oxidation (M)[6]                                 |  |  |  |  | Mascot |
|    | 1410.7158                                    | 1410.688  | -0.0278 | -20  | 1397         | 1408 | TLQQHMSSVHVK                |      |    |    |   | Oxidation (M)[6]                                 |  |  |  |  | Mascot |
|    | 1426.8628                                    | 1426.6827 | -0.1801 | -126 | 146          | 158  | LASDAKINIIQK                |      |    |    |   |                                                  |  |  |  |  | Mascot |
|    | 1426.8628                                    | 1426.6827 | -0.1801 | -126 | 146          | 158  | LASDAKINIIQK                |      |    |    |   |                                                  |  |  |  |  | Mascot |
|    | 1515.7107                                    | 1515.7354 | 0.0247  | 16   | 433          | 446  | VSECTYITGSVGR               |      |    |    |   | Carbamidomethyl (C)[5]                           |  |  |  |  | Mascot |
|    | 1547.6393                                    | 1547.7684 | 0.1291  | 83   | 1440         | 1451 | GMEELMAYWEK                 |      |    |    |   | Oxidation (M)[2,7]                               |  |  |  |  | Mascot |
|    | 1580.8472                                    | 1580.7896 | -0.0576 | -36  | 1274         | 1286 | LFVPTNKYWTPSK               |      |    |    |   |                                                  |  |  |  |  | Mascot |
|    | 1580.8472                                    | 1580.7896 | -0.0576 | -36  | 1274         | 1286 | LFVPTNKYWTPSK               |      |    |    |   |                                                  |  |  |  |  | Mascot |
|    | 1790.8411                                    | 1790.87   | 0.0289  | 16   | 431          | 446  | MKVSECTYITGSVGR             |      |    |    |   | Carbamidomethyl (C)[7], Oxidation (M)[1]         |  |  |  |  | Mascot |
|    | 2137.1177                                    | 2137.0896 | -0.0281 | -13  | 181          | 200  | ILSSQEASSMMIGVACRIL<br>K    |      |    |    |   |                                                  |  |  |  |  | Mascot |
|    | 2225.0583                                    | 2225.0935 | 0.0352  | 16   | 224          | 242  | NELADSWFTMTFVSSAF<br>KK     |      |    |    |   | Oxidation (M)[10]                                |  |  |  |  | Mascot |
|    | 2628.2214                                    | 2628.3391 | 0.1177  | 45   | 201          | 223  | GGDYDLQVSLMEALCRM<br>VSPAQR |      |    |    |   | Carbamidomethyl (C)[15], Oxidation<br>(M)[11,17] |  |  |  |  | Mascot |
|    | 2675.3418                                    | 2675.3347 | -0.0071 | -3   | 107          | 129  | NEGLIKLAEDLFDVLMVV<br>HESCK |      |    |    |   | Carbamidomethyl (C)[22], Oxidation (M)[16]       |  |  |  |  | Mascot |
|    | 2692.3257                                    | 2692.3264 | 0.0007  | 0    | 1386         | 1408 | MMDLYTSQSLKTLQQHM<br>SSVHVK |      |    |    |   |                                                  |  |  |  |  | Mascot |
|    | 2692.3257                                    | 2692.3264 | 0.0007  | 0    | 1386         | 1408 | MMDLYTSQSLKTLQQHM<br>SSVHVK |      |    |    |   |                                                  |  |  |  |  | Mascot |
| 28 | poly [ADP-ribose] polymerase 1 [Danio rerio] |           |         |      | gi 113677594 |      | 112704.8                    | 8.86 | 13 | 39 | 0 |                                                  |  |  |  |  |        |

Peptide Information

| Calc. Mass | Obsrv. Mass | ± da    | ± ppm | Start Seq. | End Seq. | Sequence          | Ion Score | C. I. | % Modification                                    | Rank | Result | Type   |
|------------|-------------|---------|-------|------------|----------|-------------------|-----------|-------|---------------------------------------------------|------|--------|--------|
| 996.5374   | 996.5841    | 0.0467  | 47    | 857        | 864      | QLLWHGSR          |           |       |                                                   |      |        | Mascot |
| 1026.4343  | 1026.417    | -0.0173 | -17   | 123        | 131      | STCKGCDQK         |           |       | Carbamidomethyl (C)[3]                            |      |        | Mascot |
| 1194.5936  | 1194.5714   | -0.0222 | -19   | 315        | 324      | CVFKTQTPDR        | 3         | 0     |                                                   |      |        | Mascot |
| 1194.5936  | 1194.5714   | -0.0222 | -19   | 315        | 324      | CVFKTQTPDR        |           |       |                                                   |      |        | Mascot |
| 1332.7018  | 1332.6588   | -0.043  | -32   | 587        | 599      | SWGRVGTIGGNK      |           |       |                                                   |      |        | Mascot |
| 1515.8165  | 1515.7354   | -0.0811 | -54   | 806        | 818      | SSHEAQLILQYVK     |           |       |                                                   |      |        | Mascot |
| 1580.8643  | 1580.7896   | -0.0747 | -47   | 143        | 156      | TVDPEKPQLGLIDR    |           |       |                                                   |      |        | Mascot |
| 1580.8643  | 1580.7896   | -0.0747 | -47   | 143        | 156      | TVDPEKPQLGLIDR    |           |       |                                                   |      |        | Mascot |
| 1708.9592  | 1708.7849   | -0.1743 | -102  | 142        | 156      | KTVDPEKPQLGLIDR   |           |       |                                                   |      |        | Mascot |
| 2019.8643  | 2020.073    | 0.2087  | 103   | 277        | 293      | LSDCMAFGSLKPCETCK |           |       | Carbamidomethyl (C)[4,13,16], Oxidation<br>(M)[5] |      |        | Mascot |
| 2019.8643  | 2020.073    | 0.2087  | 103   | 277        | 293      | LSDCMAFGSLKPCETCK |           |       | Carbamidomethyl (C)[4,13,16], Oxidation           |      |        | Mascot |

|    |                            |           |         |     |             |         |                                   |                                                     |        |   |
|----|----------------------------|-----------|---------|-----|-------------|---------|-----------------------------------|-----------------------------------------------------|--------|---|
|    | 2121.126                   | 2121.092  | -0.034  | -16 | 761         | 778     | VQMLDNLDDIEVAYSLLR                | (M)[5]<br>Oxidation (M)[3]                          | Mascot |   |
|    | 2233.1863                  | 2233.054  | -0.1323 | -59 | 551         | 570     | IYSATLGLVDIVRGTSYY<br>K           |                                                     | Mascot |   |
|    | 2675.3247                  | 2675.3347 | 0.01    | 4   | 878         | 902     | IAPPEAPVTGYMFGKGVY<br>FADMVSK     |                                                     | Mascot |   |
|    | 2676.2651                  | 2676.3235 | 0.0584  | 22  | 277         | 299     | LSDCMAFGSLKPCETCK<br>GQLVFK       | Carbamidomethyl (C)[4, 13, 16]                      | Mascot |   |
|    | 2691.3196                  | 2691.3345 | 0.0149  | 6   | 878         | 902     | IAPPEAPVTGYMFGKGVY<br>FADMVSK     | Oxidation (M)[12]                                   | Mascot |   |
|    | 2692.26                    | 2692.3264 | 0.0664  | 25  | 277         | 299     | LSDCMAFGSLKPCETCK<br>GQLVFK       | Carbamidomethyl (C)[4, 13, 16], Oxidation<br>(M)[5] | Mascot |   |
|    | 2692.26                    | 2692.3264 | 0.0664  | 25  | 277         | 299     | LSDCMAFGSLKPCETCK<br>GQLVFK       | Carbamidomethyl (C)[4, 13, 16], Oxidation<br>(M)[5] | Mascot |   |
|    | 2778.3792                  | 2778.2092 | -0.17   | -61 | 350         | 379     | VFPKDAPPAATPSSGST<br>TSAATSVSSASK |                                                     | Mascot |   |
| 29 | Gnl3 protein [Danio rerio] |           |         |     | gi 79158644 | 62967.1 | 9.46                              | 11                                                  | 39     | 0 |

#### Peptide Information

| Calc. Mass | Obsrv. Mass | ± da    | ± ppm | Start Seq. | End Seq. | Sequence                        | Ion Score | C. I. % | Modification                              | Rank | Result Type |
|------------|-------------|---------|-------|------------|----------|---------------------------------|-----------|---------|-------------------------------------------|------|-------------|
| 1167.5826  | 1167.598    | 0.0154  | 13    | 130        | 138      | TFKCQELNK                       |           |         | Carbamidomethyl (C)[4]                    |      | Mascot      |
| 1167.5826  | 1167.598    | 0.0154  | 13    | 130        | 138      | TFKCQELNK                       |           |         | Carbamidomethyl (C)[4]                    |      | Mascot      |
| 1269.6586  | 1269.5741   | -0.0845 | -67   | 407        | 416      | LSYYSRVPER                      |           |         |                                           |      | Mascot      |
| 1295.6447  | 1295.6909   | 0.0462  | 36    | 275        | 285      | SSIINSMKEMR                     |           |         |                                           |      | Mascot      |
| 1515.777   | 1515.7354   | -0.0416 | -27   | 294        | 306      | GLTRCMQEVHITK                   |           |         |                                           |      | Mascot      |
| 1563.6234  | 1563.7633   | 0.1399  | 89    | 549        | 561      | NNEDAYDFNTDFV                   |           |         |                                           |      | Mascot      |
| 1790.8602  | 1790.87     | 0.0098  | 5     | 226        | 242      | GTNAVLDSRAASCFGK                |           |         | Carbamidomethyl (C)[14]                   |      | Mascot      |
| 1846.973   | 1846.9727   | -0.0003 | 0     | 257        | 274      | DGETMLKGVVGFNPVG<br>K           |           |         |                                           |      | Mascot      |
| 1862.968   | 1862.9655   | -0.0025 | -1    | 257        | 274      | DGETMLKGVVGFNPVG<br>K           |           |         | Oxidation (M)[5]                          |      | Mascot      |
| 2328.2415  | 2328.1199   | -0.1216 | -52   | 308        | 330      | VKMIDSPGILAALSNPGS<br>AMALR     |           |         | Oxidation (M)[3]                          |      | Mascot      |
| 2628.2988  | 2628.3391   | 0.0403  | 15    | 194        | 214      | WLHYLEAECPTFLFKSS<br>MQLK       |           |         | Carbamidomethyl (C)[9]                    |      | Mascot      |
| 2675.3181  | 2675.3347   | 0.0166  | 6     | 347        | 367      | NLLKQCNCQHIMLQYNV<br>PDYR       |           |         | Carbamidomethyl (C)[6]                    |      | Mascot      |
| 2691.313   | 2691.3345   | 0.0215  | 8     | 347        | 367      | NLLKQCNCQHIMLQYNV<br>PDYR       |           |         | Carbamidomethyl (C)[6], Oxidation (M)[12] |      | Mascot      |
| 2778.3655  | 2778.2092   | -0.1563 | -56   | 453        | 479      | FPNLASCISFDSNGPTAG<br>VLDVSELPK |           |         |                                           |      | Mascot      |

30 PREDICTED: disks large homolog 2-like [Danio rerio] gi|326671323 84474.7 5.73 12 38 0

#### Peptide Information

| Calc. Mass | Obsrv. Mass | ± da    | ± ppm | Start Seq. | End Seq. | Sequence | Ion Score | C. I. % | Modification | Rank | Result Type |
|------------|-------------|---------|-------|------------|----------|----------|-----------|---------|--------------|------|-------------|
| 1009.4697  | 1009.5175   | 0.0478  | 47    | 604        | 611      | RDYEVDGR |           |         |              |      | Mascot      |
| 1026.4462  | 1026.417    | -0.0292 | -28   | 612        | 619      | DYHFMSAR |           |         |              |      | Mascot      |

|           |           |         |     |     |     |                                  |  |  |                   |  |  |        |
|-----------|-----------|---------|-----|-----|-----|----------------------------------|--|--|-------------------|--|--|--------|
| 1167.6117 | 1167.598  | -0.0137 | -12 | 356 | 367 | GATHEQAAAALK                     |  |  |                   |  |  | Mascot |
| 1167.6117 | 1167.598  | -0.0137 | -12 | 356 | 367 | GATHEQAAAALK                     |  |  |                   |  |  | Mascot |
| 1181.5541 | 1181.5778 | 0.0237  | 20  | 687 | 696 | SIESLMEMNK                       |  |  |                   |  |  | Mascot |
| 1181.5541 | 1181.5778 | 0.0237  | 20  | 687 | 696 | SIESLMEMNK                       |  |  |                   |  |  | Mascot |
| 1269.662  | 1269.5741 | -0.0879 | -69 | 658 | 669 | HCILDVSGNAIK                     |  |  |                   |  |  | Mascot |
| 1323.4932 | 1323.6088 | 0.1156  | 87  | 528 | 539 | DADEQDGSDSER                     |  |  |                   |  |  | Mascot |
| 1332.7191 | 1332.6588 | -0.0603 | -45 | 118 | 128 | RPMLETVTEIK                      |  |  | Oxidation (M)[3]  |  |  | Mascot |
| 1414.6631 | 1414.7891 | 0.126   | 89  | 620 | 630 | EQMEKDIQEHK                      |  |  |                   |  |  | Mascot |
| 1846.8851 | 1846.9727 | 0.0876  | 47  | 463 | 479 | VTPEGDSEEMGVPSKR                 |  |  | Oxidation (M)[10] |  |  | Mascot |
| 2230.0769 | 2230.0452 | -0.0317 | -14 | 79  | 98  | VNDCILRVNESDVSEVSH<br>SK         |  |  |                   |  |  | Mascot |
| 2233.0771 | 2233.054  | -0.0231 | -10 | 631 | 650 | FIEAGQYNDNLYGTSVQS<br>VK         |  |  |                   |  |  | Mascot |
| 2757.3477 | 2757.416  | 0.0683  | 25  | 37  | 64  | GNSGLGFSIAGGTDNPHI<br>GDDPGIFITK |  |  |                   |  |  | Mascot |

31 PREDICTED: protein kinase C alpha type [Danio rerio] gi|292614846 76223.6 6.16 13 38 0

#### Peptide Information

| Calc. Mass | Obsrv. Mass | ± da    | ± ppm | Start Seq. | End Seq. | Sequence                     | Ion Score | C. I. | % Modification                              | Rank | Result Type |
|------------|-------------|---------|-------|------------|----------|------------------------------|-----------|-------|---------------------------------------------|------|-------------|
| 948.4203   | 948.5493    | 0.129   | 136   | 579        | 587      | LGCGQEGER                    |           |       |                                             |      | Mascot      |
| 996.4607   | 996.5841    | 0.1234  | 124   | 267        | 274      | SPVCGWYK                     |           |       | Carbamidomethyl (C)[4]                      |      | Mascot      |
| 1009.52    | 1009.5175   | -0.0025 | -2    | 358        | 366      | SSDELFAIK                    |           |       |                                             |      | Mascot      |
| 1167.5463  | 1167.598    | 0.0517  | 44    | 616        | 626      | VCGKGAENFDK                  | 3         | 0     |                                             |      | Mascot      |
| 1167.5463  | 1167.598    | 0.0517  | 44    | 616        | 626      | VCGKGAENFDK                  |           |       |                                             |      | Mascot      |
| 1295.6698  | 1295.6909   | 0.0211  | 16    | 562        | 573      | EAVSICKGLMTK                 |           |       | Oxidation (M)[10]                           |      | Mascot      |
| 1323.7307  | 1323.6088   | -0.1219 | -92   | 334        | 345      | LSDFNFLAVLGK                 |           |       |                                             |      | Mascot      |
| 1332.6324  | 1332.6588   | 0.0264  | 20    | 579        | 590      | LGCGQEGERDIR                 |           |       |                                             |      | Mascot      |
| 1563.693   | 1563.7633   | 0.0703  | 45    | 76         | 89       | CHELVTFSCPGADK               |           |       | Carbamidomethyl (C)[1]                      |      | Mascot      |
| 1708.7368  | 1708.7849   | 0.0481  | 28    | 2          | 17       | ADTQSNEQSSSDVANR             |           |       |                                             |      | Mascot      |
| 1827.9231  | 1827.9148   | -0.0083 | -5    | 351        | 366      | VMLAEMKSSDELFAIK             |           |       | Oxidation (M)[2]                            |      | Mascot      |
| 2019.868   | 2020.073    | 0.205   | 101   | 140        | 156      | QCVMNVPSLCGTDHTER            |           |       | Carbamidomethyl (C)[2,10], Oxidation (M)[4] |      | Mascot      |
| 2019.868   | 2020.073    | 0.205   | 101   | 140        | 156      | QCVMNVPSLCGTDHTER            |           |       | Carbamidomethyl (C)[2,10], Oxidation (M)[4] |      | Mascot      |
| 2229.979   | 2230.0452   | 0.0662  | 30    | 1          | 20       | MADTQSNEQSSSDVANR<br>FAR     |           |       | Oxidation (M)[1]                            |      | Mascot      |
| 2757.218   | 2757.416    | 0.198   | 72    | 251        | 274      | NDFMGSMFSGVSELMKS<br>PVCGWYK |           |       | Carbamidomethyl (C)[20]                     |      | Mascot      |
| 2773.2129  | 2773.4209   | 0.208   | 75    | 251        | 274      | NDFMGSMFSGVSELMKS<br>PVCGWYK |           |       | Carbamidomethyl (C)[20], Oxidation (M)[4]   |      | Mascot      |

32 PREDICTED: caseinolytic peptidase B protein homolog, partial [Danio rerio] gi|292621865 46908.5 7.45 9 38 0

### Peptide Information

| Calc. Mass | Obsrv. Mass | ± da    | ± ppm | Start Seq. | End Seq. | Sequence                   | Ion Score | C. I. | % Modification | Rank | Result Type |
|------------|-------------|---------|-------|------------|----------|----------------------------|-----------|-------|----------------|------|-------------|
| 1050.5115  | 1050.4922   | -0.0193 | -18   | 323        | 331      | GYNLHYGAR                  |           |       |                |      | Mascot      |
| 1253.6372  | 1253.5792   | -0.058  | -46   | 242        | 252      | SENITISNTFK                |           |       |                |      | Mascot      |
| 1295.6339  | 1295.6909   | 0.057   | 44    | 367        | 378      | DSQHTDGAPVLR               |           |       |                |      | Mascot      |
| 1378.7225  | 1378.6663   | -0.0562 | -41   | 323        | 334      | GYNLHYGARSIK               |           |       |                |      | Mascot      |
| 1547.7952  | 1547.7684   | -0.0268 | -17   | 156        | 169      | QSPSAVVLDFEVEK             |           |       |                |      | Mascot      |
| 1708.767   | 1708.7849   | 0.0179  | 10    | 120        | 133      | MDMSEFQEKHEVAK             |           |       |                |      | Mascot      |
| 1940.9899  | 1940.8831   | -0.1068 | -55   | 170        | 186      | AHPDVLTVMLQLFDEGR          |           |       |                |      | Mascot      |
| 2284.168   | 2284.1475   | -0.0205 | -9    | 7          | 27       | NDLGHTPLSYARDGELS<br>AVLR  |           |       |                |      | Mascot      |
| 2328.1982  | 2328.1199   | -0.0783 | -34   | 134        | 155      | FIGSPPGYVGHDEGGQL<br>TKQLK |           |       |                |      | Mascot      |

33 PREDICTED: dnaJ homolog subfamily C member 11-like [Danio rerio] gi|326681047 63468.3 6.95 10 37 0

### Peptide Information

| Calc. Mass | Obsrv. Mass | ± da    | ± ppm | Start Seq. | End Seq. | Sequence                  | Ion Score | C. I. | % Modification         | Rank | Result Type |
|------------|-------------|---------|-------|------------|----------|---------------------------|-----------|-------|------------------------|------|-------------|
| 842.4842   | 842.4995    | 0.0153  | 18    | 99         | 105      | RTPAEIR                   |           |       |                        |      | Mascot      |
| 1167.6343  | 1167.598    | -0.0363 | -31   | 221        | 230      | GPLFGMKVFR                |           |       | Oxidation (M)[6]       |      | Mascot      |
| 1167.6343  | 1167.598    | -0.0363 | -31   | 221        | 230      | GPLFGMKVFR                |           |       | Oxidation (M)[6]       |      | Mascot      |
| 1309.6351  | 1309.6586   | 0.0235  | 18    | 250        | 261      | GIRPSASTMMAR              |           |       | Oxidation (M)[9,10]    |      | Mascot      |
| 1332.6552  | 1332.6588   | 0.0036  | 3     | 37         | 46       | RLCMLYHPDK                |           |       | Carbamidomethyl (C)[3] |      | Mascot      |
| 1378.7551  | 1378.6663   | -0.0888 | -64   | 461        | 472      | MGLIILNAWYGK              |           |       |                        |      | Mascot      |
| 1410.6106  | 1410.688    | 0.0774  | 55    | 208        | 220      | GWGEMEFAGDVR              |           |       |                        |      | Mascot      |
| 1410.6106  | 1410.688    | 0.0774  | 55    | 208        | 220      | GWGEMEFAGDVR              |           |       |                        |      | Mascot      |
| 1426.6056  | 1426.6827   | 0.0771  | 54    | 208        | 220      | GWGEMEFAGDVR              |           |       | Oxidation (M)[5]       |      | Mascot      |
| 1426.6056  | 1426.6827   | 0.0771  | 54    | 208        | 220      | GWGEMEFAGDVR              |           |       | Oxidation (M)[5]       |      | Mascot      |
| 1863.0698  | 1862.9655   | -0.1043 | -56   | 347        | 365      | HSVLAATVSIGVPQGVSL<br>K   |           |       |                        |      | Mascot      |
| 1940.8918  | 1940.8831   | -0.0087 | -4    | 203        | 220      | VTSARGWGEMEFAGD<br>VR     |           |       | Oxidation (M)[10]      |      | Mascot      |
| 2020.0345  | 2020.073    | 0.0385  | 19    | 124        | 142      | TNPKGTISVGIDATDLFDR       |           |       |                        |      | Mascot      |
| 2020.0345  | 2020.073    | 0.0385  | 19    | 124        | 142      | TNPKGTISVGIDATDLFDR       |           |       |                        |      | Mascot      |
| 2284.1794  | 2284.1475   | -0.0319 | -14   | 461        | 480      | MGLIILNAWYGK FVSDNS<br>QK |           |       |                        |      | Mascot      |

34 PREDICTED: hypothetical protein LOC796178 [Danio rerio] gi|125820434 18261.1 7.01 6 37 0

### Peptide Information

|    | Calc. Mass               | Obsrv. Mass | ± da    | ± ppm | Start Seq.  | End Sequence Seq.   | Ion Score | C. I. % | Modification           | Rank | Result Type |
|----|--------------------------|-------------|---------|-------|-------------|---------------------|-----------|---------|------------------------|------|-------------|
|    | 948.493                  | 948.5493    | 0.0563  | 59    | 124         | 131 QTCELARK        |           |         |                        |      | Mascot      |
|    | 1365.6719                | 1365.6913   | 0.0194  | 14    | 107         | 117 SMEVEIFPLER     |           |         | Oxidation (M)[2]       |      | Mascot      |
|    | 1410.7416                | 1410.688    | -0.0536 | -38   | 2           | 14 AAGFSVLFGVWEK    |           |         |                        |      | Mascot      |
|    | 1410.7416                | 1410.688    | -0.0536 | -38   | 2           | 14 AAGFSVLFGVWEK    |           |         |                        |      | Mascot      |
|    | 1516.8516                | 1516.7217   | -0.1299 | -86   | 118         | 130 VSVLLKQTCELAR   |           |         | Carbamidomethyl (C)[9] |      | Mascot      |
|    | 1541.7821                | 1541.6721   | -0.11   | -71   | 1           | 14 MAAGFSVLFGVWEK   |           |         |                        |      | Mascot      |
|    | 1708.8574                | 1708.7849   | -0.0725 | -42   | 103         | 117 SAGKSMEVEIFPLER |           |         | Oxidation (M)[6]       |      | Mascot      |
| 35 | Zgc:101859 [Danio rerio] |             |         |       | gi 53733776 |                     | 22255.2   | 5.65    | 7                      | 37   | 0           |

#### Peptide Information

|    | Calc. Mass                                   | Obsrv. Mass | ± da    | ± ppm | Start Seq.   | End Sequence Seq.           | Ion Score | C. I. % | Modification                              | Rank | Result Type |
|----|----------------------------------------------|-------------|---------|-------|--------------|-----------------------------|-----------|---------|-------------------------------------------|------|-------------|
|    | 1077.58                                      | 1077.5387   | -0.0413 | -38   | 33           | 41 GFDNIRSIR                |           |         |                                           |      | Mascot      |
|    | 1214.5181                                    | 1214.5306   | 0.0125  | 10    | 152          | 161 GQQYIMECDK              |           |         |                                           |      | Mascot      |
|    | 1214.5181                                    | 1214.5306   | 0.0125  | 10    | 152          | 161 GQQYIMECDK              |           |         |                                           |      | Mascot      |
|    | 1229.5334                                    | 1229.5663   | 0.0329  | 27    | 162          | 170 HSEDYQHWK               |           |         |                                           |      | Mascot      |
|    | 1708.7742                                    | 1708.7849   | 0.0107  | 6     | 19           | 32 CQELTSECRNIQER           |           |         |                                           |      | Mascot      |
|    | 1846.8721                                    | 1846.9727   | 0.1006  | 54    | 84           | 99 MMSLRPICSAVHQDSR         |           |         | Oxidation (M)[1]                          |      | Mascot      |
|    | 1862.8669                                    | 1862.9655   | 0.0986  | 53    | 84           | 99 MMSLRPICSAVHQDSR         |           |         | Oxidation (M)[1,2]                        |      | Mascot      |
|    | 2232.9246                                    | 2233.054    | 0.1294  | 58    | 112          | 130 SVELCDDYPSLQAMGWC DK    |           |         | Carbamidomethyl (C)[5], Oxidation (M)[14] |      | Mascot      |
|    | 2628.24                                      | 2628.3391   | 0.0991  | 38    | 84           | 105 MMSLRPICSAVHQDSRM TIFEK |           |         | Oxidation (M)[1,2,17]                     |      | Mascot      |
| 36 | TPA_inf: von Willebrand factor [Danio rerio] |             |         |       | gi 334191710 |                             | 307555.5  | 5.39    | 26                                        | 37   | 0           |

#### Peptide Information

|  | Calc. Mass | Obsrv. Mass | ± da    | ± ppm | Start Seq. | End Sequence Seq. | Ion Score | C. I. % | Modification     | Rank | Result Type |
|--|------------|-------------|---------|-------|------------|-------------------|-----------|---------|------------------|------|-------------|
|  | 1026.4496  | 1026.417    | -0.0326 | -32   | 1          | 8 MEACKWSR        |           |         | Oxidation (M)[1] |      | Mascot      |
|  | 1045.5571  | 1045.5505   | -0.0066 | -6    | 1556       | 1563 EQVVQRMR     |           |         |                  |      | Mascot      |
|  | 1050.4884  | 1050.4922   | 0.0038  | 4     | 2506       | 2515 SSCEEGLLR    |           |         |                  |      | Mascot      |
|  | 1062.5261  | 1062.4854   | -0.0407 | -38   | 1287       | 1295 FRMGSAHTR    |           |         |                  |      | Mascot      |
|  | 1078.5211  | 1078.4958   | -0.0253 | -23   | 1287       | 1295 FRMGSAHTR    |           |         | Oxidation (M)[3] |      | Mascot      |
|  | 1093.4731  | 1093.5406   | 0.0675  | 62    | 1122       | 1130 ESGVQCEWR    |           |         |                  |      | Mascot      |
|  | 1167.5422  | 1167.598    | 0.0558  | 48    | 2661       | 2671 ANTTTRTDGCTK |           |         |                  |      | Mascot      |
|  | 1167.5422  | 1167.598    | 0.0558  | 48    | 2661       | 2671 ANTTTRTDGCTK |           |         |                  |      | Mascot      |



|    |                                           |           |         |     |              |      |                                 |     |                                               |        |   |
|----|-------------------------------------------|-----------|---------|-----|--------------|------|---------------------------------|-----|-----------------------------------------------|--------|---|
|    | 1214.4598                                 | 1214.5306 | 0.0708  | 58  | 213          | 222  | DQMSACESMR                      |     | Carbamidomethyl (C)[6]                        | Mascot |   |
|    | 1214.4598                                 | 1214.5306 | 0.0708  | 58  | 213          | 222  | DQMSACESMR                      |     | Carbamidomethyl (C)[6]                        | Mascot |   |
|    | 1253.6783                                 | 1253.5792 | -0.0991 | -79 | 756          | 766  | RSLSCPPPLQR                     |     |                                               | Mascot |   |
|    | 1309.7296                                 | 1309.6586 | -0.071  | -54 | 1969         | 1979 | VKSACSYLLLR                     |     | Carbamidomethyl (C)[5]                        | Mascot |   |
|    | 1323.5377                                 | 1323.6088 | 0.0711  | 54  | 316          | 328  | EECVDGCICPAGK                   |     |                                               | Mascot |   |
|    | 1378.6519                                 | 1378.6663 | 0.0144  | 10  | 2008         | 2020 | EGGTSVVLQDDMK                   |     |                                               | Mascot |   |
|    | 1515.8386                                 | 1515.7354 | -0.1032 | -68 | 1790         | 1803 | MGIPKAVVMVVTDR                  |     |                                               | Mascot |   |
|    | 1516.6989                                 | 1516.7217 | 0.0228  | 15  | 1326         | 1339 | YTGGDVAFMDEAIK                  |     |                                               | Mascot |   |
|    | 1547.8284                                 | 1547.7684 | -0.06   | -39 | 1790         | 1803 | MGIPKAVVMVVTDR                  |     | Oxidation (M)[1,9]                            | Mascot |   |
|    | 1564.917                                  | 1564.787  | -0.13   | -83 | 2037         | 2050 | VTVTQIGSILHQLR                  |     |                                               | Mascot |   |
|    | 1564.917                                  | 1564.787  | -0.13   | -83 | 2037         | 2050 | VTVTQIGSILHQLR                  |     |                                               | Mascot |   |
|    | 1708.7162                                 | 1708.7849 | 0.0687  | 40  | 2596         | 2610 | VMLDVCTHCECVGDK                 |     | Carbamidomethyl (C)[6]                        | Mascot |   |
|    | 1790.8701                                 | 1790.87   | -0.0001 | 0   | 196          | 212  | RVLPPSQSCNSTGESTK               |     |                                               | Mascot |   |
|    | 1852.8397                                 | 1852.8485 | 0.0088  | 5   | 585          | 599  | FEPCHYMVNPEPYVK                 |     |                                               | Mascot |   |
|    | 2120.927                                  | 2121.092  | 0.165   | 78  | 329          | 348  | VLDGDRCDVVSQCSCSTH<br>AGR       |     |                                               | Mascot |   |
|    | 2210.8464                                 | 2211.0818 | 0.2354  | 106 | 2325         | 2342 | MGSKCCPQYECVCDINCK              |     | Carbamidomethyl (C)[5,6,11], Oxidation (M)[1] | Mascot |   |
|    | 2283.0144                                 | 2283.1553 | 0.1409  | 62  | 585          | 602  | FEPCHYMVNPEPYVKNC<br>R          |     | Carbamidomethyl (C)[4]                        | Mascot |   |
|    | 2328.0781                                 | 2328.1199 | 0.0418  | 18  | 2160         | 2180 | SVACQPNALCDLVTAYST<br>VCR       |     | Carbamidomethyl (C)[4,10]                     | Mascot |   |
|    | 2595.0691                                 | 2595.313  | 0.2439  | 94  | 548          | 569  | MNADCDDVQMQNSDPC<br>SLNPKR      |     | Carbamidomethyl (C)[5,16]                     | Mascot |   |
|    | 2675.4072                                 | 2675.3347 | -0.0725 | -27 | 2008         | 2033 | EGGTSVVLQDDMKVTVG<br>GVLTAVPFR  |     |                                               | Mascot |   |
|    | 2691.4021                                 | 2691.3345 | -0.0676 | -25 | 2008         | 2033 | EGGTSVVLQDDMKVTVG<br>GVLTAVPFR  |     | Oxidation (M)[12]                             | Mascot |   |
|    | 2692.075                                  | 2692.3264 | 0.2514  | 93  | 2619         | 2641 | KMSCSPCSEGYTMEPIP<br>NACCGR     |     | Carbamidomethyl (C)[4,7,20,21]                | Mascot |   |
|    | 2692.075                                  | 2692.3264 | 0.2514  | 93  | 2619         | 2641 | KMSCSPCSEGYTMEPIP<br>NACCGR     |     | Carbamidomethyl (C)[4,7,20,21]                | Mascot |   |
|    | 2757.1082                                 | 2757.416  | 0.3078  | 112 | 603          | 629  | YDVCACADGQECLCDAV<br>SSYAVACAAR |     |                                               | Mascot |   |
|    | 2773.1897                                 | 2773.4209 | 0.2312  | 83  | 197          | 222  | VLPPSQSCNSTGESTKD<br>QMSACESMR  |     |                                               | Mascot |   |
| 37 | PREDICTED: contactin-4-like [Danio rerio] |           |         |     | gi 292626879 |      | 113117.9                        | 8.9 | 13                                            | 36     | 0 |

| Peptide Information |             |         |       |            |                   |               |         |              |                  |
|---------------------|-------------|---------|-------|------------|-------------------|---------------|---------|--------------|------------------|
| Calc. Mass          | Obsrv. Mass | ± da    | ± ppm | Start Seq. | End Sequence Seq. | Ion Score     | C. I. % | Modification | Rank Result Type |
| 1181.5983           | 1181.5778   | -0.0205 | -17   | 475        | 485               | LDAGLYTCVAR   | 4       | 0            | Mascot           |
| 1181.5983           | 1181.5778   | -0.0205 | -17   | 475        | 485               | LDAGLYTCVAR   |         |              | Mascot           |
| 1194.6001           | 1194.5714   | -0.0287 | -24   | 871        | 881               | GLDPSSTYNIK   |         |              | Mascot           |
| 1194.6001           | 1194.5714   | -0.0287 | -24   | 871        | 881               | GLDPSSTYNIK   |         |              | Mascot           |
| 1214.66             | 1214.5306   | -0.1294 | -107  | 705        | 717               | ITPARVSGGGGSR |         |              | Mascot           |

|           |           |         |      |      |      |                            |  |  |  |                         |  |        |
|-----------|-----------|---------|------|------|------|----------------------------|--|--|--|-------------------------|--|--------|
| 1214.66   | 1214.5306 | -0.1294 | -107 | 705  | 717  | ITPARVSGGGGSR              |  |  |  |                         |  | Mascot |
| 1236.5977 | 1236.5139 | -0.0838 | -68  | 438  | 447  | MSPRGMISWR                 |  |  |  | Oxidation (M)[1]        |  | Mascot |
| 1269.681  | 1269.5741 | -0.1069 | -84  | 395  | 405  | HGRVFANAELR                |  |  |  |                         |  | Mascot |
| 1564.8403 | 1564.787  | -0.0533 | -34  | 913  | 925  | VMWNTTDSKLILK              |  |  |  | Oxidation (M)[2]        |  | Mascot |
| 1564.8403 | 1564.787  | -0.0533 | -34  | 913  | 925  | VMWNTTDSKLILK              |  |  |  | Oxidation (M)[2]        |  | Mascot |
| 1790.9548 | 1790.87   | -0.0848 | -47  | 31   | 46   | QPGSIVFPLHLNEPSR           |  |  |  |                         |  | Mascot |
| 1827.9811 | 1827.9148 | -0.0663 | -36  | 678  | 695  | VLATNSIGTGEPKPSQK          |  |  |  |                         |  | Mascot |
| 1853.0829 | 1852.8485 | -0.2344 | -126 | 1010 | 1025 | KALPVFVTLVLHCTVR           |  |  |  | Carbamidomethyl (C)[13] |  | Mascot |
| 1941.1418 | 1940.8831 | -0.2587 | -133 | 231  | 248  | IEVQFPEVLAVAKGLTVK         |  |  |  |                         |  | Mascot |
| 2246.1453 | 2246.0422 | -0.1031 | -46  | 816  | 835  | SLSASEVEVSWKPLPWS<br>TSR   |  |  |  |                         |  | Mascot |
| 2283.1648 | 2283.1553 | -0.0095 | -4   | 578  | 598  | YTCAVQTKVDSASIATDV<br>VVR  |  |  |  | Carbamidomethyl (C)[3]  |  | Mascot |
| 2328.2532 | 2328.1199 | -0.1333 | -57  | 244  | 264  | GLTVKLECFALGNPVP<br>PAISWR |  |  |  | Carbamidomethyl (C)[8]  |  | Mascot |

38 PREDICTED: huntingtin-interacting protein 1-related protein-like [Danio rerio] gi|326671469 126222.3 5.94 15 36 0

#### Peptide Information

| Calc. Mass | Obsrv. Mass | ± da    | ± ppm | Start Seq. | End Seq. | Sequence                      | Ion Score | C. I. | % Modification          | Rank | Result Type |
|------------|-------------|---------|-------|------------|----------|-------------------------------|-----------|-------|-------------------------|------|-------------|
| 842.5206   | 842.4995    | -0.0211 | -25   | 973        | 979      | VRLGELR                       |           |       |                         |      | Mascot      |
| 1181.6749  | 1181.5778   | -0.0971 | -82   | 905        | 914      | KLHTLQQASR                    |           |       |                         |      | Mascot      |
| 1181.6749  | 1181.5778   | -0.0971 | -82   | 905        | 914      | KLHTLQQASR                    |           |       |                         |      | Mascot      |
| 1214.6488  | 1214.5306   | -0.1182 | -97   | 480        | 489      | LEAQRAEIER                    |           |       |                         |      | Mascot      |
| 1214.6488  | 1214.5306   | -0.1182 | -97   | 480        | 489      | LEAQRAEIER                    |           |       |                         |      | Mascot      |
| 1332.7495  | 1332.6588   | -0.0907 | -68   | 734        | 744      | ILHQQQDLRPR                   |           |       |                         |      | Mascot      |
| 1365.6678  | 1365.6913   | 0.0235  | 17    | 950        | 960      | LKTEEMDTQVR                   |           |       | Oxidation (M)[6]        |      | Mascot      |
| 1410.7335  | 1410.688    | -0.0455 | -32   | 499        | 511      | AEVSQVHNALQSK                 |           |       |                         |      | Mascot      |
| 1410.7335  | 1410.688    | -0.0455 | -32   | 499        | 511      | AEVSQVHNALQSK                 |           |       |                         |      | Mascot      |
| 1541.7019  | 1541.6721   | -0.0298 | -19   | 237        | 248      | DHFNSLTEFFER                  |           |       |                         |      | Mascot      |
| 1547.8792  | 1547.7684   | -0.1108 | -72   | 26         | 38       | EQFVKLQLQSISK                 |           |       |                         |      | Mascot      |
| 1852.7913  | 1852.8485   | 0.0572  | 31    | 178        | 194      | QMDSHSTSSTTAVGQCR             |           |       | Carbamidomethyl (C)[16] |      | Mascot      |
| 2211.2344  | 2211.0818   | -0.1526 | -69   | 514        | 534      | AGDQLSSVLVGLQAEKD<br>VLLR     |           |       |                         |      | Mascot      |
| 2283.155   | 2283.1553   | 0.0003  | 0     | 616        | 634      | VDDPLHVCISTPDYLIN<br>R        |           |       | Carbamidomethyl (C)[9]  |      | Mascot      |
| 2328.1211  | 2328.1199   | -0.0012 | -1    | 929        | 949      | SGQMQIEDKNSMDFSG<br>L<br>SLIK |           |       |                         |      | Mascot      |
| 2675.3708  | 2675.3347   | -0.0361 | -13   | 872        | 896      | GKYEELIVCSHEIAASTA<br>QLVAASK |           |       | Carbamidomethyl (C)[9]  |      | Mascot      |
| 2757.4668  | 2757.416    | -0.0508 | -18   | 129        | 153      | HPEIPANLEASEEVL<br>DKVIAIDINK |           |       |                         |      | Mascot      |

|    |                                                               |           |        |   |             |       |                               |   |    |   |  |  |        |
|----|---------------------------------------------------------------|-----------|--------|---|-------------|-------|-------------------------------|---|----|---|--|--|--------|
|    | 2773.4116                                                     | 2773.4209 | 0.0093 | 3 | 154         | 177   | VFDITGEVL DYMEAGLKL<br>QETVFR |   |    |   |  |  | Mascot |
| 39 | transcription elongation factor B polypeptide 1 [Danio rerio] |           |        |   | gi 73088652 | 12495 | 4.74                          | 5 | 36 | 0 |  |  |        |

| Peptide Information |             |         |       |            |          |                           |           |       |   |                                           |      |             |
|---------------------|-------------|---------|-------|------------|----------|---------------------------|-----------|-------|---|-------------------------------------------|------|-------------|
| Calc. Mass          | Obsrv. Mass | ± da    | ± ppm | Start Seq. | End Seq. | Sequence                  | Ion Score | C. I. | % | Modification                              | Rank | Result Type |
| 1009.5676           | 1009.5175   | -0.0501 | -50   | 64         | 72       | EIPSHVLSK                 |           |       |   |                                           |      | Mascot      |
| 1309.6432           | 1309.6586   | 0.0154  | 12    | 73         | 82       | VCMYFTYKVR                |           |       |   |                                           |      | Mascot      |
| 1325.6381           | 1325.6294   | -0.0087 | -7    | 73         | 82       | VCMYFTYKVR                |           |       |   | Oxidation (M)[3]                          |      | Mascot      |
| 1547.6505           | 1547.7684   | 0.1179  | 76    | 7          | 20       | TYGGCEGPDAMYVK            |           |       |   | Carbamidomethyl (C)[5]                    |      | Mascot      |
| 1563.6454           | 1563.7633   | 0.1179  | 75    | 7          | 20       | TYGGCEGPDAMYVK            |           |       |   | Carbamidomethyl (C)[5], Oxidation (M)[11] |      | Mascot      |
| 2211.0134           | 2211.0818   | 0.0684  | 31    | 44         | 63       | AMLSGPGGQFAENETNEV<br>NFR |           |       |   |                                           |      | Mascot      |
| 2282.925            | 2283.1553   | 0.2303  | 101   | 1          | 20       | MDSEEEKTYGGCEGPDAM<br>YVK |           |       |   | Carbamidomethyl (C)[11], Oxidation (M)[1] |      | Mascot      |

|    |                                  |  |  |  |              |         |      |   |    |   |  |  |
|----|----------------------------------|--|--|--|--------------|---------|------|---|----|---|--|--|
| 40 | Zgc:111960 protein [Danio rerio] |  |  |  | gi 166796880 | 39211.8 | 5.12 | 8 | 36 | 0 |  |  |
|----|----------------------------------|--|--|--|--------------|---------|------|---|----|---|--|--|

| Peptide Information |             |         |       |            |          |                     |           |       |   |                                           |      |             |
|---------------------|-------------|---------|-------|------------|----------|---------------------|-----------|-------|---|-------------------------------------------|------|-------------|
| Calc. Mass          | Obsrv. Mass | ± da    | ± ppm | Start Seq. | End Seq. | Sequence            | Ion Score | C. I. | % | Modification                              | Rank | Result Type |
| 1062.5499           | 1062.4854   | -0.0645 | -61   | 324        | 332      | LLMEQLDGK           |           |       |   | Oxidation (M)[3]                          |      | Mascot      |
| 1410.676            | 1410.688    | 0.012   | 9     | 70         | 81       | TSQKFGQWADSR        |           |       |   |                                           |      | Mascot      |
| 1410.676            | 1410.688    | 0.012   | 9     | 70         | 81       | TSQKFGQWADSR        |           |       |   |                                           |      | Mascot      |
| 1516.8077           | 1516.7217   | -0.086  | -57   | 287        | 300      | LQAAELSSSGLRER      |           |       |   |                                           |      | Mascot      |
| 1564.7384           | 1564.787    | 0.0486  | 31    | 179        | 192      | CESELQALRDSSAR      |           |       |   |                                           |      | Mascot      |
| 1564.819            | 1564.787    | -0.032  | -20   | 299        | 311      | ERVELLQGEAQHR       |           |       |   |                                           |      | Mascot      |
| 1708.8938           | 1708.7849   | -0.1089 | -64   | 55         | 69       | VIINSTITPNMNFTK     |           |       |   | Oxidation (M)[11]                         |      | Mascot      |
| 2019.9725           | 2020.073    | 0.1005  | 50    | 269        | 286      | QAEIIPQLMAECESLSGK  |           |       |   | Carbamidomethyl (C)[12], Oxidation (M)[9] |      | Mascot      |
| 2019.9725           | 2020.073    | 0.1005  | 50    | 269        | 286      | QAEIIPQLMAECESLSGK  |           |       |   | Carbamidomethyl (C)[12], Oxidation (M)[9] |      | Mascot      |
| 2137.1321           | 2137.0896   | -0.0425 | -20   | 55         | 73       | VIINSTITPNMNFTKTSQK |           |       |   |                                           |      | Mascot      |

|    |                             |  |  |  |             |         |      |    |    |   |  |  |
|----|-----------------------------|--|--|--|-------------|---------|------|----|----|---|--|--|
| 41 | novel protein [Danio rerio] |  |  |  | gi 94733078 | 59497.8 | 5.33 | 10 | 36 | 0 |  |  |
|----|-----------------------------|--|--|--|-------------|---------|------|----|----|---|--|--|

| Peptide Information |             |         |       |            |          |            |           |       |   |                  |      |             |
|---------------------|-------------|---------|-------|------------|----------|------------|-----------|-------|---|------------------|------|-------------|
| Calc. Mass          | Obsrv. Mass | ± da    | ± ppm | Start Seq. | End Seq. | Sequence   | Ion Score | C. I. | % | Modification     | Rank | Result Type |
| 842.5709            | 842.4995    | -0.0714 | -85   | 18         | 24       | VEKLLLK    |           |       |   |                  |      | Mascot      |
| 1045.6769           | 1045.5505   | -0.1264 | -121  | 171        | 179      | LLFLLSALR  |           |       |   |                  |      | Mascot      |
| 1214.7037           | 1214.5306   | -0.1731 | -143  | 502        | 511      | KELIRPMGVR |           |       |   | Oxidation (M)[7] |      | Mascot      |

|    |                                              |           |         |      |              |         |                       |   |                  |   |        |
|----|----------------------------------------------|-----------|---------|------|--------------|---------|-----------------------|---|------------------|---|--------|
|    | 1214.7037                                    | 1214.5306 | -0.1731 | -143 | 503          | 512     | ELIRPMGVVRK           |   | Oxidation (M)[6] |   | Mascot |
|    | 1325.6921                                    | 1325.6294 | -0.0627 | -47  | 399          | 410     | QGAAEFLFVLCK          |   |                  |   | Mascot |
|    | 1516.9209                                    | 1516.7217 | -0.1992 | -131 | 171          | 183     | LLFLLSALRTDVR         |   |                  |   | Mascot |
|    | 1541.901                                     | 1541.6721 | -0.2289 | -148 | 195          | 207     | LLTNVLERTLDVR         |   |                  |   | Mascot |
|    | 1563.7384                                    | 1563.7633 | 0.0249  | 16   | 2            | 16      | SLSDILSEIDGGDDK       |   |                  |   | Mascot |
|    | 1852.9659                                    | 1852.8485 | -0.1174 | -63  | 315          | 329     | NMDTVQILLDFMIKR       |   | Oxidation (M)[2] |   | Mascot |
|    | 2283.0193                                    | 2283.1553 | 0.136   | 60   | 98           | 118     | ICVAGHEGEPLLEAQSAAEER |   |                  |   | Mascot |
| 42 | hypothetical protein LOC568893 [Danio rerio] |           |         |      | gi 113681485 | 44669.5 | 6.54                  | 9 | 35               | 0 |        |

#### Peptide Information

|  | Calc. Mass | Obsrv. Mass | ± da    | ± ppm | Start Seq. | End Seq. | Sequence               | Ion Score | C. I. % | Modification           | Rank | Result Type |
|--|------------|-------------|---------|-------|------------|----------|------------------------|-----------|---------|------------------------|------|-------------|
|  | 1077.6302  | 1077.5387   | -0.0915 | -85   | 135        | 143      | EAYVQKLVK              |           |         |                        |      | Mascot      |
|  | 1214.5769  | 1214.5306   | -0.0463 | -38   | 264        | 272      | TLQRYMCSR              |           |         | Carbamidomethyl (C)[7] |      | Mascot      |
|  | 1214.5769  | 1214.5306   | -0.0463 | -38   | 264        | 272      | TLQRYMCSR              |           |         | Carbamidomethyl (C)[7] |      | Mascot      |
|  | 1253.5426  | 1253.5792   | 0.0366  | 29    | 1          | 11       | MSTADVSEQNR            |           |         | Oxidation (M)[1]       |      | Mascot      |
|  | 1332.6841  | 1332.6588   | -0.0253 | -19   | 302        | 311      | RYDCLVTLHR             |           |         | Carbamidomethyl (C)[4] |      | Mascot      |
|  | 1563.7518  | 1563.7633   | 0.0115  | 7     | 12         | 23       | RCCVLSWEQVQR           |           |         | Carbamidomethyl (C)[2] |      | Mascot      |
|  | 1564.8105  | 1564.787    | -0.0235 | -15   | 89         | 102      | DLDLIFGLSLTDDK         |           |         |                        |      | Mascot      |
|  | 1564.8105  | 1564.787    | -0.0235 | -15   | 89         | 102      | DLDLIFGLSLTDDK         |           |         |                        |      | Mascot      |
|  | 1791.0123  | 1790.87     | -0.1423 | -79   | 229        | 245      | IIATHSPPEIRGGGLLK      |           |         |                        |      | Mascot      |
|  | 1846.8541  | 1846.9727   | 0.1186  | 64    | 287        | 301      | LEAYLQNHFNMGMEHK       |           |         | Oxidation (M)[12]      |      | Mascot      |
|  | 2675.2739  | 2675.3347   | 0.0608  | 23    | 303        | 325      | YDCLVTLHRVDESTVCLMGHER |           |         |                        |      | Mascot      |
|  | 2691.2688  | 2691.3345   | 0.0657  | 24    | 303        | 325      | YDCLVTLHRVDESTVCLMGHER |           |         | Oxidation (M)[19]      |      | Mascot      |

43 discs, large (Drosophila) homolog 2 [Danio rerio] gi|122890894 92284.5 6.05 12 35 0

#### Peptide Information

|  | Calc. Mass | Obsrv. Mass | ± da    | ± ppm | Start Seq. | End Seq. | Sequence      | Ion Score | C. I. % | Modification | Rank | Result Type |
|--|------------|-------------|---------|-------|------------|----------|---------------|-----------|---------|--------------|------|-------------|
|  | 1009.4697  | 1009.5175   | 0.0478  | 47    | 710        | 717      | RDYEV DGR     |           |         |              |      | Mascot      |
|  | 1026.4462  | 1026.417    | -0.0292 | -28   | 718        | 725      | DYHF MASR     |           |         |              |      | Mascot      |
|  | 1167.6117  | 1167.598    | -0.0137 | -12   | 462        | 473      | GATHEQAAAALK  |           |         |              |      | Mascot      |
|  | 1167.6117  | 1167.598    | -0.0137 | -12   | 462        | 473      | GATHEQAAAALK  |           |         |              |      | Mascot      |
|  | 1181.5541  | 1181.5778   | 0.0237  | 20    | 793        | 802      | SIESLMEMNK    |           |         |              |      | Mascot      |
|  | 1181.5541  | 1181.5778   | 0.0237  | 20    | 793        | 802      | SIESLMEMNK    |           |         |              |      | Mascot      |
|  | 1269.662   | 1269.5741   | -0.0879 | -69   | 764        | 775      | HCILDVSGNAIK  |           |         |              |      | Mascot      |
|  | 1323.4932  | 1323.6088   | 0.1156  | 87    | 634        | 645      | DADEQDGS DSER |           |         |              |      | Mascot      |

|    |                                                      |           |         |     |              |        |                                  |    |                   |        |
|----|------------------------------------------------------|-----------|---------|-----|--------------|--------|----------------------------------|----|-------------------|--------|
|    | 1332.7191                                            | 1332.6588 | -0.0603 | -45 | 224          | 234    | RPMLETVTEIK                      |    | Oxidation (M)[3]  | Mascot |
|    | 1414.6631                                            | 1414.7891 | 0.126   | 89  | 726          | 736    | EQMEKDIQEHK                      |    |                   | Mascot |
|    | 1846.8851                                            | 1846.9727 | 0.0876  | 47  | 569          | 585    | VTPEGDSEEMGVIPSKR                |    | Oxidation (M)[10] | Mascot |
|    | 2230.0769                                            | 2230.0452 | -0.0317 | -14 | 185          | 204    | VNDCILRVNESDVSEVSH<br>SK         |    |                   | Mascot |
|    | 2233.0771                                            | 2233.054  | -0.0231 | -10 | 737          | 756    | FIEAGQYNDNLYGTSVQS<br>VK         |    |                   | Mascot |
|    | 2757.3477                                            | 2757.416  | 0.0683  | 25  | 143          | 170    | GNSGLGFSIAGGTDNPHI<br>GDDPGIFITK |    |                   | Mascot |
| 44 | cytoplasmic FMR1-interacting protein 2 [Danio rerio] |           |         |     | gi 148224828 | 145659 | 6.54                             | 17 | 35                | 0      |

Peptide Information

| Calc. Mass | Obsrv. Mass | ± da    | ± ppm | Start Seq. | End Seq. | Sequence                     | Ion Score | C. I. % | Modification       | Rank | Result Type |
|------------|-------------|---------|-------|------------|----------|------------------------------|-----------|---------|--------------------|------|-------------|
| 948.5261   | 948.5493    | 0.0232  | 24    | 50         | 58       | NAFVTGIAR                    |           |         |                    |      | Mascot      |
| 1045.5524  | 1045.5505   | -0.0019 | -2    | 1188       | 1196     | QDGKDEIHK                    |           |         |                    |      | Mascot      |
| 1050.4673  | 1050.4922   | 0.0249  | 24    | 515        | 523      | TICDWEGAR                    |           |         |                    |      | Mascot      |
| 1093.5775  | 1093.5406   | -0.0369 | -34   | 980        | 988      | DIIEYAEIK                    |           |         |                    |      | Mascot      |
| 1167.6844  | 1167.598    | -0.0864 | -74   | 1065       | 1075     | LGTPQQIAIAR                  |           |         |                    |      | Mascot      |
| 1167.6844  | 1167.598    | -0.0864 | -74   | 1065       | 1075     | LGTPQQIAIAR                  |           |         |                    |      | Mascot      |
| 1181.5983  | 1181.5778   | -0.0205 | -17   | 132        | 141      | AIERFCSEVK                   |           |         |                    |      | Mascot      |
| 1181.5983  | 1181.5778   | -0.0205 | -17   | 132        | 141      | AIERFCSEVK                   |           |         |                    |      | Mascot      |
| 1194.5936  | 1194.5714   | -0.0222 | -19   | 466        | 475      | MESVFNQAIR                   |           |         |                    |      | Mascot      |
| 1194.5936  | 1194.5714   | -0.0222 | -19   | 466        | 475      | MESVFNQAIR                   |           |         |                    |      | Mascot      |
| 1269.5052  | 1269.5741   | 0.0689  | 54    | 425        | 435      | DCPGTAEIYER                  |           |         |                    |      | Mascot      |
| 1295.6274  | 1295.6909   | 0.0635  | 49    | 122        | 130      | LMKFMYFQR                    |           |         | Oxidation (M)[2,5] |      | Mascot      |
| 1410.7773  | 1410.688    | -0.0893 | -63   | 765        | 776      | LITQRISAAMYK                 |           |         | Oxidation (M)[10]  |      | Mascot      |
| 1410.7773  | 1410.688    | -0.0893 | -63   | 765        | 776      | LITQRISAAMYK                 |           |         | Oxidation (M)[10]  |      | Mascot      |
| 1414.7147  | 1414.7891   | 0.0744  | 53    | 623        | 633      | EFFLELTMGRR                  |           |         | Oxidation (M)[8]   |      | Mascot      |
| 1515.7889  | 1515.7354   | -0.0535 | -35   | 905        | 917      | NFVGPPHFKTICR                |           |         |                    |      | Mascot      |
| 1564.8264  | 1564.787    | -0.0394 | -25   | 548        | 561      | RAVGPSSTQLYMVR               |           |         |                    |      | Mascot      |
| 1564.8264  | 1564.787    | -0.0394 | -25   | 548        | 561      | RAVGPSSTQLYMVR               |           |         |                    |      | Mascot      |
| 1580.8213  | 1580.7896   | -0.0317 | -20   | 548        | 561      | RAVGPSSTQLYMVR               |           |         | Oxidation (M)[12]  |      | Mascot      |
| 1580.8213  | 1580.7896   | -0.0317 | -20   | 548        | 561      | RAVGPSSTQLYMVR               |           |         | Oxidation (M)[12]  |      | Mascot      |
| 1862.976   | 1862.9655   | -0.0105 | -6    | 476        | 491      | HTIYSALQDFAQVTLR             |           |         |                    |      | Mascot      |
| 2233.1572  | 2233.054    | -0.1032 | -46   | 704        | 723      | LADQIFAYYKAMAGSVLL<br>DK     |           |         | Oxidation (M)[12]  |      | Mascot      |
| 2283.2205  | 2283.1553   | -0.0652 | -29   | 298        | 316      | FFKLQVVPLFGDMQIELS<br>R      |           |         | Oxidation (M)[13]  |      | Mascot      |
| 2675.3394  | 2675.3347   | -0.0047 | -2    | 261        | 283      | HMLLKVMGFGLYLM DGN<br>VSNIYK |           |         | Oxidation (M)[2,7] |      | Mascot      |

|    |                                |           |        |   |              |     |                              |     |   |    |   |                       |        |
|----|--------------------------------|-----------|--------|---|--------------|-----|------------------------------|-----|---|----|---|-----------------------|--------|
|    | 2691.3342                      | 2691.3345 | 0.0003 | 0 | 261          | 283 | HMLLKVMGFGLYLM DGN<br>VSNIYK |     |   |    |   | Oxidation (M)[2,7,14] | Mascot |
| 45 | si:ch211-10a23.2 [Danio rerio] |           |        |   | gi 224809215 |     | 16528.4                      | 6.1 | 6 | 35 | 0 |                       |        |

Peptide Information

| Calc. Mass | Obsrv. Mass | ± da    | ± ppm | Start Seq. | End Seq. | Sequence                      | Ion Score | C. I. | % | Modification                             | Rank | Result Type |
|------------|-------------|---------|-------|------------|----------|-------------------------------|-----------|-------|---|------------------------------------------|------|-------------|
| 1009.6226  | 1009.5175   | -0.1051 | -104  | 27         | 35       | LIVMGIVHK                     |           |       |   |                                          |      | Mascot      |
| 1214.6852  | 1214.5306   | -0.1546 | -127  | 128        | 138      | QTQLASLNALR                   |           |       |   |                                          |      | Mascot      |
| 1214.6852  | 1214.5306   | -0.1546 | -127  | 128        | 138      | QTQLASLNALR                   |           |       |   |                                          |      | Mascot      |
| 1253.6228  | 1253.5792   | -0.0436 | -35   | 39         | 49       | SMVVIVSCQSK                   |           |       |   | Carbamidomethyl (C)[8], Oxidation (M)[2] |      | Mascot      |
| 1378.8239  | 1378.6663   | -0.1576 | -114  | 27         | 38       | LIVMGIVHKQPK                  |           |       |   | Oxidation (M)[4]                         |      | Mascot      |
| 1708.7772  | 1708.7849   | 0.0077  | 5     | 5          | 18       | ENNRNEEDYVGEIK                |           |       |   |                                          |      | Mascot      |
| 2778.4832  | 2778.2092   | -0.274  | -99   | 114        | 138      | ILVDGQPLCGFAHRQTQL<br>ASLNALR |           |       |   | Carbamidomethyl (C)[9]                   |      | Mascot      |

|    |                                                                                          |  |  |  |              |  |          |      |   |  |    |   |  |
|----|------------------------------------------------------------------------------------------|--|--|--|--------------|--|----------|------|---|--|----|---|--|
| 46 | novel protein similar to vertebrate collagen, type XVII, alpha 1 (COL17A1) [Danio rerio] |  |  |  | gi 220675919 |  | 137803.3 | 8.99 | 1 |  | 24 | 0 |  |
|----|------------------------------------------------------------------------------------------|--|--|--|--------------|--|----------|------|---|--|----|---|--|

Peptide Information

| Calc. Mass | Obsrv. Mass | ± da   | ± ppm | Start Seq. | End Seq. | Sequence   | Ion Score | C. I. | % | Modification         | Rank | Result Type |
|------------|-------------|--------|-------|------------|----------|------------|-----------|-------|---|----------------------|------|-------------|
| 1214.4962  | 1214.5306   | 0.0344 | 28    | 1056       | 1065     | MMNEQGMIGR | 24        | 0     |   | Oxidation (M)[1,2,7] | 2    | Mascot      |

|    |                                                                                |  |  |  |              |  |         |      |   |  |    |   |  |
|----|--------------------------------------------------------------------------------|--|--|--|--------------|--|---------|------|---|--|----|---|--|
| 47 | transducin-like enhancer of split 2 (E(sp1) homolog, Drosophila) [Danio rerio] |  |  |  | gi 194578929 |  | 86315.1 | 6.68 | 1 |  | 21 | 0 |  |
|----|--------------------------------------------------------------------------------|--|--|--|--------------|--|---------|------|---|--|----|---|--|

Peptide Information

| Calc. Mass | Obsrv. Mass | ± da    | ± ppm | Start Seq. | End Seq. | Sequence    | Ion Score | C. I. | % | Modification | Rank | Result Type |
|------------|-------------|---------|-------|------------|----------|-------------|-----------|-------|---|--------------|------|-------------|
| 1214.6052  | 1214.5306   | -0.0746 | -61   | 768        | 778      | TPYGSSIFQSK | 21        | 0     |   |              | 3    | Mascot      |

|    |                                                         |  |  |  |             |  |          |      |   |  |    |   |  |
|----|---------------------------------------------------------|--|--|--|-------------|--|----------|------|---|--|----|---|--|
| 48 | inositol polyphosphate phosphatase-like 1 [Danio rerio] |  |  |  | gi 94732527 |  | 121085.3 | 6.38 | 1 |  | 18 | 0 |  |
|----|---------------------------------------------------------|--|--|--|-------------|--|----------|------|---|--|----|---|--|

Peptide Information

| Calc. Mass | Obsrv. Mass | ± da    | ± ppm | Start Seq. | End Seq. | Sequence    | Ion Score | C. I. | % | Modification     | Rank | Result Type |
|------------|-------------|---------|-------|------------|----------|-------------|-----------|-------|---|------------------|------|-------------|
| 1410.7086  | 1410.688    | -0.0206 | -15   | 483        | 493      | EEKIMFPPTYR | 18        | 0     |   |                  | 2    | Mascot      |
| 1426.7035  | 1426.6827   | -0.0208 | -15   | 483        | 493      | EEKIMFPPTYR | 3         | 0     |   | Oxidation (M)[5] | 10   | Mascot      |

|    |                                                        |  |  |  |             |  |         |      |   |  |    |   |  |
|----|--------------------------------------------------------|--|--|--|-------------|--|---------|------|---|--|----|---|--|
| 49 | coiled-coil domain-containing protein 77 [Danio rerio] |  |  |  | gi 70887567 |  | 50397.4 | 8.49 | 1 |  | 18 | 0 |  |
|----|--------------------------------------------------------|--|--|--|-------------|--|---------|------|---|--|----|---|--|

Peptide Information

| Calc. Mass | Obsrv. Mass | ± da | ± ppm | Start Seq. | End Seq. | Sequence | Ion Score | C. I. | % | Modification | Rank | Result Type |
|------------|-------------|------|-------|------------|----------|----------|-----------|-------|---|--------------|------|-------------|
|------------|-------------|------|-------|------------|----------|----------|-----------|-------|---|--------------|------|-------------|

|    |                                                   |              |           |         |    |     |     |            |    |   |                  |   |        |
|----|---------------------------------------------------|--------------|-----------|---------|----|-----|-----|------------|----|---|------------------|---|--------|
|    |                                                   | 1181.5831    | 1181.5778 | -0.0053 | -4 | 255 | 264 | TQSLLMESTR | 18 | 0 | Oxidation (M)[6] | 3 | Mascot |
| 50 | Unknown (protein for IMAGE:6962011) [Danio rerio] | gi 197245616 | 292441.8  | 6.31    | 1  |     |     |            | 17 | 0 |                  |   |        |

#### Peptide Information

| Calc. Mass | Obsrv. Mass | ± da    | ± ppm | Start Seq. | End Sequence Seq. | Ion Score   | C. I. % | Modification | Rank | Result Type |
|------------|-------------|---------|-------|------------|-------------------|-------------|---------|--------------|------|-------------|
| 1181.7252  | 1181.5778   | -0.1474 | -125  | 1328       | 1338              | SDPKVKPIVAK | 18      | 0            | 2    | Mascot      |

|                       |           |                               |                |                       |                    |
|-----------------------|-----------|-------------------------------|----------------|-----------------------|--------------------|
| <b>Gel Idx/Pos</b>    | 206/I6    | <b>Instr./Gel Origin</b>      | BA2060/110707A | <b>Process Status</b> | Analysis Succeeded |
| <b>Plate [#] Name</b> | [1] 31496 | <b>Instrument Sample Name</b> |                | <b>Spectra</b>        | 11                 |

| Rank | Protein Name                                    | Accession No. | Protein MW | Protein PI | Pep. Count | Protein Score | Protein Score C. I. % | Total Ion Score | Total Ion C. I. % |
|------|-------------------------------------------------|---------------|------------|------------|------------|---------------|-----------------------|-----------------|-------------------|
| 1    | hypothetical protein LOC100034647 [Danio rerio] | gi 131888757  | 46317.3    | 5.36       | 15         | 406           | 100                   | 313             | 100               |

#### Peptide Information

| Calc. Mass | Obsrv. Mass | ± da    | ± ppm | Start Seq. | End Sequence Seq. | Ion Score           | C. I. % | Modification      | Rank | Result Type |
|------------|-------------|---------|-------|------------|-------------------|---------------------|---------|-------------------|------|-------------|
| 1009.5312  | 1009.5089   | -0.0223 | -22   | 287        | 294               | SEFTELKR            |         |                   |      | Mascot      |
| 1077.5609  | 1077.514    | -0.0469 | -44   | 182        | 190               | VLDELTMTTR          | 13      | 0                 |      | Mascot      |
| 1077.5609  | 1077.514    | -0.0469 | -44   | 182        | 190               | VLDELTMTTR          |         |                   |      | Mascot      |
| 1153.5558  | 1153.5748   | 0.019   | 16    | 366        | 374               | LEMEIAEYR           |         |                   |      | Mascot      |
| 1167.6117  | 1167.5614   | -0.0503 | -43   | 170        | 180               | HAVEADISGLR         |         |                   |      | Mascot      |
| 1181.5909  | 1181.5719   | -0.019  | -16   | 210        | 219               | NHEEELLAAR          | 77      | 100               |      | Mascot      |
| 1181.5909  | 1181.5719   | -0.019  | -16   | 210        | 219               | NHEEELLAAR          |         |                   |      | Mascot      |
| 1194.5861  | 1194.5635   | -0.0226 | -19   | 22         | 35                | AGSVYGGAGGSGVR      | 84      | 100               |      | Mascot      |
| 1194.5861  | 1194.5635   | -0.0226 | -19   | 22         | 35                | AGSVYGGAGGSGVR      |         |                   |      | Mascot      |
| 1295.7067  | 1295.6853   | -0.0214 | -17   | 170        | 181               | HAVEADISGLRK        |         |                   |      | Mascot      |
| 1332.6754  | 1332.6483   | -0.0271 | -20   | 311        | 323               | ASLEGLTADTQAR       |         |                   |      | Mascot      |
| 1410.7046  | 1410.679    | -0.0256 | -18   | 364        | 374               | TRLEMEIAEYR         |         |                   |      | Mascot      |
| 1426.6995  | 1426.6699   | -0.0296 | -21   | 364        | 374               | TRLEMEIAEYR         |         | Oxidation (M)[5]  |      | Mascot      |
| 1564.8152  | 1564.7742   | -0.041  | -26   | 352        | 363               | QRQEYQMLLDIK        |         |                   |      | Mascot      |
| 1580.8101  | 1580.7805   | -0.0296 | -19   | 352        | 363               | QRQEYQMLLDIK        |         | Oxidation (M)[7]  |      | Mascot      |
| 1708.8064  | 1708.7771   | -0.0293 | -17   | 119        | 133               | DYSAYYATISDLQAK     |         |                   |      | Mascot      |
| 1862.9893  | 1862.9504   | -0.0389 | -21   | 295        | 310               | TLQSLQIELQSQLSMK    |         | Oxidation (M)[15] |      | Mascot      |
| 2020.0974  | 2020.0612   | -0.0362 | -18   | 134        | 152               | ILHATGVNAGIYLHIDNAK | 138     | 100               |      | Mascot      |
| 2020.0974  | 2020.0612   | -0.0362 | -18   | 134        | 152               | ILHATGVNAGIYLHIDNAK |         |                   |      | Mascot      |

|   |                                                    |           |         |     |              |         |                                     |   |     |     |     |     |                  |        |
|---|----------------------------------------------------|-----------|---------|-----|--------------|---------|-------------------------------------|---|-----|-----|-----|-----|------------------|--------|
|   | 2137.1096                                          | 2137.0828 | -0.0268 | -13 | 191          | 208     | SDLEMQIEGLKEELVFLK                  |   |     |     |     |     | Oxidation (M)[5] | Mascot |
|   | 2778.2236                                          | 2778.1975 | -0.0261 | -9  | 44           | 74      | SYSAGGGAGFGGGAGA<br>GFNLSDGIDSSANEK |   |     |     |     |     |                  | Mascot |
| 2 | PREDICTED: tubulin beta-2 chain-like [Danio rerio] |           |         |     | gi 326664656 | 46950.6 | 4.83                                | 9 | 249 | 100 | 209 | 100 |                  |        |

#### Peptide Information

| Calc. Mass | Obsrv. Mass | ± da    | ± ppm | Start Seq. | End Seq. | Sequence                       | Ion Score | C. I. % | Modification     | Rank | Result Type |
|------------|-------------|---------|-------|------------|----------|--------------------------------|-----------|---------|------------------|------|-------------|
| 1053.6091  | 1053.5903   | -0.0188 | -18   | 277        | 285      | YLTVAIFR                       |           |         |                  |      | Mascot      |
| 1077.5323  | 1077.514    | -0.0183 | -17   | 122        | 129      | IREEYPDR                       | 30        | 73.345  |                  |      | Mascot      |
| 1077.5323  | 1077.514    | -0.0183 | -17   | 122        | 129      | IREEYPDR                       |           |         |                  |      | Mascot      |
| 1130.5953  | 1130.5736   | -0.0217 | -19   | 209        | 218      | FPGQLNADLR                     |           |         |                  |      | Mascot      |
| 1130.5953  | 1130.5736   | -0.0217 | -19   | 209        | 218      | FPGQLNADLR                     | 60        | 99.975  |                  |      | Mascot      |
| 1143.6343  | 1143.611    | -0.0233 | -20   | 220        | 229      | LAVNMVPFPR                     |           |         |                  |      | Mascot      |
| 1159.6292  | 1159.6042   | -0.025  | -22   | 220        | 229      | LAVNMVPFPR                     |           |         | Oxidation (M)[5] |      | Mascot      |
| 1229.5983  | 1229.5704   | -0.0279 | -23   | 348        | 357      | ISEQFTAMFR                     |           |         |                  |      | Mascot      |
| 1245.5933  | 1245.5704   | -0.0229 | -18   | 348        | 357      | ISEQFTAMFR                     | 12        | 0       | Oxidation (M)[8] |      | Mascot      |
| 1245.5933  | 1245.5704   | -0.0229 | -18   | 348        | 357      | ISEQFTAMFR                     |           |         | Oxidation (M)[8] |      | Mascot      |
| 1636.8304  | 1636.7954   | -0.035  | -21   | 230        | 243      | LHFFMPGFAPLTSR                 |           |         | Oxidation (M)[5] |      | Mascot      |
| 1696.8329  | 1696.797    | -0.0359 | -21   | 304        | 317      | NSSYFVEWIPNNVK                 |           |         |                  |      | Mascot      |
| 1958.9817  | 1958.9482   | -0.0335 | -17   | 71         | 88       | GHYTEGAELVDSVLDVV<br>R         | 106       | 100     |                  |      | Mascot      |
| 1958.9817  | 1958.9482   | -0.0335 | -17   | 71         | 88       | GHYTEGAELVDSVLDVV<br>R         |           |         |                  |      | Mascot      |
| 2798.3433  | 2798.2908   | -0.0525 | -19   | 45         | 70       | SGPFGQIFRPDNFVFGQ<br>SGAGNNWAK |           |         |                  |      | Mascot      |

|   |                                                       |  |  |  |              |         |      |   |     |     |     |     |  |  |
|---|-------------------------------------------------------|--|--|--|--------------|---------|------|---|-----|-----|-----|-----|--|--|
| 3 | PREDICTED: tubulin beta chain isoform 1 [Danio rerio] |  |  |  | gi 326666192 | 49614.9 | 4.81 | 9 | 247 | 100 | 209 | 100 |  |  |
|---|-------------------------------------------------------|--|--|--|--------------|---------|------|---|-----|-----|-----|-----|--|--|

#### Peptide Information

| Calc. Mass | Obsrv. Mass | ± da    | ± ppm | Start Seq. | End Seq. | Sequence   | Ion Score | C. I. % | Modification     | Rank | Result Type |
|------------|-------------|---------|-------|------------|----------|------------|-----------|---------|------------------|------|-------------|
| 1039.5935  | 1039.5737   | -0.0198 | -19   | 310        | 318      | YLTVAAVFR  |           |         |                  |      | Mascot      |
| 1077.5323  | 1077.514    | -0.0183 | -17   | 155        | 162      | IREEYPDR   | 30        | 73.345  |                  |      | Mascot      |
| 1077.5323  | 1077.514    | -0.0183 | -17   | 155        | 162      | IREEYPDR   |           |         |                  |      | Mascot      |
| 1130.5953  | 1130.5736   | -0.0217 | -19   | 242        | 251      | FPGQLNADLR |           |         |                  |      | Mascot      |
| 1130.5953  | 1130.5736   | -0.0217 | -19   | 242        | 251      | FPGQLNADLR | 60        | 99.975  |                  |      | Mascot      |
| 1143.6343  | 1143.611    | -0.0233 | -20   | 253        | 262      | LAVNMVPFPR |           |         |                  |      | Mascot      |
| 1159.6292  | 1159.6042   | -0.025  | -22   | 253        | 262      | LAVNMVPFPR |           |         | Oxidation (M)[5] |      | Mascot      |
| 1229.5983  | 1229.5704   | -0.0279 | -23   | 381        | 390      | ISEQFTAMFR |           |         |                  |      | Mascot      |
| 1245.5933  | 1245.5704   | -0.0229 | -18   | 381        | 390      | ISEQFTAMFR | 12        | 0       | Oxidation (M)[8] |      | Mascot      |



|   |                                |           |         |     |             |     |                                |      |     |     |     |     |     |                  |        |
|---|--------------------------------|-----------|---------|-----|-------------|-----|--------------------------------|------|-----|-----|-----|-----|-----|------------------|--------|
|   | 1245.5933                      | 1245.5704 | -0.0229 | -18 | 381         | 390 | ISEQFTAMFR                     |      |     |     |     |     |     | Oxidation (M)[8] | Mascot |
|   | 1636.8304                      | 1636.7954 | -0.035  | -21 | 263         | 276 | LHFFMPGFAPLTSR                 |      |     |     |     |     |     | Oxidation (M)[5] | Mascot |
|   | 1696.8329                      | 1696.797  | -0.0359 | -21 | 337         | 350 | NSSYFVEWIPNNVK                 |      |     |     |     |     |     |                  | Mascot |
|   | 1958.9817                      | 1958.9482 | -0.0335 | -17 | 104         | 121 | GHYTEGAELVDSVLDVV<br>R         | 106  | 100 |     |     |     |     |                  | Mascot |
|   | 1958.9817                      | 1958.9482 | -0.0335 | -17 | 104         | 121 | GHYTEGAELVDSVLDVV<br>R         |      |     |     |     |     |     |                  | Mascot |
|   | 2798.3433                      | 2798.2908 | -0.0525 | -19 | 78          | 103 | SGPFGQIFRPDNFVFGQ<br>SGAGNNWAK |      |     |     |     |     |     |                  | Mascot |
| 4 | tubulin, beta 2B [Danio rerio] |           |         |     | gi 47087299 |     | 49769                          | 4.79 | 9   | 247 | 100 | 209 | 100 |                  |        |

Peptide Information

| Calc. Mass | Obsrv. Mass | ± da    | ± ppm | Start Seq. | End Seq. | Sequence                       | Ion Score | C. I.  | % Modification   | Rank | Result | Type   |
|------------|-------------|---------|-------|------------|----------|--------------------------------|-----------|--------|------------------|------|--------|--------|
| 1039.5935  | 1039.5737   | -0.0198 | -19   | 310        | 318      | YLTVAAVFR                      |           |        |                  |      |        | Mascot |
| 1077.5323  | 1077.514    | -0.0183 | -17   | 155        | 162      | IREEYPDR                       | 30        | 73.345 |                  |      |        | Mascot |
| 1077.5323  | 1077.514    | -0.0183 | -17   | 155        | 162      | IREEYPDR                       |           |        |                  |      |        | Mascot |
| 1130.5953  | 1130.5736   | -0.0217 | -19   | 242        | 251      | FPGQLNADLR                     |           |        |                  |      |        | Mascot |
| 1130.5953  | 1130.5736   | -0.0217 | -19   | 242        | 251      | FPGQLNADLR                     | 60        | 99.975 |                  |      |        | Mascot |
| 1143.6343  | 1143.611    | -0.0233 | -20   | 253        | 262      | LAVNMVPFPR                     |           |        |                  |      |        | Mascot |
| 1159.6292  | 1159.6042   | -0.025  | -22   | 253        | 262      | LAVNMVPFPR                     |           |        | Oxidation (M)[5] |      |        | Mascot |
| 1229.5983  | 1229.5704   | -0.0279 | -23   | 381        | 390      | ISEQFTAMFR                     |           |        |                  |      |        | Mascot |
| 1245.5933  | 1245.5704   | -0.0229 | -18   | 381        | 390      | ISEQFTAMFR                     | 12        | 0      | Oxidation (M)[8] |      |        | Mascot |
| 1245.5933  | 1245.5704   | -0.0229 | -18   | 381        | 390      | ISEQFTAMFR                     |           |        | Oxidation (M)[8] |      |        | Mascot |
| 1636.8304  | 1636.7954   | -0.035  | -21   | 263        | 276      | LHFFMPGFAPLTSR                 |           |        | Oxidation (M)[5] |      |        | Mascot |
| 1696.8329  | 1696.797    | -0.0359 | -21   | 337        | 350      | NSSYFVEWIPNNVK                 |           |        |                  |      |        | Mascot |
| 1958.9817  | 1958.9482   | -0.0335 | -17   | 104        | 121      | GHYTEGAELVDSVLDVV<br>R         | 106       | 100    |                  |      |        | Mascot |
| 1958.9817  | 1958.9482   | -0.0335 | -17   | 104        | 121      | GHYTEGAELVDSVLDVV<br>R         |           |        |                  |      |        | Mascot |
| 2784.3276  | 2784.2913   | -0.0363 | -13   | 78         | 103      | SGPFGQVFRPDNFVFGQ<br>SGAGNNWAK |           |        |                  |      |        | Mascot |

|   |                               |  |  |  |             |  |         |      |   |     |     |     |     |  |  |
|---|-------------------------------|--|--|--|-------------|--|---------|------|---|-----|-----|-----|-----|--|--|
| 5 | tubulin, beta 2 [Danio rerio] |  |  |  | gi 66773102 |  | 50534.3 | 4.76 | 9 | 247 | 100 | 209 | 100 |  |  |
|---|-------------------------------|--|--|--|-------------|--|---------|------|---|-----|-----|-----|-----|--|--|

Peptide Information

| Calc. Mass | Obsrv. Mass | ± da    | ± ppm | Start Seq. | End Seq. | Sequence   | Ion Score | C. I.  | % Modification | Rank | Result | Type   |
|------------|-------------|---------|-------|------------|----------|------------|-----------|--------|----------------|------|--------|--------|
| 1053.6091  | 1053.5903   | -0.0188 | -18   | 310        | 318      | YLTVAAI FR |           |        |                |      |        | Mascot |
| 1077.5323  | 1077.514    | -0.0183 | -17   | 155        | 162      | IREEYPDR   | 30        | 73.345 |                |      |        | Mascot |
| 1077.5323  | 1077.514    | -0.0183 | -17   | 155        | 162      | IREEYPDR   |           |        |                |      |        | Mascot |
| 1130.5953  | 1130.5736   | -0.0217 | -19   | 242        | 251      | FPGQLNADLR |           |        |                |      |        | Mascot |
| 1130.5953  | 1130.5736   | -0.0217 | -19   | 242        | 251      | FPGQLNADLR | 60        | 99.975 |                |      |        | Mascot |

|           |           |         |     |     |     |                                |     |     |  |                  |  |  |        |
|-----------|-----------|---------|-----|-----|-----|--------------------------------|-----|-----|--|------------------|--|--|--------|
| 1143.6343 | 1143.611  | -0.0233 | -20 | 253 | 262 | LAVNMVPFPR                     |     |     |  |                  |  |  | Mascot |
| 1159.6292 | 1159.6042 | -0.025  | -22 | 253 | 262 | LAVNMVPFPR                     |     |     |  | Oxidation (M)[5] |  |  | Mascot |
| 1229.5983 | 1229.5704 | -0.0279 | -23 | 381 | 390 | ISEQFTAMFR                     |     |     |  |                  |  |  | Mascot |
| 1245.5933 | 1245.5704 | -0.0229 | -18 | 381 | 390 | ISEQFTAMFR                     | 12  | 0   |  | Oxidation (M)[8] |  |  | Mascot |
| 1245.5933 | 1245.5704 | -0.0229 | -18 | 381 | 390 | ISEQFTAMFR                     |     |     |  | Oxidation (M)[8] |  |  | Mascot |
| 1636.8304 | 1636.7954 | -0.035  | -21 | 263 | 276 | LHFFMPGFAPLTSR                 |     |     |  | Oxidation (M)[5] |  |  | Mascot |
| 1696.8329 | 1696.797  | -0.0359 | -21 | 337 | 350 | NSSYFVEWIPNNVK                 |     |     |  |                  |  |  | Mascot |
| 1958.9817 | 1958.9482 | -0.0335 | -17 | 104 | 121 | GHYTEGAELVDSVLDDV<br>R         | 106 | 100 |  |                  |  |  | Mascot |
| 1958.9817 | 1958.9482 | -0.0335 | -17 | 104 | 121 | GHYTEGAELVDSVLDDV<br>R         |     |     |  |                  |  |  | Mascot |
| 2798.3433 | 2798.2908 | -0.0525 | -19 | 78  | 103 | SGPFGQIFRPDNFVFGQ<br>SGAGNNWAK |     |     |  |                  |  |  | Mascot |

6 PREDICTED: tubulin beta chain isoform 2 [Danio rerio] gi|326666194 50293.2 4.81 9 246 100 209 100

#### Peptide Information

| Calc. Mass | Obsrv. Mass | ± da    | ± ppm | Start Seq. | End Seq. | Sequence                       | Ion Score | C. I.  | % Modification   | Rank | Result Type |
|------------|-------------|---------|-------|------------|----------|--------------------------------|-----------|--------|------------------|------|-------------|
| 1039.5935  | 1039.5737   | -0.0198 | -19   | 316        | 324      | YLTVAAVFR                      |           |        |                  |      | Mascot      |
| 1077.5323  | 1077.514    | -0.0183 | -17   | 161        | 168      | IREEYPDR                       | 30        | 73.345 |                  |      | Mascot      |
| 1077.5323  | 1077.514    | -0.0183 | -17   | 161        | 168      | IREEYPDR                       |           |        |                  |      | Mascot      |
| 1130.5953  | 1130.5736   | -0.0217 | -19   | 248        | 257      | FPGQLNADLR                     |           |        |                  |      | Mascot      |
| 1130.5953  | 1130.5736   | -0.0217 | -19   | 248        | 257      | FPGQLNADLR                     | 60        | 99.975 |                  |      | Mascot      |
| 1143.6343  | 1143.611    | -0.0233 | -20   | 259        | 268      | LAVNMVPFPR                     |           |        |                  |      | Mascot      |
| 1159.6292  | 1159.6042   | -0.025  | -22   | 259        | 268      | LAVNMVPFPR                     |           |        | Oxidation (M)[5] |      | Mascot      |
| 1229.5983  | 1229.5704   | -0.0279 | -23   | 387        | 396      | ISEQFTAMFR                     |           |        |                  |      | Mascot      |
| 1245.5933  | 1245.5704   | -0.0229 | -18   | 387        | 396      | ISEQFTAMFR                     | 12        | 0      | Oxidation (M)[8] |      | Mascot      |
| 1245.5933  | 1245.5704   | -0.0229 | -18   | 387        | 396      | ISEQFTAMFR                     |           |        | Oxidation (M)[8] |      | Mascot      |
| 1636.8304  | 1636.7954   | -0.035  | -21   | 269        | 282      | LHFFMPGFAPLTSR                 |           |        | Oxidation (M)[5] |      | Mascot      |
| 1696.8329  | 1696.797    | -0.0359 | -21   | 343        | 356      | NSSYFVEWIPNNVK                 |           |        |                  |      | Mascot      |
| 1958.9817  | 1958.9482   | -0.0335 | -17   | 110        | 127      | GHYTEGAELVDSVLDDV<br>R         | 106       | 100    |                  |      | Mascot      |
| 1958.9817  | 1958.9482   | -0.0335 | -17   | 110        | 127      | GHYTEGAELVDSVLDDV<br>R         |           |        |                  |      | Mascot      |
| 2798.3433  | 2798.2908   | -0.0525 | -19   | 84         | 109      | SGPFGQIFRPDNFVFGQ<br>SGAGNNWAK |           |        |                  |      | Mascot      |

7 hypothetical protein LOC641565 [Danio rerio] gi|83025072 50237.2 4.8 8 240 100 209 100

#### Peptide Information

| Calc. Mass | Obsrv. Mass | ± da | ± ppm | Start Seq. | End Seq. | Sequence | Ion Score | C. I. | % Modification | Rank | Result Type |
|------------|-------------|------|-------|------------|----------|----------|-----------|-------|----------------|------|-------------|
|------------|-------------|------|-------|------------|----------|----------|-----------|-------|----------------|------|-------------|

|   |                                |           |         |     |             |     |                                |      |        |                  |     |     |     |  |        |
|---|--------------------------------|-----------|---------|-----|-------------|-----|--------------------------------|------|--------|------------------|-----|-----|-----|--|--------|
|   | 1053.6091                      | 1053.5903 | -0.0188 | -18 | 310         | 318 | YLTVA AIFR                     |      |        |                  |     |     |     |  | Mascot |
|   | 1077.5323                      | 1077.514  | -0.0183 | -17 | 155         | 162 | IREEYPDR                       | 30   | 73.345 |                  |     |     |     |  | Mascot |
|   | 1077.5323                      | 1077.514  | -0.0183 | -17 | 155         | 162 | IREEYPDR                       |      |        |                  |     |     |     |  | Mascot |
|   | 1130.5953                      | 1130.5736 | -0.0217 | -19 | 242         | 251 | FPGQLNADLR                     |      |        |                  |     |     |     |  | Mascot |
|   | 1130.5953                      | 1130.5736 | -0.0217 | -19 | 242         | 251 | FPGQLNADLR                     | 60   | 99.975 |                  |     |     |     |  | Mascot |
|   | 1143.6343                      | 1143.611  | -0.0233 | -20 | 253         | 262 | LAVNMVPFPR                     |      |        |                  |     |     |     |  | Mascot |
|   | 1159.6292                      | 1159.6042 | -0.025  | -22 | 253         | 262 | LAVNMVPFPR                     |      |        | Oxidation (M)[5] |     |     |     |  | Mascot |
|   | 1229.5983                      | 1229.5704 | -0.0279 | -23 | 381         | 390 | ISEQFTAMFR                     |      |        |                  |     |     |     |  | Mascot |
|   | 1245.5933                      | 1245.5704 | -0.0229 | -18 | 381         | 390 | ISEQFTAMFR                     | 12   | 0      | Oxidation (M)[8] |     |     |     |  | Mascot |
|   | 1245.5933                      | 1245.5704 | -0.0229 | -18 | 381         | 390 | ISEQFTAMFR                     |      |        | Oxidation (M)[8] |     |     |     |  | Mascot |
|   | 1696.8329                      | 1696.797  | -0.0359 | -21 | 337         | 350 | NSSYFVEWIPNNVK                 |      |        |                  |     |     |     |  | Mascot |
|   | 1958.9817                      | 1958.9482 | -0.0335 | -17 | 104         | 121 | GHYTEGAELVDSVLDVV<br>R         | 106  | 100    |                  |     |     |     |  | Mascot |
|   | 1958.9817                      | 1958.9482 | -0.0335 | -17 | 104         | 121 | GHYTEGAELVDSVLDVV<br>R         |      |        |                  |     |     |     |  | Mascot |
|   | 2798.3103                      | 2798.2908 | -0.0195 | -7  | 78          | 103 | SGPMGQIFRPDNFVFGQ<br>SGAGNNWAK |      |        | Oxidation (M)[4] |     |     |     |  | Mascot |
| 8 | tubulin, beta, 2 [Danio rerio] |           |         |     | gi 82658236 |     | 49684.9                        | 4.81 | 8      | 228              | 100 | 197 | 100 |  |        |

Peptide Information

| Calc. Mass | Obsrv. Mass | ± da    | ± ppm | Start Seq. | End Seq. | Sequence                       | Ion Score | C. I.  | % Modification   | Rank | Result | Type   |
|------------|-------------|---------|-------|------------|----------|--------------------------------|-----------|--------|------------------|------|--------|--------|
| 1053.6091  | 1053.5903   | -0.0188 | -18   | 310        | 318      | YLTVA AIFR                     |           |        |                  |      |        | Mascot |
| 1077.5323  | 1077.514    | -0.0183 | -17   | 155        | 162      | IREEYPDR                       | 30        | 73.345 |                  |      |        | Mascot |
| 1077.5323  | 1077.514    | -0.0183 | -17   | 155        | 162      | IREEYPDR                       |           |        |                  |      |        | Mascot |
| 1130.5953  | 1130.5736   | -0.0217 | -19   | 242        | 251      | FPGQLNADLR                     |           |        |                  |      |        | Mascot |
| 1130.5953  | 1130.5736   | -0.0217 | -19   | 242        | 251      | FPGQLNADLR                     | 60        | 99.975 |                  |      |        | Mascot |
| 1143.6343  | 1143.611    | -0.0233 | -20   | 253        | 262      | LAVNMVPFPR                     |           |        |                  |      |        | Mascot |
| 1159.6292  | 1159.6042   | -0.025  | -22   | 253        | 262      | LAVNMVPFPR                     |           |        | Oxidation (M)[5] |      |        | Mascot |
| 1636.8304  | 1636.7954   | -0.035  | -21   | 263        | 276      | LHFFMPGFAPLTSR                 |           |        | Oxidation (M)[5] |      |        | Mascot |
| 1696.8329  | 1696.797    | -0.0359 | -21   | 337        | 350      | NSSYFVEWIPNNVK                 |           |        |                  |      |        | Mascot |
| 1958.9817  | 1958.9482   | -0.0335 | -17   | 104        | 121      | GHYTEGAELVDSVLDVV<br>R         | 106       | 100    |                  |      |        | Mascot |
| 1958.9817  | 1958.9482   | -0.0335 | -17   | 104        | 121      | GHYTEGAELVDSVLDVV<br>R         |           |        |                  |      |        | Mascot |
| 2784.3276  | 2784.2913   | -0.0363 | -13   | 78         | 103      | SGPFGQVFRPDNFVFGQ<br>SGAGNNWAK |           |        |                  |      |        | Mascot |

9 type I cytokeratin, enveloping layer [Danio rerio] gi|94732411 40437.7 5.15 9 219 100 175 100

Peptide Information

| Calc. Mass | Obsrv. Mass | ± da | ± ppm | Start Seq. | End Seq. | Sequence | Ion Score | C. I. | % Modification | Rank | Result | Type |
|------------|-------------|------|-------|------------|----------|----------|-----------|-------|----------------|------|--------|------|
|------------|-------------|------|-------|------------|----------|----------|-----------|-------|----------------|------|--------|------|

|    |                                                    |           |         |     |             |     |                          |      |     |                   |     |     |        |
|----|----------------------------------------------------|-----------|---------|-----|-------------|-----|--------------------------|------|-----|-------------------|-----|-----|--------|
|    | 1077.5609                                          | 1077.514  | -0.0469 | -44 | 129         | 137 | VLDELTMTTR               | 13   | 0   |                   |     |     | Mascot |
|    | 1077.5609                                          | 1077.514  | -0.0469 | -44 | 129         | 137 | VLDELTMTTR               |      |     |                   |     |     | Mascot |
|    | 1153.5558                                          | 1153.5748 | 0.019   | 16  | 313         | 321 | LEMEIAEYR                |      |     |                   |     |     | Mascot |
|    | 1181.5909                                          | 1181.5719 | -0.019  | -16 | 157         | 166 | NHEEELLAAR               | 77   | 100 |                   |     |     | Mascot |
|    | 1181.5909                                          | 1181.5719 | -0.019  | -16 | 157         | 166 | NHEEELLAAR               |      |     |                   |     |     | Mascot |
|    | 1194.5861                                          | 1194.5635 | -0.0226 | -19 | 31          | 44  | AGSVYGGAGGSGVR           | 84   | 100 |                   |     |     | Mascot |
|    | 1194.5861                                          | 1194.5635 | -0.0226 | -19 | 31          | 44  | AGSVYGGAGGSGVR           |      |     |                   |     |     | Mascot |
|    | 1332.6754                                          | 1332.6483 | -0.0271 | -20 | 258         | 270 | ASLEGLADTQAR             |      |     |                   |     |     | Mascot |
|    | 1410.7046                                          | 1410.679  | -0.0256 | -18 | 311         | 321 | TRLEMEIAEYR              |      |     |                   |     |     | Mascot |
|    | 1426.6995                                          | 1426.6699 | -0.0296 | -21 | 311         | 321 | TRLEMEIAEYR              |      |     | Oxidation (M)[5]  |     |     | Mascot |
|    | 1708.8064                                          | 1708.7771 | -0.0293 | -17 | 66          | 80  | DYSAYYATISDLQAK          |      |     |                   |     |     | Mascot |
|    | 2020.0743                                          | 2020.0612 | -0.0131 | -6  | 241         | 257 | RTLQSLIEIQSQLSMK         |      |     | Oxidation (M)[16] |     |     | Mascot |
|    | 2020.0743                                          | 2020.0612 | -0.0131 | -6  | 241         | 257 | RTLQSLIEIQSQLSMK         |      |     | Oxidation (M)[16] |     |     | Mascot |
|    | 2225.0867                                          | 2225.0872 | 0.0005  | 0   | 109         | 127 | YENELSMRQSV EADIVGL<br>R |      |     | Oxidation (M)[7]  |     |     | Mascot |
|    | 2225.0867                                          | 2225.0872 | 0.0005  | 0   | 109         | 127 | YENELSMRQSV EADIVGL<br>R |      |     | Oxidation (M)[7]  |     |     | Mascot |
| 10 | type I cytokeratin, enveloping layer [Danio rerio] |           |         |     | gi 18858519 |     | 46655.7                  | 5.13 | 9   | 214               | 100 | 175 | 100    |

Peptide Information

|    | Calc. Mass                                   | Obsrv. Mass | ± da    | ± ppm | Start Seq.   | End Seq. | Sequence                 | Ion Score | C. I. | % Modification    | Rank | Result | Type   |
|----|----------------------------------------------|-------------|---------|-------|--------------|----------|--------------------------|-----------|-------|-------------------|------|--------|--------|
|    | 1077.5609                                    | 1077.514    | -0.0469 | -44   | 191          | 199      | VLDELTMTTR               | 13        | 0     |                   |      |        | Mascot |
|    | 1077.5609                                    | 1077.514    | -0.0469 | -44   | 191          | 199      | VLDELTMTTR               |           |       |                   |      |        | Mascot |
|    | 1153.5558                                    | 1153.5748   | 0.019   | 16    | 375          | 383      | LEMEIAEYR                |           |       |                   |      |        | Mascot |
|    | 1181.5909                                    | 1181.5719   | -0.019  | -16   | 219          | 228      | NHEEELLAAR               | 77        | 100   |                   |      |        | Mascot |
|    | 1181.5909                                    | 1181.5719   | -0.019  | -16   | 219          | 228      | NHEEELLAAR               |           |       |                   |      |        | Mascot |
|    | 1194.5861                                    | 1194.5635   | -0.0226 | -19   | 31           | 44       | AGSVYGGAGGSGVR           | 84        | 100   |                   |      |        | Mascot |
|    | 1194.5861                                    | 1194.5635   | -0.0226 | -19   | 31           | 44       | AGSVYGGAGGSGVR           |           |       |                   |      |        | Mascot |
|    | 1332.6754                                    | 1332.6483   | -0.0271 | -20   | 320          | 332      | ASLEGLADTQAR             |           |       |                   |      |        | Mascot |
|    | 1410.7046                                    | 1410.679    | -0.0256 | -18   | 373          | 383      | TRLEMEIAEYR              |           |       |                   |      |        | Mascot |
|    | 1426.6995                                    | 1426.6699   | -0.0296 | -21   | 373          | 383      | TRLEMEIAEYR              |           |       | Oxidation (M)[5]  |      |        | Mascot |
|    | 1708.8064                                    | 1708.7771   | -0.0293 | -17   | 128          | 142      | DYSAYYATISDLQAK          |           |       |                   |      |        | Mascot |
|    | 2020.0743                                    | 2020.0612   | -0.0131 | -6    | 303          | 319      | RTLQSLIEIQSQLSMK         |           |       | Oxidation (M)[16] |      |        | Mascot |
|    | 2020.0743                                    | 2020.0612   | -0.0131 | -6    | 303          | 319      | RTLQSLIEIQSQLSMK         |           |       | Oxidation (M)[16] |      |        | Mascot |
|    | 2225.0867                                    | 2225.0872   | 0.0005  | 0     | 171          | 189      | YENELSMRQSV EADIVGL<br>R |           |       | Oxidation (M)[7]  |      |        | Mascot |
|    | 2225.0867                                    | 2225.0872   | 0.0005  | 0     | 171          | 189      | YENELSMRQSV EADIVGL<br>R |           |       | Oxidation (M)[7]  |      |        | Mascot |
| 11 | hypothetical protein LOC767806 [Danio rerio] |             |         |       | gi 115529425 |          | 49898.2                  | 4.81      | 5     | 209               | 100  | 195    | 100    |

| Peptide Information |                                                          |         |       |            |                            |           |         |                   |      |             |     |     |
|---------------------|----------------------------------------------------------|---------|-------|------------|----------------------------|-----------|---------|-------------------|------|-------------|-----|-----|
| Calc. Mass          | Obsrv. Mass                                              | ± da    | ± ppm | Start Seq. | End Sequence Seq.          | Ion Score | C. I. % | Modification      | Rank | Result Type |     |     |
| 1053.6091           | 1053.5903                                                | -0.0188 | -18   | 310        | 318 YLTVAAIR               |           |         |                   |      | Mascot      |     |     |
| 1077.5323           | 1077.514                                                 | -0.0183 | -17   | 155        | 162 IREEYPDR               | 30        | 73.345  |                   |      | Mascot      |     |     |
| 1077.5323           | 1077.514                                                 | -0.0183 | -17   | 155        | 162 IREEYPDR               |           |         |                   |      | Mascot      |     |     |
| 1130.5953           | 1130.5736                                                | -0.0217 | -19   | 242        | 251 FPGQLNADLR             |           |         |                   |      | Mascot      |     |     |
| 1130.5953           | 1130.5736                                                | -0.0217 | -19   | 242        | 251 FPGQLNADLR             | 60        | 99.975  |                   |      | Mascot      |     |     |
| 1143.6343           | 1143.611                                                 | -0.0233 | -20   | 253        | 262 LAVNMVPFPR             |           |         |                   |      | Mascot      |     |     |
| 1159.6292           | 1159.6042                                                | -0.025  | -22   | 253        | 262 LAVNMVPFPR             |           |         | Oxidation (M)[5]  |      | Mascot      |     |     |
| 1958.9817           | 1958.9482                                                | -0.0335 | -17   | 104        | 121 GHYTEGAELVDSVLDVV<br>R | 106       | 100     |                   |      | Mascot      |     |     |
| 1958.9817           | 1958.9482                                                | -0.0335 | -17   | 104        | 121 GHYTEGAELVDSVLDVV<br>R |           |         |                   |      | Mascot      |     |     |
| 12                  | type I cytokeratin, enveloping layer, like [Danio rerio] |         |       |            | gi 130504059               | 46617.6   | 5.13    | 8                 | 206  | 100         | 175 | 100 |
| Peptide Information |                                                          |         |       |            |                            |           |         |                   |      |             |     |     |
| Calc. Mass          | Obsrv. Mass                                              | ± da    | ± ppm | Start Seq. | End Sequence Seq.          | Ion Score | C. I. % | Modification      | Rank | Result Type |     |     |
| 1077.5609           | 1077.514                                                 | -0.0469 | -44   | 191        | 199 VLDELTMTTR             | 13        | 0       |                   |      | Mascot      |     |     |
| 1077.5609           | 1077.514                                                 | -0.0469 | -44   | 191        | 199 VLDELTMTTR             |           |         |                   |      | Mascot      |     |     |
| 1153.5558           | 1153.5748                                                | 0.019   | 16    | 375        | 383 LEMEIAEYR              |           |         |                   |      | Mascot      |     |     |
| 1181.5909           | 1181.5719                                                | -0.019  | -16   | 219        | 228 NHEEELLAAR             | 77        | 100     |                   |      | Mascot      |     |     |
| 1181.5909           | 1181.5719                                                | -0.019  | -16   | 219        | 228 NHEEELLAAR             |           |         |                   |      | Mascot      |     |     |
| 1194.5861           | 1194.5635                                                | -0.0226 | -19   | 31         | 44 AGSVYGGAGGSGVR          | 84        | 100     |                   |      | Mascot      |     |     |
| 1194.5861           | 1194.5635                                                | -0.0226 | -19   | 31         | 44 AGSVYGGAGGSGVR          |           |         |                   |      | Mascot      |     |     |
| 1332.6754           | 1332.6483                                                | -0.0271 | -20   | 320        | 332 ASLEGLTADTQAR          |           |         |                   |      | Mascot      |     |     |
| 1410.7046           | 1410.679                                                 | -0.0256 | -18   | 373        | 383 TRLEMEIAEYR            |           |         |                   |      | Mascot      |     |     |
| 1426.6995           | 1426.6699                                                | -0.0296 | -21   | 373        | 383 TRLEMEIAEYR            |           |         | Oxidation (M)[5]  |      | Mascot      |     |     |
| 1708.8064           | 1708.7771                                                | -0.0293 | -17   | 128        | 142 DYSAYYATISDLQAK        |           |         |                   |      | Mascot      |     |     |
| 2020.0743           | 2020.0612                                                | -0.0131 | -6    | 303        | 319 RTLQSLEIELQSLSMK       |           |         | Oxidation (M)[16] |      | Mascot      |     |     |
| 2020.0743           | 2020.0612                                                | -0.0131 | -6    | 303        | 319 RTLQSLEIELQSLSMK       |           |         | Oxidation (M)[16] |      | Mascot      |     |     |
| 13                  | hypothetical protein LOC767746 [Danio rerio]             |         |       |            | gi 115529301               | 49556.9   | 4.85    | 8                 | 133  | 100         | 102 | 100 |
| Peptide Information |                                                          |         |       |            |                            |           |         |                   |      |             |     |     |
| Calc. Mass          | Obsrv. Mass                                              | ± da    | ± ppm | Start Seq. | End Sequence Seq.          | Ion Score | C. I. % | Modification      | Rank | Result Type |     |     |
| 1039.5935           | 1039.5737                                                | -0.0198 | -19   | 310        | 318 YLTVAAVFR              |           |         |                   |      | Mascot      |     |     |

|    |                                      |           |         |     |             |     |                                |      |        |                  |     |    |        |
|----|--------------------------------------|-----------|---------|-----|-------------|-----|--------------------------------|------|--------|------------------|-----|----|--------|
|    | 1077.5323                            | 1077.514  | -0.0183 | -17 | 155         | 162 | IREEYPDR                       | 30   | 73.345 |                  |     |    | Mascot |
|    | 1077.5323                            | 1077.514  | -0.0183 | -17 | 155         | 162 | IREEYPDR                       |      |        |                  |     |    | Mascot |
|    | 1130.5953                            | 1130.5736 | -0.0217 | -19 | 242         | 251 | FPGQLNADLR                     |      |        |                  |     |    | Mascot |
|    | 1130.5953                            | 1130.5736 | -0.0217 | -19 | 242         | 251 | FPGQLNADLR                     | 60   | 99.975 |                  |     |    | Mascot |
|    | 1143.6343                            | 1143.611  | -0.0233 | -20 | 253         | 262 | LAVNMVPFPR                     |      |        |                  |     |    | Mascot |
|    | 1159.6292                            | 1159.6042 | -0.025  | -22 | 253         | 262 | LAVNMVPFPR                     |      |        | Oxidation (M)[5] |     |    | Mascot |
|    | 1229.5983                            | 1229.5704 | -0.0279 | -23 | 381         | 390 | ISEQFTAMFR                     |      |        |                  |     |    | Mascot |
|    | 1245.5933                            | 1245.5704 | -0.0229 | -18 | 381         | 390 | ISEQFTAMFR                     | 12   | 0      | Oxidation (M)[8] |     |    | Mascot |
|    | 1245.5933                            | 1245.5704 | -0.0229 | -18 | 381         | 390 | ISEQFTAMFR                     |      |        | Oxidation (M)[8] |     |    | Mascot |
|    | 1636.8304                            | 1636.7954 | -0.035  | -21 | 263         | 276 | LHFFMPGFAPLTSR                 |      |        | Oxidation (M)[5] |     |    | Mascot |
|    | 1696.8329                            | 1696.797  | -0.0359 | -21 | 337         | 350 | NSSYFVEWIPNNVK                 |      |        |                  |     |    | Mascot |
|    | 2798.3433                            | 2798.2908 | -0.0525 | -19 | 78          | 103 | SGPFGQIFRPDNFVFGQ<br>SGAGNNWAK |      |        |                  |     |    | Mascot |
| 14 | glutamine synthetase 1 [Danio rerio] |           |         |     | gi 31581593 |     | 41585.8                        | 5.57 | 6      | 119              | 100 | 97 | 100    |

#### Peptide Information

| Calc. Mass | Obsrv. Mass | ± da    | ± ppm | Start Seq. | End Seq. | Sequence                    | Ion Score | C. I. | % Modification          | Rank | Result Type |
|------------|-------------|---------|-------|------------|----------|-----------------------------|-----------|-------|-------------------------|------|-------------|
| 839.4271   | 839.4151    | -0.012  | -14   | 281        | 286      | HNYHIR                      |           |       |                         |      | Mascot      |
| 1002.5002  | 1002.4849   | -0.0153 | -15   | 174        | 181      | DIVEAHYR                    |           |       |                         |      | Mascot      |
| 1932.9596  | 1932.9259   | -0.0337 | -17   | 341        | 357      | RPSANCDPYAVTEALIR           |           |       | Carbamidomethyl (C)[6]  |      | Mascot      |
| 1932.9596  | 1932.9259   | -0.0337 | -17   | 341        | 357      | RPSANCDPYAVTEALIR           | 97        | 100   | Carbamidomethyl (C)[6]  |      | Mascot      |
| 2177.0483  | 2177.0178   | -0.0305 | -14   | 300        | 319      | LTGHHETSNIHEFSAGV<br>NR     |           |       |                         |      | Mascot      |
| 2333.1494  | 2333.1191   | -0.0303 | -13   | 299        | 319      | RLTGHETSNIHEFSAGV<br>ANR    |           |       |                         |      | Mascot      |
| 2700.2834  | 2700.2766   | -0.0068 | -3    | 335        | 357      | GYFEDRRPSANCDPYAV<br>TEALIR |           |       | Carbamidomethyl (C)[12] |      | Mascot      |

|    |                                                                             |  |  |  |             |  |         |      |   |     |     |    |     |
|----|-----------------------------------------------------------------------------|--|--|--|-------------|--|---------|------|---|-----|-----|----|-----|
| 15 | novel protein similar to type I cytokeratin, enveloping layer [Danio rerio] |  |  |  | gi 94732405 |  | 43116.8 | 5.22 | 6 | 116 | 100 | 97 | 100 |
|----|-----------------------------------------------------------------------------|--|--|--|-------------|--|---------|------|---|-----|-----|----|-----|

#### Peptide Information

| Calc. Mass | Obsrv. Mass | ± da    | ± ppm | Start Seq. | End Seq. | Sequence       | Ion Score | C. I. | % Modification | Rank | Result Type |
|------------|-------------|---------|-------|------------|----------|----------------|-----------|-------|----------------|------|-------------|
| 1077.5609  | 1077.514    | -0.0469 | -44   | 189        | 197      | VLDELTMTTR     | 13        | 0     |                |      | Mascot      |
| 1077.5609  | 1077.514    | -0.0469 | -44   | 189        | 197      | VLDELTMTTR     |           |       |                |      | Mascot      |
| 1153.5558  | 1153.5748   | 0.019   | 16    | 373        | 381      | LEMEIAEYR      |           |       |                |      | Mascot      |
| 1194.5861  | 1194.5635   | -0.0226 | -19   | 34         | 47       | AGSVYGGAGGSGVR | 84        | 100   |                |      | Mascot      |
| 1194.5861  | 1194.5635   | -0.0226 | -19   | 34         | 47       | AGSVYGGAGGSGVR |           |       |                |      | Mascot      |
| 1332.6754  | 1332.6483   | -0.0271 | -20   | 318        | 330      | ASLEGLADTQAR   |           |       |                |      | Mascot      |

|           |           |         |     |     |     |                   |  |  |  |                   |  |  |        |
|-----------|-----------|---------|-----|-----|-----|-------------------|--|--|--|-------------------|--|--|--------|
| 1410.7046 | 1410.679  | -0.0256 | -18 | 371 | 381 | TRLEMEIAEYR       |  |  |  |                   |  |  | Mascot |
| 1426.6995 | 1426.6699 | -0.0296 | -21 | 371 | 381 | TRLEMEIAEYR       |  |  |  | Oxidation (M)[5]  |  |  | Mascot |
| 2020.0743 | 2020.0612 | -0.0131 | -6  | 301 | 317 | RTLQSLEIELQSQLSMK |  |  |  | Oxidation (M)[16] |  |  | Mascot |
| 2020.0743 | 2020.0612 | -0.0131 | -6  | 301 | 317 | RTLQSLEIELQSQLSMK |  |  |  | Oxidation (M)[16] |  |  | Mascot |

16 Zgc:109868 [Danio rerio] gi|92097956 47235.8 5.25 6 114 100 97 100

#### Peptide Information

| Calc. Mass | Obsrv. Mass | ± da    | ± ppm | Start Seq. | End Seq. | Sequence          | Ion Score | C. I. | % Modification    | Rank | Result Type |
|------------|-------------|---------|-------|------------|----------|-------------------|-----------|-------|-------------------|------|-------------|
| 1077.5609  | 1077.514    | -0.0469 | -44   | 189        | 197      | VLDELTMTTR        | 13        | 0     |                   |      | Mascot      |
| 1077.5609  | 1077.514    | -0.0469 | -44   | 189        | 197      | VLDELTMTTR        |           |       |                   |      | Mascot      |
| 1153.5558  | 1153.5748   | 0.019   | 16    | 373        | 381      | LEMEIAEYR         |           |       |                   |      | Mascot      |
| 1194.5861  | 1194.5635   | -0.0226 | -19   | 34         | 47       | AGSVYGGAGGSGVR    | 84        | 100   |                   |      | Mascot      |
| 1194.5861  | 1194.5635   | -0.0226 | -19   | 34         | 47       | AGSVYGGAGGSGVR    |           |       |                   |      | Mascot      |
| 1332.6754  | 1332.6483   | -0.0271 | -20   | 318        | 330      | ASLEGLADTQAR      |           |       |                   |      | Mascot      |
| 1410.7046  | 1410.679    | -0.0256 | -18   | 371        | 381      | TRLEMEIAEYR       |           |       |                   |      | Mascot      |
| 1426.6995  | 1426.6699   | -0.0296 | -21   | 371        | 381      | TRLEMEIAEYR       |           |       | Oxidation (M)[5]  |      | Mascot      |
| 2020.0743  | 2020.0612   | -0.0131 | -6    | 301        | 317      | RTLQSLEIELQSQLSMK |           |       | Oxidation (M)[16] |      | Mascot      |
| 2020.0743  | 2020.0612   | -0.0131 | -6    | 301        | 317      | RTLQSLEIELQSQLSMK |           |       | Oxidation (M)[16] |      | Mascot      |

17 TPA\_exp: glutamine synthetase [Danio rerio] gi|30141105 41549.8 5.57 5 113 100 97 100

#### Peptide Information

| Calc. Mass | Obsrv. Mass | ± da    | ± ppm | Start Seq. | End Seq. | Sequence                 | Ion Score | C. I. | % Modification         | Rank | Result Type |
|------------|-------------|---------|-------|------------|----------|--------------------------|-----------|-------|------------------------|------|-------------|
| 839.4271   | 839.4151    | -0.012  | -14   | 281        | 286      | HNYHIR                   |           |       |                        |      | Mascot      |
| 1002.5002  | 1002.4849   | -0.0153 | -15   | 174        | 181      | DIVEAHYR                 |           |       |                        |      | Mascot      |
| 1932.9596  | 1932.9259   | -0.0337 | -17   | 341        | 357      | RPSANCDPYAVTEALIR        |           |       | Carbamidomethyl (C)[6] |      | Mascot      |
| 1932.9596  | 1932.9259   | -0.0337 | -17   | 341        | 357      | RPSANCDPYAVTEALIR        | 97        | 100   | Carbamidomethyl (C)[6] |      | Mascot      |
| 2177.0483  | 2177.0178   | -0.0305 | -14   | 300        | 319      | LTGHHETSNIHEFSAGV<br>NR  |           |       |                        |      | Mascot      |
| 2333.1494  | 2333.1191   | -0.0303 | -13   | 299        | 319      | RLTGHETSNIHEFSAGV<br>ANR |           |       |                        |      | Mascot      |

18 PREDICTED: tubulin beta-6 chain-like [Danio rerio] gi|125819301 52544.5 4.9 5 108 100 95 100

#### Peptide Information

| Calc. Mass | Obsrv. Mass | ± da    | ± ppm | Start Seq. | End Seq. | Sequence  | Ion Score | C. I.  | % Modification | Rank | Result Type |
|------------|-------------|---------|-------|------------|----------|-----------|-----------|--------|----------------|------|-------------|
| 1039.5935  | 1039.5737   | -0.0198 | -19   | 310        | 318      | YLTVAGIFR |           |        |                |      | Mascot      |
| 1077.5323  | 1077.514    | -0.0183 | -17   | 155        | 162      | IREEYPDR  | 30        | 73.345 |                |      | Mascot      |

|    |                                    |           |         |     |              |     |            |      |        |     |                                            |    |     |  |  |        |
|----|------------------------------------|-----------|---------|-----|--------------|-----|------------|------|--------|-----|--------------------------------------------|----|-----|--|--|--------|
|    | 1077.5323                          | 1077.514  | -0.0183 | -17 | 155          | 162 | IREEYPDR   |      |        |     |                                            |    |     |  |  | Mascot |
|    | 1130.5953                          | 1130.5736 | -0.0217 | -19 | 242          | 251 | FPGQLNADLR |      |        |     |                                            |    |     |  |  | Mascot |
|    | 1130.5953                          | 1130.5736 | -0.0217 | -19 | 242          | 251 | FPGQLNADLR | 60   | 99.975 |     |                                            |    |     |  |  | Mascot |
|    | 1143.6343                          | 1143.611  | -0.0233 | -20 | 253          | 262 | LAVNMVPFPR |      |        |     |                                            |    |     |  |  | Mascot |
|    | 1159.6292                          | 1159.6042 | -0.025  | -22 | 253          | 262 | LAVNMVPFPR |      |        |     | Oxidation (M)[5]                           |    |     |  |  | Mascot |
|    | 1194.5177                          | 1194.5635 | 0.0458  | 38  | 298          | 307 | NMMTACDPRR | 4    | 0      |     |                                            |    |     |  |  | Mascot |
|    | 1194.5177                          | 1194.5635 | 0.0458  | 38  | 298          | 307 | NMMTACDPRR |      |        |     |                                            |    |     |  |  | Mascot |
|    | 1267.5341                          | 1267.5913 | 0.0572  | 45  | 298          | 307 | NMMTACDPRR |      |        |     | Carbamidomethyl (C)[6], Oxidation (M)[2]   |    |     |  |  | Mascot |
|    | 1283.5289                          | 1283.5876 | 0.0587  | 46  | 298          | 307 | NMMTACDPRR |      |        |     | Carbamidomethyl (C)[6], Oxidation (M)[2,3] |    |     |  |  | Mascot |
| 19 | glutamine synthetase [Danio rerio] |           |         |     | gi 225579106 |     | 41854.1    | 5.98 | 4      | 106 | 100                                        | 97 | 100 |  |  |        |

#### Peptide Information

| Calc. Mass | Obsrv. Mass | ± da    | ± ppm | Start Seq. | End Seq. | Sequence                 | Ion Score | C. I. | % | Modification            | Rank | Result Type |
|------------|-------------|---------|-------|------------|----------|--------------------------|-----------|-------|---|-------------------------|------|-------------|
| 1009.5438  | 1009.5089   | -0.0349 | -35   | 280        | 286      | RHQYHIR                  |           |       |   |                         |      | Mascot      |
| 1932.9596  | 1932.9259   | -0.0337 | -17   | 341        | 357      | RPSANCDPYAVTEALIR        |           |       |   | Carbamidomethyl (C)[6]  |      | Mascot      |
| 1932.9596  | 1932.9259   | -0.0337 | -17   | 341        | 357      | RPSANCDPYAVTEALIR        | 97        | 100   |   | Carbamidomethyl (C)[6]  |      | Mascot      |
| 2283.2278  | 2283.1489   | -0.0789 | -35   | 96         | 114      | LVLCDVLKYNHKPAETNL R     |           |       |   | Carbamidomethyl (C)[4]  |      | Mascot      |
| 2700.2834  | 2700.2766   | -0.0068 | -3    | 335        | 357      | GYFEDRRRPSANCDPYAVTEALIR |           |       |   | Carbamidomethyl (C)[12] |      | Mascot      |

|    |                                                                             |  |  |  |             |  |         |      |   |     |     |    |     |  |  |  |
|----|-----------------------------------------------------------------------------|--|--|--|-------------|--|---------|------|---|-----|-----|----|-----|--|--|--|
| 20 | novel protein similar to type I cytoke <span>...</span> layer [Danio rerio] |  |  |  | gi 94732413 |  | 49661.4 | 5.31 | 6 | 105 | 100 | 90 | 100 |  |  |  |
|----|-----------------------------------------------------------------------------|--|--|--|-------------|--|---------|------|---|-----|-----|----|-----|--|--|--|

#### Peptide Information

| Calc. Mass | Obsrv. Mass | ± da    | ± ppm | Start Seq. | End Seq. | Sequence      | Ion Score | C. I. | % | Modification     | Rank | Result Type |
|------------|-------------|---------|-------|------------|----------|---------------|-----------|-------|---|------------------|------|-------------|
| 1077.5609  | 1077.514    | -0.0469 | -44   | 212        | 220      | VLDELTMTTR    | 13        | 0     |   |                  |      | Mascot      |
| 1077.5609  | 1077.514    | -0.0469 | -44   | 212        | 220      | VLDELTMTTR    |           |       |   |                  |      | Mascot      |
| 1143.6984  | 1143.611    | -0.0874 | -76   | 439        | 448      | KVVTIVEEVK    |           |       |   |                  |      | Mascot      |
| 1153.5558  | 1153.5748   | 0.019   | 16    | 396        | 404      | LEMEIAEYR     |           |       |   |                  |      | Mascot      |
| 1181.5909  | 1181.5719   | -0.019  | -16   | 240        | 249      | NHEEELLAAR    | 77        | 100   |   |                  |      | Mascot      |
| 1181.5909  | 1181.5719   | -0.019  | -16   | 240        | 249      | NHEEELLAAR    |           |       |   |                  |      | Mascot      |
| 1332.6754  | 1332.6483   | -0.0271 | -20   | 341        | 353      | ASLEGLTADTQAR |           |       |   |                  |      | Mascot      |
| 1410.7046  | 1410.679    | -0.0256 | -18   | 394        | 404      | TRLEMEIAEYR   |           |       |   |                  |      | Mascot      |
| 1426.6995  | 1426.6699   | -0.0296 | -21   | 394        | 404      | TRLEMEIAEYR   |           |       |   | Oxidation (M)[5] |      | Mascot      |

|    |                                              |  |  |  |             |  |         |      |   |    |     |    |        |  |  |  |
|----|----------------------------------------------|--|--|--|-------------|--|---------|------|---|----|-----|----|--------|--|--|--|
| 21 | hypothetical protein LOC335798 [Danio rerio] |  |  |  | gi 41053911 |  | 49602.9 | 4.81 | 8 | 99 | 100 | 72 | 99.998 |  |  |  |
|----|----------------------------------------------|--|--|--|-------------|--|---------|------|---|----|-----|----|--------|--|--|--|

#### Peptide Information

| Calc. Mass | Obsrv. Mass | ± da | ± ppm | Start | End | Sequence | Ion | C. I. | % | Modification | Rank | Result Type |
|------------|-------------|------|-------|-------|-----|----------|-----|-------|---|--------------|------|-------------|
|------------|-------------|------|-------|-------|-----|----------|-----|-------|---|--------------|------|-------------|



|    |                                              |           |         |     | Seq.        | Seq. | Score                          |      |        |                                                  |        |        |        |
|----|----------------------------------------------|-----------|---------|-----|-------------|------|--------------------------------|------|--------|--------------------------------------------------|--------|--------|--------|
|    | 1039.5935                                    | 1039.5737 | -0.0198 | -19 | 310         | 318  | YLTVAAVFR                      |      |        |                                                  |        | Mascot |        |
|    | 1130.5953                                    | 1130.5736 | -0.0217 | -19 | 242         | 251  | FPGQLNADLR                     |      |        |                                                  |        | Mascot |        |
|    | 1130.5953                                    | 1130.5736 | -0.0217 | -19 | 242         | 251  | FPGQLNADLR                     | 60   | 99.975 |                                                  |        | Mascot |        |
|    | 1143.6343                                    | 1143.611  | -0.0233 | -20 | 253         | 262  | LAVNMVPFPR                     |      |        |                                                  |        | Mascot |        |
|    | 1159.6292                                    | 1159.6042 | -0.025  | -22 | 253         | 262  | LAVNMVPFPR                     |      |        | Oxidation (M)[5]                                 |        | Mascot |        |
|    | 1229.5983                                    | 1229.5704 | -0.0279 | -23 | 381         | 390  | ISEQFTAMFR                     |      |        |                                                  |        | Mascot |        |
|    | 1245.5933                                    | 1245.5704 | -0.0229 | -18 | 381         | 390  | ISEQFTAMFR                     | 12   | 0      | Oxidation (M)[8]                                 |        | Mascot |        |
|    | 1245.5933                                    | 1245.5704 | -0.0229 | -18 | 381         | 390  | ISEQFTAMFR                     |      |        | Oxidation (M)[8]                                 |        | Mascot |        |
|    | 1636.8304                                    | 1636.7954 | -0.035  | -21 | 263         | 276  | LHFFMPGFAPLTSR                 |      |        | Oxidation (M)[5]                                 |        | Mascot |        |
|    | 1696.8329                                    | 1696.797  | -0.0359 | -21 | 337         | 350  | NSSYFVEWIPNNVK                 |      |        |                                                  |        | Mascot |        |
|    | 2784.2822                                    | 2784.2913 | 0.0091  | 3   | 283         | 306  | VLSVPELTQQMFDAKNM<br>MAACDPR   |      |        | Carbamidomethyl (C)[21], Oxidation<br>(M)[11,17] |        | Mascot |        |
|    | 2798.3433                                    | 2798.2908 | -0.0525 | -19 | 78          | 103  | SGPFGQIFRPDNFVFGQ<br>SGAGNNWAK |      |        |                                                  |        | Mascot |        |
| 22 | hypothetical protein LOC550458 [Danio rerio] |           |         |     | gi 62955497 |      | 24485.8                        | 4.79 | 5      | 79                                               | 99.946 | 60     | 99.975 |

#### Peptide Information

|    | Calc. Mass                             | Obsrv. Mass | ± da    | ± ppm | Start Seq.   | End Seq. | Sequence                      | Ion Score | C. I.  | % Modification                                | Rank | Result Type |
|----|----------------------------------------|-------------|---------|-------|--------------|----------|-------------------------------|-----------|--------|-----------------------------------------------|------|-------------|
|    | 1130.5953                              | 1130.5736   | -0.0217 | -19   | 10           | 19       | FPGQLNADLR                    |           |        |                                               |      | Mascot      |
|    | 1130.5953                              | 1130.5736   | -0.0217 | -19   | 10           | 19       | FPGQLNADLR                    | 60        | 99.975 |                                               |      | Mascot      |
|    | 1143.6343                              | 1143.611    | -0.0233 | -20   | 21           | 30       | LAVNMVPFPR                    |           |        |                                               |      | Mascot      |
|    | 1159.6292                              | 1159.6042   | -0.025  | -22   | 21           | 30       | LAVNMVPFPR                    |           |        | Oxidation (M)[5]                              |      | Mascot      |
|    | 1267.7191                              | 1267.5913   | -0.1278 | -101  | 119          | 130      | VAVCDIPPRGLK                  |           |        |                                               |      | Mascot      |
|    | 1696.8329                              | 1696.797    | -0.0359 | -21   | 105          | 118      | NSSYFVEWIPNNVK                |           |        |                                               |      | Mascot      |
|    | 2798.2729                              | 2798.2908   | 0.0179  | 6     | 51           | 74       | ALTVPPELTQQMFDARNM<br>MAACDPR |           |        | Carbamidomethyl (C)[21], Oxidation (M)[11,17] |      | Mascot      |
| 23 | PREDICTED: protein NLRC3 [Danio rerio] |             |         |       | gi 326676393 | 81579.2  | 5.58                          | 13        | 41     | 0                                             |      |             |

#### Peptide Information

|  | Calc. Mass | Obsrv. Mass | ± da    | ± ppm | Start Seq. | End Seq. | Sequence      | Ion Score | C. I. | % Modification | Rank | Result Type |
|--|------------|-------------|---------|-------|------------|----------|---------------|-----------|-------|----------------|------|-------------|
|  | 1002.46    | 1002.4849   | 0.0249  | 25    | 681        | 688      | MDFFDLSK      |           |       |                |      | Mascot      |
|  | 1009.52    | 1009.5089   | -0.0111 | -11   | 610        | 617      | EETVQYIK      |           |       |                |      | Mascot      |
|  | 1130.5551  | 1130.5736   | 0.0185  | 16    | 680        | 688      | KMDFFDLSK     |           |       |                |      | Mascot      |
|  | 1130.5551  | 1130.5736   | 0.0185  | 16    | 680        | 688      | KMDFFDLSK     |           |       |                |      | Mascot      |
|  | 1143.7096  | 1143.611    | -0.0986 | -86   | 208        | 219      | TVLTKGAVAGIGK |           |       |                |      | Mascot      |
|  | 1153.5922  | 1153.5748   | -0.0174 | -15   | 295        | 304      | VSLDFKCDVK    |           |       |                |      | Mascot      |

|    |                                                 |           |         |      |     |     |                           |         |      |    |    |   |                    |        |
|----|-------------------------------------------------|-----------|---------|------|-----|-----|---------------------------|---------|------|----|----|---|--------------------|--------|
|    | 1167.4657                                       | 1167.5614 | 0.0957  | 82   | 30  | 39  | SDQSM DPPMK               |         |      |    |    |   | Oxidation (M)[5,9] | Mascot |
|    | 1181.6385                                       | 1181.5719 | -0.0666 | -56  | 171 | 179 | HEL RQ IETR               |         |      |    |    |   |                    | Mascot |
|    | 1181.6385                                       | 1181.5719 | -0.0666 | -56  | 171 | 179 | HEL RQ IETR               |         |      |    |    |   |                    | Mascot |
|    | 1245.7565                                       | 1245.5704 | -0.1861 | -149 | 456 | 466 | LGKLA FEQLVK              |         |      |    |    |   |                    | Mascot |
|    | 1245.7565                                       | 1245.5704 | -0.1861 | -149 | 456 | 466 | LGKLA FEQLVK              |         |      |    |    |   |                    | Mascot |
|    | 1410.6393                                       | 1410.679  | 0.0397  | 28   | 30  | 41  | SDQSM DPPMKFK             |         |      |    |    |   |                    | Mascot |
|    | 1426.7035                                       | 1426.6699 | -0.0336 | -24  | 283 | 294 | VLFI DGLDECR              |         |      |    |    |   |                    | Mascot |
|    | 2232.0247                                       | 2232.0173 | -0.0074 | -3   | 54  | 72  | SSCVSMKSDWSMDRPIQ<br>FK   |         |      |    |    |   |                    | Mascot |
|    | 2284.0332                                       | 2284.1411 | 0.1079  | 47   | 96  | 116 | SDQSMGPPINVMEEHSA<br>ADLR |         |      |    |    |   |                    | Mascot |
|    | 2297.2175                                       | 2297.1599 | -0.0576 | -25  | 459 | 477 | LA FEQLVKGNLIFYEEDL<br>R  |         |      |    |    |   |                    | Mascot |
| 24 | E3 ubiquitin-protein ligase TRAF7 [Danio rerio] |           |         |      |     |     | gi 122114575              | 71362.2 | 6.32 | 13 | 41 | 0 |                    |        |

Peptide Information

| Calc. Mass | Obsrv. Mass | ± da    | ± ppm | Start Seq. | End Seq. | Sequence                        | Ion Score | C. I. | % Modification            | Rank | Result Type |
|------------|-------------|---------|-------|------------|----------|---------------------------------|-----------|-------|---------------------------|------|-------------|
| 1009.4883  | 1009.5089   | 0.0206  | 20    | 159        | 168      | YGCRPAASGK                      |           |       |                           |      | Mascot      |
| 1116.5031  | 1116.5781   | 0.075   | 67    | 391        | 399      | VWDTCTTYK                       |           |       |                           |      | Mascot      |
| 1159.6357  | 1159.6042   | -0.0315 | -27   | 471        | 480      | VWDIVGTELK                      |           |       |                           |      | Mascot      |
| 1194.5637  | 1194.5635   | -0.0002 | 0     | 306        | 315      | FDVL DENQSK                     |           |       |                           |      | Mascot      |
| 1194.5637  | 1194.5635   | -0.0002 | 0     | 306        | 315      | FDVL DENQSK                     |           |       |                           |      | Mascot      |
| 1295.6412  | 1295.6853   | 0.0441  | 34    | 316        | 325      | LSEDLMEFRR                      |           |       |                           |      | Mascot      |
| 1563.7042  | 1563.7562   | 0.052   | 33    | 109        | 121      | DPVITTCGHTFCR                   |           |       | Carbamidomethyl (C)[7,12] |      | Mascot      |
| 1696.8251  | 1696.797    | -0.0281 | -17   | 169        | 184      | SGAYEVDPLGCPFTIK                |           |       |                           |      | Mascot      |
| 2211.1113  | 2211.0657   | -0.0456 | -21   | 169        | 188      | SGAYEVDPLGCPFTIKLS<br>TR        |           |       | Carbamidomethyl (C)[11]   |      | Mascot      |
| 2297.1741  | 2297.1599   | -0.0142 | -6    | 400        | 420      | CQKTLEGH DGIVLALCIQ<br>GNK      |           |       | Carbamidomethyl (C)[1]    |      | Mascot      |
| 2333.1199  | 2333.1191   | -0.0008 | 0     | 202        | 221      | CPNNPNC PPLTMNLEA<br>HLK        |           |       | Carbamidomethyl (C)[1,7]  |      | Mascot      |
| 2685.3486  | 2685.3127   | -0.0359 | -13   | 446        | 470      | AHDNPVCTLVSSH NMLF<br>SGSLKAIK  |           |       | Oxidation (M)[15]         |      | Mascot      |
| 2784.489   | 2784.2913   | -0.1977 | -71   | 559        | 584      | EQVRTLTGHVGT VYALA<br>VISTPDQTK |           |       |                           |      | Mascot      |
| 2798.2786  | 2798.2908   | 0.0122  | 4     | 28         | 53       | TPSTSSTLT YSTRDDDDG<br>MPPISTPR |           |       |                           |      | Mascot      |

|    |                             |  |  |  |  |  |              |       |      |   |    |   |  |  |
|----|-----------------------------|--|--|--|--|--|--------------|-------|------|---|----|---|--|--|
| 25 | novel protein [Danio rerio] |  |  |  |  |  | gi 220679558 | 45035 | 4.99 | 9 | 40 | 0 |  |  |
|----|-----------------------------|--|--|--|--|--|--------------|-------|------|---|----|---|--|--|

Peptide Information

| Calc. Mass | Obsrv. Mass | ± da   | ± ppm | Start Seq. | End Seq. | Sequence | Ion Score | C. I. | % Modification | Rank | Result Type |
|------------|-------------|--------|-------|------------|----------|----------|-----------|-------|----------------|------|-------------|
| 842.473    | 842.4942    | 0.0212 | 25    | 382        | 388      | DPKDVLR  |           |       |                |      | Mascot      |

|    |                                                                      |           |         |     |     |              |                                |      |    |    |   |                                          |  |  |  |  |        |
|----|----------------------------------------------------------------------|-----------|---------|-----|-----|--------------|--------------------------------|------|----|----|---|------------------------------------------|--|--|--|--|--------|
|    | 882.4791                                                             | 882.5475  | 0.0684  | 78  | 1   | 7            | VSTYTRR                        |      |    |    |   |                                          |  |  |  |  | Mascot |
|    | 1045.5889                                                            | 1045.5425 | -0.0464 | -44 | 54  | 62           | VIDTLESLR                      |      |    |    |   |                                          |  |  |  |  | Mascot |
|    | 1143.4744                                                            | 1143.611  | 0.1366  | 119 | 8   | 16           | CPGCQMIYR                      |      |    |    |   | Carbamidomethyl (C)[1], Oxidation (M)[6] |  |  |  |  | Mascot |
|    | 1159.5841                                                            | 1159.6042 | 0.0201  | 17  | 375 | 384          | LDETDVKDPK                     |      |    |    |   |                                          |  |  |  |  | Mascot |
|    | 1283.5806                                                            | 1283.5876 | 0.007   | 5   | 7   | 16           | RCPGCQMIYR                     |      |    |    |   | Carbamidomethyl (C)[2]                   |  |  |  |  | Mascot |
|    | 2247.2205                                                            | 2247.0815 | -0.139  | -62 | 43  | 62           | HSLQSHVGLSRVIDTLES<br>LR       |      |    |    |   |                                          |  |  |  |  | Mascot |
|    | 2297.0544                                                            | 2297.1599 | 0.1055  | 46  | 253 | 274          | ICGSSGGCSVVMCPHGV<br>VYSLK     |      |    |    |   | Carbamidomethyl (C)[2,8]                 |  |  |  |  | Mascot |
|    | 2685.302                                                             | 2685.3127 | 0.0107  | 4   | 253 | 278          | ICGSSGGCSVVMCPHGV<br>VYSLKFNLK |      |    |    |   |                                          |  |  |  |  | Mascot |
|    | 2701.2969                                                            | 2701.3164 | 0.0195  | 7   | 253 | 278          | ICGSSGGCSVVMCPHGV<br>VYSLKFNLK |      |    |    |   | Oxidation (M)[12]                        |  |  |  |  | Mascot |
| 26 | PREDICTED: tripartite motif-containing protein 59-like [Danio rerio] |           |         |     |     | gi 125836979 | 39637.8                        | 5.73 | 10 | 40 | 0 |                                          |  |  |  |  |        |

#### Peptide Information

| Calc. Mass | Obsrv. Mass | ± da    | ± ppm | Start Seq. | End Seq. | Sequence                     | Ion Score | C. I. | % Modification         | Rank | Result Type |
|------------|-------------|---------|-------|------------|----------|------------------------------|-----------|-------|------------------------|------|-------------|
| 864.3668   | 864.4733    | 0.1065  | 123   | 157        | 162      | WEEMNR                       |           |       |                        |      | Mascot      |
| 1045.5636  | 1045.5425   | -0.0211 | -20   | 174        | 182      | SEALVQKDR                    |           |       |                        |      | Mascot      |
| 1165.61    | 1165.7201   | 0.1101  | 94    | 131        | 140      | IDDLQTAYVK                   |           |       |                        |      | Mascot      |
| 1167.5463  | 1167.5614   | 0.0151  | 13    | 201        | 209      | EQFMQALER                    |           |       | Oxidation (M)[4]       |      | Mascot      |
| 1295.6412  | 1295.6853   | 0.0441  | 34    | 200        | 209      | KEQFMQALER                   |           |       | Oxidation (M)[5]       |      | Mascot      |
| 2177.1965  | 2177.0178   | -0.1787 | -82   | 181        | 199      | DREVALVFFQGLETLAQ<br>K       |           |       |                        |      | Mascot      |
| 2232.082   | 2232.0173   | -0.0647 | -29   | 263        | 282      | INTLNCTPMPTVPSLQMS<br>PR     |           |       | Oxidation (M)[9,17]    |      | Mascot      |
| 2283.0281  | 2283.1489   | 0.1208  | 53    | 94         | 113      | SPSCPEHPGQPLNVYCV<br>QDR     |           |       | Carbamidomethyl (C)[4] |      | Mascot      |
| 2333.2434  | 2333.1191   | -0.1243 | -53   | 32         | 51       | SCLESVLQVSVNFSIWRP<br>LR     |           |       |                        |      | Mascot      |
| 2784.5593  | 2784.2913   | -0.268  | -96   | 32         | 55       | SCLESVLQVSVNFSIWRP<br>LRLPLK |           |       |                        |      | Mascot      |

27 PREDICTED: protein NLRC3-like [Danio rerio] gi|326676399 101864.8 6.45 15 39 0

#### Peptide Information

| Calc. Mass | Obsrv. Mass | ± da    | ± ppm | Start Seq. | End Seq. | Sequence     | Ion Score | C. I. | % Modification   | Rank | Result Type |
|------------|-------------|---------|-------|------------|----------|--------------|-----------|-------|------------------|------|-------------|
| 850.4417   | 850.5272    | 0.0855  | 101   | 593        | 599      | IFSQAER      |           |       |                  |      | Mascot      |
| 864.4937   | 864.4733    | -0.0204 | -24   | 718        | 724      | NVFKQTK      |           |       |                  |      | Mascot      |
| 1116.6194  | 1116.5781   | -0.0413 | -37   | 886        | 894      | LLPVMRESR    |           |       | Oxidation (M)[5] |      | Mascot      |
| 1143.7096  | 1143.611    | -0.0986 | -86   | 391        | 402      | TVLTGKVAGIGK |           |       |                  |      | Mascot      |
| 1159.6106  | 1159.6042   | -0.0064 | -6    | 478        | 487      | VSLEFHSNVK   |           |       |                  |      | Mascot      |

|           |           |         |      |     |     |                            |                                            |        |
|-----------|-----------|---------|------|-----|-----|----------------------------|--------------------------------------------|--------|
| 1166.5181 | 1166.5292 | 0.0111  | 10   | 288 | 297 | SMPPESSCKK                 | Carbamidomethyl (C)[8], Oxidation (M)[2]   | Mascot |
| 1194.542  | 1194.5635 | 0.0215  | 18   | 366 | 376 | AATEDTSIQCR                |                                            | Mascot |
| 1194.542  | 1194.5635 | 0.0215  | 18   | 366 | 376 | AATEDTSIQCR                |                                            | Mascot |
| 1245.7565 | 1245.5704 | -0.1861 | -149 | 639 | 649 | LGKLAFEQLVK                |                                            | Mascot |
| 1245.7565 | 1245.5704 | -0.1861 | -149 | 639 | 649 | LGKLAFEQLVK                |                                            | Mascot |
| 1281.5814 | 1281.6235 | 0.0421  | 33   | 253 | 264 | SNSLEPSCVSMK               |                                            | Mascot |
| 1295.5607 | 1295.6853 | 0.1246  | 96   | 218 | 229 | SSSPEPSCVSMK               | Carbamidomethyl (C)[8]                     | Mascot |
| 1426.7035 | 1426.6699 | -0.0336 | -24  | 466 | 477 | VLFIFDGLDECR               |                                            | Mascot |
| 1564.7457 | 1564.7742 | 0.0285  | 18   | 146 | 159 | LRSSSPEPSCVSMK             | Carbamidomethyl (C)[10]                    | Mascot |
| 1580.7407 | 1580.7805 | 0.0398  | 25   | 146 | 159 | LRSSSPEPSCVSMK             | Carbamidomethyl (C)[10], Oxidation (M)[13] | Mascot |
| 1696.821  | 1696.797  | -0.024  | -14  | 780 | 794 | ELLTQPGSCSYNKEK            |                                            | Mascot |
| 1959.0909 | 1958.9482 | -0.1427 | -73  | 31  | 47  | QHSLLDIHLTAELLDDK          |                                            | Mascot |
| 1959.0909 | 1958.9482 | -0.1427 | -73  | 31  | 47  | QHSLLDIHLTAELLDDK          |                                            | Mascot |
| 2194.0854 | 2194.0737 | -0.0117 | -5   | 55  | 75  | LTNHSGRSLAIGGCVCIIY<br>SSR |                                            | Mascot |

28 Wu:fc64b08 protein [Danio rerio] gi|111308030 42615.9 5.76 3 37 0 29 65.423

#### Peptide Information

| Calc. Mass | Obsrv. Mass | $\pm$ da | $\pm$ ppm | Start Seq. | End Seq. | Sequence   | Ion Score | C. I.  | % Modification     | Rank | Result Type |
|------------|-------------|----------|-----------|------------|----------|------------|-----------|--------|--------------------|------|-------------|
| 1130.5801  | 1130.5736   | -0.0065  | -6        | 282        | 290      | EEERLADLR  |           |        |                    |      | Mascot      |
| 1130.5801  | 1130.5736   | -0.0065  | -6        | 282        | 290      | EEERLADLR  | 29        | 65.423 |                    |      | Mascot      |
| 1236.6075  | 1236.743    | 0.1355   | 110       | 210        | 219      | MCIIDQIQTR |           |        | Oxidation (M)[1]   |      | Mascot      |
| 1281.5925  | 1281.6235   | 0.031    | 24        | 179        | 188      | LDAMMEVERR |           |        | Oxidation (M)[4,5] |      | Mascot      |

29 MxD protein [Danio rerio] gi|28475263 27618.7 6.6 8 37 0

#### Peptide Information

| Calc. Mass | Obsrv. Mass | $\pm$ da | $\pm$ ppm | Start Seq. | End Seq. | Sequence      | Ion Score | C. I. | % Modification   | Rank | Result Type |
|------------|-------------|----------|-----------|------------|----------|---------------|-----------|-------|------------------|------|-------------|
| 839.4621   | 839.4151    | -0.047   | -56       | 185        | 191      | DLVDHIK       |           |       |                  |      | Mascot      |
| 842.444    | 842.4942    | 0.0502   | 60        | 128        | 134      | KGYTMVK       |           |       | Oxidation (M)[5] |      | Mascot      |
| 1039.6042  | 1039.5737   | -0.0305  | -29       | 56         | 63       | LIMKYIMK      |           |       |                  |      | Mascot      |
| 1181.6888  | 1181.5719   | -0.1169  | -99       | 182        | 191      | LTKDLVDHIK    |           |       |                  |      | Mascot      |
| 1181.6888  | 1181.5719   | -0.1169  | -99       | 182        | 191      | LTKDLVDHIK    |           |       |                  |      | Mascot      |
| 1229.5942  | 1229.5704   | -0.0238  | -19       | 86         | 96       | MAQNVDPEGIR   |           |       |                  |      | Mascot      |
| 1245.5892  | 1245.5704   | -0.0188  | -15       | 86         | 96       | MAQNVDPEGIR   |           |       | Oxidation (M)[1] |      | Mascot      |
| 1245.5892  | 1245.5704   | -0.0188  | -15       | 86         | 96       | MAQNVDPEGIR   |           |       | Oxidation (M)[1] |      | Mascot      |
| 1426.8516  | 1426.6699   | -0.1817  | -127      | 97         | 109      | TVAILTKPDLIDK |           |       |                  |      | Mascot      |

|                     |                                                                     |             |         |       |              |          |                          |           |       |   |                        |                   |             |
|---------------------|---------------------------------------------------------------------|-------------|---------|-------|--------------|----------|--------------------------|-----------|-------|---|------------------------|-------------------|-------------|
|                     | 1708.8496                                                           | 1708.7771   | -0.0725 | -42   | 9            | 24       | GVGICDDLITLEVMSK         |           |       |   |                        | Oxidation (M)[14] | Mascot      |
|                     | 2284.2217                                                           | 2284.1411   | -0.0806 | -35   | 65           | 85       | ETINLVVPCNIDIATTEAL<br>R |           |       |   |                        |                   | Mascot      |
| 30                  | PREDICTED: poly [ADP-ribose] polymerase 15 [Danio rerio]            |             |         |       | gi 326670904 | 97229.2  | 6.93                     | 10        | 37    | 0 | 15                     | 0                 |             |
| Peptide Information |                                                                     |             |         |       |              |          |                          |           |       |   |                        |                   |             |
|                     | Calc. Mass                                                          | Obsrv. Mass | ± da    | ± ppm | Start Seq.   | End Seq. | Sequence                 | Ion Score | C. I. | % | Modification           | Rank              | Result Type |
|                     | 870.5267                                                            | 870.5242    | -0.0025 | -3    | 599          | 606      | GAAVQRLR                 |           |       |   |                        |                   | Mascot      |
|                     | 1051.5387                                                           | 1051.692    | 0.1533  | 146   | 827          | 836      | VVTGAMCKSR               |           |       |   |                        |                   | Mascot      |
|                     | 1077.5898                                                           | 1077.514    | -0.0758 | -70   | 113          | 122      | KGSITTESVR               | 4         |       | 0 |                        |                   | Mascot      |
|                     | 1077.5898                                                           | 1077.514    | -0.0758 | -70   | 113          | 122      | KGSITTESVR               |           |       |   |                        |                   | Mascot      |
|                     | 1130.5986                                                           | 1130.5736   | -0.025  | -22   | 97           | 105      | MPENQVKIR                |           |       |   | Oxidation (M)[1]       |                   | Mascot      |
|                     | 1130.5986                                                           | 1130.5736   | -0.025  | -22   | 97           | 105      | MPENQVKIR                | 15        |       | 0 | Oxidation (M)[1]       |                   | Mascot      |
|                     | 1165.6211                                                           | 1165.7201   | 0.099   | 85    | 711          | 720      | IEAEFVRSSK               |           |       |   |                        |                   | Mascot      |
|                     | 1236.7576                                                           | 1236.743    | -0.0146 | -12   | 449          | 458      | RVHIVIFQPK               |           |       |   |                        |                   | Mascot      |
|                     | 1281.6797                                                           | 1281.6235   | -0.0562 | -44   | 359          | 370      | APQPEDGVVLTR             |           |       |   |                        |                   | Mascot      |
|                     | 1564.7588                                                           | 1564.7742   | 0.0154  | 10    | 519          | 532      | SLLDLLSEESK              |           |       |   |                        |                   | Mascot      |
|                     | 1580.8279                                                           | 1580.7805   | -0.0474 | -30   | 2            | 16       | VGPENITDITHSLGK          |           |       |   |                        |                   | Mascot      |
|                     | 2136.8928                                                           | 2137.0828   | 0.19    | 89    | 802          | 820      | DAWYSCQDQYSSVDGS<br>GLR  |           |       |   |                        |                   | Mascot      |
|                     | 2193.9141                                                           | 2194.0737   | 0.1596  | 73    | 802          | 820      | DAWYSCQDQYSSVDGS<br>GLR  |           |       |   | Carbamidomethyl (C)[6] |                   | Mascot      |
| 31                  | PREDICTED: putative Polycomb group protein ASXL2-like [Danio rerio] |             |         |       | gi 189531021 | 131591.5 | 9.22                     | 14        | 36    | 0 |                        |                   |             |
| Peptide Information |                                                                     |             |         |       |              |          |                          |           |       |   |                        |                   |             |
|                     | Calc. Mass                                                          | Obsrv. Mass | ± da    | ± ppm | Start Seq.   | End Seq. | Sequence                 | Ion Score | C. I. | % | Modification           | Rank              | Result Type |
|                     | 839.4297                                                            | 839.4151    | -0.0146 | -17   | 207          | 212      | YTWELK                   |           |       |   |                        |                   | Mascot      |
|                     | 842.4011                                                            | 842.4942    | 0.0931  | 111   | 1174         | 1179     | CYCRLK                   |           |       |   | Carbamidomethyl (C)[1] |                   | Mascot      |
|                     | 870.5267                                                            | 870.5242    | -0.0025 | -3    | 252          | 258      | LNARQLR                  |           |       |   |                        |                   | Mascot      |
|                     | 1045.6                                                              | 1045.5425   | -0.0575 | -55   | 622          | 631      | TGARTLADIK               |           |       |   |                        |                   | Mascot      |
|                     | 1077.5647                                                           | 1077.514    | -0.0507 | -47   | 642          | 653      | AAAAAARSSSSK             | 7         |       | 0 |                        |                   | Mascot      |
|                     | 1077.5647                                                           | 1077.514    | -0.0507 | -47   | 642          | 653      | AAAAAARSSSSK             |           |       |   |                        |                   | Mascot      |
|                     | 1236.6769                                                           | 1236.743    | 0.0661  | 53    | 74           | 84       | VPGRMGVYTLK              |           |       |   | Oxidation (M)[5]       |                   | Mascot      |
|                     | 1281.5991                                                           | 1281.6235   | 0.0244  | 19    | 1035         | 1046     | SESPSLSCLSK              |           |       |   | Carbamidomethyl (C)[8] |                   | Mascot      |
|                     | 1283.743                                                            | 1283.5876   | -0.1554 | -121  | 33           | 42       | EILQVIQRER               |           |       |   |                        |                   | Mascot      |
|                     | 1332.6437                                                           | 1332.6483   | 0.0046  | 3     | 177          | 188      | RQCGISNASSPR             |           |       |   | Carbamidomethyl (C)[3] |                   | Mascot      |

|    |                                              |           |         |     |      |              |                                |      |   |    |   |                                              |        |
|----|----------------------------------------------|-----------|---------|-----|------|--------------|--------------------------------|------|---|----|---|----------------------------------------------|--------|
|    | 1563.7758                                    | 1563.7562 | -0.0196 | -13 | 494  | 507          | TPTSPLEAMVTCLK                 |      |   |    |   | Carbamidomethyl (C)[12], Oxidation (M)[9]    | Mascot |
|    | 1564.8516                                    | 1564.7742 | -0.0774 | -49 | 415  | 427          | VNPVIEVIHMELR                  |      |   |    |   | Oxidation (M)[10]                            | Mascot |
|    | 1958.8616                                    | 1958.9482 | 0.0866  | 44  | 1057 | 1073         | ETCSKGQLDMCSTIQGK              |      |   |    |   | Carbamidomethyl (C)[3,11], Oxidation (M)[10] | Mascot |
|    | 1958.8616                                    | 1958.9482 | 0.0866  | 44  | 1057 | 1073         | ETCSKGQLDMCSTIQGK              |      |   |    |   | Carbamidomethyl (C)[3,11], Oxidation (M)[10] | Mascot |
|    | 2332.9309                                    | 2333.1191 | 0.1882  | 81  | 1180 | 1200         | AMIMCKGCGAFCHDDCI<br>GPSK      |      |   |    |   | Carbamidomethyl (C)[5,8], Oxidation (M)[2,4] | Mascot |
|    | 2798.3235                                    | 2798.2908 | -0.0327 | -12 | 48   | 73           | SGTSPLACLNAMLHTNS<br>RGDEGIFYK |      |   |    |   | Oxidation (M)[12]                            | Mascot |
| 32 | hypothetical protein LOC325276 [Danio rerio] |           |         |     |      | gi 131889587 | 59624                          | 6.59 | 3 | 36 | 0 | 29                                           | 65.423 |

#### Peptide Information

| Calc. Mass | Obsrv. Mass | ± da    | ± ppm | Start Seq. | End Seq. | Sequence   | Ion Score | C. I.  | % | Modification       | Rank | Result Type |
|------------|-------------|---------|-------|------------|----------|------------|-----------|--------|---|--------------------|------|-------------|
| 1130.5801  | 1130.5736   | -0.0065 | -6    | 282        | 290      | EEERLADLR  |           |        |   |                    |      | Mascot      |
| 1130.5801  | 1130.5736   | -0.0065 | -6    | 282        | 290      | EEERLADLR  | 29        | 65.423 |   |                    |      | Mascot      |
| 1236.6075  | 1236.743    | 0.1355  | 110   | 210        | 219      | MCIIDIQTR  |           |        |   | Oxidation (M)[1]   |      | Mascot      |
| 1281.5925  | 1281.6235   | 0.031   | 24    | 179        | 188      | LDAMMEVERR |           |        |   | Oxidation (M)[4,5] |      | Mascot      |

|    |                                     |  |  |  |  |             |         |      |   |    |   |    |        |
|----|-------------------------------------|--|--|--|--|-------------|---------|------|---|----|---|----|--------|
| 33 | heat shock protein 47 [Danio rerio] |  |  |  |  | gi 18858869 | 45489.4 | 8.61 | 4 | 35 | 0 | 28 | 55.966 |
|----|-------------------------------------|--|--|--|--|-------------|---------|------|---|----|---|----|--------|

#### Peptide Information

| Calc. Mass | Obsrv. Mass | ± da    | ± ppm | Start Seq. | End Seq. | Sequence                  | Ion Score | C. I.  | % | Modification | Rank | Result Type |
|------------|-------------|---------|-------|------------|----------|---------------------------|-----------|--------|---|--------------|------|-------------|
| 1077.4749  | 1077.514    | 0.0391  | 36    | 139        | 146      | HYNIEHSK                  | 28        | 55.966 |   |              |      | Mascot      |
| 1077.4749  | 1077.514    | 0.0391  | 36    | 139        | 146      | HYNIEHSK                  |           |        |   |              |      | Mascot      |
| 1281.6191  | 1281.6235   | 0.0044  | 3     | 215        | 225      | SHTVSVPMHR                |           |        |   |              |      | Mascot      |
| 1564.6914  | 1564.7742   | 0.0828  | 53    | 226        | 238      | TGIYGFYEDTENR             |           |        |   |              |      | Mascot      |
| 2333.2607  | 2333.1191   | -0.1416 | -61   | 1          | 22       | MWVSSIALCLLAVAVSG<br>EDKK |           |        |   |              |      | Mascot      |

|    |                                                                         |  |  |  |  |              |         |     |   |    |   |  |  |
|----|-------------------------------------------------------------------------|--|--|--|--|--------------|---------|-----|---|----|---|--|--|
| 34 | PREDICTED: putative uncharacterized protein C6orf183-like [Danio rerio] |  |  |  |  | gi 125841231 | 17473.1 | 9.2 | 6 | 35 | 0 |  |  |
|----|-------------------------------------------------------------------------|--|--|--|--|--------------|---------|-----|---|----|---|--|--|

#### Peptide Information

| Calc. Mass | Obsrv. Mass | ± da    | ± ppm | Start Seq. | End Seq. | Sequence   | Ion Score | C. I. | % | Modification     | Rank | Result Type |
|------------|-------------|---------|-------|------------|----------|------------|-----------|-------|---|------------------|------|-------------|
| 996.4996   | 996.5745    | 0.0749  | 75    | 2          | 10       | SQTYSSPVK  |           |       |   |                  |      | Mascot      |
| 996.4996   | 996.5745    | 0.0749  | 75    | 2          | 10       | SQTYSSPVK  |           |       |   |                  |      | Mascot      |
| 1039.5791  | 1039.5737   | -0.0054 | -5    | 117        | 124      | CKYLLMLR   |           |       |   |                  |      | Mascot      |
| 1143.535   | 1143.611    | 0.076   | 66    | 1          | 10       | MSQTYSSPVK |           |       |   | Oxidation (M)[1] |      | Mascot      |
| 1166.6503  | 1166.5292   | -0.1211 | -104  | 119        | 126      | YLLMLRWR   |           |       |   | Oxidation (M)[4] |      | Mascot      |
| 1283.6816  | 1283.5876   | -0.094  | -73   | 138        | 147      | LYPQYKVNMK |           |       |   |                  |      | Mascot      |



38    ATP-dependent RNA helicase DDX1 [Danio rerio]    ACSYHK  
gi|309243086    82361.6    6.62    13    34    0

Peptide Information

| Calc. Mass | Obsrv. Mass | ± da    | ± ppm | Start Seq. | End Seq. | Sequence                      | Ion Score | C. I. % | Modification                              | Rank | Result Type |
|------------|-------------|---------|-------|------------|----------|-------------------------------|-----------|---------|-------------------------------------------|------|-------------|
| 870.5294   | 870.5242    | -0.0052 | -6    | 289        | 296      | ALIIEPSK                      |           |         |                                           |      | Mascot      |
| 1143.6017  | 1143.611    | 0.0093  | 8     | 597        | 605      | ENYVHRIGR                     |           |         |                                           |      | Mascot      |
| 1153.5493  | 1153.5748   | 0.0255  | 22    | 506        | 514      | MDQAIIFCR                     |           |         | Carbamidomethyl (C)[8]                    |      | Mascot      |
| 1165.6034  | 1165.7201   | 0.1167  | 100   | 568        | 577      | FLICTDVAAR                    |           |         | Carbamidomethyl (C)[4]                    |      | Mascot      |
| 1283.6453  | 1283.5876   | -0.0577 | -45   | 224        | 234      | SQPF FASCVLK                  |           |         | Carbamidomethyl (C)[8]                    |      | Mascot      |
| 1563.7406  | 1563.7562   | 0.0156  | 10    | 503        | 514      | EHKMDQAIIFCR                  |           |         | Carbamidomethyl (C)[11], Oxidation (M)[4] |      | Mascot      |
| 1564.7543  | 1564.7742   | 0.0199  | 13    | 240        | 252      | FNFGDEAFKHQPK                 |           |         |                                           |      | Mascot      |
| 1636.8396  | 1636.7954   | -0.0442 | -27   | 609        | 623      | ADRMGLAISLVAMEK               |           |         | Oxidation (M)[4,13]                       |      | Mascot      |
| 1696.8652  | 1696.797    | -0.0682 | -40   | 253        | 268      | DGYVALNQAPEGHVVK              |           |         |                                           |      | Mascot      |
| 1932.8479  | 1932.9259   | 0.078   | 40    | 131        | 146      | GRYYYYEVACHDQGLCR             |           |         |                                           |      | Mascot      |
| 1932.8479  | 1932.9259   | 0.078   | 40    | 131        | 146      | GRYYYYEVACHDQGLCR             |           |         |                                           |      | Mascot      |
| 2019.9263  | 2020.0612   | 0.1349  | 67    | 99         | 117      | STAF AIGSDGLCCQSREF<br>K      |           |         |                                           |      | Mascot      |
| 2019.9263  | 2020.0612   | 0.1349  | 67    | 99         | 117      | STAF AIGSDGLCCQSREF<br>K      |           |         |                                           |      | Mascot      |
| 2784.2893  | 2784.2913   | 0.002   | 1     | 466        | 490      | TDEVHAKDDTRPGANSP<br>EMWSEAIK |           |         |                                           |      | Mascot      |
| 2798.196   | 2798.2908   | 0.0948  | 34    | 178        | 200      | QFDSYGEEFTMHDTIGC<br>YIDLEK   |           |         | Carbamidomethyl (C)[17]                   |      | Mascot      |

39    nitrogen fixation cluster-like [Danio rerio]    gi|221307563    17420.2    8.83    6    34    0

Peptide Information

| Calc. Mass | Obsrv. Mass | ± da    | ± ppm | Start Seq. | End Seq. | Sequence                  | Ion Score | C. I. % | Modification            | Rank | Result Type |
|------------|-------------|---------|-------|------------|----------|---------------------------|-----------|---------|-------------------------|------|-------------|
| 882.5294   | 882.5475    | 0.0181  | 21    | 122        | 129      | ELSLPPVK                  |           |         |                         |      | Mascot      |
| 1002.5829  | 1002.4849   | -0.098  | -98   | 107        | 115      | SVDEALKIK                 |           |         |                         |      | Mascot      |
| 1045.5636  | 1045.5425   | -0.0211 | -20   | 42         | 51       | NVGS LDKNAK               |           |         |                         |      | Mascot      |
| 1958.9785  | 1958.9482   | -0.0303 | -15   | 49         | 68       | NAKNVGTGLVGAPACGD<br>VMK  |           |         | Carbamidomethyl (C)[15] |      | Mascot      |
| 1958.9785  | 1958.9482   | -0.0303 | -15   | 49         | 68       | NAKNVGTGLVGAPACGD<br>VMK  |           |         | Carbamidomethyl (C)[15] |      | Mascot      |
| 2194.1611  | 2194.0737   | -0.0874 | -40   | 122        | 141      | ELSLPPVKLHCSMLAEDA<br>IK  |           |         |                         |      | Mascot      |
| 2247.1113  | 2247.0815   | -0.0298 | -13   | 84         | 104      | FKTFGCGSAIASSSLATE<br>WVK |           |         | Carbamidomethyl (C)[6]  |      | Mascot      |

40    angiopoietin 1 [Danio rerio]    gi|148724939    58333.5    6.48    10    34    0

Peptide Information



|    |                                                                             | Calc. Mass | Obsrv. Mass | $\pm$ da | $\pm$ ppm | Start Seq. | End Sequence Seq.                | Ion Score | C. I. % | Modification         | Rank | Result Type |
|----|-----------------------------------------------------------------------------|------------|-------------|----------|-----------|------------|----------------------------------|-----------|---------|----------------------|------|-------------|
|    |                                                                             | 839.5137   | 839.4151    | -0.0986  | -117      | 415        | 420 YRLFLK                       |           |         |                      |      | Mascot      |
|    |                                                                             | 850.4125   | 850.5272    | 0.1147   | 135       | 34         | 41 SNSSSGRR                      |           |         |                      |      | Mascot      |
|    |                                                                             | 1167.6229  | 1167.5614   | -0.0615  | -53       | 216        | 224 HRQEESLR                     |           |         |                      |      | Mascot      |
|    |                                                                             | 1194.5709  | 1194.5635   | -0.0074  | -6        | 29         | 40 SSTPKSNSSSGR                  |           |         |                      |      | Mascot      |
|    |                                                                             | 1194.5709  | 1194.5635   | -0.0074  | -6        | 29         | 40 SSTPKSNSSSGR                  |           |         |                      |      | Mascot      |
|    |                                                                             | 1229.5692  | 1229.5704   | 0.0012   | 1         | 209        | 217 MQELEDHR                     |           |         | Oxidation (M)[1]     |      | Mascot      |
|    |                                                                             | 1267.6351  | 1267.5913   | -0.0438  | -35       | 111        | 120 IENYKDNMK                    |           |         |                      |      | Mascot      |
|    |                                                                             | 1281.5563  | 1281.6235   | 0.0672   | 52        | 261        | 270 QQQDLMESMR                   |           |         | Oxidation (M)[6]     |      | Mascot      |
|    |                                                                             | 1283.63    | 1283.5876   | -0.0424  | -33       | 111        | 120 IENYKDNMK                    |           |         | Oxidation (M)[9]     |      | Mascot      |
|    |                                                                             | 1563.8013  | 1563.7562   | -0.0451  | -29       | 312        | 325 NGVYTINISPQETK               |           |         |                      |      | Mascot      |
|    |                                                                             | 2297.0608  | 2297.1599   | 0.0991   | 43        | 251        | 270 ATGNSTALQRQQDLME<br>SMR      |           |         | Oxidation (M)[16,19] |      | Mascot      |
|    |                                                                             | 2701.2939  | 2701.3164   | 0.0225   | 8         | 360        | 383 MGFGSVSGEHWLGNEF<br>VHVLTNQR |           |         |                      |      | Mascot      |
| 41 | coiled-coil domain-containing protein 77 [Danio rerio]                      |            |             |          |           |            | gi 70887567                      | 50397.4   | 8.49    | 1                    | 21   | 0           |
|    | Peptide Information                                                         |            |             |          |           |            |                                  |           |         |                      |      |             |
|    |                                                                             | Calc. Mass | Obsrv. Mass | $\pm$ da | $\pm$ ppm | Start Seq. | End Sequence Seq.                | Ion Score | C. I. % | Modification         | Rank | Result Type |
|    |                                                                             | 1181.5831  | 1181.5719   | -0.0112  | -9        | 255        | 264 TQSLLMESTR                   | 21        | 0       | Oxidation (M)[6]     | 2    | Mascot      |
| 42 | LOC569134 protein [Danio rerio]                                             |            |             |          |           |            | gi 141796290                     | 54957.9   | 6.18    | 1                    | 18   | 0           |
|    | Peptide Information                                                         |            |             |          |           |            |                                  |           |         |                      |      |             |
|    |                                                                             | Calc. Mass | Obsrv. Mass | $\pm$ da | $\pm$ ppm | Start Seq. | End Sequence Seq.                | Ion Score | C. I. % | Modification         | Rank | Result Type |
|    |                                                                             | 1077.5687  | 1077.514    | -0.0547  | -51       | 288        | 295 REEEFIVR                     | 18        | 0       |                      | 3    | Mascot      |
| 43 | neural orphan nuclear receptor Nur77 [Danio rerio]                          |            |             |          |           |            | gi 47060283                      | 63776.4   | 5.79    | 1                    | 17   | 0           |
|    | Peptide Information                                                         |            |             |          |           |            |                                  |           |         |                      |      |             |
|    |                                                                             | Calc. Mass | Obsrv. Mass | $\pm$ da | $\pm$ ppm | Start Seq. | End Sequence Seq.                | Ion Score | C. I. % | Modification         | Rank | Result Type |
|    |                                                                             | 1077.5436  | 1077.514    | -0.0296  | -27       | 505        | 512 RIEDFQNR                     | 17        | 0       |                      | 4    | Mascot      |
| 44 | PREDICTED: ras-specific guanine nucleotide-releasing factor 1 [Danio rerio] |            |             |          |           |            | gi 292623725                     | 143434.7  | 6.88    | 1                    | 16   | 0           |
|    | Peptide Information                                                         |            |             |          |           |            |                                  |           |         |                      |      |             |
|    |                                                                             | Calc. Mass | Obsrv. Mass | $\pm$ da | $\pm$ ppm | Start Seq. | End Sequence Seq.                | Ion Score | C. I. % | Modification         | Rank | Result Type |

|                     |                                                                                                     |            |             |         |       |            |                   |             |      |           |         |                  |   |      |             |
|---------------------|-----------------------------------------------------------------------------------------------------|------------|-------------|---------|-------|------------|-------------------|-------------|------|-----------|---------|------------------|---|------|-------------|
|                     |                                                                                                     | 1077.5687  | 1077.514    | -0.0547 | -51   | 922        | 930               | NGDKEFVIR   |      | 16        | 0       |                  |   | 5    | Mascot      |
| 45                  | alpha-L-iduronidase [Danio rerio]                                                                   |            |             |         |       |            | gi 41055190       | 53903       | 9.32 | 1         |         | 16               | 0 |      |             |
| Peptide Information |                                                                                                     |            |             |         |       |            |                   |             |      |           |         |                  |   |      |             |
|                     |                                                                                                     | Calc. Mass | Obsrv. Mass | ± da    | ± ppm | Start Seq. | End Sequence Seq. |             |      | Ion Score | C. I. % | Modification     |   | Rank | Result Type |
|                     |                                                                                                     | 1130.6793  | 1130.5736   | -0.1057 | -93   | 72         | 80                | FRVLQQALR   |      | 16        | 0       |                  |   | 3    | Mascot      |
| 46                  | PREDICTED: arf-GAP with Rho-GAP domain, ANK repeat and PH domain-containing protein 3 [Danio rerio] |            |             |         |       |            | gi 189527791      | 188417.3    | 7.49 | 1         |         | 15               | 0 |      |             |
| Peptide Information |                                                                                                     |            |             |         |       |            |                   |             |      |           |         |                  |   |      |             |
|                     |                                                                                                     | Calc. Mass | Obsrv. Mass | ± da    | ± ppm | Start Seq. | End Sequence Seq. |             |      | Ion Score | C. I. % | Modification     |   | Rank | Result Type |
|                     |                                                                                                     | 1130.639   | 1130.5736   | -0.0654 | -58   | 1492       | 1501              | FGTMPLVPIR  |      | 15        | 0       |                  |   | 4    | Mascot      |
| 47                  | Unknown (protein for IMAGE:6962011) [Danio rerio]                                                   |            |             |         |       |            | gi 197245616      | 292441.8    | 6.31 | 1         |         | 15               | 0 |      |             |
| Peptide Information |                                                                                                     |            |             |         |       |            |                   |             |      |           |         |                  |   |      |             |
|                     |                                                                                                     | Calc. Mass | Obsrv. Mass | ± da    | ± ppm | Start Seq. | End Sequence Seq. |             |      | Ion Score | C. I. % | Modification     |   | Rank | Result Type |
|                     |                                                                                                     | 1181.7252  | 1181.5719   | -0.1533 | -130  | 1328       | 1338              | SDPKVKPIVAK |      | 17        | 0       |                  |   | 3    | Mascot      |
| 48                  | LOC100148704 protein [Danio rerio]                                                                  |            |             |         |       |            | gi 169642057      | 94325.7     | 7.16 | 1         |         | 15               | 0 |      |             |
| Peptide Information |                                                                                                     |            |             |         |       |            |                   |             |      |           |         |                  |   |      |             |
|                     |                                                                                                     | Calc. Mass | Obsrv. Mass | ± da    | ± ppm | Start Seq. | End Sequence Seq. |             |      | Ion Score | C. I. % | Modification     |   | Rank | Result Type |
|                     |                                                                                                     | 1130.5986  | 1130.5736   | -0.025  | -22   | 69         | 77                | MPENQVKIR   |      | 15        | 0       | Oxidation (M)[1] |   | 5    | Mascot      |
| 49                  | PREDICTED: hypothetical protein LOC564101 [Danio rerio]                                             |            |             |         |       |            | gi 189523351      | 330152.6    | 5.31 | 1         |         | 15               | 0 |      |             |
| Peptide Information |                                                                                                     |            |             |         |       |            |                   |             |      |           |         |                  |   |      |             |
|                     |                                                                                                     | Calc. Mass | Obsrv. Mass | ± da    | ± ppm | Start Seq. | End Sequence Seq. |             |      | Ion Score | C. I. % | Modification     |   | Rank | Result Type |
|                     |                                                                                                     | 1077.5356  | 1077.514    | -0.0216 | -20   | 2052       | 2059              | EREMEVLR    |      | 16        | 0       | Oxidation (M)[4] |   | 5    | Mascot      |
| 50                  | PREDICTED: hypothetical protein LOC407633 [Danio rerio]                                             |            |             |         |       |            | gi 326677031      | 282878.7    | 9.17 | 1         |         | 15               | 0 |      |             |
| Peptide Information |                                                                                                     |            |             |         |       |            |                   |             |      |           |         |                  |   |      |             |
|                     |                                                                                                     | Calc. Mass | Obsrv. Mass | ± da    | ± ppm | Start Seq. | End Sequence Seq. |             |      | Ion Score | C. I. % | Modification     |   | Rank | Result Type |

|           |          |        |    |     |     |            |    |   |   |        |
|-----------|----------|--------|----|-----|-----|------------|----|---|---|--------|
| 1077.4596 | 1077.514 | 0.0544 | 50 | 407 | 416 | SSWGESGDPR | 15 | 0 | 7 | Mascot |
|-----------|----------|--------|----|-----|-----|------------|----|---|---|--------|

|                |           |                        |                |                |                    |
|----------------|-----------|------------------------|----------------|----------------|--------------------|
| Gel Idx/Pos    | 207/I7    | Instr./Gel Origin      | BA2060/110707A | Process Status | Analysis Succeeded |
| Plate [#] Name | [1] 31496 | Instrument Sample Name |                | Spectra        | 11                 |

| Rank | Protein Name               | Accession No. | Protein MW | Protein PI | Pep. Count | Protein Score | Protein Score C. I. % | Total Ion Score | Total Ion C. I. % |
|------|----------------------------|---------------|------------|------------|------------|---------------|-----------------------|-----------------|-------------------|
| 1    | Krt4 protein [Danio rerio] | gi 161612220  | 53979.9    | 5.34       | 25         | 960           | 100                   | 767             | 100               |

Peptide Information

| Calc. Mass | Obsrv. Mass | ± da    | ± ppm | Start Seq. | End Sequence Seq. | Ion Score | C. I. % | Modification     | Rank | Result Type |
|------------|-------------|---------|-------|------------|-------------------|-----------|---------|------------------|------|-------------|
| 827.4297   | 827.4138    | -0.0159 | -19   | 125        | 131 FASFIDK       |           |         |                  |      | Mascot      |
| 882.4349   | 882.5457    | 0.1108  | 126   | 33         | 40 MSSVTSVR       |           |         | Oxidation (M)[1] |      | Mascot      |
| 915.4893   | 915.4689    | -0.0204 | -22   | 328        | 335 AEIAELNR      |           |         |                  |      | Mascot      |
| 932.4683   | 932.4484    | -0.0199 | -21   | 417        | 424 LLEGEESR      |           |         |                  |      | Mascot      |
| 950.4941   | 950.4712    | -0.0229 | -24   | 249        | 256 AVYEAELR      |           |         |                  |      | Mascot      |
| 973.4948   | 973.4887    | -0.0061 | -6    | 173        | 181 QLDGLGNEK     |           |         |                  |      | Mascot      |
| 983.4468   | 983.4212    | -0.0256 | -26   | 299        | 306 AEAESWYK      |           |         |                  |      | Mascot      |
| 987.5105   | 987.4866    | -0.0239 | -24   | 378        | 385 ELEEALQR      |           |         |                  |      | Mascot      |
| 1060.5632  | 1060.5389   | -0.0243 | -23   | 416        | 424 KLEGEESR      |           |         |                  |      | Mascot      |
| 1079.5116  | 1079.4886   | -0.023  | -21   | 288        | 296 AQYEDIANR     |           |         |                  |      | Mascot      |
| 1153.5558  | 1153.5287   | -0.0271 | -23   | 396        | 404 EYQELMNVK     |           |         |                  |      | Mascot      |
| 1169.5507  | 1169.5322   | -0.0185 | -16   | 396        | 404 EYQELMNVK     |           |         | Oxidation (M)[6] |      | Mascot      |
| 1226.5801  | 1226.5541   | -0.026  | -21   | 297        | 306 SRAEAESWYK    |           |         |                  |      | Mascot      |
| 1248.6833  | 1248.6549   | -0.0284 | -23   | 210        | 220 ASVENEFVLLK   |           |         |                  |      | Mascot      |
| 1256.6957  | 1256.6704   | -0.0253 | -20   | 376        | 385 IRELEEALQR    |           |         |                  |      | Mascot      |
| 1256.6957  | 1256.6704   | -0.0253 | -20   | 376        | 385 IRELEEALQR    | 31        | 79.101  |                  |      | Mascot      |
| 1277.71    | 1277.6833   | -0.0267 | -21   | 405        | 415 LALDIEIATYR   |           |         |                  |      | Mascot      |
| 1277.71    | 1277.6833   | -0.0267 | -21   | 405        | 415 LALDIEIATYR   | 86        | 100     |                  |      | Mascot      |
| 1361.673   | 1361.6444   | -0.0286 | -21   | 276        | 287 NLDMDSIVA EVR |           |         |                  |      | Mascot      |
| 1362.7013  | 1362.6691   | -0.0322 | -24   | 146        | 156 WSLLEQQTTR    |           |         |                  |      | Mascot      |
| 1362.7013  | 1362.6691   | -0.0322 | -24   | 146        | 156 WSLLEQQTTR    | 80        | 100     |                  |      | Mascot      |
| 1377.6678  | 1377.6392   | -0.0286 | -21   | 276        | 287 NLDMDSIVA EVR |           |         | Oxidation (M)[4] |      | Mascot      |
| 1432.743   | 1432.7126   | -0.0304 | -21   | 237        | 248 VDALQDEINFLR  |           |         |                  |      | Mascot      |
| 1432.743   | 1432.7126   | -0.0304 | -21   | 237        | 248 VDALQDEINFLR  | 102       | 100     |                  |      | Mascot      |
| 1443.7074  | 1443.6746   | -0.0328 | -23   | 352        | 364 ANLEAQIAEAEER | 89        | 100     |                  |      | Mascot      |

|   |                         |           |         |      |     |             |                         |      |     |                  |     |     |     |  |  |  |  |  |  |        |
|---|-------------------------|-----------|---------|------|-----|-------------|-------------------------|------|-----|------------------|-----|-----|-----|--|--|--|--|--|--|--------|
|   | 1443.7074               | 1443.6746 | -0.0328 | -23  | 352 | 364         | ANLEAQIAEAEER           |      |     |                  |     |     |     |  |  |  |  |  |  | Mascot |
|   | 1743.837                | 1743.797  | -0.04   | -23  | 157 | 171         | SNIDAMFEAYISNLR         |      |     |                  |     |     |     |  |  |  |  |  |  | Mascot |
|   | 1743.837                | 1743.797  | -0.04   | -23  | 157 | 171         | SNIDAMFEAYISNLR         | 157  | 100 |                  |     |     |     |  |  |  |  |  |  | Mascot |
|   | 1759.8319               | 1759.7922 | -0.0397 | -23  | 157 | 171         | SNIDAMFEAYISNLR         | 86   | 100 | Oxidation (M)[6] |     |     |     |  |  |  |  |  |  | Mascot |
|   | 1759.8319               | 1759.7922 | -0.0397 | -23  | 157 | 171         | SNIDAMFEAYISNLR         |      |     | Oxidation (M)[6] |     |     |     |  |  |  |  |  |  | Mascot |
|   | 1846.7913               | 1846.7467 | -0.0446 | -24  | 309 | 324         | FEEMQSTAGQYGDDL         |      |     |                  |     |     |     |  |  |  |  |  |  | Mascot |
|   | 1862.7861               | 1862.745  | -0.0411 | -22  | 309 | 324         | FEEMQSTAGQYGDDL         |      |     | Oxidation (M)[4] |     |     |     |  |  |  |  |  |  | Mascot |
|   | 1899.9381               | 1899.896  | -0.0421 | -22  | 157 | 172         | SNIDAMFEAYISNLR         |      |     |                  |     |     |     |  |  |  |  |  |  | Mascot |
|   | 1915.933                | 1915.8911 | -0.0419 | -22  | 157 | 172         | SNIDAMFEAYISNLR         |      |     | Oxidation (M)[6] |     |     |     |  |  |  |  |  |  | Mascot |
|   | 2041.0559               | 2041.0117 | -0.0442 | -22  | 352 | 370         | ANLEAQIAEAEERGELAV<br>K | 117  | 100 |                  |     |     |     |  |  |  |  |  |  | Mascot |
|   | 2041.0559               | 2041.0117 | -0.0442 | -22  | 352 | 370         | ANLEAQIAEAEERGELAV<br>K |      |     |                  |     |     |     |  |  |  |  |  |  | Mascot |
|   | 2102.1128               | 2101.8718 | -0.241  | -115 | 231 | 248         | VELEAKVDALQDEINFLR      |      |     |                  |     |     |     |  |  |  |  |  |  | Mascot |
|   | 2102.9448               | 2102.8892 | -0.0556 | -26  | 307 | 324         | QKFEEMQSTAGQYGDDL<br>R  |      |     |                  |     |     |     |  |  |  |  |  |  | Mascot |
|   | 2118.9397               | 2118.8967 | -0.043  | -20  | 307 | 324         | QKFEEMQSTAGQYGDDL<br>R  |      |     | Oxidation (M)[6] |     |     |     |  |  |  |  |  |  | Mascot |
|   | 2118.9397               | 2118.8967 | -0.043  | -20  | 307 | 324         | QKFEEMQSTAGQYGDDL<br>R  | 106  | 100 | Oxidation (M)[6] |     |     |     |  |  |  |  |  |  | Mascot |
| 2 | keratin 4 [Danio rerio] |           |         |      |     | gi 18858947 | 54242                   | 5.42 | 24  | 944              | 100 | 769 | 100 |  |  |  |  |  |  |        |

### Peptide Information

| Calc. Mass | Obsrv. Mass | ± da    | ± ppm | Start Seq. | End Seq. | Sequence    | Ion Score | C. I. % | Modification     | Rank | Result Type |
|------------|-------------|---------|-------|------------|----------|-------------|-----------|---------|------------------|------|-------------|
| 882.4349   | 882.5457    | 0.1108  | 126   | 33         | 40       | MSSVTSVR    |           |         | Oxidation (M)[1] |      | Mascot      |
| 915.4893   | 915.4689    | -0.0204 | -22   | 329        | 336      | AEIAELNR    |           |         |                  |      | Mascot      |
| 932.4683   | 932.4484    | -0.0199 | -21   | 418        | 425      | LLEGEESR    |           |         |                  |      | Mascot      |
| 950.4941   | 950.4712    | -0.0229 | -24   | 250        | 257      | AVYEAE LR   |           |         |                  |      | Mascot      |
| 973.4948   | 973.4887    | -0.0061 | -6    | 174        | 182      | QLDGLGNEK   |           |         |                  |      | Mascot      |
| 983.4468   | 983.4212    | -0.0256 | -26   | 300        | 307      | AEAESWYK    |           |         |                  |      | Mascot      |
| 987.5105   | 987.4866    | -0.0239 | -24   | 379        | 386      | ELEEALQR    |           |         |                  |      | Mascot      |
| 1060.5632  | 1060.5389   | -0.0243 | -23   | 417        | 425      | KLLEGEESR   |           |         |                  |      | Mascot      |
| 1079.5116  | 1079.4886   | -0.023  | -21   | 289        | 297      | AQYEDIANR   |           |         |                  |      | Mascot      |
| 1153.5558  | 1153.5287   | -0.0271 | -23   | 397        | 405      | EYQELMNVK   |           |         |                  |      | Mascot      |
| 1169.5507  | 1169.5322   | -0.0185 | -16   | 397        | 405      | EYQELMNVK   |           |         | Oxidation (M)[6] |      | Mascot      |
| 1226.5801  | 1226.5541   | -0.026  | -21   | 298        | 307      | SRAEAESWYK  |           |         |                  |      | Mascot      |
| 1248.6833  | 1248.6549   | -0.0284 | -23   | 211        | 221      | ASVENEFVLLK |           |         |                  |      | Mascot      |
| 1256.6957  | 1256.6704   | -0.0253 | -20   | 377        | 386      | IRELEELALQR |           |         |                  |      | Mascot      |
| 1256.6957  | 1256.6704   | -0.0253 | -20   | 377        | 386      | IRELEELALQR | 31        | 79.101  |                  |      | Mascot      |

|           |           |         |      |     |     |                         |     |     |                  |  |  |  |        |
|-----------|-----------|---------|------|-----|-----|-------------------------|-----|-----|------------------|--|--|--|--------|
| 1277.71   | 1277.6833 | -0.0267 | -21  | 406 | 416 | LALDIEIATYR             |     |     |                  |  |  |  | Mascot |
| 1277.71   | 1277.6833 | -0.0267 | -21  | 406 | 416 | LALDIEIATYR             | 86  | 100 |                  |  |  |  | Mascot |
| 1361.673  | 1361.6444 | -0.0286 | -21  | 277 | 288 | NLDMSIVAIEVR            |     |     |                  |  |  |  | Mascot |
| 1362.7013 | 1362.6691 | -0.0322 | -24  | 147 | 157 | WSLLQEQTTR              |     |     |                  |  |  |  | Mascot |
| 1362.7013 | 1362.6691 | -0.0322 | -24  | 147 | 157 | WSLLQEQTTR              | 80  | 100 |                  |  |  |  | Mascot |
| 1377.6678 | 1377.6392 | -0.0286 | -21  | 277 | 288 | NLDMSIVAIEVR            |     |     | Oxidation (M)[4] |  |  |  | Mascot |
| 1432.743  | 1432.7126 | -0.0304 | -21  | 238 | 249 | VDALQDEINFLR            |     |     |                  |  |  |  | Mascot |
| 1432.743  | 1432.7126 | -0.0304 | -21  | 238 | 249 | VDALQDEINFLR            | 102 | 100 |                  |  |  |  | Mascot |
| 1443.7074 | 1443.6746 | -0.0328 | -23  | 353 | 365 | ANLEAQIAEAEER           | 89  | 100 |                  |  |  |  | Mascot |
| 1443.7074 | 1443.6746 | -0.0328 | -23  | 353 | 365 | ANLEAQIAEAEER           |     |     |                  |  |  |  | Mascot |
| 1743.837  | 1743.797  | -0.04   | -23  | 158 | 172 | SNIDAMFEAYISNLR         |     |     |                  |  |  |  | Mascot |
| 1743.837  | 1743.797  | -0.04   | -23  | 158 | 172 | SNIDAMFEAYISNLR         | 157 | 100 |                  |  |  |  | Mascot |
| 1759.8319 | 1759.7922 | -0.0397 | -23  | 158 | 172 | SNIDAMFEAYISNLR         | 86  | 100 | Oxidation (M)[6] |  |  |  | Mascot |
| 1759.8319 | 1759.7922 | -0.0397 | -23  | 158 | 172 | SNIDAMFEAYISNLR         |     |     | Oxidation (M)[6] |  |  |  | Mascot |
| 1846.7913 | 1846.7467 | -0.0446 | -24  | 310 | 325 | FEEMQSTAGQYGDDL         |     |     |                  |  |  |  | Mascot |
| 1862.7861 | 1862.745  | -0.0411 | -22  | 310 | 325 | FEEMQSTAGQYGDDL         |     |     | Oxidation (M)[4] |  |  |  | Mascot |
| 1899.9381 | 1899.896  | -0.0421 | -22  | 158 | 173 | SNIDAMFEAYISNLR         |     |     |                  |  |  |  | Mascot |
| 1915.933  | 1915.8911 | -0.0419 | -22  | 158 | 173 | SNIDAMFEAYISNLR         |     |     | Oxidation (M)[6] |  |  |  | Mascot |
| 2041.0559 | 2041.0117 | -0.0442 | -22  | 353 | 371 | ANLEAQIAEAEERGELAV<br>K | 117 | 100 |                  |  |  |  | Mascot |
| 2041.0559 | 2041.0117 | -0.0442 | -22  | 353 | 371 | ANLEAQIAEAEERGELAV<br>K |     |     |                  |  |  |  | Mascot |
| 2102.1128 | 2101.8718 | -0.241  | -115 | 232 | 249 | VELEAKVDALQDEINFLR      |     |     |                  |  |  |  | Mascot |
| 2102.9448 | 2102.8892 | -0.0556 | -26  | 308 | 325 | QKFEEMQSTAGQYGDDL<br>R  |     |     |                  |  |  |  | Mascot |
| 2118.9397 | 2118.8967 | -0.043  | -20  | 308 | 325 | QKFEEMQSTAGQYGDDL<br>R  |     |     | Oxidation (M)[6] |  |  |  | Mascot |
| 2118.9397 | 2118.8967 | -0.043  | -20  | 308 | 325 | QKFEEMQSTAGQYGDDL<br>R  | 106 | 100 | Oxidation (M)[6] |  |  |  | Mascot |

3

Krt5 protein [Danio rerio]

gi|39645432

57792.3

5.27

18

526

100

420

100

| Peptide Information |             |         |       |            |          |               |           |       |   |              |      |             |
|---------------------|-------------|---------|-------|------------|----------|---------------|-----------|-------|---|--------------|------|-------------|
| Calc. Mass          | Obsrv. Mass | ± da    | ± ppm | Start Seq. | End Seq. | Sequence      | Ion Score | C. I. | % | Modification | Rank | Result Type |
| 827.4297            | 827.4138    | -0.0159 | -19   | 155        | 161      | FASFDK        |           |       |   |              |      | Mascot      |
| 932.4683            | 932.4484    | -0.0199 | -21   | 447        | 454      | LLEGEESR      |           |       |   |              |      | Mascot      |
| 973.4948            | 973.4887    | -0.0061 | -6    | 203        | 211      | QLDGLGNEK     |           |       |   |              |      | Mascot      |
| 983.4468            | 983.4212    | -0.0256 | -26   | 329        | 336      | AEAESWYK      |           |       |   |              |      | Mascot      |
| 1060.5632           | 1060.5389   | -0.0243 | -23   | 446        | 454      | KLLEGEESR     |           |       |   |              |      | Mascot      |
| 1079.5116           | 1079.4886   | -0.023  | -21   | 318        | 326      | AQYEDIANR     |           |       |   |              |      | Mascot      |
| 1093.4877           | 1093.5111   | 0.0234  | 21    | 2          | 14       | SGGMGGGMGGGIR |           |       |   |              |      | Mascot      |

|           |           |         |     |     |     |                        |     |        |                    |        |
|-----------|-----------|---------|-----|-----|-----|------------------------|-----|--------|--------------------|--------|
| 1153.5558 | 1153.5287 | -0.0271 | -23 | 426 | 434 | EYQELMNVK              |     |        |                    | Mascot |
| 1169.5507 | 1169.5322 | -0.0185 | -16 | 426 | 434 | EYQELMNVK              |     |        | Oxidation (M)[6]   | Mascot |
| 1226.5801 | 1226.5541 | -0.026  | -21 | 327 | 336 | SRAEAESWYK             |     |        |                    | Mascot |
| 1248.6252 | 1248.6549 | 0.0297  | 24  | 203 | 213 | QLDGLGNEKMK            |     |        | Oxidation (M)[10]  | Mascot |
| 1256.5179 | 1256.6704 | 0.1525  | 121 | 1   | 14  | MSGGMGGGMGGGIR         |     |        | Oxidation (M)[1,5] | Mascot |
| 1256.5179 | 1256.6704 | 0.1525  | 121 | 1   | 14  | MSGGMGGGMGGGIR         |     |        | Oxidation (M)[1,5] | Mascot |
| 1277.71   | 1277.6833 | -0.0267 | -21 | 435 | 445 | LALDIEIATYR            |     |        |                    | Mascot |
| 1277.71   | 1277.6833 | -0.0267 | -21 | 435 | 445 | LALDIEIATYR            | 86  | 100    |                    | Mascot |
| 1361.673  | 1361.6444 | -0.0286 | -21 | 306 | 317 | NLDMDAIVAEVR           |     |        | Oxidation (M)[4]   | Mascot |
| 1362.7013 | 1362.6691 | -0.0322 | -24 | 176 | 186 | WSLLQEQTTR             |     |        |                    | Mascot |
| 1362.7013 | 1362.6691 | -0.0322 | -24 | 176 | 186 | WSLLQEQTTR             | 80  | 100    |                    | Mascot |
| 1443.7074 | 1443.6746 | -0.0328 | -23 | 382 | 394 | ANLEAQIAEAER           | 89  | 100    |                    | Mascot |
| 1443.7074 | 1443.6746 | -0.0328 | -23 | 382 | 394 | ANLEAQIAEAER           |     |        |                    | Mascot |
| 1743.837  | 1743.797  | -0.04   | -23 | 187 | 201 | SNIDAMFEAYIANLR        |     |        | Oxidation (M)[6]   | Mascot |
| 1743.837  | 1743.797  | -0.04   | -23 | 187 | 201 | SNIDAMFEAYIANLR        | 48  | 99.543 | Oxidation (M)[6]   | Mascot |
| 1899.9381 | 1899.896  | -0.0421 | -22 | 187 | 202 | SNIDAMFEAYIANLRR       |     |        | Oxidation (M)[6]   | Mascot |
| 2041.0559 | 2041.0117 | -0.0442 | -22 | 382 | 400 | ANLEAQIAEAERGELAV<br>K | 117 | 100    |                    | Mascot |
| 2041.0559 | 2041.0117 | -0.0442 | -22 | 382 | 400 | ANLEAQIAEAERGELAV<br>K |     |        |                    | Mascot |

### Peptide Information

|   |                         |           |         |     |             |     |                         |      |        |     |     |                  |     |  |  |        |
|---|-------------------------|-----------|---------|-----|-------------|-----|-------------------------|------|--------|-----|-----|------------------|-----|--|--|--------|
|   | 1362.7013               | 1362.6691 | -0.0322 | -24 | 186         | 196 | WSLLQEQTTR              |      |        |     |     |                  |     |  |  | Mascot |
|   | 1362.7013               | 1362.6691 | -0.0322 | -24 | 186         | 196 | WSLLQEQTTR              | 80   | 100    |     |     |                  |     |  |  | Mascot |
|   | 1443.7074               | 1443.6746 | -0.0328 | -23 | 392         | 404 | ANLEAQIAEAEER           | 89   | 100    |     |     |                  |     |  |  | Mascot |
|   | 1443.7074               | 1443.6746 | -0.0328 | -23 | 392         | 404 | ANLEAQIAEAEER           |      |        |     |     |                  |     |  |  | Mascot |
|   | 1743.837                | 1743.797  | -0.04   | -23 | 197         | 211 | SNIDAMFEAYIANLR         |      |        |     |     | Oxidation (M)[6] |     |  |  | Mascot |
|   | 1743.837                | 1743.797  | -0.04   | -23 | 197         | 211 | SNIDAMFEAYIANLR         | 48   | 99.543 |     |     | Oxidation (M)[6] |     |  |  | Mascot |
|   | 1899.9381               | 1899.896  | -0.0421 | -22 | 197         | 212 | SNIDAMFEAYIANLRR        |      |        |     |     | Oxidation (M)[6] |     |  |  | Mascot |
|   | 2041.0559               | 2041.0117 | -0.0442 | -22 | 392         | 410 | ANLEAQIAEAEERGELAV<br>K | 117  | 100    |     |     |                  |     |  |  | Mascot |
|   | 2041.0559               | 2041.0117 | -0.0442 | -22 | 392         | 410 | ANLEAQIAEAEERGELAV<br>K |      |        |     |     |                  |     |  |  | Mascot |
| 5 | keratin 8 [Danio rerio] |           |         |     | gi 29335502 |     | 55516.4                 | 5.01 | 9      | 161 | 100 | 134              | 100 |  |  |        |

Peptide Information

| Calc. Mass | Obsrv. Mass | ± da    | ± ppm | Start Seq. | End Seq. | Sequence            | Ion Score | C. I.  | % | Modification     | Rank | Result Type |
|------------|-------------|---------|-------|------------|----------|---------------------|-----------|--------|---|------------------|------|-------------|
| 827.4297   | 827.4138    | -0.0159 | -19   | 105        | 111      | FASFDK              |           |        |   |                  |      | Mascot      |
| 1079.5116  | 1079.4886   | -0.023  | -21   | 268        | 276      | AQYEDIANR           |           |        |   |                  |      | Mascot      |
| 1248.6252  | 1248.6549   | 0.0297  | 24    | 153        | 163      | QLDSLGNCKMK         |           |        |   |                  |      | Mascot      |
| 1277.71    | 1277.6833   | -0.0267 | -21   | 385        | 395      | LALDIEIATYR         |           |        |   |                  |      | Mascot      |
| 1277.71    | 1277.6833   | -0.0267 | -21   | 385        | 395      | LALDIEIATYR         | 86        | 100    |   |                  |      | Mascot      |
| 1361.673   | 1361.6444   | -0.0286 | -21   | 256        | 267      | NLDMDAIVAEVR        |           |        |   | Oxidation (M)[4] |      | Mascot      |
| 1475.7635  | 1475.7234   | -0.0401 | -27   | 308        | 319      | TEIADLNRMQR         |           |        |   | Oxidation (M)[9] |      | Mascot      |
| 1743.837   | 1743.797    | -0.04   | -23   | 137        | 151      | SNIDAMFEAYIANLR     |           |        |   | Oxidation (M)[6] |      | Mascot      |
| 1743.837   | 1743.797    | -0.04   | -23   | 137        | 151      | SNIDAMFEAYIANLR     | 48        | 99.543 |   | Oxidation (M)[6] |      | Mascot      |
| 1899.9381  | 1899.896    | -0.0421 | -22   | 137        | 152      | SNIDAMFEAYIANLRR    |           |        |   | Oxidation (M)[6] |      | Mascot      |
| 2119.1282  | 2118.8967   | -0.2315 | -109  | 211        | 228      | VELEAKLESILTDEINFLR |           |        |   |                  |      | Mascot      |
| 2119.1282  | 2118.8967   | -0.2315 | -109  | 211        | 228      | VELEAKLESILTDEINFLR | 3         | 0      |   |                  |      | Mascot      |

|   |                                               |  |  |  |             |  |         |      |   |     |     |     |     |  |  |  |
|---|-----------------------------------------------|--|--|--|-------------|--|---------|------|---|-----|-----|-----|-----|--|--|--|
| 6 | keratin, type II cytoskeletal 8 [Danio rerio] |  |  |  | gi 41056085 |  | 57723.4 | 5.15 | 9 | 160 | 100 | 134 | 100 |  |  |  |
|---|-----------------------------------------------|--|--|--|-------------|--|---------|------|---|-----|-----|-----|-----|--|--|--|

Peptide Information

| Calc. Mass | Obsrv. Mass | ± da    | ± ppm | Start Seq. | End Seq. | Sequence     | Ion Score | C. I. | % | Modification     | Rank | Result Type |
|------------|-------------|---------|-------|------------|----------|--------------|-----------|-------|---|------------------|------|-------------|
| 827.4297   | 827.4138    | -0.0159 | -19   | 126        | 132      | FASFDK       |           |       |   |                  |      | Mascot      |
| 1079.5116  | 1079.4886   | -0.023  | -21   | 289        | 297      | AQYEDIANR    |           |       |   |                  |      | Mascot      |
| 1248.6252  | 1248.6549   | 0.0297  | 24    | 174        | 184      | QLDSLGNCKMK  |           |       |   |                  |      | Mascot      |
| 1277.71    | 1277.6833   | -0.0267 | -21   | 406        | 416      | LALDIEIATYR  |           |       |   |                  |      | Mascot      |
| 1277.71    | 1277.6833   | -0.0267 | -21   | 406        | 416      | LALDIEIATYR  | 86        | 100   |   |                  |      | Mascot      |
| 1361.673   | 1361.6444   | -0.0286 | -21   | 277        | 288      | NLDMDAIVAEVR |           |       |   | Oxidation (M)[4] |      | Mascot      |

|   |                         |           |         |      |              |     |                    |     |        |     |     |     |                  |        |
|---|-------------------------|-----------|---------|------|--------------|-----|--------------------|-----|--------|-----|-----|-----|------------------|--------|
|   | 1475.7635               | 1475.7234 | -0.0401 | -27  | 329          | 340 | TEIADLNRMQIR       |     |        |     |     |     | Oxidation (M)[9] | Mascot |
|   | 1743.837                | 1743.797  | -0.04   | -23  | 158          | 172 | SNIDAMFEAYIANLR    |     |        |     |     |     | Oxidation (M)[6] | Mascot |
|   | 1743.837                | 1743.797  | -0.04   | -23  | 158          | 172 | SNIDAMFEAYIANLR    | 48  | 99.543 |     |     |     | Oxidation (M)[6] | Mascot |
|   | 1899.9381               | 1899.896  | -0.0421 | -22  | 158          | 173 | SNIDAMFEAYIANLRR   |     |        |     |     |     | Oxidation (M)[6] | Mascot |
|   | 2119.1282               | 2118.8967 | -0.2315 | -109 | 232          | 249 | VELEAKLESLTDEINFLR |     |        |     |     |     |                  | Mascot |
|   | 2119.1282               | 2118.8967 | -0.2315 | -109 | 232          | 249 | VELEAKLESLTDEINFLR | 3   | 0      |     |     |     |                  | Mascot |
| 7 | Keratin 8 [Danio rerio] |           |         |      | gi 159155987 |     | 57624.4            | 5.1 | 8      | 156 | 100 | 134 | 100              |        |

#### Peptide Information

|  | Calc. Mass | Obsrv. Mass | ± da    | ± ppm | Start Seq. | End Seq. | Sequence           | Ion Score | C. I.  | % | Modification     | Rank | Result Type |
|--|------------|-------------|---------|-------|------------|----------|--------------------|-----------|--------|---|------------------|------|-------------|
|  | 827.4297   | 827.4138    | -0.0159 | -19   | 126        | 132      | FASFDIK            |           |        |   |                  |      | Mascot      |
|  | 1079.5116  | 1079.4886   | -0.023  | -21   | 289        | 297      | AQYEDIANR          |           |        |   |                  |      | Mascot      |
|  | 1248.6252  | 1248.6549   | 0.0297  | 24    | 174        | 184      | QLDSLGNCKMK        |           |        |   |                  |      | Mascot      |
|  | 1277.71    | 1277.6833   | -0.0267 | -21   | 406        | 416      | LALDIEIATYR        |           |        |   |                  |      | Mascot      |
|  | 1277.71    | 1277.6833   | -0.0267 | -21   | 406        | 416      | LALDIEIATYR        | 86        | 100    |   |                  |      | Mascot      |
|  | 1475.7635  | 1475.7234   | -0.0401 | -27   | 329        | 340      | TEIADLNRMQIR       |           |        |   | Oxidation (M)[9] |      | Mascot      |
|  | 1743.837   | 1743.797    | -0.04   | -23   | 158        | 172      | SNIDAMFEAYIANLR    |           |        |   | Oxidation (M)[6] |      | Mascot      |
|  | 1743.837   | 1743.797    | -0.04   | -23   | 158        | 172      | SNIDAMFEAYIANLR    | 48        | 99.543 |   | Oxidation (M)[6] |      | Mascot      |
|  | 1899.9381  | 1899.896    | -0.0421 | -22   | 158        | 173      | SNIDAMFEAYIANLRR   |           |        |   | Oxidation (M)[6] |      | Mascot      |
|  | 2119.1282  | 2118.8967   | -0.2315 | -109  | 232        | 249      | VELEAKLESLTDEINFLR |           |        |   |                  |      | Mascot      |
|  | 2119.1282  | 2118.8967   | -0.2315 | -109  | 232        | 249      | VELEAKLESLTDEINFLR | 3         | 0      |   |                  |      | Mascot      |

|   |                                                       |  |  |  |             |  |       |      |    |     |     |     |     |  |
|---|-------------------------------------------------------|--|--|--|-------------|--|-------|------|----|-----|-----|-----|-----|--|
| 8 | class III intermediate filament protein [Danio rerio] |  |  |  | gi 38374177 |  | 51255 | 5.28 | 10 | 151 | 100 | 115 | 100 |  |
|---|-------------------------------------------------------|--|--|--|-------------|--|-------|------|----|-----|-----|-----|-----|--|

#### Peptide Information

|  | Calc. Mass | Obsrv. Mass | ± da    | ± ppm | Start Seq. | End Seq. | Sequence     | Ion Score | C. I. | % | Modification     | Rank | Result Type |
|--|------------|-------------|---------|-------|------------|----------|--------------|-----------|-------|---|------------------|------|-------------|
|  | 850.4265   | 850.524     | 0.0975  | 115   | 435        | 441      | ESTTERK      |           |       |   |                  |      | Mascot      |
|  | 932.4683   | 932.4484    | -0.0199 | -21   | 381        | 388      | LLEGEESR     |           |       |   |                  |      | Mascot      |
|  | 1060.5632  | 1060.5389   | -0.0243 | -23   | 380        | 388      | KLLEGEESR    |           |       |   |                  |      | Mascot      |
|  | 1093.5272  | 1093.5111   | -0.0161 | -15   | 273        | 282      | FADLTDAANR   |           |       |   |                  |      | Mascot      |
|  | 1134.5712  | 1134.5354   | -0.0358 | -32   | 343        | 351      | LEDEIQMLK    |           |       |   | Oxidation (M)[7] |      | Mascot      |
|  | 1277.71    | 1277.6833   | -0.0267 | -21   | 369        | 379      | LALDIEIATYR  |           |       |   |                  |      | Mascot      |
|  | 1277.71    | 1277.6833   | -0.0267 | -21   | 369        | 379      | LALDIEIATYR  | 86        | 100   |   |                  |      | Mascot      |
|  | 1308.6543  | 1308.6278   | -0.0265 | -20   | 271        | 282      | SKFADLTDAANR |           |       |   |                  |      | Mascot      |
|  | 1377.6216  | 1377.6392   | 0.0176  | 13    | 1          | 11       | MESQRSFSSYR  |           |       |   |                  |      | Mascot      |
|  | 1432.7682  | 1432.7126   | -0.0556 | -39   | 202        | 213      | IEALQDEINFLK |           |       |   |                  |      | Mascot      |



|    |                                               |            |             |         |       |              |                   |               |      |           |        |     |                  |     |      |             |
|----|-----------------------------------------------|------------|-------------|---------|-------|--------------|-------------------|---------------|------|-----------|--------|-----|------------------|-----|------|-------------|
|    |                                               | 1432.7682  | 1432.7126   | -0.0556 | -39   | 202          | 213               | IEALQDEINFLK  |      | 29        | 65.316 |     |                  |     |      | Mascot      |
|    |                                               | 1475.7522  | 1475.7234   | -0.0288 | -20   | 300          | 312               | QIQGLTCDLESLR |      |           |        |     |                  |     |      | Mascot      |
| 9  | Gfap protein [Danio rerio]                    |            |             |         |       | gi 124504410 |                   | 51101         | 5.34 | 10        | 150    | 100 | 115              | 100 |      |             |
|    | Peptide Information                           |            |             |         |       |              |                   |               |      |           |        |     |                  |     |      |             |
|    |                                               | Calc. Mass | Obsrv. Mass | ± da    | ± ppm | Start Seq.   | End Sequence Seq. |               |      | Ion Score | C. I.  | %   | Modification     |     | Rank | Result Type |
|    |                                               | 850.4265   | 850.524     | 0.0975  | 115   | 434          | 440               | ESTTERK       |      |           |        |     |                  |     |      | Mascot      |
|    |                                               | 932.4683   | 932.4484    | -0.0199 | -21   | 380          | 387               | LLEGEESR      |      |           |        |     |                  |     |      | Mascot      |
|    |                                               | 1060.5632  | 1060.5389   | -0.0243 | -23   | 379          | 387               | KLLEGEESR     |      |           |        |     |                  |     |      | Mascot      |
|    |                                               | 1093.5272  | 1093.5111   | -0.0161 | -15   | 272          | 281               | FADLTDAANR    |      |           |        |     |                  |     |      | Mascot      |
|    |                                               | 1134.5712  | 1134.5354   | -0.0358 | -32   | 342          | 350               | LEDEIQMLK     |      |           |        |     | Oxidation (M)[7] |     |      | Mascot      |
|    |                                               | 1277.71    | 1277.6833   | -0.0267 | -21   | 368          | 378               | LALDIEIATYR   |      |           |        |     |                  |     |      | Mascot      |
|    |                                               | 1277.71    | 1277.6833   | -0.0267 | -21   | 368          | 378               | LALDIEIATYR   | 86   |           | 100    |     |                  |     |      | Mascot      |
|    |                                               | 1308.6543  | 1308.6278   | -0.0265 | -20   | 270          | 281               | SKFADLTDAANR  |      |           |        |     |                  |     |      | Mascot      |
|    |                                               | 1377.6857  | 1377.6392   | -0.0465 | -34   | 428          | 439               | DGEIIKESTTER  |      |           |        |     |                  |     |      | Mascot      |
|    |                                               | 1432.7682  | 1432.7126   | -0.0556 | -39   | 201          | 212               | IEALQDEINFLK  |      |           |        |     |                  |     |      | Mascot      |
|    |                                               | 1432.7682  | 1432.7126   | -0.0556 | -39   | 201          | 212               | IEALQDEINFLK  | 29   |           | 65.316 |     |                  |     |      | Mascot      |
|    |                                               | 1475.7522  | 1475.7234   | -0.0288 | -20   | 299          | 311               | QIQGLTCDLESLR |      |           |        |     |                  |     |      | Mascot      |
| 10 | glial fibrillary acidic protein [Danio rerio] |            |             |         |       | gi 37722304  |                   | 51205         | 5.34 | 10        | 149    | 100 | 115              | 100 |      |             |
|    | Peptide Information                           |            |             |         |       |              |                   |               |      |           |        |     |                  |     |      |             |
|    |                                               | Calc. Mass | Obsrv. Mass | ± da    | ± ppm | Start Seq.   | End Sequence Seq. |               |      | Ion Score | C. I.  | %   | Modification     |     | Rank | Result Type |
|    |                                               | 850.4265   | 850.524     | 0.0975  | 115   | 435          | 441               | ESTTERK       |      |           |        |     |                  |     |      | Mascot      |
|    |                                               | 932.4683   | 932.4484    | -0.0199 | -21   | 381          | 388               | LLEGEESR      |      |           |        |     |                  |     |      | Mascot      |
|    |                                               | 1060.5632  | 1060.5389   | -0.0243 | -23   | 380          | 388               | KLLEGEESR     |      |           |        |     |                  |     |      | Mascot      |
|    |                                               | 1093.5272  | 1093.5111   | -0.0161 | -15   | 273          | 282               | FADLTDAANR    |      |           |        |     |                  |     |      | Mascot      |
|    |                                               | 1134.5712  | 1134.5354   | -0.0358 | -32   | 343          | 351               | LEDEIQMLK     |      |           |        |     | Oxidation (M)[7] |     |      | Mascot      |
|    |                                               | 1277.71    | 1277.6833   | -0.0267 | -21   | 369          | 379               | LALDIEIATYR   |      |           |        |     |                  |     |      | Mascot      |
|    |                                               | 1277.71    | 1277.6833   | -0.0267 | -21   | 369          | 379               | LALDIEIATYR   | 86   |           | 100    |     |                  |     |      | Mascot      |
|    |                                               | 1308.6543  | 1308.6278   | -0.0265 | -20   | 271          | 282               | SKFADLTDAANR  |      |           |        |     |                  |     |      | Mascot      |
|    |                                               | 1377.6216  | 1377.6392   | 0.0176  | 13    | 1            | 11                | MESQRSFSSYR   |      |           |        |     |                  |     |      | Mascot      |
|    |                                               | 1432.7682  | 1432.7126   | -0.0556 | -39   | 202          | 213               | IEALQDEINFLK  |      |           |        |     |                  |     |      | Mascot      |
|    |                                               | 1432.7682  | 1432.7126   | -0.0556 | -39   | 202          | 213               | IEALQDEINFLK  | 29   |           | 65.316 |     |                  |     |      | Mascot      |
|    |                                               | 1475.7522  | 1475.7234   | -0.0288 | -20   | 300          | 312               | QIQGLTCDLESLR |      |           |        |     |                  |     |      | Mascot      |
| 11 | glial fibrillary acidic protein [Danio rerio] |            |             |         |       | gi 20977259  |                   | 42127.4       | 5.03 | 9         | 146    | 100 | 115              | 100 |      |             |

| Peptide Information |                                               |             |         |       |              |                   |           |         |                  |                  |     |    |     |
|---------------------|-----------------------------------------------|-------------|---------|-------|--------------|-------------------|-----------|---------|------------------|------------------|-----|----|-----|
|                     | Calc. Mass                                    | Obsrv. Mass | ± da    | ± ppm | Start Seq.   | End Sequence Seq. | Ion Score | C. I. % | Modification     | Rank Result Type |     |    |     |
|                     | 850.4265                                      | 850.524     | 0.0975  | 115   | 351          | 357 ESTTERK       |           |         |                  | Mascot           |     |    |     |
|                     | 932.4683                                      | 932.4484    | -0.0199 | -21   | 297          | 304 LLEGEESR      |           |         |                  | Mascot           |     |    |     |
|                     | 1060.5632                                     | 1060.5389   | -0.0243 | -23   | 296          | 304 KLEGEESR      |           |         |                  | Mascot           |     |    |     |
|                     | 1093.5272                                     | 1093.5111   | -0.0161 | -15   | 189          | 198 FADLTDAANR    |           |         |                  | Mascot           |     |    |     |
|                     | 1134.5712                                     | 1134.5354   | -0.0358 | -32   | 259          | 267 LEDEIQMLK     |           |         | Oxidation (M)[7] | Mascot           |     |    |     |
|                     | 1277.71                                       | 1277.6833   | -0.0267 | -21   | 285          | 295 LALDIEIATYR   |           |         |                  | Mascot           |     |    |     |
|                     | 1277.71                                       | 1277.6833   | -0.0267 | -21   | 285          | 295 LALDIEIATYR   | 86        | 100     |                  | Mascot           |     |    |     |
|                     | 1308.6543                                     | 1308.6278   | -0.0265 | -20   | 187          | 198 SKFADLTDAANR  |           |         |                  | Mascot           |     |    |     |
|                     | 1377.6857                                     | 1377.6392   | -0.0465 | -34   | 345          | 356 DGEIKESTTER   |           |         |                  | Mascot           |     |    |     |
|                     | 1432.7682                                     | 1432.7126   | -0.0556 | -39   | 118          | 129 IEALQDEINFLK  |           |         |                  | Mascot           |     |    |     |
|                     | 1432.7682                                     | 1432.7126   | -0.0556 | -39   | 118          | 129 IEALQDEINFLK  | 29        | 65.316  |                  | Mascot           |     |    |     |
| 12                  | glial fibrillary acidic protein [Danio rerio] |             |         |       | gij239596173 |                   | 19203.6   | 4.89    | 7                | 125              | 100 | 86 | 100 |
| Peptide Information |                                               |             |         |       |              |                   |           |         |                  |                  |     |    |     |
|                     | Calc. Mass                                    | Obsrv. Mass | ± da    | ± ppm | Start Seq.   | End Sequence Seq. | Ion Score | C. I. % | Modification     | Rank Result Type |     |    |     |
|                     | 932.4683                                      | 932.4484    | -0.0199 | -21   | 122          | 129 LLEGEESR      |           |         |                  | Mascot           |     |    |     |
|                     | 1060.5632                                     | 1060.5389   | -0.0243 | -23   | 121          | 129 KLEGEESR      |           |         |                  | Mascot           |     |    |     |
|                     | 1093.5272                                     | 1093.5111   | -0.0161 | -15   | 14           | 23 FADLTDAANR     |           |         |                  | Mascot           |     |    |     |
|                     | 1134.5712                                     | 1134.5354   | -0.0358 | -32   | 84           | 92 LEDEIQMLK      |           |         | Oxidation (M)[7] | Mascot           |     |    |     |
|                     | 1277.71                                       | 1277.6833   | -0.0267 | -21   | 110          | 120 LALDIEIATYR   |           |         |                  | Mascot           |     |    |     |
|                     | 1277.71                                       | 1277.6833   | -0.0267 | -21   | 110          | 120 LALDIEIATYR   | 86        | 100     |                  | Mascot           |     |    |     |
|                     | 1308.6543                                     | 1308.6278   | -0.0265 | -20   | 12           | 23 SKFADLTDAANR   |           |         |                  | Mascot           |     |    |     |
|                     | 1475.7522                                     | 1475.7234   | -0.0288 | -20   | 41           | 53 QIQGLTCDLESLR  |           |         |                  | Mascot           |     |    |     |
| 13                  | keratin type II, tail domain [Danio rerio]    |             |         |       | gij4107170   |                   | 10583.9   | 8.29    | 3                | 104              | 100 | 86 | 100 |
| Peptide Information |                                               |             |         |       |              |                   |           |         |                  |                  |     |    |     |
|                     | Calc. Mass                                    | Obsrv. Mass | ± da    | ± ppm | Start Seq.   | End Sequence Seq. | Ion Score | C. I. % | Modification     | Rank Result Type |     |    |     |
|                     | 932.4683                                      | 932.4484    | -0.0199 | -21   | 16           | 23 LLEGEESR       |           |         |                  | Mascot           |     |    |     |
|                     | 1060.5632                                     | 1060.5389   | -0.0243 | -23   | 15           | 23 KLEGEESR       |           |         |                  | Mascot           |     |    |     |
|                     | 1277.71                                       | 1277.6833   | -0.0267 | -21   | 4            | 14 LALDIEIATYR    |           |         |                  | Mascot           |     |    |     |
|                     | 1277.71                                       | 1277.6833   | -0.0267 | -21   | 4            | 14 LALDIEIATYR    | 86        | 100     |                  | Mascot           |     |    |     |

14 Zgc:158846 [Danio rerio] gi|158253572 55223 5.44 6 96 99.999 86 100

| Peptide Information |             |         |       |            |          |              |           |       |                |      |             |
|---------------------|-------------|---------|-------|------------|----------|--------------|-----------|-------|----------------|------|-------------|
| Calc. Mass          | Obsrv. Mass | ± da    | ± ppm | Start Seq. | End Seq. | Sequence     | Ion Score | C. I. | % Modification | Rank | Result Type |
| 827.4297            | 827.4138    | -0.0159 | -19   | 87         | 93       | FASFIDK      |           |       |                |      | Mascot      |
| 932.4683            | 932.4484    | -0.0199 | -21   | 379        | 386      | LLEGEESR     |           |       |                |      | Mascot      |
| 996.5472            | 996.5739    | 0.0267  | 27    | 421        | 429      | DIHNTGLVK    |           |       |                |      | Mascot      |
| 1060.5632           | 1060.5389   | -0.0243 | -23   | 378        | 386      | KLLEGEESR    |           |       |                |      | Mascot      |
| 1277.71             | 1277.6833   | -0.0267 | -21   | 367        | 377      | LALDIEIATYR  |           |       |                |      | Mascot      |
| 1277.71             | 1277.6833   | -0.0267 | -21   | 367        | 377      | LALDIEIATYR  | 86        | 100   |                |      | Mascot      |
| 1426.6882           | 1426.6681   | -0.0201 | -14   | 152        | 163      | DMNTLVEDFKSK |           |       |                |      | Mascot      |

15 PREDICTED: keratin, type II cytoskeletal 8 [Danio rerio] gi|125849603 49959.2 5.46 6 94 99.998 86 100

| Peptide Information |             |         |       |            |          |              |           |         |                  |                  |
|---------------------|-------------|---------|-------|------------|----------|--------------|-----------|---------|------------------|------------------|
| Calc. Mass          | Obsrv. Mass | ± da    | ± ppm | Start Seq. | End Seq. | Sequence     | Ion Score | C. I. % | Modification     | Rank Result Type |
| 973.4948            | 973.4887    | -0.0061 | -6    | 343        | 350      | DLEEALQR     |           |         |                  | Mascot           |
| 1060.6361           | 1060.5389   | -0.0972 | -92   | 422        | 430      | IVIKTTETR    |           |         |                  | Mascot           |
| 1153.5558           | 1153.5287   | -0.0271 | -23   | 361        | 369      | EYQELMNVK    |           |         |                  | Mascot           |
| 1169.5507           | 1169.5322   | -0.0185 | -16   | 361        | 369      | EYQELMNVK    |           |         | Oxidation (M)[6] | Mascot           |
| 1181.6121           | 1181.564    | -0.0481 | -41   | 8          | 19       | ISSSSSVRSSGK |           |         |                  | Mascot           |
| 1256.5793           | 1256.6704   | 0.0911  | 72    | 264        | 273      | EEAESWYKSK   |           |         |                  | Mascot           |
| 1256.5793           | 1256.6704   | 0.0911  | 72    | 264        | 273      | EEAESWYKSK   |           |         |                  | Mascot           |
| 1277.71             | 1277.6833   | -0.0267 | -21   | 370        | 380      | LALDIEIATYR  |           |         |                  | Mascot           |
| 1277.71             | 1277.6833   | -0.0267 | -21   | 370        | 380      | LALDIEIATYR  | 86        | 100     |                  | Mascot           |

16 novel protein similar to vertebrate keratin family [Danio rerio] gi|157885973 46874.6 5.23 5 93 99.998 86 100

| Peptide Information |             |         |       |            |          |              |           |         |                  |      |             |
|---------------------|-------------|---------|-------|------------|----------|--------------|-----------|---------|------------------|------|-------------|
| Calc. Mass          | Obsrv. Mass | ± da    | ± ppm | Start Seq. | End Seq. | Sequence     | Ion Score | C. I. % | Modification     | Rank | Result Type |
| 973.4948            | 973.4887    | -0.0061 | -6    | 365        | 372      | DLEEALQR     |           |         |                  |      | Mascot      |
| 1153.5558           | 1153.5287   | -0.0271 | -23   | 383        | 391      | EYQELMNVK    |           |         |                  |      | Mascot      |
| 1169.5507           | 1169.5322   | -0.0185 | -16   | 383        | 391      | EYQELMNVK    |           |         | Oxidation (M)[6] |      | Mascot      |
| 1181.6121           | 1181.564    | -0.0481 | -41   | 30         | 41       | ISSSSSVRSSGK |           |         |                  |      | Mascot      |
| 1256.5793           | 1256.6704   | 0.0911  | 72    | 286        | 295      | EEAESWYKSK   |           |         |                  |      | Mascot      |
| 1256.5793           | 1256.6704   | 0.0911  | 72    | 286        | 295      | EEAESWYKSK   |           |         |                  |      | Mascot      |

|    |                                              |         |           |         |     |     |              |             |      |     |    |        |  |  |  |  |        |
|----|----------------------------------------------|---------|-----------|---------|-----|-----|--------------|-------------|------|-----|----|--------|--|--|--|--|--------|
|    |                                              | 1277.71 | 1277.6833 | -0.0267 | -21 | 392 | 402          | LALDIEIATYR |      |     |    |        |  |  |  |  | Mascot |
|    |                                              | 1277.71 | 1277.6833 | -0.0267 | -21 | 392 | 402          | LALDIEIATYR | 86   | 100 |    |        |  |  |  |  | Mascot |
| 17 | RAS guanyl-releasing protein 1 [Danio rerio] |         |           |         |     |     | gi 113678177 | 77834.7     | 7.57 | 14  | 50 | 59.415 |  |  |  |  |        |

#### Peptide Information

| Calc. Mass | Obsrv. Mass | ± da    | ± ppm | Start Seq. | End Seq. | Sequence                     | Ion Score | C. I. | % Modification                              | Rank | Result | Type   |
|------------|-------------|---------|-------|------------|----------|------------------------------|-----------|-------|---------------------------------------------|------|--------|--------|
| 842.4882   | 842.4896    | 0.0014  | 2     | 271        | 277      | FIHVAQK                      |           |       |                                             |      |        | Mascot |
| 932.3712   | 932.4484    | 0.0772  | 83    | 569        | 576      | DCGVNCHK                     |           |       | Carbamidomethyl (C)[2]                      |      |        | Mascot |
| 983.4536   | 983.4212    | -0.0324 | -33   | 466        | 473      | QMVDSIMK                     |           |       | Oxidation (M)[2,7]                          |      |        | Mascot |
| 987.4022   | 987.4866    | 0.0844  | 85    | 1          | 8        | MGFDTMNR                     |           |       | Oxidation (M)[1]                            |      |        | Mascot |
| 1165.5703  | 1165.5551   | -0.0152 | -13   | 580        | 589      | DVVGMECLKR                   |           |       | Oxidation (M)[5]                            |      |        | Mascot |
| 1165.5703  | 1165.7173   | 0.147   | 126   | 580        | 589      | DVVGMECLKR                   |           |       | Oxidation (M)[5]                            |      |        | Mascot |
| 1169.636   | 1169.5322   | -0.1038 | -89   | 119        | 127      | RPQICHFIR                    |           |       |                                             |      |        | Mascot |
| 1181.4714  | 1181.564    | 0.0926  | 78    | 66         | 75       | CLHCFDSGK                    |           |       | Carbamidomethyl (C)[1]                      |      |        | Mascot |
| 1226.6575  | 1226.5541   | -0.1034 | -84   | 119        | 127      | RPQICHFIR                    |           |       | Carbamidomethyl (C)[5]                      |      |        | Mascot |
| 1361.6375  | 1361.6444   | 0.0069  | 5     | 577        | 588      | HCKDVVGMECLK                 |           |       |                                             |      |        | Mascot |
| 1377.6323  | 1377.6392   | 0.0069  | 5     | 577        | 588      | HCKDVVGMECLK                 |           |       | Oxidation (M)[8]                            |      |        | Mascot |
| 1475.6803  | 1475.7234   | 0.0431  | 29    | 577        | 588      | HCKDVVGMECLK                 |           |       | Carbamidomethyl (C)[2,10]                   |      |        | Mascot |
| 1762.7206  | 1762.9688   | 0.2482  | 141   | 563        | 576      | QGYHCKDCGVNCHK               |           |       | Carbamidomethyl (C)[5,8,12]                 |      |        | Mascot |
| 1846.864   | 1846.7467   | -0.1173 | -64   | 507        | 521      | EGEISREEITSYFMR              |           |       |                                             |      |        | Mascot |
| 1862.8589  | 1862.745    | -0.1139 | -61   | 507        | 521      | EGEISREEITSYFMR              |           |       | Oxidation (M)[14]                           |      |        | Mascot |
| 1899.9244  | 1899.896    | -0.0284 | -15   | 546        | 562      | RPTFCDCGGFLWGVIK             |           |       |                                             |      |        | Mascot |
| 2280.1296  | 2280.0908   | -0.0388 | -17   | 240        | 258      | SVMLCNGVSQWVQLMILNR          |           |       | Carbamidomethyl (C)[5], Oxidation (M)[3,15] |      |        | Mascot |
| 2284.2812  | 2284.1218   | -0.1594 | -70   | 433        | 454      | IQPVAPVKPPVVAEWGS            |           |       |                                             |      |        | Mascot |
| 2834.3501  | 2834.2317   | -0.1184 | -42   | 522        | 545      | GMSVCAKLGFNHLNLHN<br>FHETTYK |           |       | Carbamidomethyl (C)[5], Oxidation (M)[2]    |      |        | Mascot |

|    |                                                                                   |  |  |  |  |  |             |       |      |   |    |        |  |  |  |  |  |
|----|-----------------------------------------------------------------------------------|--|--|--|--|--|-------------|-------|------|---|----|--------|--|--|--|--|--|
| 18 | PREDICTED: cytochrome c oxidase subunit 5A, mitochondrial isoform 2 [Danio rerio] |  |  |  |  |  | gi 68444185 | 19242 | 8.69 | 8 | 49 | 45.252 |  |  |  |  |  |
|----|-----------------------------------------------------------------------------------|--|--|--|--|--|-------------|-------|------|---|----|--------|--|--|--|--|--|

#### Peptide Information

| Calc. Mass | Obsrv. Mass | ± da    | ± ppm | Start Seq. | End Seq. | Sequence   | Ion Score | C. I. | % Modification         | Rank | Result | Type   |
|------------|-------------|---------|-------|------------|----------|------------|-----------|-------|------------------------|------|--------|--------|
| 915.5509   | 915.4689    | -0.082  | -90   | 130        | 137      | ILEAVKDK   |           |       |                        |      |        | Mascot |
| 1134.5684  | 1134.5354   | -0.033  | -29   | 12         | 21       | CASDVISARR |           |       | Carbamidomethyl (C)[1] |      |        | Mascot |
| 1169.679   | 1169.5322   | -0.1468 | -126  | 22         | 31       | VLQFSLIGHR |           |       |                        |      |        | Mascot |
| 1226.5172  | 1226.5541   | 0.0369  | 30    | 68         | 77       | VETDEEFDSR |           |       |                        |      |        | Mascot |

|    |                                                                      |           |         |     |    |              |                     |     |    |    |   |                           |  |        |
|----|----------------------------------------------------------------------|-----------|---------|-----|----|--------------|---------------------|-----|----|----|---|---------------------------|--|--------|
|    | 1254.7277                                                            | 1254.6763 | -0.0514 | -41 | 50 | 61           | TRAAQTAPLAVR        |     |    |    |   |                           |  | Mascot |
|    | 1743.8959                                                            | 1743.797  | -0.0989 | -57 | 52 | 67           | AAQTAPLAVRCYSHAK    |     |    |    |   | Carbamidomethyl (C)[11]   |  | Mascot |
|    | 1743.8959                                                            | 1743.797  | -0.0989 | -57 | 52 | 67           | AAQTAPLAVRCYSHAK    |     |    |    |   | Carbamidomethyl (C)[11]   |  | Mascot |
|    | 1915.8126                                                            | 1915.8911 | 0.0785  | 41  | 62 | 77           | CYSHAKVETDEEFDSR    |     |    |    |   |                           |  | Mascot |
|    | 2040.9225                                                            | 2041.0117 | 0.0892  | 44  | 2  | 20           | GPPYSSASCRCASDVISAR |     |    |    |   | Carbamidomethyl (C)[9,11] |  | Mascot |
|    | 2040.9225                                                            | 2041.0117 | 0.0892  | 44  | 2  | 20           | GPPYSSASCRCASDVISAR |     |    |    |   | Carbamidomethyl (C)[9,11] |  | Mascot |
| 19 | PREDICTED: gastrula zinc finger protein XICGF57.1-like [Danio rerio] |           |         |     |    | gi 326666728 | 33351.9             | 9.4 | 10 | 42 | 0 |                           |  |        |

#### Peptide Information

| Calc. Mass | Obsrv. Mass | ± da    | ± ppm | Start Seq. | End Seq. | Sequence            | Ion Score | C. I. | % Modification                            | Rank | Result Type |
|------------|-------------|---------|-------|------------|----------|---------------------|-----------|-------|-------------------------------------------|------|-------------|
| 915.3811   | 915.4689    | 0.0878  | 96    | 33         | 40       | FTCTQCGR            |           |       |                                           |      | Mascot      |
| 950.5101   | 950.4712    | -0.0389 | -41   | 191        | 197      | HMRIHTR             |           |       |                                           |      | Mascot      |
| 1045.5459  | 1045.5375   | -0.0084 | -8    | 129        | 137      | SSTLNKHK            |           |       |                                           |      | Mascot      |
| 1153.5959  | 1153.5287   | -0.0672 | -58   | 125        | 134      | SFNRSSSTLNK         |           |       |                                           |      | Mascot      |
| 1181.6022  | 1181.564    | -0.0382 | -32   | 265        | 274      | SFRQSSSLNR          |           |       |                                           |      | Mascot      |
| 1362.6041  | 1362.6691   | 0.065   | 48    | 33         | 44       | FTCTQCGRSFGR        |           |       |                                           |      | Mascot      |
| 1362.6041  | 1362.6691   | 0.065   | 48    | 33         | 44       | FTCTQCGRSFGR        |           |       |                                           |      | Mascot      |
| 1649.7775  | 1649.8845   | 0.107   | 65    | 54         | 68       | IHTGEKPFCTCTQCGK    |           |       |                                           |      | Mascot      |
| 1649.7775  | 1649.8845   | 0.107   | 65    | 250        | 264      | IHTGEKPFCTCTQCGK    |           |       |                                           |      | Mascot      |
| 1862.9     | 1862.745    | -0.155  | -83   | 194        | 208      | IHTREKPFCTCTQCGK    |           |       | Carbamidomethyl (C)[10,13]                |      | Mascot      |
| 2102.9932  | 2102.8892   | -0.104  | -49   | 219        | 236      | HMKIHTGEKPFCTCTQCGK |           |       | Carbamidomethyl (C)[13]                   |      | Mascot      |
| 2118.988   | 2118.8967   | -0.0913 | -43   | 219        | 236      | HMKIHTGEKPFCTCTQCGK |           |       | Carbamidomethyl (C)[13], Oxidation (M)[2] |      | Mascot      |
| 2118.988   | 2118.8967   | -0.0913 | -43   | 219        | 236      | HMKIHTGEKPFCTCTQCGK |           |       | Carbamidomethyl (C)[13], Oxidation (M)[2] |      | Mascot      |
| 2211.0432  | 2211.0591   | 0.0159  | 7     | 54         | 72       | IHTGEKPFCTCTQCGKSFG |           |       | Carbamidomethyl (C)[10,13]                |      | Mascot      |

20 novel protein [Danio rerio] gi|123231159 11826.2 9.18 6 41 0

#### Peptide Information

| Calc. Mass | Obsrv. Mass | ± da    | ± ppm | Start Seq. | End Seq. | Sequence         | Ion Score | C. I. | % Modification                            | Rank | Result Type |
|------------|-------------|---------|-------|------------|----------|------------------|-----------|-------|-------------------------------------------|------|-------------|
| 864.472    | 864.4708    | -0.0012 | -1    | 15         | 21       | RTSMLTR          |           |       |                                           |      | Mascot      |
| 996.5182   | 996.5739    | 0.0557  | 56    | 49         | 57       | DCPLVAPPK        |           |       | Carbamidomethyl (C)[2]                    |      | Mascot      |
| 1045.516   | 1045.5375   | 0.0215  | 21    | 72         | 80       | QTNITDEPK        |           |       |                                           |      | Mascot      |
| 1716.7891  | 1716.8151   | 0.026   | 15    | 16         | 30       | TSMLTRMADSSSESLR |           |       | Oxidation (M)[3,7]                        |      | Mascot      |
| 1846.9302  | 1846.7467   | -0.1835 | -99   | 1          | 15       | VVCASYQPLHLMEKR  |           |       | Carbamidomethyl (C)[3], Oxidation (M)[12] |      | Mascot      |

|                     |                                                    |             |         |       |            |          |                          |  |           |       |   |                                           |      |              |          |      |    |    |   |  |
|---------------------|----------------------------------------------------|-------------|---------|-------|------------|----------|--------------------------|--|-----------|-------|---|-------------------------------------------|------|--------------|----------|------|----|----|---|--|
|                     | 2063.0742                                          | 2062.9817   | -0.0925 | -45   | 31         | 48       | QYGLSQLFHPVLLTCTR        |  |           |       |   |                                           |      | Mascot       |          |      |    |    |   |  |
| 21                  | PREDICTED: transcription factor E2F8 [Danio rerio] |             |         |       |            |          |                          |  |           |       |   |                                           |      | gi 326669232 | 102227.6 | 9.39 | 14 | 41 | 0 |  |
| Peptide Information |                                                    |             |         |       |            |          |                          |  |           |       |   |                                           |      |              |          |      |    |    |   |  |
|                     | Calc. Mass                                         | Obsrv. Mass | ± da    | ± ppm | Start Seq. | End Seq. | Sequence                 |  | Ion Score | C. I. | % | Modification                              | Rank | Result Type  |          |      |    |    |   |  |
|                     | 827.4257                                           | 827.4138    | -0.0119 | -14   | 358        | 364      | VHVTEDK                  |  |           |       |   |                                           |      | Mascot       |          |      |    |    |   |  |
|                     | 950.4941                                           | 950.4712    | -0.0229 | -24   | 408        | 416      | NLFSSPGTK                |  |           |       |   |                                           |      | Mascot       |          |      |    |    |   |  |
|                     | 973.4957                                           | 973.4887    | -0.007  | -7    | 463        | 471      | MAHLAAICK                |  |           |       |   | Oxidation (M)[1]                          |      | Mascot       |          |      |    |    |   |  |
|                     | 1060.6626                                          | 1060.5389   | -0.1237 | -117  | 422        | 430      | HHSLVKLVK                |  |           |       |   |                                           |      | Mascot       |          |      |    |    |   |  |
|                     | 1165.479                                           | 1165.5551   | 0.0761  | 65    | 752        | 761      | EPQCSNESSK               |  |           |       |   | Carbamidomethyl (C)[4]                    |      | Mascot       |          |      |    |    |   |  |
|                     | 1179.5786                                          | 1179.5734   | -0.0052 | -4    | 612        | 622      | SSVGSPSKMQR              |  |           |       |   | Oxidation (M)[9]                          |      | Mascot       |          |      |    |    |   |  |
|                     | 1181.6538                                          | 1181.564    | -0.0898 | -76   | 418        | 427      | GFTRHHSLVK               |  |           |       |   |                                           |      | Mascot       |          |      |    |    |   |  |
|                     | 1226.6052                                          | 1226.5541   | -0.0511 | -42   | 372        | 382      | WTGPEDIPSPK              |  |           |       |   |                                           |      | Mascot       |          |      |    |    |   |  |
|                     | 1254.6221                                          | 1254.6763   | 0.0542  | 43    | 1          | 11       | MLSPTMYNAVK              |  |           |       |   |                                           |      | Mascot       |          |      |    |    |   |  |
|                     | 1383.7816                                          | 1383.6533   | -0.1283 | -93   | 145        | 156      | SLGLLCYKFLAR             |  |           |       |   |                                           |      | Mascot       |          |      |    |    |   |  |
|                     | 1443.7988                                          | 1443.6746   | -0.1242 | -86   | 627        | 639      | SVSPKLCEILQAR            |  |           |       |   |                                           |      | Mascot       |          |      |    |    |   |  |
|                     | 1443.7988                                          | 1443.6746   | -0.1242 | -86   | 627        | 639      | SVSPKLCEILQAR            |  |           |       |   |                                           |      | Mascot       |          |      |    |    |   |  |
|                     | 2085.9683                                          | 2085.8743   | -0.094  | -45   | 577        | 596      | TSPATLTSNNQTNQSSS<br>YGK |  |           |       |   |                                           |      | Mascot       |          |      |    |    |   |  |
|                     | 2119.187                                           | 2118.8967   | -0.2903 | -137  | 300        | 319      | FVMLFLVSSPPVSLDVA<br>AK  |  |           |       |   |                                           |      | Mascot       |          |      |    |    |   |  |
|                     | 2119.187                                           | 2118.8967   | -0.2903 | -137  | 300        | 319      | FVMLFLVSSPPVSLDVA<br>AK  |  |           |       |   |                                           |      | Mascot       |          |      |    |    |   |  |
|                     | 2225.1667                                          | 2225.0718   | -0.0949 | -43   | 185        | 203      | IYDIMNVLESLNMVSRLA<br>K  |  |           |       |   | Oxidation (M)[5]                          |      | Mascot       |          |      |    |    |   |  |
| 22                  | Pbx2 [Danio rerio]                                 |             |         |       |            |          |                          |  |           |       |   |                                           |      | gi 7861936   | 18895.6  | 9.08 | 7  | 41 | 0 |  |
| Peptide Information |                                                    |             |         |       |            |          |                          |  |           |       |   |                                           |      |              |          |      |    |    |   |  |
|                     | Calc. Mass                                         | Obsrv. Mass | ± da    | ± ppm | Start Seq. | End Seq. | Sequence                 |  | Ion Score | C. I. | % | Modification                              | Rank | Result Type  |          |      |    |    |   |  |
|                     | 864.4686                                           | 864.4708    | 0.0022  | 3     | 153        | 159      | SRFLDAR                  |  |           |       |   |                                           |      | Mascot       |          |      |    |    |   |  |
|                     | 1051.5782                                          | 1051.6881   | 0.1099  | 105   | 133        | 141      | FSSIQTQLK                |  |           |       |   |                                           |      | Mascot       |          |      |    |    |   |  |
|                     | 1179.6442                                          | 1179.5734   | -0.0708 | -60   | 1          | 10       | ALFSVLCEIK               |  |           |       |   | Carbamidomethyl (C)[7]                    |      | Mascot       |          |      |    |    |   |  |
|                     | 1649.8129                                          | 1649.8845   | 0.0716  | 43    | 19         | 32       | NVQEEPPDPQLVR            |  |           |       |   |                                           |      | Mascot       |          |      |    |    |   |  |
|                     | 1649.8129                                          | 1649.8845   | 0.0716  | 43    | 19         | 32       | NVQEEPPDPQLVR            |  |           |       |   |                                           |      | Mascot       |          |      |    |    |   |  |
|                     | 1743.9388                                          | 1743.797    | -0.1418 | -81   | 79         | 92       | LSQIRNIYHTELEK           |  |           |       |   |                                           |      | Mascot       |          |      |    |    |   |  |
|                     | 1743.9388                                          | 1743.797    | -0.1418 | -81   | 79         | 92       | LSQIRNIYHTELEK           |  |           |       |   |                                           |      | Mascot       |          |      |    |    |   |  |
|                     | 2054.927                                           | 2054.9158   | -0.0112 | -5    | 93         | 109      | YEQACSESTTHVMNLLR        |  |           |       |   | Carbamidomethyl (C)[5], Oxidation (M)[13] |      | Mascot       |          |      |    |    |   |  |
|                     | 2283.1836                                          | 2283.1252   | -0.0584 | -26   | 133        | 152      | FSSIQTQLKQSTCEAVMI<br>LR |  |           |       |   |                                           |      | Mascot       |          |      |    |    |   |  |

23 PREDICTED: gastrula zinc finger protein  
XICGF57.1-like [Danio rerio] gi|326680865 30821.8 9.88 10 39 0

Peptide Information

| Calc. Mass | Obsrv. Mass | ± da    | ± ppm | Start Seq. | End Sequence Seq.     | Ion Score | C. I. % Modification                      | Rank | Result Type |
|------------|-------------|---------|-------|------------|-----------------------|-----------|-------------------------------------------|------|-------------|
| 915.3811   | 915.4689    | 0.0878  | 96    | 12         | 19 FTCTQCGR           |           |                                           |      | Mascot      |
| 950.5101   | 950.4712    | -0.0389 | -41   | 170        | 176 HMRIHTR           |           |                                           |      | Mascot      |
| 1045.5459  | 1045.5375   | -0.0084 | -8    | 108        | 116 SSTLNKHK          |           |                                           |      | Mascot      |
| 1153.5959  | 1153.5287   | -0.0672 | -58   | 104        | 113 SFNRSSLNK         |           |                                           |      | Mascot      |
| 1181.6022  | 1181.564    | -0.0382 | -32   | 244        | 253 SFRQSSSLNR        |           |                                           |      | Mascot      |
| 1362.6041  | 1362.6691   | 0.065   | 48    | 12         | 23 FTCTQCGRSFR        |           |                                           |      | Mascot      |
| 1362.6041  | 1362.6691   | 0.065   | 48    | 12         | 23 FTCTQCGRSFR        |           |                                           |      | Mascot      |
| 1649.7775  | 1649.8845   | 0.107   | 65    | 33         | 47 IHTGEKPFCTQCGK     |           |                                           |      | Mascot      |
| 1649.7775  | 1649.8845   | 0.107   | 65    | 229        | 243 IHTGEKPFCTQCGK    |           |                                           |      | Mascot      |
| 1862.9     | 1862.745    | -0.155  | -83   | 173        | 187 IHTREKPFCTQCGK    |           | Carbamidomethyl (C)[10,13]                |      | Mascot      |
| 2102.9932  | 2102.8892   | -0.104  | -49   | 198        | 215 HMKIHTGEKPFCTQCGK |           | Carbamidomethyl (C)[13]                   |      | Mascot      |
| 2118.988   | 2118.8967   | -0.0913 | -43   | 198        | 215 HMKIHTGEKPFCTQCGK |           | Carbamidomethyl (C)[13], Oxidation (M)[2] |      | Mascot      |
| 2118.988   | 2118.8967   | -0.0913 | -43   | 198        | 215 HMKIHTGEKPFCTQCGK |           | Carbamidomethyl (C)[13], Oxidation (M)[2] |      | Mascot      |
| 2211.0432  | 2211.0591   | 0.0159  | 7     | 33         | 51 IHTGEKPFCTQCGKSFR  |           | Carbamidomethyl (C)[10,13]                |      | Mascot      |

24 ectonucleotide pyrophosphatase/phosphodiesterase family member 2 [Danio rerio] gi|41054802 97130.8 8.14 15 38 0

Peptide Information

| Calc. Mass | Obsrv. Mass | ± da    | ± ppm | Start Seq. | End Sequence Seq.   | Ion Score | C. I. % Modification     | Rank | Result Type |
|------------|-------------|---------|-------|------------|---------------------|-----------|--------------------------|------|-------------|
| 950.4651   | 950.4712    | 0.0061  | 6     | 802        | 808 WVEELMK         |           | Oxidation (M)[6]         |      | Mascot      |
| 1045.3826  | 1045.5375   | 0.1549  | 148   | 123        | 130 GDCCTNYR        |           | Carbamidomethyl (C)[3,4] |      | Mascot      |
| 1079.5983  | 1079.4886   | -0.1097 | -102  | 832        | 840 TYEILALK        |           |                          |      | Mascot      |
| 1134.5538  | 1134.5354   | -0.0184 | -16   | 392        | 401 NPNNSKFDAK      |           |                          |      | Mascot      |
| 1181.671   | 1181.564    | -0.107  | -91   | 17         | 26 LTVCKTYVVR       |           |                          |      | Mascot      |
| 1362.5599  | 1362.6691   | 0.1092  | 80    | 123        | 134 GDCCTNYRSLCK    |           |                          |      | Mascot      |
| 1362.5599  | 1362.6691   | 0.1092  | 80    | 123        | 134 GDCCTNYRSLCK    |           |                          |      | Mascot      |
| 1475.6583  | 1475.7234   | 0.0651  | 44    | 647        | 659 VPTAYSQSCSNYR   |           |                          |      | Mascot      |
| 1649.8944  | 1649.8845   | -0.0099 | -6    | 584        | 597 NLPYGRPAVMFRTK  |           |                          |      | Mascot      |
| 1649.8944  | 1649.8845   | -0.0099 | -6    | 584        | 597 NLPYGRPAVMFRTK  |           |                          |      | Mascot      |
| 1759.8319  | 1759.7922   | -0.0397 | -23   | 41         | 56 SFSDQPFTSLAGSCKK |           | Carbamidomethyl (C)[14]  |      | Mascot      |

|    |                                                                                                    |           |         |     |              |     |                         |      |                           |        |   |
|----|----------------------------------------------------------------------------------------------------|-----------|---------|-----|--------------|-----|-------------------------|------|---------------------------|--------|---|
|    | 1759.8319                                                                                          | 1759.7922 | -0.0397 | -23 | 41           | 56  | SFSDQPFTSLAGSCKK        |      | Carbamidomethyl (C)[14]   | Mascot |   |
|    | 1762.7999                                                                                          | 1762.9688 | 0.1689  | 96  | 57           | 70  | RCFELVEADPPNCR          |      | Carbamidomethyl (C)[2,13] | Mascot |   |
|    | 2020.0472                                                                                          | 2020.0532 | 0.006   | 3   | 262          | 279 | QGVKAGSFFWPVAIPME<br>R  |      |                           | Mascot |   |
|    | 2103.0918                                                                                          | 2102.8892 | -0.2026 | -96 | 1            | 16  | MLQLKWVFSVMWLFSSR       |      | Oxidation (M)[1,11]       | Mascot |   |
|    | 2210.999                                                                                           | 2211.0591 | 0.0601  | 27  | 346          | 364 | CINIILVGDHGMEEAHCD<br>K |      | Carbamidomethyl (C)[1,17] | Mascot |   |
|    | 2233.1545                                                                                          | 2233.0356 | -0.1189 | -53 | 577          | 595 | QVIDDNKNLPYGRPAVM<br>FR |      |                           | Mascot |   |
|    | 2282.9661                                                                                          | 2283.1252 | 0.1591  | 70  | 58           | 76  | CFELVEADPPNCRCDNL<br>CK |      | Carbamidomethyl (C)[1,12] | Mascot |   |
| 25 | novel protein similar to vertebrate uveal autoantigen with coiled-coil domains and ankyrin repeats |           |         |     | gi 157886098 |     | 84044.6                 | 5.83 | 13                        | 37     | 0 |

#### Peptide Information

| Calc. Mass | Obsrv. Mass | ± da    | ± ppm | Start Seq. | End Seq. | Sequence                  | Ion Score | C. I. | % Modification           | Rank | Result Type |
|------------|-------------|---------|-------|------------|----------|---------------------------|-----------|-------|--------------------------|------|-------------|
| 842.5094   | 842.4896    | -0.0198 | -24   | 330        | 337      | LDAALALR                  |           |       |                          |      | Mascot      |
| 915.4893   | 915.4689    | -0.0204 | -22   | 410        | 418      | EAAVAELGR                 |           |       |                          |      | Mascot      |
| 950.4213   | 950.4712    | 0.0499  | 53    | 11         | 18       | NESTEWGK                  |           |       |                          |      | Mascot      |
| 983.3743   | 983.4212    | 0.0469  | 48    | 755        | 761      | MREECVC                   |           |       | Carbamidomethyl (C)[5,7] |      | Mascot      |
| 987.5469   | 987.4866    | -0.0603 | -61   | 455        | 462      | EELINTLR                  |           |       |                          |      | Mascot      |
| 1256.6705  | 1256.6704   | -0.0001 | 0     | 407        | 418      | GQREAAVAELGR              |           |       |                          |      | Mascot      |
| 1256.6705  | 1256.6704   | -0.0001 | 0     | 407        | 418      | GQREAAVAELGR              |           |       |                          |      | Mascot      |
| 1649.7435  | 1649.8845   | 0.141   | 85    | 136        | 152      | VLCDSGASVDAVDADGR         |           |       |                          |      | Mascot      |
| 1649.7435  | 1649.8845   | 0.141   | 85    | 136        | 152      | VLCDSGASVDAVDADGR         |           |       |                          |      | Mascot      |
| 1716.7646  | 1716.8151   | 0.0505  | 29    | 479        | 492      | EAQTPSEWCSKHEK            |           |       | Carbamidomethyl (C)[9]   |      | Mascot      |
| 1743.8507  | 1743.797    | -0.0537 | -31   | 601        | 615      | VPNTKEEGVQTEEQR           |           |       |                          |      | Mascot      |
| 1743.8507  | 1743.797    | -0.0537 | -31   | 601        | 615      | VPNTKEEGVQTEEQR           |           |       |                          |      | Mascot      |
| 2063.0073  | 2062.9817   | -0.0256 | -12   | 132        | 152      | ATIKVLCDSGASVDAVDA<br>DGR |           |       |                          |      | Mascot      |
| 2101.9595  | 2101.8718   | -0.0877 | -42   | 493        | 511      | STITETCGDNVDLENYISK       |           |       |                          |      | Mascot      |
| 2283.1284  | 2283.1252   | -0.0032 | -1    | 539        | 557      | HQCILEENQSLLETQEQ<br>K    |           |       |                          |      | Mascot      |
| 2304.0615  | 2304.2371   | 0.1756  | 76    | 206        | 225      | TKADVFMADVHGHDAYH<br>YAR  |           |       |                          |      | Mascot      |

26 PREDICTED: zinc finger protein 135-like, partial [Danio rerio] gi|326667148 47351.9 9.79 12 37 0

#### Peptide Information

| Calc. Mass | Obsrv. Mass | ± da   | ± ppm | Start Seq. | End Seq. | Sequence  | Ion Score | C. I. | % Modification | Rank | Result Type |
|------------|-------------|--------|-------|------------|----------|-----------|-----------|-------|----------------|------|-------------|
| 987.4022   | 987.4866    | 0.0844 | 85    | 181        | 189      | SFTCNQCCK |           |       |                |      | Mascot      |



|           |           |         |     |     |     |                               |                                           |        |
|-----------|-----------|---------|-----|-----|-----|-------------------------------|-------------------------------------------|--------|
| 1134.4376 | 1134.5354 | 0.0978  | 86  | 12  | 21  | SCFTCTQCGK                    | Carbamidomethyl (C)[2]                    | Mascot |
| 1169.5442 | 1169.5322 | -0.012  | -10 | 292 | 301 | KPFTCTQCGK                    | Carbamidomethyl (C)[5]                    | Mascot |
| 1181.603  | 1181.564  | -0.039  | -33 | 368 | 376 | HMKIHTCVR                     | Carbamidomethyl (C)[7]                    | Mascot |
| 1226.5657 | 1226.5541 | -0.0116 | -9  | 292 | 301 | KPFTCTQCGK                    | Carbamidomethyl (C)[5,8]                  | Mascot |
| 1248.4806 | 1248.6549 | 0.1743  | 140 | 12  | 21  | SCFTCTQCGK                    | Carbamidomethyl (C)[2,5,8]                | Mascot |
| 1377.5596 | 1377.6392 | 0.0796  | 58  | 10  | 21  | DKSCFTCTQCGK                  | Carbamidomethyl (C)[4]                    | Mascot |
| 1475.6947 | 1475.7234 | 0.0287  | 19  | 327 | 339 | CGKSFNQSSYLNK                 |                                           | Mascot |
| 1649.7775 | 1649.8845 | 0.107   | 65  | 35  | 49  | IHTGEKPFTCTQCGK               |                                           | Mascot |
| 1649.7775 | 1649.8845 | 0.107   | 65  | 259 | 273 | IHTGEKPFTCTQCGK               |                                           | Mascot |
| 1743.7686 | 1743.797  | 0.0284  | 16  | 371 | 384 | IHTCVREYMCLECK                | Oxidation (M)[9]                          | Mascot |
| 1743.8306 | 1743.797  | -0.0336 | -19 | 312 | 326 | HMNIHTGEKPFTCTK               |                                           | Mascot |
| 1759.8254 | 1759.7922 | -0.0332 | -19 | 312 | 326 | HMNIHTGEKPFTCTK               | Oxidation (M)[2]                          | Mascot |
| 1759.8254 | 1759.7922 | -0.0332 | -19 | 312 | 326 | HMNIHTGEKPFTCTK               | Oxidation (M)[2]                          | Mascot |
| 1762.8727 | 1762.9688 | 0.0961  | 55  | 287 | 301 | IHTGKKPFTCTQCGK               | Carbamidomethyl (C)[10,13]                | Mascot |
| 2102.9932 | 2102.8892 | -0.104  | -49 | 144 | 161 | HMKIHTGEKPFTCTQCGK            | Carbamidomethyl (C)[13]                   | Mascot |
| 2118.988  | 2118.8967 | -0.0913 | -43 | 144 | 161 | HMKIHTGEKPFTCTQCGK            | Carbamidomethyl (C)[13], Oxidation (M)[2] | Mascot |
| 2118.988  | 2118.8967 | -0.0913 | -43 | 144 | 161 | HMKIHTGEKPFTCTQCGK            | Carbamidomethyl (C)[13], Oxidation (M)[2] | Mascot |
| 2834.3599 | 2834.2317 | -0.1282 | -45 | 259 | 283 | IHTGEKPFTCTQCGKSFS<br>LSSSLYR | Carbamidomethyl (C)[10]                   | Mascot |

27 PREDICTED: zinc finger protein 420 isoform 2 [Danio rerio] gi|326678086 70371 9.08 14 37 0

#### Peptide Information

| Calc. Mass | Obsrv. Mass | ± da    | ± ppm | Start Seq. | End Seq. | Sequence           | Ion Score | C. I. % | Modification                             | Rank | Result Type |
|------------|-------------|---------|-------|------------|----------|--------------------|-----------|---------|------------------------------------------|------|-------------|
| 842.5206   | 842.4896    | -0.031  | -37   | 25         | 31       | QRQGLLK            |           |         |                                          |      | Mascot      |
| 864.4798   | 864.4708    | -0.009  | -10   | 591        | 597      | HRSVHTK            |           |         |                                          |      | Mascot      |
| 950.3706   | 950.4712    | 0.1006  | 106   | 36         | 43       | MSDPEPCR           |           |         | Oxidation (M)[1]                         |      | Mascot      |
| 987.5621   | 987.4866    | -0.0755 | -76   | 497        | 505      | TFITAGHLK          |           |         |                                          |      | Mascot      |
| 1045.536   | 1045.5375   | 0.0015  | 1     | 134        | 141      | FHCARNLK           |           |         | Carbamidomethyl (C)[3]                   |      | Mascot      |
| 1093.4531  | 1093.5111   | 0.058   | 53    | 62         | 70       | EDLSEDEEK          |           |         |                                          |      | Mascot      |
| 1248.5712  | 1248.6549   | 0.0837  | 67    | 36         | 45       | MSDPEPCRIK         |           |         | Carbamidomethyl (C)[7], Oxidation (M)[1] |      | Mascot      |
| 1743.833   | 1743.797    | -0.036  | -21   | 556        | 571      | VSSSLNSHMLTHTGEK   |           |         | Oxidation (M)[9]                         |      | Mascot      |
| 1743.9144  | 1743.797    | -0.1174 | -67   | 295        | 309      | CGHCGKTFLRPAVLK    |           |         | Carbamidomethyl (C)[1,4]                 |      | Mascot      |
| 1759.9412  | 1759.7922   | -0.149  | -85   | 81         | 95       | IKIDHNFLMETTAVK    |           |         |                                          |      | Mascot      |
| 1759.9412  | 1759.7922   | -0.149  | -85   | 81         | 95       | IKIDHNFLMETTAVK    |           |         |                                          |      | Mascot      |
| 2102.0085  | 2101.8718   | -0.1367 | -65   | 488        | 505      | EFVCFECEKTFITAGHLK |           |         |                                          |      | Mascot      |
| 2118.9958  | 2118.8967   | -0.0991 | -47   | 538        | 555      | VHTGEKPFACHTCGKSF  |           |         | Carbamidomethyl (C)[10,13]               |      | Mascot      |

|    |                                        |           |         |     |              |     |                             |      |                            |    |        |
|----|----------------------------------------|-----------|---------|-----|--------------|-----|-----------------------------|------|----------------------------|----|--------|
|    | 2118.9958                              | 2118.8967 | -0.0991 | -47 | 538          | 555 | R<br>VHTGEKPFACHTCGKSF<br>R |      | Carbamidomethyl (C)[10,13] |    | Mascot |
|    | 2211.0798                              | 2211.0591 | -0.0207 | -9  | 450          | 468 | IHLRVHTNEKPYSCPECG<br>K     |      |                            |    | Mascot |
|    | 2283.0579                              | 2283.1252 | 0.0673  | 29  | 227          | 245 | HQMIHTGEKPYKCSHCD<br>LR     |      |                            |    | Mascot |
| 28 | PREDICTED: plakophilin-4 [Danio rerio] |           |         |     | gi 189520147 |     | 125040                      | 9.07 | 15                         | 37 | 0      |

#### Peptide Information

|  | Calc. Mass | Obsrv. Mass | ± da    | ± ppm | Start Seq. | End Seq. | Sequence                 | Ion Score | C. I. | % Modification                            | Rank | Result Type |
|--|------------|-------------|---------|-------|------------|----------|--------------------------|-----------|-------|-------------------------------------------|------|-------------|
|  | 973.5312   | 973.4887    | -0.0425 | -44   | 901        | 910      | ALAQTGGIDK               |           |       |                                           |      | Mascot      |
|  | 983.5632   | 983.4212    | -0.142  | -144  | 559        | 568      | NSGGIPALVR               |           |       |                                           |      | Mascot      |
|  | 996.4778   | 996.5739    | 0.0961  | 96    | 405        | 413      | TTSQCSTLR                |           |       |                                           |      | Mascot      |
|  | 1153.6476  | 1153.5287   | -0.1189 | -103  | 807        | 816      | FASYIRAAVR               |           |       |                                           |      | Mascot      |
|  | 1165.7416  | 1165.7173   | -0.0243 | -21   | 629        | 638      | LKLHSSLVLR               |           |       |                                           |      | Mascot      |
|  | 1383.6473  | 1383.6533   | 0.006   | 4     | 727        | 737      | QADYSCWGLRK              |           |       | Carbamidomethyl (C)[6]                    |      | Mascot      |
|  | 1426.7107  | 1426.6681   | -0.0426 | -30   | 1          | 12       | MPTPRQSPVEER             |           |       |                                           |      | Mascot      |
|  | 1443.7009  | 1443.6746   | -0.0263 | -18   | 405        | 416      | TTSQCSTLRYQR             |           |       |                                           |      | Mascot      |
|  | 1443.7009  | 1443.6746   | -0.0263 | -18   | 405        | 416      | TTSQCSTLRYQR             |           |       |                                           |      | Mascot      |
|  | 1649.8098  | 1649.8845   | 0.0747  | 45    | 830        | 844      | MDNDRVVCVATALR           |           |       |                                           |      | Mascot      |
|  | 1649.8098  | 1649.8845   | 0.0747  | 45    | 830        | 844      | MDNDRVVCVATALR           |           |       |                                           |      | Mascot      |
|  | 1846.9625  | 1846.7467   | -0.2158 | -117  | 835        | 851      | VVCSVATALRNMALDAR        |           |       | Carbamidomethyl (C)[3]                    |      | Mascot      |
|  | 1862.9575  | 1862.745    | -0.2125 | -114  | 835        | 851      | VVCSVATALRNMALDAR        |           |       | Carbamidomethyl (C)[3], Oxidation (M)[12] |      | Mascot      |
|  | 2040.9304  | 2041.0117   | 0.0813  | 40    | 1010       | 1026     | RTQSSMQLHNYGDANR         |           |       |                                           |      | Mascot      |
|  | 2040.9304  | 2041.0117   | 0.0813  | 40    | 1010       | 1026     | RTQSSMQLHNYGDANR         |           |       |                                           |      | Mascot      |
|  | 2055.0435  | 2054.9158   | -0.1277 | -62   | 657        | 673      | QMRCCGLIDSLLYIK          |           |       | Carbamidomethyl (C)[4]                    |      | Mascot      |
|  | 2280.0562  | 2280.0908   | 0.0346  | 15    | 92         | 115      | SAESSGAGVSKPSDGCPSPTFGVR |           |       |                                           |      | Mascot      |
|  | 2284.0469  | 2284.1218   | 0.0749  | 33    | 170        | 192      | SEGRSQSTSSAPSGSPTLAMSSR  |           |       | Oxidation (M)[20]                         |      | Mascot      |
|  | 2834.2886  | 2834.2317   | -0.0569 | -20   | 414        | 437      | YQRGLFSMGSMATHSDTYRPGHYR |           |       | Oxidation (M)[8]                          |      | Mascot      |

29 PREDICTED: single-strand selective monofunctional uracil DNA glycosylase, partial [Danio rerio] gi|326671525 36263.3 8.51 8 36 0

#### Peptide Information

|  | Calc. Mass | Obsrv. Mass | ± da    | ± ppm | Start Seq. | End Seq. | Sequence    | Ion Score | C. I. | % Modification   | Rank | Result Type |
|--|------------|-------------|---------|-------|------------|----------|-------------|-----------|-------|------------------|------|-------------|
|  | 987.5734   | 987.4866    | -0.0868 | -88   | 163        | 170      | NWLKITGR    |           |       |                  |      | Mascot      |
|  | 1277.667   | 1277.6833   | 0.0163  | 13    | 99         | 109      | LQMLSFGNPVR |           |       | Oxidation (M)[3] |      | Mascot      |
|  | 1277.667   | 1277.6833   | 0.0163  | 13    | 99         | 109      | LQMLSFGNPVR |           |       | Oxidation (M)[3] |      | Mascot      |

|  |           |           |         |      |     |     |                    |  |  |  |                        |  |  |        |
|--|-----------|-----------|---------|------|-----|-----|--------------------|--|--|--|------------------------|--|--|--------|
|  | 1383.7491 | 1383.6533 | -0.0958 | -69  | 301 | 313 | NPLANKGWASVAR      |  |  |  |                        |  |  | Mascot |
|  | 1426.6123 | 1426.6681 | 0.0558  | 39   | 245 | 257 | DALLSCCDSALCR      |  |  |  | Carbamidomethyl (C)[6] |  |  | Mascot |
|  | 1443.8604 | 1443.6746 | -0.1858 | -129 | 258 | 272 | VVTALGISMVIGVGK    |  |  |  |                        |  |  | Mascot |
|  | 1443.8604 | 1443.6746 | -0.1858 | -129 | 258 | 272 | VVTALGISMVIGVGK    |  |  |  |                        |  |  | Mascot |
|  | 1759.9272 | 1759.7922 | -0.135  | -77  | 291 | 306 | VEGIMHSPRNPLANK    |  |  |  |                        |  |  | Mascot |
|  | 1759.9272 | 1759.7922 | -0.135  | -77  | 291 | 306 | VEGIMHSPRNPLANK    |  |  |  |                        |  |  | Mascot |
|  | 1862.9714 | 1862.745  | -0.2264 | -122 | 6   | 21  | CLKLSLSDLQQVQMEK   |  |  |  |                        |  |  | Mascot |
|  | 2118.9922 | 2118.8967 | -0.0955 | -45  | 215 | 232 | HCFVHNLCPLIFMSESGK |  |  |  | Carbamidomethyl (C)[2] |  |  | Mascot |
|  | 2118.9922 | 2118.8967 | -0.0955 | -45  | 215 | 232 | HCFVHNLCPLIFMSESGK |  |  |  | Carbamidomethyl (C)[2] |  |  | Mascot |

30 PREDICTED: kelch repeat and BTB domain-containing protein 3-like [Danio rerio] gi|125838537 67263.7 5.04 10 35 0

#### Peptide Information

| Calc. Mass | Obsrv. Mass | ± da    | ± ppm | Start Seq. | End Seq. | Sequence                      | Ion Score | C. I. % | Modification            | Rank | Result Type |
|------------|-------------|---------|-------|------------|----------|-------------------------------|-----------|---------|-------------------------|------|-------------|
| 1332.7205  | 1332.6417   | -0.0788 | -59   | 2          | 12       | AVSPQRCVFLR                   |           |         | Carbamidomethyl (C)[7]  |      | Mascot      |
| 1361.6155  | 1361.6444   | 0.0289  | 21    | 556        | 566      | SEWQEVSPMPR                   |           |         | Oxidation (M)[9]        |      | Mascot      |
| 1362.7233  | 1362.6691   | -0.0542 | -40   | 213        | 224      | TSLMQQLLACVR                  |           |         |                         |      | Mascot      |
| 1362.7233  | 1362.6691   | -0.0542 | -40   | 213        | 224      | TSLMQQLLACVR                  |           |         |                         |      | Mascot      |
| 1426.642   | 1426.6681   | 0.0261  | 18    | 287        | 297      | HTFCYEIVSDR                   |           |         | Carbamidomethyl (C)[4]  |      | Mascot      |
| 1899.9884  | 1899.896    | -0.0924 | -49   | 191        | 206      | VPDEETVLQALLCWVK              |           |         | Carbamidomethyl (C)[13] |      | Mascot      |
| 2041.0072  | 2041.0117   | 0.0045  | 2     | 567        | 582      | ALTEFHCQVLNFSRYR              |           |         | Carbamidomethyl (C)[7]  |      | Mascot      |
| 2041.0072  | 2041.0117   | 0.0045  | 2     | 567        | 582      | ALTEFHCQVLNFSRYR              |           |         | Carbamidomethyl (C)[7]  |      | Mascot      |
| 2102.927   | 2102.8892   | -0.0378 | -18   | 281        | 297      | TEESMRHTFCYEIVSDR             |           |         |                         |      | Mascot      |
| 2118.9219  | 2118.8967   | -0.0252 | -12   | 281        | 297      | TEESMRHTFCYEIVSDR             |           |         | Oxidation (M)[5]        |      | Mascot      |
| 2118.9219  | 2118.8967   | -0.0252 | -12   | 281        | 297      | TEESMRHTFCYEIVSDR             |           |         | Oxidation (M)[5]        |      | Mascot      |
| 2280.2168  | 2280.0908   | -0.126  | -55   | 31         | 49       | KLLDFSIIHVQDETLLCH<br>R       |           |         |                         |      | Mascot      |
| 2304.0544  | 2304.2371   | 0.1827  | 79    | 50         | 68       | CVLAACSHFFRAMFELD<br>MR       |           |         | Carbamidomethyl (C)[1]  |      | Mascot      |
| 2834.4104  | 2834.2317   | -0.1787 | -63   | 298        | 322      | WTPLPEDAMRILELPGSV<br>MTSFAEK |           |         | Oxidation (M)[9]        |      | Mascot      |

31 Cox5ab protein [Danio rerio] gi|37590361 17063 7.93 6 35 0

#### Peptide Information

| Calc. Mass | Obsrv. Mass | ± da    | ± ppm | Start Seq. | End Seq. | Sequence   | Ion Score | C. I. % | Modification | Rank | Result Type |
|------------|-------------|---------|-------|------------|----------|------------|-----------|---------|--------------|------|-------------|
| 915.5509   | 915.4689    | -0.082  | -90   | 109        | 116      | ILEAVKDK   |           |         |              |      | Mascot      |
| 1169.679   | 1169.5322   | -0.1468 | -126  | 1          | 10       | VLQFSLIGHR |           |         |              |      | Mascot      |

|    |                                    |           |         |     |    |             |                  |      |   |    |   |                         |  |  |  |  |        |
|----|------------------------------------|-----------|---------|-----|----|-------------|------------------|------|---|----|---|-------------------------|--|--|--|--|--------|
|    | 1226.5172                          | 1226.5541 | 0.0369  | 30  | 47 | 56          | VETDEEFDSR       |      |   |    |   |                         |  |  |  |  | Mascot |
|    | 1254.7277                          | 1254.6763 | -0.0514 | -41 | 29 | 40          | TRAAQTAPLAVR     |      |   |    |   |                         |  |  |  |  | Mascot |
|    | 1743.8959                          | 1743.797  | -0.0989 | -57 | 31 | 46          | AAQTAPLAVRCYSHAK |      |   |    |   | Carbamidomethyl (C)[11] |  |  |  |  | Mascot |
|    | 1743.8959                          | 1743.797  | -0.0989 | -57 | 31 | 46          | AAQTAPLAVRCYSHAK |      |   |    |   | Carbamidomethyl (C)[11] |  |  |  |  | Mascot |
|    | 1915.8126                          | 1915.8911 | 0.0785  | 41  | 41 | 56          | CYSHAKVETDEEFDSR |      |   |    |   |                         |  |  |  |  | Mascot |
| 32 | monoglyceride lipase [Danio rerio] |           |         |     |    | gi 41053549 | 33639.1          | 6.14 | 7 | 35 | 0 |                         |  |  |  |  |        |

#### Peptide Information

| Calc. Mass | Obsrv. Mass | ± da    | ± ppm | Start Seq. | End Seq. | Sequence                 | Ion Score | C. I. | % Modification          | Rank | Result Type |
|------------|-------------|---------|-------|------------|----------|--------------------------|-----------|-------|-------------------------|------|-------------|
| 850.4668   | 850.524     | 0.0572  | 67    | 249        | 255      | LLYNEAK                  |           |       |                         |      | Mascot      |
| 932.4142   | 932.4484    | 0.0342  | 37    | 1          | 8        | MPEPEGTR                 |           |       | Oxidation (M)[1]        |      | Mascot      |
| 1093.6187  | 1093.5111   | -0.1076 | -98   | 161        | 169      | VFMAKVLNR                |           |       | Oxidation (M)[3]        |      | Mascot      |
| 1362.8354  | 1362.6691   | -0.1663 | -122  | 170        | 182      | LAPKLTGPIIDPK            |           |       |                         |      | Mascot      |
| 1362.8354  | 1362.6691   | -0.1663 | -122  | 170        | 182      | LAPKLTGPIIDPK            |           |       |                         |      | Mascot      |
| 1426.7471  | 1426.6681   | -0.079  | -55   | 99         | 110      | DSLQHDIMKAR              |           |       |                         |      | Mascot      |
| 2119.043   | 2118.8967   | -0.1463 | -69   | 229        | 245      | WPFYILHGDADKLCDIR        |           |       | Carbamidomethyl (C)[14] |      | Mascot      |
| 2119.043   | 2118.8967   | -0.1463 | -69   | 229        | 245      | WPFYILHGDADKLCDIR        | 3         | 0     | Carbamidomethyl (C)[14] |      | Mascot      |
| 2834.4722  | 2834.2317   | -0.2405 | -85   | 261        | 284      | LKVYEEAYHALHDLPET IESVLK |           |       |                         |      | Mascot      |

33 PREDICTED: cadherin-like protein 26-like [Danio rerio] gi|326678922 80539.3 5.09 11 35 0

#### Peptide Information

| Calc. Mass | Obsrv. Mass | ± da    | ± ppm | Start Seq. | End Seq. | Sequence         | Ion Score | C. I. | % Modification                           | Rank | Result Type |
|------------|-------------|---------|-------|------------|----------|------------------|-----------|-------|------------------------------------------|------|-------------|
| 842.5094   | 842.4896    | -0.0198 | -24   | 527        | 534      | GLLPLSSR         |           |       |                                          |      | Mascot      |
| 915.5509   | 915.4689    | -0.082  | -90   | 166        | 173      | VLIEAKDK         |           |       |                                          |      | Mascot      |
| 950.4472   | 950.4712    | 0.024   | 25    | 618        | 625      | RSENGTMR         |           |       |                                          |      | Mascot      |
| 987.4166   | 987.4866    | 0.07    | 71    | 241        | 248      | GNEEGYYR         |           |       |                                          |      | Mascot      |
| 1153.4911  | 1153.5287   | 0.0376  | 33    | 432        | 441      | TVMCANNMNR       |           |       |                                          |      | Mascot      |
| 1169.4861  | 1169.5322   | 0.0461  | 39    | 432        | 441      | TVMCANNMNR       |           |       | Oxidation (M)[3]                         |      | Mascot      |
| 1226.5074  | 1226.5541   | 0.0467  | 38    | 432        | 441      | TVMCANNMNR       |           |       | Carbamidomethyl (C)[4], Oxidation (M)[3] |      | Mascot      |
| 1256.6885  | 1256.6704   | -0.0181 | -14   | 311        | 321      | VIDLNDPPVFK      |           |       |                                          |      | Mascot      |
| 1256.6885  | 1256.6704   | -0.0181 | -14   | 311        | 321      | VIDLNDPPVFK      |           |       |                                          |      | Mascot      |
| 1377.6144  | 1377.6392   | 0.0248  | 18    | 149        | 160      | QLAFSGCFDFDK     |           |       |                                          |      | Mascot      |
| 1649.9585  | 1649.8845   | -0.074  | -45   | 295        | 310      | TSAPPPKPQTTKVAVK |           |       |                                          |      | Mascot      |
| 1649.9585  | 1649.8845   | -0.074  | -45   | 295        | 310      | TSAPPPKPQTTKVAVK |           |       |                                          |      | Mascot      |
| 1716.9279  | 1716.8151   | -0.1128 | -66   | 225        | 240      | DTPNTPASRAVFSILK |           |       |                                          |      | Mascot      |

|    |                                            |           |         |     |              |     |                    |      |    |    |   |  |  |  |  |        |
|----|--------------------------------------------|-----------|---------|-----|--------------|-----|--------------------|------|----|----|---|--|--|--|--|--------|
|    | 1743.8911                                  | 1743.797  | -0.0941 | -54 | 330          | 345 | NENGKPGDVLFTPDIK   |      |    |    |   |  |  |  |  | Mascot |
|    | 1743.8911                                  | 1743.797  | -0.0941 | -54 | 330          | 345 | NENGKPGDVLFTPDIK   |      |    |    |   |  |  |  |  | Mascot |
|    | 1763.0975                                  | 1762.9688 | -0.1287 | -73 | 535          | 552 | LGPAAIGLMIAGLLLLAR |      |    |    |   |  |  |  |  | Mascot |
| 34 | zinc finger protein 502-like [Danio rerio] |           |         |     | gi 162138984 |     | 34465.2            | 9.71 | 10 | 35 | 0 |  |  |  |  |        |

#### Peptide Information

| Calc. Mass | Obsrv. Mass | ± da    | ± ppm | Start Seq. | End Seq. | Sequence                | Ion Score | C. I. % | Modification               | Rank | Result Type |
|------------|-------------|---------|-------|------------|----------|-------------------------|-----------|---------|----------------------------|------|-------------|
| 882.4904   | 882.5457    | 0.0553  | 63    | 80         | 86       | SLRNHQK                 |           |         |                            |      | Mascot      |
| 1060.5422  | 1060.5389   | -0.0033 | -3    | 171        | 179      | THTGEKPYK               |           |         |                            |      | Mascot      |
| 1377.7195  | 1377.6392   | -0.0803 | -58   | 102        | 113      | TFCTAESLKIHK            |           |         |                            |      | Mascot      |
| 1426.7372  | 1426.6681   | -0.0691 | -48   | 131        | 142      | FSQLAHMKTHAR            |           |         |                            |      | Mascot      |
| 1649.7775  | 1649.8845   | 0.107   | 65    | 3          | 17       | IHTGEKPFTCTQCGK         |           |         |                            |      | Mascot      |
| 1649.7775  | 1649.8845   | 0.107   | 65    | 3          | 17       | IHTGEKPFTCTQCGK         |           |         |                            |      | Mascot      |
| 1762.8615  | 1762.9688   | 0.1073  | 61    | 115        | 129      | IHTGEKPYICSLCNK         |           |         | Carbamidomethyl (C)[10]    |      | Mascot      |
| 1862.9     | 1862.745    | -0.155  | -83   | 2          | 17       | RIHTGEKPFTCTQCGK        |           |         | Carbamidomethyl (C)[11]    |      | Mascot      |
| 1899.8727  | 1899.896    | 0.0233  | 12    | 143        | 157      | IHTGEKPYKCSYCEK         |           |         | Carbamidomethyl (C)[10,13] |      | Mascot      |
| 1993.9404  | 1993.9285   | -0.0119 | -6    | 1          | 17       | MRIHTGEKPFTCTQCGK       |           |         | Carbamidomethyl (C)[12]    |      | Mascot      |
| 2119.0713  | 2118.8967   | -0.1746 | -82   | 21         | 39       | ASSTLNNHMLIHTGEKTH<br>K |           |         |                            |      | Mascot      |
| 2119.0713  | 2118.8967   | -0.1746 | -82   | 21         | 39       | ASSTLNNHMLIHTGEKTH<br>K |           |         |                            |      | Mascot      |

|    |                                                                                              |  |  |  |              |  |          |      |    |    |   |  |  |  |  |  |
|----|----------------------------------------------------------------------------------------------|--|--|--|--------------|--|----------|------|----|----|---|--|--|--|--|--|
| 35 | novel protein similar to inositol polyphosphate-4-phosphatase, type I (inpp4a) [Danio rerio] |  |  |  | gi 169158824 |  | 105398.8 | 6.58 | 14 | 35 | 0 |  |  |  |  |  |
|----|----------------------------------------------------------------------------------------------|--|--|--|--------------|--|----------|------|----|----|---|--|--|--|--|--|

#### Peptide Information

| Calc. Mass | Obsrv. Mass | ± da    | ± ppm | Start Seq. | End Seq. | Sequence           | Ion Score | C. I. % | Modification            | Rank | Result Type |
|------------|-------------|---------|-------|------------|----------|--------------------|-----------|---------|-------------------------|------|-------------|
| 1045.5524  | 1045.5375   | -0.0149 | -14   | 258        | 266      | LLLEEDSAR          |           |         |                         |      | Mascot      |
| 1169.6538  | 1169.5322   | -0.1216 | -104  | 801        | 810      | FLGQNVHARK         |           |         |                         |      | Mascot      |
| 1181.6095  | 1181.564    | -0.0455 | -39   | 827        | 836      | LNGVRFTSCK         |           |         | Carbamidomethyl (C)[9]  |      | Mascot      |
| 1248.6597  | 1248.6549   | -0.0048 | -4    | 4          | 12       | RERPWSVYR          |           |         |                         |      | Mascot      |
| 1254.7164  | 1254.6763   | -0.0401 | -32   | 144        | 154      | LNIPLRSAENK        |           |         |                         |      | Mascot      |
| 1743.8959  | 1743.797    | -0.0989 | -57   | 813        | 826      | NVDILWQAAEICRR     |           |         | Carbamidomethyl (C)[12] |      | Mascot      |
| 1743.8959  | 1743.797    | -0.0989 | -57   | 813        | 826      | NVDILWQAAEICRR     |           |         | Carbamidomethyl (C)[12] |      | Mascot      |
| 1759.9159  | 1759.7922   | -0.1237 | -70   | 519        | 533      | VWGNVDKSLECIQR     |           |         |                         |      | Mascot      |
| 1759.9159  | 1759.7922   | -0.1237 | -70   | 519        | 533      | VWGNVDKSLECIQR     |           |         |                         |      | Mascot      |
| 1900.0386  | 1899.896    | -0.1426 | -75   | 187        | 204      | TVLPVDESLETESGVRAK |           |         |                         |      | Mascot      |
| 2041.0861  | 2041.0117   | -0.0744 | -36   | 615        | 632      | DVVFQCQTLTALICGFIK |           |         | Carbamidomethyl (C)[5]  |      | Mascot      |

|    |                                    |           |         |      |              |     |                             |      |                        |        |   |
|----|------------------------------------|-----------|---------|------|--------------|-----|-----------------------------|------|------------------------|--------|---|
|    | 2041.0861                          | 2041.0117 | -0.0744 | -36  | 615          | 632 | DVVFCQTLTALICGFIK           |      | Carbamidomethyl (C)[5] | Mascot |   |
|    | 2086.1655                          | 2085.8743 | -0.2912 | -140 | 456          | 475 | LLASAVQALNAARPEYIA<br>SK    |      |                        | Mascot |   |
|    | 2102.0852                          | 2101.8718 | -0.2134 | -102 | 706          | 724 | DGFNVRIPLPGSMFDALP<br>R     |      |                        | Mascot |   |
|    | 2103.0063                          | 2102.8892 | -0.1171 | -56  | 267          | 284 | VSELEELGELSPCWENL<br>R      |      |                        | Mascot |   |
|    | 2284.0146                          | 2284.1218 | 0.1072  | 47   | 543          | 563 | LHSSSSEDMFQSDQQG<br>GTSKK   |      |                        | Mascot |   |
|    | 2834.3884                          | 2834.2317 | -0.1567 | -55  | 591          | 614 | SMVFLLMQDSAPTAMDL<br>SLQYRR |      | Oxidation (M)[2,7,16]  | Mascot |   |
| 36 | LOC100006972 protein [Danio rerio] |           |         |      | gi 158253437 |     | 64992.4                     | 5.83 | 10                     | 35     | 0 |

#### Peptide Information

|  | Calc. Mass | Obsrv. Mass | ± da    | ± ppm | Start Seq. | End Seq. | Sequence                | Ion Score | C. I. | % Modification         | Rank | Result Type |
|--|------------|-------------|---------|-------|------------|----------|-------------------------|-----------|-------|------------------------|------|-------------|
|  | 850.5032   | 850.524     | 0.0208  | 24    | 368        | 374      | IKLSDFK                 |           |       |                        |      | Mascot      |
|  | 932.4472   | 932.4484    | 0.0012  | 1     | 438        | 445      | TPHFSTDK                |           |       |                        |      | Mascot      |
|  | 1060.5422  | 1060.5389   | -0.0033 | -3    | 438        | 446      | TPHFSTDKK               |           |       |                        |      | Mascot      |
|  | 1079.5402  | 1079.4886   | -0.0516 | -48   | 475        | 484      | CGTEITATVK              |           |       | Carbamidomethyl (C)[1] |      | Mascot      |
|  | 1248.6332  | 1248.6549   | 0.0217  | 17    | 178        | 188      | IGQWTNVSSSTR            |           |       |                        |      | Mascot      |
|  | 1254.63    | 1254.6763   | 0.0463  | 37    | 216        | 225      | MSSHYFQVKK              |           |       |                        |      | Mascot      |
|  | 1277.71    | 1277.6833   | -0.0267 | -21   | 106        | 116      | IKVELQGESFK             |           |       |                        |      | Mascot      |
|  | 1277.71    | 1277.6833   | -0.0267 | -21   | 106        | 116      | IKVELQGESFK             |           |       |                        |      | Mascot      |
|  | 1362.6899  | 1362.6691   | -0.0208 | -15   | 337        | 348      | SESVHLTYEIGK            |           |       |                        |      | Mascot      |
|  | 1362.6899  | 1362.6691   | -0.0208 | -15   | 337        | 348      | SESVHLTYEIGK            |           |       |                        |      | Mascot      |
|  | 1383.7842  | 1383.6533   | -0.1309 | -95   | 95         | 107      | APLAEAESVQKIK           |           |       |                        |      | Mascot      |
|  | 2020.0354  | 2020.0532   | 0.0178  | 9     | 294        | 312      | TGCAIHNFGLSMLLNSTL<br>K |           |       |                        |      | Mascot      |

|    |                                   |  |  |  |              |  |         |      |   |    |   |
|----|-----------------------------------|--|--|--|--------------|--|---------|------|---|----|---|
| 37 | rab-like protein 2B [Danio rerio] |  |  |  | gi 113678774 |  | 25299.4 | 5.23 | 7 | 35 | 0 |
|----|-----------------------------------|--|--|--|--------------|--|---------|------|---|----|---|

#### Peptide Information

|  | Calc. Mass | Obsrv. Mass | ± da    | ± ppm | Start Seq. | End Seq. | Sequence                | Ion Score | C. I. | % Modification      | Rank | Result Type |
|--|------------|-------------|---------|-------|------------|----------|-------------------------|-----------|-------|---------------------|------|-------------|
|  | 983.4316   | 983.4212    | -0.0104 | -11   | 14         | 21       | YDSDEQVK                |           |       |                     |      | Mascot      |
|  | 1165.5095  | 1165.5551   | 0.0456  | 39    | 83         | 91       | SMHPSYYHK               |           |       | Oxidation (M)[2]    |      | Mascot      |
|  | 1169.6313  | 1169.5322   | -0.0991 | -85   | 139        | 148      | VTQKSFNFAK              |           |       |                     |      | Mascot      |
|  | 1362.53    | 1362.6691   | 0.1391  | 102   | 182        | 192      | NSSDFMDEVMR             |           |       | Oxidation (M)[6,10] |      | Mascot      |
|  | 1362.53    | 1362.6691   | 0.1391  | 102   | 182        | 192      | NSSDFMDEVMR             |           |       | Oxidation (M)[6,10] |      | Mascot      |
|  | 2041.0752  | 2041.0117   | -0.0635 | -31   | 149        | 167      | KQGLPFYFVSAADGTNV<br>VK |           |       |                     |      | Mascot      |
|  | 2041.0752  | 2041.0117   | -0.0635 | -31   | 149        | 167      | KQGLPFYFVSAADGTNV<br>VK |           |       |                     |      | Mascot      |

|    |                                                                 |           |        |      |     |              |                          |      |    |    |   |  |                         |        |
|----|-----------------------------------------------------------------|-----------|--------|------|-----|--------------|--------------------------|------|----|----|---|--|-------------------------|--------|
|    | 2086.1113                                                       | 2085.8743 | -0.237 | -114 | 116 | 132          | ELREYRPEIPCLVVANK        |      |    |    |   |  | Carbamidomethyl (C)[11] | Mascot |
|    | 2304.1726                                                       | 2304.2371 | 0.0645 | 28   | 119 | 138          | EYRPEIPCLVVANKIDAD<br>MK |      |    |    |   |  |                         | Mascot |
| 38 | PREDICTED: uncharacterized protein C20orf117-like [Danio rerio] |           |        |      |     | gi 292627122 | 156910.7                 | 6.37 | 17 | 35 | 0 |  |                         |        |

Peptide Information

| Calc. Mass | Obsrv. Mass | ± da    | ± ppm | Start Seq. | End Seq. | Sequence              | Ion Score | C. I. | % | Modification                             | Rank | Result Type |
|------------|-------------|---------|-------|------------|----------|-----------------------|-----------|-------|---|------------------------------------------|------|-------------|
| 864.4131   | 864.4708    | 0.0577  | 67    | 1280       | 1286     | TNIEMEK               |           |       |   |                                          |      | Mascot      |
| 882.4203   | 882.5457    | 0.1254  | 142   | 240        | 246      | SENEYLK               |           |       |   |                                          |      | Mascot      |
| 915.5145   | 915.4689    | -0.0456 | -50   | 355        | 362      | LQDLEVAK              |           |       |   |                                          |      | Mascot      |
| 983.4172   | 983.4212    | 0.004   | 4     | 388        | 395      | EESALMCK              |           |       |   | Carbamidomethyl (C)[7], Oxidation (M)[6] |      | Mascot      |
| 1079.5779  | 1079.4886   | -0.0893 | -83   | 284        | 291      | ACRILQYR              |           |       |   | Carbamidomethyl (C)[2]                   |      | Mascot      |
| 1134.579   | 1134.5354   | -0.0436 | -38   | 680        | 689      | NIFNVGEDVK            |           |       |   |                                          |      | Mascot      |
| 1181.6313  | 1181.564    | -0.0673 | -57   | 992        | 1001     | IYYSPPSAKR            |           |       |   |                                          |      | Mascot      |
| 1226.4777  | 1226.5541   | 0.0764  | 62    | 1361       | 1372     | GLEEGACDCSSR          |           |       |   |                                          |      | Mascot      |
| 1254.6549  | 1254.6763   | 0.0214  | 17    | 981        | 991      | SHTAPERTSIR           |           |       |   |                                          |      | Mascot      |
| 1256.6957  | 1256.6704   | -0.0253 | -20   | 458        | 467      | RIVELEVENR            |           |       |   |                                          |      | Mascot      |
| 1256.6957  | 1256.6704   | -0.0253 | -20   | 458        | 467      | RIVELEVENR            | 10        |       | 0 |                                          |      | Mascot      |
| 1361.7644  | 1361.6444   | -0.12   | -88   | 927        | 938      | MVLKTAMTKPNK          |           |       |   |                                          |      | Mascot      |
| 1377.7593  | 1377.6392   | -0.1201 | -87   | 927        | 938      | MVLKTAMTKPNK          |           |       |   | Oxidation (M)[1]                         |      | Mascot      |
| 1426.8011  | 1426.6681   | -0.133  | -93   | 459        | 470      | IVELEVENRGLR          |           |       |   |                                          |      | Mascot      |
| 1432.7794  | 1432.7126   | -0.0668 | -47   | 680        | 692      | NIFNVGEDVKAVK         |           |       |   |                                          |      | Mascot      |
| 1432.7794  | 1432.7126   | -0.0668 | -47   | 680        | 692      | NIFNVGEDVKAVK         |           |       |   |                                          |      | Mascot      |
| 1846.948   | 1846.7467   | -0.2013 | -109  | 812        | 827      | ASWAVECAELKSLINR      |           |       |   | Carbamidomethyl (C)[7]                   |      | Mascot      |
| 1862.8701  | 1862.745    | -0.1251 | -67   | 372        | 387      | SQDDSDLKCKQLHFAK      |           |       |   | Carbamidomethyl (C)[10]                  |      | Mascot      |
| 1915.8743  | 1915.8911   | 0.0168  | 9     | 261        | 275      | DLYMEDDVYQLQLR        |           |       |   |                                          |      | Mascot      |
| 2062.957   | 2062.9817   | 0.0247  | 12    | 1333       | 1349     | QNQKEEAVCQSQTQTQ<br>R |           |       |   | Carbamidomethyl (C)[9]                   |      | Mascot      |

|    |                                  |  |  |  |  |              |         |      |    |    |   |  |  |  |
|----|----------------------------------|--|--|--|--|--------------|---------|------|----|----|---|--|--|--|
| 39 | Zgc:153569 protein [Danio rerio] |  |  |  |  | gi 171846383 | 59551.2 | 7.18 | 12 | 34 | 0 |  |  |  |
|----|----------------------------------|--|--|--|--|--------------|---------|------|----|----|---|--|--|--|

Peptide Information

| Calc. Mass | Obsrv. Mass | ± da    | ± ppm | Start Seq. | End Seq. | Sequence   | Ion Score | C. I. | % | Modification           | Rank | Result Type |
|------------|-------------|---------|-------|------------|----------|------------|-----------|-------|---|------------------------|------|-------------|
| 850.4669   | 850.524     | 0.0571  | 67    | 326        | 332      | LIAQDYK    |           |       |   |                        |      | Mascot      |
| 983.4688   | 983.4212    | -0.0476 | -48   | 198        | 205      | LICGFMDK   |           |       |   | Carbamidomethyl (C)[3] |      | Mascot      |
| 1093.4579  | 1093.5111   | 0.0532  | 49    | 154        | 162      | ECADEERGK  |           |       |   | Carbamidomethyl (C)[2] |      | Mascot      |
| 1256.6715  | 1256.6704   | -0.0011 | -1    | 427        | 436      | TLHCLMRVAR |           |       |   | Carbamidomethyl (C)[4] |      | Mascot      |

|           |           |         |     |     |     |                    |                         |        |
|-----------|-----------|---------|-----|-----|-----|--------------------|-------------------------|--------|
| 1256.6715 | 1256.6704 | -0.0011 | -1  | 427 | 436 | TLHCLMRVAR         | Carbamidomethyl (C)[4]  | Mascot |
| 1308.6113 | 1308.6278 | 0.0165  | 13  | 412 | 423 | GEIEAHCSGLHR       |                         | Mascot |
| 1743.7789 | 1743.797  | 0.0181  | 10  | 380 | 394 | TVSGDCQAEMLDYRR    |                         | Mascot |
| 1743.7789 | 1743.797  | 0.0181  | 10  | 380 | 394 | TVSGDCQAEMLDYRR    |                         | Mascot |
| 1759.7738 | 1759.7922 | 0.0184  | 10  | 380 | 394 | TVSGDCQAEMLDYRR    | 3 0 Oxidation (M)[10]   | Mascot |
| 1759.7738 | 1759.7922 | 0.0184  | 10  | 380 | 394 | TVSGDCQAEMLDYRR    | Oxidation (M)[10]       | Mascot |
| 1899.9442 | 1899.896  | -0.0482 | -25 | 137 | 153 | FESVALEVCTSTMLELK  |                         | Mascot |
| 1915.9391 | 1915.8911 | -0.048  | -25 | 137 | 153 | FESVALEVCTSTMLELK  | Oxidation (M)[13]       | Mascot |
| 1993.9583 | 1993.9285 | -0.0298 | -15 | 163 | 179 | GYLMSCLVDHRANITER  | Oxidation (M)[4]        | Mascot |
| 2019.9701 | 2020.0532 | 0.0831  | 41  | 395 | 411 | MLMEDFSLSPEIVLHCR  |                         | Mascot |
| 2086.0386 | 2085.8743 | -0.1643 | -79 | 95  | 111 | HTWTNNLSVLECLQDKK  | Carbamidomethyl (C)[12] | Mascot |
| 2233.0925 | 2233.0356 | -0.0569 | -25 | 394 | 411 | RMLMEDFSLSPEIVLHCR | Carbamidomethyl (C)[17] | Mascot |
| 2280.1265 | 2280.0908 | -0.0357 | -16 | 506 | 523 | MVQDCEHRLLELQYFISR |                         | Mascot |

40 type I inositol-3,4-bisphosphate 4-phosphatase [Danio rerio] gi|190570270 103792.5 6.86 14 34 0

#### Peptide Information

| Calc. Mass | Obsrv. Mass | ± da    | ± ppm | Start Seq. | End Seq. | Sequence                 | Ion Score | C. I. % | Modification            | Rank | Result Type |
|------------|-------------|---------|-------|------------|----------|--------------------------|-----------|---------|-------------------------|------|-------------|
| 1045.5524  | 1045.5375   | -0.0149 | -14   | 258        | 266      | LLLEEDSAR                |           |         |                         |      | Mascot      |
| 1169.6538  | 1169.5322   | -0.1216 | -104  | 801        | 810      | FLGQNVHARK               |           |         |                         |      | Mascot      |
| 1181.6095  | 1181.564    | -0.0455 | -39   | 827        | 836      | LNGVRFTSCK               |           |         | Carbamidomethyl (C)[9]  |      | Mascot      |
| 1248.6597  | 1248.6549   | -0.0048 | -4    | 4          | 12       | RERPWSVYR                |           |         |                         |      | Mascot      |
| 1254.7164  | 1254.6763   | -0.0401 | -32   | 144        | 154      | LNIPLRSAENK              |           |         |                         |      | Mascot      |
| 1743.8959  | 1743.797    | -0.0989 | -57   | 813        | 826      | NVDILWQAAEICRR           |           |         | Carbamidomethyl (C)[12] |      | Mascot      |
| 1743.8959  | 1743.797    | -0.0989 | -57   | 813        | 826      | NVDILWQAAEICRR           |           |         | Carbamidomethyl (C)[12] |      | Mascot      |
| 1759.9159  | 1759.7922   | -0.1237 | -70   | 519        | 533      | VWGNVDKSLECIQR           |           |         |                         |      | Mascot      |
| 1759.9159  | 1759.7922   | -0.1237 | -70   | 519        | 533      | VWGNVDKSLECIQR           |           |         |                         |      | Mascot      |
| 1900.0386  | 1899.896    | -0.1426 | -75   | 187        | 204      | TVLPVDESLTESVGVRK        |           |         |                         |      | Mascot      |
| 2041.0861  | 2041.0117   | -0.0744 | -36   | 615        | 632      | DVVFQQLTALICGFIK         |           |         | Carbamidomethyl (C)[5]  |      | Mascot      |
| 2041.0861  | 2041.0117   | -0.0744 | -36   | 615        | 632      | DVVFQQLTALICGFIK         |           |         | Carbamidomethyl (C)[5]  |      | Mascot      |
| 2086.1655  | 2085.8743   | -0.2912 | -140  | 456        | 475      | LLASAVQALNAARPEYIA SK    |           |         |                         |      | Mascot      |
| 2102.0852  | 2101.8718   | -0.2134 | -102  | 706        | 724      | DGFNVRIPGPSMFDALP R      |           |         |                         |      | Mascot      |
| 2103.0063  | 2102.8892   | -0.1171 | -56   | 267        | 284      | VSELEELGELSPCWENL R      |           |         |                         |      | Mascot      |
| 2284.0146  | 2284.1218   | 0.1072  | 47    | 543        | 563      | LHSSSEDMFQSDQQG GTSKK    |           |         |                         |      | Mascot      |
| 2834.3884  | 2834.2317   | -0.1567 | -55   | 591        | 614      | SMVFLLMQDSAPTAMDL SLQYRR |           |         | Oxidation (M)[2,7,16]   |      | Mascot      |



41 hypothetical protein LOC562838 [Danio rerio] gi|89886305 21428.2 8.77 6 34 0

Peptide Information

| Calc. Mass | Obsrv. Mass | ± da    | ± ppm | Start Seq. | End Seq. | Sequence          | Ion Score | C. I. | % Modification         | Rank | Result Type |
|------------|-------------|---------|-------|------------|----------|-------------------|-----------|-------|------------------------|------|-------------|
| 950.4941   | 950.4712    | -0.0229 | -24   | 167        | 174      | TVFDEAIR          |           |       |                        |      | Mascot      |
| 1051.6333  | 1051.6881   | 0.0548  | 52    | 175        | 184      | AVLCPPPVKK        |           |       |                        |      | Mascot      |
| 1060.5455  | 1060.5389   | -0.0066 | -6    | 6          | 16       | CVVVG DGAVGK      |           |       | Carbamidomethyl (C)[1] |      | Mascot      |
| 1248.6947  | 1248.6549   | -0.0398 | -32   | 164        | 174      | GLKTVFDEAIR       |           |       |                        |      | Mascot      |
| 1443.7987  | 1443.6746   | -0.1241 | -86   | 2          | 16       | QAIKCVVVG DGAVGK  |           |       |                        |      | Mascot      |
| 1443.7987  | 1443.6746   | -0.1241 | -86   | 2          | 16       | QAIKCVVVG DGAVGK  |           |       |                        |      | Mascot      |
| 2102.1538  | 2101.8718   | -0.282  | -134  | 103        | 120      | HHCQTTPILVGTKLDLR |           |       | Carbamidomethyl (C)[3] |      | Mascot      |

42 Si:ch211-20b12.1 [Danio rerio] gi|67678177 55996.8 8.09 5 34 0 31 77.502

Peptide Information

| Calc. Mass | Obsrv. Mass | ± da    | ± ppm | Start Seq. | End Seq. | Sequence   | Ion Score | C. I.  | % Modification         | Rank | Result Type |
|------------|-------------|---------|-------|------------|----------|------------|-----------|--------|------------------------|------|-------------|
| 827.4522   | 827.4138    | -0.0384 | -46   | 393        | 399      | SPIAFHR    |           |        |                        |      | Mascot      |
| 973.5254   | 973.4887    | -0.0367 | -38   | 220        | 226      | HYIHLYK    |           |        |                        |      | Mascot      |
| 983.5533   | 983.4212    | -0.1321 | -134  | 392        | 399      | RSPIAFHR   |           |        |                        |      | Mascot      |
| 1093.6     | 1093.5111   | -0.0889 | -81   | 358        | 367      | QYITTALGAR |           |        |                        |      | Mascot      |
| 1277.6307  | 1277.6833   | 0.0526  | 41    | 436        | 445      | CHDIIISTYR |           |        | Carbamidomethyl (C)[1] |      | Mascot      |
| 1277.6307  | 1277.6833   | 0.0526  | 41    | 436        | 445      | CHDIIISTYR | 31        | 77.502 | Carbamidomethyl (C)[1] |      | Mascot      |

43 PREDICTED: hypothetical protein LOC568208 [Danio rerio] gi|326675483 189350.8 7.33 17 34 0

Peptide Information

| Calc. Mass | Obsrv. Mass | ± da    | ± ppm | Start Seq. | End Seq. | Sequence     | Ion Score | C. I. | % Modification         | Rank | Result Type |
|------------|-------------|---------|-------|------------|----------|--------------|-----------|-------|------------------------|------|-------------|
| 827.5097   | 827.4138    | -0.0959 | -116  | 1522       | 1528     | GLIQQLR      |           |       |                        |      | Mascot      |
| 864.396    | 864.4708    | 0.0748  | 87    | 1060       | 1065     | FFYEMK       |           |       |                        |      | Mascot      |
| 932.5239   | 932.4484    | -0.0755 | -81   | 1283       | 1289     | FYLKAYK      |           |       |                        |      | Mascot      |
| 950.4941   | 950.4712    | -0.0229 | -24   | 846        | 853      | TFTIDPTR     |           |       |                        |      | Mascot      |
| 987.5734   | 987.4866    | -0.0868 | -88   | 1271       | 1278     | SLRAHLYK     |           |       |                        |      | Mascot      |
| 1051.6146  | 1051.6881   | 0.0735  | 70    | 1143       | 1152     | KALSFLGSTK   |           |       |                        |      | Mascot      |
| 1079.603   | 1079.4886   | -0.1144 | -106  | 934        | 942      | EIMPHLALR    |           |       |                        |      | Mascot      |
| 1432.7253  | 1432.7126   | -0.0127 | -9    | 1406       | 1417     | LDPFLQDCLVGR |           |       | Carbamidomethyl (C)[8] |      | Mascot      |
| 1432.7253  | 1432.7126   | -0.0127 | -9    | 1406       | 1417     | LDPFLQDCLVGR |           |       | Carbamidomethyl (C)[8] |      | Mascot      |

|    |                                       |           |         |     |              |         |                         |                                           |        |   |
|----|---------------------------------------|-----------|---------|-----|--------------|---------|-------------------------|-------------------------------------------|--------|---|
|    | 1743.8809                             | 1743.797  | -0.0839 | -48 | 388          | 402     | FICAPSVMKDTLFSK         | Carbamidomethyl (C)[3]                    | Mascot |   |
|    | 1743.8809                             | 1743.797  | -0.0839 | -48 | 388          | 402     | FICAPSVMKDTLFSK         | Carbamidomethyl (C)[3]                    | Mascot |   |
|    | 1759.8656                             | 1759.7922 | -0.0734 | -42 | 1624         | 1638    | ANLHCSLRQFQSAER         |                                           | Mascot |   |
|    | 1759.8757                             | 1759.7922 | -0.0835 | -47 | 388          | 402     | FICAPSVMKDTLFSK         | Carbamidomethyl (C)[3], Oxidation (M)[8]  | Mascot |   |
|    | 1762.8831                             | 1762.9688 | 0.0857  | 49  | 706          | 721     | LTQALTEGGNRNAFDR        |                                           | Mascot |   |
|    | 1846.8536                             | 1846.7467 | -0.1069 | -58 | 1066         | 1081    | CFDLAALCIQYAAEMK        | Carbamidomethyl (C)[1]                    | Mascot |   |
|    | 1862.8485                             | 1862.745  | -0.1035 | -56 | 1066         | 1081    | CFDLAALCIQYAAEMK        | Carbamidomethyl (C)[1], Oxidation (M)[15] | Mascot |   |
|    | 2020.0684                             | 2020.0532 | -0.0152 | -8  | 1043         | 1059    | AIHLKPDAYDLYIMRGK       | Oxidation (M)[14]                         | Mascot |   |
|    | 2041.0488                             | 2041.0117 | -0.0371 | -18 | 1350         | 1367    | GLLYVELNDYSSALQDLK      |                                           | Mascot |   |
|    | 2041.0488                             | 2041.0117 | -0.0371 | -18 | 1350         | 1367    | GLLYVELNDYSSALQDLK      |                                           | Mascot |   |
|    | 2102.9343                             | 2102.8892 | -0.0451 | -21 | 1662         | 1679    | GCLGWMEEEAMEDYRTA<br>LK |                                           | Mascot |   |
|    | 2118.9292                             | 2118.8967 | -0.0325 | -15 | 1662         | 1679    | GCLGWMEEEAMEDYRTA<br>LK | Oxidation (M)[6]                          | Mascot |   |
|    | 2119.0464                             | 2118.8967 | -0.1497 | -71 | 369          | 387     | AATLCASELRMFWNPAP<br>PK | Oxidation (M)[11]                         | Mascot |   |
|    | 2304.2168                             | 2304.2371 | 0.0203  | 9   | 1039         | 1057    | DLTRAIHLKPDAYDLYIMR     |                                           | Mascot |   |
| 44 | zinc finger protein 238 [Danio rerio] |           |         |     | gi 130495945 | 59169.8 | 5.8                     | 10                                        | 34     | 0 |

Peptide Information

| Calc. Mass | Obsrv. Mass | ± da    | ± ppm | Start Seq. | End Seq. | Sequence              | Ion Score | C. I. | % Modification          | Rank | Result Type |
|------------|-------------|---------|-------|------------|----------|-----------------------|-----------|-------|-------------------------|------|-------------|
| 1093.5057  | 1093.5111   | 0.0054  | 5     | 433        | 441      | TFSCMYTLK             |           |       |                         |      | Mascot      |
| 1179.6844  | 1179.5734   | -0.111  | -94   | 320        | 330      | LGLEAHLALR            |           |       |                         |      | Mascot      |
| 1226.631   | 1226.5541   | -0.0769 | -63   | 9          | 18       | HLLQCLSEQR            |           |       |                         |      | Mascot      |
| 1256.506   | 1256.6704   | 0.1644  | 131   | 130        | 140      | REEDTSSCS DK          |           |       |                         |      | Mascot      |
| 1256.506   | 1256.6704   | 0.1644  | 131   | 130        | 140      | REEDTSSCS DK          |           |       |                         |      | Mascot      |
| 1377.6604  | 1377.6392   | -0.0212 | -15   | 208        | 222      | SPAGSPSSSTGSLSR       |           |       |                         |      | Mascot      |
| 1432.7253  | 1432.7126   | -0.0127 | -9    | 503        | 514      | FHCELVNSLSVK          |           |       | Carbamidomethyl (C)[3]  |      | Mascot      |
| 1432.7253  | 1432.7126   | -0.0127 | -9    | 503        | 514      | FHCELVNSLSVK          |           |       | Carbamidomethyl (C)[3]  |      | Mascot      |
| 1443.662   | 1443.6746   | 0.0126  | 9     | 478        | 488      | EKPHACKWCER           |           |       | Carbamidomethyl (C)[6]  |      | Mascot      |
| 1443.662   | 1443.6746   | 0.0126  | 9     | 478        | 488      | EKPHACKWCER           |           |       | Carbamidomethyl (C)[6]  |      | Mascot      |
| 1716.8407  | 1716.8151   | -0.0256 | -15   | 416        | 432      | AKPAGDVNPTCSICGK      |           |       | Carbamidomethyl (C)[12] |      | Mascot      |
| 1862.9832  | 1862.745    | -0.2382 | -128  | 303        | 319      | EPPSTNGTHLSLVAQRR     |           |       |                         |      | Mascot      |
| 2283.0757  | 2283.1252   | 0.0495  | 22    | 1          | 18       | MEFPDHSRHLQLCSE<br>QR |           |       | Carbamidomethyl (C)[13] |      | Mascot      |

|    |                                                              |  |  |  |              |          |      |   |    |   |
|----|--------------------------------------------------------------|--|--|--|--------------|----------|------|---|----|---|
| 45 | PREDICTED: insulin receptor substrate 1-B-like [Danio rerio] |  |  |  | gi 326674337 | 118937.4 | 8.49 | 1 | 24 | 0 |
|----|--------------------------------------------------------------|--|--|--|--------------|----------|------|---|----|---|

Peptide Information

| Calc. Mass | Obsrv. Mass | ± da | ± ppm | Start | End | Sequence | Ion | C. I. | % Modification | Rank | Result Type |
|------------|-------------|------|-------|-------|-----|----------|-----|-------|----------------|------|-------------|
|------------|-------------|------|-------|-------|-----|----------|-----|-------|----------------|------|-------------|

|    |                                                                                                |            |             | Seq.    | Seq.  |              | Score             |                  |           |         |                   |                  |
|----|------------------------------------------------------------------------------------------------|------------|-------------|---------|-------|--------------|-------------------|------------------|-----------|---------|-------------------|------------------|
|    |                                                                                                | 1743.9421  | 1743.797    | -0.1451 | -83   | 179          | 194               | LNSDAAAVVLQLMNIR | 24        | 0       | Oxidation (M)[13] | 3 Mascot         |
| 46 | PREDICTED: neurabin-1-like [Danio rerio]                                                       |            |             |         |       | gi 326670455 | 143069.6          | 4.9              | 1         | 19      | 0                 |                  |
|    | Peptide Information                                                                            |            |             |         |       |              |                   |                  |           |         |                   |                  |
|    |                                                                                                | Calc. Mass | Obsrv. Mass | ± da    | ± ppm | Start Seq.   | End Sequence Seq. |                  | Ion Score | C. I. % | Modification      | Rank Result Type |
|    |                                                                                                | 1362.614   | 1362.6691   | 0.0551  | 40    | 371          | 383               | EQCLDPAGAGMVR    | 19        | 0       | Oxidation (M)[11] | 2 Mascot         |
| 47 | cell adhesion molecule 1a isoform 2 [Danio rerio]                                              |            |             |         |       | gi 158538876 | 48182.2           | 4.82             | 1         | 18      | 0                 |                  |
|    | Peptide Information                                                                            |            |             |         |       |              |                   |                  |           |         |                   |                  |
|    |                                                                                                | Calc. Mass | Obsrv. Mass | ± da    | ± ppm | Start Seq.   | End Sequence Seq. |                  | Ion Score | C. I. % | Modification      | Rank Result Type |
|    |                                                                                                | 1362.6859  | 1362.6691   | -0.0168 | -12   | 107          | 119               | VLSNVLSLDEGR     | 18        | 0       |                   | 3 Mascot         |
| 48 | PREDICTED: transient receptor potential cation channel subfamily M member 4-like [Danio rerio] |            |             |         |       | gi 326666046 | 137203.1          | 6.89             | 1         | 16      | 0                 |                  |
|    | Peptide Information                                                                            |            |             |         |       |              |                   |                  |           |         |                   |                  |
|    |                                                                                                | Calc. Mass | Obsrv. Mass | ± da    | ± ppm | Start Seq.   | End Sequence Seq. |                  | Ion Score | C. I. % | Modification      | Rank Result Type |
|    |                                                                                                | 1432.7828  | 1432.7126   | -0.0702 | -49   | 1141         | 1152              | VDSVLKQMVEIR     | 16        | 0       | Oxidation (M)[8]  | 3 Mascot         |
| 49 | calcium-binding protein 1 [Danio rerio]                                                        |            |             |         |       | gi 50539888  | 19114.3           | 4.69             | 1         | 15      | 0                 |                  |
|    | Peptide Information                                                                            |            |             |         |       |              |                   |                  |           |         |                   |                  |
|    |                                                                                                | Calc. Mass | Obsrv. Mass | ± da    | ± ppm | Start Seq.   | End Sequence Seq. |                  | Ion Score | C. I. % | Modification      | Rank Result Type |
|    |                                                                                                | 1432.6737  | 1432.7126   | 0.0389  | 27    | 18           | 28                | ELRPEEMDELRL     | 15        | 0       | Oxidation (M)[7]  | 4 Mascot         |
| 50 | PREDICTED: PH and SEC7 domain-containing protein 4-like [Danio rerio]                          |            |             |         |       | gi 326668322 | 90694.7           | 4.54             | 1         | 14      | 0                 |                  |
|    | Peptide Information                                                                            |            |             |         |       |              |                   |                  |           |         |                   |                  |
|    |                                                                                                | Calc. Mass | Obsrv. Mass | ± da    | ± ppm | Start Seq.   | End Sequence Seq. |                  | Ion Score | C. I. % | Modification      | Rank Result Type |
|    |                                                                                                | 1743.833   | 1743.797    | -0.036  | -21   | 504          | 518               | SLMPETDREQDGPLR  | 14        | 0       |                   | 4 Mascot         |
|    |                                                                                                | 1759.828   | 1759.7922   | -0.0358 | -20   | 504          | 518               | SLMPETDREQDGPLR  | 12        | 0       | Oxidation (M)[3]  | 3 Mascot         |

|                |           |                        |                |  |  |  |                |                    |  |
|----------------|-----------|------------------------|----------------|--|--|--|----------------|--------------------|--|
| Gel Idx/Pos    | 208/I8    | Instr./Gel Origin      | BA2060/110707A |  |  |  | Process Status | Analysis Succeeded |  |
| Plate [#] Name | [1] 31496 | Instrument Sample Name |                |  |  |  | Spectra        | 11                 |  |

| Rank | Protein Name                                       | Accession No. | Protein MW | Protein PI | Pep. Count | Protein Score | Protein Score C. I. % | Total Ion Score | Total Ion C. I. % |
|------|----------------------------------------------------|---------------|------------|------------|------------|---------------|-----------------------|-----------------|-------------------|
| 1    | Type I cytokeratin, enveloping layer [Danio rerio] | gi 41388915   | 46524.6    | 5.13       | 25         | 667           | 100                   | 430             | 100               |

Peptide Information

| Calc. Mass | Obsrv. Mass | ± da    | ± ppm | Start Seq. | End Seq. | Sequence      | Ion Score | C. I. % | Modification     | Rank | Result Type |
|------------|-------------|---------|-------|------------|----------|---------------|-----------|---------|------------------|------|-------------|
| 807.3995   | 807.3759    | -0.0236 | -29   | 161        | 167      | LAADDFR       |           |         |                  |      | Mascot      |
| 961.5312   | 961.5016    | -0.0296 | -31   | 295        | 302      | SEITEVKR      |           |         |                  |      | Mascot      |
| 1062.4998  | 1062.4702   | -0.0296 | -28   | 83         | 91       | ATMQNLNDR     |           |         |                  |      | Mascot      |
| 1077.5609  | 1077.5311   | -0.0298 | -28   | 190        | 198      | VLDELTMTTR    |           |         |                  |      | Mascot      |
| 1078.4946  | 1078.4645   | -0.0301 | -28   | 83         | 91       | ATMQNLNDR     |           |         | Oxidation (M)[3] |      | Mascot      |
| 1093.5558  | 1093.5104   | -0.0454 | -42   | 190        | 198      | VLDELTMTTR    |           |         | Oxidation (M)[7] |      | Mascot      |
| 1123.5419  | 1123.5077   | -0.0342 | -30   | 267        | 275      | DLESWFQAK     | 64        | 99.989  |                  |      | Mascot      |
| 1123.5419  | 1123.5077   | -0.0342 | -30   | 267        | 275      | DLESWFQAK     |           |         |                  |      | Mascot      |
| 1153.5558  | 1153.5214   | -0.0344 | -30   | 374        | 382      | LEMEIAEYR     |           |         |                  |      | Mascot      |
| 1169.5507  | 1169.5792   | 0.0285  | 24    | 374        | 382      | LEMEIAEYR     |           |         | Oxidation (M)[3] |      | Mascot      |
| 1169.5507  | 1169.5792   | 0.0285  | 24    | 374        | 382      | LEMEIAEYR     | 7         | 0       | Oxidation (M)[3] |      | Mascot      |
| 1181.5909  | 1181.5582   | -0.0327 | -28   | 218        | 227      | NHEEELLAAR    |           |         |                  |      | Mascot      |
| 1186.6426  | 1186.6079   | -0.0347 | -29   | 178        | 188      | QSVEADIVGLR   | 86        | 100     |                  |      | Mascot      |
| 1186.6426  | 1186.6079   | -0.0347 | -29   | 178        | 188      | QSVEADIVGLR   |           |         |                  |      | Mascot      |
| 1221.6508  | 1221.6132   | -0.0376 | -31   | 189        | 198      | KVLDELTMTTR   |           |         | Oxidation (M)[8] |      | Mascot      |
| 1268.6304  | 1268.5938   | -0.0366 | -29   | 168        | 177      | VKYENELSMR    |           |         |                  |      | Mascot      |
| 1284.6252  | 1284.592    | -0.0332 | -26   | 168        | 177      | VKYENELSMR    |           |         | Oxidation (M)[9] |      | Mascot      |
| 1309.6569  | 1309.6371   | -0.0198 | -15   | 374        | 383      | LEMEIAEYRR    |           |         |                  |      | Mascot      |
| 1314.7375  | 1314.7013   | -0.0362 | -28   | 178        | 189      | QSVEADIVGLRK  |           |         |                  |      | Mascot      |
| 1325.6517  | 1325.6156   | -0.0361 | -27   | 374        | 383      | LEMEIAEYRR    |           |         | Oxidation (M)[3] |      | Mascot      |
| 1332.6754  | 1332.6376   | -0.0378 | -28   | 319        | 331      | ASLEGLADTQAR  |           |         |                  |      | Mascot      |
| 1410.7046  | 1410.6642   | -0.0404 | -29   | 372        | 382      | TRLEMEIAEYR   | 48        | 99.577  |                  |      | Mascot      |
| 1410.7046  | 1410.6642   | -0.0404 | -29   | 372        | 382      | TRLEMEIAEYR   |           |         |                  |      | Mascot      |
| 1414.8151  | 1414.7742   | -0.0409 | -29   | 401        | 413      | KVVTIVEEVVDGK |           |         |                  |      | Mascot      |
| 1420.7278  | 1420.6896   | -0.0382 | -27   | 282        | 294      | EVAVSTETLQTSR |           |         |                  |      | Mascot      |
| 1426.6995  | 1426.6582   | -0.0413 | -29   | 372        | 382      | TRLEMEIAEYR   |           |         | Oxidation (M)[5] |      | Mascot      |
| 1426.6995  | 1426.6582   | -0.0413 | -29   | 372        | 382      | TRLEMEIAEYR   | 27        | 50.838  | Oxidation (M)[5] |      | Mascot      |

|   |                                                    |           |           |         |     |             |     |                             |      |     |                   |     |     |        |
|---|----------------------------------------------------|-----------|-----------|---------|-----|-------------|-----|-----------------------------|------|-----|-------------------|-----|-----|--------|
|   |                                                    | 1465.7356 | 1465.6823 | -0.0533 | -36 | 360         | 371 | QGQEYQMLLDIK                |      |     |                   |     |     | Mascot |
|   |                                                    | 1481.7305 | 1481.6874 | -0.0431 | -29 | 360         | 371 | QGQEYQMLLDIK                |      |     | Oxidation (M)[7]  |     |     | Mascot |
|   |                                                    | 1708.8064 | 1708.7563 | -0.0501 | -29 | 127         | 141 | DYSAYYATISDLQAK             | 118  | 100 |                   |     |     | Mascot |
|   |                                                    | 1708.8064 | 1708.7563 | -0.0501 | -29 | 127         | 141 | DYSAYYATISDLQAK             |      |     |                   |     |     | Mascot |
|   |                                                    | 1725.8501 | 1725.8    | -0.0501 | -29 | 384         | 400 | LLDGEATTVSTSSSTR            |      |     |                   |     |     | Mascot |
|   |                                                    | 1847.9783 | 1847.9242 | -0.0541 | -29 | 303         | 318 | TLQSLEIELQSLSMK             |      |     |                   |     |     | Mascot |
|   |                                                    | 1863.9731 | 1863.9189 | -0.0542 | -29 | 303         | 318 | TLQSLEIELQSLSMK             |      |     | Oxidation (M)[15] |     |     | Mascot |
|   |                                                    | 1956.0548 | 1955.996  | -0.0588 | -30 | 142         | 160 | ILHATGVNGGIYLSIDNAK         |      |     |                   |     |     | Mascot |
|   |                                                    | 2117.1741 | 2117.115  | -0.0591 | -28 | 199         | 216 | SDLELQIEGLKEELIFLK          | 114  | 100 |                   |     |     | Mascot |
|   |                                                    | 2117.1741 | 2117.115  | -0.0591 | -28 | 199         | 216 | SDLELQIEGLKEELIFLK          |      |     |                   |     |     | Mascot |
|   |                                                    | 2225.0867 | 2225.0564 | -0.0303 | -14 | 170         | 188 | YENELSMRQSVEADIVGL<br>R     |      |     | Oxidation (M)[7]  |     |     | Mascot |
|   |                                                    | 2260.0762 | 2260.0181 | -0.0581 | -26 | 228         | 248 | TQMSGQVNVEVDAAPQE<br>DLTK   |      |     |                   |     |     | Mascot |
|   |                                                    | 2276.071  | 2276.0137 | -0.0573 | -25 | 228         | 248 | TQMSGQVNVEVDAAPQE<br>DLTK   |      |     | Oxidation (M)[3]  |     |     | Mascot |
|   |                                                    | 2774.3818 | 2774.303  | -0.0788 | -28 | 332         | 354 | YTNNMLNGYQFQVSLEE<br>QLIQLR |      |     |                   |     |     | Mascot |
|   |                                                    | 2790.3767 | 2790.3132 | -0.0635 | -23 | 332         | 354 | YTNNMLNGYQFQVSLEE<br>QLIQLR |      |     | Oxidation (M)[4]  |     |     | Mascot |
| 2 | type I cytokeratin, enveloping layer [Danio rerio] |           |           |         |     | gi 18858519 |     | 46655.7                     | 5.13 | 25  | 666               | 100 | 430 | 100    |

### Peptide Information

| Calc. Mass | Obsrv. Mass | ± da    | ± ppm | Start Seq. | End Sequence Seq. | Ion Score | C. I. % Modification | Rank             | Result Type |
|------------|-------------|---------|-------|------------|-------------------|-----------|----------------------|------------------|-------------|
| 807.3995   | 807.3759    | -0.0236 | -29   | 162        | 168 LAADDFR       |           |                      |                  | Mascot      |
| 961.5312   | 961.5016    | -0.0296 | -31   | 296        | 303 SEITEVKR      |           |                      |                  | Mascot      |
| 1062.4998  | 1062.4702   | -0.0296 | -28   | 84         | 92 ATMQNLNDR      |           |                      |                  | Mascot      |
| 1077.5609  | 1077.5311   | -0.0298 | -28   | 191        | 199 VLDELTMTTR    |           |                      |                  | Mascot      |
| 1078.4946  | 1078.4645   | -0.0301 | -28   | 84         | 92 ATMQNLNDR      |           | Oxidation (M)[3]     |                  | Mascot      |
| 1093.5558  | 1093.5104   | -0.0454 | -42   | 191        | 199 VLDELTMTTR    |           | Oxidation (M)[7]     |                  | Mascot      |
| 1123.5419  | 1123.5077   | -0.0342 | -30   | 268        | 276 DLESWFQAK     | 64        | 99.989               |                  | Mascot      |
| 1123.5419  | 1123.5077   | -0.0342 | -30   | 268        | 276 DLESWFQAK     |           |                      |                  | Mascot      |
| 1153.5558  | 1153.5214   | -0.0344 | -30   | 375        | 383 LEMEIAEYR     |           |                      |                  | Mascot      |
| 1169.5507  | 1169.5792   | 0.0285  | 24    | 375        | 383 LEMEIAEYR     |           | Oxidation (M)[3]     |                  | Mascot      |
| 1169.5507  | 1169.5792   | 0.0285  | 24    | 375        | 383 LEMEIAEYR     | 7         | 0                    | Oxidation (M)[3] | Mascot      |
| 1181.5909  | 1181.5582   | -0.0327 | -28   | 219        | 228 NHEEELLAAR    |           |                      |                  | Mascot      |
| 1186.6426  | 1186.6079   | -0.0347 | -29   | 179        | 189 QSVEADIVGLR   | 86        | 100                  |                  | Mascot      |
| 1186.6426  | 1186.6079   | -0.0347 | -29   | 179        | 189 QSVEADIVGLR   |           |                      |                  | Mascot      |
| 1221.6508  | 1221.6132   | -0.0376 | -31   | 190        | 199 KVLDELTMTTR   |           | Oxidation (M)[8]     |                  | Mascot      |
| 1268.6304  | 1268.5938   | -0.0366 | -29   | 169        | 178 VKYENELSMR    |           |                      |                  | Mascot      |

|   |                                                    |           |         |     |             |                                 |      |        |                   |        |     |     |
|---|----------------------------------------------------|-----------|---------|-----|-------------|---------------------------------|------|--------|-------------------|--------|-----|-----|
|   | 1284.6252                                          | 1284.592  | -0.0332 | -26 | 169         | 178 VKYENELSMR                  |      |        | Oxidation (M)[9]  | Mascot |     |     |
|   | 1309.6569                                          | 1309.6371 | -0.0198 | -15 | 375         | 384 LEMEIAEYRR                  |      |        |                   | Mascot |     |     |
|   | 1314.7375                                          | 1314.7013 | -0.0362 | -28 | 179         | 190 QSVEADIVGLRK                |      |        |                   | Mascot |     |     |
|   | 1325.6517                                          | 1325.6156 | -0.0361 | -27 | 375         | 384 LEMEIAEYRR                  |      |        | Oxidation (M)[3]  | Mascot |     |     |
|   | 1332.6754                                          | 1332.6376 | -0.0378 | -28 | 320         | 332 ASLEGTLDLTQAR               |      |        |                   | Mascot |     |     |
|   | 1410.7046                                          | 1410.6642 | -0.0404 | -29 | 373         | 383 TRLEMEIAEYR                 | 48   | 99.577 |                   | Mascot |     |     |
|   | 1410.7046                                          | 1410.6642 | -0.0404 | -29 | 373         | 383 TRLEMEIAEYR                 |      |        |                   | Mascot |     |     |
|   | 1414.8151                                          | 1414.7742 | -0.0409 | -29 | 402         | 414 KVVTVIEEVVDGK               |      |        |                   | Mascot |     |     |
|   | 1420.7278                                          | 1420.6896 | -0.0382 | -27 | 283         | 295 EVAVSTETLQTSR               |      |        |                   | Mascot |     |     |
|   | 1426.6995                                          | 1426.6582 | -0.0413 | -29 | 373         | 383 TRLEMEIAEYR                 |      |        | Oxidation (M)[5]  | Mascot |     |     |
|   | 1426.6995                                          | 1426.6582 | -0.0413 | -29 | 373         | 383 TRLEMEIAEYR                 | 27   | 50.838 | Oxidation (M)[5]  | Mascot |     |     |
|   | 1465.7356                                          | 1465.6823 | -0.0533 | -36 | 361         | 372 QGQEYQMLLDIK                |      |        |                   | Mascot |     |     |
|   | 1481.7305                                          | 1481.6874 | -0.0431 | -29 | 361         | 372 QGQEYQMLLDIK                |      |        | Oxidation (M)[7]  | Mascot |     |     |
|   | 1708.8064                                          | 1708.7563 | -0.0501 | -29 | 128         | 142 DYSAYYATISDLQAK             | 118  | 100    |                   | Mascot |     |     |
|   | 1708.8064                                          | 1708.7563 | -0.0501 | -29 | 128         | 142 DYSAYYATISDLQAK             |      |        |                   | Mascot |     |     |
|   | 1725.8501                                          | 1725.8    | -0.0501 | -29 | 385         | 401 LLDGEATTVSTSSTTR            |      |        |                   | Mascot |     |     |
|   | 1847.9783                                          | 1847.9242 | -0.0541 | -29 | 304         | 319 TLQSLEIELQSQLSMK            |      |        |                   | Mascot |     |     |
|   | 1863.9731                                          | 1863.9189 | -0.0542 | -29 | 304         | 319 TLQSLEIELQSQLSMK            |      |        | Oxidation (M)[15] | Mascot |     |     |
|   | 1956.0548                                          | 1955.996  | -0.0588 | -30 | 143         | 161 ILHATGVNGGIYLSIDNAK         |      |        |                   | Mascot |     |     |
|   | 2117.1741                                          | 2117.115  | -0.0591 | -28 | 200         | 217 SDLELQIEGLKEELIFLK          | 114  | 100    |                   | Mascot |     |     |
|   | 2117.1741                                          | 2117.115  | -0.0591 | -28 | 200         | 217 SDLELQIEGLKEELIFLK          |      |        |                   | Mascot |     |     |
|   | 2225.0867                                          | 2225.0564 | -0.0303 | -14 | 171         | 189 YENELSMRQSVEADIVGL<br>R     |      |        | Oxidation (M)[7]  | Mascot |     |     |
|   | 2260.0762                                          | 2260.0181 | -0.0581 | -26 | 229         | 249 TQMSGQVNVEVDAAPQE<br>DLTK   |      |        |                   | Mascot |     |     |
|   | 2276.071                                           | 2276.0137 | -0.0573 | -25 | 229         | 249 TQMSGQVNVEVDAAPQE<br>DLTK   |      |        | Oxidation (M)[3]  | Mascot |     |     |
|   | 2774.3818                                          | 2774.303  | -0.0788 | -28 | 333         | 355 YTNMLNGYQFQVSSLEE<br>QLIQLR |      |        |                   | Mascot |     |     |
|   | 2790.3767                                          | 2790.3132 | -0.0635 | -23 | 333         | 355 YTNMLNGYQFQVSSLEE<br>QLIQLR |      |        | Oxidation (M)[4]  | Mascot |     |     |
| 3 | type I cytokeratin, enveloping layer [Danio rerio] |           |         |     | gj 94732411 | 40437.7                         | 5.15 | 24     | 666               | 100    | 430 | 100 |

### Peptide Information

| Calc. Mass | Obsrv. Mass | ± da    | ± ppm | Start Seq. | End Seq. | Sequence   | Ion Score | C. I. % | Modification     | Rank | Result Type |
|------------|-------------|---------|-------|------------|----------|------------|-----------|---------|------------------|------|-------------|
| 807.3995   | 807.3759    | -0.0236 | -29   | 100        | 106      | LAADDFR    |           |         |                  |      | Mascot      |
| 961.5312   | 961.5016    | -0.0296 | -31   | 234        | 241      | SEITEVKR   |           |         |                  |      | Mascot      |
| 1077.5609  | 1077.5311   | -0.0298 | -28   | 129        | 137      | VLDELTMTTR |           |         |                  |      | Mascot      |
| 1093.5558  | 1093.5104   | -0.0454 | -42   | 129        | 137      | VLDELTMTTR |           |         | Oxidation (M)[7] |      | Mascot      |

|           |           |         |     |     |     |                         |     |                   |                         |
|-----------|-----------|---------|-----|-----|-----|-------------------------|-----|-------------------|-------------------------|
| 1123.5419 | 1123.5077 | -0.0342 | -30 | 206 | 214 | DLESWFQAK               | 64  | 99.989            | Mascot                  |
| 1123.5419 | 1123.5077 | -0.0342 | -30 | 206 | 214 | DLESWFQAK               |     |                   | Mascot                  |
| 1153.5558 | 1153.5214 | -0.0344 | -30 | 313 | 321 | LEMEIAEYR               |     |                   | Mascot                  |
| 1169.5507 | 1169.5792 | 0.0285  | 24  | 313 | 321 | LEMEIAEYR               |     | Oxidation (M)[3]  | Mascot                  |
| 1169.5507 | 1169.5792 | 0.0285  | 24  | 313 | 321 | LEMEIAEYR               | 7   | 0                 | Oxidation (M)[3] Mascot |
| 1181.5909 | 1181.5582 | -0.0327 | -28 | 157 | 166 | NHEEELLAAR              |     |                   | Mascot                  |
| 1186.6426 | 1186.6079 | -0.0347 | -29 | 117 | 127 | QSVEADIVGLR             | 86  | 100               | Mascot                  |
| 1186.6426 | 1186.6079 | -0.0347 | -29 | 117 | 127 | QSVEADIVGLR             |     |                   | Mascot                  |
| 1221.6508 | 1221.6132 | -0.0376 | -31 | 128 | 137 | KVLDELTMTTR             |     | Oxidation (M)[8]  | Mascot                  |
| 1268.6304 | 1268.5938 | -0.0366 | -29 | 107 | 116 | VKYENELSMR              |     |                   | Mascot                  |
| 1284.6252 | 1284.592  | -0.0332 | -26 | 107 | 116 | VKYENELSMR              |     | Oxidation (M)[9]  | Mascot                  |
| 1309.6569 | 1309.6371 | -0.0198 | -15 | 313 | 322 | LEMEIAEYRR              |     |                   | Mascot                  |
| 1314.7375 | 1314.7013 | -0.0362 | -28 | 117 | 128 | QSVEADIVGLRK            |     |                   | Mascot                  |
| 1325.6517 | 1325.6156 | -0.0361 | -27 | 313 | 322 | LEMEIAEYRR              |     | Oxidation (M)[3]  | Mascot                  |
| 1332.6754 | 1332.6376 | -0.0378 | -28 | 258 | 270 | ASLEGLTADTQAR           |     |                   | Mascot                  |
| 1410.7046 | 1410.6642 | -0.0404 | -29 | 311 | 321 | TRLEMEIAEYR             | 48  | 99.577            | Mascot                  |
| 1410.7046 | 1410.6642 | -0.0404 | -29 | 311 | 321 | TRLEMEIAEYR             |     |                   | Mascot                  |
| 1414.8151 | 1414.7742 | -0.0409 | -29 | 340 | 352 | KVVTIVEEVVDGK           |     |                   | Mascot                  |
| 1420.7278 | 1420.6896 | -0.0382 | -27 | 221 | 233 | EVAVSTETLQTSR           |     |                   | Mascot                  |
| 1426.6995 | 1426.6582 | -0.0413 | -29 | 311 | 321 | TRLEMEIAEYR             |     | Oxidation (M)[5]  | Mascot                  |
| 1426.6995 | 1426.6582 | -0.0413 | -29 | 311 | 321 | TRLEMEIAEYR             | 27  | 50.838            | Oxidation (M)[5] Mascot |
| 1465.7356 | 1465.6823 | -0.0533 | -36 | 299 | 310 | QGQEYQMLLDIK            |     |                   | Mascot                  |
| 1481.7305 | 1481.6874 | -0.0431 | -29 | 299 | 310 | QGQEYQMLLDIK            |     | Oxidation (M)[7]  | Mascot                  |
| 1708.8064 | 1708.7563 | -0.0501 | -29 | 66  | 80  | DYSAYYATISDLQAK         | 118 | 100               | Mascot                  |
| 1708.8064 | 1708.7563 | -0.0501 | -29 | 66  | 80  | DYSAYYATISDLQAK         |     |                   | Mascot                  |
| 1725.8501 | 1725.8    | -0.0501 | -29 | 323 | 339 | LLDGEATTVSTSSSTTR       |     |                   | Mascot                  |
| 1847.9783 | 1847.9242 | -0.0541 | -29 | 242 | 257 | TLQSLEIELQSLSMK         |     |                   | Mascot                  |
| 1863.9731 | 1863.9189 | -0.0542 | -29 | 242 | 257 | TLQSLEIELQSLSMK         |     | Oxidation (M)[15] | Mascot                  |
| 1956.0548 | 1955.996  | -0.0588 | -30 | 81  | 99  | ILHATGVNGGIYLSIDNAK     |     |                   | Mascot                  |
| 2117.1741 | 2117.115  | -0.0591 | -28 | 138 | 155 | SDLELQIEGLKEELIFLK      | 114 | 100               | Mascot                  |
| 2117.1741 | 2117.115  | -0.0591 | -28 | 138 | 155 | SDLELQIEGLKEELIFLK      |     |                   | Mascot                  |
| 2225.0867 | 2225.0564 | -0.0303 | -14 | 109 | 127 | YENELSMRQSVEADIVGLR     |     | Oxidation (M)[7]  | Mascot                  |
| 2260.0762 | 2260.0181 | -0.0581 | -26 | 167 | 187 | TQMSGQVNVVEVDAAPQEDLTk  |     |                   | Mascot                  |
| 2276.071  | 2276.0137 | -0.0573 | -25 | 167 | 187 | TQMSGQVNVVEVDAAPQEDLTk  |     | Oxidation (M)[3]  | Mascot                  |
| 2774.3818 | 2774.303  | -0.0788 | -28 | 271 | 293 | YTNMLNGYQFQVSSLEEQLIQLR |     |                   | Mascot                  |
| 2790.3767 | 2790.3132 | -0.0635 | -23 | 271 | 293 | YTNMLNGYQFQVSSLEE       |     | Oxidation (M)[4]  | Mascot                  |

4 type I cytokeratin, enveloping layer, like [Danio rerio] g|130504059 QLIQLR 46617.6 5.13 23 639 100 430 100

| Peptide Information |             |         |       |            |                     |           |         |                  |                  |
|---------------------|-------------|---------|-------|------------|---------------------|-----------|---------|------------------|------------------|
| Calc. Mass          | Obsrv. Mass | ± da    | ± ppm | Start Seq. | End Sequence Seq.   | Ion Score | C. I. % | Modification     | Rank Result Type |
| 807.3995            | 807.3759    | -0.0236 | -29   | 162        | 168 LAADDFR         |           |         |                  | Mascot           |
| 961.5312            | 961.5016    | -0.0296 | -31   | 296        | 303 SEITEVKR        |           |         |                  | Mascot           |
| 1062.4998           | 1062.4702   | -0.0296 | -28   | 84         | 92 ATMQNLNDR        |           |         |                  | Mascot           |
| 1077.5609           | 1077.5311   | -0.0298 | -28   | 191        | 199 VLDELTMTTR      |           |         |                  | Mascot           |
| 1078.4946           | 1078.4645   | -0.0301 | -28   | 84         | 92 ATMQNLNDR        |           |         | Oxidation (M)[3] | Mascot           |
| 1093.5558           | 1093.5104   | -0.0454 | -42   | 191        | 199 VLDELTMTTR      |           |         | Oxidation (M)[7] | Mascot           |
| 1123.5419           | 1123.5077   | -0.0342 | -30   | 268        | 276 DLESWFQAK       | 64        | 99.989  |                  | Mascot           |
| 1123.5419           | 1123.5077   | -0.0342 | -30   | 268        | 276 DLESWFQAK       |           |         |                  | Mascot           |
| 1153.5558           | 1153.5214   | -0.0344 | -30   | 375        | 383 LEMEIAEYR       |           |         |                  | Mascot           |
| 1169.5507           | 1169.5792   | 0.0285  | 24    | 375        | 383 LEMEIAEYR       |           |         | Oxidation (M)[3] | Mascot           |
| 1169.5507           | 1169.5792   | 0.0285  | 24    | 375        | 383 LEMEIAEYR       | 7         | 0       | Oxidation (M)[3] | Mascot           |
| 1181.5909           | 1181.5582   | -0.0327 | -28   | 219        | 228 NHEEELLAAR      |           |         |                  | Mascot           |
| 1186.6426           | 1186.6079   | -0.0347 | -29   | 179        | 189 QSVEADIVGLR     | 86        | 100     |                  | Mascot           |
| 1186.6426           | 1186.6079   | -0.0347 | -29   | 179        | 189 QSVEADIVGLR     |           |         |                  | Mascot           |
| 1221.6508           | 1221.6132   | -0.0376 | -31   | 190        | 199 KVLDELTMTTR     |           |         | Oxidation (M)[8] | Mascot           |
| 1282.646            | 1282.6121   | -0.0339 | -26   | 169        | 178 VKYENELTMR      |           |         |                  | Mascot           |
| 1298.6409           | 1298.6073   | -0.0336 | -26   | 169        | 178 VKYENELTMR      |           |         | Oxidation (M)[9] | Mascot           |
| 1309.6569           | 1309.6371   | -0.0198 | -15   | 375        | 384 LEMEIAEYRR      |           |         |                  | Mascot           |
| 1314.7375           | 1314.7013   | -0.0362 | -28   | 179        | 190 QSVEADIVGLRK    |           |         |                  | Mascot           |
| 1325.6517           | 1325.6156   | -0.0361 | -27   | 375        | 384 LEMEIAEYRR      |           |         | Oxidation (M)[3] | Mascot           |
| 1332.6754           | 1332.6376   | -0.0378 | -28   | 320        | 332 ASLEGLTADTQAR   |           |         |                  | Mascot           |
| 1410.7046           | 1410.6642   | -0.0404 | -29   | 373        | 383 TRLEMEIAEYR     | 48        | 99.577  |                  | Mascot           |
| 1410.7046           | 1410.6642   | -0.0404 | -29   | 373        | 383 TRLEMEIAEYR     |           |         |                  | Mascot           |
| 1414.8151           | 1414.7742   | -0.0409 | -29   | 402        | 414 KVVTVIEEVVDGK   |           |         |                  | Mascot           |
| 1420.7278           | 1420.6896   | -0.0382 | -27   | 283        | 295 EVAVSTETLQTSR   |           |         |                  | Mascot           |
| 1426.6995           | 1426.6582   | -0.0413 | -29   | 373        | 383 TRLEMEIAEYR     |           |         | Oxidation (M)[5] | Mascot           |
| 1426.6995           | 1426.6582   | -0.0413 | -29   | 373        | 383 TRLEMEIAEYR     | 27        | 50.838  | Oxidation (M)[5] | Mascot           |
| 1465.7356           | 1465.6823   | -0.0533 | -36   | 361        | 372 QGQEYQMLLDIK    |           |         |                  | Mascot           |
| 1481.7305           | 1481.6874   | -0.0431 | -29   | 361        | 372 QGQEYQMLLDIK    |           |         | Oxidation (M)[7] | Mascot           |
| 1708.8064           | 1708.7563   | -0.0501 | -29   | 128        | 142 DYSAYYATISDLQAK | 118       | 100     |                  | Mascot           |
| 1708.8064           | 1708.7563   | -0.0501 | -29   | 128        | 142 DYSAYYATISDLQAK |           |         |                  | Mascot           |



|   |                                                 |           |         |     |              |     |                             |      |     |     |     |     |                   |  |  |  |        |
|---|-------------------------------------------------|-----------|---------|-----|--------------|-----|-----------------------------|------|-----|-----|-----|-----|-------------------|--|--|--|--------|
|   | 1847.9783                                       | 1847.9242 | -0.0541 | -29 | 304          | 319 | TLQSLEIELQSQLSMK            |      |     |     |     |     |                   |  |  |  | Mascot |
|   | 1863.9731                                       | 1863.9189 | -0.0542 | -29 | 304          | 319 | TLQSLEIELQSQLSMK            |      |     |     |     |     | Oxidation (M)[15] |  |  |  | Mascot |
|   | 1956.0548                                       | 1955.996  | -0.0588 | -30 | 143          | 161 | ILHATGVNGGIYLSIDNAK         |      |     |     |     |     |                   |  |  |  | Mascot |
|   | 2117.1741                                       | 2117.115  | -0.0591 | -28 | 200          | 217 | SDLELQIEGLKEELIFLK          |      | 114 |     | 100 |     |                   |  |  |  | Mascot |
|   | 2117.1741                                       | 2117.115  | -0.0591 | -28 | 200          | 217 | SDLELQIEGLKEELIFLK          |      |     |     |     |     |                   |  |  |  | Mascot |
|   | 2260.0762                                       | 2260.0181 | -0.0581 | -26 | 229          | 249 | TQMSGQVNVEVDAAPQE<br>DLTK   |      |     |     |     |     | Oxidation (M)[3]  |  |  |  | Mascot |
|   | 2276.071                                        | 2276.0137 | -0.0573 | -25 | 229          | 249 | TQMSGQVNVEVDAAPQE<br>DLTK   |      |     |     |     |     |                   |  |  |  | Mascot |
|   | 2774.3818                                       | 2774.303  | -0.0788 | -28 | 333          | 355 | YTNMLNGYQFQVSSLEE<br>QLIQLR |      |     |     |     |     |                   |  |  |  | Mascot |
|   | 2790.3767                                       | 2790.3132 | -0.0635 | -23 | 333          | 355 | YTNMLNGYQFQVSSLEE<br>QLIQLR |      |     |     |     |     | Oxidation (M)[4]  |  |  |  | Mascot |
| 5 | hypothetical protein LOC100034647 [Danio rerio] |           |         |     | gi 131888757 |     | 46317.3                     | 5.36 | 12  | 240 | 100 | 166 | 100               |  |  |  |        |

### Peptide Information

| Calc. Mass | Obsrv. Mass | ± da    | ± ppm | Start Seq. | End Seq. | Sequence                  | Ion Score | C. I.  | % Modification   | Rank | Result Type |
|------------|-------------|---------|-------|------------|----------|---------------------------|-----------|--------|------------------|------|-------------|
| 1062.4998  | 1062.4702   | -0.0296 | -28   | 75         | 83       | ATMQNLNDR                 |           |        |                  |      | Mascot      |
| 1077.5609  | 1077.5311   | -0.0298 | -28   | 182        | 190      | VLDELTMTTR                |           |        |                  |      | Mascot      |
| 1078.4946  | 1078.4645   | -0.0301 | -28   | 75         | 83       | ATMQNLNDR                 |           |        | Oxidation (M)[3] |      | Mascot      |
| 1093.5558  | 1093.5104   | -0.0454 | -42   | 182        | 190      | VLDELTMTTR                |           |        | Oxidation (M)[7] |      | Mascot      |
| 1153.5558  | 1153.5214   | -0.0344 | -30   | 366        | 374      | LEMEIAEYR                 |           |        |                  |      | Mascot      |
| 1169.5507  | 1169.5792   | 0.0285  | 24    | 366        | 374      | LEMEIAEYR                 |           |        | Oxidation (M)[3] |      | Mascot      |
| 1169.5507  | 1169.5792   | 0.0285  | 24    | 366        | 374      | LEMEIAEYR                 | 7         | 0      | Oxidation (M)[3] |      | Mascot      |
| 1181.5909  | 1181.5582   | -0.0327 | -28   | 210        | 219      | NHEEEELLAAR               |           |        |                  |      | Mascot      |
| 1221.6508  | 1221.6132   | -0.0376 | -31   | 181        | 190      | KVLDELTMTTR               |           |        | Oxidation (M)[8] |      | Mascot      |
| 1309.6569  | 1309.6371   | -0.0198 | -15   | 366        | 375      | LEMEIAEYRR                |           |        |                  |      | Mascot      |
| 1325.6517  | 1325.6156   | -0.0361 | -27   | 366        | 375      | LEMEIAEYRR                |           |        | Oxidation (M)[3] |      | Mascot      |
| 1332.6754  | 1332.6376   | -0.0378 | -28   | 311        | 323      | ASLEGLADTQAR              |           |        |                  |      | Mascot      |
| 1410.7046  | 1410.6642   | -0.0404 | -29   | 364        | 374      | TRLEMEIAEYR               | 48        | 99.577 |                  |      | Mascot      |
| 1410.7046  | 1410.6642   | -0.0404 | -29   | 364        | 374      | TRLEMEIAEYR               |           |        |                  |      | Mascot      |
| 1414.7788  | 1414.7742   | -0.0046 | -3    | 93         | 104      | ILEKENADLELK              |           |        |                  |      | Mascot      |
| 1426.6995  | 1426.6582   | -0.0413 | -29   | 364        | 374      | TRLEMEIAEYR               |           |        | Oxidation (M)[5] |      | Mascot      |
| 1426.6995  | 1426.6582   | -0.0413 | -29   | 364        | 374      | TRLEMEIAEYR               | 27        | 50.838 | Oxidation (M)[5] |      | Mascot      |
| 1481.7329  | 1481.6874   | -0.0455 | -31   | 376        | 390      | LLDGEATSVSTSSSK           |           |        |                  |      | Mascot      |
| 1708.8064  | 1708.7563   | -0.0501 | -29   | 119        | 133      | DYSAYYATISDLQAK           | 118       | 100    |                  |      | Mascot      |
| 1708.8064  | 1708.7563   | -0.0501 | -29   | 119        | 133      | DYSAYYATISDLQAK           |           |        |                  |      | Mascot      |
| 2230.0657  | 2230.0432   | -0.0225 | -10   | 220        | 240      | TQMGGQVNVEVDAAPQ<br>EDLTK |           |        |                  |      | Mascot      |
| 2246.0605  | 2246.0095   | -0.051  | -23   | 220        | 240      | TQMGGQVNVEVDAAPQ          |           |        | Oxidation (M)[3] |      | Mascot      |

6 type I cytokeratin, enveloping layer [Danio rerio] EDLTK gi|94732407 24286.5 4.8 13 230 100 112 100

| Peptide Information |             |         |       |            |                              |           |         |                   |                  |
|---------------------|-------------|---------|-------|------------|------------------------------|-----------|---------|-------------------|------------------|
| Calc. Mass          | Obsrv. Mass | ± da    | ± ppm | Start Seq. | End Sequence Seq.            | Ion Score | C. I. % | Modification      | Rank Result Type |
| 961.5312            | 961.5016    | -0.0296 | -31   | 84         | 91 SEITEVKR                  |           |         |                   | Mascot           |
| 1123.5419           | 1123.5077   | -0.0342 | -30   | 56         | 64 DLESWFQAK                 | 64        | 99.989  |                   | Mascot           |
| 1123.5419           | 1123.5077   | -0.0342 | -30   | 56         | 64 DLESWFQAK                 |           |         |                   | Mascot           |
| 1153.5558           | 1153.5214   | -0.0344 | -30   | 163        | 171 LEMEIAEYR                |           |         |                   | Mascot           |
| 1169.5507           | 1169.5792   | 0.0285  | 24    | 163        | 171 LEMEIAEYR                |           |         | Oxidation (M)[3]  | Mascot           |
| 1169.5507           | 1169.5792   | 0.0285  | 24    | 163        | 171 LEMEIAEYR                | 7         | 0       | Oxidation (M)[3]  | Mascot           |
| 1309.6569           | 1309.6371   | -0.0198 | -15   | 163        | 172 LEMEIAEYRR               |           |         |                   | Mascot           |
| 1325.6517           | 1325.6156   | -0.0361 | -27   | 163        | 172 LEMEIAEYRR               |           |         | Oxidation (M)[3]  | Mascot           |
| 1332.6754           | 1332.6376   | -0.0378 | -28   | 108        | 120 ASLEGLTADTQAR            |           |         |                   | Mascot           |
| 1410.7046           | 1410.6642   | -0.0404 | -29   | 161        | 171 TRLEMEIAEYR              | 48        | 99.577  |                   | Mascot           |
| 1410.7046           | 1410.6642   | -0.0404 | -29   | 161        | 171 TRLEMEIAEYR              |           |         |                   | Mascot           |
| 1414.8151           | 1414.7742   | -0.0409 | -29   | 190        | 202 KVVTVIEEVVDGK            |           |         |                   | Mascot           |
| 1420.7278           | 1420.6896   | -0.0382 | -27   | 71         | 83 EVAVSTETLQTSR             |           |         |                   | Mascot           |
| 1426.6995           | 1426.6582   | -0.0413 | -29   | 161        | 171 TRLEMEIAEYR              |           |         | Oxidation (M)[5]  | Mascot           |
| 1426.6995           | 1426.6582   | -0.0413 | -29   | 161        | 171 TRLEMEIAEYR              | 27        | 50.838  | Oxidation (M)[5]  | Mascot           |
| 1465.7356           | 1465.6823   | -0.0533 | -36   | 149        | 160 QGQEYQMLLDIK             |           |         |                   | Mascot           |
| 1481.7305           | 1481.6874   | -0.0431 | -29   | 149        | 160 QGQEYQMLLDIK             |           |         | Oxidation (M)[7]  | Mascot           |
| 1725.8501           | 1725.8      | -0.0501 | -29   | 173        | 189 LLDGEATTVSTSSSTTR        |           |         |                   | Mascot           |
| 1847.9783           | 1847.9242   | -0.0541 | -29   | 92         | 107 TLQSLEIELQSQLSMK         |           |         |                   | Mascot           |
| 1863.9731           | 1863.9189   | -0.0542 | -29   | 92         | 107 TLQSLEIELQSQLSMK         |           |         | Oxidation (M)[15] | Mascot           |
| 2260.0762           | 2260.0181   | -0.0581 | -26   | 17         | 37 TQMSGQVNVEVDAAPQE DLTk    |           |         |                   | Mascot           |
| 2276.071            | 2276.0137   | -0.0573 | -25   | 17         | 37 TQMSGQVNVEVDAAPQE DLTk    |           |         | Oxidation (M)[3]  | Mascot           |
| 2774.3818           | 2774.303    | -0.0788 | -28   | 121        | 143 YTNMLNGYQFQVSSLEE QLIQLR |           |         |                   | Mascot           |
| 2790.3767           | 2790.3132   | -0.0635 | -23   | 121        | 143 YTNMLNGYQFQVSSLEE QLIQLR |           |         | Oxidation (M)[4]  | Mascot           |

7 type I cytokeratin [Danio rerio] gi|18858423 46692.5 5.38 15 139 100 48 99.577

| Peptide Information |             |         |       |            |                   |           |         |              |                  |
|---------------------|-------------|---------|-------|------------|-------------------|-----------|---------|--------------|------------------|
| Calc. Mass          | Obsrv. Mass | ± da    | ± ppm | Start Seq. | End Sequence Seq. | Ion Score | C. I. % | Modification | Rank Result Type |
| 807.3995            | 807.3759    | -0.0236 | -29   | 158        | 164 LAADDFR       |           |         |              | Mascot           |
| 1062.4998           | 1062.4702   | -0.0296 | -28   | 80         | 88 ATMQNLNDR      |           |         |              | Mascot           |

|           |           |         |     |     |     |                           |    |        |                  |        |
|-----------|-----------|---------|-----|-----|-----|---------------------------|----|--------|------------------|--------|
| 1077.5609 | 1077.5311 | -0.0298 | -28 | 187 | 195 | VDELTMTR                  |    |        |                  | Mascot |
| 1078.4946 | 1078.4645 | -0.0301 | -28 | 80  | 88  | ATMQNLNDR                 |    |        | Oxidation (M)[3] | Mascot |
| 1093.5312 | 1093.5104 | -0.0208 | -19 | 264 | 272 | DLEGWFQAK                 |    |        |                  | Mascot |
| 1153.5558 | 1153.5214 | -0.0344 | -30 | 371 | 379 | LEMEIAEYR                 |    |        |                  | Mascot |
| 1169.5507 | 1169.5792 | 0.0285  | 24  | 371 | 379 | LEMEIAEYR                 |    |        | Oxidation (M)[3] | Mascot |
| 1169.5507 | 1169.5792 | 0.0285  | 24  | 371 | 379 | LEMEIAEYR                 | 7  | 0      | Oxidation (M)[3] | Mascot |
| 1221.6262 | 1221.6132 | -0.013  | -11 | 263 | 272 | KDLEGWFQAK                |    |        |                  | Mascot |
| 1268.6304 | 1268.5938 | -0.0366 | -29 | 165 | 174 | VKYENELSMR                |    |        |                  | Mascot |
| 1284.6252 | 1284.592  | -0.0332 | -26 | 165 | 174 | VKYENELSMR                |    |        | Oxidation (M)[9] | Mascot |
| 1309.6569 | 1309.6371 | -0.0198 | -15 | 371 | 380 | LEMEIAEYRR                |    |        |                  | Mascot |
| 1314.7124 | 1314.7013 | -0.0111 | -8  | 175 | 186 | QSVEADIAGLRR              |    |        |                  | Mascot |
| 1325.6517 | 1325.6156 | -0.0361 | -27 | 371 | 380 | LEMEIAEYRR                |    |        | Oxidation (M)[3] | Mascot |
| 1332.6754 | 1332.6376 | -0.0378 | -28 | 316 | 328 | ASLEGLTADTQAR             |    |        |                  | Mascot |
| 1410.7046 | 1410.6642 | -0.0404 | -29 | 369 | 379 | TRLEMEIAEYR               | 48 | 99.577 |                  | Mascot |
| 1410.7046 | 1410.6642 | -0.0404 | -29 | 369 | 379 | TRLEMEIAEYR               |    |        |                  | Mascot |
| 1414.8151 | 1414.7742 | -0.0409 | -29 | 398 | 410 | KVVTIVEEVVDGK             |    |        |                  | Mascot |
| 1420.7278 | 1420.6896 | -0.0382 | -27 | 279 | 291 | EVAVSTETLQTSR             |    |        |                  | Mascot |
| 1426.6995 | 1426.6582 | -0.0413 | -29 | 369 | 379 | TRLEMEIAEYR               |    |        | Oxidation (M)[5] | Mascot |
| 1426.6995 | 1426.6582 | -0.0413 | -29 | 369 | 379 | TRLEMEIAEYR               | 27 | 50.838 | Oxidation (M)[5] | Mascot |
| 1465.7356 | 1465.6823 | -0.0533 | -36 | 357 | 368 | QGQEYQMLLDIK              |    |        |                  | Mascot |
| 1481.7305 | 1481.6874 | -0.0431 | -29 | 357 | 368 | QGQEYQMLLDIK              |    |        | Oxidation (M)[7] | Mascot |
| 2260.0762 | 2260.0181 | -0.0581 | -26 | 225 | 245 | AQMTGQVNVEVDAAPQE<br>DLTK |    |        | Oxidation (M)[3] | Mascot |

### Peptide Information

|   |                                |           |         |     |             |         |                           |    |                   |                  |    |        |        |
|---|--------------------------------|-----------|---------|-----|-------------|---------|---------------------------|----|-------------------|------------------|----|--------|--------|
|   | 1268.6304                      | 1268.5938 | -0.0366 | -29 | 165         | 174     | VKYENELSMR                |    |                   |                  |    |        | Mascot |
|   | 1284.6252                      | 1284.592  | -0.0332 | -26 | 165         | 174     | VKYENELSMR                |    | Oxidation (M)[9]  |                  |    |        | Mascot |
|   | 1309.6569                      | 1309.6371 | -0.0198 | -15 | 371         | 380     | LEMEIAEYRR                |    |                   |                  |    |        | Mascot |
|   | 1314.7124                      | 1314.7013 | -0.0111 | -8  | 175         | 186     | QSVEADIAGLRR              |    |                   |                  |    |        | Mascot |
|   | 1325.6517                      | 1325.6156 | -0.0361 | -27 | 371         | 380     | LEMEIAEYRR                |    | Oxidation (M)[3]  |                  |    |        | Mascot |
|   | 1332.6754                      | 1332.6376 | -0.0378 | -28 | 316         | 328     | ASLEGTLADTQAR             |    |                   |                  |    |        | Mascot |
|   | 1410.7046                      | 1410.6642 | -0.0404 | -29 | 369         | 379     | TRLEMEIAEYR               | 48 | 99.577            |                  |    |        | Mascot |
|   | 1410.7046                      | 1410.6642 | -0.0404 | -29 | 369         | 379     | TRLEMEIAEYR               |    |                   |                  |    |        | Mascot |
|   | 1414.8151                      | 1414.7742 | -0.0409 | -29 | 400         | 412     | KVVTIVEEVVDGK             |    |                   |                  |    |        | Mascot |
|   | 1426.6995                      | 1426.6582 | -0.0413 | -29 | 369         | 379     | TRLEMEIAEYR               |    | Oxidation (M)[5]  |                  |    |        | Mascot |
|   | 1426.6995                      | 1426.6582 | -0.0413 | -29 | 369         | 379     | TRLEMEIAEYR               | 27 | 50.838            | Oxidation (M)[5] |    |        | Mascot |
|   | 1847.9783                      | 1847.9242 | -0.0541 | -29 | 300         | 315     | TLQSLEIELQSQLSMK          |    |                   |                  |    |        | Mascot |
|   | 1863.9731                      | 1863.9189 | -0.0542 | -29 | 300         | 315     | TLQSLEIELQSQLSMK          |    | Oxidation (M)[15] |                  |    |        | Mascot |
|   | 2260.0762                      | 2260.0181 | -0.0581 | -26 | 225         | 245     | AQMTGQVNVEVDAAPQE<br>DLTK |    | Oxidation (M)[3]  |                  |    |        | Mascot |
| 9 | cytokeratin-like [Danio rerio] |           |         |     | gi 62955621 | 47177.9 | 5.31                      | 13 | 126               | 100              | 48 | 99.577 |        |

| Calc. Mass | Obsrv. Mass | ± da    | ± ppm | Start Seq. | End Seq. | Sequence      | Ion Score | C. I.  | % Modification   | Rank | Result Type |
|------------|-------------|---------|-------|------------|----------|---------------|-----------|--------|------------------|------|-------------|
| 807.3995   | 807.3759    | -0.0236 | -29   | 159        | 165      | LAADDFR       |           |        |                  |      | Mascot      |
| 961.5312   | 961.5016    | -0.0296 | -31   | 293        | 300      | SEITEVKR      |           |        |                  |      | Mascot      |
| 1062.4998  | 1062.4702   | -0.0296 | -28   | 81         | 89       | ATMQNLNDR     |           |        |                  |      | Mascot      |
| 1077.5609  | 1077.5311   | -0.0298 | -28   | 188        | 196      | VLDELTMT      |           |        |                  |      | Mascot      |
| 1078.4946  | 1078.4645   | -0.0301 | -28   | 81         | 89       | ATMQNLNDR     |           |        | Oxidation (M)[3] |      | Mascot      |
| 1093.5558  | 1093.5104   | -0.0454 | -42   | 188        | 196      | VLDELTMT      |           |        | Oxidation (M)[7] |      | Mascot      |
| 1153.5558  | 1153.5214   | -0.0344 | -30   | 372        | 380      | LEMEIAEYR     |           |        |                  |      | Mascot      |
| 1169.5507  | 1169.5792   | 0.0285  | 24    | 372        | 380      | LEMEIAEYR     |           |        | Oxidation (M)[3] |      | Mascot      |
| 1169.5507  | 1169.5792   | 0.0285  | 24    | 372        | 380      | LEMEIAEYR     | 7         | 0      | Oxidation (M)[3] |      | Mascot      |
| 1268.6304  | 1268.5938   | -0.0366 | -29   | 166        | 175      | VKYENELSMR    |           |        |                  |      | Mascot      |
| 1284.6252  | 1284.592    | -0.0332 | -26   | 166        | 175      | VKYENELSMR    |           |        | Oxidation (M)[9] |      | Mascot      |
| 1309.6569  | 1309.6371   | -0.0198 | -15   | 372        | 381      | LEMEIAEYRR    |           |        |                  |      | Mascot      |
| 1314.7124  | 1314.7013   | -0.0111 | -8    | 176        | 187      | QSVEADIAGLRR  |           |        |                  |      | Mascot      |
| 1325.6517  | 1325.6156   | -0.0361 | -27   | 372        | 381      | LEMEIAEYRR    |           |        | Oxidation (M)[3] |      | Mascot      |
| 1332.6754  | 1332.6376   | -0.0378 | -28   | 317        | 329      | ASLEGLTADTQAR |           |        |                  |      | Mascot      |
| 1410.7046  | 1410.6642   | -0.0404 | -29   | 370        | 380      | TRLEMEIAEYR   | 48        | 99.577 |                  |      | Mascot      |
| 1410.7046  | 1410.6642   | -0.0404 | -29   | 370        | 380      | TRLEMEIAEYR   |           |        |                  |      | Mascot      |
| 1414.8151  | 1414.7742   | -0.0409 | -29   | 401        | 413      | KVVTIVEEVVDGK |           |        |                  |      | Mascot      |

|    |                                         |           |         |     |             |     |                            |      |        |     |     |    |        |                   |        |
|----|-----------------------------------------|-----------|---------|-----|-------------|-----|----------------------------|------|--------|-----|-----|----|--------|-------------------|--------|
|    | 1426.6995                               | 1426.6582 | -0.0413 | -29 | 370         | 380 | TRLEMEIAEYR                |      |        |     |     |    |        | Oxidation (M)[5]  | Mascot |
|    | 1426.6995                               | 1426.6582 | -0.0413 | -29 | 370         | 380 | TRLEMEIAEYR                | 27   | 50.838 |     |     |    |        | Oxidation (M)[5]  | Mascot |
|    | 1847.9783                               | 1847.9242 | -0.0541 | -29 | 301         | 316 | TLQSLEIELQSQLSMK           |      |        |     |     |    |        |                   | Mascot |
|    | 1863.9731                               | 1863.9189 | -0.0542 | -29 | 301         | 316 | TLQSLEIELQSQLSMK           |      |        |     |     |    |        | Oxidation (M)[15] | Mascot |
|    | 2260.0762                               | 2260.0181 | -0.0581 | -26 | 226         | 246 | AQMTGQVNVVEVDAAPQE<br>DLTK |      |        |     |     |    |        | Oxidation (M)[3]  | Mascot |
| 10 | novel protein similar to type I cyto    |           |         |     | gi 94732405 |     | 43116.8                    | 5.22 | 12     | 121 | 100 | 48 | 99.577 |                   |        |
|    | keratin, enveloping layer [Danio rerio] |           |         |     |             |     |                            |      |        |     |     |    |        |                   |        |

Peptide Information

| Calc. Mass | Obsrv. Mass | ± da    | ± ppm | Start Seq. | End Seq. | Sequence                   | Ion Score | C. I.  | % | Modification      | Rank | Result | Type |
|------------|-------------|---------|-------|------------|----------|----------------------------|-----------|--------|---|-------------------|------|--------|------|
| 807.3995   | 807.3759    | -0.0236 | -29   | 160        | 166      | LAADDFR                    |           |        |   |                   |      | Mascot |      |
| 961.5312   | 961.5016    | -0.0296 | -31   | 294        | 301      | SEITEVKR                   |           |        |   |                   |      | Mascot |      |
| 1062.4998  | 1062.4702   | -0.0296 | -28   | 82         | 90       | ATMQNLNDR                  |           |        |   |                   |      | Mascot |      |
| 1077.5609  | 1077.5311   | -0.0298 | -28   | 189        | 197      | VLDELTMTTR                 |           |        |   |                   |      | Mascot |      |
| 1078.4946  | 1078.4645   | -0.0301 | -28   | 82         | 90       | ATMQNLNDR                  |           |        |   | Oxidation (M)[3]  |      | Mascot |      |
| 1093.5558  | 1093.5104   | -0.0454 | -42   | 189        | 197      | VLDELTMTTR                 |           |        |   | Oxidation (M)[7]  |      | Mascot |      |
| 1153.5558  | 1153.5214   | -0.0344 | -30   | 373        | 381      | LEMEIAEYR                  |           |        |   |                   |      | Mascot |      |
| 1169.5507  | 1169.5792   | 0.0285  | 24    | 373        | 381      | LEMEIAEYR                  |           |        |   | Oxidation (M)[3]  |      | Mascot |      |
| 1169.5507  | 1169.5792   | 0.0285  | 24    | 373        | 381      | LEMEIAEYR                  | 7         | 0      |   | Oxidation (M)[3]  |      | Mascot |      |
| 1268.6304  | 1268.5938   | -0.0366 | -29   | 167        | 176      | VKYENELSMR                 |           |        |   |                   |      | Mascot |      |
| 1284.6252  | 1284.592    | -0.0332 | -26   | 167        | 176      | VKYENELSMR                 |           |        |   | Oxidation (M)[9]  |      | Mascot |      |
| 1309.6569  | 1309.6371   | -0.0198 | -15   | 373        | 382      | LEMEIAEYRR                 |           |        |   |                   |      | Mascot |      |
| 1314.7124  | 1314.7013   | -0.0111 | -8    | 177        | 188      | QSVEADIAGLRR               |           |        |   |                   |      | Mascot |      |
| 1325.6517  | 1325.6156   | -0.0361 | -27   | 373        | 382      | LEMEIAEYRR                 |           |        |   | Oxidation (M)[3]  |      | Mascot |      |
| 1332.6754  | 1332.6376   | -0.0378 | -28   | 318        | 330      | ASLEGTLDATQAR              |           |        |   |                   |      | Mascot |      |
| 1410.7046  | 1410.6642   | -0.0404 | -29   | 371        | 381      | TRLEMEIAEYR                | 48        | 99.577 |   |                   |      | Mascot |      |
| 1410.7046  | 1410.6642   | -0.0404 | -29   | 371        | 381      | TRLEMEIAEYR                |           |        |   |                   |      | Mascot |      |
| 1426.6995  | 1426.6582   | -0.0413 | -29   | 371        | 381      | TRLEMEIAEYR                |           |        |   | Oxidation (M)[5]  |      | Mascot |      |
| 1426.6995  | 1426.6582   | -0.0413 | -29   | 371        | 381      | TRLEMEIAEYR                | 27        | 50.838 |   | Oxidation (M)[5]  |      | Mascot |      |
| 1847.9783  | 1847.9242   | -0.0541 | -29   | 302        | 317      | TLQSLEIELQSQLSMK           |           |        |   |                   |      | Mascot |      |
| 1863.9731  | 1863.9189   | -0.0542 | -29   | 302        | 317      | TLQSLEIELQSQLSMK           |           |        |   | Oxidation (M)[15] |      | Mascot |      |
| 2260.0762  | 2260.0181   | -0.0581 | -26   | 227        | 247      | AQMTGQVNVVEVDAAPQE<br>DLTK |           |        |   | Oxidation (M)[3]  |      | Mascot |      |

|    |                          |             |         |      |    |     |     |    |        |
|----|--------------------------|-------------|---------|------|----|-----|-----|----|--------|
| 11 | Zgc:109868 [Danio rerio] | gi 92097956 | 47235.8 | 5.25 | 12 | 117 | 100 | 48 | 99.577 |
|----|--------------------------|-------------|---------|------|----|-----|-----|----|--------|

Peptide Information

| Calc. Mass | Obsrv. Mass | ± da | ± ppm | Start | End | Sequence | Ion | C. I. | % | Modification | Rank | Result | Type |
|------------|-------------|------|-------|-------|-----|----------|-----|-------|---|--------------|------|--------|------|
|------------|-------------|------|-------|-------|-----|----------|-----|-------|---|--------------|------|--------|------|

|    |                                                                             | Seq.      |         | Seq. |             | Score   |                            |    |        |                   |        |        |
|----|-----------------------------------------------------------------------------|-----------|---------|------|-------------|---------|----------------------------|----|--------|-------------------|--------|--------|
|    | 807.3995                                                                    | 807.3759  | -0.0236 | -29  | 160         | 166     | LAADDFR                    |    |        |                   | Mascot |        |
|    | 961.5312                                                                    | 961.5016  | -0.0296 | -31  | 294         | 301     | SEITEVKR                   |    |        |                   | Mascot |        |
|    | 1062.4998                                                                   | 1062.4702 | -0.0296 | -28  | 82          | 90      | ATMQNLNDR                  |    |        |                   | Mascot |        |
|    | 1077.5609                                                                   | 1077.5311 | -0.0298 | -28  | 189         | 197     | VLDELTMTTR                 |    |        |                   | Mascot |        |
|    | 1078.4946                                                                   | 1078.4645 | -0.0301 | -28  | 82          | 90      | ATMQNLNDR                  |    |        | Oxidation (M)[3]  | Mascot |        |
|    | 1093.5558                                                                   | 1093.5104 | -0.0454 | -42  | 189         | 197     | VLDELTMTTR                 |    |        | Oxidation (M)[7]  | Mascot |        |
|    | 1153.5558                                                                   | 1153.5214 | -0.0344 | -30  | 373         | 381     | LEMEIAEYR                  |    |        |                   | Mascot |        |
|    | 1169.5507                                                                   | 1169.5792 | 0.0285  | 24   | 373         | 381     | LEMEIAEYR                  |    |        | Oxidation (M)[3]  | Mascot |        |
|    | 1169.5507                                                                   | 1169.5792 | 0.0285  | 24   | 373         | 381     | LEMEIAEYR                  | 7  | 0      | Oxidation (M)[3]  | Mascot |        |
|    | 1268.6304                                                                   | 1268.5938 | -0.0366 | -29  | 167         | 176     | VKYENELSMR                 |    |        |                   | Mascot |        |
|    | 1284.6252                                                                   | 1284.592  | -0.0332 | -26  | 167         | 176     | VKYENELSMR                 |    |        | Oxidation (M)[9]  | Mascot |        |
|    | 1309.6569                                                                   | 1309.6371 | -0.0198 | -15  | 373         | 382     | LEMEIAEYRR                 |    |        |                   | Mascot |        |
|    | 1314.7124                                                                   | 1314.7013 | -0.0111 | -8   | 177         | 188     | QSVEADIAGLR                |    |        |                   | Mascot |        |
|    | 1325.6517                                                                   | 1325.6156 | -0.0361 | -27  | 373         | 382     | LEMEIAEYRR                 |    |        | Oxidation (M)[3]  | Mascot |        |
|    | 1332.6754                                                                   | 1332.6376 | -0.0378 | -28  | 318         | 330     | ASLEGLADTQAR               |    |        |                   | Mascot |        |
|    | 1410.7046                                                                   | 1410.6642 | -0.0404 | -29  | 371         | 381     | TRLEMEIAEYR                | 48 | 99.577 |                   | Mascot |        |
|    | 1410.7046                                                                   | 1410.6642 | -0.0404 | -29  | 371         | 381     | TRLEMEIAEYR                |    |        |                   | Mascot |        |
|    | 1426.6995                                                                   | 1426.6582 | -0.0413 | -29  | 371         | 381     | TRLEMEIAEYR                |    |        | Oxidation (M)[5]  | Mascot |        |
|    | 1426.6995                                                                   | 1426.6582 | -0.0413 | -29  | 371         | 381     | TRLEMEIAEYR                | 27 | 50.838 | Oxidation (M)[5]  | Mascot |        |
|    | 1847.9783                                                                   | 1847.9242 | -0.0541 | -29  | 302         | 317     | TLQSLEIELQSQLSMK           |    |        |                   | Mascot |        |
|    | 1863.9731                                                                   | 1863.9189 | -0.0542 | -29  | 302         | 317     | TLQSLEIELQSQLSMK           |    |        | Oxidation (M)[15] | Mascot |        |
|    | 2260.0762                                                                   | 2260.0181 | -0.0581 | -26  | 227         | 247     | AQMTGQVNVVEVDAAPQE<br>DLTK |    |        | Oxidation (M)[3]  | Mascot |        |
| 12 | novel protein similar to type I cytokeratin, enveloping layer [Danio rerio] |           |         |      | gi 94732413 | 49661.4 | 5.31                       | 12 | 112    | 100               | 48     | 99.577 |

Peptide Information

| Calc. Mass | Obsrv. Mass | ± da    | ± ppm | Start Seq. | End Sequence Seq. | Ion Score  | C. I. | % Modification | Rank             | Result Type |
|------------|-------------|---------|-------|------------|-------------------|------------|-------|----------------|------------------|-------------|
| 807.3995   | 807.3759    | -0.0236 | -29   | 183        | 189               | LAADDFR    |       |                |                  | Mascot      |
| 1062.4998  | 1062.4702   | -0.0296 | -28   | 105        | 113               | ATMQNLNDR  |       |                |                  | Mascot      |
| 1077.5609  | 1077.5311   | -0.0298 | -28   | 212        | 220               | VLDELTMTTR |       |                |                  | Mascot      |
| 1078.4946  | 1078.4645   | -0.0301 | -28   | 105        | 113               | ATMQNLNDR  |       |                | Oxidation (M)[3] | Mascot      |
| 1093.5558  | 1093.5104   | -0.0454 | -42   | 212        | 220               | VLDELTMTTR |       |                | Oxidation (M)[7] | Mascot      |
| 1153.5558  | 1153.5214   | -0.0344 | -30   | 396        | 404               | LEMEIAEYR  |       |                |                  | Mascot      |
| 1169.5507  | 1169.5792   | 0.0285  | 24    | 396        | 404               | LEMEIAEYR  |       |                | Oxidation (M)[3] | Mascot      |

|           |           |         |     |     |     |                  |    |        |                  |        |
|-----------|-----------|---------|-----|-----|-----|------------------|----|--------|------------------|--------|
| 1169.5507 | 1169.5792 | 0.0285  | 24  | 396 | 404 | LEMEIAEYR        | 7  | 0      | Oxidation (M)[3] | Mascot |
| 1181.5909 | 1181.5582 | -0.0327 | -28 | 240 | 249 | NHEEELLAAR       |    |        |                  | Mascot |
| 1221.6508 | 1221.6132 | -0.0376 | -31 | 211 | 220 | KVLDELTMTTR      |    |        | Oxidation (M)[8] | Mascot |
| 1268.6304 | 1268.5938 | -0.0366 | -29 | 190 | 199 | VKYENELSMR       |    |        |                  | Mascot |
| 1284.6252 | 1284.592  | -0.0332 | -26 | 190 | 199 | VKYENELSMR       |    |        | Oxidation (M)[9] | Mascot |
| 1309.6569 | 1309.6371 | -0.0198 | -15 | 396 | 405 | LEMEIAEYRR       |    |        |                  | Mascot |
| 1325.6517 | 1325.6156 | -0.0361 | -27 | 396 | 405 | LEMEIAEYRR       |    |        | Oxidation (M)[3] | Mascot |
| 1332.6754 | 1332.6376 | -0.0378 | -28 | 341 | 353 | ASLEGLTADTQAR    |    |        |                  | Mascot |
| 1410.7046 | 1410.6642 | -0.0404 | -29 | 394 | 404 | TRLEMEIAEYR      | 48 | 99.577 |                  | Mascot |
| 1410.7046 | 1410.6642 | -0.0404 | -29 | 394 | 404 | TRLEMEIAEYR      |    |        |                  | Mascot |
| 1426.6995 | 1426.6582 | -0.0413 | -29 | 394 | 404 | TRLEMEIAEYR      |    |        | Oxidation (M)[5] | Mascot |
| 1426.6995 | 1426.6582 | -0.0413 | -29 | 394 | 404 | TRLEMEIAEYR      | 27 | 50.838 | Oxidation (M)[5] | Mascot |
| 1465.7356 | 1465.6823 | -0.0533 | -36 | 382 | 393 | QGQEYQMLLDIK     |    |        |                  | Mascot |
| 1481.7305 | 1481.6874 | -0.0431 | -29 | 382 | 393 | QGQEYQMLLDIK     |    |        | Oxidation (M)[7] | Mascot |
| 1847.8922 | 1847.9242 | 0.032   | 17  | 289 | 303 | DLEHWFQSKSES LNK |    |        |                  | Mascot |

13 type I keratin [Danio rerio] gi|5733816 11569.6 4.88 5 93 99.998 48 99.577

Peptide Information

| Calc. Mass | Obsrv. Mass | ± da    | ± ppm | Start Seq. | End Seq. | Sequence      | Ion Score | C. I.  | % Modification   | Rank | Result Type |
|------------|-------------|---------|-------|------------|----------|---------------|-----------|--------|------------------|------|-------------|
| 1153.5558  | 1153.5214   | -0.0344 | -30   | 64         | 72       | LEMEIAEYR     |           |        |                  |      | Mascot      |
| 1169.5507  | 1169.5792   | 0.0285  | 24    | 64         | 72       | LEMEIAEYR     |           |        | Oxidation (M)[3] |      | Mascot      |
| 1169.5507  | 1169.5792   | 0.0285  | 24    | 64         | 72       | LEMEIAEYR     | 7         | 0      | Oxidation (M)[3] |      | Mascot      |
| 1309.6569  | 1309.6371   | -0.0198 | -15   | 64         | 73       | LEMEIAEYRR    |           |        |                  |      | Mascot      |
| 1325.6517  | 1325.6156   | -0.0361 | -27   | 64         | 73       | LEMEIAEYRR    |           |        | Oxidation (M)[3] |      | Mascot      |
| 1332.6754  | 1332.6376   | -0.0378 | -28   | 9          | 21       | ASLEGLTADTQAR |           |        |                  |      | Mascot      |
| 1410.7046  | 1410.6642   | -0.0404 | -29   | 62         | 72       | TRLEMEIAEYR   | 48        | 99.577 |                  |      | Mascot      |
| 1410.7046  | 1410.6642   | -0.0404 | -29   | 62         | 72       | TRLEMEIAEYR   |           |        |                  |      | Mascot      |
| 1426.6995  | 1426.6582   | -0.0413 | -29   | 62         | 72       | TRLEMEIAEYR   |           |        | Oxidation (M)[5] |      | Mascot      |
| 1426.6995  | 1426.6582   | -0.0413 | -29   | 62         | 72       | TRLEMEIAEYR   | 27        | 50.838 | Oxidation (M)[5] |      | Mascot      |
| 1465.7356  | 1465.6823   | -0.0533 | -36   | 50         | 61       | QGQEYQMLLDIK  |           |        |                  |      | Mascot      |
| 1481.7305  | 1481.6874   | -0.0431 | -29   | 50         | 61       | QGQEYQMLLDIK  |           |        | Oxidation (M)[7] |      | Mascot      |

14 type I keratin E7-like [Danio rerio] gi|316659401 43783.1 4.97 9 91 99.997 48 99.577

Peptide Information

| Calc. Mass | Obsrv. Mass | ± da | ± ppm | Start Seq. | End Seq. | Sequence | Ion Score | C. I. | % Modification | Rank | Result Type |
|------------|-------------|------|-------|------------|----------|----------|-----------|-------|----------------|------|-------------|
|------------|-------------|------|-------|------------|----------|----------|-----------|-------|----------------|------|-------------|

|  |           |           |         |      |     |     |                |    |                  |                         |
|--|-----------|-----------|---------|------|-----|-----|----------------|----|------------------|-------------------------|
|  | 1078.6255 | 1078.4645 | -0.161  | -149 | 69  | 77  | LASYLEKVR      |    |                  | Mascot                  |
|  | 1123.5854 | 1123.5077 | -0.0777 | -69  | 194 | 203 | NHAEELAALR     |    |                  | Mascot                  |
|  | 1123.5854 | 1123.5077 | -0.0777 | -69  | 194 | 203 | NHAEELAALR     |    |                  | Mascot                  |
|  | 1153.5558 | 1153.5214 | -0.0344 | -30  | 351 | 359 | LEMEIAEYR      |    |                  | Mascot                  |
|  | 1169.5507 | 1169.5792 | 0.0285  | 24   | 351 | 359 | LEMEIAEYR      |    | Oxidation (M)[3] | Mascot                  |
|  | 1169.5507 | 1169.5792 | 0.0285  | 24   | 351 | 359 | LEMEIAEYR      | 7  | 0                | Oxidation (M)[3] Mascot |
|  | 1186.5521 | 1186.6079 | 0.0558  | 47   | 1   | 10  | MSQVTQSFSR     |    | Oxidation (M)[1] | Mascot                  |
|  | 1186.5521 | 1186.6079 | 0.0558  | 47   | 1   | 10  | MSQVTQSFSR     |    | Oxidation (M)[1] | Mascot                  |
|  | 1298.6521 | 1298.6073 | -0.0448 | -34  | 1   | 11  | MSQVTQSFSRK    |    |                  | Mascot                  |
|  | 1309.6569 | 1309.6371 | -0.0198 | -15  | 351 | 360 | LEMEIAEYRR     |    |                  | Mascot                  |
|  | 1314.6471 | 1314.7013 | 0.0542  | 41   | 1   | 11  | MSQVTQSFSRK    |    | Oxidation (M)[1] | Mascot                  |
|  | 1325.6517 | 1325.6156 | -0.0361 | -27  | 351 | 360 | LEMEIAEYRR     |    | Oxidation (M)[3] | Mascot                  |
|  | 1410.7046 | 1410.6642 | -0.0404 | -29  | 349 | 359 | TRLEMEIAEYR    | 48 | 99.577           | Mascot                  |
|  | 1410.7046 | 1410.6642 | -0.0404 | -29  | 349 | 359 | TRLEMEIAEYR    |    |                  | Mascot                  |
|  | 1420.8046 | 1420.6896 | -0.115  | -81  | 337 | 348 | QASEYKLLLDIK   |    |                  | Mascot                  |
|  | 1426.6995 | 1426.6582 | -0.0413 | -29  | 349 | 359 | TRLEMEIAEYR    |    | Oxidation (M)[5] | Mascot                  |
|  | 1426.6995 | 1426.6582 | -0.0413 | -29  | 349 | 359 | TRLEMEIAEYR    | 27 | 50.838           | Oxidation (M)[5] Mascot |
|  | 1464.842  | 1464.6581 | -0.1839 | -126 | 370 | 383 | QTVKVVEVVAPPQA |    |                  | Mascot                  |

### Peptide Information



|    |                                        |           |         |     |             |     |                             |      |        |    |        |                  |                  |  |  |        |
|----|----------------------------------------|-----------|---------|-----|-------------|-----|-----------------------------|------|--------|----|--------|------------------|------------------|--|--|--------|
|    | 1420.8046                              | 1420.6896 | -0.115  | -81 | 358         | 369 | QASEYKLLLDIK                |      |        |    |        |                  |                  |  |  | Mascot |
|    | 1426.6995                              | 1426.6582 | -0.0413 | -29 | 370         | 380 | TRLEMEIAEYR                 |      |        |    |        |                  | Oxidation (M)[5] |  |  | Mascot |
|    | 1426.6995                              | 1426.6582 | -0.0413 | -29 | 370         | 380 | TRLEMEIAEYR                 | 27   | 50.838 |    |        | Oxidation (M)[5] |                  |  |  | Mascot |
|    | 2260.0007                              | 2260.0181 | 0.0174  | 8   | 58          | 80  | GGFDMSSALAGGDNGF<br>GMVVNEK |      |        |    |        |                  |                  |  |  | Mascot |
|    | 2275.9956                              | 2276.0137 | 0.0181  | 8   | 58          | 80  | GGFDMSSALAGGDNGF<br>GMVVNEK |      |        |    |        | Oxidation (M)[5] |                  |  |  | Mascot |
| 16 | Si:dkeyp-113d7.4 protein [Danio rerio] |           |         |     | gi 62203256 |     | 51673.7                     | 5.05 | 8      | 84 | 99.983 | 48               | 99.577           |  |  |        |

#### Peptide Information

| Calc. Mass | Obsrv. Mass | ± da    | ± ppm | Start Seq. | End Seq. | Sequence        | Ion Score | C. I.  | % | Modification     | Rank | Result | Type |
|------------|-------------|---------|-------|------------|----------|-----------------|-----------|--------|---|------------------|------|--------|------|
| 1078.6255  | 1078.4645   | -0.161  | -149  | 140        | 148      | LASYLEKVR       |           |        |   |                  |      | Mascot |      |
| 1093.6099  | 1093.5104   | -0.0995 | -91   | 478        | 488      | VVSSSSTSLVK     |           |        |   |                  |      | Mascot |      |
| 1153.5558  | 1153.5214   | -0.0344 | -30   | 424        | 432      | LEMEIAEYR       |           |        |   |                  |      | Mascot |      |
| 1169.5507  | 1169.5792   | 0.0285  | 24    | 424        | 432      | LEMEIAEYR       |           |        |   | Oxidation (M)[3] |      | Mascot |      |
| 1169.5507  | 1169.5792   | 0.0285  | 24    | 424        | 432      | LEMEIAEYR       | 7         | 0      |   | Oxidation (M)[3] |      | Mascot |      |
| 1282.646   | 1282.6121   | -0.0339 | -26   | 218        | 227      | IKYENELSMR      |           |        |   |                  |      | Mascot |      |
| 1298.6409  | 1298.6073   | -0.0336 | -26   | 218        | 227      | IKYENELSMR      |           |        |   | Oxidation (M)[9] |      | Mascot |      |
| 1309.6569  | 1309.6371   | -0.0198 | -15   | 424        | 433      | LEMEIAEYRR      |           |        |   |                  |      | Mascot |      |
| 1325.6517  | 1325.6156   | -0.0361 | -27   | 424        | 433      | LEMEIAEYRR      |           |        |   | Oxidation (M)[3] |      | Mascot |      |
| 1410.7046  | 1410.6642   | -0.0404 | -29   | 422        | 432      | TRLEMEIAEYR     | 48        | 99.577 |   |                  |      | Mascot |      |
| 1410.7046  | 1410.6642   | -0.0404 | -29   | 422        | 432      | TRLEMEIAEYR     |           |        |   |                  |      | Mascot |      |
| 1426.6995  | 1426.6582   | -0.0413 | -29   | 422        | 432      | TRLEMEIAEYR     |           |        |   | Oxidation (M)[5] |      | Mascot |      |
| 1426.6995  | 1426.6582   | -0.0413 | -29   | 422        | 432      | TRLEMEIAEYR     | 27        | 50.838 |   | Oxidation (M)[5] |      | Mascot |      |
| 1465.6653  | 1465.6823   | 0.017   | 12    | 449        | 463      | SGFSSTSSSTTSTTK |           |        |   |                  |      | Mascot |      |
| 1481.7305  | 1481.6874   | -0.0431 | -29   | 410        | 421      | QQQEYQMLLDIK    |           |        |   | Oxidation (M)[7] |      | Mascot |      |

|    |                                                                         |  |  |  |             |  |         |      |   |    |        |    |        |  |  |  |
|----|-------------------------------------------------------------------------|--|--|--|-------------|--|---------|------|---|----|--------|----|--------|--|--|--|
| 17 | novel protein similar to vertebrate keratin type I family [Danio rerio] |  |  |  | gi 94732967 |  | 45812.2 | 5.08 | 8 | 83 | 99.976 | 48 | 99.577 |  |  |  |
|----|-------------------------------------------------------------------------|--|--|--|-------------|--|---------|------|---|----|--------|----|--------|--|--|--|

#### Peptide Information

| Calc. Mass | Obsrv. Mass | ± da    | ± ppm | Start Seq. | End Seq. | Sequence   | Ion Score | C. I. | % | Modification     | Rank | Result | Type |
|------------|-------------|---------|-------|------------|----------|------------|-----------|-------|---|------------------|------|--------|------|
| 1078.6255  | 1078.4645   | -0.161  | -149  | 87         | 95       | LASYLEKVR  |           |       |   |                  |      | Mascot |      |
| 1123.5854  | 1123.5077   | -0.0777 | -69   | 212        | 221      | NHAEELAALR |           |       |   |                  |      | Mascot |      |
| 1123.5854  | 1123.5077   | -0.0777 | -69   | 212        | 221      | NHAEELAALR |           |       |   |                  |      | Mascot |      |
| 1153.5558  | 1153.5214   | -0.0344 | -30   | 369        | 377      | LEMEIAEYR  |           |       |   |                  |      | Mascot |      |
| 1169.5507  | 1169.5792   | 0.0285  | 24    | 369        | 377      | LEMEIAEYR  |           |       |   | Oxidation (M)[3] |      | Mascot |      |
| 1169.5507  | 1169.5792   | 0.0285  | 24    | 369        | 377      | LEMEIAEYR  | 7         | 0     |   | Oxidation (M)[3] |      | Mascot |      |

|    |                                |           |         |      |              |     |                         |      |        |                  |        |    |                   |  |  |  |        |
|----|--------------------------------|-----------|---------|------|--------------|-----|-------------------------|------|--------|------------------|--------|----|-------------------|--|--|--|--------|
|    | 1309.6569                      | 1309.6371 | -0.0198 | -15  | 369          | 378 | LEMEIAEYRR              |      |        |                  |        |    |                   |  |  |  | Mascot |
|    | 1325.6517                      | 1325.6156 | -0.0361 | -27  | 369          | 378 | LEMEIAEYRR              |      |        |                  |        |    | Oxidation (M)[3]  |  |  |  | Mascot |
|    | 1410.7046                      | 1410.6642 | -0.0404 | -29  | 367          | 377 | TRLEMEIAEYR             | 48   | 99.577 |                  |        |    |                   |  |  |  | Mascot |
|    | 1410.7046                      | 1410.6642 | -0.0404 | -29  | 367          | 377 | TRLEMEIAEYR             |      |        |                  |        |    |                   |  |  |  | Mascot |
|    | 1420.8046                      | 1420.6896 | -0.115  | -81  | 355          | 366 | QASEYKLLLDIK            |      |        |                  |        |    |                   |  |  |  | Mascot |
|    | 1426.6995                      | 1426.6582 | -0.0413 | -29  | 367          | 377 | TRLEMEIAEYR             |      |        |                  |        |    | Oxidation (M)[5]  |  |  |  | Mascot |
|    | 1426.6995                      | 1426.6582 | -0.0413 | -29  | 367          | 377 | TRLEMEIAEYR             | 27   | 50.838 | Oxidation (M)[5] |        |    |                   |  |  |  | Mascot |
|    | 1464.842                       | 1464.6581 | -0.1839 | -126 | 388          | 401 | QTVKVVVVAPPQA           |      |        |                  |        |    |                   |  |  |  | Mascot |
|    | 2230.0227                      | 2230.0432 | 0.0205  | 9    | 9            | 28  | CPTRAETETMSQVTQS<br>FSR |      |        |                  |        |    |                   |  |  |  | Mascot |
|    | 2246.0176                      | 2246.0095 | -0.0081 | -4   | 9            | 28  | CPTRAETETMSQVTQS<br>FSR |      |        |                  |        |    | Oxidation (M)[11] |  |  |  | Mascot |
| 18 | si:dkeyp-113d7.4 [Danio rerio] |           |         |      | gi 167234796 |     | 49903.8                 | 4.94 | 7      | 79               | 99.948 | 48 | 99.577            |  |  |  |        |

Peptide Information

| Calc. Mass | Obsrv. Mass | ± da    | ± ppm | Start Seq. | End Seq. | Sequence       | Ion Score | C. I.  | % Modification   | Rank | Result Type |
|------------|-------------|---------|-------|------------|----------|----------------|-----------|--------|------------------|------|-------------|
| 1093.6099  | 1093.5104   | -0.0995 | -91   | 463        | 473      | VVSSSSTSLVK    |           |        |                  |      | Mascot      |
| 1153.5558  | 1153.5214   | -0.0344 | -30   | 409        | 417      | LEMEIAEYR      |           |        |                  |      | Mascot      |
| 1169.5507  | 1169.5792   | 0.0285  | 24    | 409        | 417      | LEMEIAEYR      |           |        | Oxidation (M)[3] |      | Mascot      |
| 1169.5507  | 1169.5792   | 0.0285  | 24    | 409        | 417      | LEMEIAEYR      | 7         | 0      | Oxidation (M)[3] |      | Mascot      |
| 1282.646   | 1282.6121   | -0.0339 | -26   | 203        | 212      | IKYENELSMR     |           |        |                  |      | Mascot      |
| 1298.6409  | 1298.6073   | -0.0336 | -26   | 203        | 212      | IKYENELSMR     |           |        | Oxidation (M)[9] |      | Mascot      |
| 1309.6569  | 1309.6371   | -0.0198 | -15   | 409        | 418      | LEMEIAEYRR     |           |        |                  |      | Mascot      |
| 1325.6517  | 1325.6156   | -0.0361 | -27   | 409        | 418      | LEMEIAEYRR     |           |        | Oxidation (M)[3] |      | Mascot      |
| 1410.7046  | 1410.6642   | -0.0404 | -29   | 407        | 417      | TRLEMEIAEYR    | 48        | 99.577 |                  |      | Mascot      |
| 1410.7046  | 1410.6642   | -0.0404 | -29   | 407        | 417      | TRLEMEIAEYR    |           |        |                  |      | Mascot      |
| 1426.6995  | 1426.6582   | -0.0413 | -29   | 407        | 417      | TRLEMEIAEYR    |           |        | Oxidation (M)[5] |      | Mascot      |
| 1426.6995  | 1426.6582   | -0.0413 | -29   | 407        | 417      | TRLEMEIAEYR    | 27        | 50.838 | Oxidation (M)[5] |      | Mascot      |
| 1464.6787  | 1464.6581   | -0.0206 | -14   | 1          | 14       | MATTFSSGSFVSSR |           |        |                  |      | Mascot      |
| 1465.7356  | 1465.6823   | -0.0533 | -36   | 395        | 406      | QGQEYQMLLDIK   |           |        |                  |      | Mascot      |
| 1481.7305  | 1481.6874   | -0.0431 | -29   | 395        | 406      | QGQEYQMLLDIK   |           |        | Oxidation (M)[7] |      | Mascot      |

|    |                          |  |  |  |             |  |         |      |   |    |        |    |        |  |  |  |  |
|----|--------------------------|--|--|--|-------------|--|---------|------|---|----|--------|----|--------|--|--|--|--|
| 19 | keratin 15 [Danio rerio] |  |  |  | gi 47087241 |  | 49093.4 | 5.13 | 6 | 74 | 99.814 | 48 | 99.577 |  |  |  |  |
|----|--------------------------|--|--|--|-------------|--|---------|------|---|----|--------|----|--------|--|--|--|--|

Peptide Information

| Calc. Mass | Obsrv. Mass | ± da    | ± ppm | Start Seq. | End Seq. | Sequence  | Ion Score | C. I. | % Modification   | Rank | Result Type |
|------------|-------------|---------|-------|------------|----------|-----------|-----------|-------|------------------|------|-------------|
| 1062.4998  | 1062.4702   | -0.0296 | -28   | 109        | 117      | ATMQNLNDR |           |       |                  |      | Mascot      |
| 1078.4946  | 1078.4645   | -0.0301 | -28   | 109        | 117      | ATMQNLNDR |           |       | Oxidation (M)[3] |      | Mascot      |

|           |           |         |     |     |     |              |    |        |  |  |  |  |                  |  |  |  |        |
|-----------|-----------|---------|-----|-----|-----|--------------|----|--------|--|--|--|--|------------------|--|--|--|--------|
| 1153.5558 | 1153.5214 | -0.0344 | -30 | 400 | 408 | LEMEIAEYR    |    |        |  |  |  |  |                  |  |  |  | Mascot |
| 1169.5507 | 1169.5792 | 0.0285  | 24  | 400 | 408 | LEMEIAEYR    |    |        |  |  |  |  | Oxidation (M)[3] |  |  |  | Mascot |
| 1169.5507 | 1169.5792 | 0.0285  | 24  | 400 | 408 | LEMEIAEYR    | 7  | 0      |  |  |  |  | Oxidation (M)[3] |  |  |  | Mascot |
| 1284.6252 | 1284.592  | -0.0332 | -26 | 194 | 203 | TKYENELTMR   |    |        |  |  |  |  |                  |  |  |  | Mascot |
| 1309.6569 | 1309.6371 | -0.0198 | -15 | 400 | 409 | LEMEIAEYRR   |    |        |  |  |  |  |                  |  |  |  | Mascot |
| 1325.6517 | 1325.6156 | -0.0361 | -27 | 400 | 409 | LEMEIAEYRR   |    |        |  |  |  |  | Oxidation (M)[3] |  |  |  | Mascot |
| 1410.7046 | 1410.6642 | -0.0404 | -29 | 398 | 408 | TRLEMEIAEYR  | 48 | 99.577 |  |  |  |  |                  |  |  |  | Mascot |
| 1410.7046 | 1410.6642 | -0.0404 | -29 | 398 | 408 | TRLEMEIAEYR  |    |        |  |  |  |  |                  |  |  |  | Mascot |
| 1426.6995 | 1426.6582 | -0.0413 | -29 | 398 | 408 | TRLEMEIAEYR  |    |        |  |  |  |  | Oxidation (M)[5] |  |  |  | Mascot |
| 1426.6995 | 1426.6582 | -0.0413 | -29 | 398 | 408 | TRLEMEIAEYR  | 27 | 50.838 |  |  |  |  | Oxidation (M)[5] |  |  |  | Mascot |
| 1465.772  | 1465.6823 | -0.0897 | -61 | 386 | 397 | QGQEYKMLLDIK |    |        |  |  |  |  |                  |  |  |  | Mascot |
| 1481.7668 | 1481.6874 | -0.0794 | -54 | 386 | 397 | QGQEYKMLLDIK |    |        |  |  |  |  | Oxidation (M)[7] |  |  |  | Mascot |

20 Si:dkeyp-113d7.4 protein [Danio rerio] gi|126632119 51495.6 5 6 73 99.792 48 99.577

Peptide Information

| Calc. Mass | Obsrv. Mass | ± da    | ± ppm | Start Seq. | End Seq. | Sequence     | Ion Score | C. I.  | % | Modification     | Rank | Result | Type   |
|------------|-------------|---------|-------|------------|----------|--------------|-----------|--------|---|------------------|------|--------|--------|
| 1093.6099  | 1093.5104   | -0.0995 | -91   | 478        | 488      | VVSSSSTSLVK  |           |        |   |                  |      |        | Mascot |
| 1153.5558  | 1153.5214   | -0.0344 | -30   | 424        | 432      | LEMEIAEYR    |           |        |   |                  |      |        | Mascot |
| 1169.5507  | 1169.5792   | 0.0285  | 24    | 424        | 432      | LEMEIAEYR    |           |        |   | Oxidation (M)[3] |      |        | Mascot |
| 1169.5507  | 1169.5792   | 0.0285  | 24    | 424        | 432      | LEMEIAEYR    | 7         | 0      |   | Oxidation (M)[3] |      |        | Mascot |
| 1282.646   | 1282.6121   | -0.0339 | -26   | 218        | 227      | IKYENELSMR   |           |        |   |                  |      |        | Mascot |
| 1298.6409  | 1298.6073   | -0.0336 | -26   | 218        | 227      | IKYENELSMR   |           |        |   | Oxidation (M)[9] |      |        | Mascot |
| 1309.6569  | 1309.6371   | -0.0198 | -15   | 424        | 433      | LEMEIAEYRR   |           |        |   |                  |      |        | Mascot |
| 1325.6517  | 1325.6156   | -0.0361 | -27   | 424        | 433      | LEMEIAEYRR   |           |        |   | Oxidation (M)[3] |      |        | Mascot |
| 1410.7046  | 1410.6642   | -0.0404 | -29   | 422        | 432      | TRLEMEIAEYR  | 48        | 99.577 |   |                  |      |        | Mascot |
| 1410.7046  | 1410.6642   | -0.0404 | -29   | 422        | 432      | TRLEMEIAEYR  |           |        |   |                  |      |        | Mascot |
| 1426.6995  | 1426.6582   | -0.0413 | -29   | 422        | 432      | TRLEMEIAEYR  |           |        |   | Oxidation (M)[5] |      |        | Mascot |
| 1426.6995  | 1426.6582   | -0.0413 | -29   | 422        | 432      | TRLEMEIAEYR  | 27        | 50.838 |   | Oxidation (M)[5] |      |        | Mascot |
| 1465.7356  | 1465.6823   | -0.0533 | -36   | 410        | 421      | QGQEYQMLLDIK |           |        |   |                  |      |        | Mascot |
| 1481.7305  | 1481.6874   | -0.0431 | -29   | 410        | 421      | QGQEYQMLLDIK |           |        |   | Oxidation (M)[7] |      |        | Mascot |

21 keratin 15 [Danio rerio] gi|169158744 48848.4 5.13 6 73 99.787 48 99.577

Peptide Information

| Calc. Mass | Obsrv. Mass | ± da    | ± ppm | Start Seq. | End Seq. | Sequence  | Ion Score | C. I. | % | Modification | Rank | Result | Type   |
|------------|-------------|---------|-------|------------|----------|-----------|-----------|-------|---|--------------|------|--------|--------|
| 1062.4998  | 1062.4702   | -0.0296 | -28   | 109        | 117      | ATMQNLNDR |           |       |   |              |      |        | Mascot |

|    |                                          |           |         |     |              |     |              |      |   |        |        |    |        |  |                  |  |        |
|----|------------------------------------------|-----------|---------|-----|--------------|-----|--------------|------|---|--------|--------|----|--------|--|------------------|--|--------|
|    | 1078.4946                                | 1078.4645 | -0.0301 | -28 | 109          | 117 | ATMQNLNDR    |      |   |        |        |    |        |  | Oxidation (M)[3] |  | Mascot |
|    | 1153.5558                                | 1153.5214 | -0.0344 | -30 | 400          | 408 | LEMEIAEYR    |      |   |        |        |    |        |  |                  |  | Mascot |
|    | 1169.5507                                | 1169.5792 | 0.0285  | 24  | 400          | 408 | LEMEIAEYR    |      |   |        |        |    |        |  | Oxidation (M)[3] |  | Mascot |
|    | 1169.5507                                | 1169.5792 | 0.0285  | 24  | 400          | 408 | LEMEIAEYR    | 7    |   | 0      |        |    |        |  | Oxidation (M)[3] |  | Mascot |
|    | 1284.6252                                | 1284.592  | -0.0332 | -26 | 194          | 203 | TKYENELTMR   |      |   |        |        |    |        |  |                  |  | Mascot |
|    | 1309.6569                                | 1309.6371 | -0.0198 | -15 | 400          | 409 | LEMEIAEYRR   |      |   |        |        |    |        |  |                  |  | Mascot |
|    | 1325.6517                                | 1325.6156 | -0.0361 | -27 | 400          | 409 | LEMEIAEYRR   |      |   |        |        |    |        |  | Oxidation (M)[3] |  | Mascot |
|    | 1410.7046                                | 1410.6642 | -0.0404 | -29 | 398          | 408 | TRLEMEIAEYR  | 48   |   | 99.577 |        |    |        |  |                  |  | Mascot |
|    | 1410.7046                                | 1410.6642 | -0.0404 | -29 | 398          | 408 | TRLEMEIAEYR  |      |   |        |        |    |        |  |                  |  | Mascot |
|    | 1426.6995                                | 1426.6582 | -0.0413 | -29 | 398          | 408 | TRLEMEIAEYR  |      |   |        |        |    |        |  | Oxidation (M)[5] |  | Mascot |
|    | 1426.6995                                | 1426.6582 | -0.0413 | -29 | 398          | 408 | TRLEMEIAEYR  | 27   |   | 50.838 |        |    |        |  | Oxidation (M)[5] |  | Mascot |
|    | 1465.772                                 | 1465.6823 | -0.0897 | -61 | 386          | 397 | QGQEQKMLLDIK |      |   |        |        |    |        |  |                  |  | Mascot |
|    | 1481.7668                                | 1481.6874 | -0.0794 | -54 | 386          | 397 | QGQEQKMLLDIK |      |   |        |        |    |        |  | Oxidation (M)[7] |  | Mascot |
| 22 | novel protein (zgc:171226) [Danio rerio] |           |         |     | gi 169158742 |     | 41278.5      | 4.86 | 5 | 49     | 47.716 | 33 | 87.848 |  |                  |  |        |

#### Peptide Information

| Calc. Mass | Obsrv. Mass | ± da    | ± ppm | Start Seq. | End Seq. | Sequence           | Ion Score | C. I.  | % Modification   | Rank | Result Type |
|------------|-------------|---------|-------|------------|----------|--------------------|-----------|--------|------------------|------|-------------|
| 1078.6255  | 1078.4645   | -0.161  | -149  | 60         | 68       | LASYLEKVR          |           |        |                  |      | Mascot      |
| 1153.567   | 1153.5214   | -0.0456 | -40   | 136        | 144      | KYENELAMR          |           |        |                  |      | Mascot      |
| 1169.5619  | 1169.5792   | 0.0173  | 15    | 136        | 144      | KYENELAMR          |           |        | Oxidation (M)[8] |      | Mascot      |
| 1169.5619  | 1169.5792   | 0.0173  | 15    | 136        | 144      | KYENELAMR          |           |        | Oxidation (M)[8] |      | Mascot      |
| 1181.5731  | 1181.5582   | -0.0149 | -13   | 137        | 145      | YENELAMRR          |           |        |                  |      | Mascot      |
| 1332.6907  | 1332.6376   | -0.0531 | -40   | 23         | 35       | ISSPAGFLNSSPR      |           |        |                  |      | Mascot      |
| 2117.1741  | 2117.115    | -0.0591 | -28   | 166        | 183      | SDLELQIEALKEEFIVLK | 33        | 87.848 |                  |      | Mascot      |
| 2117.1741  | 2117.115    | -0.0591 | -28   | 166        | 183      | SDLELQIEALKEEFIVLK |           |        |                  |      | Mascot      |

23 novel protein (zgc:171226) [Danio rerio] gi|169158743 44606.2 4.73 5 48 27.828 33 87.848

#### Peptide Information

| Calc. Mass | Obsrv. Mass | ± da    | ± ppm | Start Seq. | End Seq. | Sequence      | Ion Score | C. I. | % Modification   | Rank | Result Type |
|------------|-------------|---------|-------|------------|----------|---------------|-----------|-------|------------------|------|-------------|
| 1078.6255  | 1078.4645   | -0.161  | -149  | 60         | 68       | LASYLEKVR     |           |       |                  |      | Mascot      |
| 1153.567   | 1153.5214   | -0.0456 | -40   | 136        | 144      | KYENELAMR     |           |       |                  |      | Mascot      |
| 1169.5619  | 1169.5792   | 0.0173  | 15    | 136        | 144      | KYENELAMR     |           |       | Oxidation (M)[8] |      | Mascot      |
| 1169.5619  | 1169.5792   | 0.0173  | 15    | 136        | 144      | KYENELAMR     |           |       | Oxidation (M)[8] |      | Mascot      |
| 1181.5731  | 1181.5582   | -0.0149 | -13   | 137        | 145      | YENELAMRR     |           |       |                  |      | Mascot      |
| 1332.6907  | 1332.6376   | -0.0531 | -40   | 23         | 35       | ISSPAGFLNSSPR |           |       |                  |      | Mascot      |

|    |                                  |          |         |     |              |     |                    |      |        |    |        |    |        |
|----|----------------------------------|----------|---------|-----|--------------|-----|--------------------|------|--------|----|--------|----|--------|
|    | 2117.1741                        | 2117.115 | -0.0591 | -28 | 166          | 183 | SDLELQIEALKEEFIVLK | 33   | 87.848 |    |        |    | Mascot |
|    | 2117.1741                        | 2117.115 | -0.0591 | -28 | 166          | 183 | SDLELQIEALKEEFIVLK |      |        |    |        |    | Mascot |
| 24 | Zgc:171226 protein [Danio rerio] |          |         |     | gi 134024897 |     | 45341.6            | 4.72 | 5      | 47 | 11.209 | 33 | 87.848 |

#### Peptide Information

|  | Calc. Mass | Obsrv. Mass | ± da    | ± ppm | Start Seq. | End Sequence Seq. | Ion Score          | C. I. | % Modification   | Rank | Result Type |
|--|------------|-------------|---------|-------|------------|-------------------|--------------------|-------|------------------|------|-------------|
|  | 1078.6255  | 1078.4645   | -0.161  | -149  | 66         | 74                | LASYLEKVR          |       |                  |      | Mascot      |
|  | 1153.567   | 1153.5214   | -0.0456 | -40   | 142        | 150               | KYENELAMR          |       |                  |      | Mascot      |
|  | 1169.5619  | 1169.5792   | 0.0173  | 15    | 142        | 150               | KYENELAMR          |       | Oxidation (M)[8] |      | Mascot      |
|  | 1169.5619  | 1169.5792   | 0.0173  | 15    | 142        | 150               | KYENELAMR          |       | Oxidation (M)[8] |      | Mascot      |
|  | 1181.5731  | 1181.5582   | -0.0149 | -13   | 143        | 151               | YENELAMRR          |       |                  |      | Mascot      |
|  | 1332.6907  | 1332.6376   | -0.0531 | -40   | 29         | 41                | ISSPAGFLNSSPR      |       |                  |      | Mascot      |
|  | 2117.1741  | 2117.115    | -0.0591 | -28   | 172        | 189               | SDLELQIEALKEEFIVLK | 33    | 87.848           |      | Mascot      |
|  | 2117.1741  | 2117.115    | -0.0591 | -28   | 172        | 189               | SDLELQIEALKEEFIVLK |       |                  |      | Mascot      |

|    |                                                                     |  |  |  |              |  |         |      |    |    |   |  |  |
|----|---------------------------------------------------------------------|--|--|--|--------------|--|---------|------|----|----|---|--|--|
| 25 | PREDICTED: f-box/WD repeat-containing protein 10-like [Danio rerio] |  |  |  | gi 292619674 |  | 95885.6 | 9.41 | 17 | 46 | 0 |  |  |
|----|---------------------------------------------------------------------|--|--|--|--------------|--|---------|------|----|----|---|--|--|

#### Peptide Information

|  | Calc. Mass | Obsrv. Mass | ± da    | ± ppm | Start Seq. | End Sequence Seq. | Ion Score           | C. I. | % Modification          | Rank | Result Type |
|--|------------|-------------|---------|-------|------------|-------------------|---------------------|-------|-------------------------|------|-------------|
|  | 961.485    | 961.5016    | 0.0166  | 17    | 594        | 601               | LQAYSHSR            |       |                         |      | Mascot      |
|  | 1077.4418  | 1077.5311   | 0.0893  | 83    | 711        | 719               | DAWGPDTCTCR         |       | Carbamidomethyl (C)[8]  |      | Mascot      |
|  | 1123.5392  | 1123.5077   | -0.0315 | -28   | 194        | 203               | HFQHGGTSPR          |       |                         |      | Mascot      |
|  | 1123.5392  | 1123.5077   | -0.0315 | -28   | 194        | 203               | HFQHGGTSPR          |       |                         |      | Mascot      |
|  | 1169.6426  | 1169.5792   | -0.0634 | -54   | 810        | 818               | HIQLDPYKR           |       |                         |      | Mascot      |
|  | 1169.6426  | 1169.5792   | -0.0634 | -54   | 810        | 818               | HIQLDPYKR           |       |                         |      | Mascot      |
|  | 1186.615   | 1186.6079   | -0.0071 | -6    | 444        | 452               | CLRTFQHPK           |       | Carbamidomethyl (C)[1]  |      | Mascot      |
|  | 1186.615   | 1186.6079   | -0.0071 | -6    | 444        | 452               | CLRTFQHPK           |       | Carbamidomethyl (C)[1]  |      | Mascot      |
|  | 1282.6763  | 1282.6121   | -0.0642 | -50   | 672        | 682               | RGPHPVTPER          |       |                         |      | Mascot      |
|  | 1325.7286  | 1325.6156   | -0.113  | -85   | 453        | 463               | EVLAMSFLFLR         |       |                         |      | Mascot      |
|  | 1332.6113  | 1332.6376   | 0.0263  | 20    | 709        | 719               | VRDAWGPDTCTCR       |       | Carbamidomethyl (C)[10] |      | Mascot      |
|  | 1420.6484  | 1420.6896   | 0.0412  | 29    | 840        | 851               | QQQVCKNGSEDK        |       | Carbamidomethyl (C)[5]  |      | Mascot      |
|  | 1465.6376  | 1465.6823   | 0.0447  | 30    | 9          | 21                | GEAGDSVLEWSCR       |       | Carbamidomethyl (C)[12] |      | Mascot      |
|  | 1708.9203  | 1708.7563   | -0.164  | -96   | 475        | 488               | IFNFLNGDCLRVIK      |       | Carbamidomethyl (C)[9]  |      | Mascot      |
|  | 1708.9203  | 1708.7563   | -0.164  | -96   | 475        | 488               | IFNFLNGDCLRVIK      |       | Carbamidomethyl (C)[9]  |      | Mascot      |
|  | 1863.7888  | 1863.9189   | 0.1301  | 70    | 96         | 113               | ALPEDTMWSMDGGGPD GK |       |                         |      | Mascot      |

|    |                                       |           |         |     |            |     |                               |      |    |    |   |    |   |                                             |        |
|----|---------------------------------------|-----------|---------|-----|------------|-----|-------------------------------|------|----|----|---|----|---|---------------------------------------------|--------|
|    | 2117.0583                             | 2117.115  | 0.0567  | 27  | 141        | 157 | HWQSLTEEILTEMEVKK             |      |    |    |   |    |   | Oxidation (M)[13]                           | Mascot |
|    | 2117.0583                             | 2117.115  | 0.0567  | 27  | 141        | 157 | HWQSLTEEILTEMEVKK             |      |    |    |   |    |   | Oxidation (M)[13]                           | Mascot |
|    | 2138.9116                             | 2139.0923 | 0.1807  | 84  | 94         | 113 | SRALPEDTMWSDGGG<br>PDGK       |      |    |    |   |    |   | Oxidation (M)[9,12]                         | Mascot |
|    | 2230.1787                             | 2230.0432 | -0.1355 | -61 | 174        | 193 | VNPVYAKICEVLPISEG<br>DK       |      |    |    |   |    |   | Carbamidomethyl (C)[9]                      | Mascot |
|    | 2260.1538                             | 2260.0181 | -0.1357 | -60 | 453        | 472 | EVLAMSFLFLRIITGCMD<br>GK      |      |    |    |   |    |   | Oxidation (M)[5]                            | Mascot |
|    | 2276.1487                             | 2276.0137 | -0.135  | -59 | 453        | 472 | EVLAMSFLFLRIITGCMD<br>GK      |      |    |    |   |    |   | Oxidation (M)[5,17]                         | Mascot |
|    | 2774.3821                             | 2774.303  | -0.0791 | -29 | 369        | 393 | HPKPIMCVKMSETLVISS<br>CSGGQIR |      |    |    |   |    |   | Carbamidomethyl (C)[7], Oxidation (M)[6]    | Mascot |
|    | 2790.377                              | 2790.3132 | -0.0638 | -23 | 369        | 393 | HPKPIMCVKMSETLVISS<br>CSGGQIR |      |    |    |   |    |   | Carbamidomethyl (C)[7], Oxidation (M)[6,10] | Mascot |
| 26 | protein tyrosine kinase [Danio rerio] |           |         |     | gi 3093296 |     | 81950.7                       | 6.66 | 11 | 46 | 0 | 20 | 0 |                                             |        |

#### Peptide Information

|  | Calc. Mass | Obsrv. Mass | ± da    | ± ppm | Start Seq. | End Seq. | Sequence                   | Ion Score | C. I. | % | Modification                              | Rank | Result Type |
|--|------------|-------------|---------|-------|------------|----------|----------------------------|-----------|-------|---|-------------------------------------------|------|-------------|
|  | 807.3301   | 807.3759    | 0.0458  | 57    | 307        | 312      | EECVDR                     |           |       |   | Carbamidomethyl (C)[3]                    |      | Mascot      |
|  | 1155.623   | 1155.5026   | -0.1204 | -104  | 313        | 322      | IPWIAPECVK                 |           |       |   |                                           |      | Mascot      |
|  | 1282.5844  | 1282.6121   | 0.0277  | 22    | 495        | 505      | YKGICNEEGGR                |           |       |   | Carbamidomethyl (C)[5]                    |      | Mascot      |
|  | 1410.7522  | 1410.6642   | -0.088  | -62   | 646        | 658      | LIGPTHGQMTVTR              |           |       |   |                                           |      | Mascot      |
|  | 1410.7522  | 1410.6642   | -0.088  | -62   | 646        | 658      | LIGPTHGQMTVTR              |           |       |   |                                           |      | Mascot      |
|  | 1426.7471  | 1426.6582   | -0.0889 | -62   | 646        | 658      | LIGPTHGQMTVTR              |           |       |   | Oxidation (M)[9]                          |      | Mascot      |
|  | 1426.7471  | 1426.6582   | -0.0889 | -62   | 646        | 658      | LIGPTHGQMTVTR              |           |       |   | Oxidation (M)[9]                          |      | Mascot      |
|  | 1448.822   | 1448.6653   | -0.1567 | -108  | 75         | 86       | ELLEHLQGQLLR               |           |       |   |                                           |      | Mascot      |
|  | 1465.7897  | 1465.6823   | -0.1074 | -73   | 254        | 266      | QLASALSYLEDKK              |           |       |   |                                           |      | Mascot      |
|  | 1708.7716  | 1708.7563   | -0.0153 | -9    | 380        | 392      | LMTHCMTYDPRQR              | 20        | 0     |   | Carbamidomethyl (C)[5]                    |      | Mascot      |
|  | 1708.7716  | 1708.7563   | -0.0153 | -9    | 380        | 392      | LMTHCMTYDPRQR              |           |       |   | Carbamidomethyl (C)[5]                    |      | Mascot      |
|  | 2179.0383  | 2178.8967   | -0.1416 | -65   | 669        | 685      | IPRPDDCSEQLYNLMRR          |           |       |   | Carbamidomethyl (C)[7], Oxidation (M)[15] |      | Mascot      |
|  | 2230.0776  | 2230.0432   | -0.0344 | -15   | 97         | 115      | CCPPQPREISNLLVMTTD<br>R    |           |       |   | Carbamidomethyl (C)[1]                    |      | Mascot      |
|  | 2246.0725  | 2246.0095   | -0.063  | -28   | 97         | 115      | CCPPQPREISNLLVMTTD<br>R    |           |       |   | Carbamidomethyl (C)[1], Oxidation (M)[15] |      | Mascot      |
|  | 2284.1528  | 2284.1067   | -0.0461 | -20   | 408        | 427      | QNPSIQPVPMLEVDPTVF<br>EK   |           |       |   | Oxidation (M)[10]                         |      | Mascot      |
|  | 2774.2742  | 2774.303    | 0.0288  | 10    | 594        | 615      | DDLSPVFVWYAPECLIHC<br>KFYR |           |       |   | Carbamidomethyl (C)[14]                   |      | Mascot      |

27 RecName: Full=Tyrosine-protein kinase JAK1;  
AltName: Full=Janus kinase 1; Short=JAK-1

#### Peptide Information

|  | Calc. Mass | Obsrv. Mass | ± da | ± ppm | Start Seq. | End Seq. | Sequence | Ion Score | C. I. | % | Modification | Rank | Result Type |
|--|------------|-------------|------|-------|------------|----------|----------|-----------|-------|---|--------------|------|-------------|
|--|------------|-------------|------|-------|------------|----------|----------|-----------|-------|---|--------------|------|-------------|

|           |                                            |         |      |      |             |                            |          |      |    |    |   |    |   |  |  |                                           |        |
|-----------|--------------------------------------------|---------|------|------|-------------|----------------------------|----------|------|----|----|---|----|---|--|--|-------------------------------------------|--------|
| 807.3301  | 807.3759                                   | 0.0458  | 57   | 749  | 754         | EECVDR                     |          |      |    |    |   |    |   |  |  | Carbamidomethyl (C)[3]                    | Mascot |
| 961.5101  | 961.5016                                   | -0.0085 | -9   | 218  | 225         | FIPDSLR                    |          |      |    |    |   |    |   |  |  |                                           | Mascot |
| 1155.623  | 1155.5026                                  | -0.1204 | -104 | 755  | 764         | IPWIAPECVK                 |          |      |    |    |   |    |   |  |  |                                           | Mascot |
| 1282.5844 | 1282.6121                                  | 0.0277  | 22   | 937  | 947         | YKGICNEEGGR                |          |      |    |    |   |    |   |  |  | Carbamidomethyl (C)[5]                    | Mascot |
| 1410.7522 | 1410.6642                                  | -0.088  | -62  | 1088 | 1100        | LIGPTHGQMTVTR              |          |      |    |    |   |    |   |  |  |                                           | Mascot |
| 1410.7522 | 1410.6642                                  | -0.088  | -62  | 1088 | 1100        | LIGPTHGQMTVTR              |          |      |    |    |   |    |   |  |  |                                           | Mascot |
| 1426.7471 | 1426.6582                                  | -0.0889 | -62  | 1088 | 1100        | LIGPTHGQMTVTR              |          |      |    |    |   |    |   |  |  | Oxidation (M)[9]                          | Mascot |
| 1426.7471 | 1426.6582                                  | -0.0889 | -62  | 1088 | 1100        | LIGPTHGQMTVTR              |          |      |    |    |   |    |   |  |  | Oxidation (M)[9]                          | Mascot |
| 1448.822  | 1448.6653                                  | -0.1567 | -108 | 517  | 528         | ELLEHLQGQLLR               |          |      |    |    |   |    |   |  |  |                                           | Mascot |
| 1465.7897 | 1465.6823                                  | -0.1074 | -73  | 696  | 708         | QLASALSYLEDKK              |          |      |    |    |   |    |   |  |  |                                           | Mascot |
| 1708.7716 | 1708.7563                                  | -0.0153 | -9   | 822  | 834         | LMTHCMTYDPRQR              | 20       | 0    |    |    |   |    |   |  |  | Carbamidomethyl (C)[5]                    | Mascot |
| 1708.7716 | 1708.7563                                  | -0.0153 | -9   | 822  | 834         | LMTHCMTYDPRQR              |          |      |    |    |   |    |   |  |  | Carbamidomethyl (C)[5]                    | Mascot |
| 2179.0383 | 2178.8967                                  | -0.1416 | -65  | 1111 | 1127        | LPRPDDCSEQLYNLMRR          |          |      |    |    |   |    |   |  |  | Carbamidomethyl (C)[7], Oxidation (M)[15] | Mascot |
| 2230.0776 | 2230.0432                                  | -0.0344 | -15  | 539  | 557         | CCPPQPREISNLLVMTTD<br>R    |          |      |    |    |   |    |   |  |  | Carbamidomethyl (C)[1]                    | Mascot |
| 2245.1289 | 2245.2058                                  | 0.0769  | 34   | 356  | 374         | DSGWTLSDFHEITHIVIK         |          |      |    |    |   |    |   |  |  |                                           | Mascot |
| 2246.0725 | 2246.0095                                  | -0.063  | -28  | 539  | 557         | CCPPQPREISNLLVMTTD<br>R    |          |      |    |    |   |    |   |  |  | Carbamidomethyl (C)[1], Oxidation (M)[15] | Mascot |
| 2284.1528 | 2284.1067                                  | -0.0461 | -20  | 850  | 869         | QNPSIQPVPMLEVDPTVF<br>EK   |          |      |    |    |   |    |   |  |  | Oxidation (M)[10]                         | Mascot |
| 2774.2742 | 2774.303                                   | 0.0288  | 10   | 1036 | 1057        | DDLDSVPFWYAPECLIHC<br>KFYR |          |      |    |    |   |    |   |  |  | Carbamidomethyl (C)[14]                   | Mascot |
| 28        | tyrosine-protein kinase JAK1 [Danio rerio] |         |      |      | gi 56790256 |                            | 132430.2 | 7.64 | 13 | 40 | 0 | 20 | 0 |  |  |                                           |        |

Peptide Information

| Calc. Mass | Obsrv. Mass | ± da    | ± ppm | Start Seq. | End Seq. | Sequence          | Ion Score | C. I. % | Modification                              | Rank | Result Type |
|------------|-------------|---------|-------|------------|----------|-------------------|-----------|---------|-------------------------------------------|------|-------------|
| 807.3301   | 807.3759    | 0.0458  | 57    | 749        | 754      | EECVDR            |           |         | Carbamidomethyl (C)[3]                    |      | Mascot      |
| 961.5101   | 961.5016    | -0.0085 | -9    | 218        | 225      | FIPDSLR           |           |         |                                           |      | Mascot      |
| 1155.623   | 1155.5026   | -0.1204 | -104  | 755        | 764      | IPWIAPECVK        |           |         |                                           |      | Mascot      |
| 1282.5844  | 1282.6121   | 0.0277  | 22    | 937        | 947      | YKGICNEEGGR       |           |         | Carbamidomethyl (C)[5]                    |      | Mascot      |
| 1410.7522  | 1410.6642   | -0.088  | -62   | 1088       | 1100     | LIGPTHGQMTVTR     |           |         |                                           |      | Mascot      |
| 1410.7522  | 1410.6642   | -0.088  | -62   | 1088       | 1100     | LIGPTHGQMTVTR     |           |         |                                           |      | Mascot      |
| 1426.7471  | 1426.6582   | -0.0889 | -62   | 1088       | 1100     | LIGPTHGQMTVTR     |           |         | Oxidation (M)[9]                          |      | Mascot      |
| 1426.7471  | 1426.6582   | -0.0889 | -62   | 1088       | 1100     | LIGPTHGQMTVTR     |           |         | Oxidation (M)[9]                          |      | Mascot      |
| 1448.822   | 1448.6653   | -0.1567 | -108  | 517        | 528      | ELLEHLQGQLLR      |           |         |                                           |      | Mascot      |
| 1465.7897  | 1465.6823   | -0.1074 | -73   | 696        | 708      | QLASALSYLEDKK     |           |         |                                           |      | Mascot      |
| 1708.7716  | 1708.7563   | -0.0153 | -9    | 822        | 834      | LMTHCMTYDPRQR     | 20        | 0       | Carbamidomethyl (C)[5]                    |      | Mascot      |
| 1708.7716  | 1708.7563   | -0.0153 | -9    | 822        | 834      | LMTHCMTYDPRQR     |           |         | Carbamidomethyl (C)[5]                    |      | Mascot      |
| 2179.0383  | 2178.8967   | -0.1416 | -65   | 1111       | 1127     | LPRPDDCSEQLYNLMRR |           |         | Carbamidomethyl (C)[7], Oxidation (M)[15] |      | Mascot      |

|    |                                              |           |         |     |              |      |                         |      |   |    |   |    |                                           |        |
|----|----------------------------------------------|-----------|---------|-----|--------------|------|-------------------------|------|---|----|---|----|-------------------------------------------|--------|
|    | 2230.0776                                    | 2230.0432 | -0.0344 | -15 | 539          | 557  | CCPPQPREISNLLVMTTDR     |      |   |    |   |    | Carbamidomethyl (C)[1]                    | Mascot |
|    | 2245.1289                                    | 2245.2058 | 0.0769  | 34  | 356          | 374  | DSGWTLFSDFEITHIVIK      |      |   |    |   |    |                                           | Mascot |
|    | 2246.0725                                    | 2246.0095 | -0.063  | -28 | 539          | 557  | CCPPQPREISNLLVMTTDR     |      |   |    |   |    | Carbamidomethyl (C)[1], Oxidation (M)[15] | Mascot |
|    | 2284.1528                                    | 2284.1067 | -0.0461 | -20 | 850          | 869  | QNPSIQPVPMLEVDPTVF EK   |      |   |    |   |    | Oxidation (M)[10]                         | Mascot |
|    | 2774.2742                                    | 2774.303  | 0.0288  | 10  | 1036         | 1057 | DDLDSPVFWYAPECLIHK KFYR |      |   |    |   |    | Carbamidomethyl (C)[14]                   | Mascot |
| 29 | hypothetical protein LOC503885 [Danio rerio] |           |         |     | gi 116235436 |      | 43315.1                 | 7.62 | 3 | 39 | 0 | 32 | 81.608                                    |        |

#### Peptide Information

| Calc. Mass | Obsrv. Mass | ± da    | ± ppm | Start Seq. | End Seq. | Sequence            | Ion Score | C. I.  | % Modification | Rank | Result Type |
|------------|-------------|---------|-------|------------|----------|---------------------|-----------|--------|----------------|------|-------------|
| 1186.6538  | 1186.6079   | -0.0459 | -39   | 165        | 174      | QDADITVRLR          | 32        | 81.608 |                |      | Mascot      |
| 1186.6538  | 1186.6079   | -0.0459 | -39   | 165        | 174      | QDADITVRLR          |           |        |                |      | Mascot      |
| 1956.9558  | 1956.9873   | 0.0315  | 16    | 340        | 356      | TQEFILPICTACDYIAR   |           |        |                |      | Mascot      |
| 1956.9558  | 1956.9873   | 0.0315  | 16    | 340        | 356      | TQEFILPICTACDYIAR   |           |        |                |      | Mascot      |
| 2260.063   | 2260.0181   | -0.0449 | -20   | 229        | 247      | AYAKFLDYNEYPTLASC K |           |        |                |      | Mascot      |

|    |                                                                                        |  |  |  |              |  |         |      |    |    |   |  |  |
|----|----------------------------------------------------------------------------------------|--|--|--|--------------|--|---------|------|----|----|---|--|--|
| 30 | PREDICTED: g2/M phase-specific E3 ubiquitin-protein ligase-like, partial [Danio rerio] |  |  |  | gi 326680912 |  | 55309.6 | 5.35 | 10 | 39 | 0 |  |  |
|----|----------------------------------------------------------------------------------------|--|--|--|--------------|--|---------|------|----|----|---|--|--|

#### Peptide Information

| Calc. Mass | Obsrv. Mass | ± da    | ± ppm | Start Seq. | End Seq. | Sequence                  | Ion Score | C. I. | % Modification                            | Rank | Result Type |
|------------|-------------|---------|-------|------------|----------|---------------------------|-----------|-------|-------------------------------------------|------|-------------|
| 807.4511   | 807.3759    | -0.0752 | -93   | 465        | 470      | ILGYWR                    |           |       |                                           |      | Mascot      |
| 1045.4845  | 1045.5327   | 0.0482  | 46    | 480        | 488      | GLNIIFYCC                 |           |       |                                           |      | Mascot      |
| 1268.6667  | 1268.5938   | -0.0729 | -57   | 37         | 47       | GVKIYIGSMER               |           |       | Oxidation (M)[9]                          |      | Mascot      |
| 1325.6843  | 1325.6156   | -0.0687 | -52   | 259        | 269      | EFLTLLMDCLK               |           |       |                                           |      | Mascot      |
| 1448.6395  | 1448.6653   | 0.0258  | 18    | 1          | 12       | KTETSSVDCFMK              |           |       | Carbamidomethyl (C)[9], Oxidation (M)[11] |      | Mascot      |
| 1481.7855  | 1481.6874   | -0.0981 | -66   | 258        | 269      | REFLTLLMDCLK              |           |       |                                           |      | Mascot      |
| 1566.6927  | 1566.7596   | 0.0669  | 43    | 2          | 14       | TETSSVDCFMKFR             |           |       | Oxidation (M)[10]                         |      | Mascot      |
| 2233.1035  | 2233.0234   | -0.0801 | -36   | 282        | 300      | FLTFNNAAVREDEYFLAG R      |           |       |                                           |      | Mascot      |
| 2283.2344  | 2283.082    | -0.1524 | -67   | 59         | 78       | RLPLEVETNWTSEQVLIA GK     |           |       |                                           |      | Mascot      |
| 2774.2866  | 2774.303    | 0.0164  | 6     | 81         | 104      | VKDFNQDMEDGPYVLLY PDGSEVK |           |       | Oxidation (M)[8]                          |      | Mascot      |

|    |                                                        |  |  |  |              |  |         |      |   |    |   |    |        |  |
|----|--------------------------------------------------------|--|--|--|--------------|--|---------|------|---|----|---|----|--------|--|
| 31 | coiled-coil domain-containing protein 46 [Danio rerio] |  |  |  | gi 149773535 |  | 79141.3 | 6.63 | 5 | 38 | 0 | 29 | 68.622 |  |
|----|--------------------------------------------------------|--|--|--|--------------|--|---------|------|---|----|---|----|--------|--|

#### Peptide Information

| Calc. Mass | Obsrv. Mass | ± da | ± ppm | Start Seq. | End Seq. | Sequence | Ion Score | C. I. | % Modification | Rank | Result Type |
|------------|-------------|------|-------|------------|----------|----------|-----------|-------|----------------|------|-------------|
|------------|-------------|------|-------|------------|----------|----------|-----------|-------|----------------|------|-------------|



|           |           |         |     |     |     |              |    |        |  |        |
|-----------|-----------|---------|-----|-----|-----|--------------|----|--------|--|--------|
| 1045.5524 | 1045.5327 | -0.0197 | -19 | 269 | 277 | KNGEIDELK    |    |        |  | Mascot |
| 1186.6613 | 1186.6079 | -0.0534 | -45 | 605 | 614 | QQLMELGVLR   | 29 | 68.622 |  | Mascot |
| 1186.6613 | 1186.6079 | -0.0534 | -45 | 605 | 614 | QQLMELGVLR   |    |        |  | Mascot |
| 1282.675  | 1282.6121 | -0.0629 | -49 | 532 | 542 | LQTLQTHNAEK  |    |        |  | Mascot |
| 1314.7562 | 1314.7013 | -0.0549 | -42 | 604 | 614 | KQQLMELGVLR  |    |        |  | Mascot |
| 1410.7699 | 1410.6642 | -0.1057 | -75 | 531 | 542 | KLQTLQTHNAEK |    |        |  | Mascot |
| 1410.7699 | 1410.6642 | -0.1057 | -75 | 531 | 542 | KLQTLQTHNAEK |    |        |  | Mascot |

### Peptide Information

|    |                                                   |           |         |     |              |      |                           |     |   |    |   |    |                                               |  |  |  |  |  |        |
|----|---------------------------------------------------|-----------|---------|-----|--------------|------|---------------------------|-----|---|----|---|----|-----------------------------------------------|--|--|--|--|--|--------|
|    | 1481.6724                                         | 1481.6874 | 0.015   | 10  | 2515         | 2527 | MDGASLDETRMQK             |     |   |    |   |    |                                               |  |  |  |  |  | Mascot |
|    | 1566.8638                                         | 1566.7596 | -0.1042 | -67 | 509          | 521  | FYLADQLVQRVSK             |     |   |    |   |    |                                               |  |  |  |  |  | Mascot |
|    | 1582.6472                                         | 1582.7546 | 0.1074  | 68  | 5683         | 5697 | AGCDLMESAGEEAR            |     |   |    |   |    | Carbamidomethyl (C)[3]                        |  |  |  |  |  | Mascot |
|    | 1730.8894                                         | 1730.7361 | -0.1533 | -89 | 4717         | 4730 | EIECLGQRWDALLK            |     |   |    |   |    | Carbamidomethyl (C)[4]                        |  |  |  |  |  | Mascot |
|    | 1847.9895                                         | 1847.9242 | -0.0653 | -35 | 1443         | 1458 | EQIGEALRTTQLMLTK          |     |   |    |   |    | Oxidation (M)[13]                             |  |  |  |  |  | Mascot |
|    | 1955.9678                                         | 1955.996  | 0.0282  | 14  | 5107         | 5123 | TTAQLQAQKSFSMDIMR         |     |   |    |   |    |                                               |  |  |  |  |  | Mascot |
|    | 1956.9636                                         | 1956.9873 | 0.0237  | 12  | 3838         | 3853 | WKHMLAQIDAGWEEVK          |     |   |    |   |    | Oxidation (M)[4]                              |  |  |  |  |  | Mascot |
|    | 1956.9636                                         | 1956.9873 | 0.0237  | 12  | 3838         | 3853 | WKHMLAQIDAGWEEVK          |     |   |    |   |    | Oxidation (M)[4]                              |  |  |  |  |  | Mascot |
|    | 2117.0161                                         | 2117.115  | 0.0989  | 47  | 326          | 341  | WVEYQNMVNYLSQWIK          |     |   |    |   |    | Oxidation (M)[7]                              |  |  |  |  |  | Mascot |
|    | 2117.0178                                         | 2117.115  | 0.0972  | 46  | 863          | 880  | SSSLHRLLEDLIQESMDEK       |     |   |    |   |    |                                               |  |  |  |  |  | Mascot |
|    | 2138.9441                                         | 2139.0923 | 0.1482  | 69  | 5683         | 5702 | AGCDLMESAGEEARGLQNK       |     |   |    |   |    | Carbamidomethyl (C)[3], Oxidation (M)[6]      |  |  |  |  |  | Mascot |
|    | 2211.1301                                         | 2211.0413 | -0.0888 | -40 | 6571         | 6590 | STVMVRVGGGWALDEFLVK       |     |   |    |   |    | Oxidation (M)[4]                              |  |  |  |  |  | Mascot |
|    | 2225.1548                                         | 2225.0564 | -0.0984 | -44 | 5419         | 5438 | DTQELLKELEPGVDPSVVK       |     |   |    |   |    |                                               |  |  |  |  |  | Mascot |
|    | 2245.1204                                         | 2245.2058 | 0.0854  | 38  | 6225         | 6245 | ATSMGEAILSICHPDSITTIK     |     |   |    |   |    | Carbamidomethyl (C)[12]                       |  |  |  |  |  | Mascot |
|    | 2745.4451                                         | 2745.2874 | -0.1577 | -57 | 1778         | 1802 | ARLTVDEAVQCGLISSSSALLVLER |     |   |    |   |    | Carbamidomethyl (C)[11]                       |  |  |  |  |  | Mascot |
|    | 2761.4229                                         | 2761.2861 | -0.1368 | -50 | 5370         | 5392 | AVQDKLDQMVFLLWTDIQALLEER  |     |   |    |   |    |                                               |  |  |  |  |  | Mascot |
|    | 2774.4604                                         | 2774.303  | -0.1574 | -57 | 1780         | 1804 | LTVDEAVQCGLISSSSALLVLERQK |     |   |    |   |    | Carbamidomethyl (C)[9]                        |  |  |  |  |  | Mascot |
|    | 2775.2158                                         | 2775.2974 | 0.0816  | 29  | 1048         | 1071 | DSESEVFTMADCAQLEKEVLACK   |     |   |    |   |    | Carbamidomethyl (C)[13,23]                    |  |  |  |  |  | Mascot |
|    | 2775.2158                                         | 2775.2974 | 0.0816  | 29  | 1048         | 1071 | DSESEVFTMADCAQLEKEVLACK   |     |   |    |   |    | Carbamidomethyl (C)[13,23]                    |  |  |  |  |  | Mascot |
|    | 2790.4026                                         | 2790.3132 | -0.0894 | -32 | 5396         | 5418 | LLDVMDLAEKFWCDHICALIVTIK  |     |   |    |   |    | Carbamidomethyl (C)[13,16]                    |  |  |  |  |  | Mascot |
|    | 2791.2107                                         | 2791.2983 | 0.0876  | 31  | 1048         | 1071 | DSESEVFTMADCAQLEKEVLACK   |     |   |    |   |    | Carbamidomethyl (C)[13,23], Oxidation (M)[10] |  |  |  |  |  | Mascot |
|    | 2791.2107                                         | 2791.2983 | 0.0876  | 31  | 1048         | 1071 | DSESEVFTMADCAQLEKEVLACK   |     |   |    |   |    | Carbamidomethyl (C)[13,23], Oxidation (M)[10] |  |  |  |  |  | Mascot |
| 33 | Unknown (protein for IMAGE:8129958) [Danio rerio] |           |         |     | gi 112418958 |      | 20963.9                   | 8.4 | 1 | 36 | 0 | 32 | 81.608                                        |  |  |  |  |  |        |

Peptide Information

| Calc. Mass | Obsrv. Mass | ± da    | ± ppm | Start Seq. | End Seq. | Sequence   | Ion Score | C. I.  | % | Modification | Rank | Result | Type   |
|------------|-------------|---------|-------|------------|----------|------------|-----------|--------|---|--------------|------|--------|--------|
| 1186.6538  | 1186.6079   | -0.0459 | -39   | 165        | 174      | QDADITVRLR | 32        | 81.608 |   |              |      |        | Mascot |
| 1186.6538  | 1186.6079   | -0.0459 | -39   | 165        | 174      | QDADITVRLR |           |        |   |              |      |        | Mascot |

34 PREDICTED: zinc finger protein 91 [Danio rerio] gi|326678135 96401.5 9.32 18 35 0

Peptide Information

| Calc. Mass | Obsrv. Mass | ± da | ± ppm | Start Seq. | End Seq. | Sequence | Ion Score | C. I. | % | Modification | Rank | Result | Type   |
|------------|-------------|------|-------|------------|----------|----------|-----------|-------|---|--------------|------|--------|--------|
| 961.4416   | 961.5016    | 0.06 | 62    | 486        | 493      | HVCLMCQK |           |       |   |              |      |        | Mascot |

|    |                                                                  |           |         |      |     |             |                          |      |    |    |   |  |                                                |  |  |  |        |
|----|------------------------------------------------------------------|-----------|---------|------|-----|-------------|--------------------------|------|----|----|---|--|------------------------------------------------|--|--|--|--------|
|    | 1062.5439                                                        | 1062.4702 | -0.0737 | -69  | 64  | 72          | THTGERPHK                |      |    |    |   |  |                                                |  |  |  | Mascot |
|    | 1078.5925                                                        | 1078.4645 | -0.128  | -119 | 252 | 261         | LAVMTSALTR               |      |    |    |   |  | Oxidation (M)[4]                               |  |  |  | Mascot |
|    | 1155.613                                                         | 1155.5026 | -0.1104 | -96  | 144 | 153         | AHQHIHTGVR               |      |    |    |   |  |                                                |  |  |  | Mascot |
|    | 1314.7052                                                        | 1314.7013 | -0.0039 | -3   | 783 | 793         | ETFIYSASLKR              |      |    |    |   |  |                                                |  |  |  | Mascot |
|    | 1730.7836                                                        | 1730.7361 | -0.0475 | -27  | 73  | 87          | CDQCGKTFSSISSEL          |      |    |    |   |  | Carbamidomethyl (C)[1]                         |  |  |  | Mascot |
|    | 1885.8795                                                        | 1885.9022 | 0.0227  | 12   | 423 | 437         | IHTGEKPFKCSHCER          |      |    |    |   |  | Carbamidomethyl (C)[10,13]                     |  |  |  | Mascot |
|    | 2116.9426                                                        | 2117.115  | 0.1724  | 81   | 6   | 22          | DYPTILEDRFNCTQCGK        |      |    |    |   |  | Carbamidomethyl (C)[12,15]                     |  |  |  | Mascot |
|    | 2116.9763                                                        | 2117.115  | 0.1387  | 66   | 794 | 811         | HQRTHTGGKPYTCTQCGK       |      |    |    |   |  | Carbamidomethyl (C)[13,16]                     |  |  |  | Mascot |
|    | 2211.1067                                                        | 2211.0413 | -0.0654 | -30  | 135 | 153         | GFSHQSHFKAHQHIHTGVR      |      |    |    |   |  |                                                |  |  |  | Mascot |
|    | 2224.8628                                                        | 2225.0564 | 0.1936  | 87   | 598 | 615         | HMMIHNEENPHECDQCGK       |      |    |    |   |  | Carbamidomethyl (C)[13], Oxidation (M)[2]      |  |  |  | Mascot |
|    | 2230.0239                                                        | 2230.0432 | 0.0193  | 9    | 89  | 106         | HLRVHTNERPYSCSECK        |      |    |    |   |  | Carbamidomethyl (C)[13,16]                     |  |  |  | Mascot |
|    | 2245.064                                                         | 2245.2058 | 0.1418  | 63   | 116 | 134         | QHERIHTGEKPFVCFECK       |      |    |    |   |  |                                                |  |  |  | Mascot |
|    | 2245.99                                                          | 2246.0095 | 0.0195  | 9    | 391 | 409         | THEMTHTGERPFVCAQCGK      |      |    |    |   |  | Carbamidomethyl (C)[14,17]                     |  |  |  | Mascot |
|    | 2276.0232                                                        | 2276.0137 | -0.0095 | -4   | 32  | 50          | FHMMIHTGEKPFKCSHC        |      |    |    |   |  |                                                |  |  |  | Mascot |
|    | 2281.884                                                         | 2282.0215 | 0.1375  | 60   | 598 | 615         | HMMIHNEENPHECDQCGK       |      |    |    |   |  | Carbamidomethyl (C)[13,16], Oxidation (M)[2]   |  |  |  | Mascot |
|    | 2283.2061                                                        | 2283.082  | -0.1241 | -54  | 232 | 251         | IHTMENTNVIRALCGAILTR     |      |    |    |   |  | Carbamidomethyl (C)[14]                        |  |  |  | Mascot |
|    | 2297.8792                                                        | 2298.0588 | 0.1796  | 78   | 598 | 615         | HMMIHNEENPHECDQCGK       |      |    |    |   |  | Carbamidomethyl (C)[13,16], Oxidation (M)[2,3] |  |  |  | Mascot |
|    | 2775.3123                                                        | 2775.2974 | -0.0149 | -5   | 565 | 587         | NNLTIHMRIHTGEKPYTC       |      |    |    |   |  | Carbamidomethyl (C)[18,21], Oxidation (M)[7]   |  |  |  | Mascot |
|    | 2775.3123                                                        | 2775.2974 | -0.0149 | -5   | 565 | 587         | NNLTIHMRIHTGEKPYTC       |      |    |    |   |  | Carbamidomethyl (C)[18,21], Oxidation (M)[7]   |  |  |  | Mascot |
|    | 2791.2498                                                        | 2791.2983 | 0.0485  | 17   | 391 | 414         | THEMTHTGERPFVCAQCGKSYSHK |      |    |    |   |  | Carbamidomethyl (C)[14]                        |  |  |  | Mascot |
|    | 2791.2498                                                        | 2791.2983 | 0.0485  | 17   | 391 | 414         | THEMTHTGERPFVCAQCGKSYSHK |      |    |    |   |  | Carbamidomethyl (C)[14]                        |  |  |  | Mascot |
| 35 | myeloid/lymphoid or mixed-lineage leukemia protein [Danio rerio] |           |         |      |     | gi 86129850 | 127802.9                 | 8.91 | 18 | 34 | 0 |  |                                                |  |  |  |        |

Peptide Information

| Calc. Mass | Obsrv. Mass | ± da    | ± ppm | Start Seq. | End Seq. | Sequence   | Ion Score | C. I. % | Modification             | Rank | Result Type |
|------------|-------------|---------|-------|------------|----------|------------|-----------|---------|--------------------------|------|-------------|
| 807.4392   | 807.3759    | -0.0633 | -78   | 459        | 465      | KANSMLK    |           |         | Oxidation (M)[5]         |      | Mascot      |
| 961.4594   | 961.5016    | 0.0422  | 44    | 276        | 284      | GNLCPLCNK  |           |         |                          |      | Mascot      |
| 1077.5048  | 1077.5311   | 0.0263  | 24    | 846        | 854      | HPSFPPCHR  |           |         |                          |      | Mascot      |
| 1093.5646  | 1093.5104   | -0.0542 | -50   | 234        | 242      | VWVCTKCVR  |           |         |                          |      | Mascot      |
| 1169.5771  | 1169.5792   | 0.0021  | 2     | 755        | 764      | LFPVGYQCSR |           |         |                          |      | Mascot      |
| 1169.5771  | 1169.5792   | 0.0021  | 2     | 755        | 764      | LFPVGYQCSR |           |         |                          |      | Mascot      |
| 1221.5714  | 1221.6132   | 0.0418  | 34    | 204        | 212      | QLLECDKCR  |           |         | Carbamidomethyl (C)[5,8] |      | Mascot      |

|           |           |         |     |      |      |                           |   |   |  |                             |  |        |
|-----------|-----------|---------|-----|------|------|---------------------------|---|---|--|-----------------------------|--|--------|
| 1298.6448 | 1298.6073 | -0.0375 | -29 | 894  | 905  | HSTSSISAQQPR              |   |   |  |                             |  | Mascot |
| 1426.726  | 1426.6582 | -0.0678 | -48 | 683  | 693  | VYCQHHKDLVK               |   |   |  | Carbamidomethyl (C)[3]      |  | Mascot |
| 1426.726  | 1426.6582 | -0.0678 | -48 | 683  | 693  | VYCQHHKDLVK               |   |   |  | Carbamidomethyl (C)[3]      |  | Mascot |
| 1582.8986 | 1582.7546 | -0.144  | -91 | 782  | 795  | ILVCRPPLSETLNK            |   |   |  |                             |  | Mascot |
| 1708.7992 | 1708.7563 | -0.0429 | -25 | 1056 | 1071 | ANPNKEGNMTSMAALK          |   |   |  | Oxidation (M)[9,12]         |  | Mascot |
| 1708.7992 | 1708.7563 | -0.0429 | -25 | 1056 | 1071 | ANPNKEGNMTSMAALK          |   |   |  | Oxidation (M)[9,12]         |  | Mascot |
| 1863.9559 | 1863.9189 | -0.037  | -20 | 443  | 459  | IIQTAFNSDGGQLESRK         |   |   |  |                             |  | Mascot |
| 1956.0518 | 1955.996  | -0.0558 | -29 | 780  | 795  | CRILVCRPPLSETLNK          |   |   |  | Carbamidomethyl (C)[1,6]    |  | Mascot |
| 1957.0978 | 1956.9873 | -0.1105 | -56 | 356  | 372  | QVLTALFNSRTSTHLLR         |   |   |  |                             |  | Mascot |
| 1957.0978 | 1956.9873 | -0.1105 | -56 | 356  | 372  | QVLTALFNSRTSTHLLR         |   |   |  |                             |  | Mascot |
| 2116.8845 | 2117.115  | 0.2305  | 109 | 583  | 600  | QCALCLNYGDEKTNDG<br>R     | 0 | 0 |  | Carbamidomethyl (C)[2,5]    |  | Mascot |
| 2116.8845 | 2117.115  | 0.2305  | 109 | 583  | 600  | QCALCLNYGDEKTNDG<br>R     |   |   |  | Carbamidomethyl (C)[2,5]    |  | Mascot |
| 2233.093  | 2233.0234 | -0.0696 | -31 | 213  | 231  | NSYHPECLGPNHPTRPT<br>KK   |   |   |  | Carbamidomethyl (C)[7]      |  | Mascot |
| 2245.0627 | 2245.2058 | 0.1431  | 64  | 1033 | 1053 | DNDLPAGATFMSSHPLA<br>MLPK |   |   |  | Oxidation (M)[11,18]        |  | Mascot |
| 2245.8794 | 2246.0095 | 0.1301  | 58  | 276  | 294  | GNLCPLCNKGYDDDCD<br>SK    |   |   |  | Carbamidomethyl (C)[4,7,16] |  | Mascot |
| 2275.9761 | 2276.0137 | 0.0376  | 17  | 254  | 272  | AWDAQWSHDFSLCHDC<br>AKR   |   |   |  |                             |  | Mascot |

36 Zgc:152732 protein [Danio rerio] gi|53734123 33465.3 9.09 7 34 0

Peptide Information

| Calc. Mass | Obsrv. Mass | ± da    | ± ppm | Start Seq. | End Seq. | Sequence                    | Ion Score | C. I. | % Modification         | Rank | Result Type |
|------------|-------------|---------|-------|------------|----------|-----------------------------|-----------|-------|------------------------|------|-------------|
| 1062.5287  | 1062.4702   | -0.0585 | -55   | 233        | 241      | TIRNDN SSR                  |           |       |                        |      | Mascot      |
| 1465.7784  | 1465.6823   | -0.0961 | -66   | 256        | 268      | LASADIETYLLEK               |           |       |                        |      | Mascot      |
| 1582.7457  | 1582.7546   | 0.0089  | 6     | 36         | 48       | ECFVPDAIEEFVK               |           |       | Carbamidomethyl (C)[2] |      | Mascot      |
| 1708.9116  | 1708.7563   | -0.1553 | -91   | 256        | 270      | LASADIETYLLEKSR             |           |       |                        |      | Mascot      |
| 1708.9116  | 1708.7563   | -0.1553 | -91   | 256        | 270      | LASADIETYLLEKSR             |           |       |                        |      | Mascot      |
| 2139.0791  | 2139.0923   | 0.0132  | 6     | 36         | 54       | ECFVPDAIEEFVKATVVS<br>R     |           |       |                        |      | Mascot      |
| 2727.2832  | 2727.2981   | 0.0149  | 5     | 147        | 169      | RTEAPPHIYSISDNAYQY<br>MLADR |           |       | Oxidation (M)[19]      |      | Mascot      |
| 2775.3308  | 2775.2974   | -0.0334 | -12   | 107        | 129      | ERYAAWMIYTYSGLFCVT<br>VNPYK |           |       |                        |      | Mascot      |
| 2775.3308  | 2775.2974   | -0.0334 | -12   | 107        | 129      | ERYAAWMIYTYSGLFCVT<br>VNPYK |           |       |                        |      | Mascot      |
| 2791.3257  | 2791.2983   | -0.0274 | -10   | 107        | 129      | ERYAAWMIYTYSGLFCVT<br>VNPYK |           |       | Oxidation (M)[7]       |      | Mascot      |
| 2791.3257  | 2791.2983   | -0.0274 | -10   | 107        | 129      | ERYAAWMIYTYSGLFCVT<br>VNPYK |           |       | Oxidation (M)[7]       |      | Mascot      |

37 PREDICTED: legumain-like [Danio rerio] gi|125832132 33877.4 5.2 8 33 0

| Peptide Information |                                     |             |         |       |             |          |                       |           |       |                |                  |
|---------------------|-------------------------------------|-------------|---------|-------|-------------|----------|-----------------------|-----------|-------|----------------|------------------|
|                     | Calc. Mass                          | Obsrv. Mass | ± da    | ± ppm | Start Seq.  | End Seq. | Sequence              | Ion Score | C. I. | % Modification | Rank Result Type |
| 38                  | 961.4836                            | 961.5016    | 0.018   | 19    | 2           | 9        | EVVKEDDK              |           |       |                | Mascot           |
|                     | 1093.5524                           | 1093.5104   | -0.042  | -38   | 112         | 121      | SVPLDYTGNK            |           |       |                | Mascot           |
|                     | 1181.4449                           | 1181.5582   | 0.1133  | 96    | 271         | 281      | DDSCPCEIGDK           |           |       |                | Mascot           |
|                     | 1332.7198                           | 1332.6376   | -0.0822 | -62   | 258         | 268      | ATFSKLFDYIK           |           |       |                | Mascot           |
|                     | 1414.8668                           | 1414.7742   | -0.0926 | -65   | 282         | 293      | EIPKLLISNFLK          |           |       |                | Mascot           |
|                     | 1448.6886                           | 1448.6653   | -0.0233 | -16   | 10          | 21       | VVRCCSQPNTWR          |           |       |                | Mascot           |
|                     | 1725.855                            | 1725.8      | -0.055  | -32   | 286         | 301      | LLISNFLKLEGCDCA       |           |       |                | Mascot           |
|                     | 2282.0618                           | 2282.0215   | -0.0403 | -18   | 206         | 226      | GLYTNIHVYGVASCDSANQNR |           |       |                | Mascot           |
| 38                  | asparagine synthetase [Danio rerio] |             |         |       | gi 46195775 | 63956.4  | 6.11                  | 10        | 33    | 0              |                  |

| Peptide Information |                                                        |         |       |            |              |                          |           |       |                         |      |             |   |
|---------------------|--------------------------------------------------------|---------|-------|------------|--------------|--------------------------|-----------|-------|-------------------------|------|-------------|---|
| Calc. Mass          | Obsrv. Mass                                            | ± da    | ± ppm | Start Seq. | End Seq.     | Sequence                 | Ion Score | C. I. | % Modification          | Rank | Result Type |   |
| 1078.4808           | 1078.4645                                              | -0.0163 | -15   | 203        | 211          | FHCCTDKPK                |           |       |                         |      | Mascot      |   |
| 1153.5735           | 1153.5214                                              | -0.0521 | -45   | 467        | 477          | EAFSDGLTSVK              |           |       |                         |      | Mascot      |   |
| 1284.6543           | 1284.592                                               | -0.0623 | -48   | 379        | 391          | APSPKAGAEDSVR            |           |       |                         |      | Mascot      |   |
| 1410.7448           | 1410.6642                                              | -0.0806 | -57   | 404        | 416          | ADRTTAAHGLELR            |           |       |                         |      | Mascot      |   |
| 1410.7448           | 1410.6642                                              | -0.0806 | -57   | 404        | 416          | ADRTTAAHGLELR            |           |       |                         |      | Mascot      |   |
| 1847.8315           | 1847.9242                                              | 0.0927  | 50    | 203        | 217          | FHCCTDKPKHADFNK          |           |       | Carbamidomethyl (C)[3]  |      | Mascot      |   |
| 2230.0789           | 2230.0432                                              | -0.0357 | -16   | 67         | 83           | FPYLWLCYNGEIYNHIK        |           |       | Carbamidomethyl (C)[7]  |      | Mascot      |   |
| 2283.136            | 2283.082                                               | -0.054  | -24   | 148        | 168          | MLTDDGFLAVCSEGKLTQIK     |           |       | Carbamidomethyl (C)[11] |      | Mascot      |   |
| 2284.1829           | 2284.1067                                              | -0.0762 | -33   | 113        | 132          | MCSLLDGVFAFILLDTANRK     |           |       | Carbamidomethyl (C)[2]  |      | Mascot      |   |
| 2298.3464           | 2298.0588                                              | -0.2876 | -125  | 252        | 274          | IGCLLSGGLDSSLVAALLVKLAK  |           |       | Carbamidomethyl (C)[3]  |      | Mascot      |   |
| 2790.3589           | 2790.3132                                              | -0.0457 | -16   | 138        | 162          | DTYGVRLFRMLTDDGFLAVCSEGK |           |       |                         |      | Mascot      |   |
| 39                  | PREDICTED: zinc finger protein 658B-like [Danio rerio] |         |       |            | gi 189517772 | 35183.6                  | 9.63      | 9     | 33                      | 0    | 10          | 0 |

| Peptide Information |             |         |       |            |          |            |           |       |                        |                  |
|---------------------|-------------|---------|-------|------------|----------|------------|-----------|-------|------------------------|------------------|
| Calc. Mass          | Obsrv. Mass | ± da    | ± ppm | Start Seq. | End Seq. | Sequence   | Ion Score | C. I. | % Modification         | Rank Result Type |
| 1062.6055           | 1062.4702   | -0.1353 | -127  | 256        | 264      | RFSQLGNLK  |           |       |                        | Mascot           |
| 1123.5854           | 1123.5077   | -0.0777 | -69   | 60         | 69       | SFRASSNLNK | 10        | 0     |                        | Mascot           |
| 1123.5854           | 1123.5077   | -0.0777 | -69   | 60         | 69       | SFRASSNLNK |           |       |                        | Mascot           |
| 1181.5402           | 1181.5582   | 0.018   | 15    | 22         | 31       | ERVTCTQCGK |           |       | Carbamidomethyl (C)[5] | Mascot           |

|    |                                                       |           |         |     |     |            |                              |      |                                           |        |   |
|----|-------------------------------------------------------|-----------|---------|-----|-----|------------|------------------------------|------|-------------------------------------------|--------|---|
|    | 1284.5823                                             | 1284.592  | 0.0097  | 8   | 82  | 91         | CDQCGKTFLR                   |      | Carbamidomethyl (C)[1,4]                  | Mascot |   |
|    | 1314.5817                                             | 1314.7013 | 0.1196  | 91  | 105 | 115        | EKPYSQSVCGK                  |      | Carbamidomethyl (C)[6,9]                  | Mascot |   |
|    | 1414.6494                                             | 1414.7742 | 0.1248  | 88  | 129 | 140        | IHTGVSEYMCFK                 |      |                                           | Mascot |   |
|    | 1847.8125                                             | 1847.9242 | 0.1117  | 60  | 129 | 143        | IHTGVSEYMCFKCEK              |      | Carbamidomethyl (C)[10], Oxidation (M)[9] | Mascot |   |
|    | 2245.0488                                             | 2245.2058 | 0.157   | 70  | 265 | 283        | IHERIHTGENSFTCEQCL<br>K      |      |                                           | Mascot |   |
|    | 2761.3547                                             | 2761.2861 | -0.0686 | -25 | 213 | 236        | IHTGEKPYICSHCNKSFS<br>QLGNLK |      | Carbamidomethyl (C)[10]                   | Mascot |   |
| 40 | MHC class II-associated invariant chain [Danio rerio] |           |         |     |     | gi 4580926 | 25898.9                      | 8.43 | 8                                         | 33     | 0 |

#### Peptide Information

| Calc. Mass | Obsrv. Mass | ± da    | ± ppm | Start Seq. | End Seq. | Sequence                      | Ion Score | C. I. % | Modification             | Rank | Result Type |
|------------|-------------|---------|-------|------------|----------|-------------------------------|-----------|---------|--------------------------|------|-------------|
| 1325.6808  | 1325.6156   | -0.0652 | -49   | 62         | 73       | QHINALTSGQEK                  |           |         |                          |      | Mascot      |
| 1426.6333  | 1426.6582   | 0.0249  | 17    | 102        | 114      | DYSDPTSDQTAVK                 |           |         |                          |      | Mascot      |
| 1426.6333  | 1426.6582   | 0.0249  | 17    | 102        | 114      | DYSDPTSDQTAVK                 |           |         |                          |      | Mascot      |
| 1448.6881  | 1448.6653   | -0.0228 | -16   | 142        | 152      | LMPKMMHLPMR                   |           |         | Oxidation (M)[2,5,6,10]  |      | Mascot      |
| 1464.726   | 1464.6581   | -0.0679 | -46   | 89         | 101      | AMSLPMNSMPLLK                 |           |         | Oxidation (M)[2,6]       |      | Mascot      |
| 1465.703   | 1465.6823   | -0.0207 | -14   | 2          | 13       | EPDHQNESLIQR                  |           |         |                          |      | Mascot      |
| 1566.8599  | 1566.7596   | -0.1003 | -64   | 62         | 75       | QHINALTSGQEKLK                |           |         |                          |      | Mascot      |
| 2139.0317  | 2139.0923   | 0.0606  | 28    | 82         | 101      | MSAGAPKAMSLPMNSM<br>PLLK      |           |         | Oxidation (M)[1,9,13,16] |      | Mascot      |
| 2791.5249  | 2791.2983   | -0.2266 | -81   | 36         | 61       | ITGLTVLACLLLAGQALTA<br>YMWGQK |           |         | Carbamidomethyl (C)[9]   |      | Mascot      |
| 2791.5249  | 2791.2983   | -0.2266 | -81   | 36         | 61       | ITGLTVLACLLLAGQALTA<br>YMWGQK |           |         | Carbamidomethyl (C)[9]   |      | Mascot      |

|    |                                              |  |  |  |  |             |       |      |   |    |   |
|----|----------------------------------------------|--|--|--|--|-------------|-------|------|---|----|---|
| 41 | invariant chain-like protein 1 [Danio rerio] |  |  |  |  | gi 18858881 | 26214 | 8.12 | 8 | 33 | 0 |
|----|----------------------------------------------|--|--|--|--|-------------|-------|------|---|----|---|

#### Peptide Information

| Calc. Mass | Obsrv. Mass | ± da    | ± ppm | Start Seq. | End Seq. | Sequence                      | Ion Score | C. I. % | Modification             | Rank | Result Type |
|------------|-------------|---------|-------|------------|----------|-------------------------------|-----------|---------|--------------------------|------|-------------|
| 1325.6808  | 1325.6156   | -0.0652 | -49   | 62         | 73       | QHINALTSGQEK                  |           |         |                          |      | Mascot      |
| 1426.6333  | 1426.6582   | 0.0249  | 17    | 102        | 114      | DYSDPTSDQTAVK                 |           |         |                          |      | Mascot      |
| 1426.6333  | 1426.6582   | 0.0249  | 17    | 102        | 114      | DYSDPTSDQTAVK                 |           |         |                          |      | Mascot      |
| 1448.6881  | 1448.6653   | -0.0228 | -16   | 142        | 152      | LMPKMMHLPMR                   |           |         | Oxidation (M)[2,5,6,10]  |      | Mascot      |
| 1464.726   | 1464.6581   | -0.0679 | -46   | 89         | 101      | AMSLPMNSMPLLK                 |           |         | Oxidation (M)[2,6]       |      | Mascot      |
| 1465.703   | 1465.6823   | -0.0207 | -14   | 2          | 13       | EPDHQNESLIQR                  |           |         |                          |      | Mascot      |
| 1566.8599  | 1566.7596   | -0.1003 | -64   | 62         | 75       | QHINALTSGQEKLK                |           |         |                          |      | Mascot      |
| 2139.0317  | 2139.0923   | 0.0606  | 28    | 82         | 101      | MSAGAPKAMSLPMNSM<br>PLLK      |           |         | Oxidation (M)[1,9,13,16] |      | Mascot      |
| 2791.5249  | 2791.2983   | -0.2266 | -81   | 36         | 61       | ITGLTVLACLLLAGQALTA<br>YMWGQK |           |         | Carbamidomethyl (C)[9]   |      | Mascot      |

[illegible]

|           |           |         |      |      |      |                             |                                          |   |        |
|-----------|-----------|---------|------|------|------|-----------------------------|------------------------------------------|---|--------|
| 1045.5272 | 1045.5327 | 0.0055  | 5    | 2836 | 2843 | LVEDEERR                    |                                          |   | Mascot |
| 1078.5527 | 1078.4645 | -0.0882 | -82  | 4590 | 4598 | WVKQSSSEK                   |                                          |   | Mascot |
| 1153.5558 | 1153.5214 | -0.0344 | -30  | 3112 | 3120 | MDLEKPNYK                   | Oxidation (M)[1]                         |   | Mascot |
| 1155.5681 | 1155.5026 | -0.0655 | -57  | 3488 | 3496 | WEKTSETFK                   |                                          |   | Mascot |
| 1169.7188 | 1169.5792 | -0.1396 | -119 | 2753 | 2762 | AMRLRLPSLR                  |                                          |   | Mascot |
| 1169.7188 | 1169.5792 | -0.1396 | -119 | 2753 | 2762 | AMRLRLPSLR                  | 13                                       | 0 | Mascot |
| 1186.6565 | 1186.6079 | -0.0486 | -41  | 846  | 855  | VDDLLEIEK                   |                                          |   | Mascot |
| 1186.6565 | 1186.6079 | -0.0486 | -41  | 846  | 855  | VDDLLEIEK                   |                                          |   | Mascot |
| 1221.6262 | 1221.6132 | -0.013  | -11  | 1489 | 1498 | GWDDLFNKVK                  |                                          |   | Mascot |
| 1268.5286 | 1268.5938 | 0.0652  | 51   | 540  | 550  | EGMEAWAAMK                  | Oxidation (M)[3]                         |   | Mascot |
| 1284.5234 | 1284.592  | 0.0686  | 53   | 540  | 550  | EGMEAWAAMK                  | Oxidation (M)[3,10]                      |   | Mascot |
| 1298.6587 | 1298.6073 | -0.0514 | -40  | 611  | 621  | VKDIESLHDK                  |                                          |   | Mascot |
| 1309.6899 | 1309.6371 | -0.0528 | -40  | 1181 | 1190 | QFEKQVDLFR                  |                                          |   | Mascot |
| 1325.6736 | 1325.6156 | -0.058  | -44  | 835  | 845  | LAETVFNFQEK                 |                                          |   | Mascot |
| 1410.6246 | 1410.6642 | 0.0396  | 28   | 4271 | 4282 | LFTCSSFDSEFK                |                                          |   | Mascot |
| 1410.6246 | 1410.6642 | 0.0396  | 28   | 4271 | 4282 | LFTCSSFDSEFK                |                                          |   | Mascot |
| 1448.7137 | 1448.6653 | -0.0484 | -33  | 2442 | 2452 | MEHIMDFTRLR                 |                                          |   | Mascot |
| 1464.7086 | 1464.6581 | -0.0505 | -34  | 2442 | 2452 | MEHIMDFTRLR                 | Oxidation (M)[1]                         |   | Mascot |
| 1708.8839 | 1708.7563 | -0.1276 | -75  | 3394 | 3407 | WAIAQLNYADMLKR              | Oxidation (M)[11]                        |   | Mascot |
| 1708.8839 | 1708.7563 | -0.1276 | -75  | 3394 | 3407 | WAIAQLNYADMLKR              | Oxidation (M)[11]                        |   | Mascot |
| 2138.9673 | 2139.0923 | 0.125   | 58   | 1926 | 1943 | FVLVFNCDTDFQAMG<br>R        |                                          |   | Mascot |
| 2210.9944 | 2211.0413 | 0.0469  | 21   | 531  | 550  | EVDGLDVSKEGMEAWEA<br>AMK    | Oxidation (M)[12]                        |   | Mascot |
| 2230.1689 | 2230.0432 | -0.1257 | -56  | 2943 | 2961 | TTLRSRFVAMNGLSVYQI<br>K     | Oxidation (M)[10]                        |   | Mascot |
| 2233.0627 | 2233.0234 | -0.0393 | -18  | 3561 | 3580 | WQANSLPADDLCTENAI<br>MLK    |                                          |   | Mascot |
| 2245.0449 | 2245.2058 | 0.1609  | 72   | 862  | 879  | SLETCTMYEHKMFTEILNR         |                                          |   | Mascot |
| 2282.1638 | 2282.0215 | -0.1423 | -62  | 3121 | 3139 | VPDYMPIVYDKLPQPPTH<br>R     | Oxidation (M)[5]                         |   | Mascot |
| 2283.1624 | 2283.082  | -0.0804 | -35  | 2004 | 2024 | QVKVSAEMAIFITMNPY<br>AGR    |                                          |   | Mascot |
| 2284.2561 | 2284.1067 | -0.1494 | -65  | 4504 | 4523 | NIHVNLGRFLVPEAYITAT<br>R    |                                          |   | Mascot |
| 2727.3083 | 2727.2981 | -0.0102 | -4   | 3682 | 3704 | DPTVEFPDLCSRETQVN<br>FTVTR  | Carbamidomethyl (C)[11]                  |   | Mascot |
| 2745.291  | 2745.2874 | -0.0036 | -1   | 1944 | 1966 | IFVGLCQVGAWGCFDEF<br>NRLEER | Carbamidomethyl (C)[6]                   |   | Mascot |
| 2775.2727 | 2775.2974 | 0.0247  | 9    | 2358 | 2380 | CGMVWFSEDLVSTDMIF<br>NHFLAR | Carbamidomethyl (C)[1]                   |   | Mascot |
| 2775.2727 | 2775.2974 | 0.0247  | 9    | 2358 | 2380 | CGMVWFSEDLVSTDMIF<br>NHFLAR | Carbamidomethyl (C)[1]                   |   | Mascot |
| 2790.4395 | 2790.3132 | -0.1263 | -45  | 3052 | 3075 | WFTSQVIRNLHVFTMNP<br>SSEGLK |                                          |   | Mascot |
| 2791.2676 | 2791.2983 | 0.0307  | 11   | 2358 | 2380 | CGMVWFSEDLVSTDMIF           | Carbamidomethyl (C)[1], Oxidation (M)[3] |   | Mascot |



|    |                                                         |           |        |    |      |              |                                      |      |   |    |   |                                          |        |
|----|---------------------------------------------------------|-----------|--------|----|------|--------------|--------------------------------------|------|---|----|---|------------------------------------------|--------|
|    | 2791.2676                                               | 2791.2983 | 0.0307 | 11 | 2358 | 2380         | NHFLAR<br>CGMVWFSEDLSTDMIF<br>NHFLAR |      |   |    |   | Carbamidomethyl (C)[1], Oxidation (M)[3] | Mascot |
| 45 | PREDICTED: hypothetical protein LOC569848 [Danio rerio] |           |        |    |      | gi 326678298 | 44982.2                              | 6.29 | 8 | 32 | 0 |                                          |        |

Peptide Information

| Calc. Mass | Obsrv. Mass | ± da    | ± ppm | Start Seq. | End Seq. | Sequence                    | Ion Score | C. I. | % Modification                           | Rank | Result Type |
|------------|-------------|---------|-------|------------|----------|-----------------------------|-----------|-------|------------------------------------------|------|-------------|
| 1123.6106  | 1123.5077   | -0.1029 | -92   | 350        | 359      | VISRGEATYK                  |           |       |                                          |      | Mascot      |
| 1123.6106  | 1123.5077   | -0.1029 | -92   | 350        | 359      | VISRGEATYK                  |           |       |                                          |      | Mascot      |
| 1282.6381  | 1282.6121   | -0.026  | -20   | 270        | 281      | MIVSCGESVTLK                |           |       | Oxidation (M)[1]                         |      | Mascot      |
| 1325.6484  | 1325.6156   | -0.0328 | -25   | 312        | 321      | EITYPDERFR                  |           |       |                                          |      | Mascot      |
| 1410.7699  | 1410.6642   | -0.1057 | -75   | 168        | 179      | IHTAERENVTLK                |           |       |                                          |      | Mascot      |
| 1410.7699  | 1410.6642   | -0.1057 | -75   | 168        | 179      | IHTAERENVTLK                |           |       |                                          |      | Mascot      |
| 1448.7056  | 1448.6653   | -0.0403 | -28   | 255        | 266      | ETSNFNFSVYIK                |           |       |                                          |      | Mascot      |
| 1708.8972  | 1708.7563   | -0.1409 | -82   | 81         | 95       | LMLKETGSLTINNMK             |           |       | Oxidation (M)[2]                         |      | Mascot      |
| 1708.8972  | 1708.7563   | -0.1409 | -82   | 81         | 95       | LMLKETGSLTINNMK             |           |       | Oxidation (M)[2]                         |      | Mascot      |
| 1725.8397  | 1725.8      | -0.0397 | -23   | 267        | 281      | EEKMIVSCGESVTLK             |           |       | Carbamidomethyl (C)[8], Oxidation (M)[4] |      | Mascot      |
| 2775.3406  | 2775.2974   | -0.0432 | -16   | 289        | 311      | EDEVQWLFHIENDLIAKM<br>TGNTR |           |       | Oxidation (M)[18]                        |      | Mascot      |
| 2775.3406  | 2775.2974   | -0.0432 | -16   | 289        | 311      | EDEVQWLFHIENDLIAKM<br>TGNTR |           |       | Oxidation (M)[18]                        |      | Mascot      |

|    |                                                      |  |  |  |  |              |          |      |   |    |        |  |
|----|------------------------------------------------------|--|--|--|--|--------------|----------|------|---|----|--------|--|
| 46 | PREDICTED: sickle tail protein homolog [Danio rerio] |  |  |  |  | gi 292610753 | 206402.5 | 8.61 | 1 | 31 | 80.156 |  |
|----|------------------------------------------------------|--|--|--|--|--------------|----------|------|---|----|--------|--|

Peptide Information

| Calc. Mass | Obsrv. Mass | ± da    | ± ppm | Start Seq. | End Seq. | Sequence      | Ion Score | C. I.  | % Modification | Rank | Result Type |
|------------|-------------|---------|-------|------------|----------|---------------|-----------|--------|----------------|------|-------------|
| 1426.7438  | 1426.6582   | -0.0856 | -60   | 1098       | 1110     | RFYPSATGLTTGR | 31        | 80.156 |                | 1    | Mascot      |

|    |                                                            |  |  |  |  |              |       |      |   |    |   |  |
|----|------------------------------------------------------------|--|--|--|--|--------------|-------|------|---|----|---|--|
| 47 | PREDICTED: hypothetical protein LOC100331676 [Danio rerio] |  |  |  |  | gi 292611776 | 26950 | 4.93 | 1 | 24 | 0 |  |
|----|------------------------------------------------------------|--|--|--|--|--------------|-------|------|---|----|---|--|

Peptide Information

| Calc. Mass | Obsrv. Mass | ± da    | ± ppm | Start Seq. | End Seq. | Sequence    | Ion Score | C. I. | % Modification | Rank | Result Type |
|------------|-------------|---------|-------|------------|----------|-------------|-----------|-------|----------------|------|-------------|
| 1186.6613  | 1186.6079   | -0.0534 | -45   | 62         | 72       | KMLAAESAPIR | 24        | 0     |                | 4    | Mascot      |

|    |                                                                   |  |  |  |  |              |         |      |   |    |   |  |
|----|-------------------------------------------------------------------|--|--|--|--|--------------|---------|------|---|----|---|--|
| 48 | PREDICTED: coiled-coil domain-containing protein 80 [Danio rerio] |  |  |  |  | gi 125847898 | 79236.2 | 9.47 | 1 | 18 | 0 |  |
|----|-------------------------------------------------------------------|--|--|--|--|--------------|---------|------|---|----|---|--|

Peptide Information

| Calc. Mass | Obsrv. Mass | ± da | ± ppm | Start Seq. | End Seq. | Sequence | Ion Score | C. I. | % Modification | Rank | Result Type |
|------------|-------------|------|-------|------------|----------|----------|-----------|-------|----------------|------|-------------|
|------------|-------------|------|-------|------------|----------|----------|-----------|-------|----------------|------|-------------|

|                     |                                                   | 1186.6538   | 1186.6079   | -0.0459 | -39   | 450        | 459      | NSELIGEIRR     | 19        | 0       |                   |                  | 5      | Mascot |
|---------------------|---------------------------------------------------|-------------|-------------|---------|-------|------------|----------|----------------|-----------|---------|-------------------|------------------|--------|--------|
| 49                  | phospholipase A1 member A precursor [Danio rerio] | gi 46309481 | 50443.2     | 6.09    | 1     |            |          |                | 16        | 0       |                   |                  |        |        |
| Peptide Information |                                                   |             |             |         |       |            |          |                |           |         |                   |                  |        |        |
|                     |                                                   | Calc. Mass  | Obsrv. Mass | ± da    | ± ppm | Start Seq. | End Seq. | Sequence       | Ion Score | C. I. % | Modification      | Rank Result Type |        |        |
|                     |                                                   | 1708.728    | 1708.7563   | 0.0283  | 17    | 253        | 266      | FASMYGYVICDHMR | 16        | 0       | Oxidation (M)[13] | 3                | Mascot |        |
| 50                  | bolA-like protein 3 [Danio rerio]                 | gi 57525996 | 11715.2     | 9.56    | 1     |            |          |                | 16        | 0       |                   |                  |        |        |
| Peptide Information |                                                   |             |             |         |       |            |          |                |           |         |                   |                  |        |        |
|                     |                                                   | Calc. Mass  | Obsrv. Mass | ± da    | ± ppm | Start Seq. | End Seq. | Sequence       | Ion Score | C. I. % | Modification      | Rank Result Type |        |        |
|                     |                                                   | 1169.6096   | 1169.5792   | -0.0304 | -26   | 87         | 96       | DEIKAMHGLR     | 16        | 0       |                   | 1                | Mascot |        |

|                |           |                        |                |                |                    |
|----------------|-----------|------------------------|----------------|----------------|--------------------|
| Gel Idx/Pos    | 209/19    | Instr./Gel Origin      | BA2060/110707A | Process Status | Analysis Succeeded |
| Plate [#] Name | [1] 31496 | Instrument Sample Name |                | Spectra        | 11                 |

| Rank                | Protein Name                                              | Accession No. | Protein MW | Protein PI | Pep. Count | Protein Score      | Protein Score C. I. % | Total Ion Score | Total Ion C. I. % |              |      |             |
|---------------------|-----------------------------------------------------------|---------------|------------|------------|------------|--------------------|-----------------------|-----------------|-------------------|--------------|------|-------------|
| 1                   | Sjogren syndrome antigen B (autoantigen La) [Danio rerio] | gi 41054695   | 46109.5    | 6.68       | 20         | 522                | 100                   | 392             | 100               |              |      |             |
| Peptide Information |                                                           |               |            |            |            |                    |                       |                 |                   |              |      |             |
|                     | Calc. Mass                                                | Obsrv. Mass   | ± da       | ± ppm      | Start Seq. | End Sequence Seq.  |                       | Ion Score       | C. I. %           | Modification | Rank | Result Type |
|                     | 837.4253                                                  | 837.4025      | -0.0228    | -27        | 258        | 263 WIDFTR         |                       | 33              | 86.22             |              |      | Mascot      |
|                     | 837.4253                                                  | 837.4025      | -0.0228    | -27        | 258        | 263 WIDFTR         |                       |                 |                   |              |      | Mascot      |
|                     | 999.5693                                                  | 999.5469      | -0.0224    | -22        | 377        | 384 KRPLESNR       |                       |                 |                   |              |      | Mascot      |
|                     | 1081.5272                                                 | 1081.4974     | -0.0298    | -28        | 234        | 243 FSGELGQTSR     |                       |                 |                   |              |      | Mascot      |
|                     | 1092.5684                                                 | 1092.538      | -0.0304    | -28        | 163        | 171 AFVERDDIK      |                       |                 |                   |              |      | Mascot      |
|                     | 1112.5735                                                 | 1112.5427     | -0.0308    | -28        | 132        | 140 GTFENIYLR      |                       | 64              | 99.99             |              |      | Mascot      |
|                     | 1112.5735                                                 | 1112.5427     | -0.0308    | -28        | 132        | 140 GTFENIYLR      |                       |                 |                   |              |      | Mascot      |
|                     | 1216.6321                                                 | 1216.6155     | -0.0166    | -14        | 267        | 277 EGTILFHSNAK    |                       |                 |                   |              |      | Mascot      |
|                     | 1319.7053                                                 | 1319.5454     | -0.1599    | -121       | 72         | 83 SKTGLLEISEDK    |                       |                 |                   |              |      | Mascot      |
|                     | 1464.7581                                                 | 1464.7155     | -0.0426    | -29        | 149        | 162 GSIFAVLETEEAAK |                       |                 |                   |              |      | Mascot      |
|                     | 1472.7704                                                 | 1472.7291     | -0.0413    | -28        | 316        | 327 IIEDQQESINKR   |                       |                 |                   |              |      | Mascot      |
|                     | 1633.8894                                                 | 1633.8428     | -0.0466    | -29        | 57         | 71 SLTSEESVIVESLLK |                       |                 |                   |              |      | Mascot      |
|                     | 1659.7761                                                 | 1659.7399     | -0.0362    | -22        | 244        | 257 EDFHSVFSHQAQIK |                       |                 |                   |              |      | Mascot      |

|           |                          |         |     |     |             |                         |      |        |                   |        |
|-----------|--------------------------|---------|-----|-----|-------------|-------------------------|------|--------|-------------------|--------|
| 1659.7761 | 1659.7399                | -0.0362 | -22 | 244 | 257         | EDFHSVFSDHAQIK          | 79   | 100    |                   | Mascot |
| 1714.8031 | 1714.7578                | -0.0453 | -26 | 89  | 102         | DPNKPLPENNEEYR          |      |        |                   | Mascot |
| 1777.8322 | 1777.8333                | 0.0011  | 1   | 175 | 189         | GNEMIVMMKDAYFTK         |      |        |                   | Mascot |
| 1870.9042 | 1870.8503                | -0.0539 | -29 | 88  | 102         | RDPNKPLPENNEEYR         |      |        |                   | Mascot |
| 1950.9344 | 1950.8762                | -0.0582 | -30 | 14  | 29          | VAEQIEYYFGDHNLP         | 92   | 100    |                   | Mascot |
| 1950.9344 | 1950.8762                | -0.0582 | -30 | 14  | 29          | VAEQIEYYFGDHNLP         |      |        |                   | Mascot |
| 2031.0104 | 2030.9534                | -0.057  | -28 | 35  | 51          | EQLQLDDGWVPLETMLK       |      |        | Oxidation (M)[15] | Mascot |
| 2077.0488 | 2076.991                 | -0.0578 | -28 | 114 | 131         | GFPLETTLDDVKEWLAD<br>K  |      |        |                   | Mascot |
| 2079.0293 | 2078.9702                | -0.0591 | -28 | 13  | 29          | KVAEQIEYYFGDHNLP        | 59   | 99.965 |                   | Mascot |
| 2079.0293 | 2078.9702                | -0.0591 | -28 | 13  | 29          | KVAEQIEYYFGDHNLP        |      |        |                   | Mascot |
| 2142.0461 | 2141.989                 | -0.0571 | -27 | 89  | 106         | DPNKPLPENNEEYRDAL<br>K  | 65   | 99.993 |                   | Mascot |
| 2142.0461 | 2141.989                 | -0.0571 | -27 | 89  | 106         | DPNKPLPENNEEYRDAL<br>K  |      |        |                   | Mascot |
| 2247.085  | 2247.0405                | -0.0445 | -20 | 296 | 314         | EQAVQWEILEGDVEMET<br>LK |      |        |                   | Mascot |
| 2         | keratin 18 [Danio rerio] |         |     |     | gi 29335504 | 41247.4                 | 5.07 | 11     | 46                | 0      |

#### Peptide Information

| Calc. Mass | Obsrv. Mass | ± da    | ± ppm | Start Seq. | End Seq. | Sequence       | Ion Score | C. I. | % Modification   | Rank | Result Type |
|------------|-------------|---------|-------|------------|----------|----------------|-----------|-------|------------------|------|-------------|
| 864.4461   | 864.4699    | 0.0238  | 28    | 315        | 322      | LLDGGDFK       |           |       |                  |      | Mascot      |
| 882.4753   | 882.5418    | 0.0665  | 75    | 188        | 194      | YEKMALK        |           |       |                  |      | Mascot      |
| 996.4996   | 996.5699    | 0.0703  | 71    | 100        | 107      | YESELSIR       |           |       |                  |      | Mascot      |
| 1034.5629  | 1034.498    | -0.0649 | -63   | 91         | 99       | LAADDFRVK      |           |       |                  |      | Mascot      |
| 1045.4697  | 1045.5347   | 0.065   | 62    | 52         | 60       | GPDVHDYSR      |           |       |                  |      | Mascot      |
| 1092.4926  | 1092.538    | 0.0454  | 42    | 14         | 22       | MAMQNLNDR      |           |       |                  |      | Mascot      |
| 1158.6113  | 1158.5647   | -0.0466 | -40   | 108        | 118      | QGVEADITGLR    |           |       |                  |      | Mascot      |
| 1418.6945  | 1418.7217   | 0.0272  | 19    | 174        | 185      | GQDLSQIMEEIR   |           |       |                  |      | Mascot      |
| 1464.7111  | 1464.7155   | 0.0044  | 3     | 250        | 262      | GSLEGTLRDTEM   |           |       |                  |      | Mascot      |
| 1633.8214  | 1633.8428   | 0.0214  | 13    | 174        | 187      | GQDLSQIMEEIRAK |           |       | Oxidation (M)[8] |      | Mascot      |
| 1714.9333  | 1714.7578   | -0.1755 | -102  | 233        | 246      | RQIQTLIELESQK  |           |       |                  |      | Mascot      |

|                     |                                               |             |  |        |             |            |          |          |           |                      |      |             |
|---------------------|-----------------------------------------------|-------------|--|--------|-------------|------------|----------|----------|-----------|----------------------|------|-------------|
| 3                   | keratin, type I cytoskeletal 18 [Danio rerio] |             |  |        | gi 30410758 | 48573.1    | 5.53     | 11       | 44        | 0                    |      |             |
| Peptide Information |                                               |             |  |        |             |            |          |          |           |                      |      |             |
| Calc. Mass          |                                               | Obsrv. Mass |  | ± da   | ± ppm       | Start Seq. | End Seq. | Sequence | Ion Score | C. I. % Modification | Rank | Result Type |
| 864.4461            |                                               | 864.4699    |  | 0.0238 | 28          | 387        | 394      | LLDGGDFK |           |                      |      | Mascot      |
| 882.4753            |                                               | 882.5418    |  | 0.0665 | 75          | 260        | 266      | YEKMALK  |           |                      |      | Mascot      |

|   |                                                                                                       |              |         |      |    |    |   |
|---|-------------------------------------------------------------------------------------------------------|--------------|---------|------|----|----|---|
| 4 | RecName: Full=Keratin, type I cytoskeletal 18;<br>AltName: Full=Cytokeratin-18; Short=CK-18; AltName: | gij148886613 | 48601.1 | 5.53 | 11 | 44 | 0 |
|---|-------------------------------------------------------------------------------------------------------|--------------|---------|------|----|----|---|

| Calc. Mass | Obsrv. Mass | ± da    | ± ppm | Start Seq. | End Seq. | Sequence        | Ion Score | C. I. | % Modification   | Rank | Result Type |
|------------|-------------|---------|-------|------------|----------|-----------------|-----------|-------|------------------|------|-------------|
| 864.4461   | 864.4699    | 0.0238  | 28    | 387        | 394      | LLDGGDFK        |           |       |                  |      | Mascot      |
| 882.4753   | 882.5418    | 0.0665  | 75    | 260        | 266      | YEKMALK         |           |       |                  |      | Mascot      |
| 996.4996   | 996.5699    | 0.0703  | 71    | 172        | 179      | YESELSIR        |           |       |                  |      | Mascot      |
| 1034.5629  | 1034.498    | -0.0649 | -63   | 163        | 171      | LAADDFRVK       |           |       |                  |      | Mascot      |
| 1045.4697  | 1045.5347   | 0.065   | 62    | 124        | 132      | GPDVHDYSR       |           |       |                  |      | Mascot      |
| 1092.4926  | 1092.538    | 0.0454  | 42    | 86         | 94       | MAMQNLNDR       |           |       |                  |      | Mascot      |
| 1158.6113  | 1158.5647   | -0.0466 | -40   | 180        | 190      | QGV EADITGLR    |           |       |                  |      | Mascot      |
| 1418.6945  | 1418.7217   | 0.0272  | 19    | 246        | 257      | GQDLSQIMEEIR    |           |       |                  |      | Mascot      |
| 1464.7111  | 1464.7155   | 0.0044  | 3     | 322        | 334      | GSLEGLTRDTEMR   |           |       |                  |      | Mascot      |
| 1633.8214  | 1633.8428   | 0.0214  | 13    | 246        | 259      | GQDLSQIMEEIRAK  |           |       | Oxidation (M)[8] |      | Mascot      |
| 1714.9333  | 1714.7578   | -0.1755 | -102  | 305        | 318      | RQIQTL EIELESQK |           |       |                  |      | Mascot      |

| Calc. Mass | Obsrv. Mass | ± da    | ± ppm | Start Seq. | End Seq. | Sequence      | Ion Score | C. I. | % Modification | Rank | Result Type |
|------------|-------------|---------|-------|------------|----------|---------------|-----------|-------|----------------|------|-------------|
| 997.4836   | 997.5798    | 0.0962  | 96    | 511        | 519      | LTDGSFTEK     |           |       |                |      | Mascot      |
| 1003.524   | 1003.4822   | -0.0418 | -42   | 943        | 951      | MESTGLPLR     |           |       |                |      | Mascot      |
| 1165.6212  | 1165.7117   | 0.0905  | 78    | 558        | 567      | GSLRYVLDDK    |           |       |                |      | Mascot      |
| 1165.6212  | 1165.7117   | 0.0905  | 78    | 558        | 567      | GSLRYVLDDK    |           |       |                |      | Mascot      |
| 1319.5573  | 1319.5454   | -0.0119 | -9    | 965        | 974      | TDCKFEYEER    |           |       |                |      | Mascot      |
| 1464.7297  | 1464.7155   | -0.0142 | -10   | 608        | 620      | STNCVVDNRMVVK |           |       |                |      | Mascot      |

|           |           |         |     |     |     |                        |                                           |        |
|-----------|-----------|---------|-----|-----|-----|------------------------|-------------------------------------------|--------|
| 1503.6896 | 1503.7736 | 0.084   | 56  | 930 | 942 | YCLFGDVTNTASR          | Carbamidomethyl (C)[2]                    | Mascot |
| 1658.8068 | 1658.7775 | -0.0293 | -18 | 591 | 605 | GMSYLHTSNIAVHGR        | Oxidation (M)[2]                          | Mascot |
| 1659.8756 | 1659.7399 | -0.1357 | -82 | 5   | 17  | IWLFCFSWAFLK           |                                           | Mascot |
| 1659.8756 | 1659.7399 | -0.1357 | -82 | 5   | 17  | IWLFCFSWAFLK           |                                           | Mascot |
| 1701.8815 | 1701.8567 | -0.0248 | -15 | 783 | 797 | ADCLNFMLLPGPVVR        | Carbamidomethyl (C)[3]                    | Mascot |
| 1777.781  | 1777.8333 | 0.0523  | 29  | 743 | 756 | DNQEHESYMENLIR         |                                           | Mascot |
| 1931.983  | 1931.9087 | -0.0743 | -38 | 781 | 797 | DRADCLNFMLLPGPVVR      | Oxidation (M)[9]                          | Mascot |
| 1951.0569 | 1950.8762 | -0.1807 | -93 | 522 | 537 | IELNTLLKIDYCNLTk       | Carbamidomethyl (C)[12]                   | Mascot |
| 1951.0569 | 1950.8762 | -0.1807 | -93 | 522 | 537 | IELNTLLKIDYCNLTk       | Carbamidomethyl (C)[12]                   | Mascot |
| 2078.9158 | 2078.9702 | 0.0544  | 26  | 333 | 350 | SGSLDIQDMESVSMNYF<br>R |                                           | Mascot |
| 2078.9158 | 2078.9702 | 0.0544  | 26  | 333 | 350 | SGSLDIQDMESVSMNYF<br>R |                                           | Mascot |
| 2225.1074 | 2225.0566 | -0.0508 | -23 | 1   | 17  | MDYRIWLFVCFWAFLK       |                                           | Mascot |
| 2225.1074 | 2225.0566 | -0.0508 | -23 | 1   | 17  | MDYRIWLFVCFWAFLK       |                                           | Mascot |
| 2233.0667 | 2233.0229 | -0.0438 | -20 | 739 | 756 | IVSRDNQEHESYMENLIR     |                                           | Mascot |
| 2298.1238 | 2298.1064 | -0.0174 | -8  | 1   | 17  | MDYRIWLFVCFWAFLK       | Carbamidomethyl (C)[10], Oxidation (M)[1] | Mascot |
| 2298.1238 | 2298.1064 | -0.0174 | -8  | 1   | 17  | MDYRIWLFVCFWAFLK       | Carbamidomethyl (C)[10], Oxidation (M)[1] | Mascot |

6    PREDICTED: dual oxidase 1, partial [Danio rerio]    gi|326680379    162265.6    7.47    18    42    0

Peptide Information

| Calc. Mass | Obsrv. Mass | ± da    | ± ppm | Start Seq. | End Seq. | Sequence         | Ion Score | C. I. % | Modification      | Rank | Result Type |
|------------|-------------|---------|-------|------------|----------|------------------|-----------|---------|-------------------|------|-------------|
| 850.4273   | 850.5184    | 0.0911  | 107   | 1066       | 1072     | NLITMCR          |           |         |                   |      | Mascot      |
| 870.4144   | 870.5179    | 0.1035  | 119   | 497        | 502      | FWFENK           |           |         |                   |      | Mascot      |
| 996.5182   | 996.5699    | 0.0517  | 52    | 1420       | 1427     | FDLRTTML         |           |         |                   |      | Mascot      |
| 997.5213   | 997.5798    | 0.0585  | 59    | 996        | 1002     | FIENYRR          |           |         |                   |      | Mascot      |
| 1034.588   | 1034.498    | -0.09   | -87   | 786        | 795      | AEFASVLGLK       |           |         |                   |      | Mascot      |
| 1092.5684  | 1092.538    | -0.0304 | -28   | 1305       | 1313     | LREAYSPEK        |           |         |                   |      | Mascot      |
| 1216.6909  | 1216.6155   | -0.0754 | -62   | 972        | 980      | LYVRPQER         |           |         |                   |      | Mascot      |
| 1245.5754  | 1245.5614   | -0.014  | -11   | 100        | 110      | AGCPPEFMHIK      |           |         | Oxidation (M)[8]  |      | Mascot      |
| 1319.6736  | 1319.5454   | -0.1282 | -97   | 775        | 785      | TREALQCELTR      |           |         |                   |      | Mascot      |
| 1418.8154  | 1418.7217   | -0.0937 | -66   | 314        | 326      | FGLTLAPPGVYKR    |           |         |                   |      | Mascot      |
| 1633.8214  | 1633.8428   | 0.0214  | 13    | 62         | 77       | ISTTAMSGQSGLLSHK |           |         | Oxidation (M)[6]  |      | Mascot      |
| 1659.8199  | 1659.7399   | -0.08   | -48   | 38         | 51       | LYPAQYMDGVYLAR   |           |         |                   |      | Mascot      |
| 1659.8199  | 1659.7399   | -0.08   | -48   | 38         | 51       | LYPAQYMDGVYLAR   |           |         |                   |      | Mascot      |
| 1755.9058  | 1755.9912   | 0.0854  | 49    | 906        | 921      | DHSAQLNIKGMEVLGK |           |         | Oxidation (M)[11] |      | Mascot      |
| 1767.8601  | 1767.8215   | -0.0386 | -22   | 893        | 905      | DRFSWEDFHLLR     |           |         |                   |      | Mascot      |

|   |                                                    |           |         |     |             |         |                           |    |    |   |                   |  |  |        |
|---|----------------------------------------------------|-----------|---------|-----|-------------|---------|---------------------------|----|----|---|-------------------|--|--|--------|
|   | 1777.9482                                          | 1777.8333 | -0.1149 | -65 | 839         | 854     | LLFSTHDIKGDGFLSK          |    |    |   |                   |  |  | Mascot |
|   | 2211.075                                           | 2211.0422 | -0.0328 | -15 | 381         | 398     | EDNIIVEDLRDYMGPLR         |    |    |   |                   |  |  | Mascot |
|   | 2297.1169                                          | 2297.1257 | 0.0088  | 4   | 621         | 641     | HKEPAHGTTASEWLGHN<br>TAPR |    |    |   |                   |  |  | Mascot |
|   | 2381.1423                                          | 2380.958  | -0.1843 | -77 | 1129        | 1147    | VFSNNGSELPMKWTFWF<br>FK   |    |    |   | Oxidation (M)[11] |  |  | Mascot |
| 7 | ribosome production factor 2 homolog [Danio rerio] |           |         |     | gi 47550781 | 35438.5 | 10                        | 10 | 42 | 0 |                   |  |  |        |

Peptide Information

| Calc. Mass | Obsrv. Mass | ± da    | ± ppm | Start Seq. | End Seq. | Sequence                  | Ion Score | C. I. | % Modification                           | Rank | Result Type |
|------------|-------------|---------|-------|------------|----------|---------------------------|-----------|-------|------------------------------------------|------|-------------|
| 837.4689   | 837.4025    | -0.0664 | -79   | 238        | 244      | TAHRQPK                   |           |       |                                          |      | Mascot      |
| 837.4689   | 837.4025    | -0.0664 | -79   | 238        | 244      | TAHRQPK                   |           |       |                                          |      | Mascot      |
| 850.5396   | 850.5184    | -0.0212 | -25   | 197        | 203      | SYKVLLK                   |           |       |                                          |      | Mascot      |
| 856.4523   | 856.5021    | 0.0498  | 58    | 2          | 9        | SHTDGIVK                  |           |       |                                          |      | Mascot      |
| 1003.4877  | 1003.4822   | -0.0055 | -5    | 1          | 9        | MSHTDGIVK                 |           |       | Oxidation (M)[1]                         |      | Mascot      |
| 1245.6334  | 1245.5614   | -0.072  | -58   | 252        | 262      | KNISHDAFGTR               |           |       |                                          |      | Mascot      |
| 1319.6339  | 1319.5454   | -0.0885 | -67   | 227        | 237      | RNHTASDDLK                |           |       |                                          |      | Mascot      |
| 1734.9537  | 1734.8041   | -0.1496 | -86   | 177        | 192      | LAGLEHVLHFTALEGK          |           |       |                                          |      | Mascot      |
| 2247.2607  | 2247.0405   | -0.2202 | -98   | 172        | 192      | VSAVRLAGLEHVLHFTAL<br>EGK |           |       |                                          |      | Mascot      |
| 2283.0784  | 2283.1147   | 0.0363  | 16    | 135        | 154      | CPEGTKPMLVFAGDLFE<br>TDR  |           |       | Carbamidomethyl (C)[1]                   |      | Mascot      |
| 2283.0784  | 2283.1147   | 0.0363  | 16    | 135        | 154      | CPEGTKPMLVFAGDLFE<br>TDR  |           |       | Carbamidomethyl (C)[1]                   |      | Mascot      |
| 2298.2427  | 2298.1064   | -0.1363 | -59   | 177        | 196      | LAGLEHVLHFTALEGKIY<br>MR  |           |       |                                          |      | Mascot      |
| 2298.2427  | 2298.1064   | -0.1363 | -59   | 177        | 196      | LAGLEHVLHFTALEGKIY<br>MR  |           |       |                                          |      | Mascot      |
| 2299.0732  | 2299.1038   | 0.0306  | 13    | 135        | 154      | CPEGTKPMLVFAGDLFE<br>TDR  |           |       | Carbamidomethyl (C)[1], Oxidation (M)[8] |      | Mascot      |

|   |                                                                   |  |  |  |              |        |      |    |    |   |  |  |  |  |
|---|-------------------------------------------------------------------|--|--|--|--------------|--------|------|----|----|---|--|--|--|--|
| 8 | PREDICTED: myosin heavy chain, fast skeletal muscle [Danio rerio] |  |  |  | gi 326668722 | 222281 | 5.69 | 21 | 40 | 0 |  |  |  |  |
|---|-------------------------------------------------------------------|--|--|--|--------------|--------|------|----|----|---|--|--|--|--|

Peptide Information

| Calc. Mass | Obsrv. Mass | ± da    | ± ppm | Start Seq. | End Seq. | Sequence        | Ion Score | C. I. | % Modification   | Rank | Result Type |
|------------|-------------|---------|-------|------------|----------|-----------------|-----------|-------|------------------|------|-------------|
| 850.4338   | 850.5184    | 0.0846  | 99    | 859        | 865      | MKEDLAK         |           |       | Oxidation (M)[1] |      | Mascot      |
| 1003.4942  | 1003.4822   | -0.012  | -12   | 1580       | 1587     | DEEIEQIK        |           |       |                  |      | Mascot      |
| 1081.5686  | 1081.4974   | -0.0712 | -66   | 435        | 442      | MFLWMVVR        |           |       |                  |      | Mascot      |
| 1158.6226  | 1158.5647   | -0.0579 | -50   | 1690       | 1699     | VALEQTERGR      |           |       |                  |      | Mascot      |
| 1245.6572  | 1245.5614   | -0.0958 | -77   | 953        | 963      | DIDDLETLAK      |           |       |                  |      | Mascot      |
| 1503.7649  | 1503.7736   | 0.0087  | 6     | 169        | 183      | ENQSILITGESGAGK |           |       |                  |      | Mascot      |
| 1613.7034  | 1613.682    | -0.0214 | -13   | 1226       | 1240     | MEVDDVSSSMEAVAK |           |       | Oxidation (M)[1] |      | Mascot      |

|           |                             |         |     |              |      |                           |      |   |    |                                              |  |  |        |
|-----------|-----------------------------|---------|-----|--------------|------|---------------------------|------|---|----|----------------------------------------------|--|--|--------|
| 1659.8911 | 1659.7399                   | -0.1512 | -91 | 1290         | 1303 | QLEEKESLVSQLTR            |      |   |    |                                              |  |  | Mascot |
| 1659.8911 | 1659.7399                   | -0.1512 | -91 | 1290         | 1303 | QLEEKESLVSQLTR            |      |   |    |                                              |  |  | Mascot |
| 1687.8699 | 1687.9005                   | 0.0306  | 18  | 430          | 442  | SVYEKMFLWMVVR             |      |   |    |                                              |  |  | Mascot |
| 1755.8694 | 1755.9912                   | 0.1218  | 69  | 1792         | 1806 | DLQHRLDEAESLAMK           |      |   |    |                                              |  |  | Mascot |
| 1767.9574 | 1767.8215                   | -0.1359 | -77 | 680          | 694  | TPGLMENFLVIHQLR           |      |   |    |                                              |  |  | Mascot |
| 1777.8385 | 1777.8333                   | -0.0052 | -3  | 1280         | 1294 | LQTENGEMGRQLEEK           |      |   |    | Oxidation (M)[8]                             |  |  | Mascot |
| 1950.9478 | 1950.8762                   | -0.0716 | -37 | 1484         | 1499 | MKNSYEETLDHLETLK          |      |   |    |                                              |  |  | Mascot |
| 1950.9478 | 1950.8762                   | -0.0716 | -37 | 1484         | 1499 | MKNSYEETLDHLETLK          |      |   |    |                                              |  |  | Mascot |
| 2079.0134 | 2078.9702                   | -0.0432 | -21 | 1589         | 1606 | NSQRIIDSMQSTLDAEVR        |      |   |    | Oxidation (M)[9]                             |  |  | Mascot |
| 2079.0149 | 2078.9702                   | -0.0447 | -22 | 1327         | 1344 | NSLAHAVQSSRHCDLL<br>R     |      |   |    | Carbamidomethyl (C)[14]                      |  |  | Mascot |
| 2142.123  | 2141.989                    | -0.134  | -63 | 781          | 798  | LVILVTMTQAVCRGYVMR        |      |   |    | Carbamidomethyl (C)[12], Oxidation (M)[7,17] |  |  | Mascot |
| 2142.123  | 2141.989                    | -0.134  | -63 | 781          | 798  | LVILVTMTQAVCRGYVMR        |      |   |    | Carbamidomethyl (C)[12], Oxidation (M)[7,17] |  |  | Mascot |
| 2225.1821 | 2225.0566                   | -0.1255 | -56 | 384          | 403  | IAYLLGLNSADMLKALCY<br>PR  |      |   |    |                                              |  |  | Mascot |
| 2225.1821 | 2225.0566                   | -0.1255 | -56 | 384          | 403  | IAYLLGLNSADMLKALCY<br>PR  |      |   |    |                                              |  |  | Mascot |
| 2247.1814 | 2247.0405                   | -0.1409 | -63 | 552          | 570  | LHDQHLGKTNCQKPKP<br>AK    |      |   |    | Carbamidomethyl (C)[11]                      |  |  | Mascot |
| 2297.1265 | 2297.1257                   | -0.0008 | 0   | 414          | 434  | GQTPVQVNNATMALCKS<br>VYEK |      |   |    | Oxidation (M)[12]                            |  |  | Mascot |
| 2298.1985 | 2298.1064                   | -0.0921 | -40 | 384          | 403  | IAYLLGLNSADMLKALCY<br>PR  |      |   |    | Carbamidomethyl (C)[17], Oxidation (M)[12]   |  |  | Mascot |
| 2298.1985 | 2298.1064                   | -0.0921 | -40 | 384          | 403  | IAYLLGLNSADMLKALCY<br>PR  |      |   |    | Carbamidomethyl (C)[17], Oxidation (M)[12]   |  |  | Mascot |
| 2310.1208 | 2309.905                    | -0.2158 | -93 | 997          | 1016 | KALQEAHQQTLDLQAE<br>EDK   |      |   |    |                                              |  |  | Mascot |
| 2381.1265 | 2380.958                    | -0.1685 | -71 | 2            | 22   | SGDPEMECFGPAAYVLR<br>KPEK |      |   |    | Carbamidomethyl (C)[8]                       |  |  | Mascot |
| 9         | novel protein [Danio rerio] |         |     | gi 157888687 |      | 13969.3                   | 5.24 | 7 | 40 | 0                                            |  |  |        |

Peptide Information

| Calc. Mass | Obsrv. Mass | ± da    | ± ppm | Start Seq. | End Seq. | Sequence                | Ion Score | C. I. % | Modification                              | Rank | Result | Type |
|------------|-------------|---------|-------|------------|----------|-------------------------|-----------|---------|-------------------------------------------|------|--------|------|
| 1081.5636  | 1081.4974   | -0.0662 | -61   | 76         | 84       | SFTQKSDLR               |           |         |                                           |      | Mascot |      |
| 1092.47    | 1092.538    | 0.068   | 62    | 7          | 16       | MSDPEPCGIK              |           |         | Oxidation (M)[1]                          |      | Mascot |      |
| 1503.7083  | 1503.7736   | 0.0653  | 43    | 86         | 97       | HMMIHTGEKPYK            |           |         | Oxidation (M)[2,3]                        |      | Mascot |      |
| 1659.8094  | 1659.7399   | -0.0695 | -42   | 85         | 97       | RHMMIHTGEKPYK           |           |         | Oxidation (M)[3,4]                        |      | Mascot |      |
| 1659.8094  | 1659.7399   | -0.0695 | -42   | 85         | 97       | RHMMIHTGEKPYK           |           |         | Oxidation (M)[3,4]                        |      | Mascot |      |
| 1687.7415  | 1687.9005   | 0.159   | 94    | 2          | 16       | GSHEKMSDPEPCGIK         |           |         | Carbamidomethyl (C)[12], Oxidation (M)[6] |      | Mascot |      |
| 1777.7554  | 1777.8333   | 0.0779  | 44    | 1          | 16       | MGSHEKMSDPEPCGIK        |           |         | Oxidation (M)[1,7]                        |      | Mascot |      |
| 2078.9885  | 2078.9702   | -0.0183 | -9    | 62         | 80       | STDVVSFTCIQCGKSFTQ<br>K |           |         |                                           |      | Mascot |      |
| 2078.9885  | 2078.9702   | -0.0183 | -9    | 62         | 80       | STDVVSFTCIQCGKSFTQ<br>K |           |         |                                           |      | Mascot |      |

10 PREDICTED: spermatogenesis-associated protein 5-like, partial [Danio rerio] gi|326673238 63503.8 7.55 9 39 0

Peptide Information

| Calc. Mass | Obsrv. Mass | $\pm$ da | $\pm$ ppm | Start Seq. | End Seq. | Sequence                        | Ion Score | C. I. % | Modification            | Rank | Result Type |
|------------|-------------|----------|-----------|------------|----------|---------------------------------|-----------|---------|-------------------------|------|-------------|
| 837.4135   | 837.4025    | -0.011   | -13       | 479        | 485      | VMTSDLR                         |           |         | Oxidation (M)[2]        |      | Mascot      |
| 837.4135   | 837.4025    | -0.011   | -13       | 479        | 485      | VMTSDLR                         |           |         | Oxidation (M)[2]        |      | Mascot      |
| 870.493    | 870.5179    | 0.0249   | 29        | 498        | 505      | EVAIDVPK                        |           |         |                         |      | Mascot      |
| 1003.469   | 1003.4822   | 0.0132   | 13        | 345        | 353      | EGAQNEVEK                       |           |         |                         |      | Mascot      |
| 1112.5768  | 1112.5427   | -0.0341  | -31       | 232        | 241      | VTYSMIGGLR                      | 11        | 0       | Oxidation (M)[5]        |      | Mascot      |
| 1112.5768  | 1112.5427   | -0.0341  | -31       | 232        | 241      | VTYSMIGGLR                      |           |         | Oxidation (M)[5]        |      | Mascot      |
| 1158.6517  | 1158.5647   | -0.087   | -75       | 271        | 282      | GVLLYGPPGTGK                    |           |         |                         |      | Mascot      |
| 1687.865   | 1687.9005   | 0.0355   | 21        | 397        | 411      | FDKELEIGVPNV DGR                |           |         |                         |      | Mascot      |
| 1714.8403  | 1714.7578   | -0.0825  | -48       | 48         | 61       | WRSYLAQMSVNTMK                  |           |         |                         |      | Mascot      |
| 1734.9281  | 1734.8041   | -0.124   | -71       | 534        | 550      | GVLLYGPPGCSKTMIAK               |           |         |                         |      | Mascot      |
| 3337.5125  | 3337.6626   | 0.1501   | 45        | 201        | 231      | SAAGSFYSVCSSTNLSLSEVDLRDEQDQGSK |           |         | Carbamidomethyl (C)[10] |      | Mascot      |

11 eukaryotic translation initiation factor 3 subunit K [Danio rerio] gi|62955135 25410.7 4.92 7 39 0

Peptide Information

| Calc. Mass | Obsrv. Mass | $\pm$ da | $\pm$ ppm | Start Seq. | End Seq. | Sequence         | Ion Score | C. I. % | Modification     | Rank | Result Type |
|------------|-------------|----------|-----------|------------|----------|------------------|-----------|---------|------------------|------|-------------|
| 842.5206   | 842.4869    | -0.0337  | -40       | 15         | 21       | LLRGIDR          |           |         |                  |      | Mascot      |
| 870.5519   | 870.5179    | -0.034   | -39       | 10         | 17       | ANVGKLLR         |           |         |                  |      | Mascot      |
| 999.4564   | 999.5469    | 0.0905   | 91        | 2          | 9        | ATTFEQMR         |           |         | Oxidation (M)[7] |      | Mascot      |
| 1130.4969  | 1130.5626   | 0.0657   | 58        | 1          | 9        | MATTFEQMR        |           |         | Oxidation (M)[1] |      | Mascot      |
| 1319.6589  | 1319.5454   | -0.1135  | -86       | 22         | 32       | YNPENLATLER      |           |         |                  |      | Mascot      |
| 1658.8669  | 1658.7775   | -0.0894  | -54       | 158        | 172      | LLAEMLGDP LDTQVK |           |         | Oxidation (M)[5] |      | Mascot      |
| 1755.8265  | 1755.9912   | 0.1647   | 94        | 88         | 101      | CMIDQTHQEERPIR   |           |         |                  |      | Mascot      |

12 Wu:fc02b10 protein [Danio rerio] gi|189441648 71787.8 6.64 11 38 0

Peptide Information

| Calc. Mass | Obsrv. Mass | $\pm$ da | $\pm$ ppm | Start Seq. | End Seq. | Sequence  | Ion Score | C. I. % | Modification                             | Rank | Result Type |
|------------|-------------|----------|-----------|------------|----------|-----------|-----------|---------|------------------------------------------|------|-------------|
| 1051.5315  | 1051.6851   | 0.1536   | 146       | 232        | 240      | DLLCPFCLK |           |         |                                          |      | Mascot      |
| 1112.5261  | 1112.5427   | 0.0166   | 15        | 109        | 117      | CNSCLKMLK | 11        | 0       | Carbamidomethyl (C)[4], Oxidation (M)[7] |      | Mascot      |
| 1112.5261  | 1112.5427   | 0.0166   | 15        | 109        | 117      | CNSCLKMLK |           |         | Carbamidomethyl (C)[1], Oxidation (M)[7] |      | Mascot      |



|    |                                                                      |           |         |      |              |         |                         |   |                            |        |
|----|----------------------------------------------------------------------|-----------|---------|------|--------------|---------|-------------------------|---|----------------------------|--------|
|    | 1165.5745                                                            | 1165.7117 | 0.1372  | 118  | 232          | 240     | DLTCPFCLK               |   | Carbamidomethyl (C)[4,7]   | Mascot |
|    | 1165.5745                                                            | 1165.7117 | 0.1372  | 118  | 232          | 240     | DLTCPFCLK               |   | Carbamidomethyl (C)[4,7]   | Mascot |
|    | 1196.6093                                                            | 1196.7239 | 0.1146  | 96   | 362          | 370     | CLYNTELKR               |   | Carbamidomethyl (C)[1]     | Mascot |
|    | 1245.7347                                                            | 1245.5614 | -0.1733 | -139 | 438          | 448     | GVRSLTLVCLK             |   | Carbamidomethyl (C)[9]     | Mascot |
|    | 1464.7443                                                            | 1464.7155 | -0.0288 | -20  | 79           | 90      | LIMLVSDFYYGK            |   | Oxidation (M)[3]           | Mascot |
|    | 1472.5868                                                            | 1472.7291 | 0.1423  | 97   | 244          | 254     | SGHMYMQHYMR             |   | Oxidation (M)[4,6]         | Mascot |
|    | 1633.8658                                                            | 1633.8428 | -0.023  | -14  | 77           | 90      | GKLIMLVSDFYYGK          |   |                            | Mascot |
|    | 1659.8296                                                            | 1659.7399 | -0.0897 | -54  | 1            | 16      | ADNGKVINEANNSVSK        |   |                            | Mascot |
|    | 1659.8296                                                            | 1659.7399 | -0.0897 | -54  | 1            | 16      | ADNGKVINEANNSVSK        |   |                            | Mascot |
|    | 2077.0093                                                            | 2076.991  | -0.0183 | -9   | 178          | 194     | ICELAFETEQVLLHMR        |   | Oxidation (M)[16]          | Mascot |
|    | 2224.9321                                                            | 2225.0566 | 0.1245  | 56   | 195          | 212     | DNHKPGEMPYGCQVCN<br>YR  |   | Carbamidomethyl (C)[12,15] | Mascot |
|    | 2224.9321                                                            | 2225.0566 | 0.1245  | 56   | 195          | 212     | DNHKPGEMPYGCQVCN<br>YR  |   | Carbamidomethyl (C)[12,15] | Mascot |
|    | 2283.0247                                                            | 2283.1147 | 0.09    | 39   | 213          | 231     | SSFFCDVDNHFRTVHEN<br>TK |   |                            | Mascot |
|    | 2283.0247                                                            | 2283.1147 | 0.09    | 39   | 213          | 231     | SSFFCDVDNHFRTVHEN<br>TK |   |                            | Mascot |
| 13 | polymerase (DNA directed), delta 2, regulatory subunit [Danio rerio] |           |         |      | gi 169145957 | 28619.5 | 5.18                    | 8 | 38                         | 0      |

#### Peptide Information

| Calc. Mass | Obsrv. Mass | ± da    | ± ppm | Start Seq. | End Seq. | Sequence        | Ion Score | C. I. % | Modification           | Rank | Result Type |
|------------|-------------|---------|-------|------------|----------|-----------------|-----------|---------|------------------------|------|-------------|
| 1034.6244  | 1034.498    | -0.1264 | -122  | 151        | 160      | FVTGSVIAIK      |           |         |                        |      | Mascot      |
| 1081.5234  | 1081.4974   | -0.026  | -24   | 1          | 9        | MFSDEVLEPK      |           |         | Oxidation (M)[1]       |      | Mascot      |
| 1092.5541  | 1092.538    | -0.0161 | -15   | 79         | 87       | KLCDLQMGK       |           |         | Carbamidomethyl (C)[3] |      | Mascot      |
| 1165.6285  | 1165.7117   | 0.0832  | 71    | 88         | 97       | ECVIVGTIFK      |           |         | Carbamidomethyl (C)[2] |      | Mascot      |
| 1165.6285  | 1165.7117   | 0.0832  | 71    | 88         | 97       | ECVIVGTIFK      |           |         | Carbamidomethyl (C)[2] |      | Mascot      |
| 1403.8005  | 1403.7134   | -0.0871 | -62   | 193        | 206      | FVLLASGLGLNGSR  |           |         |                        |      | Mascot      |
| 1472.6587  | 1472.7291   | 0.0704  | 48    | 26         | 38       | AEPAYSGCSEFR    |           |         |                        |      | Mascot      |
| 1658.8496  | 1658.7775   | -0.0721 | -43   | 108        | 121      | EISEEHNLLPQPPR  |           |         |                        |      | Mascot      |
| 1950.9655  | 1950.8762   | -0.0893 | -46   | 124        | 139      | YISQSDELILEDLQR |           |         |                        |      | Mascot      |
| 1950.9655  | 1950.8762   | -0.0893 | -46   | 124        | 139      | YISQSDELILEDLQR |           |         |                        |      | Mascot      |

|    |                                                            |  |  |  |  |              |         |     |   |    |   |
|----|------------------------------------------------------------|--|--|--|--|--------------|---------|-----|---|----|---|
| 14 | PREDICTED: hypothetical protein LOC100536781 [Danio rerio] |  |  |  |  | gi 326667347 | 18770.6 | 9.8 | 8 | 38 | 0 |
|----|------------------------------------------------------------|--|--|--|--|--------------|---------|-----|---|----|---|

#### Peptide Information

| Calc. Mass | Obsrv. Mass | ± da  | ± ppm | Start Seq. | End Seq. | Sequence | Ion Score | C. I. % | Modification | Rank | Result Type |
|------------|-------------|-------|-------|------------|----------|----------|-----------|---------|--------------|------|-------------|
| 996.5109   | 996.5699    | 0.059 | 59    | 121        | 128      | LHIDQNEK |           |         |              |      | Mascot      |

|           |           |         |      |     |     |                |  |  |  |                  |  |        |
|-----------|-----------|---------|------|-----|-----|----------------|--|--|--|------------------|--|--------|
| 1112.5404 | 1112.5427 | 0.0023  | 2    | 17  | 27  | FECGVSKGASK    |  |  |  |                  |  | Mascot |
| 1112.5404 | 1112.5427 | 0.0023  | 2    | 17  | 27  | FECGVSKGASK    |  |  |  |                  |  | Mascot |
| 1130.5775 | 1130.5626 | -0.0149 | -13  | 92  | 100 | INLPYHMAR      |  |  |  | Oxidation (M)[7] |  | Mascot |
| 1158.6226 | 1158.5647 | -0.0579 | -50  | 80  | 90  | ASEGRVGDVLR    |  |  |  |                  |  | Mascot |
| 1196.682  | 1196.7239 | 0.0419  | 35   | 146 | 156 | KIVGHSTMPVK    |  |  |  |                  |  | Mascot |
| 1503.6785 | 1503.7736 | 0.0951  | 63   | 4   | 16  | NGCTDEYISNFLK  |  |  |  |                  |  | Mascot |
| 1613.8857 | 1613.682  | -0.2037 | -126 | 42  | 55  | QRIVDSQLEVEAK  |  |  |  |                  |  | Mascot |
| 1714.8595 | 1714.7578 | -0.1017 | -59  | 92  | 105 | INLPYHMARYHGSR |  |  |  |                  |  | Mascot |

15 3-hydroxyisobutyrate dehydrogenase b [Danio rerio] gi|41055658 34594.5 8.35 8 38 0

Peptide Information

| Calc. Mass | Obsrv. Mass | ± da    | ± ppm | Start Seq. | End Seq. | Sequence                    | Ion Score | C. I. % | Modification                              | Rank | Result Type |
|------------|-------------|---------|-------|------------|----------|-----------------------------|-----------|---------|-------------------------------------------|------|-------------|
| 864.4131   | 864.4699    | 0.0568  | 66    | 135        | 142      | EMAVAAEK                    |           |         | Oxidation (M)[2]                          |      | Mascot      |
| 1130.4904  | 1130.5626   | 0.0722  | 64    | 305        | 314      | MMCGRGYANK                  |           |         |                                           |      | Mascot      |
| 1245.6262  | 1245.5614   | -0.0648 | -52   | 315        | 324      | DFSSVFQFLR                  |           |         |                                           |      | Mascot      |
| 1734.8666  | 1734.8041   | -0.0625 | -36   | 33         | 49       | TQVGFIGLGNMGNPMAK           |           |         |                                           |      | Mascot      |
| 1755.8258  | 1755.9912   | 0.1654  | 94    | 164        | 179      | LTFMVGGPEEEFNAAK            |           |         | Oxidation (M)[4]                          |      | Mascot      |
| 2030.9858  | 2030.9534   | -0.0324 | -16   | 15         | 32       | CNNHVNNAVQVSIRSMAS<br>K     |           |         | Carbamidomethyl (C)[1], Oxidation (M)[15] |      | Mascot      |
| 2239.1033  | 2239.0676   | -0.0357 | -16   | 28         | 49       | SMASKTQVGFIGLGNMG<br>NPMAK  |           |         |                                           |      | Mascot      |
| 2299.0879  | 2299.1038   | 0.0159  | 7     | 180        | 202      | ELLSCMGANVVYCGQVG<br>TGQAAK |           |         |                                           |      | Mascot      |

16 DNA polymerase delta subunit 2 [Danio rerio] gi|47086937 51794 4.84 10 37 0

Peptide Information

| Calc. Mass | Obsrv. Mass | ± da    | ± ppm | Start Seq. | End Seq. | Sequence           | Ion Score | C. I. % | Modification            | Rank | Result Type |
|------------|-------------|---------|-------|------------|----------|--------------------|-----------|---------|-------------------------|------|-------------|
| 1034.6244  | 1034.498    | -0.1264 | -122  | 151        | 160      | FVTGSVIAIK         |           |         |                         |      | Mascot      |
| 1081.5234  | 1081.4974   | -0.026  | -24   | 1          | 9        | MFSDVLEPK          |           |         | Oxidation (M)[1]        |      | Mascot      |
| 1196.6746  | 1196.7239   | 0.0493  | 41    | 61         | 70       | QILTERATHK         |           |         |                         |      | Mascot      |
| 1403.8005  | 1403.7134   | -0.0871 | -62   | 193        | 206      | FVLLASGLGLNGSR     |           |         |                         |      | Mascot      |
| 1418.7607  | 1418.7217   | -0.039  | -27   | 56         | 66       | LMQMRQILTER        |           |         |                         |      | Mascot      |
| 1472.6587  | 1472.7291   | 0.0704  | 48    | 26         | 38       | AEPAYSGCSEFR       |           |         |                         |      | Mascot      |
| 1658.8496  | 1658.7775   | -0.0721 | -43   | 108        | 121      | EISEEHNLLPQPPR     |           |         |                         |      | Mascot      |
| 1950.9655  | 1950.8762   | -0.0893 | -46   | 124        | 139      | YISQSDELIIEDELQR   |           |         |                         |      | Mascot      |
| 1950.9655  | 1950.8762   | -0.0893 | -46   | 124        | 139      | YISQSDELIIEDELQR   |           |         |                         |      | Mascot      |
| 2079.0005  | 2078.9702   | -0.0303 | -15   | 371        | 388      | HLAPTAPDTLGCYPFYQK |           |         | Carbamidomethyl (C)[12] |      | Mascot      |
| 2079.0005  | 2078.9702   | -0.0303 | -15   | 371        | 388      | HLAPTAPDTLGCYPFYQK |           |         | Carbamidomethyl (C)[12] |      | Mascot      |

|    |                                                               |          |         |     |    |             |                         |      |    |    |   |                  |        |
|----|---------------------------------------------------------------|----------|---------|-----|----|-------------|-------------------------|------|----|----|---|------------------|--------|
|    | 2142.0642                                                     | 2141.989 | -0.0752 | -35 | 79 | 97          | KLCDLQMGEECVIVGTIF<br>K |      |    |    |   | Oxidation (M)[7] | Mascot |
|    | 2142.0642                                                     | 2141.989 | -0.0752 | -35 | 79 | 97          | KLCDLQMGEECVIVGTIF<br>K |      |    |    |   | Oxidation (M)[7] | Mascot |
| 17 | probable arginyl-tRNA synthetase, mitochondrial [Danio rerio] |          |         |     |    | gi 41055429 | 67239.6                 | 7.96 | 11 | 37 | 0 |                  |        |

#### Peptide Information

| Calc. Mass | Obsrv. Mass | ± da    | ± ppm | Start Seq. | End Seq. | Sequence          | Ion Score | C. I. | % Modification                           | Rank | Result Type |
|------------|-------------|---------|-------|------------|----------|-------------------|-----------|-------|------------------------------------------|------|-------------|
| 837.4478   | 837.4025    | -0.0453 | -54   | 140        | 146      | FHAGHLR           |           |       |                                          |      | Mascot      |
| 837.4478   | 837.4025    | -0.0453 | -54   | 140        | 146      | FHAGHLR           |           |       |                                          |      | Mascot      |
| 856.4246   | 856.5021    | 0.0775  | 90    | 2          | 7        | ACFFRR            |           |       | Carbamidomethyl (C)[2]                   |      | Mascot      |
| 999.5945   | 999.5469    | -0.0476 | -48   | 159        | 167      | KALGNEVIR         |           |       |                                          |      | Mascot      |
| 1003.46    | 1003.4822   | 0.0222  | 22    | 1          | 7        | MACFFRR           |           |       | Carbamidomethyl (C)[3], Oxidation (M)[1] |      | Mascot      |
| 1112.5582  | 1112.5427   | -0.0155 | -14   | 336        | 345      | SDGTSLYITR        |           |       |                                          |      | Mascot      |
| 1112.5582  | 1112.5427   | -0.0155 | -14   | 336        | 345      | SDGTSLYITR        |           |       |                                          |      | Mascot      |
| 1165.7052  | 1165.7117   | 0.0065  | 6     | 514        | 523      | SVSLLQHLLR        |           |       |                                          |      | Mascot      |
| 1165.7052  | 1165.7117   | 0.0065  | 6     | 514        | 523      | SVSLLQHLLR        |           |       |                                          |      | Mascot      |
| 1301.6219  | 1301.5911   | -0.0308 | -24   | 436        | 446      | ELEDPELTAER       |           |       |                                          |      | Mascot      |
| 1418.8365  | 1418.7217   | -0.1148 | -81   | 147        | 159      | STIIGNFIANLKK     |           |       |                                          |      | Mascot      |
| 1472.7644  | 1472.7291   | -0.0353 | -24   | 263        | 273      | HFREITIHEYK       |           |       |                                          |      | Mascot      |
| 1659.87    | 1659.7399   | -0.1301 | -78   | 101        | 115      | LLDQLRSDPDGFGVK   |           |       |                                          |      | Mascot      |
| 1659.87    | 1659.7399   | -0.1301 | -78   | 101        | 115      | LLDQLRSDPDGFGVK   |           |       |                                          |      | Mascot      |
| 2030.843   | 2030.9534   | 0.1104  | 54    | 496        | 513      | QQDCEISCDFSPLTDSR |           |       |                                          |      | Mascot      |

|    |                                              |  |  |  |  |             |         |      |   |    |   |  |  |
|----|----------------------------------------------|--|--|--|--|-------------|---------|------|---|----|---|--|--|
| 18 | hypothetical protein LOC641496 [Danio rerio] |  |  |  |  | gi 82658306 | 25293.7 | 5.02 | 7 | 37 | 0 |  |  |
|----|----------------------------------------------|--|--|--|--|-------------|---------|------|---|----|---|--|--|

#### Peptide Information

| Calc. Mass | Obsrv. Mass | ± da    | ± ppm | Start Seq. | End Seq. | Sequence                 | Ion Score | C. I. | % Modification          | Rank | Result Type |
|------------|-------------|---------|-------|------------|----------|--------------------------|-----------|-------|-------------------------|------|-------------|
| 1196.5906  | 1196.7239   | 0.1333  | 111   | 57         | 66       | AEEQVEVHQK               |           |       |                         |      | Mascot      |
| 1418.7386  | 1418.7217   | -0.0169 | -12   | 143        | 154      | TGDLRRPYPTDK             |           |       |                         |      | Mascot      |
| 1472.7777  | 1472.7291   | -0.0486 | -33   | 67         | 79       | VIALQAEINQMDK            |           |       |                         |      | Mascot      |
| 1714.8026  | 1714.7578   | -0.0448 | -26   | 38         | 51       | EIVDTMLFLDNNMK           |           |       | Oxidation (M)[6,13]     |      | Mascot      |
| 1951.0331  | 1950.8762   | -0.1569 | -80   | 125        | 142      | LAHRISASNGVCAPLAWK       |           |       | Carbamidomethyl (C)[12] |      | Mascot      |
| 1951.0331  | 1950.8762   | -0.1569 | -80   | 125        | 142      | LAHRISASNGVCAPLAWK       |           |       | Carbamidomethyl (C)[12] |      | Mascot      |
| 2299.2327  | 2299.1038   | -0.1289 | -56   | 67         | 86       | VIALQAEINQMDKLTNEL<br>QK |           |       |                         |      | Mascot      |
| 2310.1719  | 2309.905    | -0.2669 | -116  | 38         | 56       | EIVDTMLFLDNNMKQLLE<br>K  |           |       | Oxidation (M)[6]        |      | Mascot      |

19 Pold2 protein [Danio rerio] gi|28279582 51854 4.84 10 37 0

Peptide Information

| Calc. Mass | Obsrv. Mass | ± da    | ± ppm | Start Seq. | End Seq. | Sequence                | Ion Score | C. I. % | Modification            | Rank | Result Type |
|------------|-------------|---------|-------|------------|----------|-------------------------|-----------|---------|-------------------------|------|-------------|
| 1034.6244  | 1034.498    | -0.1264 | -122  | 151        | 160      | FVTGSVIAIK              |           |         |                         |      | Mascot      |
| 1081.5234  | 1081.4974   | -0.026  | -24   | 1          | 9        | MFSDVLEPK               |           |         | Oxidation (M)[1]        |      | Mascot      |
| 1196.6746  | 1196.7239   | 0.0493  | 41    | 61         | 70       | QILTERATHK              |           |         |                         |      | Mascot      |
| 1403.8005  | 1403.7134   | -0.0871 | -62   | 193        | 206      | FVLLASGLGLNGSR          |           |         |                         |      | Mascot      |
| 1418.7607  | 1418.7217   | -0.039  | -27   | 56         | 66       | LMQMRQILTER             |           |         |                         |      | Mascot      |
| 1472.6587  | 1472.7291   | 0.0704  | 48    | 26         | 38       | AEPAYSGCSEFR            |           |         |                         |      | Mascot      |
| 1658.8496  | 1658.7775   | -0.0721 | -43   | 108        | 121      | EISEEHNLLQPPR           |           |         |                         |      | Mascot      |
| 1950.9655  | 1950.8762   | -0.0893 | -46   | 124        | 139      | YISQSDEILEDELQR         |           |         |                         |      | Mascot      |
| 1950.9655  | 1950.8762   | -0.0893 | -46   | 124        | 139      | YISQSDEILEDELQR         |           |         |                         |      | Mascot      |
| 2079.0005  | 2078.9702   | -0.0303 | -15   | 371        | 388      | HLAPTAPDTLGCYPFYQK      |           |         | Carbamidomethyl (C)[12] |      | Mascot      |
| 2079.0005  | 2078.9702   | -0.0303 | -15   | 371        | 388      | HLAPTAPDTLGCYPFYQK      |           |         | Carbamidomethyl (C)[12] |      | Mascot      |
| 2142.0642  | 2141.989    | -0.0752 | -35   | 79         | 97       | KLCDLQMGEECVIVGTIF<br>K |           |         | Oxidation (M)[7]        |      | Mascot      |
| 2142.0642  | 2141.989    | -0.0752 | -35   | 79         | 97       | KLCDLQMGEECVIVGTIF<br>K |           |         | Oxidation (M)[7]        |      | Mascot      |

20 PREDICTED: interferon-induced very large GTPase 1-like [Danio rerio] gi|326665761 191677.2 6.42 22 36 0

Peptide Information

| Calc. Mass | Obsrv. Mass | ± da    | ± ppm | Start Seq. | End Seq. | Sequence    | Ion Score | C. I. % | Modification     | Rank | Result Type |
|------------|-------------|---------|-------|------------|----------|-------------|-----------|---------|------------------|------|-------------|
| 842.473    | 842.4869    | 0.0139  | 16    | 920        | 927      | SIISHASK    |           |         |                  |      | Mascot      |
| 864.4573   | 864.4699    | 0.0126  | 15    | 163        | 169      | DAFKQQK     |           |         |                  |      | Mascot      |
| 999.5581   | 999.5469    | -0.0112 | -11   | 1061       | 1068     | LNDILQQR    |           |         |                  |      | Mascot      |
| 1003.5604  | 1003.4822   | -0.0782 | -78   | 1128       | 1135     | IKDIDIMR    |           |         |                  |      | Mascot      |
| 1034.5629  | 1034.498    | -0.0649 | -63   | 1620       | 1627     | FQKNLEQK    |           |         |                  |      | Mascot      |
| 1045.5887  | 1045.5347   | -0.054  | -52   | 613        | 621      | QAELEKISK   |           |         |                  |      | Mascot      |
| 1051.5419  | 1051.6851   | 0.1432  | 136   | 1623       | 1630     | NLEQKYEK    |           |         |                  |      | Mascot      |
| 1081.6364  | 1081.4974   | -0.139  | -129  | 1358       | 1366     | SNLEKHILK   |           |         |                  |      | Mascot      |
| 1092.5571  | 1092.538    | -0.0191 | -17   | 1328       | 1336     | EPIEQSVYK   |           |         |                  |      | Mascot      |
| 1158.7245  | 1158.5647   | -0.1598 | -138  | 1404       | 1413     | FNISVLPKIK  |           |         |                  |      | Mascot      |
| 1245.7214  | 1245.5614   | -0.16   | -128  | 105        | 113      | LFQRLHLYR   |           |         |                  |      | Mascot      |
| 1301.6519  | 1301.5911   | -0.0608 | -47   | 293        | 303      | SHLMNSLINEK |           |         | Oxidation (M)[4] |      | Mascot      |
| 1319.626   | 1319.5454   | -0.0806 | -61   | 866        | 877      | LAAKDEVCAER |           |         |                  |      | Mascot      |

|           |           |         |      |      |      |                              |  |  |  |                        |  |        |
|-----------|-----------|---------|------|------|------|------------------------------|--|--|--|------------------------|--|--------|
| 1472.6937 | 1472.7291 | 0.0354  | 24   | 636  | 648  | EISQIYESCSSVK                |  |  |  |                        |  | Mascot |
| 1633.7415 | 1633.8428 | 0.1013  | 62   | 1367 | 1379 | TLAEEENFDKYMK                |  |  |  | Oxidation (M)[12]      |  | Mascot |
| 1659.8483 | 1659.7399 | -0.1084 | -65  | 471  | 485  | GREAAQQMIGLLDNK              |  |  |  | Oxidation (M)[8]       |  | Mascot |
| 1659.8483 | 1659.7399 | -0.1084 | -65  | 471  | 485  | GREAAQQMIGLLDNK              |  |  |  | Oxidation (M)[8]       |  | Mascot |
| 2030.9739 | 2030.9534 | -0.0205 | -10  | 755  | 771  | TEMNFDYILVVDTEGLR            |  |  |  | Oxidation (M)[3]       |  | Mascot |
| 2225.1033 | 2225.0566 | -0.0467 | -21  | 293  | 310  | SHLMNSLINEKHNTFFHR           |  |  |  |                        |  | Mascot |
| 2225.1033 | 2225.0566 | -0.0467 | -21  | 293  | 310  | SHLMNSLINEKHNTFFHR           |  |  |  |                        |  | Mascot |
| 2239.1174 | 2239.0676 | -0.0498 | -22  | 435  | 454  | GAIQDCLLEASANFRLDAFK         |  |  |  | Carbamidomethyl (C)[6] |  | Mascot |
| 2310.1145 | 2309.905  | -0.2095 | -91  | 320  | 340  | VLMDGVVEIAWFPCPSGKDTDK       |  |  |  |                        |  | Mascot |
| 2381.2458 | 2380.958  | -0.2878 | -121 | 1423 | 1444 | IVKAAHQSTEEVNSGDVGLWLK       |  |  |  |                        |  | Mascot |
| 3337.7024 | 3337.6626 | -0.0398 | -12  | 387  | 414  | IIQELFTNPKPLICLFTEDDSNIFELER |  |  |  |                        |  | Mascot |

21 hypothetical protein LOC559906 [Danio rerio] gi|198282017 48541.8 5.61 10 36 0

#### Peptide Information

| Calc. Mass | Obsrv. Mass | ± da    | ± ppm | Start Seq. | End Seq. | Sequence            | Ion Score | C. I. | % Modification            | Rank | Result Type |
|------------|-------------|---------|-------|------------|----------|---------------------|-----------|-------|---------------------------|------|-------------|
| 882.4349   | 882.5418    | 0.1069  | 121   | 1          | 8        | MSSSLSVR            |           |       | Oxidation (M)[1]          |      | Mascot      |
| 1051.5419  | 1051.6851   | 0.1432  | 136   | 246        | 254      | SQYEGIVQK           |           |       |                           |      | Mascot      |
| 1158.6477  | 1158.5647   | -0.083  | -72   | 96         | 105      | SNADLELR            |           |       |                           |      | Mascot      |
| 1374.7223  | 1374.6014   | -0.1209 | -88   | 92         | 103      | SLEKSNADLELR        |           |       |                           |      | Mascot      |
| 1403.6219  | 1403.7134   | 0.0915  | 65    | 207        | 217      | KNHEEEMDSL          |           |       | Oxidation (M)[7]          |      | Mascot      |
| 1467.7914  | 1467.7416   | -0.0498 | -34   | 180        | 192      | AKSDHDQIATLR        |           |       |                           |      | Mascot      |
| 1503.8641  | 1503.7736   | -0.0905 | -60   | 31         | 45       | SKAAVSFAAAKPLSR     |           |       |                           |      | Mascot      |
| 1755.8983  | 1755.9912   | 0.0929  | 53    | 218        | 233      | ARIAQEDVNVEVDAAR    |           |       |                           |      | Mascot      |
| 2298.0601  | 2298.1064   | 0.0463  | 20    | 115        | 134      | GHDIDSMMAQAHAEQEVK  |           |       | Oxidation (M)[7,8]        |      | Mascot      |
| 2298.0601  | 2298.1064   | 0.0463  | 20    | 115        | 134      | GHDIDSMMAQAHAEQEVK  |           |       | Oxidation (M)[7,8]        |      | Mascot      |
| 2299.0151  | 2299.1038   | 0.0887  | 39    | 160        | 178      | WETESAMCQSVERDCVALK |           |       | Carbamidomethyl (C)[8,15] |      | Mascot      |

22 complement factor H-like 1 protein [Danio rerio] gi|300719712 82032 6.2 13 36 0

#### Peptide Information

| Calc. Mass | Obsrv. Mass | ± da   | ± ppm | Start Seq. | End Seq. | Sequence  | Ion Score | C. I. | % Modification   | Rank | Result Type |
|------------|-------------|--------|-------|------------|----------|-----------|-----------|-------|------------------|------|-------------|
| 850.4087   | 850.5184    | 0.1097 | 129   | 303        | 310      | AEVATCTR  |           |       |                  |      | Mascot      |
| 864.4607   | 864.4699    | 0.0092 | 11    | 74         | 81       | VGQTCTKK  |           |       |                  |      | Mascot      |
| 999.4927   | 999.5469    | 0.0542 | 54    | 114        | 121      | KGYEMISR  |           |       | Oxidation (M)[5] |      | Mascot      |
| 1045.4619  | 1045.5347   | 0.0728 | 70    | 382        | 390      | EDCHDLSVK |           |       |                  |      | Mascot      |

|    |                                                                                         |           |         |     |              |       |                            |    |                            |        |
|----|-----------------------------------------------------------------------------------------|-----------|---------|-----|--------------|-------|----------------------------|----|----------------------------|--------|
|    | 1245.5428                                                                               | 1245.5614 | 0.0186  | 15  | 648          | 656   | QYYRCENGR                  |    | Carbamidomethyl (C)[5]     | Mascot |
|    | 1374.6357                                                                               | 1374.6014 | -0.0343 | -25 | 586          | 597   | IPEGEWICENGK               |    |                            | Mascot |
|    | 1658.8975                                                                               | 1658.7775 | -0.12   | -72 | 51           | 64    | VFCQIGFTGIYILK             |    | Carbamidomethyl (C)[3]     | Mascot |
|    | 1701.7975                                                                               | 1701.8567 | 0.0592  | 35  | 573          | 585   | EILNYQCMKPYDK              |    | Carbamidomethyl (C)[7]     | Mascot |
|    | 1870.7799                                                                               | 1870.8503 | 0.0704  | 38  | 287          | 301   | LDESKNYECDSGYYK            |    | Carbamidomethyl (C)[9]     | Mascot |
|    | 2239.0071                                                                               | 2239.0676 | 0.0605  | 27  | 457          | 477   | DQETAEVDCDPGFISSTP<br>SIK  |    |                            | Mascot |
|    | 2247.1299                                                                               | 2247.0405 | -0.0894 | -40 | 51           | 69    | VFCQIGFTGIYILKCENGK        |    | Carbamidomethyl (C)[3, 15] | Mascot |
|    | 2284.1248                                                                               | 2284.1089 | -0.0159 | -7  | 311          | 332   | DGLTPKPLCAGMCARPDI<br>PNAK |    | Oxidation (M)[12]          | Mascot |
|    | 2297.0867                                                                               | 2297.1257 | 0.039   | 17  | 382          | 401   | EDCHDLSVKNGFIYSQSL<br>NK   |    |                            | Mascot |
| 23 | novel protein containing multiple sushi domains (SCR repeat) (zgc:123186) [Danio rerio] |           |         |     | gi 157885953 | 81834 | 6.34                       | 12 | 35                         | 0      |

#### Peptide Information

| Calc. Mass | Obsrv. Mass | ± da    | ± ppm | Start Seq. | End Seq. | Sequence                   | Ion Score | C. I. % | Modification              | Rank | Result Type |
|------------|-------------|---------|-------|------------|----------|----------------------------|-----------|---------|---------------------------|------|-------------|
| 850.4087   | 850.5184    | 0.1097  | 129   | 303        | 310      | AEVATCTR                   |           |         |                           |      | Mascot      |
| 999.4563   | 999.5469    | 0.0906  | 91    | 533        | 541      | STVFCSNGK                  |           |         | Carbamidomethyl (C)[5]    |      | Mascot      |
| 1045.4619  | 1045.5347   | 0.0728  | 70    | 382        | 390      | EDCHDLSVK                  |           |         |                           |      | Mascot      |
| 1245.5428  | 1245.5614   | 0.0186  | 15    | 648        | 656      | QYYRCENGR                  |           |         | Carbamidomethyl (C)[5]    |      | Mascot      |
| 1374.6357  | 1374.6014   | -0.0343 | -25   | 586        | 597      | IPEGEWICENGK               |           |         |                           |      | Mascot      |
| 1658.8975  | 1658.7775   | -0.12   | -72   | 51         | 64       | VFCQIGFTGIYILK             |           |         | Carbamidomethyl (C)[3]    |      | Mascot      |
| 1701.7975  | 1701.8567   | 0.0592  | 35    | 573        | 585      | EILNYQCMKPYDK              |           |         | Carbamidomethyl (C)[7]    |      | Mascot      |
| 1870.7799  | 1870.8503   | 0.0704  | 38    | 287        | 301      | LDESKNYECDSGYYK            |           |         | Carbamidomethyl (C)[9]    |      | Mascot      |
| 2239.0071  | 2239.0676   | 0.0605  | 27    | 457        | 477      | DQETAEVDCDPGFISSTP<br>SIK  |           |         |                           |      | Mascot      |
| 2247.1299  | 2247.0405   | -0.0894 | -40   | 51         | 69       | VFCQIGFTGIYILKCENGK        |           |         | Carbamidomethyl (C)[3,15] |      | Mascot      |
| 2284.1248  | 2284.1089   | -0.0159 | -7    | 311        | 332      | DGLTPKPLCAGMCARPDI<br>PNAK |           |         | Oxidation (M)[12]         |      | Mascot      |
| 2297.0867  | 2297.1257   | 0.039   | 17    | 382        | 401      | EDCHDLSVKNGFIYSQSL<br>NK   |           |         |                           |      | Mascot      |

24 Dual oxidase 1 [Danio rerio] gi|115391856 171607.2 7.37 17 35 0

#### Peptide Information

| Calc. Mass | Obsrv. Mass | ± da   | ± ppm | Start Seq. | End Seq. | Sequence   | Ion Score | C. I. % | Modification | Rank | Result Type |
|------------|-------------|--------|-------|------------|----------|------------|-----------|---------|--------------|------|-------------|
| 850.4273   | 850.5184    | 0.0911 | 107   | 1063       | 1069     | NLITMCR    |           |         |              |      | Mascot      |
| 870.4144   | 870.5179    | 0.1035 | 119   | 494        | 499      | FWFENK     |           |         |              |      | Mascot      |
| 997.5213   | 997.5798    | 0.0585 | 59    | 993        | 999      | FIENYRR    |           |         |              |      | Mascot      |
| 1034.588   | 1034.498    | -0.09  | -87   | 783        | 792      | AEFASVLGLK |           |         |              |      | Mascot      |

|    |                                          |           |         |     |             |      |                           |      |    |    |   |                   |  |  |  |  |        |
|----|------------------------------------------|-----------|---------|-----|-------------|------|---------------------------|------|----|----|---|-------------------|--|--|--|--|--------|
|    | 1092.5684                                | 1092.538  | -0.0304 | -28 | 1302        | 1310 | LREAYSPEK                 |      |    |    |   |                   |  |  |  |  | Mascot |
|    | 1216.6909                                | 1216.6155 | -0.0754 | -62 | 969         | 977  | LYVRPQRER                 |      |    |    |   |                   |  |  |  |  | Mascot |
|    | 1245.5754                                | 1245.5614 | -0.014  | -11 | 97          | 107  | AGCPPEFMHIK               |      |    |    |   | Oxidation (M)[8]  |  |  |  |  | Mascot |
|    | 1319.6736                                | 1319.5454 | -0.1282 | -97 | 772         | 782  | TREALQCELTR               |      |    |    |   |                   |  |  |  |  | Mascot |
|    | 1418.8154                                | 1418.7217 | -0.0937 | -66 | 311         | 323  | FGLTLAPPGVYKR             |      |    |    |   |                   |  |  |  |  | Mascot |
|    | 1633.8214                                | 1633.8428 | 0.0214  | 13  | 59          | 74   | ISTTAMSGQSGLLSHK          |      |    |    |   | Oxidation (M)[6]  |  |  |  |  | Mascot |
|    | 1659.8199                                | 1659.7399 | -0.08   | -48 | 35          | 48   | LYPAQYMDGVYLAR            |      |    |    |   |                   |  |  |  |  | Mascot |
|    | 1659.8199                                | 1659.7399 | -0.08   | -48 | 35          | 48   | LYPAQYMDGVYLAR            |      |    |    |   |                   |  |  |  |  | Mascot |
|    | 1755.9058                                | 1755.9912 | 0.0854  | 49  | 903         | 918  | DHSAQLNIKGMEVLGK          |      |    |    |   | Oxidation (M)[11] |  |  |  |  | Mascot |
|    | 1767.8601                                | 1767.8215 | -0.0386 | -22 | 890         | 902  | DRFSWEDFHLLR              |      |    |    |   |                   |  |  |  |  | Mascot |
|    | 1777.9482                                | 1777.8333 | -0.1149 | -65 | 836         | 851  | LLFSTHDIKGDGFLSK          |      |    |    |   |                   |  |  |  |  | Mascot |
|    | 2211.075                                 | 2211.0422 | -0.0328 | -15 | 378         | 395  | EDNIIVEDLRDYMVGPLR        |      |    |    |   |                   |  |  |  |  | Mascot |
|    | 2297.1169                                | 2297.1257 | 0.0088  | 4   | 618         | 638  | HKEPAHGTTASEWLGHN<br>TAPR |      |    |    |   |                   |  |  |  |  | Mascot |
|    | 2381.1423                                | 2380.958  | -0.1843 | -77 | 1126        | 1144 | VFSNNGSELPMKWTFWF<br>FK   |      |    |    |   | Oxidation (M)[11] |  |  |  |  | Mascot |
| 25 | complement factor H like 1 [Danio rerio] |           |         |     | gi 83415163 |      | 81927.1                   | 7.03 | 12 | 35 | 0 |                   |  |  |  |  |        |

Peptide Information

| Calc. Mass | Obsrv. Mass | ± da    | ± ppm | Start Seq. | End Seq. | Sequence                   | Ion Score | C. I. % | Modification              | Rank | Result Type |
|------------|-------------|---------|-------|------------|----------|----------------------------|-----------|---------|---------------------------|------|-------------|
| 850.4087   | 850.5184    | 0.1097  | 129   | 303        | 310      | AEVATCTR                   |           |         |                           |      | Mascot      |
| 999.4563   | 999.5469    | 0.0906  | 91    | 533        | 541      | STVFCSENGK                 |           |         | Carbamidomethyl (C)[5]    |      | Mascot      |
| 1045.4619  | 1045.5347   | 0.0728  | 70    | 382        | 390      | EDCHDLSVK                  |           |         |                           |      | Mascot      |
| 1245.5428  | 1245.5614   | 0.0186  | 15    | 648        | 656      | QYYRCENGR                  |           |         | Carbamidomethyl (C)[5]    |      | Mascot      |
| 1374.6357  | 1374.6014   | -0.0343 | -25   | 586        | 597      | IPEGEWICENGK               |           |         |                           |      | Mascot      |
| 1658.8975  | 1658.7775   | -0.12   | -72   | 51         | 64       | VFCQIGFTGIYILK             |           |         | Carbamidomethyl (C)[3]    |      | Mascot      |
| 1870.7799  | 1870.8503   | 0.0704  | 38    | 287        | 301      | LDESKNYECDSEGYK            |           |         | Carbamidomethyl (C)[9]    |      | Mascot      |
| 2142.0237  | 2141.989    | -0.0347 | -16   | 28         | 47       | SDIYENVVPVSDASYAD<br>GK    |           |         |                           |      | Mascot      |
| 2142.0237  | 2141.989    | -0.0347 | -16   | 28         | 47       | SDIYENVVPVSDASYAD<br>GK    |           |         |                           |      | Mascot      |
| 2239.0071  | 2239.0676   | 0.0605  | 27    | 457        | 477      | DQETAEVDCDPGFISSTP<br>SIK  |           |         |                           |      | Mascot      |
| 2247.1299  | 2247.0405   | -0.0894 | -40   | 51         | 69       | VFCQIGFTGIYILKCENGK        |           |         | Carbamidomethyl (C)[3,15] |      | Mascot      |
| 2284.1248  | 2284.1089   | -0.0159 | -7    | 311        | 332      | DGLTPKPLCAGMCARPDI<br>PNAK |           |         | Oxidation (M)[12]         |      | Mascot      |
| 2297.0867  | 2297.1257   | 0.039   | 17    | 382        | 401      | EDCHDLSVKNGFIYSQSL<br>NK   |           |         |                           |      | Mascot      |

26 hypothetical protein LOC405866 [Danio rerio] gi|47086175 40709.3 9.53 8 35 0

Peptide Information

|    | Calc. Mass                                             | Obsrv. Mass | ± da    | ± ppm | Start Seq. | End Sequence Seq.          | Ion Score | C. I. % | Modification        | Rank | Result Type |
|----|--------------------------------------------------------|-------------|---------|-------|------------|----------------------------|-----------|---------|---------------------|------|-------------|
|    | 1003.5067                                              | 1003.4822   | -0.0245 | -24   | 321        | 328 RVSDGQWR               |           |         |                     |      | Mascot      |
|    | 1081.5386                                              | 1081.4974   | -0.0412 | -38   | 333        | 341 HQPTVQESR              |           |         |                     |      | Mascot      |
|    | 1130.5663                                              | 1130.5626   | -0.0037 | -3    | 49         | 57 RTYMEGVFK               |           |         |                     |      | Mascot      |
|    | 1319.6451                                              | 1319.5454   | -0.0997 | -76   | 322        | 332 VSDGQWRSTQR            |           |         |                     |      | Mascot      |
|    | 1403.6874                                              | 1403.7134   | 0.026   | 19    | 25         | 38 DPGGSSGRVTSDLR          |           |         |                     |      | Mascot      |
|    | 1472.7202                                              | 1472.7291   | 0.0089  | 6     | 203        | 214 MVSFEYNNVTIR           |           |         |                     |      | Mascot      |
|    | 2142.0027                                              | 2141.989    | -0.0137 | -6    | 2          | 23 TSSCLLIGRGSCQSNSSA ASGR |           |         |                     |      | Mascot      |
|    | 2142.0027                                              | 2141.989    | -0.0137 | -6    | 2          | 23 TSSCLLIGRGSCQSNSSA ASGR |           |         |                     |      | Mascot      |
|    | 2239.0596                                              | 2239.0676   | 0.008   | 4     | 215        | 232 TCMLKPETPFMTFYRDV K    |           |         | Oxidation (M)[3,11] |      | Mascot      |
| 27 | EF-hand domain (C-terminal) containing 2 [Danio rerio] |             |         |       |            | gi 220941673               | 85505     | 5.81    | 12                  | 35   | 0           |

Peptide Information

|    | Calc. Mass                                              | Obsrv. Mass | ± da    | ± ppm | Start Seq. | End Sequence Seq.           | Ion Score | C. I. % | Modification     | Rank | Result Type |
|----|---------------------------------------------------------|-------------|---------|-------|------------|-----------------------------|-----------|---------|------------------|------|-------------|
|    | 850.4967                                                | 850.5184    | 0.0217  | 26    | 658        | 664 IICKAFR                 |           |         |                  |      | Mascot      |
|    | 1112.6211                                               | 1112.5427   | -0.0784 | -70   | 273        | 281 DTVPKFLHR               |           |         |                  |      | Mascot      |
|    | 1112.6211                                               | 1112.5427   | -0.0784 | -70   | 273        | 281 DTVPKFLHR               |           |         |                  |      | Mascot      |
|    | 1319.6011                                               | 1319.5454   | -0.0557 | -42   | 349        | 359 VLICDCDYFTK             |           |         |                  |      | Mascot      |
|    | 1418.6838                                               | 1418.7217   | 0.0379  | 27    | 366        | 377 YGIEDFPSISYK            |           |         |                  |      | Mascot      |
|    | 1633.8108                                               | 1633.8428   | 0.032   | 20    | 364        | 377 SKYGIEDFPSISYK          |           |         |                  |      | Mascot      |
|    | 1687.8075                                               | 1687.9005   | 0.093   | 55    | 713        | 727 FDADWRGEAPEPAVK         |           |         |                  |      | Mascot      |
|    | 1777.8907                                               | 1777.8333   | -0.0574 | -32   | 60         | 76 FPKGEGSGAPAWLAFDK        |           |         |                  |      | Mascot      |
|    | 1931.9644                                               | 1931.9087   | -0.0557 | -29   | 201        | 215 QELEENMKPLRPYER         |           |         |                  |      | Mascot      |
|    | 2233.2339                                               | 2233.0229   | -0.211  | -94   | 302        | 322 TVLNVFGPVGQGGRYILD SLK  |           |         |                  |      | Mascot      |
|    | 2284.0227                                               | 2284.1089   | 0.0862  | 38    | 563        | 582 QFFTMSDPSSTGSLPYE SFR   |           |         |                  |      | Mascot      |
|    | 2297.1997                                               | 2297.1257   | -0.074  | -32   | 294        | 315 QPGEITDRTVLNVFGPVG QGGR |           |         |                  |      | Mascot      |
|    | 2298.1401                                               | 2298.1064   | -0.0337 | -15   | 699        | 718 ENPVPAVLPEDTVKFDAD WR   |           |         |                  |      | Mascot      |
|    | 2298.1401                                               | 2298.1064   | -0.0337 | -15   | 699        | 718 ENPVPAVLPEDTVKFDAD WR   |           |         |                  |      | Mascot      |
|    | 2300.0176                                               | 2300.1047   | 0.0871  | 38    | 563        | 582 QFFTMSDPSSTGSLPYE SFR   |           |         | Oxidation (M)[5] |      | Mascot      |
| 28 | probable ATP-dependent RNA helicase DDX11 [Danio rerio] |             |         |       |            | gi 55925522                 | 100596.9  | 8.26    | 14               | 35   | 0           |

Peptide Information

|  | Calc. Mass | Obsrv. Mass | ± da | ± ppm | Start | End Sequence | Ion | C. I. % | Modification | Rank | Result Type |
|--|------------|-------------|------|-------|-------|--------------|-----|---------|--------------|------|-------------|
|--|------------|-------------|------|-------|-------|--------------|-----|---------|--------------|------|-------------|



|  |           |           | Seq.    |      | Seq. | Score                          |  |                        |        |
|--|-----------|-----------|---------|------|------|--------------------------------|--|------------------------|--------|
|  | 837.3882  | 837.4025  | 0.0143  | 17   | 1    | 7 MESKNGR                      |  | Oxidation (M)[1]       | Mascot |
|  | 837.3882  | 837.4025  | 0.0143  | 17   | 1    | 7 MESKNGR                      |  | Oxidation (M)[1]       | Mascot |
|  | 864.421   | 864.4699  | 0.0489  | 57   | 228  | 235 SPYGDAVR                   |  |                        | Mascot |
|  | 996.5546  | 996.5699  | 0.0153  | 15   | 414  | 421 AKNLMYIK                   |  | Oxidation (M)[5]       | Mascot |
|  | 999.4637  | 999.5469  | 0.0832  | 83   | 299  | 306 FENLMAMK                   |  | Oxidation (M)[5]       | Mascot |
|  | 1034.5299 | 1034.498  | -0.0319 | -31  | 570  | 579 QACVAQSSLK                 |  |                        | Mascot |
|  | 1245.6521 | 1245.5614 | -0.0907 | -73  | 801  | 812 HMPHVAGKSPGK               |  |                        | Mascot |
|  | 1464.7412 | 1464.7155 | -0.0257 | -18  | 775  | 787 CIVMVGMPYPNIK              |  |                        | Mascot |
|  | 1467.7325 | 1467.7416 | 0.0091  | 6    | 725  | 737 ASQVEQVLSEYSK              |  |                        | Mascot |
|  | 1613.7927 | 1613.682  | -0.1107 | -69  | 795  | 808 MAYLDKHMPHVAGK             |  | Oxidation (M)[1]       | Mascot |
|  | 1633.8618 | 1633.8428 | -0.019  | -12  | 598  | 613 AVIIAGGTMQPVADFK           |  | Oxidation (M)[9]       | Mascot |
|  | 1701.8654 | 1701.8567 | -0.0087 | -5   | 143  | 157 ADEDDEAVKLLQLSR            |  |                        | Mascot |
|  | 1714.79   | 1714.7578 | -0.0322 | -19  | 833  | 846 HRGDYACIVLCDHR             |  | Carbamidomethyl (C)[7] | Mascot |
|  | 2310.1548 | 2309.905  | -0.2498 | -108 | 46   | 64 SLSLICGALTWLRDYEEQ<br>R     |  | Carbamidomethyl (C)[6] | Mascot |
|  | 2381.301  | 2380.958  | -0.343  | -144 | 336  | 357 MSIPAAQVVVLPYQSLLH<br>ASTR |  |                        | Mascot |

29 PREDICTED: transformation/transcription domain-associated protein [Danio rerio] gi|326672350 433471.2 8.52 28 34 0

#### Peptide Information

| Calc. Mass | Obsrv. Mass | ± da    | ± ppm | Start Seq. | End Sequence Seq. | Ion Score | C. I. % Modification   | Rank | Result Type |
|------------|-------------|---------|-------|------------|-------------------|-----------|------------------------|------|-------------|
| 837.4941   | 837.4025    | -0.0916 | -109  | 211        | 217 THTIIPR       |           |                        |      | Mascot      |
| 837.4941   | 837.4025    | -0.0916 | -109  | 211        | 217 THTIIPR       |           |                        |      | Mascot      |
| 882.5155   | 882.5418    | 0.0263  | 30    | 2182       | 2189 AVHSLLSR     |           |                        |      | Mascot      |
| 997.5717   | 997.5798    | 0.0081  | 8     | 462        | 469 YQLVSIFK      |           |                        |      | Mascot      |
| 1003.4553  | 1003.4822   | 0.0269  | 27    | 3311       | 3318 CYSVAFEK     |           | Carbamidomethyl (C)[1] |      | Mascot      |
| 1034.5741  | 1034.498    | -0.0761 | -74   | 883        | 892 VLGKFGGSNR    |           |                        |      | Mascot      |
| 1045.5095  | 1045.5347   | 0.0252  | 24    | 3604       | 3612 EVQGNMVPR    |           | Oxidation (M)[6]       |      | Mascot      |
| 1081.5312  | 1081.4974   | -0.0338 | -31   | 1443       | 1451 LFPNSFNDK    |           |                        |      | Mascot      |
| 1130.5953  | 1130.5626   | -0.0327 | -29   | 2567       | 2575 HDKFLDSLRL   |           |                        |      | Mascot      |
| 1158.4951  | 1158.5647   | 0.0696  | 60    | 2306       | 2314 LSVMNMEMR    |           | Oxidation (M)[4,6,8]   |      | Mascot      |
| 1165.5817  | 1165.7117   | 0.13    | 112   | 606        | 615 VANCQTVRMK    |           | Oxidation (M)[9]       |      | Mascot      |
| 1165.5817  | 1165.7117   | 0.13    | 112   | 606        | 615 VANCQTVRMK    |           | Oxidation (M)[9]       |      | Mascot      |
| 1196.7037  | 1196.7239   | 0.0202  | 17    | 287        | 296 TLSFLAYIIR    |           |                        |      | Mascot      |
| 1301.6241  | 1301.5911   | -0.033  | -25   | 2848       | 2857 EMAWKVNMHR   |           |                        |      | Mascot      |

|           |           |         |      |      |      |                            |                                              |        |
|-----------|-----------|---------|------|------|------|----------------------------|----------------------------------------------|--------|
| 1418.7573 | 1418.7217 | -0.0356 | -25  | 108  | 119  | SHAKNILSVMFR               | Oxidation (M)[10]                            | Mascot |
| 1464.8242 | 1464.7155 | -0.1087 | -74  | 1147 | 1159 | LGGVVSIKFLMER              | Oxidation (M)[11]                            | Mascot |
| 1503.8101 | 1503.7736 | -0.0365 | -24  | 859  | 870  | AELMQALWRTLRL              | Oxidation (M)[4]                             | Mascot |
| 1734.8195 | 1734.8041 | -0.0154 | -9   | 3569 | 3582 | GIEHDNPISRYYDR             |                                              | Mascot |
| 1767.9462 | 1767.8215 | -0.1247 | -71  | 3022 | 3036 | IHTIPTVPVDCFAQ             | Carbamidomethyl (C)[12]                      | Mascot |
| 1778.0469 | 1777.8333 | -0.2136 | -120 | 1889 | 1905 | AIVRQAMAILPAVPA            |                                              | Mascot |
| 1871.0636 | 1870.8503 | -0.2133 | -114 | 388  | 404  | QNLPLTDLSLAVQLFAK          |                                              | Mascot |
| 2079.05   | 2078.9702 | -0.0798 | -38  | 1    | 19   | MSFVPTSPSTVVDQTTL<br>MK    |                                              | Mascot |
| 2079.05   | 2078.9702 | -0.0798 | -38  | 1    | 19   | MSFVPTSPSTVVDQTTL<br>MK    |                                              | Mascot |
| 2211.0745 | 2211.0422 | -0.0323 | -15  | 1075 | 1094 | GMDPLVLIDAIACMAYEE<br>K    | Oxidation (M)[2]                             | Mascot |
| 2239.1348 | 2239.0676 | -0.0672 | -30  | 1    | 20   | MSFVPTSPSTVVDQTTL<br>MKK   | Oxidation (M)[1,18]                          | Mascot |
| 2283.0981 | 2283.1147 | 0.0166  | 7    | 3617 | 3634 | EWALHTFPNATDYWTFR<br>K     |                                              | Mascot |
| 2283.0981 | 2283.1147 | 0.0166  | 7    | 3617 | 3634 | EWALHTFPNATDYWTFR<br>K     |                                              | Mascot |
| 2284.0908 | 2284.1089 | 0.0181  | 8    | 1075 | 1094 | GMDPLVLIDAIACMAYEE<br>K    | Carbamidomethyl (C)[14], Oxidation (M)[2,15] | Mascot |
| 2297.0537 | 2297.1257 | 0.072   | 31   | 1696 | 1713 | FLCNMTFLKEYMEEIIPK         | Oxidation (M)[5,12]                          | Mascot |
| 2300.1335 | 2300.1047 | -0.0288 | -13  | 1175 | 1196 | ALLFVMMDLTGEVSNGA<br>VAMAK | Oxidation (M)[6,7]                           | Mascot |
| 2310.1152 | 2309.905  | -0.2102 | -91  | 1832 | 1851 | LMTFAWPCLLPKTCVDP<br>ACK   | Carbamidomethyl (C)[8], Oxidation (M)[2]     | Mascot |
| 2381.1377 | 2380.958  | -0.1797 | -75  | 3484 | 3504 | GHNGKIYPYLVMNDACT<br>ESR   |                                              | Mascot |
| 2496.23   | 2496.2568 | 0.0268  | 11   | 2341 | 2362 | IVEEWVKNSGNPMATNQ<br>VPNPR | Oxidation (M)[13]                            | Mascot |

30 cell division control protein 42 homolog isoform 2 [Danio rerio] gi|66392176 21356 6.15 6 34 0

#### Peptide Information

| Calc. Mass | Obsrv. Mass | ± da    | ± ppm | Start Seq. | End Seq. | Sequence                    | Ion Score | C. I. % | Modification           | Rank | Result Type |
|------------|-------------|---------|-------|------------|----------|-----------------------------|-----------|---------|------------------------|------|-------------|
| 1003.524   | 1003.4822   | -0.0418 | -42   | 6          | 16       | CVVVG DGAVGK                |           |         |                        |      | Mascot      |
| 1216.642   | 1216.6155   | -0.0265 | -22   | 121        | 131      | DDPSTIEKLAK                 |           |         |                        |      | Mascot      |
| 1403.6888  | 1403.7134   | 0.0246  | 18    | 97         | 107      | WVPEITHHCPK                 |           |         | Carbamidomethyl (C)[9] |      | Mascot      |
| 1467.7625  | 1467.7416   | -0.0209 | -14   | 154        | 166      | YVECSALTQRGLK               |           |         |                        |      | Mascot      |
| 1472.8472  | 1472.7291   | -0.1181 | -80   | 108        | 120      | TPFLLVGTQIDLR               |           |         |                        |      | Mascot      |
| 2298.1831  | 2298.1064   | -0.0767 | -33   | 6          | 27       | CVVVG DGAVGKTCLLISY<br>TTNK |           |         | Carbamidomethyl (C)[1] |      | Mascot      |
| 2298.1831  | 2298.1064   | -0.0767 | -33   | 6          | 27       | CVVVG DGAVGKTCLLISY<br>TTNK |           |         | Carbamidomethyl (C)[1] |      | Mascot      |

31 polo-like kinase 3 (Drosophila) [Danio rerio] gi|169154707 74271.7 9.04 12 34 0

#### Peptide Information

| Calc. Mass | Obsrv. Mass | $\pm$ da | $\pm$ ppm | Start Seq. | End Seq. | Sequence                  | Ion Score | C. I. % | Modification                             | Rank | Result Type |
|------------|-------------|----------|-----------|------------|----------|---------------------------|-----------|---------|------------------------------------------|------|-------------|
| 1081.6266  | 1081.4974   | -0.1292  | -119      | 143        | 151      | SLAHIWKAR                 |           |         |                                          |      | Mascot      |
| 1301.55    | 1301.5911   | 0.0411   | 32        | 73         | 83       | CYEMTDLANNK               |           |         |                                          |      | Mascot      |
| 1374.5664  | 1374.6014   | 0.035    | 25        | 73         | 83       | CYEMTDLANNK               |           |         | Carbamidomethyl (C)[1], Oxidation (M)[4] |      | Mascot      |
| 1613.7411  | 1613.682    | -0.0591  | -37       | 2          | 15       | DPSCFTTAQRLSCK            |           |         | Carbamidomethyl (C)[4]                   |      | Mascot      |
| 1687.7601  | 1687.9005   | 0.1404   | 83        | 1          | 15       | MDPSCFTTAQRLSCK           |           |         |                                          |      | Mascot      |
| 1701.9646  | 1701.8567   | -0.1079  | -63       | 104        | 117      | IINEIELHKSLQHK            |           |         |                                          |      | Mascot      |
| 1734.9272  | 1734.8041   | -0.1231  | -71       | 271        | 286      | EVKYSLPSSLTPSAQK          |           |         |                                          |      | Mascot      |
| 1871.0612  | 1870.8503   | -0.2109  | -113      | 464        | 479      | NPPCLVKTKPFIWVTK          |           |         |                                          |      | Mascot      |
| 1950.8759  | 1950.8762   | 0.0003   | 0         | 73         | 88       | CYEMTDLANNKMYAVK          |           |         | Carbamidomethyl (C)[1]                   |      | Mascot      |
| 1950.8759  | 1950.8762   | 0.0003   | 0         | 73         | 88       | CYEMTDLANNKMYAVK          |           |         | Carbamidomethyl (C)[1]                   |      | Mascot      |
| 2233.1138  | 2233.0229   | -0.0909  | -41       | 450        | 470      | VLNSCLSSMPTASRNPP<br>CLVK |           |         | Oxidation (M)[9]                         |      | Mascot      |
| 2239.1362  | 2239.0676   | -0.0686  | -31       | 16         | 36       | IMNPDMFKASPAAPPAK<br>PSR  |           |         | Oxidation (M)[2]                         |      | Mascot      |
| 2283.1326  | 2283.1147   | -0.0179  | -8        | 625        | 644      | VSYSYPLNVLSLGCSPE<br>LR   |           |         | Carbamidomethyl (C)[15]                  |      | Mascot      |
| 2283.2417  | 2283.1147   | -0.127   | -56       | 605        | 624      | IILCKPSDASYLVTFISKER      |           |         |                                          |      | Mascot      |

32 oxidoreductase NAD-binding domain-containing protein gi|160333075 30679.4 6.34 7 34 0  
1 [Danio rerio]

#### Peptide Information

| Calc. Mass | Obsrv. Mass | $\pm$ da | $\pm$ ppm | Start Seq. | End Seq. | Sequence                 | Ion Score | C. I. % | Modification           | Rank | Result Type |
|------------|-------------|----------|-----------|------------|----------|--------------------------|-----------|---------|------------------------|------|-------------|
| 997.4771   | 997.5798    | 0.1027   | 103       | 19         | 26       | QMELFSAR                 |           |         | Oxidation (M)[2]       |      | Mascot      |
| 1158.6226  | 1158.5647   | -0.0579  | -50       | 220        | 229      | GRISAEELQR               |           |         |                        |      | Mascot      |
| 1319.7317  | 1319.5454   | -0.1863  | -141      | 82         | 93       | EGAIELAVKYAR             |           |         |                        |      | Mascot      |
| 1464.7363  | 1464.7155   | -0.0208  | -14       | 27         | 39       | VCDIISESDTVKR            |           |         |                        |      | Mascot      |
| 1503.7285  | 1503.7736   | 0.0451   | 30        | 250        | 263      | VSSDLQSTGLPEDR           |           |         |                        |      | Mascot      |
| 2233.0469  | 2233.0229   | -0.024   | -11       | 156        | 174      | HTHSHRYTPGHTHLCYS<br>AK  |           |         |                        |      | Mascot      |
| 2381.1338  | 2380.958    | -0.1758  | -74       | 230        | 249      | YVDPERTLCYLCGPPPMI<br>EK |           |         | Carbamidomethyl (C)[9] |      | Mascot      |

33 RecName: Full=WASH complex subunit CCDC53; gi|82077711 21552 4.72 6 33 0  
AltName: Full=Coiled-coil domain-containing protein 53

#### Peptide Information

| Calc. Mass | Obsrv. Mass | $\pm$ da | $\pm$ ppm | Start Seq. | End Seq. | Sequence      | Ion Score | C. I. % | Modification           | Rank | Result Type |
|------------|-------------|----------|-----------|------------|----------|---------------|-----------|---------|------------------------|------|-------------|
| 999.4451   | 999.5469    | 0.1018   | 102       | 44         | 51       | FSTVCEEK      |           |         | Carbamidomethyl (C)[5] |      | Mascot      |
| 1374.6934  | 1374.6014   | -0.092   | -67       | 123        | 135      | TEAPAENIMTVAK |           |         |                        |      | Mascot      |

|           |           |         |     |    |    |                              |  |  |  |                        |  |        |
|-----------|-----------|---------|-----|----|----|------------------------------|--|--|--|------------------------|--|--------|
| 1472.7202 | 1472.7291 | 0.0089  | 6   | 40 | 51 | FLNRFSTVCEEK                 |  |  |  |                        |  | Mascot |
| 1687.8571 | 1687.9005 | 0.0434  | 26  | 1  | 17 | MDADGLPIVGSGVDLTK            |  |  |  |                        |  | Mascot |
| 1755.8945 | 1755.9912 | 0.0967  | 55  | 44 | 58 | FSTVCEEKLSTVSLR              |  |  |  | Carbamidomethyl (C)[5] |  | Mascot |
| 2496.3125 | 2496.2568 | -0.0557 | -22 | 1  | 24 | MDADGLPIVGSGVDLTKV<br>PAIQQR |  |  |  | Oxidation (M)[1]       |  | Mascot |

34 Rfc5 protein [Danio rerio] gi|63102390 37681.7 8.51 8 33 0

#### Peptide Information

| Calc. Mass | Obsrv. Mass | ± da    | ± ppm | Start Seq. | End Seq. | Sequence                    | Ion Score | C. I. % | Modification      | Rank | Result Type |
|------------|-------------|---------|-------|------------|----------|-----------------------------|-----------|---------|-------------------|------|-------------|
| 1319.71    | 1319.5454   | -0.1646 | -125  | 198        | 209      | AIVTLSTGDMRR                |           |         |                   |      | Mascot      |
| 1403.71    | 1403.7134   | 0.0034  | 2     | 168        | 179      | FGPLSQNQMIPIR               |           |         | Oxidation (M)[9]  |      | Mascot      |
| 1467.7988  | 1467.7416   | -0.0572 | -39   | 61         | 73       | TSTILACARQLYK               |           |         |                   |      | Mascot      |
| 1472.7744  | 1472.7291   | -0.0453 | -31   | 239        | 251      | SDIANILDWALNK               |           |         |                   |      | Mascot      |
| 1687.949   | 1687.9005   | -0.0485 | -29   | 91         | 106      | GIDVVRGPILSFASTR            |           |         |                   |      | Mascot      |
| 1734.8955  | 1734.8041   | -0.0914 | -53   | 209        | 223      | RSLNILQSTHMYGK              |           |         | Oxidation (M)[11] |      | Mascot      |
| 1755.7854  | 1755.9912   | 0.2058  | 117   | 76         | 90       | EFNSMVLELNASDDR             |           |         | Oxidation (M)[5]  |      | Mascot      |
| 2310.2122  | 2309.905    | -0.3072 | -133  | 306        | 327      | LASGTSEKIQQLSSMVAAF<br>QAVR |           |         | Oxidation (M)[14] |      | Mascot      |

35 replication factor C subunit 5 [Danio rerio] gi|51467970 37646.7 8.21 8 33 0

#### Peptide Information

| Calc. Mass | Obsrv. Mass | ± da    | ± ppm | Start Seq. | End Seq. | Sequence                    | Ion Score | C. I. % | Modification      | Rank | Result Type |
|------------|-------------|---------|-------|------------|----------|-----------------------------|-----------|---------|-------------------|------|-------------|
| 1319.71    | 1319.5454   | -0.1646 | -125  | 198        | 209      | AIVTLSTGDMRR                |           |         |                   |      | Mascot      |
| 1403.71    | 1403.7134   | 0.0034  | 2     | 168        | 179      | FGPLSQNQMIPIR               |           |         | Oxidation (M)[9]  |      | Mascot      |
| 1467.7988  | 1467.7416   | -0.0572 | -39   | 61         | 73       | TSTILACARQLYK               |           |         |                   |      | Mascot      |
| 1472.7744  | 1472.7291   | -0.0453 | -31   | 239        | 251      | SDIANILDWALNK               |           |         |                   |      | Mascot      |
| 1687.949   | 1687.9005   | -0.0485 | -29   | 91         | 106      | GIDVVRGPILSFASTR            |           |         |                   |      | Mascot      |
| 1734.8955  | 1734.8041   | -0.0914 | -53   | 209        | 223      | RSLNILQSTHMYGK              |           |         | Oxidation (M)[11] |      | Mascot      |
| 1755.7854  | 1755.9912   | 0.2058  | 117   | 76         | 90       | EFNSMVLELNASDDR             |           |         | Oxidation (M)[5]  |      | Mascot      |
| 2310.2122  | 2309.905    | -0.3072 | -133  | 306        | 327      | LASGTSEKIQQLSSMVAAF<br>QAVR |           |         | Oxidation (M)[14] |      | Mascot      |

36 PREDICTED: f-box only protein 48-like isoform 2 [Danio rerio] gi|326664266 12723.1 6.88 6 33 0

#### Peptide Information

| Calc. Mass | Obsrv. Mass | ± da  | ± ppm | Start Seq. | End Seq. | Sequence    | Ion Score | C. I. % | Modification           | Rank | Result Type |
|------------|-------------|-------|-------|------------|----------|-------------|-----------|---------|------------------------|------|-------------|
| 1216.5925  | 1216.6155   | 0.023 | 19    | 77         | 87       | SHCLTGLAVCR |           |         | Carbamidomethyl (C)[3] |      | Mascot      |

|           |           |         |     |    |    |                           |                         |        |
|-----------|-----------|---------|-----|----|----|---------------------------|-------------------------|--------|
| 1319.626  | 1319.5454 | -0.0806 | -61 | 1  | 14 | MSVEGAAAPSAGQK            | Oxidation (M)[1]        | Mascot |
| 1464.7627 | 1464.7155 | -0.0472 | -32 | 45 | 56 | IFGELDVRSLCR              | Carbamidomethyl (C)[11] | Mascot |
| 1467.6785 | 1467.7416 | 0.0631  | 43  | 32 | 44 | DFSEALPAEMSVR             | Oxidation (M)[10]       | Mascot |
| 1777.8405 | 1777.8333 | -0.0072 | -4  | 63 | 76 | HWNDIIEGSDHLWR            |                         | Mascot |
| 2381.1804 | 2380.958  | -0.2224 | -93 | 32 | 52 | DFSEALPAEMSVRIFGEL<br>DVR |                         | Mascot |

37 BarH-like 1.2 [Danio rerio] gi|62955401 22067.8 6.9 6 33 0

#### Peptide Information

| Calc. Mass | Obsrv. Mass | ± da    | ± ppm | Start Seq. | End Seq. | Sequence                  | Ion Score | C. I. % | Modification            | Rank | Result Type |
|------------|-------------|---------|-------|------------|----------|---------------------------|-----------|---------|-------------------------|------|-------------|
| 856.4523   | 856.5021    | 0.0498  | 58    | 31         | 38       | SPAELSPR                  |           |         |                         |      | Mascot      |
| 999.4854   | 999.5469    | 0.0615  | 62    | 54         | 62       | SSVEDAVHR                 |           |         |                         |      | Mascot      |
| 1301.6267  | 1301.5911   | -0.0356 | -27   | 27         | 38       | GECSRPAELSPR              |           |         |                         |      | Mascot      |
| 1633.8466  | 1633.8428   | -0.0038 | -2    | 186        | 200      | MELAASLNLTDTQVK           |           |         |                         |      | Mascot      |
| 1734.8943  | 1734.8041   | -0.0902 | -52   | 186        | 201      | MELAASLNLTDTQVKT          |           |         |                         |      | Mascot      |
| 2299.062   | 2299.1038   | 0.0418  | 18    | 31         | 52       | SPAELSPRDLDSGCSS<br>PPSPR |           |         | Carbamidomethyl (C)[15] |      | Mascot      |

38 PREDICTED: kelch repeat and BTB domain-containing protein 13-like [Danio rerio] gi|326669200 56244.6 5.75 9 33 0

#### Peptide Information

| Calc. Mass | Obsrv. Mass | ± da    | ± ppm | Start Seq. | End Seq. | Sequence                   | Ion Score | C. I. % | Modification            | Rank | Result Type |
|------------|-------------|---------|-------|------------|----------|----------------------------|-----------|---------|-------------------------|------|-------------|
| 837.3923   | 837.4025    | 0.0102  | 12    | 445        | 451      | EMTGFP                     |           |         |                         |      | Mascot      |
| 837.3923   | 837.4025    | 0.0102  | 12    | 445        | 451      | EMTGFP                     |           |         |                         |      | Mascot      |
| 864.4573   | 864.4699    | 0.0126  | 15    | 34         | 40       | NVFTLDR                    |           |         |                         |      | Mascot      |
| 882.4236   | 882.5418    | 0.1182  | 134   | 289        | 296      | SVMSSVEK                   |           |         | Oxidation (M)[3]        |      | Mascot      |
| 1196.6422  | 1196.7239   | 0.0817  | 68    | 31         | 40       | FGKNVFTLDR                 |           |         |                         |      | Mascot      |
| 1301.626   | 1301.5911   | -0.0349 | -27   | 335        | 345      | DATEIYEYVAK                |           |         |                         |      | Mascot      |
| 1472.7454  | 1472.7291   | -0.0163 | -11   | 230        | 242      | IYIVGGVYDMTNK              |           |         |                         |      | Mascot      |
| 1687.672   | 1687.9005   | 0.2285  | 135   | 2          | 17       | TGGNLMENSSCACSEK           |           |         | Carbamidomethyl (C)[11] |      | Mascot      |
| 1777.6859  | 1777.8333   | 0.1474  | 83    | 1          | 17       | MTGGNLMENSSCACSEK          |           |         | Oxidation (M)[1]        |      | Mascot      |
| 2283.2014  | 2283.1147   | -0.0867 | -38   | 208        | 229      | VLTHLPLNASTTMAGVTA<br>LDNK |           |         | Oxidation (M)[13]       |      | Mascot      |
| 2283.2014  | 2283.1147   | -0.0867 | -38   | 208        | 229      | VLTHLPLNASTTMAGVTA<br>LDNK |           |         | Oxidation (M)[13]       |      | Mascot      |

39 Zgc:110331 [Danio rerio] gi|62202266 17382.1 8.3 6 33 0

#### Peptide Information

| Calc. Mass | Obsrv. Mass | ± da | ± ppm | Start | End | Sequence | Ion | C. I. % | Modification | Rank | Result Type |
|------------|-------------|------|-------|-------|-----|----------|-----|---------|--------------|------|-------------|
|------------|-------------|------|-------|-------|-----|----------|-----|---------|--------------|------|-------------|

|                     |                                                                                |             |         |       |            |               |                           |         |      |           |        | Seq. |                         | Seq.   |  | Score |  |  |                                          |             |        |  |  |
|---------------------|--------------------------------------------------------------------------------|-------------|---------|-------|------------|---------------|---------------------------|---------|------|-----------|--------|------|-------------------------|--------|--|-------|--|--|------------------------------------------|-------------|--------|--|--|
|                     | 882.5294                                                                       | 882.5418    | 0.0124  | 14    | 122        | 129           | ELSLPPVK                  |         |      |           |        |      |                         |        |  |       |  |  |                                          |             | Mascot |  |  |
|                     | 1045.5636                                                                      | 1045.5347   | -0.0289 | -28   | 42         | 51            | NVGSLDKNAK                |         |      |           |        |      |                         |        |  |       |  |  |                                          |             | Mascot |  |  |
|                     | 1403.6658                                                                      | 1403.7134   | 0.0476  | 34    | 130        | 141           | LHCSMLAEDAIAK             |         |      |           |        |      |                         |        |  |       |  |  | Carbamidomethyl (C)[3], Oxidation (M)[5] |             | Mascot |  |  |
|                     | 1659.8813                                                                      | 1659.7399   | -0.1414 | -85   | 17         | 31            | TLSAPTLRTQSGYHK           |         |      |           |        |      |                         |        |  |       |  |  |                                          |             | Mascot |  |  |
|                     | 1659.8813                                                                      | 1659.7399   | -0.1414 | -85   | 17         | 31            | TLSAPTLRTQSGYHK           |         |      |           |        |      |                         |        |  |       |  |  |                                          |             | Mascot |  |  |
|                     | 1701.9026                                                                      | 1701.8567   | -0.0459 | -27   | 1          | 16            | MAASLAEKCAAPQILK          |         |      |           |        |      |                         |        |  |       |  |  | Carbamidomethyl (C)[9]                   |             | Mascot |  |  |
|                     | 2247.1113                                                                      | 2247.0405   | -0.0708 | -32   | 84         | 104           | FKTFGCGSAIASSSLATE<br>WVK |         |      |           |        |      |                         |        |  |       |  |  | Carbamidomethyl (C)[6]                   |             | Mascot |  |  |
| 40                  | PREDICTED: zinc finger and SCAN domain-containing protein 2-like [Danio rerio] |             |         |       |            | gij 326674783 |                           | 39998.2 | 9.27 | 12        | 33     | 0    |                         |        |  |       |  |  |                                          |             |        |  |  |
| Peptide Information |                                                                                |             |         |       |            |               |                           |         |      |           |        |      |                         |        |  |       |  |  |                                          |             |        |  |  |
|                     | Calc. Mass                                                                     | Obsrv. Mass | ± da    | ± ppm | Start Seq. | End Seq.      | Sequence                  |         |      | Ion Score | C. I.  | %    | Modification            |        |  |       |  |  | Rank                                     | Result Type |        |  |  |
|                     | 837.41                                                                         | 837.4025    | -0.0075 | -9    | 29         | 35            | TDFVAER                   |         |      | 2         |        | 0    |                         |        |  |       |  |  |                                          | Mascot      |        |  |  |
|                     | 837.41                                                                         | 837.4025    | -0.0075 | -9    | 29         | 35            | TDFVAER                   |         |      |           |        |      |                         |        |  |       |  |  |                                          | Mascot      |        |  |  |
|                     | 999.4788                                                                       | 999.5469    | 0.0681  | 68    | 247        | 254           | GNCKQHQQK                 |         |      |           |        |      | Carbamidomethyl (C)[3]  |        |  |       |  |  |                                          | Mascot      |        |  |  |
|                     | 1003.4335                                                                      | 1003.4822   | 0.0487  | 49    | 261        | 269           | DHVCLECGK                 |         |      |           |        |      |                         |        |  |       |  |  |                                          | Mascot      |        |  |  |
|                     | 1045.4441                                                                      | 1045.5347   | 0.0906  | 87    | 186        | 194           | CFSQSSAMK                 |         |      |           |        |      | Carbamidomethyl (C)[1]  |        |  |       |  |  |                                          | Mascot      |        |  |  |
|                     | 1092.5466                                                                      | 1092.538    | -0.0086 | -8    | 19         | 28            | GNETRISMGK                |         |      |           |        |      |                         |        |  |       |  |  |                                          | Mascot      |        |  |  |
|                     | 1216.5562                                                                      | 1216.6155   | 0.0593  | 49    | 260        | 269           | RDHVCLECGK                |         |      |           |        |      | Carbamidomethyl (C)[5]  |        |  |       |  |  |                                          | Mascot      |        |  |  |
|                     | 1319.5507                                                                      | 1319.5454   | -0.0053 | -4    | 3          | 13            | DFGGCRQMFDK               |         |      |           |        |      | Oxidation (M)[8]        |        |  |       |  |  |                                          | Mascot      |        |  |  |
|                     | 1374.6495                                                                      | 1374.6014   | -0.0481 | -35   | 63         | 74            | EQKQDLNAEDGK              |         |      |           |        |      |                         |        |  |       |  |  |                                          | Mascot      |        |  |  |
|                     | 1687.6583                                                                      | 1687.9005   | 0.2422  | 144   | 180        | 194           | CSYCDKCFQSSAMK            |         |      |           |        |      |                         |        |  |       |  |  |                                          | Mascot      |        |  |  |
|                     | 1931.9102                                                                      | 1931.9087   | -0.0015 | -1    | 149        | 166           | DHVCLECGKSFTTAGHV<br>K    |         |      |           |        |      |                         |        |  |       |  |  |                                          | Mascot      |        |  |  |
|                     | 1950.7692                                                                      | 1950.8762   | 0.107   | 55    | 47         | 62            | MDHEDAEETDQMEVK           |         |      |           |        |      | Oxidation (M)[1]        |        |  |       |  |  |                                          | Mascot      |        |  |  |
|                     | 1950.7692                                                                      | 1950.8762   | 0.107   | 55    | 47         | 62            | MDHEDAEETDQMEVK           |         |      |           |        |      | Oxidation (M)[1]        |        |  |       |  |  |                                          | Mascot      |        |  |  |
|                     | 2211.0474                                                                      | 2211.0422   | -0.0052 | -2    | 311        | 328           | IHTGEKPYCPQCQSFR          |         |      |           |        |      | Carbamidomethyl (C)[10] |        |  |       |  |  |                                          | Mascot      |        |  |  |
| 41                  | spindle and kinetochore-associated protein 1 [Danio rerio]                     |             |         |       |            | gij 50540250  |                           | 29650.5 | 9.46 | 2         | 32     | 0    | 26                      | 39.013 |  |       |  |  |                                          |             |        |  |  |
| Peptide Information |                                                                                |             |         |       |            |               |                           |         |      |           |        |      |                         |        |  |       |  |  |                                          |             |        |  |  |
|                     | Calc. Mass                                                                     | Obsrv. Mass | ± da    | ± ppm | Start Seq. | End Seq.      | Sequence                  |         |      | Ion Score | C. I.  | %    | Modification            |        |  |       |  |  | Rank                                     | Result Type |        |  |  |
|                     | 870.4719                                                                       | 870.5179    | 0.046   | 53    | 56         | 62            | FEKYVGK                   |         |      |           |        |      |                         |        |  |       |  |  |                                          | Mascot      |        |  |  |
|                     | 1112.5591                                                                      | 1112.5427   | -0.0164 | -15   | 231        | 239           | FVGMLNMLR                 |         |      | 26        | 39.013 |      | Oxidation (M)[4,7]      |        |  |       |  |  |                                          | Mascot      |        |  |  |
|                     | 1112.5591                                                                      | 1112.5427   | -0.0164 | -15   | 231        | 239           | FVGMLNMLR                 |         |      |           |        |      | Oxidation (M)[4,7]      |        |  |       |  |  |                                          | Mascot      |        |  |  |

42 novel protein similar to semaphorin 3 family (sema3) gi|94732785 80503.7 6.71 11 32 0  
[Danio rerio]

Peptide Information

| Calc. Mass | Obsrv. Mass | ± da    | ± ppm | Start Seq. | End Seq. | Sequence            | Ion Score | C. I. % | Modification                              | Rank | Result Type |
|------------|-------------|---------|-------|------------|----------|---------------------|-----------|---------|-------------------------------------------|------|-------------|
| 850.4497   | 850.5184    | 0.0687  | 81    | 191        | 196      | VYFFFK              |           |         |                                           |      | Mascot      |
| 864.5049   | 864.4699    | -0.035  | -40   | 209        | 215      | IYSRVAR             |           |         |                                           |      | Mascot      |
| 1301.5613  | 1301.5911   | 0.0298  | 23    | 54         | 64       | NLSMDCANYVR         |           |         | Oxidation (M)[4]                          |      | Mascot      |
| 1464.7615  | 1464.7155   | -0.046  | -31   | 433        | 445      | TQTPILSMELSTK       |           |         | Oxidation (M)[8]                          |      | Mascot      |
| 1472.7394  | 1472.7291   | -0.0103 | -7    | 36         | 47       | IHWPAQGEHIER        |           |         |                                           |      | Mascot      |
| 1503.6573  | 1503.7736   | 0.1163  | 77    | 308        | 318      | ESPDYRWMEYK         |           |         |                                           |      | Mascot      |
| 1687.7744  | 1687.9005   | 0.1261  | 75    | 340        | 353      | STRDFPDDVVSFMR      |           |         | Oxidation (M)[13]                         |      | Mascot      |
| 1701.7239  | 1701.8567   | 0.1328  | 78    | 687        | 702      | QNPPDEPLDGGETADF    |           |         |                                           |      | Mascot      |
| 1777.7996  | 1777.8333   | 0.0337  | 19    | 50         | 64       | YAGKNLSMDCANYVR     |           |         | Carbamidomethyl (C)[10], Oxidation (M)[8] |      | Mascot      |
| 1870.9518  | 1870.8503   | -0.1015 | -54   | 622        | 638      | AQNNLPGNHATSLRSYK   |           |         |                                           |      | Mascot      |
| 2142.0471  | 2141.989    | -0.0581 | -27   | 54         | 71       | NLSMDCANYVRLLQPFN K |           |         | Oxidation (M)[4]                          |      | Mascot      |
| 2142.0471  | 2141.989    | -0.0581 | -27   | 54         | 71       | NLSMDCANYVRLLQPFN K |           |         | Oxidation (M)[4]                          |      | Mascot      |

43 malectin precursor [Danio rerio] gi|165972473 31966.3 5.58 8 32 0

Peptide Information

| Calc. Mass | Obsrv. Mass | ± da    | ± ppm | Start Seq. | End Seq. | Sequence        | Ion Score | C. I. % | Modification           | Rank | Result Type |
|------------|-------------|---------|-------|------------|----------|-----------------|-----------|---------|------------------------|------|-------------|
| 856.3835   | 856.5021    | 0.1186  | 138   | 187        | 193      | GYDNPVK         |           |         |                        |      | Mascot      |
| 870.4614   | 870.5179    | 0.0565  | 65    | 4          | 11       | VTLHCAAR        |           |         |                        |      | Mascot      |
| 882.4904   | 882.5418    | 0.0514  | 58    | 245        | 252      | NPVRSGPR        |           |         |                        |      | Mascot      |
| 997.5209   | 997.5798    | 0.0589  | 59    | 194        | 201      | ICALYVMK        |           |         | Carbamidomethyl (C)[2] |      | Mascot      |
| 1051.5531  | 1051.6851   | 0.132   | 126   | 65         | 74       | VGKASDYGVR      |           |         |                        |      | Mascot      |
| 1196.5868  | 1196.7239   | 0.1371  | 115   | 106        | 115      | EEGDYILVMK      |           |         |                        |      | Mascot      |
| 1374.7012  | 1374.6014   | -0.0998 | -73   | 167        | 179      | LSVHGEVSTFNGK   |           |         |                        |      | Mascot      |
| 1777.8651  | 1777.8333   | -0.0318 | -18   | 187        | 201      | GYDNPVKICALYVMK |           |         |                        |      | Mascot      |

44 PREDICTED: actin-binding Rho-activating protein-like gi|189530046 19545.6 5.42 6 32 0  
[Danio rerio]

Peptide Information

| Calc. Mass | Obsrv. Mass | ± da | ± ppm | Start Seq. | End Seq. | Sequence | Ion Score | C. I. % | Modification | Rank | Result Type |
|------------|-------------|------|-------|------------|----------|----------|-----------|---------|--------------|------|-------------|
|------------|-------------|------|-------|------------|----------|----------|-----------|---------|--------------|------|-------------|

|    |                                                                                          |           |         |     |     |     |                    |         |      |                                           |    |   |        |
|----|------------------------------------------------------------------------------------------|-----------|---------|-----|-----|-----|--------------------|---------|------|-------------------------------------------|----|---|--------|
|    | 837.4464                                                                                 | 837.4025  | -0.0439 | -52 | 116 | 122 | YVNISNK            |         |      |                                           |    |   | Mascot |
|    | 837.4464                                                                                 | 837.4025  | -0.0439 | -52 | 116 | 122 | YVNISNK            |         |      |                                           |    |   | Mascot |
|    | 996.6676                                                                                 | 996.5699  | -0.0977 | -98 | 123 | 131 | LVGVLLRAR          |         |      |                                           |    |   | Mascot |
|    | 1003.4778                                                                                | 1003.4822 | 0.0044  | 4   | 77  | 84  | DAHFLMNR           |         |      |                                           |    |   | Mascot |
|    | 1687.8802                                                                                | 1687.9005 | 0.0203  | 12  | 109 | 122 | FGTLFERYVNISNK     |         |      |                                           |    |   | Mascot |
|    | 1701.8376                                                                                | 1701.8567 | 0.0191  | 11  | 43  | 57  | NPFSNGMVTPPQIQR    |         |      | Oxidation (M)[7]                          |    |   | Mascot |
|    | 2247.1008                                                                                | 2247.0405 | -0.0603 | -27 | 77  | 94  | DAHFLMNREVTELCQVIR |         |      | Carbamidomethyl (C)[14], Oxidation (M)[6] |    |   | Mascot |
| 45 | novel protein similar to vertebrate ankyrin 2, neuronal (ANK2, zgc:101738) [Danio rerio] |           |         |     |     |     | gi 123231888       | 34175.6 | 8.86 | 7                                         | 32 | 0 |        |

#### Peptide Information

| Calc. Mass | Obsrv. Mass | ± da    | ± ppm | Start Seq. | End Seq. | Sequence                | Ion Score | C. I. | % Modification         | Rank | Result Type |
|------------|-------------|---------|-------|------------|----------|-------------------------|-----------|-------|------------------------|------|-------------|
| 842.4954   | 842.4869    | -0.0085 | -10   | 17         | 24       | LNGLGGRR                |           |       |                        |      | Mascot      |
| 1034.5088  | 1034.498    | -0.0108 | -10   | 305        | 312      | IHFSREMV                |           |       | Oxidation (M)[7]       |      | Mascot      |
| 1216.7637  | 1216.6155   | -0.1482 | -122  | 192        | 202      | VRLPALHIAAR             |           |       |                        |      | Mascot      |
| 1464.7805  | 1464.7155   | -0.065  | -44   | 75         | 87       | EGHVDLVQELLGR           |           |       |                        |      | Mascot      |
| 1714.8879  | 1714.7578   | -0.1301 | -76   | 296        | 309      | TLCICHVTKIHFSR          |           |       | Carbamidomethyl (C)[3] |      | Mascot      |
| 2283.1211  | 2283.1147   | -0.0064 | -3    | 204        | 224      | DDTKSAALLLQNDHNAD VQSK  |           |       |                        |      | Mascot      |
| 2283.1211  | 2283.1147   | -0.0064 | -3    | 204        | 224      | DDTKSAALLLQNDHNAD VQSK  |           |       |                        |      | Mascot      |
| 2297.1731  | 2297.1257   | -0.0474 | -21   | 75         | 96       | EGHVDLVQELLGRGSSV DSATK |           |       |                        |      | Mascot      |

46 protein tyrosine phosphatase, non-receptor type 11, b [Danio rerio]

#### Peptide Information

| Calc. Mass | Obsrv. Mass | ± da    | ± ppm | Start Seq. | End Seq. | Sequence              | Ion Score | C. I. | % Modification   | Rank | Result Type |
|------------|-------------|---------|-------|------------|----------|-----------------------|-----------|-------|------------------|------|-------------|
| 1045.5272  | 1045.5347   | 0.0075  | 7     | 528        | 535      | LEEEQRNK              |           |       |                  |      | Mascot      |
| 1112.5385  | 1112.5427   | 0.0042  | 4     | 112        | 120      | WYHGHLGR              |           |       |                  |      | Mascot      |
| 1112.5385  | 1112.5427   | 0.0042  | 4     | 112        | 120      | WYHGHLGR              |           |       |                  |      | Mascot      |
| 1130.6165  | 1130.5626   | -0.0539 | -48   | 399        | 407      | ELEVTRLDR             |           |       |                  |      | Mascot      |
| 1216.5878  | 1216.6155   | 0.0277  | 23    | 481        | 491      | QGLDCDIDIPK           |           |       |                  |      | Mascot      |
| 1503.6492  | 1503.7736   | 0.1244  | 83    | 312        | 324      | SVNEEGRHMDEGK         |           |       | Oxidation (M)[9] |      | Mascot      |
| 1714.8793  | 1714.7578   | -0.1215 | -71   | 481        | 495      | QGLDCDIDIPKTIQR       |           |       |                  |      | Mascot      |
| 1734.9246  | 1734.8041   | -0.1205 | -69   | 221        | 235      | INAANIENRVHELNK       |           |       |                  |      | Mascot      |
| 2079.0652  | 2078.9702   | -0.095  | -46   | 444        | 464      | TQSAIPESGPVVHCSAGI GR |           |       |                  |      | Mascot      |
| 2079.0652  | 2078.9702   | -0.095  | -46   | 444        | 464      | TQSAIPESGPVVHCSAGI GR |           |       |                  |      | Mascot      |



|    |                                                                            |           |         |      |     |              |                          |      |   |    |   |  |        |
|----|----------------------------------------------------------------------------|-----------|---------|------|-----|--------------|--------------------------|------|---|----|---|--|--------|
|    | 2284.0879                                                                  | 2284.1089 | 0.021   | 9    | 179 | 198          | YDVGGGERFDTLADLVE<br>HYK |      |   |    |   |  | Mascot |
|    | 2310.1765                                                                  | 2309.905  | -0.2715 | -118 | 71  | 89           | FATLAELVQYYTEQHDL<br>R   |      |   |    |   |  | Mascot |
| 47 | PREDICTED: ankyrin repeat domain-containing protein 33B-like [Danio rerio] |           |         |      |     | gi 189515915 | 58303.8                  | 7.16 | 9 | 32 | 0 |  |        |

Peptide Information

| Calc. Mass | Obsrv. Mass | ± da    | ± ppm | Start Seq. | End Seq. | Sequence                        | Ion Score | C. I. % | Modification                                      | Rank | Result Type |
|------------|-------------|---------|-------|------------|----------|---------------------------------|-----------|---------|---------------------------------------------------|------|-------------|
| 1418.7427  | 1418.7217   | -0.021  | -15   | 254        | 265      | LTPQEWALFTGR                    |           |         |                                                   |      | Mascot      |
| 1714.9771  | 1714.7578   | -0.2193 | -128  | 1          | 17       | MVLITENGVAGGVVLVK               |           |         | Oxidation (M)[1]                                  |      | Mascot      |
| 1755.8153  | 1755.9912   | 0.1759  | 100   | 237        | 252      | SLMMTGGDIEARDFGR                |           |         |                                                   |      | Mascot      |
| 1767.8087  | 1767.8215   | 0.0128  | 7     | 216        | 231      | NCHGFTALMKAAMQGR                |           |         | Oxidation (M)[9,13]                               |      | Mascot      |
| 1870.8456  | 1870.8503   | 0.0047  | 3     | 232        | 248      | AECVRSLLMMTGGDIEAR              |           |         | Oxidation (M)[8,9]                                |      | Mascot      |
| 1932.1639  | 1931.9087   | -0.2552 | -132  | 2          | 20       | VLITENGVAGGVVLVKVH<br>K         |           |         |                                                   |      | Mascot      |
| 2079.1995  | 2078.9702   | -0.2293 | -110  | 1          | 20       | MVLITENGVAGGVVLVKV<br>HK        |           |         | Oxidation (M)[1]                                  |      | Mascot      |
| 2079.1995  | 2078.9702   | -0.2293 | -110  | 1          | 20       | MVLITENGVAGGVVLVKV<br>HK        |           |         | Oxidation (M)[1]                                  |      | Mascot      |
| 2142.1133  | 2141.989    | -0.1243 | -58   | 457        | 474      | VMLCKAPPIHMPERPP<br>R           |           |         | Carbamidomethyl (C)[4], Oxidation (M)[2]          |      | Mascot      |
| 2142.1133  | 2141.989    | -0.1243 | -58   | 457        | 474      | VMLCKAPPIHMPERPP<br>R           |           |         | Carbamidomethyl (C)[4], Oxidation (M)[2]          |      | Mascot      |
| 3337.3914  | 3337.6626   | 0.2712  | 81    | 275        | 301      | LMDKPCAQFCDSEYHMG<br>WPMLSEMVAR |           |         | Carbamidomethyl (C)[6,11], Oxidation (M)[2,16,20] |      | Mascot      |

|    |                                                         |  |  |  |  |              |          |      |    |    |   |  |
|----|---------------------------------------------------------|--|--|--|--|--------------|----------|------|----|----|---|--|
| 48 | PREDICTED: hypothetical protein LOC569436 [Danio rerio] |  |  |  |  | gi 326678363 | 352771.2 | 7.92 | 26 | 32 | 0 |  |
|----|---------------------------------------------------------|--|--|--|--|--------------|----------|------|----|----|---|--|

Peptide Information

| Calc. Mass | Obsrv. Mass | ± da    | ± ppm | Start Seq. | End Seq. | Sequence    | Ion Score | C. I. % | Modification           | Rank | Result Type |
|------------|-------------|---------|-------|------------|----------|-------------|-----------|---------|------------------------|------|-------------|
| 837.3737   | 837.4025    | 0.0288  | 34    | 25         | 31       | SDSEPFR     |           |         |                        |      | Mascot      |
| 837.3737   | 837.4025    | 0.0288  | 34    | 25         | 31       | SDSEPFR     |           |         |                        |      | Mascot      |
| 842.4743   | 842.4869    | 0.0126  | 15    | 2664       | 2669     | HFRINR      |           |         |                        |      | Mascot      |
| 856.4311   | 856.5021    | 0.071   | 83    | 1282       | 1287     | ENYFRK      |           |         |                        |      | Mascot      |
| 864.4131   | 864.4699    | 0.0568  | 66    | 603        | 610      | LGAEMSEK    |           |         |                        |      | Mascot      |
| 997.4771   | 997.5798    | 0.1027  | 103   | 1623       | 1630     | KSDECLFR    |           |         |                        |      | Mascot      |
| 1003.4625  | 1003.4822   | 0.0197  | 20    | 94         | 101      | QTLSDHMR    |           |         | Oxidation (M)[7]       |      | Mascot      |
| 1081.4653  | 1081.4974   | 0.0321  | 30    | 2158       | 2166     | MNNCELTEK   |           |         |                        |      | Mascot      |
| 1092.6122  | 1092.538    | -0.0742 | -68   | 2545       | 2554     | LFVGDMGILK  |           |         |                        |      | Mascot      |
| 1130.6238  | 1130.5626   | -0.0612 | -54   | 3057       | 3066     | GVNLLCDVLK  |           |         | Carbamidomethyl (C)[6] |      | Mascot      |
| 1165.5483  | 1165.7117   | 0.1634  | 140   | 922        | 932      | SKGDGPNFSEK |           |         |                        |      | Mascot      |

|           |                            |         |     |             |      |                          |      |    |    |                                              |  |  |        |
|-----------|----------------------------|---------|-----|-------------|------|--------------------------|------|----|----|----------------------------------------------|--|--|--------|
| 1165.5483 | 1165.7117                  | 0.1634  | 140 | 922         | 932  | SKGDGPNFSEK              |      |    |    |                                              |  |  | Mascot |
| 1196.6633 | 1196.7239                  | 0.0606  | 51  | 1778        | 1787 | LSHLELDLR                |      |    |    |                                              |  |  | Mascot |
| 1319.5458 | 1319.5454                  | -0.0004 | 0   | 1334        | 1345 | NNENNQADDASK             |      |    |    |                                              |  |  | Mascot |
| 1403.6583 | 1403.7134                  | 0.0551  | 39  | 1100        | 1110 | NETQERPIECK              |      |    |    | Carbamidomethyl (C)[10]                      |  |  | Mascot |
| 1467.8318 | 1467.7416                  | -0.0902 | -61 | 491         | 503  | TFAGPENLKIHLK            |      |    |    |                                              |  |  | Mascot |
| 1503.8451 | 1503.7736                  | -0.0715 | -48 | 1695        | 1708 | LEILGLSKCGITEK           |      |    |    |                                              |  |  | Mascot |
| 1734.8042 | 1734.8041                  | -0.0001 | 0   | 854         | 869  | GDGPNFSEQQPSSTKR         |      |    |    |                                              |  |  | Mascot |
| 1777.8108 | 1777.8333                  | 0.0225  | 13  | 297         | 311  | IHTGDRPYSCVQCGK          |      |    |    | Carbamidomethyl (C)[10,13]                   |  |  | Mascot |
| 1931.8724 | 1931.9087                  | 0.0363  | 19  | 2963        | 2979 | CCSLTDEDYKDLASALK        |      |    |    | Carbamidomethyl (C)[1]                       |  |  | Mascot |
| 2077.0779 | 2076.991                   | -0.0869 | -42 | 592         | 610  | CILISINNGRLGAEMSEK       |      |    |    | Oxidation (M)[16]                            |  |  | Mascot |
| 2142.0332 | 2141.989                   | -0.0442 | -21 | 294         | 311  | HVKIHTGDRPYSCVQCGK       |      |    |    | Carbamidomethyl (C)[13,16]                   |  |  | Mascot |
| 2142.0332 | 2141.989                   | -0.0442 | -21 | 294         | 311  | HVKIHTGDRPYSCVQCGK       |      |    |    | Carbamidomethyl (C)[13,16]                   |  |  | Mascot |
| 2224.9797 | 2225.0566                  | 0.0769  | 35  | 321         | 339  | HHMSLNHEEKPYVCGQCGR      |      |    |    |                                              |  |  | Mascot |
| 2224.9797 | 2225.0566                  | 0.0769  | 35  | 321         | 339  | HHMSLNHEEKPYVCGQCGR      |      |    |    |                                              |  |  | Mascot |
| 2232.8818 | 2233.0229                  | 0.1411  | 63  | 181         | 199  | YHMKMHSDETAFSCEECGK      |      |    |    |                                              |  |  | Mascot |
| 2239.0449 | 2239.0676                  | 0.0227  | 10  | 2476        | 2494 | LADSGMKNICLLQNVQCR       |      |    |    | Carbamidomethyl (C)[10,11], Oxidation (M)[6] |  |  | Mascot |
| 2283.2068 | 2283.1147                  | -0.0921 | -40 | 1358        | 1375 | TLTQMYTHFLRFQILQSR       |      |    |    |                                              |  |  | Mascot |
| 2283.2068 | 2283.1147                  | -0.0921 | -40 | 1358        | 1375 | TLTQMYTHFLRFQILQSR       |      |    |    |                                              |  |  | Mascot |
| 2297.144  | 2297.1257                  | -0.0183 | -8  | 2728        | 2748 | LNLSDCSISEEGYKALASALR    |      |    |    | Carbamidomethyl (C)[6]                       |  |  | Mascot |
| 2297.9961 | 2298.1064                  | 0.1103  | 48  | 321         | 339  | HHMSLNHEEKPYVCGQCGR      |      |    |    | Carbamidomethyl (C)[14], Oxidation (M)[3]    |  |  | Mascot |
| 2297.9961 | 2298.1064                  | 0.1103  | 48  | 321         | 339  | HHMSLNHEEKPYVCGQCGR      |      |    |    | Carbamidomethyl (C)[14], Oxidation (M)[3]    |  |  | Mascot |
| 2299.2017 | 2299.1038                  | -0.0979 | -43 | 1358        | 1375 | TLTQMYTHFLRFQILQSR       |      |    |    | Oxidation (M)[5]                             |  |  | Mascot |
| 2496.2173 | 2496.2568                  | 0.0395  | 16  | 1755        | 1777 | LNLLDCGISSEEGYEALATALESK |      |    |    | Carbamidomethyl (C)[6]                       |  |  | Mascot |
| 49        | Ofd1 protein [Danio rerio] |         |     | gi 53733696 |      | 104037.1                 | 5.57 | 13 | 32 | 0                                            |  |  |        |

| Peptide Information |             |         |       |            |          |                 |           |       |                  |      |        |        |  |
|---------------------|-------------|---------|-------|------------|----------|-----------------|-----------|-------|------------------|------|--------|--------|--|
| Calc. Mass          | Obsrv. Mass | ± da    | ± ppm | Start Seq. | End Seq. | Sequence        | Ion Score | C. I. | % Modification   | Rank | Result | Type   |  |
| 882.454             | 882.5418    | 0.0878  | 99    | 614        | 621      | ATAAQQHR        |           |       |                  |      |        | Mascot |  |
| 997.5425            | 997.5798    | 0.0373  | 37    | 438        | 445      | HTLELQTR        |           |       |                  |      |        | Mascot |  |
| 1003.469            | 1003.4822   | 0.0132  | 13    | 577        | 584      | ELEQEAER        |           |       |                  |      |        | Mascot |  |
| 1045.5286           | 1045.5347   | 0.0061  | 6     | 588        | 595      | AYRSHQQR        |           |       |                  |      |        | Mascot |  |
| 1130.6528           | 1130.5626   | -0.0902 | -80   | 410        | 419      | SQASLLKQKQK     |           |       |                  |      |        | Mascot |  |
| 1464.6635           | 1464.7155   | 0.052   | 36    | 6          | 17       | EESLSPDEMRQK    |           |       | Oxidation (M)[9] |      |        | Mascot |  |
| 1633.902            | 1633.8428   | -0.0592 | -36   | 121        | 135      | SLVSNIQRGQSGFLK |           |       |                  |      |        | Mascot |  |

|    |                                         |           |         |     |             |     |                            |     |                         |    |   |        |
|----|-----------------------------------------|-----------|---------|-----|-------------|-----|----------------------------|-----|-------------------------|----|---|--------|
|    | 1658.8132                               | 1658.7775 | -0.0357 | -22 | 269         | 281 | HQEIEEKDIYAQR              |     |                         |    |   | Mascot |
|    | 2078.9739                               | 2078.9702 | -0.0037 | -2  | 79          | 97  | SAGYEYTLSVFQPECGL<br>SK    |     |                         |    |   | Mascot |
|    | 2078.9739                               | 2078.9702 | -0.0037 | -2  | 79          | 97  | SAGYEYTLSVFQPECGL<br>SK    |     |                         |    |   | Mascot |
|    | 2239.1162                               | 2239.0676 | -0.0486 | -22 | 165         | 182 | ESLVEKMLQIDEEYEVLR         |     | Oxidation (M)[7]        |    |   | Mascot |
|    | 2247.0386                               | 2247.0405 | 0.0019  | 1   | 812         | 829 | ETHTLQQQPHEEQTQEQ<br>R     |     |                         |    |   | Mascot |
|    | 2297.1594                               | 2297.1257 | -0.0337 | -15 | 129         | 148 | GQSGFLKSLMELTDHS<br>VYR    |     | Oxidation (M)[11]       |    |   | Mascot |
|    | 2381.1514                               | 2380.958  | -0.1934 | -81 | 57          | 78  | SADHTDSVLVSACNSVV<br>VDHLR |     | Carbamidomethyl (C)[13] |    |   | Mascot |
| 50 | GTP-binding protein REM 1 [Danio rerio] |           |         |     | gi 54633305 |     | 33854.2                    | 8.7 | 1                       | 22 | 0 |        |

|   |                                                                                                    |           |         |     |     |              |                      |      |     |                   |   |  |  |  |  |        |
|---|----------------------------------------------------------------------------------------------------|-----------|---------|-----|-----|--------------|----------------------|------|-----|-------------------|---|--|--|--|--|--------|
|   | 1714.8031                                                                                          | 1714.7483 | -0.0548 | -32 | 89  | 102          | DPNKPLPENNEEYR       |      |     |                   |   |  |  |  |  | Mascot |
|   | 1854.9385                                                                                          | 1854.8779 | -0.0606 | -33 | 126 | 140          | EWLADKGTFFENIYLR     |      |     |                   |   |  |  |  |  | Mascot |
|   | 1870.9042                                                                                          | 1870.8479 | -0.0563 | -30 | 88  | 102          | RDPNKPLPENNEEYR      |      |     |                   |   |  |  |  |  | Mascot |
|   | 1950.9344                                                                                          | 1950.8711 | -0.0633 | -32 | 14  | 29           | VAEQIEYYFGDHNLP      | 107  | 100 |                   |   |  |  |  |  | Mascot |
|   | 1950.9344                                                                                          | 1950.8711 | -0.0633 | -32 | 14  | 29           | VAEQIEYYFGDHNLP      |      |     |                   |   |  |  |  |  | Mascot |
|   | 1972.9935                                                                                          | 1972.8564 | -0.1371 | -69 | 109 | 125          | SIYMKGFPLETTLDDVK    |      |     | Oxidation (M)[4]  |   |  |  |  |  | Mascot |
|   | 2015.0154                                                                                          | 2014.9482 | -0.0672 | -33 | 35  | 51           | EQLQLDDGWVPLETMLK    |      |     |                   |   |  |  |  |  | Mascot |
|   | 2031.0104                                                                                          | 2030.9421 | -0.0683 | -34 | 35  | 51           | EQLQLDDGWVPLETMLK    |      |     | Oxidation (M)[15] |   |  |  |  |  | Mascot |
|   | 2077.0488                                                                                          | 2076.9771 | -0.0717 | -35 | 114 | 131          | GFPLETTLDDVKEWLADK   |      |     |                   |   |  |  |  |  | Mascot |
|   | 2079.0293                                                                                          | 2078.9653 | -0.064  | -31 | 13  | 29           | KVAEQIEYYFGDHNLP     |      |     |                   |   |  |  |  |  | Mascot |
|   | 2079.0293                                                                                          | 2078.9653 | -0.064  | -31 | 13  | 29           | KVAEQIEYYFGDHNLP     | 102  | 100 |                   |   |  |  |  |  | Mascot |
|   | 2142.0461                                                                                          | 2141.9775 | -0.0686 | -32 | 89  | 106          | DPNKPLPENNEEYRDALK   |      |     |                   |   |  |  |  |  | Mascot |
|   | 2142.0461                                                                                          | 2141.9775 | -0.0686 | -32 | 89  | 106          | DPNKPLPENNEEYRDALK   | 93   | 100 |                   |   |  |  |  |  | Mascot |
|   | 2247.085                                                                                           | 2247.0237 | -0.0613 | -27 | 296 | 314          | EQAVQWEILEGDVEMETLK  |      |     |                   |   |  |  |  |  | Mascot |
|   | 2391.1748                                                                                          | 2391.105  | -0.0698 | -29 | 296 | 315          | EQAVQWEILEGDVEMETLKK |      |     | Oxidation (M)[15] |   |  |  |  |  | Mascot |
| 2 | RecName: Full=Keratin, type I cytoskeletal 18; AltName: Full=Cytokeratin-18; Short=CK-18; AltName: |           |         |     |     | gi 148886613 | 48601.1              | 5.53 | 11  | 44                | 0 |  |  |  |  |        |

Peptide Information

| Calc. Mass | Obsrv. Mass | ± da    | ± ppm | Start Seq. | End Seq. | Sequence       | Ion Score | C. I. | % Modification   | Rank | Result | Type   |
|------------|-------------|---------|-------|------------|----------|----------------|-----------|-------|------------------|------|--------|--------|
| 807.3995   | 807.3746    | -0.0249 | -31   | 163        | 169      | LAADDFR        |           |       |                  |      |        | Mascot |
| 864.4461   | 864.4656    | 0.0195  | 23    | 387        | 394      | LLDGGDFK       |           |       |                  |      |        | Mascot |
| 882.4753   | 882.5382    | 0.0629  | 71    | 260        | 266      | YEKMALK        |           |       |                  |      |        | Mascot |
| 996.4996   | 996.5663    | 0.0667  | 67    | 172        | 179      | YESELSIR       |           |       |                  |      |        | Mascot |
| 1045.4697  | 1045.5308   | 0.0611  | 58    | 124        | 132      | GPDVHDYSR      |           |       |                  |      |        | Mascot |
| 1092.4926  | 1092.5282   | 0.0356  | 33    | 86         | 94       | MAMQNLNDR      |           |       |                  |      |        | Mascot |
| 1107.5906  | 1107.5105   | -0.0801 | -72   | 25         | 33       | RTTNVPTYR      |           |       |                  |      |        | Mascot |
| 1434.6893  | 1434.7269   | 0.0376  | 26    | 246        | 257      | GQDLSQIMEEIR   |           |       | Oxidation (M)[8] |      |        | Mascot |
| 1464.7111  | 1464.7103   | -0.0008 | -1    | 322        | 334      | GSLEGTLRDTMR   |           |       |                  |      |        | Mascot |
| 1633.8214  | 1633.8365   | 0.0151  | 9     | 246        | 259      | GQDLSQIMEEIRAK |           |       | Oxidation (M)[8] |      |        | Mascot |
| 1714.9333  | 1714.7483   | -0.185  | -108  | 305        | 318      | RQIQTLEIELESQK |           |       |                  |      |        | Mascot |

3 Wu:fc02b10 protein [Danio rerio] gi|189441648 71787.8 6.64 13 42 0

Peptide Information

| Calc. Mass | Obsrv. Mass | ± da | ± ppm | Start Seq. | End Seq. | Sequence | Ion Score | C. I. | % Modification | Rank | Result | Type |
|------------|-------------|------|-------|------------|----------|----------|-----------|-------|----------------|------|--------|------|
|------------|-------------|------|-------|------------|----------|----------|-----------|-------|----------------|------|--------|------|

|   |                                                                                                   |           |         |     |     |     |                         |   |   |                                          |  |  |  |  |  |  |        |        |
|---|---------------------------------------------------------------------------------------------------|-----------|---------|-----|-----|-----|-------------------------|---|---|------------------------------------------|--|--|--|--|--|--|--------|--------|
|   | 807.364                                                                                           | 807.3746  | 0.0106  | 13  | 122 | 127 | FMNHMK                  |   |   |                                          |  |  |  |  |  |  |        | Mascot |
|   | 1051.5315                                                                                         | 1051.6791 | 0.1476  | 140 | 232 | 240 | DLLCPFCLK               |   |   |                                          |  |  |  |  |  |  |        | Mascot |
|   | 1112.5261                                                                                         | 1112.5389 | 0.0128  | 12  | 109 | 117 | CNSCLKMLK               | 7 | 0 | Carbamidomethyl (C)[4], Oxidation (M)[7] |  |  |  |  |  |  | Mascot |        |
|   | 1112.5261                                                                                         | 1112.5389 | 0.0128  | 12  | 109 | 117 | CNSCLKMLK               |   |   | Carbamidomethyl (C)[1], Oxidation (M)[7] |  |  |  |  |  |  | Mascot |        |
|   | 1165.5745                                                                                         | 1165.5503 | -0.0242 | -21 | 232 | 240 | DLLCPFCLK               |   |   | Carbamidomethyl (C)[4,7]                 |  |  |  |  |  |  | Mascot |        |
|   | 1165.5745                                                                                         | 1165.7085 | 0.134   | 115 | 232 | 240 | DLLCPFCLK               |   |   | Carbamidomethyl (C)[4,7]                 |  |  |  |  |  |  | Mascot |        |
|   | 1196.6093                                                                                         | 1196.7197 | 0.1104  | 92  | 362 | 370 | CLYNTELKR               |   |   | Carbamidomethyl (C)[1]                   |  |  |  |  |  |  | Mascot |        |
|   | 1196.6093                                                                                         | 1196.7197 | 0.1104  | 92  | 362 | 370 | CLYNTELKR               |   |   | Carbamidomethyl (C)[1]                   |  |  |  |  |  |  | Mascot |        |
|   | 1320.63                                                                                           | 1320.5431 | -0.0869 | -66 | 118 | 127 | NNIRFMNHMK              |   |   | Oxidation (M)[6]                         |  |  |  |  |  |  | Mascot |        |
|   | 1464.7443                                                                                         | 1464.7103 | -0.034  | -23 | 79  | 90  | LIMLVSDFFYYGK           |   |   | Oxidation (M)[3]                         |  |  |  |  |  |  | Mascot |        |
|   | 1472.5868                                                                                         | 1472.7281 | 0.1413  | 96  | 244 | 254 | SGHMYMQHYMR             |   |   | Oxidation (M)[4,6]                       |  |  |  |  |  |  | Mascot |        |
|   | 1633.8658                                                                                         | 1633.8365 | -0.0293 | -18 | 77  | 90  | GKLIMLVSDFFYYGK         |   |   |                                          |  |  |  |  |  |  | Mascot |        |
|   | 1659.8296                                                                                         | 1659.7222 | -0.1074 | -65 | 1   | 16  | ADNGKVINEANNSVSK        |   |   |                                          |  |  |  |  |  |  | Mascot |        |
|   | 1659.8296                                                                                         | 1659.7222 | -0.1074 | -65 | 1   | 16  | ADNGKVINEANNSVSK        |   |   |                                          |  |  |  |  |  |  | Mascot |        |
|   | 2077.0093                                                                                         | 2076.9771 | -0.0322 | -16 | 178 | 194 | ICELAFETEQLLEHMR        |   |   | Oxidation (M)[16]                        |  |  |  |  |  |  | Mascot |        |
|   | 2224.9321                                                                                         | 2225.0479 | 0.1158  | 52  | 195 | 212 | DNHKPGEMPYGCQVCN<br>YR  |   |   | Carbamidomethyl (C)[12,15]               |  |  |  |  |  |  | Mascot |        |
|   | 2224.9321                                                                                         | 2225.0479 | 0.1158  | 52  | 195 | 212 | DNHKPGEMPYGCQVCN<br>YR  |   |   | Carbamidomethyl (C)[12,15]               |  |  |  |  |  |  | Mascot |        |
|   | 2283.0247                                                                                         | 2283.1047 | 0.08    | 35  | 213 | 231 | SSFFCDVDNHFRTVHEN<br>TK |   |   |                                          |  |  |  |  |  |  | Mascot |        |
|   | 2391.1182                                                                                         | 2391.105  | -0.0132 | -6  | 380 | 399 | CMECLHDVDPYIHYPLS<br>LK |   |   | Oxidation (M)[2]                         |  |  |  |  |  |  | Mascot |        |
| 4 | ATPase family AAA domain-containing protein 3 [Danio rerio] gi 45387821 69799.9 8.57 10 40 0 10 0 |           |         |     |     |     |                         |   |   |                                          |  |  |  |  |  |  |        |        |

#### Peptide Information

|  | Calc. Mass | Obsrv. Mass | ± da    | ± ppm | Start Seq. | End Sequence Seq. | Ion Score                  | C. I. % | Modification | Rank                   | Result Type |
|--|------------|-------------|---------|-------|------------|-------------------|----------------------------|---------|--------------|------------------------|-------------|
|  | 1051.5756  | 1051.6791   | 0.1035  | 98    | 552        | 560               | VDAAVRQHR                  |         |              |                        | Mascot      |
|  | 1081.6152  | 1081.4918   | -0.1234 | -114  | 478        | 485               | LVRLYFDR                   |         |              |                        | Mascot      |
|  | 1092.5796  | 1092.5282   | -0.0514 | -47   | 124        | 132               | AQYQDKLAR                  |         |              |                        | Mascot      |
|  | 1179.5891  | 1179.5645   | -0.0246 | -21   | 89         | 98                | EYEAQVEQLK                 |         |              |                        | Mascot      |
|  | 1179.5891  | 1179.5645   | -0.0246 | -21   | 89         | 98                | EYEAQVEQLK                 | 10      | 0            |                        | Mascot      |
|  | 1357.707   | 1357.6755   | -0.0315 | -23   | 141        | 151               | QQTLLNEENLR                |         |              |                        | Mascot      |
|  | 1420.7682  | 1420.611    | -0.1572 | -111  | 87         | 98                | IKEYEAQVEQLK               |         |              |                        | Mascot      |
|  | 2110.041   | 2109.9102   | -0.1308 | -62   | 598        | 615               | AQEELRPLQVEPDSQN<br>K      |         |              |                        | Mascot      |
|  | 2297.0359  | 2297.116    | 0.0801  | 35    | 359        | 380               | LAVHSGMDYAIMTGGDV<br>APMGR |         |              | Oxidation (M)[7,12,20] | Mascot      |
|  | 2305.2397  | 2305.0833   | -0.1564 | -68   | 301        | 321               | LQSKPQDALEGVVLSPPL         |         |              |                        | Mascot      |

|   | 2409.136                         | 2409.1289   | -0.0071 | -3    | 358          | 380      | EER<br>KLAVHSGMDYAIMTGGD<br>VAPMGR |           |       |   | Oxidation (M)[8,13]                       | Mascot           |
|---|----------------------------------|-------------|---------|-------|--------------|----------|------------------------------------|-----------|-------|---|-------------------------------------------|------------------|
| 5 | Zgc:153569 protein [Danio rerio] |             |         |       | gi 171846383 | 59551.2  | 7.18                               | 14        | 39    | 0 |                                           |                  |
|   | Peptide Information              |             |         |       |              |          |                                    |           |       |   |                                           |                  |
|   | Calc. Mass                       | Obsrv. Mass | ± da    | ± ppm | Start Seq.   | End Seq. | Sequence                           | Ion Score | C. I. | % | Modification                              | Rank Result Type |
|   | 850.4669                         | 850.5144    | 0.0475  | 56    | 326          | 332      | LIAQDYK                            |           |       |   |                                           | Mascot           |
|   | 999.4637                         | 999.5364    | 0.0727  | 73    | 198          | 205      | LICGFMDK                           |           |       |   | Carbamidomethyl (C)[3], Oxidation (M)[6]  | Mascot           |
|   | 1090.4404                        | 1090.4946   | 0.0542  | 50    | 506          | 513      | MVQDCEHR                           |           |       |   | Carbamidomethyl (C)[5], Oxidation (M)[1]  | Mascot           |
|   | 1234.5773                        | 1234.6421   | 0.0648  | 52    | 188          | 197      | MTSIVFSDYR                         |           |       |   | Oxidation (M)[1]                          | Mascot           |
|   | 1320.5784                        | 1320.5431   | -0.0353 | -27   | 350          | 360      | CNPDTSMPRAR                        |           |       |   | Carbamidomethyl (C)[1], Oxidation (M)[7]  | Mascot           |
|   | 1365.6328                        | 1365.5994   | -0.0334 | -24   | 412          | 423      | GEIEAHCSGLHR                       |           |       |   | Carbamidomethyl (C)[7]                    | Mascot           |
|   | 1493.7278                        | 1493.6898   | -0.038  | -25   | 412          | 424      | GEIEAHCSGLHRK                      |           |       |   | Carbamidomethyl (C)[7]                    | Mascot           |
|   | 1493.7278                        | 1493.6898   | -0.038  | -25   | 412          | 424      | GEIEAHCSGLHRK                      |           |       |   | Carbamidomethyl (C)[7]                    | Mascot           |
|   | 1972.9606                        | 1972.8564   | -0.1042 | -53   | 137          | 153      | FESVALEVCTSTMLELK                  |           |       |   | Carbamidomethyl (C)[9], Oxidation (M)[13] | Mascot           |
|   | 1993.9583                        | 1993.9119   | -0.0464 | -23   | 163          | 179      | GYLMSCLVDHRANITER                  |           |       |   | Oxidation (M)[4]                          | Mascot           |
|   | 2076.9915                        | 2076.9771   | -0.0144 | -7    | 395          | 411      | MLMEDFSLSPEIVLHCR                  |           |       |   | Carbamidomethyl (C)[16]                   | Mascot           |
|   | 2109.9653                        | 2109.9102   | -0.0551 | -26   | 488          | 505      | NGDPMILSCLMEHLYTEK                 |           |       |   | Oxidation (M)[5]                          | Mascot           |
|   | 2142.0068                        | 2141.9775   | -0.0293 | -14   | 188          | 205      | MTSIVFSDYRLICGFMDK                 |           |       |   | Oxidation (M)[1]                          | Mascot           |
|   | 2142.0068                        | 2141.9775   | -0.0293 | -14   | 188          | 205      | MTSIVFSDYRLICGFMDK                 |           |       |   | Oxidation (M)[1]                          | Mascot           |
|   | 2233.0925                        | 2233.0168   | -0.0757 | -34   | 394          | 411      | RMLMEDFSLSPEIVLHCR                 |           |       |   | Carbamidomethyl (C)[17]                   | Mascot           |
|   | 2297.1592                        | 2297.116    | -0.0432 | -19   | 46           | 71       | AAILNPGNNAAAAAAAAA<br>ASSGSQTR     |           |       |   |                                           | Mascot           |
| 6 | sideroflexin-2 [Danio rerio]     |             |         |       | gi 47086585  | 35601.3  | 9.38                               | 9         | 39    | 0 |                                           |                  |
|   | Peptide Information              |             |         |       |              |          |                                    |           |       |   |                                           |                  |
|   | Calc. Mass                       | Obsrv. Mass | ± da    | ± ppm | Start Seq.   | End Seq. | Sequence                           | Ion Score | C. I. | % | Modification                              | Rank Result Type |
|   | 1393.7045                        | 1393.6879   | -0.0166 | -12   | 23           | 33       | LKHFFNITDCR                        |           |       |   |                                           | Mascot           |
|   | 1464.7151                        | 1464.7103   | -0.0048 | -3    | 1            | 13       | MEAVKGFIDIDAPR                     |           |       |   | Oxidation (M)[1]                          | Mascot           |
|   | 1493.6655                        | 1493.6898   | 0.0243  | 16    | 72           | 84       | LYDSAFHPDTGDR                      |           |       |   |                                           | Mascot           |
|   | 1493.6655                        | 1493.6898   | 0.0243  | 16    | 72           | 84       | LYDSAFHPDTGDR                      |           |       |   |                                           | Mascot           |
|   | 1855.0366                        | 1854.8779   | -0.1587 | -86   | 232          | 248      | VTMAAPGMILPIIMQR                   |           |       |   |                                           | Mascot           |
|   | 1871.0315                        | 1870.8479   | -0.1836 | -98   | 232          | 248      | VTMAAPGMILPIIMQR                   |           |       |   | Oxidation (M)[3]                          | Mascot           |
|   | 2014.9076                        | 2014.9482   | 0.0406  | 20    | 6            | 22       | GFDIDAPRWQSTFMGR                   |           |       |   | Oxidation (M)[15]                         | Mascot           |
|   | 2077.0181                        | 2076.9771   | -0.041  | -20   | 177          | 195      | WVPFAAVAAANCVNIPM<br>MR            |           |       |   | Oxidation (M)[17]                         | Mascot           |
|   | 2142.0503                        | 2141.9775   | -0.0728 | -34   | 302          | 319      | ESIISQYGEQISHVYFNK                 |           |       |   |                                           | Mascot           |



|    |                                      |           |         |             |      |         |                          |                         |        |   |
|----|--------------------------------------|-----------|---------|-------------|------|---------|--------------------------|-------------------------|--------|---|
|    | 807.3049                             | 807.3746  | 0.0697  | 86          | 468  | 475     | GDGADGCR                 | Carbamidomethyl (C)[7]  | Mascot |   |
|    | 837.4134                             | 837.3991  | -0.0143 | -17         | 1214 | 1221    | VKASVSCS                 | Carbamidomethyl (C)[7]  | Mascot |   |
|    | 837.4134                             | 837.3991  | -0.0143 | -17         | 1214 | 1221    | VKASVSCS                 | Carbamidomethyl (C)[7]  | Mascot |   |
|    | 1045.5823                            | 1045.5308 | -0.0515 | -49         | 683  | 690     | LQIKDCLR                 | Carbamidomethyl (C)[6]  | Mascot |   |
|    | 1107.5139                            | 1107.5105 | -0.0034 | -3          | 926  | 934     | DPEDFMVVR                |                         | Mascot |   |
|    | 1112.567                             | 1112.5389 | -0.0281 | -25         | 917  | 925     | NPNMKPHFK                |                         | Mascot |   |
|    | 1112.567                             | 1112.5389 | -0.0281 | -25         | 917  | 925     | NPNMKPHFK                |                         | Mascot |   |
|    | 1179.5641                            | 1179.5645 | 0.0004  | 0           | 1187 | 1196    | VRPEDSGEYK               |                         | Mascot |   |
|    | 1179.5641                            | 1179.5645 | 0.0004  | 0           | 1187 | 1196    | VRPEDSGEYK               |                         | Mascot |   |
|    | 1234.6864                            | 1234.6421 | -0.0443 | -36         | 21   | 31      | VPGVMITQYVK              |                         | Mascot |   |
|    | 1434.7587                            | 1434.7269 | -0.0318 | -22         | 845  | 857     | DGGNKILGYQIEK            |                         | Mascot |   |
|    | 1493.8145                            | 1493.6898 | -0.1247 | -83         | 19   | 31      | SRVPGVMITQYVK            | Oxidation (M)[7]        | Mascot |   |
|    | 1493.8145                            | 1493.6898 | -0.1247 | -83         | 19   | 31      | SRVPGVMITQYVK            | Oxidation (M)[7]        | Mascot |   |
|    | 1583.8176                            | 1583.6996 | -0.118  | -75         | 61   | 75      | AVVNGDPAPTVTWTR          |                         | Mascot |   |
|    | 1633.8795                            | 1633.8365 | -0.043  | -26         | 2    | 16      | PQPAEEIPVGQVEIK          |                         | Mascot |   |
|    | 2015.059                             | 2014.9482 | -0.1108 | -55         | 215  | 232     | VVENVDNMKPIEVKTSG<br>R   |                         | Mascot |   |
|    | 2031.0538                            | 2030.9421 | -0.1117 | -55         | 215  | 232     | VVENVDNMKPIEVKTSG<br>R   | Oxidation (M)[8]        | Mascot |   |
|    | 2109.8889                            | 2109.9102 | 0.0213  | 10          | 410  | 429     | DGAGDGADDFARCLADE<br>QAR | Carbamidomethyl (C)[13] | Mascot |   |
|    | 2142.1707                            | 2141.9775 | -0.1932 | -90         | 56   | 75      | VALFKAVVNGDPAPTVT<br>WTR |                         | Mascot |   |
|    | 2142.1707                            | 2141.9775 | -0.1932 | -90         | 56   | 75      | VALFKAVVNGDPAPTVT<br>WTR |                         | Mascot |   |
|    | 2233.0527                            | 2233.0168 | -0.0359 | -16         | 917  | 934     | NPNMKPHFKDPEDFMVV<br>R   | Oxidation (M)[4,15]     | Mascot |   |
| 10 | casein kinase 1-alphaL [Danio rerio] |           |         | gi 21591725 |      | 40471.7 | 9.54                     | 10                      | 37     | 0 |

### Peptide Information

| Calc. Mass | Obsrv. Mass | ± da    | ± ppm | Start Seq. | End Seq. | Sequence        | Ion Score | C. I. % | Modification                             | Rank | Result Type |
|------------|-------------|---------|-------|------------|----------|-----------------|-----------|---------|------------------------------------------|------|-------------|
| 1045.5459  | 1045.5308   | -0.0151 | -14   | 153        | 161      | CLESPVGKR       |           |         | Carbamidomethyl (C)[1]                   |      | Mascot      |
| 1092.6676  | 1092.5282   | -0.1394 | -128  | 307        | 314      | QLFRILFR        |           |         |                                          |      | Mascot      |
| 1179.5748  | 1179.5645   | -0.0103 | -9    | 269        | 278      | MSTPVEVLCK      |           |         | Carbamidomethyl (C)[9], Oxidation (M)[1] |      | Mascot      |
| 1179.5748  | 1179.5645   | -0.0103 | -9    | 269        | 278      | MSTPVEVLCK      |           |         | Carbamidomethyl (C)[9], Oxidation (M)[1] |      | Mascot      |
| 1234.6534  | 1234.6421   | -0.0113 | -9    | 268        | 278      | KMSTPVEVLCK     |           |         |                                          |      | Mascot      |
| 1393.7178  | 1393.6879   | -0.0299 | -21   | 112        | 123      | TVLMLADQMISR    |           |         | Oxidation (M)[4]                         |      | Mascot      |
| 1475.7675  | 1475.7104   | -0.0571 | -39   | 136        | 148      | DIKPDNFLMGIGR   |           |         |                                          |      | Mascot      |
| 1714.8983  | 1714.7483   | -0.15   | -87   | 215        | 229      | YASINAHLGIEQSRR |           |         |                                          |      | Mascot      |
| 1993.9476  | 1993.9119   | -0.0357 | -18   | 296        | 310      | FEEAPDYMYLRQLFR |           |         | Oxidation (M)[8]                         |      | Mascot      |



|           |           |         |     |     |     |                              |                                           |        |
|-----------|-----------|---------|-----|-----|-----|------------------------------|-------------------------------------------|--------|
| 2014.995  | 2014.9482 | -0.0468 | -23 | 136 | 152 | DIKPDNFLMGIGRHCNK            | Carbamidomethyl (C)[15]                   | Mascot |
| 2030.9899 | 2030.9421 | -0.0478 | -24 | 136 | 152 | DIKPDNFLMGIGRHCNK            | Carbamidomethyl (C)[15], Oxidation (M)[9] | Mascot |
| 2247.075  | 2247.0237 | -0.0513 | -23 | 331 | 353 | QKAAQQAASSGGQGQQ<br>AQTP TGF |                                           | Mascot |

11 Gefiltin [Danio rerio] gi|61403519 54189.8 5.23 11 36 0

Peptide Information

| Calc. Mass | Obsrv. Mass | ± da    | ± ppm | Start Seq. | End Seq. | Sequence                | Ion Score | C. I. % | Modification     | Rank | Result Type |
|------------|-------------|---------|-------|------------|----------|-------------------------|-----------|---------|------------------|------|-------------|
| 882.4427   | 882.5382    | 0.0955  | 108   | 106        | 112      | NLEQHNK                 |           |         |                  |      | Mascot      |
| 999.5152   | 999.5364    | 0.0212  | 21    | 359        | 366      | SEMARHLR                |           |         |                  |      | Mascot      |
| 1090.4946  | 1090.4946   | 0       | 0     | 88         | 96       | EQMQGLNDR               |           |         |                  |      | Mascot      |
| 1092.5432  | 1092.5282   | -0.015  | -14   | 299        | 306      | EELNEFRR                |           |         |                  |      | Mascot      |
| 1234.5984  | 1234.6421   | 0.0437  | 35    | 417        | 427      | LYSSTSMSSKK             |           |         | Oxidation (M)[7] |      | Mascot      |
| 1365.6757  | 1365.5994   | -0.0763 | -56   | 278        | 289      | SKFADLSEQANR            |           |         |                  |      | Mascot      |
| 1393.7507  | 1393.6879   | -0.0628 | -45   | 376        | 387      | MALDIEIAAYRK            |           |         |                  |      | Mascot      |
| 1583.7336  | 1583.6996   | -0.034  | -21   | 2          | 15       | SYGSDIYSASSYRK          |           |         |                  |      | Mascot      |
| 1714.7742  | 1714.7483   | -0.0259 | -15   | 1          | 15       | MSYGSDIYSASSYRK         |           |         |                  |      | Mascot      |
| 1972.9255  | 1972.8564   | -0.0691 | -35   | 88         | 103      | EQMQGLNDRFAMFIEK        |           |         | Oxidation (M)[3] |      | Mascot      |
| 2233.0229  | 2233.0168   | -0.0061 | -3    | 259        | 277      | GQYEAMASKNLQSAEE<br>WYK |           |         |                  |      | Mascot      |

12 hypothetical protein LOC641496 [Danio rerio] gi|82658306 25293.7 5.02 7 35 0

Peptide Information

| Calc. Mass | Obsrv. Mass | ± da    | ± ppm | Start Seq. | End Seq. | Sequence           | Ion Score | C. I. % | Modification            | Rank | Result Type |
|------------|-------------|---------|-------|------------|----------|--------------------|-----------|---------|-------------------------|------|-------------|
| 1109.6135  | 1109.4548   | -0.1587 | -143  | 1          | 9        | MATKFQLVR          |           |         | Oxidation (M)[1]        |      | Mascot      |
| 1196.5906  | 1196.7197   | 0.1291  | 108   | 57         | 66       | AEEQVEVHQK         |           |         |                         |      | Mascot      |
| 1196.5906  | 1196.7197   | 0.1291  | 108   | 57         | 66       | AEEQVEVHQK         |           |         |                         |      | Mascot      |
| 1416.7303  | 1416.8978   | 0.1675  | 118   | 129        | 142      | ISASNGVCAPLAWK     |           |         |                         |      | Mascot      |
| 1472.7777  | 1472.7281   | -0.0496 | -34   | 67         | 79       | VIALQAEINQMDK      |           |         |                         |      | Mascot      |
| 1475.8104  | 1475.7104   | -0.1    | -68   | 112        | 124      | ADKKPVSFEDLVK      |           |         |                         |      | Mascot      |
| 1714.8026  | 1714.7483   | -0.0543 | -32   | 38         | 51       | EIVDTMLFLDNNMK     |           |         | Oxidation (M)[6,13]     |      | Mascot      |
| 1951.0331  | 1950.8711   | -0.162  | -83   | 125        | 142      | LAHRISASNGVCAPLAWK |           |         | Carbamidomethyl (C)[12] |      | Mascot      |
| 1951.0331  | 1950.8711   | -0.162  | -83   | 125        | 142      | LAHRISASNGVCAPLAWK |           |         | Carbamidomethyl (C)[12] |      | Mascot      |

13 interleukin 7 receptor [Danio rerio] gi|164698523 38565.6 5.52 8 35 0

Peptide Information

| Calc. Mass | Obsrv. Mass | ± da | ± ppm | Start | End | Sequence | Ion | C. I. % | Modification | Rank | Result Type |
|------------|-------------|------|-------|-------|-----|----------|-----|---------|--------------|------|-------------|
|------------|-------------|------|-------|-------|-----|----------|-----|---------|--------------|------|-------------|

|    |                                                                    | Seq.      |         |      |     | Seq.        |                       | Score   |      |    |    |                        |   |   |        |
|----|--------------------------------------------------------------------|-----------|---------|------|-----|-------------|-----------------------|---------|------|----|----|------------------------|---|---|--------|
|    | 1092.5969                                                          | 1092.5282 | -0.0687 | -63  | 66  | 74          | EIDLTkmvK             |         |      |    |    | Oxidation (M)[7]       |   |   | Mascot |
|    | 1107.627                                                           | 1107.5105 | -0.1165 | -105 | 283 | 291         | LPREQshlK             |         |      |    |    |                        |   |   | Mascot |
|    | 1179.6521                                                          | 1179.5645 | -0.0876 | -74  | 208 | 217         | YITPNiPhPK            |         |      |    |    |                        |   |   | Mascot |
|    | 1179.6521                                                          | 1179.5645 | -0.0876 | -74  | 208 | 217         | YITPNiPhPK            |         |      |    |    |                        |   |   | Mascot |
|    | 1420.6665                                                          | 1420.611  | -0.0555 | -39  | 321 | 332         | EEAYVTmSSlFK          |         |      |    |    | Oxidation (M)[7]       |   |   | Mascot |
|    | 1633.7778                                                          | 1633.8365 | 0.0587  | 36   | 321 | 334         | EEAYVTmSSlFKtQ        |         |      |    |    |                        |   |   | Mascot |
|    | 2079.1167                                                          | 2078.9653 | -0.1514 | -73  | 208 | 225         | YITPNiPhPKATLAQMQR    |         |      |    |    |                        |   |   | Mascot |
|    | 2079.1167                                                          | 2078.9653 | -0.1514 | -73  | 208 | 225         | YITPNiPhPKATLAQMQR    |         |      |    |    |                        |   |   | Mascot |
|    | 2247.0671                                                          | 2247.0237 | -0.0434 | -19  | 314 | 332         | SPQLECKEEAYVTmSSlFK   |         |      |    |    | Carbamidomethyl (C)[6] |   |   | Mascot |
|    | 2409.2236                                                          | 2409.1289 | -0.0947 | -39  | 226 | 246         | AKEGLPFTFSPEIFSDAFIHR |         |      |    |    |                        |   |   | Mascot |
| 14 | signal transducer and activator of transcription 5.2 [Danio rerio] |           |         |      |     | gi 51591885 |                       | 89784.4 | 5.83 | 10 | 34 | 0                      | 9 | 0 |        |

#### Peptide Information

| Calc. Mass | Obsrv. Mass | ± da    | ± ppm | Start Seq. | End Seq. | Sequence               | Ion Score | C. I. | % Modification     | Rank | Result Type |
|------------|-------------|---------|-------|------------|----------|------------------------|-----------|-------|--------------------|------|-------------|
| 1107.6746  | 1107.5105   | -0.1641 | -148  | 233        | 241      | HQRTLALLR              |           |       |                    |      | Mascot      |
| 1179.6117  | 1179.5645   | -0.0472 | -40   | 655        | 664      | DFSIRSLADR             |           |       |                    |      | Mascot      |
| 1179.6117  | 1179.5645   | -0.0472 | -40   | 655        | 664      | DFSIRSLADR             |           |       |                    |      | Mascot      |
| 1234.6791  | 1234.6421   | -0.037  | -30   | 208        | 217      | KSTLETWLTR             |           |       |                    |      | Mascot      |
| 1659.8523  | 1659.7222   | -0.1301 | -78   | 72         | 86       | AEHQMGGDGfLLKIK        | 9         | 0     | Oxidation (M)[5]   |      | Mascot      |
| 1659.8523  | 1659.7222   | -0.1301 | -78   | 72         | 86       | AEHQMGGDGfLLKIK        |           |       | Oxidation (M)[5]   |      | Mascot      |
| 1714.901   | 1714.7483   | -0.1527 | -89   | 243        | 256      | QQTViVDdELiQWK         |           |       |                    |      | Mascot      |
| 1871.0021  | 1870.8479   | -0.1542 | -82   | 243        | 257      | QQTViVDdELiQWKR        |           |       |                    |      | Mascot      |
| 2076.9888  | 2076.9771   | -0.0117 | -6    | 568        | 583      | NFTFWQWFDGViELMK       |           |       | Oxidation (M)[15]  |      | Mascot      |
| 2110.042   | 2109.9102   | -0.1318 | -62   | 602        | 619      | QQAQDMLMSKPNgtFLLR     |           |       | Oxidation (M)[6,8] |      | Mascot      |
| 2297.0503  | 2297.116    | 0.0657  | 29    | 769        | 787      | QVEEFLRQPMETTWSGQ      |           |       | Oxidation (M)[10]  |      | Mascot      |
| 2391.2124  | 2391.105    | -0.1074 | -45   | 87         | 107      | LGHYATQLKNSYDACPL ELVR |           |       |                    |      | Mascot      |

15 ATP-binding cassette, sub-family D (ALD), member 3b [Danio rerio] gi|194578945 75186.1 9.16 11 34 0

#### Peptide Information

| Calc. Mass | Obsrv. Mass | ± da   | ± ppm | Start Seq. | End Seq. | Sequence | Ion Score | C. I. | % Modification         | Rank | Result Type |
|------------|-------------|--------|-------|------------|----------|----------|-----------|-------|------------------------|------|-------------|
| 850.4716   | 850.5144    | 0.0428 | 50    | 153        | 158      | LCFRVR   |           |       | Carbamidomethyl (C)[2] |      | Mascot      |

|           |           |         |     |     |     |                        |  |  |  |                        |  |        |
|-----------|-----------|---------|-----|-----|-----|------------------------|--|--|--|------------------------|--|--------|
| 864.4244  | 864.4656  | 0.0412  | 48  | 255 | 261 | MTVTEQR                |  |  |  |                        |  | Mascot |
| 882.5342  | 882.5382  | 0.004   | 5   | 67  | 73  | RICHILK                |  |  |  |                        |  | Mascot |
| 1090.5276 | 1090.4946 | -0.033  | -30 | 346 | 354 | HINSTYAER              |  |  |  |                        |  | Mascot |
| 1107.569  | 1107.5105 | -0.0585 | -53 | 74  | 82  | ILMPQAFCK              |  |  |  | Carbamidomethyl (C)[8] |  | Mascot |
| 1196.631  | 1196.7197 | 0.0887  | 74  | 643 | 652 | GNYEFKPITK             |  |  |  |                        |  | Mascot |
| 1196.631  | 1196.7197 | 0.0887  | 74  | 643 | 652 | GNYEFKPITK             |  |  |  |                        |  | Mascot |
| 1357.795  | 1357.6755 | -0.1195 | -88 | 616 | 627 | VGITLFTVSHRK           |  |  |  |                        |  | Mascot |
| 1393.7111 | 1393.6879 | -0.0232 | -17 | 159 | 169 | LTNHLYNDYLK            |  |  |  |                        |  | Mascot |
| 1583.8275 | 1583.6996 | -0.1279 | -81 | 183 | 196 | IANPDQLITQDVEK         |  |  |  |                        |  | Mascot |
| 2015.0242 | 2014.9482 | -0.076  | -38 | 307 | 323 | FIHFRFSMGVMDSIIAK      |  |  |  | Oxidation (M)[8]       |  | Mascot |
| 2031.019  | 2030.9421 | -0.0769 | -38 | 307 | 323 | FIHFRFSMGVMDSIIAK      |  |  |  | Oxidation (M)[8,11]    |  | Mascot |
| 2142.1528 | 2141.9775 | -0.1753 | -82 | 503 | 520 | GKLFYVPQRPYMTLGSL<br>R |  |  |  | Oxidation (M)[12]      |  | Mascot |
| 2142.1528 | 2141.9775 | -0.1753 | -82 | 503 | 520 | GKLFYVPQRPYMTLGSL<br>R |  |  |  | Oxidation (M)[12]      |  | Mascot |

16 branched-chain-amino-acid aminotransferase, cytosolic gi|41152384 42664.4 6.79 8 34 0  
[Danio rerio]

#### Peptide Information

| Calc. Mass | Obsrv. Mass | ± da    | ± ppm | Start Seq. | End Seq. | Sequence                 | Ion Score | C. I. | % Modification                              | Rank | Result Type |
|------------|-------------|---------|-------|------------|----------|--------------------------|-----------|-------|---------------------------------------------|------|-------------|
| 842.4665   | 842.484     | 0.0175  | 21    | 121        | 127      | MLKSAHR                  |           |       |                                             |      | Mascot      |
| 864.4838   | 864.4656    | -0.0182 | -21   | 210        | 215      | YIRAWR                   |           |       |                                             |      | Mascot      |
| 1107.5     | 1107.5105   | 0.0105  | 9     | 213        | 222      | AWRGGTGDCK               |           |       | Carbamidomethyl (C)[9]                      |      | Mascot      |
| 1165.6221  | 1165.5503   | -0.0718 | -62   | 111        | 119      | LFRPMLNMK                |           |       | Oxidation (M)[5]                            |      | Mascot      |
| 1165.6221  | 1165.7085   | 0.0864  | 74    | 111        | 119      | LFRPMLNMK                |           |       | Oxidation (M)[5]                            |      | Mascot      |
| 1420.7915  | 1420.611    | -0.1805 | -127  | 109        | 119      | VRLFRPMLNMK              |           |       | Oxidation (M)[7]                            |      | Mascot      |
| 2014.9104  | 2014.9482   | 0.0378  | 19    | 128        | 144      | ACLPSFDCAELMECIKK        |           |       | Carbamidomethyl (C)[2,8]                    |      | Mascot      |
| 2030.9054  | 2030.9421   | 0.0367  | 18    | 128        | 144      | ACLPSFDCAELMECIKK        |           |       | Carbamidomethyl (C)[2,8], Oxidation (M)[12] |      | Mascot      |
| 2077.1174  | 2076.9771   | -0.1403 | -68   | 272        | 291      | GEEELATPPLDGIILPGVT<br>R |           |       |                                             |      | Mascot      |
| 2297.0181  | 2297.116    | 0.0979  | 43    | 124        | 143      | SAHRACLPSFDCAELME<br>CIK |           |       | Carbamidomethyl (C)[6], Oxidation (M)[16]   |      | Mascot      |

17 vwa2 protein [Danio rerio] gi|272938025 16568.8 7.94 6 34 0

#### Peptide Information

| Calc. Mass | Obsrv. Mass | ± da    | ± ppm | Start Seq. | End Seq. | Sequence    | Ion Score | C. I. | % Modification         | Rank | Result Type |
|------------|-------------|---------|-------|------------|----------|-------------|-----------|-------|------------------------|------|-------------|
| 842.4518   | 842.484     | 0.0322  | 38    | 64         | 69       | YNKVYR      |           |       |                        |      | Mascot      |
| 1109.5295  | 1109.4548   | -0.0747 | -67   | 23         | 31       | VESYPCVQK   |           |       | Carbamidomethyl (C)[6] |      | Mascot      |
| 1365.6957  | 1365.5994   | -0.0963 | -71   | 67         | 77       | VYRQHPAVCHR |           |       |                        |      | Mascot      |

|    |                                                 |           |         |     |              |    |                            |      |   |                                            |   |  |        |
|----|-------------------------------------------------|-----------|---------|-----|--------------|----|----------------------------|------|---|--------------------------------------------|---|--|--------|
|    | 1460.6627                                       | 1460.7493 | 0.0866  | 59  | 52           | 63 | YSAYTSLCPHYR               |      |   |                                            |   |  | Mascot |
|    | 1951.0106                                       | 1950.8711 | -0.1395 | -72 | 32           | 47 | TLETVKQLQGNFVCWK           |      |   | Carbamidomethyl (C)[14]                    |   |  | Mascot |
|    | 1951.0106                                       | 1950.8711 | -0.1395 | -72 | 32           | 47 | TLETVKQLQGNFVCWK           |      |   | Carbamidomethyl (C)[14]                    |   |  | Mascot |
|    | 2305.0872                                       | 2305.0833 | -0.0039 | -2  | 1            | 22 | VNGLFTSLTSSVCM SIP<br>SGCK |      |   | Carbamidomethyl (C)[14], Oxidation (M)[15] |   |  | Mascot |
| 18 | hypothetical protein LOC100124598 [Danio rerio] |           |         |     | gi 156616342 |    | 11312.5                    | 6.69 | 5 | 34                                         | 0 |  |        |

#### Peptide Information

|  | Calc. Mass | Obsrv. Mass | ± da    | ± ppm | Start Seq. | End Seq. | Sequence               | Ion Score | C. I. | % Modification         | Rank | Result Type |
|--|------------|-------------|---------|-------|------------|----------|------------------------|-----------|-------|------------------------|------|-------------|
|  | 1090.4834  | 1090.4946   | 0.0112  | 10    | 68         | 76       | EICADPTER              |           |       | Carbamidomethyl (C)[3] |      | Mascot      |
|  | 1092.4852  | 1092.5282   | 0.043   | 39    | 31         | 39       | CCFSFSTIK              |           |       | Carbamidomethyl (C)[1] |      | Mascot      |
|  | 1472.764   | 1472.7281   | -0.0359 | -24   | 31         | 43       | CCFSFSTIKIPVK          |           |       |                        |      | Mascot      |
|  | 1659.7908  | 1659.7222   | -0.0686 | -41   | 68         | 80       | EICADPTERWWQR          |           |       | Carbamidomethyl (C)[3] |      | Mascot      |
|  | 1659.7908  | 1659.7222   | -0.0686 | -41   | 68         | 80       | EICADPTERWWQR          |           |       | Carbamidomethyl (C)[3] |      | Mascot      |
|  | 2142.0913  | 2141.9775   | -0.1138 | -53   | 40         | 57       | IPVKQVQSYHTAHFQCQ<br>K |           |       |                        |      | Mascot      |
|  | 2142.0913  | 2141.9775   | -0.1138 | -53   | 40         | 57       | IPVKQVQSYHTAHFQCQ<br>K |           |       |                        |      | Mascot      |

|    |                                                                              |  |  |  |              |  |          |      |    |    |   |  |  |
|----|------------------------------------------------------------------------------|--|--|--|--------------|--|----------|------|----|----|---|--|--|
| 19 | PREDICTED: transposon TX1 uncharacterized 149 kDa protein-like [Danio rerio] |  |  |  | gi 326674296 |  | 180436.7 | 7.83 | 21 | 34 | 0 |  |  |
|----|------------------------------------------------------------------------------|--|--|--|--------------|--|----------|------|----|----|---|--|--|

#### Peptide Information

|  | Calc. Mass | Obsrv. Mass | ± da    | ± ppm | Start Seq. | End Seq. | Sequence         | Ion Score | C. I. | % Modification                           | Rank | Result Type |
|--|------------|-------------|---------|-------|------------|----------|------------------|-----------|-------|------------------------------------------|------|-------------|
|  | 807.3995   | 807.3746    | -0.0249 | -31   | 469        | 475      | EFNGNVK          |           |       |                                          |      | Mascot      |
|  | 850.4087   | 850.5144    | 0.1057  | 124   | 595        | 601      | DITQAMR          |           |       | Oxidation (M)[6]                         |      | Mascot      |
|  | 996.493    | 996.5663    | 0.0733  | 74    | 564        | 571      | KQCFSDLR         |           |       |                                          |      | Mascot      |
|  | 1045.5717  | 1045.5308   | -0.0409 | -39   | 662        | 669      | FFFSLEKK         |           |       |                                          |      | Mascot      |
|  | 1092.5216  | 1092.5282   | 0.0066  | 6     | 1367       | 1374     | TMKYCFVK         |           |       | Carbamidomethyl (C)[5], Oxidation (M)[2] |      | Mascot      |
|  | 1179.6455  | 1179.5645   | -0.081  | -69   | 1218       | 1226     | VWRLFSLCR        |           |       |                                          |      | Mascot      |
|  | 1179.6844  | 1179.5645   | -0.1199 | -102  | 855        | 864      | SILDNVHLIR       |           |       |                                          |      | Mascot      |
|  | 1193.6711  | 1193.5795   | -0.0916 | -77   | 306        | 314      | RMQLYELIK        |           |       |                                          |      | Mascot      |
|  | 1320.5571  | 1320.5431   | -0.014  | -11   | 87         | 97       | CFGCGQEGHLR      |           |       | Carbamidomethyl (C)[1,4]                 |      | Mascot      |
|  | 1416.7998  | 1416.8978   | 0.098   | 69    | 1500       | 1511     | WQLINFLVGQAK     |           |       |                                          |      | Mascot      |
|  | 1420.6677  | 1420.611    | -0.0567 | -40   | 572        | 582      | QWWDCGKAEIK      |           |       | Carbamidomethyl (C)[5]                   |      | Mascot      |
|  | 1460.7783  | 1460.7493   | -0.029  | -20   | 899        | 911      | TLESFGFGSKFIK    |           |       |                                          |      | Mascot      |
|  | 1475.71    | 1475.7104   | 0.0004  | 0     | 583        | 594      | LFCQQYAFNVSR     |           |       |                                          |      | Mascot      |
|  | 1659.7903  | 1659.7222   | -0.0681 | -41   | 1357       | 1370     | DVNLTM MQGK TMYK |           |       |                                          |      | Mascot      |

|    |                                                                |           |         |     |      |             |                           |      |    |    |   |  |                                             |  |  |  |        |
|----|----------------------------------------------------------------|-----------|---------|-----|------|-------------|---------------------------|------|----|----|---|--|---------------------------------------------|--|--|--|--------|
|    | 1659.7903                                                      | 1659.7222 | -0.0681 | -41 | 1357 | 1370        | DVNLTM MQGK TMYK          |      |    |    |   |  |                                             |  |  |  | Mascot |
|    | 1714.8217                                                      | 1714.7483 | -0.0734 | -43 | 254  | 267         | NMKNVQ VDF FSDR           |      |    |    |   |  | Oxidation (M)[2]                            |  |  |  | Mascot |
|    | 1854.8214                                                      | 1854.8779 | 0.0565  | 30  | 71   | 86          | VDGYDY VVF ASSETMR        |      |    |    |   |  | Oxidation (M)[15]                           |  |  |  | Mascot |
|    | 1994.0642                                                      | 1993.9119 | -0.1523 | -76 | 276  | 291         | IVFVFCY TLF LMGVIR        |      |    |    |   |  | Carbamidomethyl (C)[6], Oxidation (M)[12]   |  |  |  | Mascot |
|    | 2077.1262                                                      | 2076.9771 | -0.1491 | -72 | 813  | 829         | NWRPVSL LCT DLKIFSK       |      |    |    |   |  | Carbamidomethyl (C)[9]                      |  |  |  | Mascot |
|    | 2297.25                                                        | 2297.116  | -0.134  | -58 | 1422 | 1443        | ILHGIVAV NAFISV VNSSV DDK |      |    |    |   |  |                                             |  |  |  | Mascot |
|    | 2298.0818                                                      | 2298.0898 | 0.008   | 3   | 2    | 23          | AAAMETP ASAFSG DAPF ERLSR |      |    |    |   |  | Oxidation (M)[4]                            |  |  |  | Mascot |
|    | 2409.1094                                                      | 2409.1289 | 0.0195  | 8   | 29   | 50          | IVPEMACS VEECSL AVGE TVGR |      |    |    |   |  | Carbamidomethyl (C)[7,12], Oxidation (M)[5] |  |  |  | Mascot |
| 20 | Eukaryotic translation elongation factor 2, like [Danio rerio] |           |         |     |      | gi 28278942 | 95388.8                   | 6.28 | 14 | 33 | 0 |  |                                             |  |  |  |        |

Peptide Information

|    | Calc. Mass                                                                   | Obsrv. Mass | ± da    | ± ppm | Start Seq. | End Seq.     | Sequence             | Ion Score | C. I. | % Modification         | Rank | Result Type |
|----|------------------------------------------------------------------------------|-------------|---------|-------|------------|--------------|----------------------|-----------|-------|------------------------|------|-------------|
|    | 807.3917                                                                     | 807.3746    | -0.0171 | -21   | 401        | 407          | MVPTTDK              |           |       | Oxidation (M)[1]       |      | Mascot      |
|    | 837.4321                                                                     | 837.3991    | -0.033  | -39   | 450        | 456          | TILMMGR              |           |       | Oxidation (M)[4]       |      | Mascot      |
|    | 837.4321                                                                     | 837.3991    | -0.033  | -39   | 450        | 456          | TILMMGR              |           |       | Oxidation (M)[4]       |      | Mascot      |
|    | 864.4495                                                                     | 864.4656    | 0.0161  | 19    | 253        | 259          | VEDVMKK              |           |       | Oxidation (M)[5]       |      | Mascot      |
|    | 1118.5801                                                                    | 1118.4785   | -0.1016 | -91   | 620        | 629          | GDVSSRQELK           |           |       |                        |      | Mascot      |
|    | 1234.6096                                                                    | 1234.6421   | 0.0325  | 26    | 62         | 71           | DEQERCITIK           |           |       |                        |      | Mascot      |
|    | 1393.8049                                                                    | 1393.6879   | -0.117  | -84   | 513        | 525          | NPADLPKLVEGLK        |           |       |                        |      | Mascot      |
|    | 1420.7253                                                                    | 1420.611    | -0.1143 | -80   | 728        | 739          | VLVYACQLTAEPR        |           |       | Carbamidomethyl (C)[5] |      | Mascot      |
|    | 1475.7896                                                                    | 1475.7104   | -0.0792 | -54   | 151        | 162          | LKPVLM MNKMDR        |           |       |                        |      | Mascot      |
|    | 1493.6835                                                                    | 1493.6898   | 0.0063  | 4     | 689        | 701          | EGALCEENMRAVR        |           |       | Oxidation (M)[9]       |      | Mascot      |
|    | 1493.6835                                                                    | 1493.6898   | 0.0063  | 4     | 689        | 701          | EGALCEENMRAVR        |           |       | Oxidation (M)[9]       |      | Mascot      |
|    | 1659.8483                                                                    | 1659.7222   | -0.1261 | -76   | 826        | 840          | DAASKPCQIVADTRK      |           |       | Carbamidomethyl (C)[7] |      | Mascot      |
|    | 1659.8483                                                                    | 1659.7222   | -0.1261 | -76   | 826        | 840          | DAASKPCQIVADTRK      |           |       | Carbamidomethyl (C)[7] |      | Mascot      |
|    | 1950.9524                                                                    | 1950.8711   | -0.0813 | -42   | 482        | 498          | TGTITTFDQA HNM RV MK |           |       |                        |      | Mascot      |
|    | 1950.9524                                                                    | 1950.8711   | -0.0813 | -42   | 482        | 498          | TGTITTFDQA HNM RV MK |           |       |                        |      | Mascot      |
|    | 2077.1296                                                                    | 2076.9771   | -0.1525 | -73   | 440        | 456          | EDLYLKPIQRTILMMGR    |           |       |                        |      | Mascot      |
|    | 2079.0579                                                                    | 2078.9653   | -0.0926 | -45   | 602        | 619          | LYMKARPFDPGLAEDIDK   |           |       |                        |      | Mascot      |
|    | 2079.0579                                                                    | 2078.9653   | -0.0926 | -45   | 602        | 619          | LYMKARPFDPGLAEDIDK   |           |       |                        |      | Mascot      |
|    | 2225.0681                                                                    | 2225.0479   | -0.0202 | -9    | 72         | 90           | STAISMYE LTENDLAFIK  |           |       | Oxidation (M)[6]       |      | Mascot      |
|    | 2225.0681                                                                    | 2225.0479   | -0.0202 | -9    | 72         | 90           | STAISMYE LTENDLAFIK  |           |       | Oxidation (M)[6]       |      | Mascot      |
| 21 | PREDICTED: transposon TX1 uncharacterized 149 kDa protein-like [Danio rerio] |             |         |       |            | gi 326664772 | 131122               | 9.55      | 14    | 33                     | 0    |             |

| Peptide Information |                                            |             |         |       |             |          |                          |           |         |                         |      |             |
|---------------------|--------------------------------------------|-------------|---------|-------|-------------|----------|--------------------------|-----------|---------|-------------------------|------|-------------|
|                     | Calc. Mass                                 | Obsrv. Mass | ± da    | ± ppm | Start Seq.  | End Seq. | Sequence                 | Ion Score | C. I. % | Modification            | Rank | Result Type |
|                     | 1045.5499                                  | 1045.5308   | -0.0191 | -18   | 913         | 921      | CPVAFNLPK                |           |         | Carbamidomethyl (C)[1]  |      | Mascot      |
|                     | 1051.5935                                  | 1051.6791   | 0.0856  | 81    | 824         | 831      | FFLLNLER                 |           |         |                         |      | Mascot      |
|                     | 1393.6715                                  | 1393.6879   | 0.0164  | 12    | 184         | 194      | LVDCFKTMHQR              |           |         | Oxidation (M)[8]        |      | Mascot      |
|                     | 1434.6981                                  | 1434.7269   | 0.0288  | 20    | 184         | 194      | LVDCFKTMHQR              |           |         | Carbamidomethyl (C)[4]  |      | Mascot      |
|                     | 1475.8251                                  | 1475.7104   | -0.1147 | -78   | 168         | 180      | LDKTSVLLQGMVR            |           |         | Oxidation (M)[11]       |      | Mascot      |
|                     | 1493.8145                                  | 1493.6898   | -0.1247 | -83   | 171         | 183      | TSVLLQGMVRDFK            |           |         |                         |      | Mascot      |
|                     | 1493.8145                                  | 1493.6898   | -0.1247 | -83   | 171         | 183      | TSVLLQGMVRDFK            |           |         |                         |      | Mascot      |
|                     | 1950.9191                                  | 1950.8711   | -0.048  | -25   | 766         | 784      | FDEEGGGGGNWTDLLG<br>KAK  |           |         |                         |      | Mascot      |
|                     | 1951.0317                                  | 1950.8711   | -0.1606 | -82   | 346         | 362      | NEMSVLSEIQSKGFILR        |           |         |                         |      | Mascot      |
|                     | 2031.0691                                  | 2030.9421   | -0.127  | -63   | 143         | 160      | APLILAGDFNCILTNKDR       |           |         | Carbamidomethyl (C)[11] |      | Mascot      |
|                     | 2076.9988                                  | 2076.9771   | -0.0217 | -10   | 1008        | 1027     | GMAKTSICPRPGCSSPE<br>TVR |           |         |                         |      | Mascot      |
|                     | 2110.1067                                  | 2109.9102   | -0.1965 | -93   | 421         | 437      | QTDEYIQLEVLNFLEKK        |           |         |                         |      | Mascot      |
|                     | 2141.9458                                  | 2141.9775   | 0.0317  | 15    | 190         | 207      | TMHQREEGFTWFSGDG<br>TR   |           |         |                         |      | Mascot      |
|                     | 2141.9458                                  | 2141.9775   | 0.0317  | 15    | 190         | 207      | TMHQREEGFTWFSGDG<br>TR   |           |         |                         |      | Mascot      |
|                     | 2225.051                                   | 2225.0479   | -0.0031 | -1    | 546         | 565      | MSMVLEDVIHPDQACAV<br>PGR |           |         | Carbamidomethyl (C)[15] |      | Mascot      |
|                     | 2225.051                                   | 2225.0479   | -0.0031 | -1    | 546         | 565      | MSMVLEDVIHPDQACAV<br>PGR |           |         | Carbamidomethyl (C)[15] |      | Mascot      |
|                     | 2300.1445                                  | 2300.093    | -0.0515 | -22   | 327         | 345      | YFNLLNEGLDFNDEIKEV<br>K  |           |         |                         |      | Mascot      |
|                     | 2391.1516                                  | 2391.105    | -0.0466 | -19   | 57          | 76       | RWEELWTPGPSIWSGSN<br>FNK |           |         |                         |      | Mascot      |
| 22                  | zinc finger protein 384 like [Danio rerio] |             |         |       | gi 52218888 |          | 63383.2                  | 9.42      | 10      | 33                      | 0    |             |

| Peptide Information |             |         |       |            |          |                   |           |         |                                          |                  |
|---------------------|-------------|---------|-------|------------|----------|-------------------|-----------|---------|------------------------------------------|------------------|
| Calc. Mass          | Obsrv. Mass | ± da    | ± ppm | Start Seq. | End Seq. | Sequence          | Ion Score | C. I. % | Modification                             | Rank Result Type |
| 1045.5347           | 1045.5308   | -0.0039 | -4    | 40         | 48       | MKEQLGPDK         |           |         |                                          | Mascot           |
| 1090.506            | 1090.4946   | -0.0114 | -10   | 233        | 241      | MCAVTFFSK         |           |         | Carbamidomethyl (C)[2]                   | Mascot           |
| 1118.5986           | 1118.4785   | -0.1201 | -107  | 374        | 383      | KLSLNCPTSR        |           |         |                                          | Mascot           |
| 1365.6112           | 1365.5994   | -0.0118 | -9    | 231        | 241      | CRMCAVTFFSK       |           |         | Carbamidomethyl (C)[1], Oxidation (M)[3] | Mascot           |
| 1434.6365           | 1434.7269   | 0.0904  | 63    | 422        | 432      | DKPYKCHNCNR       |           |         | Carbamidomethyl (C)[6]                   | Mascot           |
| 1493.7495           | 1493.6898   | -0.0597 | -40   | 265        | 277      | SFANSSYLAQHIR     |           |         |                                          | Mascot           |
| 1493.7495           | 1493.6898   | -0.0597 | -40   | 265        | 277      | SFANSSYLAQHIR     |           |         |                                          | Mascot           |
| 1854.9821           | 1854.8779   | -0.1042 | -56   | 309        | 325      | TSVLTAPNRSPTPATWR |           |         |                                          | Mascot           |
| 1972.9974           | 1972.8564   | -0.141  | -71   | 433        | 450      | GYDATSLEVHLTTHTVK |           |         |                                          | Mascot           |

|    |                                             |           |        |    |             |     |                                          |     |                                           |        |   |
|----|---------------------------------------------|-----------|--------|----|-------------|-----|------------------------------------------|-----|-------------------------------------------|--------|---|
|    | 2305.0298                                   | 2305.0833 | 0.0535 | 23 | 454         | 472 | LYSCGLCNRSYTSETYL<br>MK                  |     | Carbamidomethyl (C)[4], Oxidation (M)[18] | Mascot |   |
|    | 3337.6201                                   | 3337.6675 | 0.0474 | 14 | 473         | 506 | HMQKHNPDLTVAAAVA<br>AQQAQNPQGSGGGSG<br>R |     |                                           | Mascot |   |
| 23 | casein kinase I isoform alpha [Danio rerio] |           |        |    | gi 23308639 |     | 37513.2                                  | 9.5 | 9                                         | 33     | 0 |

#### Peptide Information

| Calc. Mass | Obsrv. Mass | ± da    | ± ppm | Start Seq. | End Seq. | Sequence                  | Ion Score | C. I. % | Modification                              | Rank | Result Type |
|------------|-------------|---------|-------|------------|----------|---------------------------|-----------|---------|-------------------------------------------|------|-------------|
| 1092.6676  | 1092.5282   | -0.1394 | -128  | 279        | 286      | QLFRILFR                  |           |         |                                           |      | Mascot      |
| 1179.5748  | 1179.5645   | -0.0103 | -9    | 241        | 250      | MSTPVEVLCK                |           |         | Carbamidomethyl (C)[9], Oxidation (M)[1]  |      | Mascot      |
| 1179.5748  | 1179.5645   | -0.0103 | -9    | 241        | 250      | MSTPVEVLCK                |           |         | Carbamidomethyl (C)[9], Oxidation (M)[1]  |      | Mascot      |
| 1234.6534  | 1234.6421   | -0.0113 | -9    | 240        | 250      | KMSTPVEVLCK               |           |         |                                           |      | Mascot      |
| 1393.7178  | 1393.6879   | -0.0299 | -21   | 112        | 123      | TVLMLADQMISR              |           |         | Oxidation (M)[4]                          |      | Mascot      |
| 1475.7675  | 1475.7104   | -0.0571 | -39   | 136        | 148      | DIKPDNFLMGIGR             |           |         |                                           |      | Mascot      |
| 1714.8983  | 1714.7483   | -0.15   | -87   | 187        | 201      | YASINAHLGIEQSRR           |           |         |                                           |      | Mascot      |
| 1993.9476  | 1993.9119   | -0.0357 | -18   | 268        | 282      | FEEAPDYMYLRQLFR           |           |         | Oxidation (M)[8]                          |      | Mascot      |
| 2014.995   | 2014.9482   | -0.0468 | -23   | 136        | 152      | DIKPDNFLMGIGRHCNK         |           |         | Carbamidomethyl (C)[15]                   |      | Mascot      |
| 2030.9899  | 2030.9421   | -0.0478 | -24   | 136        | 152      | DIKPDNFLMGIGRHCNK         |           |         | Carbamidomethyl (C)[15], Oxidation (M)[9] |      | Mascot      |
| 2247.075   | 2247.0237   | -0.0513 | -23   | 303        | 325      | QKAAQQAASSGGQGQ<br>AQTPTF |           |         |                                           |      | Mascot      |

|    |                                     |  |  |  |             |  |         |      |   |    |   |
|----|-------------------------------------|--|--|--|-------------|--|---------|------|---|----|---|
| 24 | PREDICTED: telethonin [Danio rerio] |  |  |  | gi 68436343 |  | 20145.3 | 9.43 | 7 | 33 | 0 |
|----|-------------------------------------|--|--|--|-------------|--|---------|------|---|----|---|

#### Peptide Information

| Calc. Mass | Obsrv. Mass | ± da    | ± ppm | Start Seq. | End Seq. | Sequence                | Ion Score | C. I. % | Modification                             | Rank | Result Type |
|------------|-------------|---------|-------|------------|----------|-------------------------|-----------|---------|------------------------------------------|------|-------------|
| 1090.5925  | 1090.4946   | -0.0979 | -90   | 2          | 10       | QVCSVLEKK               |           |         | Carbamidomethyl (C)[3]                   |      | Mascot      |
| 1109.533   | 1109.4548   | -0.0782 | -70   | 1          | 9        | MQVCSVLEK               |           |         | Carbamidomethyl (C)[4], Oxidation (M)[1] |      | Mascot      |
| 1357.5835  | 1357.6755   | 0.092   | 68    | 51         | 61       | QSMLMSDDSRR             |           |         | Oxidation (M)[3,5]                       |      | Mascot      |
| 1393.6562  | 1393.6879   | 0.0317  | 23    | 11         | 24       | GGCVVGAELSCSVR          |           |         | Carbamidomethyl (C)[3]                   |      | Mascot      |
| 1464.7297  | 1464.7103   | -0.0194 | -13   | 10         | 24       | KGGCVVGAELSCSVR         |           |         |                                          |      | Mascot      |
| 2077.228   | 2076.9771   | -0.2509 | -121  | 101        | 119      | NSLPLPIFKPAELGVRLG<br>R |           |         |                                          |      | Mascot      |
| 2110.0874  | 2109.9102   | -0.1772 | -84   | 67         | 83       | YWQVRPLHQACPSGVR<br>R   |           |         | Carbamidomethyl (C)[11]                  |      | Mascot      |

|    |                                         |  |  |  |              |  |         |      |   |    |   |
|----|-----------------------------------------|--|--|--|--------------|--|---------|------|---|----|---|
| 25 | RecName: Full=Kinetochore protein Spc24 |  |  |  | gi 115311865 |  | 23383.8 | 4.73 | 6 | 33 | 0 |
|----|-----------------------------------------|--|--|--|--------------|--|---------|------|---|----|---|

#### Peptide Information

| Calc. Mass | Obsrv. Mass | ± da    | ± ppm | Start Seq. | End Seq. | Sequence    | Ion Score | C. I. % | Modification     | Rank | Result Type |
|------------|-------------|---------|-------|------------|----------|-------------|-----------|---------|------------------|------|-------------|
| 1365.6427  | 1365.5994   | -0.0433 | -32   | 88         | 98       | MEQEVQRSQSK |           |         | Oxidation (M)[1] |      | Mascot      |

|    |                              |           |         |     |             |     |                               |     |   |    |                        |  |  |        |
|----|------------------------------|-----------|---------|-----|-------------|-----|-------------------------------|-----|---|----|------------------------|--|--|--------|
|    | 1420.7352                    | 1420.611  | -0.1242 | -87 | 15          | 27  | LGESLNEIIMSSK                 |     |   |    |                        |  |  | Mascot |
|    | 2015.0193                    | 2014.9482 | -0.0711 | -35 | 167         | 185 | GVHYGADVVTINIDTSTR            |     |   |    |                        |  |  | Mascot |
|    | 2078.9739                    | 2078.9653 | -0.0086 | -4  | 186         | 202 | TPCEVSDLEWLVKTEW              |     |   |    | Carbamidomethyl (C)[3] |  |  | Mascot |
|    | 2079.0283                    | 2078.9653 | -0.063  | -30 | 71          | 87  | LLDLQKQSQMMQEIMK              |     |   |    |                        |  |  | Mascot |
|    | 3337.7063                    | 3337.6675 | -0.0388 | -12 | 156         | 185 | LEFDTEPHILKGVHYGADVVTINIDTSTR |     |   |    |                        |  |  | Mascot |
| 26 | sideroflexin 2 [Danio rerio] |           |         |     | gi 94732614 |     | 35587.3                       | 9.3 | 8 | 32 | 0                      |  |  |        |

#### Peptide Information

| Calc. Mass | Obsrv. Mass | ± da    | ± ppm | Start Seq. | End Seq. | Sequence             | Ion Score | C. I. | % Modification    | Rank | Result Type |
|------------|-------------|---------|-------|------------|----------|----------------------|-----------|-------|-------------------|------|-------------|
| 1393.7045  | 1393.6879   | -0.0166 | -12   | 23         | 33       | LKHFFNITDCR          |           |       |                   |      | Mascot      |
| 1464.7151  | 1464.7103   | -0.0048 | -3    | 1          | 13       | MEAVKGFIDAPR         |           |       | Oxidation (M)[1]  |      | Mascot      |
| 1493.6655  | 1493.6898   | 0.0243  | 16    | 72         | 84       | LYDSAFHPDTGDR        |           |       |                   |      | Mascot      |
| 1493.6655  | 1493.6898   | 0.0243  | 16    | 72         | 84       | LYDSAFHPDTGDR        |           |       |                   |      | Mascot      |
| 1855.0366  | 1854.8779   | -0.1587 | -86   | 232        | 248      | VTMAAPGMILPIIMQR     |           |       |                   |      | Mascot      |
| 1871.0315  | 1870.8479   | -0.1836 | -98   | 232        | 248      | VTMAAPGMILPIIMQR     |           |       | Oxidation (M)[3]  |      | Mascot      |
| 2014.9076  | 2014.9482   | 0.0406  | 20    | 6          | 22       | GFDIDAPRWQSTFMGR     |           |       | Oxidation (M)[15] |      | Mascot      |
| 2077.0181  | 2076.9771   | -0.041  | -20   | 177        | 195      | WVPFAAVAAANCNIPMR    |           |       | Oxidation (M)[17] |      | Mascot      |
| 2142.0503  | 2141.9775   | -0.0728 | -34   | 302        | 319      | ESIISQYGEQISHVYFNK   |           |       |                   |      | Mascot      |
| 2142.0503  | 2141.9775   | -0.0728 | -34   | 302        | 319      | ESIISQYGEQISHVYFNK   |           |       |                   |      | Mascot      |
| 2297.0916  | 2297.116    | 0.0244  | 11    | 91         | 110      | MSFQVPGGMAITGFMLQFYR |           |       | Oxidation (M)[1]  |      | Mascot      |

|    |                                                                           |  |  |  |              |  |          |      |    |    |   |  |  |  |
|----|---------------------------------------------------------------------------|--|--|--|--------------|--|----------|------|----|----|---|--|--|--|
| 27 | PREDICTED: dedicator of cytokinesis protein 9-like, partial [Danio rerio] |  |  |  | gi 326670443 |  | 167142.9 | 6.95 | 17 | 32 | 0 |  |  |  |
|----|---------------------------------------------------------------------------|--|--|--|--------------|--|----------|------|----|----|---|--|--|--|

#### Peptide Information

| Calc. Mass | Obsrv. Mass | ± da    | ± ppm | Start Seq. | End Seq. | Sequence      | Ion Score | C. I. | % Modification   | Rank | Result Type |
|------------|-------------|---------|-------|------------|----------|---------------|-----------|-------|------------------|------|-------------|
| 850.4781   | 850.5144    | 0.0363  | 43    | 1303       | 1309     | QVFTSLR       |           |       |                  |      | Mascot      |
| 999.5873   | 999.5364    | -0.0509 | -51   | 754        | 761      | SYVKYVLK      |           |       |                  |      | Mascot      |
| 1107.5615  | 1107.5105   | -0.051  | -46   | 1452       | 1460     | KTWLDSMAR     |           |       |                  |      | Mascot      |
| 1109.5044  | 1109.4548   | -0.0496 | -45   | 1035       | 1043     | DDHLMTPHK     |           |       | Oxidation (M)[5] |      | Mascot      |
| 1434.7811  | 1434.7269   | -0.0542 | -38   | 1185       | 1197     | TLEGLGPVAHERR |           |       |                  |      | Mascot      |
| 1464.7773  | 1464.7103   | -0.067  | -46   | 897        | 907      | TLYEKFKEFLK   |           |       |                  |      | Mascot      |
| 1472.7678  | 1472.7281   | -0.0397 | -27   | 1453       | 1464     | TWLDSMARIVHK  |           |       | Oxidation (M)[6] |      | Mascot      |
| 1475.7271  | 1475.7104   | -0.0167 | -11   | 958        | 970      | EVSAAVQECRDIR |           |       |                  |      | Mascot      |
| 1493.723   | 1493.6898   | -0.0332 | -22   | 426        | 438      | QDGNKLSNEDVFK |           |       |                  |      | Mascot      |



|    |                                                               |           |         |     |      |              |                              |     |   |                          |   |  |        |
|----|---------------------------------------------------------------|-----------|---------|-----|------|--------------|------------------------------|-----|---|--------------------------|---|--|--------|
|    | 1493.723                                                      | 1493.6898 | -0.0332 | -22 | 426  | 438          | QDGNKLSNEDVFK                |     |   |                          |   |  | Mascot |
|    | 1633.7423                                                     | 1633.8365 | 0.0942  | 58  | 1324 | 1336         | ADMALFCYEILK                 |     |   | Carbamidomethyl (C)[4,8] |   |  | Mascot |
|    | 1854.9854                                                     | 1854.8779 | -0.1075 | -58 | 1105 | 1123         | CHTAAAAVLGSLLRSD<br>K        |     |   |                          |   |  | Mascot |
|    | 1870.9504                                                     | 1870.8479 | -0.1025 | -55 | 762  | 778          | TETNLSNGKTVHEELAK            |     |   |                          |   |  | Mascot |
|    | 1950.879                                                      | 1950.8711 | -0.0079 | -4  | 932  | 947          | FQDLQLDYSLTDDFCK             |     |   |                          |   |  | Mascot |
|    | 1950.879                                                      | 1950.8711 | -0.0079 | -4  | 932  | 947          | FQDLQLDYSLTDDFCK             |     |   |                          |   |  | Mascot |
|    | 2283.1121                                                     | 2283.1047 | -0.0074 | -3  | 735  | 753          | VMIHVVSQCHEESLEHHL<br>R      |     |   |                          |   |  | Mascot |
|    | 2297.2183                                                     | 2297.116  | -0.1023 | -45 | 948  | 967          | NHFVVGLLLREVSAVQE<br>CR      |     |   | Carbamidomethyl (C)[19]  |   |  | Mascot |
|    | 2305.1035                                                     | 2305.0833 | -0.0202 | -9  | 571  | 589          | AFAAVLHHQQNPEFYEE<br>FK      |     |   |                          |   |  | Mascot |
|    | 2888.4626                                                     | 2888.3008 | -0.1618 | -56 | 903  | 926          | FEFLKVVCNHEHYIPLNL<br>PMPFGK |     |   | Oxidation (M)[20]        |   |  | Mascot |
| 28 | PREDICTED: hypothetical protein LOC100003217<br>[Danio rerio] |           |         |     |      | gi 326678765 | 31640.9                      | 5.2 | 8 | 32                       | 0 |  |        |

#### Peptide Information

| Calc. Mass | Obsrv. Mass | ± da    | ± ppm | Start Seq. | End Seq. | Sequence                | Ion Score | C. I. | % Modification                                     | Rank | Result Type |
|------------|-------------|---------|-------|------------|----------|-------------------------|-----------|-------|----------------------------------------------------|------|-------------|
| 842.4114   | 842.484     | 0.0726  | 86    | 78         | 84       | SREAHDK                 |           |       |                                                    |      | Mascot      |
| 1112.6422  | 1112.5389   | -0.1033 | -93   | 168        | 177      | NRPGSEIIVK              |           |       |                                                    |      | Mascot      |
| 1112.6422  | 1112.5389   | -0.1033 | -93   | 168        | 177      | NRPGSEIIVK              |           |       |                                                    |      | Mascot      |
| 1193.5289  | 1193.5795   | 0.0506  | 42    | 53         | 62       | LCQECGLDAK              |           |       | Carbamidomethyl (C)[2,5]                           |      | Mascot      |
| 1475.7887  | 1475.7104   | -0.0783 | -53   | 66         | 77       | TDLLRLSEEMR             |           |       |                                                    |      | Mascot      |
| 1493.6835  | 1493.6898   | 0.0063  | 4     | 53         | 65       | LCQECGLDAKGSR           |           |       | Carbamidomethyl (C)[2,5]                           |      | Mascot      |
| 1493.6835  | 1493.6898   | 0.0063  | 4     | 53         | 65       | LCQECGLDAKGSR           |           |       | Carbamidomethyl (C)[2,5]                           |      | Mascot      |
| 1854.9742  | 1854.8779   | -0.0963 | -52   | 36         | 52       | VADATYSMSLTVGVI<br>RR   |           |       | Oxidation (M)[8]                                   |      | Mascot      |
| 2077.0635  | 2076.9771   | -0.0864 | -42   | 33         | 51       | SYKVADATYSMSLTVGVI<br>R |           |       | Oxidation (M)[11]                                  |      | Mascot      |
| 2210.9482  | 2211.0334   | 0.0852  | 39    | 196        | 214      | DMDSHIGNACMKLICEMA<br>R |           |       | Carbamidomethyl (C)[10], Oxidation (M)[2]          |      | Mascot      |
| 2283.9646  | 2284.0989   | 0.1343  | 59    | 196        | 214      | DMDSHIGNACMKLICEMA<br>R |           |       | Carbamidomethyl (C)[10,15], Oxidation (M)[2,11]    |      | Mascot      |
| 2299.9597  | 2300.093    | 0.1333  | 58    | 196        | 214      | DMDSHIGNACMKLICEMA<br>R |           |       | Carbamidomethyl (C)[10,15], Oxidation (M)[2,11,17] |      | Mascot      |

29 protein MMS22-like [Danio rerio] gi|194578867 138313.7 6.94 14 32 0

#### Peptide Information

| Calc. Mass | Obsrv. Mass | ± da   | ± ppm | Start Seq. | End Seq. | Sequence  | Ion Score | C. I. | % Modification | Rank | Result Type |
|------------|-------------|--------|-------|------------|----------|-----------|-----------|-------|----------------|------|-------------|
| 850.4855   | 850.5144    | 0.0289 | 34    | 885        | 892      | AAMAVFLK  |           |       |                |      | Mascot      |
| 996.5108   | 996.5663    | 0.0555 | 56    | 46         | 54       | LSSNGYISR |           |       |                |      | Mascot      |
| 999.4716   | 999.5364    | 0.0648 | 65    | 343        | 351      | DPGFPVHCK |           |       |                |      | Mascot      |

|           |           |         |      |     |     |                               |  |  |  |                                          |  |        |
|-----------|-----------|---------|------|-----|-----|-------------------------------|--|--|--|------------------------------------------|--|--------|
| 1112.5443 | 1112.5389 | -0.0054 | -5   | 837 | 847 | SPDAPDARAGR                   |  |  |  |                                          |  | Mascot |
| 1112.5443 | 1112.5389 | -0.0054 | -5   | 837 | 847 | SPDAPDARAGR                   |  |  |  |                                          |  | Mascot |
| 1179.627  | 1179.5645 | -0.0625 | -53  | 950 | 959 | HWSHLLATSK                    |  |  |  |                                          |  | Mascot |
| 1179.627  | 1179.5645 | -0.0625 | -53  | 950 | 959 | HWSHLLATSK                    |  |  |  |                                          |  | Mascot |
| 1365.7484 | 1365.5994 | -0.149  | -109 | 46  | 58  | LSSNGYISRGALK                 |  |  |  |                                          |  | Mascot |
| 1714.921  | 1714.7483 | -0.1727 | -101 | 824 | 836 | AWIRCVLQQYLHK                 |  |  |  | Carbamidomethyl (C)[5]                   |  | Mascot |
| 1973.0194 | 1972.8564 | -0.163  | -83  | 560 | 577 | ACDLLAMLPTNSTPLALR            |  |  |  | Carbamidomethyl (C)[2], Oxidation (M)[7] |  | Mascot |
| 1993.8855 | 1993.9119 | 0.0264  | 13   | 470 | 487 | SCCSPAPVGSSSHTQLYR            |  |  |  | Carbamidomethyl (C)[2,3]                 |  | Mascot |
| 2077.1304 | 2076.9771 | -0.1533 | -74  | 133 | 148 | QQCVLFLSYIKVFIYR              |  |  |  | Carbamidomethyl (C)[3]                   |  | Mascot |
| 2079.0869 | 2078.9653 | -0.1216 | -58  | 595 | 614 | GLDVGALAEQLAVYFSQAAR          |  |  |  |                                          |  | Mascot |
| 2079.0869 | 2078.9653 | -0.1216 | -58  | 595 | 614 | GLDVGALAEQLAVYFSQAAR          |  |  |  |                                          |  | Mascot |
| 2225.2302 | 2225.0479 | -0.1823 | -82  | 498 | 517 | ILALHLSQEHAAGGAPWRQIK         |  |  |  |                                          |  | Mascot |
| 2225.2302 | 2225.0479 | -0.1823 | -82  | 498 | 517 | ILALHLSQEHAAGGAPWRQIK         |  |  |  |                                          |  | Mascot |
| 2305.1897 | 2305.0833 | -0.1064 | -46  | 381 | 400 | QLEDNWSFVIGLLKSICDPK          |  |  |  |                                          |  | Mascot |
| 3337.6838 | 3337.6675 | -0.0163 | -5   | 627 | 656 | LALWAPLSSYLEGVSEVFETSPNLTSEER |  |  |  |                                          |  | Mascot |

30 Zgc:110417 protein [Danio rerio] gi|49904437 24454.3 4.69 6 32 0

#### Peptide Information

| Calc. Mass | Obsrv. Mass | ± da    | ± ppm | Start Seq. | End Seq. | Sequence                        | Ion Score | C. I. % | Modification           | Rank | Result Type |
|------------|-------------|---------|-------|------------|----------|---------------------------------|-----------|---------|------------------------|------|-------------|
| 1365.6427  | 1365.5994   | -0.0433 | -32   | 99         | 109      | MEQEVQRSQSK                     |           |         | Oxidation (M)[1]       |      | Mascot      |
| 1420.7352  | 1420.611    | -0.1242 | -87   | 26         | 38       | LGESLNEIIMSSK                   |           |         |                        |      | Mascot      |
| 2015.0193  | 2014.9482   | -0.0711 | -35   | 178        | 196      | GVHYGADVVTIPINIDTSTR            |           |         |                        |      | Mascot      |
| 2078.9739  | 2078.9653   | -0.0086 | -4    | 197        | 213      | TPCEVSDELWSLVKTEW               |           |         | Carbamidomethyl (C)[3] |      | Mascot      |
| 2079.0283  | 2078.9653   | -0.063  | -30   | 82         | 98       | LLDLQKQSQMMQEIMK                |           |         |                        |      | Mascot      |
| 3337.7063  | 3337.6675   | -0.0388 | -12   | 167        | 196      | LEFDTEPHILKGVHYGADVVTIPINIDTSTR |           |         |                        |      | Mascot      |

31 PREDICTED: centriolin-like [Danio rerio] gi|326668218 252536.3 5.69 20 32 0

#### Peptide Information

| Calc. Mass | Obsrv. Mass | ± da    | ± ppm | Start Seq. | End Seq. | Sequence    | Ion Score | C. I. % | Modification     | Rank | Result Type |
|------------|-------------|---------|-------|------------|----------|-------------|-----------|---------|------------------|------|-------------|
| 842.5206   | 842.484     | -0.0366 | -43   | 1027       | 1033     | LNQALKR     |           |         |                  |      | Mascot      |
| 1045.5272  | 1045.5308   | 0.0036  | 3     | 442        | 450      | QLEDAVSQR   |           |         |                  |      | Mascot      |
| 1090.5236  | 1090.4946   | -0.029  | -27   | 1156       | 1165     | DAQVSRDSSGR |           |         |                  |      | Mascot      |
| 1092.4779  | 1092.5282   | 0.0503  | 46    | 244        | 251      | FHMEEVER    |           |         | Oxidation (M)[3] |      | Mascot      |

|           |           |         |     |      |      |                                   |  |  |  |                           |  |  |        |
|-----------|-----------|---------|-----|------|------|-----------------------------------|--|--|--|---------------------------|--|--|--------|
| 1112.5946 | 1112.5389 | -0.0557 | -50 | 1760 | 1768 | HEEELSKLK                         |  |  |  |                           |  |  | Mascot |
| 1112.5946 | 1112.5389 | -0.0557 | -50 | 1760 | 1768 | HEEELSKLK                         |  |  |  |                           |  |  | Mascot |
| 1193.5837 | 1193.5795 | -0.0042 | -4  | 2163 | 2172 | KWSADPFELT                        |  |  |  |                           |  |  | Mascot |
| 1357.7546 | 1357.6755 | -0.0791 | -58 | 2116 | 2127 | LQTEGSIQGLRR                      |  |  |  |                           |  |  | Mascot |
| 1365.6678 | 1365.5994 | -0.0684 | -50 | 1457 | 1467 | ELRETQSMVEVK                      |  |  |  | Oxidation (M)[8]          |  |  | Mascot |
| 1393.7434 | 1393.6879 | -0.0555 | -40 | 949  | 960  | DKLHSLHSTVEK                      |  |  |  |                           |  |  | Mascot |
| 1416.7329 | 1416.8978 | 0.1649  | 116 | 430  | 441  | EQQILTASEELR                      |  |  |  |                           |  |  | Mascot |
| 1420.6737 | 1420.611  | -0.0627 | -44 | 476  | 487  | GEMEAVEKQLDR                      |  |  |  | Oxidation (M)[3]          |  |  | Mascot |
| 1460.7314 | 1460.7493 | 0.0179  | 12  | 805  | 815  | KFMELQQEVHR                       |  |  |  | Oxidation (M)[3]          |  |  | Mascot |
| 1659.7101 | 1659.7222 | 0.0121  | 7   | 1922 | 1934 | DPCVQPEQELCER                     |  |  |  | Carbamidomethyl (C)[3,11] |  |  | Mascot |
| 1659.7101 | 1659.7222 | 0.0121  | 7   | 1922 | 1934 | DPCVQPEQELCER                     |  |  |  | Carbamidomethyl (C)[3,11] |  |  | Mascot |
| 1993.9462 | 1993.9119 | -0.0343 | -17 | 665  | 681  | GQVSEYEALESQQLQQR                 |  |  |  |                           |  |  | Mascot |
| 2015.0403 | 2014.9482 | -0.0921 | -46 | 425  | 441  | EIEAREQQILTASEELR                 |  |  |  |                           |  |  | Mascot |
| 2031.0353 | 2030.9421 | -0.0932 | -46 | 1580 | 1596 | DQQQEEETLQSLRSVIK                 |  |  |  |                           |  |  | Mascot |
| 2079.0022 | 2078.9653 | -0.0369 | -18 | 1710 | 1727 | CLEAAETRTSEAETELLR                |  |  |  | Carbamidomethyl (C)[1]    |  |  | Mascot |
| 2079.0022 | 2078.9653 | -0.0369 | -18 | 1710 | 1727 | CLEAAETRTSEAETELLR                |  |  |  | Carbamidomethyl (C)[1]    |  |  | Mascot |
| 2109.9756 | 2109.9102 | -0.0654 | -31 | 749  | 766  | DCLKEEVEAFQDDLNSV<br>R            |  |  |  |                           |  |  | Mascot |
| 2247.073  | 2247.0237 | -0.0493 | -22 | 1135 | 1154 | RPPANGGYWVYSPNPYS<br>HGK          |  |  |  |                           |  |  | Mascot |
| 3337.8494 | 3337.6675 | -0.1819 | -54 | 191  | 220  | LKPLNNLTCLTAGNPVS<br>SLAHYHLFLIFK |  |  |  |                           |  |  | Mascot |

32 mitochondrial Rho GTPase 1 [Danio rerio] gi|207028743 75309 6.36 11 32 0

#### Peptide Information

| Calc. Mass | Obsrv. Mass | ± da    | ± ppm | Start Seq. | End Seq. | Sequence               | Ion Score | C. I. % | Modification           | Rank | Result Type |
|------------|-------------|---------|-------|------------|----------|------------------------|-----------|---------|------------------------|------|-------------|
| 882.4791   | 882.5382    | 0.0591  | 67    | 448        | 454      | AIREEHK                |           |         |                        |      | Mascot      |
| 1112.5847  | 1112.5389   | -0.0458 | -41   | 264        | 272      | HETTWAVLR              |           |         |                        |      | Mascot      |
| 1112.5847  | 1112.5389   | -0.0458 | -41   | 264        | 272      | HETTWAVLR              |           |         |                        |      | Mascot      |
| 1193.7252  | 1193.5795   | -0.1457 | -122  | 613        | 622      | TKLYTVILSR             |           |         |                        |      | Mascot      |
| 1420.7399  | 1420.611    | -0.1289 | -91   | 180        | 191      | EMRTACVLALTR           |           |         | Carbamidomethyl (C)[6] |      | Mascot      |
| 1464.7958  | 1464.7103   | -0.0855 | -58   | 93         | 104      | VTSHWIPLINER           |           |         |                        |      | Mascot      |
| 1472.6661  | 1472.7281   | 0.062   | 42    | 537        | 548      | QQYGMTPLFCR            |           |         |                        |      | Mascot      |
| 1475.6393  | 1475.7104   | 0.0711  | 48    | 138        | 150      | YTEIETCVECSAK          |           |         |                        |      | Mascot      |
| 2014.9474  | 2014.9482   | 0.0008  | 0     | 550        | 568      | HKMPPQSYTCNTAGAP<br>SK |           |         |                        |      | Mascot      |
| 2030.9423  | 2030.9421   | -0.0002 | 0     | 550        | 568      | HKMPPQSYTCNTAGAP<br>SK |           |         | Oxidation (M)[3]       |      | Mascot      |
| 2079.0903  | 2078.9653   | -0.125  | -60   | 75         | 92       | ANVICIVSVNNQKSIEK      |           |         | Carbamidomethyl (C)[5] |      | Mascot      |

|    |                             |           |        |     |             |     |                         |       |   |    |   |                         |        |
|----|-----------------------------|-----------|--------|-----|-------------|-----|-------------------------|-------|---|----|---|-------------------------|--------|
|    | 2079.0903                   | 2078.9653 | -0.125 | -60 | 75          | 92  | ANVICIVYSVNNQKSIEK      |       |   |    |   | Carbamidomethyl (C)[5]  | Mascot |
|    | 2283.0774                   | 2283.1047 | 0.0273 | 12  | 195         | 214 | VSDLNDGVLNDNELTFF<br>QK |       |   |    |   |                         | Mascot |
|    | 2300.0686                   | 2300.093  | 0.0244 | 11  | 530         | 548 | SDLPETKQQYGMPLEF<br>CR  |       |   |    |   | Carbamidomethyl (C)[18] | Mascot |
| 33 | COX15 homolog [Danio rerio] |           |        |     | gi 41055078 |     | 44708.6                 | 10.13 | 8 | 31 | 0 |                         |        |

#### Peptide Information

| Calc. Mass | Obsrv. Mass | $\pm$ da | $\pm$ ppm | Start Seq. | End Seq. | Sequence                     | Ion Score | C. I. % | Modification                             | Rank | Result Type |
|------------|-------------|----------|-----------|------------|----------|------------------------------|-----------|---------|------------------------------------------|------|-------------|
| 1045.5748  | 1045.5308   | -0.044   | -42       | 51         | 60       | SAASDRLIGR                   |           |         |                                          |      | Mascot      |
| 1165.5387  | 1165.5503   | 0.0116   | 10        | 6          | 15       | LAMCRCQAGR                   |           |         | Carbamidomethyl (C)[4]                   |      | Mascot      |
| 1165.5387  | 1165.7085   | 0.1698   | 146       | 6          | 15       | LAMCRCQAGR                   |           |         | Carbamidomethyl (C)[4]                   |      | Mascot      |
| 1179.616   | 1179.5645   | -0.0515  | -44       | 2          | 10       | MLLRLAMCR                    |           |         | Carbamidomethyl (C)[8], Oxidation (M)[1] |      | Mascot      |
| 1179.616   | 1179.5645   | -0.0515  | -44       | 2          | 10       | MLLRLAMCR                    |           |         | Carbamidomethyl (C)[8], Oxidation (M)[1] |      | Mascot      |
| 1714.8833  | 1714.7483   | -0.135   | -79       | 81         | 95       | LTESGLSMVDWHLVK              |           |         |                                          |      | Mascot      |
| 2076.9695  | 2076.9771   | 0.0076   | 4         | 96         | 112      | EMKPPQTQAEWEQEFK             |           |         |                                          |      | Mascot      |
| 2283.2258  | 2283.1047   | -0.1211  | -53       | 143        | 161      | MWGRLVGLAYILPAAYF<br>WR      |           |         |                                          |      | Mascot      |
| 2409.4163  | 2409.1289   | -0.2874  | -119      | 57         | 80       | LIGRWLLGCSGLVLGAVV<br>LGGVTR |           |         |                                          |      | Mascot      |
| 2501.3218  | 2501.1667   | -0.1551  | -62       | 27         | 50       | QWLLQRGQNTVSSGAAS<br>VGSVSIR |           |         |                                          |      | Mascot      |

|    |                                                  |  |  |  |              |  |         |      |   |    |   |  |  |
|----|--------------------------------------------------|--|--|--|--------------|--|---------|------|---|----|---|--|--|
| 34 | novel immune-type receptor protein [Danio rerio] |  |  |  | gi 169146726 |  | 19565.8 | 9.07 | 6 | 31 | 0 |  |  |
|----|--------------------------------------------------|--|--|--|--------------|--|---------|------|---|----|---|--|--|

#### Peptide Information

| Calc. Mass | Obsrv. Mass | $\pm$ da | $\pm$ ppm | Start Seq. | End Seq. | Sequence                      | Ion Score | C. I. % | Modification           | Rank | Result Type |
|------------|-------------|----------|-----------|------------|----------|-------------------------------|-----------|---------|------------------------|------|-------------|
| 999.4934   | 999.5364    | 0.043    | 43        | 58         | 64       | ENIFWYK                       |           |         |                        |      | Mascot      |
| 1081.4943  | 1081.4918   | -0.0025  | -2        | 158        | 166      | CNKNSTTEK                     |           |         | Carbamidomethyl (C)[1] |      | Mascot      |
| 1357.8049  | 1357.6755   | -0.1294  | -95       | 40         | 52       | VLAVELGSTVTLR                 |           |         |                        |      | Mascot      |
| 1460.7494  | 1460.7493   | -0.0001  | 0         | 80         | 90       | LMEPIFYKEFK                   |           |         | Oxidation (M)[2]       |      | Mascot      |
| 2109.9771  | 2109.9102   | -0.0669  | -32       | 139        | 157      | GHQAAAFETSNFNKTCQ<br>QK       |           |         |                        |      | Mascot      |
| 2888.4507  | 2888.3008   | -0.1499  | -52       | 4          | 28       | DSPKNCYTISTMILWAFV<br>TVLCVAR |           |         | Carbamidomethyl (C)[6] |      | Mascot      |

|    |                                                                                                   |  |  |  |              |  |          |      |    |    |   |  |  |
|----|---------------------------------------------------------------------------------------------------|--|--|--|--------------|--|----------|------|----|----|---|--|--|
| 35 | novel protein similar to Janus kinase family (a protein tyrosine kinase, leukocyte) [Danio rerio] |  |  |  | gi 169145296 |  | 125997.7 | 6.83 | 15 | 31 | 0 |  |  |
|----|---------------------------------------------------------------------------------------------------|--|--|--|--------------|--|----------|------|----|----|---|--|--|

#### Peptide Information

| Calc. Mass | Obsrv. Mass | $\pm$ da | $\pm$ ppm | Start Seq. | End Seq. | Sequence | Ion Score | C. I. % | Modification | Rank | Result Type |
|------------|-------------|----------|-----------|------------|----------|----------|-----------|---------|--------------|------|-------------|
| 850.4603   | 850.5144    | 0.0541   | 64        | 399        | 405      | NGMFLLR  |           |         |              |      | Mascot      |

|           |           |         |      |      |      |                         |  |  |  |                        |  |        |
|-----------|-----------|---------|------|------|------|-------------------------|--|--|--|------------------------|--|--------|
| 864.4825  | 864.4656  | -0.0169 | -20  | 959  | 966  | IADFGLTK                |  |  |  |                        |  | Mascot |
| 999.4676  | 999.5364  | 0.0688  | 69   | 193  | 200  | SCLPETHR                |  |  |  | Carbamidomethyl (C)[2] |  | Mascot |
| 1081.5095 | 1081.4918 | -0.0177 | -16  | 825  | 834  | GNFGSVELCR              |  |  |  |                        |  | Mascot |
| 1107.5867 | 1107.5105 | -0.0762 | -69  | 597  | 605  | NIMVQEFVK               |  |  |  |                        |  | Mascot |
| 1118.6238 | 1118.4785 | -0.1453 | -130 | 482  | 490  | ELTNMIIIR               |  |  |  | Oxidation (M)[5]       |  | Mascot |
| 1179.5277 | 1179.5645 | 0.0368  | 31   | 806  | 814  | QQEDVFEER               |  |  |  |                        |  | Mascot |
| 1179.6302 | 1179.5645 | -0.0657 | -56  | 395  | 405  | AGGKNGMFLLR             |  |  |  | Oxidation (M)[7]       |  | Mascot |
| 1475.7094 | 1475.7104 | 0.001   | 1    | 308  | 319  | RLCQEQMPLLEGR           |  |  |  | Oxidation (M)[7]       |  | Mascot |
| 1973.0306 | 1972.8564 | -0.1742 | -88  | 309  | 325  | LCQEQMPLLEGRVVTLTR      |  |  |  |                        |  | Mascot |
| 2031.1484 | 2030.9421 | -0.2063 | -102 | 948  | 966  | NILVASDNLVKIADFGLTK     |  |  |  |                        |  | Mascot |
| 2211.0791 | 2211.0334 | -0.0457 | -21  | 290  | 307  | QEWQTFCDPQIIDISIK       |  |  |  |                        |  | Mascot |
| 2225.0115 | 2225.0479 | 0.0364  | 16   | 564  | 582  | NCWESLFEAASLMSQIS<br>HR |  |  |  | Oxidation (M)[13]      |  | Mascot |
| 2225.0115 | 2225.0479 | 0.0364  | 16   | 564  | 582  | NCWESLFEAASLMSQIS<br>HR |  |  |  | Oxidation (M)[13]      |  | Mascot |
| 2247.1333 | 2247.0237 | -0.1096 | -49  | 920  | 938  | LLLFASQICKGMEYLQSM<br>R |  |  |  | Oxidation (M)[12]      |  | Mascot |
| 2409.2859 | 2409.1289 | -0.157  | -65  | 1035 | 1054 | YVHSPSMAIHLTLTKNN<br>WR |  |  |  | Oxidation (M)[7]       |  | Mascot |

36 PREDICTED: serine/threonine-protein kinase 40, partial gi|326675119 42203.9 6.34 8 31 0  
[Danio rerio]

#### Peptide Information

| Calc. Mass | Obsrv. Mass | ± da    | ± ppm | Start Seq. | End Seq. | Sequence               | Ion Score | C. I. | % | Modification | Rank | Result Type |
|------------|-------------|---------|-------|------------|----------|------------------------|-----------|-------|---|--------------|------|-------------|
| 842.4366   | 842.484     | 0.0474  | 56    | 323        | 329      | NTIHETK                |           |       |   |              |      | Mascot      |
| 1081.6365  | 1081.4918   | -0.1447 | -134  | 243        | 251      | LLVLDPQQR              |           |       |   |              |      | Mascot      |
| 1109.6023  | 1109.4548   | -0.1475 | -133  | 145        | 154      | ITITNFCLGK             |           |       |   |              |      | Mascot      |
| 1193.5433  | 1193.5795   | 0.0362  | 30    | 221        | 231      | GAEYSIPEDGR            |           |       |   |              |      | Mascot      |
| 1234.6824  | 1234.6421   | -0.0403 | -33   | 232        | 242      | VSESTVCLIRK            |           |       |   |              |      | Mascot      |
| 1434.7223  | 1434.7269   | 0.0046  | 3     | 219        | 231      | IKGAEYSIPEDGR          |           |       |   |              |      | Mascot      |
| 1950.9235  | 1950.8711   | -0.0524 | -27   | 69         | 85       | RICLVLDCLCAHDFSDK      |           |       |   |              |      | Mascot      |
| 1950.9235  | 1950.8711   | -0.0524 | -27   | 69         | 85       | RICLVLDCLCAHDFSDK      |           |       |   |              |      | Mascot      |
| 2142.1777  | 2141.9775   | -0.2002 | -93   | 345        | 364      | RLGHDAQISPDAALLA<br>QR |           |       |   |              |      | Mascot      |
| 2142.1777  | 2141.9775   | -0.2002 | -93   | 345        | 364      | RLGHDAQISPDAALLA<br>QR |           |       |   |              |      | Mascot      |

37 pre-B-cell leukemia transcription factor 2 [Danio rerio] gi|18859217 44196.6 6.32 7 31 0 9 0

#### Peptide Information

| Calc. Mass | Obsrv. Mass | ± da | ± ppm | Start Seq. | End Seq. | Sequence | Ion Score | C. I. | % | Modification | Rank | Result Type |
|------------|-------------|------|-------|------------|----------|----------|-----------|-------|---|--------------|------|-------------|
|------------|-------------|------|-------|------------|----------|----------|-----------|-------|---|--------------|------|-------------|

|    |                                                      |           |         |     |     |              |                          |      |    |    |   |   |  |  |  |  |  |  |  |        |
|----|------------------------------------------------------|-----------|---------|-----|-----|--------------|--------------------------|------|----|----|---|---|--|--|--|--|--|--|--|--------|
|    | 850.41                                               | 850.5144  | 0.1044  | 123 | 85  | 91           | HALNCHR                  |      |    |    |   |   |  |  |  |  |  |  |  | Mascot |
|    | 864.4686                                             | 864.4656  | -0.003  | -3  | 247 | 253          | SRFLDAR                  |      |    |    |   |   |  |  |  |  |  |  |  | Mascot |
|    | 1051.5782                                            | 1051.6791 | 0.1009  | 96  | 227 | 235          | FSSIQTQLK                |      |    |    |   |   |  |  |  |  |  |  |  | Mascot |
|    | 1179.6732                                            | 1179.5645 | -0.1087 | -92 | 226 | 235          | KFSSIQTQLK               |      |    |    |   |   |  |  |  |  |  |  |  | Mascot |
|    | 1179.6732                                            | 1179.5645 | -0.1087 | -92 | 226 | 235          | KFSSIQTQLK               |      |    | 9  |   | 0 |  |  |  |  |  |  |  | Mascot |
|    | 1493.7563                                            | 1493.6898 | -0.0665 | -45 | 236 | 248          | QSTCEAVMILRSR            |      |    |    |   |   |  |  |  |  |  |  |  | Mascot |
|    | 1493.7563                                            | 1493.6898 | -0.0665 | -45 | 236 | 248          | QSTCEAVMILRSR            |      |    | 1  |   | 0 |  |  |  |  |  |  |  | Mascot |
|    | 1854.8802                                            | 1854.8779 | -0.0023 | -1  | 291 | 306          | QCSITVSQVSNWFGNK         |      |    |    |   |   |  |  |  |  |  |  |  | Mascot |
|    | 2283.1836                                            | 2283.1047 | -0.0789 | -35 | 227 | 246          | FSSIQTQLKQSTCEAVMI<br>LR |      |    |    |   |   |  |  |  |  |  |  |  | Mascot |
| 38 | PREDICTED: zinc finger protein 84-like [Danio rerio] |           |         |     |     | gj 326667378 | 61553.9                  | 9.36 | 15 | 31 | 0 |   |  |  |  |  |  |  |  |        |

### Peptide Information

| Calc. Mass | Obsrv. Mass | ± da    | ± ppm | Start Seq. | End Seq. | Sequence             | Ion Score | C. I. % | Modification                                 | Rank | Result Type |
|------------|-------------|---------|-------|------------|----------|----------------------|-----------|---------|----------------------------------------------|------|-------------|
| 999.4386   | 999.5364    | 0.0978  | 98    | 466        | 474      | SFICGQCGK            |           |         | Carbamidomethyl (C)[4]                       |      | Mascot      |
| 1045.4553  | 1045.5308   | 0.0755  | 72    | 492        | 500      | EIACHQCGK            |           |         | Carbamidomethyl (C)[4]                       |      | Mascot      |
| 1051.6146  | 1051.6791   | 0.0645  | 61    | 83         | 91       | TFSLKQSLK            |           |         |                                              |      | Mascot      |
| 1081.5031  | 1081.4918   | -0.0113 | -10   | 144        | 151      | HCLEVHMR             |           |         | Carbamidomethyl (C)[2]                       |      | Mascot      |
| 1092.548   | 1092.5282   | -0.0198 | -18   | 368        | 375      | NELRHHR              |           |         |                                              |      | Mascot      |
| 1107.5906  | 1107.5105   | -0.0801 | -72   | 167        | 175      | RFSQSQNLK            |           |         |                                              |      | Mascot      |
| 1109.5143  | 1109.4548   | -0.0595 | -54   | 25         | 34       | EEQTGSMALK           |           |         | Oxidation (M)[7]                             |      | Mascot      |
| 1165.567   | 1165.5503   | -0.0167 | -14   | 227        | 235      | KDYLSQHMK            |           |         | Oxidation (M)[8]                             |      | Mascot      |
| 1165.567   | 1165.7085   | 0.1415  | 121   | 227        | 235      | KDYLSQHMK            |           |         | Oxidation (M)[8]                             |      | Mascot      |
| 1179.5826  | 1179.5645   | -0.0181 | -15   | 479        | 487      | KDYLTQHMK            |           |         | Oxidation (M)[8]                             |      | Mascot      |
| 1179.5826  | 1179.5645   | -0.0181 | -15   | 479        | 487      | KDYLTQHMK            |           |         | Oxidation (M)[8]                             |      | Mascot      |
| 1493.6901  | 1493.6898   | -0.0003 | 0     | 22         | 34       | EDREEQTGSMALK        |           |         |                                              |      | Mascot      |
| 1493.6901  | 1493.6898   | -0.0003 | 0     | 22         | 34       | EDREEQTGSMALK        |           |         |                                              |      | Mascot      |
| 1854.885   | 1854.8779   | -0.0071 | -4    | 152        | 167      | VHTGEKPFACQHCKGR     |           |         | Carbamidomethyl (C)[10]                      |      | Mascot      |
| 2079.0374  | 2078.9653   | -0.0721 | -35   | 204        | 222      | SHIIHHTGKKPFTCGQCGK  |           |         |                                              |      | Mascot      |
| 2079.0374  | 2078.9653   | -0.0721 | -35   | 204        | 222      | SHIIHHTGKKPFTCGQCGK  |           |         |                                              |      | Mascot      |
| 2142.0107  | 2141.9775   | -0.0332 | -15   | 376        | 394      | THTGEKPFSCVQCGKSF TK |           |         | Carbamidomethyl (C)[10]                      |      | Mascot      |
| 2142.0107  | 2141.9775   | -0.0332 | -15   | 376        | 394      | THTGEKPFSCVQCGKSF TK |           |         | Carbamidomethyl (C)[10]                      |      | Mascot      |
| 2210.9851  | 2211.0334   | 0.0483  | 22    | 92         | 110      | IHMRTHTGENLSTCEHC GK |           |         | Carbamidomethyl (C)[14]                      |      | Mascot      |
| 2284.0015  | 2284.0989   | 0.0974  | 43    | 92         | 110      | IHMRTHTGENLSTCEHC GK |           |         | Carbamidomethyl (C)[14,17], Oxidation (M)[3] |      | Mascot      |
| 2297.0483  | 2297.116    | 0.0677  | 29    | 372        | 390      | HHMRTHTGEKPFSCVQCGK  |           |         | Carbamidomethyl (C)[14,17]                   |      | Mascot      |

39 hemoglobin beta embryonic-2 [Danio rerio] gi|47086345 16522.4 6.18 5 31 0

Peptide Information

| Calc. Mass | Obsrv. Mass | ± da    | ± ppm | Start Seq. | End Seq. | Sequence           | Ion Score | C. I. | % Modification   | Rank | Result Type |
|------------|-------------|---------|-------|------------|----------|--------------------|-----------|-------|------------------|------|-------------|
| 1081.5017  | 1081.4918   | -0.0099 | -9    | 75         | 83       | AMKNMDDIK          |           |       | Oxidation (M)[2] |      | Mascot      |
| 1092.5143  | 1092.5282   | 0.0139  | 13    | 1          | 9        | MVAWTAEER          |           |       |                  |      | Mascot      |
| 1112.5483  | 1112.5389   | -0.0094 | -8    | 97         | 105      | LHVDPDNFR          |           |       |                  |      | Mascot      |
| 1112.5483  | 1112.5389   | -0.0094 | -8    | 97         | 105      | LHVDPDNFR          |           |       |                  |      | Mascot      |
| 1714.9751  | 1714.7483   | -0.2268 | -132  | 28         | 41       | ALQRALIVYPWTQR     |           |       |                  |      | Mascot      |
| 2142.0688  | 2141.9775   | -0.0913 | -43   | 1          | 18       | MVAWTAEERAFIQDIFSK |           |       |                  |      | Mascot      |
| 2142.0688  | 2141.9775   | -0.0913 | -43   | 1          | 18       | MVAWTAEERAFIQDIFSK |           |       |                  |      | Mascot      |

40 PREDICTED: cytosolic phospholipase A2 gamma [Danio rerio] gi|326667554 62177.6 5.81 10 31 0

Peptide Information

| Calc. Mass | Obsrv. Mass | ± da    | ± ppm | Start Seq. | End Seq. | Sequence                | Ion Score | C. I. | % Modification   | Rank | Result Type |
|------------|-------------|---------|-------|------------|----------|-------------------------|-----------|-------|------------------|------|-------------|
| 1434.7627  | 1434.7269   | -0.0358 | -25   | 175        | 186      | NNPFIYTLIDK             |           |       |                  |      | Mascot      |
| 1464.7006  | 1464.7103   | 0.0097  | 7     | 473        | 484      | DFYVFKNTSTDK            |           |       |                  |      | Mascot      |
| 1475.7773  | 1475.7104   | -0.0669 | -45   | 62         | 75       | AMVGLLGSLDQLDK          |           |       | Oxidation (M)[2] |      | Mascot      |
| 1633.8333  | 1633.8365   | 0.0032  | 2     | 118        | 132      | RISGPPVSWSDAYAK         |           |       |                  |      | Mascot      |
| 1951.047   | 1950.8711   | -0.1759 | -90   | 486        | 503      | APTVIHIPLFNVINCGDK      |           |       |                  |      | Mascot      |
| 1951.047   | 1950.8711   | -0.1759 | -90   | 486        | 503      | APTVIHIPLFNVINCGDK      |           |       |                  |      | Mascot      |
| 2079.1418  | 2078.9653   | -0.1765 | -85   | 485        | 503      | KAPTVIHIPLFNVINCGDK     |           |       |                  |      | Mascot      |
| 2079.1418  | 2078.9653   | -0.1765 | -85   | 485        | 503      | KAPTVIHIPLFNVINCGDK     |           |       |                  |      | Mascot      |
| 2110.1614  | 2109.9102   | -0.2512 | -119  | 533        | 550      | NISNNKQELINVINEVIR      |           |       |                  |      | Mascot      |
| 2211.1267  | 2211.0334   | -0.0933 | -42   | 382        | 400      | NYDFLYNMRDPAVPAAL LK    |           |       |                  |      | Mascot      |
| 2247.0857  | 2247.0237   | -0.062  | -28   | 1          | 20       | MSASNVQSESEVRIAHS LN MK |           |       | Oxidation (M)[1] |      | Mascot      |
| 2284.0901  | 2284.0989   | 0.0088  | 4     | 336        | 355      | SSEDEYTLVCGLLEELQ VK    |           |       |                  |      | Mascot      |

41 myosin-Va [Danio rerio] gi|124358917 213056.8 8.69 21 31 0

Peptide Information

| Calc. Mass | Obsrv. Mass | ± da   | ± ppm | Start Seq. | End Seq. | Sequence | Ion Score | C. I. | % Modification | Rank | Result Type |
|------------|-------------|--------|-------|------------|----------|----------|-----------|-------|----------------|------|-------------|
| 837.3957   | 837.3991    | 0.0034 | 4     | 1723       | 1730     | NLMTCGAK |           |       |                |      | Mascot      |
| 837.3957   | 837.3991    | 0.0034 | 4     | 1723       | 1730     | NLMTCGAK |           |       |                |      | Mascot      |





|    |                                                                   |           |         |      |      |      |                            |        |      |                         |    |   |        |
|----|-------------------------------------------------------------------|-----------|---------|------|------|------|----------------------------|--------|------|-------------------------|----|---|--------|
|    | 1234.5811                                                         | 1234.6421 | 0.061   | 49   | 1541 | 1551 | ALDGAFNQENR                |        |      |                         |    |   | Mascot |
|    | 1320.7271                                                         | 1320.5431 | -0.184  | -139 | 424  | 434  | KSTVLQQQFNK                |        |      |                         |    |   | Mascot |
|    | 1472.7816                                                         | 1472.7281 | -0.0535 | -36  | 2193 | 2205 | QEDVIATANLSRR              |        |      |                         |    |   | Mascot |
|    | 1475.7886                                                         | 1475.7104 | -0.0782 | -53  | 859  | 872  | LLADATARMVEAAK             |        |      | Oxidation (M)[9]        |    |   | Mascot |
|    | 1493.7628                                                         | 1493.6898 | -0.073  | -49  | 1601 | 1614 | AMLESSTGLIQTAR             |        |      | Oxidation (M)[2]        |    |   | Mascot |
|    | 1493.7628                                                         | 1493.6898 | -0.073  | -49  | 1601 | 1614 | AMLESSTGLIQTAR             |        |      | Oxidation (M)[2]        |    |   | Mascot |
|    | 2077.0779                                                         | 2076.9771 | -0.1008 | -49  | 2486 | 2504 | SKMVGGAQIIAAQEEMLR         |        |      | Oxidation (M)[3,17]     |    |   | Mascot |
|    | 2079.0652                                                         | 2078.9653 | -0.0999 | -48  | 2095 | 2114 | AAAGKPHDDPAMLQLKN<br>SAK   |        |      | Oxidation (M)[12]       |    |   | Mascot |
|    | 2079.0652                                                         | 2078.9653 | -0.0999 | -48  | 2095 | 2114 | AAAGKPHDDPAMLQLKN<br>SAK   |        |      | Oxidation (M)[12]       |    |   | Mascot |
|    | 2211.1865                                                         | 2211.0334 | -0.1531 | -69  | 2059 | 2080 | LGAASLGSEDPETQVVLI<br>NAVK |        |      |                         |    |   | Mascot |
|    | 2225.1846                                                         | 2225.0479 | -0.1367 | -61  | 718  | 738  | VVVAPTISSPVCQEQLIEA<br>GK  |        |      | Carbamidomethyl (C)[12] |    |   | Mascot |
|    | 2225.1846                                                         | 2225.0479 | -0.1367 | -61  | 718  | 738  | VVVAPTISSPVCQEQLIEA<br>GK  |        |      | Carbamidomethyl (C)[12] |    |   | Mascot |
|    | 2233.0952                                                         | 2233.0168 | -0.0784 | -35  | 1337 | 1357 | AVTDSINQLISMCTQQAP<br>GQK  |        |      |                         |    |   | Mascot |
|    | 2391.135                                                          | 2391.105  | -0.03   | -13  | 36   | 57   | VPEAQLGQPSDYGLFLS<br>DDDPK |        |      |                         |    |   | Mascot |
| 43 | PREDICTED: myosin heavy chain, fast skeletal muscle [Danio rerio] |           |         |      |      |      | gi 326668722               | 222281 | 5.69 | 20                      | 31 | 0 |        |

Peptide Information

| Calc. Mass | Obsrv. Mass | ± da    | ± ppm | Start Seq. | End Seq. | Sequence          | Ion Score | C. I. | % Modification    | Rank | Result Type |
|------------|-------------|---------|-------|------------|----------|-------------------|-----------|-------|-------------------|------|-------------|
| 807.4107   | 807.3746    | -0.0361 | -45   | 1446       | 1451     | QRNFDK            |           |       |                   |      | Mascot      |
| 850.4338   | 850.5144    | 0.0806  | 95    | 859        | 865      | MKEDLAK           |           |       | Oxidation (M)[1]  |      | Mascot      |
| 1081.5686  | 1081.4918   | -0.0768 | -71   | 435        | 442      | MFLWMVVR          |           |       |                   |      | Mascot      |
| 1193.5718  | 1193.5795   | 0.0077  | 6     | 943        | 952      | LEDECSELKK        |           |       |                   |      | Mascot      |
| 1357.6747  | 1357.6755   | 0.0008  | 1     | 1083       | 1093     | KDFETSQFLSR       |           |       |                   |      | Mascot      |
| 1393.6702  | 1393.6879   | 0.0177  | 13    | 1758       | 1770     | AITDAAMMAEELK     |           |       |                   |      | Mascot      |
| 1460.6798  | 1460.7493   | 0.0695  | 48    | 1772       | 1783     | EQDTSAHLERMK      |           |       | Oxidation (M)[11] |      | Mascot      |
| 1475.7158  | 1475.7104   | -0.0054 | -4    | 1678       | 1689     | NNLMQAEIEELR      |           |       | Oxidation (M)[4]  |      | Mascot      |
| 1493.7166  | 1493.6898   | -0.0268 | -18   | 1360       | 1372     | SMSKANSEVAQWR     |           |       |                   |      | Mascot      |
| 1493.7166  | 1493.6898   | -0.0268 | -18   | 1360       | 1372     | SMSKANSEVAQWR     |           |       |                   |      | Mascot      |
| 1659.8911  | 1659.7222   | -0.1689 | -102  | 1290       | 1303     | QLEEKESLVSQLTR    |           |       |                   |      | Mascot      |
| 1659.8911  | 1659.7222   | -0.1689 | -102  | 1290       | 1303     | QLEEKESLVSQLTR    |           |       |                   |      | Mascot      |
| 1854.9192  | 1854.8779   | -0.0413 | -22   | 1177       | 1193     | DLEESTLQHEATAAALR |           |       |                   |      | Mascot      |
| 1950.9478  | 1950.8711   | -0.0767 | -39   | 1484       | 1499     | MKNSYEETLDHLETLK  |           |       |                   |      | Mascot      |
| 1950.9478  | 1950.8711   | -0.0767 | -39   | 1484       | 1499     | MKNSYEETLDHLETLK  |           |       |                   |      | Mascot      |

|    |                                         |           |         |      |      |              |                          |                                              |   |    |   |  |        |
|----|-----------------------------------------|-----------|---------|------|------|--------------|--------------------------|----------------------------------------------|---|----|---|--|--------|
|    | 1972.8601                               | 1972.8564 | -0.0037 | -2   | 1    | 18           | MSGDPEMECFGPAAYL<br>R    |                                              |   |    |   |  | Mascot |
|    | 2014.9651                               | 2014.9482 | -0.0169 | -8   | 616  | 634          | LLCHLYAAHASTEAE<br>SGGK  | Carbamidomethyl (C)[3]                       |   |    |   |  | Mascot |
|    | 2079.0134                               | 2078.9653 | -0.0481 | -23  | 1589 | 1606         | NSQRIIDSMQSTLDAEVR       | Oxidation (M)[9]                             |   |    |   |  | Mascot |
|    | 2079.0149                               | 2078.9653 | -0.0496 | -24  | 1327 | 1344         | NSLAHAVQSSRHDCDLL<br>R   | Carbamidomethyl (C)[14]                      |   |    |   |  | Mascot |
|    | 2110.1333                               | 2109.9102 | -0.2231 | -106 | 781  | 798          | LVILVTMTQAVCRGYVMR       | Carbamidomethyl (C)[12]                      |   |    |   |  | Mascot |
|    | 2142.123                                | 2141.9775 | -0.1455 | -68  | 781  | 798          | LVILVTMTQAVCRGYVMR       | Carbamidomethyl (C)[12], Oxidation (M)[7,17] |   |    |   |  | Mascot |
|    | 2142.123                                | 2141.9775 | -0.1455 | -68  | 781  | 798          | LVILVTMTQAVCRGYVMR       | Carbamidomethyl (C)[12], Oxidation (M)[7,17] |   |    |   |  | Mascot |
|    | 2225.1821                               | 2225.0479 | -0.1342 | -60  | 384  | 403          | IAYLLGLNSADMLKALCY<br>PR |                                              |   |    |   |  | Mascot |
|    | 2225.1821                               | 2225.0479 | -0.1342 | -60  | 384  | 403          | IAYLLGLNSADMLKALCY<br>PR |                                              |   |    |   |  | Mascot |
|    | 2247.1814                               | 2247.0237 | -0.1577 | -70  | 552  | 570          | LHDQHLGKTNCQKPKP<br>AK   | Carbamidomethyl (C)[11]                      |   |    |   |  | Mascot |
|    | 2297.1265                               | 2297.116  | -0.0105 | -5   | 414  | 434          | GQTPQVNNATMALCKS<br>VYEK | Oxidation (M)[12]                            |   |    |   |  | Mascot |
|    | 2298.1985                               | 2298.0898 | -0.1087 | -47  | 384  | 403          | IAYLLGLNSADMLKALCY<br>PR | Carbamidomethyl (C)[17], Oxidation (M)[12]   |   |    |   |  | Mascot |
| 44 | Si:ch211-234p6.12 protein [Danio rerio] |           |         |      |      | gi 158253488 | 25010.6                  | 4.76                                         | 6 | 30 | 0 |  |        |

#### Peptide Information

| Calc. Mass | Obsrv. Mass | ± da    | ± ppm | Start Seq. | End Seq. | Sequence     | Ion Score | C. I. % | Modification     | Rank | Result Type |
|------------|-------------|---------|-------|------------|----------|--------------|-----------|---------|------------------|------|-------------|
| 1090.535   | 1090.4946   | -0.0404 | -37   | 133        | 140      | SVYQMYRK     |           |         | Oxidation (M)[5] |      | Mascot      |
| 1112.5518  | 1112.5389   | -0.0129 | -12   | 97         | 106      | DAAMVHLSPR   |           |         | Oxidation (M)[4] |      | Mascot      |
| 1112.6786  | 1112.5389   | -0.1397 | -126  | 55         | 63       | VRLELLVDR    |           |         |                  |      | Mascot      |
| 1118.5411  | 1118.4785   | -0.0626 | -56   | 132        | 139      | RSVYQMYR     |           |         | Oxidation (M)[6] |      | Mascot      |
| 1193.595   | 1193.5795   | -0.0155 | -13   | 201        | 210      | GNVFDWNTIK   |           |         |                  |      | Mascot      |
| 1420.7583  | 1420.611    | -0.1473 | -104  | 199        | 210      | VKGNVFDWNTIK |           |         |                  |      | Mascot      |

|    |                                                                     |  |  |  |  |              |          |      |    |    |   |  |
|----|---------------------------------------------------------------------|--|--|--|--|--------------|----------|------|----|----|---|--|
| 45 | PREDICTED: sorbin and SH3 domain-containing protein 1 [Danio rerio] |  |  |  |  | gi 292620207 | 118344.9 | 6.33 | 12 | 30 | 0 |  |
|----|---------------------------------------------------------------------|--|--|--|--|--------------|----------|------|----|----|---|--|

#### Peptide Information

| Calc. Mass | Obsrv. Mass | ± da    | ± ppm | Start Seq. | End Seq. | Sequence     | Ion Score | C. I. % | Modification | Rank | Result Type |
|------------|-------------|---------|-------|------------|----------|--------------|-----------|---------|--------------|------|-------------|
| 882.4791   | 882.5382    | 0.0591  | 67    | 381        | 388      | GQQPVPTR     |           |         |              |      | Mascot      |
| 1045.5612  | 1045.5308   | -0.0304 | -29   | 319        | 326      | NMFKQIHK     |           |         |              |      | Mascot      |
| 1107.4816  | 1107.5105   | 0.0289  | 26    | 451        | 459      | FFSEMDFGK    |           |         |              |      | Mascot      |
| 1112.5735  | 1112.5389   | -0.0346 | -31   | 627        | 635      | FDFRAESLK    |           |         |              |      | Mascot      |
| 1112.5735  | 1112.5389   | -0.0346 | -31   | 627        | 635      | FDFRAESLK    |           |         |              |      | Mascot      |
| 1193.6426  | 1193.5795   | -0.0631 | -53   | 621        | 630      | TPALARFDFR   |           |         |              |      | Mascot      |
| 1434.8428  | 1434.7269   | -0.1159 | -81   | 786        | 798      | LTTSPPLPRSPR |           |         |              |      | Mascot      |

|  |           |           |         |     |     |     |                          |  |  |  |  |  |  |  |  |                                          |        |
|--|-----------|-----------|---------|-----|-----|-----|--------------------------|--|--|--|--|--|--|--|--|------------------------------------------|--------|
|  | 1464.7076 | 1464.7103 | 0.0027  | 2   | 259 | 272 | EAVAEQSGSLYQGR           |  |  |  |  |  |  |  |  |                                          | Mascot |
|  | 1950.861  | 1950.8711 | 0.0101  | 5   | 30  | 48  | DGSSSGSGSAAPECERHI<br>YK |  |  |  |  |  |  |  |  |                                          | Mascot |
|  | 1950.861  | 1950.8711 | 0.0101  | 5   | 491 | 509 | DGSSSGSGSAAPECERHI<br>YK |  |  |  |  |  |  |  |  |                                          | Mascot |
|  | 1993.9362 | 1993.9119 | -0.0243 | -12 | 958 | 974 | NNSPAELRNDVEYYGR         |  |  |  |  |  |  |  |  |                                          | Mascot |
|  | 2014.998  | 2014.9482 | -0.0498 | -25 | 756 | 773 | VKNGVDYPDAISYSPHR        |  |  |  |  |  |  |  |  |                                          | Mascot |
|  | 2078.908  | 2078.9653 | 0.0573  | 28  | 2   | 20  | SCEDDDLCKSLFVLSSSC<br>K  |  |  |  |  |  |  |  |  |                                          | Mascot |
|  | 2078.908  | 2078.9653 | 0.0573  | 28  | 2   | 20  | SCEDDDLCKSLFVLSSSC<br>K  |  |  |  |  |  |  |  |  |                                          | Mascot |
|  | 2282.9648 | 2283.1047 | 0.1399  | 61  | 1   | 20  | MSCEDDDLCKSLFVLSS<br>SCK |  |  |  |  |  |  |  |  | Carbamidomethyl (C)[3], Oxidation (M)[1] | Mascot |

46 PREDICTED: cell surface A33 antigen-like [Danio rerio] gi|189516031 30531.9 5.38 4 30 0 16 0

Peptide Information

| Calc. Mass | Obsrv. Mass | ± da    | ± ppm | Start Seq. | End Seq. | Sequence       | Ion Score | C. I. | % | Modification           | Rank | Result Type |
|------------|-------------|---------|-------|------------|----------|----------------|-----------|-------|---|------------------------|------|-------------|
| 1045.571   | 1045.5308   | -0.0402 | -38   | 6          | 14       | QSTVLIPCK      |           |       |   | Carbamidomethyl (C)[8] |      | Mascot      |
| 1493.7706  | 1493.6898   | -0.0808 | -54   | 37         | 50       | QKLSVSQDSAFAGR |           |       |   |                        |      | Mascot      |
| 1493.7706  | 1493.6898   | -0.0808 | -54   | 37         | 50       | QKLSVSQDSAFAGR | 16        |       | 0 |                        |      | Mascot      |
| 1583.8176  | 1583.6996   | -0.118  | -75   | 23         | 36       | QVSSAEWLHEKAAK |           |       |   |                        |      | Mascot      |
| 1633.8586  | 1633.8365   | -0.0221 | -14   | 1          | 14       | MCVVRQSTVLIPCK |           |       |   | Carbamidomethyl (C)[2] |      | Mascot      |

47 adenylate cyclase 1a [Danio rerio] gi|270132983 124545.3 8.43 1 20 0

Peptide Information

| Calc. Mass | Obsrv. Mass | ± da   | ± ppm | Start Seq. | End Seq. | Sequence   | Ion Score | C. I. | % | Modification             | Rank | Result Type |
|------------|-------------|--------|-------|------------|----------|------------|-----------|-------|---|--------------------------|------|-------------|
| 1179.5356  | 1179.5645   | 0.0289 | 25    | 21         | 30       | SRCLAGACER | 20        | 0     |   | Carbamidomethyl (C)[3,8] | 1    | Mascot      |

48 spindle and kinetochore-associated protein 1 [Danio rerio] gi|50540250 29650.5 9.46 1 18 0

Peptide Information

| Calc. Mass | Obsrv. Mass | ± da    | ± ppm | Start Seq. | End Seq. | Sequence  | Ion Score | C. I. | % | Modification       | Rank | Result Type |
|------------|-------------|---------|-------|------------|----------|-----------|-----------|-------|---|--------------------|------|-------------|
| 1112.5591  | 1112.5389   | -0.0202 | -18   | 231        | 239      | FVGMLNMLR | 18        | 0     |   | Oxidation (M)[4,7] | 2    | Mascot      |

49 histone H4 transcription factor [Danio rerio] gi|50878289 57450.1 6.44 1 18 0

Peptide Information

| Calc. Mass | Obsrv. Mass | ± da | ± ppm | Start Seq. | End Seq. | Sequence | Ion Score | C. I. | % | Modification | Rank | Result Type |
|------------|-------------|------|-------|------------|----------|----------|-----------|-------|---|--------------|------|-------------|
|------------|-------------|------|-------|------------|----------|----------|-----------|-------|---|--------------|------|-------------|

1659.82711659.7222-0.1049-63373385EHEDGFMRLQLIR180Oxidation (M)[7]2 Mascot

50Zgc:136688 [Danio rerio]gi|4990296048277.16.221170

| Peptide Information |             |           |       |            |          |                        |           |                |                        |                    |             |
|---------------------|-------------|-----------|-------|------------|----------|------------------------|-----------|----------------|------------------------|--------------------|-------------|
| Calc. Mass          | Obsrv. Mass | ± da      | ± ppm | Start Seq. | End Seq. | Sequence               | Ion Score | C. I.          | % Modification         | Rank               | Result Type |
| 1179.5609           | 1179.5645   | 0.0036    | 3     | 155        | 163      | KMQEQLCSR              | 17        | 0              | Carbamidomethyl (C)[7] | 2                  | Mascot      |
| Gel Idx/Pos         |             | 211/11    |       |            |          | Instr./Gel Origin      |           | BA2060/110707A |                        | Process Status     |             |
| Plate [#] Name      |             | [1] 31496 |       |            |          | Instrument Sample Name |           |                |                        | Spectra            |             |
|                     |             |           |       |            |          |                        |           |                |                        | Analysis Succeeded |             |
|                     |             |           |       |            |          |                        |           |                |                        | 11                 |             |

| Rank | Protein Name                                  | Accession No. | Protein MW | Protein PI | Pep. Count | Protein Score | Protein Score C. I. % | Total Ion Score | Total Ion C. I. % |
|------|-----------------------------------------------|---------------|------------|------------|------------|---------------|-----------------------|-----------------|-------------------|
| 1    | sarcolemma associated protein b [Danio rerio] | gi 41055754   | 43615.1    | 5.82       | 17         | 732           | 100                   | 635             | 100               |

| Peptide Information |             |         |       |            |          |               |           |         |                        |                  |
|---------------------|-------------|---------|-------|------------|----------|---------------|-----------|---------|------------------------|------------------|
| Calc. Mass          | Obsrv. Mass | ± da    | ± ppm | Start Seq. | End Seq. | Sequence      | Ion Score | C. I. % | Modification           | Rank Result Type |
| 901.5101            | 901.4617    | -0.0484 | -54   | 242        | 248      | KQQQLEK       |           |         |                        | Mascot           |
| 912.4243            | 912.4114    | -0.0129 | -14   | 102        | 109      | DSAVFSMR      |           |         |                        | Mascot           |
| 928.4193            | 928.3899    | -0.0294 | -32   | 102        | 109      | DSAVFSMR      |           |         | Oxidation (M)[7]       | Mascot           |
| 935.4363            | 935.4218    | -0.0145 | -16   | 196        | 202      | DCESLRR       |           |         | Carbamidomethyl (C)[2] | Mascot           |
| 1159.6681           | 1159.631    | -0.0371 | -32   | 13         | 22       | VSLIKDELSR    |           |         |                        | Mascot           |
| 1161.5569           | 1161.5259   | -0.031  | -27   | 90         | 98       | LQEEMENLR     |           |         |                        | Mascot           |
| 1177.5518           | 1177.5168   | -0.035  | -30   | 90         | 98       | LQEEMENLR     |           |         | Oxidation (M)[5]       | Mascot           |
| 1218.6073           | 1218.5724   | -0.0349 | -29   | 223        | 233      | ASLQENSSLR    |           |         |                        | Mascot           |
| 1238.6488           | 1238.6129   | -0.0359 | -29   | 278        | 287      | LSVLQEEHQR    |           |         |                        | Mascot           |
| 1238.6488           | 1238.6129   | -0.0359 | -29   | 278        | 287      | LSVLQEEHQR    | 51        | 99.789  |                        | Mascot           |
| 1293.6104           | 1293.5953   | -0.0151 | -12   | 71         | 81       | QQAESAKQMK    |           |         | Oxidation (M)[10]      | Mascot           |
| 1293.6334           | 1293.5953   | -0.0381 | -29   | 154        | 163      | WQQAANKYER    | 68        | 99.996  |                        | Mascot           |
| 1394.7499           | 1394.7052   | -0.0447 | -32   | 277        | 287      | RLSVLQEEHQR   |           |         |                        | Mascot           |
| 1403.7125           | 1403.6699   | -0.0426 | -30   | 329        | 340      | SVSLELQQSQER  |           |         |                        | Mascot           |
| 1403.7125           | 1403.6699   | -0.0426 | -30   | 329        | 340      | SVSLELQQSQER  | 88        | 100     |                        | Mascot           |
| 1554.7104           | 1554.6597   | -0.0507 | -33   | 305        | 317      | EYEEMQAELSGLR | 89        | 100     |                        | Mascot           |
| 1554.7104           | 1554.6597   | -0.0507 | -33   | 305        | 317      | EYEEMQAELSGLR |           |         |                        | Mascot           |
| 1570.7053           | 1570.6554   | -0.0499 | -32   | 305        | 317      | EYEEMQAELSGLR | 48        | 99.542  | Oxidation (M)[5]       | Mascot           |
| 1570.7053           | 1570.6554   | -0.0499 | -32   | 305        | 317      | EYEEMQAELSGLR |           |         | Oxidation (M)[5]       | Mascot           |
| 1602.8156           | 1602.7643   | -0.0513 | -32   | 55         | 67       | CVELQGLLEEEKR |           |         | Carbamidomethyl (C)[1] | Mascot           |

|   |                                                     |           |         |     |     |             |                      |      |     |                        |        |     |     |
|---|-----------------------------------------------------|-----------|---------|-----|-----|-------------|----------------------|------|-----|------------------------|--------|-----|-----|
|   | 1602.8156                                           | 1602.7643 | -0.0513 | -32 | 55  | 67          | CVELQGLLEEEKR        | 106  | 100 | Carbamidomethyl (C)[1] | Mascot |     |     |
|   | 1637.8241                                           | 1637.7717 | -0.0524 | -32 | 110 | 123         | QETHAAQE EVQLR       |      |     |                        | Mascot |     |     |
|   | 1637.8241                                           | 1637.7717 | -0.0524 | -32 | 110 | 123         | QETHAAQE EVQLR       | 110  | 100 |                        | Mascot |     |     |
|   | 1802.8514                                           | 1802.7957 | -0.0557 | -31 | 37  | 52          | LNQELQEANEQANSSK     |      |     |                        | Mascot |     |     |
|   | 1909.9111                                           | 1909.849  | -0.0621 | -33 | 164 | 179         | ELESVQASHQQNQQR      | 124  | 100 |                        | Mascot |     |     |
|   | 1909.9111                                           | 1909.849  | -0.0621 | -33 | 164 | 179         | ELESVQASHQQNQQR      |      |     |                        | Mascot |     |     |
|   | 2299.1636                                           | 2299.1074 | -0.0562 | -24 | 33  | 52          | VIQRLNQELQEANEQANSSK |      |     |                        | Mascot |     |     |
| 2 | peptidyl-prolyl cis-trans isomerase D [Danio rerio] |           |         |     |     | gi 50344784 | 41255.6              | 5.75 | 12  | 162                    | 100    | 100 | 100 |

Peptide Information

|  | Calc. Mass | Obsrv. Mass | ± da    | ± ppm | Start Seq. | End Seq. | Sequence             | Ion Score | C. I. | % Modification                           | Rank | Result | Type |
|--|------------|-------------|---------|-------|------------|----------|----------------------|-----------|-------|------------------------------------------|------|--------|------|
|  | 901.489    | 901.4617    | -0.0273 | -30   | 315        | 322      | AQAWQGLK             |           |       |                                          |      | Mascot |      |
|  | 953.4838   | 953.4365    | -0.0473 | -50   | 228        | 235      | NIGNNFFK             |           |       |                                          |      | Mascot |      |
|  | 1026.6095  | 1026.5775   | -0.032  | -31   | 146        | 154      | HVVFQGVLK            |           |       |                                          |      | Mascot |      |
|  | 1045.5425  | 1045.5266   | -0.0159 | -15   | 236        | 244      | AQNWQSAIK            |           |       |                                          |      | Mascot |      |
|  | 1057.5901  | 1057.5588   | -0.0313 | -30   | 314        | 322      | RAQAWQGLK            |           |       |                                          |      | Mascot |      |
|  | 1281.6473  | 1281.6101   | -0.0372 | -29   | 18         | 28       | VFFDVEIGAER          |           |       |                                          |      | Mascot |      |
|  | 1281.6473  | 1281.6101   | -0.0372 | -29   | 18         | 28       | VFFDVEIGAER          | 100       | 100   |                                          |      | Mascot |      |
|  | 1362.7667  | 1362.7224   | -0.0443 | -33   | 32         | 43       | VVFELFADVVPK         |           |       |                                          |      | Mascot |      |
|  | 1960.8627  | 1960.8969   | 0.0342  | 17    | 252        | 268      | YLEMCGNIVDDSSQKK     |           |       | Oxidation (M)[4]                         |      | Mascot |      |
|  | 1981.9105  | 1981.8762   | -0.0343 | -17   | 169        | 185      | EDNPVKPCVIAECGEHK    |           |       | Carbamidomethyl (C)[8,13]                |      | Mascot |      |
|  | 2081.1064  | 2081.0388   | -0.0676 | -32   | 32         | 49       | VVFELFADVVPKTAENFR   |           |       |                                          |      | Mascot |      |
|  | 2230.0115  | 2230.0735   | 0.062   | 28    | 249        | 267      | ALRYLEMCGNIVDDSSQK   |           |       | Carbamidomethyl (C)[8], Oxidation (M)[7] |      | Mascot |      |
|  | 2520.1921  | 2520.114    | -0.0781 | -31   | 289        | 309      | LWQEAIESCDEVLELNQNTK |           |       | Carbamidomethyl (C)[9]                   |      | Mascot |      |

|   |                                                                 |  |  |  |  |             |         |      |    |    |        |  |  |
|---|-----------------------------------------------------------------|--|--|--|--|-------------|---------|------|----|----|--------|--|--|
| 3 | MCM6 minichromosome maintenance deficient 6, like [Danio rerio] |  |  |  |  | gi 70887711 | 93152.1 | 5.23 | 16 | 54 | 81.017 |  |  |
|---|-----------------------------------------------------------------|--|--|--|--|-------------|---------|------|----|----|--------|--|--|

Peptide Information

|  | Calc. Mass | Obsrv. Mass | ± da    | ± ppm | Start Seq. | End Seq. | Sequence    | Ion Score | C. I. | % Modification | Rank | Result | Type |
|--|------------|-------------|---------|-------|------------|----------|-------------|-----------|-------|----------------|------|--------|------|
|  | 856.49     | 856.4994    | 0.0094  | 11    | 87         | 93       | AVRH FAR    |           |       |                |      | Mascot |      |
|  | 953.4761   | 953.4365    | -0.0396 | -42   | 168        | 175      | YTQPTICK    |           |       |                |      | Mascot |      |
|  | 996.5261   | 996.5679    | 0.0418  | 42    | 194        | 201      | FVDFQKGR    |           |       |                |      | Mascot |      |
|  | 1026.5367  | 1026.5775   | 0.0408  | 40    | 192        | 199      | SRFVDFQK    |           |       |                |      | Mascot |      |
|  | 1165.6252  | 1165.7091   | 0.0839  | 72    | 747        | 755      | SELINWYLK   |           |       |                |      | Mascot |      |
|  | 1184.627   | 1184.6117   | -0.0153 | -13   | 202        | 211      | IQETQ AELPR |           |       |                |      | Mascot |      |

|           |           |         |      |     |     |                           |                        |  |  |  |  |        |
|-----------|-----------|---------|------|-----|-----|---------------------------|------------------------|--|--|--|--|--------|
| 1218.7278 | 1218.5724 | -0.1554 | -128 | 361 | 372 | GILLMLFGGVAK              |                        |  |  |  |  | Mascot |
| 1238.5721 | 1238.6129 | 0.0408  | 33   | 628 | 637 | LYCSDEVQPK                | Carbamidomethyl (C)[3] |  |  |  |  | Mascot |
| 1238.5721 | 1238.6129 | 0.0408  | 33   | 628 | 637 | LYCSDEVQPK                | Carbamidomethyl (C)[3] |  |  |  |  | Mascot |
| 1281.7347 | 1281.6101 | -0.1246 | -97  | 724 | 734 | VSNLLVLHMQK               |                        |  |  |  |  | Mascot |
| 1281.7347 | 1281.6101 | -0.1246 | -97  | 724 | 734 | VSNLLVLHMQK               |                        |  |  |  |  | Mascot |
| 1293.6144 | 1293.5953 | -0.0191 | -15  | 321 | 330 | NQMTVLEWEK                | Oxidation (M)[3]       |  |  |  |  | Mascot |
| 1293.6321 | 1293.5953 | -0.0368 | -28  | 268 | 279 | EGFETDGIQGLK              |                        |  |  |  |  | Mascot |
| 1504.7312 | 1504.6289 | -0.1023 | -68  | 382 | 396 | GDINVCIVGDPSTSK           |                        |  |  |  |  | Mascot |
| 1602.7944 | 1602.7643 | -0.0301 | -19  | 628 | 640 | LYCSDEVQPKHVK             | Carbamidomethyl (C)[3] |  |  |  |  | Mascot |
| 1602.7944 | 1602.7643 | -0.0301 | -19  | 628 | 640 | LYCSDEVQPKHVK             | Carbamidomethyl (C)[3] |  |  |  |  | Mascot |
| 1620.8196 | 1620.7454 | -0.0742 | -46  | 614 | 627 | QLESMLRLSEGMR             |                        |  |  |  |  | Mascot |
| 2211.1875 | 2211.0317 | -0.1558 | -70  | 361 | 381 | GILLMLFGGVAKTTMEGT<br>SLR | Oxidation (M)[5]       |  |  |  |  | Mascot |
| 2297.1812 | 2297.1199 | -0.0613 | -27  | 575 | 593 | QFQPKITVEAQEFVVDQY<br>K   |                        |  |  |  |  | Mascot |

4 glutathione S-transferase, C-terminal domain containing gi|255003839 67751.6 6.97 13 52 73.796  
[Danio rerio]

Peptide Information

| Calc. Mass | Obsrv. Mass | ± da    | ± ppm | Start Seq. | End Seq. | Sequence           | Ion Score | C. I. % | Modification            | Rank | Result Type |
|------------|-------------|---------|-------|------------|----------|--------------------|-----------|---------|-------------------------|------|-------------|
| 870.493    | 870.5117    | 0.0187  | 21    | 76         | 83       | DELPLGLVK          |           |         |                         |      | Mascot      |
| 901.4382   | 901.4617    | 0.0235  | 26    | 546        | 552      | EHMILCR            |           |         |                         |      | Mascot      |
| 935.4727   | 935.4218    | -0.0509 | -54   | 396        | 403      | MSDSRALR           |           |         |                         |      | Mascot      |
| 996.522    | 996.5679    | 0.0459  | 46    | 186        | 193      | VHNDKIR            |           |         |                         |      | Mascot      |
| 1026.5942  | 1026.5775   | -0.0167 | -16   | 75         | 83       | RDELPLGLVK         |           |         |                         |      | Mascot      |
| 1045.571   | 1045.5266   | -0.0444 | -42   | 446        | 454      | CQVILVENK          |           |         |                         |      | Mascot      |
| 1177.5817  | 1177.5168   | -0.0649 | -55   | 571        | 580      | RCMGLVDLDR         |           |         |                         |      | Mascot      |
| 1230.5784  | 1230.5015   | -0.0769 | -62   | 1          | 10       | MKQTDPEETHK        |           |         | Oxidation (M)[1]        |      | Mascot      |
| 1565.8356  | 1565.6664   | -0.1692 | -108  | 122        | 135      | DVASLLGFKNTCLK     |           |         | Carbamidomethyl (C)[12] |      | Mascot      |
| 1637.8363  | 1637.7717   | -0.0646 | -39   | 108        | 120      | HIIQRACQLMPDR      |           |         | Carbamidomethyl (C)[7]  |      | Mascot      |
| 1637.8363  | 1637.7717   | -0.0646 | -39   | 108        | 120      | HIIQRACQLMPDR      |           |         | Carbamidomethyl (C)[7]  |      | Mascot      |
| 1671.9541  | 1671.8359   | -0.1182 | -71   | 284        | 298      | THSPSTLSHLPLLLR    |           |         |                         |      | Mascot      |
| 1960.9659  | 1960.8969   | -0.069  | -35   | 512        | 529      | AGFVISPCCYGFIQNTLK |           |         |                         |      | Mascot      |
| 2026.9611  | 2026.9514   | -0.0097 | -5    | 227        | 244      | LSTDAVCPSSREHSDIR  |           |         | Carbamidomethyl (C)[7]  |      | Mascot      |

5 unnamed protein product [Danio rerio] gi|134085246 38096.9 7.52 10 51 63.828

Peptide Information

| Calc. Mass | Obsrv. Mass | ± da | ± ppm | Start | End | Sequence | Ion | C. I. % | Modification | Rank | Result Type |
|------------|-------------|------|-------|-------|-----|----------|-----|---------|--------------|------|-------------|
|------------|-------------|------|-------|-------|-----|----------|-----|---------|--------------|------|-------------|

|   |                                              |           |         | Seq. | Seq.        | Score                       |      |                                           |    |        |
|---|----------------------------------------------|-----------|---------|------|-------------|-----------------------------|------|-------------------------------------------|----|--------|
|   | 856.5039                                     | 856.4994  | -0.0045 | -5   | 301         | 307 FPIINPR                 |      |                                           |    | Mascot |
|   | 1159.5564                                    | 1159.631  | 0.0746  | 64   | 320         | 329 SFGFPSKSMR              |      | Oxidation (M)[9]                          |    | Mascot |
|   | 1161.6527                                    | 1161.5259 | -0.1268 | -109 | 59          | 67 FKPSHYRVK                |      |                                           |    | Mascot |
|   | 1167.6125                                    | 1167.5446 | -0.0679 | -58  | 48          | 58 GHAILPCVMR               |      |                                           |    | Mascot |
|   | 1281.6005                                    | 1281.6101 | 0.0096  | 7    | 308         | 319 EHCGGIAEPGVR            |      | Carbamidomethyl (C)[3]                    |    | Mascot |
|   | 1281.6005                                    | 1281.6101 | 0.0096  | 7    | 308         | 319 EHCGGIAEPGVR            |      | Carbamidomethyl (C)[3]                    |    | Mascot |
|   | 1293.5529                                    | 1293.5953 | 0.0424  | 33   | 289         | 300 CDGGWLEDGSVR            |      |                                           |    | Mascot |
|   | 1293.5529                                    | 1293.5953 | 0.0424  | 33   | 289         | 300 CDGGWLEDGSVR            |      |                                           |    | Mascot |
|   | 1394.7314                                    | 1394.7052 | -0.0262 | -19  | 144         | 155 IEGVVFPYQSQK            |      |                                           |    | Mascot |
|   | 1570.7053                                    | 1570.6554 | -0.0499 | -32  | 167         | 180 EACAEQDATLATYK          |      | Carbamidomethyl (C)[3]                    |    | Mascot |
|   | 1570.7053                                    | 1570.6554 | -0.0499 | -32  | 167         | 180 EACAEQDATLATYK          |      | Carbamidomethyl (C)[3]                    |    | Mascot |
|   | 2080.9504                                    | 2081.0388 | 0.0884  | 42   | 283         | 300 FQQLDRCDGGWLEDGS<br>VR  |      |                                           |    | Mascot |
|   | 2211.0898                                    | 2211.0317 | -0.0581 | -26  | 1           | 20 MDFIALLLTSTCFFSCISA<br>K |      |                                           |    | Mascot |
|   | 2284.1062                                    | 2284.0969 | -0.0093 | -4   | 1           | 20 MDFIALLLTSTCFFSCISA<br>K |      | Carbamidomethyl (C)[12], Oxidation (M)[1] |    | Mascot |
| 6 | SH3 domain-binding protein 4-A [Danio rerio] |           |         |      | gi 45387913 | 104947.5                    | 7.73 | 16                                        | 50 | 58.469 |

#### Peptide Information

| Calc. Mass | Obsrv. Mass | ± da    | ± ppm | Start Seq. | End Seq. | Sequence                | Ion Score | C. I. % | Modification                              | Rank | Result | Type |
|------------|-------------|---------|-------|------------|----------|-------------------------|-----------|---------|-------------------------------------------|------|--------|------|
| 842.5822   | 842.4844    | -0.0978 | -116  | 634        | 640      | LIKTVIR                 |           |         |                                           |      | Mascot |      |
| 850.4338   | 850.5166    | 0.0828  | 97    | 358        | 364      | LSNMEIK                 |           |         | Oxidation (M)[4]                          |      | Mascot |      |
| 870.4726   | 870.5117    | 0.0391  | 45    | 1          | 7        | MAHRIR                  |           |         | Oxidation (M)[1]                          |      | Mascot |      |
| 1045.4796  | 1045.5266   | 0.047   | 45    | 762        | 770      | AELDSEPER               |           |         |                                           |      | Mascot |      |
| 1161.6184  | 1161.5259   | -0.0925 | -80   | 347        | 357      | CSTVSPVVEIK             |           |         |                                           |      | Mascot |      |
| 1218.6398  | 1218.5724   | -0.0674 | -55   | 347        | 357      | CSTVSPVVEIK             |           |         | Carbamidomethyl (C)[1]                    |      | Mascot |      |
| 1362.6835  | 1362.7224   | 0.0389  | 29    | 733        | 743      | TILMENLGNWR             |           |         | Oxidation (M)[4]                          |      | Mascot |      |
| 1602.7329  | 1602.7643   | 0.0314  | 20    | 843        | 855      | QQMEAYEAPHRDK           |           |         |                                           |      | Mascot |      |
| 1602.7329  | 1602.7643   | 0.0314  | 20    | 843        | 855      | QQMEAYEAPHRDK           |           |         |                                           |      | Mascot |      |
| 1620.8591  | 1620.7454   | -0.1137 | -70   | 554        | 567      | ADEISDFTLRVQVK          |           |         |                                           |      | Mascot |      |
| 1671.806   | 1671.8359   | 0.0299  | 18    | 432        | 445      | HVSFSSNVWNHMK           |           |         |                                           |      | Mascot |      |
| 1720.8037  | 1720.77     | -0.0337 | -20   | 247        | 260      | APSPEQFQNRDFR           |           |         |                                           |      | Mascot |      |
| 1961.0381  | 1960.8969   | -0.1412 | -72   | 796        | 812      | ELMMALLKIDCQGLVAR       |           |         | Carbamidomethyl (C)[11]                   |      | Mascot |      |
| 2081.0188  | 2081.0388   | 0.02    | 10    | 373        | 390      | VSMVTRTESPMAEIVCVR      |           |         | Carbamidomethyl (C)[16], Oxidation (M)[4] |      | Mascot |      |
| 2230.2417  | 2230.0735   | -0.1682 | -75   | 813        | 831      | LIMDFVLLTTAVEVAPRW<br>R |           |         |                                           |      | Mascot |      |

|   |                                                                                                 |           |         |     |     |     |                                    |  |  |  |  |                        |  |  |  |  |        |
|---|-------------------------------------------------------------------------------------------------|-----------|---------|-----|-----|-----|------------------------------------|--|--|--|--|------------------------|--|--|--|--|--------|
|   | 2284.2368                                                                                       | 2284.0969 | -0.1399 | -61 | 463 | 484 | TVVAIFGHDCAPKTLVS<br>EVGK          |  |  |  |  |                        |  |  |  |  | Mascot |
|   | 2300.0686                                                                                       | 2300.1023 | 0.0337  | 15  | 568 | 587 | DDQDCILAQFCVQTPQP<br>PPK           |  |  |  |  | Carbamidomethyl (C)[5] |  |  |  |  | Mascot |
|   | 3337.6052                                                                                       | 3337.6533 | 0.0481  | 14  | 269 | 298 | LARSCHDLESLGQNPBW<br>GQTQPVETNIVCK |  |  |  |  | Carbamidomethyl (C)[5] |  |  |  |  | Mascot |
| 7 | hyaluronan and proteoglycan link protein 2 [Danio rerio] gi 136255127 38069.9 7.93 10 50 57.502 |           |         |     |     |     |                                    |  |  |  |  |                        |  |  |  |  |        |

Peptide Information

| Calc. Mass | Obsrv. Mass | ± da    | ± ppm | Start Seq. | End Seq. | Sequence                | Ion Score | C. I. | % Modification                            | Rank | Result Type |
|------------|-------------|---------|-------|------------|----------|-------------------------|-----------|-------|-------------------------------------------|------|-------------|
| 856.5039   | 856.4994    | -0.0045 | -5    | 301        | 307      | FPIINPR                 |           |       |                                           |      | Mascot      |
| 1159.5564  | 1159.631    | 0.0746  | 64    | 320        | 329      | SFGFPSKSMR              |           |       | Oxidation (M)[9]                          |      | Mascot      |
| 1161.6527  | 1161.5259   | -0.1268 | -109  | 59         | 67       | FKPSHYRVK               |           |       |                                           |      | Mascot      |
| 1167.6125  | 1167.5446   | -0.0679 | -58   | 48         | 58       | GHAAILPCVMR             |           |       |                                           |      | Mascot      |
| 1281.6005  | 1281.6101   | 0.0096  | 7     | 308        | 319      | EHC GGIAEPGVR           |           |       | Carbamidomethyl (C)[3]                    |      | Mascot      |
| 1281.6005  | 1281.6101   | 0.0096  | 7     | 308        | 319      | EHC GGIAEPGVR           |           |       | Carbamidomethyl (C)[3]                    |      | Mascot      |
| 1293.5529  | 1293.5953   | 0.0424  | 33    | 289        | 300      | CDGGWLEDGSVR            |           |       |                                           |      | Mascot      |
| 1293.5529  | 1293.5953   | 0.0424  | 33    | 289        | 300      | CDGGWLEDGSVR            |           |       |                                           |      | Mascot      |
| 1394.7314  | 1394.7052   | -0.0262 | -19   | 144        | 155      | IEGVVFPYQSQK            |           |       |                                           |      | Mascot      |
| 1570.7053  | 1570.6554   | -0.0499 | -32   | 167        | 180      | EACAEQDATLATYK          |           |       | Carbamidomethyl (C)[3]                    |      | Mascot      |
| 1570.7053  | 1570.6554   | -0.0499 | -32   | 167        | 180      | EACAEQDATLATYK          |           |       | Carbamidomethyl (C)[3]                    |      | Mascot      |
| 2080.9504  | 2081.0388   | 0.0884  | 42    | 283        | 300      | FQQLDRCDGGWLEDGS<br>VR  |           |       |                                           |      | Mascot      |
| 2283.1221  | 2283.1052   | -0.0169 | -7    | 1          | 20       | MNFIALLTSTCFFSCISA<br>K |           |       | Carbamidomethyl (C)[12], Oxidation (M)[1] |      | Mascot      |

|   |                                                                                                                                              |  |  |  |  |  |  |  |  |  |  |  |  |  |  |  |  |
|---|----------------------------------------------------------------------------------------------------------------------------------------------|--|--|--|--|--|--|--|--|--|--|--|--|--|--|--|--|
| 8 | novel protein similar to vertebrate hyaluronan and proteoglycan link protein 2 (HAPLN2) [Danio rerio] gi 122891149 38136.9 7.93 10 50 55.499 |  |  |  |  |  |  |  |  |  |  |  |  |  |  |  |  |
|---|----------------------------------------------------------------------------------------------------------------------------------------------|--|--|--|--|--|--|--|--|--|--|--|--|--|--|--|--|

Peptide Information

| Calc. Mass | Obsrv. Mass | ± da    | ± ppm | Start Seq. | End Seq. | Sequence      | Ion Score | C. I. | % Modification         | Rank | Result Type |
|------------|-------------|---------|-------|------------|----------|---------------|-----------|-------|------------------------|------|-------------|
| 856.5039   | 856.4994    | -0.0045 | -5    | 301        | 307      | FPIINPR       |           |       |                        |      | Mascot      |
| 1159.5564  | 1159.631    | 0.0746  | 64    | 320        | 329      | SFGFPSKSMR    |           |       | Oxidation (M)[9]       |      | Mascot      |
| 1161.6527  | 1161.5259   | -0.1268 | -109  | 59         | 67       | FKPSHYRVK     |           |       |                        |      | Mascot      |
| 1167.6125  | 1167.5446   | -0.0679 | -58   | 48         | 58       | GHAAILPCVMR   |           |       |                        |      | Mascot      |
| 1281.6005  | 1281.6101   | 0.0096  | 7     | 308        | 319      | EHC GGIAEPGVR |           |       | Carbamidomethyl (C)[3] |      | Mascot      |
| 1281.6005  | 1281.6101   | 0.0096  | 7     | 308        | 319      | EHC GGIAEPGVR |           |       | Carbamidomethyl (C)[3] |      | Mascot      |
| 1293.5529  | 1293.5953   | 0.0424  | 33    | 289        | 300      | CDGGWLEDGSVR  |           |       |                        |      | Mascot      |
| 1293.5529  | 1293.5953   | 0.0424  | 33    | 289        | 300      | CDGGWLEDGSVR  |           |       |                        |      | Mascot      |
| 1394.7314  | 1394.7052   | -0.0262 | -19   | 144        | 155      | IEGVVFPYQSQK  |           |       |                        |      | Mascot      |



|   |                                  |           |         |     |             |     |                        |      |                            |        |   |
|---|----------------------------------|-----------|---------|-----|-------------|-----|------------------------|------|----------------------------|--------|---|
|   | 1570.7053                        | 1570.6554 | -0.0499 | -32 | 167         | 180 | EACAEQDATLATYK         |      | Carbamidomethyl (C)[3]     | Mascot |   |
|   | 1570.7053                        | 1570.6554 | -0.0499 | -32 | 167         | 180 | EACAEQDATLATYK         |      | Carbamidomethyl (C)[3]     | Mascot |   |
|   | 2080.9504                        | 2081.0388 | 0.0884  | 42  | 283         | 300 | FQQLDRCDGGWLEDGS<br>VR |      |                            | Mascot |   |
|   | 2220.1191                        | 2220.0784 | -0.0407 | -18 | 2           | 20  | NFIALLLTSTCFFSCINAK    |      | Carbamidomethyl (C)[11,15] | Mascot |   |
| 9 | Zgc:110248 protein [Danio rerio] |           |         |     | gi 34784004 |     | 67462.1                | 6.82 | 12                         | 46     | 0 |

#### Peptide Information

| Calc. Mass | Obsrv. Mass | ± da    | ± ppm | Start Seq. | End Seq. | Sequence           | Ion Score | C. I. | % Modification                           | Rank | Result Type |
|------------|-------------|---------|-------|------------|----------|--------------------|-----------|-------|------------------------------------------|------|-------------|
| 901.4382   | 901.4617    | 0.0235  | 26    | 542        | 548      | EHMILCR            |           |       |                                          |      | Mascot      |
| 935.4727   | 935.4218    | -0.0509 | -54   | 392        | 399      | MSDSRALR           |           |       |                                          |      | Mascot      |
| 996.522    | 996.5679    | 0.0459  | 46    | 182        | 189      | VHND DKIR          |           |       |                                          |      | Mascot      |
| 1045.571   | 1045.5266   | -0.0444 | -42   | 442        | 450      | CQVILVENK          |           |       |                                          |      | Mascot      |
| 1177.5817  | 1177.5168   | -0.0649 | -55   | 567        | 576      | RCMGLVDLDR         |           |       |                                          |      | Mascot      |
| 1184.5775  | 1184.6117   | 0.0342  | 29    | 109        | 117      | ACQLMPHRR          |           |       | Carbamidomethyl (C)[2], Oxidation (M)[5] |      | Mascot      |
| 1230.5784  | 1230.5015   | -0.0769 | -62   | 25         | 34       | MKQTD PETHK        |           |       | Oxidation (M)[1]                         |      | Mascot      |
| 1565.8356  | 1565.6664   | -0.1692 | -108  | 118        | 131      | DVASLLGFKNTCLK     |           |       | Carbamidomethyl (C)[12]                  |      | Mascot      |
| 1602.8468  | 1602.7643   | -0.0825 | -51   | 104        | 116      | HIIQRACQLMPHR      |           |       |                                          |      | Mascot      |
| 1602.8468  | 1602.7643   | -0.0825 | -51   | 104        | 116      | HIIQRACQLMPHR      |           |       |                                          |      | Mascot      |
| 1671.9541  | 1671.8359   | -0.1182 | -71   | 280        | 294      | THSPSTLSHLPLLLR    |           |       |                                          |      | Mascot      |
| 1960.9659  | 1960.8969   | -0.069  | -35   | 508        | 525      | AGFVISPCCYGFIQNTLK |           |       |                                          |      | Mascot      |
| 2026.9611  | 2026.9514   | -0.0097 | -5    | 223        | 240      | LSTDAVCPSSREHSDIR  |           |       | Carbamidomethyl (C)[7]                   |      | Mascot      |

|    |                        |  |  |  |             |  |         |      |    |    |   |
|----|------------------------|--|--|--|-------------|--|---------|------|----|----|---|
| 10 | Gefiltin [Danio rerio] |  |  |  | gi 61403519 |  | 54189.8 | 5.23 | 12 | 44 | 0 |
|----|------------------------|--|--|--|-------------|--|---------|------|----|----|---|

#### Peptide Information

| Calc. Mass | Obsrv. Mass | ± da    | ± ppm | Start Seq. | End Seq. | Sequence       | Ion Score | C. I. | % Modification     | Rank | Result Type |
|------------|-------------|---------|-------|------------|----------|----------------|-----------|-------|--------------------|------|-------------|
| 882.4427   | 882.5403    | 0.0976  | 111   | 106        | 112      | NLEQHNK        |           |       |                    |      | Mascot      |
| 901.4487   | 901.4617    | 0.013   | 14    | 97         | 103      | FAMFIEK        |           |       | Oxidation (M)[3]   |      | Mascot      |
| 1057.4731  | 1057.5588   | 0.0857  | 81    | 328        | 335      | QIHMEDR        |           |       |                    |      | Mascot      |
| 1159.4871  | 1159.631    | 0.1439  | 124   | 174        | 181      | FEEEMRMR       |           |       | Oxidation (M)[5,7] |      | Mascot      |
| 1218.6035  | 1218.5724   | -0.0311 | -26   | 417        | 427      | LYSSTSMSSKK    |           |       |                    |      | Mascot      |
| 1281.6508  | 1281.6101   | -0.0407 | -32   | 376        | 386      | MALDIEIAAYR    |           |       | Oxidation (M)[1]   |      | Mascot      |
| 1281.6545  | 1281.6101   | -0.0444 | -35   | 23         | 34       | FSASPSRLSSSR   |           |       |                    |      | Mascot      |
| 1602.6741  | 1602.7643   | 0.0902  | 56    | 1          | 14       | MSYGSDIYSASSYR |           |       | Oxidation (M)[1]   |      | Mascot      |
| 1602.6741  | 1602.7643   | 0.0902  | 56    | 1          | 14       | MSYGSDIYSASSYR |           |       | Oxidation (M)[1]   |      | Mascot      |
| 1620.7898  | 1620.7454   | -0.0444 | -27   | 194        | 207      | DVDNASMVRDLLEK |           |       | Oxidation (M)[7]   |      | Mascot      |

|           |           |         |     |     |     |                         |        |
|-----------|-----------|---------|-----|-----|-----|-------------------------|--------|
| 1720.8096 | 1720.77   | -0.0396 | -23 | 436 | 452 | QQSGKPGKGSSQSDDS<br>K   | Mascot |
| 1961.0087 | 1960.8969 | -0.1118 | -57 | 125 | 140 | QTEPSRLAELYQQEIR        | Mascot |
| 2233.0229 | 2233.011  | -0.0119 | -5  | 259 | 277 | GQYEAMASKNLQSAEE<br>WYK | Mascot |

11 internexin neuronal intermediate filament protein, alpha b [Danio rerio] gi|18858755 54390.9 5.23 12 44 0

Peptide Information

| Calc. Mass | Obsrv. Mass | ± da    | ± ppm | Start Seq. | End Seq. | Sequence                | Ion Score | C. I. % | Modification       | Rank | Result Type |
|------------|-------------|---------|-------|------------|----------|-------------------------|-----------|---------|--------------------|------|-------------|
| 882.4427   | 882.5403    | 0.0976  | 111   | 108        | 114      | NLEQHNK                 |           |         |                    |      | Mascot      |
| 901.4487   | 901.4617    | 0.013   | 14    | 99         | 105      | FAMFIEK                 |           |         | Oxidation (M)[3]   |      | Mascot      |
| 1057.4731  | 1057.5588   | 0.0857  | 81    | 330        | 337      | QIHEMEDR                |           |         |                    |      | Mascot      |
| 1159.4871  | 1159.631    | 0.1439  | 124   | 176        | 183      | FEEEMRMR                |           |         | Oxidation (M)[5,7] |      | Mascot      |
| 1218.6035  | 1218.5724   | -0.0311 | -26   | 419        | 429      | LYSSTSMSSKK             |           |         |                    |      | Mascot      |
| 1281.6508  | 1281.6101   | -0.0407 | -32   | 378        | 388      | MALDIEIAAYR             |           |         | Oxidation (M)[1]   |      | Mascot      |
| 1281.6545  | 1281.6101   | -0.0444 | -35   | 23         | 34       | FSASPSRLSSSR            |           |         |                    |      | Mascot      |
| 1602.6741  | 1602.7643   | 0.0902  | 56    | 1          | 14       | MSYGSDIYSASSYR          |           |         | Oxidation (M)[1]   |      | Mascot      |
| 1602.6741  | 1602.7643   | 0.0902  | 56    | 1          | 14       | MSYGSDIYSASSYR          |           |         | Oxidation (M)[1]   |      | Mascot      |
| 1620.7898  | 1620.7454   | -0.0444 | -27   | 196        | 209      | DVDNASMVRDLLEK          |           |         | Oxidation (M)[7]   |      | Mascot      |
| 1720.8096  | 1720.77     | -0.0396 | -23   | 438        | 454      | QQSGKPGKGSSQSDDS<br>K   |           |         |                    |      | Mascot      |
| 1961.0087  | 1960.8969   | -0.1118 | -57   | 127        | 142      | QTEPSRLAELYQQEIR        |           |         |                    |      | Mascot      |
| 2233.0229  | 2233.011    | -0.0119 | -5    | 261        | 279      | GQYEAMASKNLQSAEE<br>WYK |           |         |                    |      | Mascot      |

12 RecName: Full=SH3 domain-binding protein 4-A gi|123888628 108383 7.89 16 44 0

Peptide Information

| Calc. Mass | Obsrv. Mass | ± da    | ± ppm | Start Seq. | End Seq. | Sequence       | Ion Score | C. I. % | Modification           | Rank | Result Type |
|------------|-------------|---------|-------|------------|----------|----------------|-----------|---------|------------------------|------|-------------|
| 842.5822   | 842.4844    | -0.0978 | -116  | 663        | 669      | LIKTVIR        |           |         |                        |      | Mascot      |
| 850.4338   | 850.5166    | 0.0828  | 97    | 387        | 393      | LSNMEIK        |           |         | Oxidation (M)[4]       |      | Mascot      |
| 870.4726   | 870.5117    | 0.0391  | 45    | 1          | 7        | MAHRIR         |           |         | Oxidation (M)[1]       |      | Mascot      |
| 1045.4796  | 1045.5266   | 0.047   | 45    | 791        | 799      | AELDSEPER      |           |         |                        |      | Mascot      |
| 1161.6184  | 1161.5259   | -0.0925 | -80   | 376        | 386      | CSTVSPVVEIK    |           |         |                        |      | Mascot      |
| 1218.6398  | 1218.5724   | -0.0674 | -55   | 376        | 386      | CSTVSPVVEIK    |           |         | Carbamidomethyl (C)[1] |      | Mascot      |
| 1362.6835  | 1362.7224   | 0.0389  | 29    | 762        | 772      | TILMENLGNWR    |           |         | Oxidation (M)[4]       |      | Mascot      |
| 1602.7329  | 1602.7643   | 0.0314  | 20    | 872        | 884      | QQMEAYEAPHRDK  |           |         |                        |      | Mascot      |
| 1602.7329  | 1602.7643   | 0.0314  | 20    | 872        | 884      | QQMEAYEAPHRDK  |           |         |                        |      | Mascot      |
| 1620.8591  | 1620.7454   | -0.1137 | -70   | 583        | 596      | ADEISDFTLRVQVK |           |         |                        |      | Mascot      |

|    |                                                                                                     |           |         |     |              |         |                                     |                                               |        |   |
|----|-----------------------------------------------------------------------------------------------------|-----------|---------|-----|--------------|---------|-------------------------------------|-----------------------------------------------|--------|---|
|    | 1671.806                                                                                            | 1671.8359 | 0.0299  | 18  | 461          | 474     | HVSFSSNVWNHMKV                      |                                               | Mascot |   |
|    | 1720.8037                                                                                           | 1720.77   | -0.0337 | -20 | 276          | 289     | APSPEQFQNRDFR                       |                                               | Mascot |   |
|    | 2026.9792                                                                                           | 2026.9514 | -0.0278 | -14 | 825          | 841     | ELMMALLKMDCQGLVAR                   | Carbamidomethyl (C)[11], Oxidation (M)[3,4,9] | Mascot |   |
|    | 2081.0188                                                                                           | 2081.0388 | 0.02    | 10  | 402          | 419     | VSVMTRTESPMAEIVCVR                  | Carbamidomethyl (C)[16], Oxidation (M)[4]     | Mascot |   |
|    | 2230.2417                                                                                           | 2230.0735 | -0.1682 | -75 | 842          | 860     | LIMDFVLLTTAVEVAPRW<br>R             |                                               | Mascot |   |
|    | 2284.2368                                                                                           | 2284.0969 | -0.1399 | -61 | 492          | 513     | TVVAIFGHDCAPKTL LVS<br>EVGK         |                                               | Mascot |   |
|    | 2300.0686                                                                                           | 2300.1023 | 0.0337  | 15  | 597          | 616     | DDQDCILAQFCVQTQP<br>PPK             | Carbamidomethyl (C)[5]                        | Mascot |   |
|    | 3337.6052                                                                                           | 3337.6533 | 0.0481  | 14  | 298          | 327     | LARSCHDLESLGQNP<br>GWGQTQP VETNIVCK | Carbamidomethyl (C)[5]                        | Mascot |   |
| 13 | novel protein similar to MCM6 minichromosome maintenance deficient 6, mitotin (S. cerevisiae) (mcm6 |           |         |     | gi 169158286 | 93177.2 | 5.26                                | 14                                            | 43     | 0 |

### Peptide Information

|    | Calc. Mass                                              | Obsrv. Mass | ± da    | ± ppm | Start Seq. | End Sequence Seq.      | Ion Score | C. I. % | Modification               | Rank | Result Type |
|----|---------------------------------------------------------|-------------|---------|-------|------------|------------------------|-----------|---------|----------------------------|------|-------------|
|    | 856.4523                                                | 856.4994    | 0.0471  | 55    | 112        | 118 DSEKHLK            |           |         |                            |      | Mascot      |
|    | 935.4614                                                | 935.4218    | -0.0396 | -42   | 148        | 154 LNEEMKR            |           |         | Oxidation (M)[5]           |      | Mascot      |
|    | 996.4818                                                | 996.5679    | 0.0861  | 86    | 67         | 74 NVCESFLK            |           |         | Carbamidomethyl (C)[3]     |      | Mascot      |
|    | 1045.5887                                               | 1045.5266   | -0.0621 | -59   | 132        | 140 KEELNTALK          |           |         |                            |      | Mascot      |
|    | 1165.6285                                               | 1165.7091   | 0.0806  | 69    | 95         | 103 LKLFCLDK           |           |         | Carbamidomethyl (C)[5]     |      | Mascot      |
|    | 1230.6477                                               | 1230.5015   | -0.1462 | -119  | 155        | 164 EFEKTAQHIK         |           |         |                            |      | Mascot      |
|    | 1281.6256                                               | 1281.6101   | -0.0155 | -12   | 67         | 76 NVCESFLKER          |           |         | Carbamidomethyl (C)[3]     |      | Mascot      |
|    | 1281.6256                                               | 1281.6101   | -0.0155 | -12   | 67         | 76 NVCESFLKER          | 10        | 0       | Carbamidomethyl (C)[3]     |      | Mascot      |
|    | 1362.7124                                               | 1362.7224   | 0.01    | 7     | 387        | 398 VSGFRVDQALDR       |           |         |                            |      | Mascot      |
|    | 1790.8589                                               | 1790.8342   | -0.0247 | -14   | 81         | 96 SSGSEEICSLHSEKLK    |           |         | Carbamidomethyl (C)[8]     |      | Mascot      |
|    | 2081.0696                                               | 2081.0388   | -0.0308 | -15   | 209        | 226 EKLEEMNTHISALSHTIK |           |         |                            |      | Mascot      |
|    | 2282.9534                                               | 2283.1052   | 0.1518  | 66    | 369        | 386 GWGFFNSDVWCVCYGS   |           |         | Carbamidomethyl (C)[11,13] |      | Mascot      |
|    | 2297.0054                                               | 2297.1199   | 0.1145  | 50    | 368        | 386 KGWGFNSDVWCVCYGS   |           |         |                            |      | Mascot      |
| 15 | PREDICTED: hypothetical protein LOC559994 [Danio rerio] |             |         |       |            | gi 326677062           | 1030064.3 | 5.62    | 46                         | 41   | 0           |

#### Peptide Information

|  | Calc. Mass | Obsrv. Mass | ± da    | ± ppm | Start Seq. | End Sequence Seq. | Ion Score | C. I. % | Modification           | Rank | Result Type |
|--|------------|-------------|---------|-------|------------|-------------------|-----------|---------|------------------------|------|-------------|
|  | 850.5185   | 850.5166    | -0.0019 | -2    | 8569       | 8575 IKPFAFK      |           |         |                        |      | Mascot      |
|  | 856.5138   | 856.4994    | -0.0144 | -17   | 1082       | 1089 LGIIEPSK     |           |         |                        |      | Mascot      |
|  | 864.4321   | 864.4419    | 0.0098  | 11    | 3272       | 3278 EERAFAGR     |           |         |                        |      | Mascot      |
|  | 870.5559   | 870.5117    | -0.0442 | -51   | 1536       | 1542 ALLLWVR      |           |         |                        |      | Mascot      |
|  | 882.4679   | 882.5403    | 0.0724  | 82    | 3102       | 3108 NLHEELK      |           |         |                        |      | Mascot      |
|  | 912.3727   | 912.4114    | 0.0387  | 42    | 4102       | 4109 MTADSESR     |           |         | Oxidation (M)[1]       |      | Mascot      |
|  | 953.4244   | 953.4365    | 0.0121  | 13    | 5893       | 5900 QDVTMSEK     |           |         | Oxidation (M)[5]       |      | Mascot      |
|  | 1026.5579  | 1026.5775   | 0.0196  | 19    | 4148       | 4156 TLNLHTEAK    |           |         |                        |      | Mascot      |
|  | 1045.5636  | 1045.5266   | -0.037  | -35   | 8277       | 8285 DLEVRSQAK    |           |         |                        |      | Mascot      |
|  | 1057.5636  | 1057.5588   | -0.0048 | -5    | 69         | 77 IAELAQQER      |           |         |                        |      | Mascot      |
|  | 1159.6252  | 1159.631    | 0.0058  | 5     | 6638       | 6647 QIGADIMRQK   |           |         |                        |      | Mascot      |
|  | 1161.5754  | 1161.5259   | -0.0495 | -43   | 5447       | 5457 SMPAVASPVMR  |           |         | Oxidation (M)[2]       |      | Mascot      |
|  | 1167.4946  | 1167.5446   | 0.05    | 43    | 8777       | 8786 CSLSSAEEER   |           |         | Carbamidomethyl (C)[1] |      | Mascot      |
|  | 1177.5704  | 1177.5168   | -0.0536 | -46   | 5447       | 5457 SMPAVASPVMR  |           |         | Oxidation (M)[2,10]    |      | Mascot      |
|  | 1184.627   | 1184.6117   | -0.0153 | -13   | 5738       | 5747 DIVQSKHTEK   |           |         |                        |      | Mascot      |
|  | 1218.6688  | 1218.5724   | -0.0964 | -79   | 4110       | 4120 QTSEITVLATR  |           |         |                        |      | Mascot      |

|           |           |         |      |      |      |                            |                          |     |        |
|-----------|-----------|---------|------|------|------|----------------------------|--------------------------|-----|--------|
| 1230.5129 | 1230.5015 | -0.0114 | -9   | 7465 | 7474 | MMLDESEGYR                 |                          |     | Mascot |
| 1237.6093 | 1237.626  | 0.0167  | 13   | 5301 | 5311 | TLQQGVMTSEK                | Oxidation (M)[8]         |     | Mascot |
| 1238.5504 | 1238.6129 | 0.0625  | 50   | 5158 | 5168 | SMPTDASQVMR                | Oxidation (M)[2]         |     | Mascot |
| 1238.5504 | 1238.6129 | 0.0625  | 50   | 5158 | 5168 | SMPTDASQVMR                | Oxidation (M)[2]         |     | Mascot |
| 1281.6296 | 1281.6101 | -0.0195 | -15  | 2021 | 2030 | LNMQWADFIK                 | Oxidation (M)[3]         |     | Mascot |
| 1281.6296 | 1281.6101 | -0.0195 | -15  | 2021 | 2030 | LNMQWADFIK                 | Oxidation (M)[3]         |     | Mascot |
| 1293.6118 | 1293.5953 | -0.0165 | -13  | 607  | 616  | FCMYQGLLYR                 |                          |     | Mascot |
| 1293.6118 | 1293.5953 | -0.0165 | -13  | 607  | 616  | FCMYQGLLYR                 |                          |     | Mascot |
| 1336.6412 | 1336.6097 | -0.0315 | -24  | 8640 | 8650 | EENTVEMLISR                | Oxidation (M)[7]         |     | Mascot |
| 1362.7297 | 1362.7224 | -0.0073 | -5   | 3360 | 3371 | EQCASLTELKK                |                          |     | Mascot |
| 1394.7235 | 1394.7052 | -0.0183 | -13  | 6306 | 6316 | ELQFEMELLVK                | Oxidation (M)[6]         |     | Mascot |
| 1504.6995 | 1504.6289 | -0.0706 | -47  | 1543 | 1555 | DQCQKVGCPASVR              | Carbamidomethyl (C)[3,8] |     | Mascot |
| 1554.7733 | 1554.6597 | -0.1136 | -73  | 7222 | 7233 | RELLFEMQEFGFGR             |                          |     | Mascot |
| 1554.7733 | 1554.6597 | -0.1136 | -73  | 7222 | 7233 | RELLFEMQEFGFGR             |                          |     | Mascot |
| 1570.7682 | 1570.6554 | -0.1128 | -72  | 7222 | 7233 | RELLFEMQEFGFGR             | Oxidation (M)[7]         |     | Mascot |
| 1570.8489 | 1570.6554 | -0.1935 | -123 | 1177 | 1191 | VLAFLHGLHAPASFQR           |                          | 3 0 | Mascot |
| 1620.8666 | 1620.7454 | -0.1212 | -75  | 6168 | 6182 | WSAVLLATSTMAELK            |                          |     | Mascot |
| 1637.7874 | 1637.7717 | -0.0157 | -10  | 6757 | 6771 | MACQETADKIEAISK            |                          |     | Mascot |
| 1637.7878 | 1637.7717 | -0.0161 | -10  | 5561 | 5575 | HVVTDATSSHIDAR             |                          |     | Mascot |
| 1671.718  | 1671.8359 | 0.1179  | 71   | 8383 | 8396 | IHDVEDQWQACGDR             |                          |     | Mascot |
| 1681.9312 | 1681.8882 | -0.043  | -26  | 178  | 191  | EEWVFHLLPLLTGK             |                          |     | Mascot |
| 1720.733  | 1720.77   | 0.037   | 22   | 4095 | 4109 | TSESEYKMTADSESR            |                          |     | Mascot |
| 1802.9429 | 1802.7957 | -0.1472 | -82  | 1305 | 1321 | AAVLTDVMGSRSPNQLK          | Oxidation (M)[7]         |     | Mascot |
| 1910.0051 | 1909.849  | -0.1561 | -82  | 2939 | 2955 | TIHPCLAQEEKATVEK           |                          |     | Mascot |
| 1910.0051 | 1909.849  | -0.1561 | -82  | 2939 | 2955 | TIHPCLAQEEKATVEK           |                          |     | Mascot |
| 2026.9611 | 2026.9514 | -0.0097 | -5   | 5274 | 5291 | VKQHVVTDAETSSHMDA<br>R     | Oxidation (M)[15]        |     | Mascot |
| 2211.126  | 2211.0317 | -0.0943 | -43  | 8508 | 8526 | MSAAELQTTGVYIRLELC<br>R    | Carbamidomethyl (C)[18]  |     | Mascot |
| 2220.0806 | 2220.0784 | -0.0022 | -1   | 1286 | 1304 | SFLGMAGFYHRFIPNFSG<br>R    | Oxidation (M)[5]         |     | Mascot |
| 2224.9873 | 2225.0457 | 0.0584  | 26   | 4312 | 4333 | VTDAETSSQIGACAEDNE<br>SGIK |                          |     | Mascot |
| 2224.9873 | 2225.0457 | 0.0584  | 26   | 4312 | 4333 | VTDAETSSQIGACAEDNE<br>SGIK |                          |     | Mascot |
| 2230.1643 | 2230.0735 | -0.0908 | -41  | 6653 | 6671 | DSLLALESVKHMLMELLC<br>K    | Carbamidomethyl (C)[18]  |     | Mascot |
| 2233.0012 | 2233.011  | 0.0098  | 4    | 8235 | 8252 | DSTELEEWMRCAHEQLQ<br>K     |                          |     | Mascot |
| 2283.1333 | 2283.1052 | -0.0281 | -12  | 7195 | 7214 | ESPQICQDLQSLLGHCRS<br>LR   |                          |     | Mascot |
| 2284.022  | 2284.0969 | 0.0749  | 33   | 3439 | 3458 | RVLDCDAPFESEADTL<br>MDR    |                          |     | Mascot |

|    |                                                                                                      |           |         |     |              |      |                        |      |    |                             |   |  |  |        |
|----|------------------------------------------------------------------------------------------------------|-----------|---------|-----|--------------|------|------------------------|------|----|-----------------------------|---|--|--|--------|
|    | 2297.1455                                                                                            | 2297.1199 | -0.0256 | -11 | 8621         | 8639 | VLLNQHWERLGELMNSSDR    |      |    |                             |   |  |  | Mascot |
|    | 2299.0984                                                                                            | 2299.1074 | 0.009   | 4   | 2881         | 2901 | VEDIQHLTVSSDLAPCQNSR   |      |    |                             |   |  |  | Mascot |
|    | 2300.0168                                                                                            | 2300.1023 | 0.0855  | 37  | 3439         | 3458 | RVLDCDAPFESEADTLMDR    |      |    | Oxidation (M)[18]           |   |  |  | Mascot |
|    | 2442.2698                                                                                            | 2442.0718 | -0.198  | -81 | 570          | 590  | LPVNIVQMQQEDASLVPLYLER |      |    |                             |   |  |  | Mascot |
|    | 2520.1438                                                                                            | 2520.114  | -0.0298 | -12 | 357          | 376  | KMPICYLCNQEGHTKPM CPR  |      |    | Carbamidomethyl (C)[5,8,18] |   |  |  | Mascot |
| 16 | novel protein with Zinc finger, C3HC4 type (RING finger) and B-box zinc finger domains [Danio rerio] |           |         |     | gi 220672798 |      | 33474.8                | 7.53 | 11 | 41                          | 0 |  |  |        |

#### Peptide Information

| Calc. Mass | Obsrv. Mass | ± da    | ± ppm | Start Seq. | End Seq. | Sequence           | Ion Score | C. I. | % Modification             | Rank | Result Type |
|------------|-------------|---------|-------|------------|----------|--------------------|-----------|-------|----------------------------|------|-------------|
| 864.4573   | 864.4419    | -0.0154 | -18   | 152        | 158      | VKGEFER            |           |       |                            |      | Mascot      |
| 912.4131   | 912.4114    | -0.0017 | -2    | 282        | 288      | MQDIVQY            |           |       | Oxidation (M)[1]           |      | Mascot      |
| 935.4693   | 935.4218    | -0.0475 | -51   | 154        | 161      | GEFERAAR           |           |       |                            |      | Mascot      |
| 1045.6152  | 1045.5266   | -0.0886 | -85   | 57         | 66       | GHPPVNLALK         |           |       |                            |      | Mascot      |
| 1057.6251  | 1057.5588   | -0.0663 | -63   | 132        | 140      | KEELNIALK          |           |       |                            |      | Mascot      |
| 1165.6285  | 1165.7091   | 0.0806  | 69    | 95         | 103      | LKLFCELEDK         |           |       | Carbamidomethyl (C)[5]     |      | Mascot      |
| 1281.5636  | 1281.6101   | 0.0465  | 36    | 104        | 115      | QPACLVCTSEK        |           |       |                            |      | Mascot      |
| 1281.5636  | 1281.6101   | 0.0465  | 36    | 104        | 115      | QPACLVCTSEK        |           |       |                            |      | Mascot      |
| 1720.8435  | 1720.77     | -0.0735 | -43   | 67         | 80       | NLCFLAEGNERR       |           |       | Carbamidomethyl (C)[3]     |      | Mascot      |
| 1790.8589  | 1790.8342   | -0.0247 | -14   | 81         | 96       | SSGSEEICSLHSEKLK   |           |       | Carbamidomethyl (C)[8]     |      | Mascot      |
| 2081.0696  | 2081.0388   | -0.0308 | -15   | 209        | 226      | EKLEEMNTHISALSHTIK |           |       |                            |      | Mascot      |
| 2296.9922  | 2297.1199   | 0.1277  | 56    | 1          | 19       | MASSAEYDYICPVCQDIK |           |       | Carbamidomethyl (C)[11,14] |      | Mascot      |

17 hypothetical protein LOC796228 [Danio rerio] gi|160333607 34755.4 7.57 8 39 0

#### Peptide Information

| Calc. Mass | Obsrv. Mass | ± da    | ± ppm | Start Seq. | End Seq. | Sequence       | Ion Score | C. I. | % Modification                           | Rank | Result Type |
|------------|-------------|---------|-------|------------|----------|----------------|-----------|-------|------------------------------------------|------|-------------|
| 1184.5582  | 1184.6117   | 0.0535  | 45    | 13         | 24       | GGGTPFSFTGEK   |           |       |                                          |      | Mascot      |
| 1336.6677  | 1336.6097   | -0.058  | -43   | 117        | 129      | DVGSGFCLGIVGR  |           |       | Carbamidomethyl (C)[7]                   |      | Mascot      |
| 1394.7018  | 1394.7052   | 0.0034  | 2     | 165        | 176      | VAMEEIKSVTCK   |           |       | Carbamidomethyl (C)[11]                  |      | Mascot      |
| 1570.8687  | 1570.6554   | -0.2133 | -136  | 246        | 259      | NETLTTTVEIPPKK |           |       |                                          |      | Mascot      |
| 1570.8687  | 1570.6554   | -0.2133 | -136  | 246        | 259      | NETLTTTVEIPPKK |           |       |                                          |      | Mascot      |
| 1637.7781  | 1637.7717   | -0.0064 | -4    | 98         | 111      | GVEFFAHMTDWGLK |           |       |                                          |      | Mascot      |
| 1637.7781  | 1637.7717   | -0.0064 | -4    | 98         | 111      | GVEFFAHMTDWGLK |           |       |                                          |      | Mascot      |
| 1681.7271  | 1681.8882   | 0.1611  | 96    | 130        | 143      | SSEDITCMGFMFLK |           |       | Carbamidomethyl (C)[7], Oxidation (M)[8] |      | Mascot      |

|    |                                         |           |         |     |    |              |                              |      |   |    |   |                  |  |  |  |  |        |
|----|-----------------------------------------|-----------|---------|-----|----|--------------|------------------------------|------|---|----|---|------------------|--|--|--|--|--------|
|    | 2284.0854                               | 2284.0969 | 0.0115  | 5   | 98 | 116          | GVEFFAHMTDWGLKTEY<br>PR      |      |   |    |   |                  |  |  |  |  | Mascot |
|    | 2300.0803                               | 2300.1023 | 0.022   | 10  | 98 | 116          | GVEFFAHMTDWGLKTEY<br>PR      |      |   |    |   | Oxidation (M)[8] |  |  |  |  | Mascot |
|    | 2520.1897                               | 2520.114  | -0.0757 | -30 | 1  | 24           | MAYPTTLELCGRGGGTP<br>FSFTGEK |      |   |    |   |                  |  |  |  |  | Mascot |
| 18 | novel protein (zgc:77010) [Danio rerio] |           |         |     |    | gi 169158538 | 18888.4                      | 5.22 | 6 | 38 | 0 |                  |  |  |  |  |        |

Peptide Information

| Calc. Mass | Obsrv. Mass | ± da    | ± ppm | Start Seq. | End Seq. | Sequence                 | Ion Score | C. I. | % | Modification           | Rank | Result Type |
|------------|-------------|---------|-------|------------|----------|--------------------------|-----------|-------|---|------------------------|------|-------------|
| 882.4211   | 882.5403    | 0.1192  | 135   | 139        | 145      | MCSFLPK                  |           |       |   | Carbamidomethyl (C)[2] |      | Mascot      |
| 1336.693   | 1336.6097   | -0.0833 | -62   | 28         | 39       | IACLSAPSVYQK             |           |       |   | Carbamidomethyl (C)[3] |      | Mascot      |
| 1403.6624  | 1403.6699   | 0.0075  | 5     | 156        | 166      | CYVNYESRLLS              |           |       |   | Carbamidomethyl (C)[1] |      | Mascot      |
| 1403.6624  | 1403.6699   | 0.0075  | 5     | 156        | 166      | CYVNYESRLLS              |           |       |   | Carbamidomethyl (C)[1] |      | Mascot      |
| 1585.8076  | 1585.7406   | -0.067  | -42   | 119        | 133      | ILLCTGAIMEEHAGK          |           |       |   |                        |      | Mascot      |
| 1637.6901  | 1637.7717   | 0.0816  | 50    | 1          | 13       | MSQFWYSEETASR            |           |       |   | Oxidation (M)[1]       |      | Mascot      |
| 1637.6901  | 1637.7717   | 0.0816  | 50    | 1          | 13       | MSQFWYSEETASR            |           |       |   | Oxidation (M)[1]       |      | Mascot      |
| 2225.2031  | 2225.0457   | -0.1574 | -71   | 119        | 138      | ILLCTGAIMEEHAGKLLDL<br>K |           |       |   | Carbamidomethyl (C)[4] |      | Mascot      |
| 2225.2031  | 2225.0457   | -0.1574 | -71   | 119        | 138      | ILLCTGAIMEEHAGKLLDL<br>K |           |       |   | Carbamidomethyl (C)[4] |      | Mascot      |

|    |                                                  |  |  |  |  |             |         |      |   |    |   |    |   |
|----|--------------------------------------------------|--|--|--|--|-------------|---------|------|---|----|---|----|---|
| 19 | meiotic recombination 11 homolog A [Danio rerio] |  |  |  |  | gi 47777304 | 70375.3 | 5.37 | 8 | 37 | 0 | 15 | 0 |
|----|--------------------------------------------------|--|--|--|--|-------------|---------|------|---|----|---|----|---|

Peptide Information

| Calc. Mass | Obsrv. Mass | ± da    | ± ppm | Start Seq. | End Seq. | Sequence          | Ion Score | C. I. | % | Modification                             | Rank | Result Type |
|------------|-------------|---------|-------|------------|----------|-------------------|-----------|-------|---|------------------------------------------|------|-------------|
| 935.4832   | 935.4218    | -0.0614 | -66   | 460        | 467      | AVQEFVDK          |           |       |   |                                          |      | Mascot      |
| 1161.5391  | 1161.5259   | -0.0132 | -11   | 610        | 619      | TKSIMDGCLH        |           |       |   | Carbamidomethyl (C)[8]                   |      | Mascot      |
| 1177.5341  | 1177.5168   | -0.0173 | -15   | 610        | 619      | TKSIMDGCLH        |           |       |   | Carbamidomethyl (C)[8], Oxidation (M)[5] |      | Mascot      |
| 1281.5208  | 1281.6101   | 0.0893  | 70    | 72         | 81       | TMHSCMEVMR        |           |       |   | Carbamidomethyl (C)[5]                   |      | Mascot      |
| 1281.5208  | 1281.6101   | 0.0893  | 70    | 72         | 81       | TMHSCMEVMR        |           |       |   | Carbamidomethyl (C)[5]                   |      | Mascot      |
| 1403.7529  | 1403.6699   | -0.083  | -59   | 177        | 189      | IALLYGLGSIPDER    |           |       |   |                                          |      | Mascot      |
| 1403.7529  | 1403.6699   | -0.083  | -59   | 177        | 189      | IALLYGLGSIPDER    | 15        |       | 0 |                                          |      | Mascot      |
| 1554.885   | 1554.6597   | -0.2253 | -145  | 163        | 176      | VEISPVLLQKGDTR    |           |       |   |                                          |      | Mascot      |
| 1554.885   | 1554.6597   | -0.2253 | -145  | 163        | 176      | VEISPVLLQKGDTR    |           |       |   |                                          |      | Mascot      |
| 1637.7264  | 1637.7717   | 0.0453  | 28    | 368        | 381      | VDYSGGFEVFNTR     |           |       |   | Oxidation (M)[13]                        |      | Mascot      |
| 1637.8251  | 1637.7717   | -0.0534 | -33   | 193        | 205      | MFVNNQVTMLRPR     |           |       |   | Oxidation (M)[1,9]                       |      | Mascot      |
| 2225.0212  | 2225.0457   | 0.0245  | 11    | 333        | 350      | VQAFCEKVEEMLEEAER |           |       |   | Carbamidomethyl (C)[5]                   |      | Mascot      |
| 2225.0212  | 2225.0457   | 0.0245  | 11    | 333        | 350      | VQAFCEKVEEMLEEAER |           |       |   | Carbamidomethyl (C)[5]                   |      | Mascot      |

20    Glutathione peroxidase 1b [Danio rerio]                      gi|51859004                      16361.4    7.68    6    37    0

Peptide Information

| Calc. Mass | Obsrv. Mass | ± da    | ± ppm | Start Seq. | End Sequence Seq.            | Ion Score | C. I. % | Modification           | Rank | Result Type |
|------------|-------------|---------|-------|------------|------------------------------|-----------|---------|------------------------|------|-------------|
| 928.4305   | 928.3899    | -0.0406 | -44   | 1          | 7 MNELHER                    |           |         |                        |      | Mascot      |
| 1165.6099  | 1165.7091   | 0.0992  | 85    | 125        | 135 FLTSGIDGDIK              |           |         |                        |      | Mascot      |
| 1177.6187  | 1177.5168   | -0.1019 | -87   | 91         | 99 FIIWSPVCR                 |           |         | Carbamidomethyl (C)[8] |      | Mascot      |
| 1293.7048  | 1293.5953   | -0.1095 | -85   | 125        | 136 FLTSGIDGDIKK             |           |         |                        |      | Mascot      |
| 1293.7048  | 1293.5953   | -0.1095 | -85   | 125        | 136 FLTSGIDGDIKK             |           |         |                        |      | Mascot      |
| 1403.6736  | 1403.6699   | -0.0037 | -3    | 1          | 11 MNELHERFAEK               |           |         |                        |      | Mascot      |
| 1403.6736  | 1403.6699   | -0.0037 | -3    | 1          | 11 MNELHERFAEK               |           |         |                        |      | Mascot      |
| 2297.1602  | 2297.1199   | -0.0403 | -18   | 100        | 119 NDIAWNFEKFLIGSDGVP<br>FK |           |         |                        |      | Mascot      |

21    Fgfr4 protein [Danio rerio]                      gi|66267492                      99657.1    6    9    37    0    21    0

Peptide Information

| Calc. Mass | Obsrv. Mass | ± da    | ± ppm | Start Seq. | End Sequence Seq.          | Ion Score | C. I. % | Modification               | Rank | Result Type |
|------------|-------------|---------|-------|------------|----------------------------|-----------|---------|----------------------------|------|-------------|
| 870.425    | 870.5117    | 0.0867  | 100   | 502        | 508 MQVHPSR                |           |         | Oxidation (M)[1]           |      | Mascot      |
| 1045.5636  | 1045.5266   | -0.037  | -35   | 21         | 30 SITSGEPRAK              |           |         |                            |      | Mascot      |
| 1159.5643  | 1159.631    | 0.0667  | 58    | 256        | 264 APYWTHTQR              |           |         |                            |      | Mascot      |
| 1281.6256  | 1281.6101   | -0.0155 | -12   | 698        | 708 DLVSCAYQVAR            |           |         | Carbamidomethyl (C)[5]     |      | Mascot      |
| 1281.6256  | 1281.6101   | -0.0155 | -12   | 698        | 708 DLVSCAYQVAR            |           |         | Carbamidomethyl (C)[5]     |      | Mascot      |
| 1515.8101  | 1515.7034   | -0.1067 | -70   | 280        | 293 FRCPATGSPLTIR          |           |         |                            |      | Mascot      |
| 1790.9119  | 1790.8342   | -0.0777 | -43   | 161        | 175 LRCDTNRPGAVQWFK        |           |         |                            |      | Mascot      |
| 1909.9337  | 1909.849    | -0.0847 | -44   | 834        | 848 ECWHAVPTQKQIQER        | 21        | 0       | Carbamidomethyl (C)[2]     |      | Mascot      |
| 1909.9337  | 1909.849    | -0.0847 | -44   | 834        | 848 ECWHAVPTQKQIQER        |           |         | Carbamidomethyl (C)[2]     |      | Mascot      |
| 2232.9946  | 2233.011    | 0.0164  | 7     | 814        | 831 EGHKMDKPSNCTHELYM<br>K |           |         | Carbamidomethyl (C)[11]    |      | Mascot      |
| 2299.2375  | 2299.1074   | -0.1301 | -57   | 2          | 20 LSILKVFIACFMELVCSR      |           |         | Carbamidomethyl (C)[11,17] |      | Mascot      |

22    Ppp1r13b protein [Danio rerio]                      gi|116487957                      36879.9    5.66    8    37    0

Peptide Information

| Calc. Mass | Obsrv. Mass | ± da    | ± ppm | Start Seq. | End Sequence Seq. | Ion Score | C. I. % | Modification | Rank | Result Type |
|------------|-------------|---------|-------|------------|-------------------|-----------|---------|--------------|------|-------------|
| 928.441    | 928.3899    | -0.0511 | -55   | 204        | 211 ALGDFDYK      |           |         |              |      | Mascot      |
| 1161.5508  | 1161.5259   | -0.0249 | -21   | 13         | 23 HNAHGEGNGLR    |           |         |              |      | Mascot      |
| 1184.5518  | 1184.6117   | 0.0599  | 51    | 24         | 33 YGLSSMQGWR     |           |         |              |      | Mascot      |



|           |           |         |     |     |     |                 |  |  |                   |  |        |
|-----------|-----------|---------|-----|-----|-----|-----------------|--|--|-------------------|--|--------|
| 1238.5946 | 1238.6129 | 0.0183  | 15  | 319 | 329 | YLQNREGGACK     |  |  |                   |  | Mascot |
| 1238.5946 | 1238.6129 | 0.0183  | 15  | 319 | 329 | YLQNREGGACK     |  |  |                   |  | Mascot |
| 1362.6471 | 1362.7224 | 0.0753  | 55  | 111 | 121 | TGFLQIDEHMR     |  |  | Oxidation (M)[10] |  | Mascot |
| 1394.717  | 1394.7052 | -0.0118 | -8  | 1   | 12  | MGAFLDKPKMEK    |  |  |                   |  | Mascot |
| 1565.7238 | 1565.6664 | -0.0574 | -37 | 10  | 23  | MEKHNAHGEGNGLR  |  |  | Oxidation (M)[1]  |  | Mascot |
| 1802.8966 | 1802.7957 | -0.1009 | -56 | 107 | 121 | NGIRTGFLQIDEHMR |  |  | Oxidation (M)[14] |  | Mascot |

23 Ppp1r13b protein [Danio rerio] gi|79151961 37561.5 6.37 8 36 0

Peptide Information

| Calc. Mass | Obsrv. Mass | ± da    | ± ppm | Start Seq. | End Seq. | Sequence        | Ion Score | C. I. | % Modification    | Rank | Result Type |
|------------|-------------|---------|-------|------------|----------|-----------------|-----------|-------|-------------------|------|-------------|
| 928.441    | 928.3899    | -0.0511 | -55   | 204        | 211      | ALGDFDYK        |           |       |                   |      | Mascot      |
| 1161.5508  | 1161.5259   | -0.0249 | -21   | 13         | 23       | HNAHGEGNGLR     |           |       |                   |      | Mascot      |
| 1184.5518  | 1184.6117   | 0.0599  | 51    | 24         | 33       | YGLSSMQGWR      |           |       |                   |      | Mascot      |
| 1238.5946  | 1238.6129   | 0.0183  | 15    | 319        | 329      | YLQNREGGACK     |           |       |                   |      | Mascot      |
| 1238.5946  | 1238.6129   | 0.0183  | 15    | 319        | 329      | YLQNREGGACK     |           |       |                   |      | Mascot      |
| 1362.6471  | 1362.7224   | 0.0753  | 55    | 111        | 121      | TGFLQIDEHMR     |           |       | Oxidation (M)[10] |      | Mascot      |
| 1394.717   | 1394.7052   | -0.0118 | -8    | 1          | 12       | MGAFLDKPKMEK    |           |       |                   |      | Mascot      |
| 1565.7238  | 1565.6664   | -0.0574 | -37   | 10         | 23       | MEKHNAHGEGNGLR  |           |       | Oxidation (M)[1]  |      | Mascot      |
| 1802.8966  | 1802.7957   | -0.1009 | -56   | 107        | 121      | NGIRTGFLQIDEHMR |           |       | Oxidation (M)[14] |      | Mascot      |

24 PREDICTED: interferon-inducible GTPase 5 [Danio rerio] gi|292622297 54573.7 5.69 9 36 0

Peptide Information

| Calc. Mass | Obsrv. Mass | ± da    | ± ppm | Start Seq. | End Seq. | Sequence            | Ion Score | C. I. | % Modification    | Rank | Result Type |
|------------|-------------|---------|-------|------------|----------|---------------------|-----------|-------|-------------------|------|-------------|
| 1026.4924  | 1026.5775   | 0.0851  | 83    | 180        | 187      | QDCEKYLK            |           |       |                   |      | Mascot      |
| 1167.6117  | 1167.5446   | -0.0671 | -57   | 5          | 14       | VQEDHLGTIR          |           |       |                   |      | Mascot      |
| 1184.6357  | 1184.6117   | -0.024  | -20   | 234        | 243      | MLHGGWLKAR          |           |       | Oxidation (M)[1]  |      | Mascot      |
| 1515.7625  | 1515.7034   | -0.0591 | -39   | 263        | 276      | LQNMYKSTGFGAAK      |           |       |                   |      | Mascot      |
| 1554.7546  | 1554.6597   | -0.0949 | -61   | 15         | 28       | DVFAGESPETIPHR      |           |       |                   |      | Mascot      |
| 1554.7546  | 1554.6597   | -0.0949 | -61   | 15         | 28       | DVFAGESPETIPHR      |           |       |                   |      | Mascot      |
| 1570.7529  | 1570.6554   | -0.0975 | -62   | 167        | 179      | SKFSETQALEQMR       | 4         | 0     | Oxidation (M)[12] |      | Mascot      |
| 1570.7529  | 1570.6554   | -0.0975 | -62   | 167        | 179      | SKFSETQALEQMR       |           |       | Oxidation (M)[12] |      | Mascot      |
| 1981.9647  | 1981.8762   | -0.0885 | -45   | 429        | 444      | EKLSEQQMFLINSQDR    |           |       | Oxidation (M)[8]  |      | Mascot      |
| 2081.0161  | 2081.0388   | 0.0227  | 11    | 224        | 241      | AEEFSGFLDKMLHGGWLK  |           |       | Oxidation (M)[11] |      | Mascot      |
| 2283.0349  | 2283.1052   | 0.0703  | 31    | 337        | 355      | FWDISGIEAVMDYSVFEMK |           |       | Oxidation (M)[11] |      | Mascot      |

|                     |                                                                              |             |         |       |            |              |                          |           |       |    |                      |                  |
|---------------------|------------------------------------------------------------------------------|-------------|---------|-------|------------|--------------|--------------------------|-----------|-------|----|----------------------|------------------|
|                     | 2299.0298                                                                    | 2299.1074   | 0.0776  | 34    | 337        | 355          | FWDISGIEAVMDYSVFEM<br>K  |           |       |    | Oxidation (M)[11,18] | Mascot           |
| 25                  | PREDICTED: neuroblast differentiation-associated protein AHNAK [Danio rerio] |             |         |       |            | gi 292618776 | 360101                   | 9.01      | 26    | 36 | 0                    |                  |
| Peptide Information |                                                                              |             |         |       |            |              |                          |           |       |    |                      |                  |
|                     | Calc. Mass                                                                   | Obsrv. Mass | ± da    | ± ppm | Start Seq. | End Seq.     | Sequence                 | Ion Score | C. I. | %  | Modification         | Rank Result Type |
|                     | 864.4681                                                                     | 864.4419    | -0.0262 | -30   | 3301       | 3307         | MNVLKLM                  |           |       |    | Oxidation (M)[1]     | Mascot           |
|                     | 901.4988                                                                     | 901.4617    | -0.0371 | -41   | 50         | 57           | NEAVDILK                 |           |       |    |                      | Mascot           |
|                     | 1026.6306                                                                    | 1026.5775   | -0.0531 | -52   | 2169       | 2177         | INSPKLNLK                |           |       |    |                      | Mascot           |
|                     | 1051.5782                                                                    | 1051.6823   | 0.1041  | 99    | 408        | 416          | IKSSDLNFK                |           |       |    |                      | Mascot           |
|                     | 1159.5742                                                                    | 1159.631    | 0.0568  | 49    | 440        | 450          | NPNDFGLTGPK              |           |       |    |                      | Mascot           |
|                     | 1218.5857                                                                    | 1218.5724   | -0.0133 | -11   | 880        | 890          | LPDMDMPSGKK              |           |       |    |                      | Mascot           |
|                     | 1230.5961                                                                    | 1230.5015   | -0.0946 | -77   | 1510       | 1521         | SPDIDLNGQSGK             |           |       |    |                      | Mascot           |
|                     | 1293.7235                                                                    | 1293.5953   | -0.1282 | -99   | 818        | 829          | FKMPSLGLSGLK             |           |       |    | Oxidation (M)[3]     | Mascot           |
|                     | 1293.7235                                                                    | 1293.5953   | -0.1282 | -99   | 818        | 829          | FKMPSLGLSGLK             |           |       |    | Oxidation (M)[3]     | Mascot           |
|                     | 1336.693                                                                     | 1336.6097   | -0.0833 | -62   | 2984       | 2995         | MPDIGFSGQKIK             |           |       |    | Oxidation (M)[1]     | Mascot           |
|                     | 1362.5586                                                                    | 1362.7224   | 0.1638  | 120   | 340        | 351          | MMTSEMDVSTSK             |           |       |    | Oxidation (M)[1]     | Mascot           |
|                     | 1394.5485                                                                    | 1394.7052   | 0.1567  | 112   | 340        | 351          | MMTSEMDVSTSK             |           |       |    | Oxidation (M)[1,2,6] | Mascot           |
|                     | 1403.6835                                                                    | 1403.6699   | -0.0136 | -10   | 1948       | 1960         | GGIDTPDMDLTLR            |           |       |    |                      | Mascot           |
|                     | 1403.6835                                                                    | 1403.6699   | -0.0136 | -10   | 1948       | 1960         | GGIDTPDMDLTLR            |           |       |    |                      | Mascot           |
|                     | 1515.6342                                                                    | 1515.7034   | 0.0692  | 46    | 146        | 158          | MCLAPSETEFDEK            |           |       |    | Oxidation (M)[1]     | Mascot           |
|                     | 1565.7186                                                                    | 1565.6664   | -0.0522 | -33   | 2732       | 2745         | TDLTLPNMDMPSSK           |           |       |    | Oxidation (M)[8]     | Mascot           |
|                     | 1720.7562                                                                    | 1720.77     | 0.0138  | 8     | 2926       | 2939         | EPHFDDIDHPDIR            |           |       |    |                      | Mascot           |
|                     | 1790.83                                                                      | 1790.8342   | 0.0042  | 2     | 2493       | 2509         | GMTTDLTPPDINMPSGK        |           |       |    | Oxidation (M)[2]     | Mascot           |
|                     | 1802.83                                                                      | 1802.7957   | -0.0343 | -19   | 1343       | 1359         | GPQTDLTLPDMDMPSGK        |           |       |    |                      | Mascot           |
|                     | 1909.9696                                                                    | 1909.849    | -0.1206 | -63   | 1522       | 1538         | FNMAKPKMPSLNMSGLK        |           |       |    | Oxidation (M)[3]     | Mascot           |
|                     | 1909.9696                                                                    | 1909.849    | -0.1206 | -63   | 2220       | 2236         | FNMAKPKMPSLNMSGLK        |           |       |    | Oxidation (M)[3]     | Mascot           |
|                     | 1960.9321                                                                    | 1960.8969   | -0.0352 | -18   | 2077       | 2093         | TPDYDLKTPDMDLSPPR        |           |       |    |                      | Mascot           |
|                     | 1982.0375                                                                    | 1981.8762   | -0.1613 | -81   | 1973       | 1991         | SPDIDLNGPSGKLNMAKP<br>K  |           |       |    |                      | Mascot           |
|                     | 2026.9209                                                                    | 2026.9514   | 0.0305  | 15    | 1713       | 1730         | GGIDTPDMDMTLRQADF<br>K   |           |       |    | Oxidation (M)[8]     | Mascot           |
|                     | 2225.0464                                                                    | 2225.0457   | -0.0007 | 0     | 1013       | 1032         | IKGGIDTPDMDMTLPQAD<br>FK |           |       |    | Oxidation (M)[10,12] | Mascot           |
|                     | 2225.0464                                                                    | 2225.0457   | -0.0007 | 0     | 1248       | 1267         | IKGGIDTPDMDMTLPQAD<br>FK |           |       |    | Oxidation (M)[10,12] | Mascot           |
|                     | 2230.0557                                                                    | 2230.0735   | 0.0178  | 8     | 2237       | 2257         | GPHMNADVDPDLNLTA<br>STPK |           |       |    |                      | Mascot           |
|                     | 2283.1648                                                                    | 2283.1052   | -0.0596 | -26   | 2583       | 2603         | KPNIDMNAPDLINSPSG<br>KLK |           |       |    | Oxidation (M)[6]     | Mascot           |
|                     | 2284.1853                                                                    | 2284.0969   | -0.0884 | -39   | 2630       | 2650         | TPQIKGGIDTPDMDLNLL       |           |       |    | Oxidation (M)[13]    | Mascot           |

|    |                                                              |           |         |     |      |              |                                  |      |   |    |   |                     |        |
|----|--------------------------------------------------------------|-----------|---------|-----|------|--------------|----------------------------------|------|---|----|---|---------------------|--------|
|    | 2299.0217                                                    | 2299.1074 | 0.0857  | 37  | 2132 | 2152         | QAK<br>TPDLDMNAPDFDINASSG<br>KMK |      |   |    |   | Oxidation (M)[6,20] | Mascot |
|    | 2420.2173                                                    | 2420.0591 | -0.1582 | -65 | 3137 | 3157         | MTRHLPDSPDVTMALPT<br>PRPR        |      |   |    |   | Oxidation (M)[1,13] | Mascot |
| 26 | PREDICTED: alpha-(1,3)-fucosyltransferase-like [Danio rerio] |           |         |     |      | gi 326666214 | 43300                            | 7.59 | 8 | 36 | 0 |                     |        |

#### Peptide Information

| Calc. Mass | Obsrv. Mass | ± da    | ± ppm | Start Seq. | End Seq. | Sequence              | Ion Score | C. I. | % Modification         | Rank | Result Type |
|------------|-------------|---------|-------|------------|----------|-----------------------|-----------|-------|------------------------|------|-------------|
| 850.4451   | 850.5166    | 0.0715  | 84    | 232        | 238      | ETLTRCK               |           |       |                        |      | Mascot      |
| 912.3914   | 912.4114    | 0.02    | 22    | 1          | 8        | MTNTACQK              |           |       | Oxidation (M)[1]       |      | Mascot      |
| 953.4178   | 953.4365    | 0.0187  | 20    | 1          | 8        | MTNTACQK              |           |       | Carbamidomethyl (C)[6] |      | Mascot      |
| 1057.5789  | 1057.5588   | -0.0201 | -19   | 211        | 219      | HIDIYALGR             |           |       |                        |      | Mascot      |
| 1403.6736  | 1403.6699   | -0.0037 | -3    | 81         | 92       | FNIDGCHLTDR           |           |       |                        |      | Mascot      |
| 1403.6736  | 1403.6699   | -0.0037 | -3    | 81         | 92       | FNIDGCHLTDR           |           |       |                        |      | Mascot      |
| 1570.7834  | 1570.6554   | -0.128  | -81   | 187        | 198      | LVCWIVSHWNEK          |           |       | Carbamidomethyl (C)[3] |      | Mascot      |
| 1570.7834  | 1570.6554   | -0.128  | -81   | 187        | 198      | LVCWIVSHWNEK          |           |       | Carbamidomethyl (C)[3] |      | Mascot      |
| 1790.8806  | 1790.8342   | -0.0464 | -26   | 169        | 183      | NEDTEDKIFPQVLDK       |           |       |                        |      | Mascot      |
| 2283.0603  | 2283.1052   | 0.0449  | 20    | 239        | 256      | FYLSFENTNVHYDYITEK    |           |       |                        |      | Mascot      |
| 2520.197   | 2520.114    | -0.083  | -33   | 71         | 92       | QLGLNSCSEKFNIDGCHLTDR |           |       | Carbamidomethyl (C)[7] |      | Mascot      |

|    |                                                     |  |  |  |  |              |          |      |    |    |   |  |  |
|----|-----------------------------------------------------|--|--|--|--|--------------|----------|------|----|----|---|--|--|
| 27 | vacuolar protein sorting 13 homolog A [Danio rerio] |  |  |  |  | gi 169646798 | 360027.6 | 5.83 | 26 | 36 | 0 |  |  |
|----|-----------------------------------------------------|--|--|--|--|--------------|----------|------|----|----|---|--|--|

#### Peptide Information

| Calc. Mass | Obsrv. Mass | ± da    | ± ppm | Start Seq. | End Seq. | Sequence    | Ion Score | C. I. | % Modification   | Rank | Result Type |
|------------|-------------|---------|-------|------------|----------|-------------|-----------|-------|------------------|------|-------------|
| 856.5654   | 856.4994    | -0.066  | -77   | 1549       | 1555     | IALWLLK     |           |       |                  |      | Mascot      |
| 882.493    | 882.5403    | 0.0473  | 54    | 1842       | 1849     | TVISFTSK    |           |       |                  |      | Mascot      |
| 935.4866   | 935.4218    | -0.0648 | -69   | 1566       | 1573     | TEMNVVVK    |           |       | Oxidation (M)[3] |      | Mascot      |
| 953.5778   | 953.4365    | -0.1413 | -148  | 551        | 559      | SAPILLSPR   |           |       |                  |      | Mascot      |
| 1026.6346  | 1026.5775   | -0.0571 | -56   | 65         | 72       | LELKIPWK    |           |       |                  |      | Mascot      |
| 1045.5636  | 1045.5266   | -0.037  | -35   | 810        | 819      | NTQATPKASK  |           |       |                  |      | Mascot      |
| 1057.6074  | 1057.5588   | -0.0486 | -46   | 1556       | 1565     | CLAPDKLVAK  |           |       |                  |      | Mascot      |
| 1184.627   | 1184.6117   | -0.0153 | -13   | 3185       | 3194     | LEDARENLPK  |           |       |                  |      | Mascot      |
| 1230.626   | 1230.5015   | -0.1245 | -101  | 2967       | 2977     | EAMNKQPSGLR |           |       |                  |      | Mascot      |
| 1281.6984  | 1281.6101   | -0.0883 | -69   | 771        | 781      | MHGELPLLSLR |           |       | Oxidation (M)[1] |      | Mascot      |
| 1281.6984  | 1281.6101   | -0.0883 | -69   | 771        | 781      | MHGELPLLSLR |           |       | Oxidation (M)[1] |      | Mascot      |
| 1293.578   | 1293.5953   | 0.0173  | 13    | 1288       | 1297     | MYRTTFTDDK  |           |       | Oxidation (M)[1] |      | Mascot      |

|           |           |         |      |      |      |                          |                         |        |
|-----------|-----------|---------|------|------|------|--------------------------|-------------------------|--------|
| 1293.578  | 1293.5953 | 0.0173  | 13   | 1288 | 1297 | MYRTTFTDDK               | Oxidation (M)[1]        | Mascot |
| 1394.7151 | 1394.7052 | -0.0099 | -7   | 347  | 356  | LHMWSWLHIR               | Oxidation (M)[3]        | Mascot |
| 1515.7914 | 1515.7034 | -0.088  | -58  | 1259 | 1271 | NRFEIVSSPTHTK            |                         | Mascot |
| 1585.7931 | 1585.7406 | -0.0525 | -33  | 889  | 901  | NMTEFLLSFEINK            |                         | Mascot |
| 1602.8862 | 1602.7643 | -0.1219 | -76  | 316  | 328  | KYRPYVVVHTNAR            |                         | Mascot |
| 1602.8862 | 1602.7643 | -0.1219 | -76  | 316  | 328  | KYRPYVVVHTNAR            |                         | Mascot |
| 1620.8149 | 1620.7454 | -0.0695 | -43  | 615  | 628  | DLQLDELTNATLMK           | Oxidation (M)[13]       | Mascot |
| 1637.751  | 1637.7717 | 0.0207  | 13   | 1603 | 1618 | SEPSGQCMTAAISDLK         |                         | Mascot |
| 1637.751  | 1637.7717 | 0.0207  | 13   | 1603 | 1618 | SEPSGQCMTAAISDLK         |                         | Mascot |
| 1681.8102 | 1681.8882 | 0.078   | 46   | 449  | 464  | DVKTGGFDGLMTPAEK         | Oxidation (M)[11]       | Mascot |
| 1720.9302 | 1720.77   | -0.1602 | -93  | 1754 | 1769 | TVPMLLAKASFQGDVK         | Oxidation (M)[4]        | Mascot |
| 1960.8514 | 1960.8969 | 0.0455  | 23   | 944  | 959  | EICLECSEYLDSEDKK         | Carbamidomethyl (C)[3]  | Mascot |
| 1982.0243 | 1981.8762 | -0.1481 | -75  | 2852 | 2866 | YQFRTTQQLQWEVVR          |                         | Mascot |
| 2220.1077 | 2220.0784 | -0.0293 | -13  | 568  | 586  | SLLNLMFETNPLDARADQ<br>R  | Oxidation (M)[6]        | Mascot |
| 2230.1323 | 2230.0735 | -0.0588 | -26  | 2221 | 2239 | KEEGQVVLAVHSPYWMV<br>NK  | Oxidation (M)[16]       | Mascot |
| 2233.2412 | 2233.011  | -0.2302 | -103 | 2875 | 2894 | QMYVLVLGLDVLGNPFG<br>LIR | Oxidation (M)[2]        | Mascot |
| 2297.1265 | 2297.1199 | -0.0066 | -3   | 392  | 411  | TLDIFNITMARQQAEMEA<br>SK |                         | Mascot |
| 2442.252  | 2442.0718 | -0.1802 | -74  | 889  | 908  | NMTEFLLSFEINKLSVQL<br>CR | Carbamidomethyl (C)[19] | Mascot |

28 vacuolar protein sorting 13 homolog A (*S. cerevisiae*) [gi|169154016](#) 73030 9.34 11 35 0  
[Danio rerio]

#### Peptide Information

| Calc. Mass | Obsrv. Mass | ± da    | ± ppm | Start Seq. | End Sequence Seq. | Ion Score               | C. I. % Modification | Rank | Result Type |
|------------|-------------|---------|-------|------------|-------------------|-------------------------|----------------------|------|-------------|
| 935.4944   | 935.4218    | -0.0726 | -78   | 370        | 376               | LEQFRDK                 |                      |      | Mascot      |
| 953.5778   | 953.4365    | -0.1413 | -148  | 293        | 301               | SAPILLSPR               |                      |      | Mascot      |
| 1045.5636  | 1045.5266   | -0.037  | -35   | 551        | 560               | NTQATPKASK              |                      |      | Mascot      |
| 1281.6984  | 1281.6101   | -0.0883 | -69   | 512        | 522               | MHGELPLLSLR             | Oxidation (M)[1]     |      | Mascot      |
| 1281.6984  | 1281.6101   | -0.0883 | -69   | 512        | 522               | MHGELPLLSLR             | Oxidation (M)[1]     |      | Mascot      |
| 1394.7151  | 1394.7052   | -0.0099 | -7    | 95         | 104               | LHMWSWLHIR              | Oxidation (M)[3]     |      | Mascot      |
| 1585.7931  | 1585.7406   | -0.0525 | -33   | 630        | 642               | NMTEFLLSFEINK           |                      |      | Mascot      |
| 1602.8862  | 1602.7643   | -0.1219 | -76   | 64         | 76                | KYRPYVVVHTNAR           |                      |      | Mascot      |
| 1602.8862  | 1602.7643   | -0.1219 | -76   | 64         | 76                | KYRPYVVVHTNAR           |                      |      | Mascot      |
| 1620.8149  | 1620.7454   | -0.0695 | -43   | 356        | 369               | DLQLDELTNATLMK          | Oxidation (M)[13]    |      | Mascot      |
| 1681.8102  | 1681.8882   | 0.078   | 46    | 197        | 212               | DVKTGGFDGLMTPAEK        | Oxidation (M)[11]    |      | Mascot      |
| 2220.1077  | 2220.0784   | -0.0293 | -13   | 310        | 328               | SLLNLMFETNPLDARADQ<br>R | Oxidation (M)[6]     |      | Mascot      |

2297.1265

2297.1199

-0.0066

-3

140

159

TLDIFNITMARQQAEMEA  
SK

Mascot

29

PREDICTED: hypothetical protein LOC100330808

[Danio rerio]

gi|326677269

198602.1

7.55

20

35

0

| Peptide Information |             |         |       |            |          |                   | Ion Score | C. I. % | Modification           | Rank | Result Type |
|---------------------|-------------|---------|-------|------------|----------|-------------------|-----------|---------|------------------------|------|-------------|
| Calc. Mass          | Obsrv. Mass | ± da    | ± ppm | Start Seq. | End Seq. | Sequence          |           |         |                        |      |             |
| 850.5032            | 850.5166    | 0.0134  | 16    | 212        | 218      | LKEYGLK           |           |         |                        |      | Mascot      |
| 864.4937            | 864.4419    | -0.0518 | -60   | 620        | 626      | DGLLYRK           |           |         |                        |      | Mascot      |
| 882.4791            | 882.5403    | 0.0612  | 69    | 1561       | 1568     | HSVIQNGK          |           |         |                        |      | Mascot      |
| 912.3978            | 912.4114    | 0.0136  | 15    | 676        | 683      | MSSSVEEK          |           |         | Oxidation (M)[1]       |      | Mascot      |
| 935.4866            | 935.4218    | -0.0648 | -69   | 1341       | 1348     | GTLEQIMK          |           |         | Oxidation (M)[7]       |      | Mascot      |
| 1167.6746           | 1167.5446   | -0.13   | -111  | 255        | 263      | TWPRPRNLK         |           |         |                        |      | Mascot      |
| 1184.5476           | 1184.6117   | 0.0641  | 54    | 1547       | 1555     | RNTYVCSEK         |           |         | Carbamidomethyl (C)[6] |      | Mascot      |
| 1238.6058           | 1238.6129   | 0.0071  | 6     | 521        | 531      | HQIGNSSHCKK       |           |         |                        |      | Mascot      |
| 1238.6058           | 1238.6129   | 0.0071  | 6     | 521        | 531      | HQIGNSSHCKK       |           |         |                        |      | Mascot      |
| 1281.6658           | 1281.6101   | -0.0557 | -43   | 1561       | 1571     | HSVIQNGKENR       |           |         |                        |      | Mascot      |
| 1281.6658           | 1281.6101   | -0.0557 | -43   | 1561       | 1571     | HSVIQNGKENR       |           |         |                        |      | Mascot      |
| 1293.5488           | 1293.5953   | 0.0465  | 36    | 460        | 472      | AGSQNCADGLSR      |           |         |                        |      | Mascot      |
| 1293.5488           | 1293.5953   | 0.0465  | 36    | 460        | 472      | AGSQNCADGLSR      |           |         |                        |      | Mascot      |
| 1394.6844           | 1394.7052   | 0.0208  | 15    | 82         | 92       | DNSVRLCIDFR       |           |         | Carbamidomethyl (C)[7] |      | Mascot      |
| 1403.71             | 1403.6699   | -0.0401 | -29   | 1206       | 1217     | QIVSAVQYCHQK      |           |         |                        |      | Mascot      |
| 1403.7682           | 1403.6699   | -0.0983 | -70   | 949        | 959      | WEPDVYVIRK        |           |         |                        |      | Mascot      |
| 1504.8403           | 1504.6289   | -0.2114 | -140  | 817        | 829      | TLLQMLGTLENKK     |           |         | Oxidation (M)[5]       |      | Mascot      |
| 1565.7601           | 1565.6664   | -0.0937 | -60   | 516        | 529      | AICDRHQIGNSSHK    |           |         |                        |      | Mascot      |
| 1585.7023           | 1585.7406   | 0.0383  | 24    | 1548       | 1560     | NTYVCSEKATDR      |           |         | Carbamidomethyl (C)[5] |      | Mascot      |
| 1620.7759           | 1620.7454   | -0.0305 | -19   | 1530       | 1546     | KSAGAPGNNSVSSGMTR |           |         |                        |      | Mascot      |
| 1671.9064           | 1671.8359   | -0.0705 | -42   | 1137       | 1150     | ALELDPVDLFREVR    |           |         |                        |      | Mascot      |
| 1802.9357           | 1802.7957   | -0.14   | -78   | 1397       | 1411     | MKYDEITATYLLLR    |           |         | Oxidation (M)[1]       |      | Mascot      |
| 1909.9054           | 1909.849    | -0.0564 | -30   | 759        | 773      | CLWENFLVHYGFPER   |           |         |                        |      | Mascot      |
| 1909.9054           | 1909.849    | -0.0564 | -30   | 759        | 773      | CLWENFLVHYGFPER   |           |         |                        |      | Mascot      |

30

non-specific lipid-transfer protein [Danio rerio]

gi|41053664

57939.8

7.1

11

35

0

| Peptide Information |             |        |       |            |          |          |           |         |              |      |             |
|---------------------|-------------|--------|-------|------------|----------|----------|-----------|---------|--------------|------|-------------|
| Calc. Mass          | Obsrv. Mass | ± da   | ± ppm | Start Seq. | End Seq. | Sequence | Ion Score | C. I. % | Modification | Rank | Result Type |
| 882.4944            | 882.5403    | 0.0459 | 52    | 177        | 183      | VAWKNHK  |           |         |              |      | Mascot      |

|    |                                         |           |         |     |              |     |                        |       |      |   |    |   |    |   |  |  |  |        |
|----|-----------------------------------------|-----------|---------|-----|--------------|-----|------------------------|-------|------|---|----|---|----|---|--|--|--|--------|
|    | 935.4792                                | 935.4218  | -0.0574 | -61 | 474          | 483 | GSVSSDAGKK             |       |      |   |    |   |    |   |  |  |  | Mascot |
|    | 1045.4917                               | 1045.5266 | 0.0349  | 33  | 136          | 143 | HMEVMINR               |       |      |   |    |   |    |   |  |  |  | Mascot |
|    | 1159.5413                               | 1159.631  | 0.0897  | 77  | 120          | 129 | GSLSSKYMDR             |       |      |   |    |   |    |   |  |  |  | Mascot |
|    | 1165.5735                               | 1165.7091 | 0.1356  | 116 | 435          | 444 | LQEEGEAYVK             |       |      |   |    |   |    |   |  |  |  | Mascot |
|    | 1177.6                                  | 1177.5168 | -0.0832 | -71 | 167          | 176 | YGTKPEHFAK             |       |      |   |    |   |    |   |  |  |  | Mascot |
|    | 1293.6685                               | 1293.5953 | -0.0732 | -57 | 435          | 445 | LQEEGEAYVKK            |       |      |   |    |   |    |   |  |  |  | Mascot |
|    | 1293.6685                               | 1293.5953 | -0.0732 | -57 | 434          | 444 | KLQEEGEAYVK            |       |      |   |    |   |    |   |  |  |  | Mascot |
|    | 1336.7405                               | 1336.6097 | -0.1308 | -98 | 6            | 17  | NRVFIGVGMTK            |       |      |   |    |   |    |   |  |  |  | Mascot |
|    | 1565.7554                               | 1565.6664 | -0.089  | -57 | 320          | 334 | AGELIDRGDNTYGGK        |       |      |   |    |   |    |   |  |  |  | Mascot |
|    | 1790.9006                               | 1790.8342 | -0.0664 | -37 | 144          | 161 | YGLAAVPAAPQMFGNAG<br>R |       |      |   |    |   |    |   |  |  |  | Mascot |
| 31 | novel protein (zgc:91990) [Danio rerio] |           |         |     | gi 122891367 |     |                        | 24650 | 6.77 | 6 | 35 | 0 | 11 | 0 |  |  |  |        |

#### Peptide Information

| Calc. Mass | Obsrv. Mass | ± da    | ± ppm | Start Seq. | End Seq. | Sequence                  | Ion Score | C. I. | % Modification                               | Rank | Result Type |
|------------|-------------|---------|-------|------------|----------|---------------------------|-----------|-------|----------------------------------------------|------|-------------|
| 864.4937   | 864.4419    | -0.0518 | -60   | 174        | 181      | GFSVSVIR                  |           |       |                                              |      | Mascot      |
| 1281.7888  | 1281.6101   | -0.1787 | -139  | 136        | 146      | QVVLTPVLEKR               |           |       |                                              |      | Mascot      |
| 1281.7888  | 1281.6101   | -0.1787 | -139  | 136        | 146      | QVVLTPVLEKR               | 11        | 0     |                                              |      | Mascot      |
| 1504.7366  | 1504.6289   | -0.1077 | -72   | 88         | 99       | RMHWIEVAGDYK              |           |       |                                              |      | Mascot      |
| 1570.6599  | 1570.6554   | -0.0045 | -3    | 100        | 111      | YHPECFVCLSCR              | 4         | 0     | Carbamidomethyl (C)[8,11]                    |      | Mascot      |
| 1570.6599  | 1570.6554   | -0.0045 | -3    | 100        | 111      | YHPECFVCLSCR              |           |       | Carbamidomethyl (C)[5,8]                     |      | Mascot      |
| 2224.9858  | 2225.0457   | 0.0599  | 27    | 67         | 87       | FGELCHGCSLLMTGPAM<br>GPSK |           |       | Carbamidomethyl (C)[5], Oxidation (M)[12,17] |      | Mascot      |
| 2225.03    | 2225.0457   | 0.0157  | 7     | 100        | 117      | YHPECFVCLSCRVIEDR         |           |       | Carbamidomethyl (C)[5]                       |      | Mascot      |

|    |                                               |  |  |  |              |  |  |         |      |    |    |   |  |  |  |  |  |  |
|----|-----------------------------------------------|--|--|--|--------------|--|--|---------|------|----|----|---|--|--|--|--|--|--|
| 32 | testis-specific gene 10 protein [Danio rerio] |  |  |  | gi 238650185 |  |  | 82352.8 | 6.01 | 13 | 35 | 0 |  |  |  |  |  |  |
|----|-----------------------------------------------|--|--|--|--------------|--|--|---------|------|----|----|---|--|--|--|--|--|--|

#### Peptide Information

| Calc. Mass | Obsrv. Mass | ± da    | ± ppm | Start Seq. | End Seq. | Sequence      | Ion Score | C. I. | % Modification         | Rank | Result Type |
|------------|-------------|---------|-------|------------|----------|---------------|-----------|-------|------------------------|------|-------------|
| 901.4243   | 901.4617    | 0.0374  | 41    | 176        | 182      | CRHAQMR       |           |       |                        |      | Mascot      |
| 1159.6066  | 1159.631    | 0.0244  | 21    | 274        | 283      | ATISQLDQQR    |           |       |                        |      | Mascot      |
| 1161.611   | 1161.5259   | -0.0851 | -73   | 412        | 421      | TEDLLSAKER    |           |       |                        |      | Mascot      |
| 1281.691   | 1281.6101   | -0.0809 | -63   | 401        | 411      | KVQDHIADISR   |           |       |                        |      | Mascot      |
| 1281.691   | 1281.6101   | -0.0809 | -63   | 401        | 411      | KVQDHIADISR   | 5         | 0     |                        |      | Mascot      |
| 1293.6216  | 1293.5953   | -0.0263 | -20   | 488        | 498      | SCTSLSQLNLR   |           |       | Carbamidomethyl (C)[2] |      | Mascot      |
| 1293.6216  | 1293.5953   | -0.0263 | -20   | 488        | 498      | SCTSLSQLNLR   |           |       | Carbamidomethyl (C)[2] |      | Mascot      |
| 1362.6794  | 1362.7224   | 0.043   | 32    | 605        | 616      | ANSQSREMAQLK  |           |       |                        |      | Mascot      |
| 1394.6693  | 1394.7052   | 0.0359  | 26    | 598        | 610      | LSMADSKANSQSR |           |       |                        |      | Mascot      |

|    |                               |           |         |      |             |     |                          |      |    |    |                        |  |  |        |
|----|-------------------------------|-----------|---------|------|-------------|-----|--------------------------|------|----|----|------------------------|--|--|--------|
|    | 1585.8656                     | 1585.7406 | -0.125  | -79  | 261         | 273 | QVTVLREELNTQR            |      |    |    |                        |  |  | Mascot |
|    | 1681.7885                     | 1681.8882 | 0.0997  | 59   | 617         | 630 | TRSCQLEADLEMTK           |      |    |    | Carbamidomethyl (C)[4] |  |  | Mascot |
|    | 1803.0222                     | 1802.7957 | -0.2265 | -126 | 561         | 576 | LSVQTLESLLVSTREK         |      |    |    |                        |  |  | Mascot |
|    | 1960.9657                     | 1960.8969 | -0.0688 | -35  | 73          | 88  | TRMHYQQAQEEIAALR         |      |    |    | Oxidation (M)[3]       |  |  | Mascot |
|    | 2211.1001                     | 2211.0317 | -0.0684 | -31  | 294         | 312 | SDLINTANHQLDENEKTI<br>R  |      |    |    |                        |  |  | Mascot |
|    | 2233.1353                     | 2233.011  | -0.1243 | -56  | 479         | 498 | LQQALSAERSCTSQLSQ<br>LNR |      |    |    |                        |  |  | Mascot |
| 33 | Sh3bp4a protein [Danio rerio] |           |         |      | gi 66910395 |     | 76175.4                  | 8.42 | 11 | 35 | 0                      |  |  |        |

#### Peptide Information

|  | Calc. Mass | Obsrv. Mass | ± da    | ± ppm | Start Seq. | End Seq. | Sequence                           | Ion Score | C. I. | % Modification                            | Rank | Result Type |
|--|------------|-------------|---------|-------|------------|----------|------------------------------------|-----------|-------|-------------------------------------------|------|-------------|
|  | 842.5822   | 842.4844    | -0.0978 | -116  | 663        | 669      | LIKTVIR                            |           |       |                                           |      | Mascot      |
|  | 850.4338   | 850.5166    | 0.0828  | 97    | 387        | 393      | LSNMEIK                            |           |       | Oxidation (M)[4]                          |      | Mascot      |
|  | 870.4726   | 870.5117    | 0.0391  | 45    | 1          | 7        | MAHRIR                             |           |       | Oxidation (M)[1]                          |      | Mascot      |
|  | 1161.6184  | 1161.5259   | -0.0925 | -80   | 376        | 386      | CSTVSPVVEIK                        |           |       |                                           |      | Mascot      |
|  | 1218.6398  | 1218.5724   | -0.0674 | -55   | 376        | 386      | CSTVSPVVEIK                        |           |       | Carbamidomethyl (C)[1]                    |      | Mascot      |
|  | 1620.8591  | 1620.7454   | -0.1137 | -70   | 583        | 596      | ADEISDFTLRVQVK                     |           |       |                                           |      | Mascot      |
|  | 1671.806   | 1671.8359   | 0.0299  | 18    | 461        | 474      | HVSFSSNVWNHMK                      |           |       |                                           |      | Mascot      |
|  | 1720.8037  | 1720.77     | -0.0337 | -20   | 276        | 289      | APSPEQFQNRDFR                      |           |       |                                           |      | Mascot      |
|  | 2081.0188  | 2081.0388   | 0.02    | 10    | 402        | 419      | VSMTRTESPMAEIVCVR                  |           |       | Carbamidomethyl (C)[16], Oxidation (M)[4] |      | Mascot      |
|  | 2284.2368  | 2284.0969   | -0.1399 | -61   | 492        | 513      | TVVAIFGHDCAPKLLVS<br>EVGK          |           |       |                                           |      | Mascot      |
|  | 2300.0686  | 2300.1023   | 0.0337  | 15    | 597        | 616      | DDQDCILAFQCVQTPQP<br>PPK           |           |       | Carbamidomethyl (C)[5]                    |      | Mascot      |
|  | 3337.6052  | 3337.6533   | 0.0481  | 14    | 298        | 327      | LARSCHDLESLGQNPWG<br>GQTQPVETNIVCK |           |       | Carbamidomethyl (C)[5]                    |      | Mascot      |

34 prefoldin subunit 6 [Danio rerio] gi|41055782 14481.7 6.62 5 34 0

#### Peptide Information

|  | Calc. Mass | Obsrv. Mass | ± da    | ± ppm | Start Seq. | End Seq. | Sequence                   | Ion Score | C. I. | % Modification   | Rank | Result Type |
|--|------------|-------------|---------|-------|------------|----------|----------------------------|-----------|-------|------------------|------|-------------|
|  | 996.4778   | 996.5679    | 0.0901  | 90    | 22         | 30       | DVSKSMSAR                  |           |       | Oxidation (M)[6] |      | Mascot      |
|  | 1637.9473  | 1637.7717   | -0.1756 | -107  | 59         | 73       | LIGPVLVKQDLDEAK            |           |       |                  |      | Mascot      |
|  | 1637.9473  | 1637.7717   | -0.1756 | -107  | 59         | 73       | LIGPVLVKQDLDEAK            |           |       |                  |      | Mascot      |
|  | 1982.0593  | 1981.8762   | -0.1831 | -92   | 80         | 95       | LEYINGEIQRYETLLK           |           |       |                  |      | Mascot      |
|  | 2233.157   | 2233.011    | -0.146  | -65   | 106        | 125      | EVLSSLQQEYQRAQGQA<br>VAK   |           |       |                  |      | Mascot      |
|  | 2442.3853  | 2442.0718   | -0.3135 | -128  | 45         | 66       | EELALLDSQNTVYKLIGP<br>VLVK |           |       |                  |      | Mascot      |

35 PREDICTED: zinc finger protein 64 homolog, isoforms gi|292627186 71408.1 8.74 14 34 0

1 and 2 [Danio rerio]

| Peptide Information                      |             |         |       |              |          |                    |           |         |                            |      |             |
|------------------------------------------|-------------|---------|-------|--------------|----------|--------------------|-----------|---------|----------------------------|------|-------------|
| Calc. Mass                               | Obsrv. Mass | ± da    | ± ppm | Start Seq.   | End Seq. | Sequence           | Ion Score | C. I. % | Modification               | Rank | Result Type |
| 935.48                                   | 935.4218    | -0.0582 | -62   | 245          | 252      | CAMKANLK           |           |         | Carbamidomethyl (C)[1]     |      | Mascot      |
| 953.5527                                 | 953.4365    | -0.1162 | -122  | 334          | 341      | SNLLIHTR           |           |         |                            |      | Mascot      |
| 1026.667                                 | 1026.5775   | -0.0895 | -87   | 83           | 91       | KLKPALTQK          |           |         |                            |      | Mascot      |
| 1045.4077                                | 1045.5266   | 0.1189  | 114   | 270          | 277      | CDFQCSTK           |           |         | Carbamidomethyl (C)[1,5]   |      | Mascot      |
| 1237.7124                                | 1237.626    | -0.0864 | -70   | 332          | 341      | QRSNLLIHTR         |           |         |                            |      | Mascot      |
| 1336.5153                                | 1336.6097   | 0.0944  | 71    | 238          | 248      | CDLCDYRCAMK        |           |         | Oxidation (M)[10]          |      | Mascot      |
| 1394.658                                 | 1394.7052   | 0.0472  | 34    | 55           | 68       | NAGASESLQTCVSK     |           |         |                            |      | Mascot      |
| 1585.7573                                | 1585.7406   | -0.0167 | -11   | 41           | 54       | QNCCQIPSTHISVR     |           |         |                            |      | Mascot      |
| 1637.807                                 | 1637.7717   | -0.0353 | -22   | 28           | 40       | QQYNNVELFFAHK      |           |         |                            |      | Mascot      |
| 1637.807                                 | 1637.7717   | -0.0353 | -22   | 28           | 40       | QQYNNVELFFAHK      |           |         |                            |      | Mascot      |
| 2026.9109                                | 2026.9514   | 0.0405  | 20    | 229          | 244      | VHSGEKPYKCDLCDYR   |           |         | Carbamidomethyl (C)[10,13] |      | Mascot      |
| 2210.9263                                | 2211.0317   | 0.1054  | 48    | 286          | 305      | QHQAQPLQCSECSYSSK  |           |         |                            |      | Mascot      |
| 2233.0964                                | 2233.011    | -0.0854 | -38   | 182          | 200      | CQICPYASRNSSLTVHLR |           |         | Carbamidomethyl (C)[1]     |      | Mascot      |
| 2283.0798                                | 2283.1052   | 0.0254  | 11    | 173          | 190      | IHYDERPFKCQICPYASR |           |         | Carbamidomethyl (C)[10]    |      | Mascot      |
| 2420.1709                                | 2420.0591   | -0.1118 | -46   | 114          | 132      | HILHTGERPFECELCHKR |           |         | Carbamidomethyl (C)[13,16] |      | Mascot      |
| RecName: Full=Retinol dehydrogenase 10-B |             |         |       | gi 251831595 |          | 37794.1            | 7.95      | 9       | 34                         | 0    |             |

| Peptide Information                |             |         |       |             |          |                            |           |         |                                          |      |             |
|------------------------------------|-------------|---------|-------|-------------|----------|----------------------------|-----------|---------|------------------------------------------|------|-------------|
| Calc. Mass                         | Obsrv. Mass | ± da    | ± ppm | Start Seq.  | End Seq. | Sequence                   | Ion Score | C. I. % | Modification                             | Rank | Result Type |
| 1165.5454                          | 1165.7091   | 0.1637  | 140   | 287         | 295      | VMYMVTFMK                  |           |         | Oxidation (M)[2]                         |      | Mascot      |
| 1281.5376                          | 1281.6101   | 0.0725  | 57    | 71          | 81       | QSNEETAEMAR                |           |         | Oxidation (M)[9]                         |      | Mascot      |
| 1281.549                           | 1281.6101   | 0.0611  | 48    | 107         | 116      | VYTYMCDVSK                 |           |         | Carbamidomethyl (C)[6], Oxidation (M)[5] |      | Mascot      |
| 1293.5917                          | 1293.5953   | 0.0036  | 3     | 325         | 336      | ESTNNNESKTGI               |           |         |                                          |      | Mascot      |
| 1293.5917                          | 1293.5953   | 0.0036  | 3     | 325         | 336      | ESTNNNESKTGI               |           |         |                                          |      | Mascot      |
| 1515.7585                          | 1515.7034   | -0.0551 | -36   | 296         | 308      | TVLPFDAIVCMYK              |           |         | Oxidation (M)[11]                        |      | Mascot      |
| 1671.8489                          | 1671.8359   | -0.013  | -8    | 210         | 224      | FGAIGFHESLSHELK            |           |         |                                          |      | Mascot      |
| 1960.9766                          | 1960.8969   | -0.0797 | -41   | 270         | 286      | QAMRAILTDQPMICTPR          |           |         | Oxidation (M)[3]                         |      | Mascot      |
| 2081.0598                          | 2081.0388   | -0.021  | -10   | 253         | 269      | KEMAPFFPPLKPEYCVK          |           |         | Carbamidomethyl (C)[15]                  |      | Mascot      |
| 2420.1367                          | 2420.0591   | -0.0776 | -32   | 229         | 250      | DGIKMTLVCPFLVDTGMF<br>EGCK |           |         | Oxidation (M)[5]                         |      | Mascot      |
| roundabout homolog 2 [Danio rerio] |             |         |       | gil18859319 |          | 165079.5                   | 6.24      | 17      | 34                                       | 0    |             |



Peptide Information

| Calc. Mass | Obsrv. Mass | $\pm$ da | $\pm$ ppm | Start Seq. | End Seq. | Sequence             | Ion Score | C. I. % | Modification            | Rank | Result Type |
|------------|-------------|----------|-----------|------------|----------|----------------------|-----------|---------|-------------------------|------|-------------|
| 850.4451   | 850.5166    | 0.0715   | 84        | 187        | 193      | LMISNTR              |           |         | Oxidation (M)[2]        |      | Mascot      |
| 864.4858   | 864.4419    | -0.0439  | -51       | 703        | 710      | SMVLSALK             |           |         | Oxidation (M)[2]        |      | Mascot      |
| 882.4176   | 882.5403    | 0.1227   | 139       | 75         | 81       | DDPRSHR              |           |         |                         |      | Mascot      |
| 901.5352   | 901.4617    | -0.0735  | -82       | 513        | 521      | EAGSLVVVK            |           |         |                         |      | Mascot      |
| 953.5275   | 953.4365    | -0.091   | -95       | 1350       | 1358     | GPGTVPNRR            |           |         |                         |      | Mascot      |
| 1177.6211  | 1177.5168   | -0.1043  | -89       | 1191       | 1203     | GVASSPAAVSFGK        |           |         |                         |      | Mascot      |
| 1218.6073  | 1218.5724   | -0.0349  | -29       | 1429       | 1439     | LGSIERGDESR          |           |         |                         |      | Mascot      |
| 1237.5374  | 1237.626    | 0.0886   | 72        | 1399       | 1408     | QPMMGLEEMR           |           |         | Oxidation (M)[3]        |      | Mascot      |
| 1336.7471  | 1336.6097   | -0.1374  | -103      | 32         | 43       | IVEHPSDLIVSK         |           |         |                         |      | Mascot      |
| 1362.741   | 1362.7224   | -0.0186  | -14       | 301        | 313      | VGKMEASATLTVR        |           |         |                         |      | Mascot      |
| 1394.6732  | 1394.7052   | 0.032    | 23        | 100        | 112      | SKPDEGAYVCVAR        |           |         |                         |      | Mascot      |
| 1504.7438  | 1504.6289   | -0.1149  | -76       | 1379       | 1391     | IPGSRNVPHPCDR        |           |         | Carbamidomethyl (C)[11] |      | Mascot      |
| 1565.8143  | 1565.6664   | -0.1479  | -94       | 1422       | 1434     | HQQVQDRLGSIER        |           |         |                         |      | Mascot      |
| 1671.7279  | 1671.8359   | 0.108    | 65        | 285        | 300      | ATASDEGTFTCVAENR     |           |         |                         |      | Mascot      |
| 1681.8367  | 1681.8882   | 0.0515   | 31        | 445        | 459      | CHASGEPVPTISWLK      |           |         | Carbamidomethyl (C)[1]  |      | Mascot      |
| 1802.787   | 1802.7957   | 0.0087   | 5         | 195        | 211      | SDAGMYICVGTNMVGER    |           |         |                         |      | Mascot      |
| 2230.0557  | 2230.0735   | 0.0178   | 8         | 1358       | 1378     | RDASADDLPPPEPPPCQTAR |           |         |                         |      | Mascot      |

38 retinol dehydrogenase 10-B [Danio rerio] gi|41152209 37863.2 8.23 9 34 0

Peptide Information

| Calc. Mass | Obsrv. Mass | $\pm$ da | $\pm$ ppm | Start Seq. | End Seq. | Sequence               | Ion Score | C. I. % | Modification                             | Rank | Result Type |
|------------|-------------|----------|-----------|------------|----------|------------------------|-----------|---------|------------------------------------------|------|-------------|
| 1165.5454  | 1165.7091   | 0.1637   | 140       | 287        | 295      | VMYMVTFMK              |           |         | Oxidation (M)[2]                         |      | Mascot      |
| 1281.5376  | 1281.6101   | 0.0725   | 57        | 71         | 81       | QSNEETAEMAR            |           |         | Oxidation (M)[9]                         |      | Mascot      |
| 1281.549   | 1281.6101   | 0.0611   | 48        | 107        | 116      | VYTYMCDVSK             |           |         | Carbamidomethyl (C)[6], Oxidation (M)[5] |      | Mascot      |
| 1293.5917  | 1293.5953   | 0.0036   | 3         | 325        | 336      | ESTNNNESKTGI           |           |         |                                          |      | Mascot      |
| 1293.5917  | 1293.5953   | 0.0036   | 3         | 325        | 336      | ESTNNNESKTGI           |           |         |                                          |      | Mascot      |
| 1515.7585  | 1515.7034   | -0.0551  | -36       | 296        | 308      | TVLPFDAIVCMYK          |           |         | Oxidation (M)[11]                        |      | Mascot      |
| 1671.8489  | 1671.8359   | -0.013   | -8        | 210        | 224      | FGAIGFHESLSHELK        |           |         |                                          |      | Mascot      |
| 1960.9766  | 1960.8969   | -0.0797  | -41       | 270        | 286      | QAMRAILTDQPMICTPR      |           |         | Oxidation (M)[3]                         |      | Mascot      |
| 2081.0598  | 2081.0388   | -0.021   | -10       | 253        | 269      | KEMAPFFPPLKPEYCVK      |           |         | Carbamidomethyl (C)[15]                  |      | Mascot      |
| 2420.1367  | 2420.0591   | -0.0776  | -32       | 229        | 250      | DGIKMTLVCPFLVDTGMFEGCK |           |         | Oxidation (M)[5]                         |      | Mascot      |

39 PREDICTED: protein KIAA1199-like [Danio rerio] gi|326669168 124090.9 6.14 13 34 0

| Peptide Information |                                                      |         |       |            |                               |           |         |                         |      |             |
|---------------------|------------------------------------------------------|---------|-------|------------|-------------------------------|-----------|---------|-------------------------|------|-------------|
| Calc. Mass          | Obsrv. Mass                                          | ± da    | ± ppm | Start Seq. | End Sequence Seq.             | Ion Score | C. I. % | Modification            | Rank | Result Type |
| 856.4886            | 856.4994                                             | 0.0108  | 13    | 753        | 760 NPASLNLK                  |           |         |                         |      | Mascot      |
| 882.4315            | 882.5403                                             | 0.1088  | 123   | 959        | 965 LESYNTR                   |           |         |                         |      | Mascot      |
| 1045.4659           | 1045.5266                                            | 0.0607  | 58    | 892        | 900 EDFAFCSVK                 |           |         |                         |      | Mascot      |
| 1057.5135           | 1057.5588                                            | 0.0453  | 43    | 124        | 132 NYGFVCLNK                 |           |         |                         |      | Mascot      |
| 1293.5342           | 1293.5953                                            | 0.0611  | 47    | 72         | 82 DDERGSGDWEK                |           |         |                         |      | Mascot      |
| 1293.5342           | 1293.5953                                            | 0.0611  | 47    | 72         | 82 DDERGSGDWEK                | 4         | 0       |                         |      | Mascot      |
| 1515.777            | 1515.7034                                            | -0.0736 | -49   | 201        | 213 ILPCPSCSRNQIK             |           |         | Carbamidomethyl (C)[4]  |      | Mascot      |
| 1554.8063           | 1554.6597                                            | -0.1466 | -94   | 959        | 970 LESYNTRFFHIK              |           |         |                         |      | Mascot      |
| 1554.8063           | 1554.6597                                            | -0.1466 | -94   | 959        | 970 LESYNTRFFHIK              |           |         |                         |      | Mascot      |
| 1681.7638           | 1681.8882                                            | 0.1244  | 74    | 887        | 900 AHNEKEDFAFCSVK            |           |         | Carbamidomethyl (C)[11] |      | Mascot      |
| 1790.8953           | 1790.8342                                            | -0.0611 | -34   | 478        | 494 AGMILDNGVKTEANEK          |           |         |                         |      | Mascot      |
| 2026.9473           | 2026.9514                                            | 0.0041  | 2     | 620        | 636 GMQIYDGPINIQNCTFR         |           |         | Carbamidomethyl (C)[14] |      | Mascot      |
| 2219.9775           | 2220.0784                                            | 0.1009  | 45    | 679        | 697 VFFGEPGPWFSKMEMD<br>GDK   |           |         | Oxidation (M)[13]       |      | Mascot      |
| 2230.0808           | 2230.0735                                            | -0.0073 | -3    | 214        | 233 VEGKPAYLHIGEEVDGVD<br>MR  |           |         | Oxidation (M)[19]       |      | Mascot      |
| 2300.2068           | 2300.1023                                            | -0.1045 | -45   | 366        | 386 NTFDHCLGLLVKASTLLP<br>SDR |           |         |                         |      | Mascot      |
| 40                  | truncated SH3 binding domain protein 4 [Danio rerio] |         |       |            | gi 33438222                   | 84564.4   | 8.75    | 11                      | 33   | 0           |

| Peptide Information |             |         |       |            |                                        |           |       |                                           |      |             |  |
|---------------------|-------------|---------|-------|------------|----------------------------------------|-----------|-------|-------------------------------------------|------|-------------|--|
| Calc. Mass          | Obsrv. Mass | ± da    | ± ppm | Start Seq. | End Sequence Seq.                      | Ion Score | C. I. | % Modification                            | Rank | Result Type |  |
| 842.5822            | 842.4844    | -0.0978 | -116  | 634        | 640 LIKTVIR                            |           |       |                                           |      | Mascot      |  |
| 850.4338            | 850.5166    | 0.0828  | 97    | 358        | 364 LSNMEIK                            |           |       | Oxidation (M)[4]                          |      | Mascot      |  |
| 870.4726            | 870.5117    | 0.0391  | 45    | 1          | 7 MAAHRIR                              |           |       | Oxidation (M)[1]                          |      | Mascot      |  |
| 1161.6184           | 1161.5259   | -0.0925 | -80   | 347        | 357 CSTVSPVVEIK                        |           |       |                                           |      | Mascot      |  |
| 1218.6398           | 1218.5724   | -0.0674 | -55   | 347        | 357 CSTVSPVVEIK                        |           |       | Carbamidomethyl (C)[1]                    |      | Mascot      |  |
| 1620.8591           | 1620.7454   | -0.1137 | -70   | 554        | 567 ADEISDFTLRVQVK                     |           |       |                                           |      | Mascot      |  |
| 1671.806            | 1671.8359   | 0.0299  | 18    | 432        | 445 HVSFSSNVWNHVMK                     |           |       |                                           |      | Mascot      |  |
| 1720.8037           | 1720.77     | -0.0337 | -20   | 247        | 260 APSPEQFQNRDFR                      |           |       |                                           |      | Mascot      |  |
| 2081.0188           | 2081.0388   | 0.02    | 10    | 373        | 390 VSVMTRTESPMAEIVCVR                 |           |       | Carbamidomethyl (C)[16], Oxidation (M)[4] |      | Mascot      |  |
| 2284.2368           | 2284.0969   | -0.1399 | -61   | 463        | 484 TVVAIFGHDCAPKTLVLS<br>EVGK         |           |       |                                           |      | Mascot      |  |
| 2300.0686           | 2300.1023   | 0.0337  | 15    | 568        | 587 DDQDCILAQFCVQTQP<br>PPK            |           |       | Carbamidomethyl (C)[5]                    |      | Mascot      |  |
| 3337.6052           | 3337.6533   | 0.0481  | 14    | 269        | 298 LARSCHDLESLGQNPGW<br>GQTQPVETNIVCK |           |       | Carbamidomethyl (C)[5]                    |      | Mascot      |  |

41 hypothetical protein LOC335015 [Danio rerio] gi|41152468 37666.8 9.46 10 33 0

Peptide Information

| Calc. Mass | Obsrv. Mass | ± da    | ± ppm | Start Seq. | End Seq. | Sequence                   | Ion Score | C. I. % | Modification                                | Rank | Result Type |
|------------|-------------|---------|-------|------------|----------|----------------------------|-----------|---------|---------------------------------------------|------|-------------|
| 864.4607   | 864.4419    | -0.0188 | -22   | 53         | 59       | TNTICKK                    |           |         | Carbamidomethyl (C)[5]                      |      | Mascot      |
| 901.5464   | 901.4617    | -0.0847 | -94   | 308        | 316      | QVAALSKGK                  |           |         |                                             |      | Mascot      |
| 1159.5486  | 1159.631    | 0.0824  | 71    | 1          | 11       | MATSALYACTK                |           |         |                                             |      | Mascot      |
| 1165.651   | 1165.7091   | 0.0581  | 50    | 30         | 39       | ECRIAHPIVK                 |           |         |                                             |      | Mascot      |
| 1403.7286  | 1403.6699   | -0.0587 | -42   | 33         | 44       | IAHPIVKCTYCR               |           |         |                                             |      | Mascot      |
| 1403.7286  | 1403.6699   | -0.0587 | -42   | 33         | 44       | IAHPIVKCTYCR               |           |         |                                             |      | Mascot      |
| 1671.8336  | 1671.8359   | 0.0023  | 1     | 183        | 197      | ISGNLSPEQDQGLWK            |           |         |                                             |      | Mascot      |
| 1790.7982  | 1790.8342   | 0.036   | 20    | 1          | 15       | MATSALYACTKCNQR            |           |         | Carbamidomethyl (C)[9,12], Oxidation (M)[1] |      | Mascot      |
| 2026.9536  | 2026.9514   | -0.0022 | -1    | 148        | 166      | GLGSSHSNSSSLSEKEH<br>QR    |           |         |                                             |      | Mascot      |
| 2300.1565  | 2300.1023   | -0.0542 | -24   | 66         | 86       | QFGTPKPCQYCNIIAAFIG<br>TK  |           |         |                                             |      | Mascot      |
| 2442.1909  | 2442.0718   | -0.1191 | -49   | 176        | 197      | HGSSHHKISGNLSPEQD<br>QGLWK |           |         |                                             |      | Mascot      |

42 PREDICTED: macrophage-stimulating protein receptor [Danio rerio] gi|292619047 154062 6.02 15 33 0

Peptide Information

| Calc. Mass | Obsrv. Mass | ± da    | ± ppm | Start Seq. | End Seq. | Sequence        | Ion Score | C. I. % | Modification                               | Rank | Result Type |
|------------|-------------|---------|-------|------------|----------|-----------------|-----------|---------|--------------------------------------------|------|-------------|
| 856.4345   | 856.4994    | 0.0649  | 76    | 1090       | 1096     | EIHCAVK         |           |         | Carbamidomethyl (C)[4]                     |      | Mascot      |
| 882.4138   | 882.5403    | 0.1265  | 143   | 1206       | 1213     | VADFGMAR        |           |         | Oxidation (M)[6]                           |      | Mascot      |
| 996.4897   | 996.5679    | 0.0782  | 78    | 978        | 985      | LSYFHSR         |           |         |                                            |      | Mascot      |
| 1026.5261  | 1026.5775   | 0.0514  | 50    | 505        | 513      | VPQRGPGCR       |           |         | Carbamidomethyl (C)[8]                     |      | Mascot      |
| 1237.6357  | 1237.626    | -0.0097 | -8    | 283        | 291      | YREIVLECR       |           |         | Carbamidomethyl (C)[8]                     |      | Mascot      |
| 1281.662   | 1281.6101   | -0.0519 | -40   | 596        | 607      | LGETACVVQPHK    |           |         |                                            |      | Mascot      |
| 1281.662   | 1281.6101   | -0.0519 | -40   | 596        | 607      | LGETACVVQPHK    | 2         | 0       |                                            |      | Mascot      |
| 1362.7086  | 1362.7224   | 0.0138  | 10    | 285        | 295      | EIVLECRFEPK     |           |         |                                            |      | Mascot      |
| 1515.7372  | 1515.7034   | -0.0338 | -22   | 142        | 155      | ENGNNPPGPSKCLFR |           |         |                                            |      | Mascot      |
| 1565.7273  | 1565.6664   | -0.0609 | -39   | 514        | 526      | HFLTCAMCLTAPK   |           |         | Carbamidomethyl (C)[5,8], Oxidation (M)[7] |      | Mascot      |
| 1570.8005  | 1570.6554   | -0.1451 | -92   | 789        | 802      | ESHLKPVSTECRGK  |           |         |                                            |      | Mascot      |
| 1570.8005  | 1570.6554   | -0.1451 | -92   | 789        | 802      | ESHLKPVSTECRGK  |           |         |                                            |      | Mascot      |
| 1637.8241  | 1637.7717   | -0.0524 | -32   | 988        | 1001     | NNSVDLSSLVDYRR  |           |         |                                            |      | Mascot      |
| 1637.8241  | 1637.7717   | -0.0524 | -32   | 988        | 1001     | NNSVDLSSLVDYRR  |           |         |                                            |      | Mascot      |
| 1802.9404  | 1802.7957   | -0.1447 | -80   | 803        | 817      | AKPTRMECITPVFPR |           |         | Carbamidomethyl (C)[8]                     |      | Mascot      |

|    |                            |           |         |     |             |      |                            |      |   |    |   |  |  |  |  |  |        |
|----|----------------------------|-----------|---------|-----|-------------|------|----------------------------|------|---|----|---|--|--|--|--|--|--------|
|    | 2081.1099                  | 2081.0388 | -0.0711 | -34 | 1166        | 1184 | DLIGFGLQVAKGMEYLAQ<br>K    |      |   |    |   |  |  |  |  |  | Mascot |
|    | 2230.0222                  | 2230.0735 | 0.0513  | 23  | 874         | 895  | LNLVSSCMSITMTVGDVD<br>CGGK |      |   |    |   |  |  |  |  |  | Mascot |
|    | 2299.1499                  | 2299.1074 | -0.0425 | -18 | 204         | 223  | MSISVRRPVATEDGFYTD<br>VR   |      |   |    |   |  |  |  |  |  | Mascot |
| 43 | Apoa protein [Danio rerio] |           |         |     | gi 53733942 |      | 19735.1                    | 5.31 | 7 | 32 | 0 |  |  |  |  |  |        |

Peptide Information

| Calc. Mass | Obsrv. Mass | ± da    | ± ppm | Start Seq. | End Seq. | Sequence         | Ion Score | C. I. | % Modification   | Rank | Result Type |
|------------|-------------|---------|-------|------------|----------|------------------|-----------|-------|------------------|------|-------------|
| 1057.5748  | 1057.5588   | -0.016  | -15   | 57         | 65       | QNAEQLRAK        |           |       |                  |      | Mascot      |
| 1167.5527  | 1167.5446   | -0.0081 | -7    | 76         | 85       | AFESNIEETK       |           |       |                  |      | Mascot      |
| 1184.5074  | 1184.6117   | 0.1043  | 88    | 143        | 151      | MEPYMENVR        |           |       | Oxidation (M)[1] |      | Mascot      |
| 1362.6682  | 1362.7224   | 0.0542  | 40    | 9          | 19       | ERVMTDVEDLR      |           |       |                  |      | Mascot      |
| 1403.6875  | 1403.6699   | -0.0176 | -13   | 152        | 163      | TTFAQMYETIAK     |           |       |                  |      | Mascot      |
| 1403.6875  | 1403.6699   | -0.0176 | -13   | 152        | 163      | TTFAQMYETIAK     |           |       |                  |      | Mascot      |
| 1565.7958  | 1565.6664   | -0.1294 | -83   | 44         | 56       | LEPVFQEYSALNR    |           |       |                  |      | Mascot      |
| 1802.8993  | 1802.7957   | -0.1036 | -57   | 152        | 167      | TTFAQMYETIAKAIQA |           |       | Oxidation (M)[6] |      | Mascot      |

|    |                                  |  |  |  |             |  |         |      |    |    |   |  |  |  |  |  |  |
|----|----------------------------------|--|--|--|-------------|--|---------|------|----|----|---|--|--|--|--|--|--|
| 44 | Wu:fo94f09 protein [Danio rerio] |  |  |  | gi 92096553 |  | 74291.7 | 8.89 | 14 | 32 | 0 |  |  |  |  |  |  |
|----|----------------------------------|--|--|--|-------------|--|---------|------|----|----|---|--|--|--|--|--|--|

Peptide Information

| Calc. Mass | Obsrv. Mass | ± da    | ± ppm | Start Seq. | End Seq. | Sequence                | Ion Score | C. I. | % Modification             | Rank | Result Type |
|------------|-------------|---------|-------|------------|----------|-------------------------|-----------|-------|----------------------------|------|-------------|
| 935.48     | 935.4218    | -0.0582 | -62   | 269        | 276      | CAMKANLK                |           |       | Carbamidomethyl (C)[1]     |      | Mascot      |
| 953.5527   | 953.4365    | -0.1162 | -122  | 358        | 365      | SNLLIHTR                |           |       |                            |      | Mascot      |
| 1026.667   | 1026.5775   | -0.0895 | -87   | 107        | 115      | KLKPALTQK               |           |       |                            |      | Mascot      |
| 1045.4077  | 1045.5266   | 0.1189  | 114   | 294        | 301      | CDFQCSTK                |           |       | Carbamidomethyl (C)[1,5]   |      | Mascot      |
| 1237.7124  | 1237.626    | -0.0864 | -70   | 356        | 365      | QRSNLLIHTR              |           |       |                            |      | Mascot      |
| 1336.5153  | 1336.6097   | 0.0944  | 71    | 262        | 272      | CDLCDYRCAMK             |           |       | Oxidation (M)[10]          |      | Mascot      |
| 1394.658   | 1394.7052   | 0.0472  | 34    | 79         | 92       | NAGASESLQTCVSK          |           |       |                            |      | Mascot      |
| 1585.7573  | 1585.7406   | -0.0167 | -11   | 65         | 78       | QNCCQIPSTHISVR          |           |       |                            |      | Mascot      |
| 1637.807   | 1637.7717   | -0.0353 | -22   | 52         | 64       | QQYNNVELFFAHK           |           |       |                            |      | Mascot      |
| 1637.807   | 1637.7717   | -0.0353 | -22   | 52         | 64       | QQYNNVELFFAHK           |           |       |                            |      | Mascot      |
| 2026.9109  | 2026.9514   | 0.0405  | 20    | 253        | 268      | VHSGEKPYKCDLCDYR        |           |       | Carbamidomethyl (C)[10,13] |      | Mascot      |
| 2210.9263  | 2211.0317   | 0.1054  | 48    | 310        | 329      | QHQAQPLQCSECSYSC<br>SSK |           |       |                            |      | Mascot      |
| 2233.0964  | 2233.011    | -0.0854 | -38   | 206        | 224      | CQICPYASRNSSLTVHL<br>R  |           |       | Carbamidomethyl (C)[1]     |      | Mascot      |
| 2283.0798  | 2283.1052   | 0.0254  | 11    | 197        | 214      | IIHYDERPFKCQICPYASR     |           |       | Carbamidomethyl (C)[10]    |      | Mascot      |
| 2420.1709  | 2420.0591   | -0.1118 | -46   | 138        | 156      | HILHTGERPFECELCHK<br>R  |           |       | Carbamidomethyl (C)[13,16] |      | Mascot      |

45 Zgc:55983 [Danio rerio] gi|28839555 60432 9.7 10 32 0

Peptide Information

| Calc. Mass | Obsrv. Mass | ± da    | ± ppm | Start Seq. | End Seq. | Sequence            | Ion Score | C. I. % | Modification              | Rank | Result Type |
|------------|-------------|---------|-------|------------|----------|---------------------|-----------|---------|---------------------------|------|-------------|
| 856.3803   | 856.4994    | 0.1191  | 139   | 202        | 207      | NCFKCK              |           |         | Carbamidomethyl (C)[2,5]  |      | Mascot      |
| 935.4792   | 935.4218    | -0.0574 | -61   | 269        | 277      | ASLNTNTSK           |           |         |                           |      | Mascot      |
| 1045.6187  | 1045.5266   | -0.0921 | -88   | 520        | 528      | SMLKPVSKR           |           |         |                           |      | Mascot      |
| 1159.6218  | 1159.631    | 0.0092  | 8     | 278        | 287      | LGWLANKSDR          |           |         |                           |      | Mascot      |
| 1218.5386  | 1218.5724   | 0.0338  | 28    | 510        | 519      | ENDTVPSDWR          |           |         |                           |      | Mascot      |
| 1237.6801  | 1237.626    | -0.0541 | -44   | 192        | 201      | HLVDGKLYHR          |           |         |                           |      | Mascot      |
| 1570.8145  | 1570.6554   | -0.1591 | -101  | 208        | 222      | ECSTILLSGTYKAGK     |           |         |                           |      | Mascot      |
| 1570.8145  | 1570.6554   | -0.1591 | -101  | 208        | 222      | ECSTILLSGTYKAGK     |           |         |                           |      | Mascot      |
| 1602.7866  | 1602.7643   | -0.0223 | -14   | 206        | 219      | CKECSTILLSGTYK      |           |         | Carbamidomethyl (C)[1]    |      | Mascot      |
| 1602.7866  | 1602.7643   | -0.0223 | -14   | 206        | 219      | CKECSTILLSGTYK      |           |         | Carbamidomethyl (C)[1]    |      | Mascot      |
| 1790.8993  | 1790.8342   | -0.0651 | -36   | 292        | 308      | GFTDTPTPAVQLTPMAK   |           |         | Oxidation (M)[15]         |      | Mascot      |
| 2297.051   | 2297.1199   | 0.0689  | 30    | 172        | 191      | SSTPSSNCVCNQHVHLVQR |           |         | Carbamidomethyl (C)[8,11] |      | Mascot      |

46 hypothetical protein LOC100135297 [Xenopus (Silurana) tropicalis]

gi|166158082 12108.8 5.54 6 32 0

Peptide Information

| Calc. Mass | Obsrv. Mass | ± da    | ± ppm | Start Seq. | End Seq. | Sequence            | Ion Score | C. I. % | Modification                                | Rank | Result Type |
|------------|-------------|---------|-------|------------|----------|---------------------|-----------|---------|---------------------------------------------|------|-------------|
| 850.3975   | 850.5166    | 0.1191  | 140   | 1          | 8        | MAETVDGK            |           |         |                                             |      | Mascot      |
| 882.4203   | 882.5403    | 0.12    | 136   | 9          | 15       | KEEADYK             |           |         |                                             |      | Mascot      |
| 1161.4663  | 1161.5259   | 0.0596  | 51    | 25         | 33       | HTDMPEEMR           |           |         | Oxidation (M)[4]                            |      | Mascot      |
| 1165.6953  | 1165.7091   | 0.0138  | 12    | 16         | 24       | RLHNFPLIR           |           |         |                                             |      | Mascot      |
| 1177.4613  | 1177.5168   | 0.0555  | 47    | 25         | 33       | HTDMPEEMR           |           |         | Oxidation (M)[4,8]                          |      | Mascot      |
| 1585.6907  | 1585.7406   | 0.0499  | 31    | 34         | 46       | VETMELCVTACEK       |           |         | Carbamidomethyl (C)[7,11], Oxidation (M)[4] |      | Mascot      |
| 2211.0435  | 2211.0317   | -0.0118 | -5    | 88         | 106      | NLLYMFFGGSLAVCVWKCS |           |         | Carbamidomethyl (C)[14], Oxidation (M)[5]   |      | Mascot      |

47 peroxisomal carnitine O-octanoyltransferase [Danio rerio]

gi|66392217 69357.6 6.27 9 32 0

Peptide Information

| Calc. Mass | Obsrv. Mass | ± da   | ± ppm | Start Seq. | End Seq. | Sequence  | Ion Score | C. I. % | Modification | Rank | Result Type |
|------------|-------------|--------|-------|------------|----------|-----------|-----------|---------|--------------|------|-------------|
| 842.4155   | 842.4844    | 0.0689 | 82    | 13         | 18       | TFQYQR    |           |         |              |      | Mascot      |
| 1051.651   | 1051.6823   | 0.0313 | 30    | 211        | 219      | ILTPPELLR |           |         |              |      | Mascot      |

|    |                                                         |           |         |     |     |              |                         |          |      |    |    |                                            |  |  |  |  |        |
|----|---------------------------------------------------------|-----------|---------|-----|-----|--------------|-------------------------|----------|------|----|----|--------------------------------------------|--|--|--|--|--------|
|    | 1159.7197                                               | 1159.631  | -0.0887 | -76 | 19  | 29           | SLPPLPVPALR             |          |      |    |    |                                            |  |  |  |  | Mascot |
|    | 1281.5706                                               | 1281.6101 | 0.0395  | 31  | 2   | 12           | DNQVFESSAER             |          |      |    |    |                                            |  |  |  |  | Mascot |
|    | 1281.5706                                               | 1281.6101 | 0.0395  | 31  | 2   | 12           | DNQVFESSAER             | 10       |      | 0  |    |                                            |  |  |  |  | Mascot |
|    | 1403.6947                                               | 1403.6699 | -0.0248 | -18 | 493 | 505          | LMAEAQDGKGIDR           |          |      |    |    |                                            |  |  |  |  | Mascot |
|    | 1403.6947                                               | 1403.6699 | -0.0248 | -18 | 493 | 505          | LMAEAQDGKGIDR           |          |      |    |    |                                            |  |  |  |  | Mascot |
|    | 1554.7841                                               | 1554.6597 | -0.1244 | -80 | 161 | 173          | MLFCTCKVPGITK           |          |      |    |    | Carbamidomethyl (C)[4,6]                   |  |  |  |  | Mascot |
|    | 1554.7841                                               | 1554.6597 | -0.1244 | -80 | 161 | 173          | MLFCTCKVPGITK           |          |      |    |    | Carbamidomethyl (C)[4,6]                   |  |  |  |  | Mascot |
|    | 1570.7789                                               | 1570.6554 | -0.1235 | -79 | 161 | 173          | MLFCTCKVPGITK           |          |      |    |    | Carbamidomethyl (C)[4,6], Oxidation (M)[1] |  |  |  |  | Mascot |
|    | 1570.7972                                               | 1570.6554 | -0.1418 | -90 | 57  | 69           | RFEEGIGQELHQQ           |          |      |    |    |                                            |  |  |  |  | Mascot |
|    | 1802.8993                                               | 1802.7957 | -0.1036 | -57 | 361 | 375          | QMPVPEELIFTVDER         |          |      |    |    |                                            |  |  |  |  | Mascot |
|    | 2297.0222                                               | 2297.1199 | 0.0977  | 43  | 149 | 167          | AGTIPFDMDQFRMLFCTC<br>K |          |      |    |    | Carbamidomethyl (C)[16], Oxidation (M)[8]  |  |  |  |  | Mascot |
| 48 | PREDICTED: hypothetical protein LOC793474 [Danio rerio] |           |         |     |     |              |                         |          |      |    |    |                                            |  |  |  |  |        |
|    |                                                         |           |         |     |     | gi 125807786 |                         | 140995.4 | 5.91 | 14 | 32 | 0                                          |  |  |  |  |        |

Peptide Information

|  | Calc. Mass | Obsrv. Mass | ± da    | ± ppm | Start Seq. | End Seq. | Sequence                  | Ion Score | C. I. | % | Modification                             | Rank | Result Type |
|--|------------|-------------|---------|-------|------------|----------|---------------------------|-----------|-------|---|------------------------------------------|------|-------------|
|  | 912.4495   | 912.4114    | -0.0381 | -42   | 116        | 122      | FEQLTMK                   |           |       |   | Oxidation (M)[6]                         |      | Mascot      |
|  | 996.46     | 996.5679    | 0.1079  | 108   | 1182       | 1189     | MSADCLKR                  |           |       |   | Carbamidomethyl (C)[5], Oxidation (M)[1] |      | Mascot      |
|  | 1184.6171  | 1184.6117   | -0.0054 | -5    | 575        | 583      | HLQPNKEYR                 |           |       |   |                                          |      | Mascot      |
|  | 1230.5857  | 1230.5015   | -0.0842 | -68   | 1155       | 1164     | FMNTKEMLGK                |           |       |   | Oxidation (M)[2,7]                       |      | Mascot      |
|  | 1504.8005  | 1504.6289   | -0.1716 | -114  | 295        | 307      | DNIATQFPEIKTK             |           |       |   |                                          |      | Mascot      |
|  | 1602.9313  | 1602.7643   | -0.167  | -104  | 997        | 1011     | ALGTIESKDLTLTIK           |           |       |   |                                          |      | Mascot      |
|  | 1602.9313  | 1602.7643   | -0.167  | -104  | 997        | 1011     | ALGTIESKDLTLTIK           | 8         |       | 0 |                                          |      | Mascot      |
|  | 1681.8544  | 1681.8882   | 0.0338  | 20    | 463        | 476      | ETIQAFDLFKEANR            |           |       |   |                                          |      | Mascot      |
|  | 1909.9191  | 1909.849    | -0.0701 | -37   | 743        | 757      | KIEENEHFNQYVFGFR          |           |       |   |                                          |      | Mascot      |
|  | 1909.9191  | 1909.849    | -0.0701 | -37   | 744        | 758      | IEENEHFNQYVFGRK           |           |       |   |                                          |      | Mascot      |
|  | 1960.8098  | 1960.8969   | 0.0871  | 44    | 1108       | 1125     | DDNCIICPGNCHFSASK         |           |       |   |                                          |      | Mascot      |
|  | 2220.0225  | 2220.0784   | 0.0559  | 25    | 1233       | 1251     | EEMLIQDKIEEGNELLDG<br>E   |           |       |   | Oxidation (M)[3]                         |      | Mascot      |
|  | 2233.0842  | 2233.011    | -0.0732 | -33   | 160        | 179      | EVSSNENHQEIHGELQA<br>Alk  |           |       |   |                                          |      | Mascot      |
|  | 2283.0347  | 2283.1052   | 0.0705  | 31    | 690        | 709      | CGNYGESLYSSDSRFSV<br>NLK  |           |       |   | Carbamidomethyl (C)[1]                   |      | Mascot      |
|  | 2298.8125  | 2299.1074   | 0.2949  | 128   | 958        | 978      | VEAPTTSDNDSDDDDDD<br>DDDK |           |       |   |                                          |      | Mascot      |

|    |                                                                                                     |  |  |  |  |              |  |         |      |   |    |   |  |  |  |  |  |
|----|-----------------------------------------------------------------------------------------------------|--|--|--|--|--------------|--|---------|------|---|----|---|--|--|--|--|--|
| 49 | RecName: Full=mRNA export factor; AltName: Full=Rae1 protein homolog; AltName: Full=mRNA-associated |  |  |  |  |              |  |         |      |   |    |   |  |  |  |  |  |
|    |                                                                                                     |  |  |  |  | gi 166218821 |  | 41024.8 | 7.96 | 8 | 31 | 0 |  |  |  |  |  |

Peptide Information

|    | Calc. Mass                                                              | Obsrv. Mass | ± da    | ± ppm | Start Seq.   | End Sequence Seq.       | Ion Score | C. I. % | Modification          | Rank | Result Type |
|----|-------------------------------------------------------------------------|-------------|---------|-------|--------------|-------------------------|-----------|---------|-----------------------|------|-------------|
|    | 842.5094                                                                | 842.4844    | -0.025  | -30   | 206          | 212 RIESPLK             |           |         |                       |      | Mascot      |
|    | 870.4025                                                                | 870.5117    | 0.1092  | 125   | 101          | 108 VFTASCDK            |           |         |                       |      | Mascot      |
|    | 953.5566                                                                | 953.4365    | -0.1201 | -126  | 350          | 356 KNYIFLR             |           |         |                       |      | Mascot      |
|    | 1167.5364                                                               | 1167.5446   | 0.0082  | 7     | 253          | 261 DNFTFKCHR           |           |         |                       |      | Mascot      |
|    | 1238.6575                                                               | 1238.6129   | -0.0446 | -36   | 213          | 222 HQHRCVAIFK          |           |         |                       |      | Mascot      |
|    | 1238.6575                                                               | 1238.6129   | -0.0446 | -36   | 213          | 222 HQHRCVAIFK          |           |         |                       |      | Mascot      |
|    | 1565.6757                                                               | 1565.6664   | -0.0093 | -6    | 160          | 172 SPNPMMSLQMPER       |           |         | Oxidation (M)[5,6,10] |      | Mascot      |
|    | 1790.9395                                                               | 1790.8342   | -0.1053 | -59   | 223          | 239 DKQSKPTGFALGSIEGR   |           |         |                       |      | Mascot      |
|    | 1960.8965                                                               | 1960.8969   | 0.0004  | 0     | 173          | 190 CYCADVVYPMAVVATAE R |           |         |                       |      | Mascot      |
| 50 | PREDICTED: disks large-associated protein 4-like, partial [Danio rerio] |             |         |       | gi 326679363 |                         | 54241     | 9.51    | 1                     | 22   | 0           |

#### Peptide Information

| Calc. Mass | Obsrv. Mass | ± da   | ± ppm | Start Seq. | End Sequence Seq. | Ion Score | C. I. % | Modification | Rank | Result Type |
|------------|-------------|--------|-------|------------|-------------------|-----------|---------|--------------|------|-------------|
| 1281.7161  | 1281.6101   | -0.106 | -83   | 148        | 158 LPANLLDQLER   | 22        | 0       |              | 2    | Mascot      |

|                       |           |                               |                |                       |                    |
|-----------------------|-----------|-------------------------------|----------------|-----------------------|--------------------|
| <b>Gel Idx/Pos</b>    | 212/112   | <b>Instr./Gel Origin</b>      | BA2060/110707A | <b>Process Status</b> | Analysis Succeeded |
| <b>Plate [#] Name</b> | [1] 31496 | <b>Instrument Sample Name</b> |                | <b>Spectra</b>        | 11                 |

| Rank | Protein Name               | Accession No. | Protein MW | Protein PI | Pep. Count | Protein Score | Protein Score C. I. % | Total Ion Score | Total Ion C. I. % |
|------|----------------------------|---------------|------------|------------|------------|---------------|-----------------------|-----------------|-------------------|
| 1    | Urod protein [Danio rerio] | gi 62204806   | 45232.9    | 6.17       | 14         | 380           | 100                   | 301             | 100               |

#### Peptide Information

| Calc. Mass | Obsrv. Mass | ± da    | ± ppm | Start Seq. | End Sequence Seq. | Ion Score | C. I. % | Modification            | Rank | Result Type |
|------------|-------------|---------|-------|------------|-------------------|-----------|---------|-------------------------|------|-------------|
| 824.4301   | 824.4124    | -0.0177 | -21   | 77         | 82 YLPEFR         | 17        | 0       |                         |      | Mascot      |
| 824.4301   | 824.4124    | -0.0177 | -21   | 77         | 82 YLPEFR         |           |         |                         |      | Mascot      |
| 882.4389   | 882.543     | 0.1041  | 118   | 359        | 366 MLEGFGTK      |           |         |                         |      | Mascot      |
| 932.5046   | 932.478     | -0.0266 | -29   | 350        | 357 ESISEIVR      |           |         |                         |      | Mascot      |
| 1024.5461  | 1024.5189   | -0.0272 | -27   | 266        | 273 EFSLPYLR      |           |         |                         |      | Mascot      |
| 1024.5461  | 1024.5189   | -0.0272 | -27   | 266        | 273 EFSLPYLR      | 50        | 99.76   |                         |      | Mascot      |
| 1467.759   | 1467.7169   | -0.0421 | -29   | 266        | 277 EFSLPYLRDTAR  |           |         |                         |      | Mascot      |
| 1655.7668  | 1655.7225   | -0.0443 | -27   | 60         | 72 GEEIEHIPVWCMR  |           |         | Carbamidomethyl (C)[11] |      | Mascot      |
| 1655.7668  | 1655.7225   | -0.0443 | -27   | 60         | 72 GEEIEHIPVWCMR  | 57        | 99.951  | Carbamidomethyl (C)[11] |      | Mascot      |

|   |                                              |           |         |     |             |         |                                     |     |        |                                            |        |     |
|---|----------------------------------------------|-----------|---------|-----|-------------|---------|-------------------------------------|-----|--------|--------------------------------------------|--------|-----|
|   | 1671.7617                                    | 1671.72   | -0.0417 | -25 | 60          | 72      | GEEIEHIPVWCMR                       | 11  | 0      | Carbamidomethyl (C)[11], Oxidation (M)[12] | Mascot |     |
|   | 1671.7617                                    | 1671.72   | -0.0417 | -25 | 60          | 72      | GEEIEHIPVWCMR                       |     |        | Carbamidomethyl (C)[11], Oxidation (M)[12] | Mascot |     |
|   | 1673.7986                                    | 1673.7437 | -0.0549 | -33 | 96          | 109     | SPEACCELTLQPLR                      |     |        | Carbamidomethyl (C)[5,6]                   | Mascot |     |
|   | 1705.8319                                    | 1705.7832 | -0.0487 | -29 | 158         | 171     | TQVDVYSELDYVFK                      |     |        |                                            | Mascot |     |
|   | 1829.8997                                    | 1829.8514 | -0.0483 | -26 | 96          | 110     | SPEACCELTLQPLRR                     |     |        | Carbamidomethyl (C)[5,6]                   | Mascot |     |
|   | 1852.944                                     | 1852.8947 | -0.0493 | -27 | 140         | 155     | GPTFPEPLKEPEDLQR                    |     |        |                                            | Mascot |     |
|   | 1852.944                                     | 1852.8947 | -0.0493 | -27 | 140         | 155     | GPTFPEPLKEPEDLQR                    | 105 | 100    |                                            | Mascot |     |
|   | 1912.9156                                    | 1912.9221 | 0.0065  | 3   | 57          | 72      | AARGEEIEHIPVWCMR                    |     |        | Oxidation (M)[15]                          | Mascot |     |
|   | 2346.1545                                    | 2346.0894 | -0.0651 | -28 | 244         | 265     | AGAQALQVFESHTGCLG<br>PVEFK          | 72  | 99.998 | Carbamidomethyl (C)[15]                    | Mascot |     |
|   | 2346.1545                                    | 2346.0894 | -0.0651 | -28 | 244         | 265     | AGAQALQVFESHTGCLG<br>PVEFK          |     |        | Carbamidomethyl (C)[15]                    | Mascot |     |
|   | 3231.4866                                    | 3231.4143 | -0.0723 | -22 | 299         | 327     | DGHYGLEDLSESAYEVV<br>GLDWTIDPHSAR   |     |        |                                            | Mascot |     |
|   | 3379.5913                                    | 3379.5144 | -0.0769 | -23 | 367         | 397     | GYIANLGHGLYPDMDPE<br>NVGAFVEAVHNHSR |     |        |                                            | Mascot |     |
|   | 3395.5862                                    | 3395.5168 | -0.0694 | -20 | 367         | 397     | GYIANLGHGLYPDMDPE<br>NVGAFVEAVHNHSR |     |        | Oxidation (M)[14]                          | Mascot |     |
| 2 | uroporphyrinogen decarboxylase [Danio rerio] |           |         |     | gi 18859531 | 41618.1 | 6.05                                | 13  | 368    | 100                                        | 301    | 100 |

#### Peptide Information

| Calc. Mass | Obsrv. Mass | ± da    | ± ppm | Start Seq. | End Seq. | Sequence          | Ion Score | C. I.  | % Modification                             | Rank | Result Type |
|------------|-------------|---------|-------|------------|----------|-------------------|-----------|--------|--------------------------------------------|------|-------------|
| 824.4301   | 824.4124    | -0.0177 | -21   | 44         | 49       | YLPEFR            | 17        | 0      |                                            |      | Mascot      |
| 824.4301   | 824.4124    | -0.0177 | -21   | 44         | 49       | YLPEFR            |           |        |                                            |      | Mascot      |
| 882.4389   | 882.543     | 0.1041  | 118   | 326        | 333      | MLEGFGTK          |           |        |                                            |      | Mascot      |
| 932.5046   | 932.478     | -0.0266 | -29   | 317        | 324      | ESISEIVR          |           |        |                                            |      | Mascot      |
| 974.4036   | 974.3779    | -0.0257 | -26   | 56         | 62       | DFFETCR           |           |        | Carbamidomethyl (C)[6]                     |      | Mascot      |
| 1024.5461  | 1024.5189   | -0.0272 | -27   | 233        | 240      | EFSLPYLR          |           |        |                                            |      | Mascot      |
| 1024.5461  | 1024.5189   | -0.0272 | -27   | 233        | 240      | EFSLPYLR          | 50        | 99.76  |                                            |      | Mascot      |
| 1655.7668  | 1655.7225   | -0.0443 | -27   | 27         | 39       | GEEIEHIPVWCMR     |           |        | Carbamidomethyl (C)[11]                    |      | Mascot      |
| 1655.7668  | 1655.7225   | -0.0443 | -27   | 27         | 39       | GEEIEHIPVWCMR     | 57        | 99.951 | Carbamidomethyl (C)[11]                    |      | Mascot      |
| 1671.7617  | 1671.72     | -0.0417 | -25   | 27         | 39       | GEEIEHIPVWCMR     | 11        | 0      | Carbamidomethyl (C)[11], Oxidation (M)[12] |      | Mascot      |
| 1671.7617  | 1671.72     | -0.0417 | -25   | 27         | 39       | GEEIEHIPVWCMR     |           |        | Carbamidomethyl (C)[11], Oxidation (M)[12] |      | Mascot      |
| 1673.7986  | 1673.7437   | -0.0549 | -33   | 63         | 76       | SPEACCELTLQPLR    |           |        | Carbamidomethyl (C)[5,6]                   |      | Mascot      |
| 1705.8319  | 1705.7832   | -0.0487 | -29   | 125        | 138      | TQVDVYSELDYVFK    |           |        |                                            |      | Mascot      |
| 1829.8997  | 1829.8514   | -0.0483 | -26   | 63         | 77       | SPEACCELTLQPLRR   |           |        | Carbamidomethyl (C)[5,6]                   |      | Mascot      |
| 1852.944   | 1852.8947   | -0.0493 | -27   | 107        | 122      | GPTFPEPLKEPEDLQR  |           |        |                                            |      | Mascot      |
| 1852.944   | 1852.8947   | -0.0493 | -27   | 107        | 122      | GPTFPEPLKEPEDLQR  | 105       | 100    |                                            |      | Mascot      |
| 1912.9156  | 1912.9221   | 0.0065  | 3     | 24         | 39       | AARGEEIEHIPVWCMR  |           |        | Oxidation (M)[15]                          |      | Mascot      |
| 2346.1545  | 2346.0894   | -0.0651 | -28   | 211        | 232      | AGAQALQVFESHTGCLG | 72        | 99.998 | Carbamidomethyl (C)[15]                    |      | Mascot      |



|   |                                              |           |         |     |     |             |                                      |      |    |     |     |     |                         |        |
|---|----------------------------------------------|-----------|---------|-----|-----|-------------|--------------------------------------|------|----|-----|-----|-----|-------------------------|--------|
|   | 2346.1545                                    | 2346.0894 | -0.0651 | -28 | 211 | 232         | PVEFK<br>AGAQUALQVFESHTGCLG<br>PVEFK |      |    |     |     |     | Carbamidomethyl (C)[15] | Mascot |
|   | 3379.5913                                    | 3379.5144 | -0.0769 | -23 | 334 | 364         | GYIANLGHGLYPDMDPE<br>NVGAFVEAVHNHSR  |      |    |     |     |     |                         | Mascot |
|   | 3395.5862                                    | 3395.5168 | -0.0694 | -20 | 334 | 364         | GYIANLGHGLYPDMDPE<br>NVGAFVEAVHNHSR  |      |    |     |     |     | Oxidation (M)[14]       | Mascot |
| 3 | Uroporphyrinogen decarboxylase [Danio rerio] |           |         |     |     | gi 79160119 | 41656.2                              | 6.05 | 13 | 295 | 100 | 229 | 100                     |        |

#### Peptide Information

|  | Calc. Mass | Obsrv. Mass | ± da    | ± ppm | Start Seq. | End Seq. | Sequence                            | Ion Score | C. I.  | % Modification                             | Rank | Result Type |
|--|------------|-------------|---------|-------|------------|----------|-------------------------------------|-----------|--------|--------------------------------------------|------|-------------|
|  | 824.4301   | 824.4124    | -0.0177 | -21   | 44         | 49       | YLPEFR                              | 17        | 0      |                                            |      | Mascot      |
|  | 824.4301   | 824.4124    | -0.0177 | -21   | 44         | 49       | YLPEFR                              |           |        |                                            |      | Mascot      |
|  | 882.4389   | 882.543     | 0.1041  | 118   | 326        | 333      | MLEGFGTK                            |           |        |                                            |      | Mascot      |
|  | 932.5046   | 932.478     | -0.0266 | -29   | 317        | 324      | ESISEIVR                            |           |        |                                            |      | Mascot      |
|  | 974.4036   | 974.3779    | -0.0257 | -26   | 56         | 62       | DFFETCR                             |           |        | Carbamidomethyl (C)[6]                     |      | Mascot      |
|  | 1024.5461  | 1024.5189   | -0.0272 | -27   | 233        | 240      | EFSLPYLR                            |           |        |                                            |      | Mascot      |
|  | 1024.5461  | 1024.5189   | -0.0272 | -27   | 233        | 240      | EFSLPYLR                            | 50        | 99.76  |                                            |      | Mascot      |
|  | 1655.7668  | 1655.7225   | -0.0443 | -27   | 27         | 39       | GEEIEHIPVWCMR                       |           |        | Carbamidomethyl (C)[11]                    |      | Mascot      |
|  | 1655.7668  | 1655.7225   | -0.0443 | -27   | 27         | 39       | GEEIEHIPVWCMR                       | 57        | 99.951 | Carbamidomethyl (C)[11]                    |      | Mascot      |
|  | 1671.7617  | 1671.72     | -0.0417 | -25   | 27         | 39       | GEEIEHIPVWCMR                       | 11        | 0      | Carbamidomethyl (C)[11], Oxidation (M)[12] |      | Mascot      |
|  | 1671.7617  | 1671.72     | -0.0417 | -25   | 27         | 39       | GEEIEHIPVWCMR                       |           |        | Carbamidomethyl (C)[11], Oxidation (M)[12] |      | Mascot      |
|  | 1673.7986  | 1673.7437   | -0.0549 | -33   | 63         | 76       | SPEACCELTQLPLR                      |           |        | Carbamidomethyl (C)[5,6]                   |      | Mascot      |
|  | 1705.8319  | 1705.7832   | -0.0487 | -29   | 125        | 138      | TQVDVYSELDYVFK                      |           |        |                                            |      | Mascot      |
|  | 1829.8997  | 1829.8514   | -0.0483 | -26   | 63         | 77       | SPEACCELTQLPLRR                     |           |        | Carbamidomethyl (C)[5,6]                   |      | Mascot      |
|  | 1852.944   | 1852.8947   | -0.0493 | -27   | 107        | 122      | GPTFPEPLKEPEDLQR                    |           |        |                                            |      | Mascot      |
|  | 1852.944   | 1852.8947   | -0.0493 | -27   | 107        | 122      | GPTFPEPLKEPEDLQR                    | 105       | 100    |                                            |      | Mascot      |
|  | 1912.9156  | 1912.9221   | 0.0065  | 3     | 24         | 39       | AARGEEIEHIPVWCMR                    |           |        | Oxidation (M)[15]                          |      | Mascot      |
|  | 2299.1538  | 2299.1208   | -0.033  | -14   | 211        | 232      | AGAQUALQVFEPHTGCLG<br>PVEFK         |           |        |                                            |      | Mascot      |
|  | 3379.5913  | 3379.5144   | -0.0769 | -23   | 334        | 364      | GYIANLGHGLYPDMDPE<br>NVGAFVEAVHNHSR |           |        |                                            |      | Mascot      |
|  | 3395.5862  | 3395.5168   | -0.0694 | -20   | 334        | 364      | GYIANLGHGLYPDMDPE<br>NVGAFVEAVHNHSR |           |        | Oxidation (M)[14]                          |      | Mascot      |

|   |                                                    |  |  |  |  |              |         |      |   |    |        |  |  |
|---|----------------------------------------------------|--|--|--|--|--------------|---------|------|---|----|--------|--|--|
| 4 | PREDICTED: ribonuclease P 25 subunit [Danio rerio] |  |  |  |  | gi 326680347 | 22061.4 | 8.78 | 9 | 55 | 87.166 |  |  |
|---|----------------------------------------------------|--|--|--|--|--------------|---------|------|---|----|--------|--|--|

#### Peptide Information

|  | Calc. Mass | Obsrv. Mass | ± da    | ± ppm | Start Seq. | End Seq. | Sequence   | Ion Score | C. I. | % Modification | Rank | Result Type |
|--|------------|-------------|---------|-------|------------|----------|------------|-----------|-------|----------------|------|-------------|
|  | 974.4901   | 974.3779    | -0.1122 | -115  | 170        | 179      | QVDGVQGSGK |           |       |                |      | Mascot      |
|  | 1009.5056  | 1009.4827   | -0.0229 | -23   | 94         | 102      | TITCAEIMK  |           |       |                |      | Mascot      |

|           |           |         |      |     |     |                                  |                   |        |
|-----------|-----------|---------|------|-----|-----|----------------------------------|-------------------|--------|
| 1024.5244 | 1024.5189 | -0.0055 | -5   | 65  | 73  | NLLGFAMSR                        | Oxidation (M)[7]  | Mascot |
| 1024.5244 | 1024.5189 | -0.0055 | -5   | 65  | 73  | NLLGFAMSR                        | Oxidation (M)[7]  | Mascot |
| 1165.6068 | 1165.7134 | 0.1066  | 91   | 94  | 103 | TITCAEIMKR                       |                   | Mascot |
| 1277.7147 | 1277.6705 | -0.0442 | -35  | 63  | 73  | IRNLLGFAMSR                      |                   | Mascot |
| 1475.79   | 1475.7155 | -0.0745 | -50  | 183 | 195 | RPLSPCDHPGLKR                    |                   | Mascot |
| 1498.8489 | 1498.679  | -0.1699 | -113 | 105 | 117 | VAGLHQVSKLQYR                    |                   | Mascot |
| 2299.1677 | 2299.1208 | -0.0469 | -20  | 4   | 24  | ELHDNTQPVLNPTNPIG<br>PSK         |                   | Mascot |
| 3231.6389 | 3231.4143 | -0.2246 | -70  | 118 | 145 | TVTEVWESQESQMTVHR<br>TLPSICILLSK | Oxidation (M)[13] | Mascot |

5 PREDICTED: alba-like protein C9orf23-like [Danio rerio] gi|326680345 22395.5 8.44 8 45 0

#### Peptide Information

| Calc. Mass | Obsrv. Mass | $\pm$ da | $\pm$ ppm | Start Seq. | End Seq. | Sequence                         | Ion Score | C. I. % | Modification      | Rank | Result Type |
|------------|-------------|----------|-----------|------------|----------|----------------------------------|-----------|---------|-------------------|------|-------------|
| 974.4901   | 974.3779    | -0.1122  | -115      | 173        | 182      | QVDGVQGSGK                       |           |         |                   |      | Mascot      |
| 1009.5056  | 1009.4827   | -0.0229  | -23       | 97         | 105      | TITCAEIMK                        |           |         |                   |      | Mascot      |
| 1024.5244  | 1024.5189   | -0.0055  | -5        | 68         | 76       | NLLGFAMSR                        |           |         | Oxidation (M)[7]  |      | Mascot      |
| 1024.5244  | 1024.5189   | -0.0055  | -5        | 68         | 76       | NLLGFAMSR                        |           |         | Oxidation (M)[7]  |      | Mascot      |
| 1165.6068  | 1165.7134   | 0.1066   | 91        | 97         | 106      | TITCAEIMKR                       |           |         |                   |      | Mascot      |
| 1277.7147  | 1277.6705   | -0.0442  | -35       | 66         | 76       | IRNLLGFAMSR                      |           |         |                   |      | Mascot      |
| 1475.79    | 1475.7155   | -0.0745  | -50       | 186        | 198      | RPLSPCDHPGLKR                    |           |         |                   |      | Mascot      |
| 1498.8489  | 1498.679    | -0.1699  | -113      | 108        | 120      | VAGLHQVSKLQYR                    |           |         |                   |      | Mascot      |
| 3231.6389  | 3231.4143   | -0.2246  | -70       | 121        | 148      | TVTEVWESQESQMTVHR<br>TLPSICILLSK |           |         | Oxidation (M)[13] |      | Mascot      |

6 40S ribosomal protein S21 [Danio rerio] gi|41055255 8896.5 8.71 6 45 0

#### Peptide Information

| Calc. Mass | Obsrv. Mass | $\pm$ da | $\pm$ ppm | Start Seq. | End Seq. | Sequence          | Ion Score | C. I. % | Modification           | Rank | Result Type |
|------------|-------------|----------|-----------|------------|----------|-------------------|-----------|---------|------------------------|------|-------------|
| 1024.5244  | 1024.5189   | -0.0055  | -5        | 52         | 60       | TYAICGAIR         |           |         | Carbamidomethyl (C)[5] |      | Mascot      |
| 1024.5244  | 1024.5189   | -0.0055  | -5        | 52         | 60       | TYAICGAIR         |           |         | Carbamidomethyl (C)[5] |      | Mascot      |
| 1045.6252  | 1045.5383   | -0.0869  | -83       | 72         | 81       | LAKTDSIVAK        |           |         |                        |      | Mascot      |
| 1106.5146  | 1106.5132   | -0.0014  | -1        | 62         | 71       | MGEADDLLR         |           |         |                        |      | Mascot      |
| 1580.8027  | 1580.7137   | -0.089   | -56       | 28         | 41       | DHASIQINIAEVDR    |           |         |                        |      | Mascot      |
| 1881.9164  | 1881.9406   | 0.0242   | 13        | 1          | 16       | MQNDAGEFVDLYVPRK  |           |         |                        |      | Mascot      |
| 1994.0414  | 1993.9214   | -0.12    | -60       | 28         | 45       | DHASIQINIAEVDRTGR |           |         |                        |      | Mascot      |

7 hypothetical protein FLJ22318 [Danio rerio] gi|37595352 44472.4 6.24 10 40 0

#### Peptide Information

|   | Calc. Mass                           | Obsrv. Mass | ± da    | ± ppm | Start Seq.   | End Sequence Seq.                  |          | Ion Score | C. I. | % Modification                             | Rank | Result Type |   |
|---|--------------------------------------|-------------|---------|-------|--------------|------------------------------------|----------|-----------|-------|--------------------------------------------|------|-------------|---|
|   | 842.4366                             | 842.4877    | 0.0511  | 61    | 80           | 87 DIHGSVSK                        |          |           |       |                                            |      | Mascot      |   |
|   | 937.3865                             | 937.3951    | 0.0086  | 9     | 2            | 9 EQCACVER                         |          |           |       |                                            |      | Mascot      |   |
|   | 1045.4884                            | 1045.5383   | 0.0499  | 48    | 306          | 314 QCSGVWTHK                      |          |           |       |                                            |      | Mascot      |   |
|   | 1106.559                             | 1106.5132   | -0.0458 | -41   | 209          | 217 QQEALQYAR                      |          |           |       |                                            |      | Mascot      |   |
|   | 1655.6498                            | 1655.7225   | 0.0727  | 44    | 373          | 386 CPYCPMEQNPSDAK                 |          |           |       | Carbamidomethyl (C)[1], Oxidation (M)[6]   |      | Mascot      |   |
|   | 1655.6498                            | 1655.7225   | 0.0727  | 44    | 373          | 386 CPYCPMEQNPSDAK                 |          |           |       | Carbamidomethyl (C)[1], Oxidation (M)[6]   |      | Mascot      |   |
|   | 1673.8639                            | 1673.7437   | -0.1202 | -72   | 29           | 42 LDELLNNVCELR                    |          |           |       |                                            |      | Mascot      |   |
|   | 2225.1165                            | 2225.0593   | -0.0572 | -26   | 340          | 359 QQTSESNPPMKLICGHVSR            |          |           |       |                                            |      | Mascot      |   |
|   | 2225.1165                            | 2225.0593   | -0.0572 | -26   | 340          | 359 QQTSESNPPMKLICGHVSR            |          |           |       |                                            |      | Mascot      |   |
|   | 2263.9456                            | 2264.0298   | 0.0842  | 37    | 373          | 390 CPYCPMEQNPSDAKQIYF             |          |           |       | Carbamidomethyl (C)[1,4], Oxidation (M)[6] |      | Mascot      |   |
|   | 2298.1328                            | 2298.123    | -0.0098 | -4    | 340          | 359 QQTSESNPPMKLICGHVSR            |          |           |       | Carbamidomethyl (C)[14], Oxidation (M)[10] |      | Mascot      |   |
|   | 2750.3423                            | 2750.2644   | -0.0779 | -28   | 41           | 65 SRLLAYGVQDADLSVLHQTMAQCCK       |          |           |       |                                            |      | Mascot      |   |
|   | 3338.6252                            | 3338.6643   | 0.0391  | 12    | 129          | 158 QGMLSVAEDLCQSGVVIDMSMKQPFLELNR |          |           |       |                                            |      | Mascot      |   |
|   | 3395.6465                            | 3395.5168   | -0.1297 | -38   | 129          | 158 QGMLSVAEDLCQSGVVIDMSMKQPFLELNR |          |           |       | Carbamidomethyl (C)[11]                    |      | Mascot      |   |
| 8 | PREDICTED: desmoplakin [Danio rerio] |             |         |       | gi 326664664 |                                    | 287023.8 | 6.6       | 23    | 40                                         | 0    | 11          | 0 |

Peptide Information

|  | Calc. Mass | Obsrv. Mass | ± da    | ± ppm | Start Seq. | End Sequence Seq.    | Ion Score | C. I. % | Modification       | Rank | Result Type |
|--|------------|-------------|---------|-------|------------|----------------------|-----------|---------|--------------------|------|-------------|
|  | 838.394    | 838.4706    | 0.0766  | 91    | 1714       | 1719 YEEELR          |           |         |                    |      | Mascot      |
|  | 856.5614   | 856.505     | -0.0564 | -66   | 2158       | 2164 LLIVDRK         |           |         |                    |      | Mascot      |
|  | 864.388    | 864.4921    | 0.1041  | 120   | 250        | 256 DDLMQSR          |           |         |                    |      | Mascot      |
|  | 882.5043   | 882.543     | 0.0387  | 44    | 1885       | 1891 DIEHKLK         |           |         |                    |      | Mascot      |
|  | 937.5101   | 937.3951    | -0.115  | -123  | 2183       | 2189 QTLEKYR         |           |         |                    |      | Mascot      |
|  | 1106.5623  | 1106.5132   | -0.0491 | -44   | 1432       | 1440 MKLEQNATR       |           |         | Oxidation (M)[1]   |      | Mascot      |
|  | 1179.5059  | 1179.5714   | 0.0655  | 56    | 730        | 739 ENSVQECQSR       |           |         |                    |      | Mascot      |
|  | 1277.71    | 1277.6705   | -0.0395 | -31   | 1152       | 1161 LTFLIEEEKR      |           |         |                    |      | Mascot      |
|  | 1475.8217  | 1475.7155   | -0.1062 | -72   | 779        | 790 YLRAELDLINQK     |           |         |                    |      | Mascot      |
|  | 1580.7665  | 1580.7137   | -0.0528 | -33   | 1048       | 1060 SSDYYKFLGEMLK   |           |         |                    |      | Mascot      |
|  | 1613.7913  | 1613.6996   | -0.0917 | -57   | 1054       | 1066 FLGEMLKNMEELK   |           |         | Oxidation (M)[5,9] |      | Mascot      |
|  | 1673.8705  | 1673.7437   | -0.1268 | -76   | 1364       | 1377 EITLLTQNLQDETR  |           |         |                    |      | Mascot      |
|  | 1705.8867  | 1705.7832   | -0.1035 | -61   | 17         | 32 SSSRPDLTAVGYSLPR  |           |         |                    |      | Mascot      |
|  | 1829.9716  | 1829.8514   | -0.1202 | -66   | 1364       | 1378 EITLLTQNLQDETRR |           |         |                    |      | Mascot      |

|           |                                                    |         |     |      |      |                                    |          |     |    |                        |   |        |
|-----------|----------------------------------------------------|---------|-----|------|------|------------------------------------|----------|-----|----|------------------------|---|--------|
| 1852.8276 | 1852.8947                                          | 0.0671  | 36  | 64   | 83   | NSQGGGAGGAQSMSSM<br>AVQK           |          |     |    |                        |   | Mascot |
| 1852.8276 | 1852.8947                                          | 0.0671  | 36  | 64   | 83   | NSQGGGAGGAQSMSSM<br>AVQK           | 11       | 0   |    |                        |   | Mascot |
| 1881.9049 | 1881.9406                                          | 0.0357  | 19  | 2452 | 2470 | GISSPYNVSSGPSSRSG<br>SR            |          |     |    |                        |   | Mascot |
| 2032.928  | 2033.0118                                          | 0.0838  | 41  | 1892 | 1910 | SYLGGSDCIAGIYDEAKD<br>R            |          |     |    |                        |   | Mascot |
| 2092.0432 | 2091.9583                                          | -0.0849 | -41 | 382  | 398  | CIHVHLKENAAYSQFFK                  |          |     |    | Carbamidomethyl (C)[1] |   | Mascot |
| 2154.9727 | 2154.9653                                          | -0.0074 | -3  | 389  | 406  | ENAAYSQFFKEANETYS<br>R             |          |     |    |                        |   | Mascot |
| 2283.1472 | 2283.1182                                          | -0.029  | -13 | 1664 | 1682 | VEIAQIQKQFSETSMMIQ<br>R            |          |     |    | Oxidation (M)[15]      |   | Mascot |
| 2283.1472 | 2283.1182                                          | -0.029  | -13 | 1664 | 1682 | VEIAQIQKQFSETSMMIQ<br>R            |          |     |    | Oxidation (M)[15]      |   | Mascot |
| 2297.9866 | 2298.123                                           | 0.1364  | 59  | 2035 | 2053 | GYFDREMNEILSYEGDD<br>TK            |          |     |    | Oxidation (M)[7]       |   | Mascot |
| 2299.1421 | 2299.1208                                          | -0.0213 | -9  | 1664 | 1682 | VEIAQIQKQFSETSMMIQ<br>R            |          |     |    | Oxidation (M)[15,16]   |   | Mascot |
| 2750.3025 | 2750.2644                                          | -0.0381 | -14 | 135  | 158  | NAGLPNDMILRSLEDCHS<br>FYADIR       |          |     |    |                        |   | Mascot |
| 3337.5208 | 3337.6836                                          | 0.1628  | 49  | 85   | 114  | AQMLYSDCMGFLQRAQ<br>GLLETMGPASEVDK |          |     |    | Oxidation (M)[3,9,22]  |   | Mascot |
| 3337.5208 | 3337.6836                                          | 0.1628  | 49  | 85   | 114  | AQMLYSDCMGFLQRAQ<br>GLLETMGPASEVDK |          |     |    | Oxidation (M)[3,9,22]  |   | Mascot |
| 9         | Down syndrome cell adhesion molecule [Danio rerio] |         |     |      |      | gi 71834586                        | 224396.7 | 8.5 | 21 | 39                     | 0 |        |

#### Peptide Information

| Calc. Mass | Obsrv. Mass | ± da    | ± ppm | Start Seq. | End Seq. | Sequence        | Ion Score | C. I. % | Modification            | Rank | Result Type |
|------------|-------------|---------|-------|------------|----------|-----------------|-----------|---------|-------------------------|------|-------------|
| 842.4842   | 842.4877    | 0.0035  | 4     | 1748       | 1756     | TAKAGPAAR       |           |         |                         |      | Mascot      |
| 870.4389   | 870.5197    | 0.0808  | 93    | 781        | 787      | SMYLNVK         |           |         | Oxidation (M)[2]        |      | Mascot      |
| 974.5087   | 974.3779    | -0.1308 | -134  | 503        | 511      | GSADIRPMK       |           |         |                         |      | Mascot      |
| 1009.5056  | 1009.4827   | -0.0229 | -23   | 1640       | 1648     | SLAEMLMSK       |           |         |                         |      | Mascot      |
| 1024.4801  | 1024.5189   | 0.0388  | 38    | 804        | 812      | GEKIEMSK        |           |         |                         |      | Mascot      |
| 1024.4801  | 1024.5189   | 0.0388  | 38    | 804        | 812      | GEKIEMSK        |           |         |                         |      | Mascot      |
| 1051.5419  | 1051.6854   | 0.1435  | 136   | 1557       | 1566     | VYNSAGLAEK      |           |         |                         |      | Mascot      |
| 1106.5146  | 1106.5132   | -0.0014 | -1    | 1089       | 1098     | ATTMEDVPSR      |           |         |                         |      | Mascot      |
| 1179.5422  | 1179.5714   | 0.0292  | 25    | 1649       | 1658     | NTRPSDTMKN      |           |         | Oxidation (M)[8]        |      | Mascot      |
| 1277.6597  | 1277.6705   | 0.0108  | 8     | 550        | 560      | QRAFENNGTLK     |           |         |                         |      | Mascot      |
| 1451.7463  | 1451.7184   | -0.0279 | -19   | 1265       | 1277     | YNIWVMAVTAAGR   |           |         |                         |      | Mascot      |
| 1467.7413  | 1467.7169   | -0.0244 | -17   | 1265       | 1277     | YNIWVMAVTAAGR   |           |         | Oxidation (M)[6]        |      | Mascot      |
| 1498.7505  | 1498.679    | -0.0715 | -48   | 235        | 247      | EVMASHRVELPCK   |           |         |                         |      | Mascot      |
| 1580.8365  | 1580.7137   | -0.1228 | -78   | 813        | 825      | AHGEKPIMVRWEK   |           |         |                         |      | Mascot      |
| 1671.7731  | 1671.72     | -0.0531 | -32   | 830        | 842      | EKQSHMINPDMWR   |           |         |                         |      | Mascot      |
| 1671.8523  | 1671.72     | -0.1323 | -79   | 417        | 431      | VVGPNDFVSLTCHVK |           |         | Carbamidomethyl (C)[12] |      | Mascot      |

|           |           |         |      |      |      |                                    |                                          |        |
|-----------|-----------|---------|------|------|------|------------------------------------|------------------------------------------|--------|
| 1687.7679 | 1687.7537 | -0.0142 | -8   | 830  | 842  | EKQSHMINPDMWR                      | Oxidation (M)[6]                         | Mascot |
| 1705.7996 | 1705.7832 | -0.0164 | -10  | 1935 | 1949 | EAAMGQACLEPQKTR                    | Carbamidomethyl (C)[8], Oxidation (M)[4] | Mascot |
| 1977.0626 | 1977.0013 | -0.0613 | -31  | 1292 | 1309 | APAKILTFSGTVTPWMR                  |                                          | Mascot |
| 2298.2097 | 2298.123  | -0.0867 | -38  | 1884 | 1904 | FTASPPKPQDVCVINMA<br>VPK           |                                          | Mascot |
| 2299.1565 | 2299.1208 | -0.0357 | -16  | 432  | 452  | GTPQPAITWTLDDDEVVAK<br>DSR         |                                          | Mascot |
| 2306.0757 | 2306.0891 | 0.0134  | 6    | 567  | 585  | ELDEGEYSCHVQVQPQL<br>FK            | Carbamidomethyl (C)[9]                   | Mascot |
| 2750.5754 | 2750.2644 | -0.311  | -113 | 1602 | 1625 | MMVTISCILVGMVLLFVLL<br>MVLRR       |                                          | Mascot |
| 3231.5222 | 3231.4143 | -0.1079 | -33  | 1034 | 1063 | EHSTNGSHQFVCISVEAT<br>GETESLSLNNLK |                                          | Mascot |

10 protein-associating with the carboxyl-terminal domain of gij41054469 ezrin [Danio rerio]

85270.2 5.3 12 37 0

#### Peptide Information

| Calc. Mass | Obsrv. Mass | ± da    | ± ppm | Start Seq. | End Seq. | Sequence                     | Ion Score | C. I. % | Modification            | Rank | Result Type |
|------------|-------------|---------|-------|------------|----------|------------------------------|-----------|---------|-------------------------|------|-------------|
| 882.4427   | 882.543     | 0.1003  | 114   | 349        | 355      | VNEEHVR                      |           |         |                         |      | Mascot      |
| 937.4481   | 937.3951    | -0.053  | -57   | 140        | 148      | LGGMETVCK                    |           |         |                         |      | Mascot      |
| 1045.5823  | 1045.5383   | -0.044  | -42   | 622        | 630      | ALRLNPSMK                    |           |         | Oxidation (M)[8]        |      | Mascot      |
| 1165.6622  | 1165.7134   | 0.0512  | 44    | 59         | 67       | TLRHPCLLR                    |           |         | Carbamidomethyl (C)[6]  |      | Mascot      |
| 1179.6885  | 1179.5714   | -0.1171 | -99   | 308        | 317      | SFLPHLLQPK                   |           |         |                         |      | Mascot      |
| 1467.7625  | 1467.7169   | -0.0456 | -31   | 219        | 231      | NMLQASLLTPDHK                |           |         |                         |      | Mascot      |
| 1687.8538  | 1687.7537   | -0.1001 | -59   | 165        | 179      | ENSAIPPEEKLEGFK              |           |         |                         |      | Mascot      |
| 2154.9939  | 2154.9653   | -0.0286 | -13   | 689        | 706      | FEPDPELDDFFADMIPDIK          |           |         | Oxidation (M)[13]       |      | Mascot      |
| 2283.0889  | 2283.1182   | 0.0293  | 13    | 688        | 706      | KFEPDPELDDFFADMIPDIK         |           |         | Oxidation (M)[14]       |      | Mascot      |
| 2283.0889  | 2283.1182   | 0.0293  | 13    | 688        | 706      | KFEPDPELDDFFADMIPDIK         |           |         | Oxidation (M)[14]       |      | Mascot      |
| 2297.1189  | 2297.1318   | 0.0129  | 6     | 318        | 337      | QDSSVNAGEECLLSLSLY<br>RR     |           |         | Carbamidomethyl (C)[11] |      | Mascot      |
| 2367.2375  | 2367.1724   | -0.0651 | -28   | 68         | 89       | FLSCSVQDGGIHLVTEPV<br>QPLK   |           |         |                         |      | Mascot      |
| 2750.2913  | 2750.2644   | -0.0269 | -10   | 494        | 517      | TVFSSEMSFPLNGYRMS<br>TQPVESR |           |         |                         |      | Mascot      |

11 troponin T2d, cardiac [Danio rerio]

gij68448503 28495 9.39 7 37 0

#### Peptide Information

| Calc. Mass | Obsrv. Mass | ± da    | ± ppm | Start Seq. | End Seq. | Sequence         | Ion Score | C. I. % | Modification           | Rank | Result Type |
|------------|-------------|---------|-------|------------|----------|------------------|-----------|---------|------------------------|------|-------------|
| 842.4002   | 842.4877    | 0.0875  | 104   | 123        | 129      | HDEDAKK          |           |         |                        |      | Mascot      |
| 1421.757   | 1421.7091   | -0.0479 | -34   | 213        | 223      | YDINQLLCRVK      |           |         | Carbamidomethyl (C)[8] |      | Mascot      |
| 1705.8326  | 1705.7832   | -0.0494 | -29   | 132        | 146      | ALTNMTHQYGGIQQK  |           |         | Oxidation (M)[5]       |      | Mascot      |
| 1913.0127  | 1912.9221   | -0.0906 | -47   | 53         | 68       | DLTELQSLIEAHFLQR |           |         |                        |      | Mascot      |

|    |                                                                           |           |         |     |     |              |                         |      |    |    |   |  |  |  |  |  |        |
|----|---------------------------------------------------------------------------|-----------|---------|-----|-----|--------------|-------------------------|------|----|----|---|--|--|--|--|--|--------|
|    | 2092.042                                                                  | 2091.9583 | -0.0837 | -40 | 185 | 201          | DKATELWQWLMTLEAEK       |      |    |    |   |  |  |  |  |  | Mascot |
|    | 2154.8867                                                                 | 2154.9653 | 0.0786  | 36  | 2   | 20           | SDTEDVMDEAVQEEVDE<br>SK |      |    |    |   |  |  |  |  |  | Mascot |
|    | 2298.2087                                                                 | 2298.123  | -0.0857 | -37 | 50  | 68           | QEKDLTELQSLIEAHFLQ<br>R |      |    |    |   |  |  |  |  |  | Mascot |
| 12 | ras-specific guanine nucleotide-releasing factor<br>RalGPS1 [Danio rerio] |           |         |     |     | gi 153945868 | 65862.4                 | 9.26 | 11 | 37 | 0 |  |  |  |  |  |        |

Peptide Information

| Calc. Mass | Obsrv. Mass | ± da    | ± ppm | Start Seq. | End Seq. | Sequence                            | Ion Score | C. I. | % Modification         | Rank | Result Type |
|------------|-------------|---------|-------|------------|----------|-------------------------------------|-----------|-------|------------------------|------|-------------|
| 824.3533   | 824.4124    | 0.0591  | 72    | 180        | 185      | EENYNR                              |           |       |                        |      | Mascot      |
| 824.3533   | 824.4124    | 0.0591  | 72    | 180        | 185      | EENYNR                              |           |       |                        |      | Mascot      |
| 838.4304   | 838.4706    | 0.0402  | 48    | 166        | 172      | DKATFEK                             |           |       |                        |      | Mascot      |
| 856.4093   | 856.505     | 0.0957  | 112   | 561        | 567      | HLAEACR                             |           |       | Carbamidomethyl (C)[6] |      | Mascot      |
| 1421.7107  | 1421.7091   | -0.0016 | -1    | 414        | 425      | GRMYATLGPNNWR                       |           |       |                        |      | Mascot      |
| 1671.8774  | 1671.72     | -0.1574 | -94   | 260        | 272      | YLMSVRYIEELQK                       |           |       |                        |      | Mascot      |
| 1671.8774  | 1671.72     | -0.1574 | -94   | 260        | 272      | YLMSVRYIEELQK                       |           |       |                        |      | Mascot      |
| 1673.8315  | 1673.7437   | -0.0878 | -52   | 67         | 81       | AIQPEELASCGWNKK                     |           |       |                        |      | Mascot      |
| 1687.8723  | 1687.7537   | -0.1186 | -70   | 260        | 272      | YLMSVRYIEELQK                       |           |       | Oxidation (M)[3]       |      | Mascot      |
| 1705.8921  | 1705.7832   | -0.1089 | -64   | 547        | 560      | FQTGSRFSAIIWHR                      |           |       |                        |      | Mascot      |
| 1976.9957  | 1977.0013   | 0.0056  | 3     | 294        | 312      | LVSSKEDLGGPSEVSMS<br>VR             |           |       |                        |      | Mascot      |
| 2346.2678  | 2346.0894   | -0.1784 | -76   | 481        | 500      | CYWIVLSGSILIFYGSKAL<br>R            |           |       | Carbamidomethyl (C)[1] |      | Mascot      |
| 2346.2678  | 2346.0894   | -0.1784 | -76   | 481        | 500      | CYWIVLSGSILIFYGSKAL<br>R            |           |       | Carbamidomethyl (C)[1] |      | Mascot      |
| 2367.1462  | 2367.1724   | 0.0262  | 11    | 273        | 293      | FVEDDNYSLSLKIEPGNS<br>SPR           |           |       |                        |      | Mascot      |
| 3395.5735  | 3395.5168   | -0.0567 | -17   | 383        | 413      | NHTHDSVFTNGISLGSRE<br>SSFSDELSSTVER |           |       |                        |      | Mascot      |

|    |                                |  |  |  |  |              |         |      |   |    |   |  |  |  |  |  |  |
|----|--------------------------------|--|--|--|--|--------------|---------|------|---|----|---|--|--|--|--|--|--|
| 13 | glycerate kinase [Danio rerio] |  |  |  |  | gi 116517270 | 52575.3 | 5.76 | 9 | 35 | 0 |  |  |  |  |  |  |
|----|--------------------------------|--|--|--|--|--------------|---------|------|---|----|---|--|--|--|--|--|--|

Peptide Information

| Calc. Mass | Obsrv. Mass | ± da    | ± ppm | Start Seq. | End Seq. | Sequence         | Ion Score | C. I. | % Modification   | Rank | Result Type |
|------------|-------------|---------|-------|------------|----------|------------------|-----------|-------|------------------|------|-------------|
| 824.3931   | 824.4124    | 0.0193  | 23    | 1          | 7        | MSSLNTR          |           |       | Oxidation (M)[1] |      | Mascot      |
| 824.3931   | 824.4124    | 0.0193  | 23    | 1          | 7        | MSSLNTR          |           |       | Oxidation (M)[1] |      | Mascot      |
| 842.4366   | 842.4877    | 0.0511  | 61    | 269        | 275      | NQPQEVK          |           |       |                  |      | Mascot      |
| 864.4495   | 864.4921    | 0.0426  | 49    | 104        | 111      | ITVMEGAK         |           |       | Oxidation (M)[4] |      | Mascot      |
| 1051.5314  | 1051.6854   | 0.154   | 146   | 1          | 9        | MSSLNTRAR        |           |       | Oxidation (M)[1] |      | Mascot      |
| 1475.8064  | 1475.7155   | -0.0909 | -62   | 254        | 268      | EVLKSKISGQSGVK   |           |       |                  |      | Mascot      |
| 1655.9438  | 1655.7225   | -0.2213 | -134  | 169        | 184      | KLAAAGATIQELNTRV |           |       |                  |      | Mascot      |

|  |           |           |         |      |     |     |                                       |  |  |  |  |  |                         |  |  |  |        |
|--|-----------|-----------|---------|------|-----|-----|---------------------------------------|--|--|--|--|--|-------------------------|--|--|--|--------|
|  | 1655.9438 | 1655.7225 | -0.2213 | -134 | 169 | 184 | KLAAAGATIQELNTR                       |  |  |  |  |  |                         |  |  |  | Mascot |
|  | 1852.86   | 1852.8947 | 0.0347  | 19   | 228 | 243 | SDSSPEEVWAILDNYK                      |  |  |  |  |  |                         |  |  |  | Mascot |
|  | 1852.86   | 1852.8947 | 0.0347  | 19   | 228 | 243 | SDSSPEEVWAILDNYK                      |  |  |  |  |  |                         |  |  |  | Mascot |
|  | 1912.9949 | 1912.9221 | -0.0728 | -38  | 317 | 334 | SVARLYGLSSFACSPGK                     |  |  |  |  |  | Carbamidomethyl (C)[14] |  |  |  | Mascot |
|  | 3379.7466 | 3379.5144 | -0.2322 | -69  | 36  | 67  | LHVGGQSFTLTNNLYLVG<br>FGKAVLGMAAEAEER |  |  |  |  |  | Oxidation (M)[26]       |  |  |  | Mascot |

14 PREDICTED: hypothetical protein LOC100003217 [Danio rerio] gi|326678765 31640.9 5.2 8 35 0

#### Peptide Information

| Calc. Mass | Obsrv. Mass | ± da    | ± ppm | Start Seq. | End Seq. | Sequence                    | Ion Score | C. I. % | Modification                                    | Rank | Result Type |
|------------|-------------|---------|-------|------------|----------|-----------------------------|-----------|---------|-------------------------------------------------|------|-------------|
| 842.4114   | 842.4877    | 0.0763  | 91    | 78         | 84       | SREAHDK                     |           |         |                                                 |      | Mascot      |
| 932.4328   | 932.478     | 0.0452  | 48    | 29         | 35       | MMTRSYK                     |           |         | Oxidation (M)[1]                                |      | Mascot      |
| 974.5087   | 974.3779    | -0.1308 | -134  | 178        | 185      | EGQVCLIR                    |           |         | Carbamidomethyl (C)[5]                          |      | Mascot      |
| 1277.6704  | 1277.6705   | 0.0001  | 0     | 208        | 218      | LICEMARQIGK                 |           |         | Oxidation (M)[5]                                |      | Mascot      |
| 1475.7887  | 1475.7155   | -0.0732 | -50   | 66         | 77       | TDLLRLSEEMR                 |           |         |                                                 |      | Mascot      |
| 2210.9482  | 2211.0466   | 0.0984  | 45    | 196        | 214      | DMDSHIGNACMKLICEMAR         |           |         | Carbamidomethyl (C)[10], Oxidation (M)[2]       |      | Mascot      |
| 2283.9646  | 2284.1128   | 0.1482  | 65    | 196        | 214      | DMDSHIGNACMKLICEMAR         |           |         | Carbamidomethyl (C)[10,15], Oxidation (M)[2,11] |      | Mascot      |
| 2346.1799  | 2346.0894   | -0.0905 | -39   | 132        | 151      | TACEPTLLNFLEPTKPWER         |           |         |                                                 |      | Mascot      |
| 2346.1799  | 2346.0894   | -0.0905 | -39   | 132        | 151      | TACEPTLLNFLEPTKPWER         |           |         |                                                 |      | Mascot      |
| 3379.678   | 3379.5144   | -0.1636 | -48   | 132        | 159      | TACEPTLLNFLEPTKPWERDWHPLQEK |           |         |                                                 |      | Mascot      |

15 PREDICTED: huntingtin-interacting protein 1-related protein-like [Danio rerio] gi|326671469 126222.3 5.94 14 34 0

#### Peptide Information

| Calc. Mass | Obsrv. Mass | ± da    | ± ppm | Start Seq. | End Seq. | Sequence        | Ion Score | C. I. % | Modification                             | Rank | Result Type |
|------------|-------------|---------|-------|------------|----------|-----------------|-----------|---------|------------------------------------------|------|-------------|
| 842.5206   | 842.4877    | -0.0329 | -39   | 973        | 979      | VRLGELR         |           |         |                                          |      | Mascot      |
| 870.4614   | 870.5197    | 0.0583  | 67    | 434        | 440      | HADLMRK         |           |         |                                          |      | Mascot      |
| 974.4335   | 974.3779    | -0.0556 | -57   | 87         | 93       | FCHMVHK         |           |         | Carbamidomethyl (C)[2], Oxidation (M)[4] |      | Mascot      |
| 1498.7496  | 1498.679    | -0.0706 | -47   | 366        | 377      | LESELEEQRTHK    |           |         |                                          |      | Mascot      |
| 1613.8254  | 1613.6996   | -0.1258 | -78   | 94         | 107      | LLRDGHPNGNLHDR  |           |         |                                          |      | Mascot      |
| 1671.8418  | 1671.72     | -0.1218 | -73   | 1098       | 1112     | SGHMLRNAMSLDALR | 3         | 0       |                                          |      | Mascot      |
| 1671.8418  | 1671.72     | -0.1218 | -73   | 1098       | 1112     | SGHMLRNAMSLDALR |           |         |                                          |      | Mascot      |
| 1687.8358  | 1687.7537   | -0.0821 | -49   | 548        | 561      | QTLQNQQSSLQQR   |           |         |                                          |      | Mascot      |
| 1705.8062  | 1705.7832   | -0.023  | -13   | 745        | 759      | AADVRQEELADMVDK |           |         | Oxidation (M)[12]                        |      | Mascot      |

|           |           |         |     |     |     |                           |                         |        |
|-----------|-----------|---------|-----|-----|-----|---------------------------|-------------------------|--------|
| 1852.7913 | 1852.8947 | 0.1034  | 56  | 178 | 194 | QMDSHSTSSTTAVGQCR         | Carbamidomethyl (C)[16] | Mascot |
| 1852.7913 | 1852.8947 | 0.1034  | 56  | 178 | 194 | QMDSHSTSSTTAVGQCR         | Carbamidomethyl (C)[16] | Mascot |
| 1890.9443 | 1890.912  | -0.0323 | -17 | 129 | 145 | HPEIPANLEASEEVLDK         |                         | Mascot |
| 1977.0803 | 1977.0013 | -0.079  | -40 | 257 | 273 | TIQIPDLPNEPPNFLR          |                         | Mascot |
| 2211.2344 | 2211.0466 | -0.1878 | -85 | 514 | 534 | AGDQLSSVLVGLQAEKD<br>VLLR |                         | Mascot |
| 2283.155  | 2283.1182 | -0.0368 | -16 | 616 | 634 | VDDPLHVCISTPDYLIN<br>R    | Carbamidomethyl (C)[9]  | Mascot |
| 2283.155  | 2283.1182 | -0.0368 | -16 | 616 | 634 | VDDPLHVCISTPDYLIN<br>R    | Carbamidomethyl (C)[9]  | Mascot |
| 2363.1638 | 2363.0955 | -0.0683 | -29 | 97  | 117 | DGHPNGNLHDRYGHIVA<br>LYSK |                         | Mascot |

16 PREDICTED: hypothetical protein LOC563477 [Danio rerio] gi|326678117 162160.2 8.46 16 34 0 22 0

#### Peptide Information

| Calc. Mass | Obsrv. Mass | ± da    | ± ppm | Start Seq. | End Seq. | Sequence                 | Ion Score | C. I. % | Modification                                 | Rank | Result Type |
|------------|-------------|---------|-------|------------|----------|--------------------------|-----------|---------|----------------------------------------------|------|-------------|
| 824.4625   | 824.4124    | -0.0501 | -61   | 971        | 977      | HKLPSDK                  |           |         |                                              |      | Mascot      |
| 824.4625   | 824.4124    | -0.0501 | -61   | 971        | 977      | HKLPSDK                  |           |         |                                              |      | Mascot      |
| 856.3837   | 856.505     | 0.1213  | 142   | 1186       | 1192     | VRCMTCK                  |           |         | Oxidation (M)[4]                             |      | Mascot      |
| 870.4614   | 870.5197    | 0.0583  | 67    | 925        | 931      | LCQTLHR                  |           |         |                                              |      | Mascot      |
| 974.4802   | 974.3779    | -0.1023 | -105  | 533        | 540      | SHEHIHSK                 |           |         |                                              |      | Mascot      |
| 1024.5317  | 1024.5189   | -0.0128 | -12   | 218        | 226      | LFLCIACGK                |           |         | Carbamidomethyl (C)[4]                       |      | Mascot      |
| 1024.5317  | 1024.5189   | -0.0128 | -12   | 218        | 226      | LFLCIACGK                | 22        | 0       | Carbamidomethyl (C)[7]                       |      | Mascot      |
| 1165.6576  | 1165.7134   | 0.0558  | 48    | 793        | 802      | ITAITDKFTR               |           |         |                                              |      | Mascot      |
| 1179.6117  | 1179.5714   | -0.0403 | -34   | 1289       | 1298     | THEKIHTGEK               |           |         |                                              |      | Mascot      |
| 1277.6129  | 1277.6705   | 0.0576  | 45    | 1058       | 1067     | MIGYYRMSTR               |           |         |                                              |      | Mascot      |
| 1421.6642  | 1421.7091   | 0.0449  | 32    | 125        | 136      | VKSEELSEDEEK             |           |         |                                              |      | Mascot      |
| 1673.6893  | 1673.7437   | 0.0544  | 33    | 1044       | 1057     | EYNNNMAGVDLMDR           |           |         | Oxidation (M)[6,12]                          |      | Mascot      |
| 1829.7833  | 1829.8514   | 0.0681  | 37    | 291        | 305      | CSYCDKTFSEQSEYLR         |           |         |                                              |      | Mascot      |
| 1993.885   | 1993.9214   | 0.0364  | 18    | 950        | 965      | MMEKELYMTGTIMNNR         |           |         | Oxidation (M)[1,2]                           |      | Mascot      |
| 2155.1038  | 2154.9653   | -0.1385 | -64   | 1205       | 1223     | TYLSVHSLKPFSCSLCG<br>K   |           |         | Carbamidomethyl (C)[14]                      |      | Mascot      |
| 2174.0112  | 2174.0359   | 0.0247  | 11    | 1188       | 1204     | CMTCKVFLCLQLNEDVK        |           |         | Carbamidomethyl (C)[1,4,9], Oxidation (M)[2] |      | Mascot      |
| 2264.1348  | 2264.0298   | -0.105  | -46   | 338        | 356      | IHTVVKPFTCTQC GKTCV<br>K |           |         | Carbamidomethyl (C)[10,13,17]                |      | Mascot      |
| 2297.1458  | 2297.1318   | -0.014  | -6    | 1075       | 1093     | MVMHFTDLALANSWLLY<br>QK  |           |         | Oxidation (M)[1]                             |      | Mascot      |

17 Commd1 protein [Danio rerio] gi|79160149 20726.6 5.88 6 34 0

#### Peptide Information

| Calc. Mass | Obsrv. Mass | ± da | ± ppm | Start Seq. | End Seq. | Sequence | Ion Score | C. I. % | Modification | Rank | Result Type |
|------------|-------------|------|-------|------------|----------|----------|-----------|---------|--------------|------|-------------|
|------------|-------------|------|-------|------------|----------|----------|-----------|---------|--------------|------|-------------|



|    |                                             |           |         |      |              |     |                           |      |    |    |   |                        |  |  |  |  |        |
|----|---------------------------------------------|-----------|---------|------|--------------|-----|---------------------------|------|----|----|---|------------------------|--|--|--|--|--------|
|    | 870.4614                                    | 870.5197  | 0.0583  | 67   | 44           | 50  | ALHDKMR                   |      |    |    |   |                        |  |  |  |  | Mascot |
|    | 1655.8864                                   | 1655.7225 | -0.1639 | -99  | 103          | 116 | ESLLAQSRWEPALR            |      |    |    |   |                        |  |  |  |  | Mascot |
|    | 1655.8864                                   | 1655.7225 | -0.1639 | -99  | 103          | 116 | ESLLAQSRWEPALR            |      |    |    |   |                        |  |  |  |  | Mascot |
|    | 1671.921                                    | 1671.72   | -0.201  | -120 | 1            | 16  | GLLGCVSALLNGITQR          |      |    |    |   | Carbamidomethyl (C)[5] |  |  |  |  | Mascot |
|    | 1671.921                                    | 1671.72   | -0.201  | -120 | 1            | 16  | GLLGCVSALLNGITQR          |      |    |    |   | Carbamidomethyl (C)[5] |  |  |  |  | Mascot |
|    | 1890.8062                                   | 1890.912  | 0.1058  | 56   | 148          | 163 | TGESSEFVCVEFDEQK          |      |    |    |   | Carbamidomethyl (C)[9] |  |  |  |  | Mascot |
|    | 2211.0022                                   | 2211.0466 | 0.0444  | 20   | 31           | 48  | NELYAEMTEDEFRALHD<br>K    |      |    |    |   |                        |  |  |  |  | Mascot |
|    | 2283.092                                    | 2283.1182 | 0.0262  | 11   | 55           | 75  | SIASADMDQAQLEAFLTA<br>QTR |      |    |    |   | Oxidation (M)[7]       |  |  |  |  | Mascot |
|    | 2283.092                                    | 2283.1182 | 0.0262  | 11   | 55           | 75  | SIASADMDQAQLEAFLTA<br>QTR |      |    |    |   | Oxidation (M)[7]       |  |  |  |  | Mascot |
| 18 | PREDICTED: protein NLRC3-like [Danio rerio] |           |         |      | gi 292622940 |     | 73637.7                   | 5.97 | 10 | 34 | 0 |                        |  |  |  |  |        |

#### Peptide Information

| Calc. Mass | Obsrv. Mass | ± da    | ± ppm | Start Seq. | End Seq. | Sequence                          | Ion Score | C. I. | % Modification                              | Rank | Result Type |
|------------|-------------|---------|-------|------------|----------|-----------------------------------|-----------|-------|---------------------------------------------|------|-------------|
| 850.5145   | 850.521     | 0.0065  | 8     | 535        | 541      | RITGYIK                           |           |       |                                             |      | Mascot      |
| 870.5043   | 870.5197    | 0.0154  | 18    | 370        | 376      | DPERLLK                           |           |       |                                             |      | Mascot      |
| 1045.6252  | 1045.5383   | -0.0869 | -83   | 127        | 135      | DQIKTVLTK                         |           |       |                                             |      | Mascot      |
| 1277.6923  | 1277.6705   | -0.0218 | -17   | 385        | 395      | LAELAFNQLMK                       |           |       |                                             |      | Mascot      |
| 1671.8199  | 1671.72     | -0.0999 | -60   | 158        | 171      | ASQDVDFMFVLPFR                    |           |       |                                             |      | Mascot      |
| 1671.8199  | 1671.72     | -0.0999 | -60   | 158        | 171      | ASQDVDFMFVLPFR                    |           |       |                                             |      | Mascot      |
| 1687.8148  | 1687.7537   | -0.0611 | -36   | 158        | 171      | ASQDVDFMFVLPFR                    |           |       | Oxidation (M)[8]                            |      | Mascot      |
| 1829.8625  | 1829.8514   | -0.0111 | -6    | 1          | 17       | MPLPLEFSDGAEPSPDK                 |           |       |                                             |      | Mascot      |
| 2346.1655  | 2346.0894   | -0.0761 | -32   | 555        | 572      | CINLFLC LLEMKDQTL YR              |           |       | Carbamidomethyl (C)[1,7], Oxidation (M)[11] |      | Mascot      |
| 2346.1655  | 2346.0894   | -0.0761 | -32   | 555        | 572      | CINLFLC LLEMKDQTL YR              |           |       | Carbamidomethyl (C)[1,7], Oxidation (M)[11] |      | Mascot      |
| 3231.5515  | 3231.4143   | -0.1372 | -42   | 104        | 130      | TQDTPIYCS DIFKPLQEPE<br>HEEKDQIK  |           |       |                                             |      | Mascot      |
| 3338.6846  | 3338.6643   | -0.0203 | -6    | 313        | 340      | SLHIMCHIPVFCWISATVL<br>QKLLNEDDR  |           |       | Carbamidomethyl (C)[6]                      |      | Mascot      |
| 3395.6497  | 3395.5168   | -0.1329 | -39   | 587        | 615      | NLSPSHCSTIIYMLQISEE<br>ALNDEFDLKK |           |       | Carbamidomethyl (C)[7]                      |      | Mascot      |

19 PREDICTED: hypothetical protein LOC100535084 [Danio rerio]

#### Peptide Information

| Calc. Mass | Obsrv. Mass | ± da    | ± ppm | Start Seq. | End Seq. | Sequence | Ion Score | C. I. | % Modification | Rank | Result Type |
|------------|-------------|---------|-------|------------|----------|----------|-----------|-------|----------------|------|-------------|
| 838.3876   | 838.4706    | 0.083   | 99    | 201        | 207      | ADFMQAR  |           |       |                |      | Mascot      |
| 842.5206   | 842.4877    | -0.0329 | -39   | 1540       | 1546     | RTVNKPK  |           |       |                |      | Mascot      |

|           |                                         |         |     |      |              |                                   |      |   |    |   |  |  |  |  |  |                                            |        |
|-----------|-----------------------------------------|---------|-----|------|--------------|-----------------------------------|------|---|----|---|--|--|--|--|--|--------------------------------------------|--------|
| 1009.5061 | 1009.4827                               | -0.0234 | -23 | 566  | 574          | NVFSNTTAR                         |      |   |    |   |  |  |  |  |  |                                            | Mascot |
| 1045.6    | 1045.5383                               | -0.0617 | -59 | 1446 | 1455         | SAKDLAITAR                        |      |   |    |   |  |  |  |  |  |                                            | Mascot |
| 1051.6259 | 1051.6854                               | 0.0595  | 57  | 713  | 721          | VVDLLISHR                         |      |   |    |   |  |  |  |  |  |                                            | Mascot |
| 1062.6055 | 1062.6652                               | 0.0597  | 56  | 887  | 895          | RAVEATFLR                         |      |   |    |   |  |  |  |  |  |                                            | Mascot |
| 1179.6844 | 1179.5714                               | -0.113  | -96 | 2005 | 2014         | EKIPSTVLHR                        |      |   |    |   |  |  |  |  |  |                                            | Mascot |
| 1467.7261 | 1467.7169                               | -0.0092 | -6  | 908  | 920          | AAYSAQVKDMLDR                     |      |   |    |   |  |  |  |  |  |                                            | Mascot |
| 1475.6981 | 1475.7155                               | 0.0174  | 12  | 1676 | 1687         | CQQIMGDLPLER                      |      |   |    |   |  |  |  |  |  | Carbamidomethyl (C)[1], Oxidation (M)[5]   | Mascot |
| 1613.745  | 1613.6996                               | -0.0454 | -28 | 482  | 494          | KCLEVHEQYSFCK                     |      |   |    |   |  |  |  |  |  |                                            | Mascot |
| 1655.7516 | 1655.7225                               | -0.0291 | -18 | 1136 | 1149         | VMVLPNQMHDDDNK                    |      |   |    |   |  |  |  |  |  |                                            | Mascot |
| 1655.7516 | 1655.7225                               | -0.0291 | -18 | 1136 | 1149         | VMVLPNQMHDDDNK                    |      |   |    |   |  |  |  |  |  |                                            | Mascot |
| 1671.7466 | 1671.72                                 | -0.0266 | -16 | 1136 | 1149         | VMVLPNQMHDDDNK                    |      |   |    |   |  |  |  |  |  | Oxidation (M)[2]                           | Mascot |
| 1671.7466 | 1671.72                                 | -0.0266 | -16 | 1136 | 1149         | VMVLPNQMHDDDNK                    |      |   |    |   |  |  |  |  |  | Oxidation (M)[2]                           | Mascot |
| 1673.8129 | 1673.7437                               | -0.0692 | -41 | 252  | 266          | DWEALQKQEPTGSK                    |      |   |    |   |  |  |  |  |  |                                            | Mascot |
| 1687.7415 | 1687.7537                               | 0.0122  | 7   | 1136 | 1149         | VMVLPNQMHDDDNK                    |      |   |    |   |  |  |  |  |  | Oxidation (M)[2,8]                         | Mascot |
| 1829.936  | 1829.8514                               | -0.0846 | -46 | 1040 | 1056         | VNIGDKPAGCIAQLAMR                 |      |   |    |   |  |  |  |  |  | Carbamidomethyl (C)[10], Oxidation (M)[16] | Mascot |
| 1881.7887 | 1881.9406                               | 0.1519  | 81  | 830  | 846          | CGNCQPGGKEMSLAEE<br>R             |      |   |    |   |  |  |  |  |  | Carbamidomethyl (C)[1], Oxidation (M)[11]  | Mascot |
| 1912.8892 | 1912.9221                               | 0.0329  | 17  | 1134 | 1149         | EKVMVLPNQMHDDDNK                  |      |   |    |   |  |  |  |  |  |                                            | Mascot |
| 2092.0344 | 2091.9583                               | -0.0761 | -36 | 746  | 764          | TIGGTHPELFEDVTVSAY<br>R           |      |   |    |   |  |  |  |  |  |                                            | Mascot |
| 2264.2104 | 2264.0298                               | -0.1806 | -80 | 1179 | 1198         | LGQNLTQEQVRAQTPNP<br>LTR          |      |   |    |   |  |  |  |  |  |                                            | Mascot |
| 2283.1648 | 2283.1182                               | -0.0466 | -20 | 1479 | 1498         | EPTMESKPIESPNLVRAE<br>QK          |      |   |    |   |  |  |  |  |  |                                            | Mascot |
| 2283.1648 | 2283.1182                               | -0.0466 | -20 | 1479 | 1498         | EPTMESKPIESPNLVRAE<br>QK          |      |   |    |   |  |  |  |  |  |                                            | Mascot |
| 2299.1599 | 2299.1208                               | -0.0391 | -17 | 1479 | 1498         | EPTMESKPIESPNLVRAE<br>QK          |      |   |    |   |  |  |  |  |  | Oxidation (M)[4]                           | Mascot |
| 2306.1445 | 2306.0891                               | -0.0554 | -24 | 1864 | 1883         | EQTQEGCIQYVTPNSLLL<br>GR          |      |   |    |   |  |  |  |  |  | Carbamidomethyl (C)[7]                     | Mascot |
| 3379.7532 | 3379.5144                               | -0.2388 | -71 | 1603 | 1632         | VQVFQDDQLSVIPLSNS<br>WISTLLAQESHK |      |   |    |   |  |  |  |  |  |                                            | Mascot |
| 20        | glutathione peroxidase 1b [Danio rerio] |         |     |      | gi 169636422 | 21638                             | 7.66 | 6 | 34 | 0 |  |  |  |  |  |                                            |        |

Peptide Information

| Calc. Mass | Obsrv. Mass | ± da    | ± ppm | Start Seq. | End Seq. | Sequence               | Ion Score | C. I. % | Modification     | Rank | Result Type |
|------------|-------------|---------|-------|------------|----------|------------------------|-----------|---------|------------------|------|-------------|
| 1165.6099  | 1165.7134   | 0.1035  | 89    | 173        | 183      | FLTSGIDGDIK            |           |         |                  |      | Mascot      |
| 1179.6409  | 1179.5714   | -0.0695 | -59   | 157        | 167      | FLIGSDGVPFK            |           |         |                  |      | Mascot      |
| 1451.6219  | 1451.7184   | 0.0965  | 66    | 45         | 55       | DYTQMNELHER            |           |         | Oxidation (M)[5] |      | Mascot      |
| 1671.8588  | 1671.72     | -0.1388 | -83   | 14         | 28       | TLTGEEFKFSSLQGK        |           |         |                  |      | Mascot      |
| 1671.8588  | 1671.72     | -0.1388 | -83   | 14         | 28       | TLTGEEFKFSSLQGK        |           |         |                  |      | Mascot      |
| 2091.9766  | 2091.9583   | -0.0183 | -9    | 121        | 138      | EKLPPSPDEPMPFMSDP<br>K |           |         |                  |      | Mascot      |

2297.1602

2297.1318

-0.0284

-12

148

167

NDIAWNFEKFLIGSDGVP  
FK

Mascot

21

PREDICTED: bromodomain and WD repeat-containing protein 1 [Danio rerio]

gi|326674050

246451

6.53

20

34

0

| Peptide Information |             |         |       |            |          |                                  | Ion Score | C. I. | % Modification          | Rank | Result Type |
|---------------------|-------------|---------|-------|------------|----------|----------------------------------|-----------|-------|-------------------------|------|-------------|
| Calc. Mass          | Obsrv. Mass | ± da    | ± ppm | Start Seq. | End Seq. | Sequence                         |           |       |                         |      |             |
| 838.3723            | 838.4706    | 0.0983  | 117   | 729        | 735      | SQMATER                          |           |       | Oxidation (M)[3]        |      | Mascot      |
| 932.4543            | 932.478     | 0.0237  | 25    | 1168       | 1175     | GREQESAR                         |           |       |                         |      | Mascot      |
| 937.4333            | 937.3951    | -0.0382 | -41   | 2037       | 2045     | SSRSSDGNK                        |           |       |                         |      | Mascot      |
| 974.5166            | 974.3779    | -0.1387 | -142  | 390        | 397      | DGTARIWR                         |           |       |                         |      | Mascot      |
| 1009.4771           | 1009.4827   | 0.0056  | 6     | 432        | 439      | VTMVSWDR                         |           |       | Oxidation (M)[3]        |      | Mascot      |
| 1024.5244           | 1024.5189   | -0.0055 | -5    | 25         | 33       | YLSTGPCRK                        |           |       |                         |      | Mascot      |
| 1024.5244           | 1024.5189   | -0.0055 | -5    | 25         | 33       | YLSTGPCRK                        | 1         | 0     |                         |      | Mascot      |
| 1165.6099           | 1165.7134   | 0.1035  | 89    | 200        | 210      | IFTGSDDALVK                      |           |       |                         |      | Mascot      |
| 1277.71             | 1277.6705   | -0.0395 | -31   | 1008       | 1018     | DQEFVKITGIK                      |           |       |                         |      | Mascot      |
| 1464.7151           | 1464.7493   | 0.0342  | 23    | 1376       | 1387     | YENPIDVCKDIR                     |           |       |                         |      | Mascot      |
| 1498.7794           | 1498.679    | -0.1004 | -67   | 700        | 712      | MEVQSPPNVGLRR                    |           |       | Oxidation (M)[1]        |      | Mascot      |
| 1829.7705           | 1829.8514   | 0.0809  | 44    | 1914       | 1930     | QKLCASSESSSESDEK                 |           |       |                         |      | Mascot      |
| 1891.0006           | 1890.912    | -0.0886 | -47   | 180        | 195      | RILGHLSAVYCIAFDR                 |           |       | Carbamidomethyl (C)[11] |      | Mascot      |
| 1912.9625           | 1912.9221   | -0.0404 | -21   | 961        | 976      | KSPFVPQMGDEVIYFR                 |           |       |                         |      | Mascot      |
| 1993.8807           | 1993.9214   | 0.0407  | 20    | 2057       | 2073     | FKQLMGSTDSESDFETR                |           |       | Oxidation (M)[5]        |      | Mascot      |
| 2091.9851           | 2091.9583   | -0.0268 | -13   | 163        | 179      | FSSINPVSNYQHMKMHR                |           |       | Oxidation (M)[13]       |      | Mascot      |
| 2211.061            | 2211.0466   | -0.0144 | -7    | 370        | 389      | VDSIQFCHSGESLRFVSG<br>SR         |           |       |                         |      | Mascot      |
| 2283.1841           | 2283.1182   | -0.0659 | -29   | 1045       | 1063     | TFSIKYHDMADVIDFLVLR              |           |       |                         |      | Mascot      |
| 2283.1841           | 2283.1182   | -0.0659 | -29   | 1045       | 1063     | TFSIKYHDMADVIDFLVLR              |           |       |                         |      | Mascot      |
| 2299.1792           | 2299.1208   | -0.0584 | -25   | 1045       | 1063     | TFSIKYHDMADVIDFLVLR              |           |       | Oxidation (M)[9]        |      | Mascot      |
| 2306.0378           | 2306.0891   | 0.0513  | 22    | 1793       | 1812     | HRSITQESSENSSDEEVET<br>TK        |           |       |                         |      | Mascot      |
| 2362.9138           | 2363.0955   | 0.1817  | 77    | 2104       | 2126     | GSNDNGSNFESESESE<br>ASSGSR       |           |       |                         |      | Mascot      |
| 3231.6804           | 3231.4143   | -0.2661 | -82   | 253        | 282      | VWCLRTCAPVAVLQGH<br>GSITSLQFSPVK |           |       |                         |      | Mascot      |

22

proline synthase co-transcribed bacterial homolog protein [Danio rerio]

gi|187607726

31651.3

8.44

8

34

0

| Peptide Information |             |        |       |            |          |           |           |       |                |      |             |
|---------------------|-------------|--------|-------|------------|----------|-----------|-----------|-------|----------------|------|-------------|
| Calc. Mass          | Obsrv. Mass | ± da   | ± ppm | Start Seq. | End Seq. | Sequence  | Ion Score | C. I. | % Modification | Rank | Result Type |
| 937.5101            | 937.3951    | -0.115 | -123  | 242        | 250      | VGSTIFGTR |           |       |                |      | Mascot      |

|    |                                      |           |         |     |             |     |                           |      |   |    |   |                    |  |  |  |  |        |
|----|--------------------------------------|-----------|---------|-----|-------------|-----|---------------------------|------|---|----|---|--------------------|--|--|--|--|--------|
|    | 1165.6266                            | 1165.7134 | 0.0868  | 74  | 89          | 97  | WHFIGHLQK                 |      |   |    |   |                    |  |  |  |  | Mascot |
|    | 1277.7511                            | 1277.6705 | -0.0806 | -63 | 29          | 39  | RPKTLPCIPPR               |      |   |    |   |                    |  |  |  |  | Mascot |
|    | 1421.6941                            | 1421.7091 | 0.015   | 11  | 141         | 153 | IMVQINTSGEDSK             |      |   |    |   |                    |  |  |  |  | Mascot |
|    | 1613.7484                            | 1613.6996 | -0.0488 | -30 | 1           | 13  | MWRVVMMSSEEVGK            |      |   |    |   | Oxidation (M)[1,6] |  |  |  |  | Mascot |
|    | 1891.0245                            | 1890.912  | -0.1125 | -59 | 103         | 119 | LLGVPNLYMVETIDSVK         |      |   |    |   |                    |  |  |  |  | Mascot |
|    | 2032.9834                            | 2033.0118 | 0.0284  | 14  | 58          | 74  | HGQRNFGENYVNELVEK         |      |   |    |   |                    |  |  |  |  | Mascot |
|    | 2264.1194                            | 2264.0298 | -0.0896 | -40 | 242         | 262 | VGSTIFGTREYPNTPSPS<br>PEK |      |   |    |   |                    |  |  |  |  | Mascot |
| 23 | protein RMD5 homolog B [Danio rerio] |           |         |     | gi 41152122 |     | 44610.5                   | 6.03 | 9 | 33 | 0 |                    |  |  |  |  |        |

#### Peptide Information

| Calc. Mass | Obsrv. Mass | ± da    | ± ppm | Start Seq. | End Seq. | Sequence                      | Ion Score | C. I. | % Modification                             | Rank | Result Type |
|------------|-------------|---------|-------|------------|----------|-------------------------------|-----------|-------|--------------------------------------------|------|-------------|
| 842.4366   | 842.4877    | 0.0511  | 61    | 80         | 87       | DIHGSVSK                      |           |       |                                            |      | Mascot      |
| 937.3865   | 937.3951    | 0.0086  | 9     | 2          | 9        | EQCACVER                      |           |       |                                            |      | Mascot      |
| 1045.4884  | 1045.5383   | 0.0499  | 48    | 307        | 315      | QCSGVWTHK                     |           |       |                                            |      | Mascot      |
| 1106.559   | 1106.5132   | -0.0458 | -41   | 210        | 218      | QQEALQYAR                     |           |       |                                            |      | Mascot      |
| 1655.6498  | 1655.7225   | 0.0727  | 44    | 374        | 387      | CPYCPMEQNPSDAK                |           |       | Carbamidomethyl (C)[1], Oxidation (M)[6]   |      | Mascot      |
| 1655.6498  | 1655.7225   | 0.0727  | 44    | 374        | 387      | CPYCPMEQNPSDAK                |           |       | Carbamidomethyl (C)[1], Oxidation (M)[6]   |      | Mascot      |
| 1673.8639  | 1673.7437   | -0.1202 | -72   | 29         | 42       | LDELLNNVCELRSR                |           |       |                                            |      | Mascot      |
| 2225.1165  | 2225.0593   | -0.0572 | -26   | 341        | 360      | QQTSESNPPMKLICGHV<br>SR       |           |       |                                            |      | Mascot      |
| 2225.1165  | 2225.0593   | -0.0572 | -26   | 341        | 360      | QQTSESNPPMKLICGHV<br>SR       |           |       |                                            |      | Mascot      |
| 2263.9456  | 2264.0298   | 0.0842  | 37    | 374        | 391      | CPYCPMEQNPSDAKQIY<br>F        |           |       | Carbamidomethyl (C)[1,4], Oxidation (M)[6] |      | Mascot      |
| 2298.1328  | 2298.123    | -0.0098 | -4    | 341        | 360      | QQTSESNPPMKLICGHV<br>SR       |           |       | Carbamidomethyl (C)[14], Oxidation (M)[10] |      | Mascot      |
| 2750.3423  | 2750.2644   | -0.0779 | -28   | 41         | 65       | SRLLAYGVQDADLSVLH<br>QTMAQCCK |           |       |                                            |      | Mascot      |

24 small ubiquitin-related modifier 3 precursor [Danio rerio] gi|239048085 10690.3 5.34 5 33 0

#### Peptide Information

| Calc. Mass | Obsrv. Mass | ± da    | ± ppm | Start Seq. | End Seq. | Sequence                  | Ion Score | C. I. | % Modification   | Rank | Result Type |
|------------|-------------|---------|-------|------------|----------|---------------------------|-----------|-------|------------------|------|-------------|
| 838.4893   | 838.4706    | -0.0187 | -22   | 35         | 41       | RHTPLSK                   |           |       |                  |      | Mascot      |
| 864.4131   | 864.4921    | 0.079   | 91    | 1          | 7        | MSEKPK                    |           |       | Oxidation (M)[1] |      | Mascot      |
| 1277.6405  | 1277.6705   | 0.03    | 23    | 1          | 11       | MSEKPKKEGVK               |           |       | Oxidation (M)[1] |      | Mascot      |
| 1475.8217  | 1475.7155   | -0.1062 | -72   | 21         | 34       | VAGQDGSVVQFKIK            |           |       |                  |      | Mascot      |
| 2299.1677  | 2299.1208   | -0.0469 | -20   | 12         | 32       | TENDHINLKVAGQDGSV<br>VQFK |           |       |                  |      | Mascot      |

25 PREDICTED: disco-interacting protein 2 homolog A-like gi|292617384 170570.6 8.3 16 33 0

[Danio rerio]

Peptide Information

| Calc. Mass | Obsrv. Mass | $\pm$ da | $\pm$ ppm | Start Seq. | End Sequence Seq.                 | Ion Score | C. I. % | Modification                                 | Rank | Result Type |
|------------|-------------|----------|-----------|------------|-----------------------------------|-----------|---------|----------------------------------------------|------|-------------|
| 850.4161   | 850.521     | 0.1049   | 123       | 101        | 107 KMPMP SK                      |           |         | Oxidation (M)[2,4]                           |      | Mascot      |
| 856.457    | 856.505     | 0.048    | 56        | 1536       | 1541 QRMHLR                       |           |         | Oxidation (M)[3]                             |      | Mascot      |
| 1024.5673  | 1024.5189   | -0.0484  | -47       | 1275       | 1283 ITLTQSFSK                    |           |         |                                              |      | Mascot      |
| 1024.5673  | 1024.5189   | -0.0484  | -47       | 1275       | 1283 ITLTQSFSK                    |           |         |                                              |      | Mascot      |
| 1062.5612  | 1062.6652   | 0.104    | 98        | 796        | 805 LDGLMVVSGR                    |           |         | Oxidation (M)[5]                             |      | Mascot      |
| 1165.567   | 1165.7134   | 0.1464   | 126       | 1168       | 1176 LQCELYPSR                    |           |         | Carbamidomethyl (C)[3]                       |      | Mascot      |
| 1451.9056  | 1451.7184   | -0.1872  | -129      | 261        | 272 IQQLNLTKRPK                   |           |         |                                              |      | Mascot      |
| 1475.7457  | 1475.7155   | -0.0302  | -20       | 1154       | 1167 MSHAATSALCRSIK               |           |         |                                              |      | Mascot      |
| 1655.8071  | 1655.7225   | -0.0846  | -51       | 598        | 610 DMHWSLLAQ RDQR                |           |         |                                              |      | Mascot      |
| 1655.8323  | 1655.7225   | -0.1098  | -66       | 548        | 562 DAGLWHGVLTSVMNR               |           |         |                                              |      | Mascot      |
| 1671.802   | 1671.72     | -0.082   | -49       | 598        | 610 DMHWSLLAQ RDQR                |           |         | Oxidation (M)[2]                             |      | Mascot      |
| 1671.8271  | 1671.72     | -0.1071  | -64       | 548        | 562 DAGLWHGVLTSVMNR               |           |         | Oxidation (M)[13]                            |      | Mascot      |
| 1705.965   | 1705.7832   | -0.1818  | -107      | 478        | 491 HVVKPPKDWHPPIR                |           |         |                                              |      | Mascot      |
| 1852.9585  | 1852.8947   | -0.0638  | -34       | 1334       | 1350 LVERGSPHSLPLMESGK            |           |         | Oxidation (M)[13]                            |      | Mascot      |
| 1852.9585  | 1852.8947   | -0.0638  | -34       | 1334       | 1350 LVERGSPHSLPLMESGK            |           |         | Oxidation (M)[13]                            |      | Mascot      |
| 1976.9268  | 1977.0013   | 0.0745   | 38        | 160        | 180 VIQGSSTSSSASSTSSHP GGR        |           |         |                                              |      | Mascot      |
| 2154.999   | 2154.9653   | -0.0337  | -16       | 141        | 159 FASSSPYAAQASVEHWF NR          |           |         |                                              |      | Mascot      |
| 2233.0999  | 2233.0366   | -0.0633  | -28       | 1256       | 1274 NVNLSCVRTCMVVAEER PR         |           |         | Carbamidomethyl (C)[6]                       |      | Mascot      |
| 2306.1162  | 2306.0891   | -0.0271  | -12       | 1256       | 1274 NVNLSCVRTCMVVAEER PR         |           |         | Carbamidomethyl (C)[6,10], Oxidation (M)[11] |      | Mascot      |
| 2346.1912  | 2346.0894   | -0.1018  | -43       | 807        | 827 HNADDVVATALAVEPMK FVYR        |           |         |                                              |      | Mascot      |
| 2346.1912  | 2346.0894   | -0.1018  | -43       | 807        | 827 HNADDVVATALAVEPMK FVYR        |           |         |                                              |      | Mascot      |
| 3231.6157  | 3231.4143   | -0.2014  | -62       | 903        | 930 QRFLEGALHPCNVLMCP HTCVTNLPKPR |           |         | Carbamidomethyl (C)[11]                      |      | Mascot      |

26 PTEN induced putative kinase 1 [Danio rerio] gi|197245606 63734.2 9.48 10 33 0

Peptide Information

| Calc. Mass | Obsrv. Mass | $\pm$ da | $\pm$ ppm | Start Seq. | End Sequence Seq.  | Ion Score | C. I. % | Modification | Rank | Result Type |
|------------|-------------|----------|-----------|------------|--------------------|-----------|---------|--------------|------|-------------|
| 1009.5577  | 1009.4827   | -0.075   | -74       | 51         | 58 TFLPGRYR        |           |         |              |      | Mascot      |
| 1062.5916  | 1062.6652   | 0.0736   | 69        | 475        | 483 NPHKRPSAR      |           |         |              |      | Mascot      |
| 1655.8904  | 1655.7225   | -0.1679  | -101      | 126        | 139 KFQSLPKPFTSGYR |           |         |              |      | Mascot      |
| 1655.8904  | 1655.7225   | -0.1679  | -101      | 126        | 139 KFQSLPKPFTSGYR |           |         |              |      | Mascot      |

|           |           |         |     |     |     |                                     |                         |        |
|-----------|-----------|---------|-----|-----|-----|-------------------------------------|-------------------------|--------|
| 1705.807  | 1705.7832 | -0.0238 | -14 | 223 | 237 | SMSMELVPSCPQALR                     | Carbamidomethyl (C)[10] | Mascot |
| 1852.9663 | 1852.8947 | -0.0716 | -39 | 239 | 255 | EQGELTLNGHFGAVPKR                   |                         | Mascot |
| 1852.9663 | 1852.8947 | -0.0716 | -39 | 239 | 255 | EQGELTLNGHFGAVPKR                   |                         | Mascot |
| 1913.0425 | 1912.9221 | -0.1204 | -63 | 291 | 307 | LNPHGLGSNRTLFLVMK                   | Oxidation (M)[16]       | Mascot |
| 2174.1096 | 2174.0359 | -0.0737 | -34 | 325 | 343 | TQASLMFLQLLEGVDHLC<br>R             |                         | Mascot |
| 2264.1418 | 2264.0298 | -0.112  | -49 | 281 | 300 | EEYPDVLPTRLNPHGLG<br>SNR            |                         | Mascot |
| 2346.2056 | 2346.0894 | -0.1162 | -50 | 324 | 343 | RTQASLMFLQLLEGVDHL<br>CR            | Oxidation (M)[7]        | Mascot |
| 2346.2056 | 2346.0894 | -0.1162 | -50 | 324 | 343 | RTQASLMFLQLLEGVDHL<br>CR            | Oxidation (M)[7]        | Mascot |
| 3338.5823 | 3338.6643 | 0.082   | 25  | 207 | 237 | MMWNIGAGSSSDAILRS<br>MSMELVPSCPQALR |                         | Mascot |
| 3395.6038 | 3395.5168 | -0.087  | -26 | 207 | 237 | MMWNIGAGSSSDAILRS<br>MSMELVPSCPQALR | Carbamidomethyl (C)[26] | Mascot |

27 pyruvate dehydrogenase kinase, isozyme 3b [Danio rerio] gi|123702577 21003.7 8.49 7 33 0

#### Peptide Information

| Calc. Mass | Obsrv. Mass | ± da    | ± ppm | Start Seq. | End Seq. | Sequence            | Ion Score | C. I. % | Modification            | Rank | Result Type |
|------------|-------------|---------|-------|------------|----------|---------------------|-----------|---------|-------------------------|------|-------------|
| 882.4468   | 882.543     | 0.0962  | 109   | 30         | 36       | QFLDFGR             |           |         |                         |      | Mascot      |
| 1009.5023  | 1009.4827   | -0.0196 | -19   | 21         | 29       | FSPSPMSIK           |           |         | Oxidation (M)[6]        |      | Mascot      |
| 1045.5499  | 1045.5383   | -0.0116 | -11   | 43         | 50       | TSYMFLRK            |           |         |                         |      | Mascot      |
| 1165.6836  | 1165.7134   | 0.0298  | 26    | 1          | 9        | MKLFICLLK           |           |         | Carbamidomethyl (C)[6]  |      | Mascot      |
| 1613.7377  | 1613.6996   | -0.0381 | -24   | 30         | 42       | QFLDFGRENACEK       |           |         | Carbamidomethyl (C)[11] |      | Mascot      |
| 2155.0852  | 2154.9653   | -0.1199 | -56   | 96         | 113      | RSPEDPHTLNDFLEMLIK  |           |         |                         |      | Mascot      |
| 2284.1641  | 2284.1128   | -0.0513 | -22   | 97         | 115      | SPEDPHTLNDFLEMLIKIR |           |         | Oxidation (M)[14]       |      | Mascot      |

28 estrogen-related receptor delta [Danio rerio] gi|45479152 39073.7 8.84 8 33 0

#### Peptide Information

| Calc. Mass | Obsrv. Mass | ± da    | ± ppm | Start Seq. | End Seq. | Sequence       | Ion Score | C. I. % | Modification                             | Rank | Result Type |
|------------|-------------|---------|-------|------------|----------|----------------|-----------|---------|------------------------------------------|------|-------------|
| 824.4195   | 824.4124    | -0.0071 | -9    | 317        | 322      | SVRCFR         | 1         | 0       | Carbamidomethyl (C)[4]                   |      | Mascot      |
| 824.4195   | 824.4124    | -0.0071 | -9    | 317        | 322      | SVRCFR         |           |         | Carbamidomethyl (C)[4]                   |      | Mascot      |
| 937.4528   | 937.3951    | -0.0577 | -62   | 74         | 81       | CLRAGMMR       |           |         |                                          |      | Mascot      |
| 1308.665   | 1308.6438   | -0.0212 | -16   | 150        | 160      | TLMTLCDLLNR    |           |         | Oxidation (M)[3]                         |      | Mascot      |
| 1580.7672  | 1580.7137   | -0.0535 | -34   | 237        | 248      | HLTCRYQQMSLK   |           |         | Carbamidomethyl (C)[4], Oxidation (M)[9] |      | Mascot      |
| 1671.9172  | 1671.72     | -0.1972 | -118  | 123        | 136      | LICELLCEVTPLR  | 3         | 0       | Carbamidomethyl (C)[8]                   |      | Mascot      |
| 1671.9172  | 1671.72     | -0.1972 | -118  | 123        | 136      | LICELLCEVTPLR  |           |         | Carbamidomethyl (C)[3]                   |      | Mascot      |
| 1673.9189  | 1673.7437   | -0.1752 | -105  | 303        | 316      | MLMTLPLLRQTANR |           |         | Oxidation (M)[1]                         |      | Mascot      |

|  |           |           |         |     |     |     |                          |  |  |  |                         |        |
|--|-----------|-----------|---------|-----|-----|-----|--------------------------|--|--|--|-------------------------|--------|
|  | 2283.0632 | 2283.1182 | 0.055   | 24  | 41  | 60  | TIQGNIEYSCPVVNDCEIT<br>K |  |  |  | Carbamidomethyl (C)[10] | Mascot |
|  | 2283.0632 | 2283.1182 | 0.055   | 24  | 41  | 60  | TIQGNIEYSCPVVNDCEIT<br>K |  |  |  | Carbamidomethyl (C)[10] | Mascot |
|  | 2346.2097 | 2346.0894 | -0.1203 | -51 | 324 | 343 | LHTDGHVPMHKLFLEML<br>EAK |  |  |  |                         | Mascot |
|  | 2346.2097 | 2346.0894 | -0.1203 | -51 | 324 | 343 | LHTDGHVPMHKLFLEML<br>EAK |  |  |  |                         | Mascot |

29 PREDICTED: estrogen-related receptor gamma [Danio rerio] gi|326676287 50268.9 6.95 8 32 0

#### Peptide Information

| Calc. Mass | Obsrv. Mass | ± da    | ± ppm | Start Seq. | End Seq. | Sequence                 | Ion Score | C. I. | % Modification                           | Rank | Result Type |
|------------|-------------|---------|-------|------------|----------|--------------------------|-----------|-------|------------------------------------------|------|-------------|
| 824.4195   | 824.4124    | -0.0071 | -9    | 424        | 429      | SVRCFR                   | 1         | 0     | Carbamidomethyl (C)[4]                   |      | Mascot      |
| 824.4195   | 824.4124    | -0.0071 | -9    | 424        | 429      | SVRCFR                   |           |       | Carbamidomethyl (C)[4]                   |      | Mascot      |
| 937.4528   | 937.3951    | -0.0577 | -62   | 181        | 188      | CLRAGMMR                 |           |       |                                          |      | Mascot      |
| 1308.665   | 1308.6438   | -0.0212 | -16   | 257        | 267      | TLMTLCDLLNR              |           |       | Oxidation (M)[3]                         |      | Mascot      |
| 1580.7672  | 1580.7137   | -0.0535 | -34   | 344        | 355      | HLTCRYQQMSLK             |           |       | Carbamidomethyl (C)[4], Oxidation (M)[9] |      | Mascot      |
| 1671.9172  | 1671.72     | -0.1972 | -118  | 230        | 243      | LICELLCEVTPLR            | 3         | 0     | Carbamidomethyl (C)[8]                   |      | Mascot      |
| 1671.9172  | 1671.72     | -0.1972 | -118  | 230        | 243      | LICELLCEVTPLR            |           |       | Carbamidomethyl (C)[3]                   |      | Mascot      |
| 1673.9189  | 1673.7437   | -0.1752 | -105  | 410        | 423      | MLMTLPLLRQTANR           |           |       | Oxidation (M)[1]                         |      | Mascot      |
| 2283.0632  | 2283.1182   | 0.055   | 24    | 148        | 167      | TIQGNIEYSCPVVNDCEIT<br>K |           |       | Carbamidomethyl (C)[10]                  |      | Mascot      |
| 2283.0632  | 2283.1182   | 0.055   | 24    | 148        | 167      | TIQGNIEYSCPVVNDCEIT<br>K |           |       | Carbamidomethyl (C)[10]                  |      | Mascot      |
| 2346.2097  | 2346.0894   | -0.1203 | -51   | 431        | 450      | LHTDGHVPMHKLFLEML<br>EAK |           |       |                                          |      | Mascot      |
| 2346.2097  | 2346.0894   | -0.1203 | -51   | 431        | 450      | LHTDGHVPMHKLFLEML<br>EAK |           |       |                                          |      | Mascot      |

30 novel protein (zgc:55575) [Danio rerio] gi|56207459 85210.2 5.3 11 32 0

#### Peptide Information

| Calc. Mass | Obsrv. Mass | ± da    | ± ppm | Start Seq. | End Seq. | Sequence          | Ion Score | C. I. | % Modification         | Rank | Result Type |
|------------|-------------|---------|-------|------------|----------|-------------------|-----------|-------|------------------------|------|-------------|
| 882.4427   | 882.543     | 0.1003  | 114   | 349        | 355      | VNEEHVR           |           |       |                        |      | Mascot      |
| 937.4481   | 937.3951    | -0.053  | -57   | 140        | 148      | LGGMETVCK         |           |       |                        |      | Mascot      |
| 1045.5823  | 1045.5383   | -0.044  | -42   | 622        | 630      | ALRLNPSMK         |           |       | Oxidation (M)[8]       |      | Mascot      |
| 1165.6622  | 1165.7134   | 0.0512  | 44    | 59         | 67       | TLRHPCLLR         |           |       | Carbamidomethyl (C)[6] |      | Mascot      |
| 1179.6885  | 1179.5714   | -0.1171 | -99   | 308        | 317      | SFLPHLLQPK        |           |       |                        |      | Mascot      |
| 1467.7625  | 1467.7169   | -0.0456 | -31   | 219        | 231      | NMLQASLLTPDHK     |           |       |                        |      | Mascot      |
| 2154.9939  | 2154.9653   | -0.0286 | -13   | 689        | 706      | FEPDPELDFADMIPIK  |           |       | Oxidation (M)[13]      |      | Mascot      |
| 2283.0889  | 2283.1182   | 0.0293  | 13    | 688        | 706      | KFEPDPELDFADMIPIK |           |       | Oxidation (M)[14]      |      | Mascot      |

|  |           |           |         |     |     |     |                              |  |                         |        |
|--|-----------|-----------|---------|-----|-----|-----|------------------------------|--|-------------------------|--------|
|  | 2283.0889 | 2283.1182 | 0.0293  | 13  | 688 | 706 | KFEPDPELDFADMIPIK            |  | Oxidation (M)[14]       | Mascot |
|  | 2297.1189 | 2297.1318 | 0.0129  | 6   | 318 | 337 | QDSSVNAGEECLLSLSLY<br>RR     |  | Carbamidomethyl (C)[11] | Mascot |
|  | 2367.2375 | 2367.1724 | -0.0651 | -28 | 68  | 89  | FLSCSVQDGGIHLVTEPV<br>QPLK   |  |                         | Mascot |
|  | 2750.2913 | 2750.2644 | -0.0269 | -10 | 494 | 517 | TVFSSEMSFPLNGYRMS<br>TQPVESR |  |                         | Mascot |

31 oxysterol-binding protein-related protein 1 [Danio rerio] gi|113682341 110027.3 5.74 13 31 0

#### Peptide Information

| Calc. Mass | Obsrv. Mass | ± da    | ± ppm | Start Seq. | End Seq. | Sequence                 | Ion Score | C. I. % | Modification                                 | Rank | Result Type |
|------------|-------------|---------|-------|------------|----------|--------------------------|-----------|---------|----------------------------------------------|------|-------------|
| 838.449    | 838.4706    | 0.0216  | 26    | 786        | 792      | VCVLYGK                  |           |         | Carbamidomethyl (C)[2]                       |      | Mascot      |
| 864.5045   | 864.4921    | -0.0124 | -14   | 25         | 31       | LLMCKIK                  |           |         | Oxidation (M)[3]                             |      | Mascot      |
| 937.4481   | 937.3951    | -0.053  | -57   | 572        | 579      | CIGMELSK                 |           |         | Carbamidomethyl (C)[1]                       |      | Mascot      |
| 1024.5165  | 1024.5189   | 0.0024  | 2     | 571        | 579      | KCIGMELSK                |           |         | Oxidation (M)[5]                             |      | Mascot      |
| 1024.5165  | 1024.5189   | 0.0024  | 2     | 571        | 579      | KCIGMELSK                |           |         | Oxidation (M)[5]                             |      | Mascot      |
| 1106.5663  | 1106.5132   | -0.0531 | -48   | 551        | 560      | TSLPAPMFSR               |           |         |                                              |      | Mascot      |
| 1277.6525  | 1277.6705   | 0.018   | 14    | 695        | 705      | FWGKSVEAEPK              |           |         |                                              |      | Mascot      |
| 1308.6735  | 1308.6438   | -0.0297 | -23   | 682        | 692      | NFVFHGSYIPK              |           |         |                                              |      | Mascot      |
| 1451.6794  | 1451.7184   | 0.039   | 27    | 129        | 140      | SMLEATERTEER             |           |         |                                              |      | Mascot      |
| 1467.6744  | 1467.7169   | 0.0425  | 29    | 129        | 140      | SMLEATERTEER             |           |         | Oxidation (M)[2]                             |      | Mascot      |
| 1671.8127  | 1671.72     | -0.0927 | -55   | 282        | 295      | QGCKPLTQAHCMIK           |           |         | Carbamidomethyl (C)[3,11]                    |      | Mascot      |
| 1671.8127  | 1671.72     | -0.0927 | -55   | 282        | 295      | QGCKPLTQAHCMIK           |           |         | Carbamidomethyl (C)[3,11]                    |      | Mascot      |
| 1687.8076  | 1687.7537   | -0.0539 | -32   | 282        | 295      | QGCKPLTQAHCMIK           |           |         | Carbamidomethyl (C)[3,11], Oxidation (M)[12] |      | Mascot      |
| 1829.9183  | 1829.8514   | -0.0669 | -37   | 282        | 297      | QGCKPLTQAHCMIKAK         |           |         | Carbamidomethyl (C)[3], Oxidation (M)[12]    |      | Mascot      |
| 1993.9808  | 1993.9214   | -0.0594 | -30   | 757        | 773      | CCLNFKPCGLFGKELHK        |           |         | Carbamidomethyl (C)[1]                       |      | Mascot      |
| 2211.0664  | 2211.0466   | -0.0198 | -9    | 44         | 62       | SKSNHGWTPHLACYFG<br>HR   |           |         |                                              |      | Mascot      |
| 2306.0752  | 2306.0891   | 0.0139  | 6     | 891        | 910      | LRPDIRAMENGIDIMASE<br>EK |           |         | Oxidation (M)[8]                             |      | Mascot      |

32 RecName: Full=Ras-specific guanine nucleotide-releasing factor RalGPS1; AltName: Full=Ral GEF with gi|189040075 65996.6 9.38 10 31 0

#### Peptide Information

| Calc. Mass | Obsrv. Mass | ± da   | ± ppm | Start Seq. | End Seq. | Sequence | Ion Score | C. I. % | Modification           | Rank | Result Type |
|------------|-------------|--------|-------|------------|----------|----------|-----------|---------|------------------------|------|-------------|
| 824.3533   | 824.4124    | 0.0591 | 72    | 180        | 185      | EENYNR   |           |         |                        |      | Mascot      |
| 824.3533   | 824.4124    | 0.0591 | 72    | 180        | 185      | EENYNR   |           |         |                        |      | Mascot      |
| 838.4304   | 838.4706    | 0.0402 | 48    | 166        | 172      | DKATFEK  |           |         |                        |      | Mascot      |
| 856.4093   | 856.505     | 0.0957 | 112   | 561        | 567      | HLAEACR  |           |         | Carbamidomethyl (C)[6] |      | Mascot      |



|           |           |         |     |     |     |                                    |  |  |  |                  |  |  |        |
|-----------|-----------|---------|-----|-----|-----|------------------------------------|--|--|--|------------------|--|--|--------|
| 1421.7107 | 1421.7091 | -0.0016 | -1  | 414 | 425 | GRMYATLGPNWR                       |  |  |  |                  |  |  | Mascot |
| 1671.8774 | 1671.72   | -0.1574 | -94 | 260 | 272 | YLMSVRYIEELQK                      |  |  |  |                  |  |  | Mascot |
| 1671.8774 | 1671.72   | -0.1574 | -94 | 260 | 272 | YLMSVRYIEELQK                      |  |  |  |                  |  |  | Mascot |
| 1673.8315 | 1673.7437 | -0.0878 | -52 | 67  | 81  | AIQPEELASCGWNKK                    |  |  |  |                  |  |  | Mascot |
| 1687.8723 | 1687.7537 | -0.1186 | -70 | 260 | 272 | YLMSVRYIEELQK                      |  |  |  | Oxidation (M)[3] |  |  | Mascot |
| 1705.8921 | 1705.7832 | -0.1089 | -64 | 547 | 560 | FQTGSRFSAIIWHR                     |  |  |  |                  |  |  | Mascot |
| 1976.9957 | 1977.0013 | 0.0056  | 3   | 294 | 312 | LVSSKEDLGGPSEVSMS<br>VR            |  |  |  |                  |  |  | Mascot |
| 2367.1462 | 2367.1724 | 0.0262  | 11  | 273 | 293 | FVEDDNYSLSLKIEPGNS<br>SPR          |  |  |  |                  |  |  | Mascot |
| 3395.5735 | 3395.5168 | -0.0567 | -17 | 383 | 413 | NHTHDSVFTNGISLGSRE<br>SSFSDLSSTVER |  |  |  |                  |  |  | Mascot |

33 epoxide hydrolase 2 [Danio rerio] gi|56693357 61852.6 6.11 9 31 0

#### Peptide Information

| Calc. Mass | Obsrv. Mass | ± da    | ± ppm | Start Seq. | End Seq. | Sequence                            | Ion Score | C. I. | % Modification          | Rank | Result Type |
|------------|-------------|---------|-------|------------|----------|-------------------------------------|-----------|-------|-------------------------|------|-------------|
| 838.4781   | 838.4706    | -0.0075 | -9    | 549        | 556      | ASISVHPK                            |           |       |                         |      | Mascot      |
| 1467.7128  | 1467.7169   | 0.0041  | 3     | 461        | 471      | GPLNWKYRNYER                        |           |       |                         |      | Mascot      |
| 1475.8324  | 1475.7155   | -0.1169 | -79   | 482        | 495      | AKILMPALMVTAGK                      |           |       | Oxidation (M)[5,9]      |      | Mascot      |
| 1852.9738  | 1852.8947   | -0.0791 | -43   | 97         | 112      | VEFNMTFLDAAAVLRR                    |           |       |                         |      | Mascot      |
| 1852.9738  | 1852.8947   | -0.0791 | -43   | 97         | 112      | VEFNMTFLDAAAVLRR                    |           |       |                         |      | Mascot      |
| 1881.8721  | 1881.9406   | 0.0685  | 36    | 57         | 72       | TTLAQMIPEFDAECQK                    |           |       | Carbamidomethyl (C)[14] |      | Mascot      |
| 2092.0896  | 2091.9583   | -0.1313 | -63   | 272        | 290      | YQIPALADAGFRVLAPDM<br>K             |           |       | Oxidation (M)[18]       |      | Mascot      |
| 2225.113   | 2225.0593   | -0.0537 | -24   | 417        | 438      | LSPAGVCQRGGLFVGSP<br>DDPPR          |           |       |                         |      | Mascot      |
| 2225.113   | 2225.0593   | -0.0537 | -24   | 417        | 438      | LSPAGVCQRGGLFVGSP<br>DDPPR          |           |       |                         |      | Mascot      |
| 2284.2004  | 2284.1128   | -0.0876 | -38   | 496        | 516      | DPVLLPAFATGMENLIPN<br>LSR           |           |       | Oxidation (M)[12]       |      | Mascot      |
| 3379.615   | 3379.5144   | -0.1006 | -30   | 426        | 456      | GGLFVGSPDDPPRSSML<br>SVSALQFYTEQYSK |           |       | Oxidation (M)[16]       |      | Mascot      |

34 Si:ch211-215a10.4 protein [Danio rerio] gi|126631961 20359.9 9.75 5 31 0

#### Peptide Information

| Calc. Mass | Obsrv. Mass | ± da    | ± ppm | Start Seq. | End Seq. | Sequence                        | Ion Score | C. I. | % Modification                             | Rank | Result Type |
|------------|-------------|---------|-------|------------|----------|---------------------------------|-----------|-------|--------------------------------------------|------|-------------|
| 882.5519   | 882.543     | -0.0089 | -10   | 5          | 11       | LRVELPR                         |           |       |                                            |      | Mascot      |
| 1976.986   | 1977.0013   | 0.0153  | 8     | 52         | 67       | LMCLFYADAQLEVLK                 |           |       | Carbamidomethyl (C)[3]                     |      | Mascot      |
| 2367.1152  | 2367.1724   | 0.0572  | 24    | 101        | 120      | NHLYRTYDAFSTFYIGAD<br>GR        |           |       |                                            |      | Mascot      |
| 3337.7615  | 3337.6836   | -0.0779 | -23   | 41         | 67       | VVYQLTLTLWKLMLCFYY<br>ADAQLEVLK |           |       | Carbamidomethyl (C)[14], Oxidation (M)[13] |      | Mascot      |
| 3337.7615  | 3337.6836   | -0.0779 | -23   | 41         | 67       | VVYQLTLTLWKLMLCFYY              |           |       | Carbamidomethyl (C)[14], Oxidation (M)[13] |      | Mascot      |

3338.93433338.6643-0.27-81140171ADAQLEVLK  
VASMLGGALVALGIQEHR  
PALNLLPLLLSSLR

novel protein [Danio rerio]

gi|16915427485664.75.9412310

Oxidation (M)[4]

Mascot

Peptide Information

| Calc. Mass | Obsrv. Mass | ± da    | ± ppm | Start Seq. | End Seq. | Sequence                         | Ion Score | C. I. | % Modification                           | Rank | Result Type |
|------------|-------------|---------|-------|------------|----------|----------------------------------|-----------|-------|------------------------------------------|------|-------------|
| 864.3879   | 864.4921    | 0.1042  | 121   | 693        | 699      | MEEATQR                          |           |       |                                          |      | Mascot      |
| 1009.5789  | 1009.4827   | -0.0962 | -95   | 536        | 543      | HKLDQLQK                         |           |       |                                          |      | Mascot      |
| 1024.5533  | 1024.5189   | -0.0344 | -34   | 72         | 79       | DEKVQLHR                         |           |       |                                          |      | Mascot      |
| 1024.5533  | 1024.5189   | -0.0344 | -34   | 72         | 79       | DEKVQLHR                         |           |       |                                          |      | Mascot      |
| 1165.5881  | 1165.7134   | 0.1253  | 107   | 1          | 10       | MLESSVNKK                        |           |       | Oxidation (M)[1]                         |      | Mascot      |
| 1308.61    | 1308.6438   | 0.0338  | 26    | 155        | 165      | ALQTETCTQEK                      |           |       | Carbamidomethyl (C)[7]                   |      | Mascot      |
| 1613.8857  | 1613.6996   | -0.1861 | -115  | 242        | 254      | ESLLEELDIRQLR                    |           |       |                                          |      | Mascot      |
| 1829.848   | 1829.8514   | 0.0034  | 2     | 425        | 439      | YDFEEDPTIEPSLK                   |           |       |                                          |      | Mascot      |
| 1890.9412  | 1890.912    | -0.0292 | -15   | 12         | 27       | CIPSSLTQLCKQLEDR                 |           |       | Carbamidomethyl (C)[1]                   |      | Mascot      |
| 2225.1018  | 2225.0593   | -0.0425 | -19   | 641        | 659      | DHLQEAIAAWEQATCLIQK              |           |       | Carbamidomethyl (C)[15]                  |      | Mascot      |
| 2225.1018  | 2225.0593   | -0.0425 | -19   | 641        | 659      | DHLQEAIAAWEQATCLIQK              |           |       | Carbamidomethyl (C)[15]                  |      | Mascot      |
| 2233.1758  | 2233.0366   | -0.1392 | -62   | 341        | 360      | QLRAQGDVVSVAFTPQTI<br>MR         |           |       | Oxidation (M)[19]                        |      | Mascot      |
| 2306.0327  | 2306.0891   | 0.0564  | 24    | 680        | 699      | FFQPGFPGSSMARMEEA<br>TQR         |           |       | Oxidation (M)[11,14]                     |      | Mascot      |
| 3338.5952  | 3338.6643   | 0.0691  | 21    | 379        | 407      | MCPVYNDLTKEIDSASV<br>LQMDQNLEIQK |           |       | Oxidation (M)[1]                         |      | Mascot      |
| 3379.6218  | 3379.5144   | -0.1074 | -32   | 379        | 407      | MCPVYNDLTKEIDSASV<br>LQMDQNLEIQK |           |       | Carbamidomethyl (C)[2]                   |      | Mascot      |
| 3395.6167  | 3395.5168   | -0.0999 | -29   | 379        | 407      | MCPVYNDLTKEIDSASV<br>LQMDQNLEIQK |           |       | Carbamidomethyl (C)[2], Oxidation (M)[1] |      | Mascot      |

36

PREDICTED: zinc finger protein 845-like [Danio rerio]

gi|32667807876495.69.036310220

Peptide Information

| Calc. Mass | Obsrv. Mass | ± da    | ± ppm | Start Seq. | End Seq. | Sequence                         | Ion Score | C. I. | % Modification             | Rank | Result Type |
|------------|-------------|---------|-------|------------|----------|----------------------------------|-----------|-------|----------------------------|------|-------------|
| 937.485    | 937.3951    | -0.0899 | -96   | 619        | 626      | AHEKSHTK                         |           |       |                            |      | Mascot      |
| 1024.5317  | 1024.5189   | -0.0128 | -12   | 629        | 637      | LFLCIACGK                        |           |       | Carbamidomethyl (C)[4]     |      | Mascot      |
| 1024.5317  | 1024.5189   | -0.0128 | -12   | 629        | 637      | LFLCIACGK                        | 22        | 0     | Carbamidomethyl (C)[7]     |      | Mascot      |
| 1475.7423  | 1475.7155   | -0.0268 | -18   | 111        | 122      | IHTGEKPYKCSR                     |           |       | Carbamidomethyl (C)[10]    |      | Mascot      |
| 1673.7991  | 1673.7437   | -0.0554 | -33   | 280        | 293      | KHTNTYHSNSISER                   |           |       |                            |      | Mascot      |
| 1829.8638  | 1829.8514   | -0.0124 | -7    | 281        | 295      | HTNTYHSNSISERQR                  |           |       |                            |      | Mascot      |
| 3338.5139  | 3338.6643   | 0.1504  | 45    | 498        | 525      | TFNELGSLKAHEMNHTG<br>ERPYTCTQCWK |           |       | Carbamidomethyl (C)[23]    |      | Mascot      |
| 3395.5354  | 3395.5168   | -0.0186 | -5    | 498        | 525      | TFNELGSLKAHEMNHTG                |           |       | Carbamidomethyl (C)[23,26] |      | Mascot      |

37 Osbpl1a protein [Danio rerio] ERPYTCTQCWK  
gi|190338207 110421.6 5.77 13 31 0

Peptide Information

| Calc. Mass | Obsrv. Mass | ± da    | ± ppm | Start Seq. | End Seq. | Sequence                 | Ion Score | C. I. % | Modification                                 | Rank | Result Type |
|------------|-------------|---------|-------|------------|----------|--------------------------|-----------|---------|----------------------------------------------|------|-------------|
| 838.449    | 838.4706    | 0.0216  | 26    | 784        | 790      | VCVLYGK                  |           |         | Carbamidomethyl (C)[2]                       |      | Mascot      |
| 864.5045   | 864.4921    | -0.0124 | -14   | 25         | 31       | LLMCKIK                  |           |         | Oxidation (M)[3]                             |      | Mascot      |
| 937.4481   | 937.3951    | -0.053  | -57   | 572        | 579      | CIGMELSK                 |           |         | Carbamidomethyl (C)[1]                       |      | Mascot      |
| 1024.5165  | 1024.5189   | 0.0024  | 2     | 571        | 579      | KCIGMELSK                |           |         | Oxidation (M)[5]                             |      | Mascot      |
| 1024.5165  | 1024.5189   | 0.0024  | 2     | 571        | 579      | KCIGMELSK                |           |         | Oxidation (M)[5]                             |      | Mascot      |
| 1106.5663  | 1106.5132   | -0.0531 | -48   | 551        | 560      | TSLPAPMFSR               |           |         |                                              |      | Mascot      |
| 1277.6525  | 1277.6705   | 0.018   | 14    | 695        | 705      | FWGKSVEAEPK              |           |         |                                              |      | Mascot      |
| 1308.6735  | 1308.6438   | -0.0297 | -23   | 682        | 692      | NFVFHGSYYPK              |           |         |                                              |      | Mascot      |
| 1451.6794  | 1451.7184   | 0.039   | 27    | 129        | 140      | SMLEATERTEER             |           |         |                                              |      | Mascot      |
| 1467.6744  | 1467.7169   | 0.0425  | 29    | 129        | 140      | SMLEATERTEER             |           |         | Oxidation (M)[2]                             |      | Mascot      |
| 1671.8127  | 1671.72     | -0.0927 | -55   | 282        | 295      | QGCKPLTQAHCMIK           |           |         | Carbamidomethyl (C)[3,11]                    |      | Mascot      |
| 1671.8127  | 1671.72     | -0.0927 | -55   | 282        | 295      | QGCKPLTQAHCMIK           |           |         | Carbamidomethyl (C)[3,11]                    |      | Mascot      |
| 1687.8076  | 1687.7537   | -0.0539 | -32   | 282        | 295      | QGCKPLTQAHCMIK           |           |         | Carbamidomethyl (C)[3,11], Oxidation (M)[12] |      | Mascot      |
| 1829.9183  | 1829.8514   | -0.0669 | -37   | 282        | 297      | QGCKPLTQAHCMIKAK         |           |         | Carbamidomethyl (C)[3], Oxidation (M)[12]    |      | Mascot      |
| 1993.9808  | 1993.9214   | -0.0594 | -30   | 755        | 771      | CCLNFKPCGLFGKELHK        |           |         | Carbamidomethyl (C)[1]                       |      | Mascot      |
| 2211.0664  | 2211.0466   | -0.0198 | -9    | 44         | 62       | SKSNHGWTPHLACYFG<br>HR   |           |         |                                              |      | Mascot      |
| 2306.0752  | 2306.0891   | 0.0139  | 6     | 889        | 908      | LRPDIRAMENGIDIMASE<br>EK |           |         | Oxidation (M)[8]                             |      | Mascot      |

38 novel protein similar to vertebrate nischarin (NISCH) [Danio rerio] gi|220673046 27908.3 4.83 6 30 0

Peptide Information

| Calc. Mass | Obsrv. Mass | ± da    | ± ppm | Start Seq. | End Seq. | Sequence                                    | Ion Score | C. I. % | Modification           | Rank | Result Type |
|------------|-------------|---------|-------|------------|----------|---------------------------------------------|-----------|---------|------------------------|------|-------------|
| 850.3974   | 850.521     | 0.1236  | 145   | 46         | 52       | CIDESVK                                     |           |         | Carbamidomethyl (C)[1] |      | Mascot      |
| 1045.5775  | 1045.5383   | -0.0392 | -37   | 191        | 199      | ELDTVEVLK                                   |           |         |                        |      | Mascot      |
| 1179.6554  | 1179.5714   | -0.084  | -71   | 142        | 151      | HIGLLPCLEK                                  |           |         | Carbamidomethyl (C)[7] |      | Mascot      |
| 1613.8138  | 1613.6996   | -0.1142 | -71   | 33         | 45       | MLTTLDMSRNYIR                               |           |         |                        |      | Mascot      |
| 2033.0306  | 2033.0118   | -0.0188 | -9    | 152        | 168      | LNLANNPMCIIPDYRTK                           |           |         | Carbamidomethyl (C)[9] |      | Mascot      |
| 3379.5918  | 3379.5144   | -0.0774 | -23   | 218        | 253      | VSDVPGQAAGGPQSSSS<br>SLVVPSSSSPSLSRSTC<br>S |           |         |                        |      | Mascot      |

39 glial fibrillary acidic protein [Danio rerio] gi|239596173 19203.6 4.89 6 30 0

| Peptide Information |                                                                |             |         |       |              |                   |           |       |                  |                  |
|---------------------|----------------------------------------------------------------|-------------|---------|-------|--------------|-------------------|-----------|-------|------------------|------------------|
|                     | Calc. Mass                                                     | Obsrv. Mass | ± da    | ± ppm | Start Seq.   | End Sequence Seq. | Ion Score | C. I. | % Modification   | Rank Result Type |
|                     | 932.4683                                                       | 932.478     | 0.0097  | 10    | 122          | 129 LLEGEESR      |           |       |                  | Mascot           |
|                     | 1106.5259                                                      | 1106.5132   | -0.0127 | -11   | 62           | 69 QLREMEER       |           |       | Oxidation (M)[5] | Mascot           |
|                     | 1277.71                                                        | 1277.6705   | -0.0395 | -31   | 110          | 120 LALDIEIATYR   |           |       |                  | Mascot           |
|                     | 1308.6543                                                      | 1308.6438   | -0.0105 | -8    | 12           | 23 SKFADLTDAANR   |           |       |                  | Mascot           |
|                     | 1475.7522                                                      | 1475.7155   | -0.0367 | -25   | 41           | 53 QIQGLTCDLESLR  |           |       |                  | Mascot           |
|                     | 1687.738                                                       | 1687.7537   | 0.0157  | 9     | 1            | 13 SNMQETEEWYRSK  |           |       |                  | Mascot           |
| 40                  | PREDICTED: OTU domain-containing protein 7A-like [Danio rerio] |             |         |       | gi 326680401 | 116078.3          | 6.69      | 12    | 30               | 0                |

| Peptide Information |                                                                       |             |         |       |             |                                   |           |       |                                                   |                  |
|---------------------|-----------------------------------------------------------------------|-------------|---------|-------|-------------|-----------------------------------|-----------|-------|---------------------------------------------------|------------------|
|                     | Calc. Mass                                                            | Obsrv. Mass | ± da    | ± ppm | Start Seq.  | End Sequence Seq.                 | Ion Score | C. I. | % Modification                                    | Rank Result Type |
|                     | 937.4771                                                              | 937.3951    | -0.082  | -87   | 1           | 9 MLISGLSTGR                      |           |       | Oxidation (M)[1]                                  | Mascot           |
|                     | 1277.6882                                                             | 1277.6705   | -0.0177 | -14   | 1           | 12 MLISGLSTGREVK                  |           |       |                                                   | Mascot           |
|                     | 1308.7423                                                             | 1308.6438   | -0.0985 | -75   | 483         | 494 LLALHFAVDPGR                  |           |       |                                                   | Mascot           |
|                     | 1467.8099                                                             | 1467.7169   | -0.093  | -63   | 619         | 633 NMGGGLGGLVHGKISK              |           |       |                                                   | Mascot           |
|                     | 1475.6116                                                             | 1475.7155   | 0.1039  | 70    | 274         | 285 LNWWSTMCTSCK                  |           |       | Oxidation (M)[7]                                  | Mascot           |
|                     | 1613.8492                                                             | 1613.6996   | -0.1496 | -93   | 123         | 138 STGAEPGLARDLLEGK              |           |       |                                                   | Mascot           |
|                     | 1671.87                                                               | 1671.72     | -0.15   | -90   | 354         | 367 EWNELLKLASSEPR                | 2         |       | 0                                                 | Mascot           |
|                     | 1671.87                                                               | 1671.72     | -0.15   | -90   | 354         | 367 EWNELLKLASSEPR                |           |       |                                                   | Mascot           |
|                     | 1705.7131                                                             | 1705.7832   | 0.0701  | 41    | 991         | 1004 GQSGVCPMYCFQQK               |           |       | Carbamidomethyl (C)[6,10], Oxidation (M)[8]       | Mascot           |
|                     | 1993.9938                                                             | 1993.9214   | -0.0724 | -36   | 466         | 482 DQQREQAVIPLTDEHK              |           |       |                                                   | Mascot           |
|                     | 2284.2407                                                             | 2284.1128   | -0.1279 | -56   | 777         | 796 KPQTNGVALKKPEQESV FQR         |           |       |                                                   | Mascot           |
|                     | 2346.1653                                                             | 2346.0894   | -0.0759 | -32   | 205         | 227 GISHASSAIMSLARLQVS GDCAR      |           |       | Oxidation (M)[10]                                 | Mascot           |
|                     | 2346.1653                                                             | 2346.0894   | -0.0759 | -32   | 205         | 227 GISHASSAIMSLARLQVS GDCAR      |           |       | Oxidation (M)[10]                                 | Mascot           |
|                     | 3338.4619                                                             | 3338.6643   | 0.2024  | 61    | 258         | 285 DLIEQSTMMALEQAGRL NWWSTMCTSCK |           |       | Carbamidomethyl (C)[24], Oxidation (M)[8,9,23]    | Mascot           |
|                     | 3379.4883                                                             | 3379.5144   | 0.0261  | 8     | 258         | 285 DLIEQSTMMALEQAGRL NWWSTMCTSCK |           |       | Carbamidomethyl (C)[24,27], Oxidation (M)[8,9]    | Mascot           |
|                     | 3395.4834                                                             | 3395.5168   | 0.0334  | 10    | 258         | 285 DLIEQSTMMALEQAGRL NWWSTMCTSCK |           |       | Carbamidomethyl (C)[24,27], Oxidation (M)[8,9,23] | Mascot           |
| 41                  | novel protein similar to vertebrate caldesmon 1 (CALD1) [Danio rerio] |             |         |       | gi 22204206 | 28023.8                           | 8.73      | 7     | 30                                                | 0                |

| Peptide Information |            |             |      |       |            |                   |           |       |                |                  |
|---------------------|------------|-------------|------|-------|------------|-------------------|-----------|-------|----------------|------------------|
|                     | Calc. Mass | Obsrv. Mass | ± da | ± ppm | Start Seq. | End Sequence Seq. | Ion Score | C. I. | % Modification | Rank Result Type |

|    |                                              |           |         |     |     |     |                         |          |      |    |    |   |                  |  |  |  |        |
|----|----------------------------------------------|-----------|---------|-----|-----|-----|-------------------------|----------|------|----|----|---|------------------|--|--|--|--------|
|    | 824.4512                                     | 824.4124  | -0.0388 | -47 | 72  | 78  | KYSVAEK                 |          |      |    |    |   |                  |  |  |  | Mascot |
|    | 824.4512                                     | 824.4124  | -0.0388 | -47 | 72  | 78  | KYSVAEK                 |          |      |    |    |   |                  |  |  |  | Mascot |
|    | 842.4559                                     | 842.4877  | 0.0318  | 38  | 32  | 37  | WSKFFK                  |          |      |    |    |   |                  |  |  |  | Mascot |
|    | 932.4683                                     | 932.478   | 0.0097  | 10  | 174 | 182 | AKGGVEEDK               |          |      |    |    |   |                  |  |  |  | Mascot |
|    | 974.4537                                     | 974.3779  | -0.0758 | -78 | 138 | 147 | QAEGANDAAK              |          |      |    |    |   |                  |  |  |  | Mascot |
|    | 996.4666                                     | 996.5695  | 0.1029  | 103 | 206 | 214 | SDSDVKAMK               |          |      |    |    |   | Oxidation (M)[8] |  |  |  | Mascot |
|    | 996.4666                                     | 996.5695  | 0.1029  | 103 | 206 | 214 | SDSDVKAMK               |          |      |    |    |   | Oxidation (M)[8] |  |  |  | Mascot |
|    | 1467.7074                                    | 1467.7169 | 0.0095  | 6   | 215 | 226 | KQAENLTTEYDR            |          |      |    |    |   |                  |  |  |  | Mascot |
|    | 2233.1909                                    | 2233.0366 | -0.1543 | -69 | 79  | 97  | VDLSNNPVAIEHIHMKLF<br>R |          |      |    |    |   |                  |  |  |  | Mascot |
| 42 | SH3 domain-binding protein 4-A [Danio rerio] |           |         |     |     |     | gi 45387913             | 104947.5 | 7.73 | 12 | 30 | 0 |                  |  |  |  |        |

Peptide Information

| Calc. Mass | Obsrv. Mass | ± da    | ± ppm | Start Seq. | End Seq. | Sequence                           | Ion Score | C. I. % | Modification                              | Rank | Result Type |
|------------|-------------|---------|-------|------------|----------|------------------------------------|-----------|---------|-------------------------------------------|------|-------------|
| 842.5822   | 842.4877    | -0.0945 | -112  | 634        | 640      | LIKT VIR                           |           |         |                                           |      | Mascot      |
| 850.4338   | 850.521     | 0.0872  | 103   | 358        | 364      | LSNMEIK                            |           |         | Oxidation (M)[4]                          |      | Mascot      |
| 870.4726   | 870.5197    | 0.0471  | 54    | 1          | 7        | MAHRIR                             |           |         | Oxidation (M)[1]                          |      | Mascot      |
| 974.5087   | 974.3779    | -0.1308 | -134  | 804        | 812      | IDCQGLVAR                          |           |         |                                           |      | Mascot      |
| 1045.4796  | 1045.5383   | 0.0587  | 56    | 762        | 770      | AELDSEPER                          |           |         |                                           |      | Mascot      |
| 1671.806   | 1671.72     | -0.086  | -51   | 432        | 445      | HVSFSSNVWNH MVK                    |           |         |                                           |      | Mascot      |
| 1671.806   | 1671.72     | -0.086  | -51   | 432        | 445      | HVSFSSNVWNH MVK                    |           |         |                                           |      | Mascot      |
| 1673.8601  | 1673.7437   | -0.1164 | -70   | 365        | 378      | SFITLEMKVSV MTR                    |           |         | Oxidation (M)[7,12]                       |      | Mascot      |
| 1687.8009  | 1687.7537   | -0.0472 | -28   | 432        | 445      | HVSFSSNVWNH MVK                    |           |         | Oxidation (M)[12]                         |      | Mascot      |
| 1881.8503  | 1881.9406   | 0.0903  | 48    | 379        | 394      | TESPMAEIVCVRSDCK                   |           |         | Carbamidomethyl (C)[10,15]                |      | Mascot      |
| 1977.033   | 1977.0013   | -0.0317 | -16   | 796        | 812      | ELMMALLKIDCQGLVAR                  |           |         | Carbamidomethyl (C)[11], Oxidation (M)[3] |      | Mascot      |
| 2284.2368  | 2284.1128   | -0.124  | -54   | 463        | 484      | TVVAIFGHDCAPK TLLVS<br>EVGK        |           |         |                                           |      | Mascot      |
| 3337.6052  | 3337.6836   | 0.0784  | 23    | 269        | 298      | LARSCHDLESLGQNPGW<br>GQTQPVETNIVCK |           |         | Carbamidomethyl (C)[5]                    |      | Mascot      |
| 3337.6052  | 3337.6836   | 0.0784  | 23    | 269        | 298      | LARSCHDLESLGQNPGW<br>GQTQPVETNIVCK |           |         | Carbamidomethyl (C)[5]                    |      | Mascot      |
| 3338.5496  | 3338.6643   | 0.1147  | 34    | 856        | 884      | TGMVDSEAMWKPAYDFL<br>LTWAAQIGDSYR  |           |         | Oxidation (M)[3]                          |      | Mascot      |

43 PREDICTED: serine/threonine-protein kinase ATR [Danio rerio] gi|292610566 298997.8 7.68 22 30 0

Peptide Information

| Calc. Mass | Obsrv. Mass | ± da | ± ppm | Start Seq. | End Seq. | Sequence | Ion Score | C. I. % | Modification | Rank | Result Type |
|------------|-------------|------|-------|------------|----------|----------|-----------|---------|--------------|------|-------------|
|------------|-------------|------|-------|------------|----------|----------|-----------|---------|--------------|------|-------------|

|           |           |         |      |      |      |                           |  |  |  |                                          |  |  |        |
|-----------|-----------|---------|------|------|------|---------------------------|--|--|--|------------------------------------------|--|--|--------|
| 838.4053  | 838.4706  | 0.0653  | 78   | 1767 | 1773 | SDLNAYR                   |  |  |  |                                          |  |  | Mascot |
| 882.5407  | 882.543   | 0.0023  | 3    | 1304 | 1311 | IHALTSLK                  |  |  |  |                                          |  |  | Mascot |
| 932.5121  | 932.478   | -0.0341 | -37  | 2547 | 2554 | EPLMSVLK                  |  |  |  | Oxidation (M)[4]                         |  |  | Mascot |
| 996.6199  | 996.5695  | -0.0504 | -51  | 1898 | 1906 | AKEPVLALR                 |  |  |  |                                          |  |  | Mascot |
| 996.6199  | 996.5695  | -0.0504 | -51  | 1898 | 1906 | AKEPVLALR                 |  |  |  |                                          |  |  | Mascot |
| 1024.5132 | 1024.5189 | 0.0057  | 6    | 1029 | 1036 | EMLINNFK                  |  |  |  | Oxidation (M)[2]                         |  |  | Mascot |
| 1024.5132 | 1024.5189 | 0.0057  | 6    | 1029 | 1036 | EMLINNFK                  |  |  |  | Oxidation (M)[2]                         |  |  | Mascot |
| 1179.6337 | 1179.5714 | -0.0623 | -53  | 1177 | 1186 | MMTTLRTGLR                |  |  |  |                                          |  |  | Mascot |
| 1277.6656 | 1277.6705 | 0.0049  | 4    | 1550 | 1560 | EVTEEIMAVLK               |  |  |  | Oxidation (M)[7]                         |  |  | Mascot |
| 1451.6981 | 1451.7184 | 0.0203  | 14   | 1281 | 1293 | STDMQAALQLSMR             |  |  |  |                                          |  |  | Mascot |
| 1464.7535 | 1464.7493 | -0.0042 | -3   | 2431 | 2441 | HPPVFHEWFLR               |  |  |  |                                          |  |  | Mascot |
| 1467.6931 | 1467.7169 | 0.0238  | 16   | 1281 | 1293 | STDMQAALQLSMR             |  |  |  | Oxidation (M)[4]                         |  |  | Mascot |
| 1475.6327 | 1475.7155 | 0.0828  | 56   | 113  | 125  | IAACPECEDLHMK             |  |  |  | Oxidation (M)[12]                        |  |  | Mascot |
| 1580.8287 | 1580.7137 | -0.115  | -73  | 2337 | 2349 | LMEFNCLINKSLR             |  |  |  |                                          |  |  | Mascot |
| 1613.7152 | 1613.6996 | -0.0156 | -10  | 1783 | 1795 | WDLVEDYLASDCK             |  |  |  | Carbamidomethyl (C)[12]                  |  |  | Mascot |
| 1655.7703 | 1655.7225 | -0.0478 | -29  | 2334 | 2346 | DCRLMEFNCLINK             |  |  |  | Carbamidomethyl (C)[2]                   |  |  | Mascot |
| 1655.7703 | 1655.7225 | -0.0478 | -29  | 2334 | 2346 | DCRLMEFNCLINK             |  |  |  | Carbamidomethyl (C)[2]                   |  |  | Mascot |
| 1671.7651 | 1671.72   | -0.0451 | -27  | 2334 | 2346 | DCRLMEFNCLINK             |  |  |  | Carbamidomethyl (C)[2], Oxidation (M)[5] |  |  | Mascot |
| 1671.9216 | 1671.72   | -0.2016 | -121 | 2063 | 2076 | QGNLIRYIVTYFGK            |  |  |  |                                          |  |  | Mascot |
| 1687.8835 | 1687.7537 | -0.1298 | -77  | 1232 | 1245 | ETAVIMHYLIVENR            |  |  |  |                                          |  |  | Mascot |
| 1829.8883 | 1829.8514 | -0.0369 | -20  | 1355 | 1371 | LLCGECLGELGAIDPGR         |  |  |  | Carbamidomethyl (C)[3,6]                 |  |  | Mascot |
| 1912.8932 | 1912.9221 | 0.0289  | 15   | 77   | 93   | SSSLMFINPACLSDFK          |  |  |  | Oxidation (M)[5]                         |  |  | Mascot |
| 1994.0011 | 1993.9214 | -0.0797 | -40  | 902  | 920  | SNPVSVAAYTEIQALATC<br>R   |  |  |  |                                          |  |  | Mascot |
| 2155.1467 | 2154.9653 | -0.1814 | -84  | 1129 | 1148 | LLGILAFFNMQLLSSSAG<br>EK  |  |  |  | Oxidation (M)[10]                        |  |  | Mascot |
| 2174.0029 | 2174.0359 | 0.033   | 15   | 410  | 430  | TDIAIAMQDVQASVSDP<br>ADPR |  |  |  | Oxidation (M)[7]                         |  |  | Mascot |
| 2297.166  | 2297.1318 | -0.0342 | -15  | 569  | 589  | ILDAVLYLSNNLFAANSES<br>DK |  |  |  |                                          |  |  | Mascot |
| 2306.1267 | 2306.0891 | -0.0376 | -16  | 466  | 484  | SEVWAAVDCRLEELLTQ<br>MR   |  |  |  | Carbamidomethyl (C)[9]                   |  |  | Mascot |

44 serine/threonine-protein kinase PINK1, mitochondrial [Danio rerio] gi|56693328 63706.2 9.44 9 30 0

Peptide Information

| Calc. Mass | Obsrv. Mass | ± da    | ± ppm | Start Seq. | End Seq. | Sequence       | Ion Score | C. I. | % Modification | Rank | Result Type |
|------------|-------------|---------|-------|------------|----------|----------------|-----------|-------|----------------|------|-------------|
| 1062.5916  | 1062.6652   | 0.0736  | 69    | 475        | 483      | NPHKRPSAR      |           |       |                |      | Mascot      |
| 1655.8904  | 1655.7225   | -0.1679 | -101  | 126        | 139      | KFQSLPKPFTSGYR |           |       |                |      | Mascot      |
| 1655.8904  | 1655.7225   | -0.1679 | -101  | 126        | 139      | KFQSLPKPFTSGYR |           |       |                |      | Mascot      |

|    |                                                                                               |           |         |     |             |         |                                     |   |                         |        |
|----|-----------------------------------------------------------------------------------------------|-----------|---------|-----|-------------|---------|-------------------------------------|---|-------------------------|--------|
|    | 1705.807                                                                                      | 1705.7832 | -0.0238 | -14 | 223         | 237     | SMSMELVPSCPQALR                     |   | Carbamidomethyl (C)[10] | Mascot |
|    | 1852.9663                                                                                     | 1852.8947 | -0.0716 | -39 | 239         | 255     | EQGELTLNGHFGAVPKR                   |   |                         | Mascot |
|    | 1852.9663                                                                                     | 1852.8947 | -0.0716 | -39 | 239         | 255     | EQGELTLNGHFGAVPKR                   |   |                         | Mascot |
|    | 1913.0425                                                                                     | 1912.9221 | -0.1204 | -63 | 291         | 307     | LNPHGLGSNRTLFLVMK                   |   | Oxidation (M)[16]       | Mascot |
|    | 2174.1096                                                                                     | 2174.0359 | -0.0737 | -34 | 325         | 343     | TQASLMFLQLLEGVDHLC<br>R             |   |                         | Mascot |
|    | 2264.1418                                                                                     | 2264.0298 | -0.112  | -49 | 281         | 300     | EEYPDVLPTRLNPHGLG<br>SNR            |   |                         | Mascot |
|    | 2346.2056                                                                                     | 2346.0894 | -0.1162 | -50 | 324         | 343     | RTQASLMFLQLLEGVDHL<br>CR            |   | Oxidation (M)[7]        | Mascot |
|    | 2346.2056                                                                                     | 2346.0894 | -0.1162 | -50 | 324         | 343     | RTQASLMFLQLLEGVDHL<br>CR            |   | Oxidation (M)[7]        | Mascot |
|    | 3338.5823                                                                                     | 3338.6643 | 0.082   | 25  | 207         | 237     | MMWNIGAGSSSDAILRS<br>MSMELVPSCPQALR |   |                         | Mascot |
|    | 3395.6038                                                                                     | 3395.5168 | -0.087  | -26 | 207         | 237     | MMWNIGAGSSSDAILRS<br>MSMELVPSCPQALR |   | Carbamidomethyl (C)[26] | Mascot |
| 45 | protein-kinase, interferon-inducible double stranded<br>RNA dependent inhibitor [Danio rerio] |           |         |     | gi 18859261 | 57519.1 | 5.84                                | 9 | 30                      | 0      |

#### Peptide Information

| Calc. Mass | Obsrv. Mass | ± da    | ± ppm | Start Seq. | End Seq. | Sequence                    | Ion Score | C. I. | % Modification                            | Rank | Result Type |
|------------|-------------|---------|-------|------------|----------|-----------------------------|-----------|-------|-------------------------------------------|------|-------------|
| 864.4825   | 864.4921    | 0.0096  | 11    | 441        | 448      | FIDIASAK                    |           |       |                                           |      | Mascot      |
| 870.4211   | 870.5197    | 0.0986  | 113   | 314        | 320      | TCFCLVK                     |           |       | Carbamidomethyl (C)[2]                    |      | Mascot      |
| 937.4665   | 937.3951    | -0.0714 | -76   | 75         | 81       | SYLTYK                      |           |       |                                           |      | Mascot      |
| 1062.5725  | 1062.6652   | 0.0927  | 87    | 2          | 10       | TIIMESGRR                   |           |       |                                           |      | Mascot      |
| 1890.9304  | 1890.912    | -0.0184 | -10   | 153        | 168      | ADKLESLQEEVHEAHR            |           |       |                                           |      | Mascot      |
| 1976.88    | 1977.0013   | 0.1213  | 61    | 321        | 337      | MKSAAEAVDICSEAHQR           |           |       | Carbamidomethyl (C)[11], Oxidation (M)[1] |      | Mascot      |
| 2233.1108  | 2233.0366   | -0.0742 | -33   | 230        | 248      | LSQLHYSLGEHDSLNLQ<br>VR     |           |       |                                           |      | Mascot      |
| 2363.1724  | 2363.0955   | -0.0769 | -33   | 273        | 292      | QLDSAEELISEQRFQEI<br>EK     |           |       |                                           |      | Mascot      |
| 2367.1938  | 2367.1724   | -0.0214 | -9    | 52         | 74       | LLAAGQLAEALSHYHSAV<br>EGDSK |           |       |                                           |      | Mascot      |

46 protocadherin cluster 1 gamma 22 [Danio rerio] gi|50881530 103336.5 5.04 2 30 0 30 73.28

#### Peptide Information

| Calc. Mass | Obsrv. Mass | ± da    | ± ppm | Start Seq. | End Seq. | Sequence                          | Ion Score | C. I. | % Modification    | Rank | Result Type |
|------------|-------------|---------|-------|------------|----------|-----------------------------------|-----------|-------|-------------------|------|-------------|
| 1024.5496  | 1024.5189   | -0.0307 | -30   | 1          | 8        | MESLIFLR                          |           |       | Oxidation (M)[1]  |      | Mascot      |
| 1024.5496  | 1024.5189   | -0.0307 | -30   | 1          | 8        | MESLIFLR                          | 30        | 73.28 | Oxidation (M)[1]  |      | Mascot      |
| 3337.6489  | 3337.6836   | 0.0347  | 10    | 86         | 114      | IDREDVCGYNVPCVLPLQ<br>AVLENPLQMHR |           |       | Oxidation (M)[27] |      | Mascot      |
| 3337.6489  | 3337.6836   | 0.0347  | 10    | 86         | 114      | IDREDVCGYNVPCVLPLQ<br>AVLENPLQMHR |           |       | Oxidation (M)[27] |      | Mascot      |

47 protocadherin 1 gamma 22 [Danio rerio] gi|57526794 103299.5 5.11 3 30 0 30 73.28

| Peptide Information |                                                                                |             |         |       |              |          |                                   |           |         |                   |                  |
|---------------------|--------------------------------------------------------------------------------|-------------|---------|-------|--------------|----------|-----------------------------------|-----------|---------|-------------------|------------------|
|                     | Calc. Mass                                                                     | Obsrv. Mass | ± da    | ± ppm | Start Seq.   | End Seq. | Sequence                          | Ion Score | C. I. % | Modification      | Rank Result Type |
|                     | 1024.5496                                                                      | 1024.5189   | -0.0307 | -30   | 1            | 8        | MESLIFLR                          |           |         | Oxidation (M)[1]  | Mascot           |
|                     | 1024.5496                                                                      | 1024.5189   | -0.0307 | -30   | 1            | 8        | MESLIFLR                          | 30        | 73.28   | Oxidation (M)[1]  | Mascot           |
|                     | 2174.0037                                                                      | 2174.0359   | 0.0322  | 15    | 261          | 279      | ATDLDQQLNGEIEYFFAD<br>R           |           |         |                   | Mascot           |
|                     | 3337.6489                                                                      | 3337.6836   | 0.0347  | 10    | 86           | 114      | IDREDVCGYNVPCVLPLQ<br>AVLENPLQMHR |           |         | Oxidation (M)[27] | Mascot           |
|                     | 3337.6489                                                                      | 3337.6836   | 0.0347  | 10    | 86           | 114      | IDREDVCGYNVPCVLPLQ<br>AVLENPLQMHR |           |         | Oxidation (M)[27] | Mascot           |
| 48                  | PREDICTED: putative uncharacterized zinc finger protein 814-like [Danio rerio] |             |         |       | gi 292610426 |          | 61962.5                           | 9.03      | 13      | 30                | 0                |

| Peptide Information |                                         |         |       |              |          |                           |           |         |                            |      |             |
|---------------------|-----------------------------------------|---------|-------|--------------|----------|---------------------------|-----------|---------|----------------------------|------|-------------|
| Calc. Mass          | Obsrv. Mass                             | ± da    | ± ppm | Start Seq.   | End Seq. | Sequence                  | Ion Score | C. I. % | Modification               | Rank | Result Type |
| 996.5472            | 996.5695                                | 0.0223  | 22    | 350          | 358      | IHTGEKPSK                 |           |         |                            |      | Mascot      |
| 996.5472            | 996.5695                                | 0.0223  | 22    | 350          | 358      | IHTGEKPSK                 |           |         |                            |      | Mascot      |
| 1009.4805           | 1009.4827                               | 0.0022  | 2     | 243          | 252      | SALTCVQCGK                |           |         |                            |      | Mascot      |
| 1045.5789           | 1045.5383                               | -0.0406 | -39   | 365          | 373      | SFTHKGQLK                 |           |         |                            |      | Mascot      |
| 1308.5712           | 1308.6438                               | 0.0726  | 55    | 359          | 369      | CPECEKSFTHK               |           |         |                            |      | Mascot      |
| 1671.7729           | 1671.72                                 | -0.0529 | -32   | 266          | 280      | IHTGEKPFSCSCHQCGK         |           |         |                            |      | Mascot      |
| 1671.7729           | 1671.72                                 | -0.0529 | -32   | 266          | 280      | IHTGEKPFSCSCHQCGK         |           |         |                            |      | Mascot      |
| 1673.8138           | 1673.7437                               | -0.0701 | -42   | 378          | 392      | IHSGEKPYACPLCAK           |           |         | Carbamidomethyl (C)[10]    |      | Mascot      |
| 2174.0303           | 2174.0359                               | 0.0056  | 3     | 458          | 476      | MHLIIHSGERPFSCDKC<br>GK   |           |         | Oxidation (M)[1]           |      | Mascot      |
| 2225.0703           | 2225.0593                               | -0.011  | -5    | 206          | 224      | IHTRIHTGEKPYTCSHCG<br>K   |           |         | Carbamidomethyl (C)[14]    |      | Mascot      |
| 2225.1106           | 2225.0593                               | -0.0513 | -23   | 178          | 196      | HHVKIHYAGKPFTCELCG<br>K   |           |         | Carbamidomethyl (C)[14]    |      | Mascot      |
| 2297.0483           | 2297.1318                               | 0.0835  | 36    | 262          | 280      | SHMRIHTGEKPFSCSCHQC<br>GK |           |         | Carbamidomethyl (C)[14,17] |      | Mascot      |
| 2299.0781           | 2299.1208                               | 0.0427  | 19    | 98           | 117      | IHTGERPYACIQCGKSFT<br>CK  |           |         | Carbamidomethyl (C)[10]    |      | Mascot      |
| 2306.0264           | 2306.0891                               | 0.0627  | 27    | 150          | 168      | YHMLRLHTEDGPFICGQC<br>GK  |           |         | Carbamidomethyl (C)[14,17] |      | Mascot      |
| 2346.1118           | 2346.0894                               | -0.0224 | -10   | 322          | 341      | SHTGEKPFICPQCGKSFT<br>HK  |           |         | Carbamidomethyl (C)[10,13] |      | Mascot      |
| 2346.1118           | 2346.0894                               | -0.0224 | -10   | 322          | 341      | SHTGEKPFICPQCGKSFT<br>HK  |           |         | Carbamidomethyl (C)[10,13] |      | Mascot      |
| 49                  | novel zinc finger protein [Danio rerio] |         |       | gi 130496620 |          | 52184.8                   | 6.71      | 11      | 30                         | 0    |             |

| Peptide Information |             |      |       |            |                   |          |           |         |              |      |             |
|---------------------|-------------|------|-------|------------|-------------------|----------|-----------|---------|--------------|------|-------------|
| Calc. Mass          | Obsrv. Mass | ± da | ± ppm | Start Seq. | End Sequence Seq. | Sequence | Ion Score | C. I. % | Modification | Rank | Result Type |



|           |                        |         |      |             |     |                    |         |      |    |                        |   |        |
|-----------|------------------------|---------|------|-------------|-----|--------------------|---------|------|----|------------------------|---|--------|
| 856.4523  | 856.505                | 0.0527  | 62   | 112         | 118 | DSEKHLK            |         |      |    |                        |   | Mascot |
| 974.491   | 974.3779               | -0.1131 | -116 | 104         | 111 | QPVCLVCR           |         |      |    | Carbamidomethyl (C)[4] |   | Mascot |
| 996.4818  | 996.5695               | 0.0877  | 88   | 67          | 74  | NVCESFLK           |         |      |    | Carbamidomethyl (C)[3] |   | Mascot |
| 996.4818  | 996.5695               | 0.0877  | 88   | 67          | 74  | NVCESFLK           |         |      |    | Carbamidomethyl (C)[3] |   | Mascot |
| 1045.5887 | 1045.5383              | -0.0504 | -48  | 132         | 140 | KEELNTALK          |         |      |    |                        |   | Mascot |
| 1106.4718 | 1106.5132              | 0.0414  | 37   | 43          | 51  | NTQECPVCR          |         |      |    | Carbamidomethyl (C)[5] |   | Mascot |
| 1165.6285 | 1165.7134              | 0.0849  | 73   | 95          | 103 | LKLFCLDK           |         |      |    | Carbamidomethyl (C)[5] |   | Mascot |
| 1421.6915 | 1421.7091              | 0.0176  | 12   | 20          | 32  | TPVLLSCSHSFCK      |         |      |    |                        |   | Mascot |
| 1475.7714 | 1475.7155              | -0.0559 | -38  | 355         | 367 | RWSLGVTTASNQR      |         |      |    |                        |   | Mascot |
| 1580.8907 | 1580.7137              | -0.177  | -112 | 119         | 132 | HTFRPISEVAPAKK     |         |      |    |                        |   | Mascot |
| 1912.9287 | 1912.9221              | -0.0066 | -3   | 401         | 417 | VLDYDRGTVSFSDPVK   |         |      |    |                        |   | Mascot |
| 2283.1345 | 2283.1182              | -0.0163 | -7   | 420         | 437 | HLHTYTTTFTHTLYPFFR |         |      |    |                        |   | Mascot |
| 2283.1345 | 2283.1182              | -0.0163 | -7   | 420         | 437 | HLHTYTTTFTHTLYPFFR |         |      |    |                        |   | Mascot |
| 50        | muskelin [Danio rerio] |         |      | gi 47086651 |     |                    | 84322.2 | 5.91 | 10 | 29                     | 0 |        |

#### Peptide Information

| Calc. Mass | Obsrv. Mass | ± da    | ± ppm | Start Seq. | End Seq. | Sequence                 | Ion Score | C. I. | % Modification                             | Rank | Result Type |
|------------|-------------|---------|-------|------------|----------|--------------------------|-----------|-------|--------------------------------------------|------|-------------|
| 850.4781   | 850.521     | 0.0429  | 50    | 333        | 339      | QIYTLGR                  |           |       |                                            |      | Mascot      |
| 932.5134   | 932.478     | -0.0354 | -38   | 628        | 634      | HCKYLIR                  |           |       |                                            |      | Mascot      |
| 1024.4663  | 1024.5189   | 0.0526  | 51    | 325        | 332      | MCIDSQRR                 |           |       | Oxidation (M)[1]                           |      | Mascot      |
| 1024.4663  | 1024.5189   | 0.0526  | 51    | 325        | 332      | MCIDSQRR                 | 5         | 0     | Oxidation (M)[1]                           |      | Mascot      |
| 1106.5048  | 1106.5132   | 0.0084  | 8     | 301        | 309      | ENQWACISR                |           |       |                                            |      | Mascot      |
| 1421.6083  | 1421.7091   | 0.1008  | 71    | 321        | 331      | SCHKMCIDSQR              |           |       | Carbamidomethyl (C)[2,6]                   |      | Mascot      |
| 1655.6863  | 1655.7225   | 0.0362  | 22    | 380        | 392      | LVFDHQMCMDEK             |           |       | Carbamidomethyl (C)[8], Oxidation (M)[7]   |      | Mascot      |
| 1655.6863  | 1655.7225   | 0.0362  | 22    | 380        | 392      | LVFDHQMCMDEK             |           |       | Carbamidomethyl (C)[8], Oxidation (M)[7]   |      | Mascot      |
| 1671.6812  | 1671.72     | 0.0388  | 23    | 380        | 392      | LVFDHQMCMDEK             |           |       | Carbamidomethyl (C)[8], Oxidation (M)[7,9] |      | Mascot      |
| 1671.6812  | 1671.72     | 0.0388  | 23    | 380        | 392      | LVFDHQMCMDEK             |           |       | Carbamidomethyl (C)[8], Oxidation (M)[7,9] |      | Mascot      |
| 2225.0947  | 2225.0593   | -0.0354 | -16   | 702        | 720      | TQLFDTLVNFFPDNMTTPK      |           |       |                                            |      | Mascot      |
| 2225.0947  | 2225.0593   | -0.0354 | -16   | 702        | 720      | TQLFDTLVNFFPDNMTTPK      |           |       |                                            |      | Mascot      |
| 2233.0408  | 2233.0366   | -0.0042 | -2    | 682        | 701      | SSSDFIPLGFSDVDQTYAQR     |           |       |                                            |      | Mascot      |
| 2298.1626  | 2298.123    | -0.0396 | -17   | 226        | 244      | AVRDGLFNQYISQQDYKPR      |           |       |                                            |      | Mascot      |
| 2750.2468  | 2750.2644   | 0.0176  | 6     | 474        | 497      | TYLNDFFSYDVGDDHVEIISDGTK |           |       |                                            |      | Mascot      |

|                |           |                        |                |                |                    |
|----------------|-----------|------------------------|----------------|----------------|--------------------|
| Gel Idx/Pos    | 213/113   | Instr./Gel Origin      | BA2060/110707A | Process Status | Analysis Succeeded |
| Plate [#] Name | [1] 31496 | Instrument Sample Name |                | Spectra        | 11                 |

| Rank | Protein Name                                          | Accession No. | Protein MW | Protein PI | Pep. Count | Protein Score | Protein Score C. I. % | Total Ion Score | Total Ion C. I. % |
|------|-------------------------------------------------------|---------------|------------|------------|------------|---------------|-----------------------|-----------------|-------------------|
| 1    | Isocitrate dehydrogenase 3 (NAD+) alpha [Danio rerio] | gi 29124437   | 39960.3    | 7.04       | 19         | 934           | 100                   | 797             | 100               |

Peptide Information

| Calc. Mass | Obsrv. Mass | ± da    | ± ppm | Start Seq. | End Seq. | Sequence          | Ion Score | C. I. % | Modification             | Rank | Result Type |
|------------|-------------|---------|-------|------------|----------|-------------------|-----------|---------|--------------------------|------|-------------|
| 842.473    | 842.4904    | 0.0174  | 21    | 192        | 199      | TSVTAVHK          |           |         |                          |      | Mascot      |
| 918.489    | 918.4677    | -0.0213 | -23   | 169        | 176      | LITEEASR          |           |         |                          |      | Mascot      |
| 938.4764   | 938.4544    | -0.022  | -23   | 205        | 212      | MSDGLFLR          |           |         |                          |      | Mascot      |
| 954.4713   | 954.4503    | -0.021  | -22   | 205        | 212      | MSDGLFLR          |           |         | Oxidation (M)[1]         |      | Mascot      |
| 971.5018   | 971.4745    | -0.0273 | -28   | 77         | 84       | WMIPPEAK          |           |         |                          |      | Mascot      |
| 987.4941   | 987.4707    | -0.0234 | -24   | 316        | 324      | HMGLHGHAK         |           |         |                          |      | Mascot      |
| 1003.489   | 1003.4652   | -0.0238 | -24   | 316        | 324      | HMGLHGHAK         |           |         | Oxidation (M)[2]         |      | Mascot      |
| 1058.5265  | 1058.5023   | -0.0242 | -23   | 58         | 65       | TPIQWEER          | 59        | 99.964  |                          |      | Mascot      |
| 1058.5265  | 1058.5023   | -0.0242 | -23   | 58         | 65       | TPIQWEER          |           |         |                          |      | Mascot      |
| 1074.5902  | 1074.5266   | -0.0636 | -59   | 169        | 177      | LITEEASRR         |           |         |                          |      | Mascot      |
| 1225.5881  | 1225.5591   | -0.029  | -24   | 326        | 335      | IETACFDTIR        |           |         | Carbamidomethyl (C)[5]   |      | Mascot      |
| 1232.5946  | 1232.5684   | -0.0262 | -21   | 178        | 187      | IAEYAFEYAR        | 79        | 100     |                          |      | Mascot      |
| 1232.5946  | 1232.5684   | -0.0262 | -21   | 178        | 187      | IAEYAFEYAR        |           |         |                          |      | Mascot      |
| 1258.519   | 1258.4901   | -0.0289 | -23   | 350        | 359      | CSEFTADICR        | 75        | 100     | Carbamidomethyl (C)[1,9] |      | Mascot      |
| 1258.519   | 1258.4901   | -0.0289 | -23   | 350        | 359      | CSEFTADICR        |           |         | Carbamidomethyl (C)[1,9] |      | Mascot      |
| 1353.6831  | 1353.6532   | -0.0299 | -22   | 325        | 335      | KIETACFDTIR       |           |         | Carbamidomethyl (C)[6]   |      | Mascot      |
| 1353.6831  | 1353.6532   | -0.0299 | -22   | 325        | 335      | KIETACFDTIR       | 75        | 100     | Carbamidomethyl (C)[6]   |      | Mascot      |
| 1388.6957  | 1388.6646   | -0.0311 | -22   | 177        | 187      | RIAEYAFEYAR       |           |         |                          |      | Mascot      |
| 1392.7369  | 1392.7058   | -0.0311 | -22   | 134        | 145      | TPYTDVDLVTIR      |           |         |                          |      | Mascot      |
| 1392.7369  | 1392.7058   | -0.0311 | -22   | 134        | 145      | TPYTDVDLVTIR      | 83        | 100     |                          |      | Mascot      |
| 1414.6201  | 1414.6608   | 0.0407  | 29    | 350        | 360      | CSEFTADICRR       |           |         | Carbamidomethyl (C)[1,9] |      | Mascot      |
| 1590.8784  | 1590.8403   | -0.0381 | -24   | 100        | 114      | TPIAAGHPSMNLLLR   |           |         |                          |      | Mascot      |
| 1590.8784  | 1590.8403   | -0.0381 | -24   | 100        | 114      | TPIAAGHPSMNLLLR   | 104       | 100     |                          |      | Mascot      |
| 1606.8734  | 1606.8353   | -0.0381 | -24   | 100        | 114      | TPIAAGHPSMNLLLR   |           |         | Oxidation (M)[10]        |      | Mascot      |
| 1606.8734  | 1606.8353   | -0.0381 | -24   | 100        | 114      | TPIAAGHPSMNLLLR   | 34        | 87.975  | Oxidation (M)[10]        |      | Mascot      |
| 1862.9537  | 1862.9124   | -0.0413 | -22   | 299        | 315      | DMANPTALLLSAVMMLR |           |         | Oxidation (M)[2]         |      | Mascot      |
| 1878.9486  | 1878.9071   | -0.0415 | -22   | 299        | 315      | DMANPTALLLSAVMMLR |           |         | Oxidation (M)[2,14]      |      | Mascot      |

|   |                             |           |         |     |              |     |                         |      |        |     |                         |        |     |
|---|-----------------------------|-----------|---------|-----|--------------|-----|-------------------------|------|--------|-----|-------------------------|--------|-----|
|   | 1894.9435                   | 1894.9021 | -0.0414 | -22 | 299          | 315 | DMANPTALLLSAVMMLR       |      |        |     | Oxidation (M)[2,14,15]  | Mascot |     |
|   | 2132.0481                   | 2131.9983 | -0.0498 | -23 | 116          | 133 | TFDLYANVRPCVSIEGYK      |      |        |     | Carbamidomethyl (C)[11] | Mascot |     |
|   | 2132.0481                   | 2131.9983 | -0.0498 | -23 | 116          | 133 | TFDLYANVRPCVSIEGYK      | 104  | 100    |     | Carbamidomethyl (C)[11] | Mascot |     |
|   | 2260.1431                   | 2260.0886 | -0.0545 | -24 | 115          | 133 | KTFDLYANVRPCVSIEGYK     |      |        |     | Carbamidomethyl (C)[12] | Mascot |     |
|   | 2260.1431                   | 2260.0886 | -0.0545 | -24 | 115          | 133 | KTFDLYANVRPCVSIEGYK     | 61   | 99.977 |     | Carbamidomethyl (C)[12] | Mascot |     |
|   | 2502.2358                   | 2502.1831 | -0.0527 | -21 | 146          | 168 | ENTEGEYSGIEHVIVDGVVQSIK |      |        |     |                         | Mascot |     |
|   | 2502.2358                   | 2502.1831 | -0.0527 | -21 | 146          | 168 | ENTEGEYSGIEHVIVDGVVQSIK | 158  | 100    |     |                         | Mascot |     |
| 2 | ldh3a protein [Danio rerio] |           |         |     | gi 157423273 |     | 16736.4                 | 6.89 | 6      | 189 | 100                     | 150    | 100 |

Peptide Information

| Calc. Mass | Obsrv. Mass | ± da    | ± ppm | Start Seq. | End Seq. | Sequence          | Ion Score | C. I. | % | Modification             | Rank | Result Type |
|------------|-------------|---------|-------|------------|----------|-------------------|-----------|-------|---|--------------------------|------|-------------|
| 987.4941   | 987.4707    | -0.0234 | -24   | 108        | 116      | HMGLHGHAK         |           |       |   |                          |      | Mascot      |
| 1003.489   | 1003.4652   | -0.0238 | -24   | 108        | 116      | HMGLHGHAK         |           |       |   | Oxidation (M)[2]         |      | Mascot      |
| 1225.5881  | 1225.5591   | -0.029  | -24   | 118        | 127      | IETACFDTIR        |           |       |   | Carbamidomethyl (C)[5]   |      | Mascot      |
| 1258.519   | 1258.4901   | -0.0289 | -23   | 142        | 151      | CSEFTADICR        | 75        | 100   |   | Carbamidomethyl (C)[1,9] |      | Mascot      |
| 1258.519   | 1258.4901   | -0.0289 | -23   | 142        | 151      | CSEFTADICR        |           |       |   | Carbamidomethyl (C)[1,9] |      | Mascot      |
| 1353.6831  | 1353.6532   | -0.0299 | -22   | 117        | 127      | KIETACFDTIR       |           |       |   | Carbamidomethyl (C)[6]   |      | Mascot      |
| 1353.6831  | 1353.6532   | -0.0299 | -22   | 117        | 127      | KIETACFDTIR       | 75        | 100   |   | Carbamidomethyl (C)[6]   |      | Mascot      |
| 1414.6201  | 1414.6608   | 0.0407  | 29    | 142        | 152      | CSEFTADICRR       |           |       |   | Carbamidomethyl (C)[1,9] |      | Mascot      |
| 1862.9537  | 1862.9124   | -0.0413 | -22   | 91         | 107      | DMANPTALLLSAVMMLR |           |       |   | Oxidation (M)[2]         |      | Mascot      |
| 1878.9486  | 1878.9071   | -0.0415 | -22   | 91         | 107      | DMANPTALLLSAVMMLR |           |       |   | Oxidation (M)[2,14]      |      | Mascot      |
| 1894.9435  | 1894.9021   | -0.0414 | -22   | 91         | 107      | DMANPTALLLSAVMMLR |           |       |   | Oxidation (M)[2,14,15]   |      | Mascot      |

3 synaptosome-associated protein 25.2 [Danio rerio] gi|3703102 6195.9 4.15 5 43 0

Peptide Information

| Calc. Mass | Obsrv. Mass | ± da    | ± ppm | Start Seq. | End Seq. | Sequence         | Ion Score | C. I. | % | Modification     | Rank | Result Type |
|------------|-------------|---------|-------|------------|----------|------------------|-----------|-------|---|------------------|------|-------------|
| 954.3655   | 954.4503    | 0.0848  | 89    | 1          | 8        | MADESDMR         |           |       |   |                  |      | Mascot      |
| 1090.4946  | 1090.499    | 0.0044  | 4     | 9          | 17       | NELNDMQAR        |           |       |   |                  |      | Mascot      |
| 1106.4895  | 1106.5083   | 0.0188  | 17    | 9          | 17       | NELNDMQAR        |           |       |   | Oxidation (M)[6] |      | Mascot      |
| 1232.6667  | 1232.5684   | -0.0983 | -80   | 31         | 40       | RMLQLVEESK       |           |       |   |                  |      | Mascot      |
| 1232.6667  | 1232.5684   | -0.0983 | -80   | 31         | 40       | RMLQLVEESK       |           |       |   |                  |      | Mascot      |
| 1590.7792  | 1590.8403   | 0.0611  | 38    | 41         | 55       | DAGIRTLVMLDEQGG  |           |       |   | Oxidation (M)[9] |      | Mascot      |
| 1590.7792  | 1590.8403   | 0.0611  | 38    | 41         | 55       | DAGIRTLVMLDEQGG  |           |       |   | Oxidation (M)[9] |      | Mascot      |
| 1894.8019  | 1894.9021   | 0.1002  | 53    | 2          | 17       | ADESDMRNELNDMQAR |           |       |   |                  |      | Mascot      |

|                     |                                                                     |             |         |       |            |              |                            |           |       |    |                                                |      |                  |        |        |
|---------------------|---------------------------------------------------------------------|-------------|---------|-------|------------|--------------|----------------------------|-----------|-------|----|------------------------------------------------|------|------------------|--------|--------|
|                     | 1910.7968                                                           | 1910.8948   | 0.098   | 51    | 2          | 17           | ADESDMRNELNDMQAR           |           |       |    |                                                |      | Oxidation (M)[6] |        | Mascot |
| 4                   | Insulin-like growth factor 1a receptor [Danio rerio]                |             |         |       |            | gi 190337438 | 158388.2                   | 5.86      | 16    | 43 | 0                                              | 13   | 0                |        |        |
| Peptide Information |                                                                     |             |         |       |            |              |                            |           |       |    |                                                |      |                  |        |        |
|                     | Calc. Mass                                                          | Obsrv. Mass | ± da    | ± ppm | Start Seq. | End Seq.     | Sequence                   | Ion Score | C. I. | %  | Modification                                   | Rank | Result           | Type   |        |
|                     | 856.525                                                             | 856.5056    | -0.0194 | -23   | 840        | 847          | GEGIVLLR                   |           |       |    |                                                |      |                  | Mascot |        |
|                     | 1058.5088                                                           | 1058.5023   | -0.0065 | -6    | 809        | 818          | CSAAAFVFSR                 |           |       |    |                                                |      |                  | Mascot |        |
|                     | 1058.5088                                                           | 1058.5023   | -0.0065 | -6    | 809        | 818          | CSAAAFVFSR                 |           |       |    |                                                |      |                  | Mascot |        |
|                     | 1106.4507                                                           | 1106.5083   | 0.0576  | 52    | 211        | 219          | CWTSNHCQK                  |           |       |    |                                                |      |                  | Mascot |        |
|                     | 1225.5228                                                           | 1225.5591   | 0.0363  | 30    | 266        | 276          | CVEACPPDTYK                |           |       |    |                                                |      |                  | Mascot |        |
|                     | 1257.6144                                                           | 1257.4602   | -0.1542 | -123  | 615        | 626          | AYANSSSSLMVK               |           |       |    |                                                |      |                  | Mascot |        |
|                     | 1346.637                                                            | 1346.6195   | -0.0175 | -13   | 602        | 614          | TNASAPSMPLDAR              |           |       |    | Oxidation (M)[8]                               |      |                  | Mascot |        |
|                     | 1353.6653                                                           | 1353.6532   | -0.0121 | -9    | 449        | 459          | FNPKLCMSEIR                |           |       |    | Oxidation (M)[7]                               |      |                  | Mascot |        |
|                     | 1353.6653                                                           | 1353.6532   | -0.0121 | -9    | 449        | 459          | FNPKLCMSEIR                | 13        | 0     |    | Oxidation (M)[7]                               |      |                  | Mascot |        |
|                     | 1414.78                                                             | 1414.6608   | -0.1192 | -84   | 589        | 601          | HVGGAKSEVVYIR              |           |       |    |                                                |      |                  | Mascot |        |
|                     | 1590.6974                                                           | 1590.8403   | 0.1429  | 90    | 211        | 223          | CWTSNHCQKVCPCPK            |           |       |    | Carbamidomethyl (C)[1]                         |      |                  | Mascot |        |
|                     | 1590.6974                                                           | 1590.8403   | 0.1429  | 90    | 211        | 223          | CWTSNHCQKVCPCPK            |           |       |    | Carbamidomethyl (C)[1]                         |      |                  | Mascot |        |
|                     | 1862.7804                                                           | 1862.9124   | 0.132   | 71    | 277        | 290          | FEGWRCITMEMCAR             |           |       |    | Carbamidomethyl (C)[6,12], Oxidation (M)[9]    |      |                  | Mascot |        |
|                     | 1878.7754                                                           | 1878.9071   | 0.1317  | 70    | 277        | 290          | FEGWRCITMEMCAR             |           |       |    | Carbamidomethyl (C)[6,12], Oxidation (M)[9,11] |      |                  | Mascot |        |
|                     | 1911.007                                                            | 1910.8948   | -0.1122 | -59   | 754        | 770          | NISVLESNITQPELPEK          |           |       |    |                                                |      |                  | Mascot |        |
|                     | 2040.9551                                                           | 2040.9895   | 0.0344  | 17    | 1110       | 1128         | MIQMAGEIADGMAYLNA<br>NK    |           |       |    |                                                |      |                  | Mascot |        |
|                     | 2169.05                                                             | 2169.0811   | 0.0311  | 14    | 1109       | 1128         | KMIQMAGEIADGMAYLN<br>ANK   |           |       |    |                                                |      |                  | Mascot |        |
|                     | 2174.1929                                                           | 2174.0476   | -0.1453 | -67   | 78         | 95           | TLSFPKLTMVTDYILLFR         |           |       |    | Oxidation (M)[9]                               |      |                  | Mascot |        |
|                     | 2283.9724                                                           | 2284.1179   | 0.1455  | 64    | 644        | 661          | WQQQAEDGELYQHNYC<br>SK     |           |       |    | Carbamidomethyl (C)[16]                        |      |                  | Mascot |        |
|                     | 2454.9702                                                           | 2455.2585   | 0.2883  | 117   | 317        | 338          | NETQSMFCSACDGLCDK<br>VCESK |           |       |    | Carbamidomethyl (C)[8]                         |      |                  | Mascot |        |
| 5                   | 6-phosphofructo-2-kinase/fructose-2,6-biphosphatase 2 [Danio rerio] |             |         |       |            | gi 41055967  | 60086.5                    | 6.9       | 9     | 42 | 0                                              | 15   | 0                |        |        |
| Peptide Information |                                                                     |             |         |       |            |              |                            |           |       |    |                                                |      |                  |        |        |
|                     | Calc. Mass                                                          | Obsrv. Mass | ± da    | ± ppm | Start Seq. | End Seq.     | Sequence                   | Ion Score | C. I. | %  | Modification                                   | Rank | Result           | Type   |        |
|                     | 850.4781                                                            | 850.524     | 0.0459  | 54    | 271        | 277          | EFSKALR                    |           |       |    |                                                |      |                  | Mascot |        |
|                     | 1045.5902                                                           | 1045.5391   | -0.0511 | -49   | 290        | 297          | VWTSQLRR                   |           |       |    |                                                |      |                  | Mascot |        |
|                     | 1258.5845                                                           | 1258.4901   | -0.0944 | -75   | 84         | 93           | HDNEEAMKIR                 | 15        | 0     |    | Oxidation (M)[7]                               |      |                  | Mascot |        |
|                     | 1258.5845                                                           | 1258.4901   | -0.0944 | -75   | 84         | 93           | HDNEEAMKIR                 |           |       |    | Oxidation (M)[7]                               |      |                  | Mascot |        |

|           |           |         |     |     |     |                              |        |
|-----------|-----------|---------|-----|-----|-----|------------------------------|--------|
| 1388.7783 | 1388.6646 | -0.1137 | -82 | 278 | 289 | GFLETQKIPDLK                 | Mascot |
| 1483.7427 | 1483.7021 | -0.0406 | -27 | 331 | 342 | IKEAYPDEYSLR                 | Mascot |
| 1498.7173 | 1498.6818 | -0.0355 | -24 | 190 | 202 | VTYQPLDPGEHDK                | Mascot |
| 1606.8184 | 1606.8353 | 0.0169  | 11  | 455 | 468 | RNSFTPLSSQDQVK               | Mascot |
| 1606.8184 | 1606.8353 | 0.0169  | 11  | 455 | 468 | RNSFTPLSSQDQVK               | Mascot |
| 1799.907  | 1799.8525 | -0.0545 | -30 | 414 | 429 | LTPVAYGCKVDMFDLK             | Mascot |
| 2524.3162 | 2524.1577 | -0.1585 | -63 | 19  | 42  | CSWASHMTNSPTVIVLV<br>GLPARGK | Mascot |

6 PREDICTED: transposon TX1 uncharacterized 149 kDa gi|326678664 127486.3 9.2 18 41 0  
protein-like [Danio rerio]

#### Peptide Information

| Calc. Mass | Obsrv. Mass | ± da    | ± ppm | Start Seq. | End Seq. | Sequence                  | Ion Score | C. I. % | Modification                                | Rank | Result Type |
|------------|-------------|---------|-------|------------|----------|---------------------------|-----------|---------|---------------------------------------------|------|-------------|
| 850.5145   | 850.524     | 0.0095  | 11    | 117        | 123      | GRILYTK                   |           |         |                                             |      | Mascot      |
| 996.6564   | 996.5746    | -0.0818 | -82   | 535        | 543      | RAVLSLLPK                 |           |         |                                             |      | Mascot      |
| 1017.5873  | 1017.5486   | -0.0387 | -38   | 565        | 573      | ILSKCLANR                 |           |         |                                             |      | Mascot      |
| 1045.5538  | 1045.5391   | -0.0147 | -14   | 940        | 947      | RTADLQWR                  |           |         |                                             |      | Mascot      |
| 1058.6027  | 1058.5023   | -0.1004 | -95   | 526        | 534      | EKLLPLSCR                 |           |         |                                             |      | Mascot      |
| 1058.6027  | 1058.5023   | -0.1004 | -95   | 526        | 534      | EKLLPLSCR                 |           |         |                                             |      | Mascot      |
| 1074.6088  | 1074.5266   | -0.0822 | -76   | 565        | 573      | ILSKCLANR                 |           |         | Carbamidomethyl (C)[5]                      |      | Mascot      |
| 1090.6506  | 1090.499    | -0.1516 | -139  | 931        | 939      | TLYKLPVEK                 |           |         |                                             |      | Mascot      |
| 1262.7355  | 1262.6448   | -0.0907 | -72   | 1086       | 1096     | FVTKLLAEDVK               |           |         |                                             |      | Mascot      |
| 1307.7391  | 1307.6471   | -0.092  | -70   | 979        | 990      | VCLLNILLGTAK              |           |         |                                             |      | Mascot      |
| 1353.6719  | 1353.6532   | -0.0187 | -14   | 443        | 453      | TLYSKEPCDIK               |           |         | Carbamidomethyl (C)[8]                      |      | Mascot      |
| 1353.6719  | 1353.6532   | -0.0187 | -14   | 443        | 453      | TLYSKEPCDIK               |           |         | Carbamidomethyl (C)[8]                      |      | Mascot      |
| 1483.7434  | 1483.7021   | -0.0413 | -28   | 222        | 234      | VTDNMVHGARLDR             |           |         |                                             |      | Mascot      |
| 1606.8409  | 1606.8353   | -0.0056 | -3    | 552        | 564      | NWRPVSLCLDYK              |           |         |                                             |      | Mascot      |
| 1606.8409  | 1606.8353   | -0.0056 | -3    | 552        | 564      | NWRPVSLCLDYK              |           |         |                                             |      | Mascot      |
| 1799.7609  | 1799.8525   | 0.0916  | 51    | 999        | 1014     | NKGMGLMATDPECSEK          |           |         | Carbamidomethyl (C)[13], Oxidation (M)[4,7] |      | Mascot      |
| 1814.9105  | 1814.8976   | -0.0129 | -7    | 323        | 337      | VFCQNYTLNSSLQIK           |           |         | Carbamidomethyl (C)[3]                      |      | Mascot      |
| 2041.0457  | 2040.9895   | -0.0562 | -28   | 847        | 863      | CIVLDPPEDIICEIQRK         |           |         | Carbamidomethyl (C)[1]                      |      | Mascot      |
| 2240.1855  | 2240.1404   | -0.0451 | -20   | 877        | 897      | ASVIFLPVCEGGHGLVDV<br>KSR |           |         | Carbamidomethyl (C)[9]                      |      | Mascot      |
| 2260.208   | 2260.0886   | -0.1194 | -53   | 681        | 700      | QGCPKSGQLYSLMIEPLL<br>LK  |           |         | Carbamidomethyl (C)[3]                      |      | Mascot      |
| 2260.208   | 2260.0886   | -0.1194 | -53   | 681        | 700      | QGCPKSGQLYSLMIEPLL<br>LK  |           |         | Carbamidomethyl (C)[3]                      |      | Mascot      |
| 2283.1914  | 2283.1155   | -0.0759 | -33   | 319        | 337      | AQIRVFCQNYTLNSSLQI<br>K   |           |         | Carbamidomethyl (C)[7]                      |      | Mascot      |
| 2299.041   | 2299.1304   | 0.0894  | 39    | 390        | 408      | FCSIKDMDAPSSYFFNLE<br>K   |           |         | Carbamidomethyl (C)[2]                      |      | Mascot      |

7 PREDICTED: microfibrillar-associated protein 3-like isoform 3 [Danio rerio] gi|326669134 43576.9 5.54 9 40 0

Peptide Information

| Calc. Mass | Obsrv. Mass | $\pm$ da | $\pm$ ppm | Start Seq. | End Seq. | Sequence               | Ion Score | C. I. % | Modification           | Rank | Result Type |
|------------|-------------|----------|-----------|------------|----------|------------------------|-----------|---------|------------------------|------|-------------|
| 842.5345   | 842.4904    | -0.0441  | -52       | 214        | 221      | IPITS AK               |           |         |                        |      | Mascot      |
| 954.392    | 954.4503    | 0.0583   | 61        | 1          | 7        | MTSHCYR                |           |         | Carbamidomethyl (C)[5] |      | Mascot      |
| 1003.5417  | 1003.4652   | -0.0765  | -76       | 198        | 206      | TEGA EK LQK            |           |         |                        |      | Mascot      |
| 1106.5155  | 1106.5083   | -0.0072  | -7        | 178        | 186      | LCMMSSHLK              |           |         | Carbamidomethyl (C)[2] |      | Mascot      |
| 1254.6477  | 1254.5487   | -0.099   | -79       | 188        | 197      | TEKAI NEFFR            |           |         |                        |      | Mascot      |
| 1262.6222  | 1262.6448   | 0.0226   | 18        | 377        | 388      | EESVQEGGATKK           |           |         |                        |      | Mascot      |
| 1353.7382  | 1353.6532   | -0.085   | -63       | 246        | 257      | SIPLPLIMNCR            |           |         |                        |      | Mascot      |
| 1353.7382  | 1353.6532   | -0.085   | -63       | 246        | 257      | SIPLPLIMNCR            |           |         |                        |      | Mascot      |
| 1910.9238  | 1910.8948   | -0.029   | -15       | 258        | 273      | TFMEEILEVVGVEEMR       |           |         |                        |      | Mascot      |
| 2240.0547  | 2240.1404   | 0.0857   | 38        | 127        | 147      | GKYTCVASNSHGTANCT VTLR |           |         | Carbamidomethyl (C)[5] |      | Mascot      |

8 hypermethylated in cancer 1 protein [Danio rerio] gi|50540468 81385.8 6.2 13 39 0

Peptide Information

| Calc. Mass | Obsrv. Mass | $\pm$ da | $\pm$ ppm | Start Seq. | End Seq. | Sequence                 | Ion Score | C. I. % | Modification                                  | Rank | Result Type |
|------------|-------------|----------|-----------|------------|----------|--------------------------|-----------|---------|-----------------------------------------------|------|-------------|
| 842.4553   | 842.4904    | 0.0351   | 42        | 624        | 630      | NLISHMK                  |           |         |                                               |      | Mascot      |
| 870.458    | 870.5198    | 0.0618   | 71        | 591        | 596      | FTRQYR                   |           |         |                                               |      | Mascot      |
| 938.4578   | 938.4544    | -0.0034  | -4        | 730        | 737      | TIDRYSPS                 |           |         |                                               |      | Mascot      |
| 1225.5994  | 1225.5591   | -0.0403  | -33       | 2          | 12       | LDAMEVPSHAR              |           |         |                                               |      | Mascot      |
| 1241.5942  | 1241.4652   | -0.129   | -104      | 2          | 12       | LDAMEVPSHAR              |           |         | Oxidation (M)[4]                              |      | Mascot      |
| 1388.6296  | 1388.6646   | 0.035    | 25        | 1          | 12       | MLDAMEVPSHAR             |           |         | Oxidation (M)[1,5]                            |      | Mascot      |
| 1606.8013  | 1606.8353   | 0.034    | 21        | 129        | 141      | YHLSHNPTFLSYK            |           |         |                                               |      | Mascot      |
| 1606.8013  | 1606.8353   | 0.034    | 21        | 129        | 141      | YHLSHNPTFLSYK            |           |         |                                               |      | Mascot      |
| 2174.0757  | 2174.0476   | -0.0281  | -13       | 710        | 729      | MDILNSSLPPTSQQLSAE SR    |           |         |                                               |      | Mascot      |
| 2240.052   | 2240.1404   | 0.0884   | 39        | 575        | 593      | SHLGLKPFACDACGMRF TR     |           |         | Carbamidomethyl (C)[10,13], Oxidation (M)[15] |      | Mascot      |
| 2260.0354  | 2260.0886   | 0.0532   | 24        | 572        | 590      | HMRSHLGLKPFACDACG MR     |           |         | Carbamidomethyl (C)[13,16], Oxidation (M)[2]  |      | Mascot      |
| 2260.0354  | 2260.0886   | 0.0532   | 24        | 572        | 590      | HMRSHLGLKPFACDACG MR     |           |         | Carbamidomethyl (C)[13,16], Oxidation (M)[2]  |      | Mascot      |
| 2284.1113  | 2284.1179   | 0.0066   | 3         | 543        | 561      | QHEKTHWLTRPYPCSIK GK     |           |         |                                               |      | Mascot      |
| 2298.0964  | 2298.1338   | 0.0374   | 16        | 624        | 646      | NLISHMKMHSSGAAGGG LTPDGK |           |         | Oxidation (M)[6,8]                            |      | Mascot      |
| 2300.2319  | 2300.1221   | -0.1098  | -48       | 689        | 709      | AMESLYPLSKLAVDQLGL AHK   |           |         | Oxidation (M)[2]                              |      | Mascot      |

|   |                            |           |        |   |              |     |                           |      |    |    |   |  |  |  |  |  |        |
|---|----------------------------|-----------|--------|---|--------------|-----|---------------------------|------|----|----|---|--|--|--|--|--|--------|
|   | 2502.1687                  | 2502.1831 | 0.0144 | 6 | 597          | 618 | LTEHMRHSGEKPYECQ<br>VCGGK |      |    |    |   |  |  |  |  |  | Mascot |
|   | 2502.1687                  | 2502.1831 | 0.0144 | 6 | 597          | 618 | LTEHMRHSGEKPYECQ<br>VCGGK |      |    |    |   |  |  |  |  |  | Mascot |
| 9 | protein LAP2 [Danio rerio] |           |        |   | gi 302129649 |     | 148528.6                  | 5.27 | 17 | 39 | 0 |  |  |  |  |  |        |

#### Peptide Information

|  | Calc. Mass | Obsrv. Mass | ± da    | ± ppm | Start Seq. | End Sequence Seq.               | Ion Score | C. I. | % Modification          | Rank | Result Type |
|--|------------|-------------|---------|-------|------------|---------------------------------|-----------|-------|-------------------------|------|-------------|
|  | 918.4427   | 918.4677    | 0.025   | 27    | 978        | 984 DNLWSQR                     |           |       |                         |      | Mascot      |
|  | 938.5491   | 938.4544    | -0.0947 | -101  | 868        | 876 KCPPAPVVK                   |           |       |                         |      | Mascot      |
|  | 971.5165   | 971.4745    | -0.042  | -43   | 175        | 182 MLPKSMHK                    |           |       |                         |      | Mascot      |
|  | 987.5114   | 987.4707    | -0.0407 | -41   | 175        | 182 MLPKSMHK                    |           |       | Oxidation (M)[1]        |      | Mascot      |
|  | 1003.5063  | 1003.4652   | -0.0411 | -41   | 175        | 182 MLPKSMHK                    |           |       | Oxidation (M)[1,6]      |      | Mascot      |
|  | 1045.4731  | 1045.5391   | 0.066   | 63    | 469        | 476 DEREMPPR                    |           |       | Oxidation (M)[5]        |      | Mascot      |
|  | 1058.5914  | 1058.5023   | -0.0891 | -84   | 684        | 692 ESKMPLIPK                   |           |       | Oxidation (M)[4]        |      | Mascot      |
|  | 1058.5914  | 1058.5023   | -0.0891 | -84   | 684        | 692 ESKMPLIPK                   |           |       | Oxidation (M)[4]        |      | Mascot      |
|  | 1165.6323  | 1165.7192   | 0.0869  | 75    | 524        | 534 NHIGVQDVGVK                 |           |       |                         |      | Mascot      |
|  | 1254.5306  | 1254.5487   | 0.0181  | 14    | 458        | 468 AQVAFECDEDK                 |           |       |                         |      | Mascot      |
|  | 1258.6572  | 1258.4901   | -0.1671 | -133  | 179        | 188 SMHKLTQLER                  |           |       | Oxidation (M)[2]        |      | Mascot      |
|  | 1258.6572  | 1258.4901   | -0.1671 | -133  | 179        | 188 SMHKLTQLER                  |           |       | Oxidation (M)[2]        |      | Mascot      |
|  | 1262.7177  | 1262.6448   | -0.0729 | -58   | 219        | 230 LTFVPGMIGALK                |           |       | Oxidation (M)[7]        |      | Mascot      |
|  | 1388.674   | 1388.6646   | -0.0094 | -7    | 1162       | 1172 VPADWRDQVMR                |           |       | Oxidation (M)[10]       |      | Mascot      |
|  | 1483.8162  | 1483.7021   | -0.1141 | -77   | 1034       | 1046 MLPQVGQRGTQLQR             |           |       |                         |      | Mascot      |
|  | 1498.7328  | 1498.6818   | -0.051  | -34   | 1182       | 1194 VPLMNGQMCPVVR              |           |       | Carbamidomethyl (C)[9]  |      | Mascot      |
|  | 1606.6812  | 1606.8353   | 0.1541  | 96    | 1063       | 1075 RMPGMEGDYMTYR              |           |       |                         |      | Mascot      |
|  | 1606.6812  | 1606.8353   | 0.1541  | 96    | 1063       | 1075 RMPGMEGDYMTYR              |           |       |                         |      | Mascot      |
|  | 1814.8094  | 1814.8976   | 0.0882  | 49    | 1195       | 1210 SPMSCTQPPMARHPSR           |           |       | Oxidation (M)[3,10]     |      | Mascot      |
|  | 1830.9708  | 1830.9037   | -0.0671 | -37   | 1244       | 1261 IEKNPELGFSISGGIGGR         |           |       |                         |      | Mascot      |
|  | 2220.1555  | 2220.0903   | -0.0652 | -29   | 211        | 230 ELWMDGNKLTfVPGMIG<br>ALK    |           |       |                         |      | Mascot      |
|  | 2232.9907  | 2233.0327   | 0.042   | 19    | 1042       | 1062 GTLQRQSGSGSSGNPMC<br>MPDPR |           |       | Carbamidomethyl (C)[16] |      | Mascot      |

|    |                                                                |  |  |  |              |  |         |      |    |    |   |  |  |  |  |  |  |
|----|----------------------------------------------------------------|--|--|--|--------------|--|---------|------|----|----|---|--|--|--|--|--|--|
| 10 | PREDICTED: intermediate filament family orphan 1 [Danio rerio] |  |  |  | gi 326676513 |  | 70799.8 | 4.95 | 11 | 39 | 0 |  |  |  |  |  |  |
|----|----------------------------------------------------------------|--|--|--|--------------|--|---------|------|----|----|---|--|--|--|--|--|--|

#### Peptide Information

|  | Calc. Mass | Obsrv. Mass | ± da    | ± ppm | Start Seq. | End Sequence Seq. | Ion Score | C. I. | % Modification | Rank | Result Type |
|--|------------|-------------|---------|-------|------------|-------------------|-----------|-------|----------------|------|-------------|
|  | 938.5166   | 938.4544    | -0.0622 | -66   | 119        | 125 VHELERR       |           |       |                |      | Mascot      |
|  | 1017.5687  | 1017.5486   | -0.0201 | -20   | 571        | 579 LITQSGDRK     |           |       |                |      | Mascot      |

|           |           |         |     |     |     |                       |                                               |        |
|-----------|-----------|---------|-----|-----|-----|-----------------------|-----------------------------------------------|--------|
| 1045.575  | 1045.5391 | -0.0359 | -34 | 570 | 578 | RLITQSGDR             |                                               | Mascot |
| 1254.564  | 1254.5487 | -0.0153 | -12 | 354 | 363 | AMKVDMDICR            | Carbamidomethyl (C)[9], Oxidation (M)[2]      | Mascot |
| 1307.6195 | 1307.6471 | 0.0276  | 21  | 560 | 570 | GLDVQMETCRR           |                                               | Mascot |
| 1590.7944 | 1590.8403 | 0.0459  | 29  | 208 | 222 | YVSTVIGCTSNPPPR       |                                               | Mascot |
| 1590.7944 | 1590.8403 | 0.0459  | 29  | 208 | 222 | YVSTVIGCTSNPPPR       |                                               | Mascot |
| 1799.7332 | 1799.8525 | 0.1193  | 66  | 547 | 559 | HLHEYMEMCSMKR         | Carbamidomethyl (C)[9], Oxidation (M)[6,8,11] | Mascot |
| 2173.8591 | 2174.0476 | 0.1885  | 87  | 542 | 558 | SDMNRHLHEYMEMCSMK     | Oxidation (M)[3,11]                           | Mascot |
| 2220.0964 | 2220.0903 | -0.0061 | -3  | 330 | 349 | ADLVLFKGLMSNNHSDLDSK  | Oxidation (M)[10]                             | Mascot |
| 2239.9375 | 2240.1404 | 0.2029  | 91  | 442 | 459 | EVELCCSSNNQINEEMQR    | Carbamidomethyl (C)[5,6]                      | Mascot |
| 2255.9326 | 2256.1699 | 0.2373  | 105 | 442 | 459 | EVELCCSSNNQINEEMQR    | Carbamidomethyl (C)[5,6], Oxidation (M)[16]   | Mascot |
| 2260.1125 | 2260.0886 | -0.0239 | -11 | 128 | 147 | VLEKQLQQALDENAECASETK |                                               | Mascot |
| 2260.1125 | 2260.0886 | -0.0239 | -11 | 128 | 147 | VLEKQLQQALDENAECASETK |                                               | Mascot |

### Peptide Information

12 PREDICTED: collagen alpha-1(XXI) chain-like [Danio rerio]

### Peptide Information



13 protein CYR61 [Danio rerio] gi|49227384 40620.1 8.69 8 38 0 19 0

Peptide Information

| Calc. Mass | Obsrv. Mass | ± da    | ± ppm | Start Seq. | End Seq. | Sequence                   | Ion Score | C. I. | % Modification               | Rank | Result Type |
|------------|-------------|---------|-------|------------|----------|----------------------------|-----------|-------|------------------------------|------|-------------|
| 938.4359   | 938.4544    | 0.0185  | 20    | 230        | 238      | SCGTGISTR                  |           |       | Carbamidomethyl (C)[2]       |      | Mascot      |
| 1257.4843  | 1257.4602   | -0.0241 | -19   | 43         | 53       | DTCGCCLVCAR                |           |       | Carbamidomethyl (C)[3,5]     |      | Mascot      |
| 1392.6471  | 1392.7058   | 0.0587  | 42    | 310        | 320      | CCSPQNTRTIR                |           |       | Carbamidomethyl (C)[1,2]     |      | Mascot      |
| 1392.6471  | 1392.7058   | 0.0587  | 42    | 310        | 320      | CCSPQNTRTIR                | 19        | 0     | Carbamidomethyl (C)[1,2]     |      | Mascot      |
| 1862.9891  | 1862.9124   | -0.0767 | -41   | 187        | 202      | ELTNKNELISVIMNTK           |           |       | Oxidation (M)[13]            |      | Mascot      |
| 2224.9897  | 2225.0667   | 0.077   | 35    | 211        | 229      | SHQMEKCIVQTTGWSQC<br>SR    |           |       | Oxidation (M)[4]             |      | Mascot      |
| 2259.9031  | 2260.0886   | 0.1855  | 82    | 43         | 61       | DTCGCCLVCARQLNEDC<br>SR    |           |       | Carbamidomethyl (C)[3,5,6]   |      | Mascot      |
| 2259.9031  | 2260.0886   | 0.1855  | 82    | 43         | 61       | DTCGCCLVCARQLNEDC<br>SR    |           |       | Carbamidomethyl (C)[3,5,6]   |      | Mascot      |
| 2502.1282  | 2502.1831   | 0.0549  | 22    | 217        | 238      | CIVQTTGWSQCSRSCGT<br>GISTR |           |       | Carbamidomethyl (C)[1,11,15] |      | Mascot      |
| 2502.1772  | 2502.1831   | 0.0059  | 2     | 346        | 366      | HCPHASEAGFPFYRLYN<br>DIHK  |           |       |                              |      | Mascot      |

14 insulin-like growth factor 1a receptor [Danio rerio] gi|23308649 158344.4 6 15 38 0 13 0

Peptide Information

| Calc. Mass | Obsrv. Mass | ± da    | ± ppm | Start Seq. | End Seq. | Sequence          | Ion Score | C. I. | % Modification                                 | Rank | Result Type |
|------------|-------------|---------|-------|------------|----------|-------------------|-----------|-------|------------------------------------------------|------|-------------|
| 856.525    | 856.5056    | -0.0194 | -23   | 840        | 847      | GEGIVLLR          |           |       |                                                |      | Mascot      |
| 1058.5088  | 1058.5023   | -0.0065 | -6    | 809        | 818      | CSAAAFVFSR        |           |       |                                                |      | Mascot      |
| 1058.5088  | 1058.5023   | -0.0065 | -6    | 809        | 818      | CSAAAFVFSR        |           |       |                                                |      | Mascot      |
| 1106.4507  | 1106.5083   | 0.0576  | 52    | 211        | 219      | CWTSNHCQK         |           |       |                                                |      | Mascot      |
| 1225.5228  | 1225.5591   | 0.0363  | 30    | 266        | 276      | CVEACPPDTYK       |           |       |                                                |      | Mascot      |
| 1257.6144  | 1257.4602   | -0.1542 | -123  | 615        | 626      | AYANSSSSLMVK      |           |       |                                                |      | Mascot      |
| 1346.637   | 1346.6195   | -0.0175 | -13   | 602        | 614      | TNASAPSMPLDAR     |           |       | Oxidation (M)[8]                               |      | Mascot      |
| 1353.6653  | 1353.6532   | -0.0121 | -9    | 449        | 459      | FNPKLCMSEIR       |           |       | Oxidation (M)[7]                               |      | Mascot      |
| 1353.6653  | 1353.6532   | -0.0121 | -9    | 449        | 459      | FNPKLCMSEIR       | 13        | 0     | Oxidation (M)[7]                               |      | Mascot      |
| 1414.78    | 1414.6608   | -0.1192 | -84   | 589        | 601      | HVGGAKSEVVYIR     |           |       |                                                |      | Mascot      |
| 1590.6974  | 1590.8403   | 0.1429  | 90    | 211        | 223      | CWTSNHCQKVCPCPK   |           |       | Carbamidomethyl (C)[1]                         |      | Mascot      |
| 1590.6974  | 1590.8403   | 0.1429  | 90    | 211        | 223      | CWTSNHCQKVCPCPK   |           |       | Carbamidomethyl (C)[1]                         |      | Mascot      |
| 1862.7804  | 1862.9124   | 0.132   | 71    | 277        | 290      | FEGWRCITMEMCAR    |           |       | Carbamidomethyl (C)[6,12], Oxidation (M)[9]    |      | Mascot      |
| 1878.7754  | 1878.9071   | 0.1317  | 70    | 277        | 290      | FEGWRCITMEMCAR    |           |       | Carbamidomethyl (C)[6,12], Oxidation (M)[9,11] |      | Mascot      |
| 1911.007   | 1910.8948   | -0.1122 | -59   | 754        | 770      | NISVLESNITQPELPEK |           |       |                                                |      | Mascot      |
| 2040.9551  | 2040.9895   | 0.0344  | 17    | 1110       | 1128     | MIQMAGEIADGMAYLNA |           |       |                                                |      | Mascot      |

|    |                                                                                |           |         |     |      |              |                                |          |      |    |    |   |                         |  |  |  |        |
|----|--------------------------------------------------------------------------------|-----------|---------|-----|------|--------------|--------------------------------|----------|------|----|----|---|-------------------------|--|--|--|--------|
|    | 2169.05                                                                        | 2169.0811 | 0.0311  | 14  | 1109 | 1128         | NK<br>KMIQMAGEIADGMAYLN<br>ANK |          |      |    |    |   |                         |  |  |  | Mascot |
|    | 2174.1929                                                                      | 2174.0476 | -0.1453 | -67 | 78   | 95           | TLSFPKLTMTVDYILLFR             |          |      |    |    |   | Oxidation (M)[9]        |  |  |  | Mascot |
|    | 2283.9724                                                                      | 2284.1179 | 0.1455  | 64  | 644  | 661          | WQQQAEDGELYQHNYC<br>SK         |          |      |    |    |   | Carbamidomethyl (C)[16] |  |  |  | Mascot |
| 15 | PREDICTED: FYVE and coiled-coil domain-containing protein 1-like [Danio rerio] |           |         |     |      | gi 326665246 |                                | 153549.6 | 5.14 | 19 | 37 | 0 |                         |  |  |  |        |

#### Peptide Information

| Calc. Mass | Obsrv. Mass | ± da    | ± ppm | Start Seq. | End Seq. | Sequence                    | Ion Score | C. I. | % Modification          | Rank | Result Type |
|------------|-------------|---------|-------|------------|----------|-----------------------------|-----------|-------|-------------------------|------|-------------|
| 918.4614   | 918.4677    | 0.0063  | 7     | 109        | 115      | YCLVHQR                     |           |       |                         |      | Mascot      |
| 1017.5363  | 1017.5486   | 0.0123  | 12    | 1034       | 1041     | EKDALWQK                    |           |       |                         |      | Mascot      |
| 1045.491   | 1045.5391   | 0.0481  | 46    | 646        | 654      | TDHVESTTR                   |           |       |                         |      | Mascot      |
| 1051.6007  | 1051.688    | 0.0873  | 83    | 724        | 731      | RHVEELLR                    |           |       |                         |      | Mascot      |
| 1074.5677  | 1074.5266   | -0.0411 | -38   | 244        | 252      | IELDQSELK                   |           |       |                         |      | Mascot      |
| 1232.6005  | 1232.5684   | -0.0321 | -26   | 1274       | 1284     | ETTDTPLEQAK                 |           |       |                         |      | Mascot      |
| 1232.6005  | 1232.5684   | -0.0321 | -26   | 1274       | 1284     | ETTDTPLEQAK                 |           |       |                         |      | Mascot      |
| 1254.4912  | 1254.5487   | 0.0575  | 46    | 409        | 418      | EMEGNLMCR                   |           |       | Carbamidomethyl (C)[9]  |      | Mascot      |
| 1258.5654  | 1258.4901   | -0.0753 | -60   | 751        | 761      | AEIQTSMTSMK                 |           |       | Oxidation (M)[7,10]     |      | Mascot      |
| 1258.5845  | 1258.4901   | -0.0944 | -75   | 732        | 741      | CHEREETLGK                  |           |       | Carbamidomethyl (C)[1]  |      | Mascot      |
| 1262.6157  | 1262.6448   | 0.0291  | 23    | 1          | 11       | MSTVGENQLQR                 |           |       |                         |      | Mascot      |
| 1498.6379  | 1498.6818   | 0.0439  | 29    | 352        | 364      | GQQAANYCDSAWK               |           |       | Carbamidomethyl (C)[8]  |      | Mascot      |
| 1590.7679  | 1590.8403   | 0.0724  | 46    | 820        | 832      | LQELQMEAEQEEVK              |           |       | Oxidation (M)[6]        |      | Mascot      |
| 1590.7679  | 1590.8403   | 0.0724  | 46    | 820        | 832      | LQELQMEAEQEEVK              |           |       | Oxidation (M)[6]        |      | Mascot      |
| 1878.9458  | 1878.9071   | -0.0387 | -21   | 44         | 57       | FCFKLEYLLQFDQK              |           |       | Carbamidomethyl (C)[2]  |      | Mascot      |
| 2040.9452  | 2040.9895   | 0.0443  | 22    | 1060       | 1076     | DVTHCLSKSQFSWMLR            |           |       |                         |      | Mascot      |
| 2220.1084  | 2220.0903   | -0.0181 | -8    | 1307       | 1325     | NPGQYTLIFDNSFSRFVS<br>K     |           |       |                         |      | Mascot      |
| 2240.188   | 2240.1404   | -0.0476 | -21   | 253        | 271      | QQQLQEKIQLLTDEAADL<br>R     |           |       |                         |      | Mascot      |
| 2278.1594  | 2277.9463   | -0.2131 | -94   | 489        | 508      | SLLEEQLNAKMNELSVST<br>QK    |           |       | Oxidation (M)[11]       |      | Mascot      |
| 2297.917   | 2298.1338   | 0.2168  | 94    | 1078       | 1097     | YNCRFCGRPFYSCCSF<br>GGK     |           |       |                         |      | Mascot      |
| 2502.1599  | 2502.1831   | 0.0232  | 9     | 788        | 810      | ANTETAELGVHVCMLTG<br>QNEEAK |           |       | Carbamidomethyl (C)[13] |      | Mascot      |
| 2502.1599  | 2502.1831   | 0.0232  | 9     | 788        | 810      | ANTETAELGVHVCMLTG<br>QNEEAK |           |       | Carbamidomethyl (C)[13] |      | Mascot      |

|    |                                                        |  |  |  |  |              |  |         |      |    |    |   |  |  |  |  |  |
|----|--------------------------------------------------------|--|--|--|--|--------------|--|---------|------|----|----|---|--|--|--|--|--|
| 16 | DEAD (Asp-Glu-Ala-Asp) box polypeptide 3 [Danio rerio] |  |  |  |  | gi 187608185 |  | 78286.6 | 8.48 | 12 | 37 | 0 |  |  |  |  |  |
|----|--------------------------------------------------------|--|--|--|--|--------------|--|---------|------|----|----|---|--|--|--|--|--|

#### Peptide Information

| Calc. Mass | Obsrv. Mass | ± da | ± ppm | Start | End | Sequence | Ion | C. I. | % Modification | Rank | Result Type |
|------------|-------------|------|-------|-------|-----|----------|-----|-------|----------------|------|-------------|
|------------|-------------|------|-------|-------|-----|----------|-----|-------|----------------|------|-------------|

|                     |                                                                                                     | Seq.        |         | Seq.  |              | Score             |                            |                                          |                                              |                  |
|---------------------|-----------------------------------------------------------------------------------------------------|-------------|---------|-------|--------------|-------------------|----------------------------|------------------------------------------|----------------------------------------------|------------------|
|                     | 842.5094                                                                                            | 842.4904    | -0.019  | -23   | 436          | 442               | EQILAR                     |                                          | Mascot                                       |                  |
|                     | 856.3947                                                                                            | 856.5056    | 0.1109  | 129   | 140          | 146               | SAFFNDR                    |                                          | Mascot                                       |                  |
|                     | 954.4904                                                                                            | 954.4503    | -0.0401 | -42   | 638          | 646               | RFSGGFGAR                  |                                          | Mascot                                       |                  |
|                     | 996.5182                                                                                            | 996.5746    | 0.0564  | 57    | 382          | 390               | GKIGLDYCK                  |                                          | Mascot                                       |                  |
|                     | 1051.616                                                                                            | 1051.688    | 0.072   | 68    | 34           | 41                | RYIPPLR                    |                                          | Mascot                                       |                  |
|                     | 1090.4548                                                                                           | 1090.499    | 0.0442  | 41    | 48           | 57                | NDSPGWDGSR                 |                                          | Mascot                                       |                  |
|                     | 1232.5807                                                                                           | 1232.5684   | -0.0123 | -10   | 639          | 649               | FSGGFGARDYR                |                                          | Mascot                                       |                  |
|                     | 1232.5807                                                                                           | 1232.5684   | -0.0123 | -10   | 639          | 649               | FSGGFGARDYR                |                                          | Mascot                                       |                  |
|                     | 1254.5453                                                                                           | 1254.5487   | 0.0034  | 3     | 262          | 273               | DLMACAQTGSGK               | Carbamidomethyl (C)[5], Oxidation (M)[3] | Mascot                                       |                  |
|                     | 1353.625                                                                                            | 1353.6532   | 0.0282  | 21    | 261          | 273               | RDLMACAQTGSGK              | Oxidation (M)[4]                         | Mascot                                       |                  |
|                     | 1353.625                                                                                            | 1353.6532   | 0.0282  | 21    | 261          | 273               | RDLMACAQTGSGK              | Oxidation (M)[4]                         | Mascot                                       |                  |
|                     | 1498.7537                                                                                           | 1498.6818   | -0.0719 | -48   | 583          | 596               | VGNLGLATSFYNDK             |                                          | Mascot                                       |                  |
|                     | 1830.9642                                                                                           | 1830.9037   | -0.0605 | -33   | 343          | 359               | VRPCVVYGGADIGQQIR          |                                          | Mascot                                       |                  |
|                     | 2524.3909                                                                                           | 2524.1577   | -0.2332 | -92   | 477          | 499               | SFLDLLNATGKDSLTLV<br>FVETK |                                          | Mascot                                       |                  |
| 17                  | Zgc:173480 protein [Danio rerio]                                                                    |             |         |       | gi 157059806 | 32674.8           | 8.57                       | 10                                       | 37                                           | 0                |
| Peptide Information |                                                                                                     |             |         |       |              |                   |                            |                                          |                                              |                  |
|                     | Calc. Mass                                                                                          | Obsrv. Mass | ± da    | ± ppm | Start Seq.   | End Sequence Seq. | Ion Score                  | C. I.                                    | % Modification                               | Rank Result Type |
|                     | 938.4941                                                                                            | 938.4544    | -0.0397 | -42   | 155          | 162               | FTQTSNLK                   |                                          |                                              | Mascot           |
|                     | 987.5621                                                                                            | 987.4707    | -0.0914 | -93   | 182          | 190               | SFITAHLK                   |                                          |                                              | Mascot           |
|                     | 1017.6203                                                                                           | 1017.5486   | -0.0717 | -70   | 98           | 106               | GFIRLGNLK                  |                                          |                                              | Mascot           |
|                     | 1058.4393                                                                                           | 1058.5023   | 0.063   | 60    | 61           | 69                | GFTCTQCGK                  |                                          | Carbamidomethyl (C)[4,7]                     | Mascot           |
|                     | 1058.4393                                                                                           | 1058.5023   | 0.063   | 60    | 61           | 69                | GFTCTQCGK                  |                                          | Carbamidomethyl (C)[4,7]                     | Mascot           |
|                     | 1232.5762                                                                                           | 1232.5684   | -0.0078 | -6    | 1            | 10                | MSDPEPCRIK                 |                                          | Carbamidomethyl (C)[7]                       | Mascot           |
|                     | 1232.5762                                                                                           | 1232.5684   | -0.0078 | -6    | 1            | 10                | MSDPEPCRIK                 |                                          | Carbamidomethyl (C)[7]                       | Mascot           |
|                     | 1814.8199                                                                                           | 1814.8976   | 0.0777  | 43    | 120          | 134               | CDHCGKTFFISSDLK            |                                          | Carbamidomethyl (C)[1,4]                     | Mascot           |
|                     | 1878.8585                                                                                           | 1878.9071   | 0.0486  | 26    | 139          | 154               | VHTNEKPYSCEGKR             |                                          | Carbamidomethyl (C)[10]                      | Mascot           |
|                     | 2211.0908                                                                                           | 2211.053    | -0.0378 | -17   | 219          | 237               | IHERIHTGERPFACSLCG<br>K    |                                          | Carbamidomethyl (C)[14]                      | Mascot           |
|                     | 2298.0034                                                                                           | 2298.1338   | 0.1304  | 57    | 79           | 97                | HMMMIHTGEKPYKCSHC<br>DK    |                                          | Oxidation (M)[3]                             | Mascot           |
|                     | 2455.1177                                                                                           | 2455.2585   | 0.1408  | 57    | 191          | 209               | LHQMIHTGERPYKCSHC<br>ER    |                                          | Carbamidomethyl (C)[14,17], Oxidation (M)[4] | Mascot           |
| 18                  | novel protein similar to human and mouse myeloid/lymphoid or mixed-lineage leukemia 3 (MLL3) [Danio |             |         |       | gi 157885936 | 82601.8           | 9.38                       | 14                                       | 36                                           | 0                |

| Peptide Information |                                                                           |             |         |       |              |          |                           |           |       |                         |      |             |
|---------------------|---------------------------------------------------------------------------|-------------|---------|-------|--------------|----------|---------------------------|-----------|-------|-------------------------|------|-------------|
|                     | Calc. Mass                                                                | Obsrv. Mass | ± da    | ± ppm | Start Seq.   | End Seq. | Sequence                  | Ion Score | C. I. | % Modification          | Rank | Result Type |
|                     | 870.4679                                                                  | 870.5198    | 0.0519  | 60    | 140          | 147      | SISEGHLK                  |           |       |                         |      | Mascot      |
|                     | 971.4879                                                                  | 971.4745    | -0.0134 | -14   | 343          | 349      | CFSVFRR                   |           |       | Carbamidomethyl (C)[1]  |      | Mascot      |
|                     | 996.5948                                                                  | 996.5746    | -0.0202 | -20   | 462          | 470      | VLGPVAERR                 |           |       |                         |      | Mascot      |
|                     | 1045.6152                                                                 | 1045.5391   | -0.0761 | -73   | 602          | 611      | IQGLGLFAAR                |           |       |                         |      | Mascot      |
|                     | 1074.5653                                                                 | 1074.5266   | -0.0387 | -36   | 179          | 187      | WTIDIAMPK                 |           |       |                         |      | Mascot      |
|                     | 1090.5602                                                                 | 1090.499    | -0.0612 | -56   | 179          | 187      | WTIDIAMPK                 |           |       | Oxidation (M)[7]        |      | Mascot      |
|                     | 1106.5323                                                                 | 1106.5083   | -0.024  | -22   | 35           | 43       | ITKDEEESR                 |           |       |                         |      | Mascot      |
|                     | 1307.5685                                                                 | 1307.6471   | 0.0786  | 60    | 423          | 433      | YVCSVEEHEGR               |           |       |                         |      | Mascot      |
|                     | 1388.6838                                                                 | 1388.6646   | -0.0192 | -14   | 499          | 511      | IAESLPGVEACSR             |           |       | Carbamidomethyl (C)[11] |      | Mascot      |
|                     | 1590.754                                                                  | 1590.8403   | 0.0863  | 54    | 559          | 574      | CIQNSTVAASASSHSK          |           |       |                         |      | Mascot      |
|                     | 1590.754                                                                  | 1590.8403   | 0.0863  | 54    | 559          | 574      | CIQNSTVAASASSHSK          |           |       |                         |      | Mascot      |
|                     | 1800.0524                                                                 | 1799.8525   | -0.1999 | -111  | 201          | 215      | LKQLTTSRLRPCLTIR          |           |       | Carbamidomethyl (C)[11] |      | Mascot      |
|                     | 2132.1282                                                                 | 2131.9983   | -0.1299 | -61   | 516          | 535      | YGRNPLLVLPLSMNSSG<br>SAR  |           |       |                         |      | Mascot      |
|                     | 2132.1282                                                                 | 2131.9983   | -0.1299 | -61   | 516          | 535      | YGRNPLLVLPLSMNSSG<br>SAR  |           |       |                         |      | Mascot      |
|                     | 2225.0112                                                                 | 2225.0667   | 0.0555  | 25    | 668          | 686      | YINHSCSPNCVAEVVTFE<br>R   |           |       | Carbamidomethyl (C)[6]  |      | Mascot      |
|                     | 2256.1184                                                                 | 2256.1699   | 0.0515  | 23    | 616          | 634      | QTMVIEYMGDILRTEVAM<br>R   |           |       |                         |      | Mascot      |
|                     | 2283.1562                                                                 | 2283.1155   | -0.0407 | -18   | 328          | 348      | GAGAAAGLHVEHQLRCF<br>SVFR |           |       | Carbamidomethyl (C)[16] |      | Mascot      |
| 19                  | PREDICTED: receptor-type tyrosine-protein phosphatase delta [Danio rerio] |             |         |       | gi 326669738 |          | 54289.1                   | 6.81      | 10    | 35                      | 0    |             |
| Peptide Information |                                                                           |             |         |       |              |          |                           |           |       |                         |      |             |
|                     | Calc. Mass                                                                | Obsrv. Mass | ± da    | ± ppm | Start Seq.   | End Seq. | Sequence                  | Ion Score | C. I. | % Modification          | Rank | Result Type |
|                     | 918.4751                                                                  | 918.4677    | -0.0074 | -8    | 359          | 366      | DGQSRTVR                  |           |       |                         |      | Mascot      |
|                     | 987.5621                                                                  | 987.4707    | -0.0914 | -93   | 16           | 23       | ETPPKFLR                  |           |       |                         |      | Mascot      |
|                     | 1106.5663                                                                 | 1106.5083   | -0.058  | -52   | 226          | 235      | FISANLPCNK                |           |       |                         |      | Mascot      |
|                     | 1483.7283                                                                 | 1483.7021   | -0.0262 | -18   | 125          | 137      | TGCFIVIDAMLER             |           |       | Oxidation (M)[10]       |      | Mascot      |
|                     | 1814.9218                                                                 | 1814.8976   | -0.0242 | -13   | 140          | 154      | HEKTVDIYGHVTLMR           |           |       | Oxidation (M)[14]       |      | Mascot      |
|                     | 2040.9794                                                                 | 2040.9895   | 0.0101  | 5     | 197          | 214      | LTQIESGENVTGMELEFK        |           |       | Oxidation (M)[13]       |      | Mascot      |
|                     | 2132.1355                                                                 | 2131.9983   | -0.1372 | -64   | 240          | 257      | LVNIMPYESTRVCLQPIR        |           |       |                         |      | Mascot      |
|                     | 2132.1355                                                                 | 2131.9983   | -0.1372 | -64   | 240          | 257      | LVNIMPYESTRVCLQPIR        |           |       |                         |      | Mascot      |
|                     | 2233.052                                                                  | 2233.0327   | -0.0193 | -9    | 258          | 277      | GVEGSDYINGSFIDGYRQ<br>QK  |           |       |                         |      | Mascot      |
|                     | 2260.0034                                                                 | 2260.0886   | 0.0852  | 38    | 87           | 107      | DEAIYECVASNSVGETSA        |           |       | Carbamidomethyl (C)[7]  |      | Mascot      |

|    |                                                                                                   |           |         |    |    |             |                                  |      |                        |    |        |
|----|---------------------------------------------------------------------------------------------------|-----------|---------|----|----|-------------|----------------------------------|------|------------------------|----|--------|
|    | 2260.0034                                                                                         | 2260.0886 | 0.0852  | 38 | 87 | 107         | TTR<br>DEAIYECVASNSVGETSA<br>TTR |      | Carbamidomethyl (C)[7] |    | Mascot |
|    | 2283.1326                                                                                         | 2283.1155 | -0.0171 | -7 | 1  | 20          | MADAELEALHLFNEKETP<br>PK         |      |                        |    | Mascot |
|    | 2299.1274                                                                                         | 2299.1304 | 0.003   | 1  | 1  | 20          | MADAELEALHLFNEKETP<br>PK         |      | Oxidation (M)[1]       |    | Mascot |
| 20 | novel protein similar to vertebrate phospholipase A2, group VI (PLA2G6) (zgc:77476) [Danio rerio] |           |         |    |    | gi 94733407 | 90549.6                          | 6.09 | 14                     | 35 | 0      |

#### Peptide Information

| Calc. Mass | Obsrv. Mass | ± da    | ± ppm | Start Seq. | End Seq. | Sequence                     | Ion Score | C. I. % | Modification                                | Rank | Result Type |
|------------|-------------|---------|-------|------------|----------|------------------------------|-----------|---------|---------------------------------------------|------|-------------|
| 938.4213   | 938.4544    | 0.0331  | 35    | 553        | 560      | NEFGENTK                     |           |         |                                             |      | Mascot      |
| 1017.5008  | 1017.5486   | 0.0478  | 47    | 526        | 532      | CLYFRMK                      |           |         | Carbamidomethyl (C)[1]                      |      | Mascot      |
| 1045.571   | 1045.5391   | -0.0319 | -31   | 467        | 476      | LLCLDGGGIK                   |           |         | Carbamidomethyl (C)[3]                      |      | Mascot      |
| 1090.5198  | 1090.499    | -0.0208 | -19   | 169        | 177      | ELLEECQAR                    |           |         |                                             |      | Mascot      |
| 1106.5874  | 1106.5083   | -0.0791 | -71   | 569        | 578      | VMVTSVLADR                   |           |         | Oxidation (M)[2]                            |      | Mascot      |
| 1590.7792  | 1590.8403   | 0.0611  | 38    | 169        | 181      | ELLEECQARTDVK                |           |         | Carbamidomethyl (C)[6]                      |      | Mascot      |
| 1590.7792  | 1590.8403   | 0.0611  | 38    | 169        | 181      | ELLEECQARTDVK                |           |         | Carbamidomethyl (C)[6]                      |      | Mascot      |
| 1830.9167  | 1830.9037   | -0.013  | -7    | 329        | 345      | FEAAMTLLTHGADANIR            |           |         |                                             |      | Mascot      |
| 1878.8949  | 1878.9071   | 0.0122  | 6     | 133        | 147      | DCLKHNYLSQMNSR               |           |         | Carbamidomethyl (C)[2]                      |      | Mascot      |
| 1894.8898  | 1894.9021   | 0.0123  | 6     | 133        | 147      | DCLKHNYLSQMNSR               |           |         | Carbamidomethyl (C)[2], Oxidation (M)[12]   |      | Mascot      |
| 2174.1274  | 2174.0476   | -0.0798 | -37   | 306        | 325      | GCNVNYLSKTGESPLHIL<br>TK     |           |         |                                             |      | Mascot      |
| 2225.0549  | 2225.0667   | 0.0118  | 5     | 148        | 168      | DAQGQTPLHLACERGDV<br>GCVR    |           |         |                                             |      | Mascot      |
| 2259.9348  | 2260.0886   | 0.1538  | 68    | 738        | 757      | ELGKMLVDCCTSDGCA<br>VDR      |           |         | Carbamidomethyl (C)[9,10], Oxidation (M)[5] |      | Mascot      |
| 2259.9348  | 2260.0886   | 0.1538  | 68    | 738        | 757      | ELGKMLVDCCTSDGCA<br>VDR      |           |         | Carbamidomethyl (C)[9,10], Oxidation (M)[5] |      | Mascot      |
| 2283.0354  | 2283.1155   | 0.0801  | 35    | 245        | 264      | CDIMGNNGFPIHAAMKFS<br>EK     |           |         | Carbamidomethyl (C)[1], Oxidation (M)[4]    |      | Mascot      |
| 2298.158   | 2298.1338   | -0.0242 | -11   | 346        | 366      | GQDGNTALHLAMKLDNM<br>DLIK    |           |         |                                             |      | Mascot      |
| 2299.0303  | 2299.1304   | 0.1001  | 44    | 245        | 264      | CDIMGNNGFPIHAAMKFS<br>EK     |           |         | Carbamidomethyl (C)[1], Oxidation (M)[4,15] |      | Mascot      |
| 2502.2842  | 2502.1831   | -0.1011 | -40   | 427        | 450      | KAPPPGIGFNDIMQVAVA<br>VTAMSR |           |         | Oxidation (M)[13,22]                        |      | Mascot      |
| 2502.2842  | 2502.1831   | -0.1011 | -40   | 427        | 450      | KAPPPGIGFNDIMQVAVA<br>VTAMSR |           |         | Oxidation (M)[13,22]                        |      | Mascot      |

|    |                                                                                                     |  |  |  |  |             |       |      |    |    |   |
|----|-----------------------------------------------------------------------------------------------------|--|--|--|--|-------------|-------|------|----|----|---|
| 21 | novel protein similar to vertebrate phospholipase A2, group VI (cytosolic, calcium-independent) (PL |  |  |  |  | gi 94733619 | 83667 | 5.79 | 13 | 34 | 0 |
|----|-----------------------------------------------------------------------------------------------------|--|--|--|--|-------------|-------|------|----|----|---|

#### Peptide Information

| Calc. Mass | Obsrv. Mass | ± da   | ± ppm | Start Seq. | End Seq. | Sequence | Ion Score | C. I. % | Modification | Rank | Result Type |
|------------|-------------|--------|-------|------------|----------|----------|-----------|---------|--------------|------|-------------|
| 938.4213   | 938.4544    | 0.0331 | 35    | 516        | 523      | NEFGENTK |           |         |              |      | Mascot      |

|           |           |         |     |     |     |                           |                                             |        |
|-----------|-----------|---------|-----|-----|-----|---------------------------|---------------------------------------------|--------|
| 1017.5008 | 1017.5486 | 0.0478  | 47  | 489 | 495 | CLYFRMK                   | Carbamidomethyl (C)[1]                      | Mascot |
| 1045.571  | 1045.5391 | -0.0319 | -31 | 430 | 439 | LLCLDGGGIK                | Carbamidomethyl (C)[3]                      | Mascot |
| 1090.5198 | 1090.499  | -0.0208 | -19 | 171 | 179 | ELLEECQAR                 |                                             | Mascot |
| 1106.5874 | 1106.5083 | -0.0791 | -71 | 532 | 541 | VMVTSVLADR                | Oxidation (M)[2]                            | Mascot |
| 1590.7792 | 1590.8403 | 0.0611  | 38  | 171 | 183 | ELLEECQARTDVK             | Carbamidomethyl (C)[6]                      | Mascot |
| 1590.7792 | 1590.8403 | 0.0611  | 38  | 171 | 183 | ELLEECQARTDVK             | Carbamidomethyl (C)[6]                      | Mascot |
| 1830.9167 | 1830.9037 | -0.013  | -7  | 331 | 347 | FEAAMTLLTHGADANIR         |                                             | Mascot |
| 1878.8949 | 1878.9071 | 0.0122  | 6   | 135 | 149 | DCLKHNYILSQMNSR           | Carbamidomethyl (C)[2]                      | Mascot |
| 1894.8898 | 1894.9021 | 0.0123  | 6   | 135 | 149 | DCLKHNYILSQMNSR           | Carbamidomethyl (C)[2], Oxidation (M)[12]   | Mascot |
| 2174.1274 | 2174.0476 | -0.0798 | -37 | 308 | 327 | GCNVNYLSKTGESPLHIL<br>TK  |                                             | Mascot |
| 2225.0549 | 2225.0667 | 0.0118  | 5   | 150 | 170 | DAQGQTPLHLACERGDV<br>GCVR |                                             | Mascot |
| 2240.0298 | 2240.1404 | 0.1106  | 49  | 247 | 266 | CDIMGNNGFPIHTAMKFS<br>EK  |                                             | Mascot |
| 2256.0247 | 2256.1699 | 0.1452  | 64  | 247 | 266 | CDIMGNNGFPIHTAMKFS<br>EK  | Oxidation (M)[4]                            | Mascot |
| 2259.9348 | 2260.0886 | 0.1538  | 68  | 676 | 695 | ELGKMLVDCCTSDGCA<br>VDR   | Carbamidomethyl (C)[9,10], Oxidation (M)[5] | Mascot |
| 2259.9348 | 2260.0886 | 0.1538  | 68  | 676 | 695 | ELGKMLVDCCTSDGCA<br>VDR   | Carbamidomethyl (C)[9,10], Oxidation (M)[5] | Mascot |
| 2298.158  | 2298.1338 | -0.0242 | -11 | 348 | 368 | GQDGNTALHLAMKLDNM<br>DLIK |                                             | Mascot |

22 PREDICTED: coronin-2B [Danio rerio] gi|292627941 53560.2 7.91 9 34 0

Peptide Information

| Calc. Mass | Obsrv. Mass | ± da    | ± ppm | Start Seq. | End Seq. | Sequence                 | Ion Score | C. I. % | Modification                              | Rank | Result Type |
|------------|-------------|---------|-------|------------|----------|--------------------------|-----------|---------|-------------------------------------------|------|-------------|
| 850.4161   | 850.524     | 0.1079  | 127   | 316        | 322      | SLCVMPK                  |           |         | Carbamidomethyl (C)[3], Oxidation (M)[5]  |      | Mascot      |
| 856.3948   | 856.5056    | 0.1108  | 129   | 2          | 8        | SWSSAYR                  |           |         |                                           |      | Mascot      |
| 882.5519   | 882.5467    | -0.0052 | -6    | 199        | 205      | LRIIDPR                  |           |         |                                           |      | Mascot      |
| 938.553    | 938.4544    | -0.0986 | -105  | 398        | 405      | RPNPVSLR                 |           |         |                                           |      | Mascot      |
| 987.4352   | 987.4707    | 0.0355  | 36    | 1          | 8        | MSWSSAYR                 |           |         |                                           |      | Mascot      |
| 1003.4301  | 1003.4652   | 0.0351  | 35    | 1          | 8        | MSWSSAYR                 |           |         | Oxidation (M)[1]                          |      | Mascot      |
| 1346.6191  | 1346.6195   | 0.0004  | 0     | 78         | 89       | VCGHQGSVM DIK            |           |         | Carbamidomethyl (C)[2], Oxidation (M)[9]  |      | Mascot      |
| 1590.7792  | 1590.8403   | 0.0611  | 38    | 416        | 429      | GIDLLENISMNTDR           |           |         |                                           |      | Mascot      |
| 1590.7792  | 1590.8403   | 0.0611  | 38    | 416        | 429      | GIDLLENISMNTDR           |           |         |                                           |      | Mascot      |
| 1606.7742  | 1606.8353   | 0.0611  | 38    | 416        | 429      | GIDLLENISMNTDR           |           |         | Oxidation (M)[10]                         |      | Mascot      |
| 1606.7742  | 1606.8353   | 0.0611  | 38    | 416        | 429      | GIDLLENISMNTDR           |           |         | Oxidation (M)[10]                         |      | Mascot      |
| 2173.9529  | 2174.0476   | 0.0947  | 44    | 90         | 108      | WSPFMDNIIASSSEDCTV<br>R  |           |         | Oxidation (M)[5]                          |      | Mascot      |
| 2211.0435  | 2211.053    | 0.0095  | 4     | 71         | 89       | VDPHYPRVCVGHQGSVM<br>DIK |           |         | Carbamidomethyl (C)[9], Oxidation (M)[16] |      | Mascot      |

23 novel protein [Danio rerio] gi|94733372 43155.7 8.21 11 34 0

Peptide Information

| Calc. Mass | Obsrv. Mass | ± da    | ± ppm | Start Seq. | End Seq. | Sequence                 | Ion Score | C. I. % | Modification             | Rank | Result Type |
|------------|-------------|---------|-------|------------|----------|--------------------------|-----------|---------|--------------------------|------|-------------|
| 1074.4053  | 1074.5266   | 0.1213  | 113   | 273        | 281      | ECVCFECGK                |           |         | Carbamidomethyl (C)[2]   |      | Mascot      |
| 1106.4354  | 1106.5083   | 0.0729  | 66    | 217        | 225      | THTCDDQCGK               |           |         | Carbamidomethyl (C)[4,7] |      | Mascot      |
| 1225.4976  | 1225.5591   | 0.0615  | 50    | 161        | 169      | TYECLHCDK                |           |         | Carbamidomethyl (C)[4,7] |      | Mascot      |
| 1232.5762  | 1232.5684   | -0.0078 | -6    | 1          | 10       | MSDPEPCRIK               |           |         | Carbamidomethyl (C)[7]   |      | Mascot      |
| 1232.5762  | 1232.5684   | -0.0078 | -6    | 1          | 10       | MSDPEPCRIK               |           |         | Carbamidomethyl (C)[7]   |      | Mascot      |
| 1241.5653  | 1241.4652   | -0.1001 | -81   | 327        | 337      | EKPFTCTQCGK              |           |         |                          |      | Mascot      |
| 1307.6637  | 1307.6471   | -0.0166 | -13   | 150        | 160      | RHQMIHTAGEK              |           |         |                          |      | Mascot      |
| 1862.7942  | 1862.9124   | 0.1182  | 63    | 350        | 365      | LMHTGEKTHTCDDQCSR        |           |         | Oxidation (M)[2]         |      | Mascot      |
| 2169.0791  | 2169.0811   | 0.002   | 1     | 198        | 216      | SLTQISNINEHMMMLHTGV<br>K |           |         | Oxidation (M)[12]        |      | Mascot      |
| 2259.9944  | 2260.0886   | 0.0942  | 42    | 151        | 169      | HQMIHTAGEKTYECLHC<br>DK  |           |         | Oxidation (M)[3]         |      | Mascot      |
| 2259.9944  | 2260.0886   | 0.0942  | 42    | 151        | 169      | HQMIHTAGEKTYECLHC<br>DK  |           |         | Oxidation (M)[3]         |      | Mascot      |
| 2299.0417  | 2299.1304   | 0.0887  | 39    | 179        | 197      | YHTMIHTGERLYTCTQCG<br>K  |           |         | Carbamidomethyl (C)[14]  |      | Mascot      |
| 2300.0547  | 2300.1221   | 0.0674  | 29    | 98         | 117      | VHTNQRPYSCSECGKSF<br>TQK |           |         |                          |      | Mascot      |

24 ribosome production factor 2 homolog [Danio rerio] gi|47550781 35438.5 10 9 34 0

Peptide Information

| Calc. Mass | Obsrv. Mass | ± da    | ± ppm | Start Seq. | End Seq. | Sequence                 | Ion Score | C. I. % | Modification                             | Rank | Result Type |
|------------|-------------|---------|-------|------------|----------|--------------------------|-----------|---------|------------------------------------------|------|-------------|
| 850.5396   | 850.524     | -0.0156 | -18   | 197        | 203      | SYKVLLK                  |           |         |                                          |      | Mascot      |
| 856.4523   | 856.5056    | 0.0533  | 62    | 2          | 9        | SHTDGIVK                 |           |         |                                          |      | Mascot      |
| 987.4927   | 987.4707    | -0.022  | -22   | 1          | 9        | MSHTDGIVK                |           |         |                                          |      | Mascot      |
| 1003.4877  | 1003.4652   | -0.0225 | -22   | 1          | 9        | MSHTDGIVK                |           |         | Oxidation (M)[1]                         |      | Mascot      |
| 1241.5983  | 1241.4652   | -0.1331 | -107  | 161        | 171      | SVLTDFFCGPR              |           |         |                                          |      | Mascot      |
| 1254.6624  | 1254.5487   | -0.1137 | -91   | 266        | 275      | LHMQKQDLNK               |           |         |                                          |      | Mascot      |
| 1799.8521  | 1799.8525   | 0.0004  | 0     | 212        | 226      | IELEEIGPSFDFMTMR         |           |         | Oxidation (M)[14]                        |      | Mascot      |
| 2260.0566  | 2260.0886   | 0.032   | 14    | 108        | 125      | MFDFHVLDMFELGIENFR       |           |         |                                          |      | Mascot      |
| 2260.0566  | 2260.0886   | 0.032   | 14    | 108        | 125      | MFDFHVLDMFELGIENFR       |           |         |                                          |      | Mascot      |
| 2283.0784  | 2283.1155   | 0.0371  | 16    | 135        | 154      | CPEGTKPMLVFAGDLFE<br>TDR |           |         | Carbamidomethyl (C)[1]                   |      | Mascot      |
| 2298.2427  | 2298.1338   | -0.1089 | -47   | 177        | 196      | LAGLEHVLHFTALEGKIY<br>MR |           |         |                                          |      | Mascot      |
| 2299.0732  | 2299.1304   | 0.0572  | 25    | 135        | 154      | CPEGTKPMLVFAGDLFE<br>TDR |           |         | Carbamidomethyl (C)[1], Oxidation (M)[8] |      | Mascot      |

25 LOC792623 protein [Danio rerio] gi|120537543 95675.5 5.12 13 33 0

Peptide Information

| Calc. Mass | Obsrv. Mass | ± da    | ± ppm | Start Seq. | End Seq. | Sequence                   | Ion Score | C. I. % | Modification       | Rank | Result Type |
|------------|-------------|---------|-------|------------|----------|----------------------------|-----------|---------|--------------------|------|-------------|
| 971.5156   | 971.4745    | -0.0411 | -42   | 522        | 529      | ENLTPLER                   |           |         |                    |      | Mascot      |
| 987.5693   | 987.4707    | -0.0986 | -100  | 776        | 785      | ARSVLSAAGR                 |           |         |                    |      | Mascot      |
| 1017.5323  | 1017.5486   | 0.0163  | 16    | 608        | 615      | EEVLERSR                   |           |         |                    |      | Mascot      |
| 1106.5762  | 1106.5083   | -0.0679 | -61   | 827        | 835      | LDTMEKEIK                  |           |         |                    |      | Mascot      |
| 1225.5916  | 1225.5591   | -0.0325 | -27   | 230        | 240      | VLVDSMMGVSR                |           |         | Oxidation (M)[6,7] |      | Mascot      |
| 1257.6433  | 1257.4602   | -0.1831 | -146  | 472        | 482      | LQELEEQAAR                 |           |         |                    |      | Mascot      |
| 1262.6045  | 1262.6448   | 0.0403  | 32    | 282        | 291      | QLNETLMEER                 |           |         |                    |      | Mascot      |
| 1590.7581  | 1590.8403   | 0.0822  | 52    | 214        | 227      | SCAEFLDDALLTHR             |           |         |                    |      | Mascot      |
| 1590.7581  | 1590.8403   | 0.0822  | 52    | 214        | 227      | SCAEFLDDALLTHR             |           |         |                    |      | Mascot      |
| 1799.8632  | 1799.8525   | -0.0107 | -6    | 483        | 497      | HRLQDQNTSSETQQK            |           |         |                    |      | Mascot      |
| 1910.792   | 1910.8948   | 0.1028  | 54    | 292        | 308      | DEDDDETLSQCSVIDAR          |           |         |                    |      | Mascot      |
| 2282.9792  | 2283.1155   | 0.1363  | 60    | 499        | 518      | IDDDVQSILSDSSMYNFK         |           |         | Oxidation (M)[15]  |      | Mascot      |
| 2455.1992  | 2455.2585   | 0.0593  | 24    | 778        | 803      | SVLSAAGRAESVFSAGGASQLSCGSR |           |         |                    |      | Mascot      |
| 2524.3081  | 2524.1577   | -0.1504 | -60   | 134        | 155      | DRLEAPLSPDEVWPNVFIAEK      |           |         |                    |      | Mascot      |

26 centrosomal protein of 41 kDa [Danio rerio] gi|50345046 41398.8 8.58 8 33 0

Peptide Information

| Calc. Mass | Obsrv. Mass | ± da    | ± ppm | Start Seq. | End Seq. | Sequence              | Ion Score | C. I. % | Modification     | Rank | Result Type |
|------------|-------------|---------|-------|------------|----------|-----------------------|-----------|---------|------------------|------|-------------|
| 870.4025   | 870.5198    | 0.1173  | 135   | 210        | 216      | TMNPYTK               |           |         | Oxidation (M)[2] |      | Mascot      |
| 938.4465   | 938.4544    | 0.0079  | 8     | 309        | 316      | FTAEDLDK              |           |         |                  |      | Mascot      |
| 954.4673   | 954.4503    | -0.017  | -18   | 338        | 346      | MSTSSARSK             |           |         |                  |      | Mascot      |
| 1003.5432  | 1003.4652   | -0.078  | -78   | 367        | 374      | SRSSRPWK              |           |         |                  |      | Mascot      |
| 1198.5845  | 1198.6786   | 0.0941  | 79    | 334        | 344      | LSSRMSTSSAR           |           |         | Oxidation (M)[5] |      | Mascot      |
| 1392.6826  | 1392.7058   | 0.0232  | 17    | 355        | 368      | QGSSIAGSESARSR        |           |         |                  |      | Mascot      |
| 1392.6826  | 1392.7058   | 0.0232  | 17    | 355        | 368      | QGSSIAGSESARSR        |           |         |                  |      | Mascot      |
| 1483.7612  | 1483.7021   | -0.0591 | -40   | 293        | 305      | RSAQHQTSQLAEK         |           |         |                  |      | Mascot      |
| 1894.9213  | 1894.9021   | -0.0192 | -10   | 347        | 366      | ASTVGSSRQGSSIAGSE SAR |           |         |                  |      | Mascot      |

27 Si:ch211-67e16.9 protein [Danio rerio] gi|156230514 66223 9.45 10 33 0

Peptide Information

| Calc. Mass | Obsrv. Mass | ± da | ± ppm | Start | End | Sequence | Ion | C. I. % | Modification | Rank | Result Type |
|------------|-------------|------|-------|-------|-----|----------|-----|---------|--------------|------|-------------|
|------------|-------------|------|-------|-------|-----|----------|-----|---------|--------------|------|-------------|



|    |                                                       |           |         | Seq. | Seq.         | Score |                           |      |   |    |                         |    |   |        |
|----|-------------------------------------------------------|-----------|---------|------|--------------|-------|---------------------------|------|---|----|-------------------------|----|---|--------|
|    | 882.577                                               | 882.5467  | -0.0303 | -34  | 162          | 169   | KGPLLQK                   |      |   |    |                         |    |   | Mascot |
|    | 987.5006                                              | 987.4707  | -0.0299 | -30  | 443          | 451   | VFPSSHASSR                |      |   |    |                         |    |   | Mascot |
|    | 1198.615                                              | 1198.6786 | 0.0636  | 53   | 247          | 256   | ACQGHKWALK                |      |   |    | Carbamidomethyl (C)[2]  |    |   | Mascot |
|    | 1254.5493                                             | 1254.5487 | -0.0006 | 0    | 208          | 218   | FASCKYSSSMK               |      |   |    | Oxidation (M)[10]       |    |   | Mascot |
|    | 1353.662                                              | 1353.6532 | -0.0088 | -7   | 224          | 234   | FMHLTNYSVNK               |      |   |    |                         |    |   | Mascot |
|    | 1353.662                                              | 1353.6532 | -0.0088 | -7   | 224          | 234   | FMHLTNYSVNK               |      |   |    |                         |    |   | Mascot |
|    | 1414.608                                              | 1414.6608 | 0.0528  | 37   | 235          | 246   | KNSEYQNSDDK               |      |   |    |                         |    |   | Mascot |
|    | 1910.7933                                             | 1910.8948 | 0.1015  | 53   | 236          | 252   | NSEYQNSDDKACQGHK          |      |   |    |                         |    |   | Mascot |
|    | 2131.9197                                             | 2131.9983 | 0.0786  | 37   | 362          | 383   | DDFAPSGSSASSTSSL<br>CGGVR |      |   |    | Carbamidomethyl (C)[18] |    |   | Mascot |
|    | 2131.9197                                             | 2131.9983 | 0.0786  | 37   | 362          | 383   | DDFAPSGSSASSTSSL<br>CGGVR |      |   |    | Carbamidomethyl (C)[18] |    |   | Mascot |
|    | 2283.0598                                             | 2283.1155 | 0.0557  | 24   | 406          | 425   | FGDQDFCATVLDVLPD<br>DVR   |      |   |    | Carbamidomethyl (C)[7]  |    |   | Mascot |
|    | 2524.2751                                             | 2524.1577 | -0.1174 | -47  | 2            | 23    | PSTLYFSTANERVLLPA<br>EQMK |      |   |    |                         |    |   | Mascot |
| 28 | milk fat globule-EGF factor 8 protein b [Danio rerio] |           |         |      | gi 124430524 |       | 52301.6                   | 8.32 | 8 | 33 | 0                       | 13 | 0 |        |

#### Peptide Information

|    |                                                        |           |         | Calc. Mass | Obsrv. Mass  | ± da | ± ppm          | Start Seq. | End Sequence Seq. | Ion Score | C. I. | % Modification         | Rank | Result Type |
|----|--------------------------------------------------------|-----------|---------|------------|--------------|------|----------------|------------|-------------------|-----------|-------|------------------------|------|-------------|
|    | 842.4916                                               | 842.4904  | -0.0012 | -1         | 291          | 297  | IVPVVCR        |            |                   |           |       | Carbamidomethyl (C)[6] |      | Mascot      |
|    | 850.4127                                               | 850.524   | 0.1113  | 131        | 140          | 147  | CPSPYVGK       |            |                   |           |       |                        |      | Mascot      |
|    | 1225.6                                                 | 1225.5591 | -0.0409 | -33        | 440          | 449  | NVFDPPFYAR     |            |                   |           |       |                        |      | Mascot      |
|    | 1258.65                                                | 1258.4901 | -0.1599 | -127       | 232          | 242  | MGTAEFKAFK     |            |                   |           |       | Oxidation (M)[1]       |      | Mascot      |
|    | 1258.65                                                | 1258.4901 | -0.1599 | -127       | 232          | 242  | MGTAEFKAFK     |            |                   |           |       | Oxidation (M)[1]       |      | Mascot      |
|    | 1353.6949                                              | 1353.6532 | -0.0417 | -31        | 439          | 449  | KNVFDPPFYAR    |            |                   |           |       |                        |      | Mascot      |
|    | 1353.6949                                              | 1353.6532 | -0.0417 | -31        | 439          | 449  | KNVFDPPFYAR    |            |                   |           |       |                        |      | Mascot      |
|    | 1392.6862                                              | 1392.7058 | 0.0196  | 14         | 462          | 473  | ITLRMELLGCDE   |            |                   |           |       |                        |      | Mascot      |
|    | 1392.6862                                              | 1392.7058 | 0.0196  | 14         | 462          | 473  | ITLRMELLGCDE   |            |                   |           |       |                        |      | Mascot      |
|    | 1483.8268                                              | 1483.7021 | -0.1247 | -84        | 370          | 381  | SEWLQVDLLRPK   |            |                   |           |       |                        |      | Mascot      |
|    | 1606.7972                                              | 1606.8353 | 0.0381  | 24         | 405          | 418  | VAHSDDGQHWITLK |            |                   |           |       |                        |      | Mascot      |
|    | 1606.7972                                              | 1606.8353 | 0.0381  | 24         | 405          | 418  | VAHSDDGQHWITLK |            |                   | 13        | 0     |                        |      | Mascot      |
| 29 | 39S ribosomal protein L22, mitochondrial [Danio rerio] |           |         |            | gi 169790878 |      | 24209.6        | 9.77       | 6                 | 32        | 0     |                        |      |             |

#### Peptide Information

|  |           |           |         | Calc. Mass | Obsrv. Mass | ± da | ± ppm    | Start Seq. | End Sequence Seq. | Ion Score | C. I. | % Modification | Rank | Result Type |
|--|-----------|-----------|---------|------------|-------------|------|----------|------------|-------------------|-----------|-------|----------------|------|-------------|
|  | 1058.5128 | 1058.5023 | -0.0105 | -10        | 168         | 175  | VYCHYFVK |            |                   |           |       |                |      | Mascot      |

|    |                                                            |           |         |     |     |              |                            |      |    |    |   |  |  |  |  |                                             |        |
|----|------------------------------------------------------------|-----------|---------|-----|-----|--------------|----------------------------|------|----|----|---|--|--|--|--|---------------------------------------------|--------|
|    | 1058.5128                                                  | 1058.5023 | -0.0105 | -10 | 168 | 175          | VYCHYFVK                   |      |    |    |   |  |  |  |  |                                             | Mascot |
|    | 2040.938                                                   | 2040.9895 | 0.0515  | 25  | 160 | 175          | GMFGIMEKVYCHYFVK           |      |    |    |   |  |  |  |  | Carbamidomethyl (C)[11], Oxidation (M)[2,6] | Mascot |
|    | 2169.1345                                                  | 2169.0811 | -0.0534 | -25 | 2   | 22           | AASTVTWTGLAAIGRAC<br>GHIR  |      |    |    |   |  |  |  |  | Carbamidomethyl (C)[17]                     | Mascot |
|    | 2220.1692                                                  | 2220.0903 | -0.0789 | -36 | 91  | 109          | LIRGMTIDQALVQLEFND<br>K    |      |    |    |   |  |  |  |  | Oxidation (M)[5]                            | Mascot |
|    | 2300.175                                                   | 2300.1221 | -0.0529 | -23 | 1   | 22           | MAASTVTWTGLAAIGRA<br>CGHIR |      |    |    |   |  |  |  |  | Carbamidomethyl (C)[18]                     | Mascot |
|    | 2455.177                                                   | 2455.2585 | 0.0815  | 33  | 25  | 47           | LLGSSSTYSQVSLHTSS<br>ELNNK |      |    |    |   |  |  |  |  |                                             | Mascot |
| 30 | PREDICTED: zinc finger protein 420 isoform 2 [Danio rerio] |           |         |     |     | gi 326678086 | 70371                      | 9.08 | 13 | 32 | 0 |  |  |  |  |                                             |        |

#### Peptide Information

|  | Calc. Mass | Obsrv. Mass | ± da    | ± ppm | Start Seq. | End Seq. | Sequence                   | Ion Score | C. I. | % Modification         | Rank | Result Type |
|--|------------|-------------|---------|-------|------------|----------|----------------------------|-----------|-------|------------------------|------|-------------|
|  | 842.5206   | 842.4904    | -0.0302 | -36   | 25         | 31       | QRQGLLK                    |           |       |                        |      | Mascot      |
|  | 987.5621   | 987.4707    | -0.0914 | -93   | 497        | 505      | TFITAGHLK                  |           |       |                        |      | Mascot      |
|  | 1017.5574  | 1017.5486   | -0.0088 | -9    | 27         | 35       | QGLLDSEK                   |           |       |                        |      | Mascot      |
|  | 1045.536   | 1045.5391   | 0.0031  | 3     | 134        | 141      | FHCARNLK                   |           |       | Carbamidomethyl (C)[3] |      | Mascot      |
|  | 1232.5762  | 1232.5684   | -0.0078 | -6    | 36         | 45       | MSDPEPCRIK                 |           |       | Carbamidomethyl (C)[7] |      | Mascot      |
|  | 1232.5762  | 1232.5684   | -0.0078 | -6    | 36         | 45       | MSDPEPCRIK                 |           |       | Carbamidomethyl (C)[7] |      | Mascot      |
|  | 1257.5602  | 1257.4602   | -0.1    | -80   | 178        | 188      | EKPYSQSVCGK                |           |       | Carbamidomethyl (C)[6] |      | Mascot      |
|  | 2132.0164  | 2131.9983   | -0.0181 | -8    | 339        | 356      | HQQIHTAVRGFVCFECEK         |           |       |                        |      | Mascot      |
|  | 2132.0164  | 2131.9983   | -0.0181 | -8    | 339        | 356      | HQQIHTAVRGFVCFECEK         |           |       |                        |      | Mascot      |
|  | 2211.0798  | 2211.053    | -0.0268 | -12   | 450        | 468      | IHLRVHTNEKPYSCPECG<br>K    |           |       |                        |      | Mascot      |
|  | 2219.9744  | 2220.0903   | 0.1159  | 52    | 142        | 160      | SHEMLHTGEKPHKCDHC<br>SK    |           |       | Oxidation (M)[4]       |      | Mascot      |
|  | 2278.0352  | 2277.9463   | -0.0889 | -39   | 239        | 257      | CSHCDLRFSGHSLTVH<br>ER     |           |       | Carbamidomethyl (C)[1] |      | Mascot      |
|  | 2283.0579  | 2283.1155   | 0.0576  | 25    | 227        | 245      | HQMIHTGEKPYKCSHCD<br>LR    |           |       |                        |      | Mascot      |
|  | 2298.0906  | 2298.1338   | 0.0432  | 19    | 478        | 496      | LHQHVHTGVREFVCFEC<br>EK    |           |       |                        |      | Mascot      |
|  | 2299.053   | 2299.1304   | 0.0774  | 34    | 227        | 245      | HQMIHTGEKPYKCSHCD<br>LR    |           |       | Oxidation (M)[3]       |      | Mascot      |
|  | 2502.1462  | 2502.1831   | 0.0369  | 15    | 83         | 104      | IDHNFLMETTAVKDFTCT<br>QCGK |           |       |                        |      | Mascot      |
|  | 2502.1462  | 2502.1831   | 0.0369  | 15    | 83         | 104      | IDHNFLMETTAVKDFTCT<br>QCGK |           |       |                        |      | Mascot      |

|    |                                                                             |  |  |  |  |             |       |      |    |    |   |  |  |  |  |  |  |
|----|-----------------------------------------------------------------------------|--|--|--|--|-------------|-------|------|----|----|---|--|--|--|--|--|--|
| 31 | UDP-GlcNAc:betaGal beta-1,3-N-acetylglucosaminyltransferase 2 [Danio rerio] |  |  |  |  | gi 45387911 | 46923 | 9.08 | 10 | 32 | 0 |  |  |  |  |  |  |
|----|-----------------------------------------------------------------------------|--|--|--|--|-------------|-------|------|----|----|---|--|--|--|--|--|--|

#### Peptide Information

|  | Calc. Mass | Obsrv. Mass | ± da | ± ppm | Start Seq. | End Seq. | Sequence | Ion Score | C. I. | % Modification | Rank | Result Type |
|--|------------|-------------|------|-------|------------|----------|----------|-----------|-------|----------------|------|-------------|
|--|------------|-------------|------|-------|------------|----------|----------|-----------|-------|----------------|------|-------------|

|    |                                      |           |         |      |              |     |            |      |    |    |   |                  |        |
|----|--------------------------------------|-----------|---------|------|--------------|-----|------------|------|----|----|---|------------------|--------|
|    | 856.4345                             | 856.5056  | 0.0711  | 83   | 378          | 384 | SPQHMIK    |      |    |    |   | Oxidation (M)[5] | Mascot |
|    | 918.4791                             | 918.4677  | -0.0114 | -12  | 162          | 169 | ESWGKVG    |      |    |    |   |                  | Mascot |
|    | 996.4971                             | 996.5746  | 0.0775  | 78   | 234          | 242 | CPGANFIFK  |      |    |    |   |                  | Mascot |
|    | 1074.5691                            | 1074.5266 | -0.0425 | -40  | 158          | 166 | QAIRESWGK  |      |    |    |   |                  | Mascot |
|    | 1232.5914                            | 1232.5684 | -0.023  | -19  | 117          | 125 | DFLLYMRCR  |      |    |    |   | Oxidation (M)[6] | Mascot |
|    | 1232.6497                            | 1232.5684 | -0.0813 | -66  | 115          | 123 | FKDFLLYMR  |      |    |    |   |                  | Mascot |
|    | 1241.6161                            | 1241.4652 | -0.1509 | -122 | 351          | 360 | GFRTFDIEEK |      |    |    |   |                  | Mascot |
|    | 1254.6113                            | 1254.5487 | -0.0626 | -50  | 107          | 116 | DYNSLPDRFK |      |    |    |   |                  | Mascot |
|    | 1262.6058                            | 1262.6448 | 0.039   | 31   | 196          | 205 | MLHHESSIHR |      |    |    |   | Oxidation (M)[1] | Mascot |
|    | 1392.7522                            | 1392.7058 | -0.0464 | -33  | 223          | 233 | EVLFWLSTR  |      |    |    |   |                  | Mascot |
|    | 1392.7522                            | 1392.7058 | -0.0464 | -33  | 223          | 233 | EVLFWLSTR  |      |    |    |   |                  | Mascot |
| 32 | contactin-1a precursor [Danio rerio] |           |         |      | gi 136256388 |     | 114246.1   | 6.19 | 13 | 32 | 0 |                  |        |

Peptide Information

| Calc. Mass | Obsrv. Mass | ± da    | ± ppm | Start Seq. | End Seq. | Sequence                    | Ion Score | C. I. | % Modification         | Rank | Result Type |
|------------|-------------|---------|-------|------------|----------|-----------------------------|-----------|-------|------------------------|------|-------------|
| 856.5111   | 856.5056    | -0.0055 | -6    | 434        | 441      | LLGARNGR                    |           |       |                        |      | Mascot      |
| 987.5118   | 987.4707    | -0.0411 | -42   | 383        | 390      | GHEVRFSR                    |           |       |                        |      | Mascot      |
| 1045.5173  | 1045.5391   | 0.0218  | 21    | 562        | 569      | DAQHYQRK                    |           |       |                        |      | Mascot      |
| 1090.4912  | 1090.499    | 0.0078  | 7     | 656        | 664      | ESAAQQDWR                   |           |       |                        |      | Mascot      |
| 1106.5323  | 1106.5083   | -0.024  | -22   | 625        | 634      | VDEVTSDSVR                  |           |       |                        |      | Mascot      |
| 1353.6505  | 1353.6532   | 0.0027  | 2     | 994        | 1007     | AHSEGGDGAVAQVR              |           |       |                        |      | Mascot      |
| 1353.6505  | 1353.6532   | 0.0027  | 2     | 994        | 1007     | AHSEGGDGAVAQVR              |           |       |                        |      | Mascot      |
| 1388.6012  | 1388.6646   | 0.0634  | 46    | 492        | 502      | YTCFAENDRGR                 |           |       | Carbamidomethyl (C)[3] |      | Mascot      |
| 2224.9749  | 2225.0667   | 0.0918  | 41    | 388        | 406      | FSRLGFEDSGMYQCVAE<br>NR     |           |       | Oxidation (M)[11]      |      | Mascot      |
| 2256.1689  | 2256.1699   | 0.001   | 0     | 713        | 735      | TTTREARPIVAPSDIGGG<br>GGTSR |           |       |                        |      | Mascot      |
| 2278.1343  | 2277.9463   | -0.188  | -83   | 569        | 589      | KMDSASGTSSELLITH<br>QLR     |           |       | Oxidation (M)[2]       |      | Mascot      |
| 2283.092   | 2283.1155   | 0.0235  | 10    | 594        | 614      | YSCTAQTPVDNTTASAE<br>VVR    |           |       | Carbamidomethyl (C)[3] |      | Mascot      |
| 2284.2131  | 2284.1179   | -0.0952 | -42   | 442        | 460      | VVFECRPRAAPRPNITW<br>SK     |           |       | Carbamidomethyl (C)[5] |      | Mascot      |
| 2299.1426  | 2299.1304   | -0.0122 | -5    | 986        | 1007     | GEYLVEVRAHSEGGDGA<br>VAQVR  |           |       |                        |      | Mascot      |

33 PREDICTED: ribosomal protein S6 kinase alpha-2-like [Danio rerio] gi|125834099 83167.2 8.78 11 32 0

Peptide Information

| Calc. Mass | Obsrv. Mass | ± da | ± ppm | Start Seq. | End Seq. | Sequence | Ion Score | C. I. | % Modification | Rank | Result Type |
|------------|-------------|------|-------|------------|----------|----------|-----------|-------|----------------|------|-------------|
|------------|-------------|------|-------|------------|----------|----------|-----------|-------|----------------|------|-------------|

|           |           |         |      |     |     |                   |  |  |                        |  |  |        |
|-----------|-----------|---------|------|-----|-----|-------------------|--|--|------------------------|--|--|--------|
| 882.5771  | 882.5467  | -0.0304 | -34  | 661 | 668 | LTAPLVLR          |  |  |                        |  |  | Mascot |
| 918.5328  | 918.4677  | -0.0651 | -71  | 266 | 273 | ETMALILK          |  |  |                        |  |  | Mascot |
| 954.4461  | 954.4503  | 0.0042  | 4    | 501 | 507 | QKCFSER           |  |  | Carbamidomethyl (C)[3] |  |  | Mascot |
| 1165.698  | 1165.7192 | 0.0212  | 18   | 134 | 142 | LYLILDFLR         |  |  |                        |  |  | Mascot |
| 1225.5994 | 1225.5591 | -0.0403 | -33  | 693 | 704 | GAMAATYSALNR      |  |  |                        |  |  | Mascot |
| 1241.5942 | 1241.4652 | -0.129  | -104 | 693 | 704 | GAMAATYSALNR      |  |  | Oxidation (M)[3]       |  |  | Mascot |
| 1254.6034 | 1254.5487 | -0.0547 | -44  | 419 | 430 | EDIGIGAYSVCK      |  |  |                        |  |  | Mascot |
| 1814.8774 | 1814.8976 | 0.0202  | 11   | 503 | 518 | CFSEREASAVLCITIK  |  |  | Carbamidomethyl (C)[1] |  |  | Mascot |
| 1830.9781 | 1830.9037 | -0.0744 | -41  | 276 | 291 | LGMPQFLSPEVQSLLR  |  |  | Oxidation (M)[3]       |  |  | Mascot |
| 1862.9858 | 1862.9124 | -0.0734 | -39  | 184 | 199 | DLKPENILLDEEGHIK  |  |  |                        |  |  | Mascot |
| 1911.0156 | 1910.8948 | -0.1208 | -63  | 108 | 123 | MERDILAEVNHPPFIVK |  |  |                        |  |  | Mascot |
| 2041.0609 | 2040.9895 | -0.0714 | -35  | 481 | 497 | FVYLMELMRGGELLDR  |  |  |                        |  |  | Mascot |

34 PREDICTED: cerebellar degeneration-related protein 2-like [Danio rerio] gi|326666298 49910.8 5.11 9 32 0

#### Peptide Information

| Calc. Mass | Obsrv. Mass | ± da    | ± ppm | Start Seq. | End Seq. | Sequence                | Ion Score | C. I. | % Modification         | Rank | Result Type |
|------------|-------------|---------|-------|------------|----------|-------------------------|-----------|-------|------------------------|------|-------------|
| 971.4363   | 971.4745    | 0.0382  | 39    | 76         | 83       | QMNDQHAK                |           |       |                        |      | Mascot      |
| 987.4312   | 987.4707    | 0.0395  | 40    | 76         | 83       | QMNDQHAK                |           |       | Oxidation (M)[2]       |      | Mascot      |
| 1165.5704  | 1165.7192   | 0.1488  | 128   | 152        | 162      | ALGAQSMSCLK             |           |       | Carbamidomethyl (C)[9] |      | Mascot      |
| 1198.5375  | 1198.6786   | 0.1411  | 118   | 14         | 22       | SEEELWYSR               |           |       |                        |      | Mascot      |
| 1232.5146  | 1232.5684   | 0.0538  | 44    | 307        | 316      | CRCSSDSYVR              |           |       | Carbamidomethyl (C)[1] |      | Mascot      |
| 1232.5146  | 1232.5684   | 0.0538  | 44    | 307        | 316      | CRCSSDSYVR              |           |       | Carbamidomethyl (C)[1] |      | Mascot      |
| 1257.5641  | 1257.4602   | -0.1039 | -83   | 309        | 319      | CSSDSYVRGAR             |           |       | Carbamidomethyl (C)[1] |      | Mascot      |
| 1307.6703  | 1307.6471   | -0.0232 | -18   | 262        | 272      | LLWRSESSSR              |           |       |                        |      | Mascot      |
| 1862.929   | 1862.9124   | -0.0166 | -9    | 367        | 383      | CQHGANSLSHKAVQTPK       |           |       | Carbamidomethyl (C)[1] |      | Mascot      |
| 2240.0864  | 2240.1404   | 0.054   | 24    | 191        | 209      | CVEEEEETSTLQHS LHK LK   |           |       |                        |      | Mascot      |
| 2298.1104  | 2298.1338   | 0.0234  | 10    | 152        | 171      | ALGAQSMSCLK E IYDLQQ DK |           |       | Carbamidomethyl (C)[9] |      | Mascot      |

35 KIAA0650-like protein [Danio rerio] gi|57164644 131026.7 7.89 14 32 0

#### Peptide Information

| Calc. Mass | Obsrv. Mass | ± da    | ± ppm | Start Seq. | End Seq. | Sequence | Ion Score | C. I. | % Modification | Rank | Result Type |
|------------|-------------|---------|-------|------------|----------|----------|-----------|-------|----------------|------|-------------|
| 850.5508   | 850.524     | -0.0268 | -32   | 906        | 913      | VAHLALVK |           |       |                |      | Mascot      |
| 870.4977   | 870.5198    | 0.0221  | 25    | 87         | 93       | MHTVKVR  |           |       |                |      | Mascot      |

|  |           |           |         |     |      |      |                         |  |  |                           |  |  |  |        |
|--|-----------|-----------|---------|-----|------|------|-------------------------|--|--|---------------------------|--|--|--|--------|
|  | 996.5359  | 996.5746  | 0.0387  | 39  | 1    | 9    | TSFSIKEGK               |  |  |                           |  |  |  | Mascot |
|  | 1051.6398 | 1051.688  | 0.0482  | 46  | 696  | 704  | TLLYSLTLK               |  |  |                           |  |  |  | Mascot |
|  | 1058.5476 | 1058.5023 | -0.0453 | -43 | 287  | 296  | LNAEDLAQGK              |  |  |                           |  |  |  | Mascot |
|  | 1058.5476 | 1058.5023 | -0.0453 | -43 | 287  | 296  | LNAEDLAQGK              |  |  |                           |  |  |  | Mascot |
|  | 1165.5782 | 1165.7192 | 0.141   | 121 | 1047 | 1057 | CNGKFGGLQNK             |  |  |                           |  |  |  | Mascot |
|  | 1388.7532 | 1388.6646 | -0.0886 | -64 | 1051 | 1063 | FGGLQNKAPSIEK           |  |  |                           |  |  |  | Mascot |
|  | 1392.8209 | 1392.7058 | -0.1151 | -83 | 693  | 704  | ANRTLLYSLTLK            |  |  |                           |  |  |  | Mascot |
|  | 1392.8209 | 1392.7058 | -0.1151 | -83 | 693  | 704  | ANRTLLYSLTLK            |  |  |                           |  |  |  | Mascot |
|  | 1498.7635 | 1498.6818 | -0.0817 | -55 | 1153 | 1166 | SLEPESSDTPVLPK          |  |  |                           |  |  |  | Mascot |
|  | 1590.7904 | 1590.8403 | 0.0499  | 31  | 1136 | 1149 | TLARTPEQMSDAVR          |  |  | Oxidation (M)[9]          |  |  |  | Mascot |
|  | 1590.7904 | 1590.8403 | 0.0499  | 31  | 1136 | 1149 | TLARTPEQMSDAVR          |  |  | Oxidation (M)[9]          |  |  |  | Mascot |
|  | 1862.9099 | 1862.9124 | 0.0025  | 1   | 602  | 620  | GLASGSCPPAAASTLKC<br>SK |  |  | Carbamidomethyl (C)[7,17] |  |  |  | Mascot |
|  | 1894.9769 | 1894.9021 | -0.0748 | -39 | 410  | 426  | FVSGSPGSRELSFQLQR       |  |  |                           |  |  |  | Mascot |
|  | 1910.9755 | 1910.8948 | -0.0807 | -42 | 564  | 580  | VTLCAGDIFPDFMVVVK       |  |  | Carbamidomethyl (C)[4]    |  |  |  | Mascot |
|  | 2256.0601 | 2256.1699 | 0.1098  | 49  | 824  | 841  | EFFDTNQQLISELECQVR      |  |  | Carbamidomethyl (C)[15]   |  |  |  | Mascot |

36

phosphoenolpyruvate carboxykinase [GTP], mitochondrial [Danio rerio]

gi|47085983

69705.2

8.72

10

32

0

Peptide Information

| Calc. Mass | Obsrv. Mass | ± da    | ± ppm | Start Seq. | End Seq. | Sequence             | Ion Score | C. I. | % Modification          | Rank | Result Type |
|------------|-------------|---------|-------|------------|----------|----------------------|-----------|-------|-------------------------|------|-------------|
| 856.4312   | 856.5056    | 0.0744  | 87    | 392        | 398      | LTDWHGK              |           |       |                         |      | Mascot      |
| 1058.6317  | 1058.5023   | -0.1294 | -122  | 100        | 108      | TVIVTKNQR            |           |       |                         |      | Mascot      |
| 1058.6317  | 1058.5023   | -0.1294 | -122  | 100        | 108      | TVIVTKNQR            |           |       |                         |      | Mascot      |
| 1074.5902  | 1074.5266   | -0.0636 | -59   | 13         | 23       | NAISTASVGVR          |           |       |                         |      | Mascot      |
| 1090.6407  | 1090.499    | -0.1417 | -130  | 547        | 554      | VLEWIFKR             |           |       |                         |      | Mascot      |
| 1198.5925  | 1198.6786   | 0.0861  | 72    | 289        | 300      | YIAAAPSACGK          |           |       |                         |      | Mascot      |
| 1232.7218  | 1232.5684   | -0.1534 | -124  | 1          | 11       | MSCLLLGVLKR          |           |       |                         |      | Mascot      |
| 1232.7218  | 1232.5684   | -0.1534 | -124  | 1          | 11       | MSCLLLGVLKR          |           |       |                         |      | Mascot      |
| 1254.5354  | 1254.5487   | 0.0133  | 11    | 136        | 146      | EDRFPGCMAGR          |           |       | Oxidation (M)[8]        |      | Mascot      |
| 1257.6375  | 1257.4602   | -0.1773 | -141  | 392        | 401      | LTDWHGKSWK           |           |       |                         |      | Mascot      |
| 1878.8551  | 1878.9071   | 0.052   | 28    | 399        | 414      | SWKYGDSTLCAHPNSR     |           |       | Carbamidomethyl (C)[10] |      | Mascot      |
| 2174.062   | 2174.0476   | -0.0144 | -7    | 165        | 184      | FGVQVTDSPYVVASMGIMTR |           |       | Oxidation (M)[15]       |      | Mascot      |

37

PREDICTED: inactive dual specificity phosphatase 27 [Danio rerio]

gi|326663755

122568.2

4.95

14

32

0

Peptide Information

| Calc. Mass | Obsrv. Mass | ± da | ± ppm | Start | End | Sequence | Ion | C. I. | % Modification | Rank | Result Type |
|------------|-------------|------|-------|-------|-----|----------|-----|-------|----------------|------|-------------|
|------------|-------------|------|-------|-------|-----|----------|-----|-------|----------------|------|-------------|

|  |           |           |         | Seq. | Seq. | Score |                                |                        |  |        |
|--|-----------|-----------|---------|------|------|-------|--------------------------------|------------------------|--|--------|
|  | 971.5156  | 971.4745  | -0.0411 | -42  | 522  | 529   | ENLTPLER                       |                        |  | Mascot |
|  | 987.5291  | 987.4707  | -0.0584 | -59  | 887  | 894   | TCEKPKPK                       | Carbamidomethyl (C)[2] |  | Mascot |
|  | 1017.5323 | 1017.5486 | 0.0163  | 16   | 608  | 615   | EEVLERSR                       |                        |  | Mascot |
|  | 1106.5762 | 1106.5083 | -0.0679 | -61  | 827  | 835   | LDTMEKEIK                      |                        |  | Mascot |
|  | 1225.5916 | 1225.5591 | -0.0325 | -27  | 230  | 240   | VLVDSMMGVSR                    | Oxidation (M)[6,7]     |  | Mascot |
|  | 1257.6433 | 1257.4602 | -0.1831 | -146 | 472  | 482   | LQEELEQAAAR                    |                        |  | Mascot |
|  | 1262.6045 | 1262.6448 | 0.0403  | 32   | 282  | 291   | QLNETLMEER                     |                        |  | Mascot |
|  | 1590.7581 | 1590.8403 | 0.0822  | 52   | 214  | 227   | SCAEFLDDALLTHR                 |                        |  | Mascot |
|  | 1590.7581 | 1590.8403 | 0.0822  | 52   | 214  | 227   | SCAEFLDDALLTHR                 |                        |  | Mascot |
|  | 1799.7389 | 1799.8525 | 0.1136  | 63   | 983  | 998   | NCADDLDPELSYSSR                |                        |  | Mascot |
|  | 1910.792  | 1910.8948 | 0.1028  | 54   | 292  | 308   | DEDDDETLSQCVIDAR               |                        |  | Mascot |
|  | 2168.9045 | 2169.0811 | 0.1766  | 81   | 28   | 46    | CPSPSFSMMSDRFSTVS<br>DR        | Oxidation (M)[8,9]     |  | Mascot |
|  | 2282.9792 | 2283.1155 | 0.1363  | 60   | 499  | 518   | IDDDVQSILSDSSSMYNF<br>CK       | Oxidation (M)[15]      |  | Mascot |
|  | 2455.1992 | 2455.2585 | 0.0593  | 24   | 778  | 803   | SVLSAAGRAESVFSAGG<br>ASQLSCGSR |                        |  | Mascot |
|  | 2524.3081 | 2524.1577 | -0.1504 | -60  | 134  | 155   | DRLEAPLSPVDEVWPNV<br>FIAEK     |                        |  | Mascot |

38 p53 and DNA damage-regulated protein 1 [Danio rerio] gi|62955487 15052.9 6.62 5 32 0

#### Peptide Information

| Calc. Mass | Obsrv. Mass | ± da    | ± ppm | Start Seq. | End Sequence Seq.            | Ion Score | C. I. % Modification | Rank | Result Type |
|------------|-------------|---------|-------|------------|------------------------------|-----------|----------------------|------|-------------|
| 1003.553   | 1003.4652   | -0.0878 | -87   | 85         | 92 EITDLRTR                  |           |                      |      | Mascot      |
| 1058.5161  | 1058.5023   | -0.0138 | -13   | 57         | 65 VCFGNMFIK                 |           |                      |      | Mascot      |
| 1058.5161  | 1058.5023   | -0.0138 | -13   | 57         | 65 VCFGNMFIK                 |           |                      |      | Mascot      |
| 1074.5111  | 1074.5266   | 0.0155  | 14    | 57         | 65 VCFGNMFIK                 |           | Oxidation (M)[6]     |      | Mascot      |
| 1392.7006  | 1392.7058   | 0.0052  | 4     | 111        | 123 GYNLAPLSSDEVK            |           |                      |      | Mascot      |
| 1392.7006  | 1392.7058   | 0.0052  | 4     | 111        | 123 GYNLAPLSSDEVK            |           |                      |      | Mascot      |
| 2040.9629  | 2040.9895   | 0.0266  | 13    | 48         | 65 NNSPNDNVKVCFGNMF<br>K     |           |                      |      | Mascot      |
| 2132.1597  | 2131.9983   | -0.1614 | -76   | 111        | 130 GYNLAPLSSDEVKAINSL<br>LK |           |                      |      | Mascot      |
| 2132.1597  | 2131.9983   | -0.1614 | -76   | 111        | 130 GYNLAPLSSDEVKAINSL<br>LK |           |                      |      | Mascot      |

39 PREDICTED: potassium voltage-gated channel subfamily B member 2 [Danio rerio] gi|125806037 91788.7 6.68 12 32 0

#### Peptide Information

| Calc. Mass | Obsrv. Mass | ± da | ± ppm | Start Seq. | End Sequence Seq. | Ion Score | C. I. % Modification | Rank | Result Type |
|------------|-------------|------|-------|------------|-------------------|-----------|----------------------|------|-------------|
|------------|-------------|------|-------|------------|-------------------|-----------|----------------------|------|-------------|

|    |                          |                     |             |         |       |            |              |                              |           |                      |    |                          |        |      |  |  |        |
|----|--------------------------|---------------------|-------------|---------|-------|------------|--------------|------------------------------|-----------|----------------------|----|--------------------------|--------|------|--|--|--------|
|    |                          | 870.5155            | 870.5198    | 0.0043  | 5     | 51         | 57           | TLDRLPR                      |           |                      |    |                          |        |      |  |  | Mascot |
|    |                          | 954.5002            | 954.4503    | -0.0499 | -52   | 676        | 684          | SPPQGNQVK                    |           |                      |    |                          |        |      |  |  | Mascot |
|    |                          | 971.5519            | 971.4745    | -0.0774 | -80   | 577        | 584          | EKPVTEIR                     |           |                      |    |                          |        |      |  |  | Mascot |
|    |                          | 1045.5789           | 1045.5391   | -0.0398 | -38   | 605        | 614          | SALLPNFAGR                   |           |                      |    |                          |        |      |  |  | Mascot |
|    |                          | 1090.6003           | 1090.499    | -0.1013 | -93   | 288        | 296          | SVLQFQNV                     |           |                      |    |                          |        |      |  |  | Mascot |
|    |                          | 1106.5994           | 1106.5083   | -0.0911 | -82   | 251        | 259          | FLSSPNKWK                    |           |                      |    |                          |        |      |  |  | Mascot |
|    |                          | 1198.6538           | 1198.6786   | 0.0248  | 21    | 519        | 529          | STPSPQRLNAK                  |           |                      |    |                          |        |      |  |  | Mascot |
|    |                          | 1241.587            | 1241.4652   | -0.1218 | -98   | 642        | 651          | EGLYEFVPCK                   |           |                      |    | Carbamidomethyl (C)[9]   |        |      |  |  | Mascot |
|    |                          | 1483.5787           | 1483.7021   | 0.1234  | 83    | 810        | 824          | SSGDGGRSPPCETSM              |           |                      |    | Oxidation (M)[15]        |        |      |  |  | Mascot |
|    |                          | 1862.968            | 1862.9124   | -0.0556 | -30   | 455        | 470          | DAFARNMELLDVVIEK             |           |                      |    |                          |        |      |  |  | Mascot |
|    |                          | 1878.9629           | 1878.9071   | -0.0558 | -30   | 455        | 470          | DAFARNMELLDVVIEK             |           |                      |    | Oxidation (M)[7]         |        |      |  |  | Mascot |
|    |                          | 1910.9242           | 1910.8948   | -0.0294 | -15   | 499        | 515          | GFDSKYQEVGQLASPER            |           |                      |    |                          |        |      |  |  | Mascot |
|    |                          | 2278.0364           | 2277.9463   | -0.0901 | -40   | 774        | 797          | SAQNCASATAGAVGAED<br>NIQSGQK |           |                      |    |                          |        |      |  |  | Mascot |
| 40 | peregrin [Danio rerio]   |                     |             |         |       |            | gi 41056011  | 102088.8                     | 7.54      | 12                   | 31 | 0                        |        |      |  |  |        |
|    |                          | Peptide Information |             |         |       |            |              |                              |           |                      |    |                          |        |      |  |  |        |
|    |                          | Calc. Mass          | Obsrv. Mass | ± da    | ± ppm | Start Seq. | End Seq.     | Sequence                     | Ion Score | C. I. % Modification |    | Rank                     | Result | Type |  |  |        |
|    |                          | 938.5166            | 938.4544    | -0.0622 | -66   | 640        | 646          | LRHDLR                       |           |                      |    |                          |        |      |  |  | Mascot |
|    |                          | 987.4788            | 987.4707    | -0.0081 | -8    | 352        | 359          | RCPQSPSR                     |           |                      |    | Carbamidomethyl (C)[2]   |        |      |  |  | Mascot |
|    |                          | 1003.4447           | 1003.4652   | 0.0205  | 20    | 426        | 435          | GSGACIQCHK                   |           |                      |    |                          |        |      |  |  | Mascot |
|    |                          | 1058.5741           | 1058.5023   | -0.0718 | -68   | 632        | 639          | EQLKAWQR                     |           |                      |    |                          |        |      |  |  | Mascot |
|    |                          | 1058.5741           | 1058.5023   | -0.0718 | -68   | 632        | 639          | EQLKAWQR                     |           |                      |    |                          |        |      |  |  | Mascot |
|    |                          | 1090.502            | 1090.499    | -0.003  | -3    | 360        | 369          | AVDCALCPNK                   |           |                      |    | Carbamidomethyl (C)[4]   |        |      |  |  | Mascot |
|    |                          | 1225.5807           | 1225.5591   | -0.0216 | -18   | 461        | 472          | ETGANGTSFVSVR                |           |                      |    |                          |        |      |  |  | Mascot |
|    |                          | 1232.5663           | 1232.5684   | 0.0021  | 2     | 724        | 732          | MWKCYESHR                    |           |                      |    | Carbamidomethyl (C)[4]   |        |      |  |  | Mascot |
|    |                          | 1232.5663           | 1232.5684   | 0.0021  | 2     | 724        | 732          | MWKCYESHR                    |           |                      |    | Carbamidomethyl (C)[4]   |        |      |  |  | Mascot |
|    |                          | 1241.6129           | 1241.4652   | -0.1477 | -119  | 417        | 425          | LTCYICKQR                    |           |                      |    | Carbamidomethyl (C)[3,6] |        |      |  |  | Mascot |
|    |                          | 1353.6757           | 1353.6532   | -0.0225 | -17   | 461        | 473          | ETGANGTSFVSVRK               |           |                      |    |                          |        |      |  |  | Mascot |
|    |                          | 1353.6757           | 1353.6532   | -0.0225 | -17   | 461        | 473          | ETGANGTSFVSVRK               |           |                      |    |                          |        |      |  |  | Mascot |
|    |                          | 1830.9708           | 1830.9037   | -0.0671 | -37   | 878        | 893          | DTLLLDTHSHILSK               |           |                      |    |                          |        |      |  |  | Mascot |
|    |                          | 1862.8813           | 1862.9124   | 0.0311  | 17    | 100        | 115          | SHSPVRETMTYAEQR              |           |                      |    |                          |        |      |  |  | Mascot |
|    |                          | 1878.8763           | 1878.9071   | 0.0308  | 16    | 100        | 115          | SHSPVRETMTYAEQR              |           |                      |    | Oxidation (M)[9]         |        |      |  |  | Mascot |
|    |                          | 2220.0034           | 2220.0903   | 0.0869  | 39    | 436        | 455          | ANCYTAFHVTCACQAGL<br>YMK     |           |                      |    |                          |        |      |  |  | Mascot |
| 41 | actinodin4 [Danio rerio] |                     |             |         |       |            | gi 210147367 | 33840                        | 7.98      | 7                    | 31 | 0                        |        |      |  |  |        |

| Peptide Information |                                           |         |       |             |          |                     |           |       |                                            |                  |
|---------------------|-------------------------------------------|---------|-------|-------------|----------|---------------------|-----------|-------|--------------------------------------------|------------------|
| Calc. Mass          | Obsrv. Mass                               | ± da    | ± ppm | Start Seq.  | End Seq. | Sequence            | Ion Score | C. I. | % Modification                             | Rank Result Type |
| 1003.5934           | 1003.4652                                 | -0.1282 | -128  | 143         | 153      | GPVAPPPAAVK         |           |       |                                            | Mascot           |
| 1258.6538           | 1258.4901                                 | -0.1637 | -130  | 39          | 49       | AHEFLSSSRPK         |           |       |                                            | Mascot           |
| 1258.6538           | 1258.4901                                 | -0.1637 | -130  | 39          | 49       | AHEFLSSSRPK         |           |       |                                            | Mascot           |
| 1414.755            | 1414.6608                                 | -0.0942 | -67   | 39          | 50       | AHEFLSSSRPKR        |           |       |                                            | Mascot           |
| 1590.8097           | 1590.8403                                 | 0.0306  | 19    | 196         | 209      | YHPNCKLEAPPPPK      |           |       |                                            | Mascot           |
| 1590.8097           | 1590.8403                                 | 0.0306  | 19    | 196         | 209      | YHPNCKLEAPPPPK      |           |       |                                            | Mascot           |
| 1814.9945           | 1814.8976                                 | -0.0969 | -53   | 125         | 142      | GCRVSPPPAIAPPTAVK   |           |       | Carbamidomethyl (C)[2]                     | Mascot           |
| 1862.9415           | 1862.9124                                 | -0.0291 | -16   | 21          | 38       | SLMEILSPDGALSLDSSK  |           |       |                                            | Mascot           |
| 1878.9365           | 1878.9071                                 | -0.0294 | -16   | 21          | 38       | SLMEILSPDGALSLDSSK  |           |       | Oxidation (M)[3]                           | Mascot           |
| 2211.1255           | 2211.053                                  | -0.0725 | -33   | 1           | 20       | MSAVCMLSVLLLCGQLEAK |           |       | Carbamidomethyl (C)[5], Oxidation (M)[1,6] | Mascot           |
| 42                  | exocyst complex component 6 [Danio rerio] |         |       | gi 47086931 |          | 81816.3             | 5.73      | 10    | 31                                         | 0 7 0            |

| Peptide Information |                                     |         |       |              |          |                             |           |       |                                          |                  |
|---------------------|-------------------------------------|---------|-------|--------------|----------|-----------------------------|-----------|-------|------------------------------------------|------------------|
| Calc. Mass          | Obsrv. Mass                         | ± da    | ± ppm | Start Seq.   | End Seq. | Sequence                    | Ion Score | C. I. | % Modification                           | Rank Result Type |
| 938.4499            | 938.4544                            | 0.0045  | 5     | 204          | 211      | EISMSDLK                    |           |       | Oxidation (M)[4]                         | Mascot           |
| 1017.4557           | 1017.5486                           | 0.0929  | 91    | 1            | 9        | MYDSSSSLK                   |           |       |                                          | Mascot           |
| 1045.6365           | 1045.5391                           | -0.0974 | -93   | 527          | 535      | KSTNLLLTR                   |           |       |                                          | Mascot           |
| 1232.5946           | 1232.5684                           | -0.0262 | -21   | 471          | 480      | FPFHDAEIEK                  |           |       |                                          | Mascot           |
| 1232.5946           | 1232.5684                           | -0.0262 | -21   | 471          | 480      | FPFHDAEIEK                  |           |       |                                          | Mascot           |
| 1346.6885           | 1346.6195                           | -0.069  | -51   | 297          | 307      | CLHIYTVLGDR                 |           |       | Carbamidomethyl (C)[1]                   | Mascot           |
| 1353.6542           | 1353.6532                           | -0.001  | -1    | 187          | 197      | FCQIMAETLPK                 |           |       | Carbamidomethyl (C)[2], Oxidation (M)[5] | Mascot           |
| 1353.6542           | 1353.6532                           | -0.001  | -1    | 187          | 197      | FCQIMAETLPK                 |           |       | Carbamidomethyl (C)[2], Oxidation (M)[5] | Mascot           |
| 1590.7904           | 1590.8403                           | 0.0499  | 31    | 117          | 129      | EVTAQTEEVIRCR               |           |       | Carbamidomethyl (C)[12]                  | Mascot           |
| 1590.7904           | 1590.8403                           | 0.0499  | 31    | 117          | 129      | EVTAQTEEVIRCR               | 7         | 0     | Carbamidomethyl (C)[12]                  | Mascot           |
| 1606.8444           | 1606.8353                           | -0.0091 | -6    | 187          | 199      | FCQIMAETLPKLR               |           |       | Carbamidomethyl (C)[2]                   | Mascot           |
| 1606.8444           | 1606.8353                           | -0.0091 | -6    | 187          | 199      | FCQIMAETLPKLR               | 4         | 0     | Carbamidomethyl (C)[2]                   | Mascot           |
| 2256.1909           | 2256.1699                           | -0.021  | -9    | 421          | 438      | LFDLLFEVRDQYNETLLK          |           |       |                                          | Mascot           |
| 2455.1931           | 2455.2585                           | 0.0654  | 27    | 650          | 672      | STFQVFTHLPGKVAQTA<br>CMSACK |           |       |                                          | Mascot           |
| 43                  | Ets2 repressor factor [Danio rerio] |         |       | gi 113678579 |          | 67501.4                     | 6.04      | 10    | 31                                       | 0                |

| Peptide Information |             |      |       |            |          |          |           |       |                |                  |
|---------------------|-------------|------|-------|------------|----------|----------|-----------|-------|----------------|------------------|
| Calc. Mass          | Obsrv. Mass | ± da | ± ppm | Start Seq. | End Seq. | Sequence | Ion Score | C. I. | % Modification | Rank Result Type |



|    |                                                                                   |           |         |     |              |     |                         |      |    |    |   |                  |  |  |  |  |        |
|----|-----------------------------------------------------------------------------------|-----------|---------|-----|--------------|-----|-------------------------|------|----|----|---|------------------|--|--|--|--|--------|
|    | 842.528                                                                           | 842.4904  | -0.0376 | -45 | 530          | 536 | CIPLKLR                 |      |    |    |   |                  |  |  |  |  | Mascot |
|    | 1017.4959                                                                         | 1017.5486 | 0.0527  | 52  | 574          | 582 | LGEENGDRK               |      |    |    |   |                  |  |  |  |  | Mascot |
|    | 1090.568                                                                          | 1090.499  | -0.069  | -63 | 79           | 86  | ALRYYYNK                |      |    |    |   |                  |  |  |  |  | Mascot |
|    | 1225.4889                                                                         | 1225.5591 | 0.0702  | 57  | 547          | 557 | MEAGTEEAEDK             |      |    |    |   | Oxidation (M)[1] |  |  |  |  | Mascot |
|    | 1254.5969                                                                         | 1254.5487 | -0.0482 | -38 | 66           | 75  | KCKPQMNYDK              |      |    |    |   |                  |  |  |  |  | Mascot |
|    | 1262.6045                                                                         | 1262.6448 | 0.0403  | 32  | 605          | 616 | ATAQLSLENNVC            |      |    |    |   |                  |  |  |  |  | Mascot |
|    | 1353.5839                                                                         | 1353.6532 | 0.0693  | 51  | 547          | 558 | MEAGTEEAEDKK            |      |    |    |   | Oxidation (M)[1] |  |  |  |  | Mascot |
|    | 1353.5839                                                                         | 1353.6532 | 0.0693  | 51  | 547          | 558 | MEAGTEEAEDKK            |      |    |    |   | Oxidation (M)[1] |  |  |  |  | Mascot |
|    | 1498.7141                                                                         | 1498.6818 | -0.0323 | -22 | 67           | 78  | CKPQMNYDKLSR            |      |    |    |   | Oxidation (M)[5] |  |  |  |  | Mascot |
|    | 2233.126                                                                          | 2233.0327 | -0.0933 | -42 | 302          | 319 | RYLQAHTQSVYNYHLSP<br>R  |      |    |    |   |                  |  |  |  |  | Mascot |
|    | 2298.0713                                                                         | 2298.1338 | 0.0625  | 27  | 35           | 53  | EEYHDVIAWQGDYGEFVI<br>K |      |    |    |   |                  |  |  |  |  | Mascot |
| 44 | PREDICTED: protein tyrosine phosphatase domain-containing protein 1 [Danio rerio] |           |         |     | gi 292626793 |     | 74370.8                 | 6.25 | 10 | 31 | 0 |                  |  |  |  |  |        |

#### Peptide Information

|  | Calc. Mass | Obsrv. Mass | ± da    | ± ppm | Start Seq. | End Seq. | Sequence                  | Ion Score | C. I. | % Modification                                   | Rank | Result Type |
|--|------------|-------------|---------|-------|------------|----------|---------------------------|-----------|-------|--------------------------------------------------|------|-------------|
|  | 971.538    | 971.4745    | -0.0635 | -65   | 201        | 208      | RPNSIQTR                  |           |       |                                                  |      | Mascot      |
|  | 1017.5284  | 1017.5486   | 0.0202  | 20    | 650        | 658      | LIAMNEVEV                 |           |       |                                                  |      | Mascot      |
|  | 1045.5901  | 1045.5391   | -0.051  | -49   | 249        | 257      | HILHGLEAR                 |           |       |                                                  |      | Mascot      |
|  | 1165.6364  | 1165.7192   | 0.0828  | 71    | 81         | 89       | FNIIDQFLR                 |           |       |                                                  |      | Mascot      |
|  | 1254.6113  | 1254.5487   | -0.0626 | -50   | 334        | 343      | DNSQPLYVVR                |           |       |                                                  |      | Mascot      |
|  | 1590.7717  | 1590.8403   | 0.0686  | 43    | 441        | 455      | SLGVSDEQNTNSIAR           |           |       |                                                  |      | Mascot      |
|  | 1590.7717  | 1590.8403   | 0.0686  | 43    | 441        | 455      | SLGVSDEQNTNSIAR           |           |       |                                                  |      | Mascot      |
|  | 1830.9279  | 1830.9037   | -0.0242 | -13   | 6          | 22       | GSSVPRAHYTMVGEALR         |           |       |                                                  |      | Mascot      |
|  | 1910.9932  | 1910.8948   | -0.0984 | -51   | 136        | 152      | WIDYGVASLTSILDMVK         |           |       |                                                  |      | Mascot      |
|  | 2259.8894  | 2260.0886   | 0.1992  | 88    | 23         | 41       | YVIPCHMQCSMGCGGQA<br>CK   |           |       | Carbamidomethyl (C)[5,9,13,18], Oxidation (M)[7] |      | Mascot      |
|  | 2259.8894  | 2260.0886   | 0.1992  | 88    | 23         | 41       | YVIPCHMQCSMGCGGQA<br>CK   |           |       | Carbamidomethyl (C)[5,9,13,18], Oxidation (M)[7] |      | Mascot      |
|  | 2299.1255  | 2299.1304   | 0.0049  | 2     | 153        | 173      | VMSFAIQEGKMAVHCHA<br>GLGR |           |       | Carbamidomethyl (C)[15]                          |      | Mascot      |

45 Rbp2b protein [Danio rerio] gi|66267453 15649 5.77 5 31 0

#### Peptide Information

|  | Calc. Mass | Obsrv. Mass | ± da    | ± ppm | Start Seq. | End Seq. | Sequence | Ion Score | C. I. | % Modification | Rank | Result Type |
|--|------------|-------------|---------|-------|------------|----------|----------|-----------|-------|----------------|------|-------------|
|  | 954.4791   | 954.4503    | -0.0288 | -30   | 77         | 84       | GFDNRAFK |           |       |                |      | Mascot      |

|    |                                 |           |         |      |              |     |                        |      |    |    |   |                           |  |  |  |  |        |
|----|---------------------------------|-----------|---------|------|--------------|-----|------------------------|------|----|----|---|---------------------------|--|--|--|--|--------|
|    | 971.5883                        | 971.4745  | -0.1138 | -117 | 94           | 102 | LVAVQKGEK              |      |    |    |   |                           |  |  |  |  | Mascot |
|    | 1254.6378                       | 1254.5487 | -0.0891 | -71  | 106          | 115 | GWKHWIEGNK             |      |    |    |   |                           |  |  |  |  | Mascot |
|    | 2132.0039                       | 2131.9983 | -0.0056 | -3   | 116          | 132 | LYLELTCEDAVCQQVYK      |      |    |    |   | Carbamidomethyl (C)[7,12] |  |  |  |  | Mascot |
|    | 2132.0039                       | 2131.9983 | -0.0056 | -3   | 116          | 132 | LYLELTCEDAVCQQVYK      |      |    |    |   | Carbamidomethyl (C)[7,12] |  |  |  |  | Mascot |
|    | 2174.062                        | 2174.0476 | -0.0144 | -7   | 116          | 133 | LYLELTCEDAVCQQVYK<br>R |      |    |    |   |                           |  |  |  |  | Mascot |
| 46 | LOC792623 protein [Danio rerio] |           |         |      | gi 161612145 |     | 122679.2               | 4.97 | 14 | 31 | 0 |                           |  |  |  |  |        |

#### Peptide Information

|  | Calc. Mass | Obsrv. Mass | ± da    | ± ppm | Start Seq. | End Seq. | Sequence                       | Ion Score | C. I. | % Modification     | Rank | Result Type |
|--|------------|-------------|---------|-------|------------|----------|--------------------------------|-----------|-------|--------------------|------|-------------|
|  | 971.5156   | 971.4745    | -0.0411 | -42   | 524        | 531      | ENLTPLER                       |           |       |                    |      | Mascot      |
|  | 987.5693   | 987.4707    | -0.0986 | -100  | 778        | 787      | ARSVLSAAGR                     |           |       |                    |      | Mascot      |
|  | 1017.5323  | 1017.5486   | 0.0163  | 16    | 610        | 617      | EEVLERSR                       |           |       |                    |      | Mascot      |
|  | 1106.5762  | 1106.5083   | -0.0679 | -61   | 829        | 837      | LDTMEKEIK                      |           |       |                    |      | Mascot      |
|  | 1225.5916  | 1225.5591   | -0.0325 | -27   | 232        | 242      | VLVDSMMGVSR                    |           |       | Oxidation (M)[6,7] |      | Mascot      |
|  | 1257.6433  | 1257.4602   | -0.1831 | -146  | 474        | 484      | LQELEEQAAR                     |           |       |                    |      | Mascot      |
|  | 1262.6045  | 1262.6448   | 0.0403  | 32    | 284        | 293      | QLNETLMEER                     |           |       |                    |      | Mascot      |
|  | 1590.7581  | 1590.8403   | 0.0822  | 52    | 216        | 229      | SCAEFLDDALLTHR                 |           |       |                    |      | Mascot      |
|  | 1590.7581  | 1590.8403   | 0.0822  | 52    | 216        | 229      | SCAEFLDDALLTHR                 |           |       |                    |      | Mascot      |
|  | 1799.8632  | 1799.8525   | -0.0107 | -6    | 485        | 499      | HRLQDQNTSSETQQK                |           |       |                    |      | Mascot      |
|  | 1910.792   | 1910.8948   | 0.1028  | 54    | 294        | 310      | DEDDDETLSQCSVIDAR              |           |       |                    |      | Mascot      |
|  | 2168.9045  | 2169.0811   | 0.1766  | 81    | 30         | 48       | CPSPFSFMMSDRFSTVS<br>DR        |           |       | Oxidation (M)[8,9] |      | Mascot      |
|  | 2282.9792  | 2283.1155   | 0.1363  | 60    | 501        | 520      | IDDDVQSILSDSSSMYNF<br>CK       |           |       | Oxidation (M)[15]  |      | Mascot      |
|  | 2455.1992  | 2455.2585   | 0.0593  | 24    | 780        | 805      | SVLSAAGRAESVFSAGG<br>ASQLSCGSR |           |       |                    |      | Mascot      |
|  | 2524.3081  | 2524.1577   | -0.1504 | -60   | 136        | 157      | DRLEAPLSPDEVWPNV<br>FIAEK      |           |       |                    |      | Mascot      |

47 Erf protein [Danio rerio] gi|213625938 68020.6 6.04 10 31 0

#### Peptide Information

|  | Calc. Mass | Obsrv. Mass | ± da    | ± ppm | Start Seq. | End Seq. | Sequence     | Ion Score | C. I. | % Modification   | Rank | Result Type |
|--|------------|-------------|---------|-------|------------|----------|--------------|-----------|-------|------------------|------|-------------|
|  | 842.528    | 842.4904    | -0.0376 | -45   | 535        | 541      | CIPLKLR      |           |       |                  |      | Mascot      |
|  | 1017.4959  | 1017.5486   | 0.0527  | 52    | 579        | 587      | LGEENGDRK    |           |       |                  |      | Mascot      |
|  | 1090.568   | 1090.499    | -0.069  | -63   | 84         | 91       | ALRYYYNK     |           |       |                  |      | Mascot      |
|  | 1225.4889  | 1225.5591   | 0.0702  | 57    | 552        | 562      | MEAGTEEAEDK  |           |       | Oxidation (M)[1] |      | Mascot      |
|  | 1254.5969  | 1254.5487   | -0.0482 | -38   | 71         | 80       | KCKPQMNYDK   |           |       |                  |      | Mascot      |
|  | 1262.6045  | 1262.6448   | 0.0403  | 32    | 610        | 621      | ATAQLSLENNVC |           |       |                  |      | Mascot      |

|                     |                                              |             |         |       |              |                        |                          |                |            |               |                          |                  |                          |
|---------------------|----------------------------------------------|-------------|---------|-------|--------------|------------------------|--------------------------|----------------|------------|---------------|--------------------------|------------------|--------------------------|
|                     | 1353.5839                                    | 1353.6532   | 0.0693  | 51    | 552          | 563                    | MEAGTEEAEDKK             |                |            |               | Oxidation (M)[1]         | Mascot           |                          |
|                     | 1353.5839                                    | 1353.6532   | 0.0693  | 51    | 552          | 563                    | MEAGTEEAEDKK             |                |            |               | Oxidation (M)[1]         | Mascot           |                          |
|                     | 1498.7141                                    | 1498.6818   | -0.0323 | -22   | 72           | 83                     | CKPQMNYDKLSR             |                |            |               | Oxidation (M)[5]         | Mascot           |                          |
|                     | 2233.126                                     | 2233.0327   | -0.0933 | -42   | 307          | 324                    | RYLQAHTQSVYNYHLSP<br>R   |                |            |               |                          | Mascot           |                          |
|                     | 2298.0713                                    | 2298.1338   | 0.0625  | 27    | 40           | 58                     | EEYHDVIAWQGQDYGEFVI<br>K |                |            |               |                          | Mascot           |                          |
| 48                  | GRB2-related adaptor protein [Danio rerio]   |             |         |       | gi 71834318  |                        | 24669.2                  | 5.9            | 1          | 25            | 4.484                    |                  |                          |
| Peptide Information |                                              |             |         |       |              |                        |                          |                |            |               |                          |                  |                          |
|                     | Calc. Mass                                   | Obsrv. Mass | ± da    | ± ppm | Start Seq.   | End Sequence Seq.      |                          |                | Ion Score  | C. I. %       | Modification             | Rank Result Type |                          |
|                     | 1232.5615                                    | 1232.5684   | 0.0069  | 6     | 1            | 10                     | MEAEALYSFR               |                | 25         | 4.484         | Oxidation (M)[1]         | 2 Mascot         |                          |
| 49                  | Si:dkey-240a12.1 protein [Danio rerio]       |             |         |       | gi 213626374 |                        | 142787.6                 | 5.09           | 1          | 21            | 0                        |                  |                          |
| Peptide Information |                                              |             |         |       |              |                        |                          |                |            |               |                          |                  |                          |
|                     | Calc. Mass                                   | Obsrv. Mass | ± da    | ± ppm | Start Seq.   | End Sequence Seq.      |                          |                | Ion Score  | C. I. %       | Modification             | Rank Result Type |                          |
|                     | 1392.7006                                    | 1392.7058   | 0.0052  | 4     | 1004         | 1015                   | EAFTEVDEALIR             |                | 21         | 0             |                          | 2 Mascot         |                          |
| 50                  | Zgc:85866 protein [Danio rerio]              |             |         |       | gi 34785797  |                        | 44013.9                  | 8.81           | 1          | 19            | 0                        |                  |                          |
| Peptide Information |                                              |             |         |       |              |                        |                          |                |            |               |                          |                  |                          |
|                     | Calc. Mass                                   | Obsrv. Mass | ± da    | ± ppm | Start Seq.   | End Sequence Seq.      |                          |                | Ion Score  | C. I. %       | Modification             | Rank Result Type |                          |
|                     | 1392.6471                                    | 1392.7058   | 0.0587  | 42    | 341          | 351                    | CCSPQNTRTIR              |                | 19         | 0             | Carbamidomethyl (C)[1,2] | 3 Mascot         |                          |
| Gel Idx/Pos         |                                              | 214/114     |         |       |              | Instr./Gel Origin      |                          | BA2060/110707A |            |               | Process Status           |                  | Analysis Succeeded<br>11 |
| Plate [#] Name      |                                              | [1] 31496   |         |       |              | Instrument Sample Name |                          |                |            |               | Spectra                  |                  |                          |
| Rank                | Protein Name                                 |             |         |       |              | Accession No.          | Protein MW               | Protein PI     | Pep. Count | Protein Score | Protein Score C. I. %    | Total Ion Score  | Total Ion C. I. %        |
| 1                   | hypothetical protein LOC564979 [Danio rerio] |             |         |       |              | gi 157311713           | 38002.1                  | 6.31           | 10         | 235           | 100                      | 184              | 100                      |
| Peptide Information |                                              |             |         |       |              |                        |                          |                |            |               |                          |                  |                          |
|                     | Calc. Mass                                   | Obsrv. Mass | ± da    | ± ppm | Start Seq.   | End Sequence Seq.      |                          |                | Ion Score  | C. I. %       | Modification             | Rank Result Type |                          |
|                     | 1017.5727                                    | 1017.5524   | -0.0203 | -20   | 224          | 232                    | ITGFVDIPR                |                |            |               |                          | Mascot           |                          |
|                     | 1090.535                                     | 1090.5143   | -0.0207 | -19   | 49           | 56                     | MIWEENLR                 |                |            |               |                          | Mascot           |                          |
|                     | 1106.5299                                    | 1106.5144   | -0.0155 | -14   | 49           | 56                     | MIWEENLR                 |                |            |               | Oxidation (M)[1]         | Mascot           |                          |
|                     | 1190.5436                                    | 1190.5254   | -0.0182 | -15   | 38           | 47                     | SYHEDVEVGR               |                |            |               |                          | Mascot           |                          |

|   |                                              |           |         |     |     |              |                            |      |        |     |     |                          |     |  |  |  |        |
|---|----------------------------------------------|-----------|---------|-----|-----|--------------|----------------------------|------|--------|-----|-----|--------------------------|-----|--|--|--|--------|
|   | 1218.63                                      | 1218.6534 | 0.0234  | 19  | 49  | 57           | MIWEENLRK                  |      |        |     |     |                          |     |  |  |  | Mascot |
|   | 1346.6448                                    | 1346.6226 | -0.0222 | -16 | 38  | 48           | SYHEDVEVGRR                |      |        |     |     |                          |     |  |  |  | Mascot |
|   | 1498.7173                                    | 1498.6904 | -0.0269 | -18 | 196 | 208          | GLDSEQSYPYLAR              | 66   | 99.994 |     |     |                          |     |  |  |  | Mascot |
|   | 1498.7173                                    | 1498.6904 | -0.0269 | -18 | 196 | 208          | GLDSEQSYPYLAR              |      |        |     |     |                          |     |  |  |  | Mascot |
|   | 1854.7091                                    | 1854.6736 | -0.0355 | -19 | 74  | 88           | MGMNQFGDMTNEEFR            |      |        |     |     | Oxidation (M)[1,3,9]     |     |  |  |  | Mascot |
|   | 2174.0989                                    | 2174.054  | -0.0449 | -21 | 277 | 297          | LDHAVLVVGYGYQGADV<br>AGNR  |      |        |     |     |                          |     |  |  |  | Mascot |
|   | 2174.0989                                    | 2174.054  | -0.0449 | -21 | 277 | 297          | LDHAVLVVGYGYQGADV<br>AGNR  | 118  | 100    |     |     |                          |     |  |  |  | Mascot |
|   | 2278.0015                                    | 2277.9534 | -0.0481 | -21 | 135 | 154          | QCGSCWSFSSTGALEG<br>QLFR   |      |        |     |     | Carbamidomethyl (C)[2,5] |     |  |  |  | Mascot |
|   | 2555.2024                                    | 2555.1978 | -0.0046 | -2  | 101 | 122          | TSQGPLFMEPSFFAAPQ<br>QVDWR |      |        |     |     | Oxidation (M)[8]         |     |  |  |  | Mascot |
| 2 | hypothetical protein LOC564906 [Danio rerio] |           |         |     |     | gi 156739281 | 38003.1                    | 6.31 | 10     | 234 | 100 | 184                      | 100 |  |  |  |        |

#### Peptide Information

| Calc. Mass | Obsrv. Mass | ± da    | ± ppm | Start Seq. | End Seq. | Sequence                   | Ion Score | C. I.  | % | Modification             | Rank | Result Type |
|------------|-------------|---------|-------|------------|----------|----------------------------|-----------|--------|---|--------------------------|------|-------------|
| 1017.5727  | 1017.5524   | -0.0203 | -20   | 224        | 232      | ITGFVDIPR                  |           |        |   |                          |      | Mascot      |
| 1090.535   | 1090.5143   | -0.0207 | -19   | 49         | 56       | MIWEENLR                   |           |        |   |                          |      | Mascot      |
| 1106.5299  | 1106.5144   | -0.0155 | -14   | 49         | 56       | MIWEENLR                   |           |        |   | Oxidation (M)[1]         |      | Mascot      |
| 1190.5436  | 1190.5254   | -0.0182 | -15   | 38         | 47       | SYHEDVEVGR                 |           |        |   |                          |      | Mascot      |
| 1218.63    | 1218.6534   | 0.0234  | 19    | 49         | 57       | MIWEENLRK                  |           |        |   |                          |      | Mascot      |
| 1346.6448  | 1346.6226   | -0.0222 | -16   | 38         | 48       | SYHEDVEVGRR                |           |        |   |                          |      | Mascot      |
| 1498.7173  | 1498.6904   | -0.0269 | -18   | 196        | 208      | GLDSEQSYPYLAR              | 66        | 99.994 |   |                          |      | Mascot      |
| 1498.7173  | 1498.6904   | -0.0269 | -18   | 196        | 208      | GLDSEQSYPYLAR              |           |        |   |                          |      | Mascot      |
| 1854.7091  | 1854.6736   | -0.0355 | -19   | 74         | 88       | MGMNQFGDMTNEEFR            |           |        |   | Oxidation (M)[1,3,9]     |      | Mascot      |
| 2174.0989  | 2174.054    | -0.0449 | -21   | 276        | 296      | LDHAVLVVGYGYQGADV<br>AGNR  |           |        |   |                          |      | Mascot      |
| 2174.0989  | 2174.054    | -0.0449 | -21   | 276        | 296      | LDHAVLVVGYGYQGADV<br>AGNR  | 118       | 100    |   |                          |      | Mascot      |
| 2278.0015  | 2277.9534   | -0.0481 | -21   | 135        | 154      | QCGSCWSFSSTGALEG<br>QLFR   |           |        |   | Carbamidomethyl (C)[2,5] |      | Mascot      |
| 2555.2024  | 2555.1978   | -0.0046 | -2    | 101        | 122      | TSQGPLFMEPSFFAAPQ<br>QVDWR |           |        |   | Oxidation (M)[8]         |      | Mascot      |

3 hypothetical protein LOC564835 [Danio rerio] gi|157787177 38057.1 6.2 9 229 100 184 100

#### Peptide Information

| Calc. Mass | Obsrv. Mass | ± da    | ± ppm | Start Seq. | End Seq. | Sequence  | Ion Score | C. I. | % | Modification     | Rank | Result Type |
|------------|-------------|---------|-------|------------|----------|-----------|-----------|-------|---|------------------|------|-------------|
| 1017.5727  | 1017.5524   | -0.0203 | -20   | 224        | 232      | ITGFVDIPR |           |       |   |                  |      | Mascot      |
| 1090.535   | 1090.5143   | -0.0207 | -19   | 49         | 56       | MIWEENLR  |           |       |   |                  |      | Mascot      |
| 1106.5299  | 1106.5144   | -0.0155 | -14   | 49         | 56       | MIWEENLR  |           |       |   | Oxidation (M)[1] |      | Mascot      |

|           |           |         |     |     |     |                           |     |        |  |  |  |                      |                          |  |  |  |        |
|-----------|-----------|---------|-----|-----|-----|---------------------------|-----|--------|--|--|--|----------------------|--------------------------|--|--|--|--------|
| 1190.5436 | 1190.5254 | -0.0182 | -15 | 38  | 47  | SYHEDVEVGR                |     |        |  |  |  |                      |                          |  |  |  | Mascot |
| 1218.63   | 1218.6534 | 0.0234  | 19  | 49  | 57  | MIWEENLRK                 |     |        |  |  |  |                      |                          |  |  |  | Mascot |
| 1346.6448 | 1346.6226 | -0.0222 | -16 | 38  | 48  | SYHEDVEVGRR               |     |        |  |  |  |                      |                          |  |  |  | Mascot |
| 1498.7173 | 1498.6904 | -0.0269 | -18 | 196 | 208 | GLDSEQSYPYLAR             | 66  | 99.994 |  |  |  |                      |                          |  |  |  | Mascot |
| 1498.7173 | 1498.6904 | -0.0269 | -18 | 196 | 208 | GLDSEQSYPYLAR             |     |        |  |  |  |                      |                          |  |  |  | Mascot |
| 1854.7091 | 1854.6736 | -0.0355 | -19 | 74  | 88  | MGMNQFGDMTNEEFR           |     |        |  |  |  | Oxidation (M)[1,3,9] |                          |  |  |  | Mascot |
| 2174.0989 | 2174.054  | -0.0449 | -21 | 277 | 297 | LDHAVLVVGYGYQGADV<br>AGNR |     |        |  |  |  |                      |                          |  |  |  | Mascot |
| 2174.0989 | 2174.054  | -0.0449 | -21 | 277 | 297 | LDHAVLVVGYGYQGADV<br>AGNR | 118 | 100    |  |  |  |                      |                          |  |  |  | Mascot |
| 2278.0015 | 2277.9534 | -0.0481 | -21 | 135 | 154 | QCGSCWSFSSTGALEG<br>QLFR  |     |        |  |  |  |                      | Carbamidomethyl (C)[2,5] |  |  |  | Mascot |

4 hypothetical protein LOC567623 [Danio rerio] gi|162138968 37987.1 6.31 9 228 100 184 100

#### Peptide Information

| Calc. Mass | Obsrv. Mass | ± da    | ± ppm | Start Seq. | End Seq. | Sequence                   | Ion Score | C. I.  | % | Modification             | Rank | Result Type |
|------------|-------------|---------|-------|------------|----------|----------------------------|-----------|--------|---|--------------------------|------|-------------|
| 1090.535   | 1090.5143   | -0.0207 | -19   | 49         | 56       | MIWEENLR                   |           |        |   |                          |      | Mascot      |
| 1106.5299  | 1106.5144   | -0.0155 | -14   | 49         | 56       | MIWEENLR                   |           |        |   | Oxidation (M)[1]         |      | Mascot      |
| 1190.5436  | 1190.5254   | -0.0182 | -15   | 38         | 47       | SYHEDVEVGR                 |           |        |   |                          |      | Mascot      |
| 1218.63    | 1218.6534   | 0.0234  | 19    | 49         | 57       | MIWEENLRK                  |           |        |   |                          |      | Mascot      |
| 1346.6448  | 1346.6226   | -0.0222 | -16   | 38         | 48       | SYHEDVEVGRR                |           |        |   |                          |      | Mascot      |
| 1498.7173  | 1498.6904   | -0.0269 | -18   | 196        | 208      | GLDSEQSYPYLAR              | 66        | 99.994 |   |                          |      | Mascot      |
| 1498.7173  | 1498.6904   | -0.0269 | -18   | 196        | 208      | GLDSEQSYPYLAR              |           |        |   |                          |      | Mascot      |
| 1854.7091  | 1854.6736   | -0.0355 | -19   | 74         | 88       | MGMNQFGDMTNEEFR            |           |        |   | Oxidation (M)[1,3,9]     |      | Mascot      |
| 2174.0989  | 2174.054    | -0.0449 | -21   | 277        | 297      | LDHAVLVVGYGYQGADV<br>AGNR  |           |        |   |                          |      | Mascot      |
| 2174.0989  | 2174.054    | -0.0449 | -21   | 277        | 297      | LDHAVLVVGYGYQGADV<br>AGNR  | 118       | 100    |   |                          |      | Mascot      |
| 2278.0015  | 2277.9534   | -0.0481 | -21   | 135        | 154      | QCGSCWSFSSTGALEG<br>QLFR   |           |        |   | Carbamidomethyl (C)[2,5] |      | Mascot      |
| 2555.2024  | 2555.1978   | -0.0046 | -2    | 101        | 122      | TSQGPLFMEPSFFAAPQ<br>QVDWR |           |        |   | Oxidation (M)[8]         |      | Mascot      |

5 hypothetical protein LOC569326 [Danio rerio] gi|156739289 37972.2 6.45 9 225 100 184 100

#### Peptide Information

| Calc. Mass | Obsrv. Mass | ± da    | ± ppm | Start Seq. | End Seq. | Sequence   | Ion Score | C. I. | % | Modification     | Rank | Result Type |
|------------|-------------|---------|-------|------------|----------|------------|-----------|-------|---|------------------|------|-------------|
| 1017.5727  | 1017.5524   | -0.0203 | -20   | 224        | 232      | ITGFVDIPR  |           |       |   |                  |      | Mascot      |
| 1090.535   | 1090.5143   | -0.0207 | -19   | 49         | 56       | MIWEENLR   |           |       |   |                  |      | Mascot      |
| 1106.5299  | 1106.5144   | -0.0155 | -14   | 49         | 56       | MIWEENLR   |           |       |   | Oxidation (M)[1] |      | Mascot      |
| 1190.5436  | 1190.5254   | -0.0182 | -15   | 38         | 47       | SYHEDVEVGR |           |       |   |                  |      | Mascot      |
| 1218.63    | 1218.6534   | 0.0234  | 19    | 49         | 57       | MIWEENLRK  |           |       |   |                  |      | Mascot      |

|   |                                |           |         |     |             |     |                           |      |        |                          |     |     |     |  |  |  |        |
|---|--------------------------------|-----------|---------|-----|-------------|-----|---------------------------|------|--------|--------------------------|-----|-----|-----|--|--|--|--------|
|   | 1346.6448                      | 1346.6226 | -0.0222 | -16 | 38          | 48  | SYHEDVEVGRR               |      |        |                          |     |     |     |  |  |  | Mascot |
|   | 1498.7173                      | 1498.6904 | -0.0269 | -18 | 196         | 208 | GLDSEQSYPYLAR             | 66   | 99.994 |                          |     |     |     |  |  |  | Mascot |
|   | 1498.7173                      | 1498.6904 | -0.0269 | -18 | 196         | 208 | GLDSEQSYPYLAR             |      |        |                          |     |     |     |  |  |  | Mascot |
|   | 1854.7091                      | 1854.6736 | -0.0355 | -19 | 74          | 88  | MGMNQFGDMTNEEFR           |      |        | Oxidation (M)[1,3,9]     |     |     |     |  |  |  | Mascot |
|   | 2174.0989                      | 2174.054  | -0.0449 | -21 | 276         | 296 | LDHAVLVVGYGYQGADV<br>AGNR |      |        |                          |     |     |     |  |  |  | Mascot |
|   | 2174.0989                      | 2174.054  | -0.0449 | -21 | 276         | 296 | LDHAVLVVGYGYQGADV<br>AGNR | 118  | 100    |                          |     |     |     |  |  |  | Mascot |
|   | 2278.0015                      | 2277.9534 | -0.0481 | -21 | 135         | 154 | QCGSCWSFSSTGALEG<br>QLFR  |      |        | Carbamidomethyl (C)[2,5] |     |     |     |  |  |  | Mascot |
| 6 | cathepsin L, 1 b [Danio rerio] |           |         |     | gi 18858809 |     | 38005.1                   | 5.99 | 8      | 222                      | 100 | 184 | 100 |  |  |  |        |

#### Peptide Information

| Calc. Mass | Obsrv. Mass | ± da    | ± ppm | Start Seq. | End Seq. | Sequence                  | Ion Score | C. I.  | % | Modification             | Rank | Result | Type   |
|------------|-------------|---------|-------|------------|----------|---------------------------|-----------|--------|---|--------------------------|------|--------|--------|
| 1090.535   | 1090.5143   | -0.0207 | -19   | 49         | 56       | MIWEENLR                  |           |        |   |                          |      |        | Mascot |
| 1106.5299  | 1106.5144   | -0.0155 | -14   | 49         | 56       | MIWEENLR                  |           |        |   | Oxidation (M)[1]         |      |        | Mascot |
| 1190.5436  | 1190.5254   | -0.0182 | -15   | 38         | 47       | SYHEDVEVGR                |           |        |   |                          |      |        | Mascot |
| 1218.63    | 1218.6534   | 0.0234  | 19    | 49         | 57       | MIWEENLRK                 |           |        |   |                          |      |        | Mascot |
| 1346.6448  | 1346.6226   | -0.0222 | -16   | 38         | 48       | SYHEDVEVGRR               |           |        |   |                          |      |        | Mascot |
| 1498.7173  | 1498.6904   | -0.0269 | -18   | 196        | 208      | GLDSEQSYPYLAR             | 66        | 99.994 |   |                          |      |        | Mascot |
| 1498.7173  | 1498.6904   | -0.0269 | -18   | 196        | 208      | GLDSEQSYPYLAR             |           |        |   |                          |      |        | Mascot |
| 1854.7091  | 1854.6736   | -0.0355 | -19   | 74         | 88       | MGMNQFGDMTNEEFR           |           |        |   | Oxidation (M)[1,3,9]     |      |        | Mascot |
| 2174.0989  | 2174.054    | -0.0449 | -21   | 277        | 297      | LDHAVLVVGYGYQGADV<br>AGNR |           |        |   |                          |      |        | Mascot |
| 2174.0989  | 2174.054    | -0.0449 | -21   | 277        | 297      | LDHAVLVVGYGYQGADV<br>AGNR | 118       | 100    |   |                          |      |        | Mascot |
| 2278.0015  | 2277.9534   | -0.0481 | -21   | 135        | 154      | QCGSCWSFSSTGALEG<br>QLFR  |           |        |   | Carbamidomethyl (C)[2,5] |      |        | Mascot |

7 hypothetical protein LOC563390 [Danio rerio] gi|156739275 38057.1 6.31 8 219 100 184 100

#### Peptide Information

| Calc. Mass | Obsrv. Mass | ± da    | ± ppm | Start Seq. | End Seq. | Sequence        | Ion Score | C. I.  | % | Modification         | Rank | Result | Type   |
|------------|-------------|---------|-------|------------|----------|-----------------|-----------|--------|---|----------------------|------|--------|--------|
| 1017.5727  | 1017.5524   | -0.0203 | -20   | 224        | 232      | ITGFVDIPR       |           |        |   |                      |      |        | Mascot |
| 1090.535   | 1090.5143   | -0.0207 | -19   | 49         | 56       | MIWEENLR        |           |        |   |                      |      |        | Mascot |
| 1106.5299  | 1106.5144   | -0.0155 | -14   | 49         | 56       | MIWEENLR        |           |        |   | Oxidation (M)[1]     |      |        | Mascot |
| 1218.63    | 1218.6534   | 0.0234  | 19    | 49         | 57       | MIWEENLRK       |           |        |   |                      |      |        | Mascot |
| 1498.7173  | 1498.6904   | -0.0269 | -18   | 196        | 208      | GLDSEQSYPYLAR   | 66        | 99.994 |   |                      |      |        | Mascot |
| 1498.7173  | 1498.6904   | -0.0269 | -18   | 196        | 208      | GLDSEQSYPYLAR   |           |        |   |                      |      |        | Mascot |
| 1854.7091  | 1854.6736   | -0.0355 | -19   | 74         | 88       | MGMNQFGDMTNEEFR |           |        |   | Oxidation (M)[1,3,9] |      |        | Mascot |

|   |                                            |           |         |     |              |     |                            |      |     |                          |     |     |     |        |
|---|--------------------------------------------|-----------|---------|-----|--------------|-----|----------------------------|------|-----|--------------------------|-----|-----|-----|--------|
|   | 2174.0989                                  | 2174.054  | -0.0449 | -21 | 276          | 296 | LDHAVLVVGYGYQGADV<br>AGNR  |      |     |                          |     |     |     | Mascot |
|   | 2174.0989                                  | 2174.054  | -0.0449 | -21 | 276          | 296 | LDHAVLVVGYGYQGADV<br>AGNR  | 118  | 100 |                          |     |     |     | Mascot |
|   | 2278.0015                                  | 2277.9534 | -0.0481 | -21 | 135          | 154 | QCGSCWSFSSTGALEG<br>QLFR   |      |     | Carbamidomethyl (C)[2,5] |     |     |     | Mascot |
|   | 2555.2024                                  | 2555.1978 | -0.0046 | -2  | 101          | 122 | TSQGPLFMEPSFFAAPQ<br>QVDWR |      |     | Oxidation (M)[8]         |     |     |     | Mascot |
| 8 | PREDICTED: cathepsin L1-like [Danio rerio] |           |         |     | gi 326672302 |     | 37980.1                    | 6.45 | 8   | 217                      | 100 | 184 | 100 |        |

#### Peptide Information

|  | Calc. Mass | Obsrv. Mass | ± da    | ± ppm | Start Seq. | End Seq. | Sequence                  | Ion Score | C. I.  | % | Modification             | Rank | Result Type |
|--|------------|-------------|---------|-------|------------|----------|---------------------------|-----------|--------|---|--------------------------|------|-------------|
|  | 1090.535   | 1090.5143   | -0.0207 | -19   | 49         | 56       | MIWEENLR                  |           |        |   |                          |      | Mascot      |
|  | 1106.5299  | 1106.5144   | -0.0155 | -14   | 49         | 56       | MIWEENLR                  |           |        |   | Oxidation (M)[1]         |      | Mascot      |
|  | 1190.5436  | 1190.5254   | -0.0182 | -15   | 38         | 47       | SYHEDVEVGR                |           |        |   |                          |      | Mascot      |
|  | 1218.63    | 1218.6534   | 0.0234  | 19    | 49         | 57       | MIWEENLRK                 |           |        |   |                          |      | Mascot      |
|  | 1346.6448  | 1346.6226   | -0.0222 | -16   | 38         | 48       | SYHEDVEVGRR               |           |        |   |                          |      | Mascot      |
|  | 1498.7173  | 1498.6904   | -0.0269 | -18   | 196        | 208      | GLDSEQSYPYLAR             | 66        | 99.994 |   |                          |      | Mascot      |
|  | 1498.7173  | 1498.6904   | -0.0269 | -18   | 196        | 208      | GLDSEQSYPYLAR             |           |        |   |                          |      | Mascot      |
|  | 1854.7091  | 1854.6736   | -0.0355 | -19   | 74         | 88       | MGMNQFGDMTNEEFR           |           |        |   | Oxidation (M)[1,3,9]     |      | Mascot      |
|  | 2174.0989  | 2174.054    | -0.0449 | -21   | 276        | 296      | LDHAVLVVGYGYQGADV<br>AGNR |           |        |   |                          |      | Mascot      |
|  | 2174.0989  | 2174.054    | -0.0449 | -21   | 276        | 296      | LDHAVLVVGYGYQGADV<br>AGNR | 118       | 100    |   |                          |      | Mascot      |
|  | 2278.0015  | 2277.9534   | -0.0481 | -21   | 135        | 154      | QCGSCWSFSSTGALEG<br>QLFR  |           |        |   | Carbamidomethyl (C)[2,5] |      | Mascot      |

|   |                                                  |  |  |  |              |  |       |      |    |     |     |     |     |  |
|---|--------------------------------------------------|--|--|--|--------------|--|-------|------|----|-----|-----|-----|-----|--|
| 9 | phosphotriesterase-related protein [Danio rerio] |  |  |  | gi 113679255 |  | 39153 | 6.09 | 10 | 175 | 100 | 122 | 100 |  |
|---|--------------------------------------------------|--|--|--|--------------|--|-------|------|----|-----|-----|-----|-----|--|

#### Peptide Information

|  | Calc. Mass | Obsrv. Mass | ± da    | ± ppm | Start Seq. | End Seq. | Sequence                | Ion Score | C. I.  | % | Modification           | Rank | Result Type |
|--|------------|-------------|---------|-------|------------|----------|-------------------------|-----------|--------|---|------------------------|------|-------------|
|  | 850.4933   | 850.5277    | 0.0344  | 40    | 344        | 349      | RWLTFK                  |           |        |   |                        |      | Mascot      |
|  | 982.6043   | 982.5798    | -0.0245 | -25   | 337        | 344      | ILIENPKR                |           |        |   |                        |      | Mascot      |
|  | 1195.6542  | 1195.6311   | -0.0231 | -19   | 183        | 193      | VLQATAHAQTR             |           |        |   |                        |      | Mascot      |
|  | 1218.6775  | 1218.6534   | -0.0241 | -20   | 194        | 204      | LGCPVIIHPGR             |           |        |   | Carbamidomethyl (C)[3] |      | Mascot      |
|  | 1269.611   | 1269.5902   | -0.0208 | -16   | 283        | 292      | FLIQEGYEDR              |           |        |   |                        |      | Mascot      |
|  | 1269.611   | 1269.5902   | -0.0208 | -16   | 283        | 292      | FLIQEGYEDR              | 54        | 99.896 |   |                        |      | Mascot      |
|  | 1549.7645  | 1549.7361   | -0.0284 | -18   | 234        | 246      | SIYDHGELLEAFAR          |           |        |   |                        |      | Mascot      |
|  | 1549.7645  | 1549.7361   | -0.0284 | -18   | 234        | 246      | SIYDHGELLEAFAR          | 68        | 99.996 |   |                        |      | Mascot      |
|  | 1652.8966  | 1652.8668   | -0.0298 | -18   | 8          | 22       | VQTVLGQIEPDQLGR         |           |        |   |                        |      | Mascot      |
|  | 2010.0502  | 2010.0078   | -0.0424 | -21   | 145        | 163      | LTDVIVSEVLHGADGTDI<br>R |           |        |   |                        |      | Mascot      |

|    |                                                                                     |           |         |     |              |         |                              |    |     |     |     |     |  |  |        |
|----|-------------------------------------------------------------------------------------|-----------|---------|-----|--------------|---------|------------------------------|----|-----|-----|-----|-----|--|--|--------|
|    | 2490.1895                                                                           | 2490.1436 | -0.0459 | -18 | 116          | 138     | ETGVHVIAGAGYYVDVTH<br>SEETR  |    |     |     |     |     |  |  | Mascot |
|    | 2618.2844                                                                           | 2618.2339 | -0.0505 | -19 | 116          | 139     | ETGVHVIAGAGYYVDVTH<br>SEETRK |    |     |     |     |     |  |  | Mascot |
| 10 | novel protein similar to vertebrate phosphotriesterase related (PTER) [Danio rerio] |           |         |     | gi 122891390 | 40580.8 | 6.34                         | 10 | 174 | 100 | 122 | 100 |  |  |        |

#### Peptide Information

| Calc. Mass | Obsrv. Mass | ± da    | ± ppm | Start Seq. | End Seq. | Sequence                     | Ion Score | C. I.  | % Modification         | Rank | Result Type |
|------------|-------------|---------|-------|------------|----------|------------------------------|-----------|--------|------------------------|------|-------------|
| 850.4933   | 850.5277    | 0.0344  | 40    | 356        | 361      | RWLTFK                       |           |        |                        |      | Mascot      |
| 982.6043   | 982.5798    | -0.0245 | -25   | 349        | 356      | ILIENPKR                     |           |        |                        |      | Mascot      |
| 1195.6542  | 1195.6311   | -0.0231 | -19   | 195        | 205      | VLQATAHAQTR                  |           |        |                        |      | Mascot      |
| 1218.6775  | 1218.6534   | -0.0241 | -20   | 206        | 216      | LGCPVIIHPGR                  |           |        | Carbamidomethyl (C)[3] |      | Mascot      |
| 1269.611   | 1269.5902   | -0.0208 | -16   | 295        | 304      | FLIQEGYEDR                   |           |        |                        |      | Mascot      |
| 1269.611   | 1269.5902   | -0.0208 | -16   | 295        | 304      | FLIQEGYEDR                   | 54        | 99.896 |                        |      | Mascot      |
| 1549.7645  | 1549.7361   | -0.0284 | -18   | 246        | 258      | SIYDHGELLE FAR               |           |        |                        |      | Mascot      |
| 1549.7645  | 1549.7361   | -0.0284 | -18   | 246        | 258      | SIYDHGELLE FAR               | 68        | 99.996 |                        |      | Mascot      |
| 1652.8966  | 1652.8668   | -0.0298 | -18   | 20         | 34       | VQTVLGQIEPDQLGR              |           |        |                        |      | Mascot      |
| 2010.0502  | 2010.0078   | -0.0424 | -21   | 157        | 175      | LTDVIVSEVLHGADGTDI<br>R      |           |        |                        |      | Mascot      |
| 2490.1895  | 2490.1436   | -0.0459 | -18   | 128        | 150      | ETGVHVIAGAGYYVDVTH<br>SEETR  |           |        |                        |      | Mascot      |
| 2618.2844  | 2618.2339   | -0.0505 | -19   | 128        | 151      | ETGVHVIAGAGYYVDVTH<br>SEETRK |           |        |                        |      | Mascot      |

|    |                                       |  |  |  |             |         |      |    |     |     |     |     |  |  |
|----|---------------------------------------|--|--|--|-------------|---------|------|----|-----|-----|-----|-----|--|--|
| 11 | UDP-glucose 4-epimerase [Danio rerio] |  |  |  | gi 94536900 | 38812.5 | 6.27 | 11 | 166 | 100 | 106 | 100 |  |  |
|----|---------------------------------------|--|--|--|-------------|---------|------|----|-----|-----|-----|-----|--|--|

#### Peptide Information

| Calc. Mass | Obsrv. Mass | ± da    | ± ppm | Start Seq. | End Seq. | Sequence                | Ion Score | C. I. | % Modification                            | Rank | Result Type |
|------------|-------------|---------|-------|------------|----------|-------------------------|-----------|-------|-------------------------------------------|------|-------------|
| 879.4206   | 879.405     | -0.0156 | -18   | 321        | 327      | AEFDLER                 |           |       |                                           |      | Mascot      |
| 931.5359   | 931.5195    | -0.0164 | -18   | 291        | 298      | IAYQIAPR                |           |       |                                           |      | Mascot      |
| 986.5417   | 986.5226    | -0.0191 | -19   | 176        | 183      | DWNAVLLR                |           |       |                                           |      | Mascot      |
| 1059.631   | 1059.6097   | -0.0213 | -20   | 290        | 298      | KIAYQIAPR               |           |       |                                           |      | Mascot      |
| 1100.5444  | 1100.5247   | -0.0197 | -18   | 161        | 168      | YFIEEMIR                |           |       |                                           |      | Mascot      |
| 1116.5394  | 1116.5194   | -0.02   | -18   | 161        | 168      | YFIEEMIR                |           |       | Oxidation (M)[6]                          |      | Mascot      |
| 1184.627   | 1184.6062   | -0.0208 | -18   | 92         | 102      | AVGESVEQPLR             |           |       |                                           |      | Mascot      |
| 1818.8802  | 1818.843    | -0.0372 | -20   | 169        | 183      | DQCTAEKDWNAVLLR         |           |       | Carbamidomethyl (C)[3]                    |      | Mascot      |
| 1948.8779  | 1948.8737   | -0.0042 | -2    | 161        | 175      | YFIEEMIRDQCTAEK         |           |       | Carbamidomethyl (C)[11], Oxidation (M)[6] |      | Mascot      |
| 1948.9148  | 1948.8737   | -0.0411 | -21   | 221        | 238      | HLNVFGNDYSTPDGTGV<br>R  | 108       | 100   |                                           |      | Mascot      |
| 2081.1172  | 2081.0747   | -0.0425 | -20   | 106        | 124      | VNLTGTINLLEVMQSHGV<br>R |           |       |                                           |      | Mascot      |



|    |                                                        |           |         |     |              |       |                          |   |     |     |    |     |                         |        |
|----|--------------------------------------------------------|-----------|---------|-----|--------------|-------|--------------------------|---|-----|-----|----|-----|-------------------------|--------|
|    | 2097.1121                                              | 2097.0737 | -0.0384 | -18 | 106          | 124   | VNLTGTINLLEVMSHGV<br>R   |   |     |     |    |     | Oxidation (M)[13]       | Mascot |
|    | 2211.0862                                              | 2211.0601 | -0.0261 | -12 | 141          | 160   | LPIDEQHPVGGCTNPYG<br>KTK |   |     |     |    |     | Carbamidomethyl (C)[12] | Mascot |
| 12 | 3-hydroxyisobutyryl-Coenzyme A hydrolase [Danio rerio] |           |         |     | gi 169154367 | 42386 | 8.5                      | 9 | 112 | 100 | 78 | 100 |                         |        |

#### Peptide Information

| Calc. Mass | Obsrv. Mass | ± da    | ± ppm | Start Seq. | End Seq. | Sequence                     | Ion Score | C. I. | %   | Modification           | Rank | Result Type |
|------------|-------------|---------|-------|------------|----------|------------------------------|-----------|-------|-----|------------------------|------|-------------|
| 966.4461   | 966.4284    | -0.0177 | -18   | 91         | 99       | AFCAGGDIR                    |           |       |     | Carbamidomethyl (C)[3] |      | Mascot      |
| 1059.4711  | 1059.6097   | 0.1386  | 131   | 23         | 31       | IHGHMMSSK                    |           |       |     | Oxidation (M)[5,6]     |      | Mascot      |
| 1068.6523  | 1068.6326   | -0.0197 | -18   | 44         | 53       | AGVITLNRPK                   |           |       |     |                        |      | Mascot      |
| 1226.6165  | 1226.5934   | -0.0231 | -19   | 107        | 117      | AGDSLSQVFFR                  | 78        |       | 100 |                        |      | Mascot      |
| 1226.6165  | 1226.5934   | -0.0231 | -19   | 107        | 117      | AGDSLSQVFFR                  |           |       |     |                        |      | Mascot      |
| 1245.6984  | 1245.6757   | -0.0227 | -18   | 54         | 64       | ALNALTLMIR                   |           |       |     | Oxidation (M)[9]       |      | Mascot      |
| 1353.7195  | 1353.6583   | -0.0612 | -45   | 2          | 13       | SMSLIIFTSQR                  |           |       |     |                        |      | Mascot      |
| 1549.7791  | 1549.7361   | -0.043  | -28   | 91         | 106      | AFCAGGDIRAIEAGK              |           |       |     |                        |      | Mascot      |
| 1549.7791  | 1549.7361   | -0.043  | -28   | 91         | 106      | AFCAGGDIRAIEAGK              |           |       |     |                        |      | Mascot      |
| 1606.8005  | 1606.8389   | 0.0384  | 24    | 91         | 106      | AFCAGGDIRAIEAGK              |           |       |     | Carbamidomethyl (C)[3] |      | Mascot      |
| 1762.9585  | 1762.9209   | -0.0376 | -21   | 269        | 284      | LFSAGSVEEIVENLKK             |           |       |     |                        |      | Mascot      |
| 2555.3003  | 2555.1978   | -0.1025 | -40   | 161        | 184      | TLFAMPETGIGLFPDVGG<br>GYFLPR |           |       |     |                        |      | Mascot      |
| 2571.2952  | 2571.2419   | -0.0533 | -21   | 161        | 184      | TLFAMPETGIGLFPDVGG<br>GYFLPR |           |       |     | Oxidation (M)[5]       |      | Mascot      |

|    |                                       |  |  |  |              |         |      |   |    |        |    |        |  |  |
|----|---------------------------------------|--|--|--|--------------|---------|------|---|----|--------|----|--------|--|--|
| 13 | PREDICTED: cathepsin L1 [Danio rerio] |  |  |  | gi 189525870 | 38017.2 | 6.36 | 7 | 92 | 99.997 | 66 | 99.994 |  |  |
|----|---------------------------------------|--|--|--|--------------|---------|------|---|----|--------|----|--------|--|--|

#### Peptide Information

| Calc. Mass | Obsrv. Mass | ± da    | ± ppm | Start Seq. | End Seq. | Sequence                 | Ion Score | C. I. | %      | Modification             | Rank | Result Type |
|------------|-------------|---------|-------|------------|----------|--------------------------|-----------|-------|--------|--------------------------|------|-------------|
| 1090.535   | 1090.5143   | -0.0207 | -19   | 49         | 56       | MIWEENLR                 |           |       |        |                          |      | Mascot      |
| 1106.5299  | 1106.5144   | -0.0155 | -14   | 49         | 56       | MIWEENLR                 |           |       |        | Oxidation (M)[1]         |      | Mascot      |
| 1190.5436  | 1190.5254   | -0.0182 | -15   | 38         | 47       | SYHEDVEVGR               |           |       |        |                          |      | Mascot      |
| 1218.63    | 1218.6534   | 0.0234  | 19    | 49         | 57       | MIWEENLRK                |           |       |        |                          |      | Mascot      |
| 1346.6448  | 1346.6226   | -0.0222 | -16   | 38         | 48       | SYHEDVEVGRR              |           |       |        |                          |      | Mascot      |
| 1498.7173  | 1498.6904   | -0.0269 | -18   | 196        | 208      | GLDSEQSYPYLAR            | 66        |       | 99.994 |                          |      | Mascot      |
| 1498.7173  | 1498.6904   | -0.0269 | -18   | 196        | 208      | GLDSEQSYPYLAR            |           |       |        |                          |      | Mascot      |
| 1854.7091  | 1854.6736   | -0.0355 | -19   | 74         | 88       | MGMNQFGDMTNEEFR          |           |       |        | Oxidation (M)[1,3,9]     |      | Mascot      |
| 2278.0015  | 2277.9534   | -0.0481 | -21   | 135        | 154      | QCGSCWSFSSTGALEG<br>QLFR |           |       |        | Carbamidomethyl (C)[2,5] |      | Mascot      |

|    |                                                         |  |  |  |              |          |      |    |    |        |  |  |  |  |
|----|---------------------------------------------------------|--|--|--|--------------|----------|------|----|----|--------|--|--|--|--|
| 14 | PREDICTED: dynein heavy chain 3, axonemal [Danio rerio] |  |  |  | gi 326679902 | 436828.9 | 5.36 | 33 | 48 | 24.426 |  |  |  |  |
|----|---------------------------------------------------------|--|--|--|--------------|----------|------|----|----|--------|--|--|--|--|

**Peptide Information**

| Calc. Mass | Obsrv. Mass | $\pm$ da | $\pm$ ppm | Start Seq. | End Sequence Seq.      | Ion Score | C. I. % Modification      | Rank | Result Type |
|------------|-------------|----------|-----------|------------|------------------------|-----------|---------------------------|------|-------------|
| 870.5043   | 870.5258    | 0.0215   | 25        | 248        | 254 LKLEDPR            |           |                           |      | Mascot      |
| 966.4634   | 966.4284    | -0.035   | -36       | 2334       | 2341 IEVVEMCK          |           | Oxidation (M)[6]          |      | Mascot      |
| 982.4662   | 982.5798    | 0.1136   | 116       | 2864       | 2871 QQGVEYMK          |           |                           |      | Mascot      |
| 996.4489   | 996.5789    | 0.13     | 130       | 2428       | 2435 QTDQMMVK          |           | Oxidation (M)[5]          |      | Mascot      |
| 996.4489   | 996.5789    | 0.13     | 130       | 2428       | 2435 QTDQMMVK          |           | Oxidation (M)[5]          |      | Mascot      |
| 1051.5531  | 1051.6956   | 0.1425   | 136       | 452        | 460 HTSEVTIHK          |           |                           |      | Mascot      |
| 1058.436   | 1058.5037   | 0.0677   | 64        | 2178       | 2185 NYSMSDWR          |           |                           |      | Mascot      |
| 1059.5581  | 1059.6097   | 0.0516   | 49        | 789        | 796 AWEEKLQR           |           |                           |      | Mascot      |
| 1068.5507  | 1068.6326   | 0.0819   | 77        | 2502       | 2511 TMQNPPGPVK        |           |                           |      | Mascot      |
| 1090.5316  | 1090.5143   | -0.0173  | -16       | 1688       | 1695 NKFDTFYR          |           |                           |      | Mascot      |
| 1116.5756  | 1116.5194   | -0.0562  | -50       | 2385       | 2393 SEVNELRNR         |           |                           |      | Mascot      |
| 1141.4943  | 1141.5448   | 0.0505   | 44        | 3253       | 3263 FADDLGMGGSR       |           | Oxidation (M)[7]          |      | Mascot      |
| 1184.5724  | 1184.6062   | 0.0338   | 29        | 2512       | 2521 LVMESICVMK        |           | Oxidation (M)[3,9]        |      | Mascot      |
| 1195.6139  | 1195.6311   | 0.0172   | 14        | 2605       | 2614 AMEVYERVAK        |           |                           |      | Mascot      |
| 1214.6932  | 1214.5913   | -0.1019  | -84       | 1404       | 1413 LQPVPWFISK        |           |                           |      | Mascot      |
| 1226.678   | 1226.5934   | -0.0846  | -69       | 2554       | 2563 FLESLKTFNK        |           |                           |      | Mascot      |
| 1226.678   | 1226.5934   | -0.0846  | -69       | 2554       | 2563 FLESLKTFNK        |           |                           |      | Mascot      |
| 1269.5052  | 1269.5902   | 0.085    | 67        | 21         | 30 FQGDEEEMER          |           |                           |      | Mascot      |
| 1269.5052  | 1269.5902   | 0.085    | 67        | 21         | 30 FQGDEEEMER          |           |                           |      | Mascot      |
| 1353.6508  | 1353.6583   | 0.0075   | 6         | 2537       | 2547 MIEDFWGPSKK       |           | Oxidation (M)[1]          |      | Mascot      |
| 1355.5719  | 1355.6183   | 0.0464   | 34        | 985        | 995 QGMEQYSEMPR        |           |                           |      | Mascot      |
| 1498.8264  | 1498.6904   | -0.136   | -91       | 1864       | 1876 EIYGAQPPIELLR     |           |                           |      | Mascot      |
| 1498.8264  | 1498.6904   | -0.136   | -91       | 1864       | 1876 EIYGAQPPIELLR     |           |                           |      | Mascot      |
| 1549.7787  | 1549.7361   | -0.0426  | -27       | 1535       | 1548 LCLMSGEIIQMSPK    |           |                           |      | Mascot      |
| 1549.7787  | 1549.7361   | -0.0426  | -27       | 1535       | 1548 LCLMSGEIIQMSPK    |           |                           |      | Mascot      |
| 1606.8002  | 1606.8389   | 0.0387   | 24        | 1535       | 1548 LCLMSGEIIQMSPK    |           | Carbamidomethyl (C)[2]    |      | Mascot      |
| 1620.9076  | 1620.8284   | -0.0792  | -49       | 193        | 206 LFRCVAALMSLQLR     |           |                           |      | Mascot      |
| 1715.8521  | 1715.9111   | 0.059    | 34        | 3551       | 3566 SPQEVVDELAEGMLAK  |           |                           |      | Mascot      |
| 1762.7999  | 1762.9209   | 0.121    | 69        | 2733       | 2745 VECQQQWLELCNR     |           | Carbamidomethyl (C)[3,11] |      | Mascot      |
| 1854.9088  | 1854.6736   | -0.2352  | -127      | 2334       | 2348 IEVVEMCKTFQESVR   |           | Carbamidomethyl (C)[7]    |      | Mascot      |
| 1948.8705  | 1948.8737   | 0.0032   | 2         | 3719       | 3734 QETHMEEKPEDGAYIR  |           | Oxidation (M)[5]          |      | Mascot      |
| 1949.0577  | 1948.8737   | -0.184   | -94       | 3385       | 3400 LLFGLCFFHALVQERR  |           |                           |      | Mascot      |
| 2009.9307  | 2010.0078   | 0.0771   | 38        | 1893       | 1911 LDIEDVLYMSAMGPPGG |           | Oxidation (M)[9,12]       |      | Mascot      |

|    |                                                          |           |         |     |      |      |                              |                                           |        |    |    |   |
|----|----------------------------------------------------------|-----------|---------|-----|------|------|------------------------------|-------------------------------------------|--------|----|----|---|
|    | 2080.9136                                                | 2081.0747 | 0.1611  | 77  | 1170 | 1187 | GR<br>QCVVFNCSDGLDYKAMS<br>K | Carbamidomethyl (C)[2], Oxidation (M)[16] | Mascot |    |    |   |
|    | 2278.1755                                                | 2277.9534 | -0.2221 | -97 | 962  | 980  | GMVEKWLLQVENTMLMS<br>IR      |                                           | Mascot |    |    |   |
|    | 2284.2151                                                | 2284.1274 | -0.0877 | -38 | 1696 | 1715 | NLLMGITDHPRMSVKL<br>TK       | Oxidation (M)[4,14]                       | Mascot |    |    |   |
|    | 2300.0701                                                | 2300.1282 | 0.0581  | 25  | 2294 | 2312 | MFPSLINCCTIDWFQAWP<br>K      |                                           | Mascot |    |    |   |
|    | 2490.1782                                                | 2490.1436 | -0.0346 | -14 | 2068 | 2089 | VEDDSIRSLFFGDYSKPD<br>SANK   |                                           | Mascot |    |    |   |
|    | 2571.2837                                                | 2571.2419 | -0.0418 | -16 | 3356 | 3378 | ANLLRSYLSDPISDPTFF<br>NSSAR  |                                           | Mascot |    |    |   |
| 15 | PREDICTED: transmembrane protease serine 9 [Danio rerio] |           |         |     |      |      | gi 326678421                 | 85296                                     | 6.21   | 13 | 45 | 0 |

#### Peptide Information

| Calc. Mass | Obsrv. Mass | ± da    | ± ppm | Start Seq. | End Seq. | Sequence                   | Ion Score | C. I. % | Modification                                  | Rank | Result Type |
|------------|-------------|---------|-------|------------|----------|----------------------------|-----------|---------|-----------------------------------------------|------|-------------|
| 966.4526   | 966.4284    | -0.0242 | -25   | 65         | 72       | YNADLQDK                   |           |         |                                               |      | Mascot      |
| 986.6244   | 986.5226    | -0.1018 | -103  | 377        | 385      | AIVKIISK                   |           |         |                                               |      | Mascot      |
| 1059.5073  | 1059.6097   | 0.1024  | 97    | 582        | 590      | CGATLIHCK                  |           |         | Carbamidomethyl (C)[1,8]                      |      | Mascot      |
| 1232.5464  | 1232.5731   | 0.0267  | 22    | 532        | 542      | VIDCPNEADEK                |           |         |                                               |      | Mascot      |
| 1279.7157  | 1279.7528   | 0.0371  | 29    | 458        | 467      | LRNWIVSYTK                 |           |         |                                               |      | Mascot      |
| 1355.6855  | 1355.6183   | -0.0672 | -50   | 240        | 250      | HGEFPWQVSLR                |           |         |                                               |      | Mascot      |
| 1392.6246  | 1392.7068   | 0.0822  | 59    | 732        | 745      | DTCLGDSGGPLVCR             |           |         |                                               |      | Mascot      |
| 1900.901   | 1900.7697   | -0.1313 | -69   | 266        | 281      | WLVSAAHCFEVENNPK           |           |         | Carbamidomethyl (C)[8]                        |      | Mascot      |
| 1948.8488  | 1948.8737   | 0.0249  | 13    | 411        | 430      | VDSCQGDSGGPLACEVA<br>AGR   |           |         | Carbamidomethyl (C)[4]                        |      | Mascot      |
| 1948.8488  | 1948.8737   | 0.0249  | 13    | 411        | 430      | VDSCQGDSGGPLACEVA<br>AGR   |           |         | Carbamidomethyl (C)[4]                        |      | Mascot      |
| 2173.9487  | 2174.054    | 0.1053  | 48    | 525        | 542      | INPECDRVIDCPNEADEK         |           |         | Carbamidomethyl (C)[5,11]                     |      | Mascot      |
| 2173.9487  | 2174.054    | 0.1053  | 48    | 525        | 542      | INPECDRVIDCPNEADEK         |           |         | Carbamidomethyl (C)[5,11]                     |      | Mascot      |
| 2210.8975  | 2211.0601   | 0.1626  | 74    | 712        | 731      | AYGAELTDNMMCAGYM<br>EGQR   |           |         |                                               |      | Mascot      |
| 2278.0776  | 2277.9534   | -0.1242 | -55   | 390        | 410      | SSVYRGALTQNMCCAGF<br>LQ GK |           |         | Oxidation (M)[12]                             |      | Mascot      |
| 2283.0947  | 2283.1331   | 0.0384  | 17    | 313        | 332      | YDPMTTDSDVTVLELETP<br>LK   |           |         | Oxidation (M)[4]                              |      | Mascot      |
| 2283.0947  | 2283.1331   | 0.0384  | 17    | 313        | 332      | YDPMTTDSDVTVLELETP<br>LK   |           |         | Oxidation (M)[4]                              |      | Mascot      |
| 2283.9138  | 2284.1274   | 0.2136  | 94    | 712        | 731      | AYGAELTDNMMCAGYM<br>EGQR   |           |         | Carbamidomethyl (C)[12], Oxidation (M)[10]    |      | Mascot      |
| 2299.9087  | 2300.1282   | 0.2195  | 95    | 712        | 731      | AYGAELTDNMMCAGYM<br>EGQR   |           |         | Carbamidomethyl (C)[12], Oxidation (M)[10,11] |      | Mascot      |

16 ADP/ATP translocase 1 [Danio rerio] gi|47550717 32667.2 9.74 9 44 0

#### Peptide Information

| Calc. Mass | Obsrv. Mass | ± da | ± ppm | Start Seq. | End Seq. | Sequence | Ion Score | C. I. % | Modification | Rank | Result Type |
|------------|-------------|------|-------|------------|----------|----------|-----------|---------|--------------|------|-------------|
|------------|-------------|------|-------|------------|----------|----------|-----------|---------|--------------|------|-------------|

|           |           |         |      |     |     |                             |  |  |  |                         |  |        |
|-----------|-----------|---------|------|-----|-----|-----------------------------|--|--|--|-------------------------|--|--------|
| 856.4998  | 856.5107  | 0.0109  | 13   | 73  | 80  | GNLANVIR                    |  |  |  |                         |  | Mascot |
| 879.4028  | 879.405   | 0.0022  | 3    | 253 | 259 | GTIDCWK                     |  |  |  | Carbamidomethyl (C)[5]  |  | Mascot |
| 931.5029  | 931.5195  | 0.0166  | 18   | 53  | 60  | GIIDCVVR                    |  |  |  | Carbamidomethyl (C)[5]  |  | Mascot |
| 996.4536  | 996.5789  | 0.1253  | 126  | 237 | 244 | RMMMQSGR                    |  |  |  |                         |  | Mascot |
| 996.4536  | 996.5789  | 0.1253  | 126  | 237 | 244 | RMMMQSGR                    |  |  |  |                         |  | Mascot |
| 1195.5775 | 1195.6311 | 0.0536  | 45   | 153 | 163 | EFTGLGNCVAK                 |  |  |  | Carbamidomethyl (C)[8]  |  | Mascot |
| 1269.7347 | 1269.5902 | -0.1445 | -114 | 53  | 63  | GIIDCVVRIPK                 |  |  |  | Carbamidomethyl (C)[5]  |  | Mascot |
| 1269.7347 | 1269.5902 | -0.1445 | -114 | 53  | 63  | GIIDCVVRIPK                 |  |  |  | Carbamidomethyl (C)[5]  |  | Mascot |
| 2010.0146 | 2010.0078 | -0.0068 | -3   | 44  | 60  | QITADMQYKGIIDCVVR           |  |  |  | Carbamidomethyl (C)[14] |  | Mascot |
| 2283.2053 | 2283.1331 | -0.0722 | -32  | 1   | 23  | MSDAAISFLKDFLAGGVA<br>AAISK |  |  |  |                         |  | Mascot |
| 2283.2053 | 2283.1331 | -0.0722 | -32  | 1   | 23  | MSDAAISFLKDFLAGGVA<br>AAISK |  |  |  |                         |  | Mascot |
| 2284.2236 | 2284.1274 | -0.0962 | -42  | 73  | 92  | GNLANVIRYFPTQALNFA<br>FK    |  |  |  |                         |  | Mascot |

17 SH3 domain-binding protein 4-A [Danio rerio] gi|45387913 104947.5 7.73 16 42 0

#### Peptide Information

| Calc. Mass | Obsrv. Mass | ± da    | ± ppm | Start Seq. | End Seq. | Sequence                   | Ion Score | C. I. % | Modification                                 | Rank | Result Type |
|------------|-------------|---------|-------|------------|----------|----------------------------|-----------|---------|----------------------------------------------|------|-------------|
| 842.5822   | 842.4951    | -0.0871 | -103  | 634        | 640      | LIKTVIR                    |           |         |                                              |      | Mascot      |
| 850.4338   | 850.5277    | 0.0939  | 110   | 358        | 364      | LSNMEIK                    |           |         | Oxidation (M)[4]                             |      | Mascot      |
| 870.4726   | 870.5258    | 0.0532  | 61    | 1          | 7        | MAAHRIR                    |           |         | Oxidation (M)[1]                             |      | Mascot      |
| 982.539    | 982.5798    | 0.0408  | 42    | 545        | 552      | LIYMISSR                   |           |         |                                              |      | Mascot      |
| 986.6244   | 986.5226    | -0.1018 | -103  | 771        | 779      | VASVLEKLK                  |           |         |                                              |      | Mascot      |
| 1045.4796  | 1045.5437   | 0.0641  | 61    | 762        | 770      | AELDSEPER                  |           |         |                                              |      | Mascot      |
| 1218.6398  | 1218.6534   | 0.0136  | 11    | 347        | 357      | CSTVSPVEIK                 |           |         | Carbamidomethyl (C)[1]                       |      | Mascot      |
| 1232.6674  | 1232.5731   | -0.0943 | -77   | 723        | 732      | FLTYIYASVR                 |           |         |                                              |      | Mascot      |
| 1346.6885  | 1346.6226   | -0.0659 | -49   | 733        | 743      | TILMENLGNWR                |           |         |                                              |      | Mascot      |
| 1355.5818  | 1355.6183   | 0.0365  | 27    | 780        | 790      | EDCLNMETKEK                |           |         | Oxidation (M)[6]                             |      | Mascot      |
| 1620.8591  | 1620.8284   | -0.0307 | -19   | 554        | 567      | ADEISDFTLRVQVK             |           |         |                                              |      | Mascot      |
| 1900.9724  | 1900.7697   | -0.2027 | -107  | 60         | 76       | EVVAIKDYCPSSFTTLK          |           |         |                                              |      | Mascot      |
| 2081.0188  | 2081.0747   | 0.0559  | 27    | 373        | 390      | VSMTRTESPMAEIVCVR          |           |         | Carbamidomethyl (C)[16], Oxidation (M)[4]    |      | Mascot      |
| 2097.0137  | 2097.0737   | 0.06    | 29    | 373        | 390      | VSMTRTESPMAEIVCVR          |           |         | Carbamidomethyl (C)[16], Oxidation (M)[4,11] |      | Mascot      |
| 2284.2368  | 2284.1274   | -0.1094 | -48   | 463        | 484      | TVVAIFGHDCAPKTLVLS<br>EVGK |           |         |                                              |      | Mascot      |
| 2300.0686  | 2300.1282   | 0.0596  | 26    | 568        | 587      | DDQDCILAQFCVQTPQP<br>PPK   |           |         | Carbamidomethyl (C)[5]                       |      | Mascot      |
| 2490.1221  | 2490.1436   | 0.0215  | 9     | 80         | 100      | GDHLYVLDTSNGEWWY<br>AHNNR  |           |         |                                              |      | Mascot      |

18 WD repeat-containing protein 8 [Danio rerio] gi|41054037 50956.6 6.09 10 42 0

Peptide Information

| Calc. Mass | Obsrv. Mass | ± da    | ± ppm | Start Seq. | End Seq. | Sequence              | Ion Score | C. I. % | Modification           | Rank | Result Type |
|------------|-------------|---------|-------|------------|----------|-----------------------|-----------|---------|------------------------|------|-------------|
| 870.4355   | 870.5258    | 0.0903  | 104   | 2          | 8        | NFSEVFK               |           |         |                        |      | Mascot      |
| 1017.4709  | 1017.5524   | 0.0815  | 80    | 1          | 8        | MNFSEVFK              |           |         | Oxidation (M)[1]       |      | Mascot      |
| 1116.5507  | 1116.5194   | -0.0313 | -28   | 22         | 30       | YLATCVQYR             |           |         |                        |      | Mascot      |
| 1232.6481  | 1232.5731   | -0.075  | -61   | 87         | 98       | IDEGSIGLVSSR          |           |         |                        |      | Mascot      |
| 1269.6198  | 1269.5902   | -0.0296 | -23   | 376        | 385      | CFWWDPHLPR            |           |         |                        |      | Mascot      |
| 1269.6198  | 1269.5902   | -0.0296 | -23   | 376        | 385      | CFWWDPHLPR            |           |         |                        |      | Mascot      |
| 1279.7633  | 1279.7528   | -0.0105 | -8    | 247        | 256      | VRILNHITWK            |           |         |                        |      | Mascot      |
| 1715.8962  | 1715.9111   | 0.0149  | 9     | 257        | 271      | KITEFEHPATITNSK       |           |         |                        |      | Mascot      |
| 1818.8513  | 1818.843    | -0.0083 | -5    | 1          | 15       | MNFSEVFKQSNQLCK       |           |         | Oxidation (M)[1]       |      | Mascot      |
| 2081.0386  | 2081.0747   | 0.0361  | 17    | 70         | 86       | RGLVQVWSLEQPDWHC<br>K |           |         |                        |      | Mascot      |
| 2284.0525  | 2284.1274   | 0.0749  | 33    | 155        | 172      | DCKDYISVFCDDWHLL<br>R |           |         | Carbamidomethyl (C)[2] |      | Mascot      |

19 WD repeat domain 8 [Danio rerio] gi|159155126 50930.5 6.22 10 42 0

Peptide Information

| Calc. Mass | Obsrv. Mass | ± da    | ± ppm | Start Seq. | End Seq. | Sequence              | Ion Score | C. I. % | Modification           | Rank | Result Type |
|------------|-------------|---------|-------|------------|----------|-----------------------|-----------|---------|------------------------|------|-------------|
| 870.4355   | 870.5258    | 0.0903  | 104   | 2          | 8        | NFSEVFK               |           |         |                        |      | Mascot      |
| 1017.4709  | 1017.5524   | 0.0815  | 80    | 1          | 8        | MNFSEVFK              |           |         | Oxidation (M)[1]       |      | Mascot      |
| 1116.5507  | 1116.5194   | -0.0313 | -28   | 22         | 30       | YLATCVQYR             |           |         |                        |      | Mascot      |
| 1232.6481  | 1232.5731   | -0.075  | -61   | 87         | 98       | IDEGSIGLVSSR          |           |         |                        |      | Mascot      |
| 1269.6198  | 1269.5902   | -0.0296 | -23   | 376        | 385      | CFWWDPHLPR            |           |         |                        |      | Mascot      |
| 1269.6198  | 1269.5902   | -0.0296 | -23   | 376        | 385      | CFWWDPHLPR            |           |         |                        |      | Mascot      |
| 1279.7633  | 1279.7528   | -0.0105 | -8    | 247        | 256      | VRILNHITWK            |           |         |                        |      | Mascot      |
| 1715.8962  | 1715.9111   | 0.0149  | 9     | 257        | 271      | KITEFEHPATITNSK       |           |         |                        |      | Mascot      |
| 1818.8513  | 1818.843    | -0.0083 | -5    | 1          | 15       | MNFSEVFKQSNQLCK       |           |         | Oxidation (M)[1]       |      | Mascot      |
| 2081.0386  | 2081.0747   | 0.0361  | 17    | 70         | 86       | RGLVQVWSLEQPDWHC<br>K |           |         |                        |      | Mascot      |
| 2284.0525  | 2284.1274   | 0.0749  | 33    | 155        | 172      | DCKDYISVFCDDWHLL<br>R |           |         | Carbamidomethyl (C)[2] |      | Mascot      |

20 RecName: Full=Cytosolic sulfotransferase 3; AltName: gi|51701992 35354.4 6.97 8 40 0  
Full=SULT1 ST3

Peptide Information

| Calc. Mass | Obsrv. Mass | ± da | ± ppm | Start Seq. | End Seq. | Sequence | Ion Score | C. I. % | Modification | Rank | Result Type |
|------------|-------------|------|-------|------------|----------|----------|-----------|---------|--------------|------|-------------|
|------------|-------------|------|-------|------------|----------|----------|-----------|---------|--------------|------|-------------|

|           |           |         |     |     |     |                    |                     |        |
|-----------|-----------|---------|-----|-----|-----|--------------------|---------------------|--------|
| 1059.4663 | 1059.6097 | 0.1434  | 135 | 2   | 10  | EISDFSSMK          | Oxidation (M)[8]    | Mascot |
| 1190.5068 | 1190.5254 | 0.0186  | 16  | 1   | 10  | MEISDFSSMK         | Oxidation (M)[1]    | Mascot |
| 1948.9143 | 1948.8737 | -0.0406 | -21 | 242 | 257 | QNKMTNYSTIPVMDFK   | Oxidation (M)[4,13] | Mascot |
| 1948.9143 | 1948.8737 | -0.0406 | -21 | 242 | 257 | QNKMTNYSTIPVMDFK   | Oxidation (M)[4,13] | Mascot |
| 2009.9657 | 2010.0078 | 0.0421  | 21  | 174 | 189 | NVFGPWYDHSVNGYWKK  |                     | Mascot |
| 2225.0623 | 2225.0759 | 0.0136  | 6   | 272 | 289 | NHFTVAQNEQFDEVYKQ  |                     | Mascot |
| 2225.0623 | 2225.0759 | 0.0136  | 6   | 272 | 289 | NHFTVAQNEQFDEVYKQ  |                     | Mascot |
| 2278.1069 | 2277.9534 | -0.1535 | -67 | 245 | 263 | MTNYSTIPVMDFKISPFM |                     | Mascot |
| 2490.0952 | 2490.1436 | 0.0484  | 19  | 191 | 210 | QTYSNILYMFYEDMVENT | Oxidation (M)[9]    | Mascot |
| 2618.1902 | 2618.2339 | 0.0437  | 17  | 190 | 210 | KQTYSNILYMFYEDMVEN | Oxidation (M)[10]   | Mascot |

21 PREDICTED: interferon-induced very large GTPase 1-like [Danio rerio] gi|326676497 194760.8 7 23 40 0

#### Peptide Information

| Calc. Mass | Obsrv. Mass | ± da    | ± ppm | Start Seq. | End Seq. | Sequence           | Ion Score | C. I. % Modification   | Rank | Result Type |
|------------|-------------|---------|-------|------------|----------|--------------------|-----------|------------------------|------|-------------|
| 931.4631   | 931.5195    | 0.0564  | 61    | 561        | 567      | QNIEHYK            |           |                        |      | Mascot      |
| 966.5366   | 966.4284    | -0.1082 | -112  | 1450       | 1457     | HLNDIINK           |           |                        |      | Mascot      |
| 982.5679   | 982.5798    | 0.0119  | 12    | 378        | 386      | EPIAVANLR          |           |                        |      | Mascot      |
| 986.5629   | 986.5226    | -0.0403 | -41   | 483        | 491      | HSTSVSIKK          |           |                        |      | Mascot      |
| 1059.5581  | 1059.6097   | 0.0516  | 49    | 560        | 567      | KQNIEHYK           |           |                        |      | Mascot      |
| 1068.5242  | 1068.6326   | 0.1084  | 101   | 17         | 25       | EKTESVTMK          |           | Oxidation (M)[8]       |      | Mascot      |
| 1090.5051  | 1090.5143   | 0.0092  | 8     | 86         | 94       | WTDPIITDDK         |           |                        |      | Mascot      |
| 1100.5769  | 1100.5247   | -0.0522 | -47   | 1185       | 1193     | LLHSNLEMK          |           | Oxidation (M)[8]       |      | Mascot      |
| 1106.5146  | 1106.5144   | -0.0002 | 0     | 1049       | 1058     | CEADNELGKK         |           |                        |      | Mascot      |
| 1184.6494  | 1184.6062   | -0.0432 | -36   | 1229       | 1238     | NSLRPAERNK         |           |                        |      | Mascot      |
| 1218.5758  | 1218.6534   | 0.0776  | 64    | 1011       | 1019     | KHMIDWCTK          |           | Carbamidomethyl (C)[7] |      | Mascot      |
| 1232.6368  | 1232.5731   | -0.0637 | -52   | 44         | 54       | ATINTILEDK         |           |                        |      | Mascot      |
| 1245.681   | 1245.6757   | -0.0053 | -4    | 1227       | 1236     | FRNSLRPAER         |           |                        |      | Mascot      |
| 1279.6827  | 1279.7528   | 0.0701  | 55    | 1478       | 1488     | FVTNVCKNLNK        |           |                        |      | Mascot      |
| 1498.631   | 1498.6904   | 0.0594  | 40    | 1562       | 1575     | KCPFCMAPCEAGGK     |           | Carbamidomethyl (C)[2] |      | Mascot      |
| 1498.631   | 1498.6904   | 0.0594  | 40    | 1562       | 1575     | KCPFCMAPCEAGGK     |           | Carbamidomethyl (C)[2] |      | Mascot      |
| 1652.7803  | 1652.8668   | 0.0865  | 52    | 1640       | 1653     | IQPDSSIEATDYWK     |           |                        |      | Mascot      |
| 2081.0708  | 2081.0747   | 0.0039  | 2     | 646        | 663      | KLENHIANSSLGVQHFMR |           |                        |      | Mascot      |
| 2097.0657  | 2097.0737   | 0.008   | 4     | 646        | 663      | KLENHIANSSLGVQHFMR |           | Oxidation (M)[17]      |      | Mascot      |

|    |                                                    |           |         |     |              |      |                             |      |   |    |                          |  |        |
|----|----------------------------------------------------|-----------|---------|-----|--------------|------|-----------------------------|------|---|----|--------------------------|--|--------|
|    | 2225.0828                                          | 2225.0759 | -0.0069 | -3  | 464          | 482  | MNDDDFVAKLQMTVDEIL<br>K     |      |   |    |                          |  | Mascot |
|    | 2225.0828                                          | 2225.0759 | -0.0069 | -3  | 464          | 482  | MNDDDFVAKLQMTVDEIL<br>K     |      |   |    |                          |  | Mascot |
|    | 2277.9834                                          | 2277.9534 | -0.03   | -13 | 1354         | 1372 | AEMCAMQCFAPAVMEYI<br>QK     |      |   |    | Carbamidomethyl (C)[4,8] |  | Mascot |
|    | 2284.0913                                          | 2284.1274 | 0.0361  | 16  | 297          | 316  | DCSGENSIVQTDPLISF<br>VR     |      |   |    | Carbamidomethyl (C)[2]   |  | Mascot |
|    | 2300.0759                                          | 2300.1282 | 0.0523  | 23  | 356          | 375  | ICNGLVEMTWYPCGKE<br>TDK     |      |   |    |                          |  | Mascot |
|    | 2555.2302                                          | 2555.1978 | -0.0324 | -13 | 156          | 176  | TNINMEYMLMELGLQSHL<br>KNK   |      |   |    | Oxidation (M)[5,8,10]    |  | Mascot |
|    | 2618.2351                                          | 2618.2339 | -0.0012 | 0   | 853          | 875  | EVGKKPCCHFAHQNAAD<br>VAVHDK |      |   |    | Carbamidomethyl (C)[7,8] |  | Mascot |
| 22 | olfactory receptor class A related 1 [Danio rerio] |           |         |     | gi 194578829 |      | 34489.4                     | 9.57 | 8 | 40 | 0                        |  |        |

#### Peptide Information

| Calc. Mass | Obsrv. Mass | ± da    | ± ppm | Start Seq. | End Seq. | Sequence                    | Ion Score | C. I. | % Modification                           | Rank | Result Type |
|------------|-------------|---------|-------|------------|----------|-----------------------------|-----------|-------|------------------------------------------|------|-------------|
| 938.4685   | 938.395     | -0.0735 | -78   | 1          | 8        | MDLCVTIK                    |           |       | Oxidation (M)[1]                         |      | Mascot      |
| 996.4415   | 996.5789    | 0.1374  | 138   | 221        | 229      | SQGSTMETR                   |           |       |                                          |      | Mascot      |
| 996.4415   | 996.5789    | 0.1374  | 138   | 221        | 229      | SQGSTMETR                   |           |       |                                          |      | Mascot      |
| 1226.514   | 1226.5934   | 0.0794  | 65    | 295        | 304      | MVCATSEQER                  |           |       | Carbamidomethyl (C)[3], Oxidation (M)[1] |      | Mascot      |
| 1226.514   | 1226.5934   | 0.0794  | 65    | 295        | 304      | MVCATSEQER                  |           |       | Carbamidomethyl (C)[3], Oxidation (M)[1] |      | Mascot      |
| 1355.6447  | 1355.6183   | -0.0264 | -19   | 62         | 73       | GVPQTMTVFGMR                |           |       | Oxidation (M)[6,11]                      |      | Mascot      |
| 1854.7957  | 1854.6736   | -0.1221 | -66   | 295        | 310      | MVCATSEQERQAEDGK            |           |       | Carbamidomethyl (C)[3], Oxidation (M)[1] |      | Mascot      |
| 2278.2417  | 2277.9534   | -0.2883 | -127  | 190        | 210      | DFAFVGAMLASSGFILLLL<br>HR   |           |       |                                          |      | Mascot      |
| 2283.093   | 2283.1331   | 0.0401  | 18    | 62         | 82       | GVPQTMTVFGMRNLLDD<br>TGCK   |           |       |                                          |      | Mascot      |
| 2283.093   | 2283.1331   | 0.0401  | 18    | 62         | 82       | GVPQTMTVFGMRNLLDD<br>TGCK   |           |       |                                          |      | Mascot      |
| 2571.4016  | 2571.2419   | -0.1597 | -62   | 190        | 212      | DFAFVGAMLASSGFILLLL<br>HRHR |           |       |                                          |      | Mascot      |

23 PREDICTED: erythroid differentiation-related factor 1-like [Danio rerio] gi|292623005 138734.1 5.35 17 39 0

#### Peptide Information

| Calc. Mass | Obsrv. Mass | ± da    | ± ppm | Start Seq. | End Seq. | Sequence   | Ion Score | C. I. | % Modification         | Rank | Result Type |
|------------|-------------|---------|-------|------------|----------|------------|-----------|-------|------------------------|------|-------------|
| 842.3791   | 842.4951    | 0.116   | 138   | 191        | 196      | EHWNEK     |           |       |                        |      | Mascot      |
| 850.5145   | 850.5277    | 0.0132  | 16    | 466        | 472      | KIYGDIR    |           |       |                        |      | Mascot      |
| 966.5519   | 966.4284    | -0.1235 | -128  | 69         | 76       | LPPANWLR   |           |       |                        |      | Mascot      |
| 1017.5938  | 1017.5524   | -0.0414 | -41   | 604        | 613      | GLKAVDSSIK |           |       |                        |      | Mascot      |
| 1045.4983  | 1045.5437   | 0.0454  | 43    | 653        | 661      | VGPCNEELK  |           |       | Carbamidomethyl (C)[4] |      | Mascot      |
| 1165.6099  | 1165.724    | 0.1141  | 98    | 1181       | 1189     | EEEQVKIYK  |           |       |                        |      | Mascot      |

|    |                        |           |         |     |             |      |                              |      |    |    |                        |  |  |        |
|----|------------------------|-----------|---------|-----|-------------|------|------------------------------|------|----|----|------------------------|--|--|--------|
|    | 1165.6099              | 1165.724  | 0.1141  | 98  | 1181        | 1189 | EEEQVKIYK                    |      |    |    |                        |  |  | Mascot |
|    | 1269.6157              | 1269.5902 | -0.0255 | -20 | 666         | 676  | SGMLPGTWQHR                  |      |    |    |                        |  |  | Mascot |
|    | 1269.6157              | 1269.5902 | -0.0255 | -20 | 666         | 676  | SGMLPGTWQHR                  |      |    |    |                        |  |  | Mascot |
|    | 1498.7682              | 1498.6904 | -0.0778 | -52 | 653         | 665  | VGPCNEELKVPTR                |      |    |    | Carbamidomethyl (C)[4] |  |  | Mascot |
|    | 1498.7682              | 1498.6904 | -0.0778 | -52 | 653         | 665  | VGPCNEELKVPTR                |      |    |    | Carbamidomethyl (C)[4] |  |  | Mascot |
|    | 1620.9506              | 1620.8284 | -0.1222 | -75 | 467         | 480  | IYGTIRLLLLNCIK               |      |    |    |                        |  |  | Mascot |
|    | 1715.936               | 1715.9111 | -0.0249 | -15 | 473         | 486  | TLLNLCIKLLDEDR               |      |    |    | Carbamidomethyl (C)[6] |  |  | Mascot |
|    | 1762.9561              | 1762.9209 | -0.0352 | -20 | 438         | 452  | CQNPFTLPVAVLLYK              |      |    |    | Carbamidomethyl (C)[1] |  |  | Mascot |
|    | 1854.8572              | 1854.6736 | -0.1836 | -99 | 983         | 997  | AQEQUIEREVTETMMK             |      |    |    | Oxidation (M)[13,14]   |  |  | Mascot |
|    | 1948.9731              | 1948.8737 | -0.0994 | -51 | 1098        | 1114 | TLTGALEIMCETRHAFR            |      |    |    |                        |  |  | Mascot |
|    | 1948.9731              | 1948.8737 | -0.0994 | -51 | 1098        | 1114 | TLTGALEIMCETRHAFR            |      |    |    |                        |  |  | Mascot |
|    | 2010.0614              | 2010.0078 | -0.0536 | -27 | 635         | 652  | SPNGAREVEQEIALLLDR           |      |    |    |                        |  |  | Mascot |
|    | 2080.8772              | 2081.0747 | 0.1975  | 95  | 838         | 855  | NEMGVFYMNQAAAMQA<br>EK       |      |    |    | Oxidation (M)[3,8,14]  |  |  | Mascot |
|    | 2490.1208              | 2490.1436 | 0.0228  | 9   | 838         | 859  | NEMGVFYMNQAAAMQA<br>EKEGVR   |      |    |    | Oxidation (M)[3]       |  |  | Mascot |
|    | 2618.2158              | 2618.2339 | 0.0181  | 7   | 833         | 855  | LGNI RNEMGVFYMNQAA<br>AMQAEK |      |    |    | Oxidation (M)[8,13]    |  |  | Mascot |
| 24 | tektin 2 [Danio rerio] |           |         |     | gi 37682089 |      | 48740.9                      | 5.63 | 10 | 39 | 0                      |  |  |        |

Peptide Information

| Calc. Mass | Obsrv. Mass | ± da    | ± ppm | Start Seq. | End Seq. | Sequence                  | Ion Score | C. I. | % Modification         | Rank | Result | Type   |
|------------|-------------|---------|-------|------------|----------|---------------------------|-----------|-------|------------------------|------|--------|--------|
| 879.4794   | 879.405     | -0.0744 | -85   | 227        | 233      | YNISRAR                   |           |       |                        |      |        | Mascot |
| 1017.5687  | 1017.5524   | -0.0163 | -16   | 2          | 11       | ATLSSKPASR                |           |       |                        |      |        | Mascot |
| 1045.5789  | 1045.5437   | -0.0352 | -34   | 68         | 75       | INDITRWK                  |           |       |                        |      |        | Mascot |
| 1059.543   | 1059.6097   | 0.0667  | 63    | 384        | 392      | QDALSLEQR                 |           |       |                        |      |        | Mascot |
| 1184.6018  | 1184.6062   | 0.0044  | 4     | 23         | 32       | QISDTAEHKR                |           |       |                        |      |        | Mascot |
| 1190.5834  | 1190.5254   | -0.058  | -49   | 234        | 243      | EEMQASVQIR                |           |       |                        |      |        | Mascot |
| 1245.6554  | 1245.6757   | 0.0203  | 16    | 325        | 334      | IKRPGMDLCR                |           |       | Carbamidomethyl (C)[9] |      |        | Mascot |
| 2211.0261  | 2211.0601   | 0.034   | 15    | 271        | 287      | RTHHEEQAHHDMQWQL<br>K     |           |       |                        |      |        | Mascot |
| 2278.0955  | 2277.9534   | -0.1421 | -62   | 327        | 346      | RPGMDLCRDEVQFGLVD<br>EAK  |           |       |                        |      |        | Mascot |
| 2283.1365  | 2283.1331   | -0.0034 | -1    | 2          | 22       | ATLSSKPASRYSVSDWA<br>TNNK |           |       |                        |      |        | Mascot |
| 2283.1365  | 2283.1331   | -0.0034 | -1    | 2          | 22       | ATLSSKPASRYSVSDWA<br>TNNK |           |       |                        |      |        | Mascot |

25 PREDICTED: sperm-associated antigen 17 [Danio rerio] gi|326669952 169381.9 5.67 18 38 0

Peptide Information

| Calc. Mass | Obsrv. Mass | ± da | ± ppm | Start Seq. | End Seq. | Sequence | Ion Score | C. I. | % Modification | Rank | Result | Type |
|------------|-------------|------|-------|------------|----------|----------|-----------|-------|----------------|------|--------|------|
|------------|-------------|------|-------|------------|----------|----------|-----------|-------|----------------|------|--------|------|





27 tektin 2 [Danio rerio] gi|310689065 48533.7 5.63 10 37 0

Peptide Information

| Calc. Mass | Obsrv. Mass | ± da    | ± ppm | Start Seq. | End Sequence Seq.        | Ion Score | C. I. % Modification   | Rank | Result Type |
|------------|-------------|---------|-------|------------|--------------------------|-----------|------------------------|------|-------------|
| 879.4794   | 879.405     | -0.0744 | -85   | 224        | 230 YNISRRAR             |           |                        |      | Mascot      |
| 1017.5687  | 1017.5524   | -0.0163 | -16   | 2          | 11 ATLSSKPASR            |           |                        |      | Mascot      |
| 1045.5789  | 1045.5437   | -0.0352 | -34   | 68         | 75 INDITRWK              |           |                        |      | Mascot      |
| 1059.543   | 1059.6097   | 0.0667  | 63    | 381        | 389 QDALSLEQR            |           |                        |      | Mascot      |
| 1190.5834  | 1190.5254   | -0.058  | -49   | 231        | 240 EEMQASVQIR           |           |                        |      | Mascot      |
| 1218.5532  | 1218.6534   | 0.1002  | 82    | 23         | 32 QMSDTAEHKK            |           | Oxidation (M)[2]       |      | Mascot      |
| 1245.6554  | 1245.6757   | 0.0203  | 16    | 322        | 331 IKRPGMDLCR           |           | Carbamidomethyl (C)[9] |      | Mascot      |
| 2211.0261  | 2211.0601   | 0.034   | 15    | 268        | 284 RTHHEEQAHHMQWQLK     |           |                        |      | Mascot      |
| 2278.0955  | 2277.9534   | -0.1421 | -62   | 324        | 343 RPGMDLCRDEVQFGLVDEAK |           |                        |      | Mascot      |
| 2283.1365  | 2283.1331   | -0.0034 | -1    | 2          | 22 ATLSSKPASRYSVSDWATNNK |           |                        |      | Mascot      |
| 2283.1365  | 2283.1331   | -0.0034 | -1    | 2          | 22 ATLSSKPASRYSVSDWATNNK |           |                        |      | Mascot      |

28 PMS1 postmeiotic segregation increased 1 (S. cerevisiae) [Danio rerio] gi|169145696 98750.5 6.46 13 37 0

Peptide Information

| Calc. Mass | Obsrv. Mass | ± da    | ± ppm | Start Seq. | End Sequence Seq.        | Ion Score | C. I. % Modification    | Rank | Result Type |
|------------|-------------|---------|-------|------------|--------------------------|-----------|-------------------------|------|-------------|
| 856.4384   | 856.5107    | 0.0723  | 84    | 201        | 207 SRVSDHR              |           |                         |      | Mascot      |
| 882.5043   | 882.5512    | 0.0469  | 53    | 3          | 10 ALPPETVR              |           |                         |      | Mascot      |
| 1045.575   | 1045.5437   | -0.0313 | -30   | 848        | 856 ADVTNTLRR            |           |                         |      | Mascot      |
| 1058.5476  | 1058.5037   | -0.0439 | -41   | 551        | 561 ASPQDVTAAAK          |           |                         |      | Mascot      |
| 1059.5217  | 1059.6097   | 0.088   | 83    | 156        | 163 RQYYSNTK             |           |                         |      | Mascot      |
| 1141.6398  | 1141.5448   | -0.095  | -83   | 1          | 10 MKALPPETVR            |           |                         |      | Mascot      |
| 1232.6304  | 1232.5731   | -0.0573 | -46   | 605        | 615 KQMSAESPLNK          |           |                         |      | Mascot      |
| 1652.8312  | 1652.8668   | 0.0356  | 22    | 63         | 77 ATDVSVMAVKHYTSK       |           | Oxidation (M)[7]        |      | Mascot      |
| 1818.9882  | 1818.843    | -0.1452 | -80   | 94         | 111 GEALASICAISEVIITTK   |           |                         |      | Mascot      |
| 1900.864   | 1900.7697   | -0.0943 | -50   | 857        | 871 MQQELQDESQVCIHR      |           | Carbamidomethyl (C)[12] |      | Mascot      |
| 1949.0928  | 1948.8737   | -0.2191 | -112  | 697        | 712 LMLLNPFVVEEALLFK     |           | Oxidation (M)[2]        |      | Mascot      |
| 1949.0928  | 1948.8737   | -0.2191 | -112  | 697        | 712 LMLLNPFVVEEALLFK     |           | Oxidation (M)[2]        |      | Mascot      |
| 2225.001   | 2225.0759   | 0.0749  | 34    | 785        | 804 HVEVMGMADCMPPFGIGDLR |           |                         |      | Mascot      |
| 2225.001   | 2225.0759   | 0.0749  | 34    | 785        | 804 HVEVMGMADCMPPFGIGDLR |           |                         |      | Mascot      |

2284.23362284.1274-0.1062-46464483AFSNQITGEYLEPVKLHIPK

Mascot

29PREDICTED: A disintegrin and metalloproteinase with thrombospondin motifs 15-like [Danio rerio]gi|125837189103176.88.8915370

| Peptide Information |             |         |       |            |          |                            |           |         |                           |      |             |
|---------------------|-------------|---------|-------|------------|----------|----------------------------|-----------|---------|---------------------------|------|-------------|
| Calc. Mass          | Obsrv. Mass | ± da    | ± ppm | Start Seq. | End Seq. | Sequence                   | Ion Score | C. I. % | Modification              | Rank | Result Type |
| 842.3746            | 842.4951    | 0.1205  | 143   | 1          | 8        | MTCSTVGK                   |           |         | Oxidation (M)[1]          |      | Mascot      |
| 856.4821            | 856.5107    | 0.0286  | 33    | 773        | 779      | MTPPRVR                    |           |         |                           |      | Mascot      |
| 879.4682            | 879.405     | -0.0632 | -72   | 494        | 500      | QNTFKNK                    |           |         |                           |      | Mascot      |
| 966.5189            | 966.4284    | -0.0905 | -94   | 540        | 547      | YCQGLRVK                   |           |         |                           |      | Mascot      |
| 1068.5176           | 1068.6326   | 0.115   | 108   | 1          | 10       | MTCSTVGK GK                |           |         | Carbamidomethyl (C)[3]    |      | Mascot      |
| 1090.5562           | 1090.5143   | -0.0419 | -38   | 847        | 856      | LIQCLGSDGK                 |           |         | Carbamidomethyl (C)[4]    |      | Mascot      |
| 1392.694            | 1392.7068   | 0.0128  | 9     | 921        | 931      | KPQELDFCTVR                |           |         | Carbamidomethyl (C)[8]    |      | Mascot      |
| 1620.8057           | 1620.8284   | 0.0227  | 14    | 292        | 304      | HPEYWDTAILFTK              |           |         |                           |      | Mascot      |
| 1763.0465           | 1762.9209   | -0.1256 | -71   | 226        | 240      | HYLLTLLSVTAKLYK            |           |         |                           |      | Mascot      |
| 1948.8164           | 1948.8737   | 0.0573  | 29    | 565        | 580      | EEQCEMFNGFTLNTNR           |           |         | Oxidation (M)[6]          |      | Mascot      |
| 1948.8164           | 1948.8737   | 0.0573  | 29    | 565        | 580      | EEQCEMFNGFTLNTNR           |           |         | Oxidation (M)[6]          |      | Mascot      |
| 2096.9429           | 2097.0737   | 0.1308  | 62    | 470        | 487      | HFPWADGTACGTNKL CY R       |           |         | Carbamidomethyl (C)[10]   |      | Mascot      |
| 2211.0315           | 2211.0601   | 0.0286  | 13    | 835        | 856      | CSVSCGNGVQSRLIQCL GSDGK    |           |         |                           |      | Mascot      |
| 2284.0232           | 2284.1274   | 0.1042  | 46    | 827        | 846      | WVTADWSKCSVSCGNG VQSR      |           |         | Carbamidomethyl (C)[9,13] |      | Mascot      |
| 2490.1555           | 2490.1436   | -0.0119 | -5    | 11         | 29       | EAAMFYMQIIWQFMQNW PR       |           |         |                           |      | Mascot      |
| 2618.1023           | 2618.2339   | 0.1316  | 50    | 305        | 329      | QDLCGATTCDTLGMADV GTMCDPKR |           |         | Oxidation (M)[14]         |      | Mascot      |

30beta-crystallin B1 [Danio rerio]gi|5611848226797.56.449370

| Peptide Information |             |         |       |            |          |                     |           |         |                     |                  |
|---------------------|-------------|---------|-------|------------|----------|---------------------|-----------|---------|---------------------|------------------|
| Calc. Mass          | Obsrv. Mass | ± da    | ± ppm | Start Seq. | End Seq. | Sequence            | Ion Score | C. I. % | Modification        | Rank Result Type |
| 870.4679            | 870.5258    | 0.0579  | 67    | 19         | 28       | GAPAPAATSK          |           |         |                     | Mascot           |
| 966.4964            | 966.4284    | -0.068  | -70   | 93         | 100      | GEMFILEK            |           |         |                     | Mascot           |
| 982.4913            | 982.5798    | 0.0885  | 90    | 93         | 100      | GEMFILEK            |           |         | Oxidation (M)[3]    | Mascot           |
| 1214.6125           | 1214.5913   | -0.0212 | -17   | 133        | 142      | ICLFELSDFK          |           |         |                     | Mascot           |
| 1232.5953           | 1232.5731   | -0.0222 | -18   | 214        | 222      | VRDMQFHQR           |           |         | Oxidation (M)[4]    | Mascot           |
| 1715.6678           | 1715.9111   | 0.2433  | 142   | 55         | 68       | MMEVQNECMNV CER     |           |         |                     | Mascot           |
| 1900.8251           | 1900.7697   | -0.0554 | -29   | 216        | 231      | DMQFHQRGCFNMTAAK    |           |         | Oxidation (M)[2]    | Mascot           |
| 2224.9971           | 2225.0759   | 0.0788  | 35    | 115        | 132      | SDCLMSLRPFRMDPMEH K |           |         | Oxidation (M)[5,12] | Mascot           |

|    |                                         |           |         |     |              |     |                            |      |   |    |                         |        |
|----|-----------------------------------------|-----------|---------|-----|--------------|-----|----------------------------|------|---|----|-------------------------|--------|
|    | 2224.9971                               | 2225.0759 | 0.0788  | 35  | 115          | 132 | SDCLMSLRPFRMDPMEH<br>K     |      |   |    | Oxidation (M)[5,12]     | Mascot |
|    | 2277.9902                               | 2277.9534 | -0.0368 | -16 | 146          | 164 | MEIQEDDVPTLWAHGFC<br>DR    |      |   |    | Oxidation (M)[1]        | Mascot |
|    | 2618.1763                               | 2618.2339 | 0.0576  | 22  | 143          | 164 | GNKMEIQEDDVPTLWAH<br>GFCDR |      |   |    | Carbamidomethyl (C)[20] | Mascot |
| 31 | lambda-crystallin homolog [Danio rerio] |           |         |     | gi 113679944 |     | 35073.1                    | 5.96 | 8 | 37 | 0                       |        |

Peptide Information

| Calc. Mass | Obsrv. Mass | ± da    | ± ppm | Start Seq. | End Seq. | Sequence                    | Ion Score | C. I. | % | Modification           | Rank | Result Type |
|------------|-------------|---------|-------|------------|----------|-----------------------------|-----------|-------|---|------------------------|------|-------------|
| 870.4138   | 870.5258    | 0.112   | 129   | 256        | 262      | YSEGMKR                     |           |       |   |                        |      | Mascot      |
| 996.5333   | 996.5789    | 0.0456  | 46    | 293        | 300      | QEHLsARR                    |           |       |   |                        |      | Mascot      |
| 996.5333   | 996.5789    | 0.0456  | 46    | 293        | 300      | QEHLsARR                    |           |       |   |                        |      | Mascot      |
| 1058.5551  | 1058.5037   | -0.0514 | -49   | 284        | 292      | EICELIPGK                   |           |       |   | Carbamidomethyl (C)[3] |      | Mascot      |
| 1184.7361  | 1184.6062   | -0.1299 | -110  | 8          | 19       | IITVVGsGLIGR                |           |       |   |                        |      | Mascot      |
| 1214.674   | 1214.5913   | -0.0827 | -68   | 51         | 60       | KQLEELQQAk                  |           |       |   |                        |      | Mascot      |
| 1245.7235  | 1245.6757   | -0.0478 | -38   | 304        | 314      | DQLLMGLAKLK                 |           |       |   | Oxidation (M)[5]       |      | Mascot      |
| 1900.985   | 1900.7697   | -0.2153 | -113  | 139        | 154      | TRCIVsHPVNPpYYVR            |           |       |   |                        |      | Mascot      |
| 2490.2942  | 2490.1436   | -0.1506 | -60   | 209        | 231      | LVQDGVISVKDIDLVMSE<br>GLGMR |           |       |   | Oxidation (M)[16]      |      | Mascot      |

|    |                                              |  |  |  |              |  |         |      |    |    |   |    |   |
|----|----------------------------------------------|--|--|--|--------------|--|---------|------|----|----|---|----|---|
| 32 | hypothetical protein LOC777608 [Danio rerio] |  |  |  | gi 118150410 |  | 85601.5 | 6.97 | 11 | 37 | 0 | 14 | 0 |
|----|----------------------------------------------|--|--|--|--------------|--|---------|------|----|----|---|----|---|

Peptide Information

| Calc. Mass | Obsrv. Mass | ± da    | ± ppm | Start Seq. | End Seq. | Sequence                  | Ion Score | C. I. | % | Modification                | Rank | Result Type |
|------------|-------------|---------|-------|------------|----------|---------------------------|-----------|-------|---|-----------------------------|------|-------------|
| 842.5822   | 842.4951    | -0.0871 | -103  | 174        | 180      | LKSLLLR                   |           |       |   |                             |      | Mascot      |
| 850.4152   | 850.5277    | 0.1125  | 132   | 700        | 707      | SASLTDEK                  |           |       |   |                             |      | Mascot      |
| 1017.5952  | 1017.5524   | -0.0428 | -42   | 715        | 722      | LGQIFQRR                  |           |       |   |                             |      | Mascot      |
| 1116.6809  | 1116.5194   | -0.1615 | -145  | 94         | 103      | KSMNIGILLK                |           |       |   |                             |      | Mascot      |
| 1165.6034  | 1165.724    | 0.1206  | 103   | 573        | 582      | MPDLsGKVFR                |           |       |   | Oxidation (M)[1]            |      | Mascot      |
| 1165.6034  | 1165.724    | 0.1206  | 103   | 573        | 582      | MPDLsGKVFR                |           |       |   | Oxidation (M)[1]            |      | Mascot      |
| 1218.7126  | 1218.6534   | -0.0592 | -49   | 238        | 248      | MASLLKLVDTK               |           |       |   |                             |      | Mascot      |
| 1226.6163  | 1226.5934   | -0.0229 | -19   | 733        | 743      | QEGsGLVSFFR               | 14        |       | 0 |                             |      | Mascot      |
| 1226.6163  | 1226.5934   | -0.0229 | -19   | 733        | 743      | QEGsGLVSFFR               |           |       |   |                             |      | Mascot      |
| 2010.0946  | 2010.0078   | -0.0868 | -43   | 176        | 191      | SLLLREEFFpFIEEIK          |           |       |   |                             |      | Mascot      |
| 2233.0554  | 2233.0415   | -0.0139 | -6    | 669        | 689      | DKPSFSHKSAASSSLPD<br>CPSK |           |       |   | Carbamidomethyl (C)[18]     |      | Mascot      |
| 2277.9724  | 2277.9534   | -0.019  | -8    | 361        | 377      | LEECCsIFHSFCERFEK         |           |       |   | Carbamidomethyl (C)[4,5,12] |      | Mascot      |
| 2490.1267  | 2490.1436   | 0.0169  | 7     | 464        | 484      | EDNENLDSPIDSNEEKFE<br>IPR |           |       |   |                             |      | Mascot      |

|    |                                                    |  |  |  |              |  |          |      |    |    |   |  |
|----|----------------------------------------------------|--|--|--|--------------|--|----------|------|----|----|---|--|
| 33 | PREDICTED: microtubule-associated tumor suppressor |  |  |  | gi 326674005 |  | 133795.7 | 6.76 | 15 | 36 | 0 |  |
|----|----------------------------------------------------|--|--|--|--------------|--|----------|------|----|----|---|--|

candidate 2-like [Danio rerio]

| Peptide Information |             |         |       |            |                   | Ion Score               | C. I. % | Modification     | Rank | Result Type |
|---------------------|-------------|---------|-------|------------|-------------------|-------------------------|---------|------------------|------|-------------|
| Calc. Mass          | Obsrv. Mass | ± da    | ± ppm | Start Seq. | End Sequence Seq. |                         |         |                  |      |             |
| 842.4804            | 842.4951    | 0.0147  | 17    | 699        | 706               | LPLGMSPK                |         |                  |      | Mascot      |
| 850.4087            | 850.5277    | 0.119   | 140   | 110        | 117               | GALSNNMK                |         | Oxidation (M)[7] |      | Mascot      |
| 931.5142            | 931.5195    | 0.0053  | 6     | 825        | 831               | ERLMVQR                 |         |                  |      | Mascot      |
| 966.4374            | 966.4284    | -0.009  | -9    | 118        | 126               | KSDAESDSK               |         |                  |      | Mascot      |
| 996.5836            | 996.5789    | -0.0047 | -5    | 501        | 509               | KSSPPQKPK               |         |                  |      | Mascot      |
| 996.5836            | 996.5789    | -0.0047 | -5    | 501        | 509               | KSSPPQKPK               |         |                  |      | Mascot      |
| 1059.5066           | 1059.6097   | 0.1031  | 97    | 919        | 926               | ELQEEQQR                |         |                  |      | Mascot      |
| 1090.5527           | 1090.5143   | -0.0384 | -35   | 355        | 364               | FSHDSTGVIK              |         |                  |      | Mascot      |
| 1141.5736           | 1141.5448   | -0.0288 | -25   | 542        | 552               | LTPYGSSTTSK             |         |                  |      | Mascot      |
| 1214.6852           | 1214.5913   | -0.0939 | -77   | 878        | 887               | ERELSLQLAR              |         |                  |      | Mascot      |
| 1226.631            | 1226.5934   | -0.0376 | -31   | 1000       | 1009              | NLKMAHEQQK              |         |                  |      | Mascot      |
| 1226.631            | 1226.5934   | -0.0376 | -31   | 1000       | 1009              | NLKMAHEQQK              |         |                  |      | Mascot      |
| 1346.7096           | 1346.6226   | -0.087  | -65   | 1097       | 1107              | MAQKNVLLER              |         | Oxidation (M)[1] |      | Mascot      |
| 1715.8136           | 1715.9111   | 0.0975  | 57    | 189        | 203               | TQSTDSWHAPLGPYR         |         |                  |      | Mascot      |
| 1854.8213           | 1854.6736   | -0.1477 | -80   | 28         | 44                | HAEDSLDGDANANEIQR       |         |                  |      | Mascot      |
| 2010.0138           | 2010.0078   | -0.006  | -3    | 556        | 574               | TEGSRGSPVLSSSNILYD<br>K |         |                  |      | Mascot      |
| 2080.9756           | 2081.0747   | 0.0991  | 48    | 899        | 915               | WECLQGEKAQLEQSFER       |         |                  |      | Mascot      |

|    |                                              |              |        |      |    |    |   |
|----|----------------------------------------------|--------------|--------|------|----|----|---|
| 34 | RecName: Full=SH3 domain-binding protein 4-A | gi 123888628 | 108383 | 7.89 | 16 | 36 | 0 |
|----|----------------------------------------------|--------------|--------|------|----|----|---|

| Peptide Information |             |         |       |            | Ion Score       | C. I. % Modification   | Rank | Result Type |
|---------------------|-------------|---------|-------|------------|-----------------|------------------------|------|-------------|
| Calc. Mass          | Obsrv. Mass | ± da    | ± ppm | Start Seq. |                 |                        |      |             |
| 842.5822            | 842.4951    | -0.0871 | -103  | 663        | 669 LIKTVIR     |                        |      | Mascot      |
| 850.4338            | 850.5277    | 0.0939  | 110   | 387        | 393 LSNMEIK     | Oxidation (M)[4]       |      | Mascot      |
| 870.4726            | 870.5258    | 0.0532  | 61    | 1          | 7 MAAHRIR       | Oxidation (M)[1]       |      | Mascot      |
| 982.539             | 982.5798    | 0.0408  | 42    | 574        | 581 LIYMISSR    |                        |      | Mascot      |
| 986.6244            | 986.5226    | -0.1018 | -103  | 800        | 808 VASVLEKLK   |                        |      | Mascot      |
| 1045.4796           | 1045.5437   | 0.0641  | 61    | 791        | 799 AELDSEPER   |                        |      | Mascot      |
| 1218.6398           | 1218.6534   | 0.0136  | 11    | 376        | 386 CSTVSPVVEIK | Carbamidomethyl (C)[1] |      | Mascot      |
| 1232.6674           | 1232.5731   | -0.0943 | -77   | 752        | 761 FLTYIYASVR  |                        |      | Mascot      |
| 1346.6885           | 1346.6226   | -0.0659 | -49   | 762        | 772 TILMENLGNWR |                        |      | Mascot      |
| 1355.5818           | 1355.6183   | 0.0365  | 27    | 809        | 819 EDCLNMETKEK | Oxidation (M)[6]       |      | Mascot      |

|    |                            |           |         |      |     |     |                           |          |      |    |    |                                               |  |  |  |  |        |
|----|----------------------------|-----------|---------|------|-----|-----|---------------------------|----------|------|----|----|-----------------------------------------------|--|--|--|--|--------|
|    | 1620.8591                  | 1620.8284 | -0.0307 | -19  | 583 | 596 | ADEISDFTLRVQVK            |          |      |    |    |                                               |  |  |  |  | Mascot |
|    | 1900.9724                  | 1900.7697 | -0.2027 | -107 | 60  | 76  | EVVAIKDYCPSSFITLK         |          |      |    |    |                                               |  |  |  |  | Mascot |
|    | 2081.0188                  | 2081.0747 | 0.0559  | 27   | 402 | 419 | VSVMTRTESPMAEIVCVR        |          |      |    |    | Carbamidomethyl (C)[16], Oxidation (M)[4]     |  |  |  |  | Mascot |
|    | 2097.0137                  | 2097.0737 | 0.06    | 29   | 402 | 419 | VSVMTRTESPMAEIVCVR        |          |      |    |    | Carbamidomethyl (C)[16], Oxidation (M)[4, 11] |  |  |  |  | Mascot |
|    | 2284.2368                  | 2284.1274 | -0.1094 | -48  | 492 | 513 | TVVAIFGHDCAPKTLVS<br>EVGK |          |      |    |    |                                               |  |  |  |  | Mascot |
|    | 2300.0686                  | 2300.1282 | 0.0596  | 26   | 597 | 616 | DDQDCILAQFCVQTPQP<br>PPK  |          |      |    |    | Carbamidomethyl (C)[5]                        |  |  |  |  | Mascot |
|    | 2490.1221                  | 2490.1436 | 0.0215  | 9    | 80  | 100 | GDHLYVLDTSGGWWY<br>AHNNR  |          |      |    |    |                                               |  |  |  |  | Mascot |
| 35 | protein LAP2 [Danio rerio] |           |         |      |     |     | gi 302129649              | 148528.6 | 5.27 | 17 | 36 | 0                                             |  |  |  |  |        |

#### Peptide Information

|  | Calc. Mass | Obsrv. Mass | ± da    | ± ppm | Start Seq. | End Seq. | Sequence                    | Ion Score | C. I. | % | Modification            | Rank | Result Type |
|--|------------|-------------|---------|-------|------------|----------|-----------------------------|-----------|-------|---|-------------------------|------|-------------|
|  | 1045.4731  | 1045.5437   | 0.0706  | 68    | 469        | 476      | DEREMPPR                    |           |       |   | Oxidation (M)[5]        |      | Mascot      |
|  | 1058.5914  | 1058.5037   | -0.0877 | -83   | 684        | 692      | ESKMPLIPK                   |           |       |   | Oxidation (M)[4]        |      | Mascot      |
|  | 1100.6133  | 1100.5247   | -0.0886 | -81   | 170        | 178      | ENQLKMLPK                   |           |       |   |                         |      | Mascot      |
|  | 1116.6082  | 1116.5194   | -0.0888 | -80   | 170        | 178      | ENQLKMLPK                   |           |       |   | Oxidation (M)[6]        |      | Mascot      |
|  | 1165.6323  | 1165.724    | 0.0917  | 79    | 524        | 534      | NHIGVQDVGVK                 |           |       |   |                         |      | Mascot      |
|  | 1165.6323  | 1165.724    | 0.0917  | 79    | 524        | 534      | NHIGVQDVGVK                 |           |       |   |                         |      | Mascot      |
|  | 1190.6198  | 1190.5254   | -0.0944 | -79   | 574        | 583      | IPLKTSNMR                   |           |       |   | Oxidation (M)[9]        |      | Mascot      |
|  | 1218.5936  | 1218.6534   | 0.0598  | 49    | 766        | 775      | WDQINMNVAK                  |           |       |   |                         |      | Mascot      |
|  | 1226.631   | 1226.5934   | -0.0376 | -31   | 1168       | 1177     | DQVMRHIEAK                  |           |       |   |                         |      | Mascot      |
|  | 1226.631   | 1226.5934   | -0.0376 | -31   | 1168       | 1177     | DQVMRHIEAK                  |           |       |   |                         |      | Mascot      |
|  | 1321.5698  | 1321.6422   | 0.0724  | 55    | 1195       | 1206     | SPMSCTQPPMAR                |           |       |   | Oxidation (M)[3]        |      | Mascot      |
|  | 1498.5647  | 1498.6904   | 0.1257  | 84    | 1064       | 1075     | MPGMEGDYMTYR                |           |       |   | Oxidation (M)[1,4,9]    |      | Mascot      |
|  | 1498.7328  | 1498.6904   | -0.0424 | -28   | 1182       | 1194     | VPLMNGQMCPPVR               |           |       |   | Carbamidomethyl (C)[9]  |      | Mascot      |
|  | 1549.6873  | 1549.7361   | 0.0488  | 31    | 357        | 369      | LENLPEEMGDMQK               |           |       |   | Oxidation (M)[8]        |      | Mascot      |
|  | 1549.6873  | 1549.7361   | 0.0488  | 31    | 357        | 369      | LENLPEEMGDMQK               |           |       |   | Oxidation (M)[8]        |      | Mascot      |
|  | 1606.6812  | 1606.8389   | 0.1577  | 98    | 1063       | 1075     | RMPGMEGDYMTYR               |           |       |   |                         |      | Mascot      |
|  | 1620.6564  | 1620.8284   | 0.172   | 106   | 1047       | 1062     | QGS GSSGNPMCPDPR            |           |       |   |                         |      | Mascot      |
|  | 1652.6461  | 1652.8668   | 0.2207  | 134   | 1047       | 1062     | QGS GSSGNPMCPDPR            |           |       |   | Oxidation (M)[10,12]    |      | Mascot      |
|  | 1948.9471  | 1948.8737   | -0.0734 | -38   | 821        | 837      | TQSGENFNSRTDQVPLR           |           |       |   |                         |      | Mascot      |
|  | 1949.0889  | 1948.8737   | -0.2152 | -110  | 607        | 623      | IAEMRPPLIEISINQPK           |           |       |   |                         |      | Mascot      |
|  | 2232.9907  | 2233.0415   | 0.0508  | 23    | 1042       | 1062     | GTLQRQSGSSGNPMC<br>MPDPR    |           |       |   | Carbamidomethyl (C)[16] |      | Mascot      |
|  | 2618.3796  | 2618.2339   | -0.1457 | -56   | 1221       | 1243     | VSQQPPGPQRVPKETLQ<br>QEVHVK |           |       |   |                         |      | Mascot      |

|    |                                                                               |  |  |  |  |  |              |         |      |    |    |   |   |   |
|----|-------------------------------------------------------------------------------|--|--|--|--|--|--------------|---------|------|----|----|---|---|---|
| 36 | PREDICTED: NADPH:adrenodoxin oxidoreductase, mitochondrial-like [Danio rerio] |  |  |  |  |  | gi 326672609 | 52715.3 | 6.97 | 10 | 35 | 0 | 3 | 0 |
|----|-------------------------------------------------------------------------------|--|--|--|--|--|--------------|---------|------|----|----|---|---|---|

| Peptide Information |                       |         |       |             |          |                         |           |       |    |                        |      |        |      |
|---------------------|-----------------------|---------|-------|-------------|----------|-------------------------|-----------|-------|----|------------------------|------|--------|------|
| Calc. Mass          | Obsrv. Mass           | ± da    | ± ppm | Start Seq.  | End Seq. | Sequence                | Ion Score | C. I. | %  | Modification           | Rank | Result | Type |
| 1100.5881           | 1100.5247             | -0.0634 | -58   | 369         | 378      | KAIVPNDMGR              |           |       |    |                        |      | Mascot |      |
| 1116.583            | 1116.5194             | -0.0636 | -57   | 369         | 378      | KAIVPNDMGR              |           |       |    | Oxidation (M)[8]       |      | Mascot |      |
| 1165.632            | 1165.724              | 0.092   | 79    | 275         | 284      | LTDLMMKAVK              |           |       |    | Oxidation (M)[5]       |      | Mascot |      |
| 1165.632            | 1165.724              | 0.092   | 79    | 275         | 284      | LTDLMMKAVK              |           |       |    | Oxidation (M)[5]       |      | Mascot |      |
| 1184.5657           | 1184.6062             | 0.0405  | 34    | 445         | 453      | MVLFSEWEK               |           |       |    | Oxidation (M)[1]       |      | Mascot |      |
| 1195.6106           | 1195.6311             | 0.0205  | 17    | 79          | 89       | FGVAPDHPEVK             |           |       |    |                        |      | Mascot |      |
| 1218.5684           | 1218.6534             | 0.085   | 70    | 104         | 114      | CSFHGNVNVGK             |           |       |    | Carbamidomethyl (C)[1] |      | Mascot |      |
| 1498.8409           | 1498.6904             | -0.1505 | -100  | 229         | 241      | GPLQIACTIKELR           | 3         | 0     |    | Carbamidomethyl (C)[7] |      | Mascot |      |
| 1498.8409           | 1498.6904             | -0.1505 | -100  | 229         | 241      | GPLQIACTIKELR           |           |       |    | Carbamidomethyl (C)[7] |      | Mascot |      |
| 1620.8744           | 1620.8284             | -0.046  | -28   | 299         | 313      | FFRSPVEVLAVDVGK         |           |       |    |                        |      | Mascot |      |
| 2009.9709           | 2010.0078             | 0.0369  | 18    | 393         | 411      | RGPTGVIATTMNDSFDA<br>R  |           |       |    |                        |      | Mascot |      |
| 2174.0659           | 2174.054              | -0.0119 | -5    | 104         | 122      | CSFHGNVNVGKDVIEEL<br>R  |           |       |    | Carbamidomethyl (C)[1] |      | Mascot |      |
| 2174.2119           | 2174.054              | -0.1579 | -73   | 70          | 89       | LPVPFGLVRFVAPDHP<br>EVK |           |       |    |                        |      | Mascot |      |
| 37                  | spastin [Danio rerio] |         |       | gi 47086209 |          | 63100.3                 | 9.81      | 10    | 35 | 0                      |      |        |      |

| Peptide Information |                                              |         |       |             |          |                           |           |       |    |                        |      |        |      |
|---------------------|----------------------------------------------|---------|-------|-------------|----------|---------------------------|-----------|-------|----|------------------------|------|--------|------|
| Calc. Mass          | Obsrv. Mass                                  | ± da    | ± ppm | Start Seq.  | End Seq. | Sequence                  | Ion Score | C. I. | %  | Modification           | Rank | Result | Type |
| 1051.567            | 1051.6956                                    | 0.1286  | 122   | 535         | 543      | ISDFLESLK                 |           |       |    |                        |      | Mascot |      |
| 1090.5487           | 1090.5143                                    | -0.0344 | -32   | 253         | 263      | ASTTATASPQR               |           |       |    |                        |      | Mascot |      |
| 1218.6437           | 1218.6534                                    | 0.0097  | 8     | 253         | 264      | ASTTATASPQRK              |           |       |    |                        |      | Mascot |      |
| 1346.6229           | 1346.6226                                    | -0.0003 | 0     | 11          | 24       | GGRACGPVSDGSAR            |           |       |    | Carbamidomethyl (C)[5] |      | Mascot |      |
| 1355.7794           | 1355.6183                                    | -0.1611 | -119  | 34          | 44       | SLSRVPEWLLR               |           |       |    |                        |      | Mascot |      |
| 1392.7118           | 1392.7068                                    | -0.005  | -4    | 548         | 559      | SVSPQTLQYVR               |           |       |    |                        |      | Mascot |      |
| 1715.9651           | 1715.9111                                    | -0.054  | -31   | 196         | 210      | KDTLTITNQTSLRPK           |           |       |    |                        |      | Mascot |      |
| 2174.0798           | 2174.054                                     | -0.0258 | -12   | 347         | 367      | AVAMESNATFFNISAATL<br>TSK |           |       |    |                        |      | Mascot |      |
| 2174.0798           | 2174.054                                     | -0.0258 | -12   | 347         | 367      | AVAMESNATFFNISAATL<br>TSK |           |       |    |                        |      | Mascot |      |
| 2233.1421           | 2233.0415                                    | -0.1006 | -45   | 385         | 403      | ELQPSIIFIDEIDSLLCER       |           |       |    |                        |      | Mascot |      |
| 2283.2236           | 2283.1331                                    | -0.0905 | -40   | 433         | 452      | VLVMGATNRPQELDEAV<br>LRR  |           |       |    | Oxidation (M)[4]       |      | Mascot |      |
| 2283.2236           | 2283.1331                                    | -0.0905 | -40   | 433         | 452      | VLVMGATNRPQELDEAV<br>LRR  |           |       |    | Oxidation (M)[4]       |      | Mascot |      |
| 38                  | alpha-(1,6)-fucosyltransferase [Danio rerio] |         |       | gi 51467976 |          | 66656.8                   | 7.98      | 10    | 34 | 0                      |      |        |      |

| Peptide Information |                       |         |       |              |          |                          |           |         |              |      |             |
|---------------------|-----------------------|---------|-------|--------------|----------|--------------------------|-----------|---------|--------------|------|-------------|
| Calc. Mass          | Obsrv. Mass           | ± da    | ± ppm | Start Seq.   | End Seq. | Sequence                 | Ion Score | C. I. % | Modification | Rank | Result Type |
| 882.4315            | 882.5512              | 0.1197  | 136   | 442          | 448      | YTENSLR                  |           |         |              |      | Mascot      |
| 931.5393            | 931.5195              | -0.0198 | -21   | 209          | 216      | KLVCNINK                 |           |         |              |      | Mascot      |
| 1045.5326           | 1045.5437             | 0.0111  | 11    | 2            | 9        | RPWTGSWR                 |           |         |              |      | Mascot      |
| 1058.5337           | 1058.5037             | -0.03   | -28   | 55           | 62       | QQNEDLRR                 |           |         |              |      | Mascot      |
| 1141.5345           | 1141.5448             | 0.0103  | 9     | 32           | 41       | DSEHAPRSSR               |           |         |              |      | Mascot      |
| 1269.7313           | 1269.5902             | -0.1411 | -111  | 449          | 459      | GVLDIHFLSR               |           |         |              |      | Mascot      |
| 1269.7313           | 1269.5902             | -0.1411 | -111  | 449          | 459      | GVLDIHFLSR               |           |         |              |      | Mascot      |
| 1355.7174           | 1355.6183             | -0.0991 | -73   | 136          | 147      | KLPLMETGAMHK             |           |         |              |      | Mascot      |
| 1620.7509           | 1620.8284             | 0.0775  | 48    | 460          | 473      | TNYLVCTFSSQVCR           |           |         |              |      | Mascot      |
| 1818.9596           | 1818.843              | -0.1166 | -64   | 403          | 418      | RVYLATDDPSLLQEAK         |           |         |              |      | Mascot      |
| 2233.0229           | 2233.0415             | 0.0186  | 8     | 250          | 269      | YATGGWETVFKPVSDTC<br>TDR |           |         |              |      | Mascot      |
| 39                  | RecName: Full=Spastin |         |       | gi 226694319 |          | 63047.2                  | 9.74      | 10      | 34           | 0    |             |

| Peptide Information |                      |             |         |       |             |          |                           |           |         |                        |                  |
|---------------------|----------------------|-------------|---------|-------|-------------|----------|---------------------------|-----------|---------|------------------------|------------------|
|                     | Calc. Mass           | Obsrv. Mass | ± da    | ± ppm | Start Seq.  | End Seq. | Sequence                  | Ion Score | C. I. % | Modification           | Rank Result Type |
|                     | 1051.567             | 1051.6956   | 0.1286  | 122   | 535         | 543      | ISDFLESLK                 |           |         |                        | Mascot           |
|                     | 1090.5487            | 1090.5143   | -0.0344 | -32   | 253         | 263      | ASTTATASPQR               |           |         |                        | Mascot           |
|                     | 1218.6437            | 1218.6534   | 0.0097  | 8     | 253         | 264      | ASTTATASPQRK              |           |         |                        | Mascot           |
|                     | 1346.6229            | 1346.6226   | -0.0003 | 0     | 11          | 24       | GGRACGPVSDGSAR            |           |         | Carbamidomethyl (C)[5] | Mascot           |
|                     | 1355.7794            | 1355.6183   | -0.1611 | -119  | 34          | 44       | SLSRVPEWLLR               |           |         |                        | Mascot           |
|                     | 1392.7118            | 1392.7068   | -0.005  | -4    | 548         | 559      | SVSPQTLDQYVR              |           |         |                        | Mascot           |
|                     | 1715.9651            | 1715.9111   | -0.054  | -31   | 196         | 210      | KDTLTITNQTSLRPK           |           |         |                        | Mascot           |
|                     | 2174.0798            | 2174.054    | -0.0258 | -12   | 347         | 367      | AVAMESNATFFNISAATL<br>TSK |           |         |                        | Mascot           |
|                     | 2174.0798            | 2174.054    | -0.0258 | -12   | 347         | 367      | AVAMESNATFFNISAATL<br>TSK |           |         |                        | Mascot           |
|                     | 2233.1421            | 2233.0415   | -0.1006 | -45   | 385         | 403      | ELQPSIIFIDEIDSLLCER       |           |         |                        | Mascot           |
|                     | 2283.2236            | 2283.1331   | -0.0905 | -40   | 433         | 452      | VLVMGATNRPQELDEAV<br>LRR  |           |         | Oxidation (M)[4]       | Mascot           |
|                     | 2283.2236            | 2283.1331   | -0.0905 | -40   | 433         | 452      | VLVMGATNRPQELDEAV<br>LRR  |           |         | Oxidation (M)[4]       | Mascot           |
| 40                  | cirhin [Danio rerio] |             |         |       | gi 47086123 |          | 76848.1                   | 8.48      | 11      | 34                     | 0                |

| Peptide Information |             |      |       |            |          |          |           |         |              |                  |
|---------------------|-------------|------|-------|------------|----------|----------|-----------|---------|--------------|------------------|
| Calc. Mass          | Obsrv. Mass | ± da | ± ppm | Start Seq. | End Seq. | Sequence | Ion Score | C. I. % | Modification | Rank Result Type |



|                     |                                                                 |            |             |         |       |            |                   |                          |           |       |    |              |                                          |      |        |      |        |
|---------------------|-----------------------------------------------------------------|------------|-------------|---------|-------|------------|-------------------|--------------------------|-----------|-------|----|--------------|------------------------------------------|------|--------|------|--------|
|                     |                                                                 | 850.5872   | 850.5277    | -0.0595 | -70   | 381        | 387               | LLHLKVK                  |           |       |    |              |                                          |      |        |      | Mascot |
|                     |                                                                 | 986.5265   | 986.5226    | -0.0039 | -4    | 627        | 634               | SLPEEQRK                 |           |       |    |              |                                          |      |        |      | Mascot |
|                     |                                                                 | 1106.6542  | 1106.5144   | -0.1398 | -126  | 565        | 573               | LVQRQGLHR                |           |       |    |              |                                          |      |        |      | Mascot |
|                     |                                                                 | 1190.6277  | 1190.5254   | -0.1023 | -86   | 134        | 142               | IQFERNLDR                |           |       |    |              |                                          |      |        |      | Mascot |
|                     |                                                                 | 1214.6204  | 1214.5913   | -0.0291 | -24   | 11         | 20                | FFEYVPSGIR               |           |       |    |              |                                          |      |        |      | Mascot |
|                     |                                                                 | 1226.5986  | 1226.5934   | -0.0052 | -4    | 635        | 644               | SYSHAFKVCK               |           |       |    |              | Carbamidomethyl (C)[9]                   |      |        |      | Mascot |
|                     |                                                                 | 1226.5986  | 1226.5934   | -0.0052 | -4    | 635        | 644               | SYSHAFKVCK               |           |       |    |              | Carbamidomethyl (C)[9]                   |      |        |      | Mascot |
|                     |                                                                 | 1715.8745  | 1715.9111   | 0.0366  | 21    | 417        | 431               | LHCDSNNVSITKISK          |           |       |    |              | Carbamidomethyl (C)[3]                   |      |        |      | Mascot |
|                     |                                                                 | 1901.0068  | 1900.7697   | -0.2371 | -125  | 343        | 358               | AGTLLFQYPGHLELWR         |           |       |    |              |                                          |      |        |      | Mascot |
|                     |                                                                 | 2081.1138  | 2081.0747   | -0.0391 | -19   | 54         | 72                | IIPGREQAGIEGLTWVGE<br>R  |           |       |    |              |                                          |      |        |      | Mascot |
|                     |                                                                 | 2173.9792  | 2174.054    | 0.0748  | 34    | 36         | 53                | MNGSVEIFHCSDRFFQE<br>K   |           |       |    |              |                                          |      |        |      | Mascot |
|                     |                                                                 | 2173.9792  | 2174.054    | 0.0748  | 34    | 36         | 53                | MNGSVEIFHCSDRFFQE<br>K   |           |       |    |              |                                          |      |        |      | Mascot |
|                     |                                                                 | 2211.0242  | 2211.0601   | 0.0359  | 16    | 159        | 178               | IAAGMMDMIQVFNVETG<br>HSK |           |       |    |              | Oxidation (M)[5,6]                       |      |        |      | Mascot |
| 41                  | PREDICTED: GTPase IMAP family member 8 [Danio rerio]            |            |             |         |       |            |                   | gi 68368449              | 45036.2   | 4.77  | 9  | 34           | 0                                        |      |        |      |        |
| Peptide Information |                                                                 |            |             |         |       |            |                   |                          |           |       |    |              |                                          |      |        |      |        |
|                     |                                                                 | Calc. Mass | Obsrv. Mass | ± da    | ± ppm | Start Seq. | End Sequence Seq. |                          | Ion Score | C. I. | %  | Modification |                                          | Rank | Result | Type |        |
|                     |                                                                 | 842.4188   | 842.4951    | 0.0763  | 91    | 1          | 7                 | MPKGEHK                  |           |       |    |              | Oxidation (M)[1]                         |      |        |      | Mascot |
|                     |                                                                 | 966.5189   | 966.4284    | -0.0905 | -94   | 50         | 57                | MYQKALGR                 |           |       |    |              |                                          |      |        |      | Mascot |
|                     |                                                                 | 982.5138   | 982.5798    | 0.066   | 67    | 50         | 57                | MYQKALGR                 |           |       |    |              | Oxidation (M)[1]                         |      |        |      | Mascot |
|                     |                                                                 | 1045.6074  | 1045.5437   | -0.0637 | -61   | 338        | 347               | NMLAVLIGSK               |           |       |    |              |                                          |      |        |      | Mascot |
|                     |                                                                 | 1100.5582  | 1100.5247   | -0.0335 | -30   | 197        | 205               | QINPEEKDK                |           |       |    |              |                                          |      |        |      | Mascot |
|                     |                                                                 | 1116.4999  | 1116.5194   | 0.0195  | 17    | 162        | 170               | MCVFSKDMR                |           |       |    |              |                                          |      |        |      | Mascot |
|                     |                                                                 | 1141.5419  | 1141.5448   | 0.0029  | 3     | 153        | 161               | QILHECNER                |           |       |    |              |                                          |      |        |      | Mascot |
|                     |                                                                 | 1269.6329  | 1269.5902   | -0.0427 | -34   | 32         | 42                | CLVGNTMLAFK              |           |       |    |              | Carbamidomethyl (C)[1], Oxidation (M)[7] |      |        |      | Mascot |
|                     |                                                                 | 1269.6329  | 1269.5902   | -0.0427 | -34   | 32         | 42                | CLVGNTMLAFK              |           |       |    |              | Carbamidomethyl (C)[1], Oxidation (M)[7] |      |        |      | Mascot |
|                     |                                                                 | 1321.6304  | 1321.6422   | 0.0118  | 9     | 351        | 361               | SEKCEIENLK               |           |       |    |              |                                          |      |        |      | Mascot |
|                     |                                                                 | 1900.8489  | 1900.7697   | -0.0792 | -42   | 354        | 368               | CEIEENLKMFLDECK          |           |       |    |              | Carbamidomethyl (C)[1]                   |      |        |      | Mascot |
| 42                  | PREDICTED: tripartite motif-containing protein 35 [Danio rerio] |            |             |         |       |            |                   | gi 125851164             | 53131.6   | 8.03  | 11 | 34           | 0                                        |      |        |      |        |
| Peptide Information |                                                                 |            |             |         |       |            |                   |                          |           |       |    |              |                                          |      |        |      |        |
|                     |                                                                 | Calc. Mass | Obsrv. Mass | ± da    | ± ppm | Start Seq. | End Sequence Seq. |                          | Ion Score | C. I. | %  | Modification |                                          | Rank | Result | Type |        |
|                     |                                                                 | 966.4713   | 966.4284    | -0.0429 | -44   | 234        | 241               | ANDVCFLK                 |           |       |    |              | Carbamidomethyl (C)[5]                   |      |        |      | Mascot |

|    |                                          |           |         |     |     |     |                    |         |      |   |    |   |                        |  |  |  |        |
|----|------------------------------------------|-----------|---------|-----|-----|-----|--------------------|---------|------|---|----|---|------------------------|--|--|--|--------|
|    | 1045.6152                                | 1045.5437 | -0.0715 | -68 | 57  | 66  | GHPPVNLALK         |         |      |   |    |   |                        |  |  |  | Mascot |
|    | 1106.4718                                | 1106.5144 | 0.0426  | 39  | 43  | 51  | NTQECPVCR          |         |      |   |    |   | Carbamidomethyl (C)[5] |  |  |  | Mascot |
|    | 1141.6187                                | 1141.5448 | -0.0739 | -65 | 343 | 351 | HCWIVEVKK          |         |      |   |    |   |                        |  |  |  | Mascot |
|    | 1165.6285                                | 1165.724  | 0.0955  | 82  | 95  | 103 | LKLFCELEDK         |         |      |   |    |   | Carbamidomethyl (C)[5] |  |  |  | Mascot |
|    | 1165.6285                                | 1165.724  | 0.0955  | 82  | 95  | 103 | LKLFCELEDK         |         |      |   |    |   | Carbamidomethyl (C)[5] |  |  |  | Mascot |
|    | 1195.6429                                | 1195.6311 | -0.0118 | -10 | 316 | 325 | KQPVLDNPER         |         |      |   |    |   |                        |  |  |  | Mascot |
|    | 1321.5988                                | 1321.6422 | 0.0434  | 33  | 41  | 51  | SKNTQECPVCR        |         |      |   |    |   | Carbamidomethyl (C)[7] |  |  |  | Mascot |
|    | 1392.7787                                | 1392.7068 | -0.0719 | -52 | 270 | 280 | YLGNLPRVWK         |         |      |   |    |   |                        |  |  |  | Mascot |
|    | 1549.6798                                | 1549.7361 | 0.0563  | 36  | 81  | 94  | SSGSEEICSLHSEK     |         |      |   |    |   | Carbamidomethyl (C)[8] |  |  |  | Mascot |
|    | 1549.6798                                | 1549.7361 | 0.0563  | 36  | 81  | 94  | SSGSEEICSLHSEK     |         |      |   |    |   | Carbamidomethyl (C)[8] |  |  |  | Mascot |
|    | 1900.8932                                | 1900.7697 | -0.1235 | -65 | 234 | 249 | ANDVCFLKEFPVSMER   |         |      |   |    |   | Oxidation (M)[14]      |  |  |  | Mascot |
|    | 2081.0696                                | 2081.0747 | 0.0051  | 2   | 209 | 226 | EKLEEMNTHISALSHTIK |         |      |   |    |   |                        |  |  |  | Mascot |
|    | 2097.0645                                | 2097.0737 | 0.0092  | 4   | 209 | 226 | EKLEEMNTHISALSHTIK |         |      |   |    |   | Oxidation (M)[6]       |  |  |  | Mascot |
| 43 | Protoporphyrinogen oxidase [Danio rerio] |           |         |     |     |     | gi 158254356       | 51124.5 | 8.41 | 9 | 34 | 0 |                        |  |  |  |        |

#### Peptide Information

| Calc. Mass | Obsrv. Mass | $\pm$ da | $\pm$ ppm | Start Seq. | End Seq. | Sequence                  | Ion Score | C. I. | % Modification   | Rank | Result Type |
|------------|-------------|----------|-----------|------------|----------|---------------------------|-----------|-------|------------------|------|-------------|
| 986.5451   | 986.5226    | -0.0225  | -23       | 108        | 117      | MPSGLGGVLR                |           |       |                  |      | Mascot      |
| 1141.5861  | 1141.5448   | -0.0413  | -36       | 249        | 258      | NGVELHHHAK                |           |       |                  |      | Mascot      |
| 1190.5436  | 1190.5254   | -0.0182  | -15       | 49         | 59       | DDGAVFEQGPR               |           |       |                  |      | Mascot      |
| 1232.715   | 1232.5731   | -0.1419  | -115      | 98         | 107      | FLYVKGQLHK                |           |       |                  |      | Mascot      |
| 1346.6448  | 1346.6226   | -0.0222  | -16       | 48         | 59       | RDDGAVFEQGPR              |           |       |                  |      | Mascot      |
| 1549.8632  | 1549.7361   | -0.1271  | -82       | 103        | 117      | GQLHKMPISGLGGVLR          |           |       |                  |      | Mascot      |
| 1549.8632  | 1549.7361   | -0.1271  | -82       | 103        | 117      | GQLHKMPISGLGGVLR          |           |       |                  |      | Mascot      |
| 1715.8745  | 1715.9111   | 0.0366   | 21        | 233        | 247      | GMQTLPEALEDLRR            |           |       |                  |      | Mascot      |
| 2097.0583  | 2097.0737   | 0.0154   | 7         | 49         | 69       | DDGAVFEQGPRGVRPG<br>GAVGR |           |       |                  |      | Mascot      |
| 2278.2158  | 2277.9534   | -0.2624  | -115      | 1          | 23       | MQKVVAVLGGIGGLSA<br>CHHLK |           |       | Oxidation (M)[1] |      | Mascot      |

44 appb [Danio rerio] gi|165993271 75993 4.8 11 34 0

#### Peptide Information

| Calc. Mass | Obsrv. Mass | $\pm$ da | $\pm$ ppm | Start Seq. | End Seq. | Sequence     | Ion Score | C. I. | % Modification   | Rank | Result Type |
|------------|-------------|----------|-----------|------------|----------|--------------|-----------|-------|------------------|------|-------------|
| 931.438    | 931.5195    | 0.0815   | 87        | 601        | 608      | HNAGYDVR     |           |       |                  |      | Mascot      |
| 1059.5979  | 1059.6097   | 0.0118   | 11        | 624        | 634      | GAIIGLMVGGRR |           |       | Oxidation (M)[7] |      | Mascot      |
| 1232.598   | 1232.5731   | -0.0249  | -20       | 481        | 490      | MNQLSGYLYK   |           |       | Oxidation (M)[1] |      | Mascot      |

|    |                                                          |           |         |     |     |     |                           |        |      |   |  |                                                  |    |   |  |  |        |
|----|----------------------------------------------------------|-----------|---------|-----|-----|-----|---------------------------|--------|------|---|--|--------------------------------------------------|----|---|--|--|--------|
|    | 1355.6334                                                | 1355.6183 | -0.0151 | -11 | 612 | 623 | LMFLAEDMGSNK              |        |      |   |  |                                                  |    |   |  |  | Mascot |
|    | 1392.7019                                                | 1392.7068 | 0.0049  | 4   | 451 | 461 | HFEHVREVDPK               |        |      |   |  |                                                  |    |   |  |  | Mascot |
|    | 1498.6375                                                | 1498.6904 | 0.0529  | 35  | 183 | 195 | GVEFVCCPMEEQK             |        |      |   |  |                                                  |    |   |  |  | Mascot |
|    | 1498.6375                                                | 1498.6904 | 0.0529  | 35  | 183 | 195 | GVEFVCCPMEEQK             |        |      |   |  |                                                  |    |   |  |  | Mascot |
|    | 1620.7084                                                | 1620.8284 | 0.12    | 74  | 638 | 650 | YCHRNHSGYAQER             |        |      |   |  |                                                  |    |   |  |  | Mascot |
|    | 1652.8438                                                | 1652.8668 | 0.023   | 14  | 106 | 118 | QCRSHTHIVVPYR             |        |      |   |  | Carbamidomethyl (C)[2]                           |    |   |  |  | Mascot |
|    | 1762.9408                                                | 1762.9209 | -0.0199 | -11 | 651 | 666 | SSTPLFIMELLRVDA           |        |      |   |  |                                                  |    |   |  |  | Mascot |
|    | 1948.9757                                                | 1948.8737 | -0.102  | -52 | 509 | 525 | DQAEVTQQLSSLQSKMR         |        |      |   |  |                                                  |    |   |  |  | Mascot |
|    | 1948.9757                                                | 1948.8737 | -0.102  | -52 | 509 | 525 | DQAEVTQQLSSLQSKMR         |        |      |   |  |                                                  |    |   |  |  | Mascot |
|    | 2618.064                                                 | 2618.2339 | 0.1699  | 65  | 143 | 163 | MDMCESHLHWHTVAKES<br>CGDR |        |      |   |  | Carbamidomethyl (C)[4,18], Oxidation<br>(M)[1,3] |    |   |  |  | Mascot |
| 45 | PREDICTED: kinase suppressor of Ras 2-like [Danio rerio] |           |         |     |     |     | gi 326671408              | 117980 | 6.39 | 1 |  |                                                  | 19 | 0 |  |  |        |

Peptide Information

| Calc. Mass | Obsrv. Mass | ± da   | ± ppm | Start Seq. | End Seq. | Sequence       | Ion Score | C. I. | % Modification | Rank | Result Type |
|------------|-------------|--------|-------|------------|----------|----------------|-----------|-------|----------------|------|-------------|
| 1549.6985  | 1549.7361   | 0.0376 | 24    | 2          | 15       | SSVMQLPDGEMEAR | 19        | 0     |                | 2    | Mascot      |

|    |                                              |  |  |  |  |  |              |         |      |   |  |  |    |   |  |  |  |
|----|----------------------------------------------|--|--|--|--|--|--------------|---------|------|---|--|--|----|---|--|--|--|
| 46 | hypothetical protein LOC767723 [Danio rerio] |  |  |  |  |  | gi 115495237 | 18179.6 | 8.84 | 1 |  |  | 15 | 0 |  |  |  |
|----|----------------------------------------------|--|--|--|--|--|--------------|---------|------|---|--|--|----|---|--|--|--|

Peptide Information

| Calc. Mass | Obsrv. Mass | ± da    | ± ppm | Start Seq. | End Seq. | Sequence   | Ion Score | C. I. | % Modification         | Rank | Result Type |
|------------|-------------|---------|-------|------------|----------|------------|-----------|-------|------------------------|------|-------------|
| 1269.6229  | 1269.5902   | -0.0327 | -26   | 45         | 54       | QCQTIHGRNR | 15        | 0     | Carbamidomethyl (C)[2] | 2    | Mascot      |

|    |                                                                     |  |  |  |  |  |              |          |      |   |  |  |    |   |  |  |  |
|----|---------------------------------------------------------------------|--|--|--|--|--|--------------|----------|------|---|--|--|----|---|--|--|--|
| 47 | cell division cycle and apoptosis regulator protein 1 [Danio rerio] |  |  |  |  |  | gi 224495988 | 136413.2 | 5.81 | 1 |  |  | 13 | 0 |  |  |  |
|----|---------------------------------------------------------------------|--|--|--|--|--|--------------|----------|------|---|--|--|----|---|--|--|--|

Peptide Information

| Calc. Mass | Obsrv. Mass | ± da    | ± ppm | Start Seq. | End Seq. | Sequence   | Ion Score | C. I. | % Modification | Rank | Result Type |
|------------|-------------|---------|-------|------------|----------|------------|-----------|-------|----------------|------|-------------|
| 1226.7216  | 1226.5934   | -0.1282 | -105  | 348        | 357      | SDRPELILRK | 13        | 0     |                | 3    | Mascot      |

|    |                                                  |  |  |  |  |  |              |          |     |   |  |  |    |   |  |  |  |
|----|--------------------------------------------------|--|--|--|--|--|--------------|----------|-----|---|--|--|----|---|--|--|--|
| 48 | clathrin, heavy polypeptide b (Hc) [Danio rerio] |  |  |  |  |  | gi 303227979 | 191513.8 | 5.5 | 1 |  |  | 12 | 0 |  |  |  |
|----|--------------------------------------------------|--|--|--|--|--|--------------|----------|-----|---|--|--|----|---|--|--|--|

Peptide Information

| Calc. Mass | Obsrv. Mass | ± da    | ± ppm | Start Seq. | End Seq. | Sequence   | Ion Score | C. I. | % Modification | Rank | Result Type |
|------------|-------------|---------|-------|------------|----------|------------|-----------|-------|----------------|------|-------------|
| 1226.762   | 1226.5934   | -0.1686 | -137  | 1444       | 1453     | QLPLVKPYLR | 12        | 0     |                | 4    | Mascot      |

|    |                                   |  |  |  |  |  |              |         |      |   |  |  |    |   |  |  |  |
|----|-----------------------------------|--|--|--|--|--|--------------|---------|------|---|--|--|----|---|--|--|--|
| 49 | SKI-like oncogene b [Danio rerio] |  |  |  |  |  | gi 194578831 | 70975.5 | 5.59 | 1 |  |  | 12 | 0 |  |  |  |
|----|-----------------------------------|--|--|--|--|--|--------------|---------|------|---|--|--|----|---|--|--|--|

| Peptide Information |                                                                                                          |        |       |            |          |              |           |         |                                          |                  |
|---------------------|----------------------------------------------------------------------------------------------------------|--------|-------|------------|----------|--------------|-----------|---------|------------------------------------------|------------------|
| Calc. Mass          | Obsrv. Mass                                                                                              | ± da   | ± ppm | Start Seq. | End Seq. | Sequence     | Ion Score | C. I. % | Modification                             | Rank Result Type |
| 1549.6378           | 1549.7361                                                                                                | 0.0983 | 63    | 264        | 275      | CSQCRMLFCTER | 12        | 0       | Carbamidomethyl (C)[1], Oxidation (M)[6] | 3 Mascot         |
| 50                  | cysteine and glycine-rich protein 3 (cardiac LIM protein) [Danio rerio]<br>gi 54400554 20964 8.92 1 11 0 |        |       |            |          |              |           |         |                                          |                  |

| Peptide Information |             |        |       |            |          |              |           |         |              |                  |
|---------------------|-------------|--------|-------|------------|----------|--------------|-----------|---------|--------------|------------------|
| Calc. Mass          | Obsrv. Mass | ± da   | ± ppm | Start Seq. | End Seq. | Sequence     | Ion Score | C. I. % | Modification | Rank Result Type |
| 1549.7064           | 1549.7361   | 0.0297 | 19    | 16         | 28       | TVYHAEIQCNSR | 11        | 0       |              | 4 Mascot         |

|                |           |                        |                |                |                    |
|----------------|-----------|------------------------|----------------|----------------|--------------------|
| Gel Idx/Pos    | 215/I15   | Instr./Gel Origin      | BA2060/110707A | Process Status | Analysis Succeeded |
| Plate [#] Name | [1] 31496 | Instrument Sample Name |                | Spectra        | 11                 |

| Rank | Protein Name                               | Accession No. | Protein MW | Protein PI | Pep. Count | Protein Score | Protein Score C. I. % | Total Ion Score | Total Ion C. I. % |
|------|--------------------------------------------|---------------|------------|------------|------------|---------------|-----------------------|-----------------|-------------------|
| 1    | multifunctional protein ADE2 [Danio rerio] | gi 41053415   | 47046.8    | 6.99       | 17         | 415           | 100                   | 323             | 100               |

| Peptide Information |             |         |       |            |          |                |           |         |                           |                  |
|---------------------|-------------|---------|-------|------------|----------|----------------|-----------|---------|---------------------------|------------------|
| Calc. Mass          | Obsrv. Mass | ± da    | ± ppm | Start Seq. | End Seq. | Sequence       | Ion Score | C. I. % | Modification              | Rank Result Type |
| 814.4206            | 814.4111    | -0.0095 | -12   | 216        | 222      | LWPAGDR        | 45        | 98.928  |                           | Mascot           |
| 814.4206            | 814.4111    | -0.0095 | -12   | 216        | 222      | LWPAGDR        |           |         |                           | Mascot           |
| 842.4076            | 842.4996    | 0.092   | 109   | 60         | 66       | TTSCVFK        |           |         | Carbamidomethyl (C)[4]    | Mascot           |
| 929.5414            | 929.5282    | -0.0132 | -14   | 258        | 265      | LLLESQAR       |           |         |                           | Mascot           |
| 1019.5268           | 1019.5085   | -0.0183 | -18   | 112        | 120      | NPGVKEGYR      |           |         |                           | Mascot           |
| 1044.5432           | 1044.5037   | -0.0395 | -38   | 37         | 46       | DQITAGNAVR     |           |         |                           | Mascot           |
| 1050.5004           | 1050.4878   | -0.0126 | -12   | 248        | 255      | NFEWVAER       | 22        | 0       |                           | Mascot           |
| 1050.5004           | 1050.4878   | -0.0126 | -12   | 248        | 255      | NFEWVAER       |           |         |                           | Mascot           |
| 1206.6014           | 1206.5884   | -0.013  | -11   | 247        | 255      | RNFEWVAER      |           |         |                           | Mascot           |
| 1218.5862           | 1218.5825   | -0.0037 | -3    | 80         | 90       | QHSDTAFVASR    |           |         |                           | Mascot           |
| 1235.6881           | 1235.6674   | -0.0207 | -17   | 168        | 178      | STVAIFEVLEK    |           |         |                           | Mascot           |
| 1404.6511           | 1404.6337   | -0.0174 | -12   | 287        | 298      | ACASYGIPCHLR   |           |         | Carbamidomethyl (C)[2,9]  | Mascot           |
| 1423.7288           | 1423.7108   | -0.018  | -13   | 299        | 311      | VNSAHKGPDETLR  |           |         |                           | Mascot           |
| 1532.746            | 1532.746    | 0       | 0     | 286        | 298      | KACASYGIPCHLR  |           |         | Carbamidomethyl (C)[3,10] | Mascot           |
| 1644.8228           | 1644.8022   | -0.0206 | -13   | 202        | 215      | EIVLADVIDNDSWR | 129       | 100     |                           | Mascot           |
| 1644.8228           | 1644.8022   | -0.0206 | -13   | 202        | 215      | EIVLADVIDNDSWR |           |         |                           | Mascot           |

|   |                                                                                                           |           |           |         |     |     |             |                           |      |     |     |     |     |     |  |                                             |  |        |
|---|-----------------------------------------------------------------------------------------------------------|-----------|-----------|---------|-----|-----|-------------|---------------------------|------|-----|-----|-----|-----|-----|--|---------------------------------------------|--|--------|
| 2 |                                                                                                           | 1880.9025 | 1880.875  | -0.0275 | -15 | 314 | 331         | AEYEGDGEPTIFVAVAGR        |      |     |     |     |     |     |  |                                             |  | Mascot |
|   |                                                                                                           | 1952.0487 | 1952.0193 | -0.0294 | -15 | 20  | 36          | QIFEILDEPGHVLVQSK         |      |     |     |     |     |     |  |                                             |  | Mascot |
|   |                                                                                                           | 1994.9092 | 1994.9576 | 0.0484  | 24  | 266 | 283         | GRVVMMGSTSDVAHC<br>EK     |      |     |     |     |     |     |  | Carbamidomethyl (C)[16], Oxidation (M)[6,7] |  | Mascot |
|   |                                                                                                           | 2122.0815 | 2122.0508 | -0.0307 | -14 | 312 | 331         | IKAIEYEGDGEPTIFVAVA<br>GR |      |     |     |     |     |     |  |                                             |  | Mascot |
|   |                                                                                                           | 2122.0815 | 2122.0508 | -0.0307 | -14 | 312 | 331         | IKAIEYEGDGEPTIFVAVA<br>GR |      | 128 | 100 |     |     |     |  |                                             |  | Mascot |
| 2 | phosphoribosylaminoimidazole carboxylase,<br>phosphoribosylaminoimidazole succinocarboxamide<br>synthetas |           |           |         |     |     | gi 56207699 | 119387.4                  | 6.08 | 20  | 388 | 100 | 323 | 100 |  |                                             |  |        |

| Calc. Mass | Obsrv. Mass | ± da    | ± ppm | Start Seq. | End Sequence Seq.      | Ion Score | C. I. % | Modification                                | Rank | Result Type |
|------------|-------------|---------|-------|------------|------------------------|-----------|---------|---------------------------------------------|------|-------------|
| 814.4206   | 814.4111    | -0.0095 | -12   | 840        | 846 LWPAGDR            | 45        | 98.928  |                                             |      | Mascot      |
| 814.4206   | 814.4111    | -0.0095 | -12   | 840        | 846 LWPAGDR            |           |         |                                             |      | Mascot      |
| 842.4076   | 842.4996    | 0.092   | 109   | 684        | 690 TTSCVFK            |           |         | Carbamidomethyl (C)[4]                      |      | Mascot      |
| 929.5414   | 929.5282    | -0.0132 | -14   | 882        | 889 LLLESQAR           |           |         |                                             |      | Mascot      |
| 1019.5268  | 1019.5085   | -0.0183 | -18   | 736        | 744 NPGVKEGYR          |           |         |                                             |      | Mascot      |
| 1044.5432  | 1044.5037   | -0.0395 | -38   | 661        | 670 DQITAGNAVR         |           |         |                                             |      | Mascot      |
| 1050.5004  | 1050.4878   | -0.0126 | -12   | 872        | 879 NFEWVAER           | 22        | 0       |                                             |      | Mascot      |
| 1050.5004  | 1050.4878   | -0.0126 | -12   | 872        | 879 NFEWVAER           |           |         |                                             |      | Mascot      |
| 1127.6643  | 1127.6427   | -0.0216 | -19   | 205        | 214 VSKSQGRPIR         |           |         |                                             |      | Mascot      |
| 1127.6643  | 1127.6427   | -0.0216 | -19   | 205        | 214 VSKSQGRPIR         |           |         |                                             |      | Mascot      |
| 1206.6014  | 1206.5884   | -0.013  | -11   | 871        | 879 RNFEWVAER          |           |         |                                             |      | Mascot      |
| 1216.5264  | 1216.6183   | 0.0919  | 76    | 7          | 16 NMEPETDPQR          |           |         |                                             |      | Mascot      |
| 1216.5264  | 1216.6183   | 0.0919  | 76    | 7          | 16 NMEPETDPQR          |           |         |                                             |      | Mascot      |
| 1218.5862  | 1218.5825   | -0.0037 | -3    | 704        | 714 QHSDTAFVASR        |           |         |                                             |      | Mascot      |
| 1235.6881  | 1235.6674   | -0.0207 | -17   | 792        | 802 STVAIFEVLEK        |           |         |                                             |      | Mascot      |
| 1336.6903  | 1336.6675   | -0.0228 | -17   | 240        | 250 NIPNRDHLAMR        |           |         |                                             |      | Mascot      |
| 1404.6511  | 1404.6337   | -0.0174 | -12   | 911        | 922 ACASYGIPCHLR       |           |         | Carbamidomethyl (C)[2,9]                    |      | Mascot      |
| 1423.7288  | 1423.7108   | -0.018  | -13   | 923        | 935 VNSAHKGPDETLR      |           |         |                                             |      | Mascot      |
| 1532.746   | 1532.746    | 0       | 0     | 910        | 922 KACASYGIPCHLR      |           |         | Carbamidomethyl (C)[3,10]                   |      | Mascot      |
| 1644.8228  | 1644.8022   | -0.0206 | -13   | 826        | 839 EIVLADVIDNDSWR     | 129       | 100     |                                             |      | Mascot      |
| 1644.8228  | 1644.8022   | -0.0206 | -13   | 826        | 839 EIVLADVIDNDSWR     |           |         |                                             |      | Mascot      |
| 1880.9025  | 1880.875    | -0.0275 | -15   | 938        | 955 AEYEGDGEPTIFVAVAGR |           |         |                                             |      | Mascot      |
| 1952.0487  | 1952.0193   | -0.0294 | -15   | 644        | 660 QIFEILDEPGHVLVQSK  |           |         |                                             |      | Mascot      |
| 1994.9092  | 1994.9576   | 0.0484  | 24    | 890        | 907 GRVVMMGSTSDVAHC EK |           |         | Carbamidomethyl (C)[16], Oxidation (M)[6,7] |      | Mascot      |
| 2122.0815  | 2122.0508   | -0.0307 | -14   | 936        | 955 IKAIEYEGDGEPTIFVA  |           |         |                                             |      | Mascot      |

|   |                                                         |           |         |     |             |         |                                 |     |     |     |     |     |        |
|---|---------------------------------------------------------|-----------|---------|-----|-------------|---------|---------------------------------|-----|-----|-----|-----|-----|--------|
|   | 2122.0815                                               | 2122.0508 | -0.0307 | -14 | 936         | 955     | GR<br>IKAIEYEGDGEPTIFVAVA<br>GR | 128 | 100 |     |     |     | Mascot |
| 3 | citrate synthase, mitochondrial precursor [Danio rerio] |           |         |     | gi 41054571 | 51718.4 | 7.68                            | 7   | 209 | 100 | 187 | 100 |        |

Peptide Information

| Calc. Mass | Obsrv. Mass | ± da    | ± ppm | Start Seq. | End Seq. | Sequence         | Ion Score | C. I.  | % Modification         | Rank | Result Type |
|------------|-------------|---------|-------|------------|----------|------------------|-----------|--------|------------------------|------|-------------|
| 1030.5461  | 1030.5696   | 0.0235  | 23    | 18         | 27       | NAACVVVAAR       |           |        | Carbamidomethyl (C)[4] |      | Mascot      |
| 1127.6571  | 1127.6427   | -0.0144 | -13   | 443        | 452      | ALGFPLERPK       | 36        | 93.128 |                        |      | Mascot      |
| 1127.6571  | 1127.6427   | -0.0144 | -13   | 443        | 452      | ALGFPLERPK       |           |        |                        |      | Mascot      |
| 1167.6633  | 1167.6489   | -0.0144 | -12   | 343        | 353      | VVPGYGHAVLR      | 60        | 99.967 |                        |      | Mascot      |
| 1167.6633  | 1167.6489   | -0.0144 | -12   | 343        | 353      | VVPGYGHAVLR      |           |        |                        |      | Mascot      |
| 1355.6776  | 1355.6653   | -0.0123 | -9    | 330        | 339      | MRDYIWNTLK       |           |        | Oxidation (M)[1]       |      | Mascot      |
| 1532.7777  | 1532.746    | -0.0317 | -21   | 97         | 109      | GYSIPECQQLPK     |           |        | Carbamidomethyl (C)[7] |      | Mascot      |
| 1727.8455  | 1727.8198   | -0.0257 | -15   | 60         | 75       | TSIGQITVDMVYGGM  |           |        |                        |      | Mascot      |
| 1743.8405  | 1743.8185   | -0.022  | -13   | 60         | 75       | TSIGQITVDMVYGGM  |           |        | Oxidation (M)[10]      |      | Mascot      |
| 1759.8353  | 1759.8187   | -0.0166 | -9    | 60         | 75       | TSIGQITVDMVYGGM  |           |        | Oxidation (M)[10,15]   |      | Mascot      |
| 1762.8857  | 1762.861    | -0.0247 | -14   | 79         | 94       | GLVYETSVLDPDEGIR | 91        | 100    |                        |      | Mascot      |
| 1762.8857  | 1762.861    | -0.0247 | -14   | 79         | 94       | GLVYETSVLDPDEGIR |           |        |                        |      | Mascot      |

|   |                                                                            |  |  |  |              |         |      |   |     |     |     |     |  |
|---|----------------------------------------------------------------------------|--|--|--|--------------|---------|------|---|-----|-----|-----|-----|--|
| 4 | PREDICTED: citrate synthase, mitochondrial-like [Danio gi 326679221 rerio] |  |  |  | gi 326679221 | 51750.3 | 7.68 | 7 | 208 | 100 | 187 | 100 |  |
|---|----------------------------------------------------------------------------|--|--|--|--------------|---------|------|---|-----|-----|-----|-----|--|

Peptide Information

| Calc. Mass | Obsrv. Mass | ± da    | ± ppm | Start Seq. | End Seq. | Sequence         | Ion Score | C. I.  | % Modification         | Rank | Result Type |
|------------|-------------|---------|-------|------------|----------|------------------|-----------|--------|------------------------|------|-------------|
| 1030.5461  | 1030.5696   | 0.0235  | 23    | 18         | 27       | NAACVVVAAR       |           |        | Carbamidomethyl (C)[4] |      | Mascot      |
| 1127.6571  | 1127.6427   | -0.0144 | -13   | 443        | 452      | ALGFPLERPK       | 36        | 93.128 |                        |      | Mascot      |
| 1127.6571  | 1127.6427   | -0.0144 | -13   | 443        | 452      | ALGFPLERPK       |           |        |                        |      | Mascot      |
| 1167.6633  | 1167.6489   | -0.0144 | -12   | 343        | 353      | VVPGYGHAVLR      | 60        | 99.967 |                        |      | Mascot      |
| 1167.6633  | 1167.6489   | -0.0144 | -12   | 343        | 353      | VVPGYGHAVLR      |           |        |                        |      | Mascot      |
| 1355.6776  | 1355.6653   | -0.0123 | -9    | 330        | 339      | MRDYIWNTLK       |           |        | Oxidation (M)[1]       |      | Mascot      |
| 1532.7777  | 1532.746    | -0.0317 | -21   | 97         | 109      | GYSIPECQQLPK     |           |        | Carbamidomethyl (C)[7] |      | Mascot      |
| 1727.8455  | 1727.8198   | -0.0257 | -15   | 60         | 75       | TSIGQITVDMVYGGM  |           |        |                        |      | Mascot      |
| 1743.8405  | 1743.8185   | -0.022  | -13   | 60         | 75       | TSIGQITVDMVYGGM  |           |        | Oxidation (M)[10]      |      | Mascot      |
| 1759.8353  | 1759.8187   | -0.0166 | -9    | 60         | 75       | TSIGQITVDMVYGGM  |           |        | Oxidation (M)[10,15]   |      | Mascot      |
| 1762.8857  | 1762.861    | -0.0247 | -14   | 79         | 94       | GLVYETSVLDPDEGIR | 91        | 100    |                        |      | Mascot      |
| 1762.8857  | 1762.861    | -0.0247 | -14   | 79         | 94       | GLVYETSVLDPDEGIR |           |        |                        |      | Mascot      |

|   |                                      |  |  |  |             |         |      |    |     |     |     |     |  |
|---|--------------------------------------|--|--|--|-------------|---------|------|----|-----|-----|-----|-----|--|
| 5 | adenosylhomocysteinase [Danio rerio] |  |  |  | gi 40363541 | 47933.4 | 6.33 | 12 | 153 | 100 | 100 | 100 |  |
|---|--------------------------------------|--|--|--|-------------|---------|------|----|-----|-----|-----|-----|--|

| Peptide Information |             |         |       |            |          |                    |           |        |                         |      |             |  |  |
|---------------------|-------------|---------|-------|------------|----------|--------------------|-----------|--------|-------------------------|------|-------------|--|--|
| Calc. Mass          | Obsrv. Mass | ± da    | ± ppm | Start Seq. | End Seq. | Sequence           | Ion Score | C. I.  | % Modification          | Rank | Result Type |  |  |
| 874.488             | 874.4678    | -0.0202 | -23   | 198        | 205      | ESLIDGIK           |           |        |                         |      | Mascot      |  |  |
| 1007.5995           | 1007.5864   | -0.0131 | -13   | 336        | 344      | HIIVLAEGR          | 59        | 99.957 |                         |      | Mascot      |  |  |
| 1007.5995           | 1007.5864   | -0.0131 | -13   | 336        | 344      | HIIVLAEGR          |           |        |                         |      | Mascot      |  |  |
| 1030.5891           | 1030.5696   | -0.0195 | -19   | 198        | 206      | ESLIDGIKR          |           |        |                         |      | Mascot      |  |  |
| 1044.4568           | 1044.5037   | 0.0469  | 45    | 190        | 197      | FDNLYGCR           |           |        | Carbamidomethyl (C)[7]  |      | Mascot      |  |  |
| 1082.6317           | 1082.6184   | -0.0133 | -12   | 320        | 328      | INIKPQVDR          |           |        |                         |      | Mascot      |  |  |
| 1210.7266           | 1210.7117   | -0.0149 | -12   | 319        | 328      | KINIKPQVDR         |           |        |                         |      | Mascot      |  |  |
| 1216.6321           | 1216.6183   | -0.0138 | -11   | 9          | 19       | VADISLAEWGR        | 41        | 97.639 |                         |      | Mascot      |  |  |
| 1216.6321           | 1216.6183   | -0.0138 | -11   | 9          | 19       | VADISLAEWGR        |           |        |                         |      | Mascot      |  |  |
| 1259.5837           | 1259.5708   | -0.0129 | -10   | 188        | 197      | SKFDNLYGCR         |           |        | Carbamidomethyl (C)[9]  |      | Mascot      |  |  |
| 1438.7537           | 1438.7734   | 0.0197  | 14    | 390        | 402      | KLDEEVAAHLDK       |           |        |                         |      | Mascot      |  |  |
| 1875.9388           | 1875.9133   | -0.0255 | -14   | 417        | 432      | YLGLPSEGPFKPDHYR   |           |        |                         |      | Mascot      |  |  |
| 1880.8915           | 1880.875    | -0.0165 | -9    | 21         | 36       | AIEIAENEMPGLMKMR   |           |        | Oxidation (M)[9,13,15]  |      | Mascot      |  |  |
| 1994.9851           | 1994.9576   | -0.0275 | -14   | 269        | 286      | EGNIFVTTTGCEDILLGR |           |        | Carbamidomethyl (C)[11] |      | Mascot      |  |  |

6 pyruvate dehydrogenase E1 alpha 1 [Danio rerio] gi|53749653 43712.8 8.19 12 64 98.308 16 0

| Peptide Information |             |         |       |            |          |               |           |       |                                          |      |             |
|---------------------|-------------|---------|-------|------------|----------|---------------|-----------|-------|------------------------------------------|------|-------------|
| Calc. Mass          | Obsrv. Mass | ± da    | ± ppm | Start Seq. | End Seq. | Sequence      | Ion Score | C. I. | % Modification                           | Rank | Result Type |
| 874.4781            | 874.4678    | -0.0103 | -12   | 249        | 256      | GDFIPGLR      |           |       |                                          |      | Mascot      |
| 890.3937            | 890.3811    | -0.0126 | -14   | 271        | 277      | FAAEHCR       |           |       | Carbamidomethyl (C)[6]                   |      | Mascot      |
| 918.4791            | 918.4679    | -0.0112 | -12   | 123        | 130      | AHGYTLTR      |           |       |                                          |      | Mascot      |
| 999.4564            | 999.4427    | -0.0137 | -14   | 230        | 238      | YGMGTSVER     |           |       |                                          |      | Mascot      |
| 1019.5189           | 1019.5085   | -0.0104 | -10   | 136        | 144      | EIMAELTGR     |           |       |                                          |      | Mascot      |
| 1030.568            | 1030.5696   | 0.0016  | 2     | 382        | 390      | GTNPWSKLK     |           |       |                                          |      | Mascot      |
| 1035.5139           | 1035.5024   | -0.0115 | -11   | 136        | 144      | EIMAELTGR     |           |       | Oxidation (M)[3]                         |      | Mascot      |
| 1057.4949           | 1057.483    | -0.0119 | -11   | 62         | 69       | EEGLQYYR      |           |       |                                          |      | Mascot      |
| 1057.4949           | 1057.483    | -0.0119 | -11   | 62         | 69       | EEGLQYYR      | 16        | 0     |                                          |      | Mascot      |
| 1159.6066           | 1159.5892   | -0.0174 | -15   | 306        | 314      | TREEIQEVR     |           |       |                                          |      | Mascot      |
| 1179.5497           | 1179.5616   | 0.0119  | 10    | 257        | 266      | VDGMDVLCVR    |           |       | Carbamidomethyl (C)[8], Oxidation (M)[4] |      | Mascot      |
| 1320.698            | 1320.6808   | -0.0172 | -13   | 281        | 291      | GPILMELQTYR   |           |       |                                          |      | Mascot      |
| 1336.693            | 1336.6675   | -0.0255 | -19   | 281        | 291      | GPILMELQTYR   |           |       | Oxidation (M)[5]                         |      | Mascot      |
| 1382.7638           | 1382.7468   | -0.017  | -12   | 49         | 61       | LEEGPAVQAVLTR |           |       |                                          |      | Mascot      |

|  |  |          |           |         |     |     |     |               |  |  |  |  |  |  |  |  |  |  |  |  |  |  |  |  |  |  |  |  |  |  |  |  |  |  |  |  |  |  |  |  |  |  |  |  |  |  |  |  |  |  |  |  |  |  |  |  |  |  |  |  |  |  |  |  |  |  |  |  |  |  |  |  |  |  |  |  |  |  |  |  |  |  |  |  |  |  |  |  |  |  |  |  |  |  |  |  |  |  |  |  |  |  |  |  |  |  |  |  |  |  |  |  |  |  |  |  |  |  |  |  |  |  |  |  |  |  |  |  |  |  |  |  |  |  |  |  |  |  |  |  |  |  |  |  |  |  |  |  |  |  |  |  |  |  |  |  |  |  |  |  |  |  |  |  |  |  |  |  |  |  |  |  |  |  |  |  |  |  |  |  |  |  |  |  |  |  |  |  |  |  |  |  |  |  |  |  |  |  |  |  |  |  |  |  |  |  |  |  |  |  |  |  |  |  |  |  |  |  |  |  |  |  |  |  |  |  |  |  |  |  |  |  |  |  |  |  |  |  |  |  |  |  |  |  |  |  |  |  |  |  |  |  |  |  |  |  |  |  |  |  |  |  |  |  |  |  |  |  |  |  |  |  |  |  |  |  |  |  |  |  |  |  |  |  |  |  |  |  |  |  |  |  |  |  |  |  |  |  |  |  |  |  |  |  |  |  |  |  |  |  |  |  |  |  |  |  |  |  |  |  |  |  |  |  |  |  |  |  |  |  |  |  |  |  |  |  |  |  |  |  |  |  |  |  |  |  |  |  |  |  |  |  |  |  |  |  |  |  |  |  |  |  |  |  |  |  |  |  |  |  |  |  |  |  |  |  |  |  |  |  |  |  |  |  |  |  |  |  |  |  |  |  |  |  |  |  |  |  |  |  |  |  |  |  |  |  |  |  |  |  |  |  |  |  |  |  |  |  |  |  |  |  |  |  |  |  |  |  |  |  |  |  |  |  |  |  |  |  |  |  |  |  |  |  |  |  |  |  |  |  |  |  |  |  |  |  |  |  |  |  |  |  |  |  |  |  |  |  |  |  |  |  |  |  |  |  |  |  |  |  |  |  |  |  |  |  |  |  |  |  |  |  |  |  |  |  |  |  |  |  |  |  |  |  |  |  |  |  |  |  |  |  |  |  |  |  |  |  |  |  |  |  |  |  |  |  |  |  |  |  |  |  |  |  |  |  |  |  |  |  |  |  |  |  |  |  |  |  |  |  |  |  |  |  |  |  |  |  |  |  |  |  |  |  |  |  |  |  |  |  |  |  |  |  |  |  |  |  |  |  |  |  |  |  |  |  |  |  |  |  |  |  |  |  |  |  |  |  |  |  |  |  |  |  |  |  |  |  |  |  |  |  |  |  |  |  |  |  |  |  |  |  |  |  |  |  |  |  |  |  |  |  |  |  |  |  |  |  |  |  |  |  |  |  |  |  |  |  |  |  |  |  |  |  |  |  |  |  |  |  |  |  |  |  |  |  |  |  |  |  |  |  |  |  |  |  |  |  |  |  |  |  |  |  |  |  |  |  |  |  |  |  |  |  |  |  |  |  |  |  |  |  |  |  |  |  |  |  |  |  |  |  |  |  |  |  |  |  |  |  |  |  |  |  |  |  |  |  |  |  |  |  |  |  |  |  |  |  |  |  |  |  |  |  |  |  |  |  |  |  |  |  |  |  |  |  |  |  |  |  |  |  |  |  |  |  |  |  |  |  |  |  |  |  |  |  |  |  |  |  |  |  |  |  |  |  |  |  |  |  |  |  |  |  |  |  |  |  |  |  |  |  |  |  |  |  |  |  |  |  |  |  |  |  |  |  |  |  |  |  |  |  |  |  |  |  |  |  |  |  |  |  |  |  |  |  |  |  |  |  |  |  |  |  |  |  |  |  |  |  |  |  |  |  |  |  |  |  |  |  |  |  |  |  |  |  |  |  |  |  |  |  |  |  |  |  |  |  |  |  |  |  |  |  |  |  |  |  |  |  |  |  |  |  |  |  |  |  |  |  |  |  |  |  |  |  |  |  |  |  |  |  |  |  |  |  |  |  |  |  |  |  |  |  |  |  |  |  |  |  |  |  |  |  |  |  |  |  |  |  |  |  |  |  |  |  |  |  |  |  |  |  |  |  |  |  |  |  |  |  |  |  |  |  |  |  |  |  |  |  |  |  |  |  |  |  |  |  |  |  |  |  |  |  |  |  |  |  |  |  |  |  |  |  |  |  |  |  |  |  |  |  |  |  |  |  |  |  |  |  |  |  |  |  |  |  |  |  |  |  |  |  |  |  |  |  |  |  |  |  |  |  |  |  |  |  |  |  |  |  |  |  |  |  |  |  |  |  |  |  |  |  |  |  |  |  |  |  |  |  |  |  |  |  |  |  |  |  |  |  |  |  |  |  |  |  |  |  |  |  |  |  |  |  |  |  |  |  |  |  |  |  |  |  |  |  |  |  |  |  |  |  |  |  |  |  |  |  |  |  |  |  |  |  |  |  |  |  |  |  |  |  |  |  |  |  |  |  |  |  |  |  |  |  |  |  |  |  |  |  |  |  |  |  |  |  |  |  |  |  |  |  |  |  |  |  |  |  |  |  |  |  |  |  |  |  |  |  |  |  |  |  |  |  |  |  |  |  |  |  |  |  |  |  |  |  |  |  |  |  |  |  |  |  |  |  |  |  |  |  |  |  |  |  |  |  |  |  |  |  |  |  |  |  |  |  |  |  |  |  |  |  |  |  |  |  |  |  |  |  |  |  |  |  |  |  |  |  |  |  |  |  |  |  |  |  |  |  |  |  |  |  |  |  |  |  |  |  |  |  |  |  |  |  |  |  |  |  |  |  |  |  |  |  |  |  |  |  |  |  |  |  |  |  |  |  |  |  |  |  |  |  |  |  |  |  |  |  |  |  |  |  |  |  |  |  |  |  |  |  |  |  |  |  |  |  |  |  |  |  |  |  |  |  |  |  |  |  |  |  |  |  |  |  |  |  |  |  |  |  |  |  |  |  |  |  |  |  |  |  |  |  |  |  |  |  |  |  |  |  |  |  |  |  |  |  |  |  |  |  |  |  |  |  |  |  |  |  |  |  |  |  |  |  |  |  |  |  |  |  |  |  |  |  |  |  |  |  |  |  |  |  |  |  |  |  |  |  |  |  |  |  |  |  |  |  |  |  |  |
|--|--|----------|-----------|---------|-----|-----|-----|---------------|--|--|--|--|--|--|--|--|--|--|--|--|--|--|--|--|--|--|--|--|--|--|--|--|--|--|--|--|--|--|--|--|--|--|--|--|--|--|--|--|--|--|--|--|--|--|--|--|--|--|--|--|--|--|--|--|--|--|--|--|--|--|--|--|--|--|--|--|--|--|--|--|--|--|--|--|--|--|--|--|--|--|--|--|--|--|--|--|--|--|--|--|--|--|--|--|--|--|--|--|--|--|--|--|--|--|--|--|--|--|--|--|--|--|--|--|--|--|--|--|--|--|--|--|--|--|--|--|--|--|--|--|--|--|--|--|--|--|--|--|--|--|--|--|--|--|--|--|--|--|--|--|--|--|--|--|--|--|--|--|--|--|--|--|--|--|--|--|--|--|--|--|--|--|--|--|--|--|--|--|--|--|--|--|--|--|--|--|--|--|--|--|--|--|--|--|--|--|--|--|--|--|--|--|--|--|--|--|--|--|--|--|--|--|--|--|--|--|--|--|--|--|--|--|--|--|--|--|--|--|--|--|--|--|--|--|--|--|--|--|--|--|--|--|--|--|--|--|--|--|--|--|--|--|--|--|--|--|--|--|--|--|--|--|--|--|--|--|--|--|--|--|--|--|--|--|--|--|--|--|--|--|--|--|--|--|--|--|--|--|--|--|--|--|--|--|--|--|--|--|--|--|--|--|--|--|--|--|--|--|--|--|--|--|--|--|--|--|--|--|--|--|--|--|--|--|--|--|--|--|--|--|--|--|--|--|--|--|--|--|--|--|--|--|--|--|--|--|--|--|--|--|--|--|--|--|--|--|--|--|--|--|--|--|--|--|--|--|--|--|--|--|--|--|--|--|--|--|--|--|--|--|--|--|--|--|--|--|--|--|--|--|--|--|--|--|--|--|--|--|--|--|--|--|--|--|--|--|--|--|--|--|--|--|--|--|--|--|--|--|--|--|--|--|--|--|--|--|--|--|--|--|--|--|--|--|--|--|--|--|--|--|--|--|--|--|--|--|--|--|--|--|--|--|--|--|--|--|--|--|--|--|--|--|--|--|--|--|--|--|--|--|--|--|--|--|--|--|--|--|--|--|--|--|--|--|--|--|--|--|--|--|--|--|--|--|--|--|--|--|--|--|--|--|--|--|--|--|--|--|--|--|--|--|--|--|--|--|--|--|--|--|--|--|--|--|--|--|--|--|--|--|--|--|--|--|--|--|--|--|--|--|--|--|--|--|--|--|--|--|--|--|--|--|--|--|--|--|--|--|--|--|--|--|--|--|--|--|--|--|--|--|--|--|--|--|--|--|--|--|--|--|--|--|--|--|--|--|--|--|--|--|--|--|--|--|--|--|--|--|--|--|--|--|--|--|--|--|--|--|--|--|--|--|--|--|--|--|--|--|--|--|--|--|--|--|--|--|--|--|--|--|--|--|--|--|--|--|--|--|--|--|--|--|--|--|--|--|--|--|--|--|--|--|--|--|--|--|--|--|--|--|--|--|--|--|--|--|--|--|--|--|--|--|--|--|--|--|--|--|--|--|--|--|--|--|--|--|--|--|--|--|--|--|--|--|--|--|--|--|--|--|--|--|--|--|--|--|--|--|--|--|--|--|--|--|--|--|--|--|--|--|--|--|--|--|--|--|--|--|--|--|--|--|--|--|--|--|--|--|--|--|--|--|--|--|--|--|--|--|--|--|--|--|--|--|--|--|--|--|--|--|--|--|--|--|--|--|--|--|--|--|--|--|--|--|--|--|--|--|--|--|--|--|--|--|--|--|--|--|--|--|--|--|--|--|--|--|--|--|--|--|--|--|--|--|--|--|--|--|--|--|--|--|--|--|--|--|--|--|--|--|--|--|--|--|--|--|--|--|--|--|--|--|--|--|--|--|--|--|--|--|--|--|--|--|--|--|--|--|--|--|--|--|--|--|--|--|--|--|--|--|--|--|--|--|--|--|--|--|--|--|--|--|--|--|--|--|--|--|--|--|--|--|--|--|--|--|--|--|--|--|--|--|--|--|--|--|--|--|--|--|--|--|--|--|--|--|--|--|--|--|--|--|--|--|--|--|--|--|--|--|--|--|--|--|--|--|--|--|--|--|--|--|--|--|--|--|--|--|--|--|--|--|--|--|--|--|--|--|--|--|--|--|--|--|--|--|--|--|--|--|--|--|--|--|--|--|--|--|--|--|--|--|--|--|--|--|--|--|--|--|--|--|--|--|--|--|--|--|--|--|--|--|--|--|--|--|--|--|--|--|--|--|--|--|--|--|--|--|--|--|--|--|--|--|--|--|--|--|--|--|--|--|--|--|--|--|--|--|--|--|--|--|--|--|--|--|--|--|--|--|--|--|--|--|--|--|--|--|--|--|--|--|--|--|--|--|--|--|--|--|--|--|--|--|--|--|--|--|--|--|--|--|--|--|--|--|--|--|--|--|--|--|--|--|--|--|--|--|--|--|--|--|--|--|--|--|--|--|--|--|--|--|--|--|--|--|--|--|--|--|--|--|--|--|--|--|--|--|--|--|--|--|--|--|--|--|--|--|--|--|--|--|--|--|--|--|--|--|--|--|--|--|--|--|--|--|--|--|--|--|--|--|--|--|--|--|--|--|--|--|--|--|--|--|--|--|--|--|--|--|--|--|--|--|--|--|--|--|--|--|--|--|--|--|--|--|--|--|--|--|--|--|--|--|--|--|--|--|--|--|--|--|--|--|--|--|--|--|--|--|--|--|--|--|--|--|--|--|--|--|--|--|--|--|--|--|--|--|--|--|--|--|--|--|--|--|--|--|--|--|--|--|--|--|--|--|--|--|--|--|--|--|--|--|--|--|--|--|--|--|--|--|--|--|--|--|--|--|--|--|--|--|--|--|--|--|--|--|--|--|--|--|--|--|--|--|--|--|--|--|--|--|--|--|--|--|--|--|--|--|--|--|--|--|--|--|--|--|--|--|--|--|--|--|--|--|--|--|--|--|--|--|--|--|--|--|--|--|--|--|--|--|--|--|--|--|--|--|--|--|--|--|--|--|--|--|--|--|--|--|--|--|--|--|--|--|--|--|--|--|--|--|--|--|--|--|--|--|--|--|--|--|--|--|--|--|--|--|--|--|--|--|--|--|--|--|--|--|--|--|--|--|--|--|--|--|--|--|--|--|--|--|--|--|--|--|--|--|--|
|  |  | 1592.691 | 1592.6744 | -0.0166 | -10 | 292 | 305 | YHGHSMDPGVSYR |  |  |  |  |  |  |  |  |  |  |  |  |  |  |  |  |  |  |  |  |  |  |  |  |  |  |  |  |  |  |  |  |  |  |  |  |  |  |  |  |  |  |  |  |  |  |  |  |  |  |  |  |  |  |  |  |  |  |  |  |  |  |  |  |  |  |  |  |  |  |  |  |  |  |  |  |  |  |  |  |  |  |  |  |  |  |  |  |  |  |  |  |  |  |  |  |  |  |  |  |  |  |  |  |  |  |  |  |  |  |  |  |  |  |  |  |  |  |  |  |  |  |  |  |  |  |  |  |  |  |  |  |  |  |  |  |  |  |  |  |  |  |  |  |  |  |  |  |  |  |  |  |  |  |  |  |  |  |  |  |  |  |  |  |  |  |  |  |  |  |  |  |  |  |  |  |  |  |  |  |  |  |  |  |  |  |  |  |  |  |  |  |  |  |  |  |  |  |  |  |  |  |  |  |  |  |  |  |  |  |  |  |  |  |  |  |  |  |  |  |  |  |  |  |  |  |  |  |  |  |  |  |  |  |  |  |  |  |  |  |  |  |  |  |  |  |  |  |  |  |  |  |  |  |  |  |  |  |  |  |  |  |  |  |  |  |  |  |  |  |  |  |  |  |  |  |  |  |  |  |  |  |  |  |  |  |  |  |  |  |  |  |  |  |  |  |  |  |  |  |  |  |  |  |  |  |  |  |  |  |  |  |  |  |  |  |  |  |  |  |  |  |  |  |  |  |  |  |  |  |  |  |  |  |  |  |  |  |  |  |  |  |  |  |  |  |  |  |  |  |  |  |  |  |  |  |  |  |  |  |  |  |  |  |  |  |  |  |  |  |  |  |  |  |  |  |  |  |  |  |  |  |  |  |  |  |  |  |  |  |  |  |  |  |  |  |  |  |  |  |  |  |  |  |  |  |  |  |  |  |  |  |  |  |  |  |  |  |  |  |  |  |  |  |  |  |  |  |  |  |  |  |  |  |  |  |  |  |  |  |  |  |  |  |  |  |  |  |  |  |  |  |  |  |  |  |  |  |  |  |  |  |  |  |  |  |  |  |  |  |  |  |  |  |  |  |  |  |  |  |  |  |  |  |  |  |  |  |  |  |  |  |  |  |  |  |  |  |  |  |  |  |  |  |  |  |  |  |  |  |  |  |  |  |  |  |  |  |  |  |  |  |  |  |  |  |  |  |  |  |  |  |  |  |  |  |  |  |  |  |  |  |  |  |  |  |  |  |  |  |  |  |  |  |  |  |  |  |  |  |  |  |  |  |  |  |  |  |  |  |  |  |  |  |  |  |  |  |  |  |  |  |  |  |  |  |  |  |  |  |  |  |  |  |  |  |  |  |  |  |  |  |  |  |  |  |  |  |  |  |  |  |  |  |  |  |  |  |  |  |  |  |  |  |  |  |  |  |  |  |  |  |  |  |  |  |  |  |  |  |  |  |  |  |  |  |  |  |  |  |  |  |  |  |  |  |  |  |  |  |  |  |  |  |  |  |  |  |  |  |  |  |  |  |  |  |  |  |  |  |  |  |  |  |  |  |  |  |  |  |  |  |  |  |  |  |  |  |  |  |  |  |  |  |  |  |  |  |  |  |  |  |  |  |  |  |  |  |  |  |  |  |  |  |  |  |  |  |  |  |  |  |  |  |  |  |  |  |  |  |  |  |  |  |  |  |  |  |  |  |  |  |  |  |  |  |  |  |  |  |  |  |  |  |  |  |  |  |  |  |  |  |  |  |  |  |  |  |  |  |  |  |  |  |  |  |  |  |  |  |  |  |  |  |  |  |  |  |  |  |  |  |  |  |  |  |  |  |  |  |  |  |  |  |  |  |  |  |  |  |  |  |  |  |  |  |  |  |  |  |  |  |  |  |  |  |  |  |  |  |  |  |  |  |  |  |  |  |  |  |  |  |  |  |  |  |  |  |  |  |  |  |  |  |  |  |  |  |  |  |  |  |  |  |  |  |  |  |  |  |  |  |  |  |  |  |  |  |  |  |  |  |  |  |  |  |  |  |  |  |  |  |  |  |  |  |  |  |  |  |  |  |  |  |  |  |  |  |  |  |  |  |  |  |  |  |  |  |  |  |  |  |  |  |  |  |  |  |  |  |  |  |  |  |  |  |  |  |  |  |  |  |  |  |  |  |  |  |  |  |  |  |  |  |  |  |  |  |  |  |  |  |  |  |  |  |  |  |  |  |  |  |  |  |  |  |  |  |  |  |  |  |  |  |  |  |  |  |  |  |  |  |  |  |  |  |  |  |  |  |  |  |  |  |  |  |  |  |  |  |  |  |  |  |  |  |  |  |  |  |  |  |  |  |  |  |  |  |  |  |  |  |  |  |  |  |  |  |  |  |  |  |  |  |  |  |  |  |  |  |  |  |  |  |  |  |  |  |  |  |  |  |  |  |  |  |  |  |  |  |  |  |  |  |  |  |  |  |  |  |  |  |  |  |  |  |  |  |  |  |  |  |  |  |  |  |  |  |  |  |  |  |  |  |  |  |  |  |  |  |  |  |  |  |  |  |  |  |  |  |  |  |  |  |  |  |  |  |  |  |  |  |  |  |  |  |  |  |  |  |  |  |  |  |  |  |  |  |  |  |  |  |  |  |  |  |  |  |  |  |  |  |  |  |  |  |  |  |  |  |  |  |  |  |  |  |  |  |  |  |  |  |  |  |  |  |  |  |  |  |  |  |  |  |  |  |  |  |  |  |  |  |  |  |  |  |  |  |  |  |  |  |  |  |  |  |  |  |  |  |  |  |  |  |  |  |  |  |  |  |  |  |  |  |  |  |  |  |  |  |  |  |  |  |  |  |  |  |  |  |  |  |  |  |  |  |  |  |  |  |  |  |  |  |  |  |  |  |  |  |  |  |  |  |  |  |  |  |  |  |  |  |  |  |  |  |  |  |  |  |  |  |  |  |  |  |  |  |  |  |  |  |  |  |  |  |  |  |  |  |  |  |  |  |  |  |  |  |  |  |  |  |  |  |  |  |  |  |  |  |  |  |  |  |  |  |  |  |  |  |  |  |  |  |  |  |  |  |  |  |  |  |  |  |  |  |  |  |  |  |  |  |  |  |  |  |  |  |  |  |  |  |  |  |  |  |  |  |  |  |  |  |  |  |  |  |  |  |  |  |  |  |  |  |  |  |  |  |  |  |  |
|--|--|----------|-----------|---------|-----|-----|-----|---------------|--|--|--|--|--|--|--|--|--|--|--|--|--|--|--|--|--|--|--|--|--|--|--|--|--|--|--|--|--|--|--|--|--|--|--|--|--|--|--|--|--|--|--|--|--|--|--|--|--|--|--|--|--|--|--|--|--|--|--|--|--|--|--|--|--|--|--|--|--|--|--|--|--|--|--|--|--|--|--|--|--|--|--|--|--|--|--|--|--|--|--|--|--|--|--|--|--|--|--|--|--|--|--|--|--|--|--|--|--|--|--|--|--|--|--|--|--|--|--|--|--|--|--|--|--|--|--|--|--|--|--|--|--|--|--|--|--|--|--|--|--|--|--|--|--|--|--|--|--|--|--|--|--|--|--|--|--|--|--|--|--|--|--|--|--|--|--|--|--|--|--|--|--|--|--|--|--|--|--|--|--|--|--|--|--|--|--|--|--|--|--|--|--|--|--|--|--|--|--|--|--|--|--|--|--|--|--|--|--|--|--|--|--|--|--|--|--|--|--|--|--|--|--|--|--|--|--|--|--|--|--|--|--|--|--|--|--|--|--|--|--|--|--|--|--|--|--|--|--|--|--|--|--|--|--|--|--|--|--|--|--|--|--|--|--|--|--|--|--|--|--|--|--|--|--|--|--|--|--|--|--|--|--|--|--|--|--|--|--|--|--|--|--|--|--|--|--|--|--|--|--|--|--|--|--|--|--|--|--|--|--|--|--|--|--|--|--|--|--|--|--|--|--|--|--|--|--|--|--|--|--|--|--|--|--|--|--|--|--|--|--|--|--|--|--|--|--|--|--|--|--|--|--|--|--|--|--|--|--|--|--|--|--|--|--|--|--|--|--|--|--|--|--|--|--|--|--|--|--|--|--|--|--|--|--|--|--|--|--|--|--|--|--|--|--|--|--|--|--|--|--|--|--|--|--|--|--|--|--|--|--|--|--|--|--|--|--|--|--|--|--|--|--|--|--|--|--|--|--|--|--|--|--|--|--|--|--|--|--|--|--|--|--|--|--|--|--|--|--|--|--|--|--|--|--|--|--|--|--|--|--|--|--|--|--|--|--|--|--|--|--|--|--|--|--|--|--|--|--|--|--|--|--|--|--|--|--|--|--|--|--|--|--|--|--|--|--|--|--|--|--|--|--|--|--|--|--|--|--|--|--|--|--|--|--|--|--|--|--|--|--|--|--|--|--|--|--|--|--|--|--|--|--|--|--|--|--|--|--|--|--|--|--|--|--|--|--|--|--|--|--|--|--|--|--|--|--|--|--|--|--|--|--|--|--|--|--|--|--|--|--|--|--|--|--|--|--|--|--|--|--|--|--|--|--|--|--|--|--|--|--|--|--|--|--|--|--|--|--|--|--|--|--|--|--|--|--|--|--|--|--|--|--|--|--|--|--|--|--|--|--|--|--|--|--|--|--|--|--|--|--|--|--|--|--|--|--|--|--|--|--|--|--|--|--|--|--|--|--|--|--|--|--|--|--|--|--|--|--|--|--|--|--|--|--|--|--|--|--|--|--|--|--|--|--|--|--|--|--|--|--|--|--|--|--|--|--|--|--|--|--|--|--|--|--|--|--|--|--|--|--|--|--|--|--|--|--|--|--|--|--|--|--|--|--|--|--|--|--|--|--|--|--|--|--|--|--|--|--|--|--|--|--|--|--|--|--|--|--|--|--|--|--|--|--|--|--|--|--|--|--|--|--|--|--|--|--|--|--|--|--|--|--|--|--|--|--|--|--|--|--|--|--|--|--|--|--|--|--|--|--|--|--|--|--|--|--|--|--|--|--|--|--|--|--|--|--|--|--|--|--|--|--|--|--|--|--|--|--|--|--|--|--|--|--|--|--|--|--|--|--|--|--|--|--|--|--|--|--|--|--|--|--|--|--|--|--|--|--|--|--|--|--|--|--|--|--|--|--|--|--|--|--|--|--|--|--|--|--|--|--|--|--|--|--|--|--|--|--|--|--|--|--|--|--|--|--|--|--|--|--|--|--|--|--|--|--|--|--|--|--|--|--|--|--|--|--|--|--|--|--|--|--|--|--|--|--|--|--|--|--|--|--|--|--|--|--|--|--|--|--|--|--|--|--|--|--|--|--|--|--|--|--|--|--|--|--|--|--|--|--|--|--|--|--|--|--|--|--|--|--|--|--|--|--|--|--|--|--|--|--|--|--|--|--|--|--|--|--|--|--|--|--|--|--|--|--|--|--|--|--|--|--|--|--|--|--|--|--|--|--|--|--|--|--|--|--|--|--|--|--|--|--|--|--|--|--|--|--|--|--|--|--|--|--|--|--|--|--|--|--|--|--|--|--|--|--|--|--|--|--|--|--|--|--|--|--|--|--|--|--|--|--|--|--|--|--|--|--|--|--|--|--|--|--|--|--|--|--|--|--|--|--|--|--|--|--|--|--|--|--|--|--|--|--|--|--|--|--|--|--|--|--|--|--|--|--|--|--|--|--|--|--|--|--|--|--|--|--|--|--|--|--|--|--|--|--|--|--|--|--|--|--|--|--|--|--|--|--|--|--|--|--|--|--|--|--|--|--|--|--|--|--|--|--|--|--|--|--|--|--|--|--|--|--|--|--|--|--|--|--|--|--|--|--|--|--|--|--|--|--|--|--|--|--|--|--|--|--|--|--|--|--|--|--|--|--|--|--|--|--|--|--|--|--|--|--|--|--|--|--|--|--|--|--|--|--|--|--|--|--|--|--|--|--|--|--|--|--|--|--|--|--|--|--|--|--|--|--|--|--|--|--|--|--|--|--|--|--|--|--|--|--|--|--|--|--|--|--|--|--|--|--|--|--|--|--|--|--|--|--|--|--|--|--|--|--|--|--|--|--|--|--|--|--|--|--|--|--|--|--|--|--|--|--|--|--|--|--|--|--|--|--|--|--|--|--|--|--|--|--|--|--|--|--|--|--|--|--|--|--|--|--|--|--|--|--|--|--|--|--|--|--|--|--|--|--|--|--|--|--|--|--|--|--|--|--|--|--|--|--|--|--|--|--|--|--|--|--|--|--|--|--|--|--|--|--|--|--|--|--|--|--|--|--|--|--|--|--|--|--|--|--|--|--|--|--|--|--|--|--|--|--|--|--|--|--|--|--|--|--|--|--|--|--|--|--|--|--|--|--|--|--|--|--|--|--|--|--|--|--|--|--|--|--|--|--|--|--|--|--|

| Calc. Mass | Obsrv. Mass | ± da    | ± ppm | Start Seq. | End Sequence               | Ion Score | C. I. % | Modification           | Rank | Result Type |
|------------|-------------|---------|-------|------------|----------------------------|-----------|---------|------------------------|------|-------------|
| 814.4352   | 814.4111    | -0.0241 | -30   | 819        | 825 APRSPMR                | 3         | 0       |                        |      | Mascot      |
| 814.4352   | 814.4111    | -0.0241 | -30   | 819        | 825 APRSPMR                |           |         |                        |      | Mascot      |
| 818.4002   | 818.4782    | 0.078   | 95    | 247        | 252 EEREQK                 |           |         |                        |      | Mascot      |
| 856.4094   | 856.5143    | 0.1049  | 122   | 846        | 852 SLHCSPR                |           |         | Carbamidomethyl (C)[4] |      | Mascot      |
| 874.4741   | 874.4678    | -0.0063 | -7    | 250        | 256 EQKNSLR                |           |         |                        |      | Mascot      |
| 890.4261   | 890.3811    | -0.045  | -51   | 309        | 315 NRCSTPR                |           |         | Carbamidomethyl (C)[3] |      | Mascot      |
| 929.4727   | 929.5282    | 0.0555  | 60    | 551        | 557 VTLDYYR                |           |         |                        |      | Mascot      |
| 1050.4772  | 1050.4878   | 0.0106  | 10    | 214        | 221 DEEELMR                |           |         | Oxidation (M)[7]       |      | Mascot      |
| 1050.4772  | 1050.4878   | 0.0106  | 10    | 214        | 221 DEEELMR                |           |         | Oxidation (M)[7]       |      | Mascot      |
| 1057.4727  | 1057.483    | 0.0103  | 10    | 712        | 720 SMVTETMMK              |           |         |                        |      | Mascot      |
| 1057.4727  | 1057.483    | 0.0103  | 10    | 712        | 720 SMVTETMMK              |           |         |                        |      | Mascot      |
| 1201.6787  | 1201.5469   | -0.1318 | -110  | 694        | 704 QTAELALTNLK            |           |         |                        |      | Mascot      |
| 1210.6361  | 1210.7117   | 0.0756  | 62    | 632        | 641 HLQVAVDLCR             |           |         | Carbamidomethyl (C)[9] |      | Mascot      |
| 1259.6729  | 1259.5708   | -0.1021 | -81   | 660        | 670 DTEALIEEVK             |           |         |                        |      | Mascot      |
| 1270.7114  | 1270.6569   | -0.0545 | -43   | 346        | 355 QQLIQVEREK             |           |         |                        |      | Mascot      |
| 1313.7722  | 1313.632    | -0.1402 | -107  | 621        | 631 NLVAVIRCQIK            |           |         | Carbamidomethyl (C)[8] |      | Mascot      |
| 1404.6675  | 1404.6337   | -0.0338 | -24   | 27         | 38 LMAELQEANEK             |           |         |                        |      | Mascot      |
| 1644.6364  | 1644.8022   | 0.1658  | 101   | 1          | 14 MLEESDGETEEMGR          |           |         | Oxidation (M)[1,12]    |      | Mascot      |
| 1644.6992  | 1644.8022   | 0.103   | 63    | 746        | 758 CDQYVTQLDEMQR          |           |         | Oxidation (M)[11]      |      | Mascot      |
| 1762.864   | 1762.861    | -0.003  | -2    | 101        | 115 LLQESANKEAEMDIR        |           |         | Oxidation (M)[12]      |      | Mascot      |
| 1762.864   | 1762.861    | -0.003  | -2    | 101        | 115 LLQESANKEAEMDIR        |           |         | Oxidation (M)[12]      |      | Mascot      |
| 2232.8469  | 2233.0535   | 0.2066  | 93    | 286        | 304 DREEGEDEEMDSGYN<br>NSK |           |         |                        |      | Mascot      |

| Calc. Mass | Obsrv. Mass | ± da    | ± ppm | Start Seq. | End Seq. | Sequence  | Ion Score | C. I. % | Modification           | Rank | Result Type |
|------------|-------------|---------|-------|------------|----------|-----------|-----------|---------|------------------------|------|-------------|
| 856.4206   | 856.5143    | 0.0937  | 109   | 43         | 48       | RCDLHR    |           |         | Carbamidomethyl (C)[2] |      | Mascot      |
| 874.4781   | 874.4678    | -0.0103 | -12   | 249        | 256      | GDFIPGLR  |           |         |                        |      | Mascot      |
| 999.4564   | 999.4427    | -0.0137 | -14   | 230        | 238      | YGMGTSVER |           |         |                        |      | Mascot      |



|           |           |         |     |     |     |                      |  |  |                    |  |  |        |
|-----------|-----------|---------|-----|-----|-----|----------------------|--|--|--------------------|--|--|--------|
| 1019.5189 | 1019.5085 | -0.0104 | -10 | 136 | 144 | EIMAELTGR            |  |  |                    |  |  | Mascot |
| 1030.5792 | 1030.5696 | -0.0096 | -9  | 248 | 256 | RGDFIPGLR            |  |  |                    |  |  | Mascot |
| 1035.5139 | 1035.5024 | -0.0115 | -11 | 136 | 144 | EIMAELTGR            |  |  | Oxidation (M)[3]   |  |  | Mascot |
| 1159.6066 | 1159.5892 | -0.0174 | -15 | 306 | 314 | TREEIQEVR            |  |  |                    |  |  | Mascot |
| 1320.698  | 1320.6808 | -0.0172 | -13 | 281 | 291 | GPILMELQTYR          |  |  |                    |  |  | Mascot |
| 1336.693  | 1336.6675 | -0.0255 | -19 | 281 | 291 | GPILMELQTYR          |  |  | Oxidation (M)[5]   |  |  | Mascot |
| 1438.7437 | 1438.7734 | 0.0297  | 21  | 123 | 135 | AHGYTYTRGVSVK        |  |  |                    |  |  | Mascot |
| 1592.691  | 1592.6744 | -0.0166 | -10 | 292 | 305 | YHGHSMSDPGVSYR       |  |  |                    |  |  | Mascot |
| 1608.6859 | 1608.6705 | -0.0154 | -10 | 292 | 305 | YHGHSMSDPGVSYR       |  |  | Oxidation (M)[6]   |  |  | Mascot |
| 1644.9102 | 1644.8022 | -0.108  | -66 | 2   | 17  | QNMLTVIANALKGGAK     |  |  | Oxidation (M)[3]   |  |  | Mascot |
| 1644.9102 | 1644.8022 | -0.108  | -66 | 2   | 17  | QNMLTVIANALKGGAK     |  |  | Oxidation (M)[3]   |  |  | Mascot |
| 1759.9557 | 1759.8187 | -0.137  | -78 | 1   | 17  | MQNMLTVIANALKGGAK    |  |  |                    |  |  | Mascot |
| 2283.0842 | 2283.1416 | 0.0574  | 25  | 327 | 346 | MISSNMASLEEIKDIDADIR |  |  | Oxidation (M)[1,6] |  |  | Mascot |

9 cleavage and polyadenylation factor subunit, homolog gi|55925534 165578.5 6.7 20 52 73.186  
[Danio rerio]

#### Peptide Information

| Calc. Mass | Obsrv. Mass | ± da    | ± ppm | Start Seq. | End Seq. | Sequence      | Ion Score | C. I. % | Modification            | Rank | Result Type |
|------------|-------------|---------|-------|------------|----------|---------------|-----------|---------|-------------------------|------|-------------|
| 870.4977   | 870.5195    | 0.0218  | 25    | 335        | 341      | VMPVRPR       |           |         | Oxidation (M)[2]        |      | Mascot      |
| 874.4628   | 874.4678    | 0.005   | 6     | 266        | 274      | SGTTAVNPK     |           |         |                         |      | Mascot      |
| 890.4213   | 890.3811    | -0.0402 | -45   | 372        | 378      | DEDVREK       |           |         |                         |      | Mascot      |
| 929.4475   | 929.5282    | 0.0807  | 87    | 1033       | 1040     | YDPQGPPR      |           |         |                         |      | Mascot      |
| 999.5833   | 999.4427    | -0.1406 | -141  | 192        | 199      | QLLELQKK      |           |         |                         |      | Mascot      |
| 1019.5003  | 1019.5085   | 0.0082  | 8     | 315        | 323      | KDNSAVEEK     |           |         |                         |      | Mascot      |
| 1030.5276  | 1030.5696   | 0.042   | 41    | 297        | 306      | GQASSERPAK    |           |         |                         |      | Mascot      |
| 1045.5135  | 1045.5474   | 0.0339  | 32    | 1024       | 1032     | FDAPPVMPPR    |           |         | Oxidation (M)[7]        |      | Mascot      |
| 1127.6782  | 1127.6427   | -0.0355 | -31   | 192        | 200      | QLLELQKKK     |           |         |                         |      | Mascot      |
| 1127.6782  | 1127.6427   | -0.0355 | -31   | 192        | 200      | QLLELQKKK     |           |         |                         |      | Mascot      |
| 1179.6732  | 1179.5616   | -0.1116 | -95   | 236        | 246      | VNPTVPVPQTK   |           |         |                         |      | Mascot      |
| 1210.6538  | 1210.7117   | 0.0579  | 48    | 504        | 513      | RPLEDRPAEK    |           |         |                         |      | Mascot      |
| 1235.6306  | 1235.6674   | 0.0368  | 30    | 112        | 121      | STWDEIFPLK    |           |         |                         |      | Mascot      |
| 1270.6022  | 1270.6569   | 0.0547  | 43    | 388        | 398      | DEGSKNLDHQK   |           |         |                         |      | Mascot      |
| 1382.5424  | 1382.7468   | 0.2044  | 148   | 1          | 12       | MSDDGAREDACR  |           |         | Carbamidomethyl (C)[11] |      | Mascot      |
| 1411.7288  | 1411.7698   | 0.041   | 29    | 515        | 527      | DGSLQRISAAEHK |           |         |                         |      | Mascot      |
| 1438.6934  | 1438.7734   | 0.08    | 56    | 809        | 820      | HDHFLEQGRSGR  |           |         |                         |      | Mascot      |
| 1493.7166  | 1493.7046   | -0.012  | -8    | 731        | 743      | IDRPPSCTGSTFR |           |         | Carbamidomethyl (C)[7]  |      | Mascot      |

|    |                                                                   |           |         |     |              |         |                        |   |    |       |  |                           |        |
|----|-------------------------------------------------------------------|-----------|---------|-----|--------------|---------|------------------------|---|----|-------|--|---------------------------|--------|
|    | 1592.6455                                                         | 1592.6744 | 0.0289  | 18  | 1426         | 1439    | EEPADDDMEAPMVK         |   |    |       |  | Oxidation (M)[8]          | Mascot |
|    | 1608.6967                                                         | 1608.6705 | -0.0262 | -16 | 1240         | 1252    | LYTGIQCYS CGMR         |   |    |       |  | Carbamidomethyl (C)[7,10] | Mascot |
|    | 2225.0046                                                         | 2225.0881 | 0.0835  | 38  | 1253         | 1270    | FTASQTDVYADHLDWHY<br>R |   |    |       |  |                           | Mascot |
| 10 | hypothetical protein LOC100145221 [Xenopus (Silurana) tropicalis] |           |         |     | gi 187608497 | 23765.4 | 8.5                    | 8 | 49 | 39.97 |  |                           |        |

#### Peptide Information

| Calc. Mass | Obsrv. Mass | ± da    | ± ppm | Start Seq. | End Seq. | Sequence           | Ion Score | C. I. | % Modification    | Rank | Result Type |
|------------|-------------|---------|-------|------------|----------|--------------------|-----------|-------|-------------------|------|-------------|
| 890.5015   | 890.3811    | -0.1204 | -135  | 38         | 45       | TDLGLLMK           |           |       |                   |      | Mascot      |
| 1082.5411  | 1082.6184   | 0.0773  | 71    | 204        | 213      | IPGHQQAMGK         |           |       | Oxidation (M)[8]  |      | Mascot      |
| 1206.6154  | 1206.5884   | -0.027  | -22   | 125        | 134      | VYNIDFNPPK         |           |       |                   |      | Mascot      |
| 1210.6361  | 1210.7117   | 0.0756  | 62    | 203        | 213      | KIPGHQQAMGK        |           |       | Oxidation (M)[9]  |      | Mascot      |
| 1382.6798  | 1382.7468   | 0.067   | 48    | 179        | 191      | GVLETFSGTETNK      |           |       |                   |      | Mascot      |
| 1532.8352  | 1532.746    | -0.0892 | -58   | 32         | 45       | ANIEAKTDLGLLMK     |           |       | Oxidation (M)[13] |      | Mascot      |
| 1597.8068  | 1597.7637   | -0.0431 | -27   | 177        | 191      | SKGVLETFSGTETNK    |           |       |                   |      | Mascot      |
| 1875.9745  | 1875.9133   | -0.0612 | -33   | 15         | 31       | IAQSFGCLKHLSSGDMLR |           |       | Oxidation (M)[15] |      | Mascot      |

|    |                                                                                                 |  |  |  |             |          |      |    |    |   |  |  |  |
|----|-------------------------------------------------------------------------------------------------|--|--|--|-------------|----------|------|----|----|---|--|--|--|
| 11 | novel protein similar to human pre-mRNA cleavage complex II protein Pcf11 (PCF11) [Danio rerio] |  |  |  | gi 37359680 | 161171.2 | 6.59 | 20 | 45 | 0 |  |  |  |
|----|-------------------------------------------------------------------------------------------------|--|--|--|-------------|----------|------|----|----|---|--|--|--|

#### Peptide Information

| Calc. Mass | Obsrv. Mass | ± da    | ± ppm | Start Seq. | End Seq. | Sequence    | Ion Score | C. I. | % Modification   | Rank | Result Type |
|------------|-------------|---------|-------|------------|----------|-------------|-----------|-------|------------------|------|-------------|
| 870.4977   | 870.5195    | 0.0218  | 25    | 335        | 341      | VMPVRPR     |           |       | Oxidation (M)[2] |      | Mascot      |
| 874.4628   | 874.4678    | 0.005   | 6     | 266        | 274      | SGTTAVNPK   |           |       |                  |      | Mascot      |
| 890.4213   | 890.3811    | -0.0402 | -45   | 372        | 378      | DEDVREK     |           |       |                  |      | Mascot      |
| 929.4475   | 929.5282    | 0.0807  | 87    | 999        | 1006     | YDPQGPPR    |           |       |                  |      | Mascot      |
| 999.5833   | 999.4427    | -0.1406 | -141  | 192        | 199      | QLLELQKK    |           |       |                  |      | Mascot      |
| 1019.5003  | 1019.5085   | 0.0082  | 8     | 315        | 323      | KDNSAVEEK   |           |       |                  |      | Mascot      |
| 1030.5276  | 1030.5696   | 0.042   | 41    | 297        | 306      | GQASSERPAK  |           |       |                  |      | Mascot      |
| 1045.5135  | 1045.5474   | 0.0339  | 32    | 990        | 998      | FDAPPVMPPR  |           |       | Oxidation (M)[7] |      | Mascot      |
| 1127.6782  | 1127.6427   | -0.0355 | -31   | 192        | 200      | QLLELQKKK   |           |       |                  |      | Mascot      |
| 1127.6782  | 1127.6427   | -0.0355 | -31   | 192        | 200      | QLLELQKKK   |           |       |                  |      | Mascot      |
| 1179.6732  | 1179.5616   | -0.1116 | -95   | 236        | 246      | VNPTVPVPQTK |           |       |                  |      | Mascot      |
| 1210.6538  | 1210.7117   | 0.0579  | 48    | 504        | 513      | RPLED RPAEK |           |       |                  |      | Mascot      |
| 1235.6306  | 1235.6674   | 0.0368  | 30    | 112        | 121      | STWDEIFPLK  |           |       |                  |      | Mascot      |
| 1270.6022  | 1270.6569   | 0.0547  | 43    | 388        | 398      | DEGSKNLDHQK |           |       |                  |      | Mascot      |

|    |                      |           |         |             |      |      |                        |      |                           |        |   |
|----|----------------------|-----------|---------|-------------|------|------|------------------------|------|---------------------------|--------|---|
|    | 1382.5424            | 1382.7468 | 0.2044  | 148         | 1    | 12   | MSDDGAREDACR           |      | Carbamidomethyl (C)[11]   | Mascot |   |
|    | 1411.7288            | 1411.7698 | 0.041   | 29          | 515  | 527  | DGSLQRISAAEHK          |      |                           | Mascot |   |
|    | 1438.6934            | 1438.7734 | 0.08    | 56          | 775  | 786  | HDHFLEQGRSGR           |      |                           | Mascot |   |
|    | 1493.7166            | 1493.7046 | -0.012  | -8          | 697  | 709  | IDRPPSCTGSTFR          |      | Carbamidomethyl (C)[7]    | Mascot |   |
|    | 1592.6455            | 1592.6744 | 0.0289  | 18          | 1389 | 1402 | EEPADDMEAPMVK          |      | Oxidation (M)[8]          | Mascot |   |
|    | 1608.6967            | 1608.6705 | -0.0262 | -16         | 1206 | 1218 | LYTGIQCYSCGMR          |      | Carbamidomethyl (C)[7,10] | Mascot |   |
|    | 2225.0046            | 2225.0881 | 0.0835  | 38          | 1219 | 1236 | FTASQTDVYADHLDWHY<br>R |      |                           | Mascot |   |
| 12 | taln-1 [Danio rerio] |           |         | gi 57222259 |      |      | 270469.6               | 5.86 | 25                        | 45     | 0 |

Peptide Information

| Calc. Mass | Obsrv. Mass | ± da    | ± ppm | Start Seq. | End Seq. | Sequence        | Ion Score | C. I. % | Modification           | Rank | Result Type |
|------------|-------------|---------|-------|------------|----------|-----------------|-----------|---------|------------------------|------|-------------|
| 814.4529   | 814.4111    | -0.0418 | -51   | 1329       | 1336     | NQLAAAAR        |           |         |                        |      | Mascot      |
| 814.4529   | 814.4111    | -0.0418 | -51   | 1329       | 1336     | NQLAAAAR        |           |         |                        |      | Mascot      |
| 856.408    | 856.5143    | 0.1063  | 124   | 1303       | 1310     | TISMSSSK        |           |         | Oxidation (M)[4]       |      | Mascot      |
| 874.4628   | 874.4678    | 0.005   | 6     | 2508       | 2514     | ELEEARK         |           |         |                        |      | Mascot      |
| 1030.5098  | 1030.5696   | 0.0598  | 58    | 1195       | 1203     | SVNCLPGQR       |           |         | Carbamidomethyl (C)[4] |      | Mascot      |
| 1044.5183  | 1044.5037   | -0.0146 | -14   | 67         | 74       | ALDYMYLR        |           |         |                        |      | Mascot      |
| 1057.6     | 1057.483    | -0.117  | -111  | 1022       | 1031     | NLASALAE LR     |           |         |                        |      | Mascot      |
| 1057.6     | 1057.483    | -0.117  | -111  | 1022       | 1031     | NLASALAE LR     |           |         |                        |      | Mascot      |
| 1082.4783  | 1082.6184   | 0.1401  | 129   | 1083       | 1092     | CSQDLGSSTK      |           |         | Carbamidomethyl (C)[1] |      | Mascot      |
| 1159.6317  | 1159.5892   | -0.0425 | -37   | 2027       | 2038     | LLVSGAGASQEK    |           |         |                        |      | Mascot      |
| 1179.5422  | 1179.5616   | 0.0194  | 16    | 2441       | 2450     | ADQDSQTMKR      |           |         |                        |      | Mascot      |
| 1210.5746  | 1210.7117   | 0.1371  | 113   | 469        | 478      | QHITSGQMHR      |           |         | Oxidation (M)[8]       |      | Mascot      |
| 1288.7008  | 1288.6763   | -0.0245 | -19   | 1456       | 1467     | GLVDPSQFARAK    |           |         |                        |      | Mascot      |
| 1320.7271  | 1320.6808   | -0.0463 | -35   | 424        | 434      | KSTVLQQQFNK     |           |         |                        |      | Mascot      |
| 1335.6208  | 1335.6278   | 0.007   | 5     | 1059       | 1071     | DMQEAKASAAEGK   |           |         |                        |      | Mascot      |
| 1355.7642  | 1355.6653   | -0.0989 | -73   | 1674       | 1686     | ASLAAISQQLTPR   |           |         |                        |      | Mascot      |
| 1382.7023  | 1382.7468   | 0.0445  | 32    | 1168       | 1180     | AIAKPGDPDSQQR   |           |         |                        |      | Mascot      |
| 1423.725   | 1423.7108   | -0.0142 | -10   | 2164       | 2175     | TATPEEFIRMTK    |           |         |                        |      | Mascot      |
| 1438.8013  | 1438.7734   | -0.0279 | -19   | 2137       | 2149     | GTRALEATIEHIK   |           |         |                        |      | Mascot      |
| 1454.6581  | 1454.7035   | 0.0454  | 31    | 1929       | 1942     | AGALQCSPNDSYTK  |           |         |                        |      | Mascot      |
| 1493.7628  | 1493.7046   | -0.0582 | -39   | 1601       | 1614     | AMLESSTGLIQTAR  |           |         | Oxidation (M)[2]       |      | Mascot      |
| 1532.7625  | 1532.746    | -0.0165 | -11   | 182        | 194      | EQGVEESEMLLLR   |           |         |                        |      | Mascot      |
| 1759.9008  | 1759.8187   | -0.0821 | -47   | 1748       | 1762     | ILNSQQQMNVLDTK  |           |         |                        |      | Mascot      |
| 1762.7775  | 1762.861    | 0.0835  | 47    | 16         | 30       | TMQFEPSTVVYDACR |           |         | Oxidation (M)[2]       |      | Mascot      |
| 1762.7775  | 1762.861    | 0.0835  | 47    | 16         | 30       | TMQFEPSTVVYDACR |           |         | Oxidation (M)[2]       |      | Mascot      |

|    |                                |           |         |     |              |      |                            |       |      |    |    |                         |  |  |  |  |        |
|----|--------------------------------|-----------|---------|-----|--------------|------|----------------------------|-------|------|----|----|-------------------------|--|--|--|--|--------|
|    | 2211.1865                      | 2211.0728 | -0.1137 | -51 | 2059         | 2080 | LGAASLGSEDPETQVVLI<br>NAVK |       |      |    |    |                         |  |  |  |  | Mascot |
|    | 2225.1846                      | 2225.0881 | -0.0965 | -43 | 718          | 738  | VVVAPTISSPVCQEQLIEA<br>GK  |       |      |    |    | Carbamidomethyl (C)[12] |  |  |  |  | Mascot |
|    | 2233.0952                      | 2233.0535 | -0.0417 | -19 | 1337         | 1357 | AVTDSINQLISMCTQQAP<br>GQK  |       |      |    |    |                         |  |  |  |  | Mascot |
| 13 | integrin, beta 5 [Danio rerio] |           |         |     | gi 169158555 |      |                            | 89380 | 6.44 | 16 | 45 | 0                       |  |  |  |  |        |

#### Peptide Information

| Calc. Mass | Obsrv. Mass | ± da    | ± ppm | Start Seq. | End Seq. | Sequence                 | Ion Score | C. I. | % Modification              | Rank | Result Type |
|------------|-------------|---------|-------|------------|----------|--------------------------|-----------|-------|-----------------------------|------|-------------|
| 890.4625   | 890.3811    | -0.0814 | -91   | 242        | 248      | QMVSRNR                  |           |       |                             |      | Mascot      |
| 918.544    | 918.4679    | -0.0761 | -83   | 565        | 573      | GILCSGKIK                |           |       |                             |      | Mascot      |
| 999.5403   | 999.4427    | -0.0976 | -98   | 563        | 571      | HKGILCSGK                |           |       | Carbamidomethyl (C)[6]      |      | Mascot      |
| 1082.4935  | 1082.6184   | 0.1249  | 115   | 68         | 76       | CDFSQNLQK                |           |       |                             |      | Mascot      |
| 1127.5336  | 1127.6427   | 0.1091  | 97    | 1          | 9        | MWKLCSSTR                |           |       | Oxidation (M)[1]            |      | Mascot      |
| 1127.5336  | 1127.6427   | 0.1091  | 97    | 1          | 9        | MWKLCSSTR                |           |       | Oxidation (M)[1]            |      | Mascot      |
| 1201.5558  | 1201.5469   | -0.0089 | -7    | 776        | 785      | YEMASNPVYK               |           |       |                             |      | Mascot      |
| 1218.5571  | 1218.5825   | 0.0254  | 21    | 78         | 88       | GCDAPFIENPR              |           |       |                             |      | Mascot      |
| 1336.6818  | 1336.6675   | -0.0143 | -11   | 319        | 330      | MDYPSLALLGEK             |           |       |                             |      | Mascot      |
| 1426.6235  | 1426.7114   | 0.0879  | 62    | 662        | 673      | LADNQTCQRMCK             |           |       | Oxidation (M)[10]           |      | Mascot      |
| 1454.7249  | 1454.7035   | -0.0214 | -15   | 212        | 223      | LFPNCVPTFGFR             |           |       | Carbamidomethyl (C)[5]      |      | Mascot      |
| 1493.7594  | 1493.7046   | -0.0548 | -37   | 423        | 436      | IGDTVSNVTVDAR            |           |       |                             |      | Mascot      |
| 1532.6039  | 1532.746    | 0.1421  | 93    | 481        | 493      | CNSAGTYNCGLCR            |           |       | Carbamidomethyl (C)[1,9,12] |      | Mascot      |
| 1759.672   | 1759.8187   | 0.1467  | 83    | 623        | 637      | CQCTEPGAFGDTCEK          |           |       | Carbamidomethyl (C)[1,3,13] |      | Mascot      |
| 1762.8251  | 1762.861    | 0.0359  | 20    | 786        | 800      | RSVPMETDFDMHGIK          |           |       |                             |      | Mascot      |
| 1762.8251  | 1762.861    | 0.0359  | 20    | 786        | 800      | RSVPMETDFDMHGIK          |           |       |                             |      | Mascot      |
| 1994.8193  | 1994.9576   | 0.1383  | 69    | 548        | 564      | IYGTFCEDDFSCARHK         |           |       |                             |      | Mascot      |
| 2233.0693  | 2233.0535   | -0.0158 | -7    | 311        | 330      | NEYSASTKMDYPSLALLG<br>EK |           |       | Oxidation (M)[9]            |      | Mascot      |

14 novel protein (zgc:110238) [Danio rerio] gi|148725246 46118.4 9.29 14 44 0

#### Peptide Information

| Calc. Mass | Obsrv. Mass | ± da    | ± ppm | Start Seq. | End Seq. | Sequence | Ion Score | C. I. | % Modification   | Rank | Result Type |
|------------|-------------|---------|-------|------------|----------|----------|-----------|-------|------------------|------|-------------|
| 814.3988   | 814.4111    | 0.0123  | 15    | 248        | 253      | LQNHMR   |           |       | Oxidation (M)[5] |      | Mascot      |
| 814.3988   | 814.4111    | 0.0123  | 15    | 248        | 253      | LQNHMR   |           |       | Oxidation (M)[5] |      | Mascot      |
| 929.4621   | 929.5282    | 0.0661  | 71    | 302        | 309      | NSLVGHMR |           |       | Oxidation (M)[7] |      | Mascot      |
| 1035.537   | 1035.5024   | -0.0346 | -33   | 274        | 281      | SNLYFHVR |           |       |                  |      | Mascot      |
| 1050.5625  | 1050.4878   | -0.0747 | -71   | 106        | 113      | HNLKVHMR |           |       | Oxidation (M)[7] |      | Mascot      |

|           |           |         |     |     |     |                     |                                             |        |
|-----------|-----------|---------|-----|-----|-----|---------------------|---------------------------------------------|--------|
| 1050.5625 | 1050.4878 | -0.0747 | -71 | 106 | 113 | HNLKVHMR            | Oxidation (M)[7]                            | Mascot |
| 1127.5844 | 1127.6427 | 0.0583  | 52  | 325 | 333 | SFSREFNLK           |                                             | Mascot |
| 1127.5844 | 1127.6427 | 0.0583  | 52  | 325 | 333 | SFSREFNLK           |                                             | Mascot |
| 1201.5929 | 1201.5469 | -0.046  | -38 | 300 | 309 | CKNSLVGHMR          | Carbamidomethyl (C)[1]                      | Mascot |
| 1235.7219 | 1235.6674 | -0.0545 | -44 | 216 | 225 | QRPSLEKHLK          |                                             | Mascot |
| 1259.4966 | 1259.5708 | 0.0742  | 59  | 91  | 100 | NNFTCCVCGK          | Carbamidomethyl (C)[5,6,8]                  | Mascot |
| 1411.6106 | 1411.7698 | 0.1592  | 113 | 373 | 383 | CHHCGKSFNHH         | Carbamidomethyl (C)[1,4]                    | Mascot |
| 1644.7621 | 1644.8022 | 0.0401  | 24  | 170 | 184 | IHSGEKPFPCNQCGK     |                                             | Mascot |
| 1644.7621 | 1644.8022 | 0.0401  | 24  | 282 | 296 | THTGEKPFVCTHCGK     |                                             | Mascot |
| 1762.7999 | 1762.861  | 0.0611  | 35  | 142 | 156 | VHTSERPYSCPQCAK     | Carbamidomethyl (C)[10]                     | Mascot |
| 1762.7999 | 1762.861  | 0.0611  | 35  | 142 | 156 | VHTSERPYSCPQCAK     | Carbamidomethyl (C)[10]                     | Mascot |
| 1880.7659 | 1880.875  | 0.1091  | 58  | 91  | 105 | NNFTCCVCGKCFQSR     | Carbamidomethyl (C)[5,6,8]                  | Mascot |
| 2210.8833 | 2211.0728 | 0.1895  | 86  | 334 | 352 | CHMSNHTGEKPYTCGQCGK | Carbamidomethyl (C)[1,14], Oxidation (M)[3] | Mascot |

15 novel protein similar to type I cytokeratin, enveloping layer [Danio rerio] gi|94732405 43116.8 5.22 10 44 0

#### Peptide Information

| Calc. Mass | Obsrv. Mass | ± da    | ± ppm | Start Seq. | End Seq. | Sequence             | Ion Score | C. I. % | Modification       | Rank | Result Type |
|------------|-------------|---------|-------|------------|----------|----------------------|-----------|---------|--------------------|------|-------------|
| 874.4628   | 874.4678    | 0.005   | 6     | 383        | 390      | LLDGEATR             |           |         |                    |      | Mascot      |
| 918.3655   | 918.4679    | 0.1024  | 112   | 1          | 8        | MMSSSSTR             |           |         | Oxidation (M)[1,2] |      | Mascot      |
| 1019.6135  | 1019.5085   | -0.105  | -103  | 209        | 216      | EELIFLKK             |           |         |                    |      | Mascot      |
| 1030.564   | 1030.5696   | 0.0056  | 5     | 382        | 390      | RLLDGEATR            |           |         |                    |      | Mascot      |
| 1057.4619  | 1057.483    | 0.0211  | 20    | 169        | 176      | YENELSMR             |           |         | Oxidation (M)[7]   |      | Mascot      |
| 1057.4619  | 1057.483    | 0.0211  | 20    | 169        | 176      | YENELSMR             |           |         | Oxidation (M)[7]   |      | Mascot      |
| 1235.6418  | 1235.6674   | 0.0256  | 21    | 265        | 274      | KDLEAWFQAK           |           |         |                    |      | Mascot      |
| 1320.6907  | 1320.6808   | -0.0099 | -7    | 114        | 125      | QFLDSKTAPSAR         |           |         |                    |      | Mascot      |
| 1426.6995  | 1426.7114   | 0.0119  | 8     | 371        | 381      | TRLEMEIAEYR          |           |         | Oxidation (M)[5]   |      | Mascot      |
| 1762.8792  | 1762.861    | -0.0182 | -10   | 248        | 262      | IMAEIREHYESVAAK      |           |         | Oxidation (M)[2]   |      | Mascot      |
| 1762.8792  | 1762.861    | -0.0182 | -10   | 248        | 262      | IMAEIREHYESVAAK      |           |         | Oxidation (M)[2]   |      | Mascot      |
| 1875.8613  | 1875.9133   | 0.052   | 28    | 9          | 28       | TYMSSGGSSRSVSGG GAGR |           |         | Oxidation (M)[3]   |      | Mascot      |

16 PREDICTED: uveal autoantigen with coiled-coil domains and ankyrin repeats-like [Danio rerio] gi|326676072 64011.1 5.62 11 43 0

#### Peptide Information

| Calc. Mass | Obsrv. Mass | ± da | ± ppm | Start Seq. | End Seq. | Sequence | Ion Score | C. I. % | Modification | Rank | Result Type |
|------------|-------------|------|-------|------------|----------|----------|-----------|---------|--------------|------|-------------|
|------------|-------------|------|-------|------------|----------|----------|-----------|---------|--------------|------|-------------|

|  |           |           |         |     |     |     |                          |   |  |   |  |                    |                                            |  |  |  |        |
|--|-----------|-----------|---------|-----|-----|-----|--------------------------|---|--|---|--|--------------------|--------------------------------------------|--|--|--|--------|
|  | 818.4002  | 818.4782  | 0.078   | 95  | 525 | 531 | QLEESGR                  |   |  |   |  |                    |                                            |  |  |  | Mascot |
|  | 842.5094  | 842.4996  | -0.0098 | -12 | 141 | 148 | LDAALALR                 |   |  |   |  |                    |                                            |  |  |  | Mascot |
|  | 918.4713  | 918.4679  | -0.0034 | -4  | 400 | 407 | VALAEMER                 |   |  |   |  |                    |                                            |  |  |  | Mascot |
|  | 999.3692  | 999.4427  | 0.0735  | 74  | 566 | 572 | MREECVC                  |   |  |   |  |                    | Carbamidomethyl (C)[5,7], Oxidation (M)[1] |  |  |  | Mascot |
|  | 1216.5925 | 1216.6183 | 0.0258  | 21  | 193 | 202 | QMQAHLMAVR               | 1 |  | 0 |  | Oxidation (M)[2,7] |                                            |  |  |  | Mascot |
|  | 1216.5925 | 1216.6183 | 0.0258  | 21  | 193 | 202 | QMQAHLMAVR               |   |  |   |  | Oxidation (M)[2,7] |                                            |  |  |  | Mascot |
|  | 1336.6353 | 1336.6675 | 0.0322  | 24  | 158 | 169 | SSEQALHASHNR             |   |  |   |  |                    |                                            |  |  |  | Mascot |
|  | 1644.8625 | 1644.8022 | -0.0603 | -37 | 394 | 407 | EVEQLKVALAEMER           |   |  |   |  |                    |                                            |  |  |  | Mascot |
|  | 1644.8625 | 1644.8022 | -0.0603 | -37 | 394 | 407 | EVEQLKVALAEMER           |   |  |   |  |                    |                                            |  |  |  | Mascot |
|  | 1743.8507 | 1743.8185 | -0.0322 | -18 | 412 | 426 | VPNTKEEGVQTEEQR          |   |  |   |  |                    |                                            |  |  |  | Mascot |
|  | 1951.9    | 1952.0193 | 0.1193  | 61  | 274 | 289 | TRLADIETNHAEMFCK         |   |  |   |  |                    | Carbamidomethyl (C)[15], Oxidation (M)[13] |  |  |  | Mascot |
|  | 1995.1022 | 1994.9576 | -0.1446 | -72 | 42  | 61  | TTQAKPPPAGIGWTKAG<br>SVK |   |  |   |  |                    |                                            |  |  |  | Mascot |
|  | 2283.1284 | 2283.1416 | 0.0132  | 6   | 350 | 368 | HQCILEENQSLTELQEQ<br>K   |   |  |   |  |                    |                                            |  |  |  | Mascot |

17 PREDICTED: hypothetical protein LOC100535258 [Danio rerio] gi|326666977 50441.6 5.12 13 42 0

#### Peptide Information

| Calc. Mass | Obsrv. Mass | ± da    | ± ppm | Start Seq. | End Seq. | Sequence                | Ion Score | C. I. | % | Modification                             | Rank | Result | Type   |
|------------|-------------|---------|-------|------------|----------|-------------------------|-----------|-------|---|------------------------------------------|------|--------|--------|
| 874.4012   | 874.4678    | 0.0666  | 76    | 18         | 25       | ANDNGLDR                |           |       |   |                                          |      |        | Mascot |
| 1030.5024  | 1030.5696   | 0.0672  | 65    | 18         | 26       | ANDNGLDRR               |           |       |   |                                          |      |        | Mascot |
| 1044.4237  | 1044.5037   | 0.08    | 77    | 224        | 230      | CYKCEER                 |           |       |   | Carbamidomethyl (C)[1,4]                 |      |        | Mascot |
| 1045.5636  | 1045.5474   | -0.0162 | -15   | 66         | 75       | AVTERIGDGK              |           |       |   |                                          |      |        | Mascot |
| 1050.4408  | 1050.4878   | 0.047   | 45    | 420        | 428      | DEEIECANK               |           |       |   |                                          |      |        | Mascot |
| 1050.4408  | 1050.4878   | 0.047   | 45    | 420        | 428      | DEEIECANK               |           |       |   |                                          |      |        | Mascot |
| 1201.5704  | 1201.5469   | -0.0235 | -20   | 208        | 217      | LCMSPDHVVK              |           |       |   | Carbamidomethyl (C)[2], Oxidation (M)[3] |      |        | Mascot |
| 1288.6143  | 1288.6763   | 0.062   | 48    | 141        | 151      | FDHWGVCPISK             |           |       |   |                                          |      |        | Mascot |
| 1382.678   | 1382.7468   | 0.0688  | 50    | 197        | 207      | VMHSHQVKTCR             |           |       |   | Carbamidomethyl (C)[10]                  |      |        | Mascot |
| 1404.7039  | 1404.6337   | -0.0702 | -50   | 417        | 428      | LLKDEEIECANK            |           |       |   |                                          |      |        | Mascot |
| 1608.7422  | 1608.6705   | -0.0717 | -45   | 2          | 17       | DGSTVTDLAMADGVEK        |           |       |   |                                          |      |        | Mascot |
| 1743.87    | 1743.8185   | -0.0515 | -30   | 156        | 170      | FYPGTNIEDGTRFVK         |           |       |   |                                          |      |        | Mascot |
| 2232.9636  | 2233.0535   | 0.0899  | 40    | 308        | 326      | VTEQEGTTWTQMDMTD<br>SLK |           |       |   | Oxidation (M)[12,14]                     |      |        | Mascot |
| 2283.895   | 2284.1375   | 0.2425  | 106   | 252        | 269      | CECWMGEEEEVEQQV<br>GR   |           |       |   | Carbamidomethyl (C)[1,3]                 |      |        | Mascot |

18 PREDICTED: midline-1 [Danio rerio] gi|292617847 74655 6.34 8 41 0 22 0

#### Peptide Information

| Calc. Mass | Obsrv. Mass | ± da | ± ppm | Start | End | Sequence | Ion | C. I. | % | Modification | Rank | Result | Type |
|------------|-------------|------|-------|-------|-----|----------|-----|-------|---|--------------|------|--------|------|
|------------|-------------|------|-------|-------|-----|----------|-----|-------|---|--------------|------|--------|------|

|    |                                                           |           |         | Seq. | Seq.        | Score   |                  |    |                        |        |
|----|-----------------------------------------------------------|-----------|---------|------|-------------|---------|------------------|----|------------------------|--------|
|    | 842.4631                                                  | 842.4996  | 0.0365  | 43   | 154         | 160     | KPFTGHR          |    |                        | Mascot |
|    | 1045.5459                                                 | 1045.5474 | 0.0015  | 1    | 295         | 303     | LAQQIANCK        |    | Carbamidomethyl (C)[8] | Mascot |
|    | 1050.5215                                                 | 1050.4878 | -0.0337 | -32  | 571         | 579     | DSTSWVLSR        | 22 | 0                      | Mascot |
|    | 1050.5215                                                 | 1050.4878 | -0.0337 | -32  | 571         | 579     | DSTSWVLSR        |    |                        | Mascot |
|    | 1320.6576                                                 | 1320.6808 | 0.0232  | 18   | 233         | 243     | RNSELENLMAK      |    | Oxidation (M)[9]       | Mascot |
|    | 1355.6412                                                 | 1355.6653 | 0.0241  | 18   | 592         | 602     | EFPIEPSPHMR      |    | Oxidation (M)[10]      | Mascot |
|    | 1438.7107                                                 | 1438.7734 | 0.0627  | 44   | 170         | 182     | LRGLACPEHGEEK    |    |                        | Mascot |
|    | 1597.8519                                                 | 1597.7637 | -0.0882 | -55  | 459         | 472     | YIFIVKAMNQAGSR   |    |                        | Mascot |
|    | 1644.8123                                                 | 1644.8022 | -0.0101 | -6   | 465         | 480     | AMNQAGSRSSPPGQLK |    | Oxidation (M)[2]       | Mascot |
|    | 1644.8123                                                 | 1644.8022 | -0.0101 | -6   | 465         | 480     | AMNQAGSRSSPPGQLK |    | Oxidation (M)[2]       | Mascot |
| 19 | DEAD (Asp-Glu-Ala-Asp) box polypeptide 39Aa [Danio rerio] |           |         |      | gi 41054355 | 39935.5 | 6.68             | 11 | 40                     | 0      |

#### Peptide Information

| Calc. Mass | Obsrv. Mass | ± da    | ± ppm | Start Seq. | End Seq. | Sequence          | Ion Score | C. I. % | Modification                                 | Rank | Result Type |
|------------|-------------|---------|-------|------------|----------|-------------------|-----------|---------|----------------------------------------------|------|-------------|
| 929.4985   | 929.5282    | 0.0297  | 32    | 152        | 158      | EIRPVCR           |           |         | Carbamidomethyl (C)[6]                       |      | Mascot      |
| 1035.4962  | 1035.5024   | 0.0062  | 6     | 119        | 126      | MLEQLDMR          |           |         |                                              |      | Mascot      |
| 1057.5935  | 1057.483    | -0.1105 | -104  | 152        | 159      | EIRPVCRK          |           |         | Carbamidomethyl (C)[6]                       |      | Mascot      |
| 1057.5935  | 1057.483    | -0.1105 | -104  | 152        | 159      | EIRPVCRK          |           |         | Carbamidomethyl (C)[6]                       |      | Mascot      |
| 1159.5638  | 1159.5892   | 0.0254  | 22    | 63         | 73       | CAVFFGGMSIK       |           |         |                                              |      | Mascot      |
| 1206.5896  | 1206.5884   | -0.0012 | -1    | 238        | 247      | GMTQEERLSR        |           |         |                                              |      | Mascot      |
| 1216.5853  | 1216.6183   | 0.033   | 27    | 63         | 73       | CAVFFGGMSIK       |           |         | Carbamidomethyl (C)[1]                       |      | Mascot      |
| 1216.5853  | 1216.6183   | 0.033   | 27    | 63         | 73       | CAVFFGGMSIK       |           |         | Carbamidomethyl (C)[1]                       |      | Mascot      |
| 1259.6167  | 1259.5708   | -0.0459 | -36   | 248        | 256      | YQQFKDFQR         |           |         |                                              |      | Mascot      |
| 1335.5741  | 1335.6278   | 0.0537  | 40    | 141        | 151      | QCMMFSATLSK       |           |         | Carbamidomethyl (C)[2], Oxidation (M)[3,4]   |      | Mascot      |
| 1438.6851  | 1438.7734   | 0.0883  | 61    | 1          | 13       | MDILCQAKSGMGK     |           |         | Carbamidomethyl (C)[5]                       |      | Mascot      |
| 1454.6801  | 1454.7035   | 0.0234  | 16    | 1          | 13       | MDILCQAKSGMGK     |           |         | Carbamidomethyl (C)[5], Oxidation (M)[1]     |      | Mascot      |
| 1597.8333  | 1597.7637   | -0.0696 | -44   | 128        | 140      | DVQDIFRLTPHEK     |           |         |                                              |      | Mascot      |
| 1951.9438  | 1952.0193   | 0.0755  | 39    | 135        | 151      | LTPHEKQCMMFSATLSK |           |         |                                              |      | Mascot      |
| 2121.9766  | 2122.0508   | 0.0742  | 35    | 110        | 126      | HFVLDECDKMLEQLDMR |           |         |                                              |      | Mascot      |
| 2121.9766  | 2122.0508   | 0.0742  | 35    | 110        | 126      | HFVLDECDKMLEQLDMR |           |         |                                              |      | Mascot      |
| 2210.9878  | 2211.0728   | 0.085   | 38    | 110        | 126      | HFVLDECDKMLEQLDMR |           |         | Carbamidomethyl (C)[7], Oxidation (M)[10,16] |      | Mascot      |

20 ras-like protein Rhoh [Danio rerio] gi|60459928 21096.8 9.03 5 40 0 15 0

#### Peptide Information

| Calc. Mass | Obsrv. Mass | ± da   | ± ppm | Start Seq. | End Seq. | Sequence        | Ion Score | C. I. | % Modification            | Rank | Result Type |
|------------|-------------|--------|-------|------------|----------|-----------------|-----------|-------|---------------------------|------|-------------|
| 1007.4462  | 1007.5864   | 0.1402 | 139   | 126        | 135      | ANCTTSPEGK      | 15        | 0     |                           |      | Mascot      |
| 1007.4462  | 1007.5864   | 0.1402 | 139   | 126        | 135      | ANCTTSPEGK      |           |       |                           |      | Mascot      |
| 1127.6354  | 1127.6427   | 0.0073 | 6     | 179        | 187      | RLLNLNPCK       |           |       | Carbamidomethyl (C)[8]    |      | Mascot      |
| 1127.6354  | 1127.6427   | 0.0073 | 6     | 179        | 187      | RLLNLNPCK       |           |       | Carbamidomethyl (C)[8]    |      | Mascot      |
| 1235.6201  | 1235.6674   | 0.0473 | 38    | 156        | 166      | GVQQVFEC AVR    |           |       |                           |      | Mascot      |
| 1411.6998  | 1411.7698   | 0.07   | 50    | 143        | 155      | AKGYLECSALSNR   |           |       |                           |      | Mascot      |
| 1592.8134  | 1592.6744   | -0.139 | -87   | 1          | 15       | TSVKCVLVGDCAVGK |           |       | Carbamidomethyl (C)[5,11] |      | Mascot      |

21 hypothetical protein LOC619199 [Danio rerio] gi|75750507 27858.1 6.39

8 40 0

#### Peptide Information

| Calc. Mass | Obsrv. Mass | ± da    | ± ppm | Start Seq. | End Seq. | Sequence            | Ion Score | C. I. | % Modification          | Rank | Result Type |
|------------|-------------|---------|-------|------------|----------|---------------------|-----------|-------|-------------------------|------|-------------|
| 929.5203   | 929.5282    | 0.0079  | 8     | 55         | 62       | FRVPAPDK            |           |       |                         |      | Mascot      |
| 1127.5765  | 1127.6427   | 0.0662  | 59    | 88         | 96       | MLLYSEVTR           |           |       | Oxidation (M)[1]        |      | Mascot      |
| 1127.5765  | 1127.6427   | 0.0662  | 59    | 88         | 96       | MLLYSEVTR           |           |       | Oxidation (M)[1]        |      | Mascot      |
| 1179.6732  | 1179.5616   | -0.1116 | -95   | 207        | 216      | IKLYSESLAR          |           |       |                         |      | Mascot      |
| 1270.558   | 1270.6569   | 0.0989  | 78    | 235        | 248      | GSSGSVLSTGTASC      |           |       | Carbamidomethyl (C)[14] |      | Mascot      |
| 1426.6591  | 1426.7114   | 0.0523  | 37    | 234        | 248      | RGSSGSVLSTGTASC     |           |       | Carbamidomethyl (C)[15] |      | Mascot      |
| 1493.745   | 1493.7046   | -0.0404 | -27   | 15         | 28       | ECVLSGLMSANGKK      |           |       | Carbamidomethyl (C)[2]  |      | Mascot      |
| 1597.6959  | 1597.7637   | 0.0678  | 42    | 155        | 167      | THHMDPRNTSMR        |           |       |                         |      | Mascot      |
| 2211.2205  | 2211.0728   | -0.1477 | -67   | 78         | 96       | FLLANGQLVKMLLYSEVTR |           |       | Oxidation (M)[11]       |      | Mascot      |

22 hypothetical protein LOC100158480 [Xenopus (Silurana) tropicalis]

gi|189230136

48869.1 6.2

10 40 0

#### Peptide Information

| Calc. Mass | Obsrv. Mass | ± da    | ± ppm | Start Seq. | End Seq. | Sequence    | Ion Score | C. I. | % Modification   | Rank | Result Type |
|------------|-------------|---------|-------|------------|----------|-------------|-----------|-------|------------------|------|-------------|
| 882.5658   | 882.5577    | -0.0081 | -9    | 141        | 148      | EAVILPIK    |           |       |                  |      | Mascot      |
| 929.4873   | 929.5282    | 0.0409  | 44    | 340        | 347      | DALMQPVR    |           |       |                  |      | Mascot      |
| 1019.4938  | 1019.5085   | 0.0147  | 14    | 1          | 9        | MAANNNLQK   |           |       | Oxidation (M)[1] |      | Mascot      |
| 1045.5789  | 1045.5474   | -0.0315 | -30   | 348        | 356      | KVQSATHFK   |           |       |                  |      | Mascot      |
| 1057.5823  | 1057.483    | -0.0993 | -94   | 340        | 348      | DALMQPVRK   |           |       |                  |      | Mascot      |
| 1057.5823  | 1057.483    | -0.0993 | -94   | 340        | 348      | DALMQPVRK   |           |       |                  |      | Mascot      |
| 1159.5742  | 1159.5892   | 0.015   | 13    | 126        | 136      | WNDVAGLEGAK |           |       |                  |      | Mascot      |
| 1336.5912  | 1336.6675   | 0.0763  | 57    | 386        | 396      | EMTWMEVPGEK |           |       |                  |      | Mascot      |



|    |                                                         |           |           |         |     |     |     |                            |         |      |   |    |   |                   |  |  |        |
|----|---------------------------------------------------------|-----------|-----------|---------|-----|-----|-----|----------------------------|---------|------|---|----|---|-------------------|--|--|--------|
|    |                                                         | 1493.8223 | 1493.7046 | -0.1177 | -79 | 288 | 299 | RIYIPLPEEHAR               |         |      |   |    |   |                   |  |  | Mascot |
|    |                                                         | 1597.8656 | 1597.7637 | -0.1019 | -64 | 2   | 16  | AANNNLQKAIDLANK            |         |      |   |    |   |                   |  |  | Mascot |
|    |                                                         | 2283.1536 | 2283.1416 | -0.012  | -5  | 305 | 325 | LNLGTTPNLSLTESDFMTL<br>GKK |         |      |   |    |   | Oxidation (M)[16] |  |  | Mascot |
| 23 | GTP:AMP phosphotransferase, mitochondrial [Danio rerio] |           |           |         |     |     |     | gi 47085881                | 23819.3 | 7.79 | 7 | 40 | 0 |                   |  |  |        |

#### Peptide Information

| Calc. Mass | Obsrv. Mass | $\pm$ da | $\pm$ ppm | Start Seq. | End Seq. | Sequence           | Ion Score | C. I. | % Modification    | Rank | Result Type |
|------------|-------------|----------|-----------|------------|----------|--------------------|-----------|-------|-------------------|------|-------------|
| 890.5015   | 890.3811    | -0.1204  | -135      | 38         | 45       | TDLGLLMK           |           |       |                   |      | Mascot      |
| 1082.5775  | 1082.6184   | 0.0409   | 38        | 204        | 213      | IPGHKQAMGK         |           |       | Oxidation (M)[8]  |      | Mascot      |
| 1206.6154  | 1206.5884   | -0.027   | -22       | 125        | 134      | VYNIDFNPPK         |           |       |                   |      | Mascot      |
| 1382.6798  | 1382.7468   | 0.067    | 48        | 179        | 191      | GVLETFSGTETNK      |           |       |                   |      | Mascot      |
| 1532.8352  | 1532.746    | -0.0892  | -58       | 32         | 45       | ANIEAKTDLGLLMK     |           |       | Oxidation (M)[13] |      | Mascot      |
| 1597.8068  | 1597.7637   | -0.0431  | -27       | 177        | 191      | SKGVLETFSGTETNK    |           |       |                   |      | Mascot      |
| 1875.9745  | 1875.9133   | -0.0612  | -33       | 15         | 31       | IAQSFGCLKHLSSGDMLR |           |       | Oxidation (M)[15] |      | Mascot      |

|    |                                       |  |  |  |  |  |  |             |         |      |   |    |   |  |  |  |  |
|----|---------------------------------------|--|--|--|--|--|--|-------------|---------|------|---|----|---|--|--|--|--|
| 24 | protein lin-7 homolog B [Danio rerio] |  |  |  |  |  |  | gi 89191826 | 22799.9 | 8.77 | 7 | 40 | 0 |  |  |  |  |
|----|---------------------------------------|--|--|--|--|--|--|-------------|---------|------|---|----|---|--|--|--|--|

#### Peptide Information

| Calc. Mass | Obsrv. Mass | $\pm$ da | $\pm$ ppm | Start Seq. | End Seq. | Sequence         | Ion Score | C. I. | % Modification            | Rank | Result Type |
|------------|-------------|----------|-----------|------------|----------|------------------|-----------|-------|---------------------------|------|-------------|
| 1127.6895  | 1127.6427   | -0.0468  | -42       | 162        | 172      | AAQGSVKLVVR      |           |       |                           |      | Mascot      |
| 1127.6895  | 1127.6427   | -0.0468  | -42       | 162        | 172      | AAQGSVKLVVR      |           |       |                           |      | Mascot      |
| 1206.6113  | 1206.5884   | -0.0229  | -19       | 112        | 121      | EQNSPIYISR       |           |       |                           |      | Mascot      |
| 1235.6929  | 1235.6674   | -0.0255  | -21       | 41         | 51       | VLQSKFCAAIR      |           |       |                           |      | Mascot      |
| 1313.7787  | 1313.632    | -0.1467  | -112      | 156        | 168      | AVELLKAAQGSVK    |           |       |                           |      | Mascot      |
| 1532.8907  | 1532.746    | -0.1447  | -94       | 27         | 40       | SGQLPPPKLQALQR   |           |       |                           |      | Mascot      |
| 1592.7927  | 1592.6744   | -0.1183  | -74       | 77         | 92       | ATVAFAASEGHAHPR  |           |       |                           |      | Mascot      |
| 1951.8856  | 1952.0193   | 0.1337   | 68        | 1          | 16       | MAAMTEPLCLERDVCR |           |       | Carbamidomethyl (C)[9,15] |      | Mascot      |

|    |                                                         |  |  |  |  |  |  |              |         |      |    |    |   |  |  |  |  |
|----|---------------------------------------------------------|--|--|--|--|--|--|--------------|---------|------|----|----|---|--|--|--|--|
| 25 | vacuolar protein sorting 4 homolog b-like [Danio rerio] |  |  |  |  |  |  | gi 155369339 | 48868.1 | 6.66 | 10 | 39 | 0 |  |  |  |  |
|----|---------------------------------------------------------|--|--|--|--|--|--|--------------|---------|------|----|----|---|--|--|--|--|

#### Peptide Information

| Calc. Mass | Obsrv. Mass | $\pm$ da | $\pm$ ppm | Start Seq. | End Seq. | Sequence  | Ion Score | C. I. | % Modification   | Rank | Result Type |
|------------|-------------|----------|-----------|------------|----------|-----------|-----------|-------|------------------|------|-------------|
| 882.5658   | 882.5577    | -0.0081  | -9        | 141        | 148      | EAVILPIK  |           |       |                  |      | Mascot      |
| 929.4873   | 929.5282    | 0.0409   | 44        | 340        | 347      | DALMQPVR  |           |       |                  |      | Mascot      |
| 1019.4938  | 1019.5085   | 0.0147   | 14        | 1          | 9        | MAANNNLQK |           |       | Oxidation (M)[1] |      | Mascot      |
| 1045.5789  | 1045.5474   | -0.0315  | -30       | 348        | 356      | KVQSATHFK |           |       |                  |      | Mascot      |

|    |                                                                    |              |         |      |    |    |   |
|----|--------------------------------------------------------------------|--------------|---------|------|----|----|---|
| 26 | PREDICTED: leucine-rich repeat-containing protein 8D [Danio rerio] | gi 292610712 | 94599.1 | 6.61 | 13 | 39 | 0 |
|----|--------------------------------------------------------------------|--------------|---------|------|----|----|---|

| Calc. Mass | Obsrv. Mass | ± da    | ± ppm | Start Seq. | End Seq. | Sequence        | Ion Score | C. I. | % Modification         | Rank | Result Type |
|------------|-------------|---------|-------|------------|----------|-----------------|-----------|-------|------------------------|------|-------------|
| 918.5077   | 918.4679    | -0.0398 | -43   | 554        | 561      | MIGLESLR        |           |       |                        |      | Mascot      |
| 1045.6438  | 1045.5474   | -0.0964 | -92   | 601        | 609      | LLVMNSLKK       |           |       |                        |      | Mascot      |
| 1057.5312  | 1057.483    | -0.0482 | -46   | 370        | 377      | EYSFEKVR        |           |       |                        |      | Mascot      |
| 1057.5312  | 1057.483    | -0.0482 | -46   | 370        | 377      | EYSFEKVR        |           |       |                        |      | Mascot      |
| 1159.6721  | 1159.5892   | -0.0829 | -71   | 740        | 749      | VEVLPSQLFK      |           |       |                        |      | Mascot      |
| 1210.6038  | 1210.7117   | 0.1079  | 89    | 493        | 502      | ELHLYHCPAK      |           |       |                        |      | Mascot      |
| 1235.6266  | 1235.6674   | 0.0408  | 33    | 256        | 266      | DGEQAKALFEK     |           |       |                        |      | Mascot      |
| 1313.6882  | 1313.632    | -0.0562 | -43   | 683        | 693      | SLESLIICHNK     |           |       | Carbamidomethyl (C)[8] |      | Mascot      |
| 1336.7446  | 1336.6675   | -0.0771 | -58   | 661        | 670      | LVCLKLWYNK      |           |       | Carbamidomethyl (C)[3] |      | Mascot      |
| 1355.6841  | 1355.6653   | -0.0188 | -14   | 410        | 421      | FGVFLSEVSENK    |           |       |                        |      | Mascot      |
| 1426.7325  | 1426.7114   | -0.0211 | -15   | 107        | 119      | EGVWTQPQPTGVK   |           |       |                        |      | Mascot      |
| 1532.738   | 1532.746    | 0.008   | 5     | 424        | 435      | EISLNHEWTFEK    |           |       |                        |      | Mascot      |
| 1743.87    | 1743.8185   | -0.0515 | -30   | 120        | 133      | TNLDFAQYYFVNQK  |           |       |                        |      | Mascot      |
| 1760.0217  | 1759.8187   | -0.203  | -115  | 694        | 708      | VENLPPSLFHLPKLR |           |       |                        |      | Mascot      |

|    |                                                              |             |         |   |    |    |   |
|----|--------------------------------------------------------------|-------------|---------|---|----|----|---|
| 27 | vacuolar protein sorting-associated protein 4B [Danio rerio] | gjl41053850 | 48887.2 | 7 | 10 | 39 | 0 |
|----|--------------------------------------------------------------|-------------|---------|---|----|----|---|

| Calc. Mass | Obsrv. Mass | ± da    | ± ppm | Start Seq. | End Seq. | Sequence  | Ion Score | C. I. % | Modification     | Rank | Result Type |
|------------|-------------|---------|-------|------------|----------|-----------|-----------|---------|------------------|------|-------------|
| 882.5658   | 882.5577    | -0.0081 | -9    | 141        | 148      | EAVILPIK  |           |         |                  |      | Mascot      |
| 929.4873   | 929.5282    | 0.0409  | 44    | 340        | 347      | DALMQPVR  |           |         |                  |      | Mascot      |
| 1019.4938  | 1019.5085   | 0.0147  | 14    | 1          | 9        | MAANNNLQK |           |         | Oxidation (M)[1] |      | Mascot      |
| 1045.5789  | 1045.5474   | -0.0315 | -30   | 348        | 356      | KVQSATHFK |           |         |                  |      | Mascot      |

|    |                                              |           |         |     |              |     |                            |      |    |    |   |    |                   |  |  |  |  |        |
|----|----------------------------------------------|-----------|---------|-----|--------------|-----|----------------------------|------|----|----|---|----|-------------------|--|--|--|--|--------|
|    | 1057.5823                                    | 1057.483  | -0.0993 | -94 | 340          | 348 | DALMQPVRK                  |      |    |    |   |    |                   |  |  |  |  | Mascot |
|    | 1057.5823                                    | 1057.483  | -0.0993 | -94 | 340          | 348 | DALMQPVRK                  |      |    |    |   |    |                   |  |  |  |  | Mascot |
|    | 1159.5742                                    | 1159.5892 | 0.015   | 13  | 126          | 136 | WNDVAGLEGAK                |      |    |    |   |    |                   |  |  |  |  | Mascot |
|    | 1336.5912                                    | 1336.6675 | 0.0763  | 57  | 386          | 396 | EMTWMEVPGEK                |      |    |    |   |    |                   |  |  |  |  | Mascot |
|    | 1493.8223                                    | 1493.7046 | -0.1177 | -79 | 288          | 299 | RIYIPLPEEHAR               |      |    |    |   |    |                   |  |  |  |  | Mascot |
|    | 1597.8656                                    | 1597.7637 | -0.1019 | -64 | 2            | 16  | AANNLQKAIDLANK             |      |    |    |   |    |                   |  |  |  |  | Mascot |
|    | 2283.1536                                    | 2283.1416 | -0.012  | -5  | 305          | 325 | LNLGTTPNLSLTESDFMTL<br>GKK |      |    |    |   |    | Oxidation (M)[16] |  |  |  |  | Mascot |
| 28 | kinesin heavy chain isoform 5C [Danio rerio] |           |         |     | gi 181342078 |     | 113600.8                   | 6.26 | 11 | 39 | 0 | 20 | 0                 |  |  |  |  |        |

#### Peptide Information

| Calc. Mass | Obsrv. Mass | ± da    | ± ppm | Start Seq. | End Seq. | Sequence          | Ion Score | C. I. | % Modification                           | Rank | Result Type |
|------------|-------------|---------|-------|------------|----------|-------------------|-----------|-------|------------------------------------------|------|-------------|
| 882.5117   | 882.5577    | 0.046   | 52    | 584        | 590      | LFISKMK           |           |       | Oxidation (M)[6]                         |      | Mascot      |
| 1057.5347  | 1057.483    | -0.0517 | -49   | 672        | 680      | MHEVSVLDK         |           |       |                                          |      | Mascot      |
| 1057.5347  | 1057.483    | -0.0517 | -49   | 672        | 680      | MHEVSVLDK         | 20        | 0     |                                          |      | Mascot      |
| 1270.7842  | 1270.6569   | -0.1273 | -100  | 542        | 552      | RSAEILSLLR        |           |       |                                          |      | Mascot      |
| 1404.8182  | 1404.6337   | -0.1845 | -131  | 911        | 922      | RNHTAQIAKPIR      |           |       |                                          |      | Mascot      |
| 1423.6846  | 1423.7108   | 0.0262  | 18    | 602        | 613      | QLESTQSDTMRK      |           |       |                                          |      | Mascot      |
| 1426.631   | 1426.7114   | 0.0804  | 56    | 2          | 14       | VDAAECCVKVMCR     |           |       |                                          |      | Mascot      |
| 1438.692   | 1438.7734   | 0.0814  | 57    | 372        | 384      | GETVPVNEQHSNK     |           |       |                                          |      | Mascot      |
| 1532.8279  | 1532.746    | -0.0819 | -53   | 519        | 533      | SSALAGVERDLSSLK   |           |       |                                          |      | Mascot      |
| 1592.8894  | 1592.6744   | -0.215  | -135  | 223        | 237      | LSGKLYLVLAGSEK    |           |       |                                          |      | Mascot      |
| 1597.6953  | 1597.7637   | 0.0684  | 43    | 2          | 14       | VDAAECCVKVMCR     |           |       | Carbamidomethyl (C)[6,7,12]              |      | Mascot      |
| 1743.8517  | 1743.8185   | -0.0332 | -19   | 620        | 634      | ELASCQMLISQHQAK   |           |       | Carbamidomethyl (C)[5]                   |      | Mascot      |
| 1759.8466  | 1759.8187   | -0.0279 | -16   | 620        | 634      | ELASCQMLISQHQAK   |           |       | Carbamidomethyl (C)[5], Oxidation (M)[7] |      | Mascot      |
| 1952.0447  | 1952.0193   | -0.0254 | -13   | 781        | 797      | GLEETVAKELQTLHDLR |           |       |                                          |      | Mascot      |

29 PREDICTED: hypothetical protein LOC100537051 [Danio rerio]

#### Peptide Information

| Calc. Mass | Obsrv. Mass | ± da    | ± ppm | Start Seq. | End Seq. | Sequence   | Ion Score | C. I. | % Modification           | Rank | Result Type |
|------------|-------------|---------|-------|------------|----------|------------|-----------|-------|--------------------------|------|-------------|
| 874.4012   | 874.4678    | 0.0666  | 76    | 8          | 15       | ANDNGLDR   |           |       |                          |      | Mascot      |
| 1030.5024  | 1030.5696   | 0.0672  | 65    | 8          | 16       | ANDNGLDRR  |           |       |                          |      | Mascot      |
| 1044.4237  | 1044.5037   | 0.08    | 77    | 214        | 220      | CYKCEER    |           |       | Carbamidomethyl (C)[1,4] |      | Mascot      |
| 1045.5636  | 1045.5474   | -0.0162 | -15   | 56         | 65       | AVTERIGDGK |           |       |                          |      | Mascot      |
| 1050.4408  | 1050.4878   | 0.047   | 45    | 410        | 418      | DEEIECANK  |           |       |                          |      | Mascot      |



|           |           |         |     |      |      |                         |  |  |  |  |  |                                          |        |
|-----------|-----------|---------|-----|------|------|-------------------------|--|--|--|--|--|------------------------------------------|--------|
| 1438.6128 | 1438.7734 | 0.1606  | 112 | 1255 | 1267 | TPSHMSSNGPDR            |  |  |  |  |  | Oxidation (M)[6]                         | Mascot |
| 1532.8544 | 1532.746  | -0.1084 | -71 | 1649 | 1663 | HGLPGIGLSTSLQPR         |  |  |  |  |  |                                          | Mascot |
| 1727.9591 | 1727.8198 | -0.1393 | -81 | 2873 | 2886 | VVLPLVDQYFKNHR          |  |  |  |  |  |                                          | Mascot |
| 1743.9375 | 1743.8185 | -0.119  | -68 | 1541 | 1555 | SVDILELTEQQDLLK         |  |  |  |  |  |                                          | Mascot |
| 1951.8749 | 1952.0193 | 0.1444  | 74  | 297  | 313  | AIMHHEGHMDDGLTISR       |  |  |  |  |  | Oxidation (M)[3,9]                       | Mascot |
| 1995.0771 | 1994.9576 | -0.1195 | -60 | 1731 | 1747 | LFYTLLIMGIFHNGDLK       |  |  |  |  |  |                                          | Mascot |
| 2282.9839 | 2283.1416 | 0.1577  | 69  | 29   | 48   | HSYSGMYLCLSTARSS<br>TDK |  |  |  |  |  | Carbamidomethyl (C)[9], Oxidation (M)[6] | Mascot |

31 Zgc:112061 protein [Danio rerio] gi|63101292 103503.8 6.58 10 37 0 22 0

#### Peptide Information

| Calc. Mass | Obsrv. Mass | $\pm$ da | $\pm$ ppm | Start Seq. | End Seq. | Sequence                  | Ion Score | C. I. | % Modification                             | Rank | Result Type |
|------------|-------------|----------|-----------|------------|----------|---------------------------|-----------|-------|--------------------------------------------|------|-------------|
| 814.4205   | 814.4111    | -0.0094  | -12       | 341        | 347      | HGNPYVK                   |           |       |                                            |      | Mascot      |
| 814.5145   | 814.4111    | -0.1034  | -127      | 567        | 573      | AIDVLKR                   | 25        | 0     |                                            |      | Mascot      |
| 874.4992   | 874.4678    | -0.0314  | -36       | 824        | 830      | KDELLTR                   |           |       |                                            |      | Mascot      |
| 1044.6122  | 1044.5037   | -0.1085  | -104      | 764        | 772      | MELQLLGIK                 |           |       |                                            |      | Mascot      |
| 1179.5358  | 1179.5616   | 0.0258   | 22        | 773        | 782      | LQSGERACCR                |           |       | Carbamidomethyl (C)[8]                     |      | Mascot      |
| 1216.5481  | 1216.6183   | 0.0702   | 58        | 637        | 645      | YYSQELEER                 |           |       |                                            |      | Mascot      |
| 1216.5481  | 1216.6183   | 0.0702   | 58        | 637        | 645      | YYSQELEER                 |           |       |                                            |      | Mascot      |
| 1592.7889  | 1592.6744   | -0.1145  | -72       | 506        | 520      | FSAFATQLVHGPCSK           |           |       |                                            |      | Mascot      |
| 1644.6914  | 1644.8022   | 0.1108   | 67        | 591        | 603      | EEVCTEMMEVISR             |           |       | Carbamidomethyl (C)[4], Oxidation (M)[7,8] |      | Mascot      |
| 1644.6914  | 1644.8022   | 0.1108   | 67        | 591        | 603      | EEVCTEMMEVISR             |           |       | Carbamidomethyl (C)[4], Oxidation (M)[7,8] |      | Mascot      |
| 1876.03    | 1875.9133   | -0.1167  | -62       | 451        | 466      | HNQTNKSRPPVVPFR           |           |       |                                            |      | Mascot      |
| 2283.1284  | 2283.1416   | 0.0132   | 6         | 731        | 751      | FQDNLPMSGVTGTLTTTA<br>ERK |           |       | Oxidation (M)[8]                           |      | Mascot      |

32 caspase c [Danio rerio] gi|61806574 44909.8 5.99 11 37 0

#### Peptide Information

| Calc. Mass | Obsrv. Mass | $\pm$ da | $\pm$ ppm | Start Seq. | End Seq. | Sequence     | Ion Score | C. I. | % Modification           | Rank | Result Type |
|------------|-------------|----------|-----------|------------|----------|--------------|-----------|-------|--------------------------|------|-------------|
| 929.5601   | 929.5282    | -0.0319  | -34       | 347        | 354      | IILIQACR     |           |       |                          |      | Mascot      |
| 999.5693   | 999.4427    | -0.1266  | -127      | 30         | 37       | RPIKNTDR     |           |       |                          |      | Mascot      |
| 1127.4972  | 1127.6427   | 0.1455   | 129       | 378        | 385      | EKDFCCLR     |           |       | Carbamidomethyl (C)[5,6] |      | Mascot      |
| 1127.4972  | 1127.6427   | 0.1455   | 129       | 378        | 385      | EKDFCCLR     |           |       | Carbamidomethyl (C)[5,6] |      | Mascot      |
| 1179.4882  | 1179.5616   | 0.0734   | 62        | 132        | 142      | SCPGCQSNVER  |           |       |                          |      | Mascot      |
| 1259.5798  | 1259.5708   | -0.009   | -7        | 60         | 70       | MPADYVVACFK  |           |       | Oxidation (M)[1]         |      | Mascot      |
| 1335.5892  | 1335.6278   | 0.0386   | 29        | 132        | 143      | SCPGCQSNVERR |           |       |                          |      | Mascot      |

|  |           |           |         |      |     |     |                          |  |                                             |        |
|--|-----------|-----------|---------|------|-----|-----|--------------------------|--|---------------------------------------------|--------|
|  | 1336.6102 | 1336.6675 | 0.0573  | 43   | 78  | 88  | TEFSCPHFVGR              |  | Carbamidomethyl (C)[5]                      | Mascot |
|  | 1454.8512 | 1454.7035 | -0.1477 | -102 | 343 | 354 | DKPKIILIQACR             |  | Carbamidomethyl (C)[11]                     | Mascot |
|  | 1880.8743 | 1880.875  | 0.0007  | 0    | 60  | 74  | MPADYVVACFKCYLK          |  | Carbamidomethyl (C)[9,12], Oxidation (M)[1] | Mascot |
|  | 2283.0029 | 2283.1416 | 0.1387  | 61   | 288 | 307 | EEHAHSDSCFVLM SHG<br>NAR |  | Carbamidomethyl (C)[9]                      | Mascot |
|  | 2284.1926 | 2284.1375 | -0.0551 | -24  | 251 | 270 | DELSMEMLLKGLGYTVV<br>TLR |  | Oxidation (M)[5]                            | Mascot |

33 novel protein similar to Down syndrome cell adhesion molecule (dscam) [Danio rerio] gi|122891302 210775.3 8.34 20 37 0

#### Peptide Information

| Calc. Mass | Obsrv. Mass | ± da    | ± ppm | Start Seq. | End Seq. | Sequence                | Ion Score | C. I. % | Modification            | Rank | Result Type |
|------------|-------------|---------|-------|------------|----------|-------------------------|-----------|---------|-------------------------|------|-------------|
| 814.3552   | 814.4111    | 0.0559  | 69    | 1241       | 1246     | CGTWYK                  |           |         | Carbamidomethyl (C)[1]  |      | Mascot      |
| 814.3552   | 814.4111    | 0.0559  | 69    | 1241       | 1246     | CGTWYK                  |           |         | Carbamidomethyl (C)[1]  |      | Mascot      |
| 818.4267   | 818.4782    | 0.0515  | 63    | 78         | 85       | ASGHPPPR                |           |         |                         |      | Mascot      |
| 890.4578   | 890.3811    | -0.0767 | -86   | 1702       | 1709     | QSESPKSK                |           |         |                         |      | Mascot      |
| 918.4138   | 918.4679    | 0.0541  | 59    | 850        | 856      | SYQVCYR                 |           |         |                         |      | Mascot      |
| 999.5105   | 999.4427    | -0.0678 | -68   | 1866       | 1875     | EPGDLAQAAK              |           |         |                         |      | Mascot      |
| 1019.5016  | 1019.5085   | 0.0069  | 7     | 31         | 38       | HRYTGETR                |           |         |                         |      | Mascot      |
| 1030.4484  | 1030.5696   | 0.1212  | 118   | 280        | 287      | DSNHRMDR                |           |         |                         |      | Mascot      |
| 1201.6072  | 1201.5469   | -0.0603 | -50   | 1168       | 1178     | SAHNNGSFVIR             |           |         |                         |      | Mascot      |
| 1216.6613  | 1216.6183   | -0.043  | -35   | 357        | 366      | IIGYPYYSIK              |           |         |                         |      | Mascot      |
| 1216.6613  | 1216.6183   | -0.043  | -35   | 357        | 366      | IIGYPYYSIK              |           |         |                         |      | Mascot      |
| 1288.6168  | 1288.6763   | 0.0595  | 46    | 1179       | 1189     | TVKAEDSGYYR             |           |         |                         |      | Mascot      |
| 1355.6545  | 1355.6653   | 0.0108  | 8     | 1428       | 1439     | DAKSLAEMLSK             |           |         | Oxidation (M)[8,10]     |      | Mascot      |
| 1382.6766  | 1382.7468   | 0.0702  | 51    | 1431       | 1442     | SLAEMLSKNAR             |           |         | Oxidation (M)[5,7]      |      | Mascot      |
| 1404.719   | 1404.6337   | -0.0853 | -61   | 1731       | 1743     | RLVGSETGNTSQR           |           |         |                         |      | Mascot      |
| 1411.7039  | 1411.7698   | 0.0659  | 47    | 1236       | 1246     | LENLKCGTWYK             |           |         | Carbamidomethyl (C)[6]  |      | Mascot      |
| 1438.8311  | 1438.7734   | -0.0577 | -40   | 329        | 341      | INVRGPASIRPMK           |           |         |                         |      | Mascot      |
| 1454.826   | 1454.7035   | -0.1225 | -84   | 329        | 341      | INVRGPASIRPMK           |           |         | Oxidation (M)[12]       |      | Mascot      |
| 1597.8081  | 1597.7637   | -0.0444 | -28   | 888        | 900      | YTQYEVVRQAANR           |           |         |                         |      | Mascot      |
| 1608.7104  | 1608.6705   | -0.0399 | -25   | 1807       | 1820     | EATGQTCMDPQKSR          |           |         | Carbamidomethyl (C)[7]  |      | Mascot      |
| 1762.9772  | 1762.861    | -0.1162 | -66   | 1133       | 1149     | DIVLPCKAVGDPPTIK        |           |         |                         |      | Mascot      |
| 1762.9772  | 1762.861    | -0.1162 | -66   | 1133       | 1149     | DIVLPCKAVGDPPTIK        |           |         |                         |      | Mascot      |
| 1875.9368  | 1875.9133   | -0.0235 | -13   | 222        | 238      | MSTQDLVQVLEDGTPK        |           |         | Oxidation (M)[1]        |      | Mascot      |
| 1951.8596  | 1952.0193   | 0.1597  | 82    | 1800       | 1818     | GAASSGREATGQTCMDP<br>QK |           |         | Carbamidomethyl (C)[14] |      | Mascot      |

34 Cluap1 protein [Danio rerio] gi|66911064 35387.2 6.82 9 37 0

| Peptide Information |                   |         |       |              |          |                        |           |                      |                  |
|---------------------|-------------------|---------|-------|--------------|----------|------------------------|-----------|----------------------|------------------|
| Calc. Mass          | Obsrv. Mass       | ± da    | ± ppm | Start Seq.   | End Seq. | Sequence               | Ion Score | C. I. % Modification | Rank Result Type |
| 1030.5276           | 1030.5696         | 0.042   | 41    | 222          | 229      | QDLERNQK               |           |                      | Mascot           |
| 1127.5731           | 1127.6427         | 0.0696  | 62    | 86           | 95       | LYQADGYAVK             |           |                      | Mascot           |
| 1127.5731           | 1127.6427         | 0.0696  | 62    | 86           | 95       | LYQADGYAVK             |           |                      | Mascot           |
| 1167.5562           | 1167.6489         | 0.0927  | 79    | 191          | 200      | DVTESIQMTK             |           | Oxidation (M)[8]     | Mascot           |
| 1167.5562           | 1167.6489         | 0.0927  | 79    | 191          | 200      | DVTESIQMTK             |           | Oxidation (M)[8]     | Mascot           |
| 1206.6729           | 1206.5884         | -0.0845 | -70   | 128          | 138      | FDLGSKIADLK            |           |                      | Mascot           |
| 1382.7712           | 1382.7468         | -0.0244 | -18   | 100          | 111      | ITSILYNAMTK            |           |                      | Mascot           |
| 1404.5956           | 1404.6337         | 0.0381  | 27    | 284          | 294      | FEEAEMAMKMR            |           | Oxidation (M)[6,8]   | Mascot           |
| 1644.8302           | 1644.8022         | -0.028  | -17   | 86           | 99       | LYQADGYAVKEMLK         |           | Oxidation (M)[12]    | Mascot           |
| 1644.8302           | 1644.8022         | -0.028  | -17   | 86           | 99       | LYQADGYAVKEMLK         |           | Oxidation (M)[12]    | Mascot           |
| 1995.179            | 1994.9576         | -0.2214 | -111  | 29           | 45       | SPNFPLVAEILWLVKR       |           |                      | Mascot           |
| 2211.1226           | 2211.0728         | -0.0498 | -23   | 230          | 247      | RLQTLQSVRPAFMDEYE<br>K |           |                      | Mascot           |
| 35                  | bgn [Danio rerio] |         |       | gi 165993293 |          | 38198.6                | 6.7       | 8                    | 37 0             |

| Peptide Information |                                                 |         |       |             |          |                   |           |                      |                  |
|---------------------|-------------------------------------------------|---------|-------|-------------|----------|-------------------|-----------|----------------------|------------------|
| Calc. Mass          | Obsrv. Mass                                     | ± da    | ± ppm | Start Seq.  | End Seq. | Sequence          | Ion Score | C. I. % Modification | Rank Result Type |
| 856.3987            | 856.5143                                        | 0.1156  | 135   | 29          | 35       | GFWDFGK           |           |                      | Mascot           |
| 1127.6418           | 1127.6427                                       | 0.0009  | 1     | 157         | 166      | NLPSSLVELR        |           |                      | Mascot           |
| 1127.6418           | 1127.6427                                       | 0.0009  | 1     | 157         | 166      | NLPSSLVELR        |           |                      | Mascot           |
| 1206.6841           | 1206.5884                                       | -0.0957 | -79   | 211         | 220      | LNYLRISEAK        |           |                      | Mascot           |
| 1218.7205           | 1218.5825                                       | -0.138  | -113  | 113         | 123      | GLSNLYALVLR       |           |                      | Mascot           |
| 1426.7001           | 1426.7114                                       | 0.0113  | 8     | 29          | 40       | GFWDFGKDIDVK      |           |                      | Mascot           |
| 1532.8141           | 1532.746                                        | -0.0681 | -44   | 144         | 156      | LYISHNLLTSMPK     |           | Oxidation (M)[11]    | Mascot           |
| 1762.9558           | 1762.861                                        | -0.0948 | -54   | 157         | 171      | NLPSSLVELRIHDNR   |           |                      | Mascot           |
| 1762.9558           | 1762.861                                        | -0.0948 | -54   | 157         | 171      | NLPSSLVELRIHDNR   |           |                      | Mascot           |
| 1952.0963           | 1952.0193                                       | -0.077  | -39   | 113         | 129      | GLSNLYALVLRYNQISK |           |                      | Mascot           |
| 36                  | gamma-tubulin complex component 5 [Danio rerio] |         |       | gi 66392200 |          | 117376.1          | 5.72      | 14                   | 37 0             |

| Peptide Information |             |        |       |            |          |          |           |                        |                  |
|---------------------|-------------|--------|-------|------------|----------|----------|-----------|------------------------|------------------|
| Calc. Mass          | Obsrv. Mass | ± da   | ± ppm | Start Seq. | End Seq. | Sequence | Ion Score | C. I. % Modification   | Rank Result Type |
| 818.4552            | 818.4782    | 0.023  | 28    | 932        | 937      | CLLREK   |           | Carbamidomethyl (C)[1] | Mascot           |
| 929.4515            | 929.5282    | 0.0767 | 83    | 39         | 45       | FTWSNFK  |           |                        | Mascot           |

|           |           |         |     |     |     |                     |                   |        |
|-----------|-----------|---------|-----|-----|-----|---------------------|-------------------|--------|
| 1045.5347 | 1045.5474 | 0.0127  | 12  | 68  | 76  | LMVHSDLSK           | Oxidation (M)[2]  | Mascot |
| 1050.5156 | 1050.4878 | -0.0278 | -26 | 959 | 967 | WQAGFGAWK           |                   | Mascot |
| 1050.5579 | 1050.4878 | -0.0701 | -67 | 664 | 673 | FSGGSVILDR          |                   | Mascot |
| 1159.647  | 1159.5892 | -0.0578 | -50 | 433 | 442 | ASHLLNTLYK          |                   | Mascot |
| 1167.6442 | 1167.6489 | 0.0047  | 4   | 938 | 947 | VSFVKEAIMK          | Oxidation (M)[9]  | Mascot |
| 1167.6442 | 1167.6489 | 0.0047  | 4   | 938 | 947 | VSFVKEAIMK          | Oxidation (M)[9]  | Mascot |
| 1179.6368 | 1179.5616 | -0.0752 | -64 | 260 | 269 | SFVTETQVIR          |                   | Mascot |
| 1218.6266 | 1218.5825 | -0.0441 | -36 | 281 | 290 | LFIFQHNDGK          |                   | Mascot |
| 1288.7623 | 1288.6763 | -0.086  | -67 | 948 | 958 | VLNLVLIFSDR         |                   | Mascot |
| 1532.8367 | 1532.746  | -0.0907 | -59 | 402 | 414 | LSPHLAQITMLHR       | Oxidation (M)[10] | Mascot |
| 1759.8796 | 1759.8187 | -0.0609 | -35 | 68  | 82  | LMVHSDLSKAESWTR     |                   | Mascot |
| 1875.9043 | 1875.9133 | 0.009   | 5   | 606 | 622 | RGEESPTNTVTEQQATK   |                   | Mascot |
| 2233.136  | 2233.0535 | -0.0825 | -37 | 770 | 788 | HPEDSHRLSIFLETIDPAR |                   | Mascot |

37    PREDICTED: Down syndrome cell adhesion molecule [Danio rerio]    gi|326674054    222799.5    7.04    20    37    0

| Peptide Information |             |         |       |            |          |               |           |         |                        |      |        |      |
|---------------------|-------------|---------|-------|------------|----------|---------------|-----------|---------|------------------------|------|--------|------|
| Calc. Mass          | Obsrv. Mass | ± da    | ± ppm | Start Seq. | End Seq. | Sequence      | Ion Score | C. I. % | Modification           | Rank | Result | Type |
| 814.3552            | 814.4111    | 0.0559  | 69    | 1438       | 1443     | CGTWYK        |           |         | Carbamidomethyl (C)[1] |      | Mascot |      |
| 814.3552            | 814.4111    | 0.0559  | 69    | 1438       | 1443     | CGTWYK        |           |         | Carbamidomethyl (C)[1] |      | Mascot |      |
| 818.4267            | 818.4782    | 0.0515  | 63    | 242        | 249      | ASGHPPPR      |           |         |                        |      | Mascot |      |
| 918.4138            | 918.4679    | 0.0541  | 59    | 1014       | 1020     | SYQVCYR       |           |         |                        |      | Mascot |      |
| 999.5105            | 999.4427    | -0.0678 | -68   | 1975       | 1984     | EPGDLAQAAK    |           |         |                        |      | Mascot |      |
| 1019.5016           | 1019.5085   | 0.0069  | 7     | 195        | 202      | HRYTGETR      |           |         |                        |      | Mascot |      |
| 1030.4484           | 1030.5696   | 0.1212  | 118   | 444        | 451      | DSNHRMDR      |           |         |                        |      | Mascot |      |
| 1201.6072           | 1201.5469   | -0.0603 | -50   | 1332       | 1342     | SAHNNGSFVIR   |           |         |                        |      | Mascot |      |
| 1216.6613           | 1216.6183   | -0.043  | -35   | 521        | 530      | IIGYPYYSIK    |           |         |                        |      | Mascot |      |
| 1216.6613           | 1216.6183   | -0.043  | -35   | 521        | 530      | IIGYPYYSIK    |           |         |                        |      | Mascot |      |
| 1288.6168           | 1288.6763   | 0.0595  | 46    | 1343       | 1353     | TVKAEDSGYYR   |           |         |                        |      | Mascot |      |
| 1313.7324           | 1313.632    | -0.1004 | -76   | 107        | 117      | SQDLHIKAVFR   |           |         |                        |      | Mascot |      |
| 1355.6545           | 1355.6653   | 0.0108  | 8     | 1625       | 1636     | DAKSLAEMLMSK  |           |         | Oxidation (M)[8,10]    |      | Mascot |      |
| 1382.6766           | 1382.7468   | 0.0702  | 51    | 1628       | 1639     | SLAEMLMSKNAR  |           |         | Oxidation (M)[5,7]     |      | Mascot |      |
| 1404.7594           | 1404.6337   | -0.1257 | -89   | 344        | 355      | NAEKIQGINVR   |           |         |                        |      | Mascot |      |
| 1411.7039           | 1411.7698   | 0.0659  | 47    | 1433       | 1443     | LENLKCGTWYK   |           |         | Carbamidomethyl (C)[6] |      | Mascot |      |
| 1438.8311           | 1438.7734   | -0.0577 | -40   | 493        | 505      | INVRGPASIRPMK |           |         |                        |      | Mascot |      |
| 1454.826            | 1454.7035   | -0.1225 | -84   | 493        | 505      | INVRGPASIRPMK |           |         | Oxidation (M)[12]      |      | Mascot |      |



|           |           |         |     |      |      |                     |  |  |  |                         |  |  |        |
|-----------|-----------|---------|-----|------|------|---------------------|--|--|--|-------------------------|--|--|--------|
| 1597.8081 | 1597.7637 | -0.0444 | -28 | 1052 | 1064 | YTQYEVVRVQAANR      |  |  |  |                         |  |  | Mascot |
| 1608.7104 | 1608.6705 | -0.0399 | -25 | 1916 | 1929 | EATGQTCMDPQKSR      |  |  |  | Carbamidomethyl (C)[7]  |  |  | Mascot |
| 1762.9772 | 1762.861  | -0.1162 | -66 | 1297 | 1313 | DIVLPCKAVGDPPPTIK   |  |  |  |                         |  |  | Mascot |
| 1762.9772 | 1762.861  | -0.1162 | -66 | 1297 | 1313 | DIVLPCKAVGDPPPTIK   |  |  |  |                         |  |  | Mascot |
| 1875.9368 | 1875.9133 | -0.0235 | -13 | 386  | 402  | MSTQDLVQVLEDGTPK    |  |  |  | Oxidation (M)[1]        |  |  | Mascot |
| 1951.8596 | 1952.0193 | 0.1597  | 82  | 1909 | 1927 | GAASSGREATGQTCMDPQK |  |  |  | Carbamidomethyl (C)[14] |  |  | Mascot |

38 PREDICTED: PAS domain-containing serine/threonine-protein kinase [Danio rerio]

gi|326665164 133783.1 5.01 13 37 0

#### Peptide Information

| Calc. Mass | Obsrv. Mass | ± da    | ± ppm | Start Seq. | End Seq. | Sequence          | Ion Score | C. I. % | Modification           | Rank | Result Type |
|------------|-------------|---------|-------|------------|----------|-------------------|-----------|---------|------------------------|------|-------------|
| 814.5145   | 814.4111    | -0.1034 | -127  | 275        | 281      | TTPKVLR           | 10        | 0       |                        |      | Mascot      |
| 814.5145   | 814.4111    | -0.1034 | -127  | 275        | 281      | TTPKVLR           |           |         |                        |      | Mascot      |
| 818.4631   | 818.4782    | 0.0151  | 18    | 897        | 902      | NYRPLR            |           |         |                        |      | Mascot      |
| 1050.4785  | 1050.4878   | 0.0093  | 9     | 804        | 811      | THVTCYNR          |           |         | Carbamidomethyl (C)[5] |      | Mascot      |
| 1050.5499  | 1050.4878   | -0.0621 | -59   | 162        | 170      | SSQMILEVLK        |           |         | Oxidation (M)[4]       |      | Mascot      |
| 1057.5823  | 1057.483    | -0.0993 | -94   | 291        | 300      | SGLVVPACVR        |           |         | Carbamidomethyl (C)[8] |      | Mascot      |
| 1057.5823  | 1057.483    | -0.0993 | -94   | 291        | 300      | SGLVVPACVR        |           |         | Carbamidomethyl (C)[8] |      | Mascot      |
| 1127.6782  | 1127.6427   | -0.0355 | -31   | 948        | 957      | VTQEVAILVR        |           |         |                        |      | Mascot      |
| 1127.6782  | 1127.6427   | -0.0355 | -31   | 948        | 957      | VTQEVAILVR        |           |         |                        |      | Mascot      |
| 1210.6367  | 1210.7117   | 0.075   | 62    | 907        | 917      | GAFGFVWLASR       |           |         |                        |      | Mascot      |
| 1404.6287  | 1404.6337   | 0.005   | 4     | 143        | 154      | LFECAYS DLMGR     |           |         |                        |      | Mascot      |
| 1423.7792  | 1423.7108   | -0.0684 | -48   | 777        | 791      | GVLLPGDAPATSTPK   |           |         |                        |      | Mascot      |
| 1532.7236  | 1532.746    | 0.0224  | 15    | 143        | 155      | LFECAYS DLMGRK    |           |         |                        |      | Mascot      |
| 1592.6469  | 1592.6744   | 0.0275  | 17    | 36         | 49       | SDSFCMNQSFPSAR    |           |         | Oxidation (M)[6]       |      | Mascot      |
| 1727.9407  | 1727.8198   | -0.1209 | -70   | 285        | 300      | LCVQARSGLVVPACVR  |           |         | Carbamidomethyl (C)[2] |      | Mascot      |
| 1875.8905  | 1875.9133   | 0.0228  | 12    | 931        | 947      | KSAVVSECVWDDPDLGR |           |         |                        |      | Mascot      |

39 syntaxin-binding protein 6 [Danio rerio]

gi|187608529 31598.3 10.35 10 37 0

#### Peptide Information

| Calc. Mass | Obsrv. Mass | ± da    | ± ppm | Start Seq. | End Seq. | Sequence  | Ion Score | C. I. % | Modification     | Rank | Result Type |
|------------|-------------|---------|-------|------------|----------|-----------|-----------|---------|------------------|------|-------------|
| 929.4587   | 929.5282    | 0.0695  | 75    | 265        | 272      | HFAEAAQR  |           |         |                  |      | Mascot      |
| 1019.5302  | 1019.5085   | -0.0217 | -21   | 1          | 9        | MNIQSAISR |           |         |                  |      | Mascot      |
| 1035.5251  | 1035.5024   | -0.0227 | -22   | 1          | 9        | MNIQSAISR |           |         | Oxidation (M)[1] |      | Mascot      |
| 1045.5748  | 1045.5474   | -0.0274 | -26   | 237        | 245      | RASQVLSEK |           |         |                  |      | Mascot      |

|    |                                                                                    |             |         |       |               |          |                         |      |           |       |   |                        |                                          |        |      |        |        |
|----|------------------------------------------------------------------------------------|-------------|---------|-------|---------------|----------|-------------------------|------|-----------|-------|---|------------------------|------------------------------------------|--------|------|--------|--------|
|    | 1179.5536                                                                          | 1179.5616   | 0.008   | 7     | 198           | 207      | TSMTANQDRR              |      |           |       |   |                        |                                          |        |      |        | Mascot |
|    | 1288.6757                                                                          | 1288.6763   | 0.0006  | 0     | 76            | 85       | RSQWSVEQLR              |      |           |       |   |                        |                                          |        |      |        | Mascot |
|    | 1423.6335                                                                          | 1423.7108   | 0.0773  | 54    | 106           | 118      | TTDQWEASSAAEK           |      |           |       |   |                        |                                          |        |      |        | Mascot |
|    | 1438.6855                                                                          | 1438.7734   | 0.0879  | 61    | 252           | 264      | ADDKTSHMLHGAR           |      |           |       |   |                        |                                          |        |      |        | Mascot |
|    | 1454.6805                                                                          | 1454.7035   | 0.023   | 16    | 252           | 264      | ADDKTSHMLHGAR           |      |           |       |   |                        | Oxidation (M)[8]                         |        |      |        | Mascot |
|    | 1644.7543                                                                          | 1644.8022   | 0.0479  | 29    | 175           | 188      | LMGDACSVNMVIYR          |      |           |       |   |                        | Carbamidomethyl (C)[6], Oxidation (M)[2] |        |      |        | Mascot |
|    | 1644.7543                                                                          | 1644.8022   | 0.0479  | 29    | 175           | 188      | LMGDACSVNMVIYR          |      |           |       |   |                        | Carbamidomethyl (C)[6], Oxidation (M)[2] |        |      |        | Mascot |
|    | 1875.8584                                                                          | 1875.9133   | 0.0549  | 29    | 175           | 190      | LMGDACSVNMVIYRCK        |      |           |       |   |                        | Carbamidomethyl (C)[6], Oxidation (M)[2] |        |      |        | Mascot |
|    | 2233.0027                                                                          | 2233.0535   | 0.0508  | 23    | 119           | 136      | CMFVQVLYHACQNFWEA<br>K  |      |           |       |   |                        | Oxidation (M)[2]                         |        |      |        | Mascot |
| 40 | PREDICTED: retrotransposable element Tf2 155 kDa protein type 1-like [Danio rerio] |             |         |       | gij 326666222 |          | 145341.7                | 9.75 | 17        | 36    | 0 |                        |                                          |        |      |        |        |
|    | Peptide Information                                                                |             |         |       |               |          |                         |      |           |       |   |                        |                                          |        |      |        |        |
|    | Calc. Mass                                                                         | Obsrv. Mass | ± da    | ± ppm | Start Seq.    | End Seq. | Sequence                |      | Ion Score | C. I. | % | Modification           | Rank                                     | Result | Type |        |        |
|    | 856.4312                                                                           | 856.5143    | 0.0831  | 97    | 604           | 610      | WPVPDSR                 |      |           |       |   |                        |                                          |        |      | Mascot |        |
|    | 870.5406                                                                           | 870.5195    | -0.0211 | -24   | 1174          | 1181     | VLSPVTVR                |      |           |       |   |                        |                                          |        |      | Mascot |        |
|    | 874.4992                                                                           | 874.4678    | -0.0314 | -36   | 274           | 280      | LTVEEKR                 |      |           |       |   |                        |                                          |        |      | Mascot |        |
|    | 1035.547                                                                           | 1035.5024   | -0.0446 | -43   | 388           | 396      | LYSLSAPER               |      |           |       |   |                        |                                          |        |      | Mascot |        |
|    | 1044.5796                                                                          | 1044.5037   | -0.0759 | -73   | 1114          | 1123     | AKEALAQASR              |      |           |       |   |                        |                                          |        |      | Mascot |        |
|    | 1057.6187                                                                          | 1057.483    | -0.1357 | -128  | 1182          | 1190     | LKLPCTLGR               |      |           |       |   | Carbamidomethyl (C)[5] |                                          |        |      | Mascot |        |
|    | 1057.6187                                                                          | 1057.483    | -0.1357 | -128  | 1182          | 1190     | LKLPCTLGR               |      |           |       |   | Carbamidomethyl (C)[5] |                                          |        |      | Mascot |        |
|    | 1127.6643                                                                          | 1127.6427   | -0.0216 | -19   | 878           | 886      | RSLINIQQR               |      |           |       |   |                        |                                          |        |      | Mascot |        |
|    | 1127.6643                                                                          | 1127.6427   | -0.0216 | -19   | 878           | 886      | RSLINIQQR               |      |           |       |   |                        |                                          |        |      | Mascot |        |
|    | 1201.6284                                                                          | 1201.5469   | -0.0815 | -68   | 1034          | 1043     | ANQDLERSLR              |      |           |       |   |                        |                                          |        |      | Mascot |        |
|    | 1216.7776                                                                          | 1216.6183   | -0.1593 | -131  | 110           | 120      | VAFVITLLKGR             |      |           |       |   |                        |                                          |        |      | Mascot |        |
|    | 1216.7776                                                                          | 1216.6183   | -0.1593 | -131  | 110           | 120      | VAFVITLLKGR             |      |           |       |   |                        |                                          |        |      | Mascot |        |
|    | 1355.7794                                                                          | 1355.6653   | -0.1141 | -84   | 1145          | 1155     | VWLSTRDLPLR             |      |           |       |   |                        |                                          |        |      | Mascot |        |
|    | 1404.7706                                                                          | 1404.6337   | -0.1369 | -97   | 1278          | 1292     | RGEPLLGAPGGAPGR         |      |           |       |   |                        |                                          |        |      | Mascot |        |
|    | 1438.6572                                                                          | 1438.7734   | 0.1162  | 81    | 887           | 897      | FWWPSMAQDVR             |      |           |       |   | Oxidation (M)[6]       |                                          |        |      | Mascot |        |
|    | 1532.818                                                                           | 1532.746    | -0.072  | -47   | 720           | 732      | NYDIGNRELLAVR           |      |           |       |   |                        |                                          |        |      | Mascot |        |
|    | 1744.0116                                                                          | 1743.8185   | -0.1931 | -111  | 555           | 568      | QVLQRLLLENQLYVK         |      |           |       |   |                        |                                          |        |      | Mascot |        |
|    | 1875.8402                                                                          | 1875.9133   | 0.0731  | 39    | 240           | 256      | RVSGASWMNEGPSNDP<br>R   |      |           |       |   | Oxidation (M)[8]       |                                          |        |      | Mascot |        |
|    | 1880.9827                                                                          | 1880.875    | -0.1077 | -57   | 451           | 467      | YPLPLMSSAFELLQGAK       |      |           |       |   | Oxidation (M)[6]       |                                          |        |      | Mascot |        |
|    | 2211.167                                                                           | 2211.0728   | -0.0942 | -43   | 851           | 869      | LFVPASLRSEVLQWGHE<br>SR |      |           |       |   |                        |                                          |        |      | Mascot |        |
| 41 | cytoplasmic dynein 1 heavy chain 1 [Danio rerio]                                   |             |         |       | gij 112363126 |          | 532854.1                | 6.06 | 31        | 36    | 0 |                        |                                          |        |      |        |        |

**Peptide Information**

| Calc. Mass | Obsrv. Mass | $\pm$ da | $\pm$ ppm | Start Seq. | End Sequence Seq.      | Ion Score | C. I. % | Modification                             | Rank | Result Type |
|------------|-------------|----------|-----------|------------|------------------------|-----------|---------|------------------------------------------|------|-------------|
| 818.4366   | 818.4782    | 0.0416   | 51        | 1405       | 1411 SEALKDR           |           |         |                                          |      | Mascot      |
| 870.4389   | 870.5195    | 0.0806   | 93        | 656        | 662 QLTAYMK            |           |         | Oxidation (M)[6]                         |      | Mascot      |
| 874.4628   | 874.4678    | 0.005    | 6         | 3438       | 3445 DLEASIR           |           |         |                                          |      | Mascot      |
| 890.473    | 890.3811    | -0.0919  | -103      | 828        | 834 LDPYVQR            |           |         |                                          |      | Mascot      |
| 929.4435   | 929.5282    | 0.0847   | 91        | 3847       | 3854 SVSDHTQR          |           |         |                                          |      | Mascot      |
| 1019.4938  | 1019.5085   | 0.0147   | 14        | 4563       | 4572 LQGATCANNK        |           |         |                                          |      | Mascot      |
| 1044.5507  | 1044.5037   | -0.047   | -45       | 4292       | 4300 DIKMPDGIR         |           |         |                                          |      | Mascot      |
| 1045.5272  | 1045.5474   | 0.0202   | 19        | 2836       | 2843 LVEDEERR          |           |         |                                          |      | Mascot      |
| 1050.4884  | 1050.4878   | -0.0006  | -1        | 790        | 797 TCEKVEER           | 9         | 0       | Carbamidomethyl (C)[2]                   |      | Mascot      |
| 1050.4884  | 1050.4878   | -0.0006  | -1        | 790        | 797 TCEKVEER           |           |         | Carbamidomethyl (C)[2]                   |      | Mascot      |
| 1082.5841  | 1082.6184   | 0.0343   | 32        | 1688       | 1697 TAVSITEHPK        |           |         |                                          |      | Mascot      |
| 1127.6895  | 1127.6427   | -0.0468  | -42       | 376        | 385 ALRLVEAISR         |           |         |                                          |      | Mascot      |
| 1127.6895  | 1127.6427   | -0.0468  | -42       | 376        | 385 ALRLVEAISR         |           |         |                                          |      | Mascot      |
| 1167.5463  | 1167.6489   | 0.1026   | 88        | 624        | 633 VQYPQSQSCK         |           |         |                                          |      | Mascot      |
| 1167.5463  | 1167.6489   | 0.1026   | 88        | 624        | 633 VQYPQSQSCK         |           |         |                                          |      | Mascot      |
| 1179.5286  | 1179.5616   | 0.033    | 28        | 2442       | 2450 MEHIMDFTR         |           |         |                                          |      | Mascot      |
| 1235.6378  | 1235.6674   | 0.0296   | 24        | 1614       | 1623 ALGEYLERER        |           |         |                                          |      | Mascot      |
| 1259.7219  | 1259.5708   | -0.1511  | -120      | 3733       | 3742 LQGEFQLRLR        |           |         |                                          |      | Mascot      |
| 1313.55    | 1313.632    | 0.082    | 62        | 862        | 871 SLETCMYEHK         |           |         | Carbamidomethyl (C)[5], Oxidation (M)[6] |      | Mascot      |
| 1320.6793  | 1320.6808   | 0.0015   | 1         | 223        | 234 GEKPKVTDFGDK       |           |         |                                          |      | Mascot      |
| 1355.6552  | 1355.6653   | 0.0101   | 7         | 3121       | 3131 VPDYMPIVYDK       |           |         | Oxidation (M)[5]                         |      | Mascot      |
| 1382.7678  | 1382.7468   | -0.021   | -15       | 639        | 651 DLPPVSGSIIWAK      |           |         |                                          |      | Mascot      |
| 1411.6562  | 1411.7698   | 0.1136   | 80        | 400        | 410 LMHVAYEEFEK        |           |         | Oxidation (M)[2]                         |      | Mascot      |
| 1423.6271  | 1423.7108   | 0.0837   | 59        | 4364       | 4376 STSSSDAQPAWMR     |           |         |                                          |      | Mascot      |
| 1438.7372  | 1438.7734   | 0.0362   | 25        | 4111       | 4122 KLHSMQPHASFR      |           |         |                                          |      | Mascot      |
| 1454.7322  | 1454.7035   | -0.0287  | -20       | 4111       | 4122 KLHSMQPHASFR      |           |         | Oxidation (M)[5]                         |      | Mascot      |
| 1532.705   | 1532.746    | 0.041    | 27        | 3682       | 3694 DPTVEFPDLCGR      |           |         | Carbamidomethyl (C)[11]                  |      | Mascot      |
| 1644.9102  | 1644.8022   | -0.108   | -66       | 4442       | 4455 QTNVLRRLINDMVK    |           |         |                                          |      | Mascot      |
| 1644.9102  | 1644.8022   | -0.108   | -66       | 4442       | 4455 QTNVLRRLINDMVK    |           |         |                                          |      | Mascot      |
| 1727.8558  | 1727.8198   | -0.036   | -21       | 2381       | 2395 LRSIPLDEGEDEAQR   |           |         |                                          |      | Mascot      |
| 1762.9806  | 1762.861    | -0.1196  | -68       | 4329       | 4344 VLLTTQGTDMMAKLLK  |           |         |                                          |      | Mascot      |
| 1762.9806  | 1762.861    | -0.1196  | -68       | 4329       | 4344 VLLTTQGTDMMAKLLK  |           |         |                                          |      | Mascot      |
| 1875.968   | 1875.9133   | -0.0547  | -29       | 2451       | 2466 LRSLGSLFSLMLHQACR |           |         | Carbamidomethyl (C)[15]                  |      | Mascot      |

|    |                                                                      |           |         |     |      |      |                          |      |    |    |   |                   |        |
|----|----------------------------------------------------------------------|-----------|---------|-----|------|------|--------------------------|------|----|----|---|-------------------|--------|
|    | 2210.9944                                                            | 2211.0728 | 0.0784  | 35  | 531  | 550  | EVDGLDVSKEGMEAWEA<br>AMK |      |    |    |   | Oxidation (M)[12] | Mascot |
|    | 2233.0627                                                            | 2233.0535 | -0.0092 | -4  | 3561 | 3580 | WQANSLPADDLCTENAI<br>MLK |      |    |    |   |                   | Mascot |
|    | 2283.1624                                                            | 2283.1416 | -0.0208 | -9  | 2004 | 2024 | QVKVSAEMAIFITMNPY<br>AGR |      |    |    |   |                   | Mascot |
|    | 2284.2561                                                            | 2284.1375 | -0.1186 | -52 | 4504 | 4523 | NIHVNLRGLFVPEAYITAT<br>R |      |    |    |   |                   | Mascot |
| 42 | ras GTPase-activating-like protein IQGAP1 [Danio rerio] gi 190358644 |           |         |     |      |      | 191517.8                 | 6.11 | 20 | 36 | 0 |                   |        |

Peptide Information

| Calc. Mass | Obsrv. Mass | ± da    | ± ppm | Start Seq. | End Seq. | Sequence              | Ion Score | C. I. | % Modification         | Rank | Result Type |
|------------|-------------|---------|-------|------------|----------|-----------------------|-----------|-------|------------------------|------|-------------|
| 882.4944   | 882.5577    | 0.0633  | 72    | 838        | 843      | RLQYFR                |           |       |                        |      | Mascot      |
| 890.4326   | 890.3811    | -0.0515 | -58   | 278        | 285      | KEDQASGR              |           |       |                        |      | Mascot      |
| 918.4387   | 918.4679    | 0.0292  | 32    | 279        | 286      | EDQASGRR              |           |       |                        |      | Mascot      |
| 929.505    | 929.5282    | 0.0232  | 25    | 368        | 377      | DAGLGAQLGK            |           |       |                        |      | Mascot      |
| 999.4854   | 999.4427    | -0.0427 | -43   | 1363       | 1371     | ENSLSQHGK             |           |       |                        |      | Mascot      |
| 1030.5105  | 1030.5696   | 0.0591  | 57    | 1552       | 1559     | NNGYFFIR              |           |       |                        |      | Mascot      |
| 1045.5636  | 1045.5474   | -0.0162 | -15   | 1140       | 1148     | LESSNQVLR             |           |       |                        |      | Mascot      |
| 1159.6317  | 1159.5892   | -0.0425 | -37   | 1476       | 1486     | TLEQAGLVNSK           |           |       |                        |      | Mascot      |
| 1201.5591  | 1201.5469   | -0.0122 | -10   | 1628       | 1637     | AKFMGVEMEK            |           |       | Oxidation (M)[4,8]     |      | Mascot      |
| 1216.5739  | 1216.6183   | 0.0444  | 36    | 240        | 250      | GHAENTMTALR           |           |       | Oxidation (M)[7]       |      | Mascot      |
| 1216.5739  | 1216.6183   | 0.0444  | 36    | 240        | 250      | GHAENTMTALR           |           |       | Oxidation (M)[7]       |      | Mascot      |
| 1235.6167  | 1235.6674   | 0.0507  | 41    | 839        | 847      | LQYFRDHEK             |           |       |                        |      | Mascot      |
| 1270.7113  | 1270.6569   | -0.0544 | -43   | 398        | 409      | QEAVVAINSAIR          |           |       |                        |      | Mascot      |
| 1336.7107  | 1336.6675   | -0.0432 | -32   | 262        | 273      | ALAQVYQDTLSK          |           |       |                        |      | Mascot      |
| 1426.8125  | 1426.7114   | -0.1011 | -71   | 398        | 410      | QEAVVAINSAIRR         |           |       |                        |      | Mascot      |
| 1592.8279  | 1592.6744   | -0.1535 | -96   | 1489       | 1501     | YQEVINDISKDIR         |           |       |                        |      | Mascot      |
| 1597.7527  | 1597.7637   | 0.011   | 7     | 184        | 196      | VDFTEEEISNMRK         |           |       |                        |      | Mascot      |
| 1608.7362  | 1608.6705   | -0.0657 | -41   | 1273       | 1287     | GFFQAACDVPAPPEEK      |           |       |                        |      | Mascot      |
| 1762.9697  | 1762.861    | -0.1087 | -62   | 1047       | 1062     | VDHIQEIVTGNPTVIK      |           |       |                        |      | Mascot      |
| 1762.9697  | 1762.861    | -0.1087 | -62   | 1047       | 1062     | VDHIQEIVTGNPTVIK      |           |       |                        |      | Mascot      |
| 1880.8846  | 1880.875    | -0.0096 | -5    | 46         | 60       | QNIAYEYLCHLEEA        |           |       | Carbamidomethyl (C)[9] |      | Mascot      |
| 1995.0188  | 1994.9576   | -0.0612 | -31   | 240        | 257      | GHAENTMTALRNPALL<br>R |           |       | Oxidation (M)[7]       |      | Mascot      |

43 PREDICTED: dynein heavy chain 3, axonemal [Danio rerio] gi|326679902 436828.9 5.36 30 36 0

Peptide Information

| Calc. Mass | Obsrv. Mass | ± da | ± ppm | Start Seq. | End Seq. | Sequence | Ion Score | C. I. | % Modification | Rank | Result Type |
|------------|-------------|------|-------|------------|----------|----------|-----------|-------|----------------|------|-------------|
|------------|-------------|------|-------|------------|----------|----------|-----------|-------|----------------|------|-------------|

|           |           |         |      |      |      |                        |                                          |        |
|-----------|-----------|---------|------|------|------|------------------------|------------------------------------------|--------|
| 814.4344  | 814.4111  | -0.0233 | -29  | 330  | 335  | YLEVYK                 |                                          | Mascot |
| 814.4344  | 814.4111  | -0.0233 | -29  | 330  | 335  | YLEVYK                 |                                          | Mascot |
| 818.4254  | 818.4782  | 0.0528  | 65   | 182  | 189  | SSSIAPEK               |                                          | Mascot |
| 870.5043  | 870.5195  | 0.0152  | 17   | 248  | 254  | LKLEDPR                |                                          | Mascot |
| 874.4491  | 874.4678  | 0.0187  | 21   | 1184 | 1190 | AMSKFFK                | Oxidation (M)[2]                         | Mascot |
| 890.4465  | 890.3811  | -0.0654 | -73  | 2448 | 2455 | ELVSADEK               |                                          | Mascot |
| 929.4363  | 929.5282  | 0.0919  | 99   | 42   | 48   | DYEFSLR                |                                          | Mascot |
| 1007.4899 | 1007.5864 | 0.0965  | 96   | 2334 | 2341 | IEVVEMCK               | Carbamidomethyl (C)[7]                   | Mascot |
| 1007.4899 | 1007.5864 | 0.0965  | 96   | 2334 | 2341 | IEVVEMCK               | Carbamidomethyl (C)[7]                   | Mascot |
| 1030.5779 | 1030.5696 | -0.0083 | -8   | 511  | 519  | IGQLEETLK              |                                          | Mascot |
| 1035.4598 | 1035.5024 | 0.0426  | 41   | 3823 | 3832 | GVACLCQLDN             |                                          | Mascot |
| 1057.5312 | 1057.483  | -0.0482 | -46  | 42   | 49   | DYEFSLRK               |                                          | Mascot |
| 1057.5312 | 1057.483  | -0.0482 | -46  | 42   | 49   | DYEFSLRK               |                                          | Mascot |
| 1082.6205 | 1082.6184 | -0.0021 | -2   | 2564 | 2573 | DNIPPASIKK             |                                          | Mascot |
| 1127.6241 | 1127.6427 | 0.0186  | 16   | 2186 | 2194 | DNLKHLMLK              | Oxidation (M)[7]                         | Mascot |
| 1127.6241 | 1127.6427 | 0.0186  | 16   | 2186 | 2194 | DNLKHLMLK              | Oxidation (M)[7]                         | Mascot |
| 1235.507  | 1235.6674 | 0.1604  | 130  | 1499 | 1508 | QQAQCTNDDR             | Carbamidomethyl (C)[5]                   | Mascot |
| 1270.6534 | 1270.6569 | 0.0035  | 3    | 1961 | 1971 | IMVQATMAVYK            | Oxidation (M)[2]                         | Mascot |
| 1320.7383 | 1320.6808 | -0.0575 | -44  | 452  | 462  | HTSEVTIHKLR            |                                          | Mascot |
| 1355.5719 | 1355.6653 | 0.0934  | 69   | 985  | 995  | QGMEQYSEMPR            |                                          | Mascot |
| 1382.6654 | 1382.7468 | 0.0814  | 59   | 2428 | 2438 | QTDQMMVKIEK            | Oxidation (M)[5,6]                       | Mascot |
| 1404.6675 | 1404.6337 | -0.0338 | -24  | 2625 | 2636 | EAEELAVQMOK            |                                          | Mascot |
| 1426.7433 | 1426.7114 | -0.0319 | -22  | 1414 | 1424 | IIQVYEMMLVR            | Oxidation (M)[7,8]                       | Mascot |
| 1493.8322 | 1493.7046 | -0.1276 | -85  | 2816 | 2828 | LSVIKLSDSNYVR          |                                          | Mascot |
| 1592.8503 | 1592.6744 | -0.1759 | -110 | 2140 | 2155 | QDNHLLLVGIGGSGR        |                                          | Mascot |
| 1597.7236 | 1597.7637 | 0.0401  | 25   | 3567 | 3579 | LPCDFDIEMVTNK          | Carbamidomethyl (C)[3], Oxidation (M)[9] | Mascot |
| 1727.8104 | 1727.8198 | 0.0094  | 5    | 3818 | 3832 | HWVNRGVACLCQLDN        |                                          | Mascot |
| 1743.8622 | 1743.8185 | -0.0437 | -25  | 3580 | 3593 | YPLLYEESMNTVLR         | Oxidation (M)[9]                         | Mascot |
| 1762.7999 | 1762.861  | 0.0611  | 35   | 2733 | 2745 | VECQQQWLELCNR          | Carbamidomethyl (C)[3,11]                | Mascot |
| 1762.7999 | 1762.861  | 0.0611  | 35   | 2733 | 2745 | VECQQQWLELCNR          | Carbamidomethyl (C)[3,11]                | Mascot |
| 1875.8905 | 1875.9133 | 0.0228  | 12   | 3309 | 3324 | ICEEVITPENTHTSFR       |                                          | Mascot |
| 1951.8854 | 1952.0193 | 0.1339  | 69   | 2529 | 2546 | QDPGGSGKMIEDFWGPS<br>K | Oxidation (M)[9]                         | Mascot |
| 2121.9402 | 2122.0508 | 0.1106  | 52   | 1170 | 1187 | QCVVFNCSDGLDYKAMS<br>K | Carbamidomethyl (C)[2,7]                 | Mascot |
| 2122.0564 | 2122.0508 | -0.0056 | -3   | 3702 | 3718 | KYTIPIDYIGFEFEVCK      | Carbamidomethyl (C)[16]                  | Mascot |
| 2284.2151 | 2284.1375 | -0.0776 | -34  | 1696 | 1715 | NLLMGITDHPRMSVKL<br>TK | Oxidation (M)[4,14]                      | Mascot |

44 T-complex protein 1 subunit epsilon [Danio rerio] gi|47086803 59356.9 5.39 10 36 0

Peptide Information

| Calc. Mass | Obsrv. Mass | ± da    | ± ppm | Start Seq. | End Sequence Seq.           | Ion Score | C. I. % Modification                     | Rank | Result Type |
|------------|-------------|---------|-------|------------|-----------------------------|-----------|------------------------------------------|------|-------------|
| 929.5302   | 929.5282    | -0.002  | -2    | 143        | 150 IAIEQLDK                |           |                                          |      | Mascot      |
| 1082.5299  | 1082.6184   | 0.0885  | 82    | 283        | 290 DKFQEMIR                |           | Oxidation (M)[6]                         |      | Mascot      |
| 1167.6302  | 1167.6489   | 0.0187  | 16    | 401        | 410 ALHDALCVIR              | 7         | 0 Carbamidomethyl (C)[7]                 |      | Mascot      |
| 1167.6302  | 1167.6489   | 0.0187  | 16    | 401        | 410 ALHDALCVIR              |           | Carbamidomethyl (C)[7]                   |      | Mascot      |
| 1235.6123  | 1235.6674   | 0.0551  | 45    | 369        | 378 DRMLVIEECK              |           |                                          |      | Mascot      |
| 1270.5554  | 1270.6569   | 0.1015  | 80    | 440        | 449 CPSLEQYAMR              |           | Carbamidomethyl (C)[1], Oxidation (M)[9] |      | Mascot      |
| 1592.9053  | 1592.6744   | -0.2309 | -145  | 401        | 414 ALHDALCVIRNLVR          |           |                                          |      | Mascot      |
| 1608.8479  | 1608.6705   | -0.1774 | -110  | 266        | 279 LDVTSVEDYKALQK          |           |                                          |      | Mascot      |
| 1727.8785  | 1727.8198   | -0.0587 | -34   | 227        | 241 GVVDKEFSHPQMPK          |           | Oxidation (M)[13]                        |      | Mascot      |
| 1762.9408  | 1762.861    | -0.0798 | -45   | 345        | 360 FCELTPEKLG TAGLVK       |           | Carbamidomethyl (C)[2]                   |      | Mascot      |
| 1762.9408  | 1762.861    | -0.0798 | -45   | 345        | 360 FCELTPEKLG TAGLVK       |           | Carbamidomethyl (C)[2]                   |      | Mascot      |
| 2122.0483  | 2122.0508   | 0.0025  | 1     | 418        | 439 IVYGGGASEIACALAVNE AADK |           |                                          |      | Mascot      |
| 2122.0483  | 2122.0508   | 0.0025  | 1     | 418        | 439 IVYGGGASEIACALAVNE AADK |           |                                          |      | Mascot      |

45 homeodomain protein [Danio rerio] gi|295695 6990.7 11.41 5 36 0

Peptide Information

| Calc. Mass | Obsrv. Mass | ± da    | ± ppm | Start Seq. | End Sequence Seq.  | Ion Score | C. I. % Modification | Rank | Result Type |
|------------|-------------|---------|-------|------------|--------------------|-----------|----------------------|------|-------------|
| 1019.5533  | 1019.5085   | -0.0448 | -44   | 47         | 53 IWFQNR          |           |                      |      | Mascot      |
| 1218.6742  | 1218.5825   | -0.0917 | -75   | 44         | 52 QVKIWFQNR       |           |                      |      | Mascot      |
| 1382.6964  | 1382.7468   | 0.0504  | 36    | 19         | 28 EFHFNRYLTR      |           |                      |      | Mascot      |
| 1404.661   | 1404.6337   | -0.0273 | -19   | 32         | 43 VEIAHTMCLSER    |           | Oxidation (M)[7]     |      | Mascot      |
| 1743.8881  | 1743.8185   | -0.0696 | -40   | 32         | 46 VEIAHTMCLSERQVK |           |                      |      | Mascot      |
| 1759.8829  | 1759.8187   | -0.0642 | -36   | 32         | 46 VEIAHTMCLSERQVK |           | Oxidation (M)[7]     |      | Mascot      |

46 novel protein similar to vertebrate uveal autoantigen with coiled-coil domains and ankyrin repeats gi|157886098 84044.6 5.83 12 36 0

Peptide Information

| Calc. Mass | Obsrv. Mass | ± da    | ± ppm | Start Seq. | End Sequence Seq. | Ion Score | C. I. % Modification | Rank | Result Type |
|------------|-------------|---------|-------|------------|-------------------|-----------|----------------------|------|-------------|
| 818.4002   | 818.4782    | 0.078   | 95    | 714        | 720 QLEESGR       |           |                      |      | Mascot      |
| 842.5094   | 842.4996    | -0.0098 | -12   | 330        | 337 LDAALALR      |           |                      |      | Mascot      |

|    |                             |           |         |     |              |     |                          |     |    |    |   |                                            |  |  |  |  |        |
|----|-----------------------------|-----------|---------|-----|--------------|-----|--------------------------|-----|----|----|---|--------------------------------------------|--|--|--|--|--------|
|    | 918.4713                    | 918.4679  | -0.0034 | -4  | 589          | 596 | VALAEMER                 |     |    |    |   |                                            |  |  |  |  | Mascot |
|    | 999.3692                    | 999.4427  | 0.0735  | 74  | 755          | 761 | MREECVC                  |     |    |    |   |                                            |  |  |  |  | Mascot |
|    | 1216.5925                   | 1216.6183 | 0.0258  | 21  | 382          | 391 | QMQAHLMAVR               | 1   | 0  |    |   | Oxidation (M)[2,7]                         |  |  |  |  | Mascot |
|    | 1216.5925                   | 1216.6183 | 0.0258  | 21  | 382          | 391 | QMQAHLMAVR               |     |    |    |   | Oxidation (M)[2,7]                         |  |  |  |  | Mascot |
|    | 1259.6049                   | 1259.5708 | -0.0341 | -27 | 109          | 119 | CPVDSIDLQGR              |     |    |    |   | Carbamidomethyl (C)[1]                     |  |  |  |  | Mascot |
|    | 1336.6353                   | 1336.6675 | 0.0322  | 24  | 347          | 358 | SSEQALHASHNR             |     |    |    |   |                                            |  |  |  |  | Mascot |
|    | 1644.8625                   | 1644.8022 | -0.0603 | -37 | 583          | 596 | EVEQLKVALAEMER           |     |    |    |   |                                            |  |  |  |  | Mascot |
|    | 1644.8625                   | 1644.8022 | -0.0603 | -37 | 583          | 596 | EVEQLKVALAEMER           |     |    |    |   |                                            |  |  |  |  | Mascot |
|    | 1743.8507                   | 1743.8185 | -0.0322 | -18 | 601          | 615 | VPNTKEEGVQTEEQR          |     |    |    |   |                                            |  |  |  |  | Mascot |
|    | 1951.9                      | 1952.0193 | 0.1193  | 61  | 463          | 478 | TRLADIETNHAEMFCK         |     |    |    |   | Carbamidomethyl (C)[15], Oxidation (M)[13] |  |  |  |  | Mascot |
|    | 1995.1022                   | 1994.9576 | -0.1446 | -72 | 254          | 273 | TTQAKPPPAGIGWTKAG<br>SVK |     |    |    |   |                                            |  |  |  |  | Mascot |
|    | 2283.1284                   | 2283.1416 | 0.0132  | 6   | 539          | 557 | HQCILEENQSLLETQEQ<br>K   |     |    |    |   |                                            |  |  |  |  | Mascot |
| 47 | novel protein [Danio rerio] |           |         |     | gi 148725634 |     | 88547.7                  | 5.1 | 12 | 35 | 0 |                                            |  |  |  |  |        |

#### Peptide Information

| Calc. Mass | Obsrv. Mass | ± da    | ± ppm | Start Seq. | End Seq. | Sequence                | Ion Score | C. I. | % Modification         | Rank | Result Type |
|------------|-------------|---------|-------|------------|----------|-------------------------|-----------|-------|------------------------|------|-------------|
| 842.5345   | 842.4996    | -0.0349 | -41   | 588        | 595      | IIASPLTK                |           |       |                        |      | Mascot      |
| 870.4791   | 870.5195    | 0.0404  | 46    | 199        | 205      | ETSRHIK                 |           |       |                        |      | Mascot      |
| 1035.5581  | 1035.5024   | -0.0557 | -54   | 25         | 33       | SVQFKVGDR               |           |       |                        |      | Mascot      |
| 1050.5322  | 1050.4878   | -0.0444 | -42   | 40         | 48       | MLSCPEKVK               |           |       | Oxidation (M)[1]       |      | Mascot      |
| 1050.5322  | 1050.4878   | -0.0444 | -42   | 40         | 48       | MLSCPEKVK               |           |       | Oxidation (M)[1]       |      | Mascot      |
| 1057.5208  | 1057.483    | -0.0378 | -36   | 423        | 431      | NLSNMSVHR               |           |       |                        |      | Mascot      |
| 1057.5208  | 1057.483    | -0.0378 | -36   | 423        | 431      | NLSNMSVHR               |           |       |                        |      | Mascot      |
| 1082.4791  | 1082.6184   | 0.1393  | 129   | 38         | 46       | CRMLSCPEK               |           |       | Oxidation (M)[3]       |      | Mascot      |
| 1235.6049  | 1235.6674   | 0.0625  | 51    | 485        | 496      | SSGPSLAGERMK            |           |       | Oxidation (M)[11]      |      | Mascot      |
| 1288.6281  | 1288.6763   | 0.0482  | 37    | 150        | 160      | VVHRESGDFDK             |           |       |                        |      | Mascot      |
| 1335.6638  | 1335.6278   | -0.036  | -27   | 344        | 356      | EGAETSVTIDSVK           |           |       |                        |      | Mascot      |
| 1382.7162  | 1382.7468   | 0.0306  | 22    | 184        | 196      | ASLNIEGVPEEK            |           |       |                        |      | Mascot      |
| 1426.7219  | 1426.7114   | -0.0105 | -7    | 423        | 434      | NLSNMSVHRQPK            |           |       | Oxidation (M)[5]       |      | Mascot      |
| 2210.948   | 2211.0728   | 0.1248  | 56    | 357        | 375      | LSDTGMFVCEAFNEYGS<br>QR |           |       | Carbamidomethyl (C)[9] |      | Mascot      |

48 reverse transcriptase [Danio rerio] gi|34392545 93280.8 10.05 16 35 0

#### Peptide Information

| Calc. Mass | Obsrv. Mass | ± da   | ± ppm | Start Seq. | End Seq. | Sequence | Ion Score | C. I. | % Modification | Rank | Result Type |
|------------|-------------|--------|-------|------------|----------|----------|-----------|-------|----------------|------|-------------|
| 818.477    | 818.4782    | 0.0012 | 1     | 392        | 399      | SGLPGIFK |           |       |                |      | Mascot      |

|           |           |         |      |     |     |                          |                                          |        |
|-----------|-----------|---------|------|-----|-----|--------------------------|------------------------------------------|--------|
| 842.5206  | 842.4996  | -0.021  | -25  | 103 | 109 | QLLGQKR                  |                                          | Mascot |
| 890.4941  | 890.3811  | -0.113  | -127 | 784 | 792 | GIASNTLSK                |                                          | Mascot |
| 1030.5826 | 1030.5696 | -0.013  | -13  | 68  | 75  | KQLVNLCR                 | Carbamidomethyl (C)[7]                   | Mascot |
| 1035.5834 | 1035.5024 | -0.081  | -78  | 254 | 262 | LSNFLLSNK                |                                          | Mascot |
| 1050.4707 | 1050.4878 | 0.0171  | 16   | 775 | 783 | CMPVEVGSR                | Carbamidomethyl (C)[1], Oxidation (M)[2] | Mascot |
| 1050.4707 | 1050.4878 | 0.0171  | 16   | 775 | 783 | CMPVEVGSR                | Carbamidomethyl (C)[1], Oxidation (M)[2] | Mascot |
| 1167.5463 | 1167.6489 | 0.1026  | 88   | 759 | 767 | YQELVEQCR                |                                          | Mascot |
| 1167.5463 | 1167.6489 | 0.1026  | 88   | 759 | 767 | YQELVEQCR                |                                          | Mascot |
| 1206.5935 | 1206.5884 | -0.0051 | -4   | 570 | 579 | GKQAMEWNVK               | Oxidation (M)[5]                         | Mascot |
| 1235.6279 | 1235.6674 | 0.0395  | 32   | 635 | 644 | ALGEGQYRWR               |                                          | Mascot |
| 1320.7675 | 1320.6808 | -0.0867 | -66  | 91  | 102 | AAFLANPFKLTk             |                                          | Mascot |
| 1355.7583 | 1355.6653 | -0.093  | -69  | 400 | 410 | AWVYQHGIllR              |                                          | Mascot |
| 1493.807  | 1493.7046 | -0.1024 | -69  | 522 | 535 | LGSLAATRYDLASR           |                                          | Mascot |
| 1532.6434 | 1532.746  | 0.1026  | 67   | 364 | 376 | AFNCsFNDSDSIR            | Carbamidomethyl (C)[4]                   | Mascot |
| 1608.8969 | 1608.6705 | -0.2264 | -141 | 672 | 684 | VIHFIKEGQRPER            |                                          | Mascot |
| 1727.7662 | 1727.8198 | 0.0536  | 31   | 555 | 569 | SSRAMAMPQQGAWMK          | Oxidation (M)[5,7,14]                    | Mascot |
| 2283.1841 | 2283.1416 | -0.0425 | -19  | 580 | 599 | EGHLDIQPPENQVLDPR<br>GLR |                                          | Mascot |

PREDICTED: hypothetical protein LOC100538192  
[Danio rerio]

gi|326664724

9.01

25

35

0

| Peptide Information |             |         |       | Start Seq. | End Seq. | Sequence    | Ion Score | C. I. % | Modification           | Rank | Result Type |
|---------------------|-------------|---------|-------|------------|----------|-------------|-----------|---------|------------------------|------|-------------|
| Calc. Mass          | Obsrv. Mass | ± da    | ± ppm |            |          |             |           |         |                        |      |             |
| 814.4669            | 814.4111    | -0.0558 | -69   | 1335       | 1341     | LTPLDQK     |           |         |                        |      | Mascot      |
| 814.4669            | 814.4111    | -0.0558 | -69   | 1335       | 1341     | LTPLDQK     |           |         |                        |      | Mascot      |
| 856.4424            | 856.5143    | 0.0719  | 84    | 1963       | 1968     | WHTKER      |           |         |                        |      | Mascot      |
| 870.4654            | 870.5195    | 0.0541  | 62    | 465        | 470      | IFFCRK      |           |         | Carbamidomethyl (C)[4] |      | Mascot      |
| 874.5244            | 874.4678    | -0.0566 | -65   | 162        | 169      | EATVTLLK    |           |         |                        |      | Mascot      |
| 1050.5071           | 1050.4878   | -0.0193 | -18   | 1693       | 1701     | VVDSCVICR   |           |         | Carbamidomethyl (C)[5] |      | Mascot      |
| 1050.5071           | 1050.4878   | -0.0193 | -18   | 1693       | 1701     | VVDSCVICR   |           |         | Carbamidomethyl (C)[5] |      | Mascot      |
| 1057.6              | 1057.483    | -0.117  | -111  | 854        | 861      | ERELEIIR    |           |         |                        |      | Mascot      |
| 1057.6              | 1057.483    | -0.117  | -111  | 854        | 861      | ERELEIIR    |           |         |                        |      | Mascot      |
| 1127.6782           | 1127.6427   | -0.0355 | -31   | 1935       | 1944     | LKVIQGEV NK |           |         |                        |      | Mascot      |
| 1127.6782           | 1127.6427   | -0.0355 | -31   | 1935       | 1944     | LKVIQGEV NK |           |         |                        |      | Mascot      |
| 1159.5953           | 1159.5892   | -0.0061 | -5    | 279        | 288      | IQLVDSVDDR  |           |         |                        |      | Mascot      |
| 1201.686            | 1201.5469   | -0.1391 | -116  | 340        | 349      | VIELIQMVEK  |           |         |                        |      | Mascot      |
| 1206.5459           | 1206.5884   | 0.0425  | 35    | 823        | 833      | WDSIGTACEPK |           |         |                        |      | Mascot      |



|           |           |         |      |      |      |                    |                                               |        |
|-----------|-----------|---------|------|------|------|--------------------|-----------------------------------------------|--------|
| 1216.6321 | 1216.6183 | -0.0138 | -11  | 529  | 538  | WDLKNLNEGK         |                                               | Mascot |
| 1216.6321 | 1216.6183 | -0.0138 | -11  | 529  | 538  | WDLKNLNEGK         |                                               | Mascot |
| 1235.6234 | 1235.6674 | 0.044   | 36   | 1693 | 1702 | VVDSVCVCRK         | Carbamidomethyl (C)[5,8]                      | Mascot |
| 1320.653  | 1320.6808 | 0.0278  | 21   | 1819 | 1830 | LETSELEAEATK       |                                               | Mascot |
| 1336.7947 | 1336.6675 | -0.1272 | -95  | 641  | 653  | GEKITLVVHGVGK      |                                               | Mascot |
| 1382.5927 | 1382.7468 | 0.1541  | 111  | 447  | 460  | DSTEAGCIVCGAEK     |                                               | Mascot |
| 1404.8434 | 1404.6337 | -0.2097 | -149 | 715  | 726  | RPGKIDLLISHR       |                                               | Mascot |
| 1426.8013 | 1426.7114 | -0.0899 | -63  | 1993 | 2005 | VIQVNADDKGIVR      |                                               | Mascot |
| 1438.7424 | 1438.7734 | 0.031   | 22   | 1537 | 1548 | LVDEEKYSNLTK       |                                               | Mascot |
| 1454.7097 | 1454.7035 | -0.0062 | -4   | 1014 | 1024 | KMYNSVWLEER        |                                               | Mascot |
| 1493.8984 | 1493.7046 | -0.1938 | -130 | 644  | 657  | ITLVVHGVGKMAIR     |                                               | Mascot |
| 1532.9271 | 1532.746  | -0.1811 | -118 | 987  | 1000 | GPDVLPPIRAVLLR     |                                               | Mascot |
| 1644.8413 | 1644.8022 | -0.0391 | -24  | 678  | 691  | AHQLICYGLEEIAK     | Carbamidomethyl (C)[6]                        | Mascot |
| 1644.8413 | 1644.8022 | -0.0391 | -24  | 678  | 691  | AHQLICYGLEEIAK     | Carbamidomethyl (C)[6]                        | Mascot |
| 1759.8973 | 1759.8187 | -0.0786 | -45  | 1318 | 1332 | WNTDQGDIVRLVESK    |                                               | Mascot |
| 1880.9332 | 1880.875  | -0.0582 | -31  | 1747 | 1762 | VHLKVGIVYCCMASR    | Oxidation (M)[13]                             | Mascot |
| 1994.9761 | 1994.9576 | -0.0185 | -9   | 1747 | 1762 | VHLKVGIVYCCMASR    | Carbamidomethyl (C)[11,12], Oxidation (M)[13] | Mascot |
| 2211.0215 | 2211.0728 | 0.0513  | 23   | 816  | 833  | EFIDWWKWDSIGTACEPK |                                               | Mascot |

50 Ifit2 protein [Danio rerio] gi|115313658 52215.1 8.17 11 35 0

| Peptide Information |             |         |       |            |                   |                |         |                        |                  |
|---------------------|-------------|---------|-------|------------|-------------------|----------------|---------|------------------------|------------------|
| Calc. Mass          | Obsrv. Mass | ± da    | ± ppm | Start Seq. | End Sequence Seq. | Ion Score      | C. I. % | Modification           | Rank Result Type |
| 818.389             | 818.4782    | 0.0892  | 109   | 411        | 418               | TPGDSVDK       |         |                        | Mascot           |
| 870.4025            | 870.5195    | 0.117   | 134   | 303        | 309               | CLADTYK        |         | Carbamidomethyl (C)[1] | Mascot           |
| 929.5665            | 929.5282    | -0.0383 | -41   | 213        | 220               | AEILEKVK       |         |                        | Mascot           |
| 1019.4462           | 1019.5085   | 0.0623  | 61    | 179        | 187               | MASEAEPER      |         |                        | Mascot           |
| 1035.4412           | 1035.5024   | 0.0612  | 59    | 179        | 187               | MASEAEPER      |         | Oxidation (M)[1]       | Mascot           |
| 1050.4963           | 1050.4878   | -0.0085 | -8    | 286        | 293               | EGERFQER       |         |                        | Mascot           |
| 1050.4963           | 1050.4878   | -0.0085 | -8    | 286        | 293               | EGERFQER       |         |                        | Mascot           |
| 1127.5554           | 1127.6427   | 0.0873  | 77    | 303        | 311               | CLADTYKWK      |         |                        | Mascot           |
| 1127.5554           | 1127.6427   | 0.0873  | 77    | 303        | 311               | CLADTYKWK      |         |                        | Mascot           |
| 1210.65             | 1210.7117   | 0.0617  | 51    | 300        | 309               | VLKCLADTYK     |         | Carbamidomethyl (C)[4] | Mascot           |
| 1259.6953           | 1259.5708   | -0.1245 | -99   | 240        | 250               | LSDVTKVNVER    |         |                        | Mascot           |
| 1532.7915           | 1532.746    | -0.0455 | -30   | 78         | 91                | SLGSDREALESQK  |         |                        | Mascot           |
| 1762.833            | 1762.861    | 0.028   | 16    | 348        | 362               | VALAAMHYAHNTER |         | Oxidation (M)[6]       | Mascot           |

|           |           |        |    |     |     |                    |                        |        |
|-----------|-----------|--------|----|-----|-----|--------------------|------------------------|--------|
| 1762.833  | 1762.861  | 0.028  | 16 | 348 | 362 | VALAAMHYAHNTER     | Oxidation (M)[6]       | Mascot |
| 2211.0459 | 2211.0728 | 0.0269 | 12 | 201 | 218 | ACLWYECTPEQKAEILEK | Carbamidomethyl (C)[2] | Mascot |

|                       |           |                               |                |                       |                    |
|-----------------------|-----------|-------------------------------|----------------|-----------------------|--------------------|
| <b>Gel Idx/Pos</b>    | 216/116   | <b>Instr./Gel Origin</b>      | BA2060/110707A | <b>Process Status</b> | Analysis Succeeded |
| <b>Plate [#] Name</b> | [1] 31496 | <b>Instrument Sample Name</b> |                | <b>Spectra</b>        | 11                 |

| Rank | Protein Name               | Accession No. | Protein MW | Protein PI | Pep. Count | Protein Score | Protein Score C. I. % | Total Ion Score | Total Ion C. I. % |
|------|----------------------------|---------------|------------|------------|------------|---------------|-----------------------|-----------------|-------------------|
| 1    | Pgk1 protein [Danio rerio] | gi 41388972   | 44689.9    | 6.47       | 19         | 931           | 100                   | 795             | 100               |

### Peptide Information

| Calc. Mass | Obsrv. Mass | ± da    | ± ppm | Start Seq. | End Sequence Seq.      | Ion Score | C. I. % | Modification              | Rank | Result Type |
|------------|-------------|---------|-------|------------|------------------------|-----------|---------|---------------------------|------|-------------|
| 892.4886   | 892.4795    | -0.0091 | -10   | 323        | 330 LYAEAVAR           |           |         |                           |      | Mascot      |
| 892.4886   | 892.4795    | -0.0091 | -10   | 323        | 330 LYAEAVAR           | 57        | 99.944  |                           |      | Mascot      |
| 916.4522   | 916.4437    | -0.0085 | -9    | 124        | 131 FHVAEEGK           |           |         |                           |      | Mascot      |
| 1072.5494  | 1072.5409   | -0.0085 | -8    | 31         | 39 NNVTNNQR            | 76        | 100     |                           |      | Mascot      |
| 1072.5494  | 1072.5409   | -0.0085 | -8    | 31         | 39 NNVTNNQR            |           |         |                           |      | Mascot      |
| 1107.5428  | 1107.5332   | -0.0096 | -9    | 142        | 151 ASQAEIDAFR         | 81        | 100     |                           |      | Mascot      |
| 1107.5428  | 1107.5332   | -0.0096 | -9    | 142        | 151 ASQAEIDAFR         |           |         |                           |      | Mascot      |
| 1219.6569  | 1219.6447   | -0.0122 | -10   | 76         | 86 YSLEPVAAELK         |           |         |                           |      | Mascot      |
| 1367.71    | 1367.803    | 0.093   | 68    | 172        | 184 AHSSMVGVNLPQK      |           |         |                           |      | Mascot      |
| 1383.705   | 1383.6879   | -0.0171 | -12   | 172        | 184 AHSSMVGVNLPQK      |           |         | Oxidation (M)[5]          |      | Mascot      |
| 1634.7921  | 1634.7799   | -0.0122 | -7    | 157        | 171 LGDVYVNDAFGTAHR    | 134       | 100     |                           |      | Mascot      |
| 1634.7921  | 1634.7799   | -0.0122 | -7    | 157        | 171 LGDVYVNDAFGTAHR    |           |         |                           |      | Mascot      |
| 1683.7941  | 1683.7804   | -0.0137 | -8    | 42         | 56 AAVPSIQHCLDNCAK     |           |         | Carbamidomethyl (C)[9,13] |      | Mascot      |
| 1740.9126  | 1740.8966   | -0.016  | -9    | 389        | 406 VSHVSTGGGASLELLEGK |           |         |                           |      | Mascot      |
| 1743.8807  | 1743.8707   | -0.01   | -6    | 231        | 246 VNEMIIGGGMAFTFLK   |           |         | Oxidation (M)[4]          |      | Mascot      |
| 1759.8757  | 1759.8629   | -0.0128 | -7    | 231        | 246 VNEMIIGGGMAFTFLK   |           |         | Oxidation (M)[4,10]       |      | Mascot      |
| 1795.937   | 1795.9229   | -0.0141 | -8    | 107        | 123 ACADPPAGSVILLENLR  |           |         | Carbamidomethyl (C)[2]    |      | Mascot      |
| 1795.937   | 1795.9229   | -0.0141 | -8    | 107        | 123 ACADPPAGSVILLENLR  | 148       | 100     | Carbamidomethyl (C)[2]    |      | Mascot      |
| 1851.9739  | 1851.9554   | -0.0185 | -10   | 280        | 295 ITLPVDFITADKFDEK   | 82        | 100     |                           |      | Mascot      |
| 1851.9739  | 1851.9554   | -0.0185 | -10   | 280        | 295 ITLPVDFITADKFDEK   |           |         |                           |      | Mascot      |
| 1969.9423  | 1969.9259   | -0.0164 | -8    | 250        | 267 NMEIGTSLFDEEGSTIVK |           |         |                           |      | Mascot      |
| 1985.9371  | 1985.9213   | -0.0158 | -8    | 250        | 267 NMEIGTSLFDEEGSTIVK | 65        | 99.991  | Oxidation (M)[2]          |      | Mascot      |
| 1985.9371  | 1985.9213   | -0.0158 | -8    | 250        | 267 NMEIGTSLFDEEGSTIVK |           |         | Oxidation (M)[2]          |      | Mascot      |
| 2019.0514  | 2019.0311   | -0.0203 | -10   | 57         | 75 AVVLMShLGRPDGVPMPDK |           |         |                           |      | Mascot      |
| 2035.0463  | 2035.0297   | -0.0166 | -8    | 57         | 75 AVVLMShLGRPDGVPMP   |           |         | Oxidation (M)[5]          |      | Mascot      |

|   |                                         |           |         |     |     |             |                                    |      |     |     |     |     |                                            |        |
|---|-----------------------------------------|-----------|---------|-----|-----|-------------|------------------------------------|------|-----|-----|-----|-----|--------------------------------------------|--------|
|   | 2051.0413                               | 2051.0251 | -0.0162 | -8  | 57  | 75          | AVVLMSHLGRPDGVPMP<br>DK            |      |     |     |     |     | Oxidation (M)[5,16]                        | Mascot |
|   | 2401.1724                               | 2401.1543 | -0.0181 | -8  | 333 | 353         | QIVWNGPVGVEWDNFA<br>HGTK           |      |     |     |     |     |                                            | Mascot |
|   | 2401.1724                               | 2401.1543 | -0.0181 | -8  | 333 | 353         | QIVWNGPVGVEWDNFA<br>HGTK           | 152  | 100 |     |     |     |                                            | Mascot |
|   | 2515.231                                | 2515.2087 | -0.0223 | -9  | 383 | 406         | WDTEDKVSHVSTGGGAS<br>LLELEGK       |      |     |     |     |     |                                            | Mascot |
|   | 2664.228                                | 2664.2173 | -0.0107 | -4  | 296 | 322         | ATTGTATVAEGIPAGWM<br>GLDCGPESK     |      |     |     |     |     | Carbamidomethyl (C)[21]                    | Mascot |
|   | 2678.4375                               | 2678.4114 | -0.0261 | -10 | 193 | 216         | ELDYFAMALEKPQRPFLA<br>ILGGAK       |      |     |     |     |     |                                            | Mascot |
|   | 2680.2229                               | 2680.2222 | -0.0007 | 0   | 296 | 322         | ATTGTATVAEGIPAGWM<br>GLDCGPESK     |      |     |     |     |     | Carbamidomethyl (C)[21], Oxidation (M)[17] | Mascot |
|   | 2694.4324                               | 2694.4131 | -0.0193 | -7  | 193 | 216         | ELDYFAMALEKPQRPFLA<br>ILGGAK       |      |     |     |     |     | Oxidation (M)[7]                           | Mascot |
|   | 3219.6904                               | 3219.655  | -0.0354 | -11 | 57  | 86          | AVVLMSHLGRPDGVPMP<br>DKYSLEPVAAELK |      |     |     |     |     |                                            | Mascot |
|   | 3235.6853                               | 3235.6675 | -0.0178 | -6  | 57  | 86          | AVVLMSHLGRPDGVPMP<br>DKYSLEPVAAELK |      |     |     |     |     | Oxidation (M)[5]                           | Mascot |
|   | 3251.6802                               | 3251.6763 | -0.0039 | -1  | 57  | 86          | AVVLMSHLGRPDGVPMP<br>DKYSLEPVAAELK |      |     |     |     |     | Oxidation (M)[5,16]                        | Mascot |
| 2 | phosphoglycerate kinase 1 [Danio rerio] |           |         |     |     | gi 47087077 | 44661.9                            | 6.47 | 18  | 912 | 100 | 795 | 100                                        |        |

#### Peptide Information

| Calc. Mass | Obsrv. Mass | ± da    | ± ppm | Start Seq. | End Seq. | Sequence              | Ion Score | C. I. % | Modification              | Rank | Result Type |
|------------|-------------|---------|-------|------------|----------|-----------------------|-----------|---------|---------------------------|------|-------------|
| 892.4886   | 892.4795    | -0.0091 | -10   | 323        | 330      | LYAEAVAR              |           |         |                           |      | Mascot      |
| 892.4886   | 892.4795    | -0.0091 | -10   | 323        | 330      | LYAEAVAR              | 57        | 99.944  |                           |      | Mascot      |
| 916.4522   | 916.4437    | -0.0085 | -9    | 124        | 131      | FHVAEEGK              |           |         |                           |      | Mascot      |
| 1072.5494  | 1072.5409   | -0.0085 | -8    | 31         | 39       | NNVITNNQR             | 76        | 100     |                           |      | Mascot      |
| 1072.5494  | 1072.5409   | -0.0085 | -8    | 31         | 39       | NNVITNNQR             |           |         |                           |      | Mascot      |
| 1107.5428  | 1107.5332   | -0.0096 | -9    | 142        | 151      | ASQAEIDAFR            | 81        | 100     |                           |      | Mascot      |
| 1107.5428  | 1107.5332   | -0.0096 | -9    | 142        | 151      | ASQAEIDAFR            |           |         |                           |      | Mascot      |
| 1219.6569  | 1219.6447   | -0.0122 | -10   | 76         | 86       | YSLEPVAAELK           |           |         |                           |      | Mascot      |
| 1367.71    | 1367.803    | 0.093   | 68    | 172        | 184      | AHSSMVGYNLPQK         |           |         |                           |      | Mascot      |
| 1383.705   | 1383.6879   | -0.0171 | -12   | 172        | 184      | AHSSMVGYNLPQK         |           |         | Oxidation (M)[5]          |      | Mascot      |
| 1634.7921  | 1634.7799   | -0.0122 | -7    | 157        | 171      | LGDVYVNDAFGTAHR       | 134       | 100     |                           |      | Mascot      |
| 1634.7921  | 1634.7799   | -0.0122 | -7    | 157        | 171      | LGDVYVNDAFGTAHR       |           |         |                           |      | Mascot      |
| 1683.7941  | 1683.7804   | -0.0137 | -8    | 42         | 56       | AAVPSIQHC LDNCAK      |           |         | Carbamidomethyl (C)[9,13] |      | Mascot      |
| 1740.9126  | 1740.8966   | -0.016  | -9    | 389        | 406      | VSHVSTGGGASLELEG<br>K |           |         |                           |      | Mascot      |
| 1743.8807  | 1743.8707   | -0.01   | -6    | 231        | 246      | VNEMIIGGGMAFTFLK      |           |         | Oxidation (M)[4]          |      | Mascot      |
| 1759.8757  | 1759.8629   | -0.0128 | -7    | 231        | 246      | VNEMIIGGGMAFTFLK      |           |         | Oxidation (M)[4,10]       |      | Mascot      |
| 1795.937   | 1795.9229   | -0.0141 | -8    | 107        | 123      | ACADPPAGSVILLENLR     |           |         | Carbamidomethyl (C)[2]    |      | Mascot      |
| 1795.937   | 1795.9229   | -0.0141 | -8    | 107        | 123      | ACADPPAGSVILLENLR     | 148       | 100     | Carbamidomethyl (C)[2]    |      | Mascot      |

|           |           |         |     |     |     |                                |     |        |                                            |        |
|-----------|-----------|---------|-----|-----|-----|--------------------------------|-----|--------|--------------------------------------------|--------|
| 1851.9739 | 1851.9554 | -0.0185 | -10 | 280 | 295 | ITLPVDFITADKFDEK               | 82  | 100    |                                            | Mascot |
| 1851.9739 | 1851.9554 | -0.0185 | -10 | 280 | 295 | ITLPVDFITADKFDEK               |     |        |                                            | Mascot |
| 1969.9423 | 1969.9259 | -0.0164 | -8  | 250 | 267 | NMEIGTSLFDEEGSTIVK             |     |        |                                            | Mascot |
| 1985.9371 | 1985.9213 | -0.0158 | -8  | 250 | 267 | NMEIGTSLFDEEGSTIVK             | 65  | 99.991 | Oxidation (M)[2]                           | Mascot |
| 1985.9371 | 1985.9213 | -0.0158 | -8  | 250 | 267 | NMEIGTSLFDEEGSTIVK             |     |        | Oxidation (M)[2]                           | Mascot |
| 2019.0076 | 2019.0311 | 0.0235  | 12  | 23  | 39  | VDFNVPMKNNVITNNQR              |     |        | Oxidation (M)[7]                           | Mascot |
| 2401.1724 | 2401.1543 | -0.0181 | -8  | 333 | 353 | QIVWNGPVGVFWDNFA<br>HGTK       |     |        |                                            | Mascot |
| 2401.1724 | 2401.1543 | -0.0181 | -8  | 333 | 353 | QIVWNGPVGVFWDNFA<br>HGTK       | 152 | 100    |                                            | Mascot |
| 2515.231  | 2515.2087 | -0.0223 | -9  | 383 | 406 | WDTEDKVSHVSTGGGAS<br>LELLEGK   |     |        |                                            | Mascot |
| 2664.228  | 2664.2173 | -0.0107 | -4  | 296 | 322 | ATTGTATVAEGIPAGWM<br>GLDCGPESK |     |        | Carbamidomethyl (C)[21]                    | Mascot |
| 2678.4375 | 2678.4114 | -0.0261 | -10 | 193 | 216 | ELDYFAMALEKPQRPFLA<br>ILGGAK   |     |        |                                            | Mascot |
| 2680.2229 | 2680.2222 | -0.0007 | 0   | 296 | 322 | ATTGTATVAEGIPAGWM<br>GLDCGPESK |     |        | Carbamidomethyl (C)[21], Oxidation (M)[17] | Mascot |
| 2694.4324 | 2694.4131 | -0.0193 | -7  | 193 | 216 | ELDYFAMALEKPQRPFLA<br>ILGGAK   |     |        | Oxidation (M)[7]                           | Mascot |

3    PREDICTED: zinc finger protein 135-like [Danio rerio]    gi|326674472    66095.9    9.24    14    41    0

#### Peptide Information

| Calc. Mass | Obsrv. Mass | ± da    | ± ppm | Start Seq. | End Sequence Seq. | Ion Score              | C. I. % | Modification | Rank                       | Result Type |
|------------|-------------|---------|-------|------------|-------------------|------------------------|---------|--------------|----------------------------|-------------|
| 996.4996   | 996.5902    | 0.0906  | 91    | 120        | 128               | SFTTADNLK              |         |              |                            | Mascot      |
| 1072.5786  | 1072.5409   | -0.0377 | -35   | 273        | 281               | IHTGEKPYK              |         |              |                            | Mascot      |
| 1072.5786  | 1072.5409   | -0.0377 | -35   | 385        | 393               | IHTGEKPYK              |         |              |                            | Mascot      |
| 1624.7094  | 1624.9399   | 0.2305  | 142   | 329        | 343               | THAGEKPYTCTECGK        |         |              |                            | Mascot      |
| 1704.7179  | 1704.9127   | 0.1948  | 114   | 525        | 539               | IHTGEEPYCCPPCQK        |         |              |                            | Mascot      |
| 1716.7356  | 1716.8351   | 0.0995  | 58    | 394        | 408               | CSYCEKSFSYSGSLR        |         |              |                            | Mascot      |
| 1759.8142  | 1759.8629   | 0.0487  | 28    | 506        | 520               | CSYCEKSFIQSSHLK        |         |              |                            | Mascot      |
| 1785.8298  | 1785.7939   | -0.0359 | -20   | 385        | 399               | IHTGEKPYKCSYCEK        |         |              |                            | Mascot      |
| 1790.7836  | 1790.8762   | 0.0926  | 52    | 282        | 296               | CSYCEKSFTTHSSNLK       |         |              | Carbamidomethyl (C)[1]     | Mascot      |
| 1809.8258  | 1809.939    | 0.1132  | 63    | 328        | 343               | KTHAGEKPYTCTECGK       |         |              | Carbamidomethyl (C)[11]    | Mascot      |
| 1809.8258  | 1809.939    | 0.1132  | 63    | 328        | 343               | KTHAGEKPYTCTECGK       |         |              | Carbamidomethyl (C)[11]    | Mascot      |
| 1851.9244  | 1851.9554   | 0.031   | 17    | 441        | 455               | IHTNEKPYACLFCKK        |         |              | Carbamidomethyl (C)[10]    | Mascot      |
| 1851.9244  | 1851.9554   | 0.031   | 17    | 441        | 455               | IHTNEKPYACLFCKK        |         |              | Carbamidomethyl (C)[10]    | Mascot      |
| 1873.8571  | 1873.9403   | 0.0832  | 44    | 506        | 520               | CSYCEKSFIQSSHLK        |         |              | Carbamidomethyl (C)[1,4]   | Mascot      |
| 2034.9272  | 2035.0297   | 0.1025  | 50    | 217        | 232               | IHTHEKVYACAFCENR       |         |              | Carbamidomethyl (C)[10,13] | Mascot      |
| 2210.978   | 2211.0867   | 0.1087  | 49    | 130        | 147               | HQMIHNGEKPYKCSYCE<br>K |         |              | Oxidation (M)[3]           | Mascot      |
| 2680.2017  | 2680.2222   | 0.0205  | 8     | 329        | 352               | THAGEKPYTCTECGKSF      |         |              |                            | Mascot      |

|   |                                                                                          |          |        |    |     |     |                                            |  |  |  |  |  |        |
|---|------------------------------------------------------------------------------------------|----------|--------|----|-----|-----|--------------------------------------------|--|--|--|--|--|--------|
|   | 3219.5251                                                                                | 3219.655 | 0.1299 | 40 | 181 | 207 | SQLDSYK<br>TYLTYHLHVHTGEKPFTC<br>TQCGHDFKR |  |  |  |  |  | Mascot |
| 4 | PREDICTED: zinc finger protein 658B-like [Danio rerio] gi 326674478 70239.1 9.34 12 41 0 |          |        |    |     |     |                                            |  |  |  |  |  |        |

| Peptide Information |             |         |       |            |          |                              |           |       |                            |      |             |  |
|---------------------|-------------|---------|-------|------------|----------|------------------------------|-----------|-------|----------------------------|------|-------------|--|
| Calc. Mass          | Obsrv. Mass | ± da    | ± ppm | Start Seq. | End Seq. | Sequence                     | Ion Score | C. I. | % Modification             | Rank | Result Type |  |
| 1072.5786           | 1072.5409   | -0.0377 | -35   | 170        | 178      | IHTGEKPYK                    |           |       |                            |      | Mascot      |  |
| 1072.5786           | 1072.5409   | -0.0377 | -35   | 397        | 405      | IHTGEKPYK                    |           |       |                            |      | Mascot      |  |
| 1179.4921           | 1179.5914   | 0.0993  | 84    | 236        | 244      | CSYCEKSFR                    |           |       | Carbamidomethyl (C)[1]     |      | Mascot      |  |
| 1234.6399           | 1234.6636   | 0.0237  | 19    | 505        | 514      | RHQITHTGER                   |           |       |                            |      | Mascot      |  |
| 1624.7094           | 1624.9399   | 0.2305  | 142   | 341        | 355      | THAGEKPYTCTECGK              |           |       |                            |      | Mascot      |  |
| 1759.8254           | 1759.8629   | 0.0375  | 21    | 59         | 73       | IHTGEKPHKCSYCEK              |           |       |                            |      | Mascot      |  |
| 1785.8298           | 1785.7939   | -0.0359 | -20   | 397        | 411      | IHTGEKPYKCSYCEK              |           |       |                            |      | Mascot      |  |
| 1795.8506           | 1795.9229   | 0.0723  | 40    | 3          | 17       | IHTNEKPYACLFCEK              |           |       |                            |      | Mascot      |  |
| 1795.8506           | 1795.9229   | 0.0723  | 40    | 3          | 17       | IHTNEKPYACLFCEK              |           |       |                            |      | Mascot      |  |
| 1809.8258           | 1809.939    | 0.1132  | 63    | 340        | 355      | KTHAGEKPYTCTECGK             |           |       | Carbamidomethyl (C)[11]    |      | Mascot      |  |
| 1809.8258           | 1809.939    | 0.1132  | 63    | 113        | 128      | KTHAGEKPYTCTECGK             |           |       | Carbamidomethyl (C)[11]    |      | Mascot      |  |
| 1851.8251           | 1851.9554   | 0.1303  | 70    | 546        | 560      | CSYCEKSFIQSSDLK              |           |       | Carbamidomethyl (C)[1,4]   |      | Mascot      |  |
| 1851.8251           | 1851.9554   | 0.1303  | 70    | 546        | 560      | CSYCEKSFIQSSDLK              |           |       | Carbamidomethyl (C)[1,4]   |      | Mascot      |  |
| 1873.8683           | 1873.9403   | 0.072   | 38    | 59         | 73       | IHTGEKPHKCSYCEK              |           |       | Carbamidomethyl (C)[10,13] |      | Mascot      |  |
| 1970.9463           | 1970.9413   | -0.005  | -3    | 515        | 532      | DHVCLQCGKSFTTAGYL<br>K       |           |       |                            |      | Mascot      |  |
| 1970.9463           | 1970.9413   | -0.005  | -3    | 515        | 532      | DHVCLQCGKSFTTAGYL<br>K       |           |       |                            |      | Mascot      |  |
| 2211.0183           | 2211.0867   | 0.0684  | 31    | 421        | 439      | SHERIHTGEKPYHCTQC<br>GK      |           |       |                            |      | Mascot      |  |
| 2680.2017           | 2680.2222   | 0.0205  | 8     | 341        | 364      | THAGEKPYTCTECGKSF<br>SQLDSYK |           |       |                            |      | Mascot      |  |

|   |                                                              |  |  |  |  |  |  |  |  |  |  |  |
|---|--------------------------------------------------------------|--|--|--|--|--|--|--|--|--|--|--|
| 5 | Baz1a protein [Danio rerio] gi 62203451 43026.5 9.42 10 39 0 |  |  |  |  |  |  |  |  |  |  |  |
|---|--------------------------------------------------------------|--|--|--|--|--|--|--|--|--|--|--|

| Peptide Information |             |         |       |            |          |               |           |       |                        |      |             |  |
|---------------------|-------------|---------|-------|------------|----------|---------------|-----------|-------|------------------------|------|-------------|--|
| Calc. Mass          | Obsrv. Mass | ± da    | ± ppm | Start Seq. | End Seq. | Sequence      | Ion Score | C. I. | % Modification         | Rank | Result Type |  |
| 892.4669            | 892.4795    | 0.0126  | 14    | 128        | 134      | STRQLCK       |           |       | Carbamidomethyl (C)[6] |      | Mascot      |  |
| 892.4669            | 892.4795    | 0.0126  | 14    | 128        | 134      | STRQLCK       |           |       | Carbamidomethyl (C)[6] |      | Mascot      |  |
| 916.5098            | 916.4437    | -0.0661 | -72   | 338        | 344      | RILEEEK       |           |       |                        |      | Mascot      |  |
| 1045.3999           | 1045.554    | 0.1541  | 147   | 303        | 310      | EQMMSMEK      |           |       | Oxidation (M)[3,4]     |      | Mascot      |  |
| 1234.7782           | 1234.6636   | -0.1146 | -93   | 2          | 11       | PLLHKKPFVR    |           |       |                        |      | Mascot      |  |
| 1624.7676           | 1624.9399   | 0.1723  | 106   | 101        | 113      | LHEICDDVYAYVK |           |       | Carbamidomethyl (C)[5] |      | Mascot      |  |

|           |           |         |     |     |     |                           |                                          |        |
|-----------|-----------|---------|-----|-----|-----|---------------------------|------------------------------------------|--------|
| 1657.7417 | 1657.808  | 0.0663  | 40  | 298 | 310 | LMQQKEQMMSMEK             | Oxidation (M)[2]                         | Mascot |
| 1971.0367 | 1970.9413 | -0.0954 | -48 | 193 | 209 | YRVQPVSPPEACEPVIVK        | Carbamidomethyl (C)[11]                  | Mascot |
| 1971.0367 | 1970.9413 | -0.0954 | -48 | 193 | 209 | YRVQPVSPPEACEPVIVK        | Carbamidomethyl (C)[11]                  | Mascot |
| 2018.9778 | 2019.0311 | 0.0533  | 26  | 278 | 295 | GRPPNNASSTEINYIEEK        |                                          | Mascot |
| 2283.1836 | 2283.1572 | -0.0264 | -12 | 195 | 215 | VQPVSPEACEPVIVKVAQ<br>MSR | Oxidation (M)[19]                        | Mascot |
| 2384.1484 | 2384.1287 | -0.0197 | -8  | 231 | 251 | QHCEPMHGTIGVKPSSA<br>LQYK | Carbamidomethyl (C)[3], Oxidation (M)[6] | Mascot |

6 protein Wnt-1 [Danio rerio] gi|319655701 40983.9 9.23 11 39 0

#### Peptide Information

| Calc. Mass | Obsrv. Mass | ± da    | ± ppm | Start Seq. | End Seq. | Sequence                     | Ion Score | C. I. % | Modification                               | Rank | Result Type |
|------------|-------------|---------|-------|------------|----------|------------------------------|-----------|---------|--------------------------------------------|------|-------------|
| 892.4193   | 892.4795    | 0.0602  | 67    | 338        | 344      | MEQVTER                      |           |         |                                            |      | Mascot      |
| 892.4193   | 892.4795    | 0.0602  | 67    | 338        | 344      | MEQVTER                      |           |         |                                            |      | Mascot      |
| 996.4719   | 996.5902    | 0.1183  | 119   | 91         | 97       | ECKWQFR                      |           |         |                                            |      | Mascot      |
| 1107.5905  | 1107.5332   | -0.0573 | -52   | 255        | 264      | VVYANKGSNR                   |           |         |                                            |      | Mascot      |
| 1107.5905  | 1107.5332   | -0.0573 | -52   | 255        | 264      | VVYANKGSNR                   |           |         |                                            |      | Mascot      |
| 1165.563   | 1165.5778   | 0.0148  | 13    | 336        | 344      | TRMEQVTER                    |           |         | Oxidation (M)[3]                           |      | Mascot      |
| 1165.563   | 1165.736    | 0.173   | 148   | 336        | 344      | TRMEQVTER                    |           |         | Oxidation (M)[3]                           |      | Mascot      |
| 1475.6583  | 1475.74     | 0.0817  | 55    | 178        | 189      | MFGREFVDSSER                 |           |         | Oxidation (M)[1]                           |      | Mascot      |
| 1743.8384  | 1743.8707   | 0.0323  | 19    | 100        | 114      | RWNCPTTHSPNVFGK              |           |         |                                            |      | Mascot      |
| 1785.899   | 1785.7939   | -0.1051 | -59   | 192        | 206      | DLRYLTNLHNNEAGR              |           |         |                                            |      | Mascot      |
| 1970.8773  | 1970.9413   | 0.064   | 32    | 295        | 313      | SPNFCSYNGKTGTHGTS<br>GR      |           |         |                                            |      | Mascot      |
| 1970.8773  | 1970.9413   | 0.064   | 32    | 295        | 313      | SPNFCSYNGKTGTHGTS<br>GR      |           |         |                                            |      | Mascot      |
| 1985.802   | 1985.9213   | 0.1193  | 60    | 219        | 234      | CHGMSGCTVRTCWMR              |           |         | Carbamidomethyl (C)[1,8,13]                |      | Mascot      |
| 1985.8184  | 1985.9213   | 0.1029  | 52    | 314        | 332      | TCNSSSPALDGCELLCC<br>GR      |           |         | Carbamidomethyl (C)[2]                     |      | Mascot      |
| 2678.1411  | 2678.4114   | 0.2703  | 101   | 158        | 181      | GPGGPDWHWGGCSDNV<br>EFGRMFGR |           |         | Carbamidomethyl (C)[12]                    |      | Mascot      |
| 2694.136   | 2694.4131   | 0.2771  | 103   | 158        | 181      | GPGGPDWHWGGCSDNV<br>EFGRMFGR |           |         | Carbamidomethyl (C)[12], Oxidation (M)[21] |      | Mascot      |

7 novel protein similar to vertebrate actin filament associated protein 1-like 1 (AFAP1L1, zgc:114084)

#### Peptide Information

| Calc. Mass | Obsrv. Mass | ± da   | ± ppm | Start Seq. | End Seq. | Sequence | Ion Score | C. I. % | Modification | Rank | Result Type |
|------------|-------------|--------|-------|------------|----------|----------|-----------|---------|--------------|------|-------------|
| 850.5145   | 850.5363    | 0.0218 | 26    | 383        | 389      | IISFSKR  |           |         |              |      | Mascot      |
| 892.4787   | 892.4795    | 0.0008 | 1     | 226        | 232      | RFGQWAK  |           |         |              |      | Mascot      |
| 892.4787   | 892.4795    | 0.0008 | 1     | 226        | 232      | RFGQWAK  |           |         |              |      | Mascot      |

|   |                                                                    |           |           |         |     |     |     |                       |          |      |    |    |                                              |  |  |  |  |  |  |  |        |
|---|--------------------------------------------------------------------|-----------|-----------|---------|-----|-----|-----|-----------------------|----------|------|----|----|----------------------------------------------|--|--|--|--|--|--|--|--------|
|   |                                                                    | 996.4819  | 996.5902  | 0.1083  | 109 | 133 | 140 | MPEYITSR              |          |      |    |    |                                              |  |  |  |  |  |  |  | Mascot |
|   |                                                                    | 1072.6361 | 1072.5409 | -0.0952 | -89 | 671 | 679 | LTQVKENLK             |          |      |    |    |                                              |  |  |  |  |  |  |  | Mascot |
|   |                                                                    | 1072.6361 | 1072.5409 | -0.0952 | -89 | 671 | 679 | LTQVKENLK             |          |      |    |    |                                              |  |  |  |  |  |  |  | Mascot |
|   |                                                                    | 1378.6671 | 1378.795  | 0.1279  | 93  | 327 | 337 | IELDKWCSAEK           |          |      |    |    | Carbamidomethyl (C)[7]                       |  |  |  |  |  |  |  | Mascot |
|   |                                                                    | 1716.8473 | 1716.8351 | -0.0122 | -7  | 21  | 35  | LLDHETLSCATEEKK       |          |      |    |    |                                              |  |  |  |  |  |  |  | Mascot |
|   |                                                                    | 1795.8564 | 1795.9229 | 0.0665  | 37  | 644 | 658 | LTLEECVTKLEDSCR       |          |      |    |    | Carbamidomethyl (C)[6]                       |  |  |  |  |  |  |  | Mascot |
|   |                                                                    | 1795.8564 | 1795.9229 | 0.0665  | 37  | 644 | 658 | LTLEECVTKLEDSCR       |          |      |    |    | Carbamidomethyl (C)[6]                       |  |  |  |  |  |  |  | Mascot |
|   |                                                                    | 1809.7742 | 1809.939  | 0.1648  | 91  | 470 | 487 | GGAEEVAALEASCSSEDMGR  |          |      |    |    | Carbamidomethyl (C)[12]                      |  |  |  |  |  |  |  | Mascot |
|   |                                                                    | 1809.7742 | 1809.939  | 0.1648  | 91  | 470 | 487 | GGAEEVAALEASCSSEDMGR  |          | 3    |    | 0  | Carbamidomethyl (C)[12]                      |  |  |  |  |  |  |  | Mascot |
|   |                                                                    | 1954.8407 | 1954.954  | 0.1133  | 58  | 338 | 355 | QTSDSDSMPSGESARDIR    |          |      |    |    | Oxidation (M)[8]                             |  |  |  |  |  |  |  | Mascot |
|   |                                                                    | 2225.0979 | 2225.0999 | 0.002   | 1   | 681 | 701 | SLAGGEMEAPTESKPAHKTQR |          |      |    |    |                                              |  |  |  |  |  |  |  | Mascot |
|   |                                                                    | 2423.0676 | 2423.1296 | 0.062   | 26  | 702 | 721 | TEAQYMESFLPVNCASEMRK  |          |      |    |    | Carbamidomethyl (C)[14], Oxidation (M)[6,18] |  |  |  |  |  |  |  | Mascot |
|   |                                                                    | 2664.1851 | 2664.2173 | 0.0322  | 12  | 699 | 720 | TQRTEAQYMESFLPVCASEMR |          |      |    |    | Carbamidomethyl (C)[17], Oxidation (M)[9]    |  |  |  |  |  |  |  | Mascot |
|   |                                                                    | 2680.1799 | 2680.2222 | 0.0423  | 16  | 699 | 720 | TQRTEAQYMESFLPVCASEMR |          |      |    |    | Carbamidomethyl (C)[17], Oxidation (M)[9,21] |  |  |  |  |  |  |  | Mascot |
| 8 | PREDICTED: alpha-2-macroglobulin-like protein 1-like [Danio rerio] |           |           |         |     |     |     | gi 326674176          | 151677.6 | 7.04 | 17 | 38 | 0                                            |  |  |  |  |  |  |  |        |

### Peptide Information

| Calc. Mass | Obsrv. Mass | ± da    | ± ppm | Start Seq. | End Seq. | Sequence            | Ion Score | C. I. % | Modification                                | Rank | Result Type |
|------------|-------------|---------|-------|------------|----------|---------------------|-----------|---------|---------------------------------------------|------|-------------|
| 842.5458   | 842.5032    | -0.0426 | -51   | 378        | 384      | TLQKKPK             |           |         |                                             |      | Mascot      |
| 882.577    | 882.5602    | -0.0168 | -19   | 1336       | 1343     | NLKPAVIK            |           |         |                                             |      | Mascot      |
| 916.5614   | 916.4437    | -0.1177 | -128  | 2          | 9        | VTFPAILR            |           |         |                                             |      | Mascot      |
| 1051.5782  | 1051.7026   | 0.1244  | 118   | 1234       | 1242     | SNKLEFSVK           |           |         |                                             |      | Mascot      |
| 1165.4579  | 1165.5778   | 0.1199  | 103   | 1354       | 1363     | AEAETNHCA           |           |         | Carbamidomethyl (C)[9]                      |      | Mascot      |
| 1179.652   | 1179.5914   | -0.0606 | -51   | 455        | 464      | GEVTFKVPFR          |           |         |                                             |      | Mascot      |
| 1234.6533  | 1234.6636   | 0.0103  | 8     | 16         | 25       | LCMSLLKPEK          |           |         | Carbamidomethyl (C)[2], Oxidation (M)[3]    |      | Mascot      |
| 1475.8217  | 1475.74     | -0.0817 | -55   | 2          | 15       | VTFPAILRSGSEAK      |           |         |                                             |      | Mascot      |
| 1657.8254  | 1657.808    | -0.0174 | -10   | 581        | 595      | TGDAVFETFKNMGLK     |           |         |                                             |      | Mascot      |
| 1704.8447  | 1704.9127   | 0.068   | 40    | 730        | 743      | ATVFNYQSKCIMVK      |           |         | Carbamidomethyl (C)[10], Oxidation (M)[12]  |      | Mascot      |
| 1740.9438  | 1740.8966   | -0.0472 | -27   | 213        | 228      | LGVCGRYTHGRPVLGR    |           |         |                                             |      | Mascot      |
| 1790.7068  | 1790.8762   | 0.1694  | 95    | 756        | 771      | ASSDDQYSSCLCANGR    |           |         | Carbamidomethyl (C)[10,12]                  |      | Mascot      |
| 1873.9694  | 1873.9403   | -0.0291 | -16   | 723        | 738      | GEIFELKATVFNYQSK    |           |         |                                             |      | Mascot      |
| 2035.0746  | 2035.0297   | -0.0449 | -22   | 1051       | 1068     | NLYTSALLSYTFSIAKDK  |           |         |                                             |      | Mascot      |
| 2155.1104  | 2155.0056   | -0.1048 | -49   | 623        | 641      | TSVCYISLSLALHIYTDQK |           |         |                                             |      | Mascot      |
| 2384.0164  | 2384.1287   | 0.1123  | 47    | 554        | 572      | MLPTMTFTYDVEDQMEC   |           |         | Carbamidomethyl (C)[17], Oxidation (M)[1,5] |      | Mascot      |

|                     |                                                                                         |             |         |       |            |             |                                   |           |       |    |                        |      |        |        |  |        |
|---------------------|-----------------------------------------------------------------------------------------|-------------|---------|-------|------------|-------------|-----------------------------------|-----------|-------|----|------------------------|------|--------|--------|--|--------|
|                     | 2423.1948                                                                               | 2423.1296   | -0.0652 | -27   | 842        | 863         | LK<br>GQNHLEEEVELAFPQNVIE<br>GSGR |           |       |    |                        |      |        |        |  | Mascot |
| 9                   | PREDICTED: caseinolytic peptidase B protein homolog, gi 292621865 partial [Danio rerio] |             |         |       |            |             |                                   |           |       |    |                        |      |        |        |  |        |
| Peptide Information |                                                                                         |             |         |       |            |             |                                   |           |       |    |                        |      |        |        |  |        |
|                     | Calc. Mass                                                                              | Obsrv. Mass | ± da    | ± ppm | Start Seq. | End Seq.    | Sequence                          | Ion Score | C. I. | %  | Modification           | Rank | Result | Type   |  |        |
|                     | 892.4634                                                                                | 892.4795    | 0.0161  | 18    | 266        | 272         | RDEFLGR                           |           |       |    |                        |      |        | Mascot |  |        |
|                     | 892.4634                                                                                | 892.4795    | 0.0161  | 18    | 266        | 272         | RDEFLGR                           | 12        |       | 0  |                        |      |        | Mascot |  |        |
|                     | 1378.7225                                                                               | 1378.795    | 0.0725  | 53    | 323        | 334         | GYNLHYGARSIK                      |           |       |    |                        |      |        | Mascot |  |        |
|                     | 1740.7567                                                                               | 1740.8966   | 0.1399  | 80    | 120        | 133         | MDMSEFQEKHEVAK                    |           |       |    | Oxidation (M)[1,3]     |      |        | Mascot |  |        |
|                     | 1954.9982                                                                               | 1954.954    | -0.0442 | -23   | 1          | 18          | ADPSLKNDLGHTPLSYAR                |           |       |    |                        |      |        | Mascot |  |        |
|                     | 2035.1042                                                                               | 2035.0297   | -0.0745 | -37   | 56         | 74          | EHIIQGEGAINTVASAIRR               |           |       |    |                        |      |        | Mascot |  |        |
|                     | 2284.168                                                                                | 2284.1541   | -0.0139 | -6    | 7          | 27          | NDLGHTPLSYARDGELS<br>AVLR         |           |       |    |                        |      |        | Mascot |  |        |
|                     | 2515.261                                                                                | 2515.2087   | -0.0523 | -21   | 199        | 221         | DAIFIMTSNAASDEIAQHA<br>LQLR       |           |       |    |                        |      |        | Mascot |  |        |
| 10                  | glutaminyl-tRNA synthetase [Danio rerio]                                                |             |         |       |            |             |                                   |           |       |    |                        |      |        |        |  |        |
|                     |                                                                                         |             |         |       |            | gi 41055038 | 49422.5                           | 8.16      | 8     | 38 | 0                      | 16   | 0      |        |  |        |
| Peptide Information |                                                                                         |             |         |       |            |             |                                   |           |       |    |                        |      |        |        |  |        |
|                     | Calc. Mass                                                                              | Obsrv. Mass | ± da    | ± ppm | Start Seq. | End Seq.    | Sequence                          | Ion Score | C. I. | %  | Modification           | Rank | Result | Type   |  |        |
|                     | 892.4556                                                                                | 892.4795    | 0.0239  | 27    | 218        | 224         | SLMEQLR                           |           |       |    | Oxidation (M)[3]       |      |        | Mascot |  |        |
|                     | 892.4556                                                                                | 892.4795    | 0.0239  | 27    | 218        | 224         | SLMEQLR                           | 16        |       | 0  | Oxidation (M)[3]       |      |        | Mascot |  |        |
|                     | 916.525                                                                                 | 916.4437    | -0.0813 | -89   | 158        | 165         | WADGKIVK                          |           |       |    |                        |      |        | Mascot |  |        |
|                     | 1051.5796                                                                               | 1051.7026   | 0.123   | 117   | 419        | 426         | IKYTPHHR                          |           |       |    |                        |      |        | Mascot |  |        |
|                     | 1219.6429                                                                               | 1219.6447   | 0.0018  | 1     | 64         | 73          | DTNRPQFLTK                        |           |       |    |                        |      |        | Mascot |  |        |
|                     | 1657.7383                                                                               | 1657.808    | 0.0697  | 42    | 405        | 418         | MVMEDGKMDPVAYR                    |           |       |    | Oxidation (M)[1]       |      |        | Mascot |  |        |
|                     | 1683.802                                                                                | 1683.7804   | -0.0216 | -13   | 352        | 365         | GHAYVCHQRGEELK                    |           |       |    | Carbamidomethyl (C)[6] |      |        | Mascot |  |        |
|                     | 1852.0076                                                                               | 1851.9554   | -0.0522 | -28   | 64         | 78          | DTNRPQFLTKYISR                    |           |       |    |                        |      |        | Mascot |  |        |
|                     | 1852.0076                                                                               | 1851.9554   | -0.0522 | -28   | 64         | 78          | DTNRPQFLTKYISR                    |           |       |    |                        |      |        | Mascot |  |        |
|                     | 1969.9072                                                                               | 1969.9259   | 0.0187  | 9     | 292        | 308         | ANNGICFLRYDDTNPEK                 |           |       |    |                        |      |        | Mascot |  |        |
| 11                  | glycerophosphodiester phosphodiesterase domain-containing protein 1 [Danio rerio]       |             |         |       |            |             |                                   |           |       |    |                        |      |        |        |  |        |
| Peptide Information |                                                                                         |             |         |       |            |             |                                   |           |       |    |                        |      |        |        |  |        |
|                     | Calc. Mass                                                                              | Obsrv. Mass | ± da    | ± ppm | Start Seq. | End Seq.    | Sequence                          | Ion Score | C. I. | %  | Modification           | Rank | Result | Type   |  |        |
|                     | 882.4614                                                                                | 882.5602    | 0.0988  | 112   | 24         | 30          | CPSLLHR                           |           |       |    | Carbamidomethyl (C)[1] |      |        | Mascot |  |        |



|    |                               |           |         |     |              |     |                        |      |   |                         |   |  |        |
|----|-------------------------------|-----------|---------|-----|--------------|-----|------------------------|------|---|-------------------------|---|--|--------|
|    | 892.486                       | 892.4795  | -0.0065 | -7  | 38           | 44  | SRHISHR                |      |   |                         |   |  | Mascot |
|    | 892.486                       | 892.4795  | -0.0065 | -7  | 38           | 44  | SRHISHR                |      |   |                         |   |  | Mascot |
|    | 916.5098                      | 916.4437  | -0.0661 | -72 | 153          | 160 | VNNDTLIK               |      |   |                         |   |  | Mascot |
|    | 1045.5425                     | 1045.554  | 0.0115  | 11  | 262          | 270 | SLFDHLTGR              |      |   |                         |   |  | Mascot |
|    | 1234.7153                     | 1234.6636 | -0.0517 | -42 | 162          | 171 | VSELVIQYKR             |      |   |                         |   |  | Mascot |
|    | 1624.8652                     | 1624.9399 | 0.0747  | 46  | 78           | 91  | DEQVVVLHDSSLKR         |      |   |                         |   |  | Mascot |
|    | 1634.7731                     | 1634.7799 | 0.0068  | 4   | 306          | 318 | EFMEKNNYTTTIK          |      |   | Oxidation (M)[3]        |   |  | Mascot |
|    | 1634.7731                     | 1634.7799 | 0.0068  | 4   | 306          | 318 | EFMEKNNYTTTIK          |      |   | Oxidation (M)[3]        |   |  | Mascot |
|    | 2384.3223                     | 2384.1287 | -0.1936 | -81 | 132          | 152 | IPLLRDVFEAFSTPVDIK     |      |   |                         |   |  | Mascot |
|    | 2401.1743                     | 2401.1543 | -0.02   | -8  | 92           | 113 | STGINAYVADVAYADLPPYLCK |      |   | Carbamidomethyl (C)[21] |   |  | Mascot |
|    | 2401.1743                     | 2401.1543 | -0.02   | -8  | 92           | 113 | STGINAYVADVAYADLPPYLCK |      |   | Carbamidomethyl (C)[21] |   |  | Mascot |
| 12 | Ppp1r3b protein [Danio rerio] |           |         |     | gi 190337192 |     | 33606.4                | 5.74 | 8 | 37                      | 0 |  |        |

Peptide Information

| Calc. Mass | Obsrv. Mass | ± da    | ± ppm | Start Seq. | End Seq. | Sequence                | Ion Score | C. I. | % Modification          | Rank | Result Type |
|------------|-------------|---------|-------|------------|----------|-------------------------|-----------|-------|-------------------------|------|-------------|
| 1051.5782  | 1051.7026   | 0.1244  | 118   | 157        | 165      | NISFEKSVK               |           |       |                         |      | Mascot      |
| 1179.6521  | 1179.5914   | -0.0607 | -51   | 166        | 174      | LRITFDTWK               |           |       |                         |      | Mascot      |
| 1683.7651  | 1683.7804   | 0.0153  | 9     | 132        | 145      | IENDHVCLEHCMLK          |           |       |                         |      | Mascot      |
| 1740.7866  | 1740.8966   | 0.11    | 63    | 132        | 145      | IENDHVCLEHCMLK          |           |       | Carbamidomethyl (C)[7]  |      | Mascot      |
| 1809.8258  | 1809.939    | 0.1132  | 63    | 24         | 39       | YSGPLQPCLNQCSSK         |           |       | Carbamidomethyl (C)[8]  |      | Mascot      |
| 1809.8258  | 1809.939    | 0.1132  | 63    | 24         | 39       | YSGPLQPCLNQCSSK         |           |       | Carbamidomethyl (C)[8]  |      | Mascot      |
| 2211.1001  | 2211.0867   | -0.0134 | -6    | 2          | 20       | PIELAMSLYLSSDEFLNPR     |           |       | Oxidation (M)[6]        |      | Mascot      |
| 2284.0703  | 2284.1541   | 0.0838  | 37    | 168        | 185      | ITFDTWKNHTDVECQYVK      |           |       | Carbamidomethyl (C)[14] |      | Mascot      |
| 2515.2319  | 2515.2087   | -0.0232 | -9    | 24         | 46       | YSGPLQPCLNQCSSKISFSSLK  |           |       |                         |      | Mascot      |
| 2694.1199  | 2694.4131   | 0.2932  | 109   | 244        | 266      | SSNESNGGHQQYSQSDWDIHFDR |           |       |                         |      | Mascot      |

|    |                                                              |  |  |  |              |  |          |      |    |    |   |  |  |
|----|--------------------------------------------------------------|--|--|--|--------------|--|----------|------|----|----|---|--|--|
| 13 | PREDICTED: serine/threonine-protein kinase ATR [Danio rerio] |  |  |  | gi 292610566 |  | 298997.8 | 7.68 | 24 | 37 | 0 |  |  |
|----|--------------------------------------------------------------|--|--|--|--------------|--|----------|------|----|----|---|--|--|

Peptide Information

| Calc. Mass | Obsrv. Mass | ± da    | ± ppm | Start Seq. | End Seq. | Sequence   | Ion Score | C. I. | % Modification | Rank | Result Type |
|------------|-------------|---------|-------|------------|----------|------------|-----------|-------|----------------|------|-------------|
| 882.5407   | 882.5602    | 0.0195  | 22    | 1304       | 1311     | IHALTSLK   |           |       |                |      | Mascot      |
| 916.5172   | 916.4437    | -0.0735 | -80   | 2547       | 2554     | EPLMSVLK   |           |       |                |      | Mascot      |
| 996.6199   | 996.5902    | -0.0297 | -30   | 1898       | 1906     | AKEPVLALR  |           |       |                |      | Mascot      |
| 1072.6547  | 1072.5409   | -0.1138 | -106  | 1803       | 1812     | LGQMLLAACK |           |       |                |      | Mascot      |

|           |           |         |      |      |      |                                    |  |  |  |  |  |                                           |  |  |  |  |        |
|-----------|-----------|---------|------|------|------|------------------------------------|--|--|--|--|--|-------------------------------------------|--|--|--|--|--------|
| 1072.6547 | 1072.5409 | -0.1138 | -106 | 1803 | 1812 | LGQMLLAACK                         |  |  |  |  |  |                                           |  |  |  |  | Mascot |
| 1179.6337 | 1179.5914 | -0.0423 | -36  | 1177 | 1186 | MMTTLRTGLR                         |  |  |  |  |  |                                           |  |  |  |  | Mascot |
| 1378.6532 | 1378.795  | 0.1418  | 103  | 464  | 475  | SRSEVWAAVDCR                       |  |  |  |  |  |                                           |  |  |  |  | Mascot |
| 1475.6327 | 1475.74   | 0.1073  | 73   | 113  | 125  | IAACECEDLHMK                       |  |  |  |  |  | Oxidation (M)[12]                         |  |  |  |  | Mascot |
| 1624.7168 | 1624.9399 | 0.2231  | 137  | 2315 | 2328 | GSDGKFYTMCKPK                      |  |  |  |  |  | Oxidation (M)[9,10]                       |  |  |  |  | Mascot |
| 1704.7906 | 1704.9127 | 0.1221  | 72   | 2320 | 2332 | FYTMMCKPKDDL                       |  |  |  |  |  | Carbamidomethyl (C)[6]                    |  |  |  |  | Mascot |
| 1716.8236 | 1716.8351 | 0.0115  | 7    | 1513 | 1526 | VFNCSSFIIKHDIK                     |  |  |  |  |  |                                           |  |  |  |  | Mascot |
| 1743.8635 | 1743.8707 | 0.0072  | 4    | 1649 | 1662 | AYTRAVMHFESFIR                     |  |  |  |  |  | Oxidation (M)[7]                          |  |  |  |  | Mascot |
| 1785.8873 | 1785.7939 | -0.0934 | -52  | 2459 | 2475 | STAVMSVMGYILGLGDR                  |  |  |  |  |  | Oxidation (M)[5]                          |  |  |  |  | Mascot |
| 1795.9741 | 1795.9229 | -0.0512 | -29  | 2555 | 2569 | TFLHDPLVEWSKPVK                    |  |  |  |  |  |                                           |  |  |  |  | Mascot |
| 1795.9741 | 1795.9229 | -0.0512 | -29  | 2555 | 2569 | TFLHDPLVEWSKPVK                    |  |  |  |  |  |                                           |  |  |  |  | Mascot |
| 1809.767  | 1809.939  | 0.172   | 95   | 2011 | 2025 | YMEETANFESNAIMK                    |  |  |  |  |  | Oxidation (M)[2,14]                       |  |  |  |  | Mascot |
| 1809.767  | 1809.939  | 0.172   | 95   | 2011 | 2025 | YMEETANFESNAIMK                    |  |  |  |  |  | Oxidation (M)[2,14]                       |  |  |  |  | Mascot |
| 1969.9147 | 1969.9259 | 0.0112  | 6    | 77   | 93   | SSSLMFINACLSDFHK                   |  |  |  |  |  | Carbamidomethyl (C)[11], Oxidation (M)[5] |  |  |  |  | Mascot |
| 1985.9823 | 1985.9213 | -0.061  | -31  | 1853 | 1868 | LHMLCELEHVFTLQK                    |  |  |  |  |  | Oxidation (M)[3]                          |  |  |  |  | Mascot |
| 1985.9823 | 1985.9213 | -0.061  | -31  | 1853 | 1868 | LHMLCELEHVFTLQK                    |  |  |  |  |  | Oxidation (M)[3]                          |  |  |  |  | Mascot |
| 2051.0227 | 2051.0251 | 0.0024  | 1    | 902  | 920  | SNPVSVAAYTEIQALATC<br>R            |  |  |  |  |  | Carbamidomethyl (C)[18]                   |  |  |  |  | Mascot |
| 2155.1467 | 2155.0056 | -0.1411 | -65  | 1129 | 1148 | LLGILAFFNMQLSSSAG<br>EK            |  |  |  |  |  | Oxidation (M)[10]                         |  |  |  |  | Mascot |
| 2384.2908 | 2384.1287 | -0.1621 | -68  | 163  | 182  | NLMTRPSPQWPVVVERF<br>SIK           |  |  |  |  |  |                                           |  |  |  |  | Mascot |
| 2385.2595 | 2385.1313 | -0.1282 | -54  | 431  | 450  | MYEEELPAKRPNLSLPTQ<br>LR           |  |  |  |  |  |                                           |  |  |  |  | Mascot |
| 2401.2544 | 2401.1543 | -0.1001 | -42  | 431  | 450  | MYEEELPAKRPNLSLPTQ<br>LR           |  |  |  |  |  | Oxidation (M)[1]                          |  |  |  |  | Mascot |
| 2401.2544 | 2401.1543 | -0.1001 | -42  | 431  | 450  | MYEEELPAKRPNLSLPTQ<br>LR           |  |  |  |  |  | Oxidation (M)[1]                          |  |  |  |  | Mascot |
| 2423.1516 | 2423.1296 | -0.022  | -9   | 2454 | 2475 | SAYCRSTAVMSVMGYIL<br>GLGDR         |  |  |  |  |  | Carbamidomethyl (C)[4], Oxidation (M)[10] |  |  |  |  | Mascot |
| 2680.2817 | 2680.2222 | -0.0595 | -22  | 2029 | 2050 | DVTTLPEWEDGNFYLA<br>KYYDK          |  |  |  |  |  |                                           |  |  |  |  | Mascot |
| 3219.6401 | 3219.655  | 0.0149  | 5    | 485  | 514  | NHTVSQCVSAVQGLAVIF<br>HLAALCSEHSLK |  |  |  |  |  | Carbamidomethyl (C)[7]                    |  |  |  |  | Mascot |
| 3251.55   | 3251.6763 | 0.1263  | 39   | 1406 | 1434 | AFLAYADDVRAQDAAY<br>AMQELLSLFECD   |  |  |  |  |  |                                           |  |  |  |  | Mascot |

14
PREDICTED: kinesin family member 13Ba [Danio rerio] gi|125841549
203289.8
5.5
12
36
0
26
28.125

| Peptide Information |             |         |       |            |          |           |           |       |                  | Rank | Result Type |
|---------------------|-------------|---------|-------|------------|----------|-----------|-----------|-------|------------------|------|-------------|
| Calc. Mass          | Obsrv. Mass | ± da    | ± ppm | Start Seq. | End Seq. | Sequence  | Ion Score | C. I. | % Modification   |      |             |
| 842.473             | 842.5032    | 0.0302  | 36    | 393        | 399      | APELKER   |           |       |                  |      | Mascot      |
| 850.4888            | 850.5363    | 0.0475  | 56    | 884        | 890      | KLVCMIK   |           |       | Oxidation (M)[5] |      | Mascot      |
| 1072.615            | 1072.5409   | -0.0741 | -69   | 765        | 773      | GKQIWALEK |           |       |                  |      | Mascot      |

|    |                                |           |         |     |              |      |                            |       |        |                   |        |
|----|--------------------------------|-----------|---------|-----|--------------|------|----------------------------|-------|--------|-------------------|--------|
|    | 1072.6473                      | 1072.5409 | -0.1064 | -99 | 694          | 702  | EVVLTSLR                   | 29    | 61.108 |                   | Mascot |
|    | 1179.5609                      | 1179.5914 | 0.0305  | 26  | 774          | 782  | MENRLVDMR                  |       |        | Oxidation (M)[1]  | Mascot |
|    | 1634.8245                      | 1634.7799 | -0.0446 | -27 | 355          | 369  | SIVNHAVVNEDPNAR            |       |        |                   | Mascot |
|    | 1634.8245                      | 1634.7799 | -0.0446 | -27 | 355          | 369  | SIVNHAVVNEDPNAR            |       |        |                   | Mascot |
|    | 1704.8473                      | 1704.9127 | 0.0654  | 38  | 383          | 397  | DQLTQAESMKAPELK            |       |        | Oxidation (M)[9]  | Mascot |
|    | 1785.954                       | 1785.7939 | -0.1601 | -90 | 1767         | 1782 | CNPGFGLVLRPDLRSR           |       |        |                   | Mascot |
|    | 2515.3401                      | 2515.2087 | -0.1314 | -52 | 706          | 727  | EQIVRANLLVQEASFAEE<br>LDK  |       |        |                   | Mascot |
|    | 2664.3311                      | 2664.2173 | -0.1138 | -43 | 645          | 666  | QLTPDRQSMQIPQSQPL<br>QPHYR |       |        | Oxidation (M)[9]  | Mascot |
|    | 2678.1062                      | 2678.4114 | 0.3052  | 114 | 54           | 75   | GQPKTFAYDYCFWSMDE<br>SETEK |       |        | Oxidation (M)[15] | Mascot |
|    | 2680.1064                      | 2680.2222 | 0.1158  | 43  | 1087         | 1108 | NNEPQEPEGDEMDSYQ<br>ERDLER |       |        |                   | Mascot |
| 15 | CXC chemokine 64 [Danio rerio] |           |         |     | gi 187608560 |      | 11150.2                    | 10.14 | 6      | 35                | 0      |

#### Peptide Information

| Calc. Mass | Obsrv. Mass | ± da    | ± ppm | Start Seq. | End Seq. | Sequence                | Ion Score | C. I. % | Modification                               | Rank | Result Type |
|------------|-------------|---------|-------|------------|----------|-------------------------|-----------|---------|--------------------------------------------|------|-------------|
| 1045.6326  | 1045.554    | -0.0786 | -75   | 59         | 67       | LEIVVTLMK               |           |         |                                            |      | Mascot      |
| 1378.7623  | 1378.795    | 0.0327  | 24    | 47         | 58       | IQIIHPSPSCKR            |           |         |                                            |      | Mascot      |
| 1693.9305  | 1693.8414   | -0.0891 | -53   | 43         | 57       | TIEKIQIIHPSPSCK         |           |         |                                            |      | Mascot      |
| 1785.9277  | 1785.7939   | -0.1338 | -75   | 3          | 19       | TAAAFVALGCFLMVEVK       |           |         | Oxidation (M)[13]                          |      | Mascot      |
| 1955.0492  | 1954.954    | -0.0952 | -49   | 3          | 21       | TAAAFVALGCFLMVEVK<br>GK |           |         |                                            |      | Mascot      |
| 1971.0441  | 1970.9413   | -0.1028 | -52   | 3          | 21       | TAAAFVALGCFLMVEVK<br>GK |           |         | Oxidation (M)[13]                          |      | Mascot      |
| 1971.0441  | 1970.9413   | -0.1028 | -52   | 2          | 19       | KTAAAFVALGCFLMVEVK      |           |         | Carbamidomethyl (C)[11], Oxidation (M)[14] |      | Mascot      |

16 novel protein similar to H.sapiens LYST, lysosomal trafficking regulator (LYST) [Danio rerio] gi|220675907 58282.5 6.38 9 35 0

#### Peptide Information

| Calc. Mass | Obsrv. Mass | ± da    | ± ppm | Start Seq. | End Seq. | Sequence         | Ion Score | C. I. % | Modification           | Rank | Result Type |
|------------|-------------|---------|-------|------------|----------|------------------|-----------|---------|------------------------|------|-------------|
| 1045.5863  | 1045.554    | -0.0323 | -31   | 308        | 316      | CIVGYHILK        |           |         |                        |      | Mascot      |
| 1234.5442  | 1234.6636   | 0.1194  | 97    | 1          | 10       | ICIDPNDEMCK      |           |         | Carbamidomethyl (C)[2] |      | Mascot      |
| 1683.7941  | 1683.7804   | -0.0137 | -8    | 487        | 501      | VQSMMYLRHSSSGGK  |           |         | Oxidation (M)[4]       |      | Mascot      |
| 1704.8447  | 1704.9127   | 0.068   | 40    | 482        | 494      | LYQEKVQSMMYLR    |           |         | Oxidation (M)[9]       |      | Mascot      |
| 1795.9623  | 1795.9229   | -0.0394 | -22   | 433        | 448      | IIQEVLGSPDMDLLR  |           |         |                        |      | Mascot      |
| 1795.9623  | 1795.9229   | -0.0394 | -22   | 433        | 448      | IIQEVLGSPDMDLLR  | 3         | 0       |                        |      | Mascot      |
| 1970.9779  | 1970.9413   | -0.0366 | -19   | 416        | 432      | DEYLTIPQEVCLSFVK |           |         |                        |      | Mascot      |
| 1970.9779  | 1970.9413   | -0.0366 | -19   | 416        | 432      | DEYLTIPQEVCLSFVK |           |         |                        |      | Mascot      |

|    |                                                                      |           |         |     |              |     |                           |      |    |    |   |   |   |  |  |                        |        |
|----|----------------------------------------------------------------------|-----------|---------|-----|--------------|-----|---------------------------|------|----|----|---|---|---|--|--|------------------------|--------|
|    | 2225.1052                                                            | 2225.0999 | -0.0053 | -2  | 148          | 165 | YVTQEGLQCEQIRELLMR        |      |    |    |   |   |   |  |  | Oxidation (M)[17]      | Mascot |
|    | 2284.2847                                                            | 2284.1541 | -0.1306 | -57 | 365          | 384 | AQCGVWETLLTALEILIRV<br>R  |      |    |    |   |   |   |  |  |                        | Mascot |
|    | 2423.0503                                                            | 2423.1296 | 0.0793  | 33  | 81           | 101 | TYCMLGHYQHSAAEQAS<br>PSAR |      |    |    |   |   |   |  |  | Carbamidomethyl (C)[3] | Mascot |
| 17 | novel protein similar to H.sapiens TTN, titin (TTN)<br>[Danio rerio] |           |         |     | gi 169154823 |     | 842970                    | 5.81 | 40 | 35 | 0 | 0 | 0 |  |  |                        |        |

| Peptide Information |             |         |       |            |          |                   |           |       |   |                        |      |        |        |  |  |  |  |
|---------------------|-------------|---------|-------|------------|----------|-------------------|-----------|-------|---|------------------------|------|--------|--------|--|--|--|--|
| Calc. Mass          | Obsrv. Mass | ± da    | ± ppm | Start Seq. | End Seq. | Sequence          | Ion Score | C. I. | % | Modification           | Rank | Result | Type   |  |  |  |  |
| 842.444             | 842.5032    | 0.0592  | 70    | 3102       | 3108     | SYKVSMK           |           |       |   |                        |      |        | Mascot |  |  |  |  |
| 850.4814            | 850.5363    | 0.0549  | 65    | 1088       | 1094     | LTSVRMK           |           |       |   | Oxidation (M)[6]       |      |        | Mascot |  |  |  |  |
| 870.4203            | 870.532     | 0.1117  | 128   | 6420       | 6427     | LSDSGTYK          |           |       |   |                        |      |        | Mascot |  |  |  |  |
| 882.4679            | 882.5602    | 0.0923  | 105   | 2483       | 2489     | YKVSTER           |           |       |   |                        |      |        | Mascot |  |  |  |  |
| 916.5502            | 916.4437    | -0.1065 | -116  | 4747       | 4754     | IIPPTFTK          |           |       |   |                        |      |        | Mascot |  |  |  |  |
| 996.536             | 996.5902    | 0.0542  | 54    | 2586       | 2593     | LTITETYR          |           |       |   |                        |      |        | Mascot |  |  |  |  |
| 1045.5347           | 1045.554    | 0.0193  | 18    | 6656       | 6665     | CQIGGTPEIK        |           |       |   |                        |      |        | Mascot |  |  |  |  |
| 1051.5571           | 1051.7026   | 0.1455  | 138   | 6666       | 6674     | ISWFKADGK         |           |       |   |                        |      |        | Mascot |  |  |  |  |
| 1072.4615           | 1072.5409   | 0.0794  | 74    | 6700       | 6708     | SDIGEYTK          |           |       |   | Carbamidomethyl (C)[8] |      |        | Mascot |  |  |  |  |
| 1072.4615           | 1072.5409   | 0.0794  | 74    | 6700       | 6708     | SDIGEYTK          |           |       |   | Carbamidomethyl (C)[8] |      |        | Mascot |  |  |  |  |
| 1107.48             | 1107.5332   | 0.0532  | 48    | 4973       | 4982     | NETEIGSDDK        |           |       |   |                        |      |        | Mascot |  |  |  |  |
| 1107.48             | 1107.5332   | 0.0532  | 48    | 4973       | 4982     | NETEIGSDDK        |           |       |   |                        |      |        | Mascot |  |  |  |  |
| 1219.6212           | 1219.6447   | 0.0235  | 19    | 790        | 800      | RVQSTSPMSAR       |           |       |   |                        |      |        | Mascot |  |  |  |  |
| 1234.6096           | 1234.6636   | 0.054   | 44    | 6087       | 6097     | GKDASLNCELK       |           |       |   | Carbamidomethyl (C)[8] |      |        | Mascot |  |  |  |  |
| 1367.8621           | 1367.803    | -0.0591 | -43   | 646        | 656      | IIQEIEIRLK        |           |       |   |                        |      |        | Mascot |  |  |  |  |
| 1378.7325           | 1378.795    | 0.0625  | 45    | 3094       | 3104     | QQLVQEQKSYK       |           |       |   |                        |      |        | Mascot |  |  |  |  |
| 1389.7896           | 1389.7009   | -0.0887 | -64   | 2490       | 2500     | HVHRLMIQTVR       |           |       |   |                        |      |        | Mascot |  |  |  |  |
| 1475.804            | 1475.74     | -0.064  | -43   | 1964       | 1976     | GKHYSLTIINAMK     |           |       |   |                        |      |        | Mascot |  |  |  |  |
| 1624.8727           | 1624.9399   | 0.0672  | 41    | 6875       | 6888     | ISCVENTPHLTILK    |           |       |   | Carbamidomethyl (C)[3] |      |        | Mascot |  |  |  |  |
| 1634.7656           | 1634.7799   | 0.0143  | 9     | 3448       | 3462     | FSSENPSPEKADAQK   |           |       |   |                        |      |        | Mascot |  |  |  |  |
| 1634.7656           | 1634.7799   | 0.0143  | 9     | 3448       | 3462     | FSSENPSPEKADAQK   |           |       |   |                        |      |        | Mascot |  |  |  |  |
| 1693.8829           | 1693.8414   | -0.0415 | -24   | 4048       | 4061     | EHDTYTLVITKVMK    |           |       |   | Oxidation (M)[13]      |      |        | Mascot |  |  |  |  |
| 1716.9166           | 1716.8351   | -0.0815 | -47   | 2970       | 2984     | VELSQLSAAEKWVEK   |           |       |   |                        |      |        | Mascot |  |  |  |  |
| 1740.856            | 1740.8966   | 0.0406  | 23    | 690        | 704      | SYRILEGMGVTFHCK   |           |       |   |                        |      |        | Mascot |  |  |  |  |
| 1759.9047           | 1759.8629   | -0.0418 | -24   | 7465       | 7479     | YTCAVANYTQKLSIK   |           |       |   | Carbamidomethyl (C)[3] |      |        | Mascot |  |  |  |  |
| 1790.9183           | 1790.8762   | -0.0421 | -24   | 6947       | 6962     | VAGSQPLTVNWKDGR   |           |       |   |                        |      |        | Mascot |  |  |  |  |
| 1809.8357           | 1809.939    | 0.1033  | 57    | 6336       | 6352     | NEVGSDSCAMQLTVLDK |           |       |   |                        |      |        | Mascot |  |  |  |  |
| 1809.8357           | 1809.939    | 0.1033  | 57    | 6336       | 6352     | NEVGSDSCAMQLTVLDK |           |       |   |                        |      |        | Mascot |  |  |  |  |

|           |           |         |     |      |      |                                      |   |   |                                           |  |  |        |
|-----------|-----------|---------|-----|------|------|--------------------------------------|---|---|-------------------------------------------|--|--|--------|
| 1851.9598 | 1851.9554 | -0.0044 | -2  | 1326 | 1343 | APEAPGPEPGRVSFDVV<br>K               |   |   |                                           |  |  | Mascot |
| 1851.9598 | 1851.9554 | -0.0044 | -2  | 1326 | 1343 | APEAPGPEPGRVSFDVV<br>K               |   |   |                                           |  |  | Mascot |
| 1873.9177 | 1873.9403 | 0.0226  | 12  | 1384 | 1399 | RTEEGYYEAISSVELK                     |   |   |                                           |  |  | Mascot |
| 1969.931  | 1969.9259 | -0.0051 | -3  | 3980 | 3995 | EEYITEALMELEKEDK                     |   |   |                                           |  |  | Mascot |
| 1985.844  | 1985.9213 | 0.0773  | 39  | 6797 | 6815 | HSGEYTCVATNSVGSAS<br>CR              | 2 | 0 | Carbamidomethyl (C)[7]                    |  |  | Mascot |
| 1985.9259 | 1985.9213 | -0.0046 | -2  | 3980 | 3995 | EEYITEALMELEKEDK                     |   |   | Oxidation (M)[9]                          |  |  | Mascot |
| 1994.9674 | 1994.9385 | -0.0289 | -14 | 6737 | 6753 | ITSIMQIEGQPVQFECR                    |   |   | Oxidation (M)[5]                          |  |  | Mascot |
| 2019.0004 | 2019.0311 | 0.0307  | 15  | 3068 | 3086 | AVNPFGEASCSAELIVFH<br>K              |   |   |                                           |  |  | Mascot |
| 2050.9573 | 2051.0251 | 0.0678  | 33  | 4299 | 4315 | LECQVDEDTGVSIIWMR                    |   |   | Carbamidomethyl (C)[3]                    |  |  | Mascot |
| 2155.1353 | 2155.0056 | -0.1297 | -60 | 4893 | 4912 | KETNSSSLELHALKPSQS<br>AK             |   |   |                                           |  |  | Mascot |
| 2211.1438 | 2211.0867 | -0.0571 | -26 | 6494 | 6513 | SCEIALRGDTAILELHNID<br>K             |   |   |                                           |  |  | Mascot |
| 2232.9575 | 2233.0667 | 0.1092  | 49  | 1132 | 1149 | MINEFGYCSLDYEVAYS                    |   |   | Carbamidomethyl (C)[8], Oxidation (M)[1]  |  |  | Mascot |
| 2283.1899 | 2283.1572 | -0.0327 | -14 | 3240 | 3260 | EHPSQVMSALTESVTPLT<br>IVK            |   |   | Oxidation (M)[7]                          |  |  | Mascot |
| 2367.0955 | 2367.2358 | 0.1403  | 59  | 4299 | 4318 | LECQVDEDTGVSIIWMRD<br>GK             |   |   | Carbamidomethyl (C)[3], Oxidation (M)[16] |  |  | Mascot |
| 2515.2532 | 2515.2087 | -0.0445 | -18 | 2494 | 2517 | LMIQTVRMSDAGEYSVV<br>AGSSVSK         |   |   |                                           |  |  | Mascot |
| 2680.1865 | 2680.2222 | 0.0357  | 13  | 6773 | 6796 | SDSEYTMSFDDNSAVLNI<br>AKGEMR         |   |   |                                           |  |  | Mascot |
| 3219.5222 | 3219.655  | 0.1328  | 41  | 4809 | 4840 | ITNLETSDAGVFTCHATN<br>AAGHSETSGTISVK |   |   |                                           |  |  | Mascot |
| 3235.5107 | 3235.6675 | 0.1568  | 48  | 5033 | 5061 | YQCTVGNEVGQTSCDFL<br>VTMKEPPSFVQK    |   |   |                                           |  |  | Mascot |
| 3251.5056 | 3251.6763 | 0.1707  | 52  | 5033 | 5061 | YQCTVGNEVGQTSCDFL<br>VTMKEPPSFVQK    |   |   | Oxidation (M)[20]                         |  |  | Mascot |

18

required for meiotic nuclear division protein 1 homolog [Danio rerio]

gi|66472788

47369.2

7.18

10

35

0

Peptide Information

| Calc. Mass | Obsrv. Mass | ± da    | ± ppm | Start Seq. | End Seq. | Sequence               | Ion Score | C. I. | % Modification           | Rank | Result Type |
|------------|-------------|---------|-------|------------|----------|------------------------|-----------|-------|--------------------------|------|-------------|
| 1165.5782  | 1165.5778   | -0.0004 | 0     | 350        | 358      | TCQFLNINR              |           |       | Carbamidomethyl (C)[2]   |      | Mascot      |
| 1165.5782  | 1165.736    | 0.1578  | 135   | 350        | 358      | TCQFLNINR              |           |       | Carbamidomethyl (C)[2]   |      | Mascot      |
| 1475.6981  | 1475.74     | 0.0419  | 28    | 367        | 378      | LQHCTELTDLMR           |           |       | Oxidation (M)[11]        |      | Mascot      |
| 1716.9795  | 1716.8351   | -0.1444 | -84   | 67         | 81       | GPRFQVLTPNFISK         |           |       |                          |      | Mascot      |
| 1759.9207  | 1759.8629   | -0.0578 | -33   | 53         | 66       | NCFAILHHCILQKR         |           |       | Carbamidomethyl (C)[2,9] |      | Mascot      |
| 1790.9581  | 1790.8762   | -0.0819 | -46   | 9          | 24       | LQQPLKSTQACGFTLR       |           |       |                          |      | Mascot      |
| 2225.0801  | 2225.0999   | 0.0198  | 9     | 367        | 384      | LQHCTELTDLMRNHLSE<br>K |           |       | Carbamidomethyl (C)[4]   |      | Mascot      |
| 2284.1277  | 2284.1541   | 0.0264  | 12    | 341        | 358      | EDLELLYDKTCQFLNINR     |           |       | Carbamidomethyl (C)[11]  |      | Mascot      |
| 2367.1833  | 2367.2358   | 0.0525  | 22    | 15         | 36       | STQACGFTLRQINGLNSV     |           |       |                          |      | Mascot      |

|    |                                                             |              |           |         |     |     |     |                                     |  |  |  |  |                   |  |        |
|----|-------------------------------------------------------------|--------------|-----------|---------|-----|-----|-----|-------------------------------------|--|--|--|--|-------------------|--|--------|
|    |                                                             | 2664.384     | 2664.2173 | -0.1667 | -63 | 276 | 298 | TSNR<br>LAIWEVTLDSEFVSIQSIP<br>EMLK |  |  |  |  | Oxidation (M)[21] |  | Mascot |
|    |                                                             | 2680.4856    | 2680.2222 | -0.2634 | -98 | 389 | 410 | LEWMIVVLITIEVMFELAR<br>VIF          |  |  |  |  | Oxidation (M)[4]  |  | Mascot |
| 19 | bifunctional purine biosynthesis protein PURH [Danio rerio] | gi 195539484 | 64003.9   | 6.31    | 8   | 35  | 0   |                                     |  |  |  |  |                   |  |        |

#### Peptide Information

| Calc. Mass | Obsrv. Mass | ± da    | ± ppm | Start Seq. | End Seq. | Sequence                      | Ion Score | C. I. | % Modification      | Rank | Result Type |
|------------|-------------|---------|-------|------------|----------|-------------------------------|-----------|-------|---------------------|------|-------------|
| 892.4886   | 892.4795    | -0.0091 | -10   | 14         | 21       | TGLVEFAR                      |           |       |                     |      | Mascot      |
| 892.4886   | 892.4795    | -0.0091 | -10   | 14         | 21       | TGLVEFAR                      | 11        | 0     |                     |      | Mascot      |
| 1107.4623  | 1107.5332   | 0.0709  | 64    | 80         | 89       | TPSDNADMEK                    |           |       |                     |      | Mascot      |
| 1107.4623  | 1107.5332   | 0.0709  | 64    | 80         | 89       | TPSDNADMEK                    |           |       |                     |      | Mascot      |
| 1809.7629  | 1809.939    | 0.1761  | 97    | 156        | 170      | EMETSEIHDTTMETR               |           |       |                     |      | Mascot      |
| 1809.7629  | 1809.939    | 0.1761  | 97    | 156        | 170      | EMETSEIHDTTMETR               |           |       |                     |      | Mascot      |
| 1969.8478  | 1969.9259   | 0.0781  | 40    | 156        | 171      | EMETSEIHDTTMETRK              |           |       | Oxidation (M)[2,12] |      | Mascot      |
| 2034.9192  | 2035.0297   | 0.1105  | 54    | 177        | 193      | AFHTAQYDEAISDYFR              |           |       |                     |      | Mascot      |
| 2225.0764  | 2225.0999   | 0.0235  | 11    | 285        | 304      | VCMVNDMLQDLTPLATA<br>YAR      |           |       |                     |      | Mascot      |
| 2384.2397  | 2384.1287   | -0.111  | -47   | 523        | 543      | KNWISSLQAVLSSDAFF<br>PFR      |           |       |                     |      | Mascot      |
| 2694.2715  | 2694.4131   | 0.1416  | 53    | 483        | 507      | AEMANAIDQYVSGTVGE<br>GPDKEVWK |           |       |                     |      | Mascot      |

|    |                                          |             |         |      |    |    |   |    |   |
|----|------------------------------------------|-------------|---------|------|----|----|---|----|---|
| 20 | glutaminyl-tRNA synthetase [Danio rerio] | gi 49619001 | 87852.1 | 7.29 | 10 | 34 | 0 | 16 | 0 |
|----|------------------------------------------|-------------|---------|------|----|----|---|----|---|

#### Peptide Information

| Calc. Mass | Obsrv. Mass | ± da    | ± ppm | Start Seq. | End Seq. | Sequence           | Ion Score | C. I. | % Modification          | Rank | Result Type |
|------------|-------------|---------|-------|------------|----------|--------------------|-----------|-------|-------------------------|------|-------------|
| 892.4556   | 892.4795    | 0.0239  | 27    | 218        | 224      | SLMEQLR            |           |       | Oxidation (M)[3]        |      | Mascot      |
| 892.4556   | 892.4795    | 0.0239  | 27    | 218        | 224      | SLMEQLR            | 16        | 0     | Oxidation (M)[3]        |      | Mascot      |
| 916.525    | 916.4437    | -0.0813 | -89   | 158        | 165      | WADGKIVK           |           |       |                         |      | Mascot      |
| 1051.5796  | 1051.7026   | 0.123   | 117   | 419        | 426      | IKYTPHHR           |           |       |                         |      | Mascot      |
| 1219.6429  | 1219.6447   | 0.0018  | 1     | 64         | 73       | DTNRPQFLTK         |           |       |                         |      | Mascot      |
| 1657.7383  | 1657.808    | 0.0697  | 42    | 405        | 418      | MVMEDGKMDPVAYR     |           |       | Oxidation (M)[1]        |      | Mascot      |
| 1683.802   | 1683.7804   | -0.0216 | -13   | 352        | 365      | GHAYVCHQRGEELK     |           |       | Carbamidomethyl (C)[6]  |      | Mascot      |
| 1852.0076  | 1851.9554   | -0.0522 | -28   | 64         | 78       | DTNRPQFLTKYISR     |           |       |                         |      | Mascot      |
| 1852.0076  | 1851.9554   | -0.0522 | -28   | 64         | 78       | DTNRPQFLTKYISR     |           |       |                         |      | Mascot      |
| 1969.9072  | 1969.9259   | 0.0187  | 9     | 292        | 308      | ANNGICFLRYDDTNPEK  |           |       |                         |      | Mascot      |
| 1994.9409  | 1994.9385   | -0.0024 | -1    | 657        | 674      | VCELEVTCVSSDTAEKPK |           |       | Carbamidomethyl (C)[2]  |      | Mascot      |
| 2211.126   | 2211.0867   | -0.0393 | -18   | 538        | 557      | VGVTVQAQTTMEPHLEA  |           |       | Carbamidomethyl (C)[18] |      | Mascot      |

21 MOV10-like 1 [Danio rerio] CVR gi|116268043 122527.1 5.89 14 34 0

Peptide Information

| Calc. Mass | Obsrv. Mass | ± da    | ± ppm | Start Seq. | End Seq. | Sequence                         | Ion Score | C. I. % | Modification                                 | Rank | Result Type |
|------------|-------------|---------|-------|------------|----------|----------------------------------|-----------|---------|----------------------------------------------|------|-------------|
| 892.4622   | 892.4795    | 0.0173  | 19    | 653        | 660      | TDLSVTEK                         |           |         |                                              |      | Mascot      |
| 892.4622   | 892.4795    | 0.0173  | 19    | 653        | 660      | TDLSVTEK                         |           |         |                                              |      | Mascot      |
| 1045.5021  | 1045.554    | 0.0519  | 50    | 19         | 26       | RAQEEEQR                         |           |         |                                              |      | Mascot      |
| 1693.9846  | 1693.8414   | -0.1432 | -85   | 455        | 470      | DVLVVQPALAEALSLR                 |           |         |                                              |      | Mascot      |
| 1704.8955  | 1704.9127   | 0.0172  | 10    | 476        | 489      | FSALLWLEELQAER                   |           |         |                                              |      | Mascot      |
| 1716.797   | 1716.8351   | 0.0381  | 22    | 323        | 338      | SVSRCEDGGTEAPPVR                 |           |         | Carbamidomethyl (C)[5]                       |      | Mascot      |
| 1795.9602  | 1795.9229   | -0.0373 | -21   | 432        | 447      | HLPNFLGNYPQALR                   |           |         |                                              |      | Mascot      |
| 1795.9602  | 1795.9229   | -0.0373 | -21   | 432        | 447      | HLPNFLGNYPQALR                   |           |         |                                              |      | Mascot      |
| 2233.1807  | 2233.0667   | -0.114  | -51   | 1          | 18       | MVSVVQCLMSRLLWPLW<br>R           |           |         | Oxidation (M)[1]                             |      | Mascot      |
| 2283.1624  | 2283.1572   | -0.0052 | -2    | 869        | 889      | LMGNSLYACGERGFNPL<br>LVTK        |           |         |                                              |      | Mascot      |
| 2367.1082  | 2367.2358   | 0.1276  | 54    | 303        | 322      | QQLQRCVCAGWDSAQQ<br>FSVR         |           |         | Carbamidomethyl (C)[6]                       |      | Mascot      |
| 2385.092   | 2385.1313   | 0.0393  | 16    | 755        | 774      | VNATCRPEESMSEELRQ<br>YAR         |           |         | Oxidation (M)[11]                            |      | Mascot      |
| 2423.1582  | 2423.1296   | -0.0286 | -12   | 1033       | 1053     | SNESLLNEELQCMLGFLS<br>NPK        |           |         | Carbamidomethyl (C)[12]                      |      | Mascot      |
| 2678.1936  | 2678.4114   | 0.2178  | 81    | 339        | 361      | MLEEPLDIHPGQKMCVC<br>VCCTAK      |           |         | Carbamidomethyl (C)[15,17], Oxidation (M)[1] |      | Mascot      |
| 2694.4724  | 2694.4131   | -0.0593 | -22   | 503        | 527      | RGAVYLHLEVPGLAEGR<br>PSLFIGDK    |           |         |                                              |      | Mascot      |
| 3235.6602  | 3235.6675   | 0.0073  | 2     | 221        | 248      | GDLVNLVVLESSQSLYS<br>WRALCMTPLQR |           |         | Carbamidomethyl (C)[22]                      |      | Mascot      |
| 3251.655   | 3251.6763   | 0.0213  | 7     | 221        | 248      | GDLVNLVVLESSQSLYS<br>WRALCMTPLQR |           |         | Carbamidomethyl (C)[22], Oxidation (M)[23]   |      | Mascot      |

22 PREDICTED: zinc finger protein 180-like [Danio rerio] gi|125871743 31745.7 9.1 8 34 0

Peptide Information

| Calc. Mass | Obsrv. Mass | ± da   | ± ppm | Start Seq. | End Seq. | Sequence                | Ion Score | C. I. % | Modification               | Rank | Result Type |
|------------|-------------|--------|-------|------------|----------|-------------------------|-----------|---------|----------------------------|------|-------------|
| 1693.7937  | 1693.8414   | 0.0477 | 28    | 62         | 76       | FTCSQCGKTFLLHGHK        |           |         |                            |      | Mascot      |
| 1704.8196  | 1704.9127   | 0.0931 | 55    | 167        | 181      | IHTGEKPYICQCGK          |           |         |                            |      | Mascot      |
| 1759.8254  | 1759.8629   | 0.0375 | 21    | 83         | 97       | IHTGEKPFCTPCQCGK        |           |         | Carbamidomethyl (C)[10,13] |      | Mascot      |
| 1952.8993  | 1952.941    | 0.0417 | 21    | 139        | 156      | VHTGESPFCTPCQCKSF<br>K  |           |         |                            |      | Mascot      |
| 1969.8895  | 1969.9259   | 0.0364 | 18    | 223        | 240      | VHTGESPFCTQCGLSF<br>R   |           |         |                            |      | Mascot      |
| 2283.0645  | 2283.1572   | 0.0927 | 41    | 223        | 242      | VHTGESPFCTQCGLSF<br>RQK |           |         | Carbamidomethyl (C)[10]    |      | Mascot      |
| 2367.1372  | 2367.2358   | 0.0986 | 42    | 111        | 130      | IHSGEKPYPCQCGKSF        |           |         | Carbamidomethyl (C)[10]    |      | Mascot      |

|    |                                                       |           |         |     |     |              |                                     |      |    |    |   |  |        |
|----|-------------------------------------------------------|-----------|---------|-----|-----|--------------|-------------------------------------|------|----|----|---|--|--------|
|    | 2664.302                                              | 2664.2173 | -0.0847 | -32 | 195 | 218          | YLR<br>VHTGEKPFTCQQCGKSF<br>NLQGNLK |      |    |    |   |  | Mascot |
| 23 | PREDICTED: zinc finger protein 729-like [Danio rerio] |           |         |     |     | gi 326674480 | 157731.7                            | 9.21 | 20 | 34 | 0 |  |        |

| Peptide Information |             |         |       |            |          |                          |           |       |                               |      |             |  |
|---------------------|-------------|---------|-------|------------|----------|--------------------------|-----------|-------|-------------------------------|------|-------------|--|
| Calc. Mass          | Obsrv. Mass | ± da    | ± ppm | Start Seq. | End Seq. | Sequence                 | Ion Score | C. I. | % Modification                | Rank | Result Type |  |
| 870.5155            | 870.532     | 0.0165  | 19    | 62         | 68       | KLQTPQR                  |           |       |                               |      | Mascot      |  |
| 1051.5571           | 1051.7026   | 0.1455  | 138   | 820        | 828      | SFAWSVNLK                |           |       |                               |      | Mascot      |  |
| 1072.5786           | 1072.5409   | -0.0377 | -35   | 749        | 757      | IHTGEKPYK                |           |       |                               |      | Mascot      |  |
| 1072.5786           | 1072.5409   | -0.0377 | -35   | 1223       | 1231     | IHTGEKPYK                |           |       |                               |      | Mascot      |  |
| 1179.4921           | 1179.5914   | 0.0993  | 84    | 453        | 461      | CSYCEKSFR                |           |       | Carbamidomethyl (C)[1]        |      | Mascot      |  |
| 1624.7094           | 1624.9399   | 0.2305  | 142   | 911        | 925      | THAGEKPYTCTECGK          |           |       |                               |      | Mascot      |  |
| 1657.7019           | 1657.808    | 0.1061  | 64    | 229        | 243      | CSYCGKTFTQASSMK          |           |       | Oxidation (M)[14]             |      | Mascot      |  |
| 1704.7179           | 1704.9127   | 0.1948  | 114   | 1307       | 1321     | IHTGEEPYCCPPCQK          |           |       |                               |      | Mascot      |  |
| 1743.8053           | 1743.8707   | 0.0654  | 38    | 670        | 684      | HLHSCPQCGKSFASK          |           |       | Carbamidomethyl (C)[5,8]      |      | Mascot      |  |
| 1759.8254           | 1759.8629   | 0.0375  | 21    | 1279       | 1293     | IHTGEKPHKCSYCEK          |           |       |                               |      | Mascot      |  |
| 1785.7643           | 1785.7939   | 0.0296  | 17    | 416        | 430      | THTDERDHSVCLDCGK         |           |       | Carbamidomethyl (C)[10]       |      | Mascot      |  |
| 1790.7836           | 1790.8762   | 0.0926  | 52    | 976        | 990      | CSYCEKSFSQSSHLK          |           |       | Carbamidomethyl (C)[1]        |      | Mascot      |  |
| 1795.8506           | 1795.9229   | 0.0723  | 40    | 1051       | 1065     | IHTNEKPYACLFCEK          |           |       |                               |      | Mascot      |  |
| 1795.8506           | 1795.9229   | 0.0723  | 40    | 388        | 402      | IHTNEKPYACLFCEK          |           |       |                               |      | Mascot      |  |
| 1809.8258           | 1809.939    | 0.1132  | 63    | 910        | 925      | KTHAGEKPYTCTECGK         |           |       | Carbamidomethyl (C)[11]       |      | Mascot      |  |
| 1809.8258           | 1809.939    | 0.1132  | 63    | 275        | 290      | KTHAGEKPYTCTECGK         |           |       | Carbamidomethyl (C)[11]       |      | Mascot      |  |
| 1851.8251           | 1851.9554   | 0.1303  | 70    | 1288       | 1302     | CSYCEKSFIQSSDLK          |           |       | Carbamidomethyl (C)[1,4]      |      | Mascot      |  |
| 1851.8251           | 1851.9554   | 0.1303  | 70    | 1288       | 1302     | CSYCEKSFIQSSDLK          |           |       | Carbamidomethyl (C)[1,4]      |      | Mascot      |  |
| 1873.8683           | 1873.9403   | 0.072   | 38    | 1279       | 1293     | IHTGEKPHKCSYCEK          |           |       | Carbamidomethyl (C)[10,13]    |      | Mascot      |  |
| 1994.9421           | 1994.9385   | -0.0036 | -2    | 1085       | 1102     | GHVCLECGKSFQTQSGSLK      |           |       | Carbamidomethyl (C)[4,7]      |      | Mascot      |  |
| 2211.0183           | 2211.0867   | 0.0684  | 31    | 991        | 1009     | SHERIHTGEKPYHCTQCGK      |           |       |                               |      | Mascot      |  |
| 2225.0703           | 2225.0999   | 0.0296  | 13    | 216        | 234      | SHQIHTGVKPHKCSYCGK       |           |       | Carbamidomethyl (C)[14,17]    |      | Mascot      |  |
| 2384.0693           | 2384.1287   | 0.0594  | 25    | 1131       | 1149     | SHERIHTGEKPYCCPPCQK      |           |       | Carbamidomethyl (C)[13,14,17] |      | Mascot      |  |
| 2385.0168           | 2385.1313   | 0.1145  | 48    | 1303       | 1321     | SHERIHTGEEPYCCPPCQK      |           |       | Carbamidomethyl (C)[13,14,17] |      | Mascot      |  |
| 2680.2017           | 2680.2222   | 0.0205  | 8     | 911        | 934      | THAGEKPYTCTECGKSFSQLDSYK |           |       |                               |      | Mascot      |  |

|    |                                                                                                     |  |  |  |  |              |         |      |    |    |   |  |
|----|-----------------------------------------------------------------------------------------------------|--|--|--|--|--------------|---------|------|----|----|---|--|
| 24 | novel protein similar to vertebrate actin filament associated protein 1-like 1 (AFAP1L1, zgc:114084 |  |  |  |  | gi 220679093 | 84272.2 | 8.16 | 11 | 34 | 0 |  |
|----|-----------------------------------------------------------------------------------------------------|--|--|--|--|--------------|---------|------|----|----|---|--|

| Peptide Information |             |      |       |       |     |          |     |       |                |      |             |  |
|---------------------|-------------|------|-------|-------|-----|----------|-----|-------|----------------|------|-------------|--|
| Calc. Mass          | Obsrv. Mass | ± da | ± ppm | Start | End | Sequence | Ion | C. I. | % Modification | Rank | Result Type |  |



|    |                                                     |           | Seq.    |     | Seq.         |         | Score                      |   |    |                                              |        |
|----|-----------------------------------------------------|-----------|---------|-----|--------------|---------|----------------------------|---|----|----------------------------------------------|--------|
|    | 850.5145                                            | 850.5363  | 0.0218  | 26  | 383          | 389     | IISFSKR                    |   |    |                                              | Mascot |
|    | 892.4787                                            | 892.4795  | 0.0008  | 1   | 226          | 232     | RFGQWAK                    |   |    |                                              | Mascot |
|    | 892.4787                                            | 892.4795  | 0.0008  | 1   | 226          | 232     | RFGQWAK                    |   |    |                                              | Mascot |
|    | 996.4819                                            | 996.5902  | 0.1083  | 109 | 133          | 140     | MPEYITSR                   |   |    |                                              | Mascot |
|    | 1072.6361                                           | 1072.5409 | -0.0952 | -89 | 671          | 679     | LTQVKENLK                  |   |    |                                              | Mascot |
|    | 1072.6361                                           | 1072.5409 | -0.0952 | -89 | 671          | 679     | LTQVKENLK                  |   |    |                                              | Mascot |
|    | 1378.6671                                           | 1378.795  | 0.1279  | 93  | 327          | 337     | IELDKWCSAEK                |   |    | Carbamidomethyl (C)[7]                       | Mascot |
|    | 1716.8473                                           | 1716.8351 | -0.0122 | -7  | 21           | 35      | LLDHETLSCATEEKK            |   |    |                                              | Mascot |
|    | 1809.7742                                           | 1809.939  | 0.1648  | 91  | 470          | 487     | GGAEEVAALASCSSEDMG<br>R    |   |    | Carbamidomethyl (C)[12]                      | Mascot |
|    | 1809.7742                                           | 1809.939  | 0.1648  | 91  | 470          | 487     | GGAEEVAALASCSSEDMG<br>R    | 3 | 0  | Carbamidomethyl (C)[12]                      | Mascot |
|    | 1954.8407                                           | 1954.954  | 0.1133  | 58  | 338          | 355     | QTSDDSDSMPSGESARDI<br>R    |   |    | Oxidation (M)[8]                             | Mascot |
|    | 2225.0979                                           | 2225.0999 | 0.002   | 1   | 681          | 701     | SLAGGEMEAPTESKPAH<br>KTQR  |   |    |                                              | Mascot |
|    | 2423.0676                                           | 2423.1296 | 0.062   | 26  | 702          | 721     | TEAQYMESFLPVNCASE<br>MRK   |   |    | Carbamidomethyl (C)[14], Oxidation (M)[6,18] | Mascot |
|    | 2664.1851                                           | 2664.2173 | 0.0322  | 12  | 699          | 720     | TQRTEAQYMESFLPVNC<br>ASEMR |   |    | Carbamidomethyl (C)[17], Oxidation (M)[9]    | Mascot |
|    | 2680.1799                                           | 2680.2222 | 0.0423  | 16  | 699          | 720     | TQRTEAQYMESFLPVNC<br>ASEMR |   |    | Carbamidomethyl (C)[17], Oxidation (M)[9,21] | Mascot |
| 25 | cerebral dopamine neurotrophic factor [Danio rerio] |           |         |     | gi 181330650 | 20363.4 | 5.72                       | 6 | 33 | 0                                            |        |

#### Peptide Information

| Calc. Mass | Obsrv. Mass | ± da    | ± ppm | Start Seq. | End Sequence Seq. | Ion Score                   | C. I. % | Modification | Rank | Result | Type   |
|------------|-------------|---------|-------|------------|-------------------|-----------------------------|---------|--------------|------|--------|--------|
| 916.5145   | 916.4437    | -0.0708 | -77   | 103        | 109               | ICQRLQR                     |         |              |      |        | Mascot |
| 1179.5422  | 1179.5914   | 0.0492  | 42    | 61         | 71                | ACAETTGKENR                 |         |              |      |        | Mascot |
| 1634.8571  | 1634.7799   | -0.0772 | -47   | 122        | 135               | LVLDWSTDALSKMR              |         |              |      |        | Mascot |
| 1634.8571  | 1634.7799   | -0.0772 | -47   | 122        | 135               | LVLDWSTDALSKMR              |         |              |      |        | Mascot |
| 1693.8036  | 1693.8414   | 0.0378  | 22    | 142        | 156               | VLASWGEECRACLEK             |         |              |      |        | Mascot |
| 1795.9225  | 1795.9229   | 0.0004  | 0     | 119        | 133               | YERLVLDWSTDALSK             |         |              |      |        | Mascot |
| 1795.9225  | 1795.9229   | 0.0004  | 0     | 119        | 133               | YERLVLDWSTDALSK             |         |              |      |        | Mascot |
| 2680.4668  | 2680.2222   | -0.2446 | -91   | 38         | 60                | LYNSLVIRHTELSPELVEE<br>GLIR |         |              |      |        | Mascot |

26 PREDICTED: actin filament-associated protein 1-like [Danio rerio] gi|189525987 89049.3 9.08 11 33 0

#### Peptide Information

| Calc. Mass | Obsrv. Mass | ± da | ± ppm | Start Seq. | End Sequence Seq. | Ion Score | C. I. % | Modification | Rank | Result | Type |
|------------|-------------|------|-------|------------|-------------------|-----------|---------|--------------|------|--------|------|
|------------|-------------|------|-------|------------|-------------------|-----------|---------|--------------|------|--------|------|

|    |                                 |           |         |     |              |     |                                    |      |    |    |                                             |  |        |
|----|---------------------------------|-----------|---------|-----|--------------|-----|------------------------------------|------|----|----|---------------------------------------------|--|--------|
|    | 842.473                         | 842.5032  | 0.0302  | 36  | 599          | 605 | LDKNQPK                            |      |    |    |                                             |  | Mascot |
|    | 892.5073                        | 892.4795  | -0.0278 | -31 | 156          | 162 | ICAFLLR                            |      |    |    | Carbamidomethyl (C)[2]                      |  | Mascot |
|    | 892.5073                        | 892.4795  | -0.0278 | -31 | 156          | 162 | ICAFLLR                            | 12   | 0  |    | Carbamidomethyl (C)[2]                      |  | Mascot |
|    | 996.5182                        | 996.5902  | 0.072   | 72  | 178          | 185 | DNKLLCYK                           |      |    |    |                                             |  | Mascot |
|    | 1045.6074                       | 1045.554  | -0.0534 | -51 | 172          | 180 | LLCVIKDNK                          |      |    |    |                                             |  | Mascot |
|    | 1165.6211                       | 1165.5778 | -0.0433 | -37 | 18           | 27  | EYLTAGVREK                         |      |    |    |                                             |  | Mascot |
|    | 1165.6211                       | 1165.736  | 0.1149  | 99  | 18           | 27  | EYLTAGVREK                         |      |    |    |                                             |  | Mascot |
|    | 1234.6725                       | 1234.6636 | -0.0089 | -7  | 153          | 162 | DARICAFLLR                         |      |    |    | Carbamidomethyl (C)[5]                      |  | Mascot |
|    | 1389.7195                       | 1389.7009 | -0.0186 | -13 | 235          | 245 | EQAEQWLKVMK                        |      |    |    |                                             |  | Mascot |
|    | 1716.9629                       | 1716.8351 | -0.1278 | -74 | 703          | 717 | VSLELELTEVKESLK                    |      |    |    |                                             |  | Mascot |
|    | 2211.1147                       | 2211.0867 | -0.028  | -13 | 189          | 208 | DQTPQMELLLSGCSITHI<br>PK           |      |    |    |                                             |  | Mascot |
|    | 2233.124                        | 2233.0667 | -0.0573 | -26 | 408          | 428 | LLRNGQEVAVLEASSSES<br>MGR          |      |    |    |                                             |  | Mascot |
|    | 2284.1311                       | 2284.1541 | 0.023   | 10  | 189          | 208 | DQTPQMELLLSGCSITHI<br>PK           |      |    |    | Carbamidomethyl (C)[13], Oxidation (M)[6]   |  | Mascot |
|    | 2664.1809                       | 2664.2173 | 0.0364  | 14  | 243          | 268 | VMKEVCSNGNGVVD<br>CD<br>GAGSGSTVHK |      |    |    | Carbamidomethyl (C)[6,15]                   |  | Mascot |
|    | 2680.1758                       | 2680.2222 | 0.0464  | 17  | 243          | 268 | VMKEVCSNGNGVVD<br>CD<br>GAGSGSTVHK |      |    |    | Carbamidomethyl (C)[6,15], Oxidation (M)[2] |  | Mascot |
| 27 | LOC798657 protein [Danio rerio] |           |         |     | gi 120537819 |     | 53354.7                            | 9.31 | 10 | 33 | 0                                           |  |        |

Peptide Information

| Calc. Mass | Obsrv. Mass | ± da    | ± ppm | Start Seq. | End Seq. | Sequence                    | Ion Score | C. I. | % Modification                             | Rank | Result Type |
|------------|-------------|---------|-------|------------|----------|-----------------------------|-----------|-------|--------------------------------------------|------|-------------|
| 1219.6464  | 1219.6447   | -0.0017 | -1    | 97         | 106      | VRTEVMEVTR                  |           |       |                                            |      | Mascot      |
| 1234.5126  | 1234.6636   | 0.151   | 122   | 1          | 10       | FGCARMMSRR                  |           |       | Carbamidomethyl (C)[3], Oxidation (M)[6,7] |      | Mascot      |
| 1704.8677  | 1704.9127   | 0.045   | 26    | 402        | 415      | HHQRHQFTTQAVSK              |           |       |                                            |      | Mascot      |
| 1716.7936  | 1716.8351   | 0.0415  | 24    | 307        | 320      | TTDKHSQEEQPFNR              |           |       |                                            |      | Mascot      |
| 1790.8364  | 1790.8762   | 0.0398  | 22    | 389        | 401      | QEEMHHLRHQHHR               |           |       | Oxidation (M)[4]                           |      | Mascot      |
| 1809.8411  | 1809.939    | 0.0979  | 54    | 113        | 127      | NANFMLWPSCVEVQR             |           |       | Oxidation (M)[5]                           |      | Mascot      |
| 1810.1095  | 1809.939    | -0.1705 | -94   | 11         | 27       | LLLLVLAALACLRSGR            |           |       | Carbamidomethyl (C)[12]                    |      | Mascot      |
| 1985.9886  | 1985.9213   | -0.0673 | -34   | 321        | 338      | TTPQQPKSPSQTSVQSE<br>R      |           |       |                                            |      | Mascot      |
| 1985.9886  | 1985.9213   | -0.0673 | -34   | 321        | 338      | TTPQQPKSPSQTSVQSE<br>R      |           |       |                                            |      | Mascot      |
| 2211.0137  | 2211.0867   | 0.073   | 33    | 128        | 147      | CSGCCNARTLQCVPVITE<br>TR    |           |       | Carbamidomethyl (C)[1]                     |      | Mascot      |
| 2384.2642  | 2384.1287   | -0.1355 | -57   | 423        | 445      | TVMKAPPTTPSAPQTPP<br>PLPSPR |           |       | Oxidation (M)[3]                           |      | Mascot      |

28 RAB5A, member RAS oncogene family, b [Danio rerio] gi|41055758 23484.8 8.31 5 33 0

Peptide Information

| Calc. Mass | Obsrv. Mass | ± da | ± ppm | Start Seq. | End Seq. | Sequence | Ion Score | C. I. | % Modification | Rank | Result Type |
|------------|-------------|------|-------|------------|----------|----------|-----------|-------|----------------|------|-------------|
|------------|-------------|------|-------|------------|----------|----------|-----------|-------|----------------|------|-------------|

|    |                                                                             |           |         |     |     |             |                              |      |   |    |        |
|----|-----------------------------------------------------------------------------|-----------|---------|-----|-----|-------------|------------------------------|------|---|----|--------|
|    | 1072.5898                                                                   | 1072.5409 | -0.0489 | -46 | 114 | 121         | NWVKELQR                     | 8    | 0 |    | Mascot |
|    | 1072.5898                                                                   | 1072.5409 | -0.0489 | -46 | 114 | 121         | NWVKELQR                     |      |   |    | Mascot |
|    | 1624.8262                                                                   | 1624.9399 | 0.1137  | 70  | 2   | 18          | AGRGGATRPNGPNTGN<br>K        |      |   |    | Mascot |
|    | 1704.9717                                                                   | 1704.9127 | -0.059  | -35 | 19  | 34          | ICQFKLVLLGESAVGK             |      |   |    | Mascot |
|    | 1741.0581                                                                   | 1740.8966 | -0.1615 | -93 | 24  | 40          | LVLLGESAVGKSSLVLR            |      |   |    | Mascot |
|    | 2680.2083                                                                   | 2680.2222 | 0.0139  | 5   | 143 | 166         | ALDFQDAQSYADDNSLL<br>FMETSAK |      |   |    | Mascot |
| 29 | mitochondrial import inner membrane translocase subunit TIM44 [Danio rerio] |           |         |     |     | gi 61806584 | 50838                        | 7.98 | 9 | 32 | 0      |

#### Peptide Information

| Calc. Mass | Obsrv. Mass | ± da    | ± ppm | Start Seq. | End Seq. | Sequence                          | Ion Score | C. I. % | Modification                              | Rank | Result Type |
|------------|-------------|---------|-------|------------|----------|-----------------------------------|-----------|---------|-------------------------------------------|------|-------------|
| 1234.6273  | 1234.6636   | 0.0363  | 29    | 159        | 170      | QSAETVTKGGEK                      |           |         |                                           |      | Mascot      |
| 1367.6702  | 1367.803    | 0.1328  | 97    | 247        | 257      | DFKDNNVVFNR                       |           |         |                                           |      | Mascot      |
| 1389.7472  | 1389.7009   | -0.0463 | -33   | 440        | 452      | LLDISASSTEQIL                     |           |         |                                           |      | Mascot      |
| 1759.7747  | 1759.8629   | 0.0882  | 50    | 1          | 14       | MAASLCQCYQLCVR                    |           |         | Carbamidomethyl (C)[6,8,12]               |      | Mascot      |
| 2018.9851  | 2019.0311   | 0.046   | 23    | 223        | 240      | VFEANEEAMGVVLHKDS<br>K            |           |         | Oxidation (M)[9]                          |      | Mascot      |
| 2034.996   | 2035.0297   | 0.0337  | 17    | 37         | 57       | ICGAPAAAAAQVRFMSS<br>GGGR         |           |         | Carbamidomethyl (C)[2]                    |      | Mascot      |
| 2050.991   | 2051.0251   | 0.0341  | 17    | 37         | 57       | ICGAPAAAAAQVRFMSS<br>GGGR         |           |         | Carbamidomethyl (C)[2], Oxidation (M)[15] |      | Mascot      |
| 2211.1101  | 2211.0867   | -0.0234 | -11   | 294        | 312      | TEMSEVLTEILKVDPTFD<br>K           |           |         | Oxidation (M)[3]                          |      | Mascot      |
| 2423.2617  | 2423.1296   | -0.1321 | -55   | 16         | 36       | SSALVLYGHYSSELYPRAH<br>VFR        |           |         |                                           |      | Mascot      |
| 3251.54    | 3251.6763   | 0.1363  | 42    | 341        | 368      | DWCYEATYSQLAHPIQQ<br>AKAMGLQFHSAK |           |         |                                           |      | Mascot      |

30 PREDICTED: actin filament-associated protein 1-like 1-like [Danio rerio] gi|326673811 84171.2 8.16 11 32 0

#### Peptide Information

| Calc. Mass | Obsrv. Mass | ± da    | ± ppm | Start Seq. | End Seq. | Sequence    | Ion Score | C. I. % | Modification           | Rank | Result Type |
|------------|-------------|---------|-------|------------|----------|-------------|-----------|---------|------------------------|------|-------------|
| 850.5145   | 850.5363    | 0.0218  | 26    | 383        | 389      | IISFSKR     |           |         |                        |      | Mascot      |
| 892.4787   | 892.4795    | 0.0008  | 1     | 226        | 232      | RFGQWAK     |           |         |                        |      | Mascot      |
| 892.4787   | 892.4795    | 0.0008  | 1     | 226        | 232      | RFGQWAK     |           |         |                        |      | Mascot      |
| 996.4819   | 996.5902    | 0.1083  | 109   | 133        | 140      | MPEYITSR    |           |         |                        |      | Mascot      |
| 1072.6361  | 1072.5409   | -0.0952 | -89   | 670        | 678      | LTQVKENLK   |           |         |                        |      | Mascot      |
| 1072.6361  | 1072.5409   | -0.0952 | -89   | 670        | 678      | LTQVKENLK   |           |         |                        |      | Mascot      |
| 1378.6671  | 1378.795    | 0.1279  | 93    | 327        | 337      | IELDKWCSEAK |           |         | Carbamidomethyl (C)[7] |      | Mascot      |

|    |                                                                            |           |         |    |     |              |                        |      |    |    |   |  |  |  |  |  |        |
|----|----------------------------------------------------------------------------|-----------|---------|----|-----|--------------|------------------------|------|----|----|---|--|--|--|--|--|--------|
|    | 1716.8473                                                                  | 1716.8351 | -0.0122 | -7 | 21  | 35           | LLDHETLSCATEEKK        |      |    |    |   |  |  |  |  |  | Mascot |
|    | 1809.7742                                                                  | 1809.939  | 0.1648  | 91 | 470 | 487          | GGAEEVAALEASCSSEDMGR   |      |    |    |   |  |  |  |  |  | Mascot |
|    | 1809.7742                                                                  | 1809.939  | 0.1648  | 91 | 470 | 487          | GGAEEVAALEASCSSEDMGR   |      | 3  | 0  |   |  |  |  |  |  | Mascot |
|    | 1954.8407                                                                  | 1954.954  | 0.1133  | 58 | 338 | 355          | QTSDSDSPSGESARDIR      |      |    |    |   |  |  |  |  |  | Mascot |
|    | 2154.9939                                                                  | 2155.0056 | 0.0117  | 5  | 536 | 552          | TYDEVPFETEQUENERLR     |      |    |    |   |  |  |  |  |  | Mascot |
|    | 2423.0676                                                                  | 2423.1296 | 0.062   | 26 | 701 | 720          | TEAQYMESFLPVNCASEMRK   |      |    |    |   |  |  |  |  |  | Mascot |
|    | 2664.1851                                                                  | 2664.2173 | 0.0322  | 12 | 698 | 719          | TQRTEAQYMESFLPVNCASEMR |      |    |    |   |  |  |  |  |  | Mascot |
|    | 2680.1799                                                                  | 2680.2222 | 0.0423  | 16 | 698 | 719          | TQRTEAQYMESFLPVNCASEMR |      |    |    |   |  |  |  |  |  | Mascot |
| 31 | PREDICTED: macrophage mannose receptor 1-like protein 1-like [Danio rerio] |           |         |    |     | gi 326665229 | 74337.1                | 6.95 | 11 | 32 | 0 |  |  |  |  |  |        |

Peptide Information

| Calc. Mass | Obsrv. Mass | ± da    | ± ppm | Start Seq. | End Seq. | Sequence                   | Ion Score | C. I. | % | Modification            | Rank | Result Type |
|------------|-------------|---------|-------|------------|----------|----------------------------|-----------|-------|---|-------------------------|------|-------------|
| 1179.6038  | 1179.5914   | -0.0124 | -11   | 283        | 293      | LKGMGLQSDSK                |           |       |   | Oxidation (M)[4]        |      | Mascot      |
| 1683.7649  | 1683.7804   | 0.0155  | 9     | 382        | 395      | WWWSGDGDDTIAQYK            |           |       |   |                         |      | Mascot      |
| 1740.8109  | 1740.8966   | 0.0857  | 49    | 343        | 357      | FIDLATVDTMDDVNR            |           |       |   | Oxidation (M)[10]       |      | Mascot      |
| 1790.9568  | 1790.8762   | -0.0806 | -45   | 614        | 629      | SEEELSLLAQTLCKVK           |           |       |   |                         |      | Mascot      |
| 1971.0255  | 1970.9413   | -0.0842 | -43   | 425        | 442      | SSICINAGGYAIILLDK          |           |       |   | Carbamidomethyl (C)[4]  |      | Mascot      |
| 1971.0255  | 1970.9413   | -0.0842 | -43   | 425        | 442      | SSICINAGGYAIILLDK          |           |       |   | Carbamidomethyl (C)[4]  |      | Mascot      |
| 1985.9352  | 1985.9213   | -0.0139 | -7    | 79         | 95       | EISNHWVWSNGEDTIAK          |           |       |   |                         |      | Mascot      |
| 1985.9352  | 1985.9213   | -0.0139 | -7    | 79         | 95       | EISNHWVWSNGEDTIAK          |           |       |   |                         |      | Mascot      |
| 1994.8734  | 1994.9385   | 0.0651  | 33    | 122        | 138      | CSNLYGALCLDEFNGYR          |           |       |   | Carbamidomethyl (C)[1]  |      | Mascot      |
| 2034.8973  | 2035.0297   | 0.1324  | 65    | 396        | 413      | DWGPGEVPVSGNDCVYLNR        |           |       |   | Carbamidomethyl (C)[13] |      | Mascot      |
| 2284.1714  | 2284.1541   | -0.0173 | -8    | 262        | 282      | GNCALNNPSLQTVVLNQITER      |           |       |   |                         |      | Mascot      |
| 2366.999   | 2367.2358   | 0.2368  | 100   | 322        | 340      | QYNYINMPMSWPDQSYCR         |           |       |   |                         |      | Mascot      |
| 2664.1704  | 2664.2173   | 0.0469  | 18    | 203        | 228      | YWAAGQPFQSAGSVDCVGMTTTDSGK |           |       |   |                         |      | Mascot      |
| 2680.1653  | 2680.2222   | 0.0569  | 21    | 203        | 228      | YWAAGQPFQSAGSVDCVGMTTTDSGK |           |       |   | Oxidation (M)[19]       |      | Mascot      |

|    |                                                                           |  |  |  |  |             |         |      |   |    |   |  |  |  |  |  |  |
|----|---------------------------------------------------------------------------|--|--|--|--|-------------|---------|------|---|----|---|--|--|--|--|--|--|
| 32 | RecName: Full=Adenosine deaminase; AltName: Full=Adenosine aminohydrolase |  |  |  |  | gi 81167689 | 40817.5 | 6.13 | 8 | 31 | 0 |  |  |  |  |  |  |
|----|---------------------------------------------------------------------------|--|--|--|--|-------------|---------|------|---|----|---|--|--|--|--|--|--|

Peptide Information

| Calc. Mass | Obsrv. Mass | ± da    | ± ppm | Start Seq. | End Seq. | Sequence       | Ion Score | C. I. | % | Modification | Rank | Result Type |
|------------|-------------|---------|-------|------------|----------|----------------|-----------|-------|---|--------------|------|-------------|
| 1234.679   | 1234.6636   | -0.0154 | -12   | 91         | 101      | AKEGVIIYVEAR   |           |       |   |              |      | Mascot      |
| 1378.7437  | 1378.795    | 0.0513  | 37    | 211        | 224      | TVHAGEVGPASVVR |           |       |   |              |      | Mascot      |

|  |           |           |         |    |     |     |                                  |  |  |  |  |  |                             |        |
|--|-----------|-----------|---------|----|-----|-----|----------------------------------|--|--|--|--|--|-----------------------------|--------|
|  | 1743.8734 | 1743.8707 | -0.0027 | -2 | 341 | 354 | EKLLNQLYEAYGMR                   |  |  |  |  |  | Oxidation (M)[13]           | Mascot |
|  | 1759.7965 | 1759.8629 | 0.0664  | 38 | 157 | 170 | HMPNWSMEVVELCK                   |  |  |  |  |  | Carbamidomethyl (C)[13]     | Mascot |
|  | 1873.9377 | 1873.9403 | 0.0026  | 1  | 65  | 80  | FSHFMHVIAGDREAIK                 |  |  |  |  |  | Oxidation (M)[5]            | Mascot |
|  | 2423.0488 | 2423.1296 | 0.0808  | 33 | 175 | 197 | DGVVAIDLAGEDESMNCE<br>SYPGHK     |  |  |  |  |  | Oxidation (M)[14]           | Mascot |
|  | 2680.1995 | 2680.2222 | 0.0227  | 8  | 150 | 170 | SILCCMRHMPNWSMEVV<br>ELCK        |  |  |  |  |  | Carbamidomethyl (C)[4,5,20] | Mascot |
|  | 3219.4841 | 3219.655  | 0.1709  | 53 | 250 | 277 | QLLHQNMHFEMCPVSSR<br>LTGACEPDFTK |  |  |  |  |  |                             | Mascot |
|  | 3235.4792 | 3235.6675 | 0.1883  | 58 | 250 | 277 | QLLHQNMHFEMCPVSSR<br>LTGACEPDFTK |  |  |  |  |  | Oxidation (M)[7]            | Mascot |
|  | 3251.4741 | 3251.6763 | 0.2022  | 62 | 250 | 277 | QLLHQNMHFEMCPVSSR<br>LTGACEPDFTK |  |  |  |  |  | Oxidation (M)[7,11]         | Mascot |

33 PREDICTED: LOW QUALITY PROTEIN: PR domain zinc finger protein 15 [Danio rerio] gi|326671336 129785.3 8.52 19 31 0 12 0

#### Peptide Information

| Calc. Mass | Obsrv. Mass | ± da    | ± ppm | Start Seq. | End Seq. | Sequence                 | Ion Score | C. I. | % Modification                             | Rank | Result Type |
|------------|-------------|---------|-------|------------|----------|--------------------------|-----------|-------|--------------------------------------------|------|-------------|
| 1045.5472  | 1045.554    | 0.0068  | 7     | 753        | 760      | HALRHMMK                 |           |       | Oxidation (M)[7]                           |      | Mascot      |
| 1051.6047  | 1051.7026   | 0.0979  | 93    | 563        | 570      | FFRVDVLR                 |           |       |                                            |      | Mascot      |
| 1072.4915  | 1072.5409   | 0.0494  | 46    | 553        | 561      | KYTCEICGR                |           |       |                                            |      | Mascot      |
| 1072.4915  | 1072.5409   | 0.0494  | 46    | 554        | 562      | YTCEICGRK                |           |       |                                            |      | Mascot      |
| 1165.4183  | 1165.5778   | 0.1595  | 137   | 711        | 719      | SHCCEQCGK                |           |       | Carbamidomethyl (C)[3,4,7]                 |      | Mascot      |
| 1219.5624  | 1219.6447   | 0.0823  | 67    | 579        | 588      | DIALMDEQER               |           |       |                                            |      | Mascot      |
| 1378.7213  | 1378.795    | 0.0737  | 53    | 105        | 117      | TSSLQTEGAFPLK            |           |       |                                            |      | Mascot      |
| 1389.6249  | 1389.7009   | 0.076   | 55    | 850        | 861      | VEAQSCHLCGTK             |           |       | Carbamidomethyl (C)[6,9]                   |      | Mascot      |
| 1475.6971  | 1475.74     | 0.0429  | 29    | 509        | 521      | REELEVNGEEGSK            |           |       |                                            |      | Mascot      |
| 1624.8475  | 1624.9399   | 0.0924  | 57    | 809        | 822      | NTMETHKLIHTVGK           |           |       | Oxidation (M)[3]                           |      | Mascot      |
| 1683.7288  | 1683.7804   | 0.0516  | 31    | 790        | 803      | HTGTKDFMCELCGK           |           |       | Carbamidomethyl (C)[9,12]                  |      | Mascot      |
| 1743.9122  | 1743.8707   | -0.0415 | -24   | 67         | 82       | SSLPDSLEIRLAEEGK         |           |       |                                            |      | Mascot      |
| 1795.7448  | 1795.9229   | 0.1781  | 99    | 795        | 808      | DFMCELCGKTFSER           |           |       | Carbamidomethyl (C)[4,7], Oxidation (M)[3] |      | Mascot      |
| 1795.8755  | 1795.9229   | 0.0474  | 26    | 9          | 24       | SQDSLNVXTFGKQGVV         | 14        | 0     |                                            |      | Mascot      |
| 1851.8793  | 1851.9554   | 0.0761  | 41    | 579        | 593      | DIALMDEQEREDFIK          |           |       |                                            |      | Mascot      |
| 1851.9092  | 1851.9554   | 0.0462  | 25    | 816        | 831      | LIHTVGKTFSCVCDK          |           |       | Carbamidomethyl (C)[11,14]                 |      | Mascot      |
| 2233.0818  | 2233.0667   | -0.0151 | -7    | 571        | 588      | DHIHVHFKDIALMDEQER       |           |       |                                            |      | Mascot      |
| 2284.1609  | 2284.1541   | -0.0068 | -3    | 97         | 117      | FGPFATRTSSLQTEGAF<br>PLK |           |       |                                            |      | Mascot      |
| 2423.1052  | 2423.1296   | 0.0244  | 10    | 672        | 691      | DHLDPDAVQKYIHPCEM<br>CGR |           |       | Carbamidomethyl (C)[15,18]                 |      | Mascot      |

34 cytochrome P450, family 3, subfamily C, polypeptide 4 [Danio rerio] gi|117606234 57914.4 8.46 9 31 0

### Peptide Information

| Calc. Mass | Obsrv. Mass | $\pm$ da | $\pm$ ppm | Start Seq. | End Seq. | Sequence                 | Ion Score | C. I. | % Modification                                 | Rank | Result Type |
|------------|-------------|----------|-----------|------------|----------|--------------------------|-----------|-------|------------------------------------------------|------|-------------|
| 882.4753   | 882.5602    | 0.0849   | 96        | 236        | 243      | MGVTLFISK                |           |       |                                                |      | Mascot      |
| 1165.7052  | 1165.5778   | -0.1274  | -109      | 373        | 382      | LLPTAPRLER               |           |       |                                                |      | Mascot      |
| 1165.7052  | 1165.736    | 0.0308   | 26        | 373        | 382      | LLPTAPRLER               |           |       |                                                |      | Mascot      |
| 1179.6005  | 1179.5914   | -0.0091  | -8        | 263        | 272      | ESEGRVDFLK               |           |       |                                                |      | Mascot      |
| 1634.6859  | 1634.7799   | 0.094    | 58        | 360        | 372      | MDYLEMAINESMR            |           |       | Oxidation (M)[1,6]                             |      | Mascot      |
| 1634.7521  | 1634.7799   | 0.0278   | 17        | 448        | 460      | NCIGMRYAVMIMK            |           |       | Carbamidomethyl (C)[2], Oxidation (M)[5,10,12] |      | Mascot      |
| 1657.873   | 1657.808    | -0.065   | -39       | 143        | 156      | LKEIFPIAMTHADR           |           |       | Oxidation (M)[9]                               |      | Mascot      |
| 1683.8887  | 1683.7804   | -0.1083  | -64       | 91         | 104      | VVLVKECYSNFINR           |           |       |                                                |      | Mascot      |
| 1740.9102  | 1740.8966   | -0.0136  | -8        | 91         | 104      | VVLVKECYSNFINR           |           |       | Carbamidomethyl (C)[7]                         |      | Mascot      |
| 1790.8993  | 1790.8762   | -0.0231  | -13       | 477        | 491      | ETQIPLEMNVTFQPK          |           |       | Oxidation (M)[8]                               |      | Mascot      |
| 2367.1506  | 2367.2358   | 0.0852   | 36        | 360        | 379      | MDYLEMAINESMRLLPTA<br>PR |           |       | Oxidation (M)[1]                               |      | Mascot      |

35 Zgc:56540 [Danio rerio] gi|29436481 17012.4 6.69 5 31 0

### Peptide Information

| Calc. Mass | Obsrv. Mass | $\pm$ da | $\pm$ ppm | Start Seq. | End Seq. | Sequence                   | Ion Score | C. I. | % Modification            | Rank | Result Type |
|------------|-------------|----------|-----------|------------|----------|----------------------------|-----------|-------|---------------------------|------|-------------|
| 1072.6361  | 1072.5409   | -0.0952  | -89       | 24         | 32       | NIEQKSLK                   |           |       |                           |      | Mascot      |
| 1072.6361  | 1072.5409   | -0.0952  | -89       | 24         | 32       | NIEQKSLK                   |           |       |                           |      | Mascot      |
| 1475.71    | 1475.74     | 0.03     | 20        | 143        | 155      | VHFYSPSSACKHL              |           |       |                           |      | Mascot      |
| 1985.9213  | 1985.9213   | 0        | 0         | 88         | 104      | SDLNHSHGSNTHLFYTR          |           |       |                           |      | Mascot      |
| 1985.9213  | 1985.9213   | 0        | 0         | 88         | 104      | SDLNHSHGSNTHLFYTR          |           |       |                           |      | Mascot      |
| 2035.0422  | 2035.0297   | -0.0125  | -6        | 40         | 59       | GGVGKTTCSCLAVQLA<br>AVR    |           |       | Carbamidomethyl (C)[8,10] |      | Mascot      |
| 2401.1292  | 2401.1543   | 0.0251   | 10        | 2          | 23       | AASVEDEFEDAPDVEPLE<br>PTLK |           |       |                           |      | Mascot      |
| 2401.1292  | 2401.1543   | 0.0251   | 10        | 2          | 23       | AASVEDEFEDAPDVEPLE<br>PTLK |           |       |                           |      | Mascot      |

36 nucleoside diphosphate kinase-Z2 [Danio rerio] gi|6644113 16322.4 8.68 5 31 0

### Peptide Information

| Calc. Mass | Obsrv. Mass | $\pm$ da | $\pm$ ppm | Start Seq. | End Seq. | Sequence        | Ion Score | C. I. | % Modification | Rank | Result Type |
|------------|-------------|----------|-----------|------------|----------|-----------------|-----------|-------|----------------|------|-------------|
| 916.4886   | 916.4437    | -0.0449  | -49       | 51         | 57       | QHYIDLK         |           |       |                |      | Mascot      |
| 1107.5681  | 1107.5332   | -0.0349  | -32       | 41         | 50       | FVQASEDLAK      |           |       |                |      | Mascot      |
| 1107.5681  | 1107.5332   | -0.0349  | -32       | 41         | 50       | FVQASEDLAK      |           |       |                |      | Mascot      |
| 1657.8907  | 1657.808    | -0.0827  | -50       | 5          | 19       | TEPTFIIVKPDGVQR |           |       |                |      | Mascot      |

|    |                                                |           |         |     |              |    |                                |      |    |    |   |  |                   |  |  |  |        |
|----|------------------------------------------------|-----------|---------|-----|--------------|----|--------------------------------|------|----|----|---|--|-------------------|--|--|--|--------|
|    | 2035.0647                                      | 2035.0297 | -0.035  | -17 | 51           | 67 | QHYIDLKDQPFYAGLVK              |      |    |    |   |  |                   |  |  |  | Mascot |
|    | 2515.3589                                      | 2515.2087 | -0.1502 | -60 | 5            | 27 | TEPTFIADVAVKPDGVQRGLM<br>GEIHK |      |    |    |   |  | Oxidation (M)[18] |  |  |  | Mascot |
| 37 | DNA mismatch repair protein Msh3 [Danio rerio] |           |         |     | gi 157841276 |    | 121710.5                       | 6.91 | 14 | 31 | 0 |  |                   |  |  |  |        |

#### Peptide Information

| Calc. Mass | Obsrv. Mass | ± da    | ± ppm | Start Seq. | End Seq. | Sequence                         | Ion Score | C. I. | % Modification                                 | Rank | Result Type |
|------------|-------------|---------|-------|------------|----------|----------------------------------|-----------|-------|------------------------------------------------|------|-------------|
| 842.4981   | 842.5032    | 0.0051  | 6     | 150        | 156      | EEPIKVK                          |           |       |                                                |      | Mascot      |
| 870.577    | 870.532     | -0.045  | -52   | 687        | 693      | EVRLLLK                          |           |       |                                                |      | Mascot      |
| 1179.5535  | 1179.5914   | 0.0379  | 32    | 895        | 905      | MGASDNISRGR                      |           |       | Oxidation (M)[1]                               |      | Mascot      |
| 1234.5739  | 1234.6636   | 0.0897  | 73    | 157        | 166      | QEFSFSQYAK                       |           |       |                                                |      | Mascot      |
| 1367.7603  | 1367.803    | 0.0427  | 31    | 474        | 485      | LEKILLCSSSFK                     |           |       |                                                |      | Mascot      |
| 1389.7108  | 1389.7009   | -0.0099 | -7    | 77         | 89       | DEELTVTPSTLGK                    |           |       |                                                |      | Mascot      |
| 1475.7562  | 1475.74     | -0.0162 | -11   | 713        | 725      | NSMLSIVPADWVK                    |           |       | Oxidation (M)[3]                               |      | Mascot      |
| 1657.873   | 1657.808    | -0.065  | -39   | 1066       | 1080     | KNTVVILYCGGTSFR                  |           |       |                                                |      | Mascot      |
| 1716.8296  | 1716.8351   | 0.0055  | 3     | 487        | 502      | LSSDPDHMLLSAATMK                 |           |       |                                                |      | Mascot      |
| 1795.9193  | 1795.9229   | 0.0036  | 2     | 847        | 863      | AMIITGPNMGGKSSYIR                |           |       |                                                |      | Mascot      |
| 1795.9193  | 1795.9229   | 0.0036  | 2     | 847        | 863      | AMIITGPNMGGKSSYIR                |           |       |                                                |      | Mascot      |
| 1969.9258  | 1969.9259   | 0.0001  | 0     | 201        | 216      | QHVDTVLCVECGYKYR                 |           |       | Carbamidomethyl (C)[8]                         |      | Mascot      |
| 1971.0811  | 1970.9413   | -0.1398 | -71   | 517        | 533      | GSLWVLDHTQTLFGKR                 |           |       |                                                |      | Mascot      |
| 1971.0811  | 1970.9413   | -0.1398 | -71   | 517        | 533      | GSLWVLDHTQTLFGKR                 |           |       |                                                |      | Mascot      |
| 2423.2019  | 2423.1296   | -0.0723 | -30   | 340        | 361      | ELTVGMVVVQPSIGDVM<br>VDCFK       |           |       | Carbamidomethyl (C)[20]                        |      | Mascot      |
| 3235.5544  | 3235.6675   | 0.1131  | 35    | 446        | 473      | GSYSICMGLESPIICCLGP<br>VIQYLTEFK |           |       | Carbamidomethyl (C)[6,15,16]                   |      | Mascot      |
| 3251.5493  | 3251.6763   | 0.127   | 39    | 446        | 473      | GSYSICMGLESPIICCLGP<br>VIQYLTEFK |           |       | Carbamidomethyl (C)[6,15,16], Oxidation (M)[7] |      | Mascot      |

|    |                                                            |  |  |  |              |  |         |      |    |    |   |  |  |  |  |  |  |
|----|------------------------------------------------------------|--|--|--|--------------|--|---------|------|----|----|---|--|--|--|--|--|--|
| 38 | PREDICTED: hypothetical protein LOC100005214 [Danio rerio] |  |  |  | gi 292617889 |  | 82073.1 | 8.53 | 12 | 31 | 0 |  |  |  |  |  |  |
|----|------------------------------------------------------------|--|--|--|--------------|--|---------|------|----|----|---|--|--|--|--|--|--|

#### Peptide Information

| Calc. Mass | Obsrv. Mass | ± da    | ± ppm | Start Seq. | End Seq. | Sequence    | Ion Score | C. I. | % Modification         | Rank | Result Type |
|------------|-------------|---------|-------|------------|----------|-------------|-----------|-------|------------------------|------|-------------|
| 842.4955   | 842.5032    | 0.0077  | 9     | 476        | 482      | QQRLAAR     |           |       |                        |      | Mascot      |
| 850.4525   | 850.5363    | 0.0838  | 99    | 195        | 201      | KALMEMK     |           |       |                        |      | Mascot      |
| 882.4423   | 882.5602    | 0.1179  | 134   | 195        | 201      | KALMEMK     |           |       | Oxidation (M)[4,6]     |      | Mascot      |
| 1107.5428  | 1107.5332   | -0.0096 | -9    | 327        | 335      | FQSELQEAR   |           |       |                        |      | Mascot      |
| 1107.5428  | 1107.5332   | -0.0096 | -9    | 327        | 335      | FQSELQEAR   |           |       |                        |      | Mascot      |
| 1383.6144  | 1383.6879   | 0.0735  | 53    | 505        | 515      | ASPRDCIYMDR |           |       | Carbamidomethyl (C)[6] |      | Mascot      |

|    |                                      |           |         |     |              |     |                             |      |                        |        |   |
|----|--------------------------------------|-----------|---------|-----|--------------|-----|-----------------------------|------|------------------------|--------|---|
|    | 1657.7526                            | 1657.808  | 0.0554  | 33  | 136          | 148 | FFQEEDCLTEAIR               |      | Carbamidomethyl (C)[7] | Mascot |   |
|    | 1683.8523                            | 1683.7804 | -0.0719 | -43 | 672          | 684 | EMRLFIWTLESSR               |      | Oxidation (M)[2]       | Mascot |   |
|    | 1785.8                               | 1785.7939 | -0.0061 | -3  | 202          | 216 | FEPDSWSLSKSDEMK             |      |                        | Mascot |   |
|    | 1795.9008                            | 1795.9229 | 0.0221  | 12  | 84           | 99  | MGFLDSNVSNDSLKLR            |      |                        | Mascot |   |
|    | 1795.9008                            | 1795.9229 | 0.0221  | 12  | 84           | 99  | MGFLDSNVSNDSLKLR            |      |                        | Mascot |   |
|    | 1809.9507                            | 1809.939  | -0.0117 | -6  | 238          | 252 | AIKYHPNNHILYGNR             |      |                        | Mascot |   |
|    | 1809.9507                            | 1809.939  | -0.0117 | -6  | 238          | 252 | AIKYHPNNHILYGNR             |      |                        | Mascot |   |
|    | 2401.3206                            | 2401.1543 | -0.1663 | -69 | 433          | 455 | GARVFLIIISVSCGVCSAH<br>SLLR |      |                        | Mascot |   |
|    | 2401.3206                            | 2401.1543 | -0.1663 | -69 | 433          | 455 | GARVFLIIISVSCGVCSAH<br>SLLR |      |                        | Mascot |   |
|    | 2515.3542                            | 2515.2087 | -0.1455 | -58 | 51           | 70  | KQDLGHLMHVSFVWWHI<br>LLR    |      |                        | Mascot |   |
|    | 2680.2097                            | 2680.2222 | 0.0125  | 5   | 685          | 705 | ERYQSCHTILDQYFEDGT<br>YVR   |      | Carbamidomethyl (C)[6] | Mascot |   |
| 39 | finTRIM family protein [Danio rerio] |           |         |     | gi 208019415 |     | 24902.8                     | 9.08 | 7                      | 30     | 0 |

Peptide Information

| Calc. Mass | Obsrv. Mass | ± da    | ± ppm | Start Seq. | End Seq. | Sequence                    | Ion Score | C. I. | % Modification          | Rank | Result Type |
|------------|-------------|---------|-------|------------|----------|-----------------------------|-----------|-------|-------------------------|------|-------------|
| 892.4379   | 892.4795    | 0.0416  | 47    | 81         | 87       | LQEMICR                     |           |       |                         |      | Mascot      |
| 892.4379   | 892.4795    | 0.0416  | 47    | 81         | 87       | LQEMICR                     |           |       |                         |      | Mascot      |
| 996.522    | 996.5902    | 0.0682  | 68    | 72         | 80       | HNLIDATGR                   |           |       |                         |      | Mascot      |
| 1045.5636  | 1045.554    | -0.0096 | -9    | 195        | 203      | DQEKITVGR                   |           |       |                         |      | Mascot      |
| 2154.8928  | 2155.0056   | 0.1128  | 52    | 20         | 40       | HHTAAVPAGDGDVECD<br>SCTGR   |           |       | Carbamidomethyl (C)[15] |      | Mascot      |
| 2282.9878  | 2283.1572   | 0.1694  | 74    | 20         | 41       | HHTAAVPAGDGDVECD<br>SCTGRK  |           |       | Carbamidomethyl (C)[15] |      | Mascot      |
| 2384.0354  | 2384.1287   | 0.0933  | 39    | 18         | 40       | TKHHTAAVPAGDGDVE<br>DSCTGR  |           |       | Carbamidomethyl (C)[17] |      | Mascot      |
| 2694.1448  | 2694.4131   | 0.2683  | 100   | 103        | 125      | CICMLCMVDEHKDHET<br>VSTSAER |           |       | Carbamidomethyl (C)[1]  |      | Mascot      |

40 PREDICTED: cornifelin [Danio rerio] gi|326680887 9260.3 6.49 4 30 0

Peptide Information

| Calc. Mass | Obsrv. Mass | ± da    | ± ppm | Start Seq. | End Seq. | Sequence                  | Ion Score | C. I. | % Modification       | Rank | Result Type |
|------------|-------------|---------|-------|------------|----------|---------------------------|-----------|-------|----------------------|------|-------------|
| 1383.7267  | 1383.6879   | -0.0388 | -28   | 77         | 87       | LTYGIQQYERL               |           |       |                      |      | Mascot      |
| 1795.8909  | 1795.9229   | 0.032   | 18    | 73         | 86       | THMRLTYGIQQYER            |           |       |                      |      | Mascot      |
| 1795.8909  | 1795.9229   | 0.032   | 18    | 73         | 86       | THMRLTYGIQQYER            |           |       |                      |      | Mascot      |
| 1873.8063  | 1873.9403   | 0.134   | 72    | 55         | 72       | YGENVCLACVPGMAA<br>MR     |           |       | Oxidation (M)[14,17] |      | Mascot      |
| 2367.0647  | 2367.2358   | 0.1711  | 72    | 55         | 76       | YGENVCLACVPGMAA<br>MRTHMR |           |       |                      |      | Mascot      |

41 prostacyclin synthase [Danio rerio] gi|84569886 55243.7 9.33 7 30 0 7 0



| Peptide Information |                                                            |             |         |       |              |                                    |           |                                           |                  |
|---------------------|------------------------------------------------------------|-------------|---------|-------|--------------|------------------------------------|-----------|-------------------------------------------|------------------|
|                     | Calc. Mass                                                 | Obsrv. Mass | ± da    | ± ppm | Start Seq.   | End Sequence Seq.                  | Ion Score | C. I. % Modification                      | Rank Result Type |
|                     | 1219.6426                                                  | 1219.6447   | 0.0021  | 2     | 144          | 154 LLMTPSEMGLK                    |           |                                           | Mascot           |
|                     | 1634.8536                                                  | 1634.7799   | -0.0737 | -45   | 461          | 475 YGFGILQPAGDLDIR                | 7         | 0                                         | Mascot           |
|                     | 1634.8536                                                  | 1634.7799   | -0.0737 | -45   | 461          | 475 YGFGILQPAGDLDIR                |           |                                           | Mascot           |
|                     | 1704.797                                                   | 1704.9127   | 0.1157  | 68    | 252          | 265 QLQDEGIDAEMQRR                 |           | Oxidation (M)[11]                         | Mascot           |
|                     | 1790.8167                                                  | 1790.8762   | 0.0595  | 33    | 409          | 424 YPSVPWGTEDNLCPGR               |           |                                           | Mascot           |
|                     | 1995.1538                                                  | 1994.9385   | -0.2153 | -108  | 425          | 441 HFAVHAIKELVFTILTR              |           |                                           | Mascot           |
|                     | 2694.3245                                                  | 2694.4131   | 0.0886  | 33    | 409          | 432 YPSVPWGTEDNLCPGRH<br>FAVHAIK   |           |                                           | Mascot           |
|                     | 3235.5161                                                  | 3235.6675   | 0.1514  | 47    | 363          | 388 LCVFPFISPMQDPQIHQQ<br>PEMFQFDR |           | Carbamidomethyl (C)[2]                    | Mascot           |
|                     | 3251.511                                                   | 3251.6763   | 0.1653  | 51    | 363          | 388 LCVFPFISPMQDPQIHQQ<br>PEMFQFDR |           | Carbamidomethyl (C)[2], Oxidation (M)[11] | Mascot           |
| 42                  | PREDICTED: hypothetical protein LOC100005391 [Danio rerio] |             |         |       | gi 326669940 | 61722.2                            | 6.47      | 9 30 0                                    |                  |

| Peptide Information |                                 |             |         |       |              |                        |           |                      |                  |
|---------------------|---------------------------------|-------------|---------|-------|--------------|------------------------|-----------|----------------------|------------------|
|                     | Calc. Mass                      | Obsrv. Mass | ± da    | ± ppm | Start Seq.   | End Sequence Seq.      | Ion Score | C. I. % Modification | Rank Result Type |
|                     | 1179.5125                       | 1179.5914   | 0.0789  | 67    | 44           | 55 DDGESTAVNGSK        |           |                      | Mascot           |
|                     | 1234.6538                       | 1234.6636   | 0.0098  | 8     | 24           | 34 TGSYVADIRPR         |           |                      | Mascot           |
|                     | 1475.8329                       | 1475.74     | -0.0929 | -63   | 24           | 36 TGSYVADIRPRLK       |           |                      | Mascot           |
|                     | 1716.8235                       | 1716.8351   | 0.0116  | 7     | 153          | 166 RSIHENCLDHDHDK     |           |                      | Mascot           |
|                     | 1785.9606                       | 1785.7939   | -0.1667 | -93   | 251          | 266 SQLLIPPTTNQTAHHK   |           |                      | Mascot           |
|                     | 1809.8953                       | 1809.939    | 0.0437  | 24    | 513          | 527 FNQMDLDKLSGLWSR    |           |                      | Mascot           |
|                     | 1809.8953                       | 1809.939    | 0.0437  | 24    | 513          | 527 FNQMDLDKLSGLWSR    |           |                      | Mascot           |
|                     | 1851.9784                       | 1851.9554   | -0.023  | -12   | 167          | 183 HNIPNRSITTSQALSGR  |           |                      | Mascot           |
|                     | 1851.9784                       | 1851.9554   | -0.023  | -12   | 167          | 183 HNIPNRSITTSQALSGR  |           |                      | Mascot           |
|                     | 1873.9753                       | 1873.9403   | -0.035  | -19   | 414          | 430 SALDSDQVKLEIDEALK  |           |                      | Mascot           |
|                     | 1986.1018                       | 1985.9213   | -0.1805 | -91   | 267          | 284 TTEKKPVFSKPSVPSPTR |           |                      | Mascot           |
|                     | 1986.1018                       | 1985.9213   | -0.1805 | -91   | 267          | 284 TTEKKPVFSKPSVPSPTR |           |                      | Mascot           |
| 43                  | interleukin 4/13B [Danio rerio] |             |         |       | gi 193788073 | 13301.7                | 8.6       | 5 30 0               |                  |

| Peptide Information |            |             |        |       |            |                   |           |                      |                  |
|---------------------|------------|-------------|--------|-------|------------|-------------------|-----------|----------------------|------------------|
|                     | Calc. Mass | Obsrv. Mass | ± da   | ± ppm | Start Seq. | End Sequence Seq. | Ion Score | C. I. % Modification | Rank Result Type |
|                     | 1072.6249  | 1072.5409   | -0.084 | -78   | 1          | 10 LTLVPVSESK     |           |                      | Mascot           |

|    |                                                             |           |           |        |     |     |     |                                    |         |      |   |    |   |  |  |  |                                            |        |
|----|-------------------------------------------------------------|-----------|-----------|--------|-----|-----|-----|------------------------------------|---------|------|---|----|---|--|--|--|--------------------------------------------|--------|
|    |                                                             | 1072.6249 | 1072.5409 | -0.084 | -78 | 1   | 10  | LTLVPVSESK                         |         |      |   |    |   |  |  |  |                                            | Mascot |
|    |                                                             | 1179.6224 | 1179.5914 | -0.031 | -26 | 54  | 64  | KTLCQAGMALK                        |         |      |   |    |   |  |  |  | Oxidation (M)[8]                           | Mascot |
|    |                                                             | 1657.7573 | 1657.808  | 0.0507 | 31  | 106 | 118 | TKACCHYLYSAQR                      |         |      |   |    |   |  |  |  | Carbamidomethyl (C)[4,5]                   | Mascot |
|    |                                                             | 3219.4277 | 3219.655  | 0.2273 | 71  | 76  | 105 | QLNAYAAVTGTGNCSVS<br>TSGECTMKEFLEK |         |      |   |    |   |  |  |  | Oxidation (M)[24]                          | Mascot |
|    |                                                             | 3235.4565 | 3235.6675 | 0.211  | 65  | 71  | 100 | SHLQRQLNAYAAVTGTG<br>NCSVSTSGECTMK |         |      |   |    |   |  |  |  | Carbamidomethyl (C)[19]                    | Mascot |
|    |                                                             | 3251.4514 | 3251.6763 | 0.2249 | 69  | 71  | 100 | SHLQRQLNAYAAVTGTG<br>NCSVSTSGECTMK |         |      |   |    |   |  |  |  | Carbamidomethyl (C)[19], Oxidation (M)[29] | Mascot |
| 44 | zinc finger and SCAN domain containing 2-like [Danio rerio] |           |           |        |     |     |     | gil160333132                       | 39573.1 | 8.67 | 8 | 30 | 0 |  |  |  |                                            |        |

46 PREDICTED: zinc finger protein 227-like [Danio rerio] gi|125847909 86097.2 8.77 11 29 0

## Peptide Information

| Calc. Mass | Obsrv. Mass | ± da    | ± ppm | Start Seq. | End Seq. | Sequence                         | Ion Score | C. I. % | Modification                                | Rank | Result Type |
|------------|-------------|---------|-------|------------|----------|----------------------------------|-----------|---------|---------------------------------------------|------|-------------|
| 850.4127   | 850.5363    | 0.1236  | 145   | 181        | 187      | QEPFVCK                          |           |         |                                             |      | Mascot      |
| 882.4944   | 882.5602    | 0.0658  | 75    | 352        | 358      | AHVKHYYK                         |           |         |                                             |      | Mascot      |
| 916.4123   | 916.4437    | 0.0314  | 34    | 222        | 228      | MMKCLMK                          |           |         | Oxidation (M)[1,2]                          |      | Mascot      |
| 1107.4922  | 1107.5332   | 0.041   | 37    | 412        | 420      | TVTCPNCQK                        |           |         | Carbamidomethyl (C)[4,7]                    |      | Mascot      |
| 1107.4922  | 1107.5332   | 0.041   | 37    | 412        | 420      | TVTCPNCQK                        |           |         | Carbamidomethyl (C)[4,7]                    |      | Mascot      |
| 1165.6221  | 1165.5778   | -0.0443 | -38   | 552        | 561      | LYGCPICLKR                       |           |         |                                             |      | Mascot      |
| 1165.6221  | 1165.736    | 0.1139  | 98    | 552        | 561      | LYGCPICLKR                       |           |         |                                             |      | Mascot      |
| 1234.5092  | 1234.6636   | 0.1544  | 125   | 356        | 364      | HYKCSHCDK                        |           |         | Carbamidomethyl (C)[4,7]                    |      | Mascot      |
| 1475.6406  | 1475.74     | 0.0994  | 67    | 686        | 697      | FGYSSSIQMHR                      |           |         | Oxidation (M)[9,11]                         |      | Mascot      |
| 1657.8431  | 1657.808    | -0.0351 | -21   | 27         | 40       | HLSDLTTVLSEEWK                   |           |         |                                             |      | Mascot      |
| 1716.8923  | 1716.8351   | -0.0572 | -33   | 545        | 560      | AGHTGVKLYGCPICLK                 |           |         | Carbamidomethyl (C)[11]                     |      | Mascot      |
| 1809.8734  | 1809.939    | 0.0656  | 36    | 405        | 420      | HLHTAEKTVTCPNCQK                 |           |         |                                             |      | Mascot      |
| 1809.8734  | 1809.939    | 0.0656  | 36    | 405        | 420      | HLHTAEKTVTCPNCQK                 |           |         |                                             |      | Mascot      |
| 3235.5154  | 3235.6675   | 0.1521  | 47    | 609        | 636      | DCVCSICNKAFIFPSSLN<br>QHMLVHTGEK |           |         | Carbamidomethyl (C)[2,4]                    |      | Mascot      |
| 3251.5105  | 3251.6763   | 0.1658  | 51    | 609        | 636      | DCVCSICNKAFIFPSSLN<br>QHMLVHTGEK |           |         | Carbamidomethyl (C)[2,4], Oxidation (M)[21] |      | Mascot      |

47 ras-related protein Rab-2A [Danio rerio] gi|41393075 23499.7 5.98 6 29 0

## Peptide Information

| Calc. Mass | Obsrv. Mass | ± da    | ± ppm | Start Seq. | End Seq. | Sequence                  | Ion Score | C. I. % | Modification     | Rank | Result Type |
|------------|-------------|---------|-------|------------|----------|---------------------------|-----------|---------|------------------|------|-------------|
| 1045.5425  | 1045.554    | 0.0115  | 11    | 70         | 77       | SITRSYYR                  |           |         |                  |      | Mascot      |
| 1378.6671  | 1378.795    | 0.1279  | 93    | 140        | 151      | EHGLIFMETSARK             |           |         | Oxidation (M)[7] |      | Mascot      |
| 1475.8329  | 1475.74     | -0.0929 | -63   | 78         | 91       | GAAGALLVYDITRR            |           |         |                  |      | Mascot      |
| 1785.9282  | 1785.7939   | -0.1343 | -75   | 31         | 46       | FQPVHDLTIGVEFGAR          |           |         |                  |      | Mascot      |
| 2284.2256  | 2284.1541   | -0.0715 | -31   | 9          | 29       | YIIIGDTGVGKSCLLQFT<br>DK  |           |         |                  |      | Mascot      |
| 2423.2087  | 2423.1296   | -0.0791 | -33   | 166        | 186      | EIYEKIQEGVFDINNEANG<br>IK |           |         |                  |      | Mascot      |

48 intraflagellar transport protein 172 homolog [Danio rerio] gi|50539690 197598.9 5.6 17 29 0

## Peptide Information

| Calc. Mass | Obsrv. Mass | ± da | ± ppm | Start Seq. | End Seq. | Sequence | Ion Score | C. I. % | Modification | Rank | Result Type |
|------------|-------------|------|-------|------------|----------|----------|-----------|---------|--------------|------|-------------|
|------------|-------------|------|-------|------------|----------|----------|-----------|---------|--------------|------|-------------|

|    |                                                                                              |           |         |     |      |      |                            |  |  |  |                                          |  |  |  |  |  |        |
|----|----------------------------------------------------------------------------------------------|-----------|---------|-----|------|------|----------------------------|--|--|--|------------------------------------------|--|--|--|--|--|--------|
|    | 882.4501                                                                                     | 882.5602  | 0.1101  | 125 | 828  | 834  | ALECYRK                    |  |  |  |                                          |  |  |  |  |  | Mascot |
|    | 892.4384                                                                                     | 892.4795  | 0.0411  | 46  | 1080 | 1088 | THGGANAHK                  |  |  |  |                                          |  |  |  |  |  | Mascot |
|    | 892.4384                                                                                     | 892.4795  | 0.0411  | 46  | 1080 | 1088 | THGGANAHK                  |  |  |  |                                          |  |  |  |  |  | Mascot |
|    | 916.4734                                                                                     | 916.4437  | -0.0297 | -32 | 565  | 572  | GDIVDLR                    |  |  |  |                                          |  |  |  |  |  | Mascot |
|    | 1165.6034                                                                                    | 1165.5778 | -0.0256 | -22 | 1480 | 1488 | MFQELVNLR                  |  |  |  | Oxidation (M)[1]                         |  |  |  |  |  | Mascot |
|    | 1165.6034                                                                                    | 1165.736  | 0.1326  | 114 | 1480 | 1488 | MFQELVNLR                  |  |  |  | Oxidation (M)[1]                         |  |  |  |  |  | Mascot |
|    | 1378.6241                                                                                    | 1378.795  | 0.1709  | 124 | 19   | 30   | VTCTMAWAPNNAK              |  |  |  | Carbamidomethyl (C)[3], Oxidation (M)[4] |  |  |  |  |  | Mascot |
|    | 1624.7788                                                                                    | 1624.9399 | 0.1611  | 99  | 1067 | 1079 | VNDMWEEAYRIAK              |  |  |  |                                          |  |  |  |  |  | Mascot |
|    | 1657.8618                                                                                    | 1657.808  | -0.0538 | -32 | 326  | 339  | FEMTYVGLSQVIVR             |  |  |  | Oxidation (M)[3]                         |  |  |  |  |  | Mascot |
|    | 1683.8312                                                                                    | 1683.7804 | -0.0508 | -30 | 1582 | 1595 | AVGWENMAFIFLNR             |  |  |  | Oxidation (M)[7]                         |  |  |  |  |  | Mascot |
|    | 1716.9465                                                                                    | 1716.8351 | -0.1114 | -65 | 1679 | 1693 | SLPCVITGYPVLRNK            |  |  |  | Carbamidomethyl (C)[4]                   |  |  |  |  |  | Mascot |
|    | 1743.8669                                                                                    | 1743.8707 | 0.0038  | 2   | 1012 | 1025 | MYDDMIRLVAVHHK             |  |  |  | Oxidation (M)[1]                         |  |  |  |  |  | Mascot |
|    | 1759.8618                                                                                    | 1759.8629 | 0.0011  | 1   | 1012 | 1025 | MYDDMIRLVAVHHK             |  |  |  | Oxidation (M)[1,5]                       |  |  |  |  |  | Mascot |
|    | 1785.7635                                                                                    | 1785.7939 | 0.0304  | 17  | 742  | 755  | SYYSYLMETNQNEK             |  |  |  | Oxidation (M)[7]                         |  |  |  |  |  | Mascot |
|    | 1790.849                                                                                     | 1790.8762 | 0.0272  | 15  | 938  | 953  | GDHIKDAIDMYTQAGR           |  |  |  |                                          |  |  |  |  |  | Mascot |
|    | 1851.9612                                                                                    | 1851.9554 | -0.0058 | -3  | 1080 | 1096 | THGGANAHKQVAYLWAK          |  |  |  |                                          |  |  |  |  |  | Mascot |
|    | 1851.9612                                                                                    | 1851.9554 | -0.0058 | -3  | 1080 | 1096 | THGGANAHKQVAYLWAK          |  |  |  |                                          |  |  |  |  |  | Mascot |
|    | 2034.9927                                                                                    | 2035.0297 | 0.037   | 18  | 1173 | 1189 | EAVLMHVHNKDWSNAQ<br>R      |  |  |  |                                          |  |  |  |  |  | Mascot |
|    | 2050.9875                                                                                    | 2051.0251 | 0.0376  | 18  | 1173 | 1189 | EAVLMHVHNKDWSNAQ<br>R      |  |  |  | Oxidation (M)[5]                         |  |  |  |  |  | Mascot |
|    | 2211.0508                                                                                    | 2211.0867 | 0.0359  | 16  | 19   | 38   | VTCTMAWAPNNAKFAVCT<br>IDR  |  |  |  |                                          |  |  |  |  |  | Mascot |
|    | 2284.0671                                                                                    | 2284.1541 | 0.087   | 38  | 19   | 38   | VTCTMAWAPNNAKFAVCT<br>IDR  |  |  |  | Carbamidomethyl (C)[3], Oxidation (M)[4] |  |  |  |  |  | Mascot |
|    | 2385.1423                                                                                    | 2385.1313 | -0.011  | -5  | 964  | 983  | CMTQEDVSVLYVSRAQE<br>LEK   |  |  |  | Carbamidomethyl (C)[1]                   |  |  |  |  |  | Mascot |
|    | 2401.1375                                                                                    | 2401.1543 | 0.0168  | 7   | 964  | 983  | CMTQEDVSVLYVSRAQE<br>LEK   |  |  |  | Carbamidomethyl (C)[1], Oxidation (M)[2] |  |  |  |  |  | Mascot |
|    | 2401.2002                                                                                    | 2401.1543 | -0.0459 | -19 | 8    | 30   | TLLTPQDGAQVTCMAW<br>APNNAK |  |  |  |                                          |  |  |  |  |  | Mascot |
| 49 | oxysterol-binding protein-related protein 6 [Danio rerio] gi 188528718 103201.6 7.57 13 29 0 |           |         |     |      |      |                            |  |  |  |                                          |  |  |  |  |  |        |

#### Peptide Information

| Calc. Mass | Obsrv. Mass | ± da    | ± ppm | Start Seq. | End Seq. | Sequence      | Ion Score | C. I. % | Modification | Rank | Result Type |
|------------|-------------|---------|-------|------------|----------|---------------|-----------|---------|--------------|------|-------------|
| 1051.5836  | 1051.7026   | 0.119   | 113   | 83         | 90       | WPLKGWHK      |           |         |              |      | Mascot      |
| 1072.5494  | 1072.5409   | -0.0085 | -8    | 844        | 851      | IEEQQRNR      |           |         |              |      | Mascot      |
| 1072.5494  | 1072.5409   | -0.0085 | -8    | 844        | 851      | IEEQQRNR      |           |         |              |      | Mascot      |
| 1165.5121  | 1165.5778   | 0.0657  | 56    | 592        | 601      | AAQTDDPYER    |           |         |              |      | Mascot      |
| 1165.6615  | 1165.736    | 0.0745  | 64    | 92         | 101      | FFVLNNGILK    |           |         |              |      | Mascot      |
| 1367.6689  | 1367.803    | 0.1341  | 98    | 339        | 351      | LTDGIDSAGDYIK |           |         |              |      | Mascot      |

|    |                                                                 |           |         |     |     |              |                                 |      |                         |        |   |
|----|-----------------------------------------------------------------|-----------|---------|-----|-----|--------------|---------------------------------|------|-------------------------|--------|---|
|    | 1634.8359                                                       | 1634.7799 | -0.056  | -34 | 149 | 161          | SPDVFDLWVCKLR                   |      | Carbamidomethyl (C)[10] | Mascot |   |
|    | 1634.8359                                                       | 1634.7799 | -0.056  | -34 | 149 | 161          | SPDVFDLWVCKLR                   |      | Carbamidomethyl (C)[10] | Mascot |   |
|    | 1683.9462                                                       | 1683.7804 | -0.1658 | -98 | 114 | 129          | LHGSIDVGLSVMSIKK                |      |                         | Mascot |   |
|    | 1740.9677                                                       | 1740.8966 | -0.0711 | -41 | 112 | 128          | GKLHGSIDVGLSVMSIK               |      |                         | Mascot |   |
|    | 1986.0437                                                       | 1985.9213 | -0.1224 | -62 | 300 | 317          | DAKLQQQVPLSASMSQV<br>R          |      |                         | Mascot |   |
|    | 1986.0437                                                       | 1985.9213 | -0.1224 | -62 | 300 | 317          | DAKLQQQVPLSASMSQV<br>R          |      |                         | Mascot |   |
|    | 1995.0004                                                       | 1994.9385 | -0.0619 | -31 | 620 | 637          | AGSKPFNPLLGETYECIR              |      |                         | Mascot |   |
|    | 2283.1187                                                       | 2283.1572 | 0.0385  | 17  | 318 | 338          | LHSSNPNLCAELADFQAP<br>VTR       |      |                         | Mascot |   |
|    | 2367.1648                                                       | 2367.2358 | 0.071   | 30  | 620 | 640          | AGSKPFNPLLGETYECIR<br>EDK       |      |                         | Mascot |   |
|    | 2694.3118                                                       | 2694.4131 | 0.1013  | 38  | 177 | 202          | DATLRTFPSPSAGAESPQ<br>NTPSSTHPK |      |                         | Mascot |   |
| 50 | PREDICTED: uncharacterized protein C20orf117-like [Danio rerio] |           |         |     |     | gi 292627122 | 156910.1                        | 6.37 | 1                       | 23     | 0 |

### Peptide Information

| Calc. Mass | Obsrv. Mass | ± da   | ± ppm | Start Seq. | End Seq. | Sequence   | Ion Score | C. I. % | Modification | Rank | Result Type |
|------------|-------------|--------|-------|------------|----------|------------|-----------|---------|--------------|------|-------------|
| 1072.5017  | 1072.5409   | 0.0392 | 37    | 6          | 15       | VEGNPESNAR | 23        | 0       |              | 3    | Mascot      |

|                       |           |                               |                |                       |                    |
|-----------------------|-----------|-------------------------------|----------------|-----------------------|--------------------|
| <b>Gel Idx/Pos</b>    | 217/117   | <b>Instr./Gel Origin</b>      | BA2060/110707A | <b>Process Status</b> | Analysis Succeeded |
| <b>Plate [#] Name</b> | [1] 31496 | <b>Instrument Sample Name</b> |                | <b>Spectra</b>        | 11                 |

| Rank | Protein Name                            | Accession No. | Protein MW | Protein PI | Pep. Count | Protein Score | Protein Score C. I. % | Total Ion Score | Total Ion C. I. % |
|------|-----------------------------------------|---------------|------------|------------|------------|---------------|-----------------------|-----------------|-------------------|
| 1    | novel protein (zgc:56036) [Danio rerio] | gi 169145723  | 41759.7    | 8.36       | 16         | 677           | 100                   | 562             | 100               |

### Peptide Information

| Calc. Mass | Obsrv. Mass | ± da    | ± ppm | Start Seq. | End Seq. | Sequence        | Ion Score | C. I. % | Modification           | Rank | Result Type |
|------------|-------------|---------|-------|------------|----------|-----------------|-----------|---------|------------------------|------|-------------|
| 820.4926   | 820.4335    | -0.0591 | -72   | 6          | 13       | GVFIVSAK        |           |         |                        |      | Mascot      |
| 1139.6095  | 1139.6046   | -0.0049 | -4    | 15         | 25       | TPFGTYGGVLK     |           |         |                        |      | Mascot      |
| 1188.6848  | 1188.6804   | -0.0044 | -4    | 361        | 370      | ITAHLVHELK      | 79        | 100     |                        |      | Mascot      |
| 1188.6848  | 1188.6804   | -0.0044 | -4    | 361        | 370      | ITAHLVHELK      |           |         |                        |      | Mascot      |
| 1295.7106  | 1295.7073   | -0.0033 | -3    | 14         | 25       | RTPFGTYGGVLK    |           |         |                        |      | Mascot      |
| 1402.7246  | 1402.72     | -0.0046 | -3    | 159        | 171      | LPMGITAENLAEK   |           |         | Oxidation (M)[3]       |      | Mascot      |
| 1492.8304  | 1492.8203   | -0.0101 | -7    | 77         | 90       | CGVPIPVALTIVNR  | 106       | 100     | Carbamidomethyl (C)[1] |      | Mascot      |
| 1492.8304  | 1492.8203   | -0.0101 | -7    | 77         | 90       | CGVPIPVALTIVNR  |           |         | Carbamidomethyl (C)[1] |      | Mascot      |
| 1701.9058  | 1701.8966   | -0.0092 | -5    | 144        | 158      | LEDTLWAGLTDLNIK |           |         |                        |      | Mascot      |

|   |                                                      |           |         |     |             |         |                                       |     |        |                                           |        |     |
|---|------------------------------------------------------|-----------|---------|-----|-------------|---------|---------------------------------------|-----|--------|-------------------------------------------|--------|-----|
|   | 1708.698                                             | 1708.6907 | -0.0073 | -4  | 177         | 189     | EECDQYSHQTQQR                         | 73  | 99.999 | Carbamidomethyl (C)[3]                    | Mascot |     |
|   | 1708.698                                             | 1708.6907 | -0.0073 | -4  | 177         | 189     | EECDQYSHQTQQR                         |     |        | Carbamidomethyl (C)[3]                    | Mascot |     |
|   | 1862.983                                             | 1862.9497 | -0.0333 | -18 | 341         | 360     | TNVNGGAIAIGHPLGASG<br>TR              |     |        |                                           | Mascot |     |
|   | 1929.9705                                            | 1929.9614 | -0.0091 | -5  | 192         | 209     | AAHEAGYFNAEIAPIEVK                    |     |        |                                           | Mascot |     |
|   | 1929.9705                                            | 1929.9614 | -0.0091 | -5  | 192         | 209     | AAHEAGYFNAEIAPIEVK                    | 131 | 100    |                                           | Mascot |     |
|   | 2190.1587                                            | 2190.1494 | -0.0093 | -4  | 376         | 397     | YAVGSACIGGGQGIIVIL<br>ENIK            | 112 | 100    | Carbamidomethyl (C)[7]                    | Mascot |     |
|   | 2190.1587                                            | 2190.1494 | -0.0093 | -4  | 376         | 397     | YAVGSACIGGGQGIIVIL<br>ENIK            |     |        | Carbamidomethyl (C)[7]                    | Mascot |     |
|   | 2239.095                                             | 2239.1018 | 0.0068  | 3   | 313         | 332     | DMDLVEVNEAFAPQYLS<br>VAK              |     |        |                                           | Mascot |     |
|   | 2256.0271                                            | 2256.0247 | -0.0024 | -1  | 110         | 130     | ESEVVLCCGSESMSQAP<br>YAVR             |     |        | Carbamidomethyl (C)[7]                    | Mascot |     |
|   | 2272.022                                             | 2272.0178 | -0.0042 | -2  | 110         | 130     | ESEVVLCCGSESMSQAP<br>YAVR             | 17  | 0      | Carbamidomethyl (C)[7], Oxidation (M)[13] | Mascot |     |
|   | 2272.022                                             | 2272.0178 | -0.0042 | -2  | 110         | 130     | ESEVVLCCGSESMSQAP<br>YAVR             |     |        | Carbamidomethyl (C)[7], Oxidation (M)[13] | Mascot |     |
|   | 2346.1218                                            | 2346.1089 | -0.0129 | -5  | 215         | 234     | VSMTFDEHPRPQTTLQ<br>MAK               |     |        |                                           | Mascot |     |
|   | 2362.1167                                            | 2362.1104 | -0.0063 | -3  | 215         | 234     | VSMTFDEHPRPQTTLQ<br>MAK               |     |        | Oxidation (M)[3]                          | Mascot |     |
|   | 2378.1116                                            | 2378.1089 | -0.0027 | -1  | 215         | 234     | VSMTFDEHPRPQTTLQ<br>MAK               |     |        | Oxidation (M)[3,18]                       | Mascot |     |
|   | 2502.2681                                            | 2502.2581 | -0.01   | -4  | 242         | 269     | GGTVTAANASGVSDGAA<br>AVIIASEDAVK      |     |        |                                           | Mascot |     |
|   | 3282.7151                                            | 3282.7026 | -0.0125 | -4  | 39          | 71      | AALAAGNVAPELVNSVIIG<br>NVMQSSADAPYIAR |     |        |                                           | Mascot |     |
|   | 3298.71                                              | 3298.7104 | 0.0004  | 0   | 39          | 71      | AALAAGNVAPELVNSVIIG<br>NVMQSSADAPYIAR | 44  | 98.949 | Oxidation (M)[22]                         | Mascot |     |
|   | 3298.71                                              | 3298.7104 | 0.0004  | 0   | 39          | 71      | AALAAGNVAPELVNSVIIG<br>NVMQSSADAPYIAR |     |        | Oxidation (M)[22]                         | Mascot |     |
| 2 | 3-ketoacyl-CoA thiolase, mitochondrial [Danio rerio] |           |         |     | gi 47085765 | 41760.7 | 7.64                                  | 15  | 666    | 100                                       | 562    | 100 |

#### Peptide Information

| Calc. Mass | Obsrv. Mass | ± da    | ± ppm | Start Seq. | End Seq. | Sequence           | Ion Score | C. I.  | % Modification         | Rank | Result Type |
|------------|-------------|---------|-------|------------|----------|--------------------|-----------|--------|------------------------|------|-------------|
| 820.4926   | 820.4335    | -0.0591 | -72   | 6          | 13       | GVFIVSAK           |           |        |                        |      | Mascot      |
| 1139.6095  | 1139.6046   | -0.0049 | -4    | 15         | 25       | TPFGTYGGVLK        |           |        |                        |      | Mascot      |
| 1188.6848  | 1188.6804   | -0.0044 | -4    | 361        | 370      | ITAHLVHELK         | 79        | 100    |                        |      | Mascot      |
| 1188.6848  | 1188.6804   | -0.0044 | -4    | 361        | 370      | ITAHLVHELK         |           |        |                        |      | Mascot      |
| 1295.7106  | 1295.7073   | -0.0033 | -3    | 14         | 25       | RTPFGTYGGVLK       |           |        |                        |      | Mascot      |
| 1402.7246  | 1402.72     | -0.0046 | -3    | 159        | 171      | LPMGITAENLAEK      |           |        | Oxidation (M)[3]       |      | Mascot      |
| 1492.8304  | 1492.8203   | -0.0101 | -7    | 77         | 90       | CGVPIVPALTVNR      | 106       | 100    | Carbamidomethyl (C)[1] |      | Mascot      |
| 1492.8304  | 1492.8203   | -0.0101 | -7    | 77         | 90       | CGVPIVPALTVNR      |           |        | Carbamidomethyl (C)[1] |      | Mascot      |
| 1708.698   | 1708.6907   | -0.0073 | -4    | 177        | 189      | EECDQYSHQTQQR      | 73        | 99.999 | Carbamidomethyl (C)[3] |      | Mascot      |
| 1708.698   | 1708.6907   | -0.0073 | -4    | 177        | 189      | EECDQYSHQTQQR      |           |        | Carbamidomethyl (C)[3] |      | Mascot      |
| 1862.983   | 1862.9497   | -0.0333 | -18   | 341        | 360      | TNVNGGAIAIGHPLGASG |           |        |                        |      | Mascot      |

|           |           |         |    |     |     |                                       |     |        |                                           |  |  |  |  |  |  |  |        |
|-----------|-----------|---------|----|-----|-----|---------------------------------------|-----|--------|-------------------------------------------|--|--|--|--|--|--|--|--------|
| 1929.9705 | 1929.9614 | -0.0091 | -5 | 192 | 209 | TR<br>AAHEAGYFNAEIAPIEVK              |     |        |                                           |  |  |  |  |  |  |  | Mascot |
| 1929.9705 | 1929.9614 | -0.0091 | -5 | 192 | 209 | AAHEAGYFNAEIAPIEVK                    | 131 | 100    |                                           |  |  |  |  |  |  |  | Mascot |
| 2190.1587 | 2190.1494 | -0.0093 | -4 | 376 | 397 | YAVGSACIGGGQGIIVIL<br>ENIK            | 112 | 100    | Carbamidomethyl (C)[7]                    |  |  |  |  |  |  |  | Mascot |
| 2190.1587 | 2190.1494 | -0.0093 | -4 | 376 | 397 | YAVGSACIGGGQGIIVIL<br>ENIK            |     |        | Carbamidomethyl (C)[7]                    |  |  |  |  |  |  |  | Mascot |
| 2239.095  | 2239.1018 | 0.0068  | 3  | 313 | 332 | DMDLVEVNEAFAPQYLS<br>VAK              |     |        |                                           |  |  |  |  |  |  |  | Mascot |
| 2256.0271 | 2256.0247 | -0.0024 | -1 | 110 | 130 | ESEVVLGGSESMSQAP<br>YAVR              |     |        | Carbamidomethyl (C)[7]                    |  |  |  |  |  |  |  | Mascot |
| 2272.022  | 2272.0178 | -0.0042 | -2 | 110 | 130 | ESEVVLGGSESMSQAP<br>YAVR              | 17  | 0      | Carbamidomethyl (C)[7], Oxidation (M)[13] |  |  |  |  |  |  |  | Mascot |
| 2272.022  | 2272.0178 | -0.0042 | -2 | 110 | 130 | ESEVVLGGSESMSQAP<br>YAVR              |     |        | Carbamidomethyl (C)[7], Oxidation (M)[13] |  |  |  |  |  |  |  | Mascot |
| 2346.1218 | 2346.1089 | -0.0129 | -5 | 215 | 234 | VSMTFDEHPRPQTTEQ<br>MAK               |     |        |                                           |  |  |  |  |  |  |  | Mascot |
| 2362.1167 | 2362.1104 | -0.0063 | -3 | 215 | 234 | VSMTFDEHPRPQTTEQ<br>MAK               |     |        | Oxidation (M)[3]                          |  |  |  |  |  |  |  | Mascot |
| 2378.1116 | 2378.1089 | -0.0027 | -1 | 215 | 234 | VSMTFDEHPRPQTTEQ<br>MAK               |     |        | Oxidation (M)[3,18]                       |  |  |  |  |  |  |  | Mascot |
| 2502.2681 | 2502.2581 | -0.01   | -4 | 242 | 269 | GGTVTAANASGVSDGAA<br>AVIIASEDAVK      |     |        |                                           |  |  |  |  |  |  |  | Mascot |
| 3282.7151 | 3282.7026 | -0.0125 | -4 | 39  | 71  | AALAAGNVAPELVNSVIIG<br>NVMQSSADAPYIAR |     |        |                                           |  |  |  |  |  |  |  | Mascot |
| 3298.71   | 3298.7104 | 0.0004  | 0  | 39  | 71  | AALAAGNVAPELVNSVIIG<br>NVMQSSADAPYIAR | 44  | 98.949 | Oxidation (M)[22]                         |  |  |  |  |  |  |  | Mascot |
| 3298.71   | 3298.7104 | 0.0004  | 0  | 39  | 71  | AALAAGNVAPELVNSVIIG<br>NVMQSSADAPYIAR |     |        | Oxidation (M)[22]                         |  |  |  |  |  |  |  | Mascot |

3 RecName: Full=UPF0636 protein C4orf41 homolog; gi|123910003 128564.3 7.32 9 58 93.568 48 99.614  
AltName: Full=Protein foie gras

#### Peptide Information

| Calc. Mass | Obsrv. Mass | ± da    | ± ppm | Start Seq. | End Seq. | Sequence                    | Ion Score | C. I. % | Modification                               | Rank | Result Type |
|------------|-------------|---------|-------|------------|----------|-----------------------------|-----------|---------|--------------------------------------------|------|-------------|
| 1176.587   | 1176.6115   | 0.0245  | 21    | 666        | 674      | KYCFNFVAK                   |           |         | Carbamidomethyl (C)[3]                     |      | Mascot      |
| 1188.6372  | 1188.6804   | 0.0432  | 36    | 249        | 258      | TAYSLVHELK                  | 48        | 99.614  |                                            |      | Mascot      |
| 1188.6372  | 1188.6804   | 0.0432  | 36    | 249        | 258      | TAYSLVHELK                  |           |         |                                            |      | Mascot      |
| 1256.6205  | 1256.5685   | -0.052  | -41   | 613        | 623      | ADCPHPVRFSK                 |           |         |                                            |      | Mascot      |
| 1873.9377  | 1874.047    | 0.1093  | 58    | 281        | 296      | LCFQHNTPLDAIAQFR            |           |         |                                            |      | Mascot      |
| 2190.053   | 2190.1494   | 0.0964  | 44    | 647        | 665      | DILEPSSQENMCLVPGKT<br>R     |           |         | Carbamidomethyl (C)[12], Oxidation (M)[11] |      | Mascot      |
| 2190.053   | 2190.1494   | 0.0964  | 44    | 647        | 665      | DILEPSSQENMCLVPGKT<br>R     |           |         | Carbamidomethyl (C)[12], Oxidation (M)[11] |      | Mascot      |
| 2283.1921  | 2283.1694   | -0.0227 | -10   | 594        | 612      | FLSPSFHIDEPVQLHVVY<br>R     |           |         |                                            |      | Mascot      |
| 2346.053   | 2346.1089   | 0.0559  | 24    | 453        | 471      | SHLMVQMGE EYHAKDY<br>TK     |           |         | Oxidation (M)[4]                           |      | Mascot      |
| 2362.0479  | 2362.1104   | 0.0625  | 26    | 453        | 471      | SHLMVQMGE EYHAKDY<br>TK     |           |         | Oxidation (M)[4,7]                         |      | Mascot      |
| 2703.3706  | 2703.3987   | 0.0281  | 10    | 488        | 510      | WWSLLTSIVCTALKCSYL<br>MGQVK |           |         | Carbamidomethyl (C)[10], Oxidation (M)[19] |      | Mascot      |
| 2918.5596  | 2918.55     | -0.0096 | -3    | 1000       | 1025     | TVITLPHVMVENIPLYVHA         |           |         |                                            |      | Mascot      |

4 Foigr protein [Danio rerio] EVPSFGR gi|34784876 60884.4 8.86 3 55 86.248 48 99.614

Peptide Information

| Calc. Mass | Obsrv. Mass | ± da    | ± ppm | Start Seq. | End Seq. | Sequence                       | Ion Score | C. I. % | Modification | Rank | Result Type |
|------------|-------------|---------|-------|------------|----------|--------------------------------|-----------|---------|--------------|------|-------------|
| 1188.6372  | 1188.6804   | 0.0432  | 36    | 249        | 258      | TAYSLVHELRL                    | 48        | 99.614  |              |      | Mascot      |
| 1188.6372  | 1188.6804   | 0.0432  | 36    | 249        | 258      | TAYSLVHELRL                    |           |         |              |      | Mascot      |
| 1873.9377  | 1874.047    | 0.1093  | 58    | 281        | 296      | LCFQHNTPLDAIAQFR               |           |         |              |      | Mascot      |
| 2918.5596  | 2918.55     | -0.0096 | -3    | 400        | 425      | TVITLPHVMVENIPLYVHA<br>EVPSFGR |           |         |              |      | Mascot      |

5 glyceraldehyde-3-phosphate dehydrogenase [Danio rerio] gi|169403947 35761.3 8.2 6 54 81.449 30 73.229

Peptide Information

| Calc. Mass | Obsrv. Mass | ± da    | ± ppm | Start Seq. | End Seq. | Sequence              | Ion Score | C. I. % | Modification            | Rank | Result Type |
|------------|-------------|---------|-------|------------|----------|-----------------------|-----------|---------|-------------------------|------|-------------|
| 1495.8479  | 1495.8354   | -0.0125 | -8    | 233        | 246      | VPTPNVSVVDLTVR        |           |         |                         |      | Mascot      |
| 1763.8024  | 1763.7936   | -0.0088 | -5    | 308        | 321      | LVTWYDNEFGYSNR        |           |         |                         |      | Mascot      |
| 1763.8024  | 1763.9857   | 0.1833  | 104   | 308        | 321      | LVTWYDNEFGYSNR        |           |         |                         |      | Mascot      |
| 1763.8024  | 1763.9857   | 0.1833  | 104   | 308        | 321      | LVTWYDNEFGYSNR        | 30        | 73.229  |                         |      | Mascot      |
| 1861.9442  | 1861.9338   | -0.0104 | -6    | 290        | 307      | SSIFDAGAGIALNDHFVK    |           |         |                         |      | Mascot      |
| 2211.1768  | 2211.104    | -0.0728 | -33   | 65         | 84       | LVIDGHAITVYSERDPANIK  |           |         |                         |      | Mascot      |
| 2268.0349  | 2268.0283   | -0.0066 | -3    | 270        | 289      | GILGYTEHQVVSTDFNGDCR  |           |         | Carbamidomethyl (C)[19] |      | Mascot      |
| 2272.2483  | 2272.0178   | -0.2305 | -101  | 226        | 246      | LTGMAFRVPTPNVSVVDLTVR |           |         |                         |      | Mascot      |
| 2272.2483  | 2272.0178   | -0.2305 | -101  | 226        | 246      | LTGMAFRVPTPNVSVVDLTVR |           |         |                         |      | Mascot      |

6 PREDICTED: tctex1 domain-containing protein 1-like [Danio rerio] gi|125850223 20706.6 9.37 7 44 0

Peptide Information

| Calc. Mass | Obsrv. Mass | ± da    | ± ppm | Start Seq. | End Seq. | Sequence             | Ion Score | C. I. % | Modification            | Rank | Result Type |
|------------|-------------|---------|-------|------------|----------|----------------------|-----------|---------|-------------------------|------|-------------|
| 1176.6293  | 1176.6115   | -0.0178 | -15   | 107        | 117      | ELSDCIKAAVK          |           |         |                         |      | Mascot      |
| 1564.892   | 1564.6842   | -0.2078 | -133  | 124        | 136      | YKLCVWLTIGQLK        |           |         |                         |      | Mascot      |
| 1622.8285  | 1622.8436   | 0.0151  | 9     | 62         | 74       | AEQFIYQSVPERR        |           |         |                         |      | Mascot      |
| 2208.043   | 2208.041    | -0.002  | -1    | 146        | 163      | AIWCPTSDTFTEIYKNR    |           |         |                         |      | Mascot      |
| 2239.1033  | 2239.1018   | -0.0015 | -1    | 126        | 145      | LVCWLTIGQLKDSMVNCGSR |           |         | Oxidation (M)[14]       |      | Mascot      |
| 2269.1201  | 2269.0205   | -0.0996 | -44   | 87         | 106      | IVDERLETVEYSCACAVIAK |           |         | Carbamidomethyl (C)[13] |      | Mascot      |



|   |                                                            |           |        |    |    |              |                            |      |   |    |   |                           |        |
|---|------------------------------------------------------------|-----------|--------|----|----|--------------|----------------------------|------|---|----|---|---------------------------|--------|
|   | 2502.1924                                                  | 2502.2581 | 0.0657 | 26 | 92 | 113          | LETVEYSCACAVIAKELS<br>DCIK |      |   |    |   | Carbamidomethyl (C)[8,10] | Mascot |
| 7 | PREDICTED: hypothetical protein LOC100150366 [Danio rerio] |           |        |    |    | gi 292627805 | 27630.3                    | 5.91 | 7 | 40 | 0 |                           |        |

| Peptide Information |             |         |       |            |          |                                 |           |       |   |                                            |      |             |
|---------------------|-------------|---------|-------|------------|----------|---------------------------------|-----------|-------|---|--------------------------------------------|------|-------------|
| Calc. Mass          | Obsrv. Mass | ± da    | ± ppm | Start Seq. | End Seq. | Sequence                        | Ion Score | C. I. | % | Modification                               | Rank | Result Type |
| 1115.6279           | 1115.6874   | 0.0595  | 53    | 197        | 206      | ALLSRASQNR                      |           |       |   |                                            |      | Mascot      |
| 1397.7131           | 1397.5939   | -0.1192 | -85   | 174        | 184      | THDTLLQERER                     |           |       |   |                                            |      | Mascot      |
| 1701.8152           | 1701.8966   | 0.0814  | 48    | 83         | 95       | MREQYEAEIFELK                   |           |       |   | Oxidation (M)[1]                           |      | Mascot      |
| 1708.8977           | 1708.6907   | -0.207  | -121  | 19         | 32       | LLTDENVQLHERNK                  |           |       |   |                                            |      | Mascot      |
| 1708.8977           | 1708.6907   | -0.207  | -121  | 19         | 32       | LLTDENVQLHERNK                  |           |       |   |                                            |      | Mascot      |
| 1861.853            | 1861.9338   | 0.0808  | 43    | 96         | 112      | NMVLCHEGTASSLQAER               |           |       |   | Oxidation (M)[2]                           |      | Mascot      |
| 1902.8796           | 1902.9491   | 0.0695  | 37    | 96         | 112      | NMVLCHEGTASSLQAER               |           |       |   | Carbamidomethyl (C)[5]                     |      | Mascot      |
| 2190.0027           | 2190.1494   | 0.1467  | 67    | 96         | 114      | NMVLCHEGTASSLQAER<br>DR         |           |       |   | Carbamidomethyl (C)[5], Oxidation (M)[2]   |      | Mascot      |
| 2190.0027           | 2190.1494   | 0.1467  | 67    | 96         | 114      | NMVLCHEGTASSLQAER<br>DR         |           |       |   | Carbamidomethyl (C)[5], Oxidation (M)[2]   |      | Mascot      |
| 3282.5405           | 3282.7026   | 0.1621  | 49    | 85         | 112      | EQYEAEIFELKNMVLCH<br>GTASSLQAER |           |       |   | Carbamidomethyl (C)[16]                    |      | Mascot      |
| 3298.5354           | 3298.7104   | 0.175   | 53    | 85         | 112      | EQYEAEIFELKNMVLCH<br>GTASSLQAER |           |       |   | Carbamidomethyl (C)[16], Oxidation (M)[13] |      | Mascot      |
| 3298.5354           | 3298.7104   | 0.175   | 53    | 85         | 112      | EQYEAEIFELKNMVLCH<br>GTASSLQAER |           |       |   | Carbamidomethyl (C)[16], Oxidation (M)[13] |      | Mascot      |

|   |                                              |  |  |  |  |              |         |      |    |    |   |  |
|---|----------------------------------------------|--|--|--|--|--------------|---------|------|----|----|---|--|
| 8 | PREDICTED: protein FAM83C-like [Danio rerio] |  |  |  |  | gi 125820116 | 65361.5 | 6.54 | 11 | 39 | 0 |  |
|---|----------------------------------------------|--|--|--|--|--------------|---------|------|----|----|---|--|

| Peptide Information |             |         |       |            |          |                   |           |       |   |                        |      |             |
|---------------------|-------------|---------|-------|------------|----------|-------------------|-----------|-------|---|------------------------|------|-------------|
| Calc. Mass          | Obsrv. Mass | ± da    | ± ppm | Start Seq. | End Seq. | Sequence          | Ion Score | C. I. | % | Modification           | Rank | Result Type |
| 882.5043            | 882.5632    | 0.0589  | 67    | 63         | 69       | KVLHEEK           |           |       |   |                        |      | Mascot      |
| 972.5036            | 972.5805    | 0.0769  | 79    | 484        | 491      | FTDLFTTK          |           |       |   |                        |      | Mascot      |
| 1115.5844           | 1115.6874   | 0.103   | 92    | 492        | 500      | EKDLHAFQK         |           |       |   |                        |      | Mascot      |
| 1188.6875           | 1188.6804   | -0.0071 | -6    | 195        | 204      | VPVYILLDEK        |           |       |   |                        |      | Mascot      |
| 1188.6875           | 1188.6804   | -0.0071 | -6    | 195        | 204      | VPVYILLDEK        |           |       |   |                        |      | Mascot      |
| 1296.6794           | 1296.7302   | 0.0508  | 39    | 48         | 59       | LATDALLEHGEK      |           |       |   |                        |      | Mascot      |
| 1402.6454           | 1402.72     | 0.0746  | 53    | 228        | 239      | IRSVCGDTYCTK      |           |       |   | Carbamidomethyl (C)[5] |      | Mascot      |
| 1404.7747           | 1404.7225   | -0.0522 | -37   | 494        | 505      | DLHAFQKVPPPR      |           |       |   |                        |      | Mascot      |
| 1763.7727           | 1763.7936   | 0.0209  | 12    | 293        | 306      | EFRCMYADSDIIER    |           |       |   | Oxidation (M)[5]       |      | Mascot      |
| 1763.7727           | 1763.9857   | 0.213   | 121   | 293        | 306      | EFRCMYADSDIIER    |           |       |   | Oxidation (M)[5]       |      | Mascot      |
| 1763.7727           | 1763.9857   | 0.213   | 121   | 293        | 306      | EFRCMYADSDIIER    |           |       |   | Oxidation (M)[5]       |      | Mascot      |
| 1862.8615           | 1862.9497   | 0.0882  | 47    | 343        | 360      | VYSENSSSQSSSVSSIK |           |       |   |                        |      | Mascot      |

|   |                                                                                                      |           |         |     |              |         |                       |    |    |   |  |                   |        |
|---|------------------------------------------------------------------------------------------------------|-----------|---------|-----|--------------|---------|-----------------------|----|----|---|--|-------------------|--------|
|   | 1902.92                                                                                              | 1902.9491 | 0.0291  | 15  | 523          | 540     | QGPPPPGMPIDRMGPD<br>K |    |    |   |  | Oxidation (M)[9]  | Mascot |
|   | 1930.0327                                                                                            | 1929.9614 | -0.0713 | -37 | 389          | 406     | KDATSPVLHMPAAHIGR     |    |    |   |  | Oxidation (M)[10] | Mascot |
|   | 1930.0327                                                                                            | 1929.9614 | -0.0713 | -37 | 389          | 406     | KDATSPVLHMPAAHIGR     |    |    |   |  | Oxidation (M)[10] | Mascot |
| 9 | novel protein similar to vertebrate RAP1, GTP-GDP dissociation stimulator 1 (RAP1GDS1) [Danio rerio] |           |         |     | gi 220679502 | 60763.9 | 5                     | 10 | 37 | 0 |  |                   |        |

#### Peptide Information

| Calc. Mass | Obsrv. Mass | ± da    | ± ppm | Start Seq. | End Seq. | Sequence                   | Ion Score | C. I. % | Modification           | Rank | Result Type |
|------------|-------------|---------|-------|------------|----------|----------------------------|-----------|---------|------------------------|------|-------------|
| 1296.7747  | 1296.7302   | -0.0445 | -34   | 417        | 428      | GEANRLAALIR                |           |         |                        |      | Mascot      |
| 1564.7345  | 1564.6842   | -0.0503 | -32   | 381        | 395      | MMVDGQEEAASVLGK            |           |         |                        |      | Mascot      |
| 1763.8455  | 1763.7936   | -0.0519 | -29   | 396        | 410      | DEALLARVMEWCEAK            |           |         |                        |      | Mascot      |
| 1763.9147  | 1763.9857   | 0.071   | 40    | 102        | 117      | SPDQDQLLHTGRAIGR           |           |         |                        |      | Mascot      |
| 1763.9147  | 1763.9857   | 0.071   | 40    | 102        | 117      | SPDQDQLLHTGRAIGR           |           |         |                        |      | Mascot      |
| 1863.0408  | 1862.9497   | -0.0911 | -49   | 85         | 101      | EHCEAGLVLTALVPLLK          |           |         | Carbamidomethyl (C)[3] |      | Mascot      |
| 1864.036   | 1863.9562   | -0.0798 | -43   | 506        | 522      | FSALGLICSLVNSTILR          |           |         | Carbamidomethyl (C)[8] |      | Mascot      |
| 1864.036   | 1863.9562   | -0.0798 | -43   | 506        | 522      | FSALGLICSLVNSTILR          |           |         | Carbamidomethyl (C)[8] |      | Mascot      |
| 2272.2329  | 2272.0178   | -0.2151 | -95   | 64         | 84       | SPLTSQVTLLVAEMAREATVR      |           |         |                        |      | Mascot      |
| 2272.2329  | 2272.0178   | -0.2151 | -95   | 64         | 84       | SPLTSQVTLLVAEMAREATVR      |           |         |                        |      | Mascot      |
| 2349.1423  | 2349.1384   | -0.0039 | -2    | 381        | 402      | MMVDGQEEAASVLGKDEALLAR     |           |         | Oxidation (M)[1]       |      | Mascot      |
| 2362.3162  | 2362.1104   | -0.2058 | -87   | 80         | 101      | EATVREHCEAGLVLTALVPLLK     |           |         |                        |      | Mascot      |
| 2918.613   | 2918.55     | -0.063  | -22   | 506        | 531      | FSALGLICSLVNSTILREQITSLNLR |           |         | Carbamidomethyl (C)[8] |      | Mascot      |

|    |                                                              |  |  |  |              |         |      |    |    |   |  |  |  |
|----|--------------------------------------------------------------|--|--|--|--------------|---------|------|----|----|---|--|--|--|
| 10 | PREDICTED: tyrosine-protein kinase Src42A-like [Danio rerio] |  |  |  | gi 326675419 | 57185.5 | 6.59 | 12 | 36 | 0 |  |  |  |
|----|--------------------------------------------------------------|--|--|--|--------------|---------|------|----|----|---|--|--|--|

#### Peptide Information

| Calc. Mass | Obsrv. Mass | ± da   | ± ppm | Start Seq. | End Seq. | Sequence         | Ion Score | C. I. % | Modification                               | Rank | Result Type |
|------------|-------------|--------|-------|------------|----------|------------------|-----------|---------|--------------------------------------------|------|-------------|
| 972.5294   | 972.5805    | 0.0511 | 53    | 117        | 124      | CLLRPENK         |           |         |                                            |      | Mascot      |
| 1139.4642  | 1139.6046   | 0.1404 | 123   | 1          | 9        | MGNCECKPK        |           |         | Carbamidomethyl (C)[4,6], Oxidation (M)[1] |      | Mascot      |
| 1188.5715  | 1188.6804   | 0.1089 | 92    | 22         | 31       | DQQASVNRDR       |           |         |                                            |      | Mascot      |
| 1188.5715  | 1188.6804   | 0.1089 | 92    | 22         | 31       | DQQASVNRDR       |           |         |                                            |      | Mascot      |
| 1495.7131  | 1495.8354   | 0.1223 | 82    | 341        | 353      | AENILLTEMQSCK    |           |         | Oxidation (M)[9]                           |      | Mascot      |
| 1708.8257  | 1708.6907   | -0.135 | -79   | 184        | 198      | HEGGLCAKLHEACVK  |           |         | Carbamidomethyl (C)[6,13]                  |      | Mascot      |
| 1708.8257  | 1708.6907   | -0.135 | -79   | 184        | 198      | HEGGLCAKLHEACVK  |           |         | Carbamidomethyl (C)[6,13]                  |      | Mascot      |
| 1863.9303  | 1863.9562   | 0.0259 | 14    | 338        | 353      | DLRAENILLTEMQSCK |           |         |                                            |      | Mascot      |
| 1863.9303  | 1863.9562   | 0.0259 | 14    | 338        | 353      | DLRAENILLTEMQSCK |           |         |                                            |      | Mascot      |

|    |                                                                                                    |           |         |     |              |     |                                 |      |    |    |   |                                           |  |  |  |  |        |
|----|----------------------------------------------------------------------------------------------------|-----------|---------|-----|--------------|-----|---------------------------------|------|----|----|---|-------------------------------------------|--|--|--|--|--------|
|    | 1903.0258                                                                                          | 1902.9491 | -0.0767 | -40 | 117          | 132 | CLLRPENKEGAFLVWK                |      |    |    |   |                                           |  |  |  |  | Mascot |
|    | 2043.007                                                                                           | 2043.0273 | 0.0203  | 10  | 52           | 68  | GDILEVTGETEYWLYVR               |      |    |    |   |                                           |  |  |  |  | Mascot |
|    | 2225.0947                                                                                          | 2225.1113 | 0.0166  | 7   | 390          | 408 | LPVKWMAPEIFDNGEYT<br>SK         |      |    |    |   |                                           |  |  |  |  | Mascot |
|    | 2225.0947                                                                                          | 2225.1113 | 0.0166  | 7   | 390          | 408 | LPVKWMAPEIFDNGEYT<br>SK         |      |    |    |   |                                           |  |  |  |  | Mascot |
|    | 2345.9045                                                                                          | 2346.1089 | 0.2044  | 87  | 10           | 29  | CCCPCCPCCLTKDQQAS<br>VNR        |      |    |    |   | Carbamidomethyl (C)[1,2,3]                |  |  |  |  | Mascot |
|    | 2703.3225                                                                                          | 2703.3987 | 0.0762  | 28  | 276          | 299 | LYAVCTTSQPMCIIVTELM<br>KNGSLK   |      |    |    |   | Carbamidomethyl (C)[5], Oxidation (M)[11] |  |  |  |  | Mascot |
|    | 3234.5947                                                                                          | 3234.7236 | 0.1289  | 40  | 307          | 333 | EKQDLEFSLMLDFAIQITE<br>GMIYIENK |      |    |    |   | Oxidation (M)[10]                         |  |  |  |  | Mascot |
| 11 | novel protein similar to vertebrate breast cancer anti-estrogen resistance 3 (BCAR3) [Danio rerio] |           |         |     | gi 169158144 |     | 84068.2                         | 8.52 | 13 | 36 | 0 |                                           |  |  |  |  |        |

#### Peptide Information

| Calc. Mass | Obsrv. Mass | ± da    | ± ppm | Start Seq. | End Seq. | Sequence                        | Ion Score | C. I. | % Modification           | Rank | Result Type |
|------------|-------------|---------|-------|------------|----------|---------------------------------|-----------|-------|--------------------------|------|-------------|
| 882.5083   | 882.5632    | 0.0549  | 62    | 607        | 613      | SLKPFYK                         |           |       |                          |      | Mascot      |
| 1045.5524  | 1045.5592   | 0.0068  | 7     | 45         | 52       | RELEELK                         |           |       |                          |      | Mascot      |
| 1051.5895  | 1051.7098   | 0.1203  | 114   | 22         | 31       | SSVIGAKFSR                      |           |       |                          |      | Mascot      |
| 1139.5514  | 1139.6046   | 0.0532  | 47    | 114        | 123      | VVAMNEAYSR                      |           |       |                          |      | Mascot      |
| 1256.5325  | 1256.5685   | 0.036   | 29    | 675        | 685      | NADTYTCNAQR                     |           |       |                          |      | Mascot      |
| 1295.6525  | 1295.7073   | 0.0548  | 42    | 113        | 123      | RVVAMNEAYSR                     |           |       |                          |      | Mascot      |
| 1311.6473  | 1311.6519   | 0.0046  | 4     | 113        | 123      | RVVAMNEAYSR                     |           |       | Oxidation (M)[5]         |      | Mascot      |
| 1397.6478  | 1397.5939   | -0.0539 | -39   | 374        | 385      | MNSLQANGYVER                    |           |       | Oxidation (M)[1]         |      | Mascot      |
| 1475.7021  | 1475.7961   | 0.094   | 64    | 10         | 21       | TITAALCCFYQK                    |           |       | Carbamidomethyl (C)[7,8] |      | Mascot      |
| 1491.8066  | 1491.7917   | -0.0149 | -10   | 702        | 713      | TDFQLRLLWGSR                    |           |       |                          |      | Mascot      |
| 1492.7577  | 1492.8203   | 0.0626  | 42    | 288        | 300      | RMAFDLTPGEAIR                   |           |       | Oxidation (M)[2]         |      | Mascot      |
| 1492.7577  | 1492.8203   | 0.0626  | 42    | 288        | 300      | RMAFDLTPGEAIR                   |           |       | Oxidation (M)[2]         |      | Mascot      |
| 1564.7021  | 1564.6842   | -0.0179 | -11   | 563        | 576      | DSMGDLYAFSSIMK                  |           |       |                          |      | Mascot      |
| 1622.8319  | 1622.8436   | 0.0117  | 7     | 374        | 387      | MNSLQANGYVERLK                  |           |       |                          |      | Mascot      |
| 3234.5308  | 3234.7236   | 0.1928  | 60    | 675        | 701      | NADTYTCNAQRILQDFQP<br>HEDMLEILR |           |       |                          |      | Mascot      |

12 vitellogenin 5 [Danio rerio] gi|68448530 148868 8.77 14 35 0

#### Peptide Information

| Calc. Mass | Obsrv. Mass | ± da    | ± ppm | Start Seq. | End Seq. | Sequence     | Ion Score | C. I. | % Modification | Rank | Result Type |
|------------|-------------|---------|-------|------------|----------|--------------|-----------|-------|----------------|------|-------------|
| 820.4675   | 820.4335    | -0.034  | -41   | 1312       | 1318     | SLNFIAR      |           |       |                |      | Mascot      |
| 1115.6935  | 1115.6874   | -0.0061 | -5    | 333        | 341      | FVQLVQLLR    |           |       |                |      | Mascot      |
| 1402.7173  | 1402.72     | 0.0027  | 2     | 694        | 706      | SPAAEESVDRIK |           |       |                |      | Mascot      |

|    |                                                                   |           |         |      |      |      |                                  |        |      |    |    |                                              |  |  |  |  |        |
|----|-------------------------------------------------------------------|-----------|---------|------|------|------|----------------------------------|--------|------|----|----|----------------------------------------------|--|--|--|--|--------|
|    | 1463.8944                                                         | 1463.8864 | -0.008  | -5   | 532  | 544  | LVQPVALQLVLDR                    |        |      |    |    |                                              |  |  |  |  | Mascot |
|    | 1622.8536                                                         | 1622.8436 | -0.01   | -6   | 668  | 683  | AYLAGAAADVIEFGVR                 |        |      |    |    |                                              |  |  |  |  | Mascot |
|    | 1763.901                                                          | 1763.7936 | -0.1074 | -61  | 1276 | 1290 | VCKHILNAAyntGFR                  |        |      |    |    | Carbamidomethyl (C)[2]                       |  |  |  |  | Mascot |
|    | 1763.901                                                          | 1763.9857 | 0.0847  | 48   | 1276 | 1290 | VCKHILNAAyntGFR                  |        |      |    |    | Carbamidomethyl (C)[2]                       |  |  |  |  | Mascot |
|    | 1763.901                                                          | 1763.9857 | 0.0847  | 48   | 1276 | 1290 | VCKHILNAAyntGFR                  |        |      |    |    | Carbamidomethyl (C)[2]                       |  |  |  |  | Mascot |
|    | 1862.1262                                                         | 1861.9338 | -0.1924 | -103 | 363  | 379  | RWLLDALPAVGTPVIK                 |        |      |    |    |                                              |  |  |  |  | Mascot |
|    | 1863.8694                                                         | 1863.9562 | 0.0868  | 47   | 577  | 592  | TEPNMHVSSFAYSHIK                 |        |      |    |    | Oxidation (M)[5]                             |  |  |  |  | Mascot |
|    | 1863.8694                                                         | 1863.9562 | 0.0868  | 47   | 577  | 592  | TEPNMHVSSFAYSHIK                 |        |      |    |    | Oxidation (M)[5]                             |  |  |  |  | Mascot |
|    | 1930.0127                                                         | 1929.9614 | -0.0513 | -27  | 1294 | 1311 | ATNSEKEIELTAALPSQK               |        |      |    |    |                                              |  |  |  |  | Mascot |
|    | 1930.0127                                                         | 1929.9614 | -0.0513 | -27  | 1294 | 1311 | ATNSEKEIELTAALPSQK               |        |      |    |    |                                              |  |  |  |  | Mascot |
|    | 2042.9196                                                         | 2043.0273 | 0.1077  | 53   | 1142 | 1160 | DTSSGSAAASFEQMQR                 |        |      |    |    |                                              |  |  |  |  | Mascot |
|    | 2269.1975                                                         | 2269.0205 | -0.177  | -78  | 1179 | 1198 | ADQKLLGYQLAAYFDKPTAR             |        |      |    |    |                                              |  |  |  |  | Mascot |
|    | 2346.1978                                                         | 2346.1089 | -0.0889 | -38  | 597  | 619  | ITAPDMASVAGAAANVAIKLMNCK         |        |      |    |    | Carbamidomethyl (C)[22]                      |  |  |  |  | Mascot |
|    | 2362.1926                                                         | 2362.1104 | -0.0822 | -35  | 597  | 619  | ITAPDMASVAGAAANVAIKLMNCK         |        |      |    |    | Carbamidomethyl (C)[22], Oxidation (M)[6]    |  |  |  |  | Mascot |
|    | 2378.1875                                                         | 2378.1089 | -0.0786 | -33  | 597  | 619  | ITAPDMASVAGAAANVAIKLMNCK         |        |      |    |    | Carbamidomethyl (C)[22], Oxidation (M)[6,20] |  |  |  |  | Mascot |
|    | 3234.6868                                                         | 3234.7236 | 0.0368  | 11   | 733  | 761  | VFGQEVAYVNFDKSIIEEAIPMVTGPKPR    |        |      |    |    |                                              |  |  |  |  | Mascot |
|    | 3298.387                                                          | 3298.7104 | 0.3234  | 98   | 1080 | 1114 | NSRSSSSSSTSTSSSSSSSSSSSSSSSLSSSR |        | 3    |    | 0  |                                              |  |  |  |  | Mascot |
|    | 3298.387                                                          | 3298.7104 | 0.3234  | 98   | 1080 | 1114 | NSRSSSSSSTSTSSSSSSSSSSSSSSSLSSSR |        |      |    |    |                                              |  |  |  |  | Mascot |
| 13 | novel protein similar to H.sapiens TTN, titin (TTN) [Danio rerio] |           |         |      |      |      | gi 169154823                     | 842970 | 5.81 | 40 | 34 | 0                                            |  |  |  |  |        |

Peptide Information

| Calc. Mass | Obsrv. Mass | ± da    | ± ppm | Start Seq. | End Seq. | Sequence    | Ion Score | C. I. | % Modification   | Rank | Result | Type   |
|------------|-------------|---------|-------|------------|----------|-------------|-----------|-------|------------------|------|--------|--------|
| 842.444    | 842.5079    | 0.0639  | 76    | 3102       | 3108     | SYKVSMTK    |           |       |                  |      |        | Mascot |
| 850.4814   | 850.54      | 0.0586  | 69    | 1088       | 1094     | LTSVRMTK    |           |       | Oxidation (M)[6] |      |        | Mascot |
| 882.4679   | 882.5632    | 0.0953  | 108   | 2483       | 2489     | YKVSTER     |           |       |                  |      |        | Mascot |
| 972.556    | 972.5805    | 0.0245  | 25    | 7562       | 7568     | RHFMIIR     |           |       |                  |      |        | Mascot |
| 996.536    | 996.5936    | 0.0576  | 58    | 2586       | 2593     | LTITETIR    |           |       |                  |      |        | Mascot |
| 1025.556   | 1025.6066   | 0.0506  | 49    | 423        | 430      | SYARLMIR    |           |       | Oxidation (M)[6] |      |        | Mascot |
| 1045.5347  | 1045.5592   | 0.0245  | 23    | 6656       | 6665     | CQIGGTPEIK  |           |       |                  |      |        | Mascot |
| 1051.5571  | 1051.7098   | 0.1527  | 145   | 6666       | 6674     | ISWFKADGK   |           |       |                  |      |        | Mascot |
| 1115.6418  | 1115.6874   | 0.0456  | 41    | 2536       | 2544     | EITVLEKQR   |           |       |                  |      |        | Mascot |
| 1188.6848  | 1188.6804   | -0.0044 | -4    | 286        | 296      | HVKGPTPTPVR |           |       |                  |      |        | Mascot |
| 1188.6848  | 1188.6804   | -0.0044 | -4    | 286        | 296      | HVKGPTPTPVR |           |       |                  |      |        | Mascot |

|           |           |         |      |      |      |                                 |                                          |        |
|-----------|-----------|---------|------|------|------|---------------------------------|------------------------------------------|--------|
| 1256.6013 | 1256.5685 | -0.0328 | -26  | 4882 | 4892 | EMLTGGTCFIK                     | Carbamidomethyl (C)[8]                   | Mascot |
| 1295.8046 | 1295.7073 | -0.0973 | -75  | 1438 | 1448 | KLTIPTIRPEK                     |                                          | Mascot |
| 1296.698  | 1296.7302 | 0.0322  | 25   | 2959 | 2969 | FGQTTCKTILK                     | Carbamidomethyl (C)[6]                   | Mascot |
| 1397.7271 | 1397.5939 | -0.1332 | -95  | 3902 | 3914 | TEAKTSFQSVTAK                   |                                          | Mascot |
| 1402.7802 | 1402.72   | -0.0602 | -43  | 2583 | 2593 | IHRLTITETYR                     |                                          | Mascot |
| 1463.8944 | 1463.8864 | -0.008  | -5   | 123  | 136  | LDVRVTGIPAPVVK                  |                                          | Mascot |
| 1475.804  | 1475.7961 | -0.0079 | -5   | 1964 | 1976 | GKHYSLTIIINAMK                  |                                          | Mascot |
| 1491.7988 | 1491.7917 | -0.0071 | -5   | 1964 | 1976 | GKHYSLTIIINAMK                  | Oxidation (M)[12]                        | Mascot |
| 1492.7061 | 1492.8203 | 0.1142  | 77   | 6147 | 6161 | ATNNVGSDLCQGSVK                 |                                          | Mascot |
| 1492.7061 | 1492.8203 | 0.1142  | 77   | 6147 | 6161 | ATNNVGSDLCQGSVK                 |                                          | Mascot |
| 1622.7876 | 1622.8436 | 0.056   | 35   | 4732 | 4746 | VGKEQCSCSINVLDK                 |                                          | Mascot |
| 1701.829  | 1701.8966 | 0.0676  | 40   | 1175 | 1189 | DEKSLVEDSQLPEGR                 |                                          | Mascot |
| 1708.8608 | 1708.6907 | -0.1701 | -100 | 3868 | 3882 | ASTKEMLSPPVEMVR                 | Oxidation (M)[6,13]                      | Mascot |
| 1708.8608 | 1708.6907 | -0.1701 | -100 | 3868 | 3882 | ASTKEMLSPPVEMVR                 | Oxidation (M)[6,13]                      | Mascot |
| 1763.8018 | 1763.7936 | -0.0082 | -5   | 6514 | 6529 | SHAGEYTCQIINDAGK                | Carbamidomethyl (C)[8]                   | Mascot |
| 1763.9326 | 1763.9857 | 0.0531  | 30   | 4773 | 4788 | VSGSQPITISWFKEGK                |                                          | Mascot |
| 1763.9326 | 1763.9857 | 0.0531  | 30   | 4773 | 4788 | VSGSQPITISWFKEGK                |                                          | Mascot |
| 1861.9688 | 1861.9338 | -0.035  | -19  | 3723 | 3739 | MGTLVSESRESQSLPK                |                                          | Mascot |
| 1862.964  | 1862.9497 | -0.0143 | -8   | 6428 | 6446 | CKAVNSAGAAETSASLV<br>VK         | Carbamidomethyl (C)[1]                   | Mascot |
| 1874.0535 | 1874.047  | -0.0065 | -3   | 4579 | 4595 | LQGTIKGSAPITVQWFK               |                                          | Mascot |
| 1902.9478 | 1902.9491 | 0.0013  | 1    | 3519 | 3535 | EGIISMEKPDEQTAVQK               |                                          | Mascot |
| 2042.8654 | 2043.0273 | 0.1619  | 79   | 6797 | 6815 | HSGEYTCVATNSVGSAS<br>CR         | Carbamidomethyl (C)[7,18]                | Mascot |
| 2190.0093 | 2190.1494 | 0.1401  | 64   | 1569 | 1586 | DTMVTFCETNEPFVKVK               | Carbamidomethyl (C)[8], Oxidation (M)[3] | Mascot |
| 2190.0093 | 2190.1494 | 0.1401  | 64   | 1569 | 1586 | DTMVTFCETNEPFVKVK               | Carbamidomethyl (C)[8], Oxidation (M)[3] | Mascot |
| 2207.9219 | 2208.041  | 0.1191  | 54   | 4528 | 4547 | TFESADVGDYQCCISND<br>VGK        | Carbamidomethyl (C)[12]                  | Mascot |
| 2211.1438 | 2211.104  | -0.0398 | -18  | 6494 | 6513 | SCEIALRGDTAILELHNID<br>K        |                                          | Mascot |
| 2256.1006 | 2256.0247 | -0.0759 | -34  | 6089 | 6108 | DASLNCELKGSAPFEITW<br>FK        |                                          | Mascot |
| 2268.1653 | 2268.0283 | -0.137  | -60  | 6494 | 6513 | SCEIALRGDTAILELHNID<br>K        | Carbamidomethyl (C)[2]                   | Mascot |
| 2269.1724 | 2269.0205 | -0.1519 | -67  | 2563 | 2581 | NGVEIQFSVDQRFNYAIR              |                                          | Mascot |
| 2283.1899 | 2283.1694 | -0.0205 | -9   | 3240 | 3260 | EHPSQVMSALTESVTPLT<br>IVK       | Oxidation (M)[7]                         | Mascot |
| 2314.1594 | 2314.1401 | -0.0193 | -8   | 6243 | 6265 | NDAGVAECTANLTVLEPA<br>AIVDK     |                                          | Mascot |
| 2378.2747 | 2378.1089 | -0.1658 | -70  | 5230 | 5250 | SSCEAVTVLDQIIKPSFT<br>RK        | Carbamidomethyl (C)[3]                   | Mascot |
| 2502.2722 | 2502.2581 | -0.0141 | -6   | 2095 | 2116 | NQTVTETQEAVFSLELTH<br>LDVK      |                                          | Mascot |
| 3282.5293 | 3282.7026 | 0.1733  | 53   | 2455 | 2482 | AVFECELSEPNVQVTWM<br>KDGQEELSER | Oxidation (M)[17]                        | Mascot |

|    |                                                                |           |         |    |      |              |                                      |         |      |    |    |                         |        |
|----|----------------------------------------------------------------|-----------|---------|----|------|--------------|--------------------------------------|---------|------|----|----|-------------------------|--------|
|    | 3298.7068                                                      | 3298.7104 | 0.0036  | 1  | 5440 | 5467         | ITVVKPSQLVVFEQITGT<br>PEIDTYWFK      |         |      |    |    | Carbamidomethyl (C)[14] | Mascot |
|    | 3298.7351                                                      | 3298.7104 | -0.0247 | -7 | 1520 | 1551         | DVLAEDSASIMVKAINIAG<br>EASSHAFLLVQAK |         |      |    |    |                         | Mascot |
| 14 | breast cancer anti-estrogen resistance protein 3 [Danio rerio] |           |         |    |      |              |                                      |         |      |    |    |                         |        |
|    |                                                                |           |         |    |      | gi 169646666 |                                      | 94570.5 | 8.67 | 12 | 34 | 0                       |        |

#### Peptide Information

| Calc. Mass | Obsrv. Mass | ± da    | ± ppm | Start Seq. | End Seq. | Sequence                        | Ion Score | C. I. % | Modification     | Rank | Result Type |
|------------|-------------|---------|-------|------------|----------|---------------------------------|-----------|---------|------------------|------|-------------|
| 882.5083   | 882.5632    | 0.0549  | 62    | 702        | 708      | SLKPFYK                         |           |         |                  |      | Mascot      |
| 1045.5524  | 1045.5592   | 0.0068  | 7     | 140        | 147      | RELEELK                         |           |         |                  |      | Mascot      |
| 1139.5514  | 1139.6046   | 0.0532  | 47    | 209        | 218      | VVAMNEAYSR                      |           |         |                  |      | Mascot      |
| 1256.5325  | 1256.5685   | 0.036   | 29    | 770        | 780      | NADTYTCNAQR                     |           |         |                  |      | Mascot      |
| 1295.6525  | 1295.7073   | 0.0548  | 42    | 208        | 218      | RVVAMNEAYSR                     |           |         |                  |      | Mascot      |
| 1311.6473  | 1311.6519   | 0.0046  | 4     | 208        | 218      | RVVAMNEAYSR                     |           |         | Oxidation (M)[5] |      | Mascot      |
| 1397.6478  | 1397.5939   | -0.0539 | -39   | 469        | 480      | MNSLQANGYVER                    |           |         | Oxidation (M)[1] |      | Mascot      |
| 1491.8066  | 1491.7917   | -0.0149 | -10   | 797        | 808      | TDFQLRLWGSR                     |           |         |                  |      | Mascot      |
| 1492.7577  | 1492.8203   | 0.0626  | 42    | 383        | 395      | RMAFDLTPGEAIR                   |           |         | Oxidation (M)[2] |      | Mascot      |
| 1492.7577  | 1492.8203   | 0.0626  | 42    | 383        | 395      | RMAFDLTPGEAIR                   |           |         | Oxidation (M)[2] |      | Mascot      |
| 1564.7021  | 1564.6842   | -0.0179 | -11   | 658        | 671      | DSMGDLYAFSSIMK                  |           |         |                  |      | Mascot      |
| 1622.8319  | 1622.8436   | 0.0117  | 7     | 469        | 482      | MNSLQANGYVERLK                  |           |         |                  |      | Mascot      |
| 2208.1057  | 2208.041    | -0.0647 | -29   | 66         | 85       | QWEVNGNVGSLAAPYP<br>GRHR        |           |         |                  |      | Mascot      |
| 3234.5308  | 3234.7236   | 0.1928  | 60    | 770        | 796      | NADTYTCNAQRILQDFQP<br>HEDMLEILR |           |         |                  |      | Mascot      |

|    |                                                                   |  |  |  |  |              |  |         |      |    |    |   |  |
|----|-------------------------------------------------------------------|--|--|--|--|--------------|--|---------|------|----|----|---|--|
| 15 | hypothetical protein LOC100135329 [Xenopus (Silurana) tropicalis] |  |  |  |  |              |  |         |      |    |    |   |  |
|    |                                                                   |  |  |  |  | gi 166158154 |  | 52652.1 | 5.85 | 10 | 33 | 0 |  |

#### Peptide Information

| Calc. Mass | Obsrv. Mass | ± da    | ± ppm | Start Seq. | End Seq. | Sequence                  | Ion Score | C. I. % | Modification            | Rank | Result Type |
|------------|-------------|---------|-------|------------|----------|---------------------------|-----------|---------|-------------------------|------|-------------|
| 972.5836   | 972.5805    | -0.0031 | -3    | 95         | 103      | SQLKQAVAK                 |           |         |                         |      | Mascot      |
| 1188.5388  | 1188.6804   | 0.1416  | 119   | 308        | 316      | QFTTMELMR                 |           |         | Oxidation (M)[5,8]      |      | Mascot      |
| 1188.5388  | 1188.6804   | 0.1416  | 119   | 308        | 316      | QFTTMELMR                 |           |         | Oxidation (M)[5,8]      |      | Mascot      |
| 1256.7473  | 1256.5685   | -0.1788 | -142  | 409        | 419      | LAGIINFQRPK               |           |         |                         |      | Mascot      |
| 1397.6915  | 1397.5939   | -0.0976 | -70   | 99         | 110      | QAVAKMVQECYK              |           |         |                         |      | Mascot      |
| 1763.9109  | 1763.7936   | -0.1173 | -66   | 442        | 456      | TSHLIAKEEMIHNLQ           |           |         |                         |      | Mascot      |
| 1763.9546  | 1763.9857   | 0.0311  | 18    | 183        | 197      | AEFILEQMRLCIAVK           |           |         |                         |      | Mascot      |
| 1763.9546  | 1763.9857   | 0.0311  | 18    | 183        | 197      | AEFILEQMRLCIAVK           |           |         |                         |      | Mascot      |
| 2189.885   | 2190.1494   | 0.2644  | 121   | 330        | 349      | EGSMGTPDTPDVFTCTEE<br>GEK |           |         | Carbamidomethyl (C)[14] |      | Mascot      |

|    |                                              |           |        |     |     |              |                             |      |                                           |        |   |
|----|----------------------------------------------|-----------|--------|-----|-----|--------------|-----------------------------|------|-------------------------------------------|--------|---|
|    | 2189.885                                     | 2190.1494 | 0.2644 | 121 | 330 | 349          | EGSMGTPDTPDVFTCTEE<br>GEK   |      | Carbamidomethyl (C)[14]                   | Mascot |   |
|    | 2345.9861                                    | 2346.1089 | 0.1228 | 52  | 330 | 350          | EGSMGTPDTPDVFTCTEE<br>GEKR  |      | Carbamidomethyl (C)[14]                   | Mascot |   |
|    | 2361.981                                     | 2362.1104 | 0.1294 | 55  | 330 | 350          | EGSMGTPDTPDVFTCTEE<br>GEKR  |      | Carbamidomethyl (C)[14], Oxidation (M)[4] | Mascot |   |
|    | 2703.3521                                    | 2703.3987 | 0.0466 | 17  | 224 | 245          | LKYYNLMIQVDLHEGSYL<br>SICK  |      | Carbamidomethyl (C)[21], Oxidation (M)[7] | Mascot |   |
|    | 2918.3962                                    | 2918.55   | 0.1538 | 53  | 226 | 248          | YYNLMIQVDLHEGSYLSI<br>CKHYR |      | Carbamidomethyl (C)[19], Oxidation (M)[5] | Mascot |   |
| 16 | RAS guanyl-releasing protein 1 [Danio rerio] |           |        |     |     | gi 113678177 | 77834.7                     | 7.57 | 11                                        | 32     | 0 |

Peptide Information

| Calc. Mass | Obsrv. Mass | ± da    | ± ppm | Start Seq. | End Seq. | Sequence                   | Ion Score | C. I. % | Modification                                | Rank | Result Type |
|------------|-------------|---------|-------|------------|----------|----------------------------|-----------|---------|---------------------------------------------|------|-------------|
| 842.4882   | 842.5079    | 0.0197  | 23    | 271        | 277      | FIHVAQK                    |           |         |                                             |      | Mascot      |
| 1165.5703  | 1165.7401   | 0.1698  | 146   | 580        | 589      | DVVGMECLKR                 |           |         | Oxidation (M)[5]                            |      | Mascot      |
| 1295.5719  | 1295.7073   | 0.1354  | 105   | 33         | 43       | MTCPSAQEISR                |           |         | Carbamidomethyl (C)[3], Oxidation (M)[1]    |      | Mascot      |
| 1397.6691  | 1397.5939   | -0.0752 | -54   | 135        | 145      | LMFEMDPLLEK                |           |         | Oxidation (M)[2,5]                          |      | Mascot      |
| 1475.6803  | 1475.7961   | 0.1158  | 78    | 577        | 588      | HCKDVGMECLK                |           |         | Carbamidomethyl (C)[2,10]                   |      | Mascot      |
| 1491.6753  | 1491.7917   | 0.1164  | 78    | 577        | 588      | HCKDVGMECLK                |           |         | Carbamidomethyl (C)[2,10], Oxidation (M)[8] |      | Mascot      |
| 1564.6995  | 1564.6842   | -0.0153 | -10   | 66         | 78       | CLHCFDSGKLNLR              |           |         | Carbamidomethyl (C)[1]                      |      | Mascot      |
| 1862.8589  | 1862.9497   | 0.0908  | 49    | 507        | 521      | EGEISREEITSYFMR            |           |         | Oxidation (M)[14]                           |      | Mascot      |
| 2095.9165  | 2096.0117   | 0.0952  | 45    | 474        | 490      | NYDLNMDGYISLEEFK           |           |         | Oxidation (M)[6]                            |      | Mascot      |
| 2268.1223  | 2268.0283   | -0.094  | -41   | 589        | 610      | RLQVNSSSCPCTPGPVS<br>GLHTK |           |         |                                             |      | Mascot      |
| 2284.2812  | 2284.165    | -0.1162 | -51   | 433        | 454      | IQPVAPVKPPVVAEWGS<br>GVTPR |           |         |                                             |      | Mascot      |
| 2362.1396  | 2362.1104   | -0.0292 | -12   | 213        | 232      | NFCNVSFLDYRSYVVHG<br>SVR   |           |         |                                             |      | Mascot      |

|    |                             |  |  |  |  |              |         |      |   |    |   |
|----|-----------------------------|--|--|--|--|--------------|---------|------|---|----|---|
| 17 | novel protein [Danio rerio] |  |  |  |  | gi 157888684 | 14228.7 | 6.44 | 6 | 32 | 0 |
|----|-----------------------------|--|--|--|--|--------------|---------|------|---|----|---|

Peptide Information

| Calc. Mass | Obsrv. Mass | ± da    | ± ppm | Start Seq. | End Seq. | Sequence                | Ion Score | C. I. % | Modification              | Rank | Result Type |
|------------|-------------|---------|-------|------------|----------|-------------------------|-----------|---------|---------------------------|------|-------------|
| 1115.5817  | 1115.6874   | 0.1057  | 95    | 97         | 105      | IHNGERPHR               |           |         |                           |      | Mascot      |
| 1341.6984  | 1341.712    | 0.0136  | 10    | 59         | 68       | YTYTLKIHR               |           |         | Oxidation (M)[9]          |      | Mascot      |
| 1763.7574  | 1763.7936   | 0.0362  | 21    | 106        | 121      | CTDCGKSFTDSSSLQK        |           |         | Carbamidomethyl (C)[1]    |      | Mascot      |
| 1763.7574  | 1763.9857   | 0.2283  | 129   | 106        | 121      | CTDCGKSFTDSSSLQK        |           |         | Carbamidomethyl (C)[1]    |      | Mascot      |
| 1763.7574  | 1763.9857   | 0.2283  | 129   | 106        | 121      | CTDCGKSFTDSSSLQK        |           |         | Carbamidomethyl (C)[1]    |      | Mascot      |
| 2268.04    | 2268.0283   | -0.0117 | -5    | 11         | 29       | QEDTEELIGFKELSEDEE<br>K |           |         |                           |      | Mascot      |
| 2283.0579  | 2283.1694   | 0.1115  | 49    | 65         | 83       | IHMRIHTGEKPYQCSHCD<br>K |           |         |                           |      | Mascot      |
| 2298.0352  | 2298.1704   | 0.1352  | 59    | 39         | 58       | SQTDFICTGFICAQCGKS      |           |         | Carbamidomethyl (C)[7,12] |      | Mascot      |

18 Zgc:110331 [Danio rerio] FK  
gi|62202266 17382.1 8.3 6 32 0

Peptide Information

| Calc. Mass | Obsrv. Mass | ± da    | ± ppm | Start Seq. | End Seq. | Sequence               | Ion Score | C. I. % | Modification           | Rank | Result Type |
|------------|-------------|---------|-------|------------|----------|------------------------|-----------|---------|------------------------|------|-------------|
| 820.4233   | 820.4335    | 0.0102  | 12    | 1          | 8        | MAASLAEK               |           |         |                        |      | Mascot      |
| 882.5294   | 882.5632    | 0.0338  | 38    | 122        | 129      | ELSLPPVK               |           |         |                        |      | Mascot      |
| 1045.5636  | 1045.5592   | -0.0044 | -4    | 42         | 51       | NVGSLDKNAK             |           |         |                        |      | Mascot      |
| 1256.6382  | 1256.5685   | -0.0697 | -55   | 32         | 41       | KVVDHYENPR             |           |         |                        |      | Mascot      |
| 1701.9026  | 1701.8966   | -0.006  | -4    | 1          | 16       | MAASLAEKCAAPQILK       |           |         | Carbamidomethyl (C)[9] |      | Mascot      |
| 2190.0898  | 2190.1494   | 0.0596  | 27    | 84         | 104      | FKTFGCGSAIASSSLATE WVK |           |         |                        |      | Mascot      |
| 2190.0898  | 2190.1494   | 0.0596  | 27    | 84         | 104      | FKTFGCGSAIASSSLATE WVK |           |         |                        |      | Mascot      |

19 PREDICTED: actin-binding Rho-activating protein-like [Danio rerio] gi|189530046 19545.6 5.42 6 32 0

Peptide Information

| Calc. Mass | Obsrv. Mass | ± da   | ± ppm | Start Seq. | End Seq. | Sequence           | Ion Score | C. I. % | Modification     | Rank | Result Type |
|------------|-------------|--------|-------|------------|----------|--------------------|-----------|---------|------------------|------|-------------|
| 996.6676   | 996.5936    | -0.074 | -74   | 123        | 131      | LVGVLLRAR          |           |         |                  |      | Mascot      |
| 1188.5942  | 1188.6804   | 0.0862 | 73    | 75         | 84       | GKDAHFLMNR         |           |         |                  |      | Mascot      |
| 1188.5942  | 1188.6804   | 0.0862 | 73    | 75         | 84       | GKDAHFLMNR         |           |         |                  |      | Mascot      |
| 1296.7058  | 1296.7302   | 0.0244 | 19    | 105        | 115      | TAVRFGTLFER        |           |         |                  |      | Mascot      |
| 1402.6168  | 1402.72     | 0.1032 | 74    | 32         | 42       | WSNEHCENQKK        |           |         |                  |      | Mascot      |
| 1701.8376  | 1701.8966   | 0.059  | 35    | 43         | 57       | NPFSNGMVTTPQIQR    |           |         | Oxidation (M)[7] |      | Mascot      |
| 2190.0793  | 2190.1494   | 0.0701 | 32    | 77         | 94       | DAHFLMNREVTELCQVIR |           |         | Oxidation (M)[6] |      | Mascot      |
| 2190.0793  | 2190.1494   | 0.0701 | 32    | 77         | 94       | DAHFLMNREVTELCQVIR |           |         | Oxidation (M)[6] |      | Mascot      |

20 probable ATP-dependent RNA helicase DDX41 [Danio rerio] gi|41054858 34672 8.93 8 32 0

Peptide Information

| Calc. Mass | Obsrv. Mass | ± da    | ± ppm | Start Seq. | End Seq. | Sequence         | Ion Score | C. I. % | Modification           | Rank | Result Type |
|------------|-------------|---------|-------|------------|----------|------------------|-----------|---------|------------------------|------|-------------|
| 820.4497   | 820.4335    | -0.0162 | -20   | 241        | 246      | LPFCKR           |           |         | Carbamidomethyl (C)[4] |      | Mascot      |
| 1139.5798  | 1139.6046   | 0.0248  | 22    | 116        | 125      | ALMSVKEMAK       |           |         | Oxidation (M)[3,8]     |      | Mascot      |
| 1341.662   | 1341.712    | 0.05    | 37    | 296        | 306      | EQMEVVKHGVW      |           |         |                        |      | Mascot      |
| 1764.0054  | 1763.7936   | -0.2118 | -120  | 157        | 172      | KYHILVEGEGIPAPIK |           |         |                        |      | Mascot      |
| 1764.0054  | 1763.9857   | -0.0197 | -11   | 157        | 172      | KYHILVEGEGIPAPIK |           |         |                        |      | Mascot      |



|           |           |         |     |     |     |                                   |                         |  |  |  |  |        |
|-----------|-----------|---------|-----|-----|-----|-----------------------------------|-------------------------|--|--|--|--|--------|
| 1764.0054 | 1763.9857 | -0.0197 | -11 | 157 | 172 | KYHILVEGEGIPAPIK                  |                         |  |  |  |  | Mascot |
| 1861.9741 | 1861.9338 | -0.0403 | -22 | 135 | 150 | TSWNAPRYILSMPAVR                  |                         |  |  |  |  | Mascot |
| 2225.3127 | 2225.1113 | -0.2014 | -91 | 190 | 210 | KGIVHPTPIQIGIPTILSG<br>R          |                         |  |  |  |  | Mascot |
| 2225.3127 | 2225.1113 | -0.2014 | -91 | 190 | 210 | KGIVHPTPIQIGIPTILSG<br>R          |                         |  |  |  |  | Mascot |
| 2378.1335 | 2378.1089 | -0.0246 | -10 | 274 | 295 | LLEDEGAPQMRCALCIG<br>GMSVK        | Carbamidomethyl (C)[12] |  |  |  |  | Mascot |
| 3234.6499 | 3234.7236 | 0.0737  | 23  | 211 | 239 | DMIGIAFTGSGKTLVFTLP<br>IIMFCLEQEK | Oxidation (M)[2,22]     |  |  |  |  | Mascot |

21 PREDICTED: oocyte zinc finger protein XICOF6-like, partial [Danio rerio] gi|326666845 49159.4 9.4 10 32 0

#### Peptide Information

| Calc. Mass | Obsrv. Mass | ± da    | ± ppm | Start Seq. | End Seq. | Sequence                         | Ion Score | C. I. | % Modification                                 | Rank | Result Type |
|------------|-------------|---------|-------|------------|----------|----------------------------------|-----------|-------|------------------------------------------------|------|-------------|
| 1188.579   | 1188.6804   | 0.1014  | 85    | 188        | 197      | QSSSLNLHMR                       |           |       | Oxidation (M)[9]                               |      | Mascot      |
| 1188.579   | 1188.6804   | 0.1014  | 85    | 188        | 197      | QSSSLNLHMR                       |           |       | Oxidation (M)[9]                               |      | Mascot      |
| 1491.6025  | 1491.7917   | 0.1892  | 127   | 33         | 44       | DKSCFTCTQCGK                     |           |       | Carbamidomethyl (C)[4,7,10]                    |      | Mascot      |
| 1708.8146  | 1708.6907   | -0.1239 | -73   | 396        | 410      | IHTGEKPYKCSQCSK                  |           |       |                                                |      | Mascot      |
| 1708.8146  | 1708.6907   | -0.1239 | -73   | 396        | 410      | IHTGEKPYKCSQCSK                  |           |       |                                                |      | Mascot      |
| 1763.8203  | 1763.7936   | -0.0267 | -15   | 170        | 184      | IHTGEKPFTCTQCGK                  |           |       | Carbamidomethyl (C)[10,13]                     |      | Mascot      |
| 1763.8203  | 1763.9857   | 0.1654  | 94    | 170        | 184      | IHTGEKPFTCTQCGK                  |           |       | Carbamidomethyl (C)[10,13]                     |      | Mascot      |
| 1763.8203  | 1763.9857   | 0.1654  | 94    | 142        | 156      | IHTGEKPFTCTQCGK                  |           |       | Carbamidomethyl (C)[10,13]                     |      | Mascot      |
| 1862.9     | 1862.9497   | 0.0497  | 27    | 282        | 296      | IHTREKPFTCTQCGK                  |           |       | Carbamidomethyl (C)[10,13]                     |      | Mascot      |
| 2043.0337  | 2043.0273   | -0.0064 | -3    | 111        | 128      | HMKIHTGEKPFICTLCGK               |           |       |                                                |      | Mascot      |
| 2190.0076  | 2190.1494   | 0.1418  | 65    | 54         | 72       | IHMMIHTGERPFTCTQCG<br>K          |           |       |                                                |      | Mascot      |
| 2190.0076  | 2190.1494   | 0.1418  | 65    | 54         | 72       | IHMMIHTGERPFTCTQCG<br>K          |           |       |                                                |      | Mascot      |
| 2238.9763  | 2239.1018   | 0.1255  | 56    | 251        | 268      | HMMTHTIEKPFTCTQCG<br>K           |           |       | Carbamidomethyl (C)[13,16], Oxidation (M)[2,3] |      | Mascot      |
| 2918.407   | 2918.55     | 0.143   | 49    | 188        | 212      | QSSSLNLHMRIHTGEKPF<br>TCTLCGK    |           |       | Carbamidomethyl (C)[20,23], Oxidation (M)[9]   |      | Mascot      |
| 3234.4839  | 3234.7236   | 0.2397  | 74    | 251        | 278      | HMMTHTIEKPFTCTQCG<br>KSFSQSSYLNK |           |       |                                                |      | Mascot      |

22 PREDICTED: hypothetical protein LOC100537919 [Danio rerio] gi|326670747 12350 9.1 6 31 0

#### Peptide Information

| Calc. Mass | Obsrv. Mass | ± da    | ± ppm | Start Seq. | End Seq. | Sequence       | Ion Score | C. I. | % Modification         | Rank | Result Type |
|------------|-------------|---------|-------|------------|----------|----------------|-----------|-------|------------------------|------|-------------|
| 1397.6326  | 1397.5939   | -0.0387 | -28   | 41         | 53       | ESACTSNSVRTDK  |           |       |                        |      | Mascot      |
| 1495.725   | 1495.8354   | 0.1104  | 74    | 55         | 67       | DEVCLSAFPYVPR  |           |       |                        |      | Mascot      |
| 1708.8475  | 1708.6907   | -0.1568 | -92   | 54         | 67       | RDEVCLSAFPYVPR |           |       | Carbamidomethyl (C)[5] |      | Mascot      |

|    |                                                 |           |         |     |    |              |                                    |      |   |    |   |                                                    |        |
|----|-------------------------------------------------|-----------|---------|-----|----|--------------|------------------------------------|------|---|----|---|----------------------------------------------------|--------|
|    | 1708.8475                                       | 1708.6907 | -0.1568 | -92 | 54 | 67           | RDEVCLSAFPYVPR                     |      |   |    |   | Carbamidomethyl (C)[5]                             | Mascot |
|    | 2268.0344                                       | 2268.0283 | -0.0061 | -3  | 22 | 40           | VMDMEQRTSNLQTNAND<br>LR            |      |   |    |   | Oxidation (M)[2,4]                                 | Mascot |
|    | 3234.5745                                       | 3234.7236 | 0.1491  | 46  | 2  | 28           | TNFQSQQVFLTLAEMPIH<br>PKVMDMEQR    |      |   |    |   | Oxidation (M)[15]                                  | Mascot |
|    | 3282.5269                                       | 3282.7026 | 0.1757  | 54  | 78 | 107          | GKTTVLGVMSIFMCVSC<br>GGVAFTCQPACLR |      |   |    |   | Carbamidomethyl (C)[14,17,24], Oxidation (M)[9,13] | Mascot |
| 23 | hypothetical protein LOC100137114 [Danio rerio] |           |         |     |    | gi 167963476 | 51534.3                            | 6.24 | 9 | 31 | 0 |                                                    |        |

#### Peptide Information

|  | Calc. Mass | Obsrv. Mass | ± da    | ± ppm | Start Seq. | End Seq. | Sequence            | Ion Score | C. I. | % | Modification              | Rank | Result Type |
|--|------------|-------------|---------|-------|------------|----------|---------------------|-----------|-------|---|---------------------------|------|-------------|
|  | 1115.6055  | 1115.6874   | 0.0819  | 73    | 272        | 280      | AEEQLERLK           |           |       |   |                           |      | Mascot      |
|  | 1139.5699  | 1139.6046   | 0.0347  | 30    | 50         | 58       | RIYSCPLCK           |           |       |   | Carbamidomethyl (C)[5]    |      | Mascot      |
|  | 1397.6664  | 1397.5939   | -0.0725 | -52   | 149        | 159      | LQEMICPQH NK        |           |       |   | Carbamidomethyl (C)[6]    |      | Mascot      |
|  | 1404.8461  | 1404.7225   | -0.1236 | -88   | 434        | 446      | IGSATPIIIYTKK       |           |       |   |                           |      | Mascot      |
|  | 1475.7125  | 1475.7961   | 0.0836  | 57    | 420        | 433      | SFSFGSTRTGDSVK      |           |       |   |                           |      | Mascot      |
|  | 1492.7278  | 1492.8203   | 0.0925  | 62    | 2          | 14       | AEVDISVDQNQFK       |           |       |   |                           |      | Mascot      |
|  | 1492.7278  | 1492.8203   | 0.0925  | 62    | 2          | 14       | AEVDISVDQNQFK       |           |       |   |                           |      | Mascot      |
|  | 1564.8403  | 1564.6842   | -0.1561 | -100  | 70         | 82       | NVVFAMLEKLQK        |           |       |   | Oxidation (M)[7]          |      | Mascot      |
|  | 1864.0426  | 1863.9562   | -0.0864 | -46   | 428        | 445      | TGDSVKIGSATPIIIYTK  |           |       |   |                           |      | Mascot      |
|  | 1864.0426  | 1863.9562   | -0.0864 | -46   | 428        | 445      | TGDSVKIGSATPIIIYTK  |           |       |   |                           |      | Mascot      |
|  | 2349.0972  | 2349.1384   | 0.0412  | 18    | 149        | 166      | LQEMICPQH NKVMEIYCR |           |       |   | Carbamidomethyl (C)[6,17] |      | Mascot      |

24 peptidyl-prolyl cis-trans isomerase FKBP7 [Danio rerio] gi|52218882 25041.6 5.3 6 31 0

#### Peptide Information

|  | Calc. Mass | Obsrv. Mass | ± da    | ± ppm | Start Seq. | End Seq. | Sequence                       | Ion Score | C. I. | % | Modification            | Rank | Result Type |
|--|------------|-------------|---------|-------|------------|----------|--------------------------------|-----------|-------|---|-------------------------|------|-------------|
|  | 1051.567   | 1051.7098   | 0.1428  | 136   | 165        | 172      | EEIKEYLK                       |           |       |   |                         |      | Mascot      |
|  | 1402.7941  | 1402.72     | -0.0741 | -53   | 109        | 121      | KVTIPPSLAYGEK                  |           |       |   |                         |      | Mascot      |
|  | 1475.6869  | 1475.7961   | 0.1092  | 74    | 94         | 107      | GLDVALQDMCPGEK                 |           |       |   |                         |      | Mascot      |
|  | 1491.6818  | 1491.7917   | 0.1099  | 74    | 94         | 107      | GLDVALQDMCPGEK                 |           |       |   | Oxidation (M)[9]        |      | Mascot      |
|  | 1564.7676  | 1564.6842   | -0.0834 | -53   | 36         | 48       | IEVTFLPENC SQK                 |           |       |   | Carbamidomethyl (C)[10] |      | Mascot      |
|  | 1763.8997  | 1763.7936   | -0.1061 | -60   | 36         | 50       | IEVTFLPENC SQKAK               |           |       |   | Carbamidomethyl (C)[10] |      | Mascot      |
|  | 1763.8997  | 1763.9857   | 0.086   | 49    | 36         | 50       | IEVTFLPENC SQKAK               |           |       |   | Carbamidomethyl (C)[10] |      | Mascot      |
|  | 1763.8997  | 1763.9857   | 0.086   | 49    | 36         | 50       | IEVTFLPENC SQKAK               |           |       |   | Carbamidomethyl (C)[10] |      | Mascot      |
|  | 3298.8286  | 3298.7104   | -0.1182 | -36   | 1          | 26       | MFLRFLFYFCLILSLQALY<br>PFITIIR |           |       |   | Carbamidomethyl (C)[10] |      | Mascot      |
|  | 3298.8286  | 3298.7104   | -0.1182 | -36   | 1          | 26       | MFLRFLFYFCLILSLQALY<br>PFITIIR |           |       |   | Carbamidomethyl (C)[10] |      | Mascot      |

25 PREDICTED: myelin transcription factor 1-like gi|326675841 117363.1 4.8 15 30 0

protein-like [Danio rerio]

| Peptide Information |             |         |       |            |          |                        |           |       |                                                 |                  |
|---------------------|-------------|---------|-------|------------|----------|------------------------|-----------|-------|-------------------------------------------------|------------------|
| Calc. Mass          | Obsrv. Mass | ± da    | ± ppm | Start Seq. | End Seq. | Sequence               | Ion Score | C. I. | % Modification                                  | Rank Result Type |
| 842.473             | 842.5079    | 0.0349  | 41    | 1052       | 1059     | QAVQGIQV               |           |       |                                                 | Mascot           |
| 1165.6219           | 1165.7401   | 0.1182  | 101   | 562        | 570      | VL RPMCFVK             |           |       | Carbamidomethyl (C)[6], Oxidation (M)[5]        | Mascot           |
| 1176.6986           | 1176.6115   | -0.0871 | -74   | 47         | 56       | KVFLTVVDQK             |           |       |                                                 | Mascot           |
| 1188.6107           | 1188.6804   | 0.0697  | 59    | 629        | 638      | DKLDINEDVK             |           |       |                                                 | Mascot           |
| 1188.6107           | 1188.6804   | 0.0697  | 59    | 629        | 638      | DKLDINEDVK             |           |       |                                                 | Mascot           |
| 1256.6633           | 1256.5685   | -0.0948 | -75   | 475        | 484      | KPY YLK DSSR           |           |       |                                                 | Mascot           |
| 1295.6049           | 1295.7073   | 0.1024  | 79    | 379        | 390      | SKTFSSCAA EHK          |           |       |                                                 | Mascot           |
| 1296.575            | 1296.7302   | 0.1552  | 120   | 543        | 554      | AHEKHQSCDGGK           |           |       |                                                 | Mascot           |
| 1402.7173           | 1402.72     | 0.0027  | 2     | 233        | 245      | GELSLDVNSDVVR          |           |       |                                                 | Mascot           |
| 1404.7845           | 1404.7225   | -0.062  | -44   | 33         | 45       | KPLETHALEPAAK          |           |       |                                                 | Mascot           |
| 1564.6908           | 1564.6842   | -0.0066 | -4    | 935        | 948      | QQTSNGLDCDADIK         |           |       | Carbamidomethyl (C)[9]                          | Mascot           |
| 1701.9204           | 1701.8966   | -0.0238 | -14   | 760        | 775      | DLITLSGCPLADKSIR       |           |       |                                                 | Mascot           |
| 2224.9668           | 2225.1113   | 0.1445  | 65    | 599        | 617      | YSKTSFDYNNYDSSGVY SK   |           |       |                                                 | Mascot           |
| 2224.9668           | 2225.1113   | 0.1445  | 65    | 599        | 617      | YSKTSFDYNNYDSSGVY SK   |           |       |                                                 | Mascot           |
| 2239.0264           | 2239.1018   | 0.0754  | 34    | 2          | 22       | EESLESRGAVCGVKPG MSCR  |           |       | Carbamidomethyl (C)[12]                         | Mascot           |
| 2269.0708           | 2269.0205   | -0.0503 | -22   | 10         | 30       | GAVCGVKPGMSCRVYG CPVAK |           |       | Carbamidomethyl (C)[4,12,17], Oxidation (M)[10] | Mascot           |
| 2349.0874           | 2349.1384   | 0.051   | 22    | 935        | 955      | QQTSNGLDCDADIKQLD EDIK |           |       |                                                 | Mascot           |

26 ubiquinone biosynthesis protein COQ7 homolog [Danio rerio] gi|131886497 25016.5 5.84 4 30 0 18 0

| Peptide Information |             |        |       |            |          |                                |           |       |                        |                  |
|---------------------|-------------|--------|-------|------------|----------|--------------------------------|-----------|-------|------------------------|------------------|
| Calc. Mass          | Obsrv. Mass | ± da   | ± ppm | Start Seq. | End Seq. | Sequence                       | Ion Score | C. I. | % Modification         | Rank Result Type |
| 1188.5392           | 1188.6804   | 0.1412 | 119   | 61         | 71       | VDHAGEYGANR                    | 18        | 0     |                        | Mascot           |
| 1188.5392           | 1188.6804   | 0.1412 | 119   | 61         | 71       | VDHAGEYGANR                    |           |       |                        | Mascot           |
| 1862.8677           | 1862.9497   | 0.082  | 44    | 11         | 26       | LDLSHVFCPSSVWNCR               |           |       |                        | Mascot           |
| 2349.105            | 2349.1384   | 0.0334 | 14    | 7          | 26       | CAVRLDLSHVFCPSSVW NCR          |           |       | Carbamidomethyl (C)[1] | Mascot           |
| 3282.5007           | 3282.7026   | 0.2019 | 62    | 179        | 206      | EFRDDEIEHHD TGLEHDA ESVPGYMLLK |           |       |                        | Mascot           |
| 3298.4956           | 3298.7104   | 0.2148 | 65    | 179        | 206      | EFRDDEIEHHD TGLEHDA ESVPGYMLLK |           |       | Oxidation (M)[25]      | Mascot           |
| 3298.4956           | 3298.7104   | 0.2148 | 65    | 179        | 206      | EFRDDEIEHHD TGLEHDA ESVPGYMLLK |           |       | Oxidation (M)[25]      | Mascot           |

27 solute carrier family 25, member 16 [Danio rerio] gi|220678978 35307.4 9.82 7 30 0

### Peptide Information

| Calc. Mass | Obsrv. Mass | ± da    | ± ppm | Start Seq. | End Seq. | Sequence                      | Ion Score | C. I. | % Modification             | Rank | Result Type |
|------------|-------------|---------|-------|------------|----------|-------------------------------|-----------|-------|----------------------------|------|-------------|
| 972.4573   | 972.5805    | 0.1232  | 127   | 21         | 27       | DGYWLR                        |           |       |                            |      | Mascot      |
| 996.5216   | 996.5936    | 0.072   | 72    | 269        | 277      | CCSLTKTLK                     |           |       |                            |      | Mascot      |
| 1165.6224  | 1165.7401   | 0.1177  | 101   | 147        | 156      | LAFQVTGHR                     |           |       |                            |      | Mascot      |
| 1311.6362  | 1311.6519   | 0.0157  | 12    | 257        | 268      | MLGASLPDHDK                   |           |       |                            |      | Mascot      |
| 2096.0918  | 2096.0117   | -0.0801 | -38   | 1          | 20       | MTTEAVSSGARPQIPAPV<br>QR      |           |       |                            |      | Mascot      |
| 2239.0059  | 2239.1018   | 0.0959  | 43    | 21         | 40       | DGYWLRSTAGGVAGC<br>CAK        |           |       | Carbamidomethyl (C)[17,18] |      | Mascot      |
| 2918.4907  | 2918.55     | 0.0593  | 20    | 2          | 27       | TTEAVSSGARPQIPAPVQ<br>RDGYWLR |           |       |                            |      | Mascot      |

28 RecName: Full=Serine/threonine-protein kinase SIK3  
homolog; AltName: Full=Serine/threonine-protein  
gi|82185347 130884.5 6.25 6 30 0 21 0

### Peptide Information

| Calc. Mass | Obsrv. Mass | ± da    | ± ppm | Start Seq. | End Seq. | Sequence                         | Ion Score | C. I. | % Modification                            | Rank | Result Type |
|------------|-------------|---------|-------|------------|----------|----------------------------------|-----------|-------|-------------------------------------------|------|-------------|
| 820.3981   | 820.4335    | 0.0354  | 43    | 153        | 159      | MAEKDAR                          |           |       |                                           |      | Mascot      |
| 1188.6782  | 1188.6804   | 0.0022  | 2     | 112        | 120      | MLRHPHIR                         | 21        | 0     | Oxidation (M)[1]                          |      | Mascot      |
| 1188.6782  | 1188.6804   | 0.0022  | 2     | 112        | 120      | MLRHPHIR                         |           |       | Oxidation (M)[1]                          |      | Mascot      |
| 1863.0334  | 1862.9497   | -0.0837 | -45   | 181        | 196      | DLKAENLLLDHNLNIK                 |           |       |                                           |      | Mascot      |
| 2211.0798  | 2211.104    | 0.0242  | 11    | 44         | 63       | SAAAACRPPLARVGYE<br>MER          |           |       |                                           |      | Mascot      |
| 2268.1011  | 2268.0283   | -0.0728 | -32   | 44         | 63       | SAAAACRPPLARVGYE<br>MER          |           |       | Carbamidomethyl (C)[6]                    |      | Mascot      |
| 2284.0959  | 2284.165    | 0.0691  | 30    | 44         | 63       | SAAAACRPPLARVGYE<br>MER          |           |       | Carbamidomethyl (C)[6], Oxidation (M)[18] |      | Mascot      |
| 2918.3118  | 2918.55     | 0.2382  | 82    | 1094       | 1119     | HHTIQTCDDEYQVEPM<br>SGMSLLAGK    |           |       | Carbamidomethyl (C)[7]                    |      | Mascot      |
| 3282.3582  | 3282.7026   | 0.3444  | 105   | 1145       | 1174     | EGPVCDVDADVHSSCY<br>PSSCTDMLLSYK |           |       | Carbamidomethyl (C)[5], Oxidation (M)[25] |      | Mascot      |

29 leucine-rich repeat-containing protein 50 [Danio rerio] gi|38488755 61618.7 4.66 9 30 0

### Peptide Information

| Calc. Mass | Obsrv. Mass | ± da    | ± ppm | Start Seq. | End Seq. | Sequence      | Ion Score | C. I. | % Modification   | Rank | Result Type |
|------------|-------------|---------|-------|------------|----------|---------------|-----------|-------|------------------|------|-------------|
| 842.5822   | 842.5079    | -0.0743 | -88   | 230        | 236      | TLIVRLK       |           |       |                  |      | Mascot      |
| 1115.6207  | 1115.6874   | 0.0667  | 60    | 386        | 395      | QSATWGLKPK    |           |       |                  |      | Mascot      |
| 1311.7518  | 1311.6519   | -0.0999 | -76   | 195        | 206      | ISDPALVNILEK  |           |       |                  |      | Mascot      |
| 1475.7887  | 1475.7961   | 0.0074  | 5     | 279        | 291      | KIQESLDAMTAIR |           |       |                  |      | Mascot      |
| 1491.7836  | 1491.7917   | 0.0081  | 5     | 279        | 291      | KIQESLDAMTAIR |           |       | Oxidation (M)[9] |      | Mascot      |

|           |           |         |     |     |     |                              |  |  |  |                     |  |        |
|-----------|-----------|---------|-----|-----|-----|------------------------------|--|--|--|---------------------|--|--------|
| 1861.8497 | 1861.9338 | 0.0841  | 45  | 250 | 267 | DRACAEAWAAGGLEGE<br>QK       |  |  |  |                     |  | Mascot |
| 1862.976  | 1862.9497 | -0.0263 | -14 | 237 | 251 | QLTYLDDRPVFPKDR              |  |  |  |                     |  | Mascot |
| 1873.9874 | 1874.047  | 0.0596  | 32  | 207 | 222 | MPDLRVNLNMGNEVIK             |  |  |  | Oxidation (M)[1,10] |  | Mascot |
| 2362.2588 | 2362.1104 | -0.1484 | -63 | 118 | 137 | CLFLHQNLHTLENLEPLS<br>K      |  |  |  |                     |  | Mascot |
| 2918.4392 | 2918.55   | 0.1108  | 38  | 71  | 95  | LNDTLYLHFKGFSCIEGL<br>EETGLR |  |  |  |                     |  | Mascot |

30 RecName: Full=Leucine-rich repeat-containing protein gi|223635335 62106.9 4.7 9 30 0  
50

#### Peptide Information

| Calc. Mass | Obsrv. Mass | ± da    | ± ppm | Start Seq. | End Seq. | Sequence                     | Ion Score | C. I. | % Modification      | Rank | Result Type |
|------------|-------------|---------|-------|------------|----------|------------------------------|-----------|-------|---------------------|------|-------------|
| 842.5822   | 842.5079    | -0.0743 | -88   | 234        | 240      | TLIVRLK                      |           |       |                     |      | Mascot      |
| 1115.6207  | 1115.6874   | 0.0667  | 60    | 390        | 399      | QSATWGLKPK                   |           |       |                     |      | Mascot      |
| 1311.7518  | 1311.6519   | -0.0999 | -76   | 199        | 210      | ISDPALVNILEK                 |           |       |                     |      | Mascot      |
| 1475.7887  | 1475.7961   | 0.0074  | 5     | 283        | 295      | KIQESLDAMTAIR                |           |       |                     |      | Mascot      |
| 1491.7836  | 1491.7917   | 0.0081  | 5     | 283        | 295      | KIQESLDAMTAIR                |           |       | Oxidation (M)[9]    |      | Mascot      |
| 1861.8497  | 1861.9338   | 0.0841  | 45    | 254        | 271      | DRACAEAWAAGGLEGE<br>QK       |           |       |                     |      | Mascot      |
| 1862.976   | 1862.9497   | -0.0263 | -14   | 241        | 255      | QLTYLDDRPVFPKDR              |           |       |                     |      | Mascot      |
| 1873.9874  | 1874.047    | 0.0596  | 32    | 211        | 226      | MPDLRVNLNMGNEVIK             |           |       | Oxidation (M)[1,10] |      | Mascot      |
| 2362.2588  | 2362.1104   | -0.1484 | -63   | 122        | 141      | CLFLHQNLHTLENLEPLS<br>K      |           |       |                     |      | Mascot      |
| 2918.4392  | 2918.55     | 0.1108  | 38    | 75         | 99       | LNDTLYLHFKGFSCIEGL<br>EETGLR |           |       |                     |      | Mascot      |

31 adenosine deaminase [Danio rerio] gi|15593021 79875.8 9.13 10 30 0

#### Peptide Information

| Calc. Mass | Obsrv. Mass | ± da    | ± ppm | Start Seq. | End Seq. | Sequence        | Ion Score | C. I. | % Modification          | Rank | Result Type |
|------------|-------------|---------|-------|------------|----------|-----------------|-----------|-------|-------------------------|------|-------------|
| 1188.5756  | 1188.6804   | 0.1048  | 88    | 671        | 681      | GSRPGSYHEAK     |           |       |                         |      | Mascot      |
| 1188.5756  | 1188.6804   | 0.1048  | 88    | 671        | 681      | GSRPGSYHEAK     |           |       |                         |      | Mascot      |
| 1341.6692  | 1341.712    | 0.0428  | 32    | 639        | 649      | HDLGRQSQLCK     |           |       | Carbamidomethyl (C)[10] |      | Mascot      |
| 1402.6671  | 1402.72     | 0.0529  | 38    | 584        | 595      | IADMDDIPPPFR    |           |       | Oxidation (M)[4]        |      | Mascot      |
| 1495.7686  | 1495.8354   | 0.0668  | 45    | 406        | 419      | GLALNDCHAEIAR   |           |       |                         |      | Mascot      |
| 1708.8911  | 1708.6907   | -0.2004 | -117  | 406        | 420      | GLALNDCHAEIARR  |           |       | Carbamidomethyl (C)[7]  |      | Mascot      |
| 1708.8911  | 1708.6907   | -0.2004 | -117  | 406        | 420      | GLALNDCHAEIARR  |           |       | Carbamidomethyl (C)[7]  |      | Mascot      |
| 1763.8459  | 1763.7936   | -0.0523 | -30   | 354        | 368      | FSELTDNFSSPHARR |           |       |                         |      | Mascot      |
| 1763.8459  | 1763.9857   | 0.1398  | 79    | 354        | 368      | FSELTDNFSSPHARR |           |       |                         |      | Mascot      |
| 1763.8459  | 1763.9857   | 0.1398  | 79    | 354        | 368      | FSELTDNFSSPHARR |           |       |                         |      | Mascot      |

|    |                                           |           |         |     |             |     |                             |      |   |    |   |  |                   |  |  |  |  |        |
|----|-------------------------------------------|-----------|---------|-----|-------------|-----|-----------------------------|------|---|----|---|--|-------------------|--|--|--|--|--------|
|    | 1861.9014                                 | 1861.9338 | 0.0324  | 17  | 157         | 173 | SFVQFPNASEAHLAMGR           |      |   |    |   |  |                   |  |  |  |  | Mascot |
|    | 2271.9932                                 | 2272.0178 | 0.0246  | 11  | 16          | 35  | FCSLDVDEDKHLSTCSM<br>DVK    |      |   |    |   |  |                   |  |  |  |  | Mascot |
|    | 2271.9932                                 | 2272.0178 | 0.0246  | 11  | 16          | 35  | FCSLDVDEDKHLSTCSM<br>DVK    |      |   |    |   |  |                   |  |  |  |  | Mascot |
|    | 2346.1982                                 | 2346.1089 | -0.0893 | -38 | 305         | 326 | ARAAQAALSGLFNMQLD<br>QTPSR  |      |   |    |   |  |                   |  |  |  |  | Mascot |
|    | 2362.1931                                 | 2362.1104 | -0.0827 | -35 | 305         | 326 | ARAAQAALSGLFNMQLD<br>QTPSR  |      |   |    |   |  | Oxidation (M)[14] |  |  |  |  | Mascot |
|    | 2378.2058                                 | 2378.1089 | -0.0969 | -41 | 39          | 61  | NLDNLSSKEVLGEGPHLA<br>NGSAR |      |   |    |   |  |                   |  |  |  |  | Mascot |
| 32 | Ras-related protein Rab-39A [Danio rerio] |           |         |     | gi 57526713 |     | 24458.4                     | 5.73 | 6 | 30 | 0 |  |                   |  |  |  |  |        |

#### Peptide Information

| Calc. Mass | Obsrv. Mass | ± da    | ± ppm | Start Seq. | End Seq. | Sequence           | Ion Score | C. I. | % Modification         | Rank | Result Type |
|------------|-------------|---------|-------|------------|----------|--------------------|-----------|-------|------------------------|------|-------------|
| 1115.667   | 1115.6874   | 0.0204  | 18    | 11         | 21       | IILLGDSTVGK        |           |       |                        |      | Mascot      |
| 1256.6058  | 1256.5685   | -0.0373 | -30   | 2          | 10       | DTLWQYQFR          |           |       |                        |      | Mascot      |
| 1701.8186  | 1701.8966   | 0.078   | 46    | 170        | 183      | DIYELMKMGIESTR     |           |       | Oxidation (M)[6]       |      | Mascot      |
| 1708.8435  | 1708.6907   | -0.1528 | -89   | 156        | 169      | CNSNVERAFELLTR     |           |       | Carbamidomethyl (C)[1] |      | Mascot      |
| 1708.8435  | 1708.6907   | -0.1528 | -89   | 156        | 169      | CNSNVERAFELLTR     |           |       | Carbamidomethyl (C)[1] |      | Mascot      |
| 1862.9493  | 1862.9497   | 0.0004  | 0     | 191        | 207      | SGLTAKVLYPAEEEAER  |           |       |                        |      | Mascot      |
| 2268.1958  | 2268.0283   | -0.1675 | -74   | 106        | 124      | EVSEHILPHHMVYILGHK |           |       | Oxidation (M)[11]      |      | Mascot      |

|    |                                                                     |  |  |  |             |  |       |      |   |    |   |    |   |
|----|---------------------------------------------------------------------|--|--|--|-------------|--|-------|------|---|----|---|----|---|
| 33 | phosphatidylinositol 3-kinase regulatory subunit beta [Danio rerio] |  |  |  | gi 47086393 |  | 82775 | 6.09 | 5 | 30 | 0 | 21 | 0 |
|----|---------------------------------------------------------------------|--|--|--|-------------|--|-------|------|---|----|---|----|---|

#### Peptide Information

| Calc. Mass | Obsrv. Mass | ± da    | ± ppm | Start Seq. | End Seq. | Sequence                 | Ion Score | C. I. | % Modification            | Rank | Result Type |
|------------|-------------|---------|-------|------------|----------|--------------------------|-----------|-------|---------------------------|------|-------------|
| 972.5512   | 972.5805    | 0.0293  | 30    | 591        | 598      | INEWLGIK                 |           |       |                           |      | Mascot      |
| 1188.6372  | 1188.6804   | 0.0432  | 36    | 361        | 370      | VHGEYTLTLR               | 21        | 0     |                           |      | Mascot      |
| 1188.6372  | 1188.6804   | 0.0432  | 36    | 361        | 370      | VHGEYTLTLR               |           |       |                           |      | Mascot      |
| 1622.8359  | 1622.8436   | 0.0077  | 5     | 118        | 131      | QFMHPETAPPNLIK           |           |       |                           |      | Mascot      |
| 2095.9819  | 2096.0117   | 0.0298  | 14    | 17         | 34       | DWEHDIDLEPGDVLTV<br>DK   |           |       |                           |      | Mascot      |
| 2211.0935  | 2211.104    | 0.0105  | 5     | 654        | 673      | GSFACSVVVEGEIKHCVV<br>YK |           |       | Carbamidomethyl (C)[5]    |      | Mascot      |
| 2268.115   | 2268.0283   | -0.0867 | -38   | 654        | 673      | GSFACSVVVEGEIKHCVV<br>YK |           |       | Carbamidomethyl (C)[5,16] |      | Mascot      |

|    |                            |  |  |  |             |  |         |      |   |    |   |  |  |
|----|----------------------------|--|--|--|-------------|--|---------|------|---|----|---|--|--|
| 34 | protein BTG3 [Danio rerio] |  |  |  | gi 55925203 |  | 18115.1 | 5.85 | 5 | 30 | 0 |  |  |
|----|----------------------------|--|--|--|-------------|--|---------|------|---|----|---|--|--|

#### Peptide Information

| Calc. Mass | Obsrv. Mass | ± da | ± ppm | Start Seq. | End Seq. | Sequence | Ion Score | C. I. | % Modification | Rank | Result Type |
|------------|-------------|------|-------|------------|----------|----------|-----------|-------|----------------|------|-------------|
|------------|-------------|------|-------|------------|----------|----------|-----------|-------|----------------|------|-------------|

|    |                                                                                |           |        |    |     |              |                          |      |    |    |   |  |                            |  |  |  |        |
|----|--------------------------------------------------------------------------------|-----------|--------|----|-----|--------------|--------------------------|------|----|----|---|--|----------------------------|--|--|--|--------|
|    | 1491.7015                                                                      | 1491.7917 | 0.0902 | 60 | 42  | 53           | YKGHWYPDNPSK             |      |    |    |   |  |                            |  |  |  | Mascot |
|    | 2211.0208                                                                      | 2211.104  | 0.0832 | 38 | 91  | 108          | ELTLWVDPGEVCCRYGE<br>K   |      |    |    |   |  | Carbamidomethyl (C)[12,13] |  |  |  | Mascot |
|    | 2224.9412                                                                      | 2225.1113 | 0.1701 | 76 | 139 | 158          | VTSDYHSGSSSDEDSML<br>VHR |      |    |    |   |  | Oxidation (M)[16]          |  |  |  | Mascot |
|    | 2224.9412                                                                      | 2225.1113 | 0.1701 | 76 | 139 | 158          | VTSDYHSGSSSDEDSML<br>VHR |      |    |    |   |  | Oxidation (M)[16]          |  |  |  | Mascot |
|    | 2300.1414                                                                      | 2300.1643 | 0.0229 | 10 | 85  | 104          | DLGLPKELTLWVDPGEV<br>CCR |      |    |    |   |  | Carbamidomethyl (C)[18]    |  |  |  | Mascot |
|    | 2362.0105                                                                      | 2362.1104 | 0.0999 | 42 | 105 | 125          | YGEKNHGFTVATFSSD<br>DDDK |      |    |    |   |  |                            |  |  |  | Mascot |
| 35 | PREDICTED: protein-glutamine<br>gamma-glutamyltransferase 2-like [Danio rerio] |           |        |    |     | gi 326668941 | 74951.8                  | 5.69 | 10 | 29 | 0 |  |                            |  |  |  |        |

#### Peptide Information

|  | Calc. Mass | Obsrv. Mass | ± da    | ± ppm | Start Seq. | End Seq. | Sequence                   | Ion Score | C. I. | % | Modification                                | Rank | Result | Type   |
|--|------------|-------------|---------|-------|------------|----------|----------------------------|-----------|-------|---|---------------------------------------------|------|--------|--------|
|  | 820.5039   | 820.4335    | -0.0704 | -86   | 479        | 485      | LFLKGSR                    |           |       |   |                                             |      |        | Mascot |
|  | 1045.5425  | 1045.5592   | 0.0167  | 16    | 437        | 445      | AVYTEAVHR                  |           |       |   |                                             |      |        | Mascot |
|  | 1296.6075  | 1296.7302   | 0.1227  | 95    | 385        | 395      | VCWLLMTDGSR                |           |       |   | Oxidation (M)[6]                            |      |        | Mascot |
|  | 1492.6809  | 1492.8203   | 0.1394  | 93    | 68         | 81       | GTQSSTNPAQVCSR             |           |       |   | Carbamidomethyl (C)[12]                     |      |        | Mascot |
|  | 1492.6809  | 1492.8203   | 0.1394  | 93    | 68         | 81       | GTQSSTNPAQVCSR             |           |       |   | Carbamidomethyl (C)[12]                     |      |        | Mascot |
|  | 1622.8167  | 1622.8436   | 0.0269  | 17    | 398        | 412      | IMSDSRSVGQNLSTK            |           |       |   |                                             |      |        | Mascot |
|  | 1862.875   | 1862.9497   | 0.0747  | 40    | 255        | 270      | YGQCWVFAAVMCTVLR           |           |       |   | Oxidation (M)[11]                           |      |        | Mascot |
|  | 2211.0017  | 2211.104    | 0.1023  | 46    | 2          | 22       | CSSSSSNTPDQGVRVDL<br>ECVK  |           |       |   |                                             |      |        | Mascot |
|  | 2268.0229  | 2268.0283   | 0.0054  | 2     | 2          | 22       | CSSSSSNTPDQGVRVDL<br>ECVK  |           |       |   | Carbamidomethyl (C)[1]                      |      |        | Mascot |
|  | 2269.0198  | 2269.0205   | 0.0007  | 0     | 107        | 125      | HGSSSCMNTLLFNPW<br>CK      |           |       |   | Carbamidomethyl (C)[6,18], Oxidation (M)[7] |      |        | Mascot |
|  | 2362.1025  | 2362.1104   | 0.0079  | 3     | 271        | 290      | CLGIPCRVVTNYQSAHDT<br>DR   |           |       |   | Carbamidomethyl (C)[1,6]                    |      |        | Mascot |
|  | 2703.2849  | 2703.3987   | 0.1138  | 42    | 255        | 277      | YGQCWVFAAVMCTVLR<br>LGIPCR |           |       |   | Carbamidomethyl (C)[4,12]                   |      |        | Mascot |

36 rtn4rl2a [Danio rerio] gi|157676789 51961.2 7.19 8 29 0

#### Peptide Information

|  | Calc. Mass | Obsrv. Mass | ± da    | ± ppm | Start Seq. | End Seq. | Sequence         | Ion Score | C. I. | % | Modification           | Rank | Result | Type   |
|--|------------|-------------|---------|-------|------------|----------|------------------|-----------|-------|---|------------------------|------|--------|--------|
|  | 972.4455   | 972.5805    | 0.135   | 139   | 1          | 8        | METSTFTR         |           |       |   |                        |      |        | Mascot |
|  | 1176.6371  | 1176.6115   | -0.0256 | -22   | 132        | 142      | LEGGAFRGLEK      |           |       |   |                        |      |        | Mascot |
|  | 1463.7158  | 1463.8864   | 0.1706  | 117   | 291        | 304      | LSSSEVLCASPASR   |           |       |   | Carbamidomethyl (C)[8] |      |        | Mascot |
|  | 1492.8093  | 1492.8203   | 0.011   | 7     | 151        | 163      | CKLAALPHDIFHK    |           |       |   |                        |      |        | Mascot |
|  | 1492.8093  | 1492.8203   | 0.011   | 7     | 151        | 163      | CKLAALPHDIFHK    |           |       |   |                        |      |        | Mascot |
|  | 1708.8501  | 1708.6907   | -0.1594 | -93   | 365        | 381      | AHPYTGKSSVTSTSTK |           |       |   |                        |      |        | Mascot |

|  |           |           |         |     |     |     |                            |  |  |  |                     |  |  |        |
|--|-----------|-----------|---------|-----|-----|-----|----------------------------|--|--|--|---------------------|--|--|--------|
|  | 1708.8501 | 1708.6907 | -0.1594 | -93 | 365 | 381 | AHPYTGGKSSVTSTSTK          |  |  |  |                     |  |  | Mascot |
|  | 2269.1445 | 2269.0205 | -0.124  | -55 | 373 | 393 | SSVTSTSTKYELGEEEEAL<br>LPK |  |  |  |                     |  |  | Mascot |
|  | 2298.1621 | 2298.1704 | 0.0083  | 4   | 239 | 258 | LTMLFLFNNSLAELPGQA<br>MR   |  |  |  | Oxidation (M)[3,19] |  |  | Mascot |
|  | 2314.0002 | 2314.1401 | 0.1399  | 60  | 415 | 435 | CFELECPPEFDSLPPSSS<br>SSR  |  |  |  |                     |  |  | Mascot |

37 novel protein similar to H.sapiens FBXO41, F-box protein 41 (FBXO41) [Danio rerio] gi|220678004 35930.7 9.06 8 29 0

#### Peptide Information

| Calc. Mass | Obsrv. Mass | ± da    | ± ppm | Start Seq. | End Seq. | Sequence                  | Ion Score | C. I. | % Modification          | Rank | Result Type |
|------------|-------------|---------|-------|------------|----------|---------------------------|-----------|-------|-------------------------|------|-------------|
| 1025.5262  | 1025.6066   | 0.0804  | 78    | 81         | 88       | EEYLKSTR                  |           |       |                         |      | Mascot      |
| 1139.5765  | 1139.6046   | 0.0281  | 25    | 292        | 300      | KLFDEMVNK                 |           |       | Oxidation (M)[6]        |      | Mascot      |
| 1188.6517  | 1188.6804   | 0.0287  | 24    | 15         | 24       | TLLRAAEVCR                |           |       | Carbamidomethyl (C)[9]  |      | Mascot      |
| 1188.6517  | 1188.6804   | 0.0287  | 24    | 15         | 24       | TLLRAAEVCR                |           |       | Carbamidomethyl (C)[9]  |      | Mascot      |
| 1311.6475  | 1311.6519   | 0.0044  | 3     | 111        | 121      | VSHCPNLLTDR               |           |       | Carbamidomethyl (C)[4]  |      | Mascot      |
| 1564.8403  | 1564.6842   | -0.1561 | -100  | 293        | 305      | LFDEMVNKLQALK             |           |       | Oxidation (M)[5]        |      | Mascot      |
| 1929.9487  | 1929.9614   | 0.0127  | 7     | 140        | 158      | SATDPVGQEVWALGAG<br>CR    |           |       |                         |      | Mascot      |
| 1929.9487  | 1929.9614   | 0.0127  | 7     | 140        | 158      | SATDPVGQEVWALGAG<br>CR    |           |       |                         |      | Mascot      |
| 2043.0804  | 2043.0273   | -0.0531 | -26   | 159        | 176      | DIISLQVAPLHPCQPAR         |           |       | Carbamidomethyl (C)[13] |      | Mascot      |
| 2378.1511  | 2378.1089   | -0.0422 | -18   | 271        | 291      | SIVVQIGIEDYFEDPNSPE<br>AR |           |       |                         |      | Mascot      |

38 reticulon-4-interacting protein 1 homolog, mitochondrial [Danio rerio] gi|41054824 38884.1 6.68 7 29 0

#### Peptide Information

| Calc. Mass | Obsrv. Mass | ± da    | ± ppm | Start Seq. | End Seq. | Sequence                   | Ion Score | C. I. | % Modification                              | Rank | Result Type |
|------------|-------------|---------|-------|------------|----------|----------------------------|-----------|-------|---------------------------------------------|------|-------------|
| 1165.5769  | 1165.7401   | 0.1632  | 140   | 349        | 358      | TVVSIMEDQK                 |           |       | Oxidation (M)[6]                            |      | Mascot      |
| 1176.6411  | 1176.6115   | -0.0296 | -25   | 2          | 11       | PAWVIDKYGK                 |           |       |                                             |      | Mascot      |
| 1763.8334  | 1763.7936   | -0.0398 | -23   | 204        | 220      | DLGADDVVDYTAGPVEK          |           |       |                                             |      | Mascot      |
| 1763.8334  | 1763.9857   | 0.1523  | 86    | 204        | 220      | DLGADDVVDYTAGPVEK          |           |       |                                             |      | Mascot      |
| 1763.8334  | 1763.9857   | 0.1523  | 86    | 204        | 220      | DLGADDVVDYTAGPVEK          |           |       |                                             |      | Mascot      |
| 1863.0408  | 1862.9497   | -0.0911 | -49   | 166        | 184      | VLILGGSGGVGTFAIQMV<br>K    |           |       | Oxidation (M)[17]                           |      | Mascot      |
| 1902.9901  | 1902.9491   | -0.041  | -22   | 94         | 109      | YFKPGDQVWAAIPWK            |           |       |                                             |      | Mascot      |
| 2096.0547  | 2096.0117   | -0.043  | -21   | 269        | 288      | LGLADGMMQSAVTGCK<br>VVK    |           |       | Carbamidomethyl (C)[16], Oxidation (M)[7,8] |      | Mascot      |
| 2300.054   | 2300.1643   | 0.1103  | 48    | 298        | 319      | WGFFAPSGSALDEVSEM<br>VDAGK |           |       |                                             |      | Mascot      |

39 PREDICTED: ubiquitin carboxyl-terminal hydrolase gi|189517011 128296.5 9.38 12 29 0



43-like [Danio rerio]

| Peptide Information                                           |             |         |       |              |          |                                   |           |         |                                          |      |             |
|---------------------------------------------------------------|-------------|---------|-------|--------------|----------|-----------------------------------|-----------|---------|------------------------------------------|------|-------------|
| Calc. Mass                                                    | Obsrv. Mass | ± da    | ± ppm | Start Seq.   | End Seq. | Sequence                          | Ion Score | C. I. % | Modification                             | Rank | Result Type |
| 850.4377                                                      | 850.54      | 0.1023  | 120   | 1077         | 1084     | STSKTNGR                          |           |         |                                          |      | Mascot      |
| 996.5472                                                      | 996.5936    | 0.0464  | 47    | 1121         | 1130     | NGPLVPASNK                        |           |         |                                          |      | Mascot      |
| 1045.5636                                                     | 1045.5592   | -0.0044 | -4    | 1071         | 1080     | TGTVHKSTSK                        |           |         |                                          |      | Mascot      |
| 1188.5725                                                     | 1188.6804   | 0.1079  | 91    | 651          | 660      | HMVQRTSCAR                        |           |         |                                          |      | Mascot      |
| 1188.5725                                                     | 1188.6804   | 0.1079  | 91    | 651          | 660      | HMVQRTSCAR                        |           |         |                                          |      | Mascot      |
| 1341.7848                                                     | 1341.712    | -0.0728 | -54   | 172          | 183      | GEVTERLAVLVR                      |           |         |                                          |      | Mascot      |
| 1492.6962                                                     | 1492.8203   | 0.1241  | 83    | 742          | 754      | RDAIPSWASCSR                      |           |         | Carbamidomethyl (C)[11]                  |      | Mascot      |
| 1492.6962                                                     | 1492.8203   | 0.1241  | 83    | 742          | 754      | RDAIPSWASCSR                      |           |         | Carbamidomethyl (C)[11]                  |      | Mascot      |
| 1564.8516                                                     | 1564.6842   | -0.1674 | -107  | 294          | 307      | QTRPVCVTLVFSSK                    |           |         |                                          |      | Mascot      |
| 1929.9745                                                     | 1929.9614   | -0.0131 | -7    | 184          | 199      | ALWTFQYTPQLSAEFK                  |           |         |                                          |      | Mascot      |
| 1929.9745                                                     | 1929.9614   | -0.0131 | -7    | 184          | 199      | ALWTFQYTPQLSAEFK                  |           |         |                                          |      | Mascot      |
| 2255.9355                                                     | 2256.0247   | 0.0892  | 40    | 56           | 78       | SDAEDDDGGFGESAPCA<br>GNSVKK       |           |         |                                          |      | Mascot      |
| 2300.1682                                                     | 2300.1643   | -0.0039 | -2    | 247          | 265      | NKPGVRHSFVQEHFQAQ<br>YK           |           |         |                                          |      | Mascot      |
| 2314.2166                                                     | 2314.1401   | -0.0765 | -33   | 472          | 490      | LYYLMINGSQAHNFRVLF<br>K           |           |         |                                          |      | Mascot      |
| 3282.5339                                                     | 3282.7026   | 0.1687  | 51    | 120          | 148      | NHGNTCFMNAVVQCLSN<br>TDLLAEYLGLEK |           |         | Carbamidomethyl (C)[6]                   |      | Mascot      |
| 3298.5288                                                     | 3298.7104   | 0.1816  | 55    | 120          | 148      | NHGNTCFMNAVVQCLSN<br>TDLLAEYLGLEK | 3         | 0       | Carbamidomethyl (C)[6], Oxidation (M)[8] |      | Mascot      |
| 3298.5288                                                     | 3298.7104   | 0.1816  | 55    | 120          | 148      | NHGNTCFMNAVVQCLSN<br>TDLLAEYLGLEK |           |         | Carbamidomethyl (C)[6], Oxidation (M)[8] |      | Mascot      |
| PREDICTED: hypothetical protein LOC100538192<br>[Danio rerio] |             |         |       | gi 326664724 |          | 234026                            | 9.01      | 20      | 29                                       | 0    |             |

| Peptide Information |             |         |       |            |          |              |           |       |                |      |             |
|---------------------|-------------|---------|-------|------------|----------|--------------|-----------|-------|----------------|------|-------------|
| Calc. Mass          | Obsrv. Mass | ± da    | ± ppm | Start Seq. | End Seq. | Sequence     | Ion Score | C. I. | % Modification | Rank | Result Type |
| 820.4597            | 820.4335    | -0.0262 | -32   | 1586       | 1592     | QTMLTVK      |           |       |                |      | Mascot      |
| 850.4205            | 850.54      | 0.1195  | 141   | 201        | 207      | AEFAWAR      |           |       |                |      | Mascot      |
| 972.5836            | 972.5805    | -0.0031 | -3    | 695        | 702      | IVSQEKLK     |           |       |                |      | Mascot      |
| 996.5624            | 996.5936    | 0.0312  | 31    | 173        | 180      | WIPAPERK     |           |       |                |      | Mascot      |
| 1139.6102           | 1139.6046   | -0.0056 | -5    | 329        | 338      | MPALRGNQPR   |           |       |                |      | Mascot      |
| 1165.5887           | 1165.7401   | 0.1514  | 130   | 1450       | 1458     | YSVEEWPKK    |           |       |                |      | Mascot      |
| 1256.746            | 1256.5685   | -0.1775 | -141  | 371        | 381      | SIESKLPELLK  |           |       |                |      | Mascot      |
| 1341.7485           | 1341.712    | -0.0365 | -27   | 1990       | 2001     | LARVIQVNADDK |           |       |                |      | Mascot      |

|  |           |           |         |     |      |      |                               |  |  |  |  |  |                              |  |  |  |        |
|--|-----------|-----------|---------|-----|------|------|-------------------------------|--|--|--|--|--|------------------------------|--|--|--|--------|
|  | 1404.8434 | 1404.7225 | -0.1209 | -86 | 715  | 726  | RPGKIDLLISHR                  |  |  |  |  |  |                              |  |  |  | Mascot |
|  | 1622.7056 | 1622.8436 | 0.138   | 85  | 516  | 528  | GDFSDDHHYFLCPK                |  |  |  |  |  | Carbamidomethyl (C)[11]      |  |  |  | Mascot |
|  | 1763.922  | 1763.7936 | -0.1284 | -73 | 1619 | 1634 | LAVYRENSGLLVCGGR              |  |  |  |  |  | Carbamidomethyl (C)[13]      |  |  |  | Mascot |
|  | 1763.922  | 1763.9857 | 0.0637  | 36  | 1619 | 1634 | LAVYRENSGLLVCGGR              |  |  |  |  |  | Carbamidomethyl (C)[13]      |  |  |  | Mascot |
|  | 1763.922  | 1763.9857 | 0.0637  | 36  | 1619 | 1634 | LAVYRENSGLLVCGGR              |  |  |  |  |  | Carbamidomethyl (C)[13]      |  |  |  | Mascot |
|  | 2190.0859 | 2190.1494 | 0.0635  | 29  | 1900 | 1919 | EDCVEYVNPNSLLGRS<br>GPK       |  |  |  |  |  |                              |  |  |  | Mascot |
|  | 2190.0859 | 2190.1494 | 0.0635  | 29  | 1900 | 1919 | EDCVEYVNPNSLLGRS<br>GPK       |  |  |  |  |  |                              |  |  |  | Mascot |
|  | 2208.0747 | 2208.041  | -0.0337 | -15 | 577  | 597  | VKMINCSGNDQQGLVSN<br>SGLK     |  |  |  |  |  | Oxidation (M)[3]             |  |  |  | Mascot |
|  | 2211.0215 | 2211.104  | 0.0825  | 37  | 816  | 833  | EFIDWWKWDSIGTACEP<br>K        |  |  |  |  |  |                              |  |  |  | Mascot |
|  | 2255.9226 | 2256.0247 | 0.1021  | 45  | 492  | 509  | CLGVHEDDSRCSNYLC<br>R         |  |  |  |  |  | Carbamidomethyl (C)[1,11,17] |  |  |  | Mascot |
|  | 2268.043  | 2268.0283 | -0.0147 | -6  | 816  | 833  | EFIDWWKWDSIGTACEP<br>K        |  |  |  |  |  | Carbamidomethyl (C)[15]      |  |  |  | Mascot |
|  | 2272.0881 | 2272.0178 | -0.0703 | -31 | 1031 | 1048 | FLWRDTQDEEISEYAIR             |  |  |  |  |  |                              |  |  |  | Mascot |
|  | 2272.0881 | 2272.0178 | -0.0703 | -31 | 1031 | 1048 | FLWRDTQDEEISEYAIR             |  |  |  |  |  |                              |  |  |  | Mascot |
|  | 2300.1956 | 2300.1643 | -0.0313 | -14 | 671  | 691  | TPEGTVKAHQICYLEEI<br>AK       |  |  |  |  |  |                              |  |  |  | Mascot |
|  | 2346.22   | 2346.1089 | -0.1111 | -47 | 1969 | 1989 | NVAVGDVWVLADQNALR<br>SQYK     |  |  |  |  |  |                              |  |  |  | Mascot |
|  | 2349.084  | 2349.1384 | 0.0544  | 23  | 1082 | 1101 | VLEEDSYVDDILTSHNSQ<br>ER      |  |  |  |  |  |                              |  |  |  | Mascot |
|  | 2703.4307 | 2703.3987 | -0.032  | -12 | 340  | 364  | VIELIQMVEKALADLTDLG<br>NVGAMK |  |  |  |  |  | Oxidation (M)[7,24]          |  |  |  | Mascot |

41

novel protein [Danio rerio]

gi|27802780

24560.2

4.94

5

28

0

Peptide Information

| Calc. Mass | Obsrv. Mass | ± da    | ± ppm | Start Seq. | End Seq. | Sequence                  | Ion Score | C. I. | % Modification    | Rank | Result Type |
|------------|-------------|---------|-------|------------|----------|---------------------------|-----------|-------|-------------------|------|-------------|
| 1564.7489  | 1564.6842   | -0.0647 | -41   | 29         | 42       | ADNAVQDTIVFDEK            |           |       |                   |      | Mascot      |
| 2268.0391  | 2268.0283   | -0.0108 | -5    | 81         | 98       | YNRPEEDKDALYHPFDM<br>K    |           |       |                   |      | Mascot      |
| 2272.0989  | 2272.0178   | -0.0811 | -36   | 29         | 48       | ADNAVQDTIVFDEKMFLG<br>MK  | 2         |       | 0                 |      | Mascot      |
| 2272.0989  | 2272.0178   | -0.0811 | -36   | 29         | 48       | ADNAVQDTIVFDEKMFLG<br>MK  |           |       |                   |      | Mascot      |
| 2284.0339  | 2284.165    | 0.1311  | 57    | 81         | 98       | YNRPEEDKDALYHPFDM<br>K    |           |       | Oxidation (M)[17] |      | Mascot      |
| 2346.1572  | 2346.1089   | -0.0483 | -21   | 143        | 163      | EKDVIIGNNVRPIYSSPE<br>EDK |           |       |                   |      | Mascot      |
| 2502.0874  | 2502.2581   | 0.1707  | 68    | 54         | 74       | EDMDITDFDIDPDMVW<br>KAAK  |           |       | Oxidation (M)[3]  |      | Mascot      |

42

Pik3r2 protein [Danio rerio]

gi|190338110

83005.2

5.35

4

28

0

21

0

Peptide Information

| Calc. Mass | Obsrv. Mass | ± da | ± ppm | Start Seq. | End Seq. | Sequence | Ion Score | C. I. | % Modification | Rank | Result Type |
|------------|-------------|------|-------|------------|----------|----------|-----------|-------|----------------|------|-------------|
|------------|-------------|------|-------|------------|----------|----------|-----------|-------|----------------|------|-------------|

|    |                                                            |           |         |     |     |              |                          |     |   |                           |   |  |        |
|----|------------------------------------------------------------|-----------|---------|-----|-----|--------------|--------------------------|-----|---|---------------------------|---|--|--------|
|    | 972.5512                                                   | 972.5805  | 0.0293  | 30  | 592 | 599          | INEWLGIK                 |     |   |                           |   |  | Mascot |
|    | 1188.6372                                                  | 1188.6804 | 0.0432  | 36  | 362 | 371          | VHGEYTLTLR               | 21  | 0 |                           |   |  | Mascot |
|    | 1188.6372                                                  | 1188.6804 | 0.0432  | 36  | 362 | 371          | VHGEYTLTLR               |     |   |                           |   |  | Mascot |
|    | 1622.8359                                                  | 1622.8436 | 0.0077  | 5   | 118 | 131          | QFMHPETAPPNLIK           |     |   |                           |   |  | Mascot |
|    | 2211.0935                                                  | 2211.104  | 0.0105  | 5   | 655 | 674          | GSFACSVVVEGEIKHCVV<br>YK |     |   | Carbamidomethyl (C)[5]    |   |  | Mascot |
|    | 2268.115                                                   | 2268.0283 | -0.0867 | -38 | 655 | 674          | GSFACSVVVEGEIKHCVV<br>YK |     |   | Carbamidomethyl (C)[5,16] |   |  | Mascot |
| 43 | novel protein with Methyltransferase domains [Danio rerio] |           |         |     |     | gi 169158986 | 18959.9                  | 4.5 | 5 | 28                        | 0 |  |        |

#### Peptide Information

| Calc. Mass | Obsrv. Mass | ± da    | ± ppm | Start Seq. | End Seq. | Sequence                          | Ion Score | C. I. | % Modification           | Rank | Result Type |
|------------|-------------|---------|-------|------------|----------|-----------------------------------|-----------|-------|--------------------------|------|-------------|
| 1341.6433  | 1341.712    | 0.0687  | 51    | 2          | 12       | DYLPDSNARYK                       |           |       |                          |      | Mascot      |
| 1397.757   | 1397.5939   | -0.1631 | -117  | 141        | 152      | LLHQVLLESCSR                      |           |       |                          |      | Mascot      |
| 1622.7009  | 1622.8436   | 0.1427  | 88    | 23         | 35       | TEESFEWFGDFTK                     |           |       |                          |      | Mascot      |
| 1763.8315  | 1763.7936   | -0.0379 | -21   | 91         | 104      | DCAQLSWLCLDARR                    |           |       | Carbamidomethyl (C)[2,9] |      | Mascot      |
| 1763.8315  | 1763.9857   | 0.1542  | 87    | 91         | 104      | DCAQLSWLCLDARR                    |           |       | Carbamidomethyl (C)[2,9] |      | Mascot      |
| 1763.8315  | 1763.9857   | 0.1542  | 87    | 91         | 104      | DCAQLSWLCLDARR                    |           |       | Carbamidomethyl (C)[2,9] |      | Mascot      |
| 3234.6279  | 3234.7236   | 0.0957  | 30    | 105        | 133      | LAFPDGVFDVVLEKGTLD<br>AMLVEETDPWK |           |       |                          |      | Mascot      |

44 PREDICTED: centrosomal protein of 152 kDa-like [Danio rerio] gi|189537675 179442.1 5.41 16 28 0

#### Peptide Information

| Calc. Mass | Obsrv. Mass | ± da    | ± ppm | Start Seq. | End Seq. | Sequence         | Ion Score | C. I. | % Modification         | Rank | Result Type |
|------------|-------------|---------|-------|------------|----------|------------------|-----------|-------|------------------------|------|-------------|
| 972.5472   | 972.5805    | 0.0333  | 34    | 1093       | 1100     | VLKEAQER         |           |       |                        |      | Mascot      |
| 996.5108   | 996.5936    | 0.0828  | 83    | 754        | 761      | LEENLHNK         |           |       |                        |      | Mascot      |
| 1025.5487  | 1025.6066   | 0.0579  | 56    | 1150       | 1157     | EHKNTLQR         |           |       |                        |      | Mascot      |
| 1256.7208  | 1256.5685   | -0.1523 | -121  | 635        | 644      | LQERLEVLEK       |           |       |                        |      | Mascot      |
| 1311.6427  | 1311.6519   | 0.0092  | 7     | 1485       | 1496     | SIGDNSDVTIYK     |           |       |                        |      | Mascot      |
| 1397.7318  | 1397.5939   | -0.1379 | -99   | 561        | 571      | NELQRCLSHLK      |           |       | Carbamidomethyl (C)[6] |      | Mascot      |
| 1463.7125  | 1463.8864   | 0.1739  | 119   | 881        | 892      | SSLQTEKAEWER     |           |       |                        |      | Mascot      |
| 1492.7682  | 1492.8203   | 0.0521  | 35    | 869        | 880      | WLQDLTSLPEYK     |           |       |                        |      | Mascot      |
| 1492.7682  | 1492.8203   | 0.0521  | 35    | 869        | 880      | WLQDLTSLPEYK     |           |       |                        |      | Mascot      |
| 1495.7289  | 1495.8354   | 0.1065  | 71    | 211        | 223      | ATYQPHQPSNQPK    |           |       |                        |      | Mascot      |
| 1708.8977  | 1708.6907   | -0.207  | -121  | 893        | 907      | LQQQHVVQEQVSSAVK |           |       |                        |      | Mascot      |
| 1708.8977  | 1708.6907   | -0.207  | -121  | 893        | 907      | LQQQHVVQEQVSSAVK |           |       |                        |      | Mascot      |

|    |                                                        |           |         |     |             |         |                              |   |                         |        |
|----|--------------------------------------------------------|-----------|---------|-----|-------------|---------|------------------------------|---|-------------------------|--------|
|    | 1861.9147                                              | 1861.9338 | 0.0191  | 10  | 455         | 470     | LLHTGSVQEMSQLQMK             |   | Oxidation (M)[10,15]    | Mascot |
|    | 2225.1191                                              | 2225.1113 | -0.0078 | -4  | 730         | 749     | LTDLSQEVLAQECYLAVCK          |   |                         | Mascot |
|    | 2225.1191                                              | 2225.1113 | -0.0078 | -4  | 730         | 749     | LTDLSQEVLAQECYLAVCK          |   |                         | Mascot |
|    | 2239.1289                                              | 2239.1018 | -0.0271 | -12 | 1341        | 1358    | QIHQIYNQTYTSLMSKQR           |   |                         | Mascot |
|    | 2256.1401                                              | 2256.0247 | -0.1154 | -51 | 435         | 454     | ASVINTLTHRLEESQQQCAK         |   |                         | Mascot |
|    | 2271.9492                                              | 2272.0178 | 0.0686  | 30  | 1302        | 1322    | MQNAYGGSDKTDPETCDSPAK        |   | Carbamidomethyl (C)[16] | Mascot |
|    | 2271.9492                                              | 2272.0178 | 0.0686  | 30  | 1302        | 1322    | MQNAYGGSDKTDPETCDSPAK        |   | Carbamidomethyl (C)[16] | Mascot |
|    | 3234.6389                                              | 3234.7236 | 0.0847  | 26  | 236         | 263     | FDQLQRDFLDSTQNTADGQQLAQLQILK |   |                         | Mascot |
| 45 | 39S ribosomal protein L40, mitochondrial [Danio rerio] |           |         |     | gi 52219072 | 23228.2 | 9.49                         | 6 | 28                      | 0      |

#### Peptide Information

| Calc. Mass | Obsrv. Mass | $\pm$ da | $\pm$ ppm | Start Seq. | End Seq. | Sequence                    | Ion Score | C. I. % | Modification                                | Rank | Result Type |
|------------|-------------|----------|-----------|------------|----------|-----------------------------|-----------|---------|---------------------------------------------|------|-------------|
| 842.4267   | 842.5079    | 0.0812   | 96        | 119        | 124      | EWSRHK                      |           |         |                                             |      | Mascot      |
| 1115.6571  | 1115.6874   | 0.0303   | 27        | 114        | 122      | ALLLKEWSR                   |           |         |                                             |      | Mascot      |
| 1296.6299  | 1296.7302   | 0.1003   | 77        | 1          | 11       | MAGFVCRAVNR                 |           |         | Carbamidomethyl (C)[6], Oxidation (M)[1]    |      | Mascot      |
| 1564.7424  | 1564.6842   | -0.0582  | -37       | 101        | 113      | ALPEVCFEESERR               |           |         |                                             |      | Mascot      |
| 1763.8778  | 1763.7936   | -0.0842  | -48       | 12         | 27       | IISQSSCCSPVIAVR             |           |         | Carbamidomethyl (C)[8,9]                    |      | Mascot      |
| 1763.8778  | 1763.9857   | 0.1079   | 61        | 12         | 27       | IISQSSCCSPVIAVR             |           |         | Carbamidomethyl (C)[8,9]                    |      | Mascot      |
| 1763.8778  | 1763.9857   | 0.1079   | 61        | 12         | 27       | IISQSSCCSPVIAVR             |           |         | Carbamidomethyl (C)[8,9]                    |      | Mascot      |
| 3234.5857  | 3234.7236   | 0.1379   | 43        | 12         | 39       | IISQSSCCSPVIAVRHSHWFTSMLSLK |           |         | Carbamidomethyl (C)[8,9], Oxidation (M)[24] |      | Mascot      |

46 LOC100007791 protein [Danio rerio] gi|156230485 69372.3 8.33 9 28 0

#### Peptide Information

| Calc. Mass | Obsrv. Mass | $\pm$ da | $\pm$ ppm | Start Seq. | End Seq. | Sequence             | Ion Score | C. I. % | Modification            | Rank | Result Type |
|------------|-------------|----------|-----------|------------|----------|----------------------|-----------|---------|-------------------------|------|-------------|
| 882.577    | 882.5632    | -0.0138  | -16       | 2          | 9        | ANVKPLLK             |           |         |                         |      | Mascot      |
| 1139.4851  | 1139.6046   | 0.1195   | 105       | 423        | 432      | YSNDSEPEAK           |           |         |                         |      | Mascot      |
| 1311.8107  | 1311.6519   | -0.1588  | -121      | 117        | 128      | QILIGNSLIGRK         |           |         |                         |      | Mascot      |
| 1862.8813  | 1862.9497   | 0.0684   | 37        | 173        | 188      | CNDIFKVQPDGTGQQNR    |           |         |                         |      | Mascot      |
| 2042.9781  | 2043.0273   | 0.0492   | 24        | 45         | 62       | LMTVDMMVSCFGPKAEVK   |           |         | Carbamidomethyl (C)[10] |      | Mascot      |
| 2095.989   | 2096.0117   | 0.0227   | 11        | 86         | 105      | QGAASETSKSPVDYTN TSR |           |         |                         |      | Mascot      |
| 2256.1045  | 2256.0247   | -0.0798  | -35       | 265        | 282      | VMFIFDGLDEYRFELSFK   |           |         |                         |      | Mascot      |
| 2272.0994  | 2272.0178   | -0.0816  | -36       | 265        | 282      | VMFIFDGLDEYRFELSFK   |           |         | Oxidation (M)[2]        |      | Mascot      |
| 2272.0994  | 2272.0178   | -0.0816  | -36       | 265        | 282      | VMFIFDGLDEYRFELSFK   |           |         | Oxidation (M)[2]        |      | Mascot      |

|    |                                                         |           |           |        |     |     |              |                             |      |   |    |   |  |  |  |                                               |        |
|----|---------------------------------------------------------|-----------|-----------|--------|-----|-----|--------------|-----------------------------|------|---|----|---|--|--|--|-----------------------------------------------|--------|
|    |                                                         | 2314.1196 | 2314.1401 | 0.0205 | 9   | 129 | 148          | KNLDDIYTDLYVVENETG<br>GR    |      |   |    |   |  |  |  |                                               | Mascot |
|    |                                                         | 2918.2542 | 2918.55   | 0.2958 | 101 | 22  | 44           | EFQWYLMNDHVCVTKAE<br>MENADR |      |   |    |   |  |  |  | Carbamidomethyl (C)[12], Oxidation (M)[7, 18] | Mascot |
| 47 | PREDICTED: hypothetical protein LOC368914 [Danio rerio] |           |           |        |     |     | gi 292620215 | 24804.3                     | 4.94 | 5 | 28 | 0 |  |  |  |                                               |        |

#### Peptide Information

| Calc. Mass | Obsrv. Mass | ± da    | ± ppm | Start Seq. | End Seq. | Sequence                  | Ion Score | C. I. | % Modification    | Rank | Result Type |
|------------|-------------|---------|-------|------------|----------|---------------------------|-----------|-------|-------------------|------|-------------|
| 1564.7489  | 1564.6842   | -0.0647 | -41   | 31         | 44       | ADNAVQDTIVFDEK            |           |       |                   |      | Mascot      |
| 2268.0391  | 2268.0283   | -0.0108 | -5    | 83         | 100      | YNRPEEDKDALYHPFDM<br>K    |           |       |                   |      | Mascot      |
| 2272.0989  | 2272.0178   | -0.0811 | -36   | 31         | 50       | ADNAVQDTIVFDEKMFLG<br>MK  | 2         |       | 0                 |      | Mascot      |
| 2272.0989  | 2272.0178   | -0.0811 | -36   | 31         | 50       | ADNAVQDTIVFDEKMFLG<br>MK  |           |       |                   |      | Mascot      |
| 2284.0339  | 2284.165    | 0.1311  | 57    | 83         | 100      | YNRPEEDKDALYHPFDM<br>K    |           |       | Oxidation (M)[17] |      | Mascot      |
| 2346.1572  | 2346.1089   | -0.0483 | -21   | 145        | 165      | EKDVIGGNVRIPISSPE<br>EDK  |           |       |                   |      | Mascot      |
| 2502.0874  | 2502.2581   | 0.1707  | 68    | 56         | 76       | EDMDITDFDIDPDMMVW<br>KAAK |           |       | Oxidation (M)[3]  |      | Mascot      |

|    |                                                                                   |  |  |  |  |  |              |         |      |   |    |   |  |  |  |  |  |
|----|-----------------------------------------------------------------------------------|--|--|--|--|--|--------------|---------|------|---|----|---|--|--|--|--|--|
| 48 | novel protein similar to vertebrate FK506 binding protein 7 (FKBP7) [Danio rerio] |  |  |  |  |  | gi 169154861 | 25403.8 | 5.42 | 6 | 28 | 0 |  |  |  |  |  |
|----|-----------------------------------------------------------------------------------|--|--|--|--|--|--------------|---------|------|---|----|---|--|--|--|--|--|

#### Peptide Information

| Calc. Mass | Obsrv. Mass | ± da    | ± ppm | Start Seq. | End Seq. | Sequence                       | Ion Score | C. I. | % Modification          | Rank | Result Type |
|------------|-------------|---------|-------|------------|----------|--------------------------------|-----------|-------|-------------------------|------|-------------|
| 1051.567   | 1051.7098   | 0.1428  | 136   | 168        | 175      | EEIKEYLK                       |           |       |                         |      | Mascot      |
| 1402.7941  | 1402.72     | -0.0741 | -53   | 112        | 124      | KVTIPPSLAYGEK                  |           |       |                         |      | Mascot      |
| 1475.6869  | 1475.7961   | 0.1092  | 74    | 97         | 110      | GLDVALQDMCPGEK                 |           |       |                         |      | Mascot      |
| 1491.6818  | 1491.7917   | 0.1099  | 74    | 97         | 110      | GLDVALQDMCPGEK                 |           |       | Oxidation (M)[9]        |      | Mascot      |
| 1564.7676  | 1564.6842   | -0.0834 | -53   | 39         | 51       | IEVTFLPENCSQK                  |           |       | Carbamidomethyl (C)[10] |      | Mascot      |
| 1763.8997  | 1763.7936   | -0.1061 | -60   | 39         | 53       | IEVTFLPENCSQKAK                |           |       | Carbamidomethyl (C)[10] |      | Mascot      |
| 1763.8997  | 1763.9857   | 0.086   | 49    | 39         | 53       | IEVTFLPENCSQKAK                |           |       | Carbamidomethyl (C)[10] |      | Mascot      |
| 1763.8997  | 1763.9857   | 0.086   | 49    | 39         | 53       | IEVTFLPENCSQKAK                |           |       | Carbamidomethyl (C)[10] |      | Mascot      |
| 3298.8286  | 3298.7104   | -0.1182 | -36   | 4          | 29       | MFLRFLFYFCLILSLQALY<br>PFITIIR |           |       | Carbamidomethyl (C)[10] |      | Mascot      |
| 3298.8286  | 3298.7104   | -0.1182 | -36   | 4          | 29       | MFLRFLFYFCLILSLQALY<br>PFITIIR |           |       | Carbamidomethyl (C)[10] |      | Mascot      |

|    |                                                            |  |  |  |  |  |             |          |      |   |  |    |   |  |  |  |  |
|----|------------------------------------------------------------|--|--|--|--|--|-------------|----------|------|---|--|----|---|--|--|--|--|
| 49 | serine/threonine-protein kinase SIK3 homolog [Danio rerio] |  |  |  |  |  | gi 41054605 | 131079.6 | 6.26 | 1 |  | 21 | 0 |  |  |  |  |
|----|------------------------------------------------------------|--|--|--|--|--|-------------|----------|------|---|--|----|---|--|--|--|--|

#### Peptide Information

| Calc. Mass | Obsrv. Mass | ± da | ± ppm | Start Seq. | End Seq. | Sequence | Ion Score | C. I. | % Modification | Rank | Result Type |
|------------|-------------|------|-------|------------|----------|----------|-----------|-------|----------------|------|-------------|
|------------|-------------|------|-------|------------|----------|----------|-----------|-------|----------------|------|-------------|

|    |                                                                    |           |        |   |     |     |              |         |      |                  |    |        |
|----|--------------------------------------------------------------------|-----------|--------|---|-----|-----|--------------|---------|------|------------------|----|--------|
|    | 1188.6782                                                          | 1188.6804 | 0.0022 | 2 | 114 | 122 | MLRHPHIIR    | 21      | 0    | Oxidation (M)[1] | 4  | Mascot |
| 50 | PREDICTED: leucine-rich repeat-containing protein 28 [Danio rerio] |           |        |   |     |     |              |         |      |                  |    |        |
|    |                                                                    |           |        |   |     |     | gi 326669211 | 41393.4 | 6.59 | 1                | 17 | 0      |

#### Peptide Information

| Calc. Mass | Obsrv. Mass | ± da   | ± ppm | Start Seq. | End Seq. | Sequence               | Ion Score | C. I. % | Modification | Rank | Result Type |
|------------|-------------|--------|-------|------------|----------|------------------------|-----------|---------|--------------|------|-------------|
| 1930.0024  | 1929.9614   | -0.041 | -21   | 244        | 261      | QLCLTMGDVTVPSPSEV<br>K | 17        | 0       |              | 2    | Mascot      |

|                       |           |                               |                |                       |                    |
|-----------------------|-----------|-------------------------------|----------------|-----------------------|--------------------|
| <b>Gel Idx/Pos</b>    | 218/118   | <b>Instr./Gel Origin</b>      | BA2060/110707A | <b>Process Status</b> | Analysis Succeeded |
| <b>Plate [#] Name</b> | [1] 31496 | <b>Instrument Sample Name</b> |                | <b>Spectra</b>        | 11                 |

| Rank | Protein Name                                              | Accession No. | Protein MW | Protein PI | Pep. Count | Protein Score | Protein Score C. I. % | Total Ion Score | Total Ion C. I. % |
|------|-----------------------------------------------------------|---------------|------------|------------|------------|---------------|-----------------------|-----------------|-------------------|
| 1    | eukaryotic translation elongation factor 2b [Danio rerio] | gi 41386743   | 95436.8    | 6.28       | 13         | 293           | 100                   | 260             | 100               |

#### Peptide Information

| Calc. Mass | Obsrv. Mass | ± da    | ± ppm | Start Seq. | End Seq. | Sequence                    | Ion Score | C. I. % | Modification               | Rank | Result Type |
|------------|-------------|---------|-------|------------|----------|-----------------------------|-----------|---------|----------------------------|------|-------------|
| 969.5475   | 969.5462    | -0.0013 | -1    | 717        | 726      | GGGQIIPTAR                  |           |         |                            |      | Mascot      |
| 1091.5844  | 1091.5801   | -0.0043 | -4    | 2          | 10       | VNFTVDQIR                   |           |         |                            |      | Mascot      |
| 1091.5844  | 1091.5801   | -0.0043 | -4    | 2          | 10       | VNFTVDQIR                   | 53        | 99.84   |                            |      | Mascot      |
| 1402.8053  | 1402.7197   | -0.0856 | -61   | 439        | 449      | KEDLYLKPIQR                 |           |         |                            |      | Mascot      |
| 1420.7253  | 1420.7236   | -0.0017 | -1    | 728        | 739      | VLYACQLTAEPR                |           |         | Carbamidomethyl (C)[5]     |      | Mascot      |
| 1475.7896  | 1475.7522   | -0.0374 | -25   | 151        | 162      | IKPVLMMNKMDR                |           |         |                            |      | Mascot      |
| 1531.7533  | 1531.7518   | -0.0015 | -1    | 826        | 839      | DAASKPCQIVADTR              |           |         | Carbamidomethyl (C)[7]     |      | Mascot      |
| 1576.8264  | 1576.8215   | -0.0049 | -3    | 727        | 739      | RVLYACQLTAEPR               |           |         | Carbamidomethyl (C)[6]     |      | Mascot      |
| 1772.849   | 1772.8462   | -0.0028 | -2    | 634        | 647      | YLADKYEWVTEAR               | 78        | 100     |                            |      | Mascot      |
| 1772.849   | 1772.8462   | -0.0028 | -2    | 634        | 647      | YLADKYEWVTEAR               |           |         |                            |      | Mascot      |
| 1799.8962  | 1799.8937   | -0.0025 | -1    | 786        | 801      | AYLPVNESFGFTADLR            |           |         |                            |      | Mascot      |
| 1799.8962  | 1799.8937   | -0.0025 | -1    | 786        | 801      | AYLPVNESFGFTADLR            | 103       | 100     |                            |      | Mascot      |
| 2145.0571  | 2145.0566   | -0.0005 | 0     | 606        | 625      | ARPPFDGLAEDIDKGDVS<br>SR    |           |         |                            |      | Mascot      |
| 2220.1545  | 2220.1489   | -0.0056 | -3    | 163        | 180      | ALLELQLEPEELYQTFQR          | 26        | 26.647  |                            |      | Mascot      |
| 2220.1545  | 2220.1489   | -0.0056 | -3    | 163        | 180      | ALLELQLEPEELYQTFQR          |           |         |                            |      | Mascot      |
| 2225.0681  | 2225.116    | 0.0479  | 22    | 72         | 90       | STAISMYEYELTENDLAFIK        |           |         | Oxidation (M)[6]           |      | Mascot      |
| 2576.3057  | 2576.3013   | -0.0044 | -2    | 121        | 144      | VTDGALVVDCVSGVCV<br>QTETVLR |           |         | Carbamidomethyl (C)[11,16] |      | Mascot      |

|   |                                                         |             |         |      |    |     |     |     |     |
|---|---------------------------------------------------------|-------------|---------|------|----|-----|-----|-----|-----|
| 2 | Eukaryotic translation elongation factor 2, like [Danio | gi 28278942 | 95388.8 | 6.28 | 13 | 293 | 100 | 260 | 100 |
|---|---------------------------------------------------------|-------------|---------|------|----|-----|-----|-----|-----|

rerio]

| Peptide Information                      |             |         |       |              |          |                              |           |         |              |                            |     |      |             |
|------------------------------------------|-------------|---------|-------|--------------|----------|------------------------------|-----------|---------|--------------|----------------------------|-----|------|-------------|
| Calc. Mass                               | Obsrv. Mass | ± da    | ± ppm | Start Seq.   | End Seq. | Sequence                     | Ion Score | C. I. % | Modification |                            |     | Rank | Result Type |
| 969.5475                                 | 969.5462    | -0.0013 | -1    | 717          | 726      | GGGQIIPTAR                   |           |         |              |                            |     |      | Mascot      |
| 1091.5844                                | 1091.5801   | -0.0043 | -4    | 2            | 10       | VNFTVDQIR                    |           |         |              |                            |     |      | Mascot      |
| 1091.5844                                | 1091.5801   | -0.0043 | -4    | 2            | 10       | VNFTVDQIR                    | 53        | 99.84   |              |                            |     |      | Mascot      |
| 1402.8053                                | 1402.7197   | -0.0856 | -61   | 439          | 449      | KEDLYLKPIQR                  |           |         |              |                            |     |      | Mascot      |
| 1420.7253                                | 1420.7236   | -0.0017 | -1    | 728          | 739      | VLYACQLTAEPR                 |           |         |              | Carbamidomethyl (C)[5]     |     |      | Mascot      |
| 1475.7896                                | 1475.7522   | -0.0374 | -25   | 151          | 162      | LKPVLMMNKMMDR                |           |         |              |                            |     |      | Mascot      |
| 1531.7533                                | 1531.7518   | -0.0015 | -1    | 826          | 839      | DAASKPCQIVADTR               |           |         |              | Carbamidomethyl (C)[7]     |     |      | Mascot      |
| 1576.8264                                | 1576.8215   | -0.0049 | -3    | 727          | 739      | RVLYACQLTAEPR                |           |         |              | Carbamidomethyl (C)[6]     |     |      | Mascot      |
| 1772.849                                 | 1772.8462   | -0.0028 | -2    | 634          | 647      | YLADKYEWVTEAR                | 78        | 100     |              |                            |     |      | Mascot      |
| 1772.849                                 | 1772.8462   | -0.0028 | -2    | 634          | 647      | YLADKYEWVTEAR                |           |         |              |                            |     |      | Mascot      |
| 1799.8962                                | 1799.8937   | -0.0025 | -1    | 786          | 801      | AYLPVNESFGFTADLR             |           |         |              |                            |     |      | Mascot      |
| 1799.8962                                | 1799.8937   | -0.0025 | -1    | 786          | 801      | AYLPVNESFGFTADLR             | 103       | 100     |              |                            |     |      | Mascot      |
| 2145.0571                                | 2145.0566   | -0.0005 | 0     | 606          | 625      | ARPPFDGLAEDIDKGDVS<br>SR     |           |         |              |                            |     |      | Mascot      |
| 2220.1545                                | 2220.1489   | -0.0056 | -3    | 163          | 180      | ALLELQLEPEELYQTFQR           | 26        | 26.647  |              |                            |     |      | Mascot      |
| 2220.1545                                | 2220.1489   | -0.0056 | -3    | 163          | 180      | ALLELQLEPEELYQTFQR           |           |         |              |                            |     |      | Mascot      |
| 2225.0681                                | 2225.116    | 0.0479  | 22    | 72           | 90       | STAISMYEELTENDLAFIK          |           |         |              | Oxidation (M)[6]           |     |      | Mascot      |
| 2576.3057                                | 2576.3013   | -0.0044 | -2    | 121          | 144      | VTDGALVVVDCVSGVCV<br>QTETVLR |           |         |              | Carbamidomethyl (C)[11,16] |     |      | Mascot      |
| novel protein (wu:fj53d02) [Danio rerio] |             |         |       | gi 122891311 |          | 95823.2                      | 6.41      | 8       | 170          | 100                        | 156 | 100  |             |

| Peptide Information |             |         |       |            |          |                          |           |         |                            |                  |
|---------------------|-------------|---------|-------|------------|----------|--------------------------|-----------|---------|----------------------------|------------------|
| Calc. Mass          | Obsrv. Mass | ± da    | ± ppm | Start Seq. | End Seq. | Sequence                 | Ion Score | C. I. % | Modification               | Rank Result Type |
| 850.4781            | 850.542     | 0.0639  | 75    | 635        | 641      | ARYLAEK                  |           |         |                            | Mascot           |
| 969.5475            | 969.5462    | -0.0013 | -1    | 720        | 729      | GGGQIIPTAR               |           |         |                            | Mascot           |
| 1091.5844           | 1091.5801   | -0.0043 | -4    | 2          | 10       | VNFTVDQIR                |           |         |                            | Mascot           |
| 1091.5844           | 1091.5801   | -0.0043 | -4    | 2          | 10       | VNFTVDQIR                | 53        | 99.84   |                            | Mascot           |
| 1402.8053           | 1402.7197   | -0.0856 | -61   | 442        | 452      | KEDLYLKPIQR              |           |         |                            | Mascot           |
| 1475.7896           | 1475.7522   | -0.0374 | -25   | 151        | 162      | IKPVLMMNKMDR             |           |         |                            | Mascot           |
| 1799.8962           | 1799.8937   | -0.0025 | -1    | 789        | 804      | AYLPVNESFGFTADLR         |           |         |                            | Mascot           |
| 1799.8962           | 1799.8937   | -0.0025 | -1    | 789        | 804      | AYLPVNESFGFTADLR         | 103       | 100     |                            | Mascot           |
| 2174.1313           | 2174.0911   | -0.0402 | -18   | 651        | 670      | KIWCFGPDGTGPNILVDIT<br>K |           |         |                            | Mascot           |
| 2576.3057           | 2576.3013   | -0.0044 | -2    | 121        | 144      | VTDGALVVVDCVSGVCV        |           |         | Carbamidomethyl (C)[11,16] | Mascot           |

4      hypothetical protein LOC554122 [Danio rerio]      QTETVLR  
gi|66773108      39525.6      5.8      10      138      100      87      100

Peptide Information

| Calc. Mass | Obsrv. Mass | ± da    | ± ppm | Start Seq. | End Seq. | Sequence                    | Ion Score | C. I.  | % Modification         | Rank | Result Type |
|------------|-------------|---------|-------|------------|----------|-----------------------------|-----------|--------|------------------------|------|-------------|
| 863.4846   | 863.4851    | 0.0005  | 1     | 27         | 33       | HLTLSHR                     |           |        |                        |      | Mascot      |
| 878.473    | 878.4709    | -0.0021 | -2    | 139        | 145      | SQVEIFR                     | 26        | 28.974 |                        |      | Mascot      |
| 878.473    | 878.4709    | -0.0021 | -2    | 139        | 145      | SQVEIFR                     |           |        |                        |      | Mascot      |
| 1120.5819  | 1120.5466   | -0.0353 | -32   | 234        | 242      | HLVSNIMK                    |           |        | Oxidation (M)[8]       |      | Mascot      |
| 1198.679   | 1198.6777   | -0.0013 | -1    | 307        | 316      | IENILSEKPR                  |           |        |                        |      | Mascot      |
| 1198.679   | 1198.6777   | -0.0013 | -1    | 307        | 316      | IENILSEKPR                  | 61        | 99.975 |                        |      | Mascot      |
| 1262.6561  | 1262.651    | -0.0051 | -4    | 38         | 47       | NYLPNCQLIK                  |           |        | Carbamidomethyl (C)[6] |      | Mascot      |
| 1464.8461  | 1464.8417   | -0.0044 | -3    | 85         | 96       | ITLNLDFKPK                  |           |        |                        |      | Mascot      |
| 1719.7854  | 1719.7845   | -0.0009 | -1    | 261        | 275      | EVDVGS LCDNIEVDR            |           |        | Carbamidomethyl (C)[8] |      | Mascot      |
| 1730.7955  | 1730.7938   | -0.0017 | -1    | 276        | 290      | ESGDLWL GCHPNAFK            |           |        | Carbamidomethyl (C)[9] |      | Mascot      |
| 1808.8523  | 1808.8495   | -0.0028 | -2    | 291        | 306      | FFLCDPNDPAGSEVIK            |           |        | Carbamidomethyl (C)[4] |      | Mascot      |
| 2284.1455  | 2284.1562   | 0.0107  | 5     | 317        | 338      | VTQVYSDDG SVIIGSSVA<br>APYR |           |        |                        |      | Mascot      |

5      PREDICTED: elongation factor 2 [Danio rerio]      gi|326667940      100398.6      6.99      7      115      100      103      100

Peptide Information

| Calc. Mass | Obsrv. Mass | ± da    | ± ppm | Start Seq. | End Seq. | Sequence                    | Ion Score | C. I. | % Modification             | Rank | Result Type |
|------------|-------------|---------|-------|------------|----------|-----------------------------|-----------|-------|----------------------------|------|-------------|
| 850.4781   | 850.542     | 0.0639  | 75    | 675        | 681      | ARYLAEK                     |           |       |                            |      | Mascot      |
| 969.5475   | 969.5462    | -0.0013 | -1    | 760        | 769      | GGGQIIPTAR                  |           |       |                            |      | Mascot      |
| 1402.8053  | 1402.7197   | -0.0856 | -61   | 482        | 492      | KEDLYLKPIQR                 |           |       |                            |      | Mascot      |
| 1475.7896  | 1475.7522   | -0.0374 | -25   | 191        | 202      | IKPVLMMNKMDR                |           |       |                            |      | Mascot      |
| 1799.8962  | 1799.8937   | -0.0025 | -1    | 829        | 844      | AYLPVNESFGFTADLR            |           |       |                            |      | Mascot      |
| 1799.8962  | 1799.8937   | -0.0025 | -1    | 829        | 844      | AYLPVNESFGFTADLR            | 103       | 100   |                            |      | Mascot      |
| 2174.1313  | 2174.0911   | -0.0402 | -18   | 691        | 710      | KIWCFGPDGTGPNILVDIT<br>K    |           |       |                            |      | Mascot      |
| 2576.3057  | 2576.3013   | -0.0044 | -2    | 161        | 184      | VTDGALVVDCVSGVCV<br>QTETVLR |           |       | Carbamidomethyl (C)[11,16] |      | Mascot      |

6      hypothetical protein LOC568655 [Danio rerio]      gi|157311723      39628.5      5.55      6      109      100      87      100

Peptide Information

| Calc. Mass | Obsrv. Mass | ± da    | ± ppm | Start Seq. | End Seq. | Sequence | Ion Score | C. I.  | % Modification | Rank | Result Type |
|------------|-------------|---------|-------|------------|----------|----------|-----------|--------|----------------|------|-------------|
| 878.473    | 878.4709    | -0.0021 | -2    | 139        | 145      | SQVEIFR  | 26        | 28.974 |                |      | Mascot      |



|   |                                         |           |         |     |             |     |                           |      |        |    |        |    |                        |  |  |  |        |
|---|-----------------------------------------|-----------|---------|-----|-------------|-----|---------------------------|------|--------|----|--------|----|------------------------|--|--|--|--------|
|   | 878.473                                 | 878.4709  | -0.0021 | -2  | 139         | 145 | SQVEIFR                   |      |        |    |        |    |                        |  |  |  | Mascot |
|   | 1120.5819                               | 1120.5466 | -0.0353 | -32 | 234         | 242 | HLVVSNLMK                 |      |        |    |        |    | Oxidation (M)[8]       |  |  |  | Mascot |
|   | 1198.679                                | 1198.6777 | -0.0013 | -1  | 307         | 316 | IENILSEKPR                |      |        |    |        |    |                        |  |  |  | Mascot |
|   | 1198.679                                | 1198.6777 | -0.0013 | -1  | 307         | 316 | IENILSEKPR                | 61   | 99.975 |    |        |    |                        |  |  |  | Mascot |
|   | 1464.8461                               | 1464.8417 | -0.0044 | -3  | 85          | 96  | IYTLNLLDFKPK              |      |        |    |        |    |                        |  |  |  | Mascot |
|   | 1719.7854                               | 1719.7845 | -0.0009 | -1  | 261         | 275 | EVDVGSLCDNIEVD            |      |        |    |        |    | Carbamidomethyl (C)[8] |  |  |  | Mascot |
|   | 2284.1455                               | 2284.1562 | 0.0107  | 5   | 317         | 338 | VTQVYSDDGSIIGSSVA<br>APYR |      |        |    |        |    |                        |  |  |  | Mascot |
| 7 | Si:ch211-113n10.4 protein [Danio rerio] |           |         |     | gi 37590856 |     | 37494.3                   | 8.03 | 3      | 61 | 96.701 | 53 | 99.84                  |  |  |  |        |

#### Peptide Information

| Calc. Mass | Obsrv. Mass | ± da    | ± ppm | Start Seq. | End Seq. | Sequence                     | Ion Score | C. I. | %     | Modification               | Rank | Result | Type   |
|------------|-------------|---------|-------|------------|----------|------------------------------|-----------|-------|-------|----------------------------|------|--------|--------|
| 1091.5844  | 1091.5801   | -0.0043 | -4    | 2          | 10       | VNFTVDQIR                    |           |       |       |                            |      |        | Mascot |
| 1091.5844  | 1091.5801   | -0.0043 | -4    | 2          | 10       | VNFTVDQIR                    | 53        |       | 99.84 |                            |      |        | Mascot |
| 1475.7896  | 1475.7522   | -0.0374 | -25   | 151        | 162      | IKPVLMMNMKMDR                |           |       |       |                            |      |        | Mascot |
| 2576.3057  | 2576.3013   | -0.0044 | -2    | 121        | 144      | VTDGALVVVDCVSGVCV<br>QTETVLR |           |       |       | Carbamidomethyl (C)[11,16] |      |        | Mascot |

8 hypothetical protein LOC100034496 [Danio rerio] gi|131890023 54543 6.81 10 47 7.024 21 0

#### Peptide Information

| Calc. Mass | Obsrv. Mass | ± da    | ± ppm | Start Seq. | End Seq. | Sequence                | Ion Score | C. I. | % | Modification            | Rank | Result | Type   |
|------------|-------------|---------|-------|------------|----------|-------------------------|-----------|-------|---|-------------------------|------|--------|--------|
| 878.5345   | 878.4709    | -0.0636 | -72   | 143        | 149      | LKTFLEK                 |           |       |   |                         |      |        | Mascot |
| 878.5345   | 878.4709    | -0.0636 | -72   | 143        | 149      | LKTFLEK                 |           |       |   |                         |      |        | Mascot |
| 1091.4963  | 1091.5801   | 0.0838  | 77    | 127        | 136      | SAEDASQDLR              |           |       |   |                         |      |        | Mascot |
| 1091.4963  | 1091.5801   | 0.0838  | 77    | 127        | 136      | SAEDASQDLR              | 21        |       | 0 |                         |      |        | Mascot |
| 1120.5204  | 1120.5466   | 0.0262  | 23    | 150        | 157      | LRDYECHK                |           |       |   | Carbamidomethyl (C)[7]  |      |        | Mascot |
| 1353.6321  | 1353.6805   | 0.0484  | 36    | 158        | 168      | QSWDETAEFIK             |           |       |   |                         |      |        | Mascot |
| 1392.5897  | 1392.7341   | 0.1444  | 104   | 380        | 391      | MGMWYVGFCNGK            |           |       |   |                         |      |        | Mascot |
| 1772.7593  | 1772.8462   | 0.0869  | 49    | 380        | 394      | MGMWYVGFCNGKYGK         |           |       |   | Oxidation (M)[1,3]      |      |        | Mascot |
| 1772.7593  | 1772.8462   | 0.0869  | 49    | 380        | 394      | MGMWYVGFCNGKYGK         |           |       |   | Oxidation (M)[1,3]      |      |        | Mascot |
| 1993.9928  | 1993.9747   | -0.0181 | -9    | 446        | 460      | VFPYFYVHCMKHPLR         |           |       |   | Carbamidomethyl (C)[9]  |      |        | Mascot |
| 2183.0073  | 2183.0916   | 0.0843  | 39    | 78         | 96       | EEVPQEPPQDSVGFCSL<br>HK |           |       |   | Carbamidomethyl (C)[15] |      |        | Mascot |
| 2232.991   | 2233.0793   | 0.0883  | 40    | 97         | 115      | EPLDFFCTQDQVMICGK<br>CR |           |       |   |                         |      |        | Mascot |
| 2351.2031  | 2351.3132   | 0.1101  | 47    | 50         | 70       | ECPICRVVSPPNPINIM<br>LR |           |       |   | Oxidation (M)[19]       |      |        | Mascot |

9 Im:6903726 protein [Danio rerio] gi|50418480 42199.8 7.59 6 45 0 33 85.195

### Peptide Information

| Calc. Mass | Obsrv. Mass | $\pm$ da | $\pm$ ppm | Start Seq. | End Seq. | Sequence         | Ion Score | C. I.  | % Modification         | Rank | Result Type |
|------------|-------------|----------|-----------|------------|----------|------------------|-----------|--------|------------------------|------|-------------|
| 1240.6321  | 1240.6304   | -0.0017  | -1        | 238        | 248      | ELGFTAGINYS      | 33        | 85.195 |                        |      | Mascot      |
| 1240.6321  | 1240.6304   | -0.0017  | -1        | 238        | 248      | ELGFTAGINYS      |           |        |                        |      | Mascot      |
| 1357.6821  | 1357.6888   | 0.0067   | 5         | 82         | 92       | TLYLSVDPYMR      |           |        |                        |      | Mascot      |
| 1360.6776  | 1360.6343   | -0.0433  | -32       | 109        | 122      | LEECVDGGGVGVVK   |           |        |                        |      | Mascot      |
| 1373.677   | 1373.687    | 0.01     | 7         | 82         | 92       | TLYLSVDPYMR      |           |        | Oxidation (M)[10]      |      | Mascot      |
| 1682.7479  | 1682.7455   | -0.0024  | -1        | 95         | 108      | MNDDTGADYLLPWR   |           |        | Oxidation (M)[1]       |      | Mascot      |
| 1817.8025  | 1817.8652   | 0.0627   | 34        | 22         | 35       | CCTDIYFFNFVNK    |           |        | Carbamidomethyl (C)[1] |      | Mascot      |
| 1925.8633  | 1925.9547   | 0.0914   | 47        | 93         | 108      | CRMNDDTGADYLLPWR |           |        |                        |      | Mascot      |

10 PREDICTED: prostaglandin reductase 2 [Danio rerio] gi|189531025 37647.6 5.69 4 45 0 33 85.195

### Peptide Information

| Calc. Mass | Obsrv. Mass | $\pm$ da | $\pm$ ppm | Start Seq. | End Seq. | Sequence          | Ion Score | C. I.  | % Modification    | Rank | Result Type |
|------------|-------------|----------|-----------|------------|----------|-------------------|-----------|--------|-------------------|------|-------------|
| 1240.6321  | 1240.6304   | -0.0017  | -1        | 200        | 210      | ELGFTAGINYS       | 33        | 85.195 |                   |      | Mascot      |
| 1240.6321  | 1240.6304   | -0.0017  | -1        | 200        | 210      | ELGFTAGINYS       |           |        |                   |      | Mascot      |
| 1357.6821  | 1357.6888   | 0.0067   | 5         | 44         | 54       | TLYLSVDPYMR       |           |        |                   |      | Mascot      |
| 1373.677   | 1373.687    | 0.01     | 7         | 44         | 54       | TLYLSVDPYMR       |           |        | Oxidation (M)[10] |      | Mascot      |
| 1682.7479  | 1682.7455   | -0.0024  | -1        | 57         | 70       | MNDDTGADYLLPWR    |           |        | Oxidation (M)[1]  |      | Mascot      |
| 1925.9603  | 1925.9547   | -0.0056  | -3        | 263        | 279      | DVPYPPPLSQDTQEALR |           |        |                   |      | Mascot      |

11 PREDICTED: WD repeat- and FYVE domain-containing protein 4 [Danio rerio] gi|326673033 526148.3 6.32 32 41 0

### Peptide Information

| Calc. Mass | Obsrv. Mass | $\pm$ da | $\pm$ ppm | Start Seq. | End Seq. | Sequence   | Ion Score | C. I. | % Modification   | Rank | Result Type |
|------------|-------------|----------|-----------|------------|----------|------------|-----------|-------|------------------|------|-------------|
| 850.5145   | 850.542     | 0.0275   | 32        | 2616       | 2622     | RSFSLK     |           |       |                  |      | Mascot      |
| 863.3741   | 863.4851    | 0.111    | 129       | 1809       | 1816     | ENSDSSPK   |           |       |                  |      | Mascot      |
| 878.4838   | 878.4709    | -0.0129  | -15       | 1016       | 1022     | MDLMLKK    |           |       |                  |      | Mascot      |
| 878.4838   | 878.4709    | -0.0129  | -15       | 1016       | 1022     | MDLMLKK    |           |       |                  |      | Mascot      |
| 1058.5994  | 1058.5255   | -0.0739  | -70       | 1762       | 1770     | SNQGWLLK   |           |       |                  |      | Mascot      |
| 1091.5765  | 1091.5801   | 0.0036   | 3         | 2260       | 2268     | QDLLQSIMK  |           |       | Oxidation (M)[8] |      | Mascot      |
| 1091.6241  | 1091.5801   | -0.044   | -40       | 3994       | 4003     | RLCSVVSSLK | 10        | 0     |                  |      | Mascot      |
| 1160.631   | 1160.6057   | -0.0253  | -22       | 1574       | 1582     | EYLPLLQER  |           |       |                  |      | Mascot      |
| 1179.6844  | 1179.5989   | -0.0855  | -72       | 1279       | 1288     | DQHIATLLLR |           |       |                  |      | Mascot      |

|           |           |         |      |      |      |                           |   |   |  |                                            |        |
|-----------|-----------|---------|------|------|------|---------------------------|---|---|--|--------------------------------------------|--------|
| 1232.678  | 1232.5938 | -0.0842 | -68  | 516  | 526  | SAVVNRISVCK               |   |   |  | Carbamidomethyl (C)[10]                    | Mascot |
| 1262.6045 | 1262.651  | 0.0465  | 37   | 832  | 842  | AKGVEELDMDR               |   |   |  |                                            | Mascot |
| 1282.5449 | 1282.6792 | 0.1343  | 105  | 866  | 875  | MAPCQRSCTR                |   |   |  | Carbamidomethyl (C)[4,8], Oxidation (M)[1] | Mascot |
| 1353.7021 | 1353.6805 | -0.0216 | -16  | 4225 | 4235 | GDPQEFIRVHR               |   |   |  |                                            | Mascot |
| 1531.7686 | 1531.7518 | -0.0168 | -11  | 1992 | 2005 | VAICVSNPQPSNFR            |   |   |  |                                            | Mascot |
| 1576.8264 | 1576.8215 | -0.0049 | -3   | 280  | 293  | ICSQSHPTVLHINK            |   |   |  |                                            | Mascot |
| 1682.7439 | 1682.7455 | 0.0016  | 1    | 318  | 333  | DITSHSFASTAETCGR          |   |   |  |                                            | Mascot |
| 1764.8005 | 1764.918  | 0.1175  | 67   | 35   | 49   | SCLYMMPELGDKAK            |   |   |  | Oxidation (M)[5]                           | Mascot |
| 1773.0309 | 1772.8462 | -0.1847 | -104 | 62   | 77   | IAYAYIEKALSWAPIK          |   |   |  |                                            | Mascot |
| 1773.0309 | 1772.8462 | -0.1847 | -104 | 62   | 77   | IAYAYIEKALSWAPIK          |   |   |  |                                            | Mascot |
| 1799.9836 | 1799.8937 | -0.0899 | -50  | 3735 | 3748 | MAIQWLRIEEELLR            |   |   |  |                                            | Mascot |
| 1799.9836 | 1799.8937 | -0.0899 | -50  | 3735 | 3748 | MAIQWLRIEEELLR            | 0 | 0 |  |                                            | Mascot |
| 1873.0099 | 1872.894  | -0.1159 | -62  | 431  | 447  | KMPVNTDNIVTAETLVK         |   |   |  |                                            | Mascot |
| 1931.9817 | 1932.0051 | 0.0234  | 12   | 2947 | 2963 | VLLSVLETNPAMEQEMK         |   |   |  |                                            | Mascot |
| 1961.8796 | 1962.0641 | 0.1845  | 94   | 777  | 792  | ENFYVDDCLKSVESEK          |   |   |  | Carbamidomethyl (C)[8]                     | Mascot |
| 1993.9907 | 1993.9747 | -0.016  | -8   | 2521 | 2537 | QIMCEFGLLSTLLTHCK         |   |   |  | Carbamidomethyl (C)[4]                     | Mascot |
| 2119.9861 | 2120.0444 | 0.0583  | 28   | 31   | 47   | ELVRSCLYMMPELGDK          |   |   |  | Carbamidomethyl (C)[6], Oxidation (M)[9]   | Mascot |
| 2120.0725 | 2120.0444 | -0.0281 | -13  | 2947 | 2964 | VLLSVLETNPAMEQEMK<br>R    |   |   |  | Oxidation (M)[12,16]                       | Mascot |
| 2183.157  | 2183.0916 | -0.0654 | -30  | 2205 | 2222 | DLGMIPYVKIFLDVEQFR        |   |   |  |                                            | Mascot |
| 2220.2356 | 2220.1489 | -0.0867 | -39  | 3067 | 3085 | LNMINLLILLHDPNVTCT        |   |   |  |                                            | Mascot |
| 2220.2356 | 2220.1489 | -0.0867 | -39  | 3067 | 3085 | LNMINLLILLHDPNVTCT        |   |   |  |                                            | Mascot |
| 2224.9355 | 2225.116  | 0.1805  | 81   | 257  | 274  | HLCFGCLSTSHMSRDCE<br>K    |   |   |  | Carbamidomethyl (C)[3,6,16]                | Mascot |
| 2233.0127 | 2233.0793 | 0.0666  | 30   | 3183 | 3201 | SWSFECLSCICPGFEVLQ<br>K   |   |   |  | Carbamidomethyl (C)[6]                     | Mascot |
| 2283.1948 | 2283.1748 | -0.02   | -9   | 2024 | 2043 | IIQSSFMRSSNTVICSQIL<br>R  |   |   |  |                                            | Mascot |
| 2283.1948 | 2283.1748 | -0.02   | -9   | 2024 | 2043 | IIQSSFMRSSNTVICSQIL<br>R  |   |   |  |                                            | Mascot |
| 2284.1389 | 2284.1562 | 0.0173  | 8    | 2349 | 2369 | LGEALLHLGCFQKGDVP<br>ESDR |   |   |  |                                            | Mascot |
| 2300.1206 | 2300.1758 | 0.0552  | 24   | 910  | 927  | NYGWDETVPQELLHRWT<br>R    |   |   |  |                                            | Mascot |
| 2351.2249 | 2351.3132 | 0.0883  | 38   | 1390 | 1410 | AVHLEIANSLNTDACINAI<br>RR |   |   |  | Carbamidomethyl (C)[15]                    | Mascot |

12

PREDICTED: hypothetical protein LOC569436 [Danio rerio]

gi|326678363

352771.2

7.92

30

40

0

Peptide Information

| Calc. Mass | Obsrv. Mass | ± da   | ± ppm | Start Seq. | End Seq. | Sequence | Ion Score | C. I. | % Modification | Rank | Result Type |
|------------|-------------|--------|-------|------------|----------|----------|-----------|-------|----------------|------|-------------|
| 842.4743   | 842.5095    | 0.0352 | 42    | 2664       | 2669     | HFRINR   |           |       |                |      | Mascot      |
| 856.4311   | 856.5244    | 0.0933 | 109   | 1282       | 1287     | ENYFRK   |           |       |                |      | Mascot      |

|           |           |         |     |      |      |                           |                                            |        |
|-----------|-----------|---------|-----|------|------|---------------------------|--------------------------------------------|--------|
| 858.4832  | 858.5464  | 0.0632  | 74  | 2713 | 2719 | QLWNGLK                   |                                            | Mascot |
| 878.4842  | 878.4709  | -0.0133 | -15 | 2980 | 2986 | ENPLHLR                   |                                            | Mascot |
| 878.4842  | 878.4709  | -0.0133 | -15 | 2980 | 2986 | ENPLHLR                   |                                            | Mascot |
| 969.5615  | 969.5462  | -0.0153 | -16 | 1853 | 1861 | ELAPLLADK                 |                                            | Mascot |
| 1058.5225 | 1058.5255 | 0.003   | 3   | 2246 | 2255 | RNDPGESGVK                |                                            | Mascot |
| 1120.5845 | 1120.5466 | -0.0379 | -34 | 767  | 778  | SGSPVSSSVSVK              |                                            | Mascot |
| 1179.6256 | 1179.5989 | -0.0267 | -23 | 2297 | 2306 | LSELTDFNK                 |                                            | Mascot |
| 1240.5375 | 1240.6304 | 0.0929  | 75  | 1    | 10   | MHSAHQEEQK                | Oxidation (M)[1]                           | Mascot |
| 1240.5375 | 1240.6304 | 0.0929  | 75  | 1    | 10   | MHSAHQEEQK                | Oxidation (M)[1]                           | Mascot |
| 1262.6409 | 1262.651  | 0.0101  | 8   | 1741 | 1751 | LLSDNLKDNCK               |                                            | Mascot |
| 1373.6565 | 1373.687  | 0.0305  | 22  | 510  | 521  | HHVCLCGKSFSR              |                                            | Mascot |
| 1402.6121 | 1402.7197 | 0.1076  | 77  | 14   | 24   | TEFIEDYSENK               |                                            | Mascot |
| 1475.647  | 1475.7522 | 0.1052  | 71  | 1333 | 1345 | RNNENNQADDASK             |                                            | Mascot |
| 1498.7166 | 1498.7201 | 0.0035  | 2   | 698  | 712  | SGSLASSSVSMKSDR           |                                            | Mascot |
| 1576.8251 | 1576.8215 | -0.0036 | -2  | 1488 | 1501 | NESMIDLLKTAVDK            |                                            | Mascot |
| 1682.8207 | 1682.7455 | -0.0752 | -45 | 2269 | 2283 | FLSPADEVCFVTR             |                                            | Mascot |
| 1730.6455 | 1730.7938 | 0.1483  | 86  | 185  | 199  | MHSDETAFSCEECGK           | Carbamidomethyl (C)[10]                    | Mascot |
| 1764.832  | 1764.918  | 0.086   | 49  | 2987 | 3002 | ELDLSENKLGDGMEK           |                                            | Mascot |
| 1772.8207 | 1772.8462 | 0.0255  | 14  | 269  | 283  | IHSGEKLFCEQCGK            | Carbamidomethyl (C)[10]                    | Mascot |
| 1772.8207 | 1772.8462 | 0.0255  | 14  | 269  | 283  | IHSGEKLFCEQCGK            | Carbamidomethyl (C)[10]                    | Mascot |
| 1799.8744 | 1799.8937 | 0.0193  | 11  | 2043 | 2057 | FLSSEADNVCQFVKR           | Carbamidomethyl (C)[10]                    | Mascot |
| 1799.8744 | 1799.8937 | 0.0193  | 11  | 2043 | 2057 | FLSSEADNVCQFVKR           | 1 0 Carbamidomethyl (C)[10]                | Mascot |
| 1808.896  | 1808.8495 | -0.0465 | -26 | 53   | 68   | HHVKPEEISLSCSQSK          |                                            | Mascot |
| 1872.8843 | 1872.894  | 0.0097  | 5   | 527  | 541  | ANYRFVNIQDVCAMR           | Carbamidomethyl (C)[12], Oxidation (M)[14] | Mascot |
| 1931.8724 | 1932.0051 | 0.1327  | 69  | 2963 | 2979 | CCSLTDEDYKDLASALK         | Carbamidomethyl (C)[1]                     | Mascot |
| 1993.9246 | 1993.9747 | 0.0501  | 25  | 1066 | 1082 | LLNDVYTDLYMTQCASK         | Oxidation (M)[11]                          | Mascot |
| 2119.9377 | 2120.0444 | 0.1067  | 50  | 2901 | 2921 | LSLCSCSLTDDCCSAVTS<br>ALK |                                            | Mascot |
| 2120.2339 | 2120.0444 | -0.1895 | -89 | 1241 | 1260 | GNLLPSALIWITSRPAAAI<br>R  |                                            | Mascot |
| 2219.9565 | 2220.1489 | 0.1924  | 87  | 238  | 256  | HMCIHSGEKPYACDQCG<br>KR   | Carbamidomethyl (C)[3]                     | Mascot |
| 2219.9565 | 2220.1489 | 0.1924  | 87  | 238  | 256  | HMCIHSGEKPYACDQCG<br>KR   | Carbamidomethyl (C)[3]                     | Mascot |
| 2224.9797 | 2225.116  | 0.1363  | 61  | 321  | 339  | HHMSLHNEEKPYVCGQC<br>GR   |                                            | Mascot |
| 2232.8818 | 2233.0793 | 0.1975  | 88  | 181  | 199  | YHMKMHSDETAFSCEEC<br>GK   |                                            | Mascot |
| 2283.2068 | 2283.1748 | -0.032  | -14 | 1358 | 1375 | TLTQMYTHFLRFQILQSR        |                                            | Mascot |
| 2283.2068 | 2283.1748 | -0.032  | -14 | 1358 | 1375 | TLTQMYTHFLRFQILQSR        |                                            | Mascot |
| 2297.9961 | 2298.1843 | 0.1882  | 82  | 321  | 339  | HHMSLHNEEKPYVCGQC         | Carbamidomethyl (C)[14], Oxidation (M)[3]  | Mascot |

13 Shmt1 protein [Danio rerio] GR gi|42542754 53244.1 7.61 10 40 0

Peptide Information

| Calc. Mass | Obsrv. Mass | ± da    | ± ppm | Start Seq. | End Seq. | Sequence                  | Ion Score | C. I. | % Modification            | Rank | Result Type |
|------------|-------------|---------|-------|------------|----------|---------------------------|-----------|-------|---------------------------|------|-------------|
| 1091.5076  | 1091.5801   | 0.0725  | 66    | 362        | 372      | SNGTDGGRAEK               |           |       |                           |      | Mascot      |
| 1091.5076  | 1091.5801   | 0.0725  | 66    | 362        | 372      | SNGTDGGRAEK               |           |       |                           |      | Mascot      |
| 1160.5365  | 1160.6057   | 0.0692  | 60    | 1          | 10       | MSQLNGHTEK                |           |       | Oxidation (M)[1]          |      | Mascot      |
| 1232.6885  | 1232.5938   | -0.0947 | -77   | 97         | 107      | ALKVYGLDPEK               |           |       |                           |      | Mascot      |
| 1240.6354  | 1240.6304   | -0.005  | -4    | 194        | 204      | LIIAGTSCYSR               |           |       | Carbamidomethyl (C)[8]    |      | Mascot      |
| 1240.6354  | 1240.6304   | -0.005  | -4    | 194        | 204      | LIIAGTSCYSR               |           |       | Carbamidomethyl (C)[8]    |      | Mascot      |
| 1576.7821  | 1576.8215   | 0.0394  | 25    | 370        | 383      | AEKVL EACAIACNK           |           |       | Carbamidomethyl (C)[8,12] |      | Mascot      |
| 1764.8877  | 1764.918    | 0.0303  | 17    | 156        | 170      | KISATSIFFESMPYK           |           |       | Oxidation (M)[12]         |      | Mascot      |
| 1931.9644  | 1932.0051   | 0.0407  | 21    | 194        | 210      | LIIAGTSCYSRNLDYSR         |           |       |                           |      | Mascot      |
| 2182.9822  | 2183.0916   | 0.1094  | 50    | 79         | 96       | YYGGTEHVDELERLCQD<br>R    |           |       |                           |      | Mascot      |
| 2220.1292  | 2220.1489   | 0.0197  | 9     | 18         | 36       | MMLEPLSTNDPEVFDIIK<br>K   |           |       |                           |      | Mascot      |
| 2220.1292  | 2220.1489   | 0.0197  | 9     | 18         | 36       | MMLEPLSTNDPEVFDIIK<br>K   |           |       |                           |      | Mascot      |
| 2283.126   | 2283.1748   | 0.0488  | 21    | 135        | 155      | IMGLDLPDGGHLTHGFM<br>TDDK |           |       |                           |      | Mascot      |
| 2283.126   | 2283.1748   | 0.0488  | 21    | 135        | 155      | IMGLDLPDGGHLTHGFM<br>TDDK |           |       |                           |      | Mascot      |

14 novel zinc finger protein [Danio rerio] gi|126632547 52058.7 6.63 7 39 0 21 0

Peptide Information

| Calc. Mass | Obsrv. Mass | ± da    | ± ppm | Start Seq. | End Seq. | Sequence                   | Ion Score | C. I. | % Modification                              | Rank | Result Type |
|------------|-------------|---------|-------|------------|----------|----------------------------|-----------|-------|---------------------------------------------|------|-------------|
| 878.5345   | 878.4709    | -0.0636 | -72   | 142        | 148      | LKTFLEK                    |           |       |                                             |      | Mascot      |
| 878.5345   | 878.4709    | -0.0636 | -72   | 142        | 148      | LKTFLEK                    |           |       |                                             |      | Mascot      |
| 1091.4963  | 1091.5801   | 0.0838  | 77    | 126        | 135      | SAEDASQDLR                 |           |       |                                             |      | Mascot      |
| 1091.4963  | 1091.5801   | 0.0838  | 77    | 126        | 135      | SAEDASQDLR                 | 21        | 0     |                                             |      | Mascot      |
| 1353.6321  | 1353.6805   | 0.0484  | 36    | 157        | 167      | QSWDETAEFIK                |           |       |                                             |      | Mascot      |
| 1392.5897  | 1392.7341   | 0.1444  | 104   | 364        | 375      | MGMWYVGFCNGK               |           |       |                                             |      | Mascot      |
| 1772.7593  | 1772.8462   | 0.0869  | 49    | 364        | 378      | MGMWYVGFCNGKYGK            |           |       | Oxidation (M)[1,3]                          |      | Mascot      |
| 1772.7593  | 1772.8462   | 0.0869  | 49    | 364        | 378      | MGMWYVGFCNGKYGK            |           |       | Oxidation (M)[1,3]                          |      | Mascot      |
| 1993.9564  | 1993.9747   | 0.0183  | 9     | 430        | 444      | VFPYFYVHCMQHLPLR           |           |       | Carbamidomethyl (C)[9]                      |      | Mascot      |
| 2455.1711  | 2455.3079   | 0.1368  | 56    | 49         | 69       | ECPICRAVSPSPNPPIINM<br>MLR |           |       | Carbamidomethyl (C)[2,5], Oxidation (M)[18] |      | Mascot      |

15 tyrosine kinase, non-receptor, 2b [Danio rerio] gi|121583968 83453.4 9.21 13 38 0

| Peptide Information |                                              |          |           |             |                            |           |         |                                              |                  |
|---------------------|----------------------------------------------|----------|-----------|-------------|----------------------------|-----------|---------|----------------------------------------------|------------------|
| Calc. Mass          | Obsrv. Mass                                  | $\pm$ da | $\pm$ ppm | Start Seq.  | End Sequence Seq.          | Ion Score | C. I. % | Modification                                 | Rank Result Type |
| 856.4635            | 856.5244                                     | 0.0609   | 71        | 379         | 385 DIAEPRR                |           |         |                                              | Mascot           |
| 1091.5514           | 1091.5801                                    | 0.0287   | 26        | 694         | 702 EECQKVLSR              |           |         |                                              | Mascot           |
| 1091.5514           | 1091.5801                                    | 0.0287   | 26        | 694         | 702 EECQKVLSR              |           |         |                                              | Mascot           |
| 1165.5782           | 1165.7427                                    | 0.1645   | 141       | 72          | 81 SWMVKATNGR              |           |         | Oxidation (M)[3]                             | Mascot           |
| 1240.7372           | 1240.6304                                    | -0.1068  | -86       | 239         | 249 NVLLAAREQVK            |           |         |                                              | Mascot           |
| 1240.7372           | 1240.6304                                    | -0.1068  | -86       | 239         | 249 NVLLAAREQVK            |           |         |                                              | Mascot           |
| 1282.759            | 1282.6792                                    | -0.0798  | -62       | 234         | 245 DLAARNVLLAAR           |           |         |                                              | Mascot           |
| 1357.6931           | 1357.6888                                    | -0.0043  | -3        | 510         | 522 GVGVNAAQRSDQR          |           |         |                                              | Mascot           |
| 1392.7303           | 1392.7341                                    | 0.0038   | 3         | 246         | 257 EQVKIGDFGLMR           |           |         |                                              | Mascot           |
| 1464.7263           | 1464.8417                                    | 0.1154   | 79        | 250         | 262 IGDFGLMRGLDDR          |           |         |                                              | Mascot           |
| 1799.8788           | 1799.8937                                    | 0.0149   | 8         | 555         | 568 SIKPQMMMMFLDRR         |           |         | Oxidation (M)[6]                             | Mascot           |
| 1799.8788           | 1799.8937                                    | 0.0149   | 8         | 555         | 568 SIKPQMMMMFLDRR         |           |         | Oxidation (M)[6]                             | Mascot           |
| 1808.9653           | 1808.8495                                    | -0.1158  | -64       | 110         | 126 ELLFGDRLGSGSFGVVR      |           |         |                                              | Mascot           |
| 2220.1619           | 2220.1489                                    | -0.013   | -6        | 644         | 664 EAVIAQVQAAVHGVTNEE VQK |           |         |                                              | Mascot           |
| 2220.1619           | 2220.1489                                    | -0.013   | -6        | 644         | 664 EAVIAQVQAAVHGVTNEE VQK |           |         |                                              | Mascot           |
| 2233.0376           | 2233.0793                                    | 0.0417   | 19        | 676         | 693 AEQQLKTDQLYMNQCT R     |           |         |                                              | Mascot           |
| 2282.9475           | 2283.1748                                    | 0.2273   | 100       | 682         | 698 TDQLYMNQCTREECQK       |           |         | Carbamidomethyl (C)[10,15], Oxidation (M)[7] | Mascot           |
| 2282.9475           | 2283.1748                                    | 0.2273   | 100       | 682         | 698 TDQLYMNQCTREECQK       |           |         | Carbamidomethyl (C)[10,15], Oxidation (M)[7] | Mascot           |
| 16                  | hypothetical protein LOC494057 [Danio rerio] |          |           | gi 56693271 |                            | 48454.6   | 9.51    | 9                                            | 38 0             |

| Peptide Information |             |          |           |            |                       |           |         |                  |                  |
|---------------------|-------------|----------|-----------|------------|-----------------------|-----------|---------|------------------|------------------|
| Calc. Mass          | Obsrv. Mass | $\pm$ da | $\pm$ ppm | Start Seq. | End Sequence Seq.     | Ion Score | C. I. % | Modification     | Rank Result Type |
| 850.4529            | 850.542     | 0.0891   | 105       | 73         | 78 EVRQYR             |           |         |                  | Mascot           |
| 1198.5786           | 1198.6777   | 0.0991   | 83        | 403        | 411 QYNPYARMR         |           |         |                  | Mascot           |
| 1198.5786           | 1198.6777   | 0.0991   | 83        | 403        | 411 QYNPYARMR         |           |         |                  | Mascot           |
| 1232.6997           | 1232.5938   | -0.1059  | -86       | 12         | 22 FVVVLGDSIQR        |           |         |                  | Mascot           |
| 1282.5845           | 1282.6792   | 0.0947   | 74        | 62         | 72 LGEMNNGTQYR        |           |         |                  | Mascot           |
| 1357.6648           | 1357.6888   | 0.024    | 18        | 125        | 134 YSRQWAVEYR        |           |         |                  | Mascot           |
| 1360.7332           | 1360.6343   | -0.0989  | -73       | 266        | 277 QSGLSTPPVRYR      |           |         |                  | Mascot           |
| 1402.8668           | 1402.7197   | -0.1471  | -105      | 23         | 34 AVYKDLVLILQK       |           |         |                  | Mascot           |
| 1682.7915           | 1682.7455   | -0.046   | -27       | 62         | 75 LGEMNNGTQYREVR     |           |         | Oxidation (M)[4] | Mascot           |
| 2300.2141           | 2300.1758   | -0.0383  | -17       | 146        | 165 SVLPEESLVIWNMTPLG |           |         |                  | Mascot           |

17 Cnot6 protein [Danio rerio] RK  
gi|30047751 63969.6 6.2 11 37 0

Peptide Information

| Calc. Mass | Obsrv. Mass | ± da    | ± ppm | Start Seq. | End Seq. | Sequence                | Ion Score | C. I. % | Modification               | Rank | Result Type |
|------------|-------------|---------|-------|------------|----------|-------------------------|-----------|---------|----------------------------|------|-------------|
| 969.4305   | 969.5462    | 0.1157  | 119   | 279        | 286      | TMSESDRK                |           |         | Oxidation (M)[2]           |      | Mascot      |
| 1160.6534  | 1160.6057   | -0.0477 | -41   | 171        | 180      | RAPIEQPPPR              |           |         |                            |      | Mascot      |
| 1232.6521  | 1232.5938   | -0.0583 | -47   | 38         | 48       | STWAELEIVGK             |           |         |                            |      | Mascot      |
| 1240.6321  | 1240.6304   | -0.0017 | -1    | 181        | 190      | SWIPLQEPDR              |           |         |                            |      | Mascot      |
| 1240.6321  | 1240.6304   | -0.0017 | -1    | 181        | 190      | SWIPLQEPDR              |           |         |                            |      | Mascot      |
| 1360.7471  | 1360.6343   | -0.1128 | -83   | 37         | 48       | KSTWAELEIVGK            |           |         |                            |      | Mascot      |
| 1392.6827  | 1392.7341   | 0.0514  | 37    | 1          | 12       | WEINTSITGMPK            |           |         | Oxidation (M)[10]          |      | Mascot      |
| 1531.7175  | 1531.7518   | 0.0343  | 22    | 264        | 276      | EQGYEGFFSPKSR           |           |         |                            |      | Mascot      |
| 1719.7676  | 1719.7845   | 0.0169  | 10    | 22         | 36       | RMYTMSSEEAANGK          |           |         | Oxidation (M)[2,6]         |      | Mascot      |
| 1931.9387  | 1932.0051   | 0.0664  | 34    | 344        | 360      | KEMMELSAGKPLHGMEK       |           |         | Oxidation (M)[3]           |      | Mascot      |
| 2145.0288  | 2145.0566   | 0.0278  | 13    | 191        | 208      | TRPAALFSVMCYNVLCDK      |           |         | Carbamidomethyl (C)[11,16] |      | Mascot      |
| 2284.168   | 2284.1562   | -0.0118 | -5    | 138        | 157      | GNPLAEILNLYQEPDGT<br>RR |           |         |                            |      | Mascot      |

18 PREDICTED: rab15 effector protein [Danio rerio] gi|292628166 28285.2 5.83 7 37 0

Peptide Information

| Calc. Mass | Obsrv. Mass | ± da    | ± ppm | Start Seq. | End Seq. | Sequence                | Ion Score | C. I. % | Modification                              | Rank | Result Type |
|------------|-------------|---------|-------|------------|----------|-------------------------|-----------|---------|-------------------------------------------|------|-------------|
| 1091.5408  | 1091.5801   | 0.0393  | 36    | 45         | 52       | TQEYLYFK                |           |         |                                           |      | Mascot      |
| 1091.5408  | 1091.5801   | 0.0393  | 36    | 45         | 52       | TQEYLYFK                |           |         |                                           |      | Mascot      |
| 1232.6191  | 1232.5938   | -0.0253 | -21   | 236        | 246      | EGNDPLTMLVK             |           |         | Oxidation (M)[8]                          |      | Mascot      |
| 1357.5875  | 1357.6888   | 0.1013  | 75    | 1          | 11       | MYQMNTQNEAK             |           |         |                                           |      | Mascot      |
| 1373.5824  | 1373.687    | 0.1046  | 76    | 1          | 11       | MYQMNTQNEAK             |           |         | Oxidation (M)[1]                          |      | Mascot      |
| 1464.7402  | 1464.8417   | 0.1015  | 69    | 236        | 248      | EGNDPLTMLVKFT           |           |         |                                           |      | Mascot      |
| 1772.8054  | 1772.8462   | 0.0408  | 23    | 157        | 171      | TQAERMVDFCSSIGR         |           |         | Carbamidomethyl (C)[10], Oxidation (M)[6] |      | Mascot      |
| 1772.8054  | 1772.8462   | 0.0408  | 23    | 157        | 171      | TQAERMVDFCSSIGR         |           |         | Carbamidomethyl (C)[10], Oxidation (M)[6] |      | Mascot      |
| 1961.9208  | 1962.0641   | 0.1433  | 73    | 1          | 16       | MYQMNTQNEAKTSIFR        |           |         |                                           |      | Mascot      |
| 1993.9106  | 1993.9747   | 0.0641  | 32    | 1          | 16       | MYQMNTQNEAKTSIFR        |           |         | Oxidation (M)[1,4]                        |      | Mascot      |
| 2298.1282  | 2298.1843   | 0.0561  | 24    | 77         | 96       | STVLNLTDFNNTTMTPE<br>QR |           |         | Oxidation (M)[15]                         |      | Mascot      |

19 PREDICTED: huntingtin-interacting protein 1-related protein-like [Danio rerio] gi|326671469 126222.3 5.94 13 37 0

| Peptide Information |                                                        |             |         |       |             |                               |         |           |         |                        |      |             |
|---------------------|--------------------------------------------------------|-------------|---------|-------|-------------|-------------------------------|---------|-----------|---------|------------------------|------|-------------|
|                     | Calc. Mass                                             | Obsrv. Mass | ± da    | ± ppm | Start Seq.  | End Sequence Seq.             |         | Ion Score | C. I. % | Modification           | Rank | Result Type |
|                     | 842.5206                                               | 842.5095    | -0.0111 | -13   | 973         | 979 VRLGELR                   |         |           |         |                        |      | Mascot      |
|                     | 858.5043                                               | 858.5464    | 0.0421  | 49    | 485         | 491 AEIERLK                   |         |           |         |                        |      | Mascot      |
|                     | 870.4614                                               | 870.5396    | 0.0782  | 90    | 434         | 440 HADLMRK                   |         |           |         |                        |      | Mascot      |
|                     | 1091.515                                               | 1091.5801   | 0.0651  | 60    | 655         | 664 NMDDASGLLR                |         | 14        | 0       |                        |      | Mascot      |
|                     | 1091.5731                                              | 1091.5801   | 0.007   | 6     | 842         | 851 WTEGLISASK                |         |           |         |                        |      | Mascot      |
|                     | 1232.6317                                              | 1232.5938   | -0.0379 | -31   | 645         | 654 MQRSHAAYIR                |         |           |         |                        |      | Mascot      |
|                     | 1240.7372                                              | 1240.6304   | -0.1068 | -86   | 350         | 360 VEAQRAVVQLK               |         |           |         |                        |      | Mascot      |
|                     | 1240.7372                                              | 1240.6304   | -0.1068 | -86   | 350         | 360 VEAQRAVVQLK               |         |           |         |                        |      | Mascot      |
|                     | 1262.6335                                              | 1262.651    | 0.0175  | 14    | 821         | 833 DIVESGRGSGSAK             |         |           |         |                        |      | Mascot      |
|                     | 1498.7496                                              | 1498.7201   | -0.0295 | -20   | 366         | 377 LESELEEQRTHK              |         |           |         |                        |      | Mascot      |
|                     | 1932.0708                                              | 1932.0051   | -0.0657 | -34   | 729         | 744 CVLQRILHQGQDLRPR          |         |           |         |                        |      | Mascot      |
|                     | 2120.0439                                              | 2120.0444   | 0.0005  | 0     | 852         | 871 AVGWGATQMLDSADKV<br>VTDR  |         |           |         |                        |      | Mascot      |
|                     | 2120.0439                                              | 2120.0444   | 0.0005  | 0     | 852         | 871 AVGWGATQMLDSADKV<br>VTDR  |         |           |         |                        |      | Mascot      |
|                     | 2211.2344                                              | 2211.1028   | -0.1316 | -60   | 514         | 534 AGDQLSSVLVGLQAEKD<br>VLLR |         |           |         |                        |      | Mascot      |
|                     | 2283.155                                               | 2283.1748   | 0.0198  | 9     | 616         | 634 VDDPLHVRCISTPDYLIN<br>R   |         |           |         | Carbamidomethyl (C)[9] |      | Mascot      |
|                     | 2283.155                                               | 2283.1748   | 0.0198  | 9     | 616         | 634 VDDPLHVRCISTPDYLIN<br>R   |         |           |         | Carbamidomethyl (C)[9] |      | Mascot      |
| 20                  | serine/threonine-protein kinase VRK1 [Danio rerio]     |             |         |       | gij47087073 |                               | 47740.8 | 9.55      | 9       | 37                     | 0    |             |
| Peptide Information |                                                        |             |         |       |             |                               |         |           |         |                        |      |             |
|                     | Calc. Mass                                             | Obsrv. Mass | ± da    | ± ppm | Start Seq.  | End Sequence Seq.             |         | Ion Score | C. I. % | Modification           | Rank | Result Type |
|                     | 856.525                                                | 856.5244    | -0.0006 | -1    | 323         | 330 GILQQGLK                  |         |           |         |                        |      | Mascot      |
|                     | 1531.7638                                              | 1531.7518   | -0.012  | -8    | 73          | 86 VEPSDNGPLFSELK             |         |           |         |                        |      | Mascot      |
|                     | 1719.8435                                              | 1719.7845   | -0.059  | -34   | 20          | 35 LAEEFPSGEVLTDNAK           |         |           |         |                        |      | Mascot      |
|                     | 1730.7803                                              | 1730.7938   | 0.0135  | 8     | 221         | 235 CHDGTIEFTSIDAHK           |         |           |         | Carbamidomethyl (C)[1] |      | Mascot      |
|                     | 1962.0542                                              | 1962.0641   | 0.0099  | 5     | 340         | 358 LDFGVATNSTSLPSVKTP<br>K   |         |           |         |                        |      | Mascot      |
|                     | 2145.032                                               | 2145.0566   | 0.0246  | 11    | 73          | 90 VEPSDNGPLFSELKFYM<br>R     |         |           |         | Oxidation (M)[17]      |      | Mascot      |
|                     | 2174.0078                                              | 2174.0911   | 0.0833  | 38    | 289         | 308 SCFASGNIPAEMGKFMQ<br>EVK  |         |           |         |                        |      | Mascot      |
|                     | 2220.0068                                              | 2220.1489   | 0.1421  | 64    | 242         | 259 RADLEIMGYCMIQWLCS<br>R    |         |           |         | Oxidation (M)[7,11]    |      | Mascot      |
|                     | 2220.0642                                              | 2220.1489   | 0.0847  | 38    | 303         | 320 FMQEVKVLGYTDRPDYD<br>K    |         |           |         | Oxidation (M)[2]       |      | Mascot      |
| 21                  | chloride intracellular channel protein 2 [Danio rerio] |             |         |       | gij50540188 |                               | 27541.2 | 8.49      | 7       | 37                     | 0    |             |



| Peptide Information |                                                    |         |       |              |                             |           |         |                            |      |             |
|---------------------|----------------------------------------------------|---------|-------|--------------|-----------------------------|-----------|---------|----------------------------|------|-------------|
| Calc. Mass          | Obsrv. Mass                                        | ± da    | ± ppm | Start Seq.   | End Sequence Seq.           | Ion Score | C. I. % | Modification               | Rank | Result Type |
| 1160.6211           | 1160.6057                                          | -0.0154 | -13   | 98           | 106 YPHLSPRYK               |           |         |                            |      | Mascot      |
| 1240.6207           | 1240.6304                                          | 0.0097  | 8     | 107          | 118 ESFDVGAGIFAK            |           |         |                            |      | Mascot      |
| 1240.6207           | 1240.6304                                          | 0.0097  | 8     | 107          | 118 ESFDVGAGIFAK            |           |         |                            |      | Mascot      |
| 1353.7195           | 1353.6805                                          | -0.039  | -29   | 43           | 54 GVKFTVTTVDMR             |           |         |                            |      | Mascot      |
| 1531.7791           | 1531.7518                                          | -0.0273 | -18   | 105          | 118 YKESFDVGAGIFAK          |           |         |                            |      | Mascot      |
| 1817.7441           | 1817.8652                                          | 0.1211  | 67    | 19           | 34 AGHDGENVGNCPCQQR         |           |         | Carbamidomethyl (C)[11,14] |      | Mascot      |
| 2120.1274           | 2120.0444                                          | -0.083  | -39   | 80           | 97 TDFIKIEEFLETTLAPPR       |           |         |                            |      | Mascot      |
| 2120.1274           | 2120.0444                                          | -0.083  | -39   | 80           | 97 TDFIKIEEFLETTLAPPR       |           |         |                            |      | Mascot      |
| 2576.2839           | 2576.3013                                          | 0.0174  | 7     | 143          | 164 LDDYLNTPLQDELQDNIS VSKR |           |         |                            |      | Mascot      |
| 22                  | Replication factor C (activator 1) 3 [Danio rerio] |         |       | gi 156230598 | 40370                       | 8.72      | 10      | 37                         | 0    |             |

| Peptide Information |                                              |         |       |             |                            |           |         |                                                |      |             |
|---------------------|----------------------------------------------|---------|-------|-------------|----------------------------|-----------|---------|------------------------------------------------|------|-------------|
| Calc. Mass          | Obsrv. Mass                                  | ± da    | ± ppm | Start Seq.  | End Sequence Seq.          | Ion Score | C. I. % | Modification                                   | Rank | Result Type |
| 856.5363            | 856.5244                                     | -0.0119 | -14   | 271         | 277 LLEVRAR                |           |         |                                                |      | Mascot      |
| 878.444             | 878.4709                                     | 0.0269  | 31    | 1           | 7 MSLWVDK                  |           |         |                                                |      | Mascot      |
| 878.444             | 878.4709                                     | 0.0269  | 31    | 1           | 7 MSLWVDK                  |           |         |                                                |      | Mascot      |
| 1179.6984           | 1179.5989                                    | -0.0995 | -84   | 203         | 213 EGLLLPPELAK            |           |         |                                                |      | Mascot      |
| 1240.6532           | 1240.6304                                    | -0.0228 | -18   | 69          | 79 IEHQSITTPSK             |           |         |                                                |      | Mascot      |
| 1240.6532           | 1240.6304                                    | -0.0228 | -18   | 69          | 79 IEHQSITTPSK             |           |         |                                                |      | Mascot      |
| 1531.7823           | 1531.7518                                    | -0.0305 | -20   | 114         | 127 TVAQSQQIQSSAQR         |           |         |                                                |      | Mascot      |
| 1730.9656           | 1730.7938                                    | -0.1718 | -99   | 161         | 176 LILCCNSTSKVAPIR        |           |         |                                                |      | Mascot      |
| 1872.9557           | 1872.894                                     | -0.0617 | -33   | 184         | 201 VPLPSVEEVCSVLGVC R     |           |         |                                                |      | Mascot      |
| 1993.8962           | 1993.9747                                    | 0.0785  | 39    | 155         | 170 YMATCRLILCCNSTSK       |           |         | Carbamidomethyl (C)[5,10,11], Oxidation (M)[2] |      | Mascot      |
| 2183.1716           | 2183.0916                                    | -0.08   | -37   | 276         | 293 ARLYELLTHCIPPEVIMK     |           |         | Carbamidomethyl (C)[10]                        |      | Mascot      |
| 2300.1855           | 2300.1758                                    | -0.0097 | -4    | 28          | 49 NLVQCGDFPHLLVYGPS GAGKK |           |         |                                                |      | Mascot      |
| 23                  | replication factor C subunit 3 [Danio rerio] |         |       | gi 41393079 | 40301.9                    | 8.81      | 10      | 36                                             | 0    |             |

| Peptide Information |             |         |       |            |              |           |         |              |      |             |
|---------------------|-------------|---------|-------|------------|--------------|-----------|---------|--------------|------|-------------|
| Calc. Mass          | Obsrv. Mass | ± da    | ± ppm | Start Seq. | End Sequence | Ion Score | C. I. % | Modification | Rank | Result Type |
| 856.5363            | 856.5244    | -0.0119 | -14   | 271        | 277 LLEVRAR  |           |         |              |      | Mascot      |
| 878.444             | 878.4709    | 0.0269  | 31    | 1          | 7 MSLWVDK    |           |         |              |      | Mascot      |

|    |                                                                                                      |           |         |     |     |     |                            |         |      |   |    |   |  |  |  |                                                |        |
|----|------------------------------------------------------------------------------------------------------|-----------|---------|-----|-----|-----|----------------------------|---------|------|---|----|---|--|--|--|------------------------------------------------|--------|
|    | 878.444                                                                                              | 878.4709  | 0.0269  | 31  | 1   | 7   | MSLWVDK                    |         |      |   |    |   |  |  |  |                                                | Mascot |
|    | 1179.6984                                                                                            | 1179.5989 | -0.0995 | -84 | 203 | 213 | EGLLLPELAK                 |         |      |   |    |   |  |  |  |                                                | Mascot |
|    | 1240.6532                                                                                            | 1240.6304 | -0.0228 | -18 | 69  | 79  | IEHQSITTPSK                |         |      |   |    |   |  |  |  |                                                | Mascot |
|    | 1240.6532                                                                                            | 1240.6304 | -0.0228 | -18 | 69  | 79  | IEHQSITTPSK                |         |      |   |    |   |  |  |  |                                                | Mascot |
|    | 1531.7823                                                                                            | 1531.7518 | -0.0305 | -20 | 114 | 127 | TVAQSQQIQSSAQR             |         |      |   |    |   |  |  |  |                                                | Mascot |
|    | 1730.9656                                                                                            | 1730.7938 | -0.1718 | -99 | 161 | 176 | LILCCNSTSKVAPIR            |         |      |   |    |   |  |  |  |                                                | Mascot |
|    | 1872.9557                                                                                            | 1872.894  | -0.0617 | -33 | 184 | 201 | VPLPSVEEVCSVLGVC<br>R      |         |      |   |    |   |  |  |  |                                                | Mascot |
|    | 1962.0074                                                                                            | 1962.0641 | 0.0567  | 29  | 278 | 293 | LYELLTHCISPEVIMK           |         |      |   |    |   |  |  |  | Carbamidomethyl (C)[8], Oxidation (M)[15]      | Mascot |
|    | 1993.8962                                                                                            | 1993.9747 | 0.0785  | 39  | 155 | 170 | YMATCRLLCCNSTSK            |         |      |   |    |   |  |  |  | Carbamidomethyl (C)[5,10,11], Oxidation (M)[2] | Mascot |
|    | 2300.1855                                                                                            | 2300.1758 | -0.0097 | -4  | 28  | 49  | NLVQCGDFPHLLVYGPS<br>GAGKK |         |      |   |    |   |  |  |  |                                                | Mascot |
| 24 | novel protein similar to vertebrate interleukin-1 receptor-associated kinase 1 (IRAK1) [Danio rerio] |           |         |     |     |     | gi 159570376               | 61228.6 | 6.53 | 7 | 36 | 0 |  |  |  |                                                |        |

Peptide Information

| Calc. Mass | Obsrv. Mass | ± da   | ± ppm | Start Seq. | End Seq. | Sequence                  | Ion Score | C. I. | % | Modification           | Rank | Result Type |
|------------|-------------|--------|-------|------------|----------|---------------------------|-----------|-------|---|------------------------|------|-------------|
| 878.4465   | 878.4709    | 0.0244 | 28    | 498        | 505      | TDISSVEK                  |           |       |   |                        |      | Mascot      |
| 878.4465   | 878.4709    | 0.0244 | 28    | 498        | 505      | TDISSVEK                  |           |       |   |                        |      | Mascot      |
| 1091.5448  | 1091.5801   | 0.0353 | 32    | 351        | 359      | LACQCLERR                 |           |       |   |                        |      | Mascot      |
| 1091.5448  | 1091.5801   | 0.0353 | 32    | 351        | 359      | LACQCLERR                 | 16        |       | 0 |                        |      | Mascot      |
| 1165.6146  | 1165.7427   | 0.1281 | 110   | 363        | 371      | RPRMTDVFKE                |           |       |   | Oxidation (M)[4]       |      | Mascot      |
| 1464.6787  | 1464.8417   | 0.163  | 111   | 315        | 327      | DLSYGQTAEHICK             |           |       |   |                        |      | Mascot      |
| 1764.8849  | 1764.918    | 0.0331 | 19    | 77         | 92       | QIGEGGFHGVYKAVMR          |           |       |   | Oxidation (M)[15]      |      | Mascot      |
| 2183.0496  | 2183.0916   | 0.042  | 19    | 485        | 505      | SVSCGAQGIESTKTDISS<br>VEK |           |       |   | Carbamidomethyl (C)[4] |      | Mascot      |
| 2284.1377  | 2284.1562   | 0.0185 | 8     | 533        | 553      | MELYEEGRILTSDLLSSG<br>ASL |           |       |   |                        |      | Mascot      |
| 2300.1326  | 2300.1758   | 0.0432 | 19    | 533        | 553      | MELYEEGRILTSDLLSSG<br>ASL |           |       |   | Oxidation (M)[1]       |      | Mascot      |

25 caveolin-1 isoform a [Danio rerio] gi|47086737 20639.4 5.84 6 36 0

Peptide Information

| Calc. Mass | Obsrv. Mass | ± da   | ± ppm | Start Seq. | End Seq. | Sequence                | Ion Score | C. I. | % | Modification                              | Rank | Result Type |
|------------|-------------|--------|-------|------------|----------|-------------------------|-----------|-------|---|-------------------------------------------|------|-------------|
| 858.4679   | 858.5464    | 0.0785 | 91    | 51         | 57       | EIDLVNR                 |           |       |   |                                           |      | Mascot      |
| 1198.6426  | 1198.6777   | 0.0351 | 29    | 51         | 60       | EIDLVNRPDK              |           |       |   |                                           |      | Mascot      |
| 1198.6426  | 1198.6777   | 0.0351 | 29    | 51         | 60       | EIDLVNRPDK              |           |       |   |                                           |      | Mascot      |
| 1282.6572  | 1282.6792   | 0.022  | 17    | 169        | 179      | CFSNVRVTATK             |           |       |   | Carbamidomethyl (C)[1]                    |      | Mascot      |
| 2233.0127  | 2233.0793   | 0.0666 | 30    | 150        | 168      | VYSICVHTFCDPLFEAMG<br>K |           |       |   | Carbamidomethyl (C)[5], Oxidation (M)[17] |      | Mascot      |

|    |                               |           |        |    |    |              |                              |      |    |    |   |  |  |  |  |  |        |
|----|-------------------------------|-----------|--------|----|----|--------------|------------------------------|------|----|----|---|--|--|--|--|--|--------|
|    | 2284.0518                     | 2284.1562 | 0.1044 | 46 | 2  | 21           | TSGYKDGTPEEEEAHSP<br>FIR     |      |    |    |   |  |  |  |  |  | Mascot |
|    | 2351.0933                     | 2351.3132 | 0.2199 | 94 | 23 | 42           | QGNIYKPNNKEMDND<br>SIN<br>EK |      |    |    |   |  |  |  |  |  | Mascot |
| 26 | p90 autoantigen [Danio rerio] |           |        |    |    | gi 167555176 | 99404.6                      | 6.04 | 13 | 36 | 0 |  |  |  |  |  |        |

Peptide Information

| Calc. Mass | Obsrv. Mass | ± da    | ± ppm | Start Seq. | End Seq. | Sequence                  | Ion Score | C. I. | % Modification                           | Rank | Result Type |
|------------|-------------|---------|-------|------------|----------|---------------------------|-----------|-------|------------------------------------------|------|-------------|
| 850.4278   | 850.542     | 0.1142  | 134   | 16         | 21       | QYRNNR                    |           |       |                                          |      | Mascot      |
| 969.4379   | 969.5462    | 0.1083  | 112   | 1          | 8        | MDVSTCLK                  |           |       | Carbamidomethyl (C)[6], Oxidation (M)[1] |      | Mascot      |
| 1045.5887  | 1045.5614   | -0.0273 | -26   | 855        | 863      | SQLEAKLEK                 |           |       |                                          |      | Mascot      |
| 1232.5801  | 1232.5938   | 0.0137  | 11    | 667        | 677      | CQRAQAEAEAR               |           |       |                                          |      | Mascot      |
| 1420.7288  | 1420.7236   | -0.0052 | -4    | 514        | 526      | MVTPLSLAMTSNR             |           |       |                                          |      | Mascot      |
| 1531.8326  | 1531.7518   | -0.0808 | -53   | 847        | 860      | ASSLELQKSQLEAK            |           |       |                                          |      | Mascot      |
| 1576.8298  | 1576.8215   | -0.0083 | -5    | 514        | 527      | MVTPLSLAMTSNRR            |           |       |                                          |      | Mascot      |
| 1719.9496  | 1719.7845   | -0.1651 | -96   | 1          | 15       | MDVSTCLKSLLAIR            |           |       | Carbamidomethyl (C)[6]                   |      | Mascot      |
| 1730.9542  | 1730.7938   | -0.1604 | -93   | 301        | 315      | VMELLVSLCSVPVLR           |           |       | Carbamidomethyl (C)[9], Oxidation (M)[2] |      | Mascot      |
| 1839.9712  | 1839.8444   | -0.1268 | -69   | 174        | 189      | HDVTVQAHIKSQSYVK          |           |       |                                          |      | Mascot      |
| 1932.0371  | 1932.0051   | -0.032  | -17   | 421        | 438      | AGRVVDFLLVLCGDDAL<br>R    |           |       |                                          |      | Mascot      |
| 2174.1421  | 2174.0911   | -0.051  | -23   | 508        | 526      | ILQDQRMVTPSLAMTSN<br>R    |           |       |                                          |      | Mascot      |
| 2455.2319  | 2455.3079   | 0.076   | 31    | 864        | 885      | IEEELGKHTQMAMIHSLS<br>SGK |           |       | Oxidation (M)[11]                        |      | Mascot      |

|    |                                                           |  |  |  |  |              |         |      |    |    |   |  |  |  |  |  |  |
|----|-----------------------------------------------------------|--|--|--|--|--------------|---------|------|----|----|---|--|--|--|--|--|--|
| 27 | nucleolar MIF4G domain-containing protein 1 [Danio rerio] |  |  |  |  | gi 148540048 | 55892.4 | 8.35 | 10 | 36 | 0 |  |  |  |  |  |  |
|----|-----------------------------------------------------------|--|--|--|--|--------------|---------|------|----|----|---|--|--|--|--|--|--|

Peptide Information

| Calc. Mass | Obsrv. Mass | ± da    | ± ppm | Start Seq. | End Seq. | Sequence           | Ion Score | C. I. | % Modification       | Rank | Result Type |
|------------|-------------|---------|-------|------------|----------|--------------------|-----------|-------|----------------------|------|-------------|
| 996.5724   | 996.5945    | 0.0221  | 22    | 114        | 122      | KLVTSFSSK          |           |       |                      |      | Mascot      |
| 996.5724   | 996.5945    | 0.0221  | 22    | 114        | 122      | KLVTSFSSK          |           |       |                      |      | Mascot      |
| 1243.6205  | 1243.5995   | -0.021  | -17   | 188        | 198      | IPGYDPEPVEK        |           |       |                      |      | Mascot      |
| 1262.5829  | 1262.651    | 0.0681  | 54    | 172        | 181      | FMLETMMALK         |           |       | Oxidation (M)[2,6,7] |      | Mascot      |
| 1498.7384  | 1498.7201   | -0.0183 | -12   | 254        | 267      | TTTPSTKGEQYSAK     |           |       |                      |      | Mascot      |
| 1531.7681  | 1531.7518   | -0.0163 | -11   | 170        | 181      | IRFMLETMMALK       |           |       | Oxidation (M)[4,8,9] |      | Mascot      |
| 1730.8854  | 1730.7938   | -0.0916 | -53   | 202        | 217      | LQRTLIHSSAGSSDMK   |           |       |                      |      | Mascot      |
| 1873.0065  | 1872.894    | -0.1125 | -60   | 414        | 429      | LLKETEPEDLVNIFGR   |           |       |                      |      | Mascot      |
| 2119.9998  | 2120.0444   | 0.0446  | 21    | 1          | 18       | MASISSQLEELYMNTSRK |           |       | Oxidation (M)[1,13]  |      | Mascot      |
| 2119.9998  | 2120.0444   | 0.0446  | 21    | 1          | 18       | MASISSQLEELYMNTSRK |           |       | Oxidation (M)[1,13]  |      | Mascot      |

|    |                                                                                        |           |        |    |     |     |                             |  |  |  |                                           |        |
|----|----------------------------------------------------------------------------------------|-----------|--------|----|-----|-----|-----------------------------|--|--|--|-------------------------------------------|--------|
|    | 2297.9954                                                                              | 2298.1843 | 0.1889 | 82 | 234 | 253 | WWIMGSSWSGAPMIDD<br>QGNK    |  |  |  | Oxidation (M)[4,13]                       | Mascot |
|    | 2576.2405                                                                              | 2576.3013 | 0.0608 | 24 | 19  | 41  | DMNDTLTDILLAACVTPA<br>LMPER |  |  |  | Carbamidomethyl (C)[14], Oxidation (M)[2] | Mascot |
| 28 | PREDICTED: zinc finger protein 260-like [Danio rerio] gi 292613300 34642.4 6.42 8 35 0 |           |        |    |     |     |                             |  |  |  |                                           |        |

Peptide Information

| Calc. Mass | Obsrv. Mass | ± da    | ± ppm | Start Seq. | End Seq. | Sequence                  | Ion Score | C. I. | % Modification             | Rank | Result Type |
|------------|-------------|---------|-------|------------|----------|---------------------------|-----------|-------|----------------------------|------|-------------|
| 856.4709   | 856.5244    | 0.0535  | 62    | 118        | 124      | SLKPHMK                   |           |       | Oxidation (M)[6]           |      | Mascot      |
| 870.4614   | 870.5396    | 0.0782  | 90    | 230        | 236      | NLTVHMR                   |           |       |                            |      | Mascot      |
| 969.5475   | 969.5462    | -0.0013 | -1    | 89         | 96       | RSLEVHTK                  |           |       |                            |      | Mascot      |
| 1360.6426  | 1360.6343   | -0.0083 | -6    | 125        | 135      | VHNGEKPYTCR               |           |       | Carbamidomethyl (C)[10]    |      | Mascot      |
| 1464.7554  | 1464.8417   | 0.0863  | 59    | 265        | 277      | NHSDEKPLAGLQR             |           |       |                            |      | Mascot      |
| 1719.7941  | 1719.7845   | -0.0096 | -6    | 153        | 167      | IHTGEKPFSCQQCGK           |           |       | Carbamidomethyl (C)[10]    |      | Mascot      |
| 2282.9563  | 2283.1748   | 0.2185  | 96    | 181        | 200      | VHTGNMPYTCAQCGQCF<br>THK  |           |       | Carbamidomethyl (C)[10]    |      | Mascot      |
| 2282.9563  | 2283.1748   | 0.2185  | 96    | 181        | 200      | VHTGNMPYTCAQCGQCF<br>THK  |           |       | Carbamidomethyl (C)[10]    |      | Mascot      |
| 2351.127   | 2351.3132   | 0.1862  | 79    | 209        | 228      | IHTGEKPFCTPCQCGKSFT<br>QK |           |       | Carbamidomethyl (C)[10,13] |      | Mascot      |

29 PREDICTED: astrotactin-2-like, partial [Danio rerio] gi|326668303 36231.9 5.45 8 35 0

Peptide Information

| Calc. Mass | Obsrv. Mass | ± da    | ± ppm | Start Seq. | End Seq. | Sequence                | Ion Score | C. I. | % Modification                            | Rank | Result Type |
|------------|-------------|---------|-------|------------|----------|-------------------------|-----------|-------|-------------------------------------------|------|-------------|
| 1091.4939  | 1091.5801   | 0.0862  | 79    | 103        | 111      | GDVIENWCR               |           |       |                                           |      | Mascot      |
| 1091.4939  | 1091.5801   | 0.0862  | 79    | 103        | 111      | GDVIENWCR               |           |       |                                           |      | Mascot      |
| 1357.6859  | 1357.6888   | 0.0029  | 2     | 230        | 241      | FSLYAVDSRGRS            |           |       |                                           |      | Mascot      |
| 1719.7181  | 1719.7845   | 0.0664  | 39    | 40         | 54       | CQEKGSPPAACHLCR         |           |       | Carbamidomethyl (C)[1,7]                  |      | Mascot      |
| 1799.8898  | 1799.8937   | 0.0039  | 2     | 206        | 220      | NAEHPHNMIYSLVFK         |           |       |                                           |      | Mascot      |
| 1799.8898  | 1799.8937   | 0.0039  | 2     | 206        | 220      | NAEHPHNMIYSLVFK         |           |       |                                           |      | Mascot      |
| 1839.804   | 1839.8444   | 0.0404  | 22    | 87         | 102      | EAFKSATMSSYWCAGK        |           |       | Carbamidomethyl (C)[13], Oxidation (M)[8] |      | Mascot      |
| 1872.9307  | 1872.894    | -0.0367 | -20   | 112        | 129      | CDLTALGKDGLPNCSP<br>LR  |           |       |                                           |      | Mascot      |
| 2174.1121  | 2174.0911   | -0.021  | -10   | 25         | 43       | TQLLSDDLVAIVEIR<br>CQEK |           |       | Carbamidomethyl (C)[16]                   |      | Mascot      |
| 2283.1326  | 2283.1748   | 0.0422  | 18    | 280        | 298      | EQQTAYNTLMEISPLLY<br>R  |           |       | Oxidation (M)[10]                         |      | Mascot      |
| 2283.1326  | 2283.1748   | 0.0422  | 18    | 280        | 298      | EQQTAYNTLMEISPLLY<br>R  |           |       | Oxidation (M)[10]                         |      | Mascot      |

30 SH3 domain-binding protein 4-A [Danio rerio] gi|45387913 104947.5 7.73 13 35 0

Peptide Information

| Calc. Mass | Obsrv. Mass | ± da | ± ppm | Start | End | Sequence | Ion | C. I. | % Modification | Rank | Result Type |
|------------|-------------|------|-------|-------|-----|----------|-----|-------|----------------|------|-------------|
|------------|-------------|------|-------|-------|-----|----------|-----|-------|----------------|------|-------------|

|    |                                           |           |         | Seq. | Seq.         | Score                     |      |                        |    |        |
|----|-------------------------------------------|-----------|---------|------|--------------|---------------------------|------|------------------------|----|--------|
|    | 842.5822                                  | 842.5095  | -0.0727 | -86  | 634          | 640 LIKTVIR               |      |                        |    | Mascot |
|    | 850.4338                                  | 850.542   | 0.1082  | 127  | 358          | 364 LSNMEIK               |      | Oxidation (M)[4]       |    | Mascot |
|    | 870.4726                                  | 870.5396  | 0.067   | 77   | 1            | 7 MAHRIR                  |      | Oxidation (M)[1]       |    | Mascot |
|    | 1045.4796                                 | 1045.5614 | 0.0818  | 78   | 762          | 770 AELDSEPER             |      |                        |    | Mascot |
|    | 1198.6466                                 | 1198.6777 | 0.0311  | 26   | 644          | 652 NQYLLEYKK             |      |                        |    | Mascot |
|    | 1198.6466                                 | 1198.6777 | 0.0311  | 26   | 644          | 652 NQYLLEYKK             |      |                        |    | Mascot |
|    | 1232.6674                                 | 1232.5938 | -0.0736 | -60  | 723          | 732 FLTYYASVR             |      |                        |    | Mascot |
|    | 1282.7155                                 | 1282.6792 | -0.0363 | -28  | 488          | 499 SAPPVSLQLWGK          |      |                        |    | Mascot |
|    | 1357.6932                                 | 1357.6888 | -0.0044 | -3   | 463          | 475 TVVAIFGHDCAPK         |      |                        |    | Mascot |
|    | 1799.901                                  | 1799.8937 | -0.0073 | -4   | 432          | 446 HVSFSSNVWNHMKK        |      |                        |    | Mascot |
|    | 1799.9281                                 | 1799.8937 | -0.0344 | -19  | 358          | 372 LSNMEIKSFITLEMK       |      | Oxidation (M)[4]       |    | Mascot |
|    | 2284.2368                                 | 2284.1562 | -0.0806 | -35  | 463          | 484 TVVAIFGHDCAPKTLVSEVGK |      |                        |    | Mascot |
|    | 2300.0686                                 | 2300.1758 | 0.1072  | 47   | 568          | 587 DDQDCILAQFCVQTPQP PPK |      | Carbamidomethyl (C)[5] |    | Mascot |
|    | 2576.333                                  | 2576.3013 | -0.0317 | -12  | 723          | 743 FLTYYASVRTILMENLGNWR  |      | Oxidation (M)[14]      |    | Mascot |
| 31 | adenomatosis polyposis coli [Danio rerio] |           |         |      | gi 219802769 | 300905.4                  | 7.29 | 23                     | 35 | 0      |

#### Peptide Information

| Calc. Mass | Obsrv. Mass | ± da    | ± ppm | Start Seq. | End Sequence Seq.   | Ion Score | C. I. % | Modification           | Rank | Result Type |
|------------|-------------|---------|-------|------------|---------------------|-----------|---------|------------------------|------|-------------|
| 842.4617   | 842.5095    | 0.0478  | 57    | 2393       | 2400 EAPSPTLK       |           |         |                        |      | Mascot      |
| 856.4886   | 856.5244    | 0.0358  | 42    | 298        | 305 LTSHLGTK        |           |         |                        |      | Mascot      |
| 858.4832   | 858.5464    | 0.0632  | 74    | 1411       | 1418 TPTPTPTPTPT    |           |         |                        |      | Mascot      |
| 863.4178   | 863.4851    | 0.0673  | 78    | 1031       | 1037 LLDDEMK        |           |         |                        |      | Mascot      |
| 969.5475   | 969.5462    | -0.0013 | -1    | 2167       | 2175 QAQAPVISR      |           |         |                        |      | Mascot      |
| 1045.5459  | 1045.5614   | 0.0155  | 15    | 1216       | 1224 AVQKNPTCK      |           |         | Carbamidomethyl (C)[8] |      | Mascot      |
| 1051.6259  | 1051.7117   | 0.0858  | 82    | 2290       | 2298 LSQLPQLPR      |           |         |                        |      | Mascot      |
| 1091.5699  | 1091.5801   | 0.0102  | 9     | 711        | 721 MIAMGSAAALR     |           |         |                        |      | Mascot      |
| 1091.5699  | 1091.5801   | 0.0102  | 9     | 711        | 721 MIAMGSAAALR     | 6         | 0       |                        |      | Mascot      |
| 1120.6837  | 1120.5466   | -0.1371 | -122  | 400        | 408 VLHLEQIR        |           |         |                        |      | Mascot      |
| 1160.6058  | 1160.6057   | -0.0001 | 0     | 848        | 858 GFLPDGEAAKR     |           |         |                        |      | Mascot      |
| 1232.6593  | 1232.5938   | -0.0655 | -53   | 360        | 371 DSVLLGNSRGSK    |           |         |                        |      | Mascot      |
| 1353.6355  | 1353.6805   | 0.045   | 33    | 74         | 86 EMSLDPSGFSGVK    |           |         |                        |      | Mascot      |
| 1360.7583  | 1360.6343   | -0.124  | -91   | 1411       | 1423 TPTPTPTPTSTSVK |           |         |                        |      | Mascot      |
| 1392.7271  | 1392.7341   | 0.007   | 5     | 2702       | 2713 VSPFNYTPSPRK   |           |         |                        |      | Mascot      |
| 1402.6193  | 1402.7197   | 0.1004  | 72    | 2446       | 2459 APQSQNSAENGDK  |           |         |                        |      | Mascot      |

|    |                                                                             |           |         |     |      |             |                          |      |    |    |   |  |                         |  |  |  |        |
|----|-----------------------------------------------------------------------------|-----------|---------|-----|------|-------------|--------------------------|------|----|----|---|--|-------------------------|--|--|--|--------|
|    | 1531.7897                                                                   | 1531.7518 | -0.0379 | -25 | 12   | 24          | QVEALKMENSNLR            |      |    |    |   |  |                         |  |  |  | Mascot |
|    | 1730.8303                                                                   | 1730.7938 | -0.0365 | -21 | 2446 | 2462        | APQSQNSAENGDKSLK         |      |    |    |   |  |                         |  |  |  | Mascot |
|    | 1764.918                                                                    | 1764.918  | 0       | 0   | 1068 | 1081        | YQPRFVQQDLPAFR           |      |    |    |   |  |                         |  |  |  | Mascot |
|    | 1799.8962                                                                   | 1799.8937 | -0.0025 | -1  | 145  | 158         | EKDWWYAQLQNLTK           |      |    |    |   |  |                         |  |  |  | Mascot |
|    | 1799.8962                                                                   | 1799.8937 | -0.0025 | -1  | 145  | 158         | EKDWWYAQLQNLTK           |      |    |    |   |  |                         |  |  |  | Mascot |
|    | 1808.9132                                                                   | 1808.8495 | -0.0637 | -35 | 565  | 580         | ALMECALEVQKESTLK         |      |    |    |   |  | Oxidation (M)[3]        |  |  |  | Mascot |
|    | 1872.9272                                                                   | 1872.894  | -0.0332 | -18 | 581  | 597         | SVLSALWNLSAHCTENK        |      |    |    |   |  |                         |  |  |  | Mascot |
|    | 1961.795                                                                    | 1962.0641 | 0.2691  | 137 | 1248 | 1265        | GSSLSSLSSEEDEMESC<br>K   |      |    |    |   |  | Carbamidomethyl (C)[17] |  |  |  | Mascot |
|    | 2225.0586                                                                   | 2225.116  | 0.0574  | 26  | 430  | 449         | NPMPSPVEHQICPAVCVL<br>MK |      |    |    |   |  | Oxidation (M)[3,19]     |  |  |  | Mascot |
| 32 | mitochondrial import inner membrane translocase subunit TIM44 [Danio rerio] |           |         |     |      | gi 61806584 | 50838                    | 7.98 | 10 | 35 | 0 |  |                         |  |  |  |        |

#### Peptide Information

| Calc. Mass | Obsrv. Mass | ± da    | ± ppm | Start Seq. | End Seq. | Sequence                 | Ion Score | C. I. | % Modification                                | Rank | Result Type |
|------------|-------------|---------|-------|------------|----------|--------------------------|-----------|-------|-----------------------------------------------|------|-------------|
| 863.4468   | 863.4851    | 0.0383  | 44    | 159        | 166      | QSAETVTK                 |           |       |                                               |      | Mascot      |
| 1058.5     | 1058.5255   | 0.0255  | 24    | 406        | 415      | GEVVEGDPEK               |           |       |                                               |      | Mascot      |
| 1198.6361  | 1198.6777   | 0.0416  | 35    | 37         | 49       | ICGAPAAAAQVR             |           |       |                                               |      | Mascot      |
| 1198.6361  | 1198.6777   | 0.0416  | 35    | 37         | 49       | ICGAPAAAAQVR             |           |       |                                               |      | Mascot      |
| 1392.7291  | 1392.7341   | 0.005   | 4     | 294        | 305      | TEMSEVLTEILK             |           |       |                                               |      | Mascot      |
| 1402.7172  | 1402.7197   | 0.0025  | 2     | 132        | 144      | EGLEEVGRTDIGK            |           |       |                                               |      | Mascot      |
| 1772.8749  | 1772.8462   | -0.0287 | -16   | 190        | 205      | EIGDLGQMGPYRPPSR         |           |       |                                               |      | Mascot      |
| 1772.8749  | 1772.8462   | -0.0287 | -16   | 190        | 205      | EIGDLGQMGPYRPPSR         |           |       |                                               |      | Mascot      |
| 1808.97    | 1808.8495   | -0.1205 | -67   | 32         | 49       | AHVFRICGAPAAAAQVR        |           |       |                                               |      | Mascot      |
| 1817.8278  | 1817.8652   | 0.0374  | 21    | 1          | 15       | MAASLCQCYQLCVRR          |           |       | Carbamidomethyl (C)[6], Oxidation (M)[1]      |      | Mascot      |
| 1931.8706  | 1932.0051   | 0.1345  | 70    | 1          | 15       | MAASLCQCYQLCVRR          |           |       | Carbamidomethyl (C)[6,8,12], Oxidation (M)[1] |      | Mascot      |
| 1993.9694  | 1993.9747   | 0.0053  | 3     | 37         | 57       | ICGAPAAAAQVRFMSS<br>GGGR |           |       | Oxidation (M)[15]                             |      | Mascot      |
| 2211.1101  | 2211.1028   | -0.0073 | -3    | 294        | 312      | TEMSEVLTEILKVDPTFD<br>K  |           |       | Oxidation (M)[3]                              |      | Mascot      |

|    |                                                                   |  |  |  |  |              |         |      |   |    |   |  |  |  |  |  |  |
|----|-------------------------------------------------------------------|--|--|--|--|--------------|---------|------|---|----|---|--|--|--|--|--|--|
| 33 | PREDICTED: diacylglycerol kinase beta-like, partial [Danio rerio] |  |  |  |  | gi 326674321 | 85995.9 | 6.78 | 9 | 35 | 0 |  |  |  |  |  |  |
|----|-------------------------------------------------------------------|--|--|--|--|--------------|---------|------|---|----|---|--|--|--|--|--|--|

#### Peptide Information

| Calc. Mass | Obsrv. Mass | ± da   | ± ppm | Start Seq. | End Seq. | Sequence | Ion Score | C. I. | % Modification   | Rank | Result Type |
|------------|-------------|--------|-------|------------|----------|----------|-----------|-------|------------------|------|-------------|
| 842.4229   | 842.5095    | 0.0866 | 103   | 153        | 158      | LEFMFR   |           |       |                  |      | Mascot      |
| 858.4178   | 858.5464    | 0.1286 | 150   | 153        | 158      | LEFMFR   |           |       | Oxidation (M)[4] |      | Mascot      |

|    |                                                                 |           |         |     |     |              |                           |      |   |    |   |                         |        |
|----|-----------------------------------------------------------------|-----------|---------|-----|-----|--------------|---------------------------|------|---|----|---|-------------------------|--------|
|    | 1045.4264                                                       | 1045.5614 | 0.135   | 129 | 270 | 278          | QGLCCSFCK                 |      |   |    |   | Carbamidomethyl (C)[4]  | Mascot |
|    | 1091.5878                                                       | 1091.5801 | -0.0077 | -7  | 724 | 733          | LAQCSSITIR                |      |   |    |   |                         | Mascot |
|    | 1091.5878                                                       | 1091.5801 | -0.0077 | -7  | 724 | 733          | LAQCSSITIR                | 14   |   | 0  |   |                         | Mascot |
|    | 1160.5914                                                       | 1160.6057 | 0.0143  | 12  | 285 | 295          | CVSRAPPSCIK               |      |   |    |   |                         | Mascot |
|    | 1464.7839                                                       | 1464.8417 | 0.0578  | 39  | 724 | 736          | LAQCSSITIRTSK             |      |   |    |   | Carbamidomethyl (C)[4]  | Mascot |
|    | 1873                                                            | 1872.894  | -0.106  | -57 | 364 | 379          | DHILPPNTICPVVLER          |      |   |    |   | Carbamidomethyl (C)[10] | Mascot |
|    | 2144.9998                                                       | 2145.0566 | 0.0568  | 26  | 602 | 619          | LWYFEFGTSETFSATCKK        |      |   |    |   |                         | Mascot |
|    | 2283.2488                                                       | 2283.1748 | -0.074  | -32 | 115 | 135          | GSCPPLKVTSQSRPLSTV<br>QLK |      |   |    |   | Carbamidomethyl (C)[3]  | Mascot |
|    | 2283.2488                                                       | 2283.1748 | -0.074  | -32 | 115 | 135          | GSCPPLKVTSQSRPLSTV<br>QLK |      |   |    |   | Carbamidomethyl (C)[3]  | Mascot |
|    | 2284.0591                                                       | 2284.1562 | 0.0971  | 43  | 153 | 171          | LEFMFRLYDTDGNGFLD<br>SK   |      |   |    |   | Oxidation (M)[4]        | Mascot |
| 34 | PREDICTED: 6-phosphofructokinase, liver type-like [Danio rerio] |           |         |     |     | gi 189523785 | 84565.1                   | 7.22 | 5 | 35 | 0 | 26                      | 29.787 |

#### Peptide Information

| Calc. Mass | Obsrv. Mass | ± da    | ± ppm | Start Seq. | End Seq. | Sequence                   | Ion Score | C. I. | %      | Modification     | Rank | Result Type |
|------------|-------------|---------|-------|------------|----------|----------------------------|-----------|-------|--------|------------------|------|-------------|
| 856.4167   | 856.5244    | 0.1077  | 126   | 89         | 95       | CKAFTMR                    |           |       |        |                  |      | Mascot      |
| 1051.5604  | 1051.7117   | 0.1513  | 144   | 202        | 210      | TFVLEVMGR                  |           |       |        |                  |      | Mascot      |
| 1091.5878  | 1091.5801   | -0.0077 | -7    | 1          | 10       | MSSAGLEKLR                 |           |       |        |                  |      | Mascot      |
| 1091.5878  | 1091.5801   | -0.0077 | -7    | 1          | 10       | MSSAGLEKLR                 | 26        |       | 29.787 |                  |      | Mascot      |
| 1120.5415  | 1120.5466   | 0.0051  | 5     | 357        | 365      | EVQRAMNEK                  |           |       |        | Oxidation (M)[6] |      | Mascot      |
| 2298.2563  | 2298.1843   | -0.072  | -31   | 67         | 88       | LANWQSVTNIIQLGGTVI<br>GSAR |           |       |        |                  |      | Mascot      |

35 PREDICTED: hypothetical protein LOC325902 [Danio rerio] gi|292621312 43251.8 5.91 8 34 0

#### Peptide Information

| Calc. Mass | Obsrv. Mass | ± da    | ± ppm | Start Seq. | End Seq. | Sequence                | Ion Score | C. I. | % | Modification     | Rank | Result Type |
|------------|-------------|---------|-------|------------|----------|-------------------------|-----------|-------|---|------------------|------|-------------|
| 850.5145   | 850.542     | 0.0275  | 32    | 77         | 83       | IKLASYSR                |           |       |   |                  |      | Mascot      |
| 1091.5956  | 1091.5801   | -0.0155 | -14   | 79         | 88       | LASYRSPAAR              |           |       |   |                  |      | Mascot      |
| 1091.5956  | 1091.5801   | -0.0155 | -14   | 79         | 88       | LASYRSPAAR              |           |       |   |                  |      | Mascot      |
| 1719.7854  | 1719.7845   | -0.0009 | -1    | 200        | 215      | TEPPSLCTPNSTESTR        |           |       |   |                  |      | Mascot      |
| 1772.9388  | 1772.8462   | -0.0926 | -52   | 354        | 370      | NKNASSPPSLEISLTK        |           |       |   |                  |      | Mascot      |
| 1772.9388  | 1772.8462   | -0.0926 | -52   | 354        | 370      | NKNASSPPSLEISLTK        |           |       |   |                  |      | Mascot      |
| 1808.7928  | 1808.8495   | 0.0567  | 31    | 148        | 163      | CDLESMPSTLEPEVDK        |           |       |   | Oxidation (M)[6] |      | Mascot      |
| 2233.04    | 2233.0793   | 0.0393  | 18    | 335        | 353      | RSPSEPTIENEISQTMEE<br>R |           |       |   |                  |      | Mascot      |
| 2351.1787  | 2351.3132   | 0.1345  | 57    | 89         | 107      | LSAVESFRYFHMLDHML       |           |       |   |                  |      | Mascot      |

|    |                      |           |        |    |     |              |                                 |         |      |   |    |                      |        |
|----|----------------------|-----------|--------|----|-----|--------------|---------------------------------|---------|------|---|----|----------------------|--------|
|    | 2455.0984            | 2455.3079 | 0.2095 | 85 | 247 | 267          | VR<br>LGEQLAEQRAFHCSMLG<br>MMDR |         |      |   |    | Oxidation (M)[15,18] | Mascot |
| 36 | kazrin [Danio rerio] |           |        |    |     | gi 121583740 |                                 | 48879.4 | 6.17 | 9 | 34 | 0                    |        |

Peptide Information

| Calc. Mass | Obsrv. Mass | ± da    | ± ppm | Start Seq. | End Seq. | Sequence                   | Ion Score | C. I. | % Modification         | Rank | Result Type |
|------------|-------------|---------|-------|------------|----------|----------------------------|-----------|-------|------------------------|------|-------------|
| 850.4451   | 850.542     | 0.0969  | 114   | 390        | 397      | MSLGSLSR                   |           |       |                        |      | Mascot      |
| 856.4094   | 856.5244    | 0.115   | 134   | 333        | 339      | ISPCHSR                    |           |       | Carbamidomethyl (C)[4] |      | Mascot      |
| 996.4852   | 996.5945    | 0.1093  | 110   | 120        | 127      | QMKDMLSK                   |           |       | Oxidation (M)[2]       |      | Mascot      |
| 996.4852   | 996.5945    | 0.1093  | 110   | 120        | 127      | QMKDMLSK                   |           |       | Oxidation (M)[2]       |      | Mascot      |
| 1120.5415  | 1120.5466   | 0.0051  | 5     | 250        | 258      | SQIDMKENR                  |           |       |                        |      | Mascot      |
| 1160.6157  | 1160.6057   | -0.01   | -9    | 212        | 222      | ESEDAVKALAK                |           |       |                        |      | Mascot      |
| 1232.6052  | 1232.5938   | -0.0114 | -9    | 2          | 11       | MEDNKQLAQR                 |           |       |                        |      | Mascot      |
| 2174.2292  | 2174.0911   | -0.1381 | -64   | 102        | 119      | VLLREEVAQLQEEVHLLR         |           |       |                        |      | Mascot      |
| 2283.0781  | 2283.1748   | 0.0967  | 42    | 333        | 354      | ISPCHSRQPSIISDASAAD<br>GDR |           |       |                        |      | Mascot      |
| 2283.0781  | 2283.1748   | 0.0967  | 42    | 333        | 354      | ISPCHSRQPSIISDASAAD<br>GDR |           |       |                        |      | Mascot      |
| 2298.2161  | 2298.1843   | -0.0318 | -14   | 7          | 27       | QLAQRIDGAIQSASQEV<br>T NLR |           |       |                        |      | Mascot      |

|    |                                                                                                |
|----|------------------------------------------------------------------------------------------------|
| 37 | novel protein similar to vertebrate Wolf-Hirschhorn syndrome candidate 1 (WHSC1) [Danio rerio] |
|----|------------------------------------------------------------------------------------------------|

Peptide Information

| Calc. Mass | Obsrv. Mass | ± da    | ± ppm | Start Seq. | End Seq. | Sequence          | Ion Score | C. I. | % Modification         | Rank | Result Type |
|------------|-------------|---------|-------|------------|----------|-------------------|-----------|-------|------------------------|------|-------------|
| 1058.5992  | 1058.5255   | -0.0737 | -70   | 573        | 582      | FPAAPNSVKK        |           |       |                        |      | Mascot      |
| 1091.5044  | 1091.5801   | 0.0757  | 69    | 403        | 411      | FSFVYEDGK         |           |       |                        |      | Mascot      |
| 1091.5044  | 1091.5801   | 0.0757  | 69    | 403        | 411      | FSFVYEDGK         |           |       |                        |      | Mascot      |
| 1198.6538  | 1198.6777   | 0.0239  | 20    | 359        | 369      | SNQLPINISGR       |           |       |                        |      | Mascot      |
| 1198.6538  | 1198.6777   | 0.0239  | 20    | 359        | 369      | SNQLPINISGR       |           |       |                        |      | Mascot      |
| 1240.6896  | 1240.6304   | -0.0592 | -48   | 162        | 173      | LPEGVLTSP TAR     |           |       |                        |      | Mascot      |
| 1240.6896  | 1240.6304   | -0.0592 | -48   | 162        | 173      | LPEGVLTSP TAR     |           |       |                        |      | Mascot      |
| 1360.6968  | 1360.6343   | -0.0625 | -46   | 106        | 118      | GVEPVSQHASPPR     |           |       |                        |      | Mascot      |
| 1402.8152  | 1402.7197   | -0.0955 | -68   | 120        | 132      | TSVSPELTVKITK     |           |       |                        |      | Mascot      |
| 1498.8522  | 1498.7201   | -0.1321 | -88   | 130        | 143      | ITKCVVNLGGKPNR    |           |       |                        |      | Mascot      |
| 1576.9243  | 1576.8215   | -0.1028 | -65   | 91         | 105      | IPKLCAAPAGQPLLK   |           |       | Carbamidomethyl (C)[5] |      | Mascot      |
| 1730.8452  | 1730.7938   | -0.0514 | -30   | 6          | 22       | GGSLPAMPEPKSPTSMK |           |       | Oxidation (M)[7]       |      | Mascot      |
| 1799.9572  | 1799.8937   | -0.0635 | -35   | 549        | 564      | DLLCIDLDLQPKASQK  |           |       |                        |      | Mascot      |



1799.9572 1799.8937 -0.0635 -35 549 564 DLLCIDLDLQPKASQK

Mascot

38 PREDICTED: hypothetical protein LOC368753 [Danio rerio] gi|292611672 56234.5 7.88 10 34 0

Peptide Information

| Calc. Mass | Obsrv. Mass | ± da    | ± ppm | Start Seq. | End Sequence Seq.          | Ion Score | C. I. % Modification     | Rank | Result Type |
|------------|-------------|---------|-------|------------|----------------------------|-----------|--------------------------|------|-------------|
| 870.4753   | 870.5396    | 0.0643  | 74    | 395        | 401 YTMAKIK                |           | Oxidation (M)[3]         |      | Mascot      |
| 1051.6047  | 1051.7117   | 0.107   | 102   | 466        | 474 VSWGKIPHK              |           |                          |      | Mascot      |
| 1091.5149  | 1091.5801   | 0.0652  | 60    | 117        | 126 GKIEEGAECR             |           |                          |      | Mascot      |
| 1091.5149  | 1091.5801   | 0.0652  | 60    | 117        | 126 GKIEEGAECR             |           |                          |      | Mascot      |
| 1120.5667  | 1120.5466   | -0.0201 | -18   | 343        | 352 MIQQQSIESK             |           |                          |      | Mascot      |
| 1198.7266  | 1198.6777   | -0.0489 | -41   | 42         | 52 SVSLIGRTPLR             |           |                          |      | Mascot      |
| 1198.7266  | 1198.6777   | -0.0489 | -41   | 42         | 52 SVSLIGRTPLR             |           |                          |      | Mascot      |
| 1498.681   | 1498.7201   | 0.0391  | 26    | 312        | 324 RTSCGVILCS DCK         |           | Carbamidomethyl (C)[4,9] |      | Mascot      |
| 1872.955   | 1872.894    | -0.061  | -33   | 263        | 279 EDTQSDKPSSLPLEAKK      |           |                          |      | Mascot      |
| 2145.0024  | 2145.0566   | 0.0542  | 25    | 375        | 394 GIQGTMTTCVEMPLSLSG YNK |           | Oxidation (M)[6]         |      | Mascot      |
| 2173.8809  | 2174.0911   | 0.2102  | 97    | 62         | 80 GNPQYDCDCRLQSASSG CR    |           | Carbamidomethyl (C)[7,9] |      | Mascot      |
| 2224.959   | 2225.116    | 0.157   | 71    | 353        | 371 NTEQDNQAQEQYSGQE DIK   |           |                          |      | Mascot      |

39 condensin-2 complex subunit D3 [Danio rerio] gi|41056171 160392.2 6.87 16 33 0

Peptide Information

| Calc. Mass | Obsrv. Mass | ± da    | ± ppm | Start Seq. | End Sequence Seq.    | Ion Score | C. I. % Modification                       | Rank | Result Type |
|------------|-------------|---------|-------|------------|----------------------|-----------|--------------------------------------------|------|-------------|
| 856.525    | 856.5244    | -0.0006 | -1    | 1169       | 1176 AVLQVAQK        |           |                                            |      | Mascot      |
| 969.5727   | 969.5462    | -0.0265 | -27   | 513        | 520 TIELTKHK         |           |                                            |      | Mascot      |
| 1045.5636  | 1045.5614   | -0.0022 | -2    | 98         | 106 TKSPSLEQR        |           |                                            |      | Mascot      |
| 1179.662   | 1179.5989   | -0.0631 | -53   | 829        | 838 YLSSVLLQEK       |           |                                            |      | Mascot      |
| 1232.7109  | 1232.5938   | -0.1171 | -95   | 1322       | 1332 RTYAGIVTPVR     |           |                                            |      | Mascot      |
| 1240.5701  | 1240.6304   | 0.0603  | 49    | 379        | 389 MPCQDYAATIK      |           |                                            |      | Mascot      |
| 1240.5701  | 1240.6304   | 0.0603  | 49    | 379        | 389 MPCQDYAATIK      |           |                                            |      | Mascot      |
| 1357.6648  | 1357.6888   | 0.024   | 18    | 390        | 399 WLYNYSRNNK       |           |                                            |      | Mascot      |
| 1360.6422  | 1360.6343   | -0.0079 | -6    | 921        | 931 LCLQHEDLMMK      |           |                                            |      | Mascot      |
| 1392.6321  | 1392.7341   | 0.102   | 73    | 921        | 931 LCLQHEDLMMK      |           | Oxidation (M)[9,10]                        |      | Mascot      |
| 1464.7225  | 1464.8417   | 0.1192  | 81    | 663        | 674 LAWDLLGLMCEK     |           | Carbamidomethyl (C)[10], Oxidation (M)[9]  |      | Mascot      |
| 1682.8683  | 1682.7455   | -0.1228 | -73   | 851        | 865 HLYTLGVASLHCPSK  |           | Carbamidomethyl (C)[12]                    |      | Mascot      |
| 1772.838   | 1772.8462   | 0.0082  | 5     | 375        | 389 LMAKMPQCQDYAATIK |           | Carbamidomethyl (C)[7], Oxidation (M)[2,5] |      | Mascot      |

|    |                                                |           |         |    |      |      |                    |         |      |   |    |   |    |   |                                            |        |
|----|------------------------------------------------|-----------|---------|----|------|------|--------------------|---------|------|---|----|---|----|---|--------------------------------------------|--------|
|    | 1772.838                                       | 1772.8462 | 0.0082  | 5  | 375  | 389  | LMAKMPCQDYAATIK    |         |      |   |    |   |    |   | Carbamidomethyl (C)[7], Oxidation (M)[2,5] | Mascot |
|    | 1931.9609                                      | 1932.0051 | 0.0442  | 23 | 695  | 711  | FTPAFVNNLLSHTEGER  |         |      |   |    |   |    |   |                                            | Mascot |
|    | 2120.0044                                      | 2120.0444 | 0.04    | 19 | 568  | 586  | HGVIACSLNLSMLSDRC  |         |      |   |    |   |    |   | Oxidation (M)[13]                          | Mascot |
|    | 2120.0044                                      | 2120.0444 | 0.04    | 19 | 568  | 586  | HGVIACSLNLSMLSDRC  |         |      |   |    |   |    |   | Oxidation (M)[13]                          | Mascot |
|    | 2183.0649                                      | 2183.0916 | 0.0267  | 12 | 1378 | 1396 | VSKGEEENVLHLSPE    |         |      |   |    |   |    |   |                                            | Mascot |
|    | 2220.0159                                      | 2220.1489 | 0.133   | 60 | 1147 | 1168 | LTAMSGPAAGEEAQEDE  |         |      |   |    |   |    |   |                                            | Mascot |
|    | 2220.0159                                      | 2220.1489 | 0.133   | 60 | 1147 | 1168 | LTAMSGPAAGEEAQEDE  |         |      |   |    |   |    |   |                                            | Mascot |
|    | 2283.1802                                      | 2283.1748 | -0.0054 | -2 | 784  | 804  | TFSLPSEVISSCVDALVR |         |      |   |    |   |    |   |                                            | Mascot |
|    | 2283.1802                                      | 2283.1748 | -0.0054 | -2 | 784  | 804  | TFSLPSEVISSCVDALVR |         |      |   |    |   |    |   |                                            | Mascot |
| 40 | DNA polymerase epsilon subunit 2 [Danio rerio] |           |         |    |      |      | gi 27545241        | 59223.8 | 5.65 | 6 | 33 | 0 | 18 | 0 |                                            |        |

#### Peptide Information

| Calc. Mass | Obsrv. Mass | ± da    | ± ppm | Start Seq. | End Seq. | Sequence           | Ion Score | C. I. | % | Modification           | Rank | Result Type |
|------------|-------------|---------|-------|------------|----------|--------------------|-----------|-------|---|------------------------|------|-------------|
| 878.473    | 878.4709    | -0.0021 | -2    | 125        | 131      | DKAELFR            | 18        | 0     |   |                        |      | Mascot      |
| 878.473    | 878.4709    | -0.0021 | -2    | 125        | 131      | DKAELFR            |           |       |   |                        |      | Mascot      |
| 1464.788   | 1464.8417   | 0.0537  | 37    | 405        | 416      | IQYCSQELVIIR       |           |       |   |                        |      | Mascot      |
| 1475.8145  | 1475.7522   | -0.0623 | -42   | 471        | 483      | LYPVPDVIVFADK      |           |       |   |                        |      | Mascot      |
| 2220.1084  | 2220.1489   | 0.0405  | 18    | 253        | 274      | AYFGNVNFFGGPSSTAV  |           |       |   |                        |      | Mascot      |
| 2220.1692  | 2220.1489   | -0.0203 | -9    | 405        | 422      | IQYCSQELVIREDLVNK  |           |       |   | Carbamidomethyl (C)[4] |      | Mascot      |
| 2300.2383  | 2300.1758   | -0.0625 | -27   | 28         | 47       | FLLQVLESVSPAELEEVL |           |       |   |                        |      | Mascot      |

|    |                                                                     |  |  |  |  |  |              |         |      |   |    |   |    |   |  |  |
|----|---------------------------------------------------------------------|--|--|--|--|--|--------------|---------|------|---|----|---|----|---|--|--|
| 41 | wingless-type MMTV integration site family, member 8a [Danio rerio] |  |  |  |  |  | gi 220678939 | 43349.7 | 8.88 | 7 | 33 | 0 | 20 | 0 |  |  |
|----|---------------------------------------------------------------------|--|--|--|--|--|--------------|---------|------|---|----|---|----|---|--|--|

#### Peptide Information

| Calc. Mass | Obsrv. Mass | ± da   | ± ppm | Start Seq. | End Seq. | Sequence           | Ion Score | C. I. | % | Modification              | Rank | Result Type |
|------------|-------------|--------|-------|------------|----------|--------------------|-----------|-------|---|---------------------------|------|-------------|
| 1058.5233  | 1058.5255   | 0.0022 | 2     | 321        | 329      | RLCHECGLK          |           |       |   |                           |      | Mascot      |
| 1091.5011  | 1091.5801   | 0.079  | 72    | 254        | 263      | MRAGNSADNR         |           |       |   |                           |      | Mascot      |
| 1091.5011  | 1091.5801   | 0.079  | 72    | 254        | 263      | MRAGNSADNR         | 20        | 0     |   |                           |      | Mascot      |
| 1198.5192  | 1198.6777   | 0.1585 | 132   | 353        | 362      | CETCTQTVTR         |           |       |   | Carbamidomethyl (C)[1]    |      | Mascot      |
| 1198.5192  | 1198.6777   | 0.1585 | 132   | 353        | 362      | CETCTQTVTR         |           |       |   | Carbamidomethyl (C)[1]    |      | Mascot      |
| 1353.6249  | 1353.6805   | 0.0556 | 41    | 334        | 344      | RIETVSSCNCK        |           |       |   | Carbamidomethyl (C)[8,10] |      | Mascot      |
| 1925.8302  | 1925.9547   | 0.1245 | 65    | 2          | 18       | DHLCSKCLCFASQEEGR  |           |       |   |                           |      | Mascot      |
| 2144.9385  | 2145.0566   | 0.1181 | 55    | 335        | 352      | IETVSSCNCKFHWCCTVK |           |       |   | Carbamidomethyl (C)[7]    |      | Mascot      |

|    |                    |           |        |    |              |         |                           |   |    |   |  |                         |        |
|----|--------------------|-----------|--------|----|--------------|---------|---------------------------|---|----|---|--|-------------------------|--------|
|    | 2233.0442          | 2233.0793 | 0.0351 | 16 | 64           | 84      | AYLAYTSSVQAGAQSGIE<br>ECK |   |    |   |  | Carbamidomethyl (C)[20] | Mascot |
| 42 | Bmf2 [Danio rerio] |           |        |    | gi 113679664 | 25155.5 | 7.68                      | 7 | 33 | 0 |  |                         |        |

Peptide Information

| Calc. Mass | Obsrv. Mass | ± da    | ± ppm | Start Seq. | End Seq. | Sequence                   | Ion Score | C. I. | % Modification         | Rank | Result Type |
|------------|-------------|---------|-------|------------|----------|----------------------------|-----------|-------|------------------------|------|-------------|
| 878.3859   | 878.4709    | 0.085   | 97    | 12         | 18       | CCETPLR                    |           |       | Carbamidomethyl (C)[1] |      | Mascot      |
| 878.3859   | 878.4709    | 0.085   | 97    | 12         | 18       | CCETPLR                    |           |       | Carbamidomethyl (C)[1] |      | Mascot      |
| 1120.5238  | 1120.5466   | 0.0228  | 20    | 12         | 20       | CCETPLRNK                  |           |       | Carbamidomethyl (C)[1] |      | Mascot      |
| 1243.6641  | 1243.5995   | -0.0646 | -52   | 148        | 159      | DAGISVEVQIGR               |           |       |                        |      | Mascot      |
| 1392.5583  | 1392.7341   | 0.1758  | 126   | 1          | 11       | MDDEEDEQLPR                |           |       | Oxidation (M)[1]       |      | Mascot      |
| 1764.9235  | 1764.918    | -0.0055 | -3    | 208        | 223      | MTSLSAISVLNMQIPK           |           |       | Oxidation (M)[1,12]    |      | Mascot      |
| 1772.8773  | 1772.8462   | -0.0311 | -18   | 144        | 159      | EEDRDAGISVEVQIGR           |           |       |                        |      | Mascot      |
| 1772.8773  | 1772.8462   | -0.0311 | -18   | 144        | 159      | EEDRDAGISVEVQIGR           |           |       |                        |      | Mascot      |
| 2120.074   | 2120.0444   | -0.0296 | -14   | 78         | 99       | TAFRAPCGTGGLVSLTM<br>GPGAR |           |       |                        |      | Mascot      |
| 2120.074   | 2120.0444   | -0.0296 | -14   | 78         | 99       | TAFRAPCGTGGLVSLTM<br>GPGAR |           |       |                        |      | Mascot      |

|    |                                                      |  |  |  |             |         |      |    |    |   |  |  |
|----|------------------------------------------------------|--|--|--|-------------|---------|------|----|----|---|--|--|
| 43 | epidermal growth factor-like protein 6 [Danio rerio] |  |  |  | gi 50539982 | 57454.3 | 4.82 | 11 | 33 | 0 |  |  |
|----|------------------------------------------------------|--|--|--|-------------|---------|------|----|----|---|--|--|

Peptide Information

| Calc. Mass | Obsrv. Mass | ± da    | ± ppm | Start Seq. | End Seq. | Sequence                  | Ion Score | C. I. | % Modification           | Rank | Result Type |
|------------|-------------|---------|-------|------------|----------|---------------------------|-----------|-------|--------------------------|------|-------------|
| 878.3937   | 878.4709    | 0.0772  | 88    | 149        | 155      | NQCPFNR                   |           |       |                          |      | Mascot      |
| 878.3937   | 878.4709    | 0.0772  | 88    | 149        | 155      | NQCPFNR                   |           |       |                          |      | Mascot      |
| 1058.4434  | 1058.5255   | 0.0821  | 78    | 13         | 20       | LECCYGWK                  |           |       | Carbamidomethyl (C)[3]   |      | Mascot      |
| 1160.5227  | 1160.6057   | 0.083   | 72    | 46         | 55       | CKCFPGYTGK                |           |       | Carbamidomethyl (C)[1]   |      | Mascot      |
| 1243.5598  | 1243.5995   | 0.0397  | 32    | 13         | 21       | LECCYGWKK                 |           |       | Carbamidomethyl (C)[3,4] |      | Mascot      |
| 1464.6399  | 1464.8417   | 0.2018  | 138   | 9          | 20       | YGSRLLECCYGWK             |           |       |                          |      | Mascot      |
| 1498.7358  | 1498.7201   | -0.0157 | -10   | 168        | 180      | CQPGYDLKYINGK             |           |       |                          |      | Mascot      |
| 1531.7244  | 1531.7518   | 0.0274  | 18    | 122        | 136      | CLCPSPGLQLGSDGK           |           |       | Carbamidomethyl (C)[1]   |      | Mascot      |
| 1719.7577  | 1719.7845   | 0.0268  | 16    | 196        | 210      | CSHHAECINTLGSYK           |           |       | Carbamidomethyl (C)[1]   |      | Mascot      |
| 2145.0083  | 2145.0566   | 0.0483  | 23    | 215        | 232      | QGFRGSGFDCSVKPFYH<br>R    |           |       | Carbamidomethyl (C)[10]  |      | Mascot      |
| 2232.9253  | 2233.0793   | 0.154   | 69    | 25         | 45       | GQCEAQCDLGCKHGEC<br>VGPNK |           |       | Carbamidomethyl (C)[3]   |      | Mascot      |
| 2300.033   | 2300.1758   | 0.1428  | 62    | 56         | 74       | TCSQDLNECGLKPRPCE<br>HR   |           |       | Carbamidomethyl (C)[2,9] |      | Mascot      |

|    |                                             |  |  |  |             |          |      |    |    |   |  |  |
|----|---------------------------------------------|--|--|--|-------------|----------|------|----|----|---|--|--|
| 44 | arsenite resistance protein 2 [Danio rerio] |  |  |  | gi 21105449 | 103417.6 | 5.33 | 11 | 33 | 0 |  |  |
|----|---------------------------------------------|--|--|--|-------------|----------|------|----|----|---|--|--|

Peptide Information

|    | Calc. Mass                                    | Obsrv. Mass | ± da    | ± ppm | Start Seq.  | End Sequence Seq.               | Ion Score | C. I. | % Modification   | Rank | Result Type |
|----|-----------------------------------------------|-------------|---------|-------|-------------|---------------------------------|-----------|-------|------------------|------|-------------|
|    | 842.5345                                      | 842.5095    | -0.025  | -30   | 253         | 260 ILDAAVIK                    |           |       |                  |      | Mascot      |
|    | 878.4803                                      | 878.4709    | -0.0094 | -11   | 701         | 708 MGPLFSVK                    |           |       |                  |      | Mascot      |
|    | 878.4803                                      | 878.4709    | -0.0094 | -11   | 701         | 708 MGPLFSVK                    |           |       |                  |      | Mascot      |
|    | 1091.4786                                     | 1091.5801   | 0.1015  | 93    | 261         | 270 MEGGAENDLR                  |           |       |                  |      | Mascot      |
|    | 1091.4786                                     | 1091.5801   | 0.1015  | 93    | 261         | 270 MEGGAENDLR                  | 10        | 0     |                  |      | Mascot      |
|    | 1232.6382                                     | 1232.5938   | -0.0444 | -36   | 876         | 885 GDPRNIEYR                   |           |       |                  |      | Mascot      |
|    | 1373.7032                                     | 1373.687    | -0.0162 | -12   | 860         | 872 GQGGYPGKPRNSR               |           |       |                  |      | Mascot      |
|    | 1392.6729                                     | 1392.7341   | 0.0612  | 44    | 186         | 196 QQMQDFFLAHK                 |           |       |                  |      | Mascot      |
|    | 1730.8605                                     | 1730.7938   | -0.0667 | -39   | 451         | 465 TCSLFMREFAPTISK             |           |       |                  |      | Mascot      |
|    | 1772.8297                                     | 1772.8462   | 0.0165  | 9     | 271         | 284 ILEQPSEEEEEERER             |           |       |                  |      | Mascot      |
|    | 1772.8297                                     | 1772.8462   | 0.0165  | 9     | 271         | 284 ILEQPSEEEEEERER             |           |       |                  |      | Mascot      |
|    | 1799.9585                                     | 1799.8937   | -0.0648 | -36   | 503         | 517 GVNIKEICWNLQNIR             |           |       |                  |      | Mascot      |
|    | 1799.9585                                     | 1799.8937   | -0.0648 | -36   | 503         | 517 GVNIKEICWNLQNIR             | 0         | 0     |                  |      | Mascot      |
|    | 1925.9226                                     | 1925.9547   | 0.0321  | 17    | 158         | 174 EFLISLDDSVDETESVK           |           |       |                  |      | Mascot      |
|    | 2576.1416                                     | 2576.3013   | 0.1597  | 62    | 261         | 282 MEGGAENDLRILEQPSE<br>EEEEER |           |       | Oxidation (M)[1] |      | Mascot      |
| 45 | serine hydroxymethyltransferase [Danio rerio] |             |         |       | gi 62420325 |                                 | 53287.1   | 7.96  | 9                | 33   | 0           |

#### Peptide Information

|  | Calc. Mass | Obsrv. Mass | ± da    | ± ppm | Start Seq. | End Sequence Seq.             | Ion Score | C. I. | % Modification            | Rank | Result Type |
|--|------------|-------------|---------|-------|------------|-------------------------------|-----------|-------|---------------------------|------|-------------|
|  | 1091.5076  | 1091.5801   | 0.0725  | 66    | 362        | 372 SNGTDGGRAEK               |           |       |                           |      | Mascot      |
|  | 1091.5076  | 1091.5801   | 0.0725  | 66    | 362        | 372 SNGTDGGRAEK               |           |       |                           |      | Mascot      |
|  | 1232.6885  | 1232.5938   | -0.0947 | -77   | 97         | 107 ALKVYGLDPEK               |           |       |                           |      | Mascot      |
|  | 1240.6354  | 1240.6304   | -0.005  | -4    | 194        | 204 LIIAGTSCYSR               |           |       | Carbamidomethyl (C)[8]    |      | Mascot      |
|  | 1240.6354  | 1240.6304   | -0.005  | -4    | 194        | 204 LIIAGTSCYSR               |           |       | Carbamidomethyl (C)[8]    |      | Mascot      |
|  | 1576.7821  | 1576.8215   | 0.0394  | 25    | 370        | 383 AEKVL EACAIACNK           |           |       | Carbamidomethyl (C)[8,12] |      | Mascot      |
|  | 1764.8877  | 1764.918    | 0.0303  | 17    | 156        | 170 KISATSIFFESMPYK           |           |       | Oxidation (M)[12]         |      | Mascot      |
|  | 1931.9644  | 1932.0051   | 0.0407  | 21    | 194        | 210 LIIAGTSCYSRNLDYSR         |           |       |                           |      | Mascot      |
|  | 2182.9822  | 2183.0916   | 0.1094  | 50    | 79         | 96 YYGGTEHVD ELERLCQD<br>R    |           |       |                           |      | Mascot      |
|  | 2220.1292  | 2220.1489   | 0.0197  | 9     | 18         | 36 MMLEPLSTNDPEVFDIIK<br>K    |           |       |                           |      | Mascot      |
|  | 2220.1292  | 2220.1489   | 0.0197  | 9     | 18         | 36 MMLEPLSTNDPEVFDIIK<br>K    |           |       |                           |      | Mascot      |
|  | 2283.126   | 2283.1748   | 0.0488  | 21    | 135        | 155 IMGLDLPDGGHLTHGFM<br>TDDK |           |       |                           |      | Mascot      |
|  | 2283.126   | 2283.1748   | 0.0488  | 21    | 135        | 155 IMGLDLPDGGHLTHGFM<br>TDDK |           |       |                           |      | Mascot      |

46 PREDICTED: paired amphipathic helix protein Sin3a gi|292616206 144029.5 7.26 17 32 0  
[Danio rerio]

Peptide Information

| Calc. Mass | Obsrv. Mass | $\pm$ da | $\pm$ ppm | Start Seq. | End Seq. | Sequence              | Ion Score | C. I. % | Modification           | Rank | Result Type |
|------------|-------------|----------|-----------|------------|----------|-----------------------|-----------|---------|------------------------|------|-------------|
| 863.5349   | 863.4851    | -0.0498  | -58       | 1060       | 1066     | LLFQKSK               |           |         |                        |      | Mascot      |
| 996.5697   | 996.5945    | 0.0248   | 25        | 1194       | 1201     | VSTR LHQR             |           |         |                        |      | Mascot      |
| 996.5697   | 996.5945    | 0.0248   | 25        | 1194       | 1201     | VSTR LHQR             |           |         |                        |      | Mascot      |
| 1091.6207  | 1091.5801   | -0.0406  | -37       | 550        | 559      | LGSSYRALPK            |           |         |                        |      | Mascot      |
| 1091.6207  | 1091.5801   | -0.0406  | -37       | 550        | 559      | LGSSYRALPK            |           |         |                        |      | Mascot      |
| 1160.5404  | 1160.6057   | 0.0653   | 56        | 522        | 531      | ECAHIESFPK            |           |         |                        |      | Mascot      |
| 1179.5687  | 1179.5989   | 0.0302   | 26        | 560        | 569      | SFQQPRCTGR            |           |         |                        |      | Mascot      |
| 1232.5654  | 1232.5938   | 0.0284   | 23        | 699        | 707      | EEEWREAQR             |           |         |                        |      | Mascot      |
| 1243.6793  | 1243.5995   | -0.0798  | -64       | 919        | 928      | EWERNVLGLK            |           |         |                        |      | Mascot      |
| 1282.5449  | 1282.6792   | 0.1343   | 105       | 1130       | 1139     | CQRGQEMQMR            |           |         | Oxidation (M)[7]       |      | Mascot      |
| 1353.6521  | 1353.6805   | 0.0284   | 21        | 1202       | 1210     | FQMWLDRWR             |           |         | Oxidation (M)[3]       |      | Mascot      |
| 1360.6703  | 1360.6343   | -0.036   | -26       | 5          | 16       | LEDQDTVIGSQR          |           |         |                        |      | Mascot      |
| 1420.6862  | 1420.7236   | 0.0374   | 26        | 414        | 424      | QRFNQNGCQIR           |           |         | Carbamidomethyl (C)[8] |      | Mascot      |
| 1682.6343  | 1682.7455   | 0.1112   | 66        | 1148       | 1162     | SSEGGDDSKMECMFK       |           |         | Oxidation (M)[10,13]   |      | Mascot      |
| 1730.7916  | 1730.7938   | 0.0022   | 1         | 1168       | 1180     | MVYVFKSEDYMYR         |           |         |                        |      | Mascot      |
| 1817.8601  | 1817.8652   | 0.0051   | 3         | 979        | 993      | EMFTIHAYIAFTMDK       |           |         |                        |      | Mascot      |
| 1962.0654  | 1962.0641   | -0.0013  | -1        | 150        | 167      | SQSIDTPGVISRVSQLFK    |           |         |                        |      | Mascot      |
| 2283.104   | 2283.1748   | 0.0708   | 31        | 1092       | 1110     | WPDYVERYLNTSSASPE LR  |           |         |                        |      | Mascot      |
| 2283.104   | 2283.1748   | 0.0708   | 31        | 1092       | 1110     | WPDYVERYLNTSSASPE LR  |           |         |                        |      | Mascot      |
| 2455.2656  | 2455.3079   | 0.0423   | 17        | 315        | 334      | FQGQPEVYKSFLEILHTY QK |           |         |                        |      | Mascot      |

47 PREDICTED: hypothetical protein LOC100535449 gi|326675262 15714.9 10.22 7 32 0  
[Danio rerio]

Peptide Information

| Calc. Mass | Obsrv. Mass | $\pm$ da | $\pm$ ppm | Start Seq. | End Seq. | Sequence            | Ion Score | C. I. % | Modification           | Rank | Result Type |
|------------|-------------|----------|-----------|------------|----------|---------------------|-----------|---------|------------------------|------|-------------|
| 1165.6323  | 1165.7427   | 0.1104   | 95        | 38         | 47       | SNNVKSFITR          |           |         |                        |      | Mascot      |
| 1232.5221  | 1232.5938   | 0.0717   | 58        | 89         | 99       | GIGVCCMSYSR         |           |         | Carbamidomethyl (C)[5] |      | Mascot      |
| 1498.7683  | 1498.7201   | -0.0482  | -32       | 43         | 55       | SFITRLGDTTMR        |           |         |                        |      | Mascot      |
| 1817.7979  | 1817.8652   | 0.0673   | 37        | 48         | 64       | LGDTTMRFCADGCQAK    |           |         |                        |      | Mascot      |
| 1872.8368  | 1872.894    | 0.0572   | 31        | 1          | 18       | MSFSASAACPLSSAHSY R |           |         |                        |      | Mascot      |

|    |                                                                            |           |        |    |    |              |                            |      |    |    |   |                                          |        |
|----|----------------------------------------------------------------------------|-----------|--------|----|----|--------------|----------------------------|------|----|----|---|------------------------------------------|--------|
|    | 1931.8408                                                                  | 1932.0051 | 0.1643 | 85 | 48 | 64           | LGDTTMRFCADGCQAK           |      |    |    |   | Carbamidomethyl (C)[10,14]               | Mascot |
|    | 1961.9427                                                                  | 1962.0641 | 0.1214 | 62 | 89 | 105          | GIGVCCMSYSRMILLR           |      |    |    |   | Carbamidomethyl (C)[5], Oxidation (M)[7] | Mascot |
|    | 2283.99                                                                    | 2284.1562 | 0.1662 | 73 | 78 | 99           | SMMVGSTSSPKGIGVCC<br>MSYSR |      |    |    |   | Oxidation (M)[2]                         | Mascot |
|    | 2299.9849                                                                  | 2300.1758 | 0.1909 | 83 | 78 | 99           | SMMVGSTSSPKGIGVCC<br>MSYSR |      |    |    |   | Oxidation (M)[2,3]                       | Mascot |
| 48 | PREDICTED: tyrosine-protein phosphatase non-receptor type 13 [Danio rerio] |           |        |    |    | gi 326673035 | 183811                     | 6.06 | 17 | 32 | 0 |                                          |        |

#### Peptide Information

| Calc. Mass | Obsrv. Mass | ± da    | ± ppm | Start Seq. | End Seq. | Sequence                    | Ion Score | C. I. | % Modification                           | Rank | Result Type |
|------------|-------------|---------|-------|------------|----------|-----------------------------|-----------|-------|------------------------------------------|------|-------------|
| 870.4104   | 870.5396    | 0.1292  | 148   | 268        | 274      | STSFWSR                     |           |       |                                          |      | Mascot      |
| 878.4406   | 878.4709    | 0.0303  | 34    | 406        | 412      | VAPDYWK                     |           |       |                                          |      | Mascot      |
| 878.4406   | 878.4709    | 0.0303  | 34    | 406        | 412      | VAPDYWK                     |           |       |                                          |      | Mascot      |
| 969.4934   | 969.5462    | 0.0528  | 54    | 655        | 662      | YTSICRAR                    |           |       |                                          |      | Mascot      |
| 1045.575   | 1045.5614   | -0.0136 | -13   | 1192       | 1200     | SRSLDLQAR                   |           |       |                                          |      | Mascot      |
| 1120.5898  | 1120.5466   | -0.0432 | -39   | 442        | 449      | HQYYLQLR                    |           |       |                                          |      | Mascot      |
| 1240.7446  | 1240.6304   | -0.1142 | -92   | 499        | 509      | VIEKVALPCLR                 |           |       |                                          |      | Mascot      |
| 1240.7446  | 1240.6304   | -0.1142 | -92   | 499        | 509      | VIEKVALPCLR                 |           |       |                                          |      | Mascot      |
| 1262.6932  | 1262.651    | -0.0422 | -33   | 1654       | 1663     | ALWFLVSLWQ                  |           |       |                                          |      | Mascot      |
| 1353.6389  | 1353.6805   | 0.0416  | 31    | 1585       | 1596     | CTLGMTLEDAVK                |           |       | Carbamidomethyl (C)[1], Oxidation (M)[5] |      | Mascot      |
| 1357.7798  | 1357.6888   | -0.091  | -67   | 1022       | 1033     | RTGEVVSIVLER                |           |       |                                          |      | Mascot      |
| 1420.6743  | 1420.7236   | 0.0493  | 35    | 487        | 497      | NYFQTEQYISK                 |           |       |                                          |      | Mascot      |
| 1498.7318  | 1498.7201   | -0.0117 | -8    | 1119       | 1133     | SLSSGHPAGDCGLLK             |           |       | Carbamidomethyl (C)[11]                  |      | Mascot      |
| 1576.7754  | 1576.8215   | 0.0461  | 29    | 487        | 498      | NYFQTEQYISK                 |           |       |                                          |      | Mascot      |
| 1719.8408  | 1719.7845   | -0.0563 | -33   | 704        | 717      | IRQQNEVNYSPEER              |           |       |                                          |      | Mascot      |
| 1799.9862  | 1799.8937   | -0.0925 | -51   | 1286       | 1303     | ASTTNTVQTPAAPKTAIK          |           |       |                                          |      | Mascot      |
| 1799.9862  | 1799.8937   | -0.0925 | -51   | 1286       | 1303     | ASTTNTVQTPAAPKTAIK          |           |       |                                          |      | Mascot      |
| 2183.1707  | 2183.0916   | -0.0791 | -36   | 802        | 822      | LDLGIFIASIIPDGADKD<br>GR    |           |       |                                          |      | Mascot      |
| 2351.1006  | 2351.3132   | 0.2126  | 90    | 641        | 660      | QLTYCLASDDSVAKYTSI<br>CR    |           |       | Carbamidomethyl (C)[5,19]                |      | Mascot      |
| 2455.3376  | 2455.3079   | -0.0297 | -12   | 42         | 65       | GHNICNIITPASLLSATG<br>TLAFK |           |       |                                          |      | Mascot      |

49 serine hydroxymethyltransferase, cytosolic [Danio rerio] gi|41054918 53350.1 8.21 9 32 0

#### Peptide Information

| Calc. Mass | Obsrv. Mass | ± da   | ± ppm | Start Seq. | End Seq. | Sequence    | Ion Score | C. I. | % Modification | Rank | Result Type |
|------------|-------------|--------|-------|------------|----------|-------------|-----------|-------|----------------|------|-------------|
| 1091.5076  | 1091.5801   | 0.0725 | 66    | 362        | 372      | SNGTDGGRAEK |           |       |                |      | Mascot      |

|           |           |         |     |     |     |                           |  |  |                           |  |  |        |
|-----------|-----------|---------|-----|-----|-----|---------------------------|--|--|---------------------------|--|--|--------|
| 1091.5076 | 1091.5801 | 0.0725  | 66  | 362 | 372 | SNGTDGGRAEK               |  |  |                           |  |  | Mascot |
| 1232.6885 | 1232.5938 | -0.0947 | -77 | 97  | 107 | ALKVYGLDPEK               |  |  |                           |  |  | Mascot |
| 1240.6354 | 1240.6304 | -0.005  | -4  | 194 | 204 | LIIAGTSCYSR               |  |  | Carbamidomethyl (C)[8]    |  |  | Mascot |
| 1240.6354 | 1240.6304 | -0.005  | -4  | 194 | 204 | LIIAGTSCYSR               |  |  | Carbamidomethyl (C)[8]    |  |  | Mascot |
| 1576.7821 | 1576.8215 | 0.0394  | 25  | 370 | 383 | AEKVL EACAIACNK           |  |  | Carbamidomethyl (C)[8,12] |  |  | Mascot |
| 1764.8877 | 1764.918  | 0.0303  | 17  | 156 | 170 | KISATSIFFESMPYK           |  |  | Oxidation (M)[12]         |  |  | Mascot |
| 1931.9644 | 1932.0051 | 0.0407  | 21  | 194 | 210 | LIIAGTSCYSRNL DYSR        |  |  |                           |  |  | Mascot |
| 2182.9822 | 2183.0916 | 0.1094  | 50  | 79  | 96  | YYGGTEHVDELERLCQD<br>R    |  |  |                           |  |  | Mascot |
| 2220.1292 | 2220.1489 | 0.0197  | 9   | 18  | 36  | MMLEPLSTNDPEVFDIIK<br>K   |  |  |                           |  |  | Mascot |
| 2220.1292 | 2220.1489 | 0.0197  | 9   | 18  | 36  | MMLEPLSTNDPEVFDIIK<br>K   |  |  |                           |  |  | Mascot |
| 2283.126  | 2283.1748 | 0.0488  | 21  | 135 | 155 | IMGLDLPDGGHLTHGFM<br>TDDK |  |  |                           |  |  | Mascot |
| 2283.126  | 2283.1748 | 0.0488  | 21  | 135 | 155 | IMGLDLPDGGHLTHGFM<br>TDDK |  |  |                           |  |  | Mascot |

50

PREDICTED: hypothetical protein LOC100332991

[Danio rerio]

gi|292613934

19237.3

8.99

5

32

0

Peptide Information

| Calc. Mass | Obsrv. Mass | ± da    | ± ppm | Start Seq. | End Seq. | Sequence                  | Ion Score | C. I. % | Modification                                  | Rank | Result Type |
|------------|-------------|---------|-------|------------|----------|---------------------------|-----------|---------|-----------------------------------------------|------|-------------|
| 842.5709   | 842.5095    | -0.0614 | -73   | 156        | 163      | LSLVLLGK                  |           |         |                                               |      | Mascot      |
| 1091.6055  | 1091.5801   | -0.0254 | -23   | 70         | 79       | KISDSLSSVR                |           |         |                                               |      | Mascot      |
| 1091.6055  | 1091.5801   | -0.0254 | -23   | 70         | 79       | KISDSLSSVR                | 19        | 0       |                                               |      | Mascot      |
| 1240.5739  | 1240.6304   | 0.0565  | 46    | 122        | 131      | RFGMSNIEDR                |           |         | Oxidation (M)[4]                              |      | Mascot      |
| 1240.5739  | 1240.6304   | 0.0565  | 46    | 122        | 131      | RFGMSNIEDR                |           |         | Oxidation (M)[4]                              |      | Mascot      |
| 2173.8301  | 2174.0911   | 0.261   | 120   | 6          | 24       | CPSCQGSDCAMDGQRA<br>VCR   |           |         | Carbamidomethyl (C)[1,4,9], Oxidation (M)[11] |      | Mascot      |
| 2220.0835  | 2220.1489   | 0.0654  | 29    | 92         | 112      | ALLTHSGLGCPNIICPHC<br>NTR |           |         |                                               |      | Mascot      |
| 2220.0835  | 2220.1489   | 0.0654  | 29    | 92         | 112      | ALLTHSGLGCPNIICPHC<br>NTR |           |         |                                               |      | Mascot      |

|                |           |                        |                |                |                    |
|----------------|-----------|------------------------|----------------|----------------|--------------------|
| Gel Idx/Pos    | 219/119   | Instr./Gel Origin      | BA2060/110707A | Process Status | Analysis Succeeded |
| Plate [#] Name | [1] 31496 | Instrument Sample Name |                | Spectra        | 11                 |

| Rank | Protein Name                                                       | Accession No. | Protein MW | Protein PI | Pep. Count | Protein Score | Protein Score C. I. % | Total Ion Score | Total Ion C. I. % |
|------|--------------------------------------------------------------------|---------------|------------|------------|------------|---------------|-----------------------|-----------------|-------------------|
| 1    | glycerol-3-phosphate dehydrogenase 1-like protein<br>[Danio rerio] | gi 54400366   | 38259.6    | 5.45       | 11         | 463           | 100                   | 411             | 100               |

Peptide Information

| Calc. Mass | Obsrv. Mass | ± da | ± ppm | Start Seq. | End Seq. | Sequence | Ion Score | C. I. % | Modification | Rank | Result Type |
|------------|-------------|------|-------|------------|----------|----------|-----------|---------|--------------|------|-------------|
|------------|-------------|------|-------|------------|----------|----------|-----------|---------|--------------|------|-------------|

|           |           |         |     |     |     |                                |     |        |                            |        |
|-----------|-----------|---------|-----|-----|-----|--------------------------------|-----|--------|----------------------------|--------|
| 1103.5844 | 1103.5824 | -0.002  | -2  | 180 | 188 | DLLQTPNFR                      | 66  | 99.993 |                            | Mascot |
| 1103.5844 | 1103.5824 | -0.002  | -2  | 180 | 188 | DLLQTPNFR                      |     |        |                            | Mascot |
| 1334.7791 | 1334.7791 | 0       | 0   | 70  | 81  | LPENVVAVPQLR                   | 66  | 99.994 |                            | Mascot |
| 1334.7791 | 1334.7791 | 0       | 0   | 70  | 81  | LPENVVAVPQLR                   |     |        |                            | Mascot |
| 1546.7794 | 1546.7795 | 0.0001  | 0   | 7   | 21  | VCIVGSGNWGSAIAR                | 127 | 100    | Carbamidomethyl (C)[2]     | Mascot |
| 1546.7794 | 1546.7795 | 0.0001  | 0   | 7   | 21  | VCIVGSGNWGSAIAR                |     |        | Carbamidomethyl (C)[2]     | Mascot |
| 1668.9319 | 1668.9299 | -0.002  | -1  | 299 | 313 | LQGPLTSAEVYHILK                |     |        |                            | Mascot |
| 2083.0972 | 2083.0981 | 0.0009  | 0   | 82  | 100 | DAADGADLLVFVPHQFI<br>R         | 152 | 100    |                            | Mascot |
| 2083.0972 | 2083.0981 | 0.0009  | 0   | 82  | 100 | DAADGADLLVFVPHQFI<br>R         |     |        |                            | Mascot |
| 2095.9534 | 2095.9583 | 0.0049  | 2   | 206 | 225 | NIVAVGAGFCDGLQCGD<br>NTK       |     |        | Carbamidomethyl (C)[10,15] | Mascot |
| 2148.0674 | 2148.0391 | -0.0283 | -13 | 141 | 161 | MGIDVSVLMGANIANEVA<br>AEK      |     |        | Oxidation (M)[1]           | Mascot |
| 2211.1919 | 2211.1074 | -0.0845 | -38 | 82  | 101 | DAADGADLLVFVPHQFI<br>RK        |     |        |                            | Mascot |
| 2230.1365 | 2230.155  | 0.0185  | 8   | 321 | 338 | FPLFTAVYQICFEDKPVR             |     |        | Carbamidomethyl (C)[11]    | Mascot |
| 2409.1287 | 2409.2122 | 0.0835  | 35  | 30  | 49  | LQCFATTVKMWVYEEMV<br>NGK       |     |        | Oxidation (M)[10,16]       | Mascot |
| 2781.2341 | 2781.2424 | 0.0083  | 3   | 246 | 271 | DDSVSSATFLESCGVADL<br>ITTCYGGR |     |        | Carbamidomethyl (C)[13,22] | Mascot |

2 Chain A, Crystal Structure Of Zebrafish Ape gi|162329921 31891.8 5.52 9 359 100 315 100

| Peptide Information |             |         |       |            |          |                           |           |         |                        |                  |
|---------------------|-------------|---------|-------|------------|----------|---------------------------|-----------|---------|------------------------|------------------|
| Calc. Mass          | Obsrv. Mass | ± da    | ± ppm | Start Seq. | End Seq. | Sequence                  | Ion Score | C. I. % | Modification           | Rank Result Type |
| 938.4366            | 938.4402    | 0.0036  | 4     | 152        | 158      | TWDVDFR                   |           |         |                        | Mascot           |
| 1020.4744           | 1020.4731   | -0.0013 | -1    | 194        | 202      | NAGFTPEER                 |           |         |                        | Mascot           |
| 1038.5037           | 1038.504    | 0.0003  | 0     | 159        | 167      | AYLCGLDAR                 |           |         | Carbamidomethyl (C)[4] | Mascot           |
| 1066.5316           | 1066.531    | -0.0006 | -1    | 151        | 158      | KTWDVDFR                  |           |         |                        | Mascot           |
| 1160.6058           | 1160.6064   | 0.0006  | 1     | 29         | 38       | ITSWNVDGLR                |           |         |                        | Mascot           |
| 1160.6058           | 1160.6064   | 0.0006  | 1     | 29         | 38       | ITSWNVDGLR                | 49        | 99.661  |                        | Mascot           |
| 1817.8704           | 1817.8693   | -0.0011 | -1    | 203        | 218      | EGFTQLLEAGFTDSFR          |           |         |                        | Mascot           |
| 1817.8704           | 1817.8693   | -0.0011 | -1    | 203        | 218      | EGFTQLLEAGFTDSFR          | 106       | 100     |                        | Mascot           |
| 2162.1638           | 2162.1663   | 0.0025  | 1     | 168        | 186      | KPLVLCGDLNVAHQEIDL<br>K   |           |         | Carbamidomethyl (C)[6] | Mascot           |
| 2357.2175           | 2357.2214   | 0.0039  | 2     | 122        | 142      | VITAEFPDFFLVTAYVPNA<br>SR | 160       | 100     |                        | Mascot           |
| 2357.2175           | 2357.2214   | 0.0039  | 2     | 122        | 142      | VITAEFPDFFLVTAYVPNA<br>SR |           |         |                        | Mascot           |
| 2781.2324           | 2781.2424   | 0.01    | 4     | 219        | 240      | ELYPDQAYAYTFWYMM<br>NARSK |           |         | Oxidation (M)[16,17]   | Mascot           |

3 Apex1 protein [Danio rerio] gi|66910408 33299.7 6.48 9 358 100 315 100



| Peptide Information |                                         |         |       |             |          |                        |           |        |                        |                  |
|---------------------|-----------------------------------------|---------|-------|-------------|----------|------------------------|-----------|--------|------------------------|------------------|
| Calc. Mass          | Obsrv. Mass                             | ± da    | ± ppm | Start Seq.  | End Seq. | Sequence               | Ion Score | C. I.  | % Modification         | Rank Result Type |
| 938.4366            | 938.4402                                | 0.0036  | 4     | 166         | 172      | TWDVDFR                |           |        |                        | Mascot           |
| 1020.4744           | 1020.4731                               | -0.0013 | -1    | 208         | 216      | NAGFTPEER              |           |        |                        | Mascot           |
| 1038.5037           | 1038.504                                | 0.0003  | 0     | 173         | 181      | AYLCGLDAR              |           |        | Carbamidomethyl (C)[4] | Mascot           |
| 1066.5316           | 1066.531                                | -0.0006 | -1    | 165         | 172      | KTWDVDFR               |           |        |                        | Mascot           |
| 1160.6058           | 1160.6064                               | 0.0006  | 1     | 57          | 66       | ITSWNVDGLR             |           |        |                        | Mascot           |
| 1160.6058           | 1160.6064                               | 0.0006  | 1     | 57          | 66       | ITSWNVDGLR             | 49        | 99.661 |                        | Mascot           |
| 1817.8704           | 1817.8693                               | -0.0011 | -1    | 217         | 232      | EGFTQLLEAGFTDSFR       |           |        |                        | Mascot           |
| 1817.8704           | 1817.8693                               | -0.0011 | -1    | 217         | 232      | EGFTQLLEAGFTDSFR       | 106       | 100    |                        | Mascot           |
| 2162.1638           | 2162.1663                               | 0.0025  | 1     | 182         | 200      | KPLVLCGDLNVAHQEIDLK    |           |        | Carbamidomethyl (C)[6] | Mascot           |
| 2357.2175           | 2357.2214                               | 0.0039  | 2     | 136         | 156      | VITAEFPDFFLVTAYVPNASR  | 160       | 100    |                        | Mascot           |
| 2357.2175           | 2357.2214                               | 0.0039  | 2     | 136         | 156      | VITAEFPDFFLVTAYVPNASR  |           |        |                        | Mascot           |
| 2781.2324           | 2781.2424                               | 0.01    | 4     | 233         | 254      | ELYPDQAYAYTFWTYMMNARSK |           |        | Oxidation (M)[16,17]   | Mascot           |
| 4                   | novel protein (zgc:66204) [Danio rerio] |         |       | gi 55962497 |          | 34874.4                | 5.77      | 9      | 356                    | 100 315 100      |

| Peptide Information |                             |         |       |             |          |                        |           |        |                        |                  |
|---------------------|-----------------------------|---------|-------|-------------|----------|------------------------|-----------|--------|------------------------|------------------|
| Calc. Mass          | Obsrv. Mass                 | ± da    | ± ppm | Start Seq.  | End Seq. | Sequence               | Ion Score | C. I.  | % Modification         | Rank Result Type |
| 938.4366            | 938.4402                    | 0.0036  | 4     | 180         | 186      | TWDVDFR                |           |        |                        | Mascot           |
| 1020.4744           | 1020.4731                   | -0.0013 | -1    | 222         | 230      | NAGFTPEER              |           |        |                        | Mascot           |
| 1038.5037           | 1038.504                    | 0.0003  | 0     | 187         | 195      | AYLCGLDAR              |           |        | Carbamidomethyl (C)[4] | Mascot           |
| 1066.5316           | 1066.531                    | -0.0006 | -1    | 179         | 186      | KTWDVDFR               |           |        |                        | Mascot           |
| 1160.6058           | 1160.6064                   | 0.0006  | 1     | 57          | 66       | ITSWNVDGLR             |           |        |                        | Mascot           |
| 1160.6058           | 1160.6064                   | 0.0006  | 1     | 57          | 66       | ITSWNVDGLR             | 49        | 99.661 |                        | Mascot           |
| 1817.8704           | 1817.8693                   | -0.0011 | -1    | 231         | 246      | EGFTQLLEAGFTDSFR       |           |        |                        | Mascot           |
| 1817.8704           | 1817.8693                   | -0.0011 | -1    | 231         | 246      | EGFTQLLEAGFTDSFR       | 106       | 100    |                        | Mascot           |
| 2162.1638           | 2162.1663                   | 0.0025  | 1     | 196         | 214      | KPLVLCGDLNVAHQEIDLK    |           |        | Carbamidomethyl (C)[6] | Mascot           |
| 2357.2175           | 2357.2214                   | 0.0039  | 2     | 150         | 170      | VITAEFPDFFLVTAYVPNASR  | 160       | 100    |                        | Mascot           |
| 2357.2175           | 2357.2214                   | 0.0039  | 2     | 150         | 170      | VITAEFPDFFLVTAYVPNASR  |           |        |                        | Mascot           |
| 2781.2324           | 2781.2424                   | 0.01    | 4     | 247         | 268      | ELYPDQAYAYTFWTYMMNARSK |           |        | Oxidation (M)[16,17]   | Mascot           |
| 5                   | Rplp0 protein [Danio rerio] |         |       | gi 38541244 |          | 34404                  | 5.73      | 5      | 90                     | 99.995 71 99.998 |

| Peptide Information |             |      |       |       |     |          |     |       |                |                  |
|---------------------|-------------|------|-------|-------|-----|----------|-----|-------|----------------|------------------|
| Calc. Mass          | Obsrv. Mass | ± da | ± ppm | Start | End | Sequence | Ion | C. I. | % Modification | Rank Result Type |

|                     |                                                                      |             |         |       |             |          |                            |           |        |                        |              |        |             | Seq.   | Seq. | Score |  |  |  |
|---------------------|----------------------------------------------------------------------|-------------|---------|-------|-------------|----------|----------------------------|-----------|--------|------------------------|--------------|--------|-------------|--------|------|-------|--|--|--|
|                     | 1249.6284                                                            | 1249.6261   | -0.0023 | -2    | 67          | 77       | GHLENNPALER                | 71        | 99.998 |                        |              |        |             | Mascot |      |       |  |  |  |
|                     | 1249.6284                                                            | 1249.6261   | -0.0023 | -2    | 67          | 77       | GHLENNPALER                |           |        |                        |              | Mascot |             |        |      |       |  |  |  |
|                     | 1313.71                                                              | 1313.7051   | -0.0049 | -4    | 135         | 146      | TSFFQALGITTK               |           |        |                        |              | Mascot |             |        |      |       |  |  |  |
|                     | 1826.027                                                             | 1826.0262   | -0.0008 | 0     | 150         | 166      | GTIEILSDVQLIKPGDK          |           |        |                        |              | Mascot |             |        |      |       |  |  |  |
|                     | 1896                                                                 | 1895.9923   | -0.0077 | -4    | 248         | 264      | VLAVTVETDYTFPLAEK          |           |        |                        |              | Mascot |             |        |      |       |  |  |  |
|                     | 2180.1016                                                            | 2180.1082   | 0.0066  | 3     | 113         | 134      | AGAIAPCEVTVPAQNTGL<br>GPEK |           |        | Carbamidomethyl (C)[7] |              |        | Mascot      |        |      |       |  |  |  |
| 6                   | 60S acidic ribosomal protein P0 [Danio rerio]                        |             |         |       | gi 18859323 |          | 34731.2                    | 6.16      | 5      | 89                     | 99.995       | 71     | 99.998      |        |      |       |  |  |  |
| Peptide Information |                                                                      |             |         |       |             |          |                            |           |        |                        |              |        |             |        |      |       |  |  |  |
| Calc. Mass          |                                                                      | Obsrv. Mass | ± da    | ± ppm | Start Seq.  | End Seq. | Sequence                   | Ion Score | C. I.  | %                      | Modification | Rank   | Result Type |        |      |       |  |  |  |
| 1249.6284           |                                                                      | 1249.6261   | -0.0023 | -2    | 67          | 77       | GHLENNPALER                | 71        | 99.998 |                        |              |        | Mascot      |        |      |       |  |  |  |
| 1249.6284           |                                                                      | 1249.6261   | -0.0023 | -2    | 67          | 77       | GHLENNPALER                |           |        |                        |              | Mascot |             |        |      |       |  |  |  |
| 1313.71             |                                                                      | 1313.7051   | -0.0049 | -4    | 135         | 146      | TSFFQALGITTK               |           |        |                        |              | Mascot |             |        |      |       |  |  |  |
| 1826.027            |                                                                      | 1826.0262   | -0.0008 | 0     | 150         | 166      | GTIEILSDVQLIKPGDK          |           |        |                        |              | Mascot |             |        |      |       |  |  |  |
| 1896                |                                                                      | 1895.9923   | -0.0077 | -4    | 251         | 267      | VLAVTVETDYTFPLAEK          |           |        |                        |              | Mascot |             |        |      |       |  |  |  |
| 2180.1016           |                                                                      | 2180.1082   | 0.0066  | 3     | 113         | 134      | AGAIAPCEVTVPAQNTGL<br>GPEK |           |        | Carbamidomethyl (C)[7] |              |        | Mascot      |        |      |       |  |  |  |
| 7                   | NADH dehydrogenase (ubiquinone) 1 alpha subcomplex, 12 [Danio rerio] |             |         |       | gi 74315939 |          | 16958.4                    | 9.39      | 7      | 45                     | 0            |        |             |        |      |       |  |  |  |
| Peptide Information |                                                                      |             |         |       |             |          |                            |           |        |                        |              |        |             |        |      |       |  |  |  |
| Calc. Mass          |                                                                      | Obsrv. Mass | ± da    | ± ppm | Start Seq.  | End Seq. | Sequence                   | Ion Score | C. I.  | %                      | Modification | Rank   | Result Type |        |      |       |  |  |  |
| 882.4501            |                                                                      | 882.5649    | 0.1148  | 130   | 2           | 9        | AGYATLMR                   |           |        |                        |              |        | Mascot      |        |      |       |  |  |  |
| 1038.5513           |                                                                      | 1038.504    | -0.0473 | -46   | 2           | 10       | AGYATLMRR                  |           |        |                        |              |        | Mascot      |        |      |       |  |  |  |
| 1045.4805           |                                                                      | 1045.5616   | 0.0811  | 78    | 1           | 9        | MAGYATLMR                  |           |        | Oxidation (M)[1,8]     |              |        | Mascot      |        |      |       |  |  |  |
| 1234.6215           |                                                                      | 1234.6238   | 0.0023  | 2     | 11          | 22       | FVGFTGHGGVK                |           |        |                        |              |        | Mascot      |        |      |       |  |  |  |
| 1357.6456           |                                                                      | 1357.7211   | 0.0755  | 56    | 62          | 72       | WVIYTEMNGK                 |           |        | Oxidation (M)[8]       |              |        | Mascot      |        |      |       |  |  |  |
| 1390.7225           |                                                                      | 1390.7136   | -0.0089 | -6    | 10          | 22       | RFVGFTGHGGVK               |           |        |                        |              |        | Mascot      |        |      |       |  |  |  |
| 2230.042            |                                                                      | 2230.155    | 0.113   | 51    | 90          | 108      | WLHCMTDDPPTTHPPEP<br>KK    |           |        |                        |              |        | Mascot      |        |      |       |  |  |  |
| 8                   | mitochondrial uncoupling protein 3 [Danio rerio]                     |             |         |       | gi 54261747 |          | 33744.6                    | 10.02     | 9      | 44                     | 0            |        |             |        |      |       |  |  |  |
| Peptide Information |                                                                      |             |         |       |             |          |                            |           |        |                        |              |        |             |        |      |       |  |  |  |
| Calc. Mass          |                                                                      | Obsrv. Mass | ± da    | ± ppm | Start Seq.  | End Seq. | Sequence                   | Ion Score | C. I.  | %                      | Modification | Rank   | Result Type |        |      |       |  |  |  |

|   |                                               |           |         |     |     |              |                              |      |    |    |   |  |  |  |  |  |        |
|---|-----------------------------------------------|-----------|---------|-----|-----|--------------|------------------------------|------|----|----|---|--|--|--|--|--|--------|
|   | 850.4385                                      | 850.541   | 0.1025  | 121 | 296 | 302          | RAMMVS                       |      |    |    |   |  |  |  |  |  | Mascot |
|   | 996.4713                                      | 996.595   | 0.1237  | 124 | 297 | 304          | AMMVSRNR                     |      |    |    |   |  |  |  |  |  | Mascot |
|   | 1103.4939                                     | 1103.5824 | 0.0885  | 80  | 156 | 164          | YNGTMQAYR                    |      |    |    |   |  |  |  |  |  | Mascot |
|   | 1103.6207                                     | 1103.5824 | -0.0383 | -35 | 165 | 173          | QIFQLEGLR                    |      |    |    |   |  |  |  |  |  | Mascot |
|   | 1546.9203                                     | 1546.7795 | -0.1408 | -91 | 2   | 16           | VGLKPSDVPPLTVK               |      |    |    |   |  |  |  |  |  | Mascot |
|   | 1546.9203                                     | 1546.7795 | -0.1408 | -91 | 2   | 16           | VGLKPSDVPPLTVK               |      |    |    |   |  |  |  |  |  | Mascot |
|   | 1825.9629                                     | 1826.0262 | 0.0633  | 35  | 88  | 103          | QMAFASIRIGLYDNVK             |      |    |    |   |  |  |  |  |  | Mascot |
|   | 2180.0759                                     | 2180.1082 | 0.0323  | 15  | 119 | 140          | ILAGCTTGAMAVSMAQP<br>TDVVK   |      |    |    |   |  |  |  |  |  | Mascot |
|   | 2211.1702                                     | 2211.1074 | -0.0628 | -28 | 76  | 95           | SLYNGLVAGLQRQMAFA<br>SIR     |      |    |    |   |  |  |  |  |  | Mascot |
|   | 2781.2429                                     | 2781.2424 | -0.0005 | 0   | 240 | 263          | TRYMNSPPGQYSSSTNC<br>AWTMLTK |      |    |    |   |  |  |  |  |  | Mascot |
| 9 | polo-like kinase 3 (Drosophila) [Danio rerio] |           |         |     |     | gi 169154707 | 74271.7                      | 9.04 | 12 | 43 | 0 |  |  |  |  |  |        |

#### Peptide Information

| Calc. Mass | Obsrv. Mass | ± da    | ± ppm | Start Seq. | End Seq. | Sequence                  | Ion Score | C. I. % | Modification                                | Rank | Result Type |
|------------|-------------|---------|-------|------------|----------|---------------------------|-----------|---------|---------------------------------------------|------|-------------|
| 911.4257   | 911.4162    | -0.0095 | -10   | 480        | 486      | WVDYSNK                   |           |         |                                             |      | Mascot      |
| 1249.5994  | 1249.6261   | 0.0267  | 21    | 516        | 525      | TVHYCLTNNK                |           |         | Carbamidomethyl (C)[5]                      |      | Mascot      |
| 1249.5994  | 1249.6261   | 0.0267  | 21    | 516        | 525      | TVHYCLTNNK                |           |         | Carbamidomethyl (C)[5]                      |      | Mascot      |
| 1313.5613  | 1313.7051   | 0.1438  | 109   | 1          | 11       | MDPSCFTTAQR               |           |         | Carbamidomethyl (C)[5]                      |      | Mascot      |
| 1357.6899  | 1357.7211   | 0.0312  | 23    | 526        | 537      | HFSFPANALPEK              |           |         |                                             |      | Mascot      |
| 1465.7137  | 1465.6389   | -0.0748 | -51   | 450        | 463      | VLNSCLSSMPTASR            |           |         |                                             |      | Mascot      |
| 1466.7274  | 1466.6255   | -0.1019 | -69   | 593        | 604      | TLQVNFYTDHTK              |           |         |                                             |      | Mascot      |
| 1466.7274  | 1466.6255   | -0.1019 | -69   | 593        | 604      | TLQVNFYTDHTK              |           |         |                                             |      | Mascot      |
| 1701.9646  | 1701.9065   | -0.0581 | -34   | 104        | 117      | IINEIELHKSQHK             |           |         |                                             |      | Mascot      |
| 1817.7979  | 1817.8693   | 0.0714  | 39    | 1          | 15       | MDPSCFTTAQRSLCK           |           |         | Carbamidomethyl (C)[5,14], Oxidation (M)[1] |      | Mascot      |
| 1817.9214  | 1817.8693   | -0.0521 | -29   | 216        | 231      | TICGTPNYLAPEVLNR          |           |         | Carbamidomethyl (C)[3]                      |      | Mascot      |
| 2148.1191  | 2148.0391   | -0.08   | -37   | 320        | 339      | LPPSSCVMVPELNPPSP<br>AKK  |           |         | Carbamidomethyl (C)[6]                      |      | Mascot      |
| 2233.1138  | 2233.0901   | -0.0237 | -11   | 450        | 470      | VLNSCLSSMPTASRNPP<br>CLVK |           |         | Oxidation (M)[9]                            |      | Mascot      |
| 2283.1326  | 2283.1809   | 0.0483  | 21    | 625        | 644      | VSYSYPLNLVSELGCSPE<br>LR  |           |         | Carbamidomethyl (C)[15]                     |      | Mascot      |

10 ATP-binding cassette sub-family D member 4 [Danio rerio] gi|300863092 68999.7 8.28 12 42 0

#### Peptide Information

| Calc. Mass | Obsrv. Mass | ± da   | ± ppm | Start Seq. | End Seq. | Sequence | Ion Score | C. I. % | Modification | Rank | Result Type |
|------------|-------------|--------|-------|------------|----------|----------|-----------|---------|--------------|------|-------------|
| 911.4073   | 911.4162    | 0.0089 | 10    | 154        | 161      | QMSTMASR |           |         |              |      | Mascot      |

|           |           |         |      |     |     |                                 |                         |        |
|-----------|-----------|---------|------|-----|-----|---------------------------------|-------------------------|--------|
| 1038.5579 | 1038.504  | -0.0539 | -52  | 68  | 76  | VLSERSYGK                       |                         | Mascot |
| 1229.6599 | 1229.6289 | -0.031  | -25  | 126 | 135 | VYYTLNILCK                      |                         | Mascot |
| 1234.5885 | 1234.6238 | 0.0353  | 29   | 590 | 600 | LCGGGQWELSK                     | Carbamidomethyl (C)[2]  | Mascot |
| 1331.6121 | 1331.6315 | 0.0194  | 15   | 239 | 249 | ASNVEHMRTR                      | Oxidation (M)[7]        | Mascot |
| 1465.7581 | 1465.6389 | -0.1192 | -81  | 578 | 589 | STLEKHHDVMLR                    |                         | Mascot |
| 1660.8541 | 1660.8108 | -0.0433 | -26  | 375 | 389 | ELQSVPADTAFVLDR                 |                         | Mascot |
| 1668.9604 | 1668.9299 | -0.0305 | -18  | 201 | 215 | ILIGPIVSMLEQEK                  |                         | Mascot |
| 2211.198  | 2211.1074 | -0.0906 | -41  | 404 | 425 | DLTSLISQGTHLLVVGNT<br>GTGK      |                         | Mascot |
| 2225.127  | 2225.1223 | -0.0047 | -2   | 375 | 393 | ELQSVPADTAFVLDRLCY<br>K         | Carbamidomethyl (C)[17] | Mascot |
| 2225.127  | 2225.1223 | -0.0047 | -2   | 375 | 393 | ELQSVPADTAFVLDRLCY<br>K         | Carbamidomethyl (C)[17] | Mascot |
| 2230.0818 | 2230.155  | 0.0732  | 33   | 441 | 460 | GSVQMTTCFGPRGLMFL<br>PQK        | Oxidation (M)[5,15]     | Mascot |
| 2781.5469 | 2781.2424 | -0.3045 | -109 | 404 | 430 | DLTSLISQGTHLLVVGNT<br>GTGKTSLLR |                         | Mascot |

### Peptide Information

|  |           |           |         |     |      |      |                               |  |                         |        |
|--|-----------|-----------|---------|-----|------|------|-------------------------------|--|-------------------------|--------|
|  | 2357.217  | 2357.2214 | 0.0044  | 2   | 115  | 135  | SK<br>VGADNHVLPDCITIQTYL      |  | Carbamidomethyl (C)[12] | Mascot |
|  | 2357.217  | 2357.2214 | 0.0044  | 2   | 115  | 135  | SK<br>VGADNHVLPDCITIQTYL      |  | Carbamidomethyl (C)[12] | Mascot |
|  | 2781.457  | 2781.2424 | -0.2146 | -77 | 865  | 889  | SK<br>NHLIQFNPLYKAGSVPDS      |  |                         | Mascot |
|  | 3338.5918 | 3338.781  | 0.1892  | 57  | 1182 | 1210 | NTPDILK<br>MYPTDDSKPLTAGTVDDQ |  | Oxidation (M)[1]        | Mascot |
|  |           |           |         |     |      |      | LLYEVIHEAMER                  |  |                         |        |

12 SH3 domain-binding protein 4-A [Danio rerio] gi|45387913 104947.5 7.73 14 40 0

#### Peptide Information

| Calc. Mass | Obsrv. Mass | ± da    | ± ppm | Start Seq. | End Seq. | Sequence                           | Ion Score | C. I. % | Modification                             | Rank | Result Type |
|------------|-------------|---------|-------|------------|----------|------------------------------------|-----------|---------|------------------------------------------|------|-------------|
| 842.5822   | 842.5087    | -0.0735 | -87   | 634        | 640      | LIKTVIR                            |           |         |                                          |      | Mascot      |
| 850.4338   | 850.541     | 0.1072  | 126   | 358        | 364      | LSNMEIK                            |           |         | Oxidation (M)[4]                         |      | Mascot      |
| 1045.4796  | 1045.5616   | 0.082   | 78    | 762        | 770      | AELDSEPER                          |           |         |                                          |      | Mascot      |
| 1334.6443  | 1334.7791   | 0.1348  | 101   | 379        | 390      | TESPM AEIVCVR                      |           |         |                                          |      | Mascot      |
| 1334.6443  | 1334.7791   | 0.1348  | 101   | 379        | 390      | TESPM AEIVCVR                      |           |         |                                          |      | Mascot      |
| 1357.6932  | 1357.7211   | 0.0279  | 21    | 463        | 475      | TVVAIFGHDCAPK                      |           |         |                                          |      | Mascot      |
| 1362.6835  | 1362.6376   | -0.0459 | -34   | 733        | 743      | TILMENLGNWR                        |           |         | Oxidation (M)[4]                         |      | Mascot      |
| 1396.6447  | 1396.7544   | 0.1097  | 79    | 778        | 788      | LKEDCLNMETK                        |           |         | Carbamidomethyl (C)[5], Oxidation (M)[8] |      | Mascot      |
| 1671.806   | 1671.8973   | 0.0913  | 55    | 432        | 445      | HVSFSSNVWNHMK                      |           |         |                                          |      | Mascot      |
| 2053.0906  | 2052.9951   | -0.0955 | -47   | 674        | 690      | EWYIGYYQGKIGLVHVK                  |           |         |                                          |      | Mascot      |
| 2230.2417  | 2230.155    | -0.0867 | -39   | 813        | 831      | LIMDFVLLTTAVEVAPRW                 |           |         |                                          |      | Mascot      |
| 2284.2368  | 2284.1775   | -0.0593 | -26   | 463        | 484      | R<br>TVVAIFGHDCAPKTLTLLVS          |           |         |                                          |      | Mascot      |
| 2300.0686  | 2300.1809   | 0.1123  | 49    | 568        | 587      | EVGK<br>DDQDCILAQFCVQTPQP          |           |         | Carbamidomethyl (C)[5]                   |      | Mascot      |
| 2357.0901  | 2357.2214   | 0.1313  | 56    | 568        | 587      | PPK<br>DDQDCILAQFCVQTPQP           |           |         | Carbamidomethyl (C)[5,11]                |      | Mascot      |
| 2357.0901  | 2357.2214   | 0.1313  | 56    | 568        | 587      | PPK<br>DDQDCILAQFCVQTPQP           |           |         | Carbamidomethyl (C)[5,11]                |      | Mascot      |
| 3337.6052  | 3337.771    | 0.1658  | 50    | 269        | 298      | PPK<br>LARSCHDLES LGQNPGW          |           |         | Carbamidomethyl (C)[5]                   |      | Mascot      |
| 3338.5496  | 3338.781    | 0.2314  | 69    | 856        | 884      | GQTQPVETNIVCK<br>TGMVDSEAMWKPAYDFL |           |         | Oxidation (M)[3]                         |      | Mascot      |
|            |             |         |       |            |          | LTWAAQIGDSYR                       |           |         |                                          |      |             |

13 gamma-aminobutyric acid receptor subunit alpha-1 [Danio rerio] gi|116268041 51611.5 9.42 10 40 0

#### Peptide Information

| Calc. Mass | Obsrv. Mass | ± da    | ± ppm | Start Seq. | End Seq. | Sequence    | Ion Score | C. I. % | Modification | Rank | Result Type |
|------------|-------------|---------|-------|------------|----------|-------------|-----------|---------|--------------|------|-------------|
| 1020.536   | 1020.4731   | -0.0629 | -62   | 392        | 401      | SAPPPPTPEK  |           |         |              |      | Mascot      |
| 1229.5765  | 1229.6289   | 0.0524  | 43    | 134        | 144      | SVAHNMTMPNK |           |         |              |      | Mascot      |
| 1249.6787  | 1249.6261   | -0.0526 | -42   | 402        | 412      | EEP KPKPEAK |           |         |              |      | Mascot      |

|  |           |           |         |     |     |     |                              |  |  |  |  |  |                        |  |  |  |        |
|--|-----------|-----------|---------|-----|-----|-----|------------------------------|--|--|--|--|--|------------------------|--|--|--|--------|
|  | 1249.6787 | 1249.6261 | -0.0526 | -42 | 402 | 412 | EEPKPKPPEAK                  |  |  |  |  |  |                        |  |  |  | Mascot |
|  | 1331.6549 | 1331.6315 | -0.0234 | -18 | 201 | 214 | GAAQSVVVADDGSR               |  |  |  |  |  |                        |  |  |  | Mascot |
|  | 1357.6715 | 1357.7211 | 0.0496  | 37  | 133 | 144 | KVAHNMTMPNK                  |  |  |  |  |  |                        |  |  |  | Mascot |
|  | 1390.7623 | 1390.7136 | -0.0487 | -35 | 448 | 459 | KPKLQGMNLQPH                 |  |  |  |  |  |                        |  |  |  | Mascot |
|  | 1867.9297 | 1867.8486 | -0.0811 | -43 | 365 | 382 | NNTYTAATATAFAPNIAR           |  |  |  |  |  |                        |  |  |  | Mascot |
|  | 1896.0259 | 1895.9923 | -0.0336 | -18 | 148 | 163 | ITEEGTLLYTMRLTVR             |  |  |  |  |  |                        |  |  |  | Mascot |
|  | 2272.2043 | 2272.116  | -0.0883 | -39 | 45  | 64  | ILDSLLDGYDNRLRPGLG<br>ER     |  |  |  |  |  |                        |  |  |  | Mascot |
|  | 2781.2979 | 2781.2424 | -0.0555 | -20 | 160 | 183 | LTVRAECPMHLEDFPMD<br>AHACPLK |  |  |  |  |  | Carbamidomethyl (C)[7] |  |  |  | Mascot |

14 PREDICTED: coiled-coil domain-containing protein  
C16orf93 homolog [Danio rerio] gi|292619525 33587.9 5.12 8 40 0

#### Peptide Information

| Calc. Mass | Obsrv. Mass | ± da    | ± ppm | Start Seq. | End Seq. | Sequence                           | Ion Score | C. I. % | Modification            | Rank | Result Type |
|------------|-------------|---------|-------|------------|----------|------------------------------------|-----------|---------|-------------------------|------|-------------|
| 911.5382   | 911.4162    | -0.122  | -134  | 18         | 25       | IMVPQVPK                           |           |         |                         |      | Mascot      |
| 1117.483   | 1117.5894   | 0.1064  | 95    | 36         | 44       | HSDMEEIEK                          |           |         |                         |      | Mascot      |
| 1234.5182  | 1234.6238   | 0.1056  | 86    | 194        | 204      | SQSESPADEER                        |           |         |                         |      | Mascot      |
| 1357.707   | 1357.7211   | 0.0141  | 10    | 232        | 244      | SPNPGLSSKSDLR                      |           |         |                         |      | Mascot      |
| 1390.7107  | 1390.7136   | 0.0029  | 2     | 47         | 57       | STQDIERILCR                        |           |         | Carbamidomethyl (C)[10] |      | Mascot      |
| 2082.8843  | 2083.0981   | 0.2138  | 103   | 209        | 226      | ETEMDGEVQQSSELP<br>EM K            |           |         | Oxidation (M)[4]        |      | Mascot      |
| 2082.8843  | 2083.0981   | 0.2138  | 103   | 209        | 226      | ETEMDGEVQQSSELP<br>EM K            |           |         | Oxidation (M)[4]        |      | Mascot      |
| 2200.1204  | 2200.0471   | -0.0733 | -33   | 268        | 287      | NSADQLNNAISQLETNIQ<br>VK           |           |         |                         |      | Mascot      |
| 3338.7549  | 3338.781    | 0.0261  | 8     | 258        | 287      | LSAQLQQELKNSADQLN<br>NAISQLETNIQVK |           |         |                         |      | Mascot      |

15 RecName: Full=Protein Wnt-10a; Flags: Precursor gi|1175018 50014.5 8.71 12 39 0

#### Peptide Information

| Calc. Mass | Obsrv. Mass | ± da    | ± ppm | Start Seq. | End Seq. | Sequence         | Ion Score | C. I. % | Modification                 | Rank | Result Type |
|------------|-------------|---------|-------|------------|----------|------------------|-----------|---------|------------------------------|------|-------------|
| 911.3345   | 911.4162    | 0.0817  | 90    | 40         | 46       | QESCCER          |           |         | Carbamidomethyl (C)[4]       |      | Mascot      |
| 938.3818   | 938.4402    | 0.0584  | 62    | 193        | 200      | ACGCDEKR         |           |         | Carbamidomethyl (C)[2]       |      | Mascot      |
| 1030.5527  | 1030.5852   | 0.0325  | 32    | 202        | 210      | GDEEALRIK        |           |         |                              |      | Mascot      |
| 1066.5752  | 1066.531    | -0.0442 | -41   | 405        | 413      | GHNILQQTR        |           |         |                              |      | Mascot      |
| 1234.5303  | 1234.6238   | 0.0935  | 76    | 299        | 309      | CHGTSGSCQLK      |           |         | Carbamidomethyl (C)[1,8]     |      | Mascot      |
| 1465.6344  | 1465.6389   | 0.0045  | 3     | 297        | 309      | CKCHGTSGSCQLK    |           |         | Carbamidomethyl (C)[1,3]     |      | Mascot      |
| 1660.6183  | 1660.8108   | 0.1925  | 116   | 390        | 404      | TSQGMDCNESLCCGR  |           |         | Carbamidomethyl (C)[8]       |      | Mascot      |
| 2082.9153  | 2083.0981   | 0.1828  | 88    | 31         | 46       | GCWTDLLLRQESCCER |           |         | Carbamidomethyl (C)[2,13,14] |      | Mascot      |

|    |                                              |           |         |     |              |     |                                 |      |                                             |        |   |
|----|----------------------------------------------|-----------|---------|-----|--------------|-----|---------------------------------|------|---------------------------------------------|--------|---|
|    | 2082.9153                                    | 2083.0981 | 0.1828  | 88  | 31           | 46  | GCWTDLLLRQESCCER                |      | Carbamidomethyl (C)[2,13,14]                | Mascot |   |
|    | 2232.8923                                    | 2233.0901 | 0.1978  | 89  | 386          | 404 | ICNKTSQGMDCESLCCGR              |      | Carbamidomethyl (C)[2,12,16]                | Mascot |   |
|    | 2409.1689                                    | 2409.2122 | 0.0433  | 18  | 166          | 190 | ESAFAYAIAAGVVHAVSNACAMGK        |      |                                             | Mascot |   |
|    | 2781.1919                                    | 2781.2424 | 0.0505  | 18  | 390          | 413 | TSQGMDCESLCCGRGHNILQQTR         |      | Carbamidomethyl (C)[8,12], Oxidation (M)[5] | Mascot |   |
|    | 3337.8076                                    | 3337.771  | -0.0366 | -11 | 76           | 106 | ADSNEILGLKIPFDPILNANTVCLTLPGLTK |      | Carbamidomethyl (C)[23]                     | Mascot |   |
| 16 | hypothetical protein LOC777608 [Danio rerio] |           |         |     | gi 118150410 |     | 85601.5                         | 6.97 | 15                                          | 39     | 0 |

#### Peptide Information

|  | Calc. Mass | Obsrv. Mass | ± da    | ± ppm | Start Seq. | End Seq. | Sequence               | Ion Score | C. I. | % Modification          | Rank | Result Type |
|--|------------|-------------|---------|-------|------------|----------|------------------------|-----------|-------|-------------------------|------|-------------|
|  | 842.5822   | 842.5087    | -0.0735 | -87   | 174        | 180      | LKSLLLR                |           |       |                         |      | Mascot      |
|  | 850.4152   | 850.541     | 0.1258  | 148   | 700        | 707      | SASLTDEK               |           |       |                         |      | Mascot      |
|  | 1020.493   | 1020.4731   | -0.0199 | -20   | 691        | 699      | TPAQGMFPR              |           |       | Oxidation (M)[6]        |      | Mascot      |
|  | 1160.5994  | 1160.6064   | 0.007   | 6     | 690        | 699      | RTPAQGMFPR             |           |       |                         |      | Mascot      |
|  | 1160.6205  | 1160.6064   | -0.0141 | -12   | 599        | 608      | IVCTSTPRQR             |           |       |                         |      | Mascot      |
|  | 1165.6034  | 1165.7456   | 0.1422  | 122   | 573        | 582      | MPDLSGKVFR             |           |       | Oxidation (M)[1]        |      | Mascot      |
|  | 1234.7075  | 1234.6238   | -0.0837 | -68   | 238        | 248      | MASLLKLVDTK            |           |       | Oxidation (M)[1]        |      | Mascot      |
|  | 1249.5729  | 1249.6261   | 0.0532  | 43    | 677        | 689      | SAASSSLPDCPSK          |           |       |                         |      | Mascot      |
|  | 1249.5729  | 1249.6261   | 0.0532  | 43    | 677        | 689      | SAASSSLPDCPSK          |           |       |                         |      | Mascot      |
|  | 1313.6089  | 1313.7051   | 0.0962  | 73    | 118        | 129      | NGNMCFASGKLR           |           |       | Oxidation (M)[4]        |      | Mascot      |
|  | 1331.6688  | 1331.6315   | -0.0373 | -28   | 550        | 560      | KEVEEVEDLNK            |           |       |                         |      | Mascot      |
|  | 1704.781   | 1704.8705   | 0.0895  | 52    | 551        | 564      | EVEEVEDLNKEEDK         |           |       |                         |      | Mascot      |
|  | 1867.8789  | 1867.8486   | -0.0303 | -16   | 111        | 127      | DIVEAVRNGNMCFASGK      |           |       | Carbamidomethyl (C)[12] |      | Mascot      |
|  | 2200.1001  | 2200.0471   | -0.053  | -24   | 313        | 330      | QPDLLHQMEAFLRMADIR     |           |       | Oxidation (M)[8]        |      | Mascot      |
|  | 2230.1436  | 2230.155    | 0.0114  | 5     | 216        | 237      | LVLKAGNYMNAGGYAGSAIGFR |           |       |                         |      | Mascot      |
|  | 2233.0554  | 2233.0901   | 0.0347  | 16    | 669        | 689      | DKPSFSHKSAASSSLPD CPSK |           |       | Carbamidomethyl (C)[18] |      | Mascot      |

17 PREDICTED: putative uncharacterized zinc finger protein 814-like [Danio rerio] gi|292610426 61962.5 9.03 15 39 0

#### Peptide Information

|  | Calc. Mass | Obsrv. Mass | ± da    | ± ppm | Start Seq. | End Seq. | Sequence  | Ion Score | C. I. | % Modification | Rank | Result Type |
|--|------------|-------------|---------|-------|------------|----------|-----------|-----------|-------|----------------|------|-------------|
|  | 911.5421   | 911.4162    | -0.1259 | -138  | 202        | 209      | GSLKIHTR  |           |       |                |      | Mascot      |
|  | 938.5781   | 938.4402    | -0.1379 | -147  | 426        | 433      | KSLNVHLK  |           |       |                |      | Mascot      |
|  | 996.5472   | 996.595     | 0.0478  | 48    | 350        | 358      | IHTGEKPSK |           |       |                |      | Mascot      |
|  | 1045.5789  | 1045.5616   | -0.0173 | -17   | 365        | 373      | SFTHKGQLK |           |       |                |      | Mascot      |

|    |                                                            |           |         |     |              |       |                          |   |                            |        |
|----|------------------------------------------------------------|-----------|---------|-----|--------------|-------|--------------------------|---|----------------------------|--------|
|    | 1066.502                                                   | 1066.531  | 0.029   | 27  | 243          | 252   | SALTCVQCGK               |   | Carbamidomethyl (C)[5]     | Mascot |
|    | 1103.6129                                                  | 1103.5824 | -0.0305 | -28 | 503          | 511   | QINMELVIK                |   | Oxidation (M)[4]           | Mascot |
|    | 1103.6129                                                  | 1103.5824 | -0.0305 | -28 | 503          | 511   | QINMELVIK                |   | Oxidation (M)[4]           | Mascot |
|    | 1390.6882                                                  | 1390.7136 | 0.0254  | 18  | 6            | 17    | MEIVDSIDAE LR            |   |                            | Mascot |
|    | 1466.6879                                                  | 1466.6255 | -0.0624 | -43 | 85           | 97    | SFTCKGSVDVHMR            |   |                            | Mascot |
|    | 1466.6879                                                  | 1466.6255 | -0.0624 | -43 | 85           | 97    | SFTCKGSVDVHMR            |   |                            | Mascot |
|    | 1546.7893                                                  | 1546.7795 | -0.0098 | -6  | 6            | 18    | MEIVDSIDAE LR            |   |                            | Mascot |
|    | 1546.7893                                                  | 1546.7795 | -0.0098 | -6  | 6            | 18    | MEIVDSIDAE LR            |   |                            | Mascot |
|    | 1660.7571                                                  | 1660.8108 | 0.0537  | 32  | 210          | 224   | IHTGEKPYTCSHCGK          |   |                            | Mascot |
|    | 1671.7729                                                  | 1671.8973 | 0.1244  | 74  | 266          | 280   | IHTGEKPF SCHQCGK         |   |                            | Mascot |
|    | 1867.8201                                                  | 1867.8486 | 0.0285  | 15  | 528          | 543   | EQTEELLGQC PF LCGS       |   | Carbamidomethyl (C)[10,14] | Mascot |
|    | 2225.1106                                                  | 2225.1223 | 0.0117  | 5   | 178          | 196   | HHVKIHYAGKPFTCELCG<br>K  |   | Carbamidomethyl (C)[14]    | Mascot |
|    | 2225.1106                                                  | 2225.1223 | 0.0117  | 5   | 178          | 196   | HHVKIHYAGKPFTCELCG<br>K  |   | Carbamidomethyl (C)[14]    | Mascot |
|    | 2272.0784                                                  | 2272.116  | 0.0376  | 17  | 458          | 476   | MHLIIHSGERPFS CDKC<br>GK |   | Carbamidomethyl (C)[14,17] | Mascot |
|    | 2299.0781                                                  | 2299.1904 | 0.1123  | 49  | 98           | 117   | IHTGERPYACIQGKSFT<br>CK  |   | Carbamidomethyl (C)[10]    | Mascot |
| 18 | PREDICTED: hypothetical protein LOC100149486 [Danio rerio] |           |         |     | gi 292615110 | 26189 | 6.17                     | 7 | 38                         | 0      |

Peptide Information

| Calc. Mass | Obsrv. Mass | ± da    | ± ppm | Start Seq. | End Seq. | Sequence                            | Ion Score | C. I. | % Modification          | Rank | Result Type |
|------------|-------------|---------|-------|------------|----------|-------------------------------------|-----------|-------|-------------------------|------|-------------|
| 889.5214   | 889.4744    | -0.047  | -53   | 101        | 108      | LSLRASR                             |           |       |                         |      | Mascot      |
| 938.5128   | 938.4402    | -0.0726 | -77   | 3          | 9        | LYCLNKK                             |           |       | Carbamidomethyl (C)[3]  |      | Mascot      |
| 1020.5472  | 1020.4731   | -0.0741 | -73   | 86         | 93       | DKLDNIFR                            |           |       |                         |      | Mascot      |
| 1465.7758  | 1465.6389   | -0.1369 | -93   | 105        | 118      | SASRVPHPLASESK                      |           |       |                         |      | Mascot      |
| 2200.1091  | 2200.0471   | -0.062  | -28   | 131        | 150      | DSPQTLPSVDEESISLAQ<br>RK            |           |       |                         |      | Mascot      |
| 3337.4265  | 3337.771    | 0.3445  | 103   | 24         | 52       | YSEASPYFHTFPGDECQI<br>GINFADEDEAK   |           |       | Carbamidomethyl (C)[16] |      | Mascot      |
| 3338.6169  | 3338.781    | 0.1641  | 49    | 119        | 149      | ATAFSTMSGQIRDSPQTL<br>PSVDEESISLAQR |           |       | Oxidation (M)[7]        |      | Mascot      |

19 novel protein similar to H.sapiens LYST, lysosomal trafficking regulator (LYST) [Danio rerio] gi|220675907 58282.5 6.38 10 38 0

Peptide Information

| Calc. Mass | Obsrv. Mass | ± da    | ± ppm | Start Seq. | End Seq. | Sequence  | Ion Score | C. I. | % Modification         | Rank | Result Type |
|------------|-------------|---------|-------|------------|----------|-----------|-----------|-------|------------------------|------|-------------|
| 1045.5863  | 1045.5616   | -0.0247 | -24   | 308        | 316      | CIVGYHILK |           |       |                        |      | Mascot      |
| 1066.4543  | 1066.531    | 0.0767  | 72    | 259        | 267      | AVELCDCEK |           |       | Carbamidomethyl (C)[5] |      | Mascot      |



|           |           |         |     |     |     |                          |                        |        |
|-----------|-----------|---------|-----|-----|-----|--------------------------|------------------------|--------|
| 1186.5786 | 1186.6233 | 0.0447  | 38  | 385 | 393 | HPQQMFNIR                | Oxidation (M)[5]       | Mascot |
| 1229.714  | 1229.6289 | -0.0851 | -69 | 351 | 360 | LLSEILLDWK               |                        | Mascot |
| 1234.5442 | 1234.6238 | 0.0796  | 64  | 1   | 10  | ICIDPNDEMK               | Carbamidomethyl (C)[2] | Mascot |
| 1660.9128 | 1660.8108 | -0.102  | -61 | 201 | 216 | GQAQSAVVSQRPFSAK         |                        | Mascot |
| 1668.9003 | 1668.9299 | 0.0296  | 18  | 385 | 397 | HPQQMFNIRQLLK            | Oxidation (M)[5]       | Mascot |
| 1704.8447 | 1704.8705 | 0.0258  | 15  | 482 | 494 | LYQEKVQSMMYLR            | Oxidation (M)[9]       | Mascot |
| 2225.1052 | 2225.1223 | 0.0171  | 8   | 148 | 165 | YVTQEGQLQCEQIRELLMR      | Oxidation (M)[17]      | Mascot |
| 2225.1052 | 2225.1223 | 0.0171  | 8   | 148 | 165 | YVTQEGQLQCEQIRELLMR      | Oxidation (M)[17]      | Mascot |
| 2284.2847 | 2284.1775 | -0.1072 | -47 | 365 | 384 | AQCGVWETLLTALEILIRV<br>R |                        | Mascot |

20 kazrin [Danio rerio] gi|121583740 48879.4 6.17 10 38 0

#### Peptide Information

| Calc. Mass | Obsrv. Mass | ± da    | ± ppm | Start Seq. | End Seq. | Sequence                   | Ion Score | C. I. % | Modification      | Rank | Result Type |
|------------|-------------|---------|-------|------------|----------|----------------------------|-----------|---------|-------------------|------|-------------|
| 850.4451   | 850.541     | 0.0959  | 113   | 390        | 397      | MSLGSLSR                   |           |         |                   |      | Mascot      |
| 996.4852   | 996.595     | 0.1098  | 110   | 120        | 127      | QMKDMLSK                   |           |         | Oxidation (M)[2]  |      | Mascot      |
| 1117.5848  | 1117.5894   | 0.0046  | 4     | 240        | 249      | EATEQATVLR                 |           |         |                   |      | Mascot      |
| 1160.5542  | 1160.6064   | 0.0522  | 45    | 355        | 365      | SSTPSDINSR                 | 2         | 0       |                   |      | Mascot      |
| 1160.6157  | 1160.6064   | -0.0093 | -8    | 212        | 222      | ESEDAVKALAK                |           |         |                   |      | Mascot      |
| 1457.7594  | 1457.8667   | 0.1073  | 74    | 148        | 159      | VQLGEKEQEELER              |           |         |                   |      | Mascot      |
| 1701.8766  | 1701.9065   | 0.0299  | 18    | 12         | 27       | IDGAIQSASQEVNLR            |           |         |                   |      | Mascot      |
| 2096.0803  | 2095.9583   | -0.122  | -58   | 106        | 122      | EEVAQLQEEVHLLRQMK          |           |         | Oxidation (M)[16] |      | Mascot      |
| 2283.0781  | 2283.1809   | 0.1028  | 45    | 333        | 354      | ISPCHSRQPSIISDASAAD<br>GDR |           |         |                   |      | Mascot      |
| 2298.2161  | 2298.1904   | -0.0257 | -11   | 7          | 27       | QLAQRIDGAIQSASQEV<br>NLR   |           |         |                   |      | Mascot      |

21 PREDICTED: zinc finger protein 135-like [Danio rerio] gi|326667392 44003.3 8.87 12 37 0

#### Peptide Information

| Calc. Mass | Obsrv. Mass | ± da    | ± ppm | Start Seq. | End Seq. | Sequence      | Ion Score | C. I. % | Modification     | Rank | Result Type |
|------------|-------------|---------|-------|------------|----------|---------------|-----------|---------|------------------|------|-------------|
| 1020.5182  | 1020.4731   | -0.0451 | -44   | 234        | 241      | DYLTIHMK      |           |         |                  |      | Mascot      |
| 1030.5284  | 1030.5852   | 0.0568  | 55    | 262        | 269      | QCLKVHMR      |           |         | Oxidation (M)[7] |      | Mascot      |
| 1045.6516  | 1045.5616   | -0.09   | -86   | 174        | 181      | FRQIQILK      |           |         |                  |      | Mascot      |
| 1234.7631  | 1234.6238   | -0.1393 | -113  | 176        | 185      | QIQILKNHIK    |           |         |                  |      | Mascot      |
| 1334.7362  | 1334.7791   | 0.0429  | 32    | 347        | 357      | NLSQHMKLHVK   |           |         |                  |      | Mascot      |
| 1334.7362  | 1334.7791   | 0.0429  | 32    | 347        | 357      | NLSQHMKLHVK   |           |         |                  |      | Mascot      |
| 1465.6177  | 1465.6389   | 0.0212  | 14    | 34         | 45       | EESEELNETEEK  |           |         |                  |      | Mascot      |
| 1466.629   | 1466.6255   | -0.0035 | -2    | 104        | 116      | SEEKPYPCPECGK |           |         |                  |      | Mascot      |

|    |                                              |           |         |    |              |     |                         |      |   |    |   |   |                                           |  |  |  |        |
|----|----------------------------------------------|-----------|---------|----|--------------|-----|-------------------------|------|---|----|---|---|-------------------------------------------|--|--|--|--------|
|    | 1466.629                                     | 1466.6255 | -0.0035 | -2 | 104          | 116 | SEEKPYPCECGK            |      |   |    |   |   |                                           |  |  |  | Mascot |
|    | 1668.7911                                    | 1668.9299 | 0.1388  | 83 | 285          | 297 | SFTQKNNLNYHMR           |      |   |    |   |   | Oxidation (M)[12]                         |  |  |  | Mascot |
|    | 1867.7585                                    | 1867.8486 | 0.0901  | 48 | 77           | 93  | SDGNFTCSQGGMSFTQK       |      |   |    |   |   | Carbamidomethyl (C)[7], Oxidation (M)[12] |  |  |  | Mascot |
|    | 2225.0842                                    | 2225.1223 | 0.0381  | 17 | 270          | 289 | VHTGEKPYICAQCGKSFTQK    |      |   |    |   |   |                                           |  |  |  | Mascot |
|    | 2225.0842                                    | 2225.1223 | 0.0381  | 17 | 270          | 289 | VHTGEKPYICAQCGKSFTQK    |      |   |    |   |   |                                           |  |  |  | Mascot |
|    | 2230.0679                                    | 2230.155  | 0.0871  | 39 | 266          | 284 | VHMRVHTGEKPYICAQCGK     |      |   |    |   |   | Carbamidomethyl (C)[14], Oxidation (M)[3] |  |  |  | Mascot |
|    | 2781.2654                                    | 2781.2424 | -0.023  | -8 | 290          | 312 | NNLNYHMRTHTGEKPYTCSICGK |      |   |    |   |   | Carbamidomethyl (C)[18,21]                |  |  |  | Mascot |
| 22 | hypothetical protein LOC561678 [Danio rerio] |           |         |    | gi 117606186 |     | 49821.8                 | 5.68 | 8 | 37 | 0 | 7 | 0                                         |  |  |  |        |

#### Peptide Information

| Calc. Mass | Obsrv. Mass | ± da    | ± ppm | Start Seq. | End Seq. | Sequence               | Ion Score | C. I. | % Modification         | Rank | Result Type |
|------------|-------------|---------|-------|------------|----------|------------------------|-----------|-------|------------------------|------|-------------|
| 911.5057   | 911.4162    | -0.0895 | -98   | 436        | 443      | TLHSQGLR               |           |       |                        |      | Mascot      |
| 1186.65    | 1186.6233   | -0.0267 | -23   | 108        | 119      | APLVLAMAEGAK           |           |       | Oxidation (M)[7]       |      | Mascot      |
| 1249.6549  | 1249.6261   | -0.0288 | -23   | 147        | 156      | GHLRAWQPER             | 7         | 0     |                        |      | Mascot      |
| 1249.6549  | 1249.6261   | -0.0288 | -23   | 147        | 156      | GHLRAWQPER             |           |       |                        |      | Mascot      |
| 1466.6959  | 1466.6255   | -0.0704 | -48   | 316        | 326      | CFLFSVFPYMR            |           |       | Carbamidomethyl (C)[1] |      | Mascot      |
| 1466.6959  | 1466.6255   | -0.0704 | -48   | 316        | 326      | CFLFSVFPYMR            |           |       | Carbamidomethyl (C)[1] |      | Mascot      |
| 1671.7982  | 1671.8973   | 0.0991  | 59    | 260        | 273      | MLFSTKMHGESFTR         |           |       |                        |      | Mascot      |
| 2284.1833  | 2284.1775   | -0.0058 | -3    | 68         | 89       | VFQGLHSIDPGVPLHPGDGVSR |           |       |                        |      | Mascot      |
| 2299.0771  | 2299.1904   | 0.1133  | 49    | 375        | 394      | ARPRCTTYGSPQLSADEDFK   |           |       | Carbamidomethyl (C)[5] |      | Mascot      |
| 2300.137   | 2300.1809   | 0.0439  | 19    | 46         | 66       | GLSLDMLQLTMGKMASESMIK  |           |       | Oxidation (M)[6]       |      | Mascot      |

23 mitochondrial uncoupling protein 3 [Danio rerio] gi|37681967 33714.6 10.02 8 36 0

#### Peptide Information

| Calc. Mass | Obsrv. Mass | ± da    | ± ppm | Start Seq. | End Seq. | Sequence               | Ion Score | C. I. | % Modification     | Rank | Result Type |
|------------|-------------|---------|-------|------------|----------|------------------------|-----------|-------|--------------------|------|-------------|
| 850.4385   | 850.541     | 0.1025  | 121   | 296        | 302      | RAMMVSR                |           |       |                    |      | Mascot      |
| 996.4713   | 996.595     | 0.1237  | 124   | 297        | 304      | AMMVSRNR               |           |       | Oxidation (M)[2,3] |      | Mascot      |
| 1103.4939  | 1103.5824   | 0.0885  | 80    | 156        | 164      | YNGTMQAYR              |           |       |                    |      | Mascot      |
| 1103.6207  | 1103.5824   | -0.0383 | -35   | 165        | 173      | QIFQLEGLR              |           |       |                    |      | Mascot      |
| 1546.9203  | 1546.7795   | -0.1408 | -91   | 2          | 16       | VGLKPSDVPPLTVK         |           |       |                    |      | Mascot      |
| 1546.9203  | 1546.7795   | -0.1408 | -91   | 2          | 16       | VGLKPSDVPPLTVK         |           |       |                    |      | Mascot      |
| 1825.9629  | 1826.0262   | 0.0633  | 35    | 88         | 103      | QMAFASIRIGLYDNVK       |           |       |                    |      | Mascot      |
| 2180.0759  | 2180.1082   | 0.0323  | 15    | 119        | 140      | ILAGCTTGAMAVSMAQPTDVVK |           |       | Oxidation (M)[10]  |      | Mascot      |

2211.17022211.1074-0.0628-287695SLYNGLVAGLQRQMAFA  
SIR

Oxidation (M)[14]

Mascot

24peripherin [Danio rerio]gi|1885924150672.25.49360150

Peptide Information

| Calc. Mass | Obsrv. Mass | ± da    | ± ppm | Start Seq. | End Seq. | Sequence                | Ion Score | C. I. | % | Modification                               | Rank | Result Type |
|------------|-------------|---------|-------|------------|----------|-------------------------|-----------|-------|---|--------------------------------------------|------|-------------|
| 1030.5024  | 1030.5852   | 0.0828  | 80    | 289        | 296      | QDNNDLRR                |           |       |   |                                            |      | Mascot      |
| 1045.5095  | 1045.5616   | 0.0521  | 50    | 346        | 353      | HLKEEMSR                |           |       |   | Oxidation (M)[6]                           |      | Mascot      |
| 1103.5691  | 1103.5824   | 0.0133  | 12    | 181        | 190      | KDVDDATLAR              | 15        |       | 0 |                                            |      | Mascot      |
| 1103.5691  | 1103.5824   | 0.0133  | 12    | 181        | 190      | KDVDDATLAR              |           |       |   |                                            |      | Mascot      |
| 1249.5664  | 1249.6261   | 0.0597  | 48    | 119        | 128      | LGDLCCQEMR              |           |       |   | Carbamidomethyl (C)[5]                     |      | Mascot      |
| 1249.5664  | 1249.6261   | 0.0597  | 48    | 119        | 128      | LGDLCCQEMR              |           |       |   | Carbamidomethyl (C)[5]                     |      | Mascot      |
| 1334.6844  | 1334.7791   | 0.0947  | 71    | 310        | 320      | STNEALLRQMR             |           |       |   | Oxidation (M)[10]                          |      | Mascot      |
| 1334.6844  | 1334.7791   | 0.0947  | 71    | 310        | 320      | STNEALLRQMR             |           |       |   | Oxidation (M)[10]                          |      | Mascot      |
| 1396.7067  | 1396.7544   | 0.0477  | 34    | 246        | 257      | DIRSQYESIASK            |           |       |   |                                            |      | Mascot      |
| 1439.7562  | 1439.8033   | 0.0471  | 33    | 366        | 377      | MALDIEIATYRK            |           |       |   | Oxidation (M)[1]                           |      | Mascot      |
| 1466.7448  | 1466.6255   | -0.1193 | -81   | 197        | 208      | IESLMDEIEFLK            |           |       |   |                                            |      | Mascot      |
| 1466.7448  | 1466.6255   | -0.1193 | -81   | 197        | 208      | IESLMDEIEFLK            |           |       |   |                                            |      | Mascot      |
| 2233.0083  | 2233.0901   | 0.0818  | 37    | 110        | 128      | EQQQGPSGRLGDLCQQ<br>EMR |           |       |   | Carbamidomethyl (C)[14], Oxidation (M)[18] |      | Mascot      |

25Prph protein [Danio rerio]gi|6310133051452.65.369360150

Peptide Information

| Calc. Mass | Obsrv. Mass | ± da    | ± ppm | Start Seq. | End Seq. | Sequence         | Ion Score | C. I. | % | Modification                               | Rank | Result Type |
|------------|-------------|---------|-------|------------|----------|------------------|-----------|-------|---|--------------------------------------------|------|-------------|
| 1030.5024  | 1030.5852   | 0.0828  | 80    | 289        | 296      | QDNNDLRR         |           |       |   |                                            |      | Mascot      |
| 1045.5095  | 1045.5616   | 0.0521  | 50    | 346        | 353      | HLKEEMSR         |           |       |   | Oxidation (M)[6]                           |      | Mascot      |
| 1103.5691  | 1103.5824   | 0.0133  | 12    | 181        | 190      | KDVDDATLAR       | 15        |       | 0 |                                            |      | Mascot      |
| 1103.5691  | 1103.5824   | 0.0133  | 12    | 181        | 190      | KDVDDATLAR       |           |       |   |                                            |      | Mascot      |
| 1249.5664  | 1249.6261   | 0.0597  | 48    | 119        | 128      | LGDLCCQEMR       |           |       |   | Carbamidomethyl (C)[5]                     |      | Mascot      |
| 1249.5664  | 1249.6261   | 0.0597  | 48    | 119        | 128      | LGDLCCQEMR       |           |       |   | Carbamidomethyl (C)[5]                     |      | Mascot      |
| 1334.6844  | 1334.7791   | 0.0947  | 71    | 310        | 320      | STNEALLRQMR      |           |       |   | Oxidation (M)[10]                          |      | Mascot      |
| 1334.6844  | 1334.7791   | 0.0947  | 71    | 310        | 320      | STNEALLRQMR      |           |       |   | Oxidation (M)[10]                          |      | Mascot      |
| 1396.7067  | 1396.7544   | 0.0477  | 34    | 246        | 257      | DIRSQYESIASK     |           |       |   |                                            |      | Mascot      |
| 1439.7562  | 1439.8033   | 0.0471  | 33    | 366        | 377      | MALDIEIATYRK     |           |       |   | Oxidation (M)[1]                           |      | Mascot      |
| 1466.7448  | 1466.6255   | -0.1193 | -81   | 197        | 208      | IESLMDEIEFLK     |           |       |   |                                            |      | Mascot      |
| 1466.7448  | 1466.6255   | -0.1193 | -81   | 197        | 208      | IESLMDEIEFLK     |           |       |   |                                            |      | Mascot      |
| 2233.0083  | 2233.0901   | 0.0818  | 37    | 110        | 128      | EQQQGPSGRLGDLCQQ |           |       |   | Carbamidomethyl (C)[14], Oxidation (M)[18] |      | Mascot      |

26    hypothetical protein LOC560276 [Danio rerio]    EMR    gi|190194246    82767.4    9.32    14    36    0

Peptide Information

| Calc. Mass | Obsrv. Mass | ± da    | ± ppm | Start Seq. | End Seq. | Sequence                     | Ion Score | C. I. % | Modification               | Rank | Result Type |
|------------|-------------|---------|-------|------------|----------|------------------------------|-----------|---------|----------------------------|------|-------------|
| 1103.4972  | 1103.5824   | 0.0852  | 77    | 543        | 551      | LHLCSECGK                    |           |         | Carbamidomethyl (C)[4,7]   |      | Mascot      |
| 1103.4972  | 1103.5824   | 0.0852  | 77    | 543        | 551      | LHLCSECGK                    |           |         | Carbamidomethyl (C)[4,7]   |      | Mascot      |
| 1313.6631  | 1313.7051   | 0.042   | 32    | 190        | 200      | HTLNCQNVTVK                  |           |         | Carbamidomethyl (C)[5]     |      | Mascot      |
| 1334.6232  | 1334.7791   | 0.1559  | 117   | 625        | 635      | EKPYPSPVCGK                  |           |         | Carbamidomethyl (C)[6,9]   |      | Mascot      |
| 1334.6232  | 1334.7791   | 0.1559  | 117   | 625        | 635      | EKPYPSPVCGK                  |           |         | Carbamidomethyl (C)[6,9]   |      | Mascot      |
| 1396.6559  | 1396.7544   | 0.0985  | 71    | 54         | 67       | ATAVNSLTCTQCGK               |           |         |                            |      | Mascot      |
| 1660.757   | 1660.8108   | 0.0538  | 32    | 496        | 510      | VHTGEKPYPCNACGK              |           |         | Carbamidomethyl (C)[10]    |      | Mascot      |
| 1701.8264  | 1701.9065   | 0.0801  | 47    | 407        | 420      | KAHEMIHTGEELYK               |           |         | Oxidation (M)[5]           |      | Mascot      |
| 1704.7944  | 1704.8705   | 0.0761  | 45    | 468        | 481      | THTGEKPFPCSRCK               |           |         | Carbamidomethyl (C)[10,13] |      | Mascot      |
| 1817.7946  | 1817.8693   | 0.0747  | 41    | 283        | 297      | IHTEEKPYQCSHCDK              |           |         |                            |      | Mascot      |
| 1817.7946  | 1817.8693   | 0.0747  | 41    | 283        | 297      | IHTEEKPYQCSHCDK              |           |         |                            |      | Mascot      |
| 2082.9597  | 2083.0981   | 0.1384  | 66    | 493        | 510      | HERVHTGEKPYPCNACGK           |           |         | Carbamidomethyl (C)[13]    |      | Mascot      |
| 2082.9597  | 2083.0981   | 0.1384  | 66    | 493        | 510      | HERVHTGEKPYPCNACGK           |           |         | Carbamidomethyl (C)[13]    |      | Mascot      |
| 2096.1077  | 2095.9583   | -0.1494 | -71   | 376        | 392      | YHLIFHLKIHSGENPYK            |           |         |                            |      | Mascot      |
| 2229.9839  | 2230.155    | 0.1711  | 77    | 408        | 426      | AHEMIHTGEELYKCSHCNK          |           |         |                            |      | Mascot      |
| 2283.0315  | 2283.1809   | 0.1494  | 65    | 532        | 551      | MDNHSIHTTEKLHLCSECGK         |           |         |                            |      | Mascot      |
| 2299.093   | 2299.1904   | 0.0974  | 42    | 105        | 123      | SHIRLHTGEKPHQCCHSK           |           |         | Carbamidomethyl (C)[14,17] |      | Mascot      |
| 3337.4241  | 3337.771    | 0.3469  | 104   | 580        | 607      | SFRYSSQLNEHMMTHTEGKPHCEDQCGK |           |         | Carbamidomethyl (C)[23]    |      | Mascot      |

27    RecName: Full=TLN domain-containing protein KIAA1609 homolog    gi|123888881    49916.8    5.6    9    36    0

Peptide Information

| Calc. Mass | Obsrv. Mass | ± da    | ± ppm | Start Seq. | End Seq. | Sequence           | Ion Score | C. I. % | Modification           | Rank | Result Type |
|------------|-------------|---------|-------|------------|----------|--------------------|-----------|---------|------------------------|------|-------------|
| 911.5057   | 911.4162    | -0.0895 | -98   | 436        | 443      | TLHSQGLR           |           |         |                        |      | Mascot      |
| 1186.65    | 1186.6233   | -0.0267 | -23   | 108        | 119      | APLVLAMAEGAK       |           |         | Oxidation (M)[7]       |      | Mascot      |
| 1466.6959  | 1466.6255   | -0.0704 | -48   | 316        | 326      | CFLFSVFPYMR        |           |         | Carbamidomethyl (C)[1] |      | Mascot      |
| 1466.6959  | 1466.6255   | -0.0704 | -48   | 316        | 326      | CFLFSVFPYMR        |           |         | Carbamidomethyl (C)[1] |      | Mascot      |
| 1654.7754  | 1654.8368   | 0.0614  | 37    | 151        | 165      | AWHPERMGDGAQGVK    |           |         | Oxidation (M)[7]       |      | Mascot      |
| 1671.7982  | 1671.8973   | 0.0991  | 59    | 260        | 273      | MLFSTKMHGESFTR     |           |         |                        |      | Mascot      |
| 2284.1833  | 2284.1775   | -0.0058 | -3    | 68         | 89       | VFQGLHSIDPGVPLHPGD |           |         |                        |      | Mascot      |

|           |           |        |    |     |     |                                   |                        |        |
|-----------|-----------|--------|----|-----|-----|-----------------------------------|------------------------|--------|
| 2299.0771 | 2299.1904 | 0.1133 | 49 | 375 | 394 | GVSRR<br>ARPRCTTYGSPQLSADE<br>DFK | Carbamidomethyl (C)[5] | Mascot |
| 2300.137  | 2300.1809 | 0.0439 | 19 | 46  | 66  | GLSLDMLQLTMGMASE<br>SMIK          | Oxidation (M)[6]       | Mascot |
| 3337.6079 | 3337.771  | 0.1631 | 49 | 166 | 194 | LLAEQLTSELKPSDQNSC<br>DIACLEDWLFR |                        | Mascot |

28 PREDICTED: apolipoprotein B-100 [Danio rerio] gi|326675669 478034.2 5.42 31 35 0

#### Peptide Information

| Calc. Mass | Obsrv. Mass | ± da    | ± ppm | Start Seq. | End Seq. | Sequence                 | Ion Score | C. I. % | Modification           | Rank | Result Type |
|------------|-------------|---------|-------|------------|----------|--------------------------|-----------|---------|------------------------|------|-------------|
| 938.4434   | 938.4402    | -0.0032 | -3    | 497        | 504      | SSVLNCMK                 |           |         | Carbamidomethyl (C)[6] |      | Mascot      |
| 1020.4843  | 1020.4731   | -0.0112 | -11   | 1161       | 1169     | SDINSEVEK                |           |         |                        |      | Mascot      |
| 1045.5823  | 1045.5616   | -0.0207 | -20   | 2442       | 2450     | IAEVCARNIK               |           |         |                        |      | Mascot      |
| 1051.5756  | 1051.7113   | 0.1357  | 129   | 3778       | 3785     | HDLRQNLRL                |           |         |                        |      | Mascot      |
| 1103.6055  | 1103.5824   | -0.0231 | -21   | 3166       | 3176     | GKLDGSATINK              |           |         |                        |      | Mascot      |
| 1103.6055  | 1103.5824   | -0.0231 | -21   | 3166       | 3176     | GKLDGSATINK              |           |         |                        |      | Mascot      |
| 1117.6212  | 1117.5894   | -0.0318 | -28   | 1059       | 1069     | LAVTDTNAGK               |           |         |                        |      | Mascot      |
| 1229.6049  | 1229.6289   | 0.024   | 20    | 2335       | 2344     | SIQFEYISDK               |           |         |                        |      | Mascot      |
| 1234.5192  | 1234.6238   | 0.1046  | 85    | 245        | 254      | HMTEAQCTEK               |           |         | Carbamidomethyl (C)[7] |      | Mascot      |
| 1249.6534  | 1249.6261   | -0.0273 | -22   | 1218       | 1229     | IAAGSSFVDVQR             |           |         |                        |      | Mascot      |
| 1249.6674  | 1249.6261   | -0.0413 | -33   | 298        | 307      | KLFIEEVEDK               |           |         |                        |      | Mascot      |
| 1313.8191  | 1313.7051   | -0.114  | -87   | 1901       | 1912     | FLLKAEPLAIK              |           |         |                        |      | Mascot      |
| 1331.7682  | 1331.6315   | -0.1367 | -103  | 2289       | 2299     | VYLNAQELILR              |           |         |                        |      | Mascot      |
| 1362.614   | 1362.6376   | 0.0236  | 17    | 244        | 254      | KHMTEAQCTEK              |           |         | Carbamidomethyl (C)[8] |      | Mascot      |
| 1390.7181  | 1390.7136   | -0.0045 | -3    | 4155       | 4166     | EAGNLEVMMKIR             |           |         |                        |      | Mascot      |
| 1396.6083  | 1396.7544   | 0.1461  | 105   | 351        | 363      | NETLSGAADMMK             |           |         |                        |      | Mascot      |
| 1439.7273  | 1439.8033   | 0.076   | 53    | 1360       | 1372     | IMASCLTPLSYK             |           |         | Oxidation (M)[2]       |      | Mascot      |
| 1457.6954  | 1457.8667   | 0.1713  | 118   | 3771       | 3781     | DMNINWKHDLR              |           |         | Oxidation (M)[2]       |      | Mascot      |
| 1654.7781  | 1654.8368   | 0.0587  | 35    | 605        | 619      | AVQGDVSFPMDFTK           |           |         | Oxidation (M)[11]      |      | Mascot      |
| 1660.7887  | 1660.8108   | 0.0221  | 13    | 1838       | 1852     | FDLDFAGLSSVMNTK          |           |         | Oxidation (M)[12]      |      | Mascot      |
| 1668.8512  | 1668.9299   | 0.0787  | 47    | 3450       | 3464     | VEMSESEVGKVAFLK          |           |         | Oxidation (M)[3]       |      | Mascot      |
| 1671.7716  | 1671.8973   | 0.1257  | 75    | 4185       | 4198     | GVVQELYNQMSMEK           |           |         | Oxidation (M)[10]      |      | Mascot      |
| 1701.917   | 1701.9065   | -0.0105 | -6    | 745        | 759      | LEQVEDAPKGLAYLR          |           |         |                        |      | Mascot      |
| 1826.0269  | 1826.0262   | -0.0007 | 0     | 1017       | 1034     | IVLKAEGAEPTEATAVVK       |           |         |                        |      | Mascot      |
| 2180.019   | 2180.1082   | 0.0892  | 41    | 2811       | 2829     | NGISAYMDTSYNNHNLNIP<br>R |           |         |                        |      | Mascot      |
| 2200.0227  | 2200.0471   | 0.0244  | 11    | 1161       | 1178     | SDINSEVEKLFPNMEEYR       |           |         |                        |      | Mascot      |
| 2211.1113  | 2211.1074   | -0.0039 | -2    | 770        | 788      | TSDLKHVTQYINLCAETF<br>K  |           |         |                        |      | Mascot      |

|  |           |           |        |    |      |      |                                   |  |                        |        |
|--|-----------|-----------|--------|----|------|------|-----------------------------------|--|------------------------|--------|
|  | 2230.1172 | 2230.155  | 0.0378 | 17 | 2610 | 2628 | VRQIEMPEVDPEAIFGDL<br>R           |  | Oxidation (M)[6]       | Mascot |
|  | 2284.1416 | 2284.1775 | 0.0359 | 16 | 2731 | 2750 | SSLEFLDYTLDAMLQIEA<br>PK          |  |                        | Mascot |
|  | 2299.1572 | 2299.1904 | 0.0332 | 14 | 1720 | 1738 | SECMQTLNITLWTLAFRS<br>K           |  | Carbamidomethyl (C)[3] | Mascot |
|  | 2300.1367 | 2300.1809 | 0.0442 | 19 | 2731 | 2750 | SSLEFLDYTLDAMLQIEA<br>PK          |  | Oxidation (M)[13]      | Mascot |
|  | 2357.2234 | 2357.2214 | -0.002 | -1 | 2067 | 2086 | LDEFPPQKVNDIIVDLLEN<br>K          |  |                        | Mascot |
|  | 2357.2234 | 2357.2214 | -0.002 | -1 | 2067 | 2086 | LDEFPPQKVNDIIVDLLEN<br>K          |  |                        | Mascot |
|  | 3337.7654 | 3337.771  | 0.0056 | 2  | 3516 | 3544 | LFENGVSFNIPQITFGVP<br>DLFKTIPQMIR |  | Oxidation (M)[27]      | Mascot |

29

hypothetical protein LOC100158475 [Xenopus (Silurana) tropicalis]

gi|189230126

62824.3

7.62

10

35

0

| Peptide Information |             |         |       |            |          |                            |           |       |                         |                  |
|---------------------|-------------|---------|-------|------------|----------|----------------------------|-----------|-------|-------------------------|------------------|
| Calc. Mass          | Obsrv. Mass | ± da    | ± ppm | Start Seq. | End Seq. | Sequence                   | Ion Score | C. I. | % Modification          | Rank Result Type |
| 1103.5844           | 1103.5824   | -0.002  | -2    | 402        | 411      | GLTGHQLSYK                 |           |       |                         | Mascot           |
| 1103.5844           | 1103.5824   | -0.002  | -2    | 402        | 411      | GLTGHQLSYK                 |           |       |                         | Mascot           |
| 1362.774            | 1362.6376   | -0.1364 | -100  | 197        | 207      | FDRQLLQTLTK                |           |       |                         | Mascot           |
| 1439.71             | 1439.8033   | 0.0933  | 65    | 464        | 475      | KAHMLSFSEYAR               |           |       |                         | Mascot           |
| 1457.8322           | 1457.8667   | 0.0345  | 24    | 551        | 563      | NLVLVAVKSEETR              |           |       |                         | Mascot           |
| 1465.8162           | 1465.6389   | -0.1773 | -121  | 527        | 538      | IIFLQERGFQSK               |           |       |                         | Mascot           |
| 1660.9534           | 1660.8108   | -0.1426 | -86   | 74         | 87       | RYSSVWPLSLLALR             |           |       |                         | Mascot           |
| 1668.8262           | 1668.9299   | 0.1037  | 62    | 266        | 279      | VEDLHLEPLSCQTK             |           |       | Carbamidomethyl (C)[11] | Mascot           |
| 1895.9644           | 1895.9923   | 0.0279  | 15    | 264        | 279      | QRVEDLHLEPLSCQTK           |           |       |                         | Mascot           |
| 2283.0178           | 2283.1809   | 0.1631  | 71    | 343        | 362      | HFTNCPHVNVITSVACCY<br>MK   |           |       | Oxidation (M)[19]       | Mascot           |
| 2300.1704           | 2300.1809   | 0.0105  | 5     | 321        | 342      | DPGSFVLTGLHACGDLS<br>ATLLR |           |       | Carbamidomethyl (C)[13] | Mascot           |

30

PREDICTED: hypothetical protein LOC100331119 [Danio rerio]

gi|326666989

28513.6

5.24

7

35

0

| Peptide Information |             |         |       |            |          |                   |           |       |                  |                  |
|---------------------|-------------|---------|-------|------------|----------|-------------------|-----------|-------|------------------|------------------|
| Calc. Mass          | Obsrv. Mass | ± da    | ± ppm | Start Seq. | End Seq. | Sequence          | Ion Score | C. I. | % Modification   | Rank Result Type |
| 850.4637            | 850.541     | 0.0773  | 91    | 182        | 188      | LICKMAR           |           |       | Oxidation (M)[5] | Mascot           |
| 1030.6003           | 1030.5852   | -0.0151 | -15   | 37         | 45       | GSRTDLLLR         |           |       |                  | Mascot           |
| 1249.6576           | 1249.6261   | -0.0315 | -25   | 160        | 169      | EEFWSLGLLR        |           |       |                  | Mascot           |
| 1249.6576           | 1249.6261   | -0.0315 | -25   | 160        | 169      | EEFWSLGLLR        |           |       |                  | Mascot           |
| 1457.8322           | 1457.8667   | 0.0345  | 24    | 40         | 51       | TDLLRLSEEIR       |           |       |                  | Mascot           |
| 1825.9177           | 1826.0262   | 0.1085  | 59    | 207        | 223      | ETPNNIVTGLPEDADLK |           |       |                  | Mascot           |

|    |                                     |           |           |         |     |             |     |                    |      |                         |    |        |    |   |
|----|-------------------------------------|-----------|-----------|---------|-----|-------------|-----|--------------------|------|-------------------------|----|--------|----|---|
|    |                                     | 1895.8635 | 1895.9923 | 0.1288  | 68  | 170         | 185 | DMDFHIGNACMKLICK   |      | Carbamidomethyl (C)[10] |    | Mascot |    |   |
|    |                                     | 2148.127  | 2148.0391 | -0.0879 | -41 | 152         | 169 | EGQVCLIREEFWSLGLLR |      |                         |    | Mascot |    |   |
| 31 | CHMP family, member 7 [Danio rerio] |           |           |         |     | gi 44890520 |     | 50916.2            | 5.28 | 6                       | 35 | 0      | 19 | 0 |

Peptide Information

| Calc. Mass | Obsrv. Mass | ± da    | ± ppm | Start Seq. | End Seq. | Sequence         | Ion Score | C. I. | % | Modification           | Rank | Result Type |
|------------|-------------|---------|-------|------------|----------|------------------|-----------|-------|---|------------------------|------|-------------|
| 850.4165   | 850.541     | 0.1245  | 146   | 214        | 221      | FSQAGQGR         |           |       |   |                        |      | Mascot      |
| 1160.6422  | 1160.6064   | -0.0358 | -31   | 124        | 134      | WTLSALLGSGR      |           |       |   |                        |      | Mascot      |
| 1160.6422  | 1160.6064   | -0.0358 | -31   | 124        | 134      | WTLSALLGSGR      | 19        |       | 0 |                        |      | Mascot      |
| 1234.679   | 1234.6238   | -0.0552 | -45   | 149        | 159      | EKAAELLAAYR      |           |       |   |                        |      | Mascot      |
| 1313.6517  | 1313.7051   | 0.0534  | 41    | 246        | 257      | VEALGHEAEKCK     |           |       |   |                        |      | Mascot      |
| 1390.7689  | 1390.7136   | -0.0553 | -40   | 286        | 297      | ADRLFAQLETVK     |           |       |   |                        |      | Mascot      |
| 1867.8425  | 1867.8486   | 0.0061  | 3     | 58         | 73       | CGSVCVNQLDLNENFR |           |       |   | Carbamidomethyl (C)[1] |      | Mascot      |

|    |                                          |  |  |  |  |              |  |       |      |   |    |   |  |  |
|----|------------------------------------------|--|--|--|--|--------------|--|-------|------|---|----|---|--|--|
| 32 | novel protein (zgc:153679) [Danio rerio] |  |  |  |  | gi 169158661 |  | 35687 | 8.38 | 8 | 35 | 0 |  |  |
|----|------------------------------------------|--|--|--|--|--------------|--|-------|------|---|----|---|--|--|

Peptide Information

| Calc. Mass | Obsrv. Mass | ± da    | ± ppm | Start Seq. | End Seq. | Sequence       | Ion Score | C. I. | % | Modification     | Rank | Result Type |
|------------|-------------|---------|-------|------------|----------|----------------|-----------|-------|---|------------------|------|-------------|
| 1038.4963  | 1038.504    | 0.0077  | 7     | 20         | 28       | SGYEAER        |           |       |   |                  |      | Mascot      |
| 1103.4714  | 1103.5824   | 0.111   | 101   | 239        | 247      | SSMPDFYEK      |           |       |   |                  |      | Mascot      |
| 1103.4714  | 1103.5824   | 0.111   | 101   | 239        | 247      | SSMPDFYEK      |           |       |   |                  |      | Mascot      |
| 1234.6313  | 1234.6238   | -0.0075 | -6    | 183        | 192      | LNVEDLQFEK     |           |       |   |                  |      | Mascot      |
| 1334.7347  | 1334.7791   | 0.0444  | 33    | 170        | 182      | VITVSSGGMLVQK  |           |       |   | Oxidation (M)[9] |      | Mascot      |
| 1334.7347  | 1334.7791   | 0.0444  | 33    | 170        | 182      | VITVSSGGMLVQK  |           |       |   | Oxidation (M)[9] |      | Mascot      |
| 1362.6068  | 1362.6376   | 0.0308  | 23    | 239        | 249      | SSMPDFYEKMK    |           |       |   |                  |      | Mascot      |
| 1390.6962  | 1390.7136   | 0.0174  | 13    | 29         | 41       | FTPADLDVSVNGR  |           |       |   |                  |      | Mascot      |
| 1546.7972  | 1546.7795   | -0.0177 | -11   | 28         | 41       | RFTPADLDVSVNGR |           |       |   |                  |      | Mascot      |
| 1546.7972  | 1546.7795   | -0.0177 | -11   | 28         | 41       | RFTPADLDVSVNGR |           |       |   |                  |      | Mascot      |
| 1701.8079  | 1701.9065   | 0.0986  | 58    | 13         | 27       | GLQEYTKSGYEAER |           |       |   |                  |      | Mascot      |

|    |                                     |  |  |  |  |             |  |         |      |   |    |   |    |   |
|----|-------------------------------------|--|--|--|--|-------------|--|---------|------|---|----|---|----|---|
| 33 | CHMP family, member 7 [Danio rerio] |  |  |  |  | gi 94732918 |  | 50934.2 | 5.28 | 6 | 34 | 0 | 19 | 0 |
|----|-------------------------------------|--|--|--|--|-------------|--|---------|------|---|----|---|----|---|

Peptide Information

| Calc. Mass | Obsrv. Mass | ± da    | ± ppm | Start Seq. | End Seq. | Sequence    | Ion Score | C. I. | % | Modification | Rank | Result Type |
|------------|-------------|---------|-------|------------|----------|-------------|-----------|-------|---|--------------|------|-------------|
| 850.4165   | 850.541     | 0.1245  | 146   | 214        | 221      | FSQAGQGR    |           |       |   |              |      | Mascot      |
| 1160.6422  | 1160.6064   | -0.0358 | -31   | 124        | 134      | WTLSALLGSGR |           |       |   |              |      | Mascot      |

|  |           |           |         |     |     |     |                  |    |   |  |                        |  |  |        |
|--|-----------|-----------|---------|-----|-----|-----|------------------|----|---|--|------------------------|--|--|--------|
|  | 1160.6422 | 1160.6064 | -0.0358 | -31 | 124 | 134 | WTLSALLGSGR      | 19 | 0 |  |                        |  |  | Mascot |
|  | 1234.679  | 1234.6238 | -0.0552 | -45 | 149 | 159 | EKAAELLAAYR      |    |   |  |                        |  |  | Mascot |
|  | 1313.6517 | 1313.7051 | 0.0534  | 41  | 246 | 257 | VEALGHEAEKCK     |    |   |  |                        |  |  | Mascot |
|  | 1390.7689 | 1390.7136 | -0.0553 | -40 | 286 | 297 | ADRLFAQLETVK     |    |   |  |                        |  |  | Mascot |
|  | 1867.8425 | 1867.8486 | 0.0061  | 3   | 58  | 73  | CGSVCVNLQDLNENFR |    |   |  | Carbamidomethyl (C)[1] |  |  | Mascot |

34 3-hydroxyisobutyryl-Coenzyme A hydrolase [Danio rerio] gi|169154367 42386 8.5 3 34 0 27 43.622

#### Peptide Information

| Calc. Mass | Obsrv. Mass | ± da    | ± ppm | Start Seq. | End Seq. | Sequence     | Ion Score | C. I.  | % Modification | Rank | Result Type |
|------------|-------------|---------|-------|------------|----------|--------------|-----------|--------|----------------|------|-------------|
| 1117.6099  | 1117.5894   | -0.0205 | -18   | 76         | 85       | NSETDVVIK    |           |        |                |      | Mascot      |
| 1229.7035  | 1229.6289   | -0.0746 | -61   | 54         | 64       | ALNALTLMIR   |           |        |                |      | Mascot      |
| 1546.8112  | 1546.7795   | -0.0317 | -20   | 73         | 85       | WDKNSETDVVIK | 27        | 43.622 |                |      | Mascot      |
| 1546.8112  | 1546.7795   | -0.0317 | -20   | 73         | 85       | WDKNSETDVVIK |           |        |                |      | Mascot      |

35 PREDICTED: transposon TX1 uncharacterized 149 kDa protein-like [Danio rerio] gi|326678662 152395.3 9.05 18 34 0

#### Peptide Information

| Calc. Mass | Obsrv. Mass | ± da    | ± ppm | Start Seq. | End Seq. | Sequence          | Ion Score | C. I. | % Modification                           | Rank | Result Type |
|------------|-------------|---------|-------|------------|----------|-------------------|-----------|-------|------------------------------------------|------|-------------|
| 889.4559   | 889.4744    | 0.0185  | 21    | 502        | 509      | GSLPLSCR          |           |       | Carbamidomethyl (C)[7]                   |      | Mascot      |
| 911.4985   | 911.4162    | -0.0823 | -90   | 214        | 220      | FQINYVK           |           |       |                                          |      | Mascot      |
| 1030.6078  | 1030.5852   | -0.0226 | -22   | 293        | 300      | IQIKQLCK          |           |       | Carbamidomethyl (C)[7]                   |      | Mascot      |
| 1045.5571  | 1045.5616   | 0.0045  | 4     | 502        | 510      | GSLPLSCRR         |           |       | Carbamidomethyl (C)[7]                   |      | Mascot      |
| 1103.5264  | 1103.5824   | 0.056   | 51    | 21         | 28       | MCLFEFIK          |           |       | Carbamidomethyl (C)[2], Oxidation (M)[1] |      | Mascot      |
| 1103.5264  | 1103.5824   | 0.056   | 51    | 21         | 28       | MCLFEFIK          |           |       | Carbamidomethyl (C)[2], Oxidation (M)[1] |      | Mascot      |
| 1117.6727  | 1117.5894   | -0.0833 | -75   | 1207       | 1216     | NGKNIVVVK         |           |       |                                          |      | Mascot      |
| 1165.6365  | 1165.7456   | 0.1091  | 94    | 793        | 801      | WLLSQLSYR         |           |       |                                          |      | Mascot      |
| 1186.6111  | 1186.6233   | 0.0122  | 10    | 20         | 28       | RMCLFEFIK         |           |       |                                          |      | Mascot      |
| 1249.6721  | 1249.6261   | -0.046  | -37   | 713        | 722      | RLECIINNFK        |           |       |                                          |      | Mascot      |
| 1249.6721  | 1249.6261   | -0.046  | -37   | 713        | 722      | RLECIINNFK        |           |       |                                          |      | Mascot      |
| 1334.6481  | 1334.7791   | 0.131   | 98    | 198        | 208      | DNQISMARLDR       |           |       | Oxidation (M)[6]                         |      | Mascot      |
| 1334.6481  | 1334.7791   | 0.131   | 98    | 198        | 208      | DNQISMARLDR       |           |       | Oxidation (M)[6]                         |      | Mascot      |
| 1362.6619  | 1362.6376   | -0.0243 | -18   | 21         | 30       | MCLFEFIKMK        |           |       | Carbamidomethyl (C)[2], Oxidation (M)[1] |      | Mascot      |
| 1654.8542  | 1654.8368   | -0.0174 | -11   | 626        | 639      | MIEVMYSNIQSVLK    |           |       |                                          |      | Mascot      |
| 1704.7113  | 1704.8705   | 0.1592  | 93    | 1132       | 1143     | ETICHCFMYCKR      |           |       | Carbamidomethyl (C)[4,6,10]              |      | Mascot      |
| 2053.0864  | 2052.9951   | -0.0913 | -44   | 1267       | 1285     | AVWTQSELWAPPAALVS |           |       |                                          |      | Mascot      |



|    |                                              |           |         |     |     |              |                                  |      |    |    |   |  |                         |  |  |  |  |        |
|----|----------------------------------------------|-----------|---------|-----|-----|--------------|----------------------------------|------|----|----|---|--|-------------------------|--|--|--|--|--------|
|    | 2083.0317                                    | 2083.0981 | 0.0664  | 32  | 410 | 426          | YAVNFYSSLYKCEVLQR                |      |    |    |   |  |                         |  |  |  |  | Mascot |
|    | 2083.0317                                    | 2083.0981 | 0.0664  | 32  | 410 | 426          | YAVNFYSSLYKCEVLQR                |      |    |    |   |  |                         |  |  |  |  | Mascot |
|    | 2284.2588                                    | 2284.1775 | -0.0813 | -36 | 482 | 501          | VLWVPVIGEDLFLVLNDSL<br>NK        |      |    |    |   |  |                         |  |  |  |  | Mascot |
|    | 2299.0999                                    | 2299.1904 | 0.0905  | 39  | 279 | 296          | QMYSSLQQWWDGKIQI<br>K            |      |    |    |   |  | Carbamidomethyl (C)[12] |  |  |  |  | Mascot |
|    | 3337.4465                                    | 3337.771  | 0.3245  | 97  | 440 | 468          | VDDSNAMLELPISQDEL<br>YTVMMSMENGK |      |    |    |   |  | Oxidation (M)[8,22,23]  |  |  |  |  | Mascot |
| 36 | hypothetical protein LOC553448 [Danio rerio] |           |         |     |     | gi 224496090 | 145429.2                         | 8.16 | 15 | 34 | 0 |  |                         |  |  |  |  |        |

#### Peptide Information

|  | Calc. Mass | Obsrv. Mass | ± da    | ± ppm | Start Seq. | End Seq. | Sequence                    | Ion Score | C. I. | % | Modification           | Rank | Result | Type |
|--|------------|-------------|---------|-------|------------|----------|-----------------------------|-----------|-------|---|------------------------|------|--------|------|
|  | 850.4781   | 850.541     | 0.0629  | 74    | 369        | 377      | AAPPAPAQK                   |           |       |   |                        |      | Mascot |      |
|  | 889.4672   | 889.4744    | 0.0072  | 8     | 686        | 692      | LRQDCVR                     |           |       |   |                        |      | Mascot |      |
|  | 1103.5579  | 1103.5824   | 0.0245  | 22    | 743        | 751      | LEEVSEELR                   |           |       |   |                        |      | Mascot |      |
|  | 1103.5579  | 1103.5824   | 0.0245  | 22    | 743        | 751      | LEEVSEELR                   |           |       |   |                        |      | Mascot |      |
|  | 1160.5906  | 1160.6064   | 0.0158  | 14    | 1302       | 1311     | NSQDQLAKEK                  |           |       |   |                        |      | Mascot |      |
|  | 1160.5906  | 1160.6064   | 0.0158  | 14    | 1302       | 1311     | NSQDQLAKEK                  |           |       |   |                        |      | Mascot |      |
|  | 1234.646   | 1234.6238   | -0.0222 | -18   | 779        | 789      | ARVASVEVEMK                 |           |       |   | Oxidation (M)[10]      |      | Mascot |      |
|  | 1249.5695  | 1249.6261   | 0.0566  | 45    | 1084       | 1093     | SVEEEESVWR                  |           |       |   |                        |      | Mascot |      |
|  | 1249.5695  | 1249.6261   | 0.0566  | 45    | 1084       | 1093     | SVEEEESVWR                  |           |       |   |                        |      | Mascot |      |
|  | 1331.6802  | 1331.6315   | -0.0487 | -37   | 1109       | 1119     | KVQELEETAER                 |           |       |   |                        |      | Mascot |      |
|  | 1466.84    | 1466.6255   | -0.2145 | -146  | 449        | 462      | KVPVMAVPPVGTQK              |           |       |   | Oxidation (M)[5]       |      | Mascot |      |
|  | 1466.84    | 1466.6255   | -0.2145 | -146  | 449        | 462      | KVPVMAVPPVGTQK              |           |       |   | Oxidation (M)[5]       |      | Mascot |      |
|  | 1654.9235  | 1654.8368   | -0.0867 | -52   | 1296       | 1309     | LQQLLRNSQDQLAK              |           |       |   |                        |      | Mascot |      |
|  | 1660.8435  | 1660.8108   | -0.0327 | -20   | 718        | 732      | AASVEKQLNQMQASR             |           |       |   |                        |      | Mascot |      |
|  | 1817.8988  | 1817.8693   | -0.0295 | -16   | 743        | 757      | LEEVSEELRQTQSNR             |           |       |   |                        |      | Mascot |      |
|  | 1817.8988  | 1817.8693   | -0.0295 | -16   | 743        | 757      | LEEVSEELRQTQSNR             |           |       |   |                        |      | Mascot |      |
|  | 2225.1521  | 2225.1223   | -0.0298 | -13   | 758        | 778      | NNLQAQLEQAQKDAAAL<br>AEAK   |           |       |   |                        |      | Mascot |      |
|  | 2225.1521  | 2225.1223   | -0.0298 | -13   | 758        | 778      | NNLQAQLEQAQKDAAAL<br>AEAK   |           |       |   |                        |      | Mascot |      |
|  | 2230.2991  | 2230.155    | -0.1441 | -65   | 450        | 472      | VPVMAVPPVGTQKAAAV<br>TAVPVK |           |       |   |                        |      | Mascot |      |
|  | 2233.1743  | 2233.0901   | -0.0842 | -38   | 954        | 972      | ISEKESLMTTLQQEVQQL<br>K     |           |       |   |                        |      | Mascot |      |
|  | 2271.9968  | 2272.116    | 0.1192  | 52    | 1050       | 1068     | LQAAQESQCTLQSECEQ<br>YR     |           |       |   | Carbamidomethyl (C)[9] |      | Mascot |      |

|    |                                         |  |  |  |  |              |         |      |    |    |   |  |  |  |  |  |  |  |
|----|-----------------------------------------|--|--|--|--|--------------|---------|------|----|----|---|--|--|--|--|--|--|--|
| 37 | protein Wnt-10a precursor [Danio rerio] |  |  |  |  | gi 229577306 | 50082.4 | 8.71 | 11 | 34 | 0 |  |  |  |  |  |  |  |
|----|-----------------------------------------|--|--|--|--|--------------|---------|------|----|----|---|--|--|--|--|--|--|--|

#### Peptide Information

|  | Calc. Mass | Obsrv. Mass | ± da | ± ppm | Start | End | Sequence | Ion | C. I. | % | Modification | Rank | Result | Type |
|--|------------|-------------|------|-------|-------|-----|----------|-----|-------|---|--------------|------|--------|------|
|--|------------|-------------|------|-------|-------|-----|----------|-----|-------|---|--------------|------|--------|------|

|    |                                                            |           | Seq.    | Seq. | Score        |     |                                 |                                             |        |    |   |
|----|------------------------------------------------------------|-----------|---------|------|--------------|-----|---------------------------------|---------------------------------------------|--------|----|---|
|    | 911.3345                                                   | 911.4162  | 0.0817  | 90   | 40           | 46  | QESCCER                         | Carbamidomethyl (C)[4]                      | Mascot |    |   |
|    | 938.3818                                                   | 938.4402  | 0.0584  | 62   | 193          | 200 | ACGCDEKR                        | Carbamidomethyl (C)[2]                      | Mascot |    |   |
|    | 1066.5752                                                  | 1066.531  | -0.0442 | -41  | 405          | 413 | GHNILQQTR                       |                                             | Mascot |    |   |
|    | 1234.5303                                                  | 1234.6238 | 0.0935  | 76   | 299          | 309 | CHGTSGSCQLK                     | Carbamidomethyl (C)[1,8]                    | Mascot |    |   |
|    | 1465.6344                                                  | 1465.6389 | 0.0045  | 3    | 297          | 309 | CKCHGTSGSCQLK                   | Carbamidomethyl (C)[1,3]                    | Mascot |    |   |
|    | 1660.6183                                                  | 1660.8108 | 0.1925  | 116  | 390          | 404 | TSQGMDCNCSLCCGR                 | Carbamidomethyl (C)[8]                      | Mascot |    |   |
|    | 2082.9153                                                  | 2083.0981 | 0.1828  | 88   | 31           | 46  | GCWTDLLLRQESCCER                | Carbamidomethyl (C)[2,13,14]                | Mascot |    |   |
|    | 2082.9153                                                  | 2083.0981 | 0.1828  | 88   | 31           | 46  | GCWTDLLLRQESCCER                | Carbamidomethyl (C)[2,13,14]                | Mascot |    |   |
|    | 2232.8923                                                  | 2233.0901 | 0.1978  | 89   | 386          | 404 | ICNKTSQGMDCNCSLCCGR             | Carbamidomethyl (C)[2,12,16]                | Mascot |    |   |
|    | 2409.1689                                                  | 2409.2122 | 0.0433  | 18   | 166          | 190 | ESAFAYAIAAGVVHAVSNACAMGK        |                                             | Mascot |    |   |
|    | 2781.1919                                                  | 2781.2424 | 0.0505  | 18   | 390          | 413 | TSQGMDCNCSLCCGRGHNILQQTR        | Carbamidomethyl (C)[8,12], Oxidation (M)[5] | Mascot |    |   |
|    | 3337.8076                                                  | 3337.771  | -0.0366 | -11  | 76           | 106 | ADSNEILGLKIPFDPILNANTVCLTLPGLTK | Carbamidomethyl (C)[23]                     | Mascot |    |   |
| 38 | PREDICTED: hypothetical protein LOC100536892 [Danio rerio] |           |         |      | gi 326671896 |     | 43482.3                         | 5.72                                        | 8      | 34 | 0 |

#### Peptide Information

| Calc. Mass | Obsrv. Mass | ± da    | ± ppm | Start Seq. | End Seq. | Sequence         | Ion Score | C. I. | % Modification         | Rank | Result Type |
|------------|-------------|---------|-------|------------|----------|------------------|-----------|-------|------------------------|------|-------------|
| 996.4744   | 996.595     | 0.1206  | 121   | 132        | 139      | QSSFDER          |           |       |                        |      | Mascot      |
| 1066.6506  | 1066.531    | -0.1196 | -112  | 10         | 19       | VLPELPGTLK       |           |       |                        |      | Mascot      |
| 1103.5878  | 1103.5824   | -0.0054 | -5    | 377        | 385      | DCLRGELLK        |           |       | Carbamidomethyl (C)[2] |      | Mascot      |
| 1103.5878  | 1103.5824   | -0.0054 | -5    | 377        | 385      | DCLRGELLK        |           |       | Carbamidomethyl (C)[2] |      | Mascot      |
| 1160.5291  | 1160.6064   | 0.0773  | 67    | 143        | 152      | NVTQNEENGR       |           |       |                        |      | Mascot      |
| 1160.5291  | 1160.6064   | 0.0773  | 67    | 143        | 152      | NVTQNEENGR       | 0         | 0     |                        |      | Mascot      |
| 1249.6093  | 1249.6261   | 0.0168  | 13    | 330        | 340      | KSQEAMAELDK      |           |       |                        |      | Mascot      |
| 1249.6093  | 1249.6261   | 0.0168  | 13    | 330        | 340      | KSQEAMAELDK      |           |       |                        |      | Mascot      |
| 1390.7325  | 1390.7136   | -0.0189 | -14   | 117        | 128      | EQDPKHLPALDK     |           |       |                        |      | Mascot      |
| 1654.7239  | 1654.8368   | 0.1129  | 68    | 353        | 366      | DDEHQPMGNQSLR    |           |       |                        |      | Mascot      |
| 1825.8711  | 1826.0262   | 0.1551  | 85    | 313        | 328      | SIFQSLDSEAPMLPMK |           |       | Oxidation (M)[12,15]   |      | Mascot      |

39 PREDICTED: protein OSCP1-like isoform 1 [Danio rerio] gi|292630199 42867.9 6.15 5 34 0 18 0

#### Peptide Information

| Calc. Mass | Obsrv. Mass | ± da | ± ppm | Start Seq. | End Seq. | Sequence | Ion Score | C. I. | % Modification | Rank | Result Type |
|------------|-------------|------|-------|------------|----------|----------|-----------|-------|----------------|------|-------------|
|------------|-------------|------|-------|------------|----------|----------|-----------|-------|----------------|------|-------------|

|    |                                           |           |         |     |             |     |                      |      |   |                     |        |
|----|-------------------------------------------|-----------|---------|-----|-------------|-----|----------------------|------|---|---------------------|--------|
|    | 1103.5228                                 | 1103.5824 | 0.0596  | 54  | 223         | 232 | DGGNYHTALR           | 18   | 0 |                     | Mascot |
|    | 1103.5228                                 | 1103.5824 | 0.0596  | 54  | 223         | 232 | DGGNYHTALR           |      |   |                     | Mascot |
|    | 1117.5848                                 | 1117.5894 | 0.0046  | 4   | 342         | 351 | DKQTNAELAK           |      |   |                     | Mascot |
|    | 1546.7595                                 | 1546.7795 | 0.02    | 13  | 128         | 141 | DTPSILSQVDETNIK      |      |   |                     | Mascot |
|    | 1546.7595                                 | 1546.7795 | 0.02    | 13  | 128         | 141 | DTPSILSQVDETNIK      |      |   |                     | Mascot |
|    | 1817.8997                                 | 1817.8693 | -0.0304 | -17 | 74          | 89  | LAHASIMRLNQASMDK     |      |   | Oxidation (M)[7,14] | Mascot |
|    | 1817.8997                                 | 1817.8693 | -0.0304 | -17 | 74          | 89  | LAHASIMRLNQASMDK     |      |   | Oxidation (M)[7,14] | Mascot |
|    | 2298.0852                                 | 2298.1904 | 0.1052  | 46  | 246         | 266 | LGTMYSVSRPVETHMSGTSK |      |   | Oxidation (M)[5]    | Mascot |
| 40 | alpha-2,8-sialyltransferase [Danio rerio] |           |         |     | gi 64966496 |     | 32207.6              | 9.53 | 7 | 33                  | 0      |

Peptide Information

| Calc. Mass | Obsrv. Mass | ± da    | ± ppm | Start Seq. | End Seq. | Sequence           | Ion Score | C. I. | % | Modification           | Rank | Result Type |
|------------|-------------|---------|-------|------------|----------|--------------------|-----------|-------|---|------------------------|------|-------------|
| 938.4981   | 938.4402    | -0.0579 | -62   | 32         | 39       | DFIFTAPK           |           |       |   |                        |      | Mascot      |
| 1066.5931  | 1066.531    | -0.0621 | -58   | 31         | 39       | KDFIFTAPK          |           |       |   |                        |      | Mascot      |
| 1234.6466  | 1234.6238   | -0.0228 | -18   | 254        | 263      | TLVDFFVEHK         |           |       |   |                        |      | Mascot      |
| 1396.679   | 1396.7544   | 0.0754  | 54    | 184        | 194      | CNFAPEVFR          |           |       |   | Carbamidomethyl (C)[1] |      | Mascot      |
| 1660.9056  | 1660.8108   | -0.0948 | -57   | 254        | 267      | TLVDFFVEHKGQLK     |           |       |   |                        |      | Mascot      |
| 1817.8649  | 1817.8693   | 0.0044  | 2     | 48         | 62       | MYMFHAGFRSQLAMK    |           |       |   |                        |      | Mascot      |
| 1817.8649  | 1817.8693   | 0.0044  | 2     | 48         | 62       | MYMFHAGFRSQLAMK    |           |       |   |                        |      | Mascot      |
| 1867.9442  | 1867.8486   | -0.0956 | -51   | 153        | 170      | RYNTCAVVGNSGILTGSR |           |       |   |                        |      | Mascot      |

|    |                                                       |  |  |  |              |  |         |      |   |    |   |    |   |
|----|-------------------------------------------------------|--|--|--|--------------|--|---------|------|---|----|---|----|---|
| 41 | PREDICTED: protein OSCP1-like isoform 2 [Danio rerio] |  |  |  | gi 326680885 |  | 44166.5 | 5.98 | 5 | 33 | 0 | 18 | 0 |
|----|-------------------------------------------------------|--|--|--|--------------|--|---------|------|---|----|---|----|---|

Peptide Information

| Calc. Mass | Obsrv. Mass | ± da    | ± ppm | Start Seq. | End Seq. | Sequence             | Ion Score | C. I. | % | Modification        | Rank | Result Type |
|------------|-------------|---------|-------|------------|----------|----------------------|-----------|-------|---|---------------------|------|-------------|
| 1103.5228  | 1103.5824   | 0.0596  | 54    | 233        | 242      | DGGNYHTALR           | 18        | 0     |   |                     |      | Mascot      |
| 1103.5228  | 1103.5824   | 0.0596  | 54    | 233        | 242      | DGGNYHTALR           |           |       |   |                     |      | Mascot      |
| 1117.5848  | 1117.5894   | 0.0046  | 4     | 352        | 361      | DKQTNAELAK           |           |       |   |                     |      | Mascot      |
| 1546.7595  | 1546.7795   | 0.02    | 13    | 138        | 151      | DTPSILSQVDETNIK      |           |       |   |                     |      | Mascot      |
| 1546.7595  | 1546.7795   | 0.02    | 13    | 138        | 151      | DTPSILSQVDETNIK      |           |       |   |                     |      | Mascot      |
| 1817.8997  | 1817.8693   | -0.0304 | -17   | 84         | 99       | LAHASIMRLNQASMDK     |           |       |   | Oxidation (M)[7,14] |      | Mascot      |
| 1817.8997  | 1817.8693   | -0.0304 | -17   | 84         | 99       | LAHASIMRLNQASMDK     |           |       |   | Oxidation (M)[7,14] |      | Mascot      |
| 2298.0852  | 2298.1904   | 0.1052  | 46    | 256        | 276      | LGTMYSVSRPVETHMSGTSK |           |       |   | Oxidation (M)[5]    |      | Mascot      |

|    |                                              |  |  |  |              |  |        |      |    |    |   |
|----|----------------------------------------------|--|--|--|--------------|--|--------|------|----|----|---|
| 42 | RecName: Full=SH3 domain-binding protein 4-A |  |  |  | gi 123888628 |  | 108383 | 7.89 | 14 | 33 | 0 |
|----|----------------------------------------------|--|--|--|--------------|--|--------|------|----|----|---|

| Peptide Information |                             |         |       |             |                                        |           |         |                                          |      |             |
|---------------------|-----------------------------|---------|-------|-------------|----------------------------------------|-----------|---------|------------------------------------------|------|-------------|
| Calc. Mass          | Obsrv. Mass                 | ± da    | ± ppm | Start Seq.  | End Sequence Seq.                      | Ion Score | C. I. % | Modification                             | Rank | Result Type |
| 842.5822            | 842.5087                    | -0.0735 | -87   | 663         | 669 LIKTVIR                            |           |         |                                          |      | Mascot      |
| 850.4338            | 850.541                     | 0.1072  | 126   | 387         | 393 LSNMEIK                            |           |         | Oxidation (M)[4]                         |      | Mascot      |
| 1045.4796           | 1045.5616                   | 0.082   | 78    | 791         | 799 AELDSEPER                          |           |         |                                          |      | Mascot      |
| 1334.6443           | 1334.7791                   | 0.1348  | 101   | 408         | 419 TESPMAEIVCVR                       |           |         |                                          |      | Mascot      |
| 1334.6443           | 1334.7791                   | 0.1348  | 101   | 408         | 419 TESPMAEIVCVR                       |           |         |                                          |      | Mascot      |
| 1357.6932           | 1357.7211                   | 0.0279  | 21    | 492         | 504 TVVAIFGHDCAPK                      |           |         |                                          |      | Mascot      |
| 1362.6835           | 1362.6376                   | -0.0459 | -34   | 762         | 772 TILMENLGNWR                        |           |         | Oxidation (M)[4]                         |      | Mascot      |
| 1396.6447           | 1396.7544                   | 0.1097  | 79    | 807         | 817 LKEDCLNMETK                        |           |         | Carbamidomethyl (C)[5], Oxidation (M)[8] |      | Mascot      |
| 1671.806            | 1671.8973                   | 0.0913  | 55    | 461         | 474 HVSFSSNVWNHMK                      |           |         |                                          |      | Mascot      |
| 2053.0906           | 2052.9951                   | -0.0955 | -47   | 703         | 719 EWYIGYYQGKIGLVHVK                  |           |         |                                          |      | Mascot      |
| 2230.2417           | 2230.155                    | -0.0867 | -39   | 842         | 860 LIMDFVLLTTAVEVAPRW<br>R            |           |         |                                          |      | Mascot      |
| 2284.2368           | 2284.1775                   | -0.0593 | -26   | 492         | 513 TVVAIFGHDCAPKTLVLS<br>EVGK         |           |         |                                          |      | Mascot      |
| 2300.0686           | 2300.1809                   | 0.1123  | 49    | 597         | 616 DDQDCILAQFCVQTPQP<br>PPK           |           |         | Carbamidomethyl (C)[5]                   |      | Mascot      |
| 2357.0901           | 2357.2214                   | 0.1313  | 56    | 597         | 616 DDQDCILAQFCVQTPQP<br>PPK           |           |         | Carbamidomethyl (C)[5,11]                |      | Mascot      |
| 2357.0901           | 2357.2214                   | 0.1313  | 56    | 597         | 616 DDQDCILAQFCVQTPQP<br>PPK           |           |         | Carbamidomethyl (C)[5,11]                |      | Mascot      |
| 3337.6052           | 3337.771                    | 0.1658  | 50    | 298         | 327 LARSCHDLESLGQNPGW<br>GQTQPVETNIVCK |           |         | Carbamidomethyl (C)[5]                   |      | Mascot      |
| 3338.5496           | 3338.781                    | 0.2314  | 69    | 885         | 913 TGMVDSEAMWKPAYDFL<br>LTWAAQIGDSYR  |           |         | Oxidation (M)[3]                         |      | Mascot      |
| 43                  | novel protein [Danio rerio] |         |       | gi 94733369 |                                        | 31827.3   | 8.15    | 9                                        | 33   | 0           |

| Peptide Information |             |         |       |            |          |                       |           |       |                                           |      |             |
|---------------------|-------------|---------|-------|------------|----------|-----------------------|-----------|-------|-------------------------------------------|------|-------------|
| Calc. Mass          | Obsrv. Mass | ± da    | ± ppm | Start Seq. | End Seq. | Sequence              | Ion Score | C. I. | % Modification                            | Rank | Result Type |
| 938.4941            | 938.4402    | -0.0539 | -57   | 96         | 103      | SFSQQLTK              |           |       |                                           |      | Mascot      |
| 996.5294            | 996.595     | 0.0656  | 66    | 263        | 271      | SFMKAAGLR             |           |       | Oxidation (M)[3]                          |      | Mascot      |
| 1020.5255           | 1020.4731   | -0.0524 | -51   | 87         | 95       | GLTRTQCGK             |           |       | Carbamidomethyl (C)[7]                    |      | Mascot      |
| 1234.683            | 1234.6238   | -0.0592 | -48   | 123        | 132      | TFLWPSDLKK            |           |       |                                           |      | Mascot      |
| 1466.5886           | 1466.6255   | 0.0369  | 25    | 23         | 34       | DSEKMSDPEPCR          | 1         | 0     | Carbamidomethyl (C)[11], Oxidation (M)[5] |      | Mascot      |
| 1466.5886           | 1466.6255   | 0.0369  | 25    | 23         | 34       | DSEKMSDPEPCR          |           |       | Carbamidomethyl (C)[11], Oxidation (M)[5] |      | Mascot      |
| 1825.803            | 1826.0262   | 0.2232  | 122   | 163        | 178      | MTHTGKPFCTCTQCGK      |           |       | Carbamidomethyl (C)[11]                   |      | Mascot      |
| 2147.9597           | 2148.0391   | 0.0794  | 37    | 133        | 150      | HLRDHTEKPYSCSECG<br>K |           |       | Carbamidomethyl (C)[13]                   |      | Mascot      |
| 2200.0134           | 2200.0471   | 0.0337  | 15    | 217        | 234      | HLRVHANERPYSCECG<br>K |           |       | Carbamidomethyl (C)[13,16]                |      | Mascot      |
| 2210.8821           | 2211.1074   | 0.2253  | 102   | 104        | 122      | LDMMSPTGERSYSCDQC     |           |       | Carbamidomethyl (C)[14], Oxidation (M)[3] |      | Mascot      |

|    |                                                                               |           |        |     |              |     |                               |      |   |    |   |  |                                                |        |
|----|-------------------------------------------------------------------------------|-----------|--------|-----|--------------|-----|-------------------------------|------|---|----|---|--|------------------------------------------------|--------|
|    | 2283.8984                                                                     | 2284.1775 | 0.2791 | 122 | 104          | 122 | SK<br>LDMMSPTGERSYSCDQC<br>SK |      |   |    |   |  | Carbamidomethyl (C)[14,17], Oxidation (M)[3,4] | Mascot |
| 44 | sia-alpha-2,3-Gal-beta-1,4-GlcNAc-R:alpha 2,8-sialyltransferase [Danio rerio] |           |        |     | gi 164663766 |     | 42966.1                       | 9.55 | 8 | 33 | 0 |  |                                                |        |

Peptide Information

| Calc. Mass | Obsrv. Mass | ± da    | ± ppm | Start Seq. | End Seq. | Sequence           | Ion Score | C. I. | % Modification                            | Rank | Result Type |
|------------|-------------|---------|-------|------------|----------|--------------------|-----------|-------|-------------------------------------------|------|-------------|
| 938.4981   | 938.4402    | -0.0579 | -62   | 31         | 38       | DFIFTAPK           |           |       |                                           |      | Mascot      |
| 1066.5931  | 1066.531    | -0.0621 | -58   | 30         | 38       | KDFIFTAPK          |           |       |                                           |      | Mascot      |
| 1234.6466  | 1234.6238   | -0.0228 | -18   | 253        | 262      | TLVDFFVEHK         |           |       |                                           |      | Mascot      |
| 1396.679   | 1396.7544   | 0.0754  | 54    | 183        | 193      | CNFAPTEVFRR        |           |       | Carbamidomethyl (C)[1]                    |      | Mascot      |
| 1654.804   | 1654.8368   | 0.0328  | 20    | 360        | 374      | MHADGVLKLSLHCA     |           |       | Carbamidomethyl (C)[14], Oxidation (M)[1] |      | Mascot      |
| 1660.9056  | 1660.8108   | -0.0948 | -57   | 253        | 266      | TLVDFFVEHKGQLK     |           |       |                                           |      | Mascot      |
| 1817.8649  | 1817.8693   | 0.0044  | 2     | 47         | 61       | MYMFHAGFRSQLAMK    |           |       |                                           |      | Mascot      |
| 1817.8649  | 1817.8693   | 0.0044  | 2     | 47         | 61       | MYMFHAGFRSQLAMK    |           |       |                                           |      | Mascot      |
| 1867.9442  | 1867.8486   | -0.0956 | -51   | 152        | 169      | RYNTCAVVGNSGILTGSR |           |       |                                           |      | Mascot      |

|    |                                        |  |  |  |              |  |         |      |   |  |    |   |
|----|----------------------------------------|--|--|--|--------------|--|---------|------|---|--|----|---|
| 45 | PREDICTED: obscurin-like [Danio rerio] |  |  |  | gi 326669099 |  | 67040.2 | 6.58 | 1 |  | 23 | 0 |
|----|----------------------------------------|--|--|--|--------------|--|---------|------|---|--|----|---|

Peptide Information

| Calc. Mass | Obsrv. Mass | ± da    | ± ppm | Start Seq. | End Seq. | Sequence         | Ion Score | C. I. | % Modification | Rank | Result Type |
|------------|-------------|---------|-------|------------|----------|------------------|-----------|-------|----------------|------|-------------|
| 1546.8071  | 1546.7795   | -0.0276 | -18   | 254        | 269      | SDISAAATLTVSASPR | 23        | 0     |                | 3    | Mascot      |

|    |                                                 |  |  |  |              |  |         |      |   |  |    |   |
|----|-------------------------------------------------|--|--|--|--------------|--|---------|------|---|--|----|---|
| 46 | hypothetical protein LOC100149646 [Danio rerio] |  |  |  | gi 190358449 |  | 66833.8 | 7.57 | 1 |  | 20 | 0 |
|----|-------------------------------------------------|--|--|--|--------------|--|---------|------|---|--|----|---|

Peptide Information

| Calc. Mass | Obsrv. Mass | ± da    | ± ppm | Start Seq. | End Seq. | Sequence   | Ion Score | C. I. | % Modification | Rank | Result Type |
|------------|-------------|---------|-------|------------|----------|------------|-----------|-------|----------------|------|-------------|
| 1103.6055  | 1103.5824   | -0.0231 | -21   | 112        | 121      | DSNINTIKAK | 20        | 0     |                | 2    | Mascot      |

|    |                                              |  |  |  |             |  |         |      |   |  |    |   |
|----|----------------------------------------------|--|--|--|-------------|--|---------|------|---|--|----|---|
| 47 | hypothetical protein LOC550387 [Danio rerio] |  |  |  | gi 62955361 |  | 38710.2 | 5.35 | 1 |  | 18 | 0 |
|----|----------------------------------------------|--|--|--|-------------|--|---------|------|---|--|----|---|

Peptide Information

| Calc. Mass | Obsrv. Mass | ± da   | ± ppm | Start Seq. | End Seq. | Sequence  | Ion Score | C. I. | % Modification   | Rank | Result Type |
|------------|-------------|--------|-------|------------|----------|-----------|-----------|-------|------------------|------|-------------|
| 1103.5626  | 1103.5824   | 0.0198 | 18    | 89         | 97       | NNIQIAMQR | 18        | 0     | Oxidation (M)[7] | 4    | Mascot      |

|    |                                                         |  |  |  |              |  |          |      |   |  |    |   |
|----|---------------------------------------------------------|--|--|--|--------------|--|----------|------|---|--|----|---|
| 48 | PREDICTED: c2 domain-containing protein 3 [Danio rerio] |  |  |  | gi 326674118 |  | 237236.5 | 5.64 | 1 |  | 18 | 0 |
|----|---------------------------------------------------------|--|--|--|--------------|--|----------|------|---|--|----|---|

Peptide Information

|    | Calc. Mass                                     | Obsrv. Mass | ± da    | ± ppm | Start Seq.  | End Sequence Seq. | Ion Score | C. I. % | Modification | Rank | Result Type |
|----|------------------------------------------------|-------------|---------|-------|-------------|-------------------|-----------|---------|--------------|------|-------------|
|    | 1334.7903                                      | 1334.7791   | -0.0112 | -8    | 949         | 960 LLNLSLAHQGLR  | 18        | 0       |              | 2    | Mascot      |
| 49 | HEAT repeat-containing protein 1 [Danio rerio] |             |         |       | gi 41054019 | 241893.5          | 5.94      | 1       | 17           | 0    |             |

Peptide Information

|    | Calc. Mass                                                  | Obsrv. Mass | ± da    | ± ppm | Start Seq.   | End Sequence Seq. | Ion Score | C. I. % | Modification           | Rank | Result Type |
|----|-------------------------------------------------------------|-------------|---------|-------|--------------|-------------------|-----------|---------|------------------------|------|-------------|
|    | 1160.6093                                                   | 1160.6064   | -0.0029 | -2    | 1799         | 1808 LTSCPQLSVR   | 17        | 0       | Carbamidomethyl (C)[4] | 3    | Mascot      |
| 50 | Fras1 related extracellular matrix protein 2b [Danio rerio] |             |         |       | gi 212549688 | 347485.6          | 4.71      | 1       | 17                     | 0    |             |

Peptide Information

|  | Calc. Mass | Obsrv. Mass | ± da    | ± ppm | Start Seq. | End Sequence Seq. | Ion Score | C. I. % | Modification | Rank | Result Type |
|--|------------|-------------|---------|-------|------------|-------------------|-----------|---------|--------------|------|-------------|
|  | 1160.6633  | 1160.6064   | -0.0569 | -49   | 2227       | 2237 TGDISKVSVVR  | 17        | 0       |              | 4    | Mascot      |

|                |           |                        |                |                |                    |
|----------------|-----------|------------------------|----------------|----------------|--------------------|
| Gel Idx/Pos    | 220/I20   | Instr./Gel Origin      | BA2060/110707A | Process Status | Analysis Succeeded |
| Plate [#] Name | [1] 31496 | Instrument Sample Name |                | Spectra        | 11                 |

| Rank | Protein Name                                                                                        | Accession No. | Protein MW | Protein PI | Pep. Count | Protein Score | Protein Score C. I. % | Total Ion Score | Total Ion C. I. % |
|------|-----------------------------------------------------------------------------------------------------|---------------|------------|------------|------------|---------------|-----------------------|-----------------|-------------------|
| 1    | RecName: Full=Serine/arginine-rich splicing factor 1A; AltName: Full=Splicing factor, arginine/seri | gi 269849649  | 28366      | 10.3       | 11         | 358           | 100                   | 284             | 100               |

Peptide Information

|  | Calc. Mass | Obsrv. Mass | ± da    | ± ppm | Start Seq. | End Sequence Seq.             | Ion Score | C. I. % | Modification           | Rank | Result Type |
|--|------------|-------------|---------|-------|------------|-------------------------------|-----------|---------|------------------------|------|-------------|
|  | 916.5363   | 916.5383    | 0.002   | 2     | 83         | 89 LRVEFPR                    |           |         |                        |      | Mascot      |
|  | 916.5363   | 916.5383    | 0.002   | 2     | 83         | 89 LRVEFPR                    | 24        | 0       |                        |      | Mascot      |
|  | 1078.5527  | 1078.5513   | -0.0014 | -1    | 164        | 173 DGTGVVEFVR                |           |         |                        |      | Mascot      |
|  | 1123.4327  | 1123.434    | 0.0013  | 1     | 74         | 82 DGYDYDGYR                  |           |         |                        |      | Mascot      |
|  | 1162.5487  | 1162.5522   | 0.0035  | 3     | 191        | 200 SHEGETAYIR                |           |         |                        |      | Mascot      |
|  | 1256.6997  | 1256.7015   | 0.0018  | 1     | 17         | 27 IYVGNLPPDIR                |           |         |                        |      | Mascot      |
|  | 1256.6997  | 1256.7015   | 0.0018  | 1     | 17         | 27 IYVGNLPPDIR                | 84        | 100     |                        |      | Mascot      |
|  | 1401.6104  | 1401.6125   | 0.0021  | 1     | 152        | 163 EAGDVCYADVFR              | 105       | 100     | Carbamidomethyl (C)[6] |      | Mascot      |
|  | 1401.6104  | 1401.6125   | 0.0021  | 1     | 152        | 163 EAGDVCYADVFR              |           |         | Carbamidomethyl (C)[6] |      | Mascot      |
|  | 1516.6635  | 1516.6671   | 0.0036  | 2     | 97         | 118 GGFGGGGGGGGGGG<br>GGGGAPR |           |         |                        |      | Mascot      |
|  | 1564.743   | 1564.7472   | 0.0042  | 3     | 51         | 64 GGPPFAFVEFEDPR             |           |         |                        |      | Mascot      |

|   |                                                       |           |         |     |     |             |                             |         |        |    |     |                   |     |     |  |        |
|---|-------------------------------------------------------|-----------|---------|-----|-----|-------------|-----------------------------|---------|--------|----|-----|-------------------|-----|-----|--|--------|
|   | 1682.9111                                             | 1682.9154 | 0.0043  | 3   | 132 | 147         | VIVSGLPPSGSWQDLK            |         |        |    |     |                   |     |     |  | Mascot |
|   | 2238.1335                                             | 2238.103  | -0.0305 | -14 | 132 | 151         | VIVSGLPPSGSWQDLKD<br>HMR    |         |        |    |     | Oxidation (M)[19] |     |     |  | Mascot |
|   | 2555.1836                                             | 2555.1926 | 0.009   | 4   | 51  | 73          | GGPPFAFVEFEDPRDAE<br>DAVYAR |         |        |    |     |                   |     |     |  | Mascot |
|   | 2555.1836                                             | 2555.1926 | 0.009   | 4   | 51  | 73          | GGPPFAFVEFEDPRDAE<br>DAVYAR | 71      | 99.997 |    |     |                   |     |     |  | Mascot |
| 2 | serine/arginine-rich splicing factor 1A [Danio rerio] |           |         |     |     | gi 47087630 |                             | 26838.2 | 10.06  | 10 | 343 | 100               | 284 | 100 |  |        |

#### Peptide Information

| Calc. Mass | Obsrv. Mass | ± da    | ± ppm | Start Seq. | End Seq. | Sequence                    | Ion Score | C. I.  | % Modification         | Rank | Result Type |
|------------|-------------|---------|-------|------------|----------|-----------------------------|-----------|--------|------------------------|------|-------------|
| 916.5363   | 916.5383    | 0.002   | 2     | 83         | 89       | LRVEFPR                     |           |        |                        |      | Mascot      |
| 916.5363   | 916.5383    | 0.002   | 2     | 83         | 89       | LRVEFPR                     | 24        | 0      |                        |      | Mascot      |
| 1078.5527  | 1078.5513   | -0.0014 | -1    | 165        | 174      | DGTGVVEFVR                  |           |        |                        |      | Mascot      |
| 1123.4327  | 1123.434    | 0.0013  | 1     | 74         | 82       | DGYDYDGYR                   |           |        |                        |      | Mascot      |
| 1162.5487  | 1162.5522   | 0.0035  | 3     | 192        | 201      | SHEGETAYIR                  |           |        |                        |      | Mascot      |
| 1256.6997  | 1256.7015   | 0.0018  | 1     | 17         | 27       | IYVGNLPPDIR                 |           |        |                        |      | Mascot      |
| 1256.6997  | 1256.7015   | 0.0018  | 1     | 17         | 27       | IYVGNLPPDIR                 | 84        | 100    |                        |      | Mascot      |
| 1401.6104  | 1401.6125   | 0.0021  | 1     | 153        | 164      | EAGDVCYADVFR                | 105       | 100    | Carbamidomethyl (C)[6] |      | Mascot      |
| 1401.6104  | 1401.6125   | 0.0021  | 1     | 153        | 164      | EAGDVCYADVFR                |           |        | Carbamidomethyl (C)[6] |      | Mascot      |
| 1564.743   | 1564.7472   | 0.0042  | 3     | 51         | 64       | GGPPFAFVEFEDPR              |           |        |                        |      | Mascot      |
| 1682.9111  | 1682.9154   | 0.0043  | 3     | 133        | 148      | VIVSGLPPSGSWQDLK            |           |        |                        |      | Mascot      |
| 2238.1335  | 2238.103    | -0.0305 | -14   | 133        | 152      | VIVSGLPPSGSWQDLKD<br>HMR    |           |        | Oxidation (M)[19]      |      | Mascot      |
| 2555.1836  | 2555.1926   | 0.009   | 4     | 51         | 73       | GGPPFAFVEFEDPRDAE<br>DAVYAR |           |        |                        |      | Mascot      |
| 2555.1836  | 2555.1926   | 0.009   | 4     | 51         | 73       | GGPPFAFVEFEDPRDAE<br>DAVYAR | 71        | 99.997 |                        |      | Mascot      |

|   |                                         |  |  |  |  |             |  |         |      |    |     |     |     |     |  |  |
|---|-----------------------------------------|--|--|--|--|-------------|--|---------|------|----|-----|-----|-----|-----|--|--|
| 3 | inorganic pyrophosphatase [Danio rerio] |  |  |  |  | gi 62955639 |  | 32621.8 | 5.25 | 15 | 333 | 100 | 231 | 100 |  |  |
|---|-----------------------------------------|--|--|--|--|-------------|--|---------|------|----|-----|-----|-----|-----|--|--|

#### Peptide Information

| Calc. Mass | Obsrv. Mass | ± da    | ± ppm | Start Seq. | End Seq. | Sequence  | Ion Score | C. I.  | % Modification | Rank | Result Type |
|------------|-------------|---------|-------|------------|----------|-----------|-----------|--------|----------------|------|-------------|
| 846.4257   | 846.427     | 0.0013  | 2     | 223        | 229      | ATHGFWK   |           |        |                |      | Mascot      |
| 877.4243   | 877.4234    | -0.0009 | -1    | 285        | 290      | WFYYAK    |           |        |                |      | Mascot      |
| 877.4243   | 877.4234    | -0.0009 | -1    | 285        | 290      | WFYYAK    | 28        | 51.789 |                |      | Mascot      |
| 1021.5061  | 1021.5065   | 0.0004  | 0     | 9          | 17       | GNPNTLSYR | 40        | 96.475 |                |      | Mascot      |
| 1021.5061  | 1021.5065   | 0.0004  | 0     | 9          | 17       | GNPNTLSYR |           |        |                |      | Mascot      |
| 1045.5272  | 1045.5497   | 0.0225  | 22    | 169        | 177      | DLNNISDVR |           |        |                |      | Mascot      |
| 1074.5731  | 1074.5693   | -0.0038 | -4    | 81         | 89       | YVANVFPHK |           |        |                |      | Mascot      |

|   |                             |           |         |     |             |     |                          |      |        |                              |     |     |        |
|---|-----------------------------|-----------|---------|-----|-------------|-----|--------------------------|------|--------|------------------------------|-----|-----|--------|
|   | 1074.5731                   | 1074.5693 | -0.0038 | -4  | 81          | 89  | YVANVFPHK                | 46   | 99.265 |                              |     |     | Mascot |
|   | 1179.6256                   | 1179.614  | -0.0116 | -10 | 213         | 222 | DKDFAIETIK               |      |        |                              |     |     | Mascot |
|   | 1201.6284                   | 1201.6284 | 0       | 0   | 169         | 178 | DLNNISDVRR               |      |        |                              |     |     | Mascot |
|   | 1646.8167                   | 1646.8207 | 0.004   | 2   | 230         | 244 | ALLSQQTNAGELNCK          |      |        | Carbamidomethyl (C)[14]      |     |     | Mascot |
|   | 1694.89                     | 1694.8936 | 0.0036  | 2   | 179         | 192 | LKPGYLEATVDWFR           | 117  | 100    |                              |     |     | Mascot |
|   | 1694.89                     | 1694.8936 | 0.0036  | 2   | 179         | 192 | LKPGYLEATVDWFR           |      |        |                              |     |     | Mascot |
|   | 1775.8884                   | 1775.8904 | 0.002   | 1   | 141         | 156 | VLGVLAMIDEGETDWK         |      |        |                              |     |     | Mascot |
|   | 1791.8833                   | 1791.8861 | 0.0028  | 2   | 141         | 156 | VLGVLAMIDEGETDWK         |      |        | Oxidation (M)[7]             |     |     | Mascot |
|   | 1923.9235                   | 1923.931  | 0.0075  | 4   | 196         | 212 | VPDGKPENQFAFNGEFK        |      |        |                              |     |     | Mascot |
|   | 1961.7673                   | 1961.8831 | 0.1158  | 59  | 245         | 263 | NTCVSEGNSPFCCSADE<br>AK  |      |        |                              |     |     | Mascot |
|   | 2132.8318                   | 2132.8389 | 0.0071  | 3   | 245         | 263 | NTCVSEGNSPFCCSADE<br>AK  |      |        | Carbamidomethyl (C)[3,12,13] |     |     | Mascot |
|   | 2215.0818                   | 2215.0991 | 0.0173  | 8   | 194         | 212 | YKVPDGKPENQFAFNGE<br>FK  |      |        |                              |     |     | Mascot |
|   | 2232.0508                   | 2232.0613 | 0.0105  | 5   | 90          | 108 | GYIWNYGAIPQTWEDPG<br>HK  |      |        |                              |     |     | Mascot |
|   | 2283.8799                   | 2284.1787 | 0.2988  | 131 | 109         | 129 | DNDTGCCGDNPDIVCEI<br>GSK |      |        | Carbamidomethyl (C)[6,7]     |     |     | Mascot |
| 4 | Sfrs1 protein [Danio rerio] |           |         |     | gi 34785174 |     | 20721.2                  | 7.74 | 9      | 267                          | 100 | 213 | 100    |

Peptide Information

|  | Calc. Mass | Obsrv. Mass | ± da    | ± ppm | Start Seq. | End Seq. | Sequence                 | Ion Score | C. I. | % Modification         | Rank | Result Type |
|--|------------|-------------|---------|-------|------------|----------|--------------------------|-----------|-------|------------------------|------|-------------|
|  | 916.5363   | 916.5383    | 0.002   | 2     | 83         | 89       | LRVEFPR                  |           |       |                        |      | Mascot      |
|  | 916.5363   | 916.5383    | 0.002   | 2     | 83         | 89       | LRVEFPR                  | 24        | 0     |                        |      | Mascot      |
|  | 1078.5527  | 1078.5513   | -0.0014 | -1    | 154        | 163      | DGTGVVEFVR               |           |       |                        |      | Mascot      |
|  | 1123.4327  | 1123.434    | 0.0013  | 1     | 74         | 82       | DGYDYDGYR                |           |       |                        |      | Mascot      |
|  | 1130.5952  | 1130.5957   | 0.0005  | 0     | 179        | 188      | FRSHEVGVSL               |           |       |                        |      | Mascot      |
|  | 1256.6997  | 1256.7015   | 0.0018  | 1     | 17         | 27       | IYVGNLPPDIR              |           |       |                        |      | Mascot      |
|  | 1256.6997  | 1256.7015   | 0.0018  | 1     | 17         | 27       | IYVGNLPPDIR              | 84        | 100   |                        |      | Mascot      |
|  | 1401.6104  | 1401.6125   | 0.0021  | 1     | 142        | 153      | EAGDVCYADVFR             | 105       | 100   | Carbamidomethyl (C)[6] |      | Mascot      |
|  | 1401.6104  | 1401.6125   | 0.0021  | 1     | 142        | 153      | EAGDVCYADVFR             |           |       | Carbamidomethyl (C)[6] |      | Mascot      |
|  | 1564.743   | 1564.7472   | 0.0042  | 3     | 51         | 64       | GGPPFAFVEFEDPR           |           |       |                        |      | Mascot      |
|  | 1682.9111  | 1682.9154   | 0.0043  | 3     | 122        | 137      | VIVSGLPPSGSWQDLK         |           |       |                        |      | Mascot      |
|  | 2238.1335  | 2238.103    | -0.0305 | -14   | 122        | 141      | VIVSGLPPSGSWQDLKD<br>HMR |           |       | Oxidation (M)[19]      |      | Mascot      |

|                     |                                                       |             |  |      |             |            |                   |      |           |                      |     |      |             |
|---------------------|-------------------------------------------------------|-------------|--|------|-------------|------------|-------------------|------|-----------|----------------------|-----|------|-------------|
| 5                   | serine/arginine-rich splicing factor 1B [Danio rerio] |             |  |      | gi 45433540 |            | 27458.7           | 10.3 | 9         | 261                  | 100 | 213  | 100         |
| Peptide Information |                                                       |             |  |      |             |            |                   |      |           |                      |     |      |             |
| Calc. Mass          |                                                       | Obsrv. Mass |  | ± da | ± ppm       | Start Seq. | End Sequence Seq. |      | Ion Score | C. I. % Modification |     | Rank | Result Type |



|   |                                             |                     |             |         |       |            |              |                          |           |        |                        |              |      |        |      |  |        |
|---|---------------------------------------------|---------------------|-------------|---------|-------|------------|--------------|--------------------------|-----------|--------|------------------------|--------------|------|--------|------|--|--------|
|   |                                             | 916.5363            | 916.5383    | 0.002   | 2     | 83         | 89           | LRVEFPR                  |           |        |                        |              |      |        |      |  | Mascot |
|   |                                             | 916.5363            | 916.5383    | 0.002   | 2     | 83         | 89           | LRVEFPR                  | 24        | 0      |                        |              |      |        |      |  | Mascot |
|   |                                             | 1078.5527           | 1078.5513   | -0.0014 | -1    | 154        | 163          | DGTGVVEFVR               |           |        |                        |              |      |        |      |  | Mascot |
|   |                                             | 1123.4327           | 1123.434    | 0.0013  | 1     | 74         | 82           | DGYDYDGYR                |           |        |                        |              |      |        |      |  | Mascot |
|   |                                             | 1162.5487           | 1162.5522   | 0.0035  | 3     | 181        | 190          | SHEGETAYIR               |           |        |                        |              |      |        |      |  | Mascot |
|   |                                             | 1256.6997           | 1256.7015   | 0.0018  | 1     | 17         | 27           | IYVGNLPPDIR              |           |        |                        |              |      |        |      |  | Mascot |
|   |                                             | 1256.6997           | 1256.7015   | 0.0018  | 1     | 17         | 27           | IYVGNLPPDIR              | 84        | 100    |                        |              |      |        |      |  | Mascot |
|   |                                             | 1401.6104           | 1401.6125   | 0.0021  | 1     | 142        | 153          | EAGDVCYADVFR             | 105       | 100    | Carbamidomethyl (C)[6] |              |      |        |      |  | Mascot |
|   |                                             | 1401.6104           | 1401.6125   | 0.0021  | 1     | 142        | 153          | EAGDVCYADVFR             |           |        | Carbamidomethyl (C)[6] |              |      |        |      |  | Mascot |
|   |                                             | 1564.743            | 1564.7472   | 0.0042  | 3     | 51         | 64           | GGPPFAFVEFEDPR           |           |        |                        |              |      |        |      |  | Mascot |
|   |                                             | 1682.9111           | 1682.9154   | 0.0043  | 3     | 122        | 137          | VIVSGLPPSGSWQDLK         |           |        |                        |              |      |        |      |  | Mascot |
|   |                                             | 2238.1335           | 2238.103    | -0.0305 | -14   | 122        | 141          | VIVSGLPPSGSWQDLKD<br>HMR |           |        | Oxidation (M)[19]      |              |      |        |      |  | Mascot |
| 6 | Sfrs1 protein [Danio rerio]                 |                     |             |         |       |            | gi 63101956  |                          | 28927.4   | 10.1   | 8                      | 246          | 100  | 213    | 100  |  |        |
|   |                                             | Peptide Information |             |         |       |            |              |                          |           |        |                        |              |      |        |      |  |        |
|   |                                             | Calc. Mass          | Obsrv. Mass | ± da    | ± ppm | Start Seq. | End Seq.     | Sequence                 | Ion Score | C. I.  | %                      | Modification | Rank | Result | Type |  |        |
|   |                                             | 916.5363            | 916.5383    | 0.002   | 2     | 83         | 89           | LRVEFPR                  |           |        |                        |              |      |        |      |  | Mascot |
|   |                                             | 916.5363            | 916.5383    | 0.002   | 2     | 83         | 89           | LRVEFPR                  | 24        | 0      |                        |              |      |        |      |  | Mascot |
|   |                                             | 1078.5527           | 1078.5513   | -0.0014 | -1    | 154        | 163          | DGTGVVEFVR               |           |        |                        |              |      |        |      |  | Mascot |
|   |                                             | 1123.4327           | 1123.434    | 0.0013  | 1     | 74         | 82           | DGYDYDGYR                |           |        |                        |              |      |        |      |  | Mascot |
|   |                                             | 1162.5487           | 1162.5522   | 0.0035  | 3     | 181        | 190          | SHEGETAYIR               |           |        |                        |              |      |        |      |  | Mascot |
|   |                                             | 1256.6997           | 1256.7015   | 0.0018  | 1     | 17         | 27           | IYVGNLPPDIR              |           |        |                        |              |      |        |      |  | Mascot |
|   |                                             | 1256.6997           | 1256.7015   | 0.0018  | 1     | 17         | 27           | IYVGNLPPDIR              | 84        | 100    |                        |              |      |        |      |  | Mascot |
|   |                                             | 1401.6104           | 1401.6125   | 0.0021  | 1     | 142        | 153          | EAGDVCYADVFR             | 105       | 100    | Carbamidomethyl (C)[6] |              |      |        |      |  | Mascot |
|   |                                             | 1401.6104           | 1401.6125   | 0.0021  | 1     | 142        | 153          | EAGDVCYADVFR             |           |        | Carbamidomethyl (C)[6] |              |      |        |      |  | Mascot |
|   |                                             | 1682.9111           | 1682.9154   | 0.0043  | 3     | 122        | 137          | VIVSGLPPSGSWQDLK         |           |        |                        |              |      |        |      |  | Mascot |
|   |                                             | 2238.1335           | 2238.103    | -0.0305 | -14   | 122        | 141          | VIVSGLPPSGSWQDLKD<br>HMR |           |        | Oxidation (M)[19]      |              |      |        |      |  | Mascot |
| 7 | pyrophosphatase (inorganic) 1 [Danio rerio] |                     |             |         |       |            | gi 220678153 |                          | 32646.8   | 5.24   | 15                     | 216          | 100  | 114    | 100  |  |        |
|   |                                             | Peptide Information |             |         |       |            |              |                          |           |        |                        |              |      |        |      |  |        |
|   |                                             | Calc. Mass          | Obsrv. Mass | ± da    | ± ppm | Start Seq. | End Seq.     | Sequence                 | Ion Score | C. I.  | %                      | Modification | Rank | Result | Type |  |        |
|   |                                             | 846.4257            | 846.427     | 0.0013  | 2     | 223        | 229          | ATHGFWK                  |           |        |                        |              |      |        |      |  | Mascot |
|   |                                             | 877.4243            | 877.4234    | -0.0009 | -1    | 285        | 290          | WFYYAK                   |           |        |                        |              |      |        |      |  | Mascot |
|   |                                             | 877.4243            | 877.4234    | -0.0009 | -1    | 285        | 290          | WFYYAK                   | 28        | 51.789 |                        |              |      |        |      |  | Mascot |

|  |           |           |         |     |     |     |                           |    |        |                              |  |        |
|--|-----------|-----------|---------|-----|-----|-----|---------------------------|----|--------|------------------------------|--|--------|
|  | 1021.5061 | 1021.5065 | 0.0004  | 0   | 9   | 17  | GNPNTLSYR                 | 40 | 96.475 |                              |  | Mascot |
|  | 1021.5061 | 1021.5065 | 0.0004  | 0   | 9   | 17  | GNPNTLSYR                 |    |        |                              |  | Mascot |
|  | 1045.5272 | 1045.5497 | 0.0225  | 22  | 169 | 177 | DLNNISDVR                 |    |        |                              |  | Mascot |
|  | 1074.5731 | 1074.5693 | -0.0038 | -4  | 81  | 89  | YVANVFPHK                 |    |        |                              |  | Mascot |
|  | 1074.5731 | 1074.5693 | -0.0038 | -4  | 81  | 89  | YVANVFPHK                 | 46 | 99.265 |                              |  | Mascot |
|  | 1179.6256 | 1179.614  | -0.0116 | -10 | 213 | 222 | DKDFAIETIK                |    |        |                              |  | Mascot |
|  | 1201.6284 | 1201.6284 | 0       | 0   | 169 | 178 | DLNNISDVRR                |    |        |                              |  | Mascot |
|  | 1646.8167 | 1646.8207 | 0.004   | 2   | 230 | 244 | ALLSQQTNAGELNCK           |    |        | Carbamidomethyl (C)[14]      |  | Mascot |
|  | 1718.8649 | 1718.8691 | 0.0042  | 2   | 179 | 192 | HKPGYLEATVDWFR            |    |        |                              |  | Mascot |
|  | 1775.8884 | 1775.8904 | 0.002   | 1   | 141 | 156 | VLGVLAMIDEGETDWK          |    |        |                              |  | Mascot |
|  | 1791.8833 | 1791.8861 | 0.0028  | 2   | 141 | 156 | VLGVLAMIDEGETDWK          |    |        | Oxidation (M)[7]             |  | Mascot |
|  | 1923.9235 | 1923.931  | 0.0075  | 4   | 196 | 212 | VPDGKPENQFAFNGEFK         |    |        |                              |  | Mascot |
|  | 1961.7673 | 1961.8831 | 0.1158  | 59  | 245 | 263 | NTCVSEGNSPFCCSADE<br>AK   |    |        |                              |  | Mascot |
|  | 2132.8318 | 2132.8389 | 0.0071  | 3   | 245 | 263 | NTCVSEGNSPFCCSADE<br>AK   |    |        | Carbamidomethyl (C)[3,12,13] |  | Mascot |
|  | 2215.0818 | 2215.0991 | 0.0173  | 8   | 194 | 212 | YKVPDGKPENQFAFNGE<br>FK   |    |        |                              |  | Mascot |
|  | 2232.0508 | 2232.0613 | 0.0105  | 5   | 90  | 108 | GYIWNYGAIPTWEDPG<br>HK    |    |        |                              |  | Mascot |
|  | 2283.8799 | 2284.1787 | 0.2988  | 131 | 109 | 129 | DNDTGCCGDNDPIDVCEI<br>GSK |    |        | Carbamidomethyl (C)[6,7]     |  | Mascot |

8

inorganic pyrophosphatase 2, mitochondrial [Danio rerio]

gi|45387739

28324.1

5.26

4

59

94.65

46

99.265

Peptide Information

| Calc. Mass | Obsrv. Mass | ± da    | ± ppm | Start Seq. | End Seq. | Sequence                | Ion Score | C. I.  | % | Modification                                  | Rank | Result Type |
|------------|-------------|---------|-------|------------|----------|-------------------------|-----------|--------|---|-----------------------------------------------|------|-------------|
| 1074.5731  | 1074.5693   | -0.0038 | -4    | 44         | 52       | YVANVFPHK               |           |        |   |                                               |      | Mascot      |
| 1074.5731  | 1074.5693   | -0.0038 | -4    | 44         | 52       | YVANVFPHK               | 46        | 99.265 |   |                                               |      | Mascot      |
| 2215.8611  | 2216.0835   | 0.2224  | 100   | 74         | 92       | ETMCCGDNDPIDVCEIGS<br>K |           |        |   | Carbamidomethyl (C)[4,5,14], Oxidation (M)[3] |      | Mascot      |
| 2215.9668  | 2216.0835   | 0.1167  | 53    | 200        | 218      | MKDDEIVCQNSSLCDSP<br>FK |           |        |   | Carbamidomethyl (C)[8]                        |      | Mascot      |
| 2231.9617  | 2232.0613   | 0.0996  | 45    | 200        | 218      | MKDDEIVCQNSSLCDSP<br>FK |           |        |   | Carbamidomethyl (C)[8], Oxidation (M)[1]      |      | Mascot      |
| 2237.1206  | 2237.0815   | -0.0391 | -17   | 3          | 21       | MNGIIFNMVVEVPRWSN<br>AK |           |        |   | Oxidation (M)[1,8]                            |      | Mascot      |

9

PREDICTED: FERM domain-containing protein 5 [Danio rerio]

gi|189532033

65691.7

8.72

11

46

0

15

0

Peptide Information

| Calc. Mass | Obsrv. Mass | ± da    | ± ppm | Start Seq. | End Seq. | Sequence | Ion Score | C. I. | % | Modification | Rank | Result Type |
|------------|-------------|---------|-------|------------|----------|----------|-----------|-------|---|--------------|------|-------------|
| 877.4526   | 877.4234    | -0.0292 | -33   | 338        | 344      | EPPEIHR  |           |       |   |              |      | Mascot      |

|    |                             |           |         |     |             |     |                            |      |    |    |   |  |                        |  |  |  |  |        |
|----|-----------------------------|-----------|---------|-----|-------------|-----|----------------------------|------|----|----|---|--|------------------------|--|--|--|--|--------|
|    | 877.4526                    | 877.4234  | -0.0292 | -33 | 338         | 344 | EPPEIHR                    |      |    |    |   |  |                        |  |  |  |  | Mascot |
|    | 916.4747                    | 916.5383  | 0.0636  | 69  | 120         | 126 | RDLYHGR                    |      |    |    |   |  |                        |  |  |  |  | Mascot |
|    | 916.4747                    | 916.5383  | 0.0636  | 69  | 120         | 126 | RDLYHGR                    | 15   |    | 0  |   |  |                        |  |  |  |  | Mascot |
|    | 923.4919                    | 923.4473  | -0.0446 | -48 | 561         | 567 | WFACKLR                    |      |    |    |   |  |                        |  |  |  |  | Mascot |
|    | 923.4919                    | 923.4473  | -0.0446 | -48 | 561         | 567 | WFACKLR                    |      |    |    |   |  |                        |  |  |  |  | Mascot |
|    | 1162.6136                   | 1162.5522 | -0.0614 | -53 | 327         | 336 | EVMEQSAKIK                 |      |    |    |   |  |                        |  |  |  |  | Mascot |
|    | 1179.5649                   | 1179.614  | 0.0491  | 42  | 85          | 94  | SQPPFTMCLR                 |      |    |    |   |  |                        |  |  |  |  | Mascot |
|    | 1694.9186                   | 1694.8936 | -0.025  | -15 | 268         | 282 | KIILTYFAPTPEACK            |      |    |    |   |  |                        |  |  |  |  | Mascot |
|    | 1694.9186                   | 1694.8936 | -0.025  | -15 | 268         | 282 | KIILTYFAPTPEACK            |      |    |    |   |  |                        |  |  |  |  | Mascot |
|    | 1698.8274                   | 1698.8708 | 0.0434  | 26  | 154         | 167 | HPEGYSKQFFPK               |      |    |    |   |  |                        |  |  |  |  | Mascot |
|    | 1710.9319                   | 1710.8848 | -0.0471 | -28 | 371         | 385 | RAVHISIMEGLESRL            |      |    |    |   |  |                        |  |  |  |  | Mascot |
|    | 1726.9269                   | 1726.8834 | -0.0435 | -25 | 371         | 385 | RAVHISIMEGLESRL            |      |    |    |   |  | Oxidation (M)[8]       |  |  |  |  | Mascot |
|    | 1791.9282                   | 1791.8861 | -0.0421 | -23 | 345         | 361 | AGLVPSRSCPSITHGPR          |      |    |    |   |  | Carbamidomethyl (C)[9] |  |  |  |  | Mascot |
|    | 2237.2024                   | 2237.0815 | -0.1209 | -54 | 176         | 195 | IAEIHKTELIGQTPETSEL<br>K   |      |    |    |   |  |                        |  |  |  |  | Mascot |
|    | 2283.1396                   | 2283.189  | 0.0494  | 22  | 481         | 502 | AAGPMQIAGREAPLSEA<br>EQVNK |      |    |    |   |  | Oxidation (M)[5]       |  |  |  |  | Mascot |
| 10 | novel protein [Danio rerio] |           |         |     | gi 94733158 |     | 181651.4                   | 8.12 | 18 | 44 | 0 |  |                        |  |  |  |  |        |

Peptide Information

| Calc. Mass | Obsrv. Mass | ± da    | ± ppm | Start Seq. | End Seq. | Sequence                 | Ion Score | C. I. | % | Modification                             | Rank | Result Type |
|------------|-------------|---------|-------|------------|----------|--------------------------|-----------|-------|---|------------------------------------------|------|-------------|
| 846.4753   | 846.427     | -0.0483 | -57   | 956        | 963      | VEGLLGМК                 |           |       |   |                                          |      | Mascot      |
| 923.4192   | 923.4473    | 0.0281  | 30    | 1453       | 1459     | WMTGAWR                  |           |       |   | Oxidation (M)[2]                         |      | Mascot      |
| 923.4192   | 923.4473    | 0.0281  | 30    | 1453       | 1459     | WMTGAWR                  |           |       |   | Oxidation (M)[2]                         |      | Mascot      |
| 1021.4982  | 1021.5065   | 0.0083  | 8     | 1176       | 1184     | KQCPSTTEK                |           |       |   |                                          |      | Mascot      |
| 1021.4982  | 1021.5065   | 0.0083  | 8     | 1176       | 1184     | KQCPSTTEK                |           |       |   |                                          |      | Mascot      |
| 1078.5198  | 1078.5513   | 0.0315  | 29    | 1176       | 1184     | KQCPSTTEK                |           |       |   | Carbamidomethyl (C)[3]                   |      | Mascot      |
| 1256.5575  | 1256.7015   | 0.144   | 115   | 1340       | 1351     | NVSCFVSDGSGK             |           |       |   | Carbamidomethyl (C)[4]                   |      | Mascot      |
| 1256.5575  | 1256.7015   | 0.144   | 115   | 1340       | 1351     | NVSCFVSDGSGK             | 6         | 0     |   | Carbamidomethyl (C)[4]                   |      | Mascot      |
| 1401.6766  | 1401.6125   | -0.0641 | -46   | 195        | 207      | VGPWGQCMAPIR             |           |       |   |                                          |      | Mascot      |
| 1401.6766  | 1401.6125   | -0.0641 | -46   | 195        | 207      | VGPWGQCMAPIR             |           |       |   |                                          |      | Mascot      |
| 1564.8992  | 1564.7472   | -0.152  | -97   | 714        | 727      | VICVRNVGQVPPK            |           |       |   | Carbamidomethyl (C)[3]                   |      | Mascot      |
| 1698.8228  | 1698.8708   | 0.048   | 28    | 87         | 101      | GEEGIQTREVGCVHK          |           |       |   | Carbamidomethyl (C)[12]                  |      | Mascot      |
| 1813.8948  | 1813.9503   | 0.0555  | 31    | 195        | 210      | VGPWGQCMAPIRQAR          |           |       |   | Carbamidomethyl (C)[7]                   |      | Mascot      |
| 1923.9052  | 1923.931    | 0.0258  | 13    | 694        | 712      | AVPGTAVNDAFCSVGMQ<br>TR  |           |       |   |                                          |      | Mascot      |
| 1924.7847  | 1924.9214   | 0.1367  | 71    | 1          | 18       | PWGRCMGSECGPGGSQ<br>SR   |           |       |   | Carbamidomethyl (C)[5], Oxidation (M)[6] |      | Mascot      |
| 2133.0796  | 2132.8389   | -0.2407 | -113  | 158        | 177      | SVLAPPLFGGSACPNLTE<br>FR |           |       |   | Carbamidomethyl (C)[13]                  |      | Mascot      |

|    |                                                                     |           |         |     |     |              |                                 |      |    |                           |   |  |  |  |  |  |        |
|----|---------------------------------------------------------------------|-----------|---------|-----|-----|--------------|---------------------------------|------|----|---------------------------|---|--|--|--|--|--|--------|
|    | 2215.1106                                                           | 2215.0991 | -0.0115 | -5  | 585 | 604          | QLCRDAILPMPVLCEVSC<br>PK        |      |    |                           |   |  |  |  |  |  | Mascot |
|    | 2237.092                                                            | 2237.0815 | -0.0105 | -5  | 290 | 307          | FWDLQVGQYQTREVTCH<br>R          |      |    |                           |   |  |  |  |  |  | Mascot |
|    | 2254.1616                                                           | 2254.0342 | -0.1274 | -57 | 729 | 747          | CPESLRPETVRPCLLPCK<br>R         |      |    | Carbamidomethyl (C)[1]    |   |  |  |  |  |  | Mascot |
|    | 2283.177                                                            | 2283.189  | 0.012   | 5   | 728 | 746          | KCPESLRPETVRPCLLPCK<br>K        |      |    | Carbamidomethyl (C)[2,14] |   |  |  |  |  |  | Mascot |
|    | 2284.1125                                                           | 2284.1787 | 0.0662  | 29  | 437 | 457          | EVYCVQAPSETSSNLGS<br>LKSK       |      |    | Carbamidomethyl (C)[4]    |   |  |  |  |  |  | Mascot |
|    | 2298.9324                                                           | 2299.1938 | 0.2614  | 114 | 970 | 988          | ECGQGYRYQAMVCYDQ<br>DNR         |      |    |                           |   |  |  |  |  |  | Mascot |
|    | 2996.3411                                                           | 2996.4929 | 0.1518  | 51  | 865 | 891          | FAGPMPQLTQSCQLPCQ<br>DDCQLTAWSK |      |    |                           |   |  |  |  |  |  | Mascot |
| 11 | thrombospondin type-1 domain containing protein 7A<br>[Danio rerio] |           |         |     |     | gi 309756395 | 181850.5                        | 8.12 | 18 | 44                        | 0 |  |  |  |  |  |        |

#### Peptide Information

| Calc. Mass | Obsrv. Mass | ± da    | ± ppm | Start Seq. | End Seq. | Sequence                  | Ion Score | C. I. | % Modification                           | Rank | Result Type |
|------------|-------------|---------|-------|------------|----------|---------------------------|-----------|-------|------------------------------------------|------|-------------|
| 846.4753   | 846.427     | -0.0483 | -57   | 956        | 963      | VEGLLGIMK                 |           |       |                                          |      | Mascot      |
| 923.4192   | 923.4473    | 0.0281  | 30    | 1455       | 1461     | WMTGAWR                   |           |       | Oxidation (M)[2]                         |      | Mascot      |
| 923.4192   | 923.4473    | 0.0281  | 30    | 1455       | 1461     | WMTGAWR                   |           |       | Oxidation (M)[2]                         |      | Mascot      |
| 1021.4982  | 1021.5065   | 0.0083  | 8     | 1178       | 1186     | KQCPSTTEK                 |           |       |                                          |      | Mascot      |
| 1021.4982  | 1021.5065   | 0.0083  | 8     | 1178       | 1186     | KQCPSTTEK                 |           |       |                                          |      | Mascot      |
| 1078.5198  | 1078.5513   | 0.0315  | 29    | 1178       | 1186     | KQCPSTTEK                 |           |       | Carbamidomethyl (C)[3]                   |      | Mascot      |
| 1256.5575  | 1256.7015   | 0.144   | 115   | 1342       | 1353     | NVSCFVSDGSGK              |           |       | Carbamidomethyl (C)[4]                   |      | Mascot      |
| 1256.5575  | 1256.7015   | 0.144   | 115   | 1342       | 1353     | NVSCFVSDGSGK              | 6         | 0     | Carbamidomethyl (C)[4]                   |      | Mascot      |
| 1401.6766  | 1401.6125   | -0.0641 | -46   | 195        | 207      | VGPWGQCMASPIR             |           |       |                                          |      | Mascot      |
| 1401.6766  | 1401.6125   | -0.0641 | -46   | 195        | 207      | VGPWGQCMASPIR             |           |       |                                          |      | Mascot      |
| 1564.8992  | 1564.7472   | -0.152  | -97   | 714        | 727      | VICVRNVNGQVPPK            |           |       | Carbamidomethyl (C)[3]                   |      | Mascot      |
| 1698.8228  | 1698.8708   | 0.048   | 28    | 87         | 101      | GEEGIQTREVGCVHK           |           |       | Carbamidomethyl (C)[12]                  |      | Mascot      |
| 1813.8948  | 1813.9503   | 0.0555  | 31    | 195        | 210      | VGPWGQCMASPIRQAR          |           |       | Carbamidomethyl (C)[7]                   |      | Mascot      |
| 1923.9052  | 1923.931    | 0.0258  | 13    | 694        | 712      | AVPGTAVNDAFCVGMQ<br>TR    |           |       |                                          |      | Mascot      |
| 1924.7847  | 1924.9214   | 0.1367  | 71    | 1          | 18       | PWGRCMGSECGPGGSQ<br>SR    |           |       | Carbamidomethyl (C)[5], Oxidation (M)[6] |      | Mascot      |
| 2133.0796  | 2132.8389   | -0.2407 | -113  | 158        | 177      | SVLAPPLFGGSACPNLTE<br>FR  |           |       | Carbamidomethyl (C)[13]                  |      | Mascot      |
| 2215.1106  | 2215.0991   | -0.0115 | -5    | 585        | 604      | QLCRDAILPMPVLCEVSC<br>PK  |           |       |                                          |      | Mascot      |
| 2237.092   | 2237.0815   | -0.0105 | -5    | 290        | 307      | FWDLQVGQYQTREVTCH<br>R    |           |       |                                          |      | Mascot      |
| 2254.1616  | 2254.0342   | -0.1274 | -57   | 729        | 747      | CPESLRPETVRPCLLPCK<br>R   |           |       | Carbamidomethyl (C)[1]                   |      | Mascot      |
| 2283.177   | 2283.189    | 0.012   | 5     | 728        | 746      | KCPESLRPETVRPCLLPCK<br>K  |           |       | Carbamidomethyl (C)[2,14]                |      | Mascot      |
| 2284.1125  | 2284.1787   | 0.0662  | 29    | 437        | 457      | EVYCVQAPSETSSNLGS<br>LKSK |           |       | Carbamidomethyl (C)[4]                   |      | Mascot      |

|    |                                                       |           |        |     |     |              |                                 |     |    |    |   |  |  |  |  |  |        |
|----|-------------------------------------------------------|-----------|--------|-----|-----|--------------|---------------------------------|-----|----|----|---|--|--|--|--|--|--------|
|    | 2298.9324                                             | 2299.1938 | 0.2614 | 114 | 970 | 988          | ECGQGYYRYQAMVCYDQ<br>DNR        |     |    |    |   |  |  |  |  |  | Mascot |
|    | 2996.3411                                             | 2996.4929 | 0.1518 | 51  | 865 | 891          | FAGPMPQLTQSCQLPCQ<br>DDCQLTAWSK |     |    |    |   |  |  |  |  |  | Mascot |
| 12 | phosphatidylinositol phosphatase SAC1-B [Danio rerio] |           |        |     |     | gi 154091011 | 67090.8                         | 7.9 | 13 | 44 | 0 |  |  |  |  |  |        |

#### Peptide Information

| Calc. Mass | Obsrv. Mass | ± da    | ± ppm | Start Seq. | End Seq. | Sequence                 | Ion Score | C. I. | % | Modification                             | Rank | Result Type |
|------------|-------------|---------|-------|------------|----------|--------------------------|-----------|-------|---|------------------------------------------|------|-------------|
| 1073.6718  | 1073.5443   | -0.1275 | -119  | 271        | 279      | YKPKPLISK                |           |       |   |                                          |      | Mascot      |
| 1074.4633  | 1074.5693   | 0.106   | 99    | 280        | 288      | DTNHMDGLR                |           |       |   | Oxidation (M)[5]                         |      | Mascot      |
| 1074.4633  | 1074.5693   | 0.106   | 99    | 280        | 288      | DTNHMDGLR                |           |       |   | Oxidation (M)[5]                         |      | Mascot      |
| 1123.5742  | 1123.434    | -0.1402 | -125  | 376        | 385      | VLSEQSGTFR               |           |       |   |                                          |      | Mascot      |
| 1162.6619  | 1162.5522   | -0.1097 | -94   | 204        | 212      | VFEWIIISR                |           |       |   |                                          |      | Mascot      |
| 1165.6133  | 1165.7476   | 0.1343  | 115   | 35         | 45       | VSTEMTLAGIK              |           |       |   | Oxidation (M)[5]                         |      | Mascot      |
| 1273.7151  | 1273.6187   | -0.0964 | -76   | 572        | 582      | EFVDAPKLVQK              |           |       |   |                                          |      | Mascot      |
| 1636.8013  | 1636.8359   | 0.0346  | 21    | 161        | 173      | ADQRFMWNGNLLR            |           |       |   | Oxidation (M)[6]                         |      | Mascot      |
| 1813.9476  | 1813.9503   | 0.0027  | 1     | 101        | 115      | KTILHLTDIQMQDNK          |           |       |   | Oxidation (M)[11]                        |      | Mascot      |
| 1923.9017  | 1923.931    | 0.0293  | 15    | 1          | 16       | MANAYERFNLHSTPEK         |           |       |   | Oxidation (M)[1]                         |      | Mascot      |
| 1925.0386  | 1924.9214   | -0.1172 | -61   | 406        | 422      | SLQSQLQRMGVLHVQK         |           |       |   | Oxidation (M)[9]                         |      | Mascot      |
| 1958.9476  | 1958.9871   | 0.0395  | 20    | 464        | 479      | RTHWGLVMDGWNSMIR         |           |       |   |                                          |      | Mascot      |
| 2225.0471  | 2225.1265   | 0.0794  | 36    | 386        | 404      | SNCMDCLDRTNVIQSLLA<br>R  |           |       |   | Carbamidomethyl (C)[3], Oxidation (M)[4] |      | Mascot      |
| 2237.1431  | 2237.0815   | -0.0616 | -28   | 184        | 203      | FAFPVIHGFIVMKPCCING<br>K |           |       |   | Oxidation (M)[12]                        |      | Mascot      |

|    |                                                             |  |  |  |  |              |         |      |   |    |   |    |   |
|----|-------------------------------------------------------------|--|--|--|--|--------------|---------|------|---|----|---|----|---|
| 13 | PREDICTED: plexin domain-containing protein 2 [Danio rerio] |  |  |  |  | gi 189515938 | 63232.4 | 6.04 | 9 | 44 | 0 | 14 | 0 |
|----|-------------------------------------------------------------|--|--|--|--|--------------|---------|------|---|----|---|----|---|

#### Peptide Information

| Calc. Mass | Obsrv. Mass | ± da    | ± ppm | Start Seq. | End Seq. | Sequence           | Ion Score | C. I. | % | Modification           | Rank | Result Type |
|------------|-------------|---------|-------|------------|----------|--------------------|-----------|-------|---|------------------------|------|-------------|
| 916.4747   | 916.5383    | 0.0636  | 69    | 77         | 83       | RYVEHGR            |           |       |   |                        |      | Mascot      |
| 916.4747   | 916.5383    | 0.0636  | 69    | 77         | 83       | RYVEHGR            | 14        |       | 0 |                        |      | Mascot      |
| 1123.583   | 1123.434    | -0.149  | -133  | 485        | 493      | RPTHWPAMK          |           |       |   |                        |      | Mascot      |
| 1179.5286  | 1179.614    | 0.0854  | 72    | 550        | 558      | ECFVIMEHR          |           |       |   | Oxidation (M)[6]       |      | Mascot      |
| 1516.6962  | 1516.6671   | -0.0291 | -19   | 346        | 357      | LQRCSSGFDQYR       |           |       |   | Carbamidomethyl (C)[4] |      | Mascot      |
| 1564.7676  | 1564.7472   | -0.0204 | -13   | 126        | 138      | DLWVNIEKMDTGK      |           |       |   | Oxidation (M)[9]       |      | Mascot      |
| 1710.7832  | 1710.8848   | 0.1016  | 59    | 106        | 118      | DMDHIYYTSKFYK      |           |       |   |                        |      | Mascot      |
| 1726.7782  | 1726.8834   | 0.1052  | 61    | 106        | 118      | DMDHIYYTSKFYK      |           |       |   | Oxidation (M)[2]       |      | Mascot      |
| 2211.032   | 2211.1128   | 0.0808  | 37    | 541        | 558      | EGFIVSDQRECFVIMEHR |           |       |   | Oxidation (M)[15]      |      | Mascot      |

|    |                                                                   |           |         |     |     |              |                          |      |    |    |   |                        |        |
|----|-------------------------------------------------------------------|-----------|---------|-----|-----|--------------|--------------------------|------|----|----|---|------------------------|--------|
|    | 2237.2991                                                         | 2237.0815 | -0.2176 | -97 | 1   | 20           | MALPARPHVFLGIFAVIQI<br>K |      |    |    |   | Oxidation (M)[1]       | Mascot |
|    | 2253.9863                                                         | 2254.0342 | 0.0479  | 21  | 358 | 376          | QDWVDNGCLSEIKTQSC<br>DR  |      |    |    |   | Carbamidomethyl (C)[8] | Mascot |
| 14 | PREDICTED: tetratricopeptide repeat protein 34-like [Danio rerio] |           |         |     |     | gi 326679115 | 119668.1                 | 7.99 | 16 | 43 | 0 |                        |        |

#### Peptide Information

| Calc. Mass | Obsrv. Mass | ± da    | ± ppm | Start Seq. | End Seq. | Sequence                | Ion Score | C. I. % | Modification               | Rank | Result Type |
|------------|-------------|---------|-------|------------|----------|-------------------------|-----------|---------|----------------------------|------|-------------|
| 846.4865   | 846.427     | -0.0595 | -70   | 281        | 287      | VCLLVSR                 |           |         | Carbamidomethyl (C)[2]     |      | Mascot      |
| 882.4791   | 882.5673    | 0.0882  | 100   | 126        | 133      | QTPQPVGR                |           |         |                            |      | Mascot      |
| 916.5284   | 916.5383    | 0.0099  | 11    | 393        | 400      | LADCLLLR                |           |         |                            |      | Mascot      |
| 916.5284   | 916.5383    | 0.0099  | 11    | 393        | 400      | LADCLLLR                |           |         |                            |      | Mascot      |
| 996.4791   | 996.5976    | 0.1185  | 119   | 656        | 663      | HCHTASKR                |           |         | Carbamidomethyl (C)[2]     |      | Mascot      |
| 1123.5664  | 1123.434    | -0.1324 | -118  | 760        | 769      | EATQSMLSLK              |           |         | Oxidation (M)[6]           |      | Mascot      |
| 1162.566   | 1162.5522   | -0.0138 | -12   | 521        | 530      | VMLEGVEEEK              |           |         |                            |      | Mascot      |
| 1165.6252  | 1165.7476   | 0.1224  | 105   | 1050       | 1059     | AWFLTETGLK              |           |         |                            |      | Mascot      |
| 1179.6302  | 1179.614    | -0.0162 | -14   | 1028       | 1036     | QRLAEMYLR               |           |         |                            |      | Mascot      |
| 1273.5953  | 1273.6187   | 0.0234  | 18    | 723        | 733      | QPDNVQSLCGR             |           |         | Carbamidomethyl (C)[9]     |      | Mascot      |
| 1401.6903  | 1401.6125   | -0.0778 | -56   | 722        | 733      | KQPDNVQSLCGR            |           |         | Carbamidomethyl (C)[10]    |      | Mascot      |
| 1401.8099  | 1401.6125   | -0.1974 | -141  | 198        | 209      | YPILQGKVQVEK            |           |         |                            |      | Mascot      |
| 1682.9258  | 1682.9154   | -0.0104 | -6    | 786        | 800      | KSLADILLSNPVPCR         |           |         | Carbamidomethyl (C)[14]    |      | Mascot      |
| 1698.922   | 1698.8708   | -0.0512 | -30   | 281        | 297      | VCLLVSRRAAHFAAGGR       |           |         |                            |      | Mascot      |
| 1924.149   | 1923.931    | -0.218  | -113  | 592        | 608      | LLLNIEHTAPRPPILAR       |           |         |                            |      | Mascot      |
| 1958.9099  | 1958.9871   | 0.0772  | 39    | 472        | 489      | MMAGSHYLTALDYATAS<br>R  |           |         |                            |      | Mascot      |
| 2299.1797  | 2299.1938   | 0.0141  | 6     | 490        | 508      | LQLQDAAVTVRCLVPWN<br>CR |           |         | Carbamidomethyl (C)[12,18] |      | Mascot      |

|    |                                                            |  |  |  |  |              |       |      |    |    |   |  |  |
|----|------------------------------------------------------------|--|--|--|--|--------------|-------|------|----|----|---|--|--|
| 15 | PREDICTED: zinc finger protein 420 isoform 2 [Danio rerio] |  |  |  |  | gi 326678086 | 70371 | 9.08 | 14 | 40 | 0 |  |  |
|----|------------------------------------------------------------|--|--|--|--|--------------|-------|------|----|----|---|--|--|

#### Peptide Information

| Calc. Mass | Obsrv. Mass | ± da    | ± ppm | Start Seq. | End Seq. | Sequence   | Ion Score | C. I. % | Modification           | Rank | Result Type |
|------------|-------------|---------|-------|------------|----------|------------|-----------|---------|------------------------|------|-------------|
| 842.5206   | 842.5103    | -0.0103 | -12   | 25         | 31       | QRQGLLK    |           |         |                        |      | Mascot      |
| 1021.5723  | 1021.5065   | -0.0658 | -64   | 170        | 177      | MHLRVHTK   |           |         |                        |      | Mascot      |
| 1021.5723  | 1021.5065   | -0.0658 | -64   | 170        | 177      | MHLRVHTK   |           |         |                        |      | Mascot      |
| 1045.536   | 1045.5497   | 0.0137  | 13    | 134        | 141      | FHCARNLK   |           |         | Carbamidomethyl (C)[3] |      | Mascot      |
| 1073.5408  | 1073.5443   | 0.0035  | 3     | 598        | 606      | EKPPSCSLR  |           |         | Carbamidomethyl (C)[6] |      | Mascot      |
| 1162.5851  | 1162.5522   | -0.0329 | -28   | 385        | 394      | SFTQSTHLNK |           |         |                        |      | Mascot      |

|    |                             |           |         |     |              |       |                         |   |                            |        |
|----|-----------------------------|-----------|---------|-----|--------------|-------|-------------------------|---|----------------------------|--------|
|    | 1201.6357                   | 1201.6284 | -0.0073 | -6  | 598          | 607   | EKPPSCSLRK              |   | Carbamidomethyl (C)[6]     | Mascot |
|    | 1636.7094                   | 1636.8359 | 0.1265  | 77  | 96           | 109   | DFTCTQCGKSFSQK          |   | Carbamidomethyl (C)[4]     | Mascot |
|    | 1775.936                    | 1775.8904 | -0.0456 | -26 | 81           | 95    | IKIDHNFLMETTAVK         |   | Oxidation (M)[9]           | Mascot |
|    | 1961.8956                   | 1961.8831 | -0.0125 | -6  | 454          | 469   | VHTNEKPYSCPECGKR        |   | Carbamidomethyl (C)[10,13] | Mascot |
|    | 2211.0798                   | 2211.1128 | 0.033   | 15  | 450          | 468   | IHLRVHTNEKPYSCPECG<br>K |   |                            | Mascot |
|    | 2214.9841                   | 2215.0991 | 0.115   | 52  | 506          | 524   | QHQMHTGEKPYTCSHC<br>SK  |   |                            | Mascot |
|    | 2216.0515                   | 2216.0835 | 0.032   | 14  | 488          | 505   | EFVCFECEKTFITAGHLK      |   | Carbamidomethyl (C)[4,7]   | Mascot |
|    | 2216.0515                   | 2216.0835 | 0.032   | 14  | 488          | 505   | EFVCFECEKTFITAGHLK      |   | Carbamidomethyl (C)[4,7]   | Mascot |
|    | 2283.0579                   | 2283.189  | 0.1311  | 57  | 227          | 245   | HQMIHTGEKPYKCSHCD<br>LR |   |                            | Mascot |
|    | 2298.0906                   | 2298.1926 | 0.102   | 44  | 478          | 496   | LHQHVHTGVREFVCFEC<br>EK |   |                            | Mascot |
|    | 2299.053                    | 2299.1938 | 0.1408  | 61  | 227          | 245   | HQMIHTGEKPYKCSHCD<br>LR |   | Oxidation (M)[3]           | Mascot |
| 16 | novel protein [Danio rerio] |           |         |     | gi 220679558 | 45035 | 4.99                    | 9 | 40                         | 0      |

#### Peptide Information

| Calc. Mass | Obsrv. Mass | ± da    | ± ppm | Start Seq. | End Seq. | Sequence                | Ion Score | C. I. | % Modification           | Rank | Result Type |
|------------|-------------|---------|-------|------------|----------|-------------------------|-----------|-------|--------------------------|------|-------------|
| 842.473    | 842.5103    | 0.0373  | 44    | 382        | 388      | DPKDVLR                 |           |       |                          |      | Mascot      |
| 877.4698   | 877.4234    | -0.0464 | -53   | 202        | 208      | LVEELMK                 |           |       | Oxidation (M)[6]         |      | Mascot      |
| 877.4698   | 877.4234    | -0.0464 | -53   | 202        | 208      | LVEELMK                 |           |       | Oxidation (M)[6]         |      | Mascot      |
| 882.4791   | 882.5673    | 0.0882  | 100   | 1          | 7        | VSTYTRR                 |           |       |                          |      | Mascot      |
| 1045.5889  | 1045.5497   | -0.0392 | -37   | 54         | 62       | VIDTLESLR               |           |       |                          |      | Mascot      |
| 1159.5841  | 1159.6293   | 0.0452  | 39    | 375        | 384      | LDETDVKDPK              |           |       |                          |      | Mascot      |
| 1340.6021  | 1340.6671   | 0.065   | 48    | 7          | 16       | RCPGCQMIYR              |           |       | Carbamidomethyl (C)[2,5] |      | Mascot      |
| 1718.8629  | 1718.8691   | 0.0062  | 4     | 202        | 215      | LVEELMKQEVDDVR          |           |       | Oxidation (M)[6]         |      | Mascot      |
| 1813.7843  | 1813.9503   | 0.166   | 92    | 220        | 235      | DCNVDSNGSAFDMILR        |           |       | Carbamidomethyl (C)[2]   |      | Mascot      |
| 2214.9939  | 2215.0991   | 0.1052  | 47    | 217        | 235      | LCKDCNVDSNGSAFDMIL<br>R |           |       | Carbamidomethyl (C)[2,5] |      | Mascot      |

17 iron-sulfur cluster assembly enzyme [Danio rerio] gi|54261801 17796.2 8.7 7 39 0

#### Peptide Information

| Calc. Mass | Obsrv. Mass | ± da    | ± ppm | Start Seq. | End Seq. | Sequence   | Ion Score | C. I. | % Modification | Rank | Result Type |
|------------|-------------|---------|-------|------------|----------|------------|-----------|-------|----------------|------|-------------|
| 916.5461   | 916.5383    | -0.0078 | -9    | 116        | 123      | IKNTEIAK   |           |       |                |      | Mascot      |
| 916.5461   | 916.5383    | -0.0078 | -9    | 116        | 123      | IKNTEIAK   |           |       |                |      | Mascot      |
| 1045.5636  | 1045.5497   | -0.0139 | -13   | 44         | 53       | NVGSLDKNAK |           |       |                |      | Mascot      |
| 1256.6382  | 1256.7015   | 0.0633  | 50    | 34         | 43       | KVVDHYENPR |           |       |                |      | Mascot      |
| 1256.6382  | 1256.7015   | 0.0633  | 50    | 34         | 43       | KVVDHYENPR |           |       |                |      | Mascot      |

|    |                                              |           |         |     |              |     |                          |      |                                           |        |   |
|----|----------------------------------------------|-----------|---------|-----|--------------|-----|--------------------------|------|-------------------------------------------|--------|---|
|    | 1611.8774                                    | 1611.7488 | -0.1286 | -80 | 118          | 131 | NTEIAKELCLPPVK           |      | Carbamidomethyl (C)[9]                    | Mascot |   |
|    | 1718.8353                                    | 1718.8691 | 0.0338  | 20  | 19           | 33  | SMSLPELRPACSYHK          |      |                                           | Mascot |   |
|    | 1775.8567                                    | 1775.8904 | 0.0337  | 19  | 19           | 33  | SMSLPELRPACSYHK          |      | Carbamidomethyl (C)[11]                   | Mascot |   |
|    | 1791.8517                                    | 1791.8861 | 0.0344  | 19  | 19           | 33  | SMSLPELRPACSYHK          |      | Carbamidomethyl (C)[11], Oxidation (M)[2] | Mascot |   |
|    | 1958.9785                                    | 1958.9871 | 0.0086  | 4   | 51           | 70  | NAKNVGTGLVGAPACGD<br>VMK |      | Carbamidomethyl (C)[15]                   | Mascot |   |
|    | 2283.1545                                    | 2283.189  | 0.0345  | 15  | 124          | 143 | ELCLPPVKLHCSMLAEDA<br>IK |      | Carbamidomethyl (C)[3], Oxidation (M)[13] | Mascot |   |
| 18 | nitrogen fixation cluster-like [Danio rerio] |           |         |     | gi 221307563 |     | 17420.2                  | 8.83 | 7                                         | 39     | 0 |

#### Peptide Information

| Calc. Mass | Obsrv. Mass | ± da    | ± ppm | Start Seq. | End Seq. | Sequence                 | Ion Score | C. I. | % Modification          | Rank | Result Type |
|------------|-------------|---------|-------|------------|----------|--------------------------|-----------|-------|-------------------------|------|-------------|
| 846.4468   | 846.427     | -0.0198 | -23   | 25         | 31       | TQIGYHK                  |           |       |                         |      | Mascot      |
| 882.5294   | 882.5673    | 0.0379  | 43    | 122        | 129      | ELSLPPVK                 |           |       |                         |      | Mascot      |
| 916.5461   | 916.5383    | -0.0078 | -9    | 114        | 121      | IKNTEIAK                 |           |       |                         |      | Mascot      |
| 916.5461   | 916.5383    | -0.0078 | -9    | 114        | 121      | IKNTEIAK                 |           |       |                         |      | Mascot      |
| 1045.5636  | 1045.5497   | -0.0139 | -13   | 42         | 51       | NVGSLDKNAK               |           |       |                         |      | Mascot      |
| 1256.6382  | 1256.7015   | 0.0633  | 50    | 32         | 41       | KVVDHYENPR               |           |       |                         |      | Mascot      |
| 1256.6382  | 1256.7015   | 0.0633  | 50    | 32         | 41       | KVVDHYENPR               |           |       |                         |      | Mascot      |
| 1682.9622  | 1682.9154   | -0.0468 | -28   | 9          | 24       | CAAPQILKTLAPTLR          |           |       |                         |      | Mascot      |
| 1958.9785  | 1958.9871   | 0.0086  | 4     | 49         | 68       | NAKNVGTGLVGAPACGD<br>VMK |           |       | Carbamidomethyl (C)[15] |      | Mascot      |

19 novel protein similar to vertebrate brain-enriched guanylate kinase-associated homolog (rat) (BEGAI

#### Peptide Information

| Calc. Mass | Obsrv. Mass | ± da    | ± ppm | Start Seq. | End Seq. | Sequence         | Ion Score | C. I. | % Modification         | Rank | Result Type |
|------------|-------------|---------|-------|------------|----------|------------------|-----------|-------|------------------------|------|-------------|
| 850.5621   | 850.5427    | -0.0194 | -23   | 135        | 141      | LHALLRK          |           |       |                        |      | Mascot      |
| 996.4744   | 996.5976    | 0.1232  | 124   | 669        | 677      | AQEHGNLLD        |           |       |                        |      | Mascot      |
| 1130.6     | 1130.5957   | -0.0043 | -4    | 655        | 663      | MGVHHLHRK        |           |       | Oxidation (M)[1]       |      | Mascot      |
| 1256.6593  | 1256.7015   | 0.0422  | 34    | 63         | 72       | ILQQQNEDLR       |           |       |                        |      | Mascot      |
| 1256.6593  | 1256.7015   | 0.0422  | 34    | 63         | 72       | ILQQQNEDLR       | 2         | 0     |                        |      | Mascot      |
| 1475.6833  | 1475.7563   | 0.073   | 49    | 416        | 431      | SGTSSSSGGGIASHQR |           |       |                        |      | Mascot      |
| 1564.7887  | 1564.7472   | -0.0415 | -27   | 147        | 159      | KTMDQEIVELTNK    |           |       | Oxidation (M)[3]       |      | Mascot      |
| 1646.8352  | 1646.8207   | -0.0145 | -9    | 179        | 192      | QDCNLAVQLKCNK    |           |       | Carbamidomethyl (C)[3] |      | Mascot      |
| 1682.8094  | 1682.9154   | 0.106   | 63    | 200        | 213      | FADLPYELQDMVVK   |           |       |                        |      | Mascot      |
| 1698.8043  | 1698.8708   | 0.0665  | 39    | 200        | 213      | FADLPYELQDMVVK   |           |       | Oxidation (M)[11]      |      | Mascot      |



|    |                                               |           |        |    |             |          |                          |                  |    |   |  |  |        |
|----|-----------------------------------------------|-----------|--------|----|-------------|----------|--------------------------|------------------|----|---|--|--|--------|
|    | 1924.863                                      | 1924.9214 | 0.0584 | 30 | 598         | 615      | RQEFAEDVGSAGSSAEE<br>R   |                  |    |   |  |  | Mascot |
|    | 1945.8158                                     | 1945.8909 | 0.0751 | 39 | 518         | 536      | GAYSDGEEGSSAQSWT<br>ASR  |                  |    |   |  |  | Mascot |
|    | 2216.05                                       | 2216.0835 | 0.0335 | 15 | 481         | 501      | MAPSSDGLVNRTSFSS<br>ETVK | Oxidation (M)[1] |    |   |  |  | Mascot |
|    | 2216.05                                       | 2216.0835 | 0.0335 | 15 | 481         | 501      | MAPSSDGLVNRTSFSS<br>ETVK | Oxidation (M)[1] |    |   |  |  | Mascot |
| 20 | probable RNA-binding protein 19 [Danio rerio] |           |        |    | gi 38707995 | 104493.7 | 5.77                     | 15               | 36 | 0 |  |  |        |

#### Peptide Information

|  | Calc. Mass | Obsrv. Mass | ± da    | ± ppm | Start Seq. | End Seq. | Sequence               | Ion Score | C. I. | % Modification                           | Rank | Result Type |
|--|------------|-------------|---------|-------|------------|----------|------------------------|-----------|-------|------------------------------------------|------|-------------|
|  | 842.5206   | 842.5103    | -0.0103 | -12   | 786        | 793      | LGVAQAKR               |           |       |                                          |      | Mascot      |
|  | 846.5229   | 846.427     | -0.0959 | -113  | 1          | 7        | MSRLIVK                |           |       |                                          |      | Mascot      |
|  | 1045.6365  | 1045.5497   | -0.0868 | -83   | 801        | 809      | QTTSKILVR              |           |       |                                          |      | Mascot      |
|  | 1074.5426  | 1074.5693   | 0.0267  | 25    | 204        | 212      | QDNEKEALK              |           |       |                                          |      | Mascot      |
|  | 1074.5426  | 1074.5693   | 0.0267  | 25    | 204        | 212      | QDNEKEALK              |           |       |                                          |      | Mascot      |
|  | 1159.6066  | 1159.6293   | 0.0227  | 20    | 337        | 346      | SEAEVERALR             |           |       |                                          |      | Mascot      |
|  | 1340.6073  | 1340.6671   | 0.0598  | 45    | 225        | 235      | MVEKSDMLDEK            |           |       | Oxidation (M)[1]                         |      | Mascot      |
|  | 1401.6678  | 1401.6125   | -0.0553 | -39   | 213        | 224      | TGLSDMDYLRSK           |           |       | Oxidation (M)[6]                         |      | Mascot      |
|  | 1401.6678  | 1401.6125   | -0.0553 | -39   | 213        | 224      | TGLSDMDYLRSK           |           |       | Oxidation (M)[6]                         |      | Mascot      |
|  | 1475.7522  | 1475.7563   | 0.0041  | 3     | 549        | 561      | MALGETQIVQETR          |           |       |                                          |      | Mascot      |
|  | 1516.6294  | 1516.6671   | 0.0377  | 25    | 404        | 415      | NMPYTCTEEDLK           |           |       | Carbamidomethyl (C)[6], Oxidation (M)[2] |      | Mascot      |
|  | 1611.8047  | 1611.7488   | -0.0559 | -35   | 209        | 222      | EALKTGLSDMDYLRL        |           |       |                                          |      | Mascot      |
|  | 1636.7449  | 1636.8359   | 0.091   | 56    | 479        | 494      | EKADQGPDPAGSSSYK       |           |       |                                          |      | Mascot      |
|  | 1718.8544  | 1718.8691   | 0.0147  | 9     | 861        | 875      | AFSALCHSTHLYGRR        |           |       |                                          |      | Mascot      |
|  | 1775.8759  | 1775.8904   | 0.0145  | 8     | 861        | 875      | AFSALCHSTHLYGRR        |           |       | Carbamidomethyl (C)[6]                   |      | Mascot      |
|  | 1924.9183  | 1924.9214   | 0.0031  | 2     | 21         | 37       | MFADFGLTDCALKFTK       |           |       | Oxidation (M)[1]                         |      | Mascot      |
|  | 1946.0706  | 1945.8909   | -0.1797 | -92   | 278        | 294      | STRPAIEPTTEFTVKLR      |           |       |                                          |      | Mascot      |
|  | 2238.0754  | 2238.103    | 0.0276  | 12    | 761        | 778      | AMRQLQHCTVDEHQLEV<br>K |           |       | Carbamidomethyl (C)[8], Oxidation (M)[2] |      | Mascot      |

|    |                                                          |  |  |  |              |         |      |    |    |   |  |  |
|----|----------------------------------------------------------|--|--|--|--------------|---------|------|----|----|---|--|--|
| 21 | ATP-binding cassette sub-family D member 4 [Danio rerio] |  |  |  | gi 300863092 | 68999.7 | 8.28 | 11 | 36 | 0 |  |  |
|----|----------------------------------------------------------|--|--|--|--------------|---------|------|----|----|---|--|--|

#### Peptide Information

|  | Calc. Mass | Obsrv. Mass | ± da    | ± ppm | Start Seq. | End Seq. | Sequence | Ion Score | C. I. | % Modification   | Rank | Result Type |
|--|------------|-------------|---------|-------|------------|----------|----------|-----------|-------|------------------|------|-------------|
|  | 846.4315   | 846.427     | -0.0045 | -5    | 144        | 150      | ISQDVER  |           |       |                  |      | Mascot      |
|  | 923.4515   | 923.4473    | -0.0042 | -5    | 583        | 589      | HHDVMLR  |           |       | Oxidation (M)[5] |      | Mascot      |
|  | 923.4515   | 923.4473    | -0.0042 | -5    | 583        | 589      | HHDVMLR  |           |       | Oxidation (M)[5] |      | Mascot      |

|    |                                                                     |           |         |     |     |     |                           |          |      |    |    |                         |        |
|----|---------------------------------------------------------------------|-----------|---------|-----|-----|-----|---------------------------|----------|------|----|----|-------------------------|--------|
|    | 1021.5346                                                           | 1021.5065 | -0.0281 | -28 | 2   | 10  | TPMKQSSVK                 |          |      |    |    | Oxidation (M)[3]        | Mascot |
|    | 1021.5346                                                           | 1021.5065 | -0.0281 | -28 | 2   | 10  | TPMKQSSVK                 |          |      |    |    | Oxidation (M)[3]        | Mascot |
|    | 1273.6357                                                           | 1273.6187 | -0.017  | -13 | 431 | 440 | VLNSLWEPCR                |          |      |    |    | Carbamidomethyl (C)[9]  | Mascot |
|    | 1340.7103                                                           | 1340.6671 | -0.0432 | -32 | 566 | 577 | QQGMTLISLGHR              |          |      |    |    |                         | Mascot |
|    | 1475.7675                                                           | 1475.7563 | -0.0112 | -8  | 590 | 602 | LCGGGQWELSKLK             |          |      |    |    | Carbamidomethyl (C)[2]  | Mascot |
|    | 1516.7794                                                           | 1516.6671 | -0.1123 | -74 | 112 | 123 | TLTEDLHHLYFK              |          |      |    |    |                         | Mascot |
|    | 1694.8928                                                           | 1694.8936 | 0.0008  | 0   | 251 | 264 | LQMLLSTQRSLMNK            |          |      |    |    | Oxidation (M)[3,12]     | Mascot |
|    | 1694.8928                                                           | 1694.8936 | 0.0008  | 0   | 251 | 264 | LQMLLSTQRSLMNK            |          |      |    |    | Oxidation (M)[3,12]     | Mascot |
|    | 1924.0361                                                           | 1923.931  | -0.1051 | -55 | 453 | 469 | GLMFLPQKAYLTDGTLR         |          |      |    |    |                         | Mascot |
|    | 2211.198                                                            | 2211.1128 | -0.0852 | -39 | 404 | 425 | DLTSLISQGTLLVVGNT<br>GTGK |          |      |    |    |                         | Mascot |
|    | 2225.127                                                            | 2225.1265 | -0.0005 | 0   | 375 | 393 | ELQSVPADTAFVLDRLCY<br>K   |          |      |    |    | Carbamidomethyl (C)[17] | Mascot |
| 22 | thrombospondin type-1 domain-containing protein 7A<br>[Danio rerio] |           |         |     |     |     | gi 170287747              | 186916.2 | 8.18 | 17 | 36 | 0                       |        |

Peptide Information

| Calc. Mass | Obsrv. Mass | ± da    | ± ppm | Start Seq. | End Seq. | Sequence                 | Ion Score | C. I. | % | Modification              | Rank | Result | Type |
|------------|-------------|---------|-------|------------|----------|--------------------------|-----------|-------|---|---------------------------|------|--------|------|
| 846.4753   | 846.427     | -0.0483 | -57   | 1007       | 1014     | VEGLLGМК                 |           |       |   |                           |      | Mascot |      |
| 923.4192   | 923.4473    | 0.0281  | 30    | 1504       | 1510     | WMTGAWR                  |           |       |   | Oxidation (M)[2]          |      | Mascot |      |
| 923.4192   | 923.4473    | 0.0281  | 30    | 1504       | 1510     | WMTGAWR                  |           |       |   | Oxidation (M)[2]          |      | Mascot |      |
| 1021.4982  | 1021.5065   | 0.0083  | 8     | 1227       | 1235     | KQCPSTTEK                |           |       |   |                           |      | Mascot |      |
| 1021.4982  | 1021.5065   | 0.0083  | 8     | 1227       | 1235     | KQCPSTTEK                |           |       |   |                           |      | Mascot |      |
| 1078.5198  | 1078.5513   | 0.0315  | 29    | 1227       | 1235     | KQCPSTTEK                |           |       |   | Carbamidomethyl (C)[3]    |      | Mascot |      |
| 1256.5575  | 1256.7015   | 0.144   | 115   | 1391       | 1402     | NVSCFVSDGSGK             |           |       |   | Carbamidomethyl (C)[4]    |      | Mascot |      |
| 1256.5575  | 1256.7015   | 0.144   | 115   | 1391       | 1402     | NVSCFVSDGSGK             | 6         | 0     |   | Carbamidomethyl (C)[4]    |      | Mascot |      |
| 1401.6766  | 1401.6125   | -0.0641 | -46   | 246        | 258      | VGPWGQCМASPIR            |           |       |   |                           |      | Mascot |      |
| 1401.6766  | 1401.6125   | -0.0641 | -46   | 246        | 258      | VGPWGQCМASPIR            |           |       |   |                           |      | Mascot |      |
| 1564.8992  | 1564.7472   | -0.152  | -97   | 765        | 778      | VICVRNVGQVPPK            |           |       |   | Carbamidomethyl (C)[3]    |      | Mascot |      |
| 1698.8228  | 1698.8708   | 0.048   | 28    | 138        | 152      | GEEGIQTREVGCVHK          |           |       |   | Carbamidomethyl (C)[12]   |      | Mascot |      |
| 1813.8948  | 1813.9503   | 0.0555  | 31    | 246        | 261      | VGPWGQCМASPIRQAR         |           |       |   | Carbamidomethyl (C)[7]    |      | Mascot |      |
| 1923.9052  | 1923.931    | 0.0258  | 13    | 745        | 763      | AVPGTAVNDAFCSVGMQ<br>TR  |           |       |   |                           |      | Mascot |      |
| 2133.0796  | 2132.8389   | -0.2407 | -113  | 209        | 228      | SVLAPPLFGGSACPNLTE<br>FR |           |       |   | Carbamidomethyl (C)[13]   |      | Mascot |      |
| 2215.1106  | 2215.0991   | -0.0115 | -5    | 636        | 655      | QLCRDAILPMPVLCEVSC<br>PK |           |       |   |                           |      | Mascot |      |
| 2237.092   | 2237.0815   | -0.0105 | -5    | 341        | 358      | FWDLQVGыQTREVTCVH<br>R   |           |       |   |                           |      | Mascot |      |
| 2254.1616  | 2254.0342   | -0.1274 | -57   | 780        | 798      | CPESLRPETVRPCLLPCK<br>R  |           |       |   | Carbamidomethyl (C)[1]    |      | Mascot |      |
| 2283.177   | 2283.189    | 0.012   | 5     | 779        | 797      | KCPESLRPETVRPCLLPCK      |           |       |   | Carbamidomethyl (C)[2,14] |      | Mascot |      |

|    |                                              |           |        |     |              |          |                                 |                        |        |   |
|----|----------------------------------------------|-----------|--------|-----|--------------|----------|---------------------------------|------------------------|--------|---|
|    | 2284.1125                                    | 2284.1787 | 0.0662 | 29  | 488          | 508      | K<br>EVYCVQAPSETSSNLGS<br>LKSK  | Carbamidomethyl (C)[4] | Mascot |   |
|    | 2298.9324                                    | 2299.1938 | 0.2614 | 114 | 1021         | 1039     | ECGQGYRYQAMVCYDQ<br>DNR         |                        | Mascot |   |
|    | 2996.3411                                    | 2996.4929 | 0.1518 | 51  | 916          | 942      | FAGPMPQLTQSCQLPCQ<br>DDCQLTAWSK |                        | Mascot |   |
| 23 | PREDICTED: protein polybromo-1 [Danio rerio] |           |        |     | gi 292618678 | 182606.5 | 6.31                            | 19                     | 35     | 0 |

Peptide Information

|  | Calc. Mass | Obsrv. Mass | ± da    | ± ppm | Start Seq. | End Seq. | Sequence                       | Ion Score | C. I. | % Modification                                   | Rank | Result Type |
|--|------------|-------------|---------|-------|------------|----------|--------------------------------|-----------|-------|--------------------------------------------------|------|-------------|
|  | 842.4981   | 842.5103    | 0.0122  | 14    | 1086       | 1093     | ALPSVIDK                       |           |       |                                                  |      | Mascot      |
|  | 850.4491   | 850.5427    | 0.0936  | 110   | 1064       | 1071     | VASMFAPK                       |           |       |                                                  |      | Mascot      |
|  | 870.5406   | 870.5443    | 0.0037  | 4     | 744        | 750      | LIQELVR                        |           |       |                                                  |      | Mascot      |
|  | 882.4575   | 882.5673    | 0.1098  | 124   | 1002       | 1008     | CVVMFVK                        |           |       | Carbamidomethyl (C)[1]                           |      | Mascot      |
|  | 916.5396   | 916.5383    | -0.0013 | -1    | 1561       | 1567     | LRDLMLR                        |           |       |                                                  |      | Mascot      |
|  | 916.5396   | 916.5383    | -0.0013 | -1    | 1561       | 1567     | LRDLMLR                        | 1         |       | 0                                                |      | Mascot      |
|  | 923.4879   | 923.4473    | -0.0406 | -44   | 560        | 566      | LMFRNAR                        |           |       | Oxidation (M)[2]                                 |      | Mascot      |
|  | 923.4879   | 923.4473    | -0.0406 | -44   | 560        | 566      | LMFRNAR                        | 3         |       | 0 Oxidation (M)[2]                               |      | Mascot      |
|  | 1021.5425  | 1021.5065   | -0.036  | -35   | 147        | 154      | TKNEFVQR                       |           |       |                                                  |      | Mascot      |
|  | 1021.5425  | 1021.5065   | -0.036  | -35   | 147        | 154      | TKNEFVQR                       |           |       |                                                  |      | Mascot      |
|  | 1073.599   | 1073.5443   | -0.0547 | -51   | 1496       | 1504     | LLHSEAYLK                      |           |       |                                                  |      | Mascot      |
|  | 1078.5779  | 1078.5513   | -0.0266 | -25   | 629        | 637      | LNELYEAVK                      |           |       |                                                  |      | Mascot      |
|  | 1179.5901  | 1179.614    | 0.0239  | 20    | 1042       | 1051     | MWTMPLSSVK                     |           |       |                                                  |      | Mascot      |
|  | 1273.7296  | 1273.6187   | -0.1109 | -87   | 491        | 502      | MKALLAAVAETR                   |           |       |                                                  |      | Mascot      |
|  | 1516.8118  | 1516.6671   | -0.1447 | -95   | 1374       | 1386     | LVGTEWRNLEATK                  |           |       |                                                  |      | Mascot      |
|  | 1611.7617  | 1611.7488   | -0.0129 | -8    | 62         | 74       | DDQGRMLCELFIR                  |           |       | Oxidation (M)[6]                                 |      | Mascot      |
|  | 1694.8757  | 1694.8936   | 0.0179  | 11    | 1042       | 1055     | MWTMPLSSVKFVPR                 |           |       | Oxidation (M)[1]                                 |      | Mascot      |
|  | 1694.8757  | 1694.8936   | 0.0179  | 11    | 1042       | 1055     | MWTMPLSSVKFVPR                 |           |       | Oxidation (M)[1]                                 |      | Mascot      |
|  | 1710.8843  | 1710.8848   | 0.0005  | 0     | 284        | 297      | LELEHSEPIKCSIR                 |           |       | Carbamidomethyl (C)[11]                          |      | Mascot      |
|  | 1775.8818  | 1775.8904   | 0.0086  | 5     | 1342       | 1356     | KINMSGYILFSSEMR                |           |       |                                                  |      | Mascot      |
|  | 1791.8768  | 1791.8861   | 0.0093  | 5     | 1342       | 1356     | KINMSGYILFSSEMR                |           |       | Oxidation (M)[4]                                 |      | Mascot      |
|  | 2215.0159  | 2215.0991   | 0.0832  | 38    | 79         | 96       | RNQPDYYDVVSQPIDMM<br>K         |           |       | Oxidation (M)[16]                                |      | Mascot      |
|  | 2299.0767  | 2299.1938   | 0.1171  | 51    | 1177       | 1196     | KEVFLSNLEESCPMTCIG<br>GK       |           |       | Carbamidomethyl (C)[12,16]                       |      | Mascot      |
|  | 2996.3508  | 2996.4929   | 0.1421  | 47    | 1178       | 1203     | EVFLSNLEESCPMTCIGG<br>KCTVSSFK |           |       | Carbamidomethyl (C)[11,15,20], Oxidation (M)[13] |      | Mascot      |

|    |                            |  |  |  |             |         |      |    |    |   |
|----|----------------------------|--|--|--|-------------|---------|------|----|----|---|
| 24 | Fezl protein [Danio rerio] |  |  |  | gi 55250392 | 47519.5 | 9.39 | 11 | 35 | 0 |
|----|----------------------------|--|--|--|-------------|---------|------|----|----|---|

Peptide Information

| Calc. Mass | Obsrv. Mass | ± da    | ± ppm | Start Seq. | End Sequence Seq.       | Ion Score | C. I. % Modification                         | Rank | Result Type |
|------------|-------------|---------|-------|------------|-------------------------|-----------|----------------------------------------------|------|-------------|
| 846.4389   | 846.427     | -0.0119 | -14   | 192        | 199 LACVSPEK            |           |                                              |      | Mascot      |
| 1078.5428  | 1078.5513   | 0.0085  | 8     | 341        | 349 GFHQKGNYK           |           |                                              |      | Mascot      |
| 1201.6172  | 1201.6284   | 0.0112  | 9     | 16         | 27 LDDRS GATAAPK        |           |                                              |      | Mascot      |
| 1516.7979  | 1516.6671   | -0.1308 | -86   | 313        | 325 AFNRSSLNTHIR        |           |                                              |      | Mascot      |
| 1636.8198  | 1636.8359   | 0.0161  | 10    | 267        | 280 HMPVHTGARPVCK       |           | Carbamidomethyl (C)[13]                      |      | Mascot      |
| 1694.791   | 1694.8936   | 0.1026  | 61    | 1          | 15 MASSLPLETVMSCPR      |           | Carbamidomethyl (C)[13], Oxidation (M)[1]    |      | Mascot      |
| 1694.791   | 1694.8936   | 0.1026  | 61    | 1          | 15 MASSLPLETVMSCPR      |           | Carbamidomethyl (C)[13], Oxidation (M)[1]    |      | Mascot      |
| 1698.813   | 1698.8708   | 0.0578  | 34    | 326        | 340 IHAGYKPFVCEFCGK     |           |                                              |      | Mascot      |
| 1710.7859  | 1710.8848   | 0.0989  | 58    | 1          | 15 MASSLPLETVMSCPR      |           | Carbamidomethyl (C)[13], Oxidation (M)[1,11] |      | Mascot      |
| 1716.7354  | 1716.8713   | 0.1359  | 79    | 411        | 426 LHDNANCLSGGNDSSR    |           | Carbamidomethyl (C)[7]                       |      | Mascot      |
| 1961.837   | 1961.8831   | 0.0461  | 23    | 95         | 113 GALCTSAAMCKTNCGVCSK |           | Carbamidomethyl (C)[4,10]                    |      | Mascot      |
| 2216.0376  | 2216.0835   | 0.0459  | 21    | 248        | 266 NFTCEVCGKVFNAHYNLTR |           |                                              |      | Mascot      |
| 2216.0376  | 2216.0835   | 0.0459  | 21    | 248        | 266 NFTCEVCGKVFNAHYNLTR |           |                                              |      | Mascot      |
| 2254.061   | 2254.0342   | -0.0268 | -12   | 369        | 386 AFHQIYNLTFHMHNDK    |           |                                              |      | Mascot      |

25 PREDICTED: coenzyme Q-binding protein COQ10 homolog A, mitochondrial [Danio rerio]

gi|125852943 28864.7 9.67 8 35 0

#### Peptide Information

| Calc. Mass | Obsrv. Mass | ± da    | ± ppm | Start Seq. | End Sequence Seq.              | Ion Score | C. I. % Modification                       | Rank | Result Type |
|------------|-------------|---------|-------|------------|--------------------------------|-----------|--------------------------------------------|------|-------------|
| 916.4498   | 916.5383    | 0.0885  | 97    | 114        | 120 HFVPWCK                    |           |                                            |      | Mascot      |
| 916.4498   | 916.5383    | 0.0885  | 97    | 114        | 120 HFVPWCK                    |           |                                            |      | Mascot      |
| 1123.5676  | 1123.434    | -0.1336 | -119  | 218        | 226 QMVAAFERR                  |           | Oxidation (M)[2]                           |      | Mascot      |
| 1201.6688  | 1201.6284   | -0.0404 | -34   | 230        | 239 LYGPETRI PR                |           |                                            |      | Mascot      |
| 1636.8264  | 1636.8359   | 0.0095  | 6     | 237        | 249 IPRELMFHEVHQT              |           |                                            |      | Mascot      |
| 1726.8468  | 1726.8834   | 0.0366  | 21    | 16         | 30 TFSEFLEIATVGPCR             |           | Carbamidomethyl (C)[14]                    |      | Mascot      |
| 2211.1274  | 2211.1128   | -0.0146 | -7    | 41         | 58 IQHWSIRHLSSCGILMTR          |           | Carbamidomethyl (C)[12], Oxidation (M)[16] |      | Mascot      |
| 2555.1792  | 2555.1926   | 0.0134  | 5     | 93         | 113 RILGYSMQEMYEVVANVDDYK      |           | Oxidation (M)[7,10]                        |      | Mascot      |
| 2555.1792  | 2555.1926   | 0.0134  | 5     | 93         | 113 RILGYSMQEMYEVVANVDDYK      |           | Oxidation (M)[7,10]                        |      | Mascot      |
| 3337.5366  | 3337.7722   | 0.2356  | 71    | 94         | 120 ILGYSMQEMYEVVANVDYKHFVPWCK |           | Carbamidomethyl (C)[26], Oxidation (M)[6]  |      | Mascot      |

26 breast cancer 2, early onset [Danio rerio]

gi|302318878 317047.5 6.06 24 35 0

#### Peptide Information

| Calc. Mass | Obsrv. Mass | ± da | ± ppm | Start Seq. | End Sequence Seq. | Ion Score | C. I. % Modification | Rank | Result Type |
|------------|-------------|------|-------|------------|-------------------|-----------|----------------------|------|-------------|
|------------|-------------|------|-------|------------|-------------------|-----------|----------------------|------|-------------|

|    |                                                                   |           |         |     |              |      |                                     |     |   |    |                           |  |        |
|----|-------------------------------------------------------------------|-----------|---------|-----|--------------|------|-------------------------------------|-----|---|----|---------------------------|--|--------|
|    | 846.4064                                                          | 846.427   | 0.0206  | 24  | 2391         | 2397 | AEDREAR                             |     |   |    |                           |  | Mascot |
|    | 877.4447                                                          | 877.4234  | -0.0213 | -24 | 438          | 444  | CLDQTLK                             |     |   |    | Carbamidomethyl (C)[1]    |  | Mascot |
|    | 877.4447                                                          | 877.4234  | -0.0213 | -24 | 438          | 444  | CLDQTLK                             |     |   |    | Carbamidomethyl (C)[1]    |  | Mascot |
|    | 1021.5676                                                         | 1021.5065 | -0.0611 | -60 | 1310         | 1319 | VAFSATGLQK                          |     |   |    |                           |  | Mascot |
|    | 1021.5676                                                         | 1021.5065 | -0.0611 | -60 | 1310         | 1319 | VAFSATGLQK                          |     |   |    |                           |  | Mascot |
|    | 1130.6165                                                         | 1130.5957 | -0.0208 | -18 | 1020         | 1029 | VSEKALEQAR                          |     |   |    |                           |  | Mascot |
|    | 1201.6                                                            | 1201.6284 | 0.0284  | 24  | 2333         | 2341 | WDTKLGYYR                           |     |   |    |                           |  | Mascot |
|    | 1256.7144                                                         | 1256.7015 | -0.0129 | -10 | 2666         | 2676 | ALVAICNLQVR                         |     |   |    | Carbamidomethyl (C)[6]    |  | Mascot |
|    | 1256.7144                                                         | 1256.7015 | -0.0129 | -10 | 2666         | 2676 | ALVAICNLQVR                         |     |   |    | Carbamidomethyl (C)[6]    |  | Mascot |
|    | 1273.6569                                                         | 1273.6187 | -0.0382 | -30 | 2463         | 2473 | LSHKQMEAVSK                         |     |   |    | Oxidation (M)[6]          |  | Mascot |
|    | 1401.7406                                                         | 1401.6125 | -0.1281 | -91 | 433          | 444  | ADLPKCLDQTLK                        |     |   |    | Carbamidomethyl (C)[6]    |  | Mascot |
|    | 1401.7406                                                         | 1401.6125 | -0.1281 | -91 | 433          | 444  | ADLPKCLDQTLK                        |     |   |    | Carbamidomethyl (C)[6]    |  | Mascot |
|    | 1611.7972                                                         | 1611.7488 | -0.0484 | -30 | 844          | 858  | TNASSVNTSDLISFR                     |     |   |    |                           |  | Mascot |
|    | 1694.7479                                                         | 1694.8936 | 0.1457  | 86  | 1515         | 1530 | AVFAGCDEASFSHEPK                    |     |   |    |                           |  | Mascot |
|    | 1694.7479                                                         | 1694.8936 | 0.1457  | 86  | 1515         | 1530 | AVFAGCDEASFSHEPK                    |     |   |    |                           |  | Mascot |
|    | 1699.0013                                                         | 1698.8708 | -0.1305 | -77 | 2045         | 2059 | RQTIRPVPGSLYLAK                     |     |   |    |                           |  | Mascot |
|    | 1716.8148                                                         | 1716.8713 | 0.0565  | 33  | 1428         | 1443 | AVFAGCDETSFSLELK                    |     |   |    |                           |  | Mascot |
|    | 1718.8101                                                         | 1718.8691 | 0.059   | 34  | 634          | 647  | HFHVTETMCKSVSR                      |     |   |    | Carbamidomethyl (C)[9]    |  | Mascot |
|    | 1945.9899                                                         | 1945.8909 | -0.099  | -51 | 386          | 402  | LESSPEGTQCQKILLDK                   |     |   |    | Carbamidomethyl (C)[10]   |  | Mascot |
|    | 1961.7675                                                         | 1961.8831 | 0.1156  | 59  | 684          | 700  | MNFSNCSLPQSDESDCK                   |     |   |    | Carbamidomethyl (C)[6]    |  | Mascot |
|    | 2133.0215                                                         | 2132.8389 | -0.1826 | -86 | 626          | 643  | TSNQTKPKHFHVTETMC<br>K              |     |   |    | Oxidation (M)[16]         |  | Mascot |
|    | 2211.0498                                                         | 2211.1128 | 0.063   | 28  | 995          | 1014 | DKTDVVVCVDSNIHFGFST<br>AR           |     |   |    |                           |  | Mascot |
|    | 2214.9753                                                         | 2215.0991 | 0.1238  | 56  | 1322         | 1339 | NLFRGCEEEELTTEQNC<br>K              |     |   |    | Carbamidomethyl (C)[6,17] |  | Mascot |
|    | 2236.9307                                                         | 2237.0815 | 0.1508  | 67  | 681          | 700  | GFKMNFSNCSLPQSDES<br>DCK            |     |   |    |                           |  | Mascot |
|    | 2238.1135                                                         | 2238.103  | -0.0105 | -5  | 295          | 314  | ITNSSEDEVKSVFLTSEPE<br>QK           |     |   |    |                           |  | Mascot |
|    | 2254.0696                                                         | 2254.0342 | -0.0354 | -16 | 2138         | 2158 | GTVGKEEFFSALCDTPG<br>VDPK           |     |   |    | Carbamidomethyl (C)[13]   |  | Mascot |
|    | 2300.1438                                                         | 2300.1829 | 0.0391  | 17  | 1208         | 1227 | TDLINNLDQEAPQKEVCE<br>LK            |     |   |    |                           |  | Mascot |
|    | 2996.3738                                                         | 2996.4929 | 0.1191  | 40  | 2067         | 2093 | SLRDAVGCTCPSQYTQD<br>ELSQHGVHHK     |     |   |    |                           |  | Mascot |
|    | 3338.5771                                                         | 3338.7644 | 0.1873  | 56  | 1078         | 1108 | ISQPDSGVANQISNGADI<br>TTFNSENVFQEQQ |     |   |    |                           |  | Mascot |
| 27 | PREDICTED: microtubule-associated protein 6-like<br>[Danio rerio] |           |         |     | gi 292621423 |      | 42669                               | 9.6 | 8 | 34 | 0                         |  |        |

#### Peptide Information

| Calc. Mass | Obsrv. Mass | ± da | ± ppm | Start Seq. | End Sequence Seq. | Ion Score | C. I. % | Modification | Rank | Result | Type |
|------------|-------------|------|-------|------------|-------------------|-----------|---------|--------------|------|--------|------|
|------------|-------------|------|-------|------------|-------------------|-----------|---------|--------------|------|--------|------|

|    |                                          |           |         |     |             |     |                           |       |   |    |   |  |                                          |  |  |  |        |
|----|------------------------------------------|-----------|---------|-----|-------------|-----|---------------------------|-------|---|----|---|--|------------------------------------------|--|--|--|--------|
|    | 846.429                                  | 846.427   | -0.002  | -2  | 2           | 8   | AWPCITR                   |       |   |    |   |  |                                          |  |  |  | Mascot |
|    | 877.456                                  | 877.4234  | -0.0326 | -37 | 369         | 375 | SKEMINR                   |       |   |    |   |  |                                          |  |  |  | Mascot |
|    | 877.456                                  | 877.4234  | -0.0326 | -37 | 369         | 375 | SKEMINR                   |       |   |    |   |  |                                          |  |  |  | Mascot |
|    | 1159.6721                                | 1159.6293 | -0.0428 | -37 | 22          | 32  | GDIAPLVFTK                |       |   |    |   |  |                                          |  |  |  | Mascot |
|    | 1165.7052                                | 1165.7476 | 0.0424  | 36  | 317         | 326 | HNLSLTKPKK                |       |   |    |   |  |                                          |  |  |  | Mascot |
|    | 1179.6368                                | 1179.614  | -0.0228 | -19 | 300         | 309 | IRSLYSEPSK                |       |   |    |   |  |                                          |  |  |  | Mascot |
|    | 1694.7747                                | 1694.8936 | 0.1189  | 70  | 1           | 14  | MAWPCITRACCINR            |       |   |    |   |  | Carbamidomethyl (C)[5]                   |  |  |  | Mascot |
|    | 1694.7747                                | 1694.8936 | 0.1189  | 70  | 1           | 14  | MAWPCITRACCINR            |       |   |    |   |  | Carbamidomethyl (C)[5]                   |  |  |  | Mascot |
|    | 1698.7727                                | 1698.8708 | 0.0981  | 58  | 9           | 21  | ACCINRFWSELDK             |       |   |    |   |  | Carbamidomethyl (C)[2,3]                 |  |  |  | Mascot |
|    | 1710.7695                                | 1710.8848 | 0.1153  | 67  | 1           | 14  | MAWPCITRACCINR            |       |   |    |   |  | Carbamidomethyl (C)[5], Oxidation (M)[1] |  |  |  | Mascot |
|    | 2232.123                                 | 2232.0613 | -0.0617 | -28 | 141         | 161 | GDHPWIPKPTAAAAPCK<br>AESK |       |   |    |   |  | Carbamidomethyl (C)[16]                  |  |  |  | Mascot |
| 28 | fibroblast growth factor 5 [Danio rerio] |           |         |     | gi 57222261 |     | 25916.6                   | 10.36 | 7 | 34 | 0 |  |                                          |  |  |  |        |

#### Peptide Information

|  | Calc. Mass | Obsrv. Mass | ± da    | ± ppm | Start Seq. | End Sequence Seq. | Ion Score         | C. I. % | Modification            | Rank | Result Type |
|--|------------|-------------|---------|-------|------------|-------------------|-------------------|---------|-------------------------|------|-------------|
|  | 877.4559   | 877.4234    | -0.0325 | -37   | 154        | 161               | MGSSPRVK          |         | Oxidation (M)[1]        |      | Mascot      |
|  | 877.4559   | 877.4234    | -0.0325 | -37   | 154        | 161               | MGSSPRVK          |         | Oxidation (M)[1]        |      | Mascot      |
|  | 1162.6367  | 1162.5522   | -0.0845 | -73   | 141        | 149               | EWFVALNKR         |         |                         |      | Mascot      |
|  | 1636.7384  | 1636.8359   | 0.0975  | 60    | 102        | 115               | GRLHATESFTDDCK    |         | Carbamidomethyl (C)[13] |      | Mascot      |
|  | 1683.0355  | 1682.9154   | -0.1201 | -71   | 2          | 15                | NVPLLLFLLFQLPR    |         |                         |      | Mascot      |
|  | 1726.7853  | 1726.8834   | 0.0981  | 57    | 104        | 117               | LHATESFTDDCKFR    |         | Carbamidomethyl (C)[11] |      | Mascot      |
|  | 1814.076   | 1813.9503   | -0.1257 | -69   | 1          | 15                | MNVPLLLFLLFQLPR   |         |                         |      | Mascot      |
|  | 1925.0127  | 1924.9214   | -0.0913 | -47   | 189        | 205               | EEEKQPPPHPSKPSLPK |         |                         |      | Mascot      |

29 RNA binding motif protein 19 [Danio rerio] gi|190337757 104446.7 5.84 14 34 0

#### Peptide Information

|  | Calc. Mass | Obsrv. Mass | ± da    | ± ppm | Start Seq. | End Sequence Seq. | Ion Score    | C. I. % | Modification     | Rank | Result Type |
|--|------------|-------------|---------|-------|------------|-------------------|--------------|---------|------------------|------|-------------|
|  | 846.5229   | 846.427     | -0.0959 | -113  | 1          | 7                 | MSRLIVK      |         |                  |      | Mascot      |
|  | 1045.6365  | 1045.5497   | -0.0868 | -83   | 801        | 809               | QTTSKILVR    |         |                  |      | Mascot      |
|  | 1074.5426  | 1074.5693   | 0.0267  | 25    | 204        | 212               | QDNEKEALK    |         |                  |      | Mascot      |
|  | 1074.5426  | 1074.5693   | 0.0267  | 25    | 204        | 212               | QDNEKEALK    |         |                  |      | Mascot      |
|  | 1159.6066  | 1159.6293   | 0.0227  | 20    | 337        | 346               | SEAEVERALR   |         |                  |      | Mascot      |
|  | 1340.6073  | 1340.6671   | 0.0598  | 45    | 225        | 235               | MVEKSDMLDEK  |         | Oxidation (M)[1] |      | Mascot      |
|  | 1401.6678  | 1401.6125   | -0.0553 | -39   | 213        | 224               | TGLSDMDYLRSK |         | Oxidation (M)[6] |      | Mascot      |

|    |                                                                     |           |         |     |              |         |                        |   |                                          |        |
|----|---------------------------------------------------------------------|-----------|---------|-----|--------------|---------|------------------------|---|------------------------------------------|--------|
|    | 1401.6678                                                           | 1401.6125 | -0.0553 | -39 | 213          | 224     | TGLSDMDYLRSK           |   | Oxidation (M)[6]                         | Mascot |
|    | 1475.7522                                                           | 1475.7563 | 0.0041  | 3   | 549          | 561     | MALGETQIVQETR          |   |                                          | Mascot |
|    | 1516.6294                                                           | 1516.6671 | 0.0377  | 25  | 404          | 415     | NMPYTCTEEDLK           |   | Carbamidomethyl (C)[6], Oxidation (M)[2] | Mascot |
|    | 1611.8047                                                           | 1611.7488 | -0.0559 | -35 | 209          | 222     | EALKTGLSDMDYLR         |   |                                          | Mascot |
|    | 1636.7449                                                           | 1636.8359 | 0.091   | 56  | 479          | 494     | EKADQGPDPAGSSSYK       |   |                                          | Mascot |
|    | 1718.8544                                                           | 1718.8691 | 0.0147  | 9   | 861          | 875     | AFSALCHSTHLYGRR        |   |                                          | Mascot |
|    | 1775.8759                                                           | 1775.8904 | 0.0145  | 8   | 861          | 875     | AFSALCHSTHLYGRR        |   | Carbamidomethyl (C)[6]                   | Mascot |
|    | 1924.9183                                                           | 1924.9214 | 0.0031  | 2   | 21           | 37      | MFADFGTLTDCALKFTK      |   | Oxidation (M)[1]                         | Mascot |
|    | 1946.0706                                                           | 1945.8909 | -0.1797 | -92 | 278          | 294     | STRPAIEPTTEFTVKLR      |   |                                          | Mascot |
|    | 2238.0754                                                           | 2238.103  | 0.0276  | 12  | 761          | 778     | AMRQLQHCTVDEHQLEV<br>K |   | Carbamidomethyl (C)[8], Oxidation (M)[2] | Mascot |
| 30 | PREDICTED: sialic acid-binding Ig-like lectin 14-like [Danio rerio] |           |         |     | gi 292621690 | 30169.7 | 5.56                   | 7 | 34                                       | 0      |

Peptide Information

| Calc. Mass | Obsrv. Mass | ± da    | ± ppm | Start Seq. | End Seq. | Sequence                         | Ion Score | C. I. | % Modification            | Rank | Result Type |
|------------|-------------|---------|-------|------------|----------|----------------------------------|-----------|-------|---------------------------|------|-------------|
| 1162.5674  | 1162.5522   | -0.0152 | -13   | 224        | 233      | YHGNVKGEMK                       |           |       |                           |      | Mascot      |
| 1401.6202  | 1401.6125   | -0.0077 | -5    | 212        | 223      | EDNYTSIECTVK                     |           |       |                           |      | Mascot      |
| 1401.6202  | 1401.6125   | -0.0077 | -5    | 212        | 223      | EDNYTSIECTVK                     |           |       |                           |      | Mascot      |
| 1791.7048  | 1791.8861   | 0.1813  | 101   | 245        | 259      | YDDEISEENSTCQMK                  |           |       |                           |      | Mascot      |
| 1923.9731  | 1923.931    | -0.0421 | -22   | 92         | 109      | LIGSLGSFNCSLEIDEVK               |           |       |                           |      | Mascot      |
| 2238.1433  | 2238.103    | -0.0403 | -18   | 90         | 109      | TRLIGSLGSFNCSLEIDEV<br>K         |           |       | Carbamidomethyl (C)[12]   |      | Mascot      |
| 2283.0183  | 2283.189    | 0.1707  | 75    | 166        | 183      | CSVRHTCPTYQPSFSWN<br>R           |           |       | Carbamidomethyl (C)[1,7]  |      | Mascot      |
| 3337.6279  | 3337.7722   | 0.1443  | 43    | 32         | 59       | MKALVSSCVVLPNCFTYP<br>VHQQQQPSYR |           |       | Carbamidomethyl (C)[8,13] |      | Mascot      |

|    |                                                                                |  |  |  |  |              |         |      |    |    |   |
|----|--------------------------------------------------------------------------------|--|--|--|--|--------------|---------|------|----|----|---|
| 31 | PREDICTED: putative uncharacterized zinc finger protein 814-like [Danio rerio] |  |  |  |  | gi 292610426 | 61962.5 | 9.03 | 14 | 34 | 0 |
|----|--------------------------------------------------------------------------------|--|--|--|--|--------------|---------|------|----|----|---|

Peptide Information

| Calc. Mass | Obsrv. Mass | ± da    | ± ppm | Start Seq. | End Seq. | Sequence        | Ion Score | C. I. | % Modification           | Rank | Result Type |
|------------|-------------|---------|-------|------------|----------|-----------------|-----------|-------|--------------------------|------|-------------|
| 846.5308   | 846.427     | -0.1038 | -123  | 477        | 483      | RFILAAAR        |           |       |                          |      | Mascot      |
| 916.4305   | 916.5383    | 0.1078  | 118   | 90         | 97       | GSVDVHMR        |           |       | Oxidation (M)[7]         |      | Mascot      |
| 916.4305   | 916.5383    | 0.1078  | 118   | 90         | 97       | GSVDVHMR        |           |       | Oxidation (M)[7]         |      | Mascot      |
| 996.5472   | 996.5976    | 0.0504  | 51    | 350        | 358      | IHTGEKPSK       |           |       |                          |      | Mascot      |
| 1045.5789  | 1045.5497   | -0.0292 | -28   | 365        | 373      | SFTHKGQLK       |           |       |                          |      | Mascot      |
| 1123.5234  | 1123.434    | -0.0894 | -80   | 243        | 252      | SALTCVQCGK      |           |       | Carbamidomethyl (C)[5,8] |      | Mascot      |
| 1716.7468  | 1716.8713   | 0.1245  | 73    | 434        | 448      | YHSGEKLHECPECGK |           |       |                          |      | Mascot      |

|  |           |           |         |     |     |     |                          |  |  |  |  |                            |        |
|--|-----------|-----------|---------|-----|-----|-----|--------------------------|--|--|--|--|----------------------------|--------|
|  | 1718.7625 | 1718.8691 | 0.1066  | 62  | 154 | 168 | LHTEDGPFICGQCGK          |  |  |  |  | Carbamidomethyl (C)[10,13] | Mascot |
|  | 1923.9731 | 1923.931  | -0.0421 | -22 | 2   | 17  | EFIKMEIVDSIDAELR         |  |  |  |  | Oxidation (M)[5]           | Mascot |
|  | 1945.8755 | 1945.8909 | 0.0154  | 8   | 294 | 309 | THSGEKPYTCHQCGKR         |  |  |  |  | Carbamidomethyl (C)[10,13] | Mascot |
|  | 2215.0569 | 2215.0991 | 0.0422  | 19  | 458 | 476 | MHLIIHSGERPFSCKDK<br>GK  |  |  |  |  | Carbamidomethyl (C)[14]    | Mascot |
|  | 2225.1106 | 2225.1265 | 0.0159  | 7   | 178 | 196 | HHVKIHYAGKPFTCELCG<br>K  |  |  |  |  | Carbamidomethyl (C)[14]    | Mascot |
|  | 2232.0688 | 2232.0613 | -0.0075 | -3  | 322 | 341 | SHTGEKPFICPQCGKSFT<br>HK |  |  |  |  |                            | Mascot |
|  | 2238.043  | 2238.103  | 0.06    | 27  | 210 | 229 | IHTGEKPYTCSHCGKSFT<br>NK |  |  |  |  |                            | Mascot |
|  | 2299.0781 | 2299.1938 | 0.1157  | 50  | 98  | 117 | IHTGERPYACIQCGKSFT<br>CK |  |  |  |  | Carbamidomethyl (C)[10]    | Mascot |

32 PREDICTED: tudor domain-containing protein 7-like [Danio rerio] gi|326669649 45873.8 9.21 8 34 0

#### Peptide Information

| Calc. Mass | Obsrv. Mass | ± da    | ± ppm | Start Seq. | End Seq. | Sequence                       | Ion Score | C. I. | % Modification         | Rank | Result Type |
|------------|-------------|---------|-------|------------|----------|--------------------------------|-----------|-------|------------------------|------|-------------|
| 870.4679   | 870.5443    | 0.0764  | 88    | 298        | 305      | HELVSGTK                       |           |       |                        |      | Mascot      |
| 1123.5929  | 1123.434    | -0.1589 | -141  | 36         | 44       | MTLPSRFQK                      |           |       | Oxidation (M)[1]       |      | Mascot      |
| 1694.8068  | 1694.8936   | 0.0868  | 51    | 263        | 276      | NQVCAAKVENNWYR                 |           |       |                        |      | Mascot      |
| 1694.8068  | 1694.8936   | 0.0868  | 51    | 263        | 276      | NQVCAAKVENNWYR                 |           |       |                        |      | Mascot      |
| 1710.873   | 1710.8848   | 0.0118  | 7     | 367        | 380      | KVMIYLVDSQEER                  |           |       |                        |      | Mascot      |
| 1726.868   | 1726.8834   | 0.0154  | 9     | 367        | 380      | KVMIYLVDSQEER                  |           |       | Oxidation (M)[3]       |      | Mascot      |
| 1958.9719  | 1958.9871   | 0.0152  | 8     | 332        | 347      | QWSEEASIVFRNHVEK               |           |       |                        |      | Mascot      |
| 2225.1013  | 2225.1265   | 0.0252  | 11    | 239        | 256      | LVVLMGEMILHYNKMEEK             |           |       | Oxidation (M)[5,8,15]  |      | Mascot      |
| 2283.0308  | 2283.189    | 0.1582  | 69    | 381        | 399      | DIWLHDIMAEFTDEMTKT<br>A        |           |       | Oxidation (M)[8]       |      | Mascot      |
| 2299.0256  | 2299.1938   | 0.1682  | 73    | 381        | 399      | DIWLHDIMAEFTDEMTKT<br>A        |           |       | Oxidation (M)[8,15]    |      | Mascot      |
| 2996.6501  | 2996.4929   | -0.1572 | -52   | 306        | 331      | LRPLTQEFQCLPFQAITA<br>QLAGLKPR |           |       | Carbamidomethyl (C)[9] |      | Mascot      |

33 PREDICTED: zinc finger protein 226-like [Danio rerio] gi|292613304 44890.6 9.21 12 34 0

#### Peptide Information

| Calc. Mass | Obsrv. Mass | ± da   | ± ppm | Start Seq. | End Seq. | Sequence   | Ion Score | C. I. | % Modification                             | Rank | Result Type |
|------------|-------------|--------|-------|------------|----------|------------|-----------|-------|--------------------------------------------|------|-------------|
| 923.4217   | 923.4473    | 0.0256 | 28    | 380        | 387      | HSPKDDPQ   |           |       |                                            |      | Mascot      |
| 923.4217   | 923.4473    | 0.0256 | 28    | 380        | 387      | HSPKDDPQ   |           |       |                                            |      | Mascot      |
| 1159.5789  | 1159.6293   | 0.0504 | 43    | 231        | 239      | AENFRVHMR  |           |       |                                            |      | Mascot      |
| 1179.5099  | 1179.614    | 0.1041 | 88    | 343        | 351      | EDYLSEHMR  |           |       |                                            |      | Mascot      |
| 1340.5908  | 1340.6671   | 0.0763 | 57    | 286        | 295      | CKYNLACHMK |           |       | Carbamidomethyl (C)[1,7], Oxidation (M)[9] |      | Mascot      |



|           |           |         |     |     |     |                         |                            |        |
|-----------|-----------|---------|-----|-----|-----|-------------------------|----------------------------|--------|
| 1694.7261 | 1694.8936 | 0.1675  | 99  | 240 | 254 | VHTGESPYTCAQCGK         | Carbamidomethyl (C)[10,13] | Mascot |
| 1694.7261 | 1694.8936 | 0.1675  | 99  | 240 | 254 | VHTGESPYTCAQCGK         | Carbamidomethyl (C)[10,13] | Mascot |
| 1718.7836 | 1718.8691 | 0.0855  | 50  | 72  | 86  | IHTGESLITCDQCGK         | Carbamidomethyl (C)[10,13] | Mascot |
| 1924.868  | 1924.9214 | 0.0534  | 28  | 100 | 114 | THTKEKPYWCTECGK         | Carbamidomethyl (C)[10,13] | Mascot |
| 1961.9109 | 1961.8831 | -0.0278 | -14 | 323 | 338 | WLHRTDKPFACDQCGK        | Carbamidomethyl (C)[11]    | Mascot |
| 2214.9785 | 2215.0991 | 0.1206  | 54  | 17  | 35  | DQNEEHQDFLPDEPSSV<br>TK |                            | Mascot |
| 2216.0376 | 2216.0835 | 0.0459  | 21  | 128 | 145 | IHTGEKPFSCQYCGKTFR      | Carbamidomethyl (C)[10,13] | Mascot |
| 2216.0376 | 2216.0835 | 0.0459  | 21  | 128 | 145 | IHTGEKPFSCQYCGKTFR      | Carbamidomethyl (C)[10,13] | Mascot |
| 2225.0479 | 2225.1265 | 0.0786  | 35  | 296 | 314 | IHTGEKPFCTDECCKSFL<br>R | Carbamidomethyl (C)[10]    | Mascot |
| 2237.0525 | 2237.0815 | 0.029   | 13  | 180 | 198 | VHMRHTGEKPFACEHC<br>GK  | Carbamidomethyl (C)[14]    | Mascot |

34 PREDICTED: rapamycin-insensitive companion of mTOR, partial [Danio rerio] gi|326667603 180801.9 7.89 18 34 0

#### Peptide Information

| Calc. Mass | Obsrv. Mass | ± da    | ± ppm | Start Seq. | End Seq. | Sequence                  | Ion Score | C. I. % | Modification                             | Rank | Result Type |
|------------|-------------|---------|-------|------------|----------|---------------------------|-----------|---------|------------------------------------------|------|-------------|
| 846.3708   | 846.427     | 0.0562  | 66    | 1055       | 1060     | LMHCNR                    |           |         | Carbamidomethyl (C)[4], Oxidation (M)[2] |      | Mascot      |
| 870.4832   | 870.5443    | 0.0611  | 70    | 493        | 499      | WPNVNLK                   |           |         |                                          |      | Mascot      |
| 877.4162   | 877.4234    | 0.0072  | 8     | 923        | 930      | ASGWDSVR                  |           |         |                                          |      | Mascot      |
| 877.4162   | 877.4234    | 0.0072  | 8     | 923        | 930      | ASGWDSVR                  |           |         |                                          |      | Mascot      |
| 1051.5782  | 1051.7157   | 0.1375  | 131   | 758        | 766      | GYVSKQLEK                 |           |         |                                          |      | Mascot      |
| 1074.5426  | 1074.5693   | 0.0267  | 25    | 1367       | 1377     | TSPPAGDKSSK               |           |         |                                          |      | Mascot      |
| 1074.5426  | 1074.5693   | 0.0267  | 25    | 1367       | 1377     | TSPPAGDKSSK               |           |         |                                          |      | Mascot      |
| 1162.5851  | 1162.5522   | -0.0329 | -28   | 792        | 801      | KPVDGDNYVR                |           |         |                                          |      | Mascot      |
| 1179.6957  | 1179.614    | -0.0817 | -69   | 402        | 412      | LRASAAVNHLK               |           |         |                                          |      | Mascot      |
| 1340.6692  | 1340.6671   | -0.0021 | -2    | 1036       | 1048     | SPTDTKGTSTFTAK            |           |         |                                          |      | Mascot      |
| 1401.7888  | 1401.6125   | -0.1763 | -126  | 512        | 522      | RLLYFYKPSSK               |           |         |                                          |      | Mascot      |
| 1401.7888  | 1401.6125   | -0.1763 | -126  | 512        | 522      | RLLYFYKPSSK               |           |         |                                          |      | Mascot      |
| 1646.9154  | 1646.8207   | -0.0947 | -58   | 118        | 132      | MVRACIAICELALK            |           |         |                                          |      | Mascot      |
| 1710.8843  | 1710.8848   | 0.0005  | 0     | 656        | 670      | ILTAATDNCRLYATK           |           |         | Carbamidomethyl (C)[9]                   |      | Mascot      |
| 1718.9006  | 1718.8691   | -0.0315 | -18   | 1185       | 1199     | MQHSLSNNHILLSK            |           |         |                                          |      | Mascot      |
| 1945.9813  | 1945.8909   | -0.0904 | -46   | 444        | 458      | DQQHHRPHKDIYIMK           |           |         |                                          |      | Mascot      |
| 1961.9763  | 1961.8831   | -0.0932 | -48   | 444        | 458      | DQQHHRPHKDIYIMK           |           |         | Oxidation (M)[14]                        |      | Mascot      |
| 2133.0034  | 2132.8389   | -0.1645 | -77   | 611        | 628      | MLEKCGVFQCLLNLCMSK        |           |         | Carbamidomethyl (C)[5], Oxidation (M)[1] |      | Mascot      |
| 2211.1987  | 2211.1128   | -0.0859 | -39   | 121        | 140      | ACIAICELALKNPEVVAQ<br>R   |           |         | Carbamidomethyl (C)[2]                   |      | Mascot      |
| 2298.2312  | 2298.1926   | -0.0386 | -17   | 1254       | 1274     | LQQQRIHPSLSHSEALAS<br>PAK |           |         |                                          |      | Mascot      |

|    |                          |            |           |         |     |      |      |                                    |                                                     |
|----|--------------------------|------------|-----------|---------|-----|------|------|------------------------------------|-----------------------------------------------------|
| 35 | keratin 18 [Danio rerio] | 2555.3464  | 2555.1926 | -0.1538 | -60 | 1301 | 1323 | ALSFASLDKEDLLSPINHS<br>TLQR        | Mascot                                              |
|    |                          | 2555.3464  | 2555.1926 | -0.1538 | -60 | 1301 | 1323 | ALSFASLDKEDLLSPINHS<br>TLQR        | Mascot                                              |
|    |                          | 3337.5789  | 3337.7722 | 0.1933  | 58  | 1329 | 1358 | SMVSSATFGCSEDYIGLA<br>LPLDINNMFQIK | Carbamidomethyl (C)[10], Oxidation (M)[2]<br>Mascot |
|    |                          | qj29335504 | 41247.4   | 5.07    | 9   | 33   | 0    |                                    |                                                     |

### Peptide Information

| Calc. Mass | Obsrv. Mass | ± da    | ± ppm | Start Seq. | End Seq. | Sequence    | Ion Score | C. I. | % Modification   | Rank | Result Type |
|------------|-------------|---------|-------|------------|----------|-------------|-----------|-------|------------------|------|-------------|
| 846.4315   | 846.427     | -0.0045 | -5    | 226        | 232      | SEVNELR     |           |       |                  |      | Mascot      |
| 882.4753   | 882.5673    | 0.092   | 104   | 188        | 194      | YEKMALK     |           |       |                  |      | Mascot      |
| 996.4996   | 996.5976    | 0.098   | 98    | 100        | 107      | YESELSIR    |           |       |                  |      | Mascot      |
| 1045.4697  | 1045.5497   | 0.08    | 77    | 52         | 60       | GPDVHDYSR   |           |       |                  |      | Mascot      |
| 1073.5474  | 1073.5443   | -0.0031 | -3    | 323        | 331      | LQDALEEQK   |           |       |                  |      | Mascot      |
| 1078.6255  | 1078.5513   | -0.0742 | -69   | 23         | 31       | LASYLEKVR   |           |       |                  |      | Mascot      |
| 1201.6423  | 1201.6284   | -0.0139 | -12   | 323        | 332      | LQDALEEQKK  |           |       |                  |      | Mascot      |
| 1256.5688  | 1256.7015   | 0.1327  | 106   | 148        | 157      | NHDNEVMELR  |           |       |                  |      | Mascot      |
| 1256.5688  | 1256.7015   | 0.1327  | 106   | 148        | 157      | NHDNEVMELR  | 1         | 0     |                  |      | Mascot      |
| 1340.6879  | 1340.6671   | -0.0208 | -16   | 303        | 313      | MKLEAEIATYR |           |       | Oxidation (M)[1] |      | Mascot      |

|    |                          |              |         |      |   |    |   |
|----|--------------------------|--------------|---------|------|---|----|---|
| 36 | Zgc:195056 [Danio rerio] | gi 190337597 | 56955.3 | 6.95 | 9 | 33 | 0 |
|----|--------------------------|--------------|---------|------|---|----|---|

### Peptide Information

| Calc. Mass | Obsrv. Mass | ± da    | ± ppm | Start Seq. | End Seq. | Sequence               | Ion Score | C. I. % | Modification           | Rank | Result Type |
|------------|-------------|---------|-------|------------|----------|------------------------|-----------|---------|------------------------|------|-------------|
| 842.4366   | 842.5103    | 0.0737  | 87    | 260        | 267      | TLDPGSPR               |           |         |                        |      | Mascot      |
| 1123.5717  | 1123.434    | -0.1377 | -123  | 430        | 439      | CFIAFGVGPR             |           |         | Carbamidomethyl (C)[1] |      | Mascot      |
| 1475.6658  | 1475.7563   | 0.0905  | 61    | 484        | 495      | YPETFSIICCSR           |           |         | Carbamidomethyl (C)[9] |      | Mascot      |
| 1710.8949  | 1710.8848   | -0.0101 | -6    | 268        | 281      | DFIDGYLLEIEKQK         |           |         |                        |      | Mascot      |
| 1792.0844  | 1791.8861   | -0.1983 | -111  | 449        | 463      | TALFLFITSLLQRIR        |           |         |                        |      | Mascot      |
| 1958.9792  | 1958.9871   | 0.0079  | 4     | 364        | 381      | CGNIAPFGLFHETVQPTK     |           |         |                        |      | Mascot      |
| 2216.1455  | 2216.0835   | -0.062  | -28   | 464        | 483      | FSLPPDAKPMMDGILSII R   |           |         |                        |      | Mascot      |
| 2216.1455  | 2216.0835   | -0.062  | -28   | 464        | 483      | FSLPPDAKPMMDGILSII R   |           |         |                        |      | Mascot      |
| 2232.1404  | 2232.0613   | -0.0791 | -35   | 464        | 483      | FSLPPDAKPMMDGILSII R   |           |         | Oxidation (M)[10]      |      | Mascot      |
| 2238.1687  | 2238.103    | -0.0657 | -29   | 147        | 165      | SLESRVLEESQYLIAEML K   |           |         |                        |      | Mascot      |
| 2254.1636  | 2254.0342   | -0.1294 | -57   | 147        | 165      | SLESRVLEESQYLIAEML K   |           |         | Oxidation (M)[17]      |      | Mascot      |
| 2300.2737  | 2300.1829   | -0.0908 | -39   | 37         | 57       | CRFPPGPTPLPFVGNLP HLLK |           |         |                        |      | Mascot      |

37 Pip5k3 protein [Danio rerio] gi|33604217 106353.4 7.95 14 33 0

Peptide Information

| Calc. Mass | Obsrv. Mass | ± da    | ± ppm | Start Seq. | End Seq. | Sequence                | Ion Score | C. I. % | Modification                              | Rank | Result Type |
|------------|-------------|---------|-------|------------|----------|-------------------------|-----------|---------|-------------------------------------------|------|-------------|
| 846.5117   | 846.427     | -0.0847 | -100  | 889        | 895      | KLEMVVK                 |           |         |                                           |      | Mascot      |
| 916.5284   | 916.5383    | 0.0099  | 11    | 186        | 193      | GCVQIVLK                |           |         | Carbamidomethyl (C)[2]                    |      | Mascot      |
| 916.5284   | 916.5383    | 0.0099  | 11    | 186        | 193      | GCVQIVLK                |           |         | Carbamidomethyl (C)[2]                    |      | Mascot      |
| 1021.5173  | 1021.5065   | -0.0108 | -11   | 66         | 73       | QREGTQFR                |           |         |                                           |      | Mascot      |
| 1021.5173  | 1021.5065   | -0.0108 | -11   | 66         | 73       | QREGTQFR                |           |         |                                           |      | Mascot      |
| 1123.5742  | 1123.434    | -0.1402 | -125  | 445        | 455      | NPSPVVPNGDK             |           |         |                                           |      | Mascot      |
| 1162.6102  | 1162.5522   | -0.058  | -50   | 404        | 412      | LQELFQQEK               |           |         |                                           |      | Mascot      |
| 1179.6805  | 1179.614    | -0.0665 | -56   | 283        | 292      | LLEICLPPPK              |           |         | Carbamidomethyl (C)[5]                    |      | Mascot      |
| 1401.6025  | 1401.6125   | 0.01    | 7     | 340        | 350      | EEKMEDMFAQK             |           |         | Oxidation (M)[4]                          |      | Mascot      |
| 1401.6025  | 1401.6125   | 0.01    | 7     | 340        | 350      | EEKMEDMFAQK             |           |         | Oxidation (M)[4]                          |      | Mascot      |
| 1564.8152  | 1564.7472   | -0.068  | -43   | 906        | 918      | MPTVVSPELYRTR           |           |         | Oxidation (M)[1]                          |      | Mascot      |
| 1694.8795  | 1694.8936   | 0.0141  | 8     | 825        | 838      | LVHDNPLYIRSHCK          |           |         |                                           |      | Mascot      |
| 1694.8795  | 1694.8936   | 0.0141  | 8     | 825        | 838      | LVHDNPLYIRSHCK          |           |         |                                           |      | Mascot      |
| 1710.9247  | 1710.8848   | -0.0399 | -23   | 775        | 788      | LDLLVMENLFYGRK          |           |         |                                           |      | Mascot      |
| 1718.8126  | 1718.8691   | 0.0565  | 33    | 611        | 626      | NSPAKPSDNSMSQLSR        |           |         |                                           |      | Mascot      |
| 1726.9196  | 1726.8834   | -0.0362 | -21   | 775        | 788      | LDLLVMENLFYGRK          |           |         | Oxidation (M)[6]                          |      | Mascot      |
| 1924.8721  | 1924.9214   | 0.0493  | 26    | 926        | 941      | YFLMVPDHW SGLGLNC       |           |         | Carbamidomethyl (C)[16], Oxidation (M)[4] |      | Mascot      |
| 1945.976   | 1945.8909   | -0.0851 | -44   | 609        | 626      | VKN SPAKPSDNSMSQLS<br>R |           |         |                                           |      | Mascot      |
| 1961.9709  | 1961.8831   | -0.0878 | -45   | 609        | 626      | VKN SPAKPSDNSMSQLS<br>R |           |         | Oxidation (M)[13]                         |      | Mascot      |
| 2133.0745  | 2132.8389   | -0.2356 | -110  | 806        | 824      | TDQ GKESCEVLLDENLL<br>K |           |         |                                           |      | Mascot      |

38 PREDICTED: tight junction-associated protein 1-like [Danio rerio] gi|326672789 73121.9 5.65 10 33 0

Peptide Information

| Calc. Mass | Obsrv. Mass | ± da    | ± ppm | Start Seq. | End Seq. | Sequence         | Ion Score | C. I. % | Modification     | Rank | Result Type |
|------------|-------------|---------|-------|------------|----------|------------------|-----------|---------|------------------|------|-------------|
| 996.4744   | 996.5976    | 0.1232  | 124   | 658        | 666      | AQEHGNLLD        |           |         |                  |      | Mascot      |
| 1130.6     | 1130.5957   | -0.0043 | -4    | 644        | 652      | MGVHHLHRK        |           |         | Oxidation (M)[1] |      | Mascot      |
| 1256.6593  | 1256.7015   | 0.0422  | 34    | 42         | 51       | ILQQQNEDLR       |           |         |                  |      | Mascot      |
| 1256.6593  | 1256.7015   | 0.0422  | 34    | 42         | 51       | ILQQQNEDLR       | 2         | 0       |                  |      | Mascot      |
| 1475.6833  | 1475.7563   | 0.073   | 49    | 405        | 420      | SGTSSSSGGGIASHQR |           |         |                  |      | Mascot      |
| 1564.7887  | 1564.7472   | -0.0415 | -27   | 136        | 148      | KTMDQEIVELTNK    |           |         | Oxidation (M)[3] |      | Mascot      |

|    |                                                      |           |         |    |              |     |                          |      |                        |    |        |
|----|------------------------------------------------------|-----------|---------|----|--------------|-----|--------------------------|------|------------------------|----|--------|
|    | 1646.8352                                            | 1646.8207 | -0.0145 | -9 | 168          | 181 | QDCNLAVQLLKCNK           |      | Carbamidomethyl (C)[3] |    | Mascot |
|    | 1682.8094                                            | 1682.9154 | 0.106   | 63 | 189          | 202 | FADLPYELQDMVNK           |      |                        |    | Mascot |
|    | 1698.8043                                            | 1698.8708 | 0.0665  | 39 | 189          | 202 | FADLPYELQDMVNK           |      | Oxidation (M)[11]      |    | Mascot |
|    | 1924.863                                             | 1924.9214 | 0.0584  | 30 | 587          | 604 | RQEFAEDVGSAGSSAEE<br>R   |      |                        |    | Mascot |
|    | 1945.8158                                            | 1945.8909 | 0.0751  | 39 | 507          | 525 | GAYSDGEEGSSAQSWT<br>ASR  |      |                        |    | Mascot |
|    | 2216.05                                              | 2216.0835 | 0.0335  | 15 | 470          | 490 | MAPSSDGLVNRTSFSS<br>ETVK |      | Oxidation (M)[1]       |    | Mascot |
|    | 2216.05                                              | 2216.0835 | 0.0335  | 15 | 470          | 490 | MAPSSDGLVNRTSFSS<br>ETVK |      | Oxidation (M)[1]       |    | Mascot |
| 39 | PREDICTED: zinc finger protein 84-like [Danio rerio] |           |         |    | gi 326667370 |     | 65643.1                  | 9.45 | 13                     | 33 | 0      |

#### Peptide Information

| Calc. Mass | Obsrv. Mass | ± da    | ± ppm | Start Seq. | End Seq. | Sequence                 | Ion Score | C. I. | % Modification                            | Rank | Result Type |
|------------|-------------|---------|-------|------------|----------|--------------------------|-----------|-------|-------------------------------------------|------|-------------|
| 882.5155   | 882.5673    | 0.0518  | 59    | 475        | 481      | ELKLHSR                  |           |       |                                           |      | Mascot      |
| 1021.5247  | 1021.5065   | -0.0182 | -18   | 116        | 123      | GYLKTHMR                 |           |       | Oxidation (M)[7]                          |      | Mascot      |
| 1021.5247  | 1021.5065   | -0.0182 | -18   | 116        | 123      | GYLKTHMR                 |           |       | Oxidation (M)[7]                          |      | Mascot      |
| 1073.552   | 1073.5443   | -0.0077 | -7    | 171        | 179      | KGTLNTHMR                |           |       | Oxidation (M)[8]                          |      | Mascot      |
| 1074.5612  | 1074.5693   | 0.0081  | 8     | 87         | 95       | KSSLDLHMK                |           |       | Oxidation (M)[8]                          |      | Mascot      |
| 1074.5612  | 1074.5693   | 0.0081  | 8     | 87         | 95       | KSSLDLHMK                |           |       | Oxidation (M)[8]                          |      | Mascot      |
| 1159.6218  | 1159.6293   | 0.0075  | 6     | 482        | 491      | LHSDSVKAFR               |           |       |                                           |      | Mascot      |
| 1710.8302  | 1710.8848   | 0.0546  | 32    | 258        | 272      | TKTEEKPFACVQCAR          |           |       |                                           |      | Mascot      |
| 1791.8152  | 1791.8861   | 0.0709  | 40    | 342        | 356      | IHTGEKPFCEQCGK           |           |       | Carbamidomethyl (C)[10,13]                |      | Mascot      |
| 1813.8723  | 1813.9503   | 0.078   | 43    | 260        | 275      | TEEKPFACVQCARGFK         |           |       |                                           |      | Mascot      |
| 2210.978   | 2211.1128   | 0.1348  | 61    | 96         | 115      | AHMGEKPYACAECGKSF<br>THK |           |       | Oxidation (M)[3]                          |      | Mascot      |
| 2216.0195  | 2216.0835   | 0.064   | 29    | 172        | 190      | GTLNTHMRSHSGENHHI<br>CK  |           |       | Carbamidomethyl (C)[18]                   |      | Mascot      |
| 2216.0195  | 2216.0835   | 0.064   | 29    | 172        | 190      | GTLNTHMRSHSGENHHI<br>CK  |           |       | Carbamidomethyl (C)[18]                   |      | Mascot      |
| 2232.0144  | 2232.0613   | 0.0469  | 21    | 172        | 190      | GTLNTHMRSHSGENHHI<br>CK  |           |       | Carbamidomethyl (C)[18], Oxidation (M)[7] |      | Mascot      |
| 2236.9233  | 2237.0815   | 0.1582  | 71    | 124        | 143      | SHNEESSYSCALCDSSF<br>SRK |           |       |                                           |      | Mascot      |
| 2238.0793  | 2238.103    | 0.0237  | 11    | 426        | 444      | VHTGEKPFVCECGKSF<br>TR   |           |       | Carbamidomethyl (C)[10,13]                |      | Mascot      |
| 2284.0532  | 2284.1787   | 0.1255  | 55    | 204        | 222      | AHMRHTGEKPYECPQC<br>QR   |           |       |                                           |      | Mascot      |
| 2300.0481  | 2300.1829   | 0.1348  | 59    | 204        | 222      | AHMRHTGEKPYECPQC<br>QR   |           |       | Oxidation (M)[3]                          |      | Mascot      |

40 PREDICTED: intermediate filament family orphan 1 [Danio rerio] gi|326676513 70799.8 4.95 10 33 0

#### Peptide Information

| Calc. Mass | Obsrv. Mass | ± da | ± ppm | Start Seq. | End Seq. | Sequence | Ion Score | C. I. | % Modification | Rank | Result Type |
|------------|-------------|------|-------|------------|----------|----------|-----------|-------|----------------|------|-------------|
|------------|-------------|------|-------|------------|----------|----------|-----------|-------|----------------|------|-------------|

|    |                             |           |         |     |              |     |                      |      |   |                                           |   |  |        |
|----|-----------------------------|-----------|---------|-----|--------------|-----|----------------------|------|---|-------------------------------------------|---|--|--------|
|    | 1045.575                    | 1045.5497 | -0.0253 | -24 | 570          | 578 | RLITQSGDR            |      |   |                                           |   |  | Mascot |
|    | 1078.4775                   | 1078.5513 | 0.0738  | 68  | 1            | 8   | MPDFEHFR             |      |   |                                           |   |  | Mascot |
|    | 1159.6317                   | 1159.6293 | -0.0024 | -2  | 96           | 106 | NDLGSNISVLK          |      |   |                                           |   |  | Mascot |
|    | 1179.662                    | 1179.614  | -0.048  | -41 | 511          | 520 | VIKDTESLFK           |      |   |                                           |   |  | Mascot |
|    | 1401.7307                   | 1401.6125 | -0.1182 | -84 | 114          | 124 | CFLAKVHELER          |      |   | Carbamidomethyl (C)[1]                    |   |  | Mascot |
|    | 1401.7307                   | 1401.6125 | -0.1182 | -84 | 114          | 124 | CFLAKVHELER          |      |   | Carbamidomethyl (C)[1]                    |   |  | Mascot |
|    | 1611.6423                   | 1611.7488 | 0.1065  | 66  | 547          | 558 | HLHEMEMCSMK          |      |   | Carbamidomethyl (C)[9], Oxidation (M)[6]  |   |  | Mascot |
|    | 1694.7271                   | 1694.8936 | 0.1665  | 98  | 547          | 559 | HLHEMEMCSMKR         |      |   |                                           |   |  | Mascot |
|    | 1694.7271                   | 1694.8936 | 0.1665  | 98  | 547          | 559 | HLHEMEMCSMKR         |      |   |                                           |   |  | Mascot |
|    | 1710.7219                   | 1710.8848 | 0.1629  | 95  | 547          | 559 | HLHEMEMCSMKR         |      |   | Oxidation (M)[6]                          |   |  | Mascot |
|    | 1718.7744                   | 1718.8691 | 0.0947  | 55  | 1            | 13  | MPDFEHFRFSYSR        |      |   |                                           |   |  | Mascot |
|    | 1726.7168                   | 1726.8834 | 0.1666  | 96  | 547          | 559 | HLHEMEMCSMKR         |      |   | Oxidation (M)[6,8]                        |   |  | Mascot |
|    | 2214.8857                   | 2215.0991 | 0.2134  | 96  | 542          | 558 | SDMNRHLHEMEMCSM<br>K |      |   | Carbamidomethyl (C)[14], Oxidation (M)[3] |   |  | Mascot |
|    | 2237.1184                   | 2237.0815 | -0.0369 | -16 | 523          | 541 | EKEYQDTIDQIELELATAK  |      |   |                                           |   |  | Mascot |
| 41 | lft81 protein [Danio rerio] |           |         |     | gi 145337899 |     | 29908.3              | 5.76 | 8 | 33                                        | 0 |  |        |

#### Peptide Information

| Calc. Mass | Obsrv. Mass | ± da    | ± ppm | Start Seq. | End Seq. | Sequence                  | Ion Score | C. I. | % Modification         | Rank | Result Type |
|------------|-------------|---------|-------|------------|----------|---------------------------|-----------|-------|------------------------|------|-------------|
| 870.5519   | 870.5443    | -0.0076 | -9    | 200        | 206      | VLRQQVK                   |           |       |                        |      | Mascot      |
| 1045.5636  | 1045.5497   | -0.0139 | -13   | 14         | 21       | TEEILRER                  |           |       |                        |      | Mascot      |
| 1078.4647  | 1078.5513   | 0.0866  | 80    | 138        | 146      | EETAQEEER                 |           |       |                        |      | Mascot      |
| 1162.5885  | 1162.5522   | -0.0363 | -31   | 170        | 179      | ISQSMQVQVR                |           |       |                        |      | Mascot      |
| 1694.8568  | 1694.8936   | 0.0368  | 22    | 22         | 36       | HTAGQQQLQSLEAQR           |           |       |                        |      | Mascot      |
| 1694.8568  | 1694.8936   | 0.0368  | 22    | 22         | 36       | HTAGQQQLQSLEAQR           |           |       |                        |      | Mascot      |
| 1791.96    | 1791.8861   | -0.0739 | -41   | 187        | 202      | YIANTAEQESLGKVLRL         |           |       |                        |      | Mascot      |
| 2225.0879  | 2225.1265   | 0.0386  | 17    | 147        | 163      | YHHINCEREIIESQIQR         |           |       | Carbamidomethyl (C)[6] |      | Mascot      |
| 2283.1914  | 2283.189    | -0.0024 | -1    | 234        | 254      | QCYLKAQSQAPIGHVIQD<br>VGK |           |       |                        |      | Mascot      |

42 PREDICTED: zinc finger protein 567-like [Danio rerio] gi|189534954 36469.3 9.94 10 33 0

#### Peptide Information

| Calc. Mass | Obsrv. Mass | ± da    | ± ppm | Start Seq. | End Seq. | Sequence  | Ion Score | C. I. | % Modification | Rank | Result Type |
|------------|-------------|---------|-------|------------|----------|-----------|-----------|-------|----------------|------|-------------|
| 923.5421   | 923.4473    | -0.0948 | -103  | 47         | 54       | GLLTNHIR  |           |       |                |      | Mascot      |
| 923.5421   | 923.4473    | -0.0948 | -103  | 47         | 54       | GLLTNHIR  |           |       |                |      | Mascot      |
| 1051.6371  | 1051.7157   | 0.0786  | 75    | 46         | 54       | KGLLTNHIR |           |       |                |      | Mascot      |

|           |                             |         |     |     |             |                            |                                           |    |    |   |  |  |        |
|-----------|-----------------------------|---------|-----|-----|-------------|----------------------------|-------------------------------------------|----|----|---|--|--|--------|
| 1078.5891 | 1078.5513                   | -0.0378 | -35 | 210 | 218         | TFVRDAELK                  |                                           |    |    |   |  |  | Mascot |
| 1611.806  | 1611.7488                   | -0.0572 | -35 | 246 | 258         | VHERMHTGEKPYK              |                                           |    |    |   |  |  | Mascot |
| 1646.7413 | 1646.8207                   | 0.0794  | 48  | 139 | 153         | IHSGVKSFACDHCDK            |                                           |    |    |   |  |  | Mascot |
| 1961.8745 | 1961.8831                   | 0.0086  | 4   | 55  | 72          | VHTGEKPFACDHCGASF<br>R     |                                           |    |    |   |  |  | Mascot |
| 2224.9534 | 2225.1265                   | 0.1731  | 78  | 107 | 125         | DHMTIHTDDKPHKCDQC<br>GK    | Oxidation (M)[3]                          |    |    |   |  |  | Mascot |
| 2237.0049 | 2237.0815                   | 0.0766  | 34  | 55  | 74          | VHTGEKPFACDHCGASF<br>RMK   | Oxidation (M)[19]                         |    |    |   |  |  | Mascot |
| 2297.9597 | 2298.1926                   | 0.2329  | 101 | 274 | 292         | MHERTHTGENPYHCPQC<br>GK    | Carbamidomethyl (C)[14], Oxidation (M)[1] |    |    |   |  |  | Mascot |
| 2555.1702 | 2555.1926                   | 0.0224  | 9   | 79  | 100         | EHMTIHTGLRPHTCDQC<br>GLSFR | Oxidation (M)[3]                          |    |    |   |  |  | Mascot |
| 2555.1702 | 2555.1926                   | 0.0224  | 9   | 79  | 100         | EHMTIHTGLRPHTCDQC<br>GLSFR | Oxidation (M)[3]                          |    |    |   |  |  | Mascot |
| 43        | KIAA0682-like [Danio rerio] |         |     |     | gi 49619013 | 104514.8                   | 5.93                                      | 14 | 32 | 0 |  |  |        |

#### Peptide Information

| Calc. Mass | Obsrv. Mass | ± da    | ± ppm | Start Seq. | End Seq. | Sequence               | Ion Score | C. I. | % Modification                           | Rank | Result Type |
|------------|-------------|---------|-------|------------|----------|------------------------|-----------|-------|------------------------------------------|------|-------------|
| 846.5229   | 846.427     | -0.0959 | -113  | 1          | 7        | MSRLIVK                |           |       |                                          |      | Mascot      |
| 1045.6365  | 1045.5497   | -0.0868 | -83   | 802        | 810      | QTTSKILVR              |           |       |                                          |      | Mascot      |
| 1074.5426  | 1074.5693   | 0.0267  | 25    | 205        | 213      | QDNEKEALK              |           |       |                                          |      | Mascot      |
| 1074.5426  | 1074.5693   | 0.0267  | 25    | 205        | 213      | QDNEKEALK              |           |       |                                          |      | Mascot      |
| 1159.6066  | 1159.6293   | 0.0227  | 20    | 338        | 347      | SEAEVERALR             |           |       |                                          |      | Mascot      |
| 1340.6073  | 1340.6671   | 0.0598  | 45    | 226        | 236      | MVEKSDMLDEK            |           |       | Oxidation (M)[1]                         |      | Mascot      |
| 1401.6678  | 1401.6125   | -0.0553 | -39   | 214        | 225      | TGLSDMDYLRSK           |           |       | Oxidation (M)[6]                         |      | Mascot      |
| 1401.6678  | 1401.6125   | -0.0553 | -39   | 214        | 225      | TGLSDMDYLRSK           |           |       | Oxidation (M)[6]                         |      | Mascot      |
| 1475.7522  | 1475.7563   | 0.0041  | 3     | 550        | 562      | MALGETQIVQETR          |           |       |                                          |      | Mascot      |
| 1516.6294  | 1516.6671   | 0.0377  | 25    | 405        | 416      | NMPYTCTEEDLK           |           |       | Carbamidomethyl (C)[6], Oxidation (M)[2] |      | Mascot      |
| 1611.8047  | 1611.7488   | -0.0559 | -35   | 210        | 223      | EALKTGLSDMDYLRL        |           |       |                                          |      | Mascot      |
| 1636.7449  | 1636.8359   | 0.091   | 56    | 480        | 495      | EKADQGPDPAGSSSYK       |           |       |                                          |      | Mascot      |
| 1718.8544  | 1718.8691   | 0.0147  | 9     | 862        | 876      | AFSALCHSTHLYGRR        |           |       |                                          |      | Mascot      |
| 1775.8759  | 1775.8904   | 0.0145  | 8     | 862        | 876      | AFSALCHSTHLYGRR        |           |       | Carbamidomethyl (C)[6]                   |      | Mascot      |
| 1924.9183  | 1924.9214   | 0.0031  | 2     | 21         | 37       | MFADFGTLTDCALKFTK      |           |       | Oxidation (M)[1]                         |      | Mascot      |
| 1946.0706  | 1945.8909   | -0.1797 | -92   | 279        | 295      | STRPAIEPTTEFTVKLR      |           |       |                                          |      | Mascot      |
| 2238.0754  | 2238.103    | 0.0276  | 12    | 762        | 779      | AMRQLQHCTVDEHQLEV<br>K |           |       | Carbamidomethyl (C)[8], Oxidation (M)[2] |      | Mascot      |

44 RecName: Full=Tudor domain-containing protein 7B gi|334351210 121757 8.62 13 32 0

#### Peptide Information

| Calc. Mass | Obsrv. Mass | ± da | ± ppm | Start Seq. | End Seq. | Sequence | Ion Score | C. I. | % Modification | Rank | Result Type |
|------------|-------------|------|-------|------------|----------|----------|-----------|-------|----------------|------|-------------|
|------------|-------------|------|-------|------------|----------|----------|-----------|-------|----------------|------|-------------|

[illegible]

### Peptide Information

| Calc. Mass | Obsrv. Mass | ± da    | ± ppm | Start Seq. | End Seq. | Sequence                 | Ion Score | C. I. % | Modification            | Rank | Result Type |
|------------|-------------|---------|-------|------------|----------|--------------------------|-----------|---------|-------------------------|------|-------------|
| 882.5294   | 882.5673    | 0.0379  | 43    | 122        | 129      | ELSLPPVK                 |           |         |                         |      | Mascot      |
| 916.5461   | 916.5383    | -0.0078 | -9    | 114        | 121      | IKNTEIAK                 |           |         |                         |      | Mascot      |
| 916.5461   | 916.5383    | -0.0078 | -9    | 114        | 121      | IKNTEIAK                 |           |         |                         |      | Mascot      |
| 1045.5636  | 1045.5497   | -0.0139 | -13   | 42         | 51       | NVGSLDKNAK               |           |         |                         |      | Mascot      |
| 1256.6382  | 1256.7015   | 0.0633  | 50    | 32         | 41       | KVVDHYENPR               |           |         |                         |      | Mascot      |
| 1256.6382  | 1256.7015   | 0.0633  | 50    | 32         | 41       | KVVDHYENPR               |           |         |                         |      | Mascot      |
| 1682.9622  | 1682.9154   | -0.0468 | -28   | 9          | 24       | CAAPQILKTLAPTLR          |           |         |                         |      | Mascot      |
| 1958.9785  | 1958.9871   | 0.0086  | 4     | 49         | 68       | NAKNVGTGLVGAPACGD<br>VMK |           |         | Carbamidomethyl (C)[15] |      | Mascot      |

46 novel protein similar to vertebrate ataxin 10 (ATXN10)  
[Danio rerio]

### Peptide Information

|    | Calc. Mass                                           | Obsrv. Mass | ± da    | ± ppm | Start Seq.   | End Sequence Seq.                   | Ion Score | C. I. % | Modification               | Rank | Result Type |
|----|------------------------------------------------------|-------------|---------|-------|--------------|-------------------------------------|-----------|---------|----------------------------|------|-------------|
|    | 846.5043                                             | 846.427     | -0.0773 | -91   | 231          | 237 STELIRK                         |           |         |                            |      | Mascot      |
|    | 1123.5378                                            | 1123.434    | -0.1038 | -92   | 125          | 134 GSNDIYDALR                      |           |         |                            |      | Mascot      |
|    | 1646.8431                                            | 1646.8207   | -0.0224 | -14   | 381          | 395 LIGNLCHGHVVNQDK                 |           |         |                            |      | Mascot      |
|    | 1959.0341                                            | 1958.9871   | -0.047  | -24   | 381          | 397 LIGNLCHGHVVNQDKVR               |           |         | Carbamidomethyl (C)[6]     |      | Mascot      |
|    | 2237.2083                                            | 2237.0815   | -0.1268 | -57   | 376          | 395 AHLIRLIGNLCHGHVVNQDK            |           |         |                            |      | Mascot      |
|    | 2238.0422                                            | 2238.103    | 0.0608  | 27    | 90           | 109 NACVQCTQNQCRLDLGSIK             |           |         | Carbamidomethyl (C)[3]     |      | Mascot      |
|    | 2283.0354                                            | 2283.189    | 0.1536  | 67    | 266          | 286 DCLMPLSAAQFLASCFTDHGR           |           |         |                            |      | Mascot      |
|    | 2299.0305                                            | 2299.1938   | 0.1633  | 71    | 266          | 286 DCLMPLSAAQFLASCFTDHGR           |           |         | Oxidation (M)[4]           |      | Mascot      |
|    | 2996.4717                                            | 2996.4929   | 0.0212  | 7     | 125          | 151 GSNDIYDALRCGIQFLGNI<br>AVGNQLCK |           |         | Carbamidomethyl (C)[11,26] |      | Mascot      |
| 47 | PREDICTED: ribonuclease inhibitor-like [Danio rerio] |             |         |       | gi 326678374 | 93203.1                             | 5.41      | 13      | 32                         | 0    |             |

Peptide Information

|    | Calc. Mass                                                 | Obsrv. Mass | ± da    | ± ppm | Start Seq.   | End Sequence Seq.                       | Ion Score | C. I. % | Modification                               | Rank | Result Type |
|----|------------------------------------------------------------|-------------|---------|-------|--------------|-----------------------------------------|-----------|---------|--------------------------------------------|------|-------------|
|    | 846.4315                                                   | 846.427     | -0.0045 | -5    | 234          | 240 ELNLSDR                             |           |         |                                            |      | Mascot      |
|    | 1074.5975                                                  | 1074.5693   | -0.0282 | -26   | 134          | 142 LNNCKLLEK                           |           |         |                                            |      | Mascot      |
|    | 1074.5975                                                  | 1074.5693   | -0.0282 | -26   | 134          | 142 LNNCKLLEK                           |           |         |                                            |      | Mascot      |
|    | 1201.6245                                                  | 1201.6284   | 0.0039  | 3     | 422          | 432 LSALLMDSHSK                         |           |         |                                            |      | Mascot      |
|    | 1516.8152                                                  | 1516.6671   | -0.1481 | -98   | 471          | 484 LLD SGVRGICEGLK                     |           |         | Carbamidomethyl (C)[10]                    |      | Mascot      |
|    | 1682.8418                                                  | 1682.9154   | 0.0736  | 44    | 648          | 661 ELTDLLQDPHCTLK                      |           |         | Carbamidomethyl (C)[11]                    |      | Mascot      |
|    | 1698.8156                                                  | 1698.8708   | 0.0552  | 32    | 665          | 679 FLSPADEVQYVTR                       |           |         |                                            |      | Mascot      |
|    | 1710.9128                                                  | 1710.8848   | -0.028  | -16   | 447          | 462 SCSVLATCLSSKITLK                    |           |         | Carbamidomethyl (C)[2]                     |      | Mascot      |
|    | 1726.8978                                                  | 1726.8834   | -0.0144 | -8    | 246          | 260 EMVQLAALLQDKHCK                     |           |         |                                            |      | Mascot      |
|    | 1791.8541                                                  | 1791.8861   | 0.032   | 18    | 577          | 592 ELDMSNNNLQDSGVKK                    |           |         |                                            |      | Mascot      |
|    | 2225.094                                                   | 2225.1265   | 0.0325  | 15    | 814          | 832 LENS GVKNLSDLLMPYQCK                |           |         | Carbamidomethyl (C)[18], Oxidation (M)[14] |      | Mascot      |
|    | 2298.1316                                                  | 2298.1926   | 0.061   | 27    | 268          | 290 GCGLTEESCSALATVLKSNSSLK             |           |         |                                            |      | Mascot      |
|    | 2300.093                                                   | 2300.1829   | 0.0899  | 39    | 438          | 458 LNNCELTEKSCSVLATCLSSK               |           |         | Carbamidomethyl (C)[4]                     |      | Mascot      |
|    | 3338.6758                                                  | 3338.7644   | 0.0886  | 27    | 197          | 227 MNQTKSLLTPSQFLSPAA<br>EEACQFVTGVVGK |           |         | Carbamidomethyl (C)[22]                    |      | Mascot      |
| 48 | PREDICTED: hypothetical protein LOC100535449 [Danio rerio] |             |         |       | gi 326675262 | 15714.9                                 | 10.22     | 7       | 32                                         | 0    |             |

Peptide Information

|  | Calc. Mass | Obsrv. Mass | ± da | ± ppm | Start Seq. | End Sequence Seq. | Ion Score | C. I. % | Modification | Rank | Result Type |
|--|------------|-------------|------|-------|------------|-------------------|-----------|---------|--------------|------|-------------|
|--|------------|-------------|------|-------|------------|-------------------|-----------|---------|--------------|------|-------------|



|  |           |           |         |     |     |     |                             |  |  |  |  |  |                                          |  |  |  |  |        |
|--|-----------|-----------|---------|-----|-----|-----|-----------------------------|--|--|--|--|--|------------------------------------------|--|--|--|--|--------|
|  | 1021.5789 | 1021.5065 | -0.0724 | -71 | 131 | 139 | VKTGFSNLR                   |  |  |  |  |  |                                          |  |  |  |  | Mascot |
|  | 1021.5789 | 1021.5065 | -0.0724 | -71 | 131 | 139 | VKTGFSNLR                   |  |  |  |  |  |                                          |  |  |  |  | Mascot |
|  | 1165.6323 | 1165.7476 | 0.1153  | 99  | 38  | 47  | SNNVKSFITR                  |  |  |  |  |  |                                          |  |  |  |  | Mascot |
|  | 1710.9108 | 1710.8848 | -0.026  | -15 | 115 | 130 | VGHHATLVKGLGCSFK            |  |  |  |  |  | Carbamidomethyl (C)[13]                  |  |  |  |  | Mascot |
|  | 1945.853  | 1945.8909 | 0.0379  | 19  | 1   | 18  | MSFSASAACPLSSAHSY<br>R      |  |  |  |  |  | Carbamidomethyl (C)[9], Oxidation (M)[1] |  |  |  |  | Mascot |
|  | 1961.9427 | 1961.8831 | -0.0596 | -30 | 89  | 105 | GIGVCCMSYSRMILLR            |  |  |  |  |  | Carbamidomethyl (C)[5], Oxidation (M)[7] |  |  |  |  | Mascot |
|  | 2283.99   | 2284.1787 | 0.1887  | 83  | 78  | 99  | SMMVGSTSSPKGIGVCC<br>MSYSR  |  |  |  |  |  | Oxidation (M)[2]                         |  |  |  |  | Mascot |
|  | 2299.9849 | 2300.1829 | 0.198   | 86  | 78  | 99  | SMMVGSTSSPKGIGVCC<br>MSYSR  |  |  |  |  |  | Oxidation (M)[2,3]                       |  |  |  |  | Mascot |
|  | 2555.2522 | 2555.1926 | -0.0596 | -23 | 65  | 88  | LLMMLSLQGCTPRSMV<br>GSTSSPK |  |  |  |  |  |                                          |  |  |  |  | Mascot |
|  | 2555.2522 | 2555.1926 | -0.0596 | -23 | 65  | 88  | LLMMLSLQGCTPRSMV<br>GSTSSPK |  |  |  |  |  |                                          |  |  |  |  | Mascot |

49

PREDICTED: neuroblast differentiation-associated protein AHNAK-like [Danio rerio]

gi|326672815

410609.3

5.24

2

21

0

Peptide Information

| Calc. Mass | Obsrv. Mass | ± da    | ± ppm | Start Seq. | End Seq. | Sequence     | Ion Score | C. I. % | Modification     | Rank | Result Type |
|------------|-------------|---------|-------|------------|----------|--------------|-----------|---------|------------------|------|-------------|
| 1074.4698  | 1074.5693   | 0.0995  | 93    | 1009       | 1018     | STDTDSSPHK   | 9         | 0       |                  | 3    | Mascot      |
| 1401.6501  | 1401.6125   | -0.0376 | -27   | 1479       | 1490     | DSFVTMRGVDMK | 13        | 0       | Oxidation (M)[6] | 2    | Mascot      |

50

PREDICTED: regulation of nuclear pre-mRNA domain-containing protein 2, partial [Danio rerio]

gi|326674556

117214.6

9.13

1

19

0

Peptide Information

| Calc. Mass | Obsrv. Mass | ± da   | ± ppm | Start Seq. | End Seq. | Sequence | Ion Score | C. I. % | Modification     | Rank | Result Type |
|------------|-------------|--------|-------|------------|----------|----------|-----------|---------|------------------|------|-------------|
| 916.4821   | 916.5383    | 0.0562 | 61    | 1078       | 1084     | RPFMPPR  | 19        | 0       | Oxidation (M)[4] | 2    | Mascot      |

|                       |           |                               |                |                       |                    |
|-----------------------|-----------|-------------------------------|----------------|-----------------------|--------------------|
| <b>Gel Idx/Pos</b>    | 221/I21   | <b>Instr./Gel Origin</b>      | BA2060/110707A | <b>Process Status</b> | Analysis Succeeded |
| <b>Plate [#] Name</b> | [1] 31496 | <b>Instrument Sample Name</b> |                | <b>Spectra</b>        | 11                 |

| Rank | Protein Name                                                                                        | Accession No. | Protein MW | Protein PI | Pep. Count | Protein Score | Protein Score C. I. % | Total Ion Score | Total Ion C. I. % |
|------|-----------------------------------------------------------------------------------------------------|---------------|------------|------------|------------|---------------|-----------------------|-----------------|-------------------|
| 1    | RecName: Full=Serine/arginine-rich splicing factor 1A; AltName: Full=Splicing factor, arginine/seri | gi 269849649  | 28366      | 10.3       | 13         | 441           | 100                   | 349             | 100               |

Peptide Information

| Calc. Mass | Obsrv. Mass | ± da | ± ppm | Start Seq. | End Seq. | Sequence | Ion Score | C. I. % | Modification | Rank | Result Type |
|------------|-------------|------|-------|------------|----------|----------|-----------|---------|--------------|------|-------------|
|------------|-------------|------|-------|------------|----------|----------|-----------|---------|--------------|------|-------------|

|           |           |         |    |     |     |                             |     |        |                        |        |
|-----------|-----------|---------|----|-----|-----|-----------------------------|-----|--------|------------------------|--------|
| 916.5363  | 916.5395  | 0.0032  | 3  | 83  | 89  | LRVEFPR                     | 27  | 37.893 |                        | Mascot |
| 916.5363  | 916.5395  | 0.0032  | 3  | 83  | 89  | LRVEFPR                     |     |        |                        | Mascot |
| 1009.4584 | 1009.4604 | 0.002   | 2  | 65  | 73  | DAEDAVYAR                   |     |        |                        | Mascot |
| 1078.5527 | 1078.5535 | 0.0008  | 1  | 164 | 173 | DGTGVVEFVR                  | 45  | 98.995 |                        | Mascot |
| 1078.5527 | 1078.5535 | 0.0008  | 1  | 164 | 173 | DGTGVVEFVR                  |     |        |                        | Mascot |
| 1123.4327 | 1123.4373 | 0.0046  | 4  | 74  | 82  | DGYDYDGYR                   |     |        |                        | Mascot |
| 1128.5354 | 1128.541  | 0.0056  | 5  | 175 | 183 | EDMTYAVRK                   |     |        | Oxidation (M)[3]       | Mascot |
| 1162.5487 | 1162.5543 | 0.0056  | 5  | 191 | 200 | SHEGETAYIR                  |     |        |                        | Mascot |
| 1256.6997 | 1256.7063 | 0.0066  | 5  | 17  | 27  | IYVGNLPPDIR                 |     |        |                        | Mascot |
| 1256.6997 | 1256.7063 | 0.0066  | 5  | 17  | 27  | IYVGNLPPDIR                 | 87  | 100    |                        | Mascot |
| 1401.6104 | 1401.6169 | 0.0065  | 5  | 152 | 163 | EAGDVCYADVFR                |     |        | Carbamidomethyl (C)[6] | Mascot |
| 1401.6104 | 1401.6169 | 0.0065  | 5  | 152 | 163 | EAGDVCYADVFR                | 108 | 100    | Carbamidomethyl (C)[6] | Mascot |
| 1516.6635 | 1516.6703 | 0.0068  | 4  | 97  | 118 | GGFGGGGGGGGGGGG<br>GGGGAPR  |     |        |                        | Mascot |
| 1564.743  | 1564.7493 | 0.0063  | 4  | 51  | 64  | GGPPFAFVEFEDPR              |     |        |                        | Mascot |
| 1682.9111 | 1682.9185 | 0.0074  | 4  | 132 | 147 | VIVSGLPPSGSWQDLK            |     |        |                        | Mascot |
| 2222.1387 | 2222.1399 | 0.0012  | 1  | 132 | 151 | VIVSGLPPSGSWQDLKD<br>HMR    |     |        |                        | Mascot |
| 2238.1335 | 2238.1309 | -0.0026 | -1 | 132 | 151 | VIVSGLPPSGSWQDLKD<br>HMR    |     |        | Oxidation (M)[19]      | Mascot |
| 2555.1836 | 2555.1997 | 0.0161  | 6  | 51  | 73  | GGPPFAFVEFEDPRDAE<br>DAVYAR | 82  | 100    |                        | Mascot |
| 2555.1836 | 2555.1997 | 0.0161  | 6  | 51  | 73  | GGPPFAFVEFEDPRDAE<br>DAVYAR |     |        |                        | Mascot |

2

serine/arginine-rich splicing factor 1A [Danio rerio]

gi|47087630

26838.2

10.06

12

427

100

349

100

Peptide Information

| Calc. Mass | Obsrv. Mass | ± da   | ± ppm | Start Seq. | End Seq. | Sequence     | Ion Score | C. I.  | % Modification         | Rank | Result Type |
|------------|-------------|--------|-------|------------|----------|--------------|-----------|--------|------------------------|------|-------------|
| 916.5363   | 916.5395    | 0.0032 | 3     | 83         | 89       | LRVEFPR      | 27        | 37.893 |                        |      | Mascot      |
| 916.5363   | 916.5395    | 0.0032 | 3     | 83         | 89       | LRVEFPR      |           |        |                        |      | Mascot      |
| 1009.4584  | 1009.4604   | 0.002  | 2     | 65         | 73       | DAEDAVYAR    |           |        |                        |      | Mascot      |
| 1078.5527  | 1078.5535   | 0.0008 | 1     | 165        | 174      | DGTGVVEFVR   | 45        | 98.995 |                        |      | Mascot      |
| 1078.5527  | 1078.5535   | 0.0008 | 1     | 165        | 174      | DGTGVVEFVR   |           |        |                        |      | Mascot      |
| 1123.4327  | 1123.4373   | 0.0046 | 4     | 74         | 82       | DGYDYDGYR    |           |        |                        |      | Mascot      |
| 1128.5354  | 1128.541    | 0.0056 | 5     | 176        | 184      | EDMTYAVRK    |           |        | Oxidation (M)[3]       |      | Mascot      |
| 1162.5487  | 1162.5543   | 0.0056 | 5     | 192        | 201      | SHEGETAYIR   |           |        |                        |      | Mascot      |
| 1256.6997  | 1256.7063   | 0.0066 | 5     | 17         | 27       | IYVGNLPPDIR  |           |        |                        |      | Mascot      |
| 1256.6997  | 1256.7063   | 0.0066 | 5     | 17         | 27       | IYVGNLPPDIR  | 87        | 100    |                        |      | Mascot      |
| 1401.6104  | 1401.6169   | 0.0065 | 5     | 153        | 164      | EAGDVCYADVFR |           |        | Carbamidomethyl (C)[6] |      | Mascot      |
| 1401.6104  | 1401.6169   | 0.0065 | 5     | 153        | 164      | EAGDVCYADVFR | 108       | 100    | Carbamidomethyl (C)[6] |      | Mascot      |

|   |                             |           |         |    |             |     |                             |      |    |     |     |     |                   |  |  |  |        |
|---|-----------------------------|-----------|---------|----|-------------|-----|-----------------------------|------|----|-----|-----|-----|-------------------|--|--|--|--------|
|   | 1564.743                    | 1564.7493 | 0.0063  | 4  | 51          | 64  | GGPPFAFVEFEDPR              |      |    |     |     |     |                   |  |  |  | Mascot |
|   | 1682.9111                   | 1682.9185 | 0.0074  | 4  | 133         | 148 | VIVSGLPPSGSWQDLK            |      |    |     |     |     |                   |  |  |  | Mascot |
|   | 2222.1387                   | 2222.1399 | 0.0012  | 1  | 133         | 152 | VIVSGLPPSGSWQDLKD<br>HMR    |      |    |     |     |     |                   |  |  |  | Mascot |
|   | 2238.1335                   | 2238.1309 | -0.0026 | -1 | 133         | 152 | VIVSGLPPSGSWQDLKD<br>HMR    |      |    |     |     |     | Oxidation (M)[19] |  |  |  | Mascot |
|   | 2555.1836                   | 2555.1997 | 0.0161  | 6  | 51          | 73  | GGPPFAFVEFEDPRDAE<br>DAVYAR | 82   |    | 100 |     |     |                   |  |  |  | Mascot |
|   | 2555.1836                   | 2555.1997 | 0.0161  | 6  | 51          | 73  | GGPPFAFVEFEDPRDAE<br>DAVYAR |      |    |     |     |     |                   |  |  |  | Mascot |
| 3 | Sfrs1 protein [Danio rerio] |           |         |    | gi 34785174 |     | 20721.2                     | 7.74 | 10 | 332 | 100 | 267 | 100               |  |  |  |        |

#### Peptide Information

|  | Calc. Mass | Obsrv. Mass | ± da    | ± ppm | Start Seq. | End Seq. | Sequence                 | Ion Score | C. I.  | % | Modification           | Rank | Result Type |
|--|------------|-------------|---------|-------|------------|----------|--------------------------|-----------|--------|---|------------------------|------|-------------|
|  | 916.5363   | 916.5395    | 0.0032  | 3     | 83         | 89       | LRVEFPR                  | 27        | 37.893 |   |                        |      | Mascot      |
|  | 916.5363   | 916.5395    | 0.0032  | 3     | 83         | 89       | LRVEFPR                  |           |        |   |                        |      | Mascot      |
|  | 1078.5527  | 1078.5535   | 0.0008  | 1     | 154        | 163      | DGTGVVEFVR               | 45        | 98.995 |   |                        |      | Mascot      |
|  | 1078.5527  | 1078.5535   | 0.0008  | 1     | 154        | 163      | DGTGVVEFVR               |           |        |   |                        |      | Mascot      |
|  | 1123.4327  | 1123.4373   | 0.0046  | 4     | 74         | 82       | DGYDYDGYR                |           |        |   |                        |      | Mascot      |
|  | 1128.5354  | 1128.541    | 0.0056  | 5     | 165        | 173      | EDMTYAVRK                |           |        |   | Oxidation (M)[3]       |      | Mascot      |
|  | 1130.5952  | 1130.5981   | 0.0029  | 3     | 179        | 188      | FRSHEVGVSL               |           |        |   |                        |      | Mascot      |
|  | 1130.5952  | 1130.5981   | 0.0029  | 3     | 179        | 188      | FRSHEVGVSL               |           |        |   |                        |      | Mascot      |
|  | 1256.6997  | 1256.7063   | 0.0066  | 5     | 17         | 27       | IYVGNLPPDIR              |           |        |   |                        |      | Mascot      |
|  | 1256.6997  | 1256.7063   | 0.0066  | 5     | 17         | 27       | IYVGNLPPDIR              | 87        | 100    |   |                        |      | Mascot      |
|  | 1401.6104  | 1401.6169   | 0.0065  | 5     | 142        | 153      | EAGDVCYADVFR             |           |        |   | Carbamidomethyl (C)[6] |      | Mascot      |
|  | 1401.6104  | 1401.6169   | 0.0065  | 5     | 142        | 153      | EAGDVCYADVFR             | 108       | 100    |   | Carbamidomethyl (C)[6] |      | Mascot      |
|  | 1564.743   | 1564.7493   | 0.0063  | 4     | 51         | 64       | GGPPFAFVEFEDPR           |           |        |   |                        |      | Mascot      |
|  | 1682.9111  | 1682.9185   | 0.0074  | 4     | 122        | 137      | VIVSGLPPSGSWQDLK         |           |        |   |                        |      | Mascot      |
|  | 2222.1387  | 2222.1399   | 0.0012  | 1     | 122        | 141      | VIVSGLPPSGSWQDLKD<br>HMR |           |        |   |                        |      | Mascot      |
|  | 2238.1335  | 2238.1309   | -0.0026 | -1    | 122        | 141      | VIVSGLPPSGSWQDLKD<br>HMR |           |        |   | Oxidation (M)[19]      |      | Mascot      |

|   |                                                       |  |  |  |             |  |         |      |    |     |     |     |     |  |  |  |  |
|---|-------------------------------------------------------|--|--|--|-------------|--|---------|------|----|-----|-----|-----|-----|--|--|--|--|
| 4 | serine/arginine-rich splicing factor 1B [Danio rerio] |  |  |  | gi 45433540 |  | 27458.7 | 10.3 | 10 | 323 | 100 | 267 | 100 |  |  |  |  |
|---|-------------------------------------------------------|--|--|--|-------------|--|---------|------|----|-----|-----|-----|-----|--|--|--|--|

#### Peptide Information

|  | Calc. Mass | Obsrv. Mass | ± da   | ± ppm | Start Seq. | End Seq. | Sequence   | Ion Score | C. I.  | % | Modification | Rank | Result Type |
|--|------------|-------------|--------|-------|------------|----------|------------|-----------|--------|---|--------------|------|-------------|
|  | 916.5363   | 916.5395    | 0.0032 | 3     | 83         | 89       | LRVEFPR    | 27        | 37.893 |   |              |      | Mascot      |
|  | 916.5363   | 916.5395    | 0.0032 | 3     | 83         | 89       | LRVEFPR    |           |        |   |              |      | Mascot      |
|  | 1078.5527  | 1078.5535   | 0.0008 | 1     | 154        | 163      | DGTGVVEFVR | 45        | 98.995 |   |              |      | Mascot      |

|           |           |         |    |     |     |                         |  |     |  |     |  |                        |  |  |  |  |        |
|-----------|-----------|---------|----|-----|-----|-------------------------|--|-----|--|-----|--|------------------------|--|--|--|--|--------|
| 1078.5527 | 1078.5535 | 0.0008  | 1  | 154 | 163 | DGTGVVEFVR              |  |     |  |     |  |                        |  |  |  |  | Mascot |
| 1123.4327 | 1123.4373 | 0.0046  | 4  | 74  | 82  | DGYDYDGYR               |  |     |  |     |  |                        |  |  |  |  | Mascot |
| 1128.5354 | 1128.541  | 0.0056  | 5  | 165 | 173 | EDMTYAVRK               |  |     |  |     |  | Oxidation (M)[3]       |  |  |  |  | Mascot |
| 1162.5487 | 1162.5543 | 0.0056  | 5  | 181 | 190 | SHEGETAYIR              |  |     |  |     |  |                        |  |  |  |  | Mascot |
| 1256.6997 | 1256.7063 | 0.0066  | 5  | 17  | 27  | IYVGNLPPDIR             |  |     |  |     |  |                        |  |  |  |  | Mascot |
| 1256.6997 | 1256.7063 | 0.0066  | 5  | 17  | 27  | IYVGNLPPDIR             |  | 87  |  | 100 |  |                        |  |  |  |  | Mascot |
| 1401.6104 | 1401.6169 | 0.0065  | 5  | 142 | 153 | EAGDVCYADVFR            |  |     |  |     |  | Carbamidomethyl (C)[6] |  |  |  |  | Mascot |
| 1401.6104 | 1401.6169 | 0.0065  | 5  | 142 | 153 | EAGDVCYADVFR            |  | 108 |  | 100 |  | Carbamidomethyl (C)[6] |  |  |  |  | Mascot |
| 1564.743  | 1564.7493 | 0.0063  | 4  | 51  | 64  | GGPPFAFVEFEDPR          |  |     |  |     |  |                        |  |  |  |  | Mascot |
| 1682.9111 | 1682.9185 | 0.0074  | 4  | 122 | 137 | VIVSGLPPSGSWQDLK        |  |     |  |     |  |                        |  |  |  |  | Mascot |
| 2222.1387 | 2222.1399 | 0.0012  | 1  | 122 | 141 | VIVSGLPPSGSWQDLK<br>HMR |  |     |  |     |  |                        |  |  |  |  | Mascot |
| 2238.1335 | 2238.1309 | -0.0026 | -1 | 122 | 141 | VIVSGLPPSGSWQDLK<br>HMR |  |     |  |     |  | Oxidation (M)[19]      |  |  |  |  | Mascot |

5 Sfrs1 protein [Danio rerio] gi|63101956 28927.4 10.1 9 307 100 267 100

#### Peptide Information

| Calc. Mass | Obsrv. Mass | ± da    | ± ppm | Start Seq. | End Seq. | Sequence                | Ion Score | C. I.  | % Modification         | Rank | Result | Type   |
|------------|-------------|---------|-------|------------|----------|-------------------------|-----------|--------|------------------------|------|--------|--------|
| 916.5363   | 916.5395    | 0.0032  | 3     | 83         | 89       | LRVEFPR                 | 27        | 37.893 |                        |      |        | Mascot |
| 916.5363   | 916.5395    | 0.0032  | 3     | 83         | 89       | LRVEFPR                 |           |        |                        |      |        | Mascot |
| 1078.5527  | 1078.5535   | 0.0008  | 1     | 154        | 163      | DGTGVVEFVR              | 45        | 98.995 |                        |      |        | Mascot |
| 1078.5527  | 1078.5535   | 0.0008  | 1     | 154        | 163      | DGTGVVEFVR              |           |        |                        |      |        | Mascot |
| 1123.4327  | 1123.4373   | 0.0046  | 4     | 74         | 82       | DGYDYDGYR               |           |        |                        |      |        | Mascot |
| 1128.5354  | 1128.541    | 0.0056  | 5     | 165        | 173      | EDMTYAVRK               |           |        | Oxidation (M)[3]       |      |        | Mascot |
| 1162.5487  | 1162.5543   | 0.0056  | 5     | 181        | 190      | SHEGETAYIR              |           |        |                        |      |        | Mascot |
| 1256.6997  | 1256.7063   | 0.0066  | 5     | 17         | 27       | IYVGNLPPDIR             |           |        |                        |      |        | Mascot |
| 1256.6997  | 1256.7063   | 0.0066  | 5     | 17         | 27       | IYVGNLPPDIR             | 87        | 100    |                        |      |        | Mascot |
| 1401.6104  | 1401.6169   | 0.0065  | 5     | 142        | 153      | EAGDVCYADVFR            |           |        | Carbamidomethyl (C)[6] |      |        | Mascot |
| 1401.6104  | 1401.6169   | 0.0065  | 5     | 142        | 153      | EAGDVCYADVFR            | 108       | 100    | Carbamidomethyl (C)[6] |      |        | Mascot |
| 1682.9111  | 1682.9185   | 0.0074  | 4     | 122        | 137      | VIVSGLPPSGSWQDLK        |           |        |                        |      |        | Mascot |
| 2222.1387  | 2222.1399   | 0.0012  | 1     | 122        | 141      | VIVSGLPPSGSWQDLK<br>HMR |           |        |                        |      |        | Mascot |
| 2238.1335  | 2238.1309   | -0.0026 | -1    | 122        | 141      | VIVSGLPPSGSWQDLK<br>HMR |           |        | Oxidation (M)[19]      |      |        | Mascot |

6 40S ribosomal protein SA [Danio rerio] gi|41054972 33990.9 4.75 6 260 100 235 100

#### Peptide Information

| Calc. Mass | Obsrv. Mass | ± da | ± ppm | Start Seq. | End Seq. | Sequence | Ion Score | C. I. | % Modification | Rank | Result | Type |
|------------|-------------|------|-------|------------|----------|----------|-----------|-------|----------------|------|--------|------|
|------------|-------------|------|-------|------------|----------|----------|-----------|-------|----------------|------|--------|------|

|   |                                             |           |         |    |              |     |                                 |      |     |     |     |    |                         |  |  |  |  |  |        |
|---|---------------------------------------------|-----------|---------|----|--------------|-----|---------------------------------|------|-----|-----|-----|----|-------------------------|--|--|--|--|--|--------|
|   | 926.5669                                    | 926.5677  | 0.0008  | 1  | 121          | 128 | LLIVTDPR                        |      |     |     |     |    |                         |  |  |  |  |  | Mascot |
|   | 1273.6171                                   | 1273.623  | 0.0059  | 5  | 90           | 102 | FASATGSTTFAGR                   |      |     |     |     |    |                         |  |  |  |  |  | Mascot |
|   | 1698.8599                                   | 1698.8666 | 0.0067  | 4  | 103          | 117 | FTPGTFTNQIAAFR                  |      |     |     |     |    |                         |  |  |  |  |  | Mascot |
|   | 1698.8599                                   | 1698.8666 | 0.0067  | 4  | 103          | 117 | FTPGTFTNQIAAFR                  | 110  | 100 |     |     |    |                         |  |  |  |  |  | Mascot |
|   | 1813.9476                                   | 1813.9523 | 0.0047  | 3  | 64           | 80  | AIVAIENPADVCVISSR               |      |     |     |     |    | Carbamidomethyl (C)[12] |  |  |  |  |  | Mascot |
|   | 1813.9476                                   | 1813.9523 | 0.0047  | 3  | 64           | 80  | AIVAIENPADVCVISSR               | 124  | 100 |     |     |    | Carbamidomethyl (C)[12] |  |  |  |  |  | Mascot |
|   | 1923.9402                                   | 1923.936  | -0.0042 | -2 | 1            | 17  | MSGGLDVLQMKEEDVLK               |      |     |     |     |    | Oxidation (M)[1,10]     |  |  |  |  |  | Mascot |
|   | 2996.4783                                   | 2996.4829 | 0.0046  | 2  | 129          | 155 | ADHQPLTEASYVNIPTIAL<br>CNTDSPLR |      |     |     |     |    | Carbamidomethyl (C)[20] |  |  |  |  |  | Mascot |
| 7 | pyrophosphatase (inorganic) 1 [Danio rerio] |           |         |    | gi 220678153 |     | 32646.8                         | 5.24 | 15  | 190 | 100 | 91 | 100                     |  |  |  |  |  |        |

#### Peptide Information

| Calc. Mass | Obsrv. Mass | ± da    | ± ppm | Start Seq. | End Seq. | Sequence                  | Ion Score | C. I. | % Modification               | Rank | Result | Type   |
|------------|-------------|---------|-------|------------|----------|---------------------------|-----------|-------|------------------------------|------|--------|--------|
| 846.4257   | 846.4293    | 0.0036  | 4     | 223        | 229      | ATHGFWK                   |           |       |                              |      |        | Mascot |
| 877.4243   | 877.4266    | 0.0023  | 3     | 285        | 290      | WFYYAK                    |           |       |                              |      |        | Mascot |
| 1021.5061  | 1021.5103   | 0.0042  | 4     | 9          | 17       | GNPNTLSYR                 |           |       |                              |      |        | Mascot |
| 1045.5272  | 1045.5436   | 0.0164  | 16    | 169        | 177      | DLNNISDVR                 |           |       |                              |      |        | Mascot |
| 1074.5731  | 1074.5758   | 0.0027  | 3     | 81         | 89       | YVANVFPHK                 |           |       |                              |      |        | Mascot |
| 1179.6256  | 1179.6169   | -0.0087 | -7    | 213        | 222      | DKDFAIETIK                |           |       |                              |      |        | Mascot |
| 1201.6284  | 1201.6323   | 0.0039  | 3     | 169        | 178      | DLNNISDVRR                |           |       |                              |      |        | Mascot |
| 1646.8167  | 1646.8248   | 0.0081  | 5     | 230        | 244      | ALLSQQTNAGELNCK           |           |       |                              |      |        | Mascot |
| 1718.8649  | 1718.8704   | 0.0055  | 3     | 179        | 192      | HKPGYLEATVDWFR            | 91        | 100   |                              |      |        | Mascot |
| 1718.8649  | 1718.8704   | 0.0055  | 3     | 179        | 192      | HKPGYLEATVDWFR            |           |       |                              |      |        | Mascot |
| 1791.8833  | 1791.8849   | 0.0016  | 1     | 141        | 156      | VLGVLAMIDEGETDWK          |           |       | Oxidation (M)[7]             |      |        | Mascot |
| 1923.9235  | 1923.936    | 0.0125  | 6     | 196        | 212      | VPDGKPENQFAFNGEFK         |           |       |                              |      |        | Mascot |
| 1961.7673  | 1961.8923   | 0.125   | 64    | 245        | 263      | NTCVSEGNPFCCSADE<br>AK    |           |       |                              |      |        | Mascot |
| 2132.8318  | 2132.8398   | 0.008   | 4     | 245        | 263      | NTCVSEGNPFCCSADE<br>AK    |           |       | Carbamidomethyl (C)[3,12,13] |      |        | Mascot |
| 2215.0818  | 2215.0972   | 0.0154  | 7     | 194        | 212      | YKVPDGKPENQFAFNGE<br>FK   |           |       |                              |      |        | Mascot |
| 2232.0508  | 2232.0674   | 0.0166  | 7     | 90         | 108      | GYIWNYGAIPQTWEDPG<br>HK   |           |       |                              |      |        | Mascot |
| 2283.8799  | 2284.1824   | 0.3025  | 132   | 109        | 129      | DNDTGCCGDNDPIDVCEI<br>GSK |           |       | Carbamidomethyl (C)[6,7]     |      |        | Mascot |

8 tubulin, beta, 2 [Danio rerio] gi|37681963 49754 4.85 16 149 100 51 99.761

#### Peptide Information

| Calc. Mass | Obsrv. Mass | ± da   | ± ppm | Start Seq. | End Seq. | Sequence | Ion Score | C. I. | % Modification | Rank | Result | Type   |
|------------|-------------|--------|-------|------------|----------|----------|-----------|-------|----------------|------|--------|--------|
| 1077.5323  | 1077.5374   | 0.0051 | 5     | 155        | 162      | IREEYPDR |           |       |                |      |        | Mascot |

|   |                                |           |         |      |             |       |                             |    |                                           |     |        |        |  |
|---|--------------------------------|-----------|---------|------|-------------|-------|-----------------------------|----|-------------------------------------------|-----|--------|--------|--|
|   | 1130.5953                      | 1130.5981 | 0.0028  | 2    | 242         | 251   | FPGQLNADLR                  | 51 | 99.761                                    |     | Mascot |        |  |
|   | 1130.5953                      | 1130.5981 | 0.0028  | 2    | 242         | 251   | FPGQLNADLR                  |    |                                           |     | Mascot |        |  |
|   | 1143.6343                      | 1143.6393 | 0.005   | 4    | 253         | 262   | LAVNMVPFPR                  |    |                                           |     | Mascot |        |  |
|   | 1159.6292                      | 1159.6351 | 0.0059  | 5    | 253         | 262   | LAVNMVPFPR                  |    | Oxidation (M)[5]                          |     | Mascot |        |  |
|   | 1287.7241                      | 1287.7299 | 0.0058  | 5    | 252         | 262   | KLAVNMVPFPR                 |    | Oxidation (M)[6]                          |     | Mascot |        |  |
|   | 1401.6943                      | 1401.6169 | -0.0774 | -55  | 381         | 391   | ISEQFTAMFRR                 |    | Oxidation (M)[8]                          |     | Mascot |        |  |
|   | 1401.6943                      | 1401.6169 | -0.0774 | -55  | 380         | 390   | RISEQFTAMFR                 |    | Oxidation (M)[9]                          |     | Mascot |        |  |
|   | 1601.8203                      | 1601.8257 | 0.0054  | 3    | 63          | 77    | AVLVDLEPGTMDSVR             |    |                                           |     | Mascot |        |  |
|   | 1617.8152                      | 1617.8214 | 0.0062  | 4    | 63          | 77    | AVLVDLEPGTMDSVR             |    | Oxidation (M)[11]                         |     | Mascot |        |  |
|   | 1636.8304                      | 1636.8374 | 0.007   | 4    | 263         | 276   | LHFFMPGFAPLTSR              |    | Oxidation (M)[5]                          |     | Mascot |        |  |
|   | 1822.9227                      | 1822.9269 | 0.0042  | 2    | 3           | 19    | EIVHLQAGQCQGNQIGAK          |    | Carbamidomethyl (C)[10]                   |     | Mascot |        |  |
|   | 1923.8973                      | 1923.936  | 0.0387  | 20   | 321         | 336   | MSMKEVDEQMLNVQNK            |    |                                           |     | Mascot |        |  |
|   | 1958.9817                      | 1958.9872 | 0.0055  | 3    | 104         | 121   | GHYTEGAELVDSVLDVVR          |    |                                           |     | Mascot |        |  |
|   | 2126.0593                      | 2126.0715 | 0.0122  | 6    | 1           | 19    | MREIVHLQAGQCQGNQIGAK        |    | Carbamidomethyl (C)[12], Oxidation (M)[1] |     | Mascot |        |  |
|   | 2133.1008                      | 2132.8398 | -0.261  | -122 | 59          | 77    | YVPRAVLVDLEPGTMDSVR         |    | Oxidation (M)[15]                         |     | Mascot |        |  |
|   | 2708.3381                      | 2708.3342 | -0.0039 | -1   | 217         | 241   | LTTPTYGDLNHLVSATMSGVTTCLR   |    | Carbamidomethyl (C)[23]                   |     | Mascot |        |  |
|   | 2798.3433                      | 2798.3479 | 0.0046  | 2    | 78          | 103   | SGPFGQIFRPDNFVFGQSGAGNNWAK  |    |                                           |     | Mascot |        |  |
|   | 3088.3918                      | 3088.4038 | 0.012   | 4    | 20          | 46    | FWEVISDEHGIDPTGSYHGDSDLQLDR |    |                                           |     | Mascot |        |  |
| 9 | tubulin, beta 2B [Danio rerio] |           |         |      | gi 47087299 | 49769 | 4.79                        | 15 | 139                                       | 100 | 51     | 99.761 |  |

Peptide Information

| Calc. Mass | Obsrv. Mass | ± da    | ± ppm | Start Seq. | End Seq. | Sequence           | Ion Score | C. I. % | Modification            | Rank | Result | Type   |
|------------|-------------|---------|-------|------------|----------|--------------------|-----------|---------|-------------------------|------|--------|--------|
| 1077.5323  | 1077.5374   | 0.0051  | 5     | 155        | 162      | IREEYPDR           |           |         |                         |      |        | Mascot |
| 1130.5953  | 1130.5981   | 0.0028  | 2     | 242        | 251      | FPGQLNADLR         | 51        | 99.761  |                         |      |        | Mascot |
| 1130.5953  | 1130.5981   | 0.0028  | 2     | 242        | 251      | FPGQLNADLR         |           |         |                         |      |        | Mascot |
| 1143.6343  | 1143.6393   | 0.005   | 4     | 253        | 262      | LAVNMVPFPR         |           |         |                         |      |        | Mascot |
| 1159.6292  | 1159.6351   | 0.0059  | 5     | 253        | 262      | LAVNMVPFPR         |           |         | Oxidation (M)[5]        |      |        | Mascot |
| 1287.7241  | 1287.7299   | 0.0058  | 5     | 252        | 262      | KLAVNMVPFPR        |           |         | Oxidation (M)[6]        |      |        | Mascot |
| 1401.6943  | 1401.6169   | -0.0774 | -55   | 381        | 391      | ISEQFTAMFRR        |           |         | Oxidation (M)[8]        |      |        | Mascot |
| 1401.6943  | 1401.6169   | -0.0774 | -55   | 380        | 390      | RISEQFTAMFR        |           |         | Oxidation (M)[9]        |      |        | Mascot |
| 1601.8203  | 1601.8257   | 0.0054  | 3     | 63         | 77       | AVLVDLEPGTMDSVR    |           |         |                         |      |        | Mascot |
| 1617.8152  | 1617.8214   | 0.0062  | 4     | 63         | 77       | AVLVDLEPGTMDSVR    |           |         | Oxidation (M)[11]       |      |        | Mascot |
| 1636.8304  | 1636.8374   | 0.007   | 4     | 263        | 276      | LHFFMPGFAPLTSR     |           |         | Oxidation (M)[5]        |      |        | Mascot |
| 1822.9227  | 1822.9269   | 0.0042  | 2     | 3          | 19       | EIVHLQAGQCQGNQIGAK |           |         | Carbamidomethyl (C)[10] |      |        | Mascot |

|    |                                    |           |         |      |     |             |                                |         |      |    |     |                                           |    |        |  |  |        |
|----|------------------------------------|-----------|---------|------|-----|-------------|--------------------------------|---------|------|----|-----|-------------------------------------------|----|--------|--|--|--------|
|    | 1923.8973                          | 1923.936  | 0.0387  | 20   | 321 | 336         | MSMKEVDEQMLNVQNK               |         |      |    |     |                                           |    |        |  |  | Mascot |
|    | 1958.9817                          | 1958.9872 | 0.0055  | 3    | 104 | 121         | GHYTEGAELVDSVLDVV<br>R         |         |      |    |     |                                           |    |        |  |  | Mascot |
|    | 2126.0593                          | 2126.0715 | 0.0122  | 6    | 1   | 19          | MREIVHLQAGQCGNQIG<br>AK        |         |      |    |     | Carbamidomethyl (C)[12], Oxidation (M)[1] |    |        |  |  | Mascot |
|    | 2133.1008                          | 2132.8398 | -0.261  | -122 | 59  | 77          | YVPRAVLVDLEPGTMDS<br>VR        |         |      |    |     | Oxidation (M)[15]                         |    |        |  |  | Mascot |
|    | 2708.3381                          | 2708.3342 | -0.0039 | -1   | 217 | 241         | LTTPTYGDLNHLVSATMS<br>GVTTCLR  |         |      |    |     | Carbamidomethyl (C)[23]                   |    |        |  |  | Mascot |
|    | 2784.3276                          | 2784.3301 | 0.0025  | 1    | 78  | 103         | SGPFGQVFRPDNFVFGQ<br>SGAGNNWAK |         |      |    |     |                                           |    |        |  |  | Mascot |
| 10 | class I beta tubulin [Danio rerio] |           |         |      |     | gi 23452398 |                                | 49794.1 | 4.86 | 13 | 120 | 100                                       | 51 | 99.761 |  |  |        |

Peptide Information

| Calc. Mass | Obsrv. Mass | ± da    | ± ppm | Start Seq. | End Seq. | Sequence                       | Ion Score | C. I.  | % Modification                            | Rank | Result Type |
|------------|-------------|---------|-------|------------|----------|--------------------------------|-----------|--------|-------------------------------------------|------|-------------|
| 1077.5323  | 1077.5374   | 0.0051  | 5     | 155        | 162      | IREEYPDR                       |           |        |                                           |      | Mascot      |
| 1130.5953  | 1130.5981   | 0.0028  | 2     | 242        | 251      | FPGQLNADLR                     | 51        | 99.761 |                                           |      | Mascot      |
| 1130.5953  | 1130.5981   | 0.0028  | 2     | 242        | 251      | FPGQLNADLR                     |           |        |                                           |      | Mascot      |
| 1143.6343  | 1143.6393   | 0.005   | 4     | 253        | 262      | LAVNMVPFPR                     |           |        |                                           |      | Mascot      |
| 1159.6292  | 1159.6351   | 0.0059  | 5     | 253        | 262      | LAVNMVPFPR                     |           |        | Oxidation (M)[5]                          |      | Mascot      |
| 1287.7241  | 1287.7299   | 0.0058  | 5     | 252        | 262      | KLAVNMVPFPR                    |           |        | Oxidation (M)[6]                          |      | Mascot      |
| 1401.6943  | 1401.6169   | -0.0774 | -55   | 381        | 391      | ISEQFTAMFRR                    |           |        | Oxidation (M)[8]                          |      | Mascot      |
| 1401.6943  | 1401.6169   | -0.0774 | -55   | 380        | 390      | RISEQFTAMFR                    |           |        | Oxidation (M)[9]                          |      | Mascot      |
| 1636.8304  | 1636.8374   | 0.007   | 4     | 263        | 276      | LHFFMPGFAPLTSR                 |           |        | Oxidation (M)[5]                          |      | Mascot      |
| 1822.9227  | 1822.9269   | 0.0042  | 2     | 3          | 19       | EIVHIQAGQCGNQIGAK              |           |        | Carbamidomethyl (C)[10]                   |      | Mascot      |
| 1923.8973  | 1923.936    | 0.0387  | 20    | 321        | 336      | MSMKEVDEQMLNVQNK               |           |        |                                           |      | Mascot      |
| 1958.9817  | 1958.9872   | 0.0055  | 3     | 104        | 121      | GHYTEGAELVDSVLDVV<br>R         |           |        |                                           |      | Mascot      |
| 2126.0593  | 2126.0715   | 0.0122  | 6     | 1          | 19       | MREIVHIQAGQCGNQIGA<br>K        |           |        | Carbamidomethyl (C)[12], Oxidation (M)[1] |      | Mascot      |
| 2708.3381  | 2708.3342   | -0.0039 | -1    | 217        | 241      | LTTPTYGDLNHLVSATMS<br>GVTTCLR  |           |        | Carbamidomethyl (C)[23]                   |      | Mascot      |
| 2798.3433  | 2798.3479   | 0.0046  | 2     | 78         | 103      | SGPFGQIFRPDNFVFGQ<br>SGAGNNWAK |           |        |                                           |      | Mascot      |

|    |                                                       |  |  |  |  |              |  |         |      |    |     |     |    |        |  |  |  |  |
|----|-------------------------------------------------------|--|--|--|--|--------------|--|---------|------|----|-----|-----|----|--------|--|--|--|--|
| 11 | PREDICTED: tubulin beta chain isoform 1 [Danio rerio] |  |  |  |  | gi 326666192 |  | 49614.9 | 4.81 | 13 | 120 | 100 | 51 | 99.761 |  |  |  |  |
|----|-------------------------------------------------------|--|--|--|--|--------------|--|---------|------|----|-----|-----|----|--------|--|--|--|--|

Peptide Information

| Calc. Mass | Obsrv. Mass | ± da   | ± ppm | Start Seq. | End Seq. | Sequence   | Ion Score | C. I.  | % Modification | Rank | Result Type |
|------------|-------------|--------|-------|------------|----------|------------|-----------|--------|----------------|------|-------------|
| 1077.5323  | 1077.5374   | 0.0051 | 5     | 155        | 162      | IREEYPDR   |           |        |                |      | Mascot      |
| 1130.5953  | 1130.5981   | 0.0028 | 2     | 242        | 251      | FPGQLNADLR | 51        | 99.761 |                |      | Mascot      |
| 1130.5953  | 1130.5981   | 0.0028 | 2     | 242        | 251      | FPGQLNADLR |           |        |                |      | Mascot      |
| 1143.6343  | 1143.6393   | 0.005  | 4     | 253        | 262      | LAVNMVPFPR |           |        |                |      | Mascot      |

|           |           |         |     |     |     |                                |                                           |        |
|-----------|-----------|---------|-----|-----|-----|--------------------------------|-------------------------------------------|--------|
| 1159.6292 | 1159.6351 | 0.0059  | 5   | 253 | 262 | LAVNMVPFPR                     | Oxidation (M)[5]                          | Mascot |
| 1287.7241 | 1287.7299 | 0.0058  | 5   | 252 | 262 | KLAVNMVPFPR                    | Oxidation (M)[6]                          | Mascot |
| 1401.6943 | 1401.6169 | -0.0774 | -55 | 381 | 391 | ISEQFTAMFRR                    | Oxidation (M)[8]                          | Mascot |
| 1401.6943 | 1401.6169 | -0.0774 | -55 | 380 | 390 | RISEQFTAMFR                    | Oxidation (M)[9]                          | Mascot |
| 1636.8304 | 1636.8374 | 0.007   | 4   | 263 | 276 | LHFFMPGFAPLTSR                 | Oxidation (M)[5]                          | Mascot |
| 1822.9227 | 1822.9269 | 0.0042  | 2   | 3   | 19  | EIVHLQAGQCQGNQIGAK             | Carbamidomethyl (C)[10]                   | Mascot |
| 1923.8973 | 1923.936  | 0.0387  | 20  | 321 | 336 | MSMKEVDEQMLNVQNK               |                                           | Mascot |
| 1958.9817 | 1958.9872 | 0.0055  | 3   | 104 | 121 | GHYTEGAELVDSVLDVV<br>R         |                                           | Mascot |
| 2126.0593 | 2126.0715 | 0.0122  | 6   | 1   | 19  | MREIVHLQAGQCQGNQIG<br>AK       | Carbamidomethyl (C)[12], Oxidation (M)[1] | Mascot |
| 2708.3381 | 2708.3342 | -0.0039 | -1  | 217 | 241 | LTTPTYGDLNHLVSATMS<br>GVTTCLR  | Carbamidomethyl (C)[23]                   | Mascot |
| 2798.3433 | 2798.3479 | 0.0046  | 2   | 78  | 103 | SGPFGQIFRPDNFVFGQ<br>SGAGNNWAK |                                           | Mascot |

12 hypothetical protein LOC767746 [Danio rerio] gi|115529301 49556.9 4.85 13 120 100 51 99.761

#### Peptide Information

| Calc. Mass | Obsrv. Mass | ± da    | ± ppm | Start Seq. | End Seq. | Sequence                       | Ion Score | C. I.  | % Modification                            | Rank | Result Type |
|------------|-------------|---------|-------|------------|----------|--------------------------------|-----------|--------|-------------------------------------------|------|-------------|
| 1077.5323  | 1077.5374   | 0.0051  | 5     | 155        | 162      | IREEYPDR                       |           |        |                                           |      | Mascot      |
| 1130.5953  | 1130.5981   | 0.0028  | 2     | 242        | 251      | FPGQLNADLR                     | 51        | 99.761 |                                           |      | Mascot      |
| 1130.5953  | 1130.5981   | 0.0028  | 2     | 242        | 251      | FPGQLNADLR                     |           |        |                                           |      | Mascot      |
| 1143.6343  | 1143.6393   | 0.005   | 4     | 253        | 262      | LAVNMVPFPR                     |           |        |                                           |      | Mascot      |
| 1159.6292  | 1159.6351   | 0.0059  | 5     | 253        | 262      | LAVNMVPFPR                     |           |        | Oxidation (M)[5]                          |      | Mascot      |
| 1287.7241  | 1287.7299   | 0.0058  | 5     | 252        | 262      | KLAVNMVPFPR                    |           |        | Oxidation (M)[6]                          |      | Mascot      |
| 1401.6943  | 1401.6169   | -0.0774 | -55   | 381        | 391      | ISEQFTAMFRR                    |           |        | Oxidation (M)[8]                          |      | Mascot      |
| 1401.6943  | 1401.6169   | -0.0774 | -55   | 380        | 390      | RISEQFTAMFR                    |           |        | Oxidation (M)[9]                          |      | Mascot      |
| 1636.8304  | 1636.8374   | 0.007   | 4     | 263        | 276      | LHFFMPGFAPLTSR                 |           |        | Oxidation (M)[5]                          |      | Mascot      |
| 1822.9227  | 1822.9269   | 0.0042  | 2     | 3          | 19       | EIVHLQAGQCQGNQIGAK             |           |        | Carbamidomethyl (C)[10]                   |      | Mascot      |
| 1900.9762  | 1900.8574   | -0.1188 | -62   | 104        | 121      | GHYTEGAELVGSVLDVV<br>R         |           |        |                                           |      | Mascot      |
| 1923.8973  | 1923.936    | 0.0387  | 20    | 321        | 336      | MSMKEVDEQMLNVQNK               |           |        |                                           |      | Mascot      |
| 2126.0593  | 2126.0715   | 0.0122  | 6     | 1          | 19       | MREIVHLQAGQCQGNQIG<br>AK       |           |        | Carbamidomethyl (C)[12], Oxidation (M)[1] |      | Mascot      |
| 2708.3381  | 2708.3342   | -0.0039 | -1    | 217        | 241      | LTTPTYGDLNHLVSATMS<br>GVTTCLR  |           |        | Carbamidomethyl (C)[23]                   |      | Mascot      |
| 2798.3433  | 2798.3479   | 0.0046  | 2     | 78         | 103      | SGPFGQIFRPDNFVFGQ<br>SGAGNNWAK |           |        |                                           |      | Mascot      |

13 PREDICTED: tubulin beta chain isoform 2 [Danio rerio] gi|326666194 50293.2 4.81 13 119 100 51 99.761

#### Peptide Information

| Calc. Mass | Obsrv. Mass | ± da | ± ppm | Start Seq. | End Seq. | Sequence | Ion Score | C. I. | % Modification | Rank | Result Type |
|------------|-------------|------|-------|------------|----------|----------|-----------|-------|----------------|------|-------------|
|------------|-------------|------|-------|------------|----------|----------|-----------|-------|----------------|------|-------------|



[illegible]

| Calc. Mass | Obsrv. Mass | ± da   | ± ppm | Start Seq. | End Seq. | Sequence                | Ion Score | C. I.  | % Modification                            | Rank | Result Type |
|------------|-------------|--------|-------|------------|----------|-------------------------|-----------|--------|-------------------------------------------|------|-------------|
| 1077.5323  | 1077.5374   | 0.0051 | 5     | 155        | 162      | IREEYPDR                |           |        |                                           |      | Mascot      |
| 1130.5953  | 1130.5981   | 0.0028 | 2     | 242        | 251      | FPGQLNADLR              | 51        | 99.761 |                                           |      | Mascot      |
| 1130.5953  | 1130.5981   | 0.0028 | 2     | 242        | 251      | FPGQLNADLR              |           |        |                                           |      | Mascot      |
| 1143.6343  | 1143.6393   | 0.005  | 4     | 253        | 262      | LAVNMVPFPR              |           |        |                                           |      | Mascot      |
| 1159.6292  | 1159.6351   | 0.0059 | 5     | 253        | 262      | LAVNMVPFPR              |           |        | Oxidation (M)[5]                          |      | Mascot      |
| 1287.7241  | 1287.7299   | 0.0058 | 5     | 252        | 262      | KLAVNMVPFPR             |           |        | Oxidation (M)[6]                          |      | Mascot      |
| 1601.8203  | 1601.8257   | 0.0054 | 3     | 63         | 77       | AVLVDLEPGTMDSVR         |           |        |                                           |      | Mascot      |
| 1617.8152  | 1617.8214   | 0.0062 | 4     | 63         | 77       | AVLVDLEPGTMDSVR         |           |        | Oxidation (M)[11]                         |      | Mascot      |
| 1636.8304  | 1636.8374   | 0.007  | 4     | 263        | 276      | LHFFMPGFAPLTSR          |           |        | Oxidation (M)[5]                          |      | Mascot      |
| 1822.9227  | 1822.9269   | 0.0042 | 2     | 3          | 19       | EIVHLQAGQCGNQIGAK       |           |        | Carbamidomethyl (C)[10]                   |      | Mascot      |
| 1923.8973  | 1923.936    | 0.0387 | 20    | 321        | 336      | MSMKEVDEQMLNVQNK        |           |        |                                           |      | Mascot      |
| 1958.9817  | 1958.9872   | 0.0055 | 3     | 104        | 121      | GHYTEGAELVDSVLDVV<br>R  |           |        |                                           |      | Mascot      |
| 2126.0593  | 2126.0715   | 0.0122 | 6     | 1          | 19       | MREIVHLQAGQCGNQIG<br>AK |           |        | Carbamidomethyl (C)[12], Oxidation (M)[1] |      | Mascot      |
| 2133.1008  | 2132.8398   | -0.261 | -122  | 59         | 77       | YVPRAVLVDLEPGTMD<br>SVR |           |        | Oxidation (M)[15]                         |      | Mascot      |

|    |                               |           |        |   |    |             |                                |      |    |     |     |    |        |  |        |
|----|-------------------------------|-----------|--------|---|----|-------------|--------------------------------|------|----|-----|-----|----|--------|--|--------|
|    | 2784.3276                     | 2784.3301 | 0.0025 | 1 | 78 | 103         | SGPFGQVFRPDNFVFGQ<br>SGAGNNWAK |      |    |     |     |    |        |  | Mascot |
| 15 | tubulin, beta 2 [Danio rerio] |           |        |   |    | gi 66773102 | 50534.3                        | 4.76 | 12 | 111 | 100 | 51 | 99.761 |  |        |

| Peptide Information |             |         |       |            |          |                                |           |        |   |                                           |      |        |        |  |
|---------------------|-------------|---------|-------|------------|----------|--------------------------------|-----------|--------|---|-------------------------------------------|------|--------|--------|--|
| Calc. Mass          | Obsrv. Mass | ± da    | ± ppm | Start Seq. | End Seq. | Sequence                       | Ion Score | C. I.  | % | Modification                              | Rank | Result | Type   |  |
| 1077.5323           | 1077.5374   | 0.0051  | 5     | 155        | 162      | IREEYPDR                       |           |        |   |                                           |      |        | Mascot |  |
| 1130.5953           | 1130.5981   | 0.0028  | 2     | 242        | 251      | FPGQLNADLR                     | 51        | 99.761 |   |                                           |      |        | Mascot |  |
| 1130.5953           | 1130.5981   | 0.0028  | 2     | 242        | 251      | FPGQLNADLR                     |           |        |   |                                           |      |        | Mascot |  |
| 1143.6343           | 1143.6393   | 0.005   | 4     | 253        | 262      | LAVNMVPFPR                     |           |        |   |                                           |      |        | Mascot |  |
| 1159.6292           | 1159.6351   | 0.0059  | 5     | 253        | 262      | LAVNMVPFPR                     |           |        |   | Oxidation (M)[5]                          |      |        | Mascot |  |
| 1287.7241           | 1287.7299   | 0.0058  | 5     | 252        | 262      | KLAVNMVPFPR                    |           |        |   | Oxidation (M)[6]                          |      |        | Mascot |  |
| 1401.6943           | 1401.6169   | -0.0774 | -55   | 381        | 391      | ISEQFTAMFRR                    |           |        |   | Oxidation (M)[8]                          |      |        | Mascot |  |
| 1401.6943           | 1401.6169   | -0.0774 | -55   | 380        | 390      | RISEQFTAMFR                    |           |        |   | Oxidation (M)[9]                          |      |        | Mascot |  |
| 1636.8304           | 1636.8374   | 0.007   | 4     | 263        | 276      | LHFFMPGFAPLTSR                 |           |        |   | Oxidation (M)[5]                          |      |        | Mascot |  |
| 1822.9227           | 1822.9269   | 0.0042  | 2     | 3          | 19       | EIVHIQAGQCQGNQIGAK             |           |        |   | Carbamidomethyl (C)[10]                   |      |        | Mascot |  |
| 1958.9817           | 1958.9872   | 0.0055  | 3     | 104        | 121      | GHYTEGAELVDSVLDVV<br>R         |           |        |   |                                           |      |        | Mascot |  |
| 2126.0593           | 2126.0715   | 0.0122  | 6     | 1          | 19       | MREIVHIQAGQCQGNQIGA<br>K       |           |        |   | Carbamidomethyl (C)[12], Oxidation (M)[1] |      |        | Mascot |  |
| 2708.3381           | 2708.3342   | -0.0039 | -1    | 217        | 241      | LTTPTYGDLNHLVSATMS<br>GVTTCLR  |           |        |   | Carbamidomethyl (C)[23]                   |      |        | Mascot |  |
| 2798.3433           | 2798.3479   | 0.0046  | 2     | 78         | 103      | SGPFGQIFRPDNFVFGQ<br>SGAGNNWAK |           |        |   |                                           |      |        | Mascot |  |

|    |                                              |  |  |  |  |             |         |      |    |    |     |    |        |  |  |
|----|----------------------------------------------|--|--|--|--|-------------|---------|------|----|----|-----|----|--------|--|--|
| 16 | hypothetical protein LOC335798 [Danio rerio] |  |  |  |  | gi 41053911 | 49602.9 | 4.81 | 11 | 99 | 100 | 51 | 99.761 |  |  |
|----|----------------------------------------------|--|--|--|--|-------------|---------|------|----|----|-----|----|--------|--|--|

| Peptide Information |             |         |       |            |          |                               |           |        |   |                                    |      |        |        |  |
|---------------------|-------------|---------|-------|------------|----------|-------------------------------|-----------|--------|---|------------------------------------|------|--------|--------|--|
| Calc. Mass          | Obsrv. Mass | ± da    | ± ppm | Start Seq. | End Seq. | Sequence                      | Ion Score | C. I.  | % | Modification                       | Rank | Result | Type   |  |
| 1130.5953           | 1130.5981   | 0.0028  | 2     | 242        | 251      | FPGQLNADLR                    | 51        | 99.761 |   |                                    |      |        | Mascot |  |
| 1130.5953           | 1130.5981   | 0.0028  | 2     | 242        | 251      | FPGQLNADLR                    |           |        |   |                                    |      |        | Mascot |  |
| 1143.6343           | 1143.6393   | 0.005   | 4     | 253        | 262      | LAVNMVPFPR                    |           |        |   |                                    |      |        | Mascot |  |
| 1159.6292           | 1159.6351   | 0.0059  | 5     | 253        | 262      | LAVNMVPFPR                    |           |        |   | Oxidation (M)[5]                   |      |        | Mascot |  |
| 1287.7241           | 1287.7299   | 0.0058  | 5     | 252        | 262      | KLAVNMVPFPR                   |           |        |   | Oxidation (M)[6]                   |      |        | Mascot |  |
| 1401.6943           | 1401.6169   | -0.0774 | -55   | 381        | 391      | ISEQFTAMFRR                   |           |        |   | Oxidation (M)[8]                   |      |        | Mascot |  |
| 1401.6943           | 1401.6169   | -0.0774 | -55   | 380        | 390      | RISEQFTAMFR                   |           |        |   | Oxidation (M)[9]                   |      |        | Mascot |  |
| 1636.8304           | 1636.8374   | 0.007   | 4     | 263        | 276      | LHFFMPGFAPLTSR                |           |        |   | Oxidation (M)[5]                   |      |        | Mascot |  |
| 1923.8973           | 1923.936    | 0.0387  | 20    | 321        | 336      | MSMKEVDEQMLNVQNK              |           |        |   |                                    |      |        | Mascot |  |
| 2708.3381           | 2708.3342   | -0.0039 | -1    | 217        | 241      | LTTPTYGDLNHLVSATMS<br>GVTTCLR |           |        |   | Carbamidomethyl (C)[23]            |      |        | Mascot |  |
| 2784.2822           | 2784.3301   | 0.0479  | 17    | 283        | 306      | VLSVPELTQQMFDAKNM             |           |        |   | Carbamidomethyl (C)[21], Oxidation |      |        | Mascot |  |

|    |                                         |             |           |         |      |    |     |                                           |            |        |
|----|-----------------------------------------|-------------|-----------|---------|------|----|-----|-------------------------------------------|------------|--------|
| 17 | inorganic pyrophosphatase [Danio rerio] | 2798.3433   | 2798.3479 | 0.0046  | 2    | 78 | 103 | MAACDPR<br>SGPFGQIFRPDNFVFGQ<br>SGAGNNWAK | (M)[11,17] | Mascot |
|    |                                         | 3088.3918   | 3088.4038 | 0.012   | 4    | 20 | 46  | FWEVISDEHGIDPTGSYH<br>GDSDLQLDR           |            | Mascot |
|    |                                         | gi 62955639 |           | 32621.8 | 5.25 | 15 | 98  | 100                                       |            |        |

#### Peptide Information

| Calc. Mass | Obsrv. Mass | ± da    | ± ppm | Start Seq. | End Seq. | Sequence                 | Ion Score | C. I. % | Modification                 | Rank | Result Type |
|------------|-------------|---------|-------|------------|----------|--------------------------|-----------|---------|------------------------------|------|-------------|
| 846.4257   | 846.4293    | 0.0036  | 4     | 223        | 229      | ATHGFWK                  |           |         |                              |      | Mascot      |
| 877.4243   | 877.4266    | 0.0023  | 3     | 285        | 290      | WFYYAK                   |           |         |                              |      | Mascot      |
| 1021.5061  | 1021.5103   | 0.0042  | 4     | 9          | 17       | GNPNTLSYR                |           |         |                              |      | Mascot      |
| 1045.5272  | 1045.5436   | 0.0164  | 16    | 169        | 177      | DLNNISDVR                |           |         |                              |      | Mascot      |
| 1074.5731  | 1074.5758   | 0.0027  | 3     | 81         | 89       | YVANVFPHK                |           |         |                              |      | Mascot      |
| 1179.6256  | 1179.6169   | -0.0087 | -7    | 213        | 222      | DKDFAIETIK               |           |         |                              |      | Mascot      |
| 1201.6284  | 1201.6323   | 0.0039  | 3     | 169        | 178      | DLNNISDVRR               |           |         |                              |      | Mascot      |
| 1646.8167  | 1646.8248   | 0.0081  | 5     | 230        | 244      | ALLSQQTNAGELNCK          |           |         | Carbamidomethyl (C)[14]      |      | Mascot      |
| 1694.89    | 1694.8947   | 0.0047  | 3     | 179        | 192      | LKPGYLEATVDWFR           |           |         |                              |      | Mascot      |
| 1791.8833  | 1791.8849   | 0.0016  | 1     | 141        | 156      | VLGVLAMIDEGETDWK         |           |         | Oxidation (M)[7]             |      | Mascot      |
| 1923.9235  | 1923.936    | 0.0125  | 6     | 196        | 212      | VPDGKPENQFAFNGEFK        |           |         |                              |      | Mascot      |
| 1961.7673  | 1961.8923   | 0.125   | 64    | 245        | 263      | NTCVSEGNSPFCCSADE<br>AK  |           |         |                              |      | Mascot      |
| 2132.8318  | 2132.8398   | 0.008   | 4     | 245        | 263      | NTCVSEGNSPFCCSADE<br>AK  |           |         | Carbamidomethyl (C)[3,12,13] |      | Mascot      |
| 2215.0818  | 2215.0972   | 0.0154  | 7     | 194        | 212      | YKVPDGKPENQFAFNGE<br>FK  |           |         |                              |      | Mascot      |
| 2232.0508  | 2232.0674   | 0.0166  | 7     | 90         | 108      | GYIWNYGAIPQTWEDPG<br>HK  |           |         |                              |      | Mascot      |
| 2283.8799  | 2284.1824   | 0.3025  | 132   | 109        | 129      | DNDTGCCGDNPIDVCEI<br>GSK |           |         | Carbamidomethyl (C)[6,7]     |      | Mascot      |

|    |                                                    |              |  |         |      |    |    |     |    |        |  |
|----|----------------------------------------------------|--------------|--|---------|------|----|----|-----|----|--------|--|
| 18 | PREDICTED: tubulin beta-2 chain-like [Danio rerio] | gi 326664656 |  | 46950.6 | 4.83 | 10 | 98 | 100 | 51 | 99.761 |  |
|----|----------------------------------------------------|--------------|--|---------|------|----|----|-----|----|--------|--|

#### Peptide Information

| Calc. Mass | Obsrv. Mass | ± da    | ± ppm | Start Seq. | End Seq. | Sequence    | Ion Score | C. I. % | Modification     | Rank | Result Type |
|------------|-------------|---------|-------|------------|----------|-------------|-----------|---------|------------------|------|-------------|
| 1077.5323  | 1077.5374   | 0.0051  | 5     | 122        | 129      | IREEYPDR    |           |         |                  |      | Mascot      |
| 1130.5953  | 1130.5981   | 0.0028  | 2     | 209        | 218      | FPGQLNADLR  | 51        | 99.761  |                  |      | Mascot      |
| 1130.5953  | 1130.5981   | 0.0028  | 2     | 209        | 218      | FPGQLNADLR  |           |         |                  |      | Mascot      |
| 1143.6343  | 1143.6393   | 0.005   | 4     | 220        | 229      | LAVNMVPFPR  |           |         |                  |      | Mascot      |
| 1159.6292  | 1159.6351   | 0.0059  | 5     | 220        | 229      | LAVNMVPFPR  |           |         | Oxidation (M)[5] |      | Mascot      |
| 1287.7241  | 1287.7299   | 0.0058  | 5     | 219        | 229      | KLAVNMVPFPR |           |         | Oxidation (M)[6] |      | Mascot      |
| 1401.6943  | 1401.6169   | -0.0774 | -55   | 348        | 358      | ISEQFTAMFRR |           |         | Oxidation (M)[8] |      | Mascot      |

|    |                                              |           |         |     |             |     |                                |     |   |    |        |                         |        |
|----|----------------------------------------------|-----------|---------|-----|-------------|-----|--------------------------------|-----|---|----|--------|-------------------------|--------|
|    | 1401.6943                                    | 1401.6169 | -0.0774 | -55 | 347         | 357 | RISEQFTAMFR                    |     |   |    |        | Oxidation (M)[9]        | Mascot |
|    | 1636.8304                                    | 1636.8374 | 0.007   | 4   | 230         | 243 | LHFFMPGFAPLTSR                 |     |   |    |        | Oxidation (M)[5]        | Mascot |
|    | 1958.9817                                    | 1958.9872 | 0.0055  | 3   | 71          | 88  | GHYTEGAELVDSVLDDV<br>R         |     |   |    |        |                         | Mascot |
|    | 2708.3381                                    | 2708.3342 | -0.0039 | -1  | 184         | 208 | LTTPTYGDLNHLVSATMS<br>GVTTCLR  |     |   |    |        | Carbamidomethyl (C)[23] | Mascot |
|    | 2798.3433                                    | 2798.3479 | 0.0046  | 2   | 45          | 70  | SGPFGQIFRPDNFVFGQ<br>SGAGNNWAK |     |   |    |        |                         | Mascot |
| 19 | hypothetical protein LOC641565 [Danio rerio] |           |         |     | gi 83025072 |     | 50237.2                        | 4.8 | 9 | 88 | 99.992 | 51                      | 99.761 |

#### Peptide Information

|  | Calc. Mass | Obsrv. Mass | ± da    | ± ppm | Start Seq. | End Seq. | Sequence                       | Ion Score | C. I.  | % | Modification            | Rank | Result Type |
|--|------------|-------------|---------|-------|------------|----------|--------------------------------|-----------|--------|---|-------------------------|------|-------------|
|  | 1077.5323  | 1077.5374   | 0.0051  | 5     | 155        | 162      | IREEYPDR                       |           |        |   |                         |      | Mascot      |
|  | 1130.5953  | 1130.5981   | 0.0028  | 2     | 242        | 251      | FPGQLNADLR                     | 51        | 99.761 |   |                         |      | Mascot      |
|  | 1130.5953  | 1130.5981   | 0.0028  | 2     | 242        | 251      | FPGQLNADLR                     |           |        |   |                         |      | Mascot      |
|  | 1143.6343  | 1143.6393   | 0.005   | 4     | 253        | 262      | LAVNMVPFPR                     |           |        |   |                         |      | Mascot      |
|  | 1159.6292  | 1159.6351   | 0.0059  | 5     | 253        | 262      | LAVNMVPFPR                     |           |        |   | Oxidation (M)[5]        |      | Mascot      |
|  | 1287.7241  | 1287.7299   | 0.0058  | 5     | 252        | 262      | KLAVNMVPFPR                    |           |        |   | Oxidation (M)[6]        |      | Mascot      |
|  | 1401.6943  | 1401.6169   | -0.0774 | -55   | 381        | 391      | ISEQFTAMFRR                    |           |        |   | Oxidation (M)[8]        |      | Mascot      |
|  | 1401.6943  | 1401.6169   | -0.0774 | -55   | 380        | 390      | RISEQFTAMFR                    |           |        |   | Oxidation (M)[9]        |      | Mascot      |
|  | 1958.9817  | 1958.9872   | 0.0055  | 3     | 104        | 121      | GHYTEGAELVDSVLDDV<br>R         |           |        |   |                         |      | Mascot      |
|  | 2126.0593  | 2126.0715   | 0.0122  | 6     | 1          | 19       | MREIVHLQAGQCGNQIG<br>SK        |           |        |   | Carbamidomethyl (C)[12] |      | Mascot      |
|  | 2798.3103  | 2798.3479   | 0.0376  | 13    | 78         | 103      | SGPMGQIFRPDNFVFGQ<br>SGAGNNWAK |           |        |   | Oxidation (M)[4]        |      | Mascot      |

|    |                                              |  |  |  |              |  |         |      |   |    |        |    |        |
|----|----------------------------------------------|--|--|--|--------------|--|---------|------|---|----|--------|----|--------|
| 20 | hypothetical protein LOC767806 [Danio rerio] |  |  |  | gi 115529425 |  | 49898.2 | 4.81 | 5 | 64 | 98.421 | 51 | 99.761 |
|----|----------------------------------------------|--|--|--|--------------|--|---------|------|---|----|--------|----|--------|

#### Peptide Information

|  | Calc. Mass | Obsrv. Mass | ± da   | ± ppm | Start Seq. | End Seq. | Sequence               | Ion Score | C. I.  | % | Modification     | Rank | Result Type |
|--|------------|-------------|--------|-------|------------|----------|------------------------|-----------|--------|---|------------------|------|-------------|
|  | 1077.5323  | 1077.5374   | 0.0051 | 5     | 155        | 162      | IREEYPDR               |           |        |   |                  |      | Mascot      |
|  | 1130.5953  | 1130.5981   | 0.0028 | 2     | 242        | 251      | FPGQLNADLR             | 51        | 99.761 |   |                  |      | Mascot      |
|  | 1130.5953  | 1130.5981   | 0.0028 | 2     | 242        | 251      | FPGQLNADLR             |           |        |   |                  |      | Mascot      |
|  | 1143.6343  | 1143.6393   | 0.005  | 4     | 253        | 262      | LAVNMVPFPR             |           |        |   |                  |      | Mascot      |
|  | 1159.6292  | 1159.6351   | 0.0059 | 5     | 253        | 262      | LAVNMVPFPR             |           |        |   | Oxidation (M)[5] |      | Mascot      |
|  | 1287.7241  | 1287.7299   | 0.0058 | 5     | 252        | 262      | KLAVNMVPFPR            |           |        |   | Oxidation (M)[6] |      | Mascot      |
|  | 1958.9817  | 1958.9872   | 0.0055 | 3     | 104        | 121      | GHYTEGAELVDSVLDDV<br>R |           |        |   |                  |      | Mascot      |

|    |                                                    |  |  |  |              |  |         |     |   |    |        |    |        |
|----|----------------------------------------------------|--|--|--|--------------|--|---------|-----|---|----|--------|----|--------|
| 21 | PREDICTED: tubulin beta-6 chain-like [Danio rerio] |  |  |  | gi 125819301 |  | 52544.5 | 4.9 | 5 | 64 | 98.145 | 51 | 99.761 |
|----|----------------------------------------------------|--|--|--|--------------|--|---------|-----|---|----|--------|----|--------|

#### Peptide Information

|    | Calc. Mass                                   | Obsrv. Mass | ± da   | ± ppm | Start Seq.  | End Sequence Seq. | Ion Score | C. I.  | % Modification   | Rank      | Result Type |
|----|----------------------------------------------|-------------|--------|-------|-------------|-------------------|-----------|--------|------------------|-----------|-------------|
|    | 1077.5323                                    | 1077.5374   | 0.0051 | 5     | 155         | 162 IREEYPDR      |           |        |                  |           | Mascot      |
|    | 1130.5953                                    | 1130.5981   | 0.0028 | 2     | 242         | 251 FPGQLNADLR    | 51        | 99.761 |                  |           | Mascot      |
|    | 1130.5953                                    | 1130.5981   | 0.0028 | 2     | 242         | 251 FPGQLNADLR    |           |        |                  |           | Mascot      |
|    | 1143.6343                                    | 1143.6393   | 0.005  | 4     | 253         | 262 LAVNMVPFPR    |           |        |                  |           | Mascot      |
|    | 1159.6292                                    | 1159.6351   | 0.0059 | 5     | 253         | 262 LAVNMVPFPR    |           |        | Oxidation (M)[5] |           | Mascot      |
|    | 1287.7241                                    | 1287.7299   | 0.0058 | 5     | 252         | 262 KLAVNMVPFPR   |           |        | Oxidation (M)[6] |           | Mascot      |
|    | 1601.7706                                    | 1601.8257   | 0.0551 | 34    | 20          | 32 FWEVISDEHGINR  |           |        |                  |           | Mascot      |
| 22 | hypothetical protein LOC550458 [Danio rerio] |             |        |       | gi 62955497 |                   | 24485.8   | 4.79   | 4                | 64 98.057 | 51 99.761   |

#### Peptide Information

|    | Calc. Mass                                                                 | Obsrv. Mass | ± da   | ± ppm | Start Seq.   | End Sequence Seq.               | Ion Score | C. I.  | % Modification                                | Rank      | Result Type |
|----|----------------------------------------------------------------------------|-------------|--------|-------|--------------|---------------------------------|-----------|--------|-----------------------------------------------|-----------|-------------|
|    | 1130.5953                                                                  | 1130.5981   | 0.0028 | 2     | 10           | 19 FPGQLNADLR                   | 51        | 99.761 |                                               |           | Mascot      |
|    | 1130.5953                                                                  | 1130.5981   | 0.0028 | 2     | 10           | 19 FPGQLNADLR                   |           |        |                                               |           | Mascot      |
|    | 1143.6343                                                                  | 1143.6393   | 0.005  | 4     | 21           | 30 LAVNMVPFPR                   |           |        |                                               |           | Mascot      |
|    | 1159.6292                                                                  | 1159.6351   | 0.0059 | 5     | 21           | 30 LAVNMVPFPR                   |           |        | Oxidation (M)[5]                              |           | Mascot      |
|    | 1287.7241                                                                  | 1287.7299   | 0.0058 | 5     | 20           | 30 KLAVNMVPFPR                  |           |        | Oxidation (M)[6]                              |           | Mascot      |
|    | 2798.2729                                                                  | 2798.3479   | 0.075  | 27    | 51           | 74 ALTVPCLTQQMFDARNM<br>MAACDPR |           |        | Carbamidomethyl (C)[21], Oxidation (M)[11,17] |           | Mascot      |
| 23 | PREDICTED: ubiquitin carboxyl-terminal hydrolase 4 isoform 2 [Danio rerio] |             |        |       | gi 292615153 |                                 | 107715.4  | 5.37   | 14                                            | 50 52.316 | 12 0        |

#### Peptide Information

|  | Calc. Mass | Obsrv. Mass | ± da    | ± ppm | Start Seq. | End Sequence Seq.     | Ion Score | C. I. | % Modification         | Rank | Result Type |
|--|------------|-------------|---------|-------|------------|-----------------------|-----------|-------|------------------------|------|-------------|
|  | 842.5206   | 842.5118    | -0.0088 | -10   | 586        | 592 VLERIGR           |           |       |                        |      | Mascot      |
|  | 1045.5499  | 1045.5436   | -0.0063 | -6    | 137        | 145 VVEHGMFVK         |           |       |                        |      | Mascot      |
|  | 1123.5122  | 1123.4373   | -0.0749 | -67   | 423        | 432 STLVCPECSK        |           |       | Carbamidomethyl (C)[5] |      | Mascot      |
|  | 1130.5992  | 1130.5981   | -0.0011 | -1    | 921        | 929 AAYVLFYQR         |           |       |                        |      | Mascot      |
|  | 1130.5992  | 1130.5981   | -0.0011 | -1    | 921        | 929 AAYVLFYQR         |           |       |                        |      | Mascot      |
|  | 1162.5409  | 1162.5543   | 0.0134  | 12    | 516        | 525 DDGLNQIMEK        |           |       |                        |      | Mascot      |
|  | 1340.678   | 1340.6705   | -0.0075 | -6    | 541        | 550 MNLPVYFRER        |           |       | Oxidation (M)[1]       |      | Mascot      |
|  | 1617.8635  | 1617.8214   | -0.0421 | -26   | 409        | 422 NDSIIVDIFHGLFK    |           |       |                        |      | Mascot      |
|  | 1718.7327  | 1718.8704   | 0.1377  | 80    | 756        | 769 RLCYDDQAEAYDK     | 12        | 0     |                        |      | Mascot      |
|  | 1718.7327  | 1718.8704   | 0.1377  | 80    | 756        | 769 RLCYDDQAEAYDK     |           |       |                        |      | Mascot      |
|  | 1945.9614  | 1945.8866   | -0.0748 | -38   | 740        | 756 LTTHSTVAIDWDSDTKR |           |       |                        |      | Mascot      |

|    |                                         |           |         |     |              |     |                   |             |     |    |        |  |  |  |  |  |  |        |
|----|-----------------------------------------|-----------|---------|-----|--------------|-----|-------------------|-------------|-----|----|--------|--|--|--|--|--|--|--------|
|    | 1959.1174                               | 1958.9872 | -0.1302 | -66 | 120          | 136 | LVSWYGSLGNQKPIIRK |             |     |    |        |  |  |  |  |  |  | Mascot |
|    | 2211.0308                               | 2211.1138 | 0.083   | 38  | 149          | 166 | VEVYLLELNLCE      | NDNM        |     |    |        |  |  |  |  |  |  | Mascot |
|    | 2215.1541                               | 2215.0972 | -0.0569 | -26 | 433          | 451 | VS                | TFDPFCYLTLP | MPK |    |        |  |  |  |  |  |  | Mascot |
|    | 2284.1497                               | 2284.1824 | 0.0327  | 14  | 101          | 119 | EHLIDELDYVL       | VPTEAWN     |     |    |        |  |  |  |  |  |  | Mascot |
|    | 3088.356                                | 3088.4038 | 0.0478  | 15  | 787          | 811 | ECIELFTT          | METLGEHDPW  |     |    |        |  |  |  |  |  |  | Mascot |
|    |                                         |           |         |     |              |     | YCPTCKK           |             |     |    |        |  |  |  |  |  |  |        |
| 24 | slow myosin heavy chain 2 [Danio rerio] |           |         |     | gi 211578412 |     | 223149.2          | 5.5         | 26  | 49 | 46.498 |  |  |  |  |  |  |        |

Peptide Information

| Calc. Mass | Obsrv. Mass | ± da    | ± ppm | Start Seq. | End Seq. | Sequence           | Ion Score | C. I. | % Modification         | Rank | Result Type |
|------------|-------------|---------|-------|------------|----------|--------------------|-----------|-------|------------------------|------|-------------|
| 877.4025   | 877.4266    | 0.0241  | 27    | 829        | 834      | NWPWMK             |           |       | Oxidation (M)[5]       |      | Mascot      |
| 882.4679   | 882.5717    | 0.1038  | 118   | 1525       | 1531     | NIHELEK            |           |       |                        |      | Mascot      |
| 926.5053   | 926.5677    | 0.0624  | 67    | 972        | 979      | HATENKVK           |           |       |                        |      | Mascot      |
| 1009.52    | 1009.4604   | -0.0596 | -59   | 59         | 67       | VTVETEFVK          |           |       |                        |      | Mascot      |
| 1021.4917  | 1021.5103   | 0.0186  | 18    | 1246       | 1253     | ANLEKMCR           |           |       | Carbamidomethyl (C)[7] |      | Mascot      |
| 1074.5426  | 1074.5758   | 0.0332  | 31    | 1913       | 1922     | ADIAESQVVK         |           |       |                        |      | Mascot      |
| 1077.5358  | 1077.5374   | 0.0016  | 1     | 1077       | 1084     | QQMEERLK           |           |       | Oxidation (M)[3]       |      | Mascot      |
| 1130.6165  | 1130.5981   | -0.0184 | -16   | 1638       | 1647     | QASEAQQLK          |           |       |                        |      | Mascot      |
| 1130.6165  | 1130.5981   | -0.0184 | -16   | 1638       | 1647     | QASEAQQLK          |           |       |                        |      | Mascot      |
| 1159.647   | 1159.6351   | -0.0119 | -10   | 404        | 413      | VKVGNEWVK          |           |       |                        |      | Mascot      |
| 1165.6827  | 1165.5721   | -0.1106 | -95   | 1479       | 1488     | SLSTELFKLK         |           |       |                        |      | Mascot      |
| 1165.6827  | 1165.7524   | 0.0697  | 60    | 1479       | 1488     | SLSTELFKLK         |           |       |                        |      | Mascot      |
| 1287.5521  | 1287.7299   | 0.1778  | 138   | 1254       | 1263     | TLEDQMSEYR         |           |       | Oxidation (M)[6]       |      | Mascot      |
| 1340.7797  | 1340.6705   | -0.1092 | -81   | 560        | 570      | NPNFQKPRIVK        |           |       |                        |      | Mascot      |
| 1475.7601  | 1475.7592   | -0.0009 | -1    | 1363       | 1375     | SLSKANSEVAQWR      |           |       |                        |      | Mascot      |
| 1516.6948  | 1516.6703   | -0.0245 | -16   | 1254       | 1265     | TLEDQMSEYRK        |           |       | Oxidation (M)[6]       |      | Mascot      |
| 1601.8633  | 1601.8257   | -0.0376 | -23   | 956        | 969      | DIDDLELTAKVEK      |           |       |                        |      | Mascot      |
| 1636.8112  | 1636.8374   | 0.0262  | 16    | 22         | 34       | ERLEAQTRPFDMK      |           |       | Oxidation (M)[12]      |      | Mascot      |
| 1718.7295  | 1718.8704   | 0.1409  | 82    | 1251       | 1263     | MCRTLEDQMSEYR      |           |       | Carbamidomethyl (C)[2] |      | Mascot      |
| 1718.8265  | 1718.8704   | 0.0439  | 26    | 1424       | 1437     | LQNEIEDLMVDVER     |           |       | Oxidation (M)[9]       |      | Mascot      |
| 1791.9058  | 1791.8849   | -0.0209 | -12   | 68         | 83       | TVTVKEVDCHPQNPPK   |           |       |                        |      | Mascot      |
| 1900.9763  | 1900.8574   | -0.1189 | -63   | 744        | 760      | GAEKLLGSLDIDHNQYK  |           |       |                        |      | Mascot      |
| 1923.9456  | 1923.936    | -0.0096 | -5    | 1          | 18       | MGDAVMAEFGPAAPFLR  |           |       | Oxidation (M)[1]       |      | Mascot      |
| 1924.9135  | 1924.9244   | 0.0109  | 6     | 1378       | 1393     | YETDAIQRTEEEAK     |           |       |                        |      | Mascot      |
| 2232.0964  | 2232.0674   | -0.029  | -13   | 214        | 234      | GTLEDQIIQCNPALEAFG |           |       |                        |      | Mascot      |
| 2555.187   | 2555.1997   | 0.0127  | 5     | 148        | 169      | TEAPPHIFSISDNAYQYM |           |       |                        |      | Mascot      |

|    |                              |           |         |    |             |     |                                      |      |    |    |       |  |                                           |  |  |  |  |        |
|----|------------------------------|-----------|---------|----|-------------|-----|--------------------------------------|------|----|----|-------|--|-------------------------------------------|--|--|--|--|--------|
|    | 2555.187                     | 2555.1997 | 0.0127  | 5  | 148         | 169 | LSDR<br>TEAPPHIFSISDNAYQYM           |      |    |    |       |  |                                           |  |  |  |  | Mascot |
|    | 2708.3428                    | 2708.3342 | -0.0086 | -3 | 683         | 706 | LSDR<br>TPGAMENPLVMHQLRCN<br>GVLEGIR |      |    |    |       |  | Carbamidomethyl (C)[16], Oxidation (M)[5] |  |  |  |  | Mascot |
|    | 2996.4041                    | 2996.4829 | 0.0788  | 26 | 370         | 397 | EEQAEADGTEDADKVAY<br>LMGLNSADLIK     |      |    |    |       |  |                                           |  |  |  |  | Mascot |
| 25 | Pip5k3 protein [Danio rerio] |           |         |    | gi 33604217 |     | 106353.4                             | 7.95 | 17 | 49 | 39.97 |  |                                           |  |  |  |  |        |

#### Peptide Information

| Calc. Mass | Obsrv. Mass | ± da    | ± ppm | Start Seq. | End Seq. | Sequence                      | Ion Score | C. I. | % Modification                            | Rank | Result Type |
|------------|-------------|---------|-------|------------|----------|-------------------------------|-----------|-------|-------------------------------------------|------|-------------|
| 846.5117   | 846.4293    | -0.0824 | -97   | 889        | 895      | KLEMVVK                       |           |       |                                           |      | Mascot      |
| 916.5284   | 916.5395    | 0.0111  | 12    | 186        | 193      | GCVQIVLK                      |           |       | Carbamidomethyl (C)[2]                    |      | Mascot      |
| 916.5284   | 916.5395    | 0.0111  | 12    | 186        | 193      | GCVQIVLK                      |           |       | Carbamidomethyl (C)[2]                    |      | Mascot      |
| 1021.5173  | 1021.5103   | -0.007  | -7    | 66         | 73       | QREGTQFR                      |           |       |                                           |      | Mascot      |
| 1123.5742  | 1123.4373   | -0.1369 | -122  | 445        | 455      | NPSPVVPNGDK                   |           |       |                                           |      | Mascot      |
| 1128.6523  | 1128.541    | -0.1113 | -99   | 359        | 367      | GWIEKLQVR                     |           |       |                                           |      | Mascot      |
| 1162.6102  | 1162.5543   | -0.0559 | -48   | 404        | 412      | LQELFQKEK                     |           |       |                                           |      | Mascot      |
| 1179.6805  | 1179.6169   | -0.0636 | -54   | 283        | 292      | LLEICLPPPK                    |           |       | Carbamidomethyl (C)[5]                    |      | Mascot      |
| 1401.6025  | 1401.6169   | 0.0144  | 10    | 340        | 350      | EEKMEDMFAQK                   |           |       | Oxidation (M)[4]                          |      | Mascot      |
| 1401.6025  | 1401.6169   | 0.0144  | 10    | 340        | 350      | EEKMEDMFAQK                   |           |       | Oxidation (M)[4]                          |      | Mascot      |
| 1564.8152  | 1564.7493   | -0.0659 | -42   | 906        | 918      | MPTVVSPELYRTR                 |           |       | Oxidation (M)[1]                          |      | Mascot      |
| 1618.0125  | 1617.8214   | -0.1911 | -118  | 283        | 296      | LLEICLPPPKIIR                 |           |       |                                           |      | Mascot      |
| 1694.8795  | 1694.8947   | 0.0152  | 9     | 825        | 838      | LVHDNPLYIRSHCK                |           |       |                                           |      | Mascot      |
| 1718.8126  | 1718.8704   | 0.0578  | 34    | 611        | 626      | NSPAKPSDNSMSQLSR              |           |       |                                           |      | Mascot      |
| 1718.8126  | 1718.8704   | 0.0578  | 34    | 611        | 626      | NSPAKPSDNSMSQLSR              |           |       |                                           |      | Mascot      |
| 1822.9069  | 1822.9269   | 0.02    | 11    | 867        | 882      | DDSTDELVVGIIDYIR              |           |       |                                           |      | Mascot      |
| 1924.8721  | 1924.9244   | 0.0523  | 27    | 926        | 941      | YFLMVPDHW SGLGLNC             |           |       | Carbamidomethyl (C)[16], Oxidation (M)[4] |      | Mascot      |
| 1945.976   | 1945.8866   | -0.0894 | -46   | 609        | 626      | VKN SPAKPSDNSMSQLS<br>R       |           |       |                                           |      | Mascot      |
| 1961.9709  | 1961.8923   | -0.0786 | -40   | 609        | 626      | VKN SPAKPSDNSMSQLS<br>R       |           |       | Oxidation (M)[13]                         |      | Mascot      |
| 2133.0745  | 2132.8398   | -0.2347 | -110  | 806        | 824      | TDQ GKESCEVLLDENLL<br>K       |           |       |                                           |      | Mascot      |
| 2708.1653  | 2708.3342   | 0.1689  | 62    | 919        | 941      | FCEAMD KYFLMVPDHW S<br>GLGLNC |           |       | Oxidation (M)[5,11]                       |      | Mascot      |

|    |                                                          |  |  |  |              |  |         |      |    |    |        |  |  |  |  |  |  |  |
|----|----------------------------------------------------------|--|--|--|--------------|--|---------|------|----|----|--------|--|--|--|--|--|--|--|
| 26 | ATP-binding cassette sub-family D member 4 [Danio rerio] |  |  |  | gi 300863092 |  | 68999.7 | 8.28 | 13 | 49 | 38.571 |  |  |  |  |  |  |  |
|----|----------------------------------------------------------|--|--|--|--------------|--|---------|------|----|----|--------|--|--|--|--|--|--|--|

#### Peptide Information

| Calc. Mass | Obsrv. Mass | ± da | ± ppm | Start Seq. | End Seq. | Sequence | Ion Score | C. I. | % Modification | Rank | Result Type |
|------------|-------------|------|-------|------------|----------|----------|-----------|-------|----------------|------|-------------|
|------------|-------------|------|-------|------------|----------|----------|-----------|-------|----------------|------|-------------|

|    |                                                   |           |         |     |             |     |                           |     |   |                         |        |  |        |
|----|---------------------------------------------------|-----------|---------|-----|-------------|-----|---------------------------|-----|---|-------------------------|--------|--|--------|
|    | 846.4315                                          | 846.4293  | -0.0022 | -3  | 144         | 150 | ISQDVER                   |     |   |                         |        |  | Mascot |
|    | 923.4515                                          | 923.4485  | -0.003  | -3  | 583         | 589 | HHDVMLR                   |     |   | Oxidation (M)[5]        |        |  | Mascot |
|    | 923.4515                                          | 923.4485  | -0.003  | -3  | 583         | 589 | HHDVMLR                   |     |   | Oxidation (M)[5]        |        |  | Mascot |
|    | 1009.5312                                         | 1009.4604 | -0.0708 | -70 | 461         | 469 | AYLTDGTLR                 |     |   |                         |        |  | Mascot |
|    | 1021.5346                                         | 1021.5103 | -0.0243 | -24 | 2           | 10  | TPMKQSSVK                 |     |   | Oxidation (M)[3]        |        |  | Mascot |
|    | 1273.6357                                         | 1273.623  | -0.0127 | -10 | 431         | 440 | VLNSLWEPCR                |     |   | Carbamidomethyl (C)[9]  |        |  | Mascot |
|    | 1287.5854                                         | 1287.7299 | 0.1445  | 112 | 151         | 161 | LCKQMSTMASR               |     |   | Oxidation (M)[5,8]      |        |  | Mascot |
|    | 1340.7103                                         | 1340.6705 | -0.0398 | -30 | 566         | 577 | QQGMTLISLGHR              |     |   |                         |        |  | Mascot |
|    | 1475.7675                                         | 1475.7592 | -0.0083 | -6  | 590         | 602 | LCGGGQWELSKLK             |     |   | Carbamidomethyl (C)[2]  |        |  | Mascot |
|    | 1516.7794                                         | 1516.6703 | -0.1091 | -72 | 112         | 123 | TLTEDLHHLYFK              |     |   |                         |        |  | Mascot |
|    | 1694.8928                                         | 1694.8947 | 0.0019  | 1   | 251         | 264 | LQMLLSTQRSLMNK            |     |   | Oxidation (M)[3,12]     |        |  | Mascot |
|    | 1924.0361                                         | 1923.936  | -0.1001 | -52 | 453         | 469 | GLMFLPQKAYLTDGTLR         |     |   |                         |        |  | Mascot |
|    | 2211.198                                          | 2211.1138 | -0.0842 | -38 | 404         | 425 | DLTSLISQGTLLVVGNT<br>GTGK |     |   |                         |        |  | Mascot |
|    | 2225.127                                          | 2225.1301 | 0.0031  | 1   | 375         | 393 | ELQSVPADTAFVLDRLCY<br>K   |     |   | Carbamidomethyl (C)[17] |        |  | Mascot |
| 27 | iron-sulfur cluster assembly enzyme [Danio rerio] |           |         |     | gi 54261801 |     | 17796.2                   | 8.7 | 8 | 48                      | 29.471 |  |        |

Peptide Information

| Calc. Mass | Obsrv. Mass | ± da    | ± ppm | Start Seq. | End Seq. | Sequence                 | Ion Score | C. I. | % Modification                            | Rank | Result Type |
|------------|-------------|---------|-------|------------|----------|--------------------------|-----------|-------|-------------------------------------------|------|-------------|
| 916.5461   | 916.5395    | -0.0066 | -7    | 116        | 123      | IKNTEIAK                 |           |       |                                           |      | Mascot      |
| 916.5461   | 916.5395    | -0.0066 | -7    | 116        | 123      | IKNTEIAK                 |           |       |                                           |      | Mascot      |
| 1045.5636  | 1045.5436   | -0.02   | -19   | 44         | 53       | NVGSLDKNAK               |           |       |                                           |      | Mascot      |
| 1128.5432  | 1128.541    | -0.0022 | -2    | 35         | 43       | VVDHYENPR                |           |       |                                           |      | Mascot      |
| 1143.6005  | 1143.6393   | 0.0388  | 34    | 71         | 80       | LQIQVDENGK               |           |       |                                           |      | Mascot      |
| 1256.6382  | 1256.7063   | 0.0681  | 54    | 34         | 43       | KVVDHYENPR               |           |       |                                           |      | Mascot      |
| 1256.6382  | 1256.7063   | 0.0681  | 54    | 34         | 43       | KVVDHYENPR               |           |       |                                           |      | Mascot      |
| 1718.8353  | 1718.8704   | 0.0351  | 20    | 19         | 33       | SMSLPRLPACSYHK           |           |       |                                           |      | Mascot      |
| 1718.8353  | 1718.8704   | 0.0351  | 20    | 19         | 33       | SMSLPRLPACSYHK           |           |       |                                           |      | Mascot      |
| 1791.8517  | 1791.8849   | 0.0332  | 19    | 19         | 33       | SMSLPRLPACSYHK           |           |       | Carbamidomethyl (C)[11], Oxidation (M)[2] |      | Mascot      |
| 1958.9785  | 1958.9872   | 0.0087  | 4     | 51         | 70       | NAKNVGTGLVGAPACGD<br>VMK |           |       | Carbamidomethyl (C)[15]                   |      | Mascot      |
| 2283.1545  | 2283.1873   | 0.0328  | 14    | 124        | 143      | ELCLPPVKLHCSMLAEDA<br>IK |           |       | Carbamidomethyl (C)[3], Oxidation (M)[13] |      | Mascot      |

28 novel protein [Danio rerio] gi|220679558 45035 4.99 10 48 22.666

Peptide Information

| Calc. Mass | Obsrv. Mass | ± da | ± ppm | Start Seq. | End Seq. | Sequence | Ion Score | C. I. | % Modification | Rank | Result Type |
|------------|-------------|------|-------|------------|----------|----------|-----------|-------|----------------|------|-------------|
|------------|-------------|------|-------|------------|----------|----------|-----------|-------|----------------|------|-------------|



|    |                                              |           |         |     |              |     |                     |         |      |   |    |       |                                          |  |  |  |        |
|----|----------------------------------------------|-----------|---------|-----|--------------|-----|---------------------|---------|------|---|----|-------|------------------------------------------|--|--|--|--------|
|    | 842.473                                      | 842.5118  | 0.0388  | 46  | 382          | 388 | DPKDVLR             |         |      |   |    |       |                                          |  |  |  | Mascot |
|    | 877.4698                                     | 877.4266  | -0.0432 | -49 | 202          | 208 | LVEELMK             |         |      |   |    |       | Oxidation (M)[6]                         |  |  |  | Mascot |
|    | 882.4791                                     | 882.5717  | 0.0926  | 105 | 1            | 7   | VSTYTRR             |         |      |   |    |       |                                          |  |  |  | Mascot |
|    | 1045.5889                                    | 1045.5436 | -0.0453 | -43 | 54           | 62  | VIDTLESLR           |         |      |   |    |       |                                          |  |  |  | Mascot |
|    | 1143.4744                                    | 1143.6393 | 0.1649  | 144 | 8            | 16  | CPGCQMIYR           |         |      |   |    |       | Carbamidomethyl (C)[1], Oxidation (M)[6] |  |  |  | Mascot |
|    | 1159.5841                                    | 1159.6351 | 0.051   | 44  | 375          | 384 | LDETDVKDPK          |         |      |   |    |       |                                          |  |  |  | Mascot |
|    | 1340.6021                                    | 1340.6705 | 0.0684  | 51  | 7            | 16  | RCPGCQMIYR          |         |      |   |    |       | Carbamidomethyl (C)[2,5]                 |  |  |  | Mascot |
|    | 1718.8629                                    | 1718.8704 | 0.0075  | 4   | 202          | 215 | LVEELMKQEVDDVR      |         |      |   |    |       | Oxidation (M)[6]                         |  |  |  | Mascot |
|    | 1718.8629                                    | 1718.8704 | 0.0075  | 4   | 202          | 215 | LVEELMKQEVDDVR      |         |      |   |    |       | Oxidation (M)[6]                         |  |  |  | Mascot |
|    | 1813.7843                                    | 1813.9523 | 0.168   | 93  | 220          | 235 | DCNVDSNGSAFDMILR    |         |      |   |    |       | Carbamidomethyl (C)[2]                   |  |  |  | Mascot |
|    | 1813.7843                                    | 1813.9523 | 0.168   | 93  | 220          | 235 | DCNVDSNGSAFDMILR    |         |      |   |    |       | Carbamidomethyl (C)[2]                   |  |  |  | Mascot |
|    | 2214.9939                                    | 2215.0972 | 0.1033  | 47  | 217          | 235 | LCKDCNVDSNGSAFDMILR |         |      |   |    |       | Carbamidomethyl (C)[2,5]                 |  |  |  | Mascot |
| 29 | nitrogen fixation cluster-like [Danio rerio] |           |         |     | gi 221307563 |     |                     | 17420.2 | 8.83 | 8 | 47 | 13.23 |                                          |  |  |  |        |

#### Peptide Information

| Calc. Mass | Obsrv. Mass | ± da    | ± ppm | Start Seq. | End Seq. | Sequence              | Ion Score | C. I. % | Modification            | Rank | Result Type |
|------------|-------------|---------|-------|------------|----------|-----------------------|-----------|---------|-------------------------|------|-------------|
| 846.4468   | 846.4293    | -0.0175 | -21   | 25         | 31       | TQIGYHK               |           |         |                         |      | Mascot      |
| 882.5294   | 882.5717    | 0.0423  | 48    | 122        | 129      | ELSLPPVK              |           |         |                         |      | Mascot      |
| 916.5461   | 916.5395    | -0.0066 | -7    | 114        | 121      | IKNTEIAK              |           |         |                         |      | Mascot      |
| 916.5461   | 916.5395    | -0.0066 | -7    | 114        | 121      | IKNTEIAK              |           |         |                         |      | Mascot      |
| 1045.5636  | 1045.5436   | -0.02   | -19   | 42         | 51       | NVGSLDKNAK            |           |         |                         |      | Mascot      |
| 1128.5432  | 1128.541    | -0.0022 | -2    | 33         | 41       | VVDHYENPR             |           |         |                         |      | Mascot      |
| 1256.6382  | 1256.7063   | 0.0681  | 54    | 32         | 41       | KVVDHYENPR            |           |         |                         |      | Mascot      |
| 1256.6382  | 1256.7063   | 0.0681  | 54    | 32         | 41       | KVVDHYENPR            |           |         |                         |      | Mascot      |
| 1682.9622  | 1682.9185   | -0.0437 | -26   | 9          | 24       | CAAPQILKTLAPTSLR      |           |         |                         |      | Mascot      |
| 1958.9785  | 1958.9872   | 0.0087  | 4     | 49         | 68       | NAKNVGTGLVGAPACGD VMK |           |         | Carbamidomethyl (C)[15] |      | Mascot      |

30 novel protein [Danio rerio] gi|94733158 181651.4 8.12 18 46 0

#### Peptide Information

| Calc. Mass | Obsrv. Mass | ± da    | ± ppm | Start Seq. | End Seq. | Sequence  | Ion Score | C. I. % | Modification     | Rank | Result Type |
|------------|-------------|---------|-------|------------|----------|-----------|-----------|---------|------------------|------|-------------|
| 846.4753   | 846.4293    | -0.046  | -54   | 956        | 963      | VEGLLGIMK |           |         |                  |      | Mascot      |
| 923.4192   | 923.4485    | 0.0293  | 32    | 1453       | 1459     | WMTGAWR   |           |         | Oxidation (M)[2] |      | Mascot      |
| 923.4192   | 923.4485    | 0.0293  | 32    | 1453       | 1459     | WMTGAWR   |           |         | Oxidation (M)[2] |      | Mascot      |
| 1009.4917  | 1009.4604   | -0.0313 | -31   | 1220       | 1227     | TRMLDCVR  |           |         | Oxidation (M)[3] |      | Mascot      |
| 1021.4982  | 1021.5103   | 0.0121  | 12    | 1176       | 1184     | KQCPSTTEK |           |         |                  |      | Mascot      |

|           |           |         |      |      |      |                                 |                                          |        |
|-----------|-----------|---------|------|------|------|---------------------------------|------------------------------------------|--------|
| 1078.5198 | 1078.5535 | 0.0337  | 31   | 1176 | 1184 | KQCPSTTEK                       | Carbamidomethyl (C)[3]                   | Mascot |
| 1078.5198 | 1078.5535 | 0.0337  | 31   | 1176 | 1184 | KQCPSTTEK                       | Carbamidomethyl (C)[3]                   | Mascot |
| 1256.5575 | 1256.7063 | 0.1488  | 118  | 1340 | 1351 | NVSCFVSDGSGK                    | Carbamidomethyl (C)[4]                   | Mascot |
| 1256.5575 | 1256.7063 | 0.1488  | 118  | 1340 | 1351 | NVSCFVSDGSGK                    | 7 0 Carbamidomethyl (C)[4]               | Mascot |
| 1401.6766 | 1401.6169 | -0.0597 | -43  | 195  | 207  | VGPWGQCMAPIR                    |                                          | Mascot |
| 1401.6766 | 1401.6169 | -0.0597 | -43  | 195  | 207  | VGPWGQCMAPIR                    |                                          | Mascot |
| 1564.8992 | 1564.7493 | -0.1499 | -96  | 714  | 727  | VICVRVNVGQVPPK                  | Carbamidomethyl (C)[3]                   | Mascot |
| 1601.7635 | 1601.8257 | 0.0622  | 39   | 1152 | 1164 | CPLPCNVNSTRQR                   | Carbamidomethyl (C)[1,5]                 | Mascot |
| 1698.8228 | 1698.8666 | 0.0438  | 26   | 87   | 101  | GEEGIQTREVGCVHK                 | Carbamidomethyl (C)[12]                  | Mascot |
| 1698.8228 | 1698.8666 | 0.0438  | 26   | 87   | 101  | GEEGIQTREVGCVHK                 | Carbamidomethyl (C)[12]                  | Mascot |
| 1813.8948 | 1813.9523 | 0.0575  | 32   | 195  | 210  | VGPWGQCMAPIRQAR                 | Carbamidomethyl (C)[7]                   | Mascot |
| 1813.8948 | 1813.9523 | 0.0575  | 32   | 195  | 210  | VGPWGQCMAPIRQAR                 | Carbamidomethyl (C)[7]                   | Mascot |
| 1900.9004 | 1900.8574 | -0.043  | -23  | 178  | 194  | TCQPGKCEGVESLHSLR               | Carbamidomethyl (C)[2]                   | Mascot |
| 1923.9052 | 1923.936  | 0.0308  | 16   | 694  | 712  | AVPGTAVNDAFCVGMQ<br>TR          |                                          | Mascot |
| 1924.7847 | 1924.9244 | 0.1397  | 73   | 1    | 18   | PWGRCMGSECGPGGSQ<br>SR          | Carbamidomethyl (C)[5], Oxidation (M)[6] | Mascot |
| 2133.0796 | 2132.8398 | -0.2398 | -112 | 158  | 177  | SVLAPPLFGGSACPNLTE<br>FR        | Carbamidomethyl (C)[13]                  | Mascot |
| 2215.1106 | 2215.0972 | -0.0134 | -6   | 585  | 604  | QLCRDAILPMPVLCEVSC<br>PK        |                                          | Mascot |
| 2283.177  | 2283.1873 | 0.0103  | 5    | 728  | 746  | KCPESLRPETVRPCLLP<br>K          | Carbamidomethyl (C)[2,14]                | Mascot |
| 2284.1125 | 2284.1824 | 0.0699  | 31   | 437  | 457  | EYVCVQAPSETSSNLGS<br>LKSK       | Carbamidomethyl (C)[4]                   | Mascot |
| 2996.3411 | 2996.4829 | 0.1418  | 47   | 865  | 891  | FAGPMPQLTQSCQLPCQ<br>DDCQLTAWSK |                                          | Mascot |

31 thrombospondin type-1 domain containing protein 7A gi|309756395 181850.5 8.12 18 45 0 [Danio rerio]

| Peptide Information |             |         |       |            |                   |              |         |                        |                  |
|---------------------|-------------|---------|-------|------------|-------------------|--------------|---------|------------------------|------------------|
| Calc. Mass          | Obsrv. Mass | ± da    | ± ppm | Start Seq. | End Sequence Seq. | Ion Score    | C. I. % | Modification           | Rank Result Type |
| 846.4753            | 846.4293    | -0.046  | -54   | 956        | 963               | VEGLLGMIK    |         |                        | Mascot           |
| 923.4192            | 923.4485    | 0.0293  | 32    | 1455       | 1461              | WMTGAWR      |         | Oxidation (M)[2]       | Mascot           |
| 923.4192            | 923.4485    | 0.0293  | 32    | 1455       | 1461              | WMTGAWR      |         | Oxidation (M)[2]       | Mascot           |
| 1009.4917           | 1009.4604   | -0.0313 | -31   | 1222       | 1229              | TRMLDCVR     |         | Oxidation (M)[3]       | Mascot           |
| 1021.4982           | 1021.5103   | 0.0121  | 12    | 1178       | 1186              | KQCPSTTEK    |         |                        | Mascot           |
| 1078.5198           | 1078.5535   | 0.0337  | 31    | 1178       | 1186              | KQCPSTTEK    |         | Carbamidomethyl (C)[3] | Mascot           |
| 1078.5198           | 1078.5535   | 0.0337  | 31    | 1178       | 1186              | KQCPSTTEK    |         | Carbamidomethyl (C)[3] | Mascot           |
| 1256.5575           | 1256.7063   | 0.1488  | 118   | 1342       | 1353              | NVSCFVSDGSGK |         | Carbamidomethyl (C)[4] | Mascot           |
| 1256.5575           | 1256.7063   | 0.1488  | 118   | 1342       | 1353              | NVSCFVSDGSGK | 7 0     | Carbamidomethyl (C)[4] | Mascot           |

|    |                                                   |           |         |      |              |      |                                  |                                          |        |    |   |
|----|---------------------------------------------------|-----------|---------|------|--------------|------|----------------------------------|------------------------------------------|--------|----|---|
|    | 1401.6766                                         | 1401.6169 | -0.0597 | -43  | 195          | 207  | VGPWGQCMASPIR                    |                                          | Mascot |    |   |
|    | 1401.6766                                         | 1401.6169 | -0.0597 | -43  | 195          | 207  | VGPWGQCMASPIR                    |                                          | Mascot |    |   |
|    | 1564.8992                                         | 1564.7493 | -0.1499 | -96  | 714          | 727  | VICVRVNVGQVPPK                   | Carbamidomethyl (C)[3]                   | Mascot |    |   |
|    | 1601.7635                                         | 1601.8257 | 0.0622  | 39   | 1154         | 1166 | CPLPCNVNSTRQR                    | Carbamidomethyl (C)[1,5]                 | Mascot |    |   |
|    | 1698.8228                                         | 1698.8666 | 0.0438  | 26   | 87           | 101  | GEEGIQTREVGCVHK                  | Carbamidomethyl (C)[12]                  | Mascot |    |   |
|    | 1698.8228                                         | 1698.8666 | 0.0438  | 26   | 87           | 101  | GEEGIQTREVGCVHK                  | Carbamidomethyl (C)[12]                  | Mascot |    |   |
|    | 1813.8948                                         | 1813.9523 | 0.0575  | 32   | 195          | 210  | VGPWGQCMASPIRQAR                 | Carbamidomethyl (C)[7]                   | Mascot |    |   |
|    | 1813.8948                                         | 1813.9523 | 0.0575  | 32   | 195          | 210  | VGPWGQCMASPIRQAR                 | Carbamidomethyl (C)[7]                   | Mascot |    |   |
|    | 1900.9004                                         | 1900.8574 | -0.043  | -23  | 178          | 194  | TCQPGKCEGVESLHSLR                | Carbamidomethyl (C)[2]                   | Mascot |    |   |
|    | 1923.9052                                         | 1923.936  | 0.0308  | 16   | 694          | 712  | AVPGTAVNDAFCSVGMQ<br>TR          |                                          | Mascot |    |   |
|    | 1924.7847                                         | 1924.9244 | 0.1397  | 73   | 1            | 18   | PWGRCMGSECGPGGSQ<br>SR           | Carbamidomethyl (C)[5], Oxidation (M)[6] | Mascot |    |   |
|    | 2133.0796                                         | 2132.8398 | -0.2398 | -112 | 158          | 177  | SVLAPPLFGGSACPNLTE<br>FR         | Carbamidomethyl (C)[13]                  | Mascot |    |   |
|    | 2215.1106                                         | 2215.0972 | -0.0134 | -6   | 585          | 604  | QLCRDAILPMPVLCEVSC<br>PK         |                                          | Mascot |    |   |
|    | 2283.177                                          | 2283.1873 | 0.0103  | 5    | 728          | 746  | KCPESLRPETVRPCLLP<br>K           | Carbamidomethyl (C)[2,14]                | Mascot |    |   |
|    | 2284.1125                                         | 2284.1824 | 0.0699  | 31   | 437          | 457  | EYVCVQAPSETSSNLGS<br>LKSK        | Carbamidomethyl (C)[4]                   | Mascot |    |   |
|    | 2996.3411                                         | 2996.4829 | 0.1418  | 47   | 865          | 891  | FAGPM PQLTQSCQLPCQ<br>DDCQLTAWSK |                                          | Mascot |    |   |
| 32 | ventricular myosin heavy chain-like [Danio rerio] |           |         |      | gi 163644263 |      | 223174.2                         | 5.47                                     | 22     | 44 | 0 |

### Peptide Information

| Calc. Mass | Obsrv. Mass | ± da    | ± ppm | Start Seq. | End Sequence        | Ion Score | C. I. % | Modification       | Rank | Result Type |
|------------|-------------|---------|-------|------------|---------------------|-----------|---------|--------------------|------|-------------|
| 846.4679   | 846.4293    | -0.0386 | -46   | 919        | 925 AKELTER         |           |         |                    |      | Mascot      |
| 877.4025   | 877.4266    | 0.0241  | 27    | 826        | 831 NWPWMK          |           |         | Oxidation (M)[5]   |      | Mascot      |
| 926.5053   | 926.5677    | 0.0624  | 67    | 969        | 976 HATENKVK        |           |         |                    |      | Mascot      |
| 1074.5426  | 1074.5758   | 0.0332  | 31    | 1910       | 1919 ADIAESQVNK     |           |         |                    |      | Mascot      |
| 1159.647   | 1159.6351   | -0.0119 | -10   | 402        | 411 VKVGNEWVTK      |           |         |                    |      | Mascot      |
| 1165.6827  | 1165.5721   | -0.1106 | -95   | 1476       | 1485 SLSTELFKLK     |           |         |                    |      | Mascot      |
| 1165.6827  | 1165.7524   | 0.0697  | 60    | 1476       | 1485 SLSTELFKLK     |           |         |                    |      | Mascot      |
| 1179.531   | 1179.6169   | 0.0859  | 73    | 1580       | 1588 DEEMEQQVKR     |           |         | Oxidation (M)[4]   |      | Mascot      |
| 1401.6388  | 1401.6169   | -0.0219 | -16   | 848        | 858 EMANMKEEFLK     |           |         | Oxidation (M)[2,5] |      | Mascot      |
| 1401.6388  | 1401.6169   | -0.0219 | -16   | 848        | 858 EMANMKEEFLK     |           |         | Oxidation (M)[2,5] |      | Mascot      |
| 1601.8633  | 1601.8257   | -0.0376 | -23   | 953        | 966 DIDDLELTLAKVEK  |           |         |                    |      | Mascot      |
| 1646.8306  | 1646.8248   | -0.0058 | -4    | 977        | 991 NLTEEMAALDDIIAK |           |         |                    |      | Mascot      |
| 1718.8595  | 1718.8704   | 0.0109  | 6     | 595        | 609 NEDPLNETVVGlyQK |           |         |                    |      | Mascot      |
| 1718.8595  | 1718.8704   | 0.0109  | 6     | 595        | 609 NEDPLNETVVGlyQK |           |         |                    |      | Mascot      |

|    |                                                                          |           |         |     |      |      |                                |                                           |      |    |    |   |        |
|----|--------------------------------------------------------------------------|-----------|---------|-----|------|------|--------------------------------|-------------------------------------------|------|----|----|---|--------|
|    | 1791.7627                                                                | 1791.8849 | 0.1222  | 68  | 366  | 381  | QREEQAEADGTEDADK               |                                           |      |    |    |   | Mascot |
|    | 1900.9685                                                                | 1900.8574 | -0.1111 | -58 | 1226 | 1242 | LELDDVASSMEHIVKSK              |                                           |      |    |    |   | Mascot |
|    | 1924.9135                                                                | 1924.9244 | 0.0109  | 6   | 1375 | 1390 | YETDAIQRTEEELEAK               |                                           |      |    |    |   | Mascot |
|    | 1945.9146                                                                | 1945.8866 | -0.028  | -14 | 1    | 18   | MGDAEMSVFGAAAPYLR<br>K         | Oxidation (M)[1,6]                        |      |    |    |   | Mascot |
|    | 1958.9917                                                                | 1958.9872 | -0.0045 | -2  | 1504 | 1521 | ILQEEISDLTEQLGEGGK             |                                           |      |    |    |   | Mascot |
|    | 1961.941                                                                 | 1961.8923 | -0.0487 | -25 | 1652 | 1668 | DSQLQLDDSLRSNDDLK              |                                           |      |    |    |   | Mascot |
|    | 2132.9731                                                                | 2132.8398 | -0.1333 | -62 | 1338 | 1354 | HDTDLLREQYEEEQEAK              |                                           |      |    |    |   | Mascot |
|    | 2216.1313                                                                | 2216.0854 | -0.0459 | -21 | 382  | 401  | SAYLMGLNSADLIKGLCH<br>PR       | Carbamidomethyl (C)[17]                   |      |    |    |   | Mascot |
|    | 2232.1262                                                                | 2232.0674 | -0.0588 | -26 | 382  | 401  | SAYLMGLNSADLIKGLCH<br>PR       | Carbamidomethyl (C)[17], Oxidation (M)[5] |      |    |    |   | Mascot |
|    | 2555.187                                                                 | 2555.1997 | 0.0127  | 5   | 148  | 169  | TEAPPHIYSISDNAYQYM<br>LADR     |                                           |      |    |    |   | Mascot |
|    | 2555.187                                                                 | 2555.1997 | 0.0127  | 5   | 148  | 169  | TEAPPHIYSISDNAYQYM<br>LADR     |                                           |      |    |    |   | Mascot |
|    | 2708.3428                                                                | 2708.3342 | -0.0086 | -3  | 680  | 703  | TPGAMENPLVMHQLRCN<br>GVLEGIR   | Carbamidomethyl (C)[16], Oxidation (M)[5] |      |    |    |   | Mascot |
|    | 3088.4309                                                                | 3088.4038 | -0.0271 | -9  | 885  | 910  | NDLQLQVQAEQDNLCDA<br>EERCEGLIK | Carbamidomethyl (C)[15,21]                |      |    |    |   | Mascot |
| 33 | phosphatidylinositol phosphate 5-kinase type III isoform c [Danio rerio] |           |         |     |      |      | gi 164523608                   | 235662.7                                  | 6.39 | 24 | 44 | 0 |        |

Peptide Information

| Calc. Mass | Obsrv. Mass | ± da    | ± ppm | Start Seq. | End Seq. | Sequence         | Ion Score | C. I. | % Modification         | Rank | Result Type |
|------------|-------------|---------|-------|------------|----------|------------------|-----------|-------|------------------------|------|-------------|
| 842.473    | 842.5118    | 0.0388  | 46    | 63         | 71       | TGANIAPAK        |           |       |                        |      | Mascot      |
| 846.5117   | 846.4293    | -0.0824 | -97   | 2039       | 2045     | KLEMVVK          |           |       |                        |      | Mascot      |
| 916.5284   | 916.5395    | 0.0111  | 12    | 1336       | 1343     | GCVQIVLK         |           |       | Carbamidomethyl (C)[2] |      | Mascot      |
| 916.5284   | 916.5395    | 0.0111  | 12    | 1336       | 1343     | GCVQIVLK         |           |       | Carbamidomethyl (C)[2] |      | Mascot      |
| 1021.5173  | 1021.5103   | -0.007  | -7    | 1216       | 1223     | QREGTQFR         |           |       |                        |      | Mascot      |
| 1123.5742  | 1123.4373   | -0.1369 | -122  | 1595       | 1605     | NPSPPVPNGDK      |           |       |                        |      | Mascot      |
| 1128.6523  | 1128.541    | -0.1113 | -99   | 1509       | 1517     | GWIEKLQVR        |           |       |                        |      | Mascot      |
| 1130.5073  | 1130.5981   | 0.0908  | 80    | 356        | 364      | TDHSEEERK        |           |       |                        |      | Mascot      |
| 1130.5073  | 1130.5981   | 0.0908  | 80    | 356        | 364      | TDHSEEERK        |           |       |                        |      | Mascot      |
| 1162.6062  | 1162.5543   | -0.0519 | -45   | 322        | 332      | SASVTNLSLDR      |           |       |                        |      | Mascot      |
| 1165.5596  | 1165.5721   | 0.0125  | 11    | 135        | 145      | SEAPLGSHDPR      |           |       |                        |      | Mascot      |
| 1179.6805  | 1179.6169   | -0.0636 | -54   | 1433       | 1442     | LLEICLPPPK       |           |       | Carbamidomethyl (C)[5] |      | Mascot      |
| 1401.6025  | 1401.6169   | 0.0144  | 10    | 1490       | 1500     | EEKMEDMFAQK      |           |       | Oxidation (M)[4]       |      | Mascot      |
| 1401.6025  | 1401.6169   | 0.0144  | 10    | 1490       | 1500     | EEKMEDMFAQK      |           |       | Oxidation (M)[4]       |      | Mascot      |
| 1564.8152  | 1564.7493   | -0.0659 | -42   | 2056       | 2068     | MPTVVSPELYRTR    |           |       | Oxidation (M)[1]       |      | Mascot      |
| 1618.0125  | 1617.8214   | -0.1911 | -118  | 1433       | 1446     | LLEICLPPPKIIIR   |           |       |                        |      | Mascot      |
| 1682.7867  | 1682.9185   | 0.1318  | 78    | 982        | 997      | NASITSFSGGEEENIK |           |       |                        |      | Mascot      |

|    |                                                           |           |         |      |              |          |                             |    |    |   |  |  |                                             |  |  |  |  |  |        |
|----|-----------------------------------------------------------|-----------|---------|------|--------------|----------|-----------------------------|----|----|---|--|--|---------------------------------------------|--|--|--|--|--|--------|
|    | 1694.8795                                                 | 1694.8947 | 0.0152  | 9    | 1975         | 1988     | LVHDNPLYIRSHCK              |    |    |   |  |  |                                             |  |  |  |  |  | Mascot |
|    | 1718.8126                                                 | 1718.8704 | 0.0578  | 34   | 1761         | 1776     | NSPAKPSDNSMSQLSR            |    |    |   |  |  |                                             |  |  |  |  |  | Mascot |
|    | 1718.8126                                                 | 1718.8704 | 0.0578  | 34   | 1761         | 1776     | NSPAKPSDNSMSQLSR            |    |    |   |  |  |                                             |  |  |  |  |  | Mascot |
|    | 1813.7819                                                 | 1813.9523 | 0.1704  | 94   | 219          | 233      | FMGYTGDLRACTYCR             |    |    |   |  |  | Carbamidomethyl (C)[11]                     |  |  |  |  |  | Mascot |
|    | 1813.7819                                                 | 1813.9523 | 0.1704  | 94   | 219          | 233      | FMGYTGDLRACTYCR             |    |    |   |  |  | Carbamidomethyl (C)[11]                     |  |  |  |  |  | Mascot |
|    | 1822.9069                                                 | 1822.9269 | 0.02    | 11   | 2017         | 2032     | DDSTDELVVGIIIDYIR           |    |    |   |  |  |                                             |  |  |  |  |  | Mascot |
|    | 1900.9005                                                 | 1900.8574 | -0.0431 | -23  | 842          | 858      | TLMFFEGCPPQLGCTIK           |    |    |   |  |  | Oxidation (M)[3]                            |  |  |  |  |  | Mascot |
|    | 1924.8721                                                 | 1924.9244 | 0.0523  | 27   | 2076         | 2091     | YFLMVPDHWSGLGLNC            |    |    |   |  |  | Carbamidomethyl (C)[16], Oxidation (M)[4]   |  |  |  |  |  | Mascot |
|    | 1945.976                                                  | 1945.8866 | -0.0894 | -46  | 1759         | 1776     | VKNSPAKPSDNSMSQLS<br>R      |    |    |   |  |  |                                             |  |  |  |  |  | Mascot |
|    | 1961.9709                                                 | 1961.8923 | -0.0786 | -40  | 1759         | 1776     | VKNSPAKPSDNSMSQLS<br>R      |    |    |   |  |  | Oxidation (M)[13]                           |  |  |  |  |  | Mascot |
|    | 2133.0745                                                 | 2132.8398 | -0.2347 | -110 | 1956         | 1974     | TDQKGKESCEVLLDENLL<br>K     |    |    |   |  |  |                                             |  |  |  |  |  | Mascot |
|    | 2211.1123                                                 | 2211.1138 | 0.0015  | 1    | 842          | 860      | TLMFFEGCPPQLGCTIKL<br>R     |    |    |   |  |  | Carbamidomethyl (C)[8]                      |  |  |  |  |  | Mascot |
|    | 2284.1287                                                 | 2284.1824 | 0.0537  | 24   | 842          | 860      | TLMFFEGCPPQLGCTIKL<br>R     |    |    |   |  |  | Carbamidomethyl (C)[8,14], Oxidation (M)[3] |  |  |  |  |  | Mascot |
|    | 2708.1653                                                 | 2708.3342 | 0.1689  | 62   | 2069         | 2091     | FCEAMDKYFLMVPDHWS<br>GLGLNC |    |    |   |  |  | Oxidation (M)[5,11]                         |  |  |  |  |  | Mascot |
| 34 | 1-phosphatidylinositol-3-phosphate 5-kinase [Danio rerio] |           |         |      | gi 187937038 | 236760.3 | 6.51                        | 24 | 44 | 0 |  |  |                                             |  |  |  |  |  |        |

Peptide Information

| Calc. Mass | Obsrv. Mass | ± da    | ± ppm | Start Seq. | End Seq. | Sequence      | Ion Score | C. I. % | Modification           | Rank | Result | Type   |
|------------|-------------|---------|-------|------------|----------|---------------|-----------|---------|------------------------|------|--------|--------|
| 842.473    | 842.5118    | 0.0388  | 46    | 63         | 71       | TGANIAPAK     |           |         |                        |      |        | Mascot |
| 846.5117   | 846.4293    | -0.0824 | -97   | 2048       | 2054     | KLEMVVK       |           |         |                        |      |        | Mascot |
| 916.5284   | 916.5395    | 0.0111  | 12    | 1345       | 1352     | GCVQIVLK      |           |         | Carbamidomethyl (C)[2] |      |        | Mascot |
| 916.5284   | 916.5395    | 0.0111  | 12    | 1345       | 1352     | GCVQIVLK      |           |         | Carbamidomethyl (C)[2] |      |        | Mascot |
| 1021.5173  | 1021.5103   | -0.007  | -7    | 1225       | 1232     | QREGTQFR      |           |         |                        |      |        | Mascot |
| 1123.5742  | 1123.4373   | -0.1369 | -122  | 1604       | 1614     | NPSPVVPNGDK   |           |         |                        |      |        | Mascot |
| 1128.6523  | 1128.541    | -0.1113 | -99   | 1518       | 1526     | GWIEKLQVR     |           |         |                        |      |        | Mascot |
| 1130.5073  | 1130.5981   | 0.0908  | 80    | 365        | 373      | TDHSEEERK     |           |         |                        |      |        | Mascot |
| 1130.5073  | 1130.5981   | 0.0908  | 80    | 365        | 373      | TDHSEEERK     |           |         |                        |      |        | Mascot |
| 1162.6062  | 1162.5543   | -0.0519 | -45   | 331        | 341      | SASVTNLSLDR   |           |         |                        |      |        | Mascot |
| 1165.5596  | 1165.5721   | 0.0125  | 11    | 135        | 145      | SEAPLGSHDPR   |           |         |                        |      |        | Mascot |
| 1179.6805  | 1179.6169   | -0.0636 | -54   | 1442       | 1451     | LLEICLPPPK    |           |         | Carbamidomethyl (C)[5] |      |        | Mascot |
| 1401.6025  | 1401.6169   | 0.0144  | 10    | 1499       | 1509     | EKMEDMFAQK    |           |         | Oxidation (M)[4]       |      |        | Mascot |
| 1401.6025  | 1401.6169   | 0.0144  | 10    | 1499       | 1509     | EKMEDMFAQK    |           |         | Oxidation (M)[4]       |      |        | Mascot |
| 1564.8152  | 1564.7493   | -0.0659 | -42   | 2065       | 2077     | MPTVVSPELYRTR |           |         | Oxidation (M)[1]       |      |        | Mascot |
| 1618.0125  | 1617.8214   | -0.1911 | -118  | 1442       | 1455     | LLEICLPPPKIIR |           |         |                        |      |        | Mascot |

|    |                                              |           |           |         |      |      |      |                               |         |      |    |    |   |  |  |  |                                             |        |
|----|----------------------------------------------|-----------|-----------|---------|------|------|------|-------------------------------|---------|------|----|----|---|--|--|--|---------------------------------------------|--------|
|    |                                              | 1682.7867 | 1682.9185 | 0.1318  | 78   | 991  | 1006 | NASITSFSGGEEENIK              |         |      |    |    |   |  |  |  |                                             | Mascot |
|    |                                              | 1694.8795 | 1694.8947 | 0.0152  | 9    | 1984 | 1997 | LVHDNPLYIRSHCK                |         |      |    |    |   |  |  |  |                                             | Mascot |
|    |                                              | 1718.8126 | 1718.8704 | 0.0578  | 34   | 1770 | 1785 | NSPAKPSDNSMSQLSR              |         |      |    |    |   |  |  |  |                                             | Mascot |
|    |                                              | 1718.8126 | 1718.8704 | 0.0578  | 34   | 1770 | 1785 | NSPAKPSDNSMSQLSR              |         |      |    |    |   |  |  |  |                                             | Mascot |
|    |                                              | 1813.7819 | 1813.9523 | 0.1704  | 94   | 219  | 233  | FMGYTGDLRACTYCR               |         |      |    |    |   |  |  |  | Carbamidomethyl (C)[11]                     | Mascot |
|    |                                              | 1813.7819 | 1813.9523 | 0.1704  | 94   | 219  | 233  | FMGYTGDLRACTYCR               |         |      |    |    |   |  |  |  | Carbamidomethyl (C)[11]                     | Mascot |
|    |                                              | 1822.9069 | 1822.9269 | 0.02    | 11   | 2026 | 2041 | DDSTDELVVGIIIDYIR             |         |      |    |    |   |  |  |  |                                             | Mascot |
|    |                                              | 1900.9005 | 1900.8574 | -0.0431 | -23  | 851  | 867  | TLMFFEGCPPQLGCTIK             |         |      |    |    |   |  |  |  | Oxidation (M)[3]                            | Mascot |
|    |                                              | 1924.8721 | 1924.9244 | 0.0523  | 27   | 2085 | 2100 | YFLMVPDHW SGLGLNC             |         |      |    |    |   |  |  |  | Carbamidomethyl (C)[16], Oxidation (M)[4]   | Mascot |
|    |                                              | 1945.976  | 1945.8866 | -0.0894 | -46  | 1768 | 1785 | VKNSPA KPSDNSMSQLS<br>R       |         |      |    |    |   |  |  |  |                                             | Mascot |
|    |                                              | 1961.9709 | 1961.8923 | -0.0786 | -40  | 1768 | 1785 | VKNSPA KPSDNSMSQLS<br>R       |         |      |    |    |   |  |  |  | Oxidation (M)[13]                           | Mascot |
|    |                                              | 2133.0745 | 2132.8398 | -0.2347 | -110 | 1965 | 1983 | TDQGKESCEVLLDENLL<br>K        |         |      |    |    |   |  |  |  |                                             | Mascot |
|    |                                              | 2211.1123 | 2211.1138 | 0.0015  | 1    | 851  | 869  | TLMFFEGCPPQLGCTIKL<br>R       |         |      |    |    |   |  |  |  | Carbamidomethyl (C)[8]                      | Mascot |
|    |                                              | 2284.1287 | 2284.1824 | 0.0537  | 24   | 851  | 869  | TLMFFEGCPPQLGCTIKL<br>R       |         |      |    |    |   |  |  |  | Carbamidomethyl (C)[8,14], Oxidation (M)[3] | Mascot |
|    |                                              | 2708.1653 | 2708.3342 | 0.1689  | 62   | 2078 | 2100 | FCEAMD KYFLMVPDHW S<br>GLGLNC |         |      |    |    |   |  |  |  | Oxidation (M)[5,11]                         | Mascot |
| 35 | hypothetical protein LOC564706 [Danio rerio] |           |           |         |      |      |      | gi 167555073                  | 77868.5 | 8.75 | 12 | 44 | 0 |  |  |  |                                             |        |

### Peptide Information

| Calc. Mass | Obsrv. Mass | ± da    | ± ppm | Start Seq. | End Seq. | Sequence          | Ion Score | C. I. | % Modification          | Rank | Result Type |
|------------|-------------|---------|-------|------------|----------|-------------------|-----------|-------|-------------------------|------|-------------|
| 882.5043   | 882.5717    | 0.0674  | 76    | 316        | 323      | DVHLISAK          |           |       |                         |      | Mascot      |
| 923.4073   | 923.4485    | 0.0412  | 45    | 300        | 307      | QLMADCAR          |           |       | Oxidation (M)[3]        |      | Mascot      |
| 923.4073   | 923.4485    | 0.0412  | 45    | 300        | 307      | QLMADCAR          |           |       | Oxidation (M)[3]        |      | Mascot      |
| 1165.6477  | 1165.5721   | -0.0756 | -65   | 394        | 403      | FPILNPTAHR        |           |       |                         |      | Mascot      |
| 1165.7303  | 1165.7524   | 0.0221  | 19    | 515        | 525      | LVVPTVAITPR       |           |       |                         |      | Mascot      |
| 1256.6705  | 1256.7063   | 0.0358  | 28    | 20         | 30       | HLSGTRTESLR       |           |       |                         |      | Mascot      |
| 1256.6705  | 1256.7063   | 0.0358  | 28    | 20         | 30       | HLSGTRTESLR       | 2         | 0     |                         |      | Mascot      |
| 1564.7853  | 1564.7493   | -0.036  | -23   | 474        | 487      | SPKADAELSYNEIK    |           |       |                         |      | Mascot      |
| 1601.8282  | 1601.8257   | -0.0025 | -2    | 283        | 296      | VDLLPGDAQNYLQR    |           |       |                         |      | Mascot      |
| 1617.8165  | 1617.8214   | 0.0049  | 3     | 341        | 355      | HRGDVYLIGMANAGK   |           |       | Oxidation (M)[10]       |      | Mascot      |
| 1698.922   | 1698.8666   | -0.0554 | -33   | 216        | 229      | CFLIQHQQRALSVR    |           |       |                         |      | Mascot      |
| 1698.922   | 1698.8666   | -0.0554 | -33   | 216        | 229      | CFLIQHQQRALSVR    |           |       |                         |      | Mascot      |
| 1813.9515  | 1813.9523   | 0.0008  | 0     | 411        | 425      | LQQTQQNITADELRR   |           |       |                         |      | Mascot      |
| 1813.9515  | 1813.9523   | 0.0008  | 0     | 411        | 425      | LQQTQQNITADELRR   |           |       |                         |      | Mascot      |
| 1946.0276  | 1945.8866   | -0.141  | -72   | 199        | 215      | YKPLLEGGGLERAVCQR |           |       | Carbamidomethyl (C)[15] |      | Mascot      |

|    |                                                               |           |        |    |              |         |                                 |    |    |   |  |  |                                           |        |
|----|---------------------------------------------------------------|-----------|--------|----|--------------|---------|---------------------------------|----|----|---|--|--|-------------------------------------------|--------|
|    | 2996.438                                                      | 2996.4829 | 0.0449 | 15 | 343          | 369     | GDVYLIGMANAGKSTLFN<br>TLES DYCK |    |    |   |  |  | Carbamidomethyl (C)[26], Oxidation (M)[8] | Mascot |
| 36 | PREDICTED: hypothetical protein LOC100536595<br>[Danio rerio] |           |        |    | gi 326669816 | 64937.6 | 5.46                            | 11 | 41 | 0 |  |  |                                           |        |

| Peptide Information |             |         |       |            |          |                         |           |       |   |                                          |      |             |  |
|---------------------|-------------|---------|-------|------------|----------|-------------------------|-----------|-------|---|------------------------------------------|------|-------------|--|
| Calc. Mass          | Obsrv. Mass | ± da    | ± ppm | Start Seq. | End Seq. | Sequence                | Ion Score | C. I. | % | Modification                             | Rank | Result Type |  |
| 877.4698            | 877.4266    | -0.0432 | -49   | 513        | 519      | LVEELMK                 |           |       |   | Oxidation (M)[6]                         |      | Mascot      |  |
| 1045.5889           | 1045.5436   | -0.0453 | -43   | 365        | 373      | VIDTLESLR               |           |       |   |                                          |      | Mascot      |  |
| 1128.5653           | 1128.541    | -0.0243 | -22   | 195        | 204      | MSCPHKNIAK              |           |       |   |                                          |      | Mascot      |  |
| 1143.4744           | 1143.6393   | 0.1649  | 144   | 319        | 327      | CPGCQMIYR               |           |       |   | Carbamidomethyl (C)[1], Oxidation (M)[6] |      | Mascot      |  |
| 1201.5817           | 1201.6323   | 0.0506  | 42    | 195        | 204      | MSCPHKNIAK              |           |       |   | Carbamidomethyl (C)[3], Oxidation (M)[1] |      | Mascot      |  |
| 1340.6021           | 1340.6705   | 0.0684  | 51    | 318        | 327      | RCPGCQMIYR              |           |       |   | Carbamidomethyl (C)[2,5]                 |      | Mascot      |  |
| 1718.8629           | 1718.8704   | 0.0075  | 4     | 513        | 526      | LVEELMKQEVDDVR          |           |       |   | Oxidation (M)[6]                         |      | Mascot      |  |
| 1718.8629           | 1718.8704   | 0.0075  | 4     | 513        | 526      | LVEELMKQEVDDVR          |           |       |   | Oxidation (M)[6]                         |      | Mascot      |  |
| 1813.7843           | 1813.9523   | 0.168   | 93    | 531        | 546      | DCNVDSNGSAFDMILR        |           |       |   | Carbamidomethyl (C)[2]                   |      | Mascot      |  |
| 1813.7843           | 1813.9523   | 0.168   | 93    | 531        | 546      | DCNVDSNGSAFDMILR        |           |       |   | Carbamidomethyl (C)[2]                   |      | Mascot      |  |
| 2126.1392           | 2126.0715   | -0.0677 | -32   | 157        | 174      | FTLSIYEPVVNQFSRLGR      |           |       |   |                                          |      | Mascot      |  |
| 2214.9939           | 2215.0972   | 0.1033  | 47    | 528        | 546      | LCKDCNVDSNGSAFDMILR     |           |       |   | Carbamidomethyl (C)[2,5]                 |      | Mascot      |  |
| 2225.1343           | 2225.1301   | -0.0042 | -2    | 299        | 318      | NAQIVTMAGVINDVSTYTRR    |           |       |   | Oxidation (M)[7]                         |      | Mascot      |  |
| 2555.2314           | 2555.1997   | -0.0317 | -12   | 172        | 194      | LGRVMVTYNSTTGTWNCPCAKPR |           |       |   |                                          |      | Mascot      |  |
| 2555.2314           | 2555.1997   | -0.0317 | -12   | 172        | 194      | LGRVMVTYNSTTGTWNCPCAKPR |           |       |   |                                          |      | Mascot      |  |

|    |                                                                                                    |  |  |  |              |         |      |    |    |   |
|----|----------------------------------------------------------------------------------------------------|--|--|--|--------------|---------|------|----|----|---|
| 37 | PREDICTED: general transcription factor II-I repeat domain-containing protein 1-like [Danio rerio] |  |  |  | gi 326668145 | 64699.1 | 8.27 | 12 | 41 | 0 |
|----|----------------------------------------------------------------------------------------------------|--|--|--|--------------|---------|------|----|----|---|

| Peptide Information |             |         |       |            |          |                      |           |       |   |                        |      |             |  |
|---------------------|-------------|---------|-------|------------|----------|----------------------|-----------|-------|---|------------------------|------|-------------|--|
| Calc. Mass          | Obsrv. Mass | ± da    | ± ppm | Start Seq. | End Seq. | Sequence             | Ion Score | C. I. | % | Modification           | Rank | Result Type |  |
| 877.5253            | 877.4266    | -0.0987 | -112  | 202        | 208      | IFLNSRK              |           |       |   |                        |      | Mascot      |  |
| 1045.5935           | 1045.5436   | -0.0499 | -48   | 126        | 134      | AALRMAQIR            |           |       |   | Oxidation (M)[5]       |      | Mascot      |  |
| 1077.5509           | 1077.5374   | -0.0135 | -13   | 536        | 544      | RPCTYGVPK            |           |       |   | Carbamidomethyl (C)[3] |      | Mascot      |  |
| 1128.6483           | 1128.541    | -0.1073 | -95   | 328        | 336      | ILEQSNRIR            |           |       |   |                        |      | Mascot      |  |
| 1143.5641           | 1143.6393   | 0.0752  | 66    | 342        | 351      | TPEEPSREAK           |           |       |   |                        |      | Mascot      |  |
| 1516.8409           | 1516.6703   | -0.1706 | -112  | 286        | 298      | SSLVPVPYDWILK        |           |       |   |                        |      | Mascot      |  |
| 1682.8669           | 1682.9185   | 0.0516  | 31    | 516        | 531      | IACDPEAVEIIGIPDK     |           |       |   |                        |      | Mascot      |  |
| 1959.0156           | 1958.9872   | -0.0284 | -14   | 499        | 515      | YAEALGLDHMPVPYRK     |           |       |   |                        |      | Mascot      |  |
| 2225.1885           | 2225.1301   | -0.0584 | -26   | 516        | 535      | IACDPEAVEIIGIPDKIPFK |           |       |   | Carbamidomethyl (C)[3] |      | Mascot      |  |

|  |           |           |         |     |     |     |                                |  |  |  |  |  |  |  |  |  |  |        |
|--|-----------|-----------|---------|-----|-----|-----|--------------------------------|--|--|--|--|--|--|--|--|--|--|--------|
|  | 2284.1489 | 2284.1824 | 0.0335  | 15  | 178 | 199 | LNAEVACVTVHEDSVIAV<br>GTEK     |  |  |  |  |  |  |  |  |  |  | Mascot |
|  | 2555.3625 | 2555.1997 | -0.1628 | -64 | 1   | 22  | MASPPLPMVTDLAHHLI<br>WKER      |  |  |  |  |  |  |  |  |  |  | Mascot |
|  | 2555.3625 | 2555.1997 | -0.1628 | -64 | 1   | 22  | MASPPLPMVTDLAHHLI<br>WKER      |  |  |  |  |  |  |  |  |  |  | Mascot |
|  | 2708.3308 | 2708.3342 | 0.0034  | 1   | 435 | 460 | ECADNGERIGLAADLTQS<br>PPSIHVSK |  |  |  |  |  |  |  |  |  |  | Mascot |

38 PREDICTED: microtubule-associated protein 6-like [Danio rerio] gi|292621423 42669 9.6 9 41 0

#### Peptide Information

| Calc. Mass | Obsrv. Mass | ± da    | ± ppm | Start Seq. | End Seq. | Sequence                  | Ion Score | C. I. | % Modification           | Rank | Result Type |
|------------|-------------|---------|-------|------------|----------|---------------------------|-----------|-------|--------------------------|------|-------------|
| 846.429    | 846.4293    | 0.0003  | 0     | 2          | 8        | AWPCITR                   |           |       |                          |      | Mascot      |
| 877.456    | 877.4266    | -0.0294 | -34   | 369        | 375      | SKEMINR                   |           |       |                          |      | Mascot      |
| 1143.6198  | 1143.6393   | 0.0195  | 17    | 131        | 139      | DYKPWPIPK                 |           |       |                          |      | Mascot      |
| 1159.6721  | 1159.6351   | -0.037  | -32   | 22         | 32       | GDIAPLVFTK                |           |       |                          |      | Mascot      |
| 1165.7052  | 1165.5721   | -0.1331 | -114  | 317        | 326      | HNLSLTKPKK                |           |       |                          |      | Mascot      |
| 1165.7052  | 1165.7524   | 0.0472  | 40    | 317        | 326      | HNLSLTKPKK                |           |       |                          |      | Mascot      |
| 1179.6368  | 1179.6169   | -0.0199 | -17   | 300        | 309      | IRSLYSEPSK                |           |       |                          |      | Mascot      |
| 1694.7747  | 1694.8947   | 0.12    | 71    | 1          | 14       | MAWPCITRACCINR            |           |       | Carbamidomethyl (C)[5]   |      | Mascot      |
| 1698.7727  | 1698.8666   | 0.0939  | 55    | 9          | 21       | ACCINRFWSELDK             |           |       | Carbamidomethyl (C)[2,3] |      | Mascot      |
| 1698.7727  | 1698.8666   | 0.0939  | 55    | 9          | 21       | ACCINRFWSELDK             |           |       | Carbamidomethyl (C)[2,3] |      | Mascot      |
| 2232.123   | 2232.0674   | -0.0556 | -25   | 141        | 161      | GDHPWIPKPTAAAAPCK<br>AESK |           |       | Carbamidomethyl (C)[16]  |      | Mascot      |

39 phosphatidylinositol phosphate 5-kinase type III isoform d [Danio rerio] gi|164523610 234028.7 6.3 23 40 0

#### Peptide Information

| Calc. Mass | Obsrv. Mass | ± da    | ± ppm | Start Seq. | End Seq. | Sequence    | Ion Score | C. I. | % Modification         | Rank | Result Type |
|------------|-------------|---------|-------|------------|----------|-------------|-----------|-------|------------------------|------|-------------|
| 846.5117   | 846.4293    | -0.0824 | -97   | 2023       | 2029     | KLEMMVK     |           |       |                        |      | Mascot      |
| 916.5284   | 916.5395    | 0.0111  | 12    | 1320       | 1327     | GCVQIVLK    |           |       | Carbamidomethyl (C)[2] |      | Mascot      |
| 916.5284   | 916.5395    | 0.0111  | 12    | 1320       | 1327     | GCVQIVLK    |           |       | Carbamidomethyl (C)[2] |      | Mascot      |
| 1021.5173  | 1021.5103   | -0.007  | -7    | 1200       | 1207     | QREGTQFR    |           |       |                        |      | Mascot      |
| 1123.5742  | 1123.4373   | -0.1369 | -122  | 1579       | 1589     | NPSPVVPNGDK |           |       |                        |      | Mascot      |
| 1128.6523  | 1128.541    | -0.1113 | -99   | 1493       | 1501     | GWIEKLQVR   |           |       |                        |      | Mascot      |
| 1130.5073  | 1130.5981   | 0.0908  | 80    | 340        | 348      | TDHSEEERK   |           |       |                        |      | Mascot      |
| 1130.5073  | 1130.5981   | 0.0908  | 80    | 340        | 348      | TDHSEEERK   |           |       |                        |      | Mascot      |
| 1162.6062  | 1162.5543   | -0.0519 | -45   | 306        | 316      | SASVTNLSLDR |           |       |                        |      | Mascot      |



|    |                                                                                                         |           |         |      |      |      |                               |  |  |  |         |      |    |    |   |  |        |
|----|---------------------------------------------------------------------------------------------------------|-----------|---------|------|------|------|-------------------------------|--|--|--|---------|------|----|----|---|--|--------|
|    | 1165.5596                                                                                               | 1165.5721 | 0.0125  | 11   | 119  | 129  | SEAPLGSHDPR                   |  |  |  |         |      |    |    |   |  | Mascot |
|    | 1179.6805                                                                                               | 1179.6169 | -0.0636 | -54  | 1417 | 1426 | LLEICLPPPK                    |  |  |  |         |      |    |    |   |  | Mascot |
|    | 1401.6025                                                                                               | 1401.6169 | 0.0144  | 10   | 1474 | 1484 | EEKMEDMFAQK                   |  |  |  |         |      |    |    |   |  | Mascot |
|    | 1401.6025                                                                                               | 1401.6169 | 0.0144  | 10   | 1474 | 1484 | EEKMEDMFAQK                   |  |  |  |         |      |    |    |   |  | Mascot |
|    | 1564.8152                                                                                               | 1564.7493 | -0.0659 | -42  | 2040 | 2052 | MPTVVSPELYRTR                 |  |  |  |         |      |    |    |   |  | Mascot |
|    | 1617.8231                                                                                               | 1617.8214 | -0.0017 | -1   | 58   | 71   | FNKEEGRPPSVTEK                |  |  |  |         |      |    |    |   |  | Mascot |
|    | 1682.7867                                                                                               | 1682.9185 | 0.1318  | 78   | 966  | 981  | NASITSFSGGEEENIK              |  |  |  |         |      |    |    |   |  | Mascot |
|    | 1694.8795                                                                                               | 1694.8947 | 0.0152  | 9    | 1959 | 1972 | LVHDNPLYIRSHCK                |  |  |  |         |      |    |    |   |  | Mascot |
|    | 1718.8126                                                                                               | 1718.8704 | 0.0578  | 34   | 1745 | 1760 | NSPAKPSDNSMSQLSR              |  |  |  |         |      |    |    |   |  | Mascot |
|    | 1718.8126                                                                                               | 1718.8704 | 0.0578  | 34   | 1745 | 1760 | NSPAKPSDNSMSQLSR              |  |  |  |         |      |    |    |   |  | Mascot |
|    | 1813.7819                                                                                               | 1813.9523 | 0.1704  | 94   | 203  | 217  | FMGYTGDLRACTYCR               |  |  |  |         |      |    |    |   |  | Mascot |
|    | 1813.7819                                                                                               | 1813.9523 | 0.1704  | 94   | 203  | 217  | FMGYTGDLRACTYCR               |  |  |  |         |      |    |    |   |  | Mascot |
|    | 1822.9069                                                                                               | 1822.9269 | 0.02    | 11   | 2001 | 2016 | DDSTDELVVGIIDYIR              |  |  |  |         |      |    |    |   |  | Mascot |
|    | 1900.9005                                                                                               | 1900.8574 | -0.0431 | -23  | 826  | 842  | TLMFFEGCPPQLGCTIK             |  |  |  |         |      |    |    |   |  | Mascot |
|    | 1924.8721                                                                                               | 1924.9244 | 0.0523  | 27   | 2060 | 2075 | YFLMVPDHW SGLGLNC             |  |  |  |         |      |    |    |   |  | Mascot |
|    | 1945.976                                                                                                | 1945.8866 | -0.0894 | -46  | 1743 | 1760 | VKN SPAKPSDNSMSQLS<br>R       |  |  |  |         |      |    |    |   |  | Mascot |
|    | 1961.9709                                                                                               | 1961.8923 | -0.0786 | -40  | 1743 | 1760 | VKN SPAKPSDNSMSQLS<br>R       |  |  |  |         |      |    |    |   |  | Mascot |
|    | 2133.0745                                                                                               | 2132.8398 | -0.2347 | -110 | 1940 | 1958 | TDQ GKESCEVLLDENLL<br>K       |  |  |  |         |      |    |    |   |  | Mascot |
|    | 2211.1123                                                                                               | 2211.1138 | 0.0015  | 1    | 826  | 844  | TLMFFEGCPPQLGCTIKL<br>R       |  |  |  |         |      |    |    |   |  | Mascot |
|    | 2284.1287                                                                                               | 2284.1824 | 0.0537  | 24   | 826  | 844  | TLMFFEGCPPQLGCTIKL<br>R       |  |  |  |         |      |    |    |   |  | Mascot |
|    | 2708.1653                                                                                               | 2708.3342 | 0.1689  | 62   | 2053 | 2075 | FCEAMD KYFLMVPDHW S<br>GLGLNC |  |  |  |         |      |    |    |   |  | Mascot |
| 40 | novel protein similar to to adhesion molecule with Ig-like gi 169146257 domain 1 (AMIGO1) [Danio rerio] |           |         |      |      |      |                               |  |  |  | 55321.1 | 6.31 | 10 | 40 | 0 |  |        |

Peptide Information

| Calc. Mass | Obsrv. Mass | ± da    | ± ppm | Start Seq. | End Seq. | Sequence                  | Ion Score | C. I. | % Modification             | Rank | Result Type |
|------------|-------------|---------|-------|------------|----------|---------------------------|-----------|-------|----------------------------|------|-------------|
| 916.4305   | 916.5395    | 0.109   | 119   | 27         | 34       | GSTLNCHK                  |           |       | Carbamidomethyl (C)[6]     |      | Mascot      |
| 916.4305   | 916.5395    | 0.109   | 119   | 27         | 34       | GSTLNCHK                  |           |       | Carbamidomethyl (C)[6]     |      | Mascot      |
| 926.5094   | 926.5677    | 0.0583  | 63    | 437        | 444      | HVAFIDPK                  |           |       |                            |      | Mascot      |
| 1128.5942  | 1128.541    | -0.0532 | -47   | 25         | 34       | IRGSTLNCHK                |           |       |                            |      | Mascot      |
| 1179.6368  | 1179.6169   | -0.0199 | -17   | 112        | 121      | YLDLSSNVLR                |           |       |                            |      | Mascot      |
| 1201.4799  | 1201.6323   | 0.1524  | 127   | 399        | 407      | CFCCPDKSK                 |           |       | Carbamidomethyl (C)[1,3,4] |      | Mascot      |
| 1273.618   | 1273.623    | 0.005   | 4     | 1          | 10       | MPPSINWCIR                |           |       | Carbamidomethyl (C)[8]     |      | Mascot      |
| 2133.0393  | 2132.8398   | -0.1995 | -94   | 281        | 297      | EAYLEQTLILDCTRHR          |           |       | Carbamidomethyl (C)[12]    |      | Mascot      |
| 2214.9797  | 2215.0972   | 0.1175  | 53    | 27         | 47       | GSTLNCHKMCICASNIVS<br>CSK |           |       | Oxidation (M)[9]           |      | Mascot      |

|    |                                                    |           |         |     |             |     |                              |                        |   |    |   |  |        |
|----|----------------------------------------------------|-----------|---------|-----|-------------|-----|------------------------------|------------------------|---|----|---|--|--------|
|    | 2284.0762                                          | 2284.1824 | 0.1062  | 46  | 277         | 295 | ETDREAYLEQTLILDCDT<br>R      |                        |   |    |   |  | Mascot |
|    | 2784.4585                                          | 2784.3301 | -0.1284 | -46 | 1           | 24  | MPPSINWCIRWAVCLSCI<br>LALIPK | Carbamidomethyl (C)[8] |   |    |   |  | Mascot |
| 41 | rho-related GTP-binding protein RhoF [Danio rerio] |           |         |     | gi 66472464 |     | 23723.2                      | 9                      | 7 | 40 | 0 |  |        |

Peptide Information

| Calc. Mass | Obsrv. Mass | ± da    | ± ppm | Start Seq. | End Seq. | Sequence                          | Ion Score | C. I. | % Modification         | Rank | Result Type |
|------------|-------------|---------|-------|------------|----------|-----------------------------------|-----------|-------|------------------------|------|-------------|
| 926.4617   | 926.5677    | 0.106   | 114   | 45         | 52       | YAPSVFDK                          |           |       |                        |      | Mascot      |
| 1021.4948  | 1021.5103   | 0.0155  | 15    | 176        | 183      | ENVEDIFR                          |           |       |                        |      | Mascot      |
| 1074.5612  | 1074.5758   | 0.0146  | 14    | 19         | 29       | IVIVGDGGCGK                       |           |       | Carbamidomethyl (C)[9] |      | Mascot      |
| 1340.6593  | 1340.6705   | 0.0112  | 8     | 174        | 183      | YRENVEDIFR                        |           |       |                        |      | Mascot      |
| 1516.6658  | 1516.6703   | 0.0045  | 3     | 161        | 173      | EMNAEIYLECSAK                     |           |       | Oxidation (M)[2]       |      | Mascot      |
| 1698.8771  | 1698.8666   | -0.0105 | -6    | 30         | 44       | TSLLMVYAKGDFPEK                   |           |       |                        |      | Mascot      |
| 1698.8771  | 1698.8666   | -0.0105 | -6    | 30         | 44       | TSLLMVYAKGDFPEK                   |           |       |                        |      | Mascot      |
| 2784.3767  | 2784.3301   | -0.0466 | -17   | 1          | 29       | MTQNGTVAGNGTHADAL<br>KIVIVGDGGCGK |           |       |                        |      | Mascot      |

|    |                                                       |  |  |  |              |  |         |      |    |    |   |  |
|----|-------------------------------------------------------|--|--|--|--------------|--|---------|------|----|----|---|--|
| 42 | PREDICTED: amphoterin-induced protein 1 [Danio rerio] |  |  |  | gi 189522545 |  | 55420.2 | 6.31 | 10 | 40 | 0 |  |
|----|-------------------------------------------------------|--|--|--|--------------|--|---------|------|----|----|---|--|

Peptide Information

| Calc. Mass | Obsrv. Mass | ± da    | ± ppm | Start Seq. | End Seq. | Sequence                     | Ion Score | C. I. | % Modification             | Rank | Result Type |
|------------|-------------|---------|-------|------------|----------|------------------------------|-----------|-------|----------------------------|------|-------------|
| 916.4305   | 916.5395    | 0.109   | 119   | 27         | 34       | GSTLNCHK                     |           |       | Carbamidomethyl (C)[6]     |      | Mascot      |
| 916.4305   | 916.5395    | 0.109   | 119   | 27         | 34       | GSTLNCHK                     |           |       | Carbamidomethyl (C)[6]     |      | Mascot      |
| 926.5094   | 926.5677    | 0.0583  | 63    | 437        | 444      | HVAFIDPK                     |           |       |                            |      | Mascot      |
| 1128.5942  | 1128.541    | -0.0532 | -47   | 25         | 34       | IRGSTLNCHK                   |           |       |                            |      | Mascot      |
| 1179.6368  | 1179.6169   | -0.0199 | -17   | 112        | 121      | YLDLSSNVLR                   |           |       |                            |      | Mascot      |
| 1201.4799  | 1201.6323   | 0.1524  | 127   | 399        | 407      | CFCCPDKSK                    |           |       | Carbamidomethyl (C)[1,3,4] |      | Mascot      |
| 1273.618   | 1273.623    | 0.005   | 4     | 1          | 10       | MPPSINWCIR                   |           |       | Carbamidomethyl (C)[8]     |      | Mascot      |
| 2133.0393  | 2132.8398   | -0.1995 | -94   | 281        | 297      | EAYLEQTLILDCDTRHR            |           |       | Carbamidomethyl (C)[12]    |      | Mascot      |
| 2214.9797  | 2215.0972   | 0.1175  | 53    | 27         | 47       | GSTLNCHKMCICASNIVS<br>CSK    |           |       | Oxidation (M)[9]           |      | Mascot      |
| 2284.0762  | 2284.1824   | 0.1062  | 46    | 277        | 295      | ETDREAYLEQTLILDCDT<br>R      |           |       |                            |      | Mascot      |
| 2784.4585  | 2784.3301   | -0.1284 | -46   | 1          | 24       | MPPSINWCIRWAVCLSCI<br>LALIPK |           |       | Carbamidomethyl (C)[8]     |      | Mascot      |

|    |                          |  |  |  |             |  |         |     |   |    |   |  |
|----|--------------------------|--|--|--|-------------|--|---------|-----|---|----|---|--|
| 43 | Zgc:110331 [Danio rerio] |  |  |  | gi 62202266 |  | 17382.1 | 8.3 | 7 | 40 | 0 |  |
|----|--------------------------|--|--|--|-------------|--|---------|-----|---|----|---|--|

Peptide Information

| Calc. Mass | Obsrv. Mass | ± da | ± ppm | Start Seq. | End Seq. | Sequence | Ion Score | C. I. | % Modification | Rank | Result Type |
|------------|-------------|------|-------|------------|----------|----------|-----------|-------|----------------|------|-------------|
|------------|-------------|------|-------|------------|----------|----------|-----------|-------|----------------|------|-------------|

|    |                                                                          |           |           |         |     |     |     |                          |          |      |    |    |                         |  |  |  |  |        |
|----|--------------------------------------------------------------------------|-----------|-----------|---------|-----|-----|-----|--------------------------|----------|------|----|----|-------------------------|--|--|--|--|--------|
|    |                                                                          | 882.5294  | 882.5717  | 0.0423  | 48  | 122 | 129 | ELSLPPVK                 |          |      |    |    |                         |  |  |  |  | Mascot |
|    |                                                                          | 916.5461  | 916.5395  | -0.0066 | -7  | 114 | 121 | IKNTEIAK                 |          |      |    |    |                         |  |  |  |  | Mascot |
|    |                                                                          | 916.5461  | 916.5395  | -0.0066 | -7  | 114 | 121 | IKNTEIAK                 |          |      |    |    |                         |  |  |  |  | Mascot |
|    |                                                                          | 1045.5636 | 1045.5436 | -0.02   | -19 | 42  | 51  | NVGSLDKNAK               |          |      |    |    |                         |  |  |  |  | Mascot |
|    |                                                                          | 1128.5432 | 1128.541  | -0.0022 | -2  | 33  | 41  | VVDHYENPR                |          |      |    |    |                         |  |  |  |  | Mascot |
|    |                                                                          | 1256.6382 | 1256.7063 | 0.0681  | 54  | 32  | 41  | KVVDHYENPR               |          |      |    |    |                         |  |  |  |  | Mascot |
|    |                                                                          | 1256.6382 | 1256.7063 | 0.0681  | 54  | 32  | 41  | KVVDHYENPR               |          |      |    |    |                         |  |  |  |  | Mascot |
|    |                                                                          | 1682.9622 | 1682.9185 | -0.0437 | -26 | 9   | 24  | CAAPQILKTLAPTLR          |          |      |    |    |                         |  |  |  |  | Mascot |
|    |                                                                          | 1958.9785 | 1958.9872 | 0.0087  | 4   | 49  | 68  | NAKNVGTGLVGAPACGD<br>VMK |          |      |    |    | Carbamidomethyl (C)[15] |  |  |  |  | Mascot |
| 44 | phosphatidylinositol phosphate 5-kinase type III isoform b [Danio rerio] |           |           |         |     |     |     | gi 164523606             | 235126.3 | 6.42 | 23 | 40 | 0                       |  |  |  |  |        |

#### Peptide Information

| Calc. Mass | Obsrv. Mass | ± da    | ± ppm | Start Seq. | End Seq. | Sequence         | Ion Score | C. I. % | Modification            | Rank | Result Type |
|------------|-------------|---------|-------|------------|----------|------------------|-----------|---------|-------------------------|------|-------------|
| 846.5117   | 846.4293    | -0.0824 | -97   | 2032       | 2038     | KLEMVVK          |           |         |                         |      | Mascot      |
| 916.5284   | 916.5395    | 0.0111  | 12    | 1329       | 1336     | GCVQIVLK         |           |         | Carbamidomethyl (C)[2]  |      | Mascot      |
| 916.5284   | 916.5395    | 0.0111  | 12    | 1329       | 1336     | GCVQIVLK         |           |         | Carbamidomethyl (C)[2]  |      | Mascot      |
| 1021.5173  | 1021.5103   | -0.007  | -7    | 1209       | 1216     | QREGTQFR         |           |         |                         |      | Mascot      |
| 1123.5742  | 1123.4373   | -0.1369 | -122  | 1588       | 1598     | NPSPVVPNGDK      |           |         |                         |      | Mascot      |
| 1128.6523  | 1128.541    | -0.1113 | -99   | 1502       | 1510     | GWIEKLQVR        |           |         |                         |      | Mascot      |
| 1130.5073  | 1130.5981   | 0.0908  | 80    | 349        | 357      | TDHSEEERK        |           |         |                         |      | Mascot      |
| 1130.5073  | 1130.5981   | 0.0908  | 80    | 349        | 357      | TDHSEEERK        |           |         |                         |      | Mascot      |
| 1162.6062  | 1162.5543   | -0.0519 | -45   | 315        | 325      | SASVTNLSLDR      |           |         |                         |      | Mascot      |
| 1165.5596  | 1165.5721   | 0.0125  | 11    | 119        | 129      | SEAPLGSHDPR      |           |         |                         |      | Mascot      |
| 1179.6805  | 1179.6169   | -0.0636 | -54   | 1426       | 1435     | LLEICLPPPK       |           |         | Carbamidomethyl (C)[5]  |      | Mascot      |
| 1401.6025  | 1401.6169   | 0.0144  | 10    | 1483       | 1493     | EEKMEDMFAQK      |           |         | Oxidation (M)[4]        |      | Mascot      |
| 1401.6025  | 1401.6169   | 0.0144  | 10    | 1483       | 1493     | EEKMEDMFAQK      |           |         | Oxidation (M)[4]        |      | Mascot      |
| 1564.8152  | 1564.7493   | -0.0659 | -42   | 2049       | 2061     | MPTVVSPELYRTR    |           |         | Oxidation (M)[1]        |      | Mascot      |
| 1617.8231  | 1617.8214   | -0.0017 | -1    | 58         | 71       | FNKEEGRPPSVTEK   |           |         |                         |      | Mascot      |
| 1682.7867  | 1682.9185   | 0.1318  | 78    | 975        | 990      | NASITSFSGGEEENIK |           |         |                         |      | Mascot      |
| 1694.8795  | 1694.8947   | 0.0152  | 9     | 1968       | 1981     | LVHDNPLYIRSHCK   |           |         |                         |      | Mascot      |
| 1718.8126  | 1718.8704   | 0.0578  | 34    | 1754       | 1769     | NSPAKPSDNSMSQLSR |           |         |                         |      | Mascot      |
| 1718.8126  | 1718.8704   | 0.0578  | 34    | 1754       | 1769     | NSPAKPSDNSMSQLSR |           |         |                         |      | Mascot      |
| 1813.7819  | 1813.9523   | 0.1704  | 94    | 203        | 217      | FMGYTGDLRACTYCR  |           |         | Carbamidomethyl (C)[11] |      | Mascot      |
| 1813.7819  | 1813.9523   | 0.1704  | 94    | 203        | 217      | FMGYTGDLRACTYCR  |           |         | Carbamidomethyl (C)[11] |      | Mascot      |

|    |                                                                            |           |         |      |              |          |                              |    |    |   |    |   |  |                                             |  |  |  |        |
|----|----------------------------------------------------------------------------|-----------|---------|------|--------------|----------|------------------------------|----|----|---|----|---|--|---------------------------------------------|--|--|--|--------|
|    | 1822.9069                                                                  | 1822.9269 | 0.02    | 11   | 2010         | 2025     | DDSTDELVVGIIDYIR             |    |    |   |    |   |  |                                             |  |  |  | Mascot |
|    | 1900.9005                                                                  | 1900.8574 | -0.0431 | -23  | 835          | 851      | TLMFFEGCPPQLGCTIK            |    |    |   |    |   |  | Oxidation (M)[3]                            |  |  |  | Mascot |
|    | 1924.8721                                                                  | 1924.9244 | 0.0523  | 27   | 2069         | 2084     | YFLMVPDHW SGLGLNC            |    |    |   |    |   |  | Carbamidomethyl (C)[16], Oxidation (M)[4]   |  |  |  | Mascot |
|    | 1945.976                                                                   | 1945.8866 | -0.0894 | -46  | 1752         | 1769     | VKN SPAKPSD NSMSQLS<br>R     |    |    |   |    |   |  |                                             |  |  |  | Mascot |
|    | 1961.9709                                                                  | 1961.8923 | -0.0786 | -40  | 1752         | 1769     | VKN SPAKPSD NSMSQLS<br>R     |    |    |   |    |   |  | Oxidation (M)[13]                           |  |  |  | Mascot |
|    | 2133.0745                                                                  | 2132.8398 | -0.2347 | -110 | 1949         | 1967     | TDQ GKESCEV LLDENLL<br>K     |    |    |   |    |   |  |                                             |  |  |  | Mascot |
|    | 2211.1123                                                                  | 2211.1138 | 0.0015  | 1    | 835          | 853      | TLMFFEGCPPQLGCTIKL<br>R      |    |    |   |    |   |  | Carbamidomethyl (C)[8]                      |  |  |  | Mascot |
|    | 2284.1287                                                                  | 2284.1824 | 0.0537  | 24   | 835          | 853      | TLMFFEGCPPQLGCTIKL<br>R      |    |    |   |    |   |  | Carbamidomethyl (C)[8,14], Oxidation (M)[3] |  |  |  | Mascot |
|    | 2708.1653                                                                  | 2708.3342 | 0.1689  | 62   | 2062         | 2084     | FCEAMDKYFLMVPDHW S<br>GLGLNC |    |    |   |    |   |  | Oxidation (M)[5,11]                         |  |  |  | Mascot |
| 45 | PREDICTED: ubiquitin carboxyl-terminal hydrolase 4 isoform 1 [Danio rerio] |           |         |      | gi 326668740 | 112887.8 | 5.47                         | 14 | 39 | 0 | 12 | 0 |  |                                             |  |  |  |        |

Peptide Information

| Calc. Mass | Obsrv. Mass | ± da    | ± ppm | Start Seq. | End Seq. | Sequence                      | Ion Score | C. I. | % Modification            | Rank | Result Type |
|------------|-------------|---------|-------|------------|----------|-------------------------------|-----------|-------|---------------------------|------|-------------|
| 842.5206   | 842.5118    | -0.0088 | -10   | 637        | 643      | VLERIGR                       |           |       |                           |      | Mascot      |
| 1045.5499  | 1045.5436   | -0.0063 | -6    | 137        | 145      | VVEHGMFVK                     |           |       |                           |      | Mascot      |
| 1123.5122  | 1123.4373   | -0.0749 | -67   | 474        | 483      | STLVCPECSK                    |           |       | Carbamidomethyl (C)[5]    |      | Mascot      |
| 1130.5992  | 1130.5981   | -0.0011 | -1    | 972        | 980      | AAYVLFYQR                     |           |       |                           |      | Mascot      |
| 1130.5992  | 1130.5981   | -0.0011 | -1    | 972        | 980      | AAYVLFYQR                     |           |       |                           |      | Mascot      |
| 1162.5409  | 1162.5543   | 0.0134  | 12    | 567        | 576      | DDGLNQIMEK                    |           |       |                           |      | Mascot      |
| 1340.678   | 1340.6705   | -0.0075 | -6    | 592        | 601      | MNLPVYFRER                    |           |       | Oxidation (M)[1]          |      | Mascot      |
| 1617.8635  | 1617.8214   | -0.0421 | -26   | 460        | 473      | NDSIIVDIFHGLFK                |           |       |                           |      | Mascot      |
| 1718.7327  | 1718.8704   | 0.1377  | 80    | 807        | 820      | RLCYDDQAEAYDK                 | 12        | 0     |                           |      | Mascot      |
| 1718.7327  | 1718.8704   | 0.1377  | 80    | 807        | 820      | RLCYDDQAEAYDK                 |           |       |                           |      | Mascot      |
| 1945.9614  | 1945.8866   | -0.0748 | -38   | 791        | 807      | LTTHSTVAIDWSDTKR              |           |       |                           |      | Mascot      |
| 1959.1174  | 1958.9872   | -0.1302 | -66   | 120        | 136      | LVS WYGS LGNQKPIIRK           |           |       |                           |      | Mascot      |
| 2211.0308  | 2211.1138   | 0.083   | 38    | 149        | 166      | VEVYLLELNL CENDNMD<br>K       |           |       | Carbamidomethyl (C)[11]   |      | Mascot      |
| 2215.1541  | 2215.0972   | -0.0569 | -26   | 484        | 502      | VSVTFDPFCYLTLP LPMK<br>K      |           |       | Oxidation (M)[17]         |      | Mascot      |
| 2284.1497  | 2284.1824   | 0.0327  | 14    | 101        | 119      | EHLIDELDYVL VPTEAWN<br>K      |           |       |                           |      | Mascot      |
| 3088.356   | 3088.4038   | 0.0478  | 15    | 838        | 862      | ECIELFTT METLGEHPW<br>YCPTCKK |           |       | Carbamidomethyl (C)[2,20] |      | Mascot      |

46 dihydrofolate reductase [Danio rerio] gi|55926109 21684.2 8.39 7 39 0

Peptide Information

| Calc. Mass | Obsrv. Mass | ± da | ± ppm | Start Seq. | End Seq. | Sequence | Ion Score | C. I. | % Modification | Rank | Result Type |
|------------|-------------|------|-------|------------|----------|----------|-----------|-------|----------------|------|-------------|
|------------|-------------|------|-------|------------|----------|----------|-----------|-------|----------------|------|-------------|

|    |                                                            |           |         |     |    |              |                    |      |   |                                           |    |   |  |        |
|----|------------------------------------------------------------|-----------|---------|-----|----|--------------|--------------------|------|---|-------------------------------------------|----|---|--|--------|
|    | 916.5396                                                   | 916.5395  | -0.0001 | 0   | 50 | 57           | KNVVIMGR           |      |   |                                           |    |   |  | Mascot |
|    | 916.5396                                                   | 916.5395  | -0.0001 | 0   | 51 | 58           | NVVIMGRK           |      |   |                                           |    |   |  | Mascot |
|    | 1128.4548                                                  | 1128.541  | 0.0862  | 76  | 40 | 49           | MTMTPSDEGK         |      |   | Oxidation (M)[1,3]                        |    |   |  | Mascot |
|    | 1256.5497                                                  | 1256.7063 | 0.1566  | 125 | 40 | 50           | MTMTPSDEGKK        |      |   | Oxidation (M)[1,3]                        |    |   |  | Mascot |
|    | 1256.5497                                                  | 1256.7063 | 0.1566  | 125 | 40 | 50           | MTMTPSDEGKK        |      |   | Oxidation (M)[1,3]                        |    |   |  | Mascot |
|    | 1636.7458                                                  | 1636.8374 | 0.0916  | 56  | 36 | 49           | HFQKMTMTPSDEGK     |      |   |                                           |    |   |  | Mascot |
|    | 1718.8638                                                  | 1718.8704 | 0.0066  | 4   | 4  | 19           | ILNCIVAVCPDMGIGK   |      |   | Carbamidomethyl (C)[4], Oxidation (M)[12] |    |   |  | Mascot |
|    | 1718.8638                                                  | 1718.8704 | 0.0066  | 4   | 4  | 19           | ILNCIVAVCPDMGIGK   |      |   | Carbamidomethyl (C)[4], Oxidation (M)[12] |    |   |  | Mascot |
|    | 1946.002                                                   | 1945.8866 | -0.1154 | -59 | 2  | 19           | SRILNCIVAVCPDMGIGK |      |   | Carbamidomethyl (C)[6]                    |    |   |  | Mascot |
|    | 1961.9969                                                  | 1961.8923 | -0.1046 | -53 | 2  | 19           | SRILNCIVAVCPDMGIGK |      |   | Carbamidomethyl (C)[6], Oxidation (M)[14] |    |   |  | Mascot |
| 47 | PREDICTED: hypothetical protein LOC100001759 [Danio rerio] |           |         |     |    | gi 326669433 | 80882.8            | 4.62 | 1 |                                           | 20 | 0 |  |        |

#### Peptide Information

|    | Calc. Mass                                 | Obsrv. Mass | ± da    | ± ppm | Start Seq.   | End Sequence Seq. | Ion Score | C. I. % | Modification | Rank | Result Type |
|----|--------------------------------------------|-------------|---------|-------|--------------|-------------------|-----------|---------|--------------|------|-------------|
|    | 1256.7507                                  | 1256.7063   | -0.0444 | -35   | 218          | 227 ILLQELCRIR    | 20        | 0       |              | 2    | Mascot      |
| 48 | PREDICTED: endothelin-1-like [Danio rerio] |             |         |       | gi 326677209 | 15701.6           | 9.24      | 1       | 19           | 0    |             |

#### Peptide Information

|    | Calc. Mass                                                                                   | Obsrv. Mass | ± da   | ± ppm | Start Seq. | End Sequence Seq. |         | Ion Score | C. I. % | Modification | Rank | Result Type |
|----|----------------------------------------------------------------------------------------------|-------------|--------|-------|------------|-------------------|---------|-----------|---------|--------------|------|-------------|
|    | 1256.682                                                                                     | 1256.7063   | 0.0243 | 19    | 116        | 125 FKSSFLQMLR    |         | 19        | 0       |              | 3    | Mascot      |
| 49 | novel protein similar to vertebrate leucine rich repeat containing 14 (LRRC14) [Danio rerio] |             |        |       |            | gi 169146717      | 62537.7 | 5.92      | 1       | 19           | 0    |             |

#### Peptide Information

|    | Calc. Mass                          | Obsrv. Mass | ± da   | ± ppm | Start Seq.   | End Sequence Seq. |         | Ion Score | C. I. % | Modification | Rank | Result Type |
|----|-------------------------------------|-------------|--------|-------|--------------|-------------------|---------|-----------|---------|--------------|------|-------------|
|    | 916.4379                            | 916.5395    | 0.1016 | 111   | 213          | 220 MLCAEPPR      |         | 19        | 0       |              | 2    | Mascot      |
| 50 | TSC22 domain family 2 [Danio rerio] |             |        |       | gil157886329 |                   | 46847.9 | 5.04      | 1       | 18           | 0    |             |

#### Peptide Information

|  | Calc. Mass | Obsrv. Mass | ± da   | ± ppm | Start Seq. | End Sequence Seq. | Ion Score | C. I. % | Modification | Rank | Result Type |
|--|------------|-------------|--------|-------|------------|-------------------|-----------|---------|--------------|------|-------------|
|  | 1256.6382  | 1256.7063   | 0.0681 | 54    | 143        | 153 LDHGTGEPFKR   | 18        | 0       |              | 4    | Mascot      |

|                       |           |                               |                |  |  |  |                       |                    |  |
|-----------------------|-----------|-------------------------------|----------------|--|--|--|-----------------------|--------------------|--|
| <b>Gel Idx/Pos</b>    | 222/I22   | <b>Instr./Gel Origin</b>      | BA2060/110707A |  |  |  | <b>Process Status</b> | Analysis Succeeded |  |
| <b>Plate [#] Name</b> | [1] 31496 | <b>Instrument Sample Name</b> |                |  |  |  | <b>Spectra</b>        | 11                 |  |

| Rank                | Protein Name                                                                           | Accession No. | Protein MW | Protein PI | Pep. Count | Protein Score                         | Protein Score C. I. % | Total Ion Score | Total Ion C. I. %                         |      |             |
|---------------------|----------------------------------------------------------------------------------------|---------------|------------|------------|------------|---------------------------------------|-----------------------|-----------------|-------------------------------------------|------|-------------|
| 1                   | guanine nucleotide-binding protein G(I)/G(S)/G(T) subunit beta-1 [Danio rerio]         | gi 47086811   | 37262      | 5.6        | 13         | 712                                   | 100                   | 628             | 100                                       |      |             |
| Peptide Information |                                                                                        |               |            |            |            |                                       |                       |                 |                                           |      |             |
|                     | Calc. Mass                                                                             | Obsrv. Mass   | ± da       | ± ppm      | Start Seq. | End Sequence Seq.                     | Ion Score             | C. I. %         | Modification                              | Rank | Result Type |
|                     | 805.5042                                                                               | 805.5098      | 0.0056     | 7          | 90         | 96 VHAIPLR                            | 51                    | 99.773          |                                           |      | Mascot      |
|                     | 805.5042                                                                               | 805.5098      | 0.0056     | 7          | 90         | 96 VHAIPLR                            |                       |                 |                                           |      | Mascot      |
|                     | 916.4958                                                                               | 916.5284      | 0.0326     | 36         | 130        | 137 EGNVRVSR                          |                       |                 |                                           |      | Mascot      |
|                     | 1009.5173                                                                              | 1009.5239     | 0.0066     | 7          | 305        | 314 AGVLAGHDNR                        |                       |                 |                                           |      | Mascot      |
|                     | 1009.5173                                                                              | 1009.5239     | 0.0066     | 7          | 305        | 314 AGVLAGHDNR                        | 60                    | 99.973          |                                           |      | Mascot      |
|                     | 1225.5881                                                                              | 1225.5974     | 0.0093     | 8          | 198        | 209 LFGVSGACDASAK                     |                       |                 | Carbamidomethyl (C)[7]                    |      | Mascot      |
|                     | 1336.6104                                                                              | 1336.6201     | 0.0097     | 7          | 58         | 68 IYAMHWGTDSR                        |                       |                 |                                           |      | Mascot      |
|                     | 1336.6104                                                                              | 1336.6201     | 0.0097     | 7          | 58         | 68 IYAMHWGTDSR                        | 77                    | 100             |                                           |      | Mascot      |
|                     | 1352.6052                                                                              | 1352.6165     | 0.0113     | 8          | 58         | 68 IYAMHWGTDSR                        |                       |                 | Oxidation (M)[4]                          |      | Mascot      |
|                     | 1352.6052                                                                              | 1352.6165     | 0.0113     | 8          | 58         | 68 IYAMHWGTDSR                        | 22                    | 0               | Oxidation (M)[4]                          |      | Mascot      |
|                     | 1353.705                                                                               | 1353.677      | -0.028     | -21        | 79         | 89 LIIWDSYTTNK                        |                       |                 |                                           |      | Mascot      |
|                     | 1523.673                                                                               | 1523.6835     | 0.0105     | 7          | 138        | 150 ELAGHTGYLSCCR                     | 117                   | 100             | Carbamidomethyl (C)[11,12]                |      | Mascot      |
|                     | 1523.673                                                                               | 1523.6835     | 0.0105     | 7          | 138        | 150 ELAGHTGYLSCCR                     |                       |                 | Carbamidomethyl (C)[11,12]                |      | Mascot      |
|                     | 1972.9757                                                                              | 1972.9861     | 0.0104     | 5          | 24         | 42 ACADATLSQITANIDPVG R               | 158                   | 100             | Carbamidomethyl (C)[2]                    |      | Mascot      |
|                     | 1972.9757                                                                              | 1972.9861     | 0.0104     | 5          | 24         | 42 ACADATLSQITANIDPVG R               |                       |                 | Carbamidomethyl (C)[2]                    |      | Mascot      |
|                     | 2101.0706                                                                              | 2101.0815     | 0.0109     | 5          | 23         | 42 KACADATLSQITANIDPV GR              | 166                   | 100             | Carbamidomethyl (C)[3]                    |      | Mascot      |
|                     | 2101.0706                                                                              | 2101.0815     | 0.0109     | 5          | 23         | 42 KACADATLSQITANIDPV GR              |                       |                 | Carbamidomethyl (C)[3]                    |      | Mascot      |
|                     | 2127.0215                                                                              | 2127.0369     | 0.0154     | 7          | 284        | 301 LLLAGYDDFNCNVWDAL K               |                       |                 | Carbamidomethyl (C)[11]                   |      | Mascot      |
|                     | 2416.116                                                                               | 2416.1379     | 0.0219     | 9          | 315        | 337 VSCLGVTDDGMAVATGS WDSFLK          |                       |                 | Carbamidomethyl (C)[3]                    |      | Mascot      |
|                     | 2432.1108                                                                              | 2432.1348     | 0.024      | 10         | 315        | 337 VSCLGVTDDGMAVATGS WDSFLK          |                       |                 | Carbamidomethyl (C)[3], Oxidation (M)[11] |      | Mascot      |
|                     | 2698.2852                                                                              | 2698.3074     | 0.0222     | 8          | 257        | 280 ADQELMVYSHDNIICGITS VAFSK         |                       |                 | Carbamidomethyl (C)[15]                   |      | Mascot      |
|                     | 2714.28                                                                                | 2714.3083     | 0.0283     | 10         | 257        | 280 ADQELMVYSHDNIICGITS VAFSK         |                       |                 | Carbamidomethyl (C)[15], Oxidation (M)[6] |      | Mascot      |
|                     | 3521.512                                                                               | 3521.5479     | 0.0359     | 10         | 220        | 251 QTFTGHESDINAICFFPN GNAFATGSDDATCR |                       |                 | Carbamidomethyl (C)[14,31]                |      | Mascot      |
| 2                   | guanine nucleotide binding protein (G protein), beta polypeptide 1, like [Danio rerio] | gi 47087315   | 37279      | 5.6        | 13         | 712                                   | 100                   | 628             | 100                                       |      |             |

| Peptide Information |             |        |       |            |                                       |           |                                           |  |  |                  |
|---------------------|-------------|--------|-------|------------|---------------------------------------|-----------|-------------------------------------------|--|--|------------------|
| Calc. Mass          | Obsrv. Mass | ± da   | ± ppm | Start Seq. | End Sequence Seq.                     | Ion Score | C. I. % Modification                      |  |  | Rank Result Type |
| 805.5042            | 805.5098    | 0.0056 | 7     | 90         | 96 VHAIPLR                            | 51        | 99.773                                    |  |  | Mascot           |
| 805.5042            | 805.5098    | 0.0056 | 7     | 90         | 96 VHAIPLR                            |           |                                           |  |  | Mascot           |
| 916.4958            | 916.5284    | 0.0326 | 36    | 130        | 137 EGNVRVSR                          |           |                                           |  |  | Mascot           |
| 1009.5173           | 1009.5239   | 0.0066 | 7     | 305        | 314 AGVLAGHDNR                        |           |                                           |  |  | Mascot           |
| 1009.5173           | 1009.5239   | 0.0066 | 7     | 305        | 314 AGVLAGHDNR                        | 60        | 99.973                                    |  |  | Mascot           |
| 1225.5881           | 1225.5974   | 0.0093 | 8     | 198        | 209 LfvSGACDASAK                      |           | Carbamidomethyl (C)[7]                    |  |  | Mascot           |
| 1336.6104           | 1336.6201   | 0.0097 | 7     | 58         | 68 IYAMHWGTDSR                        |           |                                           |  |  | Mascot           |
| 1336.6104           | 1336.6201   | 0.0097 | 7     | 58         | 68 IYAMHWGTDSR                        | 77        | 100                                       |  |  | Mascot           |
| 1352.6052           | 1352.6165   | 0.0113 | 8     | 58         | 68 IYAMHWGTDSR                        |           | Oxidation (M)[4]                          |  |  | Mascot           |
| 1352.6052           | 1352.6165   | 0.0113 | 8     | 58         | 68 IYAMHWGTDSR                        | 22        | 0 Oxidation (M)[4]                        |  |  | Mascot           |
| 1353.705            | 1353.677    | -0.028 | -21   | 79         | 89 LIIWDSYTTNK                        |           |                                           |  |  | Mascot           |
| 1523.673            | 1523.6835   | 0.0105 | 7     | 138        | 150 ELAGHTGYLSCCR                     | 117       | 100 Carbamidomethyl (C)[11,12]            |  |  | Mascot           |
| 1523.673            | 1523.6835   | 0.0105 | 7     | 138        | 150 ELAGHTGYLSCCR                     |           | Carbamidomethyl (C)[11,12]                |  |  | Mascot           |
| 1972.9757           | 1972.9861   | 0.0104 | 5     | 24         | 42 ACADATLSQITANIDPVG R               | 158       | 100 Carbamidomethyl (C)[2]                |  |  | Mascot           |
| 1972.9757           | 1972.9861   | 0.0104 | 5     | 24         | 42 ACADATLSQITANIDPVG R               |           | Carbamidomethyl (C)[2]                    |  |  | Mascot           |
| 2101.0706           | 2101.0815   | 0.0109 | 5     | 23         | 42 KACADATLSQITANIDPV GR              | 166       | 100 Carbamidomethyl (C)[3]                |  |  | Mascot           |
| 2101.0706           | 2101.0815   | 0.0109 | 5     | 23         | 42 KACADATLSQITANIDPV GR              |           | Carbamidomethyl (C)[3]                    |  |  | Mascot           |
| 2157.032            | 2157.0488   | 0.0168 | 8     | 284        | 301 LLLAGYDDFNCNVWDTL K               |           | Carbamidomethyl (C)[11]                   |  |  | Mascot           |
| 2416.116            | 2416.1379   | 0.0219 | 9     | 315        | 337 VSCLGVTDDGMAVATGS WDSFLK          |           | Carbamidomethyl (C)[3]                    |  |  | Mascot           |
| 2432.1108           | 2432.1348   | 0.024  | 10    | 315        | 337 VSCLGVTDDGMAVATGS WDSFLK          |           | Carbamidomethyl (C)[3], Oxidation (M)[11] |  |  | Mascot           |
| 2698.2852           | 2698.3074   | 0.0222 | 8     | 257        | 280 ADQELMVYSHDNIICGITS VAFSK         |           | Carbamidomethyl (C)[15]                   |  |  | Mascot           |
| 2714.28             | 2714.3083   | 0.0283 | 10    | 257        | 280 ADQELMVYSHDNIICGITS VAFSK         |           | Carbamidomethyl (C)[15], Oxidation (M)[6] |  |  | Mascot           |
| 3521.512            | 3521.5479   | 0.0359 | 10    | 220        | 251 QTFTGHESDINAICFFPN GNAFATGSDDATCR |           | Carbamidomethyl (C)[14,31]                |  |  | Mascot           |

3
guanine nucleotide-binding protein G(I)/G(S)/G(T) subunit beta-2 [Danio rerio]
gi|61806564
37330
5.61
6
157
100
137
100

| Peptide Information |             |        |       |            |                   |           |                      |  |  |                  |
|---------------------|-------------|--------|-------|------------|-------------------|-----------|----------------------|--|--|------------------|
| Calc. Mass          | Obsrv. Mass | ± da   | ± ppm | Start Seq. | End Sequence Seq. | Ion Score | C. I. % Modification |  |  | Rank Result Type |
| 916.4958            | 916.5284    | 0.0326 | 36    | 130        | 137 EGNVRVSR      |           |                      |  |  | Mascot           |
| 1009.5173           | 1009.5239   | 0.0066 | 7     | 305        | 314 AGVLAGHDNR    |           |                      |  |  | Mascot           |

|   |                                              |           |        |     |             |     |                |         |        |                  |     |     |        |     |
|---|----------------------------------------------|-----------|--------|-----|-------------|-----|----------------|---------|--------|------------------|-----|-----|--------|-----|
|   | 1009.5173                                    | 1009.5239 | 0.0066 | 7   | 305         | 314 | AGVLAGHDNR     | 60      | 99.973 |                  |     |     | Mascot |     |
|   | 1336.6104                                    | 1336.6201 | 0.0097 | 7   | 58          | 68  | IYAMHWGTDSR    |         |        |                  |     |     | Mascot |     |
|   | 1336.6104                                    | 1336.6201 | 0.0097 | 7   | 58          | 68  | IYAMHWGTDSR    | 77      | 100    |                  |     |     | Mascot |     |
|   | 1352.6052                                    | 1352.6165 | 0.0113 | 8   | 58          | 68  | IYAMHWGTDSR    |         |        | Oxidation (M)[4] |     |     | Mascot |     |
|   | 1352.6052                                    | 1352.6165 | 0.0113 | 8   | 58          | 68  | IYAMHWGTDSR    | 22      | 0      | Oxidation (M)[4] |     |     | Mascot |     |
|   | 1353.705                                     | 1353.677  | -0.028 | -21 | 79          | 89  | LIIWDSYTTNK    |         |        |                  |     |     | Mascot |     |
|   | 1384.7291                                    | 1384.6061 | -0.123 | -89 | 9           | 19  | QEAEQLRNQIR    |         |        |                  |     |     | Mascot |     |
|   | 1728.8875                                    | 1728.8877 | 0.0002 | 0   | 2           | 15  | SELEQLRQEAEQLR | 1       | 0      |                  |     |     | Mascot |     |
|   | 1728.8875                                    | 1728.8877 | 0.0002 | 0   | 2           | 15  | SELEQLRQEAEQLR |         |        |                  |     |     | Mascot |     |
| 4 | hypothetical protein LOC492811 [Danio rerio] |           |        |     | gi 55925393 |     |                | 30709.6 | 5.95   | 1                | 117 | 100 | 117    | 100 |

#### Peptide Information

| Calc. Mass | Obsrv. Mass | ± da   | ± ppm | Start Seq. | End Seq. | Sequence      | Ion Score | C. I. | % | Modification               | Rank | Result | Type |
|------------|-------------|--------|-------|------------|----------|---------------|-----------|-------|---|----------------------------|------|--------|------|
| 1523.673   | 1523.6835   | 0.0105 | 7     | 138        | 150      | ELAGHTGYLSCCR | 117       | 100   |   | Carbamidomethyl (C)[11,12] |      | Mascot |      |
| 1523.673   | 1523.6835   | 0.0105 | 7     | 138        | 150      | ELAGHTGYLSCCR |           |       |   | Carbamidomethyl (C)[11,12] |      | Mascot |      |

|   |                                                                                 |  |  |  |              |  |  |         |      |   |    |        |    |     |
|---|---------------------------------------------------------------------------------|--|--|--|--------------|--|--|---------|------|---|----|--------|----|-----|
| 5 | PREDICTED: guanine nucleotide-binding protein subunit beta-4-like [Danio rerio] |  |  |  | gi 326664688 |  |  | 32333.8 | 7.55 | 5 | 92 | 99.997 | 77 | 100 |
|---|---------------------------------------------------------------------------------|--|--|--|--------------|--|--|---------|------|---|----|--------|----|-----|

#### Peptide Information

| Calc. Mass | Obsrv. Mass | ± da    | ± ppm | Start Seq. | End Seq. | Sequence               | Ion Score | C. I. | % | Modification                              | Rank | Result | Type |
|------------|-------------|---------|-------|------------|----------|------------------------|-----------|-------|---|-------------------------------------------|------|--------|------|
| 1336.6104  | 1336.6201   | 0.0097  | 7     | 58         | 68       | IYAMHWGTDSR            |           |       |   |                                           |      | Mascot |      |
| 1336.6104  | 1336.6201   | 0.0097  | 7     | 58         | 68       | IYAMHWGTDSR            | 77        | 100   |   |                                           |      | Mascot |      |
| 1352.6052  | 1352.6165   | 0.0113  | 8     | 58         | 68       | IYAMHWGTDSR            |           |       |   | Oxidation (M)[4]                          |      | Mascot |      |
| 1352.6052  | 1352.6165   | 0.0113  | 8     | 58         | 68       | IYAMHWGTDSR            | 22        | 0     |   | Oxidation (M)[4]                          |      | Mascot |      |
| 1384.7291  | 1384.6061   | -0.123  | -89   | 9          | 19       | QEAEQLRNQIR            |           |       |   |                                           |      | Mascot |      |
| 1728.8875  | 1728.8877   | 0.0002  | 0     | 2          | 15       | SELEQLRQEAEQLR         | 1         | 0     |   |                                           |      | Mascot |      |
| 1728.8875  | 1728.8877   | 0.0002  | 0     | 2          | 15       | SELEQLRQEAEQLR         |           |       |   |                                           |      | Mascot |      |
| 2225.1536  | 2225.136    | -0.0176 | -8    | 238        | 256      | VGSPHQCLILFIDVEGVWR    |           |       |   | Carbamidomethyl (C)[7]                    |      | Mascot |      |
| 2416.1272  | 2416.1379   | 0.0107  | 4     | 269        | 291      | VSLGVTSDGMAVATGSWDSFLR |           |       |   | Carbamidomethyl (C)[3]                    |      | Mascot |      |
| 2432.1221  | 2432.1348   | 0.0127  | 5     | 269        | 291      | VSLGVTSDGMAVATGSWDSFLR |           |       |   | Carbamidomethyl (C)[3], Oxidation (M)[11] |      | Mascot |      |

|   |                                                                 |  |  |  |              |  |  |       |      |    |    |        |  |  |
|---|-----------------------------------------------------------------|--|--|--|--------------|--|--|-------|------|----|----|--------|--|--|
| 6 | translation initiation factor IF-2, mitochondrial [Danio rerio] |  |  |  | gi 148232980 |  |  | 78605 | 6.39 | 11 | 54 | 83.466 |  |  |
|---|-----------------------------------------------------------------|--|--|--|--------------|--|--|-------|------|----|----|--------|--|--|

#### Peptide Information

| Calc. Mass | Obsrv. Mass | ± da | ± ppm | Start Seq. | End Seq. | Sequence | Ion Score | C. I. | % | Modification | Rank | Result | Type |
|------------|-------------|------|-------|------------|----------|----------|-----------|-------|---|--------------|------|--------|------|
|------------|-------------|------|-------|------------|----------|----------|-----------|-------|---|--------------|------|--------|------|



|   |                          |           |         |     |             |     |                                     |     |   |    |                           |        |
|---|--------------------------|-----------|---------|-----|-------------|-----|-------------------------------------|-----|---|----|---------------------------|--------|
|   | 805.4236                 | 805.5098  | 0.0862  | 107 | 362         | 369 | GCTLVAGK                            |     |   |    | Carbamidomethyl (C)[2]    | Mascot |
|   | 805.4236                 | 805.5098  | 0.0862  | 107 | 362         | 369 | GCTLVAGK                            |     |   |    | Carbamidomethyl (C)[2]    | Mascot |
|   | 902.4689                 | 902.4631  | -0.0058 | -6  | 139         | 145 | ENKDIQR                             |     |   |    |                           | Mascot |
|   | 902.4689                 | 902.4631  | -0.0058 | -6  | 139         | 145 | ENKDIQR                             | 17  | 0 |    |                           | Mascot |
|   | 916.5098                 | 916.5284  | 0.0186  | 20  | 559         | 566 | SIQQLAEK                            |     |   |    |                           | Mascot |
|   | 1045.4143                | 1045.5706 | 0.1563  | 150 | 426         | 433 | SYMEEQDK                            |     |   |    | Oxidation (M)[3]          | Mascot |
|   | 1384.7002                | 1384.6061 | -0.0941 | -68 | 268         | 279 | CDKPQADPQRVK                        |     |   |    |                           | Mascot |
|   | 1474.7834                | 1474.7925 | 0.0091  | 6   | 158         | 171 | APVVTIMGHIDHGK                      |     |   |    |                           | Mascot |
|   | 1515.7649                | 1515.7632 | -0.0017 | -1  | 327         | 341 | GDPTGLVEGSVIESR                     |     |   |    |                           | Mascot |
|   | 1750.8582                | 1750.8677 | 0.0095  | 5   | 208         | 223 | ITFLDTPGHAAFSAMR                    |     |   |    | Oxidation (M)[15]         | Mascot |
|   | 1759.9048                | 1759.9391 | 0.0343  | 19  | 644         | 658 | DMIWDGSVTTLKHLK                     |     |   |    | Oxidation (M)[2]          | Mascot |
|   | 3521.6841                | 3521.5479 | -0.1362 | -39 | 11          | 41  | TSLSCWHHGGPPLSPVS<br>AWTNKPPYTCSQIR |     |   |    | Carbamidomethyl (C)[5,27] | Mascot |
|   | 3522.5596                | 3522.5376 | -0.022  | -6  | 666         | 696 | TGMECGLSLDNEDLEYK<br>PGDAIICYSESEVK |     |   |    | Carbamidomethyl (C)[5,24] | Mascot |
|   | 3522.5596                | 3522.5376 | -0.022  | -6  | 666         | 696 | TGMECGLSLDNEDLEYK<br>PGDAIICYSESEVK |     |   |    | Carbamidomethyl (C)[5,24] | Mascot |
| 7 | Zgc:110331 [Danio rerio] |           |         |     | gi 62202266 |     | 17382.1                             | 8.3 | 8 | 53 | 76.646                    |        |

#### Peptide Information

|  | Calc. Mass | Obsrv. Mass | ± da    | ± ppm | Start Seq. | End Sequence Seq. | Ion Score                       | C. I. | % Modification | Rank                    | Result Type |
|--|------------|-------------|---------|-------|------------|-------------------|---------------------------------|-------|----------------|-------------------------|-------------|
|  | 882.5294   | 882.5742    | 0.0448  | 51    | 122        | 129               | ELSLPPVK                        |       |                |                         | Mascot      |
|  | 916.5461   | 916.5284    | -0.0177 | -19   | 114        | 121               | IKNTEIAK                        |       |                |                         | Mascot      |
|  | 1045.5636  | 1045.5706   | 0.007   | 7     | 42         | 51                | NVGSLDKNAK                      |       |                |                         | Mascot      |
|  | 1256.6382  | 1256.7085   | 0.0703  | 56    | 32         | 41                | KVVDHYENPR                      |       |                |                         | Mascot      |
|  | 1515.7285  | 1515.7632   | 0.0347  | 23    | 151        | 164               | QEGEPVEETAVART                  |       |                |                         | Mascot      |
|  | 1645.8036  | 1645.8855   | 0.0819  | 50    | 52         | 68                | NVGTGLVGAPACGDVMK               |       |                | Carbamidomethyl (C)[12] | Mascot      |
|  | 2157.0645  | 2157.0488   | -0.0157 | -7    | 86         | 106               | TFGCGSAIASSSLATEWV<br>KGK       |       |                | Carbamidomethyl (C)[4]  | Mascot      |
|  | 2714.3486  | 2714.3083   | -0.0403 | -15   | 52         | 78                | NVGTGLVGAPACGDVMK<br>LQVEVDEAGK |       |                | Carbamidomethyl (C)[12] | Mascot      |

8 novel protein [Danio rerio] gi|94734043 43327.8 8.57 10 50 56.512

#### Peptide Information

|  | Calc. Mass | Obsrv. Mass | ± da    | ± ppm | Start Seq. | End Sequence Seq. | Ion Score   | C. I. | % Modification | Rank                   | Result Type |
|--|------------|-------------|---------|-------|------------|-------------------|-------------|-------|----------------|------------------------|-------------|
|  | 902.4689   | 902.4631    | -0.0058 | -6    | 38         | 45                | GNSELNLR    |       |                |                        | Mascot      |
|  | 902.4689   | 902.4631    | -0.0058 | -6    | 38         | 45                | GNSELNLR    | 13    | 0              |                        | Mascot      |
|  | 916.4709   | 916.5284    | 0.0575  | 63    | 229        | 235               | WVNCPIK     |       |                | Carbamidomethyl (C)[4] | Mascot      |
|  | 1165.694   | 1165.754    | 0.06    | 51    | 154        | 164               | IIVGHSTTPIK |       |                |                        | Mascot      |

|   |                                    |           |         |     |              |     |                                      |      |    |    |       |                  |        |  |  |  |        |
|---|------------------------------------|-----------|---------|-----|--------------|-----|--------------------------------------|------|----|----|-------|------------------|--------|--|--|--|--------|
|   | 1225.6211                          | 1225.5974 | -0.0237 | -19 | 70           | 80  | AVIETGPYYGR                          |      |    |    |       |                  |        |  |  |  | Mascot |
|   | 1256.678                           | 1256.7085 | 0.0305  | 24  | 290          | 301 | GIPNLLARDGCK                         |      |    |    |       |                  |        |  |  |  | Mascot |
|   | 1353.7161                          | 1353.677  | -0.0391 | -29 | 70           | 81  | AVIETGPYYGRK                         |      |    |    |       |                  |        |  |  |  | Mascot |
|   | 1505.7516                          | 1505.6705 | -0.0811 | -54 | 237          | 249 | ALIQMVDQESLDK                        |      |    |    |       | Oxidation (M)[5] |        |  |  |  | Mascot |
|   | 1645.8578                          | 1645.8855 | 0.0277  | 17  | 236          | 249 | RALIQMVDQESLDK                       |      |    |    |       |                  |        |  |  |  | Mascot |
|   | 2233.0442                          | 2233.1003 | 0.0561  | 25  | 165          | 183 | NNLTIYEEVYSMSGEARE<br>K              |      |    |    |       |                  |        |  |  |  | Mascot |
|   | 3504.6821                          | 3504.5334 | -0.1487 | -42 | 81           | 112 | KMMTGYLAAQGVQAAEV<br>GVGQISTQMHEPYHR |      |    |    |       | Oxidation (M)[2] |        |  |  |  | Mascot |
| 9 | LOC100005105 protein [Danio rerio] |           |         |     | gi 141795160 |     | 150631                               | 8.58 | 13 | 47 | 13.23 | 27               | 46.433 |  |  |  |        |

#### Peptide Information

| Calc. Mass | Obsrv. Mass | ± da    | ± ppm | Start Seq. | End Seq. | Sequence                       | Ion Score | C. I.  | % Modification         | Rank | Result Type |
|------------|-------------|---------|-------|------------|----------|--------------------------------|-----------|--------|------------------------|------|-------------|
| 864.4825   | 864.5269    | 0.0444  | 51    | 854        | 860      | FTQDLLK                        |           |        |                        |      | Mascot      |
| 902.4689   | 902.4631    | -0.0058 | -6    | 131        | 138      | NAADDKLR                       |           |        |                        |      | Mascot      |
| 902.4689   | 902.4631    | -0.0058 | -6    | 131        | 138      | NAADDKLR                       | 27        | 46.433 |                        |      | Mascot      |
| 916.4345   | 916.5284    | 0.0939  | 102   | 1042       | 1048     | TFGYCLR                        |           |        | Carbamidomethyl (C)[5] |      | Mascot      |
| 1009.6265  | 1009.5239   | -0.1026 | -102  | 841        | 848      | RLLTLTHR                       |           |        |                        |      | Mascot      |
| 1009.6265  | 1009.5239   | -0.1026 | -102  | 841        | 848      | RLLTLTHR                       |           |        |                        |      | Mascot      |
| 1279.7845  | 1279.7872   | 0.0027  | 2     | 842        | 852      | LLTLTHRAQVK                    |           |        |                        |      | Mascot      |
| 1336.6896  | 1336.6201   | -0.0695 | -52   | 1349       | 1361     | LAANFSFTAAQPV                  |           |        |                        |      | Mascot      |
| 1336.6896  | 1336.6201   | -0.0695 | -52   | 1349       | 1361     | LAANFSFTAAQPV                  |           |        |                        |      | Mascot      |
| 1523.825   | 1523.6835   | -0.1415 | -93   | 1064       | 1077     | LCHVVKVVDTPGK                  |           |        |                        |      | Mascot      |
| 1523.825   | 1523.6835   | -0.1415 | -93   | 1064       | 1077     | LCHVVKVVDTPGK                  |           |        |                        |      | Mascot      |
| 1645.8921  | 1645.8855   | -0.0066 | -4    | 941        | 953      | EVVDLLRHQPHFR                  |           |        |                        |      | Mascot      |
| 1972.9122  | 1972.9861   | 0.0739  | 37    | 869        | 885      | QVSLQGFSGAYHWCFSR              |           |        |                        |      | Mascot      |
| 1972.9122  | 1972.9861   | 0.0739  | 37    | 869        | 885      | QVSLQGFSGAYHWCFSR              |           |        |                        |      | Mascot      |
| 2126.9702  | 2127.0369   | 0.0667  | 31    | 781        | 798      | EMVDLMRSQPSCMPVS<br>R          |           |        | Oxidation (M)[2,6,14]  |      | Mascot      |
| 2284.2229  | 2284.1895   | -0.0334 | -15   | 510        | 529      | VHMSSLQQAISAVSLLHR<br>YK       |           |        | Oxidation (M)[3]       |      | Mascot      |
| 2298.3906  | 2298.2026   | -0.188  | -82   | 821        | 841      | LLELLEAVPHVLQILGLGS<br>KR      |           |        |                        |      | Mascot      |
| 2698.3027  | 2698.3074   | 0.0047  | 2     | 293        | 318      | DGPDEGEELRPPTAAAA<br>AALFMPVEK |           |        | Oxidation (M)[22]      |      | Mascot      |

|    |                                      |  |  |  |              |  |          |      |    |    |   |  |  |  |  |  |  |
|----|--------------------------------------|--|--|--|--------------|--|----------|------|----|----|---|--|--|--|--|--|--|
| 10 | PREDICTED: girdin-like [Danio rerio] |  |  |  | gi 326668419 |  | 186585.7 | 5.85 | 17 | 44 | 0 |  |  |  |  |  |  |
|----|--------------------------------------|--|--|--|--------------|--|----------|------|----|----|---|--|--|--|--|--|--|

#### Peptide Information

| Calc. Mass | Obsrv. Mass | ± da | ± ppm | Start Seq. | End Seq. | Sequence | Ion Score | C. I. | % Modification | Rank | Result Type |
|------------|-------------|------|-------|------------|----------|----------|-----------|-------|----------------|------|-------------|
|------------|-------------|------|-------|------------|----------|----------|-----------|-------|----------------|------|-------------|

|    |                                              |           |         |      |              |      |                                     |      |   |    |   |                                           |  |  |  |  |        |
|----|----------------------------------------------|-----------|---------|------|--------------|------|-------------------------------------|------|---|----|---|-------------------------------------------|--|--|--|--|--------|
|    | 902.4578                                     | 902.4631  | 0.0053  | 6    | 671          | 677  | EELLDQR                             |      |   |    |   |                                           |  |  |  |  | Mascot |
|    | 902.5604                                     | 902.4631  | -0.0973 | -108 | 664          | 670  | RMLITLR                             | 15   | 0 |    |   |                                           |  |  |  |  | Mascot |
|    | 916.4846                                     | 916.5284  | 0.0438  | 48   | 461          | 467  | LEKENQR                             |      |   |    |   |                                           |  |  |  |  | Mascot |
|    | 1432.7617                                    | 1432.6742 | -0.0875 | -61  | 74           | 85   | AQNLSVLMYHIK                        |      |   |    |   | Oxidation (M)[8]                          |  |  |  |  | Mascot |
|    | 1474.605                                     | 1474.7925 | 0.1875  | 127  | 705          | 717  | MGDHEAVDQGQCK                       |      |   |    |   | Carbamidomethyl (C)[12]                   |  |  |  |  | Mascot |
|    | 1515.7471                                    | 1515.7632 | 0.0161  | 11   | 109          | 121  | NPVCEEGLLEEIRK                      |      |   |    |   |                                           |  |  |  |  | Mascot |
|    | 1523.723                                     | 1523.6835 | -0.0395 | -26  | 1546         | 1559 | ASCVISTSEGNRR                       |      |   |    |   | Carbamidomethyl (C)[3]                    |  |  |  |  | Mascot |
|    | 1523.723                                     | 1523.6835 | -0.0395 | -26  | 1546         | 1559 | ASCVISTSEGNRR                       |      |   |    |   | Carbamidomethyl (C)[3]                    |  |  |  |  | Mascot |
|    | 1645.8942                                    | 1645.8855 | -0.0087 | -5   | 665          | 677  | MLITLREELDQR                        |      |   |    |   | Oxidation (M)[1]                          |  |  |  |  | Mascot |
|    | 1671.9648                                    | 1671.9022 | -0.0626 | -37  | 122          | 136  | LLLLLLGCAVQCERK                     |      |   |    |   |                                           |  |  |  |  | Mascot |
|    | 1715.8857                                    | 1715.9301 | 0.0444  | 26   | 286          | 299  | RLQQENMQLLTDAR                      |      |   |    |   |                                           |  |  |  |  | Mascot |
|    | 1728.9862                                    | 1728.8877 | -0.0985 | -57  | 121          | 135  | KLLLLLLGCAVQCER                     |      |   |    |   | Carbamidomethyl (C)[9]                    |  |  |  |  | Mascot |
|    | 1728.9862                                    | 1728.8877 | -0.0985 | -57  | 122          | 136  | LLLLLLGCAVQCERK                     |      |   |    |   | Carbamidomethyl (C)[8]                    |  |  |  |  | Mascot |
|    | 2009.895                                     | 2010.0741 | 0.1791  | 89   | 984          | 1000 | MQNEICTNRNVTAECQR                   |      |   |    |   |                                           |  |  |  |  | Mascot |
|    | 2210.9707                                    | 2211.1169 | 0.1462  | 66   | 773          | 790  | DEEEKPGQCSPPERMW<br>HR              |      |   |    |   |                                           |  |  |  |  | Mascot |
|    | 2283.9871                                    | 2284.1895 | 0.2024  | 89   | 773          | 790  | DEEEKPGQCSPPERMW<br>HR              |      |   |    |   | Carbamidomethyl (C)[9], Oxidation (M)[15] |  |  |  |  | Mascot |
|    | 2368.2327                                    | 2368.1372 | -0.0955 | -40  | 870          | 890  | STVLSQNSSLVAHNTQL<br>QRRER          |      |   |    |   |                                           |  |  |  |  | Mascot |
|    | 2416.293                                     | 2416.1379 | -0.1551 | -64  | 1031         | 1051 | SQLNSIQLEQTQLESELS<br>KLK           |      |   |    |   |                                           |  |  |  |  | Mascot |
|    | 2698.3835                                    | 2698.3074 | -0.0761 | -28  | 1006         | 1027 | DWLNQTYQKLLVENEGL<br>QLEHK          |      |   |    |   |                                           |  |  |  |  | Mascot |
|    | 3521.7871                                    | 3521.5479 | -0.2392 | -68  | 221          | 253  | SAVFGSDSSLSEPESSRL<br>PLSQQHLELTHAK |      |   |    |   |                                           |  |  |  |  | Mascot |
| 11 | nitrogen fixation cluster-like [Danio rerio] |           |         |      | gi 221307563 |      | 17420.2                             | 8.83 | 7 | 43 | 0 |                                           |  |  |  |  |        |

Peptide Information

| Calc. Mass | Obsrv. Mass | ± da    | ± ppm | Start Seq. | End Seq. | Sequence                        | Ion Score | C. I. | % | Modification            | Rank | Result | Type   |
|------------|-------------|---------|-------|------------|----------|---------------------------------|-----------|-------|---|-------------------------|------|--------|--------|
| 882.5294   | 882.5742    | 0.0448  | 51    | 122        | 129      | ELSLPPVK                        |           |       |   |                         |      |        | Mascot |
| 916.5461   | 916.5284    | -0.0177 | -19   | 114        | 121      | IKNTEIAK                        |           |       |   |                         |      |        | Mascot |
| 1045.5636  | 1045.5706   | 0.007   | 7     | 42         | 51       | NVGSLDKNAK                      |           |       |   |                         |      |        | Mascot |
| 1256.6382  | 1256.7085   | 0.0703  | 56    | 32         | 41       | KVVDHYENPR                      |           |       |   |                         |      |        | Mascot |
| 1645.8036  | 1645.8855   | 0.0819  | 50    | 52         | 68       | NVGTGLVGAPACGDVMK               |           |       |   | Carbamidomethyl (C)[12] |      |        | Mascot |
| 2157.0645  | 2157.0488   | -0.0157 | -7    | 86         | 106      | TFGCGSAIASSSLATEWV<br>KGK       |           |       |   | Carbamidomethyl (C)[4]  |      |        | Mascot |
| 2714.3486  | 2714.3083   | -0.0403 | -15   | 52         | 78       | NVGTGLVGAPACGDVMK<br>LQVEVDEAGK |           |       |   | Carbamidomethyl (C)[12] |      |        | Mascot |

|    |                                                   |  |  |  |              |  |         |      |   |    |   |    |       |
|----|---------------------------------------------------|--|--|--|--------------|--|---------|------|---|----|---|----|-------|
| 12 | intraflagellar transport 81 homolog [Danio rerio] |  |  |  | gi 159570779 |  | 78814.9 | 6.43 | 9 | 40 | 0 | 27 | 44.13 |
|----|---------------------------------------------------|--|--|--|--------------|--|---------|------|---|----|---|----|-------|

Peptide Information

| Calc. Mass | Obsrv. Mass | ± da | ± ppm | Start | End | Sequence | Ion | C. I. | % | Modification | Rank | Result | Type |
|------------|-------------|------|-------|-------|-----|----------|-----|-------|---|--------------|------|--------|------|
|------------|-------------|------|-------|-------|-----|----------|-----|-------|---|--------------|------|--------|------|

|  |           |           |         | Seq. | Seq. | Score |                        |    |                        |        |
|--|-----------|-----------|---------|------|------|-------|------------------------|----|------------------------|--------|
|  | 870.5519  | 870.5449  | -0.007  | -8   | 616  | 622   | VLRQQVK                |    |                        | Mascot |
|  | 902.4941  | 902.4631  | -0.031  | -34  | 311  | 317   | ELEDKIR                |    |                        | Mascot |
|  | 902.4941  | 902.4631  | -0.031  | -34  | 311  | 317   | ELEDKIR                | 29 | 62.077                 | Mascot |
|  | 916.4734  | 916.5284  | 0.055   | 60   | 367  | 374   | EELAAVER               |    |                        | Mascot |
|  | 1045.5636 | 1045.5706 | 0.007   | 7    | 430  | 437   | TEEILRER               |    |                        | Mascot |
|  | 1225.6796 | 1225.5974 | -0.0822 | -67  | 64   | 73    | RMFTLLGMLK             |    | Oxidation (M)[2]       | Mascot |
|  | 1972.9644 | 1972.9861 | 0.0217  | 11   | 298  | 315   | VASEPAMGQAELELEDK      |    |                        | Mascot |
|  | 1972.9644 | 1972.9861 | 0.0217  | 11   | 298  | 315   | VASEPAMGQAELELEDK      |    |                        | Mascot |
|  | 2225.0879 | 2225.136  | 0.0481  | 22   | 563  | 579   | YHHINCEREIIESQIQR      |    | Carbamidomethyl (C)[6] | Mascot |
|  | 2233.1646 | 2233.1003 | -0.0643 | -29  | 291  | 310   | VVQYLQKVASEPAMGQAELELR |    | Oxidation (M)[14]      | Mascot |
|  | 2283.1914 | 2283.1948 | 0.0034  | 1    | 650  | 670   | QCYLKAQSQAPIGHVIQDVGK  |    |                        | Mascot |

13 PREDICTED: kinesin-like protein KIF13A-like, partial [Danio rerio] gi|292622799 204484.4 5.33 12 40 0 30 73.504

#### Peptide Information

| Calc. Mass | Obsrv. Mass | ± da    | ± ppm | Start Seq. | End Seq. | Sequence                        | Ion Score | C. I. % | Modification            | Rank | Result Type |
|------------|-------------|---------|-------|------------|----------|---------------------------------|-----------|---------|-------------------------|------|-------------|
| 902.4941   | 902.4631    | -0.031  | -34   | 319        | 325      | EEVEKLR                         |           |         |                         |      | Mascot      |
| 902.4941   | 902.4631    | -0.031  | -34   | 319        | 325      | EEVEKLR                         | 32        | 82.016  |                         |      | Mascot      |
| 1395.8066  | 1395.7257   | -0.0809 | -58   | 667        | 679      | GAIVSEPAIQVRR                   |           |         |                         |      | Mascot      |
| 1401.7697  | 1401.6202   | -0.1495 | -107  | 324        | 335      | LREQLSQAESLK                    |           |         |                         |      | Mascot      |
| 1458.7587  | 1458.7334   | -0.0253 | -17   | 1075       | 1086     | LVEQWVGLTEER                    |           |         |                         |      | Mascot      |
| 1474.6954  | 1474.7925   | 0.0971  | 66    | 1324       | 1337     | SLSTPNVQHSSSCK                  |           |         |                         |      | Mascot      |
| 1515.7836  | 1515.7632   | -0.0204 | -13   | 1291       | 1303     | GVLEVDNILCLDR                   |           |         | Carbamidomethyl (C)[10] |      | Mascot      |
| 1728.9326  | 1728.8877   | -0.0449 | -26   | 1803       | 1818     | CATGHGVFVKPSRLTR                |           |         |                         |      | Mascot      |
| 1728.9326  | 1728.8877   | -0.0449 | -26   | 1803       | 1818     | CATGHGVFVKPSRLTR                |           |         |                         |      | Mascot      |
| 1790.8701  | 1790.9044   | 0.0343  | 19    | 1264       | 1279     | ETLALMAARGENEETR                |           |         |                         |      | Mascot      |
| 2229.9731  | 2230.2166   | 0.2435  | 109   | 1          | 18       | VFAFDHCFWSDENIPK                |           |         | Carbamidomethyl (C)[7]  |      | Mascot      |
| 2368.1702  | 2368.1372   | -0.033  | -14   | 270        | 291      | TAMIATISPAADNYEETLS             |           |         |                         |      | Mascot      |
| 2409.3064  | 2409.2173   | -0.0891 | -37   | 394        | 414      | SFLVNLNADPALNELLVY              |           |         |                         |      | Mascot      |
| 3521.6099  | 3521.5479   | -0.062  | -18   | 1161       | 1191     | HSDDEVSAVCSWDSSIHDSIHLNRITAANER |           |         | Carbamidomethyl (C)[10] |      | Mascot      |

14 roundabout1 [Danio rerio] gi|14276863 41614.9 6.39 8 40 0

#### Peptide Information

|    | Calc. Mass                            | Obsrv. Mass | ± da    | ± ppm | Start Seq.   | End Sequence Seq.                   | Ion Score | C. I. % | Modification                             | Rank | Result Type |
|----|---------------------------------------|-------------|---------|-------|--------------|-------------------------------------|-----------|---------|------------------------------------------|------|-------------|
|    | 864.4608                              | 864.5269    | 0.0661  | 76    | 136          | 142 LMITNTR                         |           |         | Oxidation (M)[2]                         |      | Mascot      |
|    | 902.5054                              | 902.4631    | -0.0423 | -47   | 126          | 132 DERITIR                         |           |         |                                          |      | Mascot      |
|    | 902.5054                              | 902.4631    | -0.0423 | -47   | 126          | 132 DERITIR                         | 9         | 0       |                                          |      | Mascot      |
|    | 1279.6793                             | 1279.7872   | 0.1079  | 84    | 107          | 117 GHPEPTISWKK                     |           |         |                                          |      | Mascot      |
|    | 1432.6017                             | 1432.6742   | 0.0725  | 51    | 149          | 160 YVCVGTNMMGER                    |           |         | Carbamidomethyl (C)[3], Oxidation (M)[8] |      | Mascot      |
|    | 1790.9734                             | 1790.9044   | -0.069  | -39   | 28           | 42 SHRMLLPTGSLFFLR                  |           |         | Oxidation (M)[4]                         |      | Mascot      |
|    | 1973.1152                             | 1972.9861   | -0.1291 | -65   | 31           | 47 MLLPTGSLFFLRIVHGR                | 1         | 0       | Oxidation (M)[1]                         |      | Mascot      |
|    | 1973.1152                             | 1972.9861   | -0.1291 | -65   | 31           | 47 MLLPTGSLFFLRIVHGR                |           |         | Oxidation (M)[1]                         |      | Mascot      |
|    | 2009.825                              | 2010.0741   | 0.2491  | 124   | 231          | 249 LTSGDAGTYTCQAENMM GK            |           |         | Oxidation (M)[16,17]                     |      | Mascot      |
|    | 3504.7539                             | 3504.5334   | -0.2205 | -63   | 49           | 80 SKPDEGSYVCVARNYLGEAVSHNASLEVAILR |           |         | Carbamidomethyl (C)[10]                  |      | Mascot      |
| 15 | G1/S-specific cyclin-D2 [Danio rerio] |             |         |       | gi 148231179 | 34329.5                             | 5.23      | 9       | 38                                       | 0    |             |

#### Peptide Information

|    | Calc. Mass                                          | Obsrv. Mass | ± da    | ± ppm | Start Seq.   | End Sequence Seq.                 | Ion Score | C. I. % | Modification              | Rank | Result Type |
|----|-----------------------------------------------------|-------------|---------|-------|--------------|-----------------------------------|-----------|---------|---------------------------|------|-------------|
|    | 902.5458                                            | 902.4631    | -0.0827 | -92   | 87           | 94 FLAVVPTR                       |           |         |                           |      | Mascot      |
|    | 902.5458                                            | 902.4631    | -0.0827 | -92   | 87           | 94 FLAVVPTR                       |           |         |                           |      | Mascot      |
|    | 1062.5513                                           | 1062.7009   | 0.1496  | 141   | 50           | 57 DIQPFMR                        |           |         |                           |      | Mascot      |
|    | 1401.6829                                           | 1401.6202   | -0.0627 | -45   | 268          | 279 QQQQEQGGQRSK                  |           |         |                           |      | Mascot      |
|    | 1505.7703                                           | 1505.6705   | -0.0998 | -66   | 2            | 13 ELLCLEMDTIIR                   |           |         | Carbamidomethyl (C)[4]    |      | Mascot      |
|    | 1704.8236                                           | 1704.8789   | 0.0553  | 32    | 37           | 49 FLPQCSYFKCVQK                  |           |         | Carbamidomethyl (C)[5,10] |      | Mascot      |
|    | 1728.7642                                           | 1728.8877   | 0.1235  | 71    | 58           | 71 MVATWMLEVCEEQK                 |           |         | Oxidation (M)[1,6]        |      | Mascot      |
|    | 1728.7642                                           | 1728.8877   | 0.1235  | 71    | 58           | 71 MVATWMLEVCEEQK                 |           |         | Oxidation (M)[1,6]        |      | Mascot      |
|    | 1838.9689                                           | 1838.9258   | -0.0431 | -23   | 95           | 111 KCNLQLLGAVCMFLASK             |           |         |                           |      | Mascot      |
|    | 2284.1907                                           | 2284.1895   | -0.0012 | -1    | 147          | 165 LKWNLAAVTPNDFIEHIM R          |           |         | Oxidation (M)[18]         |      | Mascot      |
|    | 3522.5757                                           | 3522.5376   | -0.0381 | -11   | 58           | 86 MVATWMLEVCEEQKCEE EVFPLAMNYLDR |           |         | Oxidation (M)[1]          |      | Mascot      |
|    | 3522.5757                                           | 3522.5376   | -0.0381 | -11   | 58           | 86 MVATWMLEVCEEQKCEE EVFPLAMNYLDR |           |         | Oxidation (M)[1]          |      | Mascot      |
| 16 | PREDICTED: kinesin family member 13Bb [Danio rerio] |             |         |       | gi 326677371 | 230867.5                          | 5.3       | 10      | 38                        | 0    | 30 73.504   |

#### Peptide Information

|  | Calc. Mass | Obsrv. Mass | ± da   | ± ppm | Start Seq. | End Sequence Seq. | Ion Score | C. I. % | Modification | Rank | Result Type |
|--|------------|-------------|--------|-------|------------|-------------------|-----------|---------|--------------|------|-------------|
|  | 842.473    | 842.5162    | 0.0432 | 51    | 396        | 402 APELKER       |           |         |              |      | Mascot      |
|  | 870.4576   | 870.5449    | 0.0873 | 100   | 873        | 879 KFTCMIK       |           |         |              |      | Mascot      |

|    |                                                                   |           |         |     |      |              |                      |      |        |                        |        |    |   |
|----|-------------------------------------------------------------------|-----------|---------|-----|------|--------------|----------------------|------|--------|------------------------|--------|----|---|
|    | 902.4941                                                          | 902.4631  | -0.031  | -34 | 379  | 385          | EEVEKLR              | 32   | 82.016 | Carbamidomethyl (C)[2] | Mascot |    |   |
|    | 902.4941                                                          | 902.4631  | -0.031  | -34 | 379  | 385          | EEVEKLR              |      |        |                        | Mascot |    |   |
|    | 1225.6218                                                         | 1225.5974 | -0.0244 | -20 | 1380 | 1389         | RCLSSPNVHR           |      |        |                        | Mascot |    |   |
|    | 1320.6907                                                         | 1320.6008 | -0.0899 | -68 | 1108 | 1117         | QEYLDQRLQK           |      |        |                        | Mascot |    |   |
|    | 1353.6869                                                         | 1353.677  | -0.0099 | -7  | 566  | 577          | AGLRSDHLDVDR         |      |        |                        | Mascot |    |   |
|    | 1515.6268                                                         | 1515.7632 | 0.1364  | 90  | 1084 | 1095         | DMSYQEVDLER          |      |        |                        | Mascot |    |   |
|    | 1750.8905                                                         | 1750.8677 | -0.0228 | -13 | 629  | 641          | QRLMYEQELQQLR        |      |        |                        | Mascot |    |   |
|    | 1973.0702                                                         | 1972.9861 | -0.0841 | -43 | 700  | 717          | ANLLVQEAGFIAEDLNKK   |      |        |                        | Mascot |    |   |
|    | 1973.0702                                                         | 1972.9861 | -0.0841 | -43 | 700  | 717          | ANLLVQEAGFIAEDLNKK   |      |        |                        | Mascot |    |   |
|    | 2409.1277                                                         | 2409.2173 | 0.0896  | 37  | 146  | 165          | EGESFTVEVSYPEIYNEKVR |      |        |                        | Mascot |    |   |
| 17 | novel protein similar to H.sapiens TTN, titin (TTN) [Danio rerio] |           |         |     |      | gi 169154823 | 842970               | 5.81 | 40     | 38                     | 0      | 10 | 0 |

| Calc. Mass | Obsrv. Mass | ± da    | ± ppm | Start Seq. | End Seq. | Sequence     | Ion Score | C. I. % | Modification           | Rank | Result Type |
|------------|-------------|---------|-------|------------|----------|--------------|-----------|---------|------------------------|------|-------------|
| 842.444    | 842.5162    | 0.0722  | 86    | 3102       | 3108     | SYKVSMK      |           |         |                        |      | Mascot      |
| 850.4814   | 850.5482    | 0.0668  | 79    | 1088       | 1094     | LTSVRMK      |           |         | Oxidation (M)[6]       |      | Mascot      |
| 856.4886   | 856.5302    | 0.0416  | 49    | 6818       | 6824     | LTQEPR       |           |         |                        |      | Mascot      |
| 870.4203   | 870.5449    | 0.1246  | 143   | 6420       | 6427     | LSDSGTYK     |           |         |                        |      | Mascot      |
| 882.4679   | 882.5742    | 0.1063  | 120   | 2483       | 2489     | YKVSTER      |           |         |                        |      | Mascot      |
| 916.5502   | 916.5284    | -0.0218 | -24   | 4747       | 4754     | IIPPTFTK     |           |         |                        |      | Mascot      |
| 996.536    | 996.6045    | 0.0685  | 69    | 2586       | 2593     | LTITETYR     |           |         |                        |      | Mascot      |
| 1009.4479  | 1009.5239   | 0.076   | 75    | 2390       | 2397     | SSDRCQTR     | 12        | 0       | Carbamidomethyl (C)[5] |      | Mascot      |
| 1009.5611  | 1009.5239   | -0.0372 | -37   | 423        | 430      | SYARLMIR     |           |         |                        |      | Mascot      |
| 1045.5347  | 1045.5706   | 0.0359  | 34    | 6656       | 6665     | CQIGGTPEIK   |           |         |                        |      | Mascot      |
| 1225.53    | 1225.5974   | 0.0674  | 55    | 1191       | 1199     | VQRMDemer    |           |         | Oxidation (M)[4,7]     |      | Mascot      |
| 1256.6013  | 1256.7085   | 0.1072  | 85    | 4882       | 4892     | EMLTGGTCFIK  |           |         | Carbamidomethyl (C)[8] |      | Mascot      |
| 1279.6376  | 1279.7872   | 0.1496  | 117   | 3711       | 3722     | SETTTAVVSEQK |           |         |                        |      | Mascot      |
| 1320.5963  | 1320.6008   | 0.0045  | 3     | 6677       | 6687     | SSPTCKMEFFK  |           |         | Oxidation (M)[7]       |      | Mascot      |
| 1352.6844  | 1352.6165   | -0.0679 | -50   | 6293       | 6304     | WFKDGVELSSGK |           |         |                        |      | Mascot      |
| 1352.6844  | 1352.6165   | -0.0679 | -50   | 6293       | 6304     | WFKDGVELSSGK |           |         |                        |      | Mascot      |
| 1353.6614  | 1353.677    | 0.0156  | 12    | 4387       | 4398     | QGMSSRLSCTVK |           |         | Carbamidomethyl (C)[9] |      | Mascot      |
| 1368.7197  | 1368.6106   | -0.1091 | -80   | 7132       | 7142     | FDNLFFIEVPK  |           |         |                        |      | Mascot      |
| 1384.6963  | 1384.6061   | -0.0902 | -65   | 4882       | 4893     | EMLTGGTCFIKK |           |         | Carbamidomethyl (C)[8] |      | Mascot      |
| 1395.6243  | 1395.7257   | 0.1014  | 73    | 4735       | 4746     | EQSCSINVLDK  |           |         | Carbamidomethyl (C)[3] |      | Mascot      |
| 1432.7213  | 1432.6742   | -0.0471 | -33   | 7324       | 7335     | RMEQTEPVTVAR |           |         | Oxidation (M)[2]       |      | Mascot      |

|    |                                                               |           |           |         |     |              |          |                                         |                                            |    |   |        |
|----|---------------------------------------------------------------|-----------|-----------|---------|-----|--------------|----------|-----------------------------------------|--------------------------------------------|----|---|--------|
|    |                                                               | 1458.7838 | 1458.7334 | -0.0504 | -35 | 5831         | 5843     | ISGSLPITVEWEK                           |                                            |    |   | Mascot |
|    |                                                               | 1505.811  | 1505.6705 | -0.1405 | -93 | 4960         | 4972     | VAGSPEISIRWYK                           |                                            |    |   | Mascot |
|    |                                                               | 1523.6829 | 1523.6835 | 0.0006  | 0   | 4759         | 4772     | VDGNVGASIQMECK                          | Carbamidomethyl (C)[13], Oxidation (M)[11] |    |   | Mascot |
|    |                                                               | 1523.6829 | 1523.6835 | 0.0006  | 0   | 4759         | 4772     | VDGNVGASIQMECK                          | Carbamidomethyl (C)[13], Oxidation (M)[11] |    |   | Mascot |
|    |                                                               | 1645.7864 | 1645.8855 | 0.0991  | 60  | 724          | 737      | HGGRYQMEVLQDGR                          |                                            |    |   | Mascot |
|    |                                                               | 1673.7687 | 1673.9304 | 0.1617  | 97  | 2501         | 2517     | MSDAGEYSVVAGSSVSK                       |                                            |    |   | Mascot |
|    |                                                               | 1728.9894 | 1728.8877 | -0.1017 | -59 | 2133         | 2147     | YEITVDGLVHTLKI K                        |                                            |    |   | Mascot |
|    |                                                               | 1728.9894 | 1728.8877 | -0.1017 | -59 | 2133         | 2147     | YEITVDGLVHTLKI K                        |                                            |    |   | Mascot |
|    |                                                               | 1750.8826 | 1750.8677 | -0.0149 | -9  | 1897         | 1912     | MAVGRVETTCNLTVEK                        |                                            |    |   | Mascot |
|    |                                                               | 1759.9047 | 1759.9391 | 0.0344  | 20  | 7465         | 7479     | YTCAVANYTQKLSIK                         | Carbamidomethyl (C)[3]                     |    |   | Mascot |
|    |                                                               | 1790.9183 | 1790.9044 | -0.0139 | -8  | 6947         | 6962     | VAGSQPLTVNWYKDGR                        |                                            |    |   | Mascot |
|    |                                                               | 1839.0375 | 1838.9258 | -0.1117 | -61 | 3280         | 3295     | YPISSHQVETKLPIVK                        |                                            |    |   | Mascot |
|    |                                                               | 1973.0259 | 1972.9861 | -0.0398 | -20 | 7415         | 7432     | LTVLEAEVEKPMQDVAG<br>K                  | Oxidation (M)[12]                          |    |   | Mascot |
|    |                                                               | 1973.0371 | 1972.9861 | -0.051  | -26 | 5139         | 5156     | CTAVLTVKEPANITEQAK                      | Carbamidomethyl (C)[1]                     |    |   | Mascot |
|    |                                                               | 2010.113  | 2010.0741 | -0.0389 | -19 | 3500         | 3518     | AAPAPLHLQAVHSENLLT<br>K                 |                                            |    |   | Mascot |
|    |                                                               | 2126.9561 | 2127.0369 | 0.0808  | 38  | 3541         | 3558     | HHAASTE EKIEHTADYCK                     | Carbamidomethyl (C)[17]                    |    |   | Mascot |
|    |                                                               | 2211.1438 | 2211.1169 | -0.0269 | -12 | 6494         | 6513     | SCEIALRGDTAILELHNID<br>K                |                                            |    |   | Mascot |
|    |                                                               | 2232.9575 | 2233.1003 | 0.1428  | 64  | 1132         | 1149     | MINEFGYCSDIYEVAYS R                     | Carbamidomethyl (C)[8], Oxidation (M)[1]   |    |   | Mascot |
|    |                                                               | 2283.1899 | 2283.1948 | 0.0049  | 2   | 3240         | 3260     | EHPSQVMSALTESVTPLT<br>IVK               | Oxidation (M)[7]                           |    |   | Mascot |
|    |                                                               | 2698.4048 | 2698.3074 | -0.0974 | -36 | 4179         | 4202     | LTVTELPPEFVSKPD SM<br>TLFVGK            | Oxidation (M)[18]                          |    |   | Mascot |
|    |                                                               | 3521.6411 | 3521.5479 | -0.0932 | -26 | 4344         | 4377     | LKDTGTYTCTAANEAG S<br>SSCSSSVTVQEPPVFVK | Carbamidomethyl (C)[9]                     |    |   | Mascot |
|    |                                                               | 3522.7073 | 3522.5376 | -0.1697 | -48 | 1504         | 1532     | VYWYWPEDHVCELVI RD<br>VLAEDSASIMVK      | Carbamidomethyl (C)[11]                    |    |   | Mascot |
|    |                                                               | 3522.7073 | 3522.5376 | -0.1697 | -48 | 1504         | 1532     | VYWYWPEDHVCELVI RD<br>VLAEDSASIMVK      | Carbamidomethyl (C)[11]                    |    |   | Mascot |
| 18 | PREDICTED: uncharacterized protein K02A2.6-like [Danio rerio] |           |           |         |     | gi 326667102 | 133780.9 | 8.82                                    | 15                                         | 38 | 0 |        |

|           |           |         |     |      |      |                                   |                        |        |
|-----------|-----------|---------|-----|------|------|-----------------------------------|------------------------|--------|
| 1062.5764 | 1062.7009 | 0.1245  | 117 | 288  | 296  | SRPLPFAMK                         | Oxidation (M)[8]       | Mascot |
| 1279.7732 | 1279.7872 | 0.014   | 11  | 63   | 73   | NLVQPLKPKDK                       |                        | Mascot |
| 1336.7048 | 1336.6201 | -0.0847 | -63 | 542  | 551  | EQVIWYWGKK                        |                        | Mascot |
| 1336.7048 | 1336.6201 | -0.0847 | -63 | 542  | 551  | EQVIWYWGKK                        |                        | Mascot |
| 1353.6104 | 1353.677  | 0.0666  | 49  | 124  | 135  | CDFGASLDEALR                      | Carbamidomethyl (C)[1] | Mascot |
| 1401.6539 | 1401.6202 | -0.0337 | -24 | 690  | 702  | KAEMHGNADGLSR                     | Oxidation (M)[4]       | Mascot |
| 1432.708  | 1432.6742 | -0.0338 | -24 | 1030 | 1040 | QYLQNLHLHDHK                      |                        | Mascot |
| 2009.9927 | 2010.0741 | 0.0814  | 40  | 1045 | 1063 | SFAVDESFLRNTAGGD<br>PK            |                        | Mascot |
| 2157.0393 | 2157.0488 | 0.0095  | 4   | 990  | 1008 | YRTTPNCTTGQSPDLFL<br>R            |                        | Mascot |
| 2211.071  | 2211.1169 | 0.0459  | 21  | 162  | 180  | AFEIALSMETADRDQQL<br>R            | Oxidation (M)[8]       | Mascot |
| 2368.3274 | 2368.1372 | -0.1902 | -80 | 309  | 330  | ANIISPVTYSEWAAPVVP<br>VVKK        |                        | Mascot |
| 3504.7483 | 3504.5334 | -0.2149 | -61 | 866  | 894  | LHIDFAGPFLNNMFMIIV<br>DAYSKWLEVFR | Oxidation (M)[13,15]   | Mascot |

19 PREDICTED: leucine zipper putative tumor suppressor 2 homolog [Danio rerio] gi|326672673 69190.7 5.91 10 37 0

#### Peptide Information

| Calc. Mass | Obsrv. Mass | ± da    | ± ppm | Start Seq. | End Seq. | Sequence               | Ion Score | C. I. | % Modification        | Rank | Result Type |
|------------|-------------|---------|-------|------------|----------|------------------------|-----------|-------|-----------------------|------|-------------|
| 902.4941   | 902.4631    | -0.031  | -34   | 275        | 281      | DLEEKLR                |           |       |                       |      | Mascot      |
| 902.4941   | 902.4631    | -0.031  | -34   | 275        | 281      | DLEEKLR                | 16        | 0     |                       |      | Mascot      |
| 1256.6304  | 1256.7085   | 0.0781  | 62    | 355        | 364      | HQEEMTQILK             |           |       |                       |      | Mascot      |
| 1279.6641  | 1279.7872   | 0.1231  | 96    | 40         | 50       | ADIEVSTNFRK            |           |       |                       |      | Mascot      |
| 1384.7253  | 1384.6061   | -0.1192 | -86   | 354        | 364      | KHQEEMTQILK            |           |       |                       |      | Mascot      |
| 1458.7046  | 1458.7334   | 0.0288  | 20    | 558        | 568      | QLQQNYVQMYK            |           |       | Oxidation (M)[9]      |      | Mascot      |
| 1474.7384  | 1474.7925   | 0.0541  | 37    | 500        | 511      | EQRLAEETEELK           |           |       |                       |      | Mascot      |
| 1673.7765  | 1673.9304   | 0.1539  | 92    | 170        | 184      | FSPDAEDVSHATLER        |           |       |                       |      | Mascot      |
| 1704.7858  | 1704.8789   | 0.0931  | 55    | 476        | 489      | EKISHLEEDSSQMR         |           |       | Oxidation (M)[13]     |      | Mascot      |
| 2230.03    | 2230.2166   | 0.1866  | 84    | 337        | 353      | EQQMLQMVFQMQQEK<br>K   |           |       | Oxidation (M)[4,7,12] |      | Mascot      |
| 2409.1472  | 2409.2173   | 0.0701  | 29    | 334        | 352      | AQREQQMLQMVFQMQ<br>QEK |           |       |                       |      | Mascot      |

20 novel protein [Danio rerio] gi|55962229 275569.2 5.29 14 37 0 29 60.99

#### Peptide Information

| Calc. Mass | Obsrv. Mass | ± da   | ± ppm | Start Seq. | End Seq. | Sequence | Ion Score | C. I. | % Modification | Rank | Result Type |
|------------|-------------|--------|-------|------------|----------|----------|-----------|-------|----------------|------|-------------|
| 805.4487   | 805.5098    | 0.0611 | 76    | 699        | 705      | ELLCSLK  |           |       |                |      | Mascot      |
| 805.4487   | 805.5098    | 0.0611 | 76    | 699        | 705      | ELLCSLK  |           |       |                |      | Mascot      |



|    |                                    |           |           |         |     |              |         |                            |    |        |                         |    |   |        |
|----|------------------------------------|-----------|-----------|---------|-----|--------------|---------|----------------------------|----|--------|-------------------------|----|---|--------|
|    |                                    | 864.3992  | 864.5269  | 0.1277  | 148 | 263          | 269     | EMTRDGR                    |    |        |                         |    |   | Mascot |
|    |                                    | 882.5195  | 882.5742  | 0.0547  | 62  | 1300         | 1306    | KAFFTLR                    |    |        |                         |    |   | Mascot |
|    |                                    | 902.4988  | 902.4631  | -0.0357 | -40 | 2120         | 2126    | RMQAQIR                    |    |        |                         |    |   | Mascot |
|    |                                    | 902.4988  | 902.4631  | -0.0357 | -40 | 2120         | 2126    | RMQAQIR                    | 30 | 73.521 |                         |    |   | Mascot |
|    |                                    | 916.5098  | 916.5284  | 0.0186  | 20  | 294          | 301     | VEALSLER                   |    |        |                         |    |   | Mascot |
|    |                                    | 996.493   | 996.6045  | 0.1115  | 112 | 314          | 321     | QCISGLYR                   |    |        | Carbamidomethyl (C)[2]  |    |   | Mascot |
|    |                                    | 1320.6715 | 1320.6008 | -0.0707 | -54 | 979          | 990     | EAEEMTAVLLSK               |    |        |                         |    |   | Mascot |
|    |                                    | 1336.6665 | 1336.6201 | -0.0464 | -35 | 979          | 990     | EAEEMTAVLLSK               |    |        | Oxidation (M)[5]        |    |   | Mascot |
|    |                                    | 1336.6665 | 1336.6201 | -0.0464 | -35 | 979          | 990     | EAEEMTAVLLSK               |    |        | Oxidation (M)[5]        |    |   | Mascot |
|    |                                    | 1432.689  | 1432.6742 | -0.0148 | -10 | 931          | 942     | GLELEQVCEAWR               |    |        |                         |    |   | Mascot |
|    |                                    | 1671.8912 | 1671.9022 | 0.011   | 7   | 200          | 213     | LTQLEEQVQSLQQK             |    |        |                         |    |   | Mascot |
|    |                                    | 1704.7871 | 1704.8789 | 0.0918  | 54  | 522          | 535     | SCEYHPLQSQRGSR             |    |        | Carbamidomethyl (C)[2]  |    |   | Mascot |
|    |                                    | 1759.8578 | 1759.9391 | 0.0813  | 46  | 1489         | 1504    | SLQAQMRDCTPVGTPT           |    |        |                         |    |   | Mascot |
|    |                                    | 1972.8341 | 1972.9861 | 0.152   | 77  | 2263         | 2281    | YSGAEGLEGEAPDGSFA<br>CR    |    |        | Carbamidomethyl (C)[18] |    |   | Mascot |
|    |                                    | 1972.8341 | 1972.9861 | 0.152   | 77  | 2263         | 2281    | YSGAEGLEGEAPDGSFA<br>CR    |    |        | Carbamidomethyl (C)[18] |    |   | Mascot |
|    |                                    | 2127.0129 | 2127.0369 | 0.024   | 11  | 911          | 928     | CVLSNNEETIMSLEMLLR         |    |        | Oxidation (M)[11,15]    |    |   | Mascot |
|    |                                    | 2229.9829 | 2230.2166 | 0.2337  | 105 | 2263         | 2284    | YSGAEGLEGEAPDGSFA<br>CRTGR |    |        |                         |    |   | Mascot |
| 21 | nuclear protein MDM1 [Danio rerio] |           |           |         |     | qi 113677479 | 74247.7 | 9.88                       | 6  | 35     | 0                       | 22 | 0 |        |

### Peptide Information

22 PREDICTED: scavenger receptor cysteine-rich type 1  
protein M130-like [Danio rerio]

### Peptide Information

|    |                                                                                                     |            |             |         |       |            |                   |                       |           |                                           |                        |                  |
|----|-----------------------------------------------------------------------------------------------------|------------|-------------|---------|-------|------------|-------------------|-----------------------|-----------|-------------------------------------------|------------------------|------------------|
|    |                                                                                                     | 856.4093   | 856.5302    | 0.1209  | 141   | 465        | 471               | DAHVVCR               |           | Carbamidomethyl (C)[6]                    | Mascot                 |                  |
|    |                                                                                                     | 1279.7052  | 1279.7872   | 0.082   | 64    | 656        | 666               | QCSAHVPLRLR           |           |                                           | Mascot                 |                  |
|    |                                                                                                     | 1336.7267  | 1336.6201   | -0.1066 | -80   | 656        | 666               | QCSAHVPLRLR           |           | Carbamidomethyl (C)[2]                    | Mascot                 |                  |
|    |                                                                                                     | 1336.7267  | 1336.6201   | -0.1066 | -80   | 656        | 666               | QCSAHVPLRLR           |           | Carbamidomethyl (C)[2]                    | Mascot                 |                  |
|    |                                                                                                     | 1384.7253  | 1384.6061   | -0.1192 | -86   | 168        | 179               | ELDCGVPVQVLR          |           | Carbamidomethyl (C)[4]                    | Mascot                 |                  |
|    |                                                                                                     | 1401.6984  | 1401.6202   | -0.0782 | -56   | 609        | 620               | TLYHCPSLPWGK          |           |                                           | Mascot                 |                  |
|    |                                                                                                     | 1458.7198  | 1458.7334   | 0.0136  | 9     | 609        | 620               | TLYHCPSLPWGK          |           | Carbamidomethyl (C)[5]                    | Mascot                 |                  |
|    |                                                                                                     | 1505.7206  | 1505.6705   | -0.0501 | -33   | 199        | 211               | GNESHLVFCPAFK         |           | Carbamidomethyl (C)[9]                    | Mascot                 |                  |
|    |                                                                                                     | 1515.5814  | 1515.7632   | 0.1818  | 120   | 240        | 251               | WGTVCDACWDMR          |           | Carbamidomethyl (C)[5], Oxidation (M)[11] | Mascot                 |                  |
|    |                                                                                                     | 1523.6893  | 1523.6835   | -0.0058 | -4    | 631        | 643               | ITCSEKETDESPK         |           | Carbamidomethyl (C)[3]                    | Mascot                 |                  |
|    |                                                                                                     | 1523.6893  | 1523.6835   | -0.0058 | -4    | 631        | 643               | ITCSEKETDESPK         |           | Carbamidomethyl (C)[3]                    | Mascot                 |                  |
|    |                                                                                                     | 1715.821   | 1715.9301   | 0.1091  | 64    | 734        | 747               | GNELHLWDCPFSLK        |           | Carbamidomethyl (C)[9]                    | Mascot                 |                  |
|    |                                                                                                     | 1838.9006  | 1838.9258   | 0.0252  | 14    | 606        | 620               | HDKTLYHCPSLPWGK       |           | Carbamidomethyl (C)[8]                    | Mascot                 |                  |
|    |                                                                                                     | 1972.8962  | 1972.9861   | 0.0899  | 46    | 109        | 126               | GVSNCKHDEDAGVVCLGR    |           | Carbamidomethyl (C)[5,15]                 | Mascot                 |                  |
|    |                                                                                                     | 1972.8962  | 1972.9861   | 0.0899  | 46    | 109        | 126               | GVSNCKHDEDAGVVCLGR    |           | Carbamidomethyl (C)[5,15]                 | Mascot                 |                  |
|    |                                                                                                     | 2156.9448  | 2157.0488   | 0.104   | 48    | 212        | 231               | SSHCYTDLRLVNGSDSCSGR  |           |                                           | Mascot                 |                  |
|    |                                                                                                     | 2300.2529  | 2300.1936   | -0.0593 | -26   | 5          | 25                | SCLTVLLISTVVTLPNEGEVR |           | Carbamidomethyl (C)[2]                    | Mascot                 |                  |
|    |                                                                                                     | 2416.2288  | 2416.1379   | -0.0909 | -38   | 332        | 352               | LSGESQCEGQVEVLIQQVWRK |           |                                           | Mascot                 |                  |
| 23 | zf-FKH1=fork head gene product {forkhead domain, internal fragment} [zebrafishes, gastrula/early ne |            |             |         |       |            | gi 1245779        | 7588.8                | 8.9       | 4                                         | 35                     | 0                |
|    | Peptide Information                                                                                 |            |             |         |       |            |                   |                       |           |                                           |                        |                  |
|    |                                                                                                     | Calc. Mass | Obsrv. Mass | ± da    | ± ppm | Start Seq. | End Sequence Seq. |                       | Ion Score | C. I. %                                   | Modification           | Rank Result Type |
|    |                                                                                                     | 1353.6256  | 1353.677    | 0.0514  | 38    | 51         | 61                | HSLSFNDCFVK           |           |                                           | Carbamidomethyl (C)[8] | Mascot           |
|    |                                                                                                     | 1395.6725  | 1395.7257   | 0.0532  | 38    | 51         | 62                | HSLSFNDCFVKV          |           |                                           |                        | Mascot           |
|    |                                                                                                     | 1458.7196  | 1458.7334   | 0.0138  | 9     | 40         | 50                | ENQQRWQNSIR           |           |                                           |                        | Mascot           |
|    |                                                                                                     | 2283.2053  | 2283.1948   | -0.0105 | -5    | 1          | 20                | KPPYSYISLITMAIQSQSK   |           |                                           |                        | Mascot           |
| 24 | PREDICTED: hypothetical protein LOC100537292 [Danio rerio]                                          |            |             |         |       |            | gi 326672395      | 272747.6              | 8.49      | 22                                        | 34                     | 0                |
|    | Peptide Information                                                                                 |            |             |         |       |            |                   |                       |           |                                           |                        |                  |
|    |                                                                                                     | Calc. Mass | Obsrv. Mass | ± da    | ± ppm | Start Seq. | End Sequence Seq. |                       | Ion Score | C. I. %                                   | Modification           | Rank Result Type |
|    |                                                                                                     | 902.5094   | 902.4631    | -0.0463 | -51   | 1065       | 1072              | VAAVTQWK              |           |                                           |                        | Mascot           |
|    |                                                                                                     | 902.5094   | 902.4631    | -0.0463 | -51   | 1065       | 1072              | VAAVTQWK              |           |                                           |                        | Mascot           |



|    |                                                      |           |         |     |             |         |                |   |    |   |  |  |        |
|----|------------------------------------------------------|-----------|---------|-----|-------------|---------|----------------|---|----|---|--|--|--------|
|    | 1336.5612                                            | 1336.6201 | 0.0589  | 44  | 608         | 620     | DSGSGDEDKPSSR  | 1 | 0  |   |  |  | Mascot |
|    | 1395.7491                                            | 1395.7257 | -0.0234 | -17 | 595         | 607     | TGGLWSRLGPSHK  |   |    |   |  |  | Mascot |
|    | 1759.8933                                            | 1759.9391 | 0.0458  | 26  | 248         | 262     | KPQETRETSLQAER |   |    |   |  |  | Mascot |
| 26 | probable dimethyladenosine transferase [Danio rerio] |           |         |     | gi 57525891 | 34585.6 | 9.64           | 8 | 34 | 0 |  |  |        |

#### Peptide Information

| Calc. Mass | Obsrv. Mass | ± da    | ± ppm | Start Seq. | End Seq. | Sequence                | Ion Score | C. I. | % Modification         | Rank | Result Type |
|------------|-------------|---------|-------|------------|----------|-------------------------|-----------|-------|------------------------|------|-------------|
| 996.5836   | 996.6045    | 0.0209  | 21    | 178        | 186      | VDHLTKVGK               |           |       |                        |      | Mascot      |
| 1009.5499  | 1009.5239   | -0.026  | -26   | 228        | 236      | NKMLSAAFK               |           |       |                        |      | Mascot      |
| 1009.5499  | 1009.5239   | -0.026  | -26   | 228        | 236      | NKMLSAAFK               |           |       |                        |      | Mascot      |
| 1352.7242  | 1352.6165   | -0.1077 | -80   | 230        | 242      | MLSAAFKSAAVEK           |           |       |                        |      | Mascot      |
| 1352.7242  | 1352.6165   | -0.1077 | -80   | 230        | 242      | MLSAAFKSAAVEK           | 3         | 0     |                        |      | Mascot      |
| 1368.7191  | 1368.6106   | -0.1085 | -79   | 230        | 242      | MLSAAFKSAAVEK           |           |       | Oxidation (M)[1]       |      | Mascot      |
| 1523.7952  | 1523.6835   | -0.1117 | -73   | 269        | 281      | IESILQESKFSDK           |           |       |                        |      | Mascot      |
| 1523.7952  | 1523.6835   | -0.1117 | -73   | 269        | 281      | IESILQESKFSDK           |           |       |                        |      | Mascot      |
| 1759.9159  | 1759.9391   | 0.0232  | 13    | 18         | 33       | SQGIMFNTGIGQHILK        |           |       | Oxidation (M)[5]       |      | Mascot      |
| 2157.177   | 2157.0488   | -0.1282 | -59   | 91         | 109      | VQCTPMQNKQLILIGDVLK     |           |       | Oxidation (M)[6]       |      | Mascot      |
| 2225.1958  | 2225.136    | -0.0598 | -27   | 45         | 66       | AALRPDVLVLEVGPGTG NMTVK |           |       |                        |      | Mascot      |
| 2233.1069  | 2233.1003   | -0.0066 | -3    | 250        | 268      | IHC SVHNIEIPEDFNIAPK    |           |       | Carbamidomethyl (C)[3] |      | Mascot      |

|    |                                   |  |  |  |             |         |      |   |    |   |    |   |  |
|----|-----------------------------------|--|--|--|-------------|---------|------|---|----|---|----|---|--|
| 27 | frizzled homolog 7a [Danio rerio] |  |  |  | gi 32996705 | 63652.8 | 8.21 | 8 | 34 | 0 | 10 | 0 |  |
|----|-----------------------------------|--|--|--|-------------|---------|------|---|----|---|----|---|--|

#### Peptide Information

| Calc. Mass | Obsrv. Mass | ± da    | ± ppm | Start Seq. | End Seq. | Sequence                       | Ion Score | C. I. | % Modification                              | Rank | Result Type |
|------------|-------------|---------|-------|------------|----------|--------------------------------|-----------|-------|---------------------------------------------|------|-------------|
| 1009.444   | 1009.5239   | 0.0799  | 79    | 125        | 133      | QGCEALMNK                      |           |       | Oxidation (M)[7]                            |      | Mascot      |
| 1009.444   | 1009.5239   | 0.0799  | 79    | 125        | 133      | QGCEALMNK                      | 10        | 0     | Oxidation (M)[7]                            |      | Mascot      |
| 1523.7279  | 1523.6835   | -0.0444 | -29   | 2          | 14       | AFLKMQHCCGITR                  |           |       | Oxidation (M)[5]                            |      | Mascot      |
| 1523.7279  | 1523.6835   | -0.0444 | -29   | 2          | 14       | AFLKMQHCCGITR                  |           |       | Oxidation (M)[5]                            |      | Mascot      |
| 1750.7676  | 1750.8677   | 0.1001  | 57    | 482        | 494      | EQWEKTWHMQTCK                  |           |       | Oxidation (M)[9]                            |      | Mascot      |
| 2156.9309  | 2157.0488   | 0.1179  | 55    | 214        | 231      | DCGAPCEPTRPNGLMYF R            |           |       | Carbamidomethyl (C)[2,6], Oxidation (M)[15] |      | Mascot      |
| 2416.2546  | 2416.1379   | -0.1167 | -48   | 15         | 35       | YFLLFTVALQTTSGQYH GEK          |           |       |                                             |      | Mascot      |
| 2698.2058  | 2698.3074   | 0.1016  | 38    | 214        | 236      | DCGAPCEPTRPNGLMYF REEEVK       |           |       | Carbamidomethyl (C)[2]                      |      | Mascot      |
| 2714.2007  | 2714.3083   | 0.1076  | 40    | 214        | 236      | DCGAPCEPTRPNGLMYF REEEVK       |           |       | Carbamidomethyl (C)[2], Oxidation (M)[15]   |      | Mascot      |
| 3505.8196  | 3505.5146   | -0.305  | -87   | 237        | 265      | FGRLWVGWISILCCVSTL FTVLTYLVDNR |           |       | Carbamidomethyl (C)[13,14]                  |      | Mascot      |
| 3521.8145  | 3521.5479   | -0.2666 | -76   | 237        | 265      | FGRLWVGWISILCCVSTL             |           |       | Carbamidomethyl (C)[13,14], Oxidation       |      | Mascot      |

|    |                                   |           |         |     |             |     |                                                    |      |   |    |                                                        |        |   |
|----|-----------------------------------|-----------|---------|-----|-------------|-----|----------------------------------------------------|------|---|----|--------------------------------------------------------|--------|---|
|    | 3522.6421                         | 3522.5376 | -0.1045 | -30 | 88          | 117 | FTVLTYLVDMR<br>VQCSMDLKFFLCSEMYAP<br>VCTVLEQAIPPCR |      |   |    | (M)[28]<br>Carbamidomethyl (C)[3,12], Oxidation (M)[5] | Mascot |   |
|    | 3522.6421                         | 3522.5376 | -0.1045 | -30 | 88          | 117 | VQCSMDLKFFLCSEMYAP<br>VCTVLEQAIPPCR                |      |   |    | Carbamidomethyl (C)[3,12], Oxidation (M)[5]            | Mascot |   |
| 28 | Frizzled homolog 7a [Danio rerio] |           |         |     | gi 68085245 |     | 63589.8                                            | 8.31 | 8 | 33 | 0                                                      | 10     | 0 |

#### Peptide Information

|  | Calc. Mass | Obsrv. Mass | ± da    | ± ppm | Start Seq. | End Seq. | Sequence                            | Ion Score | C. I. | % | Modification                                  | Rank | Result Type |
|--|------------|-------------|---------|-------|------------|----------|-------------------------------------|-----------|-------|---|-----------------------------------------------|------|-------------|
|  | 1009.444   | 1009.5239   | 0.0799  | 79    | 125        | 133      | QGCEALMNK                           |           |       |   | Oxidation (M)[7]                              |      | Mascot      |
|  | 1009.444   | 1009.5239   | 0.0799  | 79    | 125        | 133      | QGCEALMNK                           | 10        | 0     |   | Oxidation (M)[7]                              |      | Mascot      |
|  | 1523.7279  | 1523.6835   | -0.0444 | -29   | 2          | 14       | AFLKMQHCCGITR                       |           |       |   | Oxidation (M)[5]                              |      | Mascot      |
|  | 1523.7279  | 1523.6835   | -0.0444 | -29   | 2          | 14       | AFLKMQHCCGITR                       |           |       |   | Oxidation (M)[5]                              |      | Mascot      |
|  | 1750.7676  | 1750.8677   | 0.1001  | 57    | 482        | 494      | EQWEKTWHMQTCK                       |           |       |   | Oxidation (M)[9]                              |      | Mascot      |
|  | 2156.9309  | 2157.0488   | 0.1179  | 55    | 214        | 231      | DCGAPCEPTRPNGLMYF<br>R              |           |       |   | Carbamidomethyl (C)[2,6], Oxidation (M)[15]   |      | Mascot      |
|  | 2416.2546  | 2416.1379   | -0.1167 | -48   | 15         | 35       | YFLLFTVALQTTSGQYH<br>GEK            |           |       |   |                                               |      | Mascot      |
|  | 2698.2058  | 2698.3074   | 0.1016  | 38    | 214        | 236      | DCGAPCEPTRPNGLMYF<br>REEEVK         |           |       |   | Carbamidomethyl (C)[2]                        |      | Mascot      |
|  | 2714.2007  | 2714.3083   | 0.1076  | 40    | 214        | 236      | DCGAPCEPTRPNGLMYF<br>REEEVK         |           |       |   | Carbamidomethyl (C)[2], Oxidation (M)[15]     |      | Mascot      |
|  | 3505.8196  | 3505.5146   | -0.305  | -87   | 237        | 265      | FGRLWVGWISILCCVSTL<br>FTVLTYLVDMR   |           |       |   | Carbamidomethyl (C)[13,14]                    |      | Mascot      |
|  | 3521.8145  | 3521.5479   | -0.2666 | -76   | 237        | 265      | FGRLWVGWISILCCVSTL<br>FTVLTYLVDMR   |           |       |   | Carbamidomethyl (C)[13,14], Oxidation (M)[28] |      | Mascot      |
|  | 3522.6421  | 3522.5376   | -0.1045 | -30   | 88         | 117      | VQCSMDLKFFLCSEMYAP<br>VCTVLEQAIPPCR |           |       |   | Carbamidomethyl (C)[3,12], Oxidation (M)[5]   |      | Mascot      |
|  | 3522.6421  | 3522.5376   | -0.1045 | -30   | 88         | 117      | VQCSMDLKFFLCSEMYAP<br>VCTVLEQAIPPCR |           |       |   | Carbamidomethyl (C)[3,12], Oxidation (M)[5]   |      | Mascot      |

29 PREDICTED: purine-rich element-binding protein gamma [Danio rerio]

#### Peptide Information

|  | Calc. Mass | Obsrv. Mass | ± da    | ± ppm | Start Seq. | End Seq. | Sequence                  | Ion Score | C. I. | % | Modification            | Rank | Result Type |
|--|------------|-------------|---------|-------|------------|----------|---------------------------|-----------|-------|---|-------------------------|------|-------------|
|  | 916.3981   | 916.5284    | 0.1303  | 142   | 291        | 297      | FGENFMR                   |           |       |   | Oxidation (M)[6]        |      | Mascot      |
|  | 1256.6633  | 1256.7085   | 0.0452  | 36    | 47         | 56       | FYLDVKQSTR                |           |       |   |                         |      | Mascot      |
|  | 1384.6578  | 1384.6061   | -0.0517 | -37   | 287        | 297      | AWARFGENFMR               |           |       |   |                         |      | Mascot      |
|  | 1972.9001  | 1972.9861   | 0.086   | 44    | 108        | 125      | GCQAAERRPEEQSNGQ<br>GR    | 1         | 0     |   |                         |      | Mascot      |
|  | 1972.9001  | 1972.9861   | 0.086   | 44    | 108        | 125      | GCQAAERRPEEQSNGQ<br>GR    |           |       |   |                         |      | Mascot      |
|  | 2156.9778  | 2157.0488   | 0.071   | 33    | 231        | 249      | ACARNHDESPPEAAS<br>FR     |           |       |   | Carbamidomethyl (C)[2]  |      | Mascot      |
|  | 2409.0623  | 2409.2173   | 0.155   | 64    | 214        | 234      | DALSQLIDDYGDDEPERA<br>CAR |           |       |   | Carbamidomethyl (C)[19] |      | Mascot      |
|  | 3522.7798  | 3522.5376   | -0.2422 | -69   | 182        | 213      | QTVTRGHGSMGYGQGI          |           |       |   | Oxidation (M)[10]       |      | Mascot      |

|                     |                                                                                                      |             |         |       |            |              |                                                        |          |           |       |    |                                          |    |                   |        |             |
|---------------------|------------------------------------------------------------------------------------------------------|-------------|---------|-------|------------|--------------|--------------------------------------------------------|----------|-----------|-------|----|------------------------------------------|----|-------------------|--------|-------------|
|                     | 3522.7798                                                                                            | 3522.5376   | -0.2422 | -69   | 182        | 213          | EQTIVLPAQGLIEFR<br>QTVTRGHGSMGYGQGI<br>EQTIVLPAQGLIEFR |          |           |       |    |                                          |    | Oxidation (M)[10] |        | Mascot      |
| 30                  | PREDICTED: hypothetical protein LOC100538190 [Danio rerio]                                           |             |         |       |            | gij326676042 |                                                        | 6084     | 9.65      | 5     | 33 | 0                                        |    |                   |        |             |
| Peptide Information |                                                                                                      |             |         |       |            |              |                                                        |          |           |       |    |                                          |    |                   |        |             |
|                     | Calc. Mass                                                                                           | Obsrv. Mass | ± da    | ± ppm | Start Seq. | End Seq.     | Sequence                                               |          | Ion Score | C. I. | %  | Modification                             |    |                   | Rank   | Result Type |
|                     | 1368.5605                                                                                            | 1368.6106   | 0.0501  | 37    | 1          | 11           | MCNFCSTNHVR                                            |          |           |       |    | Carbamidomethyl (C)[2]                   |    |                   | Mascot |             |
|                     | 1384.5555                                                                                            | 1384.6061   | 0.0506  | 37    | 1          | 11           | MCNFCSTNHVR                                            |          |           |       |    | Carbamidomethyl (C)[2], Oxidation (M)[1] |    |                   | Mascot |             |
|                     | 1458.7295                                                                                            | 1458.7334   | 0.0039  | 3     | 21         | 33           | LQSNQPESANKSR                                          |          |           |       |    |                                          |    |                   | Mascot |             |
|                     | 1474.7067                                                                                            | 1474.7925   | 0.0858  | 58    | 19         | 31           | CRLQSNQPESANK                                          |          |           |       |    |                                          |    |                   | Mascot |             |
|                     | 1505.7417                                                                                            | 1505.6705   | -0.0712 | -47   | 35         | 47           | YDLPPREMGSVNK                                          |          |           |       |    |                                          |    |                   | Mascot |             |
|                     | 1715.8145                                                                                            | 1715.9301   | 0.1156  | 67    | 2          | 15           | CNFCSTNHVRFFIK                                         |          |           |       |    |                                          |    |                   | Mascot |             |
| 31                  | voltage-dependent calcium channel subunit alpha-2/delta-1 [Danio rerio]                              |             |         |       |            | gij169234588 |                                                        | 121294.4 | 5.02      | 7     | 33 | 0                                        | 23 | 0                 |        |             |
| Peptide Information |                                                                                                      |             |         |       |            |              |                                                        |          |           |       |    |                                          |    |                   |        |             |
|                     | Calc. Mass                                                                                           | Obsrv. Mass | ± da    | ± ppm | Start Seq. | End Seq.     | Sequence                                               |          | Ion Score | C. I. | %  | Modification                             |    |                   | Rank   | Result Type |
|                     | 902.5053                                                                                             | 902.4631    | -0.0422 | -47   | 887        | 895          | ESKAAAGLR                                              |          |           |       |    |                                          |    |                   | Mascot |             |
|                     | 902.5053                                                                                             | 902.4631    | -0.0422 | -47   | 887        | 895          | ESKAAAGLR                                              |          | 23        |       | 0  |                                          |    |                   | Mascot |             |
|                     | 916.5461                                                                                             | 916.5284    | -0.0177 | -19   | 315        | 322          | TLKEAVQK                                               |          |           |       |    |                                          |    |                   | Mascot |             |
|                     | 1225.6648                                                                                            | 1225.5974   | -0.0674 | -55   | 76         | 85           | QNNPRQLVEK                                             |          |           |       |    |                                          |    |                   | Mascot |             |
|                     | 1458.7263                                                                                            | 1458.7334   | 0.0071  | 5     | 634        | 645          | FEEYGYTLIAPR                                           |          |           |       |    |                                          |    |                   | Mascot |             |
|                     | 2211.001                                                                                             | 2211.1169   | 0.1159  | 52    | 534        | 552          | SQEPVTLDFLDAEMEDEVK                                    |          |           |       |    | Oxidation (M)[14]                        |    |                   | Mascot |             |
|                     | 2432.1438                                                                                            | 2432.1348   | -0.009  | -4    | 653        | 672          | AQENENMTQFLIDFNEYIDVK                                  |          |           |       |    |                                          |    |                   | Mascot |             |
|                     | 2714.2368                                                                                            | 2714.3083   | 0.0715  | 26    | 724        | 747          | VYPASAGSEWTGQAETYESSFYKR                               |          |           |       |    |                                          |    |                   | Mascot |             |
| 32                  | novel protein similar to vertebrate NADH dehydrogenase (ubiquinone) Fe-S protein 6, 13kDa (NADH-coe) |             |         |       |            | gij94733202  |                                                        | 14223.3  | 8.41      | 5     | 33 | 0                                        |    |                   |        |             |
| Peptide Information |                                                                                                      |             |         |       |            |              |                                                        |          |           |       |    |                                          |    |                   |        |             |
|                     | Calc. Mass                                                                                           | Obsrv. Mass | ± da    | ± ppm | Start Seq. | End Seq.     | Sequence                                               |          | Ion Score | C. I. | %  | Modification                             |    |                   | Rank   | Result Type |
|                     | 864.4825                                                                                             | 864.5269    | 0.0444  | 51    | 103        | 109          | VYINLDK                                                |          |           |       |    |                                          |    |                   | Mascot |             |
|                     | 1353.658                                                                                             | 1353.677    | 0.019   | 14    | 88         | 102          | VVSCDGGGGALGHPK                                        |          |           |       |    |                                          |    |                   | Mascot |             |
|                     | 1432.8345                                                                                            | 1432.6742   | -0.1603 | -112  | 1          | 13           | MAAILPRILSFGK                                          |          |           |       |    | Oxidation (M)[1]                         |    |                   | Mascot |             |

|    |                                                |           |        |    |              |     |                   |      |    |    |   |    |                        |        |
|----|------------------------------------------------|-----------|--------|----|--------------|-----|-------------------|------|----|----|---|----|------------------------|--------|
|    | 1704.7832                                      | 1704.8789 | 0.0957 | 56 | 110          | 124 | DTRVGTGCGYGLQFK   |      |    |    |   |    | Carbamidomethyl (C)[7] | Mascot |
|    | 1972.8905                                      | 1972.9861 | 0.0956 | 48 | 113          | 129 | VGTCGYCGLQFKQTHHH |      |    |    |   |    | Carbamidomethyl (C)[4] | Mascot |
|    | 1972.8905                                      | 1972.9861 | 0.0956 | 48 | 113          | 129 | VGTCGYCGLQFKQTHHH |      |    |    |   |    | Carbamidomethyl (C)[4] | Mascot |
| 33 | DNA mismatch repair protein Msh3 [Danio rerio] |           |        |    | gi 157841276 |     | 121710.5          | 6.91 | 10 | 32 | 0 | 14 | 0                      |        |

#### Peptide Information

| Calc. Mass | Obsrv. Mass | ± da    | ± ppm | Start Seq. | End Seq. | Sequence                            | Ion Score | C. I. | % Modification                             | Rank | Result Type |
|------------|-------------|---------|-------|------------|----------|-------------------------------------|-----------|-------|--------------------------------------------|------|-------------|
| 842.4981   | 842.5162    | 0.0181  | 21    | 150        | 156      | EEPIKVK                             |           |       |                                            |      | Mascot      |
| 870.577    | 870.5449    | -0.0321 | -37   | 687        | 693      | EVRLLLK                             |           |       |                                            |      | Mascot      |
| 902.5458   | 902.4631    | -0.0827 | -92   | 1060       | 1066     | LVTQWKK                             |           |       |                                            |      | Mascot      |
| 902.5458   | 902.4631    | -0.0827 | -92   | 1060       | 1066     | LVTQWKK                             |           |       |                                            |      | Mascot      |
| 1320.5485  | 1320.6008   | 0.0523  | 40    | 362        | 372      | DNMSHSELESR                         |           |       | Oxidation (M)[3]                           |      | Mascot      |
| 1384.7682  | 1384.6061   | -0.1621 | -117  | 296        | 308      | STLVGEDVNPLLK                       |           |       |                                            |      | Mascot      |
| 1715.8561  | 1715.9301   | 0.074   | 43    | 415        | 429      | ESAMFEYPTALSIK                      |           |       | Oxidation (M)[4]                           |      | Mascot      |
| 1728.8473  | 1728.8877   | 0.0404  | 23    | 672        | 685      | EEIESVLLDIMEHR                      | 14        | 0     | Oxidation (M)[11]                          |      | Mascot      |
| 1728.8473  | 1728.8877   | 0.0404  | 23    | 672        | 685      | EEIESVLLDIMEHR                      |           |       | Oxidation (M)[11]                          |      | Mascot      |
| 2409.342   | 2409.2173   | -0.1247 | -52   | 603        | 624      | LNVELQALMPAIQSQLSS<br>PLLK          |           |       | Oxidation (M)[9]                           |      | Mascot      |
| 2416.1482  | 2416.1379   | -0.0103 | -4    | 904        | 925      | GRSTFMEELLETSIDLAC<br>ATSR          |           |       |                                            |      | Mascot      |
| 2432.1431  | 2432.1348   | -0.0083 | -3    | 904        | 925      | GRSTFMEELLETSIDLAC<br>ATSR          |           |       | Oxidation (M)[6]                           |      | Mascot      |
| 3505.5732  | 3505.5146   | -0.0586 | -17   | 309        | 339      | LGDLEQAEDVVQDSGNN<br>YLMCVSESFDKQSK |           |       | Carbamidomethyl (C)[21]                    |      | Mascot      |
| 3521.5681  | 3521.5479   | -0.0202 | -6    | 309        | 339      | LGDLEQAEDVVQDSGNN<br>YLMCVSESFDKQSK |           |       | Carbamidomethyl (C)[21], Oxidation (M)[20] |      | Mascot      |

34 novel transglutaminase family protein [Danio rerio] gi|169154545 77872.9 5.34 10 32 0

#### Peptide Information

| Calc. Mass | Obsrv. Mass | ± da    | ± ppm | Start Seq. | End Seq. | Sequence         | Ion Score | C. I. | % Modification         | Rank | Result Type |
|------------|-------------|---------|-------|------------|----------|------------------|-----------|-------|------------------------|------|-------------|
| 882.4832   | 882.5742    | 0.091   | 103   | 647        | 653      | FSFKPTR          |           |       |                        |      | Mascot      |
| 1165.6146  | 1165.754    | 0.1394  | 120   | 683        | 692      | MRHVNAVPEI       |           |       |                        |      | Mascot      |
| 1279.7269  | 1279.7872   | 0.0603  | 47    | 647        | 657      | FSFKPTRAGLR      |           |       |                        |      | Mascot      |
| 1320.6212  | 1320.6008   | -0.0204 | -15   | 220        | 231      | TITAMVNANDDR     |           |       |                        |      | Mascot      |
| 1336.6162  | 1336.6201   | 0.0039  | 3     | 220        | 231      | TITAMVNANDDR     |           |       | Oxidation (M)[5]       |      | Mascot      |
| 1336.6162  | 1336.6201   | 0.0039  | 3     | 220        | 231      | TITAMVNANDDR     |           |       | Oxidation (M)[5]       |      | Mascot      |
| 1353.5748  | 1353.677    | 0.1022  | 76    | 363        | 375      | SDGIFCCGPCPVR    |           |       |                        |      | Mascot      |
| 1505.7628  | 1505.6705   | -0.0923 | -61   | 24         | 35       | TEEMDVERLLVR     |           |       | Oxidation (M)[4]       |      | Mascot      |
| 2210.99    | 2211.1169   | 0.1269  | 57    | 327        | 342      | DTIWNYHCWVESWMKR |           |       | Carbamidomethyl (C)[8] |      | Mascot      |

|    |                                                                                   |           |         |      |             |     |                                     |      |    |    |   |  |                              |        |
|----|-----------------------------------------------------------------------------------|-----------|---------|------|-------------|-----|-------------------------------------|------|----|----|---|--|------------------------------|--------|
|    | 2714.3362                                                                         | 2714.3083 | -0.0279 | -10  | 271         | 293 | YGQCWVFTGVACTVLRC<br>LGIPTTR        |      |    |    |   |  | Carbamidomethyl (C)[4,12,17] | Mascot |
|    | 3521.9048                                                                         | 3521.5479 | -0.3569 | -101 | 36          | 66  | RGQPFSVVLQCTEQIPQL<br>PDHQINLILHLGK |      |    |    |   |  |                              | Mascot |
|    | 3522.5649                                                                         | 3522.5376 | -0.0273 | -8   | 2           | 31  | ASYNAILSVDVLDQCYENN<br>HAHRTEEMDVER |      |    |    |   |  |                              | Mascot |
|    | 3522.5649                                                                         | 3522.5376 | -0.0273 | -8   | 2           | 31  | ASYNAILSVDVLDQCYENN<br>HAHRTEEMDVER |      |    |    |   |  |                              | Mascot |
| 35 | novel protein similar to vertebrate DNA helicase<br>HEL308 (HEL308) [Danio rerio] |           |         |      | gi 94733801 |     | 79609.9                             | 7.87 | 11 | 32 | 0 |  |                              |        |

#### Peptide Information

| Calc. Mass | Obsrv. Mass | ± da    | ± ppm | Start Seq. | End Seq. | Sequence                      | Ion Score | C. I. | % Modification          | Rank | Result Type |
|------------|-------------|---------|-------|------------|----------|-------------------------------|-----------|-------|-------------------------|------|-------------|
| 856.5502   | 856.5302    | -0.02   | -23   | 270        | 277      | AILLGELK                      |           |       |                         |      | Mascot      |
| 902.5305   | 902.4631    | -0.0674 | -75   | 610        | 617      | ALLSELTR                      |           |       |                         |      | Mascot      |
| 902.5305   | 902.4631    | -0.0674 | -75   | 610        | 617      | ALLSELTR                      |           |       |                         |      | Mascot      |
| 1062.5864  | 1062.7009   | 0.1145  | 108   | 136        | 145      | GAILEMTLSK                    |           |       |                         |      | Mascot      |
| 1320.6576  | 1320.6008   | -0.0568 | -43   | 4          | 14       | TCLSLDSIQQR                   |           |       | Carbamidomethyl (C)[2]  |      | Mascot      |
| 1505.7992  | 1505.6705   | -0.1287 | -85   | 152        | 166      | STQVIGMSATLGNVK               |           |       |                         |      | Mascot      |
| 1673.8778  | 1673.9304   | 0.0526  | 31    | 367        | 382      | AGIDAMGESILILQDK              |           |       |                         |      | Mascot      |
| 1704.8413  | 1704.8789   | 0.0376  | 22    | 203        | 216      | EEACFTFSRLLNFK                |           |       |                         |      | Mascot      |
| 2009.9636  | 2010.0741   | 0.1105  | 55    | 453        | 469      | ATYKGSVDLSYCDVLYR             |           |       | Carbamidomethyl (C)[12] |      | Mascot      |
| 2127.1841  | 2127.0369   | -0.1472 | -69   | 270        | 290      | AILLGELKSSGNGSLCPV<br>LQK     |           |       |                         |      | Mascot      |
| 2416.2395  | 2416.1379   | -0.1016 | -42   | 60         | 81       | VRGLSSFGIELDFLVEEY<br>AGSK    |           |       |                         |      | Mascot      |
| 2698.3503  | 2698.3074   | -0.0429 | -16   | 509        | 533      | QFTNLSAAEQKMATTVG<br>VPESFVAR |           |       | Oxidation (M)[12]       |      | Mascot      |

|    |                      |  |  |  |              |  |         |      |   |    |   |  |  |  |
|----|----------------------|--|--|--|--------------|--|---------|------|---|----|---|--|--|--|
| 36 | merlin [Danio rerio] |  |  |  | gi 192451493 |  | 69520.8 | 5.85 | 8 | 32 | 0 |  |  |  |
|----|----------------------|--|--|--|--------------|--|---------|------|---|----|---|--|--|--|

#### Peptide Information

| Calc. Mass | Obsrv. Mass | ± da    | ± ppm | Start Seq. | End Seq. | Sequence         | Ion Score | C. I. | % Modification      | Rank | Result Type |
|------------|-------------|---------|-------|------------|----------|------------------|-----------|-------|---------------------|------|-------------|
| 902.4941   | 902.4631    | -0.031  | -34   | 447        | 454      | AKEADQLK         |           |       |                     |      | Mascot      |
| 902.4941   | 902.4631    | -0.031  | -34   | 447        | 454      | AKEADQLK         | 16        |       | 0                   |      | Mascot      |
| 996.5108   | 996.6045    | 0.0937  | 94    | 568        | 576      | GTSKQSNFK        |           |       |                     |      | Mascot      |
| 1045.6252  | 1045.5706   | -0.0546 | -52   | 469        | 477      | NKLEITSK         |           |       |                     |      | Mascot      |
| 1320.7303  | 1320.6008   | -0.1295 | -98   | 2          | 14       | ASALASKMGLSLR    |           |       | Oxidation (M)[8]    |      | Mascot      |
| 1384.6414  | 1384.6061   | -0.0353 | -25   | 198        | 208      | TRDEAEMEYLK      |           |       |                     |      | Mascot      |
| 1715.8745  | 1715.9301   | 0.0556  | 32    | 396        | 410      | LLAQKAAEAQEMQR   |           |       |                     |      | Mascot      |
| 2100.9841  | 2101.0815   | 0.0974  | 46    | 171        | 186      | RVINLYQMTAEMWEER |           |       | Oxidation (M)[8,12] |      | Mascot      |
| 2100.9841  | 2101.0815   | 0.0974  | 46    | 171        | 186      | RVINLYQMTAEMWEER |           |       | Oxidation (M)[8,12] |      | Mascot      |



2127.1565 2127.0369 -0.1196 -56 291 308 VNKLILQLCIGNHDLFMR

Mascot

37 PREDICTED: dynein heavy chain 9, axonemal-like, partial [Danio rerio] gi|326672111 51069.7 5.9 10 32 0

## Peptide Information

| Calc. Mass | Obsrv. Mass | ± da    | ± ppm | Start Seq. | End Seq. | Sequence                         | Ion Score | C. I. | % Modification             | Rank | Result Type |
|------------|-------------|---------|-------|------------|----------|----------------------------------|-----------|-------|----------------------------|------|-------------|
| 870.4389   | 870.5449    | 0.106   | 122   | 17         | 24       | TALGMFSK                         |           |       | Oxidation (M)[5]           |      | Mascot      |
| 1045.5636  | 1045.5706   | 0.007   | 7     | 282        | 290      | SIQDAIRDK                        |           |       |                            |      | Mascot      |
| 1165.5817  | 1165.754    | 0.1723  | 148   | 48         | 57       | VMDSMRATVR                       |           |       |                            |      | Mascot      |
| 1256.7072  | 1256.7085   | 0.0013  | 1     | 363        | 372      | KFITLYQLCK                       |           |       |                            |      | Mascot      |
| 1395.6653  | 1395.7257   | 0.0604  | 43    | 182        | 192      | SVLCVCCVSRR                      |           |       | Carbamidomethyl (C)[4,6,7] |      | Mascot      |
| 1671.8669  | 1671.9022   | 0.0353  | 21    | 139        | 152      | QKVMTICTIDVHAR                   |           |       | Carbamidomethyl (C)[7]     |      | Mascot      |
| 2126.9595  | 2127.0369   | 0.0774  | 36    | 227        | 244      | ALGIMVYVFNCSQMDYK                |           |       | Oxidation (M)[5]           |      | Mascot      |
| 2284.1729  | 2284.1895   | 0.0166  | 7     | 163        | 181      | VLRIFSFTCPVFNCIPASR              |           |       | Carbamidomethyl (C)[9,14]  |      | Mascot      |
| 3504.5188  | 3504.5334   | 0.0146  | 4     | 25         | 53       | EDEHVPFESHACDCTGQVEVWLNRMDSMR    |           |       | Carbamidomethyl (C)[11,13] |      | Mascot      |
| 3522.5874  | 3522.5376   | -0.0498 | -14   | 17         | 47       | TALGMFSKEDEHVPFSHACDCTGQVEVWLNRA |           |       | Oxidation (M)[5]           |      | Mascot      |
| 3522.5874  | 3522.5376   | -0.0498 | -14   | 17         | 47       | TALGMFSKEDEHVPFSHACDCTGQVEVWLNRA |           |       | Oxidation (M)[5]           |      | Mascot      |

38 novel protein similar to vertebrate NifU-like N-terminal domain containing (NIFUN) [Danio rerio] gi|37606130 17748.2 8.87 6 31 0

## Peptide Information

| Calc. Mass | Obsrv. Mass | ± da    | ± ppm | Start Seq. | End Seq. | Sequence            | Ion Score | C. I. | % Modification                            | Rank | Result Type |
|------------|-------------|---------|-------|------------|----------|---------------------|-----------|-------|-------------------------------------------|------|-------------|
| 916.5461   | 916.5284    | -0.0177 | -19   | 116        | 123      | IKNTEIAK            |           |       |                                           |      | Mascot      |
| 1045.5636  | 1045.5706   | 0.007   | 7     | 44         | 53       | NVGSLDKNAK          |           |       |                                           |      | Mascot      |
| 1256.6382  | 1256.7085   | 0.0703  | 56    | 34         | 43       | KVVDHYENPR          |           |       |                                           |      | Mascot      |
| 1645.8036  | 1645.8855   | 0.0819  | 50    | 54         | 70       | NVGTGLVGAPACGDVMK   |           |       | Carbamidomethyl (C)[12]                   |      | Mascot      |
| 2157.0645  | 2157.0488   | -0.0157 | -7    | 88         | 108      | TFGCGSAIASSSLATEWVK |           |       | Carbamidomethyl (C)[4]                    |      | Mascot      |
| 2283.1545  | 2283.1948   | 0.0403  | 18    | 124        | 143      | ELCLPPVKLHCSMLAEDA  |           |       | Carbamidomethyl (C)[3], Oxidation (M)[13] |      | Mascot      |

39 PREDICTED: stAR-related lipid transfer protein 9-like [Danio rerio] gi|326675708 277622.9 5.95 12 31 0 23 0

## Peptide Information

| Calc. Mass | Obsrv. Mass | ± da   | ± ppm | Start Seq. | End Seq. | Sequence | Ion Score | C. I. | % Modification   | Rank | Result Type |
|------------|-------------|--------|-------|------------|----------|----------|-----------|-------|------------------|------|-------------|
| 864.4243   | 864.5269    | 0.1026 | 119   | 2156       | 2162     | AMKDDLRL |           |       | Oxidation (M)[2] |      | Mascot      |

|    |                                                         |           |         |     |      |              |                           |      |    |    |   |   |   |  |  |  |                                            |        |
|----|---------------------------------------------------------|-----------|---------|-----|------|--------------|---------------------------|------|----|----|---|---|---|--|--|--|--------------------------------------------|--------|
|    | 902.4941                                                | 902.4631  | -0.031  | -34 | 463  | 469          | EEIDRLK                   |      |    |    |   |   |   |  |  |  |                                            | Mascot |
|    | 902.4941                                                | 902.4631  | -0.031  | -34 | 463  | 469          | EEIDRLK                   | 23   | 0  |    |   |   |   |  |  |  |                                            | Mascot |
|    | 916.4482                                                | 916.5284  | 0.0802  | 88  | 449  | 456          | VNEDANVR                  |      |    |    |   |   |   |  |  |  |                                            | Mascot |
|    | 1045.5173                                               | 1045.5706 | 0.0533  | 51  | 2060 | 2068         | HHVPANNEK                 |      |    |    |   |   |   |  |  |  |                                            | Mascot |
|    | 1353.5774                                               | 1353.677  | 0.0996  | 74  | 1292 | 1302         | MQNSDQDKEMK               |      |    |    |   |   |   |  |  |  |                                            | Mascot |
|    | 1474.7537                                               | 1474.7925 | 0.0388  | 26  | 1997 | 2009         | LHYGQGETDTLLK             |      |    |    |   |   |   |  |  |  |                                            | Mascot |
|    | 1523.7489                                               | 1523.6835 | -0.0654 | -43 | 1939 | 1951         | QPVDSQSPSLFYR             |      |    |    |   |   |   |  |  |  |                                            | Mascot |
|    | 1523.7489                                               | 1523.6835 | -0.0654 | -43 | 1939 | 1951         | QPVDSQSPSLFYR             |      |    |    |   |   |   |  |  |  |                                            | Mascot |
|    | 1750.8218                                               | 1750.8677 | 0.0459  | 26  | 1896 | 1909         | EQQWIPDDLPMHNK            |      |    |    |   |   |   |  |  |  |                                            | Mascot |
|    | 1790.9071                                               | 1790.9044 | -0.0027 | -2  | 244  | 259          | GPYVQGLSQHVVDYK           |      |    |    |   |   |   |  |  |  |                                            | Mascot |
|    | 2211.0928                                               | 2211.1169 | 0.0241  | 11  | 1939 | 1957         | QPVDSQSPSLFYRLESTE<br>K   |      |    |    |   |   |   |  |  |  |                                            | Mascot |
|    | 2284.0432                                               | 2284.1895 | 0.1463  | 64  | 1519 | 1539         | DCCTQTSLDIGVQTEIAS<br>ASK |      |    |    |   |   |   |  |  |  | Carbamidomethyl (C)[2,3]                   | Mascot |
|    | 2698.2488                                               | 2698.3074 | 0.0586  | 22  | 691  | 710          | LEEQQWYIECLREEIQME<br>QK  |      |    |    |   |   |   |  |  |  | Carbamidomethyl (C)[10], Oxidation (M)[17] | Mascot |
| 40 | PREDICTED: dynein heavy chain 7, axonemal [Danio rerio] |           |         |     |      |              |                           |      |    |    |   |   |   |  |  |  |                                            |        |
|    |                                                         |           |         |     |      | gi 189523512 | 455205.4                  | 5.74 | 30 | 31 | 0 | 4 | 0 |  |  |  |                                            |        |

| Peptide Information |             |         |       |            |          |              |           |       |                   |      |        |        |
|---------------------|-------------|---------|-------|------------|----------|--------------|-----------|-------|-------------------|------|--------|--------|
| Calc. Mass          | Obsrv. Mass | ± da    | ± ppm | Start Seq. | End Seq. | Sequence     | Ion Score | C. I. | % Modification    | Rank | Result | Type   |
| 805.4236            | 805.5098    | 0.0862  | 107   | 2792       | 2798     | VAMESLR      | 5         | 0     |                   |      |        | Mascot |
| 805.4348            | 805.5098    | 0.075   | 93    | 2403       | 2408     | MRVLDR       |           |       | Oxidation (M)[1]  |      |        | Mascot |
| 850.5032            | 850.5482    | 0.045   | 53    | 772        | 778      | GLYKLEK      |           |       |                   |      |        | Mascot |
| 864.4858            | 864.5269    | 0.0411  | 48    | 2545       | 2551     | TEVMKLK      |           |       | Oxidation (M)[4]  |      |        | Mascot |
| 870.5406            | 870.5449    | 0.0043  | 5     | 36         | 43       | GQLSKIPK     |           |       |                   |      |        | Mascot |
| 1009.4407           | 1009.5239   | 0.0832  | 82    | 3292       | 3299     | TSWDEICR     |           |       |                   |      |        | Mascot |
| 1009.4407           | 1009.5239   | 0.0832  | 82    | 3292       | 3299     | TSWDEICR     |           |       |                   |      |        | Mascot |
| 1051.6047           | 1051.7218   | 0.1171  | 111   | 2173       | 2180     | LWWHEVLR     |           |       |                   |      |        | Mascot |
| 1062.5975           | 1062.7009   | 0.1034  | 97    | 2790       | 2798     | LKVAMESLR    |           |       | Oxidation (M)[5]  |      |        | Mascot |
| 1225.5228           | 1225.5974   | 0.0746  | 61    | 2895       | 2904     | ATEEWIDMCK   |           |       |                   |      |        | Mascot |
| 1320.6464           | 1320.6008   | -0.0456 | -35   | 1842       | 1853     | EMLVGGLSEETR |           |       |                   |      |        | Mascot |
| 1336.6412           | 1336.6201   | -0.0211 | -16   | 1842       | 1853     | EMLVGGLSEETR |           |       | Oxidation (M)[2]  |      |        | Mascot |
| 1336.6412           | 1336.6201   | -0.0211 | -16   | 1842       | 1853     | EMLVGGLSEETR |           |       | Oxidation (M)[2]  |      |        | Mascot |
| 1352.7572           | 1352.6165   | -0.1407 | -104  | 1949       | 1959     | SVYILDFLLNR  |           |       |                   |      |        | Mascot |
| 1352.7572           | 1352.6165   | -0.1407 | -104  | 1949       | 1959     | SVYILDFLLNR  |           |       |                   |      |        | Mascot |
| 1395.621            | 1395.7257   | 0.1047  | 75    | 3726       | 3737     | LPQDFDTDAAMR |           |       | Oxidation (M)[11] |      |        | Mascot |
| 1458.6934           | 1458.7334   | 0.04    | 27    | 1547       | 1558     | MNLQVTDFFAEK |           |       | Oxidation (M)[1]  |      |        | Mascot |
| 1505.7404           | 1505.6705   | -0.0699 | -46   | 583        | 594      | VEEEEILQLEMK |           |       | Oxidation (M)[11] |      |        | Mascot |

|    |                                                      |           |         |      |              |          |                               |    |                                           |   |   |   |        |
|----|------------------------------------------------------|-----------|---------|------|--------------|----------|-------------------------------|----|-------------------------------------------|---|---|---|--------|
|    | 1515.697                                             | 1515.7632 | -0.0662 | 44   | 2762         | 2774     | WVCAMDSYDKVAK                 |    |                                           |   |   |   | Mascot |
|    | 1523.7158                                            | 1523.6835 | -0.0323 | -21  | 3726         | 3738     | LPQDFDTDAAMRK                 |    | Oxidation (M)[11]                         |   |   |   | Mascot |
|    | 1523.8176                                            | 1523.6835 | -0.1341 | -88  | 2682         | 2696     | GIKPDRIPDPSPGSGK              |    |                                           |   |   |   | Mascot |
|    | 1704.8771                                            | 1704.8789 | 0.0018  | 1    | 2913         | 2927     | NMSLMNSLGEPVKIR               |    | Oxidation (M)[2]                          |   |   |   | Mascot |
|    | 1838.9105                                            | 1838.9258 | 0.0153  | 8    | 3931         | 3945     | QDIPERQCYISPVYK               |    |                                           |   |   |   | Mascot |
|    | 1973.075                                             | 1972.9861 | -0.0889 | -45  | 802          | 818      | EHIPIVQVLCNPGLRER             | 4  | 0                                         |   |   |   | Mascot |
|    | 1973.075                                             | 1972.9861 | -0.0889 | -45  | 802          | 818      | EHIPIVQVLCNPGLRER             |    |                                           |   |   |   | Mascot |
|    | 2010.0629                                            | 2010.0741 | 0.0112  | 6    | 3543         | 3558     | KLLFSLCFFHALTQER              |    | Carbamidomethyl (C)[7]                    |   |   |   | Mascot |
|    | 2101.1189                                            | 2101.0815 | -0.0374 | -18  | 1280         | 1301     | TLFGALHLHLGGAPEGPA<br>GTGK    |    |                                           |   |   |   | Mascot |
|    | 2101.1189                                            | 2101.0815 | -0.0374 | -18  | 1280         | 1301     | TLFGALHLHLGGAPEGPA<br>GTGK    |    |                                           |   |   |   | Mascot |
|    | 2126.9019                                            | 2127.0369 | 0.135   | 63   | 1454         | 1470     | LCSEQLSSQHHDYGMGR             |    | Carbamidomethyl (C)[2], Oxidation (M)[16] |   |   |   | Mascot |
|    | 2210.8865                                            | 2211.1169 | 0.2304  | 104  | 3601         | 3618     | YMTGECNYGGRVTDDW<br>DR        |    | Carbamidomethyl (C)[6], Oxidation (M)[2]  |   |   |   | Mascot |
|    | 2225.0154                                            | 2225.136  | 0.1206  | 54   | 3226         | 3243     | DHFTYSLYCNCRSLFEK             |    |                                           |   |   |   | Mascot |
|    | 2283.2383                                            | 2283.1948 | -0.0435 | -19  | 3806         | 3825     | SYP SLKPLGGYISDFLER<br>LK     |    |                                           |   |   |   | Mascot |
|    | 2284.1025                                            | 2284.1895 | 0.087   | 38   | 3024         | 3044     | QGGSVCIRLGDSTIEYAP<br>DFR     |    |                                           |   |   |   | Mascot |
|    | 2368.0808                                            | 2368.1372 | 0.0564  | 24   | 1454         | 1473     | LCSEQLSSQHHDYGMGR<br>AVK      |    | Oxidation (M)[16]                         |   |   |   | Mascot |
|    | 2409.1074                                            | 2409.2173 | 0.1099  | 46   | 1454         | 1473     | LCSEQLSSQHHDYGMGR<br>AVK      |    | Carbamidomethyl (C)[2]                    |   |   |   | Mascot |
|    | 2416.4285                                            | 2416.1379 | -0.2906 | -120 | 1201         | 1223     | VTLGALVVLDVHARDVLA<br>SLVQK   |    |                                           |   |   |   | Mascot |
|    | 2714.5061                                            | 2714.3083 | -0.1978 | -73  | 1924         | 1948     | YNALMKLLITHQKPTVFV<br>GPTGTGK |    |                                           |   |   |   | Mascot |
| 41 | histone-lysine N-methyltransferase MLL [Danio rerio] |           |         |      | gi 160333334 | 456075.3 | 9.35                          | 17 | 31                                        | 0 | 9 | 0 |        |

### Peptide Information

|    |                                              |           |         |     |             |         |                                 |   |    |                          |        |
|----|----------------------------------------------|-----------|---------|-----|-------------|---------|---------------------------------|---|----|--------------------------|--------|
|    | 1384.7114                                    | 1384.6061 | -0.1053 | -76 | 3795        | 3806    | RPRPCPDKSSGK                    |   |    | Carbamidomethyl (C)[5]   | Mascot |
|    | 1474.79                                      | 1474.7925 | 0.0025  | 2   | 4058        | 4070    | ATSTDLPLPEKFR                   |   |    |                          | Mascot |
|    | 1515.7876                                    | 1515.7632 | -0.0244 | -16 | 4021        | 4033    | KSVLDMFNFLASK                   |   |    | Oxidation (M)[6]         | Mascot |
|    | 1671.8408                                    | 1671.9022 | 0.0614  | 37  | 2642        | 2656    | ETPQNRNAVLSNSK                  |   |    |                          | Mascot |
|    | 1750.8767                                    | 1750.8677 | -0.009  | -5  | 1359        | 1372    | CQNLQWMPKFLQK                   |   |    |                          | Mascot |
|    | 2101.1023                                    | 2101.0815 | -0.0208 | -10 | 3086        | 3104    | TQGQDPLETQLSLTTDLL<br>K         | 9 | 0  |                          | Mascot |
|    | 2101.1023                                    | 2101.0815 | -0.0208 | -10 | 3086        | 3104    | TQGQDPLETQLSLTTDLL<br>K         |   |    |                          | Mascot |
|    | 2230.2053                                    | 2230.2166 | 0.0113  | 5   | 3968        | 3987    | MLGVVHDAVVFLEQLY<br>GAR         |   |    |                          | Mascot |
|    | 2233.093                                     | 2233.1003 | 0.0073  | 3   | 1697        | 1715    | NSYHPECLGPNHPTRPT<br>KK         |   |    | Carbamidomethyl (C)[7]   | Mascot |
|    | 2409.1074                                    | 2409.2173 | 0.1099  | 46  | 4153        | 4173    | FINHSCEPNCYSRVVNVD<br>GQK       |   |    |                          | Mascot |
|    | 3504.4878                                    | 3504.5334 | 0.0456  | 13  | 1646        | 1672    | CEPFHLFCLGEAERPHD<br>EQWENWCCRR |   |    | Carbamidomethyl (C)[1,8] | Mascot |
| 42 | hypothetical protein LOC327557 [Danio rerio] |           |         |     | gi 41054167 | 45683.6 | 5.04                            | 8 | 31 | 0                        |        |

#### Peptide Information

| Calc. Mass | Obsrv. Mass | ± da    | ± ppm | Start Seq. | End Seq. | Sequence                | Ion Score | C. I. | % Modification          | Rank | Result Type |
|------------|-------------|---------|-------|------------|----------|-------------------------|-----------|-------|-------------------------|------|-------------|
| 1009.4472  | 1009.5239   | 0.0767  | 76    | 43         | 51       | AFDDELDGK               |           |       |                         |      | Mascot      |
| 1009.4472  | 1009.5239   | 0.0767  | 76    | 43         | 51       | AFDDELDGK               |           |       |                         |      | Mascot      |
| 1256.5874  | 1256.7085   | 0.1211  | 96    | 3          | 13       | NMCLPHSVSPR             |           |       | Oxidation (M)[2]        |      | Mascot      |
| 1368.6841  | 1368.6106   | -0.0735 | -54   | 276        | 287      | HPTALCGWITGR            |           |       | Carbamidomethyl (C)[6]  |      | Mascot      |
| 1384.6824  | 1384.6061   | -0.0763 | -55   | 2          | 13       | KNMCLPHSVSPR            |           |       | Oxidation (M)[3]        |      | Mascot      |
| 1395.7048  | 1395.7257   | 0.0209  | 15    | 27         | 38       | SVVDQVCARFSK            |           |       | Carbamidomethyl (C)[7]  |      | Mascot      |
| 1515.7229  | 1515.7632   | 0.0403  | 27    | 1          | 13       | MKNMCLPHSVSPR           |           |       | Oxidation (M)[1]        |      | Mascot      |
| 1750.8257  | 1750.8677   | 0.042   | 24    | 227        | 241      | SFWPDDCAGVQLVWK         |           |       |                         |      | Mascot      |
| 2368.1272  | 2368.1372   | 0.01    | 4     | 288        | 306      | EALYMESLQDREIQEVCV<br>R |           |       | Carbamidomethyl (C)[17] |      | Mascot      |

43 PREDICTED: anosmin-1-like, partial [Danio rerio] gi|326670889 21409.4 8.83 6 31 0

#### Peptide Information

| Calc. Mass | Obsrv. Mass | ± da    | ± ppm | Start Seq. | End Seq. | Sequence                | Ion Score | C. I. | % Modification   | Rank | Result Type |
|------------|-------------|---------|-------|------------|----------|-------------------------|-----------|-------|------------------|------|-------------|
| 882.5519   | 882.5742    | 0.0223  | 25    | 86         | 93       | GSPLKPRK                |           |       |                  |      | Mascot      |
| 1515.7802  | 1515.7632   | -0.017  | -11   | 2          | 16       | GPEGKPVSGSTQFPK         |           |       |                  |      | Mascot      |
| 1790.9105  | 1790.9044   | -0.0061 | -3    | 1          | 17       | MGPEGKPVSGSTQFPKK       |           |       | Oxidation (M)[1] |      | Mascot      |
| 2157.0466  | 2157.0488   | 0.0022  | 1     | 18         | 35       | HYECLTSCEFLRSVQTLK      |           |       |                  |      | Mascot      |
| 2284.147   | 2284.1895   | 0.0425  | 19    | 94         | 112      | DLQFVEHPSGQLELRWS<br>SR |           |       |                  |      | Mascot      |

|    |                                                   |           |        |    |             |         |                             |   |    |   |  |                        |        |
|----|---------------------------------------------------|-----------|--------|----|-------------|---------|-----------------------------|---|----|---|--|------------------------|--------|
|    | 2409.0002                                         | 2409.2173 | 0.2171 | 90 | 45          | 67      | ASGFEEACVQSCDSDSD<br>CTSLKK |   |    |   |  | Carbamidomethyl (C)[8] | Mascot |
| 44 | iron-sulfur cluster assembly enzyme [Danio rerio] |           |        |    | gi 54261801 | 17796.2 | 8.7                         | 6 | 31 | 0 |  |                        |        |

Peptide Information

| Calc. Mass | Obsrv. Mass | ± da    | ± ppm | Start Seq. | End Seq. | Sequence                  | Ion Score | C. I. | % | Modification                              | Rank | Result Type |
|------------|-------------|---------|-------|------------|----------|---------------------------|-----------|-------|---|-------------------------------------------|------|-------------|
| 916.5461   | 916.5284    | -0.0177 | -19   | 116        | 123      | IKNTEIAK                  |           |       |   |                                           |      | Mascot      |
| 1045.5636  | 1045.5706   | 0.007   | 7     | 44         | 53       | NVGSLDKNAK                |           |       |   |                                           |      | Mascot      |
| 1256.6382  | 1256.7085   | 0.0703  | 56    | 34         | 43       | KVVDHYENPR                |           |       |   |                                           |      | Mascot      |
| 1645.8036  | 1645.8855   | 0.0819  | 50    | 54         | 70       | NVGTGLVGAPACGDVMK         |           |       |   | Carbamidomethyl (C)[12]                   |      | Mascot      |
| 2157.0645  | 2157.0488   | -0.0157 | -7    | 88         | 108      | TFGCGSAIASSSLATEWV<br>KGK |           |       |   | Carbamidomethyl (C)[4]                    |      | Mascot      |
| 2283.1545  | 2283.1948   | 0.0403  | 18    | 124        | 143      | ELCLPPVKLHCSMLAEDA<br>IK  |           |       |   | Carbamidomethyl (C)[3], Oxidation (M)[13] |      | Mascot      |

|    |                                     |  |  |  |             |         |      |    |    |   |  |  |
|----|-------------------------------------|--|--|--|-------------|---------|------|----|----|---|--|--|
| 45 | PHD finger protein 10 [Danio rerio] |  |  |  | gi 37681905 | 46186.7 | 8.21 | 10 | 30 | 0 |  |  |
|----|-------------------------------------|--|--|--|-------------|---------|------|----|----|---|--|--|

Peptide Information

| Calc. Mass | Obsrv. Mass | ± da    | ± ppm | Start Seq. | End Seq. | Sequence                             | Ion Score | C. I. | % | Modification              | Rank | Result Type |
|------------|-------------|---------|-------|------------|----------|--------------------------------------|-----------|-------|---|---------------------------|------|-------------|
| 856.4523   | 856.5302    | 0.0779  | 91    | 26         | 32       | DLSHKEK                              |           |       |   |                           |      | Mascot      |
| 916.5098   | 916.5284    | 0.0186  | 20    | 391        | 398      | DISTPQKK                             |           |       |   |                           |      | Mascot      |
| 996.4567   | 996.6045    | 0.1478  | 148   | 19         | 25       | YPEMERR                              |           |       |   | Oxidation (M)[4]          |      | Mascot      |
| 1256.6705  | 1256.7085   | 0.038   | 30    | 254        | 265      | VKSNDRPGAQGK                         |           |       |   |                           |      | Mascot      |
| 1432.5516  | 1432.6742   | 0.1226  | 86    | 335        | 344      | MYPWQCMECK                           |           |       |   | Carbamidomethyl (C)[6,9]  |      | Mascot      |
| 1673.7307  | 1673.9304   | 0.1997  | 119   | 333        | 344      | IKMYPWQCMECK                         |           |       |   | Carbamidomethyl (C)[8,11] |      | Mascot      |
| 1750.8932  | 1750.8677   | -0.0255 | -15   | 55         | 69       | SDEVIDLMIKEYPAK                      |           |       |   |                           |      | Mascot      |
| 2211.1597  | 2211.1169   | -0.0428 | -19   | 165        | 183      | TGPFPPVALIPGQFQEYYK<br>R             |           |       |   |                           |      | Mascot      |
| 2284.2012  | 2284.1895   | -0.0117 | -5    | 163        | 182      | TKTGPFPPVALIPGQFQEY<br>YK            |           |       |   |                           |      | Mascot      |
| 3522.696   | 3522.5376   | -0.1584 | -45   | 303        | 334      | GKPEALIHCSQCQNSGH<br>PSCLDMSVDLVAKIK |           |       |   | Carbamidomethyl (C)[9,12] |      | Mascot      |
| 3522.696   | 3522.5376   | -0.1584 | -45   | 303        | 334      | GKPEALIHCSQCQNSGH<br>PSCLDMSVDLVAKIK |           |       |   | Carbamidomethyl (C)[9,12] |      | Mascot      |

|    |                                   |  |  |  |             |         |     |   |    |   |    |   |
|----|-----------------------------------|--|--|--|-------------|---------|-----|---|----|---|----|---|
| 46 | Frizzled homolog 7a [Danio rerio] |  |  |  | gi 68085067 | 63592.8 | 8.4 | 7 | 30 | 0 | 10 | 0 |
|----|-----------------------------------|--|--|--|-------------|---------|-----|---|----|---|----|---|

Peptide Information

| Calc. Mass | Obsrv. Mass | ± da    | ± ppm | Start Seq. | End Seq. | Sequence      | Ion Score | C. I. | % | Modification     | Rank | Result Type |
|------------|-------------|---------|-------|------------|----------|---------------|-----------|-------|---|------------------|------|-------------|
| 1009.444   | 1009.5239   | 0.0799  | 79    | 125        | 133      | QGCEALMNK     |           |       |   | Oxidation (M)[7] |      | Mascot      |
| 1009.444   | 1009.5239   | 0.0799  | 79    | 125        | 133      | QGCEALMNK     | 10        | 0     |   | Oxidation (M)[7] |      | Mascot      |
| 1523.7279  | 1523.6835   | -0.0444 | -29   | 2          | 14       | AFLKMQHCCGITR |           |       |   | Oxidation (M)[5] |      | Mascot      |

|    |                                     |           |         |     |     |              |                                     |          |      |   |    |   |                                               |        |
|----|-------------------------------------|-----------|---------|-----|-----|--------------|-------------------------------------|----------|------|---|----|---|-----------------------------------------------|--------|
|    | 1523.7279                           | 1523.6835 | -0.0444 | -29 | 2   | 14           | AFLKMQHCCGITR                       |          |      |   |    |   | Oxidation (M)[5]                              | Mascot |
|    | 2156.9309                           | 2157.0488 | 0.1179  | 55  | 214 | 231          | DCGAPCEPTRPNGLMYF<br>R              |          |      |   |    |   | Carbamidomethyl (C)[2,6], Oxidation (M)[15]   | Mascot |
|    | 2416.2546                           | 2416.1379 | -0.1167 | -48 | 15  | 35           | YFLLLTVALQTTSGQYH<br>GEK            |          |      |   |    |   |                                               | Mascot |
|    | 2698.2058                           | 2698.3074 | 0.1016  | 38  | 214 | 236          | DCGAPCEPTRPNGLMYF<br>REEEVK         |          |      |   |    |   | Carbamidomethyl (C)[2]                        | Mascot |
|    | 2714.2007                           | 2714.3083 | 0.1076  | 40  | 214 | 236          | DCGAPCEPTRPNGLMYF<br>REEEVK         |          |      |   |    |   | Carbamidomethyl (C)[2], Oxidation (M)[15]     | Mascot |
|    | 3505.8196                           | 3505.5146 | -0.305  | -87 | 237 | 265          | FGRLWVGWISILCCVSTL<br>FTVLTYLVDNR   |          |      |   |    |   | Carbamidomethyl (C)[13,14]                    | Mascot |
|    | 3521.8145                           | 3521.5479 | -0.2666 | -76 | 237 | 265          | FGRLWVGWISILCCVSTL<br>FTVLTYLVDNR   |          |      |   |    |   | Carbamidomethyl (C)[13,14], Oxidation (M)[28] | Mascot |
|    | 3522.6421                           | 3522.5376 | -0.1045 | -30 | 88  | 117          | VQCSMDLKFFLCSTMYAP<br>VCTVLEQAIPPCR |          |      |   |    |   | Carbamidomethyl (C)[3,12], Oxidation (M)[5]   | Mascot |
|    | 3522.6421                           | 3522.5376 | -0.1045 | -30 | 88  | 117          | VQCSMDLKFFLCSTMYAP<br>VCTVLEQAIPPCR |          |      |   |    |   | Carbamidomethyl (C)[3,12], Oxidation (M)[5]   | Mascot |
| 47 | PREDICTED: myomegalin [Danio rerio] |           |         |     |     | gi 326677193 |                                     | 153468.8 | 5.53 | 6 | 30 | 0 | 30                                            | 73.521 |

#### Peptide Information

| Calc. Mass | Obsrv. Mass | ± da    | ± ppm | Start Seq. | End Seq. | Sequence                   | Ion Score | C. I.  | % Modification          | Rank | Result Type |
|------------|-------------|---------|-------|------------|----------|----------------------------|-----------|--------|-------------------------|------|-------------|
| 882.5195   | 882.5742    | 0.0547  | 62    | 105        | 111      | KAFFTLR                    |           |        |                         |      | Mascot      |
| 902.4988   | 902.4631    | -0.0357 | -40   | 1014       | 1020     | RMQAQIR                    |           |        |                         |      | Mascot      |
| 902.4988   | 902.4631    | -0.0357 | -40   | 1014       | 1020     | RMQAQIR                    | 30        | 73.521 |                         |      | Mascot      |
| 1759.8578  | 1759.9391   | 0.0813  | 46    | 294        | 309      | SLQAQMRDCTPVGTPR           |           |        |                         |      | Mascot      |
| 1972.8341  | 1972.9861   | 0.152   | 77    | 1157       | 1175     | YSGAEGLEGEAPDGSFA<br>CR    |           |        | Carbamidomethyl (C)[18] |      | Mascot      |
| 1972.8341  | 1972.9861   | 0.152   | 77    | 1157       | 1175     | YSGAEGLEGEAPDGSFA<br>CR    |           |        | Carbamidomethyl (C)[18] |      | Mascot      |
| 2127.0723  | 2127.0369   | -0.0354 | -17   | 38         | 56       | RTAQLSLVSLQSCDQHQQ<br>LR   |           |        |                         |      | Mascot      |
| 2229.9829  | 2230.2166   | 0.2337  | 105   | 1157       | 1178     | YSGAEGLEGEAPDGSFA<br>CRTGR |           |        |                         |      | Mascot      |

48 PREDICTED: kinesin family member 13Ba [Danio rerio] gi|125841549 203289.8 5.5 1 30 73.504

#### Peptide Information

| Calc. Mass | Obsrv. Mass | ± da   | ± ppm | Start Seq. | End Seq. | Sequence | Ion Score | C. I.  | % Modification | Rank | Result Type |
|------------|-------------|--------|-------|------------|----------|----------|-----------|--------|----------------|------|-------------|
| 902.4941   | 902.4631    | -0.031 | -34   | 376        | 382      | EEVEKLR  | 32        | 82.016 |                | 1    | Mascot      |

49 extracellular matrix protein FRAS1 [Danio rerio] gi|195546942 440330.6 5.29 1 26 33.488

#### Peptide Information

| Calc. Mass | Obsrv. Mass | ± da  | ± ppm | Start Seq. | End Seq. | Sequence  | Ion Score | C. I.  | % Modification   | Rank | Result Type |
|------------|-------------|-------|-------|------------|----------|-----------|-----------|--------|------------------|------|-------------|
| 1009.4479  | 1009.5239   | 0.076 | 75    | 2697       | 2705     | TRGMSGDNR | 26        | 33.488 | Oxidation (M)[4] | 3    | Mascot      |

50    PREDICTED: hypothetical protein LOC100534684    gi|326675785    33684.7    7.6    1    21    0  
[Danio rerio]

Peptide Information

| Calc. Mass | Obsrv. Mass | ± da    | ± ppm | Start Seq. | End Sequence Seq. | Ion Score | C. I. % | Modification | Rank | Result Type |
|------------|-------------|---------|-------|------------|-------------------|-----------|---------|--------------|------|-------------|
| 902.4689   | 902.4631    | -0.0058 | -6    | 139        | 146 QGDDAKIR      | 21        | 0       |              | 8    | Mascot      |

|                |           |                        |                |                |                    |
|----------------|-----------|------------------------|----------------|----------------|--------------------|
| Gel Idx/Pos    | 223/I23   | Instr./Gel Origin      | BA2060/110707A | Process Status | Analysis Succeeded |
| Plate [#] Name | [1] 31496 | Instrument Sample Name |                | Spectra        | 11                 |

| Rank | Protein Name                         | Accession No. | Protein MW | Protein PI | Pep. Count | Protein Score | Protein Score C. I. % | Total Ion Score | Total Ion C. I. % |
|------|--------------------------------------|---------------|------------|------------|------------|---------------|-----------------------|-----------------|-------------------|
| 1    | methylosome protein 50 [Danio rerio] | gi 41054711   | 35062.3    | 5.84       | 14         | 791           | 100                   | 689             | 100               |

Peptide Information

| Calc. Mass | Obsrv. Mass | ± da    | ± ppm | Start Seq. | End Sequence Seq.                 | Ion Score | C. I. % | Modification            | Rank | Result Type |
|------------|-------------|---------|-------|------------|-----------------------------------|-----------|---------|-------------------------|------|-------------|
| 801.4001   | 801.3992    | -0.0009 | -1    | 286        | 291 HQDFVR                        |           |         |                         |      | Mascot      |
| 943.5359   | 943.5347    | -0.0012 | -1    | 182        | 188 LLLWDQR                       |           |         |                         |      | Mascot      |
| 943.5359   | 943.5347    | -0.0012 | -1    | 182        | 188 LLLWDQR                       | 59        | 99.966  |                         |      | Mascot      |
| 957.5013   | 957.5016    | 0.0003  | 0     | 285        | 291 RHQDFVR                       |           |         |                         |      | Mascot      |
| 1002.5002  | 1002.5018   | 0.0016  | 2     | 20         | 27 HLDAIDYR                       |           |         |                         |      | Mascot      |
| 1036.488   | 1036.4905   | 0.0025  | 2     | 56         | 64 LAPSEGFCR                      |           |         | Carbamidomethyl (C)[8]  |      | Mascot      |
| 1036.488   | 1036.4905   | 0.0025  | 2     | 56         | 64 LAPSEGFCR                      | 38        | 95.595  | Carbamidomethyl (C)[8]  |      | Mascot      |
| 1358.7638  | 1358.7645   | 0.0007  | 1     | 29         | 42 DGVLLLAASSLSGR                 |           |         |                         |      | Mascot      |
| 1486.8588  | 1486.861    | 0.0022  | 1     | 28         | 42 KDGVLLLAASSLSGR                |           |         |                         |      | Mascot      |
| 1625.7417  | 1625.7488   | 0.0071  | 4     | 43         | 55 CWQGSWVYSDPK                   |           |         | Carbamidomethyl (C)[1]  |      | Mascot      |
| 1727.8129  | 1727.8151   | 0.0022  | 1     | 112        | 128 QEHGDVVTGVSACVGG R            |           |         | Carbamidomethyl (C)[13] |      | Mascot      |
| 1926.9304  | 1926.9353   | 0.0049  | 3     | 65         | 82 AGVQTEAGVSDVHWISD R            | 110       | 100     |                         |      | Mascot      |
| 1926.9304  | 1926.9353   | 0.0049  | 3     | 65         | 82 AGVQTEAGVSDVHWISD R            |           |         |                         |      | Mascot      |
| 2289.1245  | 2289.1335   | 0.009   | 4     | 83         | 103 ALLLASDSGSVELWDLAE DER        |           |         |                         |      | Mascot      |
| 2289.1245  | 2289.1335   | 0.009   | 4     | 83         | 103 ALLLASDSGSVELWDLAE DER        | 148       | 100     |                         |      | Mascot      |
| 2950.4099  | 2950.4238   | 0.0139  | 5     | 251        | 278 LAYSDDSAALLASISDDC SVAVHTAELR | 190       | 100     | Carbamidomethyl (C)[18] |      | Mascot      |
| 2950.4099  | 2950.4238   | 0.0139  | 5     | 251        | 278 LAYSDDSAALLASISDDC SVAVHTAELR |           |         | Carbamidomethyl (C)[18] |      | Mascot      |
| 3052.4119  | 3052.4548   | 0.0429  | 14    | 292        | 319 GVCWSPGGSSALTTVG WDHQVLHHTPEH |           |         | Carbamidomethyl (C)[3]  |      | Mascot      |
| 3337.5906  | 3337.7168   | 0.1262  | 38    | 196        | 226 IDVQSPSCSPTAVVWHP             |           |         |                         |      | Mascot      |

|   |                                       |           |       |   |              |         |                                                       |     |     |                        |        |     |
|---|---------------------------------------|-----------|-------|---|--------------|---------|-------------------------------------------------------|-----|-----|------------------------|--------|-----|
|   | 3394.6121                             | 3394.6301 | 0.018 | 5 | 196          | 226     | QHSSTIAYGDELGR<br>IDVQSPSCSPTAVVWHP<br>QHSSTIAYGDELGR |     |     | Carbamidomethyl (C)[8] | Mascot |     |
|   | 3394.6121                             | 3394.6301 | 0.018 | 5 | 196          | 226     | IDVQSPSCSPTAVVWHP<br>QHSSTIAYGDELGR                   | 145 | 100 | Carbamidomethyl (C)[8] | Mascot |     |
| 2 | citrate lyase beta-like [Danio rerio] |           |       |   | gi 225637501 | 37908.7 | 7.12                                                  | 7   | 148 | 100                    | 122    | 100 |

#### Peptide Information

| Calc. Mass | Obsrv. Mass | ± da    | ± ppm | Start Seq. | End Seq. | Sequence                    | Ion Score | C. I. | % | Modification            | Rank | Result Type |
|------------|-------------|---------|-------|------------|----------|-----------------------------|-----------|-------|---|-------------------------|------|-------------|
| 1232.627   | 1232.6257   | -0.0013 | -1    | 50         | 60       | AVLYVPGNDER                 |           |       |   |                         |      | Mascot      |
| 1359.6539  | 1359.6578   | 0.0039  | 3     | 282        | 293      | AVQEEFAPSPER                |           |       |   |                         |      | Mascot      |
| 1359.6539  | 1359.6578   | 0.0039  | 3     | 282        | 293      | AVQEEFAPSPER                | 23        | 0     |   |                         |      | Mascot      |
| 1579.7386  | 1579.7408   | 0.0022  | 1     | 141        | 153      | VEDTGEVQWFVDR               | 99        | 100   |   |                         |      | Mascot      |
| 1579.7386  | 1579.7408   | 0.0022  | 1     | 141        | 153      | VEDTGEVQWFVDR               |           |       |   |                         |      | Mascot      |
| 1653.8529  | 1653.8911   | 0.0382  | 23    | 21         | 34       | LLLSAVPWCHSSQR              |           |       |   | Carbamidomethyl (C)[9]  |      | Mascot      |
| 1672.8329  | 1672.8354   | 0.0025  | 1     | 296        | 309      | WATELIAAFEEHQK              |           |       |   |                         |      | Mascot      |
| 2398.2651  | 2398.2466   | -0.0185 | -8    | 238        | 258      | AFGLQAIDLVIYIDYK DVE<br>GLR |           |       |   |                         |      | Mascot      |
| 2423.0833  | 2423.0903   | 0.007   | 3     | 196        | 218      | AGFHHDGVVFGSDDFCA<br>SIGATR |           |       |   | Carbamidomethyl (C)[16] |      | Mascot      |

|   |                                                                                                             |  |  |  |              |         |      |   |     |     |    |     |
|---|-------------------------------------------------------------------------------------------------------------|--|--|--|--------------|---------|------|---|-----|-----|----|-----|
| 3 | novel protein similar to vertebrate citrate lyase beta like, gi 169154287 (CLYBL, zgc:123316) [Danio rerio] |  |  |  | gi 169154287 | 13192.7 | 4.55 | 1 | 104 | 100 | 99 | 100 |
|---|-------------------------------------------------------------------------------------------------------------|--|--|--|--------------|---------|------|---|-----|-----|----|-----|

#### Peptide Information

| Calc. Mass | Obsrv. Mass | ± da   | ± ppm | Start Seq. | End Seq. | Sequence      | Ion Score | C. I. | % | Modification | Rank | Result Type |
|------------|-------------|--------|-------|------------|----------|---------------|-----------|-------|---|--------------|------|-------------|
| 1579.7386  | 1579.7408   | 0.0022 | 1     | 46         | 58       | VEDTGEVQWFVDR | 99        | 100   |   |              |      | Mascot      |
| 1579.7386  | 1579.7408   | 0.0022 | 1     | 46         | 58       | VEDTGEVQWFVDR |           |       |   |              |      | Mascot      |

|   |                             |  |  |  |             |       |      |   |     |     |    |        |
|---|-----------------------------|--|--|--|-------------|-------|------|---|-----|-----|----|--------|
| 4 | Rplp0 protein [Danio rerio] |  |  |  | gi 38541244 | 34404 | 5.73 | 7 | 103 | 100 | 72 | 99.998 |
|---|-----------------------------|--|--|--|-------------|-------|------|---|-----|-----|----|--------|

#### Peptide Information

| Calc. Mass | Obsrv. Mass | ± da    | ± ppm | Start Seq. | End Seq. | Sequence                   | Ion Score | C. I.  | % | Modification      | Rank | Result Type |
|------------|-------------|---------|-------|------------|----------|----------------------------|-----------|--------|---|-------------------|------|-------------|
| 1249.6284  | 1249.6309   | 0.0025  | 2     | 67         | 77       | GHLENNPALER                | 72        | 99.998 |   |                   |      | Mascot      |
| 1249.6284  | 1249.6309   | 0.0025  | 2     | 67         | 77       | GHLENNPALER                |           |        |   |                   |      | Mascot      |
| 1313.71    | 1313.713    | 0.003   | 2     | 135        | 146      | TSFFQALGITTK               |           |        |   |                   |      | Mascot      |
| 1826.027   | 1826.0291   | 0.0021  | 1     | 150        | 166      | GTIEILSDVQLIKPGDK          |           |        |   |                   |      | Mascot      |
| 1851.6749  | 1851.9321   | 0.2572  | 139   | 301        | 316      | EESEESDEDMGFGLFD           |           |        |   | Oxidation (M)[10] |      | Mascot      |
| 1896       | 1895.9883   | -0.0117 | -6    | 248        | 264      | VLAVTVETDYTFPLAEK          |           |        |   |                   |      | Mascot      |
| 2176.1284  | 2176.1582   | 0.0298  | 14    | 267        | 288      | AYLADPTAFAVAAPVAAA<br>TEQK |           |        |   |                   |      | Mascot      |



|   |                                               |           |        |   |             |     |                            |      |   |    |                        |        |        |
|---|-----------------------------------------------|-----------|--------|---|-------------|-----|----------------------------|------|---|----|------------------------|--------|--------|
|   | 2180.1016                                     | 2180.1167 | 0.0151 | 7 | 113         | 134 | AGAIAPCEVTVPAQNTGL<br>GPEK |      |   |    | Carbamidomethyl (C)[7] | Mascot |        |
| 5 | 60S acidic ribosomal protein P0 [Danio rerio] |           |        |   | gi 18859323 |     | 34731.2                    | 6.16 | 6 | 96 | 99.999                 | 72     | 99.998 |

Peptide Information

| Calc. Mass | Obsrv. Mass | ± da    | ± ppm | Start Seq. | End Seq. | Sequence                   | Ion Score | C. I.  | % Modification         | Rank | Result Type |
|------------|-------------|---------|-------|------------|----------|----------------------------|-----------|--------|------------------------|------|-------------|
| 1249.6284  | 1249.6309   | 0.0025  | 2     | 67         | 77       | GHLENNPALER                | 72        | 99.998 |                        |      | Mascot      |
| 1249.6284  | 1249.6309   | 0.0025  | 2     | 67         | 77       | GHLENNPALER                |           |        |                        |      | Mascot      |
| 1313.71    | 1313.713    | 0.003   | 2     | 135        | 146      | TSFFQALGITTK               |           |        |                        |      | Mascot      |
| 1826.027   | 1826.0291   | 0.0021  | 1     | 150        | 166      | GTIEILSDVQLIKPGDK          |           |        |                        |      | Mascot      |
| 1896       | 1895.9883   | -0.0117 | -6    | 251        | 267      | VLAVTVETDYTFPLAEK          |           |        |                        |      | Mascot      |
| 2176.1284  | 2176.1582   | 0.0298  | 14    | 270        | 291      | AYLADPTAFAVAAPVAAA<br>TEQK |           |        |                        |      | Mascot      |
| 2180.1016  | 2180.1167   | 0.0151  | 7     | 113        | 134      | AGAIAPCEVTVPAQNTGL<br>GPEK |           |        | Carbamidomethyl (C)[7] |      | Mascot      |

|   |                                                            |  |  |  |              |  |         |      |    |    |        |  |
|---|------------------------------------------------------------|--|--|--|--------------|--|---------|------|----|----|--------|--|
| 6 | PREDICTED: hypothetical protein LOC100331372 [Danio rerio] |  |  |  | gi 326669019 |  | 62352.3 | 5.93 | 15 | 49 | 48.906 |  |
|---|------------------------------------------------------------|--|--|--|--------------|--|---------|------|----|----|--------|--|

Peptide Information

| Calc. Mass | Obsrv. Mass | ± da    | ± ppm | Start Seq. | End Seq. | Sequence                | Ion Score | C. I. | % Modification                             | Rank | Result Type |
|------------|-------------|---------|-------|------------|----------|-------------------------|-----------|-------|--------------------------------------------|------|-------------|
| 801.4325   | 801.3992    | -0.0333 | -42   | 241        | 246      | DRQINR                  |           |       |                                            |      | Mascot      |
| 882.4389   | 882.5674    | 0.1285  | 146   | 408        | 414      | MTFNELK                 |           |       |                                            |      | Mascot      |
| 1232.6555  | 1232.6257   | -0.0298 | -24   | 54         | 65       | VILMVGETDAGK            |           |       |                                            |      | Mascot      |
| 1249.6456  | 1249.6309   | -0.0147 | -12   | 429        | 438      | MDLEKITQQK              |           |       | Oxidation (M)[1]                           |      | Mascot      |
| 1249.6456  | 1249.6309   | -0.0147 | -12   | 429        | 438      | MDLEKITQQK              |           |       | Oxidation (M)[1]                           |      | Mascot      |
| 1277.7134  | 1277.676    | -0.0374 | -29   | 269        | 279      | KSVQMTLDVLK             |           |       | Oxidation (M)[5]                           |      | Mascot      |
| 1358.7063  | 1358.7645   | 0.0582  | 43    | 17         | 28       | GPPALYQLNTER            |           |       |                                            |      | Mascot      |
| 1359.5266  | 1359.6578   | 0.1312  | 97    | 523        | 533      | YNSMDLPPEMM             |           |       | Oxidation (M)[4,10]                        |      | Mascot      |
| 1359.5266  | 1359.6578   | 0.1312  | 97    | 523        | 533      | YNSMDLPPEMM             |           |       | Oxidation (M)[4,10]                        |      | Mascot      |
| 1486.8013  | 1486.861    | 0.0597  | 40    | 17         | 29       | GPPALYQLNTERK           |           |       |                                            |      | Mascot      |
| 1635.6937  | 1635.8325   | 0.1388  | 85    | 378        | 390      | QHCTVCSGKCHYR           |           |       | Carbamidomethyl (C)[3,6]                   |      | Mascot      |
| 1639.8689  | 1639.8168   | -0.0521 | -32   | 255        | 268      | SLNGFFTILEEKNK          |           |       |                                            |      | Mascot      |
| 1653.8483  | 1653.8911   | 0.0428  | 26    | 132        | 145      | GFEKDAEIAEYLIR          |           |       |                                            |      | Mascot      |
| 1727.788   | 1727.8151   | 0.0271  | 16    | 408        | 420      | MTFNELKQFCHEK           |           |       | Carbamidomethyl (C)[10], Oxidation (M)[1]  |      | Mascot      |
| 1894.9579  | 1894.965    | 0.0071  | 4     | 494        | 509      | TGEEQKNKPVDYVMK         |           |       | Oxidation (M)[15]                          |      | Mascot      |
| 2289.0566  | 2289.1335   | 0.0769  | 34    | 146        | 164      | LFADEDGIHYIDTVCFVM<br>K |           |       | Carbamidomethyl (C)[15], Oxidation (M)[18] |      | Mascot      |
| 2289.0566  | 2289.1335   | 0.0769  | 34    | 146        | 164      | LFADEDGIHYIDTVCFVM<br>K |           |       | Carbamidomethyl (C)[15], Oxidation (M)[18] |      | Mascot      |

2384.1768

2383.9565

-0.2203

-92

247

266

SAWDLEERSLNGFFTILE  
EK

Mascot

7

PREDICTED: WD repeat- and FYVE domain-containing protein 4 [Danio rerio]

gi|326673033

526148.3

6.32

34

47

9.141

| Peptide Information |             |         |       |            |          |                   | Ion Score | C. I. % | Modification                                 | Rank | Result Type |
|---------------------|-------------|---------|-------|------------|----------|-------------------|-----------|---------|----------------------------------------------|------|-------------|
| Calc. Mass          | Obsrv. Mass | ± da    | ± ppm | Start Seq. | End Seq. | Sequence          |           |         |                                              |      |             |
| 801.4716            | 801.3992    | -0.0724 | -90   | 4367       | 4373     | DVLVVEK           |           |         |                                              |      | Mascot      |
| 850.5145            | 850.5432    | 0.0287  | 34    | 2616       | 2622     | RSFSLLK           |           |         |                                              |      | Mascot      |
| 943.5029            | 943.5347    | 0.0318  | 34    | 800        | 807      | HLTTLQK           |           |         |                                              |      | Mascot      |
| 943.5029            | 943.5347    | 0.0318  | 34    | 800        | 807      | HLTTLQK           |           |         |                                              |      | Mascot      |
| 957.5588            | 957.5016    | -0.0572 | -60   | 1873       | 1880     | QQASRVLR          |           |         |                                              |      | Mascot      |
| 1002.4859           | 1002.5018   | 0.0159  | 16    | 1902       | 1909     | ICIQNMHK          |           |         | Oxidation (M)[6]                             |      | Mascot      |
| 1036.4945           | 1036.4905   | -0.004  | -4    | 3          | 11       | AFEQGVEEK         |           |         |                                              |      | Mascot      |
| 1036.4945           | 1036.4905   | -0.004  | -4    | 3          | 11       | AFEQGVEEK         |           |         |                                              |      | Mascot      |
| 1179.6844           | 1179.6025   | -0.0819 | -69   | 1279       | 1288     | DQHIATLLLR        |           |         |                                              |      | Mascot      |
| 1202.635            | 1202.5201   | -0.1149 | -96   | 850        | 859      | ALGLQWCVQK        |           |         | Carbamidomethyl (C)[7]                       |      | Mascot      |
| 1232.678            | 1232.6257   | -0.0523 | -42   | 516        | 526      | SAVVNRISVCK       |           |         | Carbamidomethyl (C)[10]                      |      | Mascot      |
| 1249.7151           | 1249.6309   | -0.0842 | -67   | 193        | 204      | GKSFATTITPVK      |           |         |                                              |      | Mascot      |
| 1249.7151           | 1249.6309   | -0.0842 | -67   | 193        | 204      | GKSFATTITPVK      |           |         |                                              |      | Mascot      |
| 1313.5581           | 1313.713    | 0.1549  | 118   | 1322       | 1331     | IMSDCCLCRR        |           |         | Carbamidomethyl (C)[5,6]                     |      | Mascot      |
| 1344.7786           | 1344.6594   | -0.1192 | -89   | 3751       | 3763     | GLFGPGPGVFLKR     |           |         |                                              |      | Mascot      |
| 1358.5684           | 1358.7645   | 0.1961  | 144   | 1321       | 1330     | KIMSDCCLCR        |           |         | Carbamidomethyl (C)[6,7,9], Oxidation (M)[3] |      | Mascot      |
| 1486.7821           | 1486.861    | 0.0789  | 53    | 1118       | 1130     | ADMVIKIDDPEIK     |           |         |                                              |      | Mascot      |
| 1564.8621           | 1564.835    | -0.0271 | -17   | 3962       | 3974     | FLLEDNALEIFLK     |           |         |                                              |      | Mascot      |
| 1579.859            | 1579.7408   | -0.1182 | -75   | 2895       | 2908     | YIGNYLALNVQGVR    |           |         |                                              |      | Mascot      |
| 1579.859            | 1579.7408   | -0.1182 | -75   | 2895       | 2908     | YIGNYLALNVQGVR    |           |         |                                              |      | Mascot      |
| 1625.7518           | 1625.7488   | -0.003  | -2    | 1336       | 1348     | MMLQKMADLPMER     |           |         | Oxidation (M)[1,2]                           |      | Mascot      |
| 1635.7189           | 1635.8325   | 0.1136  | 69    | 257        | 270      | HLCFGCLSTSHMSR    |           |         | Carbamidomethyl (C)[3]                       |      | Mascot      |
| 1638.6848           | 1638.8582   | 0.1734  | 106   | 35         | 47       | SCLYMMPELGYDK     |           |         | Carbamidomethyl (C)[2], Oxidation (M)[5,6]   |      | Mascot      |
| 1639.8043           | 1639.8168   | 0.0125  | 8     | 388        | 400      | RTQFLLECTMGQER    |           |         | Carbamidomethyl (C)[7]                       |      | Mascot      |
| 1708.7352           | 1708.8048   | 0.0696  | 41    | 257        | 270      | HLCFGCLSTSHMSR    |           |         | Carbamidomethyl (C)[3,6], Oxidation (M)[12]  |      | Mascot      |
| 1710.9094           | 1710.8059   | -0.1035 | -60   | 2812       | 2828     | SCLVTVYLNATAIGTGK |           |         |                                              |      | Mascot      |
| 1727.9802           | 1727.8151   | -0.1651 | -96   | 4566       | 4581     | NVIITGSADGVVRIWK  |           |         |                                              |      | Mascot      |
| 1851.8298           | 1851.9321   | 0.1023  | 55    | 255        | 270      | EKHLCFGCLSTSHMSR  |           |         | Oxidation (M)[14]                            |      | Mascot      |
| 1895.9895           | 1895.9883   | -0.0012 | -1    | 1771       | 1787     | SISFLSNRDTEVGVMIK |           |         |                                              |      | Mascot      |
| 1993.9907           | 1993.9792   | -0.0115 | -6    | 2521       | 2537     | QIMCEFGLLSTLLTHCK |           |         | Carbamidomethyl (C)[4]                       |      | Mascot      |

|   |                                       |           |         |     |             |      |                                  |      |   |    |   |    |                                            |  |  |  |  |        |
|---|---------------------------------------|-----------|---------|-----|-------------|------|----------------------------------|------|---|----|---|----|--------------------------------------------|--|--|--|--|--------|
|   | 2175.9912                             | 2176.1582 | 0.167   | 77  | 3183        | 3201 | SWSFECLSCICPGFEVLQ<br>K          |      |   |    |   |    |                                            |  |  |  |  | Mascot |
|   | 2180.0991                             | 2180.1167 | 0.0176  | 8   | 738         | 757  | MTVHLFGAVSSPSCAIFA<br>LR         |      |   |    |   |    | Carbamidomethyl (C)[14], Oxidation (M)[1]  |  |  |  |  | Mascot |
|   | 2224.9355                             | 2225.1274 | 0.1919  | 86  | 257         | 274  | HLCFGCLSTSHMSRDCE<br>K           |      |   |    |   |    | Carbamidomethyl (C)[3,6,16]                |  |  |  |  | Mascot |
|   | 2224.9355                             | 2225.1274 | 0.1919  | 86  | 257         | 274  | HLCFGCLSTSHMSRDCE<br>K           |      |   |    |   |    | Carbamidomethyl (C)[3,6,16]                |  |  |  |  | Mascot |
|   | 2233.0127                             | 2233.0911 | 0.0784  | 35  | 3183        | 3201 | SWSFECLSCICPGFEVLQ<br>K          |      |   |    |   |    | Carbamidomethyl (C)[6]                     |  |  |  |  | Mascot |
|   | 2283.1948                             | 2283.1855 | -0.0093 | -4  | 2024        | 2043 | IIQSSFMRSSNTVICSQIL<br>R         |      |   |    |   |    |                                            |  |  |  |  | Mascot |
|   | 2284.1389                             | 2284.1831 | 0.0442  | 19  | 2349        | 2369 | LGEALLHLGCFQKGDPV<br>ESDR        |      |   |    |   |    |                                            |  |  |  |  | Mascot |
|   | 2289.0791                             | 2289.1335 | 0.0544  | 24  | 815         | 833  | WVSNSCYVLQAMPQEY<br>RAK          |      |   |    |   |    | Oxidation (M)[12]                          |  |  |  |  | Mascot |
|   | 2289.0791                             | 2289.1335 | 0.0544  | 24  | 815         | 833  | WVSNSCYVLQAMPQEY<br>RAK          |      |   |    |   |    | Oxidation (M)[12]                          |  |  |  |  | Mascot |
|   | 2423.1521                             | 2423.0903 | -0.0618 | -26 | 691         | 710  | FRQEPVAFMGDVQAMYY<br>QVK         |      |   |    |   |    | Oxidation (M)[9]                           |  |  |  |  | Mascot |
|   | 3052.4277                             | 3052.4548 | 0.0271  | 9   | 355         | 381  | SDQVILTYAFLDPGSSAT<br>FCSEQLMQK  |      |   |    |   |    | Carbamidomethyl (C)[20], Oxidation (M)[25] |  |  |  |  | Mascot |
|   | 3337.6045                             | 3337.7168 | 0.1123  | 34  | 3638        | 3666 | EGQVSMADVSPWEEQ<br>ATKSWQLFIDSQK |      |   |    |   |    |                                            |  |  |  |  | Mascot |
| 8 | Citrate lyase beta-like [Danio rerio] |           |         |     | gi 81673067 |      | 37870.7                          | 7.08 | 6 | 43 | 0 | 23 | 0                                          |  |  |  |  |        |

Peptide Information

| Calc. Mass | Obsrv. Mass | ± da    | ± ppm | Start Seq. | End Seq. | Sequence                    | Ion Score | C. I. | % | Modification            | Rank | Result Type |
|------------|-------------|---------|-------|------------|----------|-----------------------------|-----------|-------|---|-------------------------|------|-------------|
| 1232.627   | 1232.6257   | -0.0013 | -1    | 50         | 60       | AVLYVPGNDER                 |           |       |   |                         |      | Mascot      |
| 1359.6539  | 1359.6578   | 0.0039  | 3     | 282        | 293      | AVQEEFAPSPER                |           |       |   |                         |      | Mascot      |
| 1359.6539  | 1359.6578   | 0.0039  | 3     | 282        | 293      | AVQEEFAPSPER                | 23        |       | 0 |                         |      | Mascot      |
| 1564.7642  | 1564.835    | 0.0708  | 45    | 141        | 153      | VEDTGEVLWFVDR               |           |       |   |                         |      | Mascot      |
| 1672.8329  | 1672.8354   | 0.0025  | 1     | 296        | 309      | WATELIAAFEHHQK              |           |       |   |                         |      | Mascot      |
| 2398.2651  | 2398.2466   | -0.0185 | -8    | 238        | 258      | AFGLQAIDLVIYIDYKDVE<br>GLR  |           |       |   |                         |      | Mascot      |
| 2423.0833  | 2423.0903   | 0.007   | 3     | 196        | 218      | AGFHHDGVVFGSDDFCA<br>SIGATR |           |       |   | Carbamidomethyl (C)[16] |      | Mascot      |

9 novel protein [Danio rerio] gi|169145320 46345 5.35 11 42 0

Peptide Information

| Calc. Mass | Obsrv. Mass | ± da    | ± ppm | Start Seq. | End Seq. | Sequence      | Ion Score | C. I. | % | Modification     | Rank | Result Type |
|------------|-------------|---------|-------|------------|----------|---------------|-----------|-------|---|------------------|------|-------------|
| 801.4325   | 801.3992    | -0.0333 | -42   | 255        | 260      | DRQINR        |           |       |   |                  |      | Mascot      |
| 1202.4863  | 1202.5201   | 0.0338  | 28    | 392        | 402      | QHCTVCSGKCH   |           |       |   |                  |      | Mascot      |
| 1232.6555  | 1232.6257   | -0.0298 | -24   | 68         | 79       | VILMVGETDAGK  |           |       |   |                  |      | Mascot      |
| 1277.7134  | 1277.676    | -0.0374 | -29   | 283        | 293      | KSVQMTLDVLK   |           |       |   | Oxidation (M)[5] |      | Mascot      |
| 1335.6937  | 1335.7087   | 0.015   | 11    | 1          | 13       | MASVSSLIQQSGK |           |       |   |                  |      | Mascot      |

|    |                                                                           |           |         |     |     |              |                          |                                            |    |    |   |  |        |
|----|---------------------------------------------------------------------------|-----------|---------|-----|-----|--------------|--------------------------|--------------------------------------------|----|----|---|--|--------|
|    | 1358.7063                                                                 | 1358.7645 | 0.0582  | 43  | 31  | 42           | GPPALYQLNTER             |                                            |    |    |   |  | Mascot |
|    | 1486.8013                                                                 | 1486.861  | 0.0597  | 40  | 31  | 43           | GPPALYQLNTERK            |                                            |    |    |   |  | Mascot |
|    | 1639.8689                                                                 | 1639.8168 | -0.0521 | -32 | 269 | 282          | SLNGFFTILEEKNK           |                                            |    |    |   |  | Mascot |
|    | 1653.8483                                                                 | 1653.8911 | 0.0428  | 26  | 146 | 159          | GFEKDAEIAEYLIR           |                                            |    |    |   |  | Mascot |
|    | 2289.0566                                                                 | 2289.1335 | 0.0769  | 34  | 160 | 178          | LFADGEDGIHYIDTVCFVM<br>K | Carbamidomethyl (C)[15], Oxidation (M)[18] |    |    |   |  | Mascot |
|    | 2289.0566                                                                 | 2289.1335 | 0.0769  | 34  | 160 | 178          | LFADGEDGIHYIDTVCFVM<br>K | Carbamidomethyl (C)[15], Oxidation (M)[18] |    |    |   |  | Mascot |
|    | 2384.1768                                                                 | 2383.9565 | -0.2203 | -92 | 261 | 280          | SAWDLEERSLNGFFTILE<br>EK |                                            |    |    |   |  | Mascot |
| 10 | PREDICTED: rapamycin-insensitive companion of mTOR, partial [Danio rerio] |           |         |     |     | gi 326667603 | 180801.9                 | 7.89                                       | 19 | 42 | 0 |  |        |

# Peptide Information

| Calc. Mass | Obsrv. Mass | ± da    | ± ppm | Start Seq. | End Seq. | Sequence                           | Ion Score | C. I. % | Modification                              | Rank | Result | Type |
|------------|-------------|---------|-------|------------|----------|------------------------------------|-----------|---------|-------------------------------------------|------|--------|------|
| 1051.5782  | 1051.712    | 0.1338  | 127   | 758        | 766      | GYVSKQLEK                          |           |         |                                           |      | Mascot |      |
| 1179.6957  | 1179.6025   | -0.0932 | -79   | 402        | 412      | LRASAAVNHLK                        |           |         |                                           |      | Mascot |      |
| 1335.7631  | 1335.7087   | -0.0544 | -41   | 44         | 54       | YLIRDSSILQK                        |           |         |                                           |      | Mascot |      |
| 1486.8013  | 1486.861    | 0.0597  | 40    | 523        | 535      | LYSALELDHAKAR                      |           |         |                                           |      | Mascot |      |
| 1557.7261  | 1557.8682   | 0.1421  | 91    | 1049       | 1060     | TPDELRLMHGK                        |           |         | Carbamidomethyl (C)[10], Oxidation (M)[8] |      | Mascot |      |
| 1579.7784  | 1579.7408   | -0.0376 | -24   | 1124       | 1139     | LTCDGASVLPGGGTFK                   |           |         | Carbamidomethyl (C)[3]                    |      | Mascot |      |
| 1579.7784  | 1579.7408   | -0.0376 | -24   | 1124       | 1139     | LTCDGASVLPGGGTFK                   |           |         | Carbamidomethyl (C)[3]                    |      | Mascot |      |
| 1638.9075  | 1638.8582   | -0.0493 | -30   | 1009       | 1022     | SPFTILTTPSHLR                      |           |         |                                           |      | Mascot |      |
| 1646.9154  | 1646.8633   | -0.0521 | -32   | 118        | 132      | MVRACIAICELALK                     |           |         |                                           |      | Mascot |      |
| 1653.9071  | 1653.8911   | -0.016  | -10   | 1007       | 1020     | ERSPFTILTTPSHLR                    |           |         |                                           |      | Mascot |      |
| 1672.7677  | 1672.8354   | 0.0677  | 40    | 615        | 628      | CGVFQCLLNLCMSK                     |           |         | Carbamidomethyl (C)[1,6]                  |      | Mascot |      |
| 1710.8843  | 1710.8059   | -0.0784 | -46   | 656        | 670      | ILTAATDNCRLYATK                    |           |         | Carbamidomethyl (C)[9]                    |      | Mascot |      |
| 1874.0164  | 1873.9421   | -0.0743 | -40   | 141        | 157      | GGLSTILKNVIDCQLSR                  |           |         | Carbamidomethyl (C)[13]                   |      | Mascot |      |
| 1895.8613  | 1895.9883   | 0.127   | 67    | 701        | 717      | TISMEALDILDEACEDK                  |           |         |                                           |      | Mascot |      |
| 1926.9344  | 1926.9353   | 0.0009  | 0     | 293        | 309      | FQDSWRLSDGFVAAEAK                  |           |         |                                           |      | Mascot |      |
| 1926.9344  | 1926.9353   | 0.0009  | 0     | 293        | 309      | FQDSWRLSDGFVAAEAK                  |           |         |                                           |      | Mascot |      |
| 2180.0659  | 2180.1167   | 0.0508  | 23    | 181        | 198      | ADVELEQILAPYTDHFYR                 |           |         |                                           |      | Mascot |      |
| 2211.1987  | 2211.115    | -0.0837 | -38   | 121        | 140      | ACIAICELALKNPEVVAQ<br>R            |           |         | Carbamidomethyl (C)[2]                    |      | Mascot |      |
| 2305.1204  | 2305.1479   | 0.0275  | 12    | 1223       | 1243     | SPSVATIKSLVDCSYMYT<br>SPR          |           |         |                                           |      | Mascot |      |
| 2423.1702  | 2423.0903   | -0.0799 | -33   | 615        | 635      | CGVFQCLLNLCMSKMQD<br>HLLK          |           |         | Oxidation (M)[13]                         |      | Mascot |      |
| 3337.5789  | 3337.7168   | 0.1379  | 41    | 1329       | 1358     | SMVSSATFGCSEDIYGLA<br>LPLDINNMFQIK |           |         | Carbamidomethyl (C)[10], Oxidation (M)[2] |      | Mascot |      |

|    |                                 |  |  |  |  |              |         |      |   |    |   |  |  |
|----|---------------------------------|--|--|--|--|--------------|---------|------|---|----|---|--|--|
| 11 | LOC559330 protein [Danio rerio] |  |  |  |  | gi 134025099 | 59917.2 | 6.33 | 9 | 42 | 0 |  |  |
|----|---------------------------------|--|--|--|--|--------------|---------|------|---|----|---|--|--|

| Peptide Information |                                                                                    |             |         |       |              |                                        |         |           |         |                          |      |             |        |
|---------------------|------------------------------------------------------------------------------------|-------------|---------|-------|--------------|----------------------------------------|---------|-----------|---------|--------------------------|------|-------------|--------|
|                     | Calc. Mass                                                                         | Obsrv. Mass | ± da    | ± ppm | Start Seq.   | End Sequence Seq.                      |         | Ion Score | C. I. % | Modification             | Rank | Result Type |        |
|                     | 943.5319                                                                           | 943.5347    | 0.0028  | 3     | 329          | 336 QRSNTLPK                           |         |           |         |                          |      | Mascot      |        |
|                     | 943.5319                                                                           | 943.5347    | 0.0028  | 3     | 329          | 336 QRSNTLPK                           |         | 10        | 0       |                          |      | Mascot      |        |
|                     | 1165.6034                                                                          | 1165.7457   | 0.1423  | 122   | 416          | 424 QVMKPLYDR                          |         |           |         | Oxidation (M)[3]         |      | Mascot      |        |
|                     | 1277.6155                                                                          | 1277.676    | 0.0605  | 47    | 382          | 392 DMTREQIGAEK                        |         |           |         |                          |      | Mascot      |        |
|                     | 1313.7423                                                                          | 1313.713    | -0.0293 | -22   | 386          | 397 EQIGAEKVAIQK                       |         |           |         |                          |      | Mascot      |        |
|                     | 1344.6404                                                                          | 1344.6594   | 0.019   | 14    | 29           | 38 HQREQQESFR                          |         |           |         |                          |      | Mascot      |        |
|                     | 1564.79                                                                            | 1564.835    | 0.045   | 29    | 413          | 424 NERQVMKPLYDR                       |         |           |         | Oxidation (M)[6]         |      | Mascot      |        |
|                     | 1710.9272                                                                          | 1710.8059   | -0.1213 | -71   | 351          | 366 APKPPVESTLETVTNK                   |         |           |         |                          |      | Mascot      |        |
|                     | 2398.1919                                                                          | 2398.2466   | 0.0547  | 23    | 498          | 518 LSNLHAATMQELVEELQE<br>AQK          |         |           |         | Oxidation (M)[9]         |      | Mascot      |        |
|                     | 3408.5669                                                                          | 3408.6541   | 0.0872  | 26    | 211          | 240 FYGYGDGHQYLLDDEVP<br>PSPPNHASFVSRR |         |           |         |                          |      | Mascot      |        |
| 12                  | alanine aminotransferase 2-like [Danio rerio]                                      |             |         |       | gi 218505800 |                                        | 54786.7 | 8.26      | 7       | 41                       | 0    | 26          | 30.182 |
| Peptide Information |                                                                                    |             |         |       |              |                                        |         |           |         |                          |      |             |        |
|                     | Calc. Mass                                                                         | Obsrv. Mass | ± da    | ± ppm | Start Seq.   | End Sequence Seq.                      |         | Ion Score | C. I. % | Modification             | Rank | Result Type |        |
|                     | 850.4781                                                                           | 850.5432    | 0.0651  | 77    | 29           | 35 KVDYAVR                             |         |           |         |                          |      | Mascot      |        |
|                     | 943.5108                                                                           | 943.5347    | 0.0239  | 25    | 481          | 487 LKDFHQR                            |         |           |         |                          |      | Mascot      |        |
|                     | 943.5108                                                                           | 943.5347    | 0.0239  | 25    | 481          | 487 LKDFHQR                            |         | 26        | 30.182  |                          |      | Mascot      |        |
|                     | 1002.5829                                                                          | 1002.5018   | -0.0811 | -81   | 377          | 386 TAVLSALAEK                         |         |           |         |                          |      | Mascot      |        |
|                     | 1179.438                                                                           | 1179.6025   | 0.1645  | 139   | 312          | 320 CYMGECGFR                          |         |           |         | Carbamidomethyl (C)[1,6] |      | Mascot      |        |
|                     | 1358.6844                                                                          | 1358.7645   | 0.0801  | 59    | 2            | 13 QQKMSENGAIPR                        |         |           |         |                          |      | Mascot      |        |
|                     | 1557.6924                                                                          | 1557.8682   | 0.1758  | 113   | 321          | 334 GGYMEVINMDADVK                     |         |           |         | Oxidation (M)[4]         |      | Mascot      |        |
|                     | 1851.8979                                                                          | 1851.9321   | 0.0342  | 18    | 81           | 96 QVMALCTYPQLDDNK                     |         |           |         |                          |      | Mascot      |        |
| 13                  | novel protein containing an ATP synthase E chain domain (zgc:153661) [Danio rerio] |             |         |       | gi 148724895 |                                        | 8311.5  | 6.32      | 5       | 41                       | 0    |             |        |
| Peptide Information |                                                                                    |             |         |       |              |                                        |         |           |         |                          |      |             |        |
|                     | Calc. Mass                                                                         | Obsrv. Mass | ± da    | ± ppm | Start Seq.   | End Sequence Seq.                      |         | Ion Score | C. I. % | Modification             | Rank | Result Type |        |
|                     | 1002.5214                                                                          | 1002.5018   | -0.0196 | -20   | 52           | 59 EEQERIAK                            |         |           |         |                          |      | Mascot      |        |
|                     | 1307.7755                                                                          | 1307.677    | -0.0985 | -75   | 1            | 12 MVPPVQVSPLIK                        |         |           |         |                          |      | Mascot      |        |
|                     | 1344.7006                                                                          | 1344.6594   | -0.0412 | -31   | 60           | 71 QLAEANEDTILK                        |         |           |         |                          |      | Mascot      |        |
|                     | 1475.8733                                                                          | 1475.7573   | -0.116  | -79   | 16           | 28 WSALLVGIIYGKR                       |         |           |         |                          |      | Mascot      |        |
|                     | 1635.9614                                                                          | 1635.8325   | -0.1289 | -79   | 1            | 15 MVPPVQVSPLIKTAR                     |         |           |         |                          |      | Mascot      |        |

|    |                         |             |         |      |   |    |   |
|----|-------------------------|-------------|---------|------|---|----|---|
| 14 | cofilin-2 [Danio rerio] | gi 45387807 | 18556.7 | 7.62 | 6 | 40 | 0 |
|----|-------------------------|-------------|---------|------|---|----|---|

### Peptide Information

| Calc. Mass | Obsrv. Mass | ± da    | ± ppm | Start Seq. | End Seq. | Sequence                        | Ion Score | C. I. | % Modification          | Rank | Result Type |
|------------|-------------|---------|-------|------------|----------|---------------------------------|-----------|-------|-------------------------|------|-------------|
| 943.5029   | 943.5347    | 0.0318  | 34    | 74         | 81       | LLPLNDCR                        | 4         | 0     |                         |      | Mascot      |
| 943.557    | 943.5347    | -0.0223 | -24   | 46         | 53       | KIIVEEGR                        |           |       |                         |      | Mascot      |
| 1335.6825  | 1335.7087   | 0.0262  | 20    | 1          | 13       | MASGVTVSDEVIK                   |           |       |                         |      | Mascot      |
| 2211.0637  | 2211.115    | 0.0513  | 23    | 54         | 73       | QILVGDIGDSVDDPYACFVK            |           |       | Carbamidomethyl (C)[17] |      | Mascot      |
| 2305.1169  | 2305.1479   | 0.031   | 13    | 74         | 92       | LLPLNDCRYGLYDATYETK             |           |       | Carbamidomethyl (C)[7]  |      | Mascot      |
| 2950.4866  | 2950.4238   | -0.0628 | -21   | 47         | 73       | IIVEEGRQILVGDIGDSVD<br>DPYACFVK |           |       |                         |      | Mascot      |
| 2950.4866  | 2950.4238   | -0.0628 | -21   | 47         | 73       | IIVEEGRQILVGDIGDSVD<br>DPYACFVK |           |       |                         |      | Mascot      |

|    |                                                                           |              |         |      |   |    |   |    |        |
|----|---------------------------------------------------------------------------|--------------|---------|------|---|----|---|----|--------|
| 15 | glutamic pyruvate transaminase (alanine aminotransferase) 2 [Danio rerio] | gi 122891393 | 62456.5 | 7.61 | 6 | 40 | 0 | 26 | 30.182 |
|----|---------------------------------------------------------------------------|--------------|---------|------|---|----|---|----|--------|

### Peptide Information

| Calc. Mass | Obsrv. Mass | ± da    | ± ppm | Start Seq. | End Sequence Seq.    | Ion Score | C. I. % Modification     | Rank | Result Type |
|------------|-------------|---------|-------|------------|----------------------|-----------|--------------------------|------|-------------|
| 850.4781   | 850.5432    | 0.0651  | 77    | 98         | 104 KVDYAVR          |           |                          |      | Mascot      |
| 943.5108   | 943.5347    | 0.0239  | 25    | 550        | 556 LKDFHQ           |           |                          |      | Mascot      |
| 943.5108   | 943.5347    | 0.0239  | 25    | 550        | 556 LKDFHQ           | 26        | 30.182                   |      | Mascot      |
| 1002.5829  | 1002.5018   | -0.0811 | -81   | 446        | 455 TAVLSALAEK       |           |                          |      | Mascot      |
| 1179.438   | 1179.6025   | 0.1645  | 139   | 381        | 389 CYMGECGFR        |           | Carbamidomethyl (C)[1,6] |      | Mascot      |
| 1557.6924  | 1557.8682   | 0.1758  | 113   | 390        | 403 GGYMEVINMDADVK   |           | Oxidation (M)[4]         |      | Mascot      |
| 1851.8979  | 1851.9321   | 0.0342  | 18    | 150        | 165 QVMALCTYPQLLDDNK |           |                          |      | Mascot      |

|    |                             |             |         |      |   |    |   |    |        |
|----|-----------------------------|-------------|---------|------|---|----|---|----|--------|
| 16 | Gpt2l protein [Danio rerio] | qil38303791 | 58335.5 | 6.84 | 6 | 40 | 0 | 26 | 30.182 |
|----|-----------------------------|-------------|---------|------|---|----|---|----|--------|

### Peptide Information

| Calc. Mass | Obsrv. Mass | ± da    | ± ppm | Start Seq. | End Sequence Seq. | Ion Score        | C. I. % Modification | Rank                     | Result Type |
|------------|-------------|---------|-------|------------|-------------------|------------------|----------------------|--------------------------|-------------|
| 850.4781   | 850.5432    | 0.0651  | 77    | 62         | 68                | KVDYAVR          |                      |                          | Mascot      |
| 943.5108   | 943.5347    | 0.0239  | 25    | 514        | 520               | LKDFHQ           |                      |                          | Mascot      |
| 943.5108   | 943.5347    | 0.0239  | 25    | 514        | 520               | LKDFHQ           | 26                   | 30.182                   | Mascot      |
| 1002.5829  | 1002.5018   | -0.0811 | -81   | 410        | 419               | TAVLSALAEK       |                      |                          | Mascot      |
| 1179.438   | 1179.6025   | 0.1645  | 139   | 345        | 353               | CYMGECGFR        |                      | Carbamidomethyl (C)[1,6] | Mascot      |
| 1557.6924  | 1557.8682   | 0.1758  | 113   | 354        | 367               | GGYMEVINMDADVK   |                      | Oxidation (M)[4]         | Mascot      |
| 1851.8979  | 1851.9321   | 0.0342  | 18    | 114        | 129               | QVMALCTYPQLLDDNK |                      |                          | Mascot      |

17 Si:ch211-175f11.3 protein [Danio rerio] gi|60416070 46582.6 7.73 9 39 0

Peptide Information

| Calc. Mass | Obsrv. Mass | ± da    | ± ppm | Start Seq. | End Seq. | Sequence                       | Ion Score | C. I. | % Modification         | Rank | Result Type |
|------------|-------------|---------|-------|------------|----------|--------------------------------|-----------|-------|------------------------|------|-------------|
| 1002.4713  | 1002.5018   | 0.0305  | 30    | 220        | 227      | FNNFSVMK                       |           |       | Oxidation (M)[7]       |      | Mascot      |
| 1045.6113  | 1045.5654   | -0.0459 | -44   | 368        | 376      | SSLRQTVVR                      |           |       |                        |      | Mascot      |
| 1335.6473  | 1335.7087   | 0.0614  | 46    | 163        | 175      | GGVAGCQKEPFSR                  |           |       |                        |      | Mascot      |
| 1344.5889  | 1344.6594   | 0.0705  | 52    | 199        | 209      | FTCDDVDFNLR                    |           |       |                        |      | Mascot      |
| 1579.9207  | 1579.7408   | -0.1799 | -114  | 264        | 277      | HVFLATPAQLLLEK                 |           |       |                        |      | Mascot      |
| 1579.9207  | 1579.7408   | -0.1799 | -114  | 264        | 277      | HVFLATPAQLLLEK                 |           |       |                        |      | Mascot      |
| 1646.8464  | 1646.8633   | 0.0169  | 10    | 357        | 371      | GATLCVICPNRSSLR                |           |       | Carbamidomethyl (C)[5] |      | Mascot      |
| 1672.8652  | 1672.8354   | -0.0298 | -18   | 372        | 384      | QTVVRLELEDEWR                  |           |       |                        |      | Mascot      |
| 2211.0308  | 2211.115    | 0.0842  | 38    | 244        | 263      | MTDVPTTIQPSQYICAPD<br>SK       |           |       | Oxidation (M)[1]       |      | Mascot      |
| 2950.4219  | 2950.4238   | 0.0019  | 1     | 132        | 157      | NVSLKQVLQHMESSPDIT<br>QYGLCGMR |           |       | Oxidation (M)[11]      |      | Mascot      |
| 2950.4219  | 2950.4238   | 0.0019  | 1     | 132        | 157      | NVSLKQVLQHMESSPDIT<br>QYGLCGMR |           |       | Oxidation (M)[11]      |      | Mascot      |

18 RecName: Full=Alanine aminotransferase 2-like; Short=ALT2; AltName: Full=Glutamate pyruvate transaminase gi|161789027 61052.9 8.57 6 39 0 26 30.182

Peptide Information

| Calc. Mass | Obsrv. Mass | ± da    | ± ppm | Start Seq. | End Seq. | Sequence         | Ion Score | C. I.  | % Modification           | Rank | Result Type |
|------------|-------------|---------|-------|------------|----------|------------------|-----------|--------|--------------------------|------|-------------|
| 850.4781   | 850.5432    | 0.0651  | 77    | 85         | 91       | KVDYAVR          |           |        |                          |      | Mascot      |
| 943.5108   | 943.5347    | 0.0239  | 25    | 537        | 543      | LKDFHQR          |           |        |                          |      | Mascot      |
| 943.5108   | 943.5347    | 0.0239  | 25    | 537        | 543      | LKDFHQR          | 26        | 30.182 |                          |      | Mascot      |
| 1002.5829  | 1002.5018   | -0.0811 | -81   | 433        | 442      | TAVLSALAEK       |           |        |                          |      | Mascot      |
| 1179.438   | 1179.6025   | 0.1645  | 139   | 368        | 376      | CYMGECGFR        |           |        | Carbamidomethyl (C)[1,6] |      | Mascot      |
| 1557.6924  | 1557.8682   | 0.1758  | 113   | 377        | 390      | GGYMEVINMDADVK   |           |        | Oxidation (M)[4]         |      | Mascot      |
| 1851.8979  | 1851.9321   | 0.0342  | 18    | 137        | 152      | QVMALCTYPQLLDDNK |           |        |                          |      | Mascot      |

19 PREDICTED: hypothetical protein LOC100536966 [Danio rerio]

gi|326672251 113653.1 8.65 11 38 0

Peptide Information

| Calc. Mass | Obsrv. Mass | ± da    | ± ppm | Start Seq. | End Seq. | Sequence  | Ion Score | C. I. | % Modification | Rank | Result Type |
|------------|-------------|---------|-------|------------|----------|-----------|-----------|-------|----------------|------|-------------|
| 943.5458   | 943.5347    | -0.0111 | -12   | 997        | 1005     | ADIPSSLLK |           |       |                |      | Mascot      |

|  |           |           |         |      |     |      |                    |    |   |                        |        |
|--|-----------|-----------|---------|------|-----|------|--------------------|----|---|------------------------|--------|
|  | 943.5458  | 943.5347  | -0.0111 | -12  | 997 | 1005 | ADIPSSLLK          | 14 | 0 |                        | Mascot |
|  | 1045.5533 | 1045.5654 | 0.0121  | 12   | 927 | 935  | LPMDIMLGR          |    |   |                        | Mascot |
|  | 1165.6099 | 1165.7457 | 0.1358  | 117  | 4   | 14   | ASSDIAFVDIK        |    |   |                        | Mascot |
|  | 1232.6125 | 1232.6257 | 0.0132  | 11   | 677 | 687  | GLLCREVCDPK        |    |   |                        | Mascot |
|  | 1344.6365 | 1344.6594 | 0.0229  | 17   | 176 | 186  | DGTLRFCVDYR        |    |   |                        | Mascot |
|  | 1359.7994 | 1359.6578 | -0.1416 | -104 | 306 | 317  | LGDFNLKVKPTK       |    |   |                        | Mascot |
|  | 1359.7994 | 1359.6578 | -0.1416 | -104 | 306 | 317  | LGDFNLKVKPTK       |    |   |                        | Mascot |
|  | 1486.7397 | 1486.861  | 0.1213  | 82   | 549 | 562  | TNGNADALSRWPGK     |    |   |                        | Mascot |
|  | 1579.7178 | 1579.7408 | 0.023   | 15   | 251 | 264  | MPMGLCNAPGTFQR     | 4  | 0 | Carbamidomethyl (C)[6] | Mascot |
|  | 1579.7178 | 1579.7408 | 0.023   | 15   | 251 | 264  | MPMGLCNAPGTFQR     |    |   | Carbamidomethyl (C)[6] | Mascot |
|  | 1639.8875 | 1639.8168 | -0.0707 | -43  | 654 | 667  | ERAAEDRPTQVVLR     |    |   |                        | Mascot |
|  | 1825.8326 | 1826.0291 | 0.1965  | 108  | 402 | 416  | AERWAWGEMQESAFK    |    |   |                        | Mascot |
|  | 1916.9963 | 1916.9828 | -0.0135 | -7   | 16  | 33   | EAILQADAFGEVEIQGVK |    |   |                        | Mascot |

20 PREDICTED: butyrophilin subfamily 1 member A1-like [Danio rerio] gi|326665740 56645.3 6.53 8 38 0

#### Peptide Information

| Calc. Mass | Obsrv. Mass | ± da    | ± ppm | Start Seq. | End Seq. | Sequence                    | Ion Score | C. I. | % Modification         | Rank | Result Type |
|------------|-------------|---------|-------|------------|----------|-----------------------------|-----------|-------|------------------------|------|-------------|
| 943.5431   | 943.5347    | -0.0084 | -9    | 273        | 280      | SRIQLGNR                    |           |       |                        |      | Mascot      |
| 943.5431   | 943.5347    | -0.0084 | -9    | 273        | 280      | SRIQLGNR                    | 13        | 0     |                        |      | Mascot      |
| 1045.6     | 1045.5654   | -0.0346 | -33   | 308        | 317      | SSAASLLLQR                  |           |       |                        |      | Mascot      |
| 1202.547   | 1202.5201   | -0.0269 | -22   | 180        | 189      | LSPESTEMHR                  |           |       | Oxidation (M)[8]       |      | Mascot      |
| 1277.6709  | 1277.676    | 0.0051  | 4     | 198        | 208      | HTVTVHQRDQK                 |           |       |                        |      | Mascot      |
| 1727.7621  | 1727.8151   | 0.053   | 31    | 376        | 390      | EGFSSGCFYFEVEVK             |           |       |                        |      | Mascot      |
| 1825.9304  | 1826.0291   | 0.0987  | 54    | 190        | 205      | NTDGFSVKHTVTVHQR            |           |       |                        |      | Mascot      |
| 2211.0425  | 2211.115    | 0.0725  | 33    | 376        | 394      | EGFSSGCFYFEVEVKGQIK         |           |       | Carbamidomethyl (C)[7] |      | Mascot      |
| 3052.4568  | 3052.4548   | -0.002  | -1    | 124        | 151      | TWSDDTTNVNKEAVGSPPMITVDGFDR |           |       | Oxidation (M)[20]      |      | Mascot      |

21 sirtuin 3 [Danio rerio] gi|122114557 40120.5 8.34 9 37 0

#### Peptide Information

| Calc. Mass | Obsrv. Mass | ± da    | ± ppm | Start Seq. | End Seq. | Sequence        | Ion Score | C. I. | % Modification          | Rank | Result Type |
|------------|-------------|---------|-------|------------|----------|-----------------|-----------|-------|-------------------------|------|-------------|
| 957.5767   | 957.5016    | -0.0751 | -78   | 337        | 344      | LVELLGWK        |           |       |                         |      | Mascot      |
| 1165.6113  | 1165.7457   | 0.1344  | 115   | 42         | 51       | TLSHFPHAQK      |           |       |                         |      | Mascot      |
| 1307.6677  | 1307.677    | 0.0093  | 7     | 15         | 24       | CFAENLLWRR      |           |       |                         |      | Mascot      |
| 1635.7539  | 1635.8325   | 0.0786  | 48    | 233        | 247      | DDIMAGTVPKCPTCK |           |       | Carbamidomethyl (C)[11] |      | Mascot      |



|    |                                                |           |         |     |     |              |                            |      |                                              |        |   |
|----|------------------------------------------------|-----------|---------|-----|-----|--------------|----------------------------|------|----------------------------------------------|--------|---|
|    | 1638.8784                                      | 1638.8582 | -0.0202 | -12 | 2   | 14           | LYLNTFLPSVCRR              |      | Carbamidomethyl (C)[11]                      | Mascot |   |
|    | 1639.7922                                      | 1639.8168 | 0.0246  | 15  | 81  | 94           | DNVHQQTLEDIAEK             |      |                                              | Mascot |   |
|    | 1646.8054                                      | 1646.8633 | 0.0579  | 35  | 228 | 242          | GEELRDDIMAGTVPK            |      | Oxidation (M)[9]                             | Mascot |   |
|    | 1708.7703                                      | 1708.8048 | 0.0345  | 20  | 233 | 247          | DDIMAGTVPKCPTCK            |      | Carbamidomethyl (C)[11,14], Oxidation (M)[4] | Mascot |   |
|    | 1926.8871                                      | 1926.9353 | 0.0482  | 25  | 206 | 223          | MLVEAHGTFATATCTVC<br>R     |      | Oxidation (M)[1]                             | Mascot |   |
|    | 1926.8871                                      | 1926.9353 | 0.0482  | 25  | 206 | 223          | MLVEAHGTFATATCTVC<br>R     |      | Oxidation (M)[1]                             | Mascot |   |
|    | 2284.1316                                      | 2284.1831 | 0.0515  | 23  | 74  | 94           | GLFGGGRDNNVHQQTLED<br>IAEK |      |                                              | Mascot |   |
| 22 | plasma membrane calcium ATPase 4 [Danio rerio] |           |         |     |     | gi 171222380 | 129650.3                   | 5.57 | 15                                           | 36     | 0 |

#### Peptide Information

|  | Calc. Mass | Obsrv. Mass | ± da    | ± ppm | Start Seq. | End Seq. | Sequence                     | Ion Score | C. I. | % Modification             | Rank | Result Type |
|--|------------|-------------|---------|-------|------------|----------|------------------------------|-----------|-------|----------------------------|------|-------------|
|  | 850.4273   | 850.5432    | 0.1159  | 136   | 643        | 649      | TICVAMR                      |           |       | Carbamidomethyl (C)[3]     |      | Mascot      |
|  | 1036.4728  | 1036.4905   | 0.0177  | 17    | 624        | 631      | DRDEMVKQ                     |           |       | Oxidation (M)[5]           |      | Mascot      |
|  | 1036.4728  | 1036.4905   | 0.0177  | 17    | 624        | 631      | DRDEMVKQ                     |           |       | Oxidation (M)[5]           |      | Mascot      |
|  | 1179.6045  | 1179.6025   | -0.002  | -2    | 391        | 400      | TFGIEGIEWK                   |           |       |                            |      | Mascot      |
|  | 1249.631   | 1249.6309   | -0.0001 | 0     | 560        | 569      | DEVPEEKLYK                   |           |       |                            |      | Mascot      |
|  | 1249.631   | 1249.6309   | -0.0001 | 0     | 560        | 569      | DEVPEEKLYK                   |           |       |                            |      | Mascot      |
|  | 1277.6233  | 1277.676    | 0.0527  | 41    | 731        | 740      | DFNQQIRNDK                   |           |       |                            |      | Mascot      |
|  | 1335.7123  | 1335.7087   | -0.0036 | -3    | 913        | 923      | DKPLISRTMMK                  |           |       | Oxidation (M)[9]           |      | Mascot      |
|  | 1359.7644  | 1359.6578   | -0.1066 | -78   | 1096       | 1106     | GQILWFRGLNR                  |           |       |                            |      | Mascot      |
|  | 1359.7644  | 1359.6578   | -0.1066 | -78   | 1096       | 1106     | GQILWFRGLNR                  |           |       |                            |      | Mascot      |
|  | 1557.9032  | 1557.8682   | -0.035  | -22   | 540        | 553      | TECALLGLVLELKR               |           |       |                            |      | Mascot      |
|  | 1625.7992  | 1625.7488   | -0.0504 | -31   | 480        | 493      | MTVVQAYIGDTHYK               |           |       |                            |      | Mascot      |
|  | 1639.7678  | 1639.8168   | 0.049   | 30    | 45         | 58       | IAECYGDVQGICRR               |           |       | Carbamidomethyl (C)[4]     |      | Mascot      |
|  | 1895.7932  | 1895.9883   | 0.1951  | 103   | 454        | 471      | HLDACETMGNATAICSDK           |           |       | Oxidation (M)[8]           |      | Mascot      |
|  | 1993.969   | 1993.9792   | 0.0102  | 5     | 632        | 649      | VIEPMACDGLRTICVAMR           |           |       | Oxidation (M)[5]           |      | Mascot      |
|  | 2176.0374  | 2176.1582   | 0.1208  | 56    | 249        | 268      | SLEKDPMLLSGTHVMEG<br>SGR     |           |       | Oxidation (M)[7,15]        |      | Mascot      |
|  | 2398.1482  | 2398.2466   | 0.0984  | 41    | 1153       | 1174     | ISTIDEGCAEFELPFSSKP<br>LQS   |           |       |                            |      | Mascot      |
|  | 2705.2075  | 2705.1721   | -0.0354 | -13   | 448        | 471      | DNNLVRHLDACETMGNA<br>TAICSDK |           |       | Carbamidomethyl (C)[11,21] |      | Mascot      |

|    |                                                           |  |  |  |  |  |              |         |      |   |    |   |
|----|-----------------------------------------------------------|--|--|--|--|--|--------------|---------|------|---|----|---|
| 23 | coiled-coil domain-containing protein 85C-A [Danio rerio] |  |  |  |  |  | gi 113679219 | 44136.4 | 6.38 | 9 | 36 | 0 |
|----|-----------------------------------------------------------|--|--|--|--|--|--------------|---------|------|---|----|---|

#### Peptide Information

|  | Calc. Mass | Obsrv. Mass | ± da | ± ppm | Start Seq. | End Seq. | Sequence | Ion Score | C. I. | % Modification | Rank | Result Type |
|--|------------|-------------|------|-------|------------|----------|----------|-----------|-------|----------------|------|-------------|
|--|------------|-------------|------|-------|------------|----------|----------|-----------|-------|----------------|------|-------------|

|           |           |         |     |     |     |                           |        |
|-----------|-----------|---------|-----|-----|-----|---------------------------|--------|
| 1036.4703 | 1036.4905 | 0.0202  | 19  | 359 | 366 | EMCNVVWR                  | Mascot |
| 1036.4703 | 1036.4905 | 0.0202  | 19  | 359 | 366 | EMCNVVWR                  | Mascot |
| 1307.5896 | 1307.677  | 0.0874  | 67  | 127 | 137 | ELESNQDSVMR               | Mascot |
| 1313.7535 | 1313.713  | -0.0405 | -31 | 367 | 379 | KLGDAAGTKPSIR             | Mascot |
| 1475.761  | 1475.7573 | -0.0037 | -3  | 355 | 366 | AIVREMCNVVWR              | Mascot |
| 1486.8853 | 1486.861  | -0.0243 | -16 | 58  | 69  | LQLHLHEIRSLK              | Mascot |
| 1557.7803 | 1557.8682 | 0.0879  | 56  | 216 | 228 | RSMDDLSTNHLLR             | Mascot |
| 1564.7635 | 1564.835  | 0.0715  | 46  | 125 | 137 | LKELESNQDSVMR             | Mascot |
| 1916.9574 | 1916.9828 | 0.0254  | 13  | 109 | 124 | YTASVMWKEVGVFQQK          | Mascot |
| 2225.1785 | 2225.1274 | -0.0511 | -23 | 368 | 388 | LGDAAGTKPSIRQHLSGN<br>QFK | Mascot |
| 2225.1785 | 2225.1274 | -0.0511 | -23 | 368 | 388 | LGDAAGTKPSIRQHLSGN<br>QFK | Mascot |

24

novel protein similar to vertebrate protein kinase C, theta (PRKCQ) [Danio rerio]

gi|55962227

81064.5

7.59

13

35

0

Peptide Information

| Calc. Mass | Obsrv. Mass | ± da    | ± ppm | Start Seq. | End Seq. | Sequence                         | Ion Score | C. I. | % Modification                           | Rank | Result Type |
|------------|-------------|---------|-------|------------|----------|----------------------------------|-----------|-------|------------------------------------------|------|-------------|
| 850.4781   | 850.5432    | 0.0651  | 77    | 31         | 37       | GQVYKQK                          |           |       |                                          |      | Mascot      |
| 957.4167   | 957.5016    | 0.0849  | 89    | 521        | 528      | IADFGMCK                         |           |       | Carbamidomethyl (C)[7], Oxidation (M)[6] |      | Mascot      |
| 1045.5789  | 1045.5654   | -0.0135 | -13   | 614        | 621      | LFVREPER                         |           |       |                                          |      | Mascot      |
| 1277.6881  | 1277.676    | -0.0121 | -9    | 200        | 212      | VIAKCTGSAVNSK                    |           |       |                                          |      | Mascot      |
| 1359.5238  | 1359.6578   | 0.134   | 99    | 257        | 267      | CEECGMNVHHK                      |           |       | Carbamidomethyl (C)[1], Oxidation (M)[6] |      | Mascot      |
| 1359.5238  | 1359.6578   | 0.134   | 99    | 257        | 267      | CEECGMNVHHK                      |           |       | Carbamidomethyl (C)[1], Oxidation (M)[6] |      | Mascot      |
| 1579.7322  | 1579.7408   | 0.0086  | 5     | 594        | 605      | TDDPCYPRWLTR                     |           |       | Carbamidomethyl (C)[5]                   |      | Mascot      |
| 1579.7322  | 1579.7408   | 0.0086  | 5     | 594        | 605      | TDDPCYPRWLTR                     |           |       | Carbamidomethyl (C)[5]                   |      | Mascot      |
| 1635.837   | 1635.8325   | -0.0045 | -3    | 72         | 86       | TEATVQLDTLASRCK                  |           |       |                                          |      | Mascot      |
| 1727.8322  | 1727.8151   | -0.0171 | -10   | 173        | 186      | EFVWGLNQGYQCR                    |           |       |                                          |      | Mascot      |
| 1896.0337  | 1895.9883   | -0.0454 | -24   | 88         | 103      | ENGKLEIWVELKPQGR                 |           |       |                                          |      | Mascot      |
| 2284.0989  | 2284.1831   | 0.0842  | 37    | 537        | 556      | TCTFCGTPDYIAPELLGQ<br>K          |           |       | Carbamidomethyl (C)[2,5]                 |      | Mascot      |
| 2950.3838  | 2950.4238   | 0.04    | 14    | 229        | 252      | FKVYNYMSPTFCEHCGT<br>LLWGLAR     |           |       | Carbamidomethyl (C)[12,15]               |      | Mascot      |
| 2950.3838  | 2950.4238   | 0.04    | 14    | 229        | 252      | FKVYNYMSPTFCEHCGT<br>LLWGLAR     |           |       | Carbamidomethyl (C)[12,15]               |      | Mascot      |
| 3052.5117  | 3052.4548   | -0.0569 | -19   | 529        | 556      | ENIIGEARTCTFCGTPDYI<br>APEILLGQK |           |       |                                          |      | Mascot      |
| 3337.5266  | 3337.7168   | 0.1902  | 57    | 154        | 180      | CHEFTATFFPQPTFC SVC<br>KEFVWGLNK |           |       | Carbamidomethyl (C)[1,15,18]             |      | Mascot      |

25

PREDICTED: discoidin, CUB and LCCL domain-containing protein 1-like [Danio rerio]

gi|326675097

56678.4

8.43

9

34

0

| Peptide Information |                                              |          |           |              |          |                                        |           |       |    |                                          |                  |
|---------------------|----------------------------------------------|----------|-----------|--------------|----------|----------------------------------------|-----------|-------|----|------------------------------------------|------------------|
| Calc. Mass          | Obsrv. Mass                                  | $\pm$ da | $\pm$ ppm | Start Seq.   | End Seq. | Sequence                               | Ion Score | C. I. | %  | Modification                             | Rank Result Type |
| 1002.6346           | 1002.5018                                    | -0.1328  | -132      | 222          | 229      | YLLKPKQK                               |           |       |    |                                          | Mascot           |
| 1198.6038           | 1198.6265                                    | 0.0227   | 19        | 96           | 104      | VVFKECNR                               |           |       |    | Carbamidomethyl (C)[7]                   | Mascot           |
| 1475.6444           | 1475.7573                                    | 0.1129   | 77        | 451          | 462      | SDRQQYDCPAHR                           |           |       |    |                                          | Mascot           |
| 1672.7979           | 1672.8354                                    | 0.0375   | 22        | 28           | 42       | GVAGEIWGWHGQGYR                        |           |       |    |                                          | Mascot           |
| 2175.9685           | 2176.1582                                    | 0.1897   | 87        | 105          | 122      | ELMVMAYNTSSVWDEVN<br>R                 |           |       |    | Oxidation (M)[3,5]                       | Mascot           |
| 2211.155            | 2211.115                                     | -0.04    | -18       | 50           | 71       | AAVHAGVISDSLGGMINV<br>SLQR             |           |       |    | Oxidation (M)[15]                        | Mascot           |
| 3052.4009           | 3052.4548                                    | 0.0539   | 18        | 1            | 27       | MELISCLHRGTHFSSQQI<br>SAFCPAGCR        |           |       |    | Carbamidomethyl (C)[6], Oxidation (M)[1] | Mascot           |
| 3394.8887           | 3394.6301                                    | -0.2586  | -76       | 284          | 317      | SSGPSQAVILVAGMVLGA<br>ALCVGCLLAGLILWRR |           |       |    |                                          | Mascot           |
| 3394.8887           | 3394.6301                                    | -0.2586  | -76       | 283          | 316      | RSSGPSQAVILVAGMVL<br>GAALCVGCLLAGLILWR |           |       |    |                                          | Mascot           |
| 26                  | hypothetical protein LOC564848 [Danio rerio] |          |           | gi 117606127 |          | 56064                                  | 9.49      | 7     | 34 | 0 14 0                                   |                  |

| Peptide Information |                          |          |           |             |          |                  |           |       |    |                          |                  |
|---------------------|--------------------------|----------|-----------|-------------|----------|------------------|-----------|-------|----|--------------------------|------------------|
| Calc. Mass          | Obsrv. Mass              | $\pm$ da | $\pm$ ppm | Start Seq.  | End Seq. | Sequence         | Ion Score | C. I. | %  | Modification             | Rank Result Type |
| 1249.6569           | 1249.6309                | -0.026   | -21       | 127         | 138      | SKKPVCSGQK       |           |       |    |                          | Mascot           |
| 1249.6569           | 1249.6309                | -0.026   | -21       | 127         | 138      | SKKPVCSGQK       |           |       |    |                          | Mascot           |
| 1359.705            | 1359.6578                | -0.0472  | -35       | 214         | 226      | GCQSQVINSAPKK    |           |       |    |                          | Mascot           |
| 1359.705            | 1359.6578                | -0.0472  | -35       | 214         | 226      | GCQSQVINSAPKK    |           |       |    |                          | Mascot           |
| 1486.8297           | 1486.861                 | 0.0313   | 21        | 149         | 162      | VGTEMKSNPVALLK   |           |       |    |                          | Mascot           |
| 1579.8452           | 1579.7408                | -0.1044  | -66       | 354         | 367      | VHHEVGAKVPHDVR   | 14        |       | 0  |                          | Mascot           |
| 1579.8452           | 1579.7408                | -0.1044  | -66       | 354         | 367      | VHHEVGAKVPHDVR   |           |       |    |                          | Mascot           |
| 1635.7755           | 1635.8325                | 0.057    | 35        | 312         | 325      | QAICLSTQDSTQQR   |           |       |    | Carbamidomethyl (C)[4]   | Mascot           |
| 1653.7373           | 1653.8911                | 0.1538   | 93        | 21          | 32       | CQRPYCLYNHSR     |           |       |    | Carbamidomethyl (C)[1,6] | Mascot           |
| 1851.9333           | 1851.9321                | -0.0012  | -1        | 381         | 397      | SSVTVQDAFEKALAEK |           |       |    |                          | Mascot           |
| 27                  | Zgc:114199 [Danio rerio] |          |           | gi 66911026 |          | 30557.2          | 4.15      | 7     | 34 | 0                        |                  |

| Peptide Information |             |          |           |            |          |             |           |       |   |              |                  |
|---------------------|-------------|----------|-----------|------------|----------|-------------|-----------|-------|---|--------------|------------------|
| Calc. Mass          | Obsrv. Mass | $\pm$ da | $\pm$ ppm | Start Seq. | End Seq. | Sequence    | Ion Score | C. I. | % | Modification | Rank Result Type |
| 996.4632            | 996.5983    | 0.1351   | 136       | 119        | 127      | SNVVDGDK    |           |       |   |              | Mascot           |
| 1036.4615           | 1036.4905   | 0.029    | 28        | 11         | 18       | TLEEEEMR    |           |       |   |              | Mascot           |
| 1036.4615           | 1036.4905   | 0.029    | 28        | 11         | 18       | TLEEEEMR    |           |       |   |              | Mascot           |
| 1307.6049           | 1307.677    | 0.0721   | 55        | 222        | 232      | CNINVPEALER |           |       |   |              | Mascot           |

|           |           |        |     |     |     |                 |        |
|-----------|-----------|--------|-----|-----|-----|-----------------|--------|
| 1335.6791 | 1335.7087 | 0.0296 | 22  | 211 | 221 | DNEQALYELLK     | Mascot |
| 1564.6973 | 1564.835  | 0.1377 | 88  | 19  | 33  | EGESNGSSEIADLEK | Mascot |
| 1635.6616 | 1635.8325 | 0.1709 | 104 | 128 | 142 | ESEGEEDGLSPEDSR | Mascot |
| 1825.7731 | 1826.0291 | 0.256  | 140 | 239 | 253 | SSKDEMLPWSEEECR | Mascot |

28 RecName: Full=Coatomer subunit gamma-2; AltName: gi|193806152 97466.3 5.44 13 34 0  
Full=Gamma-2-coat protein; Short=Gamma-2-COP

#### Peptide Information

| Calc. Mass | Obsrv. Mass | ± da    | ± ppm | Start Seq. | End Seq. | Sequence                           | Ion Score | C. I. % | Modification                               | Rank | Result Type |
|------------|-------------|---------|-------|------------|----------|------------------------------------|-----------|---------|--------------------------------------------|------|-------------|
| 801.4828   | 801.3992    | -0.0836 | -104  | 489        | 497      | AAAVSALAK                          |           |         |                                            |      | Mascot      |
| 1232.7473  | 1232.6257   | -0.1216 | -99   | 455        | 465      | ILHLLGKEGPR                        |           |         |                                            |      | Mascot      |
| 1307.5581  | 1307.677    | 0.1189  | 91    | 225        | 234      | SPFAYCMMIR                         |           |         | Carbamidomethyl (C)[6], Oxidation (M)[7,8] |      | Mascot      |
| 1358.6772  | 1358.7645   | 0.0873  | 64    | 528        | 538      | ATFYMNVLQQK                        |           |         | Oxidation (M)[5]                           |      | Mascot      |
| 1359.7532  | 1359.6578   | -0.0954 | -70   | 823        | 834      | NSHVLFLAGVFR                       |           |         |                                            |      | Mascot      |
| 1359.7532  | 1359.6578   | -0.0954 | -70   | 823        | 834      | NSHVLFLAGVFR                       |           |         |                                            |      | Mascot      |
| 1579.7542  | 1579.7408   | -0.0134 | -8    | 394        | 406      | HSVMMNFLSNMLR                      |           |         |                                            |      | Mascot      |
| 1579.7542  | 1579.7408   | -0.0134 | -8    | 394        | 406      | HSVMMNFLSNMLR                      |           |         |                                            |      | Mascot      |
| 1635.7692  | 1635.8325   | 0.0633  | 39    | 221        | 234      | SGLKSPFAYCMMIR                     |           |         | Oxidation (M)[11,12]                       |      | Mascot      |
| 1727.936   | 1727.8151   | -0.1209 | -70   | 152        | 168      | VPSVSSSALVSSLHVMK                  |           |         |                                            |      | Mascot      |
| 1927.0548  | 1926.9353   | -0.1195 | -62   | 818        | 834      | VPENKNSHVLFLAGVFR                  |           |         |                                            |      | Mascot      |
| 1927.0548  | 1926.9353   | -0.1195 | -62   | 818        | 834      | VPENKNSHVLFLAGVFR                  |           |         |                                            |      | Mascot      |
| 2283.1033  | 2283.1855   | 0.0822  | 36    | 318        | 338      | HPSAVTACNLDLENLITD<br>SNR          |           |         |                                            |      | Mascot      |
| 2398.301   | 2398.2466   | -0.0544 | -23   | 146        | 168      | QAIVDKVPSVSSSALVSS<br>LHVMK        |           |         | Oxidation (M)[21]                          |      | Mascot      |
| 3337.5916  | 3337.7168   | 0.1252  | 38    | 649        | 675      | CIKHTFANHMIFQFDCNTN<br>TLNDQLLQK   |           |         | Carbamidomethyl (C)[1,16]                  |      | Mascot      |
| 3408.7507  | 3408.6541   | -0.0966 | -28   | 561        | 590      | SLHQYTLEPSEKPFDMKT<br>VPLATAPITEHK |           |         |                                            |      | Mascot      |

29 PREDICTED: serine/threonine-protein kinase 35-like isoform 2 [Danio rerio] gi|326679334 45683.4 8.61 9 34 0

#### Peptide Information

| Calc. Mass | Obsrv. Mass | ± da    | ± ppm | Start Seq. | End Seq. | Sequence       | Ion Score | C. I. % | Modification | Rank | Result Type |
|------------|-------------|---------|-------|------------|----------|----------------|-----------|---------|--------------|------|-------------|
| 801.494    | 801.3992    | -0.0948 | -118  | 93         | 100      | SGARVAIK       |           |         |              |      | Mascot      |
| 850.4338   | 850.5432    | 0.1094  | 129   | 364        | 371      | SIMSEGVK       |           |         |              |      | Mascot      |
| 1179.6368  | 1179.6025   | -0.0343 | -29   | 319        | 328      | ITFIDAEKR      |           |         |              |      | Mascot      |
| 1486.7834  | 1486.861    | 0.0776  | 52    | 16         | 28       | AKPPSAIMWRDSK  |           |         |              |      | Mascot      |
| 1564.8118  | 1564.835    | 0.0232  | 15    | 57         | 70       | KDNFEAGIVFTAPR |           |         |              |      | Mascot      |

|    |                                                 |           |         |    |             |     |                                 |      |   |    |   |  |                                            |  |  |  |        |
|----|-------------------------------------------------|-----------|---------|----|-------------|-----|---------------------------------|------|---|----|---|--|--------------------------------------------|--|--|--|--------|
|    | 1851.9493                                       | 1851.9321 | -0.0172 | -9 | 126         | 140 | RHENVVQLEECVLQR                 |      |   |    |   |  |                                            |  |  |  | Mascot |
|    | 2398.1602                                       | 2398.2466 | 0.0864  | 36 | 127         | 146 | HENVVQLEECVLQRNGM<br>AQK        |      |   |    |   |  | Carbamidomethyl (C)[10], Oxidation (M)[17] |  |  |  | Mascot |
|    | 2950.345                                        | 2950.4238 | 0.0788  | 27 | 252         | 277 | VCAGLSCMQNEGDDQV<br>NNKNIVNINK  |      |   |    |   |  | Carbamidomethyl (C)[2,7], Oxidation (M)[8] |  |  |  | Mascot |
|    | 2950.345                                        | 2950.4238 | 0.0788  | 27 | 252         | 277 | VCAGLSCMQNEGDDQV<br>NNKNIVNINK  |      |   |    |   |  | Carbamidomethyl (C)[2,7], Oxidation (M)[8] |  |  |  | Mascot |
|    | 3408.6667                                       | 3408.6541 | -0.0126 | -4 | 29          | 57  | VLRPLPVETNNDEEPM<br>EDDFSLGFLKK |      |   |    |   |  |                                            |  |  |  | Mascot |
| 30 | ATP-dependent RNA helicase DDX19B [Danio rerio] |           |         |    | gi 27545267 |     | 54748                           | 5.56 | 9 | 34 | 0 |  |                                            |  |  |  |        |

#### Peptide Information

|  | Calc. Mass | Obsrv. Mass | ± da    | ± ppm | Start Seq. | End Seq. | Sequence                          | Ion Score | C. I. | % Modification          | Rank | Result Type |
|--|------------|-------------|---------|-------|------------|----------|-----------------------------------|-----------|-------|-------------------------|------|-------------|
|  | 1202.6376  | 1202.5201   | -0.1175 | -98   | 62         | 72       | DDKAAQSLLNK                       |           |       |                         |      | Mascot      |
|  | 1249.7878  | 1249.6309   | -0.1569 | -126  | 296        | 306      | IVDPNIIKLK                        |           |       |                         |      | Mascot      |
|  | 1249.7878  | 1249.6309   | -0.1569 | -126  | 296        | 306      | IVDPNIIKLK                        |           |       |                         |      | Mascot      |
|  | 1926.9337  | 1926.9353   | 0.0016  | 1     | 364        | 380      | EGHQVALLSGEMQVEQR                 |           |       | Oxidation (M)[12]       |      | Mascot      |
|  | 1926.9337  | 1926.9353   | 0.0016  | 1     | 364        | 380      | EGHQVALLSGEMQVEQR                 |           |       | Oxidation (M)[12]       |      | Mascot      |
|  | 2176.0479  | 2176.1582   | 0.1103  | 51    | 308        | 325      | EEETLDTIKQYYVICNSK                |           |       |                         |      | Mascot      |
|  | 2211.0283  | 2211.115    | 0.0867  | 39    | 170        | 188      | WPECLCVCPTYELALQT<br>GK           |           |       | Carbamidomethyl (C)[4]  |      | Mascot      |
|  | 2233.0693  | 2233.0911   | 0.0218  | 10    | 308        | 325      | EEETLDTIKQYYVICNSK                |           |       | Carbamidomethyl (C)[15] |      | Mascot      |
|  | 2289.2061  | 2289.1335   | -0.0726 | -32   | 189        | 207      | VIEQMGKHYPEVQLVYAI<br>R           |           |       | Oxidation (M)[5]        |      | Mascot      |
|  | 2289.2061  | 2289.1335   | -0.0726 | -32   | 189        | 207      | VIEQMGKHYPEVQLVYAI<br>R           |           |       | Oxidation (M)[5]        |      | Mascot      |
|  | 2384.2642  | 2383.9565   | -0.3077 | -129  | 214        | 235      | GAKLQEQIVIGTPGTVLD<br>WCQK        |           |       |                         |      | Mascot      |
|  | 2423.1411  | 2423.0903   | -0.0508 | -21   | 275        | 294      | TCQMLLFSAFETVWN<br>FAK            |           |       | Carbamidomethyl (C)[2]  |      | Mascot      |
|  | 3052.5269  | 3052.4548   | -0.0721 | -24   | 353        | 380      | TAGWLAGELSGREGHQVA<br>LLSGEMQVEQR |           |       |                         |      | Mascot      |

31 coatomer subunit gamma-2 [Danio rerio] gi|18858453 97484.2 5.44 13 33 0

#### Peptide Information

|  | Calc. Mass | Obsrv. Mass | ± da    | ± ppm | Start Seq. | End Seq. | Sequence      | Ion Score | C. I. | % Modification                             | Rank | Result Type |
|--|------------|-------------|---------|-------|------------|----------|---------------|-----------|-------|--------------------------------------------|------|-------------|
|  | 801.4828   | 801.3992    | -0.0836 | -104  | 489        | 497      | AAAVSALAK     |           |       |                                            |      | Mascot      |
|  | 1232.7473  | 1232.6257   | -0.1216 | -99   | 455        | 465      | ILHLLGKEGPR   |           |       |                                            |      | Mascot      |
|  | 1307.5581  | 1307.677    | 0.1189  | 91    | 225        | 234      | SPFAYCMMIR    |           |       | Carbamidomethyl (C)[6], Oxidation (M)[7,8] |      | Mascot      |
|  | 1358.6772  | 1358.7645   | 0.0873  | 64    | 528        | 538      | ATFYMNVLQKQ   |           |       | Oxidation (M)[5]                           |      | Mascot      |
|  | 1359.7532  | 1359.6578   | -0.0954 | -70   | 823        | 834      | NSHVLFLAGVFR  |           |       |                                            |      | Mascot      |
|  | 1359.7532  | 1359.6578   | -0.0954 | -70   | 823        | 834      | NSHVLFLAGVFR  |           |       |                                            |      | Mascot      |
|  | 1579.7542  | 1579.7408   | -0.0134 | -8    | 394        | 406      | HSVMMNFLSNMLR |           |       |                                            |      | Mascot      |

|           |                                           |         |     |     |              |                                    |      |   |    |                           |  |  |        |
|-----------|-------------------------------------------|---------|-----|-----|--------------|------------------------------------|------|---|----|---------------------------|--|--|--------|
| 1579.7542 | 1579.7408                                 | -0.0134 | -8  | 394 | 406          | HSVMMNFLSNMLR                      |      |   |    |                           |  |  | Mascot |
| 1635.7692 | 1635.8325                                 | 0.0633  | 39  | 221 | 234          | SGLKSPFAYCMMIR                     |      |   |    | Oxidation (M)[11,12]      |  |  | Mascot |
| 1727.936  | 1727.8151                                 | -0.1209 | -70 | 152 | 168          | VPSVSSSALVSSLHMK                   |      |   |    |                           |  |  | Mascot |
| 1927.0548 | 1926.9353                                 | -0.1195 | -62 | 818 | 834          | VPENKNSHVLFLAGVFR                  |      |   |    |                           |  |  | Mascot |
| 1927.0548 | 1926.9353                                 | -0.1195 | -62 | 818 | 834          | VPENKNSHVLFLAGVFR                  |      |   |    |                           |  |  | Mascot |
| 2283.1033 | 2283.1855                                 | 0.0822  | 36  | 318 | 338          | HPSAVTACNLDLENLITD<br>SNR          |      |   |    |                           |  |  | Mascot |
| 2398.301  | 2398.2466                                 | -0.0544 | -23 | 146 | 168          | QAIVDKVPSVSSSALVSS<br>LHMK         |      |   |    | Oxidation (M)[21]         |  |  | Mascot |
| 3337.5916 | 3337.7168                                 | 0.1252  | 38  | 649 | 675          | CIKHTFANHMIQFQDCTN<br>TLNDQLLQK    |      |   |    | Carbamidomethyl (C)[1,16] |  |  | Mascot |
| 3408.7507 | 3408.6541                                 | -0.0966 | -28 | 561 | 590          | SLHQYTLEPSEKPFDMKT<br>VPLATAPITEHK |      |   |    |                           |  |  | Mascot |
| 32        | protein disulfide-isomerase [Danio rerio] |         |     |     | gi 193788703 | 56598.2                            | 4.55 | 9 | 33 | 0                         |  |  |        |

Peptide Information

| Calc. Mass | Obsrv. Mass | ± da    | ± ppm | Start Seq. | End Seq. | Sequence                         | Ion Score | C. I. % | Modification           | Rank | Result Type |
|------------|-------------|---------|-------|------------|----------|----------------------------------|-----------|---------|------------------------|------|-------------|
| 943.5206   | 943.5347    | 0.0141  | 15    | 414        | 422      | DNANIVVAK                        |           |         |                        |      | Mascot      |
| 943.5206   | 943.5347    | 0.0141  | 15    | 414        | 422      | DNANIVVAK                        |           |         |                        |      | Mascot      |
| 996.4632   | 996.5983    | 0.1351  | 136   | 212        | 220      | NTFDGEVSK                        |           |         |                        |      | Mascot      |
| 1307.6147  | 1307.677    | 0.0623  | 48    | 423        | 434      | MDSTANEIEAVK                     |           |         |                        |      | Mascot      |
| 1672.9056  | 1672.8354   | -0.0702 | -42   | 400        | 413      | QLAPIWDQLGEKFK                   |           |         |                        |      | Mascot      |
| 1727.8599  | 1727.8151   | -0.0448 | -26   | 452        | 466      | VIDYNGERTLDGFTK                  |           |         |                        |      | Mascot      |
| 1851.9236  | 1851.9321   | 0.0085  | 5     | 113        | 128      | EYSAGRQAEDIVSWLK                 |           |         |                        |      | Mascot      |
| 2233.1169  | 2233.0911   | -0.0258 | -12   | 423        | 442      | MDSTANEIEAVKVHSFPT<br>LK         |           |         | Oxidation (M)[1]       |      | Mascot      |
| 2705.4138  | 2705.1721   | -0.2417 | -89   | 4          | 28       | FLIVCALAAMSAAEIAEEE<br>DVLVLK    |           |         | Carbamidomethyl (C)[5] |      | Mascot      |
| 3052.6018  | 3052.4548   | -0.147  | -48   | 1          | 28       | MLKFLIVCALAAMSAAEIA<br>EEEDVLVLK |           |         | Oxidation (M)[1,13]    |      | Mascot      |

33 protein kinase C, theta [Danio rerio] gi|269315875 81814.9 8.06 13 33 0

Peptide Information

| Calc. Mass | Obsrv. Mass | ± da    | ± ppm | Start Seq. | End Seq. | Sequence       | Ion Score | C. I. % | Modification                             | Rank | Result Type |
|------------|-------------|---------|-------|------------|----------|----------------|-----------|---------|------------------------------------------|------|-------------|
| 850.4781   | 850.5432    | 0.0651  | 77    | 42         | 48       | GQVYKQK        |           |         |                                          |      | Mascot      |
| 957.4167   | 957.5016    | 0.0849  | 89    | 526        | 533      | IADFGMCK       |           |         | Carbamidomethyl (C)[7], Oxidation (M)[6] |      | Mascot      |
| 1045.5789  | 1045.5654   | -0.0135 | -13   | 619        | 626      | LFVREPER       |           |         |                                          |      | Mascot      |
| 1277.6881  | 1277.676    | -0.0121 | -9    | 205        | 217      | VIAKCTGSVAVNSK |           |         |                                          |      | Mascot      |
| 1359.5238  | 1359.6578   | 0.134   | 99    | 262        | 272      | CEECGMNVHHK    |           |         | Carbamidomethyl (C)[1], Oxidation (M)[6] |      | Mascot      |
| 1359.5238  | 1359.6578   | 0.134   | 99    | 262        | 272      | CEECGMNVHHK    |           |         | Carbamidomethyl (C)[1], Oxidation (M)[6] |      | Mascot      |

|    |                                                  |           |         |     |             |     |                               |       |                              |        |   |
|----|--------------------------------------------------|-----------|---------|-----|-------------|-----|-------------------------------|-------|------------------------------|--------|---|
|    | 1579.7322                                        | 1579.7408 | 0.0086  | 5   | 599         | 610 | TDDPCYPRWLTR                  |       | Carbamidomethyl (C)[5]       | Mascot |   |
|    | 1579.7322                                        | 1579.7408 | 0.0086  | 5   | 599         | 610 | TDDPCYPRWLTR                  |       | Carbamidomethyl (C)[5]       | Mascot |   |
|    | 1635.837                                         | 1635.8325 | -0.0045 | -3  | 83          | 97  | TEATVQLDTLASRCK               |       |                              | Mascot |   |
|    | 1727.8322                                        | 1727.8151 | -0.0171 | -10 | 178         | 191 | EFVWGLNKQGYQCR                |       |                              | Mascot |   |
|    | 1896.0337                                        | 1895.9883 | -0.0454 | -24 | 99          | 114 | ENGKLEIWVELKPQGR              |       |                              | Mascot |   |
|    | 2284.0989                                        | 2284.1831 | 0.0842  | 37  | 542         | 561 | TCTFCGTPDYIAPEILLGQK          |       | Carbamidomethyl (C)[2,5]     | Mascot |   |
|    | 2950.3838                                        | 2950.4238 | 0.04    | 14  | 234         | 257 | FKVYNYMSPTFCEHCGTLLWGLAR      |       | Carbamidomethyl (C)[12,15]   | Mascot |   |
|    | 2950.3838                                        | 2950.4238 | 0.04    | 14  | 234         | 257 | FKVYNYMSPTFCEHCGTLLWGLAR      |       | Carbamidomethyl (C)[12,15]   | Mascot |   |
|    | 3052.5117                                        | 3052.4548 | -0.0569 | -19 | 534         | 561 | ENIIGEARTCTFCGTPDYIAPEILLGQK  |       |                              | Mascot |   |
|    | 3337.5266                                        | 3337.7168 | 0.1902  | 57  | 159         | 185 | CHEFTATFFPQPTFC SVC KEFVWGLNK |       | Carbamidomethyl (C)[1,15,18] | Mascot |   |
| 34 | mitochondrial uncoupling protein 3 [Danio rerio] |           |         |     | gi 37681967 |     | 33714.6                       | 10.02 | 7                            | 33     | 0 |

Peptide Information

| Calc. Mass | Obsrv. Mass | ± da    | ± ppm | Start Seq. | End Seq. | Sequence               | Ion Score | C. I. | % Modification         | Rank | Result Type |
|------------|-------------|---------|-------|------------|----------|------------------------|-----------|-------|------------------------|------|-------------|
| 850.4385   | 850.5432    | 0.1047  | 123   | 296        | 302      | RAMMVSR                |           |       |                        |      | Mascot      |
| 943.5682   | 943.5347    | -0.0335 | -36   | 48         | 57       | AVTGAAGKIR             |           |       |                        |      | Mascot      |
| 943.5682   | 943.5347    | -0.0335 | -36   | 48         | 57       | AVTGAAGKIR             | 4         | 0     |                        |      | Mascot      |
| 996.4713   | 996.5983    | 0.127   | 127   | 297        | 304      | AMMVSRNR               |           |       | Oxidation (M)[2,3]     |      | Mascot      |
| 1825.9629  | 1826.0291   | 0.0662  | 36    | 88         | 103      | QMAFASIRIGLYDNVK       |           |       |                        |      | Mascot      |
| 1851.952   | 1851.9321   | -0.0199 | -11   | 186        | 201      | NALVNCTELVSYDLIK       |           |       | Carbamidomethyl (C)[6] |      | Mascot      |
| 2180.0759  | 2180.1167   | 0.0408  | 19    | 119        | 140      | ILAGCTTGAMAVSMAQPTDVVK |           |       | Oxidation (M)[10]      |      | Mascot      |
| 2211.1702  | 2211.115    | -0.0552 | -25   | 76         | 95       | SLYNGLVAGLQRQMAFA SIR  |           |       | Oxidation (M)[14]      |      | Mascot      |

|    |                                                                         |  |  |  |  |             |         |      |   |    |   |
|----|-------------------------------------------------------------------------|--|--|--|--|-------------|---------|------|---|----|---|
| 35 | MOSC domain-containing protein 1, mitochondrial precursor [Danio rerio] |  |  |  |  | gi 62122937 | 36692.9 | 6.28 | 5 | 32 | 0 |
|----|-------------------------------------------------------------------------|--|--|--|--|-------------|---------|------|---|----|---|

Peptide Information

| Calc. Mass | Obsrv. Mass | ± da    | ± ppm | Start Seq. | End Seq. | Sequence       | Ion Score | C. I. | % Modification          | Rank | Result Type |
|------------|-------------|---------|-------|------------|----------|----------------|-----------|-------|-------------------------|------|-------------|
| 943.557    | 943.5347    | -0.0223 | -24   | 251        | 258      | IGEVELKR       |           |       |                         |      | Mascot      |
| 943.557    | 943.5347    | -0.0223 | -24   | 251        | 258      | IGEVELKR       | 16        | 0     |                         |      | Mascot      |
| 957.5615   | 957.5016    | -0.0599 | -63   | 280        | 287      | KEPLETLK       |           |       |                         |      | Mascot      |
| 1249.6787  | 1249.6309   | -0.0478 | -38   | 281        | 290      | EPLETLKTYR     |           |       |                         |      | Mascot      |
| 1249.6787  | 1249.6309   | -0.0478 | -38   | 281        | 290      | EPLETLKTYR     |           |       |                         |      | Mascot      |
| 1635.7795  | 1635.8325   | 0.053   | 32    | 128        | 141      | FPLNNSSDLVVDCR |           |       | Carbamidomethyl (C)[13] |      | Mascot      |
| 1653.8959  | 1653.8911   | -0.0048 | -3    | 296        | 309      | QKTSPILGQYYTVR |           |       |                         |      | Mascot      |

36 hypothetical protein LOC100191015 [Danio rerio] gi|209863095 44412.9 9.4 8 32 0

Peptide Information

| Calc. Mass | Obsrv. Mass | ± da    | ± ppm | Start Seq. | End Sequence Seq.          | Ion Score | C. I. % | Modification            | Rank | Result Type |
|------------|-------------|---------|-------|------------|----------------------------|-----------|---------|-------------------------|------|-------------|
| 996.5373   | 996.5983    | 0.061   | 61    | 282        | 288 QRIFNYR                |           |         |                         |      | Mascot      |
| 1313.7172  | 1313.713    | -0.0042 | -3    | 42         | 52 LVQELRLDDGR             |           |         |                         |      | Mascot      |
| 1475.6802  | 1475.7573   | 0.0771  | 52    | 176        | 188 APDNSGSLFYNYK          |           |         |                         |      | Mascot      |
| 1486.757   | 1486.861    | 0.104   | 70    | 312        | 326 GAIEISPANVDACVK        |           |         |                         |      | Mascot      |
| 1825.9009  | 1826.0291   | 0.1282  | 70    | 1          | 16 MEDQVVACCVALLYLR        |           |         |                         |      | Mascot      |
| 1993.9834  | 1993.9792   | -0.0042 | -2    | 309        | 326 MYRGAIEISPANVDACVK     |           |         | Carbamidomethyl (C)[16] |      | Mascot      |
| 2211.1743  | 2211.115    | -0.0593 | -27   | 294        | 311 LIVENTFGILTAQWRMYR     |           |         |                         |      | Mascot      |
| 2398.1714  | 2398.2466   | 0.0752  | 31    | 374        | 394 VRETFTSYFSTEGAVPW QPVP |           |         |                         |      | Mascot      |

37 Zgc:152968 protein [Danio rerio] gi|157279115 134261.4 6.28 11 32 0 14 0

Peptide Information

| Calc. Mass | Obsrv. Mass | ± da    | ± ppm | Start Seq. | End Sequence Seq.                | Ion Score | C. I. % | Modification           | Rank | Result Type |
|------------|-------------|---------|-------|------------|----------------------------------|-----------|---------|------------------------|------|-------------|
| 1249.6569  | 1249.6309   | -0.026  | -21   | 89         | 100 SKKPVCSTSGQK                 |           |         |                        |      | Mascot      |
| 1249.6569  | 1249.6309   | -0.026  | -21   | 89         | 100 SKKPVCSTSGQK                 |           |         |                        |      | Mascot      |
| 1313.6696  | 1313.713    | 0.0434  | 33    | 136        | 147 SSDKVDIDHGLK                 |           |         |                        |      | Mascot      |
| 1358.746   | 1358.7645   | 0.0185  | 14    | 673        | 685 GCQSQVIISAPKK                |           |         |                        |      | Mascot      |
| 1486.8297  | 1486.861    | 0.0313  | 21    | 608        | 621 VGTEMKSNPVALLK               |           |         |                        |      | Mascot      |
| 1579.8452  | 1579.7408   | -0.1044 | -66   | 813        | 826 VHHEVGAKVPHDVR               | 14        | 0       |                        |      | Mascot      |
| 1579.8452  | 1579.7408   | -0.1044 | -66   | 813        | 826 VHHEVGAKVPHDVR               |           |         |                        |      | Mascot      |
| 1625.712   | 1625.7488   | 0.0368  | 23    | 1190       | 1202 EDATACMELMLWR               |           |         | Carbamidomethyl (C)[6] |      | Mascot      |
| 1635.7755  | 1635.8325   | 0.057   | 35    | 771        | 784 QAICLSTQDSTQQR               |           |         | Carbamidomethyl (C)[4] |      | Mascot      |
| 1851.9333  | 1851.9321   | -0.0012 | -1    | 840        | 856 SSVTVQDAFEKALAEK             |           |         |                        |      | Mascot      |
| 1994.0123  | 1993.9792   | -0.0331 | -17   | 305        | 323 EANDGQIIKGITMANHPG K         |           |         |                        |      | Mascot      |
| 2305.0183  | 2305.1479   | 0.1296  | 56    | 223        | 243 SSDGLPSHEMKCTLSQ ENAR        |           |         |                        |      | Mascot      |
| 3052.4827  | 3052.4548   | -0.0279 | -9    | 391        | 418 MLPVNSVYGDECISQS PRSALQNLTSR |           |         |                        |      | Mascot      |

38 Zgc:153795 protein [Danio rerio] gi|92097819 42352.1 5.79 10 32 0

Peptide Information

| Calc. Mass | Obsrv. Mass | ± da   | ± ppm | Start Seq. | End Sequence Seq. | Ion Score | C. I. % | Modification | Rank | Result Type |
|------------|-------------|--------|-------|------------|-------------------|-----------|---------|--------------|------|-------------|
| 1249.5664  | 1249.6309   | 0.0645 | 52    | 1          | 10 EIMNVEQCQR     |           |         |              |      | Mascot      |



|    |                                          |           |        |     |             |     |                          |      |    |    |   |                                            |  |  |  |  |        |
|----|------------------------------------------|-----------|--------|-----|-------------|-----|--------------------------|------|----|----|---|--------------------------------------------|--|--|--|--|--------|
|    | 1249.5664                                | 1249.6309 | 0.0645 | 52  | 1           | 10  | EIMNVEQCQR               |      |    |    |   |                                            |  |  |  |  | Mascot |
|    | 1277.71                                  | 1277.676  | -0.034 | -27 | 233         | 244 | EQEGPVIPAIPK             |      |    |    |   |                                            |  |  |  |  | Mascot |
|    | 1625.6128                                | 1625.7488 | 0.136  | 84  | 293         | 306 | YGSEEECMSVCSTK           |      |    |    |   | Carbamidomethyl (C)[7], Oxidation (M)[8]   |  |  |  |  | Mascot |
|    | 1638.692                                 | 1638.8582 | 0.1662 | 101 | 26          | 40  | TADGPQECNLVNCMK          |      |    |    |   | Oxidation (M)[14]                          |  |  |  |  | Mascot |
|    | 1708.7815                                | 1708.8048 | 0.0233 | 14  | 11          | 25  | ACCEREDCQLALIGK          |      |    |    |   | Carbamidomethyl (C)[2]                     |  |  |  |  | Mascot |
|    | 1851.7194                                | 1851.9321 | 0.2127 | 115 | 213         | 228 | NNYESEDSCMTACTVK         |      |    |    |   | Carbamidomethyl (C)[9]                     |  |  |  |  | Mascot |
|    | 2179.9053                                | 2180.1167 | 0.2114 | 97  | 288         | 306 | GNLNRYGSEEECMSVCS<br>TK  |      |    |    |   | Carbamidomethyl (C)[12], Oxidation (M)[13] |  |  |  |  | Mascot |
|    | 2211.0122                                | 2211.115  | 0.1028 | 46  | 158         | 176 | NDVDPKALTEMTSEEFQ<br>EK  |      |    |    |   |                                            |  |  |  |  | Mascot |
|    | 2288.9851                                | 2289.1335 | 0.1484 | 65  | 193         | 212 | FYYNNGVCQQFIYGGCG<br>GNK |      |    |    |   | Carbamidomethyl (C)[8]                     |  |  |  |  | Mascot |
|    | 2288.9851                                | 2289.1335 | 0.1484 | 65  | 193         | 212 | FYYNNGVCQQFIYGGCG<br>GNK |      |    |    |   | Carbamidomethyl (C)[8]                     |  |  |  |  | Mascot |
|    | 2304.9875                                | 2305.1479 | 0.1604 | 70  | 268         | 287 | MFFFEASSQSQPFYIYGG<br>CR |      |    |    |   |                                            |  |  |  |  | Mascot |
| 39 | kinesin-like protein KIF11 [Danio rerio] |           |        |     | gi 27545273 |     | 106935.8                 | 5.64 | 13 | 32 | 0 |                                            |  |  |  |  |        |

Peptide Information

| Calc. Mass | Obsrv. Mass | ± da    | ± ppm | Start Seq. | End Seq. | Sequence                          | Ion Score | C. I. | % Modification                            | Rank | Result Type |
|------------|-------------|---------|-------|------------|----------|-----------------------------------|-----------|-------|-------------------------------------------|------|-------------|
| 943.5029   | 943.5347    | 0.0318  | 34    | 181        | 188      | LQLVCDPR                          |           |       |                                           |      | Mascot      |
| 943.5029   | 943.5347    | 0.0318  | 34    | 181        | 188      | LQLVCDPR                          |           |       |                                           |      | Mascot      |
| 1002.4713  | 1002.5018   | 0.0305  | 30    | 940        | 946      | KEYMYPR                           |           |       | Oxidation (M)[4]                          |      | Mascot      |
| 1051.567   | 1051.712    | 0.145   | 138   | 435        | 443      | IIDLFTDSK                         |           |       |                                           |      | Mascot      |
| 1179.662   | 1179.6025   | -0.0595 | -50   | 434        | 443      | KIIDLFTDSK                        |           |       |                                           |      | Mascot      |
| 1249.647   | 1249.6309   | -0.0161 | -13   | 24         | 33       | CRPFNTVERK                        |           |       |                                           |      | Mascot      |
| 1249.647   | 1249.6309   | -0.0161 | -13   | 24         | 33       | CRPFNTVERK                        |           |       |                                           |      | Mascot      |
| 1277.6519  | 1277.676    | 0.0241  | 19    | 48         | 59       | EVIMRTGGATDK                      |           |       |                                           |      | Mascot      |
| 1307.7206  | 1307.677    | -0.0436 | -33   | 435        | 445      | IIDLFTDSKQK                       |           |       |                                           |      | Mascot      |
| 1335.6361  | 1335.7087   | 0.0726  | 54    | 690        | 700      | ECPLQGFDTLR                       |           |       | Carbamidomethyl (C)[2]                    |      | Mascot      |
| 1486.7094  | 1486.861    | 0.1516  | 102   | 579        | 592      | ETLGAVCESYSSIK                    |           |       |                                           |      | Mascot      |
| 1826.0493  | 1826.0291   | -0.0202 | -11   | 283        | 299      | EAGNINQSLLTLGRVIK                 |           |       |                                           |      | Mascot      |
| 2398.1553  | 2398.2466   | 0.0913  | 38    | 579        | 601      | ETLGAVCESYSSIKGAVG<br>EGVER       |           |       | Carbamidomethyl (C)[7]                    |      | Mascot      |
| 3052.4463  | 3052.4548   | 0.0085  | 3     | 83         | 110      | SVVCPILDEVIMGYNCTIF<br>AYGQTGTGK  |           |       | Carbamidomethyl (C)[4], Oxidation (M)[12] |      | Mascot      |
| 3408.489   | 3408.6541   | 0.1651  | 48    | 672        | 700      | TDMMTFFDAYTESLASM<br>RECPLQGFDTLR |           |       | Oxidation (M)[3,4]                        |      | Mascot      |

40 17-beta hydroxysteroid dehydrogenase type 3 [Danio rerio] gi|45356824 33995.9 8.93 7 32 0

Peptide Information

| Calc. Mass | Obsrv. Mass | ± da | ± ppm | Start | End | Sequence | Ion | C. I. | % Modification | Rank | Result Type |
|------------|-------------|------|-------|-------|-----|----------|-----|-------|----------------|------|-------------|
|------------|-------------|------|-------|-------|-----|----------|-----|-------|----------------|------|-------------|

|    |                       |           |           | Seq.    | Seq.         | Score     |      |                           |                                            |        |
|----|-----------------------|-----------|-----------|---------|--------------|-----------|------|---------------------------|--------------------------------------------|--------|
| 41 | titin a [Danio rerio] | 943.4158  | 943.5347  | 0.1189  | 126          | 162       | 168  | SMVKMCR                   | Carbamidomethyl (C)[6], Oxidation (M)[2,5] | Mascot |
|    |                       | 943.4158  | 943.5347  | 0.1189  | 126          | 162       | 168  | SMVKMCR                   | Carbamidomethyl (C)[6], Oxidation (M)[2,5] | Mascot |
|    |                       | 1249.7258 | 1249.6309 | -0.0949 | -76          | 23        | 33   | IASLIMMLITK               | Oxidation (M)[6]                           | Mascot |
|    |                       | 1249.7258 | 1249.6309 | -0.0949 | -76          | 23        | 33   | IASLIMMLITK               | Oxidation (M)[6]                           | Mascot |
|    |                       | 1313.7899 | 1313.713  | -0.0769 | -59          | 179       | 191  | RGVILNVSSGIAK             |                                            | Mascot |
|    |                       | 1625.839  | 1625.7488 | -0.0902 | -55          | 152       | 165  | IYDIVNCNVKSMVK            |                                            | Mascot |
|    |                       | 2180.0981 | 2180.1167 | 0.0186  | 9            | 49        | 69   | WAVITGGSDGIGRAYAEE<br>LSK |                                            | Mascot |
|    |                       | 2384.2966 | 2383.9565 | -0.3401 | -143         | 1         | 22   | MTLTEIIFVLGTCAILVFG<br>GK | Carbamidomethyl (C)[14]                    | Mascot |
|    |                       | 2423.2122 | 2423.0903 | -0.1219 | -50          | 142       | 161  | LLETSDLEERIYDIVNCNV<br>K  | Carbamidomethyl (C)[17]                    | Mascot |
|    |                       |           |           |         | gi 110005909 | 3646149.2 | 6.18 | 70                        | 32                                         | 0      |

### Peptide Information

| Calc. Mass | Obsrv. Mass | ± da    | ± ppm | Start Seq. | End Seq. | Sequence     | Ion Score | C. I. | % Modification                           | Rank | Result Type |
|------------|-------------|---------|-------|------------|----------|--------------|-----------|-------|------------------------------------------|------|-------------|
| 801.4141   | 801.3992    | -0.0149 | -19   | 9160       | 9166     | EFPPSPK      |           |       |                                          |      | Mascot      |
| 842.5094   | 842.5084    | -0.001  | -1    | 15232      | 15239    | LSIPGVTR     |           |       |                                          |      | Mascot      |
| 850.5396   | 850.5432    | 0.0036  | 4     | 17926      | 17932    | FLLTKTK      |           |       |                                          |      | Mascot      |
| 882.4679   | 882.5674    | 0.0995  | 113   | 2876       | 2882     | YKVSTER      |           |       |                                          |      | Mascot      |
| 943.5107   | 943.5347    | 0.024   | 25    | 9616       | 9622     | EKVFHQR      | 14        | 0     |                                          |      | Mascot      |
| 943.5359   | 943.5347    | -0.0012 | -1    | 32548      | 32556    | VTAFVAAHK    |           |       |                                          |      | Mascot      |
| 957.504    | 957.5016    | -0.0024 | -3    | 8631       | 8638     | KDVYFSAK     |           |       |                                          |      | Mascot      |
| 996.591    | 996.5983    | 0.0073  | 7     | 9064       | 9072     | MKAVPLPPK    |           |       | Oxidation (M)[1]                         |      | Mascot      |
| 1002.5189  | 1002.5018   | -0.0171 | -17   | 24279      | 24286    | LPDGRWMK     |           |       |                                          |      | Mascot      |
| 1036.488   | 1036.4905   | 0.0025  | 2     | 15834      | 15841    | ETWKQCNK     |           |       |                                          |      | Mascot      |
| 1036.5322  | 1036.4905   | -0.0417 | -40   | 7927       | 7934     | TQWFRNGK     |           |       |                                          |      | Mascot      |
| 1045.5347  | 1045.5654   | 0.0307  | 29    | 7144       | 7153     | CQIGGTPEIK   |           |       |                                          |      | Mascot      |
| 1051.6259  | 1051.712    | 0.0861  | 82    | 32375      | 32384    | SPIASPPRVK   |           |       |                                          |      | Mascot      |
| 1165.6211  | 1165.7457   | 0.1246  | 107   | 28447      | 28457    | VSAENKFGVSK  |           |       |                                          |      | Mascot      |
| 1179.6078  | 1179.6025   | -0.0053 | -4    | 28311      | 28319    | VTWKLEEMK    |           |       | Oxidation (M)[8]                         |      | Mascot      |
| 1198.6136  | 1198.6265   | 0.0129  | 11    | 31541      | 31550    | TLKMAQEFSK   |           |       | Oxidation (M)[4]                         |      | Mascot      |
| 1202.5179  | 1202.5201   | 0.0022  | 2     | 12045      | 12054    | KYDMVADGCK   |           |       | Carbamidomethyl (C)[9], Oxidation (M)[4] |      | Mascot      |
| 1232.6157  | 1232.6257   | 0.01    | 8     | 8021       | 8030     | DTWELKESPK   |           |       |                                          |      | Mascot      |
| 1249.6536  | 1249.6309   | -0.0227 | -18   | 31164      | 31174    | KEWSTVVSSAR  |           |       |                                          |      | Mascot      |
| 1249.6635  | 1249.6309   | -0.0326 | -26   | 7813       | 7823     | DITDQTTTVKK  |           |       |                                          |      | Mascot      |
| 1277.7688  | 1277.676    | -0.0928 | -73   | 16200      | 16211    | EKIVVHAGGVIR |           |       |                                          |      | Mascot      |

|           |           |         |     |       |       |                          |                                          |  |        |
|-----------|-----------|---------|-----|-------|-------|--------------------------|------------------------------------------|--|--------|
| 1307.6842 | 1307.677  | -0.0072 | -6  | 6703  | 6713  | ITFENNEVTLK              |                                          |  | Mascot |
| 1313.6406 | 1313.713  | 0.0724  | 55  | 7185  | 7196  | VAKSDIGEYTK              |                                          |  | Mascot |
| 1335.6208 | 1335.7087 | 0.0879  | 66  | 18202 | 18212 | DKVEMEGEQVR              | Oxidation (M)[5]                         |  | Mascot |
| 1344.61   | 1344.6594 | 0.0494  | 37  | 7474  | 7485  | SQLSDSGTYVCK             | Carbamidomethyl (C)[11]                  |  | Mascot |
| 1358.7321 | 1358.7645 | 0.0324  | 24  | 18543 | 18555 | VAARNAIGCSLAR            | Carbamidomethyl (C)[9]                   |  | Mascot |
| 1359.658  | 1359.6578 | -0.0002 | 0   | 30521 | 30531 | GLLEGFEYEFR              |                                          |  | Mascot |
| 1359.6799 | 1359.6578 | -0.0221 | -16 | 7171  | 7181  | MEFFKGIACLK              | Carbamidomethyl (C)[9], Oxidation (M)[1] |  | Mascot |
| 1475.7601 | 1475.7573 | -0.0028 | -2  | 30138 | 30150 | VFAENETGLSRPR            |                                          |  | Mascot |
| 1486.7571 | 1486.861  | 0.1039  | 70  | 12056 | 12068 | KLVIHDCTLDDSK            |                                          |  | Mascot |
| 1557.743  | 1557.8682 | 0.1252  | 80  | 20269 | 20281 | VSGLSEEIEYFR             |                                          |  | Mascot |
| 1564.8481 | 1564.835  | -0.0131 | -8  | 27353 | 27365 | IPNLVKGTEYQFR            |                                          |  | Mascot |
| 1579.7897 | 1579.7408 | -0.0489 | -31 | 11668 | 11681 | LHPSKVVMHSEDGK           | Oxidation (M)[9]                         |  | Mascot |
| 1579.7897 | 1579.7408 | -0.0489 | -31 | 11668 | 11681 | LHPSKVVMHSEDGK           | Oxidation (M)[9]                         |  | Mascot |
| 1625.7554 | 1625.7488 | -0.0066 | -4  | 32067 | 32079 | HEVSSFEEKYESQR           |                                          |  | Mascot |
| 1635.8312 | 1635.8325 | 0.0013  | 1   | 21208 | 21222 | CVLSWLPLHDGGGK           | Carbamidomethyl (C)[1]                   |  | Mascot |
| 1638.9061 | 1638.8582 | -0.0479 | -29 | 7730  | 7743  | DIDIVELLRNVDPK           |                                          |  | Mascot |
| 1639.7849 | 1639.8168 | 0.0319  | 19  | 4519  | 4532  | EGYPVFENSLEDIK           |                                          |  | Mascot |
| 1646.9324 | 1646.8633 | -0.0691 | -42 | 19700 | 19714 | ISVESTTTNTVLLIR          |                                          |  | Mascot |
| 1653.8707 | 1653.8911 | 0.0204  | 12  | 9667  | 9680  | VHFLAKQNEEVSPR           |                                          |  | Mascot |
| 1672.8441 | 1672.8354 | -0.0087 | -5  | 14259 | 14271 | DLIQNGEYYFRVR            |                                          |  | Mascot |
| 1708.8608 | 1708.8048 | -0.056  | -33 | 4391  | 4405  | ASTKEMLSPVEMVR           | Oxidation (M)[6,13]                      |  | Mascot |
| 1710.8037 | 1710.8059 | 0.0022  | 1   | 6852  | 6866  | DTQSIVGKSMELDCK          | Carbamidomethyl (C)[14]                  |  | Mascot |
| 1727.7839 | 1727.8151 | 0.0312  | 18  | 18707 | 18721 | GDWVTAVSCTKTSCR          | Carbamidomethyl (C)[9,14]                |  | Mascot |
| 1825.9918 | 1826.0291 | 0.0373  | 20  | 3610  | 3624  | QVSVFHKQQLVQEKK          |                                          |  | Mascot |
| 1851.9191 | 1851.9321 | 0.013   | 7   | 11733 | 11749 | DEVVLMCEVSKSSAQVK        |                                          |  | Mascot |
| 1873.9655 | 1873.9421 | -0.0234 | -12 | 9520  | 9535  | EVLITIEQNNNTFPK          |                                          |  | Mascot |
| 1894.9116 | 1894.965  | 0.0534  | 28  | 19811 | 19826 | LHDGTEYIFRVCAENK         |                                          |  | Mascot |
| 1896.0226 | 1895.9883 | -0.0343 | -18 | 28077 | 28094 | VLDTPGPPGPLSKDVTR        |                                          |  | Mascot |
| 1916.9998 | 1916.9828 | -0.017  | -9  | 4474  | 4491  | SATSMTSELVLGPLPIER       | Oxidation (M)[5]                         |  | Mascot |
| 1926.9225 | 1926.9353 | 0.0128  | 7   | 26393 | 26410 | SSDPVLAIACEPPNSVR        | 2 0 Carbamidomethyl (C)[11]              |  | Mascot |
| 1926.9412 | 1926.9353 | -0.0059 | -3  | 29740 | 29759 | VMACNAGGAGEPAEIPG<br>VVK | Carbamidomethyl (C)[4]                   |  | Mascot |
| 1994.0117 | 1993.9792 | -0.0325 | -16 | 9143  | 9158  | NIYLPYQEEDEIVLQK         |                                          |  | Mascot |
| 2176.1384 | 2176.1582 | 0.0198  | 9   | 27586 | 27604 | DESVIPQIEFAEKSLLTIK      |                                          |  | Mascot |
| 2180.1016 | 2180.1167 | 0.0151  | 7   | 26246 | 26265 | ETTTANWIEVSSAVARCT<br>IK |                                          |  | Mascot |
| 2211.1438 | 2211.115  | -0.0288 | -13 | 6982  | 7001  | SCEIALRGDTAILELHNID<br>K |                                          |  | Mascot |
| 2225.0801 | 2225.1274 | 0.0473  | 21  | 488   | 506   | IRKPMHVEGAQMEEED         |                                          |  | Mascot |

|           |                                              |         |     |             |       |                                    |      |   |    |                                          |  |        |
|-----------|----------------------------------------------|---------|-----|-------------|-------|------------------------------------|------|---|----|------------------------------------------|--|--------|
| 2225.1382 | 2225.1274                                    | -0.0108 | -5  | 29539       | 29559 | VR<br>VAATNRFGIGGFLQSEVV<br>ECK    |      |   |    |                                          |  | Mascot |
| 2232.9575 | 2233.0911                                    | 0.1336  | 60  | 1525        | 1542  | MINEFGYCSLDYEVAYSR                 |      |   |    | Carbamidomethyl (C)[8], Oxidation (M)[1] |  | Mascot |
| 2283.1899 | 2283.1855                                    | -0.0044 | -2  | 3763        | 3783  | EHPSQVMSALTESVTPLT<br>IVK          |      |   |    | Oxidation (M)[7]                         |  | Mascot |
| 2284.1819 | 2284.1831                                    | 0.0012  | 1   | 21598       | 21618 | EITKDSVSLIWDPPVIDGG<br>SR          |      |   |    |                                          |  | Mascot |
| 2289.1279 | 2289.1335                                    | 0.0056  | 2   | 15962       | 15983 | DDSAMYTLTATNSLGTAT<br>KSIK         |      |   |    |                                          |  | Mascot |
| 2289.1279 | 2289.1335                                    | 0.0056  | 2   | 15962       | 15983 | DDSAMYTLTATNSLGTAT<br>KSIK         |      |   |    |                                          |  | Mascot |
| 2305.1228 | 2305.1479                                    | 0.0251  | 11  | 15962       | 15983 | DDSAMYTLTATNSLGTAT<br>KSIK         |      |   |    | Oxidation (M)[5]                         |  | Mascot |
| 2384.0129 | 2383.9565                                    | -0.0564 | -24 | 30220       | 30239 | NHLSVMTDEQEDEGLY<br>TCR            |      |   |    | Carbamidomethyl (C)[19]                  |  | Mascot |
| 2398.2036 | 2398.2466                                    | 0.043   | 18  | 4922        | 4942  | GSPELHVTFWFLNDKPLN<br>SSEK         |      |   |    |                                          |  | Mascot |
| 2423.1733 | 2423.0903                                    | -0.083  | -34 | 20947       | 20968 | AVVVGNMFKSSGLMDGI<br>AYEFR         |      |   |    | Oxidation (M)[7, 14]                     |  | Mascot |
| 2705.2585 | 2705.1721                                    | -0.0864 | -32 | 11239       | 11261 | HMLVINHCFEDEGEYTI<br>EVLGK         |      |   |    |                                          |  | Mascot |
| 2950.4639 | 2950.4238                                    | -0.0401 | -14 | 22615       | 22641 | TEGEINEAAQIDITSSFTS<br>LVIENVNR    |      |   |    |                                          |  | Mascot |
| 2950.6248 | 2950.4238                                    | -0.201  | -68 | 22262       | 22289 | SVIINVKVLDRPGPDGPI<br>SIYGVTSK     | 0    | 0 |    |                                          |  | Mascot |
| 3052.4172 | 3052.4548                                    | 0.0376  | 12  | 1013        | 1037  | RMAQQTQMMQTFISET<br>EQISAIR        |      |   |    | Oxidation (M)[2,8,9]                     |  | Mascot |
| 3337.4834 | 3337.7168                                    | 0.2334  | 70  | 4869        | 4900  | DTGTYTCTAANEAGSSS<br>CSSSVTVQEPVFK |      |   |    | Carbamidomethyl (C)[7,18]                |  | Mascot |
| 3394.5784 | 3394.6301                                    | 0.0517  | 15  | 8926        | 8954  | ESIFSSEFTNETFSHEGL<br>PRELVMAYEK   |      |   |    | Oxidation (M)[24]                        |  | Mascot |
| 3394.5784 | 3394.6301                                    | 0.0517  | 15  | 8926        | 8954  | ESIFSSEFTNETFSHEGL<br>PRELVMAYEK   |      |   |    | Oxidation (M)[24]                        |  | Mascot |
| 42        | hypothetical protein LOC567956 [Danio rerio] |         |     | gi 83415148 |       | 42398.5                            | 9.28 | 9 | 32 | 0                                        |  |        |

Peptide Information

| Calc. Mass | Obsrv. Mass | ± da    | ± ppm | Start Seq. | End Seq. | Sequence                      | Ion Score | C. I. | % Modification         | Rank | Result Type |
|------------|-------------|---------|-------|------------|----------|-------------------------------|-----------|-------|------------------------|------|-------------|
| 1036.5057  | 1036.4905   | -0.0152 | -15   | 321        | 328      | FNTLEQER                      |           |       |                        |      | Mascot      |
| 1036.5212  | 1036.4905   | -0.0307 | -30   | 302        | 309      | RILCLCCR                      |           |       | Carbamidomethyl (C)[4] |      | Mascot      |
| 1045.5095  | 1045.5654   | 0.0559  | 53    | 218        | 226      | MSQHTSQVK                     |           |       |                        |      | Mascot      |
| 1198.6613  | 1198.6265   | -0.0348 | -29   | 227        | 236      | HKETVVNLMK                    |           |       |                        |      | Mascot      |
| 1249.6648  | 1249.6309   | -0.0339 | -27   | 331        | 340      | RVQQESYLAR                    |           |       |                        |      | Mascot      |
| 1249.6648  | 1249.6309   | -0.0339 | -27   | 332        | 341      | VQQESYLARR                    |           |       |                        |      | Mascot      |
| 1486.7471  | 1486.861    | 0.1139  | 77    | 126        | 137      | HQTIFTMQLHSK                  |           |       | Oxidation (M)[7]       |      | Mascot      |
| 1926.9628  | 1926.9353   | -0.0275 | -14   | 344        | 361      | DAGAAQENGGRVLQEN<br>K         |           |       |                        |      | Mascot      |
| 1926.9628  | 1926.9353   | -0.0275 | -14   | 344        | 361      | DAGAAQENGGRVLQEN<br>K         |           |       |                        |      | Mascot      |
| 3052.4509  | 3052.4548   | 0.0039  | 1     | 2          | 27       | VCYNNETVVFYSISHKNI<br>SDTWGTK |           |       |                        |      | Mascot      |

43 1-phosphatidylinositol-3-phosphate 5-kinase [Danio rerio] gi|187937038 236760.3 6.51 22 32 0

Peptide Information

| Calc. Mass | Obsrv. Mass | ± da    | ± ppm | Start Seq. | End Seq. | Sequence                  | Ion Score | C. I. % | Modification                                | Rank | Result Type |
|------------|-------------|---------|-------|------------|----------|---------------------------|-----------|---------|---------------------------------------------|------|-------------|
| 842.473    | 842.5084    | 0.0354  | 42    | 63         | 71       | TGANIAPAK                 |           |         |                                             |      | Mascot      |
| 943.5029   | 943.5347    | 0.0318  | 34    | 1716       | 1723     | VPIAVCER                  |           |         | Carbamidomethyl (C)[6]                      |      | Mascot      |
| 943.5029   | 943.5347    | 0.0318  | 34    | 1716       | 1723     | VPIAVCER                  |           |         | Carbamidomethyl (C)[6]                      |      | Mascot      |
| 1002.4122  | 1002.5018   | 0.0896  | 89    | 365        | 372      | TDHSEEER                  |           |         |                                             |      | Mascot      |
| 1179.6805  | 1179.6025   | -0.078  | -66   | 1442       | 1451     | LLEICLPPPK                |           |         | Carbamidomethyl (C)[5]                      |      | Mascot      |
| 1198.5812  | 1198.6265   | 0.0453  | 38    | 1585       | 1594     | HRQPTTDESK                |           |         |                                             |      | Mascot      |
| 1202.59    | 1202.5201   | -0.0699 | -58   | 1239       | 1249     | APIKADSEEDK               |           |         |                                             |      | Mascot      |
| 1277.5732  | 1277.676    | 0.1028  | 80    | 1707       | 1715     | HYLMYEHER                 |           |         |                                             |      | Mascot      |
| 1307.6664  | 1307.677    | 0.0106  | 8     | 2065       | 2075     | MPTVVSPELYR               |           |         | Oxidation (M)[1]                            |      | Mascot      |
| 1344.6615  | 1344.6594   | -0.0021 | -2    | 88         | 100      | SQSASSSPQGPRR             |           |         |                                             |      | Mascot      |
| 1486.7147  | 1486.861    | 0.1463  | 98    | 1826       | 1836     | IYYAEFHKMR                |           |         |                                             |      | Mascot      |
| 1564.8152  | 1564.835    | 0.0198  | 13    | 2065       | 2077     | MPTVVSPELYRTR             |           |         | Oxidation (M)[1]                            |      | Mascot      |
| 1653.917   | 1653.8911   | -0.0259 | -16   | 73         | 87       | LAKLEEGRPPSVTEK           |           |         |                                             |      | Mascot      |
| 1708.8693  | 1708.8048   | -0.0645 | -38   | 837        | 850      | FYLHSFQLPNSEVK            |           |         |                                             |      | Mascot      |
| 1710.9247  | 1710.8059   | -0.1188 | -69   | 1934       | 1947     | LDLLVMENLFYGRK            |           |         |                                             |      | Mascot      |
| 1825.937   | 1826.0291   | 0.0921  | 50    | 1137       | 1151     | DYFPEQVYLSPLLNK           |           |         |                                             |      | Mascot      |
| 1851.8557  | 1851.9321   | 0.0764  | 41    | 2085       | 2100     | YFLMVPDHWGSLGLNC          |           |         |                                             |      | Mascot      |
| 1873.8433  | 1873.9421   | 0.0988  | 53    | 387        | 401      | KICHNTTGMEFQDHR           |           |         | Carbamidomethyl (C)[3]                      |      | Mascot      |
| 1894.8422  | 1894.965    | 0.1228  | 65    | 681        | 695      | SCDDMDIRQFVHIK            |           |         | Carbamidomethyl (C)[2], Oxidation (M)[6]    |      | Mascot      |
| 2211.1123  | 2211.115    | 0.0027  | 1     | 851        | 869      | TLMFFEGCPPQLGCTIKL<br>R   |           |         | Carbamidomethyl (C)[8]                      |      | Mascot      |
| 2233.1719  | 2233.0911   | -0.0808 | -36   | 1716       | 1736     | VPIAVCEREPSIIAFALS<br>CK  |           |         |                                             |      | Mascot      |
| 2284.1287  | 2284.1831   | 0.0544  | 24    | 851        | 869      | TLMFFEGCPPQLGCTIKL<br>R   |           |         | Carbamidomethyl (C)[8,14], Oxidation (M)[3] |      | Mascot      |
| 2289.1431  | 2289.1335   | -0.0096 | -4    | 572        | 592      | MEVLLSEDGGQHISISDA<br>FIK |           |         |                                             |      | Mascot      |
| 2289.1431  | 2289.1335   | -0.0096 | -4    | 572        | 592      | MEVLLSEDGGQHISISDA<br>FIK |           |         |                                             |      | Mascot      |
| 2305.1379  | 2305.1479   | 0.01    | 4     | 572        | 592      | MEVLLSEDGGQHISISDA<br>FIK |           |         | Oxidation (M)[1]                            |      | Mascot      |
| 2383.9087  | 2383.9565   | 0.0478  | 20    | 172        | 189      | QYWMPDSQCCEKYDCN<br>EK    |           |         | Carbamidomethyl (C)[9,12]                   |      | Mascot      |

44 PREDICTED: protein FAM13A isoform 1 [Danio rerio] gi|189515024 66495.5 6.03 8 31 0

Peptide Information

| Calc. Mass | Obsrv. Mass | ± da | ± ppm | Start Seq. | End Seq. | Sequence | Ion Score | C. I. % | Modification | Rank | Result Type |
|------------|-------------|------|-------|------------|----------|----------|-----------|---------|--------------|------|-------------|
|------------|-------------|------|-------|------------|----------|----------|-----------|---------|--------------|------|-------------|

|    |                                                                                            |           |         |     |     |     |                                  |    |   |                  |  |  |        |
|----|--------------------------------------------------------------------------------------------|-----------|---------|-----|-----|-----|----------------------------------|----|---|------------------|--|--|--------|
|    | 943.5319                                                                                   | 943.5347  | 0.0028  | 3   | 329 | 336 | QRSNTLPK                         |    |   |                  |  |  | Mascot |
|    | 943.5319                                                                                   | 943.5347  | 0.0028  | 3   | 329 | 336 | QRSNTLPK                         | 10 | 0 |                  |  |  | Mascot |
|    | 1165.6034                                                                                  | 1165.7457 | 0.1423  | 122 | 416 | 424 | QVMKPLYDR                        |    |   | Oxidation (M)[3] |  |  | Mascot |
|    | 1277.6155                                                                                  | 1277.676  | 0.0605  | 47  | 382 | 392 | DMTREQIGAEK                      |    |   |                  |  |  | Mascot |
|    | 1313.7423                                                                                  | 1313.713  | -0.0293 | -22 | 386 | 397 | EQIGAEKVAIQK                     |    |   |                  |  |  | Mascot |
|    | 1344.6404                                                                                  | 1344.6594 | 0.019   | 14  | 29  | 38  | HQREQQESFR                       |    |   |                  |  |  | Mascot |
|    | 1564.79                                                                                    | 1564.835  | 0.045   | 29  | 413 | 424 | NERQVMKPLYDR                     |    |   | Oxidation (M)[6] |  |  | Mascot |
|    | 1710.9272                                                                                  | 1710.8059 | -0.1213 | -71 | 351 | 366 | APKPPVESTLETVTNK                 |    |   |                  |  |  | Mascot |
|    | 3408.5669                                                                                  | 3408.6541 | 0.0872  | 26  | 211 | 240 | FYGYGDGHQYLDDEVP<br>PSPNAHSFVSRR |    |   |                  |  |  | Mascot |
| 45 | novel protein similar to vertebrate trichorhinophalangeal syndrome I (TRPS1) [Danio rerio] |           |         |     |     |     |                                  |    |   |                  |  |  |        |
|    | gi 148726496                                                                               | 66303.5   | 8.32    | 6   | 31  | 0   |                                  |    |   |                  |  |  |        |

#### Peptide Information

|    | Calc. Mass                              | Obsrv. Mass | ± da    | ± ppm | Start Seq.  | End Sequence Seq.     | Ion Score | C. I. | % Modification            | Rank | Result Type |
|----|-----------------------------------------|-------------|---------|-------|-------------|-----------------------|-----------|-------|---------------------------|------|-------------|
|    | 943.5319                                | 943.5347    | 0.0028  | 3     | 114         | 121 ERAGEILR          |           |       |                           |      | Mascot      |
|    | 943.5319                                | 943.5347    | 0.0028  | 3     | 114         | 121 ERAGEILR          | 19        | 0     |                           |      | Mascot      |
|    | 1036.3888                               | 1036.4905   | 0.1017  | 98    | 522         | 529 MDDPEEER          |           |       | Oxidation (M)[1]          |      | Mascot      |
|    | 1036.3888                               | 1036.4905   | 0.1017  | 98    | 522         | 529 MDDPEEER          |           |       | Oxidation (M)[1]          |      | Mascot      |
|    | 1249.6422                               | 1249.6309   | -0.0113 | -9    | 170         | 182 GYLSGTPAGAVEK     |           |       |                           |      | Mascot      |
|    | 1249.6422                               | 1249.6309   | -0.0113 | -9    | 170         | 182 GYLSGTPAGAVEK     |           |       |                           |      | Mascot      |
|    | 1359.705                                | 1359.6578   | -0.0472 | -35   | 144         | 155 EPQTQKGATMLR      |           |       |                           |      | Mascot      |
|    | 1359.705                                | 1359.6578   | -0.0472 | -35   | 144         | 155 EPQTQKGATMLR      |           |       |                           |      | Mascot      |
|    | 1916.8741                               | 1916.9828   | 0.1087  | 57    | 227         | 243 KNANGGYVCNACGLYQK |           |       | Carbamidomethyl (C)[9,12] |      | Mascot      |
|    | 1926.9338                               | 1926.9353   | 0.0015  | 1     | 271         | 287 LNPDPMPSEQVGSKQQR |           |       | Oxidation (M)[6]          |      | Mascot      |
|    | 1926.9338                               | 1926.9353   | 0.0015  | 1     | 271         | 287 LNPDPMPSEQVGSKQQR |           |       | Oxidation (M)[6]          |      | Mascot      |
| 46 | Si:ch211-175f11.3 protein [Danio rerio] |             |         |       | gil61402751 |                       | 76132.9   | 6.83  | 10                        | 31   | 0           |

#### Peptide Information

|  | Calc. Mass | Obsrv. Mass | ± da    | ± ppm | Start Seq. | End Sequence Seq. | Ion Score | C. I. | % Modification     | Rank | Result Type |
|--|------------|-------------|---------|-------|------------|-------------------|-----------|-------|--------------------|------|-------------|
|  | 1002.4713  | 1002.5018   | 0.0305  | 30    | 472        | 479 FNNFSVMK      |           |       | Oxidation (M)[7]   |      | Mascot      |
|  | 1045.6113  | 1045.5654   | -0.0459 | -44   | 620        | 628 SSLRQTVVR     |           |       |                    |      | Mascot      |
|  | 1335.6473  | 1335.7087   | 0.0614  | 46    | 415        | 427 GGVAGCQKEPFSR |           |       |                    |      | Mascot      |
|  | 1344.5889  | 1344.6594   | 0.0705  | 52    | 451        | 461 FTCDDVDFNLR   |           |       |                    |      | Mascot      |
|  | 1557.6382  | 1557.8682   | 0.23    | 148   | 20         | 31 MMTCTEQSLYYR   |           |       | Oxidation (M)[1,2] |      | Mascot      |

|    |                                                            |           |         |      |     |              |                                |      |   |    |                        |  |  |        |
|----|------------------------------------------------------------|-----------|---------|------|-----|--------------|--------------------------------|------|---|----|------------------------|--|--|--------|
|    | 1579.9207                                                  | 1579.7408 | -0.1799 | -114 | 516 | 529          | HVFLATPAQLLLEK                 |      |   |    |                        |  |  | Mascot |
|    | 1579.9207                                                  | 1579.7408 | -0.1799 | -114 | 516 | 529          | HVFLATPAQLLLEK                 |      |   |    |                        |  |  | Mascot |
|    | 1646.8464                                                  | 1646.8633 | 0.0169  | 10   | 609 | 623          | GATLCVICPNRSSLR                |      |   |    | Carbamidomethyl (C)[5] |  |  | Mascot |
|    | 1672.8652                                                  | 1672.8354 | -0.0298 | -18  | 624 | 636          | QTVVRLELEDEWR                  |      |   |    |                        |  |  | Mascot |
|    | 2211.0308                                                  | 2211.115  | 0.0842  | 38   | 496 | 515          | MTDVPTTIQPSQYICAPD<br>SK       |      |   |    | Oxidation (M)[1]       |  |  | Mascot |
|    | 2950.4219                                                  | 2950.4238 | 0.0019  | 1    | 384 | 409          | NVSLKQVLQHMESSPDIT<br>QYGLCGMR |      |   |    | Oxidation (M)[11]      |  |  | Mascot |
|    | 2950.4219                                                  | 2950.4238 | 0.0019  | 1    | 384 | 409          | NVSLKQVLQHMESSPDIT<br>QYGLCGMR |      |   |    | Oxidation (M)[11]      |  |  | Mascot |
| 47 | PREDICTED: hypothetical protein LOC100537298 [Danio rerio] |           |         |      |     | gi 326667816 | 6120                           | 8.38 | 5 | 31 | 0                      |  |  |        |

#### Peptide Information

| Calc. Mass | Obsrv. Mass | ± da    | ± ppm | Start Seq. | End Seq. | Sequence                | Ion Score | C. I. | % | Modification                                | Rank | Result | Type |
|------------|-------------|---------|-------|------------|----------|-------------------------|-----------|-------|---|---------------------------------------------|------|--------|------|
| 1165.5895  | 1165.7457   | 0.1562  | 134   | 10         | 18       | CLRVNYGQR               |           |       |   | Carbamidomethyl (C)[1]                      |      | Mascot |      |
| 1486.7141  | 1486.861    | 0.1469  | 99    | 1          | 12       | MAESSIFTRCLR            |           |       |   | Carbamidomethyl (C)[10], Oxidation (M)[1]   |      | Mascot |      |
| 1635.7726  | 1635.8325   | 0.0599  | 37    | 38         | 51       | VLSCMHLPTCAIMK          |           |       |   | Carbamidomethyl (C)[4], Oxidation (M)[5,13] |      | Mascot |      |
| 1916.9829  | 1916.9828   | -0.0001 | 0     | 38         | 54       | VLSCMHLPTCAIMKVTI       |           |       |   | Carbamidomethyl (C)[4]                      |      | Mascot |      |
| 2225.0073  | 2225.1274   | 0.1201  | 54    | 19         | 37       | CANDCPDVLYNTAEQSL<br>RR |           |       |   | Carbamidomethyl (C)[1]                      |      | Mascot |      |
| 2225.0073  | 2225.1274   | 0.1201  | 54    | 19         | 37       | CANDCPDVLYNTAEQSL<br>RR |           |       |   | Carbamidomethyl (C)[1]                      |      | Mascot |      |

|    |                                                            |  |  |  |  |              |          |      |   |  |    |       |  |
|----|------------------------------------------------------------|--|--|--|--|--------------|----------|------|---|--|----|-------|--|
| 48 | PREDICTED: hypothetical protein LOC100537480 [Danio rerio] |  |  |  |  | gi 326665101 | 105910.1 | 4.52 | 1 |  | 24 | 6.466 |  |
|----|------------------------------------------------------------|--|--|--|--|--------------|----------|------|---|--|----|-------|--|

#### Peptide Information

| Calc. Mass | Obsrv. Mass | ± da   | ± ppm | Start Seq. | End Seq. | Sequence  | Ion Score | C. I. | %     | Modification | Rank | Result | Type |
|------------|-------------|--------|-------|------------|----------|-----------|-----------|-------|-------|--------------|------|--------|------|
| 943.5757   | 943.5347    | -0.041 | -43   | 33         | 41       | LLIGCLGVR | 24        |       | 6.466 |              | 3    | Mascot |      |

|    |                                                             |  |  |  |  |              |         |     |   |  |    |   |  |
|----|-------------------------------------------------------------|--|--|--|--|--------------|---------|-----|---|--|----|---|--|
| 49 | PREDICTED: tubulin polyglutamylase TTLL5-like [Danio rerio] |  |  |  |  | gi 326675847 | 75929.5 | 9.3 | 1 |  | 22 | 0 |  |
|----|-------------------------------------------------------------|--|--|--|--|--------------|---------|-----|---|--|----|---|--|

#### Peptide Information

| Calc. Mass | Obsrv. Mass | ± da    | ± ppm | Start Seq. | End Seq. | Sequence | Ion Score | C. I. | % | Modification | Rank | Result | Type |
|------------|-------------|---------|-------|------------|----------|----------|-----------|-------|---|--------------|------|--------|------|
| 943.5934   | 943.5347    | -0.0587 | -62   | 133        | 140      | LLTLEARK | 24        |       | 0 |              | 4    | Mascot |      |

|    |                                        |  |  |  |  |              |          |     |   |  |    |   |  |
|----|----------------------------------------|--|--|--|--|--------------|----------|-----|---|--|----|---|--|
| 50 | Si:dkey-246a16.2 protein [Danio rerio] |  |  |  |  | gi 171846979 | 121136.5 | 8.9 | 1 |  | 21 | 0 |  |
|----|----------------------------------------|--|--|--|--|--------------|----------|-----|---|--|----|---|--|

#### Peptide Information

| Calc. Mass | Obsrv. Mass | ± da | ± ppm | Start Seq. | End Seq. | Sequence | Ion Score | C. I. | % | Modification | Rank | Result | Type |
|------------|-------------|------|-------|------------|----------|----------|-----------|-------|---|--------------|------|--------|------|
|------------|-------------|------|-------|------------|----------|----------|-----------|-------|---|--------------|------|--------|------|

|                                                    |                                                           |                                 |            |            |            |                            |                       |                    |                   |                  |
|----------------------------------------------------|-----------------------------------------------------------|---------------------------------|------------|------------|------------|----------------------------|-----------------------|--------------------|-------------------|------------------|
| 943.557943.5347-0.0223-24374381LLSVLENR2105 Mascot |                                                           |                                 |            |            |            |                            |                       |                    |                   |                  |
| Gel Idx/Pos224/I24                                 |                                                           | Instr./Gel OriginBA2060/110707A |            |            |            | Process Status             |                       | Analysis Succeeded |                   |                  |
| Plate [#] Name[1] 31496                            |                                                           | Instrument Sample Name          |            |            |            | Spectra                    |                       | 11                 |                   |                  |
| Rank                                               | Protein Name                                              | Accession No.                   | Protein MW | Protein PI | Pep. Count | Protein Score              | Protein Score C. I. % | Total Ion Score    | Total Ion C. I. % |                  |
| 1                                                  | heterogeneous nuclear ribonucleoprotein A/B [Danio rerio] | gi 47086935                     | 34227.3    | 6.85       | 10         | 230                        | 100                   | 184                | 100               |                  |
| Peptide Information                                |                                                           |                                 |            |            |            |                            |                       |                    |                   |                  |
|                                                    | Calc. Mass                                                | Obsrv. Mass                     | ± da       | ± ppm      | Start Seq. | End Sequence Seq.          | Ion Score             | C. I. %            | Modification      | Rank Result Type |
|                                                    | 807.3478                                                  | 807.3823                        | 0.0345     | 43         | 95         | 101 ESDSVDR                |                       |                    |                   | Mascot           |
|                                                    | 850.4668                                                  | 850.5427                        | 0.0759     | 89         | 179        | 185 EEFAVKK                |                       |                    |                   | Mascot           |
|                                                    | 882.454                                                   | 882.5682                        | 0.1142     | 129        | 107        | 113 EHRLDGR                |                       |                    |                   | Mascot           |
|                                                    | 928.529                                                   | 928.5276                        | -0.0014    | -2         | 87         | 94 GFGFILFK                |                       |                    |                   | Mascot           |
|                                                    | 958.5396                                                  | 958.5389                        | -0.0007    | -1         | 171        | 178 GFVFITFK               |                       |                    |                   | Mascot           |
|                                                    | 1249.6072                                                 | 1249.6309                       | 0.0237     | 19         | 299        | 309 RGGHQSGYKPY            |                       |                    |                   | Mascot           |
|                                                    | 1533.7795                                                 | 1533.78                         | 0.0005     | 0          | 131        | 144 IFVGGLNPETTEEK         | 66                    | 99.994             |                   | Mascot           |
|                                                    | 1533.7795                                                 | 1533.78                         | 0.0005     | 0          | 131        | 144 IFVGGLNPETTEEK         |                       |                    |                   | Mascot           |
|                                                    | 1661.8937                                                 | 1661.8954                       | 0.0017     | 1          | 171        | 184 GFVFITFKEEFAVK         |                       |                    |                   | Mascot           |
|                                                    | 2172.0383                                                 | 2172.05                         | 0.0117     | 5          | 147        | 165 EYFGSFGEIETIELPTDPK    |                       |                    |                   | Mascot           |
|                                                    | 2172.0383                                                 | 2172.05                         | 0.0117     | 5          | 147        | 165 EYFGSFGEIETIELPTDPK    | 65                    | 99.992             |                   | Mascot           |
|                                                    | 2441.2234                                                 | 2441.23                         | 0.0066     | 3          | 145        | 165 IREYFGSFGEIETIELPTD PK |                       |                    |                   | Mascot           |
|                                                    | 2441.2234                                                 | 2441.23                         | 0.0066     | 3          | 145        | 165 IREYFGSFGEIETIELPTD PK | 53                    | 99.877             |                   | Mascot           |
| 2                                                  | hypothetical protein LOC563390 [Danio rerio]              | gi 156739275                    | 38057.1    | 6.31       | 10         | 82                         | 99.973                | 32                 | 85.139            |                  |
| Peptide Information                                |                                                           |                                 |            |            |            |                            |                       |                    |                   |                  |
|                                                    | Calc. Mass                                                | Obsrv. Mass                     | ± da       | ± ppm      | Start Seq. | End Sequence Seq.          | Ion Score             | C. I. %            | Modification      | Rank Result Type |
|                                                    | 1017.5727                                                 | 1017.5729                       | 0.0002     | 0          | 224        | 232 ITGFVDIPR              |                       |                    |                   | Mascot           |
|                                                    | 1090.535                                                  | 1090.5352                       | 0.0002     | 0          | 49         | 56 MIWEENLR                |                       |                    |                   | Mascot           |
|                                                    | 1106.5299                                                 | 1106.5325                       | 0.0026     | 2          | 49         | 56 MIWEENLR                |                       |                    | Oxidation (M)[1]  | Mascot           |
|                                                    | 1234.6249                                                 | 1234.6785                       | 0.0536     | 43         | 49         | 57 MIWEENLRK               |                       |                    | Oxidation (M)[1]  | Mascot           |
|                                                    | 1249.563                                                  | 1249.6309                       | 0.0679     | 54         | 209        | 218 DDLPCRYDPR             |                       |                    |                   | Mascot           |
|                                                    | 1360.6604                                                 | 1360.6259                       | -0.0345    | -25        | 38         | 48 SYHEDLEVGRR             |                       |                    |                   | Mascot           |
|                                                    | 1498.7173                                                 | 1498.7189                       | 0.0016     | 1          | 196        | 208 GLDSEQSYPYLAR          |                       |                    |                   | Mascot           |



|   |                                              |           |         |     |     |              |                           |     |        |                          |        |        |        |
|---|----------------------------------------------|-----------|---------|-----|-----|--------------|---------------------------|-----|--------|--------------------------|--------|--------|--------|
|   | 1498.7173                                    | 1498.7189 | 0.0016  | 1   | 196 | 208          | GLDSEQSYPYLAR             | 32  | 85.139 |                          |        | Mascot |        |
|   | 1638.7073                                    | 1638.8595 | 0.1522  | 93  | 321 | 335          | NNHCGIATMASYPLM           |     |        | Oxidation (M)[9]         |        | Mascot |        |
|   | 1838.7142                                    | 1838.9203 | 0.2061  | 112 | 74  | 88           | MGMNQFGDMTNEEFR           |     |        | Oxidation (M)[1,3]       |        | Mascot |        |
|   | 2174.0989                                    | 2174.0835 | -0.0154 | -7  | 276 | 296          | LDHAVLVVGYGYQGADV<br>AGNR |     |        |                          |        | Mascot |        |
|   | 2278.0015                                    | 2278.0154 | 0.0139  | 6   | 135 | 154          | QCGSCWSFSSTGALEG<br>QLFR  |     |        | Carbamidomethyl (C)[2,5] |        | Mascot |        |
| 3 | hypothetical protein LOC564835 [Danio rerio] |           |         |     |     | gi 157787177 | 38057.1                   | 6.2 | 9      | 76                       | 99.875 | 32     | 85.139 |

#### Peptide Information

|  | Calc. Mass | Obsrv. Mass | ± da    | ± ppm | Start Seq. | End Seq. | Sequence                  | Ion Score | C. I.  | % Modification           | Rank | Result Type |
|--|------------|-------------|---------|-------|------------|----------|---------------------------|-----------|--------|--------------------------|------|-------------|
|  | 1017.5727  | 1017.5729   | 0.0002  | 0     | 224        | 232      | ITGFVDIPR                 |           |        |                          |      | Mascot      |
|  | 1090.535   | 1090.5352   | 0.0002  | 0     | 49         | 56       | MIWEENLR                  |           |        |                          |      | Mascot      |
|  | 1106.5299  | 1106.5325   | 0.0026  | 2     | 49         | 56       | MIWEENLR                  |           |        | Oxidation (M)[1]         |      | Mascot      |
|  | 1234.6249  | 1234.6785   | 0.0536  | 43    | 49         | 57       | MIWEENLRK                 |           |        | Oxidation (M)[1]         |      | Mascot      |
|  | 1249.563   | 1249.6309   | 0.0679  | 54    | 209        | 218      | DDLPCRYDPR                |           |        |                          |      | Mascot      |
|  | 1498.7173  | 1498.7189   | 0.0016  | 1     | 196        | 208      | GLDSEQSYPYLAR             |           |        |                          |      | Mascot      |
|  | 1498.7173  | 1498.7189   | 0.0016  | 1     | 196        | 208      | GLDSEQSYPYLAR             | 32        | 85.139 |                          |      | Mascot      |
|  | 1638.7073  | 1638.8595   | 0.1522  | 93    | 322        | 336      | NNHCGIATMASYPLM           |           |        | Oxidation (M)[9]         |      | Mascot      |
|  | 1838.7142  | 1838.9203   | 0.2061  | 112   | 74         | 88       | MGMNQFGDMTNEEFR           |           |        | Oxidation (M)[1,3]       |      | Mascot      |
|  | 2174.0989  | 2174.0835   | -0.0154 | -7    | 277        | 297      | LDHAVLVVGYGYQGADV<br>AGNR |           |        |                          |      | Mascot      |
|  | 2278.0015  | 2278.0154   | 0.0139  | 6     | 135        | 154      | QCGSCWSFSSTGALEG<br>QLFR  |           |        | Carbamidomethyl (C)[2,5] |      | Mascot      |

|   |                                              |  |  |  |  |              |         |      |   |    |        |    |        |
|---|----------------------------------------------|--|--|--|--|--------------|---------|------|---|----|--------|----|--------|
| 4 | hypothetical protein LOC564906 [Danio rerio] |  |  |  |  | gi 156739281 | 38003.1 | 6.31 | 9 | 74 | 99.827 | 32 | 85.139 |
|---|----------------------------------------------|--|--|--|--|--------------|---------|------|---|----|--------|----|--------|

#### Peptide Information

|  | Calc. Mass | Obsrv. Mass | ± da    | ± ppm | Start Seq. | End Seq. | Sequence          | Ion Score | C. I.  | % Modification     | Rank | Result Type |
|--|------------|-------------|---------|-------|------------|----------|-------------------|-----------|--------|--------------------|------|-------------|
|  | 1017.5727  | 1017.5729   | 0.0002  | 0     | 224        | 232      | ITGFVDIPR         |           |        |                    |      | Mascot      |
|  | 1090.535   | 1090.5352   | 0.0002  | 0     | 49         | 56       | MIWEENLR          |           |        |                    |      | Mascot      |
|  | 1106.5299  | 1106.5325   | 0.0026  | 2     | 49         | 56       | MIWEENLR          |           |        | Oxidation (M)[1]   |      | Mascot      |
|  | 1234.6249  | 1234.6785   | 0.0536  | 43    | 49         | 57       | MIWEENLRK         |           |        | Oxidation (M)[1]   |      | Mascot      |
|  | 1249.563   | 1249.6309   | 0.0679  | 54    | 209        | 218      | DDLPCRYDPR        |           |        |                    |      | Mascot      |
|  | 1498.7173  | 1498.7189   | 0.0016  | 1     | 196        | 208      | GLDSEQSYPYLAR     |           |        |                    |      | Mascot      |
|  | 1498.7173  | 1498.7189   | 0.0016  | 1     | 196        | 208      | GLDSEQSYPYLAR     | 32        | 85.139 |                    |      | Mascot      |
|  | 1638.7073  | 1638.8595   | 0.1522  | 93    | 321        | 335      | NNHCGIATMASYPLM   |           |        | Oxidation (M)[9]   |      | Mascot      |
|  | 1838.7142  | 1838.9203   | 0.2061  | 112   | 74         | 88       | MGMNQFGDMTNEEFR   |           |        | Oxidation (M)[1,3] |      | Mascot      |
|  | 2174.0989  | 2174.0835   | -0.0154 | -7    | 276        | 296      | LDHAVLVVGYGYQGADV |           |        |                    |      | Mascot      |

|   |                                              |           |        |   |              |         |                                  |   |    |        |    |                          |        |
|---|----------------------------------------------|-----------|--------|---|--------------|---------|----------------------------------|---|----|--------|----|--------------------------|--------|
|   | 2278.0015                                    | 2278.0154 | 0.0139 | 6 | 135          | 154     | AGNR<br>QCGSCWSFSSTGALEG<br>QLFR |   |    |        |    | Carbamidomethyl (C)[2,5] | Mascot |
| 5 | hypothetical protein LOC569326 [Danio rerio] |           |        |   | gi 156739289 | 37972.2 | 6.45                             | 9 | 73 | 99.772 | 32 | 85.139                   |        |

Peptide Information

| Calc. Mass | Obsrv. Mass | ± da    | ± ppm | Start Seq. | End Seq. | Sequence                 | Ion Score | C. I.  | % Modification           | Rank | Result Type |
|------------|-------------|---------|-------|------------|----------|--------------------------|-----------|--------|--------------------------|------|-------------|
| 1017.5727  | 1017.5729   | 0.0002  | 0     | 224        | 232      | ITGFVDIPR                |           |        |                          |      | Mascot      |
| 1090.535   | 1090.5352   | 0.0002  | 0     | 49         | 56       | MIWEENLR                 |           |        |                          |      | Mascot      |
| 1106.5299  | 1106.5325   | 0.0026  | 2     | 49         | 56       | MIWEENLR                 |           |        | Oxidation (M)[1]         |      | Mascot      |
| 1234.6249  | 1234.6785   | 0.0536  | 43    | 49         | 57       | MIWEENLRK                |           |        | Oxidation (M)[1]         |      | Mascot      |
| 1249.563   | 1249.6309   | 0.0679  | 54    | 209        | 218      | DDLPCRYDPR               |           |        |                          |      | Mascot      |
| 1498.7173  | 1498.7189   | 0.0016  | 1     | 196        | 208      | GLDSEQSYPYLAR            |           |        |                          |      | Mascot      |
| 1498.7173  | 1498.7189   | 0.0016  | 1     | 196        | 208      | GLDSEQSYPYLAR            | 32        | 85.139 |                          |      | Mascot      |
| 1638.7073  | 1638.8595   | 0.1522  | 93    | 321        | 335      | NNHCGIATMASYPLM          |           |        | Oxidation (M)[9]         |      | Mascot      |
| 1838.7142  | 1838.9203   | 0.2061  | 112   | 74         | 88       | MGMNQFGDMTNEEFR          |           |        | Oxidation (M)[1,3]       |      | Mascot      |
| 2174.0989  | 2174.0835   | -0.0154 | -7    | 276        | 296      | LDHAVLVVGYGYQGADV        |           |        |                          |      | Mascot      |
|            |             |         |       |            |          | AGNR                     |           |        |                          |      | Mascot      |
| 2278.0015  | 2278.0154   | 0.0139  | 6     | 135        | 154      | QCGSCWSFSSTGALEG<br>QLFR |           |        | Carbamidomethyl (C)[2,5] |      | Mascot      |

|   |                                              |  |  |  |              |         |      |   |    |        |    |        |  |
|---|----------------------------------------------|--|--|--|--------------|---------|------|---|----|--------|----|--------|--|
| 6 | hypothetical protein LOC564979 [Danio rerio] |  |  |  | gi 157311713 | 38002.1 | 6.31 | 8 | 68 | 99.244 | 32 | 85.139 |  |
|---|----------------------------------------------|--|--|--|--------------|---------|------|---|----|--------|----|--------|--|

Peptide Information

| Calc. Mass | Obsrv. Mass | ± da    | ± ppm | Start Seq. | End Seq. | Sequence                 | Ion Score | C. I.  | % Modification           | Rank | Result Type |
|------------|-------------|---------|-------|------------|----------|--------------------------|-----------|--------|--------------------------|------|-------------|
| 1017.5727  | 1017.5729   | 0.0002  | 0     | 224        | 232      | ITGFVDIPR                |           |        |                          |      | Mascot      |
| 1090.535   | 1090.5352   | 0.0002  | 0     | 49         | 56       | MIWEENLR                 |           |        |                          |      | Mascot      |
| 1106.5299  | 1106.5325   | 0.0026  | 2     | 49         | 56       | MIWEENLR                 |           |        | Oxidation (M)[1]         |      | Mascot      |
| 1234.6249  | 1234.6785   | 0.0536  | 43    | 49         | 57       | MIWEENLRK                |           |        | Oxidation (M)[1]         |      | Mascot      |
| 1249.563   | 1249.6309   | 0.0679  | 54    | 209        | 218      | DDLPCRYDPR               |           |        |                          |      | Mascot      |
| 1498.7173  | 1498.7189   | 0.0016  | 1     | 196        | 208      | GLDSEQSYPYLAR            |           |        |                          |      | Mascot      |
| 1498.7173  | 1498.7189   | 0.0016  | 1     | 196        | 208      | GLDSEQSYPYLAR            | 32        | 85.139 |                          |      | Mascot      |
| 1838.7142  | 1838.9203   | 0.2061  | 112   | 74         | 88       | MGMNQFGDMTNEEFR          |           |        | Oxidation (M)[1,3]       |      | Mascot      |
| 2174.0989  | 2174.0835   | -0.0154 | -7    | 277        | 297      | LDHAVLVVGYGYQGADV        |           |        |                          |      | Mascot      |
|            |             |         |       |            |          | AGNR                     |           |        |                          |      | Mascot      |
| 2278.0015  | 2278.0154   | 0.0139  | 6     | 135        | 154      | QCGSCWSFSSTGALEG<br>QLFR |           |        | Carbamidomethyl (C)[2,5] |      | Mascot      |

|   |                                            |  |  |  |              |         |      |   |    |        |    |        |  |
|---|--------------------------------------------|--|--|--|--------------|---------|------|---|----|--------|----|--------|--|
| 7 | PREDICTED: cathepsin L1-like [Danio rerio] |  |  |  | gi 326672297 | 38038.1 | 6.25 | 8 | 68 | 99.227 | 32 | 85.139 |  |
|---|--------------------------------------------|--|--|--|--------------|---------|------|---|----|--------|----|--------|--|

Peptide Information

| Calc. Mass | Obsrv. Mass | ± da | ± ppm | Start | End | Sequence | Ion | C. I. | % Modification | Rank | Result Type |
|------------|-------------|------|-------|-------|-----|----------|-----|-------|----------------|------|-------------|
|------------|-------------|------|-------|-------|-----|----------|-----|-------|----------------|------|-------------|

|   |                                            | Seq.      |         | Seq. |              | Score |                           |      |                          |           |           |
|---|--------------------------------------------|-----------|---------|------|--------------|-------|---------------------------|------|--------------------------|-----------|-----------|
|   | 1090.535                                   | 1090.5352 | 0.0002  | 0    | 49           | 56    | MIWEENLR                  |      |                          |           | Mascot    |
|   | 1106.5299                                  | 1106.5325 | 0.0026  | 2    | 49           | 56    | MIWEENLR                  |      | Oxidation (M)[1]         |           | Mascot    |
|   | 1234.6249                                  | 1234.6785 | 0.0536  | 43   | 49           | 57    | MIWEENLRK                 |      | Oxidation (M)[1]         |           | Mascot    |
|   | 1249.563                                   | 1249.6309 | 0.0679  | 54   | 209          | 218   | DDLPCRYDPR                |      |                          |           | Mascot    |
|   | 1498.7173                                  | 1498.7189 | 0.0016  | 1    | 196          | 208   | GLDSEQSYPYLAR             |      |                          |           | Mascot    |
|   | 1498.7173                                  | 1498.7189 | 0.0016  | 1    | 196          | 208   | GLDSEQSYPYLAR             | 32   | 85.139                   |           | Mascot    |
|   | 1638.7073                                  | 1638.8595 | 0.1522  | 93   | 322          | 336   | NNHCGIATMASYPLM           |      | Oxidation (M)[9]         |           | Mascot    |
|   | 1838.7142                                  | 1838.9203 | 0.2061  | 112  | 74           | 88    | MGMNQFGDMTNEEFR           |      | Oxidation (M)[1,3]       |           | Mascot    |
|   | 2174.0989                                  | 2174.0835 | -0.0154 | -7   | 277          | 297   | LDHAVLVVGYGYQGADV<br>AGNR |      |                          |           | Mascot    |
|   | 2278.0015                                  | 2278.0154 | 0.0139  | 6    | 135          | 154   | QCGSCWSFSSTGALEG<br>QLFR  |      | Carbamidomethyl (C)[2,5] |           | Mascot    |
| 8 | PREDICTED: cathepsin L1-like [Danio rerio] |           |         |      | gi 326672302 |       | 37980.1                   | 6.45 | 8                        | 65 98.593 | 32 85.139 |

#### Peptide Information

| Calc. Mass | Obsrv. Mass | ± da    | ± ppm | Start Seq. | End Sequence Seq.             | Ion Score | C. I. % | Modification             | Rank | Result Type |
|------------|-------------|---------|-------|------------|-------------------------------|-----------|---------|--------------------------|------|-------------|
| 1090.535   | 1090.5352   | 0.0002  | 0     | 49         | 56 MIWEENLR                   |           |         |                          |      | Mascot      |
| 1106.5299  | 1106.5325   | 0.0026  | 2     | 49         | 56 MIWEENLR                   |           |         | Oxidation (M)[1]         |      | Mascot      |
| 1234.6249  | 1234.6785   | 0.0536  | 43    | 49         | 57 MIWEENLRK                  |           |         | Oxidation (M)[1]         |      | Mascot      |
| 1249.563   | 1249.6309   | 0.0679  | 54    | 209        | 218 DDLPCRYDPR                |           |         |                          |      | Mascot      |
| 1498.7173  | 1498.7189   | 0.0016  | 1     | 196        | 208 GLDSEQSYPYLAR             |           |         |                          |      | Mascot      |
| 1498.7173  | 1498.7189   | 0.0016  | 1     | 196        | 208 GLDSEQSYPYLAR             | 32        | 85.139  |                          |      | Mascot      |
| 1638.7073  | 1638.8595   | 0.1522  | 93    | 321        | 335 NNHCGIATMASYPLM           |           |         | Oxidation (M)[9]         |      | Mascot      |
| 1838.7142  | 1838.9203   | 0.2061  | 112   | 74         | 88 MGMNQFGDMTNEEFR            |           |         | Oxidation (M)[1,3]       |      | Mascot      |
| 2174.0989  | 2174.0835   | -0.0154 | -7    | 276        | 296 LDHAVLVVGYGYQGADV<br>AGNR |           |         |                          |      | Mascot      |
| 2278.0015  | 2278.0154   | 0.0139  | 6     | 135        | 154 QCGSCWSFSSTGALEG<br>QLFR  |           |         | Carbamidomethyl (C)[2,5] |      | Mascot      |

9 cathepsin L, 1 b [Danio rerio] gi|18858809 38005.1 5.99 7 62 97.498 32 85.139

#### Peptide Information

| Calc. Mass | Obsrv. Mass | ± da   | ± ppm | Start Seq. | End Sequence Seq. | Ion Score | C. I. % | Modification     | Rank | Result Type |
|------------|-------------|--------|-------|------------|-------------------|-----------|---------|------------------|------|-------------|
| 1090.535   | 1090.5352   | 0.0002 | 0     | 49         | 56 MIWEENLR       |           |         |                  |      | Mascot      |
| 1106.5299  | 1106.5325   | 0.0026 | 2     | 49         | 56 MIWEENLR       |           |         | Oxidation (M)[1] |      | Mascot      |
| 1234.6249  | 1234.6785   | 0.0536 | 43    | 49         | 57 MIWEENLRK      |           |         | Oxidation (M)[1] |      | Mascot      |
| 1249.563   | 1249.6309   | 0.0679 | 54    | 209        | 218 DDLPCRYDPR    |           |         |                  |      | Mascot      |
| 1498.7173  | 1498.7189   | 0.0016 | 1     | 196        | 208 GLDSEQSYPYLAR |           |         |                  |      | Mascot      |

|    |                                              |           |         |     |              |     |                           |      |                          |    |        |    |        |
|----|----------------------------------------------|-----------|---------|-----|--------------|-----|---------------------------|------|--------------------------|----|--------|----|--------|
|    | 1498.7173                                    | 1498.7189 | 0.0016  | 1   | 196          | 208 | GLDSEQSYPYLAR             | 32   | 85.139                   |    | Mascot |    |        |
|    | 1838.7142                                    | 1838.9203 | 0.2061  | 112 | 74           | 88  | MGMNQFGDMTNEEFR           |      | Oxidation (M)[1,3]       |    | Mascot |    |        |
|    | 2174.0989                                    | 2174.0835 | -0.0154 | -7  | 277          | 297 | LDHAVLVVGYGYQGADV<br>AGNR |      |                          |    | Mascot |    |        |
|    | 2278.0015                                    | 2278.0154 | 0.0139  | 6   | 135          | 154 | QCGSCWSFSSTGALEG<br>QLFR  |      | Carbamidomethyl (C)[2,5] |    | Mascot |    |        |
| 10 | hypothetical protein LOC567623 [Danio rerio] |           |         |     | gi 162138968 |     | 37987.1                   | 6.31 | 7                        | 62 | 96.991 | 32 | 85.139 |

#### Peptide Information

| Calc. Mass | Obsrv. Mass | ± da    | ± ppm | Start Seq. | End Seq. | Sequence                  | Ion Score | C. I.  | % Modification           | Rank | Result Type |
|------------|-------------|---------|-------|------------|----------|---------------------------|-----------|--------|--------------------------|------|-------------|
| 1090.535   | 1090.5352   | 0.0002  | 0     | 49         | 56       | MIWEENLR                  |           |        |                          |      | Mascot      |
| 1106.5299  | 1106.5325   | 0.0026  | 2     | 49         | 56       | MIWEENLR                  |           |        | Oxidation (M)[1]         |      | Mascot      |
| 1234.6249  | 1234.6785   | 0.0536  | 43    | 49         | 57       | MIWEENLRK                 |           |        | Oxidation (M)[1]         |      | Mascot      |
| 1249.563   | 1249.6309   | 0.0679  | 54    | 209        | 218      | DDLPCRYDPR                |           |        |                          |      | Mascot      |
| 1498.7173  | 1498.7189   | 0.0016  | 1     | 196        | 208      | GLDSEQSYPYLAR             |           |        |                          |      | Mascot      |
| 1498.7173  | 1498.7189   | 0.0016  | 1     | 196        | 208      | GLDSEQSYPYLAR             | 32        | 85.139 |                          |      | Mascot      |
| 1838.7142  | 1838.9203   | 0.2061  | 112   | 74         | 88       | MGMNQFGDMTNEEFR           |           |        | Oxidation (M)[1,3]       |      | Mascot      |
| 2174.0989  | 2174.0835   | -0.0154 | -7    | 277        | 297      | LDHAVLVVGYGYQGADV<br>AGNR |           |        |                          |      | Mascot      |
| 2278.0015  | 2278.0154   | 0.0139  | 6     | 135        | 154      | QCGSCWSFSSTGALEG<br>QLFR  |           |        | Carbamidomethyl (C)[2,5] |      | Mascot      |

|    |                                       |  |  |  |              |         |      |   |    |       |    |        |
|----|---------------------------------------|--|--|--|--------------|---------|------|---|----|-------|----|--------|
| 11 | PREDICTED: cathepsin L1 [Danio rerio] |  |  |  | gi 189525870 | 38017.2 | 6.36 | 7 | 59 | 94.65 | 32 | 85.139 |
|----|---------------------------------------|--|--|--|--------------|---------|------|---|----|-------|----|--------|

#### Peptide Information

| Calc. Mass | Obsrv. Mass | ± da   | ± ppm | Start Seq. | End Seq. | Sequence                 | Ion Score | C. I.  | % Modification           | Rank | Result Type |
|------------|-------------|--------|-------|------------|----------|--------------------------|-----------|--------|--------------------------|------|-------------|
| 1090.535   | 1090.5352   | 0.0002 | 0     | 49         | 56       | MIWEENLR                 |           |        |                          |      | Mascot      |
| 1106.5299  | 1106.5325   | 0.0026 | 2     | 49         | 56       | MIWEENLR                 |           |        | Oxidation (M)[1]         |      | Mascot      |
| 1234.6249  | 1234.6785   | 0.0536 | 43    | 49         | 57       | MIWEENLRK                |           |        | Oxidation (M)[1]         |      | Mascot      |
| 1249.563   | 1249.6309   | 0.0679 | 54    | 209        | 218      | DDLPCRYDPR               |           |        |                          |      | Mascot      |
| 1498.7173  | 1498.7189   | 0.0016 | 1     | 196        | 208      | GLDSEQSYPYLAR            |           |        |                          |      | Mascot      |
| 1498.7173  | 1498.7189   | 0.0016 | 1     | 196        | 208      | GLDSEQSYPYLAR            | 32        | 85.139 |                          |      | Mascot      |
| 1638.7073  | 1638.8595   | 0.1522 | 93    | 321        | 335      | NNHCGIATMASYP LM         |           |        | Oxidation (M)[9]         |      | Mascot      |
| 1838.7142  | 1838.9203   | 0.2061 | 112   | 74         | 88       | MGMNQFGDMTNEEFR          |           |        | Oxidation (M)[1,3]       |      | Mascot      |
| 2278.0015  | 2278.0154   | 0.0139 | 6     | 135        | 154      | QCGSCWSFSSTGALEG<br>QLFR |           |        | Carbamidomethyl (C)[2,5] |      | Mascot      |

|    |                                                                    |  |  |  |             |         |      |   |    |        |    |        |
|----|--------------------------------------------------------------------|--|--|--|-------------|---------|------|---|----|--------|----|--------|
| 12 | eukaryotic translation initiation factor 3 subunit G [Danio rerio] |  |  |  | gi 41055906 | 32790.4 | 5.84 | 3 | 52 | 72.561 | 43 | 98.718 |
|----|--------------------------------------------------------------------|--|--|--|-------------|---------|------|---|----|--------|----|--------|

#### Peptide Information

| Calc. Mass | Obsrv. Mass | ± da | ± ppm | Start | End | Sequence | Ion | C. I. | % Modification | Rank | Result Type |
|------------|-------------|------|-------|-------|-----|----------|-----|-------|----------------|------|-------------|
|------------|-------------|------|-------|-------|-----|----------|-----|-------|----------------|------|-------------|

|                     |                                                                                                     |            |             |         |       |            |          |                        |  |  |           |        |                  | Seq.             | Seq.         | Score  |          |      |     |                  |                  |        |        |  |  |        |  |        |  |  |  |
|---------------------|-----------------------------------------------------------------------------------------------------|------------|-------------|---------|-------|------------|----------|------------------------|--|--|-----------|--------|------------------|------------------|--------------|--------|----------|------|-----|------------------|------------------|--------|--------|--|--|--------|--|--------|--|--|--|
|                     |                                                                                                     |            |             |         |       |            |          |                        |  |  |           |        |                  | 850.5032         | 850.5427     | 0.0395 | 46       | 241  | 247 | IYLAKDK          |                  |        |        |  |  | Mascot |  |        |  |  |  |
|                     |                                                                                                     |            |             |         |       |            |          |                        |  |  |           |        |                  | 1090.5059        | 1090.5352    | 0.0293 | 27       | 199  | 207 | GESMQPNRR        | Oxidation (M)[4] |        |        |  |  | Mascot |  |        |  |  |  |
|                     |                                                                                                     |            |             |         |       |            |          |                        |  |  |           |        |                  | 1894.9657        | 1894.9691    | 0.0034 | 2        | 225  | 240 | ETDLQELFRPFGSISR |                  |        |        |  |  | Mascot |  |        |  |  |  |
|                     |                                                                                                     |            |             |         |       |            |          |                        |  |  |           |        |                  | 1894.9657        | 1894.9691    | 0.0034 | 2        | 225  | 240 | ETDLQELFRPFGSISR | 43               | 98.718 |        |  |  |        |  | Mascot |  |  |  |
| 13                  | PREDICTED: regulation of nuclear pre-mRNA domain-containing protein 1A-like [Danio rerio]           |            |             |         |       |            |          |                        |  |  |           |        |                  |                  | gi 326676846 |        | 35366.6  | 8.79 | 10  | 52               | 69.213           |        |        |  |  |        |  |        |  |  |  |
| Peptide Information |                                                                                                     |            |             |         |       |            |          |                        |  |  |           |        |                  |                  |              |        |          |      |     |                  |                  |        |        |  |  |        |  |        |  |  |  |
|                     |                                                                                                     | Calc. Mass | Obsrv. Mass | ± da    | ± ppm | Start Seq. | End Seq. | Sequence               |  |  | Ion Score | C. I.  | % Modification   | Rank Result Type |              |        |          |      |     |                  |                  |        |        |  |  |        |  |        |  |  |  |
|                     |                                                                                                     | 928.5686   | 928.5276    | -0.041  | -44   | 268        | 275      | LARVSQVR               |  |  |           |        |                  | Mascot           |              |        |          |      |     |                  |                  |        |        |  |  |        |  |        |  |  |  |
|                     |                                                                                                     | 1081.5571  | 1081.5571   | 0       | 0     | 291        | 300      | LPNVTGGHMR             |  |  |           |        |                  | Mascot           |              |        |          |      |     |                  |                  |        |        |  |  |        |  |        |  |  |  |
|                     |                                                                                                     | 1106.5728  | 1106.5325   | -0.0403 | -36   | 2          | 11       | SVFSEPALEK             |  |  |           |        |                  | Mascot           |              |        |          |      |     |                  |                  |        |        |  |  |        |  |        |  |  |  |
|                     |                                                                                                     | 1179.5892  | 1179.6016   | 0.0124  | 11    | 115        | 124      | AVYENDILDK             |  |  |           |        |                  | Mascot           |              |        |          |      |     |                  |                  |        |        |  |  |        |  |        |  |  |  |
|                     |                                                                                                     | 1234.6677  | 1234.6785   | 0.0108  | 9     | 2          | 12       | SVFSEPALEKK            |  |  |           |        |                  | Mascot           |              |        |          |      |     |                  |                  |        |        |  |  |        |  |        |  |  |  |
|                     |                                                                                                     | 1381.7031  | 1381.6804   | -0.0227 | -16   | 1          | 12       | MSVFSEPALEKK           |  |  |           |        | Oxidation (M)[1] | Mascot           |              |        |          |      |     |                  |                  |        |        |  |  |        |  |        |  |  |  |
|                     |                                                                                                     | 1493.8335  | 1493.7352   | -0.0983 | -66   | 103        | 114      | HLGRVLSIWQER           |  |  |           |        |                  | Mascot           |              |        |          |      |     |                  |                  |        |        |  |  |        |  |        |  |  |  |
|                     |                                                                                                     | 1895.0385  | 1894.9691   | -0.0694 | -37   | 57         | 72       | LTFLYLANDVIQNSKR       |  |  |           |        |                  | Mascot           |              |        |          |      |     |                  |                  |        |        |  |  |        |  |        |  |  |  |
|                     |                                                                                                     | 1895.0385  | 1894.9691   | -0.0694 | -37   | 57         | 72       | LTFLYLANDVIQNSKR       |  |  |           |        |                  | Mascot           |              |        |          |      |     |                  |                  |        |        |  |  |        |  |        |  |  |  |
|                     |                                                                                                     | 2174.1565  | 2174.0835   | -0.073  | -34   | 242        | 260      | TLAVFLQSQRDGLVQNE QK   |  |  |           |        |                  | Mascot           |              |        |          |      |     |                  |                  |        |        |  |  |        |  |        |  |  |  |
|                     |                                                                                                     | 2300.0977  | 2300.1838   | 0.0861  | 37    | 291        | 312      | LPNVTGGHMRPSSGDL YSPSD |  |  |           |        |                  | Mascot           |              |        |          |      |     |                  |                  |        |        |  |  |        |  |        |  |  |  |
| 14                  | RecName: Full=Eukaryotic translation initiation factor 3 subunit G; Short=elF3g; AltName: Full=Euka |            |             |         |       |            |          |                        |  |  |           |        |                  |                  | gi 82236106  |        | 32823.4  | 6.39 | 4   | 51               | 64.652           | 43     | 98.718 |  |  |        |  |        |  |  |  |
| Peptide Information |                                                                                                     |            |             |         |       |            |          |                        |  |  |           |        |                  |                  |              |        |          |      |     |                  |                  |        |        |  |  |        |  |        |  |  |  |
|                     |                                                                                                     | Calc. Mass | Obsrv. Mass | ± da    | ± ppm | Start Seq. | End Seq. | Sequence               |  |  | Ion Score | C. I.  | % Modification   | Rank Result Type |              |        |          |      |     |                  |                  |        |        |  |  |        |  |        |  |  |  |
|                     |                                                                                                     | 850.5032   | 850.5427    | 0.0395  | 46    | 241        | 247      | IYLAKDK                |  |  |           |        |                  | Mascot           |              |        |          |      |     |                  |                  |        |        |  |  |        |  |        |  |  |  |
|                     |                                                                                                     | 1081.5577  | 1081.5571   | -0.0006 | -1    | 254        | 262      | GFAFISFHR              |  |  |           |        |                  | Mascot           |              |        |          |      |     |                  |                  |        |        |  |  |        |  |        |  |  |  |
|                     |                                                                                                     | 1090.5059  | 1090.5352   | 0.0293  | 27    | 199        | 207      | GESMQPNRR              |  |  |           |        | Oxidation (M)[4] | Mascot           |              |        |          |      |     |                  |                  |        |        |  |  |        |  |        |  |  |  |
|                     |                                                                                                     | 1894.9657  | 1894.9691   | 0.0034  | 2     | 225        | 240      | ETDLQELFRPFGSISR       |  |  |           |        |                  | Mascot           |              |        |          |      |     |                  |                  |        |        |  |  |        |  |        |  |  |  |
|                     |                                                                                                     | 1894.9657  | 1894.9691   | 0.0034  | 2     | 225        | 240      | ETDLQELFRPFGSISR       |  |  | 43        | 98.718 | Mascot           |                  |              |        |          |      |     |                  |                  |        |        |  |  |        |  |        |  |  |  |
| 15                  | PREDICTED: girdin [Danio rerio]                                                                     |            |             |         |       |            |          |                        |  |  |           |        |                  |                  | gi 292621031 |        | 111560.2 | 5.43 | 16  | 48               | 22.666           |        |        |  |  |        |  |        |  |  |  |
| Peptide Information |                                                                                                     |            |             |         |       |            |          |                        |  |  |           |        |                  |                  |              |        |          |      |     |                  |                  |        |        |  |  |        |  |        |  |  |  |
|                     |                                                                                                     | Calc. Mass | Obsrv. Mass | ± da    | ± ppm | Start Seq. | End Seq. | Sequence               |  |  | Ion Score | C. I.  | % Modification   | Rank Result Type |              |        |          |      |     |                  |                  |        |        |  |  |        |  |        |  |  |  |

|    |                                                    |           |         |     |              |     |                           |      |                                          |        |       |
|----|----------------------------------------------------|-----------|---------|-----|--------------|-----|---------------------------|------|------------------------------------------|--------|-------|
|    | 807.3777                                           | 807.3823  | 0.0046  | 6   | 251          | 256 | EREMAR                    |      | Oxidation (M)[4]                         | Mascot |       |
|    | 1045.5636                                          | 1045.5651 | 0.0015  | 1   | 97           | 106 | AAESLAEARK                |      |                                          | Mascot |       |
|    | 1090.5123                                          | 1090.5352 | 0.0229  | 21  | 326          | 335 | DLANESAQSR                |      |                                          | Mascot |       |
|    | 1150.5343                                          | 1150.5852 | 0.0509  | 44  | 285          | 293 | MCQDLAQLR                 |      | Carbamidomethyl (C)[2], Oxidation (M)[1] | Mascot |       |
|    | 1234.6321                                          | 1234.6785 | 0.0464  | 38  | 353          | 362 | TRLQMASQQR                |      | Oxidation (M)[5]                         | Mascot |       |
|    | 1249.614                                           | 1249.6309 | 0.0169  | 14  | 284          | 293 | RMCQDLAQLR                |      | Oxidation (M)[2]                         | Mascot |       |
|    | 1311.5885                                          | 1311.5803 | -0.0082 | -6  | 294          | 304 | ESCAQFEELQK               |      |                                          | Mascot |       |
|    | 1320.5848                                          | 1320.5875 | 0.0027  | 2   | 234          | 244 | EACQAELESQR               |      | Carbamidomethyl (C)[3]                   | Mascot |       |
|    | 1321.6132                                          | 1321.6364 | 0.0232  | 18  | 896          | 908 | GGVSQSFSFGDQR             |      |                                          | Mascot |       |
|    | 1360.6815                                          | 1360.6259 | -0.0556 | -41 | 207          | 219 | ESGVEAESLARGR             |      |                                          | Mascot |       |
|    | 1381.776                                           | 1381.6804 | -0.0956 | -69 | 779          | 791 | VLEPALPAMSPLK             |      | Oxidation (M)[9]                         | Mascot |       |
|    | 1493.7264                                          | 1493.7352 | 0.0088  | 6   | 733          | 745 | ENKALMESSLESR             |      |                                          | Mascot |       |
|    | 1533.7941                                          | 1533.78   | -0.0141 | -9  | 106          | 118 | KQIEVLQGESMQK             |      | Oxidation (M)[11]                        | Mascot |       |
|    | 1533.7941                                          | 1533.78   | -0.0141 | -9  | 106          | 118 | KQIEVLQGESMQK             |      | Oxidation (M)[11]                        | Mascot |       |
|    | 2172.1555                                          | 2172.05   | -0.1055 | -49 | 773          | 791 | IMDQYRVLEPALPAMSPL<br>K   |      |                                          | Mascot |       |
|    | 2172.1555                                          | 2172.05   | -0.1055 | -49 | 773          | 791 | IMDQYRVLEPALPAMSPL<br>K   |      |                                          | Mascot |       |
|    | 2298.1506                                          | 2298.1975 | 0.0469  | 20  | 355          | 375 | LQMASQQRSTPEVALSP<br>PDSR |      |                                          | Mascot |       |
|    | 2299.9949                                          | 2300.1838 | 0.1889  | 82  | 961          | 981 | VSSGTEDFHSSFDKPQD<br>SDSK |      |                                          | Mascot |       |
| 16 | Replication factor C (activator 1) 3 [Danio rerio] |           |         |     | gi 156230598 |     | 40370                     | 8.72 | 12                                       | 47     | 13.23 |

#### Peptide Information

| Calc. Mass | Obsrv. Mass | ± da    | ± ppm | Start Seq. | End Sequence Seq. | Ion Score              | C. I. % Modification                           | Rank | Result | Type |
|------------|-------------|---------|-------|------------|-------------------|------------------------|------------------------------------------------|------|--------|------|
| 1081.5381  | 1081.5571   | 0.019   | 18    | 161        | 170               | LILCCNSTSK             |                                                |      | Mascot |      |
| 1179.6984  | 1179.6016   | -0.0968 | -82   | 203        | 213               | EGLLLPPELAK            |                                                |      | Mascot |      |
| 1234.679   | 1234.6785   | -0.0005 | 0     | 58         | 68                | ELYGAGVEKLR            |                                                |      | Mascot |      |
| 1249.5374  | 1249.6309   | 0.0935  | 75    | 151        | 160               | TMEKYMATCR             | Oxidation (M)[2]                               |      | Mascot |      |
| 1267.5956  | 1267.5594   | -0.0362 | -29   | 225        | 234               | KALLMCEACR             | Carbamidomethyl (C)[6,9], Oxidation (M)[5]     |      | Mascot |      |
| 1381.5439  | 1381.6804   | 0.1365  | 99    | 346        | 356               | FMEDGLDNFMF            | Oxidation (M)[2]                               |      | Mascot |      |
| 1493.6439  | 1493.7352   | 0.0913  | 61    | 345        | 356               | KFMEDGLDNFMF           |                                                |      | Mascot |      |
| 1915.0067  | 1914.8812   | -0.1255 | -66   | 278        | 293               | LYELLTHCIPPEVIMK       | Oxidation (M)[15]                              |      | Mascot |      |
| 1993.8962  | 1993.9805   | 0.0843  | 42    | 155        | 170               | YMATCRILCCNSTSK        | Carbamidomethyl (C)[5,10,11], Oxidation (M)[2] |      | Mascot |      |
| 1993.8962  | 1993.9805   | 0.0843  | 42    | 155        | 170               | YMATCRILCCNSTSK        | Carbamidomethyl (C)[5,10,11], Oxidation (M)[2] |      | Mascot |      |
| 2115.0935  | 2115.0432   | -0.0503 | -24   | 184        | 202               | VPLPSVEEVCSVLGVC<br>RK | Carbamidomethyl (C)[10,17]                     |      | Mascot |      |

|    |                                                         |           |         |     |    |              |                            |      |    |    |   |  |  |  |  |  |        |
|----|---------------------------------------------------------|-----------|---------|-----|----|--------------|----------------------------|------|----|----|---|--|--|--|--|--|--------|
|    | 2172.0906                                               | 2172.05   | -0.0406 | -19 | 28 | 48           | NLVQCGDFPHLLVYGPS<br>GAGK  |      |    |    |   |  |  |  |  |  | Mascot |
|    | 2172.0906                                               | 2172.05   | -0.0406 | -19 | 28 | 48           | NLVQCGDFPHLLVYGPS<br>GAGK  |      |    |    |   |  |  |  |  |  | Mascot |
|    | 2300.1855                                               | 2300.1838 | -0.0017 | -1  | 28 | 49           | NLVQCGDFPHLLVYGPS<br>GAGKK |      |    |    |   |  |  |  |  |  | Mascot |
| 17 | PREDICTED: centrosomal protein of 170 kDa [Danio rerio] |           |         |     |    | gi 326668423 | 145558.9                   | 7.62 | 18 | 46 | 0 |  |  |  |  |  |        |

#### Peptide Information

| Calc. Mass | Obsrv. Mass | ± da    | ± ppm | Start Seq. | End Seq. | Sequence                    | Ion Score | C. I. % | Modification                              | Rank | Result Type |
|------------|-------------|---------|-------|------------|----------|-----------------------------|-----------|---------|-------------------------------------------|------|-------------|
| 996.4489   | 996.5975    | 0.1486  | 149   | 638        | 646      | VSAMACTEK                   |           |         | Carbamidomethyl (C)[6]                    |      | Mascot      |
| 1081.5889  | 1081.5571   | -0.0318 | -29   | 115        | 123      | YTSQLQLTK                   |           |         |                                           |      | Mascot      |
| 1090.531   | 1090.5352   | 0.0042  | 4     | 1301       | 1309     | SQNEILACR                   |           |         | Carbamidomethyl (C)[8]                    |      | Mascot      |
| 1150.5698  | 1150.5852   | 0.0154  | 13    | 966        | 976      | SDSEATSGKIR                 |           |         |                                           |      | Mascot      |
| 1267.5769  | 1267.5594   | -0.0175 | -14   | 638        | 648      | VSAMACTEKDR                 |           |         | Carbamidomethyl (C)[6]                    |      | Mascot      |
| 1320.6793  | 1320.5875   | -0.0918 | -70   | 486        | 497      | VFGVEDNQALTK                |           |         |                                           |      | Mascot      |
| 1373.7495  | 1373.71     | -0.0395 | -29   | 994        | 1007     | STGVSTTAAPRAR               |           |         |                                           |      | Mascot      |
| 1434.7183  | 1434.7721   | 0.0538  | 37    | 860        | 873      | GQNISKAEQTSGK               |           |         |                                           |      | Mascot      |
| 1475.7853  | 1475.757    | -0.0283 | -19   | 112        | 123      | HEKYTSQLQLTK                |           |         |                                           |      | Mascot      |
| 1638.7462  | 1638.8595   | 0.1133  | 69    | 28         | 41       | DDCELMLQSRVSDK              |           |         |                                           |      | Mascot      |
| 1838.9242  | 1838.9203   | -0.0039 | -2    | 139        | 156      | GAEGGKETEVSRPAPK            |           |         |                                           |      | Mascot      |
| 1950.9714  | 1951.0182   | 0.0468  | 24    | 1018       | 1035     | CPGTLHVQSTPAAGGRWR          |           |         | Carbamidomethyl (C)[1]                    |      | Mascot      |
| 2066.0044  | 2066.0806   | 0.0762  | 37    | 923        | 943      | MSVASEASTASSASRPSAGRR       |           |         |                                           |      | Mascot      |
| 2096.1274  | 2096.0588   | -0.0686 | -33   | 1321       | 1339     | TDLLPTVYTDILHGIPEAK         |           |         |                                           |      | Mascot      |
| 2114.9668  | 2115.0432   | 0.0764  | 36    | 21         | 37       | EMIFVGRDDCELMLQSR           |           |         | Carbamidomethyl (C)[10], Oxidation (M)[2] |      | Mascot      |
| 2173.9592  | 2174.0835   | 0.1243  | 57    | 360        | 379      | HEDGTQSDTENALGEQLSSR        |           |         |                                           |      | Mascot      |
| 2441.1865  | 2441.23     | 0.0435  | 18    | 584        | 605      | TLPQLPSEDSTMDPLAPEVTQR      |           |         | Oxidation (M)[12]                         |      | Mascot      |
| 2441.1865  | 2441.23     | 0.0435  | 18    | 584        | 605      | TLPQLPSEDSTMDPLAPEVTQR      |           |         | Oxidation (M)[12]                         |      | Mascot      |
| 2872.6479  | 2872.4014   | -0.2465 | -86   | 879        | 905      | TSVTPAAPTSPKPTTLPRRPTRASILR |           |         |                                           |      | Mascot      |

|    |                                                  |  |  |  |  |              |         |      |    |    |   |  |  |  |  |  |  |
|----|--------------------------------------------------|--|--|--|--|--------------|---------|------|----|----|---|--|--|--|--|--|--|
| 18 | PREDICTED: protein NLRC3 isoform 2 [Danio rerio] |  |  |  |  | gi 326667051 | 87403.4 | 6.43 | 13 | 42 | 0 |  |  |  |  |  |  |
|----|--------------------------------------------------|--|--|--|--|--------------|---------|------|----|----|---|--|--|--|--|--|--|

#### Peptide Information

| Calc. Mass | Obsrv. Mass | ± da    | ± ppm | Start Seq. | End Seq. | Sequence  | Ion Score | C. I. % | Modification | Rank | Result Type |
|------------|-------------|---------|-------|------------|----------|-----------|-----------|---------|--------------|------|-------------|
| 807.4909   | 807.3823    | -0.1086 | -134  | 112        | 117      | MIRFLK    |           |         |              |      | Mascot      |
| 1017.5799  | 1017.5729   | -0.007  | -7    | 326        | 334      | GLNLTRSTR |           |         |              |      | Mascot      |

|    |                                     |           |         |     |              |     |                            |      |    |    |   |  |  |  |  |  |  |  |  |        |
|----|-------------------------------------|-----------|---------|-----|--------------|-----|----------------------------|------|----|----|---|--|--|--|--|--|--|--|--|--------|
|    | 1045.5272                           | 1045.5651 | 0.0379  | 36  | 651          | 659 | GLLTQQDDR                  |      |    |    |   |  |  |  |  |  |  |  |  | Mascot |
|    | 1234.7041                           | 1234.6785 | -0.0256 | -21 | 664          | 673 | EEIIAYIKQK                 |      |    |    |   |  |  |  |  |  |  |  |  | Mascot |
|    | 1277.7212                           | 1277.6429 | -0.0783 | -61 | 636          | 646 | FLLSLSLQSNR                |      |    |    |   |  |  |  |  |  |  |  |  | Mascot |
|    | 1277.7212                           | 1277.6429 | -0.0783 | -61 | 636          | 646 | FLLSLSLQSNR                |      |    |    |   |  |  |  |  |  |  |  |  | Mascot |
|    | 1498.7166                           | 1498.7189 | 0.0023  | 2   | 54           | 68  | SGSCVSSSVSLKSDR            |      |    |    |   |  |  |  |  |  |  |  |  | Mascot |
|    | 1498.7166                           | 1498.7189 | 0.0023  | 2   | 54           | 68  | SGSCVSSSVSLKSDR            |      |    |    |   |  |  |  |  |  |  |  |  | Mascot |
|    | 1533.7769                           | 1533.78   | 0.0031  | 2   | 469          | 481 | HRTHAETLQESPK              |      |    |    |   |  |  |  |  |  |  |  |  | Mascot |
|    | 1533.7906                           | 1533.78   | -0.0106 | -7  | 126          | 137 | ILQEENREEFVK               |      |    |    |   |  |  |  |  |  |  |  |  | Mascot |
|    | 2066.1758                           | 2066.0806 | -0.0952 | -46 | 378          | 397 | GNLLPSALIWITSRPAAAS<br>K   |      |    |    |   |  |  |  |  |  |  |  |  | Mascot |
|    | 2211.2092                           | 2211.113  | -0.0962 | -44 | 144          | 162 | SIITEAALDLTLFFLREMK        |      |    |    |   |  |  |  |  |  |  |  |  | Mascot |
|    | 2298.1812                           | 2298.1975 | 0.0163  | 7   | 482          | 499 | TLTQMYTHFLRFQIQSR          |      |    |    |   |  |  |  |  |  |  |  |  | Mascot |
|    | 2367.1028                           | 2367.2705 | 0.1677  | 71  | 542          | 562 | DCGIDVYKASVYSGMCT<br>QILK  |      |    |    |   |  |  |  |  |  |  |  |  | Mascot |
|    | 2632.3188                           | 2632.3059 | -0.0129 | -5  | 471          | 492 | THAETLQESPKTLTQMYT<br>HFLR |      |    |    |   |  |  |  |  |  |  |  |  | Mascot |
| 19 | PREDICTED: myomesin-2 [Danio rerio] |           |         |     | gi 326671673 |     | 164417.3                   | 8.26 | 18 | 42 | 0 |  |  |  |  |  |  |  |  |        |

Peptide Information

| Calc. Mass | Obsrv. Mass | ± da    | ± ppm | Start Seq. | End Seq. | Sequence                | Ion Score | C. I. % | Modification           | Rank | Result Type |
|------------|-------------|---------|-------|------------|----------|-------------------------|-----------|---------|------------------------|------|-------------|
| 807.3842   | 807.3823    | -0.0019 | -2    | 912        | 918      | EVTSSSR                 |           |         |                        |      | Mascot      |
| 842.3899   | 842.5108    | 0.1209  | 144   | 1212       | 1217     | LQCYMK                  |           |         | Carbamidomethyl (C)[3] |      | Mascot      |
| 1017.5727  | 1017.5729   | 0.0002  | 0     | 121        | 129      | APDFLVSLR               |           |         |                        |      | Mascot      |
| 1076.5591  | 1076.6115   | 0.0524  | 49    | 103        | 111      | EVKGMMPLR               |           |         | Oxidation (M)[5]       |      | Mascot      |
| 1081.516   | 1081.5571   | 0.0411  | 38    | 312        | 320      | DDEGLYTLR               |           |         |                        |      | Mascot      |
| 1124.5769  | 1124.5308   | -0.0461 | -41   | 967        | 975      | MLDLSYNIR               |           |         |                        |      | Mascot      |
| 1249.6212  | 1249.6309   | 0.0097  | 8     | 588        | 598      | TSAFVQWDAPK             |           |         |                        |      | Mascot      |
| 1299.7056  | 1299.6233   | -0.0823 | -63   | 927        | 937      | HSKLTFFVNPEK            |           |         |                        |      | Mascot      |
| 1311.7056  | 1311.5803   | -0.1253 | -96   | 130        | 140      | SHTVWEKTPVK             |           |         |                        |      | Mascot      |
| 1493.6802  | 1493.7352   | 0.055   | 37    | 57         | 68       | ERAPEGMQEYQR            |           |         |                        |      | Mascot      |
| 1707.8853  | 1707.7977   | -0.0876 | -51   | 631        | 645      | FVVHGLTPGDTYVFR         |           |         |                        |      | Mascot      |
| 1915.0721  | 1914.8812   | -0.1909 | -100  | 137        | 154      | TPVKLFCTVSGQPTPIVK      |           |         |                        |      | Mascot      |
| 1950.9668  | 1951.0182   | 0.0514  | 26    | 713        | 730      | EAGSVDWKEVSPSPAVH<br>R  |           |         |                        |      | Mascot      |
| 1994.0382  | 1993.9805   | -0.0577 | -29   | 321        | 337      | IWTKDGTVEHSAYLFVK       |           |         |                        |      | Mascot      |
| 1994.0382  | 1993.9805   | -0.0577 | -29   | 321        | 337      | IWTKDGTVEHSAYLFVK       |           |         |                        |      | Mascot      |
| 2095.9355  | 2096.0588   | 0.1233  | 59    | 1278       | 1295     | NFDLSGQAYTDAYAEFQ<br>R  |           |         |                        |      | Mascot      |
| 2278.1326  | 2278.0154   | -0.1172 | -51   | 502        | 520      | APVWYLIEKCVGDSDIW<br>QR |           |         |                        |      | Mascot      |
| 2284.0229  | 2284.1812   | 0.1583  | 69    | 1240       | 1259     | MRIGGTSEMAWMQICEP       |           |         |                        |      | Mascot      |



|    |                                                       |           |        |    |              |       |                                    |   |    |   |                        |        |
|----|-------------------------------------------------------|-----------|--------|----|--------------|-------|------------------------------------|---|----|---|------------------------|--------|
|    | 2298.103                                              | 2298.1975 | 0.0945 | 41 | 187          | 209   | TDK<br>CAVSDSGVYSAVATNPQ<br>GKATSK |   |    |   | Carbamidomethyl (C)[1] | Mascot |
|    | 2300.0178                                             | 2300.1838 | 0.166  | 72 | 1240         | 1259  | MRIGGTSEMAWMQICEP<br>TDK           |   |    |   | Oxidation (M)[1]       | Mascot |
| 20 | 28S ribosomal protein S6, mitochondrial [Danio rerio] |           |        |    | gi 113671790 | 13389 | 9.39                               | 7 | 41 | 0 |                        |        |

#### Peptide Information

| Calc. Mass | Obsrv. Mass | ± da    | ± ppm | Start Seq. | End Seq. | Sequence       | Ion Score | C. I. % | Modification           | Rank | Result Type |
|------------|-------------|---------|-------|------------|----------|----------------|-----------|---------|------------------------|------|-------------|
| 842.4478   | 842.5108    | 0.063   | 75    | 51         | 57       | ISKHDSR        |           |         |                        |      | Mascot      |
| 1045.5636  | 1045.5651   | 0.0015  | 1     | 38         | 46       | SLENLGERK      |           |         |                        |      | Mascot      |
| 1150.6215  | 1150.5852   | -0.0363 | -32   | 24         | 32       | RTVETLFER      |           |         |                        |      | Mascot      |
| 1179.5245  | 1179.6016   | 0.0771  | 65    | 103        | 113      | GQCCGVAREEK    |           |         |                        |      | Mascot      |
| 1311.7129  | 1311.5803   | -0.1326 | -101  | 2          | 11       | PRYELVMVLK     |           |         |                        |      | Mascot      |
| 1498.827   | 1498.7189   | -0.1081 | -72   | 12         | 24       | AMQRPETA AVLRR |           |         |                        |      | Mascot      |
| 1498.827   | 1498.7189   | -0.1081 | -72   | 12         | 24       | AMQRPETA AVLRR |           |         |                        |      | Mascot      |
| 1533.7148  | 1533.78     | 0.0652  | 43    | 97         | 110      | DTELPKGQCCGVAR |           |         | Carbamidomethyl (C)[9] |      | Mascot      |
| 1533.7148  | 1533.78     | 0.0652  | 43    | 97         | 110      | DTELPKGQCCGVAR |           |         | Carbamidomethyl (C)[9] |      | Mascot      |

|    |                                  |  |  |  |              |          |      |    |    |   |  |  |
|----|----------------------------------|--|--|--|--------------|----------|------|----|----|---|--|--|
| 21 | Zgc:175202 protein [Danio rerio] |  |  |  | gi 166796345 | 111533.3 | 5.46 | 15 | 40 | 0 |  |  |
|----|----------------------------------|--|--|--|--------------|----------|------|----|----|---|--|--|

#### Peptide Information

| Calc. Mass | Obsrv. Mass | ± da    | ± ppm | Start Seq. | End Seq. | Sequence                 | Ion Score | C. I. % | Modification                             | Rank | Result Type |
|------------|-------------|---------|-------|------------|----------|--------------------------|-----------|---------|------------------------------------------|------|-------------|
| 807.3777   | 807.3823    | 0.0046  | 6     | 251        | 256      | EREMAR                   |           |         | Oxidation (M)[4]                         |      | Mascot      |
| 1045.5636  | 1045.5651   | 0.0015  | 1     | 97         | 106      | AAESLAEARK               |           |         |                                          |      | Mascot      |
| 1090.5123  | 1090.5352   | 0.0229  | 21    | 326        | 335      | DLANESAQSR               |           |         |                                          |      | Mascot      |
| 1150.5343  | 1150.5852   | 0.0509  | 44    | 285        | 293      | MCQDLAQLR                |           |         | Carbamidomethyl (C)[2], Oxidation (M)[1] |      | Mascot      |
| 1234.6321  | 1234.6785   | 0.0464  | 38    | 353        | 362      | TRLQMASQQR               |           |         | Oxidation (M)[5]                         |      | Mascot      |
| 1249.614   | 1249.6309   | 0.0169  | 14    | 284        | 293      | RMCQDLAQLR               |           |         | Oxidation (M)[2]                         |      | Mascot      |
| 1311.5885  | 1311.5803   | -0.0082 | -6    | 294        | 304      | ESCAQFEELQK              |           |         |                                          |      | Mascot      |
| 1320.5848  | 1320.5875   | 0.0027  | 2     | 234        | 244      | EACQAELESQR              |           |         | Carbamidomethyl (C)[3]                   |      | Mascot      |
| 1321.6132  | 1321.6364   | 0.0232  | 18    | 896        | 908      | GGVSQSFS PGDQR           |           |         |                                          |      | Mascot      |
| 1360.6815  | 1360.6259   | -0.0556 | -41   | 207        | 219      | ESGVEAESLARGR            |           |         |                                          |      | Mascot      |
| 1381.776   | 1381.6804   | -0.0956 | -69   | 779        | 791      | VLEPALPAM SPLK           |           |         | Oxidation (M)[9]                         |      | Mascot      |
| 1493.7264  | 1493.7352   | 0.0088  | 6     | 733        | 745      | ENKALMESSLESR            |           |         |                                          |      | Mascot      |
| 1533.7941  | 1533.78     | -0.0141 | -9    | 106        | 118      | KQIEVLQGESMQK            |           |         | Oxidation (M)[11]                        |      | Mascot      |
| 1533.7941  | 1533.78     | -0.0141 | -9    | 106        | 118      | KQIEVLQGESMQK            |           |         | Oxidation (M)[11]                        |      | Mascot      |
| 2172.1555  | 2172.05     | -0.1055 | -49   | 773        | 791      | IMDQYRVLEPALPAM SPL<br>K |           |         |                                          |      | Mascot      |

|    |                                |           |         |     |              |     |                           |      |    |    |   |  |  |  |  |  |        |
|----|--------------------------------|-----------|---------|-----|--------------|-----|---------------------------|------|----|----|---|--|--|--|--|--|--------|
|    | 2172.1555                      | 2172.05   | -0.1055 | -49 | 773          | 791 | IMDQYRVLEPALPAMSPL<br>K   |      |    |    |   |  |  |  |  |  | Mascot |
|    | 2298.1506                      | 2298.1975 | 0.0469  | 20  | 355          | 375 | LQMASQQRSTPEVALSP<br>PDSR |      |    |    |   |  |  |  |  |  | Mascot |
| 22 | scinderin like a [Danio rerio] |           |         |     | gi 136255943 |     | 79965.8                   | 6.95 | 12 | 40 | 0 |  |  |  |  |  |        |

Peptide Information

| Calc. Mass | Obsrv. Mass | ± da    | ± ppm | Start Seq. | End Seq. | Sequence                   | Ion Score | C. I. | % Modification         | Rank | Result Type |
|------------|-------------|---------|-------|------------|----------|----------------------------|-----------|-------|------------------------|------|-------------|
| 1249.6211  | 1249.6309   | 0.0098  | 8     | 581        | 592      | EPAAFWSSLGGK               |           |       |                        |      | Mascot      |
| 1267.6715  | 1267.5594   | -0.1121 | -88   | 301        | 311      | SAMKVAEQFIK                |           |       | Oxidation (M)[3]       |      | Mascot      |
| 1357.6971  | 1357.7174   | 0.0203  | 15    | 391        | 401      | VQVWRVEGNDR                |           |       |                        |      | Mascot      |
| 1360.6526  | 1360.6259   | -0.0267 | -20   | 457        | 469      | LDDSMGGAPVQVR              |           |       | Oxidation (M)[5]       |      | Mascot      |
| 1713.8363  | 1713.8348   | -0.0015 | -1    | 564        | 580      | YVCSILGGSATEISEGK          |           |       |                        |      | Mascot      |
| 1713.8363  | 1713.8348   | -0.0015 | -1    | 564        | 580      | YVCSILGGSATEISEGK          |           |       |                        |      | Mascot      |
| 2114.9607  | 2115.0432   | 0.0825  | 39    | 689        | 706      | QGFEPPTSFTGWFAQWD<br>SK    |           |       |                        |      | Mascot      |
| 2174.1128  | 2174.0835   | -0.0293 | -13   | 92         | 110      | EVQNNESVTFLGYFKTGI<br>K    |           |       |                        |      | Mascot      |
| 2194.0332  | 2194.0479   | 0.0147  | 7     | 267        | 285      | QELLNPSCYILDNGLDS<br>K     |           |       | Carbamidomethyl (C)[9] |      | Mascot      |
| 2233.1533  | 2233.0898   | -0.0635 | -28   | 522        | 541      | AVEVEPCASKLNTNDVFV<br>LK   |           |       | Carbamidomethyl (C)[7] |      | Mascot      |
| 2283.0823  | 2283.1787   | 0.0964  | 42    | 111        | 131      | YKQGGVSSGFNHVVSNE<br>MNTK  |           |       |                        |      | Mascot      |
| 2283.0823  | 2283.1787   | 0.0964  | 42    | 111        | 131      | YKQGGVSSGFNHVVSNE<br>MNTK  |           |       |                        |      | Mascot      |
| 2298.199   | 2298.1975   | -0.0015 | -1    | 532        | 550      | LNTNDVFVLKFPEGMFL<br>WK    |           |       |                        |      | Mascot      |
| 2367.1689  | 2367.2705   | 0.1016  | 43    | 542        | 563      | FPEGMFLWKGVGASEEE<br>IAAAK |           |       |                        |      | Mascot      |

|    |                                                  |  |  |  |              |  |       |      |    |    |   |  |  |  |  |  |  |
|----|--------------------------------------------------|--|--|--|--------------|--|-------|------|----|----|---|--|--|--|--|--|--|
| 23 | PREDICTED: protein NLRC3 isoform 1 [Danio rerio] |  |  |  | gi 326667049 |  | 94863 | 6.12 | 13 | 39 | 0 |  |  |  |  |  |  |
|----|--------------------------------------------------|--|--|--|--------------|--|-------|------|----|----|---|--|--|--|--|--|--|

Peptide Information

| Calc. Mass | Obsrv. Mass | ± da    | ± ppm | Start Seq. | End Seq. | Sequence        | Ion Score | C. I. | % Modification | Rank | Result Type |
|------------|-------------|---------|-------|------------|----------|-----------------|-----------|-------|----------------|------|-------------|
| 807.4909   | 807.3823    | -0.1086 | -134  | 121        | 126      | MIRFLK          |           |       |                |      | Mascot      |
| 1017.5799  | 1017.5729   | -0.007  | -7    | 335        | 343      | GLNLTRSTR       |           |       |                |      | Mascot      |
| 1045.5272  | 1045.5651   | 0.0379  | 36    | 660        | 668      | GLLTQQDDR       |           |       |                |      | Mascot      |
| 1234.7041  | 1234.6785   | -0.0256 | -21   | 673        | 682      | EEIIAYIKQK      |           |       |                |      | Mascot      |
| 1277.7212  | 1277.6429   | -0.0783 | -61   | 645        | 655      | FLLSLSLQSNR     |           |       |                |      | Mascot      |
| 1277.7212  | 1277.6429   | -0.0783 | -61   | 645        | 655      | FLLSLSLQSNR     |           |       |                |      | Mascot      |
| 1498.7166  | 1498.7189   | 0.0023  | 2     | 54         | 68       | SGSCVSSSVSLKSDR |           |       |                |      | Mascot      |
| 1498.7166  | 1498.7189   | 0.0023  | 2     | 54         | 68       | SGSCVSSSVSLKSDR |           |       |                |      | Mascot      |
| 1533.7769  | 1533.78     | 0.0031  | 2     | 478        | 490      | HRTHAETLQESPK   |           |       |                |      | Mascot      |

|    |                                                         |           |         |     |     |              |                            |      |    |    |   |  |                                           |  |  |  |        |
|----|---------------------------------------------------------|-----------|---------|-----|-----|--------------|----------------------------|------|----|----|---|--|-------------------------------------------|--|--|--|--------|
|    | 1533.7906                                               | 1533.78   | -0.0106 | -7  | 135 | 146          | ILQEENREEFVK               |      |    |    |   |  |                                           |  |  |  | Mascot |
|    | 2066.1758                                               | 2066.0806 | -0.0952 | -46 | 387 | 406          | GNLLPSALIWITSRPAAAS<br>K   |      |    |    |   |  |                                           |  |  |  | Mascot |
|    | 2211.2092                                               | 2211.113  | -0.0962 | -44 | 153 | 171          | SIITEAALDLTLFFLREMK        |      |    |    |   |  |                                           |  |  |  | Mascot |
|    | 2298.1812                                               | 2298.1975 | 0.0163  | 7   | 491 | 508          | TLTQMYTHFLRFQIQQSR         |      |    |    |   |  |                                           |  |  |  | Mascot |
|    | 2367.1028                                               | 2367.2705 | 0.1677  | 71  | 551 | 571          | DCGIDVYKASVYSGMCT<br>QILK  |      |    |    |   |  | Carbamidomethyl (C)[2], Oxidation (M)[15] |  |  |  | Mascot |
|    | 2632.3188                                               | 2632.3059 | -0.0129 | -5  | 480 | 501          | THAETLQESPKTLTQMYT<br>HFLR |      |    |    |   |  |                                           |  |  |  | Mascot |
| 24 | PREDICTED: hypothetical protein LOC563653 [Danio rerio] |           |         |     |     | gi 292621547 | 110431.7                   | 9.74 | 14 | 38 | 0 |  |                                           |  |  |  |        |

#### Peptide Information

| Calc. Mass | Obsrv. Mass | ± da    | ± ppm | Start Seq. | End Seq. | Sequence               | Ion Score | C. I. | % Modification         | Rank | Result Type |
|------------|-------------|---------|-------|------------|----------|------------------------|-----------|-------|------------------------|------|-------------|
| 842.4366   | 842.5108    | 0.0742  | 88    | 593        | 599      | ENQVPQK                |           |       |                        |      | Mascot      |
| 1045.5823  | 1045.5651   | -0.0172 | -16   | 247        | 256      | VVSPKMAGTR             |           |       |                        |      | Mascot      |
| 1106.5762  | 1106.5325   | -0.0437 | -39   | 450        | 459      | LEMLDSALSK             |           |       |                        |      | Mascot      |
| 1249.6973  | 1249.6309   | -0.0664 | -53   | 349        | 358      | MIYVLQQQVK             |           |       |                        |      | Mascot      |
| 1299.6149  | 1299.6233   | 0.0084  | 6     | 3          | 15       | GNNPARSNGGAER          |           |       |                        |      | Mascot      |
| 1320.6444  | 1320.5875   | -0.0569 | -43   | 912        | 921      | YRENHDAFLR             |           |       |                        |      | Mascot      |
| 1321.6932  | 1321.6364   | -0.0568 | -43   | 896        | 907      | GVYLTVPASMQR           |           |       |                        |      | Mascot      |
| 1357.7509  | 1357.7174   | -0.0335 | -25   | 783        | 794      | LQGPTLESMLLR           |           |       |                        |      | Mascot      |
| 1359.646   | 1359.6248   | -0.0212 | -16   | 321        | 332      | ECVVEALEPNEK           |           |       |                        |      | Mascot      |
| 1373.7457  | 1373.71     | -0.0357 | -26   | 783        | 794      | LQGPTLESMLLR           |           |       | Oxidation (M)[9]       |      | Mascot      |
| 1493.7893  | 1493.7352   | -0.0541 | -36   | 896        | 908      | GVYLTVPASMQR           |           |       | Oxidation (M)[10]      |      | Mascot      |
| 1582.6472  | 1582.8323   | 0.1851  | 117   | 795        | 806      | MEEMERDQDEVR           |           |       | Oxidation (M)[1]       |      | Mascot      |
| 1707.9427  | 1707.7977   | -0.145  | -85   | 75         | 89       | TNYSNPVVVIFSLR         |           |       |                        |      | Mascot      |
| 1895.0093  | 1894.9691   | -0.0402 | -21   | 715        | 732      | IQPLLDQAQRVAGAGSD<br>R |           |       |                        |      | Mascot      |
| 1895.0093  | 1894.9691   | -0.0402 | -21   | 715        | 732      | IQPLLDQAQRVAGAGSD<br>R |           |       |                        |      | Mascot      |
| 2211.0454  | 2211.113    | 0.0676  | 31    | 783        | 800      | LQGPTLESMLLRMEEME<br>R |           |       | Oxidation (M)[9,13,16] |      | Mascot      |

25 novel protein [Danio rerio] gi|148725299 82126.8 6.15 12 38 0

#### Peptide Information

| Calc. Mass | Obsrv. Mass | ± da    | ± ppm | Start Seq. | End Seq. | Sequence  | Ion Score | C. I. | % Modification | Rank | Result Type |
|------------|-------------|---------|-------|------------|----------|-----------|-----------|-------|----------------|------|-------------|
| 807.4909   | 807.3823    | -0.1086 | -134  | 61         | 66       | MIRFLK    |           |       |                |      | Mascot      |
| 1017.5799  | 1017.5729   | -0.007  | -7    | 275        | 283      | GLNLTRSTR |           |       |                |      | Mascot      |
| 1045.5272  | 1045.5651   | 0.0379  | 36    | 600        | 608      | GLLTQQDDR |           |       |                |      | Mascot      |

|    |                                                                         |           |         |     |              |     |                            |     |    |    |   |  |                                           |  |  |  |        |
|----|-------------------------------------------------------------------------|-----------|---------|-----|--------------|-----|----------------------------|-----|----|----|---|--|-------------------------------------------|--|--|--|--------|
|    | 1234.7041                                                               | 1234.6785 | -0.0256 | -21 | 613          | 622 | EEIIAYIKQK                 |     |    |    |   |  |                                           |  |  |  | Mascot |
|    | 1277.7212                                                               | 1277.6429 | -0.0783 | -61 | 585          | 595 | FLLSLSLQSNR                |     |    |    |   |  |                                           |  |  |  | Mascot |
|    | 1277.7212                                                               | 1277.6429 | -0.0783 | -61 | 585          | 595 | FLLSLSLQSNR                |     |    |    |   |  |                                           |  |  |  | Mascot |
|    | 1533.7769                                                               | 1533.78   | 0.0031  | 2   | 418          | 430 | HRTHAETLQESPK              |     |    |    |   |  |                                           |  |  |  | Mascot |
|    | 1533.7906                                                               | 1533.78   | -0.0106 | -7  | 75           | 86  | ILQEENREEFVK               |     |    |    |   |  |                                           |  |  |  | Mascot |
|    | 2066.1758                                                               | 2066.0806 | -0.0952 | -46 | 327          | 346 | GNLLPSALIWITSRPAAAS<br>K   |     |    |    |   |  |                                           |  |  |  | Mascot |
|    | 2211.2092                                                               | 2211.113  | -0.0962 | -44 | 93           | 111 | SIITEAALDLTLFFLREMK        |     |    |    |   |  |                                           |  |  |  | Mascot |
|    | 2298.1812                                                               | 2298.1975 | 0.0163  | 7   | 431          | 448 | TLTQMYTHFLRFQIQQSR         |     |    |    |   |  |                                           |  |  |  | Mascot |
|    | 2367.1028                                                               | 2367.2705 | 0.1677  | 71  | 491          | 511 | DCGIDVYKASVYSGMCT<br>QILK  |     |    |    |   |  | Carbamidomethyl (C)[2], Oxidation (M)[15] |  |  |  | Mascot |
|    | 2632.3188                                                               | 2632.3059 | -0.0129 | -5  | 420          | 441 | THAETLQESPKTLTQMYT<br>HFLR |     |    |    |   |  |                                           |  |  |  | Mascot |
| 26 | PREDICTED: histone-lysine N-methyltransferase SETD1B-like [Danio rerio] |           |         |     | gi 326670190 |     | 95032.3                    | 7.4 | 13 | 38 | 0 |  |                                           |  |  |  |        |

### Peptide Information

| Calc. Mass | Obsrv. Mass | ± da    | ± ppm | Start Seq. | End Seq. | Sequence                   | Ion Score | C. I. | % Modification          | Rank | Result Type |
|------------|-------------|---------|-------|------------|----------|----------------------------|-----------|-------|-------------------------|------|-------------|
| 807.4359   | 807.3823    | -0.0536 | -66   | 654        | 660      | HELPSPK                    |           |       |                         |      | Mascot      |
| 928.4271   | 928.5276    | 0.1005  | 108   | 390        | 396      | YQNAYNR                    |           |       |                         |      | Mascot      |
| 1045.4329  | 1045.5651   | 0.1322  | 126   | 118        | 126      | DGFLSEMCK                  |           |       | Oxidation (M)[7]        |      | Mascot      |
| 1179.6593  | 1179.6016   | -0.0577 | -49   | 158        | 168      | AANNAVKNLHK                |           |       |                         |      | Mascot      |
| 1311.5668  | 1311.5803   | 0.0135  | 10    | 1          | 11       | MCESVEKEGQR                |           |       | Oxidation (M)[1]        |      | Mascot      |
| 1359.6512  | 1359.6248   | -0.0264 | -19   | 366        | 378      | TPGGNSHPSNHVR              |           |       |                         |      | Mascot      |
| 1360.7947  | 1360.6259   | -0.1688 | -124  | 654        | 665      | HELPSPKKPLSK               |           |       |                         |      | Mascot      |
| 1381.7362  | 1381.6804   | -0.0558 | -40   | 94         | 105      | LKVDEYYVGAPK               |           |       |                         |      | Mascot      |
| 1434.6893  | 1434.7721   | 0.0828  | 58    | 797        | 811      | LGTAGGEGCILDGSK            |           |       | Carbamidomethyl (C)[9]  |      | Mascot      |
| 1475.8215  | 1475.757    | -0.0645 | -44   | 151        | 164      | VVFESVKAANNAVK             |           |       |                         |      | Mascot      |
| 1915.0422  | 1914.8812   | -0.161  | -84   | 397        | 410      | RPQHRHYIHRPVYR             |           |       |                         |      | Mascot      |
| 2174.0085  | 2174.0835   | 0.075   | 34    | 751        | 767      | MIEIMAFKAFDQWWDDK          |           |       |                         |      | Mascot      |
| 2278.1165  | 2278.0154   | -0.1011 | -44   | 790        | 811      | VMEQSLRLGTAGGEGCI<br>LDSGK |           |       | Carbamidomethyl (C)[16] |      | Mascot      |

27 DNA repair endonuclease XPF [Danio rerio] gi|41054253 100983.4 6.32 14 38 0

### Peptide Information

| Calc. Mass | Obsrv. Mass | ± da    | ± ppm | Start Seq. | End Seq. | Sequence  | Ion Score | C. I. | % Modification | Rank | Result Type |
|------------|-------------|---------|-------|------------|----------|-----------|-----------|-------|----------------|------|-------------|
| 807.4722   | 807.3823    | -0.0899 | -111  | 146        | 152      | NKTGFIK   |           |       |                |      | Mascot      |
| 1017.5033  | 1017.5729   | 0.0696  | 68    | 609        | 617      | ASMVVPEER |           |       |                |      | Mascot      |

|    |                                                                                          |           |         |     |     |     |                            |  |  |  |              |                         |      |    |    |   |        |
|----|------------------------------------------------------------------------------------------|-----------|---------|-----|-----|-----|----------------------------|--|--|--|--------------|-------------------------|------|----|----|---|--------|
|    | 1051.5895                                                                                | 1051.7152 | 0.1257  | 120 | 664 | 672 | SELPSSLHR                  |  |  |  |              |                         |      |    |    |   | Mascot |
|    | 1320.639                                                                                 | 1320.5875 | -0.0515 | -39 | 473 | 484 | LSRVSQDDSDADK              |  |  |  |              |                         |      |    |    |   | Mascot |
|    | 1321.6859                                                                                | 1321.6364 | -0.0495 | -37 | 643 | 654 | AGGLEEVKEPHR               |  |  |  |              |                         |      |    |    |   | Mascot |
|    | 1359.6685                                                                                | 1359.6248 | -0.0437 | -32 | 609 | 620 | ASMVVPEEREGR               |  |  |  |              |                         |      |    |    |   | Mascot |
|    | 1360.6815                                                                                | 1360.6259 | -0.0556 | -41 | 630 | 642 | SQEPASAAATNTRK             |  |  |  |              |                         |      |    |    |   | Mascot |
|    | 1381.7144                                                                                | 1381.6804 | -0.034  | -25 | 402 | 412 | TCAQLKEYIQK                |  |  |  |              | Carbamidomethyl (C)[2]  |      |    |    |   | Mascot |
|    | 1475.6947                                                                                | 1475.757  | 0.0623  | 42  | 158 | 170 | ATSFSSGFCKVER              |  |  |  |              | Carbamidomethyl (C)[9]  |      |    |    |   | Mascot |
|    | 1661.8169                                                                                | 1661.8954 | 0.0785  | 47  | 576 | 589 | VYFLIYGGSTEEQR             |  |  |  |              |                         |      |    |    |   | Mascot |
|    | 2194.1252                                                                                | 2194.0479 | -0.0773 | -35 | 771 | 788 | LLWCPSPYVTAEFQELK          |  |  |  |              | Carbamidomethyl (C)[4]  |      |    |    |   | Mascot |
|    | 2233.1545                                                                                | 2233.0898 | -0.0647 | -29 | 126 | 143 | AHNIIESCQEAFILRLYR         |  |  |  |              | Carbamidomethyl (C)[8]  |      |    |    |   | Mascot |
|    | 2283.1802                                                                                | 2283.1787 | -0.0015 | -1  | 520 | 539 | EPLTVIHPLKGCSDPYSL<br>TR   |  |  |  |              | Carbamidomethyl (C)[12] |      |    |    |   | Mascot |
|    | 2283.1802                                                                                | 2283.1787 | -0.0015 | -1  | 520 | 539 | EPLTVIHPLKGCSDPYSL<br>TR   |  |  |  |              | Carbamidomethyl (C)[12] |      |    |    |   | Mascot |
|    | 2441.1719                                                                                | 2441.23   | 0.0581  | 24  | 233 | 254 | YNPTLEAEDLSLENSLGT<br>AFEK |  |  |  |              |                         |      |    |    |   | Mascot |
|    | 2441.1719                                                                                | 2441.23   | 0.0581  | 24  | 233 | 254 | YNPTLEAEDLSLENSLGT<br>AFEK |  |  |  |              |                         |      |    |    |   | Mascot |
| 28 | novel protein similar to vertebrate centrosomal protein<br>170kDa (CEP170) [Danio rerio] |           |         |     |     |     |                            |  |  |  | gi 122890563 | 140783.3                | 7.09 | 16 | 37 | 0 |        |

| Peptide Information |             |         |       |            |          |                            |           |       |   |                                           |      |             |
|---------------------|-------------|---------|-------|------------|----------|----------------------------|-----------|-------|---|-------------------------------------------|------|-------------|
| Calc. Mass          | Obsrv. Mass | ± da    | ± ppm | Start Seq. | End Seq. | Sequence                   | Ion Score | C. I. | % | Modification                              | Rank | Result Type |
| 996.4489            | 996.5975    | 0.1486  | 149   | 639        | 647      | VSAMACTEK                  |           |       |   | Carbamidomethyl (C)[6]                    |      | Mascot      |
| 1081.5889           | 1081.5571   | -0.0318 | -29   | 115        | 123      | YTSQLQLTK                  |           |       |   |                                           |      | Mascot      |
| 1150.5698           | 1150.5852   | 0.0154  | 13    | 967        | 977      | SDSEATSGKIR                |           |       |   |                                           |      | Mascot      |
| 1267.5769           | 1267.5594   | -0.0175 | -14   | 639        | 649      | VSAMACTEKDR                |           |       |   | Carbamidomethyl (C)[6]                    |      | Mascot      |
| 1320.6793           | 1320.5875   | -0.0918 | -70   | 486        | 497      | VFGVEDNQALTK               |           |       |   |                                           |      | Mascot      |
| 1373.7495           | 1373.71     | -0.0395 | -29   | 995        | 1008     | STGVSTTAAPRAR              |           |       |   |                                           |      | Mascot      |
| 1434.7183           | 1434.7721   | 0.0538  | 37    | 861        | 874      | GQNISSKAEQTSGK             |           |       |   |                                           |      | Mascot      |
| 1475.7853           | 1475.757    | -0.0283 | -19   | 112        | 123      | HEKYTSQLQLTK               |           |       |   |                                           |      | Mascot      |
| 1638.7462           | 1638.8595   | 0.1133  | 69    | 28         | 41       | DDCELMQSRSDVK              |           |       |   |                                           |      | Mascot      |
| 1838.9242           | 1838.9203   | -0.0039 | -2    | 139        | 156      | GAEGGKETEVVPSEPAP<br>K     |           |       |   |                                           |      | Mascot      |
| 1950.9714           | 1951.0182   | 0.0468  | 24    | 1019       | 1036     | CPGTLHVQSTPAAGGRW<br>R     |           |       |   | Carbamidomethyl (C)[1]                    |      | Mascot      |
| 2066.0044           | 2066.0806   | 0.0762  | 37    | 924        | 944      | MSVASEASTASSASRPS<br>AGRR  |           |       |   |                                           |      | Mascot      |
| 2114.9668           | 2115.0432   | 0.0764  | 36    | 21         | 37       | EMIFVGRDDCELMQLSR          |           |       |   | Carbamidomethyl (C)[10], Oxidation (M)[2] |      | Mascot      |
| 2173.9592           | 2174.0835   | 0.1243  | 57    | 360        | 379      | HEDGTQSDTENALGEQL<br>SSR   |           |       |   |                                           |      | Mascot      |
| 2441.1865           | 2441.23     | 0.0435  | 18    | 585        | 606      | TLPQLPSEDSTMDPLAPE<br>VTQR |           |       |   | Oxidation (M)[12]                         |      | Mascot      |

|    |                                                                                                  |           |         |     |              |     |                                  |     |    |    |   |  |                   |        |
|----|--------------------------------------------------------------------------------------------------|-----------|---------|-----|--------------|-----|----------------------------------|-----|----|----|---|--|-------------------|--------|
|    | 2441.1865                                                                                        | 2441.23   | 0.0435  | 18  | 585          | 606 | TLPQLPSEDSTMDPLAPE<br>VTQR       |     |    |    |   |  | Oxidation (M)[12] | Mascot |
|    | 2872.6479                                                                                        | 2872.4014 | -0.2465 | -86 | 880          | 906 | TSVTPAAPTSPKPTTLPRP<br>RPTRASILR |     |    |    |   |  |                   | Mascot |
| 29 | PREDICTED: armadillo repeat protein deleted in<br>velo-cardio-facial syndrome-like [Danio rerio] |           |         |     | gi 326670916 |     | 96072.9                          | 6.8 | 14 | 37 | 0 |  |                   |        |

#### Peptide Information

|  | Calc. Mass | Obsrv. Mass | ± da    | ± ppm | Start Seq. | End Seq. | Sequence                     | Ion Score | C. I. | % Modification           | Rank | Result Type |
|--|------------|-------------|---------|-------|------------|----------|------------------------------|-----------|-------|--------------------------|------|-------------|
|  | 807.3777   | 807.3823    | 0.0046  | 6     | 408        | 414      | NTSGCLR                      |           |       | Carbamidomethyl (C)[5]   |      | Mascot      |
|  | 1179.5575  | 1179.6016   | 0.0441  | 37    | 496        | 505      | KDKPDCFGGR                   |           |       | Carbamidomethyl (C)[6]   |      | Mascot      |
|  | 1249.6028  | 1249.6309   | 0.0281  | 22    | 454        | 463      | SVENCVCILR                   |           |       | Carbamidomethyl (C)[5,7] |      | Mascot      |
|  | 1267.6464  | 1267.5594   | -0.087  | -69   | 621        | 631      | NKDLIGSYAMR                  |           |       |                          |      | Mascot      |
|  | 1311.644   | 1311.5803   | -0.0637 | -49   | 313        | 323      | NISFGRDNFNK                  |           |       |                          |      | Mascot      |
|  | 1321.6793  | 1321.6364   | -0.0429 | -32   | 307        | 318      | ACGALRNISFGR                 |           |       | Carbamidomethyl (C)[2]   |      | Mascot      |
|  | 1359.7703  | 1359.6248   | -0.1455 | -107  | 683        | 694      | LVSINRTSQSVR                 |           |       |                          |      | Mascot      |
|  | 1373.7324  | 1373.71     | -0.0224 | -16   | 835        | 845      | SWRNGVEIVWK                  |           |       |                          |      | Mascot      |
|  | 1381.6528  | 1381.6804   | 0.0276  | 20    | 497        | 508      | DKPDCFGGRITTK                |           |       | Carbamidomethyl (C)[5]   |      | Mascot      |
|  | 1582.7968  | 1582.8323   | 0.0355  | 22    | 249        | 262      | EVIAMLSHPMDPVK               |           |       | Oxidation (M)[5]         |      | Mascot      |
|  | 1707.8812  | 1707.7977   | -0.0835 | -49   | 464        | 478      | NLSYHVVHKEVPGAEEK            |           |       |                          |      | Mascot      |
|  | 2115.0151  | 2115.0432   | 0.0281  | 13    | 846        | 862      | WTLTLCCFWQSSLLNSR            |           |       | Carbamidomethyl (C)[6]   |      | Mascot      |
|  | 2172.0364  | 2172.05     | 0.0136  | 6     | 846        | 862      | WTLTLCCFWQSSLLNSR            |           |       | Carbamidomethyl (C)[6,7] |      | Mascot      |
|  | 2172.0364  | 2172.05     | 0.0136  | 6     | 846        | 862      | WTLTLCCFWQSSLLNSR            |           |       | Carbamidomethyl (C)[6,7] |      | Mascot      |
|  | 2194.0994  | 2194.0479   | -0.0515 | -23   | 244        | 262      | DPNLREVIAMLSHPMDPV<br>K      |           |       | Oxidation (M)[10,15]     |      | Mascot      |
|  | 2632.3335  | 2632.3059   | -0.0276 | -10   | 623        | 646      | DLIGSYAMRDLVSNLPCG<br>QQRPAK |           |       |                          |      | Mascot      |

|    |                        |  |  |  |             |  |         |      |    |    |   |  |  |  |
|----|------------------------|--|--|--|-------------|--|---------|------|----|----|---|--|--|--|
| 30 | muskelin [Danio rerio] |  |  |  | gi 47086651 |  | 84322.2 | 5.91 | 13 | 37 | 0 |  |  |  |
|----|------------------------|--|--|--|-------------|--|---------|------|----|----|---|--|--|--|

#### Peptide Information

|  | Calc. Mass | Obsrv. Mass | ± da    | ± ppm | Start Seq. | End Seq. | Sequence     | Ion Score | C. I. | % Modification         | Rank | Result Type |
|--|------------|-------------|---------|-------|------------|----------|--------------|-----------|-------|------------------------|------|-------------|
|  | 850.4781   | 850.5427    | 0.0646  | 76    | 333        | 339      | QIYTLGR      |           |       |                        |      | Mascot      |
|  | 958.5244   | 958.5389    | 0.0145  | 15    | 9          | 16       | VLSYSVYK     |           |       |                        |      | Mascot      |
|  | 1081.5248  | 1081.5571   | 0.0323  | 30    | 393        | 401      | HMIYTFGGR    |           |       |                        |      | Mascot      |
|  | 1106.5048  | 1106.5325   | 0.0277  | 25    | 301        | 309      | ENQWACISR    |           |       |                        |      | Mascot      |
|  | 1234.6249  | 1234.6785   | 0.0536  | 43    | 70         | 79       | YEKTHVCNLK   |           |       |                        |      | Mascot      |
|  | 1249.5841  | 1249.6309   | 0.0468  | 37    | 402        | 413      | ILTCNGSVDDGR |           |       |                        |      | Mascot      |
|  | 1434.7886  | 1434.7721   | -0.0165 | -11   | 617        | 627      | LCRPSKEYLLR  |           |       | Carbamidomethyl (C)[2] |      | Mascot      |
|  | 1582.6699  | 1582.8323   | 0.1624  | 103   | 380        | 392      | LVFDHQMCMDSK |           |       |                        |      | Mascot      |

|    |                                                                           |           |           |         |     |     |     |                          |                  |      |    |    |        |
|----|---------------------------------------------------------------------------|-----------|-----------|---------|-----|-----|-----|--------------------------|------------------|------|----|----|--------|
|    |                                                                           | 1707.8887 | 1707.7977 | -0.091  | -53 | 609 | 622 | LDDFWSLKLCRPSK           |                  |      |    |    | Mascot |
|    |                                                                           | 2194.2278 | 2194.0479 | -0.1799 | -82 | 196 | 213 | IALEHPMLTHLHERLVLR       | Oxidation (M)[7] |      |    |    | Mascot |
|    |                                                                           | 2225.0947 | 2225.1265 | 0.0318  | 14  | 702 | 720 | TQLFDTLVNFFPDNMTTP<br>K  |                  |      |    |    | Mascot |
|    |                                                                           | 2225.0947 | 2225.1265 | 0.0318  | 14  | 702 | 720 | TQLFDTLVNFFPDNMTTP<br>K  |                  |      |    |    | Mascot |
|    |                                                                           | 2233.0408 | 2233.0898 | 0.049   | 22  | 682 | 701 | SSSDFIPLGFSDVDQTYA<br>QR |                  |      |    |    | Mascot |
|    |                                                                           | 2298.1626 | 2298.1975 | 0.0349  | 15  | 226 | 244 | AVRDGLFNQYISQQDYK<br>PR  |                  |      |    |    | Mascot |
| 31 | PREDICTED: chromodomain-helicase-DNA-binding protein 9-like [Danio rerio] |           |           |         |     |     |     | gi 326669481             | 278654.9         | 8.67 | 24 | 37 | 0      |

|  |           |           |        |    |      |      |                            |  |  |  |  |                  |  |        |
|--|-----------|-----------|--------|----|------|------|----------------------------|--|--|--|--|------------------|--|--------|
|  | 2282.9988 | 2283.1787 | 0.1799 | 79 | 356  | 374  | AHFFADEDPFNPDYVEV<br>DR    |  |  |  |  |                  |  | Mascot |
|  | 2282.9988 | 2283.1787 | 0.1799 | 79 | 356  | 374  | AHFFADEDPFNPDYVEV<br>DR    |  |  |  |  |                  |  | Mascot |
|  | 2298.146  | 2298.1975 | 0.0515 | 22 | 1901 | 1922 | LLDNASTLPEDPSDSPQ<br>GSKVK |  |  |  |  |                  |  | Mascot |
|  | 2632.2319 | 2632.3059 | 0.074  | 28 | 1262 | 1283 | SEMPAMWWDMLSDKCL<br>LLGVYK |  |  |  |  | Oxidation (M)[3] |  | Mascot |

32 PREDICTED: hypothetical protein LOC100537225 [Danio rerio] gi|326677219 17749.8 4.92 6 37 0

#### Peptide Information

| Calc. Mass | Obsrv. Mass | ± da    | ± ppm | Start Seq. | End Seq. | Sequence                | Ion Score | C. I. % | Modification                                       | Rank | Result Type |
|------------|-------------|---------|-------|------------|----------|-------------------------|-----------|---------|----------------------------------------------------|------|-------------|
| 1150.6295  | 1150.5852   | -0.0443 | -39   | 107        | 115      | DFFVLPVWK               |           |         |                                                    |      | Mascot      |
| 1249.6576  | 1249.6309   | -0.0267 | -21   | 69         | 78       | EEFWSLGLLR              |           |         |                                                    |      | Mascot      |
| 1277.6704  | 1277.6429   | -0.0275 | -22   | 91         | 101      | LICEMARQIGK             |           |         | Oxidation (M)[5]                                   |      | Mascot      |
| 1277.6704  | 1277.6429   | -0.0275 | -22   | 91         | 101      | LICEMARQIGK             |           |         | Oxidation (M)[5]                                   |      | Mascot      |
| 1321.5333  | 1321.6364   | 0.1031  | 78    | 79         | 90       | DMDSHIGNACMK            |           |         |                                                    |      | Mascot      |
| 1360.6313  | 1360.6259   | -0.0054 | -4    | 24         | 34       | SACEPTKPWER             |           |         | Carbamidomethyl (C)[3]                             |      | Mascot      |
| 2210.9482  | 2211.113    | 0.1648  | 75    | 79         | 97       | DMDSHIGNACMKLICEMA<br>R |           |         | Carbamidomethyl (C)[10], Oxidation (M)[2]          |      | Mascot      |
| 2283.9646  | 2284.1812   | 0.2166  | 95    | 79         | 97       | DMDSHIGNACMKLICEMA<br>R |           |         | Carbamidomethyl (C)[10,15], Oxidation (M)[2,11]    |      | Mascot      |
| 2299.9597  | 2300.1838   | 0.2241  | 97    | 79         | 97       | DMDSHIGNACMKLICEMA<br>R |           |         | Carbamidomethyl (C)[10,15], Oxidation (M)[2,11,17] |      | Mascot      |

33 prefoldin subunit 6 [Danio rerio] gi|41055782 14481.7 6.62 6 36 0

#### Peptide Information

| Calc. Mass | Obsrv. Mass | ± da    | ± ppm | Start Seq. | End Seq. | Sequence                 | Ion Score | C. I. % | Modification     | Rank | Result Type |
|------------|-------------|---------|-------|------------|----------|--------------------------|-----------|---------|------------------|------|-------------|
| 807.4141   | 807.3823    | -0.0318 | -39   | 26         | 32       | SMSARQK                  |           |         |                  |      | Mascot      |
| 958.5567   | 958.5389    | -0.0178 | -19   | 8          | 15       | KLQAELEK                 |           |         |                  |      | Mascot      |
| 996.4778   | 996.5975    | 0.1197  | 120   | 22         | 30       | DVSKSMSAR                |           |         | Oxidation (M)[6] |      | Mascot      |
| 1234.6426  | 1234.6785   | 0.0359  | 29    | 80         | 89       | LEYINGEIQR               |           |         |                  |      | Mascot      |
| 1311.6614  | 1311.5803   | -0.0811 | -62   | 90         | 99       | YETLLKEMER               |           |         |                  |      | Mascot      |
| 2233.157   | 2233.0898   | -0.0672 | -30   | 106        | 125      | EVLSSLQQEYQRAQGQA<br>VAK |           |         |                  |      | Mascot      |

34 PREDICTED: metabotropic glutamate receptor 5-like [Danio rerio] gi|292611331 130054.1 8.37 16 35 0

#### Peptide Information

| Calc. Mass | Obsrv. Mass | ± da | ± ppm | Start Seq. | End Seq. | Sequence | Ion Score | C. I. % | Modification | Rank | Result Type |
|------------|-------------|------|-------|------------|----------|----------|-----------|---------|--------------|------|-------------|
|------------|-------------|------|-------|------------|----------|----------|-----------|---------|--------------|------|-------------|



|           |           |         |     |     |     |                             |                                                  |        |
|-----------|-----------|---------|-----|-----|-----|-----------------------------|--------------------------------------------------|--------|
| 807.4215  | 807.3823  | -0.0392 | -49 | 291 | 297 | GILMAMR                     | Oxidation (M)[4]                                 | Mascot |
| 850.5257  | 850.5427  | 0.017   | 20  | 270 | 276 | LRSHLPK                     |                                                  | Mascot |
| 928.5938  | 928.5276  | -0.0662 | -71 | 675 | 683 | IARILAGSK                   |                                                  | Mascot |
| 1051.5684 | 1051.7152 | 0.1468  | 140 | 950 | 957 | YPVTYRPR                    |                                                  | Mascot |
| 1081.4288 | 1081.5571 | 0.1283  | 119 | 515 | 523 | SVCSDPCEK                   | Carbamidomethyl (C)[3,7]                         | Mascot |
| 1124.4711 | 1124.5308 | 0.0597  | 53  | 134 | 144 | CSTEGGGTPMK                 | Carbamidomethyl (C)[1]                           | Mascot |
| 1150.6327 | 1150.5852 | -0.0475 | -41 | 865 | 874 | SSSLANLFRR                  |                                                  | Mascot |
| 1234.5555 | 1234.6785 | 0.123   | 100 | 74  | 83  | VEAMHTLDR                   | Oxidation (M)[4,5]                               | Mascot |
| 1359.7015 | 1359.6248 | -0.0767 | -56 | 610 | 621 | FHDTPVVKSSSR                |                                                  | Mascot |
| 1360.6968 | 1360.6259 | -0.0709 | -52 | 767 | 778 | TRNVPANFNEAK                |                                                  | Mascot |
| 1373.6591 | 1373.71   | 0.0509  | 37  | 851 | 864 | MHVGDGKSASAASR              |                                                  | Mascot |
| 1475.7238 | 1475.757  | 0.0332  | 22  | 391 | 402 | ESLRHQYAQDTK                |                                                  | Mascot |
| 1661.7622 | 1661.8954 | 0.1332  | 80  | 239 | 253 | DMAAKEGICIAHSDK             | Carbamidomethyl (C)[9], Oxidation (M)[2]         | Mascot |
| 1707.9349 | 1707.7977 | -0.1372 | -80 | 655 | 671 | LGIGLSPAMSYSALVTK           |                                                  | Mascot |
| 2233.0417 | 2233.0898 | 0.0481  | 22  | 279 | 297 | VVACFCEGMTVRGILMA<br>MR     | Carbamidomethyl (C)[4,6], Oxidation<br>(M)[9,16] | Mascot |
| 2283.0522 | 2283.1787 | 0.1265  | 55  | 450 | 471 | TNFGSGVSGEVVLFDENG<br>DSPGR |                                                  | Mascot |
| 2283.0522 | 2283.1787 | 0.1265  | 55  | 450 | 471 | TNFGSGVSGEVVLFDENG<br>DSPGR |                                                  | Mascot |

35 PREDICTED: hypothetical protein LOC100003217 [Danio rerio] gi|326678765 31640.9 5.2 8 35 0

#### Peptide Information

| Calc. Mass | Obsrv. Mass | ± da    | ± ppm | Start Seq. | End Seq. | Sequence            | Ion Score | C. I. | % Modification                                     | Rank | Result Type |
|------------|-------------|---------|-------|------------|----------|---------------------|-----------|-------|----------------------------------------------------|------|-------------|
| 842.4114   | 842.5108    | 0.0994  | 118   | 78         | 84       | SREAHDK             |           |       |                                                    |      | Mascot      |
| 1249.6576  | 1249.6309   | -0.0267 | -21   | 186        | 195      | EEFWSLGLLR          |           |       |                                                    |      | Mascot      |
| 1277.6704  | 1277.6429   | -0.0275 | -22   | 208        | 218      | LICEMARQIGK         |           |       | Oxidation (M)[5]                                   |      | Mascot      |
| 1277.6704  | 1277.6429   | -0.0275 | -22   | 208        | 218      | LICEMARQIGK         |           |       | Oxidation (M)[5]                                   |      | Mascot      |
| 1321.5333  | 1321.6364   | 0.1031  | 78    | 196        | 207      | DMDSHIGNACMK        |           |       |                                                    |      | Mascot      |
| 1475.7887  | 1475.757    | -0.0317 | -21   | 66         | 77       | TDLLRLSEEMR         |           |       |                                                    |      | Mascot      |
| 1493.6835  | 1493.7352   | 0.0517  | 35    | 53         | 65       | LCQECGLDAKGSR       |           |       | Carbamidomethyl (C)[2,5]                           |      | Mascot      |
| 1838.9792  | 1838.9203   | -0.0589 | -32   | 36         | 52       | VADATYSMSLTGVIRR    |           |       |                                                    |      | Mascot      |
| 2210.9482  | 2211.113    | 0.1648  | 75    | 196        | 214      | DMDSHIGNACMKLICEMAR |           |       | Carbamidomethyl (C)[10], Oxidation (M)[2]          |      | Mascot      |
| 2283.9646  | 2284.1812   | 0.2166  | 95    | 196        | 214      | DMDSHIGNACMKLICEMAR |           |       | Carbamidomethyl (C)[10,15], Oxidation (M)[2,11]    |      | Mascot      |
| 2299.9597  | 2300.1838   | 0.2241  | 97    | 196        | 214      | DMDSHIGNACMKLICEMAR |           |       | Carbamidomethyl (C)[10,15], Oxidation (M)[2,11,17] |      | Mascot      |

36 FYVE, RhoGEF and PH domain-containing protein 6 [Danio rerio] gi|153792522 147346.7 6.22 15 34 0

Peptide Information

| Calc. Mass | Obsrv. Mass | ± da    | ± ppm | Start Seq. | End Seq. | Sequence                   | Ion Score | C. I. % | Modification                                 | Rank | Result Type |
|------------|-------------|---------|-------|------------|----------|----------------------------|-----------|---------|----------------------------------------------|------|-------------|
| 1076.6251  | 1076.6115   | -0.0136 | -13   | 1280       | 1287     | LQFKLYHK                   |           |         |                                              |      | Mascot      |
| 1150.5958  | 1150.5852   | -0.0106 | -9    | 1027       | 1037     | VNSMLSLAGMK                |           |         |                                              |      | Mascot      |
| 1165.6649  | 1165.7471   | 0.0822  | 71    | 987        | 996      | VFLKEGTLMK                 |           |         |                                              |      | Mascot      |
| 1277.6228  | 1277.6429   | 0.0201  | 16    | 366        | 376      | SLPQMVDSLCK                |           |         | Carbamidomethyl (C)[10]                      |      | Mascot      |
| 1277.6228  | 1277.6429   | 0.0201  | 16    | 366        | 376      | SLPQMVDSLCK                |           |         | Carbamidomethyl (C)[10]                      |      | Mascot      |
| 1321.8024  | 1321.6364   | -0.166  | -126  | 42         | 54       | GKPAVAPKPCLLK              |           |         |                                              |      | Mascot      |
| 1434.6616  | 1434.7721   | 0.1105  | 77    | 694        | 705      | CAELAVGFQMHR               |           |         | Carbamidomethyl (C)[1], Oxidation (M)[10]    |      | Mascot      |
| 1533.7764  | 1533.78     | 0.0036  | 2     | 364        | 376      | QKSLPQMVDSLCK              |           |         | Carbamidomethyl (C)[12]                      |      | Mascot      |
| 1533.7764  | 1533.78     | 0.0036  | 2     | 364        | 376      | QKSLPQMVDSLCK              |           |         | Carbamidomethyl (C)[12]                      |      | Mascot      |
| 1661.7999  | 1661.8954   | 0.0955  | 57    | 692        | 705      | QRCAELAVGFQMHR             |           |         | Oxidation (M)[12]                            |      | Mascot      |
| 1707.8119  | 1707.7977   | -0.0142 | -8    | 870        | 883      | EFDRNVALLDEQCR             |           |         |                                              |      | Mascot      |
| 1714.005   | 1713.8348   | -0.1702 | -99   | 783        | 796      | VFVDVLKLLHIDFR             |           |         |                                              |      | Mascot      |
| 1714.005   | 1713.8348   | -0.1702 | -99   | 783        | 796      | VFVDVLKLLHIDFR             |           |         |                                              |      | Mascot      |
| 2095.9255  | 2096.0588   | 0.1333  | 64    | 1121       | 1137     | TTMCMICTCEFTLTWRR          |           |         |                                              |      | Mascot      |
| 2194.106   | 2194.0479   | -0.0581 | -26   | 430        | 449      | LSCGSQVIAITKPYIDGDE<br>K   |           |         | Carbamidomethyl (C)[3]                       |      | Mascot      |
| 2278.0637  | 2278.0154   | -0.0483 | -21   | 694        | 713      | CAELAVGFQMHRNLNQA<br>CGR   |           |         | Carbamidomethyl (C)[1], Oxidation (M)[10]    |      | Mascot      |
| 2282.9849  | 2283.1787   | 0.1938  | 85    | 1121       | 1137     | TTMCMICTCEFTLTWRR          |           |         | Carbamidomethyl (C)[4,7,9], Oxidation (M)[3] |      | Mascot      |
| 2282.9849  | 2283.1787   | 0.1938  | 85    | 1121       | 1137     | TTMCMICTCEFTLTWRR          |           |         | Carbamidomethyl (C)[4,7,9], Oxidation (M)[3] |      | Mascot      |
| 2284.1602  | 2284.1812   | 0.021   | 9     | 940        | 960      | DTQTALSVVKEVANHAN<br>DIMK  |           |         |                                              |      | Mascot      |
| 2300.155   | 2300.1838   | 0.0288  | 13    | 940        | 960      | DTQTALSVVKEVANHAN<br>DIMK  |           |         | Oxidation (M)[20]                            |      | Mascot      |
| 2367.1172  | 2367.2705   | 0.1533  | 65    | 537        | 558      | SFSSADLQRVDNGSEAS<br>EQLAR |           |         |                                              |      | Mascot      |

37 replication factor C subunit 3 [Danio rerio] gi|41393079 40301.9 8.81 10 34 0

Peptide Information

| Calc. Mass | Obsrv. Mass | ± da    | ± ppm | Start Seq. | End Seq. | Sequence          | Ion Score | C. I. % | Modification                               | Rank | Result Type |
|------------|-------------|---------|-------|------------|----------|-------------------|-----------|---------|--------------------------------------------|------|-------------|
| 1081.5381  | 1081.5571   | 0.019   | 18    | 161        | 170      | LILCCNSTSK        |           |         |                                            |      | Mascot      |
| 1179.6984  | 1179.6016   | -0.0968 | -82   | 203        | 213      | EGLLLPPELAK       |           |         |                                            |      | Mascot      |
| 1234.679   | 1234.6785   | -0.0005 | 0     | 58         | 68       | ELYGAGVEKLR       |           |         |                                            |      | Mascot      |
| 1249.5374  | 1249.6309   | 0.0935  | 75    | 151        | 160      | TMEKYMATCR        |           |         | Oxidation (M)[2]                           |      | Mascot      |
| 1267.5956  | 1267.5594   | -0.0362 | -29   | 225        | 234      | KALLMCEACR        |           |         | Carbamidomethyl (C)[6,9], Oxidation (M)[5] |      | Mascot      |
| 1915.08    | 1914.8812   | -0.1988 | -104  | 322        | 338      | LQLGNKAIYHLEAFVAK |           |         |                                            |      | Mascot      |
| 1993.8962  | 1993.9805   | 0.0843  | 42    | 155        | 170      | YMATCRLILCCNSTSK  |           |         | Carbamidomethyl (C)[5,10,11], Oxidation    |      | Mascot      |

|    |                                              |           |         |     |             |         |                            |                                                                                        |        |   |   |   |
|----|----------------------------------------------|-----------|---------|-----|-------------|---------|----------------------------|----------------------------------------------------------------------------------------|--------|---|---|---|
|    | 1993.8962                                    | 1993.9805 | 0.0843  | 42  | 155         | 170     | YMATCRLILCCNSTSK           | (M)[2]<br>Carbamidomethyl (C)[5,10,11], Oxidation (M)[2]<br>Carbamidomethyl (C)[10,17] | Mascot |   |   |   |
|    | 2115.0935                                    | 2115.0432 | -0.0503 | -24 | 184         | 202     | VPLPSVEEVCSVLSGVC<br>RK    |                                                                                        | Mascot |   |   |   |
|    | 2172.0906                                    | 2172.05   | -0.0406 | -19 | 28          | 48      | NLVQCGDFPHLLVYGPS<br>GAGK  |                                                                                        | Mascot |   |   |   |
|    | 2172.0906                                    | 2172.05   | -0.0406 | -19 | 28          | 48      | NLVQCGDFPHLLVYGPS<br>GAGK  |                                                                                        | Mascot |   |   |   |
|    | 2300.1855                                    | 2300.1838 | -0.0017 | -1  | 28          | 49      | NLVQCGDFPHLLVYGPS<br>GAGKK |                                                                                        | Mascot |   |   |   |
| 38 | tufelin-interacting protein 11 [Danio rerio] |           |         |     | gi 50540512 | 94517.8 | 5.51                       | 12                                                                                     | 34     | 0 | 2 | 0 |

#### Peptide Information

| Calc. Mass | Obsrv. Mass | ± da    | ± ppm | Start Seq. | End Seq. | Sequence                 | Ion Score | C. I. | % Modification   | Rank | Result Type |
|------------|-------------|---------|-------|------------|----------|--------------------------|-----------|-------|------------------|------|-------------|
| 807.4028   | 807.3823    | -0.0205 | -25   | 268        | 274      | VIDMTGR                  |           |       | Oxidation (M)[4] |      | Mascot      |
| 1081.4918  | 1081.5571   | 0.0653  | 60    | 1          | 9        | MSMSHLYGR                |           |       |                  |      | Mascot      |
| 1106.5524  | 1106.5325   | -0.0199 | -18   | 2          | 10       | SMSHLYGRR                |           |       |                  |      | Mascot      |
| 1249.6973  | 1249.6309   | -0.0664 | -53   | 155        | 165      | LLQKMGYVPGK              |           |       | Oxidation (M)[5] |      | Mascot      |
| 1321.6833  | 1321.6364   | -0.0469 | -35   | 791        | 801      | HMGKQLFTFGR              |           |       |                  |      | Mascot      |
| 1359.5997  | 1359.6248   | 0.0251  | 18    | 278        | 288      | VYNSYSHMSQK              |           |       | Oxidation (M)[8] |      | Mascot      |
| 1360.6412  | 1360.6259   | -0.0153 | -11   | 383        | 395      | EGDPALSLQECAK            |           |       |                  |      | Mascot      |
| 1434.7158  | 1434.7721   | 0.0563  | 39    | 707        | 721      | AVASGLGGYMQPGAR          |           |       |                  |      | Mascot      |
| 1493.6326  | 1493.7352   | 0.1026  | 69    | 437        | 449      | DCSDGLEEVGQWR            |           |       |                  |      | Mascot      |
| 1498.7537  | 1498.7189   | -0.0348 | -23   | 73         | 86       | DYSTPVSFVSAGLR           |           |       |                  |      | Mascot      |
| 1498.7537  | 1498.7189   | -0.0348 | -23   | 73         | 86       | DYSTPVSFVSAGLR           | 2         | 0     |                  |      | Mascot      |
| 1533.7981  | 1533.78     | -0.0181 | -12   | 776        | 789      | AEENGIVFMPLVAK           |           |       | Oxidation (M)[9] |      | Mascot      |
| 1533.7981  | 1533.78     | -0.0181 | -12   | 776        | 789      | AEENGIVFMPLVAK           |           |       | Oxidation (M)[9] |      | Mascot      |
| 2172.1733  | 2172.05     | -0.1233 | -57   | 770        | 789      | DLVQAKAEENGIVFMPLV<br>AK |           |       |                  |      | Mascot      |
| 2172.1733  | 2172.05     | -0.1233 | -57   | 770        | 789      | DLVQAKAEENGIVFMPLV<br>AK |           |       |                  |      | Mascot      |

39 PREDICTED: gelsolin-like [Danio rerio] gi|326668568 79933.9 6.95 11 34 0

#### Peptide Information

| Calc. Mass | Obsrv. Mass | ± da    | ± ppm | Start Seq. | End Seq. | Sequence          | Ion Score | C. I. | % Modification   | Rank | Result Type |
|------------|-------------|---------|-------|------------|----------|-------------------|-----------|-------|------------------|------|-------------|
| 1249.6211  | 1249.6309   | 0.0098  | 8     | 581        | 592      | EPAAFWSSLGGK      |           |       |                  |      | Mascot      |
| 1267.6715  | 1267.5594   | -0.1121 | -88   | 301        | 311      | SAMKVAEQFIK       |           |       | Oxidation (M)[3] |      | Mascot      |
| 1357.6971  | 1357.7174   | 0.0203  | 15    | 391        | 401      | VQVWRVEGNDR       |           |       |                  |      | Mascot      |
| 1360.6526  | 1360.6259   | -0.0267 | -20   | 457        | 469      | LDDSMGGAPVQVR     |           |       | Oxidation (M)[5] |      | Mascot      |
| 1713.8363  | 1713.8348   | -0.0015 | -1    | 564        | 580      | YVCSILGGSATEISEGK |           |       |                  |      | Mascot      |

|  |           |           |         |     |     |     |                           |  |  |  |  |                        |  |  |  |  |        |
|--|-----------|-----------|---------|-----|-----|-----|---------------------------|--|--|--|--|------------------------|--|--|--|--|--------|
|  | 1713.8363 | 1713.8348 | -0.0015 | -1  | 564 | 580 | YVCSILGGSATEISEGK         |  |  |  |  |                        |  |  |  |  | Mascot |
|  | 2114.9607 | 2115.0432 | 0.0825  | 39  | 689 | 706 | QGFEPPSFTGWFAQWD<br>SK    |  |  |  |  |                        |  |  |  |  | Mascot |
|  | 2174.1128 | 2174.0835 | -0.0293 | -13 | 92  | 110 | EVQNNESVTLGYFKTGI<br>K    |  |  |  |  |                        |  |  |  |  | Mascot |
|  | 2194.0332 | 2194.0479 | 0.0147  | 7   | 267 | 285 | QELLNPSCYILDNGLDS<br>K    |  |  |  |  | Carbamidomethyl (C)[9] |  |  |  |  | Mascot |
|  | 2233.1533 | 2233.0898 | -0.0635 | -28 | 522 | 541 | AVEVEPCASKLNTNDVFV<br>LK  |  |  |  |  | Carbamidomethyl (C)[7] |  |  |  |  | Mascot |
|  | 2283.0823 | 2283.1787 | 0.0964  | 42  | 111 | 131 | YKQGGVSSGFNHVVSNE<br>MNTK |  |  |  |  |                        |  |  |  |  | Mascot |
|  | 2283.0823 | 2283.1787 | 0.0964  | 42  | 111 | 131 | YKQGGVSSGFNHVVSNE<br>MNTK |  |  |  |  |                        |  |  |  |  | Mascot |
|  | 2298.199  | 2298.1975 | -0.0015 | -1  | 532 | 550 | LNTNDVFVLKFPEGMFL<br>WK   |  |  |  |  |                        |  |  |  |  | Mascot |

40 ribonuclease P protein subunit p30 [Danio rerio] gi|61806528 29368.3 8.8 7 34 0

#### Peptide Information

| Calc. Mass | Obsrv. Mass | ± da    | ± ppm | Start Seq. | End Seq. | Sequence                 | Ion Score | C. I. | % Modification | Rank | Result Type |
|------------|-------------|---------|-------|------------|----------|--------------------------|-----------|-------|----------------|------|-------------|
| 1051.5823  | 1051.7152   | 0.1329  | 126   | 96         | 104      | FDLVAVYPK                |           |       |                |      | Mascot      |
| 1179.6772  | 1179.6016   | -0.0756 | -64   | 95         | 104      | KFDLVAVYPK               |           |       |                |      | Mascot      |
| 1582.7782  | 1582.8323   | 0.0541  | 34    | 2          | 15       | SVFMDLNIINSSDK           |           |       |                |      | Mascot      |
| 1713.8186  | 1713.8348   | 0.0162  | 9     | 1          | 15       | MSVFMDLNIINSSDK          |           |       |                |      | Mascot      |
| 1713.8186  | 1713.8348   | 0.0162  | 9     | 1          | 15       | MSVFMDLNIINSSDK          |           |       |                |      | Mascot      |
| 1838.9858  | 1838.9203   | -0.0655 | -36   | 243        | 258      | KPQILQKEEEETPAAK         |           |       |                |      | Mascot      |
| 1951.1157  | 1951.0182   | -0.0975 | -50   | 232        | 249      | ATASGVIHTMKKPQILQK       |           |       |                |      | Mascot      |
| 2066.0439  | 2066.0806   | 0.0367  | 18    | 195        | 214      | GPYDIANLGLVFSLSEGD<br>AK |           |       |                |      | Mascot      |

41 novel protein similar to human titin (TTN) [Danio rerio] gi|29561775 2113153 6.46 61 34 0

#### Peptide Information

| Calc. Mass | Obsrv. Mass | ± da    | ± ppm | Start Seq. | End Seq. | Sequence   | Ion Score | C. I. | % Modification | Rank | Result Type |
|------------|-------------|---------|-------|------------|----------|------------|-----------|-------|----------------|------|-------------|
| 807.393    | 807.3823    | -0.0107 | -13   | 8728       | 8733     | WTRCNK     |           |       |                |      | Mascot      |
| 842.5094   | 842.5108    | 0.0014  | 2     | 1522       | 1529     | LSIPGVTR   |           |       |                |      | Mascot      |
| 850.5396   | 850.5427    | 0.0031  | 4     | 4200       | 4206     | FLLTKTK    |           |       |                |      | Mascot      |
| 928.4886   | 928.5276    | 0.039   | 42    | 5895       | 5901     | EYSFRVK    |           |       |                |      | Mascot      |
| 958.4159   | 958.5389    | 0.123   | 128   | 5989       | 5997     | DCHRGDAGK  |           |       |                |      | Mascot      |
| 996.5373   | 996.5975    | 0.0602  | 60    | 670        | 676      | QYQFRVR    |           |       |                |      | Mascot      |
| 1017.5687  | 1017.5729   | 0.0042  | 4     | 15423      | 15431    | KTGIDLQSR  |           |       |                |      | Mascot      |
| 1045.6404  | 1045.5651   | -0.0753 | -72   | 2435       | 2444     | GTKFVVPGLK |           |       |                |      | Mascot      |
| 1051.6259  | 1051.7152   | 0.0893  | 85    | 18684      | 18693    | SPIASPPRVK |           |       |                |      | Mascot      |

|           |           |         |      |       |       |                     |                        |        |
|-----------|-----------|---------|------|-------|-------|---------------------|------------------------|--------|
| 1076.6021 | 1076.6115 | 0.0094  | 9    | 4748  | 4756  | KMDVLEITK           |                        | Mascot |
| 1081.5425 | 1081.5571 | 0.0146  | 13   | 1361  | 1368  | FHYTERTK            |                        | Mascot |
| 1090.4987 | 1090.5352 | 0.0365  | 33   | 16580 | 16589 | YYAGCGTSLR          |                        | Mascot |
| 1106.5411 | 1106.5325 | -0.0086 | -8   | 3010  | 3018  | ETKANMWAR           |                        | Mascot |
| 1124.5154 | 1124.5308 | 0.0154  | 14   | 11627 | 11636 | DPCAPPSQPR          | Carbamidomethyl (C)[3] | Mascot |
| 1150.5885 | 1150.5852 | -0.0033 | -3   | 12457 | 12466 | DGQVLKSTMR          | Oxidation (M)[9]       | Mascot |
| 1165.6211 | 1165.7471 | 0.126   | 108  | 14756 | 14766 | VSAENKFGVSK         |                        | Mascot |
| 1179.6078 | 1179.6016 | -0.0062 | -5   | 14620 | 14628 | VTWKLEEMK           | Oxidation (M)[8]       | Mascot |
| 1234.7041 | 1234.6785 | -0.0256 | -21  | 6941  | 6951  | ITGYVIEAQLK         |                        | Mascot |
| 1249.6536 | 1249.6309 | -0.0227 | -18  | 17473 | 17483 | KEWSTVVSSAR         |                        | Mascot |
| 1267.6793 | 1267.5594 | -0.1199 | -95  | 14057 | 14066 | LIKONEYQFR          |                        | Mascot |
| 1277.7688 | 1277.6429 | -0.1259 | -99  | 2490  | 2501  | EKIVVHAGGVIR        |                        | Mascot |
| 1277.7688 | 1277.6429 | -0.1259 | -99  | 2490  | 2501  | EKIVVHAGGVIR        |                        | Mascot |
| 1299.658  | 1299.6233 | -0.0347 | -27  | 13813 | 13823 | DSVTLQWEPPK         |                        | Mascot |
| 1311.6791 | 1311.5803 | -0.0988 | -75  | 5709  | 5720  | YVLTLENSSGTK        |                        | Mascot |
| 1320.7369 | 1320.5875 | -0.1494 | -113 | 10302 | 10314 | LNVSSSTATSTVLK      |                        | Mascot |
| 1321.6456 | 1321.6364 | -0.0092 | -7   | 10199 | 10210 | GSEEWIVATVCK        |                        | Mascot |
| 1359.6328 | 1359.6248 | -0.008  | -6   | 17538 | 17548 | NTEVTWYFGSR         |                        | Mascot |
| 1360.7583 | 1360.6259 | -0.1324 | -97  | 10742 | 10754 | VLDRPGPPDGPLK       |                        | Mascot |
| 1373.7059 | 1373.71   | 0.0041  | 3    | 15231 | 15241 | VNKTYTIYDTR         |                        | Mascot |
| 1381.707  | 1381.6804 | -0.0266 | -19  | 14367 | 14378 | YTLSENNSGRK         |                        | Mascot |
| 1475.7601 | 1475.757  | -0.0031 | -2   | 16447 | 16459 | VFAENETGLSRPR       |                        | Mascot |
| 1493.7166 | 1493.7352 | 0.0186  | 12   | 14434 | 14445 | LSWQEVSECTR         |                        | Mascot |
| 1498.7537 | 1498.7189 | -0.0348 | -23  | 15244 | 15256 | ITGLLEGSDYQFR       |                        | Mascot |
| 1498.8264 | 1498.7189 | -0.1075 | -72  | 10056 | 10069 | VLDTPGAPQNLFVK      |                        | Mascot |
| 1533.7101 | 1533.78   | 0.0699  | 46   | 9963  | 9975  | MDAPEIELDSELR       | Oxidation (M)[1]       | Mascot |
| 1533.7227 | 1533.78   | 0.0573  | 37   | 14244 | 14255 | VNNQTCIQTHYR        | Carbamidomethyl (C)[6] | Mascot |
| 1582.7716 | 1582.8323 | 0.0607  | 38   | 3897  | 3909  | TMLTNNFPVVQMR       | Oxidation (M)[2,12]    | Mascot |
| 1661.8051 | 1661.8954 | 0.0903  | 54   | 9963  | 9976  | MDAPEIELDSELRK      | Oxidation (M)[1]       | Mascot |
| 1707.8557 | 1707.7977 | -0.058  | -34  | 6462  | 6475  | LLWTKLAENVMDCR      | Oxidation (M)[11]      | Mascot |
| 1713.8378 | 1713.8348 | -0.003  | -2   | 1300  | 1313  | MHTWRQPIETPSSK      | Oxidation (M)[1]       | Mascot |
| 1713.8378 | 1713.8348 | -0.003  | -2   | 1300  | 1313  | MHTWRQPIETPSSK      | Oxidation (M)[1]       | Mascot |
| 1817.9176 | 1817.9473 | 0.0297  | 16   | 7453  | 7467  | MEIKTLDFYSCLINK     |                        | Mascot |
| 1838.9    | 1838.9203 | 0.0203  | 11   | 11627 | 11642 | DPCAPPSQPRVMNTR     | Carbamidomethyl (C)[3] | Mascot |
| 1894.9116 | 1894.9691 | 0.0575  | 30   | 6085  | 6100  | LHDGTEYIFRVCAENK    |                        | Mascot |
| 1894.9116 | 1894.9691 | 0.0575  | 30   | 6085  | 6100  | LHDGTEYIFRVCAENK    |                        | Mascot |
| 1951.0229 | 1951.0182 | -0.0047 | -2   | 6367  | 6385  | SSDIVQISSTPTSSTLSIK |                        | Mascot |

|    |                                                         |           |           |         |     |              |          |                                 |                            |        |   |    |   |
|----|---------------------------------------------------------|-----------|-----------|---------|-----|--------------|----------|---------------------------------|----------------------------|--------|---|----|---|
|    |                                                         | 1994.0706 | 1993.9805 | -0.0901 | -45 | 2089         | 2107     | NTVTLTWVPPKNDGGAP<br>VK         |                            | Mascot |   |    |   |
|    |                                                         | 1994.0706 | 1993.9805 | -0.0901 | -45 | 2089         | 2107     | NTVTLTWVPPKNDGGAP<br>VK         |                            | Mascot |   |    |   |
|    |                                                         | 2096.1387 | 2096.0588 | -0.0799 | -38 | 11120        | 11138    | YVLTLENNIGSKSAFNV<br>K          |                            | Mascot |   |    |   |
|    |                                                         | 2115.075  | 2115.0432 | -0.0318 | -15 | 6295         | 6315     | AKNAAGAISAPSETTEPL<br>VCK       | Carbamidomethyl (C)[20]    | Mascot |   |    |   |
|    |                                                         | 2172.1619 | 2172.05   | -0.1119 | -52 | 8458         | 8480     | VIARNAAGVSSVPSDSTG<br>AITAK     |                            | Mascot |   |    |   |
|    |                                                         | 2172.1619 | 2172.05   | -0.1119 | -52 | 8458         | 8480     | VIARNAAGVSSVPSDSTG<br>AITAK     |                            | Mascot |   |    |   |
|    |                                                         | 2174.1023 | 2174.0835 | -0.0188 | -9  | 10714        | 10734    | DCIRVDGGHFVLSLSNVG<br>GTK       |                            | Mascot |   |    |   |
|    |                                                         | 2194.0583 | 2194.0479 | -0.0104 | -5  | 10133        | 10152    | VMAENEFGIGLPVETEE<br>S VK       | Oxidation (M)[2]           | Mascot |   |    |   |
|    |                                                         | 2211.0713 | 2211.113  | 0.0417  | 19  | 16266        | 16285    | TPLCPPEPPSFPEIMDV<br>TK         | Oxidation (M)[16]          | Mascot |   |    |   |
|    |                                                         | 2225.0479 | 2225.1265 | 0.0786  | 35  | 5030         | 5048     | HPFDPPSEPLNCCVNKV<br>SK         | Carbamidomethyl (C)[12,13] | Mascot |   |    |   |
|    |                                                         | 2225.1382 | 2225.1265 | -0.0117 | -5  | 15848        | 15868    | VAATNRFGIGGFLQSEV<br>ECK        |                            | Mascot |   |    |   |
|    |                                                         | 2278.0906 | 2278.0154 | -0.0752 | -33 | 176          | 197      | VAAENAVGPSEFCELED<br>SVLAK      |                            | Mascot |   |    |   |
|    |                                                         | 2283.1284 | 2283.1787 | 0.0503  | 22  | 76           | 97       | VRAVNVAGESEPSEPSD<br>PVLCK      |                            | Mascot |   |    |   |
|    |                                                         | 2283.1511 | 2283.1787 | 0.0276  | 12  | 1873         | 1892     | IFMDISADELLCVRAGTP<br>K         | Carbamidomethyl (C)[12]    | Mascot |   |    |   |
|    |                                                         | 2284.1819 | 2284.1812 | -0.0007 | 0   | 7907         | 7927     | EITKDSVSLIWDPPVIDG<br>SR        |                            | Mascot |   |    |   |
|    |                                                         | 2298.2083 | 2298.1975 | -0.0108 | -5  | 12404        | 12423    | DMVLPVLVKDQLEAPEIN<br>MK        | Oxidation (M)[2]           | Mascot |   |    |   |
|    |                                                         | 2300.0764 | 2300.1838 | 0.1074  | 47  | 2336         | 2353     | ECQYIVQRLTEGHEYEFR              |                            | Mascot |   |    |   |
|    |                                                         | 2367.2917 | 2367.2705 | -0.0212 | -9  | 10238        | 10259    | SDPRPLASPVIADVTIEP<br>SFK       |                            | Mascot |   |    |   |
|    |                                                         | 2441.1978 | 2441.23   | 0.0322  | 13  | 4494         | 4514     | KCNTSGQLVLTEYTISNL<br>DER       | Carbamidomethyl (C)[2]     | Mascot |   |    |   |
|    |                                                         | 2441.1978 | 2441.23   | 0.0322  | 13  | 4494         | 4514     | KCNTSGQLVLTEYTISNL<br>DER       | Carbamidomethyl (C)[2]     | Mascot |   |    |   |
|    |                                                         | 2872.4258 | 2872.4014 | -0.0244 | -8  | 14492        | 14517    | RLDVIDTTSTTASLVWMK<br>PEHDGGS R |                            | Mascot |   |    |   |
| 42 | PREDICTED: hypothetical protein LOC797545 [Danio rerio] |           |           |         |     | gi 326680244 | 414217.4 | 4.68                            | 21                         | 33     | 0 | 19 | 0 |

|           |           |         |     |      |      |                          |    |   |                   |                  |  |        |
|-----------|-----------|---------|-----|------|------|--------------------------|----|---|-------------------|------------------|--|--------|
| 1179.5852 | 1179.6016 | 0.0164  | 14  | 2601 | 2612 | TGSTISGEGKDK             |    |   |                   |                  |  | Mascot |
| 1234.5487 | 1234.6785 | 0.1298  | 105 | 3700 | 3708 | DWYQQTHEK                |    |   |                   |                  |  | Mascot |
| 1249.5542 | 1249.6309 | 0.0767  | 61  | 3277 | 3286 | EESDEEREVK               |    |   |                   |                  |  | Mascot |
| 1311.5668 | 1311.5803 | 0.0135  | 10  | 1037 | 1049 | EMQAAAMGNGTSK            |    |   |                   | Oxidation (M)[2] |  | Mascot |
| 1360.6954 | 1360.6259 | -0.0695 | -51 | 1956 | 1968 | DQSVPESSITVAK            |    |   |                   |                  |  | Mascot |
| 1373.6907 | 1373.71   | 0.0193  | 14  | 2502 | 2513 | EKEDTHSSLLSK             |    |   |                   |                  |  | Mascot |
| 1498.7457 | 1498.7189 | -0.0268 | -18 | 3226 | 3237 | QTEEIIMEKYSK             |    |   |                   |                  |  | Mascot |
| 1498.7457 | 1498.7189 | -0.0268 | -18 | 3226 | 3237 | QTEEIIMEKYSK             |    |   |                   |                  |  | Mascot |
| 1582.698  | 1582.8323 | 0.1343  | 85  | 2615 | 2629 | LGSDDSKDDPFSSGR          |    |   |                   |                  |  | Mascot |
| 1661.7904 | 1661.8954 | 0.105   | 63  | 2350 | 2363 | VTYEVEKESYEASK           |    |   |                   |                  |  | Mascot |
| 1707.8184 | 1707.7977 | -0.0207 | -12 | 2446 | 2458 | DLYQEEELVREER            |    |   |                   |                  |  | Mascot |
| 1713.8087 | 1713.8348 | 0.0261  | 15  | 442  | 455  | EMQFLMQKWAGNSK           | 19 | 0 | Oxidation (M)[6]  |                  |  | Mascot |
| 1713.8087 | 1713.8348 | 0.0261  | 15  | 442  | 455  | EMQFLMQKWAGNSK           |    |   | Oxidation (M)[2]  |                  |  | Mascot |
| 1894.9392 | 1894.9691 | 0.0299  | 16  | 2750 | 2768 | DSVSSLVYGGTAEVPQT<br>GK  |    |   |                   |                  |  | Mascot |
| 1894.9392 | 1894.9691 | 0.0299  | 16  | 2750 | 2768 | DSVSSLVYGGTAEVPQT<br>GK  |    |   |                   |                  |  | Mascot |
| 2096.1233 | 2096.0588 | -0.0645 | -31 | 1526 | 1543 | QVKQVEEIQPEKPEISSK       |    |   |                   |                  |  | Mascot |
| 2174.1299 | 2174.0835 | -0.0464 | -21 | 1758 | 1776 | LIEETQNTQQLQKADISS<br>K  |    |   |                   |                  |  | Mascot |
| 2367.1418 | 2367.2705 | 0.1287  | 54  | 2674 | 2694 | TDLVSSKPLVVSTEEEC<br>MVR |    |   | Oxidation (M)[19] |                  |  | Mascot |

43 novel protein similar to vertebrate SWIVSNF related,  
matrix associated, actin dependent regulator gi|55963379 29300 9.77 7 33 0

#### Peptide Information

| Calc. Mass | Obsrv. Mass | ± da    | ± ppm | Start Seq. | End Seq. | Sequence                  | Ion Score | C. I. % | Modification            | Rank | Result Type |
|------------|-------------|---------|-------|------------|----------|---------------------------|-----------|---------|-------------------------|------|-------------|
| 1234.5746  | 1234.6785   | 0.1039  | 84    | 135        | 144      | CVSHSENRFK                |           |         |                         |      | Mascot      |
| 1320.6794  | 1320.5875   | -0.0919 | -70   | 159        | 170      | SIPSKNYDPATK              |           |         |                         |      | Mascot      |
| 1475.7522  | 1475.757    | 0.0048  | 3     | 70         | 82       | QTQLIDINAACTK             |           |         | Carbamidomethyl (C)[11] |      | Mascot      |
| 1582.9064  | 1582.8323   | -0.0741 | -47   | 111        | 125      | RPPKPPEPAANIPAK           |           |         |                         |      | Mascot      |
| 2115.1848  | 2115.0432   | -0.1416 | -67   | 145        | 163      | VEVGYHADLILVFKSIPSK       |           |         |                         |      | Mascot      |
| 2211.0286  | 2211.113    | 0.0844  | 38    | 41         | 61       | HTQSGTTGGPAKNNQHF<br>ASDR |           |         |                         |      | Mascot      |
| 2367.2263  | 2367.2705   | 0.0442  | 19    | 247        | 267      | LEVDIGYQADVIGIFKQM<br>PSK |           |         | Oxidation (M)[18]       |      | Mascot      |

44 PREDICTED: protein FAM55C-like [Danio rerio] gi|326679503 31615.8 8.63 8 32 0

#### Peptide Information

| Calc. Mass | Obsrv. Mass | ± da | ± ppm | Start Seq. | End Seq. | Sequence | Ion Score | C. I. % | Modification | Rank | Result Type |
|------------|-------------|------|-------|------------|----------|----------|-----------|---------|--------------|------|-------------|
|------------|-------------|------|-------|------------|----------|----------|-----------|---------|--------------|------|-------------|

|    |                                          |           |         |     |              |     |                             |      |   |                            |   |  |        |
|----|------------------------------------------|-----------|---------|-----|--------------|-----|-----------------------------|------|---|----------------------------|---|--|--------|
|    | 1045.5061                                | 1045.5651 | 0.059   | 56  | 184          | 191 | YRESSFTR                    |      |   |                            |   |  | Mascot |
|    | 1090.375                                 | 1090.5352 | 0.1602  | 147 | 227          | 234 | GNCCCEYK                    |      |   | Carbamidomethyl (C)[3,4,5] |   |  | Mascot |
|    | 1320.6729                                | 1320.5875 | -0.0854 | -65 | 250          | 260 | LSCDKLVYHSR                 |      |   |                            |   |  | Mascot |
|    | 1381.7686                                | 1381.6804 | -0.0882 | -64 | 171          | 182 | LEHSSEVVQILK                |      |   |                            |   |  | Mascot |
|    | 1498.7583                                | 1498.7189 | -0.0394 | -26 | 238          | 249 | TGTVWHCERPKK                |      |   | Carbamidomethyl (C)[7]     |   |  | Mascot |
|    | 1498.7583                                | 1498.7189 | -0.0394 | -26 | 238          | 249 | TGTVWHCERPKK                |      |   | Carbamidomethyl (C)[7]     |   |  | Mascot |
|    | 2065.9729                                | 2066.0806 | 0.1077  | 52  | 2            | 18  | TYFCVCLLAISCMWLWR           |      |   | Carbamidomethyl (C)[4]     |   |  | Mascot |
|    | 2171.9819                                | 2172.05   | 0.0681  | 31  | 1            | 18  | MTYFCVCLLAISCMWLWR          |      |   | Oxidation (M)[1,14]        |   |  | Mascot |
|    | 2171.9819                                | 2172.05   | 0.0681  | 31  | 1            | 18  | MTYFCVCLLAISCMWLWR          |      |   | Oxidation (M)[1,14]        |   |  | Mascot |
|    | 2872.3765                                | 2872.4014 | 0.0249  | 9   | 2            | 25  | TYFCVCLLAISCMWLRL<br>TENHPR |      |   | Oxidation (M)[13]          |   |  | Mascot |
| 45 | novel protein (zgc:153390) [Danio rerio] |           |         |     | gi 220679356 |     | 13359                       | 9.55 | 6 | 32                         | 0 |  |        |

#### Peptide Information

|  | Calc. Mass | Obsrv. Mass | ± da    | ± ppm | Start Seq. | End Seq. | Sequence       | Ion Score | C. I. | % Modification         | Rank | Result Type |
|--|------------|-------------|---------|-------|------------|----------|----------------|-----------|-------|------------------------|------|-------------|
|  | 842.4478   | 842.5108    | 0.063   | 75    | 51         | 57       | ISKHDSR        |           |       |                        |      | Mascot      |
|  | 1045.5636  | 1045.5651   | 0.0015  | 1     | 38         | 46       | SLENLGERK      |           |       |                        |      | Mascot      |
|  | 1150.6215  | 1150.5852   | -0.0363 | -32   | 24         | 32       | RTVETLFR       |           |       |                        |      | Mascot      |
|  | 1311.7129  | 1311.5803   | -0.1326 | -101  | 2          | 11       | PRYELVMVLK     |           |       |                        |      | Mascot      |
|  | 1498.827   | 1498.7189   | -0.1081 | -72   | 12         | 24       | AMQRPETA AVLRR |           |       |                        |      | Mascot      |
|  | 1498.827   | 1498.7189   | -0.1081 | -72   | 12         | 24       | AMQRPETA AVLRR |           |       |                        |      | Mascot      |
|  | 1533.7148  | 1533.78     | 0.0652  | 43    | 97         | 110      | DTELPKGQCCGVAR |           |       | Carbamidomethyl (C)[9] |      | Mascot      |
|  | 1533.7148  | 1533.78     | 0.0652  | 43    | 97         | 110      | DTELPKGQCCGVAR |           |       | Carbamidomethyl (C)[9] |      | Mascot      |

46 Retinoid x receptor, beta b [Danio rerio] gi|190336859 46645.2 6.61 9 32 0

#### Peptide Information

|  | Calc. Mass | Obsrv. Mass | ± da    | ± ppm | Start Seq. | End Seq. | Sequence            | Ion Score | C. I. | % Modification                             | Rank | Result Type |
|--|------------|-------------|---------|-------|------------|----------|---------------------|-----------|-------|--------------------------------------------|------|-------------|
|  | 1081.47    | 1081.5571   | 0.0871  | 81    | 88         | 96       | RMCAICGDR           |           |       | Carbamidomethyl (C)[3]                     |      | Mascot      |
|  | 1234.683   | 1234.6785   | -0.0045 | -4    | 224        | 233      | QLFTLVEWAK          |           |       |                                            |      | Mascot      |
|  | 1267.6641  | 1267.5594   | -0.1047 | -83   | 189        | 199      | ILEAETA VEHR        |           |       |                                            |      | Mascot      |
|  | 1357.5657  | 1357.7174   | 0.1517  | 112   | 89         | 100      | MCAICGDRSSGK        |           |       | Carbamidomethyl (C)[2,5], Oxidation (M)[1] |      | Mascot      |
|  | 1359.5455  | 1359.6248   | 0.0793  | 58    | 101        | 111      | HYGVYSCEGCK         |           |       | Carbamidomethyl (C)[7,10]                  |      | Mascot      |
|  | 1475.7198  | 1475.757    | 0.0372  | 25    | 359        | 370      | VYASLESYCKQK        |           |       | Carbamidomethyl (C)[9]                     |      | Mascot      |
|  | 1661.7046  | 1661.8954   | 0.1908  | 115   | 97         | 111      | SSGKHVGVYSCEGCK     |           |       | Carbamidomethyl (C)[11]                    |      | Mascot      |
|  | 1838.7988  | 1838.9203   | 0.1215  | 66    | 101        | 115      | HYGVYSCEGCKGFFK     |           |       | Carbamidomethyl (C)[7,10]                  |      | Mascot      |
|  | 2174.0508  | 2174.0835   | 0.0327  | 15    | 404        | 422      | LIGNTPIDTFLMEMLESPH |           |       | Oxidation (M)[12]                          |      | Mascot      |



| Peptide Information |             |         |       |            |          |          |           |         |                        |      |             |
|---------------------|-------------|---------|-------|------------|----------|----------|-----------|---------|------------------------|------|-------------|
| Calc. Mass          | Obsrv. Mass | ± da    | ± ppm | Start Seq. | End Seq. | Sequence | Ion Score | C. I. % | Modification           | Rank | Result Type |
| 887.4832            | 887.4819    | -0.0013 | -1    | 171        | 179      | VGVPDSVK |           |         |                        |      | Mascot      |
| 1026.4673           | 1026.4692   | 0.0019  | 2     | 150        | 157      | ENFSLCTR | 61        | 99.979  | Carbamidomethyl (C)[5] |      | Mascot      |
| 1026.4673           | 1026.4692   | 0.0019  | 2     | 150        | 157      | ENFSLCTR |           |         | Carbamidomethyl (C)[5] |      | Mascot      |

|   |                                                      |             |         |      |    |     |     |     |     |
|---|------------------------------------------------------|-------------|---------|------|----|-----|-----|-----|-----|
| 2 | malate dehydrogenase 1a, NAD (soluble) [Danio rerio] | gi 41053939 | 33395.9 | 8.13 | 13 | 825 | 100 | 743 | 100 |
|---|------------------------------------------------------|-------------|---------|------|----|-----|-----|-----|-----|

| Calc. Mass | Obsrv. Mass | ± da    | ± ppm | Start Seq. | End Seq. | Sequence     | Ion Score | C. I.  | % Modification         | Rank | Result Type |
|------------|-------------|---------|-------|------------|----------|--------------|-----------|--------|------------------------|------|-------------|
| 887.4832   | 887.4819    | -0.0013 | -1    | 143        | 151      | VGVPSPDSVK   |           |        |                        |      | Mascot      |
| 1026.4673  | 1026.4692   | 0.0019  | 2     | 122        | 129      | ENFSCLTR     | 61        | 99.979 | Carbamidomethyl (C)[5] |      | Mascot      |
| 1026.4673  | 1026.4692   | 0.0019  | 2     | 122        | 129      | ENFSCLTR     |           |        | Carbamidomethyl (C)[5] |      | Mascot      |
| 1150.5851  | 1150.5905   | 0.0054  | 5     | 193        | 202      | GDFISTVQQR   |           |        |                        |      | Mascot      |
| 1150.5851  | 1150.5905   | 0.0054  | 5     | 193        | 202      | GDFISTVQQR   | 68        | 99.996 |                        |      | Mascot      |
| 1321.6747  | 1321.6801   | 0.0054  | 4     | 271        | 282      | VVDGLSINDFSR |           |        |                        |      | Mascot      |
| 1321.6747  | 1321.6801   | 0.0054  | 4     | 271        | 282      | VVDGLSINDFSR | 93        | 100    |                        |      | Mascot      |
| 1334.6256  | 1334.6307   | 0.0051  | 4     | 285        | 296      | MDATAAELVEER |           |        |                        |      | Mascot      |
| 1334.6256  | 1334.6307   | 0.0051  | 4     | 285        | 296      | MDATAAELVEER | 69        | 99.996 |                        |      | Mascot      |

|   |                                                 |           |         |     |             |         |                             |     |        |                         |     |                  |        |
|---|-------------------------------------------------|-----------|---------|-----|-------------|---------|-----------------------------|-----|--------|-------------------------|-----|------------------|--------|
|   | 1350.6206                                       | 1350.6249 | 0.0043  | 3   | 285         | 296     | MDATAAELVEER                |     |        |                         |     | Oxidation (M)[1] | Mascot |
|   | 1357.7144                                       | 1357.7208 | 0.0064  | 5   | 52          | 64      | DLDAAILVGSMR                |     |        |                         |     |                  | Mascot |
|   | 1357.7144                                       | 1357.7208 | 0.0064  | 5   | 52          | 64      | DLDAAILVGSMR                | 101 | 100    |                         |     |                  | Mascot |
|   | 1373.7094                                       | 1373.7159 | 0.0065  | 5   | 52          | 64      | DLDAAILVGSMR                | 65  | 99.991 | Oxidation (M)[11]       |     |                  | Mascot |
|   | 1373.7094                                       | 1373.7159 | 0.0065  | 5   | 52          | 64      | DLDAAILVGSMR                |     |        | Oxidation (M)[11]       |     |                  | Mascot |
|   | 1460.7994                                       | 1460.8047 | 0.0053  | 4   | 39          | 51      | EVIPTDKVEVGFK               | 79  | 100    |                         |     |                  | Mascot |
|   | 1460.7994                                       | 1460.8047 | 0.0053  | 4   | 39          | 51      | EVIPTDKVEVGFK               |     |        |                         |     |                  | Mascot |
|   | 1535.7369                                       | 1535.7439 | 0.007   | 5   | 283         | 296     | GKMDATAAELVEER              |     |        | Oxidation (M)[3]        |     |                  | Mascot |
|   | 1689.9282                                       | 1689.8571 | -0.0711 | -42 | 193         | 208     | GDFISTVQQRGAIVK             |     |        |                         |     |                  | Mascot |
|   | 1707.8224                                       | 1707.8312 | 0.0088  | 5   | 178         | 192     | EIAAFDAVNDESWLK             | 100 | 100    |                         |     |                  | Mascot |
|   | 1707.8224                                       | 1707.8312 | 0.0088  | 5   | 178         | 192     | EIAAFDAVNDESWLK             |     |        |                         |     |                  | Mascot |
|   | 1769.9578                                       | 1769.9673 | 0.0095  | 5   | 98          | 114     | VLVGNPANTNCLIASK            |     |        | Carbamidomethyl (C)[12] |     |                  | Mascot |
|   | 2254.0908                                       | 2254.1084 | 0.0176  | 8   | 285         | 305     | MDATAAELVEERDTALTF<br>LSA   |     |        |                         |     |                  | Mascot |
|   | 2632.3015                                       | 2632.3235 | 0.022   | 8   | 152         | 174     | NVTIWGNHSSTQYPDVH<br>HAIVTR | 173 | 100    |                         |     |                  | Mascot |
|   | 2632.3015                                       | 2632.3235 | 0.022   | 8   | 152         | 174     | NVTIWGNHSSTQYPDVH<br>HAIVTR |     |        |                         |     |                  | Mascot |
| 3 | malate dehydrogenase, cytoplasmic [Danio rerio] |           |         |     | gi 41053921 | 36196.8 | 6.02                        | 3   | 171    | 100                     | 162 | 100              |        |

#### Peptide Information

| Calc. Mass | Obsrv. Mass | ± da   | ± ppm | Start Seq. | End Seq. | Sequence         | Ion Score | C. I.  | %                 | Modification           | Rank | Result Type |
|------------|-------------|--------|-------|------------|----------|------------------|-----------|--------|-------------------|------------------------|------|-------------|
| 1026.4673  | 1026.4692   | 0.0019 | 2     | 150        | 157      | ENFSCLTR         | 61        | 99.979 |                   | Carbamidomethyl (C)[5] |      | Mascot      |
| 1026.4673  | 1026.4692   | 0.0019 | 2     | 150        | 157      | ENFSCLTR         |           |        |                   | Carbamidomethyl (C)[5] |      | Mascot      |
| 1357.7144  | 1357.7208   | 0.0064 | 5     | 80         | 92       | DLDAAILVGSMR     |           |        |                   |                        |      | Mascot      |
| 1357.7144  | 1357.7208   | 0.0064 | 5     | 80         | 92       | DLDAAILVGSMR     | 101       | 100    |                   |                        |      | Mascot      |
| 1373.7094  | 1373.7159   | 0.0065 | 5     | 80         | 92       | DLDAAILVGSMR     | 65        | 99.991 | Oxidation (M)[11] |                        |      | Mascot      |
| 1373.7094  | 1373.7159   | 0.0065 | 5     | 80         | 92       | DLDAAILVGSMR     |           |        | Oxidation (M)[11] |                        |      | Mascot      |
| 1707.7975  | 1707.8312   | 0.0337 | 20    | 240        | 255      | LSSAMSAAKAICDHMR |           |        | Oxidation (M)[5]  |                        |      | Mascot      |
| 1707.7975  | 1707.8312   | 0.0337 | 20    | 240        | 255      | LSSAMSAAKAICDHMR |           |        | Oxidation (M)[5]  |                        |      | Mascot      |

4 RecName: Full=Dual specificity protein kinase Ttk;  
AltName: Full=Mitotic checkpoint serine/threonin

gi|146336816 109942.2 7.36 14 43 0

#### Peptide Information

| Calc. Mass | Obsrv. Mass | ± da    | ± ppm | Start Seq. | End Seq. | Sequence  | Ion Score | C. I. | % | Modification     | Rank | Result Type |
|------------|-------------|---------|-------|------------|----------|-----------|-----------|-------|---|------------------|------|-------------|
| 850.4199   | 850.5432    | 0.1233  | 145   | 237        | 243      | RTAMAER   |           |       |   | Oxidation (M)[4] |      | Mascot      |
| 1106.639   | 1106.5552   | -0.0838 | -76   | 95         | 103      | MLVRFAELK |           |       |   |                  |      | Mascot      |

|   |                                                           |           |         |     |     |              |                                  |      |    |    |   |                         |        |
|---|-----------------------------------------------------------|-----------|---------|-----|-----|--------------|----------------------------------|------|----|----|---|-------------------------|--------|
|   | 1302.7028                                                 | 1302.7203 | 0.0175  | 13  | 652 | 661          | QFFIFKMIGR                       |      |    |    |   | Oxidation (M)[7]        | Mascot |
|   | 1357.5657                                                 | 1357.7208 | 0.1551  | 114 | 953 | 965          | AASNLAMMCNSGR                    |      |    |    |   | Oxidation (M)[7,8]      | Mascot |
|   | 1357.5657                                                 | 1357.7208 | 0.1551  | 114 | 953 | 965          | AASNLAMMCNSGR                    | 6    | 0  |    |   | Oxidation (M)[7,8]      | Mascot |
|   | 1393.6495                                                 | 1393.7356 | 0.0861  | 62  | 265 | 277          | AEAPFTHSSGFSR                    |      |    |    |   |                         | Mascot |
|   | 1763.8558                                                 | 1763.8093 | -0.0465 | -26 | 104 | 119          | AIQDVNDAQTSFDIAR                 |      |    |    |   |                         | Mascot |
|   | 1769.8889                                                 | 1769.9673 | 0.0784  | 44  | 184 | 199          | ENLSVSALDHTQGSRR                 |      |    |    |   |                         | Mascot |
|   | 2232.9827                                                 | 2233.1057 | 0.123   | 55  | 417 | 436          | GIEDPEDAADDFSIARSH<br>CK         |      |    |    |   | Carbamidomethyl (C)[19] | Mascot |
|   | 2299.1553                                                 | 2299.2009 | 0.0456  | 20  | 433 | 452          | SHCKAFAFVHIAHAQFEL<br>SR         |      |    |    |   |                         | Mascot |
|   | 2300.0027                                                 | 2300.198  | 0.1953  | 85  | 1   | 19           | MDEEESTERQMQUIAMLC<br>QK         |      |    |    |   |                         | Mascot |
|   | 2632.3616                                                 | 2632.3235 | -0.0381 | -14 | 295 | 318          | KGTPDGDSYSLNIKPPVI<br>SPDYLR     |      |    |    |   |                         | Mascot |
|   | 2632.3616                                                 | 2632.3235 | -0.0381 | -14 | 295 | 318          | KGTPDGDSYSLNIKPPVI<br>SPDYLR     |      |    |    |   |                         | Mascot |
|   | 2641.241                                                  | 2641.415  | 0.174   | 66  | 488 | 511          | TLLPAEHQESSEAEENVE<br>AQNGMK     |      |    |    |   | Oxidation (M)[23]       | Mascot |
|   | 3157.4954                                                 | 3157.6069 | 0.1115  | 35  | 338 | 365          | ETARTEETDINQIISTNS<br>TEGCQAFK   |      |    |    |   | Carbamidomethyl (C)[23] | Mascot |
|   | 3337.6055                                                 | 3337.7959 | 0.1904  | 57  | 840 | 868          | GDVWSLGCILYCMTYGK<br>TPFQNTNQISK |      |    |    |   | Carbamidomethyl (C)[8]  | Mascot |
| 5 | PREDICTED: Bardet-Biedl syndrome 12 protein [Danio rerio] |           |         |     |     | gi 292629102 | 86220.5                          | 6.61 | 15 | 41 | 0 |                         |        |

#### Peptide Information

| Calc. Mass | Obsrv. Mass | ± da    | ± ppm | Start Seq. | End Seq. | Sequence       | Ion Score | C. I. % | Modification                               | Rank | Result Type |
|------------|-------------|---------|-------|------------|----------|----------------|-----------|---------|--------------------------------------------|------|-------------|
| 887.3749   | 887.4819    | 0.107   | 121   | 7          | 13       | QCSFAMK        |           |         | Carbamidomethyl (C)[2], Oxidation (M)[6]   |      | Mascot      |
| 1279.6675  | 1279.7836   | 0.1161  | 91    | 109        | 120      | GISVSDIKSAMR   |           |         | Oxidation (M)[11]                          |      | Mascot      |
| 1316.5531  | 1316.6626   | 0.1095  | 83    | 299        | 309      | SIDQCMDMTLK    |           |         | Oxidation (M)[6,8]                         |      | Mascot      |
| 1321.5875  | 1321.6801   | 0.0926  | 70    | 261        | 271      | SDDQCKHMTLK    |           |         | Oxidation (M)[8]                           |      | Mascot      |
| 1321.5875  | 1321.6801   | 0.0926  | 70    | 261        | 271      | SDDQCKHMTLK    |           |         | Oxidation (M)[8]                           |      | Mascot      |
| 1334.5426  | 1334.6307   | 0.0881  | 66    | 332        | 342      | SDDQCMYMTLK    |           |         |                                            |      | Mascot      |
| 1334.5426  | 1334.6307   | 0.0881  | 66    | 332        | 342      | SDDQCMYMTLK    |           |         |                                            |      | Mascot      |
| 1350.5375  | 1350.6249   | 0.0874  | 65    | 332        | 342      | SDDQCMYMTLK    |           |         | Oxidation (M)[6]                           |      | Mascot      |
| 1357.5797  | 1357.7208   | 0.1411  | 104   | 299        | 309      | SIDQCMDMTLK    |           |         | Carbamidomethyl (C)[5], Oxidation (M)[6]   |      | Mascot      |
| 1357.5797  | 1357.7208   | 0.1411  | 104   | 299        | 309      | SIDQCMDMTLK    |           |         | Carbamidomethyl (C)[5], Oxidation (M)[6]   |      | Mascot      |
| 1373.5746  | 1373.7159   | 0.1413  | 103   | 299        | 309      | SIDQCMDMTLK    |           |         | Carbamidomethyl (C)[5], Oxidation (M)[6,8] |      | Mascot      |
| 1373.5746  | 1373.7159   | 0.1413  | 103   | 299        | 309      | SIDQCMDMTLK    |           |         | Carbamidomethyl (C)[5], Oxidation (M)[6,8] |      | Mascot      |
| 1460.6951  | 1460.8047   | 0.1096  | 75    | 694        | 705      | TEAWTSITHQMR   |           |         |                                            |      | Mascot      |
| 1460.6951  | 1460.8047   | 0.1096  | 75    | 694        | 705      | TEAWTSITHQMR   |           |         |                                            |      | Mascot      |
| 1475.615   | 1475.7606   | 0.1456  | 99    | 1          | 13       | MDPSCKQCSFAMK  |           |         |                                            |      | Mascot      |
| 1707.9686  | 1707.8312   | -0.1374 | -80   | 636        | 650      | LLHGAGVTELCIRR |           |         | Carbamidomethyl (C)[12]                    |      | Mascot      |

|           |           |         |     |     |     |                             |                                            |        |
|-----------|-----------|---------|-----|-----|-----|-----------------------------|--------------------------------------------|--------|
| 1707.9686 | 1707.8312 | -0.1374 | -80 | 636 | 650 | LLHGAGVTELCIRR              | Carbamidomethyl (C)[12]                    | Mascot |
| 1729.8109 | 1729.8164 | 0.0055  | 3   | 370 | 383 | LDNQSMHMTLKHSR              | Oxidation (M)[6,8]                         | Mascot |
| 1754.7255 | 1754.8131 | 0.0876  | 50  | 223 | 236 | SNDQCMDMTLKHSR              | Carbamidomethyl (C)[5], Oxidation (M)[6,8] | Mascot |
| 1763.6895 | 1763.8093 | 0.1198  | 68  | 185 | 198 | SDDQCMDMTLKHSR              | Carbamidomethyl (C)[5], Oxidation (M)[6]   | Mascot |
| 2210.9585 | 2211.1262 | 0.1677  | 76  | 199 | 217 | YANTQTEHAQSDDNVQD<br>FK     |                                            | Mascot |
| 2210.9585 | 2211.1262 | 0.1677  | 76  | 199 | 217 | YANTQTEHAQSDDNVQD<br>FK     |                                            | Mascot |
| 2283.0532 | 2283.1978 | 0.1446  | 63  | 552 | 571 | HFSTCTGAVPVSYICQLD<br>ER    | Carbamidomethyl (C)[5]                     | Mascot |
| 2297.0789 | 2297.207  | 0.1281  | 56  | 121 | 141 | GGLQECLDACTQLAVSV<br>EEFK   | Carbamidomethyl (C)[6]                     | Mascot |
| 2648.2773 | 2648.3223 | 0.045   | 17  | 707 | 730 | HTDIGVTDGLGVYDNTV<br>KCEAWR |                                            | Mascot |

6 PREDICTED: echinoderm microtubule associated protein like 6 [Danio rerio] gi|326672044 191942.5 7.32 19 40 0

#### Peptide Information

| Calc. Mass | Obsrv. Mass | ± da    | ± ppm | Start Seq. | End Seq. | Sequence                          | Ion Score | C. I. % | Modification            | Rank | Result Type |
|------------|-------------|---------|-------|------------|----------|-----------------------------------|-----------|---------|-------------------------|------|-------------|
| 842.4617   | 842.5107    | 0.049   | 58    | 433        | 439      | EDLPQLK                           |           |         |                         |      | Mascot      |
| 850.4451   | 850.5432    | 0.0981  | 115   | 1228       | 1234     | QTMSVLR                           |           |         | Oxidation (M)[3]        |      | Mascot      |
| 996.5546   | 996.5989    | 0.0443  | 44    | 714        | 721      | CLKTYAIK                          |           |         | Carbamidomethyl (C)[1]  |      | Mascot      |
| 1051.651   | 1051.7164   | 0.0654  | 62    | 1117       | 1126     | AAPLPDKLVK                        |           |         |                         |      | Mascot      |
| 1106.5034  | 1106.5552   | 0.0518  | 47    | 1441       | 1450     | DGEIMEVGEK                        |           |         |                         |      | Mascot      |
| 1150.535   | 1150.5905   | 0.0555  | 48    | 130        | 138      | NTVCVWDWK                         |           |         |                         |      | Mascot      |
| 1150.6327  | 1150.5905   | -0.0422 | -37   | 1615       | 1624     | RQIHEVPSGK                        |           |         |                         |      | Mascot      |
| 1179.5575  | 1179.6034   | 0.0459  | 39    | 1269       | 1278     | WQEGSRVCSK                        |           |         |                         |      | Mascot      |
| 1302.6688  | 1302.7203   | 0.0515  | 40    | 1605       | 1615     | YIEVSTGSYKR                       |           |         |                         |      | Mascot      |
| 1321.6747  | 1321.6801   | 0.0054  | 4     | 272        | 282      | IDLREAEQGYK                       |           |         |                         |      | Mascot      |
| 1321.6747  | 1321.6801   | 0.0054  | 4     | 272        | 282      | IDLREAEQGYK                       |           |         |                         |      | Mascot      |
| 1350.7012  | 1350.6249   | -0.0763 | -56   | 276        | 287      | EAEQGYKGLSIR                      |           |         |                         |      | Mascot      |
| 1535.8217  | 1535.7439   | -0.0778 | -51   | 529        | 541      | DPAIHVWDIQLK                      |           |         |                         |      | Mascot      |
| 1769.9598  | 1769.9673   | 0.0075  | 4     | 618        | 632      | HIKFWLHTGGGLTFR                   |           |         |                         |      | Mascot      |
| 2283.2019  | 2283.1978   | -0.0041 | -2    | 1285       | 1304     | IFVVEFRPDSDTQFVSVG<br>IK          |           |         |                         |      | Mascot      |
| 2300.0764  | 2300.198    | 0.1216  | 53    | 1135       | 1153     | TVEELSLDHVFGYRGFD<br>CR           |           |         | Carbamidomethyl (C)[18] |      | Mascot      |
| 2615.2261  | 2615.3284   | 0.1023  | 39    | 363        | 386      | CNMEEAVRSVSFINDGS<br>QLALGMK      |           |         | Oxidation (M)[3]        |      | Mascot      |
| 2641.2634  | 2641.415    | 0.1516  | 57    | 1441       | 1465     | DGEIMEVGEKNAASNTII<br>NGHTQGR     |           |         |                         |      | Mascot      |
| 3157.6238  | 3157.6069   | -0.0169 | -5    | 1560       | 1588     | LLAVGSVESAVDFYDLTL<br>GPSLNRIQYCK |           |         | Carbamidomethyl (C)[28] |      | Mascot      |
| 3338.6436  | 3338.7847   | 0.1411  | 42    | 949        | 979      | MEWATWTSVLGGTCEGI                 |           |         |                         |      | Mascot      |

7      WPTLSLVNASSLTK  
 PREDICTED: hypothetical protein LOC100538187      gi|326671902      13561.6      8.77      7      38      0  
 [Danio rerio]

Peptide Information

| Calc. Mass | Obsrv. Mass | ± da    | ± ppm | Start Seq. | End Seq. | Sequence            | Ion Score | C. I. % | Modification           | Rank | Result Type |
|------------|-------------|---------|-------|------------|----------|---------------------|-----------|---------|------------------------|------|-------------|
| 1334.6595  | 1334.6307   | -0.0288 | -22   | 53         | 63       | AHIIQFMSEMK         |           |         |                        |      | Mascot      |
| 1334.6595  | 1334.6307   | -0.0288 | -22   | 53         | 63       | AHIIQFMSEMK         |           |         |                        |      | Mascot      |
| 1350.6544  | 1350.6249   | -0.0295 | -22   | 53         | 63       | AHIIQFMSEMK         |           |         | Oxidation (M)[7]       |      | Mascot      |
| 1357.707   | 1357.7208   | 0.0138  | 10    | 2          | 13       | VDKDQAEVNAIR        |           |         |                        |      | Mascot      |
| 1357.707   | 1357.7208   | 0.0138  | 10    | 2          | 13       | VDKDQAEVNAIR        |           |         |                        |      | Mascot      |
| 1475.7377  | 1475.7606   | 0.0229  | 16    | 35         | 48       | WLSISESGVSGPEK      |           |         |                        |      | Mascot      |
| 1614.7303  | 1614.8129   | 0.0826  | 51    | 75         | 86       | AEMFHCQFRNFK        |           |         | Carbamidomethyl (C)[6] |      | Mascot      |
| 1763.8567  | 1763.8093   | -0.0474 | -27   | 49         | 63       | ADSRAHIIQFMSEMK     |           |         |                        |      | Mascot      |
| 2225.0344  | 2225.1375   | 0.1031  | 46    | 94         | 111      | NNWETIGHLWSNFGRCYK  |           |         |                        |      | Mascot      |
| 2297.0999  | 2297.207    | 0.1071  | 47    | 91         | 108      | YFRNNWETIGHLWSNFG R |           |         |                        |      | Mascot      |

8      dual specificity protein kinase Ttk [Danio rerio]      gi|28077097      110018.2      7.35      13      37      0

Peptide Information

| Calc. Mass | Obsrv. Mass | ± da    | ± ppm | Start Seq. | End Seq. | Sequence                      | Ion Score | C. I. % | Modification            | Rank | Result Type |
|------------|-------------|---------|-------|------------|----------|-------------------------------|-----------|---------|-------------------------|------|-------------|
| 850.4199   | 850.5432    | 0.1233  | 145   | 238        | 244      | RTAMAER                       |           |         | Oxidation (M)[4]        |      | Mascot      |
| 1106.639   | 1106.5552   | -0.0838 | -76   | 95         | 103      | MLVRFAELK                     |           |         |                         |      | Mascot      |
| 1302.7028  | 1302.7203   | 0.0175  | 13    | 653        | 662      | QFFIFKMIGR                    |           |         | Oxidation (M)[7]        |      | Mascot      |
| 1357.5657  | 1357.7208   | 0.1551  | 114   | 954        | 966      | AASNLAMMCNSGR                 |           |         | Oxidation (M)[7,8]      |      | Mascot      |
| 1357.5657  | 1357.7208   | 0.1551  | 114   | 954        | 966      | AASNLAMMCNSGR                 | 6         | 0       | Oxidation (M)[7,8]      |      | Mascot      |
| 1393.6495  | 1393.7356   | 0.0861  | 62    | 266        | 278      | AEAPFTHSSGF SR                |           |         |                         |      | Mascot      |
| 1763.8558  | 1763.8093   | -0.0465 | -26   | 104        | 119      | AIQDVNDAQTSFDIAR              |           |         |                         |      | Mascot      |
| 1769.8889  | 1769.9673   | 0.0784  | 44    | 184        | 199      | ENLSVSALDHTQGSRR              |           |         |                         |      | Mascot      |
| 2232.9827  | 2233.1057   | 0.123   | 55    | 418        | 437      | GIEDPEDAADD FS IARSH CK       |           |         | Carbamidomethyl (C)[19] |      | Mascot      |
| 2299.1553  | 2299.2009   | 0.0456  | 20    | 434        | 453      | SHCKAF AFVHIAHAQFEL SR        |           |         |                         |      | Mascot      |
| 2300.0027  | 2300.198    | 0.1953  | 85    | 1          | 19       | MDEEESTERQM Q IAML C QK       |           |         |                         |      | Mascot      |
| 2632.3616  | 2632.3235   | -0.0381 | -14   | 296        | 319      | KGTPDGDSYSLN I KPPVI SPDYLR   |           |         |                         |      | Mascot      |
| 2632.3616  | 2632.3235   | -0.0381 | -14   | 296        | 319      | KGTPDGDSYSLN I KPPVI SPDYLR   |           |         |                         |      | Mascot      |
| 3157.4954  | 3157.6069   | 0.1115  | 35    | 339        | 366      | ETARTEETDINQ I STNS TEGCQAFLK |           |         | Carbamidomethyl (C)[23] |      | Mascot      |

|   |                                                                      |           |        |    |             |         |                                   |   |    |   |  |                        |        |
|---|----------------------------------------------------------------------|-----------|--------|----|-------------|---------|-----------------------------------|---|----|---|--|------------------------|--------|
|   | 3337.6055                                                            | 3337.7959 | 0.1904 | 57 | 841         | 869     | GDVWSLGCILYCMTYGK<br>TPFQNITNQISK |   |    |   |  | Carbamidomethyl (C)[8] | Mascot |
| 9 | NADH dehydrogenase (ubiquinone) 1 alpha subcomplex, 12 [Danio rerio] |           |        |    | gi 74315939 | 16958.4 | 9.39                              | 6 | 36 | 0 |  |                        |        |

Peptide Information

| Calc. Mass | Obsrv. Mass | ± da   | ± ppm | Start Seq. | End Seq. | Sequence                | Ion Score | C. I. | % Modification     | Rank | Result Type |
|------------|-------------|--------|-------|------------|----------|-------------------------|-----------|-------|--------------------|------|-------------|
| 882.4501   | 882.5688    | 0.1187 | 135   | 2          | 9        | AGYATLMR                |           |       |                    |      | Mascot      |
| 1045.4805  | 1045.5643   | 0.0838 | 80    | 1          | 9        | MAGYATLMR               |           |       | Oxidation (M)[1,8] |      | Mascot      |
| 1321.5807  | 1321.6801   | 0.0994 | 75    | 45         | 54       | YGNKYEDNR               |           |       |                    |      | Mascot      |
| 1321.5807  | 1321.6801   | 0.0994 | 75    | 45         | 54       | YGNKYEDNR               |           |       |                    |      | Mascot      |
| 1357.6456  | 1357.7208   | 0.0752 | 55    | 62         | 72       | WVIYTTEMNGK             |           |       | Oxidation (M)[8]   |      | Mascot      |
| 1357.6456  | 1357.7208   | 0.0752 | 55    | 62         | 72       | WVIYTTEMNGK             |           |       | Oxidation (M)[8]   |      | Mascot      |
| 1460.7955  | 1460.8047   | 0.0092 | 6     | 31         | 44       | VQETKTGALIGTDK          |           |       |                    |      | Mascot      |
| 1460.7955  | 1460.8047   | 0.0092 | 6     | 31         | 44       | VQETKTGALIGTDK          |           |       |                    |      | Mascot      |
| 2230.042   | 2230.2021   | 0.1601 | 72    | 90         | 108      | WLHCMTDDPPTTHPPEP<br>KK |           |       |                    |      | Mascot      |

|    |                                                         |  |  |  |              |          |      |    |    |   |  |  |
|----|---------------------------------------------------------|--|--|--|--------------|----------|------|----|----|---|--|--|
| 10 | PREDICTED: hypothetical protein LOC569436 [Danio rerio] |  |  |  | gi 326678363 | 352771.2 | 7.92 | 26 | 35 | 0 |  |  |
|----|---------------------------------------------------------|--|--|--|--------------|----------|------|----|----|---|--|--|

Peptide Information

| Calc. Mass | Obsrv. Mass | ± da    | ± ppm | Start Seq. | End Seq. | Sequence          | Ion Score | C. I. | % Modification          | Rank | Result Type |
|------------|-------------|---------|-------|------------|----------|-------------------|-----------|-------|-------------------------|------|-------------|
| 842.4743   | 842.5107    | 0.0364  | 43    | 2664       | 2669     | HFRINR            |           |       |                         |      | Mascot      |
| 887.4594   | 887.4819    | 0.0225  | 25    | 463        | 469      | SFRHANR           |           |       |                         |      | Mascot      |
| 935.425    | 935.4583    | 0.0333  | 36    | 2720       | 2727     | NNNCTLEK          |           |       |                         |      | Mascot      |
| 1179.6256  | 1179.6034   | -0.0222 | -19   | 2297       | 2306     | LSELTLD FNK       |           |       |                         |      | Mascot      |
| 1373.6565  | 1373.7159   | 0.0594  | 43    | 510        | 521      | HHVCLCGKSFSR      |           |       |                         |      | Mascot      |
| 1373.6565  | 1373.7159   | 0.0594  | 43    | 510        | 521      | HHVCLCGKSFSR      |           |       |                         |      | Mascot      |
| 1393.7434  | 1393.7356   | -0.0078 | -6    | 2749       | 2760     | SNPSHLIELDLR      |           |       |                         |      | Mascot      |
| 1475.647   | 1475.7606   | 0.1136  | 77    | 1333       | 1345     | RNNENNQADDASK     |           |       |                         |      | Mascot      |
| 1576.8251  | 1576.8428   | 0.0177  | 11    | 1488       | 1501     | NESMIDLLKTAVDK    |           |       |                         |      | Mascot      |
| 1614.7316  | 1614.8129   | 0.0813  | 50    | 2728       | 2741     | LNLSDCSISEEGYK    |           |       | Carbamidomethyl (C)[6]  |      | Mascot      |
| 1684.8058  | 1684.9733   | 0.1675  | 99    | 1709       | 1725     | TCSALASALSSDSSSLK |           |       | Carbamidomethyl (C)[2]  |      | Mascot      |
| 1689.6189  | 1689.8571   | 0.2382  | 141   | 185        | 199      | MHSDetafsceecgk   |           |       | Oxidation (M)[1]        |      | Mascot      |
| 1700.8458  | 1700.9706   | 0.1248  | 73    | 3057       | 3071     | GVNLLCDVLKDSHCK   |           |       | Carbamidomethyl (C)[6]  |      | Mascot      |
| 1707.8007  | 1707.8312   | 0.0305  | 18    | 1474       | 1487     | KNVFMDESPELENR    |           |       |                         |      | Mascot      |
| 1707.8007  | 1707.8312   | 0.0305  | 18    | 1474       | 1487     | KNVFMDESPELENR    |           |       |                         |      | Mascot      |
| 1739.8422  | 1739.8208   | -0.0214 | -12   | 2269       | 2283     | FLSPAaDEVcqvtr    |           |       | Carbamidomethyl (C)[10] |      | Mascot      |

|           |           |         |     |      |      |                              |                                           |        |
|-----------|-----------|---------|-----|------|------|------------------------------|-------------------------------------------|--------|
| 1754.8918 | 1754.8131 | -0.0787 | -45 | 905  | 921  | YLSGSPVSSSVSVKSDR            |                                           | Mascot |
| 1769.8965 | 1769.9673 | 0.0708  | 40  | 1174 | 1188 | QSLMSLICQFFPEVK              |                                           | Mascot |
| 1993.9246 | 1993.9885 | 0.0639  | 32  | 1066 | 1082 | LLNDVYTDLYMTQCASK            | Oxidation (M)[11]                         | Mascot |
| 2224.9797 | 2225.1375 | 0.1578  | 71  | 321  | 339  | HHMSLHNEEKPYVCGQC<br>GR      |                                           | Mascot |
| 2232.8818 | 2233.1057 | 0.2239  | 100 | 181  | 199  | YHMKMHSDETAFSCEEC<br>GK      |                                           | Mascot |
| 2254.2781 | 2254.1084 | -0.1697 | -75 | 1516 | 1534 | FLLGMSLKYNRPLFQGLL<br>K      | Oxidation (M)[5]                          | Mascot |
| 2269.1282 | 2269.0459 | -0.0823 | -36 | 2038 | 2056 | DLQLRFLSSEADNVCQF<br>VK      | Carbamidomethyl (C)[15]                   | Mascot |
| 2283.2068 | 2283.1978 | -0.009  | -4  | 1358 | 1375 | TLTQMYTHFLRFQILQSR           |                                           | Mascot |
| 2297.144  | 2297.207  | 0.063   | 27  | 2728 | 2748 | LNLSDCSISEEGYKALAS<br>ALR    | Carbamidomethyl (C)[6]                    | Mascot |
| 2297.9961 | 2298.2056 | 0.2095  | 91  | 321  | 339  | HHMSLHNEEKPYVCGQC<br>GR      | Carbamidomethyl (C)[14], Oxidation (M)[3] | Mascot |
| 2299.2017 | 2299.2009 | -0.0008 | 0   | 1358 | 1375 | TLTQMYTHFLRFQILQSR           | Oxidation (M)[5]                          | Mascot |
| 2615.1812 | 2615.3284 | 0.1472  | 56  | 321  | 342  | HHMSLHNEEKPYVCGQC<br>GRSFR   |                                           | Mascot |
| 2632.2085 | 2632.3235 | 0.115   | 44  | 2898 | 2921 | LERLSLCSCSLTDDCCSA<br>VTSALK | Carbamidomethyl (C)[7,9]                  | Mascot |
| 2632.2085 | 2632.3235 | 0.115   | 44  | 2898 | 2921 | LERLSLCSCSLTDDCCSA<br>VTSALK | Carbamidomethyl (C)[7,9]                  | Mascot |
| 2648.1584 | 2648.3223 | 0.1639  | 62  | 233  | 255  | ASVNRHMCIHSGEKPYA<br>CDQCGK  | Carbamidomethyl (C)[8,18]                 | Mascot |

### Peptide Information



|           |           |         |     |      |      |                                |                         |        |
|-----------|-----------|---------|-----|------|------|--------------------------------|-------------------------|--------|
| 2211.0322 | 2211.1262 | 0.094   | 43  | 1589 | 1606 | TDYHILRDPELCYMAAQR             | Oxidation (M)[14]       | Mascot |
| 2230.0715 | 2230.2021 | 0.1306  | 59  | 459  | 475  | DYQLEGVNWLLFNWYNR              |                         | Mascot |
| 2282.9988 | 2283.1978 | 0.199   | 87  | 356  | 374  | AHFFADEDPFNPDYVEV<br>DR        |                         | Mascot |
| 2297.3015 | 2297.207  | -0.0945 | -41 | 502  | 522  | TGIKGPFLIIAPLSTIANWE<br>R      |                         | Mascot |
| 2298.146  | 2298.2056 | 0.0596  | 26  | 1901 | 1922 | LLDNASTLPEDPSDSPQ<br>GSKVK     |                         | Mascot |
| 2299.1816 | 2299.2009 | 0.0193  | 8   | 273  | 293  | KPAVQLFVENPTEEDAAV<br>VDK      |                         | Mascot |
| 2455.1523 | 2455.2314 | 0.0791  | 32  | 998  | 1019 | ASFVASGNRTDISLDDPN<br>FWDK     |                         | Mascot |
| 2632.1218 | 2632.3235 | 0.2017  | 77  | 397  | 417  | WCSLPYEDSTWELMEDV<br>DQTK      | Carbamidomethyl (C)[2]  | Mascot |
| 2632.2319 | 2632.3235 | 0.0916  | 35  | 1262 | 1283 | SEMPAMWWDMMLSDKCL<br>LLGVYK    | Oxidation (M)[3]        | Mascot |
| 2648.2268 | 2648.3223 | 0.0955  | 36  | 1262 | 1283 | SEMPAMWWDMMLSDKCL<br>LLGVYK    | Oxidation (M)[3,6]      | Mascot |
| 3338.5801 | 3338.7847 | 0.2046  | 61  | 1548 | 1575 | HPQLYEHLCQPGPDL<br>PVWWETGSHDR | Carbamidomethyl (C)[11] | Mascot |

12 LOC402838 protein [Danio rerio] gi|32451936 67920.2 5.19 11 35 0

#### Peptide Information

| Calc. Mass | Obsrv. Mass | ± da    | ± ppm | Start Seq. | End Seq. | Sequence                     | Ion Score | C. I. % Modification | Rank | Result Type |
|------------|-------------|---------|-------|------------|----------|------------------------------|-----------|----------------------|------|-------------|
| 842.5206   | 842.5107    | -0.0099 | -12   | 61         | 67       | ALQIKNR                      |           |                      |      | Mascot      |
| 887.4442   | 887.4819    | 0.0377  | 42    | 267        | 274      | AANRADNR                     |           |                      |      | Mascot      |
| 1106.6091  | 1106.5552   | -0.0539 | -49   | 199        | 207      | VVEIYENLK                    |           |                      |      | Mascot      |
| 1393.6284  | 1393.7356   | 0.1072  | 77    | 107        | 116      | YWNQFDEHVR                   |           |                      |      | Mascot      |
| 1614.8698  | 1614.8129   | -0.0569 | -35   | 446        | 459      | TEVIQLEDTLAQVR               |           |                      |      | Mascot      |
| 1678.8694  | 1678.9548   | 0.0854  | 51    | 488        | 501      | HLISTLQTHNQMK                |           |                      |      | Mascot      |
| 1729.781   | 1729.8164   | 0.0354  | 20    | 429        | 442      | QLDHMENDEVSLQR               |           | Oxidation (M)[5]     |      | Mascot      |
| 1801.7657  | 1802.0049   | 0.2392  | 133   | 122        | 138      | CDQSGSEPVESQPPEGR            |           |                      |      | Mascot      |
| 2254.0503  | 2254.1084   | 0.0581  | 26    | 24         | 47       | KGGEDGEGMSTGSGGS<br>TAVETVIK |           |                      |      | Mascot      |
| 2299.0918  | 2299.2009   | 0.1091  | 47    | 243        | 262      | LCQLTDGLQQKSHMTS<br>ESR      |           |                      |      | Mascot      |
| 2300.1816  | 2300.198    | 0.0164  | 7     | 222        | 242      | DGGLWDVAVRLNALLTG<br>MNER    |           |                      |      | Mascot      |

13 PREDICTED: calcium-dependent secretion activator 1 [Danio rerio] gi|326668736 141178 5.62 15 34 0

#### Peptide Information

| Calc. Mass | Obsrv. Mass | ± da    | ± ppm | Start Seq. | End Seq. | Sequence  | Ion Score | C. I. % Modification | Rank | Result Type |
|------------|-------------|---------|-------|------------|----------|-----------|-----------|----------------------|------|-------------|
| 1026.5077  | 1026.4692   | -0.0385 | -38   | 93         | 101      | CIAYPFNAK |           |                      |      | Mascot      |
| 1026.5077  | 1026.4692   | -0.0385 | -38   | 93         | 101      | CIAYPFNAK |           |                      |      | Mascot      |

|    |                                         |           |         |     |              |      |                              |      |   |    |   |                         |  |  |  |  |        |
|----|-----------------------------------------|-----------|---------|-----|--------------|------|------------------------------|------|---|----|---|-------------------------|--|--|--|--|--------|
|    | 1045.5459                               | 1045.5643 | 0.0184  | 18  | 280          | 288  | LQMADQIAR                    |      |   |    |   |                         |  |  |  |  | Mascot |
|    | 1150.5739                               | 1150.5905 | 0.0166  | 14  | 1134         | 1142 | VNEEVYIER                    |      |   |    |   |                         |  |  |  |  | Mascot |
|    | 1150.5739                               | 1150.5905 | 0.0166  | 14  | 1134         | 1142 | VNEEVYIER                    |      |   |    |   |                         |  |  |  |  | Mascot |
|    | 1179.6343                               | 1179.6034 | -0.0309 | -26 | 578          | 586  | ILWVQAMYP                    |      |   |    |   |                         |  |  |  |  | Mascot |
|    | 1321.6343                               | 1321.6801 | 0.0458  | 35  | 32           | 43   | ISPSRTSESSDR                 |      |   |    |   |                         |  |  |  |  | Mascot |
|    | 1321.7032                               | 1321.6801 | -0.0231 | -17 | 223          | 235  | MTASAASELILSK                |      |   |    |   |                         |  |  |  |  | Mascot |
|    | 1350.6504                               | 1350.6249 | -0.0255 | -19 | 161          | 173  | MVQTGGLSALDCR                |      |   |    |   |                         |  |  |  |  | Mascot |
|    | 1373.8185                               | 1373.7159 | -0.1026 | -75 | 760          | 771  | ATLSLLERVLMK                 | 5    |   | 0  |   |                         |  |  |  |  | Mascot |
|    | 1373.8185                               | 1373.7159 | -0.1026 | -75 | 760          | 771  | ATLSLLERVLMK                 |      |   |    |   |                         |  |  |  |  | Mascot |
|    | 1393.6958                               | 1393.7356 | 0.0398  | 29  | 1132         | 1142 | DKVNEEVYIER                  |      |   |    |   |                         |  |  |  |  | Mascot |
|    | 1684.7339                               | 1684.9733 | 0.2394  | 142 | 1032         | 1046 | DQSAKLCAMEMGQEK              |      |   |    |   | Oxidation (M)[9]        |  |  |  |  | Mascot |
|    | 1700.7288                               | 1700.9706 | 0.2418  | 142 | 1032         | 1046 | DQSAKLCAMEMGQEK              |      |   |    |   | Oxidation (M)[9,11]     |  |  |  |  | Mascot |
|    | 1754.8167                               | 1754.8131 | -0.0036 | -2  | 609          | 624  | AAQMDAPISQFYADR              |      |   |    |   |                         |  |  |  |  | Mascot |
|    | 2224.9397                               | 2225.1375 | 0.1978  | 89  | 1            | 20   | MLDPSSSEESDGIVEEE<br>SR      |      |   |    |   |                         |  |  |  |  | Mascot |
|    | 2233.166                                | 2233.1057 | -0.0603 | -27 | 84           | 101  | LQLYVFMRCIAYPFNAK            |      |   |    |   | Carbamidomethyl (C)[10] |  |  |  |  | Mascot |
|    | 2254.092                                | 2254.1084 | 0.0164  | 7   | 919          | 937  | YVDLMESSIAQSIHRGFE<br>R      |      |   |    |   | Oxidation (M)[5]        |  |  |  |  | Mascot |
|    | 2615.3174                               | 2615.3284 | 0.011   | 4   | 1101         | 1124 | AASKYVEVPKPGMDVAD<br>GYVTFVR |      |   |    |   | Oxidation (M)[13]       |  |  |  |  | Mascot |
| 14 | glutathione peroxidase 1b [Danio rerio] |           |         |     | gi 169636422 |      | 21638                        | 7.66 | 6 | 34 | 0 |                         |  |  |  |  |        |

Peptide Information

| Calc. Mass | Obsrv. Mass | ± da    | ± ppm | Start Seq. | End Seq. | Sequence                 | Ion Score | C. I. | % Modification   | Rank | Result Type |
|------------|-------------|---------|-------|------------|----------|--------------------------|-----------|-------|------------------|------|-------------|
| 1165.6099  | 1165.7502   | 0.1403  | 120   | 173        | 183      | FLTSGIDGDIK              |           |       |                  |      | Mascot      |
| 1179.6409  | 1179.6034   | -0.0375 | -32   | 157        | 167      | FLIGSDGVPFK              |           |       |                  |      | Mascot      |
| 1279.6429  | 1279.7836   | 0.1407  | 110   | 88         | 98       | YVRPGNGYEPK              |           |       |                  |      | Mascot      |
| 1321.7111  | 1321.6801   | -0.031  | -23   | 172        | 183      | RFLTSGIDGDIK             |           |       |                  |      | Mascot      |
| 1321.7111  | 1321.6801   | -0.031  | -23   | 172        | 183      | RFLTSGIDGDIK             |           |       |                  |      | Mascot      |
| 1460.7454  | 1460.8047   | 0.0593  | 41    | 1          | 13       | MAGIKSFYDITAK            |           |       | Oxidation (M)[1] |      | Mascot      |
| 1460.7454  | 1460.8047   | 0.0593  | 41    | 1          | 13       | MAGIKSFYDITAK            |           |       | Oxidation (M)[1] |      | Mascot      |
| 2297.1602  | 2297.207    | 0.0468  | 20    | 148        | 167      | NDIAWNFEKFLIGSDGVP<br>FK |           |       |                  |      | Mascot      |

15 PREDICTED: desmoplakin [Danio rerio] gi|326664664 287023.8 6.6 27 34 0

Peptide Information

| Calc. Mass | Obsrv. Mass | ± da   | ± ppm | Start Seq. | End Seq. | Sequence | Ion Score | C. I. | % Modification | Rank | Result Type |
|------------|-------------|--------|-------|------------|----------|----------|-----------|-------|----------------|------|-------------|
| 882.5043   | 882.5688    | 0.0645 | 73    | 1885       | 1891     | DIEHKLK  |           |       |                |      | Mascot      |

|  |           |           |         |     |      |      |                                   |   |   |  |                          |  |        |
|--|-----------|-----------|---------|-----|------|------|-----------------------------------|---|---|--|--------------------------|--|--------|
|  | 887.4944  | 887.4819  | -0.0125 | -14 | 1422 | 1428 | RELDVQK                           |   |   |  |                          |  | Mascot |
|  | 935.468   | 935.4583  | -0.0097 | -10 | 1224 | 1232 | SAAELETSK                         |   |   |  |                          |  | Mascot |
|  | 1106.5623 | 1106.5552 | -0.0071 | -6  | 1432 | 1440 | MKLEQNATR                         |   |   |  | Oxidation (M)[1]         |  | Mascot |
|  | 1150.5305 | 1150.5905 | 0.06    | 52  | 845  | 853  | YCMTLKTMK                         |   |   |  | Oxidation (M)[3,8]       |  | Mascot |
|  | 1150.6215 | 1150.5905 | -0.031  | -27 | 2404 | 2412 | LQDTRNYIK                         |   |   |  |                          |  | Mascot |
|  | 1179.5059 | 1179.6034 | 0.0975  | 83  | 730  | 739  | ENSVQECSQR                        |   |   |  |                          |  | Mascot |
|  | 1277.71   | 1277.6447 | -0.0653 | -51 | 1152 | 1161 | LTFLEEEKR                         |   |   |  |                          |  | Mascot |
|  | 1279.7256 | 1279.7836 | 0.058   | 45  | 1969 | 1980 | LLSAEKAVTGYK                      |   |   |  |                          |  | Mascot |
|  | 1302.7012 | 1302.7203 | 0.0191  | 15  | 1784 | 1794 | LTAELRSVEER                       |   |   |  |                          |  | Mascot |
|  | 1321.7031 | 1321.6801 | -0.023  | -17 | 861  | 872  | GVLKAMETELSK                      |   |   |  | Oxidation (M)[6]         |  | Mascot |
|  | 1321.7031 | 1321.6801 | -0.023  | -17 | 861  | 872  | GVLKAMETELSK                      |   |   |  | Oxidation (M)[6]         |  | Mascot |
|  | 1334.6587 | 1334.6307 | -0.028  | -21 | 1246 | 1256 | QTYESEIHVTK                       |   |   |  |                          |  | Mascot |
|  | 1334.6587 | 1334.6307 | -0.028  | -21 | 1246 | 1256 | QTYESEIHVTK                       |   |   |  |                          |  | Mascot |
|  | 1350.7012 | 1350.6249 | -0.0763 | -56 | 1751 | 1761 | SQYELKEGQIR                       |   |   |  |                          |  | Mascot |
|  | 1357.6239 | 1357.7208 | 0.0969  | 71  | 1672 | 1682 | QFSETSMMIQR                       |   |   |  |                          |  | Mascot |
|  | 1357.6239 | 1357.7208 | 0.0969  | 71  | 1672 | 1682 | QFSETSMMIQR                       |   |   |  |                          |  | Mascot |
|  | 1373.6188 | 1373.7159 | 0.0971  | 71  | 1672 | 1682 | QFSETSMMIQR                       | 5 | 0 |  | Oxidation (M)[8]         |  | Mascot |
|  | 1373.6188 | 1373.7159 | 0.0971  | 71  | 1672 | 1682 | QFSETSMMIQR                       |   |   |  | Oxidation (M)[7]         |  | Mascot |
|  | 1393.7242 | 1393.7356 | 0.0114  | 8   | 652  | 663  | EVVMVETDSKLK                      |   |   |  | Oxidation (M)[4]         |  | Mascot |
|  | 1460.7162 | 1460.8047 | 0.0885  | 61  | 1349 | 1361 | MDLADANRVAQEK                     |   |   |  |                          |  | Mascot |
|  | 1460.7162 | 1460.8047 | 0.0885  | 61  | 1349 | 1361 | MDLADANRVAQEK                     |   |   |  |                          |  | Mascot |
|  | 1475.8217 | 1475.7606 | -0.0611 | -41 | 779  | 790  | YLRAELDLINQK                      |   |   |  |                          |  | Mascot |
|  | 1535.7734 | 1535.7439 | -0.0295 | -19 | 1799 | 1811 | LQSSDKEISELMR                     |   |   |  |                          |  | Mascot |
|  | 1678.8759 | 1678.9548 | 0.0789  | 47  | 2164 | 2177 | KTGIQYDIQESLQR                    |   |   |  |                          |  | Mascot |
|  | 1684.855  | 1684.9733 | 0.1183  | 70  | 1911 | 1924 | VMPFYQAMKDGLLR                    |   |   |  | Oxidation (M)[2]         |  | Mascot |
|  | 1689.8303 | 1689.8571 | 0.0268  | 16  | 925  | 938  | QLNHYQQTSSINR                     |   |   |  |                          |  | Mascot |
|  | 1700.8861 | 1700.9706 | 0.0845  | 50  | 1    | 15   | MSLSGSQTRLHQISR                   |   |   |  |                          |  | Mascot |
|  | 1729.8966 | 1729.8164 | -0.0802 | -46 | 1833 | 1847 | QTQTDEISKPVVEQK                   |   |   |  |                          |  | Mascot |
|  | 2253.9131 | 2254.1084 | 0.1953  | 87  | 2423 | 2441 | ISYKEAMDNCMVEENNG<br>MK           |   |   |  | Oxidation (M)[7, 11, 18] |  | Mascot |
|  | 2283.1472 | 2283.1978 | 0.0506  | 22  | 1664 | 1682 | VEIAQIQKQFSETSMMIQ<br>R           |   |   |  | Oxidation (M)[15]        |  | Mascot |
|  | 2297.9866 | 2298.2056 | 0.219   | 95  | 2035 | 2053 | GYFDREMNEILSYEGDD<br>TK           |   |   |  | Oxidation (M)[7]         |  | Mascot |
|  | 2299.1421 | 2299.2009 | 0.0588  | 26  | 1664 | 1682 | VEIAQIQKQFSETSMMIQ<br>R           |   |   |  | Oxidation (M)[15, 16]    |  | Mascot |
|  | 3337.5208 | 3337.7959 | 0.2751  | 82  | 85   | 114  | AQMLYSDCMGFLQRAQ<br>GLETMGPASEVDK |   |   |  | Oxidation (M)[3,9,22]    |  | Mascot |

16    PREDICTED: general transcription factor 3C    gi|292625227    60505.3    6.88    10    34    0  
polypeptide 5 [Danio rerio]

| Peptide Information |                                   |             |           |         |             |          |          |                        |       |                |                                           |        |        |
|---------------------|-----------------------------------|-------------|-----------|---------|-------------|----------|----------|------------------------|-------|----------------|-------------------------------------------|--------|--------|
|                     | Calc. Mass                        | Obsrv. Mass | ± da      | ± ppm   | Start Seq.  | End Seq. | Sequence | Ion Score              | C. I. | % Modification | Rank                                      | Result | Type   |
| 17                  |                                   | 882.4468    | 882.5688  | 0.122   | 138         | 322      | 328      | FGYDPRK                |       |                |                                           |        | Mascot |
|                     |                                   | 935.5057    | 935.4583  | -0.0474 | -51         | 221      | 228      | DHIIAPNR               |       |                |                                           |        | Mascot |
|                     |                                   | 996.6564    | 996.5989  | -0.0575 | -58         | 167      | 174      | IILRKPEK               |       |                |                                           |        | Mascot |
|                     |                                   | 1279.7117   | 1279.7836 | 0.0719  | 56          | 432      | 442      | IQNLIHKNDGK            |       |                |                                           |        | Mascot |
|                     |                                   | 1321.7587   | 1321.6801 | -0.0786 | -59         | 104      | 114      | YSSTNLLLRVR            |       |                |                                           |        | Mascot |
|                     |                                   | 1321.7587   | 1321.6801 | -0.0786 | -59         | 104      | 114      | YSSTNLLLRVR            |       |                |                                           |        | Mascot |
|                     |                                   | 1350.559    | 1350.6249 | 0.0659  | 49          | 439      | 449      | NDGKEEVCDER            |       |                | Carbamidomethyl (C)[8]                    |        | Mascot |
|                     |                                   | 1393.7507   | 1393.7356 | -0.0151 | -11         | 463      | 474      | NIISGMIQQYVK           |       |                |                                           |        | Mascot |
|                     |                                   | 1448.7855   | 1448.9305 | 0.145   | 100         | 286      | 298      | NAVKANIDIHPEK          |       |                |                                           |        | Mascot |
|                     |                                   | 1535.8765   | 1535.7439 | -0.1326 | -86         | 475      | 488      | ANRPGPSTQKPVKR         |       |                |                                           |        | Mascot |
|                     |                                   | 2632.2244   | 2632.3235 | 0.0991  | 38          | 411      | 431      | EGMLPPYRQMFYQLCDL DVEK |       |                | Carbamidomethyl (C)[15]                   |        | Mascot |
|                     |                                   | 2632.2244   | 2632.3235 | 0.0991  | 38          | 411      | 431      | EGMLPPYRQMFYQLCDL DVEK |       |                | Carbamidomethyl (C)[15]                   |        | Mascot |
|                     |                                   | 2648.2192   | 2648.3223 | 0.1031  | 39          | 411      | 431      | EGMLPPYRQMFYQLCDL DVEK |       |                | Carbamidomethyl (C)[15], Oxidation (M)[3] |        | Mascot |
| 17                  | prefoldin subunit 1 [Danio rerio] |             |           |         | gi 61651844 |          | 13978.4  | 8.83                   | 5     | 33             | 0                                         | 8      | 0      |

| Peptide Information |                                                                                                    |             |         |       |              |                      |          |           |       |                  |      |             |
|---------------------|----------------------------------------------------------------------------------------------------|-------------|---------|-------|--------------|----------------------|----------|-----------|-------|------------------|------|-------------|
|                     | Calc. Mass                                                                                         | Obsrv. Mass | ± da    | ± ppm | Start Seq.   | End Sequence         |          | Ion Score | C. I. | % Modification   | Rank | Result Type |
|                     | 882.4753                                                                                           | 882.5688    | 0.0935  | 106   | 67           | 73 MFILQSK           |          |           |       | Oxidation (M)[1] |      | Mascot      |
|                     | 887.5196                                                                                           | 887.4819    | -0.0377 | -42   | 91           | 97 IKELEQK           |          |           |       |                  |      | Mascot      |
|                     | 1614.8131                                                                                          | 1614.8129   | -0.0002 | 0     | 60           | 73 MFEGAGRMFILQSK    |          |           |       |                  |      | Mascot      |
|                     | 1707.8734                                                                                          | 1707.8312   | -0.0422 | -25   | 12           | 26 AFAELQAKMVDTQQK   |          | 8         |       | 0                |      | Mascot      |
|                     | 1707.8734                                                                                          | 1707.8312   | -0.0422 | -25   | 12           | 26 AFAELQAKMVDTQQK   |          |           |       |                  |      | Mascot      |
|                     | 1994.0626                                                                                          | 1993.9885   | -0.0741 | -37   | 67           | 83 MFILQSKGEISNQLLEK |          |           |       | Oxidation (M)[1] |      | Mascot      |
| 18                  | novel protein similar to vertebrate cytoplasmic linker associated protein 1 (CLASP1) [Danio rerio] |             |         |       | gij159569348 |                      | 164674.4 | 8.99      | 16    | 32               | 0    |             |

| Peptide Information |             |         |       |            |          |              |           |       |                |                  |
|---------------------|-------------|---------|-------|------------|----------|--------------|-----------|-------|----------------|------------------|
| Calc. Mass          | Obsrv. Mass | ± da    | ± ppm | Start Seq. | End Seq. | Sequence     | Ion Score | C. I. | % Modification | Rank Result Type |
| 1026.548            | 1026.4692   | -0.0788 | -77   | 826        | 834      | NGGIPHYLR    |           |       |                | Mascot           |
| 1026.548            | 1026.4692   | -0.0788 | -77   | 826        | 834      | NGGIPHYLR    |           |       |                | Mascot           |
| 1165.6801           | 1165.7502   | 0.0701  | 60    | 1313       | 1322     | DHTIRALALR   |           |       |                | Mascot           |
| 1321.5913           | 1321.6801   | 0.0888  | 67    | 707        | 718      | SQGCSRETSPNR |           |       |                | Mascot           |

|    |                                                                 |                     |             |         |       |            |                      |                              |                    |       |                        |   |      |             |
|----|-----------------------------------------------------------------|---------------------|-------------|---------|-------|------------|----------------------|------------------------------|--------------------|-------|------------------------|---|------|-------------|
|    |                                                                 | 1321.5913           | 1321.6801   | 0.0888  | 67    | 707        | 718                  | SQGCSRETSPPNR                |                    |       |                        |   |      | Mascot      |
|    |                                                                 | 1334.6304           | 1334.6307   | 0.0003  | 0     | 730        | 741                  | IPRPSMSQGCGR                 | Oxidation (M)[6]   |       |                        |   |      | Mascot      |
|    |                                                                 | 1334.6304           | 1334.6307   | 0.0003  | 0     | 730        | 741                  | IPRPSMSQGCGR                 | Oxidation (M)[6]   |       |                        |   |      | Mascot      |
|    |                                                                 | 1357.6747           | 1357.7208   | 0.0461  | 34    | 1127       | 1138                 | GVTEAIQSFSYR                 |                    |       |                        |   |      | Mascot      |
|    |                                                                 | 1357.7184           | 1357.7208   | 0.0024  | 2     | 1335       | 1345                 | FKNYAELTIMK                  |                    |       |                        |   |      | Mascot      |
|    |                                                                 | 1373.7134           | 1373.7159   | 0.0025  | 2     | 1335       | 1345                 | FKNYAELTIMK                  | Oxidation (M)[10]  |       |                        |   |      | Mascot      |
|    |                                                                 | 1373.7134           | 1373.7159   | 0.0025  | 2     | 1335       | 1345                 | FKNYAELTIMK                  | Oxidation (M)[10]  |       |                        |   |      | Mascot      |
|    |                                                                 | 1475.6802           | 1475.7606   | 0.0804  | 54    | 1288       | 1299                 | EDSLAVWDEHFK                 |                    |       |                        |   |      | Mascot      |
|    |                                                                 | 1614.9214           | 1614.8129   | -0.1085 | -67   | 1003       | 1016                 | LAVSRIITWTTEPK               |                    |       |                        |   |      | Mascot      |
|    |                                                                 | 1700.9078           | 1700.9706   | 0.0628  | 37    | 1186       | 1201                 | TSLNTSPRSFAGPR               |                    |       |                        |   |      | Mascot      |
|    |                                                                 | 1739.7614           | 1739.8208   | 0.0594  | 34    | 1064       | 1080                 | NSSNTSNVSSPSNTMGR            |                    |       |                        |   |      | Mascot      |
|    |                                                                 | 1802.0204           | 1802.0049   | -0.0155 | -9    | 442        | 458                  | LPIITSNCTSKSVAVR             |                    |       |                        |   |      | Mascot      |
|    |                                                                 | 2225.207            | 2225.1375   | -0.0695 | -31   | 379        | 399                  | SQVVREACITLGHLSLLGNK         |                    |       |                        |   |      | Mascot      |
|    |                                                                 | 2254.1462           | 2254.1084   | -0.0378 | -17   | 1252       | 1271                 | GFSPDLVADLLKELSNHNER         |                    |       |                        |   |      | Mascot      |
|    |                                                                 | 2284.0769           | 2284.1938   | 0.1169  | 51    | 1          | 19                   | MEPNMEYCLTQVLQKDVAR          | Oxidation (M)[1]   |       |                        |   |      | Mascot      |
|    |                                                                 | 2300.072            | 2300.198    | 0.126   | 55    | 1          | 19                   | MEPNMEYCLTQVLQKDVAR          | Oxidation (M)[1,5] |       |                        |   |      | Mascot      |
|    |                                                                 | 2641.3687           | 2641.415    | 0.0463  | 18    | 143        | 167                  | TREGVCLCLISTLNTYGAQGLTLTK    |                    |       |                        |   |      | Mascot      |
|    |                                                                 | 3338.7485           | 3338.7847   | 0.0362  | 11    | 50         | 80                   | MVDGIATSWVNSSFALLGMDLLSALVTR | Oxidation (M)[1]   |       |                        |   |      | Mascot      |
| 19 | euchromatic histone-lysine N-methyltransferase 1b [Danio rerio] |                     |             |         |       |            | gi 289191301         | 140285.8                     | 6.16               | 16    | 32                     | 0 |      |             |
|    |                                                                 | Peptide Information |             |         |       |            |                      |                              |                    |       |                        |   |      |             |
|    |                                                                 | Calc. Mass          | Obsrv. Mass | ± da    | ± ppm | Start Seq. | End Sequence Seq.    |                              | Ion Score          | C. I. | % Modification         |   | Rank | Result Type |
|    |                                                                 | 1026.4772           | 1026.4692   | -0.008  | -8    | 20         | 28 ETMKSEGTK         |                              | 3                  | 0     | Oxidation (M)[3]       |   |      | Mascot      |
|    |                                                                 | 1026.4772           | 1026.4692   | -0.008  | -8    | 20         | 28 ETMKSEGTK         |                              |                    |       | Oxidation (M)[3]       |   |      | Mascot      |
|    |                                                                 | 1179.619            | 1179.6034   | -0.0156 | -13   | 932        | 941 LDCVNLFLSR       |                              |                    |       |                        |   |      | Mascot      |
|    |                                                                 | 1279.7732           | 1279.7836   | 0.0104  | 8     | 865        | 875 HVDQVKLLLLSK     |                              |                    |       |                        |   |      | Mascot      |
|    |                                                                 | 1316.7419           | 1316.6626   | -0.0793 | -60   | 165        | 176 AETETKNGIILK     |                              |                    |       |                        |   |      | Mascot      |
|    |                                                                 | 1321.6392           | 1321.6801   | 0.0409  | 31    | 1034       | 1044 NITHLQYCVCK     |                              |                    |       |                        |   |      | Mascot      |
|    |                                                                 | 1321.6392           | 1321.6801   | 0.0409  | 31    | 1034       | 1044 NITHLQYCVCK     |                              |                    |       |                        |   |      | Mascot      |
|    |                                                                 | 1393.7448           | 1393.7356   | -0.0092 | -7    | 398        | 409 AKGDHAWLRPSR     |                              |                    |       |                        |   |      | Mascot      |
|    |                                                                 | 1614.7871           | 1614.8129   | 0.0258  | 16    | 120        | 135 TNWSPTGGTTLGHGDK |                              |                    |       |                        |   |      | Mascot      |
|    |                                                                 | 1678.8064           | 1678.9548   | 0.1484  | 88    | 2          | 18 ASMKTEPSSLANGNSGK |                              |                    |       |                        |   |      | Mascot      |
|    |                                                                 | 1707.6477           | 1707.8312   | 0.1835  | 107   | 32         | 46 SDQEEGGYDDHQDGR   |                              |                    |       |                        |   |      | Mascot      |
|    |                                                                 | 1707.8258           | 1707.8312   | 0.0054  | 3     | 1019       | 1033 YVPDSCVTSPLNIDK |                              |                    |       | Carbamidomethyl (C)[6] |   |      | Mascot      |

|    |                                                                     |           |         |      |      |      |                                  |        |      |    |    |   |                                                  |  |  |  |        |
|----|---------------------------------------------------------------------|-----------|---------|------|------|------|----------------------------------|--------|------|----|----|---|--------------------------------------------------|--|--|--|--------|
|    | 1754.9899                                                           | 1754.8131 | -0.1768 | -101 | 698  | 713  | ETLQSVLLALDAEKP                  |        |      |    |    |   |                                                  |  |  |  | Mascot |
|    | 2254.0625                                                           | 2254.1084 | 0.0459  | 20   | 511  | 530  | CMATESIDGQLSRCQSA<br>VLK         |        |      |    |    |   | Carbamidomethyl (C)[1,14]                        |  |  |  | Mascot |
|    | 2283.0557                                                           | 2283.1978 | 0.1421  | 62   | 47   | 66   | TGPLREAIEQNGTYENM<br>DTK         |        |      |    |    |   | Oxidation (M)[17]                                |  |  |  | Mascot |
|    | 2615.0088                                                           | 2615.3284 | 0.3196  | 122  | 1045 | 1065 | DDCSSASCMCGQLSLRC<br>WYDK        |        |      |    |    |   | Carbamidomethyl (C)[3,8,10,17], Oxidation (M)[9] |  |  |  | Mascot |
|    | 3157.314                                                            | 3157.6069 | 0.2929  | 93   | 556  | 583  | HQCCPGCGFFCRAGTFM<br>ECQPEVNISHR |        |      |    |    |   |                                                  |  |  |  | Mascot |
|    | 3337.4897                                                           | 3337.7959 | 0.3062  | 92   | 1069 | 1095 | LLPEFSNEEPPLIFECNH<br>ACSCWRTCK  |        |      |    |    |   | Carbamidomethyl (C)[16,20,22]                    |  |  |  | Mascot |
| 20 | novel protein similar to vertebrate desmoplakin (DSP) [Danio rerio] |           |         |      |      |      |                                  |        |      |    |    |   |                                                  |  |  |  |        |
|    |                                                                     |           |         |      |      |      | gi 122890640                     | 173751 | 6.73 | 19 | 32 | 0 |                                                  |  |  |  |        |

### Peptide Information

| Calc. Mass | Obsrv. Mass | ± da    | ± ppm | Start Seq. | End Seq. | Sequence          | Ion Score | C. I. % | Modification           | Rank | Result Type |
|------------|-------------|---------|-------|------------|----------|-------------------|-----------|---------|------------------------|------|-------------|
| 882.5043   | 882.5688    | 0.0645  | 73    | 888        | 894      | DIEHKLK           |           |         |                        |      | Mascot      |
| 887.4944   | 887.4819    | -0.0125 | -14   | 425        | 431      | RELDVQK           |           |         |                        |      | Mascot      |
| 935.468    | 935.4583    | -0.0097 | -10   | 227        | 235      | SAAELETSK         |           |         |                        |      | Mascot      |
| 1106.5623  | 1106.5552   | -0.0071 | -6    | 435        | 443      | MKLEQNATR         |           |         | Oxidation (M)[1]       |      | Mascot      |
| 1150.6215  | 1150.5905   | -0.031  | -27   | 1407       | 1415     | LQDTRNYIK         |           |         |                        |      | Mascot      |
| 1150.6215  | 1150.5905   | -0.031  | -27   | 1407       | 1415     | LQDTRNYIK         |           |         |                        |      | Mascot      |
| 1277.71    | 1277.6447   | -0.0653 | -51   | 155        | 164      | LTFLIEEEKR        |           |         |                        |      | Mascot      |
| 1279.7256  | 1279.7836   | 0.058   | 45    | 972        | 983      | LLSAEKAVTGYK      |           |         |                        |      | Mascot      |
| 1302.7012  | 1302.7203   | 0.0191  | 15    | 787        | 797      | LTAELRSVEER       |           |         |                        |      | Mascot      |
| 1334.6587  | 1334.6307   | -0.028  | -21   | 249        | 259      | QTYESEIHVTK       |           |         |                        |      | Mascot      |
| 1334.6587  | 1334.6307   | -0.028  | -21   | 249        | 259      | QTYESEIHVTK       |           |         |                        |      | Mascot      |
| 1350.7012  | 1350.6249   | -0.0763 | -56   | 754        | 764      | SQYELKEGQIR       |           |         |                        |      | Mascot      |
| 1357.6239  | 1357.7208   | 0.0969  | 71    | 675        | 685      | QFSETSMMIQR       |           |         |                        |      | Mascot      |
| 1357.6239  | 1357.7208   | 0.0969  | 71    | 675        | 685      | QFSETSMMIQR       |           |         |                        |      | Mascot      |
| 1373.6188  | 1373.7159   | 0.0971  | 71    | 675        | 685      | QFSETSMMIQR       | 5         | 0       | Oxidation (M)[8]       |      | Mascot      |
| 1373.6188  | 1373.7159   | 0.0971  | 71    | 675        | 685      | QFSETSMMIQR       |           |         | Oxidation (M)[7]       |      | Mascot      |
| 1460.7162  | 1460.8047   | 0.0885  | 61    | 352        | 364      | MDLADANRVAQEK     |           |         |                        |      | Mascot      |
| 1460.7162  | 1460.8047   | 0.0885  | 61    | 352        | 364      | MDLADANRVAQEK     |           |         |                        |      | Mascot      |
| 1535.7734  | 1535.7439   | -0.0295 | -19   | 802        | 814      | LQSSDKEISELMR     |           |         |                        |      | Mascot      |
| 1678.8759  | 1678.9548   | 0.0789  | 47    | 1167       | 1180     | KTGIQYDIQESLQR    |           |         |                        |      | Mascot      |
| 1684.855   | 1684.9733   | 0.1183  | 70    | 914        | 927      | VMPFYQAMKDGLLR    |           |         | Oxidation (M)[2]       |      | Mascot      |
| 1700.8499  | 1700.9706   | 0.1207  | 71    | 914        | 927      | VMPFYQAMKDGLLR    |           |         | Oxidation (M)[2,8]     |      | Mascot      |
| 1729.8966  | 1729.8164   | -0.0802 | -46   | 836        | 850      | QTQTDEISKPVVEQK   |           |         |                        |      | Mascot      |
| 2253.9131  | 2254.1084   | 0.1953  | 87    | 1426       | 1444     | ISYKEAMDNCMVEENNG |           |         | Oxidation (M)[7,11,18] |      | Mascot      |

|                     |                                                    |              |             |          |       |            |          |                                         |           |       |   |                                            |                      |        |        |
|---------------------|----------------------------------------------------|--------------|-------------|----------|-------|------------|----------|-----------------------------------------|-----------|-------|---|--------------------------------------------|----------------------|--------|--------|
|                     |                                                    | 2283.1472    | 2283.1978   | 0.0506   | 22    | 667        | 685      | VEIAQIQKQFSETSMMIQ<br>MK<br>R           |           |       |   |                                            | Oxidation (M)[15]    |        | Mascot |
|                     |                                                    | 2297.9866    | 2298.2056   | 0.219    | 95    | 1038       | 1056     | GYFDREMNEILSYEGDD<br>TK                 |           |       |   |                                            | Oxidation (M)[7]     |        | Mascot |
|                     |                                                    | 2299.1421    | 2299.2009   | 0.0588   | 26    | 667        | 685      | VEIAQIQKQFSETSMMIQ<br>R                 |           |       |   |                                            | Oxidation (M)[15,16] |        | Mascot |
| 21                  | PREDICTED: prostaglandin reductase 2 [Danio rerio] | gij189531025 |             | 37647.6  | 5.69  | 7          | 32       | 0                                       |           |       |   |                                            |                      |        |        |
| Peptide Information |                                                    |              |             |          |       |            |          |                                         |           |       |   |                                            |                      |        |        |
|                     |                                                    | Calc. Mass   | Obsrv. Mass | ± da     | ± ppm | Start Seq. | End Seq. | Sequence                                | Ion Score | C. I. | % | Modification                               | Rank                 | Result | Type   |
|                     |                                                    | 1106.551     | 1106.5552   | 0.0042   | 4     | 183        | 193      | TVVGICGSDQK                             |           |       |   |                                            |                      | Mascot |        |
|                     |                                                    | 1357.6821    | 1357.7208   | 0.0387   | 29    | 44         | 54       | TLYLSVDPYMR                             |           |       |   |                                            |                      | Mascot |        |
|                     |                                                    | 1357.6821    | 1357.7208   | 0.0387   | 29    | 44         | 54       | TLYLSVDPYMR                             |           |       |   |                                            |                      | Mascot |        |
|                     |                                                    | 1373.677     | 1373.7159   | 0.0389   | 28    | 44         | 54       | TLYLSVDPYMR                             |           |       |   | Oxidation (M)[10]                          |                      | Mascot |        |
|                     |                                                    | 1373.677     | 1373.7159   | 0.0389   | 28    | 44         | 54       | TLYLSVDPYMR                             |           |       |   | Oxidation (M)[10]                          |                      | Mascot |        |
|                     |                                                    | 1535.7787    | 1535.7439   | -0.0348  | -23   | 297        | 309      | HAEGLMQLSHWVK                           |           |       |   |                                            |                      | Mascot |        |
|                     |                                                    | 1689.8087    | 1689.8571   | 0.0484   | 29    | 44         | 56       | TLYLSVDPYMR                             |           |       |   | Carbamidomethyl (C)[12], Oxidation (M)[10] |                      | Mascot |        |
|                     |                                                    | 1769.8552    | 1769.9673   | 0.1121   | 63    | 22         | 36       | ENFRVEETTSSELK                          |           |       |   |                                            |                      | Mascot |        |
|                     |                                                    | 2641.2932    | 2641.415    | 0.1218   | 46    | 149        | 177      | GHVTAGAQQTMTVVSGAA<br>GACGSVAGQIGR      |           |       |   |                                            |                      | Mascot |        |
|                     |                                                    | 3157.5298    | 3157.6069   | 0.0771   | 24    | 149        | 182      | GHVTAGAQQTMTVVSGAA<br>GACGSVAGQIGRLDGCK |           |       |   |                                            |                      | Mascot |        |
| 22                  | LOC402838 protein [Danio rerio]                    | gij27882353  |             | 64909.8  | 5.17  | 10         | 31       | 0                                       |           |       |   |                                            |                      |        |        |
| Peptide Information |                                                    |              |             |          |       |            |          |                                         |           |       |   |                                            |                      |        |        |
|                     |                                                    | Calc. Mass   | Obsrv. Mass | ± da     | ± ppm | Start Seq. | End Seq. | Sequence                                | Ion Score | C. I. | % | Modification                               | Rank                 | Result | Type   |
|                     |                                                    | 842.5206     | 842.5107    | -0.0099  | -12   | 30         | 36       | ALQIKNR                                 |           |       |   |                                            |                      | Mascot |        |
|                     |                                                    | 887.4442     | 887.4819    | 0.0377   | 42    | 236        | 243      | AANRADNR                                |           |       |   |                                            |                      | Mascot |        |
|                     |                                                    | 1106.6091    | 1106.5552   | -0.0539  | -49   | 168        | 176      | VVEIYENLK                               |           |       |   |                                            |                      | Mascot |        |
|                     |                                                    | 1393.7169    | 1393.7356   | 0.0187   | 13    | 2          | 16       | STGSGGSTAVETVIK                         |           |       |   |                                            |                      | Mascot |        |
|                     |                                                    | 1614.8698    | 1614.8129   | -0.0569  | -35   | 415        | 428      | TEVIQLEDTLAQVR                          |           |       |   |                                            |                      | Mascot |        |
|                     |                                                    | 1678.8694    | 1678.9548   | 0.0854   | 51    | 457        | 470      | HLISTLQTHNQMK                           |           |       |   |                                            |                      | Mascot |        |
|                     |                                                    | 1729.781     | 1729.8164   | 0.0354   | 20    | 398        | 411      | QLDHMENDEVSLQR                          |           |       |   | Oxidation (M)[5]                           |                      | Mascot |        |
|                     |                                                    | 1801.7657    | 1802.0049   | 0.2392   | 133   | 91         | 107      | CDQSGSEPVESQPPEGR                       |           |       |   |                                            |                      | Mascot |        |
|                     |                                                    | 2299.0918    | 2299.2009   | 0.1091   | 47    | 212        | 231      | LCQLTDGLQKQKSHMTS<br>ESR                |           |       |   |                                            |                      | Mascot |        |
|                     |                                                    | 2300.1816    | 2300.198    | 0.0164   | 7     | 191        | 211      | DGGLWDVAVRLNALLTG<br>MNER               |           |       |   |                                            |                      | Mascot |        |
| 23                  | novel protein (zgc:113068) [Danio rerio]           | gij220673197 |             | 105566.2 | 6.07  | 12         | 31       | 0                                       |           |       |   |                                            |                      |        |        |

| Peptide Information |                                          |          |           |             |          |                                     |           |       |                         |      |             |
|---------------------|------------------------------------------|----------|-----------|-------------|----------|-------------------------------------|-----------|-------|-------------------------|------|-------------|
| Calc. Mass          | Obsrv. Mass                              | $\pm$ da | $\pm$ ppm | Start Seq.  | End Seq. | Sequence                            | Ion Score | C. I. | % Modification          | Rank | Result Type |
| 996.5117            | 996.5989                                 | 0.0872   | 88        | 496         | 503      | AQLCMRFK                            |           |       |                         |      | Mascot      |
| 1026.4231           | 1026.4692                                | 0.0461   | 45        | 1           | 9        | SLSMEGDCK                           |           |       | Carbamidomethyl (C)[8]  |      | Mascot      |
| 1026.4231           | 1026.4692                                | 0.0461   | 45        | 1           | 9        | SLSMEGDCK                           |           |       | Carbamidomethyl (C)[8]  |      | Mascot      |
| 1321.7144           | 1321.6801                                | -0.0343  | -26       | 333         | 344      | VKESSTVMVVAR                        |           |       | Oxidation (M)[8]        |      | Mascot      |
| 1321.7144           | 1321.6801                                | -0.0343  | -26       | 333         | 344      | VKESSTVMVVAR                        |           |       | Oxidation (M)[8]        |      | Mascot      |
| 1393.7507           | 1393.7356                                | -0.0151  | -11       | 923         | 934      | AVVSELIALCYR                        |           |       | Carbamidomethyl (C)[10] |      | Mascot      |
| 1448.7501           | 1448.9305                                | 0.1804   | 125       | 490         | 501      | LFVSHKAQLCMR                        |           |       | Oxidation (M)[11]       |      | Mascot      |
| 1460.7825           | 1460.8047                                | 0.0222   | 15        | 573         | 586      | GALGALMTCLRAAR                      |           |       | Carbamidomethyl (C)[9]  |      | Mascot      |
| 1460.7825           | 1460.8047                                | 0.0222   | 15        | 573         | 586      | GALGALMTCLRAAR                      |           |       | Carbamidomethyl (C)[9]  |      | Mascot      |
| 1689.8887           | 1689.8571                                | -0.0316  | -19       | 568         | 583      | VTGNRGALGALMTCLR                    |           |       | Carbamidomethyl (C)[14] |      | Mascot      |
| 1993.9695           | 1993.9885                                | 0.019    | 10        | 616         | 632      | HDQVRMDALGLLCETHR                   |           |       |                         |      | Mascot      |
| 2300.2253           | 2300.198                                 | -0.0273  | -12       | 158         | 178      | ILVGCHVAQAQLMQYSLA<br>AVK           |           |       | Carbamidomethyl (C)[5]  |      | Mascot      |
| 2615.3035           | 2615.3284                                | 0.0249   | 10        | 640         | 661      | DEMDLIRHFLPFLNLSQS<br>PGIR          |           |       | Oxidation (M)[3]        |      | Mascot      |
| 2630.4561           | 2630.3174                                | -0.1387  | -53       | 593         | 615      | LVDEKLWGCLVPIPLMQ<br>QALVHK         |           |       |                         |      | Mascot      |
| 3338.6948           | 3338.7847                                | 0.0899   | 27        | 243         | 273      | SLLGNGDNLHFIVAGLLQ<br>CSVDAGSTPQWLR |           |       | Carbamidomethyl (C)[19] |      | Mascot      |
| 24                  | beta-carotene oxygenase 2a [Danio rerio] |          |           | gi 94536962 |          | 62903.9                             | 6.26      | 9     | 31                      | 0    |             |

| Peptide Information |                                                              |          |           |              |          |                                 |           |       |                         |      |             |
|---------------------|--------------------------------------------------------------|----------|-----------|--------------|----------|---------------------------------|-----------|-------|-------------------------|------|-------------|
| Calc. Mass          | Obsrv. Mass                                                  | $\pm$ da | $\pm$ ppm | Start Seq.   | End Seq. | Sequence                        | Ion Score | C. I. | % Modification          | Rank | Result Type |
| 1045.5413           | 1045.5643                                                    | 0.023    | 22        | 178          | 186      | IDPETLETK                       |           |       |                         |      | Mascot      |
| 1106.6456           | 1106.5552                                                    | -0.0904  | -82       | 522          | 531      | STFLLVLDK                       |           |       |                         |      | Mascot      |
| 1277.6161           | 1277.6447                                                    | 0.0286   | 22        | 295          | 305      | GINEGVYWDPK                     |           |       |                         |      | Mascot      |
| 1302.6787           | 1302.7203                                                    | 0.0416   | 32        | 178          | 188      | IDPETLETKEK                     |           |       |                         |      | Mascot      |
| 1707.7319           | 1707.8312                                                    | 0.0993   | 58        | 164          | 177      | GDYYVSTETNFMHK                  |           |       | Oxidation (M)[12]       |      | Mascot      |
| 1707.7319           | 1707.8312                                                    | 0.0993   | 58        | 164          | 177      | GDYYVSTETNFMHK                  |           |       | Oxidation (M)[12]       |      | Mascot      |
| 1763.8706           | 1763.8093                                                    | -0.0613  | -35       | 121          | 136      | IIVSEFGTVAMPDPCK                |           |       | Carbamidomethyl (C)[15] |      | Mascot      |
| 2615.2593           | 2615.3284                                                    | 0.0691   | 26        | 114          | 136      | ENLEHNRIIVSEFGTVAM<br>PDPCK     |           |       | Oxidation (M)[18]       |      | Mascot      |
| 2632.2036           | 2632.3235                                                    | 0.1199   | 46        | 78           | 99       | SSFNHWFDGMALLHQFH<br>IEDGK      |           |       | Oxidation (M)[10]       |      | Mascot      |
| 2632.2036           | 2632.3235                                                    | 0.1199   | 46        | 78           | 99       | SSFNHWFDGMALLHQFH<br>IEDGK      |           |       | Oxidation (M)[10]       |      | Mascot      |
| 3157.457            | 3157.6069                                                    | 0.1499   | 47        | 151          | 177      | LSDNANVSFVQYKGDYY<br>VSTETNFMHK |           |       |                         |      | Mascot      |
| 25                  | novel protein similar to retinol saturase (all-trans-retinol |          |           | gi 169154572 |          | 67886.6                         | 7.85      | 10    | 31                      | 0    |             |



13,14-reductase) (retsat, zgc:123334)

| Peptide Information |                                                         |         |       |              |          |                                 |           |                                            |                  |
|---------------------|---------------------------------------------------------|---------|-------|--------------|----------|---------------------------------|-----------|--------------------------------------------|------------------|
| Calc. Mass          | Obsrv. Mass                                             | ± da    | ± ppm | Start Seq.   | End Seq. | Sequence                        | Ion Score | C. I. % Modification                       | Rank Result Type |
| 850.4516            | 850.5432                                                | 0.0916  | 108   | 236          | 243      | TSTSEVVK                        |           |                                            | Mascot           |
| 1302.6742           | 1302.7203                                               | 0.0461  | 35    | 17           | 26       | GTFWYLFGR                       |           |                                            | Mascot           |
| 1334.5681           | 1334.6307                                               | 0.0626  | 47    | 477          | 486      | GEEYENYKMR                      |           | Oxidation (M)[9]                           | Mascot           |
| 1334.5681           | 1334.6307                                               | 0.0626  | 47    | 477          | 486      | GEEYENYKMR                      |           | Oxidation (M)[9]                           | Mascot           |
| 1535.7212           | 1535.7439                                               | 0.0227  | 15    | 487          | 498      | FANHLFDWACVR                    |           | Carbamidomethyl (C)[10]                    | Mascot           |
| 1684.8146           | 1684.9733                                               | 0.1587  | 94    | 266          | 280      | NSSCMIDALLHHSK                  |           | Oxidation (M)[5]                           | Mascot           |
| 2211.1248           | 2211.1262                                               | 0.0014  | 1     | 1            | 16       | MWWILLFLEWFVDWAR                |           |                                            | Mascot           |
| 2211.1248           | 2211.1262                                               | 0.0014  | 1     | 1            | 16       | MWWILLFLEWFVDWAR                |           |                                            | Mascot           |
| 2282.9944           | 2283.1978                                               | 0.2034  | 89    | 404          | 422      | LYKGNNVDEMMEEFASDK              |           |                                            | Mascot           |
| 2298.9893           | 2299.2009                                               | 0.2116  | 92    | 404          | 422      | LYKGNNVDEMMEEFASDK              |           | Oxidation (M)[10]                          | Mascot           |
| 2632.3464           | 2632.3235                                               | -0.0229 | -9    | 317          | 340      | VLVNEQQNAYGVAVKTGDEDIEIK        |           |                                            | Mascot           |
| 2632.3464           | 2632.3235                                               | -0.0229 | -9    | 317          | 340      | VLVNEQQNAYGVAVKTGDEDIEIK        |           |                                            | Mascot           |
| 3337.5615           | 3337.7959                                               | 0.2344  | 70    | 552          | 582      | NLYLSGQDIFTAGYSGALHGGFLCASTVMDR |           | Carbamidomethyl (C)[24], Oxidation (M)[29] | Mascot           |
| 3338.6799           | 3338.7847                                               | 0.1048  | 31    | 1            | 25       | MWWILLFLEWFVDWARGTFWYLFGR       |           |                                            | Mascot           |
| 26                  | PREDICTED: hypothetical protein LOC562053 [Danio rerio] |         |       |              |          |                                 |           |                                            |                  |
|                     |                                                         |         |       | gi 189535582 | 29270.9  | 9.01                            | 7         | 31                                         | 0                |

| Peptide Information |             |         |       |            |          |                     |           |                         |                  |
|---------------------|-------------|---------|-------|------------|----------|---------------------|-----------|-------------------------|------------------|
| Calc. Mass          | Obsrv. Mass | ± da    | ± ppm | Start Seq. | End Seq. | Sequence            | Ion Score | C. I. % Modification    | Rank Result Type |
| 1316.7355           | 1316.6626   | -0.0729 | -55   | 119        | 129      | TNQVCLREILK         |           |                         | Mascot           |
| 1334.6798           | 1334.6307   | -0.0491 | -37   | 155        | 166      | SESSDSLILDR         |           |                         | Mascot           |
| 1334.6798           | 1334.6307   | -0.0491 | -37   | 155        | 166      | SESSDSLILDR         |           |                         | Mascot           |
| 1373.757            | 1373.7159   | -0.0411 | -30   | 119        | 129      | TNQVCLREILK         |           | Carbamidomethyl (C)[5]  | Mascot           |
| 1373.757            | 1373.7159   | -0.0411 | -30   | 119        | 129      | TNQVCLREILK         |           | Carbamidomethyl (C)[5]  | Mascot           |
| 1707.9388           | 1707.8312   | -0.1076 | -63   | 138        | 154      | NALPPALLGLVQSSGDR   |           |                         | Mascot           |
| 1707.9388           | 1707.8312   | -0.1076 | -63   | 138        | 154      | NALPPALLGLVQSSGDR   |           |                         | Mascot           |
| 1739.9333           | 1739.8208   | -0.1125 | -65   | 189        | 202      | RPDLLQDIRLNACR      |           | Carbamidomethyl (C)[13] | Mascot           |
| 1763.9666           | 1763.8093   | -0.1573 | -89   | 218        | 232      | SSLFWPLKCLPGIFR     |           |                         | Mascot           |
| 2233.0884           | 2233.1057   | 0.0173  | 8     | 2          | 21       | AAEIDHDDPFQEILHQIGK |           |                         | Mascot           |
| 2254.0593           | 2254.1084   | 0.0491  | 22    | 100        | 118      | AMTCSLVIFIFTQDYVCDK |           | Carbamidomethyl (C)[4]  | Mascot           |

27    PREDICTED: collagen alpha-3(VI) chain [Danio rerio]    gi|326670666    159048.8    6.06    10    31    0    18    0

Peptide Information

| Calc. Mass | Obsrv. Mass | ± da    | ± ppm | Start Seq. | End Seq. | Sequence                       | Ion Score | C. I. | % Modification    | Rank | Result Type |
|------------|-------------|---------|-------|------------|----------|--------------------------------|-----------|-------|-------------------|------|-------------|
| 1026.5691  | 1026.4692   | -0.0999 | -97   | 1246       | 1254     | LNVPANKDR                      |           |       |                   |      | Mascot      |
| 1026.5691  | 1026.4692   | -0.0999 | -97   | 1246       | 1254     | LNVPANKDR                      |           |       |                   |      | Mascot      |
| 1373.7886  | 1373.7159   | -0.0727 | -53   | 1345       | 1357     | DIGVITLSIESVK                  | 18        | 0     |                   |      | Mascot      |
| 1373.7886  | 1373.7159   | -0.0727 | -53   | 1345       | 1357     | DIGVITLSIESVK                  |           |       |                   |      | Mascot      |
| 1684.8441  | 1684.9733   | 0.1292  | 77    | 1066       | 1079     | EPQVHFYLNTHATK                 |           |       |                   |      | Mascot      |
| 1700.9     | 1700.9706   | 0.0706  | 42    | 847        | 860      | RMVLDLDIDQDIVR                 |           |       |                   |      | Mascot      |
| 1729.953   | 1729.8164   | -0.1366 | -79   | 922        | 937      | HHLGVPQVLIVMTGGR               |           |       | Oxidation (M)[12] |      | Mascot      |
| 1739.8962  | 1739.8208   | -0.0754 | -43   | 800        | 813      | LKNYVNFQEQLTK                  |           |       |                   |      | Mascot      |
| 2211.1577  | 2211.1262   | -0.0315 | -14   | 269        | 288      | MEIDLNSFSSKEALISALV<br>K       |           |       | Oxidation (M)[1]  |      | Mascot      |
| 2211.1577  | 2211.1262   | -0.0315 | -14   | 269        | 288      | MEIDLNSFSSKEALISALV<br>K       |           |       | Oxidation (M)[1]  |      | Mascot      |
| 2233.2122  | 2233.1057   | -0.1065 | -48   | 693        | 715      | AVNGLTLAGGRGLNTGA<br>ALTFMK    |           |       |                   |      | Mascot      |
| 2269.1975  | 2269.0459   | -0.1516 | -67   | 428        | 447      | DIVFLVDGSNYVGNNLRF<br>VK       |           |       |                   |      | Mascot      |
| 2630.2693  | 2630.3174   | 0.0481  | 18    | 93         | 119      | YPGGEANLGAALQEVD<br>SLLGEDAGGR |           |       |                   |      | Mascot      |

28    anaphase-promoting complex subunit 5 [Danio rerio]    gi|41054525    85847.5    6.21    9    31    0    8    0

Peptide Information

| Calc. Mass | Obsrv. Mass | ± da    | ± ppm | Start Seq. | End Seq. | Sequence                         | Ion Score | C. I. | % Modification                           | Rank | Result Type |
|------------|-------------|---------|-------|------------|----------|----------------------------------|-----------|-------|------------------------------------------|------|-------------|
| 887.5196   | 887.4819    | -0.0377 | -42   | 286        | 294      | LILSGAEGK                        |           |       |                                          |      | Mascot      |
| 996.5182   | 996.5989    | 0.0807  | 81    | 134        | 141      | QMLLAYNK                         |           |       | Oxidation (M)[2]                         |      | Mascot      |
| 1026.4972  | 1026.4692   | -0.028  | -27   | 737        | 744      | NRCAMLFR                         |           |       | Oxidation (M)[5]                         |      | Mascot      |
| 1026.4972  | 1026.4692   | -0.028  | -27   | 737        | 744      | NRCAMLFR                         |           |       | Oxidation (M)[5]                         |      | Mascot      |
| 1373.7358  | 1373.7159   | -0.0199 | -14   | 307        | 318      | YAVLNLATLHCR                     | 8         | 0     |                                          |      | Mascot      |
| 1373.7358  | 1373.7159   | -0.0199 | -14   | 307        | 318      | YAVLNLATLHCR                     |           |       |                                          |      | Mascot      |
| 1684.8839  | 1684.9733   | 0.0894  | 53    | 404        | 417      | LLDALRGTDIMHWK                   |           |       | Oxidation (M)[11]                        |      | Mascot      |
| 1729.953   | 1729.8164   | -0.1366 | -79   | 304        | 318      | SLRYAVLNLATLHCR                  |           |       |                                          |      | Mascot      |
| 1739.8859  | 1739.8208   | -0.0651 | -37   | 512        | 524      | LWMLCDLKIQFEK                    |           |       | Carbamidomethyl (C)[5], Oxidation (M)[3] |      | Mascot      |
| 2654.3857  | 2654.314    | -0.0717 | -27   | 418        | 440      | QSLSELIEISLAQTTSIWR<br>MYGK      |           |       |                                          |      | Mascot      |
| 3337.6851  | 3337.7959   | 0.1108  | 33    | 241        | 268      | LQDELNNILKFNPDAEA<br>HYLSYLNLSLR |           |       |                                          |      | Mascot      |

29    Ferrochelatase [Danio rerio]    gi|62202077    46002.4    8.35    9    30    0

### Peptide Information

| Calc. Mass | Obsrv. Mass | ± da    | ± ppm | Start Seq. | End Sequence Seq.           | Ion Score | C. I. % Modification     | Rank | Result Type |
|------------|-------------|---------|-------|------------|-----------------------------|-----------|--------------------------|------|-------------|
| 1460.6886  | 1460.8047   | 0.1161  | 79    | 273        | 284 VMDRLGHCNPYR            |           |                          |      | Mascot      |
| 1460.6886  | 1460.8047   | 0.1161  | 79    | 273        | 284 VMDRLGHCNPYR            |           |                          |      | Mascot      |
| 1614.8929  | 1614.8129   | -0.08   | -50   | 2          | 15 AVLGCACRLVQLVR           |           | Carbamidomethyl (C)[5,7] |      | Mascot      |
| 1700.8689  | 1700.9706   | 0.1017  | 60    | 277        | 290 LGHCNPYRLVWQSK          |           |                          |      | Mascot      |
| 1729.934   | 1729.8164   | -0.1176 | -68   | 52         | 67 KPKTGILMLNMGGPEK         |           | Oxidation (M)[8]         |      | Mascot      |
| 1801.9041  | 1802.0049   | 0.1008  | 56    | 151        | 165 YVHPLTEEAIELMEK         |           |                          |      | Mascot      |
| 2230.0454  | 2230.2021   | 0.1567  | 70    | 389        | 408 CPLCVNPTCAQTKAFFSS QK   |           | Carbamidomethyl (C)[1]   |      | Mascot      |
| 2269.0781  | 2269.0459   | -0.0322 | -14   | 132        | 150 LLDDEMCPDTAPHKFYIGF R   |           | Oxidation (M)[5]         |      | Mascot      |
| 2298.1733  | 2298.2056   | 0.0323  | 14    | 291        | 311 VGPMAWLGPQTDEVIKG LCQR  |           |                          |      | Mascot      |
| 2630.3315  | 2630.3174   | -0.0141 | -5    | 55         | 77 TGILMLNMGGPEKLEDV HDFLLR |           | Oxidation (M)[5,8]       |      | Mascot      |

30 sorting nexin family member 27 [Danio rerio] gi|41054611 64121.8 5.8 10 30 0

### Peptide Information

| Calc. Mass | Obsrv. Mass | ± da    | ± ppm | Start Seq. | End Sequence Seq.           | Ion Score | C. I. % Modification                      | Rank | Result Type |
|------------|-------------|---------|-------|------------|-----------------------------|-----------|-------------------------------------------|------|-------------|
| 842.5094   | 842.5107    | 0.0013  | 2     | 121        | 127 QVVDLIR                 |           |                                           |      | Mascot      |
| 1179.6368  | 1179.6034   | -0.0334 | -28   | 400        | 409 VGEKSYQLQK              |           |                                           |      | Mascot      |
| 1334.6561  | 1334.6307   | -0.0254 | -19   | 185        | 195 FVVYNVYMAGR             |           | Oxidation (M)[8]                          |      | Mascot      |
| 1334.6561  | 1334.6307   | -0.0254 | -19   | 185        | 195 FVVYNVYMAGR             |           | Oxidation (M)[8]                          |      | Mascot      |
| 1393.7434  | 1393.7356   | -0.0078 | -6    | 404        | 414 SYQLQKLTEQR             |           |                                           |      | Mascot      |
| 1576.7754  | 1576.8428   | 0.0674  | 43    | 228        | 240 WPFSLSEQQLDAR           |           |                                           |      | Mascot      |
| 1754.8741  | 1754.8131   | -0.061  | -35   | 298        | 312 KNCTTDQVYQAVVTK         |           | Carbamidomethyl (C)[3]                    |      | Mascot      |
| 2225.0283  | 2225.1375   | 0.1092  | 49    | 24         | 47 NGSMSAGTCAGGLVAT TVTSGPR |           | Carbamidomethyl (C)[10], Oxidation (M)[5] |      | Mascot      |
| 2232.8743  | 2233.1057   | 0.2314  | 104   | 425        | 442 TCEGYNEITFPHCSCDSR      |           | Carbamidomethyl (C)[2,13,15]              |      | Mascot      |
| 2269.0989  | 2269.0459   | -0.053  | -23   | 1          | 23 MADVVEGDGTRSAAPSA IHSAR  |           |                                           |      | Mascot      |
| 2283.9321  | 2284.1938   | 0.2617  | 115   | 482        | 500 WDTDEEGMAFCFEYARG EK    |           |                                           |      | Mascot      |
| 2299.927   | 2300.198    | 0.271   | 118   | 482        | 500 WDTDEEGMAFCFEYARG EK    |           | Oxidation (M)[8]                          |      | Mascot      |

31 Josephin-1 [Danio rerio] gi|115497592 26182.5 9.34 6 30 0

### Peptide Information

| Calc. Mass | Obsrv. Mass | ± da | ± ppm | Start Seq. | End Sequence Seq. | Ion Score | C. I. % Modification | Rank | Result Type |
|------------|-------------|------|-------|------------|-------------------|-----------|----------------------|------|-------------|
|------------|-------------|------|-------|------------|-------------------|-----------|----------------------|------|-------------|

|    |                                                       |           |         |     |              |     |                             |                        |    |        |   |
|----|-------------------------------------------------------|-----------|---------|-----|--------------|-----|-----------------------------|------------------------|----|--------|---|
|    | 1051.5908                                             | 1051.7164 | 0.1256  | 119 | 170          | 177 | RQHWIGVR                    |                        |    | Mascot |   |
|    | 1179.6732                                             | 1179.6034 | -0.0698 | -59 | 96           | 106 | LSPSTLVTPHK                 |                        |    | Mascot |   |
|    | 1357.6635                                             | 1357.7208 | 0.0573  | 42  | 178          | 189 | EVAGVYYNLDSK                |                        |    | Mascot |   |
|    | 1357.6635                                             | 1357.7208 | 0.0573  | 42  | 178          | 189 | EVAGVYYNLDSK                |                        |    | Mascot |   |
|    | 1535.8289                                             | 1535.7439 | -0.085  | -55 | 190          | 203 | LRSPHAIGTADELRL             |                        |    | Mascot |   |
|    | 2233.0818                                             | 2233.1057 | 0.0239  | 11  | 67           | 86  | ELCALHALNNVFQDGAA<br>FSR    | Carbamidomethyl (C)[3] |    | Mascot |   |
|    | 2654.3003                                             | 2654.314  | 0.0137  | 5   | 64           | 86  | QHRELCALHALNNVFQD<br>GAAFSR | Carbamidomethyl (C)[6] |    | Mascot |   |
| 32 | PREDICTED: zinc finger protein 850-like [Danio rerio] |           |         |     | gi 326673953 |     | 89557.8                     | 9.2                    | 17 | 30     | 0 |

| Peptide Information |                                                            |             |         |       |              |                              |           |                        |                  |   |
|---------------------|------------------------------------------------------------|-------------|---------|-------|--------------|------------------------------|-----------|------------------------|------------------|---|
|                     | Calc. Mass                                                 | Obsrv. Mass | ± da    | ± ppm | Start Seq.   | End Sequence Seq.            | Ion Score | C. I. % Modification   | Rank Result Type |   |
|                     | 887.5308                                                   | 887.4819    | -0.0489 | -55   | 680          | 686 TIKELQR                  |           |                        | Mascot           |   |
|                     | 1150.6479                                                  | 1150.5905   | -0.0574 | -50   | 371          | 379 HNPLISWRK                |           |                        | Mascot           |   |
|                     | 1150.6479                                                  | 1150.5905   | -0.0574 | -50   | 370          | 378 KHNPLISWR                |           |                        | Mascot           |   |
|                     | 1179.5728                                                  | 1179.6034   | 0.0306  | 26    | 776          | 785 SHPCAFFSRK               |           |                        | Mascot           |   |
|                     | 1302.7528                                                  | 1302.7203   | -0.0325 | -25   | 1243         | 1253 INKQITPVSFR             |           |                        | Mascot           |   |
|                     | 1321.6317                                                  | 1321.6801   | 0.0484  | 37    | 501          | 511 DGGLRPCIDYR              |           | Carbamidomethyl (C)[7] | Mascot           |   |
|                     | 1321.6317                                                  | 1321.6801   | 0.0484  | 37    | 501          | 511 DGGLRPCIDYR              |           | Carbamidomethyl (C)[7] | Mascot           |   |
|                     | 1334.7314                                                  | 1334.6307   | -0.1007 | -75   | 168          | 178 TLDQFIELSIR              |           |                        | Mascot           |   |
|                     | 1334.7314                                                  | 1334.6307   | -0.1007 | -75   | 168          | 178 TLDQFIELSIR              |           |                        | Mascot           |   |
|                     | 1357.7474                                                  | 1357.7208   | -0.0266 | -20   | 22           | 34 LALPEKYGGNPAK             |           |                        | Mascot           |   |
|                     | 1357.7474                                                  | 1357.7208   | -0.0266 | -20   | 22           | 34 LALPEKYGGNPAK             |           |                        | Mascot           |   |
|                     | 1729.8115                                                  | 1729.8164   | 0.0049  | 3     | 805          | 818 AAMEEWRHWLEGAK           |           | Oxidation (M)[3]       | Mascot           |   |
|                     | 1739.8751                                                  | 1739.8208   | -0.0543 | -31   | 485          | 500 HSTSPASAGFFFVEKK         |           |                        | Mascot           |   |
|                     | 1754.9224                                                  | 1754.8131   | -0.1093 | -62   | 1128         | 1141 YLIWAEYAQNLSRK          |           |                        | Mascot           |   |
|                     | 1763.9174                                                  | 1763.8093   | -0.1081 | -61   | 164          | 178 DEGKTLQFIELSIR           |           |                        | Mascot           |   |
|                     | 2225.062                                                   | 2225.1375   | 0.0755  | 34    | 1313         | 1331 RGGTLQYLVDWEGYGPEER     |           |                        | Mascot           |   |
|                     | 2630.2905                                                  | 2630.3174   | 0.0269  | 10    | 459          | 480 IFPLSQTETETMNAYIEEELKK   |           | Oxidation (M)[12]      | Mascot           |   |
|                     | 2654.2878                                                  | 2654.314    | 0.0262  | 10    | 433          | 456 ATELPHTREYDCAIELSPGTTPPR |           |                        | Mascot           |   |
| 34                  | PREDICTED: hypothetical protein LOC100537957 [Danio rerio] |             |         |       | gi 326680154 | 13500.6                      | 8.77      | 6                      | 30               | 0 |
| Peptide Information |                                                            |             |         |       |              |                              |           |                        |                  |   |
|                     | Calc. Mass                                                 | Obsrv. Mass | ± da    | ± ppm | Start Seq.   | End Sequence Seq.            | Ion Score | C. I. % Modification   | Rank Result Type |   |
|                     | 1334.6595                                                  | 1334.6307   | -0.0288 | -22   | 53           | 63 AHIIQFMSEMK               |           |                        | Mascot           |   |
|                     | 1334.6595                                                  | 1334.6307   | -0.0288 | -22   | 53           | 63 AHIIQFMSEMK               |           |                        | Mascot           |   |
|                     | 1350.6544                                                  | 1350.6249   | -0.0295 | -22   | 53           | 63 AHIIQFMSEMK               |           | Oxidation (M)[7]       | Mascot           |   |
|                     | 1475.7377                                                  | 1475.7606   | 0.0229  | 16    | 35           | 48 WLSISESGVSGPEK            |           |                        | Mascot           |   |
|                     | 1614.7303                                                  | 1614.8129   | 0.0826  | 51    | 75           | 86 AEMFHCQFRNFK              |           | Carbamidomethyl (C)[6] | Mascot           |   |
|                     | 1763.8931                                                  | 1763.8093   | -0.0838 | -48   | 49           | 63 AVSRAHIIQFMSEMK           |           | Oxidation (M)[11]      | Mascot           |   |
|                     | 2225.0344                                                  | 2225.1375   | 0.1031  | 46    | 94           | 111 NNWETIGHLWSNFGRCYK       |           |                        | Mascot           |   |
|                     | 2297.0999                                                  | 2297.207    | 0.1071  | 47    | 91           | 108 YFRNNWETIGHLWSNFG R      |           |                        | Mascot           |   |
| 35                  | PR domain containing 1c [Danio rerio]                      |             |         |       | gi 161347477 | 15431.7                      | 7.19      | 5                      | 30               | 0 |

| Peptide Information |                                                           |             |         |       |            |                              |         |           |         |                                                  |      |             |
|---------------------|-----------------------------------------------------------|-------------|---------|-------|------------|------------------------------|---------|-----------|---------|--------------------------------------------------|------|-------------|
|                     | Calc. Mass                                                | Obsrv. Mass | ± da    | ± ppm | Start Seq. | End Sequence Seq.            |         | Ion Score | C. I. % | Modification                                     | Rank | Result Type |
|                     | 887.4944                                                  | 887.4819    | -0.0125 | -14   | 90         | 97 QPISSSLR                  |         |           |         |                                                  |      | Mascot      |
|                     | 1302.6437                                                 | 1302.7203   | 0.0766  | 59    | 103        | 114 QPPPTHDPQGK              |         |           |         |                                                  |      | Mascot      |
|                     | 1373.7747                                                 | 1373.7159   | -0.0588 | -43   | 90         | 102 QPISSSLRTSGLK            |         |           |         |                                                  |      | Mascot      |
|                     | 1373.7747                                                 | 1373.7159   | -0.0588 | -43   | 90         | 102 QPISSSLRTSGLK            |         |           |         |                                                  |      | Mascot      |
|                     | 1535.8176                                                 | 1535.7439   | -0.0737 | -48   | 85         | 97 SLEYRQPISSSLR             |         |           |         |                                                  |      | Mascot      |
|                     | 1707.8436                                                 | 1707.8312   | -0.0124 | -7    | 121        | 135 GYTVTEILDLPRTD           |         |           |         |                                                  |      | Mascot      |
|                     | 1707.8436                                                 | 1707.8312   | -0.0124 | -7    | 121        | 135 GYTVTEILDLPRTD           |         |           |         |                                                  |      | Mascot      |
| 36                  | PREDICTED: collagen alpha-1(XXI) chain-like [Danio rerio] |             |         |       |            | gi 292629362                 | 17314.5 | 9.43      | 5       | 30                                               | 0    |             |
| Peptide Information |                                                           |             |         |       |            |                              |         |           |         |                                                  |      |             |
|                     | Calc. Mass                                                | Obsrv. Mass | ± da    | ± ppm | Start Seq. | End Sequence Seq.            |         | Ion Score | C. I. % | Modification                                     | Rank | Result Type |
|                     | 804.3958                                                  | 804.2794    | -0.1164 | -145  | 89         | 96 GDKGSQGR                  |         |           |         |                                                  |      | Mascot      |
|                     | 1165.651                                                  | 1165.7502   | 0.0992  | 85    | 71         | 82 GLPGRPGVPGMK              |         |           |         |                                                  |      | Mascot      |
|                     | 2300.2468                                                 | 2300.198    | -0.0488 | -21   | 12         | 31 DILRSEIPALLSSQHSQHR       |         |           |         |                                                  |      | Mascot      |
|                     | 2632.1636                                                 | 2632.3235   | 0.1599  | 61    | 137        | 160 RQSGEPGQPGVCHPAMCYGAMIR  |         |           |         | Carbamidomethyl (C)[13,18], Oxidation (M)[17]    |      | Mascot      |
|                     | 2632.1636                                                 | 2632.3235   | 0.1599  | 61    | 138        | 161 GQSGEPGQPGVCHPAMCYGAMIRR |         |           |         | Carbamidomethyl (C)[12,17], Oxidation (M)[16]    |      | Mascot      |
|                     | 2648.1584                                                 | 2648.3223   | 0.1639  | 62    | 138        | 161 GQSGEPGQPGVCHPAMCYGAMIRR |         |           |         | Carbamidomethyl (C)[12,17], Oxidation (M)[16,21] |      | Mascot      |
| 37                  | si:ch211-192p3.1 [Danio rerio]                            |             |         |       |            | gi 313661370                 | 60460   | 9.71      | 9       | 30                                               | 0    |             |
| Peptide Information |                                                           |             |         |       |            |                              |         |           |         |                                                  |      |             |
|                     | Calc. Mass                                                | Obsrv. Mass | ± da    | ± ppm | Start Seq. | End Sequence Seq.            |         | Ion Score | C. I. % | Modification                                     | Rank | Result Type |
|                     | 935.4792                                                  | 935.4583    | -0.0209 | -22   | 269        | 277 ASLNTNTSK                |         |           |         |                                                  |      | Mascot      |
|                     | 1045.6187                                                 | 1045.5643   | -0.0544 | -52   | 520        | 528 SMLKPVSKR                |         |           |         |                                                  |      | Mascot      |
|                     | 1150.5925                                                 | 1150.5905   | -0.002  | -2    | 220        | 230 AGKEPGTFICK              |         |           |         |                                                  |      | Mascot      |
|                     | 1150.5925                                                 | 1150.5905   | -0.002  | -2    | 220        | 230 AGKEPGTFICK              |         |           |         |                                                  |      | Mascot      |
|                     | 1179.5388                                                 | 1179.6034   | 0.0646  | 55    | 56         | 64 ENIYENNQR                 |         |           |         |                                                  |      | Mascot      |
|                     | 1302.6987                                                 | 1302.7203   | 0.0216  | 17    | 2          | 12 AAVKALQQWCK               |         |           |         | Carbamidomethyl (C)[10]                          |      | Mascot      |
|                     | 1684.8865                                                 | 1684.9733   | 0.0868  | 52    | 382        | 398 TTPPETTTTPRPAGAGK        |         |           |         |                                                  |      | Mascot      |
|                     | 1769.8956                                                 | 1769.9673   | 0.0717  | 41    | 348        | 364 FFESSSSSPSILVPASK        |         |           |         |                                                  |      | Mascot      |
|                     | 2269.124                                                  | 2269.0459   | -0.0781 | -34   | 110        | 132 SPIGGMGGIKRPAEESNEAPSGK  |         |           |         |                                                  |      | Mascot      |

|    |                                                                            |          |       |    |     |     |                          |          |      |    |    |                           |        |
|----|----------------------------------------------------------------------------|----------|-------|----|-----|-----|--------------------------|----------|------|----|----|---------------------------|--------|
|    | 2297.051                                                                   | 2297.207 | 0.156 | 68 | 172 | 191 | SSTPSSNCSVCNQHVHL<br>VQR |          |      |    |    | Carbamidomethyl (C)[8,11] | Mascot |
| 38 | PREDICTED: calcium-dependent secretion activator 1 isoform 2 [Danio rerio] |          |       |    |     |     | gi 326668728             | 149997.5 | 5.59 | 15 | 29 | 0                         |        |

| Peptide Information |             |         |       |            |          |                              |           |       |   |                         |      |             |
|---------------------|-------------|---------|-------|------------|----------|------------------------------|-----------|-------|---|-------------------------|------|-------------|
| Calc. Mass          | Obsrv. Mass | ± da    | ± ppm | Start Seq. | End Seq. | Sequence                     | Ion Score | C. I. | % | Modification            | Rank | Result Type |
| 1026.5077           | 1026.4692   | -0.0385 | -38   | 93         | 101      | CIAYPFNAK                    |           |       |   |                         |      | Mascot      |
| 1026.5077           | 1026.4692   | -0.0385 | -38   | 93         | 101      | CIAYPFNAK                    |           |       |   |                         |      | Mascot      |
| 1045.5459           | 1045.5643   | 0.0184  | 18    | 280        | 288      | LQMADQIAR                    |           |       |   |                         |      | Mascot      |
| 1150.5739           | 1150.5905   | 0.0166  | 14    | 1214       | 1222     | VNEEVYIER                    |           |       |   |                         |      | Mascot      |
| 1150.5739           | 1150.5905   | 0.0166  | 14    | 1214       | 1222     | VNEEVYIER                    |           |       |   |                         |      | Mascot      |
| 1179.6343           | 1179.6034   | -0.0309 | -26   | 578        | 586      | ILWVQAMYR                    |           |       |   |                         |      | Mascot      |
| 1321.6343           | 1321.6801   | 0.0458  | 35    | 32         | 43       | ISPSRTSESSDR                 |           |       |   |                         |      | Mascot      |
| 1321.7032           | 1321.6801   | -0.0231 | -17   | 223        | 235      | MTASAASELILSK                |           |       |   |                         |      | Mascot      |
| 1350.6504           | 1350.6249   | -0.0255 | -19   | 161        | 173      | MVQTGGLSALDCR                |           |       |   |                         |      | Mascot      |
| 1373.8185           | 1373.7159   | -0.1026 | -75   | 777        | 788      | ATLSLLERVLMK                 | 5         |       | 0 |                         |      | Mascot      |
| 1373.8185           | 1373.7159   | -0.1026 | -75   | 777        | 788      | ATLSLLERVLMK                 |           |       |   |                         |      | Mascot      |
| 1393.6958           | 1393.7356   | 0.0398  | 29    | 1212       | 1222     | DKVNEEVYIER                  |           |       |   |                         |      | Mascot      |
| 1684.7339           | 1684.9733   | 0.2394  | 142   | 1112       | 1126     | DQSAKLCAMEMGQEK              |           |       |   | Oxidation (M)[9]        |      | Mascot      |
| 1700.7288           | 1700.9706   | 0.2418  | 142   | 1112       | 1126     | DQSAKLCAMEMGQEK              |           |       |   | Oxidation (M)[9,11]     |      | Mascot      |
| 1754.8167           | 1754.8131   | -0.0036 | -2    | 609        | 624      | AAQMDAPISQFYADR              |           |       |   |                         |      | Mascot      |
| 2224.9397           | 2225.1375   | 0.1978  | 89    | 1          | 20       | MLDPSSEEEESDGIVEEE<br>SR     |           |       |   |                         |      | Mascot      |
| 2233.166            | 2233.1057   | -0.0603 | -27   | 84         | 101      | LQLYVFMRCIAYPFNAK            |           |       |   | Carbamidomethyl (C)[10] |      | Mascot      |
| 2254.092            | 2254.1084   | 0.0164  | 7     | 945        | 963      | YVDLMESSIAQSIHRGFE<br>R      |           |       |   | Oxidation (M)[5]        |      | Mascot      |
| 2615.3174           | 2615.3284   | 0.011   | 4     | 1181       | 1204     | AASKYVEVPKPGMDVAD<br>GYVTFVR |           |       |   | Oxidation (M)[13]       |      | Mascot      |

|    |                                                 |  |  |  |  |  |              |         |      |   |    |   |  |
|----|-------------------------------------------------|--|--|--|--|--|--------------|---------|------|---|----|---|--|
| 39 | hypothetical protein LOC100000539 [Danio rerio] |  |  |  |  |  | gi 148232441 | 69297.7 | 5.68 | 9 | 29 | 0 |  |
|----|-------------------------------------------------|--|--|--|--|--|--------------|---------|------|---|----|---|--|

| Peptide Information |             |         |       |            |          |                           |           |       |   |                                             |      |             |
|---------------------|-------------|---------|-------|------------|----------|---------------------------|-----------|-------|---|---------------------------------------------|------|-------------|
| Calc. Mass          | Obsrv. Mass | ± da    | ± ppm | Start Seq. | End Seq. | Sequence                  | Ion Score | C. I. | % | Modification                                | Rank | Result Type |
| 935.425             | 935.4583    | 0.0333  | 36    | 330        | 336      | ECDEKVR                   |           |       |   | Carbamidomethyl (C)[2]                      |      | Mascot      |
| 1277.6592           | 1277.6447   | -0.0145 | -11   | 170        | 180      | VMSVLSLQCPK               |           |       |   | Carbamidomethyl (C)[9], Oxidation (M)[2]    |      | Mascot      |
| 1769.9115           | 1769.9673   | 0.0558  | 32    | 438        | 453      | ADGHTAFLELIRACPR          |           |       |   |                                             |      | Mascot      |
| 2230.0188           | 2230.2021   | 0.1833  | 82    | 592        | 610      | LSCLDLSGCWEMSLSNIT<br>K   |           |       |   | Carbamidomethyl (C)[3,9], Oxidation (M)[12] |      | Mascot      |
| 2299.1963           | 2299.2009   | 0.0046  | 2     | 350        | 370      | DVQGLSLDTLEAVGKVC<br>PELR |           |       |   | Carbamidomethyl (C)[17]                     |      | Mascot      |

|    |                                                              |           |         |     |             |         |                                    |   |    |   |  |  |                        |        |
|----|--------------------------------------------------------------|-----------|---------|-----|-------------|---------|------------------------------------|---|----|---|--|--|------------------------|--------|
|    | 2455.3352                                                    | 2455.2314 | -0.1038 | -42 | 505         | 524     | QMKPPLCWTSLKDVLWALLR               |   |    |   |  |  | Carbamidomethyl (C)[7] | Mascot |
|    | 2641.3401                                                    | 2641.415  | 0.0749  | 28  | 371         | 394     | VLSLDCLQNIVNADSFEH<br>GAVLAR       |   |    |   |  |  | Carbamidomethyl (C)[6] | Mascot |
|    | 3157.5364                                                    | 3157.6069 | 0.0705  | 22  | 127         | 155     | CQNLQSLDLSGSQNISAS<br>VLCELLGSQHR  |   |    |   |  |  | Carbamidomethyl (C)[1] | Mascot |
|    | 3338.6982                                                    | 3338.7847 | 0.0865  | 26  | 365         | 394     | VCPELRVLSLDCLQNIVN<br>ADSFEHGAVALR |   |    |   |  |  | Carbamidomethyl (C)[2] | Mascot |
| 40 | bcl-2-related ovarian killer protein homolog B [Danio rerio] |           |         |     | gi 41055421 | 23818.6 | 7.71                               | 6 | 29 | 0 |  |  |                        |        |

Peptide Information

| Calc. Mass | Obsrv. Mass | ± da    | ± ppm | Start Seq. | End Seq. | Sequence                | Ion Score | C. I. % | Modification                             | Rank | Result Type |
|------------|-------------|---------|-------|------------|----------|-------------------------|-----------|---------|------------------------------------------|------|-------------|
| 842.5134   | 842.5107    | -0.0027 | -3    | 161        | 167      | SLVPWLK                 |           |         |                                          |      | Mascot      |
| 850.4668   | 850.5432    | 0.0764  | 90    | 26         | 32       | ELVFQSK                 |           |         |                                          |      | Mascot      |
| 887.4985   | 887.4819    | -0.0166 | -19   | 170        | 177      | GGWVDILK                |           |         |                                          |      | Mascot      |
| 1535.8179  | 1535.7439   | -0.074  | -48   | 200        | 211      | EFIKTMYVYLTK            |           |         |                                          |      | Mascot      |
| 1689.9355  | 1689.8571   | -0.0784 | -46   | 124        | 140      | VVAIYAVAAGLAVDCVR       |           |         |                                          |      | Mascot      |
| 2654.3079  | 2654.314    | 0.0061  | 2     | 178        | 199      | CVVNMDSRRAHVHWLSTAVLTWR |           |         | Carbamidomethyl (C)[1], Oxidation (M)[5] |      | Mascot      |

|    |                                                                         |  |  |  |              |         |      |    |    |   |  |  |  |  |
|----|-------------------------------------------------------------------------|--|--|--|--------------|---------|------|----|----|---|--|--|--|--|
| 41 | PREDICTED: rho guanine nucleotide exchange factor 12-like [Danio rerio] |  |  |  | gi 326674149 | 55540.9 | 6.42 | 10 | 29 | 0 |  |  |  |  |
|----|-------------------------------------------------------------------------|--|--|--|--------------|---------|------|----|----|---|--|--|--|--|

Peptide Information

| Calc. Mass | Obsrv. Mass | ± da    | ± ppm | Start Seq. | End Seq. | Sequence          | Ion Score | C. I. % | Modification            | Rank | Result Type |
|------------|-------------|---------|-------|------------|----------|-------------------|-----------|---------|-------------------------|------|-------------|
| 1026.5876  | 1026.4692   | -0.1184 | -115  | 146        | 153      | LILRCHSK          |           |         | Carbamidomethyl (C)[5]  |      | Mascot      |
| 1026.5876  | 1026.4692   | -0.1184 | -115  | 146        | 153      | LILRCHSK          |           |         | Carbamidomethyl (C)[5]  |      | Mascot      |
| 1045.5387  | 1045.5643   | 0.0256  | 24    | 185        | 193      | SFFVISMSK         |           |         |                         |      | Mascot      |
| 1279.7117  | 1279.7836   | 0.0719  | 56    | 58         | 68       | QILNHVNQSVK       |           |         |                         |      | Mascot      |
| 1393.6311  | 1393.7356   | 0.1045  | 75    | 1          | 11       | MQEAESNRLCR       |           |         | Carbamidomethyl (C)[10] |      | Mascot      |
| 1448.7566  | 1448.9305   | 0.1739  | 120   | 17         | 28       | DIIPAEMQRFTK      |           |         |                         |      | Mascot      |
| 1475.7198  | 1475.7606   | 0.0408  | 28    | 467        | 477      | EMETKYYNLLR       |           |         | Oxidation (M)[2]        |      | Mascot      |
| 1535.766   | 1535.7439   | -0.0221 | -14   | 251        | 265      | GSDRISTGSIQSAEK   |           |         |                         |      | Mascot      |
| 1729.8463  | 1729.8164   | -0.0299 | -17   | 478        | 493      | QRPVGSAEADESREK   |           |         |                         |      | Mascot      |
| 1801.7657  | 1802.0049   | 0.2392  | 133   | 277        | 292      | DCVPDTNPG EEDQVAR |           |         | Carbamidomethyl (C)[2]  |      | Mascot      |
| 1993.9899  | 1993.9885   | -0.0014 | -1    | 90         | 106      | QSENPMISEFKNLDTK  |           |         |                         |      | Mascot      |

|    |                                                            |  |  |  |              |         |      |   |    |   |  |  |  |  |
|----|------------------------------------------------------------|--|--|--|--------------|---------|------|---|----|---|--|--|--|--|
| 42 | PREDICTED: hypothetical protein LOC100537225 [Danio rerio] |  |  |  | gi 326677219 | 17749.8 | 4.92 | 5 | 29 | 0 |  |  |  |  |
|----|------------------------------------------------------------|--|--|--|--------------|---------|------|---|----|---|--|--|--|--|

Peptide Information

| Calc. Mass | Obsrv. Mass | ± da | ± ppm | Start | End | Sequence | Ion | C. I. % | Modification | Rank | Result Type |
|------------|-------------|------|-------|-------|-----|----------|-----|---------|--------------|------|-------------|
|------------|-------------|------|-------|-------|-----|----------|-----|---------|--------------|------|-------------|



|    |                                                      |           | Seq.    |     | Seq.         |     | Score                  |      |                                                    |    |   |        |
|----|------------------------------------------------------|-----------|---------|-----|--------------|-----|------------------------|------|----------------------------------------------------|----|---|--------|
|    | 1150.6295                                            | 1150.5905 | -0.039  | -34 | 107          | 115 | DFFVLPVWK              |      |                                                    |    |   | Mascot |
|    | 1150.6295                                            | 1150.5905 | -0.039  | -34 | 107          | 115 | DFFVLPVWK              |      |                                                    |    |   | Mascot |
|    | 1277.6704                                            | 1277.6447 | -0.0257 | -20 | 91           | 101 | LICEMARQIGK            |      | Oxidation (M)[5]                                   |    |   | Mascot |
|    | 1321.5333                                            | 1321.6801 | 0.1468  | 111 | 79           | 90  | DMDSHIGNACMK           |      |                                                    |    |   | Mascot |
|    | 1321.5333                                            | 1321.6801 | 0.1468  | 111 | 79           | 90  | DMDSHIGNACMK           |      |                                                    |    |   | Mascot |
|    | 1334.6919                                            | 1334.6307 | -0.0612 | -46 | 91           | 101 | LICEMARQIGK            |      | Carbamidomethyl (C)[3], Oxidation (M)[5]           |    |   | Mascot |
|    | 1334.6919                                            | 1334.6307 | -0.0612 | -46 | 91           | 101 | LICEMARQIGK            |      | Carbamidomethyl (C)[3], Oxidation (M)[5]           |    |   | Mascot |
|    | 2210.9482                                            | 2211.1262 | 0.178   | 81  | 79           | 97  | DMDSHIGNACMKLICEMAR    |      | Carbamidomethyl (C)[10], Oxidation (M)[2]          |    |   | Mascot |
|    | 2210.9482                                            | 2211.1262 | 0.178   | 81  | 79           | 97  | DMDSHIGNACMKLICEMAR    |      | Carbamidomethyl (C)[10], Oxidation (M)[2]          |    |   | Mascot |
|    | 2283.9646                                            | 2284.1938 | 0.2292  | 100 | 79           | 97  | DMDSHIGNACMKLICEMAR    |      | Carbamidomethyl (C)[10,15], Oxidation (M)[2,11]    |    |   | Mascot |
|    | 2299.9597                                            | 2300.198  | 0.2383  | 104 | 79           | 97  | DMDSHIGNACMKLICEMAR    |      | Carbamidomethyl (C)[10,15], Oxidation (M)[2,11,17] |    |   | Mascot |
|    | 2641.1843                                            | 2641.415  | 0.2307  | 87  | 69           | 90  | EEFWSLGLLRDMDSHIGNACMK |      | Carbamidomethyl (C)[20], Oxidation (M)[12,21]      |    |   | Mascot |
| 43 | PREDICTED: GTPase IMAP family member 8 [Danio rerio] |           |         |     | gij326674352 |     | 83853.5                | 5.62 | 10                                                 | 29 | 0 |        |

#### Peptide Information

| Calc. Mass | Obsrv. Mass | ± da    | ± ppm | Start Seq. | End Seq. | Sequence                 | Ion Score | C. I. | % Modification         | Rank | Result Type |
|------------|-------------|---------|-------|------------|----------|--------------------------|-----------|-------|------------------------|------|-------------|
| 842.4366   | 842.5107    | 0.0741  | 88    | 49         | 56       | HSEIAGTK                 |           |       |                        |      | Mascot      |
| 1026.4752  | 1026.4692   | -0.006  | -6    | 661        | 668      | GHHEYIDR                 |           |       |                        |      | Mascot      |
| 1026.4752  | 1026.4692   | -0.006  | -6    | 661        | 668      | GHHEYIDR                 |           |       |                        |      | Mascot      |
| 1106.496   | 1106.5552   | 0.0592  | 54    | 713        | 723      | SQEAPGESSK               |           |       |                        |      | Mascot      |
| 1150.6466  | 1150.5905   | -0.0561 | -49   | 244        | 254      | IVLLGYNSSGK              |           |       |                        |      | Mascot      |
| 1150.6466  | 1150.5905   | -0.0561 | -49   | 244        | 254      | IVLLGYNSSGK              |           |       |                        |      | Mascot      |
| 1302.676   | 1302.7203   | 0.0443  | 34    | 274        | 285      | RSVIQEGDVSGR             |           |       |                        |      | Mascot      |
| 1321.7184  | 1321.6801   | -0.0383 | -29   | 520        | 531      | KLTVVCTPGFEK             |           |       |                        |      | Mascot      |
| 1321.7184  | 1321.6801   | -0.0383 | -29   | 520        | 531      | KLTVVCTPGFEK             |           |       |                        |      | Mascot      |
| 1535.6941  | 1535.7439   | 0.0498  | 32    | 108        | 119      | QNEKDILCDNMR             |           |       | Carbamidomethyl (C)[8] |      | Mascot      |
| 2233.1533  | 2233.1057   | -0.0476 | -21   | 1          | 20       | MNPSSPYDSSELRIILLGPK     |           |       | Oxidation (M)[1]       |      | Mascot      |
| 2615.4014  | 2615.3284   | -0.073  | -28   | 89         | 111      | CPPGPHVLLLVLNVDTPFKQNEK  |           |       | Carbamidomethyl (C)[1] |      | Mascot      |
| 2641.1934  | 2641.415    | 0.2216  | 84    | 713        | 738      | SQEAPGESSKMSGVQSLGSIPEFD |           |       |                        |      | Mascot      |

44 Chain A, The X-Ray Structure Of Zebrafish Rnase5 gi|312597298 14502.2 9.24 6 28 0

#### Peptide Information

|    |                                                                  | Calc. Mass | Obsrv. Mass | ± da    | ± ppm | Start Seq. | End Sequence Seq.        | Ion Score | C. I. | % Modification                           | Rank | Result Type |
|----|------------------------------------------------------------------|------------|-------------|---------|-------|------------|--------------------------|-----------|-------|------------------------------------------|------|-------------|
|    |                                                                  | 996.46     | 996.5989    | 0.1389  | 139   | 28         | 35 CDRAMSIK              |           |       | Carbamidomethyl (C)[1], Oxidation (M)[5] |      | Mascot      |
|    |                                                                  | 1150.6102  | 1150.5905   | -0.0197 | -17   | 47         | 56 EVNTFIQATK            |           |       |                                          |      | Mascot      |
|    |                                                                  | 1150.6102  | 1150.5905   | -0.0197 | -17   | 47         | 56 EVNTFIQATK            |           |       |                                          |      | Mascot      |
|    |                                                                  | 1350.6444  | 1350.6249   | -0.0195 | -14   | 89         | 99 SGNRRPNCQYR           |           |       |                                          |      | Mascot      |
|    |                                                                  | 1460.793   | 1460.8047   | 0.0117  | 8     | 76         | 88 SNQPFPPVVTCKLK        |           |       |                                          |      | Mascot      |
|    |                                                                  | 1460.793   | 1460.8047   | 0.0117  | 8     | 76         | 88 SNQPFPPVVTCKLK        |           |       |                                          |      | Mascot      |
|    |                                                                  | 1689.8376  | 1689.8571   | 0.0195  | 12    | 14         | 27 FLRQHVDADMSVQK        |           |       | Oxidation (M)[10]                        |      | Mascot      |
|    |                                                                  | 1769.8605  | 1769.9673   | 0.1068  | 60    | 114        | 128 GWPVHYDEGIIDVNR      |           |       |                                          |      | Mascot      |
| 45 | Zgc:136513 protein [Danio rerio]                                 |            |             |         |       |            | gi 92096381              | 10593.2   | 9.27  | 4                                        | 28   | 0           |
|    | Peptide Information                                              |            |             |         |       |            |                          |           |       |                                          |      |             |
|    |                                                                  | Calc. Mass | Obsrv. Mass | ± da    | ± ppm | Start Seq. | End Sequence Seq.        | Ion Score | C. I. | % Modification                           | Rank | Result Type |
|    |                                                                  | 842.4982   | 842.5107    | 0.0125  | 15    | 38         | 45 SPLTLSPK              |           |       |                                          |      | Mascot      |
|    |                                                                  | 1026.5731  | 1026.4692   | -0.1039 | -101  | 29         | 36 NYISVFKR              | 6         |       | 0                                        |      | Mascot      |
|    |                                                                  | 1026.5731  | 1026.4692   | -0.1039 | -101  | 29         | 36 NYISVFKR              |           |       |                                          |      | Mascot      |
|    |                                                                  | 1302.778   | 1302.7203   | -0.0577 | -44   | 47         | 58 KYAVAVVSPQLK          |           |       |                                          |      | Mascot      |
|    |                                                                  | 2282.9553  | 2283.1978   | 0.2425  | 106   | 59         | 78 HDSCETGQSDVLFTFGS HCR |           |       | Carbamidomethyl (C)[4]                   |      | Mascot      |
| 46 | PREDICTED: calcium-dependent secretion activator 1 [Danio rerio] |            |             |         |       |            | gi 326668730             | 145894.4  | 5.69  | 15                                       | 28   | 0           |
|    | Peptide Information                                              |            |             |         |       |            |                          |           |       |                                          |      |             |
|    |                                                                  | Calc. Mass | Obsrv. Mass | ± da    | ± ppm | Start Seq. | End Sequence Seq.        | Ion Score | C. I. | % Modification                           | Rank | Result Type |
|    |                                                                  | 1026.5077  | 1026.4692   | -0.0385 | -38   | 93         | 101 CIAYPFNAK            |           |       |                                          |      | Mascot      |
|    |                                                                  | 1026.5077  | 1026.4692   | -0.0385 | -38   | 93         | 101 CIAYPFNAK            |           |       |                                          |      | Mascot      |
|    |                                                                  | 1045.5459  | 1045.5643   | 0.0184  | 18    | 280        | 288 LQMADQIAR            |           |       |                                          |      | Mascot      |
|    |                                                                  | 1150.5739  | 1150.5905   | 0.0166  | 14    | 1174       | 1182 VNEEVYIER           |           |       |                                          |      | Mascot      |
|    |                                                                  | 1150.5739  | 1150.5905   | 0.0166  | 14    | 1174       | 1182 VNEEVYIER           |           |       |                                          |      | Mascot      |
|    |                                                                  | 1179.6343  | 1179.6034   | -0.0309 | -26   | 578        | 586 ILWVQAMYR            |           |       |                                          |      | Mascot      |
|    |                                                                  | 1321.6343  | 1321.6801   | 0.0458  | 35    | 32         | 43 ISPSRTSESSDR          |           |       |                                          |      | Mascot      |
|    |                                                                  | 1321.7032  | 1321.6801   | -0.0231 | -17   | 223        | 235 MTASAASELILSK        |           |       |                                          |      | Mascot      |
|    |                                                                  | 1350.6504  | 1350.6249   | -0.0255 | -19   | 161        | 173 MVQTGGLSALDCR        |           |       |                                          |      | Mascot      |
|    |                                                                  | 1373.8185  | 1373.7159   | -0.1026 | -75   | 777        | 788 ATLSLLERVLMK         | 5         |       | 0                                        |      | Mascot      |
|    |                                                                  | 1373.8185  | 1373.7159   | -0.1026 | -75   | 777        | 788 ATLSLLERVLMK         |           |       |                                          |      | Mascot      |

|    |                                         |           |         |     |             |      |                              |      |   |                         |   |  |        |
|----|-----------------------------------------|-----------|---------|-----|-------------|------|------------------------------|------|---|-------------------------|---|--|--------|
|    | 1393.6958                               | 1393.7356 | 0.0398  | 29  | 1172        | 1182 | DKVNEEVYIER                  |      |   |                         |   |  | Mascot |
|    | 1684.7339                               | 1684.9733 | 0.2394  | 142 | 1072        | 1086 | DQSAKLCAMEMGQEK              |      |   | Oxidation (M)[9]        |   |  | Mascot |
|    | 1700.7288                               | 1700.9706 | 0.2418  | 142 | 1072        | 1086 | DQSAKLCAMEMGQEK              |      |   | Oxidation (M)[9,11]     |   |  | Mascot |
|    | 1754.8167                               | 1754.8131 | -0.0036 | -2  | 609         | 624  | AAAQMDAPISQFYADR             |      |   |                         |   |  | Mascot |
|    | 2224.9397                               | 2225.1375 | 0.1978  | 89  | 1           | 20   | MLDPSSSEESDGIVEEE<br>SR      |      |   |                         |   |  | Mascot |
|    | 2233.166                                | 2233.1057 | -0.0603 | -27 | 84          | 101  | LQLYVFVMRCIAYPFNAK           |      |   | Carbamidomethyl (C)[10] |   |  | Mascot |
|    | 2254.092                                | 2254.1084 | 0.0164  | 7   | 959         | 977  | YVDLMESSIAQSIHRGFE<br>R      |      |   | Oxidation (M)[5]        |   |  | Mascot |
|    | 2615.3174                               | 2615.3284 | 0.011   | 4   | 1141        | 1164 | AASKYVEVPKPGMDVAD<br>GYVTFVR |      |   | Oxidation (M)[13]       |   |  | Mascot |
| 47 | Glutathione peroxidase 1b [Danio rerio] |           |         |     | gi 51859004 |      | 16361.4                      | 7.68 | 5 | 28                      | 0 |  |        |

Peptide Information

| Calc. Mass | Obsrv. Mass | ± da    | ± ppm | Start Seq. | End Seq. | Sequence                 | Ion Score | C. I. | % Modification | Rank | Result Type |
|------------|-------------|---------|-------|------------|----------|--------------------------|-----------|-------|----------------|------|-------------|
| 1165.6099  | 1165.7502   | 0.1403  | 120   | 125        | 135      | FLTSGIDGDIK              |           |       |                |      | Mascot      |
| 1179.6409  | 1179.6034   | -0.0375 | -32   | 109        | 119      | FLIGSDGVPFK              |           |       |                |      | Mascot      |
| 1279.6429  | 1279.7836   | 0.1407  | 110   | 40         | 50       | YVRPGNGYEPK              |           |       |                |      | Mascot      |
| 1321.7111  | 1321.6801   | -0.031  | -23   | 124        | 135      | RFLTSGIDGDIK             |           |       |                |      | Mascot      |
| 1321.7111  | 1321.6801   | -0.031  | -23   | 124        | 135      | RFLTSGIDGDIK             |           |       |                |      | Mascot      |
| 2297.1602  | 2297.207    | 0.0468  | 20    | 100        | 119      | NDIAWNFEKFLIGSDGVP<br>FK |           |       |                |      | Mascot      |

48 novel zinc finger protein [Danio rerio] gi|130496620 52184.8 6.71 11 28 0

Peptide Information

| Calc. Mass | Obsrv. Mass | ± da    | ± ppm | Start Seq. | End Seq. | Sequence        | Ion Score | C. I. | % Modification            | Rank | Result Type |
|------------|-------------|---------|-------|------------|----------|-----------------|-----------|-------|---------------------------|------|-------------|
| 935.4614   | 935.4583    | -0.0031 | -3    | 148        | 154      | LNEEMKR         |           |       | Oxidation (M)[5]          |      | Mascot      |
| 996.4818   | 996.5989    | 0.1171  | 118   | 67         | 74       | NVCESFLK        |           |       | Carbamidomethyl (C)[3]    |      | Mascot      |
| 1045.5887  | 1045.5643   | -0.0244 | -23   | 132        | 140      | KEELNTALK       |           |       |                           |      | Mascot      |
| 1106.4718  | 1106.5552   | 0.0834  | 75    | 43         | 51       | NTQECPVCR       |           |       | Carbamidomethyl (C)[5]    |      | Mascot      |
| 1150.5851  | 1150.5905   | 0.0054  | 5     | 399        | 407      | VRVDLDYDR       |           |       |                           |      | Mascot      |
| 1150.5851  | 1150.5905   | 0.0054  | 5     | 399        | 407      | VRVDLDYDR       |           |       |                           |      | Mascot      |
| 1165.6285  | 1165.7502   | 0.1217  | 104   | 95         | 103      | LKLFLEDK        |           |       | Carbamidomethyl (C)[5]    |      | Mascot      |
| 1357.6932  | 1357.7208   | 0.0276  | 20    | 344        | 354      | HCWIVEVKESK     |           |       |                           |      | Mascot      |
| 1357.6932  | 1357.7208   | 0.0276  | 20    | 344        | 354      | HCWIVEVKESK     |           |       |                           |      | Mascot      |
| 1475.7714  | 1475.7606   | -0.0108 | -7    | 355        | 367      | RWSLGVTTASNQR   |           |       |                           |      | Mascot      |
| 1535.7345  | 1535.7439   | 0.0094  | 6     | 20         | 32       | TPVLLSCSHSFCK   |           |       | Carbamidomethyl (C)[7,12] |      | Mascot      |
| 1801.8169  | 1802.0049   | 0.188   | 104   | 227        | 241      | DMEEMLKANDVCFLK |           |       | Oxidation (M)[2]          |      | Mascot      |

2283.13452283.19780.063328420437HLHTYTTTTFTHTLYPFFR

Mascot

49adenine nucleotide translocator 3 [Danio rerio]gi|19245356632742.99.757280

Peptide Information

| Calc. Mass | Obsrv. Mass | ± da    | ± ppm | Start Seq. | End Seq. | Sequence                | Ion Score | C. I. % | Modification           | Rank | Result Type |
|------------|-------------|---------|-------|------------|----------|-------------------------|-----------|---------|------------------------|------|-------------|
| 935.5308   | 935.4583    | -0.0725 | -77   | 164        | 171      | IFKSDGLR                |           |         |                        |      | Mascot      |
| 996.4536   | 996.5989    | 0.1453  | 146   | 237        | 244      | RMMMQSGR                |           |         |                        |      | Mascot      |
| 1350.7198  | 1350.6249   | -0.0949 | -70   | 50         | 60       | QYKGIVDCIVR             |           |         | Carbamidomethyl (C)[8] |      | Mascot      |
| 1689.8635  | 1689.8571   | -0.0064 | -4    | 81         | 94       | YFPTQALNFAFKDK          |           |         |                        |      | Mascot      |
| 1729.8037  | 1729.8164   | 0.0127  | 7     | 246        | 260      | GADIMYTGTLDCWRK         |           |         |                        |      | Mascot      |
| 2284.2236  | 2284.1938   | -0.0298 | -13   | 73         | 92       | GNLANVIRYFPTQALNFAFK    |           |         |                        |      | Mascot      |
| 2455.3091  | 2455.2314   | -0.0777 | -32   | 167        | 188      | SDGLRGLYQGFFNVSVQGIIIYR |           |         |                        |      | Mascot      |

50chloride channel 1, skeletal muscle [Danio rerio]gi|130498679103825.46.471257.528

Peptide Information

| Calc. Mass | Obsrv. Mass | ± da    | ± ppm | Start Seq. | End Seq. | Sequence  | Ion Score | C. I. % | Modification | Rank | Result Type |
|------------|-------------|---------|-------|------------|----------|-----------|-----------|---------|--------------|------|-------------|
| 1026.4851  | 1026.4692   | -0.0159 | -15   | 694        | 702      | NLFSSSSER | 25        | 7.528   |              | 2    | Mascot      |

|                |           |                        |                |                |                    |
|----------------|-----------|------------------------|----------------|----------------|--------------------|
| Gel Idx/Pos    | 226/J2    | Instr./Gel Origin      | BA2060/110707A | Process Status | Analysis Succeeded |
| Plate [#] Name | [1] 31496 | Instrument Sample Name |                | Spectra        | 11                 |

| Rank | Protein Name                                                   | Accession No. | Protein MW | Protein PI | Pep. Count | Protein Score | Protein Score C. I. % | Total Ion Score | Total Ion C. I. % |
|------|----------------------------------------------------------------|---------------|------------|------------|------------|---------------|-----------------------|-----------------|-------------------|
| 1    | RecName: Full=L-lactate dehydrogenase B-A chain; Short=LDH-B-A | gi 313104308  | 36224      | 6.4        | 6          | 245           | 100                   | 222             | 100               |

Peptide Information

| Calc. Mass | Obsrv. Mass | ± da    | ± ppm | Start Seq. | End Seq. | Sequence             | Ion Score | C. I. % | Modification                               | Rank | Result Type |
|------------|-------------|---------|-------|------------|----------|----------------------|-----------|---------|--------------------------------------------|------|-------------|
| 913.5828   | 913.5813    | -0.0015 | -2    | 92         | 100      | IVVVTAGVR            |           |         |                                            |      | Mascot      |
| 1418.8002  | 1418.802    | 0.0018  | 1     | 8          | 21       | LITPLASGPAEPPR       |           |         |                                            |      | Mascot      |
| 1418.8002  | 1418.802    | 0.0018  | 1     | 8          | 21       | LITPLASGPAEPPR       | 73        | 99.999  |                                            |      | Mascot      |
| 1685.8593  | 1685.8613   | 0.002   | 1     | 44         | 58       | ELADELALVDVVEDR      |           |         |                                            |      | Mascot      |
| 1685.8593  | 1685.8613   | 0.002   | 1     | 44         | 58       | ELADELALVDVVEDR      | 148       | 100     |                                            |      | Mascot      |
| 1844.9939  | 1844.9989   | 0.005   | 3     | 59         | 74       | LKGEMLDLQHGSFLK      |           |         | Oxidation (M)[5]                           |      | Mascot      |
| 2045.1245  | 2045.1313   | 0.0068  | 3     | 24         | 43       | VTIVGVGQVGMACAVSVLLR |           |         | Carbamidomethyl (C)[13], Oxidation (M)[11] |      | Mascot      |

|   |                                         |           |        |   |             |     |                          |      |   |     |     |     |     |        |
|---|-----------------------------------------|-----------|--------|---|-------------|-----|--------------------------|------|---|-----|-----|-----|-----|--------|
|   | 2151.1331                               | 2151.1392 | 0.0061 | 3 | 247         | 266 | GYTNWAIGLSVADLTETL<br>VK |      |   |     |     |     |     | Mascot |
| 2 | prostaglandin reductase 1 [Danio rerio] |           |        |   | gi 56693373 |     | 35789.1                  | 6.19 | 6 | 166 | 100 | 142 | 100 |        |

Peptide Information

| Calc. Mass | Obsrv. Mass | ± da    | ± ppm | Start Seq. | End Seq. | Sequence                 | Ion Score | C. I.  | % | Modification            | Rank | Result Type |
|------------|-------------|---------|-------|------------|----------|--------------------------|-----------|--------|---|-------------------------|------|-------------|
| 908.4658   | 908.4657    | -0.0001 | 0     | 268        | 275      | MEGFLVGR                 |           |        |   |                         |      | Mascot      |
| 924.4607   | 924.4619    | 0.0012  | 1     | 268        | 275      | MEGFLVGR                 |           |        |   | Oxidation (M)[1]        |      | Mascot      |
| 975.4682   | 975.4663    | -0.0019 | -2    | 11         | 18       | QHFDGFPK                 |           |        |   |                         |      | Mascot      |
| 1086.6041  | 1086.6035   | -0.0006 | -1    | 196        | 205      | TVPSLEEALK               |           |        |   |                         |      | Mascot      |
| 1331.6266  | 1331.6287   | 0.0021  | 2     | 185        | 195      | ELGFDQAFNYK              | 57        | 99.956 |   |                         |      | Mascot      |
| 1331.6266  | 1331.6287   | 0.0021  | 2     | 185        | 195      | ELGFDQAFNYK              |           |        |   |                         |      | Mascot      |
| 1626.7805  | 1626.7838   | 0.0033  | 2     | 75         | 89       | SNNPSFPVGCHVVGR          | 85        | 100    |   | Carbamidomethyl (C)[10] |      | Mascot      |
| 1626.7805  | 1626.7838   | 0.0033  | 2     | 75         | 89       | SNNPSFPVGCHVVGR          |           |        |   | Carbamidomethyl (C)[10] |      | Mascot      |
| 2156.9812  | 2157        | 0.0188  | 9     | 300        | 318      | EHVTVGFEENMPAAFMGM<br>LK |           |        |   | Oxidation (M)[10,15,17] |      | Mascot      |

|   |                                                         |  |  |  |              |  |         |      |   |    |        |    |        |  |
|---|---------------------------------------------------------|--|--|--|--------------|--|---------|------|---|----|--------|----|--------|--|
| 3 | PREDICTED: prostaglandin reductase 1-like [Danio rerio] |  |  |  | gi 125821425 |  | 36603.8 | 8.26 | 2 | 63 | 97.718 | 57 | 99.956 |  |
|---|---------------------------------------------------------|--|--|--|--------------|--|---------|------|---|----|--------|----|--------|--|

Peptide Information

| Calc. Mass | Obsrv. Mass | ± da    | ± ppm | Start Seq. | End Seq. | Sequence    | Ion Score | C. I.  | % | Modification | Rank | Result Type |
|------------|-------------|---------|-------|------------|----------|-------------|-----------|--------|---|--------------|------|-------------|
| 1086.6041  | 1086.6035   | -0.0006 | -1    | 201        | 210      | TVPSLEEALK  |           |        |   |              |      | Mascot      |
| 1331.6266  | 1331.6287   | 0.0021  | 2     | 190        | 200      | ELGFDQAFNYK | 57        | 99.956 |   |              |      | Mascot      |
| 1331.6266  | 1331.6287   | 0.0021  | 2     | 190        | 200      | ELGFDQAFNYK |           |        |   |              |      | Mascot      |

|   |                                                               |  |  |  |              |  |          |      |    |    |   |  |  |
|---|---------------------------------------------------------------|--|--|--|--------------|--|----------|------|----|----|---|--|--|
| 4 | structural maintenance of chromosomes protein 6 [Danio rerio] |  |  |  | gi 190358624 |  | 126205.1 | 8.74 | 21 | 44 | 0 |  |  |
|---|---------------------------------------------------------------|--|--|--|--------------|--|----------|------|----|----|---|--|--|

Peptide Information

| Calc. Mass | Obsrv. Mass | ± da    | ± ppm | Start Seq. | End Seq. | Sequence  | Ion Score | C. I. | % | Modification | Rank | Result Type |
|------------|-------------|---------|-------|------------|----------|-----------|-----------|-------|---|--------------|------|-------------|
| 850.4304   | 850.5429    | 0.1125  | 132   | 133        | 139      | DAYKPEK   |           |       |   |              |      | Mascot      |
| 850.4304   | 850.5429    | 0.1125  | 132   | 133        | 139      | DAYKPEK   |           |       |   |              |      | Mascot      |
| 864.4355   | 864.5372    | 0.1017  | 118   | 769        | 775      | RQTQTCK   |           |       |   |              |      | Mascot      |
| 868.4635   | 868.5515    | 0.088   | 101   | 366        | 373      | TAEAALHR  |           |       |   |              |      | Mascot      |
| 958.4635   | 958.4433    | -0.0202 | -21   | 631        | 639      | GGQAPRNCR |           |       |   |              |      | Mascot      |
| 975.4741   | 975.4663    | -0.0078 | -8    | 299        | 306      | EQITAEER  |           |       |   |              |      | Mascot      |
| 996.5585   | 996.5972    | 0.0387  | 39    | 366        | 374      | TAEAALHRK |           |       |   |              |      | Mascot      |
| 996.5585   | 996.5972    | 0.0387  | 39    | 366        | 374      | TAEAALHRK |           |       |   |              |      | Mascot      |

|           |           |         |     |      |      |                                   |                                  |        |
|-----------|-----------|---------|-----|------|------|-----------------------------------|----------------------------------|--------|
| 1086.5513 | 1086.6035 | 0.0522  | 48  | 552  | 559  | IMGRFYQR                          | Oxidation (M)[2]                 | Mascot |
| 1233.6433 | 1233.7218 | 0.0785  | 64  | 868  | 878  | TAKSLDSEINR                       |                                  | Mascot |
| 1279.606  | 1279.7781 | 0.1721  | 134 | 467  | 477  | QRDLAAMESSR                       | Oxidation (M)[7]                 | Mascot |
| 1352.6515 | 1352.7363 | 0.0848  | 63  | 757  | 768  | ISVCGEEFEALR                      |                                  | Mascot |
| 1393.6958 | 1393.7307 | 0.0349  | 25  | 428  | 439  | DSTLAQQIDQFK                      |                                  | Mascot |
| 1418.687  | 1418.802  | 0.115   | 81  | 806  | 817  | LNNSDQEVERSK                      |                                  | Mascot |
| 1418.687  | 1418.802  | 0.115   | 81  | 806  | 817  | LNNSDQEVERSK                      |                                  | Mascot |
| 1439.7026 | 1439.7291 | 0.0265  | 18  | 1078 | 1090 | GHSALPFSQRNPE                     |                                  | Mascot |
| 1503.7334 | 1503.7828 | 0.0494  | 33  | 213  | 224  | FFMKATQLDQMK                      | Oxidation (M)[3]                 | Mascot |
| 1626.8011 | 1626.7838 | -0.0173 | -11 | 1033 | 1046 | ISMDMMLKIAASQR                    | Oxidation (M)[3,5]               | Mascot |
| 1626.8011 | 1626.7838 | -0.0173 | -11 | 1033 | 1046 | ISMDMMLKIAASQR                    | Oxidation (M)[3,5]               | Mascot |
| 1784.8571 | 1784.9138 | 0.0567  | 32  | 932  | 945  | HNVYAEMRMYLSVR                    | Oxidation (M)[7]                 | Mascot |
| 1985.996  | 1986.0566 | 0.0606  | 31  | 845  | 862  | EQELQAAIAKASEICPER                |                                  | Mascot |
| 2052.0469 | 2052.1045 | 0.0576  | 28  | 668  | 684  | DVEEEIRHLQSALQTQR                 |                                  | Mascot |
| 2297.0432 | 2297.1953 | 0.1521  | 66  | 280  | 298  | NQMAWALVAEMEDEM<br>PMK            | Oxidation (M)[3,11]              | Mascot |
| 2299.175  | 2299.1907 | 0.0157  | 7   | 963  | 983  | MIFDCHKNEILSISVQPGEG<br>GK        |                                  | Mascot |
| 3338.4729 | 3338.7664 | 0.2935  | 88  | 520  | 547  | DQDLALAVECCCLKALMLA<br>FCCDNHADER | Carbamidomethyl (C)[10,11,20,21] | Mascot |

5 hypothetical protein LOC751722 [Danio rerio] gi|113679753 31904.4 6.69 9 43 0

#### Peptide Information

| Calc. Mass | Obsrv. Mass | ± da    | ± ppm | Start Seq. | End Seq. | Sequence                | Ion Score | C. I. % | Modification      | Rank | Result Type |
|------------|-------------|---------|-------|------------|----------|-------------------------|-----------|---------|-------------------|------|-------------|
| 870.577    | 870.5435    | -0.0335 | -38   | 190        | 197      | LLLLKAAK                |           |         |                   |      | Mascot      |
| 1086.4996  | 1086.6035   | 0.1039  | 96    | 1          | 9        | MNNLNPPR                |           |         | Oxidation (M)[1]  |      | Mascot      |
| 1279.6616  | 1279.7781   | 0.1165  | 91    | 231        | 240      | NGNLMWLYLR              |           |         |                   |      | Mascot      |
| 1331.6195  | 1331.6287   | 0.0092  | 7     | 219        | 229      | HCADLLNMDKR             |           |         | Oxidation (M)[8]  |      | Mascot      |
| 1331.6195  | 1331.6287   | 0.0092  | 7     | 219        | 229      | HCADLLNMDKR             |           |         | Oxidation (M)[8]  |      | Mascot      |
| 1640.9442  | 1640.8029   | -0.1413 | -86   | 132        | 147      | LLQSGVAGTALRDALR        |           |         |                   |      | Mascot      |
| 1685.8639  | 1685.8613   | -0.0026 | -2    | 103        | 116      | ALISHSQQLMEERK          |           |         | Oxidation (M)[10] |      | Mascot      |
| 1685.8639  | 1685.8613   | -0.0026 | -2    | 102        | 115      | KALISHSQQLMEER          |           |         | Oxidation (M)[11] |      | Mascot      |
| 2166.1011  | 2166.0542   | -0.0469 | -22   | 198        | 215      | HMLGAELHLEEDLRDIFK      |           |         |                   |      | Mascot      |
| 2225.1409  | 2225.1257   | -0.0152 | -7    | 74         | 92       | ETLTENQRTAAHLELELE<br>K |           |         |                   |      | Mascot      |
| 2225.1409  | 2225.1257   | -0.0152 | -7    | 74         | 92       | ETLTENQRTAAHLELELE<br>K |           |         |                   |      | Mascot      |

6 fin bud initiation factor precursor [Danio rerio] gi|224922848 24213.1 5.12 8 43 0

#### Peptide Information

|   | Calc. Mass                  | Obsrv. Mass | ± da    | ± ppm | Start Seq.   | End Sequence Seq.      | Ion Score | C. I. | % Modification                              | Rank | Result Type |   |   |
|---|-----------------------------|-------------|---------|-------|--------------|------------------------|-----------|-------|---------------------------------------------|------|-------------|---|---|
|   | 842.3898                    | 842.51      | 0.1202  | 143   | 57           | 62 CQMLFK              |           |       | Carbamidomethyl (C)[1], Oxidation (M)[3]    |      | Mascot      |   |   |
|   | 913.4962                    | 913.5813    | 0.0851  | 93    | 195          | 202 SHGTRLSR           |           |       |                                             |      | Mascot      |   |   |
|   | 975.4741                    | 975.4663    | -0.0078 | -8    | 145          | 152 QSQENELK           |           |       |                                             |      | Mascot      |   |   |
|   | 1331.7417                   | 1331.6287   | -0.113  | -85   | 174          | 185 ETLDISLGLKDK       |           |       |                                             |      | Mascot      |   |   |
|   | 1331.7417                   | 1331.6287   | -0.113  | -85   | 174          | 185 ETLDISLGLKDK       |           |       |                                             |      | Mascot      |   |   |
|   | 1393.6265                   | 1393.7307   | 0.1042  | 75    | 69           | 80 CTLDEDQDSVIR        |           |       |                                             |      | Mascot      |   |   |
|   | 1498.7133                   | 1498.7201   | 0.0068  | 5     | 145          | 156 QSQENELKEEHK       |           |       |                                             |      | Mascot      |   |   |
|   | 2157.0938                   | 2157        | -0.0938 | -43   | 1            | 19 MGTMASPLFIACLLSM R  |           |       | Carbamidomethyl (C)[14], Oxidation (M)[1,4] |      | Mascot      |   |   |
|   | 2283.0808                   | 2283.188    | 0.1072  | 47    | 69           | 87 CTLDEDQDSVIRDDFTIIK |           |       | Carbamidomethyl (C)[1]                      |      | Mascot      |   |   |
|   | 2283.0808                   | 2283.188    | 0.1072  | 47    | 69           | 87 CTLDEDQDSVIRDDFTIIK |           |       | Carbamidomethyl (C)[1]                      |      | Mascot      |   |   |
| 7 | novel protein [Danio rerio] |             |         |       | gi 126632850 |                        | 14386.2   | 8.68  | 6                                           | 40   | 0           | 1 | 0 |

#### Peptide Information

|  |  | Calc. Mass | Obsrv. Mass | ± da   | ± ppm | Start Seq. | End Sequence Seq.          | Ion Score | C. I. | % Modification         | Rank | Result Type |
|--|--|------------|-------------|--------|-------|------------|----------------------------|-----------|-------|------------------------|------|-------------|
|  |  | 842.473    | 842.51      | 0.037  | 44    | 14         | 21 TAITTHAK                |           |       |                        |      | Mascot      |
|  |  | 996.5737   | 996.5972    | 0.0235 | 24    | 104        | 111 TLPWRPAR               |           |       |                        |      | Mascot      |
|  |  | 996.5737   | 996.5972    | 0.0235 | 24    | 104        | 111 TLPWRPAR               | 1         |       | 0                      |      | Mascot      |
|  |  | 1418.7461  | 1418.802    | 0.0559 | 39    | 1          | 13 MGLPGKPTFTDVR           |           |       |                        |      | Mascot      |
|  |  | 1418.7461  | 1418.802    | 0.0559 | 39    | 1          | 13 MGLPGKPTFTDVR           |           |       |                        |      | Mascot      |
|  |  | 1626.6887  | 1626.7838   | 0.0951 | 58    | 32         | 45 VAQFMCHDTSTSDK          |           |       | Carbamidomethyl (C)[6] |      | Mascot      |
|  |  | 1626.6887  | 1626.7838   | 0.0951 | 58    | 32         | 45 VAQFMCHDTSTSDK          |           |       | Carbamidomethyl (C)[6] |      | Mascot      |
|  |  | 1754.7837  | 1754.8033   | 0.0196 | 11    | 31         | 45 KVAQFMCHDTSTSDK         |           |       | Carbamidomethyl (C)[7] |      | Mascot      |
|  |  | 1985.8934  | 1986.0566   | 0.1632 | 82    | 66         | 84 ALVEEEEDGEAAGTESP<br>PR |           |       |                        |      | Mascot      |

8 PREDICTED: ribonuclease inhibitor-like [Danio rerio] gi|326678374 93203.1 5.41 13 40 0

#### Peptide Information

|  |  | Calc. Mass | Obsrv. Mass | ± da    | ± ppm | Start Seq. | End Sequence Seq. | Ion Score | C. I. | % Modification | Rank | Result Type |
|--|--|------------|-------------|---------|-------|------------|-------------------|-----------|-------|----------------|------|-------------|
|  |  | 868.5978   | 868.5515    | -0.0463 | -53   | 261        | 267 LIILQLR       |           |       |                |      | Mascot      |
|  |  | 958.4588   | 958.4433    | -0.0155 | -16   | 638        | 647 GNDPGQSGVK    |           |       |                |      | Mascot      |
|  |  | 1320.6803  | 1320.6271   | -0.0532 | -40   | 68         | 78 HCTLNLTMLFK    |           |       |                |      | Mascot      |
|  |  | 1393.7434  | 1393.7307   | -0.0127 | -9    | 626        | 637 SNPSHLIELDLR  |           |       |                |      | Mascot      |
|  |  | 1498.7133  | 1498.7201   | 0.0068  | 5     | 348        | 360 ELNLSDELGDTR  |           |       |                |      | Mascot      |

|   |                                                         |           |         |     |     |              |                                     |      |                                            |        |   |
|---|---------------------------------------------------------|-----------|---------|-----|-----|--------------|-------------------------------------|------|--------------------------------------------|--------|---|
|   | 2045.022                                                | 2045.1313 | 0.1093  | 53  | 414 | 432          | LGDLDEKLSALLMDSH<br>SK              |      | Oxidation (M)[14]                          | Mascot |   |
|   | 2052.0105                                               | 2052.1045 | 0.094   | 46  | 18  | 36           | FLSPAADEACQFLAEVVG<br>K             |      | Carbamidomethyl (C)[10]                    | Mascot |   |
|   | 2225.094                                                | 2225.1257 | 0.0317  | 14  | 814 | 832          | LENSGVKNLSDLLMYPQ<br>CK             |      | Carbamidomethyl (C)[18], Oxidation (M)[14] | Mascot |   |
|   | 2225.094                                                | 2225.1257 | 0.0317  | 14  | 814 | 832          | LENSGVKNLSDLLMYPQ<br>CK             |      | Carbamidomethyl (C)[18], Oxidation (M)[14] | Mascot |   |
|   | 2297.0562                                               | 2297.1953 | 0.1391  | 61  | 571 | 591          | SDSSLKELDMSNNNLQD<br>SGVK           |      | Oxidation (M)[10]                          | Mascot |   |
|   | 2298.1316                                               | 2298.1985 | 0.0669  | 29  | 268 | 290          | GCGLTEESCSALATVLKS<br>NSSLK         |      |                                            | Mascot |   |
|   | 2300.093                                                | 2300.1873 | 0.0943  | 41  | 438 | 458          | LNNCELTEKSCSVLATCL<br>SSK           |      | Carbamidomethyl (C)[4]                     | Mascot |   |
|   | 3004.4722                                               | 3004.3591 | -0.1131 | -38 | 544 | 570          | HCTIKTLMHNCGLTEES<br>CSALTTILR      |      | Oxidation (M)[8]                           | Mascot |   |
|   | 3338.6758                                               | 3338.7664 | 0.0906  | 27  | 197 | 227          | MNQTKSLLTPSQFLSPAA<br>EEACQFVTGVVGK |      | Carbamidomethyl (C)[22]                    | Mascot |   |
| 9 | vacuolar protein sorting 4 homolog b-like [Danio rerio] |           |         |     |     | gi 155369339 | 48868.1                             | 6.66 | 9                                          | 38     | 0 |

#### Peptide Information

| Calc. Mass | Obsrv. Mass | $\pm$ da | $\pm$ ppm | Start Seq. | End Seq. | Sequence                       | Ion Score | C. I. % | Modification            | Rank | Result Type |
|------------|-------------|----------|-----------|------------|----------|--------------------------------|-----------|---------|-------------------------|------|-------------|
| 848.4148   | 848.5279    | 0.1131   | 133       | 201        | 207      | WLGESEK                        |           |         |                         |      | Mascot      |
| 882.5658   | 882.5671    | 0.0013   | 1         | 141        | 148      | EAVILPIK                       |           |         |                         |      | Mascot      |
| 1045.5789  | 1045.5626   | -0.0163  | -16       | 348        | 356      | KVQSATHFK                      |           |         |                         |      | Mascot      |
| 1352.5861  | 1352.7363   | 0.1502   | 111       | 386        | 396      | EMTWMEVPG EK                   |           |         | Oxidation (M)[2]        |      | Mascot      |
| 1498.786   | 1498.7201   | -0.0659  | -44       | 81         | 94       | APAKPVKESQSN DK                |           |         |                         |      | Mascot      |
| 1503.791   | 1503.7828   | -0.0082  | -5        | 397        | 409      | LLEPIVMSDMLR                   |           |         |                         |      | Mascot      |
| 1535.7808  | 1535.7725   | -0.0083  | -5        | 397        | 409      | LLEPIVMSDMLR                   |           |         | Oxidation (M)[8,11]     |      | Mascot      |
| 2045.1212  | 2045.1313   | 0.0101   | 5         | 108        | 125      | KFQNQLSGAIVMEKPN IK            |           |         |                         |      | Mascot      |
| 2283.1536  | 2283.188    | 0.0344   | 15        | 305        | 325      | LNLGTTPNLSLTESDFMTL<br>GKK     |           |         | Oxidation (M)[16]       |      | Mascot      |
| 2283.1536  | 2283.188    | 0.0344   | 15        | 305        | 325      | LNLGTTPNLSLTESDFMTL<br>GKK     |           |         | Oxidation (M)[16]       |      | Mascot      |
| 3004.5559  | 3004.3591   | -0.1968  | -66       | 211        | 236      | SLFTLAREHKPSIIFIDEID<br>SLCGSR |           |         | Carbamidomethyl (C)[23] |      | Mascot      |

10 novel gene [Danio rerio] gi|55962596 45409.6 7.22 9 37 0

#### Peptide Information

| Calc. Mass | Obsrv. Mass | $\pm$ da | $\pm$ ppm | Start Seq. | End Seq. | Sequence     | Ion Score | C. I. % | Modification | Rank | Result Type |
|------------|-------------|----------|-----------|------------|----------|--------------|-----------|---------|--------------|------|-------------|
| 842.5458   | 842.51      | -0.0358  | -42       | 391        | 397      | KLIDVVR      |           |         |              |      | Mascot      |
| 848.4471   | 848.5279    | 0.0808   | 95        | 334        | 341      | EVGSSLTR     |           |         |              |      | Mascot      |
| 996.5109   | 996.5972    | 0.0863   | 87        | 136        | 143      | LHIDQNEK     |           |         |              |      | Mascot      |
| 996.5109   | 996.5972    | 0.0863   | 87        | 136        | 143      | LHIDQNEK     |           |         |              |      | Mascot      |
| 1233.6586  | 1233.7218   | 0.0632   | 51        | 71         | 82       | AVTETGPAFGRK |           |         |              |      | Mascot      |



|           |           |         |    |     |     |                       |        |
|-----------|-----------|---------|----|-----|-----|-----------------------|--------|
| 1397.7172 | 1397.7433 | 0.0261  | 19 | 172 | 182 | NNLTIYQNVYR           | Mascot |
| 1503.6785 | 1503.7828 | 0.1043  | 69 | 19  | 31  | NGCTDEYISNFLK         | Mascot |
| 1535.7853 | 1535.7725 | -0.0128 | -8 | 183 | 195 | SAVIEYGIWDQVR         | Mascot |
| 1685.8645 | 1685.8613 | -0.0032 | -2 | 121 | 135 | NLNPIPYAAEYVGHK       | Mascot |
| 1685.8645 | 1685.8613 | -0.0032 | -2 | 121 | 135 | NLNPIPYAAEYVGHK       | Mascot |
| 2501.1587 | 2501.2512 | 0.0925  | 37 | 217 | 237 | NNTERQPYCQTPSTNNHIVER | Mascot |

11 Ba2 globin [Danio rerio] gi|31419195 16392.3 7.7 6 37 0

#### Peptide Information

| Calc. Mass | Obsrv. Mass | ± da    | ± ppm | Start Seq. | End Seq. | Sequence            | Ion Score | C. I. % | Modification      | Rank | Result Type |
|------------|-------------|---------|-------|------------|----------|---------------------|-----------|---------|-------------------|------|-------------|
| 958.572    | 958.4433    | -0.1287 | -134  | 10         | 18       | TAILGLWGK           |           |         |                   |      | Mascot      |
| 1062.5612  | 1062.6921   | 0.1309  | 123   | 75         | 83       | AIKNMDNIK           |           |         | Oxidation (M)[5]  |      | Mascot      |
| 1367.6731  | 1367.7344   | 0.0613  | 45    | 106        | 118      | LLADCITVCAAMK       |           |         | Oxidation (M)[12] |      | Mascot      |
| 1439.7853  | 1439.7291   | -0.0562 | -39   | 19         | 31       | LNIDEIAPQALSR       |           |         |                   |      | Mascot      |
| 1985.9789  | 1986.0566   | 0.0777  | 39    | 42         | 60       | YFATFGNLSSPAAIMGNPK |           |         |                   |      | Mascot      |
| 2166.0317  | 2166.0542   | 0.0225  | 10    | 78         | 96       | NMDNIKNTYAALSMHSEK  |           |         |                   |      | Mascot      |

12 vacuolar protein sorting-associated protein 4B [Danio rerio] gi|41053850 48887.2 7 9 37 0

#### Peptide Information

| Calc. Mass | Obsrv. Mass | ± da    | ± ppm | Start Seq. | End Seq. | Sequence                   | Ion Score | C. I. % | Modification            | Rank | Result Type |
|------------|-------------|---------|-------|------------|----------|----------------------------|-----------|---------|-------------------------|------|-------------|
| 848.4148   | 848.5279    | 0.1131  | 133   | 201        | 207      | WLGESEK                    |           |         |                         |      | Mascot      |
| 882.5658   | 882.5671    | 0.0013  | 1     | 141        | 148      | EAVILPIK                   |           |         |                         |      | Mascot      |
| 1045.5789  | 1045.5626   | -0.0163 | -16   | 348        | 356      | KVQSATHFK                  |           |         |                         |      | Mascot      |
| 1352.5861  | 1352.7363   | 0.1502  | 111   | 386        | 396      | EMTWMEVPGEK                |           |         | Oxidation (M)[2]        |      | Mascot      |
| 1498.786   | 1498.7201   | -0.0659 | -44   | 81         | 94       | APAKPVKESQSN DK            |           |         |                         |      | Mascot      |
| 1503.791   | 1503.7828   | -0.0082 | -5    | 397        | 409      | LLEPIVMSDMLR               |           |         |                         |      | Mascot      |
| 1535.7808  | 1535.7725   | -0.0083 | -5    | 397        | 409      | LLEPIVMSDMLR               |           |         | Oxidation (M)[8,11]     |      | Mascot      |
| 2045.1212  | 2045.1313   | 0.0101  | 5     | 108        | 125      | KFQNQLSGAIVMEKPNIK         |           |         |                         |      | Mascot      |
| 2283.1536  | 2283.188    | 0.0344  | 15    | 305        | 325      | LNLGTPNSLTESDFMTLGKK       |           |         | Oxidation (M)[16]       |      | Mascot      |
| 2283.1536  | 2283.188    | 0.0344  | 15    | 305        | 325      | LNLGTPNSLTESDFMTLGKK       |           |         | Oxidation (M)[16]       |      | Mascot      |
| 3004.5559  | 3004.3591   | -0.1968 | -66   | 211        | 236      | SLFTLAREHKPSIIFIDEIDSLCGSR |           |         | Carbamidomethyl (C)[23] |      | Mascot      |

13 sorting nexin family member 27 [Danio rerio] gi|41054611 64121.8 5.8 10 36 0

| Peptide Information |                           |         |       |             |          |                                 |           |       |                                           |                  |
|---------------------|---------------------------|---------|-------|-------------|----------|---------------------------------|-----------|-------|-------------------------------------------|------------------|
| Calc. Mass          | Obsrv. Mass               | ± da    | ± ppm | Start Seq.  | End Seq. | Sequence                        | Ion Score | C. I. | % Modification                            | Rank Result Type |
| 842.5094            | 842.51                    | 0.0006  | 1     | 121         | 127      | QVVDLIR                         |           |       |                                           | Mascot           |
| 1331.7351           | 1331.6287                 | -0.1064 | -80   | 284         | 295      | IAMPDKTTVTVR                    |           |       |                                           | Mascot           |
| 1331.7351           | 1331.6287                 | -0.1064 | -80   | 284         | 295      | IAMPDKTTVTVR                    |           |       |                                           | Mascot           |
| 1393.7434           | 1393.7307                 | -0.0127 | -9    | 404         | 414      | SYQLQKLTEQR                     |           |       |                                           | Mascot           |
| 1626.7792           | 1626.7838                 | 0.0046  | 3     | 299         | 312      | NCTTDQVYQAVVTK                  |           |       | Carbamidomethyl (C)[2]                    | Mascot           |
| 1626.7792           | 1626.7838                 | 0.0046  | 3     | 299         | 312      | NCTTDQVYQAVVTK                  |           |       | Carbamidomethyl (C)[2]                    | Mascot           |
| 1754.8741           | 1754.8033                 | -0.0708 | -40   | 298         | 312      | KNCTTDQVYQAVVTK                 |           |       | Carbamidomethyl (C)[3]                    | Mascot           |
| 1985.7681           | 1986.0566                 | 0.2885  | 145   | 482         | 497      | WDTDEEGMAFCFEYAR                |           |       | Oxidation (M)[8]                          | Mascot           |
| 2225.0283           | 2225.1257                 | 0.0974  | 44    | 24          | 47       | NGSGMSAGTCAGGLVAT<br>TVTSGPR    |           |       | Carbamidomethyl (C)[10], Oxidation (M)[5] | Mascot           |
| 2225.0283           | 2225.1257                 | 0.0974  | 44    | 24          | 47       | NGSGMSAGTCAGGLVAT<br>TVTSGPR    |           |       | Carbamidomethyl (C)[10], Oxidation (M)[5] | Mascot           |
| 2232.8743           | 2233.0903                 | 0.216   | 97    | 425         | 442      | TCEGYNEITFPHCSCDSR              |           |       | Carbamidomethyl (C)[2,13,15]              | Mascot           |
| 2283.9321           | 2284.1812                 | 0.2491  | 109   | 482         | 500      | WDTDEEGMAFCFEYARG<br>EK         |           |       |                                           | Mascot           |
| 2299.927            | 2300.1873                 | 0.2603  | 113   | 482         | 500      | WDTDEEGMAFCFEYARG<br>EK         |           |       | Oxidation (M)[8]                          | Mascot           |
| 3089.5876           | 3089.5994                 | 0.0118  | 4     | 337         | 363      | LAPNEFPHKLYVQNYTSA<br>VPGTCLTLR |           |       | Carbamidomethyl (C)[23]                   | Mascot           |
| 14                  | mitofusin-1 [Danio rerio] |         |       | gi 41055265 |          | 84215.9                         | 5.88      | 13    | 36                                        | 0                |

| Peptide Information |             |         |       |            |              |                         |           |         |                        |      |             |
|---------------------|-------------|---------|-------|------------|--------------|-------------------------|-----------|---------|------------------------|------|-------------|
| Calc. Mass          | Obsrv. Mass | ± da    | ± ppm | Start Seq. | End Sequence | Seq.                    | Ion Score | C. I. % | Modification           | Rank | Result Type |
| 908.3843            | 908.4657    | 0.0814  | 90    | 128        | 135          | TEGSEEEK                |           |         |                        |      | Mascot      |
| 975.4741            | 975.4663    | -0.0078 | -8    | 692        | 699          | DLESDIQR                |           |         |                        |      | Mascot      |
| 1311.7631           | 1311.6329   | -0.1302 | -99   | 381        | 391          | NQLNLLIQDIK             |           |         |                        |      | Mascot      |
| 1367.6688           | 1367.7344   | 0.0656  | 48    | 124        | 135          | AFLKTEGSEEEK            |           |         |                        |      | Mascot      |
| 1393.6416           | 1393.7307   | 0.0891  | 64    | 319        | 330          | SFEECISHSAVK            |           |         | Carbamidomethyl (C)[5] |      | Mascot      |
| 1439.858            | 1439.7291   | -0.1289 | -90   | 381        | 392          | NQLNLLIQDIKK            |           |         |                        |      | Mascot      |
| 1448.8008           | 1448.9255   | 0.1247  | 86    | 275        | 287          | AQAPNRIFFVSAK           |           |         |                        |      | Mascot      |
| 1503.8352           | 1503.7828   | -0.0524 | -35   | 597        | 610          | TSMSVIIVGGVVWR          |           |         |                        |      | Mascot      |
| 1535.7006           | 1535.7725   | 0.0719  | 47    | 39         | 52           | ETCANESLENIANK          |           |         |                        |      | Mascot      |
| 1784.7432           | 1784.9138   | 0.1706  | 96    | 240        | 254          | WDASAAEPEYMEDVR         |           |         | Oxidation (M)[11]      |      | Mascot      |
| 2052.0544           | 2052.1045   | 0.0501  | 24    | 616        | 632          | LIALSMSMYGLLYLYER       |           |         | Oxidation (M)[6]       |      | Mascot      |
| 2283.1074           | 2283.188    | 0.0806  | 35    | 719        | 737          | HKATALEMQLEDFSSQY<br>LR |           |         | Oxidation (M)[8]       |      | Mascot      |
| 2283.1074           | 2283.188    | 0.0806  | 35    | 719        | 737          | HKATALEMQLEDFSSQY<br>LR |           |         | Oxidation (M)[8]       |      | Mascot      |

3089.5347

3089.5994

0.0647

21

168

195

CALLRDDLVLVDSPGTDV  
TTELDSWIDK

Mascot

15

rho-associated protein kinase 2 [Danio rerio]

gi|27819643

159673.7

5.77

20

36

0

Peptide Information

| Calc. Mass | Obsrv. Mass | ± da    | ± ppm | Start Seq. | End Seq. | Sequence                          | Ion Score | C. I. | % Modification                           | Rank | Result Type |
|------------|-------------|---------|-------|------------|----------|-----------------------------------|-----------|-------|------------------------------------------|------|-------------|
| 848.4545   | 848.5279    | 0.0734  | 87    | 15         | 21       | QLEAMIK                           |           |       | Oxidation (M)[5]                         |      | Mascot      |
| 850.4318   | 850.5429    | 0.1111  | 131   | 1157       | 1162     | RFGWER                            |           |       |                                          |      | Mascot      |
| 850.4318   | 850.5429    | 0.1111  | 131   | 1157       | 1162     | RFGWER                            |           |       |                                          |      | Mascot      |
| 868.428    | 868.5515    | 0.1235  | 142   | 1285       | 1291     | CHIKCHK                           |           |       |                                          |      | Mascot      |
| 870.454    | 870.5435    | 0.0895  | 103   | 498        | 504      | SVESHRR                           |           |       |                                          |      | Mascot      |
| 908.4683   | 908.4657    | -0.0026 | -3    | 569        | 576      | KTQTESSK                          |           |       |                                          |      | Mascot      |
| 924.3727   | 924.4619    | 0.0892  | 96    | 839        | 846      | QSDSGQMK                          |           |       | Oxidation (M)[7]                         |      | Mascot      |
| 975.4741   | 975.4663    | -0.0078 | -8    | 1103       | 1110     | DSDIEQLR                          |           |       |                                          |      | Mascot      |
| 1045.6252  | 1045.5626   | -0.0626 | -60   | 1065       | 1073     | EKLNSTIIK                         |           |       |                                          |      | Mascot      |
| 1086.4456  | 1086.6035   | 0.1579  | 145   | 1289       | 1296     | CHKDHMDK                          |           |       | Carbamidomethyl (C)[1], Oxidation (M)[6] |      | Mascot      |
| 1165.6034  | 1165.7461   | 0.1427  | 122   | 313        | 322      | NIICAFLTDR                        |           |       |                                          |      | Mascot      |
| 1165.6034  | 1165.7461   | 0.1427  | 122   | 313        | 322      | NIICAFLTDR                        |           |       |                                          |      | Mascot      |
| 1233.5892  | 1233.7218   | 0.1326  | 107   | 514        | 523      | CLENEVNSLR                        |           |       | Carbamidomethyl (C)[1]                   |      | Mascot      |
| 1331.6624  | 1331.6287   | -0.0337 | -25   | 200        | 210      | DVKPDNMLLDR                       |           |       | Oxidation (M)[7]                         |      | Mascot      |
| 1331.6624  | 1331.6287   | -0.0337 | -25   | 200        | 210      | DVKPDNMLLDR                       |           |       | Oxidation (M)[7]                         |      | Mascot      |
| 1418.7281  | 1418.802    | 0.0739  | 52    | 1356       | 1367     | VQSSQSMRRPSR                      |           |       |                                          |      | Mascot      |
| 1418.7281  | 1418.802    | 0.0739  | 52    | 1356       | 1367     | VQSSQSMRRPSR                      |           |       |                                          |      | Mascot      |
| 1439.7278  | 1439.7291   | 0.0013  | 1     | 53         | 63       | NIENFLNRYEK                       |           |       |                                          |      | Mascot      |
| 1503.7948  | 1503.7828   | -0.012  | -8    | 1018       | 1030     | TQAVNKLAEIMNR                     |           |       | Oxidation (M)[11]                        |      | Mascot      |
| 1626.8962  | 1626.7838   | -0.1124 | -69   | 1143       | 1156     | LEGWLSLPVRNNTK                    |           |       |                                          |      | Mascot      |
| 1626.8962  | 1626.7838   | -0.1124 | -69   | 1143       | 1156     | LEGWLSLPVRNNTK                    |           |       |                                          |      | Mascot      |
| 1640.7924  | 1640.8029   | 0.0105  | 6     | 211        | 224      | YGHKLADFGTCMK                     |           |       | Carbamidomethyl (C)[12]                  |      | Mascot      |
| 1986.025   | 1986.0566   | 0.0316  | 16    | 549        | 566      | QLDEANALLRAESEVATR                |           |       |                                          |      | Mascot      |
| 2051.9373  | 2052.1045   | 0.1672  | 81    | 514        | 530      | CLENEVNSLRDQLDEMK                 |           |       | Oxidation (M)[16]                        |      | Mascot      |
| 3337.583   | 3337.769    | 0.186   | 56    | 150        | 178      | SLYVMVMEYMPGGDLVNL<br>TSTDVPEKWAK |           |       |                                          |      | Mascot      |

16

Fin bud initiation factor [Danio rerio]

gi|62204463

23923.9

5.12

7

35

0

Peptide Information

| Calc. Mass | Obsrv. Mass | ± da   | ± ppm | Start Seq. | End Seq. | Sequence | Ion Score | C. I. | % Modification                           | Rank | Result Type |
|------------|-------------|--------|-------|------------|----------|----------|-----------|-------|------------------------------------------|------|-------------|
| 842.3898   | 842.51      | 0.1202 | 143   | 54         | 59       | CQMLFK   |           |       | Carbamidomethyl (C)[1], Oxidation (M)[3] |      | Mascot      |

|    |                             |           |         |     |              |         |                     |   |    |                        |  |  |        |
|----|-----------------------------|-----------|---------|-----|--------------|---------|---------------------|---|----|------------------------|--|--|--------|
|    | 913.4962                    | 913.5813  | 0.0851  | 93  | 192          | 199     | SHGTRLSR            |   |    |                        |  |  | Mascot |
|    | 975.4741                    | 975.4663  | -0.0078 | -8  | 142          | 149     | QSQENELK            |   |    |                        |  |  | Mascot |
|    | 1331.7417                   | 1331.6287 | -0.113  | -85 | 171          | 182     | ETLDISLGLKDK        |   |    |                        |  |  | Mascot |
|    | 1331.7417                   | 1331.6287 | -0.113  | -85 | 171          | 182     | ETLDISLGLKDK        |   |    |                        |  |  | Mascot |
|    | 1393.6265                   | 1393.7307 | 0.1042  | 75  | 66           | 77      | CTLDEDQDSVIR        |   |    |                        |  |  | Mascot |
|    | 1498.7133                   | 1498.7201 | 0.0068  | 5   | 142          | 153     | QSQENELKEEHK        |   |    |                        |  |  | Mascot |
|    | 2283.0808                   | 2283.188  | 0.1072  | 47  | 66           | 84      | CTLDEDQDSVIRDDFTIHK |   |    | Carbamidomethyl (C)[1] |  |  | Mascot |
|    | 2283.0808                   | 2283.188  | 0.1072  | 47  | 66           | 84      | CTLDEDQDSVIRDDFTIHK |   |    | Carbamidomethyl (C)[1] |  |  | Mascot |
| 17 | lft81 protein [Danio rerio] |           |         |     | gi 145337899 | 29908.3 | 5.76                | 8 | 35 | 0                      |  |  |        |

#### Peptide Information

| Calc. Mass | Obsrv. Mass | ± da    | ± ppm | Start Seq. | End Seq. | Sequence                  | Ion Score | C. I. | % Modification         | Rank | Result Type |
|------------|-------------|---------|-------|------------|----------|---------------------------|-----------|-------|------------------------|------|-------------|
| 870.5519   | 870.5435    | -0.0084 | -10   | 200        | 206      | VLRQQVK                   |           |       |                        |      | Mascot      |
| 1045.5636  | 1045.5626   | -0.001  | -1    | 14         | 21       | TEEILRER                  |           |       |                        |      | Mascot      |
| 1397.6399  | 1397.7433   | 0.1034  | 74    | 63         | 74       | GRTLDDMSEMVK              |           |       | Oxidation (M)[7]       |      | Mascot      |
| 1640.7697  | 1640.8029   | 0.0332  | 20    | 112        | 126      | KAQYETCAAGLESNR           |           |       |                        |      | Mascot      |
| 1700.8126  | 1700.9633   | 0.1507  | 89    | 99         | 112      | QEHAELAPEYEEKK            |           |       |                        |      | Mascot      |
| 1784.8231  | 1784.9138   | 0.0907  | 51    | 113        | 128      | AQYETCAAGLESNRSK          |           |       | Carbamidomethyl (C)[6] |      | Mascot      |
| 2225.0879  | 2225.1257   | 0.0378  | 17    | 147        | 163      | YHHINCEREIIESQIQR         |           |       | Carbamidomethyl (C)[6] |      | Mascot      |
| 2225.0879  | 2225.1257   | 0.0378  | 17    | 147        | 163      | YHHINCEREIIESQIQR         |           |       | Carbamidomethyl (C)[6] |      | Mascot      |
| 2283.1914  | 2283.188    | -0.0034 | -1    | 234        | 254      | QCYLKAQSQAPIGHVIQD<br>VGK |           |       |                        |      | Mascot      |
| 2283.1914  | 2283.188    | -0.0034 | -1    | 234        | 254      | QCYLKAQSQAPIGHVIQD<br>VGK |           |       |                        |      | Mascot      |

18 DEAD (Asp-Glu-Ala-Asp) box polypeptide 3 [Danio rerio] gi|187608185 78286.6 8.48 12 34 0

#### Peptide Information

| Calc. Mass | Obsrv. Mass | ± da   | ± ppm | Start Seq. | End Seq. | Sequence    | Ion Score | C. I. | % Modification         | Rank | Result Type |
|------------|-------------|--------|-------|------------|----------|-------------|-----------|-------|------------------------|------|-------------|
| 842.5094   | 842.51      | 0.0006 | 1     | 436        | 442      | EIQILAR     |           |       |                        |      | Mascot      |
| 868.4232   | 868.5515    | 0.1283 | 148   | 384        | 390      | IGLDYCK     |           |       | Carbamidomethyl (C)[6] |      | Mascot      |
| 996.5182   | 996.5972    | 0.079  | 79    | 382        | 390      | GKIGLDYCK   |           |       |                        |      | Mascot      |
| 996.5182   | 996.5972    | 0.079  | 79    | 382        | 390      | GKIGLDYCK   |           |       |                        |      | Mascot      |
| 1051.616   | 1051.714    | 0.098  | 93    | 34         | 41       | RYIPPHLR    |           |       |                        |      | Mascot      |
| 1051.616   | 1051.714    | 0.098  | 93    | 34         | 41       | RYIPPHLR    |           |       |                        |      | Mascot      |
| 1320.5963  | 1320.6271   | 0.0308 | 23    | 425        | 435      | QTMMFSATFPK |           |       | Oxidation (M)[3,4]     |      | Mascot      |
| 1352.6338  | 1352.7363   | 0.1025 | 76    | 400        | 410      | MLDMGFEPQIR |           |       | Oxidation (M)[1]       |      | Mascot      |

|           |           |         |     |     |     |                          |  |  |                  |  |        |
|-----------|-----------|---------|-----|-----|-----|--------------------------|--|--|------------------|--|--------|
| 1397.7059 | 1397.7433 | 0.0374  | 27  | 500 | 511 | KGADALEDFLYR             |  |  |                  |  | Mascot |
| 1448.7744 | 1448.9255 | 0.1511  | 104 | 325 | 336 | ELALQIYDEARK             |  |  |                  |  | Mascot |
| 1498.7537 | 1498.7201 | -0.0336 | -22 | 583 | 596 | VGNLGLATSFYNDK           |  |  |                  |  | Mascot |
| 1535.7131 | 1535.7725 | 0.0594  | 39  | 650 | 664 | QMPGGGNTFGNRGAR          |  |  | Oxidation (M)[2] |  | Mascot |
| 1685.7449 | 1685.8613 | 0.1164  | 69  | 647 | 661 | DYRQMPGGGNTFGNR          |  |  | Oxidation (M)[5] |  | Mascot |
| 1685.7449 | 1685.8613 | 0.1164  | 69  | 647 | 661 | DYRQMPGGGNTFGNR          |  |  | Oxidation (M)[5] |  | Mascot |
| 2045.0881 | 2045.1313 | 0.0432  | 21  | 540 | 559 | CPIMVATAVAARGLDISN<br>VK |  |  | Oxidation (M)[4] |  | Mascot |

19 L-asparaginase [Danio rerio] gi|61806630 32907.4 5.83 8 34 0

#### Peptide Information

| Calc. Mass | Obsrv. Mass | ± da    | ± ppm | Start Seq. | End Seq. | Sequence                            | Ion Score | C. I. | % Modification      | Rank | Result Type |
|------------|-------------|---------|-------|------------|----------|-------------------------------------|-----------|-------|---------------------|------|-------------|
| 848.491    | 848.5279    | 0.0369  | 43    | 106        | 112      | LVMEKTK                             |           |       |                     |      | Mascot      |
| 864.4858   | 864.5372    | 0.0514  | 59    | 106        | 112      | LVMEKTK                             |           |       | Oxidation (M)[3]    |      | Mascot      |
| 1503.7737  | 1503.7828   | 0.0091  | 6     | 113        | 126      | HLCLTAEGASKFAR                      |           |       |                     |      | Mascot      |
| 1626.9148  | 1626.7838   | -0.131  | -81   | 1          | 16       | MLPVVVHGGAGHIPK                     |           |       | Oxidation (M)[1]    |      | Mascot      |
| 1626.9148  | 1626.7838   | -0.131  | -81   | 1          | 16       | MLPVVVHGGAGHIPK                     |           |       | Oxidation (M)[1]    |      | Mascot      |
| 1985.996   | 1986.0566   | 0.0606  | 31    | 40         | 59       | GGSAVDAVVEAVALMET<br>NPR            |           |       |                     |      | Mascot      |
| 2044.8521  | 2045.1313   | 0.2792  | 137   | 192        | 211      | MEGRVGDTPCVGCGGY<br>ADNK            |           |       | Oxidation (M)[1]    |      | Mascot      |
| 2284.0835  | 2284.1812   | 0.0977  | 43    | 127        | 146      | SMGVPEVPEESLITDYAK<br>MR            |           |       | Oxidation (M)[2,19] |      | Mascot      |
| 3004.396   | 3004.3591   | -0.0369 | -12   | 196        | 226      | VGDTPCVGCGGYADNKI<br>GAVSPTGHGEAIMK |           |       |                     |      | Mascot      |
| 3020.3909  | 3020.3516   | -0.0393 | -13   | 196        | 226      | VGDTPCVGCGGYADNKI<br>GAVSPTGHGEAIMK |           |       | Oxidation (M)[30]   |      | Mascot      |
| 3089.3828  | 3089.5994   | 0.2166  | 70    | 165        | 195      | MGTVGAVAVDMDGNAC<br>ATSTGGMINKMEGR  |           |       | Oxidation (M)[1,11] |      | Mascot      |

20 hypothetical protein LOC393702 [Danio rerio] gi|41152266 20567.3 5.44 6 33 0

#### Peptide Information

| Calc. Mass | Obsrv. Mass | ± da    | ± ppm | Start Seq. | End Seq. | Sequence               | Ion Score | C. I. | % Modification      | Rank | Result Type |
|------------|-------------|---------|-------|------------|----------|------------------------|-----------|-------|---------------------|------|-------------|
| 864.4131   | 864.5372    | 0.1241  | 144   | 128        | 135      | VISCEEGK               |           |       |                     |      | Mascot      |
| 1320.6907  | 1320.6271   | -0.0636 | -48   | 152        | 162      | ENQTAVEVFKR            |           |       |                     |      | Mascot      |
| 1397.7821  | 1397.7433   | -0.0388 | -28   | 98         | 109      | VIHEKLLDMVGK           |           |       | Oxidation (M)[9]    |      | Mascot      |
| 1700.8635  | 1700.9633   | 0.0998  | 59    | 163        | 178      | IILEAEKMDGGAPQGR       |           |       | Oxidation (M)[8]    |      | Mascot      |
| 1954.1228  | 1954.1207   | -0.0021 | -1    | 103        | 120      | LLDMVGKVQVPIMLVGN<br>K |           |       |                     |      | Mascot      |
| 1986.1125  | 1986.0566   | -0.0559 | -28   | 103        | 120      | LLDMVGKVQVPIMLVGN<br>K |           |       | Oxidation (M)[4,13] |      | Mascot      |
| 3337.6475  | 3337.769    | 0.1215  | 36    | 16         | 45       | SVGKSSLTIQFVEGQFVD     |           |       |                     |      | Mascot      |

21 fast skeletal myosin alkali light chain 1 [Danio rerio] SYDPTIENTFTK gi|41053385 20918.4 4.63 6 33 0

Peptide Information

| Calc. Mass | Obsrv. Mass | ± da    | ± ppm | Start Seq. | End Seq. | Sequence                    | Ion Score | C. I. | % Modification    | Rank | Result Type |
|------------|-------------|---------|-------|------------|----------|-----------------------------|-----------|-------|-------------------|------|-------------|
| 1233.5892  | 1233.7218   | 0.1326  | 107   | 138        | 149      | EGNGTVMGAELR                |           |       |                   |      | Mascot      |
| 1439.7529  | 1439.7291   | -0.0238 | -17   | 16         | 30       | AEPAPAPAPAPEPPK             |           |       |                   |      | Mascot      |
| 1844.9423  | 1844.9989   | 0.0566  | 31    | 86         | 102      | EVTKILGNPTADDMVNK           |           |       |                   |      | Mascot      |
| 2174.1313  | 2174.1067   | -0.0246 | -11   | 104        | 122      | VDFEGFLPMLQVVINPNK          |           |       |                   |      | Mascot      |
| 2233.1394  | 2233.0903   | -0.0491 | -22   | 66         | 85       | VAYNQIADIMRALGQNPTNK        |           |       | Oxidation (M)[10] |      | Mascot      |
| 3020.2957  | 3020.3516   | 0.0559  | 19    | 159        | 185      | MSEAEIDALMQGQEDENGCVNYEAFVK |           |       |                   |      | Mascot      |

22 PREDICTED: Down syndrome cell adhesion molecule like 1 [Danio rerio] gi|292621329 232717.7 8.83 14 32 0 15 0

Peptide Information

| Calc. Mass | Obsrv. Mass | ± da    | ± ppm | Start Seq. | End Seq. | Sequence                     | Ion Score | C. I. | % Modification          | Rank | Result Type |
|------------|-------------|---------|-------|------------|----------|------------------------------|-----------|-------|-------------------------|------|-------------|
| 882.4501   | 882.5671    | 0.117   | 133   | 56         | 62       | DCKTFLR                      |           |       |                         |      | Mascot      |
| 924.4785   | 924.4619    | -0.0166 | -18   | 479        | 486      | IVSSFSEK                     |           |       |                         |      | Mascot      |
| 1165.5782  | 1165.7461   | 0.1679  | 144   | 2          | 11       | TVPRMGGYER                   | 15        |       | 0                       |      | Mascot      |
| 1165.5782  | 1165.7461   | 0.1679  | 144   | 2          | 11       | TVPRMGGYER                   |           |       |                         |      | Mascot      |
| 1207.6001  | 1207.5027   | -0.0974 | -81   | 974        | 982      | SMNLRWTQR                    |           |       | Oxidation (M)[2]        |      | Mascot      |
| 1233.6005  | 1233.7218   | 0.1213  | 98    | 873        | 883      | GQNKELNCTAR                  |           |       |                         |      | Mascot      |
| 1498.78    | 1498.7201   | -0.0599 | -40   | 1131       | 1143     | FAQYGVVVQAFNR                |           |       |                         |      | Mascot      |
| 1535.7596  | 1535.7725   | 0.0129  | 8     | 487        | 501      | VVAPGEPFSLMCAAK              |           |       | Oxidation (M)[11]       |      | Mascot      |
| 1626.875   | 1626.7838   | -0.0912 | -56   | 1130       | 1143     | KFAQYGVVVQAFNR               |           |       |                         |      | Mascot      |
| 1626.875   | 1626.7838   | -0.0912 | -56   | 1130       | 1143     | KFAQYGVVVQAFNR               |           |       |                         |      | Mascot      |
| 1640.7511  | 1640.8029   | 0.0518  | 32    | 1398       | 1412     | DSEDTAIPVTQDGHR              |           |       |                         |      | Mascot      |
| 1685.8792  | 1685.8613   | -0.0179 | -11   | 1985       | 1999     | KQAEHLDPVPPR                 |           |       |                         |      | Mascot      |
| 1685.9432  | 1685.8613   | -0.0819 | -49   | 917        | 931      | SDEVISTLKLKPAER              | 6         |       | 0                       |      | Mascot      |
| 1754.8638  | 1754.8033   | -0.0605 | -34   | 681        | 696      | LMYIACVVSSGDMPIR             |           |       |                         |      | Mascot      |
| 2299.1499  | 2299.1907   | 0.0408  | 18    | 610        | 629      | DGMLLPDNRQVVYENGTLK          |           |       |                         |      | Mascot      |
| 3089.5095  | 3089.5994   | 0.0899  | 29    | 345        | 372      | LTGLTISDLRLSDSGNYICEVTNSFGSK |           |       | Carbamidomethyl (C)[19] |      | Mascot      |

23 plexin b2b [Danio rerio] gi|309243104 203041.6 6.62 17 31 0

Peptide Information

|    | Calc. Mass                                      | Obsrv. Mass | ± da    | ± ppm | Start Seq.  | End Sequence Seq.                  | Ion Score | C. I. | % Modification          | Rank | Result Type |
|----|-------------------------------------------------|-------------|---------|-------|-------------|------------------------------------|-----------|-------|-------------------------|------|-------------|
|    | 850.4206                                        | 850.5429    | 0.1223  | 144   | 213         | 218 YLHDFR                         |           |       |                         |      | Mascot      |
|    | 850.4206                                        | 850.5429    | 0.1223  | 144   | 213         | 218 YLHDFR                         |           |       |                         |      | Mascot      |
|    | 870.4791                                        | 870.5435    | 0.0644  | 74    | 1699        | 1705 TEHKLSR                       |           |       |                         |      | Mascot      |
|    | 975.5217                                        | 975.4663    | -0.0554 | -57   | 1366        | 1373 RSETVVER                      |           |       |                         |      | Mascot      |
|    | 996.522                                         | 996.5972    | 0.0752  | 75    | 369         | 376 HDKDIVNR                       |           |       |                         |      | Mascot      |
|    | 996.522                                         | 996.5972    | 0.0752  | 75    | 369         | 376 HDKDIVNR                       |           |       |                         |      | Mascot      |
|    | 1051.5717                                       | 1051.714    | 0.1423  | 135   | 479         | 487 VPVQACHLK                      |           |       | Carbamidomethyl (C)[6]  |      | Mascot      |
|    | 1051.5717                                       | 1051.714    | 0.1423  | 135   | 479         | 487 VPVQACHLK                      |           |       | Carbamidomethyl (C)[6]  |      | Mascot      |
|    | 1086.5215                                       | 1086.6035   | 0.082   | 75    | 1723        | 1730 RNVDEYYK                      |           |       |                         |      | Mascot      |
|    | 1331.7351                                       | 1331.6287   | -0.1064 | -80   | 114         | 125 GICSLNLTNVK                    |           |       | Carbamidomethyl (C)[3]  |      | Mascot      |
|    | 1331.7351                                       | 1331.6287   | -0.1064 | -80   | 114         | 125 GICSLNLTNVK                    |           |       | Carbamidomethyl (C)[3]  |      | Mascot      |
|    | 1397.5977                                       | 1397.7433   | 0.1456  | 104   | 498         | 509 DPYCGWCVLEGR                   |           |       |                         |      | Mascot      |
|    | 1535.8097                                       | 1535.7725   | -0.0372 | -24   | 1114        | 1127 SVITENSMTIIVTGR               |           |       | Oxidation (M)[8]        |      | Mascot      |
|    | 1626.9061                                       | 1626.7838   | -0.1223 | -75   | 1797        | 1811 LQQIAAALENKVTDL               |           |       |                         |      | Mascot      |
|    | 1626.9061                                       | 1626.7838   | -0.1223 | -75   | 1797        | 1811 LQQIAAALENKVTDL               |           |       |                         |      | Mascot      |
|    | 1700.9846                                       | 1700.9633   | -0.0213 | -13   | 1654        | 1667 TNSLPLRFWVNILK                |           |       |                         |      | Mascot      |
|    | 1754.8741                                       | 1754.8033   | -0.0708 | -40   | 767         | 782 IDSSLNVTLNCSLGR                |           |       |                         |      | Mascot      |
|    | 1844.9905                                       | 1844.9989   | 0.0084  | 5     | 685         | 700 FENPDPVLIPVGKTR                |           |       |                         |      | Mascot      |
|    | 2300.0752                                       | 2300.1873   | 0.1121  | 49    | 286         | 305 ELAQVMTDSGEYGTIKE WDK          |           |       |                         |      | Mascot      |
|    | 2501.2302                                       | 2501.2512   | 0.021   | 8     | 306         | 328 VLFVVASSEEGATESALC MYPLK       |           |       | Carbamidomethyl (C)[18] |      | Mascot      |
|    | 3089.7578                                       | 3089.5994   | -0.1584 | -51   | 1204        | 1231 YSLPLAVIIPAVLVPMLMII AISVVCYR |           |       | Oxidation (M)[16,18]    |      | Mascot      |
|    | 3337.5974                                       | 3337.769    | 0.1716  | 51    | 1086        | 1113 TFVQLDNLQMELTPFAYY PNPTFDELSK |           |       | Oxidation (M)[10]       |      | Mascot      |
| 24 | arrestin 3a, retinal (X-arrestin) [Danio rerio] |             |         |       | gi 50539878 |                                    | 39475.5   | 6.05  | 8                       | 31   | 0           |

Peptide Information

|  | Calc. Mass | Obsrv. Mass | ± da    | ± ppm | Start Seq. | End Sequence Seq.    | Ion Score | C. I. % Modification | Rank | Result Type |
|--|------------|-------------|---------|-------|------------|----------------------|-----------|----------------------|------|-------------|
|  | 870.4389   | 870.5435    | 0.1046  | 120   | 1          | 7 MADKVYK            |           | Oxidation (M)[1]     |      | Mascot      |
|  | 975.5403   | 975.4663    | -0.074  | -76   | 161        | 168 DTCRLVIR         |           |                      |      | Mascot      |
|  | 1320.7245  | 1320.6271   | -0.0974 | -74   | 49         | 59 KVVWQLACAFR       |           |                      |      | Mascot      |
|  | 1393.8124  | 1393.7307   | -0.0817 | -59   | 312        | 323 EMLGILVSYKIK     |           |                      |      | Mascot      |
|  | 1448.7228  | 1448.9255   | 0.2027  | 140   | 294        | 306 DEDTNLASTTIIR    |           |                      |      | Mascot      |
|  | 1700.8597  | 1700.9633   | 0.1036  | 61    | 307        | 321 TGMDKEMLGILVSYK  |           | Oxidation (M)[3]     |      | Mascot      |
|  | 1985.9927  | 1986.0566   | 0.0639  | 32    | 22         | 39 RDYVDHVDVDDAVEGAV |           |                      |      | Mascot      |

|                     |                                                                   |             |         |       |              |          |                                |    |           |       |                          |                    |             |
|---------------------|-------------------------------------------------------------------|-------------|---------|-------|--------------|----------|--------------------------------|----|-----------|-------|--------------------------|--------------------|-------------|
|                     | 2501.2336                                                         | 2501.2512   | 0.0176  | 7     | 183          | 204      | K<br>AELCKSFMMSDKPVLL<br>ASLEK |    |           |       |                          | Oxidation (M)[8,9] | Mascot      |
| 25                  | hypothetical protein LOC100158480 [Xenopus (Silurana) tropicalis] |             |         |       | gi 189230136 | 48869.1  | 6.2                            | 8  | 31        | 0     |                          |                    |             |
| Peptide Information |                                                                   |             |         |       |              |          |                                |    |           |       |                          |                    |             |
|                     | Calc. Mass                                                        | Obsrv. Mass | ± da    | ± ppm | Start Seq.   | End Seq. | Sequence                       |    | Ion Score | C. I. | % Modification           | Rank               | Result Type |
|                     | 882.5658                                                          | 882.5671    | 0.0013  | 1     | 141          | 148      | EAVILPIK                       |    |           |       |                          |                    | Mascot      |
|                     | 1045.5789                                                         | 1045.5626   | -0.0163 | -16   | 348          | 356      | KVQSATHFK                      |    |           |       |                          |                    | Mascot      |
|                     | 1352.5861                                                         | 1352.7363   | 0.1502  | 111   | 386          | 396      | EMTWMEVPGEK                    |    |           |       | Oxidation (M)[2]         |                    | Mascot      |
|                     | 1498.786                                                          | 1498.7201   | -0.0659 | -44   | 81           | 94       | APAKPVKESQSN DK                |    |           |       |                          |                    | Mascot      |
|                     | 1503.791                                                          | 1503.7828   | -0.0082 | -5    | 397          | 409      | LLEPIVMSDMLR                   |    |           |       |                          |                    | Mascot      |
|                     | 1535.7808                                                         | 1535.7725   | -0.0083 | -5    | 397          | 409      | LLEPIVMSDMLR                   |    |           |       | Oxidation (M)[8, 11]     |                    | Mascot      |
|                     | 2045.1212                                                         | 2045.1313   | 0.0101  | 5     | 108          | 125      | KFQNQLSGAIVMEKPNIK             |    |           |       |                          |                    | Mascot      |
|                     | 2283.1536                                                         | 2283.188    | 0.0344  | 15    | 305          | 325      | LNLGTTPNSLTESDFMTL<br>GKK      |    |           |       | Oxidation (M)[16]        |                    | Mascot      |
|                     | 2283.1536                                                         | 2283.188    | 0.0344  | 15    | 305          | 325      | LNLGTTPNSLTESDFMTL<br>GKK      |    |           |       | Oxidation (M)[16]        |                    | Mascot      |
|                     | 3004.5559                                                         | 3004.3591   | -0.1968 | -66   | 211          | 236      | SLFTLAREHKPSIIFIDEID<br>SLCGSR |    |           |       | Carbamidomethyl (C)[23]  |                    | Mascot      |
| 26                  | PREDICTED: thyroglobulin [Danio rerio]                            |             |         |       | gi 292622408 | 277440.2 | 5.37                           | 22 | 31        | 0     |                          |                    |             |
| Peptide Information |                                                                   |             |         |       |              |          |                                |    |           |       |                          |                    |             |
|                     | Calc. Mass                                                        | Obsrv. Mass | ± da    | ± ppm | Start Seq.   | End Seq. | Sequence                       |    | Ion Score | C. I. | % Modification           | Rank               | Result Type |
|                     | 850.4668                                                          | 850.5429    | 0.0761  | 89    | 763          | 769      | QVSEFLK                        |    |           |       |                          |                    | Mascot      |
|                     | 850.4668                                                          | 850.5429    | 0.0761  | 89    | 763          | 769      | QVSEFLK                        |    |           |       |                          |                    | Mascot      |
|                     | 908.36                                                            | 908.4657    | 0.1057  | 116   | 553          | 559      | CPSQCEK                        |    |           |       | Carbamidomethyl (C)[1,5] |                    | Mascot      |
|                     | 924.4819                                                          | 924.4619    | -0.02   | -22   | 1283         | 1290     | SKLSCTTK                       |    |           |       | Carbamidomethyl (C)[5]   |                    | Mascot      |
|                     | 1045.5823                                                         | 1045.5626   | -0.0197 | -19   | 560          | 568      | ERQMAIAVK                      |    |           |       |                          |                    | Mascot      |
|                     | 1062.5579                                                         | 1062.6921   | 0.1342  | 126   | 1954         | 1962     | EPAQSVYIR                      |    |           |       |                          |                    | Mascot      |
|                     | 1086.5725                                                         | 1086.6035   | 0.031   | 29    | 984          | 992      | ELPMTRSPR                      |    |           |       |                          |                    | Mascot      |
|                     | 1279.6528                                                         | 1279.7781   | 0.1253  | 98    | 569          | 581      | ASSSAGSEVFIPK                  |    |           |       |                          |                    | Mascot      |
|                     | 1352.728                                                          | 1352.7363   | 0.0083  | 6     | 2217         | 2229     | SKPAHSINAAQTK                  |    |           |       |                          |                    | Mascot      |
|                     | 1367.5831                                                         | 1367.7344   | 0.1513  | 111   | 210          | 220      | FRCPSPCESER                    |    |           |       | Carbamidomethyl (C)[3]   |                    | Mascot      |
|                     | 1393.7838                                                         | 1393.7307   | -0.0531 | -38   | 373          | 384      | LQENLFGGKFLK                   |    |           |       |                          |                    | Mascot      |
|                     | 1439.6431                                                         | 1439.7291   | 0.086   | 60    | 1607         | 1621     | TLSACSGSAVGEDSR                |    |           |       |                          |                    | Mascot      |
|                     | 1448.7379                                                         | 1448.9255   | 0.1876  | 129   | 1291         | 1304     | GDFLSAQKDPVSGK                 |    |           |       |                          |                    | Mascot      |
|                     | 1498.757                                                          | 1498.7201   | -0.0369 | -25   | 1285         | 1298     | LSCTTKGDFLSAQK                 |    |           |       |                          |                    | Mascot      |



|    |                                     |           |         |     |              |      |                                 |      |    |    |                            |  |        |
|----|-------------------------------------|-----------|---------|-----|--------------|------|---------------------------------|------|----|----|----------------------------|--|--------|
|    | 1638.7751                           | 1638.8604 | 0.0853  | 52  | 1605         | 1621 | AKTLSACSGSAVGEDSR               |      |    |    |                            |  | Mascot |
|    | 1700.8424                           | 1700.9633 | 0.1209  | 71  | 1848         | 1862 | NPDVCPPFSLRSPSK                 |      |    |    | Carbamidomethyl (C)[5]     |  | Mascot |
|    | 1754.7546                           | 1754.8033 | 0.0487  | 28  | 729          | 744  | QCWCVDLEGDMLAGSK                |      |    |    |                            |  | Mascot |
|    | 1844.9865                           | 1844.9989 | 0.0124  | 7   | 2132         | 2149 | NIALFGGDPTKVTGAER               |      |    |    |                            |  | Mascot |
|    | 1953.8469                           | 1954.1207 | 0.2738  | 140 | 141          | 156  | KAYPELSSYCFCADSR                |      |    |    | Carbamidomethyl (C)[10,12] |  | Mascot |
|    | 2166.0039                           | 2166.0542 | 0.0503  | 23  | 2015         | 2033 | FSPQPADWTGTWNATF<br>SR          |      |    |    |                            |  | Mascot |
|    | 2174.189                            | 2174.1067 | -0.0823 | -38 | 342          | 362  | VTNILADVLQGMFPSGAL<br>ALK       |      |    |    | Oxidation (M)[12]          |  | Mascot |
|    | 2284.072                            | 2284.1812 | 0.1092  | 48  | 1607         | 1629 | TLSACSGSAVGEDSRSA<br>LSDSVK     |      |    |    | Carbamidomethyl (C)[5]     |  | Mascot |
|    | 3089.5217                           | 3089.5994 | 0.0777  | 25  | 1702         | 1728 | VCGAYDKPLRQTCSLVM<br>TQSLQTAYQK |      |    |    | Carbamidomethyl (C)[2]     |  | Mascot |
| 27 | PREDICTED: myomesin-2 [Danio rerio] |           |         |     | gi 326671673 |      | 164417.3                        | 8.26 | 15 | 30 | 0                          |  |        |

#### Peptide Information

| Calc. Mass | Obsrv. Mass | ± da    | ± ppm | Start Seq. | End Seq. | Sequence                          | Ion Score | C. I. % | Modification           | Rank | Result Type |
|------------|-------------|---------|-------|------------|----------|-----------------------------------|-----------|---------|------------------------|------|-------------|
| 842.3899   | 842.51      | 0.1201  | 143   | 1212       | 1217     | LQCYMK                            |           |         | Carbamidomethyl (C)[3] |      | Mascot      |
| 848.4481   | 848.5279    | 0.0798  | 94    | 106        | 112      | GMMPLRK                           |           |         | Oxidation (M)[2]       |      | Mascot      |
| 864.4429   | 864.5372    | 0.0943  | 109   | 106        | 112      | GMMPLRK                           |           |         | Oxidation (M)[2,3]     |      | Mascot      |
| 1086.5619  | 1086.6035   | 0.0416  | 38    | 1121       | 1128     | ETKFTWFK                          |           |         |                        |      | Mascot      |
| 1207.5775  | 1207.5027   | -0.0748 | -62   | 292        | 303      | WAEMSVGGGVAK                      |           |         | Oxidation (M)[4]       |      | Mascot      |
| 1311.7056  | 1311.6329   | -0.0727 | -55   | 130        | 140      | SHTVWEKTPVK                       |           |         |                        |      | Mascot      |
| 1331.7469  | 1331.6287   | -0.1182 | -89   | 500        | 510      | GRAPVWYLIEK                       |           |         |                        |      | Mascot      |
| 1331.7469  | 1331.6287   | -0.1182 | -89   | 500        | 510      | GRAPVWYLIEK                       |           |         |                        |      | Mascot      |
| 1640.8754  | 1640.8029   | -0.0725 | -44   | 836        | 850      | VTGLESASYVFRVR                    |           |         |                        |      | Mascot      |
| 1700.8966  | 1700.9633   | 0.0667  | 39    | 983        | 996      | TELNYEILEKGHVR                    |           |         |                        |      | Mascot      |
| 2052.0735  | 2052.1045   | 0.031   | 15    | 141        | 157      | LFCTVSGQPTPIVKWYR                 |           |         | Carbamidomethyl (C)[3] |      | Mascot      |
| 2157.1008  | 2157        | -0.1008 | -47   | 1027       | 1045     | ISHDVSTGIIQMTIEHFTK               |           |         |                        |      | Mascot      |
| 2284.0229  | 2284.1812   | 0.1583  | 69    | 1240       | 1259     | MRIGGTSEMAWMQICEP<br>TDK          |           |         |                        |      | Mascot      |
| 2298.103   | 2298.1985   | 0.0955  | 42    | 187        | 209      | CAVSDSGVYSAVATNPQ<br>GKATSK       |           |         | Carbamidomethyl (C)[1] |      | Mascot      |
| 2299.1538  | 2299.1907   | 0.0369  | 16    | 829        | 848      | VEHCFLKVTGLESASYV<br>FR           |           |         | Carbamidomethyl (C)[4] |      | Mascot      |
| 2300.0178  | 2300.1873   | 0.1695  | 74    | 1240       | 1259     | MRIGGTSEMAWMQICEP<br>TDK          |           |         | Oxidation (M)[1]       |      | Mascot      |
| 3089.5823  | 3089.5994   | 0.0171  | 6     | 1182       | 1211     | VFEDIINAIASAGSSASDL<br>VLQCTPEGIR |           |         |                        |      | Mascot      |
| 3337.6211  | 3337.769    | 0.1479  | 44    | 599        | 627      | HATNLLGYYVDASVVG<br>KDWFCNHRPYK   |           |         |                        |      | Mascot      |

28 novel protein (zgc:114168) [Danio rerio] gi|220673162 33328.8 5.18 7 30 0

#### Peptide Information

|    | Calc. Mass                              | Obsrv. Mass | ± da    | ± ppm | Start Seq.   | End Sequence Seq.          | Ion Score | C. I. % | Modification            | Rank | Result Type |
|----|-----------------------------------------|-------------|---------|-------|--------------|----------------------------|-----------|---------|-------------------------|------|-------------|
|    | 1045.516                                | 1045.5626   | 0.0466  | 45    | 256          | 264 STELPDVER              |           |         |                         |      | Mascot      |
|    | 1367.757                                | 1367.7344   | -0.0226 | -17   | 265          | 275 LKPYQSLIDK             |           |         |                         |      | Mascot      |
|    | 1626.8638                               | 1626.7838   | -0.08   | -49   | 112          | 125 DWFQLVGLIHDTV          |           |         |                         |      | Mascot      |
|    | 1626.8638                               | 1626.7838   | -0.08   | -49   | 112          | 125 DWFQLVGLIHDTV          |           |         |                         |      | Mascot      |
|    | 2157.0359                               | 2157        | -0.0359 | -17   | 148          | 166 FQNSIVFRNSTFEGNPDG K   |           |         |                         |      | Mascot      |
|    | 2166.0171                               | 2166.0542   | 0.0371  | 17    | 167          | 185 NPALNTEFGIYEPQCGLD K   |           |         | Carbamidomethyl (C)[15] |      | Mascot      |
|    | 2233.1399                               | 2233.0903   | -0.0496 | -22   | 107          | 125 EHPDKDWFQLVGLIHDTV GK  |           |         |                         |      | Mascot      |
|    | 2298.1118                               | 2298.1985   | 0.0867  | 38    | 2            | 21 RVVNMGPDPSPSLAYRPEC HEK |           |         |                         |      | Mascot      |
| 29 | nuclear receptor ROR-beta [Danio rerio] |             |         |       | gi 130490232 |                            | 52627.3   | 7.49    | 9                       | 30   | 0           |

#### Peptide Information

|    | Calc. Mass                                        | Obsrv. Mass | ± da    | ± ppm | Start Seq.  | End Sequence Seq.     | Ion Score | C. I. % | Modification                             | Rank | Result Type |
|----|---------------------------------------------------|-------------|---------|-------|-------------|-----------------------|-----------|---------|------------------------------------------|------|-------------|
|    | 850.4273                                          | 850.5429    | 0.1156  | 136   | 70          | 77 CLALGMSR           |           |         |                                          |      | Mascot      |
|    | 850.4273                                          | 850.5429    | 0.1156  | 136   | 70          | 77 CLALGMSR           |           |         |                                          |      | Mascot      |
|    | 913.456                                           | 913.5813    | 0.1253  | 137   | 255         | 261 MYQSKTR           |           |         |                                          |      | Mascot      |
|    | 1279.6497                                         | 1279.7781   | 0.1284  | 100   | 70          | 81 CLALGMSRDAVK       |           |         | Oxidation (M)[6]                         |      | Mascot      |
|    | 1320.6763                                         | 1320.6271   | -0.0492 | -37   | 70          | 81 CLALGMSRDAVK       |           |         | Carbamidomethyl (C)[1]                   |      | Mascot      |
|    | 1418.6984                                         | 1418.802    | 0.1036  | 73    | 454         | 466 ELFNPDAAAVMPK     |           |         | Oxidation (M)[11]                        |      | Mascot      |
|    | 1418.6984                                         | 1418.802    | 0.1036  | 73    | 454         | 466 ELFNPDAAAVMPK     |           |         | Oxidation (M)[11]                        |      | Mascot      |
|    | 1638.7401                                         | 1638.8604   | 0.1203  | 73    | 37          | 50 SQQNNASYSCPRQR     |           |         |                                          |      | Mascot      |
|    | 1700.8199                                         | 1700.9633   | 0.1434  | 84    | 338         | 353 TLGCDDLVSADFVDFAK |           |         |                                          |      | Mascot      |
|    | 1953.9673                                         | 1954.1207   | 0.1534  | 79    | 313         | 329 MCRAFNPLNNTVLFEGK |           |         |                                          |      | Mascot      |
|    | 2052.0503                                         | 2052.1045   | 0.0542  | 26    | 286         | 302 ITGFMELCQNDQILLK  |           |         | Carbamidomethyl (C)[8], Oxidation (M)[5] |      | Mascot      |
|    | 2151.1301                                         | 2151.1392   | 0.0091  | 4     | 285         | 302 RITGFMELCQNDQILLK |           |         | Oxidation (M)[6]                         |      | Mascot      |
| 30 | malate dehydrogenase, mitochondrial [Danio rerio] |             |         |       | gi 47085883 |                       | 35397.5   | 8.4     | 7                                        | 30   | 0           |

#### Peptide Information

|  | Calc. Mass | Obsrv. Mass | ± da    | ± ppm | Start Seq. | End Sequence Seq.  | Ion Score | C. I. % | Modification           | Rank | Result Type |
|--|------------|-------------|---------|-------|------------|--------------------|-----------|---------|------------------------|------|-------------|
|  | 1233.7201  | 1233.7218   | 0.0017  | 1     | 165        | 175 IFGVTTLDIVR    |           |         |                        |      | Mascot      |
|  | 1320.6793  | 1320.6271   | -0.0522 | -40   | 78         | 90 GYIGADQLGDALK   |           |         |                        |      | Mascot      |
|  | 1352.7355  | 1352.7363   | 0.0008  | 1     | 91         | 103 GCEVVVIPAGVPR  |           |         | Carbamidomethyl (C)[2] |      | Mascot      |
|  | 1503.7802  | 1503.7828   | 0.0026  | 2     | 215        | 228 VEFPADQLSALTGR |           |         |                        |      | Mascot      |

|           |           |        |     |     |     |                                   |                           |        |
|-----------|-----------|--------|-----|-----|-----|-----------------------------------|---------------------------|--------|
| 2044.8949 | 2045.1313 | 0.2364 | 116 | 269 | 285 | EGVVECSFVRSEETECK                 | Carbamidomethyl (C)[6,16] | Mascot |
| 2166.0496 | 2166.0542 | 0.0046 | 2   | 110 | 129 | DDLFTNATIVATLVDGC<br>AR           | Carbamidomethyl (C)[18]   | Mascot |
| 3089.5901 | 3089.5994 | 0.0093 | 3   | 45  | 73  | NSPLVSELSLFDIAHTPG<br>VAADLSHIETR |                           | Mascot |

31 RecName: Full=Contactin-1a; AltName: gi|55976512 114263.1 6.25 12 30 0  
Full=F3/F11/contactin; AltName: Full=Neural cell  
recognition m

#### Peptide Information

| Calc. Mass | Obsrv. Mass | ± da    | ± ppm | Start Seq. | End Seq. | Sequence                          | Ion Score | C. I. % | Modification                              | Rank | Result Type |
|------------|-------------|---------|-------|------------|----------|-----------------------------------|-----------|---------|-------------------------------------------|------|-------------|
| 975.4927   | 975.4663    | -0.0264 | -27   | 977        | 984      | QSIDLPMR                          |           |         | Oxidation (M)[7]                          |      | Mascot      |
| 1045.5173  | 1045.5626   | 0.0453  | 43    | 562        | 569      | DAQHYQRK                          |           |         |                                           |      | Mascot      |
| 1062.5513  | 1062.6921   | 0.1408  | 133   | 442        | 449      | VVFECRPR                          |           |         | Carbamidomethyl (C)[5]                    |      | Mascot      |
| 1331.5797  | 1331.6287   | 0.049   | 37    | 492        | 502      | YTCFAENDRGR                       |           |         |                                           |      | Mascot      |
| 1331.5797  | 1331.6287   | 0.049   | 37    | 492        | 502      | YTCFAENDRGR                       |           |         |                                           |      | Mascot      |
| 1418.7283  | 1418.802    | 0.0737  | 52    | 1          | 12       | MIPEAFQPRAMK                      |           |         |                                           |      | Mascot      |
| 1418.7283  | 1418.802    | 0.0737  | 52    | 1          | 12       | MIPEAFQPRAMK                      |           |         |                                           |      | Mascot      |
| 2224.9749  | 2225.1257   | 0.1508  | 68    | 388        | 406      | FSRLGFEDSGMYQCVAE<br>NR           |           |         | Oxidation (M)[11]                         |      | Mascot      |
| 2225.1772  | 2225.1257   | -0.0515 | -23   | 695        | 716      | VIATNTLTGTGPPSESPK<br>TTTR        |           |         |                                           |      | Mascot      |
| 2283.092   | 2283.188    | 0.096   | 42    | 594        | 614      | YSCTAQTVPDNTTASAE<br>VVR          |           |         | Carbamidomethyl (C)[3]                    |      | Mascot      |
| 2283.092   | 2283.188    | 0.096   | 42    | 594        | 614      | YSCTAQTVPDNTTASAE<br>VVR          |           |         | Carbamidomethyl (C)[3]                    |      | Mascot      |
| 2284.2131  | 2284.1812   | -0.0319 | -14   | 442        | 460      | VVFECRPRAAPRPNITW<br>SK           |           |         | Carbamidomethyl (C)[5]                    |      | Mascot      |
| 2299.1426  | 2299.1907   | 0.0481  | 21    | 986        | 1007     | GEYLVVRAHSEGGDGA<br>VAQVR         |           |         |                                           |      | Mascot      |
| 3089.4314  | 3089.5994   | 0.168   | 54    | 391        | 417      | LGFEESGMYQCVAENRH<br>GVIHANAELR   |           |         | Carbamidomethyl (C)[11], Oxidation (M)[8] |      | Mascot      |
| 3338.7102  | 3338.7664   | 0.0562  | 17    | 256        | 284      | SPDSWALLGQNVLTLECF<br>ALGNPIQIRWR |           |         | Carbamidomethyl (C)[16]                   |      | Mascot      |

32 PREDICTED: izumo sperm-egg fusion protein 1-like gi|326665195 38579.9 6.1 7 29 0  
[Danio rerio]

#### Peptide Information

| Calc. Mass | Obsrv. Mass | ± da    | ± ppm | Start Seq. | End Seq. | Sequence         | Ion Score | C. I. % | Modification            | Rank | Result Type |
|------------|-------------|---------|-------|------------|----------|------------------|-----------|---------|-------------------------|------|-------------|
| 870.4216   | 870.5435    | 0.1219  | 140   | 92         | 97       | HWKEDR           |           |         |                         |      | Mascot      |
| 975.5217   | 975.4663    | -0.0554 | -57   | 240        | 248      | DQKGTALSR        |           |         |                         |      | Mascot      |
| 1393.7223  | 1393.7307   | 0.0084  | 6     | 53         | 63       | KIIDHAYTNYR      |           |         |                         |      | Mascot      |
| 1640.8464  | 1640.8029   | -0.0435 | -27   | 119        | 132      | HLEIFIAEGLCPNK   |           |         | Carbamidomethyl (C)[11] |      | Mascot      |
| 1845.0116  | 1844.9989   | -0.0127 | -7    | 98         | 113      | TNSLQWDLITIVEKGK |           |         |                         |      | Mascot      |

|    |                                    |           |         |     |             |     |                     |      |    |    |   |  |  |        |
|----|------------------------------------|-----------|---------|-----|-------------|-----|---------------------|------|----|----|---|--|--|--------|
|    | 2151.1477                          | 2151.1392 | -0.0085 | -4  | 221         | 239 | IVLNQLSVSEEGSYRCLL  |      |    |    |   |  |  | Mascot |
|    |                                    |           |         |     |             |     | K                   |      |    |    |   |  |  |        |
|    | 2300.2659                          | 2300.1873 | -0.0786 | -34 | 1           | 20  | MTLPILLGWFLTLCSSHIV |      |    |    |   |  |  | Mascot |
|    |                                    |           |         |     |             |     | R                   |      |    |    |   |  |  |        |
| 33 | CWF19-like protein 2 [Danio rerio] |           |         |     | gi 76253886 |     | 110501.9            | 8.48 | 12 | 29 | 0 |  |  |        |

#### Peptide Information

| Calc. Mass | Obsrv. Mass | ± da    | ± ppm | Start Seq. | End Seq. | Sequence                       | Ion Score | C. I. | % Modification                               | Rank | Result Type |
|------------|-------------|---------|-------|------------|----------|--------------------------------|-----------|-------|----------------------------------------------|------|-------------|
| 958.47     | 958.4433    | -0.0267 | -28   | 357        | 364      | SPNAERER                       |           |       |                                              |      | Mascot      |
| 975.5105   | 975.4663    | -0.0442 | -45   | 247        | 255      | SLDSVVAER                      |           |       |                                              |      | Mascot      |
| 1045.5571  | 1045.5626   | 0.0055  | 5     | 579        | 587      | LRAQMEAAAR                     |           |       |                                              |      | Mascot      |
| 1062.5619  | 1062.6921   | 0.1302  | 123   | 193        | 200      | LELNPYWK                       |           |       |                                              |      | Mascot      |
| 1498.8046  | 1498.7201   | -0.0845 | -56   | 915        | 927      | EILGGMLDLEPRR                  |           |       |                                              |      | Mascot      |
| 1700.7705  | 1700.9633   | 0.1928  | 113   | 830        | 842      | HLHMYECVPMPR                   |           |       | Carbamidomethyl (C)[8], Oxidation (M)[4, 11] |      | Mascot      |
| 1844.8959  | 1844.9989   | 0.103   | 56    | 1          | 17       | MAAYGVNFESANSIKSR              |           |       |                                              |      | Mascot      |
| 1954.0044  | 1954.1207   | 0.1163  | 60    | 943        | 957      | VLKFAQWWKPFDDTK                |           |       | Carbamidomethyl (C)[13]                      |      | Mascot      |
| 1985.9774  | 1986.0566   | 0.0792  | 40    | 506        | 523      | SSAVQDSETPTLQKHTE<br>K         |           |       |                                              |      | Mascot      |
| 2284.0623  | 2284.1812   | 0.1189  | 52    | 393        | 413      | GSSSNQSAAFRKPDDV<br>EMSR       |           |       | Oxidation (M)[19]                            |      | Mascot      |
| 2298.0239  | 2298.1985   | 0.1746  | 76    | 810        | 828      | MFESQELDCVFLETHMN<br>PK        |           |       |                                              |      | Mascot      |
| 3089.3362  | 3089.5994   | 0.2632  | 85    | 533        | 559      | TTTTVSSSESEEEEEELI<br>LTDEEMNK |           |       |                                              |      | Mascot      |

|    |                            |  |  |  |             |  |         |      |   |    |   |  |  |
|----|----------------------------|--|--|--|-------------|--|---------|------|---|----|---|--|--|
| 34 | Rorb protein [Danio rerio] |  |  |  | gi 66910331 |  | 45200.7 | 8.99 | 8 | 29 | 0 |  |  |
|----|----------------------------|--|--|--|-------------|--|---------|------|---|----|---|--|--|

#### Peptide Information

| Calc. Mass | Obsrv. Mass | ± da    | ± ppm | Start Seq. | End Seq. | Sequence           | Ion Score | C. I. | % Modification                           | Rank | Result Type |
|------------|-------------|---------|-------|------------|----------|--------------------|-----------|-------|------------------------------------------|------|-------------|
| 850.4273   | 850.5429    | 0.1156  | 136   | 70         | 77       | CLALGMSR           |           |       |                                          |      | Mascot      |
| 850.4273   | 850.5429    | 0.1156  | 136   | 70         | 77       | CLALGMSR           |           |       |                                          |      | Mascot      |
| 913.456    | 913.5813    | 0.1253  | 137   | 255        | 261      | MYQSKTR            |           |       |                                          |      | Mascot      |
| 1279.6497  | 1279.7781   | 0.1284  | 100   | 70         | 81       | CLALGMSRDAVK       |           |       | Oxidation (M)[6]                         |      | Mascot      |
| 1320.6763  | 1320.6271   | -0.0492 | -37   | 70         | 81       | CLALGMSRDAVK       |           |       | Carbamidomethyl (C)[1]                   |      | Mascot      |
| 1638.7401  | 1638.8604   | 0.1203  | 73    | 37         | 50       | SQQNNASYSCPRQR     |           |       |                                          |      | Mascot      |
| 1700.8199  | 1700.9633   | 0.1434  | 84    | 338        | 353      | TLGCDDLVSADFVDFAK  |           |       |                                          |      | Mascot      |
| 1953.9673  | 1954.1207   | 0.1534  | 79    | 313        | 329      | MCRAFNPLNNTVLFEGK  |           |       |                                          |      | Mascot      |
| 2052.0503  | 2052.1045   | 0.0542  | 26    | 286        | 302      | ITGFMELCQNDQILLLK  |           |       | Carbamidomethyl (C)[8], Oxidation (M)[5] |      | Mascot      |
| 2151.1301  | 2151.1392   | 0.0091  | 4     | 285        | 302      | RITGFMELCQNDQILLLK |           |       | Oxidation (M)[6]                         |      | Mascot      |

|    |                             |  |  |  |              |  |         |      |    |    |   |  |  |
|----|-----------------------------|--|--|--|--------------|--|---------|------|----|----|---|--|--|
| 35 | novel protein [Danio rerio] |  |  |  | gi 148725296 |  | 79374.4 | 6.72 | 10 | 29 | 0 |  |  |
|----|-----------------------------|--|--|--|--------------|--|---------|------|----|----|---|--|--|

| Peptide Information |                                      |         |       |              |          |                            |           |                         |                  |   |
|---------------------|--------------------------------------|---------|-------|--------------|----------|----------------------------|-----------|-------------------------|------------------|---|
| Calc. Mass          | Obsrv. Mass                          | ± da    | ± ppm | Start Seq.   | End Seq. | Sequence                   | Ion Score | C. I. % Modification    | Rank Result Type |   |
| 848.477             | 848.5279                             | 0.0509  | 60    | 506          | 512      | MRLIGSR                    |           | Oxidation (M)[1]        | Mascot           |   |
| 864.4937            | 864.5372                             | 0.0435  | 50    | 433          | 439      | EVFRVSK                    |           |                         | Mascot           |   |
| 908.5563            | 908.4657                             | -0.0906 | -100  | 513          | 520      | EPLPLLAR                   |           |                         | Mascot           |   |
| 1165.6034           | 1165.7461                            | 0.1427  | 122   | 225          | 234      | FCEQAVTIVR                 |           |                         | Mascot           |   |
| 1165.6034           | 1165.7461                            | 0.1427  | 122   | 225          | 234      | FCEQAVTIVR                 |           |                         | Mascot           |   |
| 1233.5706           | 1233.7218                            | 0.1512  | 123   | 612          | 622      | QDQGSLTAEER                |           |                         | Mascot           |   |
| 1352.7208           | 1352.7363                            | 0.0155  | 11    | 531          | 541      | ELKGYYPNQK                 |           |                         | Mascot           |   |
| 1638.842            | 1638.8604                            | 0.0184  | 11    | 534          | 546      | GYYPNQKNIICR               |           | Carbamidomethyl (C)[12] | Mascot           |   |
| 2166.0132           | 2166.0542                            | 0.041   | 19    | 679          | 698      | VFGDILDGTSMPVGTDQ<br>QNR   |           | Oxidation (M)[11]       | Mascot           |   |
| 2283.1875           | 2283.188                             | 0.0005  | 0     | 447          | 466      | MFSPIPVCILHVINNDTLE<br>K   |           |                         | Mascot           |   |
| 2283.2554           | 2283.188                             | -0.0674 | -30   | 8            | 29       | ESSAGLLQSQDALASNK<br>PLLLK |           |                         | Mascot           |   |
| 2299.1824           | 2299.1907                            | 0.0083  | 4     | 447          | 466      | MFSPIPVCILHVINNDTLE<br>K   |           | Oxidation (M)[1]        | Mascot           |   |
| 36                  | contactin-1a precursor [Danio rerio] |         |       | gi 136256388 |          | 114246.1                   | 6.19      | 12                      | 29               | 0 |

| Peptide Information |             |         |       |            |          |                            |           |                                           |                  |
|---------------------|-------------|---------|-------|------------|----------|----------------------------|-----------|-------------------------------------------|------------------|
| Calc. Mass          | Obsrv. Mass | ± da    | ± ppm | Start Seq. | End Seq. | Sequence                   | Ion Score | C. I. % Modification                      | Rank Result Type |
| 975.4927            | 975.4663    | -0.0264 | -27   | 977        | 984      | QSIDLPMR                   |           | Oxidation (M)[7]                          | Mascot           |
| 1045.5173           | 1045.5626   | 0.0453  | 43    | 562        | 569      | DAQHYQRK                   |           |                                           | Mascot           |
| 1062.5513           | 1062.6921   | 0.1408  | 133   | 442        | 449      | VVFECRPR                   |           | Carbamidomethyl (C)[5]                    | Mascot           |
| 1331.5797           | 1331.6287   | 0.049   | 37    | 492        | 502      | YTCFAENDRGR                |           |                                           | Mascot           |
| 1331.5797           | 1331.6287   | 0.049   | 37    | 492        | 502      | YTCFAENDRGR                |           |                                           | Mascot           |
| 1418.7283           | 1418.802    | 0.0737  | 52    | 1          | 12       | MIPEAFQPRAMK               |           |                                           | Mascot           |
| 1418.7283           | 1418.802    | 0.0737  | 52    | 1          | 12       | MIPEAFQPRAMK               |           |                                           | Mascot           |
| 1638.7581           | 1638.8604   | 0.1023  | 62    | 931        | 944      | MHYSGSSINIAWEK             |           | Oxidation (M)[1]                          | Mascot           |
| 2224.9749           | 2225.1257   | 0.1508  | 68    | 388        | 406      | FSRLGFEDSGMYQCVAE<br>NR    |           | Oxidation (M)[11]                         | Mascot           |
| 2225.1772           | 2225.1257   | -0.0515 | -23   | 695        | 716      | VIATNTLTGTPPSESPK<br>TTTR  |           |                                           | Mascot           |
| 2283.092            | 2283.188    | 0.096   | 42    | 594        | 614      | YSCTAQTPVDNTTASAE<br>L VVR |           | Carbamidomethyl (C)[3]                    | Mascot           |
| 2283.092            | 2283.188    | 0.096   | 42    | 594        | 614      | YSCTAQTPVDNTTASAE<br>L VVR |           | Carbamidomethyl (C)[3]                    | Mascot           |
| 2284.2131           | 2284.1812   | -0.0319 | -14   | 442        | 460      | VVFECRPRAAPRPNITW<br>SK    |           | Carbamidomethyl (C)[5]                    | Mascot           |
| 2299.1426           | 2299.1907   | 0.0481  | 21    | 986        | 1007     | GEYLVVRAHSEGGDGA<br>VAQVR  |           |                                           | Mascot           |
| 3089.4314           | 3089.5994   | 0.168   | 54    | 391        | 417      | LGFEDSGMYQCVAENRH          |           | Carbamidomethyl (C)[11], Oxidation (M)[8] | Mascot           |

37      GVIHANAELR  
 PREDICTED: deleted in malignant brain tumors 1      gi|292615093      50462.5      8.16      8      29      0  
 protein-like [Danio rerio]

Peptide Information

| Calc. Mass | Obsrv. Mass | ± da    | ± ppm | Start Seq. | End Sequence Seq.        | Ion Score | C. I. % Modification    | Rank Result Type |
|------------|-------------|---------|-------|------------|--------------------------|-----------|-------------------------|------------------|
| 848.4736   | 848.5279    | 0.0543  | 64    | 373        | 379 KNGQVFR              |           |                         | Mascot           |
| 868.4385   | 868.5515    | 0.113   | 130   | 104        | 109 LVCWYK               |           | Carbamidomethyl (C)[3]  | Mascot           |
| 1393.7153  | 1393.7307   | 0.0154  | 11    | 8          | 19 ALTVVCWIMCVR          |           |                         | Mascot           |
| 1439.6869  | 1439.7291   | 0.0422  | 29    | 323        | 335 IKDCSLNVTESCK        |           |                         | Mascot           |
| 1498.7029  | 1498.7201   | 0.0172  | 11    | 246        | 258 GESCMGYLNINLK        |           | Carbamidomethyl (C)[4]  | Mascot           |
| 1535.6399  | 1535.7725   | 0.1326  | 86    | 420        | 433 DSNSGVHLCMQNCK       |           |                         | Mascot           |
| 2165.9705  | 2166.0542   | 0.0837  | 39    | 202        | 220 NMFVPVEFACSTEMVYN GK |           |                         | Mascot           |
| 2174.1758  | 2174.1067   | -0.0691 | -32   | 2          | 19 ILNNIRALTVCWIMCVR     |           | Carbamidomethyl (C)[12] | Mascot           |

38      PREDICTED: tripartite motif-containing protein 59-like      gi|125836979      39637.8      5.73      8      29      0  
 [Danio rerio]

Peptide Information

| Calc. Mass | Obsrv. Mass | ± da    | ± ppm | Start Seq. | End Sequence Seq.           | Ion Score | C. I. % Modification    | Rank Result Type |
|------------|-------------|---------|-------|------------|-----------------------------|-----------|-------------------------|------------------|
| 1045.5636  | 1045.5626   | -0.001  | -1    | 174        | 182 SEALVQKDR               |           |                         | Mascot           |
| 1165.61    | 1165.7461   | 0.1361  | 117   | 131        | 140 IDDLQTAYVK              |           |                         | Mascot           |
| 1165.61    | 1165.7461   | 0.1361  | 117   | 131        | 140 IDDLQTAYVK              |           |                         | Mascot           |
| 1279.6464  | 1279.7781   | 0.1317  | 103   | 200        | 209 KEQFMQALER              |           |                         | Mascot           |
| 1754.8828  | 1754.8033   | -0.0795 | -45   | 115        | 130 LICGFCLTIGQHGHK         |           |                         | Mascot           |
| 2044.903   | 2045.1313   | 0.2283  | 112   | 301        | 318 DGPLPEISWHSESCSTS R     |           | Carbamidomethyl (C)[14] | Mascot           |
| 2166.1587  | 2166.0542   | -0.1045 | -48   | 61         | 80 SVVELPTNGLDALPVNVC LR    |           | Carbamidomethyl (C)[18] | Mascot           |
| 2283.0281  | 2283.188    | 0.1599  | 70    | 94         | 113 SPSCPEHPGQPLNVYCV QDR   |           | Carbamidomethyl (C)[4]  | Mascot           |
| 2283.0281  | 2283.188    | 0.1599  | 70    | 94         | 113 SPSCPEHPGQPLNVYCV QDR   |           | Carbamidomethyl (C)[4]  | Mascot           |
| 2501.231   | 2501.2512   | 0.0202  | 8     | 261        | 282 ERINTLNCTPMPTVPSLQ MSPR |           | Oxidation (M)[11]       | Mascot           |

39      Cwf19l2 protein [Danio rerio]      gi|190339169      111090.1      8.07      12      29      0

Peptide Information

| Calc. Mass | Obsrv. Mass | ± da    | ± ppm | Start Seq. | End Sequence Seq. | Ion Score | C. I. % Modification | Rank Result Type |
|------------|-------------|---------|-------|------------|-------------------|-----------|----------------------|------------------|
| 975.5105   | 975.4663    | -0.0442 | -45   | 247        | 255 SLDSVVAER     |           |                      | Mascot           |

|    |                                                    |           |         |     |     |              |                                |      |    |                                             |   |  |        |
|----|----------------------------------------------------|-----------|---------|-----|-----|--------------|--------------------------------|------|----|---------------------------------------------|---|--|--------|
|    | 1045.5571                                          | 1045.5626 | 0.0055  | 5   | 583 | 591          | LRAQMEAR                       |      |    |                                             |   |  | Mascot |
|    | 1062.5619                                          | 1062.6921 | 0.1302  | 123 | 193 | 200          | LELNPYWK                       |      |    |                                             |   |  | Mascot |
|    | 1498.8046                                          | 1498.7201 | -0.0845 | -56 | 919 | 931          | EILGGMLDLEPRR                  |      |    |                                             |   |  | Mascot |
|    | 1503.7285                                          | 1503.7828 | 0.0543  | 36  | 602 | 615          | DQSKQASEPAVSEK                 |      |    |                                             |   |  | Mascot |
|    | 1700.7705                                          | 1700.9633 | 0.1928  | 113 | 834 | 846          | HLHVMYECVPMPR                  |      |    | Carbamidomethyl (C)[8], Oxidation (M)[4,11] |   |  | Mascot |
|    | 1844.8959                                          | 1844.9989 | 0.103   | 56  | 1   | 17           | MAAYGVNFESANSIKSR              |      |    |                                             |   |  | Mascot |
|    | 1954.0044                                          | 1954.1207 | 0.1163  | 60  | 947 | 961          | VLKFAQWWKPFDDTK                |      |    | Carbamidomethyl (C)[13]                     |   |  | Mascot |
|    | 2044.9822                                          | 2045.1313 | 0.1491  | 73  | 247 | 264          | SLDSVVAERYGSTEEFK              |      |    |                                             |   |  | Mascot |
|    | 2284.0623                                          | 2284.1812 | 0.1189  | 52  | 396 | 416          | GSSSNQSAAFRKPDDV<br>EMSR       |      |    | Oxidation (M)[19]                           |   |  | Mascot |
|    | 2298.0239                                          | 2298.1985 | 0.1746  | 76  | 814 | 832          | MFESQELDCVFLETHMN<br>PK        |      |    |                                             |   |  | Mascot |
|    | 3089.3362                                          | 3089.5994 | 0.2632  | 85  | 537 | 563          | TTTTVSSSESEEEEEELI<br>LTDEEMNK |      |    |                                             |   |  | Mascot |
| 40 | PREDICTED: CWF19-like protein 2-like [Danio rerio] |           |         |     |     | gi 326674466 | 110596.9                       | 7.87 | 12 | 29                                          | 0 |  |        |

Peptide Information

| Calc. Mass | Obsrv. Mass | ± da    | ± ppm | Start Seq. | End Seq. | Sequence                       | Ion Score | C. I. | % Modification                              | Rank | Result Type |
|------------|-------------|---------|-------|------------|----------|--------------------------------|-----------|-------|---------------------------------------------|------|-------------|
| 958.47     | 958.4433    | -0.0267 | -28   | 354        | 361      | SPNAERER                       |           |       |                                             |      | Mascot      |
| 975.5105   | 975.4663    | -0.0442 | -45   | 247        | 255      | SLDSVVAER                      |           |       |                                             |      | Mascot      |
| 1045.5571  | 1045.5626   | 0.0055  | 5     | 580        | 588      | LRAQMEAR                       |           |       |                                             |      | Mascot      |
| 1062.5619  | 1062.6921   | 0.1302  | 123   | 193        | 200      | LELNPYWK                       |           |       |                                             |      | Mascot      |
| 1498.8046  | 1498.7201   | -0.0845 | -56   | 916        | 928      | EILGGMLDLEPRR                  |           |       |                                             |      | Mascot      |
| 1503.7285  | 1503.7828   | 0.0543  | 36    | 599        | 612      | DQSKQASEPAVSEK                 |           |       |                                             |      | Mascot      |
| 1700.7705  | 1700.9633   | 0.1928  | 113   | 831        | 843      | HLHVMYECVPMPR                  |           |       | Carbamidomethyl (C)[8], Oxidation (M)[4,11] |      | Mascot      |
| 1844.8959  | 1844.9989   | 0.103   | 56    | 1          | 17       | MAAYGVNFESANSIKSR              |           |       |                                             |      | Mascot      |
| 1954.0044  | 1954.1207   | 0.1163  | 60    | 944        | 958      | VLKFAQWWKPFDDTK                |           |       | Carbamidomethyl (C)[13]                     |      | Mascot      |
| 2284.0623  | 2284.1812   | 0.1189  | 52    | 390        | 410      | GSSSNQSAAFRKPDDV<br>EMSR       |           |       | Oxidation (M)[19]                           |      | Mascot      |
| 2298.0239  | 2298.1985   | 0.1746  | 76    | 811        | 829      | MFESQELDCVFLETHMN<br>PK        |           |       |                                             |      | Mascot      |
| 3089.3362  | 3089.5994   | 0.2632  | 85    | 534        | 560      | TTTTVSSSESEEEEEELI<br>LTDEEMNK |           |       |                                             |      | Mascot      |

41 lft81 protein [Danio rerio] gi|62531096 28309.4 5.61 7 28 0

Peptide Information

| Calc. Mass | Obsrv. Mass | ± da    | ± ppm | Start Seq. | End Seq. | Sequence     | Ion Score | C. I. | % Modification | Rank | Result Type |
|------------|-------------|---------|-------|------------|----------|--------------|-----------|-------|----------------|------|-------------|
| 870.5519   | 870.5435    | -0.0084 | -10   | 186        | 192      | VLRQQVK      |           |       |                |      | Mascot      |
| 1331.7278  | 1331.6287   | -0.0991 | -74   | 113        | 123      | STLEQEVRTLRL |           |       |                |      | Mascot      |
| 1331.7278  | 1331.6287   | -0.0991 | -74   | 113        | 123      | STLEQEVRTLRL |           |       |                |      | Mascot      |

|    |                                         |           |         |    |             |     |                           |     |   |    |                        |        |
|----|-----------------------------------------|-----------|---------|----|-------------|-----|---------------------------|-----|---|----|------------------------|--------|
|    | 1397.6399                               | 1397.7433 | 0.1034  | 74 | 49          | 60  | GRTLDDMSEMVK              |     |   |    | Oxidation (M)[7]       | Mascot |
|    | 1640.7697                               | 1640.8029 | 0.0332  | 20 | 98          | 112 | KAQYETCAAGLESNR           |     |   |    |                        | Mascot |
|    | 1700.8126                               | 1700.9633 | 0.1507  | 89 | 85          | 98  | QEHAELAPEYEEKK            |     |   |    |                        | Mascot |
|    | 2225.0879                               | 2225.1257 | 0.0378  | 17 | 133         | 149 | YHHINCEREIIESQIQR         |     |   |    | Carbamidomethyl (C)[6] | Mascot |
|    | 2225.0879                               | 2225.1257 | 0.0378  | 17 | 133         | 149 | YHHINCEREIIESQIQR         |     |   |    | Carbamidomethyl (C)[6] | Mascot |
|    | 2283.1914                               | 2283.188  | -0.0034 | -1 | 220         | 240 | QCYLKAQSQAPIGHVIQD<br>VGK |     |   |    |                        | Mascot |
|    | 2283.1914                               | 2283.188  | -0.0034 | -1 | 220         | 240 | QCYLKAQSQAPIGHVIQD<br>VGK |     |   |    |                        | Mascot |
| 42 | hemoglobin subunit beta-2 [Danio rerio] |           |         |    | gi 53749219 |     | 16378.2                   | 7.7 | 5 | 28 | 0                      |        |

Peptide Information

| Calc. Mass | Obsrv. Mass | ± da    | ± ppm | Start Seq. | End Seq. | Sequence                | Ion Score | C. I. | % | Modification      | Rank | Result Type |
|------------|-------------|---------|-------|------------|----------|-------------------------|-----------|-------|---|-------------------|------|-------------|
| 958.572    | 958.4433    | -0.1287 | -134  | 10         | 18       | TAILGLWGK               |           |       |   |                   |      | Mascot      |
| 1062.5612  | 1062.6921   | 0.1309  | 123   | 75         | 83       | AIKNMDNIK               |           |       |   | Oxidation (M)[5]  |      | Mascot      |
| 1367.6731  | 1367.7344   | 0.0613  | 45    | 106        | 118      | LLADCITVCAAMK           |           |       |   | Oxidation (M)[12] |      | Mascot      |
| 1985.9789  | 1986.0566   | 0.0777  | 39    | 42         | 60       | YFATFGNLSSPAAIMGNP<br>K |           |       |   |                   |      | Mascot      |
| 2166.0317  | 2166.0542   | 0.0225  | 10    | 78         | 96       | NMDNIKNTYAALSMVHS<br>EK |           |       |   |                   |      | Mascot      |

|    |                              |  |  |  |  |  |             |         |      |   |    |   |
|----|------------------------------|--|--|--|--|--|-------------|---------|------|---|----|---|
| 43 | Map2k4 protein [Danio rerio] |  |  |  |  |  | gi 62204799 | 27024.9 | 8.92 | 7 | 28 | 0 |
|----|------------------------------|--|--|--|--|--|-------------|---------|------|---|----|---|

Peptide Information

| Calc. Mass | Obsrv. Mass | ± da    | ± ppm | Start Seq. | End Seq. | Sequence          | Ion Score | C. I. | % | Modification           | Rank | Result Type |
|------------|-------------|---------|-------|------------|----------|-------------------|-----------|-------|---|------------------------|------|-------------|
| 975.5217   | 975.4663    | -0.0554 | -57   | 15         | 22       | IRSTVDER          |           |       |   |                        |      | Mascot      |
| 1311.7129  | 1311.6329   | -0.08   | -61   | 222        | 232      | FINFVNLCLTK       |           |       |   |                        |      | Mascot      |
| 1397.7393  | 1397.7433   | 0.004   | 3     | 1          | 13       | MAHKPSGQIMAVK     |           |       |   |                        |      | Mascot      |
| 1439.8079  | 1439.7291   | -0.0788 | -55   | 222        | 233      | FINFVNLCLTKK      |           |       |   |                        |      | Mascot      |
| 1638.7476  | 1638.8604   | 0.1128  | 69    | 143        | 156      | TRDAGCRPYMAPER    |           |       |   | Oxidation (M)[10]      |      | Mascot      |
| 1954.0055  | 1954.1207   | 0.1152  | 59    | 73         | 89       | YVYSSLDEVIPEEILGK |           |       |   |                        |      | Mascot      |
| 2051.8218  | 2052.1045   | 0.2827  | 138   | 53         | 69       | EGDCWICMELMSTSFDK |           |       |   | Carbamidomethyl (C)[4] |      | Mascot      |

|    |                                                            |  |  |  |  |  |              |         |      |   |    |   |
|----|------------------------------------------------------------|--|--|--|--|--|--------------|---------|------|---|----|---|
| 44 | PREDICTED: hypothetical protein LOC100538187 [Danio rerio] |  |  |  |  |  | gi 326671902 | 13561.6 | 8.77 | 6 | 28 | 0 |
|----|------------------------------------------------------------|--|--|--|--|--|--------------|---------|------|---|----|---|

Peptide Information

| Calc. Mass | Obsrv. Mass | ± da    | ± ppm | Start Seq. | End Seq. | Sequence | Ion Score | C. I. | % | Modification           | Rank | Result Type |
|------------|-------------|---------|-------|------------|----------|----------|-----------|-------|---|------------------------|------|-------------|
| 958.4814   | 958.4433    | -0.0381 | -40   | 84         | 90       | NFKYVCK  |           |       |   | Carbamidomethyl (C)[6] |      | Mascot      |



|    |                                         |           |        |     |             |     |                        |      |   |    |   |                                              |        |
|----|-----------------------------------------|-----------|--------|-----|-------------|-----|------------------------|------|---|----|---|----------------------------------------------|--------|
|    | 1086.4707                               | 1086.6035 | 0.1328 | 122 | 64          | 72  | CCSKAQDFK              |      |   |    |   | Carbamidomethyl (C)[1]                       | Mascot |
|    | 1498.6566                               | 1498.7201 | 0.0635 | 42  | 73          | 83  | EKAEMFHCQFR            |      |   |    |   | Carbamidomethyl (C)[8], Oxidation (M)[5]     | Mascot |
|    | 1844.8162                               | 1844.9989 | 0.1827 | 99  | 53          | 67  | AHIIQFMSEMKCCSK        |      |   |    |   | Carbamidomethyl (C)[12], Oxidation (M)[7,10] | Mascot |
|    | 2225.0344                               | 2225.1257 | 0.0913 | 41  | 94          | 111 | NNWETIGHLWSNFGRCY<br>K |      |   |    |   |                                              | Mascot |
|    | 2225.0344                               | 2225.1257 | 0.0913 | 41  | 94          | 111 | NNWETIGHLWSNFGRCY<br>K |      |   |    |   |                                              | Mascot |
|    | 2297.0999                               | 2297.1953 | 0.0954 | 42  | 91          | 108 | YFRNNWETIGHLWSNFG<br>R |      |   |    |   |                                              | Mascot |
| 45 | sterol carrier protein 2b [Danio rerio] |           |        |     | gi 54400688 |     | 15300.9                | 9.35 | 5 | 28 | 0 |                                              |        |

Peptide Information

| Calc. Mass | Obsrv. Mass | ± da    | ± ppm | Start Seq. | End Seq. | Sequence                         | Ion Score | C. I. | % Modification                                 | Rank | Result Type |
|------------|-------------|---------|-------|------------|----------|----------------------------------|-----------|-------|------------------------------------------------|------|-------------|
| 958.4224   | 958.4433    | 0.0209  | 22    | 78         | 86       | GSVHNDSDK                        |           |       |                                                |      | Mascot      |
| 1086.6014  | 1086.6035   | 0.0021  | 2     | 2          | 11       | RVPQVSSSAR                       |           |       |                                                |      | Mascot      |
| 1233.6368  | 1233.7218   | 0.085   | 69    | 1          | 11       | MRVPQVSSSAR                      |           |       | Oxidation (M)[1]                               |      | Mascot      |
| 1320.6793  | 1320.6271   | -0.0522 | -40   | 39         | 49       | LQEDGEQFVKK                      |           |       |                                                |      | Mascot      |
| 3338.5046  | 3338.7664   | 0.2618  | 78    | 88         | 117      | ADCTIAMADSDLLDLMTG<br>KMNPQTAFQK |           |       | Carbamidomethyl (C)[3], Oxidation (M)[7,16,20] |      | Mascot      |

|    |                                              |  |  |  |              |  |         |      |   |    |   |  |  |
|----|----------------------------------------------|--|--|--|--------------|--|---------|------|---|----|---|--|--|
| 46 | hypothetical protein LOC559906 [Danio rerio] |  |  |  | gi 198282017 |  | 48541.8 | 5.61 | 9 | 28 | 0 |  |  |
|----|----------------------------------------------|--|--|--|--------------|--|---------|------|---|----|---|--|--|

Peptide Information

| Calc. Mass | Obsrv. Mass | ± da    | ± ppm | Start Seq. | End Seq. | Sequence                | Ion Score | C. I. | % Modification            | Rank | Result Type |
|------------|-------------|---------|-------|------------|----------|-------------------------|-----------|-------|---------------------------|------|-------------|
| 882.4349   | 882.5671    | 0.1322  | 150   | 1          | 8        | MSSSLSVR                |           |       | Oxidation (M)[1]          |      | Mascot      |
| 1062.5499  | 1062.6921   | 0.1422  | 134   | 142        | 150      | IMLEIDNAK               |           |       | Oxidation (M)[2]          |      | Mascot      |
| 1279.6641  | 1279.7781   | 0.114   | 89    | 351        | 360      | NKTDYEQLLR              |           |       |                           |      | Mascot      |
| 1311.5964  | 1311.6329   | 0.0365  | 28    | 255        | 264      | NKEEAESWYR              |           |       |                           |      | Mascot      |
| 1367.6624  | 1367.7344   | 0.072   | 53    | 363        | 373      | QNLEMEIATYR             |           |       |                           |      | Mascot      |
| 1503.8641  | 1503.7828   | -0.0813 | -54   | 31         | 45       | SKAAVSFAAAKPLSR         |           |       |                           |      | Mascot      |
| 1685.9109  | 1685.8613   | -0.0496 | -29   | 294        | 307      | FLQTLEVELES LHK         |           |       |                           |      | Mascot      |
| 1685.9109  | 1685.8613   | -0.0496 | -29   | 294        | 307      | FLQTLEVELES LHK         |           |       |                           |      | Mascot      |
| 2298.0601  | 2298.1985   | 0.1384  | 60    | 115        | 134      | GHDIDSMMQAHALEQE<br>VRK |           |       | Oxidation (M)[7,8]        |      | Mascot      |
| 2299.0151  | 2299.1907   | 0.1756  | 76    | 160        | 178      | WETESAMCQSVERDCV<br>ALK |           |       | Carbamidomethyl (C)[8,15] |      | Mascot      |

|    |                                                  |  |  |  |              |  |         |      |   |    |   |    |   |
|----|--------------------------------------------------|--|--|--|--------------|--|---------|------|---|----|---|----|---|
| 47 | PREDICTED: anosmin-1-like, partial [Danio rerio] |  |  |  | gi 326670889 |  | 21409.4 | 8.83 | 4 | 28 | 0 | 13 | 0 |
|----|--------------------------------------------------|--|--|--|--------------|--|---------|------|---|----|---|----|---|

Peptide Information

| Calc. Mass | Obsrv. Mass | ± da | ± ppm | Start Seq. | End Seq. | Sequence | Ion Score | C. I. | % Modification | Rank | Result Type |
|------------|-------------|------|-------|------------|----------|----------|-----------|-------|----------------|------|-------------|
|------------|-------------|------|-------|------------|----------|----------|-----------|-------|----------------|------|-------------|

|    |                            |           |         |     |             |     |                         |     |   |                        |        |
|----|----------------------------|-----------|---------|-----|-------------|-----|-------------------------|-----|---|------------------------|--------|
|    | 882.5519                   | 882.5671  | 0.0152  | 17  | 86          | 93  | GSPLKPRK                |     |   |                        | Mascot |
|    | 1685.7775                  | 1685.8613 | 0.0838  | 50  | 17          | 29  | KHYECLTSCEFLR           |     |   | Carbamidomethyl (C)[5] | Mascot |
|    | 1685.7775                  | 1685.8613 | 0.0838  | 50  | 17          | 29  | KHYECLTSCEFLR           | 13  | 0 | Carbamidomethyl (C)[9] | Mascot |
|    | 2157.0466                  | 2157      | -0.0466 | -22 | 18          | 35  | HYECLTSCEFLRSVQTLK      |     |   |                        | Mascot |
|    | 2284.147                   | 2284.1812 | 0.0342  | 15  | 94          | 112 | DLQFVEHPSGQLELRWS<br>SR |     |   |                        | Mascot |
| 48 | Thy1 protein [Danio rerio] |           |         |     | q l78070494 |     | 16884.6                 | 8.7 | 5 | 28                     | 0      |

1

annexin A1b [Danio rerio]

gi|32308159

37416.3

6.11

15

419

100

315

100

| Peptide Information |             |         |       |            |          |                                       | Ion Score | C. I. % | Modification            | Rank   | Result Type |        |                         |        |        |
|---------------------|-------------|---------|-------|------------|----------|---------------------------------------|-----------|---------|-------------------------|--------|-------------|--------|-------------------------|--------|--------|
| Calc. Mass          | Obsrv. Mass | ± da    | ± ppm | Start Seq. | End Seq. | Sequence                              |           |         |                         |        |             |        |                         |        |        |
| 1045.5061           | 1045.535    | 0.0289  | 28    | 201        | 209      | ALYEAGEHR                             | 46        | 99.397  |                         |        | Mascot      |        |                         |        |        |
| 1174.6062           | 1174.603    | -0.0032 | -3    | 284        | 294      | GLGTDNDTLIR                           |           |         |                         |        | Mascot      |        |                         |        |        |
| 1234.6102           | 1234.6273   | 0.0171  | 14    | 232        | 241      | TFQYYGQLSK                            |           |         |                         |        | Mascot      |        |                         |        |        |
| 1234.6102           | 1234.6273   | 0.0171  | 14    | 232        | 241      | TFQYYGQLSK                            |           |         |                         |        | Mascot      |        |                         |        |        |
| 1327.7467           | 1327.7408   | -0.0059 | -4    | 55         | 67       | GVDEAAIIEVLAK                         |           |         |                         |        | Mascot      |        |                         |        |        |
| 1407.7002           | 1407.7087   | 0.0085  | 6     | 154        | 165      | EAYGELLEENIK                          | 54        | 99.893  |                         |        | Mascot      |        |                         |        |        |
| 1407.7002           | 1407.7087   | 0.0085  | 6     | 154        | 165      | EAYGELLEENIK                          |           |         |                         |        | Mascot      |        |                         |        |        |
| 1411.7004           | 1411.6959   | -0.0045 | -3    | 266        | 277      | SAWNKPAYFAEK                          |           |         |                         |        | Mascot      |        |                         |        |        |
| 1471.7175           | 1471.7124   | -0.0051 | -3    | 18         | 33       | GSPAPFQDAGPSGGVK                      |           |         |                         |        | Mascot      |        |                         |        |        |
| 1585.9523           | 1585.9478   | -0.0045 | -3    | 210        | 224      | IGTVVSVLIDVLTR                        |           |         |                         |        | 68          | 99.996 |                         |        | Mascot |
| 1585.9523           | 1585.9478   | -0.0045 | -3    | 210        | 224      | IGTVVSVLIDVLTR                        | Mascot    |         |                         |        |             |        |                         |        |        |
| 1623.8125           | 1623.8043   | -0.0082 | -5    | 34         | 48       | FSQAFNAQNDAAVLK                       | Mascot    |         |                         |        |             |        |                         |        |        |
| 1629.8806           | 1629.8773   | -0.0033 | -2    | 125        | 140      | GLGTNEAVLSEILGTR                      | 147       | 100     |                         |        |             |        |                         |        | Mascot |
| 1629.8806           | 1629.8773   | -0.0033 | -2    | 125        | 140      | GLGTNEAVLSEILGTR                      |           |         |                         |        |             |        |                         |        | Mascot |
| 1751.9075           | 1751.9036   | -0.0039 | -2    | 34         | 49       | FSQAFNAQNDAAVLKK                      |           |         |                         |        | Mascot      |        |                         |        |        |
| 1789.9807           | 1789.9778   | -0.0029 | -2    | 78         | 94       | AAYQQSTGKPLADALKK                     |           |         |                         |        | Mascot      |        |                         |        |        |
| 2177.127            | 2177.1233   | -0.0037 | -2    | 247        | 265      | ALESELHGHLEDCLLTIVK                   |           |         |                         |        |             |        | Carbamidomethyl (C)[13] | Mascot |        |
| 2187.042            | 2187.0461   | 0.0041  | 2     | 307        | 325      | IMQEYSTMQGQSLQAAI<br>QK               |           |         | Oxidation (M)[2,8]      | Mascot |             |        |                         |        |        |
| 3787.8442           | 3787.8743   | 0.0301  | 8     | 166        | 200      | SEVSGQLETTLLALCQAT<br>RPEGYNIDDAHTDAK |           |         | Carbamidomethyl (C)[15] | Mascot |             |        |                         |        |        |

2

annexin A1b [Danio rerio]

gi|220673189

37450.3

6.21

14

409

100

315

100

| Peptide Information |             |         |       |            |          |               |           |        |                |      |             |
|---------------------|-------------|---------|-------|------------|----------|---------------|-----------|--------|----------------|------|-------------|
| Calc. Mass          | Obsrv. Mass | ± da    | ± ppm | Start Seq. | End Seq. | Sequence      | Ion Score | C. I.  | % Modification | Rank | Result Type |
| 1045.5061           | 1045.535    | 0.0289  | 28    | 201        | 209      | ALYEAGEHR     |           |        |                |      | Mascot      |
| 1174.6062           | 1174.603    | -0.0032 | -3    | 284        | 294      | GLGTDNDTLIR   |           |        |                |      | Mascot      |
| 1234.6102           | 1234.6273   | 0.0171  | 14    | 232        | 241      | TFQYYGQLSK    |           |        |                |      | Mascot      |
| 1234.6102           | 1234.6273   | 0.0171  | 14    | 232        | 241      | TFQYYGQLSK    | 46        | 99.397 |                |      | Mascot      |
| 1327.7467           | 1327.7408   | -0.0059 | -4    | 55         | 67       | GVDEAAIIEVLAK |           |        |                |      | Mascot      |
| 1407.7002           | 1407.7087   | 0.0085  | 6     | 154        | 165      | EAYGELLEENIK  |           |        |                |      | Mascot      |
| 1407.7002           | 1407.7087   | 0.0085  | 6     | 154        | 165      | EAYGELLEENIK  | 54        | 99.893 |                |      | Mascot      |
| 1411.7004           | 1411.6959   | -0.0045 | -3    | 266        | 277      | SAWNKPAYFAEK  |           |        |                |      | Mascot      |

|   |                                                                   |           |         |    |     |              |                                       |     |        |                         |     |     |        |
|---|-------------------------------------------------------------------|-----------|---------|----|-----|--------------|---------------------------------------|-----|--------|-------------------------|-----|-----|--------|
|   | 1585.9523                                                         | 1585.9478 | -0.0045 | -3 | 210 | 224          | IGTVVSVLIDVLTTTR                      | 68  | 99.996 |                         |     |     | Mascot |
|   | 1585.9523                                                         | 1585.9478 | -0.0045 | -3 | 210 | 224          | IGTVVSVLIDVLTTTR                      |     |        |                         |     |     | Mascot |
|   | 1623.8125                                                         | 1623.8043 | -0.0082 | -5 | 34  | 48           | FSQAFNAQNDAAVLK                       |     |        |                         |     |     | Mascot |
|   | 1629.8806                                                         | 1629.8773 | -0.0033 | -2 | 125 | 140          | GLGTNEAVLSEILGTR                      |     |        |                         |     |     | Mascot |
|   | 1629.8806                                                         | 1629.8773 | -0.0033 | -2 | 125 | 140          | GLGTNEAVLSEILGTR                      | 147 | 100    |                         |     |     | Mascot |
|   | 1751.9075                                                         | 1751.9036 | -0.0039 | -2 | 34  | 49           | FSQAFNAQNDAAVLKK                      |     |        |                         |     |     | Mascot |
|   | 1789.9807                                                         | 1789.9778 | -0.0029 | -2 | 78  | 94           | AAYQQSTGKPLADALKK                     |     |        |                         |     |     | Mascot |
|   | 2177.127                                                          | 2177.1233 | -0.0037 | -2 | 247 | 265          | ALESELHGHLEDCLLTIVK                   |     |        | Carbamidomethyl (C)[13] |     |     | Mascot |
|   | 2187.042                                                          | 2187.0461 | 0.0041  | 2  | 307 | 325          | IMQEYSTMQQGSLQAAI<br>QK               |     |        | Oxidation (M)[2,8]      |     |     | Mascot |
|   | 3787.8442                                                         | 3787.8743 | 0.0301  | 8  | 166 | 200          | SEVSGQLETTLLALCQAT<br>RPEGYNIDDAHTDAK |     |        | Carbamidomethyl (C)[15] |     |     | Mascot |
| 3 | RecName: Full=L-lactate dehydrogenase B-A chain;<br>Short=LDH-B-A |           |         |    |     | gi 313104308 | 36224                                 | 6.4 | 4      | 155                     | 100 | 144 | 100    |

#### Peptide Information

| Calc. Mass | Obsrv. Mass | ± da    | ± ppm | Start Seq. | End Seq. | Sequence        | Ion Score | C. I. | % Modification | Rank | Result Type |
|------------|-------------|---------|-------|------------|----------|-----------------|-----------|-------|----------------|------|-------------|
| 907.5471   | 907.4729    | -0.0742 | -82   | 151        | 158      | LSGLPKHR        |           |       |                |      | Mascot      |
| 913.5828   | 913.5778    | -0.005  | -5    | 92         | 100      | IVVVTAGVR       |           |       |                |      | Mascot      |
| 1418.8002  | 1418.7982   | -0.002  | -1    | 8          | 21       | LITPLASGPAEPPR  |           |       |                |      | Mascot      |
| 1685.8593  | 1685.8553   | -0.004  | -2    | 44         | 58       | ELADELALVDVVEDR | 144       | 100   |                |      | Mascot      |
| 1685.8593  | 1685.8553   | -0.004  | -2    | 44         | 58       | ELADELALVDVVEDR |           |       |                |      | Mascot      |

4 Josephin-1 [Danio rerio] gi|115497592 26182.5 9.34 8 47 4.859

#### Peptide Information

| Calc. Mass | Obsrv. Mass | ± da    | ± ppm | Start Seq. | End Seq. | Sequence                 | Ion Score | C. I. | % Modification                             | Rank | Result Type |
|------------|-------------|---------|-------|------------|----------|--------------------------|-----------|-------|--------------------------------------------|------|-------------|
| 1051.5908  | 1051.7104   | 0.1196  | 114   | 170        | 177      | RQHWIGVR                 |           |       |                                            |      | Mascot      |
| 1051.5908  | 1051.7104   | 0.1196  | 114   | 170        | 177      | RQHWIGVR                 |           |       |                                            |      | Mascot      |
| 1137.5364  | 1137.5479   | 0.0115  | 10    | 128        | 136      | GFEAVWWDK                |           |       |                                            |      | Mascot      |
| 1179.6732  | 1179.5959   | -0.0773 | -66   | 96         | 106      | LSPSTLVTPHK              |           |       |                                            |      | Mascot      |
| 1307.7682  | 1307.6395   | -0.1287 | -98   | 96         | 107      | LSPSTLVTPHKK             |           |       |                                            |      | Mascot      |
| 1581.7188  | 1581.9062   | 0.1874  | 118   | 12         | 25       | GVGGFQELGCMPPWK          |           |       | Carbamidomethyl (C)[10], Oxidation (M)[11] |      | Mascot      |
| 1626.8485  | 1626.7854   | -0.0631 | -39   | 178        | 191      | EVAGVYYNLD SKLR          |           |       |                                            |      | Mascot      |
| 2233.0818  | 2233.084    | 0.0022  | 1     | 67         | 86       | ELCALHALNNVFQDGAA<br>FSR |           |       | Carbamidomethyl (C)[3]                     |      | Mascot      |
| 2255.1377  | 2255.0872   | -0.0505 | -22   | 214        | 232      | NCELLLVSEEVEVHQT<br>WK   |           |       |                                            |      | Mascot      |

5 T-complex protein 1 subunit theta [Danio rerio] gi|41055032 59262.8 5.22 12 43 0

| Peptide Information |                                                                   |         |       |             |          |                   |           |       |                                                |                  |
|---------------------|-------------------------------------------------------------------|---------|-------|-------------|----------|-------------------|-----------|-------|------------------------------------------------|------------------|
| Calc. Mass          | Obsrv. Mass                                                       | ± da    | ± ppm | Start Seq.  | End Seq. | Sequence          | Ion Score | C. I. | % Modification                                 | Rank Result Type |
| 1307.6378           | 1307.6395                                                         | 0.0017  | 1     | 21          | 31       | HYSGLEEAVFR       |           |       |                                                | Mascot           |
| 1331.7164           | 1331.6263                                                         | -0.0901 | -68   | 282         | 296      | AIADSGASVVVTGGK   |           |       |                                                | Mascot           |
| 1348.6591           | 1348.7513                                                         | 0.0922  | 68    | 226         | 238      | EAEGDVTSVKDAK     |           |       |                                                | Mascot           |
| 1365.5951           | 1365.6542                                                         | 0.0591  | 43    | 379         | 390      | GSTDNLMDIER       |           |       |                                                | Mascot           |
| 1475.7635           | 1475.7515                                                         | -0.012  | -8    | 32          | 44       | NIQACKELAQTTTR    |           |       |                                                | Mascot           |
| 1623.9039           | 1623.8043                                                         | -0.0996 | -61   | 2           | 16       | ALHVPKAPGFAQMLK   |           |       | Oxidation (M)[13]                              | Mascot           |
| 1626.7754           | 1626.7854                                                         | 0.01    | 6     | 491         | 504      | DMMEAGILDPYLVK    |           |       | Oxidation (M)[2,3]                             | Mascot           |
| 1629.8806           | 1629.8773                                                         | -0.0033 | -2    | 451         | 466      | ALAENSGVKGNELISK  |           |       |                                                | Mascot           |
| 1629.8806           | 1629.8773                                                         | -0.0033 | -2    | 451         | 466      | ALAENSGVKGNELISK  |           |       |                                                | Mascot           |
| 1790.0322           | 1789.9778                                                         | -0.0544 | -30   | 505         | 520      | YWGIKLATNAAITVLR  |           |       |                                                | Mascot           |
| 2048.989            | 2048.9512                                                         | -0.0378 | -18   | 45          | 62       | TAYGPNMKNMNVINHLK |           |       | Oxidation (M)[8,11]                            | Mascot           |
| 2384.1592           | 2383.9514                                                         | -0.2078 | -87   | 204         | 224      | VCKILGCGLNSSTMLHG |           |       | Carbamidomethyl (C)[2,7], Oxidation (M)[14,18] | Mascot           |
| 2486.2668           | 2486.2356                                                         | -0.0312 | -13   | 239         | 260      | IAVFSCPFDCVTETKGT |           |       | Carbamidomethyl (C)[6,10]                      | Mascot           |
| 6                   | phosphatidylinositol transfer protein alpha isoform [Danio rerio] |         |       | gi 41055576 |          | 31853             | 5.98      | 6     | 39                                             | 0 23 0           |

| Peptide Information |                                                                        |         |       |              |          |              |           |       |                        |                  |
|---------------------|------------------------------------------------------------------------|---------|-------|--------------|----------|--------------|-----------|-------|------------------------|------------------|
| Calc. Mass          | Obsrv. Mass                                                            | ± da    | ± ppm | Start Seq.   | End Seq. | Sequence     | Ion Score | C. I. | % Modification         | Rank Result Type |
| 907.4784            | 907.4729                                                               | -0.0055 | -6    | 220          | 226      | LFTSFHR      |           |       |                        | Mascot           |
| 1137.551            | 1137.5479                                                              | -0.0031 | -3    | 227          | 234      | QLFCWLDR     |           |       | Carbamidomethyl (C)[4] | Mascot           |
| 1165.6113           | 1165.7404                                                              | 0.1291  | 111   | 55           | 63       | GQYTHKIYR    |           |       |                        | Mascot           |
| 1165.6113           | 1165.7404                                                              | 0.1291  | 111   | 55           | 63       | GQYTHKIYR    |           |       |                        | Mascot           |
| 1200.5255           | 1200.5228                                                              | -0.0027 | -2    | 87           | 95       | AWNAYPYCR    |           |       | Carbamidomethyl (C)[8] | Mascot           |
| 1307.63             | 1307.6395                                                              | 0.0095  | 7     | 235          | 244      | WIDLTMEDIR   |           |       | Oxidation (M)[6]       | Mascot           |
| 1407.759            | 1407.7087                                                              | -0.0503 | -36   | 135          | 146      | QVEVIHIDIADR |           |       |                        | Mascot           |
| 1407.759            | 1407.7087                                                              | -0.0503 | -36   | 135          | 146      | QVEVIHIDIADR | 23        | 0     |                        | Mascot           |
| 7                   | PREDICTED: leucine-rich repeat-containing protein 7-like [Danio rerio] |         |       | gi 326668654 |          | 165765.9     | 6.33      | 17    | 38                     | 0                |

| Peptide Information |             |       |       |            |          |          |           |       |                  |                  |
|---------------------|-------------|-------|-------|------------|----------|----------|-----------|-------|------------------|------------------|
| Calc. Mass          | Obsrv. Mass | ± da  | ± ppm | Start Seq. | End Seq. | Sequence | Ion Score | C. I. | % Modification   | Rank Result Type |
| 819.3817            | 819.4697    | 0.088 | 107   | 1194       | 1199     | MPVDWR   |           |       | Oxidation (M)[1] | Mascot           |

|           |           |         |      |      |      |                                        |                                          |  |  |  |  |        |
|-----------|-----------|---------|------|------|------|----------------------------------------|------------------------------------------|--|--|--|--|--------|
| 907.3639  | 907.4729  | 0.109   | 120  | 468  | 475  | EEEDNSGK                               |                                          |  |  |  |  | Mascot |
| 1109.5771 | 1109.4902 | -0.0869 | -78  | 1366 | 1374 | CFIQTKGQK                              | Carbamidomethyl (C)[1]                   |  |  |  |  | Mascot |
| 1165.5704 | 1165.7404 | 0.17    | 146  | 858  | 867  | SSERLSPMMK                             |                                          |  |  |  |  | Mascot |
| 1165.5704 | 1165.7404 | 0.17    | 146  | 858  | 867  | SSERLSPMMK                             |                                          |  |  |  |  | Mascot |
| 1316.7355 | 1316.5469 | -0.1886 | -143 | 493  | 504  | NMVKSQNLVVGK                           |                                          |  |  |  |  | Mascot |
| 1348.6201 | 1348.7513 | 0.1312  | 97   | 1240 | 1250 | SMTINFYNNTK                            | Oxidation (M)[2]                         |  |  |  |  | Mascot |
| 1358.7889 | 1358.6879 | -0.101  | -74  | 1462 | 1473 | TVDLVILRESTI                           |                                          |  |  |  |  | Mascot |
| 1493.7343 | 1493.7281 | -0.0062 | -4   | 1328 | 1340 | TARDQQYEGAINK                          |                                          |  |  |  |  | Mascot |
| 1581.8054 | 1581.9062 | 0.1008  | 64   | 1173 | 1186 | SPEADMNLRPVPQK                         |                                          |  |  |  |  | Mascot |
| 1585.7928 | 1585.9478 | 0.155   | 98   | 661  | 674  | ETPPSSTLQQRGER                         |                                          |  |  |  |  | Mascot |
| 1585.7928 | 1585.9478 | 0.155   | 98   | 661  | 674  | ETPPSSTLQQRGER                         |                                          |  |  |  |  | Mascot |
| 1609.6581 | 1609.8849 | 0.2268  | 141  | 514  | 527  | CSSGTNMEHSQDK                          | Carbamidomethyl (C)[1], Oxidation (M)[7] |  |  |  |  | Mascot |
| 1751.8455 | 1751.9036 | 0.0581  | 33   | 1375 | 1389 | SMDGFPEQLCVRIEK                        |                                          |  |  |  |  | Mascot |
| 1789.9517 | 1789.9778 | 0.0261  | 15   | 357  | 371  | LEFLPDEIGQMTKLR                        |                                          |  |  |  |  | Mascot |
| 1993.9358 | 1993.9698 | 0.034   | 17   | 538  | 555  | EVMLLYPDSMGGSPNDI<br>R                 |                                          |  |  |  |  | Mascot |
| 2126.9116 | 2126.998  | 0.0864  | 41   | 514  | 531  | CSSGTNMEHSQDKYEP<br>K                  | Carbamidomethyl (C)[1], Oxidation (M)[7] |  |  |  |  | Mascot |
| 2384.0969 | 2383.9514 | -0.1455 | -61  | 1078 | 1097 | SMLEQQNSLSTMADTQF<br>HKR               | Oxidation (M)[2,12]                      |  |  |  |  | Mascot |
| 3787.8728 | 3787.8743 | 0.0015  | 0    | 240  | 274  | NRIESLDADISGCESLEDL<br>LLSANMLQLPDSIGK |                                          |  |  |  |  | Mascot |

8 scavenger mRNA-decapping enzyme DcpS [Danio rerio] gi|67514547 37274.2 6.19 8 38 0

Peptide Information

| Calc. Mass | Obsrv. Mass | ± da    | ± ppm | Start Seq. | End Sequence Seq. | Ion Score                 | C. I. % | Modification           | Rank | Result Type |
|------------|-------------|---------|-------|------------|-------------------|---------------------------|---------|------------------------|------|-------------|
| 819.4722   | 819.4697    | -0.0025 | -3    | 301        | 307               | SLSFPLR                   |         |                        |      | Mascot      |
| 1137.5278  | 1137.5479   | 0.0201  | 18    | 114        | 123               | TTVMCPATEK                |         | Carbamidomethyl (C)[5] |      | Mascot      |
| 1581.9111  | 1581.9062   | -0.0049 | -3    | 197        | 209               | QLQDLYLIAIVHR             |         |                        |      | Mascot      |
| 1609.8909  | 1609.8849   | -0.006  | -4    | 217        | 230               | DLTAEHLTLLTNIR            |         |                        |      | Mascot      |
| 2048.9519  | 2048.9512   | -0.0007 | 0     | 27         | 44                | NADEQSTDNPVVDQFLT<br>R    |         |                        |      | Mascot      |
| 2127.0029  | 2126.998    | -0.0049 | -2    | 128        | 144               | YLHQEVFLLEESGEDYR         |         |                        |      | Mascot      |
| 2255.0979  | 2255.0872   | -0.0107 | -5    | 127        | 144               | KYLHQEVFLLEESGEDYR        |         |                        |      | Mascot      |
| 2486.2422  | 2486.2356   | -0.0066 | -3    | 280        | 300               | AHLLSDVIQNLQLDSSYY<br>HNR |         |                        |      | Mascot      |

9 hypothetical protein LOC100145372 [Xenopus (Silurana) tropicalis] gi|187607587 26110.4 9.46 7 37 0

Peptide Information

|    | Calc. Mass                                   | Obsrv. Mass | ± da    | ± ppm | Start Seq.  | End Seq. | Sequence           | Ion Score | C. I. | % Modification                             | Rank | Result Type |
|----|----------------------------------------------|-------------|---------|-------|-------------|----------|--------------------|-----------|-------|--------------------------------------------|------|-------------|
|    | 1051.5908                                    | 1051.7104   | 0.1196  | 114   | 170         | 177      | RQHWIGVR           |           |       |                                            |      | Mascot      |
|    | 1051.5908                                    | 1051.7104   | 0.1196  | 114   | 170         | 177      | RQHWIGVR           |           |       |                                            |      | Mascot      |
|    | 1137.5364                                    | 1137.5479   | 0.0115  | 10    | 128         | 136      | GFEAVWWDK          |           |       |                                            |      | Mascot      |
|    | 1179.6732                                    | 1179.5959   | -0.0773 | -66   | 96          | 106      | LSPSTLVTPHK        |           |       |                                            |      | Mascot      |
|    | 1307.7682                                    | 1307.6395   | -0.1287 | -98   | 96          | 107      | LSPSTLVTPHKK       |           |       |                                            |      | Mascot      |
|    | 1581.7188                                    | 1581.9062   | 0.1874  | 118   | 12          | 25       | GVGGFQELGCMPPWK    |           |       | Carbamidomethyl (C)[10], Oxidation (M)[11] |      | Mascot      |
|    | 1626.8485                                    | 1626.7854   | -0.0631 | -39   | 178         | 191      | EVAGVYYNLD SKLR    |           |       |                                            |      | Mascot      |
|    | 2255.1377                                    | 2255.0872   | -0.0505 | -22   | 214         | 232      | NCELLLVSEEVEVHQTWK |           |       |                                            |      | Mascot      |
| 10 | sorting nexin family member 27 [Danio rerio] |             |         |       | gi 41054611 | 64121.8  | 5.8                | 11        | 37    | 0                                          |      |             |

#### Peptide Information

|    | Calc. Mass                                                  | Obsrv. Mass | ± da    | ± ppm | Start Seq.  | End Seq. | Sequence                  | Ion Score | C. I. | % Modification                            | Rank | Result Type |
|----|-------------------------------------------------------------|-------------|---------|-------|-------------|----------|---------------------------|-----------|-------|-------------------------------------------|------|-------------|
|    | 842.5094                                                    | 842.5073    | -0.0021 | -2    | 121         | 127      | QVVDLIR                   |           |       |                                           |      | Mascot      |
|    | 1137.5873                                                   | 1137.5479   | -0.0394 | -35   | 522         | 529      | VFCELKWR                  |           |       | Carbamidomethyl (C)[3]                    |      | Mascot      |
|    | 1179.6368                                                   | 1179.5959   | -0.0409 | -35   | 400         | 409      | VGEKSYQLQK                |           |       |                                           |      | Mascot      |
|    | 1331.7351                                                   | 1331.6263   | -0.1088 | -82   | 284         | 295      | IAMPDKTTVTVR              |           |       |                                           |      | Mascot      |
|    | 1393.7434                                                   | 1393.7286   | -0.0148 | -11   | 404         | 414      | SYQLQKLTEQR               |           |       |                                           |      | Mascot      |
|    | 1581.7941                                                   | 1581.9062   | 0.1121  | 71    | 243         | 255      | GLEEYLEKVC SVR            |           |       | Carbamidomethyl (C)[10]                   |      | Mascot      |
|    | 1626.7792                                                   | 1626.7854   | 0.0062  | 4     | 299         | 312      | NCTTDQVYQAVVTK            |           |       | Carbamidomethyl (C)[2]                    |      | Mascot      |
|    | 2127.1267                                                   | 2126.998    | -0.1287 | -61   | 346         | 364      | LYVQNYTSAPVGTCLTLRK       |           |       |                                           |      | Mascot      |
|    | 2225.0283                                                   | 2225.1191   | 0.0908  | 41    | 24          | 47       | NGSGMSAGTCAGGLVAT TVTSGPR |           |       | Carbamidomethyl (C)[10], Oxidation (M)[5] |      | Mascot      |
|    | 2225.0283                                                   | 2225.1191   | 0.0908  | 41    | 24          | 47       | NGSGMSAGTCAGGLVAT TVTSGPR |           |       | Carbamidomethyl (C)[10], Oxidation (M)[5] |      | Mascot      |
|    | 2232.8743                                                   | 2233.084    | 0.2097  | 94    | 425         | 442      | TCEGYNEITFPHCSCDSR        |           |       | Carbamidomethyl (C)[2,13,15]              |      | Mascot      |
|    | 2283.9321                                                   | 2284.1724   | 0.2403  | 105   | 482         | 500      | WDTDEEGMAFCFEYARG EK      |           |       |                                           |      | Mascot      |
|    | 2299.927                                                    | 2300.1763   | 0.2493  | 108   | 482         | 500      | WDTDEEGMAFCFEYARG EK      |           |       | Oxidation (M)[8]                          |      | Mascot      |
| 11 | chaperonin containing TCP1, subunit 8 (theta) [Danio rerio] |             |         |       | gi 37362194 | 59262.8  | 5.22                      | 11        | 36    | 0                                         |      |             |

#### Peptide Information

|  | Calc. Mass | Obsrv. Mass | ± da    | ± ppm | Start Seq. | End Seq. | Sequence        | Ion Score | C. I. | % Modification | Rank | Result Type |
|--|------------|-------------|---------|-------|------------|----------|-----------------|-----------|-------|----------------|------|-------------|
|  | 1307.6378  | 1307.6395   | 0.0017  | 1     | 21         | 31       | HYSGLEEAVFR     |           |       |                |      | Mascot      |
|  | 1331.7164  | 1331.6263   | -0.0901 | -68   | 282        | 296      | AIADSGASVVVTGGK |           |       |                |      | Mascot      |

|           |                                                |         |     |     |             |                           |      |    |    |                                                   |  |        |
|-----------|------------------------------------------------|---------|-----|-----|-------------|---------------------------|------|----|----|---------------------------------------------------|--|--------|
| 1365.5951 | 1365.6542                                      | 0.0591  | 43  | 379 | 390         | GSTDNLMDIER               |      |    |    |                                                   |  | Mascot |
| 1475.7635 | 1475.7515                                      | -0.012  | -8  | 32  | 44          | NIQACKELAQTTR             |      |    |    |                                                   |  | Mascot |
| 1623.9039 | 1623.8043                                      | -0.0996 | -61 | 2   | 16          | ALHVPKAPGFAQMLK           |      |    |    | Oxidation (M)[13]                                 |  | Mascot |
| 1626.7754 | 1626.7854                                      | 0.01    | 6   | 491 | 504         | DMMEAGILDPYLVK            |      |    |    | Oxidation (M)[2,3]                                |  | Mascot |
| 1629.8806 | 1629.8773                                      | -0.0033 | -2  | 451 | 466         | ALAENSGVKGNELISK          |      |    |    |                                                   |  | Mascot |
| 1629.8806 | 1629.8773                                      | -0.0033 | -2  | 451 | 466         | ALAENSGVKGNELISK          |      |    |    |                                                   |  | Mascot |
| 1790.0322 | 1789.9778                                      | -0.0544 | -30 | 505 | 520         | YWGIKLATNAITVLR           |      |    |    |                                                   |  | Mascot |
| 2048.989  | 2048.9512                                      | -0.0378 | -18 | 45  | 62          | TAYGPNGMNKMVINHLE<br>K    |      |    |    | Oxidation (M)[8,11]                               |  | Mascot |
| 2384.1592 | 2383.9514                                      | -0.2078 | -87 | 204 | 224         | VCKILGCGLSSTMLHG<br>MVFK  |      |    |    | Carbamidomethyl (C)[2,7], Oxidation<br>(M)[14,18] |  | Mascot |
| 2486.2668 | 2486.2356                                      | -0.0312 | -13 | 239 | 260         | IAVFSCPFDCVTETKGT<br>VLIK |      |    |    | Carbamidomethyl (C)[6,10]                         |  | Mascot |
| 12        | spectrin beta chain, erythrocyte [Danio rerio] |         |     |     | gi 18859423 | 272658.4                  | 5.26 | 23 | 36 | 0                                                 |  |        |

Peptide Information

| Calc. Mass | Obsrv. Mass | ± da    | ± ppm | Start Seq. | End Seq. | Sequence          | Ion Score | C. I. % | Modification            | Rank | Result Type |
|------------|-------------|---------|-------|------------|----------|-------------------|-----------|---------|-------------------------|------|-------------|
| 819.4318   | 819.4697    | 0.0379  | 46    | 178        | 184      | QETRSAK           |           |         |                         |      | Mascot      |
| 1045.5524  | 1045.535    | -0.0174 | -17   | 393        | 402      | EGALVSDINK        |           |         |                         |      | Mascot      |
| 1051.5531  | 1051.7104   | 0.1573  | 150   | 2211       | 2219     | KHELEGPNK         |           |         |                         |      | Mascot      |
| 1051.5531  | 1051.7104   | 0.1573  | 150   | 2212       | 2220     | HELEGPNNK         |           |         |                         |      | Mascot      |
| 1109.5255  | 1109.4902   | -0.0353 | -32   | 1258       | 1266     | MSSIEERNK         |           |         | Oxidation (M)[1]        |      | Mascot      |
| 1234.5909  | 1234.6273   | 0.0364  | 29    | 1060       | 1070     | DREDSLGEVSK       |           |         |                         |      | Mascot      |
| 1234.5909  | 1234.6273   | 0.0364  | 29    | 1060       | 1070     | DREDSLGEVSK       |           |         |                         |      | Mascot      |
| 1277.6381  | 1277.7023   | 0.0642  | 50    | 185        | 194      | DALLLWCQMK        |           |         | Carbamidomethyl (C)[7]  |      | Mascot      |
| 1320.7198  | 1320.5818   | -0.138  | -104  | 517        | 526      | LWDYLQELLK        |           |         |                         |      | Mascot      |
| 1348.6968  | 1348.7513   | 0.0545  | 40    | 2100       | 2109     | KQQQEIQQYR        |           |         |                         |      | Mascot      |
| 1365.6896  | 1365.6542   | -0.0354 | -26   | 1390       | 1401     | SELFQQLADLK       |           |         |                         |      | Mascot      |
| 1407.621   | 1407.7087   | 0.0877  | 62    | 1219       | 1230     | HEDFVTMTDANK      |           |         |                         |      | Mascot      |
| 1407.621   | 1407.7087   | 0.0877  | 62    | 1219       | 1230     | HEDFVTMTDANK      |           |         |                         |      | Mascot      |
| 1418.6798  | 1418.7982   | 0.1184  | 83    | 1044       | 1055     | QEELDAAWDTLK      |           |         |                         |      | Mascot      |
| 1493.7845  | 1493.7281   | -0.0564 | -38   | 1390       | 1402     | SELFQQLADLKK      |           |         |                         |      | Mascot      |
| 1581.8193  | 1581.9062   | 0.0869  | 55    | 836        | 848      | DMYIELLTLSDLR     |           |         |                         |      | Mascot      |
| 1609.8367  | 1609.8849   | 0.0482  | 30    | 74         | 86       | VSCRISDLYDLR      |           |         | Carbamidomethyl (C)[3]  |      | Mascot      |
| 1623.783   | 1623.8043   | 0.0213  | 13    | 898        | 911      | LSILAQEMGNMQTR    |           |         | Oxidation (M)[8,11]     |      | Mascot      |
| 1685.8315  | 1685.8553   | 0.0238  | 14    | 2281       | 2294     | LRLGDGSEYLFQCK    |           |         | Carbamidomethyl (C)[13] |      | Mascot      |
| 1685.8315  | 1685.8553   | 0.0238  | 14    | 2281       | 2294     | LRLGDGSEYLFQCK    |           |         | Carbamidomethyl (C)[13] |      | Mascot      |
| 1993.9569  | 1993.9698   | 0.0129  | 6     | 699        | 715      | DNLKQVMDEGESMIQIK |           |         | Oxidation (M)[7]        |      | Mascot      |



|                     |                                                   |             |         |       |              |          |                            |      |           |       |                           |                                           |      |             |
|---------------------|---------------------------------------------------|-------------|---------|-------|--------------|----------|----------------------------|------|-----------|-------|---------------------------|-------------------------------------------|------|-------------|
|                     | 2127.0574                                         | 2126.998    | -0.0594 | -28   | 703          | 721      | QVMDEGESMIQIKHLGSP<br>K    |      |           |       |                           |                                           |      | Mascot      |
|                     | 2187.0798                                         | 2187.0461   | -0.0337 | -15   | 620          | 637      | VQHLDLCYQQLCALAAQ<br>R     |      |           |       | Carbamidomethyl (C)[7,12] |                                           |      | Mascot      |
|                     | 2284.2507                                         | 2284.1724   | -0.0783 | -34   | 984          | 1004     | VIESTQDLGNDLAAVITIQ<br>RK  |      |           |       |                           |                                           |      | Mascot      |
|                     | 2299.1963                                         | 2299.1863   | -0.01   | -4    | 2189         | 2210     | AASLPTESTQVQPVLMG<br>GTLAR |      |           |       |                           |                                           |      | Mascot      |
|                     | 2384.1453                                         | 2383.9514   | -0.1939 | -81   | 1324         | 1343     | HQAFMAELASNKDWLHN<br>IDK   |      |           |       | Oxidation (M)[5]          |                                           |      | Mascot      |
| 13                  | intraflagellar transport 81 homolog [Danio rerio] |             |         |       | gi 159570779 |          | 78814.9                    | 6.43 | 15        | 36    | 0                         |                                           |      |             |
| Peptide Information |                                                   |             |         |       |              |          |                            |      |           |       |                           |                                           |      |             |
|                     | Calc. Mass                                        | Obsrv. Mass | ± da    | ± ppm | Start Seq.   | End Seq. | Sequence                   |      | Ion Score | C. I. | %                         | Modification                              | Rank | Result Type |
|                     | 819.3954                                          | 819.4697    | 0.0743  | 91    | 380          | 386      | TSQAQER                    |      |           |       |                           |                                           |      | Mascot      |
|                     | 870.5519                                          | 870.5366    | -0.0153 | -18   | 616          | 622      | VLRQQVK                    |      |           |       |                           |                                           |      | Mascot      |
|                     | 1045.5636                                         | 1045.535    | -0.0286 | -27   | 430          | 437      | TEEILRER                   |      |           |       |                           |                                           |      | Mascot      |
|                     | 1179.6342                                         | 1179.5959   | -0.0383 | -32   | 195          | 204      | RVEAVANHQR                 |      |           |       |                           |                                           |      | Mascot      |
|                     | 1186.6725                                         | 1186.5629   | -0.1096 | -92   | 240          | 248      | LQRCQIQLK                  |      |           |       |                           | Carbamidomethyl (C)[4]                    |      | Mascot      |
|                     | 1186.6725                                         | 1186.5629   | -0.1096 | -92   | 240          | 248      | LQRCQIQLK                  |      |           |       |                           | Carbamidomethyl (C)[4]                    |      | Mascot      |
|                     | 1200.5123                                         | 1200.5228   | 0.0105  | 9     | 481          | 490      | TLDDMSEMVK                 |      |           |       |                           | Oxidation (M)[5,8]                        |      | Mascot      |
|                     | 1331.6802                                         | 1331.6263   | -0.0539 | -40   | 356          | 366      | ETKVEELQEAR                |      |           |       |                           |                                           |      | Mascot      |
|                     | 1358.6732                                         | 1358.6879   | 0.0147  | 11    | 298          | 310      | VASEPAMGQAELR              |      |           |       |                           |                                           |      | Mascot      |
|                     | 1365.693                                          | 1365.6542   | -0.0388 | -28   | 467          | 478      | VSAIKSELDEMK               |      |           |       |                           | Oxidation (M)[11]                         |      | Mascot      |
|                     | 1434.7006                                         | 1434.7642   | 0.0636  | 44    | 375          | 386      | ELNMKTSQAQER               |      |           |       |                           |                                           |      | Mascot      |
|                     | 1581.7651                                         | 1581.9062   | 0.1411  | 89    | 637          | 648      | MWKDLETLECK                |      |           |       |                           | Carbamidomethyl (C)[11], Oxidation (M)[1] |      | Mascot      |
|                     | 1789.8636                                         | 1789.9778   | 0.1142  | 64    | 249          | 264      | DLQQAADKPESLMK             |      |           |       |                           | Oxidation (M)[15]                         |      | Mascot      |
|                     | 2225.0879                                         | 2225.1191   | 0.0312  | 14    | 563          | 579      | YHHINCEREIIESQIQR          |      |           |       |                           | Carbamidomethyl (C)[6]                    |      | Mascot      |
|                     | 2225.0879                                         | 2225.1191   | 0.0312  | 14    | 563          | 579      | YHHINCEREIIESQIQR          |      |           |       |                           | Carbamidomethyl (C)[6]                    |      | Mascot      |
|                     | 2233.1646                                         | 2233.084    | -0.0806 | -36   | 291          | 310      | VVQYLQKVASEPAMGQA<br>ELR   |      |           |       |                           | Oxidation (M)[14]                         |      | Mascot      |
|                     | 2283.1914                                         | 2283.1821   | -0.0093 | -4    | 650          | 670      | QCYLKAQSQAPIGHVIQD<br>VGK  |      |           |       |                           |                                           |      | Mascot      |
| 14                  | hypothetical protein LOC553738 [Danio rerio]      |             |         |       | gi 66472320  |          | 27546.3                    | 9.57 | 9         | 35    | 0                         |                                           |      |             |
| Peptide Information |                                                   |             |         |       |              |          |                            |      |           |       |                           |                                           |      |             |
|                     | Calc. Mass                                        | Obsrv. Mass | ± da    | ± ppm | Start Seq.   | End Seq. | Sequence                   |      | Ion Score | C. I. | %                         | Modification                              | Rank | Result Type |
|                     | 1165.6212                                         | 1165.7404   | 0.1192  | 102   | 194          | 203      | TFVTADDLKR                 |      |           |       |                           |                                           |      | Mascot      |
|                     | 1165.6212                                         | 1165.7404   | 0.1192  | 102   | 194          | 203      | TFVTADDLKR                 |      |           |       |                           |                                           |      | Mascot      |
|                     | 1179.615                                          | 1179.5959   | -0.0191 | -16   | 166          | 175      | SCTRQSSLIK                 |      |           |       |                           | Carbamidomethyl (C)[2]                    |      | Mascot      |
|                     | 1365.6501                                         | 1365.6542   | 0.0041  | 3     | 13           | 25       | TGEKPITCTQCGK              |      |           |       |                           |                                           |      | Mascot      |

|    |                                                                                |           |        |    |     |              |                          |      |    |                                               |   |  |        |
|----|--------------------------------------------------------------------------------|-----------|--------|----|-----|--------------|--------------------------|------|----|-----------------------------------------------|---|--|--------|
|    | 1751.8601                                                                      | 1751.9036 | 0.0435 | 25 | 10  | 25           | MVRTGEKPITCTQCGK         |      |    |                                               |   |  | Mascot |
|    | 2048.9172                                                                      | 2048.9512 | 0.034  | 17 | 36  | 53           | HMMIHTGEKPFTCTQCGK       |      |    |                                               |   |  | Mascot |
|    | 2126.9529                                                                      | 2126.998  | 0.0451 | 21 | 151 | 169          | VHTNERPYSCSVCGKSCTR      |      |    |                                               |   |  | Mascot |
|    | 2233.0752                                                                      | 2233.084  | 0.0088 | 4  | 147 | 165          | FHLRVHTNERPYSCSVC GK     |      |    |                                               |   |  | Mascot |
|    | 2284.0168                                                                      | 2284.1724 | 0.1556 | 68 | 204 | 221          | HQRIHTGEKPYMCSHCDK       |      |    | Carbamidomethyl (C)[13,16]                    |   |  | Mascot |
|    | 2300.0117                                                                      | 2300.1763 | 0.1646 | 72 | 204 | 221          | HQRIHTGEKPYMCSHCDK       |      |    | Carbamidomethyl (C)[13,16], Oxidation (M)[12] |   |  | Mascot |
|    | 2486.1763                                                                      | 2486.2356 | 0.0593 | 24 | 13  | 35           | TGEKPITCTQCGKSFSQS SNLNR |      |    |                                               |   |  | Mascot |
| 15 | PREDICTED: NACHT, LRR and PYD domains-containing protein 12-like [Danio rerio] |           |        |    |     | gi 292610042 | 103784.1                 | 7.26 | 14 | 34                                            | 0 |  |        |

#### Peptide Information

| Calc. Mass | Obsrv. Mass | ± da    | ± ppm | Start Seq. | End Seq. | Sequence              | Ion Score | C. I. | % Modification            | Rank | Result Type |
|------------|-------------|---------|-------|------------|----------|-----------------------|-----------|-------|---------------------------|------|-------------|
| 819.4219   | 819.4697    | 0.0478  | 58    | 2          | 7        | TYRSHR                |           |       |                           |      | Mascot      |
| 870.577    | 870.5366    | -0.0404 | -46   | 660        | 666      | LEKLVLRL              |           |       |                           |      | Mascot      |
| 1179.6732  | 1179.5959   | -0.0773 | -66   | 263        | 272      | LADEIIQHLK            |           |       |                           |      | Mascot      |
| 1307.5896  | 1307.6395   | 0.0499  | 38    | 70         | 80       | STTEDTPIQCR           |           |       | Carbamidomethyl (C)[10]   |      | Mascot      |
| 1327.6351  | 1327.7408   | 0.1057  | 80    | 604        | 615      | SAVLWYCGVSDK          |           |       |                           |      | Mascot      |
| 1358.6521  | 1358.6879   | 0.0358  | 26    | 20         | 30       | KFQCLYEGTGRIK         |           |       | Carbamidomethyl (C)[4]    |      | Mascot      |
| 1471.7362  | 1471.7124   | -0.0238 | -16   | 21         | 32       | FQCLYEGTGRIK          |           |       | Carbamidomethyl (C)[3]    |      | Mascot      |
| 1475.8719  | 1475.7515   | -0.1204 | -82   | 903        | 915      | SEVSVIVLLEFIK         |           |       |                           |      | Mascot      |
| 1685.7621  | 1685.8553   | 0.0932  | 55    | 841        | 857      | YCGVSDEGCAALASALR     |           |       |                           |      | Mascot      |
| 1685.7621  | 1685.8553   | 0.0932  | 55    | 841        | 857      | YCGVSDEGCAALASALR     |           |       |                           |      | Mascot      |
| 1751.8236  | 1751.9036   | 0.08    | 46    | 667        | 683      | CCGVSVEGCAALASVLR     |           |       | Carbamidomethyl (C)[1,2]  |      | Mascot      |
| 2048.9851  | 2048.9512   | -0.0339 | -17   | 781        | 799      | LRDCGVSVEGCADLASALR   |           |       | Carbamidomethyl (C)[4,11] |      | Mascot      |
| 2187.1155  | 2187.0461   | -0.0694 | -32   | 170        | 187      | VLFIIDGLDECRLSLDFK    |           |       | Carbamidomethyl (C)[11]   |      | Mascot      |
| 2211.1047  | 2211.1025   | -0.0022 | -1    | 721        | 741      | LWLGYCGVSDKGCAALASALR |           |       | Carbamidomethyl (C)[6]    |      | Mascot      |
| 2233.1614  | 2233.084    | -0.0774 | -35   | 663        | 683      | LVLRCGVSVEGCAALASVLR  |           |       | Carbamidomethyl (C)[5,6]  |      | Mascot      |

16 Fanconi anemia group F protein [Danio rerio] gi|148225150 37464 5.55 7 34 0

#### Peptide Information

| Calc. Mass | Obsrv. Mass | ± da   | ± ppm | Start Seq. | End Seq. | Sequence     | Ion Score | C. I. | % Modification | Rank | Result Type |
|------------|-------------|--------|-------|------------|----------|--------------|-----------|-------|----------------|------|-------------|
| 850.4821   | 850.5397    | 0.0576 | 68    | 251        | 257      | LYWGALK      |           |       |                |      | Mascot      |
| 1279.6124  | 1279.7676   | 0.1552 | 121   | 56         | 67       | SSLESGLTDTNR |           |       |                |      | Mascot      |

|    |                                                                                        |           |         |     |     |              |                          |          |      |    |    |   |                         |  |  |  |        |
|----|----------------------------------------------------------------------------------------|-----------|---------|-----|-----|--------------|--------------------------|----------|------|----|----|---|-------------------------|--|--|--|--------|
|    | 1365.6614                                                                              | 1365.6542 | -0.0072 | -5  | 180 | 192          | CLLDSVRCNSAGK            |          |      |    |    |   |                         |  |  |  | Mascot |
|    | 1629.7755                                                                              | 1629.8773 | 0.1018  | 62  | 144 | 157          | TSSYYGLQTEPEVR           |          |      |    |    |   |                         |  |  |  | Mascot |
|    | 1629.7755                                                                              | 1629.8773 | 0.1018  | 62  | 144 | 157          | TSSYYGLQTEPEVR           | 4        |      | 0  |    |   |                         |  |  |  | Mascot |
|    | 2191.238                                                                               | 2191.1226 | -0.1154 | -53 | 1   | 19           | MEAVLRHLNNILELLAVS<br>R  |          |      |    |    |   |                         |  |  |  | Mascot |
|    | 2225.0793                                                                              | 2225.1191 | 0.0398  | 18  | 48  | 67           | YQSNPTVRSSLESGLTDT<br>NR |          |      |    |    |   |                         |  |  |  | Mascot |
|    | 2225.0793                                                                              | 2225.1191 | 0.0398  | 18  | 48  | 67           | YQSNPTVRSSLESGLTDT<br>NR |          |      |    |    |   |                         |  |  |  | Mascot |
|    | 2384.0862                                                                              | 2383.9514 | -0.1348 | -57 | 71  | 90           | ETFPSYSPVEFSELAQCQ<br>HK |          |      |    |    |   | Carbamidomethyl (C)[17] |  |  |  | Mascot |
| 17 | PREDICTED: phosphatidylinositol-3,4,5-trisphosphate 5-phosphatase 1-like [Danio rerio] |           |         |     |     |              |                          |          |      |    |    |   |                         |  |  |  |        |
|    |                                                                                        |           |         |     |     | gi 326668645 |                          | 124316.7 | 8.13 | 14 | 34 | 0 |                         |  |  |  |        |

Peptide Information

| Calc. Mass | Obsrv. Mass | ± da    | ± ppm | Start Seq. | End Seq. | Sequence                   | Ion Score | C. I. | % Modification         | Rank | Result Type |
|------------|-------------|---------|-------|------------|----------|----------------------------|-----------|-------|------------------------|------|-------------|
| 819.4393   | 819.4697    | 0.0304  | 37    | 207        | 213      | LTQNICK                    |           |       |                        |      | Mascot      |
| 1174.6677  | 1174.603    | -0.0647 | -55   | 266        | 275      | LIQSIEDKTK                 |           |       |                        |      | Mascot      |
| 1200.583   | 1200.5228   | -0.0602 | -50   | 519        | 529      | GAVGVSFMFNR                |           |       | Oxidation (M)[8]       |      | Mascot      |
| 1316.7322  | 1316.5469   | -0.1853 | -141  | 476        | 486      | QIATQTLWSIR                |           |       |                        |      | Mascot      |
| 1365.6282  | 1365.6542   | 0.026   | 19    | 931        | 943      | TSYDHATSSPTAK              |           |       |                        |      | Mascot      |
| 1471.7461  | 1471.7124   | -0.0337 | -23   | 302        | 314      | SDSLGISNKMYLEK             |           |       | Oxidation (M)[10]      |      | Mascot      |
| 1493.723   | 1493.7281   | 0.0051  | 3     | 930        | 943      | KTSYDHATSSPTAK             |           |       |                        |      | Mascot      |
| 1581.7941  | 1581.9062   | 0.1121  | 71    | 589        | 602      | VDLPSHEAENIVMK             |           |       |                        |      | Mascot      |
| 1585.7639  | 1585.9478   | 0.1839  | 116   | 915        | 929      | TGPSKDMTHGNISPK            |           |       | Oxidation (M)[7]       |      | Mascot      |
| 1585.7639  | 1585.9478   | 0.1839  | 116   | 915        | 929      | TGPSKDMTHGNISPK            |           |       | Oxidation (M)[7]       |      | Mascot      |
| 1623.7981  | 1623.8043   | 0.0062  | 4     | 379        | 391      | EGFCQLLQQMKNK              |           |       | Carbamidomethyl (C)[4] |      | Mascot      |
| 1685.9221  | 1685.8553   | -0.0668 | -40   | 838        | 853      | TGWLTGAIQLPKSEGK           |           |       |                        |      | Mascot      |
| 1685.9221  | 1685.8553   | -0.0668 | -40   | 838        | 853      | TGWLTGAIQLPKSEGK           |           |       |                        |      | Mascot      |
| 1707.8173  | 1707.7656   | -0.0517 | -30   | 1          | 14       | MFSPQPWHHGNITR             |           |       |                        |      | Mascot      |
| 2225.01    | 2225.1191   | 0.1091  | 49    | 881        | 901      | MSSSVLASDISNPSYMG<br>VGYSK |           |       | Oxidation (M)[1,16]    |      | Mascot      |
| 2225.01    | 2225.1191   | 0.1091  | 49    | 881        | 901      | MSSSVLASDISNPSYMG<br>VGYSK |           |       | Oxidation (M)[1,16]    |      | Mascot      |
| 2299.1135  | 2299.1863   | 0.0728  | 32    | 185        | 205      | ASVCLDAEQVQNGNQTL<br>PHFK  |           |       |                        |      | Mascot      |

18 Zgc:55395 protein [Danio rerio] gi|159155715 38358.6 8.55 9 34 0

Peptide Information

| Calc. Mass | Obsrv. Mass | ± da    | ± ppm | Start Seq. | End Seq. | Sequence  | Ion Score | C. I. | % Modification | Rank | Result Type |
|------------|-------------|---------|-------|------------|----------|-----------|-----------|-------|----------------|------|-------------|
| 882.577    | 882.5636    | -0.0134 | -15   | 308        | 316      | GLPKLGIGK |           |       |                |      | Mascot      |

|    |                             |           |         |      |              |     |                           |     |    |    |   |                        |  |        |
|----|-----------------------------|-----------|---------|------|--------------|-----|---------------------------|-----|----|----|---|------------------------|--|--------|
|    | 1316.5986                   | 1316.5469 | -0.0517 | -39  | 138          | 148 | NNCTFCGVFRR               |     |    |    |   |                        |  | Mascot |
|    | 1348.6096                   | 1348.7513 | 0.1417  | 105  | 2            | 12  | PVQCSNCEQKR               |     |    |    |   | Carbamidomethyl (C)[4] |  | Mascot |
|    | 1407.6719                   | 1407.7087 | 0.0368  | 26   | 274          | 286 | EGVKMPVQGTCSR             |     |    |    |   | Oxidation (M)[5]       |  | Mascot |
|    | 1407.6719                   | 1407.7087 | 0.0368  | 26   | 274          | 286 | EGVKMPVQGTCSR             |     |    |    |   | Oxidation (M)[5]       |  | Mascot |
|    | 1685.825                    | 1685.8553 | 0.0303  | 18   | 133          | 147 | QVGLKNNCTFCGVFR           |     |    |    |   |                        |  | Mascot |
|    | 1685.825                    | 1685.8553 | 0.0303  | 18   | 133          | 147 | QVGLKNNCTFCGVFR           |     |    |    |   |                        |  | Mascot |
|    | 1707.9752                   | 1707.7656 | -0.2096 | -123 | 62           | 76  | DSTVLAHVIKLLNER           |     |    |    |   |                        |  | Mascot |
|    | 2126.9851                   | 2126.998  | 0.0129  | 6    | 226          | 242 | KLDYFSTECIYSPNAYR         |     |    |    |   | Carbamidomethyl (C)[9] |  | Mascot |
|    | 2187.0532                   | 2187.0461 | -0.0071 | -3   | 163          | 182 | ICTGHNADDVAETVLMNV<br>LR  |     |    |    |   | Oxidation (M)[16]      |  | Mascot |
|    | 2191.0845                   | 2191.1226 | 0.0381  | 17   | 191          | 211 | CTAISTSSEGDGAIPRCK<br>PLK |     |    |    |   | Carbamidomethyl (C)[1] |  | Mascot |
| 19 | novel protein [Danio rerio] |           |         |      | gi 169146109 |     | 64501.6                   | 6.3 | 10 | 34 | 0 |                        |  |        |

#### Peptide Information

| Calc. Mass | Obsrv. Mass | ± da    | ± ppm | Start Seq. | End Seq. | Sequence                   | Ion Score | C. I. % | Modification                               | Rank | Result Type |
|------------|-------------|---------|-------|------------|----------|----------------------------|-----------|---------|--------------------------------------------|------|-------------|
| 819.3842   | 819.4697    | 0.0855  | 104   | 226        | 232      | GELESER                    |           |         |                                            |      | Mascot      |
| 996.5836   | 996.5935    | 0.0099  | 10    | 508        | 517      | SPGILSPGIR                 |           |         |                                            |      | Mascot      |
| 996.5836   | 996.5935    | 0.0099  | 10    | 508        | 517      | SPGILSPGIR                 |           |         |                                            |      | Mascot      |
| 1045.5411  | 1045.535    | -0.0061 | -6    | 118        | 126      | VIADLEEEK                  |           |         |                                            |      | Mascot      |
| 1179.5319  | 1179.5959   | 0.064   | 54    | 92         | 101      | LVMAHCTNMK                 |           |         | Oxidation (M)[3,9]                         |      | Mascot      |
| 1307.7106  | 1307.6395   | -0.0711 | -54   | 524        | 535      | AEKFHSPVPAK                |           |         |                                            |      | Mascot      |
| 1320.5663  | 1320.5818   | 0.0155  | 12    | 67         | 78       | DSELSQAQDDGR               |           |         |                                            |      | Mascot      |
| 1493.6909  | 1493.7281   | 0.0372  | 25    | 92         | 103      | LVMAHCTNMKEK               |           |         | Carbamidomethyl (C)[6], Oxidation (M)[3,9] |      | Mascot      |
| 1707.749   | 1707.7656   | 0.0166  | 10    | 130        | 145      | AQDAAAGDDITDMLER           |           |         | Oxidation (M)[13]                          |      | Mascot      |
| 1994.1029  | 1993.9698   | -0.1331 | -67   | 497        | 517      | NLAAASSPTGKSPGILSP<br>GIR  |           |         |                                            |      | Mascot      |
| 2486.2092  | 2486.2356   | 0.0264  | 11    | 394        | 416      | RLASLGCSSPTYSSYQ<br>ASINQR |           |         |                                            |      | Mascot      |

20 interleukin 4/13B [Danio rerio] gi|193788073 13301.7 8.6 6 34 0

#### Peptide Information

| Calc. Mass | Obsrv. Mass | ± da    | ± ppm | Start Seq. | End Seq. | Sequence                | Ion Score | C. I. % | Modification           | Rank | Result Type |
|------------|-------------|---------|-------|------------|----------|-------------------------|-----------|---------|------------------------|------|-------------|
| 1179.6224  | 1179.5959   | -0.0265 | -22   | 54         | 64       | KTLCQAGMALK             |           |         | Oxidation (M)[8]       |      | Mascot      |
| 1277.6704  | 1277.7023   | 0.0319  | 25    | 55         | 66       | TLCQAGMALKGK            |           |         | Carbamidomethyl (C)[3] |      | Mascot      |
| 1789.9364  | 1789.9778   | 0.0414  | 23    | 13         | 27       | TDEILLMEIIQSVNR         |           |         | Oxidation (M)[7]       |      | Mascot      |
| 2299.269   | 2299.1863   | -0.0827 | -36   | 13         | 32       | TDEILLMEIIQSVNRILNGK    |           |         |                        |      | Mascot      |
| 2300.0903  | 2300.1763   | 0.086   | 37    | 36         | 54       | MDLDQFIPDIYETGHYSK<br>K |           |         |                        |      | Mascot      |

|                     |                                                                         |             |         |       |            |                                |                           |           |       |   |                         |      |             |      |    |    |   |
|---------------------|-------------------------------------------------------------------------|-------------|---------|-------|------------|--------------------------------|---------------------------|-----------|-------|---|-------------------------|------|-------------|------|----|----|---|
|                     | 2486.1543                                                               | 2486.2356   | 0.0813  | 33    | 33         | 53                             | GEKMDLDQFIPDIYETGH<br>YSK |           |       |   |                         |      | Mascot      |      |    |    |   |
| 21                  | small ubiquitin-related modifier 3 precursor [Danio rerio] gi 239048085 |             |         |       |            |                                |                           |           |       |   |                         |      | 10690.3     | 5.34 | 5  | 34 | 0 |
| Peptide Information |                                                                         |             |         |       |            |                                |                           |           |       |   |                         |      |             |      |    |    |   |
|                     | Calc. Mass                                                              | Obsrv. Mass | ± da    | ± ppm | Start Seq. | End Sequence Seq.              |                           | Ion Score | C. I. | % | Modification            | Rank | Result Type |      |    |    |   |
|                     | 864.4131                                                                | 864.5067    | 0.0936  | 108   | 1          | 7 MSEEKPK                      |                           |           |       |   | Oxidation (M)[1]        |      | Mascot      |      |    |    |   |
|                     | 1234.6426                                                               | 1234.6273   | -0.0153 | -12   | 21         | 32 VAGQDGSVVQFK                |                           |           |       |   |                         |      | Mascot      |      |    |    |   |
|                     | 1234.6426                                                               | 1234.6273   | -0.0153 | -12   | 21         | 32 VAGQDGSVVQFK                |                           |           |       |   |                         |      | Mascot      |      |    |    |   |
|                     | 1277.6405                                                               | 1277.7023   | 0.0618  | 48    | 1          | 11 MSEEKPKGVK                  |                           |           |       |   | Oxidation (M)[1]        |      | Mascot      |      |    |    |   |
|                     | 1475.8217                                                               | 1475.7515   | -0.0702 | -48   | 21         | 34 VAGQDGSVVQFKIK              |                           |           |       |   |                         |      | Mascot      |      |    |    |   |
|                     | 2299.1677                                                               | 2299.1863   | 0.0186  | 8     | 12         | 32 TENDHINLKVAGQDGSV<br>VQFK   |                           |           |       |   |                         |      | Mascot      |      |    |    |   |
| 22                  | PREDICTED: tRNA-dihydrouridine synthase 2-like [Danio rerio]            |             |         |       |            |                                |                           |           |       |   |                         |      | 56676.6     | 6.04 | 11 | 33 | 0 |
| Peptide Information |                                                                         |             |         |       |            |                                |                           |           |       |   |                         |      |             |      |    |    |   |
|                     | Calc. Mass                                                              | Obsrv. Mass | ± da    | ± ppm | Start Seq. | End Sequence Seq.              |                           | Ion Score | C. I. | % | Modification            | Rank | Result Type |      |    |    |   |
|                     | 842.473                                                                 | 842.5073    | 0.0343  | 41    | 436        | 443 TLGLPEGR                   |                           |           |       |   |                         |      | Mascot      |      |    |    |   |
|                     | 913.5287                                                                | 913.5778    | 0.0491  | 54    | 19         | 26 NILAPMVR                    |                           |           |       |   |                         |      | Mascot      |      |    |    |   |
|                     | 1045.4628                                                               | 1045.535    | 0.0722  | 69    | 288        | 295 YCLCQMLR                   |                           |           |       |   | Oxidation (M)[6]        |      | Mascot      |      |    |    |   |
|                     | 1051.6007                                                               | 1051.7104   | 0.1097  | 104   | 180        | 190 TGVAAlAVHGR                |                           |           |       |   |                         |      | Mascot      |      |    |    |   |
|                     | 1051.6007                                                               | 1051.7104   | 0.1097  | 104   | 180        | 190 TGVAAlAVHGR                |                           |           |       |   |                         |      | Mascot      |      |    |    |   |
|                     | 1277.6041                                                               | 1277.7023   | 0.0982  | 77    | 129        | 141 GGMGSALLSDPEK              |                           |           |       |   | Oxidation (M)[3]        |      | Mascot      |      |    |    |   |
|                     | 1316.5908                                                               | 1316.5469   | -0.0439 | -33   | 288        | 297 YCLCQMLRDR                 |                           |           |       |   | Oxidation (M)[6]        |      | Mascot      |      |    |    |   |
|                     | 1348.7041                                                               | 1348.7513   | 0.0472  | 35    | 424        | 435 FAEQAAALVCLR               |                           |           |       |   | Carbamidomethyl (C)[10] |      | Mascot      |      |    |    |   |
|                     | 1365.6467                                                               | 1365.6542   | 0.0075  | 5     | 89         | 100 VVFQMGTDAPER               |                           |           |       |   | Oxidation (M)[5]        |      | Mascot      |      |    |    |   |
|                     | 1789.8458                                                               | 1789.9778   | 0.132   | 74    | 107        | 123 LVENDVAADVNMGCPK           |                           |           |       |   | Oxidation (M)[13]       |      | Mascot      |      |    |    |   |
|                     | 2299.1387                                                               | 2299.1863   | 0.0476  | 21    | 259        | 278 QQGALSVDQVMQEYITY<br>AVR   |                           |           |       |   |                         |      | Mascot      |      |    |    |   |
|                     | 2384.1484                                                               | 2383.9514   | -0.197  | -83   | 237        | 258 ESTGASSVMLARAAMWN<br>PSVFR |                           |           |       |   | Oxidation (M)[9]        |      | Mascot      |      |    |    |   |
| 23                  | hypothetical protein LOC574002 [Danio rerio]                            |             |         |       |            |                                |                           |           |       |   |                         |      | 32267.9     | 7.04 | 7  | 33 | 0 |
| Peptide Information |                                                                         |             |         |       |            |                                |                           |           |       |   |                         |      |             |      |    |    |   |
|                     | Calc. Mass                                                              | Obsrv. Mass | ± da    | ± ppm | Start Seq. | End Sequence Seq.              |                           | Ion Score | C. I. | % | Modification            | Rank | Result Type |      |    |    |   |
|                     | 1174.6215                                                               | 1174.603    | -0.0185 | -16   | 137        | 146 KPFPDNTVTR                 |                           |           |       |   |                         |      | Mascot      |      |    |    |   |
|                     | 1279.6501                                                               | 1279.7676   | 0.1175  | 92    | 2          | 13 AQSISGHTHVSR                |                           |           |       |   |                         |      | Mascot      |      |    |    |   |

|    |                                              |           |         |     |             |     |                           |      |   |    |   |  |                          |  |  |        |
|----|----------------------------------------------|-----------|---------|-----|-------------|-----|---------------------------|------|---|----|---|--|--------------------------|--|--|--------|
|    | 1327.6497                                    | 1327.7408 | 0.0911  | 69  | 147         | 158 | CYVASDGLCLKR              |      |   |    |   |  |                          |  |  | Mascot |
|    | 1358.6456                                    | 1358.6879 | 0.0423  | 31  | 54          | 63  | ACRLVCHEWK                |      |   |    |   |  | Carbamidomethyl (C)[2,6] |  |  | Mascot |
|    | 1475.7158                                    | 1475.7515 | 0.0357  | 24  | 264         | 277 | VTNSSVEICPAAER            |      |   |    |   |  |                          |  |  | Mascot |
|    | 1585.8333                                    | 1585.9478 | 0.1145  | 72  | 112         | 126 | AEAGLQGWGKVDNK            |      |   |    |   |  |                          |  |  | Mascot |
|    | 1585.8333                                    | 1585.9478 | 0.1145  | 72  | 112         | 126 | AEAGLQGWGKVDNK            |      |   |    |   |  |                          |  |  | Mascot |
|    | 2384.1736                                    | 2383.9514 | -0.2222 | -93 | 137         | 157 | KPFPDNTVTRCYVASDG<br>LCLK |      |   |    |   |  | Carbamidomethyl (C)[11]  |  |  | Mascot |
| 24 | hypothetical protein LOC619199 [Danio rerio] |           |         |     | gi 75750507 |     | 27858.1                   | 6.39 | 7 | 32 | 0 |  |                          |  |  |        |

Peptide Information

| Calc. Mass | Obsrv. Mass | ± da    | ± ppm | Start Seq. | End Seq. | Sequence                 | Ion Score | C. I. | % Modification         | Rank | Result Type |
|------------|-------------|---------|-------|------------|----------|--------------------------|-----------|-------|------------------------|------|-------------|
| 1179.6732  | 1179.5959   | -0.0773 | -66   | 207        | 216      | IKLYSESLAR               |           |       |                        |      | Mascot      |
| 1365.65    | 1365.6542   | 0.0042  | 3     | 15         | 27       | ECVLSGLMSANGK            |           |       | Carbamidomethyl (C)[2] |      | Mascot      |
| 1493.745   | 1493.7281   | -0.0169 | -11   | 15         | 28       | ECVLSGLMSANGKK           |           |       | Carbamidomethyl (C)[2] |      | Mascot      |
| 1629.6857  | 1629.8773   | 0.1916  | 118   | 155        | 167      | THHDMDPRNTSMR            |           |       | Oxidation (M)[5,12]    |      | Mascot      |
| 1629.6857  | 1629.8773   | 0.1916  | 118   | 155        | 167      | THHDMDPRNTSMR            |           |       | Oxidation (M)[5,12]    |      | Mascot      |
| 1685.8169  | 1685.8553   | 0.0384  | 23    | 141        | 154      | FLSFVLNFDSDPR            |           |       |                        |      | Mascot      |
| 1685.8169  | 1685.8553   | 0.0384  | 23    | 141        | 154      | FLSFVLNFDSDPR            |           |       |                        |      | Mascot      |
| 2211.2205  | 2211.1025   | -0.118  | -53   | 78         | 96       | FLLANGQLVKMLLYSEVT<br>R  |           |       | Oxidation (M)[11]      |      | Mascot      |
| 2255.0681  | 2255.0872   | 0.0191  | 8     | 117        | 136      | VPITEAETQASDLGMGMD<br>KR |           |       | Oxidation (M)[14]      |      | Mascot      |

25 zinc finger protein Eos [Danio rerio] gi|294489252 53711.7 7.09 11 32 0

Peptide Information

| Calc. Mass | Obsrv. Mass | ± da    | ± ppm | Start Seq. | End Seq. | Sequence                  | Ion Score | C. I. | % Modification                              | Rank | Result Type |
|------------|-------------|---------|-------|------------|----------|---------------------------|-----------|-------|---------------------------------------------|------|-------------|
| 819.457    | 819.4697    | 0.0127  | 15    | 46         | 53       | SLSANSIK                  |           |       |                                             |      | Mascot      |
| 882.4791   | 882.5636    | 0.0845  | 96    | 196        | 203      | DALTGHLR                  |           |       |                                             |      | Mascot      |
| 1137.5687  | 1137.5479   | -0.0208 | -18   | 473        | 481      | YEFSSHIVR                 |           |       |                                             |      | Mascot      |
| 1623.7874  | 1623.8043   | 0.0169  | 10    | 469        | 481      | SQDRYEFSSHIVR             |           |       |                                             |      | Mascot      |
| 1629.7827  | 1629.8773   | 0.0946  | 58    | 30         | 45       | GPTVSTPNSQQSSPSR          |           |       |                                             |      | Mascot      |
| 1629.7827  | 1629.8773   | 0.0946  | 58    | 30         | 45       | GPTVSTPNSQQSSPSR          |           |       |                                             |      | Mascot      |
| 1789.7856  | 1789.9778   | 0.1922  | 107   | 458        | 472      | QPFECNICGHRSQDR           |           |       |                                             |      | Mascot      |
| 2187.0979  | 2187.0461   | -0.0518 | -24   | 127        | 146      | LKCDICGMICIGPNVLMV<br>HK  |           |       |                                             |      | Mascot      |
| 2191.0312  | 2191.1226   | 0.0914  | 42    | 129        | 147      | CDICGMICIGPNVLMVHK<br>R   |           |       | Carbamidomethyl (C)[1], Oxidation (M)[6,15] |      | Mascot      |
| 2224.8464  | 2225.1191   | 0.2727  | 123   | 2          | 22       | NADDCNGRSYMSGSGD<br>SSTER |           |       | Oxidation (M)[11]                           |      | Mascot      |

|    |                                                                         |           |        |    |     |     |                          |  |  |  |         |      |   |    |   |                         |        |
|----|-------------------------------------------------------------------------|-----------|--------|----|-----|-----|--------------------------|--|--|--|---------|------|---|----|---|-------------------------|--------|
|    | 2225.0657                                                               | 2225.1191 | 0.0534 | 24 | 303 | 321 | HMRLNISEAPYDLDPNDK       |  |  |  |         |      |   |    |   |                         | Mascot |
|    | 2283.0029                                                               | 2283.1821 | 0.1792 | 78 | 148 | 167 | SHTGERPFQCNCQGASF<br>TQK |  |  |  |         |      |   |    |   | Carbamidomethyl (C)[10] | Mascot |
| 26 | novel protein similar to vertebrate (PIWIL2) [Danio rerio] gi 123232882 |           |        |    |     |     |                          |  |  |  | 22624.7 | 6.37 | 5 | 32 | 0 | 7                       | 0      |

Peptide Information

| Calc. Mass | Obsrv. Mass | ± da    | ± ppm | Start Seq. | End Seq. | Sequence                    | Ion Score | C. I. | % Modification    | Rank | Result Type |
|------------|-------------|---------|-------|------------|----------|-----------------------------|-----------|-------|-------------------|------|-------------|
| 1407.7665  | 1407.7087   | -0.0578 | -41   | 40         | 52       | GLIMPIDEPLPGR               |           |       |                   |      | Mascot      |
| 1407.7665  | 1407.7087   | -0.0578 | -41   | 40         | 52       | GLIMPIDEPLPGR               |           |       |                   |      | Mascot      |
| 1418.7208  | 1418.7982   | 0.0774  | 55    | 53         | 65       | GRAFSVPGEMPVR               |           |       | Oxidation (M)[10] |      | Mascot      |
| 1629.8628  | 1629.8773   | 0.0145  | 9     | 69         | 84       | GITQSIAAEPLVGMAR            |           |       | Oxidation (M)[14] |      | Mascot      |
| 1629.8628  | 1629.8773   | 0.0145  | 9     | 69         | 84       | GITQSIAAEPLVGMAR            | 7         | 0     | Oxidation (M)[14] |      | Mascot      |
| 2233.1646  | 2233.084    | -0.0806 | -36   | 149        | 171      | VGSPGTGSSLVSMFRGL<br>GIEPGK |           |       |                   |      | Mascot      |
| 2384.1477  | 2383.9514   | -0.1963 | -82   | 17         | 37       | APWQQSTEDQSQLLDQP<br>SLGR   |           |       |                   |      | Mascot      |

|    |                                       |  |  |  |  |  |  |  |  |  |              |         |      |   |    |   |
|----|---------------------------------------|--|--|--|--|--|--|--|--|--|--------------|---------|------|---|----|---|
| 27 | PDZ domain containing 3 [Danio rerio] |  |  |  |  |  |  |  |  |  | gi 195546794 | 57507.4 | 6.03 | 9 | 32 | 0 |
|----|---------------------------------------|--|--|--|--|--|--|--|--|--|--------------|---------|------|---|----|---|

Peptide Information

| Calc. Mass | Obsrv. Mass | ± da    | ± ppm | Start Seq. | End Seq. | Sequence                  | Ion Score | C. I. | % Modification         | Rank | Result Type |
|------------|-------------|---------|-------|------------|----------|---------------------------|-----------|-------|------------------------|------|-------------|
| 996.5472   | 996.5935    | 0.0463  | 46    | 74         | 83       | LLDSPGPAAR                |           |       |                        |      | Mascot      |
| 996.5472   | 996.5935    | 0.0463  | 46    | 74         | 83       | LLDSPGPAAR                |           |       |                        |      | Mascot      |
| 1137.5535  | 1137.5479   | -0.0056 | -5    | 122        | 131      | AYEQVVSEGR                |           |       |                        |      | Mascot      |
| 1320.6642  | 1320.5818   | -0.0824 | -62   | 512        | 524      | VKTGDSGQQTLSI             |           |       |                        |      | Mascot      |
| 1358.7526  | 1358.6879   | -0.0647 | -48   | 464        | 476      | GGETLSLLVVDQK             |           |       |                        |      | Mascot      |
| 1471.7573  | 1471.7124   | -0.0449 | -31   | 452        | 463      | ESLEDVIMHVKR              |           |       | Oxidation (M)[8]       |      | Mascot      |
| 1685.8805  | 1685.8553   | -0.0252 | -15   | 142        | 155      | GEGWRPPHLCHIRK            |           |       |                        |      | Mascot      |
| 1685.8805  | 1685.8553   | -0.0252 | -15   | 142        | 155      | GEGWRPPHLCHIRK            |           |       |                        |      | Mascot      |
| 2225.2612  | 2225.1191   | -0.1421 | -64   | 349        | 369      | LGLSPLLFCVDVPSALPE<br>VKK |           |       |                        |      | Mascot      |
| 2225.2612  | 2225.1191   | -0.1421 | -64   | 349        | 369      | LGLSPLLFCVDVPSALPE<br>VKK |           |       |                        |      | Mascot      |
| 2233.0562  | 2233.084    | 0.0278  | 12    | 240        | 258      | MPILPAMADAENMPYRP<br>QR   |           |       | Oxidation (M)[1,7]     |      | Mascot      |
| 2299.0693  | 2299.1863   | 0.117   | 51    | 218        | 237      | CSSHMTVLVIDSDTEKSY<br>AR  |           |       | Carbamidomethyl (C)[1] |      | Mascot      |

|    |                                                          |  |  |  |  |  |  |  |  |  |             |       |      |    |    |   |
|----|----------------------------------------------------------|--|--|--|--|--|--|--|--|--|-------------|-------|------|----|----|---|
| 28 | ATP-binding cassette sub-family D member 3 [Danio rerio] |  |  |  |  |  |  |  |  |  | gi 47087309 | 74945 | 9.47 | 12 | 32 | 0 |
|----|----------------------------------------------------------|--|--|--|--|--|--|--|--|--|-------------|-------|------|----|----|---|

Peptide Information

| Calc. Mass | Obsrv. Mass | ± da | ± ppm | Start Seq. | End Seq. | Sequence | Ion Score | C. I. | % Modification | Rank | Result Type |
|------------|-------------|------|-------|------------|----------|----------|-----------|-------|----------------|------|-------------|
|------------|-------------|------|-------|------------|----------|----------|-----------|-------|----------------|------|-------------|

|    |                                                                    |           |           |         |     |     |             |                            |      |    |    |   |  |  |  |  |        |
|----|--------------------------------------------------------------------|-----------|-----------|---------|-----|-----|-------------|----------------------------|------|----|----|---|--|--|--|--|--------|
|    |                                                                    | 819.3777  | 819.4697  | 0.092   | 112 | 174 | 180         | MGNLDNR                    |      |    |    |   |  |  |  |  | Mascot |
|    |                                                                    | 850.4716  | 850.5397  | 0.0681  | 80  | 151 | 156         | LCFRVR                     |      |    |    |   |  |  |  |  | Mascot |
|    |                                                                    | 1051.6146 | 1051.7104 | 0.0958  | 91  | 2   | 11          | AAVSKYLTA                  |      |    |    |   |  |  |  |  | Mascot |
|    |                                                                    | 1051.6411 | 1051.7104 | 0.0693  | 66  | 61  | 68          | LFFIRISR                   |      |    |    |   |  |  |  |  | Mascot |
|    |                                                                    | 1179.6885 | 1179.5959 | -0.0926 | -78 | 56  | 65          | AAVDKLFIR                  |      |    |    |   |  |  |  |  | Mascot |
|    |                                                                    | 1307.6923 | 1307.6395 | -0.0528 | -40 | 362 | 372         | MLLRMSQALGR                |      |    |    |   |  |  |  |  | Mascot |
|    |                                                                    | 1348.6339 | 1348.7513 | 0.1174  | 87  | 40  | 52          | GSANELNSEKDGK              |      |    |    |   |  |  |  |  | Mascot |
|    |                                                                    | 1585.818  | 1585.9478 | 0.1298  | 82  | 181 | 194         | IANADQLLTQDVER             |      |    |    |   |  |  |  |  | Mascot |
|    |                                                                    | 1585.818  | 1585.9478 | 0.1298  | 82  | 181 | 194         | IANADQLLTQDVER             |      |    |    |   |  |  |  |  | Mascot |
|    |                                                                    | 1629.9938 | 1629.8773 | -0.1165 | -71 | 12  | 27          | NSAVAGGVLLVLYLK            |      |    |    |   |  |  |  |  | Mascot |
|    |                                                                    | 1629.9938 | 1629.8773 | -0.1165 | -71 | 12  | 27          | NSAVAGGVLLVLYLK            |      |    |    |   |  |  |  |  | Mascot |
|    |                                                                    | 1685.9275 | 1685.8553 | -0.0722 | -43 | 297 | 309         | KLVDHLHNFIFR               |      |    |    |   |  |  |  |  | Mascot |
|    |                                                                    | 1685.9275 | 1685.8553 | -0.0722 | -43 | 297 | 309         | KLVDHLHNFIFR               |      |    |    |   |  |  |  |  | Mascot |
|    |                                                                    | 2211.2283 | 2211.1025 | -0.1258 | -57 | 482 | 501         | VLGELWPLFGGNLTKPE<br>RGK   |      |    |    |   |  |  |  |  | Mascot |
|    |                                                                    | 2297.0723 | 2297.1912 | 0.1189  | 52  | 455 | 476         | DLCFEVKSGTNVLVCGP<br>NGCGK |      |    |    |   |  |  |  |  | Mascot |
| 29 | 3'-phosphoadenosine 5'-phosphosulfate synthase 2b<br>[Danio rerio] |           |           |         |     |     | gi 47086905 | 69402.5                    | 6.65 | 12 | 32 | 0 |  |  |  |  |        |

#### Peptide Information

| Calc. Mass | Obsrv. Mass | ± da    | ± ppm | Start Seq. | End Seq. | Sequence                   | Ion Score | C. I. % | Modification                              | Rank | Result Type |
|------------|-------------|---------|-------|------------|----------|----------------------------|-----------|---------|-------------------------------------------|------|-------------|
| 864.4937   | 864.5067    | 0.013   | 15    | 428        | 434      | LLDRGYK                    |           |         |                                           |      | Mascot      |
| 1045.4772  | 1045.535    | 0.0578  | 55    | 559        | 566      | RAMDFYDK                   |           |         |                                           |      | Mascot      |
| 1174.5198  | 1174.603    | 0.0832  | 71    | 560        | 568      | AMDFYDKER                  |           |         |                                           |      | Mascot      |
| 1179.5463  | 1179.5959   | 0.0496  | 42    | 512        | 522      | DPAGMPHPETK                |           |         |                                           |      | Mascot      |
| 1200.651   | 1200.5228   | -0.1282 | -107  | 602        | 611      | VLVEYYSSLK                 |           |         |                                           |      | Mascot      |
| 1307.5984  | 1307.6395   | 0.0411  | 31    | 341        | 351      | CARQWGTTCPK                |           |         | Carbamidomethyl (C)[1]                    |      | Mascot      |
| 1327.6826  | 1327.7408   | 0.0582  | 44    | 500        | 511      | MIAGANFYIVGR               |           |         | Oxidation (M)[1]                          |      | Mascot      |
| 1407.7015  | 1407.7087   | 0.0072  | 5     | 376        | 386      | IKWNDGLDQYR                |           |         |                                           |      | Mascot      |
| 1407.7015  | 1407.7087   | 0.0072  | 5     | 376        | 386      | IKWNDGLDQYR                |           |         |                                           |      | Mascot      |
| 1585.8624  | 1585.9478   | 0.0854  | 54    | 599        | 611      | AWKVLVEYYSSLK              |           |         |                                           |      | Mascot      |
| 1585.8624  | 1585.9478   | 0.0854  | 54    | 599        | 611      | AWKVLVEYYSSLK              |           |         |                                           |      | Mascot      |
| 1789.8538  | 1789.9778   | 0.124   | 69    | 582        | 598      | SLARSGENPPDGFMAPK          |           |         | Oxidation (M)[14]                         |      | Mascot      |
| 2255.1311  | 2255.0872   | -0.0439 | -19   | 309        | 328      | LDGCAAFVLEFNGQKVAI<br>MR   |           |         | Carbamidomethyl (C)[4], Oxidation (M)[19] |      | Mascot      |
| 2486.2297  | 2486.2356   | 0.0059  | 2     | 211        | 232      | EQDIVPTGVTEEVNELFV<br>PENK |           |         |                                           |      | Mascot      |



30 PREDICTED: regulation of nuclear pre-mRNA domain-containing protein 1A-like [Danio rerio] gi|326676846 35366.6 8.79 7 32 0

Peptide Information

| Calc. Mass | Obsrv. Mass | ± da    | ± ppm | Start Seq. | End Seq. | Sequence                   | Ion Score | C. I. % | Modification     | Rank | Result Type |
|------------|-------------|---------|-------|------------|----------|----------------------------|-----------|---------|------------------|------|-------------|
| 1179.5892  | 1179.5959   | 0.0067  | 6     | 115        | 124      | AVYENDILDK                 |           |         |                  |      | Mascot      |
| 1234.6677  | 1234.6273   | -0.0404 | -33   | 2          | 12       | SVFSEPALEKK                |           |         |                  |      | Mascot      |
| 1234.6677  | 1234.6273   | -0.0404 | -33   | 2          | 12       | SVFSEPALEKK                |           |         |                  |      | Mascot      |
| 1365.7083  | 1365.6542   | -0.0541 | -40   | 1          | 12       | MSVFSEPALEKK               |           |         |                  |      | Mascot      |
| 1493.8335  | 1493.7281   | -0.1054 | -71   | 103        | 114      | HLGRVLSIWQER               |           |         |                  |      | Mascot      |
| 1685.7872  | 1685.8553   | 0.0681  | 40    | 214        | 228      | LVEEACMLLADYSGR            |           |         | Oxidation (M)[7] |      | Mascot      |
| 1685.7872  | 1685.8553   | 0.0681  | 40    | 214        | 228      | LVEEACMLLADYSGR            |           |         | Oxidation (M)[7] |      | Mascot      |
| 2191.1394  | 2191.1226   | -0.0168 | -8    | 107        | 124      | VLSIWQERAVYENDILDK         |           |         |                  |      | Mascot      |
| 2300.0977  | 2300.1763   | 0.0786  | 34    | 291        | 312      | LPNVTGGHMRPLSSGDL<br>YSPSD |           |         |                  |      | Mascot      |

31 PREDICTED: hypothetical protein LOC100538026 [Danio rerio] gi|326673594 14275.3 8.81 6 32 0

Peptide Information

| Calc. Mass | Obsrv. Mass | ± da    | ± ppm | Start Seq. | End Seq. | Sequence                  | Ion Score | C. I. % | Modification           | Rank | Result Type |
|------------|-------------|---------|-------|------------|----------|---------------------------|-----------|---------|------------------------|------|-------------|
| 1179.6224  | 1179.5959   | -0.0265 | -22   | 62         | 72       | KTLCQAGMALK               |           |         | Oxidation (M)[8]       |      | Mascot      |
| 1277.6704  | 1277.7023   | 0.0319  | 25    | 63         | 74       | TLCQAGMALKGK              |           |         | Carbamidomethyl (C)[3] |      | Mascot      |
| 1789.9364  | 1789.9778   | 0.0414  | 23    | 21         | 35       | TDEILLMEIIQSVNRR          |           |         | Oxidation (M)[7]       |      | Mascot      |
| 2299.269   | 2299.1863   | -0.0827 | -36   | 21         | 40       | TDEILLMEIIQSVNRILNGK      |           |         |                        |      | Mascot      |
| 2300.0903  | 2300.1763   | 0.086   | 37    | 44         | 62       | MDLDQFIPDIYETGHYSK        |           |         |                        |      | Mascot      |
| 2486.1543  | 2486.2356   | 0.0813  | 33    | 41         | 61       | GEKMDLDQFIPDIYETGH<br>YSK |           |         |                        |      | Mascot      |

32 guanine nucleotide-binding protein G(i) subunit alpha-2 [Danio rerio] gi|41054141 39570.8 5.55 8 31 0

Peptide Information

| Calc. Mass | Obsrv. Mass | ± da    | ± ppm | Start Seq. | End Seq. | Sequence         | Ion Score | C. I. % | Modification | Rank | Result Type |
|------------|-------------|---------|-------|------------|----------|------------------|-----------|---------|--------------|------|-------------|
| 1407.6532  | 1407.7087   | 0.0555  | 39    | 2          | 15       | GCTVSAEDKAAAER   |           |         |              |      | Mascot      |
| 1407.6532  | 1407.7087   | 0.0555  | 39    | 2          | 15       | GCTVSAEDKAAAER   |           |         |              |      | Mascot      |
| 1434.7224  | 1434.7642   | 0.0418  | 29    | 158        | 169      | SDYIPTQQDVLRR    |           |         |              |      | Mascot      |
| 1581.759   | 1581.9062   | 0.1472  | 93    | 122        | 135      | RLWADSGVGQCFRR   |           |         |              |      | Mascot      |
| 1585.9523  | 1585.9478   | -0.0045 | -3    | 28         | 43       | LLLLGAGESGKSTIVK |           |         |              |      | Mascot      |

|    |                                                       |           |         |     |     |     |                                      |       |      |   |    |   |                                              |  |  |  |        |
|----|-------------------------------------------------------|-----------|---------|-----|-----|-----|--------------------------------------|-------|------|---|----|---|----------------------------------------------|--|--|--|--------|
|    | 1585.9523                                             | 1585.9478 | -0.0045 | -3  | 28  | 43  | LLLLGAGESGKSTIVK                     |       |      |   |    |   |                                              |  |  |  | Mascot |
|    | 1626.7832                                             | 1626.7854 | 0.0022  | 1   | 274 | 288 | SPLTICFPEYSGANK                      |       |      |   |    |   |                                              |  |  |  | Mascot |
|    | 1707.9315                                             | 1707.7656 | -0.1659 | -97 | 324 | 338 | NVQFVFDAVTDVIK                       |       |      |   |    |   |                                              |  |  |  | Mascot |
|    | 2177.1965                                             | 2177.1233 | -0.0732 | -34 | 324 | 342 | NVQFVFDAVTDVIKNNLK                   |       |      |   |    |   |                                              |  |  |  | Mascot |
|    | 3787.7803                                             | 3787.8743 | 0.094   | 25  | 204 | 235 | WIHCFEGVTAIIFCVALSA<br>YDLVLAEDEEMNR |       |      |   |    |   | Carbamidomethyl (C)[4,14], Oxidation (M)[30] |  |  |  | Mascot |
| 33 | 28S ribosomal protein S6, mitochondrial [Danio rerio] |           |         |     |     |     | gi 113671790                         | 13389 | 9.39 | 6 | 31 | 0 |                                              |  |  |  |        |

#### Peptide Information

| Calc. Mass | Obsrv. Mass | ± da    | ± ppm | Start Seq. | End Seq. | Sequence     | Ion Score | C. I. | % Modification           | Rank | Result Type |
|------------|-------------|---------|-------|------------|----------|--------------|-----------|-------|--------------------------|------|-------------|
| 842.4478   | 842.5073    | 0.0595  | 71    | 51         | 57       | ISKHDSR      |           |       |                          |      | Mascot      |
| 907.3872   | 907.4729    | 0.0857  | 94    | 103        | 110      | GQCCGVAR     |           |       | Carbamidomethyl (C)[3,4] |      | Mascot      |
| 1045.5636  | 1045.535    | -0.0286 | -27   | 38         | 46       | SLENLGERK    |           |       |                          |      | Mascot      |
| 1179.5245  | 1179.5959   | 0.0714  | 61    | 103        | 113      | GQCCGVAREEK  |           |       |                          |      | Mascot      |
| 1327.7079  | 1327.7408   | 0.0329  | 25    | 2          | 11       | PRYELVMVLK   |           |       | Oxidation (M)[7]         |      | Mascot      |
| 1358.7208  | 1358.6879   | -0.0329 | -24   | 12         | 23       | AMQRPETAAVLR |           |       | Oxidation (M)[2]         |      | Mascot      |

|    |                                                             |  |  |  |  |  |              |          |      |    |    |   |  |  |  |  |  |
|----|-------------------------------------------------------------|--|--|--|--|--|--------------|----------|------|----|----|---|--|--|--|--|--|
| 34 | PREDICTED: ras GTPase-activating protein nGAP [Danio rerio] |  |  |  |  |  | gi 326664974 | 149038.9 | 7.89 | 15 | 31 | 0 |  |  |  |  |  |
|----|-------------------------------------------------------------|--|--|--|--|--|--------------|----------|------|----|----|---|--|--|--|--|--|

#### Peptide Information

| Calc. Mass | Obsrv. Mass | ± da    | ± ppm | Start Seq. | End Seq. | Sequence               | Ion Score | C. I. | % Modification          | Rank | Result Type |
|------------|-------------|---------|-------|------------|----------|------------------------|-----------|-------|-------------------------|------|-------------|
| 842.4842   | 842.5073    | 0.0231  | 27    | 326        | 332      | RTVQPNK                |           |       |                         |      | Mascot      |
| 1137.5786  | 1137.5479   | -0.0307 | -27   | 1323       | 1332     | LSITENGEFK             |           |       |                         |      | Mascot      |
| 1174.5634  | 1174.603    | 0.0396  | 34    | 327        | 336      | TVQPNKDNCR             |           |       |                         |      | Mascot      |
| 1234.6902  | 1234.6273   | -0.0629 | -51   | 2          | 12       | VVNSVIPNQHK            |           |       |                         |      | Mascot      |
| 1234.6902  | 1234.6273   | -0.0629 | -51   | 2          | 12       | VVNSVIPNQHK            |           |       |                         |      | Mascot      |
| 1327.6311  | 1327.7408   | 0.1097  | 83    | 1263       | 1274     | DHAEMQAVIDAK           |           |       |                         |      | Mascot      |
| 1358.6771  | 1358.6879   | 0.0108  | 8     | 1000       | 1014     | SASPSASGGRGATPR        |           |       |                         |      | Mascot      |
| 1365.7307  | 1365.6542   | -0.0765 | -56   | 1          | 12       | MVVNSVIPNQHK           |           |       |                         |      | Mascot      |
| 1393.8049  | 1393.7286   | -0.0763 | -55   | 14         | 25       | TENIVIEPLLPR           |           |       |                         |      | Mascot      |
| 1411.6998  | 1411.6959   | -0.0039 | -3    | 827        | 838      | SPVQEHEALVR            |           |       | Oxidation (M)[7]        |      | Mascot      |
| 1581.8457  | 1581.9062   | 0.0605  | 38    | 609        | 621      | IINSYCVFRELK           |           |       |                         |      | Mascot      |
| 1585.7162  | 1585.9478   | 0.2316  | 146   | 1323       | 1336     | LSITENGEFKNSSC         |           |       | Carbamidomethyl (C)[14] |      | Mascot      |
| 1585.7162  | 1585.9478   | 0.2316  | 146   | 1323       | 1336     | LSITENGEFKNSSC         |           |       | Carbamidomethyl (C)[14] |      | Mascot      |
| 1623.7972  | 1623.8043   | 0.0071  | 4     | 1017       | 1030     | IPSTSSVEEEFSRR         |           |       |                         |      | Mascot      |
| 2232.9729  | 2233.084    | 0.1111  | 50    | 378        | 396      | SDCLFWGEHFEFSGLP<br>MK |           |       | Oxidation (M)[18]       |      | Mascot      |

|    |                                                                                       |           |         |     |     |     |                            |  |  |  |  |  |                        |        |
|----|---------------------------------------------------------------------------------------|-----------|---------|-----|-----|-----|----------------------------|--|--|--|--|--|------------------------|--------|
|    | 2297.0408                                                                             | 2297.1912 | 0.1504  | 65  | 600 | 618 | MCCELAFCCKIINSYCVFP<br>R   |  |  |  |  |  | Carbamidomethyl (C)[2] | Mascot |
|    | 2486.2971                                                                             | 2486.2356 | -0.0615 | -25 | 415 | 436 | NNYVGLVNIPVHGVMGR<br>QFVEK |  |  |  |  |  | Oxidation (M)[15]      | Mascot |
| 35 | alpha-2,6-sialyltransferase ST6GalNAc V [Danio rerio] gi 46425414 35841.8 9.33 8 31 0 |           |         |     |     |     |                            |  |  |  |  |  |                        |        |

Peptide Information

| Calc. Mass | Obsrv. Mass | ± da    | ± ppm | Start Seq. | End Seq. | Sequence                | Ion Score | C. I. | % | Modification                              | Rank | Result | Type |
|------------|-------------|---------|-------|------------|----------|-------------------------|-----------|-------|---|-------------------------------------------|------|--------|------|
| 819.3954   | 819.4697    | 0.0743  | 91    | 195        | 201      | NETGKDR                 |           |       |   |                                           |      | Mascot |      |
| 1186.5813  | 1186.5629   | -0.0184 | -16   | 186        | 194      | MLQFDELFLK              |           |       |   | Oxidation (M)[1]                          |      | Mascot |      |
| 1186.5813  | 1186.5629   | -0.0184 | -16   | 186        | 194      | MLQFDELFLK              |           |       |   | Oxidation (M)[1]                          |      | Mascot |      |
| 1320.7456  | 1320.5818   | -0.1638 | -124  | 160        | 170      | GLVYNNLRMLK             |           |       |   |                                           |      | Mascot |      |
| 1348.6869  | 1348.7513   | 0.0644  | 48    | 268        | 278      | HGSHHRFITEK             |           |       |   |                                           |      | Mascot |      |
| 1623.7213  | 1623.8043   | 0.083   | 51    | 72         | 87       | SCALVTSSGHTGSGR         |           |       |   | Carbamidomethyl (C)[2], Oxidation (M)[11] |      | Mascot |      |
| 2049.0408  | 2048.9512   | -0.0896 | -44   | 111        | 128      | DVGQHTNLRVIAHSSMQ<br>R  |           |       |   |                                           |      | Mascot |      |
| 2176.9961  | 2177.1233   | 0.1272  | 58    | 88         | 106      | GAEIDETECVIRMNDAPT<br>R |           |       |   | Carbamidomethyl (C)[9]                    |      | Mascot |      |
| 2384.3047  | 2383.9514   | -0.3533 | -148  | 176        | 194      | LQVYIISRPKMLQFDELFLK    |           |       |   | Oxidation (M)[11]                         |      | Mascot |      |

|    |                                                                         |  |  |  |  |  |  |  |  |  |  |  |  |  |
|----|-------------------------------------------------------------------------|--|--|--|--|--|--|--|--|--|--|--|--|--|
| 36 | muscle segment homeobox C [Danio rerio] gi 27802781 30126.5 9.66 7 31 0 |  |  |  |  |  |  |  |  |  |  |  |  |  |
|----|-------------------------------------------------------------------------|--|--|--|--|--|--|--|--|--|--|--|--|--|

Peptide Information

| Calc. Mass | Obsrv. Mass | ± da    | ± ppm | Start Seq. | End Seq. | Sequence                     | Ion Score | C. I. | % | Modification           | Rank | Result | Type |
|------------|-------------|---------|-------|------------|----------|------------------------------|-----------|-------|---|------------------------|------|--------|------|
| 1179.531   | 1179.5959   | 0.0649  | 55    | 111        | 120      | RGDMEELSDK                   |           |       |   |                        |      | Mascot |      |
| 1200.6833  | 1200.5228   | -0.1605 | -134  | 209        | 218      | LQEAEELEKLK                  |           |       |   |                        |      | Mascot |      |
| 1279.6576  | 1279.7676   | 0.11    | 86    | 137        | 147      | HSSPPPTLRK                   |           |       |   | Carbamidomethyl (C)[7] |      | Mascot |      |
| 1307.571   | 1307.6395   | 0.0685  | 52    | 25         | 36       | SADKEDAQSNDK                 |           |       |   |                        |      | Mascot |      |
| 1393.7507  | 1393.7286   | -0.0221 | -16   | 85         | 96       | LKLSPMALYADR                 |           |       |   | Oxidation (M)[6]       |      | Mascot |      |
| 1993.9028  | 1993.9698   | 0.067   | 34    | 1          | 19       | MAPLSSMMNSEGPLSQE<br>GK      |           |       |   |                        |      | Mascot |      |
| 2486.2004  | 2486.2356   | 0.0352  | 14    | 61         | 84       | TSSRTLYTSSEAGIISPTS<br>GADER |           |       |   |                        |      | Mascot |      |

|    |                                                                                                                                            |  |  |  |  |  |  |  |  |  |  |  |  |  |
|----|--------------------------------------------------------------------------------------------------------------------------------------------|--|--|--|--|--|--|--|--|--|--|--|--|--|
| 37 | novel protein similar to vertebrate low density lipoprotein-related protein 1B (deleted in tumors) gi 148725599 322473.7 5.38 20 31 0 13 0 |  |  |  |  |  |  |  |  |  |  |  |  |  |
|----|--------------------------------------------------------------------------------------------------------------------------------------------|--|--|--|--|--|--|--|--|--|--|--|--|--|

Peptide Information

| Calc. Mass | Obsrv. Mass | ± da   | ± ppm | Start Seq. | End Seq. | Sequence | Ion Score | C. I. | % | Modification           | Rank | Result | Type |
|------------|-------------|--------|-------|------------|----------|----------|-----------|-------|---|------------------------|------|--------|------|
| 864.4607   | 864.5067    | 0.046  | 53    | 1080       | 1087     | VSGKCVSK |           |       |   | Carbamidomethyl (C)[5] |      | Mascot |      |
| 913.5366   | 913.5778    | 0.0412 | 45    | 1388       | 1394     | QRHVVFVK |           |       |   |                        |      | Mascot |      |

|    |                                             |           |         |     |              |      |                          |      |   |    |   |  |                                          |  |  |  |        |
|----|---------------------------------------------|-----------|---------|-----|--------------|------|--------------------------|------|---|----|---|--|------------------------------------------|--|--|--|--------|
|    | 996.4996                                    | 996.5935  | 0.0939  | 94  | 1801         | 1808 | VYDKDTQK                 |      |   |    |   |  |                                          |  |  |  | Mascot |
|    | 996.4996                                    | 996.5935  | 0.0939  | 94  | 1801         | 1808 | VYDKDTQK                 |      |   |    |   |  |                                          |  |  |  | Mascot |
|    | 1137.6051                                   | 1137.5479 | -0.0572 | -50 | 1595         | 1603 | IYWADVKS                 |      |   |    |   |  |                                          |  |  |  | Mascot |
|    | 1174.5819                                   | 1174.603  | 0.0211  | 18  | 869          | 877  | CLNNRCIPK                |      |   |    |   |  | Carbamidomethyl (C)[1,6]                 |  |  |  | Mascot |
|    | 1179.5786                                   | 1179.5959 | 0.0173  | 15  | 1379         | 1389 | IEGASMSGKQR              |      |   |    |   |  | Oxidation (M)[6]                         |  |  |  | Mascot |
|    | 1200.6331                                   | 1200.5228 | -0.1103 | -92 | 2468         | 2477 | GERILLDDNR               |      |   |    |   |  |                                          |  |  |  | Mascot |
|    | 1234.5382                                   | 1234.6273 | 0.0891  | 72  | 446          | 456  | THACSPDPHGR              |      |   |    |   |  | Carbamidomethyl (C)[4]                   |  |  |  | Mascot |
|    | 1234.5382                                   | 1234.6273 | 0.0891  | 72  | 446          | 456  | THACSPDPHGR              |      |   |    |   |  | Carbamidomethyl (C)[4]                   |  |  |  | Mascot |
|    | 1316.5293                                   | 1316.5469 | 0.0176  | 13  | 2519         | 2528 | MQYCENRNCR               |      |   |    |   |  |                                          |  |  |  | Mascot |
|    | 1348.5885                                   | 1348.7513 | 0.1628  | 121 | 915          | 924  | CIPENWRCRDR              |      |   |    |   |  | Carbamidomethyl (C)[1]                   |  |  |  | Mascot |
|    | 1358.7526                                   | 1358.6879 | -0.0647 | -48 | 738          | 749  | LDLLSDDVSLLR             |      |   |    |   |  |                                          |  |  |  | Mascot |
|    | 1434.7118                                   | 1434.7642 | 0.0524  | 37  | 1537         | 1549 | LSANNSTCQGVKR            |      |   |    |   |  | Carbamidomethyl (C)[8]                   |  |  |  | Mascot |
|    | 1475.589                                    | 1475.7515 | 0.1625  | 110 | 2515         | 2525 | SDEKMQYCENR              |      |   |    |   |  | Carbamidomethyl (C)[8], Oxidation (M)[5] |  |  |  | Mascot |
|    | 1493.7383                                   | 1493.7281 | -0.0102 | -7  | 2352         | 2364 | LYFSDGSLGHIER            |      |   |    |   |  |                                          |  |  |  | Mascot |
|    | 1581.7373                                   | 1581.9062 | 0.1689  | 107 | 1196         | 1207 | HLRCSQVCEQHK             |      |   |    |   |  | Carbamidomethyl (C)[4,8]                 |  |  |  | Mascot |
|    | 1623.7352                                   | 1623.8043 | 0.0691  | 43  | 1735         | 1749 | CNLDGSGLDVIDSMK          |      |   |    |   |  | Carbamidomethyl (C)[1]                   |  |  |  | Mascot |
|    | 1629.8312                                   | 1629.8773 | 0.0461  | 28  | 44           | 57   | VRCPVNNIQLGTR            |      |   |    |   |  | Carbamidomethyl (C)[3]                   |  |  |  | Mascot |
|    | 1629.8312                                   | 1629.8773 | 0.0461  | 28  | 44           | 57   | VRCPVNNIQLGTR            |      |   | 13 | 0 |  | Carbamidomethyl (C)[10]                  |  |  |  | Mascot |
|    | 2191.0159                                   | 2191.1226 | 0.1067  | 49  | 1847         | 1865 | STCEGLQSFLMYSVNEGI<br>R  |      |   |    |   |  | Carbamidomethyl (C)[3]                   |  |  |  | Mascot |
|    | 2232.9546                                   | 2233.084  | 0.1294  | 58  | 1682         | 1701 | MFWMDGGTINMANMDG<br>SNIK |      |   |    |   |  |                                          |  |  |  | Mascot |
|    | 2254.8909                                   | 2255.0872 | 0.1963  | 87  | 65           | 83   | LCDGVVRCDEGYDEGVH<br>CR  |      |   |    |   |  | Carbamidomethyl (C)[2,8]                 |  |  |  | Mascot |
|    | 2296.9341                                   | 2297.1912 | 0.2571  | 112 | 1682         | 1701 | MFWMDGGTINMANMDG<br>SNIK |      |   |    |   |  | Oxidation (M)[1,4,11,14]                 |  |  |  | Mascot |
| 38 | PREDICTED: protein NLRC3-like [Danio rerio] |           |         |     | gi 326667285 |      | 62976.7                  | 6.15 | 9 | 30 | 0 |  |                                          |  |  |  |        |

Peptide Information

| Calc. Mass | Obsrv. Mass | ± da    | ± ppm | Start Seq. | End Seq. | Sequence       | Ion Score | C. I. | % | Modification            | Rank | Result Type |
|------------|-------------|---------|-------|------------|----------|----------------|-----------|-------|---|-------------------------|------|-------------|
| 907.4553   | 907.4729    | 0.0176  | 19    | 134        | 140      | EMNLKEK        |           |       |   | Oxidation (M)[2]        |      | Mascot      |
| 1045.5272  | 1045.535    | 0.0078  | 7     | 423        | 431      | GLLTQQDDR      |           |       |   |                         |      | Mascot      |
| 1234.7041  | 1234.6273   | -0.0768 | -62   | 436        | 445      | EEIIAYIKQK     |           |       |   |                         |      | Mascot      |
| 1234.7041  | 1234.6273   | -0.0768 | -62   | 436        | 445      | EEIIAYIKQK     |           |       |   |                         |      | Mascot      |
| 1434.6755  | 1434.7642   | 0.0887  | 62    | 371        | 383      | ASVYSGMCTQIFK  |           |       |   |                         |      | Mascot      |
| 1585.7605  | 1585.9478   | 0.1873  | 118   | 80         | 92       | HLFEAAEQDEQIR  |           |       |   |                         |      | Mascot      |
| 1585.7605  | 1585.9478   | 0.1873  | 118   | 80         | 92       | HLFEAAEQDEQIR  |           |       |   |                         |      | Mascot      |
| 1623.8523  | 1623.8043   | -0.048  | -30   | 529        | 542      | SVTALQARTFELCK |           |       |   | Carbamidomethyl (C)[13] |      | Mascot      |
| 1629.8231  | 1629.8773   | 0.0542  | 33    | 394        | 407      | ALESENGHLDLYLR |           |       |   |                         |      | Mascot      |

|                     |                                                                                         |            |             |         |       |              |                         |                         |      |           |         |                                          |  |                         |      |        |        |
|---------------------|-----------------------------------------------------------------------------------------|------------|-------------|---------|-------|--------------|-------------------------|-------------------------|------|-----------|---------|------------------------------------------|--|-------------------------|------|--------|--------|
|                     |                                                                                         | 1629.8231  | 1629.8773   | 0.0542  | 33    | 394          | 407                     | ALESENGHLDLYLR          |      |           |         |                                          |  |                         |      |        | Mascot |
|                     |                                                                                         | 2187.0273  | 2187.0461   | 0.0188  | 9     | 352          | 370                     | NNVIFYESDLKDCGIDVD<br>K |      |           |         |                                          |  |                         |      |        | Mascot |
|                     |                                                                                         | 2191.1541  | 2191.1226   | -0.0315 | -14   | 1            | 17                      | MEIYELLFIYQLKCSLK       |      |           |         |                                          |  | Carbamidomethyl (C)[14] |      |        | Mascot |
| 39                  | Mpx protein [Danio rerio]                                                               |            |             |         |       | gi 33604059  |                         | 98909.4                 | 8.49 | 12        | 30      | 0                                        |  |                         |      |        |        |
| Peptide Information |                                                                                         |            |             |         |       |              |                         |                         |      |           |         |                                          |  |                         |      |        |        |
|                     |                                                                                         | Calc. Mass | Obsrv. Mass | ± da    | ± ppm | Start Seq.   | End Sequence Seq.       |                         |      | Ion Score | C. I. % | Modification                             |  |                         | Rank | Result | Type   |
|                     |                                                                                         | 819.4835   | 819.4697    | -0.0138 | -17   | 653          | 658 QFQKIR              |                         |      |           |         |                                          |  |                         |      |        | Mascot |
|                     |                                                                                         | 864.5189   | 864.5067    | -0.0122 | -14   | 827          | 834 SLGFVTLK            |                         |      |           |         |                                          |  |                         |      |        | Mascot |
|                     |                                                                                         | 907.5247   | 907.4729    | -0.0518 | -57   | 39           | 46 KIVDAAYK             |                         |      |           |         |                                          |  |                         |      |        | Mascot |
|                     |                                                                                         | 1165.6398  | 1165.7404   | 0.1006  | 86    | 642          | 652 VGSLFACLISR         |                         |      |           |         |                                          |  |                         |      |        | Mascot |
|                     |                                                                                         | 1165.6398  | 1165.7404   | 0.1006  | 86    | 642          | 652 VGSLFACLISR         |                         |      |           |         |                                          |  |                         |      |        | Mascot |
|                     |                                                                                         | 1179.6116  | 1179.5959   | -0.0157 | -13   | 865          | 874 GDRVYVEVSR          |                         |      |           |         |                                          |  |                         |      |        | Mascot |
|                     |                                                                                         | 1471.7864  | 1471.7124   | -0.074  | -50   | 330          | 342 ELRDLTNDGGLLR       |                         |      |           |         |                                          |  |                         |      |        | Mascot |
|                     |                                                                                         | 1493.7343  | 1493.7281   | -0.0062 | -4    | 726          | 739 ETDRDSIPGPPGPR      |                         |      |           |         |                                          |  |                         |      |        | Mascot |
|                     |                                                                                         | 1585.8081  | 1585.9478   | 0.1397  | 88    | 730          | 745 DSIPGPPGPRGPPGER    |                         |      |           |         |                                          |  |                         |      |        | Mascot |
|                     |                                                                                         | 1585.8081  | 1585.9478   | 0.1397  | 88    | 730          | 745 DSIPGPPGPRGPPGER    |                         |      |           |         |                                          |  |                         |      |        | Mascot |
|                     |                                                                                         | 1609.688   | 1609.8849   | 0.1969  | 122   | 123          | 136 MTGCEAQRTPPSCR      |                         |      |           |         | Carbamidomethyl (C)[4], Oxidation (M)[1] |  |                         |      |        | Mascot |
|                     |                                                                                         | 1623.8376  | 1623.8043   | -0.0333 | -21   | 445          | 458 EYLPLIVGTDAYNR      |                         |      |           |         |                                          |  |                         |      |        | Mascot |
|                     |                                                                                         | 1789.9741  | 1789.9778   | 0.0037  | 2     | 189          | 204 LYNGAALPMVRLVSNR    |                         |      |           |         | Oxidation (M)[9]                         |  |                         |      |        | Mascot |
|                     |                                                                                         | 2187.1729  | 2187.0461   | -0.1268 | -58   | 104          | 122 RSINATNLLTQDELQTITR |                         |      |           |         |                                          |  |                         |      |        | Mascot |
| 40                  | PREDICTED: bromodomain adjacent to zinc finger domain protein 1A, partial [Danio rerio] |            |             |         |       | gi 125841384 |                         | 81560.8                 | 6.03 | 11        | 30      | 0                                        |  |                         |      |        |        |
| Peptide Information |                                                                                         |            |             |         |       |              |                         |                         |      |           |         |                                          |  |                         |      |        |        |
|                     |                                                                                         | Calc. Mass | Obsrv. Mass | ± da    | ± ppm | Start Seq.   | End Sequence Seq.       |                         |      | Ion Score | C. I. % | Modification                             |  |                         | Rank | Result | Type   |
|                     |                                                                                         | 819.4505   | 819.4697    | 0.0192  | 23    | 210          | 216 VAQMSRK             |                         |      |           |         |                                          |  |                         |      |        | Mascot |
|                     |                                                                                         | 1045.3999  | 1045.535    | 0.1351  | 129   | 303          | 310 EQMMSMEK            |                         |      |           |         | Oxidation (M)[3,4]                       |  |                         |      |        | Mascot |
|                     |                                                                                         | 1186.6434  | 1186.5629   | -0.0805 | -68   | 594          | 603 LKILHSMCGK          |                         |      |           |         | Carbamidomethyl (C)[8]                   |  |                         |      |        | Mascot |
|                     |                                                                                         | 1186.6434  | 1186.5629   | -0.0805 | -68   | 594          | 603 LKILHSMCGK          |                         |      |           |         | Carbamidomethyl (C)[8]                   |  |                         |      |        | Mascot |
|                     |                                                                                         | 1234.7782  | 1234.6273   | -0.1509 | -122  | 2            | 11 PLLHKKPFVR           |                         |      |           |         |                                          |  |                         |      |        | Mascot |
|                     |                                                                                         | 1234.7782  | 1234.6273   | -0.1509 | -122  | 2            | 11 PLLHKKPFVR           |                         |      |           |         |                                          |  |                         |      |        | Mascot |
|                     |                                                                                         | 1277.7939  | 1277.7023   | -0.0916 | -72   | 393          | 403 ELPKPIPVKTR         |                         |      |           |         |                                          |  |                         |      |        | Mascot |
|                     |                                                                                         | 1316.5796  | 1316.5469   | -0.0327 | -25   | 303          | 312 EQMMSMEKFR          |                         |      |           |         |                                          |  |                         |      |        | Mascot |
|                     |                                                                                         | 1348.5695  | 1348.7513   | 0.1818  | 135   | 303          | 312 EQMMSMEKFR          |                         |      |           |         | Oxidation (M)[3,4]                       |  |                         |      |        | Mascot |

|    |                                              |           |         |     |              |     |                          |      |                         |        |   |
|----|----------------------------------------------|-----------|---------|-----|--------------|-----|--------------------------|------|-------------------------|--------|---|
|    | 1365.6151                                    | 1365.6542 | 0.0391  | 29  | 231          | 241 | QHCEPMHGTIR              |      | Carbamidomethyl (C)[3]  | Mascot |   |
|    | 1581.7828                                    | 1581.9062 | 0.1234  | 78  | 580          | 593 | LSCTSVYDLLPGEK           |      | Carbamidomethyl (C)[3]  | Mascot |   |
|    | 1685.7952                                    | 1685.8553 | 0.0601  | 36  | 114          | 127 | DRFFPGEMVDITSR           |      | Oxidation (M)[8]        | Mascot |   |
|    | 1685.7952                                    | 1685.8553 | 0.0601  | 36  | 114          | 127 | DRFFPGEMVDITSR           |      | Oxidation (M)[8]        | Mascot |   |
|    | 1993.9912                                    | 1993.9698 | -0.0214 | -11 | 535          | 552 | LHILSSGADCGFTNAKFR       |      | Carbamidomethyl (C)[10] | Mascot |   |
|    | 2283.1836                                    | 2283.1821 | -0.0015 | -1  | 195          | 215 | VQPVSPCEAPVIVKVAQ<br>MSR |      | Oxidation (M)[19]       | Mascot |   |
| 41 | hypothetical protein LOC797046 [Danio rerio] |           |         |     | gi 167963524 |     | 11905.9                  | 7.66 | 5                       | 30     | 0 |

#### Peptide Information

| Calc. Mass | Obsrv. Mass | ± da    | ± ppm | Start Seq. | End Seq. | Sequence               | Ion Score | C. I. | % Modification      | Rank | Result Type |
|------------|-------------|---------|-------|------------|----------|------------------------|-----------|-------|---------------------|------|-------------|
| 1320.6576  | 1320.5818   | -0.0758 | -57   | 14         | 25       | KQAEDILCSTGR           |           |       |                     |      | Mascot      |
| 1348.6379  | 1348.7513   | 0.1134  | 84    | 2          | 13       | EDLAEYHGSISK           |           |       |                     |      | Mascot      |
| 1623.7683  | 1623.8043   | 0.036   | 22    | 1          | 14       | MEDLAEYHGSISKK         |           |       | Oxidation (M)[1]    |      | Mascot      |
| 1707.8192  | 1707.7656   | -0.0536 | -31   | 60         | 74       | GGLWTIEMAPGMKER        |           |       | Oxidation (M)[8,12] |      | Mascot      |
| 2211.1631  | 2211.1025   | -0.0606 | -27   | 88         | 106      | MPDQGITFLLYPVNKPK<br>H |           |       | Oxidation (M)[1]    |      | Mascot      |

|    |                                            |  |  |  |              |  |          |      |    |    |   |
|----|--------------------------------------------|--|--|--|--------------|--|----------|------|----|----|---|
| 42 | Spectrin, beta, erythrocytic [Danio rerio] |  |  |  | gi 190338653 |  | 272596.4 | 5.26 | 22 | 30 | 0 |
|----|--------------------------------------------|--|--|--|--------------|--|----------|------|----|----|---|

#### Peptide Information

| Calc. Mass | Obsrv. Mass | ± da    | ± ppm | Start Seq. | End Seq. | Sequence     | Ion Score | C. I. | % Modification         | Rank | Result Type |
|------------|-------------|---------|-------|------------|----------|--------------|-----------|-------|------------------------|------|-------------|
| 819.4318   | 819.4697    | 0.0379  | 46    | 178        | 184      | QETRSAK      |           |       |                        |      | Mascot      |
| 1045.5524  | 1045.535    | -0.0174 | -17   | 393        | 402      | EGALVSDINK   |           |       |                        |      | Mascot      |
| 1051.5531  | 1051.7104   | 0.1573  | 150   | 2211       | 2219     | KHELEGPNNK   |           |       |                        |      | Mascot      |
| 1051.5531  | 1051.7104   | 0.1573  | 150   | 2212       | 2220     | HELEGPNNK    |           |       |                        |      | Mascot      |
| 1109.5255  | 1109.4902   | -0.0353 | -32   | 1258       | 1266     | MSSIEERNK    |           |       | Oxidation (M)[1]       |      | Mascot      |
| 1174.6062  | 1174.603    | -0.0032 | -3    | 1019       | 1028     | LDSLRDEAQK   |           |       |                        |      | Mascot      |
| 1234.5909  | 1234.6273   | 0.0364  | 29    | 1060       | 1070     | DREDSLGEVSK  |           |       |                        |      | Mascot      |
| 1234.5909  | 1234.6273   | 0.0364  | 29    | 1060       | 1070     | DREDSLGEVSK  |           |       |                        |      | Mascot      |
| 1277.6381  | 1277.7023   | 0.0642  | 50    | 185        | 194      | DALLLWCQMK   |           |       | Carbamidomethyl (C)[7] |      | Mascot      |
| 1320.7198  | 1320.5818   | -0.138  | -104  | 517        | 526      | LWDYLQELLK   |           |       |                        |      | Mascot      |
| 1348.6968  | 1348.7513   | 0.0545  | 40    | 2100       | 2109     | KQQQEIQQYR   |           |       |                        |      | Mascot      |
| 1365.6896  | 1365.6542   | -0.0354 | -26   | 1390       | 1401     | SELFDQSLADLK |           |       |                        |      | Mascot      |
| 1407.621   | 1407.7087   | 0.0877  | 62    | 1219       | 1230     | HEDFVTMTDANK |           |       |                        |      | Mascot      |
| 1407.621   | 1407.7087   | 0.0877  | 62    | 1219       | 1230     | HEDFVTMTDANK |           |       |                        |      | Mascot      |
| 1418.6798  | 1418.7982   | 0.1184  | 83    | 1044       | 1055     | QEELDAAWDTLK |           |       |                        |      | Mascot      |
| 1493.7845  | 1493.7281   | -0.0564 | -38   | 1390       | 1402     | SELFDQSLADLK |           |       |                        |      | Mascot      |

|           |           |         |     |      |      |                            |  |  |  |                         |  |  |        |
|-----------|-----------|---------|-----|------|------|----------------------------|--|--|--|-------------------------|--|--|--------|
| 1581.8193 | 1581.9062 | 0.0869  | 55  | 836  | 848  | DMYIELLTLSDLR              |  |  |  |                         |  |  | Mascot |
| 1609.8367 | 1609.8849 | 0.0482  | 30  | 74   | 86   | VSCRISDLYLDLR              |  |  |  | Carbamidomethyl (C)[3]  |  |  | Mascot |
| 1623.783  | 1623.8043 | 0.0213  | 13  | 898  | 911  | LSILAQEMGNMQTR             |  |  |  | Oxidation (M)[8,11]     |  |  | Mascot |
| 1685.8315 | 1685.8553 | 0.0238  | 14  | 2281 | 2294 | LRLGDGSEYLFQCK             |  |  |  | Carbamidomethyl (C)[13] |  |  | Mascot |
| 1685.8315 | 1685.8553 | 0.0238  | 14  | 2281 | 2294 | LRLGDGSEYLFQCK             |  |  |  | Carbamidomethyl (C)[13] |  |  | Mascot |
| 1993.9569 | 1993.9698 | 0.0129  | 6   | 699  | 715  | DNLKQVMDEGESMIQIK          |  |  |  | Oxidation (M)[7]        |  |  | Mascot |
| 2127.0574 | 2126.998  | -0.0594 | -28 | 703  | 721  | QVMDEGESMIQIKHLGSP<br>K    |  |  |  |                         |  |  | Mascot |
| 2284.2507 | 2284.1724 | -0.0783 | -34 | 984  | 1004 | VIESTQDLGNDLAAVITIQ<br>RK  |  |  |  |                         |  |  | Mascot |
| 2299.1963 | 2299.1863 | -0.01   | -4  | 2189 | 2210 | AASLPTESTQVQPVLME<br>GTLAR |  |  |  |                         |  |  | Mascot |

43 PREDICTED: NADH dehydrogenase [ubiquinone] 1  
alpha subcomplex subunit 9, mitochondrial-like [Danio

gi|68437403 26034.6 9.74 6 30 0

#### Peptide Information

| Calc. Mass | Obsrv. Mass | ± da    | ± ppm | Start Seq. | End Seq. | Sequence         | Ion Score | C. I. | % Modification   | Rank | Result Type |
|------------|-------------|---------|-------|------------|----------|------------------|-----------|-------|------------------|------|-------------|
| 850.4781   | 850.5397    | 0.0616  | 72    | 178        | 184      | SPSKYLR          |           |       |                  |      | Mascot      |
| 1165.6034  | 1165.7404   | 0.137   | 118   | 78         | 87       | MGSQVVIPIYR      |           |       | Oxidation (M)[1] |      | Mascot      |
| 1165.6034  | 1165.7404   | 0.137   | 118   | 78         | 87       | MGSQVVIPIYR      |           |       | Oxidation (M)[1] |      | Mascot      |
| 1179.5752  | 1179.5959   | 0.0207  | 18    | 205        | 214      | ASELFGREDR       |           |       |                  |      | Mascot      |
| 1475.8151  | 1475.7515   | -0.0636 | -43   | 75         | 87       | LGRMGQVVIPIYR    |           |       |                  |      | Mascot      |
| 1581.8319  | 1581.9062   | 0.0743  | 47    | 165        | 177      | KFIHMSHLNADIR    |           |       |                  |      | Mascot      |
| 1685.9441  | 1685.8553   | -0.0888 | -53   | 1          | 16       | MASVTLICRPAGILPK |           |       | Oxidation (M)[1] |      | Mascot      |
| 1685.9441  | 1685.8553   | -0.0888 | -53   | 1          | 16       | MASVTLICRPAGILPK |           |       | Oxidation (M)[1] |      | Mascot      |

44 novel protein similar to human and mouse  
myeloid/lymphoid or mixed-lineage leukemia 3 (MLL3)  
[Danio

gi|157885936 82601.8 9.38 13 29 0

#### Peptide Information

| Calc. Mass | Obsrv. Mass | ± da    | ± ppm | Start Seq. | End Seq. | Sequence    | Ion Score | C. I. | % Modification           | Rank | Result Type |
|------------|-------------|---------|-------|------------|----------|-------------|-----------|-------|--------------------------|------|-------------|
| 864.5189   | 864.5067    | -0.0122 | -14   | 636        | 642      | ELLYKAK     |           |       |                          |      | Mascot      |
| 870.4679   | 870.5366    | 0.0687  | 79    | 140        | 147      | SISEGHLK    |           |       |                          |      | Mascot      |
| 996.5948   | 996.5935    | -0.0013 | -1    | 462        | 470      | VLGPVAERR   |           |       |                          |      | Mascot      |
| 996.5948   | 996.5935    | -0.0013 | -1    | 462        | 470      | VLGPVAERR   |           |       |                          |      | Mascot      |
| 1045.6152  | 1045.535    | -0.0802 | -77   | 602        | 611      | IQGLGLFAAR  |           |       |                          |      | Mascot      |
| 1174.488   | 1174.603    | 0.115   | 98    | 17         | 24       | QQWCQHCK    |           |       | Carbamidomethyl (C)[4,7] |      | Mascot      |
| 1307.5685  | 1307.6395   | 0.071   | 54    | 423        | 433      | YVCSVEEHEGR |           |       |                          |      | Mascot      |

|    |                    |           |         |     |            |     |                        |      |   |    |                           |  |  |        |
|----|--------------------|-----------|---------|-----|------------|-----|------------------------|------|---|----|---------------------------|--|--|--------|
|    | 1331.6624          | 1331.6263 | -0.0361 | -27 | 499        | 511 | IAESLPGVEACSR          |      |   |    |                           |  |  | Mascot |
|    | 1609.7686          | 1609.8849 | 0.1163  | 72  | 273        | 285 | QRGQTVVCAFCQR          |      |   |    | Carbamidomethyl (C)[8,11] |  |  | Mascot |
|    | 1623.7002          | 1623.8043 | 0.1041  | 64  | 421        | 433 | CRYVCSVEEHEGR          |      |   |    | Carbamidomethyl (C)[1]    |  |  | Mascot |
|    | 1707.8483          | 1707.7656 | -0.0827 | -48 | 499        | 513 | IAESLPGVEACSR          |      |   |    | Carbamidomethyl (C)[11]   |  |  | Mascot |
|    | 1751.8724          | 1751.9036 | 0.0312  | 18  | 156        | 169 | LHSHLEDKQWHHGK         |      |   |    |                           |  |  | Mascot |
|    | 2225.0112          | 2225.1191 | 0.1079  | 48  | 668        | 686 | YINHSCSPNCVAEVTFR      |      |   |    | Carbamidomethyl (C)[6]    |  |  | Mascot |
|    | 2225.0112          | 2225.1191 | 0.1079  | 48  | 668        | 686 | YINHSCSPNCVAEVTFR      |      |   |    | Carbamidomethyl (C)[6]    |  |  | Mascot |
|    | 2283.1562          | 2283.1821 | 0.0259  | 11  | 328        | 348 | GAGAAAGLHVEHQLRCF SVFR |      |   |    | Carbamidomethyl (C)[16]   |  |  | Mascot |
| 45 | Pbx2 [Danio rerio] |           |         |     | gi 7861936 |     | 18895.6                | 9.08 | 6 | 29 | 0                         |  |  |        |

#### Peptide Information

| Calc. Mass | Obsrv. Mass | ± da    | ± ppm | Start Seq. | End Seq. | Sequence              | Ion Score | C. I. | % Modification         | Rank | Result Type |
|------------|-------------|---------|-------|------------|----------|-----------------------|-----------|-------|------------------------|------|-------------|
| 864.4686   | 864.5067    | 0.0381  | 44    | 153        | 159      | SRFLDAR               |           |       |                        |      | Mascot      |
| 1051.5782  | 1051.7104   | 0.1322  | 126   | 133        | 141      | FSSIQTQLK             |           |       |                        |      | Mascot      |
| 1051.5782  | 1051.7104   | 0.1322  | 126   | 133        | 141      | FSSIQTQLK             |           |       |                        |      | Mascot      |
| 1179.6442  | 1179.5959   | -0.0483 | -41   | 1          | 10       | ALFSVLCEIK            |           |       | Carbamidomethyl (C)[7] |      | Mascot      |
| 1307.6447  | 1307.6395   | -0.0052 | -4    | 142        | 152      | QSTCEAVMILR           |           |       | Carbamidomethyl (C)[4] |      | Mascot      |
| 1493.7563  | 1493.7281   | -0.0282 | -19   | 142        | 154      | QSTCEAVMILRSR         |           |       |                        |      | Mascot      |
| 2283.1836  | 2283.1821   | -0.0015 | -1    | 133        | 152      | FSSIQTQLKQSTCEAVMI LR |           |       |                        |      | Mascot      |
| 2299.1785  | 2299.1863   | 0.0078  | 3     | 133        | 152      | FSSIQTQLKQSTCEAVMI LR |           |       | Oxidation (M)[17]      |      | Mascot      |

46 novel NACHT domain containing protein [Danio rerio] gi|169158294 81351.9 5.71 10 29 0

#### Peptide Information

| Calc. Mass | Obsrv. Mass | ± da    | ± ppm | Start Seq. | End Seq. | Sequence      | Ion Score | C. I. | % Modification   | Rank | Result Type |
|------------|-------------|---------|-------|------------|----------|---------------|-----------|-------|------------------|------|-------------|
| 819.4318   | 819.4697    | 0.0379  | 46    | 570        | 576      | TQAEKSR       |           |       |                  |      | Mascot      |
| 882.4791   | 882.5636    | 0.0845  | 96    | 670        | 676      | EIQSHLR       |           |       |                  |      | Mascot      |
| 907.4553   | 907.4729    | 0.0176  | 19    | 274        | 280      | EMNLKEK       |           |       | Oxidation (M)[2] |      | Mascot      |
| 1045.5272  | 1045.535    | 0.0078  | 7     | 620        | 628      | GLLTQQDDR     |           |       |                  |      | Mascot      |
| 1200.5929  | 1200.5228   | -0.0701 | -58   | 18         | 29       | SGSCVFSSVSLK  |           |       |                  |      | Mascot      |
| 1234.7041  | 1234.6273   | -0.0768 | -62   | 633        | 642      | EEIIAYIKQK    |           |       |                  |      | Mascot      |
| 1234.7041  | 1234.6273   | -0.0768 | -62   | 633        | 642      | EEIIAYIKQK    |           |       |                  |      | Mascot      |
| 1277.7212  | 1277.7023   | -0.0189 | -15   | 605        | 615      | FLLSLSLQSNR   |           |       |                  |      | Mascot      |
| 1434.6755  | 1434.7642   | 0.0887  | 62    | 522        | 534      | ASVYSGMCTQIFK |           |       |                  |      | Mascot      |
| 1585.7605  | 1585.9478   | 0.1873  | 118   | 220        | 232      | HLFEAAEQDEQIR |           |       |                  |      | Mascot      |



|    |                                                                                                     |              |             |         |       |            |          |                          |           |         |                                          |      |             |        |
|----|-----------------------------------------------------------------------------------------------------|--------------|-------------|---------|-------|------------|----------|--------------------------|-----------|---------|------------------------------------------|------|-------------|--------|
|    |                                                                                                     | 1585.7605    | 1585.9478   | 0.1873  | 118   | 220        | 232      | HLFEAAEQDEQIR            |           |         |                                          |      |             | Mascot |
|    |                                                                                                     | 1629.8231    | 1629.8773   | 0.0542  | 33    | 591        | 604      | ALESENGHLDLYLR           |           |         |                                          |      |             | Mascot |
|    |                                                                                                     | 1629.8231    | 1629.8773   | 0.0542  | 33    | 591        | 604      | ALESENGHLDLYLR           |           |         |                                          |      |             | Mascot |
| 47 | novel protein similar to human guanylate binding protein 1, interferon-inducible, 67kDa (GBP1) [Dan | gi 94732983  | 70719.1     | 6.33    | 11    | 29         | 0        |                          |           |         |                                          |      |             |        |
|    | Peptide Information                                                                                 |              |             |         |       |            |          |                          |           |         |                                          |      |             |        |
|    |                                                                                                     | Calc. Mass   | Obsrv. Mass | ± da    | ± ppm | Start Seq. | End Seq. | Sequence                 | Ion Score | C. I. % | Modification                             | Rank | Result Type |        |
|    |                                                                                                     | 819.4505     | 819.4697    | 0.0192  | 23    | 577        | 582      | QQIMRK                   |           |         | Oxidation (M)[4]                         |      | Mascot      |        |
|    |                                                                                                     | 913.4737     | 913.5778    | 0.1041  | 114   | 365        | 372      | DTDGKHLK                 |           |         |                                          |      | Mascot      |        |
|    |                                                                                                     | 1365.6925    | 1365.6542   | -0.0383 | -28   | 164        | 173      | FFPHFIWCLR               |           |         |                                          |      | Mascot      |        |
|    |                                                                                                     | 1407.6896    | 1407.7087   | 0.0191  | 14    | 583        | 595      | ICDSVDSSGRIAK            |           |         | Carbamidomethyl (C)[2]                   |      | Mascot      |        |
|    |                                                                                                     | 1407.6896    | 1407.7087   | 0.0191  | 14    | 583        | 595      | ICDSVDSSGRIAK            |           |         | Carbamidomethyl (C)[2]                   |      | Mascot      |        |
|    |                                                                                                     | 1418.8114    | 1418.7982   | -0.0132 | -9    | 57         | 69       | RTGFALSSNIKPK            |           |         |                                          |      | Mascot      |        |
|    |                                                                                                     | 1581.7698    | 1581.9062   | 0.1364  | 86    | 206        | 217      | VMMYNLPRECIR             |           |         | Carbamidomethyl (C)[10]                  |      | Mascot      |        |
|    |                                                                                                     | 1585.7632    | 1585.9478   | 0.1846  | 116   | 185        | 197      | DLTEDEYLEFALK            |           |         |                                          |      | Mascot      |        |
|    |                                                                                                     | 1585.7632    | 1585.9478   | 0.1846  | 116   | 185        | 197      | DLTEDEYLEFALK            |           |         |                                          |      | Mascot      |        |
|    |                                                                                                     | 1685.9003    | 1685.8553   | -0.045  | -27   | 484        | 497      | LQVDDVQMNLVRQK           |           |         |                                          |      | Mascot      |        |
|    |                                                                                                     | 1685.9003    | 1685.8553   | -0.045  | -27   | 484        | 497      | LQVDDVQMNLVRQK           |           |         |                                          |      | Mascot      |        |
|    |                                                                                                     | 1707.8193    | 1707.7656   | -0.0537 | -31   | 350        | 364      | LSSMATQAFMARSK           |           |         | Oxidation (M)[4,10]                      |      | Mascot      |        |
|    |                                                                                                     | 1789.7859    | 1789.9778   | 0.1919  | 107   | 70         | 83       | TEGIWMWCMPHPTK           |           |         | Carbamidomethyl (C)[8], Oxidation (M)[6] |      | Mascot      |        |
|    |                                                                                                     | 2284.1606    | 2284.1724   | 0.0118  | 5     | 451        | 471      | TPHVLEVPGASVPEEGI<br>SFR |           |         |                                          |      | Mascot      |        |
| 48 | novel protein similar to vertebrate Rab6-interacting protein 2 (RAB6IP2) [Danio rerio]              | gi 148725254 | 16579.4     | 5.72    | 1     | 14         | 0        |                          |           |         |                                          |      |             |        |
|    | Peptide Information                                                                                 |              |             |         |       |            |          |                          |           |         |                                          |      |             |        |
|    |                                                                                                     | Calc. Mass   | Obsrv. Mass | ± da    | ± ppm | Start Seq. | End Seq. | Sequence                 | Ion Score | C. I. % | Modification                             | Rank | Result Type |        |
|    |                                                                                                     | 1407.7222    | 1407.7087   | -0.0135 | -10   | 1          | 12       | MEELLAAMEKVK             | 14        | 0       | Oxidation (M)[8]                         | 3    | Mascot      |        |
| 49 | PREDICTED: low-density lipoprotein receptor-related protein 1B, partial [Danio rerio]               | gi 326678476 | 326092.8    | 5.15    | 1     | 13         | 0        |                          |           |         |                                          |      |             |        |
|    | Peptide Information                                                                                 |              |             |         |       |            |          |                          |           |         |                                          |      |             |        |
|    |                                                                                                     | Calc. Mass   | Obsrv. Mass | ± da    | ± ppm | Start Seq. | End Seq. | Sequence                 | Ion Score | C. I. % | Modification                             | Rank | Result Type |        |
|    |                                                                                                     | 1629.8312    | 1629.8773   | 0.0461  | 28    | 42         | 55       | VRCPVNNIQLGTR            | 13        | 0       | Carbamidomethyl (C)[10]                  | 2    | Mascot      |        |
| 50 | PREDICTED: microtubule-actin cross-linking factor 1, isoforms 1/2/3/5-like [Danio rerio]            | gi 326674648 | 241935.3    | 5.5     | 1     | 12         | 0        |                          |           |         |                                          |      |             |        |

### Peptide Information

| Calc. Mass | Obsrv. Mass | ± da   | ± ppm | Start Seq. | End Sequence Seq.   | Ion Score | C. I. % | Modification     | Rank | Result Type |
|------------|-------------|--------|-------|------------|---------------------|-----------|---------|------------------|------|-------------|
| 1585.8115  | 1585.9478   | 0.1363 | 86    | 1240       | 1253 SAIHRMLEASEVAR | 12        | 0       | Oxidation (M)[6] | 2    | Mascot      |

|                |           |                        |                |                |                    |
|----------------|-----------|------------------------|----------------|----------------|--------------------|
| Gel Idx/Pos    | 228/J4    | Instr./Gel Origin      | BA2060/110707A | Process Status | Analysis Succeeded |
| Plate [#] Name | [1] 31496 | Instrument Sample Name |                | Spectra        | 11                 |

| Rank | Protein Name                 | Accession No. | Protein MW | Protein PI | Pep. Count | Protein Score | Protein Score C. I. % | Total Ion Score | Total Ion C. I. % |
|------|------------------------------|---------------|------------|------------|------------|---------------|-----------------------|-----------------|-------------------|
| 1    | vitellogenin 1 [Danio rerio] | gi 21391474   | 21118.2    | 9          | 3          | 90            | 99.996                | 78              | 100               |

### Peptide Information

| Calc. Mass | Obsrv. Mass | ± da    | ± ppm | Start Seq. | End Sequence Seq.    | Ion Score | C. I. % | Modification      | Rank | Result Type |
|------------|-------------|---------|-------|------------|----------------------|-----------|---------|-------------------|------|-------------|
| 1695.8999  | 1695.88     | -0.0199 | -12   | 119        | 134 VFAPAGVSPTVMNLHR |           |         |                   |      | Mascot      |
| 1699.9377  | 1699.9181   | -0.0196 | -12   | 34         | 49 YEALLLGGLPQEGRLAR | 78        | 100     |                   |      | Mascot      |
| 1699.9377  | 1699.9181   | -0.0196 | -12   | 34         | 49 YEALLLGGLPQEGRLAR |           |         |                   |      | Mascot      |
| 1711.8948  | 1711.8756   | -0.0192 | -11   | 119        | 134 VFAPAGVSPTVMNLHR |           |         | Oxidation (M)[12] |      | Mascot      |
| 1796.8928  | 1796.9912   | 0.0984  | 55    | 72         | 86 LMDPLLYEYAGTWPK   |           |         |                   |      | Mascot      |

|   |                                  |              |          |      |    |    |        |    |     |
|---|----------------------------------|--------------|----------|------|----|----|--------|----|-----|
| 2 | Zgc:136383 protein [Danio rerio] | gi 125857991 | 148644.2 | 8.93 | 11 | 89 | 99.995 | 76 | 100 |
|---|----------------------------------|--------------|----------|------|----|----|--------|----|-----|

### Peptide Information

| Calc. Mass | Obsrv. Mass | ± da    | ± ppm | Start Seq. | End Sequence Seq.    | Ion Score | C. I. % | Modification            | Rank | Result Type |
|------------|-------------|---------|-------|------------|----------------------|-----------|---------|-------------------------|------|-------------|
| 1023.5105  | 1023.4974   | -0.0131 | -13   | 194        | 202 DVGLAYTER        |           |         |                         |      | Mascot      |
| 1045.5465  | 1045.5513   | 0.0048  | 5     | 1345       | 1352 DFLSWIHK        |           |         |                         |      | Mascot      |
| 1118.5986  | 1118.4963   | -0.1023 | -91   | 1316       | 1324 IPEITMSRR       |           |         | Oxidation (M)[6]        |      | Mascot      |
| 1193.6348  | 1193.6031   | -0.0317 | -27   | 1115       | 1124 TATIMEPFRK      |           |         |                         |      | Mascot      |
| 1193.6348  | 1193.6031   | -0.0317 | -27   | 1115       | 1124 TATIMEPFRK      |           |         |                         |      | Mascot      |
| 1383.6725  | 1383.6716   | -0.0009 | -1    | 1223       | 1234 VTAKFSWGAECK    |           |         | Carbamidomethyl (C)[11] |      | Mascot      |
| 1427.7021  | 1427.7695   | 0.0674  | 47    | 1112       | 1123 MSKTATIMEPFR    |           |         | Oxidation (M)[1]        |      | Mascot      |
| 1695.8999  | 1695.88     | -0.0199 | -12   | 118        | 133 VFAPAGVSPTVMNLHR |           |         |                         |      | Mascot      |
| 1699.9377  | 1699.9181   | -0.0196 | -12   | 33         | 48 YEALLLGGLPQEGRLAR | 78        | 100     |                         |      | Mascot      |
| 1699.9377  | 1699.9181   | -0.0196 | -12   | 33         | 48 YEALLLGGLPQEGRLAR |           |         |                         |      | Mascot      |
| 1711.8948  | 1711.8756   | -0.0192 | -11   | 118        | 133 VFAPAGVSPTVMNLHR |           |         | Oxidation (M)[12]       |      | Mascot      |
| 1716.918   | 1716.8309   | -0.0871 | -51   | 581        | 595 HVASFAYSHIKSLTR  |           |         |                         |      | Mascot      |

|   |                              |           |        |     |              |     |                            |      |   |    |        |    |     |  |  |        |
|---|------------------------------|-----------|--------|-----|--------------|-----|----------------------------|------|---|----|--------|----|-----|--|--|--------|
|   | 1796.8928                    | 1796.9912 | 0.0984 | 55  | 71           | 85  | LMDPLLYEYAGTWPK            |      |   |    |        |    |     |  |  | Mascot |
|   | 2233.2009                    | 2233.0579 | -0.143 | -64 | 592          | 613 | SLTRITAPDMAYVAGAAN<br>VAIK |      |   |    |        |    |     |  |  | Mascot |
| 3 | vitellogenin 6 [Danio rerio] |           |        |     | gi 303227889 |     | 150936.1                   | 8.84 | 9 | 87 | 99.991 | 78 | 100 |  |  |        |

#### Peptide Information

|  | Calc. Mass | Obsrv. Mass | ± da    | ± ppm | Start Seq. | End Seq. | Sequence                   | Ion Score | C. I. | %   | Modification            | Rank | Result Type |
|--|------------|-------------|---------|-------|------------|----------|----------------------------|-----------|-------|-----|-------------------------|------|-------------|
|  | 1023.5105  | 1023.4974   | -0.0131 | -13   | 206        | 214      | DVGLAYTER                  |           |       |     |                         |      | Mascot      |
|  | 1090.5925  | 1090.5172   | -0.0753 | -69   | 1337       | 1345     | IPEITMSKR                  |           |       |     | Oxidation (M)[6]        |      | Mascot      |
|  | 1193.6348  | 1193.6031   | -0.0317 | -27   | 1136       | 1145     | TATIMEPFRK                 |           |       |     |                         |      | Mascot      |
|  | 1193.6348  | 1193.6031   | -0.0317 | -27   | 1136       | 1145     | TATIMEPFRK                 |           |       |     |                         |      | Mascot      |
|  | 1383.6725  | 1383.6716   | -0.0009 | -1    | 1244       | 1255     | VTAKFSWGAECK               |           |       |     | Carbamidomethyl (C)[11] |      | Mascot      |
|  | 1427.7021  | 1427.7695   | 0.0674  | 47    | 1133       | 1144     | MSKTATIMEPFR               |           |       |     | Oxidation (M)[1]        |      | Mascot      |
|  | 1695.8999  | 1695.88     | -0.0199 | -12   | 130        | 145      | VFAPAGVSPTVMNLHR           |           |       |     |                         |      | Mascot      |
|  | 1699.9377  | 1699.9181   | -0.0196 | -12   | 45         | 60       | YEALLLGGLPQEGLAR           | 78        |       | 100 |                         |      | Mascot      |
|  | 1699.9377  | 1699.9181   | -0.0196 | -12   | 45         | 60       | YEALLLGGLPQEGLAR           |           |       |     |                         |      | Mascot      |
|  | 1711.8948  | 1711.8756   | -0.0192 | -11   | 130        | 145      | VFAPAGVSPTVMNLHR           |           |       |     | Oxidation (M)[12]       |      | Mascot      |
|  | 1796.8928  | 1796.9912   | 0.0984  | 55    | 83         | 97       | LMDPLLYEYAGTWPK            |           |       |     |                         |      | Mascot      |
|  | 2233.2009  | 2233.0579   | -0.143  | -64   | 604        | 625      | SLTRITAPDMAYVAGAAN<br>VAIK |           |       |     |                         |      | Mascot      |

|   |                                                             |  |  |  |             |  |          |      |   |    |       |    |     |  |  |  |
|---|-------------------------------------------------------------|--|--|--|-------------|--|----------|------|---|----|-------|----|-----|--|--|--|
| 4 | novel protein similar to vitellogenin 1 (vg1) [Danio rerio] |  |  |  | gi 94733734 |  | 149808.5 | 8.83 | 9 | 86 | 99.99 | 78 | 100 |  |  |  |
|---|-------------------------------------------------------------|--|--|--|-------------|--|----------|------|---|----|-------|----|-----|--|--|--|

#### Peptide Information

|  | Calc. Mass | Obsrv. Mass | ± da    | ± ppm | Start Seq. | End Seq. | Sequence                   | Ion Score | C. I. | %   | Modification            | Rank | Result Type |
|--|------------|-------------|---------|-------|------------|----------|----------------------------|-----------|-------|-----|-------------------------|------|-------------|
|  | 1023.5105  | 1023.4974   | -0.0131 | -13   | 199        | 207      | DVGLAYTER                  |           |       |     |                         |      | Mascot      |
|  | 1090.5925  | 1090.5172   | -0.0753 | -69   | 1326       | 1334     | IPEITMSKR                  |           |       |     | Oxidation (M)[6]        |      | Mascot      |
|  | 1193.6348  | 1193.6031   | -0.0317 | -27   | 1125       | 1134     | TATIMEPFRK                 |           |       |     |                         |      | Mascot      |
|  | 1193.6348  | 1193.6031   | -0.0317 | -27   | 1125       | 1134     | TATIMEPFRK                 |           |       |     |                         |      | Mascot      |
|  | 1383.6725  | 1383.6716   | -0.0009 | -1    | 1233       | 1244     | VTAKFSWGAECK               |           |       |     | Carbamidomethyl (C)[11] |      | Mascot      |
|  | 1427.7021  | 1427.7695   | 0.0674  | 47    | 1122       | 1133     | MSKTATIMEPFR               |           |       |     | Oxidation (M)[1]        |      | Mascot      |
|  | 1695.8999  | 1695.88     | -0.0199 | -12   | 123        | 138      | VFAPAGVSPTVMNLHR           |           |       |     |                         |      | Mascot      |
|  | 1699.9377  | 1699.9181   | -0.0196 | -12   | 38         | 53       | YEALLLGGLPQEGLAR           | 78        |       | 100 |                         |      | Mascot      |
|  | 1699.9377  | 1699.9181   | -0.0196 | -12   | 38         | 53       | YEALLLGGLPQEGLAR           |           |       |     |                         |      | Mascot      |
|  | 1711.8948  | 1711.8756   | -0.0192 | -11   | 123        | 138      | VFAPAGVSPTVMNLHR           |           |       |     | Oxidation (M)[12]       |      | Mascot      |
|  | 1796.8928  | 1796.9912   | 0.0984  | 55    | 76         | 90       | LMDPLLYEYAGTWPK            |           |       |     |                         |      | Mascot      |
|  | 2233.2009  | 2233.0579   | -0.143  | -64   | 597        | 618      | SLTRITAPDMAYVAGAAN<br>VAIK |           |       |     |                         |      | Mascot      |

5 Unknown (protein for MGC:174137) [Danio rerio] gi|152012733 17051.5 7.71 2 86 99.99 78 100

Peptide Information

| Calc. Mass | Obsrv. Mass | ± da    | ± ppm | Start Seq. | End Sequence Seq.   | Ion Score | C. I. % | Modification | Rank | Result Type |
|------------|-------------|---------|-------|------------|---------------------|-----------|---------|--------------|------|-------------|
| 1699.9377  | 1699.9181   | -0.0196 | -12   | 34         | 49 YEALLLGGLPQEGLAR | 78        | 100     |              |      | Mascot      |
| 1699.9377  | 1699.9181   | -0.0196 | -12   | 34         | 49 YEALLLGGLPQEGLAR |           |         |              |      | Mascot      |
| 1796.8928  | 1796.9912   | 0.0984  | 55    | 72         | 86 LMDPLLYEYAGTWPK  |           |         |              |      | Mascot      |

6 hypothetical protein LOC678536 [Danio rerio] gi|160420306 148750.2 8.89 10 86 99.99 76 100

Peptide Information

| Calc. Mass | Obsrv. Mass | ± da    | ± ppm | Start Seq. | End Sequence Seq.              | Ion Score | C. I. % | Modification            | Rank | Result Type |
|------------|-------------|---------|-------|------------|--------------------------------|-----------|---------|-------------------------|------|-------------|
| 1023.5105  | 1023.4974   | -0.0131 | -13   | 195        | 203 DVGLAYTER                  |           |         |                         |      | Mascot      |
| 1045.5465  | 1045.5513   | 0.0048  | 5     | 1346       | 1353 DFLSWIHK                  |           |         |                         |      | Mascot      |
| 1118.5986  | 1118.4963   | -0.1023 | -91   | 1317       | 1325 IPEITMSRR                 |           |         | Oxidation (M)[6]        |      | Mascot      |
| 1193.6348  | 1193.6031   | -0.0317 | -27   | 1116       | 1125 TATIMEPFRK                |           |         |                         |      | Mascot      |
| 1193.6348  | 1193.6031   | -0.0317 | -27   | 1116       | 1125 TATIMEPFRK                |           |         |                         |      | Mascot      |
| 1383.6725  | 1383.6716   | -0.0009 | -1    | 1224       | 1235 VTAKFSWGAECK              |           |         | Carbamidomethyl (C)[11] |      | Mascot      |
| 1427.7021  | 1427.7695   | 0.0674  | 47    | 1113       | 1124 MSKTATIMEPFR              |           |         | Oxidation (M)[1]        |      | Mascot      |
| 1695.8999  | 1695.88     | -0.0199 | -12   | 119        | 134 VFAPAGVSPTVMNLHR           |           |         |                         |      | Mascot      |
| 1699.9377  | 1699.9181   | -0.0196 | -12   | 34         | 49 YEALLLGGLPQEGLAR            | 78        | 100     |                         |      | Mascot      |
| 1699.9377  | 1699.9181   | -0.0196 | -12   | 34         | 49 YEALLLGGLPQEGLAR            |           |         |                         |      | Mascot      |
| 1711.8948  | 1711.8756   | -0.0192 | -11   | 119        | 134 VFAPAGVSPTVMNLHR           |           |         | Oxidation (M)[12]       |      | Mascot      |
| 1796.8928  | 1796.9912   | 0.0984  | 55    | 72         | 86 LMDPLLYEYAGTWPK             |           |         |                         |      | Mascot      |
| 2233.2009  | 2233.0579   | -0.143  | -64   | 593        | 614 SLTRITAPDMAYVAGAAN<br>VAIK |           |         |                         |      | Mascot      |

7 novel protein similar to vitellogenin 1 (vg1) [Danio rerio] gi|94733733 149143.4 8.92 10 86 99.988 76 100

Peptide Information

| Calc. Mass | Obsrv. Mass | ± da    | ± ppm | Start Seq. | End Sequence Seq. | Ion Score | C. I. % | Modification            | Rank | Result Type |
|------------|-------------|---------|-------|------------|-------------------|-----------|---------|-------------------------|------|-------------|
| 1023.5105  | 1023.4974   | -0.0131 | -13   | 199        | 207 DVGLAYTER     |           |         |                         |      | Mascot      |
| 1045.5465  | 1045.5513   | 0.0048  | 5     | 1350       | 1357 DFLSWIHK     |           |         |                         |      | Mascot      |
| 1118.5986  | 1118.4963   | -0.1023 | -91   | 1321       | 1329 IPEITMSRR    |           |         | Oxidation (M)[6]        |      | Mascot      |
| 1193.6348  | 1193.6031   | -0.0317 | -27   | 1120       | 1129 TATIMEPFRK   |           |         |                         |      | Mascot      |
| 1193.6348  | 1193.6031   | -0.0317 | -27   | 1120       | 1129 TATIMEPFRK   |           |         |                         |      | Mascot      |
| 1383.6725  | 1383.6716   | -0.0009 | -1    | 1228       | 1239 VTAKFSWGAECK |           |         | Carbamidomethyl (C)[11] |      | Mascot      |

|           |           |         |     |      |      |                            |    |     |  |                   |        |
|-----------|-----------|---------|-----|------|------|----------------------------|----|-----|--|-------------------|--------|
| 1427.7021 | 1427.7695 | 0.0674  | 47  | 1117 | 1128 | MSKTATIMEPFR               |    |     |  | Oxidation (M)[1]  | Mascot |
| 1695.8999 | 1695.88   | -0.0199 | -12 | 123  | 138  | VFAPAGVSPTVMNLHR           |    |     |  |                   | Mascot |
| 1699.9377 | 1699.9181 | -0.0196 | -12 | 38   | 53   | YEALLLGGLPQEGLAR           | 78 | 100 |  |                   | Mascot |
| 1699.9377 | 1699.9181 | -0.0196 | -12 | 38   | 53   | YEALLLGGLPQEGLAR           |    |     |  |                   | Mascot |
| 1711.8948 | 1711.8756 | -0.0192 | -11 | 123  | 138  | VFAPAGVSPTVMNLHR           |    |     |  | Oxidation (M)[12] | Mascot |
| 1796.8928 | 1796.9912 | 0.0984  | 55  | 76   | 90   | LMDPLLYEYAGTWPK            |    |     |  |                   | Mascot |
| 2233.2009 | 2233.0579 | -0.143  | -64 | 597  | 618  | SLTRITAPDMAYVAGAAN<br>VAIK |    |     |  |                   | Mascot |

8 novel protein similar to vitellogenin 1 (vg1) [Danio rerio] gi|94732723 147084.2 8.73 8 85 99.985 76 100

#### Peptide Information

| Calc. Mass | Obsrv. Mass | ± da    | ± ppm | Start Seq. | End Seq. | Sequence           | Ion Score | C. I. | % Modification   | Rank | Result Type |
|------------|-------------|---------|-------|------------|----------|--------------------|-----------|-------|------------------|------|-------------|
| 1090.5925  | 1090.5172   | -0.0753 | -69   | 1300       | 1308     | IPEITMSKR          |           |       | Oxidation (M)[6] |      | Mascot      |
| 1109.4818  | 1109.4774   | -0.0044 | -4    | 1087       | 1097     | SHSTSSSSSSSR       |           |       |                  |      | Mascot      |
| 1118.6238  | 1118.4963   | -0.1275 | -114  | 1194       | 1204     | KICADGALLSK        |           |       |                  |      | Mascot      |
| 1193.6083  | 1193.6031   | -0.0052 | -4    | 828        | 837      | LESMTLDQLK         |           |       | Oxidation (M)[4] |      | Mascot      |
| 1193.6083  | 1193.6031   | -0.0052 | -4    | 828        | 837      | LESMTLDQLK         |           |       | Oxidation (M)[4] |      | Mascot      |
| 1263.5118  | 1263.681    | 0.1692  | 134   | 1098       | 1110     | SSSSSSSSMSSSR      |           |       |                  |      | Mascot      |
| 1699.9047  | 1699.9181   | 0.0134  | 8     | 597        | 614      | ITAPDMASVAGAANVAIK |           |       |                  |      | Mascot      |
| 1699.9377  | 1699.9181   | -0.0196 | -12   | 34         | 49       | YEALLLGGLPQEGLAR   | 78        | 100   |                  |      | Mascot      |
| 1796.9581  | 1796.9912   | 0.0331  | 18    | 342        | 356      | LSTLDKFEAIWAQFK    |           |       |                  |      | Mascot      |

9 vitellogenin 7 [Danio rerio] gi|156713467 148739.2 8.76 8 85 99.985 76 100

#### Peptide Information

| Calc. Mass | Obsrv. Mass | ± da    | ± ppm | Start Seq. | End Seq. | Sequence           | Ion Score | C. I. | % Modification   | Rank | Result Type |
|------------|-------------|---------|-------|------------|----------|--------------------|-----------|-------|------------------|------|-------------|
| 1090.5925  | 1090.5172   | -0.0753 | -69   | 1315       | 1323     | IPEITMSKR          |           |       | Oxidation (M)[6] |      | Mascot      |
| 1109.4818  | 1109.4774   | -0.0044 | -4    | 1087       | 1097     | SHSTSSSSSSSR       |           |       |                  |      | Mascot      |
| 1118.6238  | 1118.4963   | -0.1275 | -114  | 1209       | 1219     | KICADGALLSK        |           |       |                  |      | Mascot      |
| 1193.6083  | 1193.6031   | -0.0052 | -4    | 828        | 837      | LESMTLDQLK         |           |       | Oxidation (M)[4] |      | Mascot      |
| 1193.6083  | 1193.6031   | -0.0052 | -4    | 828        | 837      | LESMTLDQLK         |           |       | Oxidation (M)[4] |      | Mascot      |
| 1263.5118  | 1263.681    | 0.1692  | 134   | 1098       | 1110     | SSSSSSSSMSSSR      |           |       |                  |      | Mascot      |
| 1699.9047  | 1699.9181   | 0.0134  | 8     | 597        | 614      | ITAPDMASVAGAANVAIK |           |       |                  |      | Mascot      |
| 1699.9377  | 1699.9181   | -0.0196 | -12   | 34         | 49       | YEALLLGGLPQEGLAR   | 78        | 100   |                  |      | Mascot      |
| 1796.9581  | 1796.9912   | 0.0331  | 18    | 342        | 356      | LSTLDKFEAIWAQFK    |           |       |                  |      | Mascot      |

10 vitellogenin 1 [Danio rerio] gi|94733730 149140.4 8.74 7 84 99.981 76 100

| Peptide Information |                                                             |             |         |       |              |                            |           |         |                  |                  |        |
|---------------------|-------------------------------------------------------------|-------------|---------|-------|--------------|----------------------------|-----------|---------|------------------|------------------|--------|
|                     | Calc. Mass                                                  | Obsrv. Mass | ± da    | ± ppm | Start Seq.   | End Sequence Seq.          | Ion Score | C. I. % | Modification     | Rank Result Type |        |
|                     | 1023.5105                                                   | 1023.4974   | -0.0131 | -13   | 195          | 203 DVGLAYTER              | 78        | 100     | Oxidation (M)[6] | Mascot           |        |
|                     | 1090.5925                                                   | 1090.5172   | -0.0753 | -69   | 1319         | 1327 IPEITMSKR             |           |         |                  | Mascot           |        |
|                     | 1695.8999                                                   | 1695.88     | -0.0199 | -12   | 119          | 134 VFAPAGVSPTVMNLHR       |           |         |                  | Mascot           |        |
|                     | 1699.9047                                                   | 1699.9181   | 0.0134  | 8     | 597          | 614 ITAPDMASVAGAANVAIK     |           |         |                  | Mascot           |        |
|                     | 1699.9377                                                   | 1699.9181   | -0.0196 | -12   | 34           | 49 YEALLLGGLPQEGLAR        |           |         |                  | Mascot           |        |
|                     | 1711.8948                                                   | 1711.8756   | -0.0192 | -11   | 119          | 134 VFAPAGVSPTVMNLHR       |           |         |                  | Mascot           |        |
|                     | 1796.9078                                                   | 1796.9912   | 0.0834  | 46    | 1279         | 1293 HILTAAYDTGFRFER       |           |         |                  | Mascot           |        |
|                     | 1954.8745                                                   | 1954.8542   | -0.0203 | -10   | 147          | 163 TQNIYEMQEAGAQQGVC      |           |         |                  | Mascot           |        |
|                     | 1970.8695                                                   | 1970.8472   | -0.0223 | -11   | 147          | 163 TQNIYEMQEAGAQQGVC      |           |         |                  | Mascot           |        |
| 11                  | vitellogenin 1 [Danio rerio]                                |             |         |       | gij166795887 |                            | 149452.5  | 8.68    | 6                | 78 99.924        | 78 100 |
| Peptide Information |                                                             |             |         |       |              |                            |           |         |                  |                  |        |
|                     | Calc. Mass                                                  | Obsrv. Mass | ± da    | ± ppm | Start Seq.   | End Sequence Seq.          | Ion Score | C. I. % | Modification     | Rank Result Type |        |
|                     | 1090.5925                                                   | 1090.5172   | -0.0753 | -69   | 1319         | 1327 IPEITMSKR             | 78        | 100     | Oxidation (M)[6] | Mascot           |        |
|                     | 1695.8999                                                   | 1695.88     | -0.0199 | -12   | 119          | 134 VFAPAGVSPTVMNLHR       |           |         |                  | Mascot           |        |
|                     | 1699.9377                                                   | 1699.9181   | -0.0196 | -12   | 34           | 49 YEALLLGGLPQEGLAR        |           |         |                  | Mascot           |        |
|                     | 1699.9377                                                   | 1699.9181   | -0.0196 | -12   | 34           | 49 YEALLLGGLPQEGLAR        |           |         |                  | Mascot           |        |
|                     | 1711.8948                                                   | 1711.8756   | -0.0192 | -11   | 119          | 134 VFAPAGVSPTVMNLHR       |           |         |                  | Mascot           |        |
|                     | 1796.9078                                                   | 1796.9912   | 0.0834  | 46    | 1279         | 1293 HILTAAYDTGFRFER       |           |         |                  | Mascot           |        |
|                     | 1954.8745                                                   | 1954.8542   | -0.0203 | -10   | 147          | 163 TQNIYEMQEAGAQQGVC      |           |         |                  | Mascot           |        |
|                     | 1970.8695                                                   | 1970.8472   | -0.0223 | -11   | 147          | 163 TQNIYEMQEAGAQQGVC      |           |         |                  | Mascot           |        |
|                     | 2233.2009                                                   | 2233.0579   | -0.143  | -64   | 593          | 614 SLTRITAPDMAYVAGAANVAIK |           |         |                  | Mascot           |        |
| 12                  | novel protein similar to vitellogenin 1 (vg1) [Danio rerio] |             |         |       | gij94733731  |                            | 149169.2  | 8.84    | 5                | 76 99.888        | 76 100 |
| Peptide Information |                                                             |             |         |       |              |                            |           |         |                  |                  |        |
|                     | Calc. Mass                                                  | Obsrv. Mass | ± da    | ± ppm | Start Seq.   | End Sequence Seq.          | Ion Score | C. I. % | Modification     | Rank Result Type |        |
|                     | 1023.5105                                                   | 1023.4974   | -0.0131 | -13   | 199          | 207 DVGLAYTER              | 78        | 100     | Oxidation (M)[6] | Mascot           |        |
|                     | 1090.5925                                                   | 1090.5172   | -0.0753 | -69   | 1321         | 1329 IPEITMSKR             |           |         |                  | Mascot           |        |
|                     | 1699.9047                                                   | 1699.9181   | 0.0134  | 8     | 601          | 618 ITAPDMASVAGAANVAIK     |           |         |                  | Mascot           |        |
|                     | 1699.9377                                                   | 1699.9181   | -0.0196 | -12   | 38           | 53 YEALLLGGLPQEGLAR        |           |         |                  | Mascot           |        |
|                     | 1954.8745                                                   | 1954.8542   | -0.0203 | -10   | 151          | 167 TQNIYEMQEAGAQQGVC      |           |         |                  | Mascot           |        |
|                     | 1970.8695                                                   | 1970.8472   | -0.0223 | -11   | 151          | 167 TQNIYEMQEAGAQQGVC      |           |         |                  | Mascot           |        |

13 PREDICTED: dynein heavy chain 6, axonemal [Danio rerio] gi|326663948 454774.1 5.57 34 55 85.928

Peptide Information

| Calc. Mass | Obsrv. Mass | ± da    | ± ppm | Start Seq. | End Seq. | Sequence          | Ion Score | C. I. % | Modification                             | Rank | Result Type |
|------------|-------------|---------|-------|------------|----------|-------------------|-----------|---------|------------------------------------------|------|-------------|
| 847.4243   | 847.4418    | 0.0175  | 21    | 303        | 309      | VWCANVR           |           |         |                                          |      | Mascot      |
| 993.4855   | 993.486     | 0.0005  | 1     | 1823       | 1831     | DGLMALCVR         |           |         | Oxidation (M)[4]                         |      | Mascot      |
| 995.4978   | 995.5035    | 0.0057  | 6     | 2477       | 2484     | CFQIELSR          |           |         |                                          |      | Mascot      |
| 1037.4656  | 1037.5153   | 0.0497  | 48    | 2468       | 2476     | LAAHMCGYR         |           |         | Oxidation (M)[5]                         |      | Mascot      |
| 1045.4221  | 1045.5513   | 0.1292  | 124   | 3724       | 3731     | YEFNDSDR          |           |         |                                          |      | Mascot      |
| 1090.6771  | 1090.5172   | -0.1599 | -147  | 289        | 297      | IPVFALFRK         |           |         |                                          |      | Mascot      |
| 1109.5078  | 1109.4774   | -0.0304 | -27   | 1867       | 1875     | MLCLANSER         |           |         | Carbamidomethyl (C)[3], Oxidation (M)[1] |      | Mascot      |
| 1119.5695  | 1119.4893   | -0.0802 | -72   | 2          | 10       | YSFQKGHPR         |           |         |                                          |      | Mascot      |
| 1234.6572  | 1234.6648   | 0.0076  | 6     | 2962       | 2972     | TMALTEARLGR       |           |         | Oxidation (M)[2]                         |      | Mascot      |
| 1234.6572  | 1234.6648   | 0.0076  | 6     | 2962       | 2972     | TMALTEARLGR       | 6         | 0       | Oxidation (M)[2]                         |      | Mascot      |
| 1265.667   | 1265.6366   | -0.0304 | -24   | 382        | 391      | FRELMEVAR         |           |         | Oxidation (M)[6]                         |      | Mascot      |
| 1277.6704  | 1277.696    | 0.0256  | 20    | 1867       | 1877     | MLCLANSERIK       |           |         |                                          |      | Mascot      |
| 1302.7814  | 1302.6985   | -0.0829 | -64   | 1657       | 1669     | AVKSVLVMAGSLK     |           |         |                                          |      | Mascot      |
| 1308.647   | 1308.6412   | -0.0058 | -4    | 2869       | 2879     | YISNPDFVPEK       |           |         |                                          |      | Mascot      |
| 1329.6256  | 1329.6488   | 0.0232  | 17    | 99         | 109      | SGYMKPYNNQK       |           |         |                                          |      | Mascot      |
| 1357.6707  | 1357.6993   | 0.0286  | 21    | 2743       | 2754     | LAVDQENADQVR      |           |         |                                          |      | Mascot      |
| 1390.693   | 1390.6646   | -0.0284 | -20   | 384        | 395      | ELVMEVARNACR      |           |         |                                          |      | Mascot      |
| 1434.7621  | 1434.7551   | -0.007  | -5    | 2957       | 2969     | ETLAKTMALTEAR     |           |         |                                          |      | Mascot      |
| 1434.7621  | 1434.7551   | -0.007  | -5    | 2957       | 2969     | ETLAKTMALTEAR     |           |         |                                          |      | Mascot      |
| 1460.7703  | 1460.78     | 0.0097  | 7     | 2973       | 2986     | SGKLTALGDEQVR     |           |         |                                          |      | Mascot      |
| 1493.8838  | 1493.7188   | -0.165  | -110  | 950        | 963      | GLPPNNVVPFLKAK    |           |         |                                          |      | Mascot      |
| 1493.8838  | 1493.7188   | -0.165  | -110  | 950        | 963      | GLPPNNVVPFLKAK    |           |         |                                          |      | Mascot      |
| 1499.7601  | 1499.76     | -0.0001 | 0     | 2341       | 2352     | VFHDLINNEDK       |           |         |                                          |      | Mascot      |
| 1555.855   | 1555.7369   | -0.1181 | -76   | 2447       | 2462     | QERGNALLVGVGGTGK  |           |         |                                          |      | Mascot      |
| 1711.7059  | 1711.8756   | 0.1697  | 99    | 340        | 352      | EMCYHISDMPLCR     |           |         | Carbamidomethyl (C)[3,12]                |      | Mascot      |
| 1716.7765  | 1716.8309   | 0.0544  | 32    | 2194       | 2206     | QFQDFHGFYDREK     |           |         |                                          |      | Mascot      |
| 1796.7587  | 1796.9912   | 0.2325  | 129   | 2889       | 2902     | SMCMWVRAMDLYSR    |           |         | Oxidation (M)[2,4,9]                     |      | Mascot      |
| 1970.9567  | 1970.8472   | -0.1095 | -56   | 363        | 378      | EFQRAQYTQLEEVSSR  |           |         |                                          |      | Mascot      |
| 1994.1334  | 1993.9531   | -0.1803 | -90   | 3492       | 3508     | GHWNQQLGAFQKLILIK |           |         |                                          |      | Mascot      |
| 1994.1334  | 1993.9531   | -0.1803 | -90   | 3492       | 3508     | GHWNQQLGAFQKLILIK |           |         |                                          |      | Mascot      |
| 1997.9507  | 1997.9514   | 0.0007  | 0     | 2468       | 2484     | LAAHMCGYRCFQIELSR |           |         |                                          |      | Mascot      |

|           |           |         |     |      |      |                                |                                                  |        |
|-----------|-----------|---------|-----|------|------|--------------------------------|--------------------------------------------------|--------|
| 2233.1897 | 2233.0579 | -0.1318 | -59 | 455  | 474  | LADYLIVNTTHMLVVNSV<br>SK       | Oxidation (M)[12]                                | Mascot |
| 2261.137  | 2261.0452 | -0.0918 | -41 | 3879 | 3898 | IPDKLDMDAAVESLFLQD<br>PK       | Oxidation (M)[7]                                 | Mascot |
| 2284.2546 | 2284.1499 | -0.1047 | -46 | 3138 | 3158 | ETLDPALEPILLKQTFVSG<br>GR      |                                                  | Mascot |
| 2367.0842 | 2367.2385 | 0.1543  | 65  | 2346 | 2365 | LINNEDKSYFNTMISEMA<br>SK       | Oxidation (M)[13,17]                             | Mascot |
| 2367.0842 | 2367.2385 | 0.1543  | 65  | 2346 | 2365 | LINNEDKSYFNTMISEMA<br>SK       | Oxidation (M)[13,17]                             | Mascot |
| 2399.1133 | 2398.9922 | -0.1211 | -50 | 2600 | 2618 | MFPSLVNCTIDWFVQW<br>PR         | Carbamidomethyl (C)[8]                           | Mascot |
| 2888.4597 | 2888.3716 | -0.0881 | -31 | 590  | 615  | ICGDGPSVEEILEEDAYL<br>QNIILNIK |                                                  | Mascot |
| 3048.5144 | 3048.4673 | -0.0471 | -15 | 3602 | 3626 | NGIWIFLQNCCHLAVSWML<br>AMEELIK | Carbamidomethyl (C)[10], Oxidation<br>(M)[17,20] | Mascot |

14 Idh3a protein [Danio rerio] gi|157423273 16736.4 6.89 7 48 31.076

#### Peptide Information

| Calc. Mass | Obsrv. Mass | ± da    | ± ppm | Start Seq. | End Seq. | Sequence          | Ion Score | C. I. | % Modification         | Rank | Result Type |
|------------|-------------|---------|-------|------------|----------|-------------------|-----------|-------|------------------------|------|-------------|
| 1003.489   | 1003.5383   | 0.0493  | 49    | 108        | 116      | HMGLHGHAK         |           |       | Oxidation (M)[2]       |      | Mascot      |
| 1109.5693  | 1109.4774   | -0.0919 | -83   | 7          | 17       | STVSCIMGAIK       |           |       |                        |      | Mascot      |
| 1201.4976  | 1201.6021   | 0.1045  | 87    | 142        | 151      | CSEFTADICR        |           |       | Carbamidomethyl (C)[1] |      | Mascot      |
| 1300.5773  | 1300.5516   | -0.0257 | -20   | 142        | 152      | CSEFTADICRR       |           |       |                        |      | Mascot      |
| 1316.707   | 1316.5343   | -0.1727 | -131  | 18         | 28       | TQTPQPRVFSR       |           |       |                        |      | Mascot      |
| 1357.5988  | 1357.6993   | 0.1005  | 74    | 142        | 152      | CSEFTADICRR       |           |       | Carbamidomethyl (C)[1] |      | Mascot      |
| 1707.8669  | 1707.7516   | -0.1153 | -68   | 2          | 17       | ANAWRSTVSCIMGAIK  |           |       |                        |      | Mascot      |
| 1838.9073  | 1838.8944   | -0.0129 | -7    | 1          | 17       | MANAWRSTVSCIMGAIK |           |       |                        |      | Mascot      |

15 Nin protein [Danio rerio] gi|134024887 72497.9 4.67 9 47 17.135 25 0

#### Peptide Information

| Calc. Mass | Obsrv. Mass | ± da    | ± ppm | Start Seq. | End Seq. | Sequence     | Ion Score | C. I. | % Modification         | Rank | Result Type |
|------------|-------------|---------|-------|------------|----------|--------------|-----------|-------|------------------------|------|-------------|
| 807.4029   | 807.389     | -0.0139 | -17   | 424        | 430      | ESMTALR      |           |       |                        |      | Mascot      |
| 993.4669   | 993.486     | 0.0191  | 19    | 613        | 620      | AMVDEEKR     |           |       | Oxidation (M)[2]       |      | Mascot      |
| 1179.4397  | 1179.5885   | 0.1488  | 126   | 133        | 142      | DEDAQESDDR   |           |       |                        |      | Mascot      |
| 1179.6256  | 1179.5885   | -0.0371 | -31   | 384        | 393      | FDLDTAEKLK   |           |       |                        |      | Mascot      |
| 1234.6824  | 1234.6648   | -0.0176 | -14   | 278        | 289      | ISCALSSTIALR |           |       |                        |      | Mascot      |
| 1234.6824  | 1234.6648   | -0.0176 | -14   | 278        | 289      | ISCALSSTIALR | 25        | 0     |                        |      | Mascot      |
| 1365.7042  | 1365.6259   | -0.0783 | -57   | 424        | 435      | ESMTALRTELSK |           |       |                        |      | Mascot      |
| 1365.7042  | 1365.6259   | -0.0783 | -57   | 424        | 435      | ESMTALRTELSK |           |       |                        |      | Mascot      |
| 1390.6995  | 1390.6646   | -0.0349 | -25   | 180        | 191      | GKALSLCDLEER |           |       | Carbamidomethyl (C)[7] |      | Mascot      |



|  |           |           |         |    |     |     |               |  |  |  |  |  |  |  |  |  |        |
|--|-----------|-----------|---------|----|-----|-----|---------------|--|--|--|--|--|--|--|--|--|--------|
|  | 1555.6805 | 1555.7369 | 0.0564  | 36 | 535 | 546 | SYEEQCRELQDR  |  |  |  |  |  |  |  |  |  | Mascot |
|  | 1695.8846 | 1695.88   | -0.0046 | -3 | 363 | 376 | AEIRHLLCVDLER |  |  |  |  |  |  |  |  |  | Mascot |

16 Nin protein [Danio rerio] gi|158253705 85484.2 4.67 9 46 0 25 0

Peptide Information

| Calc. Mass | Obsrv. Mass | ± da    | ± ppm | Start Seq. | End Seq. | Sequence      | Ion Score | C. I. | % | Modification           | Rank | Result Type |
|------------|-------------|---------|-------|------------|----------|---------------|-----------|-------|---|------------------------|------|-------------|
| 807.4029   | 807.389     | -0.0139 | -17   | 423        | 429      | ESMTALR       |           |       |   |                        |      | Mascot      |
| 993.4669   | 993.486     | 0.0191  | 19    | 612        | 619      | AMVDEEKR      |           |       |   | Oxidation (M)[2]       |      | Mascot      |
| 1179.4397  | 1179.5885   | 0.1488  | 126   | 132        | 141      | DEDAQESDDR    |           |       |   |                        |      | Mascot      |
| 1179.6256  | 1179.5885   | -0.0371 | -31   | 383        | 392      | FDLDTAEKLK    |           |       |   |                        |      | Mascot      |
| 1234.6824  | 1234.6648   | -0.0176 | -14   | 277        | 288      | ISCALSSTIALR  |           |       |   |                        |      | Mascot      |
| 1234.6824  | 1234.6648   | -0.0176 | -14   | 277        | 288      | ISCALSSTIALR  | 25        |       | 0 |                        |      | Mascot      |
| 1365.7042  | 1365.6259   | -0.0783 | -57   | 423        | 434      | ESMTALRTELSK  |           |       |   |                        |      | Mascot      |
| 1365.7042  | 1365.6259   | -0.0783 | -57   | 423        | 434      | ESMTALRTELSK  |           |       |   |                        |      | Mascot      |
| 1390.6995  | 1390.6646   | -0.0349 | -25   | 179        | 190      | GKALSLCDLEER  |           |       |   | Carbamidomethyl (C)[7] |      | Mascot      |
| 1555.6805  | 1555.7369   | 0.0564  | 36    | 534        | 545      | SYEEQCRELQDR  |           |       |   |                        |      | Mascot      |
| 1695.8846  | 1695.88     | -0.0046 | -3    | 362        | 375      | AEIRHLLCVDLER |           |       |   |                        |      | Mascot      |

17 Nin protein [Danio rerio] gi|118763668 85245 4.63 9 46 0 25 0

Peptide Information

| Calc. Mass | Obsrv. Mass | ± da    | ± ppm | Start Seq. | End Seq. | Sequence      | Ion Score | C. I. | % | Modification           | Rank | Result Type |
|------------|-------------|---------|-------|------------|----------|---------------|-----------|-------|---|------------------------|------|-------------|
| 807.4029   | 807.389     | -0.0139 | -17   | 423        | 429      | ESMTALR       |           |       |   |                        |      | Mascot      |
| 993.4669   | 993.486     | 0.0191  | 19    | 612        | 619      | AMVDEEKR      |           |       |   | Oxidation (M)[2]       |      | Mascot      |
| 1179.4397  | 1179.5885   | 0.1488  | 126   | 132        | 141      | DEDAQESDDR    |           |       |   |                        |      | Mascot      |
| 1179.6256  | 1179.5885   | -0.0371 | -31   | 383        | 392      | FDLDTAEKLK    |           |       |   |                        |      | Mascot      |
| 1234.6824  | 1234.6648   | -0.0176 | -14   | 277        | 288      | ISCALSSTIALR  |           |       |   |                        |      | Mascot      |
| 1234.6824  | 1234.6648   | -0.0176 | -14   | 277        | 288      | ISCALSSTIALR  | 25        |       | 0 |                        |      | Mascot      |
| 1365.7042  | 1365.6259   | -0.0783 | -57   | 423        | 434      | ESMTALRTELSK  |           |       |   |                        |      | Mascot      |
| 1365.7042  | 1365.6259   | -0.0783 | -57   | 423        | 434      | ESMTALRTELSK  |           |       |   |                        |      | Mascot      |
| 1390.6995  | 1390.6646   | -0.0349 | -25   | 179        | 190      | GKALSLCDLEER  |           |       |   | Carbamidomethyl (C)[7] |      | Mascot      |
| 1555.6805  | 1555.7369   | 0.0564  | 36    | 534        | 545      | SYEEQCRELQDR  |           |       |   |                        |      | Mascot      |
| 1695.8846  | 1695.88     | -0.0046 | -3    | 362        | 375      | AEIRHLLCVDLER |           |       |   |                        |      | Mascot      |

18 pleckstrin homology domain-containing family G member 7 [Danio rerio] gi|113681918 49035.5 6.76 10 46 0

Peptide Information

|    |                                                                      | Calc. Mass | Obsrv. Mass | $\pm$ da | $\pm$ ppm | Start Seq.  | End Sequence Seq.           | Ion Score | C. I. % | Modification           | Rank | Result Type |
|----|----------------------------------------------------------------------|------------|-------------|----------|-----------|-------------|-----------------------------|-----------|---------|------------------------|------|-------------|
|    |                                                                      | 993.4709   | 993.486     | 0.0151   | 15        | 387         | 394 AWMSEIEK                |           |         |                        |      | Mascot      |
|    |                                                                      | 1165.6034  | 1165.5714   | -0.032   | -27       | 1           | 10 MSLVDFLQGR               |           |         |                        |      | Mascot      |
|    |                                                                      | 1165.6034  | 1165.5714   | -0.032   | -27       | 1           | 10 MSLVDFLQGR               |           |         |                        |      | Mascot      |
|    |                                                                      | 1193.6313  | 1193.6031   | -0.0282  | -24       | 219         | 227 WLDNYQVK                |           |         |                        |      | Mascot      |
|    |                                                                      | 1193.6313  | 1193.6031   | -0.0282  | -24       | 217         | 225 VKWLDNYQK               |           |         |                        |      | Mascot      |
|    |                                                                      | 1263.5786  | 1263.681    | 0.1024   | 81        | 61          | 70 QCLQDIDSWR               |           |         |                        |      | Mascot      |
|    |                                                                      | 1320.6001  | 1320.5679   | -0.0322  | -24       | 61          | 70 QCLQDIDSWR               |           |         | Carbamidomethyl (C)[2] |      | Mascot      |
|    |                                                                      | 1365.6289  | 1365.6259   | -0.003   | -2        | 115         | 126 AFSESICHCLQK            |           |         |                        |      | Mascot      |
|    |                                                                      | 1365.6289  | 1365.6259   | -0.003   | -2        | 115         | 126 AFSESICHCLQK            |           |         |                        |      | Mascot      |
|    |                                                                      | 1493.7239  | 1493.7188   | -0.0051  | -3        | 114         | 126 KAFSESICHCLQK           |           |         |                        |      | Mascot      |
|    |                                                                      | 1493.7239  | 1493.7188   | -0.0051  | -3        | 114         | 126 KAFSESICHCLQK           |           |         |                        |      | Mascot      |
|    |                                                                      | 1707.8986  | 1707.7516   | -0.147   | -86       | 387         | 401 AWMSEIEKAVSSLLK         |           |         | Oxidation (M)[3]       |      | Mascot      |
|    |                                                                      | 1971.0586  | 1970.8472   | -0.2114  | -107      | 228         | 243 QLKETLVWLPVWESDK        |           |         |                        |      | Mascot      |
|    |                                                                      | 2283.9646  | 2284.1499   | 0.1853   | 81        | 95          | 113 EMWTDPDSCSTQSLHDL<br>FR |           |         | Oxidation (M)[2]       |      | Mascot      |
| 19 | NADH dehydrogenase (ubiquinone) 1 alpha subcomplex, 12 [Danio rerio] |            |             |          |           | gi 74315939 | 16958.4                     | 9.39      | 7       | 45                     | 0    |             |

#### Peptide Information

|    |                                      | Calc. Mass | Obsrv. Mass | $\pm$ da | $\pm$ ppm | Start Seq.   | End Sequence Seq. | Ion Score | C. I. % | Modification       | Rank | Result Type |
|----|--------------------------------------|------------|-------------|----------|-----------|--------------|-------------------|-----------|---------|--------------------|------|-------------|
|    |                                      | 882.4501   | 882.5568    | 0.1067   | 121       | 2            | 9 AGYATLMR        |           |         |                    |      | Mascot      |
|    |                                      | 1045.4805  | 1045.5513   | 0.0708   | 68        | 1            | 9 MAGYATLMR       |           |         | Oxidation (M)[1,8] |      | Mascot      |
|    |                                      | 1201.5817  | 1201.6021   | 0.0204   | 17        | 1            | 10 MAGYATLMRR     |           |         | Oxidation (M)[1,8] |      | Mascot      |
|    |                                      | 1234.6215  | 1234.6648   | 0.0433   | 35        | 11           | 22 FVGEFTGHGGVK   |           |         |                    |      | Mascot      |
|    |                                      | 1234.6215  | 1234.6648   | 0.0433   | 35        | 11           | 22 FVGEFTGHGGVK   |           |         |                    |      | Mascot      |
|    |                                      | 1357.6456  | 1357.6993   | 0.0537   | 40        | 62           | 72 WVIYTEMNGK     |           |         | Oxidation (M)[8]   |      | Mascot      |
|    |                                      | 1390.7225  | 1390.6646   | -0.0579  | -42       | 10           | 22 RFVGEFTGHGGVK  |           |         |                    |      | Mascot      |
|    |                                      | 1460.7955  | 1460.78     | -0.0155  | -11       | 31           | 44 VQETKTGALIGTDK |           |         |                    |      | Mascot      |
| 20 | contactin-1a precursor [Danio rerio] |            |             |          |           | gi 136256388 | 114246.1          | 6.19      | 15      | 45                 | 0    |             |

#### Peptide Information

|  |  | Calc. Mass | Obsrv. Mass | $\pm$ da | $\pm$ ppm | Start Seq. | End Sequence Seq. | Ion Score | C. I. % | Modification | Rank | Result Type |
|--|--|------------|-------------|----------|-----------|------------|-------------------|-----------|---------|--------------|------|-------------|
|  |  | 993.5839   | 993.486     | -0.0979  | -99       | 917        | 925 KSPPSRPPK     |           |         |              |      | Mascot      |
|  |  | 1045.5173  | 1045.5513   | 0.034    | 33        | 562        | 569 DAQHYQRK      |           |         |              |      | Mascot      |

|           |                                 |         |      |              |     |                                      |      |    |    |   |    |   |                        |  |  |  |  |        |
|-----------|---------------------------------|---------|------|--------------|-----|--------------------------------------|------|----|----|---|----|---|------------------------|--|--|--|--|--------|
| 1090.4912 | 1090.5172                       | 0.026   | 24   | 656          | 664 | ESAAQQDWR                            |      |    |    |   |    |   |                        |  |  |  |  | Mascot |
| 1107.6885 | 1107.5273                       | -0.1612 | -146 | 285          | 294 | KLDGVLPLR                            |      |    |    |   |    |   |                        |  |  |  |  | Mascot |
| 1118.4572 | 1118.4963                       | 0.0391  | 35   | 492          | 500 | YTCFAENDR                            |      |    |    |   |    |   |                        |  |  |  |  | Mascot |
| 1308.575  | 1308.6412                       | 0.0662  | 51   | 898          | 910 | ACNGAGYGPASQR                        |      |    |    |   |    |   | Carbamidomethyl (C)[2] |  |  |  |  | Mascot |
| 1365.6857 | 1365.6259                       | -0.0598 | -44  | 503          | 516 | ANSTGSL SITDATK                      |      |    |    |   |    |   |                        |  |  |  |  | Mascot |
| 1365.6857 | 1365.6259                       | -0.0598 | -44  | 503          | 516 | ANSTGSL SITDATK                      |      |    |    |   |    |   |                        |  |  |  |  | Mascot |
| 1434.7231 | 1434.7551                       | 0.032   | 22   | 1            | 12  | MIPEAFQPRAMK                         |      |    |    |   |    |   | Oxidation (M)[1]       |  |  |  |  | Mascot |
| 1434.7231 | 1434.7551                       | 0.032   | 22   | 1            | 12  | MIPEAFQPRAMK                         |      |    |    |   |    |   | Oxidation (M)[1]       |  |  |  |  | Mascot |
| 1707.7683 | 1707.7516                       | -0.0167 | -10  | 138          | 151 | VQFGYLD MFSTDER                      |      |    |    |   |    |   |                        |  |  |  |  | Mascot |
| 1796.9249 | 1796.9912                       | 0.0663  | 37   | 717          | 735 | EARPIVAPSDIGGGGGTS<br>R              |      |    |    |   |    |   |                        |  |  |  |  | Mascot |
| 2225.1772 | 2225.0991                       | -0.0781 | -35  | 695          | 716 | VIATNTLTGTPPSEPSK<br>TTTR            |      |    |    |   |    |   |                        |  |  |  |  | Mascot |
| 2283.092  | 2283.1577                       | 0.0657  | 29   | 594          | 614 | YSCTAQT PVDNTTASAEL<br>VVR           |      |    |    |   |    |   | Carbamidomethyl (C)[3] |  |  |  |  | Mascot |
| 2284.2131 | 2284.1499                       | -0.0632 | -28  | 442          | 460 | VVFECRPRAAPRNITW<br>SK               |      |    |    |   |    |   | Carbamidomethyl (C)[5] |  |  |  |  | Mascot |
| 3048.4414 | 3048.4673                       | 0.0259  | 8    | 883          | 910 | LDNMKPD SHYLVEVRAC<br>NGAGYGPASQR    |      |    |    |   |    |   |                        |  |  |  |  | Mascot |
| 3097.5371 | 3097.3794                       | -0.1577 | -51  | 594          | 624 | YSCTAQT PVDNTTASAEL<br>VVRGPPGPPGGVR |      |    |    |   |    |   |                        |  |  |  |  | Mascot |
| 21        | PREDICTED: ninein [Danio rerio] |         |      | gi 326673087 |     | 160970.7                             | 4.92 | 14 | 43 | 0 | 23 | 0 |                        |  |  |  |  |        |

Peptide Information

| Calc. Mass | Obsrv. Mass | ± da    | ± ppm | Start Seq. | End Seq. | Sequence               | Ion Score | C. I. | % Modification         | Rank | Result Type |
|------------|-------------|---------|-------|------------|----------|------------------------|-----------|-------|------------------------|------|-------------|
| 807.4029   | 807.389     | -0.0139 | -17   | 423        | 429      | ESMTALR                |           |       |                        |      | Mascot      |
| 847.354    | 847.4418    | 0.0878  | 104   | 997        | 1003     | ENQDDAR                |           |       |                        |      | Mascot      |
| 973.5312   | 973.5184    | -0.0128 | -13   | 796        | 803      | LNSILEER               |           |       |                        |      | Mascot      |
| 993.4669   | 993.486     | 0.0191  | 19    | 612        | 619      | AMVDEEKR               |           |       | Oxidation (M)[2]       |      | Mascot      |
| 1179.4397  | 1179.5885   | 0.1488  | 126   | 132        | 141      | DEDAQESDDR             |           |       |                        |      | Mascot      |
| 1179.6256  | 1179.5885   | -0.0371 | -31   | 383        | 392      | FOLDTAEKLK             |           |       |                        |      | Mascot      |
| 1201.6536  | 1201.6021   | -0.0515 | -43   | 1116       | 1125     | ITQQERDALK             |           |       |                        |      | Mascot      |
| 1234.6824  | 1234.6648   | -0.0176 | -14   | 277        | 288      | ISCALSSTIALR           |           |       |                        |      | Mascot      |
| 1234.6824  | 1234.6648   | -0.0176 | -14   | 277        | 288      | ISCALSSTIALR           | 25        | 0     |                        |      | Mascot      |
| 1365.6315  | 1365.6259   | -0.0056 | -4    | 766        | 776      | TEQECTELEKR            |           |       |                        |      | Mascot      |
| 1365.7042  | 1365.6259   | -0.0783 | -57   | 423        | 434      | ESMTALRTELK            |           |       |                        |      | Mascot      |
| 1390.6995  | 1390.6646   | -0.0349 | -25   | 179        | 190      | GKALSCLDLEER           |           |       | Carbamidomethyl (C)[7] |      | Mascot      |
| 1555.6805  | 1555.7369   | 0.0564  | 36    | 534        | 545      | SYEEQCRELQDR           |           |       |                        |      | Mascot      |
| 1695.8846  | 1695.88     | -0.0046 | -3    | 362        | 375      | AEIRHLLCVDLER          |           |       |                        |      | Mascot      |
| 2284.1616  | 2284.1499   | -0.0117 | -5    | 849        | 867      | ASMENKHHALLQLHLE<br>ER |           |       |                        |      | Mascot      |

22 PREDICTED: actin-binding LIM protein 3-like [Danio rerio] gi|326673723 79710 8.72 15 43 0

Peptide Information

| Calc. Mass | Obsrv. Mass | ± da    | ± ppm | Start Seq. | End Seq. | Sequence                    | Ion Score | C. I. % | Modification            | Rank | Result Type |
|------------|-------------|---------|-------|------------|----------|-----------------------------|-----------|---------|-------------------------|------|-------------|
| 842.473    | 842.4988    | 0.0258  | 31    | 656        | 662      | LPKDVDR                     |           |         |                         |      | Mascot      |
| 847.438    | 847.4418    | 0.0038  | 4     | 284        | 290      | QASRTER                     |           |         |                         |      | Mascot      |
| 995.4727   | 995.5035    | 0.0308  | 31    | 1          | 9        | MAVNQFGGR                   |           |         | Oxidation (M)[1]        |      | Mascot      |
| 1003.4778  | 1003.5383   | 0.0605  | 60    | 37         | 45       | SSGPIHCFR                   |           |         |                         |      | Mascot      |
| 1023.5833  | 1023.4974   | -0.0859 | -84   | 157        | 165      | LVNPNEPIK                   |           |         |                         |      | Mascot      |
| 1037.537   | 1037.5153   | -0.0217 | -21   | 544        | 551      | MILKEEMK                    |           |         | Oxidation (M)[1]        |      | Mascot      |
| 1119.5153  | 1119.4893   | -0.026  | -23   | 191        | 198      | QWHVSCFR                    |           |         | Carbamidomethyl (C)[6]  |      | Mascot      |
| 1201.7085  | 1201.6021   | -0.1064 | -89   | 537        | 547      | IQGGIGRMILK                 |           |         | Oxidation (M)[8]        |      | Mascot      |
| 1302.5565  | 1302.6985   | 0.142   | 109   | 231        | 241      | CETCDRYISGR                 |           |         |                         |      | Mascot      |
| 1308.6642  | 1308.6412   | -0.023  | -18   | 476        | 487      | SKTSEDIVQSSK                |           |         |                         |      | Mascot      |
| 1695.8384  | 1695.88     | 0.0416  | 25    | 242        | 256      | VLEAGGKHYHPTCAR             |           |         | Carbamidomethyl (C)[13] |      | Mascot      |
| 1711.8394  | 1711.8756   | 0.0362  | 21    | 315        | 328      | VICAKMDNEILDYK              |           |         | Carbamidomethyl (C)[3]  |      | Mascot      |
| 2261.1443  | 2261.0452   | -0.0991 | -44   | 297        | 319      | TSEASISPPGSSISSPSRV<br>ICAK |           |         |                         |      | Mascot      |
| 2284.0305  | 2284.1499   | 0.1194  | 52    | 570        | 590      | SGSREMLHSMGHNNTVN<br>GSPR   |           |         | Oxidation (M)[6]        |      | Mascot      |
| 2399.1475  | 2398.9922   | -0.1553 | -65   | 429        | 450      | SSPYYSQLDARSSTPTTN<br>QAPK  |           |         |                         |      | Mascot      |

23 ATPase, Ca++ transporting, plasma membrane 3a [Danio rerio] gi|49903091 79409.9 5.25 13 41 0

Peptide Information

| Calc. Mass | Obsrv. Mass | ± da    | ± ppm | Start Seq. | End Seq. | Sequence        | Ion Score | C. I. % | Modification           | Rank | Result Type |
|------------|-------------|---------|-------|------------|----------|-----------------|-----------|---------|------------------------|------|-------------|
| 882.4501   | 882.5568    | 0.1067  | 121   | 609        | 615      | CSFILSR         |           |         | Carbamidomethyl (C)[1] |      | Mascot      |
| 973.604    | 973.5184    | -0.0856 | -88   | 358        | 366      | SVLQGKLTk       |           |         |                        |      | Mascot      |
| 1003.5465  | 1003.5383   | -0.0082 | -8    | 694        | 702      | CQRAGITVR       |           |         |                        |      | Mascot      |
| 1090.6078  | 1090.5172   | -0.0906 | -83   | 714        | 723      | APLSVFCVRV      |           |         |                        |      | Mascot      |
| 1165.6074  | 1165.5714   | -0.036  | -31   | 84         | 93       | VFGMNFIPPK      |           |         | Oxidation (M)[4]       |      | Mascot      |
| 1165.6074  | 1165.5714   | -0.036  | -31   | 84         | 93       | VFGMNFIPPK      |           |         | Oxidation (M)[4]       |      | Mascot      |
| 1265.6484  | 1265.6366   | -0.0118 | -9    | 497        | 507      | DIPTPDQINPR     |           |         |                        |      | Mascot      |
| 1277.7074  | 1277.696    | -0.0114 | -9    | 83         | 93       | KVFGMNFIPPK     |           |         |                        |      | Mascot      |
| 1555.7244  | 1555.7369   | 0.0125  | 8     | 582        | 595      | SMSTVIQMPDGSFR  |           |         |                        |      | Mascot      |
| 1699.8142  | 1699.9181   | 0.1039  | 61    | 581        | 595      | KSMSTVIQMPDGSFR |           |         | Oxidation (M)[3]       |      | Mascot      |

|           |           |         |      |     |     |                                   |                           |        |
|-----------|-----------|---------|------|-----|-----|-----------------------------------|---------------------------|--------|
| 1699.8142 | 1699.9181 | 0.1039  | 61   | 581 | 595 | KSMSTVIQMPDGSFR                   | Oxidation (M)[3]          | Mascot |
| 1971.0942 | 1970.8472 | -0.247  | -125 | 538 | 555 | QVGNKTECALLGLVLDLK                | Carbamidomethyl (C)[8]    | Mascot |
| 1993.8412 | 1993.9531 | 0.1119  | 56   | 457 | 474 | HLDACETMGNATAICSDK                | Carbamidomethyl (C)[5,15] | Mascot |
| 1993.8412 | 1993.9531 | 0.1119  | 56   | 457 | 474 | HLDACETMGNATAICSDK                | Carbamidomethyl (C)[5,15] | Mascot |
| 2211.2053 | 2211.0833 | -0.122  | -55  | 200 | 220 | NSTVIQIPVAEMVVGDI<br>QVK          |                           | Mascot |
| 3097.5796 | 3097.3794 | -0.2002 | -65  | 274 | 302 | MLVTAVGVNSQTGIIFTLL<br>GAGEMEEEEK | Oxidation (M)[1,24]       | Mascot |

24 ras-related protein Rab-14 [Danio rerio] gi|41393147 23859.9 5.84 7 41 0

#### Peptide Information

| Calc. Mass | Obsrv. Mass | ± da    | ± ppm | Start Seq. | End Seq. | Sequence         | Ion Score | C. I. | % | Modification           | Rank | Result Type |
|------------|-------------|---------|-------|------------|----------|------------------|-----------|-------|---|------------------------|------|-------------|
| 973.4949   | 973.5184    | 0.0235  | 24    | 202        | 210      | LSSDAQPQK        |           |       |   |                        |      | Mascot      |
| 1165.6285  | 1165.5714   | -0.0571 | -49   | 14         | 24       | YIIIGDMGVGK      |           |       |   |                        |      | Mascot      |
| 1165.6285  | 1165.5714   | -0.0571 | -49   | 14         | 24       | YIIIGDMGVGK      |           |       |   |                        |      | Mascot      |
| 1316.6593  | 1316.5343   | -0.125  | -95   | 62         | 72       | LQIWDTAGQER      |           |       |   |                        |      | Mascot      |
| 1390.7147  | 1390.6646   | -0.0501 | -36   | 25         | 35       | SCLLHQFTEKK      |           |       |   | Carbamidomethyl (C)[2] |      | Mascot      |
| 1493.7118  | 1493.7188   | 0.007   | 5     | 157        | 170      | TGENVEDAFLEAAK   |           |       |   |                        |      | Mascot      |
| 1493.7893  | 1493.7188   | -0.0705 | -47   | 83         | 96       | GAAGALMVYDITRR   | 4         |       | 0 |                        |      | Mascot      |
| 1796.8094  | 1796.9912   | 0.1818  | 101   | 36         | 51       | FMADCPHTIGVEFGTR |           |       |   | Oxidation (M)[2]       |      | Mascot      |

25 PREDICTED: abhydrolase domain-containing protein 10, mitochondrial-like isoform 2 [Danio rerio] gi|125817662 31619.2 6.06 6 40 0 15 0

#### Peptide Information

| Calc. Mass | Obsrv. Mass | ± da    | ± ppm | Start Seq. | End Seq. | Sequence    | Ion Score | C. I. | % | Modification     | Rank | Result Type |
|------------|-------------|---------|-------|------------|----------|-------------|-----------|-------|---|------------------|------|-------------|
| 995.4713   | 995.5035    | 0.0322  | 32    | 260        | 267      | MSEKEDIK    |           |       |   | Oxidation (M)[1] |      | Mascot      |
| 1037.5851  | 1037.5153   | -0.0698 | -67   | 21         | 29       | HQLQLSGVR   |           |       |   |                  |      | Mascot      |
| 1109.5269  | 1109.4774   | -0.0495 | -45   | 255        | 263      | HGQHRMSEK   |           |       |   |                  |      | Mascot      |
| 1165.5524  | 1165.5714   | 0.019   | 16    | 175        | 183      | EIEEQGFWK   |           |       |   |                  |      | Mascot      |
| 1165.5524  | 1165.5714   | 0.019   | 16    | 175        | 183      | EIEEQGFWK   |           |       |   |                  |      | Mascot      |
| 1193.6862  | 1193.6031   | -0.0831 | -70   | 20         | 29       | RHQLQLSGVR  |           |       |   |                  |      | Mascot      |
| 1193.6862  | 1193.6031   | -0.0831 | -70   | 20         | 29       | RHQLQLSGVR  | 15        |       | 0 |                  |      | Mascot      |
| 1302.7389  | 1302.6985   | -0.0404 | -31   | 21         | 31       | HQLQLSGVRHK |           |       |   |                  |      | Mascot      |

26 transgelin 3a [Danio rerio] gi|156739273 24423.1 6.92 8 40 0

#### Peptide Information

| Calc. Mass | Obsrv. Mass | ± da | ± ppm | Start Seq. | End Seq. | Sequence | Ion Score | C. I. | % | Modification | Rank | Result Type |
|------------|-------------|------|-------|------------|----------|----------|-----------|-------|---|--------------|------|-------------|
|------------|-------------|------|-------|------------|----------|----------|-----------|-------|---|--------------|------|-------------|

[illegible]

### Peptide Information

| Calc. Mass | Obsrv. Mass | ± da    | ± ppm | Start Seq. | End Seq. | Sequence                  | Ion Score | C. I. | % Modification         | Rank | Result Type |
|------------|-------------|---------|-------|------------|----------|---------------------------|-----------|-------|------------------------|------|-------------|
| 1037.5084  | 1037.5153   | 0.0069  | 7     | 478        | 486      | NFCDIQVAK                 |           |       |                        |      | Mascot      |
| 1045.6074  | 1045.5513   | -0.0561 | -54   | 2          | 11       | VLLAAAVCTK                |           |       | Carbamidomethyl (C)[8] |      | Mascot      |
| 1119.6265  | 1119.4893   | -0.1372 | -123  | 1          | 11       | MVLLAAAVCTK               |           |       |                        |      | Mascot      |
| 1193.6095  | 1193.6031   | -0.0064 | -5    | 477        | 486      | RNFCDIQVAK                |           |       |                        |      | Mascot      |
| 1193.6095  | 1193.6031   | -0.0064 | -5    | 477        | 486      | RNFCDIQVAK                |           |       |                        |      | Mascot      |
| 1234.646   | 1234.6648   | 0.0188  | 15    | 277        | 287      | VEEKISLTCGR               |           |       |                        |      | Mascot      |
| 1234.7041  | 1234.6648   | -0.0393 | -32   | 336        | 346      | LFTNESLIGLK               | 3         | 0     |                        |      | Mascot      |
| 1320.639   | 1320.5679   | -0.0711 | -54   | 243        | 255      | SEGENIVTTSAGR             |           |       |                        |      | Mascot      |
| 1555.8367  | 1555.7369   | -0.0998 | -64   | 437        | 449      | NILEWSLPVIDEK             |           |       |                        |      | Mascot      |
| 2211.1113  | 2211.0833   | -0.028  | -13   | 478        | 497      | NFCDIQVAKVTYVEGGSP<br>VK  |           |       | Carbamidomethyl (C)[3] |      | Mascot      |
| 2261.1516  | 2261.0452   | -0.1064 | -47   | 288        | 308      | DGGLQNMEVLGMITLKV<br>ADEK |           |       |                        |      | Mascot      |

28 novel protein similar to vertebrate actin binding LIM  
protein family, member 3 (ABLM3, zgc:158673)

### Peptide Information

| Calc. Mass | Obsrv. Mass | ± da   | ± ppm | Start Seq. | End Seq. | Sequence | Ion Score | C. I. | % Modification | Rank | Result Type |
|------------|-------------|--------|-------|------------|----------|----------|-----------|-------|----------------|------|-------------|
| 842.473    | 842.4988    | 0.0258 | 31    | 633        | 639      | LPKDVDR  |           |       |                |      | Mascot      |

|  |           |           |         |     |     |     |                             |  |  |  |  |                         |  |  |  |  |        |
|--|-----------|-----------|---------|-----|-----|-----|-----------------------------|--|--|--|--|-------------------------|--|--|--|--|--------|
|  | 847.438   | 847.4418  | 0.0038  | 4   | 261 | 267 | QASRTER                     |  |  |  |  |                         |  |  |  |  | Mascot |
|  | 1003.4778 | 1003.5383 | 0.0605  | 60  | 14  | 22  | SSGPIHCFR                   |  |  |  |  |                         |  |  |  |  | Mascot |
|  | 1023.5833 | 1023.4974 | -0.0859 | -84 | 134 | 142 | LVNPNEPIK                   |  |  |  |  |                         |  |  |  |  | Mascot |
|  | 1037.537  | 1037.5153 | -0.0217 | -21 | 521 | 528 | MILKEEMK                    |  |  |  |  | Oxidation (M)[1]        |  |  |  |  | Mascot |
|  | 1119.5153 | 1119.4893 | -0.026  | -23 | 168 | 175 | QWHVSCFR                    |  |  |  |  | Carbamidomethyl (C)[6]  |  |  |  |  | Mascot |
|  | 1201.7085 | 1201.6021 | -0.1064 | -89 | 514 | 524 | IQGGIGRMILK                 |  |  |  |  | Oxidation (M)[8]        |  |  |  |  | Mascot |
|  | 1302.5565 | 1302.6985 | 0.142   | 109 | 208 | 218 | CETCDRYISGR                 |  |  |  |  |                         |  |  |  |  | Mascot |
|  | 1308.6642 | 1308.6412 | -0.023  | -18 | 453 | 464 | SKTSEDIVQSSK                |  |  |  |  |                         |  |  |  |  | Mascot |
|  | 1695.8384 | 1695.88   | 0.0416  | 25  | 219 | 233 | VLEAGGKHYHPTCAR             |  |  |  |  | Carbamidomethyl (C)[13] |  |  |  |  | Mascot |
|  | 1711.8394 | 1711.8756 | 0.0362  | 21  | 292 | 305 | VICAKMDNEILDYK              |  |  |  |  | Carbamidomethyl (C)[3]  |  |  |  |  | Mascot |
|  | 2261.1443 | 2261.0452 | -0.0991 | -44 | 274 | 296 | TSEASISPPGSSISSPSRV<br>ICAK |  |  |  |  |                         |  |  |  |  | Mascot |
|  | 2284.0305 | 2284.1499 | 0.1194  | 52  | 547 | 567 | SGSREMLHSMGHNNTVN<br>GSPR   |  |  |  |  | Oxidation (M)[6]        |  |  |  |  | Mascot |
|  | 2399.1475 | 2398.9922 | -0.1553 | -65 | 406 | 427 | SSPYYSQLDARSSTPTTN<br>QAPK  |  |  |  |  |                         |  |  |  |  | Mascot |

29 actin-binding LIM protein 3 [Danio rerio] gi|123705188 77658.1 8.74 14 39 0

#### Peptide Information

| Calc. Mass | Obsrv. Mass | ± da    | ± ppm | Start Seq. | End Seq. | Sequence                    | Ion Score | C. I. | % Modification          | Rank | Result Type |
|------------|-------------|---------|-------|------------|----------|-----------------------------|-----------|-------|-------------------------|------|-------------|
| 842.473    | 842.4988    | 0.0258  | 31    | 636        | 642      | LPKDVDR                     |           |       |                         |      | Mascot      |
| 847.438    | 847.4418    | 0.0038  | 4     | 264        | 270      | QASRTER                     |           |       |                         |      | Mascot      |
| 1003.4778  | 1003.5383   | 0.0605  | 60    | 17         | 25       | SSGPIHCFR                   |           |       |                         |      | Mascot      |
| 1023.5833  | 1023.4974   | -0.0859 | -84   | 137        | 145      | LVNPNEPIK                   |           |       |                         |      | Mascot      |
| 1037.537   | 1037.5153   | -0.0217 | -21   | 524        | 531      | MILKEEMK                    |           |       | Oxidation (M)[1]        |      | Mascot      |
| 1119.5153  | 1119.4893   | -0.026  | -23   | 171        | 178      | QWHVSCFR                    |           |       | Carbamidomethyl (C)[6]  |      | Mascot      |
| 1201.7085  | 1201.6021   | -0.1064 | -89   | 517        | 527      | IQGGIGRMILK                 |           |       | Oxidation (M)[8]        |      | Mascot      |
| 1302.5565  | 1302.6985   | 0.142   | 109   | 211        | 221      | CETCDRYISGR                 |           |       |                         |      | Mascot      |
| 1308.6642  | 1308.6412   | -0.023  | -18   | 456        | 467      | SKTSEDIVQSSK                |           |       |                         |      | Mascot      |
| 1695.8384  | 1695.88     | 0.0416  | 25    | 222        | 236      | VLEAGGKHYHPTCAR             |           |       | Carbamidomethyl (C)[13] |      | Mascot      |
| 1711.8394  | 1711.8756   | 0.0362  | 21    | 295        | 308      | VICAKMDNEILDYK              |           |       | Carbamidomethyl (C)[3]  |      | Mascot      |
| 2261.1443  | 2261.0452   | -0.0991 | -44   | 277        | 299      | TSEASISPPGSSISSPSRV<br>ICAK |           |       |                         |      | Mascot      |
| 2284.0305  | 2284.1499   | 0.1194  | 52    | 550        | 570      | SGSREMLHSMGHNNTVN<br>GSPR   |           |       | Oxidation (M)[6]        |      | Mascot      |
| 2399.1475  | 2398.9922   | -0.1553 | -65   | 409        | 430      | SSPYYSQLDARSSTPTTN<br>QAPK  |           |       |                         |      | Mascot      |

30 Isocitrate dehydrogenase 3 (NAD+) alpha [Danio rerio] gi|29124437 39960.3 7.04 10 39 0

#### Peptide Information

| Calc. Mass | Obsrv. Mass | ± da | ± ppm | Start | End | Sequence | Ion | C. I. | % Modification | Rank | Result Type |
|------------|-------------|------|-------|-------|-----|----------|-----|-------|----------------|------|-------------|
|------------|-------------|------|-------|-------|-----|----------|-----|-------|----------------|------|-------------|

|                     |                                                                                   | Seq.       |             |         |       | Seq.         |          |                               |     | Score     |       |   |                        |        |        |        |  |
|---------------------|-----------------------------------------------------------------------------------|------------|-------------|---------|-------|--------------|----------|-------------------------------|-----|-----------|-------|---|------------------------|--------|--------|--------|--|
|                     |                                                                                   | 842.473    | 842.4988    | 0.0258  | 31    | 192          | 199      | TSVTAVHK                      |     |           |       |   |                        |        |        | Mascot |  |
|                     |                                                                                   | 1003.489   | 1003.5383   | 0.0493  | 49    | 316          | 324      | HMGLHGHAK                     |     |           |       |   | Oxidation (M)[2]       |        |        | Mascot |  |
|                     |                                                                                   | 1109.5693  | 1109.4774   | -0.0919 | -83   | 7            | 17       | STVSCIMGAIK                   |     |           |       |   |                        |        |        | Mascot |  |
|                     |                                                                                   | 1201.4976  | 1201.6021   | 0.1045  | 87    | 350          | 359      | CSEFTADICR                    |     |           |       |   | Carbamidomethyl (C)[1] |        |        | Mascot |  |
|                     |                                                                                   | 1300.5773  | 1300.5516   | -0.0257 | -20   | 350          | 360      | CSEFTADICRR                   |     |           |       |   |                        |        |        | Mascot |  |
|                     |                                                                                   | 1316.707   | 1316.5343   | -0.1727 | -131  | 18           | 28       | TQTPQPRVFSR                   |     |           |       |   |                        |        |        | Mascot |  |
|                     |                                                                                   | 1357.5988  | 1357.6993   | 0.1005  | 74    | 350          | 360      | CSEFTADICRR                   |     |           |       |   | Carbamidomethyl (C)[1] |        |        | Mascot |  |
|                     |                                                                                   | 1427.7787  | 1427.7695   | -0.0092 | -6    | 192          | 204      | TSVTAVHKANIMR                 |     |           |       |   |                        |        |        | Mascot |  |
|                     |                                                                                   | 1555.772   | 1555.7369   | -0.0351 | -23   | 200          | 212      | ANIMRMSDGLFLR                 |     |           |       |   | Oxidation (M)[4,6]     |        |        | Mascot |  |
|                     |                                                                                   | 1707.8669  | 1707.7516   | -0.1153 | -68   | 2            | 17       | ANAWRSTVSCIMGAIK              |     |           |       |   |                        |        |        | Mascot |  |
|                     |                                                                                   | 1838.9073  | 1838.8944   | -0.0129 | -7    | 1            | 17       | MANAWRSTVSCIMGAIK             |     |           |       |   |                        |        |        | Mascot |  |
| 31                  | novel protein [Danio rerio]                                                       |            |             |         |       | gij157886402 |          | 88196.6                       | 8.5 | 13        | 39    | 0 |                        |        |        |        |  |
| Peptide Information |                                                                                   |            |             |         |       |              |          |                               |     |           |       |   |                        |        |        |        |  |
|                     |                                                                                   | Calc. Mass | Obsrv. Mass | ± da    | ± ppm | Start Seq.   | End Seq. | Sequence                      |     | Ion Score | C. I. | % | Modification           | Rank   | Result | Type   |  |
|                     |                                                                                   | 993.4709   | 993.486     | 0.0151  | 15    | 735          | 742      | AWMSEIEK                      |     |           |       |   |                        |        |        | Mascot |  |
|                     |                                                                                   | 1165.5518  | 1165.5714   | 0.0196  | 17    | 221          | 231      | SQTLDNQSICK                   |     |           |       |   |                        |        |        | Mascot |  |
|                     |                                                                                   | 1165.5518  | 1165.5714   | 0.0196  | 17    | 221          | 231      | SQTLDNQSICK                   |     |           |       |   |                        |        |        | Mascot |  |
|                     |                                                                                   | 1193.6313  | 1193.6031   | -0.0282 | -24   | 567          | 575      | WLDNYQKVK                     |     |           |       |   |                        |        |        | Mascot |  |
|                     |                                                                                   | 1193.6313  | 1193.6031   | -0.0282 | -24   | 565          | 573      | VKWLDNYQK                     |     |           |       |   |                        |        |        | Mascot |  |
|                     |                                                                                   | 1263.5786  | 1263.681    | 0.1024  | 81    | 409          | 418      | QCLQDIDSWR                    |     |           |       |   |                        |        |        | Mascot |  |
|                     |                                                                                   | 1265.5492  | 1265.6366   | 0.0874  | 69    | 246          | 256      | ESTTDDNEQVK                   |     |           |       |   |                        |        |        | Mascot |  |
|                     |                                                                                   | 1320.6001  | 1320.5679   | -0.0322 | -24   | 409          | 418      | QCLQDIDSWR                    |     |           |       |   | Carbamidomethyl (C)[2] |        |        | Mascot |  |
|                     |                                                                                   | 1365.6289  | 1365.6259   | -0.003  | -2    | 463          | 474      | AFSESICHCLQK                  |     |           |       |   |                        |        |        | Mascot |  |
|                     |                                                                                   | 1365.6289  | 1365.6259   | -0.003  | -2    | 463          | 474      | AFSESICHCLQK                  |     |           |       |   |                        |        |        | Mascot |  |
|                     |                                                                                   | 1475.7576  | 1475.7424   | -0.0152 | -10   | 108          | 119      | MPLPLHTPNFHR                  |     |           |       |   | Oxidation (M)[1]       |        |        | Mascot |  |
|                     |                                                                                   | 1493.7239  | 1493.7188   | -0.0051 | -3    | 462          | 474      | KAFSESICHCLQK                 |     |           |       |   |                        |        |        | Mascot |  |
|                     |                                                                                   | 1493.7239  | 1493.7188   | -0.0051 | -3    | 462          | 474      | KAFSESICHCLQK                 |     |           |       |   |                        |        |        | Mascot |  |
|                     |                                                                                   | 1707.8986  | 1707.7516   | -0.147  | -86   | 735          | 749      | AWMSEIEKAVSSLLK               |     |           |       |   | Oxidation (M)[3]       |        |        | Mascot |  |
|                     |                                                                                   | 1971.0586  | 1970.8472   | -0.2114 | -107  | 576          | 591      | QLKETLVWLPVWESDK              |     |           |       |   |                        |        |        | Mascot |  |
|                     |                                                                                   | 2283.9646  | 2284.1499   | 0.1853  | 81    | 443          | 461      | EMWTDPDSCSTQSLHDLFR           |     |           |       |   | Oxidation (M)[2]       |        |        | Mascot |  |
|                     |                                                                                   | 2888.4709  | 2888.3716   | -0.0993 | -34   | 269          | 297      | SSVVVSLPGLDVSPGDLFVSNGAADMLNK |     |           |       |   |                        |        |        | Mascot |  |
| 32                  | PREDICTED: guanine nucleotide-binding protein subunit alpha-15-like [Danio rerio] |            |             |         |       | gij326678594 |          | 43174.9                       | 8.7 | 2         | 39    | 0 | 33                     | 85.458 |        |        |  |



| Peptide Information |                       |         |       |             |          |                    |           |        |                |                  |
|---------------------|-----------------------|---------|-------|-------------|----------|--------------------|-----------|--------|----------------|------------------|
| Calc. Mass          | Obsrv. Mass           | ± da    | ± ppm | Start Seq.  | End Seq. | Sequence           | Ion Score | C. I.  | % Modification | Rank Result Type |
| 1234.6902           | 1234.6648             | -0.0254 | -21   | 128         | 137      | LQRSYVEAIR         |           |        |                | Mascot           |
| 1234.6902           | 1234.6648             | -0.0254 | -21   | 128         | 137      | LQRSYVEAIR         | 33        | 85.458 |                | Mascot           |
| 2367.0459           | 2367.2385             | 0.1926  | 81    | 2           | 20       | GHYYTGPCIVWFLSEEEK |           |        |                | Mascot           |
| 2367.0459           | 2367.2385             | 0.1926  | 81    | 2           | 20       | GHYYTGPCIVWFLSEEEK |           |        |                | Mascot           |
| 33                  | talin-1 [Danio rerio] |         |       | gi 57222259 |          | 270469.6           | 5.86      | 19     | 39             | 0 16 0           |

| Peptide Information |             |         |       |            |          |                           |           |       |                         |                  |
|---------------------|-------------|---------|-------|------------|----------|---------------------------|-----------|-------|-------------------------|------------------|
| Calc. Mass          | Obsrv. Mass | ± da    | ± ppm | Start Seq. | End Seq. | Sequence                  | Ion Score | C. I. | % Modification          | Rank Result Type |
| 807.4359            | 807.389     | -0.0469 | -58   | 1520       | 1526     | QFVQSAK                   |           |       |                         | Mascot           |
| 973.4883            | 973.5184    | 0.0301  | 31    | 1195       | 1203     | SVNCLPGQR                 |           |       |                         | Mascot           |
| 1003.5054           | 1003.5383   | 0.0329  | 33    | 2506       | 2513     | EKELEEAR                  |           |       |                         | Mascot           |
| 1023.4411           | 1023.4974   | 0.0563  | 55    | 2441       | 2449     | ADQDSQTMK                 |           |       |                         | Mascot           |
| 1107.5906           | 1107.5273   | -0.0633 | -57   | 2262       | 2270     | QQLANYSKR                 |           |       |                         | Mascot           |
| 1109.5442           | 1109.4774   | -0.0668 | -60   | 2206       | 2215     | AVADMLRCK                 |           |       | Oxidation (M)[5]        | Mascot           |
| 1165.6576           | 1165.5714   | -0.0862 | -74   | 1615       | 1625     | SLAVNPKDPPK               |           |       |                         | Mascot           |
| 1165.6576           | 1165.5714   | -0.0862 | -74   | 1615       | 1625     | SLAVNPKDPPK               |           |       |                         | Mascot           |
| 1179.5422           | 1179.5885   | 0.0463  | 39    | 2441       | 2450     | ADQDSQTMKR                |           |       |                         | Mascot           |
| 1179.5422           | 1179.5885   | 0.0463  | 39    | 2441       | 2450     | ADQDSQTMKR                | 16        | 0     |                         | Mascot           |
| 1234.5811           | 1234.6648   | 0.0837  | 68    | 1541       | 1551     | ALDGAFNQENR               |           |       |                         | Mascot           |
| 1234.5811           | 1234.6648   | 0.0837  | 68    | 1541       | 1551     | ALDGAFNQENR               |           |       |                         | Mascot           |
| 1316.6804           | 1316.5343   | -0.1461 | -111  | 2193       | 2204     | QEDVIATANLSR              |           |       |                         | Mascot           |
| 1320.7271           | 1320.5679   | -0.1592 | -121  | 424        | 434      | KSTVLQQQFNK               |           |       |                         | Mascot           |
| 1384.6633           | 1384.6514   | -0.0119 | -9    | 107        | 118      | IVSDMLMTICAR              |           |       | Oxidation (M)[5,7]      | Mascot           |
| 1475.7886           | 1475.7424   | -0.0462 | -31   | 859        | 872      | LLADATARMVEAAK            |           |       | Oxidation (M)[9]        | Mascot           |
| 1493.7628           | 1493.7188   | -0.044  | -29   | 1601       | 1614     | AMLESSTGLIQTAR            |           |       | Oxidation (M)[2]        | Mascot           |
| 1493.7628           | 1493.7188   | -0.044  | -29   | 1601       | 1614     | AMLESSTGLIQTAR            |           |       | Oxidation (M)[2]        | Mascot           |
| 1555.8036           | 1555.7369   | -0.0667 | -43   | 1763       | 1776     | TLAESALQMLYTAK            |           |       | Oxidation (M)[9]        | Mascot           |
| 2211.1865           | 2211.0833   | -0.1032 | -47   | 2059       | 2080     | LGAASLGSEDPETQVVLI NAVK   |           |       |                         | Mascot           |
| 2225.1846           | 2225.0991   | -0.0855 | -38   | 718        | 738      | VVAPTISSPVCQEQLIEA GK     |           |       | Carbamidomethyl (C)[12] | Mascot           |
| 2233.0952           | 2233.0579   | -0.0373 | -17   | 1337       | 1357     | AVTDSINQLISMCTQQAP GQK    |           |       |                         | Mascot           |
| 2399.2598           | 2398.9922   | -0.2676 | -112  | 586        | 609      | GVKLLAALMEDEGGNGQ QLLGAAK |           |       | Oxidation (M)[9]        | Mascot           |

34 Rab14 protein [Danio rerio] gi|157423419 17352.6 5.41 6 39 0

Peptide Information

| Calc. Mass | Obsrv. Mass | ± da    | ± ppm | Start Seq. | End Seq. | Sequence         | Ion Score | C. I. % | Modification           | Rank | Result Type |
|------------|-------------|---------|-------|------------|----------|------------------|-----------|---------|------------------------|------|-------------|
| 973.4949   | 973.5184    | 0.0235  | 24    | 144        | 152      | LSSDAQPQK        |           |         |                        |      | Mascot      |
| 1165.6285  | 1165.5714   | -0.0571 | -49   | 14         | 24       | YIIIGDMGVGK      |           |         |                        |      | Mascot      |
| 1165.6285  | 1165.5714   | -0.0571 | -49   | 14         | 24       | YIIIGDMGVGK      |           |         |                        |      | Mascot      |
| 1316.6593  | 1316.5343   | -0.125  | -95   | 62         | 72       | LQIWDTAGQER      |           |         |                        |      | Mascot      |
| 1390.7147  | 1390.6646   | -0.0501 | -36   | 25         | 35       | SCLLHQFTEKK      |           |         | Carbamidomethyl (C)[2] |      | Mascot      |
| 1493.7118  | 1493.7188   | 0.007   | 5     | 99         | 112      | TGENVEDAFLEAAK   |           |         |                        |      | Mascot      |
| 1493.7118  | 1493.7188   | 0.007   | 5     | 99         | 112      | TGENVEDAFLEAAK   |           |         |                        |      | Mascot      |
| 1796.8094  | 1796.9912   | 0.1818  | 101   | 36         | 51       | FMADCPHTIGVEFGTR |           |         | Oxidation (M)[2]       |      | Mascot      |

35 Zgc:161981 protein [Danio rerio] gi|117168022 47547.7 7.19 9 38 0

Peptide Information

| Calc. Mass | Obsrv. Mass | ± da    | ± ppm | Start Seq. | End Seq. | Sequence            | Ion Score | C. I. % | Modification           | Rank | Result Type |
|------------|-------------|---------|-------|------------|----------|---------------------|-----------|---------|------------------------|------|-------------|
| 993.4709   | 993.486     | 0.0151  | 15    | 374        | 381      | AWMSEIEK            |           |         |                        |      | Mascot      |
| 1193.6313  | 1193.6031   | -0.0282 | -24   | 206        | 214      | WLDNYQKVK           |           |         |                        |      | Mascot      |
| 1193.6313  | 1193.6031   | -0.0282 | -24   | 204        | 212      | VKWLDNYQK           |           |         |                        |      | Mascot      |
| 1263.5786  | 1263.681    | 0.1024  | 81    | 48         | 57       | QCLQDIDSWR          |           |         |                        |      | Mascot      |
| 1320.6001  | 1320.5679   | -0.0322 | -24   | 48         | 57       | QCLQDIDSWR          |           |         | Carbamidomethyl (C)[2] |      | Mascot      |
| 1365.6289  | 1365.6259   | -0.003  | -2    | 102        | 113      | AFSESICHCLQK        |           |         |                        |      | Mascot      |
| 1365.6289  | 1365.6259   | -0.003  | -2    | 102        | 113      | AFSESICHCLQK        |           |         |                        |      | Mascot      |
| 1493.7239  | 1493.7188   | -0.0051 | -3    | 101        | 113      | KAFSESICHCLQK       |           |         |                        |      | Mascot      |
| 1493.7239  | 1493.7188   | -0.0051 | -3    | 101        | 113      | KAFSESICHCLQK       |           |         |                        |      | Mascot      |
| 1707.8986  | 1707.7516   | -0.147  | -86   | 374        | 388      | AWMSEIEKAVSSLLK     |           |         | Oxidation (M)[3]       |      | Mascot      |
| 1971.0586  | 1970.8472   | -0.2114 | -107  | 215        | 230      | QLKETLVWLPPWESDK    |           |         |                        |      | Mascot      |
| 2283.9646  | 2284.1499   | 0.1853  | 81    | 82         | 100      | EMWTDPDSCSTQSLHDLFR |           |         | Oxidation (M)[2]       |      | Mascot      |

36 PREDICTED: UDP-GlcNAc:betaGal beta-1,3-N-acetylglucosaminyltransferase 2 [Danio rerio] gi|125843963 48322.6 8.69 9 38 0

Peptide Information

| Calc. Mass | Obsrv. Mass | ± da   | ± ppm | Start Seq. | End Seq. | Sequence | Ion Score | C. I. % | Modification | Rank | Result Type |
|------------|-------------|--------|-------|------------|----------|----------|-----------|---------|--------------|------|-------------|
| 847.4091   | 847.4418    | 0.0327 | 39    | 402        | 408      | SPQQTMR  |           |         |              |      | Mascot      |

|           |           |         |     |     |     |              |  |  |  |  |                        |  |        |
|-----------|-----------|---------|-----|-----|-----|--------------|--|--|--|--|------------------------|--|--------|
| 1003.5101 | 1003.5383 | 0.0282  | 28  | 401 | 408 | RSPQQTMR     |  |  |  |  |                        |  | Mascot |
| 1107.4371 | 1107.5273 | 0.0902  | 81  | 158 | 166 | CALDNEDDR    |  |  |  |  | Carbamidomethyl (C)[1] |  | Mascot |
| 1165.5847 | 1165.5714 | -0.0133 | -11 | 193 | 202 | EGEYDGLKVR   |  |  |  |  |                        |  | Mascot |
| 1165.5847 | 1165.5714 | -0.0133 | -11 | 193 | 202 | EGEYDGLKVR   |  |  |  |  |                        |  | Mascot |
| 1179.5753 | 1179.5885 | 0.0132  | 11  | 378 | 386 | TFDIREQDR    |  |  |  |  |                        |  | Mascot |
| 1179.5753 | 1179.5885 | 0.0132  | 11  | 378 | 386 | TFDIREQDR    |  |  |  |  |                        |  | Mascot |
| 1263.6229 | 1263.681  | 0.0581  | 46  | 373 | 382 | HDGFRTFDIR   |  |  |  |  |                        |  | Mascot |
| 1302.6736 | 1302.6985 | 0.0249  | 19  | 402 | 411 | SPQQTMLWR    |  |  |  |  |                        |  | Mascot |
| 1460.6976 | 1460.78   | 0.0824  | 56  | 98  | 110 | QLDSADNTTDPK |  |  |  |  |                        |  | Mascot |
| 1493.7094 | 1493.7188 | 0.0094  | 6   | 112 | 123 | FHCSPESFELLK |  |  |  |  | Carbamidomethyl (C)[3] |  | Mascot |
| 1493.7094 | 1493.7188 | 0.0094  | 6   | 112 | 123 | FHCSPESFELLK |  |  |  |  | Carbamidomethyl (C)[3] |  | Mascot |

37 PREDICTED: microtubule-associated protein 6-like [Danio rerio] gi|292621423 42669 9.6 11 38 0

#### Peptide Information

| Calc. Mass | Obsrv. Mass | ± da    | ± ppm | Start Seq. | End Seq. | Sequence                 | Ion Score | C. I. | % Modification         | Rank | Result Type |
|------------|-------------|---------|-------|------------|----------|--------------------------|-----------|-------|------------------------|------|-------------|
| 807.3552   | 807.389     | 0.0338  | 42    | 179        | 184      | CEIEEK                   |           |       | Carbamidomethyl (C)[1] |      | Mascot      |
| 973.5173   | 973.5184    | 0.0011  | 1     | 220        | 228      | RSAADALNR                |           |       |                        |      | Mascot      |
| 993.4644   | 993.486     | 0.0216  | 22    | 1          | 8        | MAWPCITR                 |           |       | Oxidation (M)[1]       |      | Mascot      |
| 1037.6102  | 1037.5153   | -0.0949 | -91   | 317        | 325      | HNLSLTKPK                |           |       |                        |      | Mascot      |
| 1165.7052  | 1165.5714   | -0.1338 | -115  | 317        | 326      | HNLSLTKPKK               |           |       |                        |      | Mascot      |
| 1165.7052  | 1165.5714   | -0.1338 | -115  | 317        | 326      | HNLSLTKPKK               |           |       |                        |      | Mascot      |
| 1179.6368  | 1179.5885   | -0.0483 | -41   | 300        | 309      | IRSLYSEPSK               |           |       |                        |      | Mascot      |
| 1179.6368  | 1179.5885   | -0.0483 | -41   | 300        | 309      | IRSLYSEPSK               |           |       |                        |      | Mascot      |
| 1234.5984  | 1234.6648   | 0.0664  | 54    | 201        | 211      | EPVSEASKMEK              |           |       |                        |      | Mascot      |
| 1234.5984  | 1234.6648   | 0.0664  | 54    | 201        | 211      | EPVSEASKMEK              |           |       |                        |      | Mascot      |
| 1316.644   | 1316.5343   | -0.1097 | -83   | 282        | 293      | GEQAKPQTDDNK             |           |       |                        |      | Mascot      |
| 1329.6104  | 1329.6488   | 0.0384  | 29    | 179        | 188      | CEIEEKQHEK               |           |       | Carbamidomethyl (C)[1] |      | Mascot      |
| 1427.8733  | 1427.7695   | -0.1038 | -73   | 246        | 257      | AYRDIKPVKPIK             |           |       |                        |      | Mascot      |
| 2261.0061  | 2261.0452   | 0.0391  | 17    | 165        | 184      | HEQAAAEMETGVEKCEI<br>EEK |           |       |                        |      | Mascot      |

38 novel protein similar to vertebrate angiopoietin-like protein family [Danio rerio] gi|55962487 26786.6 5.97 7 38 0

#### Peptide Information

| Calc. Mass | Obsrv. Mass | ± da    | ± ppm | Start Seq. | End Seq. | Sequence | Ion Score | C. I. | % Modification     | Rank | Result Type |
|------------|-------------|---------|-------|------------|----------|----------|-----------|-------|--------------------|------|-------------|
| 993.5219   | 993.486     | -0.0359 | -36   | 216        | 223      | VSMMIRPK |           |       | Oxidation (M)[3,4] |      | Mascot      |

|    |                                              |              |         |      |    |    |   |
|----|----------------------------------------------|--------------|---------|------|----|----|---|
| 39 | hypothetical protein LOC790927 [Danio rerio] | gi 121583715 | 57741.7 | 6.08 | 12 | 38 | 0 |
|----|----------------------------------------------|--------------|---------|------|----|----|---|

| Calc. Mass | Obsrv. Mass | ± da    | ± ppm | Start Seq. | End Seq. | Sequence            | Ion Score | C. I. % | Modification             | Rank | Result Type |
|------------|-------------|---------|-------|------------|----------|---------------------|-----------|---------|--------------------------|------|-------------|
| 847.4705   | 847.4418    | -0.0287 | -34   | 497        | 504      | ATKSKPLC            |           |         |                          |      | Mascot      |
| 973.5061   | 973.5184    | 0.0123  | 13    | 414        | 421      | DKQDLQAR            |           |         |                          |      | Mascot      |
| 1045.5524  | 1045.5513   | -0.0011 | -1    | 212        | 219      | IEEEIERK            |           |         |                          |      | Mascot      |
| 1118.5212  | 1118.4963   | -0.0249 | -22   | 46         | 55       | DDVDGEIDLK          |           |         |                          |      | Mascot      |
| 1119.5099  | 1119.4893   | -0.0206 | -18   | 295        | 303      | AVMEEQEQR           |           |         |                          |      | Mascot      |
| 1201.5959  | 1201.6021   | 0.0062  | 5     | 460        | 468      | ENELQYLHR           |           |         |                          |      | Mascot      |
| 1265.5613  | 1265.6366   | 0.0753  | 59    | 282        | 291      | CSDVLQQMER          |           |         | Carbamidomethyl (C)[1]   |      | Mascot      |
| 1302.618   | 1302.6985   | 0.0805  | 62    | 485        | 496      | SSVCVCVSSYL R       |           |         |                          |      | Mascot      |
| 1383.7339  | 1383.6716   | -0.0623 | -45   | 349        | 360      | QTRALDSHTLNK        |           |         |                          |      | Mascot      |
| 1493.7385  | 1493.7188   | -0.0197 | -13   | 448        | 459      | SCCEMQVLLRVR        |           |         | Carbamidomethyl (C)[2]   |      | Mascot      |
| 1493.7385  | 1493.7188   | -0.0197 | -13   | 448        | 459      | SCCEMQVLLRVR        |           |         | Carbamidomethyl (C)[2]   |      | Mascot      |
| 1716.8407  | 1716.8309   | -0.0098 | -6    | 485        | 499      | SSVCVCVSSYL R ATK   |           |         | Carbamidomethyl (C)[4,6] |      | Mascot      |
| 2211.0017  | 2211.0833   | 0.0816  | 37    | 395        | 412      | DDSDTQIRLMDTQMEQL R |           |         | Oxidation (M)[10]        |      | Mascot      |

|    |                                  |              |         |      |    |    |   |
|----|----------------------------------|--------------|---------|------|----|----|---|
| 40 | Zgc:162848 protein [Danio rerio] | gi 141795670 | 51350.1 | 5.88 | 10 | 38 | 0 |
|----|----------------------------------|--------------|---------|------|----|----|---|

| Calc. Mass | Obsrv. Mass | ± da    | ± ppm | Start Seq. | End Seq. | Sequence    | Ion Score | C. I. % Modification                     | Rank | Result Type |
|------------|-------------|---------|-------|------------|----------|-------------|-----------|------------------------------------------|------|-------------|
| 1045.5411  | 1045.5513   | 0.0102  | 10    | 174        | 182      | DAVEEELLK   |           |                                          |      | Mascot      |
| 1201.6536  | 1201.6021   | -0.0515 | -43   | 197        | 206      | TLDQTINQIR  |           |                                          |      | Mascot      |
| 1263.5933  | 1263.681    | 0.0877  | 69    | 365        | 374      | TLRPNMEQCR  |           | Oxidation (M)[6]                         |      | Mascot      |
| 1300.5698  | 1300.5516   | -0.0182 | -14   | 76         | 86       | NQAENICHESR |           |                                          |      | Mascot      |
| 1320.6147  | 1320.5679   | -0.0468 | -35   | 365        | 374      | TLRPNMEQCR  |           | Carbamidomethyl (C)[9], Oxidation (M)[6] |      | Mascot      |
| 1329.7485  | 1329.6488   | -0.0997 | -75   | 196        | 206      | KTLDTINQIR  |           |                                          |      | Mascot      |

|    |                                                  |           |         |     |              |     |                         |      |                         |        |   |
|----|--------------------------------------------------|-----------|---------|-----|--------------|-----|-------------------------|------|-------------------------|--------|---|
|    | 1357.5913                                        | 1357.6993 | 0.108   | 80  | 76           | 86  | NQAENICHESR             |      | Carbamidomethyl (C)[7]  | Mascot |   |
|    | 1390.7074                                        | 1390.6646 | -0.0428 | -31 | 339          | 350 | NISHLQEAVHDK            |      |                         | Mascot |   |
|    | 1475.7812                                        | 1475.7424 | -0.0388 | -26 | 128          | 140 | LSAETDLQISSRR           |      |                         | Mascot |   |
|    | 1555.7356                                        | 1555.7369 | 0.0013  | 1   | 307          | 319 | AFTQRCVEMSQAK           |      | Carbamidomethyl (C)[6]  | Mascot |   |
|    | 1954.8929                                        | 1954.8542 | -0.0387 | -20 | 55           | 70  | YTPDEWFDNNSALLNR        |      |                         | Mascot |   |
|    | 2283.0823                                        | 2283.1577 | 0.0754  | 33  | 245          | 263 | HPSSAVLQDQVCDEEVW<br>RK |      | Carbamidomethyl (C)[12] | Mascot |   |
| 41 | PREDICTED: zinc finger protein 729 [Danio rerio] |           |         |     | gi 326678104 |     | 141499.3                | 9.06 | 25                      | 38     | 0 |

#### Peptide Information

| Calc. Mass | Obsrv. Mass | ± da    | ± ppm | Start Seq. | End Seq. | Sequence                 | Ion Score | C. I. | % Modification                            | Rank | Result Type |
|------------|-------------|---------|-------|------------|----------|--------------------------|-----------|-------|-------------------------------------------|------|-------------|
| 882.4501   | 882.5568    | 0.1067  | 121   | 126        | 132      | CDKTFLR                  |           |       |                                           |      | Mascot      |
| 1003.6159  | 1003.5383   | -0.0776 | -77   | 138        | 145      | IHLRVHTK                 |           |       |                                           |      | Mascot      |
| 1023.5469  | 1023.4974   | -0.0495 | -48   | 1133       | 1141     | SFSQLSNLK                |           |       |                                           |      | Mascot      |
| 1037.5132  | 1037.5153   | 0.0021  | 2     | 22         | 29       | HCLQLHMR                 |           |       |                                           |      | Mascot      |
| 1045.4731  | 1045.5513   | 0.0782  | 75    | 288        | 296      | QHTSANEMK                |           |       |                                           |      | Mascot      |
| 1107.5695  | 1107.5273   | -0.0422 | -38   | 622        | 630      | SFRQSAHFK                |           |       |                                           |      | Mascot      |
| 1109.41    | 1109.4774   | 0.0674  | 61    | 900        | 908      | EFMCFACDK                |           |       | Oxidation (M)[3]                          |      | Mascot      |
| 1118.4791  | 1118.4963   | 0.0172  | 15    | 584        | 593      | KCFTCTQCGK               |           |       |                                           |      | Mascot      |
| 1119.4631  | 1119.4893   | 0.0262  | 23    | 7          | 16       | KCFTCTECGK               |           |       |                                           |      | Mascot      |
| 1165.4764  | 1165.5714   | 0.095   | 82    | 491        | 499      | CSYCDKSFR                |           |       | Carbamidomethyl (C)[1]                    |      | Mascot      |
| 1165.4764  | 1165.5714   | 0.095   | 82    | 491        | 499      | CSYCDKSFR                |           |       | Carbamidomethyl (C)[1]                    |      | Mascot      |
| 1277.642   | 1277.696    | 0.054   | 42    | 360        | 369      | SKQSLQFHMR               |           |       | Oxidation (M)[9]                          |      | Mascot      |
| 1300.6024  | 1300.5516   | -0.0508 | -39   | 788        | 799      | SVTCDVCGKNFK             |           |       |                                           |      | Mascot      |
| 1308.5533  | 1308.6412   | 0.0879  | 67    | 987        | 996      | CSFCIMTFSR               |           |       | Carbamidomethyl (C)[1,4]                  |      | Mascot      |
| 1316.5796  | 1316.5343   | -0.0453 | -34   | 847        | 856      | CDQCSKMFII               |           |       | Carbamidomethyl (C)[1,4]                  |      | Mascot      |
| 1357.6239  | 1357.6993   | 0.0754  | 56    | 788        | 799      | SVTCDVCGKNFK             |           |       | Carbamidomethyl (C)[4]                    |      | Mascot      |
| 1383.5715  | 1383.6716   | 0.1001  | 72    | 931        | 940      | CSHCERFTR                |           |       | Carbamidomethyl (C)[1,4]                  |      | Mascot      |
| 1695.7828  | 1695.88     | 0.0972  | 57    | 142        | 156      | VHTKEKPYSCECGK           |           |       |                                           |      | Mascot      |
| 1711.76    | 1711.8756   | 0.1156  | 68    | 426        | 440      | VHTKEKPYSCECGK           |           |       |                                           |      | Mascot      |
| 1716.7832  | 1716.8309   | 0.0477  | 28    | 1118       | 1132     | THTGEKPFTCDHCLK          |           |       |                                           |      | Mascot      |
| 1796.8127  | 1796.9912   | 0.1785  | 99    | 170        | 184      | IHTGVKEYVCCQCEK          |           |       | Carbamidomethyl (C)[10]                   |      | Mascot      |
| 1998.0841  | 1997.9514   | -0.1327 | -66   | 328        | 344      | AEKIPHLLTEGVFLMQR        |           |       | Oxidation (M)[15]                         |      | Mascot      |
| 2282.999   | 2283.1577   | 0.1587  | 70    | 1058       | 1076     | THEMSHTGEKPFKCAFC<br>EK  |           |       | Carbamidomethyl (C)[14], Oxidation (M)[4] |      | Mascot      |
| 2284.0168  | 2284.1499   | 0.1331  | 58    | 716        | 733      | HQMIHTGEKPYRCSHCD<br>K   |           |       | Carbamidomethyl (C)[13,16]                |      | Mascot      |
| 2367.1543  | 2367.2385   | 0.0842  | 36    | 775        | 796      | THTGLSHTLVKSVTCD<br>VCGK |           |       | Carbamidomethyl (C)[17]                   |      | Mascot      |

|    |                                                                                                     |           |        |    |      |              |                              |      |    |    |   |                                                |        |
|----|-----------------------------------------------------------------------------------------------------|-----------|--------|----|------|--------------|------------------------------|------|----|----|---|------------------------------------------------|--------|
|    | 2367.1543                                                                                           | 2367.2385 | 0.0842 | 36 | 775  | 796          | THTGLSHTLHVSKSVTCD<br>VCGK   |      |    |    |   | Carbamidomethyl (C)[17]                        | Mascot |
|    | 2872.311                                                                                            | 2872.3652 | 0.0542 | 19 | 22   | 44           | HCLQLHMRHTGEKPYTC<br>TECGK   |      |    |    |   | Carbamidomethyl (C)[2,18,21], Oxidation (M)[7] | Mascot |
|    | 2888.3276                                                                                           | 2888.3716 | 0.044  | 15 | 1086 | 1110         | AHMRHIGDKPYSCSYCE<br>STFSLSR |      |    |    |   |                                                | Mascot |
| 42 | novel protein similar to vertebrate actin binding LIM protein family, member 3 (ABLIM3, zgc:158673) |           |        |    |      | gi 220679095 | 77672.1                      | 8.74 | 14 | 38 | 0 |                                                |        |

#### Peptide Information

| Calc. Mass | Obsrv. Mass | ± da    | ± ppm | Start Seq. | End Seq. | Sequence                    | Ion Score | C. I. | % Modification          | Rank | Result Type |
|------------|-------------|---------|-------|------------|----------|-----------------------------|-----------|-------|-------------------------|------|-------------|
| 842.473    | 842.4988    | 0.0258  | 31    | 636        | 642      | LPKDVDR                     |           |       |                         |      | Mascot      |
| 847.438    | 847.4418    | 0.0038  | 4     | 264        | 270      | QASRTER                     |           |       |                         |      | Mascot      |
| 1003.4778  | 1003.5383   | 0.0605  | 60    | 17         | 25       | SSGPIHCFR                   |           |       |                         |      | Mascot      |
| 1023.5833  | 1023.4974   | -0.0859 | -84   | 137        | 145      | LVNPNEPIK                   |           |       |                         |      | Mascot      |
| 1037.537   | 1037.5153   | -0.0217 | -21   | 524        | 531      | MILKEEMK                    |           |       | Oxidation (M)[1]        |      | Mascot      |
| 1119.5153  | 1119.4893   | -0.026  | -23   | 171        | 178      | QWHVSCFR                    |           |       | Carbamidomethyl (C)[6]  |      | Mascot      |
| 1201.7085  | 1201.6021   | -0.1064 | -89   | 517        | 527      | IQGGIGRMILK                 |           |       | Oxidation (M)[8]        |      | Mascot      |
| 1300.6168  | 1300.5516   | -0.0652 | -50   | 409        | 419      | TSPYYSQLDAR                 |           |       |                         |      | Mascot      |
| 1302.5565  | 1302.6985   | 0.142   | 109   | 211        | 221      | CETCDRYISGR                 |           |       |                         |      | Mascot      |
| 1308.6642  | 1308.6412   | -0.023  | -18   | 456        | 467      | SKTSEDIVQSSK                |           |       |                         |      | Mascot      |
| 1695.8384  | 1695.88     | 0.0416  | 25    | 222        | 236      | VLEAGGKHYHPTCAR             |           |       | Carbamidomethyl (C)[13] |      | Mascot      |
| 1711.8394  | 1711.8756   | 0.0362  | 21    | 295        | 308      | VICAKMDNEILDYK              |           |       | Carbamidomethyl (C)[3]  |      | Mascot      |
| 2261.1443  | 2261.0452   | -0.0991 | -44   | 277        | 299      | TSEASISPPGSSISSPSRV<br>ICAK |           |       |                         |      | Mascot      |
| 2284.0305  | 2284.1499   | 0.1194  | 52    | 550        | 570      | SGSREMLHSMGHNNVTN<br>GSPR   |           |       | Oxidation (M)[6]        |      | Mascot      |

43 PREDICTED: rabphilin-3A [Danio rerio] gi|292616540 65174.9 8.63 13 37 0

#### Peptide Information

| Calc. Mass | Obsrv. Mass | ± da    | ± ppm | Start Seq. | End Seq. | Sequence    | Ion Score | C. I. | % Modification         | Rank | Result Type |
|------------|-------------|---------|-------|------------|----------|-------------|-----------|-------|------------------------|------|-------------|
| 842.4195   | 842.4988    | 0.0793  | 94    | 126        | 132      | SGAWFFK     |           |       |                        |      | Mascot      |
| 1023.4233  | 1023.4974   | 0.0741  | 72    | 41         | 48       | MEAMEQER    |           |       |                        |      | Mascot      |
| 1118.5986  | 1118.4963   | -0.1023 | -91   | 52         | 60       | LVNRLDNMK   |           |       | Oxidation (M)[8]       |      | Mascot      |
| 1193.6095  | 1193.6031   | -0.0064 | -5    | 405        | 413      | KNFNICLER   |           |       | Carbamidomethyl (C)[6] |      | Mascot      |
| 1193.6095  | 1193.6031   | -0.0064 | -5    | 405        | 413      | KNFNICLER   |           |       | Carbamidomethyl (C)[6] |      | Mascot      |
| 1277.6306  | 1277.696    | 0.0654  | 51    | 115        | 124      | ICSEQREVWK  |           |       |                        |      | Mascot      |
| 1365.625   | 1365.6259   | 0.0009  | 1     | 41         | 51       | MEAMEQERIGR |           |       | Oxidation (M)[1]       |      | Mascot      |
| 1365.625   | 1365.6259   | 0.0009  | 1     | 41         | 51       | MEAMEQERIGR |           |       | Oxidation (M)[1]       |      | Mascot      |

|    |                                               |           |         |      |     |     |                                  |         |      |    |    |                                            |        |
|----|-----------------------------------------------|-----------|---------|------|-----|-----|----------------------------------|---------|------|----|----|--------------------------------------------|--------|
|    | 1383.5879                                     | 1383.6716 | 0.0837  | 60   | 38  | 48  | AEKMEAMEQER                      |         |      |    |    | Oxidation (M)[4,7]                         | Mascot |
|    | 1555.7244                                     | 1555.7369 | 0.0125  | 8    | 542 | 556 | CNDYIGGCQLGITAK                  |         |      |    |    |                                            | Mascot |
|    | 1707.9574                                     | 1707.7516 | -0.2058 | -120 | 447 | 461 | GRILISLMYSTQLGR                  |         |      |    |    |                                            | Mascot |
|    | 1838.8418                                     | 1838.8944 | 0.0526  | 29   | 94  | 108 | NMCTKCGVQTNTRPR                  |         |      |    |    | Carbamidomethyl (C)[3,6], Oxidation (M)[2] | Mascot |
|    | 1954.9109                                     | 1954.8542 | -0.0567 | -29  | 542 | 559 | CNDYIGGCQLGITAKGER               |         |      |    |    | Carbamidomethyl (C)[1]                     | Mascot |
|    | 2225.127                                      | 2225.0991 | -0.0279 | -13  | 218 | 239 | TVNVHAARPVSSSTAAG<br>LESDR       |         |      |    |    |                                            | Mascot |
|    | 3048.5417                                     | 3048.4673 | -0.0744 | -24  | 10  | 37  | GVHVQSGPCLGAELTDE<br>EKEIINNVIAR |         |      |    |    | Carbamidomethyl (C)[9]                     | Mascot |
| 44 | polo-like kinase 3 (Drosophila) [Danio rerio] |           |         |      |     |     | gi 169154707                     | 74271.7 | 9.04 | 12 | 37 | 0                                          |        |

#### Peptide Information

| Calc. Mass | Obsrv. Mass | ± da    | ± ppm | Start Seq. | End Sequence Seq. | Ion Score                 | C. I. | % Modification                           | Rank | Result Type |
|------------|-------------|---------|-------|------------|-------------------|---------------------------|-------|------------------------------------------|------|-------------|
| 995.4689   | 995.5035    | 0.0346  | 35    | 16         | 23                | IMNPDMFK                  |       |                                          |      | Mascot      |
| 1119.6561  | 1119.4893   | -0.1668 | -149  | 471        | 479               | TKPFIWVTK                 |       |                                          |      | Mascot      |
| 1329.5562  | 1329.6488   | 0.0926  | 70    | 1          | 11                | MDPSCFTTAQR               |       | Carbamidomethyl (C)[5], Oxidation (M)[1] |      | Mascot      |
| 1357.6899  | 1357.6993   | 0.0094  | 7     | 526        | 537               | HFSFPANALPEK              |       |                                          |      | Mascot      |
| 1365.7736  | 1365.6259   | -0.1477 | -108  | 102        | 112               | EKIINEIELHK               |       |                                          |      | Mascot      |
| 1365.7736  | 1365.6259   | -0.1477 | -108  | 102        | 112               | EKIINEIELHK               |       |                                          |      | Mascot      |
| 1383.7994  | 1383.6716   | -0.1278 | -92   | 161        | 171               | YYLRQIISLK                |       |                                          |      | Mascot      |
| 1499.7054  | 1499.76     | 0.0546  | 36    | 12         | 23                | LSCKIMNPDMFK              |       | Carbamidomethyl (C)[3], Oxidation (M)[6] |      | Mascot      |
| 1954.9691  | 1954.8542   | -0.1149 | -59   | 182        | 197               | DLKLGNTFFVNMELR           |       | Oxidation (M)[13]                        |      | Mascot      |
| 1998.098   | 1997.9514   | -0.1466 | -73   | 605        | 622               | IILCKPSDASYLVTFISK        |       |                                          |      | Mascot      |
| 2233.1138  | 2233.0579   | -0.0559 | -25   | 450        | 470               | VLNSCLSSMPTASRNPP<br>CLVK |       | Oxidation (M)[9]                         |      | Mascot      |
| 2261.2751  | 2261.0452   | -0.2299 | -102  | 274        | 294               | YSLPSSLTPSAQKLISSIL<br>QK |       |                                          |      | Mascot      |
| 2283.1326  | 2283.1577   | 0.0251  | 11    | 625        | 644               | VSYSYPLNVLSLGCSP<br>LR    |       | Carbamidomethyl (C)[15]                  |      | Mascot      |

45 sperm-associated antigen 7 homolog [Danio rerio] gi|41055106 26247.3 8.91 7 37 0

#### Peptide Information

| Calc. Mass | Obsrv. Mass | ± da    | ± ppm | Start Seq. | End Sequence Seq. | Ion Score     | C. I. | % Modification           | Rank | Result Type |
|------------|-------------|---------|-------|------------|-------------------|---------------|-------|--------------------------|------|-------------|
| 1107.5615  | 1107.5273   | -0.0342 | -31   | 70         | 78                | YNPMGKIER     |       |                          |      | Mascot      |
| 1193.5281  | 1193.6031   | 0.075   | 63    | 218        | 230               | KGDEEAAGSGSSV |       |                          |      | Mascot      |
| 1193.5281  | 1193.6031   | 0.075   | 63    | 218        | 230               | KGDEEAAGSGSSV |       |                          |      | Mascot      |
| 1234.6361  | 1234.6648   | 0.0287  | 23    | 188        | 198               | AYGCVPVANKR   |       | Carbamidomethyl (C)[4]   |      | Mascot      |
| 1234.6361  | 1234.6648   | 0.0287  | 23    | 188        | 198               | AYGCVPVANKR   | 4     | 0 Carbamidomethyl (C)[4] |      | Mascot      |
| 1384.6703  | 1384.6514   | -0.0189 | -14   | 142        | 154               | AALAAAAASHTQK |       |                          |      | Mascot      |

|           |           |         |     |     |     |                            |        |
|-----------|-----------|---------|-----|-----|-----|----------------------------|--------|
| 1390.6995 | 1390.6646 | -0.0349 | -25 | 202 | 213 | SIEEAMNEIRAK               | Mascot |
| 1555.691  | 1555.7369 | 0.0459  | 30  | 110 | 122 | EFAPSDEELEAYR              | Mascot |
| 2225.1421 | 2225.0991 | -0.043  | -19 | 167 | 187 | YSHLIGHTSAAKDAAHTLQ<br>ANR | Mascot |

46 PREDICTED: hypothetical protein LOC100002352 [Danio rerio] gi|326667104 28311.2 4.72 8 37 0

#### Peptide Information

| Calc. Mass | Obsrv. Mass | $\pm$ da | $\pm$ ppm | Start Seq. | End Seq. | Sequence            | Ion Score | C. I. | % Modification                                  | Rank | Result Type |
|------------|-------------|----------|-----------|------------|----------|---------------------|-----------|-------|-------------------------------------------------|------|-------------|
| 1023.4887  | 1023.4974   | 0.0087   | 9         | 47         | 54       | LSEEMRSR            |           |       | Oxidation (M)[5]                                |      | Mascot      |
| 1193.5289  | 1193.6031   | 0.0742   | 62        | 28         | 37       | LCQECGLDAK          |           |       | Carbamidomethyl (C)[2,5]                        |      | Mascot      |
| 1193.5289  | 1193.6031   | 0.0742   | 62        | 28         | 37       | LCQECGLDAK          |           |       | Carbamidomethyl (C)[2,5]                        |      | Mascot      |
| 1277.6704  | 1277.696    | 0.0256   | 20        | 179        | 189      | LICEMARQIGK         |           |       | Oxidation (M)[5]                                |      | Mascot      |
| 1320.5493  | 1320.5679   | 0.0186   | 14        | 167        | 178      | DMNSHIGNACMK        |           |       |                                                 |      | Mascot      |
| 1475.7887  | 1475.7424   | -0.0463  | -31       | 41         | 52       | TDLLRLSEEMR         |           |       |                                                 |      | Mascot      |
| 1493.6835  | 1493.7188   | 0.0353   | 24        | 28         | 40       | LCQECGLDAKGSR       |           |       | Carbamidomethyl (C)[2,5]                        |      | Mascot      |
| 1493.6835  | 1493.7188   | 0.0353   | 24        | 28         | 40       | LCQECGLDAKGSR       |           |       | Carbamidomethyl (C)[2,5]                        |      | Mascot      |
| 1997.8644  | 1997.9514   | 0.087    | 44        | 1          | 17       | MEESDESENYPPKDIK    |           |       | Oxidation (M)[1]                                |      | Mascot      |
| 2282.9807  | 2283.1577   | 0.177    | 78        | 167        | 185      | DMNSHIGNACMKLICEMAR |           |       | Carbamidomethyl (C)[10,15], Oxidation (M)[2,11] |      | Mascot      |

47 PREDICTED: kelch-like protein 3 [Danio rerio] gi|68373307 65029.1 5.58 11 36 0

#### Peptide Information

| Calc. Mass | Obsrv. Mass | $\pm$ da | $\pm$ ppm | Start Seq. | End Seq. | Sequence             | Ion Score | C. I. | % Modification                           | Rank | Result Type |
|------------|-------------|----------|-----------|------------|----------|----------------------|-----------|-------|------------------------------------------|------|-------------|
| 882.5155   | 882.5568    | 0.0413   | 47        | 285        | 291      | HLIKTDR              |           |       |                                          |      | Mascot      |
| 1003.5417  | 1003.5383   | -0.0034  | -3        | 433        | 443      | SSVGVGVDGK           |           |       |                                          |      | Mascot      |
| 1193.6387  | 1193.6031   | -0.0356  | -30       | 214        | 223      | VFEAMVAWIK           |           |       |                                          |      | Mascot      |
| 1193.6387  | 1193.6031   | -0.0356  | -30       | 214        | 223      | VFEAMVAWIK           |           |       |                                          |      | Mascot      |
| 1234.6215  | 1234.6648   | 0.0433   | 35        | 328        | 337      | WYQVADLPSR           |           |       |                                          |      | Mascot      |
| 1234.6215  | 1234.6648   | 0.0433   | 35        | 328        | 337      | WYQVADLPSR           | 6         | 0     |                                          |      | Mascot      |
| 1263.5133  | 1263.681    | 0.1677   | 133       | 471        | 480      | WCYVSDMSTR           |           |       | Oxidation (M)[7]                         |      | Mascot      |
| 1265.7688  | 1265.6366   | -0.1322  | -104      | 292        | 302      | TRPRTPISLPK          |           |       |                                          |      | Mascot      |
| 1320.5348  | 1320.5679   | 0.0331   | 25        | 471        | 480      | WCYVSDMSTR           |           |       | Carbamidomethyl (C)[2], Oxidation (M)[7] |      | Mascot      |
| 1390.7227  | 1390.6646   | -0.0581  | -42       | 328        | 338      | WYQVADLPSRR          |           |       |                                          |      | Mascot      |
| 1460.641   | 1460.78     | 0.139    | 95        | 471        | 481      | WCYVSDMSTRR          |           |       | Carbamidomethyl (C)[2]                   |      | Mascot      |
| 1695.8337  | 1695.88     | 0.0463   | 27        | 506        | 519      | KSVEVYDPTNTWR        |           |       |                                          |      | Mascot      |
| 2224.9702  | 2225.0991   | 0.1289   | 58        | 2          | 22       | DYDGFVPCPVPSLDSQDDAK |           |       |                                          |      | Mascot      |



|    |                                                               |           |         |     |              |     |                          |      |   |    |   |  |  |  |  |  |  |        |
|----|---------------------------------------------------------------|-----------|---------|-----|--------------|-----|--------------------------|------|---|----|---|--|--|--|--|--|--|--------|
|    | 2367.3533                                                     | 2367.2385 | -0.1148 | -48 | 242          | 261 | LPLLSRDYLVQIVVEEPLI<br>K |      |   |    |   |  |  |  |  |  |  | Mascot |
|    | 2367.3533                                                     | 2367.2385 | -0.1148 | -48 | 242          | 261 | LPLLSRDYLVQIVVEEPLI<br>K |      |   |    |   |  |  |  |  |  |  | Mascot |
| 48 | PREDICTED: hypothetical protein LOC100330438<br>[Danio rerio] |           |         |     | gi 326666979 |     | 36156.2                  | 5.13 | 9 | 36 | 0 |  |  |  |  |  |  |        |

#### Peptide Information

| Calc. Mass | Obsrv. Mass | ± da    | ± ppm | Start Seq. | End Seq. | Sequence            | Ion Score | C. I. % | Modification            | Rank | Result Type |
|------------|-------------|---------|-------|------------|----------|---------------------|-----------|---------|-------------------------|------|-------------|
| 847.4519   | 847.4418    | -0.0101 | -12   | 80         | 86       | DELSKQK             |           |         |                         |      | Mascot      |
| 1023.4887  | 1023.4974   | 0.0087  | 9     | 112        | 119      | LSEEMRSR            |           |         | Oxidation (M)[5]        |      | Mascot      |
| 1193.5289  | 1193.6031   | 0.0742  | 62    | 92         | 102      | GLCQECGLDAK         |           |         | Carbamidomethyl (C)[3]  |      | Mascot      |
| 1193.5289  | 1193.6031   | 0.0742  | 62    | 92         | 102      | GLCQECGLDAK         |           |         | Carbamidomethyl (C)[3]  |      | Mascot      |
| 1277.6704  | 1277.696    | 0.0256  | 20    | 248        | 258      | LICEMARQIGK         |           |         | Oxidation (M)[5]        |      | Mascot      |
| 1383.5338  | 1383.6716   | 0.1378  | 100   | 236        | 247      | DMDSHIGNTCMK        |           |         | Oxidation (M)[2,11]     |      | Mascot      |
| 1475.7887  | 1475.7424   | -0.0463 | -31   | 106        | 117      | TDLLRLSEEMR         |           |         |                         |      | Mascot      |
| 1493.6835  | 1493.7188   | 0.0353  | 24    | 92         | 105      | GLCQECGLDAKGSR      |           |         | Carbamidomethyl (C)[3]  |      | Mascot      |
| 1493.6835  | 1493.7188   | 0.0353  | 24    | 92         | 105      | GLCQECGLDAKGSR      |           |         | Carbamidomethyl (C)[3]  |      | Mascot      |
| 1997.8644  | 1997.9514   | 0.087   | 44    | 1          | 17       | MEESDESENYPPKDIK    |           |         | Oxidation (M)[1]        |      | Mascot      |
| 2224.9641  | 2225.0991   | 0.135   | 61    | 236        | 254      | DMDSHIGNTCMKLICEMAR |           |         | Carbamidomethyl (C)[10] |      | Mascot      |

|    |                            |  |  |  |              |  |          |      |   |    |   |  |  |  |  |  |  |  |
|----|----------------------------|--|--|--|--------------|--|----------|------|---|----|---|--|--|--|--|--|--|--|
| 49 | Msh2 protein [Danio rerio] |  |  |  | gi 182889828 |  | 103705.5 | 6.32 | 1 | 24 | 0 |  |  |  |  |  |  |  |
|----|----------------------------|--|--|--|--------------|--|----------|------|---|----|---|--|--|--|--|--|--|--|

#### Peptide Information

| Calc. Mass | Obsrv. Mass | ± da   | ± ppm | Start Seq. | End Seq. | Sequence    | Ion Score | C. I. % | Modification           | Rank | Result Type |
|------------|-------------|--------|-------|------------|----------|-------------|-----------|---------|------------------------|------|-------------|
| 1234.6533  | 1234.6648   | 0.0115 | 9     | 265        | 275      | IAMSCLEAVIK | 24        | 0       | Carbamidomethyl (C)[5] | 3    | Mascot      |

|    |                               |  |  |  |              |  |       |      |   |    |   |  |  |  |  |  |  |  |
|----|-------------------------------|--|--|--|--------------|--|-------|------|---|----|---|--|--|--|--|--|--|--|
| 50 | Ccxc101 protein [Danio rerio] |  |  |  | gi 201090170 |  | 33213 | 8.21 | 1 | 23 | 0 |  |  |  |  |  |  |  |
|----|-------------------------------|--|--|--|--------------|--|-------|------|---|----|---|--|--|--|--|--|--|--|

#### Peptide Information

| Calc. Mass | Obsrv. Mass | ± da   | ± ppm | Start Seq. | End Seq. | Sequence    | Ion Score | C. I. % | Modification           | Rank | Result Type |
|------------|-------------|--------|-------|------------|----------|-------------|-----------|---------|------------------------|------|-------------|
| 1234.5732  | 1234.6648   | 0.0916 | 74    | 68         | 78       | ADAEAECSILR | 23        | 0       | Carbamidomethyl (C)[7] | 4    | Mascot      |

|                |           |                        |                |                |                    |
|----------------|-----------|------------------------|----------------|----------------|--------------------|
| Gel Idx/Pos    | 229/J5    | Instr./Gel Origin      | BA2060/110707A | Process Status | Analysis Succeeded |
| Plate [#] Name | [1] 31496 | Instrument Sample Name |                | Spectra        | 11                 |

| Rank | Protein Name                 | Accession No. | Protein MW | Protein PI | Pep. Count | Protein Score | Protein Score C. I. % | Total Ion Score | Total Ion C. I. % |
|------|------------------------------|---------------|------------|------------|------------|---------------|-----------------------|-----------------|-------------------|
| 1    | vitellogenin 1 [Danio rerio] | gi 94733730   | 149140.4   | 8.74       | 16         | 552           | 100                   | 512             | 100               |

| Peptide Information |                              |         |       |              |          |                          |           |         |                                           |     |     |                  |
|---------------------|------------------------------|---------|-------|--------------|----------|--------------------------|-----------|---------|-------------------------------------------|-----|-----|------------------|
| Calc. Mass          | Obsrv. Mass                  | ± da    | ± ppm | Start Seq.   | End Seq. | Sequence                 | Ion Score | C. I. % | Modification                              |     |     | Rank Result Type |
| 925.3502            | 925.3301                     | -0.0201 | -22   | 204          | 210      | CAECTER                  |           |         | Carbamidomethyl (C)[1,4]                  |     |     | Mascot           |
| 1023.5105           | 1023.4912                    | -0.0193 | -19   | 195          | 203      | DVGLAYTER                | 65        | 99.991  |                                           |     |     | Mascot           |
| 1023.5105           | 1023.4912                    | -0.0193 | -19   | 195          | 203      | DVGLAYTER                |           |         |                                           |     |     | Mascot           |
| 1044.4528           | 1044.4315                    | -0.0213 | -20   | 184          | 191      | DLSHCQER                 |           |         | Carbamidomethyl (C)[5]                    |     |     | Mascot           |
| 1177.6462           | 1177.6218                    | -0.0244 | -21   | 260          | 269      | QTLAFVEIEK               |           |         |                                           |     |     | Mascot           |
| 1215.6005           | 1215.5762                    | -0.0243 | -20   | 164          | 173      | THYVINEDPK               | 65        | 99.991  |                                           |     |     | Mascot           |
| 1215.6005           | 1215.5762                    | -0.0243 | -20   | 164          | 173      | THYVINEDPK               |           |         |                                           |     |     | Mascot           |
| 1238.7831           | 1238.7572                    | -0.0259 | -21   | 135          | 145      | GILNILQLNLK              |           |         |                                           |     |     | Mascot           |
| 1259.5797           | 1259.5557                    | -0.024  | -19   | 182          | 191      | SKDLSHCQER               |           |         | Carbamidomethyl (C)[7]                    |     |     | Mascot           |
| 1466.894            | 1466.8621                    | -0.0319 | -22   | 95           | 108      | LTSALAAQLQIPIK           |           |         |                                           |     |     | Mascot           |
| 1599.8298           | 1599.7952                    | -0.0346 | -22   | 58           | 71       | VLISATTENTYLMK           |           |         | Oxidation (M)[13]                         |     |     | Mascot           |
| 1695.8999           | 1695.8687                    | -0.0312 | -18   | 119          | 134      | VFAPAGVSPTVMNLHR         |           |         |                                           |     |     | Mascot           |
| 1699.9047           | 1699.9042                    | -0.0005 | 0     | 597          | 614      | ITAPDMASVAGAANVAIK       |           |         |                                           |     |     | Mascot           |
| 1699.9377           | 1699.9042                    | -0.0335 | -20   | 34           | 49       | YEALLLGGLPQEGLAR         | 130       | 100     |                                           |     |     | Mascot           |
| 1711.8948           | 1711.8638                    | -0.031  | -18   | 119          | 134      | VFAPAGVSPTVMNLHR         |           |         | Oxidation (M)[12]                         |     |     | Mascot           |
| 1711.8948           | 1711.8638                    | -0.031  | -18   | 119          | 134      | VFAPAGVSPTVMNLHR         | 17        | 0       | Oxidation (M)[12]                         |     |     | Mascot           |
| 1796.8928           | 1796.8574                    | -0.0354 | -20   | 72           | 86       | LMDPLLYEYAGTWPK          |           |         |                                           |     |     | Mascot           |
| 1812.8877           | 1812.853                     | -0.0347 | -19   | 72           | 86       | LMDPLLYEYAGTWPK          | 83        | 100     | Oxidation (M)[2]                          |     |     | Mascot           |
| 1812.8877           | 1812.853                     | -0.0347 | -19   | 72           | 86       | LMDPLLYEYAGTWPK          |           |         | Oxidation (M)[2]                          |     |     | Mascot           |
| 1954.8745           | 1954.8373                    | -0.0372 | -19   | 147          | 163      | TQNIYEMQEAGAQQGVC        |           |         | Carbamidomethyl (C)[16]                   |     |     | Mascot           |
| 1954.8745           | 1954.8373                    | -0.0372 | -19   | 147          | 163      | TQNIYEMQEAGAQQGVC        | 155       | 100     | Carbamidomethyl (C)[16]                   |     |     | Mascot           |
| 1970.8695           | 1970.8354                    | -0.0341 | -17   | 147          | 163      | TQNIYEMQEAGAQQGVC        | 60        | 99.972  | Carbamidomethyl (C)[16], Oxidation (M)[7] |     |     | Mascot           |
| 1970.8695           | 1970.8354                    | -0.0341 | -17   | 147          | 163      | TQNIYEMQEAGAQQGVC        |           |         | Carbamidomethyl (C)[16], Oxidation (M)[7] |     |     | Mascot           |
| 2098.9644           | 2098.9324                    | -0.032  | -15   | 146          | 163      | KTQNIYEMQEAGAQQVC        |           |         | Carbamidomethyl (C)[17], Oxidation (M)[8] |     |     | Mascot           |
| 2299.2292           | 2299.1428                    | -0.0864 | -38   | 1039         | 1058     | R<br>QINIIDDDTPEGQAFLLKL |           |         |                                           |     |     | Mascot           |
| 2                   | vitellogenin 1 [Danio rerio] |         |       | gi 166795887 |          | 149452.5                 | 8.68      | 17      | 496                                       | 100 | 449 | 100              |

| Peptide Information |             |         |       |            |          |            |           |       |                          |                  |
|---------------------|-------------|---------|-------|------------|----------|------------|-----------|-------|--------------------------|------------------|
| Calc. Mass          | Obsrv. Mass | ± da    | ± ppm | Start Seq. | End Seq. | Sequence   | Ion Score | C. I. | % Modification           | Rank Result Type |
| 925.3502            | 925.3301    | -0.0201 | -22   | 204        | 210      | CAECTER    |           |       | Carbamidomethyl (C)[1,4] | Mascot           |
| 1044.4528           | 1044.4315   | -0.0213 | -20   | 184        | 191      | DLSHCQER   |           |       | Carbamidomethyl (C)[5]   | Mascot           |
| 1177.6462           | 1177.6218   | -0.0244 | -21   | 260        | 269      | QTLAFVEIEK |           |       |                          | Mascot           |

|           |           |         |     |      |      |                                       |     |        |                                           |  |        |
|-----------|-----------|---------|-----|------|------|---------------------------------------|-----|--------|-------------------------------------------|--|--------|
| 1215.6005 | 1215.5762 | -0.0243 | -20 | 164  | 173  | THYVINEDPK                            | 65  | 99.991 |                                           |  | Mascot |
| 1215.6005 | 1215.5762 | -0.0243 | -20 | 164  | 173  | THYVINEDPK                            |     |        |                                           |  | Mascot |
| 1238.7831 | 1238.7572 | -0.0259 | -21 | 135  | 145  | GILNILQLNLK                           |     |        |                                           |  | Mascot |
| 1259.5797 | 1259.5557 | -0.024  | -19 | 182  | 191  | SKDLSHCQER                            |     |        | Carbamidomethyl (C)[7]                    |  | Mascot |
| 1466.894  | 1466.8621 | -0.0319 | -22 | 95   | 108  | LTSALAAQLQIPIK                        |     |        |                                           |  | Mascot |
| 1599.8298 | 1599.7952 | -0.0346 | -22 | 58   | 71   | VLISATTENTYLMK                        |     |        | Oxidation (M)[13]                         |  | Mascot |
| 1695.8999 | 1695.8687 | -0.0312 | -18 | 119  | 134  | VFAPAGVSPTVMNLHR                      |     |        |                                           |  | Mascot |
| 1699.9377 | 1699.9042 | -0.0335 | -20 | 34   | 49   | YEALLLGGLPQEGLAR                      | 130 | 100    |                                           |  | Mascot |
| 1699.9377 | 1699.9042 | -0.0335 | -20 | 34   | 49   | YEALLLGGLPQEGLAR                      |     |        |                                           |  | Mascot |
| 1711.8948 | 1711.8638 | -0.031  | -18 | 119  | 134  | VFAPAGVSPTVMNLHR                      |     |        | Oxidation (M)[12]                         |  | Mascot |
| 1711.8948 | 1711.8638 | -0.031  | -18 | 119  | 134  | VFAPAGVSPTVMNLHR                      | 17  | 0      | Oxidation (M)[12]                         |  | Mascot |
| 1796.8928 | 1796.8574 | -0.0354 | -20 | 72   | 86   | LMDPLLYEYAGTWPK                       |     |        |                                           |  | Mascot |
| 1812.8877 | 1812.853  | -0.0347 | -19 | 72   | 86   | LMDPLLYEYAGTWPK                       | 83  | 100    | Oxidation (M)[2]                          |  | Mascot |
| 1812.8877 | 1812.853  | -0.0347 | -19 | 72   | 86   | LMDPLLYEYAGTWPK                       |     |        | Oxidation (M)[2]                          |  | Mascot |
| 1954.8745 | 1954.8373 | -0.0372 | -19 | 147  | 163  | TQNIYEMQEAGAQQGVCR                    |     |        | Carbamidomethyl (C)[16]                   |  | Mascot |
| 1954.8745 | 1954.8373 | -0.0372 | -19 | 147  | 163  | TQNIYEMQEAGAQQGVCR                    | 155 | 100    | Carbamidomethyl (C)[16]                   |  | Mascot |
| 1970.8695 | 1970.8354 | -0.0341 | -17 | 147  | 163  | TQNIYEMQEAGAQQGVCR                    | 60  | 99.972 | Carbamidomethyl (C)[16], Oxidation (M)[7] |  | Mascot |
| 1970.8695 | 1970.8354 | -0.0341 | -17 | 147  | 163  | TQNIYEMQEAGAQQGVCR                    |     |        | Carbamidomethyl (C)[16], Oxidation (M)[7] |  | Mascot |
| 2098.9644 | 2098.9324 | -0.032  | -15 | 146  | 163  | KTQNIYEMQEAGAQQGVC<br>R               |     |        | Carbamidomethyl (C)[17], Oxidation (M)[8] |  | Mascot |
| 2233.2009 | 2233.0486 | -0.1523 | -68 | 593  | 614  | SLTRITAPDMAYVAGAAN<br>VAIK            |     |        |                                           |  | Mascot |
| 2299.2292 | 2299.1428 | -0.0864 | -38 | 1039 | 1058 | QINIIDDDTPEGQAFLKL<br>R               |     |        |                                           |  | Mascot |
| 2305.1394 | 2305.1248 | -0.0146 | -6  | 577  | 596  | TEPNMHVASFAYSHIKSL<br>TR              |     |        | Oxidation (M)[5]                          |  | Mascot |
| 3338.6421 | 3338.7092 | 0.0671  | 20  | 930  | 961  | SIPLVPELSLQNSQASYA<br>GDLSSSEMSSVASVR |     |        | Oxidation (M)[25]                         |  | Mascot |

3 novel protein similar to vitellogenin 1 (vg1) [Danio rerio] gi|94733731 149169.2 8.84 14 441 100 413 100

Peptide Information

| Calc. Mass | Obsrv. Mass | ± da    | ± ppm | Start Seq. | End Sequence Seq. | Ion Score   | C. I. % | Modification | Rank                   | Result Type |
|------------|-------------|---------|-------|------------|-------------------|-------------|---------|--------------|------------------------|-------------|
| 1023.5105  | 1023.4912   | -0.0193 | -19   | 199        | 207               | DVGLAYTER   | 65      | 99.991       |                        | Mascot      |
| 1023.5105  | 1023.4912   | -0.0193 | -19   | 199        | 207               | DVGLAYTER   |         |              |                        | Mascot      |
| 1044.4528  | 1044.4315   | -0.0213 | -20   | 188        | 195               | DLSHCQER    |         |              | Carbamidomethyl (C)[5] | Mascot      |
| 1177.6462  | 1177.6218   | -0.0244 | -21   | 264        | 273               | QTLAFVEIEK  |         |              |                        | Mascot      |
| 1215.6005  | 1215.5762   | -0.0243 | -20   | 168        | 177               | THYVINEDPK  | 65      | 99.991       |                        | Mascot      |
| 1215.6005  | 1215.5762   | -0.0243 | -20   | 168        | 177               | THYVINEDPK  |         |              |                        | Mascot      |
| 1238.7831  | 1238.7572   | -0.0259 | -21   | 139        | 149               | GILNILQLNLK |         |              |                        | Mascot      |

|           |           |         |     |      |      |                           |     |        |  |                                           |        |
|-----------|-----------|---------|-----|------|------|---------------------------|-----|--------|--|-------------------------------------------|--------|
| 1259.5797 | 1259.5557 | -0.024  | -19 | 186  | 195  | SKDLSHCQER                |     |        |  | Carbamidomethyl (C)[7]                    | Mascot |
| 1466.894  | 1466.8621 | -0.0319 | -22 | 99   | 112  | LTSALAAQLQIPIK            |     |        |  |                                           | Mascot |
| 1699.9047 | 1699.9042 | -0.0005 | 0   | 601  | 618  | ITAPDMASVAGAANVAIK        |     |        |  |                                           | Mascot |
| 1699.9377 | 1699.9042 | -0.0335 | -20 | 38   | 53   | YEALLLGGLPQEGLAR          | 130 | 100    |  |                                           | Mascot |
| 1721.9043 | 1721.884  | -0.0203 | -12 | 123  | 138  | VFAPAGVSPTVMNLYR          |     |        |  |                                           | Mascot |
| 1954.8745 | 1954.8373 | -0.0372 | -19 | 151  | 167  | TQNIYEMQEAGAQQGVCR        |     |        |  | Carbamidomethyl (C)[16]                   | Mascot |
| 1954.8745 | 1954.8373 | -0.0372 | -19 | 151  | 167  | TQNIYEMQEAGAQQGVCR        | 155 | 100    |  | Carbamidomethyl (C)[16]                   | Mascot |
| 1970.8695 | 1970.8354 | -0.0341 | -17 | 151  | 167  | TQNIYEMQEAGAQQGVCR        | 60  | 99.972 |  | Carbamidomethyl (C)[16], Oxidation (M)[7] | Mascot |
| 1970.8695 | 1970.8354 | -0.0341 | -17 | 151  | 167  | TQNIYEMQEAGAQQGVCR        |     |        |  | Carbamidomethyl (C)[16], Oxidation (M)[7] | Mascot |
| 2098.9644 | 2098.9324 | -0.032  | -15 | 150  | 167  | KTQNIYEMQEAGAQQVC<br>R    |     |        |  | Carbamidomethyl (C)[17], Oxidation (M)[8] | Mascot |
| 2299.2292 | 2299.1428 | -0.0864 | -38 | 1043 | 1062 | QINIIDDDTPEGQAFLLKL<br>R  |     |        |  |                                           | Mascot |
| 2305.1394 | 2305.1248 | -0.0146 | -6  | 581  | 600  | TEPNMHVSSSFAYSHIKSL<br>TR |     |        |  |                                           | Mascot |
| 2321.1343 | 2321.124  | -0.0103 | -4  | 581  | 600  | TEPNMHVSSSFAYSHIKSL<br>TR |     |        |  | Oxidation (M)[5]                          | Mascot |

4 vitellogenin 5 [Danio rerio] gi|68448530 148868 8.77 13 437 100 413 100

#### Peptide Information

| Calc. Mass | Obsrv. Mass | ± da    | ± ppm | Start Seq. | End Seq. | Sequence                 | Ion Score | C. I. % | Modification                              | Rank | Result Type |
|------------|-------------|---------|-------|------------|----------|--------------------------|-----------|---------|-------------------------------------------|------|-------------|
| 1023.5105  | 1023.4912   | -0.0193 | -19   | 195        | 203      | DVGLAYTER                | 65        | 99.991  |                                           |      | Mascot      |
| 1023.5105  | 1023.4912   | -0.0193 | -19   | 195        | 203      | DVGLAYTER                |           |         |                                           |      | Mascot      |
| 1044.4528  | 1044.4315   | -0.0213 | -20   | 184        | 191      | DLSHCQER                 |           |         | Carbamidomethyl (C)[5]                    |      | Mascot      |
| 1177.6462  | 1177.6218   | -0.0244 | -21   | 260        | 269      | QTLAFVEIEK               |           |         |                                           |      | Mascot      |
| 1215.6005  | 1215.5762   | -0.0243 | -20   | 164        | 173      | THYVINEDPK               | 65        | 99.991  |                                           |      | Mascot      |
| 1215.6005  | 1215.5762   | -0.0243 | -20   | 164        | 173      | THYVINEDPK               |           |         |                                           |      | Mascot      |
| 1238.7831  | 1238.7572   | -0.0259 | -21   | 135        | 145      | GILNILQLNLK              |           |         |                                           |      | Mascot      |
| 1259.5797  | 1259.5557   | -0.024  | -19   | 182        | 191      | SKDLSHCQER               |           |         | Carbamidomethyl (C)[7]                    |      | Mascot      |
| 1466.894   | 1466.8621   | -0.0319 | -22   | 95         | 108      | LTSALAAQLQIPIK           |           |         |                                           |      | Mascot      |
| 1699.9047  | 1699.9042   | -0.0005 | 0     | 597        | 614      | ITAPDMASVAGAANVAIK       |           |         |                                           |      | Mascot      |
| 1699.9377  | 1699.9042   | -0.0335 | -20   | 34         | 49       | YEALLLGGLPQEGLAR         | 130       | 100     |                                           |      | Mascot      |
| 1954.8745  | 1954.8373   | -0.0372 | -19   | 147        | 163      | TQNIYEMQEAGAQQGVCR       |           |         | Carbamidomethyl (C)[16]                   |      | Mascot      |
| 1954.8745  | 1954.8373   | -0.0372 | -19   | 147        | 163      | TQNIYEMQEAGAQQGVCR       | 155       | 100     | Carbamidomethyl (C)[16]                   |      | Mascot      |
| 1970.8695  | 1970.8354   | -0.0341 | -17   | 147        | 163      | TQNIYEMQEAGAQQGVCR       | 60        | 99.972  | Carbamidomethyl (C)[16], Oxidation (M)[7] |      | Mascot      |
| 1970.8695  | 1970.8354   | -0.0341 | -17   | 147        | 163      | TQNIYEMQEAGAQQGVCR       |           |         | Carbamidomethyl (C)[16], Oxidation (M)[7] |      | Mascot      |
| 2098.9644  | 2098.9324   | -0.032  | -15   | 146        | 163      | KTQNIYEMQEAGAQQVC<br>R   |           |         | Carbamidomethyl (C)[17], Oxidation (M)[8] |      | Mascot      |
| 2299.2292  | 2299.1428   | -0.0864 | -38   | 1039       | 1058     | QINIIDDDTPEGQAFLLKL<br>R |           |         |                                           |      | Mascot      |
| 2305.1394  | 2305.1248   | -0.0146 | -6    | 577        | 596      | TEPNMHVSSSFAYSHIKSL      |           |         |                                           |      | Mascot      |

|   |                                                             |          |         |    |     |             |                                |      |    |     |                  |     |        |
|---|-------------------------------------------------------------|----------|---------|----|-----|-------------|--------------------------------|------|----|-----|------------------|-----|--------|
|   | 2321.1343                                                   | 2321.124 | -0.0103 | -4 | 577 | 596         | TR<br>TEPNMHVSSFAYSHIKSL<br>TR |      |    |     | Oxidation (M)[5] |     | Mascot |
| 5 | novel protein similar to vitellogenin 1 (vg1) [Danio rerio] |          |         |    |     | gi 94733734 | 149808.5                       | 8.83 | 15 | 393 | 100              | 359 | 100    |

Peptide Information

| Calc. Mass | Obsrv. Mass | ± da    | ± ppm | Start Seq. | End Seq. | Sequence               | Ion Score | C. I.  | % Modification         | Rank | Result Type |
|------------|-------------|---------|-------|------------|----------|------------------------|-----------|--------|------------------------|------|-------------|
| 864.4461   | 864.4752    | 0.0291  | 34    | 91         | 98       | DSFVPATK               |           |        |                        |      | Mascot      |
| 1023.5105  | 1023.4912   | -0.0193 | -19   | 199        | 207      | DVGLAYTER              | 65        | 99.991 |                        |      | Mascot      |
| 1023.5105  | 1023.4912   | -0.0193 | -19   | 199        | 207      | DVGLAYTER              |           |        |                        |      | Mascot      |
| 1044.4528  | 1044.4315   | -0.0213 | -20   | 188        | 195      | DLSHCQER               |           |        | Carbamidomethyl (C)[5] |      | Mascot      |
| 1177.6462  | 1177.6218   | -0.0244 | -21   | 264        | 273      | QTLAFVEIEK             |           |        |                        |      | Mascot      |
| 1215.6005  | 1215.5762   | -0.0243 | -20   | 168        | 177      | THYVINEDPK             | 65        | 99.991 |                        |      | Mascot      |
| 1215.6005  | 1215.5762   | -0.0243 | -20   | 168        | 177      | THYVINEDPK             |           |        |                        |      | Mascot      |
| 1238.7831  | 1238.7572   | -0.0259 | -21   | 139        | 149      | GILNILQLNLK            |           |        |                        |      | Mascot      |
| 1259.5797  | 1259.5557   | -0.024  | -19   | 186        | 195      | SKDLSHCQER             |           |        | Carbamidomethyl (C)[7] |      | Mascot      |
| 1466.894   | 1466.8621   | -0.0319 | -22   | 99         | 112      | LTSALAAQLQIPIK         |           |        |                        |      | Mascot      |
| 1695.8999  | 1695.8687   | -0.0312 | -18   | 123        | 138      | VFAPAGVSPTVMNLHR       |           |        |                        |      | Mascot      |
| 1699.9377  | 1699.9042   | -0.0335 | -20   | 38         | 53       | YEALLLGGLPQEGLAR       | 130       | 100    |                        |      | Mascot      |
| 1699.9377  | 1699.9042   | -0.0335 | -20   | 38         | 53       | YEALLLGGLPQEGLAR       |           |        |                        |      | Mascot      |
| 1711.8948  | 1711.8638   | -0.031  | -18   | 123        | 138      | VFAPAGVSPTVMNLHR       |           |        | Oxidation (M)[12]      |      | Mascot      |
| 1711.8948  | 1711.8638   | -0.031  | -18   | 123        | 138      | VFAPAGVSPTVMNLHR       | 17        | 0      | Oxidation (M)[12]      |      | Mascot      |
| 1796.8928  | 1796.8574   | -0.0354 | -20   | 76         | 90       | LMDPLLYEYAGTWPK        |           |        |                        |      | Mascot      |
| 1812.8877  | 1812.853    | -0.0347 | -19   | 76         | 90       | LMDPLLYEYAGTWPK        | 83        | 100    | Oxidation (M)[2]       |      | Mascot      |
| 1812.8877  | 1812.853    | -0.0347 | -19   | 76         | 90       | LMDPLLYEYAGTWPK        |           |        | Oxidation (M)[2]       |      | Mascot      |
| 2194.0469  | 2194.0535   | 0.0066  | 3     | 1063       | 1083     | EILDTEAKNAPVSSSSSSR    |           |        |                        |      | Mascot      |
| 2233.2009  | 2233.0486   | -0.1523 | -68   | 597        | 618      | SLTRITAPDMAYVAGAANVAIK |           |        |                        |      | Mascot      |
| 2299.2292  | 2299.1428   | -0.0864 | -38   | 1043       | 1062     | QINIIDDDTPEGQAFLLKL R  |           |        |                        |      | Mascot      |
| 2305.1394  | 2305.1248   | -0.0146 | -6    | 581        | 600      | TEPNMHVASFAYSHIKSL TR  |           |        | Oxidation (M)[5]       |      | Mascot      |

|   |                              |  |  |  |  |              |          |      |    |     |     |     |     |
|---|------------------------------|--|--|--|--|--------------|----------|------|----|-----|-----|-----|-----|
| 6 | vitellogenin 6 [Danio rerio] |  |  |  |  | gi 303227889 | 150936.1 | 8.84 | 15 | 392 | 100 | 359 | 100 |
|---|------------------------------|--|--|--|--|--------------|----------|------|----|-----|-----|-----|-----|

Peptide Information

| Calc. Mass | Obsrv. Mass | ± da    | ± ppm | Start Seq. | End Seq. | Sequence  | Ion Score | C. I.  | % Modification | Rank | Result Type |
|------------|-------------|---------|-------|------------|----------|-----------|-----------|--------|----------------|------|-------------|
| 864.4461   | 864.4752    | 0.0291  | 34    | 98         | 105      | DSFVPATK  |           |        |                |      | Mascot      |
| 1023.5105  | 1023.4912   | -0.0193 | -19   | 206        | 214      | DVGLAYTER | 65        | 99.991 |                |      | Mascot      |

|   |                                                                                                          |           |         |     |      |      |                            |     |        |                   |  |  |  |  |  |  |        |
|---|----------------------------------------------------------------------------------------------------------|-----------|---------|-----|------|------|----------------------------|-----|--------|-------------------|--|--|--|--|--|--|--------|
|   | 1023.5105                                                                                                | 1023.4912 | -0.0193 | -19 | 206  | 214  | DVGLAYTER                  |     |        |                   |  |  |  |  |  |  | Mascot |
|   | 1044.4528                                                                                                | 1044.4315 | -0.0213 | -20 | 195  | 202  | DLSHCQER                   |     |        |                   |  |  |  |  |  |  | Mascot |
|   | 1177.6462                                                                                                | 1177.6218 | -0.0244 | -21 | 271  | 280  | QTLAFVEIEK                 |     |        |                   |  |  |  |  |  |  | Mascot |
|   | 1215.6005                                                                                                | 1215.5762 | -0.0243 | -20 | 175  | 184  | THYVINEDPK                 | 65  | 99.991 |                   |  |  |  |  |  |  | Mascot |
|   | 1215.6005                                                                                                | 1215.5762 | -0.0243 | -20 | 175  | 184  | THYVINEDPK                 |     |        |                   |  |  |  |  |  |  | Mascot |
|   | 1238.7831                                                                                                | 1238.7572 | -0.0259 | -21 | 146  | 156  | GILNILQLNLK                |     |        |                   |  |  |  |  |  |  | Mascot |
|   | 1259.5797                                                                                                | 1259.5557 | -0.024  | -19 | 193  | 202  | SKDLSHCQER                 |     |        |                   |  |  |  |  |  |  | Mascot |
|   | 1466.894                                                                                                 | 1466.8621 | -0.0319 | -22 | 106  | 119  | LTSALAAQLQIPIK             |     |        |                   |  |  |  |  |  |  | Mascot |
|   | 1695.8999                                                                                                | 1695.8687 | -0.0312 | -18 | 130  | 145  | VFAPAGVSPTVMNLHR           |     |        |                   |  |  |  |  |  |  | Mascot |
|   | 1699.9377                                                                                                | 1699.9042 | -0.0335 | -20 | 45   | 60   | YEALLLGGLPQEGLAR           | 130 | 100    |                   |  |  |  |  |  |  | Mascot |
|   | 1699.9377                                                                                                | 1699.9042 | -0.0335 | -20 | 45   | 60   | YEALLLGGLPQEGLAR           |     |        |                   |  |  |  |  |  |  | Mascot |
|   | 1711.8948                                                                                                | 1711.8638 | -0.031  | -18 | 130  | 145  | VFAPAGVSPTVMNLHR           |     |        |                   |  |  |  |  |  |  | Mascot |
|   | 1711.8948                                                                                                | 1711.8638 | -0.031  | -18 | 130  | 145  | VFAPAGVSPTVMNLHR           | 17  | 0      | Oxidation (M)[12] |  |  |  |  |  |  | Mascot |
|   | 1796.8928                                                                                                | 1796.8574 | -0.0354 | -20 | 83   | 97   | LMDPLLYEYAGTWPK            |     |        |                   |  |  |  |  |  |  | Mascot |
|   | 1812.8877                                                                                                | 1812.853  | -0.0347 | -19 | 83   | 97   | LMDPLLYEYAGTWPK            | 83  | 100    | Oxidation (M)[2]  |  |  |  |  |  |  | Mascot |
|   | 1812.8877                                                                                                | 1812.853  | -0.0347 | -19 | 83   | 97   | LMDPLLYEYAGTWPK            |     |        | Oxidation (M)[2]  |  |  |  |  |  |  | Mascot |
|   | 2194.0469                                                                                                | 2194.0535 | 0.0066  | 3   | 1070 | 1090 | EILDTEAKNAPVSSSESS<br>SSR  |     |        |                   |  |  |  |  |  |  | Mascot |
|   | 2233.2009                                                                                                | 2233.0486 | -0.1523 | -68 | 604  | 625  | SLTRITAPDMAYVAGAAN<br>VAIK |     |        |                   |  |  |  |  |  |  | Mascot |
|   | 2299.2292                                                                                                | 2299.1428 | -0.0864 | -38 | 1050 | 1069 | QINIIDDDTPEGQAFLLKL<br>R   |     |        |                   |  |  |  |  |  |  | Mascot |
|   | 2305.1394                                                                                                | 2305.1248 | -0.0146 | -6  | 588  | 607  | TEPNMHVASFAYSHIKSL<br>TR   |     |        |                   |  |  |  |  |  |  | Mascot |
| 7 | novel protein similar to vitellogenin 1 (vg1) [Danio rerio] gi 94733733 149143.4 8.92 15 391 100 357 100 |           |         |     |      |      |                            |     |        |                   |  |  |  |  |  |  |        |

| Peptide Information |             |         |       |            |          |                |           |        |   |                        |      |             |
|---------------------|-------------|---------|-------|------------|----------|----------------|-----------|--------|---|------------------------|------|-------------|
| Calc. Mass          | Obsrv. Mass | ± da    | ± ppm | Start Seq. | End Seq. | Sequence       | Ion Score | C. I.  | % | Modification           | Rank | Result Type |
| 864.4461            | 864.4752    | 0.0291  | 34    | 91         | 98       | DSFVPATK       |           |        |   |                        |      | Mascot      |
| 1023.5105           | 1023.4912   | -0.0193 | -19   | 199        | 207      | DVGLAYTER      | 65        | 99.991 |   |                        |      | Mascot      |
| 1023.5105           | 1023.4912   | -0.0193 | -19   | 199        | 207      | DVGLAYTER      |           |        |   |                        |      | Mascot      |
| 1044.4528           | 1044.4315   | -0.0213 | -20   | 188        | 195      | DLSHCQER       |           |        |   | Carbamidomethyl (C)[5] |      | Mascot      |
| 1045.5465           | 1045.5414   | -0.0051 | -5    | 1350       | 1357     | DFLSWIHK       |           |        |   |                        |      | Mascot      |
| 1177.6462           | 1177.6218   | -0.0244 | -21   | 264        | 273      | QTLAFVEIEK     |           |        |   |                        |      | Mascot      |
| 1215.6005           | 1215.5762   | -0.0243 | -20   | 168        | 177      | THYVINEDPK     | 65        | 99.991 |   |                        |      | Mascot      |
| 1215.6005           | 1215.5762   | -0.0243 | -20   | 168        | 177      | THYVINEDPK     |           |        |   |                        |      | Mascot      |
| 1238.7831           | 1238.7572   | -0.0259 | -21   | 139        | 149      | GILNILQLNLK    |           |        |   |                        |      | Mascot      |
| 1259.5797           | 1259.5557   | -0.024  | -19   | 186        | 195      | SKDLSHCQER     |           |        |   | Carbamidomethyl (C)[7] |      | Mascot      |
| 1466.894            | 1466.8621   | -0.0319 | -22   | 99         | 112      | LTSALAAQLQIPIK |           |        |   |                        |      | Mascot      |

|   |                                  |           |         |     |              |      |                            |      |     |                   |     |     |     |  |  |        |
|---|----------------------------------|-----------|---------|-----|--------------|------|----------------------------|------|-----|-------------------|-----|-----|-----|--|--|--------|
|   | 1695.8999                        | 1695.8687 | -0.0312 | -18 | 123          | 138  | VFAPAGVSPTVMNLHR           |      |     |                   |     |     |     |  |  | Mascot |
|   | 1699.9377                        | 1699.9042 | -0.0335 | -20 | 38           | 53   | YEALLLGGLPQEGLAR           | 130  | 100 |                   |     |     |     |  |  | Mascot |
|   | 1699.9377                        | 1699.9042 | -0.0335 | -20 | 38           | 53   | YEALLLGGLPQEGLAR           |      |     |                   |     |     |     |  |  | Mascot |
|   | 1711.8948                        | 1711.8638 | -0.031  | -18 | 123          | 138  | VFAPAGVSPTVMNLHR           |      |     | Oxidation (M)[12] |     |     |     |  |  | Mascot |
|   | 1711.8948                        | 1711.8638 | -0.031  | -18 | 123          | 138  | VFAPAGVSPTVMNLHR           | 17   | 0   | Oxidation (M)[12] |     |     |     |  |  | Mascot |
|   | 1796.8928                        | 1796.8574 | -0.0354 | -20 | 76           | 90   | LMDPLLYEYAGTWPK            |      |     |                   |     |     |     |  |  | Mascot |
|   | 1812.8877                        | 1812.853  | -0.0347 | -19 | 76           | 90   | LMDPLLYEYAGTWPK            | 83   | 100 | Oxidation (M)[2]  |     |     |     |  |  | Mascot |
|   | 1812.8877                        | 1812.853  | -0.0347 | -19 | 76           | 90   | LMDPLLYEYAGTWPK            |      |     | Oxidation (M)[2]  |     |     |     |  |  | Mascot |
|   | 2233.2009                        | 2233.0486 | -0.1523 | -68 | 597          | 618  | SLTRITAPDMAYVAGAAN<br>VAIK |      |     |                   |     |     |     |  |  | Mascot |
|   | 2299.2292                        | 2299.1428 | -0.0864 | -38 | 1043         | 1062 | QINIIDDDTPEGQAFLLKL<br>R   |      |     |                   |     |     |     |  |  | Mascot |
|   | 2305.1394                        | 2305.1248 | -0.0146 | -6  | 581          | 600  | TEPNMHVASFAYSHIKSL<br>TR   |      |     | Oxidation (M)[5]  |     |     |     |  |  | Mascot |
| 8 | Zgc:136383 protein [Danio rerio] |           |         |     | gi 125857991 |      | 148644.2                   | 8.93 | 15  | 391               | 100 | 357 | 100 |  |  |        |

Peptide Information

| Calc. Mass | Obsrv. Mass | ± da    | ± ppm | Start Seq. | End Seq. | Sequence         | Ion Score | C. I.  | % Modification         | Rank | Result Type |
|------------|-------------|---------|-------|------------|----------|------------------|-----------|--------|------------------------|------|-------------|
| 864.4461   | 864.4752    | 0.0291  | 34    | 86         | 93       | DSFVPATK         |           |        |                        |      | Mascot      |
| 1023.5105  | 1023.4912   | -0.0193 | -19   | 194        | 202      | DVGLAYTER        | 65        | 99.991 |                        |      | Mascot      |
| 1023.5105  | 1023.4912   | -0.0193 | -19   | 194        | 202      | DVGLAYTER        |           |        |                        |      | Mascot      |
| 1044.4528  | 1044.4315   | -0.0213 | -20   | 183        | 190      | DLSHCQER         |           |        | Carbamidomethyl (C)[5] |      | Mascot      |
| 1045.5465  | 1045.5414   | -0.0051 | -5    | 1345       | 1352     | DFLSWIHK         |           |        |                        |      | Mascot      |
| 1177.6462  | 1177.6218   | -0.0244 | -21   | 259        | 268      | QTLAFVEIEK       |           |        |                        |      | Mascot      |
| 1215.6005  | 1215.5762   | -0.0243 | -20   | 163        | 172      | THYVINEDPK       | 65        | 99.991 |                        |      | Mascot      |
| 1215.6005  | 1215.5762   | -0.0243 | -20   | 163        | 172      | THYVINEDPK       |           |        |                        |      | Mascot      |
| 1238.7831  | 1238.7572   | -0.0259 | -21   | 134        | 144      | GILNILQLNLK      |           |        |                        |      | Mascot      |
| 1259.5797  | 1259.5557   | -0.024  | -19   | 181        | 190      | SKDLSHCQER       |           |        | Carbamidomethyl (C)[7] |      | Mascot      |
| 1466.894   | 1466.8621   | -0.0319 | -22   | 94         | 107      | LTSALAAQLQIPIK   |           |        |                        |      | Mascot      |
| 1695.8999  | 1695.8687   | -0.0312 | -18   | 118        | 133      | VFAPAGVSPTVMNLHR |           |        |                        |      | Mascot      |
| 1699.9377  | 1699.9042   | -0.0335 | -20   | 33         | 48       | YEALLLGGLPQEGLAR | 130       | 100    |                        |      | Mascot      |
| 1699.9377  | 1699.9042   | -0.0335 | -20   | 33         | 48       | YEALLLGGLPQEGLAR |           |        |                        |      | Mascot      |
| 1711.8948  | 1711.8638   | -0.031  | -18   | 118        | 133      | VFAPAGVSPTVMNLHR |           |        | Oxidation (M)[12]      |      | Mascot      |
| 1711.8948  | 1711.8638   | -0.031  | -18   | 118        | 133      | VFAPAGVSPTVMNLHR | 17        | 0      | Oxidation (M)[12]      |      | Mascot      |
| 1796.8928  | 1796.8574   | -0.0354 | -20   | 71         | 85       | LMDPLLYEYAGTWPK  |           |        |                        |      | Mascot      |
| 1812.8877  | 1812.853    | -0.0347 | -19   | 71         | 85       | LMDPLLYEYAGTWPK  | 83        | 100    | Oxidation (M)[2]       |      | Mascot      |
| 1812.8877  | 1812.853    | -0.0347 | -19   | 71         | 85       | LMDPLLYEYAGTWPK  |           |        | Oxidation (M)[2]       |      | Mascot      |
| 1856.9402  | 1856.9148   | -0.0254 | -14   | 576        | 591      | TEPNRHVASFAYSHIK |           |        |                        |      | Mascot      |

|    |                                                             |            |             |         |       |            |                        |                             |           |         |                        |     |     |      |             |
|----|-------------------------------------------------------------|------------|-------------|---------|-------|------------|------------------------|-----------------------------|-----------|---------|------------------------|-----|-----|------|-------------|
|    |                                                             | 2233.2009  | 2233.0486   | -0.1523 | -68   | 592        | 613                    | SLTRITAPDMAYVAGAAAN<br>VAIK |           |         |                        |     |     |      | Mascot      |
|    |                                                             | 2299.2292  | 2299.1428   | -0.0864 | -38   | 1038       | 1057                   | QINIIDDDTPEGQAFLKL<br>R     |           |         |                        |     |     |      | Mascot      |
| 9  | vitellogenin 1 [Danio rerio]                                |            |             |         |       |            | gij 21391474           | 21118.2                     | 9         | 8       | 349                    | 100 | 294 | 100  |             |
|    | Peptide Information                                         |            |             |         |       |            |                        |                             |           |         |                        |     |     |      |             |
|    |                                                             | Calc. Mass | Obsrv. Mass | ± da    | ± ppm | Start Seq. | End Sequence Seq.      |                             | Ion Score | C. I. % | Modification           |     |     | Rank | Result Type |
|    |                                                             | 864.4461   | 864.4752    | 0.0291  | 34    | 87         | 94 DSFVPATK            |                             |           |         |                        |     |     |      | Mascot      |
|    |                                                             | 1044.4528  | 1044.4315   | -0.0213 | -20   | 184        | 191 DLSHCQER           |                             |           |         | Carbamidomethyl (C)[5] |     |     |      | Mascot      |
|    |                                                             | 1215.6005  | 1215.5762   | -0.0243 | -20   | 164        | 173 THYVINEDPK         |                             | 65        | 99.991  |                        |     |     |      | Mascot      |
|    |                                                             | 1215.6005  | 1215.5762   | -0.0243 | -20   | 164        | 173 THYVINEDPK         |                             |           |         |                        |     |     |      | Mascot      |
|    |                                                             | 1238.7831  | 1238.7572   | -0.0259 | -21   | 135        | 145 GILNILQLNLK        |                             |           |         |                        |     |     |      | Mascot      |
|    |                                                             | 1259.5797  | 1259.5557   | -0.024  | -19   | 182        | 191 SKDLSHCQER         |                             |           |         | Carbamidomethyl (C)[7] |     |     |      | Mascot      |
|    |                                                             | 1695.8999  | 1695.8687   | -0.0312 | -18   | 119        | 134 VFAPAGVSPTVMNLHR   |                             |           |         |                        |     |     |      | Mascot      |
|    |                                                             | 1699.9377  | 1699.9042   | -0.0335 | -20   | 34         | 49 YEALLLGGLPQEGLAR    |                             | 130       | 100     |                        |     |     |      | Mascot      |
|    |                                                             | 1699.9377  | 1699.9042   | -0.0335 | -20   | 34         | 49 YEALLLGGLPQEGLAR    |                             |           |         |                        |     |     |      | Mascot      |
|    |                                                             | 1711.8948  | 1711.8638   | -0.031  | -18   | 119        | 134 VFAPAGVSPTVMNLHR   |                             |           |         | Oxidation (M)[12]      |     |     |      | Mascot      |
|    |                                                             | 1711.8948  | 1711.8638   | -0.031  | -18   | 119        | 134 VFAPAGVSPTVMNLHR   |                             | 17        | 0       | Oxidation (M)[12]      |     |     |      | Mascot      |
|    |                                                             | 1796.8928  | 1796.8574   | -0.0354 | -20   | 72         | 86 LMDPLLYEYAGTWPK     |                             |           |         |                        |     |     |      | Mascot      |
|    |                                                             | 1812.8877  | 1812.853    | -0.0347 | -19   | 72         | 86 LMDPLLYEYAGTWPK     |                             | 83        | 100     | Oxidation (M)[2]       |     |     |      | Mascot      |
|    |                                                             | 1812.8877  | 1812.853    | -0.0347 | -19   | 72         | 86 LMDPLLYEYAGTWPK     |                             |           |         | Oxidation (M)[2]       |     |     |      | Mascot      |
| 10 | novel protein similar to vitellogenin 1 (vg1) [Danio rerio] |            |             |         |       |            | gij 94732723           | 147084.2                    | 8.73      | 12      | 296                    | 100 | 276 | 100  |             |
|    | Peptide Information                                         |            |             |         |       |            |                        |                             |           |         |                        |     |     |      |             |
|    |                                                             | Calc. Mass | Obsrv. Mass | ± da    | ± ppm | Start Seq. | End Sequence Seq.      |                             | Ion Score | C. I. % | Modification           |     |     | Rank | Result Type |
|    |                                                             | 1044.4528  | 1044.4315   | -0.0213 | -20   | 184        | 191 DLSHCQER           |                             |           |         | Carbamidomethyl (C)[5] |     |     |      | Mascot      |
|    |                                                             | 1177.6133  | 1177.6218   | 0.0085  | 7     | 828        | 837 LESMTLDQLK         |                             |           |         |                        |     |     |      | Mascot      |
|    |                                                             | 1215.6005  | 1215.5762   | -0.0243 | -20   | 164        | 173 THYVINEDPK         |                             | 65        | 99.991  |                        |     |     |      | Mascot      |
|    |                                                             | 1215.6005  | 1215.5762   | -0.0243 | -20   | 164        | 173 THYVINEDPK         |                             |           |         |                        |     |     |      | Mascot      |
|    |                                                             | 1238.7831  | 1238.7572   | -0.0259 | -21   | 135        | 145 GILNILQLNLK        |                             |           |         |                        |     |     |      | Mascot      |
|    |                                                             | 1259.5797  | 1259.5557   | -0.024  | -19   | 182        | 191 SKDLSHCQER         |                             |           |         | Carbamidomethyl (C)[7] |     |     |      | Mascot      |
|    |                                                             | 1466.894   | 1466.8621   | -0.0319 | -22   | 95         | 108 LTSALAAQLIPIK      |                             |           |         |                        |     |     |      | Mascot      |
|    |                                                             | 1699.9047  | 1699.9042   | -0.0005 | 0     | 597        | 614 ITAPDMASVAGAANVAIK |                             |           |         |                        |     |     |      | Mascot      |
|    |                                                             | 1699.9377  | 1699.9042   | -0.0335 | -20   | 34         | 49 YEALLLGGLPQEGLAR    |                             | 130       | 100     |                        |     |     |      | Mascot      |
|    |                                                             | 1721.9043  | 1721.884    | -0.0203 | -12   | 119        | 134 VFAPAGVSPTVMNLYR   |                             |           |         |                        |     |     |      | Mascot      |
|    |                                                             | 1796.8928  | 1796.8574   | -0.0354 | -20   | 72         | 86 LMDPLLYEYAGTWPK     |                             |           |         |                        |     |     |      | Mascot      |



|    |                              |           |         |     |              |      |                                    |      |     |                  |        |     |     |
|----|------------------------------|-----------|---------|-----|--------------|------|------------------------------------|------|-----|------------------|--------|-----|-----|
|    | 1812.8877                    | 1812.853  | -0.0347 | -19 | 72           | 86   | LMDPLL YEYAGTWPK                   | 83   | 100 | Oxidation (M)[2] | Mascot |     |     |
|    | 1812.8877                    | 1812.853  | -0.0347 | -19 | 72           | 86   | LMDPLL YEYAGTWPK                   |      |     | Oxidation (M)[2] | Mascot |     |     |
|    | 2313.1873                    | 2313.137  | -0.0503 | -22 | 1160         | 1179 | DDQKLLGYQLAAYFDKP<br>TAR           |      |     |                  | Mascot |     |     |
|    | 3337.7539                    | 3337.7229 | -0.031  | -9  | 1164         | 1193 | LLGYQLAAYFDKPTARVQ<br>LIASSIAENDNR |      |     |                  | Mascot |     |     |
| 11 | vitellogenin 7 [Danio rerio] |           |         |     | gi 156713467 |      | 148739.2                           | 8.76 | 12  | 295              | 100    | 276 | 100 |

#### Peptide Information

| Calc. Mass | Obsrv. Mass | ± da    | ± ppm | Start Seq. | End Seq. | Sequence                           | Ion Score | C. I.  | % | Modification           | Rank | Result | Type |
|------------|-------------|---------|-------|------------|----------|------------------------------------|-----------|--------|---|------------------------|------|--------|------|
| 1044.4528  | 1044.4315   | -0.0213 | -20   | 184        | 191      | DLSHCQER                           |           |        |   | Carbamidomethyl (C)[5] |      | Mascot |      |
| 1177.6133  | 1177.6218   | 0.0085  | 7     | 828        | 837      | LESMTLDQLK                         |           |        |   |                        |      | Mascot |      |
| 1215.6005  | 1215.5762   | -0.0243 | -20   | 164        | 173      | THYVINEDPK                         | 65        | 99.991 |   |                        |      | Mascot |      |
| 1215.6005  | 1215.5762   | -0.0243 | -20   | 164        | 173      | THYVINEDPK                         |           |        |   |                        |      | Mascot |      |
| 1238.7831  | 1238.7572   | -0.0259 | -21   | 135        | 145      | GILNILQLNLK                        |           |        |   |                        |      | Mascot |      |
| 1259.5797  | 1259.5557   | -0.024  | -19   | 182        | 191      | SKDLSHCQER                         |           |        |   | Carbamidomethyl (C)[7] |      | Mascot |      |
| 1466.894   | 1466.8621   | -0.0319 | -22   | 95         | 108      | LTSALAAQLQIPIK                     |           |        |   |                        |      | Mascot |      |
| 1699.9047  | 1699.9042   | -0.0005 | 0     | 597        | 614      | ITAPDMASVAGAAANVAIK                |           |        |   |                        |      | Mascot |      |
| 1699.9377  | 1699.9042   | -0.0335 | -20   | 34         | 49       | YEALLLGGLPQEGLAR                   | 130       | 100    |   |                        |      | Mascot |      |
| 1721.9043  | 1721.884    | -0.0203 | -12   | 119        | 134      | VFAPAGVSPTVMNLYR                   |           |        |   |                        |      | Mascot |      |
| 1796.8928  | 1796.8574   | -0.0354 | -20   | 72         | 86       | LMDPLLYEYAGTWPK                    |           |        |   |                        |      | Mascot |      |
| 1812.8877  | 1812.853    | -0.0347 | -19   | 72         | 86       | LMDPLLYEYAGTWPK                    | 83        | 100    |   | Oxidation (M)[2]       |      | Mascot |      |
| 1812.8877  | 1812.853    | -0.0347 | -19   | 72         | 86       | LMDPLLYEYAGTWPK                    |           |        |   | Oxidation (M)[2]       |      | Mascot |      |
| 2313.1873  | 2313.137    | -0.0503 | -22   | 1175       | 1194     | DDQKLLGYQLAAYFDKP<br>TAR           |           |        |   |                        |      | Mascot |      |
| 3337.7539  | 3337.7229   | -0.031  | -9    | 1179       | 1208     | LLGYQLAAYFDKPTARVQ<br>LIASSIAENDNR |           |        |   |                        |      | Mascot |      |

|    |                            |  |  |  |             |  |         |      |   |     |     |     |     |
|----|----------------------------|--|--|--|-------------|--|---------|------|---|-----|-----|-----|-----|
| 12 | Vtg1 protein [Danio rerio] |  |  |  | gi 63100501 |  | 36409.1 | 9.23 | 3 | 228 | 100 | 220 | 100 |
|----|----------------------------|--|--|--|-------------|--|---------|------|---|-----|-----|-----|-----|

#### Peptide Information

| Calc. Mass | Obsrv. Mass | ± da    | ± ppm | Start Seq. | End Seq. | Sequence           | Ion Score | C. I.  | % | Modification                              | Rank | Result | Type |
|------------|-------------|---------|-------|------------|----------|--------------------|-----------|--------|---|-------------------------------------------|------|--------|------|
| 1215.6005  | 1215.5762   | -0.0243 | -20   | 71         | 80       | THYVINEDPK         | 65        | 99.991 |   |                                           |      | Mascot |      |
| 1215.6005  | 1215.5762   | -0.0243 | -20   | 71         | 80       | THYVINEDPK         |           |        |   |                                           |      | Mascot |      |
| 1796.9078  | 1796.8574   | -0.0504 | -28   | 239        | 253      | HILTAAYDTGFRFER    |           |        |   |                                           |      | Mascot |      |
| 1954.8745  | 1954.8373   | -0.0372 | -19   | 54         | 70       | TQNIYEMQEAGAQQGVCR |           |        |   | Carbamidomethyl (C)[16]                   |      | Mascot |      |
| 1954.8745  | 1954.8373   | -0.0372 | -19   | 54         | 70       | TQNIYEMQEAGAQQGVCR | 155       | 100    |   | Carbamidomethyl (C)[16]                   |      | Mascot |      |
| 1970.8695  | 1970.8354   | -0.0341 | -17   | 54         | 70       | TQNIYEMQEAGAQQGVCR | 60        | 99.972 |   | Carbamidomethyl (C)[16], Oxidation (M)[7] |      | Mascot |      |
| 1970.8695  | 1970.8354   | -0.0341 | -17   | 54         | 70       | TQNIYEMQEAGAQQGVCR |           |        |   | Carbamidomethyl (C)[16], Oxidation (M)[7] |      | Mascot |      |

13 Unknown (protein for MGC:174137) [Danio rerio] gi|152012733 17051.5 7.71 3 227 100 213 100

Peptide Information

| Calc. Mass | Obsrv. Mass | ± da    | ± ppm | Start Seq. | End Seq. | Sequence         | Ion Score | C. I. | % Modification    | Rank | Result | Type |
|------------|-------------|---------|-------|------------|----------|------------------|-----------|-------|-------------------|------|--------|------|
| 1599.8298  | 1599.7952   | -0.0346 | -22   | 58         | 71       | VLISATTENTYLMK   |           |       | Oxidation (M)[13] |      | Mascot |      |
| 1699.9377  | 1699.9042   | -0.0335 | -20   | 34         | 49       | YEALLLGGLPQEGLAR | 130       | 100   |                   |      | Mascot |      |
| 1699.9377  | 1699.9042   | -0.0335 | -20   | 34         | 49       | YEALLLGGLPQEGLAR |           |       |                   |      | Mascot |      |
| 1796.8928  | 1796.8574   | -0.0354 | -20   | 72         | 86       | LMDPLLYEYAGTWPK  |           |       |                   |      | Mascot |      |
| 1812.8877  | 1812.853    | -0.0347 | -19   | 72         | 86       | LMDPLLYEYAGTWPK  | 83        | 100   | Oxidation (M)[2]  |      | Mascot |      |
| 1812.8877  | 1812.853    | -0.0347 | -19   | 72         | 86       | LMDPLLYEYAGTWPK  |           |       | Oxidation (M)[2]  |      | Mascot |      |

14 vitellogenin 1 [Danio rerio] gi|21391472 127954.2 8.69 6 73 99.755 65 99.991

Peptide Information

| Calc. Mass | Obsrv. Mass | ± da    | ± ppm | Start Seq. | End Seq. | Sequence                 | Ion Score | C. I.  | % Modification           | Rank | Result | Type |
|------------|-------------|---------|-------|------------|----------|--------------------------|-----------|--------|--------------------------|------|--------|------|
| 925.3502   | 925.3301    | -0.0201 | -22   | 13         | 19       | CAECTER                  |           |        | Carbamidomethyl (C)[1,4] |      | Mascot |      |
| 1023.5105  | 1023.4912   | -0.0193 | -19   | 4          | 12       | DVGLAYTER                | 65        | 99.991 |                          |      | Mascot |      |
| 1023.5105  | 1023.4912   | -0.0193 | -19   | 4          | 12       | DVGLAYTER                |           |        |                          |      | Mascot |      |
| 1177.6462  | 1177.6218   | -0.0244 | -21   | 69         | 78       | QTLAFVEIEK               |           |        |                          |      | Mascot |      |
| 1699.9047  | 1699.9042   | -0.0005 | 0     | 406        | 423      | ITAPDMASVAGAAANVAIK      |           |        |                          |      | Mascot |      |
| 1699.9047  | 1699.9042   | -0.0005 | 0     | 406        | 423      | ITAPDMASVAGAAANVAIK      |           |        |                          |      | Mascot |      |
| 1796.9078  | 1796.8574   | -0.0504 | -28   | 1086       | 1100     | HILTAAYDTGFRFER          |           |        |                          |      | Mascot |      |
| 2299.2292  | 2299.1428   | -0.0864 | -38   | 848        | 867      | QINIIDDDTPEGQAFLLKL<br>R |           |        |                          |      | Mascot |      |

15 PREDICTED: hypothetical protein LOC798813 [Danio rerio] gi|189517093 61723.2 5.86 11 43 0

Peptide Information

| Calc. Mass | Obsrv. Mass | ± da    | ± ppm | Start Seq. | End Seq. | Sequence        | Ion Score | C. I. | % Modification         | Rank | Result | Type |
|------------|-------------|---------|-------|------------|----------|-----------------|-----------|-------|------------------------|------|--------|------|
| 801.4001   | 801.3394    | -0.0607 | -76   | 60         | 65       | FDHVQR          |           |       |                        |      | Mascot |      |
| 990.489    | 990.3634    | -0.1256 | -127  | 526        | 533      | SELEAWQK        |           |       |                        |      | Mascot |      |
| 1045.5571  | 1045.5414   | -0.0157 | -15   | 244        | 251      | IRMDQNIR        |           |       |                        |      | Mascot |      |
| 1259.6127  | 1259.5557   | -0.057  | -45   | 60         | 69       | FDHVQRSENK      |           |       |                        |      | Mascot |      |
| 1520.7261  | 1520.6945   | -0.0316 | -21   | 377        | 389      | ILDCLEVASSEER   |           |       | Carbamidomethyl (C)[4] |      | Mascot |      |
| 1599.8951  | 1599.7952   | -0.0999 | -62   | 96         | 110      | NLGAVLKDTLEGLEK |           |       |                        |      | Mascot |      |
| 1721.8275  | 1721.884    | 0.0565  | 33    | 35         | 47       | WTLQRETELENMR   |           |       | Oxidation (M)[12]      |      | Mascot |      |

|    |                                         |           |         |    |              |     |                         |      |   |    |   |                         |  |  |  |        |
|----|-----------------------------------------|-----------|---------|----|--------------|-----|-------------------------|------|---|----|---|-------------------------|--|--|--|--------|
|    | 1812.8698                               | 1812.853  | -0.0168 | -9 | 362          | 376 | NAQNIFQRYMEDVGK         |      |   |    |   |                         |  |  |  | Mascot |
|    | 1812.8698                               | 1812.853  | -0.0168 | -9 | 362          | 376 | NAQNIFQRYMEDVGK         |      |   |    |   |                         |  |  |  | Mascot |
|    | 2283.0996                               | 2283.1433 | 0.0437  | 19 | 274          | 292 | MEQFLTDLEESAVQLDR<br>MK |      |   |    |   |                         |  |  |  | Mascot |
|    | 2283.0996                               | 2283.1433 | 0.0437  | 19 | 274          | 292 | MEQFLTDLEESAVQLDR<br>MK |      |   |    |   |                         |  |  |  | Mascot |
|    | 2284.1543                               | 2284.1338 | -0.0205 | -9 | 526          | 544 | SELEAWQKIHDSLIGIWR      |      |   |    |   |                         |  |  |  | Mascot |
|    | 2299.0945                               | 2299.1428 | 0.0483  | 21 | 274          | 292 | MEQFLTDLEESAVQLDR<br>MK |      |   |    |   | Oxidation (M)[1]        |  |  |  | Mascot |
|    | 2305.1208                               | 2305.1248 | 0.004   | 2  | 203          | 221 | SFLWFEDVYSCKTGEPL<br>VK |      |   |    |   | Carbamidomethyl (C)[11] |  |  |  | Mascot |
| 16 | novel protein (zgc:73157) [Danio rerio] |           |         |    | gi 148725328 |     | 24797.4                 | 9.03 | 7 | 40 | 0 |                         |  |  |  |        |

#### Peptide Information

| Calc. Mass | Obsrv. Mass | ± da    | ± ppm | Start Seq. | End Seq. | Sequence                 | Ion Score | C. I. % | Modification                              | Rank | Result Type |
|------------|-------------|---------|-------|------------|----------|--------------------------|-----------|---------|-------------------------------------------|------|-------------|
| 842.4665   | 842.4925    | 0.026   | 31    | 120        | 126      | MLKSAHR                  |           |         |                                           |      | Mascot      |
| 864.4838   | 864.4752    | -0.0086 | -10   | 209        | 214      | YIRAWR                   |           |         |                                           |      | Mascot      |
| 955.3607   | 955.4689    | 0.1082  | 113   | 215        | 224      | GGTGDCKMGG               |           |         | Carbamidomethyl (C)[6], Oxidation (M)[8]  |      | Mascot      |
| 1084.5754  | 1084.5103   | -0.0651 | -60   | 1          | 10       | MLGGHVCVLR               |           |         |                                           |      | Mascot      |
| 1507.637   | 1507.7444   | 0.1074  | 71    | 13         | 26       | YTENGMASSASSFK           |           |         |                                           |      | Mascot      |
| 1695.8855  | 1695.8687   | -0.0168 | -10   | 110        | 122      | LFRPMLNMNRMLK            |           |         | Oxidation (M)[5,8]                        |      | Mascot      |
| 1711.8805  | 1711.8638   | -0.0167 | -10   | 110        | 122      | LFRPMLNMNRMLK            |           |         | Oxidation (M)[5,8,11]                     |      | Mascot      |
| 1711.8805  | 1711.8638   | -0.0167 | -10   | 110        | 122      | LFRPMLNMNRMLK            |           |         | Oxidation (M)[5,8,11]                     |      | Mascot      |
| 2297.0181  | 2297.1562   | 0.1381  | 60    | 123        | 142      | SAHRACLPSTFDCALME<br>CIK |           |         | Carbamidomethyl (C)[6], Oxidation (M)[16] |      | Mascot      |

17 CTAGE family, member 5 [Danio rerio] gi|41053471 77796.7 5.5 13 39 0

#### Peptide Information

| Calc. Mass | Obsrv. Mass | ± da    | ± ppm | Start Seq. | End Seq. | Sequence       | Ion Score | C. I. % | Modification                              | Rank | Result Type |
|------------|-------------|---------|-------|------------|----------|----------------|-----------|---------|-------------------------------------------|------|-------------|
| 850.4417   | 850.5236    | 0.0819  | 96    | 404        | 410      | LTDAQFR        |           |         |                                           |      | Mascot      |
| 990.485    | 990.3634    | -0.1216 | -123  | 244        | 251      | SLEEDKNR       |           |         |                                           |      | Mascot      |
| 1023.5442  | 1023.4912   | -0.053  | -52   | 396        | 403      | ENAHLRQR       |           |         |                                           |      | Mascot      |
| 1023.5442  | 1023.4912   | -0.053  | -52   | 396        | 403      | ENAHLRQR       |           |         |                                           |      | Mascot      |
| 1051.567   | 1051.6935   | 0.1265  | 120   | 15         | 23       | VLETFSEVK      |           |         |                                           |      | Mascot      |
| 1084.5608  | 1084.5103   | -0.0505 | -47   | 634        | 643      | GPLPPGMFPR     |           |         | Oxidation (M)[7]                          |      | Mascot      |
| 1466.7247  | 1466.8621   | 0.1374  | 94    | 376        | 388      | AHDNWLAAARAADR |           |         |                                           |      | Mascot      |
| 1507.8114  | 1507.7444   | -0.067  | -44   | 336        | 348      | KISLAAEELNTYR  |           |         |                                           |      | Mascot      |
| 1695.8547  | 1695.8687   | 0.014   | 8     | 264        | 277      | EDLHEGIKQLEEQQ |           |         |                                           |      | Mascot      |
| 1699.7335  | 1699.9042   | 0.1707  | 100   | 157        | 169      | LSELEEEEMKMCER |           |         | Carbamidomethyl (C)[11], Oxidation (M)[8] |      | Mascot      |

|    |                                                            |           |         |     |             |         |                         |   |                                           |        |
|----|------------------------------------------------------------|-----------|---------|-----|-------------|---------|-------------------------|---|-------------------------------------------|--------|
|    | 1699.7335                                                  | 1699.9042 | 0.1707  | 100 | 157         | 169     | LSELEEEEMKMCER          |   | Carbamidomethyl (C)[11], Oxidation (M)[8] | Mascot |
|    | 1711.6469                                                  | 1711.8638 | 0.2169  | 127 | 170         | 184     | SHAGMMEDCANKDDR         |   | Oxidation (M)[5,6]                        | Mascot |
|    | 1711.6469                                                  | 1711.8638 | 0.2169  | 127 | 170         | 184     | SHAGMMEDCANKDDR         |   | Oxidation (M)[5,6]                        | Mascot |
|    | 1812.6954                                                  | 1812.853  | 0.1576  | 87  | 166         | 181     | MCERSHAGMMEDCANK        |   |                                           | Mascot |
|    | 1812.6954                                                  | 1812.853  | 0.1576  | 87  | 166         | 181     | MCERSHAGMMEDCANK        |   |                                           | Mascot |
|    | 2233.0725                                                  | 2233.0486 | -0.0239 | -11 | 605         | 623     | DPHFPHRGPFGPPDYFP<br>PR |   |                                           | Mascot |
|    | 2283.136                                                   | 2283.1433 | 0.0073  | 3   | 294         | 311     | LQQKLQIMTEMYQENEL<br>K  |   | Oxidation (M)[8]                          | Mascot |
|    | 2283.136                                                   | 2283.1433 | 0.0073  | 3   | 294         | 311     | LQQKLQIMTEMYQENEL<br>K  |   | Oxidation (M)[8]                          | Mascot |
|    | 2299.1309                                                  | 2299.1428 | 0.0119  | 5   | 294         | 311     | LQQKLQIMTEMYQENEL<br>K  |   | Oxidation (M)[8,11]                       | Mascot |
| 18 | zinc finger CCHC domain-containing protein 9 [Danio rerio] |           |         |     | gi 38198649 | 28388.1 | 9.59                    | 9 | 39                                        | 0      |

#### Peptide Information

| Calc. Mass | Obsrv. Mass | ± da    | ± ppm | Start Seq. | End Seq. | Sequence                         | Ion Score | C. I. % | Modification                                  | Rank | Result Type |
|------------|-------------|---------|-------|------------|----------|----------------------------------|-----------|---------|-----------------------------------------------|------|-------------|
| 801.3559   | 801.3394    | -0.0165 | -21   | 185        | 191      | ACPDNPK                          |           |         | Carbamidomethyl (C)[2]                        |      | Mascot      |
| 1084.4662  | 1084.5103   | 0.0441  | 41    | 192        | 201      | GLYAAGGCCR                       |           |         | Carbamidomethyl (C)[8,9]                      |      | Mascot      |
| 1160.4645  | 1160.5831   | 0.1186  | 102   | 113        | 121      | SNMICFNCR                        |           |         | Carbamidomethyl (C)[5], Oxidation (M)[3]      |      | Mascot      |
| 1215.5431  | 1215.5762   | 0.0331  | 27    | 112        | 121      | KSNMICFNCR                       |           |         |                                               |      | Mascot      |
| 1215.5431  | 1215.5762   | 0.0331  | 27    | 112        | 121      | KSNMICFNCR                       |           |         |                                               |      | Mascot      |
| 1695.74    | 1695.8687   | 0.1287  | 76    | 185        | 201      | ACPDNPKGLYAAGGCCR                |           |         |                                               |      | Mascot      |
| 1721.9293  | 1721.884    | -0.0453 | -26   | 73         | 87       | QTGQTLQKHTPVDLR                  |           |         |                                               |      | Mascot      |
| 1838.8014  | 1838.8696   | 0.0682  | 37    | 58         | 72       | QHDNEDVNGFMEYLK                  |           |         |                                               |      | Mascot      |
| 2299.0845  | 2299.1428   | 0.0583  | 25    | 212        | 231      | DCPEHQNSTNSITLGRLS<br>NR         |           |         | Carbamidomethyl (C)[2]                        |      | Mascot      |
| 3338.3862  | 3338.7092   | 0.323   | 97    | 113        | 141      | SNMICFNCRKPGHGLAD<br>CPEANDEEMGR |           |         | Carbamidomethyl (C)[5,8], Oxidation (M)[3]    |      | Mascot      |
| 3354.3811  | 3354.7192   | 0.3381  | 101   | 113        | 141      | SNMICFNCRKPGHGLAD<br>CPEANDEEMGR |           |         | Carbamidomethyl (C)[5,8], Oxidation (M)[3,27] |      | Mascot      |

19 Sipa111 protein [Danio rerio] gi|190340108 188873.8 8.64 19 38 0

#### Peptide Information

| Calc. Mass | Obsrv. Mass | ± da    | ± ppm | Start Seq. | End Seq. | Sequence     | Ion Score | C. I. % | Modification     | Rank | Result Type |
|------------|-------------|---------|-------|------------|----------|--------------|-----------|---------|------------------|------|-------------|
| 801.3671   | 801.3394    | -0.0277 | -35   | 1000       | 1006     | GCSELHR      |           |         |                  |      | Mascot      |
| 856.5363   | 856.5086    | -0.0277 | -32   | 1703       | 1709     | LQAQIKR      |           |         |                  |      | Mascot      |
| 864.4495   | 864.4752    | 0.0257  | 30    | 557        | 563      | VTEQLMK      |           |         | Oxidation (M)[6] |      | Mascot      |
| 1055.5956  | 1055.5295   | -0.0661 | -63   | 1553       | 1562     | SPTTRGAPLR   |           |         |                  |      | Mascot      |
| 1177.592   | 1177.6218   | 0.0298  | 25    | 1499       | 1510     | LSSSGPSSSGRR |           |         |                  |      | Mascot      |

|           |           |         |      |      |      |                          |        |
|-----------|-----------|---------|------|------|------|--------------------------|--------|
| 1215.6997 | 1215.5762 | -0.1235 | -102 | 794  | 803  | FPFISLAHKR               | Mascot |
| 1215.6997 | 1215.5762 | -0.1235 | -102 | 794  | 803  | FPFISLAHKR               | Mascot |
| 1238.6376 | 1238.7572 | 0.1196  | 97   | 782  | 793  | HVTSTPIDPSGK             | Mascot |
| 1397.6267 | 1397.575  | -0.0517 | -37  | 1635 | 1646 | GFMFSSQDVSHR             | Mascot |
| 1520.7354 | 1520.6945 | -0.0409 | -27  | 1310 | 1323 | APSPWHSPDGGRR            | Mascot |
| 1599.8965 | 1599.7952 | -0.1013 | -63  | 986  | 999  | VVIIPPHEDATPRR           | Mascot |
| 1699.8134 | 1699.9042 | 0.0908  | 53   | 1179 | 1194 | VEDSSDRPPSDAPVTK         | Mascot |
| 1699.8134 | 1699.9042 | 0.0908  | 53   | 1179 | 1194 | VEDSSDRPPSDAPVTK         | Mascot |
| 1721.8817 | 1721.884  | 0.0023  | 1    | 1429 | 1444 | KPGSTINSVDFGDTRK         | Mascot |
| 1812.8268 | 1812.853  | 0.0262  | 14   | 1632 | 1646 | MQRGFMFSSQDVSHR          | Mascot |
| 1812.8915 | 1812.853  | -0.0385 | -21  | 441  | 455  | SNILEHVDLGAYYYR          | Mascot |
| 1856.7604 | 1856.9148 | 0.1544  | 83   | 1356 | 1372 | DGSTYSLSDMASYSSNR        | Mascot |
| 2225.0364 | 2225.0825 | 0.0461  | 21   | 1572 | 1591 | MHGDLSASDTSLADLHD<br>RQR | Mascot |
| 2225.0364 | 2225.0825 | 0.0461  | 21   | 1572 | 1591 | MHGDLSASDTSLADLHD<br>RQR | Mascot |
| 2233.1709 | 2233.0486 | -0.1223 | -55  | 1666 | 1687 | LSPSEGPSSYGKVSQLEALVK    | Mascot |
| 2255.0647 | 2255.0283 | -0.0364 | -16  | 1037 | 1058 | TSSSPQQSLTASPQSHSGTPNR   | Mascot |
| 2300.0725 | 2300.136  | 0.0635  | 28   | 641  | 659  | DYEIMFHVSTMLPYTPNN<br>K  | Mascot |

Oxidation (M)[10]

20    PREDICTED: oocyte zinc finger protein XICOF6-like [Danio rerio]    gi|292613478    35303.1    8.36    10    37    0

Peptide Information

| Calc. Mass | Obsrv. Mass | ± da    | ± ppm | Start Seq. | End Sequence Seq. | Ion Score                           | C. I. % | Modification               | Rank | Result Type |
|------------|-------------|---------|-------|------------|-------------------|-------------------------------------|---------|----------------------------|------|-------------|
| 870.4064   | 870.5206    | 0.1142  | 131   | 284        | 290               | DNLESHR                             |         |                            |      | Mascot      |
| 955.4955   | 955.4689    | -0.0266 | -28   | 116        | 123               | SNLEVHTR                            |         |                            |      | Mascot      |
| 1023.5139  | 1023.4912   | -0.0227 | -22   | 79         | 87                | ECGKSLTTK                           |         | Carbamidomethyl (C)[2]     |      | Mascot      |
| 1023.5139  | 1023.4912   | -0.0227 | -22   | 79         | 87                | ECGKSLTTK                           |         | Carbamidomethyl (C)[2]     |      | Mascot      |
| 1044.533   | 1044.4315   | -0.1015 | -97   | 144        | 151               | MLLEVHMR                            |         | Oxidation (M)[1]           |      | Mascot      |
| 1733.8098  | 1733.8379   | 0.0281  | 16    | 96         | 110               | IHTGEKPFTCQQCGK                     |         | Carbamidomethyl (C)[10]    |      | Mascot      |
| 1796.8319  | 1796.8574   | 0.0255  | 14    | 157        | 171               | KPYACQHCNGSNFTRK                    |         | Carbamidomethyl (C)[5]     |      | Mascot      |
| 2193.999   | 2194.0535   | 0.0545  | 25    | 124        | 142               | IHTGEKPFICPQCNGCFS<br>R             |         | Carbamidomethyl (C)[10]    |      | Mascot      |
| 2238.9768  | 2239.0947   | 0.1179  | 53    | 208        | 226               | NHTGEKPFTCQQCGNGF<br>TR             |         | Carbamidomethyl (C)[10,13] |      | Mascot      |
| 2304.9893  | 2305.1248   | 0.1355  | 59    | 61         | 82                | TSENSAQQTGPVSCFTCKECKG              |         |                            |      | Mascot      |
| 3337.531   | 3337.7229   | 0.1919  | 57    | 48         | 78                | DLDEEGHLISGVKTSENS<br>AQQTGPVSCFTCK |         | Carbamidomethyl (C)[27]    |      | Mascot      |

21    suppressor of cytokine signaling 2 [Danio rerio]    gi|167621492    22312.3    8.39    6    36    0

| Peptide Information |                                          |         |       |              |          |                                  |           |       |                         |                  |
|---------------------|------------------------------------------|---------|-------|--------------|----------|----------------------------------|-----------|-------|-------------------------|------------------|
| Calc. Mass          | Obsrv. Mass                              | ± da    | ± ppm | Start Seq.   | End Seq. | Sequence                         | Ion Score | C. I. | % Modification          | Rank Result Type |
| 1507.7314           | 1507.7444                                | 0.013   | 9     | 186          | 197      | LKDYLTDTYTNV                     |           |       |                         | Mascot           |
| 1721.8049           | 1721.884                                 | 0.0791  | 46    | 17           | 31       | RSQSETQVADTEQSR                  |           |       |                         | Mascot           |
| 2225.0461           | 2225.0825                                | 0.0364  | 16    | 18           | 37       | SQSETQVADTEQSRIATA MR            |           |       | Oxidation (M)[19]       | Mascot           |
| 2225.0461           | 2225.0825                                | 0.0364  | 16    | 18           | 37       | SQSETQVADTEQSRIATA MR            |           |       | Oxidation (M)[19]       | Mascot           |
| 2297.24             | 2297.1562                                | -0.0838 | -36   | 112          | 130      | LKQFDSVVHLVEHYVQLS R             |           |       |                         | Mascot           |
| 2532.2664           | 2532.3743                                | 0.1079  | 43    | 114          | 134      | QFDSVVHLVEHYVQLSR TSCK           |           |       | Carbamidomethyl (C)[20] | Mascot           |
| 3337.7573           | 3337.7229                                | -0.0344 | -10   | 137          | 167      | TNQIAPSNGTVQLLLTTP VYTATPSLQHLCR |           |       |                         | Mascot           |
| 22                  | plexin domain containing 1 [Danio rerio] |         |       | gi 226000885 |          | 52033.5                          | 5.83      | 9     | 36                      | 0                |

| Peptide Information |                                                       |         |       |              |          |                      |           |       |                              |                  |
|---------------------|-------------------------------------------------------|---------|-------|--------------|----------|----------------------|-----------|-------|------------------------------|------------------|
| Calc. Mass          | Obsrv. Mass                                           | ± da    | ± ppm | Start Seq.   | End Seq. | Sequence             | Ion Score | C. I. | % Modification               | Rank Result Type |
| 1023.4337           | 1023.4912                                             | 0.0575  | 56    | 35           | 44       | TDGGSSDTQR           |           |       |                              | Mascot           |
| 1023.4337           | 1023.4912                                             | 0.0575  | 56    | 35           | 44       | TDGGSSDTQR           |           |       |                              | Mascot           |
| 1055.552            | 1055.5295                                             | -0.0225 | -21   | 215          | 223      | NGTIVFNYK            |           |       |                              | Mascot           |
| 1084.484            | 1084.5103                                             | 0.0263  | 24    | 318          | 326      | CSDGIDRYR            |           |       |                              | Mascot           |
| 1699.7963           | 1699.9042                                             | 0.1079  | 63    | 181          | 194      | YLDNGDTFVVQWWDK      |           |       |                              | Mascot           |
| 1699.7963           | 1699.9042                                             | 0.1079  | 63    | 181          | 194      | YLDNGDTFVVQWWDK      |           |       |                              | Mascot           |
| 1796.9119           | 1796.8574                                             | -0.0545 | -30   | 122          | 136      | VALTFDFPFYGHQVR      |           |       |                              | Mascot           |
| 1838.7399           | 1838.8696                                             | 0.1297  | 71    | 342          | 358      | CDDYAHGGPESSNSPFR    |           |       |                              | Mascot           |
| 1954.9657           | 1954.8373                                             | -0.1284 | -66   | 181          | 196      | YLDNGDTFVVQWDKVR     |           |       |                              | Mascot           |
| 1954.9657           | 1954.8373                                             | -0.1284 | -66   | 181          | 196      | YLDNGDTFVVQWDKVR     |           |       |                              | Mascot           |
| 2239.1406           | 2239.0947                                             | -0.0459 | -20   | 118          | 136      | QASRVALTDFPFYGHQ VR  |           |       |                              | Mascot           |
| 2283.0063           | 2283.1433                                             | 0.137   | 60    | 299          | 317      | QCLQSNITSGCGWCNTL QR |           |       | Carbamidomethyl (C)[2,11,14] | Mascot           |
| 2283.0063           | 2283.1433                                             | 0.137   | 60    | 299          | 317      | QCLQSNITSGCGWCNTL QR |           |       | Carbamidomethyl (C)[2,11,14] | Mascot           |
| 23                  | PREDICTED: zinc finger protein 665-like [Danio rerio] |         |       | gi 326673959 |          | 47843                | 9.13      | 12    | 35                           | 0                |

| Peptide Information |             |         |       |            |          |          |           |       |                  |                  |
|---------------------|-------------|---------|-------|------------|----------|----------|-----------|-------|------------------|------------------|
| Calc. Mass          | Obsrv. Mass | ± da    | ± ppm | Start Seq. | End Seq. | Sequence | Ion Score | C. I. | % Modification   | Rank Result Type |
| 1044.5143           | 1044.4315   | -0.0828 | -79   | 216        | 223      | ENLKEHMK |           |       | Oxidation (M)[7] | Mascot           |
| 1062.5149           | 1062.6714   | 0.1565  | 147   | 244        | 251      | QNFTIHMR |           |       | Oxidation (M)[7] | Mascot           |

|    |                                                                       |           |         |     |              |     |                     |      |   |    |   |  |                                              |  |  |  |        |
|----|-----------------------------------------------------------------------|-----------|---------|-----|--------------|-----|---------------------|------|---|----|---|--|----------------------------------------------|--|--|--|--------|
|    | 1177.6146                                                             | 1177.6218 | 0.0072  | 6   | 159          | 167 | KQYLTTHMR           |      |   |    |   |  |                                              |  |  |  | Mascot |
|    | 1238.5946                                                             | 1238.7572 | 0.1626  | 131 | 220          | 229 | EHMKIHNGEK          |      |   |    |   |  | Oxidation (M)[3]                             |  |  |  | Mascot |
|    | 1397.6543                                                             | 1397.575  | -0.0793 | -57 | 32           | 43  | HEDPEEQTVVSK        |      |   |    |   |  |                                              |  |  |  | Mascot |
|    | 1695.8424                                                             | 1695.8687 | 0.0263  | 16  | 239          | 251 | SFTWKQNFTIHMR       |      |   |    |   |  |                                              |  |  |  | Mascot |
|    | 1711.8373                                                             | 1711.8638 | 0.0265  | 15  | 239          | 251 | SFTWKQNFTIHMR       |      |   |    |   |  | Oxidation (M)[12]                            |  |  |  | Mascot |
|    | 1711.8373                                                             | 1711.8638 | 0.0265  | 15  | 239          | 251 | SFTWKQNFTIHMR       |      |   |    |   |  | Oxidation (M)[12]                            |  |  |  | Mascot |
|    | 1721.8098                                                             | 1721.884  | 0.0742  | 43  | 224          | 238 | IHNGEKLYTCQQCGK     |      |   |    |   |  |                                              |  |  |  | Mascot |
|    | 1796.88                                                               | 1796.8574 | -0.0226 | -13 | 6            | 20  | EESEDIKIEETFTVK     |      |   |    |   |  |                                              |  |  |  | Mascot |
|    | 1812.8268                                                             | 1812.853  | 0.0262  | 14  | 168          | 182 | IHTGEKPFNCQHCGK     |      |   |    |   |  | Carbamidomethyl (C)[10,13]                   |  |  |  | Mascot |
|    | 1812.8268                                                             | 1812.853  | 0.0262  | 14  | 168          | 182 | IHTGEKPFNCQHCGK     |      |   |    |   |  | Carbamidomethyl (C)[10,13]                   |  |  |  | Mascot |
|    | 2225.0754                                                             | 2225.0825 | 0.0071  | 3   | 32           | 50  | HEDPEEQTVVSKENLMPVK |      |   |    |   |  | Oxidation (M)[16]                            |  |  |  | Mascot |
|    | 2225.0754                                                             | 2225.0825 | 0.0071  | 3   | 32           | 50  | HEDPEEQTVVSKENLMPVK |      |   |    |   |  | Oxidation (M)[16]                            |  |  |  | Mascot |
|    | 2297.0596                                                             | 2297.1562 | 0.0966  | 42  | 332          | 350 | DHIRMHNGEKPHACLHGK  |      |   |    |   |  | Carbamidomethyl (C)[14,17]                   |  |  |  | Mascot |
|    | 2313.0547                                                             | 2313.137  | 0.0823  | 36  | 332          | 350 | DHIRMHNGEKPHACLHGK  |      |   |    |   |  | Carbamidomethyl (C)[14,17], Oxidation (M)[5] |  |  |  | Mascot |
|    | 2321.0549                                                             | 2321.124  | 0.0691  | 30  | 280          | 298 | IHTGEKPYNCQHCEKSFSR |      |   |    |   |  | Carbamidomethyl (C)[10]                      |  |  |  | Mascot |
| 24 | PREDICTED: corepressor interacting with RBPJ 1, partial [Danio rerio] |           |         |     | gi 326670450 |     | 18483               | 7.63 | 7 | 35 | 0 |  |                                              |  |  |  |        |

#### Peptide Information

| Calc. Mass | Obsrv. Mass | ± da    | ± ppm | Start Seq. | End Seq. | Sequence                 | Ion Score | C. I. | % Modification                            | Rank | Result | Type   |
|------------|-------------|---------|-------|------------|----------|--------------------------|-----------|-------|-------------------------------------------|------|--------|--------|
| 801.3889   | 801.3394    | -0.0495 | -62   | 13         | 19       | DFHPASK                  |           |       |                                           |      |        | Mascot |
| 1062.5612  | 1062.6714   | 0.1102  | 104   | 57         | 65       | LLMGDDRVK                |           |       | Oxidation (M)[3]                          |      |        | Mascot |
| 1160.6211  | 1160.5831   | -0.038  | -33   | 93         | 101      | FEWQKVAPR                |           |       |                                           |      |        | Mascot |
| 1796.8068  | 1796.8574   | 0.0506  | 28    | 125        | 138      | CIKCHNWGHVNTDR           |           |       | Carbamidomethyl (C)[1,4]                  |      |        | Mascot |
| 1838.9105  | 1838.8696   | -0.0409 | -22   | 64         | 80       | VKNGLNFMYEAPPGASK        |           |       | Oxidation (M)[8]                          |      |        | Mascot |
| 2098.9749  | 2098.9324   | -0.0425 | -20   | 66         | 84       | NGLNFMYEAPPGASKEE TK     |           |       | Oxidation (M)[6]                          |      |        | Mascot |
| 2283.0266  | 2283.1433   | 0.1167  | 51    | 139        | 161      | ECPLFGLSGINASSMAGD EAGTV |           |       | Carbamidomethyl (C)[2]                    |      |        | Mascot |
| 2283.0266  | 2283.1433   | 0.1167  | 51    | 139        | 161      | ECPLFGLSGINASSMAGD EAGTV |           |       | Carbamidomethyl (C)[2]                    |      |        | Mascot |
| 2299.0217  | 2299.1428   | 0.1211  | 53    | 139        | 161      | ECPLFGLSGINASSMAGD EAGTV |           |       | Carbamidomethyl (C)[2], Oxidation (M)[15] |      |        | Mascot |

25 transferrin [Danio rerio] gi|27464846 37480.1 6.28 9 34 0

#### Peptide Information

| Calc. Mass | Obsrv. Mass | ± da | ± ppm | Start Seq. | End Seq. | Sequence | Ion Score | C. I. | % Modification | Rank | Result | Type |
|------------|-------------|------|-------|------------|----------|----------|-----------|-------|----------------|------|--------|------|
|------------|-------------|------|-------|------------|----------|----------|-----------|-------|----------------|------|--------|------|

|    |                                                 |           |         |     |             |       |                                      |    |                                          |        |
|----|-------------------------------------------------|-----------|---------|-----|-------------|-------|--------------------------------------|----|------------------------------------------|--------|
|    | 955.4553                                        | 955.4689  | 0.0136  | 14  | 319         | 325   | YIDMIER                              |    | Oxidation (M)[4]                         | Mascot |
|    | 1044.5143                                       | 1044.4315 | -0.0828 | -79 | 24          | 32    | CDSLHDHVKK                           |    |                                          | Mascot |
|    | 1215.5786                                       | 1215.5762 | -0.0024 | -2  | 22          | 31    | NKCDSLHDHVK                          |    | Carbamidomethyl (C)[3]                   | Mascot |
|    | 1215.5786                                       | 1215.5762 | -0.0024 | -2  | 22          | 31    | NKCDSLHDHVK                          |    | Carbamidomethyl (C)[3]                   | Mascot |
|    | 1238.6012                                       | 1238.7572 | 0.156   | 126 | 283         | 293   | NNDLFTSKDGK                          |    |                                          | Mascot |
|    | 1520.8365                                       | 1520.6945 | -0.142  | -93 | 252         | 265   | CNLAQVPVHAVITR                       |    |                                          | Mascot |
|    | 1695.8622                                       | 1695.8687 | 0.0065  | 4   | 303         | 317   | CLQEIKGSVDDFLTK                      |    |                                          | Mascot |
|    | 2297.0676                                       | 2297.1562 | 0.0886  | 39  | 226         | 245   | DLKSEDFELICNPDPDTT<br>MK             |    |                                          | Mascot |
|    | 2300.1768                                       | 2300.136  | -0.0408 | -18 | 270         | 290   | SAVVSFLSDIQSKNNDLF<br>TSK            |    |                                          | Mascot |
|    | 2313.0625                                       | 2313.137  | 0.0745  | 32  | 226         | 245   | DLKSEDFELICNPDPDTT<br>MK             |    | Oxidation (M)[19]                        | Mascot |
|    | 3338.5085                                       | 3338.7092 | 0.2007  | 60  | 68          | 100   | CGLVPVMAEQSNSQSCS<br>SGSGGTASYAVAVVR |    | Carbamidomethyl (C)[1], Oxidation (M)[7] | Mascot |
| 26 | amyloid protein-binding protein 2 [Danio rerio] |           |         |     | gi 47086773 | 67035 | 6.38                                 | 10 | 34                                       | 0      |

#### Peptide Information

|  | Calc. Mass | Obsrv. Mass | ± da    | ± ppm | Start Seq. | End Seq. | Sequence                  | Ion Score | C. I. | % Modification          | Rank | Result Type |
|--|------------|-------------|---------|-------|------------|----------|---------------------------|-----------|-------|-------------------------|------|-------------|
|  | 955.4553   | 955.4689    | 0.0136  | 14    | 188        | 195      | LAQSYMDK                  |           |       |                         |      | Mascot      |
|  | 1397.7504  | 1397.575    | -0.1754 | -125  | 162        | 173      | AVECCVRLHVR               |           |       |                         |      | Mascot      |
|  | 1555.8148  | 1555.7198   | -0.095  | -61   | 447        | 459      | EAEEMHIKAIQIK             |           |       | Oxidation (M)[5]        |      | Mascot      |
|  | 1796.849   | 1796.8574   | 0.0084  | 5     | 504        | 518      | KLFGEYSGLEYDYR            |           |       |                         |      | Mascot      |
|  | 1856.8921  | 1856.9148   | 0.0227  | 12    | 53         | 68       | LCQLGAEFCELEVFAK          |           |       | Carbamidomethyl (C)[2]  |      | Mascot      |
|  | 2099.0537  | 2098.9324   | -0.1213 | -58   | 76         | 92       | RHLLHHCFQALMDHGVK         |           |       | Carbamidomethyl (C)[7]  |      | Mascot      |
|  | 2225.1458  | 2225.0825   | -0.0633 | -28   | 53         | 71       | LCQLGAEFCELEVFAKVL<br>R   |           |       | Carbamidomethyl (C)[2]  |      | Mascot      |
|  | 2225.1458  | 2225.0825   | -0.0633 | -28   | 53         | 71       | LCQLGAEFCELEVFAKVL<br>R   |           |       | Carbamidomethyl (C)[2]  |      | Mascot      |
|  | 2255.1753  | 2255.0283   | -0.147  | -65   | 199        | 219      | HGHQANKAALYGELCAL<br>LFAK |           |       |                         |      | Mascot      |
|  | 2283.1284  | 2283.1433   | 0.0149  | 7     | 383        | 401      | ALILEEIAIDCHNKETEER       |           |       | Carbamidomethyl (C)[11] |      | Mascot      |
|  | 2283.1284  | 2283.1433   | 0.0149  | 7     | 383        | 401      | ALILEEIAIDCHNKETEER       |           |       | Carbamidomethyl (C)[11] |      | Mascot      |
|  | 2532.2527  | 2532.3743   | 0.1216  | 48    | 142        | 161      | VFLSCLQLCTLHDEVLHW<br>YR  |           |       | Carbamidomethyl (C)[5]  |      | Mascot      |

27 PREDICTED: hypothetical protein LOC100536452 [Danio rerio] gi|326670699 51641.8 7.55 9 34 0

#### Peptide Information

|  | Calc. Mass | Obsrv. Mass | ± da    | ± ppm | Start Seq. | End Seq. | Sequence | Ion Score | C. I. | % Modification | Rank | Result Type |
|--|------------|-------------|---------|-------|------------|----------|----------|-----------|-------|----------------|------|-------------|
|  | 870.5406   | 870.5206    | -0.02   | -23   | 18         | 24       | ENLLLLR  |           |       |                |      | Mascot      |
|  | 925.4625   | 925.3301    | -0.1324 | -143  | 287        | 294      | SISFQSEK |           |       |                |      | Mascot      |



|    |                               |           |         |     |              |     |                           |      |   |    |   |                                              |  |  |  |  |        |
|----|-------------------------------|-----------|---------|-----|--------------|-----|---------------------------|------|---|----|---|----------------------------------------------|--|--|--|--|--------|
|    | 972.5585                      | 972.5613  | 0.0028  | 3   | 136          | 143 | TRPLKDSR                  |      |   |    |   |                                              |  |  |  |  | Mascot |
|    | 1215.5939                     | 1215.5762 | -0.0177 | -15 | 295          | 304 | LYPANHQMNK                |      |   |    |   |                                              |  |  |  |  | Mascot |
|    | 1215.6593                     | 1215.5762 | -0.0831 | -68 | 173          | 182 | NFTPTVRQPR                |      |   |    |   |                                              |  |  |  |  | Mascot |
|    | 1599.7584                     | 1599.7952 | 0.0368  | 23  | 189          | 202 | HSMPAFALTSHEQK            |      |   |    |   | Oxidation (M)[3]                             |  |  |  |  | Mascot |
|    | 2232.8765                     | 2233.0486 | 0.1721  | 77  | 144          | 162 | SMDSLMSLSDCDLDCPE<br>NK   |      |   |    |   | Carbamidomethyl (C)[11,15], Oxidation (M)[2] |  |  |  |  | Mascot |
|    | 2239.0408                     | 2239.0947 | 0.0539  | 24  | 103          | 123 | SNRGSVGSLHQMSDSG<br>YESLK |      |   |    |   |                                              |  |  |  |  | Mascot |
|    | 2255.0356                     | 2255.0283 | -0.0073 | -3  | 103          | 123 | SNRGSVGSLHQMSDSG<br>YESLK |      |   |    |   | Oxidation (M)[12]                            |  |  |  |  | Mascot |
|    | 2298.166                      | 2298.1514 | -0.0146 | -6  | 183          | 202 | SLTLQRHSMPAFALTSHE<br>QK  |      |   |    |   | Oxidation (M)[9]                             |  |  |  |  | Mascot |
| 28 | si:dkey-24h18.2 [Danio rerio] |           |         |     | gi 226423852 |     | 41261.2                   | 6.05 | 8 | 34 | 0 |                                              |  |  |  |  |        |

#### Peptide Information

| Calc. Mass | Obsrv. Mass | ± da    | ± ppm | Start Seq. | End Seq. | Sequence                | Ion Score | C. I. | % Modification               | Rank | Result Type |
|------------|-------------|---------|-------|------------|----------|-------------------------|-----------|-------|------------------------------|------|-------------|
| 1055.552   | 1055.5295   | -0.0225 | -21   | 116        | 124      | NGTIVFNYK               |           |       |                              |      | Mascot      |
| 1084.484   | 1084.5103   | 0.0263  | 24    | 219        | 227      | CSDGIDRYR               |           |       |                              |      | Mascot      |
| 1699.7963  | 1699.9042   | 0.1079  | 63    | 82         | 95       | YLDNGDTFVVQWDK          |           |       |                              |      | Mascot      |
| 1699.7963  | 1699.9042   | 0.1079  | 63    | 82         | 95       | YLDNGDTFVVQWDK          |           |       |                              |      | Mascot      |
| 1796.9119  | 1796.8574   | -0.0545 | -30   | 23         | 37       | VALTFDFPFYGHQVR         |           |       |                              |      | Mascot      |
| 1838.7399  | 1838.8696   | 0.1297  | 71    | 243        | 259      | CDDYAHGGPESSNSPFR       |           |       |                              |      | Mascot      |
| 1954.9657  | 1954.8373   | -0.1284 | -66   | 82         | 97       | YLDNGDTFVVQWDKVR        |           |       |                              |      | Mascot      |
| 1954.9657  | 1954.8373   | -0.1284 | -66   | 82         | 97       | YLDNGDTFVVQWDKVR        |           |       |                              |      | Mascot      |
| 2239.1406  | 2239.0947   | -0.0459 | -20   | 19         | 37       | QASRVALTFDFPFYGHQ<br>VR |           |       |                              |      | Mascot      |
| 2283.0063  | 2283.1433   | 0.137   | 60    | 200        | 218      | QCLQSNITSGCGWCNTL<br>QR |           |       | Carbamidomethyl (C)[2,11,14] |      | Mascot      |
| 2283.0063  | 2283.1433   | 0.137   | 60    | 200        | 218      | QCLQSNITSGCGWCNTL<br>QR |           |       | Carbamidomethyl (C)[2,11,14] |      | Mascot      |

29 signal-induced proliferation-associated 1-like protein 1 [Danio rerio] gi|113462023 187789.3 8.87 17 34 0

#### Peptide Information

| Calc. Mass | Obsrv. Mass | ± da    | ± ppm | Start Seq. | End Seq. | Sequence     | Ion Score | C. I. | % Modification   | Rank | Result Type |
|------------|-------------|---------|-------|------------|----------|--------------|-----------|-------|------------------|------|-------------|
| 801.3671   | 801.3394    | -0.0277 | -35   | 999        | 1005     | GCSELHR      |           |       |                  |      | Mascot      |
| 856.5363   | 856.5086    | -0.0277 | -32   | 1676       | 1682     | LQAQIKR      |           |       |                  |      | Mascot      |
| 864.4495   | 864.4752    | 0.0257  | 30    | 556        | 562      | VTEQLMK      |           |       | Oxidation (M)[6] |      | Mascot      |
| 1055.5956  | 1055.5295   | -0.0661 | -63   | 1526       | 1535     | SPTTRGAPLR   |           |       |                  |      | Mascot      |
| 1177.592   | 1177.6218   | 0.0298  | 25    | 1472       | 1483     | LSSSGPSSSGRR |           |       |                  |      | Mascot      |
| 1215.6997  | 1215.5762   | -0.1235 | -102  | 793        | 802      | FPFISLAHKR   |           |       |                  |      | Mascot      |

|    |                                                            |           |         |      |      |              |                        |      |    |    |   |  |  |  |  |  |        |
|----|------------------------------------------------------------|-----------|---------|------|------|--------------|------------------------|------|----|----|---|--|--|--|--|--|--------|
|    | 1215.6997                                                  | 1215.5762 | -0.1235 | -102 | 793  | 802          | FPFISLAHKR             |      |    |    |   |  |  |  |  |  | Mascot |
|    | 1238.6376                                                  | 1238.7572 | 0.1196  | 97   | 781  | 792          | HVTSTPIDPSGK           |      |    |    |   |  |  |  |  |  | Mascot |
|    | 1397.6267                                                  | 1397.575  | -0.0517 | -37  | 1608 | 1619         | GFMFSSQDVSHR           |      |    |    |   |  |  |  |  |  | Mascot |
|    | 1599.8965                                                  | 1599.7952 | -0.1013 | -63  | 985  | 998          | VVIIPPHEDATPRR         |      |    |    |   |  |  |  |  |  | Mascot |
|    | 1721.8817                                                  | 1721.884  | 0.0023  | 1    | 1402 | 1417         | KPGSTINSVDFGDTRK       |      |    |    |   |  |  |  |  |  | Mascot |
|    | 1812.8268                                                  | 1812.853  | 0.0262  | 14   | 1605 | 1619         | MQRGFMFSSQDVSHR        |      |    |    |   |  |  |  |  |  | Mascot |
|    | 1812.8915                                                  | 1812.853  | -0.0385 | -21  | 440  | 454          | SNILEHVDLGAYYYR        |      |    |    |   |  |  |  |  |  | Mascot |
|    | 1970.9965                                                  | 1970.8354 | -0.1611 | -82  | 1141 | 1158         | QKSMPEGDLHTTGTLRS      | 3    |    | 0  |   |  |  |  |  |  | Mascot |
|    | 1970.9965                                                  | 1970.8354 | -0.1611 | -82  | 1141 | 1158         | QKSMPEGDLHTTGTLRS      |      |    |    |   |  |  |  |  |  | Mascot |
|    | 2225.0364                                                  | 2225.0825 | 0.0461  | 21   | 1545 | 1564         | MHGDLSASDTSLADLHDRQR   |      |    |    |   |  |  |  |  |  | Mascot |
|    | 2225.0364                                                  | 2225.0825 | 0.0461  | 21   | 1545 | 1564         | MHGDLSASDTSLADLHDRQR   |      |    |    |   |  |  |  |  |  | Mascot |
|    | 2233.1709                                                  | 2233.0486 | -0.1223 | -55  | 1639 | 1660         | LSPSEGPPSSYGKVSQLEALVK |      |    |    |   |  |  |  |  |  | Mascot |
|    | 2255.0647                                                  | 2255.0283 | -0.0364 | -16  | 1036 | 1057         | TSSSPQQSLTASPQSHSGTPNR |      |    |    |   |  |  |  |  |  | Mascot |
|    | 2300.0725                                                  | 2300.136  | 0.0635  | 28   | 640  | 658          | DYEIMFHVSTMLPYTPNNK    |      |    |    |   |  |  |  |  |  | Mascot |
| 30 | PREDICTED: hypothetical protein LOC100004944 [Danio rerio] |           |         |      |      | gi 125854141 | 69244.2                | 6.33 | 10 | 33 | 0 |  |  |  |  |  |        |

Peptide Information

|    | Calc. Mass                                                     | Obsrv. Mass | ± da    | ± ppm | Start Seq. | End Seq.     | Sequence                 | Ion Score | C. I. | % Modification         | Rank | Result Type |
|----|----------------------------------------------------------------|-------------|---------|-------|------------|--------------|--------------------------|-----------|-------|------------------------|------|-------------|
|    | 972.5472                                                       | 972.5613    | 0.0141  | 14    | 91         | 98           | NKNDLIQK                 |           |       |                        |      | Mascot      |
|    | 1023.533                                                       | 1023.4912   | -0.0418 | -41   | 133        | 140          | RDENKPHK                 |           |       |                        |      | Mascot      |
|    | 1023.533                                                       | 1023.4912   | -0.0418 | -41   | 133        | 140          | RDENKPHK                 |           |       |                        |      | Mascot      |
|    | 1045.452                                                       | 1045.5414   | 0.0894  | 86    | 472        | 479          | CHYSDHVK                 |           |       | Carbamidomethyl (C)[1] |      | Mascot      |
|    | 1259.6525                                                      | 1259.5557   | -0.0968 | -77   | 299        | 309          | EAQIKCALNGR              |           |       | Carbamidomethyl (C)[6] |      | Mascot      |
|    | 1599.8588                                                      | 1599.7952   | -0.0636 | -40   | 376        | 389          | ISDLQLVGQEQK             |           |       |                        |      | Mascot      |
|    | 1796.9211                                                      | 1796.8574   | -0.0637 | -35   | 234        | 249          | IDDLTHEINAVCLVNK         |           |       |                        |      | Mascot      |
|    | 1838.9503                                                      | 1838.8696   | -0.0807 | -44   | 153        | 168          | TTLVNMVNMYMLGVER         |           |       |                        |      | Mascot      |
|    | 2211.1147                                                      | 2211.0671   | -0.0476 | -22   | 153        | 171          | TTLVNMVNMYMLGVERE<br>DK  |           |       |                        |      | Mascot      |
|    | 2239.2485                                                      | 2239.0947   | -0.1538 | -69   | 278        | 298          | IVLLFTHSDFPPSNALIA<br>VK |           |       |                        |      | Mascot      |
|    | 2283.2595                                                      | 2283.1433   | -0.1162 | -51   | 544        | 563          | IALNTDSLNTLLHIDFLIEK     |           |       |                        |      | Mascot      |
|    | 2283.2595                                                      | 2283.1433   | -0.1162 | -51   | 544        | 563          | IALNTDSLNTLLHIDFLIEK     |           |       |                        |      | Mascot      |
| 31 | PREDICTED: disco-interacting protein 2 homolog C [Danio rerio] |             |         |       |            | gi 189536803 | 170745                   | 7.39      | 16    | 33                     | 0    |             |

| Peptide Information |                                             |          |           |             |          |                                     |           |       |                                           |      |             |
|---------------------|---------------------------------------------|----------|-----------|-------------|----------|-------------------------------------|-----------|-------|-------------------------------------------|------|-------------|
| Calc. Mass          | Obsrv. Mass                                 | $\pm$ da | $\pm$ ppm | Start Seq.  | End Seq. | Sequence                            | Ion Score | C. I. | % Modification                            | Rank | Result Type |
| 856.457             | 856.5086                                    | 0.0516   | 60        | 1534        | 1539     | QRMHLR                              |           |       | Oxidation (M)[3]                          |      | Mascot      |
| 882.4501            | 882.5478                                    | 0.0977   | 111       | 581         | 587      | VCQYKGK                             |           |       | Carbamidomethyl (C)[2]                    |      | Mascot      |
| 996.4852            | 996.5762                                    | 0.091    | 91        | 1014        | 1021     | IATMLMER                            |           |       | Oxidation (M)[4,6]                        |      | Mascot      |
| 996.4852            | 996.5762                                    | 0.091    | 91        | 1014        | 1021     | IATMLMER                            |           |       | Oxidation (M)[4,6]                        |      | Mascot      |
| 1045.5887           | 1045.5414                                   | -0.0473  | -45       | 1242        | 1251     | GLGLQTESLK                          |           |       |                                           |      | Mascot      |
| 1084.615            | 1084.5103                                   | -0.1047  | -97       | 572         | 580      | VNPLSWIQK                           |           |       |                                           |      | Mascot      |
| 1165.567            | 1165.7233                                   | 0.1563   | 134       | 1166        | 1174     | LQCELYPSR                           |           |       | Carbamidomethyl (C)[3]                    |      | Mascot      |
| 1555.7356           | 1555.7198                                   | -0.0158  | -10       | 1152        | 1165     | MSHTATSAFCRSIK                      |           |       | Oxidation (M)[1]                          |      | Mascot      |
| 1599.8271           | 1599.7952                                   | -0.0319  | -20       | 370         | 383      | LGTKQEPMVRPGDR                      |           |       | Oxidation (M)[8]                          |      | Mascot      |
| 1699.7012           | 1699.9042                                   | 0.203    | 119       | 1228        | 1241     | DTFCSYSVMELCTK                      |           |       | Carbamidomethyl (C)[4], Oxidation (M)[9]  |      | Mascot      |
| 1699.7012           | 1699.9042                                   | 0.203    | 119       | 1228        | 1241     | DTFCSYSVMELCTK                      |           |       | Carbamidomethyl (C)[4], Oxidation (M)[9]  |      | Mascot      |
| 1954.8707           | 1954.8373                                   | -0.0334  | -17       | 1226        | 1241     | VRDTFCSYSVMELCTK                    |           |       | Carbamidomethyl (C)[6], Oxidation (M)[11] |      | Mascot      |
| 1955.0378           | 1954.8373                                   | -0.2005  | -103      | 930         | 948      | QPEIGPASVMVGNLVSG<br>KR             |           |       | Oxidation (M)[10]                         |      | Mascot      |
| 2211.1074           | 2211.0671                                   | -0.0403  | -18       | 676         | 695      | GVLSMQGLSYGVIRVDS<br>EER            |           |       | Oxidation (M)[5]                          |      | Mascot      |
| 2283.092            | 2283.1433                                   | 0.0513   | 22        | 236         | 257      | YGNAELMETGDGVPVSS<br>RVSAK          |           |       | Oxidation (M)[7]                          |      | Mascot      |
| 2283.092            | 2283.1433                                   | 0.0513   | 22        | 236         | 257      | YGNAELMETGDGVPVSS<br>RVSAK          |           |       | Oxidation (M)[7]                          |      | Mascot      |
| 2313.2053           | 2313.137                                    | -0.0683  | -30       | 642         | 663      | GLRPEVICPCASSAEALT<br>VAIR          |           |       | Carbamidomethyl (C)[8]                    |      | Mascot      |
| 2532.2478           | 2532.3743                                   | 0.1265   | 50        | 753         | 774      | NTFEVFPMTISGAPISEYP<br>FIR          |           |       | Oxidation (M)[8]                          |      | Mascot      |
| 3338.7341           | 3338.7092                                   | -0.0249  | -7        | 1121        | 1151     | KPPQLYKPSNPDTLAYLD<br>FSVSTTGMLAGVK |           |       |                                           |      | Mascot      |
| 3354.729            | 3354.7192                                   | -0.0098  | -3        | 1121        | 1151     | KPPQLYKPSNPDTLAYLD<br>FSVSTTGMLAGVK |           |       | Oxidation (M)[26]                         |      | Mascot      |
| 32                  | immunoglobulin mu heavy chain [Danio rerio] |          |           | gi 51559382 |          | 24154.7                             | 8.14      | 6     | 33                                        | 0    |             |

| Peptide Information |             |          |           |            |          |                        |           |       |                                           |      |             |
|---------------------|-------------|----------|-----------|------------|----------|------------------------|-----------|-------|-------------------------------------------|------|-------------|
| Calc. Mass          | Obsrv. Mass | $\pm$ da | $\pm$ ppm | Start Seq. | End Seq. | Sequence               | Ion Score | C. I. | % Modification                            | Rank | Result Type |
| 801.4253            | 801.3394    | -0.0859  | -107      | 174        | 180      | WKDPAGK                |           |       |                                           |      | Mascot      |
| 864.4097            | 864.4752    | 0.0655   | 76        | 208        | 214      | SDWIDTK                |           |       |                                           |      | Mascot      |
| 1397.673            | 1397.575    | -0.098   | -70       | 16         | 27       | CQTFTQSEAVVK           |           |       | Carbamidomethyl (C)[1]                    |      | Mascot      |
| 1856.9471           | 1856.9148   | -0.0323  | -17       | 1          | 15       | MFHIFMILSILSCTK        |           |       | Carbamidomethyl (C)[13], Oxidation (M)[1] |      | Mascot      |
| 1954.9545           | 1954.8373   | -0.1172  | -60       | 176        | 193      | DPAGKDLSDFVQYPAFG<br>K |           |       |                                           |      | Mascot      |
| 1954.9545           | 1954.8373   | -0.1172  | -60       | 176        | 193      | DPAGKDLSDFVQYPAFG<br>K |           |       |                                           |      | Mascot      |
| 3337.6851           | 3337.7229   | 0.0378   | 11        | 59         | 87       | ALEWIAYISTQSSPIYYSQ    |           |       |                                           |      | Mascot      |

33 glutathione S-transferase, C-terminal domain containing gi|255003839 67751.6 6.97 10 33 0  
[Danio rerio]

Peptide Information

| Calc. Mass | Obsrv. Mass | ± da    | ± ppm | Start Seq. | End Seq. | Sequence                    | Ion Score | C. I. % | Modification           | Rank | Result Type |
|------------|-------------|---------|-------|------------|----------|-----------------------------|-----------|---------|------------------------|------|-------------|
| 870.493    | 870.5206    | 0.0276  | 32    | 76         | 83       | DELPGLVK                    |           |         |                        |      | Mascot      |
| 955.4479   | 955.4689    | 0.021   | 22    | 3          | 10       | QTDPECHK                    |           |         |                        |      | Mascot      |
| 990.4495   | 990.3634    | -0.0861 | -87   | 113        | 120      | ACQLMPDR                    |           |         | Carbamidomethyl (C)[2] |      | Mascot      |
| 996.522    | 996.5762    | 0.0542  | 54    | 186        | 193      | VHNDKIR                     |           |         |                        |      | Mascot      |
| 996.522    | 996.5762    | 0.0542  | 54    | 186        | 193      | VHNDKIR                     |           |         |                        |      | Mascot      |
| 1045.571   | 1045.5414   | -0.0296 | -28   | 446        | 454      | CQVILVENK                   |           |         |                        |      | Mascot      |
| 1177.5817  | 1177.6218   | 0.0401  | 34    | 571        | 580      | RCMGLVLDLR                  |           |         |                        |      | Mascot      |
| 1856.9033  | 1856.9148   | 0.0115  | 6     | 538        | 552      | FAETLSYKEHMILCR             |           |         | Oxidation (M)[11]      |      | Mascot      |
| 2305.2563  | 2305.1248   | -0.1315 | -57   | 284        | 302      | THSPSTLSHLPLLLRWYQ<br>R     |           |         |                        |      | Mascot      |
| 2313.1479  | 2313.137    | -0.0109 | -5    | 546        | 565      | EHMILCRFADQTAVSLPP<br>ER    |           |         |                        |      | Mascot      |
| 2532.2559  | 2532.3743   | 0.1184  | 47    | 507        | 529      | CLQARAGFVISPCCYGFI<br>QNTLK |           |         |                        |      | Mascot      |

34 TAF6 RNA polymerase II, TATA box binding protein (TBP)-associated factor [Danio rerio] gi|122891283 63624.9 8.9 10 33 0

Peptide Information

| Calc. Mass | Obsrv. Mass | ± da    | ± ppm | Start Seq. | End Seq. | Sequence                 | Ion Score | C. I. % | Modification            | Rank | Result Type |
|------------|-------------|---------|-------|------------|----------|--------------------------|-----------|---------|-------------------------|------|-------------|
| 850.4385   | 850.5236    | 0.0851  | 100   | 146        | 151      | MRMKPR                   |           |         | Oxidation (M)[1,3]      |      | Mascot      |
| 870.5294   | 870.5206    | -0.0088 | -10   | 75         | 82       | VPLDVSLK                 |           |         |                         |      | Mascot      |
| 1160.627   | 1160.5831   | -0.0439 | -38   | 132        | 143      | GQSAVSAEVKKG             |           |         |                         |      | Mascot      |
| 1165.6464  | 1165.7233   | 0.0769  | 66    | 298        | 307      | TFTKALLDEK               |           |         |                         |      | Mascot      |
| 1397.6664  | 1397.575    | -0.0914 | -65   | 271        | 282      | DFAARLMAQSCK             |           |         | Carbamidomethyl (C)[11] |      | Mascot      |
| 1599.7319  | 1599.7952   | 0.0633  | 40    | 572        | 586      | LECSESPATSTQLPH          |           |         |                         |      | Mascot      |
| 1711.8973  | 1711.8638   | -0.0335 | -20   | 283        | 297      | TFSTTTNNIQSRIK           |           |         |                         |      | Mascot      |
| 1711.8973  | 1711.8638   | -0.0335 | -20   | 283        | 297      | TFSTTTNNIQSRIK           |           |         |                         |      | Mascot      |
| 2247.2715  | 2247.0559   | -0.2156 | -96   | 209        | 227      | VNVVQNNLALLIYLMRMV<br>K  |           |         | Oxidation (M)[15]       |      | Mascot      |
| 2297.207   | 2297.1562   | -0.0508 | -22   | 370        | 389      | HCASVVAKTRPVPDLVE<br>QYK |           |         | Carbamidomethyl (C)[2]  |      | Mascot      |
| 2313.1914  | 2313.137    | -0.0544 | -24   | 27         | 45       | LKNVEPLYGFQSEEFIPF<br>R  |           |         |                         |      | Mascot      |

35 PREDICTED: hypothetical protein LOC572219 [Danio rerio] gi|292613753 117863.8 9.16 14 32 0

### Peptide Information

| Calc. Mass | Obsrv. Mass | ± da    | ± ppm | Start Seq. | End Seq. | Sequence                 | Ion Score | C. I. % | Modification            | Rank | Result Type |
|------------|-------------|---------|-------|------------|----------|--------------------------|-----------|---------|-------------------------|------|-------------|
| 850.4417   | 850.5236    | 0.0819  | 96    | 90         | 96       | DVVFQSR                  |           |         |                         |      | Mascot      |
| 864.3879   | 864.4752    | 0.0873  | 101   | 600        | 608      | GCTSGSPAK                |           |         | Carbamidomethyl (C)[2]  |      | Mascot      |
| 882.4427   | 882.5478    | 0.1051  | 119   | 309        | 317      | ASGQAPHSK                |           |         |                         |      | Mascot      |
| 1062.5942  | 1062.6714   | 0.0772  | 73    | 968        | 976      | AERVPSIYK                |           |         |                         |      | Mascot      |
| 1084.5607  | 1084.5103   | -0.0504 | -46   | 657        | 666      | SAHNSRSIGR               |           |         |                         |      | Mascot      |
| 1177.6324  | 1177.6218   | -0.0106 | -9    | 555        | 564      | KDPHPLSIDR               |           |         |                         |      | Mascot      |
| 1397.6503  | 1397.575    | -0.0753 | -54   | 414        | 427      | RLSGDSDSSTASSK           |           |         |                         |      | Mascot      |
| 1466.6957  | 1466.8621   | 0.1664  | 113   | 297        | 308      | CAAYAHRYQQAQ             |           |         | Carbamidomethyl (C)[1]  |      | Mascot      |
| 1507.7512  | 1507.7444   | -0.0068 | -5    | 62         | 74       | HANNVNRAAHEFK            |           |         |                         |      | Mascot      |
| 1555.826   | 1555.7198   | -0.1062 | -68   | 75         | 89       | ANCPDAALSLRIPSK          |           |         |                         |      | Mascot      |
| 1711.8107  | 1711.8638   | 0.0531  | 31    | 309        | 325      | ASGQAPHSKSSSTHSSR        |           |         |                         |      | Mascot      |
| 1711.8107  | 1711.8638   | 0.0531  | 31    | 309        | 325      | ASGQAPHSKSSSTHSSR        |           |         |                         |      | Mascot      |
| 1796.7802  | 1796.8574   | 0.0772  | 43    | 809        | 825      | GGLTNGGMMEGERWGG<br>R    |           |         | Oxidation (M)[8,9]      |      | Mascot      |
| 2255.0298  | 2255.0283   | -0.0015 | -1    | 278        | 296      | VGGGWDTLEHYLDKHDP<br>CR  |           |         | Carbamidomethyl (C)[18] |      | Mascot      |
| 2313.1445  | 2313.137    | -0.0075 | -3    | 272        | 291      | THVMVRVGGGWDTLEH<br>YLDK |           |         |                         |      | Mascot      |

36 novel protein (zgc:175284) [Danio rerio] gi|220672690 49638.2 8.91 11 32 0

### Peptide Information

| Calc. Mass | Obsrv. Mass | ± da    | ± ppm | Start Seq. | End Seq. | Sequence                  | Ion Score | C. I. % | Modification                              | Rank | Result Type |
|------------|-------------|---------|-------|------------|----------|---------------------------|-----------|---------|-------------------------------------------|------|-------------|
| 820.3076   | 820.1981    | -0.1095 | -133  | 92         | 97       | CSHCEK                    |           |         | Carbamidomethyl (C)[1,4]                  |      | Mascot      |
| 1044.5143  | 1044.4315   | -0.0828 | -79   | 2          | 10       | SDPEPCRIK                 |           |         |                                           |      | Mascot      |
| 1160.6245  | 1160.5831   | -0.0414 | -36   | 257        | 265      | NYHNLMIKK                 |           |         |                                           |      | Mascot      |
| 1599.7496  | 1599.7952   | 0.0456  | 29    | 27         | 39       | EELSEDEEKHQVK             |           |         |                                           |      | Mascot      |
| 1812.8168  | 1812.853    | 0.0362  | 20    | 40         | 55       | SESETQSETENSILMK          |           |         |                                           |      | Mascot      |
| 1812.8519  | 1812.853    | 0.0011  | 1     | 201        | 215      | IHTGEKPYKCPHCDK           |           |         | Carbamidomethyl (C)[10]                   |      | Mascot      |
| 2098.9644  | 2098.9324   | -0.032  | -15   | 266        | 283      | EESVHSKEKPHSCSLCG<br>K    |           |         | Carbamidomethyl (C)[13,16]                |      | Mascot      |
| 2193.9587  | 2194.0535   | 0.0948  | 43    | 294        | 311      | HQMVHTDEKPHKCDQC<br>GK    |           |         | Carbamidomethyl (C)[13], Oxidation (M)[3] |      | Mascot      |
| 2299.0571  | 2299.1428   | 0.0857  | 37    | 139        | 158      | NVHNLIVVEESDDVSEDE<br>EK  |           |         |                                           |      | Mascot      |
| 2305.0977  | 2305.1248   | 0.0271  | 12    | 36         | 55       | HQVKSESETQSETENSIL<br>MK  |           |         |                                           |      | Mascot      |
| 2313.0762  | 2313.137    | 0.0608  | 26    | 40         | 60       | SESETQSETENSILMKET<br>AAK |           |         |                                           |      | Mascot      |
| 2321.0925  | 2321.124    | 0.0315  | 14    | 36         | 55       | HQVKSESETQSETENSIL        |           |         | Oxidation (M)[19]                         |      | Mascot      |

37 PREDICTED: hypothetical protein LOC100535959 [Danio rerio] MK gi|326679206 3892.8 4.69 4 32 0

Peptide Information

| Calc. Mass | Obsrv. Mass | ± da    | ± ppm | Start Seq. | End Seq. | Sequence            | Ion Score | C. I. % | Modification                                   | Rank | Result Type |
|------------|-------------|---------|-------|------------|----------|---------------------|-----------|---------|------------------------------------------------|------|-------------|
| 990.4747   | 990.3634    | -0.1113 | -112  | 1          | 8        | MTVLHMDK            |           |         | Oxidation (M)[1]                               |      | Mascot      |
| 1160.5793  | 1160.5831   | 0.0038  | 3     | 24         | 34       | GKQDGLDLTDV         |           |         |                                                |      | Mascot      |
| 1796.7942  | 1796.8574   | 0.0632  | 35    | 9          | 23       | ETHTVDCFCCKIEESR    |           |         |                                                |      | Mascot      |
| 2210.9702  | 2211.0671   | 0.0969  | 44    | 1          | 18       | MTVLHMDKETHTVDCFC K |           |         | Carbamidomethyl (C)[15], Oxidation (M)[1]      |      | Mascot      |
| 2283.9866  | 2284.1338   | 0.1472  | 64    | 1          | 18       | MTVLHMDKETHTVDCFC K |           |         | Carbamidomethyl (C)[15,17], Oxidation (M)[1,6] |      | Mascot      |

38 muskelin [Danio rerio] gi|47086651 84322.2 5.91 12 31 0

Peptide Information

| Calc. Mass | Obsrv. Mass | ± da    | ± ppm | Start Seq. | End Seq. | Sequence              | Ion Score | C. I. % | Modification                             | Rank | Result Type |
|------------|-------------|---------|-------|------------|----------|-----------------------|-----------|---------|------------------------------------------|------|-------------|
| 850.4781   | 850.5236    | 0.0455  | 53    | 333        | 339      | QIYTLGR               |           |         |                                          |      | Mascot      |
| 925.3866   | 925.3301    | -0.0565 | -61   | 325        | 331      | MCIDSQR               |           |         | Carbamidomethyl (C)[2], Oxidation (M)[1] |      | Mascot      |
| 1023.5145  | 1023.4912   | -0.0233 | -23   | 609        | 616      | LDDFWSLK              |           |         |                                          |      | Mascot      |
| 1023.5145  | 1023.4912   | -0.0233 | -23   | 609        | 616      | LDDFWSLK              |           |         |                                          |      | Mascot      |
| 1084.5997  | 1084.5103   | -0.0894 | -82   | 642        | 651      | AQTEPLNALK            |           |         |                                          |      | Mascot      |
| 1215.5535  | 1215.5762   | 0.0227  | 19    | 314        | 324      | ESGPSARSCHK           |           |         | Carbamidomethyl (C)[9]                   |      | Mascot      |
| 1215.5535  | 1215.5762   | 0.0227  | 19    | 314        | 324      | ESGPSARSCHK           |           |         | Carbamidomethyl (C)[9]                   |      | Mascot      |
| 1259.6776  | 1259.5557   | -0.1219 | -97   | 167        | 176      | EQEAIRLCLK            |           |         | Carbamidomethyl (C)[8]                   |      | Mascot      |
| 1520.6282  | 1520.6945   | 0.0663  | 44    | 437        | 450      | EDSCNAGPEDIQSR        |           |         |                                          |      | Mascot      |
| 1599.7657  | 1599.7952   | 0.0295  | 18    | 115        | 126      | IDEQMFPICRFK          |           |         | Carbamidomethyl (C)[8], Oxidation (M)[5] |      | Mascot      |
| 2194.2278  | 2194.0535   | -0.1743 | -79   | 196        | 213      | IALEHPMLTHLHERLVLR    |           |         | Oxidation (M)[7]                         |      | Mascot      |
| 2225.0947  | 2225.0825   | -0.0122 | -5    | 702        | 720      | TQLFDTLVNFFPDNMTTP K  |           |         |                                          |      | Mascot      |
| 2225.0947  | 2225.0825   | -0.0122 | -5    | 702        | 720      | TQLFDTLVNFFPDNMTTP K  |           |         |                                          |      | Mascot      |
| 2233.0408  | 2233.0486   | 0.0078  | 3     | 682        | 701      | SSSDFIPLGFSDVDQTYA QR |           |         |                                          |      | Mascot      |
| 2298.1626  | 2298.1514   | -0.0112 | -5    | 226        | 244      | AVRDGLFNQYISQQDYK PR  |           |         |                                          |      | Mascot      |

39 Zgc:175171 protein [Danio rerio] gi|161612243 31520.2 9.32 9 31 0

Peptide Information

| Calc. Mass | Obsrv. Mass | ± da | ± ppm | Start Seq. | End Seq. | Sequence | Ion Score | C. I. % | Modification | Rank | Result Type |
|------------|-------------|------|-------|------------|----------|----------|-----------|---------|--------------|------|-------------|
|------------|-------------|------|-------|------------|----------|----------|-----------|---------|--------------|------|-------------|

|           |           |         |     |     |     |                          |  |  |  |  |                                                  |        |
|-----------|-----------|---------|-----|-----|-----|--------------------------|--|--|--|--|--------------------------------------------------|--------|
| 801.3737  | 801.3394  | -0.0343 | -43 | 94  | 101 | EQDGPAGK                 |  |  |  |  |                                                  | Mascot |
| 1507.7244 | 1507.7444 | 0.02    | 13  | 70  | 81  | EMRPSEDMQLKK             |  |  |  |  | Oxidation (M)[2]                                 | Mascot |
| 1599.7366 | 1599.7952 | 0.0586  | 37  | 15  | 30  | MMSPLGPASAHGSGQR         |  |  |  |  | Oxidation (M)[1]                                 | Mascot |
| 1711.8367 | 1711.8638 | 0.0271  | 16  | 14  | 30  | KMMSPLGPASAHGSGQ<br>R    |  |  |  |  |                                                  | Mascot |
| 1711.8367 | 1711.8638 | 0.0271  | 16  | 14  | 30  | KMMSPLGPASAHGSGQ<br>R    |  |  |  |  |                                                  | Mascot |
| 2193.9661 | 2194.0535 | 0.0874  | 40  | 193 | 211 | HSLTHTGVKPYACSMCD<br>MR  |  |  |  |  | Carbamidomethyl (C)[13]                          | Mascot |
| 2210.9087 | 2211.0671 | 0.1584  | 72  | 221 | 239 | HSLTHTGEKPFACDMCD<br>MR  |  |  |  |  | Oxidation (M)[15,18]                             | Mascot |
| 2225.124  | 2225.0825 | -0.0415 | -19 | 36  | 55  | GTQGHMVLPTSMTCPL<br>LLR  |  |  |  |  | Carbamidomethyl (C)[14], Oxidation (M)[6]        | Mascot |
| 2225.124  | 2225.0825 | -0.0415 | -19 | 36  | 55  | GTQGHMVLPTSMTCPL<br>LLR  |  |  |  |  | Carbamidomethyl (C)[14], Oxidation (M)[6]        | Mascot |
| 2255.0881 | 2255.0283 | -0.0598 | -27 | 137 | 155 | HILIHTGEKPFACAVCD<br>R   |  |  |  |  | Carbamidomethyl (C)[13,16]                       | Mascot |
| 2282.9773 | 2283.1433 | 0.166   | 73  | 165 | 183 | HSLTHTGVKPYACSMCD<br>MR  |  |  |  |  | Carbamidomethyl (C)[13,16], Oxidation (M)[15,18] | Mascot |
| 2282.9773 | 2283.1433 | 0.166   | 73  | 193 | 211 | HSLTHTGVKPYACSMCD<br>MR  |  |  |  |  | Carbamidomethyl (C)[13,16], Oxidation (M)[15,18] | Mascot |
| 2297.1465 | 2297.1562 | 0.0097  | 4   | 136 | 155 | RHILIHTGEKPFACAVCD<br>MR |  |  |  |  |                                                  | Mascot |
| 2313.1414 | 2313.137  | -0.0044 | -2  | 136 | 155 | RHILIHTGEKPFACAVCD<br>MR |  |  |  |  | Oxidation (M)[19]                                | Mascot |

40 PREDICTED: mitogen-activated protein kinase kinase  
kinase 2-like [Danio rerio]

gi|68361880 69346.8 6.37 10 31 0

#### Peptide Information

| Calc. Mass | Obsrv. Mass | ± da    | ± ppm | Start Seq. | End Seq. | Sequence                  | Ion Score | C. I. % | Modification           | Rank | Result Type |
|------------|-------------|---------|-------|------------|----------|---------------------------|-----------|---------|------------------------|------|-------------|
| 972.522    | 972.5613    | 0.0393  | 40    | 39         | 46       | NQNDVRVK                  |           |         |                        |      | Mascot      |
| 1084.5647  | 1084.5103   | -0.0544 | -50   | 353        | 361      | SPRAPTNWR                 |           |         |                        |      | Mascot      |
| 1215.6077  | 1215.5762   | -0.0315 | -26   | 34         | 44       | ASSPKNQNDVR               |           |         |                        |      | Mascot      |
| 1215.6077  | 1215.5762   | -0.0315 | -26   | 34         | 44       | ASSPKNQNDVR               |           |         |                        |      | Mascot      |
| 1259.5725  | 1259.5557   | -0.0168 | -13   | 374        | 384      | VFLCYDADTGR               |           |         |                        |      | Mascot      |
| 1397.757   | 1397.575    | -0.182  | -130  | 101        | 112      | AVELLDRSVHMK              |           |         |                        |      | Mascot      |
| 1813.0217  | 1812.853    | -0.1687 | -93   | 55         | 70       | ILQFPRPVSLLEDLSAK         |           |         |                        |      | Mascot      |
| 1813.0217  | 1812.853    | -0.1687 | -93   | 55         | 70       | ILQFPRPVSLLEDLSAK         |           |         |                        |      | Mascot      |
| 1856.921   | 1856.9148   | -0.0062 | -3    | 374        | 389      | VFLCYDADTGRELAVK          |           |         | Carbamidomethyl (C)[4] |      | Mascot      |
| 1955.092   | 1954.8373   | -0.2547 | -130  | 20         | 38       | SSRPSVLSDLAKPKASSP<br>K   |           |         |                        |      | Mascot      |
| 1955.092   | 1954.8373   | -0.2547 | -130  | 20         | 38       | SSRPSVLSDLAKPKASSP<br>K   |           |         |                        |      | Mascot      |
| 2255.1191  | 2255.0283   | -0.0908 | -40   | 130        | 149      | DLLPTHDILDNTDFSAPD<br>KK  |           |         |                        |      | Mascot      |
| 2284.0989  | 2284.1338   | 0.0349  | 15    | 431        | 450      | DTHEKTLISIFMEYMPGGS<br>IK |           |         |                        |      | Mascot      |
| 2300.0938  | 2300.136    | 0.0422  | 18    | 431        | 450      | DTHEKTLISIFMEYMPGGS       |           |         | Oxidation (M)[11]      |      | Mascot      |

41 PREDICTED: zinc finger protein 569-like [Danio rerio] IK  
gi|326667010 33962.6 9.76 10 31 0

Peptide Information

| Calc. Mass | Obsrv. Mass | ± da    | ± ppm | Start Seq. | End Seq. | Sequence                        | Ion Score | C. I. % | Modification               | Rank | Result Type |
|------------|-------------|---------|-------|------------|----------|---------------------------------|-----------|---------|----------------------------|------|-------------|
| 842.4553   | 842.4925    | 0.0372  | 44    | 281        | 287      | SLINHMK                         |           |         |                            |      | Mascot      |
| 1051.5453  | 1051.6935   | 0.1482  | 141   | 248        | 256      | SLTCKDSIK                       |           |         | Carbamidomethyl (C)[4]     |      | Mascot      |
| 1062.5149  | 1062.6714   | 0.1565  | 147   | 172        | 179      | QNFTIHMR                        |           |         | Oxidation (M)[7]           |      | Mascot      |
| 1215.5535  | 1215.5762   | 0.0227  | 19    | 142        | 151      | QNGNLETHMR                      |           |         | Oxidation (M)[9]           |      | Mascot      |
| 1215.5535  | 1215.5762   | 0.0227  | 19    | 142        | 151      | QNGNLETHMR                      |           |         | Oxidation (M)[9]           |      | Mascot      |
| 1507.7764  | 1507.7444   | -0.032  | -21   | 111        | 123      | SFYSTGNLAVHRR                   |           |         |                            |      | Mascot      |
| 1520.8002  | 1520.6945   | -0.1057 | -70   | 281        | 293      | SLINHMKLHNGEK                   |           |         |                            |      | Mascot      |
| 1695.769   | 1695.8687   | 0.0997  | 59    | 152        | 165      | THTGERSFICTQCR                  |           |         | Carbamidomethyl (C)[10]    |      | Mascot      |
| 1954.9625  | 1954.8373   | -0.1252 | -64   | 79         | 95       | QCGKSFYITGNLTVHMR               |           |         |                            |      | Mascot      |
| 1954.9625  | 1954.8373   | -0.1252 | -64   | 79         | 95       | QCGKSFYITGNLTVHMR               |           |         |                            |      | Mascot      |
| 1970.9575  | 1970.8354   | -0.1221 | -62   | 79         | 95       | QCGKSFYITGNLTVHMR               |           |         | Oxidation (M)[16]          |      | Mascot      |
| 1970.9575  | 1970.8354   | -0.1221 | -62   | 79         | 95       | QCGKSFYITGNLTVHMR               |           |         | Oxidation (M)[16]          |      | Mascot      |
| 2297.9744  | 2298.1514   | 0.177   | 77    | 228        | 247      | ARIMNHMNGHTGTTCDCGK             |           |         | Carbamidomethyl (C)[15,18] |      | Mascot      |
| 3354.5928  | 3354.7192   | 0.1264  | 38    | 83         | 110      | SFYITGNLTVHMRHTGE<br>RPYTCCQCGK |           |         | Carbamidomethyl (C)[23,26] |      | Mascot      |

42 novel protein similar to vertebrate kinesin family member 5A (KIF5A) [Danio rerio] IK  
gi|169158591 96952.9 5.41 12 30 0

Peptide Information

| Calc. Mass | Obsrv. Mass | ± da    | ± ppm | Start Seq. | End Seq. | Sequence         | Ion Score | C. I. % | Modification           | Rank | Result Type |
|------------|-------------|---------|-------|------------|----------|------------------|-----------|---------|------------------------|------|-------------|
| 882.5117   | 882.5478    | 0.0361  | 41    | 596        | 602      | LYISKMK          |           |         |                        |      | Mascot      |
| 955.4665   | 955.4689    | 0.0024  | 3     | 314        | 321      | STLMFGQR         |           |         | Oxidation (M)[4]       |      | Mascot      |
| 1062.5942  | 1062.6714   | 0.0772  | 73    | 804        | 812      | LFVQDLATR        |           |         |                        |      | Mascot      |
| 1160.5793  | 1160.5831   | 0.0038  | 3     | 241        | 252      | TGAEGAVLDEAK     |           |         |                        |      | Mascot      |
| 1238.6449  | 1238.7572   | 0.1123  | 91    | 426        | 435      | CEVELGKLYK       |           |         | Carbamidomethyl (C)[1] |      | Mascot      |
| 1599.6998  | 1599.7952   | 0.0954  | 60    | 1          | 14       | MADPAECTIKVMCR   |           |         | Oxidation (M)[1,12]    |      | Mascot      |
| 1711.7439  | 1711.8638   | 0.1199  | 70    | 815        | 831      | KSAEMDSDETGGSAQK |           |         |                        |      | Mascot      |
| 1711.7439  | 1711.8638   | 0.1199  | 70    | 815        | 831      | KSAEMDSDETGGSAQK |           |         |                        |      | Mascot      |
| 1733.8527  | 1733.8379   | -0.0148 | -9    | 327        | 341      | NTVCVNVELTAEQWK  |           |         |                        |      | Mascot      |
| 1812.9338  | 1812.853    | -0.0808 | -45   | 144        | 159      | DLLDVSKTNLSVHEDK |           |         |                        |      | Mascot      |
| 1812.9338  | 1812.853    | -0.0808 | -45   | 144        | 159      | DLLDVSKTNLSVHEDK |           |         |                        |      | Mascot      |



|    |                                          |            |             |         |       |               |          |                           |      |           |                        |                          |                  |        |
|----|------------------------------------------|------------|-------------|---------|-------|---------------|----------|---------------------------|------|-----------|------------------------|--------------------------|------------------|--------|
|    |                                          | 1838.8674  | 1838.8696   | -0.0022 | 1     | 188           | 203      | SNRHVAVTNMNEHSSR          |      |           |                        |                          |                  | Mascot |
|    |                                          | 1970.9198  | 1970.8354   | -0.0844 | -43   | 296           | 313      | TTIVICCSPSAFNEAETK        | 3    | 0         | Carbamidomethyl (C)[6] |                          | Mascot           |        |
|    |                                          | 1970.9198  | 1970.8354   | -0.0844 | -43   | 296           | 313      | TTIVICCSPSAFNEAETK        |      |           | Carbamidomethyl (C)[6] |                          | Mascot           |        |
|    |                                          | 2284.1819  | 2284.1338   | -0.0481 | -21   | 257           | 278      | VLSLGNVISALAEGSTY<br>VPYR |      |           |                        |                          | Mascot           |        |
| 43 | Josephin-1 [Danio rerio]                 |            |             |         |       | gij 115497592 |          | 26182.5                   | 9.34 | 6         | 30                     | 0                        |                  |        |
|    | Peptide Information                      |            |             |         |       |               |          |                           |      |           |                        |                          |                  |        |
|    |                                          | Calc. Mass | Obsrv. Mass | ± da    | ± ppm | Start Seq.    | End Seq. | Sequence                  |      | Ion Score | C. I. %                | Modification             | Rank Result Type |        |
|    |                                          | 1051.5908  | 1051.6935   | 0.1027  | 98    | 170           | 177      | RQHWIGVR                  |      |           |                        |                          | Mascot           |        |
|    |                                          | 1721.825   | 1721.884    | 0.059   | 34    | 10            | 25       | GRGVGGFQELGCMPPWK         |      |           |                        |                          | Mascot           |        |
|    |                                          | 1838.8927  | 1838.8696   | -0.0231 | -13   | 12            | 28       | GVGGFQELGCMPPWKS<br>K     |      |           |                        | Oxidation (M)[11]        | Mascot           |        |
|    |                                          | 2194.0742  | 2194.0535   | -0.0207 | -9    | 108           | 127      | NMLGNGNYDVNVIMAAL<br>QTR  |      |           |                        |                          | Mascot           |        |
|    |                                          | 2233.0818  | 2233.0486   | -0.0332 | -15   | 67            | 86       | ELCALHALNNVFQDGAA<br>FSR  |      |           |                        | Carbamidomethyl (C)[3]   | Mascot           |        |
|    |                                          | 2255.1377  | 2255.0283   | -0.1094 | -49   | 214           | 232      | NCELLLVSEEVEVHQT<br>WK    |      |           |                        |                          | Mascot           |        |
| 44 | novel protein (zgc:175284) [Danio rerio] |            |             |         |       | gij 220672689 |          | 29493.2                   | 7.07 | 8         | 30                     | 0                        |                  |        |
|    | Peptide Information                      |            |             |         |       |               |          |                           |      |           |                        |                          |                  |        |
|    |                                          | Calc. Mass | Obsrv. Mass | ± da    | ± ppm | Start Seq.    | End Seq. | Sequence                  |      | Ion Score | C. I. %                | Modification             | Rank Result Type |        |
|    |                                          | 820.3076   | 820.1981    | -0.1095 | -133  | 92            | 97       | CSHCEK                    |      |           |                        | Carbamidomethyl (C)[1,4] | Mascot           |        |
|    |                                          | 1044.5143  | 1044.4315   | -0.0828 | -79   | 2             | 10       | SDPEPCRIK                 |      |           |                        |                          | Mascot           |        |
|    |                                          | 1599.7496  | 1599.7952   | 0.0456  | 29    | 27            | 39       | EELSEDEEKHQVK             |      |           |                        |                          | Mascot           |        |
|    |                                          | 1812.8168  | 1812.853    | 0.0362  | 20    | 40            | 55       | SESETQSETENSILMK          |      |           |                        |                          | Mascot           |        |
|    |                                          | 1812.8519  | 1812.853    | 0.0011  | 1     | 201           | 215      | IHTGEKPYKCPHC DK          |      |           |                        | Carbamidomethyl (C)[10]  | Mascot           |        |
|    |                                          | 2299.0571  | 2299.1428   | 0.0857  | 37    | 139           | 158      | NVHNLIIVEESDDVSEDE<br>EK  |      |           |                        |                          | Mascot           |        |
|    |                                          | 2305.0977  | 2305.1248   | 0.0271  | 12    | 36            | 55       | HQVKSESETQSETENSIL<br>MK  |      |           |                        |                          | Mascot           |        |
|    |                                          | 2313.0762  | 2313.137    | 0.0608  | 26    | 40            | 60       | SESETQSETENSILMKET<br>AAK |      |           |                        |                          | Mascot           |        |
|    |                                          | 2321.0925  | 2321.124    | 0.0315  | 14    | 36            | 55       | HQVKSESETQSETENSIL<br>MK  |      |           |                        | Oxidation (M)[19]        | Mascot           |        |
| 45 | Si:ch211-235e18.3 protein [Danio rerio]  |            |             |         |       | gij 63100921  |          | 59580.1                   | 8.4  | 9         | 30                     | 0                        |                  |        |
|    | Peptide Information                      |            |             |         |       |               |          |                           |      |           |                        |                          |                  |        |
|    |                                          | Calc. Mass | Obsrv. Mass | ± da    | ± ppm | Start Seq.    | End Seq. | Sequence                  |      | Ion Score | C. I. %                | Modification             | Rank Result Type |        |
|    |                                          | 864.4686   | 864.4752    | 0.0066  | 8     | 306           | 312      | VTEGRFR                   |      |           |                        |                          | Mascot           |        |

|           |           |         |      |     |     |                           |                          |        |
|-----------|-----------|---------|------|-----|-----|---------------------------|--------------------------|--------|
| 1044.587  | 1044.4315 | -0.1555 | -149 | 328 | 336 | MLVVDPAKR                 | Oxidation (M)[1]         | Mascot |
| 1084.6626 | 1084.5103 | -0.1523 | -140 | 150 | 158 | LLNHPIIK                  |                          | Mascot |
| 1177.5089 | 1177.6218 | 0.1129  | 96   | 6   | 15  | QVCPSSCSR                 | Carbamidomethyl (C)[3,8] | Mascot |
| 1813.0516 | 1812.853  | -0.1986 | -110 | 144 | 158 | EVQIMKLLNHPIIK            |                          | Mascot |
| 1813.0516 | 1812.853  | -0.1986 | -110 | 144 | 158 | EVQIMKLLNHPIIK            |                          | Mascot |
| 1856.9033 | 1856.9148 | 0.0115  | 6    | 313 | 327 | IPFFMSQDCENLIRK           | Oxidation (M)[5]         | Mascot |
| 2247.0493 | 2247.0559 | 0.0066  | 3    | 19  | 40  | GSLGPTMCPSSLQSSS<br>GPRER | Oxidation (M)[7]         | Mascot |
| 2305.0249 | 2305.1248 | 0.0999  | 43   | 433 | 453 | SRTASDSSTPEVIMESSD<br>SFR | Oxidation (M)[14]        | Mascot |
| 2320.9922 | 2321.124  | 0.1318  | 57   | 178 | 197 | NGEMFDYLTSGRMRSEN<br>EAR  |                          | Mascot |

46 Zgc:77174 protein [Danio rerio] gi|33416597 80327.9 9.07 11 30 0

#### Peptide Information

| Calc. Mass | Obsrv. Mass | ± da    | ± ppm | Start Seq. | End Seq. | Sequence                 | Ion Score | C. I. % | Modification                              | Rank | Result Type |
|------------|-------------|---------|-------|------------|----------|--------------------------|-----------|---------|-------------------------------------------|------|-------------|
| 842.4227   | 842.4925    | 0.0698  | 83    | 699        | 706      | GGDGQPRR                 |           |         |                                           |      | Mascot      |
| 925.4486   | 925.3301    | -0.1185 | -128  | 249        | 255      | SRDTYQR                  |           |         |                                           |      | Mascot      |
| 1165.567   | 1165.7233   | 0.1563  | 134   | 515        | 524      | FSTPADPKMR               |           |         | Oxidation (M)[9]                          |      | Mascot      |
| 1466.691   | 1466.8621   | 0.1711  | 117   | 616        | 627      | DSVDINNYVNWK             |           |         |                                           |      | Mascot      |
| 1520.7605  | 1520.6945   | -0.066  | -43   | 707        | 718      | SRPTQQYYQPPR             |           |         |                                           |      | Mascot      |
| 1555.7281  | 1555.7198   | -0.0083 | -5    | 71         | 83       | DHEESQAAPRMLR            |           |         | Oxidation (M)[11]                         |      | Mascot      |
| 1711.769   | 1711.8638   | 0.0948  | 55    | 1          | 15       | LTDEGIEECKSSSEK          |           |         | Carbamidomethyl (C)[9]                    |      | Mascot      |
| 1711.8801  | 1711.8638   | -0.0163 | -10   | 161        | 177      | NIGAEGGPPPFVFGQK         |           |         |                                           |      | Mascot      |
| 1733.8564  | 1733.8379   | -0.0185 | -11   | 564        | 580      | AGGVSNTPLPNGDLEHR        |           |         |                                           |      | Mascot      |
| 2194.063   | 2194.0535   | -0.0095 | -4    | 84         | 103      | VQMTDGHTACTGLEFKQ<br>LSK |           |         |                                           |      | Mascot      |
| 2211.0354  | 2211.0671   | 0.0317  | 14    | 81         | 99       | MLRVQMTDGHTACTGLE<br>FK  |           |         | Carbamidomethyl (C)[13], Oxidation (M)[1] |      | Mascot      |

47 RNA binding motif protein [Danio rerio] gi|37595358 30616.8 9.84 8 30 0

#### Peptide Information

| Calc. Mass | Obsrv. Mass | ± da    | ± ppm | Start Seq. | End Seq. | Sequence     | Ion Score | C. I. % | Modification     | Rank | Result Type |
|------------|-------------|---------|-------|------------|----------|--------------|-----------|---------|------------------|------|-------------|
| 801.3889   | 801.3394    | -0.0495 | -62   | 215        | 221      | DYGPPPR      |           |         |                  |      | Mascot      |
| 864.4355   | 864.4752    | 0.0397  | 46    | 179        | 185      | DSLMSRR      |           |         |                  |      | Mascot      |
| 990.4672   | 990.3634    | -0.1038 | -105  | 1          | 9        | MAEADRP GK   |           |         | Oxidation (M)[1] |      | Mascot      |
| 1160.5551  | 1160.5831   | 0.028   | 24    | 131        | 141      | GMSSRGPPPMK  |           |         | Oxidation (M)[2] |      | Mascot      |
| 1215.5898  | 1215.5762   | -0.0136 | -11   | 156        | 167      | SAPSGPMGRPSR |           |         | Oxidation (M)[7] |      | Mascot      |
| 1215.5898  | 1215.5762   | -0.0136 | -11   | 156        | 167      | SAPSGPMGRPSR |           |         | Oxidation (M)[7] |      | Mascot      |

|    |                                                     |           |         |     |     |              |                          |      |    |    |   |  |  |  |  |  |        |
|----|-----------------------------------------------------|-----------|---------|-----|-----|--------------|--------------------------|------|----|----|---|--|--|--|--|--|--------|
|    | 1259.5399                                           | 1259.5557 | 0.0158  | 13  | 244 | 255          | GYSDRDGYGGGR             |      |    |    |   |  |  |  |  |  | Mascot |
|    | 1733.8929                                           | 1733.8379 | -0.055  | -32 | 81  | 95           | VEQATKPQFETSGRR          |      |    |    |   |  |  |  |  |  | Mascot |
|    | 2233.1458                                           | 2233.0486 | -0.0972 | -44 | 2   | 22           | AEADRPGLKFIGLNTET<br>SEK |      |    |    |   |  |  |  |  |  | Mascot |
| 48 | novel NACHT domain containing protein [Danio rerio] |           |         |     |     | gi 169154603 | 89510.1                  | 5.45 | 11 | 29 | 0 |  |  |  |  |  |        |

#### Peptide Information

| Calc. Mass | Obsrv. Mass | ± da    | ± ppm | Start Seq. | End Seq. | Sequence                  | Ion Score | C. I. % | Modification                             | Rank | Result Type |
|------------|-------------|---------|-------|------------|----------|---------------------------|-----------|---------|------------------------------------------|------|-------------|
| 925.4261   | 925.3301    | -0.096  | -104  | 658        | 665      | SVFDQDSK                  |           |         |                                          |      | Mascot      |
| 955.5207   | 955.4689    | -0.0518 | -54   | 761        | 768      | EIQTHLSK                  |           |         |                                          |      | Mascot      |
| 1062.5803  | 1062.6714   | 0.0911  | 86    | 552        | 559      | FQIQQSRR                  |           |         |                                          |      | Mascot      |
| 1507.6919  | 1507.7444   | 0.0525  | 35    | 609        | 621      | ASVYSGMCTQIFK             |           |         | Carbamidomethyl (C)[8], Oxidation (M)[7] |      | Mascot      |
| 1555.7095  | 1555.7198   | 0.0103  | 7     | 515        | 528      | NNDVKHNQADDASK            |           |         |                                          |      | Mascot      |
| 1599.8125  | 1599.7952   | -0.0173 | -11   | 682        | 695      | ALESDNGHLDLFLR            |           |         |                                          |      | Mascot      |
| 1812.9564  | 1812.853    | -0.1034 | -57   | 193        | 207      | EAALDLTLYLFLREMK          |           |         |                                          |      | Mascot      |
| 1812.9564  | 1812.853    | -0.1034 | -57   | 193        | 207      | EAALDLTLYLFLREMK          |           |         |                                          |      | Mascot      |
| 2225.0173  | 2225.0825   | 0.0652  | 29    | 14         | 34       | HSVSDSCVSGSVSVKSD<br>CSK  |           |         | Carbamidomethyl (C)[8,19]                |      | Mascot      |
| 2225.0173  | 2225.0825   | 0.0652  | 29    | 14         | 34       | HSVSDSCVSGSVSVKSD<br>CSK  |           |         | Carbamidomethyl (C)[8,19]                |      | Mascot      |
| 2255.0317  | 2255.0283   | -0.0034 | -2    | 30         | 50       | SDCSKDGDLPNFSVEKP<br>MSAK |           |         |                                          |      | Mascot      |
| 2284.178   | 2284.1338   | -0.0442 | -19   | 352        | 370      | EKETLSLMELITQFFPETK       |           |         |                                          |      | Mascot      |
| 2298.1812  | 2298.1514   | -0.0298 | -13   | 541        | 558      | TLTQMYTHFLRFQIQSR         |           |         |                                          |      | Mascot      |
| 2300.1731  | 2300.136    | -0.0371 | -16   | 352        | 370      | EKETLSLMELITQFFPETK       |           |         | Oxidation (M)[8]                         |      | Mascot      |

49 Ppp1r3b protein [Danio rerio] gi|190337192 33606.4 5.74 7 29 0

#### Peptide Information

| Calc. Mass | Obsrv. Mass | ± da    | ± ppm | Start Seq. | End Seq. | Sequence                | Ion Score | C. I. % | Modification            | Rank | Result Type |
|------------|-------------|---------|-------|------------|----------|-------------------------|-----------|---------|-------------------------|------|-------------|
| 925.4308   | 925.3301    | -0.1007 | -109  | 267        | 274      | YGSPRCR                 |           |         |                         |      | Mascot      |
| 972.5658   | 972.5613    | -0.0045 | -5    | 57         | 65       | ALMIPGRAK               |           |         | Oxidation (M)[3]        |      | Mascot      |
| 1051.5782  | 1051.6935   | 0.1153  | 110   | 157        | 165      | NISFEKSVK               |           |         |                         |      | Mascot      |
| 1699.76    | 1699.9042   | 0.1442  | 85    | 132        | 145      | IENDHVCLEHCMLK          |           |         | Oxidation (M)[12]       |      | Mascot      |
| 1699.76    | 1699.9042   | 0.1442  | 85    | 132        | 145      | IENDHVCLEHCMLK          |           |         | Oxidation (M)[12]       |      | Mascot      |
| 1721.9697  | 1721.884    | -0.0857 | -50   | 67         | 82       | HVSFADHKGLALTIVK        |           |         |                         |      | Mascot      |
| 2211.1001  | 2211.0671   | -0.033  | -15   | 2          | 20       | PIELAMSLYLSSDEFLNP<br>R |           |         | Oxidation (M)[6]        |      | Mascot      |
| 2284.0703  | 2284.1338   | 0.0635  | 28    | 168        | 185      | ITFDTWKNHTDVECQYVK      |           |         | Carbamidomethyl (C)[14] |      | Mascot      |

50 PREDICTED: hypothetical protein LOC794259 [Danio rerio] gi|292619409 289002.1 6.76 1 23 0

rerio]

Peptide Information

| Calc. Mass | Obsrv. Mass | ± da    | ± ppm | Start Seq. | End Seq. | Sequence    | Ion Score | C. I. % | Modification | Rank | Result Type |
|------------|-------------|---------|-------|------------|----------|-------------|-----------|---------|--------------|------|-------------|
| 1215.6038  | 1215.5762   | -0.0276 | -23   | 611        | 621      | DTGQCPLKEPK | 23        | 0       |              | 2    | Mascot      |

|                |           |                        |                |                |                    |
|----------------|-----------|------------------------|----------------|----------------|--------------------|
| Gel Idx/Pos    | 230/J6    | Instr./Gel Origin      | BA2060/110707A | Process Status | Analysis Succeeded |
| Plate [#] Name | [1] 31496 | Instrument Sample Name |                | Spectra        | 11                 |

| Rank | Protein Name                                           | Accession No. | Protein MW | Protein PI | Pep. Count | Protein Score | Protein Score C. I. % | Total Ion Score | Total Ion C. I. % |
|------|--------------------------------------------------------|---------------|------------|------------|------------|---------------|-----------------------|-----------------|-------------------|
| 1    | glyceraldehyde-3-phosphate dehydrogenase [Danio rerio] | gi 169403947  | 35761.3    | 8.2        | 9          | 593           | 100                   | 545             | 100               |

Peptide Information

| Calc. Mass | Obsrv. Mass | ± da    | ± ppm | Start Seq. | End Seq. | Sequence                  | Ion Score | C. I. % | Modification            | Rank | Result Type |
|------------|-------------|---------|-------|------------|----------|---------------------------|-----------|---------|-------------------------|------|-------------|
| 811.413    | 811.3922    | -0.0208 | -26   | 226        | 232      | LTGMAFR                   |           |         | Oxidation (M)[4]        |      | Mascot      |
| 1495.8479  | 1495.8064   | -0.0415 | -28   | 233        | 246      | VPTPNVSVVDLTVR            |           |         |                         |      | Mascot      |
| 1495.8479  | 1495.8064   | -0.0415 | -28   | 233        | 246      | VPTPNVSVVDLTVR            | 114       | 100     |                         |      | Mascot      |
| 1572.838   | 1572.7936   | -0.0444 | -28   | 65         | 78       | LVIDGHAITVYSER            |           |         |                         |      | Mascot      |
| 1572.838   | 1572.7936   | -0.0444 | -28   | 65         | 78       | LVIDGHAITVYSER            | 88        | 100     |                         |      | Mascot      |
| 1763.8024  | 1763.7555   | -0.0469 | -27   | 308        | 321      | LVTWYDNEFGYSNR            |           |         |                         |      | Mascot      |
| 1763.8024  | 1763.7555   | -0.0469 | -27   | 308        | 321      | LVTWYDNEFGYSNR            | 120       | 100     |                         |      | Mascot      |
| 1861.9442  | 1861.8936   | -0.0506 | -27   | 290        | 307      | SSIFDAGAGIALNDHFVK        | 122       | 100     |                         |      | Mascot      |
| 1861.9442  | 1861.8936   | -0.0506 | -27   | 290        | 307      | SSIFDAGAGIALNDHFVK        |           |         |                         |      | Mascot      |
| 2211.0134  | 2211.0793   | 0.0659  | 30    | 270        | 289      | GILGYTEHQVVSTDFNGD CR     |           |         |                         |      | Mascot      |
| 2231.0867  | 2231.0825   | -0.0042 | -2    | 85         | 105      | WGDAGATYVVESTGVFT TIEK    |           |         |                         |      | Mascot      |
| 2245.0991  | 2245.0493   | -0.0498 | -22   | 117        | 137      | VII SAPSADAPMFVMGVN HEK   |           |         | Oxidation (M)[12, 15]   |      | Mascot      |
| 2268.0349  | 2267.9756   | -0.0593 | -26   | 270        | 289      | GILGYTEHQVVSTDFNGD CR     | 102       | 100     | Carbamidomethyl (C)[19] |      | Mascot      |
| 2268.0349  | 2267.9756   | -0.0593 | -26   | 270        | 289      | GILGYTEHQVVSTDFNGD CR     |           |         | Carbamidomethyl (C)[19] |      | Mascot      |
| 2616.3701  | 2616.3196   | -0.0505 | -19   | 161        | 184      | VINDNFVIVEGLMSTVHAI TATQK |           |         | Oxidation (M)[13]       |      | Mascot      |

|   |                             |             |         |      |   |     |     |     |     |
|---|-----------------------------|-------------|---------|------|---|-----|-----|-----|-----|
| 2 | Gapdh protein [Danio rerio] | gi 92097970 | 38443.6 | 7.29 | 8 | 464 | 100 | 426 | 100 |
|---|-----------------------------|-------------|---------|------|---|-----|-----|-----|-----|

Peptide Information

| Calc. Mass | Obsrv. Mass | ± da | ± ppm | Start Seq. | End Seq. | Sequence | Ion Score | C. I. % | Modification | Rank | Result Type |
|------------|-------------|------|-------|------------|----------|----------|-----------|---------|--------------|------|-------------|
|------------|-------------|------|-------|------------|----------|----------|-----------|---------|--------------|------|-------------|

|   |                                         |           |         |     |     |             |                              |      |     |     |                         |                  |        |
|---|-----------------------------------------|-----------|---------|-----|-----|-------------|------------------------------|------|-----|-----|-------------------------|------------------|--------|
|   | 811.413                                 | 811.3922  | -0.0208 | -26 | 249 | 255         | LTGMAFR                      |      |     |     |                         | Oxidation (M)[4] | Mascot |
|   | 1495.8479                               | 1495.8064 | -0.0415 | -28 | 256 | 269         | VPTPNVSVVDLTVR               |      |     |     |                         |                  | Mascot |
|   | 1495.8479                               | 1495.8064 | -0.0415 | -28 | 256 | 269         | VPTPNVSVVDLTVR               | 114  | 100 |     |                         |                  | Mascot |
|   | 1572.838                                | 1572.7936 | -0.0444 | -28 | 88  | 101         | LVIDGHAITVYSER               |      |     |     |                         |                  | Mascot |
|   | 1572.838                                | 1572.7936 | -0.0444 | -28 | 88  | 101         | LVIDGHAITVYSER               | 88   | 100 |     |                         |                  | Mascot |
|   | 1861.9442                               | 1861.8936 | -0.0506 | -27 | 313 | 330         | SSIFDAGAGIALNDHFVK           | 122  | 100 |     |                         |                  | Mascot |
|   | 1861.9442                               | 1861.8936 | -0.0506 | -27 | 313 | 330         | SSIFDAGAGIALNDHFVK           |      |     |     |                         |                  | Mascot |
|   | 2211.0134                               | 2211.0793 | 0.0659  | 30  | 293 | 312         | GILGYTEHQVVSTDFNGD<br>CR     |      |     |     |                         |                  | Mascot |
|   | 2231.0867                               | 2231.0825 | -0.0042 | -2  | 108 | 128         | WGDAGATYVVESTGVFT<br>TIEK    |      |     |     |                         |                  | Mascot |
|   | 2245.0991                               | 2245.0493 | -0.0498 | -22 | 140 | 160         | VIISAPSADAPMFVMGVN<br>HEK    |      |     |     | Oxidation (M)[12,15]    |                  | Mascot |
|   | 2268.0349                               | 2267.9756 | -0.0593 | -26 | 293 | 312         | GILGYTEHQVVSTDFNGD<br>CR     | 102  | 100 |     | Carbamidomethyl (C)[19] |                  | Mascot |
|   | 2268.0349                               | 2267.9756 | -0.0593 | -26 | 293 | 312         | GILGYTEHQVVSTDFNGD<br>CR     |      |     |     | Carbamidomethyl (C)[19] |                  | Mascot |
|   | 2616.3701                               | 2616.3196 | -0.0505 | -19 | 184 | 207         | VINDNFVIVEGLMSTVHAI<br>TATQK |      |     |     | Oxidation (M)[13]       |                  | Mascot |
| 3 | 40S ribosomal protein S3a [Danio rerio] |           |         |     |     | gi 41152457 | 30179.9                      | 9.75 | 10  | 272 | 100                     | 233              | 100    |

#### Peptide Information

|  | Calc. Mass | Obsrv. Mass | ± da    | ± ppm | Start Seq. | End Seq. | Sequence           | Ion Score | C. I. | % | Modification                             | Rank | Result | Type |
|--|------------|-------------|---------|-------|------------|----------|--------------------|-----------|-------|---|------------------------------------------|------|--------|------|
|  | 842.3932   | 842.4849    | 0.0917  | 109   | 110        | 116      | MCSMVKK            |           |       |   | Oxidation (M)[1]                         |      | Mascot |      |
|  | 919.4818   | 919.4553    | -0.0265 | -29   | 35         | 42       | APAMFNIR           |           |       |   |                                          |      | Mascot |      |
|  | 935.4767   | 935.45      | -0.0267 | -29   | 35         | 42       | APAMFNIR           |           |       |   | Oxidation (M)[4]                         |      | Mascot |      |
|  | 938.4941   | 938.4674    | -0.0267 | -28   | 129        | 136      | TTDGYLLR           |           |       |   |                                          |      | Mascot |      |
|  | 1217.6022  | 1217.5714   | -0.0308 | -25   | 153        | 162      | TSYAQQHQQVR        |           |       |   |                                          |      | Mascot |      |
|  | 1345.6971  | 1345.6646   | -0.0325 | -24   | 152        | 162      | KTSYAQQHQQVR       |           |       |   |                                          |      | Mascot |      |
|  | 1578.7152  | 1578.6738   | -0.0414 | -26   | 95         | 107      | NCLTNFHGMDLTR      |           |       |   | Carbamidomethyl (C)[2]                   |      | Mascot |      |
|  | 1594.7101  | 1594.6644   | -0.0457 | -29   | 95         | 107      | NCLTNFHGMDLTR      |           |       |   | Carbamidomethyl (C)[2], Oxidation (M)[9] |      | Mascot |      |
|  | 1720.8475  | 1720.803    | -0.0445 | -26   | 200        | 213      | ACQSIYPLHDVYVR     | 83        | 100   |   | Carbamidomethyl (C)[2]                   |      | Mascot |      |
|  | 1720.8475  | 1720.803    | -0.0445 | -26   | 200        | 213      | ACQSIYPLHDVYVR     |           |       |   | Carbamidomethyl (C)[2]                   |      | Mascot |      |
|  | 1791.921   | 1791.6786   | -0.2424 | -135  | 200        | 214      | ACQSIYPLHDVYVRK    |           |       |   |                                          |      | Mascot |      |
|  | 1951.976   | 1951.9247   | -0.0513 | -26   | 66         | 82       | VFEVSLADLQNDEVAFR  |           |       |   |                                          |      | Mascot |      |
|  | 1951.976   | 1951.9247   | -0.0513 | -26   | 66         | 82       | VFEVSLADLQNDEVAFR  | 151       | 100   |   |                                          |      | Mascot |      |
|  | 2080.0708  | 2080.0183   | -0.0525 | -25   | 66         | 83       | VFEVSLADLQNDEVAFRK |           |       |   |                                          |      | Mascot |      |

4 GTP-binding nuclear protein Ran [Danio rerio] gi|18859307 24444.6 6.6 4 65 98.717 51 99.792

#### Peptide Information

|  | Calc. Mass | Obsrv. Mass | ± da | ± ppm | Start | End | Sequence | Ion | C. I. | % | Modification | Rank | Result | Type |
|--|------------|-------------|------|-------|-------|-----|----------|-----|-------|---|--------------|------|--------|------|
|--|------------|-------------|------|-------|-------|-----|----------|-----|-------|---|--------------|------|--------|------|

|   | Seq.                                            |           |         |     | Seq.         | Score |                    |      |        |           |
|---|-------------------------------------------------|-----------|---------|-----|--------------|-------|--------------------|------|--------|-----------|
|   | 922.4642                                        | 922.4402  | -0.024  | -26 | 99           | 105   | NVPNWHR            |      |        | Mascot    |
|   | 1310.6012                                       | 1310.5654 | -0.0358 | -27 | 60           | 70    | YNVWDTAGQEK        |      |        | Mascot    |
|   | 1784.9119                                       | 1784.8604 | -0.0515 | -29 | 152          | 165   | SNYNFEKPFLWLAR     | 51   | 99.792 | Mascot    |
|   | 1784.9119                                       | 1784.8604 | -0.0515 | -29 | 152          | 165   | SNYNFEKPFLWLAR     |      |        | Mascot    |
|   | 2052.1025                                       | 2052.0471 | -0.0554 | -27 | 38           | 55    | YVATLGVEVHPLVFHTNR |      |        | Mascot    |
| 5 | hypothetical protein LOC100126029 [Danio rerio] |           |         |     | gi 157787173 |       | 31587.6            | 5.62 | 9      | 48 22.666 |

#### Peptide Information

|   | Calc. Mass                                                   | Obsrv. Mass | ± da    | ± ppm | Start Seq.   | End Sequence Seq.          | Ion Score | C. I. % | Modification           | Rank | Result Type |
|---|--------------------------------------------------------------|-------------|---------|-------|--------------|----------------------------|-----------|---------|------------------------|------|-------------|
|   | 856.525                                                      | 856.499     | -0.026  | -30   | 239          | 246 LGKNLSPK               |           |         |                        |      | Mascot      |
|   | 864.4131                                                     | 864.467     | 0.0539  | 62    | 255          | 261 VELESCK                |           |         | Carbamidomethyl (C)[6] |      | Mascot      |
|   | 919.4124                                                     | 919.4553    | 0.0429  | 47    | 64           | 70 MEMAHLR                 |           |         | Oxidation (M)[1,3]     |      | Mascot      |
|   | 935.4866                                                     | 935.45      | -0.0366 | -39   | 255          | 262 VELESCCK               |           |         |                        |      | Mascot      |
|   | 1106.551                                                     | 1106.5294   | -0.0216 | -20   | 252          | 261 NGKVELESCK             |           |         |                        |      | Mascot      |
|   | 1695.7201                                                    | 1695.8179   | 0.0978  | 58    | 1            | 15 MEESNNTCESVPDLK         |           |         |                        |      | Mascot      |
|   | 1711.715                                                     | 1711.8464   | 0.1314  | 77    | 1            | 15 MEESNNTCESVPDLK         |           |         | Oxidation (M)[1]       |      | Mascot      |
|   | 1991.004                                                     | 1991.0446   | 0.0406  | 20    | 214          | 232 TNGTLDKTATQLVSSDSP R   |           |         |                        |      | Mascot      |
|   | 2192.9626                                                    | 2193.0828   | 0.1202  | 55    | 35           | 52 EEHKMVSHHQTDDNETE K     |           |         |                        |      | Mascot      |
|   | 2245.2915                                                    | 2245.0493   | -0.2422 | -108  | 71           | 91 AADV KILNQLLALHEGIEA VK |           |         |                        |      | Mascot      |
| 6 | PREDICTED: tyrosine-protein kinase Src42A-like [Danio rerio] |             |         |       | gi 326675419 |                            | 57185.5   | 6.59    | 13                     | 46 0 |             |

#### Peptide Information

|  | Calc. Mass | Obsrv. Mass | ± da    | ± ppm | Start Seq. | End Sequence Seq.    | Ion Score | C. I. % | Modification                               | Rank | Result Type |
|--|------------|-------------|---------|-------|------------|----------------------|-----------|---------|--------------------------------------------|------|-------------|
|  | 856.4345   | 856.499     | 0.0645  | 75    | 192        | 198 LHEACVK          |           |         | Carbamidomethyl (C)[5]                     |      | Mascot      |
|  | 919.5207   | 919.4553    | -0.0654 | -71   | 218        | 225 SSLTKQQK         |           |         |                                            |      | Mascot      |
|  | 935.4073   | 935.45      | 0.0427  | 46    | 2          | 9 GNCECKPK           |           |         | Carbamidomethyl (C)[3]                     |      | Mascot      |
|  | 1106.5558  | 1106.5294   | -0.0264 | -24   | 435        | 443 MSCVRGIQR        |           |         | Carbamidomethyl (C)[3]                     |      | Mascot      |
|  | 1217.7001  | 1217.5714   | -0.1287 | -106  | 354        | 364 IADFGLAQVRK      |           |         |                                            |      | Mascot      |
|  | 1495.7131  | 1495.8064   | 0.0933  | 62    | 341        | 353 AENILLTEMQSCK    |           |         | Oxidation (M)[9]                           |      | Mascot      |
|  | 1495.7131  | 1495.8064   | 0.0933  | 62    | 341        | 353 AENILLTEMQSCK    |           |         | Oxidation (M)[9]                           |      | Mascot      |
|  | 1594.7828  | 1594.6644   | -0.1184 | -74   | 184        | 198 HEGGLCAKLHEACVK  |           |         |                                            |      | Mascot      |
|  | 1936.9467  | 1936.8641   | -0.0826 | -43   | 338        | 353 DLRAENILLTEMQSCK |           |         | Carbamidomethyl (C)[15], Oxidation (M)[12] |      | Mascot      |

|   |                                              |           |         |     |             |     |                         |                           |        |    |   |
|---|----------------------------------------------|-----------|---------|-----|-------------|-----|-------------------------|---------------------------|--------|----|---|
|   | 2192.804                                     | 2193.0828 | 0.2788  | 127 | 2           | 21  | GNCECKPKCCCCPCCPCC LTK  | Carbamidomethyl (C)[3]    | Mascot |    |   |
|   | 2225.0947                                    | 2225.0671 | -0.0276 | -12 | 390         | 408 | LPVKWMAPEIFDNGEYT SK    |                           | Mascot |    |   |
|   | 2225.0947                                    | 2225.0671 | -0.0276 | -12 | 390         | 408 | LPVKWMAPEIFDNGEYT SK    |                           | Mascot |    |   |
|   | 2245.0735                                    | 2245.0493 | -0.0242 | -11 | 276         | 294 | LYAVCTTSQPMCIIVTELM K   | Carbamidomethyl (C)[5,12] | Mascot |    |   |
|   | 2282.8179                                    | 2283.1208 | 0.3029  | 133 | 1           | 21  | MGNCECKPKCCCCPCCP CCLTK | Oxidation (M)[1]          | Mascot |    |   |
|   | 2282.8179                                    | 2283.1208 | 0.3029  | 133 | 1           | 21  | MGNCECKPKCCCCPCCP CCLTK | Oxidation (M)[1]          | Mascot |    |   |
|   | 2297.095                                     | 2297.1306 | 0.0356  | 15  | 447         | 466 | MPRPAGCPESLYGIMLLC WK   | Oxidation (M)[1,15]       | Mascot |    |   |
| 7 | hypothetical protein LOC393492 [Danio rerio] |           |         |     | gi 41055892 |     | 11150.2                 | 4.26                      | 6      | 42 | 0 |

Peptide Information

| Calc. Mass | Obsrv. Mass | ± da    | ± ppm | Start Seq. | End Seq. | Sequence               | Ion Score | C. I. % | Modification     | Rank | Result Type |
|------------|-------------|---------|-------|------------|----------|------------------------|-----------|---------|------------------|------|-------------|
| 842.4114   | 842.4849    | 0.0735  | 87    | 88         | 94       | QNTHTNK                |           |         |                  |      | Mascot      |
| 1503.7366  | 1503.7324   | -0.0042 | -3    | 63         | 74       | WPPEDFLITEEK           |           |         |                  |      | Mascot      |
| 1695.5988  | 1695.8179   | 0.2191  | 129   | 75         | 87       | EEEEEEEEDEDR           |           |         |                  |      | Mascot      |
| 1699.7158  | 1699.8876   | 0.1718  | 101   | 1          | 15       | MTDVMISAAPMDDMR        |           |         | Oxidation (M)[1] |      | Mascot      |
| 1711.8326  | 1711.8464   | 0.0138  | 8     | 23         | 36       | LTFQIFDPSPDFER         |           |         |                  |      | Mascot      |
| 2299.1775  | 2299.1267   | -0.0508 | -22   | 42         | 62       | ERLPSIVVEATEGEVESG ELR |           |         |                  |      | Mascot      |

8 Wu:fc64b08 protein [Danio rerio] gi|51859557 35347.9 6.26 10 42 0

Peptide Information

| Calc. Mass | Obsrv. Mass | ± da    | ± ppm | Start Seq. | End Seq. | Sequence              | Ion Score | C. I. % | Modification            | Rank | Result Type |
|------------|-------------|---------|-------|------------|----------|-----------------------|-----------|---------|-------------------------|------|-------------|
| 919.4479   | 919.4553    | 0.0074  | 8     | 2          | 11       | PQSAASSSGK            |           |         |                         |      | Mascot      |
| 1051.5643  | 1051.6844   | 0.1201  | 114   | 12         | 21       | LSGGSFAFTR            |           |         |                         |      | Mascot      |
| 1277.634   | 1277.6776   | 0.0436  | 34    | 256        | 265      | MCIIDQIQTR            |           |         | Carbamidomethyl (C)[2]  |      | Mascot      |
| 1578.7428  | 1578.6738   | -0.069  | -44   | 177        | 189      | ANTLRMEQEDEVK         |           |         | Oxidation (M)[6]        |      | Mascot      |
| 1629.8191  | 1629.7964   | -0.0227 | -14   | 154        | 167      | QKNQNLSELEAEAR        |           |         |                         |      | Mascot      |
| 1707.9323  | 1707.7273   | -0.205  | -120  | 191        | 204      | LNELIQKVQCHAVR        |           |         | Carbamidomethyl (C)[10] |      | Mascot      |
| 1711.9086  | 1711.8464   | -0.0622 | -36   | 234        | 247      | RQALEAQEQIEQLR        |           |         |                         |      | Mascot      |
| 1791.8728  | 1791.6786   | -0.1942 | -108  | 256        | 269      | MCIIDQIQTRQEEK        |           |         | Carbamidomethyl (C)[2]  |      | Mascot      |
| 1795.8933  | 1795.7542   | -0.1391 | -77   | 2          | 20       | PQSAASSSGKLSGGSFAF TR |           |         |                         |      | Mascot      |
| 2231.0007  | 2231.0825   | 0.0818  | 37    | 41         | 59       | LHSTADMHNHPEGENER TR  |           |         |                         |      | Mascot      |

9 Wu:fc64b08 protein [Danio rerio] gi|94573495 40652.3 9.43 10 40 0

| Peptide Information |                                                                          |             |         |       |              |                              |           |                         |                  |    |   |
|---------------------|--------------------------------------------------------------------------|-------------|---------|-------|--------------|------------------------------|-----------|-------------------------|------------------|----|---|
|                     | Calc. Mass                                                               | Obsrv. Mass | ± da    | ± ppm | Start Seq.   | End Sequence Seq.            | Ion Score | C. I. % Modification    | Rank Result Type |    |   |
|                     | 919.4479                                                                 | 919.4553    | 0.0074  | 8     | 2            | 11 PQSAASSSGK                |           |                         | Mascot           |    |   |
|                     | 1051.5643                                                                | 1051.6844   | 0.1201  | 114   | 12           | 21 LSGGSATFRR                |           |                         | Mascot           |    |   |
|                     | 1277.634                                                                 | 1277.6776   | 0.0436  | 34    | 256          | 265 MCIIIDQIQTR              |           | Carbamidomethyl (C)[2]  | Mascot           |    |   |
|                     | 1578.7428                                                                | 1578.6738   | -0.069  | -44   | 177          | 189 ANTLRMEQEDEVK            |           | Oxidation (M)[6]        | Mascot           |    |   |
|                     | 1629.8191                                                                | 1629.7964   | -0.0227 | -14   | 154          | 167 QKNQNLSELEAEAR           |           |                         | Mascot           |    |   |
|                     | 1707.9323                                                                | 1707.7273   | -0.205  | -120  | 191          | 204 LNELIQKVQCHAVR           |           | Carbamidomethyl (C)[10] | Mascot           |    |   |
|                     | 1711.9086                                                                | 1711.8464   | -0.0622 | -36   | 234          | 247 RQALEAQEQIEQLR           |           |                         | Mascot           |    |   |
|                     | 1791.8728                                                                | 1791.6786   | -0.1942 | -108  | 256          | 269 MCIIIDQIQTRQEEK          |           | Carbamidomethyl (C)[2]  | Mascot           |    |   |
|                     | 1795.8933                                                                | 1795.7542   | -0.1391 | -77   | 2            | 20 PQSAASSSGKLSGGSAF<br>TR   |           |                         | Mascot           |    |   |
|                     | 2231.0007                                                                | 2231.0825   | 0.0818  | 37    | 41           | 59 LHSTADMHNHPEGENER<br>TR   |           |                         | Mascot           |    |   |
| 10                  | GMP synthase [Danio rerio]                                               |             |         |       | gi 254588106 |                              | 76886.8   | 6.55                    | 12               | 38 | 0 |
| Peptide Information |                                                                          |             |         |       |              |                              |           |                         |                  |    |   |
|                     | Calc. Mass                                                               | Obsrv. Mass | ± da    | ± ppm | Start Seq.   | End Sequence Seq.            | Ion Score | C. I. % Modification    | Rank Result Type |    |   |
|                     | 842.4301                                                                 | 842.4849    | 0.0548  | 65    | 552          | 558 ICHSINR                  |           |                         | Mascot           |    |   |
|                     | 864.3879                                                                 | 864.467     | 0.0791  | 92    | 2            | 9 ALCNGDSK                   |           | Carbamidomethyl (C)[3]  | Mascot           |    |   |
|                     | 870.493                                                                  | 870.5159    | 0.0229  | 26    | 10           | 17 LDIVGEPK                  |           |                         | Mascot           |    |   |
|                     | 938.407                                                                  | 938.4674    | 0.0604  | 64    | 1            | 9 MALCNGDSK                  |           |                         | Mascot           |    |   |
|                     | 1045.5061                                                                | 1045.5367   | 0.0306  | 29    | 412          | 419 DFHKDEVK                 |           |                         | Mascot           |    |   |
|                     | 1179.535                                                                 | 1179.571    | 0.036   | 31    | 524          | 534 SYSYVCGVSSK              |           |                         | Mascot           |    |   |
|                     | 1277.6042                                                                | 1277.6776   | 0.0734  | 57    | 325          | 335 TLNMTTNPEEK              |           |                         | Mascot           |    |   |
|                     | 1572.7628                                                                | 1572.7936   | 0.0308  | 20    | 535          | 547 EAPHWDSLMFLAR            |           |                         | Mascot           |    |   |
|                     | 1572.7628                                                                | 1572.7936   | 0.0308  | 20    | 535          | 547 EAPHWDSLMFLAR            |           |                         | Mascot           |    |   |
|                     | 1578.7759                                                                | 1578.6738   | -0.1021 | -65   | 145          | 158 EEHVLLTHGDSVDK           |           |                         | Mascot           |    |   |
|                     | 1711.9337                                                                | 1711.8464   | -0.0873 | -51   | 165          | 181 IVAQSGNIVAGIANEQK        |           |                         | Mascot           |    |   |
|                     | 2052.0847                                                                | 2052.0471   | -0.0376 | -18   | 535          | 551 EAPHWDSLMFLARLIPR        |           |                         | Mascot           |    |   |
|                     | 2299.1135                                                                | 2299.1267   | 0.0132  | 6     | 121          | 140 SVREDGVFNIALDNSCSL<br>FR |           | Carbamidomethyl (C)[16] | Mascot           |    |   |
| 11                  | PREDICTED: solute carrier family 12 member 6-like, partial [Danio rerio] |             |         |       | gi 326668968 |                              | 26763.8   | 8.83                    | 7                | 38 | 0 |
| Peptide Information |                                                                          |             |         |       |              |                              |           |                         |                  |    |   |
|                     | Calc. Mass                                                               | Obsrv. Mass | ± da    | ± ppm | Start Seq.   | End Sequence Seq.            | Ion Score | C. I. % Modification    | Rank Result Type |    |   |



|  |           |           |         |      |     |     |                          |                        |  |  |  |  |        |
|--|-----------|-----------|---------|------|-----|-----|--------------------------|------------------------|--|--|--|--|--------|
|  | 850.4781  | 850.521   | 0.0429  | 50   | 133 | 139 | TFINTVR                  |                        |  |  |  |  | Mascot |
|  | 1345.7408 | 1345.6646 | -0.0762 | -57  | 83  | 94  | GFVQCIVAQKPR             |                        |  |  |  |  | Mascot |
|  | 1572.9043 | 1572.7936 | -0.1107 | -70  | 81  | 94  | VKGFVQCIVAQKPR           |                        |  |  |  |  | Mascot |
|  | 1572.9043 | 1572.7936 | -0.1107 | -70  | 81  | 94  | VKGFVQCIVAQKPR           |                        |  |  |  |  | Mascot |
|  | 1629.9257 | 1629.7964 | -0.1293 | -79  | 81  | 94  | VKGFVQCIVAQKPR           | Carbamidomethyl (C)[7] |  |  |  |  | Mascot |
|  | 1718.8458 | 1718.8385 | -0.0073 | -4   | 29  | 42  | YIEYHGYYVTMTTLK          |                        |  |  |  |  | Mascot |
|  | 1990.9943 | 1991.0446 | 0.0503  | 25   | 29  | 45  | YIEYHGYYVTMTTLKAGK       | Oxidation (M)[10]      |  |  |  |  | Mascot |
|  | 2211.3223 | 2211.0793 | -0.243  | -110 | 133 | 152 | TFINTVRVTTTAHLALLVL<br>K |                        |  |  |  |  | Mascot |
|  | 2230.0664 | 2230.0957 | 0.0293  | 13   | 197 | 215 | CALRIFTVAQMEDNSIQM<br>K  | Oxidation (M)[11,18]   |  |  |  |  | Mascot |

12 PREDICTED: zinc finger protein 271-like [Danio rerio] gi|326667020 48876.1 9.61 10 37 0

#### Peptide Information

|  | Calc. Mass | Obsrv. Mass | ± da    | ± ppm | Start Seq. | End Seq. | Sequence                 | Ion Score | C. I. % | Modification                                 | Rank | Result Type |
|--|------------|-------------|---------|-------|------------|----------|--------------------------|-----------|---------|----------------------------------------------|------|-------------|
|  | 1572.7474  | 1572.7936   | 0.0462  | 29    | 382        | 394      | SFSQSSYL NKHMK           |           |         | Oxidation (M)[12]                            |      | Mascot      |
|  | 1572.7474  | 1572.7936   | 0.0462  | 29    | 382        | 394      | SFSQSSYL NKHMK           |           |         | Oxidation (M)[12]                            |      | Mascot      |
|  | 1578.723   | 1578.6738   | -0.0492 | -31   | 102        | 114      | SFNSSSHFNKHMR            |           |         |                                              |      | Mascot      |
|  | 1594.7179  | 1594.6644   | -0.0535 | -34   | 102        | 114      | SFNSSSHFNKHMR            |           |         | Oxidation (M)[12]                            |      | Mascot      |
|  | 1695.7651  | 1695.8179   | 0.0528  | 31    | 367        | 381      | IHTGEKPFMCTQCGK          |           |         | Oxidation (M)[9]                             |      | Mascot      |
|  | 1718.8352  | 1718.8385   | 0.0033  | 2     | 395        | 409      | IHTGEKPFCTICQCGK         |           |         | Carbamidomethyl (C)[10]                      |      | Mascot      |
|  | 1763.8203  | 1763.7555   | -0.0648 | -37   | 311        | 325      | IHTGEKPFCTCTQCGK         |           |         | Carbamidomethyl (C)[10,13]                   |      | Mascot      |
|  | 1763.8203  | 1763.7555   | -0.0648 | -37   | 3          | 17       | IHTGEKPFCTCTQCGK         |           |         | Carbamidomethyl (C)[10,13]                   |      | Mascot      |
|  | 1791.8405  | 1791.6786   | -0.1619 | -90   | 419        | 433      | DLYLSPEIMCGVHNK          |           |         | Carbamidomethyl (C)[10], Oxidation (M)[9]    |      | Mascot      |
|  | 1936.9191  | 1936.8641   | -0.055  | -28   | 1          | 17       | MRIHTGEKPFCTCTQCGK       |           |         |                                              |      | Mascot      |
|  | 1993.9404  | 1993.9196   | -0.0208 | -10   | 1          | 17       | MRIHTGEKPFCTCTQCGK       |           |         | Carbamidomethyl (C)[12]                      |      | Mascot      |
|  | 2192.9819  | 2193.0828   | 0.1009  | 46    | 364        | 381      | HMRIHTGEKPFMCTQCG<br>K   |           |         | Carbamidomethyl (C)[13], Oxidation (M)[2,12] |      | Mascot      |
|  | 2211.0369  | 2211.0793   | 0.0424  | 19    | 139        | 157      | HHMRIHTGEKPFCTQCG<br>K   |           |         |                                              |      | Mascot      |
|  | 2268.0583  | 2267.9756   | -0.0827 | -36   | 139        | 157      | HHMRIHTGEKPFCTQCG<br>K   |           |         | Carbamidomethyl (C)[14]                      |      | Mascot      |
|  | 2268.0583  | 2267.9756   | -0.0827 | -36   | 139        | 157      | HHMRIHTGEKPFCTQCG<br>K   |           |         | Carbamidomethyl (C)[14]                      |      | Mascot      |
|  | 2284.0532  | 2284.1187   | 0.0655  | 29    | 139        | 157      | HHMRIHTGEKPFCTQCG<br>K   |           |         | Carbamidomethyl (C)[14], Oxidation (M)[3]    |      | Mascot      |
|  | 2299.0957  | 2299.1267   | 0.031   | 13    | 63         | 82       | DKPFTCTQCGRSFSHLS<br>SLK |           |         | Carbamidomethyl (C)[6]                       |      | Mascot      |

13 novel protein [Danio rerio] gi|126632590 18984.4 8.81 7 37 0

#### Peptide Information

|  | Calc. Mass | Obsrv. Mass | ± da | ± ppm | Start Seq. | End Seq. | Sequence | Ion Score | C. I. % | Modification | Rank | Result Type |
|--|------------|-------------|------|-------|------------|----------|----------|-----------|---------|--------------|------|-------------|
|--|------------|-------------|------|-------|------------|----------|----------|-----------|---------|--------------|------|-------------|

|                     |                                                          |            |             |         |       |            |             |                             |      |           |                         |                                            |      |             |
|---------------------|----------------------------------------------------------|------------|-------------|---------|-------|------------|-------------|-----------------------------|------|-----------|-------------------------|--------------------------------------------|------|-------------|
|                     |                                                          | 811.3259   | 811.3922    | 0.0663  | 82    | 154        | 160         | MGCCEIR                     |      |           |                         |                                            |      | Mascot      |
|                     |                                                          | 882.4944   | 882.5421    | 0.0477  | 54    | 72         | 78          | LISAHWR                     |      |           |                         |                                            |      | Mascot      |
|                     |                                                          | 996.4423   | 996.5714    | 0.1291  | 130   | 152        | 160         | GKMGCCEIR                   |      |           |                         |                                            |      | Mascot      |
|                     |                                                          | 1503.6211  | 1503.7324   | 0.1113  | 74    | 154        | 166         | MGCCEIRYGCSPK               |      |           | Carbamidomethyl (C)[3]  |                                            |      | Mascot      |
|                     |                                                          | 1578.8123  | 1578.6738   | -0.1385 | -88   | 79         | 92          | LNDSLNVYDILSGR              |      |           |                         |                                            |      | Mascot      |
|                     |                                                          | 1763.8971  | 1763.7555   | -0.1416 | -80   | 17         | 30          | YSIPRISICYVMFR              |      |           | Oxidation (M)[12]       |                                            |      | Mascot      |
|                     |                                                          | 1763.8971  | 1763.7555   | -0.1416 | -80   | 17         | 30          | YSIPRISICYVMFR              |      |           | Oxidation (M)[12]       |                                            |      | Mascot      |
|                     |                                                          | 2284.0378  | 2284.1187   | 0.0809  | 35    | 50         | 69          | TFEGFIGGSALFPCYYDP<br>SR    |      |           | Carbamidomethyl (C)[14] |                                            |      | Mascot      |
| 14                  | immunoglobulin heavy chain variable region [Danio rerio] |            |             |         |       |            | gi 13375189 | 15925.7                     | 6.71 | 6         | 37                      | 0                                          |      |             |
| Peptide Information |                                                          |            |             |         |       |            |             |                             |      |           |                         |                                            |      |             |
|                     |                                                          | Calc. Mass | Obsrv. Mass | ± da    | ± ppm | Start Seq. | End Seq.    | Sequence                    |      | Ion Score | C. I. %                 | Modification                               | Rank | Result Type |
|                     |                                                          | 811.3865   | 811.3922    | 0.0057  | 7     | 134        | 141         | GTMVTVTS                    |      |           |                         | Oxidation (M)[3]                           |      | Mascot      |
|                     |                                                          | 1277.634   | 1277.6776   | 0.0436  | 34    | 34         | 44          | RPGETVMISCK                 |      |           |                         | Carbamidomethyl (C)[10]                    |      | Mascot      |
|                     |                                                          | 1993.9412  | 1993.9196   | -0.0216 | -11   | 45         | 59          | ISGFTMTRYMHWIR              |      |           |                         | Oxidation (M)[6,11]                        |      | Mascot      |
|                     |                                                          | 2233.1316  | 2233.0371   | -0.0945 | -42   | 25         | 44          | LDQSPSVTKRPGETVMISCK        |      |           |                         | Carbamidomethyl (C)[19]                    |      | Mascot      |
|                     |                                                          | 2245.0442  | 2245.0493   | 0.0051  | 2     | 87         | 105         | NQFTLSEDVSQNMQYLEAK         |      |           |                         |                                            |      | Mascot      |
|                     |                                                          | 2617.2561  | 2617.0767   | -0.1794 | -69   | 87         | 108         | NQFTLSEDVSQNMQYLEAKSLR      |      |           |                         | Oxidation (M)[13]                          |      | Mascot      |
| 15                  | glycine cleavage system protein H [Danio rerio]          |            |             |         |       |            | gi 61806486 | 18748.2                     | 4.83 | 6         | 36                      | 0                                          |      |             |
| Peptide Information |                                                          |            |             |         |       |            |             |                             |      |           |                         |                                            |      |             |
|                     |                                                          | Calc. Mass | Obsrv. Mass | ± da    | ± ppm | Start Seq. | End Seq.    | Sequence                    |      | Ion Score | C. I. %                 | Modification                               | Rank | Result Type |
|                     |                                                          | 850.4273   | 850.521     | 0.0937  | 110   | 2          | 8           | AMCTVLR                     |      |           |                         | Carbamidomethyl (C)[3]                     |      | Mascot      |
|                     |                                                          | 1217.6062  | 1217.5714   | -0.0348 | -29   | 54         | 62          | FTDKHEWVR                   |      |           |                         |                                            |      | Mascot      |
|                     |                                                          | 2080.071   | 2080.0183   | -0.0527 | -25   | 2          | 20          | AMCTVLRCSVSVLTSSLP<br>R     |      |           |                         | Carbamidomethyl (C)[3]                     |      | Mascot      |
|                     |                                                          | 2211.1116  | 2211.0793   | -0.0323 | -15   | 1          | 20          | MAMCTVLRCSVSVLTSS<br>LPR    |      |           |                         | Carbamidomethyl (C)[4]                     |      | Mascot      |
|                     |                                                          | 2268.1331  | 2267.9756   | -0.1575 | -69   | 1          | 20          | MAMCTVLRCSVSVLTSS<br>LPR    |      |           |                         | Carbamidomethyl (C)[4,9]                   |      | Mascot      |
|                     |                                                          | 2268.1331  | 2267.9756   | -0.1575 | -69   | 1          | 20          | MAMCTVLRCSVSVLTSS<br>LPR    |      |           |                         | Carbamidomethyl (C)[4,9]                   |      | Mascot      |
|                     |                                                          | 2269.0364  | 2268.9763   | -0.0601 | -26   | 148        | 167         | MTVSIPEELDGLMDEAAY<br>ER    |      |           |                         |                                            |      | Mascot      |
|                     |                                                          | 2284.1279  | 2284.1187   | -0.0092 | -4    | 1          | 20          | MAMCTVLRCSVSVLTSS<br>LPR    |      |           |                         | Carbamidomethyl (C)[4,9], Oxidation (M)[1] |      | Mascot      |
|                     |                                                          | 2705.2683  | 2705.1084   | -0.1599 | -59   | 148        | 170         | MTVSIPEELDGLMDEAAY<br>ERYIK |      |           |                         | Oxidation (M)[1,13]                        |      | Mascot      |

16 PREDICTED: hypothetical protein LOC569436 [Danio rerio] gi|326678363 352771.2 7.92 27 36 0

Peptide Information

| Calc. Mass | Obsrv. Mass | $\pm$ da | $\pm$ ppm | Start Seq. | End Seq. | Sequence              | Ion Score | C. I. % | Modification                             | Rank | Result Type |
|------------|-------------|----------|-----------|------------|----------|-----------------------|-----------|---------|------------------------------------------|------|-------------|
| 842.4743   | 842.4849    | 0.0106   | 13        | 2664       | 2669     | HFRINR                |           |         |                                          |      | Mascot      |
| 856.4311   | 856.499     | 0.0679   | 79        | 1282       | 1287     | ENYFRK                |           |         |                                          |      | Mascot      |
| 864.4131   | 864.467     | 0.0539   | 62        | 603        | 610      | LGAEMSEK              |           |         |                                          |      | Mascot      |
| 922.4298   | 922.4402    | 0.0104   | 11        | 1902       | 1910     | TNLGDSGMK             |           |         |                                          |      | Mascot      |
| 935.425    | 935.45      | 0.025    | 27        | 2720       | 2727     | NNNCTLEK              |           |         |                                          |      | Mascot      |
| 938.4247   | 938.4674    | 0.0427   | 46        | 1902       | 1910     | TNLGDSGMK             |           |         | Oxidation (M)[8]                         |      | Mascot      |
| 1165.5483  | 1165.7137   | 0.1654   | 142       | 922        | 932      | SKGDGPNFSEK           |           |         |                                          |      | Mascot      |
| 1179.6256  | 1179.571    | -0.0546  | -46       | 2297       | 2306     | LSELTDFNK             |           |         |                                          |      | Mascot      |
| 1217.6195  | 1217.5714   | -0.0481  | -40       | 2142       | 2152     | LSALLMDSHSK           |           |         | Oxidation (M)[6]                         |      | Mascot      |
| 1475.647   | 1475.7114   | 0.0644   | 44        | 1333       | 1345     | RNNENNQADDASK         |           |         |                                          |      | Mascot      |
| 1495.7859  | 1495.8064   | 0.0205   | 14        | 1690       | 1702     | STMCKLEILGLSK         |           |         | Carbamidomethyl (C)[4], Oxidation (M)[3] |      | Mascot      |
| 1495.7859  | 1495.8064   | 0.0205   | 14        | 1690       | 1702     | STMCKLEILGLSK         |           |         | Carbamidomethyl (C)[4], Oxidation (M)[3] |      | Mascot      |
| 1503.8451  | 1503.7324   | -0.1127  | -75       | 1695       | 1708     | LEILGLSKCGITEK        |           |         |                                          |      | Mascot      |
| 1572.8016  | 1572.7936   | -0.008   | -5        | 1502       | 1515     | ALES DTGHLDFVR        |           |         |                                          |      | Mascot      |
| 1572.8016  | 1572.7936   | -0.008   | -5        | 1502       | 1515     | ALES DTGHLDFVR        |           |         |                                          |      | Mascot      |
| 1578.703   | 1578.6738   | -0.0292  | -18       | 854        | 868      | GDGPNFSEQQPSSTK       |           |         |                                          |      | Mascot      |
| 1594.8845  | 1594.6644   | -0.2201  | -138      | 589        | 602      | HNKCILISINNGR         |           |         |                                          |      | Mascot      |
| 1699.9086  | 1699.8876   | -0.021   | -12       | 2183       | 2197     | ELNLNNSRLLD SGVR      |           |         |                                          |      | Mascot      |
| 1707.8007  | 1707.7273   | -0.0734  | -43       | 1474       | 1487     | KNVFMDESPELENR        |           |         |                                          |      | Mascot      |
| 1720.7893  | 1720.803    | 0.0137   | 8         | 297        | 311      | IHTGDRPYSCVQCGK       |           |         | Carbamidomethyl (C)[10]                  |      | Mascot      |
| 1720.7893  | 1720.803    | 0.0137   | 8         | 297        | 311      | IHTGDRPYSCVQCGK       |           |         | Carbamidomethyl (C)[10]                  |      | Mascot      |
| 1785.0004  | 1784.8604   | -0.14    | -78       | 1224       | 1240     | DVSSPASLDVLLTNLIK     |           |         |                                          |      | Mascot      |
| 1785.0004  | 1784.8604   | -0.14    | -78       | 1224       | 1240     | DVSSPASLDVLLTNLIK     |           |         |                                          |      | Mascot      |
| 1861.9119  | 1861.8936   | -0.0183  | -10       | 2615       | 2629     | FFQGPAEETYQYLIR       |           |         |                                          |      | Mascot      |
| 1861.9119  | 1861.8936   | -0.0183  | -10       | 2615       | 2629     | FFQGPAEETYQYLIR       |           |         |                                          |      | Mascot      |
| 1993.9246  | 1993.9196   | -0.005   | -3        | 1066       | 1082     | LLNDVYTDLYMTQCASK     |           |         | Oxidation (M)[11]                        |      | Mascot      |
| 2080.0896  | 2080.0183   | -0.0713  | -34       | 2269       | 2287     | FLSPA ADEVCFVTRIVG K  |           |         |                                          |      | Mascot      |
| 2224.9797  | 2225.0671   | 0.0874   | 39        | 321        | 339      | HHMSLHNEEKPYVCGQC GR  |           |         |                                          |      | Mascot      |
| 2224.9797  | 2225.0671   | 0.0874   | 39        | 321        | 339      | HHMSLHNEEKPYVCGQC GR  |           |         |                                          |      | Mascot      |
| 2232.8818  | 2233.0371   | 0.1553   | 70        | 181        | 199      | YHMKMHSDETA FSCEEC GK |           |         |                                          |      | Mascot      |
| 2269.1282  | 2268.9763   | -0.1519  | -67       | 2038       | 2056     | DLQLRFLSSEADNVCQF     |           |         | Carbamidomethyl (C)[15]                  |      | Mascot      |

|    |                                 |           |         |     |              |      |                             |      |   |                              |   |  |  |        |
|----|---------------------------------|-----------|---------|-----|--------------|------|-----------------------------|------|---|------------------------------|---|--|--|--------|
|    | 2283.2068                       | 2283.1208 | -0.086  | -38 | 1358         | 1375 | TLTQMYTHFLRFQILQSR          |      |   |                              |   |  |  | Mascot |
|    | 2283.2068                       | 2283.1208 | -0.086  | -38 | 1358         | 1375 | TLTQMYTHFLRFQILQSR          |      |   |                              |   |  |  | Mascot |
|    | 2297.144                        | 2297.1306 | -0.0134 | -6  | 2728         | 2748 | LNLSDCSISEEGYKALAS<br>ALR   |      |   | Carbamidomethyl (C)[6]       |   |  |  | Mascot |
|    | 2299.2017                       | 2299.1267 | -0.075  | -33 | 1358         | 1375 | TLTQMYTHFLRFQILQSR          |      |   | Oxidation (M)[5]             |   |  |  | Mascot |
|    | 2705.1799                       | 2705.1084 | -0.0715 | -26 | 233          | 255  | ASVNRHMCIHSGEKPYA<br>CDQCGK |      |   | Carbamidomethyl (C)[8,18,21] |   |  |  | Mascot |
| 17 | LOC560618 protein [Danio rerio] |           |         |     | gi 183985554 |      | 36438.9                     | 5.69 | 8 | 35                           | 0 |  |  |        |

#### Peptide Information

|  | Calc. Mass | Obsrv. Mass | ± da    | ± ppm | Start Seq. | End Seq. | Sequence                 | Ion Score | C. I. | % Modification          | Rank | Result Type |
|--|------------|-------------|---------|-------|------------|----------|--------------------------|-----------|-------|-------------------------|------|-------------|
|  | 1165.6113  | 1165.7137   | 0.1024  | 88    | 173        | 182      | LPSHWSSVPR               |           |       |                         |      | Mascot      |
|  | 1231.5199  | 1231.5604   | 0.0405  | 33    | 2          | 11       | VCMGMMMMIK               |           |       | Carbamidomethyl (C)[2]  |      | Mascot      |
|  | 1503.7407  | 1503.7324   | -0.0083 | -6    | 142        | 154      | VHQMTTGKPMTTTR           |           |       | Oxidation (M)[4]        |      | Mascot      |
|  | 1699.8696  | 1699.8876   | 0.018   | 11    | 102        | 117      | VNPNCNGNGKTGVVVWR        |           |       |                         |      | Mascot      |
|  | 1711.8544  | 1711.8464   | -0.008  | -5    | 72         | 86       | AQLAEAQKHGLETCT          |           |       | Carbamidomethyl (C)[14] |      | Mascot      |
|  | 1718.8079  | 1718.8385   | 0.0306  | 18    | 262        | 275      | EDLQKTQEEQVEDK           |           |       |                         |      | Mascot      |
|  | 1763.9762  | 1763.7555   | -0.2207 | -125  | 155        | 172      | SSVAPTAGVHLRGSPLS<br>K   |           |       |                         |      | Mascot      |
|  | 1763.9762  | 1763.7555   | -0.2207 | -125  | 155        | 172      | SSVAPTAGVHLRGSPLS<br>K   |           |       |                         |      | Mascot      |
|  | 2268.0935  | 2267.9756   | -0.1179 | -52   | 12         | 31       | MVLFSGMFMSGLAFDMQ<br>LVK |           |       | Oxidation (M)[1]        |      | Mascot      |
|  | 2268.0935  | 2267.9756   | -0.1179 | -52   | 12         | 31       | MVLFSGMFMSGLAFDMQ<br>LVK |           |       | Oxidation (M)[1]        |      | Mascot      |
|  | 2284.0884  | 2284.1187   | 0.0303  | 13    | 12         | 31       | MVLFSGMFMSGLAFDMQ<br>LVK |           |       | Oxidation (M)[1,7]      |      | Mascot      |

18 transcription elongation factor A protein 3 [Danio rerio] gi|45387785 45894.2 9.44 10 34 0

#### Peptide Information

|  | Calc. Mass | Obsrv. Mass | ± da    | ± ppm | Start Seq. | End Seq. | Sequence                | Ion Score | C. I. | % Modification   | Rank | Result Type |
|--|------------|-------------|---------|-------|------------|----------|-------------------------|-----------|-------|------------------|------|-------------|
|  | 856.4233   | 856.499     | 0.0757  | 88    | 290        | 296      | ATDMKYK                 |           |       |                  |      | Mascot      |
|  | 864.4607   | 864.467     | 0.0063  | 7     | 14         | 20       | LDKMVSR                 |           |       | Oxidation (M)[4] |      | Mascot      |
|  | 919.4479   | 919.4553    | 0.0074  | 8     | 109        | 116      | TSPEKDSR                |           |       |                  |      | Mascot      |
|  | 1231.61    | 1231.5604   | -0.0496 | -40   | 21         | 31       | NNMDGALDLLR             |           |       |                  |      | Mascot      |
|  | 1594.8258  | 1594.6644   | -0.1614 | -101  | 35         | 47       | DFNMTLKLLQDTR           |           |       |                  |      | Mascot      |
|  | 1720.8469  | 1720.803    | -0.0439 | -26   | 17         | 31       | MVSRNNMDGALDLLR         |           |       | Oxidation (M)[1] |      | Mascot      |
|  | 1720.8469  | 1720.803    | -0.0439 | -26   | 17         | 31       | MVSRNNMDGALDLLR         |           |       | Oxidation (M)[1] |      | Mascot      |
|  | 1936.9471  | 1936.8641   | -0.083  | -43   | 95         | 113      | NGSHPSKPSGSPSRTSP<br>EK |           |       |                  |      | Mascot      |
|  | 2231.1606  | 2231.0825   | -0.0781 | -35   | 117        | 136      | KDAPVDFFPPPSINSHPP      |           |       |                  |      | Mascot      |

|    |                                                  |           |        |    |     |              |                                   |      |                                          |        |   |
|----|--------------------------------------------------|-----------|--------|----|-----|--------------|-----------------------------------|------|------------------------------------------|--------|---|
|    | 2616.0752                                        | 2616.3196 | 0.2444 | 93 | 268 | 289          | LR<br>DYGTNCEAMGAIEDIYIY<br>QETK  |      | Carbamidomethyl (C)[6], Oxidation (M)[9] | Mascot |   |
|    | 3337.3672                                        | 3337.6877 | 0.3205 | 96 | 262 | 289          | TDDDYKDYGTNCEAMGA<br>EIEDIYIYQETK |      | Carbamidomethyl (C)[12]                  | Mascot |   |
| 19 | PREDICTED: UHRF1-binding protein 1 [Danio rerio] |           |        |    |     | gi 326678910 | 147432.6                          | 5.48 | 15                                       | 34     | 0 |

#### Peptide Information

| Calc. Mass | Obsrv. Mass | ± da    | ± ppm | Start Seq. | End Seq. | Sequence                         | Ion Score | C. I. % | Modification                                    | Rank | Result Type |
|------------|-------------|---------|-------|------------|----------|----------------------------------|-----------|---------|-------------------------------------------------|------|-------------|
| 811.38     | 811.3922    | 0.0122  | 15    | 458        | 464      | SSCMVIR                          |           |         | Oxidation (M)[4]                                |      | Mascot      |
| 882.4501   | 882.5421    | 0.092   | 104   | 797        | 803      | MKDYLGR                          |           |         |                                                 |      | Mascot      |
| 919.4413   | 919.4553    | 0.014   | 15    | 1324       | 1330     | AVCERER                          |           |         | Carbamidomethyl (C)[3]                          |      | Mascot      |
| 935.4944   | 935.45      | -0.0444 | -47   | 691        | 699      | VTLGFDGAR                        |           |         |                                                 |      | Mascot      |
| 1045.5425  | 1045.5367   | -0.0058 | -6    | 182        | 189      | EINWQSLR                         |           |         |                                                 |      | Mascot      |
| 1231.526   | 1231.5604   | 0.0344  | 28    | 728        | 737      | DSHCIEDDLK                       |           |         | Carbamidomethyl (C)[4]                          |      | Mascot      |
| 1572.7627  | 1572.7936   | 0.0309  | 20    | 637        | 649      | SFFNTTQCKPFPR                    |           |         |                                                 |      | Mascot      |
| 1572.7627  | 1572.7936   | 0.0309  | 20    | 637        | 649      | SFFNTTQCKPFPR                    |           |         |                                                 |      | Mascot      |
| 1629.7842  | 1629.7964   | 0.0122  | 7     | 637        | 649      | SFFNTTQCKPFPR                    |           |         | Carbamidomethyl (C)[8]                          |      | Mascot      |
| 1720.8992  | 1720.803    | -0.0962 | -56   | 784        | 796      | MWLNHYQFIALLR                    |           |         | Oxidation (M)[1]                                |      | Mascot      |
| 1720.8992  | 1720.803    | -0.0962 | -56   | 784        | 796      | MWLNHYQFIALLR                    |           |         | Oxidation (M)[1]                                |      | Mascot      |
| 1936.9871  | 1936.8641   | -0.123  | -64   | 77         | 92       | TSPICFLDKVEVEMR                  |           |         | Carbamidomethyl (C)[5]                          |      | Mascot      |
| 2229.9143  | 2230.0957   | 0.1814  | 81    | 1191       | 1209     | HCAQSESLGFMEVCVSG<br>CR          |           |         | Carbamidomethyl (C)[2,14,18], Oxidation (M)[11] |      | Mascot      |
| 2284.0662  | 2284.1187   | 0.0525  | 23    | 738        | 757      | SPSRFSQEFSCAPNDLIS<br>NK         |           |         | Carbamidomethyl (C)[11]                         |      | Mascot      |
| 2384.1729  | 2383.8904   | -0.2825 | -118  | 932        | 954      | HSSTFSIEGDFSSALNAT<br>KGVTK      |           |         |                                                 |      | Mascot      |
| 2616.197   | 2616.3196   | 0.1226  | 47    | 706        | 727      | TLPFVEPFMSMLWMCHP<br>DAFTK       |           |         | Oxidation (M)[10,14]                            |      | Mascot      |
| 2617.3132  | 2617.0767   | -0.2365 | -90   | 140        | 161      | AFHASFQLWLQGC SLN<br>PKWQK       |           |         |                                                 |      | Mascot      |
| 3337.426   | 3337.6877   | 0.2617  | 78    | 359        | 386      | LGFDYYPFHRPGDGCQH<br>WERHCGAMDSR |           |         |                                                 |      | Mascot      |

|    |                                                                               |  |  |  |  |              |          |      |   |    |   |    |   |
|----|-------------------------------------------------------------------------------|--|--|--|--|--------------|----------|------|---|----|---|----|---|
| 20 | PREDICTED: potassium voltage-gated channel subfamily H member 8 [Danio rerio] |  |  |  |  | gi 292624195 | 124090.7 | 6.56 | 9 | 34 | 0 | 20 | 0 |
|----|-------------------------------------------------------------------------------|--|--|--|--|--------------|----------|------|---|----|---|----|---|

#### Peptide Information

| Calc. Mass | Obsrv. Mass | ± da    | ± ppm | Start Seq. | End Seq. | Sequence    | Ion Score | C. I. % | Modification     | Rank | Result Type |
|------------|-------------|---------|-------|------------|----------|-------------|-----------|---------|------------------|------|-------------|
| 856.4747   | 856.499     | 0.0243  | 28    | 953        | 960      | RGGSQVPR    |           |         |                  |      | Mascot      |
| 919.5029   | 919.4553    | -0.0476 | -52   | 340        | 346      | LLQKMDR     |           |         | Oxidation (M)[5] |      | Mascot      |
| 1165.575   | 1165.7137   | 0.1387  | 119   | 481        | 489      | WSSYHTRTK   |           |         |                  |      | Mascot      |
| 1179.746   | 1179.571    | -0.175  | -148  | 320        | 330      | VSVVSVVHLLK |           |         |                  |      | Mascot      |

|    |                                  |           |         |     |             |     |                         |      |   |    |                            |        |
|----|----------------------------------|-----------|---------|-----|-------------|-----|-------------------------|------|---|----|----------------------------|--------|
|    | 1503.6237                        | 1503.7324 | 0.1087  | 72  | 686         | 698 | MSSKSMDTQMEGR           |      |   |    | Oxidation (M)[1]           | Mascot |
|    | 1720.8878                        | 1720.803  | -0.0848 | -49 | 167         | 181 | SSTVLYHISGHLHNR         | 20   |   | 0  |                            | Mascot |
|    | 1720.8878                        | 1720.803  | -0.0848 | -49 | 167         | 181 | SSTVLYHISGHLHNR         |      |   |    |                            | Mascot |
|    | 1862.0244                        | 1861.8936 | -0.1308 | -70 | 102         | 117 | KSGSVFWCLLDIVPIK        |      |   |    | Carbamidomethyl (C)[8]     | Mascot |
|    | 1862.0244                        | 1861.8936 | -0.1308 | -70 | 102         | 117 | KSGSVFWCLLDIVPIK        |      |   |    | Carbamidomethyl (C)[8]     | Mascot |
|    | 1994.0414                        | 1993.9196 | -0.1218 | -61 | 824         | 841 | HLNQEVSLSGREVAELG<br>R  |      |   |    |                            | Mascot |
|    | 2211.0896                        | 2211.0793 | -0.0103 | -5  | 628         | 646 | TNADVKALTYCDLQCINL<br>R |      |   |    | Carbamidomethyl (C)[11]    | Mascot |
|    | 2268.1111                        | 2267.9756 | -0.1355 | -60 | 628         | 646 | TNADVKALTYCDLQCINL<br>R |      |   |    | Carbamidomethyl (C)[11,15] | Mascot |
|    | 2268.1111                        | 2267.9756 | -0.1355 | -60 | 628         | 646 | TNADVKALTYCDLQCINL<br>R |      |   |    | Carbamidomethyl (C)[11,15] | Mascot |
| 21 | Wu:fc64b08 protein [Danio rerio] |           |         |     | gi 60551942 |     | 38263.5                 | 5.97 | 9 | 34 | 0                          |        |

#### Peptide Information

| Calc. Mass | Obsrv. Mass | ± da    | ± ppm | Start Seq. | End Seq. | Sequence                 | Ion Score | C. I. | % Modification          | Rank | Result Type |
|------------|-------------|---------|-------|------------|----------|--------------------------|-----------|-------|-------------------------|------|-------------|
| 919.4479   | 919.4553    | 0.0074  | 8     | 2          | 11       | PQSAASSSGK               |           |       |                         |      | Mascot      |
| 1051.5643  | 1051.6844   | 0.1201  | 114   | 12         | 21       | LSGGSFAFTR               |           |       |                         |      | Mascot      |
| 1277.634   | 1277.6776   | 0.0436  | 34    | 256        | 265      | MCIIDQIQTR               |           |       | Carbamidomethyl (C)[2]  |      | Mascot      |
| 1578.7428  | 1578.6738   | -0.069  | -44   | 177        | 189      | ANTLRMEQEDEVK            |           |       | Oxidation (M)[6]        |      | Mascot      |
| 1629.8191  | 1629.7964   | -0.0227 | -14   | 154        | 167      | QKNQNLSELEAEAR           |           |       |                         |      | Mascot      |
| 1707.9323  | 1707.7273   | -0.205  | -120  | 191        | 204      | LNELIQKVQCHAVR           |           |       | Carbamidomethyl (C)[10] |      | Mascot      |
| 1791.8728  | 1791.6786   | -0.1942 | -108  | 256        | 269      | MCIIDQIQTRQEEK           |           |       | Carbamidomethyl (C)[2]  |      | Mascot      |
| 1795.8933  | 1795.7542   | -0.1391 | -77   | 2          | 20       | PQSAASSSGKLSGGSFAF<br>TR |           |       |                         |      | Mascot      |
| 2231.0007  | 2231.0825   | 0.0818  | 37    | 41         | 59       | LHSTADMHNHPEGENER<br>TR  |           |       |                         |      | Mascot      |

22 novel protein with Zinc finger, C3HC4 type (RING finger) and B-box zinc finger domains [Danio rerio]

#### Peptide Information

| Calc. Mass | Obsrv. Mass | ± da    | ± ppm | Start Seq. | End Seq. | Sequence    | Ion Score | C. I. | % Modification         | Rank | Result Type |
|------------|-------------|---------|-------|------------|----------|-------------|-----------|-------|------------------------|------|-------------|
| 864.4573   | 864.467     | 0.0097  | 11    | 152        | 158      | VKGEFER     |           |       |                        |      | Mascot      |
| 919.4366   | 919.4553    | 0.0187  | 20    | 198        | 204      | EEEEQKK     |           |       |                        |      | Mascot      |
| 935.4693   | 935.45      | -0.0193 | -21   | 154        | 161      | GEFERAAR    |           |       |                        |      | Mascot      |
| 1045.6152  | 1045.5367   | -0.0785 | -75   | 57         | 66       | GHPPVNLALK  |           |       |                        |      | Mascot      |
| 1106.4718  | 1106.5294   | 0.0576  | 52    | 43         | 51       | NTQECPVCR   |           |       | Carbamidomethyl (C)[5] |      | Mascot      |
| 1165.6285  | 1165.7137   | 0.0852  | 73    | 95         | 103      | LKLFLEDK    |           |       | Carbamidomethyl (C)[5] |      | Mascot      |
| 1310.6812  | 1310.5654   | -0.1158 | -88   | 165        | 175      | AQAETHERQIK |           |       |                        |      | Mascot      |

|    |                                                |           |         |     |    |    |                     |        |     |   |    |                            |        |
|----|------------------------------------------------|-----------|---------|-----|----|----|---------------------|--------|-----|---|----|----------------------------|--------|
|    | 1720.8435                                      | 1720.803  | -0.0405 | -24 | 67 | 80 | NLCFLAEGNERR        |        |     |   |    | Carbamidomethyl (C)[3]     | Mascot |
|    | 1720.8435                                      | 1720.803  | -0.0405 | -24 | 67 | 80 | NLCFLAEGNERR        |        |     |   |    | Carbamidomethyl (C)[3]     | Mascot |
|    | 2051.9089                                      | 2052.0471 | 0.1382  | 67  | 2  | 19 | ASSAEYDYICPVCQDIFK  |        |     |   |    |                            | Mascot |
|    | 2296.9922                                      | 2297.1306 | 0.1384  | 60  | 1  | 19 | MASSAEYDYICPVCQDIFK |        |     |   |    | Carbamidomethyl (C)[11,14] | Mascot |
| 23 | sphingosine-1-phosphate receptor [Danio rerio] |           |         |     |    |    | gi 333034503        | 3478.7 | 9.3 | 4 | 33 | 0                          |        |

#### Peptide Information

| Calc. Mass | Obsrv. Mass | ± da    | ± ppm | Start Seq. | End Seq. | Sequence           | Ion Score | C. I. | % | Modification                                 | Rank | Result Type |
|------------|-------------|---------|-------|------------|----------|--------------------|-----------|-------|---|----------------------------------------------|------|-------------|
| 1475.7021  | 1475.7114   | 0.0093  | 6     | 6          | 18       | LFAGFCQAVTMSK      |           |       |   | Carbamidomethyl (C)[6], Oxidation (M)[11]    |      | Mascot      |
| 1503.7842  | 1503.7324   | -0.0518 | -34   | 19         | 30       | YSQYFNKTLIQV       |           |       |   |                                              |      | Mascot      |
| 1936.9077  | 1936.8641   | -0.0436 | -23   | 2          | 18       | TTCRLFAGFCQAVTMSK  |           |       |   | Carbamidomethyl (C)[3], Oxidation (M)[15]    |      | Mascot      |
| 1993.9292  | 1993.9196   | -0.0096 | -5    | 2          | 18       | TTCRLFAGFCQAVTMSK  |           |       |   | Carbamidomethyl (C)[3,10], Oxidation (M)[15] |      | Mascot      |
| 2051.9534  | 2052.0471   | 0.0937  | 46    | 1          | 18       | MTTCRLFAGFCQAVTMSK |           |       |   | Carbamidomethyl (C)[4]                       |      | Mascot      |

|    |                                                   |  |  |  |  |  |              |         |      |   |    |   |  |
|----|---------------------------------------------------|--|--|--|--|--|--------------|---------|------|---|----|---|--|
| 24 | PREDICTED: transmembrane protein 81 [Danio rerio] |  |  |  |  |  | gi 125824086 | 29288.1 | 8.49 | 7 | 32 | 0 |  |
|----|---------------------------------------------------|--|--|--|--|--|--------------|---------|------|---|----|---|--|

#### Peptide Information

| Calc. Mass | Obsrv. Mass | ± da    | ± ppm | Start Seq. | End Seq. | Sequence              | Ion Score | C. I. | % | Modification                              | Rank | Result Type |
|------------|-------------|---------|-------|------------|----------|-----------------------|-----------|-------|---|-------------------------------------------|------|-------------|
| 811.5035   | 811.3922    | -0.1113 | -137  | 146        | 152      | VVLDPRL               |           |       |   |                                           |      | Mascot      |
| 850.3975   | 850.521     | 0.1235  | 145   | 161        | 168      | CDVLDTGK              |           |       |   |                                           |      | Mascot      |
| 938.4828   | 938.4674    | -0.0154 | -16   | 138        | 145      | YEALSLDK              |           |       |   |                                           |      | Mascot      |
| 1165.5994  | 1165.7137   | 0.1143  | 98    | 68         | 77       | NISTSSCKLR            |           |       |   | Carbamidomethyl (C)[7]                    |      | Mascot      |
| 1707.8114  | 1707.7273   | -0.0841 | -49   | 100        | 114      | LVLDCLEEVMEAMGR       |           |       |   |                                           |      | Mascot      |
| 1936.9288  | 1936.8641   | -0.0647 | -33   | 99         | 114      | RLVLDCLEEVMEAMGR      |           |       |   | Carbamidomethyl (C)[6], Oxidation (M)[11] |      | Mascot      |
| 2268.1111  | 2267.9756   | -0.1355 | -60   | 78         | 98       | TISCLDSWQCGLKTQTATVGR |           |       |   |                                           |      | Mascot      |
| 2268.1111  | 2267.9756   | -0.1355 | -60   | 78         | 98       | TISCLDSWQCGLKTQTATVGR |           |       |   |                                           |      | Mascot      |

|    |                                                                                                     |  |  |  |  |  |             |         |      |   |    |   |    |   |
|----|-----------------------------------------------------------------------------------------------------|--|--|--|--|--|-------------|---------|------|---|----|---|----|---|
| 25 | novel protein similar to vertebrate potassium voltage-gated channel, subfamily H (eag-related), mem |  |  |  |  |  | gi 94733538 | 78650.5 | 7.84 | 6 | 32 | 0 | 20 | 0 |
|----|-----------------------------------------------------------------------------------------------------|--|--|--|--|--|-------------|---------|------|---|----|---|----|---|

#### Peptide Information

| Calc. Mass | Obsrv. Mass | ± da    | ± ppm | Start Seq. | End Seq. | Sequence        | Ion Score | C. I. | % | Modification     | Rank | Result Type |
|------------|-------------|---------|-------|------------|----------|-----------------|-----------|-------|---|------------------|------|-------------|
| 919.5029   | 919.4553    | -0.0476 | -52   | 340        | 346      | LLQKMDR         |           |       |   | Oxidation (M)[5] |      | Mascot      |
| 1165.575   | 1165.7137   | 0.1387  | 119   | 481        | 489      | WSSYHTRTK       |           |       |   |                  |      | Mascot      |
| 1179.746   | 1179.571    | -0.175  | -148  | 320        | 330      | VSVSVVHLLK      |           |       |   |                  |      | Mascot      |
| 1720.8878  | 1720.803    | -0.0848 | -49   | 167        | 181      | SSTVLYHISGHLHNR | 20        |       | 0 |                  |      | Mascot      |

|    |                             |           |         |     |             |     |                         |                            |   |    |   |  |        |
|----|-----------------------------|-----------|---------|-----|-------------|-----|-------------------------|----------------------------|---|----|---|--|--------|
|    | 1720.8878                   | 1720.803  | -0.0848 | -49 | 167         | 181 | SSTVLYHISGHLHNR         |                            |   |    |   |  | Mascot |
|    | 1862.0244                   | 1861.8936 | -0.1308 | -70 | 102         | 117 | KSGSVFWCLLDIVPIK        | Carbamidomethyl (C)[8]     |   |    |   |  | Mascot |
|    | 1862.0244                   | 1861.8936 | -0.1308 | -70 | 102         | 117 | KSGSVFWCLLDIVPIK        | Carbamidomethyl (C)[8]     |   |    |   |  | Mascot |
|    | 2211.0896                   | 2211.0793 | -0.0103 | -5  | 628         | 646 | TNADVKALTYCDLQCINL<br>R | Carbamidomethyl (C)[11]    |   |    |   |  | Mascot |
|    | 2268.1111                   | 2267.9756 | -0.1355 | -60 | 628         | 646 | TNADVKALTYCDLQCINL<br>R | Carbamidomethyl (C)[11,15] |   |    |   |  | Mascot |
|    | 2268.1111                   | 2267.9756 | -0.1355 | -60 | 628         | 646 | TNADVKALTYCDLQCINL<br>R | Carbamidomethyl (C)[11,15] |   |    |   |  | Mascot |
| 26 | necdin-like 2 [Danio rerio] |           |         |     | gi 38488704 |     | 8126.4                  | 8.01                       | 4 | 32 | 0 |  |        |

Peptide Information

| Calc. Mass | Obsrv. Mass | ± da    | ± ppm | Start Seq. | End Seq. | Sequence           | Ion Score | C. I. | % Modification    | Rank | Result Type |
|------------|-------------|---------|-------|------------|----------|--------------------|-----------|-------|-------------------|------|-------------|
| 1106.6204  | 1106.5294   | -0.091  | -82   | 46         | 54       | KVVTEEFVR          |           |       |                   |      | Mascot      |
| 1495.8956  | 1495.8064   | -0.0892 | -60   | 2          | 14       | GLLFVILSVIFMK      |           |       | Oxidation (M)[12] |      | Mascot      |
| 1495.8956  | 1495.8064   | -0.0892 | -60   | 2          | 14       | GLLFVILSVIFMK      |           |       | Oxidation (M)[12] |      | Mascot      |
| 1572.8744  | 1572.7936   | -0.0808 | -51   | 15         | 28       | GGTIKENLVWNTLK     |           |       |                   |      | Mascot      |
| 1572.8744  | 1572.7936   | -0.0808 | -51   | 15         | 28       | GGTIKENLVWNTLK     |           |       |                   |      | Mascot      |
| 1952.1653  | 1951.9247   | -0.2406 | -123  | 2          | 19       | GLLFVILSVIFMKGGTIK |           |       | Oxidation (M)[12] |      | Mascot      |
| 1952.1653  | 1951.9247   | -0.2406 | -123  | 2          | 19       | GLLFVILSVIFMKGGTIK |           |       | Oxidation (M)[12] |      | Mascot      |

|    |                                      |  |  |  |             |  |         |     |    |    |   |  |  |
|----|--------------------------------------|--|--|--|-------------|--|---------|-----|----|----|---|--|--|
| 27 | CTAGE family, member 5 [Danio rerio] |  |  |  | gi 41053471 |  | 77796.7 | 5.5 | 11 | 32 | 0 |  |  |
|----|--------------------------------------|--|--|--|-------------|--|---------|-----|----|----|---|--|--|

Peptide Information

| Calc. Mass | Obsrv. Mass | ± da    | ± ppm | Start Seq. | End Seq. | Sequence                | Ion Score | C. I. | % Modification                            | Rank | Result Type |
|------------|-------------|---------|-------|------------|----------|-------------------------|-----------|-------|-------------------------------------------|------|-------------|
| 811.3944   | 811.3922    | -0.0022 | -3    | 551        | 557      | SDSSFLR                 |           |       |                                           |      | Mascot      |
| 850.4417   | 850.521     | 0.0793  | 93    | 404        | 410      | LTDAQFR                 |           |       |                                           |      | Mascot      |
| 1051.567   | 1051.6844   | 0.1174  | 112   | 15         | 23       | VLETFSEVK               |           |       |                                           |      | Mascot      |
| 1578.6853  | 1578.6738   | -0.0115 | -7    | 144        | 156      | EQLMQEAEGWGER           |           |       | Oxidation (M)[4]                          |      | Mascot      |
| 1695.8547  | 1695.8179   | -0.0368 | -22   | 264        | 277      | EDLHEGIKQLEEQK          |           |       |                                           |      | Mascot      |
| 1699.7335  | 1699.8876   | 0.1541  | 91    | 157        | 169      | LSELEEEMKMCER           |           |       | Carbamidomethyl (C)[11], Oxidation (M)[8] |      | Mascot      |
| 1711.6469  | 1711.8464   | 0.1995  | 117   | 170        | 184      | SHAGMMEDCANKDDR         |           |       | Oxidation (M)[5,6]                        |      | Mascot      |
| 2233.0725  | 2233.0371   | -0.0354 | -16   | 605        | 623      | DPHFPHRGPFPPDYFP<br>PR  |           |       |                                           |      | Mascot      |
| 2268.1353  | 2267.9756   | -0.1597 | -70   | 278        | 297      | ELLVSESANYSSSQKLQ<br>QK |           |       |                                           |      | Mascot      |
| 2268.1353  | 2267.9756   | -0.1597 | -70   | 278        | 297      | ELLVSESANYSSSQKLQ<br>QK |           |       |                                           |      | Mascot      |
| 2269.1418  | 2268.9763   | -0.1655 | -73   | 106        | 124      | SQLEQDNTTLKIHEINTER     |           |       |                                           |      | Mascot      |
| 2283.136   | 2283.1208   | -0.0152 | -7    | 294        | 311      | LQKKLQIMTEMYQENEL<br>K  |           |       | Oxidation (M)[8]                          |      | Mascot      |



|    |                                              |           |         |    |              |     |                        |      |    |    |   |                     |        |
|----|----------------------------------------------|-----------|---------|----|--------------|-----|------------------------|------|----|----|---|---------------------|--------|
|    | 2283.136                                     | 2283.1208 | -0.0152 | -7 | 294          | 311 | LQQKLQIMTEMYQENEL<br>K |      |    |    |   | Oxidation (M)[8]    | Mascot |
|    | 2299.1309                                    | 2299.1267 | -0.0042 | -2 | 294          | 311 | LQQKLQIMTEMYQENEL<br>K |      |    |    |   | Oxidation (M)[8,11] | Mascot |
| 28 | hypothetical protein LOC678536 [Danio rerio] |           |         |    | gi 160420306 |     | 148750.2               | 8.89 | 15 | 31 | 0 |                     |        |

#### Peptide Information

| Calc. Mass | Obsrv. Mass | ± da    | ± ppm | Start Seq. | End Seq. | Sequence                      | Ion Score | C. I. | % Modification          | Rank | Result Type |
|------------|-------------|---------|-------|------------|----------|-------------------------------|-----------|-------|-------------------------|------|-------------|
| 864.4461   | 864.467     | 0.0209  | 24    | 87         | 94       | DSFVPATK                      |           |       |                         |      | Mascot      |
| 1045.5465  | 1045.5367   | -0.0098 | -9    | 1346       | 1353     | DFLSWIHK                      |           |       |                         |      | Mascot      |
| 1629.8496  | 1629.7964   | -0.0532 | -33   | 995        | 1008     | NSTLFYIIGHHTAR                |           |       |                         |      | Mascot      |
| 1695.8999  | 1695.8179   | -0.082  | -48   | 119        | 134      | VFAPAGVSPTVMNLHR              |           |       |                         |      | Mascot      |
| 1699.9377  | 1699.8876   | -0.0501 | -29   | 34         | 49       | YEALLGGLPQEGLAR               |           |       |                         |      | Mascot      |
| 1711.8948  | 1711.8464   | -0.0484 | -28   | 119        | 134      | VFAPAGVSPTVMNLHR              |           |       | Oxidation (M)[12]       |      | Mascot      |
| 1791.8523  | 1791.6786   | -0.1737 | -97   | 1228       | 1242     | FSWGAECKQYAVFAK               |           |       | Carbamidomethyl (C)[7]  |      | Mascot      |
| 1862.1262  | 1861.8936   | -0.2326 | -125  | 363        | 379      | RWLLDALPAVGTPVLIK             |           |       |                         |      | Mascot      |
| 1862.1262  | 1861.8936   | -0.2326 | -125  | 363        | 379      | RWLLDALPAVGTPVLIK             |           |       |                         |      | Mascot      |
| 1936.9181  | 1936.8641   | -0.054  | -28   | 147        | 163      | TQNIYELQEAGAQGVCRR            |           |       | Carbamidomethyl (C)[16] |      | Mascot      |
| 1991.0959  | 1991.0446   | -0.0513 | -26   | 32         | 49       | YKYEALLGGLPQEGLAR             |           |       |                         |      | Mascot      |
| 2193.2676  | 2193.0828   | -0.1848 | -84   | 746        | 765      | TIIEEAIPMTVGPKRALL<br>K       |           |       | Oxidation (M)[9]        |      | Mascot      |
| 2233.2009  | 2233.0371   | -0.1638 | -73   | 593        | 614      | SLTRITAPDMAYVAGAAN<br>VAIK    |           |       |                         |      | Mascot      |
| 2245.1248  | 2245.0493   | -0.0755 | -34   | 1243       | 1262     | AEAGVLGEYPAARLEVE<br>WER      |           |       |                         |      | Mascot      |
| 2269.1975  | 2268.9763   | -0.2212 | -97   | 1177       | 1196     | ADQKLLGYQLAAYFDKPT<br>AR      |           |       |                         |      | Mascot      |
| 2299.2292  | 2299.1267   | -0.1025 | -45   | 1039       | 1058     | QINIIDDDTPEGQAFLKL<br>R       |           |       |                         |      | Mascot      |
| 2617.4092  | 2617.0767   | -0.3325 | -127  | 552        | 576      | MVACIVLFEAEPSVALISS<br>LAGALR |           |       | Carbamidomethyl (C)[4]  |      | Mascot      |

|    |                                                                                                           |  |  |  |              |  |         |      |   |    |   |  |  |
|----|-----------------------------------------------------------------------------------------------------------|--|--|--|--------------|--|---------|------|---|----|---|--|--|
| 29 | PREDICTED:<br>beta-1,3-galactosyl-O-glycosyl-glycoprotein<br>beta-1,6-N-acetylglucosaminyltransferase 4-l |  |  |  | gi 125837099 |  | 48072.7 | 6.61 | 8 | 31 | 0 |  |  |
|----|-----------------------------------------------------------------------------------------------------------|--|--|--|--------------|--|---------|------|---|----|---|--|--|

#### Peptide Information

| Calc. Mass | Obsrv. Mass | ± da    | ± ppm | Start Seq. | End Seq. | Sequence         | Ion Score | C. I. | % Modification         | Rank | Result Type |
|------------|-------------|---------|-------|------------|----------|------------------|-----------|-------|------------------------|------|-------------|
| 1217.626   | 1217.5714   | -0.0546 | -45   | 337        | 347      | SDPEISELISK      |           |       |                        |      | Mascot      |
| 1495.7937  | 1495.8064   | 0.0127  | 8     | 45         | 57       | QQLTVKYGINCTK    |           |       |                        |      | Mascot      |
| 1495.7937  | 1495.8064   | 0.0127  | 8     | 45         | 57       | QQLTVKYGINCTK    |           |       |                        |      | Mascot      |
| 1594.8046  | 1594.6644   | -0.1402 | -88   | 205        | 217      | YVINLCGQDFPLR    |           |       | Carbamidomethyl (C)[6] |      | Mascot      |
| 1795.98    | 1795.7542   | -0.2258 | -126  | 337        | 352      | SDPEISELISKTHLVK |           |       |                        |      | Mascot      |

|    |                                                                         |           |         |     |     |     |                          |  |  |  |          |                         |    |    |   |  |        |
|----|-------------------------------------------------------------------------|-----------|---------|-----|-----|-----|--------------------------|--|--|--|----------|-------------------------|----|----|---|--|--------|
|    | 1862.0092                                                               | 1861.8936 | -0.1156 | -62 | 58  | 73  | IYEMEPVEVGKSLVIR         |  |  |  |          |                         |    |    |   |  | Mascot |
|    | 1862.0092                                                               | 1861.8936 | -0.1156 | -62 | 58  | 73  | IYEMEPVEVGKSLVIR         |  |  |  |          |                         |    |    |   |  | Mascot |
|    | 1990.9956                                                               | 1991.0446 | 0.049   | 25  | 135 | 150 | AVYVPHNIYCIHYDRK         |  |  |  |          |                         |    |    |   |  | Mascot |
|    | 2245.1699                                                               | 2245.0493 | -0.1206 | -54 | 132 | 149 | LLRAVYVPHNIYCIHYDR       |  |  |  |          |                         |    |    |   |  | Mascot |
|    | 2283.2932                                                               | 2283.1208 | -0.1724 | -76 | 12  | 31  | NVIFVFGTLGLLCTTVIFL<br>R |  |  |  |          | Carbamidomethyl (C)[13] |    |    |   |  | Mascot |
|    | 2283.2932                                                               | 2283.1208 | -0.1724 | -76 | 12  | 31  | NVIFVFGTLGLLCTTVIFL<br>R |  |  |  |          | Carbamidomethyl (C)[13] |    |    |   |  | Mascot |
| 30 | novel protein similar to vitellogenin 1 (vg1) [Danio rerio] gi 94733733 |           |         |     |     |     |                          |  |  |  | 149143.4 | 8.92                    | 15 | 31 | 0 |  |        |

#### Peptide Information

|  | Calc. Mass | Obsrv. Mass | ± da    | ± ppm | Start Seq. | End Seq. | Sequence                     | Ion Score | C. I. | % Modification          | Rank | Result Type |
|--|------------|-------------|---------|-------|------------|----------|------------------------------|-----------|-------|-------------------------|------|-------------|
|  | 864.4461   | 864.467     | 0.0209  | 24    | 91         | 98       | DSFVPATK                     |           |       |                         |      | Mascot      |
|  | 1045.5465  | 1045.5367   | -0.0098 | -9    | 1350       | 1357     | DFLSWIHK                     |           |       |                         |      | Mascot      |
|  | 1629.8496  | 1629.7964   | -0.0532 | -33   | 999        | 1012     | NSTLFYIIGHHTAR               |           |       |                         |      | Mascot      |
|  | 1695.8999  | 1695.8179   | -0.082  | -48   | 123        | 138      | VFAPAGVSPTVMNLHR             |           |       |                         |      | Mascot      |
|  | 1699.9377  | 1699.8876   | -0.0501 | -29   | 38         | 53       | YEALLGLLPQEGLAR              |           |       |                         |      | Mascot      |
|  | 1711.8948  | 1711.8464   | -0.0484 | -28   | 123        | 138      | VFAPAGVSPTVMNLHR             |           |       | Oxidation (M)[12]       |      | Mascot      |
|  | 1791.8523  | 1791.6786   | -0.1737 | -97   | 1232       | 1246     | FSWGAECKQYAVFAK              |           |       | Carbamidomethyl (C)[7]  |      | Mascot      |
|  | 1862.1262  | 1861.8936   | -0.2326 | -125  | 367        | 383      | RWLLDALPAVGTPVLIK            |           |       |                         |      | Mascot      |
|  | 1862.1262  | 1861.8936   | -0.2326 | -125  | 367        | 383      | RWLLDALPAVGTPVLIK            |           |       |                         |      | Mascot      |
|  | 1936.9181  | 1936.8641   | -0.054  | -28   | 151        | 167      | TQNIYELQEAGAQQGVCRR          |           |       | Carbamidomethyl (C)[16] |      | Mascot      |
|  | 1991.0959  | 1991.0446   | -0.0513 | -26   | 36         | 53       | YKYEALLGLLPQEGLAR            |           |       |                         |      | Mascot      |
|  | 2193.2676  | 2193.0828   | -0.1848 | -84   | 750        | 769      | TIIEEAIPMVTGPKPRALL<br>K     |           |       | Oxidation (M)[9]        |      | Mascot      |
|  | 2233.2009  | 2233.0371   | -0.1638 | -73   | 597        | 618      | SLTRITAPDMAYVAGAAN<br>VAIK   |           |       |                         |      | Mascot      |
|  | 2245.1248  | 2245.0493   | -0.0755 | -34   | 1247       | 1266     | AEAGVLGEYPAARLEVE<br>WER     |           |       |                         |      | Mascot      |
|  | 2269.1975  | 2268.9763   | -0.2212 | -97   | 1181       | 1200     | ADQKLLGYQLAAYFDKPT<br>AR     |           |       |                         |      | Mascot      |
|  | 2299.2292  | 2299.1267   | -0.1025 | -45   | 1043       | 1062     | QINIIDDDTPEGQAFLKL<br>R      |           |       |                         |      | Mascot      |
|  | 2617.4092  | 2617.0767   | -0.3325 | -127  | 556        | 580      | MVACIVLFEAPSVALLIS<br>LAGALR |           |       | Carbamidomethyl (C)[4]  |      | Mascot      |

31 novel protein similar to vertebrate phospholipase A2, group VI (PLA2G6) (zgc:77476) [Danio rerio] gi|94733408 23280 8.53 6 31 0

#### Peptide Information

|  | Calc. Mass | Obsrv. Mass | ± da    | ± ppm | Start Seq. | End Seq. | Sequence  | Ion Score | C. I. | % Modification | Rank | Result Type |
|--|------------|-------------|---------|-------|------------|----------|-----------|-----------|-------|----------------|------|-------------|
|  | 935.4832   | 935.45      | -0.0332 | -35   | 19         | 27       | GFVEADGLK |           |       |                |      | Mascot      |
|  | 938.4213   | 938.4674    | 0.0461  | 49    | 121        | 128      | NEFGENTK  |           |       |                |      | Mascot      |

|    |                                         |           |         |     |              |     |                          |      |   |    |   |                        |        |
|----|-----------------------------------------|-----------|---------|-----|--------------|-----|--------------------------|------|---|----|---|------------------------|--------|
|    | 1045.571                                | 1045.5367 | -0.0343 | -33 | 35           | 44  | LLCLDGGGIK               |      |   |    |   | Carbamidomethyl (C)[3] | Mascot |
|    | 1106.5874                               | 1106.5294 | -0.058  | -52 | 137          | 146 | VMVTSVLADR               |      |   |    |   | Oxidation (M)[2]       | Mascot |
|    | 1795.902                                | 1795.7542 | -0.1478 | -82 | 188          | 204 | AARSSGAAPTYFRPMGR        |      |   |    |   |                        | Mascot |
|    | 2193.1597                               | 2193.0828 | -0.0769 | -35 | 137          | 155 | VMVTSVLADRHHPGELHL<br>FR |      |   |    |   | Oxidation (M)[2]       | Mascot |
| 32 | growth arrest-specific 1a [Danio rerio] |           |         |     | gi 162287355 |     | 28605.4                  | 5.71 | 8 | 31 | 0 |                        |        |

#### Peptide Information

|  | Calc. Mass | Obsrv. Mass | ± da    | ± ppm | Start Seq. | End Seq. | Sequence                | Ion Score | C. I. | % | Modification                              | Rank | Result Type |
|--|------------|-------------|---------|-------|------------|----------|-------------------------|-----------|-------|---|-------------------------------------------|------|-------------|
|  | 870.4753   | 870.5159    | 0.0406  | 47    | 114        | 121      | AIEPCLPK                |           |       |   |                                           |      | Mascot      |
|  | 882.4501   | 882.5421    | 0.092   | 104   | 166        | 172      | NVIAYMR                 |           |       |   | Oxidation (M)[6]                          |      | Mascot      |
|  | 919.4665   | 919.4553    | -0.0112 | -12   | 2          | 9        | ATCAELVR                |           |       |   | Carbamidomethyl (C)[3]                    |      | Mascot      |
|  | 1277.6453  | 1277.6776   | 0.0323  | 25    | 1          | 12       | MATCAELVRGAR            |           |       |   |                                           |      | Mascot      |
|  | 1345.5624  | 1345.6646   | 0.1022  | 76    | 154        | 165      | LFSGSSCSNQCR            |           |       |   | Carbamidomethyl (C)[7]                    |      | Mascot      |
|  | 1861.9147  | 1861.8936   | -0.0211 | -11   | 174        | 190      | LPKAQLLDTCVCDGTER       |           |       |   |                                           |      | Mascot      |
|  | 1861.9147  | 1861.8936   | -0.0211 | -11   | 174        | 190      | LPKAQLLDTCVCDGTER       |           |       |   |                                           |      | Mascot      |
|  | 1936.8926  | 1936.8641   | -0.0285 | -15   | 114        | 131      | AIEPCLPKTSNMGCTEAR      |           |       |   | Oxidation (M)[12]                         |      | Mascot      |
|  | 1993.9139  | 1993.9196   | 0.0057  | 3     | 114        | 131      | AIEPCLPKTSNMGCTEAR      |           |       |   | Carbamidomethyl (C)[5], Oxidation (M)[12] |      | Mascot      |
|  | 2192.9998  | 2193.0828   | 0.083   | 38    | 154        | 172      | LFSGSSCSNQCRNVIAY<br>MR |           |       |   | Carbamidomethyl (C)[7]                    |      | Mascot      |

|    |                                                                                                   |  |  |  |             |  |         |      |    |    |   |  |  |
|----|---------------------------------------------------------------------------------------------------|--|--|--|-------------|--|---------|------|----|----|---|--|--|
| 33 | novel protein similar to vertebrate phospholipase A2, group VI (PLA2G6) (zgc:77476) [Danio rerio] |  |  |  | gi 94733407 |  | 90549.6 | 6.09 | 13 | 31 | 0 |  |  |
|----|---------------------------------------------------------------------------------------------------|--|--|--|-------------|--|---------|------|----|----|---|--|--|

#### Peptide Information

|  | Calc. Mass | Obsrv. Mass | ± da    | ± ppm | Start Seq. | End Seq. | Sequence                 | Ion Score | C. I. | % | Modification                             | Rank | Result Type |
|--|------------|-------------|---------|-------|------------|----------|--------------------------|-----------|-------|---|------------------------------------------|------|-------------|
|  | 935.4832   | 935.45      | -0.0332 | -35   | 451        | 459      | GFVEADGLK                |           |       |   |                                          |      | Mascot      |
|  | 938.4213   | 938.4674    | 0.0461  | 49    | 553        | 560      | NEFGENTK                 |           |       |   |                                          |      | Mascot      |
|  | 1045.571   | 1045.5367   | -0.0343 | -33   | 467        | 476      | LLCLDGGGIK               |           |       |   | Carbamidomethyl (C)[3]                   |      | Mascot      |
|  | 1106.5874  | 1106.5294   | -0.058  | -52   | 569        | 578      | VMVTSVLADR               |           |       |   | Oxidation (M)[2]                         |      | Mascot      |
|  | 1231.5194  | 1231.5604   | 0.041   | 33    | 184        | 194      | NETPMHCAAK               |           |       |   | Carbamidomethyl (C)[8], Oxidation (M)[6] |      | Mascot      |
|  | 1572.8129  | 1572.7936   | -0.0193 | -12   | 635        | 647      | VTDEEQLVWRAAR            |           |       |   |                                          |      | Mascot      |
|  | 1572.8129  | 1572.7936   | -0.0193 | -12   | 635        | 647      | VTDEEQLVWRAAR            |           |       |   |                                          |      | Mascot      |
|  | 1718.7811  | 1718.8385   | 0.0574  | 33    | 245        | 260      | CDIMGNNGFPIHAAMK         |           |       |   |                                          |      | Mascot      |
|  | 1791.7975  | 1791.6786   | -0.1189 | -66   | 245        | 260      | CDIMGNNGFPIHAAMK         |           |       |   | Carbamidomethyl (C)[1], Oxidation (M)[4] |      | Mascot      |
|  | 1795.902   | 1795.7542   | -0.1478 | -82   | 645        | 661      | AARSSGAAPTYFRPMGR        |           |       |   |                                          |      | Mascot      |
|  | 2193.1597  | 2193.0828   | -0.0769 | -35   | 569        | 587      | VMVTSVLADRHHPGELHL<br>FR |           |       |   | Oxidation (M)[2]                         |      | Mascot      |

|    |                                                   |           |         |      |             |     |                            |     |    |                                             |   |  |  |        |
|----|---------------------------------------------------|-----------|---------|------|-------------|-----|----------------------------|-----|----|---------------------------------------------|---|--|--|--------|
|    | 2225.0549                                         | 2225.0671 | 0.0122  | 5    | 148         | 168 | DAQGQTPLHLACERGDV<br>GCVR  |     |    |                                             |   |  |  | Mascot |
|    | 2225.0549                                         | 2225.0671 | 0.0122  | 5    | 148         | 168 | DAQGQTPLHLACERGDV<br>GCVR  |     |    |                                             |   |  |  | Mascot |
|    | 2231.1489                                         | 2231.0825 | -0.0664 | -30  | 306         | 325 | GCNVNYLSKTGESPLHIL<br>TK   |     |    | Carbamidomethyl (C)[2]                      |   |  |  | Mascot |
|    | 2283.0354                                         | 2283.1208 | 0.0854  | 37   | 245         | 264 | CDIMGNNGFPIHAAMKFS<br>EK   |     |    | Carbamidomethyl (C)[1], Oxidation (M)[4]    |   |  |  | Mascot |
|    | 2283.0354                                         | 2283.1208 | 0.0854  | 37   | 245         | 264 | CDIMGNNGFPIHAAMKFS<br>EK   |     |    | Carbamidomethyl (C)[1], Oxidation (M)[4]    |   |  |  | Mascot |
|    | 2299.0303                                         | 2299.1267 | 0.0964  | 42   | 245         | 264 | CDIMGNNGFPIHAAMKFS<br>EK   |     |    | Carbamidomethyl (C)[1], Oxidation (M)[4,15] |   |  |  | Mascot |
|    | 2617.3442                                         | 2617.0767 | -0.2675 | -102 | 1           | 23  | MQFLGRILDTVSSVSLF<br>SNPYR |     |    |                                             |   |  |  | Mascot |
| 34 | non-specific lipid-transfer protein [Danio rerio] |           |         |      | gi 41053664 |     | 57939.8                    | 7.1 | 10 | 30                                          | 0 |  |  |        |

#### Peptide Information

| Calc. Mass | Obsrv. Mass | ± da    | ± ppm | Start Seq. | End Seq. | Sequence                       | Ion Score | C. I. | % Modification        | Rank | Result Type |
|------------|-------------|---------|-------|------------|----------|--------------------------------|-----------|-------|-----------------------|------|-------------|
| 811.358    | 811.3922    | 0.0342  | 42    | 327        | 334      | GDNTYGGK                       |           |       |                       |      | Mascot      |
| 882.4944   | 882.5421    | 0.0477  | 54    | 177        | 183      | VAWKNHK                        |           |       |                       |      | Mascot      |
| 935.4792   | 935.45      | -0.0292 | -31   | 474        | 483      | GSVSSDAGKK                     |           |       |                       |      | Mascot      |
| 1045.4917  | 1045.5367   | 0.045   | 43    | 136        | 143      | HMEVMINR                       |           |       | Oxidation (M)[2]      |      | Mascot      |
| 1106.5436  | 1106.5294   | -0.0142 | -13   | 471        | 482      | NGKGSVSSDAGK                   |           |       |                       |      | Mascot      |
| 1165.5735  | 1165.7137   | 0.1402  | 120   | 435        | 444      | LQEEGEAYVK                     |           |       |                       |      | Mascot      |
| 1310.663   | 1310.5654   | -0.0976 | -74   | 514        | 525      | LKITGNMGAMK                    |           |       | Oxidation (M)[7]      |      | Mascot      |
| 1763.7874  | 1763.7555   | -0.0319 | -18   | 130        | 143      | TNPMDKHMEVMINR                 |           |       | Oxidation (M)[4,8,11] |      | Mascot      |
| 1763.7874  | 1763.7555   | -0.0319 | -18   | 130        | 143      | TNPMDKHMEVMINR                 |           |       | Oxidation (M)[4,8,11] |      | Mascot      |
| 2269.0012  | 2268.9763   | -0.0249 | -11   | 47         | 67       | YSAIQQACVGYVYGDST<br>CGQR      |           |       |                       |      | Mascot      |
| 2705.3398  | 2705.1084   | -0.2314 | -86   | 347        | 372      | GHPLGATGLAQCAELCW<br>QLRAEAGPR |           |       |                       |      | Mascot      |

35 PREDICTED: EMILIN-2-like [Danio rerio] gi|326664942 119160.6 5.89 13 30 0

#### Peptide Information

| Calc. Mass | Obsrv. Mass | ± da    | ± ppm | Start Seq. | End Seq. | Sequence        | Ion Score | C. I. | % Modification         | Rank | Result Type |
|------------|-------------|---------|-------|------------|----------|-----------------|-----------|-------|------------------------|------|-------------|
| 811.446    | 811.3922    | -0.0538 | -66   | 67         | 72       | FRPTYK          |           |       |                        |      | Mascot      |
| 1165.5823  | 1165.7137   | 0.1314  | 113   | 21         | 29       | NWCAFIVQK       |           |       | Carbamidomethyl (C)[3] |      | Mascot      |
| 1179.6117  | 1179.571    | -0.0407 | -35   | 130        | 138      | ETVQYDLRR       |           |       |                        |      | Mascot      |
| 1217.6736  | 1217.5714   | -0.1022 | -84   | 231        | 241      | LNDVTDALKTK     |           |       |                        |      | Mascot      |
| 1495.641   | 1495.8064   | 0.1654  | 111   | 433        | 444      | NAETYCFYVEEK    |           |       |                        |      | Mascot      |
| 1495.641   | 1495.8064   | 0.1654  | 111   | 433        | 444      | NAETYCFYVEEK    |           |       |                        |      | Mascot      |
| 1718.882   | 1718.8385   | -0.0435 | -25   | 1000       | 1015     | SVQKLDAGYSSGHLR |           |       |                        |      | Mascot      |

|    |                                                 |           |         |     |              |     |                         |      |                                             |        |   |
|----|-------------------------------------------------|-----------|---------|-----|--------------|-----|-------------------------|------|---------------------------------------------|--------|---|
|    | 1763.7799                                       | 1763.7555 | -0.0244 | -14 | 216          | 230 | GQTHGEREMETVMAR         |      | Oxidation (M)[9,13]                         | Mascot |   |
|    | 1763.7799                                       | 1763.7555 | -0.0244 | -14 | 216          | 230 | GQTHGEREMETVMAR         |      | Oxidation (M)[9,13]                         | Mascot |   |
|    | 1861.7666                                       | 1861.8936 | 0.127   | 68  | 50           | 64  | CPEHQPDCEPQMIYR         |      | Oxidation (M)[12]                           | Mascot |   |
|    | 1861.7666                                       | 1861.8936 | 0.127   | 68  | 50           | 64  | CPEHQPDCEPQMIYR         |      | Oxidation (M)[12]                           | Mascot |   |
|    | 1951.9463                                       | 1951.9247 | -0.0216 | -11 | 223          | 239 | EMETVMARLNDVTDALK       |      | Oxidation (M)[2]                            | Mascot |   |
|    | 1951.9463                                       | 1951.9247 | -0.0216 | -11 | 223          | 239 | EMETVMARLNDVTDALK       |      | Oxidation (M)[2]                            | Mascot |   |
|    | 1993.9106                                       | 1993.9196 | 0.009   | 5   | 574          | 590 | MSPEKQFINAHMQDTGK       |      | Oxidation (M)[1,12]                         | Mascot |   |
|    | 2232.9583                                       | 2233.0371 | 0.0788  | 35  | 50           | 66  | CPEHQPDCEPQMIYRTR       |      | Carbamidomethyl (C)[1,8], Oxidation (M)[12] | Mascot |   |
|    | 2283.0056                                       | 2283.1208 | 0.1152  | 50  | 427          | 444 | MNVTERNAETYCFYVEE<br>K  |      | Carbamidomethyl (C)[12]                     | Mascot |   |
|    | 2283.0056                                       | 2283.1208 | 0.1152  | 50  | 427          | 444 | MNVTERNAETYCFYVEE<br>K  |      | Carbamidomethyl (C)[12]                     | Mascot |   |
|    | 2299.0005                                       | 2299.1267 | 0.1262  | 55  | 427          | 444 | MNVTERNAETYCFYVEE<br>K  |      | Carbamidomethyl (C)[12], Oxidation (M)[1]   | Mascot |   |
|    | 2384.0215                                       | 2383.8904 | -0.1311 | -55 | 77           | 95  | TVTELEWRCCPGYQGPD<br>CR |      | Carbamidomethyl (C)[9,10,18]                | Mascot |   |
| 36 | brain-derived neurotrophic factor [Danio rerio] |           |         |     | gi 169145642 |     | 25880.8                 | 5.62 | 6                                           | 30     | 0 |

#### Peptide Information

| Calc. Mass | Obsrv. Mass | ± da    | ± ppm | Start Seq. | End Seq. | Sequence                | Ion Score | C. I. | % Modification                              | Rank | Result Type |
|------------|-------------|---------|-------|------------|----------|-------------------------|-----------|-------|---------------------------------------------|------|-------------|
| 938.4578   | 938.4674    | 0.0096  | 10    | 117        | 124      | DVDLYASR                |           |       |                                             |      | Mascot      |
| 1572.7257  | 1572.7936   | 0.0679  | 43    | 146        | 158      | NYLDAANMSMRVR           |           |       | Oxidation (M)[8,10]                         |      | Mascot      |
| 1572.7257  | 1572.7936   | 0.0679  | 43    | 146        | 158      | NYLDAANMSMRVR           |           |       | Oxidation (M)[8,10]                         |      | Mascot      |
| 1720.9149  | 1720.803    | -0.1119 | -65   | 185        | 200      | KTAIDMSGQTVTVLEK        |           |       |                                             |      | Mascot      |
| 1720.9149  | 1720.803    | -0.1119 | -65   | 185        | 200      | KTAIDMSGQTVTVLEK        |           |       |                                             |      | Mascot      |
| 1936.932   | 1936.8641   | -0.0679 | -35   | 167        | 184      | GELSVCDSSISQWVTAVD<br>K |           |       |                                             |      | Mascot      |
| 1993.9535  | 1993.9196   | -0.0339 | -17   | 167        | 184      | GELSVCDSSISQWVTAVD<br>K |           |       | Carbamidomethyl (C)[6]                      |      | Mascot      |
| 2230.0779  | 2230.0957   | 0.0178  | 8     | 8          | 25       | VMTILFVTMVISYFSCMR      |           |       | Carbamidomethyl (C)[16], Oxidation (M)[2,9] |      | Mascot      |
| 2297.1677  | 2297.1306   | -0.0371 | -16   | 7          | 25       | RVMTILFVTMVISYFSCM<br>R |           |       |                                             |      | Mascot      |

37 plasma membrane calcium ATPase 3a [Danio rerio] gi|313482836 129460.6 5.41 14 30 0

#### Peptide Information

| Calc. Mass | Obsrv. Mass | ± da    | ± ppm | Start Seq. | End Seq. | Sequence   | Ion Score | C. I. | % Modification         | Rank | Result Type |
|------------|-------------|---------|-------|------------|----------|------------|-----------|-------|------------------------|------|-------------|
| 864.4131   | 864.467     | 0.0539  | 62    | 626        | 632      | DKDEMVK    |           |       |                        |      | Mascot      |
| 882.4501   | 882.5421    | 0.092   | 104   | 609        | 615      | CSFILSR    |           |       | Carbamidomethyl (C)[1] |      | Mascot      |
| 919.5148   | 919.4553    | -0.0595 | -65   | 1100       | 1106     | GQILWFR    |           |       |                        |      | Mascot      |
| 922.4628   | 922.4402    | -0.0226 | -24   | 950        | 957      | IFDIDSGR   |           |       |                        |      | Mascot      |
| 1165.6074  | 1165.7137   | 0.1063  | 91    | 84         | 93       | VFGMNFIPPK |           |       | Oxidation (M)[4]       |      | Mascot      |

|           |           |         |     |     |     |                              |  |  |  |                            |  |  |        |
|-----------|-----------|---------|-----|-----|-----|------------------------------|--|--|--|----------------------------|--|--|--------|
| 1231.5913 | 1231.5604 | -0.0309 | -25 | 742 | 751 | NEKGEIEQER                   |  |  |  |                            |  |  | Mascot |
| 1277.7074 | 1277.6776 | -0.0298 | -23 | 83  | 93  | KVFGMNFIPPK                  |  |  |  |                            |  |  | Mascot |
| 1629.7603 | 1629.7964 | 0.0361  | 22  | 65  | 80  | TSPADGLSDNPADLEK             |  |  |  |                            |  |  | Mascot |
| 1699.8142 | 1699.8876 | 0.0734  | 43  | 581 | 595 | KSMSTVIQMPDGSFR              |  |  |  | Oxidation (M)[3]           |  |  | Mascot |
| 1791.7863 | 1791.6786 | -0.1077 | -60 | 719 | 734 | CGIIHPGDDFLCMEGK             |  |  |  | Carbamidomethyl (C)[1]     |  |  | Mascot |
| 1936.8198 | 1936.8641 | 0.0443  | 23  | 457 | 474 | HLDACETMGNATAICSDK           |  |  |  | Carbamidomethyl (C)[5]     |  |  | Mascot |
| 1993.8412 | 1993.9196 | 0.0784  | 39  | 457 | 474 | HLDACETMGNATAICSDK           |  |  |  | Carbamidomethyl (C)[5,15]  |  |  | Mascot |
| 2211.2053 | 2211.0793 | -0.126  | -57 | 200 | 220 | NSTVIQIPVAEMVVGDI<br>QVK     |  |  |  |                            |  |  | Mascot |
| 2282.999  | 2283.1208 | 0.1218  | 53  | 719 | 738 | CGIIHPGDDFLCMEGKDF<br>NR     |  |  |  | Oxidation (M)[13]          |  |  | Mascot |
| 2282.999  | 2283.1208 | 0.1218  | 53  | 719 | 738 | CGIIHPGDDFLCMEGKDF<br>NR     |  |  |  | Oxidation (M)[13]          |  |  | Mascot |
| 2705.2075 | 2705.1084 | -0.0991 | -37 | 451 | 474 | DNNLVRHLDACETMGNA<br>TAICSDK |  |  |  | Carbamidomethyl (C)[11,21] |  |  | Mascot |

38 RecName: Full=Intraflagellar transport protein 172 homolog gi|82232659 197655 5.61 19 30 0

#### Peptide Information

| Calc. Mass | Obsrv. Mass | ± da    | ± ppm | Start Seq. | End Seq. | Sequence                | Ion Score | C. I. % | Modification                 | Rank | Result Type |
|------------|-------------|---------|-------|------------|----------|-------------------------|-----------|---------|------------------------------|------|-------------|
| 811.4018   | 811.3922    | -0.0096 | -12   | 1291       | 1297     | AVDCYLK                 |           |         |                              |      | Mascot      |
| 882.4501   | 882.5421    | 0.092   | 104   | 828        | 834      | ALECYRK                 |           |         |                              |      | Mascot      |
| 1051.5419  | 1051.6844   | 0.1425  | 136   | 1384       | 1391     | LEEYVDKR                |           |         |                              |      | Mascot      |
| 1165.6034  | 1165.7137   | 0.1103  | 95    | 1480       | 1488     | MFQELVNL                |           |         | Oxidation (M)[1]             |      | Mascot      |
| 1217.5289  | 1217.5714   | 0.0425  | 35    | 1010       | 1018     | NKMYDDMIR               |           |         | Oxidation (M)[3,7]           |      | Mascot      |
| 1345.6747  | 1345.6646   | -0.0101 | -8    | 488        | 498      | IDWLELNETGR             |           |         |                              |      | Mascot      |
| 1495.775   | 1495.8064   | 0.0314  | 21    | 1664       | 1678     | GTYEASLVAASTGIR         |           |         |                              |      | Mascot      |
| 1495.775   | 1495.8064   | 0.0314  | 21    | 1664       | 1678     | GTYEASLVAASTGIR         |           |         |                              |      | Mascot      |
| 1572.8744  | 1572.7936   | -0.0808 | -51   | 507        | 519      | LRLHLYDISSVK            |           |         |                              |      | Mascot      |
| 1572.8744  | 1572.7936   | -0.0808 | -51   | 507        | 519      | LRLHLYDISSVK            |           |         |                              |      | Mascot      |
| 1594.8839  | 1594.6644   | -0.2195 | -138  | 81         | 94       | IAVAQTDNIIFVYK          |           |         |                              |      | Mascot      |
| 1629.7611  | 1629.7964   | 0.0353  | 22    | 964        | 977      | CMTQEDVSVLYVSR          |           |         |                              |      | Mascot      |
| 1699.8035  | 1699.8876   | 0.0841  | 49    | 225        | 238      | EGNVIQTFDYSRDR          |           |         |                              |      | Mascot      |
| 1707.9388  | 1707.7273   | -0.2115 | -124  | 899        | 913      | ALHILELQEDRTAAK         |           |         |                              |      | Mascot      |
| 1720.9268  | 1720.803    | -0.1238 | -72   | 1158       | 1172     | FNEAEIEFIKAGKPK         |           |         |                              |      | Mascot      |
| 1720.9268  | 1720.803    | -0.1238 | -72   | 1158       | 1172     | FNEAEIEFIKAGKPK         |           |         |                              |      | Mascot      |
| 1937.0814  | 1936.8641   | -0.2173 | -112  | 630        | 646      | TLSKLSLEAQQHLIAER       |           |         |                              |      | Mascot      |
| 2211.0508  | 2211.0793   | 0.0285  | 13    | 19         | 38       | VTMAWAPNNAKFAVCT<br>IDR |           |         |                              |      | Mascot      |
| 2230.0234  | 2230.0957   | 0.0723  | 32    | 301        | 319      | LSVGTLCGGVEMFDCC        |           |         | Carbamidomethyl (C)[7,15,16] |      | Mascot      |

|    |                                  |           |         |     |      |              |                                 |                                          |   |    |   |  |        |
|----|----------------------------------|-----------|---------|-----|------|--------------|---------------------------------|------------------------------------------|---|----|---|--|--------|
|    | 2268.0488                        | 2267.9756 | -0.0732 | -32 | 742  | 760          | RR<br>SYYSYLMETNQNEKAAE<br>VK   |                                          |   |    |   |  | Mascot |
|    | 2268.0723                        | 2267.9756 | -0.0967 | -43 | 19   | 38           | VTCTMAWAPNNAKFAVCT<br>IDR       | Carbamidomethyl (C)[3]                   |   |    |   |  | Mascot |
|    | 2284.0671                        | 2284.1187 | 0.0516  | 23  | 19   | 38           | VTCTMAWAPNNAKFAVCT<br>IDR       | Carbamidomethyl (C)[3], Oxidation (M)[4] |   |    |   |  | Mascot |
|    | 2705.3542                        | 2705.1084 | -0.2458 | -91 | 1572 | 1595         | AFYEAGLAAKAVGWENM<br>AFIFLNR    | Oxidation (M)[17]                        |   |    |   |  | Mascot |
|    | 3337.3862                        | 3337.6877 | 0.3015  | 90  | 1263 | 1290         | EYSEGNWGVGEMIEQA<br>QEWEQTGEYSR | Oxidation (M)[13]                        |   |    |   |  | Mascot |
| 39 | Zgc:171573 protein [Danio rerio] |           |         |     |      | gi 166796220 | 28101.6                         | 9.65                                     | 6 | 30 | 0 |  |        |

#### Peptide Information

| Calc. Mass | Obsrv. Mass | ± da    | ± ppm | Start Seq. | End Seq. | Sequence                  | Ion Score | C. I. % | Modification                                 | Rank | Result Type |
|------------|-------------|---------|-------|------------|----------|---------------------------|-----------|---------|----------------------------------------------|------|-------------|
| 864.4937   | 864.467     | -0.0267 | -31   | 30         | 36       | IFSDKVR                   |           |         |                                              |      | Mascot      |
| 1711.9701  | 1711.8464   | -0.1237 | -72   | 35         | 50       | VRTIGVDIDALGQQVK          |           |         |                                              |      | Mascot      |
| 1795.8973  | 1795.7542   | -0.1431 | -80   | 144        | 157      | KQEQQLYSWTTQQK            |           |         |                                              |      | Mascot      |
| 1937.045   | 1936.8641   | -0.1809 | -93   | 122        | 139      | QEGQRILPGLVGEDLGQ<br>K    |           |         |                                              |      | Mascot      |
| 2211.042   | 2211.0793   | 0.0373  | 17    | 65         | 83       | VYADDLLCSDGIACILEQ<br>R   |           |         | Carbamidomethyl (C)[8,14]                    |      | Mascot      |
| 2616.1123  | 2616.3196   | 0.2073  | 79    | 169        | 189      | QEENNMTKSECLWTAEL<br>SNCR |           |         | Carbamidomethyl (C)[11,20], Oxidation (M)[6] |      | Mascot      |

|    |                                     |  |  |  |  |              |         |      |   |    |   |  |  |
|----|-------------------------------------|--|--|--|--|--------------|---------|------|---|----|---|--|--|
| 40 | igLON family member 5 [Danio rerio] |  |  |  |  | gi 136256065 | 36989.9 | 7.57 | 7 | 30 | 0 |  |  |
|----|-------------------------------------|--|--|--|--|--------------|---------|------|---|----|---|--|--|

#### Peptide Information

| Calc. Mass | Obsrv. Mass | ± da    | ± ppm | Start Seq. | End Seq. | Sequence                 | Ion Score | C. I. % | Modification                              | Rank | Result Type |
|------------|-------------|---------|-------|------------|----------|--------------------------|-----------|---------|-------------------------------------------|------|-------------|
| 811.3623   | 811.3922    | 0.0299  | 37    | 1          | 7        | MSCAMLR                  |           |         |                                           |      | Mascot      |
| 1952.0747  | 1951.9247   | -0.15   | -77   | 315        | 332      | LSGVGLWFCLSISVLMKV       |           |         |                                           |      | Mascot      |
| 1952.0747  | 1951.9247   | -0.15   | -77   | 315        | 332      | LSGVGLWFCLSISVLMKV       |           |         |                                           |      | Mascot      |
| 2080.1921  | 2080.0183   | -0.1738 | -84   | 2          | 19       | SCAMLRHALALLLALLWK       |           |         | Carbamidomethyl (C)[2]                    |      | Mascot      |
| 2211.2327  | 2211.0793   | -0.1534 | -69   | 1          | 19       | MSCAMLRHALALLLALLW<br>K  |           |         | Carbamidomethyl (C)[3]                    |      | Mascot      |
| 2245.0376  | 2245.0493   | 0.0117  | 5     | 93         | 111      | IERVMADEGPYTCSFQ<br>AR   |           |         | Carbamidomethyl (C)[14], Oxidation (M)[5] |      | Mascot      |
| 2269.0852  | 2268.9763   | -0.1089 | -48   | 96         | 115      | VMVADEGPYTCSFQARN<br>KPR |           |         |                                           |      | Mascot      |
| 2284.2368  | 2284.1187   | -0.1181 | -52   | 205        | 225      | VTVNPPIITDVKNMPAQ<br>VGK |           |         |                                           |      | Mascot      |

|    |                                                                 |  |  |  |  |             |         |      |    |    |   |  |  |
|----|-----------------------------------------------------------------|--|--|--|--|-------------|---------|------|----|----|---|--|--|
| 41 | MCM6 minichromosome maintenance deficient 6, like [Danio rerio] |  |  |  |  | gi 70887711 | 93152.1 | 5.23 | 12 | 30 | 0 |  |  |
|----|-----------------------------------------------------------------|--|--|--|--|-------------|---------|------|----|----|---|--|--|

#### Peptide Information

| Calc. Mass | Obsrv. Mass | ± da | ± ppm | Start Seq. | End Seq. | Sequence | Ion Score | C. I. % | Modification | Rank | Result Type |
|------------|-------------|------|-------|------------|----------|----------|-----------|---------|--------------|------|-------------|
|------------|-------------|------|-------|------------|----------|----------|-----------|---------|--------------|------|-------------|

|  |           |           |         |     |     |     |                           |  |  |  |  |                  |  |  |  |  |        |
|--|-----------|-----------|---------|-----|-----|-----|---------------------------|--|--|--|--|------------------|--|--|--|--|--------|
|  | 856.49    | 856.499   | 0.009   | 11  | 87  | 93  | AVRHFAR                   |  |  |  |  |                  |  |  |  |  | Mascot |
|  | 919.4591  | 919.4553  | -0.0038 | -4  | 597 | 605 | QRDGGGTTK                 |  |  |  |  |                  |  |  |  |  | Mascot |
|  | 996.5261  | 996.5714  | 0.0453  | 45  | 194 | 201 | FVDFQKGR                  |  |  |  |  |                  |  |  |  |  | Mascot |
|  | 1165.6252 | 1165.7137 | 0.0885  | 76  | 747 | 755 | SELINWYLK                 |  |  |  |  |                  |  |  |  |  | Mascot |
|  | 1217.5757 | 1217.5714 | -0.0043 | -4  | 224 | 235 | AEAVETAQAGDR              |  |  |  |  |                  |  |  |  |  | Mascot |
|  | 1277.6195 | 1277.6776 | 0.0581  | 45  | 321 | 330 | NQMTVLEWEK                |  |  |  |  |                  |  |  |  |  | Mascot |
|  | 1310.578  | 1310.5654 | -0.0126 | -10 | 735 | 745 | MEQLDEDSSLK               |  |  |  |  | Oxidation (M)[1] |  |  |  |  | Mascot |
|  | 1345.7621 | 1345.6646 | -0.0975 | -72 | 610 | 620 | ITVRQLESMLR               |  |  |  |  |                  |  |  |  |  | Mascot |
|  | 1475.7502 | 1475.7114 | -0.0388 | -26 | 90  | 102 | HFARDHGNIPPSK             |  |  |  |  |                  |  |  |  |  | Mascot |
|  | 1707.8306 | 1707.7273 | -0.1033 | -60 | 168 | 182 | YTQPTICKNPVCANR           |  |  |  |  |                  |  |  |  |  | Mascot |
|  | 2211.1875 | 2211.0793 | -0.1082 | -49 | 361 | 381 | GILLMLFGGVAKTTMEGT<br>SLR |  |  |  |  | Oxidation (M)[5] |  |  |  |  | Mascot |
|  | 2297.1812 | 2297.1306 | -0.0506 | -22 | 575 | 593 | QFQPKITVEAQEFVVDQY<br>K   |  |  |  |  |                  |  |  |  |  | Mascot |

42 PREDICTED: hypothetical protein LOC100536366 [Danio rerio] gi|326674226 29395.1 8.05 7 30 0

#### Peptide Information

| Calc. Mass | Obsrv. Mass | ± da    | ± ppm | Start Seq. | End Seq. | Sequence                         | Ion Score | C. I. | % Modification         | Rank | Result Type |
|------------|-------------|---------|-------|------------|----------|----------------------------------|-----------|-------|------------------------|------|-------------|
| 882.4791   | 882.5421    | 0.063   | 71    | 111        | 117      | HLEKAER                          |           |       |                        |      | Mascot      |
| 996.439    | 996.5714    | 0.1324  | 133   | 249        | 256      | CMNVSTWR                         |           |       |                        |      | Mascot      |
| 1231.6212  | 1231.5604   | -0.0608 | -49   | 115        | 124      | AERNCNQIVK                       |           |       | Carbamidomethyl (C)[5] |      | Mascot      |
| 1594.8444  | 1594.6644   | -0.18   | -113  | 79         | 92       | VFSCCLALQQTLLR                   |           |       |                        |      | Mascot      |
| 1937.0347  | 1936.8641   | -0.1706 | -88   | 79         | 95       | VFSCCLALQQTLLRDVK                |           |       |                        |      | Mascot      |
| 1994.0562  | 1993.9196   | -0.1366 | -69   | 79         | 95       | VFSCCLALQQTLLRDVK                |           |       | Carbamidomethyl (C)[4] |      | Mascot      |
| 2705.1904  | 2705.1084   | -0.082  | -30   | 24         | 45       | EEIQKVFDDYECVLSHTI<br>CCDR       |           |       |                        |      | Mascot      |
| 3337.6807  | 3337.6877   | 0.007   | 2     | 1          | 28       | MVEYDLFHQQIVSIMALL<br>SETAREEIQK |           |       | Oxidation (M)[1]       |      | Mascot      |

43 PREDICTED: ribonuclease P 25 subunit [Danio rerio] gi|326680347 22061.4 8.78 6 30 0

#### Peptide Information

| Calc. Mass | Obsrv. Mass | ± da    | ± ppm | Start Seq. | End Seq. | Sequence                 | Ion Score | C. I. | % Modification | Rank | Result Type |
|------------|-------------|---------|-------|------------|----------|--------------------------|-----------|-------|----------------|------|-------------|
| 938.5417   | 938.4674    | -0.0743 | -79   | 105        | 113      | VAGLHQVSK                |           |       |                |      | Mascot      |
| 1165.6068  | 1165.7137   | 0.1069  | 92    | 94         | 103      | TITCAEIMKR               |           |       |                |      | Mascot      |
| 1277.7147  | 1277.6776   | -0.0371 | -29   | 63         | 73       | IRNLLGFAMSR              |           |       |                |      | Mascot      |
| 1475.79    | 1475.7114   | -0.0786 | -53   | 183        | 195      | RPLSPCDHPGLKR            |           |       |                |      | Mascot      |
| 2193.1221  | 2193.0828   | -0.0393 | -18   | 36         | 56       | STGEPIPNPIGLASDVLE<br>MR |           |       |                |      | Mascot      |



2299.1677

2299.1267

-0.041

-18

4

24

ELHDNTQPVLNPTNPIG  
PSK

Mascot

44

PREDICTED: heat-stable enterotoxin receptor-like  
[Danio rerio]

gi|326665604

115779.3

7.15

14

30

0

Peptide Information

| Calc. Mass | Obsrv. Mass | $\pm$ da | $\pm$ ppm | Start Seq. | End Seq. | Sequence                   | Ion Score | C. I. % | Modification                                | Rank | Result Type |
|------------|-------------|----------|-----------|------------|----------|----------------------------|-----------|---------|---------------------------------------------|------|-------------|
| 850.4781   | 850.521     | 0.0429   | 50        | 921        | 927      | RGETFLK                    |           |         |                                             |      | Mascot      |
| 856.5039   | 856.499     | -0.0049  | -6        | 177        | 183      | NLKPAWK                    |           |         |                                             |      | Mascot      |
| 1051.5935  | 1051.6844   | 0.0909   | 86        | 629        | 636      | LYLVQYPR                   |           |         |                                             |      | Mascot      |
| 1165.6212  | 1165.7137   | 0.0925   | 79        | 504        | 513      | GSLRYVLDDK                 |           |         |                                             |      | Mascot      |
| 1179.4623  | 1179.571    | 0.1087   | 92        | 663        | 671      | SCWEEDPEK                  |           |         | Carbamidomethyl (C)[2]                      |      | Mascot      |
| 1310.6475  | 1310.5654   | -0.0821  | -63       | 422        | 432      | NYISLTIDEDK                |           |         |                                             |      | Mascot      |
| 1503.6896  | 1503.7324   | 0.0428   | 28        | 877        | 889      | YCLFGDTVNTASR              |           |         | Carbamidomethyl (C)[2]                      |      | Mascot      |
| 1711.7242  | 1711.8464   | 0.1222   | 71        | 490        | 503      | FDCGVFGVFECER              |           |         | Carbamidomethyl (C)[3]                      |      | Mascot      |
| 1784.74    | 1784.8604   | 0.1204   | 67        | 614        | 628      | KSPFHTSCCSDMAEK            |           |         | Carbamidomethyl (C)[8,9]                    |      | Mascot      |
| 1784.74    | 1784.8604   | 0.1204   | 67        | 614        | 628      | KSPFHTSCCSDMAEK            |           |         | Carbamidomethyl (C)[8,9]                    |      | Mascot      |
| 1795.8955  | 1795.7542   | -0.1413  | -79       | 163        | 176      | IAEFFFFHWHTSVK             |           |         |                                             |      | Mascot      |
| 1936.9844  | 1936.8641   | -0.1203  | -62       | 858        | 876      | IGIHSGPCAAGVVGNKMP<br>R    |           |         | Carbamidomethyl (C)[8], Oxidation (M)[17]   |      | Mascot      |
| 1952.0851  | 1951.9247   | -0.1604  | -82       | 598        | 614      | GDVYSFAISQEILRK            |           |         |                                             |      | Mascot      |
| 1952.0851  | 1951.9247   | -0.1604  | -82       | 468        | 483      | IELNALLRIDYYNLTK           |           |         |                                             |      | Mascot      |
| 2705.2156  | 2705.1084   | -0.1072  | -40       | 615        | 636      | SPFHTSCCSDMAEKLYL<br>VQYPR |           |         | Carbamidomethyl (C)[7,8], Oxidation (M)[11] |      | Mascot      |

45

PREDICTED: tRNA-dihydrouridine synthase 2-like  
[Danio rerio]

gi|292628574

56676.6

6.04

10

29

0

Peptide Information

| Calc. Mass | Obsrv. Mass | $\pm$ da | $\pm$ ppm | Start Seq. | End Seq. | Sequence                 | Ion Score | C. I. % | Modification        | Rank | Result Type |
|------------|-------------|----------|-----------|------------|----------|--------------------------|-----------|---------|---------------------|------|-------------|
| 842.473    | 842.4849    | 0.0119   | 14        | 436        | 443      | TLGLPEGR                 |           |         |                     |      | Mascot      |
| 919.4995   | 919.4553    | -0.0442  | -48       | 298        | 305      | VESPGGKR                 |           |         |                     |      | Mascot      |
| 1045.4628  | 1045.5367   | 0.0739   | 71        | 288        | 295      | YCLCQMLR                 |           |         | Oxidation (M)[6]    |      | Mascot      |
| 1051.6007  | 1051.6844   | 0.0837   | 80        | 180        | 190      | TGVAAIAVHGR              |           |         |                     |      | Mascot      |
| 1277.6041  | 1277.6776   | 0.0735   | 58        | 129        | 141      | GGMGSAALLSDPEK           |           |         | Oxidation (M)[3]    |      | Mascot      |
| 1310.7361  | 1310.5654   | -0.1707  | -130      | 180        | 192      | TGVAAIAVHGRMK            |           |         |                     |      | Mascot      |
| 1699.9346  | 1699.8876   | -0.047   | -28       | 19         | 33       | NILAPMVRVGTLPMPR         |           |         | Oxidation (M)[6,14] |      | Mascot      |
| 2269.1672  | 2268.9763   | -0.1909  | -84       | 34         | 53       | LLALDYGADIVYCEELIDI<br>K |           |         |                     |      | Mascot      |
| 2299.1387  | 2299.1267   | -0.012   | -5        | 259        | 278      | QQGALSVDQVMQEYITY<br>AVR |           |         |                     |      | Mascot      |

|    |                                            |           |        |      |              |     |                            |      |    |    |   |                  |        |
|----|--------------------------------------------|-----------|--------|------|--------------|-----|----------------------------|------|----|----|---|------------------|--------|
|    | 2384.1484                                  | 2383.8904 | -0.258 | -108 | 237          | 258 | ESTGASSVMLARAAMWN<br>PSVFR |      |    |    |   | Oxidation (M)[9] | Mascot |
| 46 | zinc finger protein 502-like [Danio rerio] |           |        |      | gi 118150562 |     | 50759.6                    | 9.28 | 13 | 29 | 0 |                  |        |

Peptide Information

| Calc. Mass | Obsrv. Mass | ± da    | ± ppm | Start Seq. | End Seq. | Sequence           | Ion Score | C. I. % | Modification               | Rank | Result Type |
|------------|-------------|---------|-------|------------|----------|--------------------|-----------|---------|----------------------------|------|-------------|
| 820.3076   | 820.1927    | -0.1149 | -140  | 327        | 332      | CSHCEK             |           |         | Carbamidomethyl (C)[1,4]   |      | Mascot      |
| 919.3872   | 919.4553    | 0.0681  | 74    | 327        | 333      | CSHCEKR            |           |         | Carbamidomethyl (C)[1]     |      | Mascot      |
| 922.441    | 922.4402    | -0.0008 | -1    | 250        | 257      | CSKSGDLR           |           |         | Carbamidomethyl (C)[1]     |      | Mascot      |
| 1045.5537  | 1045.5367   | -0.017  | -16   | 333        | 341      | RFNSSGHLK          |           |         |                            |      | Mascot      |
| 1217.6749  | 1217.5714   | -0.1035 | -85   | 280        | 289      | DLGHLKIHIER        |           |         |                            |      | Mascot      |
| 1699.8043  | 1699.8876   | 0.0833  | 49    | 154        | 167      | ERPYPCTVCGKSFR     |           |         | Carbamidomethyl (C)[6]     |      | Mascot      |
| 1707.8192  | 1707.7273   | -0.0919 | -54   | 206        | 220      | VHTGEKPYICSVCSK    |           |         | Carbamidomethyl (C)[10]    |      | Mascot      |
| 1718.7626  | 1718.8385   | 0.0759  | 44    | 374        | 388      | IHTGEKPYTCSHCDK    |           |         |                            |      | Mascot      |
| 1795.8102  | 1795.7542   | -0.056  | -31   | 290        | 304      | THTGEKPYTCSLCNK    |           |         | Carbamidomethyl (C)[10,13] |      | Mascot      |
| 1861.8319  | 1861.8936   | 0.0617  | 33    | 262        | 276      | THTGEKPYKCSHCEK    |           |         | Carbamidomethyl (C)[10,13] |      | Mascot      |
| 1861.8319  | 1861.8936   | 0.0617  | 33    | 262        | 276      | THTGEKPYKCSHCEK    |           |         | Carbamidomethyl (C)[10,13] |      | Mascot      |
| 1951.9113  | 1951.9247   | 0.0134  | 7     | 290        | 305      | THTGEKPYTCSLCNKR   |           |         | Carbamidomethyl (C)[10,13] |      | Mascot      |
| 1951.9113  | 1951.9247   | 0.0134  | 7     | 290        | 305      | THTGEKPYTCSLCNKR   |           |         | Carbamidomethyl (C)[10,13] |      | Mascot      |
| 2079.8972  | 2080.0183   | 0.1211  | 58    | 184        | 199      | EYMCFECEKTFHTAVK   |           |         | Carbamidomethyl (C)[4,7]   |      | Mascot      |
| 2225.0339  | 2225.0671   | 0.0332  | 15    | 371        | 388      | HVRIHTGEKPYTCSHCDK |           |         | Carbamidomethyl (C)[13,16] |      | Mascot      |
| 2225.0339  | 2225.0671   | 0.0332  | 15    | 371        | 388      | HVRIHTGEKPYTCSHCDK |           |         | Carbamidomethyl (C)[13,16] |      | Mascot      |

|    |                                                                                                        |  |  |  |              |  |        |      |    |    |   |  |  |
|----|--------------------------------------------------------------------------------------------------------|--|--|--|--------------|--|--------|------|----|----|---|--|--|
| 47 | novel protein similar to H.sapiens ATPase, Ca++<br>transporting, plasma membrane (zgc:92885) [Danio re |  |  |  | gi 169145692 |  | 138055 | 5.51 | 14 | 29 | 0 |  |  |
|----|--------------------------------------------------------------------------------------------------------|--|--|--|--------------|--|--------|------|----|----|---|--|--|

Peptide Information

| Calc. Mass | Obsrv. Mass | ± da    | ± ppm | Start Seq. | End Seq. | Sequence         | Ion Score | C. I. % | Modification           | Rank | Result Type |
|------------|-------------|---------|-------|------------|----------|------------------|-----------|---------|------------------------|------|-------------|
| 864.4131   | 864.467     | 0.0539  | 62    | 626        | 632      | DKDEMVK          |           |         |                        |      | Mascot      |
| 882.4501   | 882.5421    | 0.092   | 104   | 609        | 615      | CSFILSR          |           |         | Carbamidomethyl (C)[1] |      | Mascot      |
| 919.5148   | 919.4553    | -0.0595 | -65   | 1100       | 1106     | GQILWFR          |           |         |                        |      | Mascot      |
| 922.4628   | 922.4402    | -0.0226 | -24   | 950        | 957      | IFDIDSGR         |           |         |                        |      | Mascot      |
| 1165.6074  | 1165.7137   | 0.1063  | 91    | 84         | 93       | VFGMNFIPPK       |           |         | Oxidation (M)[4]       |      | Mascot      |
| 1231.5913  | 1231.5604   | -0.0309 | -25   | 742        | 751      | NEKGEIEQER       |           |         |                        |      | Mascot      |
| 1277.7074  | 1277.6776   | -0.0298 | -23   | 83         | 93       | KVFGMNFIPPK      |           |         |                        |      | Mascot      |
| 1629.7603  | 1629.7964   | 0.0361  | 22    | 65         | 80       | TSPADGLSDNPADLEK |           |         |                        |      | Mascot      |
| 1699.8142  | 1699.8876   | 0.0734  | 43    | 581        | 595      | KSMSTVIQMPDGSFR  |           |         | Oxidation (M)[3]       |      | Mascot      |

|    |                                                                       |           |         |     |     |     |                              |      |                            |        |   |
|----|-----------------------------------------------------------------------|-----------|---------|-----|-----|-----|------------------------------|------|----------------------------|--------|---|
|    | 1791.7863                                                             | 1791.6786 | -0.1077 | -60 | 719 | 734 | CGIIHPGDDFLCMEGK             |      | Carbamidomethyl (C)[1]     | Mascot |   |
|    | 1936.8198                                                             | 1936.8641 | 0.0443  | 23  | 457 | 474 | HLDACETMGNATAICSDK           |      | Carbamidomethyl (C)[5]     | Mascot |   |
|    | 1993.8412                                                             | 1993.9196 | 0.0784  | 39  | 457 | 474 | HLDACETMGNATAICSDK           |      | Carbamidomethyl (C)[5,15]  | Mascot |   |
|    | 2211.2053                                                             | 2211.0793 | -0.126  | -57 | 200 | 220 | NSTVIQIPVAEMVVGDI<br>QVK     |      |                            | Mascot |   |
|    | 2282.999                                                              | 2283.1208 | 0.1218  | 53  | 719 | 738 | CGIIHPGDDFLCMEGKDF<br>NR     |      | Oxidation (M)[13]          | Mascot |   |
|    | 2282.999                                                              | 2283.1208 | 0.1218  | 53  | 719 | 738 | CGIIHPGDDFLCMEGKDF<br>NR     |      | Oxidation (M)[13]          | Mascot |   |
|    | 2705.2075                                                             | 2705.1084 | -0.0991 | -37 | 451 | 474 | DNNLVRHLDACETMGNA<br>TAICSDK |      | Carbamidomethyl (C)[11,21] | Mascot |   |
| 48 | guanine nucleotide binding protein (G protein), alpha 11 gi 113682158 |           |         |     |     |     | 46986.8                      | 5.43 | 8                          | 29     | 0 |
|    | (Gq class) [Danio rerio]                                              |           |         |     |     |     |                              |      |                            |        |   |

#### Peptide Information

| Calc. Mass | Obsrv. Mass | ± da    | ± ppm | Start Seq. | End Seq. | Sequence                    | Ion Score | C. I. % | Modification                                | Rank | Result Type |
|------------|-------------|---------|-------|------------|----------|-----------------------------|-----------|---------|---------------------------------------------|------|-------------|
| 1165.6     | 1165.7137   | 0.1137  | 98    | 97         | 105      | IPFRFEDNK                   |           |         |                                             |      | Mascot      |
| 1578.8057  | 1578.6738   | -0.1319 | -84   | 169        | 181      | GYMPTQQDVLRVR               |           |         | Oxidation (M)[3]                            |      | Mascot      |
| 1695.6403  | 1695.8179   | 0.1776  | 105   | 2          | 16       | TLESMMACCMSEEAK             |           |         | Oxidation (M)[5,6]                          |      | Mascot      |
| 1699.9014  | 1699.8876   | -0.0138 | -8    | 387        | 400      | DTILQHNLKEYNLV              |           |         |                                             |      | Mascot      |
| 1711.6351  | 1711.8464   | 0.2113  | 123   | 2          | 16       | TLESMMACCMSEEAK             |           |         | Oxidation (M)[5,6,10]                       |      | Mascot      |
| 1720.6719  | 1720.803    | 0.1311  | 76    | 2          | 16       | TLESMMACCMSEEAK             |           |         | Carbamidomethyl (C)[8]                      |      | Mascot      |
| 1720.6719  | 1720.803    | 0.1311  | 76    | 2          | 16       | TLESMMACCMSEEAK             |           |         | Carbamidomethyl (C)[8]                      |      | Mascot      |
| 1763.8381  | 1763.7555   | -0.0826 | -47   | 56         | 70       | QMRIHGTGYTDEDK              |           |         |                                             |      | Mascot      |
| 1763.8381  | 1763.7555   | -0.0826 | -47   | 56         | 70       | QMRIHGTGYTDEDK              |           |         |                                             |      | Mascot      |
| 2268.1216  | 2267.9756   | -0.146  | -64   | 113        | 132      | EVDVEKVCSEQPYVA<br>AI<br>NK |           |         |                                             |      | Mascot      |
| 2268.1216  | 2267.9756   | -0.146  | -64   | 113        | 132      | EVDVEKVCSEQPYVA<br>AI<br>NK |           |         |                                             |      | Mascot      |
| 2268.8984  | 2268.9763   | 0.0779  | 34    | 1          | 19       | MTLESMMACCMSEEAK<br>SK      |           |         | Carbamidomethyl (C)[9,10], Oxidation (M)[1] |      | Mascot      |
| 2284.2375  | 2284.1187   | -0.1188 | -52   | 298        | 316      | TIITYPWFQNSSVILFLNK         |           |         |                                             |      | Mascot      |

49 85 kDa calcium-independent phospholipase A2 [Danio rerio] gi|47085837 90633.6 6.09 13 29 0

#### Peptide Information

| Calc. Mass | Obsrv. Mass | ± da    | ± ppm | Start Seq. | End Seq. | Sequence   | Ion Score | C. I. % | Modification           | Rank | Result Type |
|------------|-------------|---------|-------|------------|----------|------------|-----------|---------|------------------------|------|-------------|
| 935.4832   | 935.45      | -0.0332 | -35   | 451        | 459      | GFVEADGLK  |           |         |                        |      | Mascot      |
| 938.4213   | 938.4674    | 0.0461  | 49    | 553        | 560      | NEFGENTK   |           |         |                        |      | Mascot      |
| 1045.571   | 1045.5367   | -0.0343 | -33   | 467        | 476      | LLCLDGGGIK |           |         | Carbamidomethyl (C)[3] |      | Mascot      |
| 1106.5874  | 1106.5294   | -0.058  | -52   | 569        | 578      | VMVTSVLADR |           |         | Oxidation (M)[2]       |      | Mascot      |

|    |                                                  |           |         |      |              |     |                            |      |                                          |        |   |
|----|--------------------------------------------------|-----------|---------|------|--------------|-----|----------------------------|------|------------------------------------------|--------|---|
|    | 1231.5194                                        | 1231.5604 | 0.041   | 33   | 184          | 194 | NGETPMHCAAK                |      | Carbamidomethyl (C)[8], Oxidation (M)[6] | Mascot |   |
|    | 1572.8129                                        | 1572.7936 | -0.0193 | -12  | 635          | 647 | VTDEEQLVWRAAR              |      |                                          | Mascot |   |
|    | 1572.8129                                        | 1572.7936 | -0.0193 | -12  | 635          | 647 | VTDEEQLVWRAAR              |      |                                          | Mascot |   |
|    | 1718.6489                                        | 1718.8385 | 0.1896  | 110  | 742          | 757 | MLVDCCTSDSGCAVDR           |      | Oxidation (M)[1]                         | Mascot |   |
|    | 1795.902                                         | 1795.7542 | -0.1478 | -82  | 645          | 661 | AARSSGAAPTYFRPMGR          |      |                                          | Mascot |   |
|    | 2193.1597                                        | 2193.0828 | -0.0769 | -35  | 569          | 587 | VMVTSVLADRHHPGELHL<br>FR   |      | Oxidation (M)[2]                         | Mascot |   |
|    | 2225.0549                                        | 2225.0671 | 0.0122  | 5    | 148          | 168 | DAQGQTPLHLACERGDV<br>GCVR  |      |                                          | Mascot |   |
|    | 2225.0549                                        | 2225.0671 | 0.0122  | 5    | 148          | 168 | DAQGQTPLHLACERGDV<br>GCVR  |      |                                          | Mascot |   |
|    | 2231.1489                                        | 2231.0825 | -0.0664 | -30  | 306          | 325 | GCNVNYLSKTGESPLHIL<br>TK   |      | Carbamidomethyl (C)[2]                   | Mascot |   |
|    | 2297.051                                         | 2297.1306 | 0.0796  | 35   | 245          | 264 | CDIMGNNGFPIHTAMKFS<br>EK   |      | Carbamidomethyl (C)[1]                   | Mascot |   |
|    | 2617.3442                                        | 2617.0767 | -0.2675 | -102 | 1            | 23  | MQFLGRILDTVSSVSLF<br>SNPYR |      |                                          | Mascot |   |
| 50 | PREDICTED: thyroid peroxidase-like [Danio rerio] |           |         |      | gi 326675404 |     | 36205.2                    | 4.89 | 1                                        | 18     | 0 |

#### Peptide Information

| Calc. Mass | Obsrv. Mass | ± da    | ± ppm | Start Seq. | End Seq. | Sequence          | Ion Score | C. I. % | Modification                             | Rank | Result Type |
|------------|-------------|---------|-------|------------|----------|-------------------|-----------|---------|------------------------------------------|------|-------------|
| 1951.9252  | 1951.9247   | -0.0005 | 0     | 245        | 261      | VICDNSGLMEVPLDAFR | 18        | 0       | Carbamidomethyl (C)[3], Oxidation (M)[9] | 2    | Mascot      |

|                       |           |                               |                |                       |                    |
|-----------------------|-----------|-------------------------------|----------------|-----------------------|--------------------|
| <b>Gel Idx/Pos</b>    | 231/J7    | <b>Instr./Gel Origin</b>      | BA2060/110707A | <b>Process Status</b> | Analysis Succeeded |
| <b>Plate [#] Name</b> | [1] 31496 | <b>Instrument Sample Name</b> |                | <b>Spectra</b>        | 11                 |

| Rank | Protein Name                                      | Accession No. | Protein MW | Protein PI | Pep. Count | Protein Score | Protein Score C. I. % | Total Ion Score | Total Ion C. I. % |
|------|---------------------------------------------------|---------------|------------|------------|------------|---------------|-----------------------|-----------------|-------------------|
| 1    | malate dehydrogenase, mitochondrial [Danio rerio] | gi 47085883   | 35397.5    | 8.4        | 13         | 923           | 100                   | 836             | 100               |

#### Peptide Information

| Calc. Mass | Obsrv. Mass | ± da    | ± ppm | Start Seq. | End Seq. | Sequence      | Ion Score | C. I. % | Modification           | Rank | Result Type |
|------------|-------------|---------|-------|------------|----------|---------------|-----------|---------|------------------------|------|-------------|
| 992.5411   | 992.5095    | -0.0316 | -32   | 176        | 184      | ANTFVAELK     |           |         |                        |      | Mascot      |
| 1090.5813  | 1090.5186   | -0.0627 | -57   | 314        | 323      | LVADAMTELK    |           |         |                        |      | Mascot      |
| 1106.5762  | 1106.5194   | -0.0568 | -51   | 314        | 323      | LVADAMTELK    |           |         | Oxidation (M)[6]       |      | Mascot      |
| 1138.6506  | 1138.6178   | -0.0328 | -29   | 286        | 295      | YFSTPLLLGK    |           |         |                        |      | Mascot      |
| 1181.5619  | 1181.5293   | -0.0326 | -28   | 269        | 278      | EGVVECSFVR    | 91        | 100     | Carbamidomethyl (C)[6] |      | Mascot      |
| 1181.5619  | 1181.5293   | -0.0326 | -28   | 269        | 278      | EGVVECSFVR    |           |         | Carbamidomethyl (C)[6] |      | Mascot      |
| 1233.7201  | 1233.6848   | -0.0353 | -29   | 165        | 175      | IFGVTTLDIVR   |           |         |                        |      | Mascot      |
| 1233.7201  | 1233.6848   | -0.0353 | -29   | 165        | 175      | IFGVTTLDIVR   | 86        | 100     |                        |      | Mascot      |
| 1320.6793  | 1320.6439   | -0.0354 | -27   | 78         | 90       | GYIGADQLGDALK |           |         |                        |      | Mascot      |

|  |           |           |         |     |     |     |                               |     |     |  |  |  |                         |        |
|--|-----------|-----------|---------|-----|-----|-----|-------------------------------|-----|-----|--|--|--|-------------------------|--------|
|  | 1352.7355 | 1352.699  | -0.0365 | -27 | 91  | 103 | GCEVVVIPAGVPR                 |     |     |  |  |  | Carbamidomethyl (C)[2]  | Mascot |
|  | 1352.7355 | 1352.699  | -0.0365 | -27 | 91  | 103 | GCEVVVIPAGVPR                 | 102 | 100 |  |  |  | Carbamidomethyl (C)[2]  | Mascot |
|  | 1454.7056 | 1454.6658 | -0.0398 | -27 | 241 | 256 | AGAGSATLSMAYAGAR              |     |     |  |  |  |                         | Mascot |
|  | 1470.7006 | 1470.6592 | -0.0414 | -28 | 241 | 256 | AGAGSATLSMAYAGAR              |     |     |  |  |  | Oxidation (M)[10]       | Mascot |
|  | 1503.7802 | 1503.7397 | -0.0405 | -27 | 215 | 228 | VEFPADQLSALTGR                |     |     |  |  |  |                         | Mascot |
|  | 1503.7802 | 1503.7397 | -0.0405 | -27 | 215 | 228 | VEFPADQLSALTGR                | 134 | 100 |  |  |  |                         | Mascot |
|  | 1793.0895 | 1793.0408 | -0.0487 | -27 | 26  | 44  | VAVLGASGGIGQPLSLLK            |     |     |  |  |  |                         | Mascot |
|  | 2166.0496 | 2165.9907 | -0.0589 | -27 | 110 | 129 | DDL FNTNATIVATLV DGCAR        |     |     |  |  |  | Carbamidomethyl (C)[18] | Mascot |
|  | 2166.0496 | 2165.9907 | -0.0589 | -27 | 110 | 129 | DDL FNTNATIVATLV DGCAR        | 206 | 100 |  |  |  | Carbamidomethyl (C)[18] | Mascot |
|  | 2470.385  | 2470.3232 | -0.0618 | -25 | 191 | 214 | VNVPVVGGHAGITIIP LISKQCTPK    |     |     |  |  |  | Carbamidomethyl (C)[21] | Mascot |
|  | 3089.5901 | 3089.5176 | -0.0725 | -23 | 45  | 73  | NSPLVSELSLFDIAHTPGVAADLSHIETR | 216 | 100 |  |  |  |                         | Mascot |
|  | 3089.5901 | 3089.5176 | -0.0725 | -23 | 45  | 73  | NSPLVSELSLFDIAHTPGVAADLSHIETR |     |     |  |  |  |                         | Mascot |

2 Prps1a protein [Danio rerio] gi|68534248 34857.1 6.51 12 319 100 252 100

#### Peptide Information

| Calc. Mass | Obsrv. Mass | ± da    | ± ppm | Start Seq. | End Seq. | Sequence               | Ion Score | C. I. | % | Modification                                 | Rank | Result Type |
|------------|-------------|---------|-------|------------|----------|------------------------|-----------|-------|---|----------------------------------------------|------|-------------|
| 860.4909   | 860.4687    | -0.0222 | -26   | 207        | 214      | MVLVGDK                |           |       |   |                                              |      | Mascot      |
| 876.4858   | 876.4598    | -0.026  | -30   | 207        | 214      | MVLVGDK                |           |       |   | Oxidation (M)[1]                             |      | Mascot      |
| 1169.6677  | 1169.6351   | -0.0326 | -28   | 187        | 196      | LNVDFA LIHK            |           |       |   |                                              |      | Mascot      |
| 1393.7296  | 1393.6927   | -0.0369 | -26   | 85         | 96       | VTAVIPC FPYAR          | 79        | 100   |   | Carbamidomethyl (C)[7]                       |      | Mascot      |
| 1393.7296  | 1393.6927   | -0.0369 | -26   | 85         | 96       | VTAVIPC FPYAR          |           |       |   | Carbamidomethyl (C)[7]                       |      | Mascot      |
| 1402.6962  | 1402.6555   | -0.0407 | -29   | 6          | 18       | IFSGSSH PDLSQK         |           |       |   |                                              |      | Mascot      |
| 1454.8114  | 1454.6658   | -0.1456 | -100  | 187        | 198      | LNVDFA LIHKER          |           |       |   |                                              |      | Mascot      |
| 1684.9666  | 1684.9191   | -0.0475 | -28   | 289        | 303      | IQVIDIS MILAEAIR       |           |       |   |                                              |      | Mascot      |
| 1700.9615  | 1700.9149   | -0.0466 | -27   | 289        | 303      | IQVIDIS MILAEAIR       | 37        | 94.16 |   | Oxidation (M)[8]                             |      | Mascot      |
| 1700.9615  | 1700.9149   | -0.0466 | -27   | 289        | 303      | IQVIDIS MILAEAIR       |           |       |   | Oxidation (M)[8]                             |      | Mascot      |
| 1754.8014  | 1754.7528   | -0.0486 | -28   | 35         | 49       | FSNQETC VEIGESVR       | 136       | 100   |   | Carbamidomethyl (C)[7]                       |      | Mascot      |
| 1754.8014  | 1754.7528   | -0.0486 | -28   | 35         | 49       | FSNQETC VEIGESVR       |           |       |   | Carbamidomethyl (C)[7]                       |      | Mascot      |
| 1801.9958  | 1801.9453   | -0.0505 | -28   | 246        | 262      | VYAILTHG IFSGPAISR     |           |       |   |                                              |      | Mascot      |
| 1882.8962  | 1882.8414   | -0.0548 | -29   | 34         | 49       | KFSNQETC VEIGESVR      |           |       |   | Carbamidomethyl (C)[8]                       |      | Mascot      |
| 1986.0114  | 1986.0006   | -0.0108 | -5    | 1          | 18       | MPNIKIFSGSSH PDLSQK    |           |       |   |                                              |      | Mascot      |
| 2278.0149  | 2277.9631   | -0.0518 | -23   | 217        | 237      | VAILVDDMADTCGTVCHADK   |           |       |   | Carbamidomethyl (C)[12,16], Oxidation (M)[8] |      | Mascot      |
| 2457.2983  | 2457.2349   | -0.0634 | -26   | 263        | 284      | INNANFEAVVVTNTIPQEDKIK |           |       |   |                                              |      | Mascot      |

3 ribose-phosphate pyrophosphokinase 1 [Danio rerio] gi|115496856 34778 6.51 10 300 100 252 100

| Peptide Information |                                                          |          |           |            |                           |           |                      |                                              |     |                  |      |        |      |
|---------------------|----------------------------------------------------------|----------|-----------|------------|---------------------------|-----------|----------------------|----------------------------------------------|-----|------------------|------|--------|------|
| Calc. Mass          | Obsrv. Mass                                              | $\pm$ da | $\pm$ ppm | Start Seq. | End Sequence Seq.         | Ion Score | C. I. % Modification |                                              |     |                  | Rank | Result | Type |
| 860.4909            | 860.4687                                                 | -0.0222  | -26       | 205        | 212 MVLVGDK               |           |                      |                                              |     |                  |      | Mascot |      |
| 876.4858            | 876.4598                                                 | -0.026   | -30       | 205        | 212 MVLVGDK               |           |                      |                                              |     | Oxidation (M)[1] |      | Mascot |      |
| 1169.6677           | 1169.6351                                                | -0.0326  | -28       | 185        | 194 LNVDFALHK             |           |                      |                                              |     |                  |      | Mascot |      |
| 1393.7296           | 1393.6927                                                | -0.0369  | -26       | 85         | 96 VTAVIPCFPYAR           | 79        | 100                  | Carbamidomethyl (C)[7]                       |     |                  |      | Mascot |      |
| 1393.7296           | 1393.6927                                                | -0.0369  | -26       | 85         | 96 VTAVIPCFPYAR           |           |                      | Carbamidomethyl (C)[7]                       |     |                  |      | Mascot |      |
| 1454.8114           | 1454.6658                                                | -0.1456  | -100      | 185        | 196 LNVDFALHKER           |           |                      |                                              |     |                  |      | Mascot |      |
| 1684.9666           | 1684.9191                                                | -0.0475  | -28       | 287        | 301 IQVIDISMILAEAIR       |           |                      |                                              |     |                  |      | Mascot |      |
| 1700.9615           | 1700.9149                                                | -0.0466  | -27       | 287        | 301 IQVIDISMILAEAIR       | 37        | 94.16                | Oxidation (M)[8]                             |     |                  |      | Mascot |      |
| 1700.9615           | 1700.9149                                                | -0.0466  | -27       | 287        | 301 IQVIDISMILAEAIR       |           |                      | Oxidation (M)[8]                             |     |                  |      | Mascot |      |
| 1754.8014           | 1754.7528                                                | -0.0486  | -28       | 35         | 49 FSNQETCVEIGESVR        | 136       | 100                  | Carbamidomethyl (C)[7]                       |     |                  |      | Mascot |      |
| 1754.8014           | 1754.7528                                                | -0.0486  | -28       | 35         | 49 FSNQETCVEIGESVR        |           |                      | Carbamidomethyl (C)[7]                       |     |                  |      | Mascot |      |
| 1801.9958           | 1801.9453                                                | -0.0505  | -28       | 244        | 260 VYALTHGIFSGPAISR      |           |                      |                                              |     |                  |      | Mascot |      |
| 1882.8962           | 1882.8414                                                | -0.0548  | -29       | 34         | 49 KFSNQETCVEIGESVR       |           |                      | Carbamidomethyl (C)[8]                       |     |                  |      | Mascot |      |
| 2166.1772           | 2165.9907                                                | -0.1865  | -86       | 283        | 301 HCPKIQVIDISMILAEAIR   |           |                      | Oxidation (M)[12]                            |     |                  |      | Mascot |      |
| 2166.1772           | 2165.9907                                                | -0.1865  | -86       | 283        | 301 HCPKIQVIDISMILAEAIR   |           |                      | Oxidation (M)[12]                            |     |                  |      | Mascot |      |
| 2278.0149           | 2277.9631                                                | -0.0518  | -23       | 215        | 235 VAILVDDMADTCGTVCHAADK |           |                      | Carbamidomethyl (C)[12,16], Oxidation (M)[8] |     |                  |      | Mascot |      |
| 4                   | phosphoribosyl pyrophosphate synthetase 1A [Danio rerio] |          |           |            | gi 126541102              | 32796.1   | 6.66                 | 11                                           | 274 | 100              | 216  | 100    |      |

| Peptide Information |             |          |           |            |                      |           |                      |                        |  |                  |      |        |      |
|---------------------|-------------|----------|-----------|------------|----------------------|-----------|----------------------|------------------------|--|------------------|------|--------|------|
| Calc. Mass          | Obsrv. Mass | $\pm$ da | $\pm$ ppm | Start Seq. | End Sequence Seq.    | Ion Score | C. I. % Modification |                        |  |                  | Rank | Result | Type |
| 860.4909            | 860.4687    | -0.0222  | -26       | 207        | 214 MVLVGDK          |           |                      |                        |  |                  |      | Mascot |      |
| 876.4858            | 876.4598    | -0.026   | -30       | 207        | 214 MVLVGDK          |           |                      |                        |  | Oxidation (M)[1] |      | Mascot |      |
| 1169.6677           | 1169.6351   | -0.0326  | -28       | 187        | 196 LNVDFALHK        |           |                      |                        |  |                  |      | Mascot |      |
| 1393.7296           | 1393.6927   | -0.0369  | -26       | 85         | 96 VTAVIPCFPYAR      | 79        | 100                  | Carbamidomethyl (C)[7] |  |                  |      | Mascot |      |
| 1393.7296           | 1393.6927   | -0.0369  | -26       | 85         | 96 VTAVIPCFPYAR      |           |                      | Carbamidomethyl (C)[7] |  |                  |      | Mascot |      |
| 1402.6962           | 1402.6555   | -0.0407  | -29       | 6          | 18 IFSGSSHPDLSQK     |           |                      |                        |  |                  |      | Mascot |      |
| 1454.8114           | 1454.6658   | -0.1456  | -100      | 187        | 198 LNVDFALHKER      |           |                      |                        |  |                  |      | Mascot |      |
| 1754.8014           | 1754.7528   | -0.0486  | -28       | 35         | 49 FSNQETCVEIGESVR   | 136       | 100                  | Carbamidomethyl (C)[7] |  |                  |      | Mascot |      |
| 1754.8014           | 1754.7528   | -0.0486  | -28       | 35         | 49 FSNQETCVEIGESVR   |           |                      | Carbamidomethyl (C)[7] |  |                  |      | Mascot |      |
| 1801.9958           | 1801.9453   | -0.0505  | -28       | 246        | 262 VYALTHGIFSGPAISR |           |                      |                        |  |                  |      | Mascot |      |
| 1882.8962           | 1882.8414   | -0.0548  | -29       | 34         | 49 KFSNQETCVEIGESVR  |           |                      | Carbamidomethyl (C)[8] |  |                  |      | Mascot |      |

|   |                                                                         |           |         |     |     |             |                            |      |    |    |        |  |                                              |  |  |        |
|---|-------------------------------------------------------------------------|-----------|---------|-----|-----|-------------|----------------------------|------|----|----|--------|--|----------------------------------------------|--|--|--------|
|   | 1986.0114                                                               | 1986.0006 | -0.0108 | -5  | 1   | 18          | MPNIKIFSGSSHPDLSQK         |      |    |    |        |  |                                              |  |  | Mascot |
|   | 2278.0149                                                               | 2277.9631 | -0.0518 | -23 | 217 | 237         | VAILVDDMADTCGTVCHA<br>ADK  |      |    |    |        |  | Carbamidomethyl (C)[12,16], Oxidation (M)[8] |  |  | Mascot |
|   | 2457.2983                                                               | 2457.2349 | -0.0634 | -26 | 263 | 284         | INNANFEAVVVTNTIPQE<br>DKIK |      |    |    |        |  |                                              |  |  | Mascot |
| 5 | MOSC domain-containing protein 1, mitochondrial precursor [Danio rerio] |           |         |     |     | gi 62122937 | 36692.9                    | 6.28 | 12 | 71 | 99.662 |  |                                              |  |  |        |

#### Peptide Information

| Calc. Mass | Obsrv. Mass | ± da    | ± ppm | Start Seq. | End Seq. | Sequence                   | Ion Score | C. I. | % Modification          | Rank | Result Type |
|------------|-------------|---------|-------|------------|----------|----------------------------|-----------|-------|-------------------------|------|-------------|
| 890.473    | 890.4456    | -0.0274 | -31   | 156        | 162      | VSEWLTR                    |           |       |                         |      | Mascot      |
| 1006.5316  | 1006.5005   | -0.0311 | -31   | 142        | 150      | VFSVDVQGR                  |           |       |                         |      | Mascot      |
| 1074.5942  | 1074.5635   | -0.0307 | -29   | 163        | 171      | FLEADKPVR                  |           |       |                         |      | Mascot      |
| 1204.599   | 1204.5631   | -0.0359 | -30   | 63         | 73       | AVSVEAAECLR                |           |       | Carbamidomethyl (C)[9]  |      | Mascot      |
| 1311.6328  | 1311.5953   | -0.0375 | -29   | 5          | 15       | EAFATIFDQNR                |           |       |                         |      | Mascot      |
| 1397.7423  | 1397.7041   | -0.0382 | -27   | 298        | 309      | TSPILGQYYTVR               |           |       |                         |      | Mascot      |
| 1439.7278  | 1439.6903   | -0.0375 | -26   | 5          | 16       | EAFATIFDQNRK               |           |       |                         |      | Mascot      |
| 1635.7795  | 1635.7357   | -0.0438 | -27   | 128        | 141      | FPLNNSSDLVVDCR             |           |       | Carbamidomethyl (C)[13] |      | Mascot      |
| 1728.8262  | 1728.7749   | -0.0513 | -30   | 265        | 279      | CLFTTVDPETGVFSR            |           |       | Carbamidomethyl (C)[1]  |      | Mascot      |
| 1766.8643  | 1766.8162   | -0.0481 | -27   | 85         | 99       | HWLVITEDGHMVTGR            |           |       | Oxidation (M)[11]       |      | Mascot      |
| 1986.0555  | 1986.0006   | -0.0549 | -28   | 172        | 187      | LVHYEPDLKPQRPHEK           |           |       |                         |      | Mascot      |
| 2697.4512  | 2697.3767   | -0.0745 | -28   | 172        | 193      | LVHYEPDLKPQRPHEKE<br>PLFPK |           |       |                         |      | Mascot      |

|   |                                                        |  |  |  |  |             |          |      |    |    |        |  |  |  |  |  |
|---|--------------------------------------------------------|--|--|--|--|-------------|----------|------|----|----|--------|--|--|--|--|--|
| 6 | lethal(2) giant larvae protein homolog 2 [Danio rerio] |  |  |  |  | gi 47086863 | 113772.6 | 6.05 | 15 | 59 | 94.891 |  |  |  |  |  |
|---|--------------------------------------------------------|--|--|--|--|-------------|----------|------|----|----|--------|--|--|--|--|--|

#### Peptide Information

| Calc. Mass | Obsrv. Mass | ± da    | ± ppm | Start Seq. | End Seq. | Sequence       | Ion Score | C. I. | % Modification                           | Rank | Result Type |
|------------|-------------|---------|-------|------------|----------|----------------|-----------|-------|------------------------------------------|------|-------------|
| 850.3914   | 850.5179    | 0.1265  | 149   | 7          | 13       | HGHESQR        |           |       |                                          |      | Mascot      |
| 996.5624   | 996.566     | 0.0036  | 4     | 416        | 424      | KPWPINGGK      |           |       |                                          |      | Mascot      |
| 1006.4925  | 1006.5005   | 0.008   | 8     | 6          | 13       | RHGHESQR       |           |       |                                          |      | Mascot      |
| 1090.564   | 1090.5186   | -0.0454 | -42   | 178        | 186      | VPEDYVGRR      |           |       |                                          |      | Mascot      |
| 1204.5966  | 1204.5631   | -0.0335 | -28   | 879        | 887      | MLVHYPCIR      |           |       | Carbamidomethyl (C)[7], Oxidation (M)[1] |      | Mascot      |
| 1233.6296  | 1233.6848   | 0.0552  | 45    | 211        | 220      | GLMVLWDLDR     |           |       | Oxidation (M)[3]                         |      | Mascot      |
| 1233.6296  | 1233.6848   | 0.0552  | 45    | 211        | 220      | GLMVLWDLDR     | 14        | 0     | Oxidation (M)[3]                         |      | Mascot      |
| 1320.6696  | 1320.6439   | -0.0257 | -19   | 16         | 25       | HKQDLYQFNK     |           |       |                                          |      | Mascot      |
| 1360.6976  | 1360.609    | -0.0886 | -65   | 879        | 888      | MLVHYPCIRR     |           |       | Carbamidomethyl (C)[7], Oxidation (M)[1] |      | Mascot      |
| 1498.6631  | 1498.6738   | 0.0107  | 7     | 490        | 502      | KVGCFDPYSDDPR  |           |       |                                          |      | Mascot      |
| 1503.7777  | 1503.7397   | -0.038  | -25   | 293        | 306      | QGPPFLIFSGGMPR |           |       |                                          |      | Mascot      |

|   |                                 |           |         |     |              |     |                           |      |    |                                             |        |
|---|---------------------------------|-----------|---------|-----|--------------|-----|---------------------------|------|----|---------------------------------------------|--------|
|   | 1503.7777                       | 1503.7397 | -0.038  | -25 | 293          | 306 | QGPPFLIFSGGMPR            | 2    | 0  |                                             | Mascot |
|   | 1684.9016                       | 1684.9191 | 0.0175  | 10  | 783          | 798 | GAPLPEPLEVAHDLAR          |      |    |                                             | Mascot |
|   | 1787.8406                       | 1787.8177 | -0.0229 | -13 | 163          | 177 | ELEENNISVEDVQNR           |      |    |                                             | Mascot |
|   | 1792.854                        | 1793.0408 | 0.1868  | 104 | 902          | 916 | YGQGFYLISPSEFER           |      |    |                                             | Mascot |
|   | 2165.9988                       | 2165.9907 | -0.0081 | -4  | 624          | 642 | CTLNPSDQMAMEGPLSR<br>VK   |      |    | Carbamidomethyl (C)[1], Oxidation (M)[9,11] | Mascot |
|   | 2165.9988                       | 2165.9907 | -0.0081 | -4  | 624          | 642 | CTLNPSDQMAMEGPLSR<br>VK   |      |    | Carbamidomethyl (C)[1], Oxidation (M)[9,11] | Mascot |
|   | 2283.2681                       | 2283.1228 | -0.1453 | -64 | 286          | 306 | IIQLPSKQGPPFLIFSGGM<br>PR |      |    |                                             | Mascot |
| 7 | PREDICTED: girdin [Danio rerio] |           |         |     | gi 292621031 |     | 111560.2                  | 5.43 | 18 | 54                                          | 81.449 |

Peptide Information

|  | Calc. Mass | Obsrv. Mass | ± da    | ± ppm | Start Seq. | End Seq. | Sequence                     | Ion Score | C. I. % | Modification            | Rank | Result Type |
|--|------------|-------------|---------|-------|------------|----------|------------------------------|-----------|---------|-------------------------|------|-------------|
|  | 876.4785   | 876.4598    | -0.0187 | -21   | 68         | 75       | SKVAEQSK                     |           |         |                         |      | Mascot      |
|  | 992.4102   | 992.5095    | 0.0993  | 100   | 714        | 721      | ANMEEENR                     |           |         |                         |      | Mascot      |
|  | 1006.4622  | 1006.5005   | 0.0383  | 38    | 528        | 536      | CAALEAESR                    |           |         | Carbamidomethyl (C)[1]  |      | Mascot      |
|  | 1045.5524  | 1045.5339   | -0.0185 | -18   | 220        | 228      | EEALLEVSR                    |           |         |                         |      | Mascot      |
|  | 1090.5123  | 1090.5186   | 0.0063  | 6     | 326        | 335      | DLANESAQSR                   |           |         |                         |      | Mascot      |
|  | 1138.5409  | 1138.6178   | 0.0769  | 68    | 736        | 745      | ALMESSLESR                   |           |         | Oxidation (M)[3]        |      | Mascot      |
|  | 1181.6538  | 1181.5293   | -0.1245 | -105  | 883        | 893      | LGSRHGWALGK                  |           |         |                         |      | Mascot      |
|  | 1181.6538  | 1181.5293   | -0.1245 | -105  | 883        | 893      | LGSRHGWALGK                  |           |         |                         |      | Mascot      |
|  | 1233.6191  | 1233.6848   | 0.0657  | 53    | 284        | 293      | RMCDLAQLR                    |           |         |                         |      | Mascot      |
|  | 1233.6191  | 1233.6848   | 0.0657  | 53    | 284        | 293      | RMCDLAQLR                    |           |         |                         |      | Mascot      |
|  | 1302.6219  | 1302.6831   | 0.0612  | 47    | 582        | 592      | SSHRSLAQCK                   |           |         | Carbamidomethyl (C)[10] |      | Mascot      |
|  | 1311.5885  | 1311.5953   | 0.0068  | 5     | 294        | 304      | ESCAQFEELQK                  |           |         |                         |      | Mascot      |
|  | 1320.5913  | 1320.6439   | 0.0526  | 40    | 7          | 18       | GEAEGEKETENK                 |           |         |                         |      | Mascot      |
|  | 1360.6815  | 1360.609    | -0.0725 | -53   | 207        | 219      | ESGVEAESLARGR                |           |         |                         |      | Mascot      |
|  | 1402.7173  | 1402.6555   | -0.0618 | -44   | 605        | 616      | KAQLEEAESIR                  |           |         |                         |      | Mascot      |
|  | 1503.7472  | 1503.7397   | -0.0075 | -5    | 134        | 146      | MQAAIIAQLEDER                |           |         | Oxidation (M)[1]        |      | Mascot      |
|  | 1503.7472  | 1503.7397   | -0.0075 | -5    | 134        | 146      | MQAAIIAQLEDER                |           |         | Oxidation (M)[1]        |      | Mascot      |
|  | 2166.0105  | 2165.9907   | -0.0198 | -9    | 736        | 753      | ALMESSLESRDQHHNQ<br>R        |           |         |                         |      | Mascot      |
|  | 2166.0105  | 2165.9907   | -0.0198 | -9    | 736        | 753      | ALMESSLESRDQHHNQ<br>R        |           |         |                         |      | Mascot      |
|  | 2298.1506  | 2298.1265   | -0.0241 | -10   | 355        | 375      | LQMASQQRSTPEVALSP<br>PDSR    |           |         |                         |      | Mascot      |
|  | 2299.9949  | 2300.114    | 0.1191  | 52    | 961        | 981      | VSSGTEDFHSSFDKPQD<br>SDSK    |           |         |                         |      | Mascot      |
|  | 2697.2671  | 2697.3767   | 0.1096  | 41    | 294        | 317      | ESCAQFEELQKENTQLA<br>SLNAESK |           |         |                         |      | Mascot      |

|   |                                              |  |  |  |              |  |          |      |    |    |        |
|---|----------------------------------------------|--|--|--|--------------|--|----------|------|----|----|--------|
| 8 | PREDICTED: echinoderm microtubule associated |  |  |  | gi 326672044 |  | 191942.5 | 7.32 | 21 | 49 | 45.252 |
|---|----------------------------------------------|--|--|--|--------------|--|----------|------|----|----|--------|



protein like 6 [Danio rerio]

| Peptide Information |             |         |       |            |                                  |           |         |                          |      |        |        |
|---------------------|-------------|---------|-------|------------|----------------------------------|-----------|---------|--------------------------|------|--------|--------|
| Calc. Mass          | Obsrv. Mass | ± da    | ± ppm | Start Seq. | End Sequence Seq.                | Ion Score | C. I. % | Modification             | Rank | Result | Type   |
| 842.4617            | 842.4854    | 0.0237  | 28    | 433        | 439 EDLPQLK                      |           |         |                          |      |        | Mascot |
| 850.4451            | 850.5179    | 0.0728  | 86    | 1228       | 1234 QTMSVLRL                    |           |         | Oxidation (M)[3]         |      |        | Mascot |
| 992.473             | 992.5095    | 0.0365  | 37    | 288        | 295 SVCWRADRL                    |           |         |                          |      |        | Mascot |
| 996.5546            | 996.566     | 0.0114  | 11    | 714        | 721 CLKTYAIK                     |           |         | Carbamidomethyl (C)[1]   |      |        | Mascot |
| 1106.5034           | 1106.5194   | 0.016   | 14    | 1441       | 1450 DGEIMEVGEK                  |           |         |                          |      |        | Mascot |
| 1181.6049           | 1181.5293   | -0.0756 | -64   | 939        | 948 QTISSLEFEK                   |           |         |                          |      |        | Mascot |
| 1181.6049           | 1181.5293   | -0.0756 | -64   | 939        | 948 QTISSLEFEK                   |           |         |                          |      |        | Mascot |
| 1233.6521           | 1233.6848   | 0.0327  | 27    | 283        | 292 GLSIRSVLCWR                  |           |         | Carbamidomethyl (C)[8]   |      |        | Mascot |
| 1233.6521           | 1233.6848   | 0.0327  | 27    | 283        | 292 GLSIRSVLCWR                  |           |         | Carbamidomethyl (C)[8]   |      |        | Mascot |
| 1302.6688           | 1302.6831   | 0.0143  | 11    | 1605       | 1615 YIEVSTGSYKR                 |           |         |                          |      |        | Mascot |
| 1311.5569           | 1311.5953   | 0.0384  | 29    | 821        | 832 GGRCCAFSPDGK                 |           |         | Carbamidomethyl (C)[4,5] |      |        | Mascot |
| 1320.6769           | 1320.6439   | -0.033  | -25   | 176        | 187 FWALCGNALTPK                 |           |         |                          |      |        | Mascot |
| 1360.6824           | 1360.609    | -0.0734 | -54   | 1228       | 1239 QTMSVLRCAHAK                |           |         | Oxidation (M)[3]         |      |        | Mascot |
| 1470.8274           | 1470.6592   | -0.1682 | -114  | 1383       | 1396 DGLIVTGGKERPTK              |           |         |                          |      |        | Mascot |
| 1626.7104           | 1626.7356   | 0.0252  | 15    | 701        | 713 DGVVELWDDMFER                |           |         | Oxidation (M)[10]        |      |        | Mascot |
| 1711.8234           | 1711.7539   | -0.0695 | -41   | 13         | 25 LEWIGHYRGHQCR                 |           |         | Carbamidomethyl (C)[12]  |      |        | Mascot |
| 1787.8494           | 1787.8177   | -0.0317 | -18   | 902        | 917 GASSCITHVDWDVVRGK            |           |         | Carbamidomethyl (C)[5]   |      |        | Mascot |
| 1792.9227           | 1793.0408   | 0.1181  | 66    | 1134       | 1148 KTVEELSLDHVFGYR             |           |         |                          |      |        | Mascot |
| 1943.9385           | 1943.9105   | -0.028  | -14   | 208        | 224 EEVTYSGALNGDIYVWK            |           |         |                          |      |        | Mascot |
| 2166.0859           | 2165.9907   | -0.0952 | -44   | 293        | 311 ADRILAGTQDSEIFEVMV<br>R      |           |         | Oxidation (M)[17]        |      |        | Mascot |
| 2166.0859           | 2165.9907   | -0.0952 | -44   | 293        | 311 ADRILAGTQDSEIFEVMV<br>R      |           |         | Oxidation (M)[17]        |      |        | Mascot |
| 2283.2019           | 2283.1228   | -0.0791 | -35   | 1285       | 1304 IFVVEFRPDSDTQFVSVG<br>IK    |           |         |                          |      |        | Mascot |
| 2300.0764           | 2300.114    | 0.0376  | 16    | 1135       | 1153 TVEELSLDHVFGYRGFD<br>CR     |           |         | Carbamidomethyl (C)[18]  |      |        | Mascot |
| 2697.3782           | 2697.3767   | -0.0015 | -1    | 471        | 494 NNLFYTQAGEVVYHVAA<br>VAVVYNR |           |         |                          |      |        | Mascot |

9 novel protein [Danio rerio] gi|126632850 14386.2 8.68 7 48 20.865

| Peptide Information |             |         |       |            |                   |           |         |              |      |        |        |
|---------------------|-------------|---------|-------|------------|-------------------|-----------|---------|--------------|------|--------|--------|
| Calc. Mass          | Obsrv. Mass | ± da    | ± ppm | Start Seq. | End Sequence Seq. | Ion Score | C. I. % | Modification | Rank | Result | Type   |
| 842.473             | 842.4854    | 0.0124  | 15    | 14         | 21 TAITTHAK       |           |         |              |      |        | Mascot |
| 996.5737            | 996.566     | -0.0077 | -8    | 104        | 111 TLPWRPAR      |           |         |              |      |        | Mascot |

|           |           |         |      |     |     |                         |  |  |  |                        |  |        |
|-----------|-----------|---------|------|-----|-----|-------------------------|--|--|--|------------------------|--|--------|
| 1181.6902 | 1181.5293 | -0.1609 | -136 | 104 | 113 | TLPWRPARGK              |  |  |  |                        |  | Mascot |
| 1181.6902 | 1181.5293 | -0.1609 | -136 | 104 | 113 | TLPWRPARGK              |  |  |  |                        |  | Mascot |
| 1418.7461 | 1418.7616 | 0.0155  | 11   | 1   | 13  | MGLPGKPTFTDVR           |  |  |  |                        |  | Mascot |
| 1626.6887 | 1626.7356 | 0.0469  | 29   | 32  | 45  | VAQFMCHDTSTSDK          |  |  |  | Carbamidomethyl (C)[6] |  | Mascot |
| 1754.7837 | 1754.7528 | -0.0309 | -18  | 31  | 45  | KVAQFMCHDTSTSDK         |  |  |  | Carbamidomethyl (C)[7] |  | Mascot |
| 1754.7837 | 1754.7528 | -0.0309 | -18  | 31  | 45  | KVAQFMCHDTSTSDK         |  |  |  | Carbamidomethyl (C)[7] |  | Mascot |
| 1985.8934 | 1986.0006 | 0.1072  | 54   | 66  | 84  | ALVEEEEDGEAAGTESP<br>PR |  |  |  |                        |  | Mascot |

10 ral guanine nucleotide dissociation stimulator-like 2  
[Danio rerio] gi|227430353 80400.1 8.77 13 47 11.209

Peptide Information

| Calc. Mass | Obsrv. Mass | ± da    | ± ppm | Start Seq. | End Seq. | Sequence                  | Ion Score | C. I. | % Modification         | Rank | Result Type |
|------------|-------------|---------|-------|------------|----------|---------------------------|-----------|-------|------------------------|------|-------------|
| 1106.5762  | 1106.5194   | -0.0568 | -51   | 422        | 431      | DLTMLDTAVK                |           |       |                        |      | Mascot      |
| 1233.5681  | 1233.6848   | 0.1167  | 95    | 612        | 621      | MDLHDGNLYR                |           |       |                        |      | Mascot      |
| 1233.5681  | 1233.6848   | 0.1167  | 95    | 612        | 621      | MDLHDGNLYR                |           |       |                        |      | Mascot      |
| 1302.7303  | 1302.6831   | -0.0472 | -36   | 652        | 662      | YELIQLLPEGK               |           |       |                        |      | Mascot      |
| 1352.6804  | 1352.699    | 0.0186  | 14    | 375        | 385      | DNYSQSRELLK               |           |       |                        |      | Mascot      |
| 1352.6957  | 1352.699    | 0.0033  | 2     | 434        | 444      | LENGFINFDKR               |           |       |                        |      | Mascot      |
| 1393.6992  | 1393.6927   | -0.0065 | -5    | 422        | 433      | DLTMLDTAVKDR              |           |       | Oxidation (M)[4]       |      | Mascot      |
| 1393.6992  | 1393.6927   | -0.0065 | -5    | 422        | 433      | DLTMLDTAVKDR              |           |       | Oxidation (M)[4]       |      | Mascot      |
| 1402.761   | 1402.6555   | -0.1055 | -75   | 20         | 32       | LADCLSLAELK               |           |       | Carbamidomethyl (C)[5] |      | Mascot      |
| 1728.9425  | 1728.7749   | -0.1676 | -97   | 1          | 15       | MKRPEGDGVLLQTLR           |           |       | Oxidation (M)[1]       |      | Mascot      |
| 1754.9647  | 1754.7528   | -0.2119 | -121  | 179        | 195      | LAPLLPTDSSGAEIKSR         |           |       |                        |      | Mascot      |
| 1754.9647  | 1754.7528   | -0.2119 | -121  | 179        | 195      | LAPLLPTDSSGAEIKSR         |           |       |                        |      | Mascot      |
| 2074.9788  | 2074.9858   | 0.007   | 3     | 689        | 709      | GGNTPTGSPNLGNETSA<br>TFPR |           |       |                        |      | Mascot      |
| 2224.9678  | 2225.061    | 0.0932  | 42    | 151        | 168      | AVCTVFSTWMTDYPEDF<br>R    |           |       | Carbamidomethyl (C)[3] |      | Mascot      |
| 2224.9678  | 2225.061    | 0.0932  | 42    | 151        | 168      | AVCTVFSTWMTDYPEDF<br>R    |           |       | Carbamidomethyl (C)[3] |      | Mascot      |
| 2233.0083  | 2233.0273   | 0.019   | 9     | 586        | 606      | RSVSCGNNPTNSKPEAG<br>PDMR |           |       | Oxidation (M)[20]      |      | Mascot      |
| 2284.1577  | 2284.1169   | -0.0408 | -18   | 288        | 307      | QFNRLANAVTASCLWMT<br>TLK  |           |       | Oxidation (M)[16]      |      | Mascot      |

11 Zgc:175202 protein [Danio rerio] gi|166796345 111533.3 5.46 17 45 0

Peptide Information

| Calc. Mass | Obsrv. Mass | ± da    | ± ppm | Start Seq. | End Seq. | Sequence | Ion Score | C. I. | % Modification | Rank | Result Type |
|------------|-------------|---------|-------|------------|----------|----------|-----------|-------|----------------|------|-------------|
| 876.4785   | 876.4598    | -0.0187 | -21   | 68         | 75       | SKVAEQSK |           |       |                |      | Mascot      |

|           |           |         |      |     |     |                              |  |  |  |  |                         |  |        |
|-----------|-----------|---------|------|-----|-----|------------------------------|--|--|--|--|-------------------------|--|--------|
| 992.4102  | 992.5095  | 0.0993  | 100  | 714 | 721 | ANMEEENR                     |  |  |  |  |                         |  | Mascot |
| 1006.4622 | 1006.5005 | 0.0383  | 38   | 528 | 536 | CAALEAESR                    |  |  |  |  | Carbamidomethyl (C)[1]  |  | Mascot |
| 1045.5524 | 1045.5339 | -0.0185 | -18  | 220 | 228 | EEALLEVSR                    |  |  |  |  |                         |  | Mascot |
| 1090.5123 | 1090.5186 | 0.0063  | 6    | 326 | 335 | DLANESAQSR                   |  |  |  |  |                         |  | Mascot |
| 1138.5409 | 1138.6178 | 0.0769  | 68   | 736 | 745 | ALMESSLESR                   |  |  |  |  | Oxidation (M)[3]        |  | Mascot |
| 1181.6538 | 1181.5293 | -0.1245 | -105 | 883 | 893 | LGSRHGWALGK                  |  |  |  |  |                         |  | Mascot |
| 1181.6538 | 1181.5293 | -0.1245 | -105 | 883 | 893 | LGSRHGWALGK                  |  |  |  |  |                         |  | Mascot |
| 1233.6191 | 1233.6848 | 0.0657  | 53   | 284 | 293 | RMCQDLAQLR                   |  |  |  |  |                         |  | Mascot |
| 1233.6191 | 1233.6848 | 0.0657  | 53   | 284 | 293 | RMCQDLAQLR                   |  |  |  |  |                         |  | Mascot |
| 1302.6219 | 1302.6831 | 0.0612  | 47   | 582 | 592 | SSHSLEAQCK                   |  |  |  |  | Carbamidomethyl (C)[10] |  | Mascot |
| 1311.5885 | 1311.5953 | 0.0068  | 5    | 294 | 304 | ESCAQFEELQK                  |  |  |  |  |                         |  | Mascot |
| 1320.5848 | 1320.6439 | 0.0591  | 45   | 234 | 244 | EACQAELESQR                  |  |  |  |  | Carbamidomethyl (C)[3]  |  | Mascot |
| 1360.6815 | 1360.609  | -0.0725 | -53  | 207 | 219 | ESGVEAESLARGR                |  |  |  |  |                         |  | Mascot |
| 1402.7173 | 1402.6555 | -0.0618 | -44  | 605 | 616 | KAQLEEAESIR                  |  |  |  |  |                         |  | Mascot |
| 1503.7472 | 1503.7397 | -0.0075 | -5   | 134 | 146 | MQAAIIAQLEDER                |  |  |  |  | Oxidation (M)[1]        |  | Mascot |
| 1503.7472 | 1503.7397 | -0.0075 | -5   | 134 | 146 | MQAAIIAQLEDER                |  |  |  |  | Oxidation (M)[1]        |  | Mascot |
| 2166.0105 | 2165.9907 | -0.0198 | -9   | 736 | 753 | ALMESSLESRDQHHNQQ<br>R       |  |  |  |  |                         |  | Mascot |
| 2166.0105 | 2165.9907 | -0.0198 | -9   | 736 | 753 | ALMESSLESRDQHHNQQ<br>R       |  |  |  |  |                         |  | Mascot |
| 2298.1506 | 2298.1265 | -0.0241 | -10  | 355 | 375 | LQMASQQRSTPEVALSP<br>PDSR    |  |  |  |  |                         |  | Mascot |
| 2697.2671 | 2697.3767 | 0.1096  | 41   | 294 | 317 | ESCAQFEELQKENTQLA<br>SLNAESK |  |  |  |  |                         |  | Mascot |

12    hypothetical protein LOC100158480 [Xenopus (Silurana) tropicalis]    gi|189230136    48869.1    6.2    10    43    0

| Peptide Information |             |         |       |            |          |                    |           |       |                   |      |        |        |  |
|---------------------|-------------|---------|-------|------------|----------|--------------------|-----------|-------|-------------------|------|--------|--------|--|
| Calc. Mass          | Obsrv. Mass | ± da    | ± ppm | Start Seq. | End Seq. | Sequence           | Ion Score | C. I. | % Modification    | Rank | Result | Type   |  |
| 882.5658            | 882.5417    | -0.0241 | -27   | 141        | 148      | EAVILPIK           |           |       |                   |      |        | Mascot |  |
| 992.4279            | 992.5095    | 0.0816  | 82    | 237        | 245      | SENESEAAAR         |           |       |                   |      |        | Mascot |  |
| 1045.5789           | 1045.5339   | -0.045  | -43   | 348        | 356      | KVQSATHFK          |           |       |                   |      |        | Mascot |  |
| 1352.5861           | 1352.699    | 0.1129  | 83    | 386        | 396      | EMTWMEVPGEK        |           |       | Oxidation (M)[2]  |      |        | Mascot |  |
| 1352.5861           | 1352.699    | 0.1129  | 83    | 386        | 396      | EMTWMEVPGEK        |           |       | Oxidation (M)[2]  |      |        | Mascot |  |
| 1402.7173           | 1402.6555   | -0.0618 | -44   | 10         | 22       | AIDLANKASQEDK      |           |       |                   |      |        | Mascot |  |
| 1498.786            | 1498.6738   | -0.1122 | -75   | 81         | 94       | APAKPVKESQSN DK    |           |       |                   |      |        | Mascot |  |
| 1503.791            | 1503.7397   | -0.0513 | -34   | 397        | 409      | LLEPIVMSDMLR       |           |       |                   |      |        | Mascot |  |
| 1503.791            | 1503.7397   | -0.0513 | -34   | 397        | 409      | LLEPIVMSDMLR       |           |       |                   |      |        | Mascot |  |
| 1728.9061           | 1728.7749   | -0.1312 | -76   | 1          | 16       | MAANNNLQKAIDLANK   |           |       |                   |      |        | Mascot |  |
| 2283.1536           | 2283.1228   | -0.0308 | -13   | 305        | 325      | LNLGTTPNSLTESDFMTL |           |       | Oxidation (M)[16] |      |        | Mascot |  |

|    |                                                                                                   |           |         |     |     |             |                                   |      |    |    |   |  |  |  |  |        |
|----|---------------------------------------------------------------------------------------------------|-----------|---------|-----|-----|-------------|-----------------------------------|------|----|----|---|--|--|--|--|--------|
|    | 2377.218                                                                                          | 2377.0159 | -0.2021 | -85 | 326 | 347         | GKK<br>TDGYSGADISIIVRDALM<br>QPVR |      |    |    |   |  |  |  |  | Mascot |
| 13 | novel protein similar to vertebrate phospholipase A2, group VI (PLA2G6) (zgc:77476) [Danio rerio] |           |         |     |     | gi 94733407 | 90549.6                           | 6.09 | 14 | 43 | 0 |  |  |  |  |        |

| Peptide Information |             |         |       |            |          |                                 |           |       |   |                                             |      |        |      |
|---------------------|-------------|---------|-------|------------|----------|---------------------------------|-----------|-------|---|---------------------------------------------|------|--------|------|
| Calc. Mass          | Obsrv. Mass | ± da    | ± ppm | Start Seq. | End Seq. | Sequence                        | Ion Score | C. I. | % | Modification                                | Rank | Result | Type |
| 1045.571            | 1045.5339   | -0.0371 | -35   | 467        | 476      | LLCLDGGGIK                      |           |       |   | Carbamidomethyl (C)[3]                      |      | Mascot |      |
| 1090.5198           | 1090.5186   | -0.0012 | -1    | 169        | 177      | ELLEECQAR                       |           |       |   |                                             |      | Mascot |      |
| 1106.5874           | 1106.5194   | -0.068  | -61   | 569        | 578      | VMVTSVLADR                      |           |       |   | Oxidation (M)[2]                            |      | Mascot |      |
| 1138.5375           | 1138.6178   | 0.0803  | 71    | 26         | 35       | DVQLSDYNGK                      |           |       |   |                                             |      | Mascot |      |
| 1320.694            | 1320.6439   | -0.0501 | -38   | 295        | 305      | TAEMSRLLDR                      |           |       |   | Oxidation (M)[4]                            |      | Mascot |      |
| 1393.707            | 1393.6927   | -0.0143 | -10   | 24         | 35       | VRDVQLSDYNGK                    |           |       |   |                                             |      | Mascot |      |
| 1393.707            | 1393.6927   | -0.0143 | -10   | 24         | 35       | VRDVQLSDYNGK                    |           |       |   |                                             |      | Mascot |      |
| 1402.7325           | 1402.6555   | -0.077  | -55   | 634        | 644      | KVTDEEQLVWR                     |           |       |   |                                             |      | Mascot |      |
| 1792.8007           | 1793.0408   | 0.2401  | 134   | 758        | 771      | ARAWCEMADINYHR                  |           |       |   | Carbamidomethyl (C)[5]                      |      | Mascot |      |
| 2225.0549           | 2225.061    | 0.0061  | 3     | 148        | 168      | DAQGQTPLHLACERGDV<br>GCVR       |           |       |   |                                             |      | Mascot |      |
| 2225.0549           | 2225.061    | 0.0061  | 3     | 148        | 168      | DAQGQTPLHLACERGDV<br>GCVR       |           |       |   |                                             |      | Mascot |      |
| 2283.0354           | 2283.1228   | 0.0874  | 38    | 245        | 264      | CDIMGNNGFPIHAAMKFS<br>EK        |           |       |   | Carbamidomethyl (C)[1], Oxidation (M)[4]    |      | Mascot |      |
| 2298.158            | 2298.1265   | -0.0315 | -14   | 346        | 366      | GQDGNTALHLAMKLDNM<br>DLIK       |           |       |   |                                             |      | Mascot |      |
| 2457.1948           | 2457.2349   | 0.0401  | 16    | 237        | 260      | GLLGGGARCDIMGNGF<br>PIHAAMK     |           |       |   | Carbamidomethyl (C)[9]                      |      | Mascot |      |
| 2470.2944           | 2470.3232   | 0.0288  | 12    | 427        | 450      | KAPPPGIGFNDIMQVAVA<br>VTAMSR    |           |       |   |                                             |      | Mascot |      |
| 3089.5442           | 3089.5176   | -0.0266 | -9    | 400        | 426      | VLLNMLCSVGVERCHPP<br>SLNSPTHSLR |           |       |   | Carbamidomethyl (C)[7,14], Oxidation (M)[5] |      | Mascot |      |
| 3089.5442           | 3089.5176   | -0.0266 | -9    | 400        | 426      | VLLNMLCSVGVERCHPP<br>SLNSPTHSLR |           |       |   | Carbamidomethyl (C)[7,14], Oxidation (M)[5] |      | Mascot |      |

|    |                                                         |  |  |  |  |              |         |      |    |    |   |  |  |  |  |  |
|----|---------------------------------------------------------|--|--|--|--|--------------|---------|------|----|----|---|--|--|--|--|--|
| 14 | vacuolar protein sorting 4 homolog b-like [Danio rerio] |  |  |  |  | gi 155369339 | 48868.1 | 6.66 | 10 | 42 | 0 |  |  |  |  |  |
|----|---------------------------------------------------------|--|--|--|--|--------------|---------|------|----|----|---|--|--|--|--|--|

| Peptide Information |             |         |       |            |          |               |           |       |   |                  |      |        |      |
|---------------------|-------------|---------|-------|------------|----------|---------------|-----------|-------|---|------------------|------|--------|------|
| Calc. Mass          | Obsrv. Mass | ± da    | ± ppm | Start Seq. | End Seq. | Sequence      | Ion Score | C. I. | % | Modification     | Rank | Result | Type |
| 882.5658            | 882.5417    | -0.0241 | -27   | 141        | 148      | EAVILPIK      |           |       |   |                  |      | Mascot |      |
| 992.4279            | 992.5095    | 0.0816  | 82    | 237        | 245      | SENESEAAR     |           |       |   |                  |      | Mascot |      |
| 1045.5789           | 1045.5339   | -0.045  | -43   | 348        | 356      | KVQSATHFK     |           |       |   |                  |      | Mascot |      |
| 1352.5861           | 1352.699    | 0.1129  | 83    | 386        | 396      | EMTWMEVPGEK   |           |       |   | Oxidation (M)[2] |      | Mascot |      |
| 1352.5861           | 1352.699    | 0.1129  | 83    | 386        | 396      | EMTWMEVPGEK   |           |       |   | Oxidation (M)[2] |      | Mascot |      |
| 1402.7173           | 1402.6555   | -0.0618 | -44   | 10         | 22       | AIDLANKASQEDK |           |       |   |                  |      | Mascot |      |

|    |                                                              |           |         |     |     |     |                            |         |   |    |                   |   |  |        |
|----|--------------------------------------------------------------|-----------|---------|-----|-----|-----|----------------------------|---------|---|----|-------------------|---|--|--------|
|    | 1498.786                                                     | 1498.6738 | -0.1122 | -75 | 81  | 94  | APAKPVKESQSNDK             |         |   |    |                   |   |  | Mascot |
|    | 1503.791                                                     | 1503.7397 | -0.0513 | -34 | 397 | 409 | LLEPIVMSDMLR               |         |   |    |                   |   |  | Mascot |
|    | 1503.791                                                     | 1503.7397 | -0.0513 | -34 | 397 | 409 | LLEPIVMSDMLR               |         |   |    |                   |   |  | Mascot |
|    | 1728.9061                                                    | 1728.7749 | -0.1312 | -76 | 1   | 16  | MAANNLQKAILANK             |         |   |    |                   |   |  | Mascot |
|    | 2283.1536                                                    | 2283.1228 | -0.0308 | -13 | 305 | 325 | LNLGTTPNLSLTFDFTL<br>GKK   |         |   |    | Oxidation (M)[16] |   |  | Mascot |
|    | 2377.218                                                     | 2377.0159 | -0.2021 | -85 | 326 | 347 | TDGYSGADISIIVRDALM<br>QPVR |         |   |    |                   |   |  | Mascot |
| 15 | vacuolar protein sorting-associated protein 4B [Danio rerio] |           |         |     |     |     | gi 41053850                | 48887.2 | 7 | 10 | 42                | 0 |  |        |

#### Peptide Information

| Calc. Mass | Obsrv. Mass | ± da    | ± ppm | Start Seq. | End Seq. | Sequence                   | Ion Score | C. I. | % Modification    | Rank | Result Type |
|------------|-------------|---------|-------|------------|----------|----------------------------|-----------|-------|-------------------|------|-------------|
| 882.5658   | 882.5417    | -0.0241 | -27   | 141        | 148      | EAVILPIK                   |           |       |                   |      | Mascot      |
| 992.4279   | 992.5095    | 0.0816  | 82    | 237        | 245      | SENESEAAR                  |           |       |                   |      | Mascot      |
| 1045.5789  | 1045.5339   | -0.045  | -43   | 348        | 356      | KVQSATHFK                  |           |       |                   |      | Mascot      |
| 1352.5861  | 1352.699    | 0.1129  | 83    | 386        | 396      | EMTWMEVPGEK                |           |       | Oxidation (M)[2]  |      | Mascot      |
| 1352.5861  | 1352.699    | 0.1129  | 83    | 386        | 396      | EMTWMEVPGEK                |           |       | Oxidation (M)[2]  |      | Mascot      |
| 1402.7173  | 1402.6555   | -0.0618 | -44   | 10         | 22       | AIDLANKASQEDK              |           |       |                   |      | Mascot      |
| 1498.786   | 1498.6738   | -0.1122 | -75   | 81         | 94       | APAKPVKESQSNDK             |           |       |                   |      | Mascot      |
| 1503.791   | 1503.7397   | -0.0513 | -34   | 397        | 409      | LLEPIVMSDMLR               |           |       |                   |      | Mascot      |
| 1503.791   | 1503.7397   | -0.0513 | -34   | 397        | 409      | LLEPIVMSDMLR               |           |       |                   |      | Mascot      |
| 1728.9061  | 1728.7749   | -0.1312 | -76   | 1          | 16       | MAANNLQKAILANK             |           |       |                   |      | Mascot      |
| 2283.1536  | 2283.1228   | -0.0308 | -13   | 305        | 325      | LNLGTTPNLSLTFDFTL<br>GKK   |           |       | Oxidation (M)[16] |      | Mascot      |
| 2377.218   | 2377.0159   | -0.2021 | -85   | 326        | 347      | TDGYSGADISIIVRDALM<br>QPVR |           |       |                   |      | Mascot      |

|    |                                                                                              |  |  |  |  |  |              |         |      |   |    |   |  |  |
|----|----------------------------------------------------------------------------------------------|--|--|--|--|--|--------------|---------|------|---|----|---|--|--|
| 16 | PREDICTED: endoplasmic reticulum-Golgi intermediate compartment protein 2-like [Danio rerio] |  |  |  |  |  | gi 326672443 | 41433.5 | 8.68 | 9 | 41 | 0 |  |  |
|----|----------------------------------------------------------------------------------------------|--|--|--|--|--|--------------|---------|------|---|----|---|--|--|

#### Peptide Information

| Calc. Mass | Obsrv. Mass | ± da    | ± ppm | Start Seq. | End Seq. | Sequence         | Ion Score | C. I. | % Modification          | Rank | Result Type |
|------------|-------------|---------|-------|------------|----------|------------------|-----------|-------|-------------------------|------|-------------|
| 842.5206   | 842.4854    | -0.0352 | -42   | 3          | 9        | RPSLKNK          |           |       |                         |      | Mascot      |
| 890.5015   | 890.4456    | -0.0559 | -63   | 80         | 87       | IDITVAMK         |           |       |                         |      | Mascot      |
| 1106.639   | 1106.5194   | -0.1196 | -108  | 296        | 304      | YKLSPLMVR        |           |       |                         |      | Mascot      |
| 1439.7715  | 1439.6903   | -0.0812 | -56   | 336        | 347      | LIGSFVDIICFR     |           |       | Carbamidomethyl (C)[10] |      | Mascot      |
| 1498.8475  | 1498.6738   | -0.1737 | -116  | 91         | 106      | LGADVLDIAGAVVASK |           |       |                         |      | Mascot      |
| 1685.9196  | 1685.8705   | -0.0491 | -29   | 336        | 349      | LIGSFVDIICFRFR   |           |       |                         |      | Mascot      |
| 1787.9473  | 1787.8177   | -0.1296 | -72   | 319        | 335      | LCGIVGGIFSTDLLHR |           |       |                         |      | Mascot      |

|    |                                             |           |         |     |     |             |                         |         |      |   |    |   |                        |        |
|----|---------------------------------------------|-----------|---------|-----|-----|-------------|-------------------------|---------|------|---|----|---|------------------------|--------|
|    | 1944.0219                                   | 1943.9105 | -0.1114 | -57 | 88  | 106         | CERLGADVLDIAGAVVAS<br>K |         |      |   |    |   | Carbamidomethyl (C)[1] | Mascot |
|    | 2278.0789                                   | 2277.9631 | -0.1158 | -51 | 199 | 217         | GHAHYASFIKDEVYNFSH<br>R |         |      |   |    |   |                        | Mascot |
| 17 | friend leukemia integration 1 [Danio rerio] |           |         |     |     | gi 94734177 |                         | 13937.6 | 5.27 | 6 | 40 | 0 |                        |        |

Peptide Information

| Calc. Mass | Obsrv. Mass | ± da    | ± ppm | Start Seq. | End Seq. | Sequence                   | Ion Score | C. I. | % Modification | Rank | Result Type |
|------------|-------------|---------|-------|------------|----------|----------------------------|-----------|-------|----------------|------|-------------|
| 1090.4912  | 1090.5186   | 0.0274  | 25    | 36         | 44       | EYDHINGSR                  |           |       |                |      | Mascot      |
| 1138.5262  | 1138.6178   | 0.0916  | 80    | 114        | 123      | EYGLQEIDTA                 |           |       |                |      | Mascot      |
| 1393.6343  | 1393.6927   | 0.0584  | 42    | 2          | 14       | TASGTQDYGQTHK              |           |       |                |      | Mascot      |
| 1393.6343  | 1393.6927   | 0.0584  | 42    | 2          | 14       | TASGTQDYGQTHK              |           |       |                |      | Mascot      |
| 1787.9438  | 1787.8177   | -0.1261 | -71   | 90         | 105      | VIVPADPSLWSPDHVR           |           |       |                |      | Mascot      |
| 1944.045   | 1943.9105   | -0.1345 | -69   | 89         | 105      | RVIVPADPSLWSPDHVR          |           |       |                |      | Mascot      |
| 2457.019   | 2457.2349   | 0.2159  | 88    | 55         | 76       | CNKMVGGTEASQMNYT<br>GYMDEK |           |       |                |      | Mascot      |

|    |                                                           |  |  |  |  |             |  |         |      |   |    |   |  |  |
|----|-----------------------------------------------------------|--|--|--|--|-------------|--|---------|------|---|----|---|--|--|
| 18 | glucosamine 6-phosphate N-acetyltransferase [Danio rerio] |  |  |  |  | gi 66773342 |  | 20759.6 | 5.95 | 6 | 40 | 0 |  |  |
|----|-----------------------------------------------------------|--|--|--|--|-------------|--|---------|------|---|----|---|--|--|

Peptide Information

| Calc. Mass | Obsrv. Mass | ± da    | ± ppm | Start Seq. | End Seq. | Sequence        | Ion Score | C. I. | % Modification          | Rank | Result Type |
|------------|-------------|---------|-------|------------|----------|-----------------|-----------|-------|-------------------------|------|-------------|
| 860.4545   | 860.4687    | 0.0142  | 17    | 153        | 160      | VTLECAPK        |           |       |                         |      | Mascot      |
| 876.4032   | 876.4598    | 0.0566  | 65    | 73         | 79       | ANFEHMK         |           |       |                         |      | Mascot      |
| 1233.6144  | 1233.6848   | 0.0704  | 57    | 119        | 129      | VEEVVSDVCR      |           |       |                         |      | Mascot      |
| 1233.6144  | 1233.6848   | 0.0704  | 57    | 119        | 129      | VEEVVSDVCR      | 4         |       | 0                       |      | Mascot      |
| 1418.7307  | 1418.7616   | 0.0309  | 22    | 119        | 131      | VEEVVSDVCRGK    |           |       |                         |      | Mascot      |
| 1503.7583  | 1503.7397   | -0.0186 | -12   | 117        | 129      | GRVEEVVSDVCR    |           |       | Carbamidomethyl (C)[12] |      | Mascot      |
| 1503.7583  | 1503.7397   | -0.0186 | -12   | 117        | 129      | GRVEEVVSDVCR    |           |       | Carbamidomethyl (C)[12] |      | Mascot      |
| 1801.752   | 1801.9453   | 0.1933  | 107   | 167        | 181      | KFGYSASDETYMQCR |           |       | Oxidation (M)[12]       |      | Mascot      |

|    |                                                                                 |  |  |  |  |              |  |          |      |    |    |   |    |   |
|----|---------------------------------------------------------------------------------|--|--|--|--|--------------|--|----------|------|----|----|---|----|---|
| 19 | PREDICTED: transformation/transcription domain-associated protein [Danio rerio] |  |  |  |  | gi 326672350 |  | 433471.2 | 8.52 | 27 | 39 | 0 | 11 | 0 |
|----|---------------------------------------------------------------------------------|--|--|--|--|--------------|--|----------|------|----|----|---|----|---|

Peptide Information

| Calc. Mass | Obsrv. Mass | ± da    | ± ppm | Start Seq. | End Seq. | Sequence  | Ion Score | C. I. | % Modification   | Rank | Result Type |
|------------|-------------|---------|-------|------------|----------|-----------|-----------|-------|------------------|------|-------------|
| 882.5155   | 882.5417    | 0.0262  | 30    | 2182       | 2189     | AVHSLLSR  |           |       |                  |      | Mascot      |
| 890.4512   | 890.4456    | -0.0056 | -6    | 606        | 613      | VANCQTVR  |           |       |                  |      | Mascot      |
| 992.4643   | 992.5095    | 0.0452  | 46    | 2520       | 2527     | ERENSETK  |           |       |                  |      | Mascot      |
| 1045.5095  | 1045.5339   | 0.0244  | 23    | 3604       | 3612     | EVQGNMVPR |           |       | Oxidation (M)[6] |      | Mascot      |



|    |                                          |           |         |     |              |     |                        |      |   |    |   |                         |  |        |
|----|------------------------------------------|-----------|---------|-----|--------------|-----|------------------------|------|---|----|---|-------------------------|--|--------|
|    | 890.4213                                 | 890.4456  | 0.0243  | 27  | 173          | 179 | IDEKDDR                |      |   |    |   |                         |  | Mascot |
|    | 992.5808                                 | 992.5095  | -0.0713 | -72 | 699          | 707 | SMVLSALKK              |      |   |    |   | Oxidation (M)[2]        |  | Mascot |
|    | 1074.5062                                | 1074.5635 | 0.0573  | 53  | 70           | 78  | VETDKDDPR              |      |   |    |   |                         |  | Mascot |
|    | 1138.5674                                | 1138.6178 | 0.0504  | 44  | 839          | 847 | DFRDVMISR              |      |   |    |   |                         |  | Mascot |
|    | 1503.8165                                | 1503.7397 | -0.0768 | -51 | 829          | 841 | SEPQTIIIGKDFR          |      |   |    |   |                         |  | Mascot |
|    | 1503.8165                                | 1503.7397 | -0.0768 | -51 | 829          | 841 | SEPQTIIIGKDFR          |      |   |    |   |                         |  | Mascot |
|    | 1700.9                                   | 1700.9149 | 0.0149  | 9   | 464          | 478 | DPRMSLQDLGSLQIK        | 4    |   | 0  |   |                         |  | Mascot |
|    | 1700.9                                   | 1700.9149 | 0.0149  | 9   | 464          | 478 | DPRMSLQDLGSLQIK        |      |   |    |   |                         |  | Mascot |
|    | 1728.7493                                | 1728.7749 | 0.0256  | 15  | 285          | 300 | ATASDEGTFTCVAENR       |      |   |    |   | Carbamidomethyl (C)[11] |  | Mascot |
|    | 1882.9327                                | 1882.8414 | -0.0913 | -48 | 600          | 617 | AVNVQGLSDPSMSEPV<br>R  |      |   |    |   |                         |  | Mascot |
|    | 2075.1243                                | 2074.9858 | -0.1385 | -67 | 113          | 131 | NYLGEAVSRNASLEVAL<br>R |      |   |    |   |                         |  | Mascot |
|    | 2166.0706                                | 2165.9907 | -0.0799 | -37 | 842          | 860 | DVMISRNNSTTEQITDV<br>K |      |   |    |   | Oxidation (M)[3]        |  | Mascot |
|    | 2166.0706                                | 2165.9907 | -0.0799 | -37 | 842          | 860 | DVMISRNNSTTEQITDV<br>K |      |   |    |   | Oxidation (M)[3]        |  | Mascot |
| 21 | novel protein (zgc:114168) [Danio rerio] |           |         |     | gi 220673162 |     | 33328.8                | 5.18 | 8 | 38 | 0 |                         |  |        |

#### Peptide Information

| Calc. Mass | Obsrv. Mass | ± da    | ± ppm | Start Seq. | End Seq. | Sequence                   | Ion Score | C. I. | % Modification          | Rank | Result Type |
|------------|-------------|---------|-------|------------|----------|----------------------------|-----------|-------|-------------------------|------|-------------|
| 1045.516   | 1045.5339   | 0.0179  | 17    | 256        | 264      | STELPDVER                  |           |       |                         |      | Mascot      |
| 1367.757   | 1367.6932   | -0.0638 | -47   | 265        | 275      | LKPYQSLIDK                 |           |       |                         |      | Mascot      |
| 1626.8638  | 1626.7356   | -0.1282 | -79   | 112        | 125      | DWFQLVGLIHDVGK             |           |       |                         |      | Mascot      |
| 1684.7788  | 1684.9191   | 0.1403  | 83    | 186        | 198      | VLMSWGHDEYLYR              |           |       | Oxidation (M)[3]        |      | Mascot      |
| 2166.0171  | 2165.9907   | -0.0264 | -12   | 167        | 185      | NPALNTEFGIYEPQCGLD<br>K    |           |       | Carbamidomethyl (C)[15] |      | Mascot      |
| 2166.0171  | 2165.9907   | -0.0264 | -12   | 167        | 185      | NPALNTEFGIYEPQCGLD<br>K    |           |       | Carbamidomethyl (C)[15] |      | Mascot      |
| 2233.1399  | 2233.0273   | -0.1126 | -50   | 107        | 125      | EHPDKDWFQLVGLIHDV<br>GK    |           |       |                         |      | Mascot      |
| 2298.1118  | 2298.1265   | 0.0147  | 6     | 2          | 21       | RVVNMGPDPSPRAYRPEC<br>HEK  |           |       |                         |      | Mascot      |
| 2470.178   | 2470.3232   | 0.1452  | 59    | 126        | 147      | VMALYSEPQWAVVGDTY<br>PVGCK |           |       | Carbamidomethyl (C)[21] |      | Mascot      |

22 PREDICTED: GTPase IMAP family member 4 [Danio rerio] gi|292616657 46823 9.07 10 37 0

#### Peptide Information

| Calc. Mass | Obsrv. Mass | ± da    | ± ppm | Start Seq. | End Seq. | Sequence    | Ion Score | C. I. | % Modification   | Rank | Result Type |
|------------|-------------|---------|-------|------------|----------|-------------|-----------|-------|------------------|------|-------------|
| 842.4189   | 842.4854    | 0.0665  | 79    | 305        | 311      | VHQAEMK     |           |       |                  |      | Mascot      |
| 1090.5739  | 1090.5186   | -0.0553 | -51   | 84         | 94       | SATGNTILGEK |           |       |                  |      | Mascot      |
| 1138.4541  | 1138.6178   | 0.1637  | 144   | 35         | 45       | GNMSNEGNSR  |           |       | Oxidation (M)[3] |      | Mascot      |



|  |           |           |         |     |     |     |                            |  |  |  |  |  |  |  |  |  |        |
|--|-----------|-----------|---------|-----|-----|-----|----------------------------|--|--|--|--|--|--|--|--|--|--------|
|  | 1181.5038 | 1181.5293 | 0.0255  | 22  | 291 | 299 | CQETEREMR                  |  |  |  |  |  |  |  |  |  | Mascot |
|  | 1181.5038 | 1181.5293 | 0.0255  | 22  | 291 | 299 | CQETEREMR                  |  |  |  |  |  |  |  |  |  | Mascot |
|  | 1320.6907 | 1320.6439 | -0.0468 | -35 | 195 | 206 | LNGGSIQEFISR               |  |  |  |  |  |  |  |  |  | Mascot |
|  | 1360.6526 | 1360.609  | -0.0436 | -32 | 243 | 253 | VDELMIQNENR                |  |  |  |  |  |  |  |  |  | Mascot |
|  | 1439.7025 | 1439.6903 | -0.0122 | -8  | 222 | 233 | FVAFNNKNSNR                |  |  |  |  |  |  |  |  |  | Mascot |
|  | 2211.1074 | 2211.0491 | -0.0583 | -26 | 305 | 323 | VHQAEMKEQENSANIELI<br>K    |  |  |  |  |  |  |  |  |  | Mascot |
|  | 2377.0796 | 2377.0159 | -0.0637 | -27 | 51  | 72  | ISAERTDNNNEGACGS<br>QNVLR  |  |  |  |  |  |  |  |  |  | Mascot |
|  | 2697.3831 | 2697.3767 | -0.0064 | -2  | 1   | 23  | MFARELDTFAHQLSPA<br>HKPVHK |  |  |  |  |  |  |  |  |  | Mascot |

23

glutathione S-transferase, C-terminal domain containing gi|255003839 [Danio rerio]

67751.6

6.97

12

37

0

Peptide Information

| Calc. Mass | Obsrv. Mass | $\pm$ da | $\pm$ ppm | Start Seq. | End Seq. | Sequence                | Ion Score | C. I. % | Modification                             | Rank | Result Type |
|------------|-------------|----------|-----------|------------|----------|-------------------------|-----------|---------|------------------------------------------|------|-------------|
| 870.493    | 870.5158    | 0.0228   | 26        | 76         | 83       | DELPGLVK                |           |         |                                          |      | Mascot      |
| 996.522    | 996.566     | 0.044    | 44        | 186        | 193      | VHND DKIR               |           |         |                                          |      | Mascot      |
| 1006.4444  | 1006.5005   | 0.0561   | 56        | 113        | 120      | ACQLMPDR                |           |         | Carbamidomethyl (C)[2], Oxidation (M)[5] |      | Mascot      |
| 1045.571   | 1045.5339   | -0.0371  | -35       | 446        | 454      | CQVILVENK               |           |         |                                          |      | Mascot      |
| 1106.5323  | 1106.5194   | -0.0129  | -12       | 203        | 212      | SDSQVKDAEK              |           |         |                                          |      | Mascot      |
| 1352.6189  | 1352.699    | 0.0801   | 59        | 158        | 168      | HLQNPEDETNR             |           |         |                                          |      | Mascot      |
| 1352.6189  | 1352.699    | 0.0801   | 59        | 158        | 168      | HLQNPEDETNR             |           |         |                                          |      | Mascot      |
| 1503.693   | 1503.7397   | 0.0467   | 31        | 600        | 614      | GCSPKNNMLVGPEPTG        |           |         |                                          |      | Mascot      |
| 1503.7914  | 1503.7397   | -0.0517  | -34       | 213        | 226      | EPHPNVELSAALAR          |           |         |                                          |      | Mascot      |
| 1635.8601  | 1635.7357   | -0.1244  | -76       | 299        | 311      | WYQRTQELSGVLR           |           |         |                                          |      | Mascot      |
| 1766.8313  | 1766.8162   | -0.0151  | -9        | 131        | 145      | NTCLKACAEVSQWTR         |           |         | Carbamidomethyl (C)[3]                   |      | Mascot      |
| 2075.0088  | 2074.9858   | -0.023   | -11       | 512        | 529      | AGFVISPCCYGFIQNTLK      |           |         | Carbamidomethyl (C)[8,9]                 |      | Mascot      |
| 2166.0471  | 2165.9907   | -0.0564  | -26       | 581        | 599      | SWAAEAHGYSVRVMTMI<br>PK |           |         | Oxidation (M)[14,16]                     |      | Mascot      |
| 2166.0471  | 2165.9907   | -0.0564  | -26       | 581        | 599      | SWAAEAHGYSVRVMTMI<br>PK |           |         | Oxidation (M)[14,16]                     |      | Mascot      |

24

sorting nexin family member 27 [Danio rerio]

gi|41054611

64121.8

5.8

10

37

0

Peptide Information

| Calc. Mass | Obsrv. Mass | $\pm$ da | $\pm$ ppm | Start Seq. | End Seq. | Sequence      | Ion Score | C. I. % | Modification | Rank | Result Type |
|------------|-------------|----------|-----------|------------|----------|---------------|-----------|---------|--------------|------|-------------|
| 842.5094   | 842.4854    | -0.024   | -28       | 121        | 127      | QVVDLIR       |           |         |              |      | Mascot      |
| 1138.5963  | 1138.6178   | 0.0215   | 19        | 12         | 23       | SAAPSAIHS AAR |           |         |              |      | Mascot      |
| 1393.7434  | 1393.6927   | -0.0507  | -36       | 404        | 414      | SYQLQKLTEQR   |           |         |              |      | Mascot      |

|           |           |         |     |     |     |                                 |                                           |  |  |  |  |        |
|-----------|-----------|---------|-----|-----|-----|---------------------------------|-------------------------------------------|--|--|--|--|--------|
| 1393.7434 | 1393.6927 | -0.0507 | -36 | 404 | 414 | SYQLQKLTEQR                     |                                           |  |  |  |  | Mascot |
| 1626.7792 | 1626.7356 | -0.0436 | -27 | 299 | 312 | NCTTDQVYQAVVTK                  | Carbamidomethyl (C)[2]                    |  |  |  |  | Mascot |
| 1754.8741 | 1754.7528 | -0.1213 | -69 | 298 | 312 | KNCTTDQVYQAVVTK                 | Carbamidomethyl (C)[3]                    |  |  |  |  | Mascot |
| 1754.8741 | 1754.7528 | -0.1213 | -69 | 298 | 312 | KNCTTDQVYQAVVTK                 | Carbamidomethyl (C)[3]                    |  |  |  |  | Mascot |
| 1985.7681 | 1986.0006 | 0.2325  | 117 | 482 | 497 | WDTDEEGMAFCFEYAR                | Oxidation (M)[8]                          |  |  |  |  | Mascot |
| 2225.0283 | 2225.061  | 0.0327  | 15  | 24  | 47  | NGSGMSAGTCAGGLVAT<br>TVTSGPR    | Carbamidomethyl (C)[10], Oxidation (M)[5] |  |  |  |  | Mascot |
| 2225.0283 | 2225.061  | 0.0327  | 15  | 24  | 47  | NGSGMSAGTCAGGLVAT<br>TVTSGPR    | Carbamidomethyl (C)[10], Oxidation (M)[5] |  |  |  |  | Mascot |
| 2232.8743 | 2233.0273 | 0.153   | 69  | 425 | 442 | TCEGYNEITFPHCSCDSR              | Carbamidomethyl (C)[2,13,15]              |  |  |  |  | Mascot |
| 2283.9321 | 2284.1169 | 0.1848  | 81  | 482 | 500 | WDTDEEGMAFCFEYARG<br>EK         |                                           |  |  |  |  | Mascot |
| 2299.927  | 2300.114  | 0.187   | 81  | 482 | 500 | WDTDEEGMAFCFEYARG<br>EK         | Oxidation (M)[8]                          |  |  |  |  | Mascot |
| 3089.5876 | 3089.5176 | -0.07   | -23 | 337 | 363 | LAPNEFPHKLYVQNYTSA<br>VPGTCLTLR | Carbamidomethyl (C)[23]                   |  |  |  |  | Mascot |
| 3089.5876 | 3089.5176 | -0.07   | -23 | 337 | 363 | LAPNEFPHKLYVQNYTSA<br>VPGTCLTLR | Carbamidomethyl (C)[23]                   |  |  |  |  | Mascot |

25 PREDICTED: myosin heavy chain, fast skeletal muscle-like [Danio rerio] gi|326678010 161130.5 6.2 17 37 0

#### Peptide Information

| Calc. Mass | Obsrv. Mass | ± da    | ± ppm | Start Seq. | End Seq. | Sequence                 | Ion Score | C. I. % | Modification            | Rank | Result Type |
|------------|-------------|---------|-------|------------|----------|--------------------------|-----------|---------|-------------------------|------|-------------|
| 876.4785   | 876.4598    | -0.0187 | -21   | 922        | 928      | LKETTER                  |           |         |                         |      | Mascot      |
| 890.5305   | 890.4456    | -0.0849 | -95   | 1020       | 1027     | VNTLTISK                 |           |         |                         |      | Mascot      |
| 1006.5502  | 1006.5005   | -0.0497 | -49   | 400        | 407      | ALCYPYRVK                |           |         | Carbamidomethyl (C)[3]  |      | Mascot      |
| 1074.5426  | 1074.5635   | 0.0209  | 19    | 1386       | 1395     | ADIAESQVVK               |           |         |                         |      | Mascot      |
| 1204.6506  | 1204.5631   | -0.0875 | -73   | 562        | 572      | CSAFQKPKPAK              |           |         |                         |      | Mascot      |
| 1233.611   | 1233.6848   | 0.0738  | 60    | 24         | 34       | IEAQNTPFDAK              |           |         |                         |      | Mascot      |
| 1233.611   | 1233.6848   | 0.0738  | 60    | 24         | 34       | IEAQNTPFDAK              |           |         |                         |      | Mascot      |
| 1302.6035  | 1302.6831   | 0.0796  | 61    | 73         | 83       | EDEVFPMNPPK              |           |         |                         |      | Mascot      |
| 1360.689   | 1360.609    | -0.08   | -59   | 445        | 455      | INEMLDTKQPR              |           |         | Oxidation (M)[4]        |      | Mascot      |
| 1397.7535  | 1397.7041   | -0.0494 | -35   | 643        | 655      | KGGSFQTVSALFR            |           |         |                         |      | Mascot      |
| 1684.7404  | 1684.9191   | 0.1787  | 106   | 1229       | 1243     | MEIDDLSSNMEAVAK          |           |         | Oxidation (M)[1,10]     |      | Mascot      |
| 1685.8639  | 1685.8705   | 0.0066  | 4     | 416        | 431      | GQTVPVQVNNVAVSALCK       |           |         | Carbamidomethyl (C)[15] |      | Mascot      |
| 1728.772   | 1728.7749   | 0.0029  | 2     | 2          | 17       | GDGEMECFGPAAIYLR         |           |         |                         |      | Mascot      |
| 1792.9744  | 1793.0408   | 0.0664  | 37    | 130        | 145      | WLPVYDAVVVAGYRGK         |           |         |                         |      | Mascot      |
| 1801.8198  | 1801.9453   | 0.1255  | 70    | 370        | 385      | QREEQAEPDGTEVADK         |           |         |                         |      | Mascot      |
| 2075.0139  | 2074.9858   | -0.0281 | -14   | 1028       | 1045     | SKLEQQVDDLEGSLEQE<br>K   |           |         |                         |      | Mascot      |
| 2300.1599  | 2300.114    | -0.0459 | -20   | 386        | 405      | IAYLMGLNSADMLKALCY<br>PR |           |         | Carbamidomethyl (C)[17] |      | Mascot      |
| 2457.1311  | 2457.2349   | 0.1038  | 42    | 1375       | 1395     | VQHEMEEAQERADIAES        |           |         | Oxidation (M)[5]        |      | Mascot      |

26      PREDICTED: NACHT, LRR and PYD domains-containing protein 12 [Danio rerio]      QV NK  
gi|292621731      149261.8      5.29      17      37      0

| Peptide Information |             |         |       |            |          |                       |           |         |                         |      |             |
|---------------------|-------------|---------|-------|------------|----------|-----------------------|-----------|---------|-------------------------|------|-------------|
| Calc. Mass          | Obsrv. Mass | ± da    | ± ppm | Start Seq. | End Seq. | Sequence              | Ion Score | C. I. % | Modification            | Rank | Result Type |
| 842.4114            | 842.4854    | 0.074   | 88    | 1214       | 1220     | SNSEHLR               |           |         |                         |      | Mascot      |
| 860.426             | 860.4687    | 0.0427  | 50    | 211        | 217      | HDFGKEK               |           |         |                         |      | Mascot      |
| 870.5593            | 870.5158    | -0.0435 | -50   | 1011       | 1017     | KLLPMIR               |           |         |                         |      | Mascot      |
| 876.5341            | 876.4598    | -0.0743 | -85   | 224        | 230      | IILFGWK               |           |         |                         |      | Mascot      |
| 890.5345            | 890.4456    | -0.0889 | -100  | 232        | 238      | EKYLPIK               |           |         |                         |      | Mascot      |
| 992.537             | 992.5095    | -0.0275 | -28   | 485        | 493      | RSTTDTAIK             |           |         |                         |      | Mascot      |
| 1006.5237           | 1006.5005   | -0.0232 | -23   | 551        | 558      | EINLMKDK              |           |         | Oxidation (M)[5]        |      | Mascot      |
| 1302.53             | 1302.6831   | 0.1531  | 118   | 389        | 400      | STESESSCVSMR          |           |         |                         |      | Mascot      |
| 1418.691            | 1418.7616   | 0.0706  | 50    | 1293       | 1304     | LFSDLKDDSHNK          |           |         |                         |      | Mascot      |
| 1684.9116           | 1684.9191   | 0.0075  | 4     | 1115       | 1130     | LGDSVTLLSAVLEDPR      |           |         |                         |      | Mascot      |
| 1700.8529           | 1700.9149   | 0.062   | 36    | 988        | 1001     | LEEFNINEFVVGYSK       |           |         |                         |      | Mascot      |
| 1700.8529           | 1700.9149   | 0.062   | 36    | 988        | 1001     | LEEFNINEFVVGYSK       |           |         |                         |      | Mascot      |
| 1766.8667           | 1766.8162   | -0.0505 | -29   | 1271       | 1285     | SNPEHLRDLDLSENK       |           |         |                         |      | Mascot      |
| 1792.948            | 1793.0408   | 0.0928  | 52    | 522        | 536      | TVSVQKFILDWAEELK      |           |         |                         |      | Mascot      |
| 1882.9579           | 1882.8414   | -0.1165 | -62   | 1172       | 1189     | LGDSVTVLSAVLEDPHCK    |           |         |                         |      | Mascot      |
| 2225.2839           | 2225.061    | -0.2229 | -100  | 890        | 908      | FLLGLSVESHQILLQRLMK   |           |         |                         |      | Mascot      |
| 2225.2839           | 2225.061    | -0.2229 | -100  | 890        | 908      | FLLGLSVESHQILLQRLMK   |           |         |                         |      | Mascot      |
| 2284.0181           | 2284.1169   | 0.0988  | 43    | 380        | 400      | SDLSSVHQKSTESESSCVSMR |           |         |                         |      | Mascot      |
| 2300.0129           | 2300.114    | 0.1011  | 44    | 380        | 400      | SDLSSVHQKSTESESSCVSMR |           |         | Oxidation (M)[20]       |      | Mascot      |
| 2470.3162           | 2470.3232   | 0.007   | 3     | 316        | 336      | TLIQEPAYVLEQWACILGPLR |           |         | Carbamidomethyl (C)[15] |      | Mascot      |

27      myosin VIIA [Danio rerio]      gi|9944237      251496.9      8.81      25      36      0

| Peptide Information |             |         |       |            |          |           |           |         |                  |                  |
|---------------------|-------------|---------|-------|------------|----------|-----------|-----------|---------|------------------|------------------|
| Calc. Mass          | Obsrv. Mass | ± da    | ± ppm | Start Seq. | End Seq. | Sequence  | Ion Score | C. I. % | Modification     | Rank Result Type |
| 850.4716            | 850.5179    | 0.0463  | 54    | 824        | 830      | CRGFLVR   |           |         |                  | Mascot           |
| 876.4057            | 876.4598    | 0.0541  | 62    | 907        | 913      | EDAEREK   |           |         |                  | Mascot           |
| 992.4717            | 992.5095    | 0.0378  | 38    | 1282       | 1290     | ELCNALSDK |           |         |                  | Mascot           |
| 996.4666            | 996.566     | 0.0994  | 100   | 519        | 527      | GTDTTMLNK |           |         | Oxidation (M)[6] | Mascot           |
| 1006.5792           | 1006.5005   | -0.0787 | -78   | 797        | 804      | LQALYRSR  |           |         |                  | Mascot           |

|           |           |         |      |      |      |                              |                                                    |        |
|-----------|-----------|---------|------|------|------|------------------------------|----------------------------------------------------|--------|
| 1045.452  | 1045.5339 | 0.0819  | 78   | 1377 | 1384 | FGEYRCDR                     |                                                    | Mascot |
| 1138.5132 | 1138.6178 | 0.1046  | 92   | 1704 | 1711 | DKLWCCTR                     | Carbamidomethyl (C)[5,6]                           | Mascot |
| 1181.587  | 1181.5293 | -0.0577 | -49  | 1773 | 1781 | DEIYCQILK                    | Carbamidomethyl (C)[5]                             | Mascot |
| 1181.587  | 1181.5293 | -0.0577 | -49  | 1773 | 1781 | DEIYCQILK                    | Carbamidomethyl (C)[5]                             | Mascot |
| 1233.6772 | 1233.6848 | 0.0076  | 6    | 770  | 779  | SAMLIQKTWR                   |                                                    | Mascot |
| 1233.6837 | 1233.6848 | 0.0011  | 1    | 2098 | 2108 | YGVSLIDPKNK                  |                                                    | Mascot |
| 1302.6432 | 1302.6831 | 0.0399  | 31   | 303  | 313  | SAMKVLMTDK                   | Oxidation (M)[3,7]                                 | Mascot |
| 1320.63   | 1320.6439 | 0.0139  | 11   | 1825 | 1835 | HHPLALDCMQR                  |                                                    | Mascot |
| 1352.6879 | 1352.699  | 0.0111  | 8    | 516  | 527  | FPKGTDTTMLNK                 |                                                    | Mascot |
| 1352.6879 | 1352.699  | 0.0111  | 8    | 516  | 527  | FPKGTDTTMLNK                 |                                                    | Mascot |
| 1367.5929 | 1367.6932 | 0.1003  | 73   | 151  | 164  | DQCCIISGESGAGK               |                                                    | Mascot |
| 1393.6464 | 1393.6927 | 0.0463  | 33   | 1825 | 1835 | HHPLALDCMQR                  | Carbamidomethyl (C)[8], Oxidation (M)[9]           | Mascot |
| 1393.6464 | 1393.6927 | 0.0463  | 33   | 1825 | 1835 | HHPLALDCMQR                  | Carbamidomethyl (C)[8], Oxidation (M)[9]           | Mascot |
| 1397.6366 | 1397.7041 | 0.0675  | 48   | 337  | 348  | TYDNLDADEVVR                 |                                                    | Mascot |
| 1454.658  | 1454.6658 | 0.0078  | 5    | 337  | 348  | TYDNLDADEVVR                 | Carbamidomethyl (C)[8]                             | Mascot |
| 1498.79   | 1498.6738 | -0.1162 | -78  | 1241 | 1253 | TQPPSWLELQATK                |                                                    | Mascot |
| 1766.9548 | 1766.8162 | -0.1386 | -78  | 528  | 542  | LNSQHLNTNYIPPK               |                                                    | Mascot |
| 1787.9802 | 1787.8177 | -0.1625 | -91  | 1846 | 1860 | KYPPLVEVEAIQHK               |                                                    | Mascot |
| 1883.1112 | 1882.8414 | -0.2698 | -143 | 414  | 430  | INAAIKPPSLELKAVR             |                                                    | Mascot |
| 1985.8698 | 1986.0006 | 0.1308  | 66   | 1214 | 1230 | NFISEGPPGYAPYCEER            | Carbamidomethyl (C)[14]                            | Mascot |
| 2210.9702 | 2211.0491 | 0.0789  | 36   | 1722 | 1741 | CGGHEELSQAACMAFIA<br>VMK     | Carbamidomethyl (C)[1]                             | Mascot |
| 2278.0398 | 2277.9631 | -0.0767 | -34  | 1868 | 1887 | VYFPDDTDEAFEVESSTK<br>AK     |                                                    | Mascot |
| 2284.2158 | 2284.1169 | -0.0989 | -43  | 1938 | 1957 | ARPAKDGVPSLTQVFF<br>MK       | Oxidation (M)[19]                                  | Mascot |
| 2298.0386 | 2298.1265 | 0.0879  | 38   | 1721 | 1741 | KCGGHEELSQAACMAFI<br>AVMK    | Oxidation (M)[14]                                  | Mascot |
| 2299.9814 | 2300.114  | 0.1326  | 58   | 1722 | 1741 | CGGHEELSQAACMAFIA<br>VMK     | Carbamidomethyl (C)[1,12], Oxidation<br>(M)[13,19] | Mascot |
| 2697.377  | 2697.3767 | -0.0003 | 0    | 1566 | 1590 | SKFVVALQDNPSAADD<br>STFLSFLK |                                                    | Mascot |

28

novel protein [Danio rerio]

gi|169158231

18731.3

6.71

6

36

0

Peptide Information

| Calc. Mass | Obsrv. Mass | ± da    | ± ppm | Start Seq. | End Seq. | Sequence         | Ion Score | C. I. % | Modification | Rank | Result Type |
|------------|-------------|---------|-------|------------|----------|------------------|-----------|---------|--------------|------|-------------|
| 1138.5334  | 1138.6178   | 0.0844  | 74    | 147        | 157      | SSLSVNSDSSR      |           |         |              |      | Mascot      |
| 1367.6121  | 1367.6932   | 0.0811  | 59    | 61         | 71       | QDHMISENHTR      |           |         |              |      | Mascot      |
| 1498.8112  | 1498.6738   | -0.1374 | -92   | 17         | 29       | KQLEEEANPLLSK    |           |         |              |      | Mascot      |
| 1635.8588  | 1635.7357   | -0.1231 | -75   | 2          | 17       | SSEAILPPEGPEGPKK |           |         |              |      | Mascot      |

|    |                                    |           |         |     |             |    |                   |      |    |    |   |  |  |  |  |  |        |
|----|------------------------------------|-----------|---------|-----|-------------|----|-------------------|------|----|----|---|--|--|--|--|--|--------|
|    | 1766.8993                          | 1766.8162 | -0.0831 | -47 | 1           | 17 | MSSEAILPPEGPEGPKK |      |    |    |   |  |  |  |  |  | Mascot |
|    | 1801.9177                          | 1801.9453 | 0.0276  | 15  | 18          | 33 | QLEEEANPLLSKSTDK  |      |    |    |   |  |  |  |  |  | Mascot |
| 29 | CWF19-like protein 2 [Danio rerio] |           |         |     | gi 76253886 |    | 110501.9          | 8.48 | 13 | 36 | 0 |  |  |  |  |  |        |

Peptide Information

| Calc. Mass | Obsrv. Mass | ± da    | ± ppm | Start Seq. | End Seq. | Sequence                   | Ion Score | C. I. % | Modification                                | Rank | Result Type |
|------------|-------------|---------|-------|------------|----------|----------------------------|-----------|---------|---------------------------------------------|------|-------------|
| 1045.5571  | 1045.5339   | -0.0232 | -22   | 579        | 587      | LRAQMEAAR                  |           |         |                                             |      | Mascot      |
| 1106.4596  | 1106.5194   | 0.0598  | 54    | 330        | 338      | EDGDEEKER                  |           |         |                                             |      | Mascot      |
| 1138.5236  | 1138.6178   | 0.0942  | 83    | 420        | 430      | GSSSNQNAAFR                |           |         |                                             |      | Mascot      |
| 1470.7223  | 1470.6592   | -0.0631 | -43   | 2          | 15       | AAYGVNFESANSIK             |           |         |                                             |      | Mascot      |
| 1498.8046  | 1498.6738   | -0.1308 | -87   | 915        | 927      | EILGGMLDLEPRR              |           |         |                                             |      | Mascot      |
| 1684.7756  | 1684.9191   | 0.1435  | 85    | 830        | 842      | HLHVMVEYCVMPMR             |           |         | Carbamidomethyl (C)[8], Oxidation (M)[4]    |      | Mascot      |
| 1700.7705  | 1700.9149   | 0.1444  | 85    | 830        | 842      | HLHVMVEYCVMPMR             |           |         | Carbamidomethyl (C)[8], Oxidation (M)[4,11] |      | Mascot      |
| 1700.7705  | 1700.9149   | 0.1444  | 85    | 830        | 842      | HLHVMVEYCVMPMR             |           |         | Carbamidomethyl (C)[8], Oxidation (M)[4,11] |      | Mascot      |
| 1728.7858  | 1728.7749   | -0.0109 | -6    | 673        | 687      | EKMSSAEDQNALYSR            |           |         |                                             |      | Mascot      |
| 1985.9774  | 1986.0006   | 0.0232  | 12    | 506        | 523      | SSAVQDSETPTLQKHTK          |           |         |                                             |      | Mascot      |
| 2074.9749  | 2074.9858   | 0.0109  | 5     | 247        | 264      | SLDSVVAERYGSMEEFK          |           |         |                                             |      | Mascot      |
| 2284.0623  | 2284.1169   | 0.0546  | 24    | 393        | 413      | GSSSNQSAAFRKPVDDVEMSR      |           |         | Oxidation (M)[19]                           |      | Mascot      |
| 2298.0239  | 2298.1265   | 0.1026  | 45    | 810        | 828      | MFESQELDCVFLETHMNP         |           |         |                                             |      | Mascot      |
| 2470.1199  | 2470.3232   | 0.2033  | 82    | 810        | 829      | MFESQELDCVFLETHMNP         |           |         | Oxidation (M)[1]                            |      | Mascot      |
| 3089.3362  | 3089.5176   | 0.1814  | 59    | 533        | 559      | TTTTVSSSESEEEEEELILTDEEMNK |           |         |                                             |      | Mascot      |
| 3089.3362  | 3089.5176   | 0.1814  | 59    | 533        | 559      | TTTTVSSSESEEEEEELILTDEEMNK |           |         |                                             |      | Mascot      |

|    |                                     |  |  |  |             |  |         |      |   |    |   |  |  |  |  |  |  |
|----|-------------------------------------|--|--|--|-------------|--|---------|------|---|----|---|--|--|--|--|--|--|
| 30 | PHD finger protein 10 [Danio rerio] |  |  |  | gi 34784448 |  | 32685.5 | 6.28 | 8 | 36 | 0 |  |  |  |  |  |  |
|----|-------------------------------------|--|--|--|-------------|--|---------|------|---|----|---|--|--|--|--|--|--|

Peptide Information

| Calc. Mass | Obsrv. Mass | ± da    | ± ppm | Start Seq. | End Seq. | Sequence             | Ion Score | C. I. % | Modification     | Rank | Result Type |
|------------|-------------|---------|-------|------------|----------|----------------------|-----------|---------|------------------|------|-------------|
| 876.5189   | 876.4598    | -0.0591 | -67   | 111        | 117      | VPEYIKK              |           |         |                  |      | Mascot      |
| 996.4567   | 996.566     | 0.1093  | 110   | 19         | 25       | YPEMERR              |           |         | Oxidation (M)[4] |      | Mascot      |
| 1138.5963  | 1138.6178   | 0.0215  | 19    | 266        | 275      | DGTPRSIQHK           |           |         |                  |      | Mascot      |
| 1169.5333  | 1169.6351   | 0.1018  | 87    | 122        | 131      | AAEFNSNFNR           |           |         |                  |      | Mascot      |
| 1454.6771  | 1454.6658   | -0.0113 | -8    | 122        | 133      | AAEFNSNFNRER         |           |         |                  |      | Mascot      |
| 1766.8881  | 1766.8162   | -0.0719 | -41   | 55         | 69       | SDEVIDLMIKEYPAK      |           |         | Oxidation (M)[8] |      | Mascot      |
| 2211.1597  | 2211.0491   | -0.1106 | -50   | 165        | 183      | TGPFPPVALIPGQFQEYYKR |           |         |                  |      | Mascot      |

|    |                            |           |         |     |              |     |                           |      |   |    |   |  |  |  |  |  |  |        |
|----|----------------------------|-----------|---------|-----|--------------|-----|---------------------------|------|---|----|---|--|--|--|--|--|--|--------|
|    | 2284.2012                  | 2284.1169 | -0.0843 | -37 | 163          | 182 | TKTGPFPPVALIPGQFQEY<br>YK |      |   |    |   |  |  |  |  |  |  | Mascot |
| 31 | ictacalcin 2 [Danio rerio] |           |         |     | gi 130494223 |     | 10708.3                   | 5.03 | 5 | 36 | 0 |  |  |  |  |  |  |        |

Peptide Information

| Calc. Mass | Obsrv. Mass | ± da    | ± ppm | Start Seq. | End Seq. | Sequence          | Ion Score | C. I. | % | Modification       | Rank | Result Type |
|------------|-------------|---------|-------|------------|----------|-------------------|-----------|-------|---|--------------------|------|-------------|
| 1233.6483  | 1233.6848   | 0.0365  | 30    | 11         | 21       | AMAMLIATFHK       |           |       |   |                    |      | Mascot      |
| 1233.6483  | 1233.6848   | 0.0365  | 30    | 11         | 21       | AMAMLIATFHK       | 6         |       | 0 |                    |      | Mascot      |
| 1352.7056  | 1352.699    | -0.0066 | -5    | 52         | 63       | TTDKASLDNIFK      |           |       |   |                    |      | Mascot      |
| 1352.7056  | 1352.699    | -0.0066 | -5    | 52         | 63       | TTDKASLDNIFK      |           |       |   |                    |      | Mascot      |
| 1439.7086  | 1439.6903   | -0.0183 | -13   | 39         | 51       | ELLTAEMSDVFGK     |           |       |   |                    |      | Mascot      |
| 1684.855   | 1684.9191   | 0.0641  | 38    | 11         | 25       | AMAMLIATFHKYSGK   |           |       |   | Oxidation (M)[2]   |      | Mascot      |
| 1700.8499  | 1700.9149   | 0.065   | 38    | 11         | 25       | AMAMLIATFHKYSGK   |           |       |   | Oxidation (M)[2,4] |      | Mascot      |
| 1700.8499  | 1700.9149   | 0.065   | 38    | 11         | 25       | AMAMLIATFHKYSGK   |           |       |   | Oxidation (M)[2,4] |      | Mascot      |
| 1882.9467  | 1882.8414   | -0.1053 | -56   | 35         | 51       | GELKELLTAEMSDVFGK |           |       |   | Oxidation (M)[11]  |      | Mascot      |

|    |                             |  |  |  |              |  |         |       |   |    |   |    |   |
|----|-----------------------------|--|--|--|--------------|--|---------|-------|---|----|---|----|---|
| 32 | Rbm34 protein [Danio rerio] |  |  |  | gi 159155220 |  | 45856.6 | 10.19 | 7 | 36 | 0 | 17 | 0 |
|----|-----------------------------|--|--|--|--------------|--|---------|-------|---|----|---|----|---|

Peptide Information

| Calc. Mass | Obsrv. Mass | ± da    | ± ppm | Start Seq. | End Seq. | Sequence                 | Ion Score | C. I. | % | Modification | Rank | Result Type |
|------------|-------------|---------|-------|------------|----------|--------------------------|-----------|-------|---|--------------|------|-------------|
| 842.473    | 842.4854    | 0.0124  | 15    | 74         | 80       | DPVQKQK                  |           |       |   |              |      | Mascot      |
| 876.4686   | 876.4598    | -0.0088 | -10   | 365        | 371      | NFTKNPR                  |           |       |   |              |      | Mascot      |
| 1006.5316  | 1006.5005   | -0.0311 | -31   | 138        | 145      | FNAEERLK                 |           |       |   |              |      | Mascot      |
| 1233.6473  | 1233.6848   | 0.0375  | 30    | 18         | 29       | VGQVSGSLFPDK             |           |       |   |              |      | Mascot      |
| 1233.6473  | 1233.6848   | 0.0375  | 30    | 18         | 29       | VGQVSGSLFPDK             | 17        |       | 0 |              |      | Mascot      |
| 1498.8013  | 1498.6738   | -0.1275 | -85   | 18         | 31       | VGQVSGSLFPDKHK           |           |       |   |              |      | Mascot      |
| 1711.7882  | 1711.7539   | -0.0343 | -20   | 119        | 133      | ADGEEEEERPTKHK           |           |       |   |              |      | Mascot      |
| 2283.1501  | 2283.1228   | -0.0273 | -12   | 205        | 224      | QNINAYIVFKEEESATDAL<br>K |           |       |   |              |      | Mascot      |

|    |                                                                                 |  |  |  |             |  |         |      |   |    |   |
|----|---------------------------------------------------------------------------------|--|--|--|-------------|--|---------|------|---|----|---|
| 33 | TCR-alpha V segment I-11 (according to annotation by Tatsuya Ota) [Danio rerio] |  |  |  | gi 26984608 |  | 12725.3 | 5.32 | 5 | 35 | 0 |
|----|---------------------------------------------------------------------------------|--|--|--|-------------|--|---------|------|---|----|---|

Peptide Information

| Calc. Mass | Obsrv. Mass | ± da   | ± ppm | Start Seq. | End Seq. | Sequence        | Ion Score | C. I. | % | Modification | Rank | Result Type |
|------------|-------------|--------|-------|------------|----------|-----------------|-----------|-------|---|--------------|------|-------------|
| 1635.9767  | 1635.7357   | -0.241 | -147  | 2          | 15       | RTIFLFALLILGCR  |           |       |   |              |      | Mascot      |
| 1700.8966  | 1700.9149   | 0.0183 | 11    | 82         | 96       | FHSELSTNSVPLTIR |           |       |   |              |      | Mascot      |
| 1700.8966  | 1700.9149   | 0.0183 | 11    | 82         | 96       | FHSELSTNSVPLTIR |           |       |   |              |      | Mascot      |

|    |                                                                      |           |        |      |             |    |                         |      |   |    |   |  |  |        |
|----|----------------------------------------------------------------------|-----------|--------|------|-------------|----|-------------------------|------|---|----|---|--|--|--------|
|    | 1767.0172                                                            | 1766.8162 | -0.201 | -114 | 1           | 15 | MRTIFLFALLILGCR         |      |   |    |   |  |  | Mascot |
|    | 1801.8391                                                            | 1801.9453 | 0.1062 | 59   | 43          | 56 | TDSTQEDLFWYIQR          |      |   |    |   |  |  | Mascot |
|    | 2470.1885                                                            | 2470.3232 | 0.1347 | 55   | 43          | 62 | TDSTQEDLFWYIQRNDL<br>PK |      |   |    |   |  |  | Mascot |
| 34 | guanine nucleotide-binding protein subunit alpha-13<br>[Danio rerio] |           |        |      | gi 66793413 |    | 43761.8                 | 8.81 | 8 | 35 | 0 |  |  |        |

#### Peptide Information

| Calc. Mass | Obsrv. Mass | ± da    | ± ppm | Start Seq. | End Seq. | Sequence                         | Ion Score | C. I. | % Modification          | Rank | Result Type |
|------------|-------------|---------|-------|------------|----------|----------------------------------|-----------|-------|-------------------------|------|-------------|
| 876.5301   | 876.4598    | -0.0703 | -80   | 356        | 362      | LVFRDVK                          |           |       |                         |      | Mascot      |
| 1233.6005  | 1233.6848   | 0.0843  | 68    | 219        | 229      | MVDVGGQRSER                      |           |       |                         |      | Mascot      |
| 1233.6005  | 1233.6848   | 0.0843  | 68    | 219        | 229      | MVDVGGQRSER                      |           |       |                         |      | Mascot      |
| 1320.7634  | 1320.6439   | -0.1195 | -90   | 85         | 96       | ATIYSNVIKGV                      |           |       |                         |      | Mascot      |
| 1397.8726  | 1397.7041   | -0.1685 | -121  | 47         | 60       | LVKILLLGAGESGK                   |           |       |                         |      | Mascot      |
| 1792.8726  | 1793.0408   | 0.1682  | 94    | 150        | 164      | ALWQDSGIQNAAYDRR                 |           |       |                         |      | Mascot      |
| 1882.9917  | 1882.8414   | -0.1503 | -80   | 134        | 149      | GMMETKVFLNFLPAIR                 |           |       | Oxidation (M)[2]        |      | Mascot      |
| 2300.21    | 2300.114    | -0.096  | -42   | 9          | 29       | TAIVCIPNCLLSGGEIDQI<br>RK        |           |       | Carbamidomethyl (C)[5]  |      | Mascot      |
| 3089.5581  | 3089.5176   | -0.0405 | -13   | 1          | 28       | MADFLPSRTAIVCIPNCLL<br>SGGEIDQIR |           |       | Carbamidomethyl (C)[13] |      | Mascot      |
| 3089.5581  | 3089.5176   | -0.0405 | -13   | 1          | 28       | MADFLPSRTAIVCIPNCLL<br>SGGEIDQIR |           |       | Carbamidomethyl (C)[13] |      | Mascot      |

35 PREDICTED: zinc finger protein 235-like [Danio rerio] gi|326665729 38839 9.48 10 34 0

#### Peptide Information

| Calc. Mass | Obsrv. Mass | ± da    | ± ppm | Start Seq. | End Seq. | Sequence                | Ion Score | C. I. | % Modification                              | Rank | Result Type |
|------------|-------------|---------|-------|------------|----------|-------------------------|-----------|-------|---------------------------------------------|------|-------------|
| 1138.6327  | 1138.6178   | -0.0149 | -13   | 316        | 325      | QLGGLKThER              |           |       |                                             |      | Mascot      |
| 1181.5402  | 1181.5293   | -0.0109 | -9    | 23         | 32       | ERVtCTQCGK              | 6         | 0     | Carbamidomethyl (C)[5]                      |      | Mascot      |
| 1181.5402  | 1181.5293   | -0.0109 | -9    | 23         | 32       | ERVtCTQCGK              |           |       | Carbamidomethyl (C)[5]                      |      | Mascot      |
| 1360.6526  | 1360.609    | -0.0436 | -32   | 7          | 18       | HEKMSGQTDSLK            |           |       |                                             |      | Mascot      |
| 1439.6981  | 1439.6903   | -0.0078 | -5    | 25         | 37       | VTCTQCGKSLTNK           |           |       | Carbamidomethyl (C)[3]                      |      | Mascot      |
| 1728.8196  | 1728.7749   | -0.0447 | -26   | 78         | 92       | EKPYPcSVCGKNfTR         |           |       |                                             |      | Mascot      |
| 1766.7836  | 1766.8162   | 0.0326  | 18    | 186        | 200      | VHTGEKPYKcSDCDK         |           |       | Carbamidomethyl (C)[10]                     |      | Mascot      |
| 1787.8203  | 1787.8177   | -0.0026 | -1    | 214        | 228      | IHTGEKPYICSHCDK         |           |       | Carbamidomethyl (C)[10]                     |      | Mascot      |
| 1943.9215  | 1943.9105   | -0.011  | -6    | 214        | 229      | IHTGEKPYICSHCDKR        |           |       | Carbamidomethyl (C)[10]                     |      | Mascot      |
| 2224.9607  | 2225.061    | 0.1003  | 45    | 42         | 60       | SHMMIHTGEKpFTCTQC<br>GK |           |       | Carbamidomethyl (C)[14], Oxidation (M)[3,4] |      | Mascot      |
| 2224.9607  | 2225.061    | 0.1003  | 45    | 42         | 60       | SHMMIHTGEKpFTCTQC<br>GK |           |       | Carbamidomethyl (C)[14], Oxidation (M)[3,4] |      | Mascot      |
| 2298.1482  | 2298.1265   | -0.0217 | -9    | 126        | 144      | IHERIHTGEKPYICSLCNK     |           |       | Carbamidomethyl (C)[14]                     |      | Mascot      |

36 Myosin VIIa [Danio rerio] gi|190339980 251532 8.81 25 34 0

Peptide Information

| Calc. Mass | Obsrv. Mass | ± da    | ± ppm | Start Seq. | End Seq. | Sequence                  | Ion Score | C. I. % | Modification                                    | Rank | Result Type |
|------------|-------------|---------|-------|------------|----------|---------------------------|-----------|---------|-------------------------------------------------|------|-------------|
| 850.4716   | 850.5179    | 0.0463  | 54    | 824        | 830      | CRGFLVR                   |           |         |                                                 |      | Mascot      |
| 876.4057   | 876.4598    | 0.0541  | 62    | 907        | 913      | EDAEREK                   |           |         |                                                 |      | Mascot      |
| 992.4717   | 992.5095    | 0.0378  | 38    | 1282       | 1290     | ELCNALSDK                 |           |         |                                                 |      | Mascot      |
| 996.4666   | 996.566     | 0.0994  | 100   | 519        | 527      | GTDTTMLNK                 |           |         | Oxidation (M)[6]                                |      | Mascot      |
| 1006.5792  | 1006.5005   | -0.0787 | -78   | 797        | 804      | LQALYRSR                  |           |         |                                                 |      | Mascot      |
| 1045.452   | 1045.5339   | 0.0819  | 78    | 1377       | 1384     | FGEYRCDR                  |           |         |                                                 |      | Mascot      |
| 1138.5132  | 1138.6178   | 0.1046  | 92    | 1704       | 1711     | DKLWCCTR                  |           |         | Carbamidomethyl (C)[5,6]                        |      | Mascot      |
| 1181.587   | 1181.5293   | -0.0577 | -49   | 1773       | 1781     | DEIYCQILK                 |           |         | Carbamidomethyl (C)[5]                          |      | Mascot      |
| 1181.587   | 1181.5293   | -0.0577 | -49   | 1773       | 1781     | DEIYCQILK                 |           |         | Carbamidomethyl (C)[5]                          |      | Mascot      |
| 1233.6772  | 1233.6848   | 0.0076  | 6     | 770        | 779      | SAMLIQKTWR                |           |         |                                                 |      | Mascot      |
| 1233.6837  | 1233.6848   | 0.0011  | 1     | 2098       | 2108     | YGVSLIDPKNK               |           |         |                                                 |      | Mascot      |
| 1302.6432  | 1302.6831   | 0.0399  | 31    | 303        | 313      | SAMKVLMTDK                |           |         | Oxidation (M)[3,7]                              |      | Mascot      |
| 1320.63    | 1320.6439   | 0.0139  | 11    | 1825       | 1835     | HHPLALDCMQR               |           |         |                                                 |      | Mascot      |
| 1352.6879  | 1352.699    | 0.0111  | 8     | 516        | 527      | FPKGTDTTMLNK              |           |         |                                                 |      | Mascot      |
| 1352.6879  | 1352.699    | 0.0111  | 8     | 516        | 527      | FPKGTDTTMLNK              |           |         |                                                 |      | Mascot      |
| 1367.5929  | 1367.6932   | 0.1003  | 73    | 151        | 164      | DQCCIISGESGAGK            |           |         |                                                 |      | Mascot      |
| 1393.6464  | 1393.6927   | 0.0463  | 33    | 1825       | 1835     | HHPLALDCMQR               |           |         | Carbamidomethyl (C)[8], Oxidation (M)[9]        |      | Mascot      |
| 1393.6464  | 1393.6927   | 0.0463  | 33    | 1825       | 1835     | HHPLALDCMQR               |           |         | Carbamidomethyl (C)[8], Oxidation (M)[9]        |      | Mascot      |
| 1397.6222  | 1397.7041   | 0.0819  | 59    | 923        | 933      | MEMLDQMEKAR               |           |         | Oxidation (M)[1]                                |      | Mascot      |
| 1498.79    | 1498.6738   | -0.1162 | -78   | 1241       | 1253     | TQPPSWLELQATK             |           |         |                                                 |      | Mascot      |
| 1766.9548  | 1766.8162   | -0.1386 | -78   | 528        | 542      | LNSQHKLNTNYIPPK           |           |         |                                                 |      | Mascot      |
| 1787.9802  | 1787.8177   | -0.1625 | -91   | 1846       | 1860     | KYPPhLVEVAIQHK            |           |         |                                                 |      | Mascot      |
| 1883.1112  | 1882.8414   | -0.2698 | -143  | 414        | 430      | INAAIYKPPSLELKAVR         |           |         |                                                 |      | Mascot      |
| 1985.9385  | 1986.0006   | 0.0621  | 31    | 333        | 348      | YEARIYDNLDADEVVR          |           |         | Carbamidomethyl (C)[12]                         |      | Mascot      |
| 2210.9702  | 2211.0491   | 0.0789  | 36    | 1722       | 1741     | CGGHEELSQEACMAFIA VMK     |           |         | Carbamidomethyl (C)[1]                          |      | Mascot      |
| 2278.0398  | 2277.9631   | -0.0767 | -34   | 1868       | 1887     | VYFPDDTDEAFEVESSTK AK     |           |         |                                                 |      | Mascot      |
| 2284.2158  | 2284.1169   | -0.0989 | -43   | 1938       | 1957     | ARPAKDGIVPSLTQVFF MK      |           |         | Oxidation (M)[19]                               |      | Mascot      |
| 2298.0386  | 2298.1265   | 0.0879  | 38    | 1721       | 1741     | KCGGHEELSQEACMAFI AVMK    |           |         | Oxidation (M)[14]                               |      | Mascot      |
| 2299.9814  | 2300.114    | 0.1326  | 58    | 1722       | 1741     | CGGHEELSQEACMAFIA VMK     |           |         | Carbamidomethyl (C)[1,12], Oxidation (M)[13,19] |      | Mascot      |
| 2697.377   | 2697.3767   | -0.0003 | 0     | 1566       | 1590     | SKFVVALQDNPSAADD STFLSFLK |           |         |                                                 |      | Mascot      |

37 FAD synthase [Danio rerio] gi|51571923 55575.2 5.86 9 34 0



| Peptide Information |                                              |          |           |             |                                 |           |         |                   |                  |
|---------------------|----------------------------------------------|----------|-----------|-------------|---------------------------------|-----------|---------|-------------------|------------------|
| Calc. Mass          | Obsrv. Mass                                  | $\pm$ da | $\pm$ ppm | Start Seq.  | End Sequence Seq.               | Ion Score | C. I. % | Modification      | Rank Result Type |
| 850.4053            | 850.5179                                     | 0.1126   | 132       | 334         | 340 YPDGKDR                     |           |         |                   | Mascot           |
| 876.5665            | 876.4598                                     | -0.1067  | -122      | 341         | 347 LKALYIR                     |           |         |                   | Mascot           |
| 890.4941            | 890.4456                                     | -0.0485  | -54       | 282         | 289 SETQLGKK                    |           |         |                   | Mascot           |
| 1181.5215           | 1181.5293                                    | 0.0078   | 7         | 2           | 12 AQNCNTSSTQK                  |           |         |                   | Mascot           |
| 1181.5215           | 1181.5293                                    | 0.0078   | 7         | 2           | 12 AQNCNTSSTQK                  |           |         |                   | Mascot           |
| 1204.599            | 1204.5631                                    | -0.0359  | -30       | 466         | 475 NPSLKMVDER                  |           |         | Oxidation (M)[6]  | Mascot           |
| 1402.761            | 1402.6555                                    | -0.1055  | -75       | 290         | 303 VAAALGTIEMALDK              |           |         |                   | Mascot           |
| 1418.7559           | 1418.7616                                    | 0.0057   | 4         | 290         | 303 VAAALGTIEMALDK              |           |         | Oxidation (M)[10] | Mascot           |
| 1503.7537           | 1503.7397                                    | -0.014   | -9        | 235         | 247 LVLDTDSVEEVER               |           |         |                   | Mascot           |
| 1503.7537           | 1503.7397                                    | -0.014   | -9        | 235         | 247 LVLDTDSVEEVER               |           |         |                   | Mascot           |
| 1801.8677           | 1801.9453                                    | 0.0776   | 43        | 113         | 129 LVEGFFGTVTSDSAPMK           |           |         | Oxidation (M)[16] | Mascot           |
| 2697.1748           | 2697.3767                                    | 0.2019   | 75        | 401         | 423 TDPYSHTLTPFCPTDPG<br>WPDYMR |           |         |                   | Mascot           |
| 38                  | hypothetical protein LOC393702 [Danio rerio] |          |           | gi 41152266 |                                 | 20567.3   | 5.44    | 6                 | 34 0             |

| Peptide Information |                                                                |          |           |              |                                       |           |         |                     |                  |
|---------------------|----------------------------------------------------------------|----------|-----------|--------------|---------------------------------------|-----------|---------|---------------------|------------------|
| Calc. Mass          | Obsrv. Mass                                                    | $\pm$ da | $\pm$ ppm | Start Seq.   | End Sequence Seq.                     | Ion Score | C. I. % | Modification        | Rank Result Type |
| 1320.6907           | 1320.6439                                                      | -0.0468  | -35       | 152          | 162 ENQTAVEVFKR                       |           |         |                     | Mascot           |
| 1397.7821           | 1397.7041                                                      | -0.078   | -56       | 98           | 109 VIHEKLLDMVGK                      |           |         | Oxidation (M)[9]    | Mascot           |
| 1684.8687           | 1684.9191                                                      | 0.0504   | 30        | 163          | 178 IILEAEKMDGGAPQGR                  |           |         |                     | Mascot           |
| 1700.8635           | 1700.9149                                                      | 0.0514   | 30        | 163          | 178 IILEAEKMDGGAPQGR                  |           |         | Oxidation (M)[8]    | Mascot           |
| 1700.8635           | 1700.9149                                                      | 0.0514   | 30        | 163          | 178 IILEAEKMDGGAPQGR                  |           |         | Oxidation (M)[8]    | Mascot           |
| 1728.7898           | 1728.7749                                                      | -0.0149  | -9        | 136          | 151 ALAESWNAAFMESSAK                  |           |         | Oxidation (M)[11]   | Mascot           |
| 1986.1125           | 1986.0006                                                      | -0.1119  | -56       | 103          | 120 LLDVMVGKVQVPIMLVGN<br>K           |           |         | Oxidation (M)[4,13] | Mascot           |
| 3337.6475           | 3337.6802                                                      | 0.0327   | 10        | 16           | 45 SVGKSSLTIQFVEGQFVD<br>SYDPTIENTFTK |           |         |                     | Mascot           |
| 39                  | PREDICTED: serine/threonine-protein kinase pim-3 [Danio rerio] |          |           | gi 326666526 |                                       | 16946.7   | 7.72    | 6                   | 33 0             |

| Peptide Information |             |          |           |            |                   |           |         |                        |                  |
|---------------------|-------------|----------|-----------|------------|-------------------|-----------|---------|------------------------|------------------|
| Calc. Mass          | Obsrv. Mass | $\pm$ da | $\pm$ ppm | Start Seq. | End Sequence Seq. | Ion Score | C. I. % | Modification           | Rank Result Type |
| 870.4727            | 870.5158    | 0.0431   | 50        | 25         | 31 TGRHIMR        |           |         |                        | Mascot           |
| 1320.7344           | 1320.6439   | -0.0905  | -69       | 66         | 77 LIDFGCGAIVKK   |           |         | Carbamidomethyl (C)[6] | Mascot           |

|  |           |           |         |     |    |    |                   |  |                                            |        |
|--|-----------|-----------|---------|-----|----|----|-------------------|--|--------------------------------------------|--------|
|  | 1402.6896 | 1402.6555 | -0.0341 | -24 | 32 | 43 | QAIHAVSVCFDR      |  | Carbamidomethyl (C)[9]                     | Mascot |
|  | 1882.9528 | 1882.8414 | -0.1114 | -59 | 28 | 43 | HIMRQAIHAVSVCFDR  |  |                                            | Mascot |
|  | 1943.9652 | 1943.9105 | -0.0547 | -28 | 1  | 15 | MERPIPCMDLLHFLR   |  | Carbamidomethyl (C)[7], Oxidation (M)[1]   | Mascot |
|  | 2225.114  | 2225.061  | -0.053  | -24 | 1  | 17 | MERPIPCMDLLHFLRHK |  | Carbamidomethyl (C)[7], Oxidation (M)[1,8] | Mascot |
|  | 2225.114  | 2225.061  | -0.053  | -24 | 1  | 17 | MERPIPCMDLLHFLRHK |  | Carbamidomethyl (C)[7], Oxidation (M)[1,8] | Mascot |

40 novel protein [Danio rerio] gi|94733589 18386.1 7.98 6 33 0

#### Peptide Information

| Calc. Mass | Obsrv. Mass | ± da    | ± ppm | Start Seq. | End Seq. | Sequence         | Ion Score | C. I. % | Modification           | Rank | Result | Type |
|------------|-------------|---------|-------|------------|----------|------------------|-----------|---------|------------------------|------|--------|------|
| 870.4679   | 870.5158    | 0.0479  | 55    | 44         | 51       | TAIATHEK         |           |         |                        |      | Mascot |      |
| 996.5737   | 996.566     | -0.0077 | -8    | 138        | 145      | TLPWRPAR         |           |         |                        |      | Mascot |      |
| 1181.6902  | 1181.5293   | -0.1609 | -136  | 138        | 147      | TLPWRPARGK       |           |         |                        |      | Mascot |      |
| 1181.6902  | 1181.5293   | -0.1609 | -136  | 138        | 147      | TLPWRPARGK       |           |         |                        |      | Mascot |      |
| 1626.6887  | 1626.7356   | 0.0469  | 29    | 62         | 75       | VAQFMCHDTSTSDK   |           |         | Carbamidomethyl (C)[6] |      | Mascot |      |
| 1754.7837  | 1754.7528   | -0.0309 | -18   | 61         | 75       | KVAQFMCHDTSTSDK  |           |         | Carbamidomethyl (C)[7] |      | Mascot |      |
| 1754.7837  | 1754.7528   | -0.0309 | -18   | 61         | 75       | KVAQFMCHDTSTSDK  |           |         | Carbamidomethyl (C)[7] |      | Mascot |      |
| 1766.8417  | 1766.8162   | -0.0255 | -14   | 44         | 59       | TAIATHEKNAHSSedr |           |         |                        |      | Mascot |      |

41 ribonuclease H1 [Danio rerio] gi|50540386 30358.9 8.68 8 33 0

#### Peptide Information

| Calc. Mass | Obsrv. Mass | ± da    | ± ppm | Start Seq. | End Seq. | Sequence         | Ion Score | C. I. % | Modification            | Rank | Result | Type |
|------------|-------------|---------|-------|------------|----------|------------------|-----------|---------|-------------------------|------|--------|------|
| 860.4736   | 860.4687    | -0.0049 | -6    | 217        | 223      | SNGWRLK          |           |         |                         |      | Mascot |      |
| 890.4399   | 890.4456    | 0.0057  | 6     | 175        | 182      | AELQAACK         |           |         | Carbamidomethyl (C)[7]  |      | Mascot |      |
| 1397.6696  | 1397.7041   | 0.0345  | 25    | 41         | 52       | FASEQDALDFVR     |           |         |                         |      | Mascot |      |
| 1470.6715  | 1470.6592   | -0.0123 | -8    | 75         | 88       | NVPCSSMAVSFGSK   |           |         | Carbamidomethyl (C)[4]  |      | Mascot |      |
| 1626.7727  | 1626.7356   | -0.0371 | -23   | 75         | 89       | NVPCSSMAVSFGSKR  |           |         | Carbamidomethyl (C)[4]  |      | Mascot |      |
| 1700.718   | 1700.9149   | 0.1969  | 116   | 89         | 103      | RTHDETEDEGPSCPCK |           |         |                         |      | Mascot |      |
| 1700.718   | 1700.9149   | 0.1969  | 116   | 90         | 104      | THDETEDEGPSCPCKR |           |         |                         |      | Mascot |      |
| 1728.8049  | 1728.7749   | -0.03   | -17   | 14         | 27       | GFKPGVYQTWEECK   |           |         | Carbamidomethyl (C)[13] |      | Mascot |      |

42 PREDICTED: CAP-Gly domain-containing linker protein 1-like [Danio rerio] gi|326668263 102281.1 5.28 13 33 0

#### Peptide Information

| Calc. Mass | Obsrv. Mass | ± da | ± ppm | Start Seq. | End Seq. | Sequence | Ion Score | C. I. % | Modification | Rank | Result | Type |
|------------|-------------|------|-------|------------|----------|----------|-----------|---------|--------------|------|--------|------|
|------------|-------------|------|-------|------------|----------|----------|-----------|---------|--------------|------|--------|------|

|           |           |         |     |     |     |                           |  |  |  |                                          |  |        |
|-----------|-----------|---------|-----|-----|-----|---------------------------|--|--|--|------------------------------------------|--|--------|
| 860.422   | 860.4687  | 0.0467  | 54  | 39  | 47  | NDGAVAGTR                 |  |  |  |                                          |  | Mascot |
| 876.4308  | 876.4598  | 0.029   | 33  | 516 | 523 | ELEDSGVK                  |  |  |  |                                          |  | Mascot |
| 1090.4768 | 1090.5186 | 0.0418  | 38  | 1   | 10  | MNCHSVAGSK                |  |  |  | Carbamidomethyl (C)[3]                   |  | Mascot |
| 1106.4717 | 1106.5194 | 0.0477  | 43  | 1   | 10  | MNCHSVAGSK                |  |  |  | Carbamidomethyl (C)[3], Oxidation (M)[1] |  | Mascot |
| 1138.5813 | 1138.6178 | 0.0365  | 32  | 823 | 831 | QIEELMTFK                 |  |  |  |                                          |  | Mascot |
| 1233.6686 | 1233.6848 | 0.0162  | 13  | 84  | 96  | TTATTAATPSALK             |  |  |  |                                          |  | Mascot |
| 1233.6686 | 1233.6848 | 0.0162  | 13  | 84  | 96  | TTATTAATPSALK             |  |  |  |                                          |  | Mascot |
| 1352.6362 | 1352.699  | 0.0628  | 46  | 640 | 651 | CTSLSAELQDTK              |  |  |  | Carbamidomethyl (C)[1]                   |  | Mascot |
| 1352.6362 | 1352.699  | 0.0628  | 46  | 640 | 651 | CTSLSAELQDTK              |  |  |  | Carbamidomethyl (C)[1]                   |  | Mascot |
| 1397.7634 | 1397.7041 | -0.0593 | -42 | 440 | 451 | STHKLELEELAK              |  |  |  |                                          |  | Mascot |
| 1418.7122 | 1418.7616 | 0.0494  | 35  | 425 | 437 | EASKAELSDALER             |  |  |  |                                          |  | Mascot |
| 1454.6865 | 1454.6658 | -0.0207 | -14 | 676 | 687 | TKLENDIMDMTK              |  |  |  | Oxidation (M)[8]                         |  | Mascot |
| 1470.6815 | 1470.6592 | -0.0223 | -15 | 676 | 687 | TKLENDIMDMTK              |  |  |  | Oxidation (M)[8,10]                      |  | Mascot |
| 1503.7584 | 1503.7397 | -0.0187 | -12 | 198 | 210 | MDQLRALVEAADR             |  |  |  | Oxidation (M)[1]                         |  | Mascot |
| 1503.7584 | 1503.7397 | -0.0187 | -12 | 198 | 210 | MDQLRALVEAADR             |  |  |  | Oxidation (M)[1]                         |  | Mascot |
| 1711.7493 | 1711.7539 | 0.0046  | 3   | 453 | 468 | HSSEAAGWVGEGMEHK          |  |  |  |                                          |  | Mascot |
| 1754.8279 | 1754.7528 | -0.0751 | -43 | 39  | 54  | NDGAVAGTRYFQCQPK          |  |  |  |                                          |  | Mascot |
| 1754.8279 | 1754.7528 | -0.0751 | -43 | 39  | 54  | NDGAVAGTRYFQCQPK          |  |  |  |                                          |  | Mascot |
| 2298.0527 | 2298.1265 | 0.0738  | 32  | 336 | 355 | SQQAESQSHSHQAEISSM<br>REK |  |  |  |                                          |  | Mascot |

43    PREDICTED: wu:fb77e12 [Danio rerio]                      gi|326679169                      160931.7                      6.5                      16                      33                      0

Peptide Information

| Calc. Mass | Obsrv. Mass | ± da    | ± ppm | Start Seq. | End Seq. | Sequence        | Ion Score | C. I. % | Modification            | Rank | Result Type |
|------------|-------------|---------|-------|------------|----------|-----------------|-----------|---------|-------------------------|------|-------------|
| 992.5523   | 992.5095    | -0.0428 | -43   | 748        | 756      | RSDPPVPVK       |           |         |                         |      | Mascot      |
| 1074.4998  | 1074.5635   | 0.0637  | 59    | 1169       | 1178     | DTSGISMAHR      |           |         |                         |      | Mascot      |
| 1090.4946  | 1090.5186   | 0.024   | 22    | 1169       | 1178     | DTSGISMAHR      |           |         | Oxidation (M)[7]        |      | Mascot      |
| 1169.6385  | 1169.6351   | -0.0034 | -3    | 1401       | 1410     | SLPQPSQTRR      |           |         |                         |      | Mascot      |
| 1302.6835  | 1302.6831   | -0.0004 | 0     | 492        | 503      | VAVSPSQVSLR     |           |         | Carbamidomethyl (C)[10] |      | Mascot      |
| 1402.671   | 1402.6555   | -0.0155 | -11   | 1269       | 1281     | AHGESDPSHLQPK   |           |         |                         |      | Mascot      |
| 1454.7598  | 1454.6658   | -0.094  | -65   | 349        | 361      | GVSDHVLVDTREK   |           |         |                         |      | Mascot      |
| 1498.6842  | 1498.6738   | -0.0104 | -7    | 783        | 796      | NPDESAACPLAEK   |           |         | Carbamidomethyl (C)[8]  |      | Mascot      |
| 1503.8641  | 1503.7397   | -0.1244 | -83   | 518        | 531      | IPTIGERTAVPPPR  |           |         |                         |      | Mascot      |
| 1503.8641  | 1503.7397   | -0.1244 | -83   | 518        | 531      | IPTIGERTAVPPPR  |           |         |                         |      | Mascot      |
| 1626.7792  | 1626.7356   | -0.0436 | -27   | 783        | 797      | NPDESAACPLAEKK  |           |         | Carbamidomethyl (C)[8]  |      | Mascot      |
| 1684.7231  | 1684.9191   | 0.196   | 116   | 442        | 455      | DTHCEIDSSEQVHK  |           |         | Carbamidomethyl (C)[4]  |      | Mascot      |
| 1700.7544  | 1700.9149   | 0.1605  | 94    | 420        | 434      | DDSDCVYRANIASSK |           |         | Carbamidomethyl (C)[5]  |      | Mascot      |

|    |                                                                       |           |        |     |      |      |                               |     |                        |        |   |
|----|-----------------------------------------------------------------------|-----------|--------|-----|------|------|-------------------------------|-----|------------------------|--------|---|
|    | 1700.7544                                                             | 1700.9149 | 0.1605 | 94  | 420  | 434  | DDSDCVYRANIASSK               |     | Carbamidomethyl (C)[5] | Mascot |   |
|    | 1792.9664                                                             | 1793.0408 | 0.0744 | 41  | 608  | 623  | VAKPTQSTHNQKTPQK              |     |                        | Mascot |   |
|    | 1801.7181                                                             | 1801.9453 | 0.2272 | 126 | 732  | 747  | NEMADNDSQSSSESPFK             |     | Oxidation (M)[3]       | Mascot |   |
|    | 2283.1108                                                             | 2283.1228 | 0.012  | 5   | 1323 | 1344 | IPSSQIANIVHDGTDICGA<br>PMK    |     | Oxidation (M)[21]      | Mascot |   |
|    | 2284.1091                                                             | 2284.1169 | 0.0078 | 3   | 575  | 596  | SESHSAPTSPQPDDVP<br>TPLPK     |     |                        | Mascot |   |
|    | 2697.1462                                                             | 2697.3767 | 0.2305 | 85  | 217  | 241  | AHCSHSCPDVCTHQHLN<br>GGEHSNVK |     |                        | Mascot |   |
| 44 | fasciculation and elongation protein zeta-1 [Danio rerio] gi 54261791 |           |        |     |      |      | 45090.5                       | 4.4 | 8                      | 32     | 0 |

Peptide Information

| Calc. Mass | Obsrv. Mass | ± da    | ± ppm | Start Seq. | End Seq. | Sequence                | Ion Score | C. I. % | Modification           | Rank | Result Type |
|------------|-------------|---------|-------|------------|----------|-------------------------|-----------|---------|------------------------|------|-------------|
| 842.473    | 842.4854    | 0.0124  | 15    | 83         | 90       | TEGLAPVR                |           |         |                        |      | Mascot      |
| 1320.6576  | 1320.6439   | -0.0137 | -10   | 297        | 308      | AMSLQGSTRPEK            |           |         | Oxidation (M)[2]       |      | Mascot      |
| 1352.6416  | 1352.699    | 0.0574  | 42    | 72         | 82       | LNVCFHNYNTK             |           |         |                        |      | Mascot      |
| 1352.6416  | 1352.699    | 0.0574  | 42    | 72         | 82       | LNVCFHNYNTK             |           |         |                        |      | Mascot      |
| 1367.7206  | 1367.6932   | -0.0274 | -20   | 342        | 352      | QYLNTVIPYEK             |           |         |                        |      | Mascot      |
| 1792.9374  | 1793.0408   | 0.1034  | 58    | 269        | 283      | NTFITALMEVQNRQK         |           |         |                        |      | Mascot      |
| 1882.8245  | 1882.8414   | 0.0169  | 9     | 20         | 34       | MEELECEQPPCRPHK         |           |         | Carbamidomethyl (C)[6] |      | Mascot      |
| 1985.8143  | 1986.0006   | 0.1863  | 94    | 44         | 59       | EDFSELENFSEMMSFK        |           |         | Oxidation (M)[12]      |      | Mascot      |
| 2233.1182  | 2233.0273   | -0.0909 | -41   | 72         | 90       | LNVCFHNYNTKTEGLAPV<br>R |           |         | Carbamidomethyl (C)[4] |      | Mascot      |

45 PREDICTED: amine sulfotransferase [Danio rerio] gi|68372820 34418.6 8.81 7 32 0

Peptide Information

| Calc. Mass | Obsrv. Mass | ± da    | ± ppm | Start Seq. | End Seq. | Sequence                         | Ion Score | C. I. % | Modification      | Rank | Result Type |
|------------|-------------|---------|-------|------------|----------|----------------------------------|-----------|---------|-------------------|------|-------------|
| 860.4294   | 860.4687    | 0.0393  | 46    | 224        | 230      | NMKQDPK                          |           |         |                   |      | Mascot      |
| 876.4243   | 876.4598    | 0.0355  | 41    | 224        | 230      | NMKQDPK                          |           |         | Oxidation (M)[2]  |      | Mascot      |
| 882.4355   | 882.5417    | 0.1062  | 120   | 171        | 176      | EWYKEK                           |           |         |                   |      | Mascot      |
| 890.473    | 890.4456    | -0.0274 | -31   | 249        | 256      | KGTVGDWK                         |           |         |                   |      | Mascot      |
| 1503.7662  | 1503.7397   | -0.0265 | -18   | 84         | 96       | EGRADYSLRPSPR                    |           |         |                   |      | Mascot      |
| 1503.7662  | 1503.7397   | -0.0265 | -18   | 84         | 96       | EGRADYSLRPSPR                    |           |         |                   |      | Mascot      |
| 2211.0288  | 2211.0491   | 0.0203  | 9     | 70         | 86       | YPNNLEQMPWLEYREGR                |           |         | Oxidation (M)[8]  |      | Mascot      |
| 2278.0947  | 2277.9631   | -0.1316 | -58   | 177        | 194      | ENYDILFLSYEDMIIDLK               |           |         | Oxidation (M)[13] |      | Mascot      |
| 3337.5588  | 3337.6802   | 0.1214  | 36    | 147        | 174      | SFEDFLQQYLAGNVGGS<br>SWFDHVKEWYK |           |         |                   |      | Mascot      |

46 cytochrome P450, family 2, subfamily K, polypeptide 6 [Danio rerio] gi|41055730 57345 8.73 9 32 0

| Peptide Information |            |             |         |       |            |                     |           |                      |                  |
|---------------------|------------|-------------|---------|-------|------------|---------------------|-----------|----------------------|------------------|
|                     | Calc. Mass | Obsrv. Mass | ± da    | ± ppm | Start Seq. | End Sequence Seq.   | Ion Score | C. I. % Modification | Rank Result Type |
|                     | 842.4366   | 842.4854    | 0.0488  | 58    | 349        | 355 QPVVEDR         |           |                      | Mascot           |
|                     | 996.4785   | 996.566     | 0.0875  | 88    | 172        | 180 FGGNPFETK       |           |                      | Mascot           |
|                     | 1006.6295  | 1006.5005   | -0.129  | -128  | 86         | 94 KVVILSGYK        |           |                      | Mascot           |
|                     | 1360.6644  | 1360.609    | -0.0554 | -41   | 111        | 121 DISPIFHDFNR     |           |                      | Mascot           |
|                     | 1397.8514  | 1397.7041   | -0.1473 | -105  | 397        | 409 GTPVFPLLVSCLR   |           |                      | Mascot           |
|                     | 1470.676   | 1470.6592   | -0.0168 | -11   | 122        | 134 GYGIAFSNGENWR   |           |                      | Mascot           |
|                     | 1498.8304  | 1498.6738   | -0.1566 | -104  | 74         | 86 YGPIYTVYLGPKK    |           |                      | Mascot           |
|                     | 1754.6851  | 1754.7528   | 0.0677  | 39    | 410        | 423 DEDEWEMPDSFNPK  |           | Oxidation (M)[7]     | Mascot           |
|                     | 1754.6851  | 1754.7528   | 0.0677  | 39    | 410        | 423 DEDEWEMPDSFNPK  |           | Oxidation (M)[7]     | Mascot           |
|                     | 1766.8894  | 1766.8162   | -0.0732 | -41   | 382        | 396 QTTCDVHLNGYFIKK |           |                      | Mascot           |

47 BTB/POZ domain-containing protein KCTD9 [Danio rerio] gi|57526544 42676.4 5.58 8 32 0

| Peptide Information |            |             |         |       |            |                       |           |                        |                  |
|---------------------|------------|-------------|---------|-------|------------|-----------------------|-----------|------------------------|------------------|
|                     | Calc. Mass | Obsrv. Mass | ± da    | ± ppm | Start Seq. | End Sequence Seq.     | Ion Score | C. I. % Modification   | Rank Result Type |
|                     | 860.477    | 860.4687    | -0.0083 | -10   | 335        | 341 LKNCNLR           |           |                        | Mascot           |
|                     | 890.5345   | 890.4456    | -0.0889 | -100  | 208        | 215 FLLATPTK          |           |                        | Mascot           |
|                     | 1181.6677  | 1181.5293   | -0.1384 | -117  | 233        | 241 LDLRYINFK         |           |                        | Mascot           |
|                     | 1181.6677  | 1181.5293   | -0.1384 | -117  | 233        | 241 LDLRYINFK         |           |                        | Mascot           |
|                     | 1367.6083  | 1367.6932   | 0.0849  | 62    | 111        | 121 ETESMLAHMFR       |           | Oxidation (M)[5]       | Mascot           |
|                     | 1393.7838  | 1393.6927   | -0.0911 | -65   | 204        | 215 EFARFLLATPTK      |           |                        | Mascot           |
|                     | 1393.7838  | 1393.6927   | -0.0911 | -65   | 204        | 215 EFARFLLATPTK      |           |                        | Mascot           |
|                     | 1397.6478  | 1397.7041   | 0.0563  | 40    | 220        | 232 CQGLNFSGTDLSR     |           |                        | Mascot           |
|                     | 1454.6692  | 1454.6658   | -0.0034 | -2    | 220        | 232 CQGLNFSGTDLSR     |           | Carbamidomethyl (C)[1] | Mascot           |
|                     | 1626.7251  | 1626.7356   | 0.0105  | 6     | 111        | 123 ETESMLAHMFRDK     |           | Oxidation (M)[5,9]     | Mascot           |
|                     | 1882.9076  | 1882.8414   | -0.0662 | -35   | 216        | 232 SELRCQGLNFSGTDLSR |           |                        | Mascot           |

48 PREDICTED: hypothetical protein LOC100537860 [Danio rerio] gi|326674785 35038.9 9.57 1 21 0

| Peptide Information |            |             |        |       |            |                   |           |                      |                  |
|---------------------|------------|-------------|--------|-------|------------|-------------------|-----------|----------------------|------------------|
|                     | Calc. Mass | Obsrv. Mass | ± da   | ± ppm | Start Seq. | End Sequence Seq. | Ion Score | C. I. % Modification | Rank Result Type |
|                     | 1233.5957  | 1233.6848   | 0.0891 | 72    | 14         | 23 LEKEDLTDDR     | 21        | 0                    | 2 Mascot         |

49

Lsm14a protein [Danio rerio]

gi|32451807

26013.7

5.81

1

20

0

Peptide Information

| Calc. Mass | Obsrv. Mass | ± da    | ± ppm | Start Seq. | End Seq. | Sequence          | Ion Score | C. I. % | Modification     | Rank | Result Type |
|------------|-------------|---------|-------|------------|----------|-------------------|-----------|---------|------------------|------|-------------|
| 1754.9357  | 1754.7528   | -0.1829 | -104  | 1          | 17       | MSGGTPYIGSKISLISK | 20        | 0       | Oxidation (M)[1] | 2    | Mascot      |

50

glycosaminoglycan xylosylkinase [Danio rerio]

gi|113677490

45839.4

7.62

1

20

0

Peptide Information

| Calc. Mass | Obsrv. Mass | ± da   | ± ppm | Start Seq. | End Seq. | Sequence     | Ion Score | C. I. % | Modification | Rank | Result Type |
|------------|-------------|--------|-------|------------|----------|--------------|-----------|---------|--------------|------|-------------|
| 1233.662   | 1233.6848   | 0.0228 | 18    | 44         | 55       | MEASLSLAKGAR | 20        | 0       |              | 3    | Mascot      |

|                |           |                        |                |                |                    |
|----------------|-----------|------------------------|----------------|----------------|--------------------|
| Gel Idx/Pos    | 232/J8    | Instr./Gel Origin      | BA2060/110707A | Process Status | Analysis Succeeded |
| Plate [#] Name | [1] 31496 | Instrument Sample Name |                | Spectra        | 11                 |

| Rank | Protein Name                  | Accession No. | Protein MW | Protein PI | Pep. Count | Protein Score | Protein Score C. I. % | Total Ion Score | Total Ion C. I. % |
|------|-------------------------------|---------------|------------|------------|------------|---------------|-----------------------|-----------------|-------------------|
| 1    | Hnrpa0l protein [Danio rerio] | gi 112180524  | 32001.9    | 7.62       | 5          | 162           | 100                   | 143             | 100               |

Peptide Information

| Calc. Mass | Obsrv. Mass | ± da    | ± ppm | Start Seq. | End Seq. | Sequence               | Ion Score | C. I. % | Modification                               | Rank | Result Type |
|------------|-------------|---------|-------|------------|----------|------------------------|-----------|---------|--------------------------------------------|------|-------------|
| 985.4672   | 985.4341    | -0.0331 | -34   | 159        | 166      | FHSICGHK               |           |         | Carbamidomethyl (C)[5]                     |      | Mascot      |
| 1061.4646  | 1061.4308   | -0.0338 | -32   | 267        | 276      | TGYGNYSSGR             |           |         |                                            |      | Mascot      |
| 1718.9071  | 1718.8511   | -0.056  | -33   | 8          | 23       | LFVGGLNVQTTDEGLR       | 143       | 100     |                                            |      | Mascot      |
| 1718.9071  | 1718.8511   | -0.056  | -33   | 8          | 23       | LFVGGLNVQTTDEGLR       |           |         |                                            |      | Mascot      |
| 2225.022   | 2225.0518   | 0.0298  | 13    | 139        | 158      | GFGFVYFDDNDSADKAV VMK  |           |         |                                            |      | Mascot      |
| 2225.022   | 2225.0518   | 0.0298  | 13    | 139        | 158      | GFGFVYFDDNDSADKAV VMK  |           |         |                                            |      | Mascot      |
| 2649.2549  | 2649.1777   | -0.0772 | -29   | 24         | 45       | AHFEQYGQLTDCVVMN QPLQR |           |         | Carbamidomethyl (C)[12], Oxidation (M)[16] |      | Mascot      |

2

TIA1 cytotoxic granule-associated RNA binding protein [Danio rerio]

gi|37681959

38031.2

8.36

4

138

100

129

100

Peptide Information

| Calc. Mass | Obsrv. Mass | ± da    | ± ppm | Start Seq. | End Seq. | Sequence      | Ion Score | C. I. % | Modification | Rank | Result Type |
|------------|-------------|---------|-------|------------|----------|---------------|-----------|---------|--------------|------|-------------|
| 1022.5629  | 1022.5317   | -0.0312 | -31   | 10         | 18       | TLYVGNLSR     |           |         |              |      | Mascot      |
| 1553.7781  | 1553.7214   | -0.0567 | -36   | 224        | 236      | QTFSPFGQIMEIR |           |         |              |      | Mascot      |

|   |                                         |           |         |     |              |     |                        |     |     |    |     |                                           |        |
|---|-----------------------------------------|-----------|---------|-----|--------------|-----|------------------------|-----|-----|----|-----|-------------------------------------------|--------|
|   | 1569.7729                               | 1569.7236 | -0.0493 | -31 | 224          | 236 | QTFSPFGQIMEIR          |     |     |    |     | Oxidation (M)[10]                         | Mascot |
|   | 1569.7729                               | 1569.7236 | -0.0493 | -31 | 224          | 236 | QTFSPFGQIMEIR          | 15  | 0   |    |     | Oxidation (M)[10]                         | Mascot |
|   | 2500.0796                               | 2500.0054 | -0.0742 | -30 | 40           | 59  | MILDTTGNDPYCFVEFYENR   |     |     |    |     | Carbamidomethyl (C)[12], Oxidation (M)[1] | Mascot |
|   | 2587.2058                               | 2587.1311 | -0.0747 | -29 | 92           | 114 | DTSNHFHVFGDLSPEISTDDVR | 115 | 100 |    |     |                                           | Mascot |
|   | 2587.2058                               | 2587.1311 | -0.0747 | -29 | 92           | 114 | DTSNHFHVFGDLSPEISTDDVR |     |     |    |     |                                           | Mascot |
| 3 | elongation factor 1-alpha [Danio rerio] |           |         |     | gi 239596162 |     | 24576.8                | 7.1 | 7   | 97 | 100 | 57                                        | 99.946 |

#### Peptide Information

| Calc. Mass | Obsrv. Mass | ± da    | ± ppm | Start Seq. | End Seq. | Sequence                         | Ion Score | C. I.  | % | Modification     | Rank | Result Type |
|------------|-------------|---------|-------|------------|----------|----------------------------------|-----------|--------|---|------------------|------|-------------|
| 870.5406   | 870.513     | -0.0276 | -32   | 79         | 86       | QLIVGVNK                         |           |        |   |                  |      | Mascot      |
| 1025.6101  | 1025.5756   | -0.0345 | -34   | 188        | 198      | IGGIGTVPVGR                      |           |        |   |                  |      | Mascot      |
| 1298.7467  | 1298.7068   | -0.0399 | -31   | 67         | 78       | EHALLAFTLGVK                     |           |        |   |                  |      | Mascot      |
| 1397.6002  | 1397.5557   | -0.0445 | -32   | 87         | 98       | MDSTEPYPYSQAR                    |           |        |   | Oxidation (M)[1] |      | Mascot      |
| 1404.7271  | 1404.683    | -0.0441 | -31   | 17         | 28       | YYVTIIDAPGHR                     | 57        | 99.946 |   |                  |      | Mascot      |
| 1404.7271  | 1404.683    | -0.0441 | -31   | 17         | 28       | YYVTIIDAPGHR                     |           |        |   |                  |      | Mascot      |
| 2233.1282  | 2233.019    | -0.1092 | -49   | 79         | 98       | QLIVGVNKMMDSTEPYPYSQAR           |           |        |   |                  |      | Mascot      |
| 2249.123   | 2249.0127   | -0.1103 | -49   | 79         | 98       | QLIVGVNKMMDSTEPYPYSQAR           |           |        |   | Oxidation (M)[9] |      | Mascot      |
| 2918.5581  | 2918.4626   | -0.0955 | -33   | 152        | 179      | EGNASGTTLLDALDAILP<br>PSRPTDKPLR |           |        |   |                  |      | Mascot      |

|   |                                                                  |  |  |  |             |  |       |      |   |    |        |    |        |
|---|------------------------------------------------------------------|--|--|--|-------------|--|-------|------|---|----|--------|----|--------|
| 4 | eukaryotic translation elongation factor 1 alpha 1 [Danio rerio] |  |  |  | gi 68136140 |  | 50029 | 9.04 | 9 | 93 | 99.998 | 57 | 99.946 |
|---|------------------------------------------------------------------|--|--|--|-------------|--|-------|------|---|----|--------|----|--------|

#### Peptide Information

| Calc. Mass | Obsrv. Mass | ± da    | ± ppm | Start Seq. | End Seq. | Sequence               | Ion Score | C. I.  | % | Modification     | Rank | Result Type |
|------------|-------------|---------|-------|------------|----------|------------------------|-----------|--------|---|------------------|------|-------------|
| 864.4825   | 864.4622    | -0.0203 | -23   | 372        | 378      | FAELKEK                |           |        |   |                  |      | Mascot      |
| 870.5406   | 870.513     | -0.0276 | -32   | 147        | 154      | QLIVGVNK               |           |        |   |                  |      | Mascot      |
| 1025.6101  | 1025.5756   | -0.0345 | -34   | 256        | 266      | IGGIGTVPVGR            |           |        |   |                  |      | Mascot      |
| 1298.7467  | 1298.7068   | -0.0399 | -31   | 135        | 146      | EHALLAFTLGVK           |           |        |   |                  |      | Mascot      |
| 1397.6002  | 1397.5557   | -0.0445 | -32   | 155        | 166      | MDSTEPYPYSQAR          |           |        |   | Oxidation (M)[1] |      | Mascot      |
| 1404.7271  | 1404.683    | -0.0441 | -31   | 85         | 96       | YYVTIIDAPGHR           | 57        | 99.946 |   |                  |      | Mascot      |
| 1404.7271  | 1404.683    | -0.0441 | -31   | 85         | 96       | YYVTIIDAPGHR           |           |        |   |                  |      | Mascot      |
| 1588.8805  | 1588.8239   | -0.0566 | -36   | 6          | 20       | THINIVVIGHVDSGK        |           |        |   |                  |      | Mascot      |
| 2233.1282  | 2233.019    | -0.1092 | -49   | 147        | 166      | QLIVGVNKMMDSTEPYPYSQAR |           |        |   |                  |      | Mascot      |
| 2249.123   | 2249.0127   | -0.1103 | -49   | 147        | 166      | QLIVGVNKMMDSTEPYPYSQAR |           |        |   | Oxidation (M)[9] |      | Mascot      |
| 2918.5581  | 2918.4626   | -0.0955 | -33   | 220        | 247      | EGNASGTTLLDALDAILP     |           |        |   |                  |      | Mascot      |

5 hypothetical protein LOC100145396 [Xenopus (Silurana) tropicalis] PSRPTDKPLR gi|187608024 50127.2 9.29 8 84 99.984 57 99.946

Peptide Information

| Calc. Mass | Obsrv. Mass | ± da    | ± ppm | Start Seq. | End Seq. | Sequence              | Ion Score | C. I.  | % Modification   | Rank | Result Type |
|------------|-------------|---------|-------|------------|----------|-----------------------|-----------|--------|------------------|------|-------------|
| 864.4825   | 864.4622    | -0.0203 | -23   | 372        | 378      | FAELKEK               |           |        |                  |      | Mascot      |
| 870.5406   | 870.513     | -0.0276 | -32   | 147        | 154      | QLIVGVNK              |           |        |                  |      | Mascot      |
| 882.425    | 882.5392    | 0.1142  | 129   | 424        | 430      | FAARDMR               |           |        | Oxidation (M)[6] |      | Mascot      |
| 1025.6101  | 1025.5756   | -0.0345 | -34   | 256        | 266      | IGGIGTVPVGR           |           |        |                  |      | Mascot      |
| 1397.6002  | 1397.5557   | -0.0445 | -32   | 155        | 166      | MDSTEPYPYSQAR         |           |        | Oxidation (M)[1] |      | Mascot      |
| 1404.7271  | 1404.683    | -0.0441 | -31   | 85         | 96       | YYVTIIDAPGHR          | 57        | 99.946 |                  |      | Mascot      |
| 1404.7271  | 1404.683    | -0.0441 | -31   | 85         | 96       | YYVTIIDAPGHR          |           |        |                  |      | Mascot      |
| 2166.2644  | 2165.9822   | -0.2822 | -130  | 135        | 154      | EHALLAYTLGVKQLIVGVNK  |           |        |                  |      | Mascot      |
| 2233.1282  | 2233.019    | -0.1092 | -49   | 147        | 166      | QLIVGVNKMDSTEPYPYSQAR |           |        |                  |      | Mascot      |
| 2249.123   | 2249.0127   | -0.1103 | -49   | 147        | 166      | QLIVGVNKMDSTEPYPYSQAR |           |        | Oxidation (M)[9] |      | Mascot      |

6 Zgc:109885 protein [Danio rerio] gi|124504637 50130.2 9.21 7 80 99.954 57 99.946

Peptide Information

| Calc. Mass | Obsrv. Mass | ± da    | ± ppm | Start Seq. | End Seq. | Sequence              | Ion Score | C. I.  | % Modification   | Rank | Result Type |
|------------|-------------|---------|-------|------------|----------|-----------------------|-----------|--------|------------------|------|-------------|
| 864.4825   | 864.4622    | -0.0203 | -23   | 372        | 378      | FAELKEK               |           |        |                  |      | Mascot      |
| 870.5406   | 870.513     | -0.0276 | -32   | 147        | 154      | QLIVGVNK              |           |        |                  |      | Mascot      |
| 1025.6101  | 1025.5756   | -0.0345 | -34   | 256        | 266      | IGGIGTVPVGR           |           |        |                  |      | Mascot      |
| 1397.6002  | 1397.5557   | -0.0445 | -32   | 155        | 166      | MDSTEPYPYSQAR         |           |        | Oxidation (M)[1] |      | Mascot      |
| 1404.7271  | 1404.683    | -0.0441 | -31   | 85         | 96       | YYVTIIDAPGHR          | 57        | 99.946 |                  |      | Mascot      |
| 1404.7271  | 1404.683    | -0.0441 | -31   | 85         | 96       | YYVTIIDAPGHR          |           |        |                  |      | Mascot      |
| 2166.2644  | 2165.9822   | -0.2822 | -130  | 135        | 154      | EHALLAYTLGVKQLIVGVNK  |           |        |                  |      | Mascot      |
| 2233.1282  | 2233.019    | -0.1092 | -49   | 147        | 166      | QLIVGVNKMDSTEPYPYSQAR |           |        |                  |      | Mascot      |
| 2249.123   | 2249.0127   | -0.1103 | -49   | 147        | 166      | QLIVGVNKMDSTEPYPYSQAR |           |        | Oxidation (M)[9] |      | Mascot      |

7 hypothetical protein LOC336334 [Danio rerio] gi|41152382 50307.3 9.14 5 70 99.545 57 99.946

Peptide Information

| Calc. Mass | Obsrv. Mass | ± da    | ± ppm | Start Seq. | End Seq. | Sequence | Ion Score | C. I. | % Modification | Rank | Result Type |
|------------|-------------|---------|-------|------------|----------|----------|-----------|-------|----------------|------|-------------|
| 864.4825   | 864.4622    | -0.0203 | -23   | 372        | 378      | FAELKEK  |           |       |                |      | Mascot      |



|   |                             |           |         |      |              |     |                      |      |        |    |   |  |  |  |  |  |  |        |
|---|-----------------------------|-----------|---------|------|--------------|-----|----------------------|------|--------|----|---|--|--|--|--|--|--|--------|
|   | 870.5406                    | 870.513   | -0.0276 | -32  | 147          | 154 | QLIVGVNK             |      |        |    |   |  |  |  |  |  |  | Mascot |
|   | 1025.6101                   | 1025.5756 | -0.0345 | -34  | 256          | 266 | IGGIGTVPVGR          |      |        |    |   |  |  |  |  |  |  | Mascot |
|   | 1404.7271                   | 1404.683  | -0.0441 | -31  | 85           | 96  | YYVTIIDAPGHR         | 57   | 99.946 |    |   |  |  |  |  |  |  | Mascot |
|   | 1404.7271                   | 1404.683  | -0.0441 | -31  | 85           | 96  | YYVTIIDAPGHR         |      |        |    |   |  |  |  |  |  |  | Mascot |
|   | 2166.2644                   | 2165.9822 | -0.2822 | -130 | 135          | 154 | EHALLAYTLGVKQLIVGVNK |      |        |    |   |  |  |  |  |  |  | Mascot |
| 8 | novel protein [Danio rerio] |           |         |      | gi 148725296 |     | 79374.4              | 6.72 | 13     | 46 | 0 |  |  |  |  |  |  |        |

#### Peptide Information

| Calc. Mass | Obsrv. Mass | ± da    | ± ppm | Start Seq. | End Seq. | Sequence                | Ion Score | C. I. | % Modification           | Rank | Result Type |
|------------|-------------|---------|-------|------------|----------|-------------------------|-----------|-------|--------------------------|------|-------------|
| 864.4937   | 864.4622    | -0.0315 | -36   | 433        | 439      | EVFRVSK                 |           |       |                          |      | Mascot      |
| 1022.4935  | 1022.5317   | 0.0382  | 37    | 557        | 565      | ATVQCQTSK               |           |       | Carbamidomethyl (C)[5]   |      | Mascot      |
| 1081.6299  | 1081.5287   | -0.1012 | -94   | 542        | 550      | NIICRHVVK               |           |       |                          |      | Mascot      |
| 1165.6034  | 1165.7083   | 0.1049  | 90    | 225        | 234      | FCEQAVTIVR              |           |       |                          |      | Mascot      |
| 1233.5706  | 1233.6794   | 0.1088  | 88    | 612        | 622      | QDQGSLTAEER             |           |       |                          |      | Mascot      |
| 1352.7208  | 1352.693    | -0.0278 | -21   | 531        | 541      | ELKGYYPNQK              |           |       |                          |      | Mascot      |
| 1722.8778  | 1722.8046   | -0.0732 | -42   | 221        | 234      | ACLRFCQAVTIVR           |           |       | Carbamidomethyl (C)[2,6] |      | Mascot      |
| 1727.8633  | 1727.7109   | -0.1524 | -88   | 557        | 571      | ATVQCQTSKSDVYIK         |           |       | Carbamidomethyl (C)[5]   |      | Mascot      |
| 2166.0132  | 2165.9822   | -0.031  | -14   | 679        | 698      | VFGDILDGTSMPVGTDQ       |           |       | Oxidation (M)[11]        |      | Mascot      |
| 2266.0847  | 2266.0271   | -0.0576 | -25   | 623        | 644      | VTGAGGGKEGNDQHPTDTLFHK  |           |       |                          |      | Mascot      |
| 2283.1875  | 2283.1125   | -0.075  | -33   | 447        | 466      | MFSPIPVCILHVINNDTLEK    |           |       |                          |      | Mascot      |
| 2283.2554  | 2283.1125   | -0.1429 | -63   | 8          | 29       | ESSAGLLQSQDALASNKPLLLK  |           |       |                          |      | Mascot      |
| 2299.1824  | 2299.114    | -0.0684 | -30   | 447        | 466      | MFSPIPVCILHVINNDTLEK    |           |       | Oxidation (M)[1]         |      | Mascot      |
| 2649.4255  | 2649.1777   | -0.2478 | -94   | 447        | 469      | MFSPIPVCILHVINNDTLEKIPR |           |       |                          |      | Mascot      |

|   |                                                                     |  |  |  |              |  |         |      |    |    |   |  |  |  |  |  |  |  |
|---|---------------------------------------------------------------------|--|--|--|--------------|--|---------|------|----|----|---|--|--|--|--|--|--|--|
| 9 | Wingless-type MMTV integration site family, member 2B [Danio rerio] |  |  |  | gi 190337810 |  | 44067.2 | 9.03 | 15 | 43 | 0 |  |  |  |  |  |  |  |
|---|---------------------------------------------------------------------|--|--|--|--------------|--|---------|------|----|----|---|--|--|--|--|--|--|--|

#### Peptide Information

| Calc. Mass | Obsrv. Mass | ± da    | ± ppm | Start Seq. | End Seq. | Sequence  | Ion Score | C. I. | % Modification         | Rank | Result Type |
|------------|-------------|---------|-------|------------|----------|-----------|-----------|-------|------------------------|------|-------------|
| 831.4107   | 831.4297    | 0.019   | 23    | 120        | 126      | DHTVFGR   |           |       |                        |      | Mascot      |
| 842.3569   | 842.4823    | 0.1254  | 149   | 348        | 354      | MTKCECK   |           |       |                        |      | Mascot      |
| 850.4199   | 850.5183    | 0.0984  | 116   | 320        | 326      | VCNKSSR   |           |       | Carbamidomethyl (C)[2] |      | Mascot      |
| 850.4199   | 850.5183    | 0.0984  | 116   | 320        | 326      | VCNKSSR   |           |       | Carbamidomethyl (C)[2] |      | Mascot      |
| 864.4719   | 864.4622    | -0.0097 | -11   | 127        | 133      | VMLRSSR   |           |       | Oxidation (M)[2]       |      | Mascot      |
| 1081.5385  | 1081.5287   | -0.0098 | -9    | 339        | 347      | GYDTTRVNR |           |       |                        |      | Mascot      |

|           |           |         |     |     |     |                           |                                            |        |
|-----------|-----------|---------|-----|-----|-----|---------------------------|--------------------------------------------|--------|
| 1341.7195 | 1341.675  | -0.0445 | -33 | 66  | 77  | VICDNIPGLVNK              | Carbamidomethyl (C)[3]                     | Mascot |
| 1397.6842 | 1397.5557 | -0.1285 | -92 | 85  | 97  | HPDLMQSIGQGAK             | Oxidation (M)[5]                           | Mascot |
| 1404.4833 | 1404.683  | 0.1997  | 142 | 327 | 338 | GMDGCEIMCCGR              | Carbamidomethyl (C)[5,9], Oxidation (M)[2] | Mascot |
| 1404.4833 | 1404.683  | 0.1997  | 142 | 327 | 338 | GMDGCEIMCCGR              | Carbamidomethyl (C)[5,9], Oxidation (M)[2] | Mascot |
| 1435.5828 | 1435.6346 | 0.0518  | 36  | 365 | 376 | DCEETVDVHTCK              | Carbamidomethyl (C)[2]                     | Mascot |
| 1503.6678 | 1503.7306 | 0.0628  | 42  | 2   | 15  | PECDGVGCASPARK            | Carbamidomethyl (C)[3,8]                   | Mascot |
| 1588.7438 | 1588.8239 | 0.0801  | 50  | 98  | 108 | EWIRECQHQR                | Carbamidomethyl (C)[6]                     | Mascot |
| 1718.6536 | 1718.8511 | 0.1975  | 115 | 324 | 338 | SSRGMDGCEIMCCGR           | Carbamidomethyl (C)[8,12]                  | Mascot |
| 1718.6536 | 1718.8511 | 0.1975  | 115 | 324 | 338 | SSRGMDGCEIMCCGR           | Carbamidomethyl (C)[8,12]                  | Mascot |
| 1727.751  | 1727.7109 | -0.0401 | -23 | 153 | 168 | ACSQGEIKICSCDSQR          |                                            | Mascot |
| 2300.019  | 2300.105  | 0.086   | 37  | 235 | 255 | CHGVSGSCALRTCWLAM<br>SDFR |                                            | Mascot |
| 2499.9817 | 2500.0054 | 0.0237  | 9   | 357 | 376 | WCCAVECRDCEETVDVH<br>TCK  | Carbamidomethyl (C)[2,3,7]                 | Mascot |

10 LOC560618 protein [Danio rerio] gi|183985554 36438.9 5.69 9 42 0

#### Peptide Information

| Calc. Mass | Obsrv. Mass | ± da    | ± ppm | Start Seq. | End Seq. | Sequence                  | Ion Score | C. I. | % Modification                               | Rank | Result Type |
|------------|-------------|---------|-------|------------|----------|---------------------------|-----------|-------|----------------------------------------------|------|-------------|
| 1165.6113  | 1165.7083   | 0.097   | 83    | 173        | 182      | LPSHWSSVPR                |           |       |                                              |      | Mascot      |
| 1298.7579  | 1298.7068   | -0.0511 | -39   | 111        | 122      | TGVVVWRAVPSK              |           |       |                                              |      | Mascot      |
| 1435.6057  | 1435.6346   | 0.0289  | 20    | 1          | 11       | RVCMGMMMMIK               |           |       | Carbamidomethyl (C)[3], Oxidation (M)[4,6,7] |      | Mascot      |
| 1503.7407  | 1503.7306   | -0.0101 | -7    | 142        | 154      | VHQMTTGKPMTTTR            |           |       | Oxidation (M)[4]                             |      | Mascot      |
| 1552.8845  | 1552.699    | -0.1855 | -119  | 89         | 101      | WIDEQIAVVPRVK             |           |       |                                              |      | Mascot      |
| 1718.8079  | 1718.8511   | 0.0432  | 25    | 262        | 275      | EDLQKTQEEQVEDK            |           |       |                                              |      | Mascot      |
| 1718.8079  | 1718.8511   | 0.0432  | 25    | 262        | 275      | EDLQKTQEEQVEDK            |           |       |                                              |      | Mascot      |
| 1763.9762  | 1763.939    | -0.0372 | -21   | 155        | 172      | SSVAPTAGVHLRGSPLS<br>K    |           |       |                                              |      | Mascot      |
| 1763.9762  | 1763.939    | -0.0372 | -21   | 155        | 172      | SSVAPTAGVHLRGSPLS<br>K    |           |       |                                              |      | Mascot      |
| 2266.186   | 2266.0271   | -0.1589 | -70   | 59         | 79       | DLCEHLGLTIANKAQLAE<br>AQK |           |       |                                              |      | Mascot      |
| 2284.0884  | 2284.1047   | 0.0163  | 7     | 12         | 31       | MVLFSGMFMSGLAFLDMQ<br>LVK |           |       | Oxidation (M)[1,7]                           |      | Mascot      |
| 2300.0833  | 2300.105    | 0.0217  | 9     | 12         | 31       | MVLFSGMFMSGLAFLDMQ<br>LVK |           |       | Oxidation (M)[1,7,9]                         |      | Mascot      |

11 heterogeneous nuclear ribonucleoprotein K [Danio rerio] gi|169158246 29862.7 9.67 8 40 0

#### Peptide Information

| Calc. Mass | Obsrv. Mass | ± da   | ± ppm | Start Seq. | End Seq. | Sequence   | Ion Score | C. I. | % Modification | Rank | Result Type |
|------------|-------------|--------|-------|------------|----------|------------|-----------|-------|----------------|------|-------------|
| 1025.4758  | 1025.5756   | 0.0998 | 97    | 86         | 95       | GRSSSGGFDR |           |       |                |      | Mascot      |

|    |                                       |           |         |      |     |              |                         |      |    |                            |   |  |        |
|----|---------------------------------------|-----------|---------|------|-----|--------------|-------------------------|------|----|----------------------------|---|--|--------|
|    | 1045.5823                             | 1045.5319 | -0.0504 | -48  | 27  | 35           | AERVVQCIK               |      |    |                            |   |  | Mascot |
|    | 1233.4952                             | 1233.6794 | 0.1842  | 149  | 174 | 185          | YGGSMNDGYGGR            |      |    |                            |   |  | Mascot |
|    | 1397.6226                             | 1397.5557 | -0.0669 | -48  | 88  | 101          | SSSGGFDRMPSGGR          |      |    |                            |   |  | Mascot |
|    | 1404.6139                             | 1404.683  | 0.0691  | 49   | 146 | 156          | RSDDQYYSSQR             | 1    | 0  |                            |   |  | Mascot |
|    | 1404.6139                             | 1404.683  | 0.0691  | 49   | 146 | 156          | RSDDQYYSSQR             |      |    |                            |   |  | Mascot |
|    | 1569.9032                             | 1569.7236 | -0.1796 | -114 | 36  | 49           | TMLELIVEAPIKGR          |      |    |                            |   |  | Mascot |
|    | 1569.9032                             | 1569.7236 | -0.1796 | -114 | 36  | 49           | TMLELIVEAPIKGR          | 4    | 0  |                            |   |  | Mascot |
|    | 2193.0791                             | 2193.04   | -0.0391 | -18  | 8   | 26           | LFQECCPQSTDRVVLVG<br>GK |      |    | Carbamidomethyl (C)[5,6]   |   |  | Mascot |
|    | 2300.0645                             | 2300.105  | 0.0405  | 18   | 1   | 19           | STQTTIKLFQECCPQSTD<br>R |      |    | Carbamidomethyl (C)[12,13] |   |  | Mascot |
| 12 | Erythropoietin receptor [Danio rerio] |           |         |      |     | gi 190337418 | 57852.8                 | 5.53 | 10 | 40                         | 0 |  |        |

#### Peptide Information

| Calc. Mass | Obsrv. Mass | ± da    | ± ppm | Start Seq. | End Seq. | Sequence                 | Ion Score | C. I. | % Modification         | Rank | Result Type |
|------------|-------------|---------|-------|------------|----------|--------------------------|-----------|-------|------------------------|------|-------------|
| 850.4933   | 850.5183    | 0.025   | 29    | 204        | 209      | YKVVVR                   |           |       |                        |      | Mascot      |
| 850.4933   | 850.5183    | 0.025   | 29    | 204        | 209      | YKVVVR                   |           |       |                        |      | Mascot      |
| 870.4355   | 870.513     | 0.0775  | 89    | 491        | 497      | NEIFGYK                  |           |       |                        |      | Mascot      |
| 996.4567   | 996.5654    | 0.1087  | 109   | 118        | 125      | DGQMLYNR                 |           |       |                        |      | Mascot      |
| 996.4567   | 996.5654    | 0.1087  | 109   | 118        | 125      | DGQMLYNR                 |           |       |                        |      | Mascot      |
| 1397.6484  | 1397.5557   | -0.0927 | -66   | 498        | 509      | WPFSAQQVQSGY             |           |       |                        |      | Mascot      |
| 1476.8091  | 1476.7449   | -0.0642 | -43   | 184        | 196      | VEETKASTMLVLR            |           |       |                        |      | Mascot      |
| 1569.7101  | 1569.7236   | 0.0135  | 9     | 37         | 49       | DETEDIKCFVEGK            |           |       | Carbamidomethyl (C)[8] |      | Mascot      |
| 1569.7101  | 1569.7236   | 0.0135  | 9     | 37         | 49       | DETEDIKCFVEGK            |           |       | Carbamidomethyl (C)[8] |      | Mascot      |
| 1722.8003  | 1722.8046   | 0.0043  | 2     | 174        | 188      | YAVEDSHMGKVEETK          |           |       |                        |      | Mascot      |
| 1995.9594  | 1995.8253   | -0.1341 | -67   | 344        | 360      | SDSGLTEPPHWLMEQLR        |           |       |                        |      | Mascot      |
| 2249.0662  | 2249.0127   | -0.0535 | -24   | 491        | 509      | NEIFGYKWPFSQQVQS<br>GY   |           |       |                        |      | Mascot      |
| 2297.1709  | 2297.1226   | -0.0483 | -21   | 11         | 30       | IVFMLCLAFVTSGGKYFE<br>SK |           |       | Carbamidomethyl (C)[6] |      | Mascot      |

13 PREDICTED: hypothetical protein LOC100537239  
[Danio rerio]

gi|326677015 40075.7 8.66 8 39 0

#### Peptide Information

| Calc. Mass | Obsrv. Mass | ± da   | ± ppm | Start Seq. | End Seq. | Sequence | Ion Score | C. I. | % Modification     | Rank | Result Type |
|------------|-------------|--------|-------|------------|----------|----------|-----------|-------|--------------------|------|-------------|
| 831.4457   | 831.4297    | -0.016 | -19   | 119        | 125      | VEEVEVK  |           |       |                    |      | Mascot      |
| 850.3975   | 850.5183    | 0.1208 | 142   | 192        | 198      | MEEVNTK  |           |       |                    |      | Mascot      |
| 850.3975   | 850.5183    | 0.1208 | 142   | 192        | 198      | MEEVNTK  |           |       |                    |      | Mascot      |
| 996.4488   | 996.5654    | 0.1166 | 117   | 74         | 81       | NENMMVVK |           |       | Oxidation (M)[4,5] |      | Mascot      |

|  |           |           |        |     |     |     |                              |  |  |  |  |                                           |        |
|--|-----------|-----------|--------|-----|-----|-----|------------------------------|--|--|--|--|-------------------------------------------|--------|
|  | 996.4488  | 996.5654  | 0.1166 | 117 | 74  | 81  | NENMMVVVK                    |  |  |  |  | Oxidation (M)[4,5]                        | Mascot |
|  | 1025.5383 | 1025.5756 | 0.0373 | 36  | 1   | 8   | MSCFLIRR                     |  |  |  |  |                                           | Mascot |
|  | 1279.5847 | 1279.7373 | 0.1526 | 119 | 312 | 323 | AALQFQCGGGDR                 |  |  |  |  | Carbamidomethyl (C)[7]                    | Mascot |
|  | 1404.674  | 1404.683  | 0.009  | 6   | 146 | 156 | EEEEIKEEEEEK                 |  |  |  |  |                                           | Mascot |
|  | 1404.674  | 1404.683  | 0.009  | 6   | 146 | 156 | EEEEIKEEEEEK                 |  |  |  |  |                                           | Mascot |
|  | 2238.9441 | 2239.0647 | 0.1206 | 54  | 200 | 217 | EEEDNIIEEEEEEMSEKEK          |  |  |  |  |                                           | Mascot |
|  | 2587.0857 | 2587.1311 | 0.0454 | 18  | 300 | 323 | EEEDDVGCGVMKAALQF<br>QCGGGDR |  |  |  |  | Carbamidomethyl (C)[8], Oxidation (M)[11] | Mascot |
|  | 2587.0857 | 2587.1311 | 0.0454 | 18  | 300 | 323 | EEEDDVGCGVMKAALQF<br>QCGGGDR |  |  |  |  | Carbamidomethyl (C)[8], Oxidation (M)[11] | Mascot |

14 PREDICTED: gastrula zinc finger protein XICGF57.1-like [Danio rerio] gi|326666728 33351.9 9.4 10 38 0

#### Peptide Information

| Calc. Mass | Obsrv. Mass | ± da    | ± ppm | Start Seq. | End Seq. | Sequence               | Ion Score | C. I. | % Modification             | Rank | Result Type |
|------------|-------------|---------|-------|------------|----------|------------------------|-----------|-------|----------------------------|------|-------------|
| 985.5247   | 985.4341    | -0.0906 | -92   | 46         | 53       | GDLKIHR                |           |       | Oxidation (M)[7]           |      | Mascot      |
| 1045.5459  | 1045.5319   | -0.014  | -13   | 129        | 137      | SSTLNKHKM              |           |       |                            |      | Mascot      |
| 1061.5408  | 1061.4308   | -0.11   | -104  | 129        | 137      | SSTLNKHKM              |           |       | Oxidation (M)[8]           |      | Mascot      |
| 1233.5593  | 1233.6794   | 0.1201  | 97    | 21         | 30       | QEDLQEQTDK             |           |       |                            |      | Mascot      |
| 1298.5868  | 1298.7068   | 0.12    | 92    | 198        | 208      | EKPFTCTQCGK            |           |       | Carbamidomethyl (C)[6]     |      | Mascot      |
| 1476.6471  | 1476.7449   | 0.0978  | 66    | 33         | 44       | FTCTQCGRSFGR           |           |       | Carbamidomethyl (C)[3,6]   |      | Mascot      |
| 1503.7034  | 1503.7306   | 0.0272  | 18    | 21         | 32       | QEDLQEQTDKNR           |           |       |                            |      | Mascot      |
| 1588.7285  | 1588.8239   | 0.0954  | 60    | 153        | 165      | SFNRSSHLNDHMK          |           |       | Oxidation (M)[12]          |      | Mascot      |
| 1763.8203  | 1763.939    | 0.1187  | 67    | 54         | 68       | IHTGEKPFCTQCGK         |           |       | Carbamidomethyl (C)[10,13] |      | Mascot      |
| 1763.8203  | 1763.939    | 0.1187  | 67    | 250        | 264      | IHTGEKPFCTQCGK         |           |       | Carbamidomethyl (C)[10,13] |      | Mascot      |
| 2211.0432  | 2211.0381   | -0.0051 | -2    | 54         | 72       | IHTGEKPFCTQCGKSFG<br>R |           |       | Carbamidomethyl (C)[10,13] |      | Mascot      |
| 2239.0496  | 2239.0647   | 0.0151  | 7     | 138        | 156      | IHTGEKPFCTQCGRSFN<br>R |           |       | Carbamidomethyl (C)[10]    |      | Mascot      |

15 hypothetical protein LOC100170803 [Danio rerio] gi|238859679 6301.8 4.55 4 36 0

#### Peptide Information

| Calc. Mass | Obsrv. Mass | ± da   | ± ppm | Start Seq. | End Seq. | Sequence                | Ion Score | C. I. | % Modification         | Rank | Result Type |
|------------|-------------|--------|-------|------------|----------|-------------------------|-----------|-------|------------------------|------|-------------|
| 1397.5374  | 1397.5557   | 0.0183 | 13    | 21         | 32       | DVQDDSSMDEEK            |           |       |                        |      | Mascot      |
| 1553.6384  | 1553.7214   | 0.083  | 53    | 21         | 33       | DVQDDSSMDEEKR           |           |       |                        |      | Mascot      |
| 1569.6333  | 1569.7236   | 0.0903 | 58    | 21         | 33       | DVQDDSSMDEEKR           |           |       | Oxidation (M)[8]       |      | Mascot      |
| 1569.6333  | 1569.7236   | 0.0903 | 58    | 21         | 33       | DVQDDSSMDEEKR           |           |       | Oxidation (M)[8]       |      | Mascot      |
| 1763.7865  | 1763.939    | 0.1525 | 86    | 2          | 20       | GCGNSTAASTTPGPAES<br>AK |           |       | Carbamidomethyl (C)[2] |      | Mascot      |

|    |                                                               |           |        |    |   |              |                          |      |    |    |                        |        |
|----|---------------------------------------------------------------|-----------|--------|----|---|--------------|--------------------------|------|----|----|------------------------|--------|
|    | 1763.7865                                                     | 1763.939  | 0.1525 | 86 | 2 | 20           | GCGNSTAASTTPGPAES<br>AK  |      |    |    | Carbamidomethyl (C)[2] | Mascot |
|    | 1894.8269                                                     | 1894.9038 | 0.0769 | 41 | 1 | 20           | MGCGNSTAASTTPGPAE<br>SAK |      |    |    | Carbamidomethyl (C)[3] | Mascot |
| 16 | PREDICTED: hypothetical protein LOC100316941<br>[Danio rerio] |           |        |    |   | gi 326679100 | 71589.2                  | 5.75 | 11 | 36 | 0                      |        |

#### Peptide Information

| Calc. Mass | Obsrv. Mass | ± da    | ± ppm | Start Seq. | End Seq. | Sequence                     | Ion Score | C. I. | % Modification          | Rank | Result Type |
|------------|-------------|---------|-------|------------|----------|------------------------------|-----------|-------|-------------------------|------|-------------|
| 985.5538   | 985.4341    | -0.1197 | -121  | 533        | 540      | CKLFSFIK                     |           |       |                         |      | Mascot      |
| 1022.5417  | 1022.5317   | -0.01   | -10   | 629        | 636      | ANYRILWS                     |           |       |                         |      | Mascot      |
| 1045.5208  | 1045.5319   | 0.0111  | 11    | 608        | 615      | TLRPDQCR                     |           |       | Carbamidomethyl (C)[7]  |      | Mascot      |
| 1059.6045  | 1059.5575   | -0.047  | -44   | 100        | 109      | QSLISEAIAK                   |           |       |                         |      | Mascot      |
| 1588.9091  | 1588.8239   | -0.0852 | -54   | 100        | 113      | QSLISEAIAKMIIR               |           |       | Oxidation (M)[11]       |      | Mascot      |
| 1763.8745  | 1763.939    | 0.0645  | 37    | 244        | 258      | VVADLLPCESRSDFR              |           |       | Carbamidomethyl (C)[8]  |      | Mascot      |
| 1763.8745  | 1763.939    | 0.0645  | 37    | 244        | 258      | VVADLLPCESRSDFR              |           |       | Carbamidomethyl (C)[8]  |      | Mascot      |
| 2063.9563  | 2063.8687   | -0.0876 | -42   | 290        | 307      | EGISSNEYHRSLDQCLG<br>R       |           |       |                         |      | Mascot      |
| 2211.0784  | 2211.0381   | -0.0403 | -18   | 379        | 396      | ILRQMVDSDMFLEDIVDR           |           |       | Oxidation (M)[5]        |      | Mascot      |
| 2283.2231  | 2283.1125   | -0.1106 | -48   | 587        | 607      | KVFTVPATTTSVDQIFNT<br>VSK    |           |       |                         |      | Mascot      |
| 2283.2231  | 2283.1125   | -0.1106 | -48   | 587        | 607      | KVFTVPATTTSVDQIFNT<br>VSK    |           |       |                         |      | Mascot      |
| 2305.2327  | 2305.0891   | -0.1436 | -62   | 471        | 491      | LAGILEDPLYVTATTLDPO<br>FK    |           |       |                         |      | Mascot      |
| 2649.3599  | 2649.1777   | -0.1822 | -69   | 446        | 469      | KHLAEVVTHQCSGIVMGL<br>SQALDR |           |       | Carbamidomethyl (C)[11] |      | Mascot      |

|    |                                          |  |  |  |  |             |         |     |   |    |   |  |
|----|------------------------------------------|--|--|--|--|-------------|---------|-----|---|----|---|--|
| 17 | immunoglobulin light chain [Danio rerio] |  |  |  |  | gi 11139468 | 13673.7 | 7.6 | 5 | 35 | 0 |  |
|----|------------------------------------------|--|--|--|--|-------------|---------|-----|---|----|---|--|

#### Peptide Information

| Calc. Mass | Obsrv. Mass | ± da    | ± ppm | Start Seq. | End Seq. | Sequence                  | Ion Score | C. I. | % Modification            | Rank | Result Type |
|------------|-------------|---------|-------|------------|----------|---------------------------|-----------|-------|---------------------------|------|-------------|
| 1341.7274  | 1341.675    | -0.0524 | -39   | 55         | 66       | QTPNAAPQFVLR              |           |       |                           |      | Mascot      |
| 1718.9105  | 1718.8511   | -0.0594 | -35   | 21         | 35       | VLTQKPSIMTEKGR            | 2         | 0     | Oxidation (M)[9]          |      | Mascot      |
| 1718.9105  | 1718.8511   | -0.0594 | -35   | 21         | 35       | VLTQKPSIMTEKGR            |           |       | Oxidation (M)[9]          |      | Mascot      |
| 2266.0444  | 2266.0271   | -0.0173 | -8    | 36         | 54       | SVTLDCNVEKDENVYSW<br>HK   |           |       |                           |      | Mascot      |
| 2404.2622  | 2403.9988   | -0.2634 | -110  | 1          | 20       | MLIIFYCSLLTLLSCVRCA<br>K  |           |       | Carbamidomethyl (C)[7,15] |      | Mascot      |
| 2500.2368  | 2500.0054   | -0.2314 | -93   | 46         | 66       | DENVYSWHKQTPNAAPQ<br>FVLR |           |       |                           |      | Mascot      |

|    |                             |  |  |  |  |              |         |      |   |    |   |  |
|----|-----------------------------|--|--|--|--|--------------|---------|------|---|----|---|--|
| 18 | lft81 protein [Danio rerio] |  |  |  |  | gi 145337899 | 29908.3 | 5.76 | 8 | 34 | 0 |  |
|----|-----------------------------|--|--|--|--|--------------|---------|------|---|----|---|--|

#### Peptide Information

| Calc. Mass | Obsrv. Mass | ± da | ± ppm | Start | End | Sequence | Ion | C. I. | % Modification | Rank | Result Type |
|------------|-------------|------|-------|-------|-----|----------|-----|-------|----------------|------|-------------|
|------------|-------------|------|-------|-------|-----|----------|-----|-------|----------------|------|-------------|

|    |                                            |             |         | Seq.  | Seq.         | Score                       |                           |       |                        |      |             |
|----|--------------------------------------------|-------------|---------|-------|--------------|-----------------------------|---------------------------|-------|------------------------|------|-------------|
|    | 870.5519                                   | 870.513     | -0.0389 | -45   | 200          | 206                         | VLRQQVK                   |       |                        |      | Mascot      |
|    | 1045.5636                                  | 1045.5319   | -0.0317 | -30   | 14           | 21                          | TEEILRR                   |       |                        |      | Mascot      |
|    | 1397.6399                                  | 1397.5557   | -0.0842 | -60   | 63           | 74                          | GRTLDDMSEMVK              |       | Oxidation (M)[7]       |      | Mascot      |
|    | 1404.6359                                  | 1404.683    | 0.0471  | 34    | 210          | 220                         | ENQEPNMRQMK               |       |                        |      | Mascot      |
|    | 1404.6359                                  | 1404.683    | 0.0471  | 34    | 210          | 220                         | ENQEPNMRQMK               |       |                        |      | Mascot      |
|    | 1569.6962                                  | 1569.7236   | 0.0274  | 17    | 113          | 126                         | AQYETCAAGLESNR            |       | Carbamidomethyl (C)[6] |      | Mascot      |
|    | 1569.6962                                  | 1569.7236   | 0.0274  | 17    | 113          | 126                         | AQYETCAAGLESNR            |       | Carbamidomethyl (C)[6] |      | Mascot      |
|    | 1727.8018                                  | 1727.7109   | -0.0909 | -53   | 113          | 128                         | AQYETCAAGLESNRSK          |       |                        |      | Mascot      |
|    | 2225.0879                                  | 2225.0518   | -0.0361 | -16   | 147          | 163                         | YHHINCEREIIESQIQR         |       | Carbamidomethyl (C)[6] |      | Mascot      |
|    | 2225.0879                                  | 2225.0518   | -0.0361 | -16   | 147          | 163                         | YHHINCEREIIESQIQR         |       | Carbamidomethyl (C)[6] |      | Mascot      |
|    | 2283.1914                                  | 2283.1125   | -0.0789 | -35   | 234          | 254                         | QCYLKAQSQAPIGHVIQD<br>VGK |       |                        |      | Mascot      |
|    | 2283.1914                                  | 2283.1125   | -0.0789 | -35   | 234          | 254                         | QCYLKAQSQAPIGHVIQD<br>VGK |       |                        |      | Mascot      |
| 19 | TPA: erythropoietin receptor [Danio rerio] |             |         |       | gi 159885707 | 56496.1                     | 5.22                      | 9     | 33                     | 0    |             |
|    | Peptide Information                        |             |         |       |              |                             |                           |       |                        |      |             |
|    | Calc. Mass                                 | Obsrv. Mass | ± da    | ± ppm | Start Seq.   | End Sequence Seq.           | Ion Score                 | C. I. | % Modification         | Rank | Result Type |
|    | 850.4933                                   | 850.5183    | 0.025   | 29    | 193          | 198 YKVWVR                  |                           |       |                        |      | Mascot      |
|    | 850.4933                                   | 850.5183    | 0.025   | 29    | 193          | 198 YKVWVR                  |                           |       |                        |      | Mascot      |
|    | 870.4355                                   | 870.513     | 0.0775  | 89    | 480          | 486 NEIFGYK                 |                           |       |                        |      | Mascot      |
|    | 996.4567                                   | 996.5654    | 0.1087  | 109   | 107          | 114 DGQMLYNR                |                           |       |                        |      | Mascot      |
|    | 996.4567                                   | 996.5654    | 0.1087  | 109   | 107          | 114 DGQMLYNR                |                           |       |                        |      | Mascot      |
|    | 1397.6484                                  | 1397.5557   | -0.0927 | -66   | 487          | 498 WPFSAQQVQSGY            |                           |       |                        |      | Mascot      |
|    | 1476.8091                                  | 1476.7449   | -0.0642 | -43   | 173          | 185 VEETKASTMLVLR           |                           |       |                        |      | Mascot      |
|    | 1569.7101                                  | 1569.7236   | 0.0135  | 9     | 26           | 38 DETEDIKCFVEGK            |                           |       | Carbamidomethyl (C)[8] |      | Mascot      |
|    | 1569.7101                                  | 1569.7236   | 0.0135  | 9     | 26           | 38 DETEDIKCFVEGK            |                           |       | Carbamidomethyl (C)[8] |      | Mascot      |
|    | 1722.8003                                  | 1722.8046   | 0.0043  | 2     | 163          | 177 YAVEDSHMGKVEETK         |                           |       |                        |      | Mascot      |
|    | 1995.9594                                  | 1995.8253   | -0.1341 | -67   | 333          | 349 SDSGLTEPPHWLMEQLR       |                           |       |                        |      | Mascot      |
|    | 2249.0662                                  | 2249.0127   | -0.0535 | -24   | 480          | 498 NEIFGYKWPFSAQQVQS<br>GY |                           |       |                        |      | Mascot      |
| 20 | novel protein [Danio rerio]                |             |         |       | gi 220679558 | 45035                       | 4.99                      | 8     | 33                     | 0    |             |
|    | Peptide Information                        |             |         |       |              |                             |                           |       |                        |      |             |
|    | Calc. Mass                                 | Obsrv. Mass | ± da    | ± ppm | Start Seq.   | End Sequence Seq.           | Ion Score                 | C. I. | % Modification         | Rank | Result Type |
|    | 831.4318                                   | 831.4297    | -0.0021 | -3    | 336          | 342 ANQETLR                 |                           |       |                        |      | Mascot      |



|    |                               |           |         |      |              |      |                                    |      |   |    |   |                            |        |
|----|-------------------------------|-----------|---------|------|--------------|------|------------------------------------|------|---|----|---|----------------------------|--------|
|    | 1404.694                      | 1404.683  | -0.011  | -8   | 1720         | 1731 | AQEPTLSPVFCR                       |      |   |    |   | Carbamidomethyl (C)[11]    | Mascot |
|    | 1476.7765                     | 1476.7449 | -0.0316 | -21  | 1058         | 1072 | RGPGSSIISVSSSSR                    |      |   |    |   |                            | Mascot |
|    | 1553.7476                     | 1553.7214 | -0.0262 | -17  | 1517         | 1530 | SNSIATTICSEDKK                     |      |   |    |   | Carbamidomethyl (C)[9]     | Mascot |
|    | 1569.7035                     | 1569.7236 | 0.0201  | 13   | 310          | 324  | NTEAFECAAAVCGVK                    |      |   |    |   | Carbamidomethyl (C)[7]     | Mascot |
|    | 1569.7035                     | 1569.7236 | 0.0201  | 13   | 310          | 324  | NTEAFECAAAVCGVK                    |      |   |    |   | Carbamidomethyl (C)[7]     | Mascot |
|    | 1718.8207                     | 1718.8511 | 0.0304  | 18   | 2188         | 2202 | DWPSGEEFLALMPAR                    | 2    | 0 |    |   |                            | Mascot |
|    | 1718.8207                     | 1718.8511 | 0.0304  | 18   | 2188         | 2202 | DWPSGEEFLALMPAR                    |      |   |    |   |                            | Mascot |
|    | 2174.208                      | 2173.9194 | -0.2886 | -133 | 1121         | 1139 | QQRPTLLPEFKHVALD<br>GK             |      |   |    |   |                            | Mascot |
|    | 2249.2751                     | 2249.0127 | -0.2624 | -117 | 2025         | 2045 | VPNILDDIIASVVENKIPAT<br>K          |      |   |    |   |                            | Mascot |
|    | 2296.9065                     | 2297.1226 | 0.2161  | 94   | 1827         | 1845 | EMCDACEATLFNMHWAC<br>HK            |      |   |    |   | Carbamidomethyl (C)[3]     | Mascot |
|    | 2649.3015                     | 2649.1777 | -0.1238 | -47  | 871          | 892  | QLLVVYDLTGDRPNSYQ<br>EENRR         |      |   |    |   |                            | Mascot |
|    | 3337.5674                     | 3337.6665 | 0.0991  | 30   | 462          | 491  | SQSPATVNTGYGSESPC<br>CSPETITKPQIIR |      |   |    |   | Carbamidomethyl (C)[17,18] | Mascot |
| 23 | Tnfrsfa protein [Danio rerio] |           |         |      | gi 190336943 |      | 48606.4                            | 5.31 | 9 | 32 | 0 |                            |        |

#### Peptide Information

| Calc. Mass | Obsrv. Mass | ± da    | ± ppm | Start Seq. | End Seq. | Sequence                 | Ion Score | C. I. | % | Modification                                | Rank | Result Type |
|------------|-------------|---------|-------|------------|----------|--------------------------|-----------|-------|---|---------------------------------------------|------|-------------|
| 856.4159   | 856.4957    | 0.0798  | 93    | 329        | 335      | EDDPK                    |           |       |   |                                             |      | Mascot      |
| 985.4771   | 985.4341    | -0.043  | -44   | 227        | 234      | VPIDECPR                 |           |       |   | Carbamidomethyl (C)[6]                      |      | Mascot      |
| 1059.4952  | 1059.5575   | 0.0623  | 59    | 272        | 280      | SIPVEDEDR                |           |       |   |                                             |      | Mascot      |
| 1233.5714  | 1233.6794   | 0.108   | 88    | 68         | 78       | EKCTSGHVMGK              |           |       |   | Carbamidomethyl (C)[3]                      |      | Mascot      |
| 1298.6045  | 1298.7068   | 0.1023  | 79    | 59         | 69       | NCEAGTYVKEK              |           |       |   | Carbamidomethyl (C)[2]                      |      | Mascot      |
| 1727.762   | 1727.7109   | -0.0511 | -30   | 321        | 334      | DQTESWPREDPPR            |           |       |   |                                             |      | Mascot      |
| 2211.0537  | 2211.0381   | -0.0156 | -7    | 310        | 328      | SSPPAQRPTDRDQTESW<br>PR  |           |       |   |                                             |      | Mascot      |
| 2266.2515  | 2266.0271   | -0.2244 | -99   | 398        | 417      | EGLRANINTLLQALLDLD<br>QR |           |       |   |                                             |      | Mascot      |
| 2283.9038  | 2284.1047   | 0.2009  | 88    | 41         | 58       | QMTCLNHEYPHNGFCC<br>K    |           |       |   | Carbamidomethyl (C)[4,16], Oxidation (M)[2] |      | Mascot      |

24 hypothetical protein LOC503753 [Danio rerio] gi|61651818 35986.7 4.84 6 32 0 10 0

#### Peptide Information

| Calc. Mass | Obsrv. Mass | ± da    | ± ppm | Start Seq. | End Seq. | Sequence     | Ion Score | C. I. | % | Modification | Rank | Result Type |
|------------|-------------|---------|-------|------------|----------|--------------|-----------|-------|---|--------------|------|-------------|
| 864.4937   | 864.4622    | -0.0315 | -36   | 91         | 97       | EIQPHLK      |           |       |   |              |      | Mascot      |
| 985.5723   | 985.4341    | -0.1382 | -140  | 99         | 106      | LCRPRVVK     |           |       |   |              |      | Mascot      |
| 1404.7303  | 1404.683    | -0.0473 | -34   | 25         | 36       | LLSAAMWQVTER |           |       |   |              |      | Mascot      |
| 1404.7303  | 1404.683    | -0.0473 | -34   | 25         | 36       | LLSAAMWQVTER |           |       |   |              |      | Mascot      |



|    |                                                                      |           |         |     |     |         |                          |    |    |                                           |        |
|----|----------------------------------------------------------------------|-----------|---------|-----|-----|---------|--------------------------|----|----|-------------------------------------------|--------|
|    | 1718.8782                                                            | 1718.8511 | -0.0271 | -16 | 168 | 182     | MVSVPDLSETVSWLR          | 10 | 0  |                                           | Mascot |
|    | 1718.8782                                                            | 1718.8511 | -0.0271 | -16 | 168 | 182     | MVSVPDLSETVSWLR          |    |    |                                           | Mascot |
|    | 2166.0127                                                            | 2165.9822 | -0.0305 | -14 | 183 | 202     | TCPSLLDDCIDSVSVPKD<br>MK |    |    |                                           | Mascot |
|    | 2239.0291                                                            | 2239.0647 | 0.0356  | 16  | 183 | 202     | TCPSLLDDCIDSVSVPKD<br>MK |    |    | Carbamidomethyl (C)[2], Oxidation (M)[19] | Mascot |
|    | 2304.9634                                                            | 2305.0891 | 0.1257  | 55  | 107 | 125     | EFADEDMEESEACFLDL<br>VR  |    |    | Carbamidomethyl (C)[13]                   | Mascot |
| 25 | heterogeneous nuclear ribonucleoprotein K [Danio rerio] gi 169158247 |           |         |     |     | 31206.2 | 9.46                     | 7  | 32 | 0                                         |        |

#### Peptide Information

| Calc. Mass | Obsrv. Mass | ± da    | ± ppm | Start Seq. | End Seq. | Sequence                 | Ion Score | C. I. | % Modification             | Rank | Result Type |
|------------|-------------|---------|-------|------------|----------|--------------------------|-----------|-------|----------------------------|------|-------------|
| 1025.4758  | 1025.5756   | 0.0998  | 97    | 86         | 95       | GRSSSGGFDR               |           |       |                            |      | Mascot      |
| 1045.5823  | 1045.5319   | -0.0504 | -48   | 27         | 35       | AERVVQCIK                |           |       |                            |      | Mascot      |
| 1397.6226  | 1397.5557   | -0.0669 | -48   | 88         | 101      | SSSGGFDRMPSGGR           |           |       |                            |      | Mascot      |
| 1404.6139  | 1404.683    | 0.0691  | 49    | 146        | 156      | RSDDQYYSSQR              | 1         |       | 0                          |      | Mascot      |
| 1404.6139  | 1404.683    | 0.0691  | 49    | 146        | 156      | RSDDQYYSSQR              |           |       |                            |      | Mascot      |
| 1569.9032  | 1569.7236   | -0.1796 | -114  | 36         | 49       | TMLELIVEAPIKGR           |           |       |                            |      | Mascot      |
| 1569.9032  | 1569.7236   | -0.1796 | -114  | 36         | 49       | TMLELIVEAPIKGR           | 4         |       | 0                          |      | Mascot      |
| 2193.0791  | 2193.04     | -0.0391 | -18   | 8          | 26       | LFQECCPQSTD RVVLVG<br>GK |           |       | Carbamidomethyl (C)[5,6]   |      | Mascot      |
| 2300.0645  | 2300.105    | 0.0405  | 18    | 1          | 19       | STQTTIKLFQECCPQSTD<br>R  |           |       | Carbamidomethyl (C)[12,13] |      | Mascot      |

26 RecName: Full=SH3 domain-binding protein 4-A gi|123888628 108383 7.89 13 32 0

#### Peptide Information

| Calc. Mass | Obsrv. Mass | ± da    | ± ppm | Start Seq. | End Seq. | Sequence                  | Ion Score | C. I. | % Modification         | Rank | Result Type |
|------------|-------------|---------|-------|------------|----------|---------------------------|-----------|-------|------------------------|------|-------------|
| 831.4756   | 831.4297    | -0.0459 | -55   | 926        | 932      | MKNPITK                   |           |       |                        |      | Mascot      |
| 842.5822   | 842.4823    | -0.0999 | -119  | 663        | 669      | LIKT VIR                  |           |       |                        |      | Mascot      |
| 850.4338   | 850.5183    | 0.0845  | 99    | 387        | 393      | LSNMEIK                   |           |       | Oxidation (M)[4]       |      | Mascot      |
| 850.4338   | 850.5183    | 0.0845  | 99    | 387        | 393      | LSNMEIK                   |           |       | Oxidation (M)[4]       |      | Mascot      |
| 870.4726   | 870.513     | 0.0404  | 46    | 1          | 7        | MAAHRIR                   |           |       | Oxidation (M)[1]       |      | Mascot      |
| 1025.564   | 1025.5756   | 0.0116  | 11    | 290        | 297      | TAWLNHRK                  |           |       |                        |      | Mascot      |
| 1045.4796  | 1045.5319   | 0.0523  | 50    | 791        | 799      | AELDSEPER                 |           |       |                        |      | Mascot      |
| 2064.0259  | 2063.8687   | -0.1572 | -76   | 773        | 790      | AFADALSYVNLPLTYFCR        |           |       |                        |      | Mascot      |
| 2230.2417  | 2230.1306   | -0.1111 | -50   | 842        | 860      | LIMDFVLLTTAVEVAPRW<br>R   |           |       |                        |      | Mascot      |
| 2284.2368  | 2284.1047   | -0.1321 | -58   | 492        | 513      | TVVAIFGHDCAPKLLVS<br>EVGK |           |       |                        |      | Mascot      |
| 2300.0686  | 2300.105    | 0.0364  | 16    | 597        | 616      | DDQDCILAQFCVQTPQP<br>PPK  |           |       | Carbamidomethyl (C)[5] |      | Mascot      |

|    |                                        |           |         |     |             |     |                                       |      |   |    |                        |  |        |
|----|----------------------------------------|-----------|---------|-----|-------------|-----|---------------------------------------|------|---|----|------------------------|--|--------|
|    | 2421.2065                              | 2421.0242 | -0.1823 | -75 | 18          | 40  | CKSEGLIDIDEGVTEASL<br>VDVK            |      |   |    |                        |  | Mascot |
|    | 2421.2065                              | 2421.0242 | -0.1823 | -75 | 18          | 40  | CKSEGLIDIDEGVTEASL<br>VDVK            |      |   |    |                        |  | Mascot |
|    | 2918.53                                | 2918.4626 | -0.0674 | -23 | 833         | 858 | MDCQGLVARLIMDFVLLT<br>TAVEVAPR        |      |   |    | Carbamidomethyl (C)[3] |  | Mascot |
|    | 3337.6052                              | 3337.6665 | 0.0613  | 18  | 298         | 327 | LARSCHDLES LGQNP GW<br>GQTQP VETNIVCK |      |   |    | Carbamidomethyl (C)[5] |  | Mascot |
| 27 | frizzled-related protein [Danio rerio] |           |         |     | gi 18858723 |     | 36007.6                               | 8.44 | 7 | 32 | 0                      |  |        |

#### Peptide Information

|  | Calc. Mass | Obsrv. Mass | ± da    | ± ppm | Start Seq. | End Seq. | Sequence                     | Ion Score | C. I. | % Modification                               | Rank | Result Type |
|--|------------|-------------|---------|-------|------------|----------|------------------------------|-----------|-------|----------------------------------------------|------|-------------|
|  | 850.4781   | 850.5183    | 0.0402  | 47    | 194        | 200      | SVKFNQK                      |           |       |                                              |      | Mascot      |
|  | 850.4781   | 850.5183    | 0.0402  | 47    | 194        | 200      | SVKFNQK                      |           |       |                                              |      | Mascot      |
|  | 1022.4579  | 1022.5317   | 0.0738  | 72    | 113        | 121      | CGCEPVMKR                    |           |       |                                              |      | Mascot      |
|  | 1061.5044  | 1061.4308   | -0.0736 | -69   | 25         | 35       | GTGAASCEPIR                  |           |       |                                              |      | Mascot      |
|  | 1081.4839  | 1081.5287   | 0.0448  | 41    | 111        | 120      | AKCGCEPVMK                   |           |       | Oxidation (M)[9]                             |      | Mascot      |
|  | 1763.8237  | 1763.939    | 0.1153  | 65    | 25         | 40       | GTGAASCEPIRIPMCK             |           |       | Carbamidomethyl (C)[7,15], Oxidation (M)[14] |      | Mascot      |
|  | 1763.8237  | 1763.939    | 0.1153  | 65    | 25         | 40       | GTGAASCEPIRIPMCK             |           |       | Carbamidomethyl (C)[7,15], Oxidation (M)[14] |      | Mascot      |
|  | 2192.843   | 2193.04     | 0.197   | 90    | 166        | 184      | CNPEGNPDPFMDSHNTN<br>CK      |           |       | Carbamidomethyl (C)[1], Oxidation (M)[11]    |      | Mascot      |
|  | 2649.051   | 2649.1777   | 0.1267  | 48    | 166        | 189      | CNPEGNPDPFMDSHNTN<br>CKGANDR |           |       | Oxidation (M)[11]                            |      | Mascot      |

28 Guanine nucleotide binding protein (G protein), beta polypeptide 2-like 1 [Danio rerio]

gi|152013098 35128.5 7.6 7 31 0

#### Peptide Information

|  | Calc. Mass | Obsrv. Mass | ± da    | ± ppm | Start Seq. | End Seq. | Sequence                | Ion Score | C. I. | % Modification          | Rank | Result Type |
|--|------------|-------------|---------|-------|------------|----------|-------------------------|-----------|-------|-------------------------|------|-------------|
|  | 864.4244   | 864.4622    | 0.0378  | 44    | 2          | 8        | TEQMTVR                 |           |       |                         |      | Mascot      |
|  | 1059.5946  | 1059.5575   | -0.0371 | -35   | 309        | 317      | VWQVTIGTR               |           |       |                         |      | Mascot      |
|  | 1264.6532  | 1264.592    | -0.0612 | -48   | 89         | 99       | LWDLTTGTTTR             |           |       |                         |      | Mascot      |
|  | 1279.6675  | 1279.7373   | 0.0698  | 55    | 2          | 12       | TEQMTVRGTLK             |           |       | Oxidation (M)[4]        |      | Mascot      |
|  | 1476.6787  | 1476.7449   | 0.0662  | 45    | 213        | 225      | DGQAMLWDLNEGK           |           |       |                         |      | Mascot      |
|  | 1995.8865  | 1995.8253   | -0.0612 | -31   | 140        | 155      | YTIQDSDTEWVSCVR         |           |       | Carbamidomethyl (C)[14] |      | Mascot      |
|  | 2225.073   | 2225.0518   | -0.0212 | -10   | 156        | 175      | FSPNSSNPIIVSCGWDM<br>VK |           |       | Oxidation (M)[18]       |      | Mascot      |
|  | 2225.073   | 2225.0518   | -0.0212 | -10   | 156        | 175      | FSPNSSNPIIVSCGWDM<br>VK |           |       | Oxidation (M)[18]       |      | Mascot      |
|  | 2266.0994  | 2266.0271   | -0.0723 | -32   | 156        | 175      | FSPNSSNPIIVSCGWDM<br>VK |           |       | Carbamidomethyl (C)[13] |      | Mascot      |

29 PREDICTED: si:dkey-170m15.2 [Danio rerio]

gi|292624792 132327.3 7.37 14 31 0

#### Peptide Information

| Calc. Mass | Obsrv. Mass | ± da    | ± ppm | Start Seq. | End Seq. | Sequence                    | Ion Score | C. I. | % Modification         | Rank | Result Type |
|------------|-------------|---------|-------|------------|----------|-----------------------------|-----------|-------|------------------------|------|-------------|
| 864.472    | 864.4622    | -0.0098 | -11   | 41         | 47       | RTSMLTR                     |           |       |                        |      | Mascot      |
| 996.5182   | 996.5654    | 0.0472  | 47    | 75         | 83       | DCPLVAPPK                   |           |       | Carbamidomethyl (C)[2] |      | Mascot      |
| 996.5182   | 996.5654    | 0.0472  | 47    | 75         | 83       | DCPLVAPPK                   |           |       | Carbamidomethyl (C)[2] |      | Mascot      |
| 1022.4935  | 1022.5317   | 0.0382  | 37    | 773        | 781      | ATVQCQTSK                   |           |       | Carbamidomethyl (C)[5] |      | Mascot      |
| 1045.516   | 1045.5319   | 0.0159  | 15    | 98         | 106      | QTNITDEPK                   |           |       |                        |      | Mascot      |
| 1081.6299  | 1081.5287   | -0.1012 | -94   | 758        | 766      | NIICRHVVK                   |           |       |                        |      | Mascot      |
| 1165.6034  | 1165.7083   | 0.1049  | 90    | 440        | 449      | FCEQAVTIVR                  |           |       |                        |      | Mascot      |
| 1233.5706  | 1233.6794   | 0.1088  | 88    | 828        | 838      | QDQGSLTAEER                 |           |       |                        |      | Mascot      |
| 1352.7208  | 1352.693    | -0.0278 | -21   | 747        | 757      | ELKGYIYNQK                  |           |       |                        |      | Mascot      |
| 1727.8633  | 1727.7109   | -0.1524 | -88   | 773        | 787      | ATVQCQTSKSDVYIK             |           |       | Carbamidomethyl (C)[5] |      | Mascot      |
| 2166.0132  | 2165.9822   | -0.031  | -14   | 895        | 914      | VFGDILDGTSMPVGTQDQ<br>QNR   |           |       | Oxidation (M)[11]      |      | Mascot      |
| 2266.0847  | 2266.0271   | -0.0576 | -25   | 839        | 860      | VTGAGGGKEGNDQHPT<br>DTLFHK  |           |       |                        |      | Mascot      |
| 2283.1875  | 2283.1125   | -0.075  | -33   | 663        | 682      | MFSPIPVCILHVINNDTLE<br>K    |           |       |                        |      | Mascot      |
| 2283.2554  | 2283.1125   | -0.1429 | -63   | 223        | 244      | ESSAGLLQSQDALASNK<br>PLLLK  |           |       |                        |      | Mascot      |
| 2299.1824  | 2299.114    | -0.0684 | -30   | 663        | 682      | MFSPIPVCILHVINNDTLE<br>K    |           |       | Oxidation (M)[1]       |      | Mascot      |
| 2649.4255  | 2649.1777   | -0.2478 | -94   | 663        | 685      | MFSPIPVCILHVINNDTLE<br>KIPR |           |       |                        |      | Mascot      |

30 SWI/SNF related, matrix associated, actin dependent regulator of chromatin, subfamily c, member 1b

gi|148222527 108316.5 5.33 13 31 0

#### Peptide Information

| Calc. Mass | Obsrv. Mass | ± da    | ± ppm | Start Seq. | End Seq. | Sequence          | Ion Score | C. I. | % Modification          | Rank | Result Type |
|------------|-------------|---------|-------|------------|----------|-------------------|-----------|-------|-------------------------|------|-------------|
| 870.5771   | 870.513     | -0.0641 | -74   | 178        | 184      | LKDILR            |           |       |                         |      | Mascot      |
| 1022.5305  | 1022.5317   | 0.0012  | 1     | 444        | 452      | ALPEFFNGK         |           |       |                         |      | Mascot      |
| 1051.532   | 1051.6805   | 0.1485  | 141   | 122        | 129      | FKTEQGWR          |           |       |                         |      | Mascot      |
| 1059.4928  | 1059.5575   | 0.0647  | 61    | 466        | 473      | NFMIDTYR          |           |       |                         |      | Mascot      |
| 1233.5892  | 1233.6794   | 0.0902  | 73    | 59         | 69       | KNVQSDAPSCK       |           |       | Carbamidomethyl (C)[10] |      | Mascot      |
| 1264.6685  | 1264.592    | -0.0765 | -60   | 444        | 454      | ALPEFFNGKKNK      |           |       |                         |      | Mascot      |
| 1435.6522  | 1435.6346   | -0.0176 | -12   | 867        | 877      | HFEETIMDR         |           |       | Oxidation (M)[9]        |      | Mascot      |
| 1588.9342  | 1588.8239   | -0.1103 | -69   | 846        | 859      | IKSLVALLVETQMK    |           |       | Oxidation (M)[13]       |      | Mascot      |
| 1727.9034  | 1727.7109   | -0.1925 | -111  | 880        | 893      | EALEQQRQQLSER     |           |       |                         |      | Mascot      |
| 2166.0688  | 2165.9822   | -0.0866 | -40   | 457        | 473      | TPEIYLAYRNFIDTYR  |           |       |                         |      | Mascot      |
| 2239.1204  | 2239.0647   | -0.0557 | -25   | 595        | 612      | EWTEQETLLLLLEAMYK |           |       |                         |      | Mascot      |
| 2500.1636  | 2500.0054   | -0.1582 | -63   | 36         | 55       | YWENPEIMSQMETVRSW |           |       | Oxidation (M)[8]        |      | Mascot      |

|    |                                                               |           |           |         |     |   |    |                                       |        |                                           |        |    |   |  |
|----|---------------------------------------------------------------|-----------|-----------|---------|-----|---|----|---------------------------------------|--------|-------------------------------------------|--------|----|---|--|
|    |                                                               | 2587.2087 | 2587.1311 | -0.0776 | -30 | 1 | 26 | IGK<br>MAAQTQGSAAAGLTTSQ<br>VSCSTSISR |        | Carbamidomethyl (C)[20], Oxidation (M)[1] | Mascot |    |   |  |
|    |                                                               | 2587.2087 | 2587.1311 | -0.0776 | -30 | 1 | 26 | MAAQTQGSAAAGLTTSQ<br>VSCSTSISR        |        | Carbamidomethyl (C)[20], Oxidation (M)[1] | Mascot |    |   |  |
| 31 | PREDICTED: hypothetical protein LOC100535526<br>[Danio rerio] |           |           |         |     |   |    | gi 326666594                          | 8416.1 | 6.82                                      | 5      | 31 | 0 |  |

Peptide Information

| Calc. Mass | Obsrv. Mass | ± da    | ± ppm | Start Seq. | End Seq. | Sequence               | Ion Score | C. I. | % Modification         | Rank | Result Type |
|------------|-------------|---------|-------|------------|----------|------------------------|-----------|-------|------------------------|------|-------------|
| 864.4608   | 864.4622    | 0.0014  | 2     | 1          | 7        | MTTEKVR                |           |       |                        |      | Mascot      |
| 1397.7094  | 1397.5557   | -0.1537 | -110  | 59         | 71       | AGLTESFSVSLMR          |           |       |                        |      | Mascot      |
| 1553.8104  | 1553.7214   | -0.089  | -57   | 59         | 72       | AGLTESFSVSLMRR         |           |       |                        |      | Mascot      |
| 1569.8053  | 1569.7236   | -0.0817 | -52   | 59         | 72       | AGLTESFSVSLMRR         |           |       | Oxidation (M)[12]      |      | Mascot      |
| 1569.8053  | 1569.7236   | -0.0817 | -52   | 58         | 71       | RAGLTESFSVSLMR         |           |       | Oxidation (M)[13]      |      | Mascot      |
| 2248.9897  | 2249.0127   | 0.023   | 10    | 41         | 58       | SMWTDIDCND AHLMDR<br>R |           |       | Carbamidomethyl (C)[8] |      | Mascot      |

|    |                                                                        |  |  |  |  |  |  |              |         |      |    |    |   |  |
|----|------------------------------------------------------------------------|--|--|--|--|--|--|--------------|---------|------|----|----|---|--|
| 32 | PREDICTED: CAP-Gly domain-containing linker protein 3<br>[Danio rerio] |  |  |  |  |  |  | gi 326674275 | 59111.2 | 8.27 | 11 | 31 | 0 |  |
|----|------------------------------------------------------------------------|--|--|--|--|--|--|--------------|---------|------|----|----|---|--|

Peptide Information

| Calc. Mass | Obsrv. Mass | ± da    | ± ppm | Start Seq. | End Seq. | Sequence                    | Ion Score | C. I. | % Modification       | Rank | Result Type |
|------------|-------------|---------|-------|------------|----------|-----------------------------|-----------|-------|----------------------|------|-------------|
| 831.4069   | 831.4297    | 0.0228  | 27    | 332        | 338      | YFICSAK                     |           |       |                      |      | Mascot      |
| 1022.5298  | 1022.5317   | 0.0019  | 2     | 368        | 376      | MDLSRVTKG                   |           |       | Oxidation (M)[1]     |      | Mascot      |
| 1051.6047  | 1051.6805   | 0.0758  | 72    | 420        | 428      | QGIVRFFGK                   |           |       |                      |      | Mascot      |
| 1279.6576  | 1279.7373   | 0.0797  | 62    | 204        | 215      | CLLEHGANPAVR                |           |       |                      |      | Mascot      |
| 1298.6885  | 1298.7068   | 0.0183  | 14    | 491        | 501      | KVHQVTMSQPK                 |           |       | Oxidation (M)[7]     |      | Mascot      |
| 1341.7372  | 1341.675    | -0.0622 | -46   | 407        | 419      | VEVG DQVLVAGQK              |           |       |                      |      | Mascot      |
| 1895.0708  | 1894.9038   | -0.167  | -88   | 407        | 424      | VEVG DQVLVAGQKQGIV<br>R     |           |       |                      |      | Mascot      |
| 2192.9788  | 2193.04     | 0.0612  | 28    | 522        | 538      | LLFCCWFPWMLRAEMQS           |           |       | Oxidation (M)[10,15] |      | Mascot      |
| 2247.1689  | 2247.0562   | -0.1127 | -50   | 263        | 283      | ATLPNYDNIPGNLMLSSL<br>GLK   |           |       | Oxidation (M)[14]    |      | Mascot      |
| 2404.3499  | 2403.9988   | -0.3511 | -146  | 64         | 83       | TTIPELFAIRQWVPQVQH<br>K     |           |       |                      |      | Mascot      |
| 2500.1335  | 2500.0054   | -0.1281 | -51   | 300        | 322      | FCGTTEFASGQWVGLEL<br>DEPEGK |           |       |                      |      | Mascot      |

|    |                                                                                       |  |  |  |  |  |  |             |         |     |   |    |   |  |
|----|---------------------------------------------------------------------------------------|--|--|--|--|--|--|-------------|---------|-----|---|----|---|--|
| 33 | novel protein similar to vertebrate tropomyosin 4<br>(TPM4) (zgc:63909) [Danio rerio] |  |  |  |  |  |  | gi 94732584 | 23517.9 | 4.6 | 7 | 31 | 0 |  |
|----|---------------------------------------------------------------------------------------|--|--|--|--|--|--|-------------|---------|-----|---|----|---|--|

Peptide Information

| Calc. Mass | Obsrv. Mass | ± da | ± ppm | Start Seq. | End Seq. | Sequence | Ion Score | C. I. | % Modification | Rank | Result Type |
|------------|-------------|------|-------|------------|----------|----------|-----------|-------|----------------|------|-------------|
|------------|-------------|------|-------|------------|----------|----------|-----------|-------|----------------|------|-------------|

|    |                                                                                                        |             |         |       |              |          |                        |      |           |                  |                                          |  |      |             |
|----|--------------------------------------------------------------------------------------------------------|-------------|---------|-------|--------------|----------|------------------------|------|-----------|------------------|------------------------------------------|--|------|-------------|
|    | 850.3975                                                                                               | 850.5183    | 0.1208  | 142   | 54           | 60       | AMKDEEK                |      |           |                  |                                          |  |      | Mascot      |
|    | 850.3975                                                                                               | 850.5183    | 0.1208  | 142   | 54           | 60       | AMKDEEK                |      |           |                  |                                          |  |      | Mascot      |
|    | 1165.5592                                                                                              | 1165.7083   | 0.1491  | 128   | 61           | 69       | MEIQEMQLK              |      |           | Oxidation (M)[1] |                                          |  |      | Mascot      |
|    | 1298.7678                                                                                              | 1298.7068   | -0.061  | -47   | 88           | 98       | KLVILEGELER            |      |           |                  |                                          |  |      | Mascot      |
|    | 1352.6943                                                                                              | 1352.693    | -0.0013 | -1    | 141          | 151      | YEEIEKVLSDK            |      |           |                  |                                          |  |      | Mascot      |
|    | 1476.6813                                                                                              | 1476.7449   | 0.0636  | 43    | 33           | 45       | LEEAEKAADESER          |      |           |                  |                                          |  |      | Mascot      |
|    | 1727.8922                                                                                              | 1727.7109   | -0.1813 | -105  | 12           | 25       | IQLVEEELDRAQER         |      |           |                  |                                          |  |      | Mascot      |
|    | 1763.8368                                                                                              | 1763.939    | 0.1022  | 58    | 103          | 118      | AEVAECKASDLEELK        |      |           |                  |                                          |  |      | Mascot      |
|    | 1763.8368                                                                                              | 1763.939    | 0.1022  | 58    | 103          | 118      | AEVAECKASDLEELK        |      |           |                  |                                          |  |      | Mascot      |
| 34 | novel protein [Danio rerio]                                                                            |             |         |       | gi 94732266  |          | 36954.7                | 5.69 | 7         | 31               | 0                                        |  |      |             |
|    | Peptide Information                                                                                    |             |         |       |              |          |                        |      |           |                  |                                          |  |      |             |
|    | Calc. Mass                                                                                             | Obsrv. Mass | ± da    | ± ppm | Start Seq.   | End Seq. | Sequence               |      | Ion Score | C. I.            | % Modification                           |  | Rank | Result Type |
|    | 1022.5992                                                                                              | 1022.5317   | -0.0675 | -66   | 156          | 164      | QPLIHSLSK              |      |           |                  |                                          |  |      | Mascot      |
|    | 1081.5095                                                                                              | 1081.5287   | 0.0192  | 18    | 202          | 210      | SNCTRPEFK              |      |           |                  |                                          |  |      | Mascot      |
|    | 1233.5681                                                                                              | 1233.6794   | 0.1113  | 90    | 228          | 238      | CNSSVDVAPWR            |      |           |                  |                                          |  |      | Mascot      |
|    | 1476.7781                                                                                              | 1476.7449   | -0.0332 | -22   | 290          | 301      | HVPLNCPTKPWK           |      |           |                  | Carbamidomethyl (C)[6]                   |  |      | Mascot      |
|    | 1718.853                                                                                               | 1718.8511   | -0.0019 | -1    | 239          | 254      | HEVPEVHVCEAGVSK        |      |           |                  |                                          |  |      | Mascot      |
|    | 1718.853                                                                                               | 1718.8511   | -0.0019 | -1    | 239          | 254      | HEVPEVHVCEAGVSK        |      |           |                  |                                          |  |      | Mascot      |
|    | 2421.2383                                                                                              | 2421.0242   | -0.2141 | -88   | 165          | 185      | ANSMINHVHFFIKDLTSA TK  |      |           |                  |                                          |  |      | Mascot      |
|    | 2421.2383                                                                                              | 2421.0242   | -0.2141 | -88   | 165          | 185      | ANSMINHVHFFIKDLTSA TK  |      |           |                  |                                          |  |      | Mascot      |
|    | 2587.2642                                                                                              | 2587.1311   | -0.1331 | -51   | 202          | 222      | SNCTRPEFKIVTEECHPL LEK |      |           |                  | Carbamidomethyl (C)[3,15]                |  |      | Mascot      |
|    | 2587.2642                                                                                              | 2587.1311   | -0.1331 | -51   | 202          | 222      | SNCTRPEFKIVTEECHPL LEK |      |           |                  | Carbamidomethyl (C)[3,15]                |  |      | Mascot      |
| 35 | novel protein similar to vertebrate fuse-binding protein-interacting repressor (SIAHBP1) [Danio rerio] |             |         |       | gi 169154385 |          | 17912.1                | 6.73 | 5         | 30               | 0                                        |  |      |             |
|    | Peptide Information                                                                                    |             |         |       |              |          |                        |      |           |                  |                                          |  |      |             |
|    | Calc. Mass                                                                                             | Obsrv. Mass | ± da    | ± ppm | Start Seq.   | End Seq. | Sequence               |      | Ion Score | C. I.            | % Modification                           |  | Rank | Result Type |
|    | 850.4273                                                                                               | 850.5183    | 0.091   | 107   | 88           | 94       | ALAIMCR                |      |           |                  | Carbamidomethyl (C)[6], Oxidation (M)[5] |  |      | Mascot      |
|    | 850.4273                                                                                               | 850.5183    | 0.091   | 107   | 88           | 94       | ALAIMCR                |      |           |                  | Carbamidomethyl (C)[6], Oxidation (M)[5] |  |      | Mascot      |
|    | 985.4659                                                                                               | 985.4341    | -0.0318 | -32   | 31           | 38       | YAMEQSIK               |      |           |                  | Oxidation (M)[3]                         |  |      | Mascot      |
|    | 1061.5707                                                                                              | 1061.4308   | -0.1399 | -132  | 86           | 94       | QRALAIMCR              |      |           |                  |                                          |  |      | Mascot      |
|    | 1397.6617                                                                                              | 1397.5557   | -0.106  | -76   | 121          | 132      | SIDMSWDSVTLK           |      |           |                  | Oxidation (M)[4]                         |  |      | Mascot      |
|    | 3337.6343                                                                                              | 3337.6665   | 0.0322  | 10    | 133          | 162      | HKGFAFVEYEVPEAAQL      |      |           |                  | Oxidation (M)[22]                        |  |      | Mascot      |

36 LOC794225 protein [Danio rerio] gi|111306309 57174.6 7.72 10 30 0

ALEQMNSVMLGGR

Peptide Information

| Calc. Mass | Obsrv. Mass | ± da    | ± ppm | Start Seq. | End Seq. | Sequence                  | Ion Score | C. I. % | Modification            | Rank | Result Type |
|------------|-------------|---------|-------|------------|----------|---------------------------|-----------|---------|-------------------------|------|-------------|
| 831.457    | 831.4297    | -0.0273 | -33   | 182        | 188      | ETLIAER                   |           |         |                         |      | Mascot      |
| 1025.5626  | 1025.5756   | 0.013   | 13    | 487        | 495      | SAYTSLQKK                 |           |         |                         |      | Mascot      |
| 1059.5219  | 1059.5575   | 0.0356  | 34    | 455        | 463      | TSSHLSHYK                 |           |         |                         |      | Mascot      |
| 1165.6398  | 1165.7083   | 0.0685  | 59    | 21         | 30       | VHESLMPPKK                |           |         |                         |      | Mascot      |
| 1435.692   | 1435.6346   | -0.0574 | -40   | 238        | 249      | VSDEKMPENTLR              |           |         |                         |      | Mascot      |
| 1503.7649  | 1503.7306   | -0.0343 | -23   | 118        | 130      | EDKLNDLAETLSR             |           |         |                         |      | Mascot      |
| 1727.901   | 1727.7109   | -0.1901 | -110  | 223        | 237      | EMLQHVAAVAEFRR            |           |         |                         |      | Mascot      |
| 2247.165   | 2247.0562   | -0.1088 | -48   | 250        | 269      | AMQENLSVTAQLQQLSE<br>KTK  |           |         |                         |      | Mascot      |
| 2282.9929  | 2283.1125   | 0.1196  | 52    | 42         | 61       | TGNMEETEQNAAEELTE<br>SDK  |           |         |                         |      | Mascot      |
| 2282.9929  | 2283.1125   | 0.1196  | 52    | 42         | 61       | TGNMEETEQNAAEELTE<br>SDK  |           |         |                         |      | Mascot      |
| 2298.9878  | 2299.114    | 0.1262  | 55    | 42         | 61       | TGNMEETEQNAAEELTE<br>SDK  |           |         | Oxidation (M)[4]        |      | Mascot      |
| 2649.2937  | 2649.1777   | -0.116  | -44   | 332        | 353      | QDHQELLDIHSVCTEIE<br>DLRK |           |         | Carbamidomethyl (C)[14] |      | Mascot      |

37 protein Wnt-2 [Danio rerio] gi|33504539 44105.2 9.03 13 30 0

Peptide Information

| Calc. Mass | Obsrv. Mass | ± da    | ± ppm | Start Seq. | End Seq. | Sequence        | Ion Score | C. I. % | Modification                               | Rank | Result Type |
|------------|-------------|---------|-------|------------|----------|-----------------|-----------|---------|--------------------------------------------|------|-------------|
| 831.4107   | 831.4297    | 0.019   | 23    | 120        | 126      | DHTVFGR         |           |         |                                            |      | Mascot      |
| 842.3569   | 842.4823    | 0.1254  | 149   | 348        | 354      | MTKCECK         |           |         |                                            |      | Mascot      |
| 850.4199   | 850.5183    | 0.0984  | 116   | 320        | 326      | VCNKSSR         |           |         | Carbamidomethyl (C)[2]                     |      | Mascot      |
| 850.4199   | 850.5183    | 0.0984  | 116   | 320        | 326      | VCNKSSR         |           |         | Carbamidomethyl (C)[2]                     |      | Mascot      |
| 864.4719   | 864.4622    | -0.0097 | -11   | 127        | 133      | VMLRSSR         |           |         | Oxidation (M)[2]                           |      | Mascot      |
| 1081.5385  | 1081.5287   | -0.0098 | -9    | 339        | 347      | GYDTTRVNR       |           |         |                                            |      | Mascot      |
| 1341.7195  | 1341.675    | -0.0445 | -33   | 66         | 77       | VICDNIPGLVNK    |           |         | Carbamidomethyl (C)[3]                     |      | Mascot      |
| 1397.6842  | 1397.5557   | -0.1285 | -92   | 85         | 97       | HPDLMQSIGQGAK   |           |         | Oxidation (M)[5]                           |      | Mascot      |
| 1404.4833  | 1404.683    | 0.1997  | 142   | 327        | 338      | GMDGCEIMCCGR    |           |         | Carbamidomethyl (C)[5,9], Oxidation (M)[2] |      | Mascot      |
| 1404.4833  | 1404.683    | 0.1997  | 142   | 327        | 338      | GMDGCEIMCCGR    |           |         | Carbamidomethyl (C)[5,9], Oxidation (M)[2] |      | Mascot      |
| 1435.5828  | 1435.6346   | 0.0518  | 36    | 365        | 376      | DCEETVDVHTCK    |           |         | Carbamidomethyl (C)[2]                     |      | Mascot      |
| 1588.7438  | 1588.8239   | 0.0801  | 50    | 98         | 108      | EWIRECQHQFR     |           |         | Carbamidomethyl (C)[6]                     |      | Mascot      |
| 1718.6536  | 1718.8511   | 0.1975  | 115   | 324        | 338      | SSRGMDGCEIMCCGR |           |         | Carbamidomethyl (C)[8,12]                  |      | Mascot      |

|    |                               |           |         |     |             |     |                           |      |    |    |   |  |                            |        |
|----|-------------------------------|-----------|---------|-----|-------------|-----|---------------------------|------|----|----|---|--|----------------------------|--------|
|    | 1718.6536                     | 1718.8511 | 0.1975  | 115 | 324         | 338 | SSRGMGCEIMCCGR            |      |    |    |   |  | Carbamidomethyl (C)[8,12]  | Mascot |
|    | 1727.751                      | 1727.7109 | -0.0401 | -23 | 153         | 168 | ACSQGELKICSCDSQR          |      |    |    |   |  |                            | Mascot |
|    | 2499.9817                     | 2500.0054 | 0.0237  | 9   | 357         | 376 | WCCAVEC RDCEETVDVH<br>TCK |      |    |    |   |  | Carbamidomethyl (C)[2,3,7] | Mascot |
| 38 | Smarcc1 protein [Danio rerio] |           |         |     | gi 28839767 |     | 93996.8                   | 5.31 | 11 | 30 | 0 |  |                            |        |

#### Peptide Information

|  | Calc. Mass | Obsrv. Mass | ± da    | ± ppm | Start Seq. | End Seq. | Sequence                          | Ion Score | C. I. | % Modification          | Rank | Result Type |
|--|------------|-------------|---------|-------|------------|----------|-----------------------------------|-----------|-------|-------------------------|------|-------------|
|  | 870.4427   | 870.513     | 0.0703  | 81    | 639        | 646      | VSEHVGSR                          |           |       |                         |      | Mascot      |
|  | 985.5789   | 985.4341    | -0.1448 | -147  | 92         | 100      | RVSNPALTK                         |           |       |                         |      | Mascot      |
|  | 1022.5305  | 1022.5317   | 0.0012  | 1     | 465        | 473      | ALPEFFNGK                         |           |       |                         |      | Mascot      |
|  | 1059.4928  | 1059.5575   | 0.0647  | 61    | 487        | 494      | NFMIDTYR                          |           |       |                         |      | Mascot      |
|  | 1264.6685  | 1264.592    | -0.0765 | -60   | 465        | 475      | ALPEFFNGKNK                       |           |       |                         |      | Mascot      |
|  | 1588.8441  | 1588.8239   | -0.0202 | -13   | 584        | 597      | GKDKPTDLQNFGLR                    |           |       |                         |      | Mascot      |
|  | 2166.0688  | 2165.9822   | -0.0866 | -40   | 478        | 494      | TPEIYLAYRNF MIDTYR                |           |       |                         |      | Mascot      |
|  | 2225.1045  | 2225.0518   | -0.0527 | -24   | 616        | 633      | DWTEQETLLLLLEAL EMYK              |           |       |                         |      | Mascot      |
|  | 2225.1045  | 2225.0518   | -0.0527 | -24   | 616        | 633      | DWTEQETLLLLLEAL EMYK              |           |       |                         |      | Mascot      |
|  | 2283.1299  | 2283.1125   | -0.0174 | -8    | 639        | 657      | VSEHVGSRTQDECILHFL<br>R           |           |       | Carbamidomethyl (C)[13] |      | Mascot      |
|  | 2283.1299  | 2283.1125   | -0.0174 | -8    | 639        | 657      | VSEHVGSRTQDECILHFL<br>R           |           |       | Carbamidomethyl (C)[13] |      | Mascot      |
|  | 2297.9563  | 2298.1206   | 0.1643  | 71    | 767        | 786      | TEPTETEKMDTSDSQQ<br>PDK           |           |       | Oxidation (M)[9]        |      | Mascot      |
|  | 2404.1809  | 2403.9988   | -0.1821 | -76   | 2          | 30       | ATAATAAGGTGSGGPSA<br>GQTGAGSSIGRK |           |       |                         |      | Mascot      |

|    |                                    |  |  |  |              |  |         |      |   |    |   |  |  |  |
|----|------------------------------------|--|--|--|--------------|--|---------|------|---|----|---|--|--|--|
| 39 | ovarian TNF receptor [Danio rerio] |  |  |  | gi 110811176 |  | 48771.6 | 5.37 | 9 | 30 | 0 |  |  |  |
|----|------------------------------------|--|--|--|--------------|--|---------|------|---|----|---|--|--|--|

#### Peptide Information

|  | Calc. Mass | Obsrv. Mass | ± da    | ± ppm | Start Seq. | End Seq. | Sequence                  | Ion Score | C. I. | % Modification                              | Rank | Result Type |
|--|------------|-------------|---------|-------|------------|----------|---------------------------|-----------|-------|---------------------------------------------|------|-------------|
|  | 856.4159   | 856.4957    | 0.0798  | 93    | 329        | 335      | EDDPPRK                   |           |       |                                             |      | Mascot      |
|  | 985.4771   | 985.4341    | -0.043  | -44   | 227        | 234      | VPIDECPR                  |           |       | Carbamidomethyl (C)[6]                      |      | Mascot      |
|  | 1059.4952  | 1059.5575   | 0.0623  | 59    | 272        | 280      | SIPVEDER                  |           |       |                                             |      | Mascot      |
|  | 1298.6045  | 1298.7068   | 0.1023  | 79    | 59         | 69       | NCEAGTYVKEK               |           |       | Carbamidomethyl (C)[2]                      |      | Mascot      |
|  | 1476.6813  | 1476.7449   | 0.0636  | 43    | 214        | 226      | QQSETDGNLEEVK             |           |       |                                             |      | Mascot      |
|  | 1727.762   | 1727.7109   | -0.0511 | -30   | 321        | 334      | DQTESWPRED D PPR          |           |       |                                             |      | Mascot      |
|  | 2211.0537  | 2211.0381   | -0.0156 | -7    | 310        | 328      | SSPPAQRPTDRDQTESW<br>PR   |           |       |                                             |      | Mascot      |
|  | 2266.2515  | 2266.0271   | -0.2244 | -99   | 398        | 417      | EGLRANINTLLQALLDL D<br>QR |           |       |                                             |      | Mascot      |
|  | 2283.9038  | 2284.1047   | 0.2009  | 88    | 41         | 58       | QMTCLNHEYPHNGFCC<br>K     |           |       | Carbamidomethyl (C)[4,16], Oxidation (M)[2] |      | Mascot      |

40    peptidyl-prolyl cis-trans isomerase FKBP14 [Danio rerio] gi|51011027                    24658.3    5.59            6            30            0

Peptide Information

| Calc. Mass | Obsrv. Mass | ± da    | ± ppm | Start Seq. | End Seq. | Sequence            | Ion Score | C. I. % | Modification                             | Rank | Result Type |
|------------|-------------|---------|-------|------------|----------|---------------------|-----------|---------|------------------------------------------|------|-------------|
| 1279.5881  | 1279.7373   | 0.1492  | 117   | 91         | 101      | GLQNMCAKEKR         |           |         | Carbamidomethyl (C)[6], Oxidation (M)[5] |      | Mascot      |
| 1397.6179  | 1397.5557   | -0.0622 | -45   | 191        | 202      | EDEDKDGFISSR        |           |         |                                          |      | Mascot      |
| 1552.6882  | 1552.699    | 0.0108  | 7     | 87         | 100      | GWDKGLQNMCAKEK      |           |         | Oxidation (M)[9]                         |      | Mascot      |
| 2224.9814  | 2225.0518   | 0.0704  | 32    | 140        | 157      | SHEFQEMDLNDDWKLSK   |           |         | Oxidation (M)[8]                         |      | Mascot      |
| 2224.9814  | 2225.0518   | 0.0704  | 32    | 140        | 157      | SHEFQEMDLNDDWKLSK   |           |         | Oxidation (M)[8]                         |      | Mascot      |
| 2304.9939  | 2305.0891   | 0.0952  | 41    | 136        | 154      | NGPRSHESFQEMDLNDDWK |           |         |                                          |      | Mascot      |
| 2404.2197  | 2403.9988   | -0.2209 | -92   | 2          | 21       | IPELWTCIFSVFFVYVHGA |           |         |                                          |      | Mascot      |

41    PREDICTED: protein Shroom4-like [Danio rerio]                    gi|292616002                    10930.9    8.85            1                            16            0

Peptide Information

| Calc. Mass | Obsrv. Mass | ± da   | ± ppm | Start Seq. | End Seq. | Sequence          | Ion Score | C. I. % | Modification | Rank | Result Type |
|------------|-------------|--------|-------|------------|----------|-------------------|-----------|---------|--------------|------|-------------|
| 1763.8922  | 1763.939    | 0.0468 | 27    | 56         | 72       | VGDELVNINGSALYGSR | 16        | 0       |              | 1    | Mascot      |

42    Si:ch211-219i10.1 protein [Danio rerio]                    gi|157423258                    46246    5.14            1                            16            0

Peptide Information

| Calc. Mass | Obsrv. Mass | ± da    | ± ppm | Start Seq. | End Seq. | Sequence      | Ion Score | C. I. % | Modification | Rank | Result Type |
|------------|-------------|---------|-------|------------|----------|---------------|-----------|---------|--------------|------|-------------|
| 1404.7482  | 1404.683    | -0.0652 | -46   | 200        | 212      | ATPGVSELSQLFR | 16        | 0       |              | 3    | Mascot      |

43    transcription factor E2F3 [Danio rerio]                    gi|238859663                    46441.9    7.62            1                            15            0

Peptide Information

| Calc. Mass | Obsrv. Mass | ± da    | ± ppm | Start Seq. | End Seq. | Sequence    | Ion Score | C. I. % | Modification           | Rank | Result Type |
|------------|-------------|---------|-------|------------|----------|-------------|-----------|---------|------------------------|------|-------------|
| 1404.7263  | 1404.683    | -0.0433 | -31   | 227        | 237      | RLDELIQTCTR | 15        | 0       | Carbamidomethyl (C)[9] | 4    | Mascot      |

44    large proline-rich protein BAT2 [Danio rerio]                    gi|319738640                    203991.3    9.72            1                            14            0

Peptide Information

| Calc. Mass | Obsrv. Mass | ± da   | ± ppm | Start Seq. | End Seq. | Sequence         | Ion Score | C. I. % | Modification | Rank | Result Type |
|------------|-------------|--------|-------|------------|----------|------------------|-----------|---------|--------------|------|-------------|
| 1718.8741  | 1718.8511   | -0.023 | -13   | 717        | 733      | VGDDSVKVVCEVGTGR | 14        | 0       |              | 2    | Mascot      |

45    hypothetical protein LOC560271 [Danio rerio]                    gi|71834426                    41860.1    4.74            1                            13            0



| Peptide Information |                                              |             |         |       |              |                      |      |           |         |                        |                  |
|---------------------|----------------------------------------------|-------------|---------|-------|--------------|----------------------|------|-----------|---------|------------------------|------------------|
|                     | Calc. Mass                                   | Obsrv. Mass | ± da    | ± ppm | Start Seq.   | End Sequence Seq.    |      | Ion Score | C. I. % | Modification           | Rank Result Type |
|                     | 1569.7577                                    | 1569.7236   | -0.0341 | -22   | 164          | 176 MIQGYQSEITDIR    |      | 13        | 0       | Oxidation (M)[1]       | 2 Mascot         |
| 46                  | F-box only protein 9 isoform 2 [Danio rerio] |             |         |       | gi 51592151  | 38692.1              | 5.99 | 1         | 11      | 0                      |                  |
| Peptide Information |                                              |             |         |       |              |                      |      |           |         |                        |                  |
|                     | Calc. Mass                                   | Obsrv. Mass | ± da    | ± ppm | Start Seq.   | End Sequence Seq.    |      | Ion Score | C. I. % | Modification           | Rank Result Type |
|                     | 1763.9261                                    | 1763.939    | 0.0129  | 7     | 195          | 209 GFYICARDPLVTVPR  |      | 11        | 0       | Carbamidomethyl (C)[5] | 2 Mascot         |
| 47                  | novel protein (zgc:113263) [Danio rerio]     |             |         |       | gi 169154304 | 49549.6              | 5.45 | 1         | 10      | 0                      |                  |
| Peptide Information |                                              |             |         |       |              |                      |      |           |         |                        |                  |
|                     | Calc. Mass                                   | Obsrv. Mass | ± da    | ± ppm | Start Seq.   | End Sequence Seq.    |      | Ion Score | C. I. % | Modification           | Rank Result Type |
|                     | 1718.8782                                    | 1718.8511   | -0.0271 | -16   | 168          | 182 MVSVPDLSETVSWLR  |      | 10        | 0       |                        | 3 Mascot         |
| 48                  | zinc finger protein 423 [Danio rerio]        |             |         |       | gi 121583818 | 151366.6             | 6.38 | 1         | 10      | 0                      |                  |
| Peptide Information |                                              |             |         |       |              |                      |      |           |         |                        |                  |
|                     | Calc. Mass                                   | Obsrv. Mass | ± da    | ± ppm | Start Seq.   | End Sequence Seq.    |      | Ion Score | C. I. % | Modification           | Rank Result Type |
|                     | 1404.6899                                    | 1404.683    | -0.0069 | -5    | 1049         | 1061 VTHSKSLDTGTCR   |      | 10        | 0       |                        | 6 Mascot         |
| 49                  | unnamed protein product [Danio rerio]        |             |         |       | gi 165993203 | 53658.4              | 5.88 | 1         | 9       | 0                      |                  |
| Peptide Information |                                              |             |         |       |              |                      |      |           |         |                        |                  |
|                     | Calc. Mass                                   | Obsrv. Mass | ± da    | ± ppm | Start Seq.   | End Sequence Seq.    |      | Ion Score | C. I. % | Modification           | Rank Result Type |
|                     | 1718.9282                                    | 1718.8511   | -0.0771 | -45   | 89           | 104 NTEGEIATTSKLSIVR |      | 9         | 0       |                        | 4 Mascot         |
| 50                  | novel protein (zgc:101815) [Danio rerio]     |             |         |       | gi 220673200 | 22516                | 6.19 | 1         | 9       | 0                      |                  |
| Peptide Information |                                              |             |         |       |              |                      |      |           |         |                        |                  |
|                     | Calc. Mass                                   | Obsrv. Mass | ± da    | ± ppm | Start Seq.   | End Sequence Seq.    |      | Ion Score | C. I. % | Modification           | Rank Result Type |
|                     | 1718.8322                                    | 1718.8511   | 0.0189  | 11    | 103          | 117 CHSKCMSLINKPCVR  |      | 9         | 0       |                        | 5 Mascot         |

|                |           |                        |                |                |                    |
|----------------|-----------|------------------------|----------------|----------------|--------------------|
| Gel Idx/Pos    | 233/J9    | Instr./Gel Origin      | BA2060/110707A | Process Status | Analysis Succeeded |
| Plate [#] Name | [1] 31496 | Instrument Sample Name |                | Spectra        | 11                 |

| Rank | Protein Name | Accession No. | Protein MW | Protein PI | Pep. Count | Protein Score | Protein Score C. I. % | Total Ion Score | Total Ion C. I. % |
|------|--------------|---------------|------------|------------|------------|---------------|-----------------------|-----------------|-------------------|
|------|--------------|---------------|------------|------------|------------|---------------|-----------------------|-----------------|-------------------|

|   |                                              |              |         |      |    |     |     |     |     |
|---|----------------------------------------------|--------------|---------|------|----|-----|-----|-----|-----|
| 1 | hypothetical protein LOC792137 [Danio rerio] | gi 160333322 | 29960.3 | 6.45 | 12 | 597 | 100 | 513 | 100 |
|---|----------------------------------------------|--------------|---------|------|----|-----|-----|-----|-----|

Peptide Information

| Calc. Mass | Obsrv. Mass | ± da    | ± ppm | Start Seq. | End Seq. | Sequence                    | Ion Score | C. I. % | Modification                                  | Rank | Result Type |
|------------|-------------|---------|-------|------------|----------|-----------------------------|-----------|---------|-----------------------------------------------|------|-------------|
| 1195.5742  | 1195.5336   | -0.0406 | -34   | 188        | 198      | GWPNTAYGTTK                 |           |         |                                               |      | Mascot      |
| 1208.6058  | 1208.5636   | -0.0422 | -35   | 263        | 272      | EPHGQLVWDK                  |           |         |                                               |      | Mascot      |
| 1234.679   | 1234.6379   | -0.0411 | -33   | 26         | 37       | AGFTGDILLTAR                |           |         |                                               |      | Mascot      |
| 1234.679   | 1234.6379   | -0.0411 | -33   | 26         | 37       | AGFTGDILLTAR                | 111       | 100     |                                               |      | Mascot      |
| 1349.6366  | 1349.5902   | -0.0464 | -34   | 146        | 157      | SLDQCSAELQAK                |           |         | Carbamidomethyl (C)[5]                        |      | Mascot      |
| 1547.8064  | 1547.7518   | -0.0546 | -35   | 41         | 55       | LGQEAIAGLQSEGFK             | 110       | 100     |                                               |      | Mascot      |
| 1547.8064  | 1547.7518   | -0.0546 | -35   | 41         | 55       | LGQEAIAGLQSEGFK             |           |         |                                               |      | Mascot      |
| 1664.9006  | 1664.8435   | -0.0571 | -34   | 81         | 96       | YGGLDVLINNAGIAFK            | 101       | 100     |                                               |      | Mascot      |
| 1664.9006  | 1664.8435   | -0.0571 | -34   | 81         | 96       | YGGLDVLINNAGIAFK            |           |         |                                               |      | Mascot      |
| 1750.8064  | 1750.7469   | -0.0595 | -34   | 97         | 112      | NAATEPFGEQAEVTMR            |           |         |                                               |      | Mascot      |
| 1750.8064  | 1750.7469   | -0.0595 | -34   | 97         | 112      | NAATEPFGEQAEVTMR            | 119       | 100     |                                               |      | Mascot      |
| 1766.8014  | 1766.7407   | -0.0607 | -34   | 97         | 112      | NAATEPFGEQAEVTMR            |           |         | Oxidation (M)[15]                             |      | Mascot      |
| 1766.8014  | 1766.7407   | -0.0607 | -34   | 97         | 112      | NAATEPFGEQAEVTMR            | 85        | 100     | Oxidation (M)[15]                             |      | Mascot      |
| 2050.9143  | 2050.8474   | -0.0669 | -33   | 56         | 72       | NVVFHQLDICDQGSCMK           |           |         | Carbamidomethyl (C)[10,15]                    |      | Mascot      |
| 2066.9092  | 2066.8445   | -0.0647 | -31   | 56         | 72       | NVVFHQLDICDQGSCMK           |           |         | Carbamidomethyl (C)[10,15], Oxidation (M)[16] |      | Mascot      |
| 2089.0159  | 2088.949    | -0.0669 | -32   | 243        | 262      | SPEEGAETPVYLAMLPE GAK       |           |         |                                               |      | Mascot      |
| 2105.0107  | 2104.9424   | -0.0683 | -32   | 243        | 262      | SPEEGAETPVYLAMLPE GAK       |           |         | Oxidation (M)[14]                             |      | Mascot      |
| 2194.0454  | 2194.0215   | -0.0239 | -11   | 56         | 74       | NVVFHQLDICDQGSCMK LK        |           |         | Oxidation (M)[16]                             |      | Mascot      |
| 2497.2439  | 2497.1646   | -0.0793 | -32   | 211        | 232      | VLNETRPGDGILLNACCP GWVR     | 72        | 99.998  | Carbamidomethyl (C)[16,17]                    |      | Mascot      |
| 2497.2439  | 2497.1646   | -0.0793 | -32   | 211        | 232      | VLNETRPGDGILLNACCP GWVR     |           |         | Carbamidomethyl (C)[16,17]                    |      | Mascot      |
| 3150.4353  | 3150.3574   | -0.0779 | -25   | 160        | 187      | NKDLSEELCLLMGEFV QDAQAGDHSK |           |         | Carbamidomethyl (C)[10], Oxidation (M)[13]    |      | Mascot      |

|   |                                            |             |         |      |    |     |     |     |     |
|---|--------------------------------------------|-------------|---------|------|----|-----|-----|-----|-----|
| 2 | carbonyl reductase [NADPH] 1 [Danio rerio] | gi 35902843 | 29960.3 | 6.89 | 12 | 595 | 100 | 513 | 100 |
|---|--------------------------------------------|-------------|---------|------|----|-----|-----|-----|-----|

Peptide Information

| Calc. Mass | Obsrv. Mass | ± da | ± ppm | Start Seq. | End Seq. | Sequence | Ion Score | C. I. % | Modification | Rank | Result Type |
|------------|-------------|------|-------|------------|----------|----------|-----------|---------|--------------|------|-------------|
|------------|-------------|------|-------|------------|----------|----------|-----------|---------|--------------|------|-------------|

|   |                             |           |         |     |             |     |                                |      |        |     |     |                                               |     |  |  |  |        |
|---|-----------------------------|-----------|---------|-----|-------------|-----|--------------------------------|------|--------|-----|-----|-----------------------------------------------|-----|--|--|--|--------|
|   | 1195.5742                   | 1195.5336 | -0.0406 | -34 | 188         | 198 | GWPNTAYGTTK                    |      |        |     |     |                                               |     |  |  |  | Mascot |
|   | 1208.6058                   | 1208.5636 | -0.0422 | -35 | 263         | 272 | EPHQLVWDK                      |      |        |     |     |                                               |     |  |  |  | Mascot |
|   | 1234.679                    | 1234.6379 | -0.0411 | -33 | 26          | 37  | AGFTGDILLTAR                   |      |        |     |     |                                               |     |  |  |  | Mascot |
|   | 1234.679                    | 1234.6379 | -0.0411 | -33 | 26          | 37  | AGFTGDILLTAR                   | 111  | 100    |     |     |                                               |     |  |  |  | Mascot |
|   | 1349.6366                   | 1349.5902 | -0.0464 | -34 | 146         | 157 | SLDQCSAELQAK                   |      |        |     |     | Carbamidomethyl (C)[5]                        |     |  |  |  | Mascot |
|   | 1547.8064                   | 1547.7518 | -0.0546 | -35 | 41          | 55  | LGQEAIALQSEGFK                 | 110  | 100    |     |     |                                               |     |  |  |  | Mascot |
|   | 1547.8064                   | 1547.7518 | -0.0546 | -35 | 41          | 55  | LGQEAIALQSEGFK                 |      |        |     |     |                                               |     |  |  |  | Mascot |
|   | 1664.9006                   | 1664.8435 | -0.0571 | -34 | 81          | 96  | YGGLDVLINNAGIAFK               | 101  | 100    |     |     |                                               |     |  |  |  | Mascot |
|   | 1664.9006                   | 1664.8435 | -0.0571 | -34 | 81          | 96  | YGGLDVLINNAGIAFK               |      |        |     |     |                                               |     |  |  |  | Mascot |
|   | 1750.8064                   | 1750.7469 | -0.0595 | -34 | 97          | 112 | NAATEPFGEQAEVTMR               |      |        |     |     |                                               |     |  |  |  | Mascot |
|   | 1750.8064                   | 1750.7469 | -0.0595 | -34 | 97          | 112 | NAATEPFGEQAEVTMR               | 119  | 100    |     |     |                                               |     |  |  |  | Mascot |
|   | 1766.8014                   | 1766.7407 | -0.0607 | -34 | 97          | 112 | NAATEPFGEQAEVTMR               |      |        |     |     | Oxidation (M)[15]                             |     |  |  |  | Mascot |
|   | 1766.8014                   | 1766.7407 | -0.0607 | -34 | 97          | 112 | NAATEPFGEQAEVTMR               | 85   | 100    |     |     | Oxidation (M)[15]                             |     |  |  |  | Mascot |
|   | 2050.9143                   | 2050.8474 | -0.0669 | -33 | 56          | 72  | NVVFHQDIDCDQGSCMK              |      |        |     |     | Carbamidomethyl (C)[10,15]                    |     |  |  |  | Mascot |
|   | 2066.9092                   | 2066.8445 | -0.0647 | -31 | 56          | 72  | NVVFHQDIDCDQGSCMK              |      |        |     |     | Carbamidomethyl (C)[10,15], Oxidation (M)[16] |     |  |  |  | Mascot |
|   | 2089.0159                   | 2088.949  | -0.0669 | -32 | 243         | 262 | SPEEGAETPVYLAMLPE<br>GAK       |      |        |     |     |                                               |     |  |  |  | Mascot |
|   | 2105.0107                   | 2104.9424 | -0.0683 | -32 | 243         | 262 | SPEEGAETPVYLAMLPE<br>GAK       |      |        |     |     | Oxidation (M)[14]                             |     |  |  |  | Mascot |
|   | 2194.0454                   | 2194.0215 | -0.0239 | -11 | 56          | 74  | NVVFHQDIDCDQGSCMK<br>LK        |      |        |     |     | Oxidation (M)[16]                             |     |  |  |  | Mascot |
|   | 2497.2439                   | 2497.1646 | -0.0793 | -32 | 211         | 232 | VLNETRPGDGILLNACCP<br>GWVR     | 72   | 99.998 |     |     | Carbamidomethyl (C)[16,17]                    |     |  |  |  | Mascot |
|   | 2497.2439                   | 2497.1646 | -0.0793 | -32 | 211         | 232 | VLNETRPGDGILLNACCP<br>GWVR     |      |        |     |     | Carbamidomethyl (C)[16,17]                    |     |  |  |  | Mascot |
|   | 3150.4353                   | 3150.3574 | -0.0779 | -25 | 160         | 187 | NKDLSEELCLLMGEFV<br>QDAQAGDHSK |      |        |     |     | Carbamidomethyl (C)[10], Oxidation (M)[13]    |     |  |  |  | Mascot |
| 3 | Cbr1l protein [Danio rerio] |           |         |     | gi 42542442 |     | 29961.3                        | 6.45 | 11     | 584 | 100 | 513                                           | 100 |  |  |  |        |

Peptide Information

|  | Calc. Mass | Obsrv. Mass | ± da    | ± ppm | Start Seq. | End Seq. | Sequence         | Ion Score | C. I. | % | Modification           | Rank | Result | Type   |
|--|------------|-------------|---------|-------|------------|----------|------------------|-----------|-------|---|------------------------|------|--------|--------|
|  | 1195.5742  | 1195.5336   | -0.0406 | -34   | 188        | 198      | GWPNTAYGTTK      |           |       |   |                        |      |        | Mascot |
|  | 1208.6058  | 1208.5636   | -0.0422 | -35   | 263        | 272      | EPHQLVWDK        |           |       |   |                        |      |        | Mascot |
|  | 1234.679   | 1234.6379   | -0.0411 | -33   | 26         | 37       | AGFTGDILLTAR     |           |       |   |                        |      |        | Mascot |
|  | 1234.679   | 1234.6379   | -0.0411 | -33   | 26         | 37       | AGFTGDILLTAR     | 111       | 100   |   |                        |      |        | Mascot |
|  | 1349.6366  | 1349.5902   | -0.0464 | -34   | 146        | 157      | SLDQCSAELQAK     |           |       |   | Carbamidomethyl (C)[5] |      |        | Mascot |
|  | 1547.8064  | 1547.7518   | -0.0546 | -35   | 41         | 55       | LGQEAIALQSEGFK   | 110       | 100   |   |                        |      |        | Mascot |
|  | 1547.8064  | 1547.7518   | -0.0546 | -35   | 41         | 55       | LGQEAIALQSEGFK   |           |       |   |                        |      |        | Mascot |
|  | 1664.9006  | 1664.8435   | -0.0571 | -34   | 81         | 96       | YGGLDVLINNAGIAFK | 101       | 100   |   |                        |      |        | Mascot |
|  | 1664.9006  | 1664.8435   | -0.0571 | -34   | 81         | 96       | YGGLDVLINNAGIAFK |           |       |   |                        |      |        | Mascot |

|   |                                    |           |         |     |     |             |                            |      |        |                                               |     |     |     |        |
|---|------------------------------------|-----------|---------|-----|-----|-------------|----------------------------|------|--------|-----------------------------------------------|-----|-----|-----|--------|
|   | 1750.8064                          | 1750.7469 | -0.0595 | -34 | 97  | 112         | NAATEPFGEQAEVTMR           |      |        |                                               |     |     |     | Mascot |
|   | 1750.8064                          | 1750.7469 | -0.0595 | -34 | 97  | 112         | NAATEPFGEQAEVTMR           | 119  | 100    |                                               |     |     |     | Mascot |
|   | 1766.8014                          | 1766.7407 | -0.0607 | -34 | 97  | 112         | NAATEPFGEQAEVTMR           |      |        | Oxidation (M)[15]                             |     |     |     | Mascot |
|   | 1766.8014                          | 1766.7407 | -0.0607 | -34 | 97  | 112         | NAATEPFGEQAEVTMR           | 85   | 100    | Oxidation (M)[15]                             |     |     |     | Mascot |
|   | 2050.9143                          | 2050.8474 | -0.0669 | -33 | 56  | 72          | NVVFHQDLICDQGSCMK          |      |        | Carbamidomethyl (C)[10,15]                    |     |     |     | Mascot |
|   | 2066.9092                          | 2066.8445 | -0.0647 | -31 | 56  | 72          | NVVFHQDLICDQGSCMK          |      |        | Carbamidomethyl (C)[10,15], Oxidation (M)[16] |     |     |     | Mascot |
|   | 2089.0159                          | 2088.949  | -0.0669 | -32 | 243 | 262         | SPEEGAETPVYLAMLPE<br>GAK   |      |        |                                               |     |     |     | Mascot |
|   | 2105.0107                          | 2104.9424 | -0.0683 | -32 | 243 | 262         | SPEEGAETPVYLAMLPE<br>GAK   |      |        | Oxidation (M)[14]                             |     |     |     | Mascot |
|   | 2194.0454                          | 2194.0215 | -0.0239 | -11 | 56  | 74          | NVVFHQDLICDQGSCMK<br>LK    |      |        | Oxidation (M)[16]                             |     |     |     | Mascot |
|   | 2497.2439                          | 2497.1646 | -0.0793 | -32 | 211 | 232         | VLNETRPGDGILLNACCP<br>GWVR | 72   | 99.998 | Carbamidomethyl (C)[16,17]                    |     |     |     | Mascot |
|   | 2497.2439                          | 2497.1646 | -0.0793 | -32 | 211 | 232         | VLNETRPGDGILLNACCP<br>GWVR |      |        | Carbamidomethyl (C)[16,17]                    |     |     |     | Mascot |
| 4 | carbonyl reductase 1 [Danio rerio] |           |         |     |     | gi 35903048 | 29928                      | 7.57 | 5      | 119                                           | 100 | 101 | 100 |        |

#### Peptide Information

|  | Calc. Mass | Obsrv. Mass | ± da    | ± ppm | Start Seq. | End Seq. | Sequence                   | Ion Score | C. I. | % | Modification      | Rank | Result Type |
|--|------------|-------------|---------|-------|------------|----------|----------------------------|-----------|-------|---|-------------------|------|-------------|
|  | 856.4312   | 856.4965    | 0.0653  | 76    | 112        | 118      | TNFFATR                    |           |       |   |                   |      | Mascot      |
|  | 1664.9006  | 1664.8435   | -0.0571 | -34   | 80         | 95       | YGGLDVLINNAGIAFK           | 101       | 100   |   |                   |      | Mascot      |
|  | 1664.9006  | 1664.8435   | -0.0571 | -34   | 80         | 95       | YGGLDVLINNAGIAFK           |           |       |   |                   |      | Mascot      |
|  | 1695.8258  | 1695.7665   | -0.0593 | -35   | 96         | 111      | MADTTTPTGQADVTLK           |           |       |   |                   |      | Mascot      |
|  | 1750.78    | 1750.7469   | -0.0331 | -19   | 159        | 173      | SDDITEELNGLMER             |           |       |   |                   |      | Mascot      |
|  | 1750.78    | 1750.7469   | -0.0331 | -19   | 159        | 173      | SDDITEELNGLMER             |           |       |   |                   |      | Mascot      |
|  | 1766.7749  | 1766.7407   | -0.0342 | -19   | 159        | 173      | SDDITEELNGLMER             |           |       |   | Oxidation (M)[13] |      | Mascot      |
|  | 1766.7749  | 1766.7407   | -0.0342 | -19   | 159        | 173      | SDDITEELNGLMER             |           |       |   | Oxidation (M)[13] |      | Mascot      |
|  | 2497.2842  | 2497.1646   | -0.1196 | -48   | 112        | 133      | TNFFATRDMCNVFLPIIKP<br>GGR |           |       |   |                   |      | Mascot      |
|  | 2497.2842  | 2497.1646   | -0.1196 | -48   | 112        | 133      | TNFFATRDMCNVFLPIIKP<br>GGR |           |       |   |                   |      | Mascot      |

5 vitellogenin 2 isoform 1 [Danio rerio] gi|113678458 179782.8 8.7 11 103 100 90 100

#### Peptide Information

|  | Calc. Mass | Obsrv. Mass | ± da    | ± ppm | Start Seq. | End Seq. | Sequence      | Ion Score | C. I. | % | Modification     | Rank | Result Type |
|--|------------|-------------|---------|-------|------------|----------|---------------|-----------|-------|---|------------------|------|-------------|
|  | 850.4702   | 850.5121    | 0.0419  | 49    | 1547       | 1553     | MKLESVK       |           |       |   | Oxidation (M)[1] |      | Mascot      |
|  | 864.3945   | 864.4676    | 0.0731  | 85    | 1409       | 1415     | KDEESEK       |           |       |   |                  |      | Mascot      |
|  | 1208.5946  | 1208.5636   | -0.031  | -26   | 347        | 356      | DTEAIWAQFK    |           |       |   |                  |      | Mascot      |
|  | 1521.7544  | 1521.7025   | -0.0519 | -34   | 164        | 176      | TQYVISEDPKADR |           |       |   |                  |      | Mascot      |

|   |                                                     |           |         |      |      |              |                                |     |     |     |     |    |                                            |        |
|---|-----------------------------------------------------|-----------|---------|------|------|--------------|--------------------------------|-----|-----|-----|-----|----|--------------------------------------------|--------|
|   | 1664.9152                                           | 1664.8435 | -0.0717 | -43  | 483  | 498          | VLGNAGHPSSLKPIMK               |     |     |     |     |    | Oxidation (M)[15]                          | Mascot |
|   | 1664.9152                                           | 1664.8435 | -0.0717 | -43  | 483  | 498          | VLGNAGHPSSLKPIMK               |     |     |     |     |    | Oxidation (M)[15]                          | Mascot |
|   | 1689.9323                                           | 1689.8737 | -0.0586 | -35  | 119  | 134          | VFAPAGVSPSVLNLYR               |     |     |     |     |    |                                            | Mascot |
|   | 1689.9323                                           | 1689.8737 | -0.0586 | -35  | 119  | 134          | VFAPAGVSPSVLNLYR               | 90  | 100 |     |     |    |                                            | Mascot |
|   | 2230.1682                                           | 2230.1333 | -0.0349 | -16  | 597  | 618          | ITAPDMSSVAGAANVAIK<br>LMNR     |     |     |     |     |    |                                            | Mascot |
|   | 2233.2446                                           | 2233.0103 | -0.2343 | -105 | 425  | 445          | IATIPALREVVMLGYGSMI<br>AK      |     |     |     |     |    |                                            | Mascot |
|   | 2249.2395                                           | 2249.0017 | -0.2378 | -106 | 425  | 445          | IATIPALREVVMLGYGSMI<br>AK      |     |     |     |     |    | Oxidation (M)[12]                          | Mascot |
|   | 2280.2122                                           | 2280.1023 | -0.1099 | -48  | 283  | 302          | GSLQYEFATEILQTPIQLT<br>K       |     |     |     |     |    |                                            | Mascot |
|   | 2406.1877                                           | 2406.1626 | -0.0251 | -10  | 1244 | 1263         | AEAGLLGEFPAFRLEWE<br>WER       |     |     |     |     |    |                                            | Mascot |
|   | 3124.3333                                           | 3124.5081 | 0.1748  | 56   | 1354 | 1379         | AQNYIYDYTTAQCSMMQ<br>DTISTFNNK |     |     |     |     |    | Carbamidomethyl (C)[13], Oxidation (M)[15] | Mascot |
| 6 | PREDICTED: vitellogenin-like, partial [Danio rerio] |           |         |      |      | gi 326681170 | 93358.3                        | 9.2 | 7   | 102 | 100 | 90 | 100                                        |        |

#### Peptide Information

| Calc. Mass | Obsrv. Mass | ± da    | ± ppm | Start Seq. | End Seq. | Sequence                   | Ion Score | C. I. | % Modification    | Rank | Result Type |
|------------|-------------|---------|-------|------------|----------|----------------------------|-----------|-------|-------------------|------|-------------|
| 1208.5946  | 1208.5636   | -0.031  | -26   | 347        | 356      | DTEAIWAQFK                 |           |       |                   |      | Mascot      |
| 1521.7544  | 1521.7025   | -0.0519 | -34   | 164        | 176      | TQYVISEDPKADR              |           |       |                   |      | Mascot      |
| 1664.9152  | 1664.8435   | -0.0717 | -43   | 483        | 498      | VLGNAGHPSSLKPIMK           |           |       | Oxidation (M)[15] |      | Mascot      |
| 1664.9152  | 1664.8435   | -0.0717 | -43   | 483        | 498      | VLGNAGHPSSLKPIMK           |           |       | Oxidation (M)[15] |      | Mascot      |
| 1689.9323  | 1689.8737   | -0.0586 | -35   | 119        | 134      | VFAPAGVSPSVLNLYR           |           |       |                   |      | Mascot      |
| 1689.9323  | 1689.8737   | -0.0586 | -35   | 119        | 134      | VFAPAGVSPSVLNLYR           | 90        | 100   |                   |      | Mascot      |
| 2230.1682  | 2230.1333   | -0.0349 | -16   | 597        | 618      | ITAPDMSSVAGAANVAIK<br>LMNR |           |       |                   |      | Mascot      |
| 2233.2446  | 2233.0103   | -0.2343 | -105  | 425        | 445      | IATIPALREVVMLGYGSMI<br>AK  |           |       |                   |      | Mascot      |
| 2249.2395  | 2249.0017   | -0.2378 | -106  | 425        | 445      | IATIPALREVVMLGYGSMI<br>AK  |           |       | Oxidation (M)[12] |      | Mascot      |
| 2280.2122  | 2280.1023   | -0.1099 | -48   | 283        | 302      | GSLQYEFATEILQTPIQLT<br>K   |           |       |                   |      | Mascot      |

7 PREDICTED: calcium/calmodulin-dependent 3',5'-cyclic nucleotide phosphodiesterase 1C-like, partial gi|326681376 45655.3 5.68 10 42 0

#### Peptide Information

| Calc. Mass | Obsrv. Mass | ± da    | ± ppm | Start Seq. | End Seq. | Sequence | Ion Score | C. I. | % Modification         | Rank | Result Type |
|------------|-------------|---------|-------|------------|----------|----------|-----------|-------|------------------------|------|-------------|
| 856.5515   | 856.4965    | -0.055  | -64   | 27         | 32       | IWLRLR   |           |       |                        |      | Mascot      |
| 864.4429   | 864.4676    | 0.0247  | 29    | 104        | 110      | QMGLMLR  |           |       | Oxidation (M)[2]       |      | Mascot      |
| 1045.5823  | 1045.5269   | -0.0554 | -53   | 37         | 44       | CLVKQLER |           |       | Carbamidomethyl (C)[1] |      | Mascot      |
| 1062.5691  | 1062.6549   | 0.0858  | 81    | 112        | 119      | TEEKPRFR |           |       |                        |      | Mascot      |

|   |                                                                           |           |         |      |     |     |                           |          |      |    |    |   |  |  |  |  |  |        |
|---|---------------------------------------------------------------------------|-----------|---------|------|-----|-----|---------------------------|----------|------|----|----|---|--|--|--|--|--|--------|
|   | 1457.7958                                                                 | 1457.6224 | -0.1734 | -119 | 41  | 53  | QLERGEASLVDLK             |          |      |    |    |   |  |  |  |  |  | Mascot |
|   | 1903.0358                                                                 | 1902.8788 | -0.157  | -82  | 138 | 155 | TSNMVGLSYPPNVIK           |          |      |    |    |   |  |  |  |  |  | Mascot |
|   | 1976.0535                                                                 | 1975.8392 | -0.2143 | -108 | 120 | 136 | SIVHAVQAGIFVERMYR         |          |      |    |    |   |  |  |  |  |  | Mascot |
|   | 2249.1128                                                                 | 2249.0017 | -0.1111 | -49  | 322 | 341 | ALVVEMVLATDMSCHFQ<br>QVK  |          |      |    |    |   |  |  |  |  |  | Mascot |
|   | 2283.2634                                                                 | 2283.1052 | -0.1582 | -69  | 193 | 213 | FKIPVSALVSFVEALEVG<br>YSK |          |      |    |    |   |  |  |  |  |  | Mascot |
|   | 2283.2634                                                                 | 2283.1052 | -0.1582 | -69  | 193 | 213 | FKIPVSALVSFVEALEVG<br>YSK |          |      |    |    |   |  |  |  |  |  | Mascot |
|   | 2299.2583                                                                 | 2299.1062 | -0.1521 | -66  | 195 | 215 | IPVSALVSFVEALEVGYS<br>KYK |          |      |    |    |   |  |  |  |  |  | Mascot |
| 8 | PREDICTED: chromodomain-helicase-DNA-binding protein 9-like [Danio rerio] |           |         |      |     |     | gi 326669481              | 278654.9 | 8.67 | 24 | 40 | 0 |  |  |  |  |  |        |

#### Peptide Information

| Calc. Mass | Obsrv. Mass | ± da    | ± ppm | Start Seq. | End Seq. | Sequence                | Ion Score | C. I. | % Modification           | Rank | Result Type |
|------------|-------------|---------|-------|------------|----------|-------------------------|-----------|-------|--------------------------|------|-------------|
| 842.4665   | 842.4813    | 0.0148  | 18    | 1477       | 1483     | AMARLHK                 |           |       | Oxidation (M)[2]         |      | Mascot      |
| 870.5043   | 870.5125    | 0.0082  | 9     | 1807       | 1815     | NASVVPGVK               |           |       |                          |      | Mascot      |
| 1051.5604  | 1051.6777   | 0.1173  | 112   | 603        | 611      | NCKLLEGFK               |           |       |                          |      | Mascot      |
| 1106.5437  | 1106.5178   | -0.0259 | -23   | 2356       | 2365     | AERTEAQSSK              |           |       |                          |      | Mascot      |
| 1234.6249  | 1234.6379   | 0.013   | 11    | 1294       | 1303     | ADPKLCFLDR              |           |       | Carbamidomethyl (C)[6]   |      | Mascot      |
| 1234.6637  | 1234.6379   | -0.0258 | -21   | 981        | 991      | TKTITIESEGR             |           |       |                          |      | Mascot      |
| 1279.6021  | 1279.7307   | 0.1286  | 100   | 477        | 488      | NCILADEMGLGK            |           |       | Oxidation (M)[8]         |      | Mascot      |
| 1441.8162  | 1441.6281   | -0.1881 | -130  | 2163       | 2176     | IGGAFAPPLKDLSR          |           |       |                          |      | Mascot      |
| 1521.7219  | 1521.7025   | -0.0194 | -13   | 1887       | 1900     | AYEGNAVASFYTTK          |           |       |                          |      | Mascot      |
| 1547.7998  | 1547.7518   | -0.048  | -31   | 1298       | 1310     | LCFLDRVGRPDEK           |           |       |                          |      | Mascot      |
| 1547.7998  | 1547.7518   | -0.048  | -31   | 1298       | 1310     | LCFLDRVGRPDEK           |           |       |                          |      | Mascot      |
| 1664.7333  | 1664.8435   | 0.1102  | 66    | 149        | 163      | VMSPDSFSSSSQHR          |           |       | Oxidation (M)[2]         |      | Mascot      |
| 1664.806   | 1664.8435   | 0.0375  | 23    | 968        | 980      | FCEEDIDQLQRR            |           |       |                          |      | Mascot      |
| 1686.754   | 1686.6707   | -0.0833 | -49   | 1199       | 1212     | HNPEHMLSDDGYKK          |           |       | Oxidation (M)[6]         |      | Mascot      |
| 1699.861   | 1699.8768   | 0.0158  | 9     | 2137       | 2151     | NPNKIDINSLTGEER         |           |       |                          |      | Mascot      |
| 1718.7988  | 1718.8467   | 0.0479  | 28    | 740        | 753      | CCNHPYLIKGAEEK          |           |       | Carbamidomethyl (C)[1,2] |      | Mascot      |
| 1988.0059  | 1987.9663   | -0.0396 | -20   | 841        | 856      | FSKPDSDRFVFLCTR         |           |       | Carbamidomethyl (C)[14]  |      | Mascot      |
| 2089.0527  | 2088.949    | -0.1037 | -50   | 721        | 739      | GAGQANVPNLLNTMMEL<br>RK |           |       | Oxidation (M)[14,15]     |      | Mascot      |
| 2211.0322  | 2211.0327   | 0.0005  | 0     | 1589       | 1606     | TDYHILRDPELCYMAAQR      |           |       | Oxidation (M)[14]        |      | Mascot      |
| 2230.0715  | 2230.1333   | 0.0618  | 28    | 459        | 475      | DYQLEGVNWLLFNWYNR       |           |       |                          |      | Mascot      |
| 2282.9988  | 2283.1052   | 0.1064  | 47    | 356        | 374      | AHFFAEDDPFNPDYVEV<br>DR |           |       |                          |      | Mascot      |
| 2282.9988  | 2283.1052   | 0.1064  | 47    | 356        | 374      | AHFFAEDDPFNPDYVEV<br>DR |           |       |                          |      | Mascot      |
| 2297.3015  | 2297.1106   | -0.1909 | -83   | 502        | 522      | TGIKGPFLIAPLSTIANWE     |           |       |                          |      | Mascot      |

|   |                                                              |           |         |     |              |      |                                |      |    |    |   |    |                           |  |  |  |        |
|---|--------------------------------------------------------------|-----------|---------|-----|--------------|------|--------------------------------|------|----|----|---|----|---------------------------|--|--|--|--------|
|   | 2299.1816                                                    | 2299.1062 | -0.0754 | -33 | 273          | 293  | R<br>KPAVQLFVENPTEEDAAV<br>VDK |      |    |    |   |    |                           |  |  |  | Mascot |
|   | 2353.158                                                     | 2353.0391 | -0.1189 | -51 | 1121         | 1138 | DVEWICRALLSYCLVHYR             |      |    |    |   |    | Carbamidomethyl (C)[6,13] |  |  |  | Mascot |
|   | 3338.5801                                                    | 3338.6528 | 0.0727  | 22  | 1548         | 1575 | HPQLYEHLCQPGPDL<br>PVWWETGSHDR |      |    |    |   |    | Carbamidomethyl (C)[11]   |  |  |  | Mascot |
| 9 | PREDICTED: GTPase IMAP family member 8-like<br>[Danio rerio] |           |         |     | gi 326665564 |      | 118540.2                       | 5.94 | 10 | 39 | 0 | 24 | 0                         |  |  |  |        |

#### Peptide Information

|  | Calc. Mass | Obsrv. Mass | ± da    | ± ppm | Start Seq. | End Seq. | Sequence                | Ion Score | C. I.  | % | Modification        | Rank | Result Type |
|--|------------|-------------|---------|-------|------------|----------|-------------------------|-----------|--------|---|---------------------|------|-------------|
|  | 838.4855   | 838.5138    | 0.0283  | 34    | 365        | 371      | YKVMGLK                 |           |        |   |                     |      | Mascot      |
|  | 870.458    | 870.5125    | 0.0545  | 63    | 350        | 356      | FHEGPKR                 |           |        |   |                     |      | Mascot      |
|  | 882.4059   | 882.5364    | 0.1305  | 148   | 415        | 421      | MSEMEKK                 |           |        |   |                     |      | Mascot      |
|  | 1174.5674  | 1174.6155   | 0.0481  | 41    | 357        | 366      | LCSQYGGRYK              |           |        |   |                     |      | Mascot      |
|  | 1195.6061  | 1195.5336   | -0.0725 | -61   | 1006       | 1015     | TEIICQTMLK              |           |        |   | Oxidation (M)[8]    |      | Mascot      |
|  | 1234.5732  | 1234.6379   | 0.0647  | 52    | 2          | 12       | CENEDLAALTR             |           |        |   |                     |      | Mascot      |
|  | 1234.5732  | 1234.6379   | 0.0647  | 52    | 2          | 12       | CENEDLAALTR             | 26        | 30.264 |   |                     |      | Mascot      |
|  | 1664.7937  | 1664.8435   | 0.0498  | 30    | 1017       | 1029     | HKSKPLHFHYCMH           |           |        |   |                     |      | Mascot      |
|  | 1664.7937  | 1664.8435   | 0.0498  | 30    | 1017       | 1029     | HKSKPLHFHYCMH           |           |        |   |                     |      | Mascot      |
|  | 1975.9364  | 1975.8392   | -0.0972 | -49   | 391        | 406      | TKPYSLQMYMTAQQNR        |           |        |   | Oxidation (M)[8]    |      | Mascot      |
|  | 2051.147   | 2050.8474   | -0.2996 | -146  | 519        | 538      | CVSLSAPGPHVFIVLSL<br>GR |           |        |   |                     |      | Mascot      |
|  | 2247.1008  | 2247.0615   | -0.0393 | -17   | 391        | 408      | TKPYSLQMYMTAQQNRV<br>R  |           |        |   | Oxidation (M)[8,10] |      | Mascot      |

|    |                                                               |  |  |  |              |  |          |      |   |    |   |    |        |  |  |  |  |
|----|---------------------------------------------------------------|--|--|--|--------------|--|----------|------|---|----|---|----|--------|--|--|--|--|
| 10 | PREDICTED: hypothetical protein LOC100329848<br>[Danio rerio] |  |  |  | gi 326680473 |  | 127498.5 | 5.65 | 8 | 37 | 0 | 26 | 30.264 |  |  |  |  |
|----|---------------------------------------------------------------|--|--|--|--------------|--|----------|------|---|----|---|----|--------|--|--|--|--|

#### Peptide Information

|  | Calc. Mass | Obsrv. Mass | ± da    | ± ppm | Start Seq. | End Seq. | Sequence                | Ion Score | C. I.  | % | Modification        | Rank | Result Type |
|--|------------|-------------|---------|-------|------------|----------|-------------------------|-----------|--------|---|---------------------|------|-------------|
|  | 838.4855   | 838.5138    | 0.0283  | 34    | 368        | 374      | YKVMGLK                 |           |        |   |                     |      | Mascot      |
|  | 882.4059   | 882.5364    | 0.1305  | 148   | 418        | 424      | MSEMEKK                 |           |        |   |                     |      | Mascot      |
|  | 1174.5674  | 1174.6155   | 0.0481  | 41    | 360        | 369      | LCSQYGGRYK              |           |        |   |                     |      | Mascot      |
|  | 1195.6061  | 1195.5336   | -0.0725 | -61   | 1066       | 1075     | TEIICQTMLK              |           |        |   | Oxidation (M)[8]    |      | Mascot      |
|  | 1234.5732  | 1234.6379   | 0.0647  | 52    | 2          | 12       | CENEDLAALTR             |           |        |   |                     |      | Mascot      |
|  | 1234.5732  | 1234.6379   | 0.0647  | 52    | 2          | 12       | CENEDLAALTR             | 26        | 30.264 |   |                     |      | Mascot      |
|  | 1975.9364  | 1975.8392   | -0.0972 | -49   | 394        | 409      | TKPYSLQMYMTAQQNR        |           |        |   | Oxidation (M)[8]    |      | Mascot      |
|  | 2051.147   | 2050.8474   | -0.2996 | -146  | 522        | 541      | CVSLSAPGPHVFIVLSL<br>GR |           |        |   |                     |      | Mascot      |
|  | 2247.1008  | 2247.0615   | -0.0393 | -17   | 394        | 411      | TKPYSLQMYMTAQQNRV<br>R  |           |        |   | Oxidation (M)[8,10] |      | Mascot      |

11 caspase c [Danio rerio] gi|61806574 44909.8 5.99 11 36 0

Peptide Information

| Calc. Mass | Obsrv. Mass | ± da    | ± ppm | Start Seq. | End Seq. | Sequence                 | Ion Score | C. I. % | Modification             | Rank | Result Type |
|------------|-------------|---------|-------|------------|----------|--------------------------|-----------|---------|--------------------------|------|-------------|
| 1195.524   | 1195.5336   | 0.0096  | 8     | 161        | 168      | QTYFFCWK                 |           |         | Carbamidomethyl (C)[6]   |      | Mascot      |
| 1208.5902  | 1208.5636   | -0.0266 | -22   | 251        | 260      | DELSMEMLLK               |           |         |                          |      | Mascot      |
| 1279.5889  | 1279.7307   | 0.1418  | 111   | 78         | 88       | TEFSCPHFVGR              |           |         |                          |      | Mascot      |
| 1521.7267  | 1521.7025   | -0.0242 | -16   | 78         | 90       | TEFSCPHFVGRGK            |           |         | Carbamidomethyl (C)[5]   |      | Mascot      |
| 1695.9614  | 1695.7665   | -0.1949 | -115  | 192        | 206      | VKAPDPLKPCPKQFK          |           |         |                          |      | Mascot      |
| 1750.8365  | 1750.7469   | -0.0896 | -51   | 60         | 74       | MPADYVVACFKCYLK          |           |         |                          |      | Mascot      |
| 1750.8365  | 1750.7469   | -0.0896 | -51   | 60         | 74       | MPADYVVACFKCYLK          |           |         |                          |      | Mascot      |
| 1766.8314  | 1766.7407   | -0.0907 | -51   | 60         | 74       | MPADYVVACFKCYLK          |           |         | Oxidation (M)[1]         |      | Mascot      |
| 1766.8314  | 1766.7407   | -0.0907 | -51   | 60         | 74       | MPADYVVACFKCYLK          |           |         | Oxidation (M)[1]         |      | Mascot      |
| 2067.1418  | 2066.8445   | -0.2973 | -144  | 194        | 211      | APDPLKPCPKQFKSEILR       |           |         |                          |      | Mascot      |
| 2283.0029  | 2283.1052   | 0.1023  | 45    | 288        | 307      | EEHAHSDSCFVVLMSHG<br>NAR |           |         | Carbamidomethyl (C)[9]   |      | Mascot      |
| 2283.0029  | 2283.1052   | 0.1023  | 45    | 288        | 307      | EEHAHSDSCFVVLMSHG<br>NAR |           |         | Carbamidomethyl (C)[9]   |      | Mascot      |
| 2284.1926  | 2284.0986   | -0.094  | -41   | 251        | 270      | DELSMEMLLKGLGYTVV<br>TLR |           |         | Oxidation (M)[5]         |      | Mascot      |
| 2299.113   | 2299.1062   | -0.0068 | -3    | 91         | 110      | TCGAKLSYQEICQLMPLT<br>DK |           |         | Carbamidomethyl (C)[2]   |      | Mascot      |
| 2300.1875  | 2300.0991   | -0.0884 | -38   | 251        | 270      | DELSMEMLLKGLGYTVV<br>TLR |           |         | Oxidation (M)[5,7]       |      | Mascot      |
| 2353.1526  | 2353.0391   | -0.1135 | -48   | 380        | 400      | DFCCLRSSTPVTVDPLL<br>TGK |           |         | Carbamidomethyl (C)[3,4] |      | Mascot      |

12 PREDICTED: kinesin heavy chain isoform 5A-like [Danio rerio]

gi|326668924 111180.1 6.01 14 36 0

Peptide Information

| Calc. Mass | Obsrv. Mass | ± da    | ± ppm | Start Seq. | End Seq. | Sequence       | Ion Score | C. I. % | Modification           | Rank | Result Type |
|------------|-------------|---------|-------|------------|----------|----------------|-----------|---------|------------------------|------|-------------|
| 850.4087   | 850.5121    | 0.1034  | 122   | 615        | 621      | KMEETGR        |           |         |                        |      | Mascot      |
| 1062.5942  | 1062.6549   | 0.0607  | 57    | 793        | 801      | LFVQDLTAR      |           |         |                        |      | Mascot      |
| 1208.6093  | 1208.5636   | -0.0457 | -38   | 163        | 172      | VPYVKGCTER     |           |         | Carbamidomethyl (C)[7] |      | Mascot      |
| 1279.5769  | 1279.7307   | 0.1538  | 120   | 1          | 11       | MADISAECNIR    |           |         | Carbamidomethyl (C)[8] |      | Mascot      |
| 1457.7166  | 1457.6224   | -0.0942 | -65   | 604        | 615      | QLESLLQTDCHRK  |           |         |                        |      | Mascot      |
| 1521.8523  | 1521.7025   | -0.1498 | -98   | 228        | 241      | LYLVDLAGESEKVS |           |         |                        |      | Mascot      |
| 1664.7618  | 1664.8435   | 0.0817  | 49    | 444        | 457      | EQMLDQEELLACAR |           |         | Oxidation (M)[3]       |      | Mascot      |
| 1664.7618  | 1664.8435   | 0.0817  | 49    | 444        | 457      | EQMLDQEELLACAR |           |         | Oxidation (M)[3]       |      | Mascot      |
| 1695.8336  | 1695.7665   | -0.0671 | -40   | 554        | 568      | DLNDFSFILNGDLR |           |         |                        |      | Mascot      |



|    |                                                                   |           |         |     |     |              |                         |      |   |    |                                          |        |
|----|-------------------------------------------------------------------|-----------|---------|-----|-----|--------------|-------------------------|------|---|----|------------------------------------------|--------|
|    | 1750.8397                                                         | 1750.7469 | -0.0928 | -53 | 1   | 15           | MADISAECNIRVLCR         |      |   |    | Carbamidomethyl (C)[8]                   | Mascot |
|    | 1750.8397                                                         | 1750.7469 | -0.0928 | -53 | 1   | 15           | MADISAECNIRVLCR         |      |   |    | Carbamidomethyl (C)[8]                   | Mascot |
|    | 1766.8346                                                         | 1766.7407 | -0.0939 | -53 | 1   | 15           | MADISAECNIRVLCR         |      |   |    | Carbamidomethyl (C)[8], Oxidation (M)[1] | Mascot |
|    | 1766.8346                                                         | 1766.7407 | -0.0939 | -53 | 1   | 15           | MADISAECNIRVLCR         | 4    | 0 |    | Carbamidomethyl (C)[8], Oxidation (M)[1] | Mascot |
|    | 1902.8539                                                         | 1902.8788 | 0.0249  | 13  | 935 | 951          | DQPITFSNAMFNSSSEK       |      |   |    |                                          | Mascot |
|    | 2051.0115                                                         | 2050.8474 | -0.1641 | -80 | 326 | 343          | TIMNSASVNLELTAEQWK      |      |   |    | Oxidation (M)[3]                         | Mascot |
|    | 2207.1125                                                         | 2207.0354 | -0.0771 | -35 | 326 | 344          | TIMNSASVNLELTAEQWK<br>R |      |   |    | Oxidation (M)[3]                         | Mascot |
|    | 2233.0588                                                         | 2233.0103 | -0.0485 | -22 | 444 | 462          | EQMLDQEELLACARADL<br>ER |      |   |    |                                          | Mascot |
|    | 2249.0537                                                         | 2249.0017 | -0.052  | -23 | 444 | 462          | EQMLDQEELLACARADL<br>ER |      |   |    | Oxidation (M)[3]                         | Mascot |
|    | 2280.1982                                                         | 2280.1023 | -0.0959 | -42 | 205 | 223          | SHSIFLINIKQEHVETEQQ     |      |   |    |                                          | Mascot |
| 13 | PREDICTED: glucosamine-6-phosphate isomerase 2-like [Danio rerio] |           |         |     |     | gi 125835344 | 31331.8                 | 6.26 | 7 | 35 | 0                                        |        |

Peptide Information

| Calc. Mass | Obsrv. Mass | ± da    | ± ppm | Start Seq. | End Seq. | Sequence                             | Ion Score | C. I. | % Modification          | Rank | Result Type |
|------------|-------------|---------|-------|------------|----------|--------------------------------------|-----------|-------|-------------------------|------|-------------|
| 1174.6578  | 1174.6155   | -0.0423 | -36   | 24         | 33       | IIQFKPSADR                           |           |       |                         |      | Mascot      |
| 1441.678   | 1441.6281   | -0.0499 | -35   | 68         | 79       | TFNMDEYVGLPR                         |           |       |                         |      | Mascot      |
| 1457.673   | 1457.6224   | -0.0506 | -35   | 68         | 79       | TFNMDEYVGLPR                         |           |       | Oxidation (M)[4]        |      | Mascot      |
| 1695.8258  | 1695.7665   | -0.0593 | -35   | 235        | 248      | TIFICDEDATELR                        |           |       | Carbamidomethyl (C)[5]  |      | Mascot      |
| 1821.9269  | 1821.8564   | -0.0705 | -39   | 3          | 18       | LVILDDYDLASEWAAK                     |           |       |                         |      | Mascot      |
| 1902.9418  | 1902.8788   | -0.063  | -33   | 34         | 50       | YFTLGLPTGSTPLGCYR                    |           |       | Carbamidomethyl (C)[15] |      | Mascot      |
| 2353.1143  | 2353.0391   | -0.0752 | -32   | 215        | 234      | AIEEGVNHMWTVSAFQQ<br>HPR             |           |       | Oxidation (M)[9]        |      | Mascot      |
| 3124.606   | 3124.5081   | -0.0979 | -31   | 125        | 156      | ISAAGGIELFVGGIGPDG<br>HIAFNEPGSSLSVR |           |       |                         |      | Mascot      |

|    |                                                                      |  |  |  |  |              |         |      |    |    |   |  |
|----|----------------------------------------------------------------------|--|--|--|--|--------------|---------|------|----|----|---|--|
| 14 | cytochrome P450, family 26, subfamily C, polypeptide 1 [Danio rerio] |  |  |  |  | gi 121583836 | 62611.5 | 8.72 | 10 | 35 | 0 |  |
|----|----------------------------------------------------------------------|--|--|--|--|--------------|---------|------|----|----|---|--|

Peptide Information

| Calc. Mass | Obsrv. Mass | ± da    | ± ppm | Start Seq. | End Seq. | Sequence           | Ion Score | C. I. | % Modification         | Rank | Result Type |
|------------|-------------|---------|-------|------------|----------|--------------------|-----------|-------|------------------------|------|-------------|
| 864.4057   | 864.4676    | 0.0619  | 72    | 469        | 475      | EESKSER            |           |       |                        |      | Mascot      |
| 1062.6418  | 1062.6549   | 0.0131  | 12    | 187        | 195      | SLTFRIAVR          |           |       |                        |      | Mascot      |
| 1521.6486  | 1521.7025   | 0.0539  | 35    | 343        | 357      | CNGNAISEEGEAAEK    |           |       |                        |      | Mascot      |
| 1750.9374  | 1750.7469   | -0.1905 | -109  | 421        | 435      | TVLQTFELNGYQIPK    |           |       |                        |      | Mascot      |
| 1750.9374  | 1750.7469   | -0.1905 | -109  | 421        | 435      | TVLQTFELNGYQIPK    |           |       |                        |      | Mascot      |
| 1821.8031  | 1821.8564   | 0.0533  | 29    | 341        | 357      | SRCNGNAISEEGEAAEK  |           |       | Carbamidomethyl (C)[3] |      | Mascot      |
| 1988.1763  | 1987.9663   | -0.21   | -106  | 86         | 103      | THLLGKPLIRVTGAENIR |           |       |                        |      | Mascot      |

|  |           |           |         |     |     |     |                          |  |  |  |                        |  |        |
|--|-----------|-----------|---------|-----|-----|-----|--------------------------|--|--|--|------------------------|--|--------|
|  | 2050.9722 | 2050.8474 | -0.1248 | -61 | 322 | 340 | ARAELESEGLITDGHGHC<br>R  |  |  |  |                        |  | Mascot |
|  | 2066.9673 | 2066.8445 | -0.1228 | -59 | 324 | 342 | AELESEGLITDGHGHC<br>R    |  |  |  |                        |  | Mascot |
|  | 2230.0696 | 2230.1333 | 0.0637  | 29  | 167 | 186 | SEIAKWCTETGSVEVYTA<br>AK |  |  |  | Carbamidomethyl (C)[7] |  | Mascot |
|  | 2249.0906 | 2249.0017 | -0.0889 | -40 | 172 | 191 | WCTETGSVEVYAAKSL<br>TFR  |  |  |  |                        |  | Mascot |

15 actinodin1 [Danio rerio] gi|308736982 64235 5.82 10 35 0

#### Peptide Information

| Calc. Mass | Obsrv. Mass | ± da    | ± ppm | Start Seq. | End Seq. | Sequence                    | Ion Score | C. I. % | Modification           | Rank | Result Type |
|------------|-------------|---------|-------|------------|----------|-----------------------------|-----------|---------|------------------------|------|-------------|
| 864.3668   | 864.4676    | 0.1008  | 117   | 285        | 291      | YPNC DPR                    |           |         |                        |      | Mascot      |
| 1045.4659  | 1045.5269   | 0.061   | 58    | 157        | 164      | DPYCLYSK                    |           |         | Carbamidomethyl (C)[4] |      | Mascot      |
| 1174.615   | 1174.6155   | 0.0005  | 0     | 374        | 383      | HMPAQLQPPR                  |           |         |                        |      | Mascot      |
| 1195.6833  | 1195.5336   | -0.1497 | -125  | 189        | 199      | APAYLHTPVVK                 |           |         |                        |      | Mascot      |
| 1686.8057  | 1686.6707   | -0.135  | -80   | 350        | 363      | APQIPQHDPYAMFR              |           |         | Oxidation (M)[12]      |      | Mascot      |
| 1699.8472  | 1699.8768   | 0.0296  | 17    | 141        | 156      | AEAPVPAPVKSCDPYR            |           |         |                        |      | Mascot      |
| 1766.7512  | 1766.7407   | -0.0105 | -6    | 151        | 164      | SCDPYRDPYCLYSK              |           |         | Carbamidomethyl (C)[2] |      | Mascot      |
| 1766.7512  | 1766.7407   | -0.0105 | -6    | 151        | 164      | SCDPYRDPYCLYSK              |           |         | Carbamidomethyl (C)[2] |      | Mascot      |
| 2193.9175  | 2194.0215   | 0.104   | 47    | 449        | 467      | TGVIEPDPCDPEYDRN<br>CR      |           |         |                        |      | Mascot      |
| 2233.0923  | 2233.0103   | -0.082  | -37   | 203        | 221      | SGQYYYSPLVQPFLSAE<br>QR     |           |         |                        |      | Mascot      |
| 2353.1394  | 2353.0391   | -0.1003 | -43   | 242        | 264      | AAYGYRSAAALAPSYAHL<br>GCDPK |           |         |                        |      | Mascot      |

16 PREDICTED: beta,beta-carotene 9',10'-oxygenase [Danio rerio] gi|326667805 64772.2 6.9 10 34 0

#### Peptide Information

| Calc. Mass | Obsrv. Mass | ± da    | ± ppm | Start Seq. | End Seq. | Sequence           | Ion Score | C. I. % | Modification           | Rank | Result Type |
|------------|-------------|---------|-------|------------|----------|--------------------|-----------|---------|------------------------|------|-------------|
| 864.4495   | 864.4676    | 0.0181  | 21    | 484        | 490      | MDLETKK            |           |         |                        |      | Mascot      |
| 1106.6456  | 1106.5178   | -0.1278 | -115  | 532        | 541      | STFLLVLDAK         |           |         |                        |      | Mascot      |
| 1174.5813  | 1174.6155   | 0.0342  | 29    | 330        | 338      | EMPVKYYTK          |           |         | Oxidation (M)[2]       |      | Mascot      |
| 1195.6252  | 1195.5336   | -0.0916 | -77   | 231        | 240      | NKGAMYNIIR         |           |         | Oxidation (M)[5]       |      | Mascot      |
| 1279.6675  | 1279.7307   | 0.0632  | 49    | 418        | 429      | LDSTATAICRTK       |           |         |                        |      | Mascot      |
| 1349.7675  | 1349.5902   | -0.1773 | -131  | 530        | 541      | DKSTFLLVLDAK       |           |         |                        |      | Mascot      |
| 1521.7842  | 1521.7025   | -0.0817 | -54   | 233        | 245      | GAMYNIIRVSPER      |           |         | Oxidation (M)[3]       |      | Mascot      |
| 2089.0388  | 2088.949    | -0.0898 | -43   | 309        | 325      | GIYWDPNQETIFHLIDK  |           |         |                        |      | Mascot      |
| 2194.0371  | 2194.0215   | -0.0156 | -7    | 428        | 445      | TKTQVFCTFEDLYGEDLK |           |         | Carbamidomethyl (C)[7] |      | Mascot      |
| 2211.0168  | 2211.0327   | 0.0159  | 7     | 378        | 396      | QSGEALDEMYNTMSRPL  |           |         | Oxidation (M)[9]       |      | Mascot      |

17 calcineurin B homologous protein 2 [Danio rerio] gi|41054153 22536.6 5.62 6 34 0

Peptide Information

| Calc. Mass | Obsrv. Mass | ± da    | ± ppm | Start Seq. | End Seq. | Sequence                 | Ion Score | C. I. | % Modification   | Rank | Result Type |
|------------|-------------|---------|-------|------------|----------|--------------------------|-----------|-------|------------------|------|-------------|
| 1195.6946  | 1195.5336   | -0.161  | -135  | 87         | 96       | ILAHFRPVDK               |           |       |                  |      | Mascot      |
| 1208.5946  | 1208.5636   | -0.031  | -26   | 77         | 86       | DTVDFHTFVK               |           |       |                  |      | Mascot      |
| 1441.7368  | 1441.6281   | -0.1087 | -75   | 44         | 56       | RGHLCPQDFGAIK            |           |       |                  |      | Mascot      |
| 2207.1165  | 2207.0354   | -0.0811 | -37   | 57         | 76       | ELAMNPIGDRIIDAFFSPG<br>K |           |       | Oxidation (M)[4] |      | Mascot      |
| 2283.1438  | 2283.1052   | -0.0386 | -17   | 12         | 31       | IPNVDELMQETGFSPAII<br>R  |           |       | Oxidation (M)[8] |      | Mascot      |
| 2283.1438  | 2283.1052   | -0.0386 | -17   | 12         | 31       | IPNVDELMQETGFSPAII<br>R  |           |       | Oxidation (M)[8] |      | Mascot      |
| 2284.1648  | 2284.0986   | -0.0662 | -29   | 67         | 86       | IIDAFFSPGKDTVDFHTFV<br>K |           |       |                  |      | Mascot      |

18 PREDICTED: paxillin-like [Danio rerio] gi|326667590 52290.9 8.22 7 34 0 19 0

Peptide Information

| Calc. Mass | Obsrv. Mass | ± da    | ± ppm | Start Seq. | End Seq. | Sequence                   | Ion Score | C. I. | % Modification             | Rank | Result Type |
|------------|-------------|---------|-------|------------|----------|----------------------------|-----------|-------|----------------------------|------|-------------|
| 1165.6068  | 1165.7047   | 0.0979  | 84    | 187        | 196      | KNIMIMAAQ GK               |           |       | Oxidation (M)[4,6]         |      | Mascot      |
| 1441.703   | 1441.6281   | -0.0749 | -52   | 36         | 48       | VTQASKGDEQNHK              |           |       |                            |      | Mascot      |
| 1547.8032  | 1547.7518   | -0.0514 | -33   | 223        | 237      | LGVQTVAKGVCGACK            | 19        | 0     | Carbamidomethyl (C)[11,14] |      | Mascot      |
| 1547.8032  | 1547.7518   | -0.0514 | -33   | 223        | 237      | LGVQTVAKGVCGACK            |           |       | Carbamidomethyl (C)[11,14] |      | Mascot      |
| 1689.7325  | 1689.8737   | 0.1412  | 84    | 270        | 282      | NFFERDGGPYCEK              |           |       | Carbamidomethyl (C)[11]    |      | Mascot      |
| 1689.7325  | 1689.8737   | 0.1412  | 84    | 270        | 282      | NFFERDGGPYCEK              |           |       | Carbamidomethyl (C)[11]    |      | Mascot      |
| 1788.9347  | 1788.7198   | -0.2149 | -120  | 188        | 204      | NIMIMAAQ GKSSPTSVPK        |           |       |                            |      | Mascot      |
| 1987.9867  | 1987.9663   | -0.0204 | -10   | 292        | 309      | CYYCSGPILDKVVTALDK         |           |       |                            |      | Mascot      |
| 2225.0657  | 2225.0471   | -0.0186 | -8    | 407        | 427      | GSLCSGCQKPITGR CITA<br>MGK |           |       | Carbamidomethyl (C)[4,7]   |      | Mascot      |
| 2225.0657  | 2225.0471   | -0.0186 | -8    | 407        | 427      | GSLCSGCQKPITGR CITA<br>MGK |           |       | Carbamidomethyl (C)[4,7]   |      | Mascot      |

19 PREDICTED: actin filament-associated protein 1-like [Danio rerio] gi|189525987 89049.3 9.08 13 34 0

Peptide Information

| Calc. Mass | Obsrv. Mass | ± da   | ± ppm | Start Seq. | End Seq. | Sequence | Ion Score | C. I. | % Modification | Rank | Result Type |
|------------|-------------|--------|-------|------------|----------|----------|-----------|-------|----------------|------|-------------|
| 838.4417   | 838.5138    | 0.0721 | 86    | 547        | 553      | YSPKSTR  |           |       |                |      | Mascot      |
| 842.473    | 842.4813    | 0.0083 | 10    | 599        | 605      | LDKNQPK  |           |       |                |      | Mascot      |
| 850.3974   | 850.5121    | 0.1147 | 135   | 690        | 696      | KVEDECK  |           |       |                |      | Mascot      |

|    |                                                 |           |         |     |              |     |                              |      |    |                                           |   |  |        |
|----|-------------------------------------------------|-----------|---------|-----|--------------|-----|------------------------------|------|----|-------------------------------------------|---|--|--------|
|    | 996.5182                                        | 996.5625  | 0.0443  | 44  | 178          | 185 | DNKLLCYK                     |      |    |                                           |   |  | Mascot |
|    | 996.5182                                        | 996.5625  | 0.0443  | 44  | 178          | 185 | DNKLLCYK                     |      |    |                                           |   |  | Mascot |
|    | 1045.6074                                       | 1045.5269 | -0.0805 | -77 | 172          | 180 | LLCVIKDNK                    |      |    |                                           |   |  | Mascot |
|    | 1165.6211                                       | 1165.7047 | 0.0836  | 72  | 18           | 27  | EYLTAGVREK                   |      |    |                                           |   |  | Mascot |
|    | 1174.5773                                       | 1174.6155 | 0.0382  | 33  | 391          | 401 | GCEVIPGLDSK                  |      |    | Carbamidomethyl (C)[2]                    |   |  | Mascot |
|    | 1234.6725                                       | 1234.6379 | -0.0346 | -28 | 153          | 162 | DARICAFLLR                   |      |    | Carbamidomethyl (C)[5]                    |   |  | Mascot |
|    | 1234.6725                                       | 1234.6379 | -0.0346 | -28 | 153          | 162 | DARICAFLLR                   |      |    | Carbamidomethyl (C)[5]                    |   |  | Mascot |
|    | 1975.9                                          | 1975.8392 | -0.0608 | -31 | 137          | 152 | MRHQWPSEEASMDLVK             |      |    | Oxidation (M)[1,12]                       |   |  | Mascot |
|    | 2089.1362                                       | 2088.949  | -0.1872 | -90 | 1            | 17  | MEELLAELRVFLELLDR            |      |    |                                           |   |  | Mascot |
|    | 2105.1311                                       | 2104.9424 | -0.1887 | -90 | 1            | 17  | MEELLAELRVFLELLDR            |      |    | Oxidation (M)[1]                          |   |  | Mascot |
|    | 2211.1147                                       | 2211.0327 | -0.082  | -37 | 189          | 208 | DQTPQMELLLSGCSITHI<br>PK     |      |    |                                           |   |  | Mascot |
|    | 2233.124                                        | 2233.0103 | -0.1137 | -51 | 408          | 428 | LLRNGQEVAVLEASSSES<br>MGR    |      |    |                                           |   |  | Mascot |
|    | 2248.9556                                       | 2249.0017 | 0.0461  | 20  | 246          | 268 | EVCSNGNGVVDGCDGAG<br>SGSTVHK |      |    | Carbamidomethyl (C)[3]                    |   |  | Mascot |
|    | 2284.1311                                       | 2284.0986 | -0.0325 | -14 | 189          | 208 | DQTPQMELLLSGCSITHI<br>PK     |      |    | Carbamidomethyl (C)[13], Oxidation (M)[6] |   |  | Mascot |
| 20 | PREDICTED: zinc finger protein 91 [Danio rerio] |           |         |     | gi 326678135 |     | 96401.5                      | 9.32 | 18 | 33                                        | 0 |  |        |

Peptide Information

| Calc. Mass | Obsrv. Mass | ± da    | ± ppm | Start Seq. | End Seq. | Sequence                | Ion Score | C. I. | % Modification                            | Rank | Result Type |
|------------|-------------|---------|-------|------------|----------|-------------------------|-----------|-------|-------------------------------------------|------|-------------|
| 1051.5643  | 1051.6777   | 0.1134  | 108   | 107        | 115      | SFARQSSLR               |           |       |                                           |      | Mascot      |
| 1062.6558  | 1062.6549   | -0.0009 | -1    | 191        | 199      | TFSLQLIK                |           |       |                                           |      | Mascot      |
| 1106.6027  | 1106.5178   | -0.0849 | -77   | 728        | 736      | TFLRPCELK               |           |       |                                           |      | Mascot      |
| 1256.6528  | 1256.6152   | -0.0376 | -30   | 563        | 572      | NKNNLTIHMR              |           |       | Oxidation (M)[9]                          |      | Mascot      |
| 1695.7577  | 1695.7665   | 0.0088  | 5     | 797        | 811      | THTGGKPYTCTQCGK         |           |       | Carbamidomethyl (C)[10,13]                |      | Mascot      |
| 1750.8074  | 1750.7469   | -0.0605 | -35   | 450        | 465      | MIHTGEKPFTCAQCGK        |           |       |                                           |      | Mascot      |
| 1750.8074  | 1750.7469   | -0.0605 | -35   | 450        | 465      | MIHTGEKPFTCAQCGK        |           |       |                                           |      | Mascot      |
| 1766.7584  | 1766.7407   | -0.0177 | -10   | 92         | 106      | VHTNERPYSCSECGK         |           |       | Carbamidomethyl (C)[10]                   |      | Mascot      |
| 1766.7584  | 1766.7407   | -0.0177 | -10   | 92         | 106      | VHTNERPYSCSECGK         |           |       | Carbamidomethyl (C)[10]                   |      | Mascot      |
| 1821.9025  | 1821.8564   | -0.0461 | -25   | 470        | 485      | QSCLAQHQQIHTGVSK        |           |       | Carbamidomethyl (C)[3]                    |      | Mascot      |
| 2207.0596  | 2207.0354   | -0.0242 | -11   | 144        | 162      | AHQHIHTGVREFVCVEG<br>GK |           |       | Carbamidomethyl (C)[14]                   |      | Mascot      |
| 2211.1067  | 2211.0327   | -0.074  | -33   | 135        | 153      | GFSHQSHFAHQHIHTG<br>VR  |           |       |                                           |      | Mascot      |
| 2224.8628  | 2225.0471   | 0.1843  | 83    | 598        | 615      | HMMIHNEENPHECDQCG<br>K  |           |       | Carbamidomethyl (C)[13], Oxidation (M)[2] |      | Mascot      |
| 2224.8628  | 2225.0471   | 0.1843  | 83    | 598        | 615      | HMMIHNEENPHECDQCG<br>K  |           |       | Carbamidomethyl (C)[13], Oxidation (M)[2] |      | Mascot      |
| 2230.0239  | 2230.1333   | 0.1094  | 49    | 89         | 106      | HLRVHTNERPYSCSECG<br>K  |           |       | Carbamidomethyl (C)[13,16]                |      | Mascot      |
| 2246.9375  | 2247.0615   | 0.124   | 55    | 503        | 521      | QHQMTHHTGEKPYTCSHC      |           |       | Oxidation (M)[4]                          |      | Mascot      |

|    |                                     |           |         |     |             |     |                                |      |                                              |        |   |
|----|-------------------------------------|-----------|---------|-----|-------------|-----|--------------------------------|------|----------------------------------------------|--------|---|
|    | 2283.2061                           | 2283.1052 | -0.1009 | -44 | 232         | 251 | DK<br>IHTMENTNVIRALCGAILT<br>R |      | Carbamidomethyl (C)[14]                      | Mascot |   |
|    | 2283.2061                           | 2283.1052 | -0.1009 | -44 | 232         | 251 | IHTMENTNVIRALCGAILT<br>R       |      | Carbamidomethyl (C)[14]                      | Mascot |   |
|    | 2297.0735                           | 2297.1106 | 0.0371  | 16  | 653         | 671 | KHQMIHTGEKPYVCSHC<br>GK        |      | Carbamidomethyl (C)[14,17]                   | Mascot |   |
|    | 2299.0781                           | 2299.1062 | 0.0281  | 12  | 450         | 469 | MIHTGEKPFTCAQCGKSF<br>TR       |      | Carbamidomethyl (C)[11]                      | Mascot |   |
|    | 2406.061                            | 2406.1626 | 0.1016  | 42  | 32          | 50  | FHMMIHTGEKPFKCSHC<br>DK        |      | Carbamidomethyl (C)[14,17], Oxidation (M)[3] | Mascot |   |
|    | 2479.105                            | 2479.2087 | 0.1037  | 42  | 332         | 353 | TEQSFLMERAANGFICT<br>QCGK      |      | Oxidation (M)[7]                             | Mascot |   |
| 21 | PHD finger protein 10 [Danio rerio] |           |         |     | gi 37681905 |     | 46186.7                        | 8.21 | 10                                           | 33     | 0 |

#### Peptide Information

|  | Calc. Mass | Obsrv. Mass | ± da    | ± ppm | Start Seq. | End Seq. | Sequence                           | Ion Score | C. I. % | Modification                                | Rank | Result | Type |
|--|------------|-------------|---------|-------|------------|----------|------------------------------------|-----------|---------|---------------------------------------------|------|--------|------|
|  | 856.4523   | 856.4965    | 0.0442  | 52    | 26         | 32       | DLSHKEK                            |           |         |                                             |      | Mascot |      |
|  | 996.4567   | 996.5625    | 0.1058  | 106   | 19         | 25       | YPEMERR                            |           |         | Oxidation (M)[4]                            |      | Mascot |      |
|  | 996.4567   | 996.5625    | 0.1058  | 106   | 19         | 25       | YPEMERR                            |           |         | Oxidation (M)[4]                            |      | Mascot |      |
|  | 1256.6705  | 1256.6152   | -0.0553 | -44   | 254        | 265      | VKSNDRPGAQGK                       |           |         |                                             |      | Mascot |      |
|  | 1689.7256  | 1689.8737   | 0.1481  | 88    | 333        | 344      | IKMYPWQCMECK                       |           |         | Carbamidomethyl (C)[8,11], Oxidation (M)[3] |      | Mascot |      |
|  | 1689.7256  | 1689.8737   | 0.1481  | 88    | 333        | 344      | IKMYPWQCMECK                       |           |         | Carbamidomethyl (C)[8,11], Oxidation (M)[3] |      | Mascot |      |
|  | 1750.8932  | 1750.7469   | -0.1463 | -84   | 55         | 69       | SDEVIDLMIKEYPAK                    |           |         |                                             |      | Mascot |      |
|  | 1750.8932  | 1750.7469   | -0.1463 | -84   | 55         | 69       | SDEVIDLMIKEYPAK                    |           |         |                                             |      | Mascot |      |
|  | 1766.8881  | 1766.7407   | -0.1474 | -83   | 55         | 69       | SDEVIDLMIKEYPAK                    |           |         | Oxidation (M)[8]                            |      | Mascot |      |
|  | 1766.8881  | 1766.7407   | -0.1474 | -83   | 55         | 69       | SDEVIDLMIKEYPAK                    |           |         | Oxidation (M)[8]                            |      | Mascot |      |
|  | 2211.1597  | 2211.0327   | -0.127  | -57   | 165        | 183      | TGPFPPVALIPGQFQEYYK<br>R           |           |         |                                             |      | Mascot |      |
|  | 2284.2012  | 2284.0986   | -0.1026 | -45   | 163        | 182      | TKTGPFPPVALIPGQFQEY<br>YK          |           |         |                                             |      | Mascot |      |
|  | 2352.9175  | 2353.0391   | 0.1216  | 52    | 345        | 363      | TCTVCQQPHHEEEMMFC<br>DK            |           |         | Carbamidomethyl (C)[2]                      |      | Mascot |      |
|  | 3124.2734  | 3124.5081   | 0.2347  | 75    | 364        | 390      | CDRGFHTFCVGMDSIPM<br>GCWVCDLCSK    |           |         | Carbamidomethyl (C)[1,9]                    |      | Mascot |      |
|  | 3338.5383  | 3338.6528   | 0.1145  | 34    | 303        | 332      | GKPEALIHCSQCQNSGH<br>PSCLDMSVDLVAK |           |         | Carbamidomethyl (C)[9,12,20]                |      | Mascot |      |

22 hypothetical protein LOC799147 [Danio rerio] gi|130487208 15157.6 7.64 5 33 0

#### Peptide Information

|  | Calc. Mass | Obsrv. Mass | ± da    | ± ppm | Start Seq. | End Seq. | Sequence        | Ion Score | C. I. % | Modification | Rank | Result | Type |
|--|------------|-------------|---------|-------|------------|----------|-----------------|-----------|---------|--------------|------|--------|------|
|  | 842.477    | 842.4813    | 0.0043  | 5     | 124        | 130      | KGSLFYK         |           |         |              |      | Mascot |      |
|  | 1664.8676  | 1664.8435   | -0.0241 | -14   | 110        | 124      | TVEYGLSSVTCHLKK |           |         |              |      | Mascot |      |
|  | 1664.8676  | 1664.8435   | -0.0241 | -14   | 110        | 124      | TVEYGLSSVTCHLKK |           |         |              |      | Mascot |      |

|    |                                       |           |         |     |              |    |                           |                         |   |    |   |  |  |        |
|----|---------------------------------------|-----------|---------|-----|--------------|----|---------------------------|-------------------------|---|----|---|--|--|--------|
|    | 1686.8334                             | 1686.6707 | -0.1627 | -96 | 37           | 52 | DLTGDPAGNKPDYVK           |                         |   |    |   |  |  | Mascot |
|    | 2207.2104                             | 2207.0354 | -0.175  | -79 | 9            | 29 | LVSLAVLMLASQLDFASA<br>SVR | Oxidation (M)[8]        |   |    |   |  |  | Mascot |
|    | 2225.0081                             | 2225.0471 | 0.039   | 18  | 68           | 86 | DNANPVWSAEFNPNCN<br>SK    | Carbamidomethyl (C)[16] |   |    |   |  |  | Mascot |
|    | 2225.0081                             | 2225.0471 | 0.039   | 18  | 68           | 86 | DNANPVWSAEFNPNCN<br>SK    | Carbamidomethyl (C)[16] |   |    |   |  |  | Mascot |
| 23 | SET domain containing 2 [Danio rerio] |           |         |     | gi 113470943 |    | 20601.3                   | 8.54                    | 7 | 32 | 0 |  |  |        |

#### Peptide Information

|  | Calc. Mass | Obsrv. Mass | ± da    | ± ppm | Start Seq. | End Seq. | Sequence                  | Ion Score | C. I. | % | Modification              | Rank | Result Type |
|--|------------|-------------|---------|-------|------------|----------|---------------------------|-----------|-------|---|---------------------------|------|-------------|
|  | 1051.5275  | 1051.6777   | 0.1502  | 143   | 108        | 116      | LLMIECSSR                 |           |       |   |                           |      | Mascot      |
|  | 1256.5623  | 1256.6152   | 0.0529  | 42    | 117        | 127      | CLNGAYCSNRR               |           |       |   |                           |      | Mascot      |
|  | 1547.7417  | 1547.7518   | 0.0101  | 7     | 94         | 107      | ARGILACGEDCLNR            |           |       |   | Carbamidomethyl (C)[7]    |      | Mascot      |
|  | 1547.7417  | 1547.7518   | 0.0101  | 7     | 94         | 107      | ARGILACGEDCLNR            |           |       |   | Carbamidomethyl (C)[7]    |      | Mascot      |
|  | 2067.0215  | 2066.8445   | -0.177  | -86   | 128        | 144      | FQMKQHADYEVILTESK         |           |       |   |                           |      | Mascot      |
|  | 2247.0137  | 2247.0615   | 0.0478  | 21    | 108        | 126      | LLMIECSSRCLNGAYCSN<br>R   |           |       |   | Carbamidomethyl (C)[6,10] |      | Mascot      |
|  | 2305.0918  | 2305.0896   | -0.0022 | -1    | 153        | 171      | DLQPNTFVLEYCGEVL<br>DHR   |           |       |   | Carbamidomethyl (C)[12]   |      | Mascot      |
|  | 2353.113   | 2353.0391   | -0.0739 | -31   | 96         | 116      | GILACGEDCLNRLLMIEC<br>SSR |           |       |   | Carbamidomethyl (C)[5]    |      | Mascot      |

|    |                            |  |  |  |             |  |         |      |    |    |   |  |  |  |
|----|----------------------------|--|--|--|-------------|--|---------|------|----|----|---|--|--|--|
| 24 | Svil protein [Danio rerio] |  |  |  | gi 33585888 |  | 62983.3 | 5.83 | 10 | 32 | 0 |  |  |  |
|----|----------------------------|--|--|--|-------------|--|---------|------|----|----|---|--|--|--|

#### Peptide Information

|  | Calc. Mass | Obsrv. Mass | ± da    | ± ppm | Start Seq. | End Seq. | Sequence                  | Ion Score | C. I. | % | Modification                             | Rank | Result Type |
|--|------------|-------------|---------|-------|------------|----------|---------------------------|-----------|-------|---|------------------------------------------|------|-------------|
|  | 864.4607   | 864.4676    | 0.0069  | 8     | 526        | 532      | KALEMTR                   |           |       |   | Oxidation (M)[5]                         |      | Mascot      |
|  | 1165.5483  | 1165.7047   | 0.1564  | 134   | 69         | 79       | GYGLVEGEEGR               |           |       |   |                                          |      | Mascot      |
|  | 1234.6038  | 1234.6379   | 0.0341  | 28    | 253        | 262      | ASLYLWHGCK                |           |       |   | Carbamidomethyl (C)[9]                   |      | Mascot      |
|  | 1234.6038  | 1234.6379   | 0.0341  | 28    | 253        | 262      | ASLYLWHGCK                |           |       |   | Carbamidomethyl (C)[9]                   |      | Mascot      |
|  | 1256.5286  | 1256.6152   | 0.0866  | 69    | 319        | 329      | AYDCMLQDPGK               |           |       |   | Oxidation (M)[5]                         |      | Mascot      |
|  | 1441.645   | 1441.6281   | -0.0169 | -12   | 318        | 329      | KAYDCMLQDPGK              |           |       |   | Carbamidomethyl (C)[5], Oxidation (M)[6] |      | Mascot      |
|  | 1457.7126  | 1457.6224   | -0.0902 | -62   | 414        | 425      | KCAMETVLQYSK              |           |       |   | Carbamidomethyl (C)[2]                   |      | Mascot      |
|  | 2104.9766  | 2104.9424   | -0.0342 | -16   | 184        | 202      | EPPCFLLQCFNGGMIVHA<br>GK  |           |       |   | Carbamidomethyl (C)[4]                   |      | Mascot      |
|  | 2283.1221  | 2283.1052   | -0.0169 | -7    | 35         | 54       | ELRSGECRPYDASLMLS<br>ALR  |           |       |   | Oxidation (M)[15]                        |      | Mascot      |
|  | 2283.1221  | 2283.1052   | -0.0169 | -7    | 35         | 54       | ELRSGECRPYDASLMLS<br>ALR  |           |       |   | Oxidation (M)[15]                        |      | Mascot      |
|  | 2297.1992  | 2297.1106   | -0.0886 | -39   | 467        | 486      | EAEVCHQILVEDVLSRLC<br>K   |           |       |   |                                          |      | Mascot      |
|  | 2305.1499  | 2305.0896   | -0.0603 | -26   | 336        | 356      | LFQLSSASGEFAAVEFVY<br>PSR |           |       |   |                                          |      | Mascot      |

|    |                                              |  |  |  |              |  |         |      |   |    |   |  |  |  |
|----|----------------------------------------------|--|--|--|--------------|--|---------|------|---|----|---|--|--|--|
| 25 | PREDICTED: hypothetical protein LOC100329524 |  |  |  | gi 326673694 |  | 14303.5 | 7.66 | 5 | 32 | 0 |  |  |  |
|----|----------------------------------------------|--|--|--|--------------|--|---------|------|---|----|---|--|--|--|

[Danio rerio]

Peptide Information

| Calc. Mass | Obsrv. Mass | ± da    | ± ppm | Start Seq. | End Seq. | Sequence           | Ion Score | C. I. | % Modification                            | Rank | Result | Type |
|------------|-------------|---------|-------|------------|----------|--------------------|-----------|-------|-------------------------------------------|------|--------|------|
| 1234.5383  | 1234.6379   | 0.0996  | 81    | 118        | 127      | ACFWKYCVTN         |           |       |                                           |      | Mascot |      |
| 1234.5383  | 1234.6379   | 0.0996  | 81    | 118        | 127      | ACFWKYCVTN         |           |       |                                           |      | Mascot |      |
| 1547.8289  | 1547.7518   | -0.0771 | -50   | 93         | 106      | LAAADNLRSQGYLR     |           |       |                                           |      | Mascot |      |
| 1547.8289  | 1547.7518   | -0.0771 | -50   | 93         | 106      | LAAADNLRSQGYLR     |           |       |                                           |      | Mascot |      |
| 1822.0328  | 1821.8564   | -0.1764 | -97   | 1          | 17       | MLSLAVLYILAVVCSAR  |           |       |                                           |      | Mascot |      |
| 1902.9039  | 1902.8788   | -0.0251 | -13   | 40         | 56       | LVAEVEDGQSNLDEQR   |           |       |                                           |      | Mascot |      |
| 2051.1504  | 2050.8474   | -0.303  | -148  | 1          | 18       | MLSLAVLYILAVVCSARR |           |       | Carbamidomethyl (C)[14], Oxidation (M)[1] |      | Mascot |      |

26 vitellogenin 2 isoform 2 [Danio rerio] gi|160333705 93050.4 8.22 11 31 0

Peptide Information

| Calc. Mass | Obsrv. Mass | ± da    | ± ppm | Start Seq. | End Seq. | Sequence                   | Ion Score | C. I. | % Modification                             | Rank | Result | Type |
|------------|-------------|---------|-------|------------|----------|----------------------------|-----------|-------|--------------------------------------------|------|--------|------|
| 850.4702   | 850.5121    | 0.0419  | 49    | 750        | 756      | MKLESVK                    |           |       | Oxidation (M)[1]                           |      | Mascot |      |
| 864.3945   | 864.4676    | 0.0731  | 85    | 612        | 618      | KDEESEK                    |           |       |                                            |      | Mascot |      |
| 1208.5946  | 1208.5636   | -0.031  | -26   | 93         | 102      | DTEAIWAQFK                 |           |       |                                            |      | Mascot |      |
| 1664.9152  | 1664.8435   | -0.0717 | -43   | 229        | 244      | VLGNAGHPSSLKPIMK           |           |       | Oxidation (M)[15]                          |      | Mascot |      |
| 1664.9152  | 1664.8435   | -0.0717 | -43   | 229        | 244      | VLGNAGHPSSLKPIMK           |           |       | Oxidation (M)[15]                          |      | Mascot |      |
| 1750.9633  | 1750.7469   | -0.2164 | -124  | 58         | 72       | EVLKHLVENNVAMVR            |           |       |                                            |      | Mascot |      |
| 1750.9633  | 1750.7469   | -0.2164 | -124  | 58         | 72       | EVLKHLVENNVAMVR            |           |       |                                            |      | Mascot |      |
| 1766.9581  | 1766.7407   | -0.2174 | -123  | 58         | 72       | EVLKHLVENNVAMVR            |           |       | Oxidation (M)[13]                          |      | Mascot |      |
| 1766.9581  | 1766.7407   | -0.2174 | -123  | 58         | 72       | EVLKHLVENNVAMVR            |           |       | Oxidation (M)[13]                          |      | Mascot |      |
| 1788.8546  | 1788.7198   | -0.1348 | -75   | 1          | 15       | MMEATQSLVFVEFEK            |           |       |                                            |      | Mascot |      |
| 2233.2446  | 2233.0103   | -0.2343 | -105  | 171        | 191      | IATIPALREVVMLGYGSMIAK      |           |       |                                            |      | Mascot |      |
| 2249.2395  | 2249.0017   | -0.2378 | -106  | 171        | 191      | IATIPALREVVMLGYGSMIAK      |           |       | Oxidation (M)[12]                          |      | Mascot |      |
| 2280.2122  | 2280.1023   | -0.1099 | -48   | 29         | 48       | GSLQYEFATEILQTPIQLTK       |           |       |                                            |      | Mascot |      |
| 2406.1877  | 2406.1626   | -0.0251 | -10   | 447        | 466      | AEAGLLGEFPAFRLEWEWER       |           |       |                                            |      | Mascot |      |
| 2479.2974  | 2479.2087   | -0.0887 | -36   | 1          | 22       | MMEATQSLVFVEFEKAPVVPVK     |           |       |                                            |      | Mascot |      |
| 3124.3333  | 3124.5081   | 0.1748  | 56    | 557        | 582      | AQNYIYDYTTAQCSMMQDTISTFNNK |           |       | Carbamidomethyl (C)[13], Oxidation (M)[15] |      | Mascot |      |

27 Gfap protein [Danio rerio] gi|124504410 51101 5.34 5 31 0 20 0

Peptide Information

|                     | Calc. Mass                                                      | Obsrv. Mass | ± da    | ± ppm | Start Seq.   | End Sequence Seq.              | Ion Score | C. I. % | Modification                                 | Rank | Result Type |
|---------------------|-----------------------------------------------------------------|-------------|---------|-------|--------------|--------------------------------|-----------|---------|----------------------------------------------|------|-------------|
|                     | 850.4265                                                        | 850.5121    | 0.0856  | 101   | 434          | 440 ESTTERK                    |           |         |                                              |      | Mascot      |
|                     | 1106.5259                                                       | 1106.5178   | -0.0081 | -7    | 320          | 327 QLREMEER                   |           |         | Oxidation (M)[5]                             |      | Mascot      |
|                     | 1750.835                                                        | 1750.7469   | -0.0881 | -50   | 342          | 355 LEDEIQMLKEEMAR             |           |         | Oxidation (M)[7]                             |      | Mascot      |
|                     | 1750.835                                                        | 1750.7469   | -0.0881 | -50   | 342          | 355 LEDEIQMLKEEMAR             | 20        | 0       | Oxidation (M)[7]                             |      | Mascot      |
|                     | 1766.83                                                         | 1766.7407   | -0.0893 | -51   | 342          | 355 LEDEIQMLKEEMAR             |           |         | Oxidation (M)[7,12]                          |      | Mascot      |
|                     | 1766.83                                                         | 1766.7407   | -0.0893 | -51   | 342          | 355 LEDEIQMLKEEMAR             | 16        | 0       | Oxidation (M)[7,12]                          |      | Mascot      |
|                     | 1902.9088                                                       | 1902.8788   | -0.03   | -16   | 82           | 97 VEMMGLNDRFASYIEK            |           |         |                                              |      | Mascot      |
|                     | 2230.0444                                                       | 2230.1333   | 0.0889  | 40    | 323          | 341 EMEERFAIETAAYQDTVA<br>R    |           |         |                                              |      | Mascot      |
| 28                  | PREDICTED: e3 ubiquitin-protein ligase RBBP6-like [Danio rerio] |             |         |       | gi 326670174 | 29593.2                        | 9.79      | 6       | 31                                           | 0    |             |
| Peptide Information |                                                                 |             |         |       |              |                                |           |         |                                              |      |             |
|                     | Calc. Mass                                                      | Obsrv. Mass | ± da    | ± ppm | Start Seq.   | End Sequence Seq.              | Ion Score | C. I. % | Modification                                 | Rank | Result Type |
|                     | 1441.7104                                                       | 1441.6281   | -0.0823 | -57   | 251          | 262 IQNSLSVCTTYR               |           |         | Carbamidomethyl (C)[8]                       |      | Mascot      |
|                     | 1521.7478                                                       | 1521.7025   | -0.0453 | -30   | 251          | 263 IQNSLSVCTTYRH              |           |         |                                              |      | Mascot      |
|                     | 1547.7495                                                       | 1547.7518   | 0.0023  | 1     | 156          | 169 HCPTNVGSR SAPHK            | 6         | 0       | Carbamidomethyl (C)[2]                       |      | Mascot      |
|                     | 1547.7495                                                       | 1547.7518   | 0.0023  | 1     | 156          | 169 HCPTNVGSR SAPHK            |           |         | Carbamidomethyl (C)[2]                       |      | Mascot      |
|                     | 2283.2441                                                       | 2283.1052   | -0.1389 | -61   | 99           | 119 ADPSLLSLEQLLK TENLA<br>EAK |           |         |                                              |      | Mascot      |
|                     | 2283.2441                                                       | 2283.1052   | -0.1389 | -61   | 99           | 119 ADPSLLSLEQLLK TENLA<br>EAK |           |         |                                              |      | Mascot      |
|                     | 2305.0886                                                       | 2305.0896   | 0.001   | 0     | 232          | 250 TCYSLPTRCQLMFQNLN<br>TR    |           |         | Oxidation (M)[12]                            |      | Mascot      |
|                     | 2406.0774                                                       | 2406.1626   | 0.0852  | 35    | 126          | 145 LKAVMYQSSLCYSSSE<br>AMR    |           |         | Carbamidomethyl (C)[11], Oxidation (M)[5,19] |      | Mascot      |
| 29                  | ras-related protein Rab-4A [Danio rerio]                        |             |         |       | gi 226823210 | 23987.1                        | 5.57      | 6       | 31                                           | 0    |             |
| Peptide Information |                                                                 |             |         |       |              |                                |           |         |                                              |      |             |
|                     | Calc. Mass                                                      | Obsrv. Mass | ± da    | ± ppm | Start Seq.   | End Sequence Seq.              | Ion Score | C. I. % | Modification                                 | Rank | Result Type |
|                     | 1051.5419                                                       | 1051.6777   | 0.1358  | 129   | 130          | 138 EVTFLASR                   |           |         |                                              |      | Mascot      |
|                     | 1195.4718                                                       | 1195.5336   | 0.0618  | 52    | 203          | 213 AQAESIQECGC                |           |         | Carbamidomethyl (C)[9]                       |      | Mascot      |
|                     | 1689.9026                                                       | 1689.8737   | -0.0289 | -17   | 108          | 122 MLASQNIVILCGNK             |           |         | Carbamidomethyl (C)[12], Oxidation (M)[1]    |      | Mascot      |
|                     | 1689.9026                                                       | 1689.8737   | -0.0289 | -17   | 108          | 122 MLASQNIVILCGNK             |           |         | Carbamidomethyl (C)[12], Oxidation (M)[1]    |      | Mascot      |
|                     | 1976.0236                                                       | 1975.8392   | -0.1844 | -93   | 76           | 93 SYRGAAGALLVYDITSR           |           |         |                                              |      | Mascot      |
|                     | 2207.1382                                                       | 2207.0354   | -0.1028 | -47   | 2            | 21 SETYDFLFKFLVIGNAGT<br>GK    |           |         |                                              |      | Mascot      |
|                     | 3338.687                                                        | 3338.6528   | -0.0342 | -10   | 94           | 122 ETYNALTNWLT DARM LA        |           |         | Carbamidomethyl (C)[26], Oxidation (M)[15]   |      | Mascot      |



30 novel protein (zgc:73157) [Danio rerio] SQNIVILCGNK  
gi|148725328 24797.4 9.03 6 31 0

Peptide Information

| Calc. Mass | Obsrv. Mass | ± da    | ± ppm | Start Seq. | End Seq. | Sequence             | Ion Score | C. I. % | Modification                                | Rank | Result Type |
|------------|-------------|---------|-------|------------|----------|----------------------|-----------|---------|---------------------------------------------|------|-------------|
| 842.4665   | 842.4813    | 0.0148  | 18    | 120        | 126      | MLKSAHR              |           |         |                                             |      | Mascot      |
| 864.4838   | 864.4676    | -0.0162 | -19   | 209        | 214      | YIRAWR               |           |         |                                             |      | Mascot      |
| 1256.6714  | 1256.6152   | -0.0562 | -45   | 1          | 11       | MLGGHVCVLRR          |           |         | Oxidation (M)[1]                            |      | Mascot      |
| 1695.8855  | 1695.7665   | -0.119  | -70   | 110        | 122      | LFRPMLNMNRMLK        |           |         | Oxidation (M)[5,8]                          |      | Mascot      |
| 1788.7675  | 1788.7198   | -0.0477 | -27   | 127        | 142      | ACLPSFDCAELMECIK     |           |         | Oxidation (M)[12]                           |      | Mascot      |
| 1902.8104  | 1902.8788   | 0.0684  | 36    | 127        | 142      | ACLPSFDCAELMECIK     |           |         | Carbamidomethyl (C)[2,8], Oxidation (M)[12] |      | Mascot      |
| 2297.0181  | 2297.1106   | 0.0925  | 40    | 123        | 142      | SAHRACLPSFDCAELMECIK |           |         | Carbamidomethyl (C)[6], Oxidation (M)[16]   |      | Mascot      |

31 Fibroblast growth factor receptor 4 [Danio rerio] gi|213624874 103408.9 5.69 12 31 0

Peptide Information

| Calc. Mass | Obsrv. Mass | ± da    | ± ppm | Start Seq. | End Seq. | Sequence            | Ion Score | C. I. % | Modification                                   | Rank | Result Type |
|------------|-------------|---------|-------|------------|----------|---------------------|-----------|---------|------------------------------------------------|------|-------------|
| 870.425    | 870.5125    | 0.0875  | 101   | 503        | 509      | MQVHPSR             |           |         | Oxidation (M)[1]                               |      | Mascot      |
| 1045.5636  | 1045.5269   | -0.0367 | -35   | 21         | 30       | SITSGEPRAK          |           |         |                                                |      | Mascot      |
| 1234.7126  | 1234.6379   | -0.0747 | -60   | 180        | 189      | VQHNARIQIR          |           |         |                                                |      | Mascot      |
| 1234.7126  | 1234.6379   | -0.0747 | -60   | 180        | 189      | VQHNARIQIR          |           |         |                                                |      | Mascot      |
| 1521.7267  | 1521.7025   | -0.0242 | -16   | 163        | 175      | CDTNRPQAVQWFK       |           |         |                                                |      | Mascot      |
| 1547.7424  | 1547.7518   | 0.0094  | 6     | 257        | 268      | APYWTHTQRMEK        |           |         |                                                |      | Mascot      |
| 1547.7424  | 1547.7518   | 0.0094  | 6     | 257        | 268      | APYWTHTQRMEK        |           |         |                                                |      | Mascot      |
| 1699.8373  | 1699.8768   | 0.0395  | 23    | 835        | 848      | ECWHAVPTQRPTFK      |           |         |                                                |      | Mascot      |
| 2088.897   | 2088.949    | 0.052   | 25    | 819        | 834      | MDKPSNCTHELYMKMR    |           |         | Carbamidomethyl (C)[7], Oxidation (M)[1,13,15] |      | Mascot      |
| 2105.106   | 2104.9424   | -0.1636 | -78   | 728        | 746      | NVLVTEDNVMKIADFGLAR |           |         |                                                |      | Mascot      |
| 2232.9946  | 2233.0103   | 0.0157  | 7     | 815        | 832      | EGHRMDKPSNCTHELYMK  |           |         | Carbamidomethyl (C)[11]                        |      | Mascot      |
| 2248.9895  | 2249.0017   | 0.0122  | 5     | 815        | 832      | EGHRMDKPSNCTHELYMK  |           |         | Carbamidomethyl (C)[11], Oxidation (M)[5]      |      | Mascot      |
| 2280.158   | 2280.1023   | -0.0557 | -24   | 100        | 119      | VNIFPLVNISLEDAGEYVC |           |         | Carbamidomethyl (C)[19]                        |      | Mascot      |
| 2299.2375  | 2299.1062   | -0.1313 | -57   | 2          | 20       | LSILKVFIACFMELVCSR  |           |         | Carbamidomethyl (C)[11,17]                     |      | Mascot      |
| 2353.1855  | 2353.0391   | -0.1464 | -62   | 690        | 709      | VPEEQLTFKDLVSCAYQV  |           |         | Carbamidomethyl (C)[14]                        |      | Mascot      |

32 PREDICTED: macrophage-stimulating protein receptor [Danio rerio] gi|292619047 154062 6.02 15 31 0

Peptide Information

| Calc. Mass | Obsrv. Mass | $\pm$ da | $\pm$ ppm | Start Seq. | End Seq. | Sequence                     | Ion Score | C. I. | % Modification         | Rank | Result Type |
|------------|-------------|----------|-----------|------------|----------|------------------------------|-----------|-------|------------------------|------|-------------|
| 838.4451   | 838.5138    | 0.0687   | 82        | 737        | 743      | SRVMTTK                      |           |       | Oxidation (M)[4]       |      | Mascot      |
| 856.4345   | 856.4965    | 0.062    | 72        | 1090       | 1096     | EIHCAVK                      |           |       | Carbamidomethyl (C)[4] |      | Mascot      |
| 882.4138   | 882.5364    | 0.1226   | 139       | 1206       | 1213     | VADFGMAR                     |           |       | Oxidation (M)[6]       |      | Mascot      |
| 996.4744   | 996.5625    | 0.0881   | 88        | 142        | 151      | ENGPPGPSK                    |           |       |                        |      | Mascot      |
| 996.4897   | 996.5625    | 0.0728   | 73        | 978        | 985      | LSYFSHSR                     |           |       |                        |      | Mascot      |
| 1062.5248  | 1062.6549   | 0.1301   | 122       | 896        | 904      | VLDNEITCR                    |           |       |                        |      | Mascot      |
| 1208.5802  | 1208.5636   | -0.0166  | -14       | 808        | 817      | MECITPVFPR                   |           |       | Oxidation (M)[1]       |      | Mascot      |
| 1547.854   | 1547.7518   | -0.1022  | -66       | 768        | 780      | IIIEGRNLDVYR                 |           |       |                        |      | Mascot      |
| 1547.854   | 1547.7518   | -0.1022  | -66       | 768        | 780      | IIIEGRNLDVYR                 |           |       |                        |      | Mascot      |
| 1699.9741  | 1699.8768   | -0.0973  | -57       | 1161       | 1176     | NPTVKDLIGFLQVAK              |           |       |                        |      | Mascot      |
| 1976.1174  | 1975.8392   | -0.2782  | -141      | 617        | 634      | IRSGTTETLFKPLNVTAK           |           |       |                        |      | Mascot      |
| 1987.9158  | 1987.9663   | 0.0505   | 25        | 1073       | 1089     | GHFGTVYHGYLTDHNNR            |           |       |                        |      | Mascot      |
| 2206.9929  | 2207.0354   | 0.0425   | 19        | 1195       | 1213     | NCMLDESYTVKVADFGMAR          |           |       | Carbamidomethyl (C)[2] |      | Mascot      |
| 2230.0222  | 2230.1333   | 0.1111   | 50        | 874        | 895      | LNLVSSCMSITMTVGDDVDCGGK      |           |       |                        |      | Mascot      |
| 2299.1499  | 2299.1062   | -0.0437  | -19       | 204        | 223      | MSISVRRPVATEDGFYTDVR         |           |       |                        |      | Mascot      |
| 3124.5408  | 3124.5081   | -0.0327  | -10       | 176        | 203      | VSMVEEGQTVYFFVAATVNNSVTQKYGR |           |       |                        |      | Mascot      |

33

novel protein similar to human fuse-binding protein-interacting repressor (SIAHBP1) [Danio rerio]

gi|27817319

53692.4

5.32

8

31

0

#### Peptide Information

| Calc. Mass | Obsrv. Mass | $\pm$ da | $\pm$ ppm | Start Seq. | End Seq. | Sequence                          | Ion Score | C. I. | % Modification                            | Rank | Result Type |
|------------|-------------|----------|-----------|------------|----------|-----------------------------------|-----------|-------|-------------------------------------------|------|-------------|
| 850.4273   | 850.5121    | 0.0848   | 100       | 64         | 70       | ALAIMCR                           |           |       | Carbamidomethyl (C)[6], Oxidation (M)[5]  |      | Mascot      |
| 1547.8574  | 1547.7518   | -0.1056  | -68       | 394        | 407      | QAAIQSKSTVMVLR                    |           |       | Oxidation (M)[11]                         |      | Mascot      |
| 1547.8574  | 1547.7518   | -0.1056  | -68       | 394        | 407      | QAAIQSKSTVMVLR                    |           |       | Oxidation (M)[11]                         |      | Mascot      |
| 1664.7771  | 1664.8435   | 0.0664   | 40        | 97         | 110      | SIDMSWDSVTMKHK                    |           |       |                                           |      | Mascot      |
| 1664.7771  | 1664.8435   | 0.0664   | 40        | 97         | 110      | SIDMSWDSVTMKHK                    |           |       |                                           |      | Mascot      |
| 2247.1501  | 2247.0615   | -0.0886  | -39       | 436        | 454      | VIIYQERQGEEDDAEIVK                |           |       |                                           |      | Mascot      |
| 2305.146   | 2305.0896   | -0.0564  | -24       | 164        | 183      | AYNRIYVASIHPDLSDDDIK              |           |       |                                           |      | Mascot      |
| 2497.0051  | 2497.1646   | 0.1595   | 64        | 408        | 429      | NMVGPEIDDDLEGEVMEECGK             |           |       | Carbamidomethyl (C)[20], Oxidation (M)[2] |      | Mascot      |
| 2497.0051  | 2497.1646   | 0.1595   | 64        | 408        | 429      | NMVGPEIDDDLEGEVMEECGK             |           |       | Carbamidomethyl (C)[20], Oxidation (M)[2] |      | Mascot      |
| 3124.7439  | 3124.5081   | -0.2358  | -75       | 239        | 272      | VGKAVTPPMPLLTPTTPGLPPAAAVAAAAATAK |           |       | Oxidation (M)[9]                          |      | Mascot      |
| 3337.6343  | 3337.6492   | 0.0149   | 4         | 109        | 138      | HKGFAFVEYEVPEAAQLALEQMNSVMLGGR    |           |       | Oxidation (M)[22]                         |      | Mascot      |

34 poly(U)-binding-splicing factor PUF60-B [Danio rerio] gi|50344898 53920.5 5.26 8 30 0

Peptide Information

| Calc. Mass | Obsrv. Mass | ± da    | ± ppm | Start Seq. | End Seq. | Sequence                               | Ion Score | C. I. | % Modification                            | Rank | Result Type |
|------------|-------------|---------|-------|------------|----------|----------------------------------------|-----------|-------|-------------------------------------------|------|-------------|
| 850.4273   | 850.5121    | 0.0848  | 100   | 64         | 70       | ALAIMCR                                |           |       | Carbamidomethyl (C)[6], Oxidation (M)[5]  |      | Mascot      |
| 1547.8574  | 1547.7518   | -0.1056 | -68   | 397        | 410      | QAAIQSKSTVMVLR                         |           |       | Oxidation (M)[11]                         |      | Mascot      |
| 1547.8574  | 1547.7518   | -0.1056 | -68   | 397        | 410      | QAAIQSKSTVMVLR                         |           |       | Oxidation (M)[11]                         |      | Mascot      |
| 1664.7771  | 1664.8435   | 0.0664  | 40    | 97         | 110      | SIDMSWDSVTMKHK                         |           |       |                                           |      | Mascot      |
| 1664.7771  | 1664.8435   | 0.0664  | 40    | 97         | 110      | SIDMSWDSVTMKHK                         |           |       |                                           |      | Mascot      |
| 2247.1501  | 2247.0615   | -0.0886 | -39   | 439        | 457      | VIIYQERQGEEDAEIVK                      |           |       |                                           |      | Mascot      |
| 2305.146   | 2305.0896   | -0.0564 | -24   | 164        | 183      | AYNRIYVASIHPDLSDDDI<br>K               |           |       |                                           |      | Mascot      |
| 2497.0051  | 2497.1646   | 0.1595  | 64    | 411        | 432      | NMVGPEIDDDLEGEVM<br>EECGK              |           |       | Carbamidomethyl (C)[20], Oxidation (M)[2] |      | Mascot      |
| 2497.0051  | 2497.1646   | 0.1595  | 64    | 411        | 432      | NMVGPEIDDDLEGEVM<br>EECGK              |           |       | Carbamidomethyl (C)[20], Oxidation (M)[2] |      | Mascot      |
| 3124.7439  | 3124.5081   | -0.2358 | -75   | 239        | 272      | VGKAVTPPMPLLTPTTPG<br>GLPPAAAVAAAAATAK |           |       | Oxidation (M)[9]                          |      | Mascot      |
| 3337.6343  | 3337.6492   | 0.0149  | 4     | 109        | 138      | HKGFAFVEYEVPEAAQL<br>ALEQMNSVMLGGR     |           |       | Oxidation (M)[22]                         |      | Mascot      |

35 TrkA [Danio rerio] gi|994861 18983.6 6.4 6 30 0

Peptide Information

| Calc. Mass | Obsrv. Mass | ± da    | ± ppm | Start Seq. | End Seq. | Sequence                 | Ion Score | C. I. | % Modification                            | Rank | Result Type |
|------------|-------------|---------|-------|------------|----------|--------------------------|-----------|-------|-------------------------------------------|------|-------------|
| 882.4138   | 882.5364    | 0.1226  | 139   | 142        | 149      | IGDFGMSR                 |           |       |                                           |      | Mascot      |
| 1195.5266  | 1195.5336   | 0.007   | 6     | 150        | 158      | DIYSTDYR                 |           |       |                                           |      | Mascot      |
| 1686.9207  | 1686.6707   | -0.25   | -148  | 126        | 141      | DLATRNCLVGEGLVVK         |           |       |                                           |      | Mascot      |
| 2051.0413  | 2050.8474   | -0.1939 | -95   | 131        | 149      | NCLVGEGLVVKIGDFGM<br>SR  |           |       | Carbamidomethyl (C)[2]                    |      | Mascot      |
| 2067.0361  | 2066.8445   | -0.1916 | -93   | 131        | 149      | NCLVGEGLVVKIGDFGM<br>SR  |           |       | Carbamidomethyl (C)[2], Oxidation (M)[17] |      | Mascot      |
| 2211.0857  | 2211.0327   | -0.053  | -24   | 1          | 20       | YLAECANLCPDSDKMLV<br>AIK |           |       |                                           |      | Mascot      |
| 2229.9653  | 2230.1333   | 0.168   | 75    | 51         | 69       | FYGVCAEDGEPLAMVFY<br>MR  |           |       | Oxidation (M)[13,18]                      |      | Mascot      |
| 2284.1021  | 2284.0986   | -0.0035 | -2    | 1          | 20       | YLAECANLCPDSDKMLV<br>AIK |           |       | Carbamidomethyl (C)[5], Oxidation (M)[15] |      | Mascot      |

36 glial fibrillary acidic protein [Danio rerio] gi|37722304 51205 5.34 4 30 0 20 0

Peptide Information

| Calc. Mass | Obsrv. Mass | ± da   | ± ppm | Start Seq. | End Seq. | Sequence | Ion Score | C. I. | % Modification | Rank | Result Type |
|------------|-------------|--------|-------|------------|----------|----------|-----------|-------|----------------|------|-------------|
| 850.4265   | 850.5121    | 0.0856 | 101   | 435        | 441      | ESTTERK  |           |       |                |      | Mascot      |

|  |           |           |         |     |     |     |                  |    |   |  |  |  |                     |  |        |
|--|-----------|-----------|---------|-----|-----|-----|------------------|----|---|--|--|--|---------------------|--|--------|
|  | 1106.5259 | 1106.5178 | -0.0081 | -7  | 321 | 328 | QLREMEER         |    |   |  |  |  | Oxidation (M)[5]    |  | Mascot |
|  | 1750.835  | 1750.7469 | -0.0881 | -50 | 343 | 356 | LEDEIQLMLKEEMAR  |    |   |  |  |  | Oxidation (M)[7]    |  | Mascot |
|  | 1750.835  | 1750.7469 | -0.0881 | -50 | 343 | 356 | LEDEIQLMLKEEMAR  | 20 | 0 |  |  |  | Oxidation (M)[7]    |  | Mascot |
|  | 1766.83   | 1766.7407 | -0.0893 | -51 | 343 | 356 | LEDEIQLMLKEEMAR  |    |   |  |  |  | Oxidation (M)[7,12] |  | Mascot |
|  | 1766.83   | 1766.7407 | -0.0893 | -51 | 343 | 356 | LEDEIQLMLKEEMAR  | 16 | 0 |  |  |  | Oxidation (M)[7,12] |  | Mascot |
|  | 1902.9088 | 1902.8788 | -0.03   | -16 | 83  | 98  | VEMMGLNDRFASYIEK |    |   |  |  |  |                     |  | Mascot |

37 glial fibrillary acidic protein [Danio rerio] gi|66393075 51190 5.34 4 30 0 20 0

#### Peptide Information

| Calc. Mass | Obsrv. Mass | ± da    | ± ppm | Start Seq. | End Seq. | Sequence         | Ion Score | C. I. | % Modification      | Rank | Result Type |
|------------|-------------|---------|-------|------------|----------|------------------|-----------|-------|---------------------|------|-------------|
| 850.4265   | 850.5121    | 0.0856  | 101   | 435        | 441      | ESTTERK          |           |       |                     |      | Mascot      |
| 1062.5248  | 1062.6549   | 0.1301  | 122   | 321        | 328      | QLKEMEER         |           |       |                     |      | Mascot      |
| 1750.835   | 1750.7469   | -0.0881 | -50   | 343        | 356      | LEDEIQLMLKEEMAR  |           |       | Oxidation (M)[7]    |      | Mascot      |
| 1750.835   | 1750.7469   | -0.0881 | -50   | 343        | 356      | LEDEIQLMLKEEMAR  | 20        | 0     | Oxidation (M)[7]    |      | Mascot      |
| 1766.83    | 1766.7407   | -0.0893 | -51   | 343        | 356      | LEDEIQLMLKEEMAR  |           |       | Oxidation (M)[7,12] |      | Mascot      |
| 1766.83    | 1766.7407   | -0.0893 | -51   | 343        | 356      | LEDEIQLMLKEEMAR  | 16        | 0     | Oxidation (M)[7,12] |      | Mascot      |
| 1902.9088  | 1902.8788   | -0.03   | -16   | 83         | 98       | VEMMGLNDRFASYIEK |           |       |                     |      | Mascot      |

38 PREDICTED: hypothetical protein LOC100332625 [Danio rerio] gi|292619215 9203.5 8.69 4 30 0

#### Peptide Information

| Calc. Mass | Obsrv. Mass | ± da    | ± ppm | Start Seq. | End Seq. | Sequence             | Ion Score | C. I. | % Modification                              | Rank | Result Type |
|------------|-------------|---------|-------|------------|----------|----------------------|-----------|-------|---------------------------------------------|------|-------------|
| 1821.7545  | 1821.8564   | 0.1019  | 56    | 2          | 15       | TGWNCWFEYCMLPR       |           |       | Oxidation (M)[11]                           |      | Mascot      |
| 2050.843   | 2050.8474   | 0.0044  | 2     | 1          | 15       | MTGWNCWFEYCMLPR      |           |       | Carbamidomethyl (C)[6,11]                   |      | Mascot      |
| 2066.8379  | 2066.8445   | 0.0066  | 3     | 1          | 15       | MTGWNCWFEYCMLPR      |           |       | Carbamidomethyl (C)[6,11], Oxidation (M)[1] |      | Mascot      |
| 2193.9741  | 2194.0215   | 0.0474  | 22    | 1          | 17       | MTGWNCWFEYCMLPRLK    |           |       | Oxidation (M)[1]                            |      | Mascot      |
| 2233.1208  | 2233.0103   | -0.1105 | -49   | 18         | 37       | FKPSMSDSLSTFPYAVNTSK |           |       |                                             |      | Mascot      |
| 2249.1157  | 2249.0017   | -0.114  | -51   | 18         | 37       | FKPSMSDSLSTFPYAVNTSK |           |       | Oxidation (M)[5]                            |      | Mascot      |

39 PREDICTED: nasal embryonic luteinizing hormone-releasing hormone factor-like [Danio rerio] gi|292625328 64188.4 6.35 9 30 0

#### Peptide Information

| Calc. Mass | Obsrv. Mass | ± da   | ± ppm | Start Seq. | End Seq. | Sequence | Ion Score | C. I. | % Modification | Rank | Result Type |
|------------|-------------|--------|-------|------------|----------|----------|-----------|-------|----------------|------|-------------|
| 868.4709   | 868.5223    | 0.0514 | 59    | 483        | 489      | LSRFMSK  |           |       |                |      | Mascot      |
| 1051.6119  | 1051.6777   | 0.0658 | 63    | 254        | 261      | QRRPPLER |           |       |                |      | Mascot      |

|           |           |         |     |     |     |                         |  |  |  |                                             |  |        |
|-----------|-----------|---------|-----|-----|-----|-------------------------|--|--|--|---------------------------------------------|--|--------|
| 1279.6124 | 1279.7307 | 0.1183  | 92  | 238 | 249 | SQGSLDLESSTR            |  |  |  |                                             |  | Mascot |
| 1664.8086 | 1664.8435 | 0.0349  | 21  | 238 | 253 | SQGSLDLESSTREAGK        |  |  |  |                                             |  | Mascot |
| 1664.8086 | 1664.8435 | 0.0349  | 21  | 238 | 253 | SQGSLDLESSTREAGK        |  |  |  |                                             |  | Mascot |
| 1766.8555 | 1766.7407 | -0.1148 | -65 | 110 | 124 | LSLERSFSAEEDQQK         |  |  |  |                                             |  | Mascot |
| 1766.8555 | 1766.7407 | -0.1148 | -65 | 110 | 124 | LSLERSFSAEEDQQK         |  |  |  |                                             |  | Mascot |
| 1902.6938 | 1902.8788 | 0.185   | 97  | 361 | 374 | CEDMDWEEEREMER          |  |  |  | Oxidation (M)[4]                            |  | Mascot |
| 1975.7102 | 1975.8392 | 0.129   | 65  | 361 | 374 | CEDMDWEEEREMER          |  |  |  | Carbamidomethyl (C)[1], Oxidation (M)[4,12] |  | Mascot |
| 2089.1084 | 2088.949  | -0.1594 | -76 | 446 | 463 | MLIFCQGGPGHLYLLKNK      |  |  |  | Carbamidomethyl (C)[5]                      |  | Mascot |
| 2105.1033 | 2104.9424 | -0.1609 | -76 | 446 | 463 | MLIFCQGGPGHLYLLKNK      |  |  |  | Carbamidomethyl (C)[5], Oxidation (M)[1]    |  | Mascot |
| 2211.0759 | 2211.0327 | -0.0432 | -20 | 11  | 29  | DCILSVWPA LTSACVLF<br>R |  |  |  | Carbamidomethyl (C)[2,14]                   |  | Mascot |
| 2353.0547 | 2353.0391 | -0.0156 | -7  | 115 | 134 | SFSAEEDQKKCECALQ<br>PAR |  |  |  | Carbamidomethyl (C)[11,14]                  |  | Mascot |

40 RecName: Full=Poly(U)-binding-splicing factor PUF60-B

gi|160332383 55385.1 5.25 8 30 0

Peptide Information

| Calc. Mass | Obsrv. Mass | ± da    | ± ppm | Start Seq. | End Seq. | Sequence                               | Ion Score | C. I. | % Modification                            | Rank | Result | Type |
|------------|-------------|---------|-------|------------|----------|----------------------------------------|-----------|-------|-------------------------------------------|------|--------|------|
| 850.4273   | 850.5121    | 0.0848  | 100   | 81         | 87       | ALAIMCR                                |           |       | Carbamidomethyl (C)[6], Oxidation (M)[5]  |      | Mascot |      |
| 1547.8574  | 1547.7518   | -0.1056 | -68   | 411        | 424      | QAAIQSKSTVMVLR                         |           |       | Oxidation (M)[11]                         |      | Mascot |      |
| 1547.8574  | 1547.7518   | -0.1056 | -68   | 411        | 424      | QAAIQSKSTVMVLR                         |           |       | Oxidation (M)[11]                         |      | Mascot |      |
| 1664.7771  | 1664.8435   | 0.0664  | 40    | 114        | 127      | SIDMSWDSVTMKHK                         |           |       |                                           |      | Mascot |      |
| 1664.7771  | 1664.8435   | 0.0664  | 40    | 114        | 127      | SIDMSWDSVTMKHK                         |           |       |                                           |      | Mascot |      |
| 2247.1501  | 2247.0615   | -0.0886 | -39   | 453        | 471      | VIIYQERQGEEDDAEIVK                     |           |       |                                           |      | Mascot |      |
| 2305.146   | 2305.0896   | -0.0564 | -24   | 181        | 200      | AYNRIYVASIHPDLSDDDI<br>K               |           |       |                                           |      | Mascot |      |
| 2497.0051  | 2497.1646   | 0.1595  | 64    | 425        | 446      | NMVGPEIDDDLEGEVM<br>EECGK              |           |       | Carbamidomethyl (C)[20], Oxidation (M)[2] |      | Mascot |      |
| 2497.0051  | 2497.1646   | 0.1595  | 64    | 425        | 446      | NMVGPEIDDDLEGEVM<br>EECGK              |           |       | Carbamidomethyl (C)[20], Oxidation (M)[2] |      | Mascot |      |
| 3124.7439  | 3124.5081   | -0.2358 | -75   | 256        | 289      | VGKAVTPPMPLLTPTTPG<br>GLPPAAAVAAAAATAK |           |       | Oxidation (M)[9]                          |      | Mascot |      |
| 3337.6343  | 3337.6492   | 0.0149  | 4     | 126        | 155      | HKGFAFVEYEVPEAAQL<br>ALEQMNSVMLGGR     |           |       | Oxidation (M)[22]                         |      | Mascot |      |

41 PREDICTED: interferon-induced very large GTPase 1-like [Danio rerio]

gi|326665761 191677.2 6.42 18 29 0

Peptide Information

| Calc. Mass | Obsrv. Mass | ± da   | ± ppm | Start Seq. | End Seq. | Sequence | Ion Score | C. I. | % Modification | Rank | Result | Type |
|------------|-------------|--------|-------|------------|----------|----------|-----------|-------|----------------|------|--------|------|
| 842.473    | 842.4813    | 0.0083 | 10    | 920        | 927      | SIISHASK |           |       |                |      | Mascot |      |
| 864.4573   | 864.4676    | 0.0103 | 12    | 163        | 169      | DAFKQQK  |           |       |                |      | Mascot |      |

|           |           |         |      |      |      |                                  |  |  |  |                                          |  |        |
|-----------|-----------|---------|------|------|------|----------------------------------|--|--|--|------------------------------------------|--|--------|
| 868.4774  | 868.5223  | 0.0449  | 52   | 968  | 974  | LETKYSK                          |  |  |  |                                          |  | Mascot |
| 1045.5887 | 1045.5269 | -0.0618 | -59  | 613  | 621  | QAELEKISK                        |  |  |  |                                          |  | Mascot |
| 1051.5419 | 1051.6777 | 0.1358  | 129  | 1623 | 1630 | NLEQKYEK                         |  |  |  |                                          |  | Mascot |
| 1195.5477 | 1195.5336 | -0.0141 | -12  | 1367 | 1376 | TLAEEENFDK                       |  |  |  |                                          |  | Mascot |
| 1664.806  | 1664.8435 | 0.0375  | 23   | 435  | 449  | GAIQDCLLEASANFR                  |  |  |  | Carbamidomethyl (C)[6]                   |  | Mascot |
| 1664.806  | 1664.8435 | 0.0375  | 23   | 435  | 449  | GAIQDCLLEASANFR                  |  |  |  | Carbamidomethyl (C)[6]                   |  | Mascot |
| 1686.8698 | 1686.6707 | -0.1991 | -118 | 1363 | 1376 | HILKTLAEEENFDK                   |  |  |  |                                          |  | Mascot |
| 1699.7882 | 1699.8768 | 0.0886  | 52   | 82   | 96   | HTGKEEVGTDQNEQK                  |  |  |  |                                          |  | Mascot |
| 1750.8606 | 1750.7469 | -0.1137 | -65  | 260  | 274  | NTNNETISQTQPIYK                  |  |  |  |                                          |  | Mascot |
| 1750.8606 | 1750.7469 | -0.1137 | -65  | 260  | 274  | NTNNETISQTQPIYK                  |  |  |  |                                          |  | Mascot |
| 1902.9088 | 1902.8788 | -0.03   | -16  | 1227 | 1242 | MGYNNSCIQQLIDYIK                 |  |  |  |                                          |  | Mascot |
| 1975.9252 | 1975.8392 | -0.086  | -44  | 1227 | 1242 | MGYNNSCIQQLIDYIK                 |  |  |  | Carbamidomethyl (C)[7], Oxidation (M)[1] |  | Mascot |
| 2104.8962 | 2104.9424 | 0.0462  | 22   | 341  | 359  | FNNCVAFCNLHGDAGEH<br>EK          |  |  |  |                                          |  | Mascot |
| 2194.0129 | 2194.0215 | 0.0086  | 4    | 198  | 216  | IDPMDVQMAVFHCADGF<br>LK          |  |  |  | Carbamidomethyl (C)[13]                  |  | Mascot |
| 2207.0801 | 2207.0354 | -0.0447 | -20  | 829  | 848  | LYPSCVFVHQNVSDITAG<br>EK         |  |  |  |                                          |  | Mascot |
| 2225.1033 | 2225.0471 | -0.0562 | -25  | 293  | 310  | SHLMNSLINEKHNTFFHR               |  |  |  |                                          |  | Mascot |
| 2225.1033 | 2225.0471 | -0.0562 | -25  | 293  | 310  | SHLMNSLINEKHNTFFHR               |  |  |  |                                          |  | Mascot |
| 2230.0444 | 2230.1333 | 0.0889  | 40   | 170  | 190  | TDTGSTSHGGDIFKAMSL<br>YNK        |  |  |  |                                          |  | Mascot |
| 2479.2576 | 2479.2087 | -0.0489 | -20  | 1255 | 1275 | YEFKNEFFVELVLSICNG<br>SIK        |  |  |  |                                          |  | Mascot |
| 3337.7024 | 3337.6492 | -0.0532 | -16  | 387  | 414  | IIQELFTNPKPLICLFTEDD<br>SNIFELER |  |  |  |                                          |  | Mascot |

42

novel protein similar to follistatin-like 1 (fstl1, wu:fc25c04) [Danio rerio]

gi|220673211

32875.6

5.1

7

29

0

Peptide Information

| Calc. Mass | Obsrv. Mass | ± da    | ± ppm | Start Seq. | End Seq. | Sequence                | Ion Score | C. I. | % Modification                              | Rank | Result Type |
|------------|-------------|---------|-------|------------|----------|-------------------------|-----------|-------|---------------------------------------------|------|-------------|
| 870.4315   | 870.5125    | 0.081   | 93    | 276        | 282      | HQETVEK                 |           |       |                                             |      | Mascot      |
| 1766.8424  | 1766.7407   | -0.1017 | -58   | 54         | 68       | NHCELHRDACLTGLK         |           |       | Carbamidomethyl (C)[3]                      |      | Mascot      |
| 1766.8424  | 1766.7407   | -0.1017 | -58   | 54         | 68       | NHCELHRDACLTGLK         |           |       | Carbamidomethyl (C)[3]                      |      | Mascot      |
| 2050.7617  | 2050.8474   | 0.0857  | 42    | 232        | 249      | CVCACGNWVCTAMTCD<br>EK  |           |       | Carbamidomethyl (C)[1,3]                    |      | Mascot      |
| 2066.7566  | 2066.8445   | 0.0879  | 43    | 232        | 249      | CVCACGNWVCTAMTCD<br>EK  |           |       | Carbamidomethyl (C)[1,3], Oxidation (M)[13] |      | Mascot      |
| 2225.0947  | 2225.0471   | -0.0476 | -21   | 192        | 210      | LSFDEFLNCLKPGFSPPE<br>K |           |       | Carbamidomethyl (C)[9]                      |      | Mascot      |
| 2225.0947  | 2225.0471   | -0.0476 | -21   | 192        | 210      | LSFDEFLNCLKPGFSPPE<br>K |           |       | Carbamidomethyl (C)[9]                      |      | Mascot      |
| 2299.9661  | 2300.0991   | 0.133   | 58    | 250        | 268      | TPVFDTEGDQEMTEEEW<br>TR |           |       |                                             |      | Mascot      |
| 2353.1897  | 2353.0391   | -0.1506 | -64   | 192        | 211      | LSFDEFLNCLKPGFSPPE      |           |       | Carbamidomethyl (C)[9]                      |      | Mascot      |

|    |                                                                                         |           |        |    |     |     |                                 |  |  |  |  |  |  |  |  |  |        |
|----|-----------------------------------------------------------------------------------------|-----------|--------|----|-----|-----|---------------------------------|--|--|--|--|--|--|--|--|--|--------|
|    | 2497.1047                                                                               | 2497.1646 | 0.0599 | 24 | 150 | 170 | KK<br>FIQHNETAVQMSSYAEEE<br>NNR |  |  |  |  |  |  |  |  |  | Mascot |
|    | 2497.1047                                                                               | 2497.1646 | 0.0599 | 24 | 150 | 170 | FIQHNETAVQMSSYAEEE<br>NNR       |  |  |  |  |  |  |  |  |  | Mascot |
| 43 | PREDICTED: zinc finger protein 569-like [Danio rerio] gi 125851284 48241.3 9.28 12 29 0 |           |        |    |     |     |                                 |  |  |  |  |  |  |  |  |  |        |

#### Peptide Information

| Calc. Mass | Obsrv. Mass | ± da    | ± ppm | Start Seq. | End Seq. | Sequence                 | Ion Score | C. I. % | Modification                                 | Rank | Result Type |
|------------|-------------|---------|-------|------------|----------|--------------------------|-----------|---------|----------------------------------------------|------|-------------|
| 1165.5895  | 1165.7047   | 0.1152  | 99    | 127        | 136      | AHMKIHSGER               |           |         |                                              |      | Mascot      |
| 1174.5422  | 1174.6155   | 0.0733  | 62    | 383        | 391      | MHSREDPFR                |           |         |                                              |      | Mascot      |
| 1195.5017  | 1195.5336   | 0.0319  | 27    | 220        | 229      | RPCTCQQCEK               |           |         |                                              |      | Mascot      |
| 1279.6688  | 1279.7307   | 0.0619  | 48    | 97         | 106      | LDVHMRVHTR               |           |         | Oxidation (M)[5]                             |      | Mascot      |
| 1664.752   | 1664.8435   | 0.0915  | 55    | 327        | 341      | THTGEKPFTCAQCGK          |           |         | Carbamidomethyl (C)[10]                      |      | Mascot      |
| 1664.752   | 1664.8435   | 0.0915  | 55    | 327        | 341      | THTGEKPFTCAQCGK          |           |         | Carbamidomethyl (C)[10]                      |      | Mascot      |
| 1689.8364  | 1689.8737   | 0.0373  | 22    | 21         | 34       | QEDLQEQTDLMLVK           |           |         |                                              |      | Mascot      |
| 1689.8364  | 1689.8737   | 0.0373  | 22    | 21         | 34       | QEDLQEQTDLMLVK           |           |         |                                              |      | Mascot      |
| 1788.8302  | 1788.7198   | -0.1104 | -62   | 215        | 229      | IHTGKRPTCQQCEK           |           |         | Carbamidomethyl (C)[8]                       |      | Mascot      |
| 1821.8846  | 1821.8564   | -0.0282 | -15   | 271        | 285      | VHTREKPHICEQCGK          |           |         | Carbamidomethyl (C)[10]                      |      | Mascot      |
| 1902.8732  | 1902.8788   | 0.0056  | 3     | 215        | 229      | IHTGKRPTCQQCEK           |           |         | Carbamidomethyl (C)[8,10,13]                 |      | Mascot      |
| 2104.9109  | 2104.9424   | 0.0315  | 15    | 220        | 235      | RPCTCQQCEKSFYNAR         |           |         | Carbamidomethyl (C)[3,5,8]                   |      | Mascot      |
| 2193.9111  | 2194.0215   | 0.1104  | 50    | 351        | 369      | NHMDGHTGTIVFTCDQC<br>GK  |           |         | Carbamidomethyl (C)[14,17], Oxidation (M)[3] |      | Mascot      |
| 2211.105   | 2211.0327   | -0.0723 | -33   | 243        | 262      | THTGERPFSCILGKSFS<br>LK  |           |         |                                              |      | Mascot      |
| 2284.0486  | 2284.0986   | 0.05    | 22    | 187        | 206      | VHTGEKPYTCEQCGKSF<br>GQK |           |         | Carbamidomethyl (C)[10]                      |      | Mascot      |

|    |                                                                                                                    |  |  |  |  |  |  |  |  |  |  |  |  |  |  |  |  |
|----|--------------------------------------------------------------------------------------------------------------------|--|--|--|--|--|--|--|--|--|--|--|--|--|--|--|--|
| 44 | A disintegrin and metalloproteinase with thrombospondin motifs 10 [Danio rerio] gi 181332992 123459.3 7.72 15 29 0 |  |  |  |  |  |  |  |  |  |  |  |  |  |  |  |  |
|----|--------------------------------------------------------------------------------------------------------------------|--|--|--|--|--|--|--|--|--|--|--|--|--|--|--|--|

#### Peptide Information

| Calc. Mass | Obsrv. Mass | ± da    | ± ppm | Start Seq. | End Seq. | Sequence      | Ion Score | C. I. % | Modification                                 | Rank | Result Type |
|------------|-------------|---------|-------|------------|----------|---------------|-----------|---------|----------------------------------------------|------|-------------|
| 856.3868   | 856.4965    | 0.1097  | 128   | 315        | 321      | SLDSFCK       |           |         | Carbamidomethyl (C)[6]                       |      | Mascot      |
| 868.4345   | 868.5223    | 0.0878  | 101   | 590        | 596      | YCLGERK       |           |         |                                              |      | Mascot      |
| 996.4389   | 996.5625    | 0.1236  | 124   | 255        | 262      | MMVSYHGR      |           |         | Oxidation (M)[1]                             |      | Mascot      |
| 996.4389   | 996.5625    | 0.1236  | 124   | 255        | 262      | MMVSYHGR      |           |         | Oxidation (M)[1]                             |      | Mascot      |
| 1195.4475  | 1195.5336   | 0.0861  | 72    | 1099       | 1108     | QMCCKTCQGH    |           |         | Carbamidomethyl (C)[3]                       |      | Mascot      |
| 1256.627   | 1256.6152   | -0.0118 | -9    | 755        | 765      | SKGDQYFINGK   |           |         |                                              |      | Mascot      |
| 1664.6753  | 1664.8435   | 0.1682  | 101   | 497        | 509      | YGEVCSELWCMSK |           |         | Carbamidomethyl (C)[5,10], Oxidation (M)[11] |      | Mascot      |
| 1664.6753  | 1664.8435   | 0.1682  | 101   | 497        | 509      | YGEVCSELWCMSK |           |         | Carbamidomethyl (C)[5,10], Oxidation (M)[11] |      | Mascot      |

|           |           |         |     |     |     |                                   |                                             |        |
|-----------|-----------|---------|-----|-----|-----|-----------------------------------|---------------------------------------------|--------|
| 1695.7795 | 1695.7665 | -0.013  | -8  | 860 | 873 | QADLSVVYNHFCDK                    | Carbamidomethyl (C)[12]                     | Mascot |
| 1766.853  | 1766.7407 | -0.1123 | -64 | 860 | 874 | QADLSVVYNHFCDKK                   |                                             | Mascot |
| 1766.853  | 1766.7407 | -0.1123 | -64 | 859 | 873 | KQADLSVVYNHFCDK                   |                                             | Mascot |
| 1975.8458 | 1975.8392 | -0.0066 | -3  | 497 | 512 | YGEVCSSELWCMSKGNR                 | Carbamidomethyl (C)[5,10]                   | Mascot |
| 2088.9702 | 2088.949  | -0.0212 | -10 | 578 | 595 | HCDSPRPTVGKCYCLGE<br>R            | Carbamidomethyl (C)[2,14]                   | Mascot |
| 2280.1086 | 2280.1023 | -0.0063 | -3  | 424 | 443 | LMAAHITMKTNPFWWSA<br>CSR          | Oxidation (M)[2]                            | Mascot |
| 2299.0403 | 2299.1062 | 0.0659  | 29  | 7   | 29  | SLACVGIMAMVASGGAE<br>SWSDEK       |                                             | Mascot |
| 2300.3013 | 2300.0991 | -0.2022 | -88 | 735 | 754 | GSVFIHIQELNISLNYLVL<br>K          |                                             | Mascot |
| 2353.125  | 2353.0391 | -0.0859 | -37 | 424 | 443 | LMAAHITMKTNPFWWSA<br>CSR          | Carbamidomethyl (C)[18], Oxidation (M)[2,8] | Mascot |
| 3150.4077 | 3150.3574 | -0.0503 | -16 | 643 | 670 | SCSLNCLAEGYNYFYTER<br>APAVVDGTPCR | Carbamidomethyl (C)[2,6]                    | Mascot |

45 paxillin [Danio rerio] gi|148725733 31162.6 8.27 4 29 0 19 0

#### Peptide Information

| Calc. Mass | Obsrv. Mass | $\pm$ da | $\pm$ ppm | Start Seq. | End Seq. | Sequence                  | Ion Score | C. I. % | Modification               | Rank | Result Type |
|------------|-------------|----------|-----------|------------|----------|---------------------------|-----------|---------|----------------------------|------|-------------|
| 1547.8032  | 1547.7518   | -0.0514  | -33       | 33         | 47       | LGVQTVAKGVCGACK           | 19        | 0       | Carbamidomethyl (C)[11,14] |      | Mascot      |
| 1547.8032  | 1547.7518   | -0.0514  | -33       | 33         | 47       | LGVQTVAKGVCGACK           |           |         | Carbamidomethyl (C)[11,14] |      | Mascot      |
| 1689.7325  | 1689.8737   | 0.1412   | 84        | 80         | 92       | NFFERDGGPYCEK             |           |         | Carbamidomethyl (C)[11]    |      | Mascot      |
| 1689.7325  | 1689.8737   | 0.1412   | 84        | 80         | 92       | NFFERDGGPYCEK             |           |         | Carbamidomethyl (C)[11]    |      | Mascot      |
| 1987.9867  | 1987.9663   | -0.0204  | -10       | 102        | 119      | CYYCSGPILDKVVTALDK        |           |         |                            |      | Mascot      |
| 2225.0657  | 2225.0471   | -0.0186  | -8        | 217        | 237      | GSLCSGCQKPITGRGITA<br>MGK |           |         | Carbamidomethyl (C)[4,7]   |      | Mascot      |
| 2225.0657  | 2225.0471   | -0.0186  | -8        | 217        | 237      | GSLCSGCQKPITGRGITA<br>MGK |           |         | Carbamidomethyl (C)[4,7]   |      | Mascot      |

46 PREDICTED: UPF0577 protein KIAA1324 [Danio rerio] gi|68365156 104831.8 5.42 11 29 0

#### Peptide Information

| Calc. Mass | Obsrv. Mass | $\pm$ da | $\pm$ ppm | Start Seq. | End Seq. | Sequence         | Ion Score | C. I. % | Modification           | Rank | Result Type |
|------------|-------------|----------|-----------|------------|----------|------------------|-----------|---------|------------------------|------|-------------|
| 882.4059   | 882.5364    | 0.1305   | 148       | 879        | 886      | LMMTAGDK         |           |         | Oxidation (M)[2]       |      | Mascot      |
| 1165.5735  | 1165.7047   | 0.1312   | 113       | 928        | 938      | TSDGFDSVPLK      |           |         |                        |      | Mascot      |
| 1174.6249  | 1174.6155   | -0.0094  | -8        | 753        | 762      | LRCDPSVTVK       |           |         | Carbamidomethyl (C)[3] |      | Mascot      |
| 1256.5398  | 1256.6152   | 0.0754   | 60        | 239        | 250      | CVPCAANSYSNK     |           |         |                        |      | Mascot      |
| 1349.6241  | 1349.5902   | -0.0339  | -25       | 372        | 381      | WWNKMPSNMR       |           |         |                        |      | Mascot      |
| 1521.7366  | 1521.7025   | -0.0341  | -22       | 468        | 481      | NNMVVESWSGTIGK   |           |         |                        |      | Mascot      |
| 1766.7948  | 1766.7407   | -0.0541  | -31       | 582        | 597      | EACIPCGPNTYSNKGR |           |         | Carbamidomethyl (C)[3] |      | Mascot      |
| 1766.7948  | 1766.7407   | -0.0541  | -31       | 582        | 597      | EACIPCGPNTYSNKGR | 4         | 0       | Carbamidomethyl (C)[3] |      | Mascot      |



|    |                                                                  |           |        |    |             |         |                              |   |                          |        |
|----|------------------------------------------------------------------|-----------|--------|----|-------------|---------|------------------------------|---|--------------------------|--------|
|    | 1821.8041                                                        | 1821.8564 | 0.0523 | 29 | 596         | 611     | GRSACMSDCTLALDHK             |   | Carbamidomethyl (C)[5,9] | Mascot |
|    | 2050.8447                                                        | 2050.8474 | 0.0027 | 1  | 2           | 18      | SSDYHFEYTD CDVLGSR           |   | Carbamidomethyl (C)[11]  | Mascot |
|    | 2283.0498                                                        | 2283.1052 | 0.0554 | 24 | 490         | 509     | TNSTVSFSWGFQRTGAF<br>DMK     |   | Oxidation (M)[19]        | Mascot |
|    | 2283.0498                                                        | 2283.1052 | 0.0554 | 24 | 490         | 509     | TNSTVSFSWGFQRTGAF<br>DMK     |   | Oxidation (M)[19]        | Mascot |
|    | 2496.9919                                                        | 2497.1646 | 0.1727 | 69 | 239         | 262     | CVPCAANSYSNKGATAC<br>QTCDDMK |   | Oxidation (M)[22]        | Mascot |
|    | 2496.9919                                                        | 2497.1646 | 0.1727 | 69 | 239         | 262     | CVPCAANSYSNKGATAC<br>QTCDDMK |   | Oxidation (M)[22]        | Mascot |
| 47 | eukaryotic translation initiation factor 4E type 2 [Danio rerio] |           |        |    | gi 41152155 | 26684.2 | 7.07                         | 6 | 29                       | 0      |

#### Peptide Information

| Calc. Mass | Obsrv. Mass | ± da    | ± ppm | Start Seq. | End Seq. | Sequence                | Ion Score | C. I. | % Modification                            | Rank | Result Type |
|------------|-------------|---------|-------|------------|----------|-------------------------|-----------|-------|-------------------------------------------|------|-------------|
| 856.5515   | 856.4965    | -0.055  | -64   | 129        | 134      | WIIRLR                  |           |       |                                           |      | Mascot      |
| 1062.5037  | 1062.6549   | 0.1512  | 142   | 1          | 8        | MNQFEHLK                |           |       | Oxidation (M)[1]                          |      | Mascot      |
| 1547.8138  | 1547.7518   | -0.062  | -40   | 197        | 209      | VLNLPPNTIMEYK           |           |       | Oxidation (M)[10]                         |      | Mascot      |
| 1547.8138  | 1547.7518   | -0.062  | -40   | 197        | 209      | VLNLPPNTIMEYK           |           |       | Oxidation (M)[10]                         |      | Mascot      |
| 1902.9014  | 1902.8788   | -0.0226 | -12   | 112        | 128      | EGIKPMWEDEANKNGGK       |           |       |                                           |      | Mascot      |
| 2224.7988  | 2225.0471   | 0.2483  | 112   | 9          | 26       | EEDCGDHEEMKDNNES<br>DR  |           |       | Carbamidomethyl (C)[4], Oxidation (M)[10] |      | Mascot      |
| 2224.7988  | 2225.0471   | 0.2483  | 112   | 9          | 26       | EEDCGDHEEMKDNNES<br>DR  |           |       | Carbamidomethyl (C)[4], Oxidation (M)[10] |      | Mascot      |
| 2405.9795  | 2406.1626   | 0.1831  | 76    | 1          | 19       | MNQFEHLKEEDCGDHEE<br>MK |           |       | Carbamidomethyl (C)[12]                   |      | Mascot      |

|    |                                 |  |  |  |  |             |         |      |   |    |   |
|----|---------------------------------|--|--|--|--|-------------|---------|------|---|----|---|
| 48 | Zgc:55605 protein [Danio rerio] |  |  |  |  | gi 42542454 | 47323.9 | 5.53 | 1 | 21 | 0 |
|----|---------------------------------|--|--|--|--|-------------|---------|------|---|----|---|

#### Peptide Information

| Calc. Mass | Obsrv. Mass | ± da    | ± ppm | Start Seq. | End Seq. | Sequence    | Ion Score | C. I. | % Modification | Rank | Result Type |
|------------|-------------|---------|-------|------------|----------|-------------|-----------|-------|----------------|------|-------------|
| 1234.6426  | 1234.6379   | -0.0047 | -4    | 352        | 362      | KEIFPAATDSR | 21        | 0     |                | 4    | Mascot      |

|    |                                               |  |  |  |  |             |         |      |   |    |   |
|----|-----------------------------------------------|--|--|--|--|-------------|---------|------|---|----|---|
| 49 | glial fibrillary acidic protein [Danio rerio] |  |  |  |  | gi 20977259 | 42127.5 | 5.03 | 1 | 20 | 0 |
|----|-----------------------------------------------|--|--|--|--|-------------|---------|------|---|----|---|

#### Peptide Information

| Calc. Mass | Obsrv. Mass | ± da    | ± ppm | Start Seq. | End Seq. | Sequence       | Ion Score | C. I. | % Modification      | Rank | Result Type |
|------------|-------------|---------|-------|------------|----------|----------------|-----------|-------|---------------------|------|-------------|
| 1750.835   | 1750.7469   | -0.0881 | -50   | 259        | 272      | LEDEIQMLKEEMAR | 20        | 0     | Oxidation (M)[7]    | 2    | Mascot      |
| 1766.83    | 1766.7407   | -0.0893 | -51   | 259        | 272      | LEDEIQMLKEEMAR | 16        | 0     | Oxidation (M)[7,12] | 2    | Mascot      |

|    |                        |  |  |  |  |             |         |      |   |    |   |
|----|------------------------|--|--|--|--|-------------|---------|------|---|----|---|
| 50 | paxillin [Danio rerio] |  |  |  |  | gi 42415525 | 58983.6 | 6.27 | 1 | 19 | 0 |
|----|------------------------|--|--|--|--|-------------|---------|------|---|----|---|

#### Peptide Information

| Calc. Mass | Obsrv. Mass | ± da | ± ppm | Start | End | Sequence | Ion | C. I. | % Modification | Rank | Result Type |
|------------|-------------|------|-------|-------|-----|----------|-----|-------|----------------|------|-------------|
|------------|-------------|------|-------|-------|-----|----------|-----|-------|----------------|------|-------------|

|           |           |         |     | Seq. | Seq. | Score           |    |   |                            |  |          |
|-----------|-----------|---------|-----|------|------|-----------------|----|---|----------------------------|--|----------|
| 1547.8032 | 1547.7518 | -0.0514 | -33 | 290  | 304  | LGVQTVAKGVCGACK | 19 | 0 | Carbamidomethyl (C)[11,14] |  | 2 Mascot |

|                |           |                        |                |                |                    |
|----------------|-----------|------------------------|----------------|----------------|--------------------|
| Gel Idx/Pos    | 234/J10   | Instr./Gel Origin      | BA2060/110707A | Process Status | Analysis Succeeded |
| Plate [#] Name | [1] 31496 | Instrument Sample Name |                | Spectra        | 11                 |

| Rank | Protein Name                                                           | Accession No. | Protein MW | Protein PI | Pep. Count | Protein Score | Protein Score C. I. % | Total Ion Score | Total Ion C. I. % |
|------|------------------------------------------------------------------------|---------------|------------|------------|------------|---------------|-----------------------|-----------------|-------------------|
| 1    | guanine nucleotide-binding protein subunit beta-2-like 1 [Danio rerio] | gi 18859301   | 35100.5    | 7.6        | 22         | 1,200         | 100                   | 991             | 100               |

| Peptide Information |             |         |       |            |          |                   |           |         |                         | Rank | Result Type |
|---------------------|-------------|---------|-------|------------|----------|-------------------|-----------|---------|-------------------------|------|-------------|
| Calc. Mass          | Obsrv. Mass | ± da    | ± ppm | Start Seq. | End Seq. | Sequence          | Ion Score | C. I. % | Modification            |      |             |
| 807.4433            | 807.3908    | -0.0525 | -65   | 39         | 44       | TIIMWK            |           |         | Oxidation (M)[4]        |      | Mascot      |
| 844.4787            | 844.4626    | -0.0161 | -19   | 100        | 106      | RFVGHTK           | 5         | 0       |                         |      | Mascot      |
| 844.4787            | 844.4626    | -0.0161 | -19   | 100        | 106      | RFVGHTK           |           |         |                         |      | Mascot      |
| 857.509             | 857.4856    | -0.0234 | -27   | 265        | 271      | IIVDELRL          |           |         |                         |      | Mascot      |
| 857.509             | 857.4856    | -0.0234 | -27   | 265        | 271      | IIVDELRL          | 39        | 96.641  |                         |      | Mascot      |
| 860.4512            | 860.4272    | -0.024  | -28   | 258        | 264      | IWDLEGK           |           |         |                         |      | Mascot      |
| 1004.4981           | 1004.4677   | -0.0304 | -30   | 176        | 183      | VWNLANCK          |           |         | Carbamidomethyl (C)[7]  |      | Mascot      |
| 1034.5703           | 1034.527    | -0.0433 | -42   | 37         | 44       | DKTIIMWK          |           |         |                         |      | Mascot      |
| 1050.5652           | 1050.53     | -0.0352 | -34   | 37         | 44       | DKTIIMWK          |           |         | Oxidation (M)[6]        |      | Mascot      |
| 1059.5946           | 1059.5621   | -0.0325 | -31   | 309        | 317      | VWQVTIGTR         | 76        | 100     |                         |      | Mascot      |
| 1059.5946           | 1059.5621   | -0.0325 | -31   | 309        | 317      | VWQVTIGTR         |           |         |                         |      | Mascot      |
| 1090.5714           | 1090.5328   | -0.0386 | -35   | 131        | 139      | LWNTLGVCCK        |           |         | Carbamidomethyl (C)[8]  |      | Mascot      |
| 1192.5593           | 1192.5251   | -0.0342 | -29   | 48         | 57       | DETNYGIPQR        |           |         |                         |      | Mascot      |
| 1192.5593           | 1192.5251   | -0.0342 | -29   | 48         | 57       | DETNYGIPQR        | 75        | 100     |                         |      | Mascot      |
| 1264.6532           | 1264.6165   | -0.0367 | -29   | 89         | 99       | LWDLTTGTTTR       |           |         |                         |      | Mascot      |
| 1264.6532           | 1264.6165   | -0.0367 | -29   | 89         | 99       | LWDLTTGTTTR       | 89        | 100     |                         |      | Mascot      |
| 1293.6433           | 1293.6056   | -0.0377 | -29   | 107        | 118      | DVLSVAFSADNR      |           |         |                         |      | Mascot      |
| 1293.6433           | 1293.6056   | -0.0377 | -29   | 107        | 118      | DVLSVAFSADNR      | 111       | 100     |                         |      | Mascot      |
| 1366.6824           | 1366.6393   | -0.0431 | -32   | 246        | 257      | YWLCAATGPSIK      |           |         | Carbamidomethyl (C)[4]  |      | Mascot      |
| 1492.6737           | 1492.626    | -0.0477 | -32   | 213        | 225      | DGQAMLWDLNEGK     |           |         | Oxidation (M)[5]        |      | Mascot      |
| 1562.7921           | 1562.743    | -0.0491 | -31   | 45         | 57       | LTRDETNYGIPQR     |           |         |                         |      | Mascot      |
| 1858.0281           | 1857.9689   | -0.0592 | -32   | 265        | 280      | IIVDELQRQDIITNSK  | 87        | 100     |                         |      | Mascot      |
| 1858.0281           | 1857.9689   | -0.0592 | -32   | 265        | 280      | IIVDELQRQDIITNSK  |           |         |                         |      | Mascot      |
| 1907.8956           | 1907.8336   | -0.062  | -32   | 156        | 172      | FSPNSSNPIIVSCGWDK |           |         | Carbamidomethyl (C)[13] |      | Mascot      |

|           |           |         |     |     |     |                                 |     |     |  |  |                         |        |
|-----------|-----------|---------|-----|-----|-----|---------------------------------|-----|-----|--|--|-------------------------|--------|
| 1995.8865 | 1995.8215 | -0.065  | -33 | 140 | 155 | YTIQDDSHTEWVSCVR                |     |     |  |  | Carbamidomethyl (C)[14] | Mascot |
| 1995.8865 | 1995.8215 | -0.065  | -33 | 140 | 155 | YTIQDDSHTEWVSCVR                | 136 | 100 |  |  | Carbamidomethyl (C)[14] | Mascot |
| 2225.073  | 2225.0466 | -0.0264 | -12 | 156 | 175 | FSPNSSNPIIVSCGWDKM<br>VK        |     |     |  |  | Oxidation (M)[18]       | Mascot |
| 2264.0764 | 2264.0029 | -0.0735 | -32 | 226 | 245 | HLTYLDGGDTINALCFSP<br>NR        | 171 | 100 |  |  | Carbamidomethyl (C)[15] | Mascot |
| 2264.0764 | 2264.0029 | -0.0735 | -32 | 226 | 245 | HLTYLDGGDTINALCFSP<br>NR        |     |     |  |  | Carbamidomethyl (C)[15] | Mascot |
| 2600.2925 | 2600.2058 | -0.0867 | -33 | 13  | 36  | GHSGWVTQIATTPQFPD<br>MILSASR    |     |     |  |  |                         | Mascot |
| 2616.2876 | 2616.2104 | -0.0772 | -30 | 13  | 36  | GHSGWVTQIATTPQFPD<br>MILSASR    |     |     |  |  | Oxidation (M)[18]       | Mascot |
| 2743.3103 | 2743.2261 | -0.0842 | -31 | 186 | 212 | TNHIGHTGYLNTVTVSPD<br>GSLCASGK  |     |     |  |  | Carbamidomethyl (C)[22] | Mascot |
| 3082.4575 | 3082.3618 | -0.0957 | -31 | 281 | 308 | AEPQCTSLAWSADGQT<br>LFAGYTDNLIR |     |     |  |  | Carbamidomethyl (C)[6]  | Mascot |
| 3082.4575 | 3082.3618 | -0.0957 | -31 | 281 | 308 | AEPQCTSLAWSADGQT<br>LFAGYTDNLIR | 207 | 100 |  |  | Carbamidomethyl (C)[6]  | Mascot |

2 Guanine nucleotide binding protein (G protein), beta polypeptide 2-like 1 [Danio rerio] gi|152013098 35128.5 7.6 21 1,190 100 991 100

#### Peptide Information

| Calc. Mass | Obsrv. Mass | ± da    | ± ppm | Start Seq. | End Seq. | Sequence      | Ion Score | C. I.  | % Modification         | Rank | Result Type |
|------------|-------------|---------|-------|------------|----------|---------------|-----------|--------|------------------------|------|-------------|
| 807.4433   | 807.3908    | -0.0525 | -65   | 39         | 44       | TIIMWK        |           |        | Oxidation (M)[4]       |      | Mascot      |
| 844.4787   | 844.4626    | -0.0161 | -19   | 100        | 106      | RFVGHTK       | 5         | 0      |                        |      | Mascot      |
| 844.4787   | 844.4626    | -0.0161 | -19   | 100        | 106      | RFVGHTK       |           |        |                        |      | Mascot      |
| 857.509    | 857.4856    | -0.0234 | -27   | 265        | 271      | IIVDELRL      |           |        |                        |      | Mascot      |
| 857.509    | 857.4856    | -0.0234 | -27   | 265        | 271      | IIVDELRL      | 39        | 96.641 |                        |      | Mascot      |
| 860.4512   | 860.4272    | -0.024  | -28   | 258        | 264      | IWDLEK        |           |        |                        |      | Mascot      |
| 1004.4981  | 1004.4677   | -0.0304 | -30   | 176        | 183      | VWNLANCK      |           |        | Carbamidomethyl (C)[7] |      | Mascot      |
| 1034.5703  | 1034.527    | -0.0433 | -42   | 37         | 44       | DKTIIMWK      |           |        |                        |      | Mascot      |
| 1050.5652  | 1050.53     | -0.0352 | -34   | 37         | 44       | DKTIIMWK      |           |        | Oxidation (M)[6]       |      | Mascot      |
| 1059.5946  | 1059.5621   | -0.0325 | -31   | 309        | 317      | VWQVTIGTR     | 76        | 100    |                        |      | Mascot      |
| 1059.5946  | 1059.5621   | -0.0325 | -31   | 309        | 317      | VWQVTIGTR     |           |        |                        |      | Mascot      |
| 1090.5714  | 1090.5328   | -0.0386 | -35   | 131        | 139      | LWNTLGVCCK    |           |        | Carbamidomethyl (C)[8] |      | Mascot      |
| 1192.5593  | 1192.5251   | -0.0342 | -29   | 48         | 57       | DETNYGIPQR    |           |        |                        |      | Mascot      |
| 1192.5593  | 1192.5251   | -0.0342 | -29   | 48         | 57       | DETNYGIPQR    | 75        | 100    |                        |      | Mascot      |
| 1264.6532  | 1264.6165   | -0.0367 | -29   | 89         | 99       | LWDLTTGTTTR   |           |        |                        |      | Mascot      |
| 1264.6532  | 1264.6165   | -0.0367 | -29   | 89         | 99       | LWDLTTGTTTR   | 89        | 100    |                        |      | Mascot      |
| 1293.6433  | 1293.6056   | -0.0377 | -29   | 107        | 118      | DVLSVAFSADNR  |           |        |                        |      | Mascot      |
| 1293.6433  | 1293.6056   | -0.0377 | -29   | 107        | 118      | DVLSVAFSADNR  | 111       | 100    |                        |      | Mascot      |
| 1492.6737  | 1492.626    | -0.0477 | -32   | 213        | 225      | DGQAMLWDLNEGK |           |        | Oxidation (M)[5]       |      | Mascot      |

|                     |                                     |            |             |         |       |            |          |                                 |           |       |                         |                                              |        |        |        |  |  |        |
|---------------------|-------------------------------------|------------|-------------|---------|-------|------------|----------|---------------------------------|-----------|-------|-------------------------|----------------------------------------------|--------|--------|--------|--|--|--------|
|                     |                                     | 1562.7921  | 1562.743    | -0.0491 | -31   | 45         | 57       | LTRDETNYGIPQR                   |           |       |                         |                                              |        |        |        |  |  | Mascot |
|                     |                                     | 1858.0281  | 1857.9689   | -0.0592 | -32   | 265        | 280      | IIVDELQRQDIITNSK                | 87        | 100   |                         |                                              |        |        |        |  |  | Mascot |
|                     |                                     | 1858.0281  | 1857.9689   | -0.0592 | -32   | 265        | 280      | IIVDELQRQDIITNSK                |           |       |                         |                                              |        |        |        |  |  | Mascot |
|                     |                                     | 1907.8956  | 1907.8336   | -0.062  | -32   | 156        | 172      | FSPNSSNPIIVSCGWDK               |           |       | Carbamidomethyl (C)[13] |                                              |        |        |        |  |  | Mascot |
|                     |                                     | 1995.8865  | 1995.8215   | -0.065  | -33   | 140        | 155      | YTIQDDSHTEWVSCVR                |           |       | Carbamidomethyl (C)[14] |                                              |        |        |        |  |  | Mascot |
|                     |                                     | 1995.8865  | 1995.8215   | -0.065  | -33   | 140        | 155      | YTIQDDSHTEWVSCVR                | 136       | 100   | Carbamidomethyl (C)[14] |                                              |        |        |        |  |  | Mascot |
|                     |                                     | 2225.073   | 2225.0466   | -0.0264 | -12   | 156        | 175      | FSPNSSNPIIVSCGWDKM<br>VK        |           |       | Oxidation (M)[18]       |                                              |        |        |        |  |  | Mascot |
|                     |                                     | 2264.0764  | 2264.0029   | -0.0735 | -32   | 226        | 245      | HLTYLDGGDTINALCFSP<br>NR        | 171       | 100   | Carbamidomethyl (C)[15] |                                              |        |        |        |  |  | Mascot |
|                     |                                     | 2264.0764  | 2264.0029   | -0.0735 | -32   | 226        | 245      | HLTYLDGGDTINALCFSP<br>NR        |           |       | Carbamidomethyl (C)[15] |                                              |        |        |        |  |  | Mascot |
|                     |                                     | 2600.2925  | 2600.2058   | -0.0867 | -33   | 13         | 36       | GHSGWVTQIATTPQFPD<br>MILSASR    |           |       |                         |                                              |        |        |        |  |  | Mascot |
|                     |                                     | 2616.2876  | 2616.2104   | -0.0772 | -30   | 13         | 36       | GHSGWVTQIATTPQFPD<br>MILSASR    |           |       | Oxidation (M)[18]       |                                              |        |        |        |  |  | Mascot |
|                     |                                     | 2743.3103  | 2743.2261   | -0.0842 | -31   | 186        | 212      | TNHIGHTGYLNTVTVSPD<br>GSLCASGGK |           |       | Carbamidomethyl (C)[22] |                                              |        |        |        |  |  | Mascot |
|                     |                                     | 3082.4575  | 3082.3618   | -0.0957 | -31   | 281        | 308      | AEPQCTSLAWSADGQT<br>LFAGYTDNLIR |           |       | Carbamidomethyl (C)[6]  |                                              |        |        |        |  |  | Mascot |
|                     |                                     | 3082.4575  | 3082.3618   | -0.0957 | -31   | 281        | 308      | AEPQCTSLAWSADGQT<br>LFAGYTDNLIR | 207       | 100   | Carbamidomethyl (C)[6]  |                                              |        |        |        |  |  | Mascot |
| 3                   | tektin 2 (testicular) [Danio rerio] |            |             |         |       |            |          | gi 94733681                     | 48602.7   | 5.71  | 11                      | 64                                           | 98.057 | 14     | 0      |  |  |        |
| Peptide Information |                                     |            |             |         |       |            |          |                                 |           |       |                         |                                              |        |        |        |  |  |        |
|                     |                                     | Calc. Mass | Obsrv. Mass | ± da    | ± ppm | Start Seq. | End Seq. | Sequence                        | Ion Score | C. I. | %                       | Modification                                 | Rank   | Result | Type   |  |  |        |
|                     |                                     | 1004.4764  | 1004.4677   | -0.0087 | -9    | 324        | 331      | RPGMDLCR                        |           |       |                         | Carbamidomethyl (C)[7]                       |        |        | Mascot |  |  |        |
|                     |                                     | 1045.5789  | 1045.5333   | -0.0456 | -44   | 68         | 75       | INDITRWK                        |           |       |                         |                                              |        |        | Mascot |  |  |        |
|                     |                                     | 1059.543   | 1059.5621   | 0.0191  | 18    | 381        | 389      | QDALSLEQR                       | 14        | 0     |                         |                                              |        |        | Mascot |  |  |        |
|                     |                                     | 1059.543   | 1059.5621   | 0.0191  | 18    | 381        | 389      | QDALSLEQR                       |           |       |                         |                                              |        |        | Mascot |  |  |        |
|                     |                                     | 1234.6096  | 1234.6414   | 0.0318  | 26    | 231        | 240      | EEMQVSVQIR                      |           |       |                         | Oxidation (M)[3]                             |        |        | Mascot |  |  |        |
|                     |                                     | 1323.7379  | 1323.6307   | -0.1072 | -81   | 356        | 367      | LAQAQHSLSLQSLK                  |           |       |                         |                                              |        |        | Mascot |  |  |        |
|                     |                                     | 1445.7529  | 1445.7333   | -0.0196 | -14   | 229        | 240      | AREEMQVSVQIR                    |           |       |                         |                                              |        |        | Mascot |  |  |        |
|                     |                                     | 1857.8878  | 1857.9689   | 0.0811  | 44    | 208        | 223      | VPPGSTNPQQWEQFSR                |           |       |                         |                                              |        |        | Mascot |  |  |        |
|                     |                                     | 1857.8878  | 1857.9689   | 0.0811  | 44    | 208        | 223      | VPPGSTNPQQWEQFSR                |           |       |                         |                                              |        |        | Mascot |  |  |        |
|                     |                                     | 1907.9102  | 1907.8336   | -0.0766 | -40   | 150        | 164      | VLQQCIDQAFEQLCR                 |           |       |                         | Carbamidomethyl (C)[5,14]                    |        |        | Mascot |  |  |        |
|                     |                                     | 2211.0261  | 2211.0356   | 0.0095  | 4     | 268        | 284      | RTHHEEQAHHDMQWQL<br>K           |           |       |                         |                                              |        |        | Mascot |  |  |        |
|                     |                                     | 2283.1365  | 2283.1045   | -0.032  | -14   | 2          | 22       | ATLSSKPASRYSVSDWA<br>TNNK       |           |       |                         |                                              |        |        | Mascot |  |  |        |
|                     |                                     | 2600.116   | 2600.2058   | 0.0898  | 35    | 80         | 101      | ACAAQEVDEEMDALTLK<br>EEMER      |           |       |                         | Carbamidomethyl (C)[2], Oxidation (M)[10]    |        |        | Mascot |  |  |        |
|                     |                                     | 2616.1108  | 2616.2104   | 0.0996  | 38    | 80         | 101      | ACAAQEVDEEMDALTLK<br>EEMER      |           |       |                         | Carbamidomethyl (C)[2], Oxidation (M)[10,20] |        |        | Mascot |  |  |        |
| 4                   | novel protein [Danio rerio]         |            |             |         |       |            |          | gi 169146661                    | 90814.1   | 9.64  | 14                      | 63                                           | 97.554 | 32     | 81.41  |  |  |        |

| Peptide Information |                                                      |         |       |              |          |                      |           |       |                                           |                  |
|---------------------|------------------------------------------------------|---------|-------|--------------|----------|----------------------|-----------|-------|-------------------------------------------|------------------|
| Calc. Mass          | Obsrv. Mass                                          | ± da    | ± ppm | Start Seq.   | End Seq. | Sequence             | Ion Score | C. I. | % Modification                            | Rank Result Type |
| 857.4363            | 857.4856                                             | 0.0493  | 57    | 648          | 654      | EPVDELRL             |           |       |                                           | Mascot           |
| 857.4363            | 857.4856                                             | 0.0493  | 57    | 648          | 654      | EPVDELRL             | 32        | 81.41 |                                           | Mascot           |
| 860.4584            | 860.4272                                             | -0.0312 | -36   | 333          | 339      | SDINQQRK             |           |       |                                           | Mascot           |
| 922.5257            | 922.4028                                             | -0.1229 | -133  | 742          | 748      | FFTPVRR              |           |       |                                           | Mascot           |
| 996.4719            | 996.5638                                             | 0.0919  | 92    | 619          | 625      | YWICQAR              |           |       | Carbamidomethyl (C)[4]                    | Mascot           |
| 1045.5272           | 1045.5333                                            | 0.0061  | 6     | 665          | 674      | QSQQGSPVSK           |           |       |                                           | Mascot           |
| 1091.6207           | 1091.5417                                            | -0.079  | -72   | 67           | 76       | LAEYLAAKGR           |           |       |                                           | Mascot           |
| 1165.6073           | 1165.71                                              | 0.1027  | 88    | 351          | 360      | IQSHNPVTNR           |           |       |                                           | Mascot           |
| 1277.634            | 1277.6686                                            | 0.0346  | 27    | 605          | 615      | DVMSRVPMQAK          |           |       | Oxidation (M)[3]                          | Mascot           |
| 1293.6289           | 1293.6056                                            | -0.0233 | -18   | 605          | 615      | DVMSRVPMQAK          |           |       | Oxidation (M)[3,8]                        | Mascot           |
| 1293.6289           | 1293.6056                                            | -0.0233 | -18   | 605          | 615      | DVMSRVPMQAK          |           |       | Oxidation (M)[3,8]                        | Mascot           |
| 1366.6705           | 1366.6393                                            | -0.0312 | -23   | 413          | 424      | DISCITMKVDGK         |           |       | Carbamidomethyl (C)[4]                    | Mascot           |
| 1492.7325           | 1492.626                                             | -0.1065 | -71   | 157          | 169      | LCNTQQANFNALR        |           |       |                                           | Mascot           |
| 1638.9034           | 1638.8063                                            | -0.0971 | -59   | 364          | 378      | TSVSNVQAKPAQRPR      |           |       |                                           | Mascot           |
| 1707.8044           | 1707.7192                                            | -0.0852 | -50   | 726          | 741      | SQQGAEPGQVDGHEIR     |           |       |                                           | Mascot           |
| 2264.1589           | 2264.0029                                            | -0.156  | -69   | 626          | 644      | LMEREGNLEVLSLFEEAIR  |           |       | Oxidation (M)[2]                          | Mascot           |
| 2264.1589           | 2264.0029                                            | -0.156  | -69   | 626          | 644      | LMEREGNLEVLSLFEEAIR  |           |       | Oxidation (M)[2]                          | Mascot           |
| 2384.1697           | 2383.8777                                            | -0.292  | -122  | 467          | 486      | SCVLPQTTSEHKELQQPVMR |           |       | Carbamidomethyl (C)[2], Oxidation (M)[19] | Mascot           |
| 5                   | cytoskeleton associated protein 2-like [Danio rerio] |         |       | gi 187607996 |          | 86172.8              | 9.71      | 11    | 55 85.264                                 | 32 81.41         |

| Peptide Information |             |         |       |            |          |             |           |       |                        |                  |
|---------------------|-------------|---------|-------|------------|----------|-------------|-----------|-------|------------------------|------------------|
| Calc. Mass          | Obsrv. Mass | ± da    | ± ppm | Start Seq. | End Seq. | Sequence    | Ion Score | C. I. | % Modification         | Rank Result Type |
| 857.4363            | 857.4856    | 0.0493  | 57    | 605        | 611      | EPVDELRL    |           |       |                        | Mascot           |
| 857.4363            | 857.4856    | 0.0493  | 57    | 605        | 611      | EPVDELRL    | 32        | 81.41 |                        | Mascot           |
| 922.5257            | 922.4028    | -0.1229 | -133  | 699        | 705      | FFTPVRR     |           |       |                        | Mascot           |
| 996.4719            | 996.5638    | 0.0919  | 92    | 576        | 582      | YWICQAR     |           |       | Carbamidomethyl (C)[4] | Mascot           |
| 1045.5272           | 1045.5333   | 0.0061  | 6     | 622        | 631      | QSQQGSPVSK  |           |       |                        | Mascot           |
| 1091.6207           | 1091.5417   | -0.079  | -72   | 24         | 33       | LAEYLAAKGR  |           |       |                        | Mascot           |
| 1165.6073           | 1165.71     | 0.1027  | 88    | 308        | 317      | IQSHNPVTNR  |           |       |                        | Mascot           |
| 1277.634            | 1277.6686   | 0.0346  | 27    | 562        | 572      | DVMSRVPMQAK |           |       | Oxidation (M)[3]       | Mascot           |
| 1293.6289           | 1293.6056   | -0.0233 | -18   | 562        | 572      | DVMSRVPMQAK |           |       | Oxidation (M)[3,8]     | Mascot           |
| 1293.6289           | 1293.6056   | -0.0233 | -18   | 562        | 572      | DVMSRVPMQAK |           |       | Oxidation (M)[3,8]     | Mascot           |

|           |           |         |     |     |     |                          |  |  |  |  |                  |  |        |
|-----------|-----------|---------|-----|-----|-----|--------------------------|--|--|--|--|------------------|--|--------|
| 1492.7325 | 1492.626  | -0.1065 | -71 | 114 | 126 | LCNTQQANFNALR            |  |  |  |  |                  |  | Mascot |
| 1638.9034 | 1638.8063 | -0.0971 | -59 | 321 | 335 | TSVSNVQAKPAQRPR          |  |  |  |  |                  |  | Mascot |
| 1707.8044 | 1707.7192 | -0.0852 | -50 | 683 | 698 | SQQGAEPGQVDGHEIR         |  |  |  |  |                  |  | Mascot |
| 2264.1589 | 2264.0029 | -0.156  | -69 | 583 | 601 | LMEREGNLEVLSELFEEAI<br>R |  |  |  |  | Oxidation (M)[2] |  | Mascot |
| 2264.1589 | 2264.0029 | -0.156  | -69 | 583 | 601 | LMEREGNLEVLSELFEEAI<br>R |  |  |  |  | Oxidation (M)[2] |  | Mascot |

6 tektin 2 [Danio rerio] gi|310689065 48533.7 5.63 9 47 9.141 14 0

#### Peptide Information

| Calc. Mass | Obsrv. Mass | ± da    | ± ppm | Start Seq. | End Seq. | Sequence                  | Ion Score | C. I. | % Modification                               | Rank | Result Type |
|------------|-------------|---------|-------|------------|----------|---------------------------|-----------|-------|----------------------------------------------|------|-------------|
| 1004.4764  | 1004.4677   | -0.0087 | -9    | 324        | 331      | RPGMDLCR                  |           |       | Carbamidomethyl (C)[7]                       |      | Mascot      |
| 1045.5789  | 1045.5333   | -0.0456 | -44   | 68         | 75       | INDITRWK                  |           |       |                                              |      | Mascot      |
| 1059.543   | 1059.5621   | 0.0191  | 18    | 381        | 389      | QDALSLEQR                 | 14        | 0     |                                              |      | Mascot      |
| 1059.543   | 1059.5621   | 0.0191  | 18    | 381        | 389      | QDALSLEQR                 |           |       |                                              |      | Mascot      |
| 1323.7379  | 1323.6307   | -0.1072 | -81   | 356        | 367      | LAQAQHSLSLQSLK            |           |       |                                              |      | Mascot      |
| 1857.8878  | 1857.9689   | 0.0811  | 44    | 208        | 223      | VPPGSTNPQQWEQFSR          |           |       |                                              |      | Mascot      |
| 1857.8878  | 1857.9689   | 0.0811  | 44    | 208        | 223      | VPPGSTNPQQWEQFSR          |           |       |                                              |      | Mascot      |
| 1907.9102  | 1907.8336   | -0.0766 | -40   | 150        | 164      | VLQQCIDQAFEQLCR           |           |       | Carbamidomethyl (C)[5,14]                    |      | Mascot      |
| 2211.0261  | 2211.0356   | 0.0095  | 4     | 268        | 284      | RTHHEEQAHHDMQWQL<br>K     |           |       |                                              |      | Mascot      |
| 2283.1365  | 2283.1045   | -0.032  | -14   | 2          | 22       | ATLSSKPASRYSVSDWA<br>TNNK |           |       |                                              |      | Mascot      |
| 2600.116   | 2600.2058   | 0.0898  | 35    | 80         | 101      | ACAQEVDEEMDALTLSEMER      |           |       | Carbamidomethyl (C)[2], Oxidation (M)[10]    |      | Mascot      |
| 2616.1108  | 2616.2104   | 0.0996  | 38    | 80         | 101      | ACAQEVDEEMDALTLSEMER      |           |       | Carbamidomethyl (C)[2], Oxidation (M)[10,20] |      | Mascot      |

7 beclin-1 [Danio rerio] gi|41152315 51377 4.85 11 47 7.024

#### Peptide Information

| Calc. Mass | Obsrv. Mass | ± da    | ± ppm | Start Seq. | End Seq. | Sequence         | Ion Score | C. I. | % Modification          | Rank | Result Type |
|------------|-------------|---------|-------|------------|----------|------------------|-----------|-------|-------------------------|------|-------------|
| 856.3987   | 856.4998    | 0.1011  | 118   | 356        | 361      | FFWDNK           |           |       |                         |      | Mascot      |
| 870.396    | 870.5138    | 0.1178  | 135   | 318        | 324      | MGLCFQR          |           |       | Oxidation (M)[1]        |      | Mascot      |
| 882.4753   | 882.5405    | 0.0652  | 74    | 428        | 434      | FMLTNLK          |           |       | Oxidation (M)[2]        |      | Mascot      |
| 1179.6005  | 1179.5668   | -0.0337 | -29   | 26         | 35       | LDTSFNVLDLR      |           |       |                         |      | Mascot      |
| 1264.6354  | 1264.6165   | -0.0189 | -15   | 345        | 355      | ELPLYCSGGLR      |           |       | Carbamidomethyl (C)[6]  |      | Mascot      |
| 1264.6354  | 1264.6165   | -0.0189 | -15   | 345        | 355      | ELPLYCSGGLR      |           |       | Carbamidomethyl (C)[6]  |      | Mascot      |
| 1308.698   | 1308.6179   | -0.0801 | -61   | 253        | 262      | YCQIQLDKLK       |           |       | Carbamidomethyl (C)[2]  |      | Mascot      |
| 1840.868   | 1840.903    | 0.035   | 19    | 246        | 260      | SVDNQMRYYCQIQLDK |           |       |                         |      | Mascot      |
| 1857.8323  | 1857.9689   | 0.1366  | 74    | 378        | 392      | EEVEKDDTGFCPLPYR |           |       | Carbamidomethyl (C)[11] |      | Mascot      |

|   |                                                                        |           |         |     |              |     |                         |      |    |    |   |  |                         |        |
|---|------------------------------------------------------------------------|-----------|---------|-----|--------------|-----|-------------------------|------|----|----|---|--|-------------------------|--------|
|   | 1857.8323                                                              | 1857.9689 | 0.1366  | 74  | 378          | 392 | EEVEKDDTGFCCLPYR        |      |    |    |   |  | Carbamidomethyl (C)[11] | Mascot |
|   | 1904.9335                                                              | 1904.8184 | -0.1151 | -60 | 186          | 201 | QEEESLIQELESIE TK       |      |    |    |   |  |                         | Mascot |
|   | 1907.8916                                                              | 1907.8336 | -0.058  | -30 | 214          | 228 | NHSQLMDTEELRYQK         |      |    |    |   |  | Oxidation (M)[6]        | Mascot |
|   | 2264.062                                                               | 2264.0029 | -0.0591 | -26 | 1            | 19  | METLRFSSNTMQVSFVC<br>QR |      |    |    |   |  |                         | Mascot |
|   | 2264.062                                                               | 2264.0029 | -0.0591 | -26 | 1            | 19  | METLRFSSNTMQVSFVC<br>QR |      |    |    |   |  |                         | Mascot |
| 8 | PMS1 postmeiotic segregation increased 1 (S. cerevisiae) [Danio rerio] |           |         |     | gi 169145696 |     | 98750.5                 | 6.46 | 14 | 44 | 0 |  |                         |        |

Peptide Information

|  | Calc. Mass | Obsrv. Mass | ± da    | ± ppm | Start Seq. | End Sequence Seq.               | Ion Score | C. I. % | Modification            | Rank | Result Type |
|--|------------|-------------|---------|-------|------------|---------------------------------|-----------|---------|-------------------------|------|-------------|
|  | 856.4384   | 856.4998    | 0.0614  | 72    | 201        | 207 SRVSDHR                     |           |         |                         |      | Mascot      |
|  | 860.4724   | 860.4272    | -0.0452 | -53   | 366        | 373 TSPDISLK                    |           |         |                         |      | Mascot      |
|  | 882.5043   | 882.5405    | 0.0362  | 41    | 3          | 10 ALPPETVR                     |           |         |                         |      | Mascot      |
|  | 1045.575   | 1045.5333   | -0.0417 | -40   | 848        | 856 ADVTNTLRR                   |           |         |                         |      | Mascot      |
|  | 1059.5217  | 1059.5621   | 0.0404  | 38    | 156        | 163 RQYYSNTK                    |           |         |                         |      | Mascot      |
|  | 1059.5217  | 1059.5621   | 0.0404  | 38    | 156        | 163 RQYYSNTK                    |           |         |                         |      | Mascot      |
|  | 1091.515   | 1091.5417   | 0.0267  | 24    | 775        | 784 MISGPQSSER                  |           |         |                         |      | Mascot      |
|  | 1147.6656  | 1147.5879   | -0.0777 | -68   | 696        | 704 KLMLLNPFRR                  |           |         | Oxidation (M)[3]        |      | Mascot      |
|  | 1179.6368  | 1179.5668   | -0.07   | -59   | 515        | 524 LTAYELISNR                  |           |         |                         |      | Mascot      |
|  | 1707.8582  | 1707.7192   | -0.139  | -81   | 56         | 72 DNGSGIKATDVSVMAVK            |           |         | Oxidation (M)[14]       |      | Mascot      |
|  | 1858.0619  | 1857.9689   | -0.093  | -50   | 172        | 187 VQNLLMAYAVIKPELR            |           |         |                         |      | Mascot      |
|  | 1858.0619  | 1857.9689   | -0.093  | -50   | 172        | 187 VQNLLMAYAVIKPELR            |           |         |                         |      | Mascot      |
|  | 1908.0385  | 1907.8336   | -0.2049 | -107  | 679        | 695 LVNRLASHGAWVVLGGR           |           |         | Carbamidomethyl (C)[15] |      | Mascot      |
|  | 2225.001   | 2225.0466   | 0.0456  | 20    | 785        | 804 HVEVMGMADCMPPFGIG<br>DLR    |           |         |                         |      | Mascot      |
|  | 2284.2336  | 2284.1013   | -0.1323 | -58   | 464        | 483 AFSNQITGEYLEPVKLHIP<br>K    |           |         |                         |      | Mascot      |
|  | 2600.2622  | 2600.2058   | -0.0564 | -22   | 294        | 316 YPTFMMNITIPASTVDVNL<br>TPDK |           |         | Oxidation (M)[5,6]      |      | Mascot      |

|   |                                                  |  |  |  |              |  |          |      |    |    |   |  |  |  |
|---|--------------------------------------------------|--|--|--|--------------|--|----------|------|----|----|---|--|--|--|
| 9 | PREDICTED: UHRF1-binding protein 1 [Danio rerio] |  |  |  | gi 326678910 |  | 147432.6 | 5.48 | 17 | 44 | 0 |  |  |  |
|---|--------------------------------------------------|--|--|--|--------------|--|----------|------|----|----|---|--|--|--|

Peptide Information

|  | Calc. Mass | Obsrv. Mass | ± da    | ± ppm | Start Seq. | End Sequence Seq. | Ion Score | C. I. % | Modification           | Rank | Result Type |
|--|------------|-------------|---------|-------|------------|-------------------|-----------|---------|------------------------|------|-------------|
|  | 857.4474   | 857.4856    | 0.0382  | 45    | 1182       | 1190 LESGPAAGR    |           |         |                        |      | Mascot      |
|  | 857.4474   | 857.4856    | 0.0382  | 45    | 1182       | 1190 LESGPAAGR    |           |         |                        |      | Mascot      |
|  | 882.4501   | 882.5405    | 0.0904  | 102   | 797        | 803 MKDYLGRR      |           |         |                        |      | Mascot      |
|  | 906.4349   | 906.4094    | -0.0255 | -28   | 226        | 233 DCNVLASK      |           |         | Carbamidomethyl (C)[2] |      | Mascot      |

|    |                                     |           |         |      |             |      |                             |      |   |    |                                              |    |   |  |  |        |
|----|-------------------------------------|-----------|---------|------|-------------|------|-----------------------------|------|---|----|----------------------------------------------|----|---|--|--|--------|
|    | 1045.5425                           | 1045.5333 | -0.0092 | -9   | 182         | 189  | EINWQSLR                    |      |   |    |                                              |    |   |  |  | Mascot |
|    | 1059.5681                           | 1059.5621 | -0.006  | -6   | 1314        | 1323 | LADVQSALDK                  |      |   |    |                                              |    |   |  |  | Mascot |
|    | 1059.5681                           | 1059.5621 | -0.006  | -6   | 1314        | 1323 | LADVQSALDK                  |      |   |    |                                              |    |   |  |  | Mascot |
|    | 1091.5956                           | 1091.5417 | -0.0539 | -49  | 691         | 700  | VTLGFDGARR                  |      |   |    |                                              |    |   |  |  | Mascot |
|    | 1264.5222                           | 1264.6165 | 0.0943  | 75   | 1294        | 1304 | ENADQSCLGDR                 |      |   |    | Carbamidomethyl (C)[7]                       |    |   |  |  | Mascot |
|    | 1264.5222                           | 1264.6165 | 0.0943  | 75   | 1294        | 1304 | ENADQSCLGDR                 |      |   |    | Carbamidomethyl (C)[7]                       |    |   |  |  | Mascot |
|    | 1434.8025                           | 1434.7239 | -0.0786 | -55  | 75          | 86   | LKTSPICFLDK                 |      |   |    | Carbamidomethyl (C)[7]                       |    |   |  |  | Mascot |
|    | 1492.6445                           | 1492.626  | -0.0185 | -12  | 1294        | 1306 | ENADQSCLGDRER               |      |   |    |                                              |    |   |  |  | Mascot |
|    | 1493.6722                           | 1493.6652 | -0.007  | -5   | 87          | 98   | VEVEMRTCEEPR                |      |   |    | Oxidation (M)[5]                             |    |   |  |  | Mascot |
|    | 1562.7656                           | 1562.743  | -0.0226 | -14  | 804         | 817  | LAEDLTRDSQAESK              |      |   |    |                                              |    |   |  |  | Mascot |
|    | 1936.9871                           | 1936.8516 | -0.1355 | -70  | 77          | 92   | TSPICFLDKVEVEMR             |      |   |    | Carbamidomethyl (C)[5]                       |    |   |  |  | Mascot |
|    | 1996.0295                           | 1995.8215 | -0.208  | -104 | 784         | 798  | MWLNHYQFIALLRMK             |      |   |    | Oxidation (M)[1,14]                          |    |   |  |  | Mascot |
|    | 1996.0295                           | 1995.8215 | -0.208  | -104 | 784         | 798  | MWLNHYQFIALLRMK             |      |   |    | Oxidation (M)[1,14]                          |    |   |  |  | Mascot |
|    | 2172.8928                           | 2172.9922 | 0.0994  | 46   | 1191        | 1209 | HCAQSESLGFMEVCVSG<br>CR     |      |   |    | Carbamidomethyl (C)[2,14], Oxidation (M)[11] |    |   |  |  | Mascot |
|    | 2284.0662                           | 2284.1013 | 0.0351  | 15   | 738         | 757  | SPSRFSQEFSCAPNDLIS<br>NK    |      |   |    | Carbamidomethyl (C)[11]                      |    |   |  |  | Mascot |
|    | 2384.1729                           | 2383.8777 | -0.2952 | -124 | 932         | 954  | HSSTFSIEGDFSSALNAT<br>KGVTK |      |   |    |                                              |    |   |  |  | Mascot |
|    | 2600.2021                           | 2600.2058 | 0.0037  | 1    | 706         | 727  | TLPFVEPFMSMLWMCHP<br>DAFTK  |      |   |    | Oxidation (M)[10]                            |    |   |  |  | Mascot |
|    | 2616.197                            | 2616.2104 | 0.0134  | 5    | 706         | 727  | TLPFVEPFMSMLWMCHP<br>DAFTK  |      |   |    | Oxidation (M)[10,14]                         |    |   |  |  | Mascot |
| 10 | tektin 2 (testicular) [Danio rerio] |           |         |      | gi 94733680 |      | 32364.6                     | 6.09 | 7 | 43 | 0                                            | 14 | 0 |  |  |        |

Peptide Information

| Calc. Mass | Obsrv. Mass | ± da    | ± ppm | Start Seq. | End Seq. | Sequence              | Ion Score | C. I. | % Modification         | Rank | Result | Type |
|------------|-------------|---------|-------|------------|----------|-----------------------|-----------|-------|------------------------|------|--------|------|
| 1004.4764  | 1004.4677   | -0.0087 | -9    | 183        | 190      | RPGMDLCR              |           |       | Carbamidomethyl (C)[7] |      | Mascot |      |
| 1059.543   | 1059.5621   | 0.0191  | 18    | 240        | 248      | QDALSLEQR             | 14        | 0     |                        |      | Mascot |      |
| 1059.543   | 1059.5621   | 0.0191  | 18    | 240        | 248      | QDALSLEQR             |           |       |                        |      | Mascot |      |
| 1234.6096  | 1234.6414   | 0.0318  | 26    | 90         | 99       | EEMQVSVQIR            |           |       | Oxidation (M)[3]       |      | Mascot |      |
| 1323.7379  | 1323.6307   | -0.1072 | -81   | 215        | 226      | LAQAQHSLQSLK          |           |       |                        |      | Mascot |      |
| 1445.7529  | 1445.7333   | -0.0196 | -14   | 88         | 99       | AREEMQVSVQIR          |           |       |                        |      | Mascot |      |
| 1857.8878  | 1857.9689   | 0.0811  | 44    | 67         | 82       | VPPGSTNPQQWEQFSR      |           |       |                        |      | Mascot |      |
| 1857.8878  | 1857.9689   | 0.0811  | 44    | 67         | 82       | VPPGSTNPQQWEQFSR      |           |       |                        |      | Mascot |      |
| 2211.0261  | 2211.0356   | 0.0095  | 4     | 127        | 143      | RTHHEEQAHHDMQWQL<br>K |           |       |                        |      | Mascot |      |

11 transmembrane protein 126A [Danio rerio] gi|41387164 21901.5 9.86 7 42 0

Peptide Information

| Calc. Mass | Obsrv. Mass | ± da | ± ppm | Start Seq. | End Seq. | Sequence | Ion Score | C. I. | % Modification | Rank | Result | Type |
|------------|-------------|------|-------|------------|----------|----------|-----------|-------|----------------|------|--------|------|
|------------|-------------|------|-------|------------|----------|----------|-----------|-------|----------------|------|--------|------|



|    |                        |           |         |      |     |     |                |         |      |   |    |                    |    |   |  |  |        |
|----|------------------------|-----------|---------|------|-----|-----|----------------|---------|------|---|----|--------------------|----|---|--|--|--------|
|    | 844.4523               | 844.4626  | 0.0103  | 12   | 28  | 34  | LPESDRK        |         |      |   |    |                    |    |   |  |  | Mascot |
|    | 844.4523               | 844.4626  | 0.0103  | 12   | 28  | 34  | LPESDRK        |         |      |   |    |                    |    |   |  |  | Mascot |
|    | 860.491                | 860.4272  | -0.0638 | -74  | 17  | 23  | IIEMLNK        |         |      |   |    |                    |    |   |  |  | Mascot |
|    | 1004.5808              | 1004.4677 | -0.1131 | -113 | 17  | 24  | IIEMLNKK       |         |      |   |    | Oxidation (M)[4]   |    |   |  |  | Mascot |
|    | 1147.6326              | 1147.5879 | -0.0447 | -39  | 15  | 23  | MRIIEMLNK      |         |      |   |    |                    |    |   |  |  | Mascot |
|    | 1179.6224              | 1179.5668 | -0.0556 | -47  | 15  | 23  | MRIIEMLNK      |         |      |   |    | Oxidation (M)[1,6] |    |   |  |  | Mascot |
|    | 1192.4786              | 1192.5251 | 0.0465  | 39   | 191 | 201 | MPDSDSEQLNG    |         |      |   |    |                    |    |   |  |  | Mascot |
|    | 1192.4786              | 1192.5251 | 0.0465  | 39   | 191 | 201 | MPDSDSEQLNG    |         |      |   |    |                    |    |   |  |  | Mascot |
|    | 1308.6324              | 1308.6179 | -0.0145 | -11  | 5   | 16  | DASQGLTSSRM    |         |      |   |    |                    |    |   |  |  | Mascot |
|    | 1592.7043              | 1592.8003 | 0.096   | 60   | 188 | 201 | MLRMPDSDSEQLNG |         |      |   |    |                    |    |   |  |  | Mascot |
| 12 | tektin 2 [Danio rerio] |           |         |      |     |     | gi 37682089    | 48740.9 | 5.63 | 8 | 41 | 0                  | 14 | 0 |  |  |        |

#### Peptide Information

| Calc. Mass | Obsrv. Mass | ± da    | ± ppm | Start Seq. | End Seq. | Sequence              | Ion Score | C. I. | % Modification                               | Rank | Result Type |
|------------|-------------|---------|-------|------------|----------|-----------------------|-----------|-------|----------------------------------------------|------|-------------|
| 1004.4764  | 1004.4677   | -0.0087 | -9    | 327        | 334      | RPGMDLCR              |           |       | Carbamidomethyl (C)[7]                       |      | Mascot      |
| 1045.5789  | 1045.5333   | -0.0456 | -44   | 68         | 75       | INDITRWK              |           |       |                                              |      | Mascot      |
| 1059.543   | 1059.5621   | 0.0191  | 18    | 384        | 392      | QDALSLEQR             | 14        | 0     |                                              |      | Mascot      |
| 1059.543   | 1059.5621   | 0.0191  | 18    | 384        | 392      | QDALSLEQR             |           |       |                                              |      | Mascot      |
| 1323.7379  | 1323.6307   | -0.1072 | -81   | 359        | 370      | LAQAQHSLQSLK          |           |       |                                              |      | Mascot      |
| 1857.8878  | 1857.9689   | 0.0811  | 44    | 211        | 226      | VPPGSTNPQQWEQFSR      |           |       |                                              |      | Mascot      |
| 1857.8878  | 1857.9689   | 0.0811  | 44    | 211        | 226      | VPPGSTNPQQWEQFSR      |           |       |                                              |      | Mascot      |
| 2211.0261  | 2211.0356   | 0.0095  | 4     | 271        | 287      | RTHHEEQAHHDMQWQLK     |           |       |                                              |      | Mascot      |
| 2283.1365  | 2283.1045   | -0.032  | -14   | 2          | 22       | ATLSSKPASRYSVSDWATNNK |           |       |                                              |      | Mascot      |
| 2600.116   | 2600.2058   | 0.0898  | 35    | 80         | 101      | ACAEQVDEEMDALTSKEEMER |           |       | Carbamidomethyl (C)[2], Oxidation (M)[10]    |      | Mascot      |
| 2616.1108  | 2616.2104   | 0.0996  | 38    | 80         | 101      | ACAEQVDEEMDALTSKEEMER |           |       | Carbamidomethyl (C)[2], Oxidation (M)[10,20] |      | Mascot      |

13 Zgc:171352 protein [Danio rerio] gi|63102022 61141.1 5.44 12 39 0

#### Peptide Information

| Calc. Mass | Obsrv. Mass | ± da    | ± ppm | Start Seq. | End Seq. | Sequence   | Ion Score | C. I. | % Modification         | Rank | Result Type |
|------------|-------------|---------|-------|------------|----------|------------|-----------|-------|------------------------|------|-------------|
| 1050.4819  | 1050.53     | 0.0481  | 46    | 123        | 132      | VKCGNGDCVR |           |       |                        |      | Mascot      |
| 1090.5424  | 1090.5328   | -0.0096 | -9    | 102        | 111      | CICPPPYIGK |           |       |                        |      | Mascot      |
| 1147.5638  | 1147.5879   | 0.0241  | 21    | 102        | 111      | CICPPPYIGK |           |       | Carbamidomethyl (C)[1] |      | Mascot      |
| 1165.571   | 1165.71     | 0.139   | 119   | 252        | 260      | EPWCFVKEK  |           |       |                        |      | Mascot      |

|    |                                 |           |         |     |              |     |                             |      |                              |        |   |
|----|---------------------------------|-----------|---------|-----|--------------|-----|-----------------------------|------|------------------------------|--------|---|
|    | 1179.5245                       | 1179.5668 | 0.0423  | 36  | 113          | 121 | CQNEKNVCK                   |      | Carbamidomethyl (C)[1,8]     | Mascot |   |
|    | 1493.8046                       | 1493.6652 | -0.1394 | -93 | 296          | 309 | AAFSMIAPRIFGGR              |      |                              | Mascot |   |
|    | 1562.7056                       | 1562.743  | 0.0374  | 24  | 246          | 258 | NPDGDREPWC FVK              |      |                              | Mascot |   |
|    | 1592.7042                       | 1592.8003 | 0.0961  | 60  | 491          | 505 | IDSCQGDSGGPLVCK             |      | Carbamidomethyl (C)[4,14]    | Mascot |   |
|    | 1593.6309                       | 1593.7911 | 0.1602  | 101 | 176          | 189 | ASFTCTCPEDYSGR              |      | Carbamidomethyl (C)[5]       | Mascot |   |
|    | 1840.7555                       | 1840.903  | 0.1475  | 80  | 231          | 245 | EFEGNESIGEHN YCR            |      | Carbamidomethyl (C)[14]      | Mascot |   |
|    | 1907.801                        | 1907.8336 | 0.0326  | 17  | 174          | 189 | TRASFTCTCPEDYSGR            |      | Carbamidomethyl (C)[7,9]     | Mascot |   |
|    | 2210.9487                       | 2211.0356 | 0.0869  | 39  | 154          | 173 | NAYACNPSPCQNGGTCV<br>KGR    |      | Carbamidomethyl (C)[5,10,16] | Mascot |   |
|    | 2600.0598                       | 2600.2058 | 0.146   | 56  | 176          | 198 | ASFTCTCPEDYSGRFCQ<br>VGSNDR |      | Carbamidomethyl (C)[5]       | Mascot |   |
| 14 | LOC559236 protein [Danio rerio] |           |         |     | gi 141796908 |     | 49941.7                     | 8.76 | 10                           | 38     | 0 |

Peptide Information

| Calc. Mass | Obsrv. Mass | ± da    | ± ppm | Start Seq. | End Seq. | Sequence          | Ion Score | C. I. % | Modification           | Rank | Result Type |
|------------|-------------|---------|-------|------------|----------|-------------------|-----------|---------|------------------------|------|-------------|
| 807.4141   | 807.3908    | -0.0233 | -29   | 314        | 320      | KVASSCR           |           |         | Carbamidomethyl (C)[6] |      | Mascot      |
| 877.4261   | 877.428     | 0.0019  | 2     | 21         | 28       | SEINSAEK          |           |         |                        |      | Mascot      |
| 1090.5674  | 1090.5328   | -0.0346 | -32   | 315        | 324      | VASSCRSVPK        |           |         | Carbamidomethyl (C)[5] |      | Mascot      |
| 1165.5419  | 1165.71     | 0.1681  | 144   | 382        | 390      | CTNQTREWK         |           |         |                        |      | Mascot      |
| 1234.6283  | 1234.6414   | 0.0131  | 11    | 321        | 331      | SVPKTCALMER       |           |         |                        |      | Mascot      |
| 1366.6902  | 1366.6393   | -0.0509 | -37   | 205        | 215      | FYFHLGDALQR       |           |         |                        |      | Mascot      |
| 1434.7739  | 1434.7239   | -0.05   | -35   | 170        | 181      | VHYGFILKSENK      |           |         |                        |      | Mascot      |
| 1743.7863  | 1743.8573   | 0.071   | 41    | 325        | 339      | TCALMERFPETTGCK   |           |         | Carbamidomethyl (C)[2] |      | Mascot      |
| 1840.7885  | 1840.903    | 0.1145  | 62    | 216        | 231      | VGDSAYDWYEAGHQR   |           |         |                        |      | Mascot      |
| 1993.9655  | 1993.8893   | -0.0762 | -38   | 250        | 266      | AQPWWTAEQTGYTDLVK |           |         |                        |      | Mascot      |

15 novel protein similar to vertebrate breast cancer anti-estrogen resistance 3 (BCAR3) [Danio rerio]

gi|169158144 84068.2 8.52 13 38 0

Peptide Information

| Calc. Mass | Obsrv. Mass | ± da    | ± ppm | Start Seq. | End Seq. | Sequence    | Ion Score | C. I. % | Modification | Rank | Result Type |
|------------|-------------|---------|-------|------------|----------|-------------|-----------|---------|--------------|------|-------------|
| 857.4264   | 857.4856    | 0.0592  | 69    | 103        | 109      | NSPQHFK     |           |         |              |      | Mascot      |
| 857.4264   | 857.4856    | 0.0592  | 69    | 103        | 109      | NSPQHFK     |           |         |              |      | Mascot      |
| 882.5083   | 882.5405    | 0.0322  | 36    | 607        | 613      | SLKPFYK     |           |         |              |      | Mascot      |
| 1004.537   | 1004.4677   | -0.0693 | -69   | 388        | 396      | TDGSIKLDR   |           |         |              |      | Mascot      |
| 1045.5524  | 1045.5333   | -0.0191 | -18   | 45         | 52       | RELEELK     |           |         |              |      | Mascot      |
| 1051.5895  | 1051.6798   | 0.0903  | 86    | 22         | 31       | SSVIGAKFSR  |           |         |              |      | Mascot      |
| 1320.6616  | 1320.5439   | -0.1177 | -89   | 289        | 300      | MAFDTLPGAIR |           |         |              |      | Mascot      |

|    |                    |           |         |     |            |     |                                  |      |   |    |                          |  |  |        |
|----|--------------------|-----------|---------|-----|------------|-----|----------------------------------|------|---|----|--------------------------|--|--|--------|
|    | 1357.7362          | 1357.675  | -0.0612 | -45 | 596        | 606 | KYTQTAIIEK                       |      |   |    |                          |  |  | Mascot |
|    | 1366.6597          | 1366.6393 | -0.0204 | -15 | 714        | 725 | GAAVEQTERYDK                     |      |   |    |                          |  |  | Mascot |
|    | 1445.8032          | 1445.7333 | -0.0699 | -48 | 452        | 463 | ENKPLEMTVLKK                     |      |   |    | Oxidation (M)[7]         |  |  | Mascot |
|    | 1475.7021          | 1475.7086 | 0.0065  | 4   | 10         | 21  | TITAALCCFYQK                     |      |   |    | Carbamidomethyl (C)[7,8] |  |  | Mascot |
|    | 1492.7577          | 1492.626  | -0.1317 | -88 | 288        | 300 | RMAFDTLPGEAIR                    |      |   |    | Oxidation (M)[2]         |  |  | Mascot |
|    | 1638.8268          | 1638.8063 | -0.0205 | -13 | 374        | 387 | MNSLQANGYVERLK                   |      |   |    | Oxidation (M)[1]         |  |  | Mascot |
|    | 3082.5659          | 3082.3618 | -0.2041 | -66 | 520        | 547 | LDLIERHNTMAIGVAVDIL<br>GCTGSLEER |      |   |    | Carbamidomethyl (C)[21]  |  |  | Mascot |
|    | 3082.5659          | 3082.3618 | -0.2041 | -66 | 520        | 547 | LDLIERHNTMAIGVAVDIL<br>GCTGSLEER |      |   |    | Carbamidomethyl (C)[21]  |  |  | Mascot |
| 16 | Pbx2 [Danio rerio] |           |         |     | gi 7861936 |     | 18895.6                          | 9.08 | 7 | 38 | 0                        |  |  |        |

#### Peptide Information

| Calc. Mass | Obsrv. Mass | ± da    | ± ppm | Start Seq. | End Seq. | Sequence                | Ion Score | C. I. | % Modification                           | Rank | Result Type |
|------------|-------------|---------|-------|------------|----------|-------------------------|-----------|-------|------------------------------------------|------|-------------|
| 1051.5782  | 1051.6798   | 0.1016  | 97    | 133        | 141      | FSSIQTLK                |           |       |                                          |      | Mascot      |
| 1179.6442  | 1179.5668   | -0.0774 | -66   | 1          | 10       | ALFSVLCEIK              |           |       | Carbamidomethyl (C)[7]                   |      | Mascot      |
| 1323.6395  | 1323.6307   | -0.0088 | -7    | 142        | 152      | QSTCEAVMILR             |           |       | Carbamidomethyl (C)[4], Oxidation (M)[8] |      | Mascot      |
| 1366.7623  | 1366.6393   | -0.123  | -90   | 121        | 131      | EIERMVALIHR             |           |       |                                          |      | Mascot      |
| 1493.7563  | 1493.6652   | -0.0911 | -61   | 142        | 154      | QSTCEAVMILRSR           |           |       |                                          |      | Mascot      |
| 1743.9388  | 1743.8573   | -0.0815 | -47   | 79         | 92       | LSQIRNIYHTELEK          |           |       |                                          |      | Mascot      |
| 2283.1836  | 2283.1045   | -0.0791 | -35   | 133        | 152      | FSSIQTLKQSTCEAVMI<br>LR |           |       |                                          |      | Mascot      |

17 novel protein similar to vertebrate NADPH oxidase activator 1 (NOXA1, zgc:110089) [Danio rerio] gi|148726410 30727.9 8.1 8 37 0

#### Peptide Information

| Calc. Mass | Obsrv. Mass | ± da    | ± ppm | Start Seq. | End Seq. | Sequence                   | Ion Score | C. I. | % Modification         | Rank | Result Type |
|------------|-------------|---------|-------|------------|----------|----------------------------|-----------|-------|------------------------|------|-------------|
| 860.4512   | 860.4272    | -0.024  | -28   | 9          | 15       | LWDEAVK                    |           |       |                        |      | Mascot      |
| 877.5253   | 877.428     | -0.0973 | -111  | 111        | 117      | QLGLRYK                    |           |       |                        |      | Mascot      |
| 1050.6016  | 1050.53     | -0.0716 | -68   | 1          | 8        | MLYIELIR                   |           |       |                        |      | Mascot      |
| 1562.752   | 1562.743    | -0.009  | -6    | 87         | 99       | LEEALSDCIWAQK              |           |       | Carbamidomethyl (C)[8] |      | Mascot      |
| 1743.9347  | 1743.8573   | -0.0774 | -44   | 152        | 168      | GAGRSNLIDTALEISR           |           |       |                        |      | Mascot      |
| 1858.0068  | 1857.9689   | -0.0379 | -20   | 188        | 203      | LEV DQLKPRDFLGEAK          |           |       |                        |      | Mascot      |
| 1858.0068  | 1857.9689   | -0.0379 | -20   | 188        | 203      | LEV DQLKPRDFLGEAK          |           |       |                        |      | Mascot      |
| 1908.0299  | 1907.8336   | -0.1963 | -103  | 1          | 15       | MLYIELIRLWDEAVK            |           |       | Oxidation (M)[1]       |      | Mascot      |
| 2384.1487  | 2383.8777   | -0.271  | -114  | 249        | 269      | GVS MFCPSALCTFVFSN<br>YLKI |           |       | Carbamidomethyl (C)[6] |      | Mascot      |

18 NADPH oxidase activator 1 [Danio rerio] gi|71834360 30717.9 8.1 8 37 0

### Peptide Information

| Calc. Mass | Obsrv. Mass | $\pm$ da | $\pm$ ppm | Start Seq. | End Sequence Seq.           | Ion Score | C. I. % | Modification           | Rank | Result Type |
|------------|-------------|----------|-----------|------------|-----------------------------|-----------|---------|------------------------|------|-------------|
| 860.4512   | 860.4272    | -0.024   | -28       | 9          | 15 LWDEAVK                  |           |         |                        |      | Mascot      |
| 877.5253   | 877.428     | -0.0973  | -111      | 111        | 117 QLGLRYK                 |           |         |                        |      | Mascot      |
| 1050.6016  | 1050.53     | -0.0716  | -68       | 1          | 8 MLYIELIR                  |           |         |                        |      | Mascot      |
| 1562.752   | 1562.743    | -0.009   | -6        | 87         | 99 LEEALSDCIWAQK            |           |         | Carbamidomethyl (C)[8] |      | Mascot      |
| 1743.9347  | 1743.8573   | -0.0774  | -44       | 152        | 168 GAGRSNLIDTALEISR        |           |         |                        |      | Mascot      |
| 1858.0068  | 1857.9689   | -0.0379  | -20       | 188        | 203 LEVDQLKPRDFLGEAK        |           |         |                        |      | Mascot      |
| 1858.0068  | 1857.9689   | -0.0379  | -20       | 188        | 203 LEVDQLKPRDFLGEAK        |           |         |                        |      | Mascot      |
| 1908.0299  | 1907.8336   | -0.1963  | -103      | 1          | 15 MLYIELIRLWDEAVK          |           |         | Oxidation (M)[1]       |      | Mascot      |
| 2384.1487  | 2383.8777   | -0.271   | -114      | 249        | 269 GVSFMFCPSALCTVFVSN YLKI |           |         | Carbamidomethyl (C)[6] |      | Mascot      |

19 PREDICTED: guanine nucleotide-binding protein subunit beta-4-like [Danio rerio] gi|326664688 32333.8 7.55 4 37 0 23 0

### Peptide Information

| Calc. Mass | Obsrv. Mass | $\pm$ da | $\pm$ ppm | Start Seq. | End Sequence Seq.        | Ion Score | C. I. % | Modification            | Rank | Result Type |
|------------|-------------|----------|-----------|------------|--------------------------|-----------|---------|-------------------------|------|-------------|
| 1264.5925  | 1264.6165   | 0.024    | 19        | 210        | 219 LWDIRDGMCR           |           |         |                         |      | Mascot      |
| 1264.5925  | 1264.6165   | 0.024    | 19        | 210        | 219 LWDIRDGMCR           | 23        | 0       |                         |      | Mascot      |
| 1492.6671  | 1492.626    | -0.0411  | -28       | 138        | 150 ELPGHTGYLSCCR        |           |         | Carbamidomethyl (C)[11] |      | Mascot      |
| 1995.9592  | 1995.8215   | -0.1377  | -69       | 220        | 237 QSFTGHVSDINAVCVSFK   |           |         | Carbamidomethyl (C)[14] |      | Mascot      |
| 1995.9592  | 1995.8215   | -0.1377  | -69       | 220        | 237 QSFTGHVSDINAVCVSFK   |           |         | Carbamidomethyl (C)[14] |      | Mascot      |
| 2225.1536  | 2225.0466   | -0.107   | -48       | 238        | 256 VGSPHQCLILFIDVEGVW R |           |         | Carbamidomethyl (C)[7]  |      | Mascot      |

20 lipid phosphate phosphatase-related protein type 3b [Danio rerio] gi|315468535 92766.3 7.91 13 36 0

### Peptide Information

| Calc. Mass | Obsrv. Mass | $\pm$ da | $\pm$ ppm | Start Seq. | End Sequence Seq. | Ion Score | C. I. % | Modification             | Rank | Result Type |
|------------|-------------|----------|-----------|------------|-------------------|-----------|---------|--------------------------|------|-------------|
| 842.4617   | 842.4856    | 0.0239   | 28        | 406        | 413 VGEEPAIK      |           |         |                          |      | Mascot      |
| 996.4423   | 996.5638    | 0.1215   | 122       | 793        | 800 CGCVTMLR      |           |         | Carbamidomethyl (C)[1,3] |      | Mascot      |
| 1059.5768  | 1059.5621   | -0.0147  | -14       | 324        | 331 QPMTLKWR      |           |         |                          |      | Mascot      |
| 1059.5768  | 1059.5621   | -0.0147  | -14       | 324        | 331 QPMTLKWR      |           |         |                          |      | Mascot      |
| 1147.5953  | 1147.5879   | -0.0074  | -6        | 332        | 341 ILSTTNDLDR    |           |         |                          |      | Mascot      |
| 1234.5931  | 1234.6414   | 0.0483   | 39        | 818        | 827 NCLCGGLWRR    |           |         | Carbamidomethyl (C)[2]   |      | Mascot      |
| 1308.6221  | 1308.6179   | -0.0042  | -3        | 793        | 804 CGCVTMLRSPNK  |           |         |                          |      | Mascot      |

|    |                                                                                                          |           |         |     |     |     |                         |  |  |  |  |  |                                          |  |  |  |        |
|----|----------------------------------------------------------------------------------------------------------|-----------|---------|-----|-----|-----|-------------------------|--|--|--|--|--|------------------------------------------|--|--|--|--------|
|    | 1434.7661                                                                                                | 1434.7239 | -0.0422 | -29 | 246 | 257 | IDTELLPSLFMR            |  |  |  |  |  |                                          |  |  |  | Mascot |
|    | 1445.8263                                                                                                | 1445.7333 | -0.093  | -64 | 268 | 279 | YPAVTHLKFLTR            |  |  |  |  |  |                                          |  |  |  | Mascot |
|    | 1562.7719                                                                                                | 1562.743  | -0.0289 | -18 | 815 | 826 | WIKNCLCGGLWR            |  |  |  |  |  | Carbamidomethyl (C)[5,7]                 |  |  |  | Mascot |
|    | 1716.8915                                                                                                | 1716.7966 | -0.0949 | -55 | 134 | 149 | LALHVEKSGSTNFGEK        |  |  |  |  |  |                                          |  |  |  | Mascot |
|    | 1840.8721                                                                                                | 1840.903  | 0.0309  | 17  | 2   | 15  | MDIAYVCEWEKRPK          |  |  |  |  |  | Carbamidomethyl (C)[7], Oxidation (M)[1] |  |  |  | Mascot |
|    | 1904.9171                                                                                                | 1904.8184 | -0.0987 | -52 | 388 | 405 | LSLQTVGMFYGSSGSSQ<br>R  |  |  |  |  |  |                                          |  |  |  | Mascot |
|    | 2211.0732                                                                                                | 2211.0356 | -0.0376 | -17 | 13  | 31  | RPKSNHCPSIPLVCAWS<br>CR |  |  |  |  |  | Carbamidomethyl (C)[7]                   |  |  |  | Mascot |
| 21 | PREDICTED: alpha-2-macroglobulin-like protein 1-like [Danio rerio]<br>gi 326674176 151677.6 7.04 14 36 0 |           |         |     |     |     |                         |  |  |  |  |  |                                          |  |  |  |        |

Peptide Information

| Calc. Mass | Obsrv. Mass | ± da    | ± ppm | Start Seq. | End Seq. | Sequence                | Ion Score | C. I. | % Modification                              | Rank | Result Type |
|------------|-------------|---------|-------|------------|----------|-------------------------|-----------|-------|---------------------------------------------|------|-------------|
| 842.5458   | 842.4856    | -0.0602 | -71   | 378        | 384      | TLQKKPK                 |           |       |                                             |      | Mascot      |
| 844.5291   | 844.4626    | -0.0665 | -79   | 1132       | 1138     | IVSWLVK                 | 9         | 0     |                                             |      | Mascot      |
| 844.5291   | 844.4626    | -0.0665 | -79   | 1132       | 1138     | IVSWLVK                 |           |       |                                             |      | Mascot      |
| 882.577    | 882.5405    | -0.0365 | -41   | 1336       | 1343     | NLKPAVIK                |           |       |                                             |      | Mascot      |
| 922.4927   | 922.4028    | -0.0899 | -97   | 1000       | 1006     | LFNNRMK                 |           |       |                                             |      | Mascot      |
| 1051.5782  | 1051.6798   | 0.1016  | 97    | 1234       | 1242     | SNKLEFSVK               |           |       |                                             |      | Mascot      |
| 1059.5946  | 1059.5621   | -0.0325 | -31   | 76         | 83       | YTHLIEKR                |           |       |                                             |      | Mascot      |
| 1059.5946  | 1059.5621   | -0.0325 | -31   | 76         | 83       | YTHLIEKR                |           |       |                                             |      | Mascot      |
| 1091.5844  | 1091.5417   | -0.0427 | -39   | 382        | 390      | KPKQDSFNK               |           |       |                                             |      | Mascot      |
| 1179.652   | 1179.5668   | -0.0852 | -72   | 455        | 464      | GEVTFKVPFR              |           |       |                                             |      | Mascot      |
| 1234.6533  | 1234.6414   | -0.0119 | -10   | 16         | 25       | LCMSLLKPEK              |           |       | Carbamidomethyl (C)[2], Oxidation (M)[3]    |      | Mascot      |
| 1264.642   | 1264.6165   | -0.0255 | -20   | 744        | 755      | VSPAPSSDYTLK            |           |       |                                             |      | Mascot      |
| 1264.642   | 1264.6165   | -0.0255 | -20   | 744        | 755      | VSPAPSSDYTLK            |           |       |                                             |      | Mascot      |
| 1323.5852  | 1323.6307   | 0.0455  | 34    | 1344       | 1353     | VYDYYQTSER              |           |       |                                             |      | Mascot      |
| 1475.8217  | 1475.7086   | -0.1131 | -77   | 2          | 15       | VTFPAIIRSGSEAK          |           |       |                                             |      | Mascot      |
| 1638.8519  | 1638.8063   | -0.0456 | -28   | 404        | 418      | CGVEISVTVQYTIAR         |           |       |                                             |      | Mascot      |
| 2384.0164  | 2383.8777   | -0.1387 | -58   | 554        | 572      | MLPTMTFTYDVEDQMEC<br>LK |           |       | Carbamidomethyl (C)[17], Oxidation (M)[1,5] |      | Mascot      |

|    |                                                                                                        |  |  |  |  |  |  |  |  |  |  |  |  |  |  |  |  |
|----|--------------------------------------------------------------------------------------------------------|--|--|--|--|--|--|--|--|--|--|--|--|--|--|--|--|
| 22 | tumor necrosis factor receptor superfamily member 1A [Danio rerio]<br>gi 47085979 44069.8 7.31 12 36 0 |  |  |  |  |  |  |  |  |  |  |  |  |  |  |  |  |
|----|--------------------------------------------------------------------------------------------------------|--|--|--|--|--|--|--|--|--|--|--|--|--|--|--|--|

Peptide Information

| Calc. Mass | Obsrv. Mass | ± da    | ± ppm | Start Seq. | End Seq. | Sequence | Ion Score | C. I. | % Modification | Rank | Result Type |
|------------|-------------|---------|-------|------------|----------|----------|-----------|-------|----------------|------|-------------|
| 906.4097   | 906.4094    | -0.0003 | 0     | 149        | 155      | EENRQCK  |           |       |                |      | Mascot      |

|           |           |         |     |     |     |                             |  |  |  |                           |  |        |
|-----------|-----------|---------|-----|-----|-----|-----------------------------|--|--|--|---------------------------|--|--------|
| 996.4819  | 996.5638  | 0.0819  | 82  | 332 | 339 | DAQYQMLK                    |  |  |  |                           |  | Mascot |
| 1192.5415 | 1192.5251 | -0.0164 | -14 | 123 | 132 | LGDLGWECSR                  |  |  |  | Carbamidomethyl (C)[8]    |  | Mascot |
| 1192.5415 | 1192.5251 | -0.0164 | -14 | 123 | 132 | LGDLGWECSR                  |  |  |  | Carbamidomethyl (C)[8]    |  | Mascot |
| 1308.6035 | 1308.6179 | 0.0144  | 11  | 56  | 66  | LKQECSAENMR                 |  |  |  |                           |  | Mascot |
| 1320.6365 | 1320.5439 | -0.0926 | -70 | 122 | 132 | KLGDLGWECSR                 |  |  |  | Carbamidomethyl (C)[9]    |  | Mascot |
| 1357.6239 | 1357.675  | 0.0511  | 38  | 329 | 339 | NCKDAQYQMLK                 |  |  |  | Oxidation (M)[9]          |  | Mascot |
| 1366.6241 | 1366.6393 | 0.0152  | 11  | 123 | 134 | LGDLGWECSRCK                |  |  |  |                           |  | Mascot |
| 1562.6582 | 1562.743  | 0.0848  | 54  | 170 | 183 | LCDKCKQPGCDHLCK             |  |  |  |                           |  | Mascot |
| 1593.736  | 1593.7911 | 0.0551  | 35  | 135 | 148 | KCGDGQIEIQNCTK              |  |  |  | Carbamidomethyl (C)[2]    |  | Mascot |
| 1638.7152 | 1638.8063 | 0.0911  | 56  | 153 | 165 | QCKCQENHYPFNK               |  |  |  |                           |  | Mascot |
| 1936.8488 | 1936.8516 | 0.0028  | 1   | 136 | 152 | CGDGQIEIQNCTKEENR           |  |  |  |                           |  | Mascot |
| 1993.8701 | 1993.8893 | 0.0192  | 10  | 136 | 152 | CGDGQIEIQNCTKEENR           |  |  |  | Carbamidomethyl (C)[1]    |  | Mascot |
| 2616.2544 | 2616.2104 | -0.044  | -17 | 264 | 286 | SVSFTNQPCESKPLGNL<br>PDCIPR |  |  |  | Carbamidomethyl (C)[9,20] |  | Mascot |

23 Ewing tumor-associated antigen 1 [Danio rerio] gi|162139038 71948.4 6.84 11 36 0

#### Peptide Information

| Calc. Mass | Obsrv. Mass | ± da    | ± ppm | Start Seq. | End Seq. | Sequence                      | Ion Score | C. I. % | Modification           | Rank | Result Type |
|------------|-------------|---------|-------|------------|----------|-------------------------------|-----------|---------|------------------------|------|-------------|
| 844.4423   | 844.4626    | 0.0203  | 24    | 385        | 390      | QRFEHK                        |           |         |                        |      | Mascot      |
| 844.4423   | 844.4626    | 0.0203  | 24    | 385        | 390      | QRFEHK                        |           |         |                        |      | Mascot      |
| 906.4461   | 906.4094    | -0.0367 | -40   | 627        | 633      | KQQAMER                       |           |         | Oxidation (M)[5]       |      | Mascot      |
| 922.3934   | 922.4028    | 0.0094  | 10    | 618        | 625      | CSDAEIER                      |           |         |                        |      | Mascot      |
| 996.5836   | 996.5638    | -0.0198 | -20   | 28         | 37       | SPKAAAPLNK                    |           |         |                        |      | Mascot      |
| 1050.4884  | 1050.53     | 0.0416  | 40    | 618        | 626      | CSDAEIERK                     |           |         |                        |      | Mascot      |
| 1091.5076  | 1091.5417   | 0.0341  | 31    | 250        | 259      | DNAKSDASQR                    |           |         |                        |      | Mascot      |
| 1475.7085  | 1475.7086   | 0.0001  | 0     | 2          | 14       | ESRGSSEQNEIAK                 |           |         |                        |      | Mascot      |
| 1904.884   | 1904.8184   | -0.0656 | -34   | 609        | 625      | DVCNPAVVKCSDAEIER             |           |         | Carbamidomethyl (C)[3] |      | Mascot      |
| 1994.0526  | 1993.8893   | -0.1633 | -82   | 334        | 351      | TKVSQNNSEQINGGLHR             |           |         |                        |      | Mascot      |
| 2211.155   | 2211.0356   | -0.1194 | -54   | 413        | 432      | NAIKPSQSKPSSMHQNLI<br>SK      |           |         | Oxidation (M)[13]      |      | Mascot      |
| 2384.0354  | 2383.8777   | -0.1577 | -66   | 524        | 548      | AAGPGCNVSCDAARPSG<br>SSSNGAYK |           |         | Carbamidomethyl (C)[6] |      | Mascot      |

24 Zgc:175171 protein [Danio rerio] gi|161612243 31520.2 9.32 11 36 0

#### Peptide Information

| Calc. Mass | Obsrv. Mass | ± da    | ± ppm | Start Seq. | End Seq. | Sequence | Ion Score | C. I. % | Modification | Rank | Result Type |
|------------|-------------|---------|-------|------------|----------|----------|-----------|---------|--------------|------|-------------|
| 860.4736   | 860.4272    | -0.0464 | -54   | 130        | 136      | SGYHLKR  |           |         |              |      | Mascot      |
| 906.4315   | 906.4094    | -0.0221 | -24   | 57         | 64       | EADFTAPR |           |         |              |      | Mascot      |

|    |                          |           |         |     |              |     |                              |     |   |    |                                                  |  |  |  |  |  |        |
|----|--------------------------|-----------|---------|-----|--------------|-----|------------------------------|-----|---|----|--------------------------------------------------|--|--|--|--|--|--------|
|    | 1034.5265                | 1034.527  | 0.0005  | 0   | 56           | 64  | KEADFTAPR                    |     |   |    |                                                  |  |  |  |  |  | Mascot |
|    | 1445.6089                | 1445.7333 | 0.1244  | 86  | 118          | 129 | NFICDHCYGAFR                 |     |   |    |                                                  |  |  |  |  |  | Mascot |
|    | 1743.8265                | 1743.8573 | 0.0308  | 18  | 14           | 30  | KMMSPLGPASAHGSGQ<br>R        |     |   |    | Oxidation (M)[2,3]                               |  |  |  |  |  | Mascot |
|    | 1857.8523                | 1857.9689 | 0.1166  | 63  | 115          | 129 | VQKNFICDHCYGAFR              |     |   |    | Carbamidomethyl (C)[7]                           |  |  |  |  |  | Mascot |
|    | 1857.8523                | 1857.9689 | 0.1166  | 63  | 115          | 129 | VQKNFICDHCYGAFR              |     |   |    | Carbamidomethyl (C)[7]                           |  |  |  |  |  | Mascot |
|    | 1993.9569                | 1993.8893 | -0.0676 | -34 | 65           | 80  | LLDEKEMRPSEDMQLK             |     |   |    | Oxidation (M)[7,13]                              |  |  |  |  |  | Mascot |
|    | 2210.9087                | 2211.0356 | 0.1269  | 57  | 221          | 239 | HSLTHTGEKPFACDMCD<br>MR      |     |   |    | Oxidation (M)[15,18]                             |  |  |  |  |  | Mascot |
|    | 2225.124                 | 2225.0466 | -0.0774 | -35 | 36           | 55  | GTQGHMVLPTSMTCPL<br>LLR      |     |   |    | Carbamidomethyl (C)[14], Oxidation (M)[6]        |  |  |  |  |  | Mascot |
|    | 2282.9773                | 2283.1045 | 0.1272  | 56  | 193          | 211 | HSLTHTGVKPYACSMCD<br>MR      |     |   |    | Carbamidomethyl (C)[13,16], Oxidation (M)[15,18] |  |  |  |  |  | Mascot |
|    | 2991.3118                | 2991.3586 | 0.0468  | 16  | 216          | 239 | YHLERHSLTHTGEKPFAC<br>DMCDMR |     |   |    | Carbamidomethyl (C)[18,21]                       |  |  |  |  |  | Mascot |
| 25 | Zgc:153371 [Danio rerio] |           |         |     | gi 115292070 |     | 30630.9                      | 5.3 | 7 | 35 | 0                                                |  |  |  |  |  |        |

#### Peptide Information

| Calc. Mass | Obsrv. Mass | ± da    | ± ppm | Start Seq. | End Seq. | Sequence                 | Ion Score | C. I. | % Modification                              | Rank | Result Type |
|------------|-------------|---------|-------|------------|----------|--------------------------|-----------|-------|---------------------------------------------|------|-------------|
| 807.3665   | 807.3908    | 0.0243  | 30    | 1          | 7        | MGNQVDK                  |           |       | Oxidation (M)[1]                            |      | Mascot      |
| 844.4709   | 844.4626    | -0.0083 | -10   | 218        | 224      | LCLPDKR                  |           |       |                                             |      | Mascot      |
| 844.4709   | 844.4626    | -0.0083 | -10   | 218        | 224      | LCLPDKR                  |           |       |                                             |      | Mascot      |
| 1492.6638  | 1492.626    | -0.0378 | -25   | 65         | 76       | HYSELDCAVYHR             |           |       |                                             |      | Mascot      |
| 1936.9498  | 1936.8516   | -0.0982 | -51   | 84         | 101      | SGSTAELETFSPELNK         |           |       |                                             |      | Mascot      |
| 1993.9939  | 1993.8893   | -0.1046 | -52   | 225        | 240      | FHVLEFQSLEDLIMEK         |           |       | Oxidation (M)[14]                           |      | Mascot      |
| 2211.0605  | 2211.0356   | -0.0249 | -11   | 159        | 178      | FKALCPDMVVQNAMEQV<br>GAK |           |       | Oxidation (M)[8,14]                         |      | Mascot      |
| 2264.0469  | 2264.0029   | -0.044  | -19   | 161        | 180      | ALCPDMVVQNAMEQVG<br>AKDR |           |       | Carbamidomethyl (C)[3], Oxidation (M)[6,12] |      | Mascot      |
| 2264.0469  | 2264.0029   | -0.044  | -19   | 161        | 180      | ALCPDMVVQNAMEQVG<br>AKDR |           |       | Carbamidomethyl (C)[3], Oxidation (M)[6,12] |      | Mascot      |

26 PREDICTED: probable E3 ubiquitin-protein ligase TRIM8-like [Danio rerio]

#### Peptide Information

| Calc. Mass | Obsrv. Mass | ± da    | ± ppm | Start Seq. | End Seq. | Sequence  | Ion Score | C. I. | % Modification | Rank | Result Type |
|------------|-------------|---------|-------|------------|----------|-----------|-----------|-------|----------------|------|-------------|
| 857.4264   | 857.4856    | 0.0592  | 69    | 318        | 324      | THPPYSR   |           |       |                |      | Mascot      |
| 857.4264   | 857.4856    | 0.0592  | 69    | 318        | 324      | THPPYSR   |           |       |                |      | Mascot      |
| 922.5244   | 922.4028    | -0.1216 | -132  | 156        | 163      | IFLSEVSK  |           |       |                |      | Mascot      |
| 1045.5021  | 1045.5333   | 0.0312  | 30    | 20         | 27       | QQDRIDDR  |           |       |                |      | Mascot      |
| 1050.5475  | 1050.53     | -0.0175 | -17   | 1          | 9        | MAALIWSMK |           |       |                |      | Mascot      |

|           |           |         |      |     |     |                           |  |                           |        |
|-----------|-----------|---------|------|-----|-----|---------------------------|--|---------------------------|--------|
| 1192.6508 | 1192.5251 | -0.1257 | -105 | 2   | 11  | AALIWSMKTR                |  | Oxidation (M)[7]          | Mascot |
| 1192.6508 | 1192.5251 | -0.1257 | -105 | 2   | 11  | AALIWSMKTR                |  | Oxidation (M)[7]          | Mascot |
| 1234.7041 | 1234.6414 | -0.0627 | -51  | 106 | 116 | LLSSVQVVFDDK              |  |                           | Mascot |
| 1264.6783 | 1264.6165 | -0.0618 | -49  | 28  | 37  | VKDIEEQLYK                |  |                           | Mascot |
| 1264.6783 | 1264.6165 | -0.0618 | -49  | 28  | 37  | VKDIEEQLYK                |  |                           | Mascot |
| 1323.6912 | 1323.6307 | -0.0605 | -46  | 1   | 11  | MAALIWSMKTR               |  | Oxidation (M)[1]          | Mascot |
| 1366.6671 | 1366.6393 | -0.0278 | -20  | 136 | 148 | SQSCTGSVLPPYK             |  |                           | Mascot |
| 2616.1497 | 2616.2104 | 0.0607  | 23   | 296 | 317 | KILMCTMDNVCSSVPSI<br>SNHR |  | Carbamidomethyl (C)[5,10] | Mascot |

27 PREDICTED: interferon-induced very large GTPase 1-like [Danio rerio] gi|189517554 108763.7 5.84 13 35 0

#### Peptide Information

| Calc. Mass | Obsrv. Mass | $\pm$ da | $\pm$ ppm | Start Seq. | End Seq. | Sequence                   | Ion Score | C. I. % | Modification           | Rank | Result Type |
|------------|-------------|----------|-----------|------------|----------|----------------------------|-----------|---------|------------------------|------|-------------|
| 857.509    | 857.4856    | -0.0234  | -27       | 746        | 752      | LLEDVIR                    |           |         |                        |      | Mascot      |
| 857.509    | 857.4856    | -0.0234  | -27       | 746        | 752      | LLEDVIR                    | 15        | 0       |                        |      | Mascot      |
| 922.4363   | 922.4028    | -0.0335  | -36       | 426        | 433      | TTSEEVEK                   |           |         |                        |      | Mascot      |
| 1004.4393  | 1004.4677   | 0.0284   | 28        | 434        | 441      | SMSEFFEK                   |           |         |                        |      | Mascot      |
| 1045.52    | 1045.5333   | 0.0133   | 13        | 889        | 896      | DLEKYYSK                   |           |         |                        |      | Mascot      |
| 1051.5605  | 1051.6798   | 0.1193   | 113       | 488        | 496      | MIQSFNIAK                  |           |         |                        |      | Mascot      |
| 1059.5979  | 1059.5621   | -0.0358  | -34       | 290        | 297      | MERIIIR                    |           |         |                        |      | Mascot      |
| 1059.5979  | 1059.5621   | -0.0358  | -34       | 290        | 297      | MERIIIR                    |           |         |                        |      | Mascot      |
| 1090.5674  | 1090.5328   | -0.0346  | -32       | 163        | 171      | KLLETGGR                   |           |         | Carbamidomethyl (C)[6] |      | Mascot      |
| 1234.6677  | 1234.6414   | -0.0263  | -21       | 598        | 607      | EPIEQSIYKK                 |           |         |                        |      | Mascot      |
| 1366.7035  | 1366.6393   | -0.0642  | -47       | 513        | 524      | AMLKEYQEGAVK               |           |         |                        |      | Mascot      |
| 1434.7192  | 1434.7239   | 0.0047   | 3         | 218        | 228      | QQQMKILMDR                 |           |         | Oxidation (M)[5]       |      | Mascot      |
| 1638.8585  | 1638.8063   | -0.0522  | -32       | 112        | 125      | FTESETSVKIIQK              |           |         |                        |      | Mascot      |
| 1907.8579  | 1907.8336   | -0.0243  | -13       | 426        | 441      | TTSEEVEKSMSEFFEK           |           |         |                        |      | Mascot      |
| 2743.2378  | 2743.2261   | -0.0117  | -4        | 381        | 402      | LETVYTEWSWSLHNAMM<br>ELENK |           |         | Oxidation (M)[16,17]   |      | Mascot      |

28 staphylococcal nuclease domain-containing protein 1 [Danio rerio] gi|33504513 100043.2 6.93 14 35 0

#### Peptide Information

| Calc. Mass | Obsrv. Mass | $\pm$ da | $\pm$ ppm | Start Seq. | End Seq. | Sequence  | Ion Score | C. I. % | Modification | Rank | Result Type |
|------------|-------------|----------|-----------|------------|----------|-----------|-----------|---------|--------------|------|-------------|
| 1034.5516  | 1034.527    | -0.0246  | -24       | 728        | 736      | FEKVESPAK |           |         |              |      | Mascot      |
| 1059.5179  | 1059.5621   | 0.0442   | 42        | 83         | 91       | EYGMVYLK  |           |         |              |      | Mascot      |
| 1059.5179  | 1059.5621   | 0.0442   | 42        | 83         | 91       | EYGMVYLK  |           |         |              |      | Mascot      |



|    |                                                                                    |           |         |     |     |     |                              |         |     |   |    |   |    |        |  |                                          |        |
|----|------------------------------------------------------------------------------------|-----------|---------|-----|-----|-----|------------------------------|---------|-----|---|----|---|----|--------|--|------------------------------------------|--------|
|    | 1091.5038                                                                          | 1091.5417 | 0.0379  | 35  | 125 | 133 | LCDLEDQAK                    |         |     |   |    |   |    |        |  | Carbamidomethyl (C)[2]                   | Mascot |
|    | 1147.5967                                                                          | 1147.5879 | -0.0088 | -8  | 12  | 22  | GQPRGGPPPER                  |         |     |   |    |   |    |        |  |                                          | Mascot |
|    | 1234.6646                                                                          | 1234.6414 | -0.0232 | -19 | 1   | 11  | MVLSGCAIVR                   |         |     |   |    |   |    |        |  | Carbamidomethyl (C)[6], Oxidation (M)[1] | Mascot |
|    | 1277.6525                                                                          | 1277.6686 | 0.0161  | 13  | 635 | 644 | LWANYEEKPK                   |         |     |   |    |   |    |        |  |                                          | Mascot |
|    | 1293.5879                                                                          | 1293.6056 | 0.0177  | 14  | 571 | 581 | EVEVEVESMDK                  |         |     |   |    |   |    |        |  |                                          | Mascot |
|    | 1293.5879                                                                          | 1293.6056 | 0.0177  | 14  | 571 | 581 | EVEVEVESMDK                  |         |     |   |    |   |    |        |  |                                          | Mascot |
|    | 1366.7378                                                                          | 1366.6393 | -0.0985 | -72 | 494 | 504 | QFFPFLQRAGR                  |         |     |   |    |   |    |        |  |                                          | Mascot |
|    | 1707.7828                                                                          | 1707.7192 | -0.0636 | -37 | 401 | 416 | AATNAMEMGVPAFPER             |         |     |   |    |   |    |        |  | Oxidation (M)[6]                         | Mascot |
|    | 1840.7408                                                                          | 1840.903  | 0.1622  | 88  | 873 | 887 | YGDFRDDDADEFGYR              |         |     |   |    |   |    |        |  |                                          | Mascot |
|    | 1994.0129                                                                          | 1993.8893 | -0.1236 | -62 | 731 | 747 | VESPAKVHVFIIDYGNR            |         |     |   |    |   |    |        |  |                                          | Mascot |
|    | 1995.9017                                                                          | 1995.8215 | -0.0802 | -40 | 47  | 62  | DTPDEPWAFQAREFMR             |         |     |   |    |   |    |        |  |                                          | Mascot |
|    | 1995.9017                                                                          | 1995.8215 | -0.0802 | -40 | 47  | 62  | DTPDEPWAFQAREFMR             |         |     |   |    |   |    |        |  |                                          | Mascot |
|    | 2264.011                                                                           | 2264.0029 | -0.0081 | -4  | 267 | 286 | EGFARCVDSMAVYTQ<br>GAEK      |         |     |   |    |   |    |        |  | Oxidation (M)[11]                        | Mascot |
|    | 2264.011                                                                           | 2264.0029 | -0.0081 | -4  | 267 | 286 | EGFARCVDSMAVYTQ<br>GAEK      |         |     |   |    |   |    |        |  | Oxidation (M)[11]                        | Mascot |
|    | 2743.4231                                                                          | 2743.2261 | -0.197  | -72 | 180 | 203 | DGCMVRRALLLPDYLVTV<br>MLSGIK |         |     |   |    |   |    |        |  | Carbamidomethyl (C)[3], Oxidation (M)[4] | Mascot |
| 29 | PREDICTED: proto-oncogene serine/threonine-protein kinase pim-1-like [Danio rerio] |           |         |     |     |     | gi 326670989                 | 31071.2 | 9.5 | 2 | 35 | 0 | 28 | 58.287 |  |                                          |        |

#### Peptide Information

| Calc. Mass | Obsrv. Mass | ± da    | ± ppm | Start Seq. | End Seq. | Sequence | Ion Score | C. I. | % Modification | Rank | Result Type |
|------------|-------------|---------|-------|------------|----------|----------|-----------|-------|----------------|------|-------------|
| 857.4839   | 857.4856    | 0.0017  | 2     | 77         | 84       | LIVDGQGR |           |       |                |      | Mascot      |
| 857.4839   | 857.4856    | 0.0017  | 2     | 77         | 84       | LIVDGQGR | 28        |       | 58.287         |      | Mascot      |
| 882.5658   | 882.5405    | -0.0253 | -29   | 85         | 92       | LPLEVALK |           |       |                |      | Mascot      |

30 FYVE, RhoGEF and PH domain-containing protein 6 [Danio rerio] gi|153792522 147346.7 6.22 15 35 0

#### Peptide Information

| Calc. Mass | Obsrv. Mass | ± da    | ± ppm | Start Seq. | End Seq. | Sequence    | Ion Score | C. I. | % Modification                            | Rank | Result Type |
|------------|-------------|---------|-------|------------|----------|-------------|-----------|-------|-------------------------------------------|------|-------------|
| 860.4471   | 860.4272    | -0.0199 | -23   | 760        | 766      | EEVERAK     |           |       |                                           |      | Mascot      |
| 906.4791   | 906.4094    | -0.0697 | -77   | 69         | 76       | NQHPPVSK    |           |       |                                           |      | Mascot      |
| 1034.5663  | 1034.527    | -0.0393 | -38   | 991        | 999      | EGTLMKLSR   |           |       |                                           |      | Mascot      |
| 1050.5612  | 1050.53     | -0.0312 | -30   | 991        | 999      | EGTLMKLSR   |           |       | Oxidation (M)[5]                          |      | Mascot      |
| 1165.6649  | 1165.71     | 0.0451  | 39    | 987        | 996      | VFLKEGTLMK  |           |       |                                           |      | Mascot      |
| 1277.6228  | 1277.6686   | 0.0458  | 36    | 366        | 376      | SLPQMVDLSLK |           |       | Carbamidomethyl (C)[10]                   |      | Mascot      |
| 1293.6178  | 1293.6056   | -0.0122 | -9    | 366        | 376      | SLPQMVDLSLK |           |       | Carbamidomethyl (C)[10], Oxidation (M)[5] |      | Mascot      |

|           |           |         |     |      |      |                                   |                                              |        |
|-----------|-----------|---------|-----|------|------|-----------------------------------|----------------------------------------------|--------|
| 1293.6178 | 1293.6056 | -0.0122 | -9  | 366  | 376  | SLPQMVDSLCK                       | Carbamidomethyl (C)[10], Oxidation (M)[5]    | Mascot |
| 1366.6711 | 1366.6393 | -0.0318 | -23 | 1305 | 1315 | WIEAFQEAMIL                       | Oxidation (M)[9]                             | Mascot |
| 1434.6616 | 1434.7239 | 0.0623  | 43  | 694  | 705  | CAELAVGFQMHR                      | Carbamidomethyl (C)[1], Oxidation (M)[10]    | Mascot |
| 1492.7499 | 1492.626  | -0.1239 | -83 | 364  | 376  | QKSLPQMVDSLCK                     | Oxidation (M)[7]                             | Mascot |
| 1562.7566 | 1562.743  | -0.0136 | -9  | 1163 | 1175 | NQLARVCDHCYIK                     |                                              | Mascot |
| 1707.8119 | 1707.7192 | -0.0927 | -54 | 870  | 883  | EFDRNVALLDEQCR                    |                                              | Mascot |
| 1857.9202 | 1857.9689 | 0.0487  | 26  | 1176 | 1192 | LQHKGDQSNVTFSPSGR                 |                                              | Mascot |
| 1857.9202 | 1857.9689 | 0.0487  | 26  | 1176 | 1192 | LQHKGDQSNVTFSPSGR                 |                                              | Mascot |
| 1907.9596 | 1907.8336 | -0.126  | -66 | 115  | 132  | EATLTTEVGVFKEGDSPK                |                                              | Mascot |
| 2282.9849 | 2283.1045 | 0.1196  | 52  | 1121 | 1137 | TTMCMICTCEFTLTWRR                 | Carbamidomethyl (C)[4,7,9], Oxidation (M)[3] | Mascot |
| 2284.1602 | 2284.1013 | -0.0589 | -26 | 940  | 960  | DTQTALSVVKEVANHAN<br>DIMK         |                                              | Mascot |
| 3082.5891 | 3082.3618 | -0.2273 | -74 | 69   | 97   | NQHPPVSKNGGPALLSS<br>NLSHYIIPPCNK |                                              | Mascot |
| 3082.5891 | 3082.3618 | -0.2273 | -74 | 69   | 97   | NQHPPVSKNGGPALLSS<br>NLSHYIIPPCNK |                                              | Mascot |

31 phosphoserine aminotransferase isoform 2 [Danio rerio] gi|41053792 40384.6 8.29 8 34 0

Peptide Information

| Calc. Mass | Obsrv. Mass | ± da    | ± ppm | Start Seq. | End Sequence Seq.                 | Ion Score | C. I. % Modification | Rank Result Type |
|------------|-------------|---------|-------|------------|-----------------------------------|-----------|----------------------|------------------|
| 906.405    | 906.4094    | 0.0044  | 5     | 310        | 317 EGDESLEK                      |           |                      | Mascot           |
| 1034.5     | 1034.527    | 0.027   | 26    | 309        | 317 KEGDESLEK                     |           |                      | Mascot           |
| 1050.4269  | 1050.53     | 0.1031  | 98    | 259        | 268 NNGGADAMER                    |           | Oxidation (M)[8]     | Mascot           |
| 1051.5935  | 1051.6798   | 0.0863  | 82    | 190        | 199 FGLIFAGAQK                    |           |                      | Mascot           |
| 1091.603   | 1091.5417   | -0.0613 | -56   | 300        | 308 MNIPFRIGK                     |           | Oxidation (M)[1]     | Mascot           |
| 1357.682   | 1357.675    | -0.007  | -5    | 355        | 365 ILAAYMEDFLR                   |           | Oxidation (M)[6]     | Mascot           |
| 1592.7889  | 1592.8003   | 0.0114  | 7     | 355        | 367 ILAAYMEDFLRNH                 |           |                      | Mascot           |
| 2743.5139  | 2743.2261   | -0.2878 | -105  | 71         | 96 ILFLQGGGSGQFSAVPLN<br>LIGLKEER |           |                      | Mascot           |

32 DNA mismatch repair protein Msh2 [Danio rerio] gi|47087243 103731.4 6.32 14 34 0

Peptide Information

| Calc. Mass | Obsrv. Mass | ± da    | ± ppm | Start Seq. | End Sequence Seq. | Ion Score | C. I. % Modification | Rank Result Type |
|------------|-------------|---------|-------|------------|-------------------|-----------|----------------------|------------------|
| 844.4886   | 844.4626    | -0.026  | -31   | 220        | 227 GGILLTDR      |           |                      | Mascot           |
| 844.4886   | 844.4626    | -0.026  | -31   | 901        | 907 AVKEELR       |           |                      | Mascot           |
| 870.5519   | 870.5138    | -0.0381 | -44   | 213        | 219 LKQVVQR       |           |                      | Mascot           |
| 1034.4935  | 1034.527    | 0.0335  | 32    | 483        | 490 ENMDRLEK      |           |                      | Mascot           |
| 1045.4772  | 1045.5333   | 0.0561  | 54    | 82         | 89 MNFESFVR       |           | Oxidation (M)[1]     | Mascot           |

|           |           |         |     |     |     |                             |                        |        |
|-----------|-----------|---------|-----|-----|-----|-----------------------------|------------------------|--------|
| 1050.4884 | 1050.53   | 0.0416  | 40  | 483 | 490 | ENMDRLEK                    | Oxidation (M)[3]       | Mascot |
| 1091.5514 | 1091.5417 | -0.0097 | -9  | 374 | 382 | KSCQEDLLR                   |                        | Mascot |
| 1234.6533 | 1234.6414 | -0.0119 | -10 | 265 | 275 | IAMSCLEAVIK                 | Carbamidomethyl (C)[5] | Mascot |
| 1264.6896 | 1264.6165 | -0.0731 | -58 | 160 | 171 | VVGVGYYVDSTLR               |                        | Mascot |
| 1264.6896 | 1264.6165 | -0.0731 | -58 | 160 | 171 | VVGVGYYVDSTLR               |                        | Mascot |
| 1293.6178 | 1293.6056 | -0.0122 | -9  | 889 | 900 | VKSMPVDGMSDK                |                        | Mascot |
| 1293.6178 | 1293.6056 | -0.0122 | -9  | 889 | 900 | VKSMPVDGMSDK                |                        | Mascot |
| 1475.7278 | 1475.7086 | -0.0192 | -13 | 108 | 119 | SSKEHDWQIAFK                |                        | Mascot |
| 1592.7836 | 1592.8003 | 0.0167  | 10  | 250 | 264 | GETVSSAALPEMEKK             | Oxidation (M)[12]      | Mascot |
| 1716.8479 | 1716.7966 | -0.0513 | -30 | 276 | 290 | YLELLADEANFGSFK             |                        | Mascot |
| 1996.0143 | 1995.8215 | -0.1928 | -97 | 663 | 680 | MFHIITGPSMGGKSTYIR          |                        | Mascot |
| 1996.0143 | 1995.8215 | -0.1928 | -97 | 663 | 680 | MFHIITGPSMGGKSTYIR          |                        | Mascot |
| 2616.3391 | 2616.2104 | -0.1287 | -49 | 776 | 798 | SFCLFATHFHELTALAQQ<br>VPTVR |                        | Mascot |

33 PREDICTED: GTPase IMAP family member 4-like [Danio rerio] gi|125812242 34845.7 6.51 9 34 0

#### Peptide Information

| Calc. Mass | Obsrv. Mass | ± da    | ± ppm | Start Seq. | End Seq. | Sequence         | Ion Score | C. I. % | Modification       | Rank | Result Type |
|------------|-------------|---------|-------|------------|----------|------------------|-----------|---------|--------------------|------|-------------|
| 856.4999   | 856.4998    | -0.0001 | 0     | 283        | 289      | RAEKPQK          |           |         |                    |      | Mascot      |
| 877.3533   | 877.428     | 0.0747  | 85    | 275        | 281      | EEEEEDAR         |           |         |                    |      | Mascot      |
| 882.4791   | 882.5405    | 0.0614  | 70    | 245        | 251      | HEEIARK          |           |         |                    |      | Mascot      |
| 1192.6056  | 1192.5251   | -0.0805 | -67   | 2          | 12       | TSDEKLGDLSK      |           |         |                    |      | Mascot      |
| 1192.6056  | 1192.5251   | -0.0805 | -67   | 2          | 12       | TSDEKLGDLSK      |           |         |                    |      | Mascot      |
| 1277.6808  | 1277.6686   | -0.0122 | -10   | 43         | 55       | GSGKSSTGNTILR    |           |         |                    |      | Mascot      |
| 1323.6461  | 1323.6307   | -0.0154 | -12   | 1          | 12       | MTSDEKLGDLSK     |           |         |                    |      | Mascot      |
| 1492.8005  | 1492.626    | -0.1745 | -117  | 196        | 208      | NTGFEQVSKLLEK    |           |         |                    |      | Mascot      |
| 1493.7239  | 1493.6652   | -0.0587 | -39   | 135        | 146      | DMHKLIQNMFGK     |           |         | Oxidation (M)[2,9] |      | Mascot      |
| 1904.8654  | 1904.8184   | -0.047  | -25   | 252        | 267      | LRELEENCEGEGELER |           |         |                    |      | Mascot      |

34 beclin 1 (coiled-coil, myosin-like BCL2 interacting protein) [Danio rerio]

gi|220672694 25924.7 6.58 7 34 0

#### Peptide Information

| Calc. Mass | Obsrv. Mass | ± da   | ± ppm | Start Seq. | End Seq. | Sequence | Ion Score | C. I. % | Modification     | Rank | Result Type |
|------------|-------------|--------|-------|------------|----------|----------|-----------|---------|------------------|------|-------------|
| 856.3987   | 856.4998    | 0.1011 | 118   | 131        | 136      | FFWDNK   |           |         |                  |      | Mascot      |
| 870.396    | 870.5138    | 0.1178 | 135   | 93         | 99       | MGLCFQR  |           |         | Oxidation (M)[1] |      | Mascot      |

|  |           |           |         |     |     |     |                  |  |  |  |  |  |                         |        |
|--|-----------|-----------|---------|-----|-----|-----|------------------|--|--|--|--|--|-------------------------|--------|
|  | 882.4753  | 882.5405  | 0.0652  | 74  | 203 | 209 | FMLTNLK          |  |  |  |  |  | Oxidation (M)[2]        | Mascot |
|  | 1264.6354 | 1264.6165 | -0.0189 | -15 | 120 | 130 | ELPLYCSGGLR      |  |  |  |  |  | Carbamidomethyl (C)[6]  | Mascot |
|  | 1264.6354 | 1264.6165 | -0.0189 | -15 | 120 | 130 | ELPLYCSGGLR      |  |  |  |  |  | Carbamidomethyl (C)[6]  | Mascot |
|  | 1308.698  | 1308.6179 | -0.0801 | -61 | 28  | 37  | YCQIQLDKLG       |  |  |  |  |  | Carbamidomethyl (C)[2]  | Mascot |
|  | 1840.868  | 1840.903  | 0.035   | 19  | 21  | 35  | SVDNQMRYCQIQLDK  |  |  |  |  |  |                         | Mascot |
|  | 1857.8323 | 1857.9689 | 0.1366  | 74  | 153 | 167 | EEVEKDDTGFCCLPYR |  |  |  |  |  | Carbamidomethyl (C)[11] | Mascot |
|  | 1857.8323 | 1857.9689 | 0.1366  | 74  | 153 | 167 | EEVEKDDTGFCCLPYR |  |  |  |  |  | Carbamidomethyl (C)[11] | Mascot |

35 PREDICTED: uncharacterized protein C9orf172 homolog [Danio rerio] gi|292616967 121567.5 7.99 16 34 0

#### Peptide Information

| Calc. Mass | Obsrv. Mass | ± da    | ± ppm | Start Seq. | End Seq. | Sequence               | Ion Score | C. I. | % Modification         | Rank | Result Type |
|------------|-------------|---------|-------|------------|----------|------------------------|-----------|-------|------------------------|------|-------------|
| 844.4709   | 844.4626    | -0.0083 | -10   | 933        | 939      | LQMPTVR                |           |       |                        |      | Mascot      |
| 844.4774   | 844.4626    | -0.0148 | -18   | 692        | 698      | DLIDQLK                |           |       |                        |      | Mascot      |
| 860.4658   | 860.4272    | -0.0386 | -45   | 933        | 939      | LQMPTVR                |           |       | Oxidation (M)[3]       |      | Mascot      |
| 870.4832   | 870.5138    | 0.0306  | 35    | 337        | 343      | YPIQPPR                |           |       |                        |      | Mascot      |
| 906.509    | 906.4094    | -0.0996 | -110  | 822        | 828      | HILKHCR                |           |       |                        |      | Mascot      |
| 922.4853   | 922.4028    | -0.0825 | -89   | 215        | 222      | QANTPHVR               |           |       |                        |      | Mascot      |
| 1034.6105  | 1034.527    | -0.0835 | -81   | 840        | 848      | IARVGYSR               |           |       |                        |      | Mascot      |
| 1192.6143  | 1192.5251   | -0.0892 | -75   | 988        | 996      | EICFINIQR              |           |       | Carbamidomethyl (C)[3] |      | Mascot      |
| 1192.6143  | 1192.5251   | -0.0892 | -75   | 988        | 996      | EICFINIQR              |           |       | Carbamidomethyl (C)[3] |      | Mascot      |
| 1264.7273  | 1264.6165   | -0.1108 | -88   | 373        | 382      | TRWVHTLPVR             |           |       |                        |      | Mascot      |
| 1264.7273  | 1264.6165   | -0.1108 | -88   | 373        | 382      | TRWVHTLPVR             |           |       |                        |      | Mascot      |
| 1366.7875  | 1366.6393   | -0.1482 | -108  | 928        | 939      | LPSPKLQMPTVR           |           |       |                        |      | Mascot      |
| 1434.7263  | 1434.7239   | -0.0024 | -2    | 774        | 785      | KDTTFNASLYFK           |           |       |                        |      | Mascot      |
| 1562.647   | 1562.743    | 0.096   | 61    | 1041       | 1053     | QFMCMIMAASEPR          |           |       | Oxidation (M)[3,5,7]   |      | Mascot      |
| 1592.6356  | 1592.8003   | 0.1647  | 103   | 272        | 284      | TPTPSECYNMDYR          |           |       | Oxidation (M)[10]      |      | Mascot      |
| 1707.8774  | 1707.7192   | -0.1582 | -93   | 1054       | 1068     | MLDWVGAPHLLDDII        |           |       |                        |      | Mascot      |
| 1857.8478  | 1857.9689   | 0.1211  | 65    | 1038       | 1053     | TGKQFMCMIMAASEPR       |           |       | Carbamidomethyl (C)[7] |      | Mascot      |
| 1857.8478  | 1857.9689   | 0.1211  | 65    | 1038       | 1053     | TGKQFMCMIMAASEPR       |           |       | Carbamidomethyl (C)[7] |      | Mascot      |
| 2225.0332  | 2225.0466   | 0.0134  | 6     | 1007       | 1024     | HEFPQIYNQLCEFVESNK     |           |       |                        |      | Mascot      |
| 2264.0562  | 2264.0029   | -0.0533 | -24   | 436        | 453      | MFYTRPCHYPAEVHIPM<br>R |           |       | Oxidation (M)[1]       |      | Mascot      |
| 2264.0562  | 2264.0029   | -0.0533 | -24   | 436        | 453      | MFYTRPCHYPAEVHIPM<br>R |           |       | Oxidation (M)[1]       |      | Mascot      |

36 dihydrolipoyllysine-residue succinyltransferase component of 2-oxoglutarate dehydrogenase complex, gi|41393131 48666.3 8.97 4 34 0 24 0

| Peptide Information |                                                       |         |       |            |              |                           |           |       |                  |                  |
|---------------------|-------------------------------------------------------|---------|-------|------------|--------------|---------------------------|-----------|-------|------------------|------------------|
| Calc. Mass          | Obsrv. Mass                                           | ± da    | ± ppm | Start Seq. | End Seq.     | Sequence                  | Ion Score | C. I. | % Modification   | Rank Result Type |
| 844.4634            | 844.4626                                              | -0.0008 | -1    | 21         | 28           | QGNSVLAR                  | 24        | 0     |                  | Mascot           |
| 844.4634            | 844.4626                                              | -0.0008 | -1    | 21         | 28           | QGNSVLAR                  |           |       |                  | Mascot           |
| 1434.7926           | 1434.7239                                             | -0.0687 | -48   | 279        | 291          | HGIKLGFM SAFVK            |           |       |                  | Mascot           |
| 1995.9779           | 1995.8215                                             | -0.1564 | -78   | 415        | 430          | VEVRPMMYVALTYDHR          |           |       | Oxidation (M)[6] | Mascot           |
| 1995.9779           | 1995.8215                                             | -0.1564 | -78   | 415        | 430          | VEVRPMMYVALTYDHR          |           |       | Oxidation (M)[6] | Mascot           |
| 2211.2747           | 2211.0356                                             | -0.2391 | -108  | 318        | 338          | DYVDISVAVATPKGLVVP<br>VIR |           |       |                  | Mascot           |
| 37                  | PREDICTED: TBC1 domain family member 2B [Danio rerio] |         |       |            | gi 326680312 | 109264.9                  | 5.83      | 12    | 34               | 0                |

| Peptide Information |                                                                                 |         |       |            |              |                            |           |       |                                          |                  |
|---------------------|---------------------------------------------------------------------------------|---------|-------|------------|--------------|----------------------------|-----------|-------|------------------------------------------|------------------|
| Calc. Mass          | Obsrv. Mass                                                                     | ± da    | ± ppm | Start Seq. | End Seq.     | Sequence                   | Ion Score | C. I. | % Modification                           | Rank Result Type |
| 857.5566            | 857.4856                                                                        | -0.071  | -83   | 314        | 320          | ISKLQLR                    |           |       |                                          | Mascot           |
| 857.5566            | 857.4856                                                                        | -0.071  | -83   | 314        | 320          | ISKLQLR                    | 5         | 0     |                                          | Mascot           |
| 877.4019            | 877.428                                                                         | 0.0261  | 30    | 666        | 672          | MRDCQPK                    |           |       |                                          | Mascot           |
| 1059.5792           | 1059.5621                                                                       | -0.0171 | -16   | 338        | 346          | LREELGSQK                  |           |       |                                          | Mascot           |
| 1059.5792           | 1059.5621                                                                       | -0.0171 | -16   | 338        | 346          | LREELGSQK                  |           |       |                                          | Mascot           |
| 1090.5562           | 1090.5328                                                                       | -0.0234 | -21   | 631        | 639          | EMVRSPDLK                  |           |       | Oxidation (M)[2]                         | Mascot           |
| 1234.658            | 1234.6414                                                                       | -0.0166 | -13   | 122        | 130          | YWLQQLQKQK                 |           |       |                                          | Mascot           |
| 1293.5503           | 1293.6056                                                                       | 0.0553  | 43    | 132        | 141          | WEFCNMPGPR                 |           |       | Carbamidomethyl (C)[4]                   | Mascot           |
| 1293.5503           | 1293.6056                                                                       | 0.0553  | 43    | 132        | 141          | WEFCNMPGPR                 |           |       | Carbamidomethyl (C)[4]                   | Mascot           |
| 1434.6987           | 1434.7239                                                                       | 0.0252  | 18    | 654        | 664          | VWSWCVSFHVK                |           |       | Carbamidomethyl (C)[5]                   | Mascot           |
| 1562.7937           | 1562.743                                                                        | -0.0507 | -32   | 654        | 665          | VWSWCVSFHVKK               |           |       | Carbamidomethyl (C)[5]                   | Mascot           |
| 1592.8042           | 1592.8003                                                                       | -0.0039 | -2    | 652        | 664          | SKVWSWCVSFHVK              |           |       |                                          | Mascot           |
| 1840.7726           | 1840.903                                                                        | 0.1304  | 71    | 1          | 16           | MQEEDESSANTSRNSR           |           |       |                                          | Mascot           |
| 2264.0095           | 2264.0029                                                                       | -0.0066 | -3    | 442        | 463          | LSQPSGEGETQSAECNS<br>PSVTR |           |       |                                          | Mascot           |
| 2264.0095           | 2264.0029                                                                       | -0.0066 | -3    | 442        | 463          | LSQPSGEGETQSAECNS<br>PSVTR |           |       |                                          | Mascot           |
| 2282.999            | 2283.1045                                                                       | 0.1055  | 46    | 673        | 691          | DYYHNLLCMANDKPNPA<br>CK    |           |       | Carbamidomethyl (C)[8], Oxidation (M)[9] | Mascot           |
| 38                  | PREDICTED: vacuolar protein sorting-associated protein 41 homolog [Danio rerio] |         |       |            | gi 125853163 | 99028.4                    | 5.84      | 14    | 34                                       | 0                |

| Peptide Information |             |      |       |            |          |          |           |       |                |                  |
|---------------------|-------------|------|-------|------------|----------|----------|-----------|-------|----------------|------------------|
| Calc. Mass          | Obsrv. Mass | ± da | ± ppm | Start Seq. | End Seq. | Sequence | Ion Score | C. I. | % Modification | Rank Result Type |

|           |           |         |      |     |     |                         |  |  |  |  |  |                        |  |  |  |  |  |  |  |        |
|-----------|-----------|---------|------|-----|-----|-------------------------|--|--|--|--|--|------------------------|--|--|--|--|--|--|--|--------|
| 877.5141  | 877.428   | -0.0861 | -98  | 527 | 533 | ALEIYLR                 |  |  |  |  |  |                        |  |  |  |  |  |  |  | Mascot |
| 996.4744  | 996.5638  | 0.0894  | 90   | 409 | 417 | GDYDTAARK               |  |  |  |  |  |                        |  |  |  |  |  |  |  | Mascot |
| 1004.5081 | 1004.4677 | -0.0404 | -40  | 844 | 853 | GPGSGILEMK              |  |  |  |  |  | Oxidation (M)[9]       |  |  |  |  |  |  |  | Mascot |
| 1045.5272 | 1045.5333 | 0.0061  | 6    | 2   | 10  | AEVEEQGRK               |  |  |  |  |  |                        |  |  |  |  |  |  |  | Mascot |
| 1090.6044 | 1090.5328 | -0.0716 | -66  | 57  | 66  | FLALGTHFGK              |  |  |  |  |  |                        |  |  |  |  |  |  |  | Mascot |
| 1192.5626 | 1192.5251 | -0.0375 | -31  | 1   | 10  | MAEVEEQGRK              |  |  |  |  |  | Oxidation (M)[1]       |  |  |  |  |  |  |  | Mascot |
| 1192.5626 | 1192.5251 | -0.0375 | -31  | 1   | 10  | MAEVEEQGRK              |  |  |  |  |  | Oxidation (M)[1]       |  |  |  |  |  |  |  | Mascot |
| 1234.5192 | 1234.6414 | 0.1222  | 99   | 46  | 56  | DAASCMTVHDK             |  |  |  |  |  | Carbamidomethyl (C)[5] |  |  |  |  |  |  |  | Mascot |
| 1293.6545 | 1293.6056 | -0.0489 | -38  | 139 | 150 | SNNKQFVTGGNK            |  |  |  |  |  |                        |  |  |  |  |  |  |  | Mascot |
| 1293.6545 | 1293.6056 | -0.0489 | -38  | 139 | 150 | SNNKQFVTGGNK            |  |  |  |  |  |                        |  |  |  |  |  |  |  | Mascot |
| 1366.7286 | 1366.6393 | -0.0893 | -65  | 556 | 566 | IVLLMDFDKEK             |  |  |  |  |  | Oxidation (M)[5]       |  |  |  |  |  |  |  | Mascot |
| 1492.6525 | 1492.626  | -0.0265 | -18  | 117 | 128 | EGFHENFDCPIK            |  |  |  |  |  | Carbamidomethyl (C)[9] |  |  |  |  |  |  |  | Mascot |
| 1743.8159 | 1743.8573 | 0.0414  | 24   | 425 | 437 | NMDLWENEVYRFK           |  |  |  |  |  |                        |  |  |  |  |  |  |  | Mascot |
| 1908.0854 | 1907.8336 | -0.2518 | -132 | 589 | 603 | DRPELLHVYLHKLKFK        |  |  |  |  |  |                        |  |  |  |  |  |  |  | Mascot |
| 2264.1665 | 2264.0029 | -0.1636 | -72  | 669 | 688 | ALQMIMEELANVDKAEF<br>AK |  |  |  |  |  |                        |  |  |  |  |  |  |  | Mascot |
| 2264.1665 | 2264.0029 | -0.1636 | -72  | 669 | 688 | ALQMIMEELANVDKAEF<br>AK |  |  |  |  |  |                        |  |  |  |  |  |  |  | Mascot |
| 2283.1292 | 2283.1045 | -0.0247 | -11  | 334 | 352 | DYRLEHSEGESLFYIISPK     |  |  |  |  |  |                        |  |  |  |  |  |  |  | Mascot |

39 PREDICTED: Golgi apparatus protein 1 isoform 1 gi|292628588 129597.2 6.34 16 34 0 11 0  
[Danio rerio]

#### Peptide Information

| Calc. Mass | Obsrv. Mass | ± da    | ± ppm | Start Seq. | End Seq. | Sequence     | Ion Score | C. I. | % Modification         | Rank | Result Type |
|------------|-------------|---------|-------|------------|----------|--------------|-----------|-------|------------------------|------|-------------|
| 807.3301   | 807.3908    | 0.0607  | 75    | 138        | 144      | ECAAEEER     |           |       |                        |      | Mascot      |
| 857.3934   | 857.4856    | 0.0922  | 108   | 995        | 1001     | INHEGCK      |           |       | Carbamidomethyl (C)[6] |      | Mascot      |
| 857.3934   | 857.4856    | 0.0922  | 108   | 995        | 1001     | INHEGCK      |           |       | Carbamidomethyl (C)[6] |      | Mascot      |
| 860.4518   | 860.4272    | -0.0246 | -29   | 2          | 9        | AACGRVQR     |           |       |                        |      | Mascot      |
| 877.4308   | 877.428     | -0.0028 | -3    | 557        | 563      | TEMQGRR      |           |       |                        |      | Mascot      |
| 1059.4888  | 1059.5621   | 0.0733  | 69    | 680        | 687      | HQKEMNEK     |           |       | Oxidation (M)[5]       |      | Mascot      |
| 1059.4888  | 1059.5621   | 0.0733  | 69    | 680        | 687      | HQKEMNEK     |           |       | Oxidation (M)[5]       |      | Mascot      |
| 1192.5891  | 1192.5251   | -0.064  | -54   | 903        | 912      | FCQNILNNAR   |           |       |                        |      | Mascot      |
| 1192.5891  | 1192.5251   | -0.064  | -54   | 903        | 912      | FCQNILNNAR   |           |       |                        |      | Mascot      |
| 1234.6473  | 1234.6414   | -0.0059 | -5    | 1031       | 1042     | HQCAAIPPGKGR |           |       |                        |      | Mascot      |
| 1264.5851  | 1264.6165   | 0.0314  | 25    | 553        | 562      | HAYRTEMQGR   | 13        | 0     | Oxidation (M)[7]       |      | Mascot      |
| 1264.5878  | 1264.6165   | 0.0287  | 23    | 172        | 181      | MTSIIYSDYR   |           |       | Oxidation (M)[1]       |      | Mascot      |
| 1308.6656  | 1308.6179   | -0.0477 | -36   | 510        | 519      | DWKLDPIMYK   |           |       |                        |      | Mascot      |
| 1357.5811  | 1357.675    | 0.0939  | 69    | 337        | 347      | YRCNMDTAMPR  |           |       |                        |      | Mascot      |

|           |           |         |     |     |     |                    |                         |        |
|-----------|-----------|---------|-----|-----|-----|--------------------|-------------------------|--------|
| 1434.6793 | 1434.7239 | 0.0446  | 31  | 57  | 69  | SGGWKLAEEAACR      | Carbamidomethyl (C)[12] | Mascot |
| 1493.7264 | 1493.6652 | -0.0612 | -41 | 131 | 144 | STISGIKECAAEER     |                         | Mascot |
| 1562.7367 | 1562.743  | 0.0063  | 4   | 913 | 926 | DDNELEGQVISCLK     |                         | Mascot |
| 1716.885  | 1716.7966 | -0.0884 | -51 | 898 | 912 | ADIPKFCQNILNNAR    |                         | Mascot |
| 1857.9664 | 1857.9689 | 0.0025  | 1   | 25  | 42  | GLKSVIVGTENAAENAER |                         | Mascot |
| 1857.9664 | 1857.9689 | 0.0025  | 1   | 25  | 42  | GLKSVIVGTENAAENAER |                         | Mascot |

40 chromatin assembly factor 1 subunit A [Danio rerio] gi|148539970 97162.6 5.01 12 33 0

#### Peptide Information

| Calc. Mass | Obsrv. Mass | ± da    | ± ppm | Start Seq. | End Seq. | Sequence                   | Ion Score | C. I. % | Modification            | Rank | Result Type |
|------------|-------------|---------|-------|------------|----------|----------------------------|-----------|---------|-------------------------|------|-------------|
| 807.4028   | 807.3908    | -0.012  | -15   | 377        | 384      | TLASACGK                   |           |         | Carbamidomethyl (C)[6]  |      | Mascot      |
| 844.4709   | 844.4626    | -0.0083 | -10   | 499        | 505      | CPLRLDK                    |           |         |                         |      | Mascot      |
| 844.4709   | 844.4626    | -0.0083 | -10   | 499        | 505      | CPLRLDK                    |           |         |                         |      | Mascot      |
| 857.4587   | 857.4856    | 0.0269  | 31    | 436        | 443      | SSGPTRPR                   |           |         |                         |      | Mascot      |
| 857.5203   | 857.4856    | -0.0347 | -40   | 239        | 246      | INAANKVK                   |           |         |                         |      | Mascot      |
| 996.501    | 996.5638    | 0.0628  | 63    | 428        | 435      | DWTGHKPR                   |           |         |                         |      | Mascot      |
| 1045.5636  | 1045.5333   | -0.0303 | -29   | 775        | 784      | KSASSHSITK                 |           |         |                         |      | Mascot      |
| 1323.6951  | 1323.6307   | -0.0644 | -49   | 492        | 502      | STHISPRCPLR                |           |         | Carbamidomethyl (C)[8]  |      | Mascot      |
| 1366.6307  | 1366.6393   | 0.0086  | 6     | 583        | 593      | EWENELMSK GK               |           |         | Oxidation (M)[7]        |      | Mascot      |
| 1445.7781  | 1445.7333   | -0.0448 | -31   | 371        | 384      | TQLAPKTLASACGK             |           |         | Carbamidomethyl (C)[12] |      | Mascot      |
| 1492.6824  | 1492.626    | -0.0564 | -38   | 717        | 728      | CCWYVHADVLAR               |           |         | Carbamidomethyl (C)[1]  |      | Mascot      |
| 2232.96    | 2233.0127   | 0.0527  | 24    | 752        | 773      | DEHSGSQGNSPTTNSST<br>TPSNK |           |         |                         |      | Mascot      |
| 2264.2432  | 2264.0029   | -0.2403 | -106  | 645        | 664      | NEKLLTMLLPLLHGNVNS<br>NK   |           |         | Oxidation (M)[7]        |      | Mascot      |
| 2264.2432  | 2264.0029   | -0.2403 | -106  | 645        | 664      | NEKLLTMLLPLLHGNVNS<br>NK   |           |         | Oxidation (M)[7]        |      | Mascot      |

41 novel protein similar to vertebrate SWIVSNF related, matrix associated, actin dependent regulator gi|55963379 29300 9.77 7 33 0

#### Peptide Information

| Calc. Mass | Obsrv. Mass | ± da    | ± ppm | Start Seq. | End Seq. | Sequence     | Ion Score | C. I. % | Modification     | Rank | Result Type |
|------------|-------------|---------|-------|------------|----------|--------------|-----------|---------|------------------|------|-------------|
| 856.3869   | 856.4998    | 0.1129  | 132   | 263        | 269      | QMPSKSY      |           |         | Oxidation (M)[2] |      | Mascot      |
| 1059.6422  | 1059.5621   | -0.0801 | -76   | 126        | 134      | KPAVYLRGR    |           |         |                  |      | Mascot      |
| 1059.6422  | 1059.5621   | -0.0801 | -76   | 126        | 134      | KPAVYLRGR    |           |         |                  |      | Mascot      |
| 1234.5746  | 1234.6414   | 0.0668  | 54    | 135        | 144      | CVSHSENRFRR  |           |         |                  |      | Mascot      |
| 1320.6794  | 1320.5439   | -0.1355 | -103  | 159        | 170      | SIPSKNYDPATK |           |         |                  |      | Mascot      |

|    |                        |           |         |     |              |    |                       |      |   |    |   |                         |        |
|----|------------------------|-----------|---------|-----|--------------|----|-----------------------|------|---|----|---|-------------------------|--------|
|    | 1475.7522              | 1475.7086 | -0.0436 | -30 | 70           | 82 | QTQLIDINAACTK         |      |   |    |   | Carbamidomethyl (C)[11] | Mascot |
|    | 2173.103               | 2172.9922 | -0.1108 | -51 | 62           | 82 | GQSGAPTRQTQLIDINAACTK |      |   |    |   |                         | Mascot |
|    | 2211.0286              | 2211.0356 | 0.007   | 3   | 41           | 61 | HTQSGTTGGPAKNNQHFASDR |      |   |    |   |                         | Mascot |
| 42 | tektin-4 [Danio rerio] |           |         |     | gi 224589086 |    | 51528.2               | 5.75 | 9 | 33 | 0 |                         |        |

#### Peptide Information

| Calc. Mass | Obsrv. Mass | ± da    | ± ppm | Start Seq. | End Seq. | Sequence                    | Ion Score | C. I. | % Modification                           | Rank | Result Type |
|------------|-------------|---------|-------|------------|----------|-----------------------------|-----------|-------|------------------------------------------|------|-------------|
| 877.3832   | 877.428     | 0.0448  | 51    | 300        | 307      | AQCDAVDR                    |           |       |                                          |      | Mascot      |
| 1004.5007  | 1004.4677   | -0.033  | -33   | 276        | 284      | EETASQALR                   |           |       |                                          |      | Mascot      |
| 1045.5411  | 1045.5333   | -0.0078 | -7    | 175        | 183      | DAVEEELLK                   |           |       |                                          |      | Mascot      |
| 1320.6147  | 1320.5439   | -0.0708 | -54   | 366        | 375      | TLRPNMEQCR                  |           |       | Carbamidomethyl (C)[9], Oxidation (M)[6] |      | Mascot      |
| 1357.5913  | 1357.675    | 0.0837  | 62    | 77         | 87       | NQAENICHESR                 |           |       | Carbamidomethyl (C)[7]                   |      | Mascot      |
| 1475.7812  | 1475.7086   | -0.0726 | -49   | 129        | 141      | LSAETDLQISSRR               |           |       |                                          |      | Mascot      |
| 1936.9368  | 1936.8516   | -0.0852 | -44   | 1          | 16       | MMSSQILVSRPHYDTR            |           |       | Oxidation (M)[1]                         |      | Mascot      |
| 2283.0823  | 2283.1045   | 0.0222  | 10    | 246        | 264      | HPSSAVLQDQVCDEEVWRK         |           |       | Carbamidomethyl (C)[12]                  |      | Mascot      |
| 3082.5659  | 3082.3618   | -0.2041 | -66   | 313        | 339      | CVEMSQAKTQLELHLAQILEQIGAQER |           |       | Oxidation (M)[4]                         |      | Mascot      |
| 3082.5659  | 3082.3618   | -0.2041 | -66   | 313        | 339      | CVEMSQAKTQLELHLAQILEQIGAQER |           |       | Oxidation (M)[4]                         |      | Mascot      |

|    |                       |  |  |  |              |  |         |      |   |    |   |  |  |
|----|-----------------------|--|--|--|--------------|--|---------|------|---|----|---|--|--|
| 43 | beclin1 [Danio rerio] |  |  |  | gi 123720790 |  | 51430.1 | 4.89 | 9 | 33 | 0 |  |  |
|----|-----------------------|--|--|--|--------------|--|---------|------|---|----|---|--|--|

#### Peptide Information

| Calc. Mass | Obsrv. Mass | ± da    | ± ppm | Start Seq. | End Seq. | Sequence            | Ion Score | C. I. | % Modification          | Rank | Result Type |
|------------|-------------|---------|-------|------------|----------|---------------------|-----------|-------|-------------------------|------|-------------|
| 856.3987   | 856.4998    | 0.1011  | 118   | 356        | 361      | FFWDNK              |           |       |                         |      | Mascot      |
| 870.396    | 870.5138    | 0.1178  | 135   | 318        | 324      | MGLCFQR             |           |       | Oxidation (M)[1]        |      | Mascot      |
| 882.4753   | 882.5405    | 0.0652  | 74    | 428        | 434      | FMLTNLK             |           |       | Oxidation (M)[2]        |      | Mascot      |
| 1179.6005  | 1179.5668   | -0.0337 | -29   | 26         | 35       | LDTSFNVLDR          |           |       |                         |      | Mascot      |
| 1264.6354  | 1264.6165   | -0.0189 | -15   | 345        | 355      | ELPLYCSGGLR         |           |       | Carbamidomethyl (C)[6]  |      | Mascot      |
| 1264.6354  | 1264.6165   | -0.0189 | -15   | 345        | 355      | ELPLYCSGGLR         |           |       | Carbamidomethyl (C)[6]  |      | Mascot      |
| 1857.8323  | 1857.9689   | 0.1366  | 74    | 378        | 392      | EEVEKDDTGFCCLPYR    |           |       | Carbamidomethyl (C)[11] |      | Mascot      |
| 1857.8323  | 1857.9689   | 0.1366  | 74    | 378        | 392      | EEVEKDDTGFCCLPYR    |           |       | Carbamidomethyl (C)[11] |      | Mascot      |
| 1904.9335  | 1904.8184   | -0.1151 | -60   | 186        | 201      | QEEESLIQELESIEK     |           |       |                         |      | Mascot      |
| 1907.8916  | 1907.8336   | -0.058  | -30   | 214        | 228      | NHSQLMDTEELRYQK     |           |       | Oxidation (M)[6]        |      | Mascot      |
| 2264.062   | 2264.0029   | -0.0591 | -26   | 1          | 19       | METLRFSSNTMQVSFVCQR |           |       |                         |      | Mascot      |
| 2264.062   | 2264.0029   | -0.0591 | -26   | 1          | 19       | METLRFSSNTMQVSFVCQR |           |       |                         |      | Mascot      |



44 Zgc:171352 protein [Danio rerio] gi|94573466 61577.2 5.51 11 33 0

Peptide Information

| Calc. Mass | Obsrv. Mass | ± da    | ± ppm | Start Seq. | End Seq. | Sequence                 | Ion Score | C. I. | % Modification               | Rank | Result Type |
|------------|-------------|---------|-------|------------|----------|--------------------------|-----------|-------|------------------------------|------|-------------|
| 1050.4819  | 1050.53     | 0.0481  | 46    | 127        | 136      | VKCGNGDCVR               |           |       |                              |      | Mascot      |
| 1090.5424  | 1090.5328   | -0.0096 | -9    | 106        | 115      | CICPPPYIGK               |           |       |                              |      | Mascot      |
| 1147.5638  | 1147.5879   | 0.0241  | 21    | 106        | 115      | CICPPPYIGK               |           |       | Carbamidomethyl (C)[1]       |      | Mascot      |
| 1165.571   | 1165.71     | 0.139   | 119   | 256        | 264      | EPWCFVKEK                |           |       |                              |      | Mascot      |
| 1179.5245  | 1179.5668   | 0.0423  | 36    | 117        | 125      | CQNEKNVCK                |           |       | Carbamidomethyl (C)[1,8]     |      | Mascot      |
| 1493.8046  | 1493.6652   | -0.1394 | -93   | 300        | 313      | AAFSMIAPRIFGGR           |           |       |                              |      | Mascot      |
| 1562.7056  | 1562.743    | 0.0374  | 24    | 250        | 262      | NPDGDREPWCFFVK           |           |       |                              |      | Mascot      |
| 1592.7042  | 1592.8003   | 0.0961  | 60    | 495        | 509      | IDSCQGDSDGGLPLVCK        |           |       | Carbamidomethyl (C)[4,14]    |      | Mascot      |
| 1593.6309  | 1593.7911   | 0.1602  | 101   | 180        | 193      | ASFTCTCPEDYSGR           |           |       | Carbamidomethyl (C)[5]       |      | Mascot      |
| 1840.7555  | 1840.903    | 0.1475  | 80    | 235        | 249      | EFEGNESIGEHNCR           |           |       | Carbamidomethyl (C)[14]      |      | Mascot      |
| 1907.801   | 1907.8336   | 0.0326  | 17    | 178        | 193      | TRASFTCTCPEDYSGR         |           |       | Carbamidomethyl (C)[7,9]     |      | Mascot      |
| 2210.9487  | 2211.0356   | 0.0869  | 39    | 158        | 177      | NAYACNPSPCQNGGTCV<br>KGR |           |       | Carbamidomethyl (C)[5,10,16] |      | Mascot      |

45 hypothetical protein LOC492811 [Danio rerio] gi|55925393 30709.6 5.95 3 33 0 23 0

Peptide Information

| Calc. Mass | Obsrv. Mass | ± da    | ± ppm | Start Seq. | End Seq. | Sequence                    | Ion Score | C. I. | % Modification          | Rank | Result Type |
|------------|-------------|---------|-------|------------|----------|-----------------------------|-----------|-------|-------------------------|------|-------------|
| 1264.5925  | 1264.6165   | 0.024   | 19    | 210        | 219      | LWDIRDGMCR                  |           |       |                         |      | Mascot      |
| 1264.5925  | 1264.6165   | 0.024   | 19    | 210        | 219      | LWDIRDGMCR                  | 23        | 0     |                         |      | Mascot      |
| 1323.6943  | 1323.6307   | -0.0636 | -48   | 79         | 89       | LIWDGYTTNK                  |           |       |                         |      | Mascot      |
| 2616.178   | 2616.2104   | 0.0324  | 12    | 257        | 279      | ADQELMMYTHDNIICGIT<br>SVAFS |           |       | Carbamidomethyl (C)[15] |      | Mascot      |

46 PREDICTED: neuronal acetylcholine receptor subunit beta-2, partial [Danio rerio] gi|326680966 42689.8 7.68 8 33 0

Peptide Information

| Calc. Mass | Obsrv. Mass | ± da    | ± ppm | Start Seq. | End Seq. | Sequence       | Ion Score | C. I. | % Modification   | Rank | Result Type |
|------------|-------------|---------|-------|------------|----------|----------------|-----------|-------|------------------|------|-------------|
| 860.4446   | 860.4272    | -0.0174 | -20   | 377        | 383      | FIANHMK        |           |       |                  |      | Mascot      |
| 877.4811   | 877.428     | -0.0531 | -61   | 44         | 51       | SACKIEVK       |           |       |                  |      | Mascot      |
| 1357.7772  | 1357.675    | -0.1022 | -75   | 234        | 244      | LPALLFMRQPR    |           |       | Oxidation (M)[7] |      | Mascot      |
| 1366.7073  | 1366.6393   | -0.068  | -50   | 334        | 347      | EGGANPLQGSALPR |           |       |                  |      | Mascot      |
| 1434.8566  | 1434.7239   | -0.1327 | -92   | 177        | 190      | IVPPTSLDVPLVGK |           |       |                  |      | Mascot      |

|    |                                 |           |         |      |             |     |                     |      |   |    |                                          |        |
|----|---------------------------------|-----------|---------|------|-------------|-----|---------------------|------|---|----|------------------------------------------|--------|
|    | 1593.6962                       | 1593.7911 | 0.0949  | 60   | 377         | 389 | FIANHMKSEDDDR       |      |   |    | Oxidation (M)[6]                         | Mascot |
|    | 1857.8218                       | 1857.9689 | 0.1471  | 79   | 288         | 303 | ENNEACTCYVNRASVK    |      |   |    | Carbamidomethyl (C)[6]                   | Mascot |
|    | 1857.8218                       | 1857.9689 | 0.1471  | 79   | 288         | 303 | ENNEACTCYVNRASVK    |      |   |    | Carbamidomethyl (C)[6]                   | Mascot |
|    | 2264.3372                       | 2264.0029 | -0.3343 | -148 | 157         | 176 | MTLCISVLLALTVFLLISK |      |   |    | Carbamidomethyl (C)[4], Oxidation (M)[1] | Mascot |
|    | 2264.3372                       | 2264.0029 | -0.3343 | -148 | 157         | 176 | MTLCISVLLALTVFLLISK |      |   |    | Carbamidomethyl (C)[4], Oxidation (M)[1] | Mascot |
| 47 | LOC553253 protein [Danio rerio] |           |         |      | gi 51859054 |     | 32958.8             | 9.23 | 7 | 33 | 0                                        |        |

#### Peptide Information

| Calc. Mass | Obsrv. Mass | ± da    | ± ppm | Start Seq. | End Seq. | Sequence                 | Ion Score | C. I. | % Modification           | Rank | Result Type |
|------------|-------------|---------|-------|------------|----------|--------------------------|-----------|-------|--------------------------|------|-------------|
| 857.3868   | 857.4856    | 0.0988  | 115   | 217        | 222      | CPHCRK                   |           |       | Carbamidomethyl (C)[1,4] |      | Mascot      |
| 857.3868   | 857.4856    | 0.0988  | 115   | 217        | 222      | CPHCRK                   |           |       | Carbamidomethyl (C)[1,4] |      | Mascot      |
| 860.51     | 860.4272    | -0.0828 | -96   | 120        | 126      | IHQHVVK                  |           |       |                          |      | Mascot      |
| 870.5043   | 870.5138    | 0.0095  | 11    | 45         | 52       | SPLLLDGR                 |           |       |                          |      | Mascot      |
| 1050.5223  | 1050.53     | 0.0077  | 7     | 163        | 171      | IACPRPYCK                |           |       |                          |      | Mascot      |
| 1059.5106  | 1059.5621   | 0.0515  | 49    | 292        | 300      | ISEPLHNYS                |           |       |                          |      | Mascot      |
| 1059.5106  | 1059.5621   | 0.0515  | 49    | 292        | 300      | ISEPLHNYS                |           |       |                          |      | Mascot      |
| 1320.6664  | 1320.5439   | -0.1225 | -93   | 163        | 172      | IACPRPYCKR               |           |       | Carbamidomethyl (C)[3,8] |      | Mascot      |
| 2384.1089  | 2383.8777   | -0.2312 | -97   | 24         | 44       | HQHQLVADFVPVYGMA<br>DGER |           |       |                          |      | Mascot      |

|    |                                 |  |  |  |             |  |          |      |    |    |   |  |
|----|---------------------------------|--|--|--|-------------|--|----------|------|----|----|---|--|
| 48 | Zgc:63504 protein [Danio rerio] |  |  |  | gi 39644985 |  | 175143.5 | 5.66 | 18 | 33 | 0 |  |
|----|---------------------------------|--|--|--|-------------|--|----------|------|----|----|---|--|

#### Peptide Information

| Calc. Mass | Obsrv. Mass | ± da    | ± ppm | Start Seq. | End Seq. | Sequence     | Ion Score | C. I. | % Modification         | Rank | Result Type |
|------------|-------------|---------|-------|------------|----------|--------------|-----------|-------|------------------------|------|-------------|
| 842.409    | 842.4856    | 0.0766  | 91    | 991        | 996      | MYHVHR       |           |       |                        |      | Mascot      |
| 844.4933   | 844.4626    | -0.0307 | -36   | 999        | 1004     | RMIRPR       | 6         | 0     | Oxidation (M)[2]       |      | Mascot      |
| 844.4933   | 844.4626    | -0.0307 | -36   | 999        | 1004     | RMIRPR       |           |       | Oxidation (M)[2]       |      | Mascot      |
| 860.4373   | 860.4272    | -0.0101 | -12   | 1105       | 1111     | SNAYHLR      |           |       |                        |      | Mascot      |
| 1004.5444  | 1004.4677   | -0.0767 | -76   | 399        | 406      | LCTQIEK      |           |       | Carbamidomethyl (C)[2] |      | Mascot      |
| 1034.5187  | 1034.527    | 0.0083  | 8     | 707        | 716      | ALEGIMEGAK   |           |       | Oxidation (M)[6]       |      | Mascot      |
| 1050.4891  | 1050.53     | 0.0409  | 39    | 1418       | 1425     | ETVDWWSK     |           |       |                        |      | Mascot      |
| 1165.5735  | 1165.71     | 0.1365  | 117   | 718        | 727      | LFEEATDVNK   |           |       |                        |      | Mascot      |
| 1277.6405  | 1277.6686   | 0.0281  | 22    | 705        | 716      | DKALEGIMEGAK |           |       | Oxidation (M)[8]       |      | Mascot      |
| 1293.6871  | 1293.6056   | -0.0815 | -63   | 1544       | 1554     | CDPYIKISLGK  |           |       | Carbamidomethyl (C)[1] |      | Mascot      |
| 1293.6871  | 1293.6056   | -0.0815 | -63   | 1544       | 1554     | CDPYIKISLGK  |           |       | Carbamidomethyl (C)[1] |      | Mascot      |
| 1308.6947  | 1308.6179   | -0.0768 | -59   | 429        | 438      | IKLTVYDWDR   |           |       |                        |      | Mascot      |
| 1323.5997  | 1323.6307   | 0.031   | 23    | 1539       | 1549     | DNNGKCDPYIK  |           |       | Carbamidomethyl (C)[6] |      | Mascot      |

|           |           |         |      |      |      |                            |                                                     |
|-----------|-----------|---------|------|------|------|----------------------------|-----------------------------------------------------|
| 1592.8107 | 1592.8003 | -0.0104 | -7   | 384  | 397  | NLVDPFVEAWFAGK             | Mascot                                              |
| 1743.9275 | 1743.8573 | -0.0702 | -40  | 17   | 32   | LGSPDPIASLVFRDEK           | Mascot                                              |
| 1841.0742 | 1840.903  | -0.1712 | -93  | 1226 | 1243 | NASAGEILVAAELILKTK         | Mascot                                              |
| 1904.8872 | 1904.8184 | -0.0688 | -36  | 1475 | 1491 | GKNEIDDEDPNVVGEFK          | Mascot                                              |
| 1994.1168 | 1993.8893 | -0.2275 | -114 | 684  | 701  | IPDLEGKPNLTSLDIQIK         | Mascot                                              |
| 2225.0398 | 2225.0466 | 0.0068  | 3    | 1288 | 1307 | MYQLAPVTSPCLVVECG<br>GER   | Carbamidomethyl (C)[11], Oxidation (M)[1]<br>Mascot |
| 2384.1938 | 2383.8777 | -0.3161 | -133 | 326  | 347  | EQDSDKDDVESNLLLPA<br>GVALR | Mascot                                              |

49    novel protein similar to human titin (TTN) [Danio rerio]    gi|29561775                    2113153    6.46    58    33    0

| Peptide Information |             |         |       |            |                   |             |         |                  |                  |
|---------------------|-------------|---------|-------|------------|-------------------|-------------|---------|------------------|------------------|
| Calc. Mass          | Obsrv. Mass | ± da    | ± ppm | Start Seq. | End Sequence Seq. | Ion Score   | C. I. % | Modification     | Rank Result Type |
| 807.393             | 807.3908    | -0.0022 | -3    | 8728       | 8733              | WTRCNK      |         |                  | Mascot           |
| 842.5094            | 842.4856    | -0.0238 | -28   | 1522       | 1529              | LSIPGVTR    |         |                  | Mascot           |
| 844.4635            | 844.4626    | -0.0009 | -1    | 4387       | 4393              | SPISERR     |         |                  | Mascot           |
| 844.4886            | 844.4626    | -0.026  | -31   | 17157      | 17163             | EDKLAIR     | 9       | 0                | Mascot           |
| 856.3948            | 856.4998    | 0.105   | 123   | 1704       | 1710              | GTSYWSR     |         |                  | Mascot           |
| 860.3784            | 860.4272    | 0.0488  | 57    | 4487       | 4493              | DPEEGWK     |         |                  | Mascot           |
| 877.489             | 877.428     | -0.061  | -70   | 100        | 107               | LNPPSPPR    |         |                  | Mascot           |
| 882.4315            | 882.5405    | 0.109   | 124   | 12144      | 12151             | DGSSFTLR    |         |                  | Mascot           |
| 906.4349            | 906.4094    | -0.0255 | -28   | 2727       | 2733              | EDKLMDR     |         |                  | Mascot           |
| 922.4298            | 922.4028    | -0.027  | -29   | 2727       | 2733              | EDKLMDR     |         | Oxidation (M)[5] | Mascot           |
| 996.5373            | 996.5638    | 0.0265  | 27    | 670        | 676               | QYQFRVR     |         |                  | Mascot           |
| 1004.5047           | 1004.4677   | -0.037  | -37   | 16016      | 16023             | VDQVEWTK    |         |                  | Mascot           |
| 1045.6404           | 1045.5333   | -0.1071 | -102  | 2435       | 2444              | GTKFVVPGLK  |         |                  | Mascot           |
| 1050.5314           | 1050.53     | -0.0014 | -1    | 16479      | 16487             | EDIKDTTTK   |         |                  | Mascot           |
| 1051.6259           | 1051.6798   | 0.0539  | 51    | 18684      | 18693             | SPIASPPRVK  |         |                  | Mascot           |
| 1059.4412           | 1059.5621   | 0.1209  | 114   | 7077       | 7086              | DGGQYSMTGK  |         | Oxidation (M)[7] | Mascot           |
| 1059.5834           | 1059.5621   | -0.0213 | -20   | 8848       | 8855              | LLEKHEYK    |         |                  | Mascot           |
| 1090.4987           | 1090.5328   | 0.0341  | 31    | 16580      | 16589             | YYAGCGTSLR  |         |                  | Mascot           |
| 1091.5367           | 1091.5417   | 0.005   | 5     | 15035      | 15043             | YSLTYTSTR   |         |                  | Mascot           |
| 1147.6106           | 1147.5879   | -0.0227 | -20   | 16312      | 16320             | EISTEKWVR   |         |                  | Mascot           |
| 1165.6211           | 1165.71     | 0.0889  | 76    | 14756      | 14766             | VSAENKFGVSK |         |                  | Mascot           |
| 1179.6078           | 1179.5668   | -0.041  | -35   | 14620      | 14628             | VTWKLEEMK   |         | Oxidation (M)[8] | Mascot           |
| 1192.5626           | 1192.5251   | -0.0375 | -31   | 3823       | 3833              | AVNMIGEGETR |         | Oxidation (M)[4] | Mascot           |
| 1192.5626           | 1192.5251   | -0.0375 | -31   | 3823       | 3833              | AVNMIGEGETR |         | Oxidation (M)[4] | Mascot           |
| 1234.7041           | 1234.6414   | -0.0627 | -51   | 6941       | 6951              | ITGYVIEAQLK |         |                  | Mascot           |

|           |           |         |      |       |       |                           |                                          |        |
|-----------|-----------|---------|------|-------|-------|---------------------------|------------------------------------------|--------|
| 1264.7623 | 1264.6165 | -0.1458 | -115 | 18756 | 18766 | EAPPKIIQQLK               |                                          | Mascot |
| 1264.7623 | 1264.6165 | -0.1458 | -115 | 18756 | 18766 | EAPPKIIQQLK               |                                          | Mascot |
| 1277.7688 | 1277.6686 | -0.1002 | -78  | 2490  | 2501  | EKIVVHAGGVIR              |                                          | Mascot |
| 1293.6532 | 1293.6056 | -0.0476 | -37  | 18428 | 18439 | ESETSAEVS VKK             |                                          | Mascot |
| 1293.6532 | 1293.6056 | -0.0476 | -37  | 18428 | 18439 | ESETSAEVS VKK             |                                          | Mascot |
| 1308.6154 | 1308.6179 | 0.0025  | 2    | 4107  | 4116  | CVENHIYQFR                |                                          | Mascot |
| 1320.7369 | 1320.5439 | -0.193  | -146 | 10302 | 10314 | LNVSSTATSTVLK             |                                          | Mascot |
| 1323.6362 | 1323.6307 | -0.0055 | -4   | 4688  | 4698  | TWTNCTNDLKK               |                                          | Mascot |
| 1366.8318 | 1366.6393 | -0.1925 | -141 | 5658  | 5669  | IYVPLRGRPAK               |                                          | Mascot |
| 1445.7644 | 1445.7333 | -0.0311 | -22  | 17935 | 17946 | MIKHFVPLSDMK              |                                          | Mascot |
| 1475.7601 | 1475.7086 | -0.0515 | -35  | 16447 | 16459 | VFAENETGLSRPR             |                                          | Mascot |
| 1492.7166 | 1492.626  | -0.0906 | -61  | 14980 | 14992 | DEYTPPKAELDSK             |                                          | Mascot |
| 1493.7166 | 1493.6652 | -0.0514 | -34  | 14434 | 14445 | LSWQEVSECTR               |                                          | Mascot |
| 1562.9338 | 1562.743  | -0.1908 | -122 | 15768 | 15782 | VIILDKPGVPVGP MK          |                                          | Mascot |
| 1592.7074 | 1592.8003 | 0.0929  | 58   | 4909  | 4923  | DSGYYSLSAENSTAK           |                                          | Mascot |
| 1593.7036 | 1593.7911 | 0.0875  | 55   | 5575  | 5587  | ADAEWWMKCNV PK            | Carbamidomethyl (C)[9], Oxidation (M)[7] | Mascot |
| 1707.8557 | 1707.7192 | -0.1365 | -80  | 6462  | 6475  | LLWTKLAENVMDCR            | Oxidation (M)[11]                        | Mascot |
| 1840.9301 | 1840.903  | -0.0271 | -15  | 6924  | 6940  | DTATLAWTKPKHDGGS R        |                                          | Mascot |
| 1858.1425 | 1857.9689 | -0.1736 | -93  | 7030  | 7045  | VEIPVLGRPRPLVVWK          |                                          | Mascot |
| 1858.1425 | 1857.9689 | -0.1736 | -93  | 7030  | 7045  | VEIPVLGRPRPLVVWK          |                                          | Mascot |
| 1904.9324 | 1904.8184 | -0.114  | -60  | 6233  | 6249  | NSVTLMWTAPKYDGGHK         |                                          | Mascot |
| 1907.8844 | 1907.8336 | -0.0508 | -27  | 16431 | 16446 | QFTIGGLMEATEYEFR          | Oxidation (M)[8]                         | Mascot |
| 1936.9611 | 1936.8516 | -0.1095 | -57  | 12107 | 12124 | IGPSESPETDPQVAKER         |                                          | Mascot |
| 1994.0706 | 1993.8893 | -0.1813 | -91  | 2089  | 2107  | NTVTLTWVPPKNDGGAP<br>VK   |                                          | Mascot |
| 1995.9294 | 1995.8215 | -0.1079 | -54  | 4774  | 4790  | INGYIVEYQQDGQPEDK         |                                          | Mascot |
| 1995.9592 | 1995.8215 | -0.1377 | -69  | 4006  | 4021  | LMENHEYLFRVSAENK          | Oxidation (M)[2]                         | Mascot |
| 2173.0415 | 2172.9922 | -0.0493 | -23  | 14038 | 14056 | ISWALVTSKCEACSFNAT<br>K   | Carbamidomethyl (C)[10,13]               | Mascot |
| 2211.021  | 2211.0356 | 0.0146  | 7    | 4280  | 4298  | MVWSTYSASLVNYCNV<br>TR    | Oxidation (M)[1]                         | Mascot |
| 2225.0479 | 2225.0466 | -0.0013 | -1   | 5030  | 5048  | HPFDPPSEPLNCCVNKV<br>SK   | Carbamidomethyl (C)[12,13]               | Mascot |
| 2264.2537 | 2264.0029 | -0.2508 | -111 | 12021 | 12041 | AEDPLFLPSPPAKPKIIDS<br>TK |                                          | Mascot |
| 2264.2537 | 2264.0029 | -0.2508 | -111 | 12021 | 12041 | AEDPLFLPSPPAKPKIIDS<br>TK |                                          | Mascot |
| 2283.1284 | 2283.1045 | -0.0239 | -10  | 76    | 97    | VRAVNVAGESEPEPSD<br>PVLCK |                                          | Mascot |
| 2284.0671 | 2284.1013 | 0.0342  | 15   | 5026  | 5045  | MIARHPFDPPSEPLNCCV<br>NK  | Oxidation (M)[1]                         | Mascot |
| 2384.0129 | 2383.8777 | -0.1352 | -57  | 16529 | 16548 | NHLSVMTDEQEDEGLY<br>TCR   | Carbamidomethyl (C)[19]                  | Mascot |

|    |                                 |           |         |     |              |       |                               |      |   |                                           |    |   |        |
|----|---------------------------------|-----------|---------|-----|--------------|-------|-------------------------------|------|---|-------------------------------------------|----|---|--------|
|    | 2600.2383                       | 2600.2058 | -0.0325 | -12 | 8599         | 8621  | CCISWKTPLHDGGAEVS<br>HYIVER   |      |   |                                           |    |   | Mascot |
|    | 2616.3667                       | 2616.2104 | -0.1563 | -60 | 6941         | 6963  | ITGYVIEAQLKDSQWAH<br>VTTIK    |      |   |                                           |    |   | Mascot |
|    | 2743.2524                       | 2743.2261 | -0.0263 | -10 | 16024        | 16046 | CNTTPTKICEYTLTHMPQ<br>GAEYK   |      |   | Carbamidomethyl (C)[1,9]                  |    |   | Mascot |
|    | 2991.3716                       | 2991.3586 | -0.013  | -4  | 14932        | 14956 | CNYTTITENFFVTSLVEG<br>EQYEFR  |      |   |                                           |    |   | Mascot |
|    | 3082.4319                       | 3082.3618 | -0.0701 | -23 | 1404         | 1428  | VNPELCTVQIMTVDNLDE<br>LHMYEFR |      |   | Carbamidomethyl (C)[6], Oxidation (M)[11] |    |   | Mascot |
|    | 3082.4319                       | 3082.3618 | -0.0701 | -23 | 1404         | 1428  | VNPELCTVQIMTVDNLDE<br>LHMYEFR |      |   | Carbamidomethyl (C)[6], Oxidation (M)[11] |    |   | Mascot |
| 50 | LOC558885 protein [Danio rerio] |           |         |     | gi 120537825 |       | 75332.6                       | 5.46 | 1 |                                           | 24 | 0 |        |

#### Peptide Information

| Calc. Mass | Obsrv. Mass | ± da    | ± ppm | Start Seq. | End Seq. | Sequence | Ion Score | C. I. % | Modification | Rank | Result Type |
|------------|-------------|---------|-------|------------|----------|----------|-----------|---------|--------------|------|-------------|
| 844.4634   | 844.4626    | -0.0008 | -1    | 156        | 163      | QNGISAVR | 24        | 0       |              | 1    | Mascot      |

|                |           |                        |                |                |                    |
|----------------|-----------|------------------------|----------------|----------------|--------------------|
| Gel Idx/Pos    | 235/J11   | Instr./Gel Origin      | BA2060/110707A | Process Status | Analysis Succeeded |
| Plate [#] Name | [1] 31496 | Instrument Sample Name |                | Spectra        | 11                 |

| Rank | Protein Name                                 | Accession No. | Protein MW | Protein PI | Pep. Count | Protein Score | Protein Score C. I. % | Total Ion Score | Total Ion C. I. % |
|------|----------------------------------------------|---------------|------------|------------|------------|---------------|-----------------------|-----------------|-------------------|
| 1    | hypothetical protein LOC678590 [Danio rerio] | gi 94536906   | 28172.9    | 6.78       | 5          | 527           | 100                   | 504             | 100               |

#### Peptide Information

| Calc. Mass | Obsrv. Mass | ± da    | ± ppm | Start Seq. | End Seq. | Sequence                            | Ion Score | C. I. % | Modification                               | Rank | Result Type |
|------------|-------------|---------|-------|------------|----------|-------------------------------------|-----------|---------|--------------------------------------------|------|-------------|
| 1048.6189  | 1048.5802   | -0.0387 | -37   | 96         | 104      | FVQFPGLLK                           | 45        | 99.092  |                                            |      | Mascot      |
| 1048.6189  | 1048.5802   | -0.0387 | -37   | 96         | 104      | FVQFPGLLK                           |           |         |                                            |      | Mascot      |
| 2041.8167  | 2041.7416   | -0.0751 | -37   | 150        | 166      | YYSCGPYSCWGVNSAD<br>R               | 153       | 100     | Carbamidomethyl (C)[4,9]                   |      | Mascot      |
| 2041.8167  | 2041.7416   | -0.0751 | -37   | 150        | 166      | YYSCGPYSCWGVNSAD<br>R               |           |         | Carbamidomethyl (C)[4,9]                   |      | Mascot      |
| 2054.9785  | 2054.905    | -0.0735 | -36   | 220        | 238      | SNPAGTDWISMIACPIGH<br>K             |           |         | Carbamidomethyl (C)[14]                    |      | Mascot      |
| 2070.9736  | 2070.9014   | -0.0722 | -35   | 220        | 238      | SNPAGTDWISMIACPIGH<br>K             |           |         | Carbamidomethyl (C)[14], Oxidation (M)[11] |      | Mascot      |
| 2282.9956  | 2283.0947   | 0.0991  | 43    | 148        | 166      | LKYYS CGPYSCWGVNSA<br>DR            |           |         | Carbamidomethyl (C)[6,11]                  |      | Mascot      |
| 3260.6182  | 3260.5063   | -0.1119 | -34   | 37         | 67       | QIDAGSGSVVGVNDLNQ<br>AFVLQDDVFNPVSR | 306       | 100     |                                            |      | Mascot      |
| 3260.6182  | 3260.5063   | -0.1119 | -34   | 37         | 67       | QIDAGSGSVVGVNDLNQ<br>AFVLQDDVFNPVSR |           |         |                                            |      | Mascot      |

|   |                                                 |              |         |      |   |     |     |     |     |
|---|-------------------------------------------------|--------------|---------|------|---|-----|-----|-----|-----|
| 2 | hypothetical protein LOC100126125 [Danio rerio] | gi 157954494 | 28143.8 | 6.78 | 4 | 521 | 100 | 504 | 100 |
|---|-------------------------------------------------|--------------|---------|------|---|-----|-----|-----|-----|

#### Peptide Information

| Calc. Mass | Obsrv. Mass | ± da | ± ppm | Start | End | Sequence | Ion | C. I. % | Modification | Rank | Result Type |
|------------|-------------|------|-------|-------|-----|----------|-----|---------|--------------|------|-------------|
|------------|-------------|------|-------|-------|-----|----------|-----|---------|--------------|------|-------------|

|   |                          |           |         | Seq. | Seq.        | Score |                                     |      |        |                           |     |     |        |
|---|--------------------------|-----------|---------|------|-------------|-------|-------------------------------------|------|--------|---------------------------|-----|-----|--------|
|   | 1048.6189                | 1048.5802 | -0.0387 | -37  | 96          | 104   | FVQFPGLLK                           | 45   | 99.092 |                           |     |     | Mascot |
|   | 1048.6189                | 1048.5802 | -0.0387 | -37  | 96          | 104   | FVQFPGLLK                           |      |        |                           |     |     | Mascot |
|   | 2041.8167                | 2041.7416 | -0.0751 | -37  | 150         | 166   | YYSCGPYSCWGVNSAD<br>R               | 153  | 100    | Carbamidomethyl (C)[4,9]  |     |     | Mascot |
|   | 2041.8167                | 2041.7416 | -0.0751 | -37  | 150         | 166   | YYSCGPYSCWGVNSAD<br>R               |      |        | Carbamidomethyl (C)[4,9]  |     |     | Mascot |
|   | 2282.9956                | 2283.0947 | 0.0991  | 43   | 148         | 166   | LKYYSCGPYSCWGVNSA<br>DR             |      |        | Carbamidomethyl (C)[6,11] |     |     | Mascot |
|   | 3260.6182                | 3260.5063 | -0.1119 | -34  | 37          | 67    | QIDAGSGSVVGVNDLNQ<br>AFVLQDDVFNPVSR | 306  | 100    |                           |     |     | Mascot |
|   | 3260.6182                | 3260.5063 | -0.1119 | -34  | 37          | 67    | QIDAGSGSVVGVNDLNQ<br>AFVLQDDVFNPVSR |      |        |                           |     |     | Mascot |
| 3 | Zgc:136383 [Danio rerio] |           |         |      | gi 92097636 |       | 28809.9                             | 9.33 | 10     | 519                       | 100 | 465 | 100    |

#### Peptide Information

| Calc. Mass | Obsrv. Mass | ± da    | ± ppm | Start Seq. | End Seq. | Sequence         | Ion Score | C. I. % | Modification            | Rank | Result Type |
|------------|-------------|---------|-------|------------|----------|------------------|-----------|---------|-------------------------|------|-------------|
| 826.4457   | 826.4152    | -0.0305 | -37   | 136        | 142      | QYAVFAK          |           |         |                         |      | Mascot      |
| 960.4785   | 960.4435    | -0.035  | -36   | 156        | 162      | LEVEWER          | 46        | 99.34   |                         |      | Mascot      |
| 960.4785   | 960.4435    | -0.035  | -36   | 156        | 162      | LEVEWER          |           |         |                         |      | Mascot      |
| 984.4243   | 984.3875    | -0.0368 | -37   | 128        | 135      | FSWGAECK         |           |         | Carbamidomethyl (C)[7]  |      | Mascot      |
| 1045.5465  | 1045.5255   | -0.021  | -20   | 246        | 253      | DFLSWIHK         |           |         |                         |      | Mascot      |
| 1151.5725  | 1151.4506   | -0.1219 | -106  | 2          | 12       | LPLSSSMSSSR      |           |         |                         |      | Mascot      |
| 1303.6641  | 1303.6194   | -0.0447 | -34   | 143        | 155      | AEAGVLGEYPAAR    |           |         |                         |      | Mascot      |
| 1303.6641  | 1303.6194   | -0.0447 | -34   | 143        | 155      | AEAGVLGEYPAAR    | 82        | 100     |                         |      | Mascot      |
| 1383.6725  | 1383.5879   | -0.0846 | -61   | 124        | 135      | VTAKFSWGAECK     |           |         | Carbamidomethyl (C)[11] |      | Mascot      |
| 1403.6953  | 1403.6459   | -0.0494 | -35   | 177        | 188      | YILNAAYDTGFR     | 94        | 100     |                         |      | Mascot      |
| 1403.6953  | 1403.6459   | -0.0494 | -35   | 177        | 188      | YILNAAYDTGFR     |           |         |                         |      | Mascot      |
| 1642.9315  | 1642.8739   | -0.0576 | -35   | 59         | 73       | FLGNDIPPVFIIAR   |           |         |                         |      | Mascot      |
| 1642.9315  | 1642.8739   | -0.0576 | -35   | 59         | 73       | FLGNDIPPVFIIAR   | 112       | 100     |                         |      | Mascot      |
| 1826.9799  | 1826.9142   | -0.0657 | -36   | 81         | 96       | LLGYQLAAYFDKPTAR | 131       | 100     |                         |      | Mascot      |
| 1826.9799  | 1826.9142   | -0.0657 | -36   | 81         | 96       | LLGYQLAAYFDKPTAR |           |         |                         |      | Mascot      |

4 hypothetical protein LOC678536 [Danio rerio] gi|160420306 148750.2 8.89 19 519 100 465 100

#### Peptide Information

| Calc. Mass | Obsrv. Mass | ± da    | ± ppm | Start Seq. | End Seq. | Sequence | Ion Score | C. I. % | Modification | Rank | Result Type |
|------------|-------------|---------|-------|------------|----------|----------|-----------|---------|--------------|------|-------------|
| 826.4457   | 826.4152    | -0.0305 | -37   | 1236       | 1242     | QYAVFAK  |           |         |              |      | Mascot      |
| 864.4461   | 864.4617    | 0.0156  | 18    | 87         | 94       | DSFVPATK |           |         |              |      | Mascot      |

|  |           |           |         |     |      |      |                            |     |       |                         |        |
|--|-----------|-----------|---------|-----|------|------|----------------------------|-----|-------|-------------------------|--------|
|  | 960.4785  | 960.4435  | -0.035  | -36 | 1256 | 1262 | LEVEWER                    | 46  | 99.34 |                         | Mascot |
|  | 960.4785  | 960.4435  | -0.035  | -36 | 1256 | 1262 | LEVEWER                    |     |       |                         | Mascot |
|  | 984.4243  | 984.3875  | -0.0368 | -37 | 1228 | 1235 | FSWGAECK                   |     |       | Carbamidomethyl (C)[7]  | Mascot |
|  | 992.5015  | 992.431   | -0.0705 | -71 | 615  | 622  | LMNCKLDR                   |     |       |                         | Mascot |
|  | 1045.5465 | 1045.5255 | -0.021  | -20 | 1346 | 1353 | DFLSWIHK                   |     |       |                         | Mascot |
|  | 1070.4861 | 1070.5594 | 0.0733  | 68  | 921  | 929  | NIEDHSAER                  |     |       |                         | Mascot |
|  | 1226.6991 | 1226.6429 | -0.0562 | -46 | 472  | 482  | NDIPEITLALK                |     |       |                         | Mascot |
|  | 1303.6641 | 1303.6194 | -0.0447 | -34 | 1243 | 1255 | AEAGVLGEYPAAR              |     |       |                         | Mascot |
|  | 1303.6641 | 1303.6194 | -0.0447 | -34 | 1243 | 1255 | AEAGVLGEYPAAR              | 82  | 100   |                         | Mascot |
|  | 1383.6725 | 1383.5879 | -0.0846 | -61 | 1224 | 1235 | VTAKFSWGAECK               |     |       | Carbamidomethyl (C)[11] | Mascot |
|  | 1388.7017 | 1388.6667 | -0.035  | -25 | 694  | 706  | SPAADESVDRITK              |     |       |                         | Mascot |
|  | 1395.73   | 1395.6329 | -0.0971 | -70 | 433  | 445  | EVAMLYGYSLIAR              |     |       | Oxidation (M)[4]        | Mascot |
|  | 1403.6953 | 1403.6459 | -0.0494 | -35 | 1277 | 1288 | YILNAAYDTGFR               | 94  | 100   |                         | Mascot |
|  | 1403.6953 | 1403.6459 | -0.0494 | -35 | 1277 | 1288 | YILNAAYDTGFR               |     |       |                         | Mascot |
|  | 1412.7494 | 1412.6638 | -0.0856 | -61 | 969  | 980  | TLCYAVPYIEIK               |     |       |                         | Mascot |
|  | 1642.9315 | 1642.8739 | -0.0576 | -35 | 1159 | 1173 | FLGNDIPPVFIIAR             |     |       |                         | Mascot |
|  | 1642.9315 | 1642.8739 | -0.0576 | -35 | 1159 | 1173 | FLGNDIPPVFIIAR             | 112 | 100   |                         | Mascot |
|  | 1698.8666 | 1698.8046 | -0.062  | -36 | 483  | 498  | VMGNAGHPSSLKPIMK           |     |       | Oxidation (M)[2,15]     | Mascot |
|  | 1796.8928 | 1796.8737 | -0.0191 | -11 | 72   | 86   | LMDPLLYEYAGTWPK            |     |       |                         | Mascot |
|  | 1826.9799 | 1826.9142 | -0.0657 | -36 | 1181 | 1196 | LLGYQLAAYFDKPTAR           | 131 | 100   |                         | Mascot |
|  | 1826.9799 | 1826.9142 | -0.0657 | -36 | 1181 | 1196 | LLGYQLAAYFDKPTAR           |     |       |                         | Mascot |
|  | 2233.2009 | 2233.0059 | -0.195  | -87 | 593  | 614  | SLTRITAPDMAYVAGAAN<br>VAIK |     |       |                         | Mascot |

5    novel protein similar to vitellogenin 1 (vg1) [Danio rerio]    gi|94733733    149143.4    8.92    19    518    100    465    100

Peptide Information

| Calc. Mass | Obsrv. Mass | ± da    | ± ppm | Start Seq. | End Seq. | Sequence      | Ion Score | C. I. % | Modification           | Rank | Result Type |
|------------|-------------|---------|-------|------------|----------|---------------|-----------|---------|------------------------|------|-------------|
| 826.4457   | 826.4152    | -0.0305 | -37   | 1240       | 1246     | QYAVFAK       |           |         |                        |      | Mascot      |
| 864.4461   | 864.4617    | 0.0156  | 18    | 91         | 98       | DSFVPATK      |           |         |                        |      | Mascot      |
| 960.4785   | 960.4435    | -0.035  | -36   | 1260       | 1266     | LEVEWER       | 46        | 99.34   |                        |      | Mascot      |
| 960.4785   | 960.4435    | -0.035  | -36   | 1260       | 1266     | LEVEWER       |           |         |                        |      | Mascot      |
| 984.4243   | 984.3875    | -0.0368 | -37   | 1232       | 1239     | FSWGAECK      |           |         | Carbamidomethyl (C)[7] |      | Mascot      |
| 992.5015   | 992.431     | -0.0705 | -71   | 619        | 626      | LMNCKLDR      |           |         |                        |      | Mascot      |
| 1045.5465  | 1045.5255   | -0.021  | -20   | 1350       | 1357     | DFLSWIHK      |           |         |                        |      | Mascot      |
| 1070.4861  | 1070.5594   | 0.0733  | 68    | 925        | 933      | NIEDHSAER     |           |         |                        |      | Mascot      |
| 1226.6991  | 1226.6429   | -0.0562 | -46   | 476        | 486      | NDIPEITLALK   |           |         |                        |      | Mascot      |
| 1303.6641  | 1303.6194   | -0.0447 | -34   | 1247       | 1259     | AEAGVLGEYPAAR |           |         |                        |      | Mascot      |

|           |           |         |     |      |      |                            |     |     |                         |        |
|-----------|-----------|---------|-----|------|------|----------------------------|-----|-----|-------------------------|--------|
| 1303.6641 | 1303.6194 | -0.0447 | -34 | 1247 | 1259 | AEAGVLGEYPAAR              | 82  | 100 |                         | Mascot |
| 1383.6725 | 1383.5879 | -0.0846 | -61 | 1228 | 1239 | VTAKFSWGAECK               |     |     | Carbamidomethyl (C)[11] | Mascot |
| 1388.7017 | 1388.6667 | -0.035  | -25 | 698  | 710  | SPAADESVDRITK              |     |     |                         | Mascot |
| 1395.73   | 1395.6329 | -0.0971 | -70 | 437  | 449  | EVAMLGYSGLIAR              |     |     | Oxidation (M)[4]        | Mascot |
| 1403.6953 | 1403.6459 | -0.0494 | -35 | 1281 | 1292 | YILNAAYDTGFR               | 94  | 100 |                         | Mascot |
| 1403.6953 | 1403.6459 | -0.0494 | -35 | 1281 | 1292 | YILNAAYDTGFR               |     |     |                         | Mascot |
| 1412.7494 | 1412.6638 | -0.0856 | -61 | 973  | 984  | TLCYAVPYIEIK               |     |     |                         | Mascot |
| 1642.9315 | 1642.8739 | -0.0576 | -35 | 1163 | 1177 | FLGNDIPPVFIIAR             |     |     |                         | Mascot |
| 1642.9315 | 1642.8739 | -0.0576 | -35 | 1163 | 1177 | FLGNDIPPVFIIAR             | 112 | 100 |                         | Mascot |
| 1698.8666 | 1698.8046 | -0.062  | -36 | 487  | 502  | VMGNAGHPSSLKPIMK           |     |     | Oxidation (M)[2,15]     | Mascot |
| 1796.8928 | 1796.8737 | -0.0191 | -11 | 76   | 90   | LMDPLLYEYAGTWPK            |     |     |                         | Mascot |
| 1826.9799 | 1826.9142 | -0.0657 | -36 | 1185 | 1200 | LLGYQLAAYFDKPTAR           | 131 | 100 |                         | Mascot |
| 1826.9799 | 1826.9142 | -0.0657 | -36 | 1185 | 1200 | LLGYQLAAYFDKPTAR           |     |     |                         | Mascot |
| 2233.2009 | 2233.0059 | -0.195  | -87 | 597  | 618  | SLTRITAPDMAYVAGAAN<br>VAIK |     |     |                         | Mascot |

6 Zgc:136383 protein [Danio rerio] gi|159155252 123957.1 8.78 16 502 100 465 100

#### Peptide Information

| Calc. Mass | Obsrv. Mass | ± da    | ± ppm | Start Seq. | End Seq. | Sequence       | Ion Score | C. I. % | Modification            | Rank | Result Type |
|------------|-------------|---------|-------|------------|----------|----------------|-----------|---------|-------------------------|------|-------------|
| 826.4457   | 826.4152    | -0.0305 | -37   | 1013       | 1019     | QYAVFAK        |           |         |                         |      | Mascot      |
| 960.4785   | 960.4435    | -0.035  | -36   | 1033       | 1039     | LEVEWER        | 46        | 99.34   |                         |      | Mascot      |
| 960.4785   | 960.4435    | -0.035  | -36   | 1033       | 1039     | LEVEWER        |           |         |                         |      | Mascot      |
| 984.4243   | 984.3875    | -0.0368 | -37   | 1005       | 1012     | FSWGAECK       |           |         | Carbamidomethyl (C)[7]  |      | Mascot      |
| 992.5015   | 992.431     | -0.0705 | -71   | 392        | 399      | LMNCKLDR       |           |         |                         |      | Mascot      |
| 1045.5465  | 1045.5255   | -0.021  | -20   | 1123       | 1130     | DFLSWIHK       |           |         |                         |      | Mascot      |
| 1070.4861  | 1070.5594   | 0.0733  | 68    | 698        | 706      | NIEDHSAER      |           |         |                         |      | Mascot      |
| 1303.6641  | 1303.6194   | -0.0447 | -34   | 1020       | 1032     | AEAGVLGEYPAAR  |           |         |                         |      | Mascot      |
| 1303.6641  | 1303.6194   | -0.0447 | -34   | 1020       | 1032     | AEAGVLGEYPAAR  | 82        | 100     |                         |      | Mascot      |
| 1383.6725  | 1383.5879   | -0.0846 | -61   | 1001       | 1012     | VTAKFSWGAECK   |           |         | Carbamidomethyl (C)[11] |      | Mascot      |
| 1388.7017  | 1388.6667   | -0.035  | -25   | 471        | 483      | SPAADESVDRITK  |           |         |                         |      | Mascot      |
| 1395.73    | 1395.6329   | -0.0971 | -70   | 210        | 222      | EVAMLGYSGLIAR  |           |         | Oxidation (M)[4]        |      | Mascot      |
| 1403.6953  | 1403.6459   | -0.0494 | -35   | 1054       | 1065     | YILNAAYDTGFR   | 94        | 100     |                         |      | Mascot      |
| 1403.6953  | 1403.6459   | -0.0494 | -35   | 1054       | 1065     | YILNAAYDTGFR   |           |         |                         |      | Mascot      |
| 1412.7494  | 1412.6638   | -0.0856 | -61   | 746        | 757      | TLCYAVPYIEIK   |           |         |                         |      | Mascot      |
| 1642.9315  | 1642.8739   | -0.0576 | -35   | 936        | 950      | FLGNDIPPVFIIAR |           |         |                         |      | Mascot      |
| 1642.9315  | 1642.8739   | -0.0576 | -35   | 936        | 950      | FLGNDIPPVFIIAR | 112       | 100     |                         |      | Mascot      |



|  |           |           |         |     |     |     |                            |     |     |  |                     |        |
|--|-----------|-----------|---------|-----|-----|-----|----------------------------|-----|-----|--|---------------------|--------|
|  | 1698.8666 | 1698.8046 | -0.062  | -36 | 260 | 275 | VMGNAGHPSSLKPIMK           |     |     |  | Oxidation (M)[2,15] | Mascot |
|  | 1826.9799 | 1826.9142 | -0.0657 | -36 | 958 | 973 | LLGYQLAAYFDKPTAR           | 131 | 100 |  |                     | Mascot |
|  | 1826.9799 | 1826.9142 | -0.0657 | -36 | 958 | 973 | LLGYQLAAYFDKPTAR           |     |     |  |                     | Mascot |
|  | 2233.2009 | 2233.0059 | -0.195  | -87 | 370 | 391 | SLTRITAPDMAYVAGAAN<br>VAIK |     |     |  |                     | Mascot |

7 vitellogenin 4 [Danio rerio] gi|57864783 31189.9 9.48 8 499 100 465 100

Peptide Information

| Calc. Mass | Obsrv. Mass | ± da    | ± ppm | Start Seq. | End Seq. | Sequence         | Ion Score | C. I. | % Modification          | Rank | Result Type |
|------------|-------------|---------|-------|------------|----------|------------------|-----------|-------|-------------------------|------|-------------|
| 826.4457   | 826.4152    | -0.0305 | -37   | 162        | 168      | QYAVFAK          |           |       |                         |      | Mascot      |
| 960.4785   | 960.4435    | -0.035  | -36   | 182        | 188      | LEVEWER          | 46        | 99.34 |                         |      | Mascot      |
| 960.4785   | 960.4435    | -0.035  | -36   | 182        | 188      | LEVEWER          |           |       |                         |      | Mascot      |
| 984.4243   | 984.3875    | -0.0368 | -37   | 154        | 161      | FSWGAECK         |           |       | Carbamidomethyl (C)[7]  |      | Mascot      |
| 1303.6641  | 1303.6194   | -0.0447 | -34   | 169        | 181      | AEAGVLGEYPAAR    |           |       |                         |      | Mascot      |
| 1303.6641  | 1303.6194   | -0.0447 | -34   | 169        | 181      | AEAGVLGEYPAAR    | 82        | 100   |                         |      | Mascot      |
| 1383.6725  | 1383.5879   | -0.0846 | -61   | 150        | 161      | VTAKFSWGAECK     |           |       | Carbamidomethyl (C)[11] |      | Mascot      |
| 1403.6953  | 1403.6459   | -0.0494 | -35   | 203        | 214      | YILNAAYDTGFR     | 94        | 100   |                         |      | Mascot      |
| 1403.6953  | 1403.6459   | -0.0494 | -35   | 203        | 214      | YILNAAYDTGFR     |           |       |                         |      | Mascot      |
| 1642.9315  | 1642.8739   | -0.0576 | -35   | 85         | 99       | FLGNDIPPVFIIAR   |           |       |                         |      | Mascot      |
| 1642.9315  | 1642.8739   | -0.0576 | -35   | 85         | 99       | FLGNDIPPVFIIAR   | 112       | 100   |                         |      | Mascot      |
| 1826.9799  | 1826.9142   | -0.0657 | -36   | 107        | 122      | LLGYQLAAYFDKPTAR | 131       | 100   |                         |      | Mascot      |
| 1826.9799  | 1826.9142   | -0.0657 | -36   | 107        | 122      | LLGYQLAAYFDKPTAR |           |       |                         |      | Mascot      |

8 novel protein similar to vitellogenin 1 (vg1) [Danio rerio] gi|94733734 149808.5 8.83 21 436 100 371 100

Peptide Information

| Calc. Mass | Obsrv. Mass | ± da    | ± ppm | Start Seq. | End Seq. | Sequence      | Ion Score | C. I. | % Modification         | Rank | Result Type |
|------------|-------------|---------|-------|------------|----------|---------------|-----------|-------|------------------------|------|-------------|
| 826.4457   | 826.4152    | -0.0305 | -37   | 1245       | 1251     | QYAVFAK       |           |       |                        |      | Mascot      |
| 853.4526   | 853.3942    | -0.0584 | -68   | 320        | 326      | HLVENNK       |           |       |                        |      | Mascot      |
| 864.4461   | 864.4617    | 0.0156  | 18    | 91         | 98       | DSFVPATK      |           |       |                        |      | Mascot      |
| 960.4785   | 960.4435    | -0.035  | -36   | 1265       | 1271     | LEVEWER       | 46        | 99.34 |                        |      | Mascot      |
| 960.4785   | 960.4435    | -0.035  | -36   | 1265       | 1271     | LEVEWER       |           |       |                        |      | Mascot      |
| 984.4243   | 984.3875    | -0.0368 | -37   | 1237       | 1244     | FSWGAECK      |           |       | Carbamidomethyl (C)[7] |      | Mascot      |
| 992.5015   | 992.431     | -0.0705 | -71   | 619        | 626      | LMNCKLDR      |           |       |                        |      | Mascot      |
| 1070.4861  | 1070.5594   | 0.0733  | 68    | 925        | 933      | NIEDHSAER     |           |       |                        |      | Mascot      |
| 1226.6991  | 1226.6429   | -0.0562 | -46   | 476        | 486      | NDIPEITLALK   |           |       |                        |      | Mascot      |
| 1303.6641  | 1303.6194   | -0.0447 | -34   | 1252       | 1264     | AEAGVLGEYPAAR |           |       |                        |      | Mascot      |

|   |                              |           |         |     |              |      |                            |      |                         |     |        |     |     |
|---|------------------------------|-----------|---------|-----|--------------|------|----------------------------|------|-------------------------|-----|--------|-----|-----|
|   | 1303.6641                    | 1303.6194 | -0.0447 | -34 | 1252         | 1264 | AEAGVLGEYPAAR              | 82   | 100                     |     | Mascot |     |     |
|   | 1327.7216                    | 1327.6736 | -0.048  | -36 | 1307         | 1318 | EIELTAALPSQR               |      |                         |     | Mascot |     |     |
|   | 1383.6725                    | 1383.5879 | -0.0846 | -61 | 1233         | 1244 | VTAKFSWGAECK               |      | Carbamidomethyl (C)[11] |     | Mascot |     |     |
|   | 1388.7017                    | 1388.6667 | -0.035  | -25 | 698          | 710  | SPAADESVDRITK              |      |                         |     | Mascot |     |     |
|   | 1395.7301                    | 1395.6329 | -0.0972 | -70 | 196          | 207  | IMKDVGLAYTER               |      |                         |     | Mascot |     |     |
|   | 1400.6627                    | 1400.6134 | -0.0493 | -35 | 1286         | 1297 | CILNAAYDTGFR               |      | Carbamidomethyl (C)[1]  |     | Mascot |     |     |
|   | 1412.7494                    | 1412.6638 | -0.0856 | -61 | 973          | 984  | TLCYAVPYIEIK               |      |                         |     | Mascot |     |     |
|   | 1642.9315                    | 1642.8739 | -0.0576 | -35 | 1168         | 1182 | FLGNDIPPVFIIAR             |      |                         |     | Mascot |     |     |
|   | 1642.9315                    | 1642.8739 | -0.0576 | -35 | 1168         | 1182 | FLGNDIPPVFIIAR             | 112  | 100                     |     | Mascot |     |     |
|   | 1698.8666                    | 1698.8046 | -0.062  | -36 | 487          | 502  | VMGNAGHPSSLKPIMK           |      | Oxidation (M)[2,15]     |     | Mascot |     |     |
|   | 1796.8928                    | 1796.8737 | -0.0191 | -11 | 76           | 90   | LMDPLLYEYAGTWPK            |      |                         |     | Mascot |     |     |
|   | 1826.9799                    | 1826.9142 | -0.0657 | -36 | 1190         | 1205 | LLGYQLAAYFDKPTAR           | 131  | 100                     |     | Mascot |     |     |
|   | 1826.9799                    | 1826.9142 | -0.0657 | -36 | 1190         | 1205 | LLGYQLAAYFDKPTAR           |      |                         |     | Mascot |     |     |
|   | 1958.0189                    | 1957.9463 | -0.0726 | -37 | 1301         | 1318 | ATNSEKEIELTAALPSQR         |      |                         |     | Mascot |     |     |
|   | 2233.2009                    | 2233.0059 | -0.195  | -87 | 597          | 618  | SLTRITAPDMAYVAGAAN<br>VAIK |      |                         |     | Mascot |     |     |
| 9 | vitellogenin 6 [Danio rerio] |           |         |     | gi 303227889 |      | 150936.1                   | 8.84 | 21                      | 435 | 100    | 371 | 100 |

Peptide Information

| Calc. Mass | Obsrv. Mass | ± da    | ± ppm | Start Seq. | End Seq. | Sequence      | Ion Score | C. I. | % Modification          | Rank | Result Type |
|------------|-------------|---------|-------|------------|----------|---------------|-----------|-------|-------------------------|------|-------------|
| 826.4457   | 826.4152    | -0.0305 | -37   | 1256       | 1262     | QYAVFAK       |           |       |                         |      | Mascot      |
| 853.4526   | 853.3942    | -0.0584 | -68   | 327        | 333      | HLVENNK       |           |       |                         |      | Mascot      |
| 864.4461   | 864.4617    | 0.0156  | 18    | 98         | 105      | DSFVPATK      |           |       |                         |      | Mascot      |
| 960.4785   | 960.4435    | -0.035  | -36   | 1276       | 1282     | LEVEWER       | 46        | 99.34 |                         |      | Mascot      |
| 960.4785   | 960.4435    | -0.035  | -36   | 1276       | 1282     | LEVEWER       |           |       |                         |      | Mascot      |
| 984.4243   | 984.3875    | -0.0368 | -37   | 1248       | 1255     | FSWGAECK      |           |       | Carbamidomethyl (C)[7]  |      | Mascot      |
| 992.5015   | 992.431     | -0.0705 | -71   | 626        | 633      | LMNCKLDR      |           |       |                         |      | Mascot      |
| 1070.4861  | 1070.5594   | 0.0733  | 68    | 932        | 940      | NIEDHSAER     |           |       |                         |      | Mascot      |
| 1226.6991  | 1226.6429   | -0.0562 | -46   | 483        | 493      | NDIPEITLALK   |           |       |                         |      | Mascot      |
| 1303.6641  | 1303.6194   | -0.0447 | -34   | 1263       | 1275     | AEAGVLGEYPAAR |           |       |                         |      | Mascot      |
| 1303.6641  | 1303.6194   | -0.0447 | -34   | 1263       | 1275     | AEAGVLGEYPAAR | 82        | 100   |                         |      | Mascot      |
| 1327.7216  | 1327.6736   | -0.048  | -36   | 1318       | 1329     | EIELTAALPSQR  |           |       |                         |      | Mascot      |
| 1383.6725  | 1383.5879   | -0.0846 | -61   | 1244       | 1255     | VTAKFSWGAECK  |           |       | Carbamidomethyl (C)[11] |      | Mascot      |
| 1388.7017  | 1388.6667   | -0.035  | -25   | 705        | 717      | SPAADESVDRITK |           |       |                         |      | Mascot      |
| 1395.7301  | 1395.6329   | -0.0972 | -70   | 203        | 214      | IMKDVGLAYTER  |           |       |                         |      | Mascot      |
| 1400.6627  | 1400.6134   | -0.0493 | -35   | 1297       | 1308     | CILNAAYDTGFR  |           |       | Carbamidomethyl (C)[1]  |      | Mascot      |
| 1412.7494  | 1412.6638   | -0.0856 | -61   | 980        | 991      | TLCYAVPYIEIK  |           |       |                         |      | Mascot      |

|    |                              |           |         |     |             |      |                            |      |     |                     |     |     |     |  |  |        |
|----|------------------------------|-----------|---------|-----|-------------|------|----------------------------|------|-----|---------------------|-----|-----|-----|--|--|--------|
|    | 1642.9315                    | 1642.8739 | -0.0576 | -35 | 1179        | 1193 | FLGNDIPPVFIIAR             |      |     |                     |     |     |     |  |  | Mascot |
|    | 1642.9315                    | 1642.8739 | -0.0576 | -35 | 1179        | 1193 | FLGNDIPPVFIIAR             | 112  | 100 |                     |     |     |     |  |  | Mascot |
|    | 1698.8666                    | 1698.8046 | -0.062  | -36 | 494         | 509  | VMGNAGHPSSLKPIMK           |      |     | Oxidation (M)[2,15] |     |     |     |  |  | Mascot |
|    | 1796.8928                    | 1796.8737 | -0.0191 | -11 | 83          | 97   | LMDPLLYEYAGTWPK            |      |     |                     |     |     |     |  |  | Mascot |
|    | 1826.9799                    | 1826.9142 | -0.0657 | -36 | 1201        | 1216 | LLGYQLAAYFDKPTAR           | 131  | 100 |                     |     |     |     |  |  | Mascot |
|    | 1826.9799                    | 1826.9142 | -0.0657 | -36 | 1201        | 1216 | LLGYQLAAYFDKPTAR           |      |     |                     |     |     |     |  |  | Mascot |
|    | 1958.0189                    | 1957.9463 | -0.0726 | -37 | 1312        | 1329 | ATNSEKEIELTAALPSQR         |      |     |                     |     |     |     |  |  | Mascot |
|    | 2233.2009                    | 2233.0059 | -0.195  | -87 | 604         | 625  | SLTRITAPDMAYVAGAAN<br>VAIK |      |     |                     |     |     |     |  |  | Mascot |
| 10 | vitellogenin 6 [Danio rerio] |           |         |     | gi 57864787 |      | 38968.8                    | 8.92 | 10  | 420                 | 100 | 371 | 100 |  |  |        |

Peptide Information

| Calc. Mass | Obsrv. Mass | ± da    | ± ppm | Start Seq. | End Seq. | Sequence           | Ion Score | C. I. | % | Modification            | Rank | Result Type |
|------------|-------------|---------|-------|------------|----------|--------------------|-----------|-------|---|-------------------------|------|-------------|
| 826.4457   | 826.4152    | -0.0305 | -37   | 235        | 241      | QYAVFAK            |           |       |   |                         |      | Mascot      |
| 960.4785   | 960.4435    | -0.035  | -36   | 255        | 261      | LEVEWER            | 46        | 99.34 |   |                         |      | Mascot      |
| 960.4785   | 960.4435    | -0.035  | -36   | 255        | 261      | LEVEWER            |           |       |   |                         |      | Mascot      |
| 984.4243   | 984.3875    | -0.0368 | -37   | 227        | 234      | FSWGAECK           |           |       |   | Carbamidomethyl (C)[7]  |      | Mascot      |
| 1303.6641  | 1303.6194   | -0.0447 | -34   | 242        | 254      | AEAGVLGEYPAAR      |           |       |   |                         |      | Mascot      |
| 1303.6641  | 1303.6194   | -0.0447 | -34   | 242        | 254      | AEAGVLGEYPAAR      | 82        | 100   |   |                         |      | Mascot      |
| 1327.7216  | 1327.6736   | -0.048  | -36   | 297        | 308      | EIELTAALPSQR       |           |       |   |                         |      | Mascot      |
| 1383.6725  | 1383.5879   | -0.0846 | -61   | 223        | 234      | VTAKFSWGAECK       |           |       |   | Carbamidomethyl (C)[11] |      | Mascot      |
| 1400.6627  | 1400.6134   | -0.0493 | -35   | 276        | 287      | CILNAAYDTGFR       |           |       |   | Carbamidomethyl (C)[1]  |      | Mascot      |
| 1642.9315  | 1642.8739   | -0.0576 | -35   | 158        | 172      | FLGNDIPPVFIIAR     |           |       |   |                         |      | Mascot      |
| 1642.9315  | 1642.8739   | -0.0576 | -35   | 158        | 172      | FLGNDIPPVFIIAR     | 112       | 100   |   |                         |      | Mascot      |
| 1826.9799  | 1826.9142   | -0.0657 | -36   | 180        | 195      | LLGYQLAAYFDKPTAR   | 131       | 100   |   |                         |      | Mascot      |
| 1826.9799  | 1826.9142   | -0.0657 | -36   | 180        | 195      | LLGYQLAAYFDKPTAR   |           |       |   |                         |      | Mascot      |
| 1958.0189  | 1957.9463   | -0.0726 | -37   | 291        | 308      | ATNSEKEIELTAALPSQR |           |       |   |                         |      | Mascot      |

|    |                              |  |  |  |              |  |          |      |    |     |     |     |     |  |  |  |
|----|------------------------------|--|--|--|--------------|--|----------|------|----|-----|-----|-----|-----|--|--|--|
| 11 | vitellogenin 1 [Danio rerio] |  |  |  | gi 166795887 |  | 149452.5 | 8.68 | 20 | 405 | 100 | 345 | 100 |  |  |  |
|----|------------------------------|--|--|--|--------------|--|----------|------|----|-----|-----|-----|-----|--|--|--|

Peptide Information

| Calc. Mass | Obsrv. Mass | ± da    | ± ppm | Start Seq. | End Seq. | Sequence | Ion Score | C. I. | % | Modification           | Rank | Result Type |
|------------|-------------|---------|-------|------------|----------|----------|-----------|-------|---|------------------------|------|-------------|
| 826.4457   | 826.4152    | -0.0305 | -37   | 1238       | 1244     | QYAVFAK  |           |       |   |                        |      | Mascot      |
| 960.4785   | 960.4435    | -0.035  | -36   | 1258       | 1264     | LEVEWER  | 46        | 99.34 |   |                        |      | Mascot      |
| 960.4785   | 960.4435    | -0.035  | -36   | 1258       | 1264     | LEVEWER  |           |       |   |                        |      | Mascot      |
| 984.4243   | 984.3875    | -0.0368 | -37   | 1230       | 1237     | FSWGAECK |           |       |   | Carbamidomethyl (C)[7] |      | Mascot      |
| 992.5015   | 992.431     | -0.0705 | -71   | 615        | 622      | LMNCKLDR |           |       |   |                        |      | Mascot      |

[illegible]

### Peptide Information

| Calc. Mass | Obsrv. Mass | ± da    | ± ppm | Start Seq. | End Seq. | Sequence      | Ion Score | C. I. % | Modification           | Rank | Result Type |
|------------|-------------|---------|-------|------------|----------|---------------|-----------|---------|------------------------|------|-------------|
| 826.4457   | 826.4152    | -0.0305 | -37   | 1240       | 1246     | QYAVFAK       |           |         |                        |      | Mascot      |
| 960.4785   | 960.4435    | -0.035  | -36   | 1260       | 1266     | LEVEWER       | 46        | 99.34   |                        |      | Mascot      |
| 960.4785   | 960.4435    | -0.035  | -36   | 1260       | 1266     | LEVEWER       |           |         |                        |      | Mascot      |
| 984.4243   | 984.3875    | -0.0368 | -37   | 1232       | 1239     | FSWGAECK      |           |         | Carbamidomethyl (C)[7] |      | Mascot      |
| 992.5015   | 992.431     | -0.0705 | -71   | 619        | 626      | LMNCKLDR      |           |         |                        |      | Mascot      |
| 1070.4861  | 1070.5594   | 0.0733  | 68    | 925        | 933      | NIEDHSAER     |           |         |                        |      | Mascot      |
| 1226.6991  | 1226.6429   | -0.0562 | -46   | 476        | 486      | NDIPEITLALK   |           |         |                        |      | Mascot      |
| 1303.6641  | 1303.6194   | -0.0447 | -34   | 1247       | 1259     | AEAGVLGEYPAAR |           |         |                        |      | Mascot      |
| 1303.6641  | 1303.6194   | -0.0447 | -34   | 1247       | 1259     | AEAGVLGEYPAAR | 82        | 100     |                        |      | Mascot      |
| 1395.7301  | 1395.6329   | -0.0972 | -70   | 196        | 207      | IMKDVGLAYTER  |           |         |                        |      | Mascot      |
| 1412.7494  | 1412.6638   | -0.0856 | -61   | 973        | 984      | TLCYAVPYIEIK  |           |         |                        |      | Mascot      |

|    |                            |           |         |      |             |      |                        |      |     |                      |     |     |     |  |  |  |        |
|----|----------------------------|-----------|---------|------|-------------|------|------------------------|------|-----|----------------------|-----|-----|-----|--|--|--|--------|
|    | 1642.9315                  | 1642.8739 | -0.0576 | -35  | 1163        | 1177 | FLGNDIPPVFIIAR         |      |     |                      |     |     |     |  |  |  | Mascot |
|    | 1642.9315                  | 1642.8739 | -0.0576 | -35  | 1163        | 1177 | FLGNDIPPVFIIAR         | 112  | 100 |                      |     |     |     |  |  |  | Mascot |
|    | 1698.8666                  | 1698.8046 | -0.062  | -36  | 487         | 502  | VMGNAGHPSSLKPIMK       |      |     | Oxidation (M)[2,15]  |     |     |     |  |  |  | Mascot |
|    | 1826.9799                  | 1826.9142 | -0.0657 | -36  | 1185        | 1200 | LLGYQLAAYFDKPTAR       | 131  | 100 |                      |     |     |     |  |  |  | Mascot |
|    | 1826.9799                  | 1826.9142 | -0.0657 | -36  | 1185        | 1200 | LLGYQLAAYFDKPTAR       |      |     |                      |     |     |     |  |  |  | Mascot |
|    | 1950.9491                  | 1950.7356 | -0.2135 | -109 | 320         | 336  | HLVANNKDMVHDDAPFK      |      |     |                      |     |     |     |  |  |  | Mascot |
|    | 1950.9491                  | 1950.7356 | -0.2135 | -109 | 320         | 336  | HLVANNKDMVHDDAPFK      |      |     |                      |     |     |     |  |  |  | Mascot |
|    | 2041.943                   | 2041.7416 | -0.2014 | -99  | 150         | 167  | KTQNIYEMQEAGAQQVC<br>R |      |     | Oxidation (M)[8]     |     |     |     |  |  |  | Mascot |
|    | 2041.943                   | 2041.7416 | -0.2014 | -99  | 150         | 167  | KTQNIYEMQEAGAQQVC<br>R |      |     | Oxidation (M)[8]     |     |     |     |  |  |  | Mascot |
|    | 2055.0249                  | 2054.905  | -0.1199 | -58  | 58          | 75   | VSSKVHLSAMTENTYLM<br>K |      |     | Oxidation (M)[10]    |     |     |     |  |  |  | Mascot |
|    | 2071.0198                  | 2070.9014 | -0.1184 | -57  | 58          | 75   | VSSKVHLSAMTENTYLM<br>K |      |     | Oxidation (M)[10,17] |     |     |     |  |  |  | Mascot |
| 13 | Vtg1 protein [Danio rerio] |           |         |      | gi 63100501 |      | 36409.1                | 9.23 | 11  | 404                  | 100 | 345 | 100 |  |  |  |        |

Peptide Information

|  | Calc. Mass | Obsrv. Mass | ± da    | ± ppm | Start Seq. | End Seq. | Sequence           | Ion Score | C. I.  | % Modification         | Rank | Result Type |
|--|------------|-------------|---------|-------|------------|----------|--------------------|-----------|--------|------------------------|------|-------------|
|  | 826.4457   | 826.4152    | -0.0305 | -37   | 198        | 204      | QYAVFAK            |           |        |                        |      | Mascot      |
|  | 960.4785   | 960.4435    | -0.035  | -36   | 218        | 224      | LEVEWER            | 46        | 99.34  |                        |      | Mascot      |
|  | 960.4785   | 960.4435    | -0.035  | -36   | 218        | 224      | LEVEWER            |           |        |                        |      | Mascot      |
|  | 984.4243   | 984.3875    | -0.0368 | -37   | 190        | 197      | FSWGAECK           |           |        | Carbamidomethyl (C)[7] |      | Mascot      |
|  | 1287.6691  | 1287.6245   | -0.0446 | -35   | 205        | 217      | AEAGVLGEFPAAR      | 56        | 99.936 |                        |      | Mascot      |
|  | 1287.6691  | 1287.6245   | -0.0446 | -35   | 205        | 217      | AEAGVLGEFPAAR      |           |        |                        |      | Mascot      |
|  | 1327.7216  | 1327.6736   | -0.048  | -36   | 260        | 271      | EIELTAALPSQR       |           |        |                        |      | Mascot      |
|  | 1364.6957  | 1364.6472   | -0.0485 | -36   | 239        | 250      | HILTAAYDTGFR       |           |        |                        |      | Mascot      |
|  | 1383.7743  | 1383.5879   | -0.1864 | -135  | 13         | 24       | VWPEQVLKSAAR       |           |        |                        |      | Mascot      |
|  | 1642.9315  | 1642.8739   | -0.0576 | -35   | 121        | 135      | FLGNDIPPVFIIAR     |           |        |                        |      | Mascot      |
|  | 1642.9315  | 1642.8739   | -0.0576 | -35   | 121        | 135      | FLGNDIPPVFIIAR     | 112       | 100    |                        |      | Mascot      |
|  | 1796.9078  | 1796.8737   | -0.0341 | -19   | 239        | 253      | HILTAAYDTGFRFER    |           |        |                        |      | Mascot      |
|  | 1826.9799  | 1826.9142   | -0.0657 | -36   | 143        | 158      | LLGYQLAAYFDKPTAR   | 131       | 100    |                        |      | Mascot      |
|  | 1826.9799  | 1826.9142   | -0.0657 | -36   | 143        | 158      | LLGYQLAAYFDKPTAR   |           |        |                        |      | Mascot      |
|  | 1958.0189  | 1957.9463   | -0.0726 | -37   | 254        | 271      | ATNSEKEIELTAALPSQR |           |        |                        |      | Mascot      |

|    |                            |  |  |  |              |  |          |      |    |     |     |     |     |  |  |  |  |
|----|----------------------------|--|--|--|--------------|--|----------|------|----|-----|-----|-----|-----|--|--|--|--|
| 14 | Vtg1 protein [Danio rerio] |  |  |  | gi 145337918 |  | 116565.5 | 9.07 | 17 | 397 | 100 | 345 | 100 |  |  |  |  |
|----|----------------------------|--|--|--|--------------|--|----------|------|----|-----|-----|-----|-----|--|--|--|--|

Peptide Information

|  | Calc. Mass | Obsrv. Mass | ± da | ± ppm | Start Seq. | End Seq. | Sequence | Ion Score | C. I. | % Modification | Rank | Result Type |
|--|------------|-------------|------|-------|------------|----------|----------|-----------|-------|----------------|------|-------------|
|--|------------|-------------|------|-------|------------|----------|----------|-----------|-------|----------------|------|-------------|

|    |                            |           |         |      |              |      |                    |     |        |                        |     |     |     |  |  |  |        |
|----|----------------------------|-----------|---------|------|--------------|------|--------------------|-----|--------|------------------------|-----|-----|-----|--|--|--|--------|
|    | 826.4457                   | 826.4152  | -0.0305 | -37  | 944          | 950  | QYAVFAK            |     |        |                        |     |     |     |  |  |  | Mascot |
|    | 960.4785                   | 960.4435  | -0.035  | -36  | 964          | 970  | LEVEWER            | 46  | 99.34  |                        |     |     |     |  |  |  | Mascot |
|    | 960.4785                   | 960.4435  | -0.035  | -36  | 964          | 970  | LEVEWER            |     |        |                        |     |     |     |  |  |  | Mascot |
|    | 984.4243                   | 984.3875  | -0.0368 | -37  | 936          | 943  | FSWGAECK           |     |        | Carbamidomethyl (C)[7] |     |     |     |  |  |  | Mascot |
|    | 1070.4861                  | 1070.5594 | 0.0733  | 68   | 627          | 635  | NIEDHSAER          |     |        |                        |     |     |     |  |  |  | Mascot |
|    | 1226.6991                  | 1226.6429 | -0.0562 | -46  | 178          | 188  | NDIPEITLALK        |     |        |                        |     |     |     |  |  |  | Mascot |
|    | 1287.6691                  | 1287.6245 | -0.0446 | -35  | 951          | 963  | AEAGVLGEFPAAR      | 56  | 99.936 |                        |     |     |     |  |  |  | Mascot |
|    | 1287.6691                  | 1287.6245 | -0.0446 | -35  | 951          | 963  | AEAGVLGEFPAAR      |     |        |                        |     |     |     |  |  |  | Mascot |
|    | 1327.7216                  | 1327.6736 | -0.048  | -36  | 1006         | 1017 | EIELTAALPSQR       |     |        |                        |     |     |     |  |  |  | Mascot |
|    | 1364.6957                  | 1364.6472 | -0.0485 | -36  | 985          | 996  | HILTAAYDTGFR       |     |        |                        |     |     |     |  |  |  | Mascot |
|    | 1395.7551                  | 1395.6329 | -0.1222 | -88  | 139          | 151  | EVVMLGYGSLIAK      |     |        | Oxidation (M)[4]       |     |     |     |  |  |  | Mascot |
|    | 1412.7494                  | 1412.6638 | -0.0856 | -61  | 675          | 686  | TLCYAVPYIEIK       |     |        |                        |     |     |     |  |  |  | Mascot |
|    | 1642.9315                  | 1642.8739 | -0.0576 | -35  | 867          | 881  | FLGNDIPPVFIIAR     |     |        |                        |     |     |     |  |  |  | Mascot |
|    | 1642.9315                  | 1642.8739 | -0.0576 | -35  | 867          | 881  | FLGNDIPPVFIIAR     | 112 | 100    |                        |     |     |     |  |  |  | Mascot |
|    | 1698.8666                  | 1698.8046 | -0.062  | -36  | 189          | 204  | VMGNAGHPSSLKPIMK   |     |        | Oxidation (M)[2,15]    |     |     |     |  |  |  | Mascot |
|    | 1796.9078                  | 1796.8737 | -0.0341 | -19  | 985          | 999  | HILTAAYDTGFRFER    |     |        |                        |     |     |     |  |  |  | Mascot |
|    | 1826.9799                  | 1826.9142 | -0.0657 | -36  | 889          | 904  | LLGYQLAAYFDKPTAR   | 131 | 100    |                        |     |     |     |  |  |  | Mascot |
|    | 1826.9799                  | 1826.9142 | -0.0657 | -36  | 889          | 904  | LLGYQLAAYFDKPTAR   |     |        |                        |     |     |     |  |  |  | Mascot |
|    | 1859.9109                  | 1859.7288 | -0.1821 | -98  | 283          | 298  | IEPNMHVASFAYSHIK   |     |        | Oxidation (M)[5]       |     |     |     |  |  |  | Mascot |
|    | 1958.0189                  | 1957.9463 | -0.0726 | -37  | 1000         | 1017 | ATNSEKEIELTAALPSQR |     |        |                        |     |     |     |  |  |  | Mascot |
|    | 1982.9388                  | 1982.7285 | -0.2103 | -106 | 22           | 38   | HLVSNNKDMVHDDAPFK  |     |        | Oxidation (M)[9]       |     |     |     |  |  |  | Mascot |
| 15 | Vtg5 protein [Danio rerio] |           |         |      | gi 148744685 |      | 27543.3            | 9.2 | 6      | 395                    | 100 | 371 | 100 |  |  |  |        |

Peptide Information

|  | Calc. Mass | Obsrv. Mass | ± da    | ± ppm | Start Seq. | End Seq. | Sequence         | Ion Score | C. I. | % Modification         | Rank | Result Type |
|--|------------|-------------|---------|-------|------------|----------|------------------|-----------|-------|------------------------|------|-------------|
|  | 826.4457   | 826.4152    | -0.0305 | -37   | 124        | 130      | QYAVFAK          |           |       |                        |      | Mascot      |
|  | 960.4785   | 960.4435    | -0.035  | -36   | 144        | 150      | LEVEWER          | 46        | 99.34 |                        |      | Mascot      |
|  | 960.4785   | 960.4435    | -0.035  | -36   | 144        | 150      | LEVEWER          |           |       |                        |      | Mascot      |
|  | 984.4243   | 984.3875    | -0.0368 | -37   | 116        | 123      | FSWGAECK         |           |       | Carbamidomethyl (C)[7] |      | Mascot      |
|  | 1303.6641  | 1303.6194   | -0.0447 | -34   | 131        | 143      | AEAGVLGEYPAAR    |           |       |                        |      | Mascot      |
|  | 1303.6641  | 1303.6194   | -0.0447 | -34   | 131        | 143      | AEAGVLGEYPAAR    | 82        | 100   |                        |      | Mascot      |
|  | 1642.9315  | 1642.8739   | -0.0576 | -35   | 47         | 61       | FLGNDIPPVFIIAR   |           |       |                        |      | Mascot      |
|  | 1642.9315  | 1642.8739   | -0.0576 | -35   | 47         | 61       | FLGNDIPPVFIIAR   | 112       | 100   |                        |      | Mascot      |
|  | 1826.9799  | 1826.9142   | -0.0657 | -36   | 69         | 84       | LLGYQLAAYFDKPTAR | 131       | 100   |                        |      | Mascot      |
|  | 1826.9799  | 1826.9142   | -0.0657 | -36   | 69         | 84       | LLGYQLAAYFDKPTAR |           |       |                        |      | Mascot      |

16 vitellogenin 7 [Danio rerio] gi|57864789 24318.7 8.37 8 394 100 345 100

Peptide Information

| Calc. Mass | Obsrv. Mass | ± da    | ± ppm | Start Seq. | End Sequence Seq.   | Ion Score | C. I. % | Modification           | Rank | Result Type |
|------------|-------------|---------|-------|------------|---------------------|-----------|---------|------------------------|------|-------------|
| 826.4457   | 826.4152    | -0.0305 | -37   | 93         | 99 QYAVFAK          |           |         |                        |      | Mascot      |
| 855.4359   | 855.4064    | -0.0295 | -34   | 167        | 173 SFDFIAR         |           |         |                        |      | Mascot      |
| 900.421    | 900.3904    | -0.0306 | -34   | 138        | 145 AAYDTGFR        |           |         |                        |      | Mascot      |
| 960.4785   | 960.4435    | -0.035  | -36   | 113        | 119 LEVEWER         | 46        | 99.34   |                        |      | Mascot      |
| 960.4785   | 960.4435    | -0.035  | -36   | 113        | 119 LEVEWER         |           |         |                        |      | Mascot      |
| 984.4243   | 984.3875    | -0.0368 | -37   | 85         | 92 FSWGAECK         |           |         | Carbamidomethyl (C)[7] |      | Mascot      |
| 1287.6691  | 1287.6245   | -0.0446 | -35   | 100        | 112 AEAGVLGEFPAAR   | 56        | 99.936  |                        |      | Mascot      |
| 1287.6691  | 1287.6245   | -0.0446 | -35   | 100        | 112 AEAGVLGEFPAAR   |           |         |                        |      | Mascot      |
| 1642.9315  | 1642.8739   | -0.0576 | -35   | 16         | 30 FLGNDLPPVFALLAR  |           |         |                        |      | Mascot      |
| 1642.9315  | 1642.8739   | -0.0576 | -35   | 16         | 30 FLGNDLPPVFALLAR  | 112       | 100     |                        |      | Mascot      |
| 1826.9799  | 1826.9142   | -0.0657 | -36   | 38         | 53 LLGYQLAAYFDKPTAR | 131       | 100     |                        |      | Mascot      |
| 1826.9799  | 1826.9142   | -0.0657 | -36   | 38         | 53 LLGYQLAAYFDKPTAR |           |         |                        |      | Mascot      |

17 vitellogenin 1 [Danio rerio] gi|21391472 127954.2 8.69 17 394 100 345 100

Peptide Information

| Calc. Mass | Obsrv. Mass | ± da    | ± ppm | Start Seq. | End Sequence Seq.    | Ion Score | C. I. % | Modification           | Rank | Result Type |
|------------|-------------|---------|-------|------------|----------------------|-----------|---------|------------------------|------|-------------|
| 826.4457   | 826.4152    | -0.0305 | -37   | 1045       | 1051 QYAVFAK         |           |         |                        |      | Mascot      |
| 960.4785   | 960.4435    | -0.035  | -36   | 1065       | 1071 LEVEWER         | 46        | 99.34   |                        |      | Mascot      |
| 960.4785   | 960.4435    | -0.035  | -36   | 1065       | 1071 LEVEWER         |           |         |                        |      | Mascot      |
| 984.4243   | 984.3875    | -0.0368 | -37   | 1037       | 1044 FSWGAECK        |           |         | Carbamidomethyl (C)[7] |      | Mascot      |
| 1070.4861  | 1070.5594   | 0.0733  | 68    | 730        | 738 NIEDHSAER        |           |         |                        |      | Mascot      |
| 1226.6991  | 1226.6429   | -0.0562 | -46   | 281        | 291 NDIPEITLALK      |           |         |                        |      | Mascot      |
| 1287.6691  | 1287.6245   | -0.0446 | -35   | 1052       | 1064 AEAGVLGEFPAAR   | 56        | 99.936  |                        |      | Mascot      |
| 1287.6691  | 1287.6245   | -0.0446 | -35   | 1052       | 1064 AEAGVLGEFPAAR   |           |         |                        |      | Mascot      |
| 1327.7216  | 1327.6736   | -0.048  | -36   | 1107       | 1118 EIELTAALPSQR    |           |         |                        |      | Mascot      |
| 1364.6957  | 1364.6472   | -0.0485 | -36   | 1086       | 1097 HILTAAYDTGFR    |           |         |                        |      | Mascot      |
| 1395.7301  | 1395.6329   | -0.0972 | -70   | 1          | 12 IMKDVGLAYTER      |           |         |                        |      | Mascot      |
| 1412.7494  | 1412.6638   | -0.0856 | -61   | 778        | 789 TLCYAVPYIEIK     |           |         |                        |      | Mascot      |
| 1642.9315  | 1642.8739   | -0.0576 | -35   | 968        | 982 FLGNDIPPVFALLAR  |           |         |                        |      | Mascot      |
| 1642.9315  | 1642.8739   | -0.0576 | -35   | 968        | 982 FLGNDIPPVFALLAR  | 112       | 100     |                        |      | Mascot      |
| 1698.8666  | 1698.8046   | -0.062  | -36   | 292        | 307 VMGNAGHPSSLKPIMK |           |         | Oxidation (M)[2,15]    |      | Mascot      |

|  |           |           |         |      |      |      |                    |     |     |                  |  |  |  |  |  |        |
|--|-----------|-----------|---------|------|------|------|--------------------|-----|-----|------------------|--|--|--|--|--|--------|
|  | 1796.9078 | 1796.8737 | -0.0341 | -19  | 1086 | 1100 | HILTAAYDTGFRFER    |     |     |                  |  |  |  |  |  | Mascot |
|  | 1826.9799 | 1826.9142 | -0.0657 | -36  | 990  | 1005 | LLGYQLAAYFDKPTAR   | 131 | 100 |                  |  |  |  |  |  | Mascot |
|  | 1826.9799 | 1826.9142 | -0.0657 | -36  | 990  | 1005 | LLGYQLAAYFDKPTAR   |     |     |                  |  |  |  |  |  | Mascot |
|  | 1859.9109 | 1859.7288 | -0.1821 | -98  | 386  | 401  | IEPNMHVASFAYSHIK   |     |     | Oxidation (M)[5] |  |  |  |  |  | Mascot |
|  | 1958.0189 | 1957.9463 | -0.0726 | -37  | 1101 | 1118 | ATNSEKEIELTAALPSQR |     |     |                  |  |  |  |  |  | Mascot |
|  | 1982.9388 | 1982.7285 | -0.2103 | -106 | 125  | 141  | HLVSNNKDMVHDDAPFK  |     |     | Oxidation (M)[9] |  |  |  |  |  | Mascot |

18 vitellogenin 1 [Danio rerio] gi|94733730 149140.4 8.74 18 392 100 345 100

#### Peptide Information

| Calc. Mass | Obsrv. Mass | ± da    | ± ppm | Start Seq. | End Seq. | Sequence               | Ion Score | C. I.  | % Modification         | Rank | Result Type |
|------------|-------------|---------|-------|------------|----------|------------------------|-----------|--------|------------------------|------|-------------|
| 826.4457   | 826.4152    | -0.0305 | -37   | 1238       | 1244     | QYAVFAK                |           |        |                        |      | Mascot      |
| 960.4785   | 960.4435    | -0.035  | -36   | 1258       | 1264     | LEVEWER                | 46        | 99.34  |                        |      | Mascot      |
| 960.4785   | 960.4435    | -0.035  | -36   | 1258       | 1264     | LEVEWER                |           |        |                        |      | Mascot      |
| 984.4243   | 984.3875    | -0.0368 | -37   | 1230       | 1237     | FSWGAECK               |           |        | Carbamidomethyl (C)[7] |      | Mascot      |
| 1070.4861  | 1070.5594   | 0.0733  | 68    | 921        | 929      | NIEDHSAER              |           |        |                        |      | Mascot      |
| 1226.6991  | 1226.6429   | -0.0562 | -46   | 472        | 482      | NDIPEITLALK            |           |        |                        |      | Mascot      |
| 1287.6691  | 1287.6245   | -0.0446 | -35   | 1245       | 1257     | AEAGVLGEFPAAR          | 56        | 99.936 |                        |      | Mascot      |
| 1287.6691  | 1287.6245   | -0.0446 | -35   | 1245       | 1257     | AEAGVLGEFPAAR          |           |        |                        |      | Mascot      |
| 1327.7216  | 1327.6736   | -0.048  | -36   | 1300       | 1311     | EIELTAALPSQR           |           |        |                        |      | Mascot      |
| 1364.6957  | 1364.6472   | -0.0485 | -36   | 1279       | 1290     | HILTAAYDTGFR           |           |        |                        |      | Mascot      |
| 1395.7301  | 1395.6329   | -0.0972 | -70   | 192        | 203      | IMKDVGLAYTER           |           |        |                        |      | Mascot      |
| 1412.7494  | 1412.6638   | -0.0856 | -61   | 969        | 980      | TLCYAVPYIEIK           |           |        |                        |      | Mascot      |
| 1642.9315  | 1642.8739   | -0.0576 | -35   | 1161       | 1175     | FLGNDIPPVFIIAR         |           |        |                        |      | Mascot      |
| 1642.9315  | 1642.8739   | -0.0576 | -35   | 1161       | 1175     | FLGNDIPPVFIIAR         | 112       | 100    |                        |      | Mascot      |
| 1698.8666  | 1698.8046   | -0.062  | -36   | 483        | 498      | VMGNAGHPSSLKPIMK       |           |        | Oxidation (M)[2,15]    |      | Mascot      |
| 1796.8928  | 1796.8737   | -0.0191 | -11   | 72         | 86       | LMDPLLYEYAGTWPK        |           |        |                        |      | Mascot      |
| 1826.9799  | 1826.9142   | -0.0657 | -36   | 1183       | 1198     | LLGYQLAAYFDKPTAR       | 131       | 100    |                        |      | Mascot      |
| 1826.9799  | 1826.9142   | -0.0657 | -36   | 1183       | 1198     | LLGYQLAAYFDKPTAR       |           |        |                        |      | Mascot      |
| 1859.9109  | 1859.7288   | -0.1821 | -98   | 577        | 592      | IEPNMHVASFAYSHIK       |           |        | Oxidation (M)[5]       |      | Mascot      |
| 1958.0189  | 1957.9463   | -0.0726 | -37   | 1294       | 1311     | ATNSEKEIELTAALPSQR     |           |        |                        |      | Mascot      |
| 1982.9388  | 1982.7285   | -0.2103 | -106  | 316        | 332      | HLVSNNKDMVHDDAPFK      |           |        | Oxidation (M)[9]       |      | Mascot      |
| 2041.943   | 2041.7416   | -0.2014 | -99   | 146        | 163      | KTQNIYEMQEAGAQGVC<br>R |           |        | Oxidation (M)[8]       |      | Mascot      |
| 2041.943   | 2041.7416   | -0.2014 | -99   | 146        | 163      | KTQNIYEMQEAGAQGVC<br>R |           |        | Oxidation (M)[8]       |      | Mascot      |

19 novel protein similar to vitellogenin 1 (vg1) [Danio rerio] gi|94732723 147084.2 8.73 16 382 100 345 100

#### Peptide Information



|    | Calc. Mass                   | Obsrv. Mass | ± da    | ± ppm | Start Seq.  | End Sequence Seq.      |         | Ion Score | C. I.  | % Modification         | Rank | Result Type |     |
|----|------------------------------|-------------|---------|-------|-------------|------------------------|---------|-----------|--------|------------------------|------|-------------|-----|
|    | 826.4457                     | 826.4152    | -0.0305 | -37   | 1219        | 1225 QYAVFAK           |         |           |        |                        |      | Mascot      |     |
|    | 855.4359                     | 855.4064    | -0.0295 | -34   | 1293        | 1299 SFDFIAR           |         |           |        |                        |      | Mascot      |     |
|    | 900.421                      | 900.3904    | -0.0306 | -34   | 1264        | 1271 AAYDTGFR          |         |           |        |                        |      | Mascot      |     |
|    | 960.4785                     | 960.4435    | -0.035  | -36   | 1239        | 1245 LEVEWER           |         | 46        | 99.34  |                        |      | Mascot      |     |
|    | 960.4785                     | 960.4435    | -0.035  | -36   | 1239        | 1245 LEVEWER           |         |           |        |                        |      | Mascot      |     |
|    | 984.4243                     | 984.3875    | -0.0368 | -37   | 1211        | 1218 FSWGAECK          |         |           |        | Carbamidomethyl (C)[7] |      | Mascot      |     |
|    | 1070.4861                    | 1070.5594   | 0.0733  | 68    | 921         | 929 NIEDHSAER          |         |           |        |                        |      | Mascot      |     |
|    | 1226.6991                    | 1226.6429   | -0.0562 | -46   | 472         | 482 NDIPEITLALK        |         |           |        |                        |      | Mascot      |     |
|    | 1279.5067                    | 1279.559    | 0.0523  | 41    | 1098        | 1110 SSSSSSSSMSSSR     |         |           |        | Oxidation (M)[9]       |      | Mascot      |     |
|    | 1287.6691                    | 1287.6245   | -0.0446 | -35   | 1226        | 1238 AEAGVLGEFPAAR     |         | 56        | 99.936 |                        |      | Mascot      |     |
|    | 1287.6691                    | 1287.6245   | -0.0446 | -35   | 1226        | 1238 AEAGVLGEFPAAR     |         |           |        |                        |      | Mascot      |     |
|    | 1395.7551                    | 1395.6329   | -0.1222 | -88   | 433         | 445 EVVMLGYGSLIAK      |         |           |        | Oxidation (M)[4]       |      | Mascot      |     |
|    | 1642.9315                    | 1642.8739   | -0.0576 | -35   | 1142        | 1156 FLGNDLPPVFIIAR    |         |           |        |                        |      | Mascot      |     |
|    | 1642.9315                    | 1642.8739   | -0.0576 | -35   | 1142        | 1156 FLGNDLPPVFIIAR    |         | 112       | 100    |                        |      | Mascot      |     |
|    | 1698.8666                    | 1698.8046   | -0.062  | -36   | 483         | 498 VMGNAGHPSSLKPIMK   |         |           |        | Oxidation (M)[2,15]    |      | Mascot      |     |
|    | 1796.8928                    | 1796.8737   | -0.0191 | -11   | 72          | 86 LMDPLLYEYAGTWPK     |         |           |        |                        |      | Mascot      |     |
|    | 1826.9799                    | 1826.9142   | -0.0657 | -36   | 1164        | 1179 LLGYQLAAYFDKPTAR  |         | 131       | 100    |                        |      | Mascot      |     |
|    | 1826.9799                    | 1826.9142   | -0.0657 | -36   | 1164        | 1179 LLGYQLAAYFDKPTAR  |         |           |        |                        |      | Mascot      |     |
|    | 1859.9109                    | 1859.7288   | -0.1821 | -98   | 577         | 592 IEPNMHVASFAYSHIK   |         |           |        | Oxidation (M)[5]       |      | Mascot      |     |
|    | 2063.9954                    | 2063.7258   | -0.2696 | -131  | 1039        | 1056 QMNIIDDDTPEGQAFLK |         |           |        | Oxidation (M)[2]       |      | Mascot      |     |
| 20 | vitellogenin 5 [Danio rerio] |             |         |       | gi 57864785 |                        | 72820.8 | 9         | 7      | 381                    | 100  | 371         | 100 |

Peptide Information

|  | Calc. Mass | Obsrv. Mass | ± da    | ± ppm | Start Seq. | End Sequence Seq.    | Ion Score | C. I. | % Modification         | Rank | Result Type |
|--|------------|-------------|---------|-------|------------|----------------------|-----------|-------|------------------------|------|-------------|
|  | 826.4457   | 826.4152    | -0.0305 | -37   | 544        | 550 QYAVFAK          |           |       |                        |      | Mascot      |
|  | 960.4785   | 960.4435    | -0.035  | -36   | 564        | 570 LEVEWER          | 46        | 99.34 |                        |      | Mascot      |
|  | 960.4785   | 960.4435    | -0.035  | -36   | 564        | 570 LEVEWER          |           |       |                        |      | Mascot      |
|  | 984.4243   | 984.3875    | -0.0368 | -37   | 536        | 543 FSWGAECK         |           |       | Carbamidomethyl (C)[7] |      | Mascot      |
|  | 1303.6641  | 1303.6194   | -0.0447 | -34   | 551        | 563 AEAGVLGEYPAAR    |           |       |                        |      | Mascot      |
|  | 1303.6641  | 1303.6194   | -0.0447 | -34   | 551        | 563 AEAGVLGEYPAAR    | 82        | 100   |                        |      | Mascot      |
|  | 1412.7494  | 1412.6638   | -0.0856 | -61   | 278        | 289 TLCYAVPYIEIK     |           |       |                        |      | Mascot      |
|  | 1642.9315  | 1642.8739   | -0.0576 | -35   | 467        | 481 FLGNDIPPVFIIAR   |           |       |                        |      | Mascot      |
|  | 1642.9315  | 1642.8739   | -0.0576 | -35   | 467        | 481 FLGNDIPPVFIIAR   | 112       | 100   |                        |      | Mascot      |
|  | 1826.9799  | 1826.9142   | -0.0657 | -36   | 489        | 504 LLGYQLAAYFDKPTAR | 131       | 100   |                        |      | Mascot      |

Mascot

|    |                              |              |          |      |    |     |     |     |     |
|----|------------------------------|--------------|----------|------|----|-----|-----|-----|-----|
| 21 | vitellogenin 7 [Danio rerio] | qi 156713467 | 148739.2 | 8.76 | 16 | 381 | 100 | 345 | 100 |
|----|------------------------------|--------------|----------|------|----|-----|-----|-----|-----|

### Peptide Information

| Calc. Mass | Obsrv. Mass | ± da    | ± ppm | Start Seq. | End Sequence Seq.      | Ion Score | C. I. % Modification   | Rank | Result Type |
|------------|-------------|---------|-------|------------|------------------------|-----------|------------------------|------|-------------|
| 826.4457   | 826.4152    | -0.0305 | -37   | 1234       | 1240 QYAVFAK           |           |                        |      | Mascot      |
| 855.4359   | 855.4064    | -0.0295 | -34   | 1308       | 1314 SFDFIAR           |           |                        |      | Mascot      |
| 900.421    | 900.3904    | -0.0306 | -34   | 1279       | 1286 AAYDTGFR          |           |                        |      | Mascot      |
| 960.4785   | 960.4435    | -0.035  | -36   | 1254       | 1260 LEVEWER           | 46        | 99.34                  |      | Mascot      |
| 960.4785   | 960.4435    | -0.035  | -36   | 1254       | 1260 LEVEWER           |           |                        |      | Mascot      |
| 984.4243   | 984.3875    | -0.0368 | -37   | 1226       | 1233 FSWGAECK          |           | Carbamidomethyl (C)[7] |      | Mascot      |
| 1070.4861  | 1070.5594   | 0.0733  | 68    | 921        | 929 NIEDHSAER          |           |                        |      | Mascot      |
| 1226.6991  | 1226.6429   | -0.0562 | -46   | 472        | 482 NDIPEITLALK        |           |                        |      | Mascot      |
| 1279.5067  | 1279.559    | 0.0523  | 41    | 1098       | 1110 SSSSSSSSMSSSR     |           | Oxidation (M)[9]       |      | Mascot      |
| 1287.6691  | 1287.6245   | -0.0446 | -35   | 1241       | 1253 AEAGVLGEFPAAR     | 56        | 99.936                 |      | Mascot      |
| 1287.6691  | 1287.6245   | -0.0446 | -35   | 1241       | 1253 AEAGVLGEFPAAR     |           |                        |      | Mascot      |
| 1395.7551  | 1395.6329   | -0.1222 | -88   | 433        | 445 EVVMLGYGSLIAK      |           | Oxidation (M)[4]       |      | Mascot      |
| 1642.9315  | 1642.8739   | -0.0576 | -35   | 1157       | 1171 FLGNDLPPVFALIAK   |           |                        |      | Mascot      |
| 1642.9315  | 1642.8739   | -0.0576 | -35   | 1157       | 1171 FLGNDLPPVFALIAK   | 112       | 100                    |      | Mascot      |
| 1698.8666  | 1698.8046   | -0.062  | -36   | 483        | 498 VMGNAGHPSSLKPIMK   |           | Oxidation (M)[2,15]    |      | Mascot      |
| 1796.8928  | 1796.8737   | -0.0191 | -11   | 72         | 86 LMDPLLYEYAGTWPK     |           |                        |      | Mascot      |
| 1826.9799  | 1826.9142   | -0.0657 | -36   | 1179       | 1194 LLGYQLAAYFDKPTAR  | 131       | 100                    |      | Mascot      |
| 1826.9799  | 1826.9142   | -0.0657 | -36   | 1179       | 1194 LLGYQLAAYFDKPTAR  |           |                        |      | Mascot      |
| 1859.9109  | 1859.7288   | -0.1821 | -98   | 577        | 592 IEPNMHVASFAYSHIK   |           | Oxidation (M)[5]       |      | Mascot      |
| 2063.9954  | 2063.7258   | -0.2696 | -131  | 1039       | 1056 QMNIIDDDTPEGQAFLK |           | Oxidation (M)[2]       |      | Mascot      |

|    |                                 |             |         |      |   |     |     |     |     |
|----|---------------------------------|-------------|---------|------|---|-----|-----|-----|-----|
| 22 | LOC561528 protein [Danio rerio] | qj111306312 | 31087.3 | 6.75 | 6 | 378 | 100 | 350 | 100 |
|----|---------------------------------|-------------|---------|------|---|-----|-----|-----|-----|

### Peptide Information

| Calc. Mass | Obsrv. Mass | ± da    | ± ppm | Start Seq. | End Sequence           | Ion Score | C. I. % Modification   | Rank | Result Type |
|------------|-------------|---------|-------|------------|------------------------|-----------|------------------------|------|-------------|
| 842.3898   | 842.4794    | 0.0896  | 106   | 27         | 33 LYCGAMK             |           | Carbamidomethyl (C)[3] |      | Mascot      |
| 1048.6189  | 1048.5802   | -0.0387 | -37   | 122        | 130 FVQFPGLLK          | 45        | 99.092                 |      | Mascot      |
| 1048.6189  | 1048.5802   | -0.0387 | -37   | 122        | 130 FVQFPGLLK          |           |                        |      | Mascot      |
| 1388.6813  | 1388.6667   | -0.0146 | -11   | 27         | 37 LYCGAMKVYQR         |           | Carbamidomethyl (C)[3] |      | Mascot      |
| 1985.7793  | 1985.9463   | 0.167   | 84    | 176        | 192 YYSCDPYSCWGVNSAD R |           |                        |      | Mascot      |
| 2283.9797  | 2284.0933   | 0.1136  | 50    | 174        | 192 LKYYSCDPYSCWGVNSA  |           | Carbamidomethyl (C)[6] |      | Mascot      |

|    |                                              |            |             |         |       |            |                                         |                                     |      |           |         |                         |      |             |
|----|----------------------------------------------|------------|-------------|---------|-------|------------|-----------------------------------------|-------------------------------------|------|-----------|---------|-------------------------|------|-------------|
|    |                                              | 3260.6182  | 3260.5063   | -0.1119 | -34   | 63         | 93                                      | QIDAGSGSVVGVNDLNQ<br>AFVLQDDVFNPVSR | DR   | 306       | 100     |                         |      | Mascot      |
|    |                                              | 3260.6182  | 3260.5063   | -0.1119 | -34   | 63         | 93                                      | QIDAGSGSVVGVNDLNQ<br>AFVLQDDVFNPVSR |      |           |         |                         |      | Mascot      |
| 23 | PREDICTED: fish-egg lectin [Danio rerio]     |            |             |         |       |            | gi 326671023                            | 41361.6                             | 5.67 | 3         | 315     | 100                     | 306  | 100         |
|    | Peptide Information                          |            |             |         |       |            |                                         |                                     |      |           |         |                         |      |             |
|    |                                              | Calc. Mass | Obsrv. Mass | ± da    | ± ppm | Start Seq. | End Sequence Seq.                       |                                     |      | Ion Score | C. I. % | Modification            | Rank | Result Type |
|    |                                              | 842.3898   | 842.4794    | 0.0896  | 106   | 125        | 131 LYCGAMK                             |                                     |      |           |         | Carbamidomethyl (C)[3]  |      | Mascot      |
|    |                                              | 1664.7908  | 1664.851    | 0.0602  | 36    | 105        | 120 ATTGEPLAESC<br>SNKTR                |                                     |      |           |         |                         |      | Mascot      |
|    |                                              | 3260.6182  | 3260.5063   | -0.1119 | -34   | 161        | 191 QIDAGSGSVVGVNDLNQ<br>AFVLQDDVFNPVSR | 306                                 |      | 100       |         |                         |      | Mascot      |
|    |                                              | 3260.6182  | 3260.5063   | -0.1119 | -34   | 161        | 191 QIDAGSGSVVGVNDLNQ<br>AFVLQDDVFNPVSR |                                     |      |           |         |                         |      | Mascot      |
| 24 | hypothetical protein LOC664758 [Danio rerio] |            |             |         |       |            | gi 90652821                             | 11800.8                             | 7.52 | 1         | 312     | 100                     | 306  | 100         |
|    | Peptide Information                          |            |             |         |       |            |                                         |                                     |      |           |         |                         |      |             |
|    |                                              | Calc. Mass | Obsrv. Mass | ± da    | ± ppm | Start Seq. | End Sequence Seq.                       |                                     |      | Ion Score | C. I. % | Modification            | Rank | Result Type |
|    |                                              | 3260.6182  | 3260.5063   | -0.1119 | -34   | 37         | 67 QIDAGSGSVVGVNDLNQ<br>AFVLQDDVFNPVSR  | 306                                 |      | 100       |         |                         |      | Mascot      |
|    |                                              | 3260.6182  | 3260.5063   | -0.1119 | -34   | 37         | 67 QIDAGSGSVVGVNDLNQ<br>AFVLQDDVFNPVSR  |                                     |      |           |         |                         |      | Mascot      |
| 25 | Vtg6 protein [Danio rerio]                   |            |             |         |       |            | gi 157422885                            | 27937.4                             | 9.18 | 9         | 287     | 100                     | 240  | 100         |
|    | Peptide Information                          |            |             |         |       |            |                                         |                                     |      |           |         |                         |      |             |
|    |                                              | Calc. Mass | Obsrv. Mass | ± da    | ± ppm | Start Seq. | End Sequence Seq.                       |                                     |      | Ion Score | C. I. % | Modification            | Rank | Result Type |
|    |                                              | 826.4457   | 826.4152    | -0.0305 | -37   | 129        | 135 QYAVFAK                             |                                     |      |           |         |                         |      | Mascot      |
|    |                                              | 960.4785   | 960.4435    | -0.035  | -36   | 149        | 155 LEVEWER                             | 46                                  |      | 99.34     |         |                         |      | Mascot      |
|    |                                              | 960.4785   | 960.4435    | -0.035  | -36   | 149        | 155 LEVEWER                             |                                     |      |           |         |                         |      | Mascot      |
|    |                                              | 984.4243   | 984.3875    | -0.0368 | -37   | 121        | 128 FSWGAECK                            |                                     |      |           |         | Carbamidomethyl (C)[7]  |      | Mascot      |
|    |                                              | 1303.6641  | 1303.6194   | -0.0447 | -34   | 136        | 148 AEAGVLGEYPAAR                       |                                     |      |           |         |                         |      | Mascot      |
|    |                                              | 1303.6641  | 1303.6194   | -0.0447 | -34   | 136        | 148 AEAGVLGEYPAAR                       | 82                                  |      | 100       |         |                         |      | Mascot      |
|    |                                              | 1327.7216  | 1327.6736   | -0.048  | -36   | 191        | 202 EIELTAALPSQR                        |                                     |      |           |         |                         |      | Mascot      |
|    |                                              | 1383.6725  | 1383.5879   | -0.0846 | -61   | 117        | 128 VTAKFSWGAECK                        |                                     |      |           |         | Carbamidomethyl (C)[11] |      | Mascot      |
|    |                                              | 1400.6627  | 1400.6134   | -0.0493 | -35   | 170        | 181 CILNAAYDTGFR                        |                                     |      |           |         | Carbamidomethyl (C)[1]  |      | Mascot      |
|    |                                              | 1642.9315  | 1642.8739   | -0.0576 | -35   | 52         | 66 FLGNDIPPVF<br>AIAR                   |                                     |      |           |         |                         |      | Mascot      |
|    |                                              | 1642.9315  | 1642.8739   | -0.0576 | -35   | 52         | 66 FLGNDIPPVF<br>AIAR                   | 112                                 |      | 100       |         |                         |      | Mascot      |
|    |                                              | 1958.0189  | 1957.9463   | -0.0726 | -37   | 185        | 202 ATNSEKEIELTAALPSQR                  |                                     |      |           |         |                         |      | Mascot      |

26 Zgc:158494 protein [Danio rerio] gi|156230815 28099.9 6.69 4 213 100 198 100

Peptide Information

| Calc. Mass | Obsrv. Mass | ± da    | ± ppm | Start Seq. | End Seq. | Sequence             | Ion Score | C. I. % | Modification                               | Rank | Result Type |
|------------|-------------|---------|-------|------------|----------|----------------------|-----------|---------|--------------------------------------------|------|-------------|
| 1048.6189  | 1048.5802   | -0.0387 | -37   | 96         | 104      | FVQFPGLLK            | 45        | 99.092  |                                            |      | Mascot      |
| 1048.6189  | 1048.5802   | -0.0387 | -37   | 96         | 104      | FVQFPGLLK            |           |         |                                            |      | Mascot      |
| 2041.8167  | 2041.7416   | -0.0751 | -37   | 150        | 166      | YYSCGPYSCWGVNSAD R   | 153       | 100     | Carbamidomethyl (C)[4,9]                   |      | Mascot      |
| 2041.8167  | 2041.7416   | -0.0751 | -37   | 150        | 166      | YYSCGPYSCWGVNSAD R   |           |         | Carbamidomethyl (C)[4,9]                   |      | Mascot      |
| 2054.9785  | 2054.905    | -0.0735 | -36   | 220        | 238      | SNPAGTDWISMIACPIGH K |           |         | Carbamidomethyl (C)[14]                    |      | Mascot      |
| 2070.9736  | 2070.9014   | -0.0722 | -35   | 220        | 238      | SNPAGTDWISMIACPIGH K |           |         | Carbamidomethyl (C)[14], Oxidation (M)[11] |      | Mascot      |
| 2282.9956  | 2283.0947   | 0.0991  | 43    | 148        | 166      | LKYYSCGPYSCWGVNSA DR |           |         | Carbamidomethyl (C)[6,11]                  |      | Mascot      |

27 putative galactose-binding protein [Danio rerio] gi|20385486 27965.8 6.25 2 51 65.456 45 99.092

Peptide Information

| Calc. Mass | Obsrv. Mass | ± da    | ± ppm | Start Seq. | End Seq. | Sequence             | Ion Score | C. I. % | Modification                               | Rank | Result Type |
|------------|-------------|---------|-------|------------|----------|----------------------|-----------|---------|--------------------------------------------|------|-------------|
| 1048.6189  | 1048.5802   | -0.0387 | -37   | 96         | 104      | FVQFPGLLK            | 45        | 99.092  |                                            |      | Mascot      |
| 1048.6189  | 1048.5802   | -0.0387 | -37   | 96         | 104      | FVQFPGLLK            |           |         |                                            |      | Mascot      |
| 2054.9785  | 2054.905    | -0.0735 | -36   | 220        | 238      | SNPAGTDWISMIACPIGH K |           |         | Carbamidomethyl (C)[14]                    |      | Mascot      |
| 2070.9736  | 2070.9014   | -0.0722 | -35   | 220        | 238      | SNPAGTDWISMIACPIGH K |           |         | Carbamidomethyl (C)[14], Oxidation (M)[11] |      | Mascot      |

28 ADP/ATP translocase 2 [Danio rerio] gi|27545251 32742.1 9.78 10 50 56.512

Peptide Information

| Calc. Mass | Obsrv. Mass | ± da    | ± ppm | Start Seq. | End Seq. | Sequence    | Ion Score | C. I. % | Modification                             | Rank | Result Type |
|------------|-------------|---------|-------|------------|----------|-------------|-----------|---------|------------------------------------------|------|-------------|
| 984.4423   | 984.3875    | -0.0548 | -56   | 238        | 245      | MMMQSGRK    |           |         | Oxidation (M)[1]                         |      | Mascot      |
| 996.4536   | 996.5607    | 0.1071  | 107   | 237        | 244      | RMMMQSGR    |           |         |                                          |      | Mascot      |
| 1048.5785  | 1048.5802   | 0.0017  | 2     | 98         | 106      | VFLDGVDKR   |           |         |                                          |      | Mascot      |
| 1048.5785  | 1048.5802   | 0.0017  | 2     | 98         | 106      | VFLDGVDKR   |           |         |                                          |      | Mascot      |
| 1136.6786  | 1136.536    | -0.1426 | -125  | 34         | 43       | LLLQVQHASK  |           |         |                                          |      | Mascot      |
| 1287.6912  | 1287.6245   | -0.0667 | -52   | 53         | 63       | GIMDCVVRIPK |           |         | Carbamidomethyl (C)[5]                   |      | Mascot      |
| 1287.6912  | 1287.6245   | -0.0667 | -52   | 53         | 63       | GIMDCVVRIPK |           |         | Carbamidomethyl (C)[5]                   |      | Mascot      |
| 1303.686   | 1303.6194   | -0.0666 | -51   | 53         | 63       | GIMDCVVRIPK |           |         | Carbamidomethyl (C)[5], Oxidation (M)[3] |      | Mascot      |
| 1303.686   | 1303.6194   | -0.0666 | -51   | 53         | 63       | GIMDCVVRIPK |           |         | Carbamidomethyl (C)[5], Oxidation (M)[3] |      | Mascot      |
| 1327.6497  | 1327.6736   | 0.0239  | 18    | 50         | 60       | QYKGIMDCVVR |           |         | Oxidation (M)[6]                         |      | Mascot      |

|    |                                                            |           |         |      |     |     |                           |  |  |  |              |        |      |    |    |   |        |
|----|------------------------------------------------------------|-----------|---------|------|-----|-----|---------------------------|--|--|--|--------------|--------|------|----|----|---|--------|
|    | 1395.7532                                                  | 1395.6329 | -0.1203 | -86  | 269 | 280 | AFFKGAWSNVLR              |  |  |  |              |        |      |    |    |   | Mascot |
|    | 1957.9728                                                  | 1957.9463 | -0.0265 | -14  | 189 | 206 | AAYFGIYDTAKGMLPDPK        |  |  |  |              |        |      |    |    |   | Mascot |
|    | 2071.1545                                                  | 2070.9014 | -0.2531 | -122 | 11  | 31  | DFLAGGIAAAISKTAVAPI<br>ER |  |  |  |              |        |      |    |    |   | Mascot |
|    | 2284.2236                                                  | 2284.0933 | -0.1303 | -57  | 73  | 92  | GNLANVIRYFPTQALNFA<br>FK  |  |  |  |              |        |      |    |    |   | Mascot |
| 29 | PREDICTED: e3 ubiquitin-protein ligase BRE1A [Danio rerio] |           |         |      |     |     |                           |  |  |  | gi 189527718 | 115551 | 5.66 | 17 | 46 | 0 |        |

Peptide Information

| Calc. Mass | Obsrv. Mass | ± da    | ± ppm | Start Seq. | End Seq. | Sequence               | Ion Score | C. I. | % Modification           | Rank | Result Type |
|------------|-------------|---------|-------|------------|----------|------------------------|-----------|-------|--------------------------|------|-------------|
| 842.5206   | 842.4794    | -0.0412 | -49   | 61         | 67       | ALQIKNR                |           |       |                          |      | Mascot      |
| 900.5083   | 900.3904    | -0.1179 | -131  | 649        | 657      | CAVIGGPKR              |           |       |                          |      | Mascot      |
| 960.4744   | 960.4435    | -0.0309 | -32   | 720        | 726      | ELEERER                | 15        | 0     |                          |      | Mascot      |
| 960.4744   | 960.4435    | -0.0309 | -32   | 720        | 726      | ELEERER                |           |       |                          |      | Mascot      |
| 984.4818   | 984.3875    | -0.0943 | -96   | 460        | 466      | KEYEMLR                |           |       | Oxidation (M)[5]         |      | Mascot      |
| 1045.5823  | 1045.5255   | -0.0568 | -54   | 786        | 793      | LMQQLREK               |           |       |                          |      | Mascot      |
| 1059.5793  | 1059.5227   | -0.0566 | -53   | 919        | 927      | AQEDISKLR              |           |       |                          |      | Mascot      |
| 1151.5474  | 1151.4506   | -0.0968 | -84   | 189        | 198      | VESSCKQASR             |           |       | Carbamidomethyl (C)[5]   |      | Mascot      |
| 1287.6791  | 1287.6245   | -0.0546 | -42   | 743        | 753      | SVEEQIDILNK            |           |       |                          |      | Mascot      |
| 1287.6791  | 1287.6245   | -0.0546 | -42   | 743        | 753      | SVEEQIDILNK            |           |       |                          |      | Mascot      |
| 1303.6675  | 1303.6194   | -0.0481 | -37   | 243        | 253      | LCQLTDGLQKQ            |           |       | Carbamidomethyl (C)[2]   |      | Mascot      |
| 1303.6675  | 1303.6194   | -0.0481 | -37   | 243        | 253      | LCQLTDGLQKQ            |           |       | Carbamidomethyl (C)[2]   |      | Mascot      |
| 1327.6749  | 1327.6736   | -0.0013 | -1    | 679        | 688      | EMKLLDMYR              |           |       | Oxidation (M)[2]         |      | Mascot      |
| 1395.6499  | 1395.6329   | -0.017  | -12   | 381        | 392      | AEEVARDAEYR            |           |       |                          |      | Mascot      |
| 1475.6268  | 1475.6946   | 0.0678  | 46    | 975        | 985      | CFHVFCFECVK            |           |       | Carbamidomethyl (C)[1,6] |      | Mascot      |
| 1556.8643  | 1556.7721   | -0.0922 | -59   | 741        | 753      | IRSVVEEQIDILNK         |           |       |                          |      | Mascot      |
| 1826.8514  | 1826.9142   | 0.0628  | 34    | 139        | 155      | SLKPGTPEPDGDSNQR       |           |       |                          |      | Mascot      |
| 1826.8514  | 1826.9142   | 0.0628  | 34    | 139        | 155      | SLKPGTPEPDGDSNQR       |           |       |                          |      | Mascot      |
| 1951.0205  | 1950.7356   | -0.2849 | -146  | 199        | 214      | VVEIYENLKNMVDQLK       |           |       | Oxidation (M)[11]        |      | Mascot      |
| 1951.0205  | 1950.7356   | -0.2849 | -146  | 199        | 214      | VVEIYENLKNMVDQLK       |           |       | Oxidation (M)[11]        |      | Mascot      |
| 1957.8668  | 1957.9463   | 0.0795  | 41    | 121        | 138      | RCDQSGSEPVESQPPEG<br>R |           |       |                          |      | Mascot      |
| 1982.9712  | 1982.7285   | -0.2427 | -122  | 427        | 442      | LRQLDHMENDEVSLQR       |           |       |                          |      | Mascot      |

|    |                                                             |  |  |  |  |  |  |  |  |  |             |         |      |    |    |   |  |
|----|-------------------------------------------------------------|--|--|--|--|--|--|--|--|--|-------------|---------|------|----|----|---|--|
| 30 | PREDICTED: NUA family SNF1-like kinase 1-like [Danio rerio] |  |  |  |  |  |  |  |  |  | gi 68404856 | 68532.7 | 8.84 | 11 | 46 | 0 |  |
|----|-------------------------------------------------------------|--|--|--|--|--|--|--|--|--|-------------|---------|------|----|----|---|--|

Peptide Information

| Calc. Mass | Obsrv. Mass | ± da | ± ppm | Start Seq. | End Seq. | Sequence | Ion Score | C. I. | % Modification | Rank | Result Type |
|------------|-------------|------|-------|------------|----------|----------|-----------|-------|----------------|------|-------------|
|------------|-------------|------|-------|------------|----------|----------|-----------|-------|----------------|------|-------------|

|  |           |           |         |     |     |     |                           |    |   |                         |  |  |        |
|--|-----------|-----------|---------|-----|-----|-----|---------------------------|----|---|-------------------------|--|--|--------|
|  | 960.4567  | 960.4435  | -0.0132 | -14 | 314 | 322 | DNGSPMLAR                 | 16 | 0 |                         |  |  | Mascot |
|  | 960.4567  | 960.4435  | -0.0132 | -14 | 314 | 322 | DNGSPMLAR                 |    |   |                         |  |  | Mascot |
|  | 992.506   | 992.431   | -0.075  | -76 | 146 | 152 | ETRHFFR                   |    |   |                         |  |  | Mascot |
|  | 996.5584  | 996.5607  | 0.0023  | 2   | 68  | 76  | HSGREVAIK                 |    |   |                         |  |  | Mascot |
|  | 1070.6064 | 1070.5594 | -0.047  | -44 | 432 | 440 | GILKNNQQR                 |    |   |                         |  |  | Mascot |
|  | 1377.7161 | 1377.6599 | -0.0562 | -41 | 186 | 197 | IADFGLSNLYHK              |    |   |                         |  |  | Mascot |
|  | 1383.705  | 1383.5879 | -0.1171 | -85 | 83  | 93  | IKDEQDMVHIR               |    |   |                         |  |  | Mascot |
|  | 1395.7552 | 1395.6329 | -0.1223 | -88 | 118 | 129 | DKIVIVMEYASK              |    |   |                         |  |  | Mascot |
|  | 1400.6804 | 1400.6134 | -0.067  | -48 | 130 | 140 | GELYDYISERR               |    |   |                         |  |  | Mascot |
|  | 2057.9556 | 2057.7761 | -0.1795 | -87 | 355 | 373 | KENDVGVSHCNGEDSLG<br>LK   |    |   | Carbamidomethyl (C)[10] |  |  | Mascot |
|  | 2071.0554 | 2070.9014 | -0.154  | -74 | 451 | 471 | SESSDLLSGNITPLAASS<br>PPK |    |   |                         |  |  | Mascot |
|  | 2282.9871 | 2283.0947 | 0.1076  | 47  | 521 | 540 | EESDTITNSSFCSTEWPP<br>PR  |    |   |                         |  |  | Mascot |

31 PREDICTED: ras association domain-containing protein gij189537462 49870 4.96 6 46 0 30 72.63  
10 [Danio rerio]

#### Peptide Information

| Calc. Mass | Obsrv. Mass | ± da    | ± ppm | Start Seq. | End Seq. | Sequence                         | Ion Score | C. I. % | Modification                              | Rank | Result Type |
|------------|-------------|---------|-------|------------|----------|----------------------------------|-----------|---------|-------------------------------------------|------|-------------|
| 850.4318   | 850.5122    | 0.0804  | 95    | 60         | 65       | WRGFER                           |           |         |                                           |      | Mascot      |
| 960.4632   | 960.4435    | -0.0197 | -21   | 184        | 191      | ELDGEIER                         | 30        | 72.63   |                                           |      | Mascot      |
| 960.4632   | 960.4435    | -0.0197 | -21   | 184        | 191      | ELDGEIER                         |           |         |                                           |      | Mascot      |
| 992.5193   | 992.431     | -0.0883 | -89   | 25         | 33       | RTTCADVVK                        |           |         |                                           |      | Mascot      |
| 1059.6156  | 1059.5227   | -0.0929 | -88   | 105        | 114      | SAEARVVLSK                       |           |         |                                           |      | Mascot      |
| 1796.8306  | 1796.8737   | 0.0431  | 24    | 1          | 14       | MEQEESKISVWVCR                   |           |         | Carbamidomethyl (C)[13], Oxidation (M)[1] |      | Mascot      |
| 3242.5269  | 3242.4827   | -0.0442 | -14   | 224        | 251      | SDAALAQFEEYASRCDQ<br>VIQLQEELTER |           |         |                                           |      | Mascot      |

32 S-methyl-5'-thioadenosine phosphorylase [Danio rerio] gij41054629 30827.4 5.99 9 45 0

#### Peptide Information

| Calc. Mass | Obsrv. Mass | ± da    | ± ppm | Start Seq. | End Seq. | Sequence           | Ion Score | C. I. % | Modification           | Rank | Result Type |
|------------|-------------|---------|-------|------------|----------|--------------------|-----------|---------|------------------------|------|-------------|
| 853.4236   | 853.3942    | -0.0294 | -34   | 178        | 184      | AESLMFR            |           |         |                        |      | Mascot      |
| 869.4185   | 869.3864    | -0.0321 | -37   | 178        | 184      | AESLMFR            |           |         | Oxidation (M)[5]       |      | Mascot      |
| 1059.5615  | 1059.5227   | -0.0388 | -37   | 49         | 57       | NVDCVLLAR          |           |         | Carbamidomethyl (C)[4] |      | Mascot      |
| 1226.5756  | 1226.6429   | 0.0673  | 55    | 269        | 279      | SMSQSSVMLPK        |           |         | Oxidation (M)[2,8]     |      | Mascot      |
| 1354.7939  | 1354.7432   | -0.0507 | -37   | 147        | 159      | EVLLEVAQGLGVK      |           |         |                        |      | Mascot      |
| 1796.9388  | 1796.8737   | -0.0651 | -36   | 9          | 26       | IGIIGGSGLDDPDILEGR |           |         |                        |      | Mascot      |

|    |                                                   |           |         |     |             |     |                     |     |   |    |   |                           |        |
|----|---------------------------------------------------|-----------|---------|-----|-------------|-----|---------------------|-----|---|----|---|---------------------------|--------|
|    | 1903.9                                            | 1903.8285 | -0.0715 | -38 | 80          | 96  | EEGCTHLLVTTACGSLR   |     |   |    |   | Carbamidomethyl (C)[4,13] | Mascot |
|    | 1986.0178                                         | 1985.9463 | -0.0715 | -36 | 97          | 113 | EDIQPGDIVLIDQFIDR   |     |   |    |   |                           | Mascot |
|    | 2071.0891                                         | 2070.9014 | -0.1877 | -91 | 185         | 203 | QWGADVINTTVPEVVLAK  |     |   |    |   |                           | Mascot |
|    | 2224.9348                                         | 2225.0393 | 0.1045  | 47  | 204         | 222 | EAGLCYASIAMATDYDCWK |     |   |    |   | Carbamidomethyl (C)[5,17] | Mascot |
| 33 | iron-sulfur cluster assembly enzyme [Danio rerio] |           |         |     | gi 54261801 |     | 17796.2             | 8.7 | 6 | 43 | 0 |                           |        |

#### Peptide Information

| Calc. Mass | Obsrv. Mass | ± da    | ± ppm | Start Seq. | End Seq. | Sequence             | Ion Score | C. I. | % | Modification                              | Rank | Result Type |
|------------|-------------|---------|-------|------------|----------|----------------------|-----------|-------|---|-------------------------------------------|------|-------------|
| 960.5083   | 960.4435    | -0.0648 | -67   | 1          | 9        | MALAAAAWR            |           |       |   |                                           |      | Mascot      |
| 960.5359   | 960.4435    | -0.0924 | -96   | 107        | 115      | GKSIDALK             | 16        |       | 0 |                                           |      | Mascot      |
| 1045.5636  | 1045.5255   | -0.0381 | -36   | 44         | 53       | NVGSLDKNAK           |           |       |   |                                           |      | Mascot      |
| 1403.6658  | 1403.6459   | -0.0199 | -14   | 132        | 143      | LHCSMLAEDAIK         |           |       |   | Carbamidomethyl (C)[3], Oxidation (M)[5]  |      | Mascot      |
| 1403.6658  | 1403.6459   | -0.0199 | -14   | 132        | 143      | LHCSMLAEDAIK         |           |       |   | Carbamidomethyl (C)[3], Oxidation (M)[5]  |      | Mascot      |
| 1903.9517  | 1903.8285   | -0.1232 | -65   | 19         | 34       | SMSLPKLR             |           |       |   | Carbamidomethyl (C)[11]                   |      | Mascot      |
| 2283.1545  | 2283.0947   | -0.0598 | -26   | 124        | 143      | ELCLPPVKLHCSMLAEDAIK |           |       |   | Carbamidomethyl (C)[3], Oxidation (M)[13] |      | Mascot      |

|    |                                                         |  |  |  |              |  |         |      |   |    |   |  |  |
|----|---------------------------------------------------------|--|--|--|--------------|--|---------|------|---|----|---|--|--|
| 34 | pyruvate dehydrogenase kinase, isozyme 3b [Danio rerio] |  |  |  | gi 123702577 |  | 21003.7 | 8.49 | 8 | 42 | 0 |  |  |
|----|---------------------------------------------------------|--|--|--|--------------|--|---------|------|---|----|---|--|--|

#### Peptide Information

| Calc. Mass | Obsrv. Mass | ± da    | ± ppm | Start Seq. | End Seq. | Sequence            | Ion Score | C. I. | % | Modification                              | Rank | Result Type |
|------------|-------------|---------|-------|------------|----------|---------------------|-----------|-------|---|-------------------------------------------|------|-------------|
| 882.4468   | 882.5345    | 0.0877  | 99    | 30         | 36       | QFLDFGR             |           |       |   |                                           |      | Mascot      |
| 1045.5499  | 1045.5255   | -0.0244 | -23   | 43         | 50       | TSYMFLRK            |           |       |   |                                           |      | Mascot      |
| 1165.6836  | 1165.702    | 0.0184  | 16    | 1          | 9        | MKLFICLLK           |           |       |   | Carbamidomethyl (C)[6]                    |      | Mascot      |
| 1556.7162  | 1556.7721   | 0.0559  | 36    | 30         | 42       | QFLDFGRENACEK       |           |       |   |                                           |      | Mascot      |
| 1664.7407  | 1664.851    | 0.1103  | 66    | 37         | 49       | ENACEKTSYMFLR       |           |       |   | Carbamidomethyl (C)[4], Oxidation (M)[10] |      | Mascot      |
| 2058.0325  | 2057.7761   | -0.2564 | -125  | 118        | 135      | HNDVVPTMAQGVIEYKEK  |           |       |   |                                           |      | Mascot      |
| 2071.0388  | 2070.9014   | -0.1374 | -66   | 116        | 133      | NRHNDVVPTMAQGVIEYK  |           |       |   |                                           |      | Mascot      |
| 2284.1641  | 2284.0933   | -0.0708 | -31   | 97         | 115      | SPEDPHTLNDFLEMLIKIR |           |       |   | Oxidation (M)[14]                         |      | Mascot      |

|    |                                                                      |  |  |  |             |  |         |      |   |    |   |    |   |
|----|----------------------------------------------------------------------|--|--|--|-------------|--|---------|------|---|----|---|----|---|
| 35 | PREDICTED: 5'-nucleotidase domain-containing protein 3 [Danio rerio] |  |  |  | gi 68405171 |  | 67472.1 | 8.33 | 8 | 41 | 0 | 17 | 0 |
|----|----------------------------------------------------------------------|--|--|--|-------------|--|---------|------|---|----|---|----|---|

#### Peptide Information

| Calc. Mass | Obsrv. Mass | ± da    | ± ppm | Start Seq. | End Seq. | Sequence | Ion Score | C. I. | % | Modification | Rank | Result Type |
|------------|-------------|---------|-------|------------|----------|----------|-----------|-------|---|--------------|------|-------------|
| 853.4777   | 853.3942    | -0.0835 | -98   | 201        | 208      | GLNPVPEK |           |       |   |              |      | Mascot      |

|    |                              |           |         |     |              |     |                         |      |   |    |   |    |                            |        |
|----|------------------------------|-----------|---------|-----|--------------|-----|-------------------------|------|---|----|---|----|----------------------------|--------|
|    | 900.3992                     | 900.3904  | -0.0088 | -10 | 231          | 238 | SSHGHTMK                |      |   |    |   |    | Oxidation (M)[7]           | Mascot |
|    | 1048.5897                    | 1048.5802 | -0.0095 | -9  | 49           | 57  | EARFGLLSR               | 17   | 0 |    |   |    |                            | Mascot |
|    | 1048.5897                    | 1048.5802 | -0.0095 | -9  | 49           | 57  | EARFGLLSR               |      |   |    |   |    |                            | Mascot |
|    | 1354.6572                    | 1354.7432 | 0.086   | 63  | 334          | 344 | GMNYIVGKDWR             |      |   |    |   |    | Oxidation (M)[2]           | Mascot |
|    | 1364.7644                    | 1364.6472 | -0.1172 | -86 | 274          | 285 | DVKEVIGNVHVR            |      |   |    |   |    |                            | Mascot |
|    | 1642.8845                    | 1642.8739 | -0.0106 | -6  | 277          | 290 | EVIGNVHVRGIMYR          |      |   |    |   |    |                            | Mascot |
|    | 1642.8845                    | 1642.8739 | -0.0106 | -6  | 277          | 290 | EVIGNVHVRGIMYR          |      |   |    |   |    |                            | Mascot |
|    | 1950.8354                    | 1950.7356 | -0.0998 | -51 | 60           | 78  | GPVAPLTAGNMCTCSGD<br>DK |      |   |    |   |    | Carbamidomethyl (C)[12,14] | Mascot |
|    | 1950.8354                    | 1950.7356 | -0.0998 | -51 | 60           | 78  | GPVAPLTAGNMCTCSGD<br>DK |      |   |    |   |    | Carbamidomethyl (C)[12,14] | Mascot |
|    | 2225.1238                    | 2225.0393 | -0.0845 | -38 | 345          | 363 | DLFDVVIVQADKPSFFND<br>R |      |   |    |   |    |                            | Mascot |
| 36 | Hook homolog 1 [Danio rerio] |           |         |     | gi 190339684 |     | 83123.4                 | 5.24 | 9 | 40 | 0 | 30 | 72.693                     |        |

Peptide Information

| Calc. Mass | Obsrv. Mass | ± da    | ± ppm | Start Seq. | End Seq. | Sequence                        | Ion Score | C. I.  | % Modification   | Rank | Result Type |
|------------|-------------|---------|-------|------------|----------|---------------------------------|-----------|--------|------------------|------|-------------|
| 842.5458   | 842.4794    | -0.0664 | -79   | 636        | 642      | KIALER                          |           |        |                  |      | Mascot      |
| 960.4996   | 960.4435    | -0.0561 | -58   | 323        | 330      | LEDLSDLR                        | 30        | 72.693 |                  |      | Mascot      |
| 960.4996   | 960.4435    | -0.0561 | -58   | 323        | 330      | LEDLSDLR                        |           |        |                  |      | Mascot      |
| 992.5081   | 992.431     | -0.0771 | -78   | 332        | 339      | QMKALEEK                        |           |        | Oxidation (M)[2] |      | Mascot      |
| 1136.6058  | 1136.536    | -0.0698 | -61   | 409        | 417      | ISFERDTLR                       |           |        |                  |      | Mascot      |
| 1165.5956  | 1165.702    | 0.1064  | 91    | 577        | 586      | MDELMAALKK                      |           |        | Oxidation (M)[1] |      | Mascot      |
| 1364.6614  | 1364.6472   | -0.0142 | -10   | 177        | 188      | ALEDLTEVMAEK                    |           |        | Oxidation (M)[9] |      | Mascot      |
| 1377.7155  | 1377.6599   | -0.0556 | -40   | 703        | 715      | RTMSINVPASSSK                   |           |        |                  |      | Mascot      |
| 1982.8947  | 1982.7285   | -0.1662 | -84   | 340        | 355      | NMTYMHNTVSLEEELR                |           |        | Oxidation (M)[2] |      | Mascot      |
| 3242.5935  | 3242.4827   | -0.1108 | -34   | 75         | 101      | ILQMIVDYINEVLAQQMS<br>DFPLPDLMR |           |        |                  |      | Mascot      |

37 hypothetical protein LOC100191015 [Danio rerio] gi|209863095 44412.9 9.4 9 40 0

Peptide Information

| Calc. Mass | Obsrv. Mass | ± da    | ± ppm | Start Seq. | End Seq. | Sequence        | Ion Score | C. I. | % Modification | Rank | Result Type |
|------------|-------------|---------|-------|------------|----------|-----------------|-----------|-------|----------------|------|-------------|
| 869.4628   | 869.3864    | -0.0764 | -88   | 56         | 61       | YFRLDR          |           |       |                |      | Mascot      |
| 996.5373   | 996.5607    | 0.0234  | 23    | 282        | 288      | QRIFYNYR        |           |       |                |      | Mascot      |
| 1287.6764  | 1287.6245   | -0.0519 | -40   | 362        | 373      | VGSNNATREAIR    |           |       |                |      | Mascot      |
| 1287.6764  | 1287.6245   | -0.0519 | -40   | 362        | 373      | VGSNNATREAIR    |           |       |                |      | Mascot      |
| 1475.6802  | 1475.6946   | 0.0144  | 10    | 176        | 188      | APDNSGSLFYNYK   |           |       |                |      | Mascot      |
| 1698.8995  | 1698.8046   | -0.0949 | -56   | 92         | 106      | LAICLRFLATGDSYR |           |       |                |      | Mascot      |



|    |                                       |           |         |      |             |     |                       |      |   |    |   |  |                                          |        |
|----|---------------------------------------|-----------|---------|------|-------------|-----|-----------------------|------|---|----|---|--|------------------------------------------|--------|
|    | 1993.9834                             | 1993.9017 | -0.0817 | -41  | 309         | 326 | MYRGAIEISPANVDACVK    |      |   |    |   |  | Carbamidomethyl (C)[16]                  | Mascot |
|    | 2055.0183                             | 2054.905  | -0.1133 | -55  | 1           | 17  | MEDQVVACCVALLYLRR     |      |   |    |   |  | Carbamidomethyl (C)[8], Oxidation (M)[1] | Mascot |
|    | 2073.1128                             | 2072.8752 | -0.2376 | -115 | 189         | 206 | GTYSVLLAVVDSQYRF<br>R |      |   |    |   |  |                                          | Mascot |
|    | 2211.1743                             | 2211.0259 | -0.1484 | -67  | 294         | 311 | LIVENTFGILTAQWRMYR    |      |   |    |   |  |                                          | Mascot |
| 38 | protein lin-7 homolog C [Danio rerio] |           |         |      | gi 52219174 |     | 22315.8               | 8.97 | 7 | 39 | 0 |  |                                          |        |

#### Peptide Information

| Calc. Mass | Obsrv. Mass | ± da    | ± ppm | Start Seq. | End Seq. | Sequence       | Ion Score | C. I. | % | Modification     | Rank | Result | Type |
|------------|-------------|---------|-------|------------|----------|----------------|-----------|-------|---|------------------|------|--------|------|
| 855.457    | 855.4064    | -0.0506 | -59   | 27         | 34       | TGEVPPQK       |           |       |   |                  |      | Mascot |      |
| 992.4717   | 992.431     | -0.0407 | -41   | 177        | 184      | VLEEMESR       |           |       |   |                  |      | Mascot |      |
| 1226.6852  | 1226.6429   | -0.0423 | -34   | 2          | 12       | ASLGEPVRLER    |           |       |   |                  |      | Mascot |      |
| 1279.6827  | 1279.559    | -0.1237 | -97   | 41         | 51       | VLQSEFCKAVR    |           |       |   |                  |      | Mascot |      |
| 1327.7943  | 1327.6736   | -0.1207 | -91   | 156        | 168      | AVELLKAAQGTVK  |           |       |   |                  |      | Mascot |      |
| 1403.8118  | 1403.6459   | -0.1659 | -118  | 122        | 135      | IIPGGIADRHGGLK |           |       |   |                  |      | Mascot |      |
| 1403.8118  | 1403.6459   | -0.1659 | -118  | 122        | 135      | IIPGGIADRHGGLK |           |       |   |                  |      | Mascot |      |
| 1412.6726  | 1412.6638   | -0.0088 | -6    | 177        | 187      | VLEEMESRFEK    |           |       |   | Oxidation (M)[5] |      | Mascot |      |

|    |                                      |  |  |  |              |  |         |      |   |    |   |    |        |
|----|--------------------------------------|--|--|--|--------------|--|---------|------|---|----|---|----|--------|
| 39 | protein Hook homolog 1 [Danio rerio] |  |  |  | gi 113676708 |  | 83063.4 | 5.24 | 8 | 39 | 0 | 30 | 72.693 |
|----|--------------------------------------|--|--|--|--------------|--|---------|------|---|----|---|----|--------|

#### Peptide Information

| Calc. Mass | Obsrv. Mass | ± da    | ± ppm | Start Seq. | End Seq. | Sequence                        | Ion Score | C. I.  | % | Modification     | Rank | Result | Type |
|------------|-------------|---------|-------|------------|----------|---------------------------------|-----------|--------|---|------------------|------|--------|------|
| 842.5458   | 842.4794    | -0.0664 | -79   | 636        | 642      | KIIALER                         |           |        |   |                  |      | Mascot |      |
| 960.4996   | 960.4435    | -0.0561 | -58   | 323        | 330      | LEDLSDLR                        | 30        | 72.693 |   |                  |      | Mascot |      |
| 960.4996   | 960.4435    | -0.0561 | -58   | 323        | 330      | LEDLSDLR                        |           |        |   |                  |      | Mascot |      |
| 992.5081   | 992.431     | -0.0771 | -78   | 332        | 339      | QMKALEEK                        |           |        |   | Oxidation (M)[2] |      | Mascot |      |
| 1165.5956  | 1165.702    | 0.1064  | 91    | 577        | 586      | MDELMAALKK                      |           |        |   | Oxidation (M)[1] |      | Mascot |      |
| 1364.6614  | 1364.6472   | -0.0142 | -10   | 177        | 188      | ALEDLTEVMAEK                    |           |        |   | Oxidation (M)[9] |      | Mascot |      |
| 1377.7155  | 1377.6599   | -0.0556 | -40   | 703        | 715      | RTMSINVPASSSK                   |           |        |   |                  |      | Mascot |      |
| 1982.8947  | 1982.7285   | -0.1662 | -84   | 340        | 355      | NMTYMHNTVSLEEELR                |           |        |   | Oxidation (M)[2] |      | Mascot |      |
| 3242.5935  | 3242.4827   | -0.1108 | -34   | 75         | 101      | ILQMIVDYYNEVLAQQMS<br>DFPLPDLMR |           |        |   |                  |      | Mascot |      |

|    |                                              |  |  |  |             |  |         |     |    |    |   |  |  |
|----|----------------------------------------------|--|--|--|-------------|--|---------|-----|----|----|---|--|--|
| 40 | sorting nexin family member 27 [Danio rerio] |  |  |  | gi 41054611 |  | 64121.8 | 5.8 | 12 | 39 | 0 |  |  |
|----|----------------------------------------------|--|--|--|-------------|--|---------|-----|----|----|---|--|--|

#### Peptide Information

| Calc. Mass | Obsrv. Mass | ± da  | ± ppm | Start Seq. | End Seq. | Sequence | Ion Score | C. I. | % | Modification | Rank | Result | Type |
|------------|-------------|-------|-------|------------|----------|----------|-----------|-------|---|--------------|------|--------|------|
| 842.5094   | 842.4794    | -0.03 | -36   | 121        | 127      | QVVDLIR  |           |       |   |              |      | Mascot |      |

|    |                                                |           |         |      |             |     |                                 |      |    |    |   |                                           |  |  |  |  |        |
|----|------------------------------------------------|-----------|---------|------|-------------|-----|---------------------------------|------|----|----|---|-------------------------------------------|--|--|--|--|--------|
|    | 1059.4775                                      | 1059.5227 | 0.0452  | 43   | 561         | 569 | HMNEEIIS                        |      |    |    |   |                                           |  |  |  |  | Mascot |
|    | 1070.5305                                      | 1070.5594 | 0.0289  | 27   | 215         | 223 | EFANFAFPK                       |      |    |    |   |                                           |  |  |  |  | Mascot |
|    | 1136.5946                                      | 1136.536  | -0.0586 | -52  | 242         | 250 | RGLEEYLEK                       |      |    |    |   |                                           |  |  |  |  | Mascot |
|    | 1226.6316                                      | 1226.6429 | 0.0113  | 9    | 214         | 223 | REFANFAFPK                      |      |    |    |   |                                           |  |  |  |  | Mascot |
|    | 1287.6799                                      | 1287.6245 | -0.0554 | -43  | 415         | 424 | KMTMYLSILR                      |      |    |    |   | Oxidation (M)[2,4]                        |  |  |  |  | Mascot |
|    | 1287.6799                                      | 1287.6245 | -0.0554 | -43  | 415         | 424 | KMTMYLSILR                      |      |    |    |   | Oxidation (M)[2,4]                        |  |  |  |  | Mascot |
|    | 1950.9564                                      | 1950.7356 | -0.2208 | -113 | 185         | 200 | FVVYNVYMAGRQLCSK                |      |    |    |   | Carbamidomethyl (C)[14], Oxidation (M)[8] |  |  |  |  | Mascot |
|    | 1950.9564                                      | 1950.7356 | -0.2208 | -113 | 185         | 200 | FVVYNVYMAGRQLCSK                |      |    |    |   | Carbamidomethyl (C)[14], Oxidation (M)[8] |  |  |  |  | Mascot |
|    | 1985.7681                                      | 1985.9463 | 0.1782  | 90   | 482         | 497 | WDTDEEGMAFCFEYAR                |      |    |    |   | Oxidation (M)[8]                          |  |  |  |  | Mascot |
|    | 2225.0283                                      | 2225.0393 | 0.011   | 5    | 24          | 47  | NGSGMSAGTCAGGLVAT<br>TVTSGPR    |      |    |    |   | Carbamidomethyl (C)[10], Oxidation (M)[5] |  |  |  |  | Mascot |
|    | 2232.8743                                      | 2233.0059 | 0.1316  | 59   | 425         | 442 | TCEGYNEITFPHCSCDSR              |      |    |    |   | Carbamidomethyl (C)[2,13,15]              |  |  |  |  | Mascot |
|    | 2283.9321                                      | 2284.0933 | 0.1612  | 71   | 482         | 500 | WDTDEEGMAFCFEYARG<br>EK         |      |    |    |   |                                           |  |  |  |  | Mascot |
|    | 3243.4036                                      | 3243.4863 | 0.0827  | 25   | 416         | 442 | MTMYLSILRTCEGYNEITF<br>PHCSCDSR |      |    |    |   | Carbamidomethyl (C)[11], Oxidation (M)[1] |  |  |  |  | Mascot |
| 41 | beta-1,3-galactosyltransferase 2 [Danio rerio] |           |         |      | gi 46309569 |     | 50871.7                         | 9.67 | 10 | 39 | 0 |                                           |  |  |  |  |        |

#### Peptide Information

| Calc. Mass | Obsrv. Mass | $\pm$ da | $\pm$ ppm | Start Seq. | End Seq. | Sequence                       | Ion Score | C. I. | % Modification         | Rank | Result Type |
|------------|-------------|----------|-----------|------------|----------|--------------------------------|-----------|-------|------------------------|------|-------------|
| 992.5748   | 992.431     | -0.1438  | -145      | 65         | 72       | GLRPHKER                       |           |       |                        |      | Mascot      |
| 1070.6064  | 1070.5594   | -0.047   | -44       | 175        | 183      | QLEARNAIR                      |           |       |                        |      | Mascot      |
| 1151.5701  | 1151.4506   | -0.1195  | -104      | 241        | 250      | TLMGMSWVAR                     |           |       |                        |      | Mascot      |
| 1475.6956  | 1475.6946   | -0.001   | -1        | 7          | 18       | HCCPIKMTWNVK                   |           |       | Oxidation (M)[7]       |      | Mascot      |
| 1796.9589  | 1796.8737   | -0.0852  | -47       | 56         | 70       | DNPLVYTMRGLRPHK                |           |       |                        |      | Mascot      |
| 1950.9279  | 1950.7356   | -0.1923  | -99       | 285        | 300      | QNYFTGYLMRGYAPNR               |           |       |                        |      | Mascot      |
| 1950.9279  | 1950.7356   | -0.1923  | -99       | 285        | 300      | QNYFTGYLMRGYAPNR               |           |       |                        |      | Mascot      |
| 2070.9299  | 2070.9014   | -0.0285  | -14       | 318        | 336      | YPIFCSGTGYVFSGDMA<br>AK        |           |       | Carbamidomethyl (C)[5] |      | Mascot      |
| 2073.0222  | 2072.8752   | -0.147   | -71       | 386        | 402      | YSHLITSHQFQPNELMK              |           |       |                        |      | Mascot      |
| 2283.2065  | 2283.0947   | -0.1118  | -49       | 276        | 294      | LLKPNTAPRQNYFTGYL<br>MR        |           |       |                        |      | Mascot      |
| 3243.5793  | 3243.4863   | -0.093   | -29       | 386        | 411      | YSHLITSHQFQPNELMKY<br>WNHLQSNK |           |       |                        |      | Mascot      |

42 PREDICTED: zinc finger protein 569-like [Danio rerio] gi|125851284 48241.3 9.28 13 38 0

#### Peptide Information

| Calc. Mass | Obsrv. Mass | $\pm$ da | $\pm$ ppm | Start Seq. | End Seq. | Sequence | Ion Score | C. I. | % Modification | Rank | Result Type |
|------------|-------------|----------|-----------|------------|----------|----------|-----------|-------|----------------|------|-------------|
| 826.4529   | 826.4152    | -0.0377  | -46       | 131        | 137      | IHSGERK  |           |       |                |      | Mascot      |

|           |           |         |     |     |     |                              |  |  |  |                                           |  |        |
|-----------|-----------|---------|-----|-----|-----|------------------------------|--|--|--|-------------------------------------------|--|--------|
| 1165.5895 | 1165.702  | 0.1125  | 97  | 127 | 136 | AHMKIHSGER                   |  |  |  |                                           |  | Mascot |
| 1279.6688 | 1279.559  | -0.1098 | -86 | 97  | 106 | LDVHMRVHTR                   |  |  |  | Oxidation (M)[5]                          |  | Mascot |
| 1303.6464 | 1303.6194 | -0.027  | -21 | 159 | 169 | IHTGEKPFSCCK                 |  |  |  | Carbamidomethyl (C)[10]                   |  | Mascot |
| 1303.6464 | 1303.6194 | -0.027  | -21 | 159 | 169 | IHTGEKPFSCCK                 |  |  |  | Carbamidomethyl (C)[10]                   |  | Mascot |
| 1327.5405 | 1327.6736 | 0.1331  | 100 | 387 | 397 | EDPFRCECGK                   |  |  |  | Carbamidomethyl (C)[6]                    |  | Mascot |
| 1395.7189 | 1395.6329 | -0.086  | -62 | 1   | 12  | MAFIKVESEDK                  |  |  |  |                                           |  | Mascot |
| 1556.775  | 1556.7721 | -0.0029 | -2  | 207 | 219 | QSFNTHMRIHTGK                |  |  |  |                                           |  | Mascot |
| 1664.752  | 1664.851  | 0.099   | 59  | 327 | 341 | THTGEKPFTCAQCCK              |  |  |  | Carbamidomethyl (C)[10]                   |  | Mascot |
| 2063.8733 | 2063.7258 | -0.1475 | -71 | 351 | 369 | NHMDGHTGTIVFTCDQCGK          |  |  |  |                                           |  | Mascot |
| 2072.9575 | 2072.8752 | -0.0823 | -40 | 170 | 186 | QCGKSFCHKPNLDVHMR            |  |  |  | Carbamidomethyl (C)[2], Oxidation (M)[16] |  | Mascot |
| 2211.105  | 2211.0259 | -0.0791 | -36 | 243 | 262 | THTGERPFSCILCGKSFSLK         |  |  |  |                                           |  | Mascot |
| 2284.0486 | 2284.0933 | 0.0447  | 20  | 187 | 206 | VHTGEKPYTCEQCGKSGK           |  |  |  | Carbamidomethyl (C)[10]                   |  | Mascot |
| 3260.4856 | 3260.5063 | 0.0207  | 6   | 174 | 201 | SFCHKPNLDVHMRVHTGEKPYTCEQCGK |  |  |  | Oxidation (M)[12]                         |  | Mascot |
| 3260.4856 | 3260.5063 | 0.0207  | 6   | 174 | 201 | SFCHKPNLDVHMRVHTGEKPYTCEQCGK |  |  |  | Oxidation (M)[12]                         |  | Mascot |

43 PREDICTED: RING finger protein 213-like [Danio rerio] gi|326672540 483574.6 5.97 29 38 0

#### Peptide Information

| Calc. Mass | Obsrv. Mass | ± da    | ± ppm | Start Seq. | End Seq. | Sequence        | Ion Score | C. I. | % Modification   | Rank | Result Type |
|------------|-------------|---------|-------|------------|----------|-----------------|-----------|-------|------------------|------|-------------|
| 853.4488   | 853.3942    | -0.0546 | -64   | 2708       | 2714     | MLFDTVK         |           |       |                  |      | Mascot      |
| 864.4686   | 864.4617    | -0.0069 | -8    | 1091       | 1096     | QIREYR          |           |       |                  |      | Mascot      |
| 869.4437   | 869.3864    | -0.0573 | -66   | 2708       | 2714     | MLFDTVK         |           |       | Oxidation (M)[1] |      | Mascot      |
| 882.4097   | 882.5345    | 0.1248  | 141   | 3309       | 3315     | TSRSMER         |           |       | Oxidation (M)[5] |      | Mascot      |
| 900.5148   | 900.3904    | -0.1244 | -138  | 2724       | 2731     | ELAEAVLR        |           |       |                  |      | Mascot      |
| 1048.488   | 1048.5802   | 0.0922  | 88    | 2534       | 2542     | QASHCDLFK       | 7         | 0     |                  |      | Mascot      |
| 1048.615   | 1048.5802   | -0.0348 | -33   | 2446       | 2454     | RPYLATISK       |           |       |                  |      | Mascot      |
| 1186.6731  | 1186.6375   | -0.0356 | -30   | 1262       | 1270     | WLDWLKGLR       |           |       |                  |      | Mascot      |
| 1279.6351  | 1279.559    | -0.0761 | -59   | 3048       | 3058     | MVEGPVFEVETR    |           |       | Oxidation (M)[1] |      | Mascot      |
| 1303.6034  | 1303.6194   | 0.016   | 12    | 1438       | 1447     | DWCNHLTKMR      |           |       |                  |      | Mascot      |
| 1303.6034  | 1303.6194   | 0.016   | 12    | 1438       | 1447     | DWCNHLTKMR      |           |       |                  |      | Mascot      |
| 1364.6702  | 1364.6472   | -0.023  | -17   | 3218       | 3228     | YCTMNEILHLK     |           |       |                  |      | Mascot      |
| 1383.7015  | 1383.5879   | -0.1136 | -82   | 468        | 479      | GWETSAHVLLDR    |           |       |                  |      | Mascot      |
| 1400.6548  | 1400.6134   | -0.0414 | -30   | 2125       | 2137     | MSFVVGAEKGCEK   |           |       | Oxidation (M)[1] |      | Mascot      |
| 1403.7676  | 1403.6459   | -0.1217 | -87   | 2521       | 2533     | SLAKTVIADAMQR   |           |       |                  |      | Mascot      |
| 1403.7676  | 1403.6459   | -0.1217 | -87   | 2521       | 2533     | SLAKTVIADAMQR   |           |       |                  |      | Mascot      |
| 1642.9462  | 1642.8739   | -0.0723 | -44   | 1747       | 1761     | LSVWMIASKRPAVGK |           |       |                  |      | Mascot      |

|           |           |         |      |      |      |                                   |                                              |        |
|-----------|-----------|---------|------|------|------|-----------------------------------|----------------------------------------------|--------|
| 1642.9462 | 1642.8739 | -0.0723 | -44  | 1747 | 1761 | LSVWMIASKRPAVGK                   |                                              | Mascot |
| 1664.8271 | 1664.851  | 0.0239  | 14   | 3242 | 3256 | LSRIGEQCTSITGDK                   | Carbamidomethyl (C)[8]                       | Mascot |
| 1859.8997 | 1859.7288 | -0.1709 | -92  | 3978 | 3992 | NNFVEAEFKFMEQVK                   |                                              | Mascot |
| 1903.9719 | 1903.8285 | -0.1434 | -75  | 4060 | 4078 | ALRDGVGEGSTQVGTDDG<br>LK          |                                              | Mascot |
| 1957.9874 | 1957.9463 | -0.0411 | -21  | 3817 | 3832 | EIIKCCNTFFLEVVS                   | Carbamidomethyl (C)[5]                       | Mascot |
| 1982.9496 | 1982.7285 | -0.2211 | -112 | 2163 | 2179 | FRCEIPVIIMGETGCGK                 | Carbamidomethyl (C)[3,15], Oxidation (M)[10] | Mascot |
| 1985.9861 | 1985.9463 | -0.0398 | -20  | 4138 | 4156 | EFCTALLSNHIGGPGSNL<br>R           |                                              | Mascot |
| 1993.951  | 1993.9017 | -0.0493 | -25  | 2684 | 2700 | CFLSICKTDSEQFFGLR                 |                                              | Mascot |
| 2041.976  | 2041.7416 | -0.2344 | -115 | 1551 | 1568 | ENMSGFLTHHVDVETLG<br>R            |                                              | Mascot |
| 2041.976  | 2041.7416 | -0.2344 | -115 | 1551 | 1568 | ENMSGFLTHHVDVETLG<br>R            |                                              | Mascot |
| 2057.9709 | 2057.7761 | -0.1948 | -95  | 1551 | 1568 | ENMSGFLTHHVDVETLG<br>R            | Oxidation (M)[3]                             | Mascot |
| 2064.0193 | 2063.7258 | -0.2935 | -142 | 3366 | 3382 | NHEALQECGLRHTLWR                  |                                              | Mascot |
| 2070.9688 | 2070.9014 | -0.0674 | -33  | 2138 | 2155 | GKFDPDPTYELTTDNVM<br>K            |                                              | Mascot |
| 2211.1333 | 2211.0259 | -0.1074 | -49  | 2490 | 2507 | NMALKENVFLMVVCIELR                | Carbamidomethyl (C)[14], Oxidation (M)[2,11] | Mascot |
| 2283.0405 | 2283.0947 | 0.0542  | 24   | 303  | 322  | VSKEQTNQIEANQDSTM<br>ESK          | Oxidation (M)[17]                            | Mascot |
| 3242.6106 | 3242.4827 | -0.1279 | -39  | 3189 | 3217 | ESGPSVHILLIQMDMEES<br>LCKNELIASAK | Carbamidomethyl (C)[20]                      | Mascot |
| 3243.5164 | 3243.4863 | -0.0301 | -9   | 3094 | 3119 | YSEFGNQETEELQKMYF<br>HLQTHQSLR    |                                              | Mascot |
| 3260.5425 | 3260.5063 | -0.0362 | -11  | 578  | 606  | DWGKLCQVVSECMGSF<br>GEIQTQTAPFIK  | Carbamidomethyl (C)[6]                       | Mascot |
| 3260.5425 | 3260.5063 | -0.0362 | -11  | 578  | 606  | DWGKLCQVVSECMGSF<br>GEIQTQTAPFIK  | Carbamidomethyl (C)[6]                       | Mascot |

### Peptide Information

45 novel protein (zgc:77010) [Danio rerio] RR  
gi|169158538 18888.4 5.22 6 38 0

Peptide Information

| Calc. Mass | Obsrv. Mass | ± da    | ± ppm | Start Seq. | End Seq. | Sequence             | Ion Score | C. I. % | Modification           | Rank | Result Type |
|------------|-------------|---------|-------|------------|----------|----------------------|-----------|---------|------------------------|------|-------------|
| 882.4211   | 882.5345    | 0.1134  | 129   | 139        | 145      | MCSFLPK              |           |         | Carbamidomethyl (C)[2] |      | Mascot      |
| 1279.6715  | 1279.559    | -0.1125 | -88   | 28         | 39       | IACLSAPSVYQK         |           |         |                        |      | Mascot      |
| 1403.6624  | 1403.6459   | -0.0165 | -12   | 156        | 166      | CYVNYESRLLS          |           |         | Carbamidomethyl (C)[1] |      | Mascot      |
| 1403.6624  | 1403.6459   | -0.0165 | -12   | 156        | 166      | CYVNYESRLLS          |           |         | Carbamidomethyl (C)[1] |      | Mascot      |
| 1642.8291  | 1642.8739   | 0.0448  | 27    | 119        | 133      | ILLCTGAIMEEHAGK      |           |         | Carbamidomethyl (C)[4] |      | Mascot      |
| 1642.8291  | 1642.8739   | 0.0448  | 27    | 119        | 133      | ILLCTGAIMEEHAGK      |           |         | Carbamidomethyl (C)[4] |      | Mascot      |
| 2057.9797  | 2057.7761   | -0.2036 | -99   | 139        | 155      | MCSFLPKHHNLANEFR     |           |         |                        |      | Mascot      |
| 2225.2031  | 2225.0393   | -0.1638 | -74   | 119        | 138      | ILLCTGAIMEEHAGKLLDLK |           |         | Carbamidomethyl (C)[4] |      | Mascot      |

46 Zgc:123105 [Danio rerio] gi|79151827 18445.2 9.15 7 38 0

Peptide Information

| Calc. Mass | Obsrv. Mass | ± da    | ± ppm | Start Seq. | End Seq. | Sequence        | Ion Score | C. I. % | Modification           | Rank | Result Type |
|------------|-------------|---------|-------|------------|----------|-----------------|-----------|---------|------------------------|------|-------------|
| 1151.566   | 1151.4506   | -0.1154 | -100  | 1          | 10       | MSIPAGMTRR      |           |         | Oxidation (M)[1,7]     |      | Mascot      |
| 1287.6262  | 1287.6245   | -0.0017 | -1    | 120        | 129      | YHRLAESMHK      |           |         | Oxidation (M)[8]       |      | Mascot      |
| 1287.6262  | 1287.6245   | -0.0017 | -1    | 120        | 129      | YHRLAESMHK      |           |         | Oxidation (M)[8]       |      | Mascot      |
| 1354.5992  | 1354.7432   | 0.144   | 106   | 145        | 155      | CCLFACVYTFK     |           |         | Carbamidomethyl (C)[1] |      | Mascot      |
| 1377.777   | 1377.6599   | -0.1171 | -85   | 75         | 87       | AKASSVMNSLIK    |           |         | Oxidation (M)[7]       |      | Mascot      |
| 1383.6573  | 1383.5879   | -0.0694 | -50   | 88         | 98       | QTQESMQKFEK     |           |         |                        |      | Mascot      |
| 1388.6805  | 1388.6667   | -0.0138 | -10   | 99         | 111      | QAGLTDGTGYPHK   |           |         |                        |      | Mascot      |
| 1664.7697  | 1664.851    | 0.0813  | 49    | 130        | 144      | LQMQSTDASFQHGSK |           |         |                        |      | Mascot      |

47 PREDICTED: NF-X1-type zinc finger protein NFXL1-like [Danio rerio] gi|326679373 116743.2 8.67 18 37 0 13 0

Peptide Information

| Calc. Mass | Obsrv. Mass | ± da    | ± ppm | Start Seq. | End Seq. | Sequence    | Ion Score | C. I. % | Modification             | Rank | Result Type |
|------------|-------------|---------|-------|------------|----------|-------------|-----------|---------|--------------------------|------|-------------|
| 826.4352   | 826.4152    | -0.02   | -24   | 735        | 741      | QLLCGHR     |           |         |                          |      | Mascot      |
| 853.329    | 853.3942    | 0.0652  | 76    | 400        | 406      | GACETCR     |           |         | Carbamidomethyl (C)[3,6] |      | Mascot      |
| 992.4829   | 992.431     | -0.0519 | -52   | 407        | 414      | QEVEKTCR    |           |         |                          |      | Mascot      |
| 1059.5177  | 1059.5227   | 0.005   | 5     | 19         | 29       | GQVTGNPSSGR |           |         |                          |      | Mascot      |
| 1186.6249  | 1186.6375   | 0.0126  | 11    | 1054       | 1063     | NKIGMEHTIK  |           |         | Oxidation (M)[5]         |      | Mascot      |

|  |           |           |         |      |      |      |                    |    |   |                                  |        |
|--|-----------|-----------|---------|------|------|------|--------------------|----|---|----------------------------------|--------|
|  | 1287.5391 | 1287.6245 | 0.0854  | 66   | 343  | 354  | VCHAGVCGECP        | 13 | 0 | Carbamidomethyl (C)[2]           | Mascot |
|  | 1287.5391 | 1287.6245 | 0.0854  | 66   | 343  | 354  | VCHAGVCGECP        |    |   | Carbamidomethyl (C)[2]           | Mascot |
|  | 1295.5773 | 1295.5562 | -0.0211 | -16  | 175  | 184  | DHPWPCPKCR         |    |   | Carbamidomethyl (C)[6]           | Mascot |
|  | 1395.6863 | 1395.6329 | -0.0534 | -38  | 40   | 51   | ASSQSRFDEIQK       |    |   |                                  | Mascot |
|  | 1642.8004 | 1642.8739 | 0.0735  | 45   | 13   | 29   | GQQQGRGQVTGNPSSG   |    |   |                                  | Mascot |
|  | 1642.8004 | 1642.8739 | 0.0735  | 45   | 13   | 29   | GQQQGRGQVTGNPSSG   |    |   |                                  | Mascot |
|  | 1698.8241 | 1698.8046 | -0.0195 | -11  | 520  | 533  | KPPSCHHASQEKHR     |    |   | Carbamidomethyl (C)[5]           | Mascot |
|  | 1859.7881 | 1859.7288 | -0.0593 | -32  | 385  | 399  | NLDCGLHTCSMRCHR    |    |   | Carbamidomethyl (C)[4,9]         | Mascot |
|  | 1982.7216 | 1982.7285 | 0.0069  | 3    | 448  | 463  | KCCPGNCPDCMNCGR    |    |   | Carbamidomethyl (C)[2,3,7,10,14] | Mascot |
|  | 1985.9167 | 1985.9463 | 0.0296  | 15   | 797  | 814  | HAEACAAEERALLEGEM  |    |   |                                  | Mascot |
|  | 2042.0132 | 2041.7416 | -0.2716 | -133 | 1018 | 1035 | HIMLFGCSIALPQCISHR |    |   | Oxidation (M)[3]                 | Mascot |
|  | 2042.0132 | 2041.7416 | -0.2716 | -133 | 1018 | 1035 | HIMLFGCSIALPQCISHR |    |   | Oxidation (M)[3]                 | Mascot |
|  | 2063.8513 | 2063.7258 | -0.1255 | -61  | 742  | 758  | CKLLCHAGDCDQNCGQK  |    |   | Carbamidomethyl (C)[1,5,10,14]   | Mascot |
|  | 2232.959  | 2233.0059 | 0.0469  | 21   | 185  | 202  | HEYSPHQTPTRYCYCG   |    |   |                                  | Mascot |
|  | 2284.147  | 2284.0933 | -0.0537 | -24  | 569  | 589  | ATDRANLAGPWEQPSTP  |    |   |                                  | Mascot |
|  | 3242.623  | 3242.4827 | -0.1403 | -43  | 105  | 132  | LLEQTRHYLHEVCQSGG  |    |   | Carbamidomethyl (C)[13,20]       | Mascot |

48 suppression of tumorigenicity 14 (colon carcinoma) b [Danio rerio] gi|118150452 83703 6.05 1 25 7.898

#### Peptide Information

| Calc. Mass | Obsrv. Mass | ± da   | ± ppm | Start Seq. | End Sequence Seq. | Ion Score | C. I. % | Modification           | Rank | Result Type |
|------------|-------------|--------|-------|------------|-------------------|-----------|---------|------------------------|------|-------------|
| 1048.4517  | 1048.5802   | 0.1285 | 123   | 280        | 287 DCHNDFIK      | 25        | 7.898   | Carbamidomethyl (C)[2] | 2    | Mascot      |

49 PREDICTED: zinc finger protein 710-like [Danio rerio] gi|326669438 79852.3 8.61 1 23 0

#### Peptide Information

| Calc. Mass | Obsrv. Mass | ± da    | ± ppm | Start Seq. | End Sequence Seq. | Ion Score | C. I. % | Modification | Rank | Result Type |
|------------|-------------|---------|-------|------------|-------------------|-----------|---------|--------------|------|-------------|
| 1048.5897  | 1048.5802   | -0.0095 | -9    | 625        | 633 FNLKGNLSR     | 23        | 0       |              | 3    | Mascot      |

50 cullin 1-like [Danio rerio] gi|47087291 89546.8 8.18 1 23 0

#### Peptide Information

| Calc. Mass | Obsrv. Mass | ± da   | ± ppm | Start Seq. | End Sequence Seq. | Ion Score | C. I. % | Modification | Rank | Result Type |
|------------|-------------|--------|-------|------------|-------------------|-----------|---------|--------------|------|-------------|
| 1048.5535  | 1048.5802   | 0.0267 | 25    | 400        | 408 FINNNVTR      | 23        | 0       |              | 4    | Mascot      |

|                |           |                        |                |                |                    |
|----------------|-----------|------------------------|----------------|----------------|--------------------|
| Gel Idx/Pos    | 236/J12   | Instr./Gel Origin      | BA2060/110707A | Process Status | Analysis Succeeded |
| Plate [#] Name | [1] 31496 | Instrument Sample Name |                | Spectra        | 11                 |

| Rank | Protein Name                                       | Accession No. | Protein MW | Protein PI | Pep. Count | Protein Score | Protein Score C. I. % | Total Ion Score | Total Ion C. I. % |
|------|----------------------------------------------------|---------------|------------|------------|------------|---------------|-----------------------|-----------------|-------------------|
| 1    | EF-hand domain-containing protein D2 [Danio rerio] | gi 113680776  | 26494.4    | 5.56       | 14         | 406           | 100                   | 306             | 100               |

Peptide Information

| Calc. Mass | Obsrv. Mass | ± da    | ± ppm | Start Seq. | End Seq. | Sequence               | Ion Score | C. I. % | Modification       | Rank | Result Type |
|------------|-------------|---------|-------|------------|----------|------------------------|-----------|---------|--------------------|------|-------------|
| 850.4152   | 850.5173    | 0.1021  | 120   | 2          | 9        | ATDELSSK               |           |         |                    |      | Mascot      |
| 937.5505   | 937.5228    | -0.0277 | -30   | 145        | 151      | EFLLIIR                |           |         |                    |      | Mascot      |
| 937.5505   | 937.5228    | -0.0277 | -30   | 145        | 151      | EFLLIIR                | 45        | 99.12   |                    |      | Mascot      |
| 960.4164   | 960.4514    | 0.035   | 36    | 89         | 95       | DMEKMFK                |           |         | Oxidation (M)[2,5] |      | Mascot      |
| 1030.5276  | 1030.4968   | -0.0308 | -30   | 191        | 199      | VQAINESNR              |           |         |                    |      | Mascot      |
| 1134.663   | 1134.6173   | -0.0457 | -40   | 117        | 127      | LGAPQTHLGLK            |           |         |                    |      | Mascot      |
| 1144.5674  | 1144.5328   | -0.0346 | -30   | 72         | 80       | VFNPYTEFK              |           |         |                    |      | Mascot      |
| 1144.5674  | 1144.5328   | -0.0346 | -30   | 72         | 80       | VFNPYTEFK              | 25        | 18.657  |                    |      | Mascot      |
| 1364.6838  | 1364.6545   | -0.0293 | -21   | 1          | 12       | MATDELSSKLNLR          |           |         |                    |      | Mascot      |
| 1522.7384  | 1522.6951   | -0.0433 | -28   | 132        | 144      | EVDEDLDGKLSFR          |           |         |                    |      | Mascot      |
| 1663.8114  | 1663.765    | -0.0464 | -28   | 72         | 84       | VFNPYTEFKEFSR          |           |         |                    |      | Mascot      |
| 1679.8711  | 1679.8195   | -0.0516 | -31   | 153        | 169      | AAAGELAEDSGLHVLAR      |           |         |                    |      | Mascot      |
| 1679.8711  | 1679.8195   | -0.0516 | -31   | 153        | 169      | AAAGELAEDSGLHVLAR      | 137       | 100     |                    |      | Mascot      |
| 1775.9034  | 1775.851    | -0.0524 | -30   | 191        | 205      | VQAINESNRFEAEIR        | 69        | 99.997  |                    |      | Mascot      |
| 1775.9034  | 1775.851    | -0.0524 | -30   | 191        | 205      | VQAINESNRFEAEIR        |           |         |                    |      | Mascot      |
| 1807.9661  | 1807.9113   | -0.0548 | -30   | 152        | 169      | KAAAGELAEDSGLHVLA<br>R |           |         |                    |      | Mascot      |
| 1895.9028  | 1895.8464   | -0.0564 | -30   | 55         | 71       | RGELNEGVGEHQQPSM<br>K  |           |         |                    |      | Mascot      |
| 1911.8977  | 1911.8427   | -0.055  | -29   | 55         | 71       | RGELNEGVGEHQQPSM<br>K  |           |         | Oxidation (M)[16]  |      | Mascot      |
| 1911.8977  | 1911.8427   | -0.055  | -29   | 55         | 71       | RGELNEGVGEHQQPSM<br>K  | 30        | 70.602  | Oxidation (M)[16]  |      | Mascot      |
| 2019.9215  | 2019.8612   | -0.0603 | -30   | 96         | 111      | QYDSEKDNIDLMELK        |           |         | Oxidation (M)[13]  |      | Mascot      |

|   |                                                             |             |          |      |    |     |     |     |     |
|---|-------------------------------------------------------------|-------------|----------|------|----|-----|-----|-----|-----|
| 2 | novel protein similar to vitellogenin 1 (vg1) [Danio rerio] | gi 94732723 | 147084.2 | 8.73 | 14 | 176 | 100 | 148 | 100 |
|---|-------------------------------------------------------------|-------------|----------|------|----|-----|-----|-----|-----|

Peptide Information

| Calc. Mass | Obsrv. Mass | ± da    | ± ppm | Start Seq. | End Seq. | Sequence      | Ion Score | C. I. % | Modification | Rank | Result Type |
|------------|-------------|---------|-------|------------|----------|---------------|-----------|---------|--------------|------|-------------|
| 960.4785   | 960.4514    | -0.0271 | -28   | 1239       | 1245     | LEVEWER       |           |         |              |      | Mascot      |
| 1287.6691  | 1287.6321   | -0.037  | -29   | 1226       | 1238     | AEAGVLGEFPAAR |           |         |              |      | Mascot      |

|   |                                              |           |         |      |              |      |                                    |      |        |                            |     |     |        |
|---|----------------------------------------------|-----------|---------|------|--------------|------|------------------------------------|------|--------|----------------------------|-----|-----|--------|
|   | 1477.91                                      | 1477.7659 | -0.1441 | -98  | 532          | 544  | LVQPIALQLVLDR                      |      |        |                            |     |     | Mascot |
|   | 1642.9315                                    | 1642.8756 | -0.0559 | -34  | 1142         | 1156 | FLGNDLPPVFIIAR                     |      |        |                            |     |     | Mascot |
|   | 1698.8666                                    | 1698.8087 | -0.0579 | -34  | 483          | 498  | VMGNAGHPSSLKPIMK                   |      |        | Oxidation (M)[2,15]        |     |     | Mascot |
|   | 1699.9047                                    | 1699.8792 | -0.0255 | -15  | 597          | 614  | ITAPDMASVAGAANVAIK                 |      |        |                            |     |     | Mascot |
|   | 1699.9377                                    | 1699.8792 | -0.0585 | -34  | 34           | 49   | YEALLLGGLPQEGLAR                   | 59   | 99.968 |                            |     |     | Mascot |
|   | 1721.9043                                    | 1721.8508 | -0.0535 | -31  | 119          | 134  | VFAPAGVSPTVMNLYR                   |      |        |                            |     |     | Mascot |
|   | 1737.8992                                    | 1737.8461 | -0.0531 | -31  | 119          | 134  | VFAPAGVSPTVMNLYR                   |      |        | Oxidation (M)[12]          |     |     | Mascot |
|   | 1826.9799                                    | 1826.9263 | -0.0536 | -29  | 1164         | 1179 | LLGYQLAAYFDKPTAR                   |      |        |                            |     |     | Mascot |
|   | 1886.7894                                    | 1886.7297 | -0.0597 | -32  | 195          | 210  | DVGLAYTESPECTER                    |      |        | Carbamidomethyl (C)[10,13] |     |     | Mascot |
|   | 1912.1154                                    | 1911.8427 | -0.2727 | -143 | 260          | 276  | QTLAFVEIEKTPVVPIK                  |      |        |                            |     |     | Mascot |
|   | 1912.1154                                    | 1911.8427 | -0.2727 | -143 | 260          | 276  | QTLAFVEIEKTPVVPIK                  |      |        |                            |     |     | Mascot |
|   | 1936.9181                                    | 1936.8591 | -0.059  | -30  | 147          | 163  | TQNIYELQEAGAQGVCRR                 | 90   | 100    | Carbamidomethyl (C)[16]    |     |     | Mascot |
|   | 1936.9181                                    | 1936.8591 | -0.059  | -30  | 147          | 163  | TQNIYELQEAGAQGVCRR                 |      |        | Carbamidomethyl (C)[16]    |     |     | Mascot |
|   | 2230.1682                                    | 2230.1306 | -0.0376 | -17  | 597          | 618  | ITAPDMASVAGAANVAIK<br>LMNR         |      |        | Oxidation (M)[6]           |     |     | Mascot |
|   | 3337.7539                                    | 3337.6782 | -0.0757 | -23  | 1164         | 1193 | LLGYQLAAYFDKPTARVQ<br>LIASSIAENDNR |      |        |                            |     |     | Mascot |
| 3 | hypothetical protein LOC678536 [Danio rerio] |           |         |      | gi 160420306 |      | 148750.2                           | 8.89 | 13     | 171                        | 100 | 148 | 100    |

### Peptide Information



|   |                                                                         |           |         |     |      |      |                            |          |      |    |     |     |                   |        |
|---|-------------------------------------------------------------------------|-----------|---------|-----|------|------|----------------------------|----------|------|----|-----|-----|-------------------|--------|
|   | 2249.1958                                                               | 2249.0059 | -0.1899 | -84 | 593  | 614  | SLTRITAPDMAYVAGAAN<br>VAIK |          |      |    |     |     | Oxidation (M)[10] | Mascot |
|   | 2299.2292                                                               | 2299.1135 | -0.1157 | -50 | 1039 | 1058 | QINIIDDDTPEGQAFLKL<br>R    |          |      |    |     |     |                   | Mascot |
| 4 | novel protein similar to vitellogenin 1 (vg1) [Danio rerio] gi 94733734 |           |         |     |      |      |                            | 149808.5 | 8.83 | 12 | 170 | 100 | 150               | 100    |

Peptide Information

|  | Calc. Mass | Obsrv. Mass | ± da    | ± ppm | Start Seq. | End Seq. | Sequence                   | Ion Score | C. I.  | % Modification          | Rank | Result Type |
|--|------------|-------------|---------|-------|------------|----------|----------------------------|-----------|--------|-------------------------|------|-------------|
|  | 864.4461   | 864.4805    | 0.0344  | 40    | 91         | 98       | DSFVPATK                   |           |        |                         |      | Mascot      |
|  | 960.4785   | 960.4514    | -0.0271 | -28   | 1265       | 1271     | LEVEWER                    |           |        |                         |      | Mascot      |
|  | 1638.8485  | 1638.809    | -0.0395 | -24   | 672        | 687      | TYLAGAAADVVEFGVR           |           |        |                         |      | Mascot      |
|  | 1642.9315  | 1642.8756   | -0.0559 | -34   | 1168       | 1182     | FLGNDIPPVFIIAR             |           |        |                         |      | Mascot      |
|  | 1698.8666  | 1698.8087   | -0.0579 | -34   | 487        | 502      | VMGNAGHPSSLKPIMK           |           |        | Oxidation (M)[2,15]     |      | Mascot      |
|  | 1699.9377  | 1699.8792   | -0.0585 | -34   | 38         | 53       | YEALLLGGLPQEGLAR           | 59        | 99.968 |                         |      | Mascot      |
|  | 1699.9377  | 1699.8792   | -0.0585 | -34   | 38         | 53       | YEALLLGGLPQEGLAR           |           |        |                         |      | Mascot      |
|  | 1775.936   | 1775.851    | -0.085  | -48   | 601        | 618      | ITAPDMAYVAGAANVAIK         |           |        |                         |      | Mascot      |
|  | 1775.936   | 1775.851    | -0.085  | -48   | 601        | 618      | ITAPDMAYVAGAANVAIK         |           |        |                         |      | Mascot      |
|  | 1826.9799  | 1826.9263   | -0.0536 | -29   | 1190       | 1205     | LLGYQLAAYFDKPTAR           |           |        |                         |      | Mascot      |
|  | 1912.1154  | 1911.8427   | -0.2727 | -143  | 264        | 280      | QTLAFVEIEKTPVVPIK          |           |        |                         |      | Mascot      |
|  | 1912.1154  | 1911.8427   | -0.2727 | -143  | 264        | 280      | QTLAFVEIEKTPVVPIK          |           |        |                         |      | Mascot      |
|  | 1936.9181  | 1936.8591   | -0.059  | -30   | 151        | 167      | TQNIYELQEAGAQQVCR          | 90        | 100    | Carbamidomethyl (C)[16] |      | Mascot      |
|  | 1936.9181  | 1936.8591   | -0.059  | -30   | 151        | 167      | TQNIYELQEAGAQQVCR          |           |        | Carbamidomethyl (C)[16] |      | Mascot      |
|  | 2233.2009  | 2233.0186   | -0.1823 | -82   | 597        | 618      | SLTRITAPDMAYVAGAAN<br>VAIK |           |        |                         |      | Mascot      |
|  | 2249.1958  | 2249.0059   | -0.1899 | -84   | 597        | 618      | SLTRITAPDMAYVAGAAN<br>VAIK |           |        | Oxidation (M)[10]       |      | Mascot      |
|  | 2299.2292  | 2299.1135   | -0.1157 | -50   | 1043       | 1062     | QINIIDDDTPEGQAFLKL<br>R    |           |        |                         |      | Mascot      |

|   |                                                                         |  |  |  |  |  |  |          |      |    |     |     |     |     |
|---|-------------------------------------------------------------------------|--|--|--|--|--|--|----------|------|----|-----|-----|-----|-----|
| 5 | novel protein similar to vitellogenin 1 (vg1) [Danio rerio] gi 94733733 |  |  |  |  |  |  | 149143.4 | 8.92 | 13 | 169 | 100 | 148 | 100 |
|---|-------------------------------------------------------------------------|--|--|--|--|--|--|----------|------|----|-----|-----|-----|-----|

Peptide Information

|  | Calc. Mass | Obsrv. Mass | ± da    | ± ppm | Start Seq. | End Seq. | Sequence       | Ion Score | C. I. | % Modification | Rank | Result Type |
|--|------------|-------------|---------|-------|------------|----------|----------------|-----------|-------|----------------|------|-------------|
|  | 864.4461   | 864.4805    | 0.0344  | 40    | 91         | 98       | DSFVPATK       |           |       |                |      | Mascot      |
|  | 960.4785   | 960.4514    | -0.0271 | -28   | 1260       | 1266     | LEVEWER        |           |       |                |      | Mascot      |
|  | 1045.5465  | 1045.5336   | -0.0129 | -12   | 1350       | 1357     | DFLSWIHK       |           |       |                |      | Mascot      |
|  | 1477.91    | 1477.7659   | -0.1441 | -98   | 536        | 548      | LVQPIALQLVLDR  |           |       |                |      | Mascot      |
|  | 1642.9315  | 1642.8756   | -0.0559 | -34   | 1163       | 1177     | FLGNDIPPVFIIAR |           |       |                |      | Mascot      |
|  | 1679.8064  | 1679.8195   | 0.0131  | 8     | 1350       | 1362     | DFLSWIHKYINED  |           |       |                |      | Mascot      |
|  | 1679.8064  | 1679.8195   | 0.0131  | 8     | 1350       | 1362     | DFLSWIHKYINED  |           |       |                |      | Mascot      |



|   | Calc. Mass                              | Obsrv. Mass | ± da    | ± ppm | Start Seq.  | End Sequence Seq.      | Ion Score | C. I. % | Modification            | Rank      | Result Type |
|---|-----------------------------------------|-------------|---------|-------|-------------|------------------------|-----------|---------|-------------------------|-----------|-------------|
|   | 864.4461                                | 864.4805    | 0.0344  | 40    | 87          | 94 DSFVPATK            |           |         |                         |           | Mascot      |
|   | 1699.9377                               | 1699.8792   | -0.0585 | -34   | 34          | 49 YEALLLGGLPQEGRLAR   | 59        | 99.968  |                         |           | Mascot      |
|   | 1699.9377                               | 1699.8792   | -0.0585 | -34   | 34          | 49 YEALLLGGLPQEGRLAR   |           |         |                         |           | Mascot      |
|   | 1936.9181                               | 1936.8591   | -0.059  | -30   | 147         | 163 TQNIYELQEAGAQQGVCR | 90        | 100     | Carbamidomethyl (C)[16] |           | Mascot      |
|   | 1936.9181                               | 1936.8591   | -0.059  | -30   | 147         | 163 TQNIYELQEAGAQQGVCR |           |         | Carbamidomethyl (C)[16] |           | Mascot      |
| 8 | Si:ch211-281I24.1 protein [Danio rerio] |             |         |       | gi 37748264 |                        | 25927.2   | 5.42    | 6                       | 93 99.998 | 70 99.997   |

#### Peptide Information

|   | Calc. Mass                                                              | Obsrv. Mass | ± da    | ± ppm | Start Seq.  | End Sequence Seq.          | Ion Score | C. I. % | Modification | Rank      | Result Type |
|---|-------------------------------------------------------------------------|-------------|---------|-------|-------------|----------------------------|-----------|---------|--------------|-----------|-------------|
|   | 937.5505                                                                | 937.5228    | -0.0277 | -30   | 135         | 141 EFLLIFR                |           |         |              |           | Mascot      |
|   | 937.5505                                                                | 937.5228    | -0.0277 | -30   | 135         | 141 EFLLIFR                | 45        | 99.12   |              |           | Mascot      |
|   | 1134.663                                                                | 1134.6173   | -0.0457 | -40   | 107         | 117 LGAPQTHLGLK            |           |         |              |           | Mascot      |
|   | 1144.5674                                                               | 1144.5328   | -0.0346 | -30   | 62          | 70 VFNPYTEFK               |           |         |              |           | Mascot      |
|   | 1144.5674                                                               | 1144.5328   | -0.0346 | -30   | 62          | 70 VFNPYTEFK               | 25        | 18.657  |              |           | Mascot      |
|   | 1555.6945                                                               | 1555.6769   | -0.0176 | -11   | 118         | 130 NMIKEVDEDYDGK          |           |         |              |           | Mascot      |
|   | 1663.8114                                                               | 1663.765    | -0.0464 | -28   | 62          | 74 VFNPYTEFKEFSR           |           |         |              |           | Mascot      |
|   | 2283.1501                                                               | 2283.1118   | -0.0383 | -17   | 160         | 180 LSEIDVSTEGVLGARDFF EAK |           |         |              |           | Mascot      |
|   | 2283.1501                                                               | 2283.1118   | -0.0383 | -17   | 160         | 180 LSEIDVSTEGVLGARDFF EAK |           |         |              |           | Mascot      |
| 9 | PREDICTED: EF-hand domain-containing protein D1 isoform 1 [Danio rerio] |             |         |       | gi 68381139 |                            | 26232.3   | 5.42    | 6            | 92 99.997 | 70 99.997   |

#### Peptide Information

|  | Calc. Mass | Obsrv. Mass | ± da    | ± ppm | Start Seq. | End Sequence Seq.          | Ion Score | C. I. % | Modification | Rank | Result Type |
|--|------------|-------------|---------|-------|------------|----------------------------|-----------|---------|--------------|------|-------------|
|  | 937.5505   | 937.5228    | -0.0277 | -30   | 138        | 144 EFLLIFR                |           |         |              |      | Mascot      |
|  | 937.5505   | 937.5228    | -0.0277 | -30   | 138        | 144 EFLLIFR                | 45        | 99.12   |              |      | Mascot      |
|  | 1134.663   | 1134.6173   | -0.0457 | -40   | 110        | 120 LGAPQTHLGLK            |           |         |              |      | Mascot      |
|  | 1144.5674  | 1144.5328   | -0.0346 | -30   | 65         | 73 VFNPYTEFK               |           |         |              |      | Mascot      |
|  | 1144.5674  | 1144.5328   | -0.0346 | -30   | 65         | 73 VFNPYTEFK               | 25        | 18.657  |              |      | Mascot      |
|  | 1555.6945  | 1555.6769   | -0.0176 | -11   | 121        | 133 NMIKEVDEDYDGK          |           |         |              |      | Mascot      |
|  | 1663.8114  | 1663.765    | -0.0464 | -28   | 65         | 77 VFNPYTEFKEFSR           |           |         |              |      | Mascot      |
|  | 2283.1501  | 2283.1118   | -0.0383 | -17   | 163        | 183 LSEIDVSTEGVLGARDFF EAK |           |         |              |      | Mascot      |
|  | 2283.1501  | 2283.1118   | -0.0383 | -17   | 163        | 183 LSEIDVSTEGVLGARDFF EAK |           |         |              |      | Mascot      |

10 vitellogenin 7 [Danio rerio] gi|156713467 148739.2 8.76 13 81 99.963 58 99.953

Peptide Information

| Calc. Mass | Obsrv. Mass | ± da    | ± ppm | Start Seq. | End Seq. | Sequence                           | Ion Score | C. I. % | Modification               | Rank | Result Type |
|------------|-------------|---------|-------|------------|----------|------------------------------------|-----------|---------|----------------------------|------|-------------|
| 960.4785   | 960.4514    | -0.0271 | -28   | 1254       | 1260     | LEVEWER                            |           |         |                            |      | Mascot      |
| 1287.6691  | 1287.6321   | -0.037  | -29   | 1241       | 1253     | AEAGVLGEFPAAR                      |           |         |                            |      | Mascot      |
| 1477.91    | 1477.7659   | -0.1441 | -98   | 532        | 544      | LVQPIALQLVLDR                      |           |         |                            |      | Mascot      |
| 1642.9315  | 1642.8756   | -0.0559 | -34   | 1157       | 1171     | FLGNDLPPVFIIAR                     |           |         |                            |      | Mascot      |
| 1698.8666  | 1698.8087   | -0.0579 | -34   | 483        | 498      | VMGNAGHPSSLKPIMK                   |           |         | Oxidation (M)[2,15]        |      | Mascot      |
| 1699.9047  | 1699.8792   | -0.0255 | -15   | 597        | 614      | ITAPDMASVAGAANVAIK                 |           |         |                            |      | Mascot      |
| 1699.9377  | 1699.8792   | -0.0585 | -34   | 34         | 49       | YEALLLGGLPQEGLAR                   | 59        | 99.968  |                            |      | Mascot      |
| 1721.9043  | 1721.8508   | -0.0535 | -31   | 119        | 134      | VFAPAGVSPTVMNLYR                   |           |         |                            |      | Mascot      |
| 1737.8992  | 1737.8461   | -0.0531 | -31   | 119        | 134      | VFAPAGVSPTVMNLYR                   |           |         | Oxidation (M)[12]          |      | Mascot      |
| 1826.9799  | 1826.9263   | -0.0536 | -29   | 1179       | 1194     | LLGYQLAAYFDKPTAR                   |           |         |                            |      | Mascot      |
| 1886.7894  | 1886.7297   | -0.0597 | -32   | 195        | 210      | DVGLAYTESPECTER                    |           |         | Carbamidomethyl (C)[10,13] |      | Mascot      |
| 1912.1154  | 1911.8427   | -0.2727 | -143  | 260        | 276      | QTLAFVEIEKTPVVPIK                  |           |         |                            |      | Mascot      |
| 1912.1154  | 1911.8427   | -0.2727 | -143  | 260        | 276      | QTLAFVEIEKTPVVPIK                  |           |         |                            |      | Mascot      |
| 2230.1682  | 2230.1306   | -0.0376 | -17   | 597        | 618      | ITAPDMASVAGAANVAIK<br>LMNR         |           |         | Oxidation (M)[6]           |      | Mascot      |
| 3337.7539  | 3337.6782   | -0.0757 | -23   | 1179       | 1208     | LLGYQLAAYFDKPTARVQ<br>LIASSIAENDNR |           |         |                            |      | Mascot      |

11 vitellogenin 1 [Danio rerio] gi|166795887 149452.5 8.68 12 79 99.939 59 99.968

Peptide Information

| Calc. Mass | Obsrv. Mass | ± da    | ± ppm | Start Seq. | End Seq. | Sequence           | Ion Score | C. I. % | Modification        | Rank | Result Type |
|------------|-------------|---------|-------|------------|----------|--------------------|-----------|---------|---------------------|------|-------------|
| 960.4785   | 960.4514    | -0.0271 | -28   | 1258       | 1264     | LEVEWER            |           |         |                     |      | Mascot      |
| 1287.6691  | 1287.6321   | -0.037  | -29   | 1245       | 1257     | AEAGVLGEFPAAR      |           |         |                     |      | Mascot      |
| 1364.6957  | 1364.6545   | -0.0412 | -30   | 1279       | 1290     | HILTAAYDTGFR       |           |         |                     |      | Mascot      |
| 1638.8485  | 1638.809    | -0.0395 | -24   | 668        | 683      | TYLAGAAADVVEFGVR   |           |         |                     |      | Mascot      |
| 1642.9315  | 1642.8756   | -0.0559 | -34   | 1161       | 1175     | FLGNDIPPVFIIAR     |           |         |                     |      | Mascot      |
| 1698.8666  | 1698.8087   | -0.0579 | -34   | 483        | 498      | VMGNAGHPSSLKPIMK   |           |         | Oxidation (M)[2,15] |      | Mascot      |
| 1699.9377  | 1699.8792   | -0.0585 | -34   | 34         | 49       | YEALLLGGLPQEGLAR   | 59        | 99.968  |                     |      | Mascot      |
| 1699.9377  | 1699.8792   | -0.0585 | -34   | 34         | 49       | YEALLLGGLPQEGLAR   |           |         |                     |      | Mascot      |
| 1775.936   | 1775.851    | -0.085  | -48   | 597        | 614      | ITAPDMAYVAGAANVAIK |           |         |                     |      | Mascot      |
| 1775.936   | 1775.851    | -0.085  | -48   | 597        | 614      | ITAPDMAYVAGAANVAIK |           |         |                     |      | Mascot      |
| 1826.9799  | 1826.9263   | -0.0536 | -29   | 1183       | 1198     | LLGYQLAAYFDKPTAR   |           |         |                     |      | Mascot      |
| 1912.1154  | 1911.8427   | -0.2727 | -143  | 260        | 276      | QTLAFVEIEKTPVVPIK  |           |         |                     |      | Mascot      |

|    |                              |           |         |      |             |      |                            |      |    |    |        |    |                   |  |  |  |  |        |
|----|------------------------------|-----------|---------|------|-------------|------|----------------------------|------|----|----|--------|----|-------------------|--|--|--|--|--------|
|    | 1912.1154                    | 1911.8427 | -0.2727 | -143 | 260         | 276  | QTLAFVEIEKTPVVPIK          |      |    |    |        |    |                   |  |  |  |  | Mascot |
|    | 2233.2009                    | 2233.0186 | -0.1823 | -82  | 593         | 614  | SLTRITAPDMAYVAGAAN<br>VAIK |      |    |    |        |    |                   |  |  |  |  | Mascot |
|    | 2249.1958                    | 2249.0059 | -0.1899 | -84  | 593         | 614  | SLTRITAPDMAYVAGAAN<br>VAIK |      |    |    |        |    | Oxidation (M)[10] |  |  |  |  | Mascot |
|    | 2299.2292                    | 2299.1135 | -0.1157 | -50  | 1039        | 1058 | QINIIDDDTPEGQAFLLKL<br>R   |      |    |    |        |    |                   |  |  |  |  | Mascot |
| 12 | vitellogenin 1 [Danio rerio] |           |         |      | gi 94733730 |      | 149140.4                   | 8.74 | 11 | 73 | 99.766 | 58 | 99.953            |  |  |  |  |        |

#### Peptide Information

| Calc. Mass | Obsrv. Mass | ± da    | ± ppm | Start Seq. | End Seq. | Sequence                  | Ion Score | C. I.  | % Modification      | Rank | Result Type |
|------------|-------------|---------|-------|------------|----------|---------------------------|-----------|--------|---------------------|------|-------------|
| 960.4785   | 960.4514    | -0.0271 | -28   | 1258       | 1264     | LEVEWER                   |           |        |                     |      | Mascot      |
| 1287.6691  | 1287.6321   | -0.037  | -29   | 1245       | 1257     | AEAGVLGEFPAAR             |           |        |                     |      | Mascot      |
| 1364.6957  | 1364.6545   | -0.0412 | -30   | 1279       | 1290     | HILTAAYDTGFR              |           |        |                     |      | Mascot      |
| 1642.9315  | 1642.8756   | -0.0559 | -34   | 1161       | 1175     | FLGNDIPPVFIIAR            |           |        |                     |      | Mascot      |
| 1698.8666  | 1698.8087   | -0.0579 | -34   | 483        | 498      | VMGNAGHPSSLKPIMK          |           |        | Oxidation (M)[2,15] |      | Mascot      |
| 1699.9047  | 1699.8792   | -0.0255 | -15   | 597        | 614      | ITAPDMASVAGAANVAIK        |           |        |                     |      | Mascot      |
| 1699.9377  | 1699.8792   | -0.0585 | -34   | 34         | 49       | YEALLLGGLPQEGLAR          | 59        | 99.968 |                     |      | Mascot      |
| 1826.9799  | 1826.9263   | -0.0536 | -29   | 1183       | 1198     | LLGYQLAAYFDKPTAR          |           |        |                     |      | Mascot      |
| 1912.1154  | 1911.8427   | -0.2727 | -143  | 260        | 276      | QTLAFVEIEKTPVVPIK         |           |        |                     |      | Mascot      |
| 1912.1154  | 1911.8427   | -0.2727 | -143  | 260        | 276      | QTLAFVEIEKTPVVPIK         |           |        |                     |      | Mascot      |
| 2249.2725  | 2249.0059   | -0.2666 | -119  | 425        | 445      | FATIPALREVVMLGYGSLI<br>AK |           |        |                     |      | Mascot      |
| 2299.2292  | 2299.1135   | -0.1157 | -50   | 1039       | 1058     | QINIIDDDTPEGQAFLLKL<br>R  |           |        |                     |      | Mascot      |

|    |                              |  |  |  |             |  |        |      |   |    |        |    |        |  |  |  |  |  |
|----|------------------------------|--|--|--|-------------|--|--------|------|---|----|--------|----|--------|--|--|--|--|--|
| 13 | vitellogenin 5 [Danio rerio] |  |  |  | gi 68448530 |  | 148868 | 8.77 | 9 | 68 | 99.295 | 58 | 99.953 |  |  |  |  |  |
|----|------------------------------|--|--|--|-------------|--|--------|------|---|----|--------|----|--------|--|--|--|--|--|

#### Peptide Information

| Calc. Mass | Obsrv. Mass | ± da    | ± ppm | Start Seq. | End Seq. | Sequence            | Ion Score | C. I.  | % Modification      | Rank | Result Type |
|------------|-------------|---------|-------|------------|----------|---------------------|-----------|--------|---------------------|------|-------------|
| 960.4785   | 960.4514    | -0.0271 | -28   | 1258       | 1264     | LEVEWER             |           |        |                     |      | Mascot      |
| 1642.9315  | 1642.8756   | -0.0559 | -34   | 1161       | 1175     | FLGNDIPPVFIIAR      |           |        |                     |      | Mascot      |
| 1698.8666  | 1698.8087   | -0.0579 | -34   | 483        | 498      | VMGNAGHPSSLKPIMK    |           |        | Oxidation (M)[2,15] |      | Mascot      |
| 1699.9047  | 1699.8792   | -0.0255 | -15   | 597        | 614      | ITAPDMASVAGAANVAIK  |           |        |                     |      | Mascot      |
| 1699.9377  | 1699.8792   | -0.0585 | -34   | 34         | 49       | YEALLLGGLPQEGLAR    | 59        | 99.968 |                     |      | Mascot      |
| 1737.9568  | 1737.8461   | -0.1107 | -64   | 746        | 761      | SIIEEAIPMVTGPKPR    |           |        |                     |      | Mascot      |
| 1826.9799  | 1826.9263   | -0.0536 | -29   | 1183       | 1198     | LLGYQLAAYFDKPTAR    |           |        |                     |      | Mascot      |
| 1912.1154  | 1911.8427   | -0.2727 | -143  | 260        | 276      | QTLAFVEIEKTPVVPIK   |           |        |                     |      | Mascot      |
| 1912.1154  | 1911.8427   | -0.2727 | -143  | 260        | 276      | QTLAFVEIEKTPVVPIK   |           |        |                     |      | Mascot      |
| 2299.2292  | 2299.1135   | -0.1157 | -50   | 1039       | 1058     | QINIIDDDTPEGQAFLLKL |           |        |                     |      | Mascot      |

14 novel protein similar to vitellogenin 1 (vg1) [Danio rerio] gi|94733731 149169.2 8.84 9 68 99.261 58 99.953

Peptide Information

| Calc. Mass | Obsrv. Mass | ± da    | ± ppm | Start Seq. | End Seq. | Sequence           | Ion Score | C. I.  | % Modification      | Rank | Result Type |
|------------|-------------|---------|-------|------------|----------|--------------------|-----------|--------|---------------------|------|-------------|
| 960.4785   | 960.4514    | -0.0271 | -28   | 1260       | 1266     | LEVEWER            |           |        |                     |      | Mascot      |
| 1642.9315  | 1642.8756   | -0.0559 | -34   | 1163       | 1177     | FLGNDIPPVFIIAR     |           |        |                     |      | Mascot      |
| 1698.8666  | 1698.8087   | -0.0579 | -34   | 487        | 502      | VMGNAGHPSSLKPIMK   |           |        | Oxidation (M)[2,15] |      | Mascot      |
| 1699.9047  | 1699.8792   | -0.0255 | -15   | 601        | 618      | ITAPDMASVAGAAVNAIK |           |        |                     |      | Mascot      |
| 1699.9377  | 1699.8792   | -0.0585 | -34   | 38         | 53       | YEALLLGGLPQEGLAR   | 59        | 99.968 |                     |      | Mascot      |
| 1721.9043  | 1721.8508   | -0.0535 | -31   | 123        | 138      | VFAPAGVSPTVMNLYR   |           |        |                     |      | Mascot      |
| 1737.8992  | 1737.8461   | -0.0531 | -31   | 123        | 138      | VFAPAGVSPTVMNLYR   |           |        | Oxidation (M)[12]   |      | Mascot      |
| 1826.9799  | 1826.9263   | -0.0536 | -29   | 1185       | 1200     | LLGYQLAAYFDKPTAR   |           |        |                     |      | Mascot      |
| 1912.1154  | 1911.8427   | -0.2727 | -143  | 264        | 280      | QTLAFVEIEKTPVVPIK  |           |        |                     |      | Mascot      |
| 1912.1154  | 1911.8427   | -0.2727 | -143  | 264        | 280      | QTLAFVEIEKTPVVPIK  |           |        |                     |      | Mascot      |
| 2299.2292  | 2299.1135   | -0.1157 | -50   | 1043       | 1062     | QINIIDDDTPEGQAFLKL |           |        |                     |      | Mascot      |

15 Unknown (protein for MGC:174137) [Danio rerio] gi|152012733 17051.5 7.71 1 64 98.057 59 99.968

Peptide Information

| Calc. Mass | Obsrv. Mass | ± da    | ± ppm | Start Seq. | End Seq. | Sequence         | Ion Score | C. I.  | % Modification | Rank | Result Type |
|------------|-------------|---------|-------|------------|----------|------------------|-----------|--------|----------------|------|-------------|
| 1699.9377  | 1699.8792   | -0.0585 | -34   | 34         | 49       | YEALLLGGLPQEGLAR | 59        | 99.968 |                |      | Mascot      |
| 1699.9377  | 1699.8792   | -0.0585 | -34   | 34         | 49       | YEALLLGGLPQEGLAR |           |        |                |      | Mascot      |

16 leukocyte receptor cluster (LRC) member 1 [Danio rerio] gi|52219028 32561.1 9.63 9 51 66.243 11 0

Peptide Information

| Calc. Mass | Obsrv. Mass | ± da    | ± ppm | Start Seq. | End Seq. | Sequence          | Ion Score | C. I. | % Modification   | Rank | Result Type |
|------------|-------------|---------|-------|------------|----------|-------------------|-----------|-------|------------------|------|-------------|
| 864.4057   | 864.4805    | 0.0748  | 87    | 203        | 210      | SGESSIER          |           |       |                  |      | Mascot      |
| 1030.5276  | 1030.4968   | -0.0308 | -30   | 216        | 223      | LQREAEER          |           |       |                  |      | Mascot      |
| 1051.5419  | 1051.6812   | 0.1393  | 132   | 93         | 101      | GNAEYLKEK         |           |       |                  |      | Mascot      |
| 1120.5481  | 1120.6476   | 0.0995  | 89    | 153        | 161      | SLTEEREK          |           |       |                  |      | Mascot      |
| 1134.4844  | 1134.6173   | 0.1329  | 117   | 241        | 249      | EPEREMGDR         |           |       | Oxidation (M)[6] |      | Mascot      |
| 1358.6659  | 1358.6326   | -0.0333 | -25   | 27         | 37       | AAEEEREIQQR       |           |       |                  |      | Mascot      |
| 1698.8234  | 1698.8087   | -0.0147 | -9    | 250        | 263      | DRPYNSAYFPELAR    |           |       |                  |      | Mascot      |
| 1775.877   | 1775.851    | -0.026  | -15   | 56         | 72       | GVLQQTGEVGETVESSR | 11        | 0     |                  |      | Mascot      |
| 1775.877   | 1775.851    | -0.026  | -15   | 56         | 72       | GVLQQTGEVGETVESSR |           |       |                  |      | Mascot      |

|    |                                                                                             |             |         |       |            |          |                            |           |        |    |                                            |       |        |        |  |  |        |
|----|---------------------------------------------------------------------------------------------|-------------|---------|-------|------------|----------|----------------------------|-----------|--------|----|--------------------------------------------|-------|--------|--------|--|--|--------|
|    | 1826.9183                                                                                   | 1826.9263   | 0.008   | 4     | 250        | 264      | DRPYNSAYFPELARK            |           |        |    |                                            |       |        |        |  |  | Mascot |
| 17 | PREDICTED: mitogen-activated protein kinase kinase<br>kinase 4 [Danio rerio]                |             |         |       |            |          |                            |           |        |    |                                            |       |        |        |  |  |        |
|    |                                                                                             |             |         |       |            |          | gi 189527122               | 168652.5  | 5.95   | 12 | 49                                         | 39.97 | 32     | 81.915 |  |  |        |
|    | Peptide Information                                                                         |             |         |       |            |          |                            |           |        |    |                                            |       |        |        |  |  |        |
|    | Calc. Mass                                                                                  | Obsrv. Mass | ± da    | ± ppm | Start Seq. | End Seq. | Sequence                   | Ion Score | C. I.  | %  | Modification                               | Rank  | Result | Type   |  |  |        |
|    | 1273.5696                                                                                   | 1273.5822   | 0.0126  | 10    | 85         | 95       | SAEPPEEHSYK                |           |        |    |                                            |       |        | Mascot |  |  |        |
|    | 1279.7772                                                                                   | 1279.7368   | -0.0404 | -32   | 167        | 176      | FFETLRLLLK                 |           |        |    |                                            |       |        | Mascot |  |  |        |
|    | 1555.8955                                                                                   | 1555.6769   | -0.2186 | -140  | 1300       | 1312     | LGLQEHVIRLYSK              |           |        |    |                                            |       |        | Mascot |  |  |        |
|    | 1570.7505                                                                                   | 1570.7723   | 0.0218  | 14    | 989        | 1001     | WMNFVLTKCESGR              |           |        |    |                                            |       |        | Mascot |  |  |        |
|    | 1638.8156                                                                                   | 1638.809    | -0.0066 | -4    | 877        | 890      | AFQQSMEELLSLR              |           |        |    |                                            |       |        | Mascot |  |  |        |
|    | 1679.901                                                                                    | 1679.8195   | -0.0815 | -49   | 466        | 480      | ARTALLSHMPAQEVR            |           |        |    |                                            |       |        | Mascot |  |  |        |
|    | 1679.901                                                                                    | 1679.8195   | -0.0815 | -49   | 466        | 480      | ARTALLSHMPAQEVR            | 32        | 81.915 |    |                                            |       |        | Mascot |  |  |        |
|    | 1814.0204                                                                                   | 1813.8696   | -0.1508 | -83   | 789        | 805      | LVILQLLNAAAGKDCSK          |           |        |    | Carbamidomethyl (C)[15]                    |       |        | Mascot |  |  |        |
|    | 1886.9891                                                                                   | 1886.7297   | -0.2594 | -137  | 891        | 907      | EQTSSQLIVCALEQLK           |           |        |    |                                            |       |        | Mascot |  |  |        |
|    | 2010.9987                                                                                   | 2010.9042   | -0.0945 | -47   | 657        | 675      | GGEAQSGKLFCDIAGML<br>LK    |           |        |    | Carbamidomethyl (C)[11], Oxidation (M)[16] |       |        | Mascot |  |  |        |
|    | 2249.0002                                                                                   | 2249.0059   | 0.0057  | 3     | 424        | 441      | DNETCYCPTAIYRPFVDK         |           |        |    | Carbamidomethyl (C)[5,7]                   |       |        | Mascot |  |  |        |
|    | 2283.0156                                                                                   | 2283.1118   | 0.0962  | 42    | 802        | 821      | DCSKDPDEIPENEGYLLM<br>SK   |           |        |    |                                            |       |        | Mascot |  |  |        |
|    | 2283.0156                                                                                   | 2283.1118   | 0.0962  | 42    | 802        | 821      | DCSKDPDEIPENEGYLLM<br>SK   |           |        |    |                                            |       |        | Mascot |  |  |        |
|    | 2284.2004                                                                                   | 2284.1064   | -0.094  | -41   | 1333       | 1354     | GANIFLTSSGLIKLGDFGC<br>SVK |           |        |    | Carbamidomethyl (C)[19]                    |       |        | Mascot |  |  |        |
|    | 2299.0105                                                                                   | 2299.1135   | 0.103   | 45    | 802        | 821      | DCSKDPDEIPENEGYLLM<br>SK   |           |        |    | Oxidation (M)[18]                          |       |        | Mascot |  |  |        |
| 18 | PREDICTED: structural maintenance of chromosomes<br>protein 1B-like isoform 1 [Danio rerio] |             |         |       |            |          |                            |           |        |    |                                            |       |        |        |  |  |        |
|    |                                                                                             |             |         |       |            |          | gi 125855523               | 141682.3  | 7.11   | 18 | 42                                         | 0     |        |        |  |  |        |
|    | Peptide Information                                                                         |             |         |       |            |          |                            |           |        |    |                                            |       |        |        |  |  |        |
|    | Calc. Mass                                                                                  | Obsrv. Mass | ± da    | ± ppm | Start Seq. | End Seq. | Sequence                   | Ion Score | C. I.  | %  | Modification                               | Rank  | Result | Type   |  |  |        |
|    | 870.577                                                                                     | 870.5166    | -0.0604 | -69   | 172        | 179      | LAVLQKAK                   |           |        |    |                                            |       |        | Mascot |  |  |        |
|    | 960.4996                                                                                    | 960.4514    | -0.0482 | -50   | 501        | 508      | DEVLESLR                   |           |        |    |                                            |       |        | Mascot |  |  |        |
|    | 1045.5636                                                                                   | 1045.5336   | -0.03   | -29   | 338        | 345      | RELTELER                   |           |        |    |                                            |       |        | Mascot |  |  |        |
|    | 1144.5957                                                                                   | 1144.5328   | -0.0629 | -55   | 385        | 395      | NGAILNQSAEK                |           |        |    |                                            |       |        | Mascot |  |  |        |
|    | 1144.5957                                                                                   | 1144.5328   | -0.0629 | -55   | 385        | 395      | NGAILNQSAEK                |           |        |    |                                            |       |        | Mascot |  |  |        |
|    | 1165.6068                                                                                   | 1165.7111   | 0.1043  | 89    | 683        | 692      | LSSEMRALMK                 |           |        |    |                                            |       |        | Mascot |  |  |        |
|    | 1364.7719                                                                                   | 1364.6545   | -0.1174 | -86   | 519        | 529      | LVELCQPIHKK                |           |        |    | Carbamidomethyl (C)[5]                     |       |        | Mascot |  |  |        |
|    | 1414.7284                                                                                   | 1414.7213   | -0.0071 | -5    | 362        | 374      | GAGVQLQESQLER              |           |        |    |                                            |       |        | Mascot |  |  |        |

|           |           |         |      |      |      |                          |  |  |  |                                              |  |        |
|-----------|-----------|---------|------|------|------|--------------------------|--|--|--|----------------------------------------------|--|--------|
| 1570.8296 | 1570.7723 | -0.0573 | -36  | 361  | 374  | RGAGVQLQESQLER           |  |  |  |                                              |  | Mascot |
| 1638.7601 | 1638.809  | 0.0489  | 30   | 990  | 1003 | MLTEESEVEAMLEK           |  |  |  |                                              |  | Mascot |
| 1679.8486 | 1679.8195 | -0.0291 | -17  | 819  | 832  | LSTQLEYEQALEK            |  |  |  |                                              |  | Mascot |
| 1679.8486 | 1679.8195 | -0.0291 | -17  | 819  | 832  | LSTQLEYEQALEK            |  |  |  |                                              |  | Mascot |
| 1737.906  | 1737.8461 | -0.0599 | -34  | 1174 | 1188 | MMSRESCQIIVISLK          |  |  |  |                                              |  | Mascot |
| 1813.8856 | 1813.8696 | -0.016  | -9   | 1004 | 1019 | LKEGVSSLESIMMSR          |  |  |  | Oxidation (M)[11]                            |  | Mascot |
| 1826.9172 | 1826.9263 | 0.0091  | 5    | 1174 | 1188 | MMSRESCQIIVISLK          |  |  |  | Carbamidomethyl (C)[7], Oxidation (M)[1,2]   |  | Mascot |
| 1895.9341 | 1895.8464 | -0.0877 | -46  | 990  | 1005 | MLTEESEVEAMLEKLK         |  |  |  | Oxidation (M)[1]                             |  | Mascot |
| 1911.929  | 1911.8427 | -0.0863 | -45  | 990  | 1005 | MLTEESEVEAMLEKLK         |  |  |  | Oxidation (M)[1,11]                          |  | Mascot |
| 1911.929  | 1911.8427 | -0.0863 | -45  | 990  | 1005 | MLTEESEVEAMLEKLK         |  |  |  | Oxidation (M)[1,11]                          |  | Mascot |
| 1937.0239 | 1936.8591 | -0.1648 | -85  | 385  | 401  | NGAILNQSAEKLHWEVK        |  |  |  |                                              |  | Mascot |
| 1937.0239 | 1936.8591 | -0.1648 | -85  | 385  | 401  | NGAILNQSAEKLHWEVK        |  |  |  |                                              |  | Mascot |
| 2020.0961 | 2019.8612 | -0.2349 | -116 | 819  | 835  | LSTQLEYEQALEKLVK         |  |  |  |                                              |  | Mascot |
| 2225.1052 | 2225.054  | -0.0512 | -23  | 610  | 628  | VIQYVCGNSLVCETLKDA<br>R  |  |  |  | Carbamidomethyl (C)[6,12]                    |  | Mascot |
| 2225.1052 | 2225.054  | -0.0512 | -23  | 610  | 628  | VIQYVCGNSLVCETLKDA<br>R  |  |  |  | Carbamidomethyl (C)[6,12]                    |  | Mascot |
| 2230.0664 | 2230.1306 | 0.0642  | 29   | 130  | 149  | AKNCLVYQGAVESIAMM<br>NAK |  |  |  | Carbamidomethyl (C)[4], Oxidation (M)[16,17] |  | Mascot |
| 2284.0881 | 2284.1064 | 0.0183  | 8    | 132  | 151  | NCLVYQGAVESIAMMNA<br>KER |  |  |  | Carbamidomethyl (C)[2]                       |  | Mascot |
| 2300.0833 | 2300.1057 | 0.0224  | 10   | 132  | 151  | NCLVYQGAVESIAMMNA<br>KER |  |  |  | Carbamidomethyl (C)[2], Oxidation (M)[14]    |  | Mascot |

19 PREDICTED: structural maintenance of chromosomes protein 1B-like [Danio rerio] gi|292628155 123493.8 8.42 17 41 0

#### Peptide Information

| Calc. Mass | Obsrv. Mass | ± da    | ± ppm | Start Seq. | End Seq. | Sequence        | Ion Score | C. I. % | Modification           | Rank | Result Type |
|------------|-------------|---------|-------|------------|----------|-----------------|-----------|---------|------------------------|------|-------------|
| 870.577    | 870.5166    | -0.0604 | -69   | 172        | 179      | LAVLQKAK        |           |         |                        |      | Mascot      |
| 960.4996   | 960.4514    | -0.0482 | -50   | 501        | 508      | DEVLESLR        |           |         |                        |      | Mascot      |
| 1045.5636  | 1045.5336   | -0.03   | -29   | 338        | 345      | RELTELER        |           |         |                        |      | Mascot      |
| 1144.5957  | 1144.5328   | -0.0629 | -55   | 385        | 395      | NGAILNQSAEK     |           |         |                        |      | Mascot      |
| 1144.5957  | 1144.5328   | -0.0629 | -55   | 385        | 395      | NGAILNQSAEK     |           |         |                        |      | Mascot      |
| 1165.6068  | 1165.7111   | 0.1043  | 89    | 683        | 692      | LSSEMRALMK      |           |         |                        |      | Mascot      |
| 1364.7719  | 1364.6545   | -0.1174 | -86   | 519        | 529      | LVELCQPIHKK     |           |         | Carbamidomethyl (C)[5] |      | Mascot      |
| 1414.7284  | 1414.7213   | -0.0071 | -5    | 362        | 374      | GAGVQLQESQLER   |           |         |                        |      | Mascot      |
| 1570.8296  | 1570.7723   | -0.0573 | -36   | 361        | 374      | RGAGVQLQESQLER  |           |         |                        |      | Mascot      |
| 1638.7601  | 1638.809    | 0.0489  | 30    | 834        | 847      | MLTEESEVEAMLEK  |           |         |                        |      | Mascot      |
| 1642.858   | 1642.8756   | 0.0176  | 11    | 741        | 754      | SELSNLEAHRVLMK  |           |         | Oxidation (M)[13]      |      | Mascot      |
| 1737.906   | 1737.8461   | -0.0599 | -34   | 1018       | 1032     | MMSRESCQIIVISLK |           |         |                        |      | Mascot      |



|           |           |         |     |      |      |                          |                                              |        |
|-----------|-----------|---------|-----|------|------|--------------------------|----------------------------------------------|--------|
| 1813.8856 | 1813.8696 | -0.016  | -9  | 848  | 863  | LKEGVSSLESIMMSR          | Oxidation (M)[11]                            | Mascot |
| 1826.9172 | 1826.9263 | 0.0091  | 5   | 1018 | 1032 | MMSRESCQIIVISLK          | Carbamidomethyl (C)[7], Oxidation (M)[1,2]   | Mascot |
| 1895.9341 | 1895.8464 | -0.0877 | -46 | 834  | 849  | MLTEESEVEAMLEKLK         | Oxidation (M)[1]                             | Mascot |
| 1911.929  | 1911.8427 | -0.0863 | -45 | 834  | 849  | MLTEESEVEAMLEKLK         | Oxidation (M)[1,11]                          | Mascot |
| 1911.929  | 1911.8427 | -0.0863 | -45 | 834  | 849  | MLTEESEVEAMLEKLK         | Oxidation (M)[1,11]                          | Mascot |
| 1937.0239 | 1936.8591 | -0.1648 | -85 | 385  | 401  | NGAILNQSAEKLHWEVK        |                                              | Mascot |
| 1937.0239 | 1936.8591 | -0.1648 | -85 | 385  | 401  | NGAILNQSAEKLHWEVK        |                                              | Mascot |
| 2225.1052 | 2225.054  | -0.0512 | -23 | 610  | 628  | VIQYVCGNSLV CETLKDA<br>R | Carbamidomethyl (C)[6,12]                    | Mascot |
| 2225.1052 | 2225.054  | -0.0512 | -23 | 610  | 628  | VIQYVCGNSLV CETLKDA<br>R | Carbamidomethyl (C)[6,12]                    | Mascot |
| 2230.0664 | 2230.1306 | 0.0642  | 29  | 130  | 149  | AKNCLVYQGAVESIAMM<br>NAK | Carbamidomethyl (C)[4], Oxidation (M)[16,17] | Mascot |
| 2284.0881 | 2284.1064 | 0.0183  | 8   | 132  | 151  | NCLVYQGAVESIAMMNA<br>KER | Carbamidomethyl (C)[2]                       | Mascot |
| 2300.0833 | 2300.1057 | 0.0224  | 10  | 132  | 151  | NCLVYQGAVESIAMMNA<br>KER | Carbamidomethyl (C)[2], Oxidation (M)[14]    | Mascot |

20 RecName: Full=Tudor domain-containing protein 7B gi|334351210 121757 8.62 15 41 0

#### Peptide Information

| Calc. Mass | Obsrv. Mass | ± da    | ± ppm | Start Seq. | End Seq. | Sequence               | Ion Score | C. I. % | Modification            | Rank | Result Type |
|------------|-------------|---------|-------|------------|----------|------------------------|-----------|---------|-------------------------|------|-------------|
| 864.4495   | 864.4805    | 0.031   | 36    | 939        | 945      | MEEKALK                |           |         | Oxidation (M)[1]        |      | Mascot      |
| 870.4679   | 870.5166    | 0.0487  | 56    | 984        | 991      | HELVSGTK               |           |         |                         |      | Mascot      |
| 1062.5499  | 1062.6582   | 0.1083  | 102   | 1          | 9        | MADEELVKK              |           |         |                         |      | Mascot      |
| 1134.63    | 1134.6173   | -0.0127 | -11   | 10         | 19       | MVRAVLQSSK             |           |         | Oxidation (M)[1]        |      | Mascot      |
| 1161.5609  | 1161.4996   | -0.0613 | -53   | 367        | 375      | LYQDTYKCK              |           |         |                         |      | Mascot      |
| 1358.7103  | 1358.6326   | -0.0777 | -57   | 544        | 553      | LFELNEKFYR             |           |         |                         |      | Mascot      |
| 1642.8833  | 1642.8756   | -0.0077 | -5    | 776        | 790      | DTVLHISDCSLKIAK        |           |         |                         |      | Mascot      |
| 1679.9227  | 1679.8195   | -0.1032 | -61   | 222        | 236      | LPHSAPYSPKLVQSR        |           |         |                         |      | Mascot      |
| 1679.9227  | 1679.8195   | -0.1032 | -61   | 222        | 236      | LPHSAPYSPKLVQSR        |           |         |                         |      | Mascot      |
| 1699.9048  | 1699.8792   | -0.0256 | -15   | 776        | 790      | DTVLHISDCSLKIAK        |           |         | Carbamidomethyl (C)[9]  |      | Mascot      |
| 1699.9048  | 1699.8792   | -0.0256 | -15   | 776        | 790      | DTVLHISDCSLKIAK        |           |         | Carbamidomethyl (C)[9]  |      | Mascot      |
| 1852.0076  | 1851.8713   | -0.1363 | -74   | 237        | 252      | LQEVLNKHSNGLWVSK       |           |         |                         |      | Mascot      |
| 1911.9963  | 1911.8427   | -0.1536 | -80   | 528        | 543      | VYYVDHGFSEVISIRK       |           |         |                         |      | Mascot      |
| 1911.9963  | 1911.8427   | -0.1536 | -80   | 528        | 543      | VYYVDHGFSEVISIRK       |           |         |                         |      | Mascot      |
| 2011.0647  | 2010.9042   | -0.1605 | -80   | 526        | 542      | VKVVYVDHGFSEVISIR      |           |         |                         |      | Mascot      |
| 2019.9399  | 2019.8612   | -0.0787 | -39   | 410        | 427      | VVEDENRNQSGLAGQE<br>MK |           |         | Oxidation (M)[17]       |      | Mascot      |
| 2225.1013  | 2225.054    | -0.0473 | -21   | 925        | 942      | LVVLMGEMILHYNKMEEK     |           |         | Oxidation (M)[5,8,15]   |      | Mascot      |
| 2225.1013  | 2225.054    | -0.0473 | -21   | 925        | 942      | LVVLMGEMILHYNKMEEK     |           |         | Oxidation (M)[5,8,15]   |      | Mascot      |
| 2249.1482  | 2249.0059   | -0.1423 | -63   | 445        | 464      | VEYPSVLVVDASDTNCVI     |           |         | Carbamidomethyl (C)[16] |      | Mascot      |

|    |                                                   |           |        |    |      |             |                               |     |   |    |   |                     |        |
|----|---------------------------------------------------|-----------|--------|----|------|-------------|-------------------------------|-----|---|----|---|---------------------|--------|
|    | 2283.0308                                         | 2283.1118 | 0.081  | 35 | 1067 | 1085        | LR<br>DIWLHDIMAEFTDEMTKT<br>A |     |   |    |   | Oxidation (M)[8]    | Mascot |
|    | 2283.0308                                         | 2283.1118 | 0.081  | 35 | 1067 | 1085        | DIWLHDIMAEFTDEMTKT<br>A       |     |   |    |   | Oxidation (M)[8]    | Mascot |
|    | 2299.0256                                         | 2299.1135 | 0.0879 | 38 | 1067 | 1085        | DIWLHDIMAEFTDEMTKT<br>A       |     |   |    |   | Oxidation (M)[8,15] | Mascot |
| 21 | iron-sulfur cluster assembly enzyme [Danio rerio] |           |        |    |      | gi 54261801 | 17796.2                       | 8.7 | 7 | 39 | 0 |                     |        |

#### Peptide Information

|  | Calc. Mass | Obsrv. Mass | ± da    | ± ppm | Start Seq. | End Seq. | Sequence                  | Ion Score | C. I. | % Modification                            | Rank | Result Type |
|--|------------|-------------|---------|-------|------------|----------|---------------------------|-----------|-------|-------------------------------------------|------|-------------|
|  | 960.5083   | 960.4514    | -0.0569 | -59   | 1          | 9        | MALAAAAWR                 |           |       |                                           |      | Mascot      |
|  | 1045.5636  | 1045.5336   | -0.03   | -29   | 44         | 53       | NVGSLDKNAK                |           |       |                                           |      | Mascot      |
|  | 1161.5746  | 1161.4996   | -0.075  | -65   | 155        | 164      | DEKETLAEAR                |           |       |                                           |      | Mascot      |
|  | 1775.8567  | 1775.851    | -0.0057 | -3    | 19         | 33       | SMSLPRLRPACSYHK           |           |       | Carbamidomethyl (C)[11]                   |      | Mascot      |
|  | 1775.8567  | 1775.851    | -0.0057 | -3    | 19         | 33       | SMSLPRLRPACSYHK           |           |       | Carbamidomethyl (C)[11]                   |      | Mascot      |
|  | 1911.9568  | 1911.8427   | -0.1141 | -60   | 1          | 18       | MALAAAAWRCASSALFS<br>K    |           |       | Carbamidomethyl (C)[10]                   |      | Mascot      |
|  | 1911.9568  | 1911.8427   | -0.1141 | -60   | 1          | 18       | MALAAAAWRCASSALFS<br>K    |           |       | Carbamidomethyl (C)[10]                   |      | Mascot      |
|  | 2247.1113  | 2247.0764   | -0.0349 | -16   | 86         | 106      | FKTFGCGSAIASSSLATE<br>WVK |           |       | Carbamidomethyl (C)[6]                    |      | Mascot      |
|  | 2283.1545  | 2283.1118   | -0.0427 | -19   | 124        | 143      | ELCLPPVKLHCSMLAEDA<br>IK  |           |       | Carbamidomethyl (C)[3], Oxidation (M)[13] |      | Mascot      |
|  | 2283.1545  | 2283.1118   | -0.0427 | -19   | 124        | 143      | ELCLPPVKLHCSMLAEDA<br>IK  |           |       | Carbamidomethyl (C)[3], Oxidation (M)[13] |      | Mascot      |

22 spermatogenesis associated 5-like 1 [Danio rerio] gi|285002245 81333.3 6.76 12 39 0

#### Peptide Information

|  | Calc. Mass | Obsrv. Mass | ± da    | ± ppm | Start Seq. | End Seq. | Sequence       | Ion Score | C. I. | % Modification         | Rank | Result Type |
|--|------------|-------------|---------|-------|------------|----------|----------------|-----------|-------|------------------------|------|-------------|
|  | 856.525    | 856.4984    | -0.0266 | -31   | 702        | 709      | EAALLALR       |           |       |                        |      | Mascot      |
|  | 996.5043   | 996.5695    | 0.0652  | 65    | 431        | 438      | HVQPSCLR       |           |       | Carbamidomethyl (C)[6] |      | Mascot      |
|  | 996.5043   | 996.5695    | 0.0652  | 65    | 431        | 438      | HVQPSCLR       |           |       | Carbamidomethyl (C)[6] |      | Mascot      |
|  | 1062.5037  | 1062.6582   | 0.1545  | 145   | 466        | 473      | QSIEWPMR       |           |       | Oxidation (M)[7]       |      | Mascot      |
|  | 1120.7089  | 1120.6476   | -0.0613 | -55   | 223        | 234      | GLLLIGPPGVGK   |           |       |                        |      | Mascot      |
|  | 1161.5607  | 1161.4996   | -0.0611 | -53   | 299        | 309      | RTGSSSAPENR    |           |       |                        |      | Mascot      |
|  | 1287.6879  | 1287.6321   | -0.0558 | -43   | 464        | 473      | LKQSIEWPMR     |           |       |                        |      | Mascot      |
|  | 1364.709   | 1364.6545   | -0.0545 | -40   | 164        | 175      | TCVDISTIQTVK   |           |       | Carbamidomethyl (C)[2] |      | Mascot      |
|  | 1414.7173  | 1414.7213   | 0.004   | 3     | 600        | 612      | IALLEGGDQEDVR  |           |       |                        |      | Mascot      |
|  | 1679.8938  | 1679.8195   | -0.0743 | -44   | 201        | 214      | EMITFPLRYPGSLR |           |       |                        |      | Mascot      |
|  | 1679.8938  | 1679.8195   | -0.0743 | -44   | 201        | 214      | EMITFPLRYPGSLR |           |       |                        |      | Mascot      |
|  | 1737.9534  | 1737.8461   | -0.1073 | -62   | 648        | 662      | LDQIIYVPPDLQAR |           |       |                        |      | Mascot      |

|    |                                      |           |         |     |              |     |                           |      |    |    |   |  |  |  |  |  |  |        |
|----|--------------------------------------|-----------|---------|-----|--------------|-----|---------------------------|------|----|----|---|--|--|--|--|--|--|--------|
|    | 2230.0366                            | 2230.1306 | 0.094   | 42  | 278          | 298 | DAADDGPCVLLIDEIDSL<br>CPR |      |    |    |   |  |  |  |  |  |  | Mascot |
|    | 2283.2463                            | 2283.1118 | -0.1345 | -59 | 33           | 53  | LGSPVLIRVLQGTCLCTA<br>WPR |      |    |    |   |  |  |  |  |  |  | Mascot |
|    | 2283.2463                            | 2283.1118 | -0.1345 | -59 | 33           | 53  | LGSPVLIRVLQGTCLCTA<br>WPR |      |    |    |   |  |  |  |  |  |  | Mascot |
| 23 | contactin-1a precursor [Danio rerio] |           |         |     | gi 136256388 |     | 114246.1                  | 6.19 | 14 | 38 | 0 |  |  |  |  |  |  |        |

#### Peptide Information

| Calc. Mass | Obsrv. Mass | ± da    | ± ppm | Start Seq. | End Seq. | Sequence                   | Ion Score | C. I. % | Modification           | Rank | Result Type |
|------------|-------------|---------|-------|------------|----------|----------------------------|-----------|---------|------------------------|------|-------------|
| 856.5111   | 856.4984    | -0.0127 | -15   | 434        | 441      | LLGARNGR                   |           |         |                        |      | Mascot      |
| 957.5152   | 957.422     | -0.0932 | -97   | 2          | 9        | IPEAFQPR                   |           |         |                        |      | Mascot      |
| 1045.5173  | 1045.5336   | 0.0163  | 16    | 562        | 569      | DAQHYQRK                   |           |         |                        |      | Mascot      |
| 1062.5513  | 1062.6582   | 0.1069  | 101   | 442        | 449      | VVFECRPR                   |           |         | Carbamidomethyl (C)[5] |      | Mascot      |
| 1120.611   | 1120.6476   | 0.0366  | 33    | 985        | 993      | RGEYLVEVR                  |           |         |                        |      | Mascot      |
| 1287.6879  | 1287.6321   | -0.0558 | -43   | 2          | 12       | IPEAFQPRAMK                |           |         |                        |      | Mascot      |
| 1638.7581  | 1638.809    | 0.0509  | 31    | 931        | 944      | MHYSGSSINIAWEK             |           |         | Oxidation (M)[1]       |      | Mascot      |
| 1642.8799  | 1642.8756   | -0.0043 | -3    | 771        | 784      | VTVTDPEVQKYVHK             |           |         |                        |      | Mascot      |
| 1775.9507  | 1775.851    | -0.0997 | -56   | 10         | 25       | AMKHNTTVLMLALSSR           |           |         | Oxidation (M)[2]       |      | Mascot      |
| 1775.9507  | 1775.851    | -0.0997 | -56   | 10         | 25       | AMKHNTTVLMLALSSR           |           |         | Oxidation (M)[2]       |      | Mascot      |
| 2224.9749  | 2225.054    | 0.0791  | 36    | 388        | 406      | FSRLGFEDSGMYQCVAE<br>NR    |           |         | Oxidation (M)[11]      |      | Mascot      |
| 2224.9749  | 2225.054    | 0.0791  | 36    | 388        | 406      | FSRLGFEDSGMYQCVAE<br>NR    |           |         | Oxidation (M)[11]      |      | Mascot      |
| 2230.0305  | 2230.1306   | 0.1001  | 45    | 114        | 134      | SKHAGNYTCVASNQYGS<br>VTSR  |           |         |                        |      | Mascot      |
| 2283.092   | 2283.1118   | 0.0198  | 9     | 594        | 614      | YSCTAQTPVDNTTASAE<br>VVR   |           |         | Carbamidomethyl (C)[3] |      | Mascot      |
| 2283.092   | 2283.1118   | 0.0198  | 9     | 594        | 614      | YSCTAQTPVDNTTASAE<br>VVR   |           |         | Carbamidomethyl (C)[3] |      | Mascot      |
| 2284.2131  | 2284.1064   | -0.1067 | -47   | 442        | 460      | VVFECRPRAAPRPNITW<br>SK    |           |         | Carbamidomethyl (C)[5] |      | Mascot      |
| 2299.1426  | 2299.1135   | -0.0291 | -13   | 986        | 1007     | GEYLVEVRAHSEGGDGA<br>VAQVR |           |         |                        |      | Mascot      |

24 PREDICTED: kinesin light chain 1-like [Danio rerio] gi|326678874 69824.2 6.03 12 38 0

#### Peptide Information

| Calc. Mass | Obsrv. Mass | ± da    | ± ppm | Start Seq. | End Seq. | Sequence    | Ion Score | C. I. % | Modification     | Rank | Result Type |
|------------|-------------|---------|-------|------------|----------|-------------|-----------|---------|------------------|------|-------------|
| 937.5023   | 937.5228    | 0.0205  | 22    | 551        | 558      | SSEMLVKK    |           |         | Oxidation (M)[4] |      | Mascot      |
| 937.5023   | 937.5228    | 0.0205  | 22    | 551        | 558      | SSEMLVKK    |           |         | Oxidation (M)[4] |      | Mascot      |
| 1051.5742  | 1051.6812   | 0.107   | 102   | 504        | 513      | RSTSSISSVK  |           |         |                  |      | Mascot      |
| 1287.6879  | 1287.6321   | -0.0558 | -43   | 143        | 152      | HLEFMNQLKK  |           |         |                  |      | Mascot      |
| 1414.6454  | 1414.7213   | 0.0759  | 54    | 1          | 11       | MSTMVYPREER |           |         | Oxidation (M)[1] |      | Mascot      |

|    |                                                           |           |         |     |     |             |                           |      |   |    |                                            |  |  |  |  |        |
|----|-----------------------------------------------------------|-----------|---------|-----|-----|-------------|---------------------------|------|---|----|--------------------------------------------|--|--|--|--|--------|
|    | 1477.826                                                  | 1477.7659 | -0.0601 | -41 | 393 | 404         | EAEILYKEILTR              |      |   |    |                                            |  |  |  |  | Mascot |
|    | 1522.6876                                                 | 1522.6951 | 0.0075  | 5   | 474 | 486         | LEAAETLEECAMR             |      |   |    | Carbamidomethyl (C)[10]                    |  |  |  |  | Mascot |
|    | 1679.9075                                                 | 1679.8195 | -0.088  | -52 | 267 | 281         | EAAHLLNDALSIREK           |      |   |    |                                            |  |  |  |  | Mascot |
|    | 1679.9075                                                 | 1679.8195 | -0.088  | -52 | 267 | 281         | EAAHLLNDALSIREK           |      |   |    |                                            |  |  |  |  | Mascot |
|    | 1851.8575                                                 | 1851.8713 | 0.0138  | 7   | 471 | 486         | QGKLEAAETLEECAMR          |      |   |    | Carbamidomethyl (C)[13], Oxidation (M)[15] |  |  |  |  | Mascot |
|    | 1895.8141                                                 | 1895.8464 | 0.0323  | 17  | 153 | 169         | YDDGATPEEEKNSDTPK         |      |   |    |                                            |  |  |  |  | Mascot |
|    | 2249.0107                                                 | 2249.0059 | -0.0048 | -2  | 349 | 365         | YEEVEYYYCRALDIYEK         |      |   |    |                                            |  |  |  |  | Mascot |
|    | 2283.0935                                                 | 2283.1118 | 0.0183  | 8   | 109 | 126         | LCQENQWLRDELANTQH<br>K    |      |   |    | Carbamidomethyl (C)[2]                     |  |  |  |  | Mascot |
|    | 2283.0935                                                 | 2283.1118 | 0.0183  | 8   | 109 | 126         | LCQENQWLRDELANTQH<br>K    |      |   |    | Carbamidomethyl (C)[2]                     |  |  |  |  | Mascot |
|    | 2299.3118                                                 | 2299.1135 | -0.1983 | -86 | 15  | 35          | LTQDEIISSTKLVIQGLEAL<br>K |      |   |    |                                            |  |  |  |  | Mascot |
| 25 | protein phosphatase 1 regulatory subunit 3B [Danio rerio] |           |         |     |     | gi 47086625 | 33690.5                   | 6.15 | 8 | 37 | 0                                          |  |  |  |  |        |

#### Peptide Information

| Calc. Mass | Obsrv. Mass | ± da    | ± ppm | Start Seq. | End Seq. | Sequence                 | Ion Score | C. I. | % Modification                               | Rank | Result Type |
|------------|-------------|---------|-------|------------|----------|--------------------------|-----------|-------|----------------------------------------------|------|-------------|
| 1051.5782  | 1051.6812   | 0.103   | 98    | 157        | 165      | NISFEKSVK                |           |       |                                              |      | Mascot      |
| 1663.8043  | 1663.765    | -0.0393 | -24   | 24         | 36       | YSRPLQPCLNQCK            |           |       | Carbamidomethyl (C)[8,12]                    |      | Mascot      |
| 1699.76    | 1699.8792   | 0.1192  | 70    | 132        | 145      | IENDHVCLEHCMLK           |           |       | Oxidation (M)[12]                            |      | Mascot      |
| 1699.76    | 1699.8792   | 0.1192  | 70    | 132        | 145      | IENDHVCLEHCMLK           |           |       | Oxidation (M)[12]                            |      | Mascot      |
| 1721.9697  | 1721.8508   | -0.1189 | -69   | 67         | 82       | HVSFADHKGLALTVVK         |           |       |                                              |      | Mascot      |
| 1813.803   | 1813.8696   | 0.0666  | 37    | 132        | 145      | IENDHVCLEHCMLK           |           |       | Carbamidomethyl (C)[7,11], Oxidation (M)[12] |      | Mascot      |
| 1851.9204  | 1851.8713   | -0.0491 | -27   | 24         | 39       | YSRPLQPCLNQCKSSK         |           |       |                                              |      | Mascot      |
| 2211.1001  | 2211.0386   | -0.0615 | -28   | 2          | 20       | PIELAMSLYLSSDEFLNP<br>R  |           |       | Oxidation (M)[6]                             |      | Mascot      |
| 2229.9829  | 2230.1306   | 0.1477  | 66    | 175        | 193      | NHTDVECQYVKDITYTGS<br>NR |           |       |                                              |      | Mascot      |
| 2283.0862  | 2283.1118   | 0.0256  | 11    | 168        | 185      | ITFNTWKNHTDVECQYVK       |           |       | Carbamidomethyl (C)[14]                      |      | Mascot      |
| 2283.0862  | 2283.1118   | 0.0256  | 11    | 168        | 185      | ITFNTWKNHTDVECQYVK       |           |       | Carbamidomethyl (C)[14]                      |      | Mascot      |

26 PREDICTED: ubiquitin carboxyl-terminal hydrolase 43-like [Danio rerio] gi|189517011 128296.5 9.38 17 37 0

#### Peptide Information

| Calc. Mass | Obsrv. Mass | ± da   | ± ppm | Start Seq. | End Seq. | Sequence | Ion Score | C. I. | % Modification | Rank | Result Type |
|------------|-------------|--------|-------|------------|----------|----------|-----------|-------|----------------|------|-------------|
| 850.4377   | 850.5173    | 0.0796 | 94    | 1077       | 1084     | STSKTNGR |           |       |                |      | Mascot      |
| 870.4315   | 870.5166    | 0.0851 | 98    | 1147       | 1154     | YSSTSLGR |           |       |                |      | Mascot      |
| 960.4495   | 960.4514    | 0.0019 | 2     | 104        | 111      | MFSLYGDK |           |       |                |      | Mascot      |

|    |                                                 |           |         |     |              |      |                         |      |    |    |   |                   |  |  |  |  |        |
|----|-------------------------------------------------|-----------|---------|-----|--------------|------|-------------------------|------|----|----|---|-------------------|--|--|--|--|--------|
|    | 996.5472                                        | 996.5695  | 0.0223  | 22  | 1121         | 1130 | NGPLVPASNK              |      |    |    |   |                   |  |  |  |  | Mascot |
|    | 996.5472                                        | 996.5695  | 0.0223  | 22  | 1121         | 1130 | NGPLVPASNK              |      |    |    |   |                   |  |  |  |  | Mascot |
|    | 1045.5636                                       | 1045.5336 | -0.03   | -29 | 1071         | 1080 | TGTVHKSTSK              |      |    |    |   |                   |  |  |  |  | Mascot |
|    | 1051.5353                                       | 1051.6812 | 0.1459  | 139 | 522          | 532  | LCGSGGPPPHVK            |      |    |    |   |                   |  |  |  |  | Mascot |
|    | 1062.5037                                       | 1062.6582 | 0.1545  | 145 | 1155         | 1163 | QRPVPESCF               |      |    |    |   |                   |  |  |  |  | Mascot |
|    | 1142.6165                                       | 1142.6698 | 0.0533  | 47  | 1039         | 1049 | EVGHGKTLSSK             |      |    |    |   |                   |  |  |  |  | Mascot |
|    | 1144.615                                        | 1144.5328 | -0.0822 | -72 | 733          | 741  | AAYILFYQR               |      |    |    |   |                   |  |  |  |  | Mascot |
|    | 1144.615                                        | 1144.5328 | -0.0822 | -72 | 733          | 741  | AAYILFYQR               |      |    |    |   |                   |  |  |  |  | Mascot |
|    | 1279.5736                                       | 1279.7368 | 0.1632  | 128 | 743          | 754  | DAIPSWASACSR            |      |    |    |   |                   |  |  |  |  | Mascot |
|    | 1287.6262                                       | 1287.6321 | 0.0059  | 5   | 656          | 667  | TSCARAPPGWNK            |      |    |    |   |                   |  |  |  |  | Mascot |
|    | 1364.678                                        | 1364.6545 | -0.0235 | -17 | 447          | 457  | FGPPFLMREDR             |      |    |    |   |                   |  |  |  |  | Mascot |
|    | 1414.6519                                       | 1414.7213 | 0.0694  | 49  | 1085         | 1096 | DTQVFSNTIDMK            |      |    |    |   | Oxidation (M)[11] |  |  |  |  | Mascot |
|    | 1555.7897                                       | 1555.6769 | -0.1128 | -73 | 1005         | 1018 | IHPSQILMATGESR          |      |    |    |   | Oxidation (M)[8]  |  |  |  |  | Mascot |
|    | 1570.7531                                       | 1570.7723 | 0.0192  | 12  | 1085         | 1097 | DTQVFSNTIDMKR           |      |    |    |   | Oxidation (M)[11] |  |  |  |  | Mascot |
|    | 1826.9006                                       | 1826.9263 | 0.0257  | 14  | 472          | 486  | LYYLMINGSQAHNFR         |      |    |    |   |                   |  |  |  |  | Mascot |
|    | 2300.1682                                       | 2300.1057 | -0.0625 | -27 | 247          | 265  | NKPGVRHSFVQEHFQAQ<br>YK |      |    |    |   |                   |  |  |  |  | Mascot |
| 27 | plasma membrane calcium ATPase 3a [Danio rerio] |           |         |     | gi 313482836 |      | 129460.6                | 5.41 | 15 | 37 | 0 |                   |  |  |  |  |        |

Peptide Information

| Calc. Mass | Obsrv. Mass | ± da    | ± ppm | Start Seq. | End Seq. | Sequence           | Ion Score | C. I. | % Modification                            | Rank | Result Type |
|------------|-------------|---------|-------|------------|----------|--------------------|-----------|-------|-------------------------------------------|------|-------------|
| 864.4131   | 864.4805    | 0.0674  | 78    | 626        | 632      | DKDEMVK            |           |       |                                           |      | Mascot      |
| 882.4501   | 882.5408    | 0.0907  | 103   | 609        | 615      | CSFILSR            |           |       | Carbamidomethyl (C)[1]                    |      | Mascot      |
| 1120.5602  | 1120.6476   | 0.0874  | 78    | 448        | 456      | MMKDNNLVR          |           |       |                                           |      | Mascot      |
| 1165.6074  | 1165.7111   | 0.1037  | 89    | 84         | 93       | VFGMNFIPPK         |           |       | Oxidation (M)[4]                          |      | Mascot      |
| 1414.7914  | 1414.7213   | -0.0701 | -50   | 912        | 923      | KPYGRNNPLISR       |           |       |                                           |      | Mascot      |
| 1522.757   | 1522.6951   | -0.0619 | -41   | 805        | 820      | ADVGFAMGIAGTDVAK   |           |       |                                           |      | Mascot      |
| 1555.7244  | 1555.6769   | -0.0475 | -31   | 582        | 595      | SMSTVIQMPDGSFR     |           |       |                                           |      | Mascot      |
| 1698.8883  | 1698.8087   | -0.0796 | -47   | 483        | 496      | MTVVQIYIGDQLFR     |           |       | Oxidation (M)[1]                          |      | Mascot      |
| 1699.8142  | 1699.8792   | 0.065   | 38    | 581        | 595      | KSMSTVIQMPDGSFR    |           |       | Oxidation (M)[3]                          |      | Mascot      |
| 1699.8142  | 1699.8792   | 0.065   | 38    | 581        | 595      | KSMSTVIQMPDGSFR    |           |       | Oxidation (M)[3]                          |      | Mascot      |
| 1721.7911  | 1721.8508   | 0.0597  | 35    | 49         | 62       | IQENYTNLTETLCHR    |           |       |                                           |      | Mascot      |
| 1807.7811  | 1807.9113   | 0.1302  | 72    | 719        | 734      | CGIIHPGDDFLCMEGK   |           |       | Carbamidomethyl (C)[1], Oxidation (M)[13] |      | Mascot      |
| 1895.7932  | 1895.8464   | 0.0532  | 28    | 457        | 474      | HLDACETMGNATAICSDK |           |       | Oxidation (M)[8]                          |      | Mascot      |
| 1936.8198  | 1936.8591   | 0.0393  | 20    | 457        | 474      | HLDACETMGNATAICSDK |           |       | Carbamidomethyl (C)[5]                    |      | Mascot      |
| 1936.8198  | 1936.8591   | 0.0393  | 20    | 457        | 474      | HLDACETMGNATAICSDK |           |       | Carbamidomethyl (C)[5]                    |      | Mascot      |
| 2019.9917  | 2019.8612   | -0.1305 | -65   | 49         | 64       | IQENYTNLTETLCHRLK  |           |       | Carbamidomethyl (C)[12]                   |      | Mascot      |

|    |                                          |           |         |     |     |              |                          |      |   |    |   |  |                   |  |  |  |        |
|----|------------------------------------------|-----------|---------|-----|-----|--------------|--------------------------|------|---|----|---|--|-------------------|--|--|--|--------|
|    | 2211.2053                                | 2211.0386 | -0.1667 | -75 | 200 | 220          | NSTVIQIPVAEMVVGDI<br>QVK |      |   |    |   |  |                   |  |  |  | Mascot |
|    | 2282.999                                 | 2283.1118 | 0.1128  | 49  | 719 | 738          | CGIIHPGDDFLCMEGKDF<br>NR |      |   |    |   |  | Oxidation (M)[13] |  |  |  | Mascot |
|    | 2282.999                                 | 2283.1118 | 0.1128  | 49  | 719 | 738          | CGIIHPGDDFLCMEGKDF<br>NR |      |   |    |   |  | Oxidation (M)[13] |  |  |  | Mascot |
| 28 | novel protein (zgc:112421) [Danio rerio] |           |         |     |     | gi 157886040 | 29193.6                  | 4.43 | 7 | 36 | 0 |  |                   |  |  |  |        |

Peptide Information

|  | Calc. Mass | Obsrv. Mass | ± da    | ± ppm | Start Seq. | End Seq. | Sequence                  | Ion Score | C. I. | % Modification   | Rank | Result Type |
|--|------------|-------------|---------|-------|------------|----------|---------------------------|-----------|-------|------------------|------|-------------|
|  | 850.5396   | 850.5173    | -0.0223 | -26   | 253        | 259      | LLIEILH                   |           |       |                  |      | Mascot      |
|  | 1144.5746  | 1144.5328   | -0.0418 | -37   | 69         | 77       | EAYLQVHER                 |           |       |                  |      | Mascot      |
|  | 1144.5746  | 1144.5328   | -0.0418 | -37   | 69         | 77       | EAYLQVHER                 |           |       |                  |      | Mascot      |
|  | 1161.5746  | 1161.4996   | -0.075  | -65   | 203        | 213      | GAGTDEETLIR               |           |       |                  |      | Mascot      |
|  | 1663.7294  | 1663.765    | 0.0356  | 21    | 78         | 92       | DLEADIEDDTSGEVR           |           |       |                  |      | Mascot      |
|  | 1699.9337  | 1699.8792   | -0.0545 | -32   | 203        | 218      | GAGTDEETLIRIIVGR          |           |       |                  |      | Mascot      |
|  | 1699.9337  | 1699.8792   | -0.0545 | -32   | 203        | 218      | GAGTDEETLIRIIVGR          |           |       |                  |      | Mascot      |
|  | 2233.124   | 2233.0186   | -0.1054 | -47   | 29         | 49       | GMGTDEETIISILANRSAA<br>QR |           |       |                  |      | Mascot      |
|  | 2249.1189  | 2249.0059   | -0.113  | -50   | 29         | 49       | GMGTDEETIISILANRSAA<br>QR |           |       | Oxidation (M)[2] |      | Mascot      |
|  | 2284.0881  | 2284.1064   | 0.0183  | 8     | 60         | 77       | YDDDILNYKEAYLQVHER        |           |       |                  |      | Mascot      |

|    |                                                                                    |  |  |  |  |              |         |      |    |    |   |  |  |  |  |  |  |
|----|------------------------------------------------------------------------------------|--|--|--|--|--------------|---------|------|----|----|---|--|--|--|--|--|--|
| 29 | PREDICTED: scavenger receptor cysteine-rich type 1 protein M130-like [Danio rerio] |  |  |  |  | gi 326666537 | 98034.2 | 6.08 | 13 | 36 | 0 |  |  |  |  |  |  |
|----|------------------------------------------------------------------------------------|--|--|--|--|--------------|---------|------|----|----|---|--|--|--|--|--|--|

Peptide Information

|  | Calc. Mass | Obsrv. Mass | ± da    | ± ppm | Start Seq. | End Seq. | Sequence               | Ion Score | C. I. | % Modification            | Rank | Result Type |
|--|------------|-------------|---------|-------|------------|----------|------------------------|-----------|-------|---------------------------|------|-------------|
|  | 856.4093   | 856.4984    | 0.0891  | 104   | 465        | 471      | DAHVVCR                |           |       | Carbamidomethyl (C)[6]    |      | Mascot      |
|  | 864.374    | 864.4805    | 0.1065  | 123   | 667        | 675      | GGDGRCSGR              |           |       |                           |      | Mascot      |
|  | 1279.7052  | 1279.7368   | 0.0316  | 25    | 656        | 666      | QCSAHVPLRLR            |           |       |                           |      | Mascot      |
|  | 1364.6528  | 1364.6545   | 0.0017  | 1     | 644        | 655      | SHLTCSAFPHHK           |           |       |                           |      | Mascot      |
|  | 1522.6989  | 1522.6951   | -0.0038 | -2    | 567        | 580      | DTASLICQELNCGR         |           |       |                           |      | Mascot      |
|  | 1570.66    | 1570.7723   | 0.1123  | 71    | 239        | 251      | KWGTVCDACWDMR          |           |       |                           |      | Mascot      |
|  | 1813.908   | 1813.8696   | -0.0384 | -21   | 843        | 857      | HKTTTEAVYEEIQHK        |           |       |                           |      | Mascot      |
|  | 1838.9006  | 1838.8555   | -0.0451 | -25   | 606        | 620      | HDKTLYHCPSLPWGK        |           |       | Carbamidomethyl (C)[8]    |      | Mascot      |
|  | 1936.813   | 1936.8591   | 0.0461  | 24    | 43         | 59       | GQWGTVCDDGWDLNDA<br>K  |           |       | Carbamidomethyl (C)[7]    |      | Mascot      |
|  | 1936.813   | 1936.8591   | 0.0461  | 24    | 43         | 59       | GQWGTVCDDGWDLNDA<br>K  |           |       | Carbamidomethyl (C)[7]    |      | Mascot      |
|  | 1972.8962  | 1972.8539   | -0.0423 | -21   | 109        | 126      | GVSNCKHDEDAGVVCLG<br>R |           |       | Carbamidomethyl (C)[5,15] |      | Mascot      |

|    |                                                                                                        |           |         |     |     |              |                                     |      |    |    |   |  |                         |        |
|----|--------------------------------------------------------------------------------------------------------|-----------|---------|-----|-----|--------------|-------------------------------------|------|----|----|---|--|-------------------------|--------|
|    | 2249.0591                                                                                              | 2249.0059 | -0.0532 | -24 | 180 | 198          | AAAFGKVESQMWTEIHC<br>CR             |      |    |    |   |  | Carbamidomethyl (C)[18] | Mascot |
|    | 2300.2529                                                                                              | 2300.1057 | -0.1472 | -64 | 5   | 25           | SCLTVLLISTVVTLPNEGE<br>VR           |      |    |    |   |  | Carbamidomethyl (C)[2]  | Mascot |
|    | 3337.5                                                                                                 | 3337.6782 | 0.1782  | 53  | 434 | 464          | LVGSGGDCAGRLEVFHN<br>GSWGTVCDDSWDIK |      |    |    |   |  | Carbamidomethyl (C)[8]  | Mascot |
| 30 | novel protein similar to H.sapiens ATPase, Ca++<br>transporting, plasma membrane (zgc:92885) [Danio re |           |         |     |     | gi 169145692 | 138055                              | 5.51 | 15 | 35 | 0 |  |                         |        |

#### Peptide Information

| Calc. Mass | Obsrv. Mass | ± da    | ± ppm | Start Seq. | End Seq. | Sequence                 | Ion Score | C. I. | % Modification                            | Rank | Result Type |
|------------|-------------|---------|-------|------------|----------|--------------------------|-----------|-------|-------------------------------------------|------|-------------|
| 864.4131   | 864.4805    | 0.0674  | 78    | 626        | 632      | DKDEMVK                  |           |       |                                           |      | Mascot      |
| 882.4501   | 882.5408    | 0.0907  | 103   | 609        | 615      | CSFILSR                  |           |       | Carbamidomethyl (C)[1]                    |      | Mascot      |
| 1120.5602  | 1120.6476   | 0.0874  | 78    | 448        | 456      | MMKDNNLVR                |           |       |                                           |      | Mascot      |
| 1165.6074  | 1165.7111   | 0.1037  | 89    | 84         | 93       | VFGMNFIPPK               |           |       | Oxidation (M)[4]                          |      | Mascot      |
| 1414.7914  | 1414.7213   | -0.0701 | -50   | 912        | 923      | KPYGRNNPLISR             |           |       |                                           |      | Mascot      |
| 1522.757   | 1522.6951   | -0.0619 | -41   | 805        | 820      | ADVGFAMGIAGTDVAK         |           |       |                                           |      | Mascot      |
| 1555.7244  | 1555.6769   | -0.0475 | -31   | 582        | 595      | SMSTVIQMPDGSFR           |           |       |                                           |      | Mascot      |
| 1698.8883  | 1698.8087   | -0.0796 | -47   | 483        | 496      | MTVVQIYIGDQLFR           |           |       | Oxidation (M)[1]                          |      | Mascot      |
| 1699.8142  | 1699.8792   | 0.065   | 38    | 581        | 595      | KSMSTVIQMPDGSFR          |           |       | Oxidation (M)[3]                          |      | Mascot      |
| 1699.8142  | 1699.8792   | 0.065   | 38    | 581        | 595      | KSMSTVIQMPDGSFR          |           |       | Oxidation (M)[3]                          |      | Mascot      |
| 1721.7911  | 1721.8508   | 0.0597  | 35    | 49         | 62       | IQENYNTETLCHR            |           |       |                                           |      | Mascot      |
| 1807.7811  | 1807.9113   | 0.1302  | 72    | 719        | 734      | CGIIHPGDDFLCMEGK         |           |       | Carbamidomethyl (C)[1], Oxidation (M)[13] |      | Mascot      |
| 1895.7932  | 1895.8464   | 0.0532  | 28    | 457        | 474      | HLDACETMGNATAICSDK       |           |       | Oxidation (M)[8]                          |      | Mascot      |
| 1936.8198  | 1936.8591   | 0.0393  | 20    | 457        | 474      | HLDACETMGNATAICSDK       |           |       | Carbamidomethyl (C)[5]                    |      | Mascot      |
| 1936.8198  | 1936.8591   | 0.0393  | 20    | 457        | 474      | HLDACETMGNATAICSDK       |           |       | Carbamidomethyl (C)[5]                    |      | Mascot      |
| 2019.9917  | 2019.8612   | -0.1305 | -65   | 49         | 64       | IQENYNTETLCHRLK          |           |       | Carbamidomethyl (C)[12]                   |      | Mascot      |
| 2211.2053  | 2211.0386   | -0.1667 | -75   | 200        | 220      | NSTVIQIPVAEMVVGDI<br>QVK |           |       |                                           |      | Mascot      |
| 2282.999   | 2283.1118   | 0.1128  | 49    | 719        | 738      | CGIIHPGDDFLCMEGKDF<br>NR |           |       | Oxidation (M)[13]                         |      | Mascot      |
| 2282.999   | 2283.1118   | 0.1128  | 49    | 719        | 738      | CGIIHPGDDFLCMEGKDF<br>NR |           |       | Oxidation (M)[13]                         |      | Mascot      |

|    |                                                               |  |  |  |  |              |          |      |    |    |   |  |  |  |
|----|---------------------------------------------------------------|--|--|--|--|--------------|----------|------|----|----|---|--|--|--|
| 31 | PREDICTED: hypothetical protein LOC100535084<br>[Danio rerio] |  |  |  |  | gi 326679813 | 230058.6 | 9.06 | 22 | 35 | 0 |  |  |  |
|----|---------------------------------------------------------------|--|--|--|--|--------------|----------|------|----|----|---|--|--|--|

#### Peptide Information

| Calc. Mass | Obsrv. Mass | ± da    | ± ppm | Start Seq. | End Seq. | Sequence   | Ion Score | C. I. | % Modification | Rank | Result Type |
|------------|-------------|---------|-------|------------|----------|------------|-----------|-------|----------------|------|-------------|
| 842.5206   | 842.4857    | -0.0349 | -41   | 1540       | 1546     | RTVNKPK    |           |       |                |      | Mascot      |
| 960.4996   | 960.4514    | -0.0482 | -50   | 1456       | 1463     | ESINELQK   |           |       |                |      | Mascot      |
| 1045.6     | 1045.5336   | -0.0664 | -64   | 1446       | 1455     | SAKDLAITAR |           |       |                |      | Mascot      |

|           |           |         |     |      |      |                           |                        |        |
|-----------|-----------|---------|-----|------|------|---------------------------|------------------------|--------|
| 1051.6259 | 1051.6812 | 0.0553  | 53  | 713  | 721  | VVDLLISHR                 |                        | Mascot |
| 1062.6055 | 1062.6582 | 0.0527  | 50  | 887  | 895  | RAVEATFLR                 |                        | Mascot |
| 1144.5779 | 1144.5328 | -0.0451 | -39 | 556  | 565  | LSPELAQQCR                |                        | Mascot |
| 1144.5779 | 1144.5328 | -0.0451 | -39 | 556  | 565  | LSPELAQQCR                |                        | Mascot |
| 1161.5873 | 1161.4996 | -0.0877 | -76 | 456  | 463  | LYFCKQFR                  | Carbamidomethyl (C)[4] | Mascot |
| 1287.7202 | 1287.6321 | -0.0881 | -68 | 1902 | 1912 | RLQAMQSLVNK               |                        | Mascot |
| 1522.7067 | 1522.6951 | -0.0116 | -8  | 201  | 213  | ADFMQARQAEEAR             |                        | Mascot |
| 1570.6724 | 1570.7723 | 0.0999  | 64  | 37   | 49   | NMTEM DLQDSL NK           | Oxidation (M)[2,5]     | Mascot |
| 1679.745  | 1679.8195 | 0.0745  | 44  | 814  | 829  | WDSIGAACVPKCGGCR          | Carbamidomethyl (C)[8] | Mascot |
| 1679.745  | 1679.8195 | 0.0745  | 44  | 814  | 829  | WDSIGAACVPKCGGCR          | Carbamidomethyl (C)[8] | Mascot |
| 1698.7727 | 1698.8087 | 0.036   | 21  | 483  | 495  | CLEVHEQYSFCKR             | Carbamidomethyl (C)[1] | Mascot |
| 1813.908  | 1813.8696 | -0.0384 | -21 | 284  | 298  | ELRLTTYNSADDIFR           |                        | Mascot |
| 1826.9316 | 1826.9263 | -0.0053 | -3  | 1479 | 1494 | EPTMESKPIESP NLVR         |                        | Mascot |
| 1852.0327 | 1851.8713 | -0.1614 | -87 | 103  | 117  | LDEVK VLLHETLWTR          |                        | Mascot |
| 1886.8292 | 1886.7297 | -0.0995 | -53 | 34   | 49   | TCKNMTEM DLQDSL NK        | Oxidation (M)[5]       | Mascot |
| 1895.9385 | 1895.8464 | -0.0921 | -49 | 1567 | 1583 | DIFLAEQDGVTFPNTTK         |                        | Mascot |
| 1911.9619 | 1911.8427 | -0.1192 | -62 | 847  | 862  | ELELVKEGLTYVMEDK          | Oxidation (M)[13]      | Mascot |
| 1911.9619 | 1911.8427 | -0.1192 | -62 | 847  | 862  | ELELVKEGLTYVMEDK          | Oxidation (M)[13]      | Mascot |
| 2020.0552 | 2019.8612 | -0.194  | -96 | 1913 | 1928 | FWERWSQLAGPNLFIR          |                        | Mascot |
| 2247.1252 | 2247.0764 | -0.0488 | -22 | 611  | 631  | IGTLIDLASDTNYITHSAA<br>DR |                        | Mascot |
| 2249.123  | 2249.0059 | -0.1171 | -52 | 1864 | 1883 | EQTQEGCIQYVTPNSLLL<br>GR  |                        | Mascot |
| 2283.1648 | 2283.1118 | -0.053  | -23 | 1479 | 1498 | EPTMESKPIESP NLVRAE<br>QK |                        | Mascot |
| 2283.1648 | 2283.1118 | -0.053  | -23 | 1479 | 1498 | EPTMESKPIESP NLVRAE<br>QK |                        | Mascot |
| 2299.1599 | 2299.1135 | -0.0464 | -20 | 1479 | 1498 | EPTMESKPIESP NLVRAE<br>QK | Oxidation (M)[4]       | Mascot |

### Peptide Information



|    |                               |           |         |     |              |    |                                    |                        |    |    |   |  |  |  |  |  |        |
|----|-------------------------------|-----------|---------|-----|--------------|----|------------------------------------|------------------------|----|----|---|--|--|--|--|--|--------|
|    | 1838.9899                     | 1838.8555 | -0.1344 | -73 | 51           | 67 | AVETQLLFGSSDAILFK                  |                        |    |    |   |  |  |  |  |  | Mascot |
|    | 3337.8989                     | 3337.6782 | -0.2207 | -66 | 68           | 97 | CILTSDNLVQLLFPMLIAA<br>VDKNKPLLAVK | Carbamidomethyl (C)[1] |    |    |   |  |  |  |  |  | Mascot |
| 33 | Sipa1l1 protein [Danio rerio] |           |         |     | gi 190340108 |    | 188873.8                           | 8.64                   | 18 | 34 | 0 |  |  |  |  |  |        |

#### Peptide Information

| Calc. Mass | Obsrv. Mass | ± da    | ± ppm | Start Seq. | End Seq. | Sequence                  | Ion Score | C. I. | % Modification    | Rank | Result Type |
|------------|-------------|---------|-------|------------|----------|---------------------------|-----------|-------|-------------------|------|-------------|
| 856.5363   | 856.4984    | -0.0379 | -44   | 1703       | 1709     | LQAQIKR                   |           |       |                   |      | Mascot      |
| 864.4495   | 864.4805    | 0.031   | 36    | 557        | 563      | VTEQLMK                   |           |       | Oxidation (M)[6]  |      | Mascot      |
| 957.4683   | 957.422     | -0.0463 | -48   | 999        | 1006     | RGCSELHR                  |           |       |                   |      | Mascot      |
| 960.4533   | 960.4514    | -0.0019 | -2    | 1710       | 1716     | LWEDNQR                   |           |       |                   |      | Mascot      |
| 1086.495   | 1086.5155   | 0.0205  | 19    | 154        | 163      | EYGSTSSIDK                |           |       |                   |      | Mascot      |
| 1144.6586  | 1144.5328   | -0.1258 | -110  | 1558       | 1567     | GAPLRRPSYK                |           |       |                   |      | Mascot      |
| 1144.6586  | 1144.5328   | -0.1258 | -110  | 1558       | 1567     | GAPLRRPSYK                |           |       |                   |      | Mascot      |
| 1161.5106  | 1161.4996   | -0.011  | -9    | 1143       | 1152     | SMPEGFAHNR                |           |       | Oxidation (M)[2]  |      | Mascot      |
| 1364.6342  | 1364.6545   | 0.0203  | 15    | 1310       | 1322     | APSPWHSPDGGGR             |           |       |                   |      | Mascot      |
| 1477.7355  | 1477.7659   | 0.0304  | 21    | 865        | 878      | DVIGWTLGSPASMK            |           |       | Oxidation (M)[13] |      | Mascot      |
| 1663.7931  | 1663.765    | -0.0281 | -17   | 1000       | 1013     | GCELSHRMPVVEYK            |           |       | Oxidation (M)[8]  |      | Mascot      |
| 1698.7751  | 1698.8087   | 0.0336  | 20    | 891        | 904      | SMNNNTEDFREVVK            |           |       | Oxidation (M)[2]  |      | Mascot      |
| 1699.8134  | 1699.8792   | 0.0658  | 39    | 1179       | 1194     | VEDSSDRPPSDAPVTK          |           |       |                   |      | Mascot      |
| 1699.8134  | 1699.8792   | 0.0658  | 39    | 1179       | 1194     | VEDSSDRPPSDAPVTK          |           |       |                   |      | Mascot      |
| 1721.8817  | 1721.8508   | -0.0309 | -18   | 1429       | 1444     | KPGSTINSVDFGDTRK          |           |       |                   |      | Mascot      |
| 1737.9659  | 1737.8461   | -0.1198 | -69   | 689        | 702      | NIRSHFQHV FVVVR           |           |       |                   |      | Mascot      |
| 1826.9719  | 1826.9263   | -0.0456 | -25   | 1078       | 1095     | AAAI PRSVSSDGRPLDSK       |           |       |                   |      | Mascot      |
| 2225.0364  | 2225.054    | 0.0176  | 8     | 1572       | 1591     | MHGDL SASDTSLADLHD<br>RQR |           |       |                   |      | Mascot      |
| 2225.0364  | 2225.054    | 0.0176  | 8     | 1572       | 1591     | MHGDL SASDTSLADLHD<br>RQR |           |       |                   |      | Mascot      |
| 2233.1709  | 2233.0186   | -0.1523 | -68   | 1666       | 1687     | LSPSEGPSSYGGKVSQLEALVK    |           |       |                   |      | Mascot      |
| 2300.0725  | 2300.1057   | 0.0332  | 14    | 641        | 659      | DYEIMFHVSTMLPYTPNN<br>K   |           |       |                   |      | Mascot      |

|    |                                                                       |  |  |  |              |  |          |      |    |    |   |  |  |  |  |  |  |
|----|-----------------------------------------------------------------------|--|--|--|--------------|--|----------|------|----|----|---|--|--|--|--|--|--|
| 34 | PREDICTED: inositol 1,4,5-trisphosphate receptor type 1 [Danio rerio] |  |  |  | gi 326668777 |  | 305706.9 | 5.87 | 25 | 34 | 0 |  |  |  |  |  |  |
|----|-----------------------------------------------------------------------|--|--|--|--------------|--|----------|------|----|----|---|--|--|--|--|--|--|

#### Peptide Information

| Calc. Mass | Obsrv. Mass | ± da    | ± ppm | Start Seq. | End Seq. | Sequence | Ion Score | C. I. | % Modification | Rank | Result Type |
|------------|-------------|---------|-------|------------|----------|----------|-----------|-------|----------------|------|-------------|
| 842.5206   | 842.4857    | -0.0349 | -41   | 1153       | 1159     | IRSNKPK  |           |       |                |      | Mascot      |
| 856.4423   | 856.4984    | 0.0561  | 66    | 1873       | 1879     | AFGSYRR  |           |       |                |      | Mascot      |

|           |           |         |      |      |      |                       |                                               |        |
|-----------|-----------|---------|------|------|------|-----------------------|-----------------------------------------------|--------|
| 937.4043  | 937.5228  | 0.1185  | 126  | 2650 | 2656 | EQMTEQR               | Oxidation (M)[3]                              | Mascot |
| 937.4043  | 937.5228  | 0.1185  | 126  | 2650 | 2656 | EQMTEQR               | Oxidation (M)[3]                              | Mascot |
| 957.402   | 957.422   | 0.02    | 21   | 2051 | 2058 | HDSNAER               |                                               | Mascot |
| 960.4381  | 960.4514  | 0.0133  | 14   | 1833 | 1840 | RDDNTPDK              |                                               | Mascot |
| 1045.6074 | 1045.5336 | -0.0738 | -71  | 1810 | 1818 | MKVAQVEIK             |                                               | Mascot |
| 1062.55   | 1062.6582 | 0.1082  | 102  | 962  | 970  | QDILVMDTK             |                                               | Mascot |
| 1120.5634 | 1120.6476 | 0.0842  | 75   | 2411 | 2419 | DDFILEVNR             |                                               | Mascot |
| 1142.7144 | 1142.6698 | -0.0446 | -39  | 452  | 462  | VLASIAAKLEK           |                                               | Mascot |
| 1144.6508 | 1144.5328 | -0.118  | -103 | 509  | 517  | LMREQNILK             |                                               | Mascot |
| 1144.6508 | 1144.5328 | -0.118  | -103 | 509  | 517  | LMREQNILK             |                                               | Mascot |
| 1161.6375 | 1161.4996 | -0.1379 | -119 | 92   | 101  | LHHAADLEKK            |                                               | Mascot |
| 1279.6252 | 1279.7368 | 0.1116  | 87   | 2208 | 2217 | AQPVLYWCSR            | Carbamidomethyl (C)[8]                        | Mascot |
| 1414.7358 | 1414.7213 | -0.0145 | -10  | 1391 | 1402 | CNSLLPLDDIVR          | Carbamidomethyl (C)[1]                        | Mascot |
| 1638.8995 | 1638.809  | -0.0905 | -55  | 921  | 935  | SIHGVGELMTQVVL        |                                               | Mascot |
| 1642.8192 | 1642.8756 | 0.0564  | 34   | 735  | 747  | YQLNLFARMCLDR         |                                               | Mascot |
| 1663.7706 | 1663.765  | -0.0056 | -3   | 630  | 643  | FLDYLSDLCSVMNK        | Oxidation (M)[12]                             | Mascot |
| 1679.7733 | 1679.8195 | 0.0462  | 28   | 833  | 845  | FSQTMEFVENYLR         | Oxidation (M)[5]                              | Mascot |
| 1679.7733 | 1679.8195 | 0.0462  | 28   | 833  | 845  | FSQTMEFVENYLR         | Oxidation (M)[5]                              | Mascot |
| 1699.8407 | 1699.8792 | 0.0385  | 23   | 735  | 747  | YQLNLFARMCLDR         | Carbamidomethyl (C)[10]                       | Mascot |
| 1699.8407 | 1699.8792 | 0.0385  | 23   | 735  | 747  | YQLNLFARMCLDR         | Carbamidomethyl (C)[10]                       | Mascot |
| 1737.8376 | 1737.8461 | 0.0085  | 5    | 280  | 293  | ALWEVEVVQHDP          | Carbamidomethyl (C)[13]                       | Mascot |
| 1827.0044 | 1826.9263 | -0.0781 | -43  | 409  | 424  | EEKPVMLRIGTSPLK       |                                               | Mascot |
| 1838.7917 | 1838.8555 | 0.0638  | 35   | 779  | 792  | ASFCRMMMLHMHVDR       | Carbamidomethyl (C)[4], Oxidation (M)[6,7,10] | Mascot |
| 1972.9657 | 1972.8539 | -0.1118 | -57  | 2051 | 2066 | HDSNAERILYNMRPK       |                                               | Mascot |
| 2020.0242 | 2019.8612 | -0.163  | -81  | 1542 | 1559 | AIAIPVDLDCQVNNLFMK    | Oxidation (M)[17]                             | Mascot |
| 2233.1467 | 2233.0186 | -0.1281 | -57  | 1540 | 1559 | GRAIAPVDLDCQVNNLFMK   | Oxidation (M)[19]                             | Mascot |
| 2283.2061 | 2283.1118 | -0.0943 | -41  | 915  | 935  | GSNVMRSIHGVGELMTQVVL  |                                               | Mascot |
| 2283.2061 | 2283.1118 | -0.0943 | -41  | 915  | 935  | GSNVMRSIHGVGELMTQVVL  |                                               | Mascot |
| 2299.2009 | 2299.1135 | -0.0874 | -38  | 915  | 935  | GSNVMRSIHGVGELMTQVVL  | Oxidation (M)[5]                              | Mascot |
| 2501.1694 | 2501.1689 | -0.0005 | 0    | 1726 | 1747 | SQPGGLSRAEMLMEVQCHLDR | Carbamidomethyl (C)[18]                       | Mascot |

35 Si:dkeyp-117h8.4 protein [Danio rerio] gi|158253430 74521.1 9.27 11 34 0

| Peptide Information |             |        |       |            |          |          |           |       |                |      |        |        |  |
|---------------------|-------------|--------|-------|------------|----------|----------|-----------|-------|----------------|------|--------|--------|--|
| Calc. Mass          | Obsrv. Mass | ± da   | ± ppm | Start Seq. | End Seq. | Sequence | Ion Score | C. I. | % Modification | Rank | Result | Type   |  |
| 864.4825            | 864.4805    | -0.002 | -2    | 654        | 660      | LQYSLQ   |           |       |                |      |        | Mascot |  |

|           |           |         |     |     |     |                            |  |  |  |                        |  |  |        |
|-----------|-----------|---------|-----|-----|-----|----------------------------|--|--|--|------------------------|--|--|--------|
| 937.5101  | 937.5228  | 0.0127  | 14  | 68  | 75  | VKADYSVR                   |  |  |  |                        |  |  | Mascot |
| 937.5101  | 937.5228  | 0.0127  | 14  | 68  | 75  | VKADYSVR                   |  |  |  |                        |  |  | Mascot |
| 960.5109  | 960.4514  | -0.0595 | -62 | 344 | 352 | AGLSITDQR                  |  |  |  |                        |  |  | Mascot |
| 1086.5426 | 1086.5155 | -0.0271 | -25 | 546 | 554 | QPEVEESLR                  |  |  |  |                        |  |  | Mascot |
| 1142.5551 | 1142.6698 | 0.1147  | 100 | 1   | 9   | MPLYTDQFK                  |  |  |  |                        |  |  | Mascot |
| 1273.6622 | 1273.5822 | -0.08   | -63 | 488 | 496 | KLYHHFICR                  |  |  |  | Carbamidomethyl (C)[8] |  |  | Mascot |
| 1642.8304 | 1642.8756 | 0.0452  | 28  | 608 | 620 | LKMQMNHALSWR               |  |  |  |                        |  |  | Mascot |
| 1807.9337 | 1807.9113 | -0.0224 | -12 | 563 | 577 | SPLKHFQLTDLHEDK            |  |  |  |                        |  |  | Mascot |
| 1826.8854 | 1826.9263 | 0.0409  | 22  | 11  | 25  | NNDVFRNTMEAIFQK            |  |  |  |                        |  |  | Mascot |
| 2233.1096 | 2233.0186 | -0.091  | -41 | 267 | 287 | NSVDVSGVTDQSAWIDV<br>ALTR  |  |  |  |                        |  |  | Mascot |
| 2300.1228 | 2300.1057 | -0.0171 | -7  | 516 | 537 | ESFQSPGFSSSSMSALA<br>LTPLR |  |  |  |                        |  |  | Mascot |

36 PREDICTED: tudor domain-containing protein 7-like [Danio rerio] gi|326669649 45873.8 9.21 8 34 0

#### Peptide Information

| Calc. Mass | Obsrv. Mass | ± da    | ± ppm | Start Seq. | End Seq. | Sequence                 | Ion Score | C. I. | % Modification        | Rank | Result Type |
|------------|-------------|---------|-------|------------|----------|--------------------------|-----------|-------|-----------------------|------|-------------|
| 864.4495   | 864.4805    | 0.031   | 36    | 253        | 259      | MEEKALK                  |           |       | Oxidation (M)[1]      |      | Mascot      |
| 870.4679   | 870.5166    | 0.0487  | 56    | 298        | 305      | HELVSGTK                 |           |       |                       |      | Mascot      |
| 1161.5609  | 1161.4996   | -0.0613 | -53   | 219        | 227      | LYQDTYKCK                |           |       |                       |      | Mascot      |
| 1679.9227  | 1679.8195   | -0.1032 | -61   | 74         | 88       | LPHSAPYSPKLVQSR          |           |       |                       |      | Mascot      |
| 1679.9227  | 1679.8195   | -0.1032 | -61   | 74         | 88       | LPHSAPYSPKLVQSR          |           |       |                       |      | Mascot      |
| 1852.0076  | 1851.8713   | -0.1363 | -74   | 89         | 104      | LQEVLNKHSNGLWVSK         |           |       |                       |      | Mascot      |
| 2225.1013  | 2225.054    | -0.0473 | -21   | 239        | 256      | LVVLMGEMILHYNKMEEK       |           |       | Oxidation (M)[5,8,15] |      | Mascot      |
| 2225.1013  | 2225.054    | -0.0473 | -21   | 239        | 256      | LVVLMGEMILHYNKMEEK       |           |       | Oxidation (M)[5,8,15] |      | Mascot      |
| 2249.2903  | 2249.0059   | -0.2844 | -126  | 277        | 297      | VLVKGVLNGLVSVFQLD<br>YGK |           |       |                       |      | Mascot      |
| 2283.0308  | 2283.1118   | 0.081   | 35    | 381        | 399      | DIWLHDIMAEFTDEMTKT<br>A  |           |       | Oxidation (M)[8]      |      | Mascot      |
| 2283.0308  | 2283.1118   | 0.081   | 35    | 381        | 399      | DIWLHDIMAEFTDEMTKT<br>A  |           |       | Oxidation (M)[8]      |      | Mascot      |
| 2299.0256  | 2299.1135   | 0.0879  | 38    | 381        | 399      | DIWLHDIMAEFTDEMTKT<br>A  |           |       | Oxidation (M)[8,15]   |      | Mascot      |

37 proteasome subunit beta type-2 [Danio rerio] gi|50540284 22571.6 6.1 6 34 0

#### Peptide Information

| Calc. Mass | Obsrv. Mass | ± da   | ± ppm | Start Seq. | End Seq. | Sequence | Ion Score | C. I. | % Modification | Rank | Result Type |
|------------|-------------|--------|-------|------------|----------|----------|-----------|-------|----------------|------|-------------|
| 864.4573   | 864.4805    | 0.0232 | 27    | 87         | 93       | NLADYLR  |           |       |                |      | Mascot      |
| 882.4753   | 882.5408    | 0.0655 | 74    | 35         | 41       | MFKLSEK  |           |       |                |      | Mascot      |

|    |                                              |           |         |      |              |         |                     |    |    |   |  |                  |        |
|----|----------------------------------------------|-----------|---------|------|--------------|---------|---------------------|----|----|---|--|------------------|--------|
|    | 960.4091                                     | 960.4514  | 0.0423  | 44   | 186          | 193     | DGIHDMEK            |    |    |   |  | Oxidation (M)[6] | Mascot |
|    | 1051.5717                                    | 1051.6812 | 0.1095  | 104  | 63           | 70      | NVQLYKMR            |    |    |   |  |                  | Mascot |
|    | 1776.0417                                    | 1775.851  | -0.1907 | -107 | 171          | 185     | FILNLPSFTVRLIDK     |    |    |   |  |                  | Mascot |
|    | 1776.0417                                    | 1775.851  | -0.1907 | -107 | 171          | 185     | FILNLPSFTVRLIDK     |    |    |   |  |                  | Mascot |
|    | 2020.0651                                    | 2019.8612 | -0.2039 | -101 | 127          | 145     | APFAAHGYGAFLTLSILDR |    |    |   |  |                  | Mascot |
| 38 | hypothetical protein LOC572032 [Danio rerio] |           |         |      | gi 130501553 | 75267.4 | 9.23                | 11 | 34 | 0 |  |                  |        |

#### Peptide Information

|  | Calc. Mass | Obsrv. Mass | ± da    | ± ppm | Start Seq. | End Seq. | Sequence                   | Ion Score | C. I. | % Modification         | Rank | Result Type |
|--|------------|-------------|---------|-------|------------|----------|----------------------------|-----------|-------|------------------------|------|-------------|
|  | 960.5109   | 960.4514    | -0.0595 | -62   | 344        | 352      | AGLSITDQR                  |           |       |                        |      | Mascot      |
|  | 1086.5426  | 1086.5155   | -0.0271 | -25   | 546        | 554      | QPEVEESLR                  |           |       |                        |      | Mascot      |
|  | 1120.5845  | 1120.6476   | 0.0631  | 56    | 651        | 661      | EATAVQSSTVK                |           |       |                        |      | Mascot      |
|  | 1142.5551  | 1142.6698   | 0.1147  | 100   | 1          | 9        | MPLYTDQFK                  |           |       |                        |      | Mascot      |
|  | 1273.6622  | 1273.5822   | -0.08   | -63   | 488        | 496      | KLYHHFICR                  |           |       | Carbamidomethyl (C)[8] |      | Mascot      |
|  | 1642.8304  | 1642.8756   | 0.0452  | 28    | 608        | 620      | LKMQMNHALSWR               |           |       |                        |      | Mascot      |
|  | 1807.9337  | 1807.9113   | -0.0224 | -12   | 563        | 577      | SPLKHFQLTDLHEDK            |           |       |                        |      | Mascot      |
|  | 1826.8854  | 1826.9263   | 0.0409  | 22    | 11         | 25       | NNDVFRNTMEAIFQK            |           |       |                        |      | Mascot      |
|  | 2233.1096  | 2233.0186   | -0.091  | -41   | 267        | 287      | NSVDVSGVTDQSAWIDV<br>ALTR  |           |       |                        |      | Mascot      |
|  | 2249.0906  | 2249.0059   | -0.0847 | -38   | 246        | 265      | LKSSPLNISYESSACFYS<br>PR   |           |       |                        |      | Mascot      |
|  | 2300.1228  | 2300.1057   | -0.0171 | -7    | 516        | 537      | ESFQSPGFSSSSMSALA<br>LTPLR |           |       |                        |      | Mascot      |

|    |                                              |  |  |  |              |         |      |    |    |   |  |  |  |
|----|----------------------------------------------|--|--|--|--------------|---------|------|----|----|---|--|--|--|
| 39 | hypothetical protein LOC559906 [Danio rerio] |  |  |  | gi 198282017 | 48541.8 | 5.61 | 10 | 33 | 0 |  |  |  |
|----|----------------------------------------------|--|--|--|--------------|---------|------|----|----|---|--|--|--|

#### Peptide Information

|  | Calc. Mass | Obsrv. Mass | ± da    | ± ppm | Start Seq. | End Seq. | Sequence         | Ion Score | C. I. | % Modification     | Rank | Result Type |
|--|------------|-------------|---------|-------|------------|----------|------------------|-----------|-------|--------------------|------|-------------|
|  | 882.4349   | 882.5408    | 0.1059  | 120   | 1          | 8        | MSSSLSVR         |           |       | Oxidation (M)[1]   |      | Mascot      |
|  | 957.4346   | 957.422     | -0.0126 | -13   | 323        | 329      | YTLEMER          |           |       | Oxidation (M)[5]   |      | Mascot      |
|  | 1051.5419  | 1051.6812   | 0.1393  | 132   | 246        | 254      | SQYEGIVQK        |           |       |                    |      | Mascot      |
|  | 1062.5499  | 1062.6582   | 0.1083  | 102   | 142        | 150      | IMLEIDNAK        |           |       | Oxidation (M)[2]   |      | Mascot      |
|  | 1279.6641  | 1279.7368   | 0.0727  | 57    | 351        | 360      | NKTDYEQLLR       |           |       |                    |      | Mascot      |
|  | 1555.6516  | 1555.6769   | 0.0253  | 16    | 160        | 172      | WETESAMCQSVER    |           |       |                    |      | Mascot      |
|  | 1570.7278  | 1570.7723   | 0.0445  | 28    | 15         | 28       | QPSFSSMSLRDSCR   |           |       | Oxidation (M)[7]   |      | Mascot      |
|  | 1775.9789  | 1775.851    | -0.1279 | -72   | 375        | 390      | LLEGEETVKEIPPPK  |           |       |                    |      | Mascot      |
|  | 1775.9789  | 1775.851    | -0.1279 | -72   | 375        | 390      | LLEGEETVKEIPPPK  |           |       |                    |      | Mascot      |
|  | 2298.0601  | 2298.1179   | 0.0578  | 25    | 115        | 134      | GHDIDSMMAQAHAEQE |           |       | Oxidation (M)[7,8] |      | Mascot      |

|    |                                                            |           |        |    |     |                                |          |      |    |    |                           |        |   |
|----|------------------------------------------------------------|-----------|--------|----|-----|--------------------------------|----------|------|----|----|---------------------------|--------|---|
|    | 2299.0151                                                  | 2299.1135 | 0.0984 | 43 | 160 | VRK<br>WETESAMCQSVERDCV<br>ALK |          |      |    |    | Carbamidomethyl (C)[8,15] | Mascot |   |
| 40 | PREDICTED: hypothetical protein LOC100536324 [Danio rerio] |           |        |    |     | gi 326675438                   | 274951.1 | 9.13 | 22 | 32 | 0                         | 9      | 0 |

| Peptide Information |             |         |       |            |          |                     |           |       |   |                         |      |             |
|---------------------|-------------|---------|-------|------------|----------|---------------------|-----------|-------|---|-------------------------|------|-------------|
| Calc. Mass          | Obsrv. Mass | ± da    | ± ppm | Start Seq. | End Seq. | Sequence            | Ion Score | C. I. | % | Modification            | Rank | Result Type |
| 856.4312            | 856.4984    | 0.0672  | 78    | 604        | 610      | WPVPDSR             |           |       |   |                         |      | Mascot      |
| 870.5406            | 870.5166    | -0.024  | -28   | 1174       | 1181     | VLSPVTVR            |           |       |   |                         |      | Mascot      |
| 957.5475            | 957.422     | -0.1255 | -131  | 879        | 886      | SLVNIQQR            |           |       |   |                         |      | Mascot      |
| 1051.5577           | 1051.6812   | 0.1235  | 117   | 870        | 878      | VACHPGVRR           |           |       |   | Carbamidomethyl (C)[3]  |      | Mascot      |
| 1086.4633           | 1086.5155   | 0.0522  | 48    | 839        | 850      | GGGAPEGCPEGR        |           |       |   |                         |      | Mascot      |
| 1134.601            | 1134.6173   | 0.0163  | 14    | 2087       | 2096     | GMMLEITALR          |           |       |   |                         |      | Mascot      |
| 1142.6429           | 1142.6698   | 0.0269  | 24    | 1269       | 1277     | SLIVDFHRR           |           |       |   |                         |      | Mascot      |
| 1144.5957           | 1144.5328   | -0.0629 | -55   | 2099       | 2107     | VNQLEEEKR           |           |       |   |                         |      | Mascot      |
| 1144.5957           | 1144.5328   | -0.0629 | -55   | 2099       | 2107     | VNQLEEEKR           |           |       |   |                         |      | Mascot      |
| 1287.6514           | 1287.6321   | -0.0193 | -15   | 1725       | 1734     | FDTAVRYMIR          |           |       |   | Oxidation (M)[8]        |      | Mascot      |
| 1358.6521           | 1358.6326   | -0.0195 | -14   | 2403       | 2414     | HELYKPAGGVQC        |           |       |   | Carbamidomethyl (C)[12] |      | Mascot      |
| 1414.726            | 1414.7213   | -0.0047 | -3    | 1258       | 1268     | CWIPARDILDR         |           |       |   | Carbamidomethyl (C)[1]  |      | Mascot      |
| 1522.9216           | 1522.6951   | -0.2265 | -149  | 1713       | 1724     | LLQLHRDVLFLR        |           |       |   |                         |      | Mascot      |
| 1555.8009           | 1555.6769   | -0.124  | -80   | 2146       | 2158     | MDHDVRQLISSVR       |           |       |   |                         |      | Mascot      |
| 1638.9076           | 1638.809    | -0.0986 | -60   | 1867       | 1879     | GFLLLWKQMEVFK       |           |       |   |                         |      | Mascot      |
| 1663.7843           | 1663.765    | -0.0193 | -12   | 2309       | 2322     | MESVETLQEDVLDR      |           |       |   |                         |      | Mascot      |
| 1679.7793           | 1679.8195   | 0.0402  | 24    | 2309       | 2322     | MESVETLQEDVLDR      |           |       |   | Oxidation (M)[1]        |      | Mascot      |
| 1679.8938           | 1679.8195   | -0.0743 | -44   | 87         | 101      | AFLSQCSLVFALQPR     | 10        |       | 0 |                         |      | Mascot      |
| 1698.8149           | 1698.8087   | -0.0062 | -4    | 1972       | 1985     | INTEMTLVMSERSR      |           |       |   | Oxidation (M)[5,9]      |      | Mascot      |
| 1826.8448           | 1826.9263   | 0.0815  | 45    | 833        | 850      | VEEAVRGGGAPEGCPEGR  |           |       |   | Carbamidomethyl (C)[14] |      | Mascot      |
| 1936.9296           | 1936.8591   | -0.0705 | -36   | 1986       | 2002     | HDMQIPAVLFGVFTCDK   |           |       |   | Oxidation (M)[3]        |      | Mascot      |
| 1936.9296           | 1936.8591   | -0.0705 | -36   | 1986       | 2002     | HDMQIPAVLFGVFTCDK   |           |       |   | Oxidation (M)[3]        |      | Mascot      |
| 2010.9623           | 2010.9042   | -0.0581 | -29   | 1849       | 1866     | AECVCQAEDAFQSLLKQK  |           |       |   |                         |      | Mascot      |
| 2020.1226           | 2019.8612   | -0.2614 | -129  | 626        | 644      | FIRNFSSVAAPLTALTSPK |           |       |   |                         |      | Mascot      |
| 2211.0825           | 2211.0386   | -0.0439 | -20   | 1907       | 1925     | VEIFFPSMQALAQQMDVEK |           |       |   |                         |      | Mascot      |

|    |                                                                 |  |  |  |  |              |         |      |    |    |   |
|----|-----------------------------------------------------------------|--|--|--|--|--------------|---------|------|----|----|---|
| 41 | PREDICTED: 6-phosphofructokinase, liver type-like [Danio rerio] |  |  |  |  | gi 189523785 | 84565.1 | 7.22 | 11 | 32 | 0 |
|----|-----------------------------------------------------------------|--|--|--|--|--------------|---------|------|----|----|---|

| Peptide Information |             |      |       |       |     |          |     |       |   |              |      |             |
|---------------------|-------------|------|-------|-------|-----|----------|-----|-------|---|--------------|------|-------------|
| Calc. Mass          | Obsrv. Mass | ± da | ± ppm | Start | End | Sequence | Ion | C. I. | % | Modification | Rank | Result Type |

|    |                                                                      |           | Seq.    |      | Seq.         |     | Score                               |                   |        |    |   |
|----|----------------------------------------------------------------------|-----------|---------|------|--------------|-----|-------------------------------------|-------------------|--------|----|---|
|    | 856.4167                                                             | 856.4984  | 0.0817  | 95   | 89           | 95  | CKAFTMR                             |                   | Mascot |    |   |
|    | 960.5472                                                             | 960.4514  | -0.0958 | -100 | 2            | 10  | SSAGLEKLR                           |                   | Mascot |    |   |
|    | 1051.5604                                                            | 1051.6812 | 0.1208  | 115  | 202          | 210 | TFVLEVMGR                           |                   | Mascot |    |   |
|    | 1120.5415                                                            | 1120.6476 | 0.1061  | 95   | 357          | 365 | EVQRAMNEK                           | Oxidation (M)[6]  | Mascot |    |   |
|    | 1161.6375                                                            | 1161.4996 | -0.1379 | -119 | 366          | 374 | RFEEAIQLR                           |                   | Mascot |    |   |
|    | 1287.6005                                                            | 1287.6321 | 0.0316  | 25   | 377          | 386 | SFENNWSIYK                          |                   | Mascot |    |   |
|    | 1698.9683                                                            | 1698.8087 | -0.1596 | -94  | 254          | 269 | GCRLNIIIIAEGAISR                    |                   | Mascot |    |   |
|    | 1851.9811                                                            | 1851.8713 | -0.1098 | -59  | 270          | 286 | SGEAITSNYIKDLVVS                    |                   | Mascot |    |   |
|    | 2298.2563                                                            | 2298.1179 | -0.1384 | -60  | 67           | 88  | LANWQSVTNIIQLGGTVI<br>GSAR          |                   | Mascot |    |   |
|    | 2501.2783                                                            | 2501.1689 | -0.1094 | -44  | 445          | 469 | GAVNEVSWNQVAGWTG<br>LGGSLLGTK       |                   | Mascot |    |   |
|    | 3337.7683                                                            | 3337.6782 | -0.0901 | -27  | 387          | 419 | LLAYQKSAAVQSEHSIAL<br>NVGAPAAGMNAVR | Oxidation (M)[28] | Mascot |    |   |
| 42 | PREDICTED: tetratricopeptide repeat protein 34-like<br>[Danio rerio] |           |         |      | gi 326679115 |     | 119668.1                            | 7.99              | 14     | 32 | 0 |

#### Peptide Information

| Calc. Mass | Obsrv. Mass | ± da    | ± ppm | Start Seq. | End Seq. | Sequence                | Ion Score | C. I. % | Modification               | Rank | Result Type |
|------------|-------------|---------|-------|------------|----------|-------------------------|-----------|---------|----------------------------|------|-------------|
| 882.4791   | 882.5408    | 0.0617  | 70    | 126        | 133      | QTPQPVGR                |           |         |                            |      | Mascot      |
| 937.4526   | 937.5228    | 0.0702  | 75    | 867        | 873      | AWQQNYK                 |           |         |                            |      | Mascot      |
| 937.4526   | 937.5228    | 0.0702  | 75    | 867        | 873      | AWQQNYK                 |           |         |                            |      | Mascot      |
| 960.4897   | 960.4514    | -0.0383 | -40   | 847        | 854      | QVFGQEPR                |           |         |                            |      | Mascot      |
| 996.4791   | 996.5695    | 0.0904  | 91    | 656        | 663      | HCHTASKR                |           |         | Carbamidomethyl (C)[2]     |      | Mascot      |
| 996.4791   | 996.5695    | 0.0904  | 91    | 656        | 663      | HCHTASKR                |           |         | Carbamidomethyl (C)[2]     |      | Mascot      |
| 1134.5208  | 1134.6173   | 0.0965  | 85    | 7          | 17       | GAADLCREGDK             |           |         |                            |      | Mascot      |
| 1165.6252  | 1165.7111   | 0.0859  | 74    | 1050       | 1059     | AWFLTETGLK              |           |         |                            |      | Mascot      |
| 1273.5953  | 1273.5822   | -0.0131 | -10   | 723        | 733      | QPDNVQSLCGR             |           |         | Carbamidomethyl (C)[9]     |      | Mascot      |
| 1279.6528  | 1279.7368   | 0.084   | 66    | 241        | 252      | ELQAAELFSSGK            |           |         |                            |      | Mascot      |
| 1358.746   | 1358.6326   | -0.1134 | -83   | 509        | 520      | GLLCTVLLEQGR            |           |         | Carbamidomethyl (C)[4]     |      | Mascot      |
| 1364.6957  | 1364.6545   | -0.0412 | -30   | 430        | 440      | GYSRLFIEDHK             |           |         |                            |      | Mascot      |
| 1679.8281  | 1679.8195   | -0.0086 | -5    | 376        | 390      | ALCHLEPDGGGRELR         |           |         | Carbamidomethyl (C)[3]     |      | Mascot      |
| 1679.8281  | 1679.8195   | -0.0086 | -5    | 376        | 390      | ALCHLEPDGGGRELR         |           |         | Carbamidomethyl (C)[3]     |      | Mascot      |
| 1698.922   | 1698.8087   | -0.1133 | -67   | 281        | 297      | VCLLVSRAAAHFAAGGR       |           |         |                            |      | Mascot      |
| 1972.8739  | 1972.8539   | -0.02   | -10   | 100        | 117      | MESVMQGTGQASDEIFA<br>R  |           |         | Oxidation (M)[1]           |      | Mascot      |
| 2299.1797  | 2299.1135   | -0.0662 | -29   | 490        | 508      | LQLQDAAVTVRCLVPWN<br>CR |           |         | Carbamidomethyl (C)[12,18] |      | Mascot      |

43 transcriptional co-repressor Sin3A [Danio rerio] gi|148235455 145692.6 7.01 15 32 0

Peptide Information

| Calc. Mass | Obsrv. Mass | ± da    | ± ppm | Start Seq. | End Sequence Seq.      | Ion Score | C. I. % Modification | Rank | Result Type |
|------------|-------------|---------|-------|------------|------------------------|-----------|----------------------|------|-------------|
| 850.4417   | 850.5173    | 0.0756  | 89    | 916        | 922 LYAQAER            |           |                      |      | Mascot      |
| 864.407    | 864.4805    | 0.0735  | 85    | 1198       | 1204 AHQSHER           |           |                      |      | Mascot      |
| 996.5697   | 996.5695    | -0.0002 | 0     | 1205       | 1212 VSTR LHQR         |           |                      |      | Mascot      |
| 996.5697   | 996.5695    | -0.0002 | 0     | 1205       | 1212 VSTR LHQR         |           |                      |      | Mascot      |
| 1134.5459  | 1134.6173   | 0.0714  | 63    | 1146       | 1155 GCEAQEKELK        |           |                      |      | Mascot      |
| 1144.6725  | 1144.5328   | -0.1397 | -122  | 563        | 572 ALPKSYQLPK         |           |                      |      | Mascot      |
| 1144.6725  | 1144.5328   | -0.1397 | -122  | 563        | 572 ALPKSYQLPK         |           |                      |      | Mascot      |
| 1279.7368  | 1279.7368   | 0       | 0     | 432        | 443 HSTTAITPPVKK       |           |                      |      | Mascot      |
| 1287.6652  | 1287.6321   | -0.0331 | -26   | 943        | 953 DKNENTAVQLR        |           |                      |      | Mascot      |
| 1364.7069  | 1364.6545   | -0.0524 | -38   | 319        | 329 NRFQGQPNYK         |           |                      |      | Mascot      |
| 1414.5978  | 1414.7213   | 0.1235  | 87    | 1061       | 1072 AEQLMSDENC FK     |           |                      |      | Mascot      |
| 1663.865   | 1663.765    | -0.1    | -60   | 153        | 167 EFKSQSIDTPGVISR    |           |                      |      | Mascot      |
| 1699.9126  | 1699.8792   | -0.0334 | -20   | 656        | 670 LDNTLGGFSEIIHRK    |           |                      |      | Mascot      |
| 1699.9126  | 1699.8792   | -0.0334 | -20   | 656        | 670 LDNTLGGFSEIIHRK    |           |                      |      | Mascot      |
| 1886.8623  | 1886.7297   | -0.1326 | -70   | 539        | 555 ERATEGIAMEIDYASCK  |           |                      |      | Mascot      |
| 1936.9996  | 1936.8591   | -0.1405 | -73   | 514        | 528 FPELFTWFKNFLGYK    |           |                      |      | Mascot      |
| 1936.9996  | 1936.8591   | -0.1405 | -73   | 514        | 528 FPELFTWFKNFLGYK    |           |                      |      | Mascot      |
| 1972.9473  | 1972.8539   | -0.0934 | -47   | 523        | 538 NFLGYKEMSHLETYPK   |           | Oxidation (M)[8]     |      | Mascot      |
| 2019.9996  | 2019.8612   | -0.1384 | -69   | 174        | 191 GHPDLIMGFNTFLPPGYK |           | Oxidation (M)[7]     |      | Mascot      |

44 transcription factor Her-8b [Danio rerio] gi|10863869 24148.2 9.35 6 32 0

Peptide Information

| Calc. Mass | Obsrv. Mass | ± da    | ± ppm | Start Seq. | End Sequence Seq.    | Ion Score | C. I. % Modification | Rank | Result Type |
|------------|-------------|---------|-------|------------|----------------------|-----------|----------------------|------|-------------|
| 850.5508   | 850.5173    | -0.0335 | -39   | 124        | 130 LLNHLLK          |           |                      |      | Mascot      |
| 996.6564   | 996.5695    | -0.0869 | -87   | 22         | 29 LRKPLIEK          |           |                      |      | Mascot      |
| 996.6564   | 996.5695    | -0.0869 | -87   | 22         | 29 LRKPLIEK          |           |                      |      | Mascot      |
| 1679.7805  | 1679.8195   | 0.039   | 23    | 2          | 17 TASNMGNGPEKNFNAK  |           |                      |      | Mascot      |
| 1679.7805  | 1679.8195   | 0.039   | 23    | 2          | 17 TASNMGNGPEKNFNAK  |           |                      |      | Mascot      |
| 1826.8159  | 1826.9263   | 0.1104  | 60    | 1          | 17 MTASNMGNGPEKNFNAK |           | Oxidation (M)[1]     |      | Mascot      |
| 1895.9644  | 1895.8464   | -0.118  | -62   | 60         | 75 ADVLEITVQH MENLQR |           |                      |      | Mascot      |
| 1911.9592  | 1911.8427   | -0.1165 | -61   | 60         | 75 ADVLEITVQH MENLQR |           | Oxidation (M)[11]    |      | Mascot      |

|    |                                  |           |         |     |              |     |                                   |      |   |    |   |                           |        |
|----|----------------------------------|-----------|---------|-----|--------------|-----|-----------------------------------|------|---|----|---|---------------------------|--------|
|    | 1911.9592                        | 1911.8427 | -0.1165 | -61 | 60           | 75  | ADVLEITVQHMENLQR                  |      |   |    |   | Oxidation (M)[11]         | Mascot |
|    | 3337.5583                        | 3337.6782 | 0.1199  | 36  | 95           | 123 | YSSGYIQCMHEVHNLLLS<br>CPGMDKTLGAR |      |   |    |   | Carbamidomethyl (C)[8,19] | Mascot |
| 45 | Zgc:162825 protein [Danio rerio] |           |         |     | gi 112418740 |     | 28952.4                           | 9.77 | 7 | 31 | 0 |                           |        |

Peptide Information

| Calc. Mass | Obsrv. Mass | ± da    | ± ppm | Start Seq. | End Seq. | Sequence          | Ion Score | C. I. % | Modification              | Rank | Result Type |
|------------|-------------|---------|-------|------------|----------|-------------------|-----------|---------|---------------------------|------|-------------|
| 864.3958   | 864.4805    | 0.0847  | 98    | 102        | 108      | SYNNNPR           |           |         |                           |      | Mascot      |
| 957.457    | 957.422     | -0.035  | -37   | 121        | 129      | LHNACQGSK         |           |         |                           |      | Mascot      |
| 1142.5735  | 1142.6698   | 0.0963  | 84    | 120        | 129      | KLHNACQGSK        |           |         | Carbamidomethyl (C)[6]    |      | Mascot      |
| 1165.6688  | 1165.7111   | 0.0423  | 36    | 186        | 195      | QQLKPQQPAK        |           |         |                           |      | Mascot      |
| 1638.9286  | 1638.809    | -0.1196 | -73   | 196        | 212      | AASKPAKTAASKPASPR |           |         |                           |      | Mascot      |
| 1972.9408  | 1972.8539   | -0.0869 | -44   | 86         | 101      | GKSYWCDFLGKPNLCK  |           |         | Carbamidomethyl (C)[6,15] |      | Mascot      |
| 2019.9674  | 2019.8612   | -0.1062 | -53   | 121        | 137      | LHNACQGSKVYKPMCR  |           |         | Carbamidomethyl (C)[5]    |      | Mascot      |

|    |                                   |  |  |  |              |  |       |      |    |    |   |  |  |
|----|-----------------------------------|--|--|--|--------------|--|-------|------|----|----|---|--|--|
| 46 | AFG3-like protein 2 [Danio rerio] |  |  |  | gi 162287285 |  | 88641 | 8.56 | 11 | 31 | 0 |  |  |
|----|-----------------------------------|--|--|--|--------------|--|-------|------|----|----|---|--|--|

Peptide Information

| Calc. Mass | Obsrv. Mass | ± da    | ± ppm | Start Seq. | End Seq. | Sequence                   | Ion Score | C. I. % | Modification                               | Rank | Result Type |
|------------|-------------|---------|-------|------------|----------|----------------------------|-----------|---------|--------------------------------------------|------|-------------|
| 850.4127   | 850.5173    | 0.1046  | 123   | 793        | 800      | QITGGMPF                   |           |         |                                            |      | Mascot      |
| 957.395    | 957.422     | 0.027   | 28    | 620        | 627      | MCMTLGGR                   |           |         | Carbamidomethyl (C)[2], Oxidation (M)[1,3] |      | Mascot      |
| 1051.5868  | 1051.6812   | 0.0944  | 90    | 268        | 278      | RGFAGAGRPGR                |           |         |                                            |      | Mascot      |
| 1086.6154  | 1086.5155   | -0.0999 | -92   | 293        | 301      | VLRDEIDVK                  |           |         |                                            |      | Mascot      |
| 1161.5946  | 1161.4996   | -0.095  | -82   | 5          | 13       | YLHLSRGCR                  |           |         | Carbamidomethyl (C)[8]                     |      | Mascot      |
| 1638.776   | 1638.809    | 0.033   | 20    | 614        | 627      | EQLLDRMCMTLGGR             |           |         | Oxidation (M)[7]                           |      | Mascot      |
| 1642.901   | 1642.8756   | -0.0254 | -15   | 707        | 720      | TQQLSDDKKPEVEK             |           |         |                                            |      | Mascot      |
| 1679.8026  | 1679.8195   | 0.0169  | 10    | 614        | 627      | EQLLDRMCMTLGGR             |           |         | Carbamidomethyl (C)[8]                     |      | Mascot      |
| 1679.8026  | 1679.8195   | 0.0169  | 10    | 614        | 627      | EQLLDRMCMTLGGR             |           |         | Carbamidomethyl (C)[8]                     |      | Mascot      |
| 1698.8698  | 1698.8087   | -0.0611 | -36   | 607        | 619      | EQYLYTKEQLLDR              |           |         |                                            |      | Mascot      |
| 1699.869   | 1699.8792   | 0.0102  | 6     | 164        | 177      | EVTWKDFVNSYLAK             |           |         |                                            |      | Mascot      |
| 1699.869   | 1699.8792   | 0.0102  | 6     | 164        | 177      | EVTWKDFVNSYLAK             |           |         |                                            |      | Mascot      |
| 1721.9294  | 1721.8508   | -0.0786 | -46   | 313        | 326      | LEIMEFVNFLKNPK             |           |         |                                            |      | Mascot      |
| 1737.9243  | 1737.8461   | -0.0782 | -45   | 313        | 326      | LEIMEFVNFLKNPK             |           |         | Oxidation (M)[4]                           |      | Mascot      |
| 2019.9689  | 2019.8612   | -0.1077 | -53   | 90         | 112      | EAKPTNSQKTTGGGGG<br>SSGGGK |           |         |                                            |      | Mascot      |

|    |                     |  |  |  |            |  |         |      |   |    |   |    |        |
|----|---------------------|--|--|--|------------|--|---------|------|---|----|---|----|--------|
| 47 | Evx-2 [Danio rerio] |  |  |  | gi 1617040 |  | 44814.6 | 9.13 | 2 | 31 | 0 | 31 | 78.506 |
|----|---------------------|--|--|--|------------|--|---------|------|---|----|---|----|--------|

Peptide Information



|    | Calc. Mass                                                                       | Obsrv. Mass | ± da    | ± ppm | Start Seq.   | End Sequence Seq.   | Ion Score | C. I. % | Modification     | Rank | Result Type |
|----|----------------------------------------------------------------------------------|-------------|---------|-------|--------------|---------------------|-----------|---------|------------------|------|-------------|
|    | 937.4481                                                                         | 937.5228    | 0.0747  | 80    | 8            | 14 EMILMER          |           |         | Oxidation (M)[2] |      | Mascot      |
|    | 937.4481                                                                         | 937.5228    | 0.0747  | 80    | 8            | 14 EMILMER          | 31        | 78.506  | Oxidation (M)[2] |      | Mascot      |
|    | 1555.8002                                                                        | 1555.6769   | -0.1233 | -79   | 388          | 402 SESGFLPYSAAVLSK |           |         |                  |      | Mascot      |
| 48 | potassium voltage-gated channel, Shaw-related subfamily, member 3b [Danio rerio] |             |         |       | gi 305410803 | 72332.4             | 5.77      | 1       | 22               | 0    |             |

Peptide Information

|    | Calc. Mass                                                      | Obsrv. Mass | ± da   | ± ppm | Start Seq.   | End Sequence Seq. | Ion Score | C. I. % | Modification | Rank | Result Type |
|----|-----------------------------------------------------------------|-------------|--------|-------|--------------|-------------------|-----------|---------|--------------|------|-------------|
|    | 937.4924                                                        | 937.5228    | 0.0304 | 32    | 578          | 585 ACFLLNTR      | 22        | 0       |              | 3    | Mascot      |
| 49 | PREDICTED: metabotropic glutamate receptor 5-like [Danio rerio] |             |        |       | gi 292611331 | 130054.2          | 8.37      | 1       | 20           | 0    |             |

Peptide Information

|    | Calc. Mass                                                    | Obsrv. Mass | ± da   | ± ppm | Start Seq.   | End Sequence Seq. | Ion Score | C. I. % | Modification     | Rank | Result Type |
|----|---------------------------------------------------------------|-------------|--------|-------|--------------|-------------------|-----------|---------|------------------|------|-------------|
|    | 937.5175                                                      | 937.5228    | 0.0053 | 6     | 443          | 449 LLEFLMR       | 20        | 0       | Oxidation (M)[6] | 4    | Mascot      |
| 50 | Protein phosphatase 1E (PP2C domain containing) [Danio rerio] |             |        |       | gi 190339270 | 70909             | 5.16      | 1       | 17               | 0    |             |

Peptide Information

|  | Calc. Mass | Obsrv. Mass | ± da    | ± ppm | Start Seq. | End Sequence Seq. | Ion Score | C. I. % | Modification | Rank | Result Type |
|--|------------|-------------|---------|-------|------------|-------------------|-----------|---------|--------------|------|-------------|
|  | 937.5505   | 937.5228    | -0.0277 | -30   | 14         | 20 FLELFLR        | 17        | 0       |              | 5    | Mascot      |

|                |           |                        |                |                |                    |
|----------------|-----------|------------------------|----------------|----------------|--------------------|
| Gel Idx/Pos    | 237/J13   | Instr./Gel Origin      | BA2060/110707A | Process Status | Analysis Succeeded |
| Plate [#] Name | [1] 31496 | Instrument Sample Name |                | Spectra        | 11                 |

| Rank | Protein Name               | Accession No. | Protein MW | Protein PI | Pep. Count | Protein Score | Protein Score C. I. % | Total Ion Score | Total Ion C. I. % |
|------|----------------------------|---------------|------------|------------|------------|---------------|-----------------------|-----------------|-------------------|
| 1    | Vtg1 protein [Danio rerio] | gi 63100501   | 36409.1    | 9.23       | 10         | 332           | 100                   | 276             | 100               |

Peptide Information

|  | Calc. Mass | Obsrv. Mass | ± da    | ± ppm | Start Seq. | End Sequence Seq. | Ion Score | C. I. % | Modification           | Rank | Result Type |
|--|------------|-------------|---------|-------|------------|-------------------|-----------|---------|------------------------|------|-------------|
|  | 960.4785   | 960.4465    | -0.032  | -33   | 218        | 224 LEVEWER       |           |         |                        |      | Mascot      |
|  | 984.4243   | 984.3897    | -0.0346 | -35   | 190        | 197 FSWGAECK      |           |         | Carbamidomethyl (C)[7] |      | Mascot      |

|           |           |         |     |     |     |                                   |     |        |  |  |  |  |                   |  |  |  |        |
|-----------|-----------|---------|-----|-----|-----|-----------------------------------|-----|--------|--|--|--|--|-------------------|--|--|--|--------|
| 1287.6691 | 1287.6293 | -0.0398 | -31 | 205 | 217 | AEAGVLGEFPAAR                     |     |        |  |  |  |  |                   |  |  |  | Mascot |
| 1287.6691 | 1287.6293 | -0.0398 | -31 | 205 | 217 | AEAGVLGEFPAAR                     | 66  | 99.994 |  |  |  |  |                   |  |  |  | Mascot |
| 1327.7216 | 1327.6823 | -0.0393 | -30 | 260 | 271 | EIELTAALPSQR                      |     |        |  |  |  |  |                   |  |  |  | Mascot |
| 1364.6957 | 1364.6533 | -0.0424 | -31 | 239 | 250 | HILTAAYDTGFR                      | 79  | 100    |  |  |  |  |                   |  |  |  | Mascot |
| 1364.6957 | 1364.6533 | -0.0424 | -31 | 239 | 250 | HILTAAYDTGFR                      |     |        |  |  |  |  |                   |  |  |  | Mascot |
| 1642.9315 | 1642.8798 | -0.0517 | -31 | 121 | 135 | FLGNDIPPVFIIAR                    | 116 | 100    |  |  |  |  |                   |  |  |  | Mascot |
| 1642.9315 | 1642.8798 | -0.0517 | -31 | 121 | 135 | FLGNDIPPVFIIAR                    |     |        |  |  |  |  |                   |  |  |  | Mascot |
| 1660.7119 | 1660.6855 | -0.0264 | -16 | 102 | 117 | DTSSGSAASFEQMQK                   |     |        |  |  |  |  | Oxidation (M)[14] |  |  |  | Mascot |
| 1826.9799 | 1826.9232 | -0.0567 | -31 | 143 | 158 | LLGYQLAAYFDKPTAR                  |     |        |  |  |  |  |                   |  |  |  | Mascot |
| 1826.9799 | 1826.9232 | -0.0567 | -31 | 143 | 158 | LLGYQLAAYFDKPTAR                  | 17  | 0      |  |  |  |  |                   |  |  |  | Mascot |
| 1958.0189 | 1957.9572 | -0.0617 | -32 | 254 | 271 | ATNSEKEIELTAALPSQR                |     |        |  |  |  |  |                   |  |  |  | Mascot |
| 3454.7456 | 3454.6113 | -0.1343 | -39 | 288 | 317 | DIYLPVAVPINPDGTFSE<br>TYEDFLAWIQK |     |        |  |  |  |  |                   |  |  |  | Mascot |

2

eukaryotic translation initiation factor 3, subunit F-like [Danio rerio]

gi|317108137

30037.3

5.36

11

325

100

250

100

| Peptide Information |             |         |       |            |          |                                    |           |        |                                           |      |             |
|---------------------|-------------|---------|-------|------------|----------|------------------------------------|-----------|--------|-------------------------------------------|------|-------------|
| Calc. Mass          | Obsrv. Mass | ± da    | ± ppm | Start Seq. | End Seq. | Sequence                           | Ion Score | C. I.  | % Modification                            | Rank | Result Type |
| 913.5464            | 913.5172    | -0.0292 | -32   | 163        | 170      | IGVDLLQR                           | 44        | 98.904 |                                           |      | Mascot      |
| 913.5464            | 913.5172    | -0.0292 | -32   | 163        | 170      | IGVDLLQR                           |           |        |                                           |      | Mascot      |
| 964.4516            | 964.4218    | -0.0298 | -31   | 214        | 222      | VMADNSVGR                          |           |        | Oxidation (M)[2]                          |      | Mascot      |
| 1122.5103           | 1122.4762   | -0.0341 | -30   | 155        | 162      | YIYYDTER                           | 68        | 99.995 |                                           |      | Mascot      |
| 1122.5103           | 1122.4762   | -0.0341 | -30   | 155        | 162      | YIYYDTER                           |           |        |                                           |      | Mascot      |
| 1239.6038           | 1239.5887   | -0.0151 | -12   | 131        | 142      | AYVSSQMGVPGK                       |           |        | Oxidation (M)[7]                          |      | Mascot      |
| 1278.7126           | 1278.671    | -0.0416 | -33   | 143        | 154      | TVGVMFTPLSVK                       |           |        |                                           |      | Mascot      |
| 1294.7075           | 1294.666    | -0.0415 | -32   | 143        | 154      | TVGVMFTPLSVK                       |           |        | Oxidation (M)[5]                          |      | Mascot      |
| 1615.8398           | 1615.7893   | -0.0505 | -31   | 178        | 194      | TNGLTTDLAQVAGAAGR                  |           |        |                                           |      | Mascot      |
| 1697.9221           | 1697.8694   | -0.0527 | -31   | 10         | 24       | IHPVVLASIVDSYER                    | 139       | 100    |                                           |      | Mascot      |
| 1697.9221           | 1697.8694   | -0.0527 | -31   | 10         | 24       | IHPVVLASIVDSYER                    |           |        |                                           |      | Mascot      |
| 1854.0232           | 1853.9648   | -0.0584 | -31   | 10         | 25       | IHPVVLASIVDSYERR                   |           |        |                                           |      | Mascot      |
| 1948.0134           | 1947.9528   | -0.0606 | -31   | 109        | 126      | EAPNPIHLTVDTALQSNK                 |           |        |                                           |      | Mascot      |
| 3192.3884           | 3192.3184   | -0.07   | -22   | 43         | 70       | HSVDVTNCFSVPHNESE<br>DEVAVDMEFAK   |           |        | Carbamidomethyl (C)[8]                    |      | Mascot      |
| 3208.3833           | 3208.3218   | -0.0615 | -19   | 43         | 70       | HSVDVTNCFSVPHNESE<br>DEVAVDMEFAK   |           |        | Carbamidomethyl (C)[8], Oxidation (M)[24] |      | Mascot      |
| 3454.6953           | 3454.6113   | -0.084  | -24   | 79         | 108      | VSPSEVIVGWYATGFDIT<br>EHSVLIHEYYSR |           |        |                                           |      | Mascot      |

3

Vtg1 protein [Danio rerio]

gi|145337918

116565.5

9.07

11

301

100

278

100

Peptide Information

|   | Calc. Mass                   | Obsrv. Mass | ± da    | ± ppm | Start Seq.   | End Sequence Seq.                        | Ion Score | C. I.  | % Modification         | Rank | Result Type |     |     |
|---|------------------------------|-------------|---------|-------|--------------|------------------------------------------|-----------|--------|------------------------|------|-------------|-----|-----|
|   | 960.4785                     | 960.4465    | -0.032  | -33   | 964          | 970 LEVEWER                              |           |        |                        |      | Mascot      |     |     |
|   | 984.4243                     | 984.3897    | -0.0346 | -35   | 936          | 943 FSWGAECK                             |           |        | Carbamidomethyl (C)[7] |      | Mascot      |     |     |
|   | 1287.6691                    | 1287.6293   | -0.0398 | -31   | 951          | 963 AEAGVLGEFPAAR                        |           |        |                        |      | Mascot      |     |     |
|   | 1287.6691                    | 1287.6293   | -0.0398 | -31   | 951          | 963 AEAGVLGEFPAAR                        | 66        | 99.994 |                        |      | Mascot      |     |     |
|   | 1327.7216                    | 1327.6823   | -0.0393 | -30   | 1006         | 1017 EIELTAALPSQR                        |           |        |                        |      | Mascot      |     |     |
|   | 1364.6957                    | 1364.6533   | -0.0424 | -31   | 985          | 996 HILTAAYDTGFR                         | 79        | 100    |                        |      | Mascot      |     |     |
|   | 1364.6957                    | 1364.6533   | -0.0424 | -31   | 985          | 996 HILTAAYDTGFR                         |           |        |                        |      | Mascot      |     |     |
|   | 1564.731                     | 1564.7358   | 0.0048  | 3     | 773          | 787 NAPVSSSESSSRNSR                      |           |        |                        |      | Mascot      |     |     |
|   | 1642.9315                    | 1642.8798   | -0.0517 | -31   | 867          | 881 FLGNDIPPVFIIAR                       | 116       | 100    |                        |      | Mascot      |     |     |
|   | 1642.9315                    | 1642.8798   | -0.0517 | -31   | 867          | 881 FLGNDIPPVFIIAR                       |           |        |                        |      | Mascot      |     |     |
|   | 1660.7119                    | 1660.6855   | -0.0264 | -16   | 848          | 863 DTSSGSAASFEQMQK                      |           |        | Oxidation (M)[14]      |      | Mascot      |     |     |
|   | 1826.9799                    | 1826.9232   | -0.0567 | -31   | 889          | 904 LLGYQLAAYFDKPTAR                     |           |        |                        |      | Mascot      |     |     |
|   | 1826.9799                    | 1826.9232   | -0.0567 | -31   | 889          | 904 LLGYQLAAYFDKPTAR                     | 17        | 0      |                        |      | Mascot      |     |     |
|   | 1958.0189                    | 1957.9572   | -0.0617 | -32   | 1000         | 1017 ATNSEKEIELTAALPSQR                  |           |        |                        |      | Mascot      |     |     |
|   | 3454.7456                    | 3454.6113   | -0.1343 | -39   | 1034         | 1063 DIYLPVAVPINPDGTF<br>SIE TYEDFLAWIQK |           |        |                        |      | Mascot      |     |     |
| 4 | vitellogenin 1 [Danio rerio] |             |         |       | gi 166795887 |                                          | 149452.5  | 8.68   | 14                     | 300  | 100         | 278 | 100 |

Peptide Information

|  | Calc. Mass | Obsrv. Mass | ± da    | ± ppm | Start Seq. | End Sequence Seq.     | Ion Score | C. I.  | % Modification         | Rank | Result Type |
|--|------------|-------------|---------|-------|------------|-----------------------|-----------|--------|------------------------|------|-------------|
|  | 960.4785   | 960.4465    | -0.032  | -33   | 1258       | 1264 LEVEWER          |           |        |                        |      | Mascot      |
|  | 984.4243   | 984.3897    | -0.0346 | -35   | 1230       | 1237 FSWGAECK         |           |        | Carbamidomethyl (C)[7] |      | Mascot      |
|  | 1287.6691  | 1287.6293   | -0.0398 | -31   | 1245       | 1257 AEAGVLGEFPAAR    |           |        |                        |      | Mascot      |
|  | 1287.6691  | 1287.6293   | -0.0398 | -31   | 1245       | 1257 AEAGVLGEFPAAR    | 66        | 99.994 |                        |      | Mascot      |
|  | 1327.7216  | 1327.6823   | -0.0393 | -30   | 1300       | 1311 EIELTAALPSQR     |           |        |                        |      | Mascot      |
|  | 1364.6957  | 1364.6533   | -0.0424 | -31   | 1279       | 1290 HILTAAYDTGFR     | 79        | 100    |                        |      | Mascot      |
|  | 1364.6957  | 1364.6533   | -0.0424 | -31   | 1279       | 1290 HILTAAYDTGFR     |           |        |                        |      | Mascot      |
|  | 1564.731   | 1564.7358   | 0.0048  | 3     | 1067       | 1081 NAPVSSSESSSRNSR  |           |        |                        |      | Mascot      |
|  | 1642.9315  | 1642.8798   | -0.0517 | -31   | 1161       | 1175 FLGNDIPPVFIIAR   | 116       | 100    |                        |      | Mascot      |
|  | 1642.9315  | 1642.8798   | -0.0517 | -31   | 1161       | 1175 FLGNDIPPVFIIAR   |           |        |                        |      | Mascot      |
|  | 1660.7119  | 1660.6855   | -0.0264 | -16   | 1142       | 1157 DTSSGSAASFEQMQK  |           |        | Oxidation (M)[14]      |      | Mascot      |
|  | 1821.7782  | 1821.7113   | -0.0669 | -37   | 195        | 210 DVGFAYTEKCAECTER  |           |        |                        |      | Mascot      |
|  | 1826.9799  | 1826.9232   | -0.0567 | -31   | 1183       | 1198 LLGYQLAAYFDKPTAR |           |        |                        |      | Mascot      |
|  | 1826.9799  | 1826.9232   | -0.0567 | -31   | 1183       | 1198 LLGYQLAAYFDKPTAR | 17        | 0      |                        |      | Mascot      |

|   |                              |            |             |         |       |             |          |                                        |      |           |        |     |                        |      |             |
|---|------------------------------|------------|-------------|---------|-------|-------------|----------|----------------------------------------|------|-----------|--------|-----|------------------------|------|-------------|
|   |                              | 1847.8745  | 1847.8473   | -0.0272 | -15   | 577         | 592      | TEPNMHVASFAYSHIK                       |      |           |        |     | Oxidation (M)[5]       |      | Mascot      |
|   |                              | 1958.0189  | 1957.9572   | -0.0617 | -32   | 1294        | 1311     | ATNSEKEIELTAALPSQR                     |      |           |        |     |                        |      | Mascot      |
|   |                              | 2233.2009  | 2233.0156   | -0.1853 | -83   | 593         | 614      | SLTRITAPDMAYVAGAAN<br>VAIK             |      |           |        |     |                        |      | Mascot      |
|   |                              | 3454.7456  | 3454.6113   | -0.1343 | -39   | 1328        | 1357     | DIYLPVAVPINPDGTF<br>SIE<br>TYEDFLAWIQK |      |           |        |     |                        |      | Mascot      |
| 5 | vitellogenin 1 [Danio rerio] |            |             |         |       | gi 21391472 |          | 127954.2                               | 8.69 | 11        | 298    | 100 | 278                    | 100  |             |
|   | Peptide Information          |            |             |         |       |             |          |                                        |      |           |        |     |                        |      |             |
|   |                              | Calc. Mass | Obsrv. Mass | ± da    | ± ppm | Start Seq.  | End Seq. | Sequence                               |      | Ion Score | C. I.  | %   | Modification           | Rank | Result Type |
|   |                              | 960.4785   | 960.4465    | -0.032  | -33   | 1065        | 1071     | LEVEWER                                |      |           |        |     |                        |      | Mascot      |
|   |                              | 984.4243   | 984.3897    | -0.0346 | -35   | 1037        | 1044     | FSWGAECK                               |      |           |        |     | Carbamidomethyl (C)[7] |      | Mascot      |
|   |                              | 1287.6691  | 1287.6293   | -0.0398 | -31   | 1052        | 1064     | AEAGVLGEFPAAR                          |      |           |        |     |                        |      | Mascot      |
|   |                              | 1287.6691  | 1287.6293   | -0.0398 | -31   | 1052        | 1064     | AEAGVLGEFPAAR                          |      | 66        | 99.994 |     |                        |      | Mascot      |
|   |                              | 1327.7216  | 1327.6823   | -0.0393 | -30   | 1107        | 1118     | EIELTAALPSQR                           |      |           |        |     |                        |      | Mascot      |
|   |                              | 1364.6957  | 1364.6533   | -0.0424 | -31   | 1086        | 1097     | HILTAAYDTGFR                           |      | 79        | 100    |     |                        |      | Mascot      |
|   |                              | 1364.6957  | 1364.6533   | -0.0424 | -31   | 1086        | 1097     | HILTAAYDTGFR                           |      |           |        |     |                        |      | Mascot      |
|   |                              | 1564.731   | 1564.7358   | 0.0048  | 3     | 876         | 890      | NAPVSSSESSSRNSR                        |      |           |        |     |                        |      | Mascot      |
|   |                              | 1642.9315  | 1642.8798   | -0.0517 | -31   | 968         | 982      | FLGNDIPPVFIIAR                         |      | 116       | 100    |     |                        |      | Mascot      |
|   |                              | 1642.9315  | 1642.8798   | -0.0517 | -31   | 968         | 982      | FLGNDIPPVFIIAR                         |      |           |        |     |                        |      | Mascot      |
|   |                              | 1660.7119  | 1660.6855   | -0.0264 | -16   | 949         | 964      | DTSSGSAASFEQMQK                        |      |           |        |     | Oxidation (M)[14]      |      | Mascot      |
|   |                              | 1826.9799  | 1826.9232   | -0.0567 | -31   | 990         | 1005     | LLGYQLAAYFDKPTAR                       |      |           |        |     |                        |      | Mascot      |
|   |                              | 1826.9799  | 1826.9232   | -0.0567 | -31   | 990         | 1005     | LLGYQLAAYFDKPTAR                       |      | 17        | 0      |     |                        |      | Mascot      |
|   |                              | 1958.0189  | 1957.9572   | -0.0617 | -32   | 1101        | 1118     | ATNSEKEIELTAALPSQR                     |      |           |        |     |                        |      | Mascot      |
|   |                              | 3454.7456  | 3454.6113   | -0.1343 | -39   | 1135        | 1164     | DIYLPVAVPINPDGTF<br>SIE<br>TYEDFLAWIQK |      |           |        |     |                        |      | Mascot      |
| 6 | vitellogenin 1 [Danio rerio] |            |             |         |       | gi 94733730 |          | 149140.4                               | 8.74 | 11        | 295    | 100 | 278                    | 100  |             |
|   | Peptide Information          |            |             |         |       |             |          |                                        |      |           |        |     |                        |      |             |
|   |                              | Calc. Mass | Obsrv. Mass | ± da    | ± ppm | Start Seq.  | End Seq. | Sequence                               |      | Ion Score | C. I.  | %   | Modification           | Rank | Result Type |
|   |                              | 960.4785   | 960.4465    | -0.032  | -33   | 1258        | 1264     | LEVEWER                                |      |           |        |     |                        |      | Mascot      |
|   |                              | 984.4243   | 984.3897    | -0.0346 | -35   | 1230        | 1237     | FSWGAECK                               |      |           |        |     | Carbamidomethyl (C)[7] |      | Mascot      |
|   |                              | 1287.6691  | 1287.6293   | -0.0398 | -31   | 1245        | 1257     | AEAGVLGEFPAAR                          |      |           |        |     |                        |      | Mascot      |
|   |                              | 1287.6691  | 1287.6293   | -0.0398 | -31   | 1245        | 1257     | AEAGVLGEFPAAR                          |      | 66        | 99.994 |     |                        |      | Mascot      |
|   |                              | 1327.7216  | 1327.6823   | -0.0393 | -30   | 1300        | 1311     | EIELTAALPSQR                           |      |           |        |     |                        |      | Mascot      |
|   |                              | 1364.6957  | 1364.6533   | -0.0424 | -31   | 1279        | 1290     | HILTAAYDTGFR                           |      | 79        | 100    |     |                        |      | Mascot      |
|   |                              | 1364.6957  | 1364.6533   | -0.0424 | -31   | 1279        | 1290     | HILTAAYDTGFR                           |      |           |        |     |                        |      | Mascot      |
|   |                              | 1564.731   | 1564.7358   | 0.0048  | 3     | 1067        | 1081     | NAPVSSSESSSRNSR                        |      |           |        |     |                        |      | Mascot      |

|   |                              |           |         |     |             |      |                                     |      |     |                   |     |     |     |        |
|---|------------------------------|-----------|---------|-----|-------------|------|-------------------------------------|------|-----|-------------------|-----|-----|-----|--------|
|   | 1642.9315                    | 1642.8798 | -0.0517 | -31 | 1161        | 1175 | FLGNDIPPVFIIAR                      | 116  | 100 |                   |     |     |     | Mascot |
|   | 1642.9315                    | 1642.8798 | -0.0517 | -31 | 1161        | 1175 | FLGNDIPPVFIIAR                      |      |     |                   |     |     |     | Mascot |
|   | 1660.7119                    | 1660.6855 | -0.0264 | -16 | 1142        | 1157 | DTSSGSAASFEQMQK                     |      |     | Oxidation (M)[14] |     |     |     | Mascot |
|   | 1826.9799                    | 1826.9232 | -0.0567 | -31 | 1183        | 1198 | LLGYQLAAYFDKPTAR                    |      |     |                   |     |     |     | Mascot |
|   | 1826.9799                    | 1826.9232 | -0.0567 | -31 | 1183        | 1198 | LLGYQLAAYFDKPTAR                    | 17   | 0   |                   |     |     |     | Mascot |
|   | 1958.0189                    | 1957.9572 | -0.0617 | -32 | 1294        | 1311 | ATNSEKEIELTAALPSQR                  |      |     |                   |     |     |     | Mascot |
|   | 3454.7456                    | 3454.6113 | -0.1343 | -39 | 1328        | 1357 | DIYLPVAVPINPDGTF<br>SIE TYEDFLAWIQK |      |     |                   |     |     |     | Mascot |
| 7 | vitellogenin 7 [Danio rerio] |           |         |     | gi 57864789 |      | 24318.7                             | 8.37 | 5   | 223               | 100 | 199 | 100 |        |

Peptide Information

| Calc. Mass | Obsrv. Mass | ± da    | ± ppm | Start Seq. | End Seq. | Sequence         | Ion Score | C. I.  | % | Modification           | Rank | Result Type |
|------------|-------------|---------|-------|------------|----------|------------------|-----------|--------|---|------------------------|------|-------------|
| 960.4785   | 960.4465    | -0.032  | -33   | 113        | 119      | LEVEWER          |           |        |   |                        |      | Mascot      |
| 984.4243   | 984.3897    | -0.0346 | -35   | 85         | 92       | FSWGAECK         |           |        |   | Carbamidomethyl (C)[7] |      | Mascot      |
| 1287.6691  | 1287.6293   | -0.0398 | -31   | 100        | 112      | AEAGVLGEFPAAR    |           |        |   |                        |      | Mascot      |
| 1287.6691  | 1287.6293   | -0.0398 | -31   | 100        | 112      | AEAGVLGEFPAAR    | 66        | 99.994 |   |                        |      | Mascot      |
| 1642.9315  | 1642.8798   | -0.0517 | -31   | 16         | 30       | FLGNDLPPVFIIAR   | 116       | 100    |   |                        |      | Mascot      |
| 1642.9315  | 1642.8798   | -0.0517 | -31   | 16         | 30       | FLGNDLPPVFIIAR   |           |        |   |                        |      | Mascot      |
| 1826.9799  | 1826.9232   | -0.0567 | -31   | 38         | 53       | LLGYQLAAYFDKPTAR |           |        |   |                        |      | Mascot      |
| 1826.9799  | 1826.9232   | -0.0567 | -31   | 38         | 53       | LLGYQLAAYFDKPTAR | 17        | 0      |   |                        |      | Mascot      |

|   |                              |  |  |  |              |  |          |      |   |     |     |     |     |  |
|---|------------------------------|--|--|--|--------------|--|----------|------|---|-----|-----|-----|-----|--|
| 8 | vitellogenin 7 [Danio rerio] |  |  |  | gi 156713467 |  | 148739.2 | 8.76 | 8 | 208 | 100 | 199 | 100 |  |
|---|------------------------------|--|--|--|--------------|--|----------|------|---|-----|-----|-----|-----|--|

Peptide Information

| Calc. Mass | Obsrv. Mass | ± da    | ± ppm | Start Seq. | End Seq. | Sequence                | Ion Score | C. I.  | % | Modification                                 | Rank | Result Type |
|------------|-------------|---------|-------|------------|----------|-------------------------|-----------|--------|---|----------------------------------------------|------|-------------|
| 960.4785   | 960.4465    | -0.032  | -33   | 1254       | 1260     | LEVEWER                 |           |        |   |                                              |      | Mascot      |
| 984.4243   | 984.3897    | -0.0346 | -35   | 1226       | 1233     | FSWGAECK                |           |        |   | Carbamidomethyl (C)[7]                       |      | Mascot      |
| 1287.6691  | 1287.6293   | -0.0398 | -31   | 1241       | 1253     | AEAGVLGEFPAAR           |           |        |   |                                              |      | Mascot      |
| 1287.6691  | 1287.6293   | -0.0398 | -31   | 1241       | 1253     | AEAGVLGEFPAAR           | 66        | 99.994 |   |                                              |      | Mascot      |
| 1564.731   | 1564.7358   | 0.0048  | 3     | 1067       | 1081     | NAPVSSSESSSRNSR         |           |        |   |                                              |      | Mascot      |
| 1642.9315  | 1642.8798   | -0.0517 | -31   | 1157       | 1171     | FLGNDLPPVFIIAR          | 116       | 100    |   |                                              |      | Mascot      |
| 1642.9315  | 1642.8798   | -0.0517 | -31   | 1157       | 1171     | FLGNDLPPVFIIAR          |           |        |   |                                              |      | Mascot      |
| 1826.9799  | 1826.9232   | -0.0567 | -31   | 1179       | 1194     | LLGYQLAAYFDKPTAR        |           |        |   |                                              |      | Mascot      |
| 1826.9799  | 1826.9232   | -0.0567 | -31   | 1179       | 1194     | LLGYQLAAYFDKPTAR        | 17        | 0      |   |                                              |      | Mascot      |
| 1999.9099  | 2000.0299   | 0.12    | 60    | 195        | 212      | DVGLAYTESCPECTER<br>VK  |           |        |   |                                              |      | Mascot      |
| 2275.0039  | 2274.9607   | -0.0432 | -19   | 192        | 210      | IMKDVGLAYTESCPECTE<br>R |           |        |   | Carbamidomethyl (C)[13,16], Oxidation (M)[2] |      | Mascot      |

9 novel protein similar to vitellogenin 1 (vg1) [Danio rerio] gi|94732723 147084.2 8.73 9 202 100 199 100

Peptide Information

| Calc. Mass | Obsrv. Mass | ± da    | ± ppm | Start Seq. | End Seq. | Sequence                | Ion Score | C. I.  | % Modification                               | Rank | Result Type |
|------------|-------------|---------|-------|------------|----------|-------------------------|-----------|--------|----------------------------------------------|------|-------------|
| 960.4785   | 960.4465    | -0.032  | -33   | 1239       | 1245     | LEVEWER                 |           |        |                                              |      | Mascot      |
| 984.4243   | 984.3897    | -0.0346 | -35   | 1211       | 1218     | FSWGAECK                |           |        | Carbamidomethyl (C)[7]                       |      | Mascot      |
| 1287.6691  | 1287.6293   | -0.0398 | -31   | 1226       | 1238     | AEAGVLGEFPAAR           |           |        |                                              |      | Mascot      |
| 1287.6691  | 1287.6293   | -0.0398 | -31   | 1226       | 1238     | AEAGVLGEFPAAR           | 66        | 99.994 |                                              |      | Mascot      |
| 1564.731   | 1564.7358   | 0.0048  | 3     | 1067       | 1081     | NAPVSSSESSSRNSR         |           |        |                                              |      | Mascot      |
| 1642.9315  | 1642.8798   | -0.0517 | -31   | 1142       | 1156     | FLGNDLPPVFIIAR          | 116       | 100    |                                              |      | Mascot      |
| 1642.9315  | 1642.8798   | -0.0517 | -31   | 1142       | 1156     | FLGNDLPPVFIIAR          |           |        |                                              |      | Mascot      |
| 1660.7119  | 1660.6855   | -0.0264 | -16   | 1123       | 1138     | DTSSGSAASFEQMQK         |           |        | Oxidation (M)[14]                            |      | Mascot      |
| 1826.9799  | 1826.9232   | -0.0567 | -31   | 1164       | 1179     | LLGYQLAAYFDKPTAR        |           |        |                                              |      | Mascot      |
| 1826.9799  | 1826.9232   | -0.0567 | -31   | 1164       | 1179     | LLGYQLAAYFDKPTAR        | 17        | 0      |                                              |      | Mascot      |
| 1999.9099  | 2000.0299   | 0.12    | 60    | 195        | 212      | DVGLAYTESCPECTERV<br>K  |           |        |                                              |      | Mascot      |
| 2275.0039  | 2274.9607   | -0.0432 | -19   | 192        | 210      | IMKDVGLAYTESCPECTE<br>R |           |        | Carbamidomethyl (C)[13,16], Oxidation (M)[2] |      | Mascot      |

10 vitellogenin 6 [Danio rerio] gi|57864787 38968.8 8.92 8 167 100 132 100

Peptide Information

| Calc. Mass | Obsrv. Mass | ± da    | ± ppm | Start Seq. | End Seq. | Sequence           | Ion Score | C. I. | % Modification         | Rank | Result Type |
|------------|-------------|---------|-------|------------|----------|--------------------|-----------|-------|------------------------|------|-------------|
| 960.4785   | 960.4465    | -0.032  | -33   | 255        | 261      | LEVEWER            |           |       |                        |      | Mascot      |
| 984.4243   | 984.3897    | -0.0346 | -35   | 227        | 234      | FSWGAECK           |           |       | Carbamidomethyl (C)[7] |      | Mascot      |
| 1294.5869  | 1294.666    | 0.0791  | 61    | 59         | 71       | NAPVSSSESSSSSR     |           |       |                        |      | Mascot      |
| 1327.7216  | 1327.6823   | -0.0393 | -30   | 297        | 308      | EIELTAALPSQR       |           |       |                        |      | Mascot      |
| 1642.9315  | 1642.8798   | -0.0517 | -31   | 158        | 172      | FLGNDIPPVFIIAR     | 116       | 100   |                        |      | Mascot      |
| 1642.9315  | 1642.8798   | -0.0517 | -31   | 158        | 172      | FLGNDIPPVFIIAR     |           |       |                        |      | Mascot      |
| 1660.7119  | 1660.6855   | -0.0264 | -16   | 139        | 154      | DTSSGSAASFEQMQK    |           |       | Oxidation (M)[14]      |      | Mascot      |
| 1826.9799  | 1826.9232   | -0.0567 | -31   | 180        | 195      | LLGYQLAAYFDKPTAR   |           |       |                        |      | Mascot      |
| 1826.9799  | 1826.9232   | -0.0567 | -31   | 180        | 195      | LLGYQLAAYFDKPTAR   | 17        | 0     |                        |      | Mascot      |
| 1958.0189  | 1957.9572   | -0.0617 | -32   | 291        | 308      | ATNSEKEIELTAALPSQR |           |       |                        |      | Mascot      |

11 Zgc:136383 [Danio rerio] gi|92097636 28809.9 9.33 6 156 100 132 100

Peptide Information

| Calc. Mass | Obsrv. Mass | ± da | ± ppm | Start Seq. | End Seq. | Sequence | Ion Score | C. I. | % Modification | Rank | Result Type |
|------------|-------------|------|-------|------------|----------|----------|-----------|-------|----------------|------|-------------|
|------------|-------------|------|-------|------------|----------|----------|-----------|-------|----------------|------|-------------|

|    |                            |           |         |     |              |     |                  |     |     |     |     |     |                        |  |  |  |        |
|----|----------------------------|-----------|---------|-----|--------------|-----|------------------|-----|-----|-----|-----|-----|------------------------|--|--|--|--------|
|    | 960.4785                   | 960.4465  | -0.032  | -33 | 156          | 162 | LEVEWER          |     |     |     |     |     |                        |  |  |  | Mascot |
|    | 984.4243                   | 984.3897  | -0.0346 | -35 | 128          | 135 | FSWGAECK         |     |     |     |     |     | Carbamidomethyl (C)[7] |  |  |  | Mascot |
|    | 1045.5465                  | 1045.5309 | -0.0156 | -15 | 246          | 253 | DFLSWIHK         |     |     |     |     |     |                        |  |  |  | Mascot |
|    | 1642.9315                  | 1642.8798 | -0.0517 | -31 | 59           | 73  | FLGNDIPPVFIIAR   |     | 116 | 100 |     |     |                        |  |  |  | Mascot |
|    | 1642.9315                  | 1642.8798 | -0.0517 | -31 | 59           | 73  | FLGNDIPPVFIIAR   |     |     |     |     |     |                        |  |  |  | Mascot |
|    | 1660.7119                  | 1660.6855 | -0.0264 | -16 | 40           | 55  | DTSSGSAASFEQMQK  |     |     |     |     |     | Oxidation (M)[14]      |  |  |  | Mascot |
|    | 1826.9799                  | 1826.9232 | -0.0567 | -31 | 81           | 96  | LLGYQLAAYFDKPTAR |     |     |     |     |     |                        |  |  |  | Mascot |
|    | 1826.9799                  | 1826.9232 | -0.0567 | -31 | 81           | 96  | LLGYQLAAYFDKPTAR |     | 17  | 0   |     |     |                        |  |  |  | Mascot |
| 12 | Vtg5 protein [Danio rerio] |           |         |     | gi 148744685 |     | 27543.3          | 9.2 | 5   | 151 | 100 | 132 | 100                    |  |  |  |        |

Peptide Information

| Calc. Mass | Obsrv. Mass | ± da    | ± ppm | Start Seq. | End Seq. | Sequence         | Ion Score | C. I. | % | Modification           | Rank | Result | Type   |
|------------|-------------|---------|-------|------------|----------|------------------|-----------|-------|---|------------------------|------|--------|--------|
| 960.4785   | 960.4465    | -0.032  | -33   | 144        | 150      | LEVEWER          |           |       |   |                        |      |        | Mascot |
| 984.4243   | 984.3897    | -0.0346 | -35   | 116        | 123      | FSWGAECK         |           |       |   | Carbamidomethyl (C)[7] |      |        | Mascot |
| 1642.9315  | 1642.8798   | -0.0517 | -31   | 47         | 61       | FLGNDIPPVFIIAR   | 116       | 100   |   |                        |      |        | Mascot |
| 1642.9315  | 1642.8798   | -0.0517 | -31   | 47         | 61       | FLGNDIPPVFIIAR   |           |       |   |                        |      |        | Mascot |
| 1660.7119  | 1660.6855   | -0.0264 | -16   | 28         | 43       | DTSSGSAASFEQMQK  |           |       |   | Oxidation (M)[14]      |      |        | Mascot |
| 1826.9799  | 1826.9232   | -0.0567 | -31   | 69         | 84       | LLGYQLAAYFDKPTAR |           |       |   |                        |      |        | Mascot |
| 1826.9799  | 1826.9232   | -0.0567 | -31   | 69         | 84       | LLGYQLAAYFDKPTAR | 17        | 0     |   |                        |      |        | Mascot |

|    |                              |  |  |  |             |  |         |      |   |     |     |     |     |  |  |  |  |
|----|------------------------------|--|--|--|-------------|--|---------|------|---|-----|-----|-----|-----|--|--|--|--|
| 13 | vitellogenin 4 [Danio rerio] |  |  |  | gi 57864783 |  | 31189.9 | 9.48 | 5 | 149 | 100 | 132 | 100 |  |  |  |  |
|----|------------------------------|--|--|--|-------------|--|---------|------|---|-----|-----|-----|-----|--|--|--|--|

Peptide Information

| Calc. Mass | Obsrv. Mass | ± da    | ± ppm | Start Seq. | End Seq. | Sequence         | Ion Score | C. I. | % | Modification           | Rank | Result | Type   |
|------------|-------------|---------|-------|------------|----------|------------------|-----------|-------|---|------------------------|------|--------|--------|
| 960.4785   | 960.4465    | -0.032  | -33   | 182        | 188      | LEVEWER          |           |       |   |                        |      |        | Mascot |
| 984.4243   | 984.3897    | -0.0346 | -35   | 154        | 161      | FSWGAECK         |           |       |   | Carbamidomethyl (C)[7] |      |        | Mascot |
| 1642.9315  | 1642.8798   | -0.0517 | -31   | 85         | 99       | FLGNDIPPVFIIAR   | 116       | 100   |   |                        |      |        | Mascot |
| 1642.9315  | 1642.8798   | -0.0517 | -31   | 85         | 99       | FLGNDIPPVFIIAR   |           |       |   |                        |      |        | Mascot |
| 1660.7119  | 1660.6855   | -0.0264 | -16   | 66         | 81       | DTSSGSAASFEQMQK  |           |       |   | Oxidation (M)[14]      |      |        | Mascot |
| 1826.9799  | 1826.9232   | -0.0567 | -31   | 107        | 122      | LLGYQLAAYFDKPTAR |           |       |   |                        |      |        | Mascot |
| 1826.9799  | 1826.9232   | -0.0567 | -31   | 107        | 122      | LLGYQLAAYFDKPTAR | 17        | 0     |   |                        |      |        | Mascot |

|    |                            |  |  |  |              |  |         |      |   |     |     |     |     |  |  |  |  |
|----|----------------------------|--|--|--|--------------|--|---------|------|---|-----|-----|-----|-----|--|--|--|--|
| 14 | Vtg6 protein [Danio rerio] |  |  |  | gi 157422885 |  | 27937.4 | 9.18 | 7 | 146 | 100 | 116 | 100 |  |  |  |  |
|----|----------------------------|--|--|--|--------------|--|---------|------|---|-----|-----|-----|-----|--|--|--|--|

Peptide Information

| Calc. Mass | Obsrv. Mass | ± da | ± ppm | Start Seq. | End Seq. | Sequence | Ion Score | C. I. | % | Modification | Rank | Result | Type |
|------------|-------------|------|-------|------------|----------|----------|-----------|-------|---|--------------|------|--------|------|
|------------|-------------|------|-------|------------|----------|----------|-----------|-------|---|--------------|------|--------|------|

|           |           |         |     |     |     |                    |  |     |     |  |  |                        |  |  |  |  |        |
|-----------|-----------|---------|-----|-----|-----|--------------------|--|-----|-----|--|--|------------------------|--|--|--|--|--------|
| 913.423   | 913.5172  | 0.0942  | 103 | 1   | 8   | MSSSRMSK           |  |     |     |  |  |                        |  |  |  |  | Mascot |
| 913.423   | 913.5172  | 0.0942  | 103 | 1   | 8   | MSSSRMSK           |  |     |     |  |  |                        |  |  |  |  | Mascot |
| 960.4785  | 960.4465  | -0.032  | -33 | 149 | 155 | LEVEWER            |  |     |     |  |  |                        |  |  |  |  | Mascot |
| 984.4243  | 984.3897  | -0.0346 | -35 | 121 | 128 | FSWGAECK           |  |     |     |  |  | Carbamidomethyl (C)[7] |  |  |  |  | Mascot |
| 1327.7216 | 1327.6823 | -0.0393 | -30 | 191 | 202 | EIELTAALPSQR       |  |     |     |  |  |                        |  |  |  |  | Mascot |
| 1642.9315 | 1642.8798 | -0.0517 | -31 | 52  | 66  | FLGNDIPPVFIIAR     |  | 116 | 100 |  |  |                        |  |  |  |  | Mascot |
| 1642.9315 | 1642.8798 | -0.0517 | -31 | 52  | 66  | FLGNDIPPVFIIAR     |  |     |     |  |  |                        |  |  |  |  | Mascot |
| 1660.7119 | 1660.6855 | -0.0264 | -16 | 33  | 48  | DTSSGSAASFEQMQK    |  |     |     |  |  | Oxidation (M)[14]      |  |  |  |  | Mascot |
| 1958.0189 | 1957.9572 | -0.0617 | -32 | 185 | 202 | ATNSEKEIELTAALPSQR |  |     |     |  |  |                        |  |  |  |  | Mascot |

15 vitellogenin 6 [Danio rerio] gi|303227889 150936.1 8.84 10 143 100 132 100

#### Peptide Information

| Calc. Mass | Obsrv. Mass | ± da    | ± ppm | Start Seq. | End Seq. | Sequence                   | Ion Score | C. I. | % | Modification           | Rank | Result Type |
|------------|-------------|---------|-------|------------|----------|----------------------------|-----------|-------|---|------------------------|------|-------------|
| 960.4785   | 960.4465    | -0.032  | -33   | 1276       | 1282     | LEVEWER                    |           |       |   |                        |      | Mascot      |
| 984.4243   | 984.3897    | -0.0346 | -35   | 1248       | 1255     | FSWGAECK                   |           |       |   | Carbamidomethyl (C)[7] |      | Mascot      |
| 1294.5869  | 1294.666    | 0.0791  | 61    | 1078       | 1090     | NAPVSSSSSSSR               |           |       |   |                        |      | Mascot      |
| 1327.7216  | 1327.6823   | -0.0393 | -30   | 1318       | 1329     | EIELTAALPSQR               |           |       |   |                        |      | Mascot      |
| 1642.9315  | 1642.8798   | -0.0517 | -31   | 1179       | 1193     | FLGNDIPPVFIIAR             | 116       | 100   |   |                        |      | Mascot      |
| 1642.9315  | 1642.8798   | -0.0517 | -31   | 1179       | 1193     | FLGNDIPPVFIIAR             |           |       |   |                        |      | Mascot      |
| 1660.7119  | 1660.6855   | -0.0264 | -16   | 1160       | 1175     | DTSSGSAASFEQMQK            |           |       |   | Oxidation (M)[14]      |      | Mascot      |
| 1826.9799  | 1826.9232   | -0.0567 | -31   | 1201       | 1216     | LLGYQLAAYFDKPTAR           |           |       |   |                        |      | Mascot      |
| 1826.9799  | 1826.9232   | -0.0567 | -31   | 1201       | 1216     | LLGYQLAAYFDKPTAR           | 17        | 0     |   |                        |      | Mascot      |
| 1847.8745  | 1847.8473   | -0.0272 | -15   | 588        | 603      | TEPNMHVASFAYSHIK           |           |       |   | Oxidation (M)[5]       |      | Mascot      |
| 1958.0189  | 1957.9572   | -0.0617 | -32   | 1312       | 1329     | ATNSEKEIELTAALPSQR         |           |       |   |                        |      | Mascot      |
| 2233.2009  | 2233.0156   | -0.1853 | -83   | 604        | 625      | SLTRITAPDMAYVAGAAN<br>VAIK |           |       |   |                        |      | Mascot      |

16 novel protein similar to vitellogenin 1 (vg1) [Danio rerio] gi|94733734 149808.5 8.83 10 142 100 132 100

#### Peptide Information

| Calc. Mass | Obsrv. Mass | ± da    | ± ppm | Start Seq. | End Seq. | Sequence       | Ion Score | C. I. | % | Modification           | Rank | Result Type |
|------------|-------------|---------|-------|------------|----------|----------------|-----------|-------|---|------------------------|------|-------------|
| 960.4785   | 960.4465    | -0.032  | -33   | 1265       | 1271     | LEVEWER        |           |       |   |                        |      | Mascot      |
| 984.4243   | 984.3897    | -0.0346 | -35   | 1237       | 1244     | FSWGAECK       |           |       |   | Carbamidomethyl (C)[7] |      | Mascot      |
| 1294.5869  | 1294.666    | 0.0791  | 61    | 1071       | 1083     | NAPVSSSSSSSR   |           |       |   |                        |      | Mascot      |
| 1327.7216  | 1327.6823   | -0.0393 | -30   | 1307       | 1318     | EIELTAALPSQR   |           |       |   |                        |      | Mascot      |
| 1642.9315  | 1642.8798   | -0.0517 | -31   | 1168       | 1182     | FLGNDIPPVFIIAR | 116       | 100   |   |                        |      | Mascot      |
| 1642.9315  | 1642.8798   | -0.0517 | -31   | 1168       | 1182     | FLGNDIPPVFIIAR |           |       |   |                        |      | Mascot      |



|    |                                                             |           |         |     |      |      |                            |          |      |   |     |     |                   |     |        |
|----|-------------------------------------------------------------|-----------|---------|-----|------|------|----------------------------|----------|------|---|-----|-----|-------------------|-----|--------|
|    | 1660.7119                                                   | 1660.6855 | -0.0264 | -16 | 1149 | 1164 | DTSSGSAASFEQMQK            |          |      |   |     |     | Oxidation (M)[14] |     | Mascot |
|    | 1826.9799                                                   | 1826.9232 | -0.0567 | -31 | 1190 | 1205 | LLGYQLAAYFDKPTAR           |          |      |   |     |     |                   |     | Mascot |
|    | 1826.9799                                                   | 1826.9232 | -0.0567 | -31 | 1190 | 1205 | LLGYQLAAYFDKPTAR           | 17       | 0    |   |     |     |                   |     | Mascot |
|    | 1847.8745                                                   | 1847.8473 | -0.0272 | -15 | 581  | 596  | TEPNMHVASFAYSHIK           |          |      |   |     |     | Oxidation (M)[5]  |     | Mascot |
|    | 1958.0189                                                   | 1957.9572 | -0.0617 | -32 | 1301 | 1318 | ATNSEKEIELTAALPSQR         |          |      |   |     |     |                   |     | Mascot |
|    | 2233.2009                                                   | 2233.0156 | -0.1853 | -83 | 597  | 618  | SLTRITAPDMAYVAGAAN<br>VAIK |          |      |   |     |     |                   |     | Mascot |
| 17 | novel protein similar to vitellogenin 1 (vg1) [Danio rerio] |           |         |     |      |      | gi 94733733                | 149143.4 | 8.92 | 8 | 142 | 100 | 132               | 100 |        |

Peptide Information

| Calc. Mass | Obsrv. Mass | ± da    | ± ppm | Start Seq. | End Seq. | Sequence                   | Ion Score | C. I. | % | Modification           | Rank | Result | Type |
|------------|-------------|---------|-------|------------|----------|----------------------------|-----------|-------|---|------------------------|------|--------|------|
| 960.4785   | 960.4465    | -0.032  | -33   | 1260       | 1266     | LEVEWER                    |           |       |   |                        |      | Mascot |      |
| 984.4243   | 984.3897    | -0.0346 | -35   | 1232       | 1239     | FSWGAECK                   |           |       |   | Carbamidomethyl (C)[7] |      | Mascot |      |
| 1045.5465  | 1045.5309   | -0.0156 | -15   | 1350       | 1357     | DFLSWIHK                   |           |       |   |                        |      | Mascot |      |
| 1642.9315  | 1642.8798   | -0.0517 | -31   | 1163       | 1177     | FLGNDIPPVFIIAR             | 116       | 100   |   |                        |      | Mascot |      |
| 1642.9315  | 1642.8798   | -0.0517 | -31   | 1163       | 1177     | FLGNDIPPVFIIAR             |           |       |   |                        |      | Mascot |      |
| 1660.7119  | 1660.6855   | -0.0264 | -16   | 1144       | 1159     | DTSSGSAASFEQMQK            |           |       |   | Oxidation (M)[14]      |      | Mascot |      |
| 1826.9799  | 1826.9232   | -0.0567 | -31   | 1185       | 1200     | LLGYQLAAYFDKPTAR           |           |       |   |                        |      | Mascot |      |
| 1826.9799  | 1826.9232   | -0.0567 | -31   | 1185       | 1200     | LLGYQLAAYFDKPTAR           | 17        | 0     |   |                        |      | Mascot |      |
| 1847.8745  | 1847.8473   | -0.0272 | -15   | 581        | 596      | TEPNMHVASFAYSHIK           |           |       |   | Oxidation (M)[5]       |      | Mascot |      |
| 2233.2009  | 2233.0156   | -0.1853 | -83   | 597        | 618      | SLTRITAPDMAYVAGAAN<br>VAIK |           |       |   |                        |      | Mascot |      |

|    |                              |  |  |  |  |  |             |         |   |   |     |     |     |     |  |
|----|------------------------------|--|--|--|--|--|-------------|---------|---|---|-----|-----|-----|-----|--|
| 18 | vitellogenin 5 [Danio rerio] |  |  |  |  |  | gi 57864785 | 72820.8 | 9 | 6 | 141 | 100 | 132 | 100 |  |
|----|------------------------------|--|--|--|--|--|-------------|---------|---|---|-----|-----|-----|-----|--|

Peptide Information

| Calc. Mass | Obsrv. Mass | ± da    | ± ppm | Start Seq. | End Seq. | Sequence         | Ion Score | C. I. | % | Modification           | Rank | Result | Type |
|------------|-------------|---------|-------|------------|----------|------------------|-----------|-------|---|------------------------|------|--------|------|
| 960.4785   | 960.4465    | -0.032  | -33   | 564        | 570      | LEVEWER          |           |       |   |                        |      | Mascot |      |
| 984.4243   | 984.3897    | -0.0346 | -35   | 536        | 543      | FSWGAECK         |           |       |   | Carbamidomethyl (C)[7] |      | Mascot |      |
| 1642.9315  | 1642.8798   | -0.0517 | -31   | 467        | 481      | FLGNDIPPVFIIAR   | 116       | 100   |   |                        |      | Mascot |      |
| 1642.9315  | 1642.8798   | -0.0517 | -31   | 467        | 481      | FLGNDIPPVFIIAR   |           |       |   |                        |      | Mascot |      |
| 1660.7119  | 1660.6855   | -0.0264 | -16   | 448        | 463      | DTSSGSAASFEQMQK  |           |       |   | Oxidation (M)[14]      |      | Mascot |      |
| 1719.9462  | 1719.8474   | -0.0988 | -57   | 618        | 632      | SLNFIARIPEITMSK  |           |       |   |                        |      | Mascot |      |
| 1826.9799  | 1826.9232   | -0.0567 | -31   | 489        | 504      | LLGYQLAAYFDKPTAR |           |       |   |                        |      | Mascot |      |
| 1826.9799  | 1826.9232   | -0.0567 | -31   | 489        | 504      | LLGYQLAAYFDKPTAR | 17        | 0     |   |                        |      | Mascot |      |

|    |                                  |  |  |  |  |  |              |          |      |   |     |     |     |     |  |
|----|----------------------------------|--|--|--|--|--|--------------|----------|------|---|-----|-----|-----|-----|--|
| 19 | Zgc:136383 protein [Danio rerio] |  |  |  |  |  | gi 125857991 | 148644.2 | 8.93 | 7 | 141 | 100 | 132 | 100 |  |
|----|----------------------------------|--|--|--|--|--|--------------|----------|------|---|-----|-----|-----|-----|--|

Peptide Information

|    | Calc. Mass                                                  | Obsrv. Mass | ± da    | ± ppm | Start Seq. | End Sequence Seq.              |          | Ion Score | C. I. | % Modification         | Rank | Result Type |     |
|----|-------------------------------------------------------------|-------------|---------|-------|------------|--------------------------------|----------|-----------|-------|------------------------|------|-------------|-----|
|    | 960.4785                                                    | 960.4465    | -0.032  | -33   | 1255       | 1261 LEVEWER                   |          |           |       |                        |      | Mascot      |     |
|    | 984.4243                                                    | 984.3897    | -0.0346 | -35   | 1227       | 1234 FSWGAECK                  |          |           |       | Carbamidomethyl (C)[7] |      | Mascot      |     |
|    | 1045.5465                                                   | 1045.5309   | -0.0156 | -15   | 1345       | 1352 DFLSWIHK                  |          |           |       |                        |      | Mascot      |     |
|    | 1642.9315                                                   | 1642.8798   | -0.0517 | -31   | 1158       | 1172 FLGNDIPPVFIIAR            |          | 116       | 100   |                        |      | Mascot      |     |
|    | 1642.9315                                                   | 1642.8798   | -0.0517 | -31   | 1158       | 1172 FLGNDIPPVFIIAR            |          |           |       |                        |      | Mascot      |     |
|    | 1660.7119                                                   | 1660.6855   | -0.0264 | -16   | 1139       | 1154 DTSSGSAAASFEQMQK          |          |           |       | Oxidation (M)[14]      |      | Mascot      |     |
|    | 1826.9799                                                   | 1826.9232   | -0.0567 | -31   | 1180       | 1195 LLGYQLAAYFDKPTAR          |          |           |       |                        |      | Mascot      |     |
|    | 1826.9799                                                   | 1826.9232   | -0.0567 | -31   | 1180       | 1195 LLGYQLAAYFDKPTAR          |          | 17        | 0     |                        |      | Mascot      |     |
|    | 2233.2009                                                   | 2233.0156   | -0.1853 | -83   | 592        | 613 SLTRITAPDMAYVAGAAN<br>VAIK |          |           |       |                        |      | Mascot      |     |
| 20 | novel protein similar to vitellogenin 1 (vg1) [Danio rerio] |             |         |       |            | gi 94733731                    | 149169.2 | 8.84      | 7     | 140                    | 100  | 132         | 100 |

#### Peptide Information

|    | Calc. Mass                       | Obsrv. Mass | ± da    | ± ppm | Start Seq.   | End Sequence Seq. |                  | Ion Score | C. I. | % Modification         | Rank | Result Type |     |
|----|----------------------------------|-------------|---------|-------|--------------|-------------------|------------------|-----------|-------|------------------------|------|-------------|-----|
|    | 960.4785                         | 960.4465    | -0.032  | -33   | 1260         | 1266              | LEVEWER          |           |       |                        |      | Mascot      |     |
|    | 984.4243                         | 984.3897    | -0.0346 | -35   | 1232         | 1239              | FSWGAECK         |           |       | Carbamidomethyl (C)[7] |      | Mascot      |     |
|    | 1642.9315                        | 1642.8798   | -0.0517 | -31   | 1163         | 1177              | FLGNDIPPVFIIAR   | 116       | 100   |                        |      | Mascot      |     |
|    | 1642.9315                        | 1642.8798   | -0.0517 | -31   | 1163         | 1177              | FLGNDIPPVFIIAR   |           |       |                        |      | Mascot      |     |
|    | 1660.7119                        | 1660.6855   | -0.0264 | -16   | 1144         | 1159              | DTSSGSAAASFEQMQK |           |       | Oxidation (M)[14]      |      | Mascot      |     |
|    | 1719.9462                        | 1719.8474   | -0.0988 | -57   | 1314         | 1328              | SLNFIARIPEITMSK  |           |       |                        |      | Mascot      |     |
|    | 1826.9799                        | 1826.9232   | -0.0567 | -31   | 1185         | 1200              | LLGYQLAAYFDKPTAR |           |       |                        |      | Mascot      |     |
|    | 1826.9799                        | 1826.9232   | -0.0567 | -31   | 1185         | 1200              | LLGYQLAAYFDKPTAR | 17        | 0     |                        |      | Mascot      |     |
|    | 1847.8745                        | 1847.8473   | -0.0272 | -15   | 581          | 596               | TEPNMHVSSFAYSHIK |           |       |                        |      | Mascot      |     |
| 21 | Zgc:136383 protein [Danio rerio] |             |         |       | gi 159155252 |                   | 123957.1         | 8.78      | 8     | 138                    | 100  | 132         | 100 |

#### Peptide Information

|  | Calc. Mass | Obsrv. Mass | ± da    | ± ppm | Start Seq. | End Sequence Seq.    | Ion Score | C. I. | % Modification         | Rank | Result Type |
|--|------------|-------------|---------|-------|------------|----------------------|-----------|-------|------------------------|------|-------------|
|  | 960.4785   | 960.4465    | -0.032  | -33   | 1033       | 1039 LEVEWER         |           |       |                        |      | Mascot      |
|  | 984.4243   | 984.3897    | -0.0346 | -35   | 1005       | 1012 FSWGAECK        |           |       | Carbamidomethyl (C)[7] |      | Mascot      |
|  | 1045.5465  | 1045.5309   | -0.0156 | -15   | 1123       | 1130 DFLSWIHK        |           |       |                        |      | Mascot      |
|  | 1642.9315  | 1642.8798   | -0.0517 | -31   | 936        | 950 FLGNDIPPVFIIAR   | 116       | 100   |                        |      | Mascot      |
|  | 1642.9315  | 1642.8798   | -0.0517 | -31   | 936        | 950 FLGNDIPPVFIIAR   |           |       |                        |      | Mascot      |
|  | 1660.7119  | 1660.6855   | -0.0264 | -16   | 917        | 932 DTSSGSAAASFEQMQK |           |       | Oxidation (M)[14]      |      | Mascot      |
|  | 1826.9799  | 1826.9232   | -0.0567 | -31   | 958        | 973 LLGYQLAAYFDKPTAR |           |       |                        |      | Mascot      |

|    |                                                 |           |         |     |              |          |                            |    |                  |   |        |
|----|-------------------------------------------------|-----------|---------|-----|--------------|----------|----------------------------|----|------------------|---|--------|
|    | 1826.9799                                       | 1826.9232 | -0.0567 | -31 | 958          | 973      | LLGYQLAAYFDKPTAR           | 17 | 0                |   | Mascot |
|    | 1847.8745                                       | 1847.8473 | -0.0272 | -15 | 354          | 369      | TEPNMHVASFAYSHIK           |    | Oxidation (M)[5] |   | Mascot |
|    | 2233.2009                                       | 2233.0156 | -0.1853 | -83 | 370          | 391      | SLTRITAPDMAYVAGAAN<br>VAIK |    |                  |   | Mascot |
| 22 | myosin binding protein C, cardiac [Danio rerio] |           |         |     | gi 172072588 | 142220.7 | 6.34                       | 17 | 45               | 0 |        |

Peptide Information

| Calc. Mass | Obsrv. Mass | ± da    | ± ppm | Start Seq. | End Seq. | Sequence                          | Ion Score | C. I. | % Modification    | Rank | Result Type |
|------------|-------------|---------|-------|------------|----------|-----------------------------------|-----------|-------|-------------------|------|-------------|
| 833.4264   | 833.4261    | -0.0003 | 0     | 42         | 47       | WQRESK                            |           |       |                   |      | Mascot      |
| 848.4545   | 848.4752    | 0.0207  | 24    | 194        | 201      | VCGESLLK                          |           |       |                   |      | Mascot      |
| 850.4127   | 850.5135    | 0.1008  | 119   | 212        | 218      | WMDLASK                           |           |       |                   |      | Mascot      |
| 960.4389   | 960.4465    | 0.0076  | 8     | 657        | 664      | IHLDCMGR                          |           |       | Oxidation (M)[6]  |      | Mascot      |
| 1045.4585  | 1045.5309   | 0.0724  | 69    | 1157       | 1165     | DHDFSEAPK                         |           |       |                   |      | Mascot      |
| 1051.524   | 1051.6779   | 0.1539  | 146   | 210        | 218      | GKWMDLASK                         |           |       | Oxidation (M)[4]  |      | Mascot      |
| 1122.5612  | 1122.4762   | -0.085  | -76   | 212        | 221      | WMDLASKSGK                        |           |       |                   |      | Mascot      |
| 1122.5612  | 1122.4762   | -0.085  | -76   | 212        | 221      | WMDLASKSGK                        |           |       |                   |      | Mascot      |
| 1294.6638  | 1294.666    | 0.0022  | 2     | 1006       | 1016     | NSDTDILFIR                        |           |       |                   |      | Mascot      |
| 1426.7423  | 1426.5715   | -0.1708 | -120  | 393        | 405      | LEIEVANPDAEVK                     |           |       |                   |      | Mascot      |
| 1642.8395  | 1642.8798   | 0.0403  | 25    | 700        | 714      | VLTDSDGRVHVESTK                   |           |       |                   |      | Mascot      |
| 1642.8395  | 1642.8798   | 0.0403  | 25    | 700        | 714      | VLTDSDGRVHVESTK                   |           |       |                   |      | Mascot      |
| 1826.9581  | 1826.9232   | -0.0349 | -19   | 1210       | 1224     | YRMFSNQGVLTLEIR                   |           |       |                   |      | Mascot      |
| 1826.9581  | 1826.9232   | -0.0349 | -19   | 1210       | 1224     | YRMFSNQGVLTLEIR                   |           |       |                   |      | Mascot      |
| 1847.9531  | 1847.8473   | -0.1058 | -57   | 537        | 553      | VKTNGGQSLAELMVQEK                 |           |       | Oxidation (M)[13] |      | Mascot      |
| 1854.0007  | 1853.9648   | -0.0359 | -19   | 393        | 408      | LEIEVANPDAEVKWLK                  |           |       |                   |      | Mascot      |
| 1889.0491  | 1888.845    | -0.2041 | -108  | 1039       | 1056     | ASVNIQIVDVP GPPQNLK               |           |       |                   |      | Mascot      |
| 2273.1536  | 2272.9565   | -0.1971 | -87   | 235        | 254      | VYTFEMHIIAAKANFAGA<br>YR          |           |       |                   |      | Mascot      |
| 2463.2515  | 2463.1772   | -0.0743 | -30   | 894        | 915      | EGSDEWIPAFSGLTERTS<br>VIIR        |           |       |                   |      | Mascot      |
| 3192.6455  | 3192.3184   | -0.3271 | -102  | 539        | 567      | TNGGQSLAELMVQEKQL<br>EVYQSIADLTVK |           |       |                   |      | Mascot      |
| 3208.6406  | 3208.3218   | -0.3188 | -99   | 539        | 567      | TNGGQSLAELMVQEKQL<br>EVYQSIADLTVK |           |       | Oxidation (M)[11] |      | Mascot      |

|    |                                                                        |  |  |  |              |          |      |    |    |   |  |
|----|------------------------------------------------------------------------|--|--|--|--------------|----------|------|----|----|---|--|
| 23 | PREDICTED: ubiquitin carboxyl-terminal hydrolase 43-like [Danio rerio] |  |  |  | gi 189517011 | 128296.5 | 9.38 | 16 | 44 | 0 |  |
|----|------------------------------------------------------------------------|--|--|--|--------------|----------|------|----|----|---|--|

Peptide Information

| Calc. Mass | Obsrv. Mass | ± da   | ± ppm | Start Seq. | End Seq. | Sequence | Ion Score | C. I. | % Modification | Rank | Result Type |
|------------|-------------|--------|-------|------------|----------|----------|-----------|-------|----------------|------|-------------|
| 850.4377   | 850.5135    | 0.0758 | 89    | 1077       | 1084     | STSKTNGR |           |       |                |      | Mascot      |

|           |           |         |      |      |      |                                    |  |  |  |                   |  |  |        |
|-----------|-----------|---------|------|------|------|------------------------------------|--|--|--|-------------------|--|--|--------|
| 870.4315  | 870.4901  | 0.0586  | 67   | 1147 | 1154 | YSSTSLGR                           |  |  |  |                   |  |  | Mascot |
| 960.4495  | 960.4465  | -0.003  | -3   | 104  | 111  | MFSLYGDK                           |  |  |  |                   |  |  | Mascot |
| 964.5073  | 964.4218  | -0.0855 | -89  | 447  | 454  | FGPPFLMR                           |  |  |  |                   |  |  | Mascot |
| 996.5472  | 996.5653  | 0.0181  | 18   | 1121 | 1130 | NGPLVPASNK                         |  |  |  |                   |  |  | Mascot |
| 1045.5636 | 1045.5309 | -0.0327 | -31  | 1071 | 1080 | TGTVHKSTSK                         |  |  |  |                   |  |  | Mascot |
| 1051.5353 | 1051.6779 | 0.1426  | 136  | 522  | 532  | LCGSGGPPHVK                        |  |  |  |                   |  |  | Mascot |
| 1144.615  | 1144.4584 | -0.1566 | -137 | 733  | 741  | AAYILFYQR                          |  |  |  |                   |  |  | Mascot |
| 1287.6262 | 1287.6293 | 0.0031  | 2    | 656  | 667  | TSCARAPPGWNK                       |  |  |  |                   |  |  | Mascot |
| 1287.6514 | 1287.6293 | -0.0221 | -17  | 200  | 210  | MTVSKYGAQFR                        |  |  |  |                   |  |  | Mascot |
| 1364.678  | 1364.6533 | -0.0247 | -18  | 447  | 457  | FGPPFLMREDR                        |  |  |  |                   |  |  | Mascot |
| 1364.678  | 1364.6533 | -0.0247 | -18  | 447  | 457  | FGPPFLMREDR                        |  |  |  |                   |  |  | Mascot |
| 1564.8516 | 1564.7358 | -0.1158 | -74  | 294  | 307  | QTRPVCVTLVFSSK                     |  |  |  |                   |  |  | Mascot |
| 1826.9006 | 1826.9232 | 0.0226  | 12   | 472  | 486  | LYYLMINGSQAHNFR                    |  |  |  |                   |  |  | Mascot |
| 1826.9006 | 1826.9232 | 0.0226  | 12   | 472  | 486  | LYYLMINGSQAHNFR                    |  |  |  |                   |  |  | Mascot |
| 1948.12   | 1947.9528 | -0.1672 | -86  | 311  | 328  | YLRVGLAVPLFGSLACLR                 |  |  |  |                   |  |  | Mascot |
| 2492.2529 | 2492.147  | -0.1059 | -42  | 184  | 204  | ALWTFQYTPQLSAEFKM<br>TVSK          |  |  |  | Oxidation (M)[17] |  |  | Mascot |
| 3516.6709 | 3516.5327 | -0.1382 | -39  | 120  | 150  | NHGNTCFMNAVQCLSN<br>TDLLAEYLGLERYK |  |  |  |                   |  |  | Mascot |

24 PREDICTED: hypothetical protein LOC100331050 [Danio rerio] gi|326678098 177019 5.35 19 40 0

#### Peptide Information

| Calc. Mass | Obsrv. Mass | ± da    | ± ppm | Start Seq. | End Seq. | Sequence        | Ion Score | C. I. % | Modification      | Rank | Result Type |
|------------|-------------|---------|-------|------------|----------|-----------------|-----------|---------|-------------------|------|-------------|
| 848.4359   | 848.4752    | 0.0393  | 46    | 1365       | 1371     | EKSDLEK         |           |         |                   |      | Mascot      |
| 850.4127   | 850.5135    | 0.1008  | 119   | 1204       | 1211     | MFGPEAAK        |           |         |                   |      | Mascot      |
| 964.5574   | 964.4218    | -0.1356 | -141  | 596        | 603      | IFSSRLNK        |           |         |                   |      | Mascot      |
| 996.5295   | 996.5653    | 0.0358  | 36    | 593        | 600      | MQKIFSSR        |           |         |                   |      | Mascot      |
| 1045.4983  | 1045.5309   | 0.0326  | 31    | 1429       | 1436     | HEEEKMVK        |           |         | Oxidation (M)[6]  |      | Mascot      |
| 1051.5684  | 1051.6779   | 0.1095  | 104   | 382        | 389      | IHRTFYSK        |           |         |                   |      | Mascot      |
| 1122.4884  | 1122.4762   | -0.0122 | -11   | 994        | 1001     | IEQEMWDR        |           |         | Oxidation (M)[5]  |      | Mascot      |
| 1122.4884  | 1122.4762   | -0.0122 | -11   | 994        | 1001     | IEQEMWDR        |           |         | Oxidation (M)[5]  |      | Mascot      |
| 1287.6436  | 1287.6293   | -0.0143 | -11   | 911        | 920      | MLLMKHEEEK      |           |         |                   |      | Mascot      |
| 1287.6436  | 1287.6293   | -0.0143 | -11   | 911        | 920      | MLLMKHEEEK      |           |         |                   |      | Mascot      |
| 1294.5797  | 1294.666    | 0.0863  | 67    | 1491       | 1500     | QELQDFEEK       |           |         |                   |      | Mascot      |
| 1660.8938  | 1660.6855   | -0.2083 | -125  | 872        | 885      | QVSELLEKINNMVK  |           |         | Oxidation (M)[12] |      | Mascot      |
| 1708.8615  | 1708.7289   | -0.1326 | -78   | 138        | 152      | FSSYVMNSAVYSLIK |           |         |                   |      | Mascot      |
| 1719.837   | 1719.8474   | 0.0104  | 6     | 837        | 851      | DIQHYLNSPGSTLMK |           |         | Oxidation (M)[14] |      | Mascot      |

|    |                                                                                          |           |         |     |             |      |                                      |      |    |    |   |  |                                           |  |  |        |
|----|------------------------------------------------------------------------------------------|-----------|---------|-----|-------------|------|--------------------------------------|------|----|----|---|--|-------------------------------------------|--|--|--------|
|    | 1761.9456                                                                                | 1761.7904 | -0.1552 | -88 | 1196        | 1211 | DLLDLITKMFGEAAK                      |      |    |    |   |  |                                           |  |  | Mascot |
|    | 1821.8258                                                                                | 1821.7113 | -0.1145 | -63 | 880         | 895  | INNMVKANGGSYYSCK                     |      |    |    |   |  | Carbamidomethyl (C)[15], Oxidation (M)[4] |  |  | Mascot |
|    | 1947.9116                                                                                | 1947.9528 | 0.0412  | 21  | 1491        | 1505 | QELQDFEEEEKQMHK                      |      |    |    |   |  | Oxidation (M)[12]                         |  |  | Mascot |
|    | 2238.1045                                                                                | 2238.0095 | -0.095  | -42 | 138         | 157  | FSSYVMNSAVYSLIKVCN<br>GR             |      |    |    |   |  |                                           |  |  | Mascot |
|    | 2492.1643                                                                                | 2492.147  | -0.0173 | -7  | 1460        | 1479 | EEEECEEMILTNAEIQR<br>K               |      |    |    |   |  | Carbamidomethyl (C)[5]                    |  |  | Mascot |
|    | 3454.4131                                                                                | 3454.6113 | 0.1982  | 57  | 222         | 253  | TGSDDEGGGSETGEQEE<br>TGFMTFVFLSTTMMK |      |    |    |   |  | Oxidation (M)[21,30,31]                   |  |  | Mascot |
|    | 3516.6182                                                                                | 3516.5327 | -0.0855 | -24 | 1071        | 1102 | NNEHGNEIPEDQGTSDS<br>EASDLECLRIVLFGK |      |    |    |   |  |                                           |  |  | Mascot |
| 25 | ATP-dependent Clp protease ATP-binding subunit<br>clpX-like, mitochondrial [Danio rerio] |           |         |     | gi 52219008 |      | 66389.4                              | 8.45 | 11 | 40 | 0 |  |                                           |  |  |        |

#### Peptide Information

| Calc. Mass | Obsrv. Mass | ± da    | ± ppm | Start Seq. | End Seq. | Sequence                           | Ion Score | C. I. % | Modification               | Rank | Result Type |
|------------|-------------|---------|-------|------------|----------|------------------------------------|-----------|---------|----------------------------|------|-------------|
| 848.4471   | 848.4752    | 0.0281  | 33    | 70         | 78       | KSVGEGSGK                          |           |         |                            |      | Mascot      |
| 1122.536   | 1122.4762   | -0.0598 | -53   | 190        | 199      | IYNNMPAGSR                         |           |         |                            |      | Mascot      |
| 1122.536   | 1122.4762   | -0.0598 | -53   | 190        | 199      | IYNNMPAGSR                         |           |         |                            |      | Mascot      |
| 1144.611   | 1144.4584   | -0.1526 | -133  | 168        | 177      | YVVGQDHAKK                         |           |         |                            |      | Mascot      |
| 1242.7052  | 1242.6418   | -0.0634 | -51   | 263        | 275      | SNIVLLGPTGSGK                      |           |         |                            |      | Mascot      |
| 1278.6372  | 1278.671    | 0.0338  | 26    | 189        | 199      | RIYNNMPAGSR                        |           |         |                            |      | Mascot      |
| 1287.6038  | 1287.6293   | 0.0255  | 20    | 414        | 425      | YLGFGTPSNMGK                       |           |         | Oxidation (M)[10]          |      | Mascot      |
| 1287.6038  | 1287.6293   | 0.0255  | 20    | 414        | 425      | YLGFGTPSNMGK                       |           |         | Oxidation (M)[10]          |      | Mascot      |
| 1294.6321  | 1294.666    | 0.0339  | 26    | 189        | 199      | RIYNNMPAGSR                        |           |         | Oxidation (M)[6]           |      | Mascot      |
| 1642.7893  | 1642.8798   | 0.0905  | 55    | 411        | 425      | NEKYLGFSGTPSNMGK                   |           |         |                            |      | Mascot      |
| 1642.7893  | 1642.8798   | 0.0905  | 55    | 411        | 425      | NEKYLGFSGTPSNMGK                   |           |         |                            |      | Mascot      |
| 1719.8159  | 1719.8474   | 0.0315  | 18    | 119        | 132      | CHHFFVLSETDTK                      |           |         | Carbamidomethyl (C)[1]     |      | Mascot      |
| 1847.9109  | 1847.8473   | -0.0636 | -34   | 119        | 133      | CHHFFVLSETDTKK                     |           |         | Carbamidomethyl (C)[1]     |      | Mascot      |
| 2237.9736  | 2238.0095   | 0.0359  | 16    | 94         | 112      | CPKCGDPCTHVETVSS<br>TR             |           |         | Carbamidomethyl (C)[1,4,8] |      | Mascot      |
| 3454.7859  | 3454.6113   | -0.1746 | -51   | 215        | 246      | ELLQIAGISPHGNALGAS<br>MQQLNQQTPEKR |           |         |                            |      | Mascot      |

26 PREDICTED: gigaxonin-like [Danio rerio] gi|326676001 67790.5 5.6 12 39 0

#### Peptide Information

| Calc. Mass | Obsrv. Mass | ± da    | ± ppm | Start Seq. | End Seq. | Sequence | Ion Score | C. I. % | Modification | Rank | Result Type |
|------------|-------------|---------|-------|------------|----------|----------|-----------|---------|--------------|------|-------------|
| 913.493    | 913.5172    | 0.0242  | 26    | 534        | 540      | IFPYAFR  |           |         |              |      | Mascot      |
| 913.493    | 913.5172    | 0.0242  | 26    | 534        | 540      | IFPYAFR  |           |         |              |      | Mascot      |
| 964.5396   | 964.4218    | -0.1178 | -122  | 578        | 585      | IANCKLFR |           |         |              |      | Mascot      |

|           |           |         |     |     |     |                         |                                             |        |
|-----------|-----------|---------|-----|-----|-----|-------------------------|---------------------------------------------|--------|
| 1045.4805 | 1045.5309 | 0.0504  | 48  | 488 | 496 | FGSCATMKK               | Carbamidomethyl (C)[4], Oxidation (M)[7]    | Mascot |
| 1122.5533 | 1122.4762 | -0.0771 | -69 | 251 | 259 | LCELLSMEK               | Carbamidomethyl (C)[2]                      | Mascot |
| 1122.5533 | 1122.4762 | -0.0771 | -69 | 251 | 259 | LCELLSMEK               | Carbamidomethyl (C)[2]                      | Mascot |
| 1287.6514 | 1287.6293 | -0.0221 | -17 | 497 | 508 | RLYVMGGGSYGK            |                                             | Mascot |
| 1287.6514 | 1287.6293 | -0.0221 | -17 | 497 | 508 | RLYVMGGGSYGK            |                                             | Mascot |
| 1327.5704 | 1327.6823 | 0.1119  | 84  | 368 | 377 | CMCPLYDRNR              | Carbamidomethyl (C)[1]                      | Mascot |
| 1364.6772 | 1364.6533 | -0.0239 | -18 | 571 | 582 | TSCAALRIANCK            | Carbamidomethyl (C)[3,11]                   | Mascot |
| 1364.6772 | 1364.6533 | -0.0239 | -18 | 571 | 582 | TSCAALRIANCK            | Carbamidomethyl (C)[3,11]                   | Mascot |
| 1708.7881 | 1708.7289 | -0.0592 | -35 | 57  | 71  | MIVTDEEASMSDPKR         |                                             | Mascot |
| 1759.8134 | 1759.788  | -0.0254 | -14 | 236 | 250 | DVANTEEFLQPPDR          |                                             | Mascot |
| 1759.8134 | 1759.788  | -0.0254 | -14 | 236 | 250 | DVANTEEFLQPPDR          |                                             | Mascot |
| 1847.9353 | 1847.8473 | -0.088  | -48 | 251 | 266 | LCELLSMEKLNVGNER        |                                             | Mascot |
| 1853.8818 | 1853.9648 | 0.083   | 45  | 361 | 375 | KPTAVARCMCPLYDR         | Carbamidomethyl (C)[8,10], Oxidation (M)[9] | Mascot |
| 2232.9067 | 2233.0156 | 0.1089  | 49  | 1   | 19  | MAMQKDSTSNSAGCWQ<br>ENR | Carbamidomethyl (C)[14], Oxidation (M)[1,3] | Mascot |

27 fragile X mental retardation syndrome-related protein 2 gi|45433537 74805.3 6.85 11 37 0  
[Danio rerio]

#### Peptide Information

| Calc. Mass | Obsrv. Mass | ± da    | ± ppm | Start Seq. | End Seq. | Sequence                          | Ion Score | C. I. % | Modification           | Rank | Result Type |
|------------|-------------|---------|-------|------------|----------|-----------------------------------|-----------|---------|------------------------|------|-------------|
| 913.4849   | 913.5172    | 0.0323  | 35    | 326        | 333      | LPREEGGR                          | 1         | 0       |                        |      | Mascot      |
| 913.4849   | 913.5172    | 0.0323  | 35    | 326        | 333      | LPREEGGR                          |           |         |                        |      | Mascot      |
| 1045.5272  | 1045.5309   | 0.0037  | 4     | 316        | 324      | VRIEGDNDK                         |           |         |                        |      | Mascot      |
| 1067.552   | 1067.4775   | -0.0745 | -70   | 49         | 57       | LPPPTDYHK                         |           |         |                        |      | Mascot      |
| 1242.6147  | 1242.6418   | 0.0271  | 22    | 139        | 148      | DICLTENIHK                        |           |         | Carbamidomethyl (C)[3] |      | Mascot      |
| 1327.6713  | 1327.6823   | 0.011   | 8     | 400        | 413      | APPSRSGSGVAGER                    |           |         |                        |      | Mascot      |
| 1616.7274  | 1616.7799   | 0.0525  | 32    | 71         | 83       | ANEQEPCGWWLAR                     |           |         | Carbamidomethyl (C)[7] |      | Mascot      |
| 1616.7274  | 1616.7799   | 0.0525  | 32    | 71         | 83       | ANEQEPCGWWLAR                     |           |         | Carbamidomethyl (C)[7] |      | Mascot      |
| 1660.8112  | 1660.6855   | -0.1257 | -76   | 139        | 151      | DICLTENIHKDFR                     |           |         | Carbamidomethyl (C)[3] |      | Mascot      |
| 1999.9865  | 2000.0299   | 0.0434  | 22    | 656        | 676      | RSPSNGVASPGALAMV<br>NGVS          |           |         |                        |      | Mascot      |
| 2010.0443  | 2009.8694   | -0.1749 | -87   | 41         | 57       | QLPFSDVRLPPPTDYHK                 |           |         |                        |      | Mascot      |
| 2275.2114  | 2274.9607   | -0.2507 | -110  | 129        | 148      | VPIAVPEDLRDICLTENIHK              |           |         |                        |      | Mascot      |
| 3270.5813  | 3270.2292   | -0.3521 | -108  | 22         | 48       | DVHEDSLTIVFENNWWQPE<br>ERQLPFSDVR |           |         |                        |      | Mascot      |

28 ADP/ATP translocase 1 [Danio rerio] gi|47550717 32667.2 9.74 8 37 0

#### Peptide Information

| Calc. Mass | Obsrv. Mass | ± da | ± ppm | Start | End | Sequence | Ion | C. I. % | Modification | Rank | Result Type |
|------------|-------------|------|-------|-------|-----|----------|-----|---------|--------------|------|-------------|
|------------|-------------|------|-------|-------|-----|----------|-----|---------|--------------|------|-------------|

|    |                                            |           |         | Seq. | Seq.         | Score   |                             |                         |    |        |
|----|--------------------------------------------|-----------|---------|------|--------------|---------|-----------------------------|-------------------------|----|--------|
|    | 848.4875                                   | 848.4752  | -0.0123 | -14  | 98           | 105     | IFLGGVDK                    |                         |    | Mascot |
|    | 984.4423                                   | 984.3897  | -0.0526 | -53  | 238          | 245     | MMMQSGRK                    | Oxidation (M)[1]        |    | Mascot |
|    | 996.4536                                   | 996.5653  | 0.1117  | 112  | 237          | 244     | RMMMQSGR                    |                         |    | Mascot |
|    | 1616.7448                                  | 1616.7799 | 0.0351  | 22   | 246          | 259     | GADIMYKGTIDCWK              | Oxidation (M)[5]        |    | Mascot |
|    | 1616.7448                                  | 1616.7799 | 0.0351  | 22   | 246          | 259     | GADIMYKGTIDCWK              | Oxidation (M)[5]        |    | Mascot |
|    | 1957.9728                                  | 1957.9572 | -0.0156 | -8   | 189          | 206     | AAYFGIYDTAKGMLPDPK          |                         |    | Mascot |
|    | 2010.0146                                  | 2009.8694 | -0.1452 | -72  | 44           | 60      | QITADMQYKGIIDCVVR           | Carbamidomethyl (C)[14] |    | Mascot |
|    | 2283.2053                                  | 2283.1091 | -0.0962 | -42  | 1            | 23      | MSDAAISFLKDFLAGGVA<br>AAISK |                         |    | Mascot |
|    | 2284.2236                                  | 2284.106  | -0.1176 | -51  | 73           | 92      | GNLANVIRYFPTQALNFA<br>FK    |                         |    | Mascot |
| 29 | cytosolic carboxypeptidase 2 [Danio rerio] |           |         |      | gi 149773464 | 82183.6 | 8.64                        | 13                      | 36 | 0      |

#### Peptide Information

| Calc. Mass | Obsrv. Mass | ± da    | ± ppm | Start Seq. | End Seq. | Sequence                           | Ion Score | C. I. | % Modification                           | Rank | Result Type |
|------------|-------------|---------|-------|------------|----------|------------------------------------|-----------|-------|------------------------------------------|------|-------------|
| 870.5155   | 870.4901    | -0.0254 | -29   | 182        | 190      | VGGSRGPIK                          |           |       |                                          |      | Mascot      |
| 984.4892   | 984.3897    | -0.0995 | -101  | 523        | 530      | VFPLMMSK                           |           |       | Oxidation (M)[5,6]                       |      | Mascot      |
| 1184.5636  | 1184.3943   | -0.1693 | -143  | 239        | 246      | HTQWFYFR                           |           |       |                                          |      | Mascot      |
| 1287.5826  | 1287.6293   | 0.0467  | 36    | 468        | 477      | DSFPCIWYTR                         |           |       |                                          |      | Mascot      |
| 1287.5826  | 1287.6293   | 0.0467  | 36    | 468        | 477      | DSFPCIWYTR                         |           |       |                                          |      | Mascot      |
| 1642.9196  | 1642.8798   | -0.0398 | -24   | 615        | 628      | CLEELGVLLKQEIR                     |           |       |                                          |      | Mascot      |
| 1642.9196  | 1642.8798   | -0.0398 | -24   | 615        | 628      | CLEELGVLLKQEIR                     |           |       |                                          |      | Mascot      |
| 1758.9207  | 1758.7832   | -0.1375 | -78   | 435        | 450      | VIPMLNPDGVVVGNYR                   |           |       | Oxidation (M)[4]                         |      | Mascot      |
| 1759.8295  | 1759.788    | -0.0415 | -24   | 468        | 481      | DSFPCIWYTRNMVK                     |           |       |                                          |      | Mascot      |
| 1759.8295  | 1759.788    | -0.0415 | -24   | 468        | 481      | DSFPCIWYTRNMVK                     |           |       |                                          |      | Mascot      |
| 1821.8397  | 1821.7113   | -0.1284 | -70   | 266        | 282      | SSSLYGAGMCPLLYSEK                  |           |       | Oxidation (M)[9]                         |      | Mascot      |
| 1847.8567  | 1847.8473   | -0.0094 | -5    | 464        | 477      | SMLRDSFPCIWYTR                     |           |       | Carbamidomethyl (C)[9], Oxidation (M)[2] |      | Mascot      |
| 1958.0607  | 1957.9572   | -0.1035 | -53   | 85         | 100      | QLVFDFDGERPIRLR                    |           |       |                                          |      | Mascot      |
| 2238.0496  | 2238.0095   | -0.0401 | -18   | 162        | 181      | GNTVYCIDPATKASSFTY<br>SR           |           |       | Carbamidomethyl (C)[6]                   |      | Mascot      |
| 2297.9221  | 2298.1167   | 0.1946  | 85    | 592        | 611      | SMGYCFCDTLDFCDPD<br>PAK            |           |       | Carbamidomethyl (C)[5]                   |      | Mascot      |
| 3454.5098  | 3454.6113   | 0.1015  | 29    | 582        | 611      | GTHFSTLDLKSMGYCFC<br>DTLLDFCDPDPAK |           |       | Carbamidomethyl (C)[15,17]               |      | Mascot      |

30 novel protein (zgc:112421) [Danio rerio] gi|157886040 29193.6 4.43 7 36 0

#### Peptide Information

| Calc. Mass | Obsrv. Mass | ± da | ± ppm | Start Seq. | End Seq. | Sequence | Ion Score | C. I. | % Modification | Rank | Result Type |
|------------|-------------|------|-------|------------|----------|----------|-----------|-------|----------------|------|-------------|
|------------|-------------|------|-------|------------|----------|----------|-----------|-------|----------------|------|-------------|

|  |           |           |         |      |     |     |                           |  |  |  |  |  |  |  |  |  |  |        |
|--|-----------|-----------|---------|------|-----|-----|---------------------------|--|--|--|--|--|--|--|--|--|--|--------|
|  | 850.5396  | 850.5135  | -0.0261 | -31  | 253 | 259 | LLIEILH                   |  |  |  |  |  |  |  |  |  |  | Mascot |
|  | 1144.5746 | 1144.4584 | -0.1162 | -102 | 69  | 77  | EAYLQVHER                 |  |  |  |  |  |  |  |  |  |  | Mascot |
|  | 1327.6497 | 1327.6823 | 0.0326  | 25   | 177 | 187 | DCYVTLVRCAK               |  |  |  |  |  |  |  |  |  |  | Mascot |
|  | 1719.8582 | 1719.8474 | -0.0108 | -6   | 29  | 44  | GMGTDEETIISILANR          |  |  |  |  |  |  |  |  |  |  | Mascot |
|  | 1947.9004 | 1947.9528 | 0.0524  | 27   | 234 | 251 | YDVTCLKDALSSECGGDF<br>K   |  |  |  |  |  |  |  |  |  |  | Mascot |
|  | 2233.124  | 2233.0156 | -0.1084 | -49  | 29  | 49  | GMGTDEETIISILANRSAA<br>QR |  |  |  |  |  |  |  |  |  |  | Mascot |
|  | 2284.0881 | 2284.106  | 0.0179  | 8    | 60  | 77  | YDDDILNYKEAYLQVHER        |  |  |  |  |  |  |  |  |  |  | Mascot |

31 PREDICTED: hypothetical protein LOC797378 [Danio rerio] gi|292622805 72531.1 6.46 6 35 0 23 0

#### Peptide Information

| Calc. Mass | Obsrv. Mass | ± da    | ± ppm | Start Seq. | End Seq. | Sequence              | Ion Score | C. I. | % Modification      | Rank | Result Type |
|------------|-------------|---------|-------|------------|----------|-----------------------|-----------|-------|---------------------|------|-------------|
| 870.577    | 870.4901    | -0.0869 | -100  | 493        | 500      | VAIKVVNK              |           |       |                     |      | Mascot      |
| 882.4501   | 882.5381    | 0.088   | 100   | 1          | 7        | MSTRPFK               |           |       | Oxidation (M)[1]    |      | Mascot      |
| 964.4152   | 964.4218    | 0.0066  | 7     | 222        | 230      | AGCLDQDSR             |           |       |                     |      | Mascot      |
| 1287.7015  | 1287.6293   | -0.0722 | -56   | 566        | 577      | KNNGLLSESVAR          |           |       |                     |      | Mascot      |
| 1287.7015  | 1287.6293   | -0.0722 | -56   | 566        | 577      | KNNGLLSESVAR          | 23        |       | 0                   |      | Mascot      |
| 1615.7856  | 1615.7893   | 0.0037  | 2     | 323        | 338      | QMKTAEIQHGGSSGGK      |           |       |                     |      | Mascot      |
| 2224.9221  | 2225.0535   | 0.1314  | 59    | 51         | 68       | LSEMENTRDTMTSYEE<br>K |           |       | Oxidation (M)[4,12] |      | Mascot      |

32 protein kinase C beta type [Danio rerio] gi|41055807 76256.4 6.18 13 35 0

#### Peptide Information

| Calc. Mass | Obsrv. Mass | ± da    | ± ppm | Start Seq. | End Seq. | Sequence          | Ion Score | C. I. | % Modification                            | Rank | Result Type |
|------------|-------------|---------|-------|------------|----------|-------------------|-----------|-------|-------------------------------------------|------|-------------|
| 975.5482   | 975.4407    | -0.1075 | -110  | 18         | 26       | GFARQGALR         |           |       |                                           |      | Mascot      |
| 984.5294   | 984.3897    | -0.1397 | -142  | 571        | 579      | GLMTKHPGK         |           |       | Oxidation (M)[3]                          |      | Mascot      |
| 1239.6072  | 1239.5887   | -0.0185 | -15   | 560        | 570      | SMSKEAIAICK       |           |       | Carbamidomethyl (C)[10], Oxidation (M)[2] |      | Mascot      |
| 1642.8695  | 1642.8798   | 0.0103  | 6     | 334        | 347      | MKLSDFNFLMVLGK    | 2         |       | 0                                         |      | Mascot      |
| 1642.8695  | 1642.8798   | 0.0103  | 6     | 334        | 347      | MKLSDFNFLMVLGK    |           |       |                                           |      | Mascot      |
| 1660.7213  | 1660.6855   | -0.0358 | -22   | 593        | 604      | EHGFFRYMDWEK      |           |       | Oxidation (M)[8]                          |      | Mascot      |
| 1758.7898  | 1758.7832   | -0.0066 | -4    | 142        | 157      | CVANVPSLCGTDHTER  |           |       | Carbamidomethyl (C)[1]                    |      | Mascot      |
| 1826.9316  | 1826.9232   | -0.0084 | -5    | 463        | 478      | DLKLDNVMLDAEGHIK  |           |       | Oxidation (M)[8]                          |      | Mascot      |
| 1826.9316  | 1826.9232   | -0.0084 | -5    | 463        | 478      | DLKLDNVMLDAEGHIK  |           |       | Oxidation (M)[8]                          |      | Mascot      |
| 1847.801   | 1847.8473   | 0.0463  | 25    | 1          | 17       | MAEPANSDGEERSAPMR |           |       |                                           |      | Mascot      |
| 1853.8143  | 1853.9648   | 0.1505  | 81    | 373        | 388      | DVVIQDDDVECTMVEK  |           |       | Oxidation (M)[13]                         |      | Mascot      |



|           |           |         |     |     |     |                                  |  |  |                                            |  |  |        |
|-----------|-----------|---------|-----|-----|-----|----------------------------------|--|--|--------------------------------------------|--|--|--------|
| 2000.0521 | 2000.0299 | -0.0222 | -11 | 181 | 198 | NLVPMDPNGLSDPYVKL<br>K           |  |  |                                            |  |  | Mascot |
| 2009.9154 | 2009.8694 | -0.046  | -23 | 373 | 389 | DVVIQDDDDVECTMVEKR               |  |  | Oxidation (M)[13]                          |  |  | Mascot |
| 2273.1094 | 2272.9565 | -0.1529 | -67 | 213 | 231 | TIKCLNPTWNETFTFNL<br>K           |  |  |                                            |  |  | Mascot |
| 3270.5281 | 3270.2292 | -0.2989 | -91 | 103 | 130 | FKVHTYSSPTFCDHCGS<br>LLYGLIHQGMR |  |  | Carbamidomethyl (C)[12], Oxidation (M)[27] |  |  | Mascot |

33 PREDICTED: sodium channel protein type 2 subunit  
alpha-like [Danio rerio] gi|326670825 34934.5 9.46 7 35 0

#### Peptide Information

| Calc. Mass | Obsrv. Mass | ± da    | ± ppm | Start Seq. | End Seq. | Sequence                          | Ion Score | C. I. | % Modification          | Rank | Result Type |
|------------|-------------|---------|-------|------------|----------|-----------------------------------|-----------|-------|-------------------------|------|-------------|
| 913.5717   | 913.5172    | -0.0545 | -60   | 212        | 220      | TISVVPGLK                         |           |       |                         |      | Mascot      |
| 913.5717   | 913.5172    | -0.0545 | -60   | 212        | 220      | TISVVPGLK                         |           |       |                         |      | Mascot      |
| 1122.4731  | 1122.4762   | 0.0031  | 3     | 300        | 311      | DALICGNSSDAG                      |           |       |                         |      | Mascot      |
| 1122.4731  | 1122.4762   | 0.0031  | 3     | 300        | 311      | DALICGNSSDAG                      |           |       |                         |      | Mascot      |
| 1278.567   | 1278.671    | 0.104   | 81    | 263        | 273      | CVYSTSFTENK                       |           |       |                         |      | Mascot      |
| 1616.8934  | 1616.7799   | -0.1135 | -70   | 145        | 158      | YVFTGIYTLALVK                     |           |       |                         |      | Mascot      |
| 1616.8934  | 1616.7799   | -0.1135 | -70   | 145        | 158      | YVFTGIYTLALVK                     |           |       |                         |      | Mascot      |
| 1697.8615  | 1697.8694   | 0.0079  | 5     | 1          | 15       | MAHMFTPPGPQSLRK                   | 2         |       | 0                       |      | Mascot      |
| 1697.8615  | 1697.8694   | 0.0079  | 5     | 1          | 15       | MAHMFTPPGPQSLRK                   |           |       |                         |      | Mascot      |
| 1761.8184  | 1761.7904   | -0.028  | -16   | 45         | 60       | DNECSRKPNSGLEAGK                  |           |       | Carbamidomethyl (C)[4]  |      | Mascot      |
| 3269.8477  | 3270.2292   | 0.3815  | 117   | 232        | 260      | KLSDVMILTLFCLSVFALV<br>GLQLFMGILK |           |       | Carbamidomethyl (C)[12] |      | Mascot      |

34 PREDICTED: hypothetical protein LOC100535533  
[Danio rerio] gi|326671744 3229.6 9.19 4 35 0

#### Peptide Information

| Calc. Mass | Obsrv. Mass | ± da    | ± ppm | Start Seq. | End Seq. | Sequence           | Ion Score | C. I. | % Modification         | Rank | Result Type |
|------------|-------------|---------|-------|------------|----------|--------------------|-----------|-------|------------------------|------|-------------|
| 996.4641   | 996.5653    | 0.1012  | 102   | 4          | 12       | AGPVFSCMK          |           |       | Carbamidomethyl (C)[7] |      | Mascot      |
| 1287.5894  | 1287.6293   | 0.0399  | 31    | 1          | 12       | MGKAGPVFSCMK       |           |       | Oxidation (M)[1,11]    |      | Mascot      |
| 1287.5894  | 1287.6293   | 0.0399  | 31    | 1          | 12       | MGKAGPVFSCMK       |           |       | Oxidation (M)[1,11]    |      | Mascot      |
| 1364.674   | 1364.6533   | -0.0207 | -15   | 13         | 24       | HNGHAISMEIQK       |           |       |                        |      | Mascot      |
| 1364.674   | 1364.6533   | -0.0207 | -15   | 13         | 24       | HNGHAISMEIQK       |           |       |                        |      | Mascot      |
| 2009.9862  | 2009.8694   | -0.1168 | -58   | 13         | 30       | HNGHAISMEIQKTGLWTA |           |       | Oxidation (M)[8]       |      | Mascot      |

35 CDC48 [Danio rerio] gi|34740143 89351.7 5.13 12 35 0

#### Peptide Information

| Calc. Mass | Obsrv. Mass | ± da | ± ppm | Start | End | Sequence | Ion | C. I. | % Modification | Rank | Result Type |
|------------|-------------|------|-------|-------|-----|----------|-----|-------|----------------|------|-------------|
|------------|-------------|------|-------|-------|-----|----------|-----|-------|----------------|------|-------------|

|                     |                                                                   |             |         |       |              |               |                     |      |           |         | Seq.                   | Seq. | Score                   |        |      |  |  |        |        |  |
|---------------------|-------------------------------------------------------------------|-------------|---------|-------|--------------|---------------|---------------------|------|-----------|---------|------------------------|------|-------------------------|--------|------|--|--|--------|--------|--|
|                     | 870.5267                                                          | 870.4901    | -0.0366 | -42   | 87           | 93            | VVRNNLR             |      |           |         |                        |      |                         |        |      |  |  |        | Mascot |  |
|                     | 1051.5242                                                         | 1051.6779   | 0.1537  | 146   | 46           | 53            | MDELQLFR            |      |           |         |                        |      |                         |        |      |  |  |        | Mascot |  |
|                     | 1067.519                                                          | 1067.4775   | -0.0415 | -39   | 46           | 53            | MDELQLFR            |      |           |         |                        |      | Oxidation (M)[1]        |        |      |  |  |        | Mascot |  |
|                     | 1242.6324                                                         | 1242.6418   | 0.0094  | 8     | 366          | 377           | EVDIGIPDATGR        |      |           |         |                        |      |                         |        |      |  |  |        | Mascot |  |
|                     | 1660.8289                                                         | 1660.6855   | -0.1434 | -86   | 363          | 377           | FDREVDIGIPDATGR     |      |           |         |                        |      |                         |        |      |  |  |        | Mascot |  |
|                     | 1697.8085                                                         | 1697.8694   | 0.0609  | 36    | 600          | 614           | VINQILTEMDGMSSK     |      |           |         |                        |      | Oxidation (M)[9,12]     |        |      |  |  |        | Mascot |  |
|                     | 1697.8085                                                         | 1697.8694   | 0.0609  | 36    | 600          | 614           | VINQILTEMDGMSSK     |      |           |         |                        |      | Oxidation (M)[9,12]     |        |      |  |  |        | Mascot |  |
|                     | 1758.7786                                                         | 1758.7832   | 0.0046  | 3     | 678          | 693           | MTNGFSGADLTEICQR    |      |           |         |                        |      | Oxidation (M)[1]        |        |      |  |  |        | Mascot |  |
|                     | 1826.9469                                                         | 1826.9232   | -0.0237 | -13   | 639          | 653           | LDHIMYIPLDEKSR      |      |           |         |                        |      |                         |        |      |  |  |        | Mascot |  |
|                     | 1826.9469                                                         | 1826.9232   | -0.0237 | -13   | 639          | 653           | LDHIMYIPLDEKSR      |      |           |         |                        |      |                         |        |      |  |  |        | Mascot |  |
|                     | 1888.9836                                                         | 1888.845    | -0.1386 | -73   | 96           | 112           | LGDVISIQPCPDVKYK    |      |           |         |                        |      | Carbamidomethyl (C)[10] |        |      |  |  |        | Mascot |  |
|                     | 1999.9768                                                         | 2000.0299   | 0.0531  | 27    | 506          | 524           | FGMTPSKGVLFYGP      |      |           |         |                        |      | Carbamidomethyl (C)[17] |        |      |  |  |        | Mascot |  |
|                     |                                                                   |             |         |       |              | GK            |                     |      |           |         |                        |      |                         |        |      |  |  |        |        |  |
|                     | 2284.0762                                                         | 2284.106    | 0.0298  | 13    | 714          | 733           | QTNPSAMEVEEDDPVPEI  |      |           |         |                        |      |                         |        |      |  |  |        | Mascot |  |
|                     |                                                                   |             |         |       |              | RK            |                     |      |           |         |                        |      |                         |        |      |  |  |        |        |  |
|                     | 3192.6091                                                         | 3192.3184   | -0.2907 | -91   | 26           | 53            | LIVDESINEDNSVVSLSQA |      |           |         |                        |      |                         |        |      |  |  |        | Mascot |  |
|                     |                                                                   |             |         |       |              | KMDELQLFR     |                     |      |           |         |                        |      |                         |        |      |  |  |        |        |  |
|                     | 3208.6042                                                         | 3208.3218   | -0.2824 | -88   | 26           | 53            | LIVDESINEDNSVVSLSQA |      |           |         |                        |      | Oxidation (M)[21]       |        |      |  |  |        | Mascot |  |
|                     |                                                                   |             |         |       |              | KMDELQLFR     |                     |      |           |         |                        |      |                         |        |      |  |  |        |        |  |
|                     | 3454.677                                                          | 3454.6113   | -0.0657 | -19   | 530          | 560           | AIANECQANFISIKGPELL |      |           |         |                        |      | Oxidation (M)[21]       |        |      |  |  |        | Mascot |  |
|                     |                                                                   |             |         |       |              | TMWFGESSEANVR |                     |      |           |         |                        |      |                         |        |      |  |  |        |        |  |
| 36                  | thioredoxin domain-containing protein 9 [Danio rerio]             |             |         |       | gi 41053343  |               | 26057.5             | 5.77 | 8         | 35      | 0                      |      |                         |        |      |  |  |        |        |  |
| Peptide Information |                                                                   |             |         |       |              |               |                     |      |           |         |                        |      |                         |        |      |  |  |        |        |  |
|                     | Calc. Mass                                                        | Obsrv. Mass | ± da    | ± ppm | Start Seq.   | End Seq.      | Sequence            |      | Ion Score | C. I. % | Modification           |      | Rank                    | Result | Type |  |  |        |        |  |
|                     | 833.4515                                                          | 833.4261    | -0.0254 | -30   | 130          | 136           | APFLTER             |      |           |         |                        |      |                         |        |      |  |  | Mascot |        |  |
|                     | 913.4196                                                          | 913.5172    | 0.0976  | 107   | 98           | 104           | DSTFRCK             |      |           |         | Carbamidomethyl (C)[6] |      |                         |        |      |  |  | Mascot |        |  |
|                     | 913.4196                                                          | 913.5172    | 0.0976  | 107   | 98           | 104           | DSTFRCK             |      |           |         | Carbamidomethyl (C)[6] |      |                         |        |      |  |  | Mascot |        |  |
|                     | 1067.509                                                          | 1067.4775   | -0.0315 | -30   | 90           | 97            | SVVCHFYZ            |      |           |         | Carbamidomethyl (C)[4] |      |                         |        |      |  |  | Mascot |        |  |
|                     | 1242.6801                                                         | 1242.6418   | -0.0383 | -31   | 12           | 22            | ALEQQVLQSAR         |      |           |         |                        |      |                         |        |      |  |  | Mascot |        |  |
|                     | 1564.7893                                                         | 1564.7358   | -0.0535 | -34   | 74           | 86            | EIPSEKDFPPEVK       |      |           |         |                        |      |                         |        |      |  |  | Mascot |        |  |
|                     | 1616.7638                                                         | 1616.7799   | 0.0161  | 10    | 90           | 102           | SVVCHFYZDSTFR       |      |           |         |                        |      |                         |        |      |  |  | Mascot |        |  |
|                     | 1616.7638                                                         | 1616.7799   | 0.0161  | 10    | 90           | 102           | SVVCHFYZDSTFR       |      |           |         |                        |      |                         |        |      |  |  | Mascot |        |  |
|                     | 1847.9055                                                         | 1847.8473   | -0.0582 | -31   | 23           | 37            | MVEEQLDAELEKLER     |      |           |         | Oxidation (M)[1]       |      |                         |        |      |  |  | Mascot |        |  |
|                     | 2273.1919                                                         | 2272.9565   | -0.2354 | -104  | 2            | 22            | ASQSMDIVAKALEQQVL   |      |           |         |                        |      |                         |        |      |  |  | Mascot |        |  |
|                     |                                                                   |             |         |       |              | QSAR          |                     |      |           |         |                        |      |                         |        |      |  |  |        |        |  |
| 37                  | hypothetical protein LOC100145413 [Xenopus (Silurana) tropicalis] |             |         |       | gi 187607099 |               | 39415.2             | 9.16 | 11        | 34      | 0                      |      |                         |        |      |  |  |        |        |  |

| Peptide Information |                                          |         |       |             |          |                         |           |       |                         |      |             |
|---------------------|------------------------------------------|---------|-------|-------------|----------|-------------------------|-----------|-------|-------------------------|------|-------------|
| Calc. Mass          | Obsrv. Mass                              | ± da    | ± ppm | Start Seq.  | End Seq. | Sequence                | Ion Score | C. I. | % Modification          | Rank | Result Type |
| 833.3141            | 833.4261                                 | 0.112   | 134   | 290         | 296      | CSHCNNR                 |           |       |                         |      | Mascot      |
| 848.5239            | 848.4752                                 | -0.0487 | -57   | 325         | 332      | FTLLGGLK                |           |       |                         |      | Mascot      |
| 1067.5884           | 1067.4775                                | -0.1109 | -104  | 240         | 248      | SFAWKTSLK               |           |       |                         |      | Mascot      |
| 1287.5344           | 1287.6293                                | 0.0949  | 74    | 229         | 239      | EKPYSCECGK              |           |       | Carbamidomethyl (C)[6]  |      | Mascot      |
| 1287.5344           | 1287.6293                                | 0.0949  | 74    | 229         | 239      | EKPYSCECGK              |           |       | Carbamidomethyl (C)[6]  |      | Mascot      |
| 1616.7961           | 1616.7799                                | -0.0162 | -10   | 277         | 289      | RQQMNHTGEKPYK           |           |       |                         |      | Mascot      |
| 1616.7961           | 1616.7799                                | -0.0162 | -10   | 277         | 289      | RQQMNHTGEKPYK           |           |       |                         |      | Mascot      |
| 1719.8284           | 1719.8474                                | 0.019   | 11    | 30          | 43       | QEETEEQDLKEIK           |           |       |                         |      | Mascot      |
| 1761.8887           | 1761.7904                                | -0.0983 | -56   | 290         | 304      | CSHCNNRFSLLGILK         |           |       | Carbamidomethyl (C)[1]  |      | Mascot      |
| 1999.9952           | 2000.0299                                | 0.0347  | 17    | 81          | 96       | IHMRIHTGEKPYTCTR        |           |       | Carbamidomethyl (C)[14] |      | Mascot      |
| 2211.1702           | 2211.0359                                | -0.1343 | -61   | 184         | 202      | SFIQLSTLNLHMRHAGE<br>K  |           |       | Oxidation (M)[12]       |      | Mascot      |
| 2273.0437           | 2272.9565                                | -0.0872 | -38   | 305         | 323      | THEKIHTGEKPFQCSQCD<br>K |           |       | Carbamidomethyl (C)[14] |      | Mascot      |
| 2274.9915           | 2274.9607                                | -0.0308 | -14   | 278         | 296      | QQMNHTGEKPYKCSHC<br>NNR |           |       |                         |      | Mascot      |
| 38                  | F-box/LRR-repeat protein 2 [Danio rerio] |         |       | gi 41152474 |          | 48124.1                 | 7.66      | 9     | 34                      | 0    |             |

| Peptide Information |                                     |         |       |              |          |                                    |           |       |                                             |      |             |
|---------------------|-------------------------------------|---------|-------|--------------|----------|------------------------------------|-----------|-------|---------------------------------------------|------|-------------|
| Calc. Mass          | Obsrv. Mass                         | ± da    | ± ppm | Start Seq.   | End Seq. | Sequence                           | Ion Score | C. I. | % Modification                              | Rank | Result Type |
| 870.4654            | 870.4901                            | 0.0247  | 28    | 137          | 142      | FCFKLR                             |           |       | Carbamidomethyl (C)[2]                      |      | Mascot      |
| 913.5828            | 913.5172                            | -0.0656 | -72   | 271          | 278      | LKILEAAR                           | 5         | 0     |                                             |      | Mascot      |
| 913.5828            | 913.5172                            | -0.0656 | -72   | 271          | 278      | LKILEAAR                           |           |       |                                             |      | Mascot      |
| 975.4788            | 975.4407                            | -0.0381 | -39   | 373          | 379      | NCQRLER                            |           |       | Carbamidomethyl (C)[2]                      |      | Mascot      |
| 1067.486            | 1067.4775                           | -0.0085 | -8    | 96           | 106      | GCLSVGDASMK                        |           |       |                                             |      | Mascot      |
| 1821.9528           | 1821.7113                           | -0.2415 | -133  | 195          | 210      | ALFLRGCTQLDDTALK                   |           |       | Carbamidomethyl (C)[7]                      |      | Mascot      |
| 2233.0601           | 2233.0156                           | -0.0445 | -20   | 107          | 125      | TFAQNCRNIEHLNLNGCT<br>K            |           |       | Carbamidomethyl (C)[6]                      |      | Mascot      |
| 2275.1287           | 2274.9607                           | -0.168  | -74   | 44           | 63       | CAQVSKAWNVLALDGSN<br>WQK           |           |       | Carbamidomethyl (C)[1]                      |      | Mascot      |
| 2463.3164           | 2463.1772                           | -0.1392 | -57   | 352          | 372      | LQVVELDNCPLITDITLEH<br>LK          |           |       | Carbamidomethyl (C)[9]                      |      | Mascot      |
| 3454.6035           | 3454.6113                           | 0.0078  | 2     | 159          | 188      | ALSEGCRMLENLNLSWC<br>DQITSDGIEALSR |           |       | Carbamidomethyl (C)[6,17], Oxidation (M)[8] |      | Mascot      |
| 39                  | vesicle-fusing ATPase [Danio rerio] |         |       | gi 113195584 |          | 82532.7                            | 6.4       | 12    | 34                                          | 0    |             |

| Peptide Information |             |      |       |            |          |          |           |       |                |      |             |
|---------------------|-------------|------|-------|------------|----------|----------|-----------|-------|----------------|------|-------------|
| Calc. Mass          | Obsrv. Mass | ± da | ± ppm | Start Seq. | End Seq. | Sequence | Ion Score | C. I. | % Modification | Rank | Result Type |

|    |                                                    |           |         |     |             |         |                           |    |    |                        |  |  |        |
|----|----------------------------------------------------|-----------|---------|-----|-------------|---------|---------------------------|----|----|------------------------|--|--|--------|
|    | 913.4413                                           | 913.5172  | 0.0759  | 83  | 226         | 232     | EFSDIFR                   |    |    |                        |  |  | Mascot |
|    | 913.4413                                           | 913.5172  | 0.0759  | 83  | 226         | 232     | EFSDIFR                   |    |    |                        |  |  | Mascot |
|    | 1239.644                                           | 1239.5887 | -0.0553 | -45 | 28          | 38      | DLQSGQHVTVR               |    |    |                        |  |  | Mascot |
|    | 1327.6899                                          | 1327.6823 | -0.0076 | -6  | 447         | 458     | AAQSTAMNRHIK              |    |    |                        |  |  | Mascot |
|    | 1615.8108                                          | 1615.7893 | -0.0215 | -13 | 456         | 469     | HIKATSTVEVDMER            |    |    |                        |  |  | Mascot |
|    | 1660.8033                                          | 1660.6855 | -0.1178 | -71 | 567         | 581     | ICSPDKMIGHSEISK           |    |    | Oxidation (M)[7]       |  |  | Mascot |
|    | 1826.9292                                          | 1826.9232 | -0.006  | -3  | 239         | 254     | VFPDIVEQMGCKHVK           |    |    |                        |  |  | Mascot |
|    | 1826.9292                                          | 1826.9232 | -0.006  | -3  | 239         | 254     | VFPDIVEQMGCKHVK           |    |    |                        |  |  | Mascot |
|    | 1847.9055                                          | 1847.8473 | -0.0582 | -31 | 151         | 168     | DIEAMDSSILKGEPASGK        |    |    |                        |  |  | Mascot |
|    | 1853.95                                            | 1853.9648 | 0.0148  | 8   | 90          | 105     | QCIGAMTIEIDFLQKK          |    |    | Oxidation (M)[6]       |  |  | Mascot |
|    | 2010.0146                                          | 2009.8694 | -0.1452 | -72 | 88          | 104     | SRQCIGAMTIEIDFLQK         |    |    | Carbamidomethyl (C)[4] |  |  | Mascot |
|    | 2238.093                                           | 2238.0095 | -0.0835 | -37 | 435         | 455     | NYSGAELEGLVRAAQST<br>AMNR |    |    |                        |  |  | Mascot |
|    | 2283.198                                           | 2283.1091 | -0.0889 | -39 | 510         | 529     | WGDPVTRVLEDGELLVQ<br>QTK  |    |    |                        |  |  | Mascot |
|    | 2298.1401                                          | 2298.1167 | -0.0234 | -10 | 68          | 87      | KWAGLSIGQEIEVSNNF<br>DK   |    |    |                        |  |  | Mascot |
| 40 | leucine carboxyl methyltransferase 1 [Danio rerio] |           |         |     | gi 57524448 | 37488.8 | 5.39                      | 10 | 34 | 0                      |  |  |        |

#### Peptide Information

|    | Calc. Mass                                                     | Obsrv. Mass | ± da    | ± ppm | Start Seq.  | End Seq. | Sequence                         | Ion Score | C. I. | % Modification         | Rank | Result Type |
|----|----------------------------------------------------------------|-------------|---------|-------|-------------|----------|----------------------------------|-----------|-------|------------------------|------|-------------|
|    | 842.4518                                                       | 842.4833    | 0.0315  | 37    | 60          | 66       | GYGRVK                           |           |       |                        |      | Mascot      |
|    | 848.3818                                                       | 848.4752    | 0.0934  | 110   | 101         | 107      | DENVMPK                          |           |       | Oxidation (M)[5]       |      | Mascot      |
|    | 960.4819                                                       | 960.4465    | -0.0354 | -37   | 101         | 108      | DENVMPKK                         |           |       |                        |      | Mascot      |
|    | 1239.5457                                                      | 1239.5887   | 0.043   | 35    | 19          | 29       | ATCDDASICKR                      |           |       | Carbamidomethyl (C)[3] |      | Mascot      |
|    | 1278.6763                                                      | 1278.671    | -0.0053 | -4    | 67          | 77       | GMNLLDDFLK                       |           |       |                        |      | Mascot      |
|    | 1294.6711                                                      | 1294.666    | -0.0051 | -4    | 67          | 77       | GMNLLDDFLK                       |           |       | Oxidation (M)[2]       |      | Mascot      |
|    | 1598.84                                                        | 1598.7639   | -0.0761 | -48   | 109         | 121      | FFEVDFFPMIVARK                   |           |       |                        |      | Mascot      |
|    | 1598.84                                                        | 1598.7639   | -0.0761 | -48   | 108         | 120      | KFFEVDFFPMIVAR                   |           |       |                        |      | Mascot      |
|    | 1821.8469                                                      | 1821.7113   | -0.1356 | -74   | 240         | 256      | QCNLAGVDLCQSLDSQK                |           |       |                        |      | Mascot      |
|    | 2284.0486                                                      | 2284.106    | 0.0574  | 25    | 79          | 98       | TQCDCQVVNLGAGLDTT<br>FWR         |           |       | Carbamidomethyl (C)[3] |      | Mascot      |
|    | 3192.4685                                                      | 3192.3184   | -0.1501 | -47   | 259         | 286      | FLSSGWESVNALDMMTV<br>YSMLPQEDVAR |           |       | Oxidation (M)[14]      |      | Mascot      |
|    | 3208.4636                                                      | 3208.3218   | -0.1418 | -44   | 259         | 286      | FLSSGWESVNALDMMTV<br>YSMLPQEDVAR |           |       | Oxidation (M)[14,15]   |      | Mascot      |
| 41 | phosphate cytidyltransferase 1, choline, alpha b [Danio rerio] |             |         |       | gi 66472246 | 41127.4  | 6.3                              | 9         | 33    | 0                      |      |             |

#### Peptide Information

|    | Calc. Mass                                                                                           | Obsrv. Mass | ± da    | ± ppm | Start Seq.   | End Sequence Seq.         | Ion Score | C. I. % | Modification                                 | Rank | Result Type |
|----|------------------------------------------------------------------------------------------------------|-------------|---------|-------|--------------|---------------------------|-----------|---------|----------------------------------------------|------|-------------|
|    | 833.4363                                                                                             | 833.4261    | -0.0102 | -12   | 252          | 258 NVEEKSK               |           |         |                                              |      | Mascot      |
|    | 842.4553                                                                                             | 842.4833    | 0.028   | 33    | 298          | 304 HMLKEGK               |           |         |                                              |      | Mascot      |
|    | 1144.6255                                                                                            | 1144.4584   | -0.1671 | -146  | 305          | 314 GRMLQAISPR            |           |         | Oxidation (M)[3]                             |      | Mascot      |
|    | 1364.6328                                                                                            | 1364.6533   | 0.0205  | 15    | 19           | 31 SNGEIAEGESFPK          |           |         |                                              |      | Mascot      |
|    | 1364.6328                                                                                            | 1364.6533   | 0.0205  | 15    | 19           | 31 SNGEIAEGESFPK          |           |         |                                              |      | Mascot      |
|    | 1660.9229                                                                                            | 1660.6855   | -0.2374 | -143  | 194          | 208 TEGISTSDIITRIVR       |           |         |                                              |      | Mascot      |
|    | 1826.8312                                                                                            | 1826.9232   | 0.092   | 50    | 130          | 144 YDAVCHCRYVDEVVR       |           |         |                                              |      | Mascot      |
|    | 1826.8312                                                                                            | 1826.9232   | 0.092   | 50    | 130          | 144 YDAVCHCRYVDEVVR       |           |         |                                              |      | Mascot      |
|    | 1957.976                                                                                             | 1957.9572   | -0.0188 | -10   | 59           | 75 VSMDALRGTPPEERPVR      |           |         | Oxidation (M)[3]                             |      | Mascot      |
|    | 2238.0933                                                                                            | 2238.0095   | -0.0838 | -37   | 98           | 117 CLFPNTYLIVGVCSDDLT HK |           |         |                                              |      | Mascot      |
|    | 2274.9324                                                                                            | 2274.9607   | 0.0283  | 12    | 120          | 137 GFTVMNEDERYDAVCHC R   |           |         | Carbamidomethyl (C)[15,17], Oxidation (M)[5] |      | Mascot      |
| 42 | novel protein similar to vertebrate RNA (guanine-9-) methyltransferase domain containing 1 (RG9MTD1) |             |         |       | gi 220673075 |                           | 34436.4   | 9.46    | 7                                            | 33   | 0           |

#### Peptide Information

|    | Calc. Mass                               | Obsrv. Mass | ± da    | ± ppm | Start Seq.   | End Sequence Seq.   | Ion Score | C. I. % | Modification                               | Rank | Result Type |
|----|------------------------------------------|-------------|---------|-------|--------------|---------------------|-----------|---------|--------------------------------------------|------|-------------|
|    | 850.3876                                 | 850.5135    | 0.1259  | 148   | 241          | 247 QTGCWQK         |           |         |                                            |      | Mascot      |
|    | 1122.5975                                | 1122.4762   | -0.1213 | -108  | 182          | 191 VYIVGAMVDR      | 9         | 0       |                                            |      | Mascot      |
|    | 1122.5975                                | 1122.4762   | -0.1213 | -108  | 182          | 191 VYIVGAMVDR      |           |         |                                            |      | Mascot      |
|    | 1239.5642                                | 1239.5887   | 0.0245  | 20    | 14           | 23 MCVCCQISVR       |           |         | Carbamidomethyl (C)[2], Oxidation (M)[1]   |      | Mascot      |
|    | 1327.6138                                | 1327.6823   | 0.0685  | 52    | 59           | 69 NNSIESAHNWR      |           |         |                                            |      | Mascot      |
|    | 1598.7793                                | 1598.7639   | -0.0154 | -10   | 1            | 12 MMFLRWCFPPVR     |           |         | Oxidation (M)[1]                           |      | Mascot      |
|    | 1598.7793                                | 1598.7639   | -0.0154 | -10   | 1            | 12 MMFLRWCFPPVR     |           |         | Oxidation (M)[1]                           |      | Mascot      |
|    | 1759.0146                                | 1758.7832   | -0.2314 | -132  | 226          | 240 NLTLQDMIRILTTVK |           |         |                                            |      | Mascot      |
|    | 1947.8833                                | 1947.9528   | 0.0695  | 36    | 14           | 29 MCVCCQISVRSFSSSR |           |         | Carbamidomethyl (C)[2,4], Oxidation (M)[1] |      | Mascot      |
| 43 | RecName: Full=Retinol dehydrogenase 10-B |             |         |       | gi 251831595 |                     | 37794.1   | 7.95    | 9                                          | 33   | 0           |

#### Peptide Information

|  | Calc. Mass | Obsrv. Mass | ± da    | ± ppm | Start Seq. | End Sequence Seq. | Ion Score | C. I. % | Modification     | Rank | Result Type |
|--|------------|-------------|---------|-------|------------|-------------------|-----------|---------|------------------|------|-------------|
|  | 1122.6418  | 1122.4762   | -0.1656 | -148  | 51         | 59 LFALEFARR      |           |         |                  |      | Mascot      |
|  | 1122.6418  | 1122.4762   | -0.1656 | -148  | 51         | 59 LFALEFARR      |           |         |                  |      | Mascot      |
|  | 1144.5278  | 1144.4584   | -0.0694 | -61   | 315        | 323 CMAPFLAQR     |           |         | Oxidation (M)[2] |      | Mascot      |
|  | 1165.5454  | 1165.7097   | 0.1643  | 141   | 287        | 295 VMYMTFMK      |           |         | Oxidation (M)[2] |      | Mascot      |

|    |                             |           |         |     |              |     |                                |      |   |                                              |   |  |  |        |
|----|-----------------------------|-----------|---------|-----|--------------|-----|--------------------------------|------|---|----------------------------------------------|---|--|--|--------|
|    | 1294.7001                   | 1294.666  | -0.0341 | -26 | 118          | 128 | ESVYLTAEKVR                    |      |   |                                              |   |  |  | Mascot |
|    | 1364.6338                   | 1364.6533 | 0.0195  | 14  | 107          | 117 | VYTYMCDVSKR                    |      |   |                                              |   |  |  | Mascot |
|    | 1364.6338                   | 1364.6533 | 0.0195  | 14  | 107          | 117 | VYTYMCDVSKR                    |      |   |                                              |   |  |  | Mascot |
|    | 1759.8658                   | 1759.788  | -0.0778 | -44 | 309          | 323 | FIGADKCMYPFLAQR                |      |   |                                              |   |  |  | Mascot |
|    | 1759.8658                   | 1759.788  | -0.0778 | -44 | 309          | 323 | FIGADKCMYPFLAQR                |      |   |                                              |   |  |  | Mascot |
|    | 1826.8337                   | 1826.9232 | 0.0895  | 49  | 71           | 85  | QSNEETAEMAREIYR                |      |   |                                              |   |  |  | Mascot |
|    | 1826.8337                   | 1826.9232 | 0.0895  | 49  | 71           | 85  | QSNEETAEMAREIYR                |      |   |                                              |   |  |  | Mascot |
|    | 2463.1931                   | 2463.1772 | -0.0159 | -6  | 61           | 81  | ATLVLDINRQSNEETAEMAR           |      |   | Oxidation (M)[19]                            |   |  |  | Mascot |
|    | 3270.4951                   | 3270.2292 | -0.2659 | -81 | 148          | 173 | HLLDCPDELIERTMMVNC<br>HAHFWTTK |      |   | Carbamidomethyl (C)[5,18], Oxidation (M)[14] |   |  |  | Mascot |
| 44 | novel protein [Danio rerio] |           |         |     | gi 157888703 |     | 27300.3                        | 8.82 | 9 | 33                                           | 0 |  |  |        |

#### Peptide Information

| Calc. Mass | Obsrv. Mass | ± da    | ± ppm | Start Seq. | End Seq. | Sequence           | Ion Score | C. I. % | Modification               | Rank | Result Type |
|------------|-------------|---------|-------|------------|----------|--------------------|-----------|---------|----------------------------|------|-------------|
| 975.4135   | 975.4407    | 0.0272  | 28    | 192        | 199      | HKCDQCGK           |           |         | Carbamidomethyl (C)[3]     |      | Mascot      |
| 1294.7155  | 1294.666    | -0.0495 | -38   | 200        | 209      | TFLRPYELQK         |           |         |                            |      | Mascot      |
| 1564.7411  | 1564.7358   | -0.0053 | -3    | 11         | 23       | QEDTEELIDVMVK      |           |         | Oxidation (M)[11]          |      | Mascot      |
| 1616.7883  | 1616.7799   | -0.0084 | -5    | 131        | 144      | VHTKEKPSCSVCGK     |           |         | Carbamidomethyl (C)[9,12]  |      | Mascot      |
| 1616.7883  | 1616.7799   | -0.0084 | -5    | 131        | 144      | VHTKEKPSCSVCGK     |           |         | Carbamidomethyl (C)[9,12]  |      | Mascot      |
| 1642.7676  | 1642.8798   | 0.1122  | 68    | 135        | 148      | EKPSCSVCGKSFTR     |           |         | Carbamidomethyl (C)[5,8]   |      | Mascot      |
| 1642.7676  | 1642.8798   | 0.1122  | 68    | 135        | 148      | EKPSCSVCGKSFTR     |           |         | Carbamidomethyl (C)[5,8]   |      | Mascot      |
| 1759.7891  | 1759.788    | -0.0011 | -1    | 217        | 231      | ERPYSCECGKSFTR     |           |         |                            |      | Mascot      |
| 1759.7891  | 1759.788    | -0.0011 | -1    | 217        | 231      | ERPYSCECGKSFTR     |           |         |                            |      | Mascot      |
| 1847.8527  | 1847.8473   | -0.0054 | -3    | 213        | 227      | VHTKERPYSCPEGK     |           |         | Carbamidomethyl (C)[10,13] |      | Mascot      |
| 1888.9619  | 1888.845    | -0.1169 | -62   | 44         | 61       | TEHSIVAVKALTCTQCGK |           |         |                            |      | Mascot      |
| 2233.0059  | 2233.0156   | 0.0097  | 4     | 71         | 89       | GHMRTHTGEKPFCTQCGK |           |         | Carbamidomethyl (C)[14,17] |      | Mascot      |

45 PREDICTED: zinc finger protein 260-like [Danio rerio] gi|326680512 34530.9 9.17 9 33 0

#### Peptide Information

| Calc. Mass | Obsrv. Mass | ± da    | ± ppm | Start Seq. | End Seq. | Sequence      | Ion Score | C. I. % | Modification                             | Rank | Result Type |
|------------|-------------|---------|-------|------------|----------|---------------|-----------|---------|------------------------------------------|------|-------------|
| 1067.6108  | 1067.4775   | -0.1333 | -125  | 198        | 206      | GFRLPVNHK     |           |         |                                          |      | Mascot      |
| 1184.5088  | 1184.3943   | -0.1145 | -97   | 192        | 200      | CYHCGKGFR     |           |         | Carbamidomethyl (C)[1,4]                 |      | Mascot      |
| 1242.5063  | 1242.6418   | 0.1355  | 109   | 104        | 113      | MDFTCKHCGK    |           |         | Carbamidomethyl (C)[5], Oxidation (M)[1] |      | Mascot      |
| 1294.6525  | 1294.666    | 0.0135  | 10    | 2          | 12       | AFIKEESEDVK   |           |         |                                          |      | Mascot      |
| 1564.7914  | 1564.7358   | -0.0556 | -36   | 254        | 266      | HFRSSGHLTVHMR |           |         |                                          |      | Mascot      |

|    |                                                                    |           |         |     |     |     |                                 |         |      |   |    |   |                                            |        |
|----|--------------------------------------------------------------------|-----------|---------|-----|-----|-----|---------------------------------|---------|------|---|----|---|--------------------------------------------|--------|
|    | 1697.741                                                           | 1697.8694 | 0.1284  | 76  | 77  | 90  | TFACYQCCKSFSNK                  |         |      |   |    |   | Carbamidomethyl (C)[4,7]                   | Mascot |
|    | 1697.741                                                           | 1697.8694 | 0.1284  | 76  | 77  | 90  | TFACYQCCKSFSNK                  |         |      |   |    |   | Carbamidomethyl (C)[4,7]                   | Mascot |
|    | 2238.0317                                                          | 2238.0095 | -0.0222 | -10 | 155 | 174 | IHTGEKPYTCSEGLSFT<br>HK         |         |      |   |    |   |                                            | Mascot |
|    | 2283.0896                                                          | 2283.1091 | 0.0195  | 9   | 127 | 146 | IHTGEKPYTCSQCGLSFA<br>VK        |         |      |   |    |   | Carbamidomethyl (C)[10,13]                 | Mascot |
|    | 3192.575                                                           | 3192.3184 | -0.2566 | -80 | 127 | 154 | IHTGEKPYTCSQCGLSFA<br>VKTTLNHMR |         |      |   |    |   | Carbamidomethyl (C)[10]                    | Mascot |
|    | 3208.5701                                                          | 3208.3218 | -0.2483 | -77 | 127 | 154 | IHTGEKPYTCSQCGLSFA<br>VKTTLNHMR |         |      |   |    |   | Carbamidomethyl (C)[10], Oxidation (M)[27] | Mascot |
| 46 | lysosomal cofactor/neurotrophic factor prosaposin<br>[Danio rerio] |           |         |     |     |     | gi 17985369                     | 57393.6 | 4.86 | 5 | 32 | 0 | 22                                         | 0      |

#### Peptide Information

| Calc. Mass | Obsrv. Mass | ± da    | ± ppm | Start Seq. | End Seq. | Sequence          | Ion Score | C. I. | % Modification                              | Rank | Result Type |
|------------|-------------|---------|-------|------------|----------|-------------------|-----------|-------|---------------------------------------------|------|-------------|
| 1045.4302  | 1045.5309   | 0.1007  | 96    | 508        | 515      | CNALDHCR          |           |       | Carbamidomethyl (C)[1,7]                    |      | Mascot      |
| 1144.5099  | 1144.4584   | -0.0515 | -45   | 508        | 516      | CNALDHCR          |           |       | Carbamidomethyl (C)[1]                      |      | Mascot      |
| 1287.7493  | 1287.6293   | -0.12   | -93   | 279        | 290      | SIPAVKMFPVAVK     |           |       |                                             |      | Mascot      |
| 1287.7493  | 1287.6293   | -0.12   | -93   | 279        | 290      | SIPAVKMFPVAVK     | 22        | 0     |                                             |      | Mascot      |
| 1616.6753  | 1616.7799   | 0.1046  | 65    | 308        | 320      | DSPQCAICEYVMK     |           |       | Carbamidomethyl (C)[5,8], Oxidation (M)[12] |      | Mascot      |
| 1616.6753  | 1616.7799   | 0.1046  | 65    | 308        | 320      | DSPQCAICEYVMK     |           |       | Carbamidomethyl (C)[5,8], Oxidation (M)[12] |      | Mascot      |
| 2000.1102  | 2000.0299   | -0.0803 | -40   | 162        | 178      | VSPFLLNIPQLLYPEEK |           |       |                                             |      | Mascot      |

47 vacuolar fusion protein CCZ1 homolog [Danio rerio] gi|41055976 55859.1 5.73 10 32 0

#### Peptide Information

| Calc. Mass | Obsrv. Mass | ± da    | ± ppm | Start Seq. | End Seq. | Sequence                 | Ion Score | C. I. | % Modification         | Rank | Result Type |
|------------|-------------|---------|-------|------------|----------|--------------------------|-----------|-------|------------------------|------|-------------|
| 848.3995   | 848.4752    | 0.0757  | 89    | 35         | 41       | EGEEEEKK                 |           |       |                        |      | Mascot      |
| 960.5512   | 960.4465    | -0.1047 | -109  | 280        | 288      | FLTGPANLK                |           |       |                        |      | Mascot      |
| 1615.8182  | 1615.7893   | -0.0289 | -18   | 395        | 409      | MASVSLTSVHPDLMK          |           |       |                        |      | Mascot      |
| 1758.8632  | 1758.7832   | -0.08   | -45   | 467        | 480      | RLCATQFNIFFLD            |           |       | Carbamidomethyl (C)[3] |      | Mascot      |
| 1759.9081  | 1759.788    | -0.1201 | -68   | 394        | 409      | KMASVSLTSVHPDLMK         |           |       | Oxidation (M)[2]       |      | Mascot      |
| 1759.9081  | 1759.788    | -0.1201 | -68   | 394        | 409      | KMASVSLTSVHPDLMK         |           |       | Oxidation (M)[2]       |      | Mascot      |
| 1848.0225  | 1847.8473   | -0.1752 | -95   | 204        | 219      | IQSFVNRVEESLSLVK         |           |       |                        |      | Mascot      |
| 2273.0154  | 2272.9565   | -0.0589 | -26   | 88         | 104      | QFFHEPEENYWMVMV<br>R     |           |       | Oxidation (M)[12,14]   |      | Mascot      |
| 2275.1909  | 2274.9607   | -0.2302 | -101  | 16         | 34       | QYTPSLLSFFIYNPKFGP<br>R  |           |       |                        |      | Mascot      |
| 2284.1001  | 2284.106    | 0.0059  | 3     | 376        | 393      | FIYFNHNMNLAEKSTIHMR      |           |       | Oxidation (M)[7,17]    |      | Mascot      |
| 2463.207   | 2463.1772   | -0.0298 | -12   | 410        | 430      | ILGDINCFARVDEDEEII<br>VK |           |       | Carbamidomethyl (C)[7] |      | Mascot      |

48 novel protein similar to vertebrate N-glycanase 1 gi|126632448 72396.7 6 1 24 0

(NGLY1) [Danio rerio]

Peptide Information

| Calc. Mass | Obsrv. Mass | ± da    | ± ppm | Start Seq. | End Sequence Seq. | Ion Score | C. I. % | Modification | Rank | Result Type |
|------------|-------------|---------|-------|------------|-------------------|-----------|---------|--------------|------|-------------|
| 913.5577   | 913.5172    | -0.0405 | -44   | 415        | 421 KQQLLQR       | 24        | 0       |              | 2    | Mascot      |

49 zinc finger CCCH domain-containing protein 10 [Danio rerio] gi|46309561 55532.6 8.3 1 24 0

Peptide Information

| Calc. Mass | Obsrv. Mass | ± da    | ± ppm | Start Seq. | End Sequence Seq. | Ion Score | C. I. % | Modification | Rank | Result Type |
|------------|-------------|---------|-------|------------|-------------------|-----------|---------|--------------|------|-------------|
| 913.5464   | 913.5172    | -0.0292 | -32   | 138        | 145 KTGELPLR      | 24        | 0       |              | 3    | Mascot      |

50 PREDICTED: hypothetical protein LOC796277 [Danio rerio] gi|292622807 79431.9 5.54 1 23 0

Peptide Information

| Calc. Mass | Obsrv. Mass | ± da    | ± ppm | Start Seq. | End Sequence Seq. | Ion Score | C. I. % | Modification | Rank | Result Type |
|------------|-------------|---------|-------|------------|-------------------|-----------|---------|--------------|------|-------------|
| 1287.7015  | 1287.6293   | -0.0722 | -56   | 638        | 649 KNNGLLSSEVAR  | 23        | 0       |              | 2    | Mascot      |

|                |           |                        |                |                |                    |
|----------------|-----------|------------------------|----------------|----------------|--------------------|
| Gel Idx/Pos    | 238/J14   | Instr./Gel Origin      | BA2060/110707A | Process Status | Analysis Succeeded |
| Plate [#] Name | [1] 31496 | Instrument Sample Name |                | Spectra        | 11                 |

| Rank | Protein Name               | Accession No. | Protein MW | Protein PI | Pep. Count | Protein Score | Protein Score C. I. % | Total Ion Score | Total Ion C. I. % |
|------|----------------------------|---------------|------------|------------|------------|---------------|-----------------------|-----------------|-------------------|
| 1    | Vtg1 protein [Danio rerio] | gi 63100501   | 36409.1    | 9.23       | 16         | 853           | 100                   | 738             | 100               |

Peptide Information

| Calc. Mass | Obsrv. Mass | ± da    | ± ppm | Start Seq. | End Sequence Seq. | Ion Score | C. I. % | Modification           | Rank | Result Type |
|------------|-------------|---------|-------|------------|-------------------|-----------|---------|------------------------|------|-------------|
| 826.4457   | 826.4244    | -0.0213 | -26   | 198        | 204 QYAVFAK       |           |         |                        |      | Mascot      |
| 895.5359   | 895.4765    | -0.0594 | -66   | 81         | 88 ANHIIVTK       |           |         |                        |      | Mascot      |
| 960.4785   | 960.453     | -0.0255 | -27   | 218        | 224 LEVEWER       | 44        | 98.825  |                        |      | Mascot      |
| 960.4785   | 960.453     | -0.0255 | -27   | 218        | 224 LEVEWER       |           |         |                        |      | Mascot      |
| 976.5322   | 976.4487    | -0.0835 | -86   | 25         | 32 FSSVPRQR       |           |         |                        |      | Mascot      |
| 984.4243   | 984.395     | -0.0293 | -30   | 190        | 197 FSWGAECK      |           |         | Carbamidomethyl (C)[7] |      | Mascot      |
| 984.4243   | 984.395     | -0.0293 | -30   | 190        | 197 FSWGAECK      | 51        | 99.803  | Carbamidomethyl (C)[7] |      | Mascot      |
| 1118.682   | 1118.6486   | -0.0334 | -30   | 225        | 234 LPIIVTTYAK    |           |         |                        |      | Mascot      |



|   |                              |           |         |      |              |     |                               |      |     |                                            |        |     |     |
|---|------------------------------|-----------|---------|------|--------------|-----|-------------------------------|------|-----|--------------------------------------------|--------|-----|-----|
|   | 1287.6691                    | 1287.6376 | -0.0315 | -24  | 205          | 217 | AEAGVLGEFPAAR                 | 112  | 100 |                                            | Mascot |     |     |
|   | 1287.6691                    | 1287.6376 | -0.0315 | -24  | 205          | 217 | AEAGVLGEFPAAR                 |      |     |                                            | Mascot |     |     |
|   | 1327.7216                    | 1327.687  | -0.0346 | -26  | 260          | 271 | EIELTAALPSQR                  |      |     |                                            | Mascot |     |     |
|   | 1327.7216                    | 1327.687  | -0.0346 | -26  | 260          | 271 | EIELTAALPSQR                  | 90   | 100 |                                            | Mascot |     |     |
|   | 1364.6957                    | 1364.6595 | -0.0362 | -27  | 239          | 250 | HILTAAYDTGFR                  | 83   | 100 |                                            | Mascot |     |     |
|   | 1364.6957                    | 1364.6595 | -0.0362 | -27  | 239          | 250 | HILTAAYDTGFR                  |      |     |                                            | Mascot |     |     |
|   | 1383.7743                    | 1383.6537 | -0.1206 | -87  | 13           | 24  | VWPEQVLKSAAR                  |      |     |                                            | Mascot |     |     |
|   | 1642.9315                    | 1642.8878 | -0.0437 | -27  | 121          | 135 | FLGNDIPPVFIIAR                | 131  | 100 |                                            | Mascot |     |     |
|   | 1642.9315                    | 1642.8878 | -0.0437 | -27  | 121          | 135 | FLGNDIPPVFIIAR                |      |     |                                            | Mascot |     |     |
|   | 1660.8574                    | 1660.8142 | -0.0432 | -26  | 159          | 173 | VQLIVSSIAENDNMK               |      |     |                                            | Mascot |     |     |
|   | 1676.8523                    | 1676.8079 | -0.0444 | -26  | 159          | 173 | VQLIVSSIAENDNMK               |      |     | Oxidation (M)[14]                          | Mascot |     |     |
|   | 1796.9078                    | 1796.959  | 0.0512  | 28   | 239          | 253 | HILTAAYDTGFRFER               |      |     |                                            | Mascot |     |     |
|   | 1826.9799                    | 1826.9319 | -0.048  | -26  | 143          | 158 | LLGYQLAAYFDKPTAR              |      |     |                                            | Mascot |     |     |
|   | 1826.9799                    | 1826.9319 | -0.048  | -26  | 143          | 158 | LLGYQLAAYFDKPTAR              | 137  | 100 |                                            | Mascot |     |     |
|   | 1958.0189                    | 1957.9656 | -0.0533 | -27  | 254          | 271 | ATNSEKEIELTAALPSQR            |      |     |                                            | Mascot |     |     |
|   | 1958.0189                    | 1957.9656 | -0.0533 | -27  | 254          | 271 | ATNSEKEIELTAALPSQR            | 93   | 100 |                                            | Mascot |     |     |
|   | 2705.3848                    | 2705.0928 | -0.292  | -108 | 159          | 183 | VQLIVSSIAENDNMKICAD<br>GALLSK |      |     | Carbamidomethyl (C)[17], Oxidation (M)[14] | Mascot |     |     |
| 2 | vitellogenin 1 [Danio rerio] |           |         |      | gi 166795887 |     | 149452.5                      | 8.68 | 20  | 799                                        | 100    | 738 | 100 |

| Peptide Information |             |         |       |            |          |               |           |        |   |                        |      |             |
|---------------------|-------------|---------|-------|------------|----------|---------------|-----------|--------|---|------------------------|------|-------------|
| Calc. Mass          | Obsrv. Mass | ± da    | ± ppm | Start Seq. | End Seq. | Sequence      | Ion Score | C. I.  | % | Modification           | Rank | Result Type |
| 826.4457            | 826.4244    | -0.0213 | -26   | 1238       | 1244     | QYAVFAK       |           |        |   |                        |      | Mascot      |
| 895.5359            | 895.4765    | -0.0594 | -66   | 174        | 181      | ANHIIIVTK     |           |        |   |                        |      | Mascot      |
| 960.4785            | 960.453     | -0.0255 | -27   | 1258       | 1264     | LEVEWER       | 44        | 98.825 |   |                        |      | Mascot      |
| 960.4785            | 960.453     | -0.0255 | -27   | 1258       | 1264     | LEVEWER       |           |        |   |                        |      | Mascot      |
| 984.4243            | 984.395     | -0.0293 | -30   | 1230       | 1237     | FSWGAECK      |           |        |   | Carbamidomethyl (C)[7] |      | Mascot      |
| 984.4243            | 984.395     | -0.0293 | -30   | 1230       | 1237     | FSWGAECK      | 51        | 99.803 |   | Carbamidomethyl (C)[7] |      | Mascot      |
| 992.5015            | 992.4415    | -0.06   | -60   | 615        | 622      | LMNCKLDR      |           |        |   |                        |      | Mascot      |
| 1118.682            | 1118.6486   | -0.0334 | -30   | 1265       | 1274     | LPIIVTTYAK    |           |        |   |                        |      | Mascot      |
| 1287.6691           | 1287.6376   | -0.0315 | -24   | 1245       | 1257     | AEAGVLGEFPAAR | 112       | 100    |   |                        |      | Mascot      |
| 1287.6691           | 1287.6376   | -0.0315 | -24   | 1245       | 1257     | AEAGVLGEFPAAR |           |        |   |                        |      | Mascot      |
| 1327.7216           | 1327.687    | -0.0346 | -26   | 1300       | 1311     | EIELTAALPSQR  |           |        |   |                        |      | Mascot      |
| 1327.7216           | 1327.687    | -0.0346 | -26   | 1300       | 1311     | EIELTAALPSQR  | 90        | 100    |   |                        |      | Mascot      |
| 1364.6957           | 1364.6595   | -0.0362 | -27   | 1279       | 1290     | HILTAAYDTGFR  | 83        | 100    |   |                        |      | Mascot      |
| 1364.6957           | 1364.6595   | -0.0362 | -27   | 1279       | 1290     | HILTAAYDTGFR  |           |        |   |                        |      | Mascot      |
| 1385.6981           | 1385.6288   | -0.0693 | -50   | 828        | 838      | LESMTYEQLKK   |           |        |   | Oxidation (M)[4]       |      | Mascot      |

|           |                              |         |      |      |             |                               |          |      |    |     |     |                                            |     |  |  |  |        |
|-----------|------------------------------|---------|------|------|-------------|-------------------------------|----------|------|----|-----|-----|--------------------------------------------|-----|--|--|--|--------|
| 1412.7494 | 1412.6796                    | -0.0698 | -49  | 969  | 980         | TLCYAVPYIEIK                  |          |      |    |     |     |                                            |     |  |  |  | Mascot |
| 1642.9315 | 1642.8878                    | -0.0437 | -27  | 1161 | 1175        | FLGNDIPPVFIIAR                | 131      | 100  |    |     |     |                                            |     |  |  |  | Mascot |
| 1642.9315 | 1642.8878                    | -0.0437 | -27  | 1161 | 1175        | FLGNDIPPVFIIAR                |          |      |    |     |     |                                            |     |  |  |  | Mascot |
| 1660.8574 | 1660.8142                    | -0.0432 | -26  | 1199 | 1213        | VQLIVSSIAENDNMK               |          |      |    |     |     |                                            |     |  |  |  | Mascot |
| 1676.8523 | 1676.8079                    | -0.0444 | -26  | 1199 | 1213        | VQLIVSSIAENDNMK               |          |      |    |     |     | Oxidation (M)[14]                          |     |  |  |  | Mascot |
| 1711.8948 | 1711.8153                    | -0.0795 | -46  | 119  | 134         | VFAPAGVSPTVMNLHR              |          |      |    |     |     | Oxidation (M)[12]                          |     |  |  |  | Mascot |
| 1796.9078 | 1796.959                     | 0.0512  | 28   | 1279 | 1293        | HILTAAYDTGFRFER               |          |      |    |     |     |                                            |     |  |  |  | Mascot |
| 1826.9799 | 1826.9319                    | -0.048  | -26  | 1183 | 1198        | LLGYQLAAYFDKPTAR              |          |      |    |     |     |                                            |     |  |  |  | Mascot |
| 1826.9799 | 1826.9319                    | -0.048  | -26  | 1183 | 1198        | LLGYQLAAYFDKPTAR              | 137      | 100  |    |     |     |                                            |     |  |  |  | Mascot |
| 1958.0189 | 1957.9656                    | -0.0533 | -27  | 1294 | 1311        | ATNSEKEIELTAALPSQR            |          |      |    |     |     |                                            |     |  |  |  | Mascot |
| 1958.0189 | 1957.9656                    | -0.0533 | -27  | 1294 | 1311        | ATNSEKEIELTAALPSQR            | 93       | 100  |    |     |     |                                            |     |  |  |  | Mascot |
| 2041.943  | 2041.76                      | -0.183  | -90  | 146  | 163         | KTQNIYEMQEAGAQQGVC<br>R       |          |      |    |     |     | Oxidation (M)[8]                           |     |  |  |  | Mascot |
| 2652.3418 | 2652.095                     | -0.2468 | -93  | 72   | 94          | LMDPLLYEYAGTWPKDP<br>FVPATK   |          |      |    |     |     |                                            |     |  |  |  | Mascot |
| 2705.3848 | 2705.0928                    | -0.292  | -108 | 1199 | 1223        | VQLIVSSIAENDNMKICAD<br>GALLSK |          |      |    |     |     | Carbamidomethyl (C)[17], Oxidation (M)[14] |     |  |  |  | Mascot |
| 3         | vitellogenin 1 [Danio rerio] |         |      |      | gi 94733730 |                               | 149140.4 | 8.74 | 19 | 795 | 100 | 738                                        | 100 |  |  |  |        |

Peptide Information

| Calc. Mass | Obsrv. Mass | $\pm$ da | $\pm$ ppm | Start Seq. | End Seq. | Sequence       | Ion Score | C. I.  | % Modification         | Rank | Result | Type   |
|------------|-------------|----------|-----------|------------|----------|----------------|-----------|--------|------------------------|------|--------|--------|
| 826.4457   | 826.4244    | -0.0213  | -26       | 1238       | 1244     | QYAVFAK        |           |        |                        |      |        | Mascot |
| 895.5359   | 895.4765    | -0.0594  | -66       | 174        | 181      | ANHIIIVTK      |           |        |                        |      |        | Mascot |
| 960.4785   | 960.453     | -0.0255  | -27       | 1258       | 1264     | LEVEWER        | 44        | 98.825 |                        |      |        | Mascot |
| 960.4785   | 960.453     | -0.0255  | -27       | 1258       | 1264     | LEVEWER        |           |        |                        |      |        | Mascot |
| 984.4243   | 984.395     | -0.0293  | -30       | 1230       | 1237     | FSWGAECK       |           |        | Carbamidomethyl (C)[7] |      |        | Mascot |
| 984.4243   | 984.395     | -0.0293  | -30       | 1230       | 1237     | FSWGAECK       | 51        | 99.803 | Carbamidomethyl (C)[7] |      |        | Mascot |
| 1118.682   | 1118.6486   | -0.0334  | -30       | 1265       | 1274     | LPIIVTTYAK     |           |        |                        |      |        | Mascot |
| 1287.6691  | 1287.6376   | -0.0315  | -24       | 1245       | 1257     | AEAGVLGEFPAAR  | 112       | 100    |                        |      |        | Mascot |
| 1287.6691  | 1287.6376   | -0.0315  | -24       | 1245       | 1257     | AEAGVLGEFPAAR  |           |        |                        |      |        | Mascot |
| 1327.7216  | 1327.687    | -0.0346  | -26       | 1300       | 1311     | EIELTAALPSQR   |           |        |                        |      |        | Mascot |
| 1327.7216  | 1327.687    | -0.0346  | -26       | 1300       | 1311     | EIELTAALPSQR   | 90        | 100    |                        |      |        | Mascot |
| 1364.6957  | 1364.6595   | -0.0362  | -27       | 1279       | 1290     | HILTAAYDTGFR   | 83        | 100    |                        |      |        | Mascot |
| 1364.6957  | 1364.6595   | -0.0362  | -27       | 1279       | 1290     | HILTAAYDTGFR   |           |        |                        |      |        | Mascot |
| 1385.6981  | 1385.6288   | -0.0693  | -50       | 828        | 838      | LESMTYEQLKK    |           |        | Oxidation (M)[4]       |      |        | Mascot |
| 1412.7494  | 1412.6796   | -0.0698  | -49       | 969        | 980      | TLCYAVPYIEIK   |           |        |                        |      |        | Mascot |
| 1642.9315  | 1642.8878   | -0.0437  | -27       | 1161       | 1175     | FLGNDIPPVFIIAR | 131       | 100    |                        |      |        | Mascot |
| 1642.9315  | 1642.8878   | -0.0437  | -27       | 1161       | 1175     | FLGNDIPPVFIIAR |           |        |                        |      |        | Mascot |

|           |           |         |      |      |      |                               |  |  |  |     |  |     |                                            |  |  |  |  |  |        |
|-----------|-----------|---------|------|------|------|-------------------------------|--|--|--|-----|--|-----|--------------------------------------------|--|--|--|--|--|--------|
| 1660.8574 | 1660.8142 | -0.0432 | -26  | 1199 | 1213 | VQLIVSSIAENDNMK               |  |  |  |     |  |     |                                            |  |  |  |  |  | Mascot |
| 1676.8523 | 1676.8079 | -0.0444 | -26  | 1199 | 1213 | VQLIVSSIAENDNMK               |  |  |  |     |  |     | Oxidation (M)[14]                          |  |  |  |  |  | Mascot |
| 1711.8948 | 1711.8153 | -0.0795 | -46  | 119  | 134  | VFAPAGVSPTVMNLHR              |  |  |  |     |  |     | Oxidation (M)[12]                          |  |  |  |  |  | Mascot |
| 1796.9078 | 1796.959  | 0.0512  | 28   | 1279 | 1293 | HILTAAYDTGFRFER               |  |  |  |     |  |     |                                            |  |  |  |  |  | Mascot |
| 1826.9799 | 1826.9319 | -0.048  | -26  | 1183 | 1198 | LLGYQLAAYFDKPTAR              |  |  |  |     |  |     |                                            |  |  |  |  |  | Mascot |
| 1826.9799 | 1826.9319 | -0.048  | -26  | 1183 | 1198 | LLGYQLAAYFDKPTAR              |  |  |  | 137 |  | 100 |                                            |  |  |  |  |  | Mascot |
| 1958.0189 | 1957.9656 | -0.0533 | -27  | 1294 | 1311 | ATNSEKEIELTAALPSQR            |  |  |  |     |  |     |                                            |  |  |  |  |  | Mascot |
| 1958.0189 | 1957.9656 | -0.0533 | -27  | 1294 | 1311 | ATNSEKEIELTAALPSQR            |  |  |  | 93  |  | 100 |                                            |  |  |  |  |  | Mascot |
| 2041.943  | 2041.76   | -0.183  | -90  | 146  | 163  | KTQNIYEMQEAGAQQVC<br>R        |  |  |  |     |  |     | Oxidation (M)[8]                           |  |  |  |  |  | Mascot |
| 2652.3418 | 2652.095  | -0.2468 | -93  | 72   | 94   | LMDPLLYEYAGTWPKDP<br>FVPATK   |  |  |  |     |  |     |                                            |  |  |  |  |  | Mascot |
| 2705.3848 | 2705.0928 | -0.292  | -108 | 1199 | 1223 | VQLIVSSIAENDNMKICAD<br>GALLSK |  |  |  |     |  |     | Carbamidomethyl (C)[17], Oxidation (M)[14] |  |  |  |  |  | Mascot |

4 Vtg1 protein [Danio rerio] gi|145337918 116565.5 9.07 15 783 100 738 100

Peptide Information

| Calc. Mass | Obsrv. Mass | ± da    | ± ppm | Start Seq. | End Seq. | Sequence         | Ion Score | C. I.  | % | Modification           | Rank | Result Type |
|------------|-------------|---------|-------|------------|----------|------------------|-----------|--------|---|------------------------|------|-------------|
| 826.4457   | 826.4244    | -0.0213 | -26   | 944        | 950      | QYAVFAK          |           |        |   |                        |      | Mascot      |
| 960.4785   | 960.453     | -0.0255 | -27   | 964        | 970      | LEVEWER          | 44        | 98.825 |   |                        |      | Mascot      |
| 960.4785   | 960.453     | -0.0255 | -27   | 964        | 970      | LEVEWER          |           |        |   |                        |      | Mascot      |
| 984.4243   | 984.395     | -0.0293 | -30   | 936        | 943      | FSWGAECK         |           |        |   | Carbamidomethyl (C)[7] |      | Mascot      |
| 984.4243   | 984.395     | -0.0293 | -30   | 936        | 943      | FSWGAECK         | 51        | 99.803 |   | Carbamidomethyl (C)[7] |      | Mascot      |
| 1118.682   | 1118.6486   | -0.0334 | -30   | 971        | 980      | LPIIVTTYAK       |           |        |   |                        |      | Mascot      |
| 1287.6691  | 1287.6376   | -0.0315 | -24   | 951        | 963      | AEAGVLGEFPAAR    | 112       | 100    |   |                        |      | Mascot      |
| 1287.6691  | 1287.6376   | -0.0315 | -24   | 951        | 963      | AEAGVLGEFPAAR    |           |        |   |                        |      | Mascot      |
| 1327.7216  | 1327.687    | -0.0346 | -26   | 1006       | 1017     | EIELTAALPSQR     |           |        |   |                        |      | Mascot      |
| 1327.7216  | 1327.687    | -0.0346 | -26   | 1006       | 1017     | EIELTAALPSQR     | 90        | 100    |   |                        |      | Mascot      |
| 1364.6957  | 1364.6595   | -0.0362 | -27   | 985        | 996      | HILTAAYDTGFR     | 83        | 100    |   |                        |      | Mascot      |
| 1364.6957  | 1364.6595   | -0.0362 | -27   | 985        | 996      | HILTAAYDTGFR     |           |        |   |                        |      | Mascot      |
| 1385.6981  | 1385.6288   | -0.0693 | -50   | 534        | 544      | LESMTYEQLKK      |           |        |   | Oxidation (M)[4]       |      | Mascot      |
| 1412.7494  | 1412.6796   | -0.0698 | -49   | 675        | 686      | TLCYAVPYIEIK     |           |        |   |                        |      | Mascot      |
| 1642.9315  | 1642.8878   | -0.0437 | -27   | 867        | 881      | FLGNDIPPVFIIAR   | 131       | 100    |   |                        |      | Mascot      |
| 1642.9315  | 1642.8878   | -0.0437 | -27   | 867        | 881      | FLGNDIPPVFIIAR   |           |        |   |                        |      | Mascot      |
| 1660.8574  | 1660.8142   | -0.0432 | -26   | 905        | 919      | VQLIVSSIAENDNMK  |           |        |   |                        |      | Mascot      |
| 1676.8523  | 1676.8079   | -0.0444 | -26   | 905        | 919      | VQLIVSSIAENDNMK  |           |        |   | Oxidation (M)[14]      |      | Mascot      |
| 1796.9078  | 1796.959    | 0.0512  | 28    | 985        | 999      | HILTAAYDTGFRFER  |           |        |   |                        |      | Mascot      |
| 1826.9799  | 1826.9319   | -0.048  | -26   | 889        | 904      | LLGYQLAAYFDKPTAR |           |        |   |                        |      | Mascot      |

|  |           |           |         |      |      |      |                               |     |     |                                            |  |        |
|--|-----------|-----------|---------|------|------|------|-------------------------------|-----|-----|--------------------------------------------|--|--------|
|  | 1826.9799 | 1826.9319 | -0.048  | -26  | 889  | 904  | LLGYQLAAYFDKPTAR              | 137 | 100 |                                            |  | Mascot |
|  | 1958.0189 | 1957.9656 | -0.0533 | -27  | 1000 | 1017 | ATNSEKEIELTAALPSQR            |     |     |                                            |  | Mascot |
|  | 1958.0189 | 1957.9656 | -0.0533 | -27  | 1000 | 1017 | ATNSEKEIELTAALPSQR            | 93  | 100 |                                            |  | Mascot |
|  | 2705.3848 | 2705.0928 | -0.292  | -108 | 905  | 929  | VQLIVSSIAENDNMKICAD<br>GALLSK |     |     | Carbamidomethyl (C)[17], Oxidation (M)[14] |  | Mascot |

5 vitellogenin 1 [Danio rerio] gi|21391472 127954.2 8.69 15 780 100 738 100

#### Peptide Information

| Calc. Mass | Obsrv. Mass | ± da    | ± ppm | Start Seq. | End Seq. | Sequence                      | Ion Score | C. I. % | Modification                               | Rank | Result Type |
|------------|-------------|---------|-------|------------|----------|-------------------------------|-----------|---------|--------------------------------------------|------|-------------|
| 826.4457   | 826.4244    | -0.0213 | -26   | 1045       | 1051     | QYAVFAK                       |           |         |                                            |      | Mascot      |
| 960.4785   | 960.453     | -0.0255 | -27   | 1065       | 1071     | LEVEWER                       | 44        | 98.825  |                                            |      | Mascot      |
| 960.4785   | 960.453     | -0.0255 | -27   | 1065       | 1071     | LEVEWER                       |           |         |                                            |      | Mascot      |
| 984.4243   | 984.395     | -0.0293 | -30   | 1037       | 1044     | FSWGAECK                      |           |         | Carbamidomethyl (C)[7]                     |      | Mascot      |
| 984.4243   | 984.395     | -0.0293 | -30   | 1037       | 1044     | FSWGAECK                      | 51        | 99.803  | Carbamidomethyl (C)[7]                     |      | Mascot      |
| 1118.682   | 1118.6486   | -0.0334 | -30   | 1072       | 1081     | LPIIVTTYAK                    |           |         |                                            |      | Mascot      |
| 1287.6691  | 1287.6376   | -0.0315 | -24   | 1052       | 1064     | AEAGVLGEFPAAR                 | 112       | 100     |                                            |      | Mascot      |
| 1287.6691  | 1287.6376   | -0.0315 | -24   | 1052       | 1064     | AEAGVLGEFPAAR                 |           |         |                                            |      | Mascot      |
| 1327.7216  | 1327.687    | -0.0346 | -26   | 1107       | 1118     | EIELTAALPSQR                  |           |         |                                            |      | Mascot      |
| 1327.7216  | 1327.687    | -0.0346 | -26   | 1107       | 1118     | EIELTAALPSQR                  | 90        | 100     |                                            |      | Mascot      |
| 1364.6957  | 1364.6595   | -0.0362 | -27   | 1086       | 1097     | HILTAAYDTGFR                  | 83        | 100     |                                            |      | Mascot      |
| 1364.6957  | 1364.6595   | -0.0362 | -27   | 1086       | 1097     | HILTAAYDTGFR                  |           |         |                                            |      | Mascot      |
| 1385.6981  | 1385.6288   | -0.0693 | -50   | 637        | 647      | LESMTYEQLKK                   |           |         | Oxidation (M)[4]                           |      | Mascot      |
| 1412.7494  | 1412.6796   | -0.0698 | -49   | 778        | 789      | TLCYAVPYIEIK                  |           |         |                                            |      | Mascot      |
| 1642.9315  | 1642.8878   | -0.0437 | -27   | 968        | 982      | FLGNDIPPVFIIAR                | 131       | 100     |                                            |      | Mascot      |
| 1642.9315  | 1642.8878   | -0.0437 | -27   | 968        | 982      | FLGNDIPPVFIIAR                |           |         |                                            |      | Mascot      |
| 1660.8574  | 1660.8142   | -0.0432 | -26   | 1006       | 1020     | VQLIVSSIAENDNMK               |           |         |                                            |      | Mascot      |
| 1676.8523  | 1676.8079   | -0.0444 | -26   | 1006       | 1020     | VQLIVSSIAENDNMK               |           |         | Oxidation (M)[14]                          |      | Mascot      |
| 1796.9078  | 1796.959    | 0.0512  | 28    | 1086       | 1100     | HILTAAYDTGFRFER               |           |         |                                            |      | Mascot      |
| 1826.9799  | 1826.9319   | -0.048  | -26   | 990        | 1005     | LLGYQLAAYFDKPTAR              |           |         |                                            |      | Mascot      |
| 1826.9799  | 1826.9319   | -0.048  | -26   | 990        | 1005     | LLGYQLAAYFDKPTAR              | 137       | 100     |                                            |      | Mascot      |
| 1958.0189  | 1957.9656   | -0.0533 | -27   | 1101       | 1118     | ATNSEKEIELTAALPSQR            |           |         |                                            |      | Mascot      |
| 1958.0189  | 1957.9656   | -0.0533 | -27   | 1101       | 1118     | ATNSEKEIELTAALPSQR            | 93        | 100     |                                            |      | Mascot      |
| 2705.3848  | 2705.0928   | -0.292  | -108  | 1006       | 1030     | VQLIVSSIAENDNMKICAD<br>GALLSK |           |         | Carbamidomethyl (C)[17], Oxidation (M)[14] |      | Mascot      |

6 vitellogenin 6 [Danio rerio] gi|57864787 38968.8 8.92 9 589 100 546 100

#### Peptide Information

| Calc. Mass | Obsrv. Mass | ± da | ± ppm | Start | End | Sequence | Ion | C. I. % | Modification | Rank | Result Type |
|------------|-------------|------|-------|-------|-----|----------|-----|---------|--------------|------|-------------|
|------------|-------------|------|-------|-------|-----|----------|-----|---------|--------------|------|-------------|

|   |                                                             |           |         | Seq. | Seq.        | Score    |                    |     |        |                         |     |     |        |
|---|-------------------------------------------------------------|-----------|---------|------|-------------|----------|--------------------|-----|--------|-------------------------|-----|-----|--------|
|   | 826.4457                                                    | 826.4244  | -0.0213 | -26  | 235         | 241      | QYAVFAK            |     |        |                         |     |     | Mascot |
|   | 960.4785                                                    | 960.453   | -0.0255 | -27  | 255         | 261      | LEVEWER            | 44  | 98.825 |                         |     |     | Mascot |
|   | 960.4785                                                    | 960.453   | -0.0255 | -27  | 255         | 261      | LEVEWER            |     |        |                         |     |     | Mascot |
|   | 984.4243                                                    | 984.395   | -0.0293 | -30  | 227         | 234      | FSWGAECK           |     |        | Carbamidomethyl (C)[7]  |     |     | Mascot |
|   | 984.4243                                                    | 984.395   | -0.0293 | -30  | 227         | 234      | FSWGAECK           | 51  | 99.803 | Carbamidomethyl (C)[7]  |     |     | Mascot |
|   | 1327.7216                                                   | 1327.687  | -0.0346 | -26  | 297         | 308      | EIELTAALPSQR       |     |        |                         |     |     | Mascot |
|   | 1327.7216                                                   | 1327.687  | -0.0346 | -26  | 297         | 308      | EIELTAALPSQR       | 90  | 100    |                         |     |     | Mascot |
|   | 1383.6725                                                   | 1383.6537 | -0.0188 | -14  | 223         | 234      | VTAKFSWGAECK       |     |        | Carbamidomethyl (C)[11] |     |     | Mascot |
|   | 1642.9315                                                   | 1642.8878 | -0.0437 | -27  | 158         | 172      | FLGNDIPPVFIIAR     | 131 | 100    |                         |     |     | Mascot |
|   | 1642.9315                                                   | 1642.8878 | -0.0437 | -27  | 158         | 172      | FLGNDIPPVFIIAR     |     |        |                         |     |     | Mascot |
|   | 1660.7119                                                   | 1660.8142 | 0.1023  | 62   | 139         | 154      | DTSSGSAASFEQMQK    |     |        | Oxidation (M)[14]       |     |     | Mascot |
|   | 1826.9799                                                   | 1826.9319 | -0.048  | -26  | 180         | 195      | LLGYQLAAYFDKPTAR   |     |        |                         |     |     | Mascot |
|   | 1826.9799                                                   | 1826.9319 | -0.048  | -26  | 180         | 195      | LLGYQLAAYFDKPTAR   | 137 | 100    |                         |     |     | Mascot |
|   | 1958.0189                                                   | 1957.9656 | -0.0533 | -27  | 291         | 308      | ATNSEKEIELTAALPSQR |     |        |                         |     |     | Mascot |
|   | 1958.0189                                                   | 1957.9656 | -0.0533 | -27  | 291         | 308      | ATNSEKEIELTAALPSQR | 93  | 100    |                         |     |     | Mascot |
| 7 | novel protein similar to vitellogenin 1 (vg1) [Danio rerio] |           |         |      | gi 94733734 | 149808.5 | 8.83               | 14  | 571    | 100                     | 546 | 100 |        |

#### Peptide Information

|  | Calc. Mass | Obsrv. Mass | ± da    | ± ppm | Start Seq. | End Sequence Seq. | Ion Score        | C. I. | % Modification | Rank                    | Result Type |
|--|------------|-------------|---------|-------|------------|-------------------|------------------|-------|----------------|-------------------------|-------------|
|  | 826.4457   | 826.4244    | -0.0213 | -26   | 1245       | 1251              | QYAVFAK          |       |                |                         | Mascot      |
|  | 960.4785   | 960.453     | -0.0255 | -27   | 1265       | 1271              | LEVEWER          | 44    | 98.825         |                         | Mascot      |
|  | 960.4785   | 960.453     | -0.0255 | -27   | 1265       | 1271              | LEVEWER          |       |                |                         | Mascot      |
|  | 984.4243   | 984.395     | -0.0293 | -30   | 1237       | 1244              | FSWGAECK         |       |                | Carbamidomethyl (C)[7]  | Mascot      |
|  | 984.4243   | 984.395     | -0.0293 | -30   | 1237       | 1244              | FSWGAECK         | 51    | 99.803         | Carbamidomethyl (C)[7]  | Mascot      |
|  | 992.5015   | 992.4415    | -0.06   | -60   | 619        | 626               | LMNCKLDR         |       |                |                         | Mascot      |
|  | 1327.7216  | 1327.687    | -0.0346 | -26   | 1307       | 1318              | EIELTAALPSQR     |       |                |                         | Mascot      |
|  | 1327.7216  | 1327.687    | -0.0346 | -26   | 1307       | 1318              | EIELTAALPSQR     | 90    | 100            |                         | Mascot      |
|  | 1383.6725  | 1383.6537   | -0.0188 | -14   | 1233       | 1244              | VTAKFSWGAECK     |       |                | Carbamidomethyl (C)[11] | Mascot      |
|  | 1385.6981  | 1385.6288   | -0.0693 | -50   | 832        | 842               | LESMTYEQLKK      |       |                | Oxidation (M)[4]        | Mascot      |
|  | 1412.7494  | 1412.6796   | -0.0698 | -49   | 973        | 984               | TLCYAVPYIEIK     |       |                |                         | Mascot      |
|  | 1642.9315  | 1642.8878   | -0.0437 | -27   | 1168       | 1182              | FLGNDIPPVFIIAR   | 131   | 100            |                         | Mascot      |
|  | 1642.9315  | 1642.8878   | -0.0437 | -27   | 1168       | 1182              | FLGNDIPPVFIIAR   |       |                |                         | Mascot      |
|  | 1660.7119  | 1660.8142   | 0.1023  | 62    | 1149       | 1164              | DTSSGSAASFEQMQK  |       |                | Oxidation (M)[14]       | Mascot      |
|  | 1711.8948  | 1711.8153   | -0.0795 | -46   | 123        | 138               | VFAPAGVSPTVMNLHR |       |                | Oxidation (M)[12]       | Mascot      |

|   |                              |           |         |     |              |      |                    |      |     |     |     |     |     |  |  |  |        |
|---|------------------------------|-----------|---------|-----|--------------|------|--------------------|------|-----|-----|-----|-----|-----|--|--|--|--------|
|   | 1796.8928                    | 1796.959  | 0.0662  | 37  | 76           | 90   | LMDPLLYEYAGTWPK    |      |     |     |     |     |     |  |  |  | Mascot |
|   | 1826.9799                    | 1826.9319 | -0.048  | -26 | 1190         | 1205 | LLGYQLAAYFDKPTAR   |      |     |     |     |     |     |  |  |  | Mascot |
|   | 1826.9799                    | 1826.9319 | -0.048  | -26 | 1190         | 1205 | LLGYQLAAYFDKPTAR   |      | 137 | 100 |     |     |     |  |  |  | Mascot |
|   | 1958.0189                    | 1957.9656 | -0.0533 | -27 | 1301         | 1318 | ATNSEKEIELTAALPSQR |      |     |     |     |     |     |  |  |  | Mascot |
|   | 1958.0189                    | 1957.9656 | -0.0533 | -27 | 1301         | 1318 | ATNSEKEIELTAALPSQR |      | 93  | 100 |     |     |     |  |  |  | Mascot |
| 8 | vitellogenin 6 [Danio rerio] |           |         |     | gi 303227889 |      | 150936.1           | 8.84 | 14  | 570 | 100 | 546 | 100 |  |  |  |        |

#### Peptide Information

| Calc. Mass | Obsrv. Mass | ± da    | ± ppm | Start Seq. | End Seq. | Sequence           | Ion Score | C. I.  | % Modification          | Rank | Result Type |
|------------|-------------|---------|-------|------------|----------|--------------------|-----------|--------|-------------------------|------|-------------|
| 826.4457   | 826.4244    | -0.0213 | -26   | 1256       | 1262     | QYAVFAK            |           |        |                         |      | Mascot      |
| 960.4785   | 960.453     | -0.0255 | -27   | 1276       | 1282     | LEVEWER            | 44        | 98.825 |                         |      | Mascot      |
| 960.4785   | 960.453     | -0.0255 | -27   | 1276       | 1282     | LEVEWER            |           |        |                         |      | Mascot      |
| 984.4243   | 984.395     | -0.0293 | -30   | 1248       | 1255     | FSWGAECK           |           |        | Carbamidomethyl (C)[7]  |      | Mascot      |
| 984.4243   | 984.395     | -0.0293 | -30   | 1248       | 1255     | FSWGAECK           | 51        | 99.803 | Carbamidomethyl (C)[7]  |      | Mascot      |
| 992.5015   | 992.4415    | -0.06   | -60   | 626        | 633      | LMNCKLDR           |           |        |                         |      | Mascot      |
| 1327.7216  | 1327.687    | -0.0346 | -26   | 1318       | 1329     | EIELTAALPSQR       |           |        |                         |      | Mascot      |
| 1327.7216  | 1327.687    | -0.0346 | -26   | 1318       | 1329     | EIELTAALPSQR       | 90        | 100    |                         |      | Mascot      |
| 1383.6725  | 1383.6537   | -0.0188 | -14   | 1244       | 1255     | VTAKFSWGAECK       |           |        | Carbamidomethyl (C)[11] |      | Mascot      |
| 1385.6981  | 1385.6288   | -0.0693 | -50   | 839        | 849      | LESMTYEQLKK        |           |        | Oxidation (M)[4]        |      | Mascot      |
| 1412.7494  | 1412.6796   | -0.0698 | -49   | 980        | 991      | TLCYAVPYIEIK       |           |        |                         |      | Mascot      |
| 1642.9315  | 1642.8878   | -0.0437 | -27   | 1179       | 1193     | FLGNDIPPVFIIAR     | 131       | 100    |                         |      | Mascot      |
| 1642.9315  | 1642.8878   | -0.0437 | -27   | 1179       | 1193     | FLGNDIPPVFIIAR     |           |        |                         |      | Mascot      |
| 1660.7119  | 1660.8142   | 0.1023  | 62    | 1160       | 1175     | DTSSGSAASFEQMQK    |           |        | Oxidation (M)[14]       |      | Mascot      |
| 1711.8948  | 1711.8153   | -0.0795 | -46   | 130        | 145      | VFAPAGVSPVMNLHR    |           |        | Oxidation (M)[12]       |      | Mascot      |
| 1796.8928  | 1796.959    | 0.0662  | 37    | 83         | 97       | LMDPLLYEYAGTWPK    |           |        |                         |      | Mascot      |
| 1826.9799  | 1826.9319   | -0.048  | -26   | 1201       | 1216     | LLGYQLAAYFDKPTAR   |           |        |                         |      | Mascot      |
| 1826.9799  | 1826.9319   | -0.048  | -26   | 1201       | 1216     | LLGYQLAAYFDKPTAR   | 137       | 100    |                         |      | Mascot      |
| 1958.0189  | 1957.9656   | -0.0533 | -27   | 1312       | 1329     | ATNSEKEIELTAALPSQR |           |        |                         |      | Mascot      |
| 1958.0189  | 1957.9656   | -0.0533 | -27   | 1312       | 1329     | ATNSEKEIELTAALPSQR | 93        | 100    |                         |      | Mascot      |

|   |                              |  |  |  |             |  |         |      |   |     |     |     |     |  |  |  |  |
|---|------------------------------|--|--|--|-------------|--|---------|------|---|-----|-----|-----|-----|--|--|--|--|
| 9 | vitellogenin 7 [Danio rerio] |  |  |  | gi 57864789 |  | 24318.7 | 8.37 | 7 | 516 | 100 | 474 | 100 |  |  |  |  |
|---|------------------------------|--|--|--|-------------|--|---------|------|---|-----|-----|-----|-----|--|--|--|--|

#### Peptide Information

| Calc. Mass | Obsrv. Mass | ± da    | ± ppm | Start Seq. | End Seq. | Sequence | Ion Score | C. I.  | % Modification | Rank | Result Type |
|------------|-------------|---------|-------|------------|----------|----------|-----------|--------|----------------|------|-------------|
| 826.4457   | 826.4244    | -0.0213 | -26   | 93         | 99       | QYAVFAK  |           |        |                |      | Mascot      |
| 960.4785   | 960.453     | -0.0255 | -27   | 113        | 119      | LEVEWER  | 44        | 98.825 |                |      | Mascot      |

|    |                                                                                                          |           |         |     |     |     |                  |     |        |                        |  |  |                        |  |  |  |        |
|----|----------------------------------------------------------------------------------------------------------|-----------|---------|-----|-----|-----|------------------|-----|--------|------------------------|--|--|------------------------|--|--|--|--------|
|    | 960.4785                                                                                                 | 960.453   | -0.0255 | -27 | 113 | 119 | LEVEWER          |     |        |                        |  |  |                        |  |  |  | Mascot |
|    | 984.4243                                                                                                 | 984.395   | -0.0293 | -30 | 85  | 92  | FSWGAECK         |     |        |                        |  |  | Carbamidomethyl (C)[7] |  |  |  | Mascot |
|    | 984.4243                                                                                                 | 984.395   | -0.0293 | -30 | 85  | 92  | FSWGAECK         | 51  | 99.803 | Carbamidomethyl (C)[7] |  |  |                        |  |  |  | Mascot |
|    | 1118.6238                                                                                                | 1118.6486 | 0.0248  | 22  | 68  | 78  | KICADGALLSK      |     |        |                        |  |  |                        |  |  |  | Mascot |
|    | 1287.6691                                                                                                | 1287.6376 | -0.0315 | -24 | 100 | 112 | AEAGVLGEFPAAR    | 112 | 100    |                        |  |  |                        |  |  |  | Mascot |
|    | 1287.6691                                                                                                | 1287.6376 | -0.0315 | -24 | 100 | 112 | AEAGVLGEFPAAR    |     |        |                        |  |  |                        |  |  |  | Mascot |
|    | 1642.9315                                                                                                | 1642.8878 | -0.0437 | -27 | 16  | 30  | FLGNDLPPVFIIAR   | 131 | 100    |                        |  |  |                        |  |  |  | Mascot |
|    | 1642.9315                                                                                                | 1642.8878 | -0.0437 | -27 | 16  | 30  | FLGNDLPPVFIIAR   |     |        |                        |  |  |                        |  |  |  | Mascot |
|    | 1826.9799                                                                                                | 1826.9319 | -0.048  | -26 | 38  | 53  | LLGYQLAAYFDKPTAR |     |        |                        |  |  |                        |  |  |  | Mascot |
|    | 1826.9799                                                                                                | 1826.9319 | -0.048  | -26 | 38  | 53  | LLGYQLAAYFDKPTAR | 137 | 100    |                        |  |  |                        |  |  |  | Mascot |
| 10 | novel protein similar to vitellogenin 1 (vg1) [Danio rerio] gi 94732723 147084.2 8.73 10 475 100 474 100 |           |         |     |     |     |                  |     |        |                        |  |  |                        |  |  |  |        |

#### Peptide Information

| Calc. Mass | Obsrv. Mass | ± da    | ± ppm | Start Seq. | End Seq. | Sequence                    | Ion Score | C. I.  | % Modification         | Rank | Result Type |
|------------|-------------|---------|-------|------------|----------|-----------------------------|-----------|--------|------------------------|------|-------------|
| 826.4457   | 826.4244    | -0.0213 | -26   | 1219       | 1225     | QYAVFAK                     |           |        |                        |      | Mascot      |
| 960.4785   | 960.453     | -0.0255 | -27   | 1239       | 1245     | LEVEWER                     | 44        | 98.825 |                        |      | Mascot      |
| 960.4785   | 960.453     | -0.0255 | -27   | 1239       | 1245     | LEVEWER                     |           |        |                        |      | Mascot      |
| 984.4243   | 984.395     | -0.0293 | -30   | 1211       | 1218     | FSWGAECK                    |           |        | Carbamidomethyl (C)[7] |      | Mascot      |
| 984.4243   | 984.395     | -0.0293 | -30   | 1211       | 1218     | FSWGAECK                    | 51        | 99.803 | Carbamidomethyl (C)[7] |      | Mascot      |
| 1118.6238  | 1118.6486   | 0.0248  | 22    | 1194       | 1204     | KICADGALLSK                 |           |        |                        |      | Mascot      |
| 1287.6691  | 1287.6376   | -0.0315 | -24   | 1226       | 1238     | AEAGVLGEFPAAR               | 112       | 100    |                        |      | Mascot      |
| 1287.6691  | 1287.6376   | -0.0315 | -24   | 1226       | 1238     | AEAGVLGEFPAAR               |           |        |                        |      | Mascot      |
| 1642.9315  | 1642.8878   | -0.0437 | -27   | 1142       | 1156     | FLGNDLPPVFIIAR              | 131       | 100    |                        |      | Mascot      |
| 1642.9315  | 1642.8878   | -0.0437 | -27   | 1142       | 1156     | FLGNDLPPVFIIAR              |           |        |                        |      | Mascot      |
| 1660.7119  | 1660.8142   | 0.1023  | 62    | 1123       | 1138     | DTSSGSAAASFEQMQK            |           |        | Oxidation (M)[14]      |      | Mascot      |
| 1796.9581  | 1796.959    | 0.0009  | 1     | 342        | 356      | LSTLDKFEAIWAQFK             |           |        |                        |      | Mascot      |
| 1826.9799  | 1826.9319   | -0.048  | -26   | 1164       | 1179     | LLGYQLAAYFDKPTAR            |           |        |                        |      | Mascot      |
| 1826.9799  | 1826.9319   | -0.048  | -26   | 1164       | 1179     | LLGYQLAAYFDKPTAR            | 137       | 100    |                        |      | Mascot      |
| 2652.3418  | 2652.095    | -0.2468 | -93   | 72         | 94       | LMDPLLIEYAGTWPKDP<br>FVPATK |           |        |                        |      | Mascot      |

11 vitellogenin 7 [Danio rerio] gi|156713467 148739.2 8.76 9 474 100 474 100

#### Peptide Information

| Calc. Mass | Obsrv. Mass | ± da    | ± ppm | Start Seq. | End Seq. | Sequence | Ion Score | C. I.  | % Modification | Rank | Result Type |
|------------|-------------|---------|-------|------------|----------|----------|-----------|--------|----------------|------|-------------|
| 826.4457   | 826.4244    | -0.0213 | -26   | 1234       | 1240     | QYAVFAK  |           |        |                |      | Mascot      |
| 960.4785   | 960.453     | -0.0255 | -27   | 1254       | 1260     | LEVEWER  | 44        | 98.825 |                |      | Mascot      |

|           |           |         |     |      |      |                             |     |        |  |  |  |  |  |  |  |                        |        |
|-----------|-----------|---------|-----|------|------|-----------------------------|-----|--------|--|--|--|--|--|--|--|------------------------|--------|
| 960.4785  | 960.453   | -0.0255 | -27 | 1254 | 1260 | LEVEWER                     |     |        |  |  |  |  |  |  |  |                        | Mascot |
| 984.4243  | 984.395   | -0.0293 | -30 | 1226 | 1233 | FSWGAECK                    |     |        |  |  |  |  |  |  |  | Carbamidomethyl (C)[7] | Mascot |
| 984.4243  | 984.395   | -0.0293 | -30 | 1226 | 1233 | FSWGAECK                    | 51  | 99.803 |  |  |  |  |  |  |  | Carbamidomethyl (C)[7] | Mascot |
| 1118.6238 | 1118.6486 | 0.0248  | 22  | 1209 | 1219 | KICADGALLSK                 |     |        |  |  |  |  |  |  |  |                        | Mascot |
| 1287.6691 | 1287.6376 | -0.0315 | -24 | 1241 | 1253 | AEAGVLGEFPAAR               | 112 | 100    |  |  |  |  |  |  |  |                        | Mascot |
| 1287.6691 | 1287.6376 | -0.0315 | -24 | 1241 | 1253 | AEAGVLGEFPAAR               |     |        |  |  |  |  |  |  |  |                        | Mascot |
| 1642.9315 | 1642.8878 | -0.0437 | -27 | 1157 | 1171 | FLGNDLPPVFIIAR              | 131 | 100    |  |  |  |  |  |  |  |                        | Mascot |
| 1642.9315 | 1642.8878 | -0.0437 | -27 | 1157 | 1171 | FLGNDLPPVFIIAR              |     |        |  |  |  |  |  |  |  |                        | Mascot |
| 1796.9581 | 1796.959  | 0.0009  | 1   | 342  | 356  | LSTLDKFEAIWAQFK             |     |        |  |  |  |  |  |  |  |                        | Mascot |
| 1826.9799 | 1826.9319 | -0.048  | -26 | 1179 | 1194 | LLGYQLAAYFDKPTAR            |     |        |  |  |  |  |  |  |  |                        | Mascot |
| 1826.9799 | 1826.9319 | -0.048  | -26 | 1179 | 1194 | LLGYQLAAYFDKPTAR            | 137 | 100    |  |  |  |  |  |  |  |                        | Mascot |
| 2652.3418 | 2652.095  | -0.2468 | -93 | 72   | 94   | LMDPLLYEYAGTWPKDP<br>FVPATK |     |        |  |  |  |  |  |  |  |                        | Mascot |

12 Vtg6 protein [Danio rerio] gi|157422885 27937.4 9.18 9 456 100 409 100

#### Peptide Information

| Calc. Mass | Obsrv. Mass | ± da    | ± ppm | Start Seq. | End Seq. | Sequence           | Ion Score | C. I.  | % Modification          | Rank | Result Type |
|------------|-------------|---------|-------|------------|----------|--------------------|-----------|--------|-------------------------|------|-------------|
| 826.4457   | 826.4244    | -0.0213 | -26   | 129        | 135      | QYAVFAK            |           |        |                         |      | Mascot      |
| 913.423    | 913.5219    | 0.0989  | 108   | 1          | 8        | MSSSRMSK           |           |        |                         |      | Mascot      |
| 960.4785   | 960.453     | -0.0255 | -27   | 149        | 155      | LEVEWER            | 44        | 98.825 |                         |      | Mascot      |
| 960.4785   | 960.453     | -0.0255 | -27   | 149        | 155      | LEVEWER            |           |        |                         |      | Mascot      |
| 984.4243   | 984.395     | -0.0293 | -30   | 121        | 128      | FSWGAECK           |           |        | Carbamidomethyl (C)[7]  |      | Mascot      |
| 984.4243   | 984.395     | -0.0293 | -30   | 121        | 128      | FSWGAECK           | 51        | 99.803 | Carbamidomethyl (C)[7]  |      | Mascot      |
| 1327.7216  | 1327.687    | -0.0346 | -26   | 191        | 202      | EIELTAALPSQR       |           |        |                         |      | Mascot      |
| 1327.7216  | 1327.687    | -0.0346 | -26   | 191        | 202      | EIELTAALPSQR       | 90        | 100    |                         |      | Mascot      |
| 1383.6725  | 1383.6537   | -0.0188 | -14   | 117        | 128      | VTAKFSWGAECK       |           |        | Carbamidomethyl (C)[11] |      | Mascot      |
| 1642.9315  | 1642.8878   | -0.0437 | -27   | 52         | 66       | FLGNDIPPVFIIAR     | 131       | 100    |                         |      | Mascot      |
| 1642.9315  | 1642.8878   | -0.0437 | -27   | 52         | 66       | FLGNDIPPVFIIAR     |           |        |                         |      | Mascot      |
| 1660.7119  | 1660.8142   | 0.1023  | 62    | 33         | 48       | DTSSGSAAASFEQMQK   |           |        | Oxidation (M)[14]       |      | Mascot      |
| 1958.0189  | 1957.9656   | -0.0533 | -27   | 185        | 202      | ATNSEKEIELTAALPSQR |           |        |                         |      | Mascot      |
| 1958.0189  | 1957.9656   | -0.0533 | -27   | 185        | 202      | ATNSEKEIELTAALPSQR | 93        | 100    |                         |      | Mascot      |

13 Zgc:136383 [Danio rerio] gi|92097636 28809.9 9.33 9 408 100 363 100

#### Peptide Information

| Calc. Mass | Obsrv. Mass | ± da    | ± ppm | Start Seq. | End Seq. | Sequence | Ion Score | C. I. | % Modification | Rank | Result Type |
|------------|-------------|---------|-------|------------|----------|----------|-----------|-------|----------------|------|-------------|
| 826.4457   | 826.4244    | -0.0213 | -26   | 136        | 142      | QYAVFAK  |           |       |                |      | Mascot      |



|  |           |           |         |     |     |     |                  |     |        |  |                         |  |  |        |
|--|-----------|-----------|---------|-----|-----|-----|------------------|-----|--------|--|-------------------------|--|--|--------|
|  | 960.4785  | 960.453   | -0.0255 | -27 | 156 | 162 | LEVEWER          | 44  | 98.825 |  |                         |  |  | Mascot |
|  | 960.4785  | 960.453   | -0.0255 | -27 | 156 | 162 | LEVEWER          |     |        |  |                         |  |  | Mascot |
|  | 984.4243  | 984.395   | -0.0293 | -30 | 128 | 135 | FSWGAECK         |     |        |  | Carbamidomethyl (C)[7]  |  |  | Mascot |
|  | 984.4243  | 984.395   | -0.0293 | -30 | 128 | 135 | FSWGAECK         | 51  | 99.803 |  | Carbamidomethyl (C)[7]  |  |  | Mascot |
|  | 1045.5465 | 1045.5353 | -0.0112 | -11 | 246 | 253 | DFLSWIHK         |     |        |  |                         |  |  | Mascot |
|  | 1118.5986 | 1118.6486 | 0.05    | 45  | 217 | 225 | IPEITMSRR        |     |        |  | Oxidation (M)[6]        |  |  | Mascot |
|  | 1383.6725 | 1383.6537 | -0.0188 | -14 | 124 | 135 | VTAKFSWGAECK     |     |        |  | Carbamidomethyl (C)[11] |  |  | Mascot |
|  | 1642.9315 | 1642.8878 | -0.0437 | -27 | 59  | 73  | FLGNDIPPVFIIAR   | 131 | 100    |  |                         |  |  | Mascot |
|  | 1642.9315 | 1642.8878 | -0.0437 | -27 | 59  | 73  | FLGNDIPPVFIIAR   |     |        |  |                         |  |  | Mascot |
|  | 1660.7703 | 1660.8142 | 0.0439  | 26  | 1   | 15  | MLPLSSSMSSSRMSK  |     |        |  | Oxidation (M)[1,8]      |  |  | Mascot |
|  | 1676.7653 | 1676.8079 | 0.0426  | 25  | 1   | 15  | MLPLSSSMSSSRMSK  |     |        |  | Oxidation (M)[1,8,13]   |  |  | Mascot |
|  | 1826.9799 | 1826.9319 | -0.048  | -26 | 81  | 96  | LLGYQLAAYFDKPTAR |     |        |  |                         |  |  | Mascot |
|  | 1826.9799 | 1826.9319 | -0.048  | -26 | 81  | 96  | LLGYQLAAYFDKPTAR | 137 | 100    |  |                         |  |  | Mascot |

14

vitellogenin 4 [Danio rerio]

gi|57864783

31189.9

9.48

8

397

100

363

100

Peptide Information

| Calc. Mass | Obsrv. Mass | ± da    | ± ppm | Start Seq. | End Seq. | Sequence         | Ion Score | C. I.  | % Modification          | Rank | Result Type |
|------------|-------------|---------|-------|------------|----------|------------------|-----------|--------|-------------------------|------|-------------|
| 826.4457   | 826.4244    | -0.0213 | -26   | 162        | 168      | QYAVFAK          |           |        |                         |      | Mascot      |
| 960.4785   | 960.453     | -0.0255 | -27   | 182        | 188      | LEVEWER          | 44        | 98.825 |                         |      | Mascot      |
| 960.4785   | 960.453     | -0.0255 | -27   | 182        | 188      | LEVEWER          |           |        |                         |      | Mascot      |
| 984.4243   | 984.395     | -0.0293 | -30   | 154        | 161      | FSWGAECK         |           |        | Carbamidomethyl (C)[7]  |      | Mascot      |
| 984.4243   | 984.395     | -0.0293 | -30   | 154        | 161      | FSWGAECK         | 51        | 99.803 | Carbamidomethyl (C)[7]  |      | Mascot      |
| 1118.5986  | 1118.6486   | 0.05    | 45    | 243        | 251      | IPEITMSRR        |           |        | Oxidation (M)[6]        |      | Mascot      |
| 1383.6725  | 1383.6537   | -0.0188 | -14   | 150        | 161      | VTAKFSWGAECK     |           |        | Carbamidomethyl (C)[11] |      | Mascot      |
| 1642.9315  | 1642.8878   | -0.0437 | -27   | 85         | 99       | FLGNDIPPVFIIAR   | 131       | 100    |                         |      | Mascot      |
| 1642.9315  | 1642.8878   | -0.0437 | -27   | 85         | 99       | FLGNDIPPVFIIAR   |           |        |                         |      | Mascot      |
| 1660.7119  | 1660.8142   | 0.1023  | 62    | 66         | 81       | DTSSGSAASFEQMQK  |           |        | Oxidation (M)[14]       |      | Mascot      |
| 1826.9799  | 1826.9319   | -0.048  | -26   | 107        | 122      | LLGYQLAAYFDKPTAR |           |        |                         |      | Mascot      |
| 1826.9799  | 1826.9319   | -0.048  | -26   | 107        | 122      | LLGYQLAAYFDKPTAR | 137       | 100    |                         |      | Mascot      |

15

Vtg5 protein [Danio rerio]

gi|148744685

27543.3

9.2

7

395

100

363

100

Peptide Information

| Calc. Mass | Obsrv. Mass | ± da    | ± ppm | Start Seq. | End Seq. | Sequence | Ion Score | C. I.  | % Modification | Rank | Result Type |
|------------|-------------|---------|-------|------------|----------|----------|-----------|--------|----------------|------|-------------|
| 826.4457   | 826.4244    | -0.0213 | -26   | 124        | 130      | QYAVFAK  |           |        |                |      | Mascot      |
| 960.4785   | 960.453     | -0.0255 | -27   | 144        | 150      | LEVEWER  | 44        | 98.825 |                |      | Mascot      |

|    |                                  |           |         |     |              |     |                  |      |        |                        |     |                        |     |  |  |  |        |
|----|----------------------------------|-----------|---------|-----|--------------|-----|------------------|------|--------|------------------------|-----|------------------------|-----|--|--|--|--------|
|    | 960.4785                         | 960.453   | -0.0255 | -27 | 144          | 150 | LEVEWER          |      |        |                        |     |                        |     |  |  |  | Mascot |
|    | 984.4243                         | 984.395   | -0.0293 | -30 | 116          | 123 | FSWGAECK         |      |        |                        |     | Carbamidomethyl (C)[7] |     |  |  |  | Mascot |
|    | 984.4243                         | 984.395   | -0.0293 | -30 | 116          | 123 | FSWGAECK         | 51   | 99.803 | Carbamidomethyl (C)[7] |     |                        |     |  |  |  | Mascot |
|    | 1376.7069                        | 1376.6588 | -0.0481 | -35 | 165          | 176 | HILNAAyntGFR     |      |        |                        |     |                        |     |  |  |  | Mascot |
|    | 1642.9315                        | 1642.8878 | -0.0437 | -27 | 47           | 61  | FLGNDIPPVFaiIAR  | 131  | 100    |                        |     |                        |     |  |  |  | Mascot |
|    | 1642.9315                        | 1642.8878 | -0.0437 | -27 | 47           | 61  | FLGNDIPPVFaiIAR  |      |        |                        |     |                        |     |  |  |  | Mascot |
|    | 1660.7119                        | 1660.8142 | 0.1023  | 62  | 28           | 43  | DTSSGSAAASFEQMqK |      |        | Oxidation (M)[14]      |     |                        |     |  |  |  | Mascot |
|    | 1826.9799                        | 1826.9319 | -0.048  | -26 | 69           | 84  | LLGYQLAAYFDKPTAR |      |        |                        |     |                        |     |  |  |  | Mascot |
|    | 1826.9799                        | 1826.9319 | -0.048  | -26 | 69           | 84  | LLGYQLAAYFDKPTAR | 137  | 100    |                        |     |                        |     |  |  |  | Mascot |
| 16 | Zgc:136383 protein [Danio rerio] |           |         |     | gi 125857991 |     | 148644.2         | 8.93 | 15     | 386                    | 100 | 363                    | 100 |  |  |  |        |

#### Peptide Information

|  | Calc. Mass | Obsrv. Mass | ± da    | ± ppm | Start Seq. | End Seq. | Sequence         | Ion Score | C. I.  | % Modification          | Rank | Result Type |
|--|------------|-------------|---------|-------|------------|----------|------------------|-----------|--------|-------------------------|------|-------------|
|  | 826.4457   | 826.4244    | -0.0213 | -26   | 1235       | 1241     | QYAVFAK          |           |        |                         |      | Mascot      |
|  | 960.4785   | 960.453     | -0.0255 | -27   | 1255       | 1261     | LEVEWER          | 44        | 98.825 |                         |      | Mascot      |
|  | 960.4785   | 960.453     | -0.0255 | -27   | 1255       | 1261     | LEVEWER          |           |        |                         |      | Mascot      |
|  | 984.4243   | 984.395     | -0.0293 | -30   | 1227       | 1234     | FSWGAECK         |           |        | Carbamidomethyl (C)[7]  |      | Mascot      |
|  | 984.4243   | 984.395     | -0.0293 | -30   | 1227       | 1234     | FSWGAECK         | 51        | 99.803 | Carbamidomethyl (C)[7]  |      | Mascot      |
|  | 992.5015   | 992.4415    | -0.06   | -60   | 614        | 621      | LMNCKLDR         |           |        |                         |      | Mascot      |
|  | 1045.5465  | 1045.5353   | -0.0112 | -11   | 1345       | 1352     | DFLSWIHK         |           |        |                         |      | Mascot      |
|  | 1118.5986  | 1118.6486   | 0.05    | 45    | 1316       | 1324     | IPEITMSRR        |           |        | Oxidation (M)[6]        |      | Mascot      |
|  | 1383.6725  | 1383.6537   | -0.0188 | -14   | 1223       | 1234     | VTAKFSWGAECK     |           |        | Carbamidomethyl (C)[11] |      | Mascot      |
|  | 1385.6981  | 1385.6288   | -0.0693 | -50   | 827        | 837      | LESMTYEQLKK      |           |        | Oxidation (M)[4]        |      | Mascot      |
|  | 1412.7494  | 1412.6796   | -0.0698 | -49   | 968        | 979      | TLCYAVPYIEIK     |           |        |                         |      | Mascot      |
|  | 1642.9315  | 1642.8878   | -0.0437 | -27   | 1158       | 1172     | FLGNDIPPVFaiIAR  | 131       | 100    |                         |      | Mascot      |
|  | 1642.9315  | 1642.8878   | -0.0437 | -27   | 1158       | 1172     | FLGNDIPPVFaiIAR  |           |        |                         |      | Mascot      |
|  | 1660.7119  | 1660.8142   | 0.1023  | 62    | 1139       | 1154     | DTSSGSAAASFEQMqK |           |        | Oxidation (M)[14]       |      | Mascot      |
|  | 1711.8948  | 1711.8153   | -0.0795 | -46   | 118        | 133      | VFAPAGVSPTVMNLHR |           |        | Oxidation (M)[12]       |      | Mascot      |
|  | 1716.918   | 1716.8019   | -0.1161 | -68   | 581        | 595      | HVASFAYSHIKSLTR  |           |        |                         |      | Mascot      |
|  | 1796.8928  | 1796.959    | 0.0662  | 37    | 71         | 85       | LMDPLLYEYAGTWPK  |           |        |                         |      | Mascot      |
|  | 1826.9799  | 1826.9319   | -0.048  | -26   | 1180       | 1195     | LLGYQLAAYFDKPTAR |           |        |                         |      | Mascot      |
|  | 1826.9799  | 1826.9319   | -0.048  | -26   | 1180       | 1195     | LLGYQLAAYFDKPTAR | 137       | 100    |                         |      | Mascot      |

17 vitellogenin 5 [Danio rerio] gi|57864785 72820.8 9 9 383 100 363 100

#### Peptide Information

|  | Calc. Mass | Obsrv. Mass | ± da | ± ppm | Start Seq. | End Seq. | Sequence | Ion Score | C. I. | % Modification | Rank | Result Type |
|--|------------|-------------|------|-------|------------|----------|----------|-----------|-------|----------------|------|-------------|
|--|------------|-------------|------|-------|------------|----------|----------|-----------|-------|----------------|------|-------------|

|    |                                  |           |           |         |     |     |              |                  |      |        |     |     |                        |     |  |  |  |  |        |
|----|----------------------------------|-----------|-----------|---------|-----|-----|--------------|------------------|------|--------|-----|-----|------------------------|-----|--|--|--|--|--------|
|    |                                  | 826.4457  | 826.4244  | -0.0213 | -26 | 544 | 550          | QYAVFAK          |      |        |     |     |                        |     |  |  |  |  | Mascot |
|    |                                  | 960.4785  | 960.453   | -0.0255 | -27 | 564 | 570          | LEVEWER          | 44   | 98.825 |     |     |                        |     |  |  |  |  | Mascot |
|    |                                  | 960.4785  | 960.453   | -0.0255 | -27 | 564 | 570          | LEVEWER          |      |        |     |     |                        |     |  |  |  |  | Mascot |
|    |                                  | 984.4243  | 984.395   | -0.0293 | -30 | 536 | 543          | FSWGAECK         |      |        |     |     | Carbamidomethyl (C)[7] |     |  |  |  |  | Mascot |
|    |                                  | 984.4243  | 984.395   | -0.0293 | -30 | 536 | 543          | FSWGAECK         | 51   | 99.803 |     |     | Carbamidomethyl (C)[7] |     |  |  |  |  | Mascot |
|    |                                  | 1376.7069 | 1376.6588 | -0.0481 | -35 | 585 | 596          | HILNAAYNTGFR     |      |        |     |     |                        |     |  |  |  |  | Mascot |
|    |                                  | 1385.6981 | 1385.6288 | -0.0693 | -50 | 137 | 147          | LESMTYEQLKK      |      |        |     |     | Oxidation (M)[4]       |     |  |  |  |  | Mascot |
|    |                                  | 1412.7494 | 1412.6796 | -0.0698 | -49 | 278 | 289          | TLCYAVPYIEIK     |      |        |     |     |                        |     |  |  |  |  | Mascot |
|    |                                  | 1642.9315 | 1642.8878 | -0.0437 | -27 | 467 | 481          | FLGNDIPPVFIIAR   | 131  | 100    |     |     |                        |     |  |  |  |  | Mascot |
|    |                                  | 1642.9315 | 1642.8878 | -0.0437 | -27 | 467 | 481          | FLGNDIPPVFIIAR   |      |        |     |     |                        |     |  |  |  |  | Mascot |
|    |                                  | 1660.7119 | 1660.8142 | 0.1023  | 62  | 448 | 463          | DTSSGSAASFEQMQK  |      |        |     |     | Oxidation (M)[14]      |     |  |  |  |  | Mascot |
|    |                                  | 1826.9799 | 1826.9319 | -0.048  | -26 | 489 | 504          | LLGYQLAAYFDKPTAR |      |        |     |     |                        |     |  |  |  |  | Mascot |
|    |                                  | 1826.9799 | 1826.9319 | -0.048  | -26 | 489 | 504          | LLGYQLAAYFDKPTAR | 137  | 100    |     |     |                        |     |  |  |  |  | Mascot |
| 18 | Zgc:136383 protein [Danio rerio] |           |           |         |     |     | gi 159155252 | 123957.1         | 8.78 | 12     | 380 | 100 | 363                    | 100 |  |  |  |  |        |

#### Peptide Information

|    | Calc. Mass                                                  | Obsrv. Mass | ± da    | ± ppm | Start Seq.  | End Sequence Seq. |                  | Ion Score | C. I.  | % Modification |                         | Rank | Result | Type   |
|----|-------------------------------------------------------------|-------------|---------|-------|-------------|-------------------|------------------|-----------|--------|----------------|-------------------------|------|--------|--------|
|    | 826.4457                                                    | 826.4244    | -0.0213 | -26   | 1013        | 1019              | QYAVFAK          |           |        |                |                         |      |        | Mascot |
|    | 960.4785                                                    | 960.453     | -0.0255 | -27   | 1033        | 1039              | LEVEWER          | 44        | 98.825 |                |                         |      |        | Mascot |
|    | 960.4785                                                    | 960.453     | -0.0255 | -27   | 1033        | 1039              | LEVEWER          |           |        |                |                         |      |        | Mascot |
|    | 984.4243                                                    | 984.395     | -0.0293 | -30   | 1005        | 1012              | FSWGAECK         |           |        |                | Carbamidomethyl (C)[7]  |      |        | Mascot |
|    | 984.4243                                                    | 984.395     | -0.0293 | -30   | 1005        | 1012              | FSWGAECK         | 51        | 99.803 |                | Carbamidomethyl (C)[7]  |      |        | Mascot |
|    | 992.5015                                                    | 992.4415    | -0.06   | -60   | 392         | 399               | LMNCKLDR         |           |        |                |                         |      |        | Mascot |
|    | 1045.5465                                                   | 1045.5353   | -0.0112 | -11   | 1123        | 1130              | DFLSWIHK         |           |        |                |                         |      |        | Mascot |
|    | 1118.5986                                                   | 1118.6486   | 0.05    | 45    | 1094        | 1102              | IPEITMSRR        |           |        |                | Oxidation (M)[6]        |      |        | Mascot |
|    | 1383.6725                                                   | 1383.6537   | -0.0188 | -14   | 1001        | 1012              | VTAKFSWGAECK     |           |        |                | Carbamidomethyl (C)[11] |      |        | Mascot |
|    | 1385.6981                                                   | 1385.6288   | -0.0693 | -50   | 605         | 615               | LESMTYEQLKK      |           |        |                | Oxidation (M)[4]        |      |        | Mascot |
|    | 1412.7494                                                   | 1412.6796   | -0.0698 | -49   | 746         | 757               | TLCYAVPYIEIK     |           |        |                |                         |      |        | Mascot |
|    | 1642.9315                                                   | 1642.8878   | -0.0437 | -27   | 936         | 950               | FLGNDIPPVFIIAR   | 131       | 100    |                |                         |      |        | Mascot |
|    | 1642.9315                                                   | 1642.8878   | -0.0437 | -27   | 936         | 950               | FLGNDIPPVFIIAR   |           |        |                |                         |      |        | Mascot |
|    | 1660.7119                                                   | 1660.8142   | 0.1023  | 62    | 917         | 932               | DTSSGSAASFEQMQK  |           |        |                | Oxidation (M)[14]       |      |        | Mascot |
|    | 1826.9799                                                   | 1826.9319   | -0.048  | -26   | 958         | 973               | LLGYQLAAYFDKPTAR |           |        |                |                         |      |        | Mascot |
|    | 1826.9799                                                   | 1826.9319   | -0.048  | -26   | 958         | 973               | LLGYQLAAYFDKPTAR | 137       | 100    |                |                         |      |        | Mascot |
| 19 | novel protein similar to vitellogenin 1 (vg1) [Danio rerio] |             |         |       | gi 94733733 |                   | 149143.4         | 8.92      | 14     | 380            | 100                     | 363  | 100    |        |

| Peptide Information |                              |             |         |       |             |          |                  |           |         |                         |                  |     |     |
|---------------------|------------------------------|-------------|---------|-------|-------------|----------|------------------|-----------|---------|-------------------------|------------------|-----|-----|
|                     | Calc. Mass                   | Obsrv. Mass | ± da    | ± ppm | Start Seq.  | End Seq. | Sequence         | Ion Score | C. I. % | Modification            | Rank Result Type |     |     |
|                     | 826.4457                     | 826.4244    | -0.0213 | -26   | 1240        | 1246     | QYAVFAK          |           |         |                         | Mascot           |     |     |
|                     | 960.4785                     | 960.453     | -0.0255 | -27   | 1260        | 1266     | LEVEWER          | 44        | 98.825  |                         | Mascot           |     |     |
|                     | 960.4785                     | 960.453     | -0.0255 | -27   | 1260        | 1266     | LEVEWER          |           |         |                         | Mascot           |     |     |
|                     | 984.4243                     | 984.395     | -0.0293 | -30   | 1232        | 1239     | FSWGAECK         |           |         | Carbamidomethyl (C)[7]  | Mascot           |     |     |
|                     | 984.4243                     | 984.395     | -0.0293 | -30   | 1232        | 1239     | FSWGAECK         | 51        | 99.803  | Carbamidomethyl (C)[7]  | Mascot           |     |     |
|                     | 992.5015                     | 992.4415    | -0.06   | -60   | 619         | 626      | LMNCKLDR         |           |         |                         | Mascot           |     |     |
|                     | 1045.5465                    | 1045.5353   | -0.0112 | -11   | 1350        | 1357     | DFLSWIHK         |           |         |                         | Mascot           |     |     |
|                     | 1118.5986                    | 1118.6486   | 0.05    | 45    | 1321        | 1329     | IPEITMSRR        |           |         | Oxidation (M)[6]        | Mascot           |     |     |
|                     | 1383.6725                    | 1383.6537   | -0.0188 | -14   | 1228        | 1239     | VTAKFSWGAECK     |           |         | Carbamidomethyl (C)[11] | Mascot           |     |     |
|                     | 1385.6981                    | 1385.6288   | -0.0693 | -50   | 832         | 842      | LESMTYEQLKK      |           |         | Oxidation (M)[4]        | Mascot           |     |     |
|                     | 1412.7494                    | 1412.6796   | -0.0698 | -49   | 973         | 984      | TLCYAVPYIEIK     |           |         |                         | Mascot           |     |     |
|                     | 1642.9315                    | 1642.8878   | -0.0437 | -27   | 1163        | 1177     | FLGNDIPPVFIIAR   | 131       | 100     |                         | Mascot           |     |     |
|                     | 1642.9315                    | 1642.8878   | -0.0437 | -27   | 1163        | 1177     | FLGNDIPPVFIIAR   |           |         |                         | Mascot           |     |     |
|                     | 1660.7119                    | 1660.8142   | 0.1023  | 62    | 1144        | 1159     | DTSSGSAAASFEQMQK |           |         | Oxidation (M)[14]       | Mascot           |     |     |
|                     | 1711.8948                    | 1711.8153   | -0.0795 | -46   | 123         | 138      | VFAPAGVSPTVMNLHR |           |         | Oxidation (M)[12]       | Mascot           |     |     |
|                     | 1796.8928                    | 1796.959    | 0.0662  | 37    | 76          | 90       | LMDPLLYEYAGTWPK  |           |         |                         | Mascot           |     |     |
|                     | 1826.9799                    | 1826.9319   | -0.048  | -26   | 1185        | 1200     | LLGYQLAAYFDKPTAR |           |         |                         | Mascot           |     |     |
|                     | 1826.9799                    | 1826.9319   | -0.048  | -26   | 1185        | 1200     | LLGYQLAAYFDKPTAR | 137       | 100     |                         | Mascot           |     |     |
| 20                  | vitellogenin 5 [Danio rerio] |             |         |       | gi 68448530 |          | 148868           | 8.77      | 12      | 377                     | 100              | 363 | 100 |

| Peptide Information |             |         |       |            |          |                |           |         |                        |                  |
|---------------------|-------------|---------|-------|------------|----------|----------------|-----------|---------|------------------------|------------------|
| Calc. Mass          | Obsrv. Mass | ± da    | ± ppm | Start Seq. | End Seq. | Sequence       | Ion Score | C. I. % | Modification           | Rank Result Type |
| 826.4457            | 826.4244    | -0.0213 | -26   | 1238       | 1244     | QYAVFAK        |           |         |                        | Mascot           |
| 960.4785            | 960.453     | -0.0255 | -27   | 1258       | 1264     | LEVEWER        | 44        | 98.825  |                        | Mascot           |
| 960.4785            | 960.453     | -0.0255 | -27   | 1258       | 1264     | LEVEWER        |           |         |                        | Mascot           |
| 984.4243            | 984.395     | -0.0293 | -30   | 1230       | 1237     | FSWGAECK       |           |         | Carbamidomethyl (C)[7] | Mascot           |
| 984.4243            | 984.395     | -0.0293 | -30   | 1230       | 1237     | FSWGAECK       | 51        | 99.803  | Carbamidomethyl (C)[7] | Mascot           |
| 992.5015            | 992.4415    | -0.06   | -60   | 615        | 622      | LMNCKLDR       |           |         |                        | Mascot           |
| 1376.7069           | 1376.6588   | -0.0481 | -35   | 1279       | 1290     | HILNAAyntGFR   |           |         |                        | Mascot           |
| 1385.6981           | 1385.6288   | -0.0693 | -50   | 828        | 838      | LESMTYEQLKK    |           |         | Oxidation (M)[4]       | Mascot           |
| 1412.7494           | 1412.6796   | -0.0698 | -49   | 969        | 980      | TLCYAVPYIEIK   |           |         |                        | Mascot           |
| 1642.9315           | 1642.8878   | -0.0437 | -27   | 1161       | 1175     | FLGNDIPPVFIIAR | 131       | 100     |                        | Mascot           |
| 1642.9315           | 1642.8878   | -0.0437 | -27   | 1161       | 1175     | FLGNDIPPVFIIAR |           |         |                        | Mascot           |

|    |                                                                         |           |         |     |      |      |                             |      |     |     |                                           |        |     |
|----|-------------------------------------------------------------------------|-----------|---------|-----|------|------|-----------------------------|------|-----|-----|-------------------------------------------|--------|-----|
|    | 1660.7119                                                               | 1660.8142 | 0.1023  | 62  | 1142 | 1157 | DTSSGSAASFEQMQK             |      |     |     | Oxidation (M)[14]                         | Mascot |     |
|    | 1826.9799                                                               | 1826.9319 | -0.048  | -26 | 1183 | 1198 | LLGYQLAAYFDKPTAR            |      |     |     |                                           | Mascot |     |
|    | 1826.9799                                                               | 1826.9319 | -0.048  | -26 | 1183 | 1198 | LLGYQLAAYFDKPTAR            | 137  | 100 |     |                                           | Mascot |     |
|    | 2041.943                                                                | 2041.76   | -0.183  | -90 | 146  | 163  | KTQNIYEMQEAGAQGVC<br>R      |      |     |     | Oxidation (M)[8]                          | Mascot |     |
|    | 2362.1926                                                               | 2362.1213 | -0.0713 | -30 | 597  | 619  | ITAPDMASVAGAANVAIK<br>LMNCK |      |     |     | Carbamidomethyl (C)[22], Oxidation (M)[6] | Mascot |     |
| 21 | novel protein similar to vitellogenin 1 (vg1) [Danio rerio] gi 94733731 |           |         |     |      |      | 149169.2                    | 8.84 | 12  | 376 | 100                                       | 363    | 100 |

#### Peptide Information

| Calc. Mass | Obsrv. Mass | ± da    | ± ppm | Start Seq. | End Seq. | Sequence                    | Ion Score | C. I.  | % | Modification                              | Rank | Result Type |
|------------|-------------|---------|-------|------------|----------|-----------------------------|-----------|--------|---|-------------------------------------------|------|-------------|
| 826.4457   | 826.4244    | -0.0213 | -26   | 1240       | 1246     | QYAVFAK                     |           |        |   |                                           |      | Mascot      |
| 960.4785   | 960.453     | -0.0255 | -27   | 1260       | 1266     | LEVEWER                     | 44        | 98.825 |   |                                           |      | Mascot      |
| 960.4785   | 960.453     | -0.0255 | -27   | 1260       | 1266     | LEVEWER                     |           |        |   |                                           |      | Mascot      |
| 984.4243   | 984.395     | -0.0293 | -30   | 1232       | 1239     | FSWGAECK                    |           |        |   | Carbamidomethyl (C)[7]                    |      | Mascot      |
| 984.4243   | 984.395     | -0.0293 | -30   | 1232       | 1239     | FSWGAECK                    | 51        | 99.803 |   | Carbamidomethyl (C)[7]                    |      | Mascot      |
| 992.5015   | 992.4415    | -0.06   | -60   | 619        | 626      | LMNCKLDR                    |           |        |   |                                           |      | Mascot      |
| 1376.7069  | 1376.6588   | -0.0481 | -35   | 1281       | 1292     | HILNAAAYNTGFR               |           |        |   |                                           |      | Mascot      |
| 1385.6981  | 1385.6288   | -0.0693 | -50   | 832        | 842      | LESMTYEQLKK                 |           |        |   | Oxidation (M)[4]                          |      | Mascot      |
| 1412.7494  | 1412.6796   | -0.0698 | -49   | 973        | 984      | TLCYAVPYIEIK                |           |        |   |                                           |      | Mascot      |
| 1642.9315  | 1642.8878   | -0.0437 | -27   | 1163       | 1177     | FLGNDIPPVFIIAR              | 131       | 100    |   |                                           |      | Mascot      |
| 1642.9315  | 1642.8878   | -0.0437 | -27   | 1163       | 1177     | FLGNDIPPVFIIAR              |           |        |   |                                           |      | Mascot      |
| 1660.7119  | 1660.8142   | 0.1023  | 62    | 1144       | 1159     | DTSSGSAASFEQMQK             |           |        |   | Oxidation (M)[14]                         |      | Mascot      |
| 1826.9799  | 1826.9319   | -0.048  | -26   | 1185       | 1200     | LLGYQLAAYFDKPTAR            |           |        |   |                                           |      | Mascot      |
| 1826.9799  | 1826.9319   | -0.048  | -26   | 1185       | 1200     | LLGYQLAAYFDKPTAR            | 137       | 100    |   |                                           |      | Mascot      |
| 2041.943   | 2041.76     | -0.183  | -90   | 150        | 167      | KTQNIYEMQEAGAQGVC<br>R      |           |        |   | Oxidation (M)[8]                          |      | Mascot      |
| 2362.1926  | 2362.1213   | -0.0713 | -30   | 601        | 623      | ITAPDMASVAGAANVAIK<br>LMNCK |           |        |   | Carbamidomethyl (C)[22], Oxidation (M)[6] |      | Mascot      |

|    |                                                                                       |  |  |  |  |  |         |      |   |    |        |    |        |
|----|---------------------------------------------------------------------------------------|--|--|--|--|--|---------|------|---|----|--------|----|--------|
| 22 | eukaryotic translation initiation factor 3, subunit F-like [Danio rerio] gi 317108137 |  |  |  |  |  | 30037.3 | 5.36 | 4 | 84 | 99.981 | 69 | 99.997 |
|----|---------------------------------------------------------------------------------------|--|--|--|--|--|---------|------|---|----|--------|----|--------|

#### Peptide Information

| Calc. Mass | Obsrv. Mass | ± da    | ± ppm | Start Seq. | End Seq. | Sequence        | Ion Score | C. I.  | % | Modification | Rank | Result Type |
|------------|-------------|---------|-------|------------|----------|-----------------|-----------|--------|---|--------------|------|-------------|
| 913.5464   | 913.5219    | -0.0245 | -27   | 163        | 170      | IGVDLLQR        |           |        |   |              |      | Mascot      |
| 937.5287   | 937.4524    | -0.0763 | -81   | 1          | 9        | MAVHGPPVK       |           |        |   |              |      | Mascot      |
| 1122.5103  | 1122.4814   | -0.0289 | -26   | 155        | 162      | YIYYDTER        |           |        |   |              |      | Mascot      |
| 1697.9221  | 1697.8749   | -0.0472 | -28   | 10         | 24       | IHPVVLASIVDSYER | 69        | 99.997 |   |              |      | Mascot      |

1697.9221 1697.8749 -0.0472 -28 10 24 IHPVVLASIVDSYER Mascot

23 iron-sulfur cluster assembly enzyme [Danio rerio] gi|54261801 17796.2 8.7 7 52 69.213

Peptide Information

| Calc. Mass | Obsrv. Mass | ± da    | ± ppm | Start Seq. | End Seq. | Sequence              | Ion Score | C. I. | % Modification                            | Rank | Result Type |
|------------|-------------|---------|-------|------------|----------|-----------------------|-----------|-------|-------------------------------------------|------|-------------|
| 913.4447   | 913.5219    | 0.0772  | 85    | 10         | 18       | CASSALFSK             |           |       |                                           |      | Mascot      |
| 960.5083   | 960.453     | -0.0553 | -58   | 1          | 9        | MALAAAAWR             |           |       |                                           |      | Mascot      |
| 960.5359   | 960.453     | -0.0829 | -86   | 107        | 115      | GKSIDALK              | 15        | 0     |                                           |      | Mascot      |
| 976.5032   | 976.4487    | -0.0545 | -56   | 1          | 9        | MALAAAAWR             |           |       | Oxidation (M)[1]                          |      | Mascot      |
| 1045.5636  | 1045.5353   | -0.0283 | -27   | 44         | 53       | NVGSLDKNAK            |           |       |                                           |      | Mascot      |
| 1711.9337  | 1711.8153   | -0.1184 | -69   | 71         | 85       | LQIQVDENGKIIDAR       |           |       |                                           |      | Mascot      |
| 1846.9303  | 1846.7911   | -0.1392 | -75   | 19         | 34       | SMSLPRLPACSYHKK       |           |       |                                           |      | Mascot      |
| 2283.1545  | 2283.1199   | -0.0346 | -15   | 124        | 143      | ELCLPPVKLHCSMLAEDIAIK |           |       | Carbamidomethyl (C)[3], Oxidation (M)[13] |      | Mascot      |

24 ADP/ATP translocase 2 [Danio rerio] gi|27545251 32742.1 9.78 10 50 52.316

Peptide Information

| Calc. Mass | Obsrv. Mass | ± da    | ± ppm | Start Seq. | End Seq. | Sequence             | Ion Score | C. I. | % Modification                            | Rank | Result Type |
|------------|-------------|---------|-------|------------|----------|----------------------|-----------|-------|-------------------------------------------|------|-------------|
| 984.4423   | 984.395     | -0.0473 | -48   | 238        | 245      | MMMQSGRK             |           |       | Oxidation (M)[1]                          |      | Mascot      |
| 984.4423   | 984.395     | -0.0473 | -48   | 238        | 245      | MMMQSGRK             |           |       | Oxidation (M)[1]                          |      | Mascot      |
| 996.4536   | 996.5706    | 0.117   | 117   | 237        | 244      | RMMMQSGR             |           |       |                                           |      | Mascot      |
| 1048.5785  | 1048.5868   | 0.0083  | 8     | 98         | 106      | VFLDGVDKR            |           |       |                                           |      | Mascot      |
| 1136.6786  | 1136.5454   | -0.1332 | -117  | 34         | 43       | LLLQVQHASK           |           |       |                                           |      | Mascot      |
| 1287.6912  | 1287.6376   | -0.0536 | -42   | 53         | 63       | GIMDCVVRIPK          |           |       | Carbamidomethyl (C)[5]                    |      | Mascot      |
| 1287.6912  | 1287.6376   | -0.0536 | -42   | 53         | 63       | GIMDCVVRIPK          |           |       | Carbamidomethyl (C)[5]                    |      | Mascot      |
| 1327.6497  | 1327.687    | 0.0373  | 28    | 50         | 60       | QYKGIMDCVVR          |           |       | Oxidation (M)[6]                          |      | Mascot      |
| 1327.6497  | 1327.687    | 0.0373  | 28    | 50         | 60       | QYKGIMDCVVR          |           |       | Oxidation (M)[6]                          |      | Mascot      |
| 1660.7094  | 1660.8142   | 0.1048  | 63    | 246        | 259      | GADIMYSGTIDCWR       |           |       | Carbamidomethyl (C)[12], Oxidation (M)[5] |      | Mascot      |
| 1707.8481  | 1707.7281   | -0.12   | -70   | 148        | 163      | AGAEREFSGLGNCLVK     |           |       | Carbamidomethyl (C)[13]                   |      | Mascot      |
| 1957.9728  | 1957.9656   | -0.0072 | -4    | 189        | 206      | AAYFGIYDTAKGMLPDPK   |           |       |                                           |      | Mascot      |
| 1957.9728  | 1957.9656   | -0.0072 | -4    | 189        | 206      | AAYFGIYDTAKGMLPDPK   |           |       |                                           |      | Mascot      |
| 2284.2236  | 2284.1165   | -0.1071 | -47   | 73         | 92       | GNLANVIRYFPTQALNFAFK |           |       |                                           |      | Mascot      |

25 Zgc:152952 [Danio rerio] gi|115528080 41421 5.97 12 49 45.252

Peptide Information

| Calc. Mass | Obsrv. Mass | ± da | ± ppm | Start Seq. | End Seq. | Sequence | Ion Score | C. I. | % Modification | Rank | Result Type |
|------------|-------------|------|-------|------------|----------|----------|-----------|-------|----------------|------|-------------|
|------------|-------------|------|-------|------------|----------|----------|-----------|-------|----------------|------|-------------|

[illegible]

| Peptide Information |             |      |       |            |              |           |         |              |                  |
|---------------------|-------------|------|-------|------------|--------------|-----------|---------|--------------|------------------|
| Calc. Mass          | Obsrv. Mass | ± da | ± ppm | Start Seq. | End Sequence | Ion Score | C. I. % | Modification | Rank Result Type |

|    |                             |           |           |         |     |     |              |                              |      |   |    |       |                                           |  |  |  |        |
|----|-----------------------------|-----------|-----------|---------|-----|-----|--------------|------------------------------|------|---|----|-------|-------------------------------------------|--|--|--|--------|
|    |                             | 913.4447  | 913.5219  | 0.0772  | 85  | 10  | 18           | CASSALFSK                    |      |   |    |       |                                           |  |  |  | Mascot |
|    |                             | 960.5359  | 960.453   | -0.0829 | -86 | 107 | 115          | GKSIDEALK                    | 15   | 0 |    |       |                                           |  |  |  | Mascot |
|    |                             | 960.5359  | 960.453   | -0.0829 | -86 | 107 | 115          | GKSIDEALK                    |      |   |    |       |                                           |  |  |  | Mascot |
|    |                             | 1045.5636 | 1045.5353 | -0.0283 | -27 | 44  | 53           | NVGSLDKNAK                   |      |   |    |       |                                           |  |  |  | Mascot |
|    |                             | 1711.9337 | 1711.8153 | -0.1184 | -69 | 71  | 85           | LQIQVDENGKIIDAR              |      |   |    |       |                                           |  |  |  | Mascot |
|    |                             | 2283.1545 | 2283.1199 | -0.0346 | -15 | 124 | 143          | ELCLPPVKLHCSMLAEDA<br>IK     |      |   |    |       | Carbamidomethyl (C)[3], Oxidation (M)[13] |  |  |  | Mascot |
|    |                             | 2652.3271 | 2652.095  | -0.2321 | -88 | 10  | 33           | CASSALFSKSLSLPELRP<br>ACSYHK |      |   |    |       | Carbamidomethyl (C)[1]                    |  |  |  | Mascot |
| 28 | novel protein [Danio rerio] |           |           |         |     |     | gi 126632850 | 14386.2                      | 8.68 | 7 | 47 | 4.859 |                                           |  |  |  |        |

#### Peptide Information

| Calc. Mass | Obsrv. Mass | ± da    | ± ppm | Start Seq. | End Seq. | Sequence        | Ion Score | C. I. | % Modification                           | Rank | Result Type |
|------------|-------------|---------|-------|------------|----------|-----------------|-----------|-------|------------------------------------------|------|-------------|
| 842.473    | 842.4883    | 0.0153  | 18    | 14         | 21       | TAITTHAK        |           |       |                                          |      | Mascot      |
| 996.5737   | 996.5706    | -0.0031 | -3    | 104        | 111      | TLPWRPAR        |           |       |                                          |      | Mascot      |
| 1287.7056  | 1287.6376   | -0.068  | -53   | 2          | 13       | GLPGKPTFTDVR    |           |       |                                          |      | Mascot      |
| 1287.7056  | 1287.6376   | -0.068  | -53   | 2          | 13       | GLPGKPTFTDVR    |           |       |                                          |      | Mascot      |
| 1385.7688  | 1385.6288   | -0.14   | -101  | 46         | 57       | FYALHLGPLQAR    |           |       |                                          |      | Mascot      |
| 1434.741   | 1434.7316   | -0.0094 | -7    | 1          | 13       | MGLPGKPTFTDVR   |           |       | Oxidation (M)[1]                         |      | Mascot      |
| 1642.6836  | 1642.8878   | 0.2042  | 124   | 32         | 45       | VAQFMCHDTSTSDK  |           |       | Carbamidomethyl (C)[6], Oxidation (M)[5] |      | Mascot      |
| 1642.6836  | 1642.8878   | 0.2042  | 124   | 32         | 45       | VAQFMCHDTSTSDK  |           |       | Carbamidomethyl (C)[6], Oxidation (M)[5] |      | Mascot      |
| 1697.7622  | 1697.8749   | 0.1127  | 66    | 31         | 45       | KVAQFMCHDTSTSDK |           |       |                                          |      | Mascot      |
| 1697.7622  | 1697.8749   | 0.1127  | 66    | 31         | 45       | KVAQFMCHDTSTSDK |           |       |                                          |      | Mascot      |

29 ATPase, Ca++ transporting, cardiac muscle, fast twitch 1 like [Danio rerio] gi|117606266 108861.1 5.05 15 46 0

#### Peptide Information

| Calc. Mass | Obsrv. Mass | ± da    | ± ppm | Start Seq. | End Seq. | Sequence    | Ion Score | C. I. | % Modification   | Rank | Result Type |
|------------|-------------|---------|-------|------------|----------|-------------|-----------|-------|------------------|------|-------------|
| 826.381    | 826.4244    | 0.0434  | 53    | 669        | 675      | RACCFAR     |           |       |                  |      | Mascot      |
| 913.4737   | 913.5219    | 0.0482  | 53    | 513        | 521      | GAPEGVIDR   |           |       |                  |      | Mascot      |
| 960.5546   | 960.453     | -0.1016 | -106  | 540        | 547      | DKIMNVIK    |           |       |                  |      | Mascot      |
| 960.5546   | 960.453     | -0.1016 | -106  | 540        | 547      | DKIMNVIK    |           |       |                  |      | Mascot      |
| 976.5495   | 976.4487    | -0.1008 | -103  | 540        | 547      | DKIMNVIK    |           |       | Oxidation (M)[4] |      | Mascot      |
| 1045.5524  | 1045.5353   | -0.0171 | -16   | 111        | 120      | NAESAIEALK  |           |       |                  |      | Mascot      |
| 1165.5735  | 1165.7144   | 0.1409  | 121   | 253        | 262      | LDEFGEQLSK  |           |       |                  |      | Mascot      |
| 1234.646   | 1234.6449   | -0.0011 | -1    | 602        | 612      | KEVTGSIELCR |           |       |                  |      | Mascot      |



|           |           |         |      |     |     |                           |                   |        |
|-----------|-----------|---------|------|-----|-----|---------------------------|-------------------|--------|
| 1287.709  | 1287.6376 | -0.0714 | -55  | 558 | 569 | CLALATRDSPLK              |                   | Mascot |
| 1287.709  | 1287.6376 | -0.0714 | -55  | 558 | 569 | CLALATRDSPLK              |                   | Mascot |
| 1323.6725 | 1323.639  | -0.0335 | -25  | 206 | 218 | NMLFSGTNIAAGK             |                   | Mascot |
| 1364.7361 | 1364.6595 | -0.0766 | -56  | 823 | 833 | EPLISGWLFFR               |                   | Mascot |
| 1364.7361 | 1364.6595 | -0.0766 | -56  | 823 | 833 | EPLISGWLFFR               |                   | Mascot |
| 1434.741  | 1434.7316 | -0.0094 | -7   | 509 | 521 | MFVKGAPEGVIDR             | Oxidation (M)[1]  | Mascot |
| 1676.9159 | 1676.8079 | -0.108  | -64  | 820 | 833 | SPKEPLISGWLFFR            |                   | Mascot |
| 1712.0065 | 1711.8153 | -0.1912 | -112 | 219 | 236 | AVGVAVATGVATEIGKIR        |                   | Mascot |
| 1838.8875 | 1838.8772 | -0.0103 | -6   | 335 | 352 | SLPSVETLGCTSVICSDK        |                   | Mascot |
| 1957.9501 | 1957.9656 | 0.0155  | 8    | 636 | 653 | IGIFSEDEDVTGKAYTGR        |                   | Mascot |
| 1957.9501 | 1957.9656 | 0.0155  | 8    | 636 | 653 | IGIFSEDEDVTGKAYTGR        |                   | Mascot |
| 2362.073  | 2362.1213 | 0.0483  | 20   | 581 | 601 | FADYETDLTFVGCVGML<br>DPPR | Oxidation (M)[16] | Mascot |

### Peptide Information

|    |                                                            |              |        |      |    |    |   |   |   |
|----|------------------------------------------------------------|--------------|--------|------|----|----|---|---|---|
| 31 | PREDICTED: e3 ubiquitin-protein ligase BRE1A [Danio rerio] | gi 189527718 | 115551 | 5.66 | 13 | 42 | 0 | 6 | 0 |
|----|------------------------------------------------------------|--------------|--------|------|----|----|---|---|---|

| Calc. Mass | Obsrv. Mass | ± da    | ± ppm | Start Seq. | End Seq. | Sequence | Ion Score | C. I. | % Modification | Rank | Result Type |
|------------|-------------|---------|-------|------------|----------|----------|-----------|-------|----------------|------|-------------|
| 842.5206   | 842.4883    | -0.0323 | -38   | 61         | 67       | ALQIKNR  |           |       |                |      | Mascot      |
| 960.4744   | 960.453     | -0.0214 | -22   | 720        | 726      | ELEERER  | 19        | 0     |                |      | Mascot      |

|           |           |         |     |     |      |                           |   |   |  |  |                          |  |        |
|-----------|-----------|---------|-----|-----|------|---------------------------|---|---|--|--|--------------------------|--|--------|
| 960.4744  | 960.453   | -0.0214 | -22 | 720 | 726  | ELEERER                   |   |   |  |  |                          |  | Mascot |
| 984.4818  | 984.395   | -0.0868 | -88 | 460 | 466  | KEYEMLR                   |   |   |  |  | Oxidation (M)[5]         |  | Mascot |
| 984.4818  | 984.395   | -0.0868 | -88 | 460 | 466  | KEYEMLR                   |   |   |  |  | Oxidation (M)[5]         |  | Mascot |
| 1045.5823 | 1045.5353 | -0.047  | -45 | 786 | 793  | LMQQLREK                  |   |   |  |  |                          |  | Mascot |
| 1122.5208 | 1122.4814 | -0.0394 | -35 | 673 | 681  | AQESQREMK                 |   |   |  |  | Oxidation (M)[8]         |  | Mascot |
| 1287.6791 | 1287.6376 | -0.0415 | -32 | 743 | 753  | SVEEQIDILNK               |   |   |  |  |                          |  | Mascot |
| 1287.6791 | 1287.6376 | -0.0415 | -32 | 743 | 753  | SVEEQIDILNK               |   |   |  |  |                          |  | Mascot |
| 1327.6749 | 1327.687  | 0.0121  | 9   | 679 | 688  | EMKLLLDMYR                |   |   |  |  | Oxidation (M)[2]         |  | Mascot |
| 1327.6749 | 1327.687  | 0.0121  | 9   | 679 | 688  | EMKLLLDMYR                | 8 | 0 |  |  | Oxidation (M)[8]         |  | Mascot |
| 1475.6268 | 1475.7162 | 0.0894  | 61  | 975 | 985  | CFHVFCECVK                |   |   |  |  | Carbamidomethyl (C)[1,6] |  | Mascot |
| 1707.7478 | 1707.7281 | -0.0197 | -12 | 995 | 1009 | CPKCNAAFGANDFHR           |   |   |  |  | Carbamidomethyl (C)[1]   |  | Mascot |
| 1716.8551 | 1716.8019 | -0.0532 | -31 | 216 | 231  | DLESGKDGGLWDVAVR          |   |   |  |  |                          |  | Mascot |
| 1826.8514 | 1826.9319 | 0.0805  | 44  | 139 | 155  | SLKPGTPEPDGDSNQR          |   |   |  |  |                          |  | Mascot |
| 1826.8514 | 1826.9319 | 0.0805  | 44  | 139 | 155  | SLKPGTPEPDGDSNQR          |   |   |  |  |                          |  | Mascot |
| 1957.8668 | 1957.9656 | 0.0988  | 50  | 121 | 138  | RCDQSGSEPVESQPPEG<br>R    |   |   |  |  |                          |  | Mascot |
| 1957.8668 | 1957.9656 | 0.0988  | 50  | 121 | 138  | RCDQSGSEPVESQPPEG<br>R    |   |   |  |  |                          |  | Mascot |
| 2300.1816 | 2300.1187 | -0.0629 | -27 | 222 | 242  | DGGLWDVAVRLNALLTG<br>MNER |   |   |  |  |                          |  | Mascot |

32    PREDICTED: tetratricopeptide repeat protein 34-like [Danio rerio]    gi|326679115    119668.1    7.99    17    41    0

| Peptide Information |             |         |       |            |          |             |           |       |                        |      |        |        |
|---------------------|-------------|---------|-------|------------|----------|-------------|-----------|-------|------------------------|------|--------|--------|
| Calc. Mass          | Obsrv. Mass | ± da    | ± ppm | Start Seq. | End Seq. | Sequence    | Ion Score | C. I. | % Modification         | Rank | Result | Type   |
| 882.4791            | 882.5435    | 0.0644  | 73    | 126        | 133      | QTPQPVGR    |           |       |                        |      |        | Mascot |
| 895.4705            | 895.4765    | 0.006   | 7     | 1030       | 1036     | LAEMYLR     |           |       |                        |      |        | Mascot |
| 937.4526            | 937.4524    | -0.0002 | 0     | 867        | 873      | AWQQNYK     |           |       |                        |      |        | Mascot |
| 960.4897            | 960.453     | -0.0367 | -38   | 847        | 854      | QVFGQEPR    |           |       |                        |      |        | Mascot |
| 960.4897            | 960.453     | -0.0367 | -38   | 847        | 854      | QVFGQEPR    |           |       |                        |      |        | Mascot |
| 973.5499            | 973.5036    | -0.0463 | -48   | 393        | 400      | LADCLLLR    |           |       | Carbamidomethyl (C)[4] |      |        | Mascot |
| 976.5686            | 976.4487    | -0.1199 | -123  | 941        | 947      | LQYLRQR     |           |       |                        |      |        | Mascot |
| 996.4791            | 996.5706    | 0.0915  | 92    | 656        | 663      | HCHTASKR    |           |       | Carbamidomethyl (C)[2] |      |        | Mascot |
| 1048.488            | 1048.5868   | 0.0988  | 94    | 981        | 988      | VWAEDLCR    |           |       | Carbamidomethyl (C)[7] |      |        | Mascot |
| 1118.5259           | 1118.6486   | 0.1227  | 110   | 1076       | 1085     | REVSGPCTVN  |           |       | Carbamidomethyl (C)[7] |      |        | Mascot |
| 1165.6252           | 1165.7144   | 0.0892  | 77    | 1050       | 1059     | AWFLTETGLK  |           |       |                        |      |        | Mascot |
| 1179.6302           | 1179.5699   | -0.0603 | -51   | 1028       | 1036     | QRLAEMYLR   |           |       |                        |      |        | Mascot |
| 1308.6881           | 1308.6257   | -0.0624 | -48   | 700        | 710      | ARCYALLGQWK |           |       |                        |      |        | Mascot |
| 1364.6957           | 1364.6595   | -0.0362 | -27   | 430        | 440      | GYSRLFIEDHK |           |       |                        |      |        | Mascot |

|           |           |         |     |     |     |                          |  |  |  |                         |  |        |
|-----------|-----------|---------|-----|-----|-----|--------------------------|--|--|--|-------------------------|--|--------|
| 1364.6957 | 1364.6595 | -0.0362 | -27 | 430 | 440 | GYSRLFIEDHK              |  |  |  |                         |  | Mascot |
| 1493.8435 | 1493.6971 | -0.1464 | -98 | 177 | 188 | ERQTQHVELIIK             |  |  |  |                         |  | Mascot |
| 1697.7986 | 1697.8749 | 0.0763  | 45  | 806 | 820 | EAFLISGALMNTDCR          |  |  |  | Carbamidomethyl (C)[14] |  | Mascot |
| 1697.7986 | 1697.8749 | 0.0763  | 45  | 806 | 820 | EAFLISGALMNTDCR          |  |  |  | Carbamidomethyl (C)[14] |  | Mascot |
| 1994.0201 | 1993.9219 | -0.0982 | -49 | 836 | 854 | GDVNAAGAHLKQVFGQE<br>PR  |  |  |  |                         |  | Mascot |
| 1994.0201 | 1993.9219 | -0.0982 | -49 | 836 | 854 | GDVNAAGAHLKQVFGQE<br>PR  |  |  |  |                         |  | Mascot |
| 2362.1277 | 2362.1213 | -0.0064 | -3  | 801 | 820 | EEHLREAFLISGALMNTD<br>CR |  |  |  | Carbamidomethyl (C)[19] |  | Mascot |

33 PREDICTED: dystonin [Danio rerio] gi|326672751 766703.7 5.12 39 41 0

#### Peptide Information

| Calc. Mass | Obsrv. Mass | ± da    | ± ppm | Start Seq. | End Seq. | Sequence     | Ion Score | C. I. % | Modification                             | Rank | Result Type |
|------------|-------------|---------|-------|------------|----------|--------------|-----------|---------|------------------------------------------|------|-------------|
| 826.4304   | 826.4244    | -0.006  | -7    | 371        | 377      | ENEIPPK      |           |         |                                          |      | Mascot      |
| 842.5168   | 842.4883    | -0.0285 | -34   | 1683       | 1689     | LCLLPVK      |           |         | Carbamidomethyl (C)[2]                   |      | Mascot      |
| 850.4087   | 850.5172    | 0.1085  | 128   | 3487       | 3493     | MEALSQR      |           |         | Oxidation (M)[1]                         |      | Mascot      |
| 870.5155   | 870.515     | -0.0005 | -1    | 1116       | 1122     | IRTPLDR      |           |         |                                          |      | Mascot      |
| 895.3461   | 895.4765    | 0.1304  | 146   | 5581       | 5587     | VMDEDDR      |           |         | Oxidation (M)[2]                         |      | Mascot      |
| 913.5353   | 913.5219    | -0.0134 | -15   | 2262       | 2269     | AIIDPEKK     |           |         |                                          |      | Mascot      |
| 960.5109   | 960.453     | -0.0579 | -60   | 5054       | 5062     | SASDALIQR    |           |         |                                          |      | Mascot      |
| 960.5546   | 960.453     | -0.1016 | -106  | 418        | 425      | LIVAMLER     | 10        | 0       | Oxidation (M)[5]                         |      | Mascot      |
| 996.5108   | 996.5706    | 0.0598  | 60    | 3265       | 3273     | LDSAGSRYK    |           |         |                                          |      | Mascot      |
| 1048.5786  | 1048.5868   | 0.0082  | 8     | 1833       | 1841     | LASDLFLNR    |           |         |                                          |      | Mascot      |
| 1118.5623  | 1118.6486   | 0.0863  | 77    | 3231       | 3240     | VLDAAKACDR   |           |         | Carbamidomethyl (C)[8]                   |      | Mascot      |
| 1122.6154  | 1122.4814   | -0.134  | -119  | 3750       | 3759     | SSDFNALLKK   |           |         |                                          |      | Mascot      |
| 1136.6422  | 1136.5454   | -0.0968 | -85   | 1623       | 1632     | LAGDILHLER   |           |         |                                          |      | Mascot      |
| 1234.7629  | 1234.6449   | -0.118  | -96   | 5570       | 5580     | LNHQAGLLKK   |           |         |                                          |      | Mascot      |
| 1277.5679  | 1277.6752   | 0.1073  | 84    | 2280       | 2290     | LGMLDDEEAER  |           |         |                                          |      | Mascot      |
| 1287.6903  | 1287.6376   | -0.0527 | -41   | 6522       | 6532     | IEDEVTRQVAK  |           |         |                                          |      | Mascot      |
| 1287.6903  | 1287.6376   | -0.0527 | -41   | 6522       | 6532     | IEDEVTRQVAK  |           |         |                                          |      | Mascot      |
| 1308.61    | 1308.6257   | 0.0157  | 12    | 3447       | 3457     | ETALEQDMISR  |           |         | Oxidation (M)[8]                         |      | Mascot      |
| 1327.6964  | 1327.687    | -0.0094 | -7    | 5278       | 5289     | HRASTLDEAISK |           |         |                                          |      | Mascot      |
| 1327.6964  | 1327.687    | -0.0094 | -7    | 5278       | 5289     | HRASTLDEAISK |           |         |                                          |      | Mascot      |
| 1376.728   | 1376.6588   | -0.0692 | -50   | 788        | 799      | AENLLLENHPAR |           |         |                                          |      | Mascot      |
| 1383.5515  | 1383.6537   | 0.1022  | 74    | 2018       | 2029     | TEECEAMDANVR |           |         | Oxidation (M)[7]                         |      | Mascot      |
| 1385.6075  | 1385.6288   | 0.0213  | 15    | 1550       | 1560     | QLCMDLEDAFK  |           |         | Carbamidomethyl (C)[3], Oxidation (M)[4] |      | Mascot      |
| 1412.6582  | 1412.6796   | 0.0214  | 15    | 1431       | 1442     | AQMSMEEMVTKK |           |         |                                          |      | Mascot      |

|           |           |         |      |      |      |                          |  |  |  |  |  |  |                        |  |  |  |        |
|-----------|-----------|---------|------|------|------|--------------------------|--|--|--|--|--|--|------------------------|--|--|--|--------|
| 1434.7271 | 1434.7316 | 0.0045  | 3    | 4627 | 4639 | SAQLHEALLHCGR            |  |  |  |  |  |  |                        |  |  |  | Mascot |
| 1493.7338 | 1493.6971 | -0.0367 | -25  | 4037 | 4049 | LKEAECICAELSK            |  |  |  |  |  |  | Carbamidomethyl (C)[6] |  |  |  | Mascot |
| 1642.7893 | 1642.8878 | 0.0985  | 60   | 3840 | 3853 | HMLAQIDAGWEEVK           |  |  |  |  |  |  | Oxidation (M)[2]       |  |  |  | Mascot |
| 1642.7893 | 1642.8878 | 0.0985  | 60   | 3840 | 3853 | HMLAQIDAGWEEVK           |  |  |  |  |  |  | Oxidation (M)[2]       |  |  |  | Mascot |
| 1711.865  | 1711.8153 | -0.0497 | -29  | 4967 | 4980 | LQSSHEELNVWLEK           |  |  |  |  |  |  |                        |  |  |  | Mascot |
| 1790.9144 | 1790.8428 | -0.0716 | -40  | 3316 | 3331 | KHQSEPIAGDPQSLQR         |  |  |  |  |  |  |                        |  |  |  | Mascot |
| 1796.8008 | 1796.959  | 0.1582  | 88   | 617  | 632  | SSFLDPNLSEDEANMK         |  |  |  |  |  |  |                        |  |  |  | Mascot |
| 1826.816  | 1826.9319 | 0.1159  | 63   | 3611 | 3625 | MAEVSSCQNQLQEFR          |  |  |  |  |  |  | Carbamidomethyl (C)[7] |  |  |  | Mascot |
| 1826.9177 | 1826.9319 | 0.0142  | 8    | 3640 | 3655 | ERVPTLQPNCEQGLR          |  |  |  |  |  |  |                        |  |  |  | Mascot |
| 1958.0706 | 1957.9656 | -0.105  | -54  | 3468 | 3486 | VKAFVESADPAAAALLQT<br>R  |  |  |  |  |  |  |                        |  |  |  | Mascot |
| 1958.0706 | 1957.9656 | -0.105  | -54  | 3468 | 3486 | VKAFVESADPAAAALLQT<br>R  |  |  |  |  |  |  |                        |  |  |  | Mascot |
| 1959.9952 | 1959.9406 | -0.0546 | -28  | 3888 | 3905 | ELMMGVLGPLSVDPNML<br>K   |  |  |  |  |  |  | Oxidation (M)[3]       |  |  |  | Mascot |
| 2041.9681 | 2041.76   | -0.2081 | -102 | 1339 | 1355 | KMQSSSDVIQEFMDLR         |  |  |  |  |  |  |                        |  |  |  | Mascot |
| 2211.1301 | 2211.0493 | -0.0808 | -37  | 6571 | 6590 | STVMVRVGGGWALDE<br>FLVK  |  |  |  |  |  |  | Oxidation (M)[4]       |  |  |  | Mascot |
| 2225.1548 | 2225.0632 | -0.0916 | -41  | 5419 | 5438 | DTQELLKEELPGVDPSV<br>VK  |  |  |  |  |  |  |                        |  |  |  | Mascot |
| 2300.1162 | 2300.1187 | 0.0025  | 1    | 3840 | 3859 | HMLAQIDAGWEEVKGSM<br>EIR |  |  |  |  |  |  |                        |  |  |  | Mascot |
| 2361.9995 | 2362.1213 | 0.1218  | 52   | 2813 | 2833 | GSSEMMSELDMDADDR<br>GQIK |  |  |  |  |  |  |                        |  |  |  | Mascot |
| 2367.071  | 2367.2029 | 0.1319  | 56   | 5951 | 5968 | QFHESWSKLEWLEESE<br>R    |  |  |  |  |  |  | Oxidation (M)[10]      |  |  |  | Mascot |
| 2384.0356 | 2383.8911 | -0.1445 | -61  | 1931 | 1950 | QLFASYLMMNSYMDPES<br>GQR |  |  |  |  |  |  | Oxidation (M)[8]       |  |  |  | Mascot |

34

PREDICTED: SAM and SH3 domain-containing protein 1-like [Danio rerio]

gi|125841197

113422.1

5.36

10

41

0

22

0

| Peptide Information |             |         |       |            |          |                    |           |       |                  |      |             |
|---------------------|-------------|---------|-------|------------|----------|--------------------|-----------|-------|------------------|------|-------------|
| Calc. Mass          | Obsrv. Mass | ± da    | ± ppm | Start Seq. | End Seq. | Sequence           | Ion Score | C. I. | % Modification   | Rank | Result Type |
| 850.4628            | 850.5172    | 0.0544  | 64    | 904        | 911      | LVSTSTSR           |           |       |                  |      | Mascot      |
| 984.4686            | 984.395     | -0.0736 | -75   | 130        | 136      | SFWQNFR            |           |       |                  |      | Mascot      |
| 984.4686            | 984.395     | -0.0736 | -75   | 130        | 136      | SFWQNFR            | 22        | 0     |                  |      | Mascot      |
| 1118.5801           | 1118.6486   | 0.0685  | 61    | 68         | 77       | RVTQEATGK          |           |       |                  |      | Mascot      |
| 1165.6364           | 1165.7144   | 0.078   | 67    | 968        | 977      | YGVPFSLVQR         |           |       |                  |      | Mascot      |
| 1277.6656           | 1277.6752   | 0.0096  | 8     | 938        | 948      | MASLEILVEEK        |           |       | Oxidation (M)[1] |      | Mascot      |
| 1516.6746           | 1516.6667   | -0.0079 | -5    | 772        | 783      | SLHLEMSCFMFR       |           |       | Oxidation (M)[6] |      | Mascot      |
| 1697.75             | 1697.8749   | 0.1249  | 74    | 223        | 236      | EQSEDELEESVTFR     |           |       |                  |      | Mascot      |
| 1697.75             | 1697.8749   | 0.1249  | 74    | 223        | 236      | EQSEDELEESVTFR     |           |       |                  |      | Mascot      |
| 2041.8556           | 2041.76     | -0.0956 | -47   | 520        | 537      | SEDGDEDELPYRGPF CG |           |       |                  |      | Mascot      |

|    |                                                      |           |        |     |              |         |                                    |   |    |   |  |  |  |  |  |  |        |
|----|------------------------------------------------------|-----------|--------|-----|--------------|---------|------------------------------------|---|----|---|--|--|--|--|--|--|--------|
|    | 2362.0422                                            | 2362.1213 | 0.0791 | 33  | 492          | 515     | R<br>SSLSGGQSSMSGQTVSTT<br>DSSASNR |   |    |   |  |  |  |  |  |  | Mascot |
|    | 2384.1201                                            | 2383.8911 | -0.229 | -96 | 375          | 396     | ALNPANYHGRTCSFGGF<br>DLTSR         |   |    |   |  |  |  |  |  |  | Mascot |
| 35 | heparan sulfate 3-O-sulfotransferase 5 [Danio rerio] |           |        |     | gi 111609800 | 34931.4 | 8.73                               | 8 | 40 | 0 |  |  |  |  |  |  |        |

#### Peptide Information

| Calc. Mass | Obsrv. Mass | ± da    | ± ppm | Start Seq. | End Seq. | Sequence                 | Ion Score | C. I. | % Modification         | Rank | Result Type |
|------------|-------------|---------|-------|------------|----------|--------------------------|-----------|-------|------------------------|------|-------------|
| 937.489    | 937.4524    | -0.0366 | -39   | 94         | 100      | KGLDWYR                  |           |       |                        |      | Mascot      |
| 960.5301   | 960.453     | -0.0771 | -80   | 199        | 205      | WLELFPR                  |           |       |                        |      | Mascot      |
| 960.5301   | 960.453     | -0.0771 | -80   | 199        | 205      | WLELFPR                  |           |       |                        |      | Mascot      |
| 1045.5499  | 1045.5353   | -0.0146 | -14   | 129        | 137      | IWAMNPAVK                |           |       | Oxidation (M)[4]       |      | Mascot      |
| 1308.7998  | 1308.6257   | -0.1741 | -133  | 138        | 148      | LLLIIRDPAER              |           |       |                        |      | Mascot      |
| 1385.5977  | 1385.6288   | 0.0311  | 22    | 249        | 260      | GFYCMLSAGHDK             |           |       | Carbamidomethyl (C)[4] |      | Mascot      |
| 1492.8118  | 1492.786    | -0.0258 | -17   | 206        | 218      | EQIHIVDGEALIR            |           |       |                        |      | Mascot      |
| 1697.7917  | 1697.8749   | 0.0832  | 49    | 81         | 93       | TEIHYFNLDENFR            |           |       |                        |      | Mascot      |
| 1697.7917  | 1697.8749   | 0.0832  | 49    | 81         | 93       | TEIHYFNLDENFR            |           |       |                        |      | Mascot      |
| 2284.1138  | 2284.1165   | 0.0027  | 1     | 261        | 280      | CLDESKGRPHAPLSNEA<br>FQK |           |       | Carbamidomethyl (C)[1] |      | Mascot      |

|    |                                                     |  |  |  |              |         |      |   |    |   |  |  |  |  |  |  |  |
|----|-----------------------------------------------------|--|--|--|--------------|---------|------|---|----|---|--|--|--|--|--|--|--|
| 36 | PREDICTED: suppressor of IKBKE 1-like [Danio rerio] |  |  |  | gi 125852483 | 24679.3 | 5.47 | 8 | 40 | 0 |  |  |  |  |  |  |  |
|----|-----------------------------------------------------|--|--|--|--------------|---------|------|---|----|---|--|--|--|--|--|--|--|

#### Peptide Information

| Calc. Mass | Obsrv. Mass | ± da    | ± ppm | Start Seq. | End Seq. | Sequence                  | Ion Score | C. I. | % Modification          | Rank | Result Type |
|------------|-------------|---------|-------|------------|----------|---------------------------|-----------|-------|-------------------------|------|-------------|
| 826.4165   | 826.4244    | 0.0079  | 10    | 191        | 196      | QHREEK                    |           |       |                         |      | Mascot      |
| 1277.6517  | 1277.6752   | 0.0235  | 18    | 2          | 13       | SCSLEKVLGDAR              |           |       |                         |      | Mascot      |
| 1455.8165  | 1455.632    | -0.1845 | -127  | 170        | 181      | LAQLEIENKELR              |           |       |                         |      | Mascot      |
| 1707.7167  | 1707.7281   | 0.0114  | 7     | 54         | 66       | YMEENTYQELSR              |           |       | Oxidation (M)[2]        |      | Mascot      |
| 1958.0818  | 1957.9656   | -0.1162 | -59   | 120        | 136      | KELDTKPVLSLHQNHAHAK       |           |       |                         |      | Mascot      |
| 1958.0818  | 1957.9656   | -0.1162 | -59   | 120        | 136      | KELDTKPVLSLHQNHAHAK       |           |       |                         |      | Mascot      |
| 1993.8855  | 1993.9219   | 0.0364  | 18    | 154        | 169      | QAVQMDDQHYCSVKER          |           |       | Carbamidomethyl (C)[11] |      | Mascot      |
| 1993.8855  | 1993.9219   | 0.0364  | 18    | 154        | 169      | QAVQMDDQHYCSVKER          |           |       | Carbamidomethyl (C)[11] |      | Mascot      |
| 2042.0037  | 2041.76     | -0.2437 | -119  | 21         | 39       | EHDTAAESLIEQSSVLGQ<br>K   |           |       |                         |      | Mascot      |
| 2283.1826  | 2283.1199   | -0.0627 | -27   | 19         | 39       | LKEHDTAAESLIEQSSVL<br>GQK |           |       |                         |      | Mascot      |

|    |                                      |  |  |  |              |         |      |   |    |   |    |   |  |  |  |  |  |
|----|--------------------------------------|--|--|--|--------------|---------|------|---|----|---|----|---|--|--|--|--|--|
| 37 | protein Hook homolog 1 [Danio rerio] |  |  |  | gi 113676708 | 83063.4 | 5.24 | 9 | 40 | 0 | 24 | 0 |  |  |  |  |  |
|----|--------------------------------------|--|--|--|--------------|---------|------|---|----|---|----|---|--|--|--|--|--|

#### Peptide Information

| Calc. Mass | Obsrv. Mass | ± da | ± ppm | Start | End | Sequence | Ion | C. I. | % Modification | Rank | Result Type |
|------------|-------------|------|-------|-------|-----|----------|-----|-------|----------------|------|-------------|
|------------|-------------|------|-------|-------|-----|----------|-----|-------|----------------|------|-------------|

|  |           |           |         | Seq. | Seq. | Score |                          |    |                   |
|--|-----------|-----------|---------|------|------|-------|--------------------------|----|-------------------|
|  | 842.5458  | 842.4883  | -0.0575 | -68  | 636  | 642   | KIALER                   |    | Mascot            |
|  | 960.4996  | 960.453   | -0.0466 | -49  | 323  | 330   | LEDLSDLR                 | 24 | 0                 |
|  | 960.4996  | 960.453   | -0.0466 | -49  | 323  | 330   | LEDLSDLR                 |    | Mascot            |
|  | 976.488   | 976.4487  | -0.0393 | -40  | 643  | 650   | ECEQAKLR                 |    | Mascot            |
|  | 992.5081  | 992.4415  | -0.0666 | -67  | 332  | 339   | QMKALEEK                 |    | Oxidation (M)[2]  |
|  | 1165.5956 | 1165.7144 | 0.1188  | 102  | 577  | 586   | MDELMAALKK               |    | Oxidation (M)[1]  |
|  | 1364.6614 | 1364.6595 | -0.0019 | -1   | 177  | 188   | ALEDLTEVMAEK             |    | Oxidation (M)[9]  |
|  | 1364.6614 | 1364.6595 | -0.0019 | -1   | 177  | 188   | ALEDLTEVMAEK             |    | Oxidation (M)[9]  |
|  | 1492.7563 | 1492.786  | 0.0297  | 20   | 176  | 188   | KALEDLTEVMAEK            |    | Oxidation (M)[10] |
|  | 1516.7788 | 1516.6667 | -0.1121 | -74  | 425  | 438   | CTQAQQDQLLAGK            |    | Mascot            |
|  | 2367.1899 | 2367.2029 | 0.013   | 5    | 274  | 293   | QLVELQHRNDELTSLAEE<br>SR |    | Mascot            |

38

tropomyosin alpha-4 chain isoform 2 [Danio rerio]

gi|47085929

28484.4

4.63

8

40

0

Peptide Information

| Calc. Mass | Obsrv. Mass | ± da    | ± ppm | Start Seq. | End Seq. | Sequence      | Ion Score | C. I. | % Modification   | Rank | Result Type |
|------------|-------------|---------|-------|------------|----------|---------------|-----------|-------|------------------|------|-------------|
| 850.3975   | 850.5172    | 0.1197  | 141   | 98         | 104      | AMKDEEK       |           |       |                  |      | Mascot      |
| 960.5294   | 960.453     | -0.0764 | -80   | 93         | 100      | VIENRAMK      | 10        | 0     |                  |      | Mascot      |
| 960.5294   | 960.453     | -0.0764 | -80   | 93         | 100      | VIENRAMK      |           |       |                  |      | Mascot      |
| 976.5244   | 976.4487    | -0.0757 | -78   | 93         | 100      | VIENRAMK      |           |       | Oxidation (M)[7] |      | Mascot      |
| 1165.5592  | 1165.7144   | 0.1552  | 133   | 105        | 113      | MEIQEMQLK     |           |       | Oxidation (M)[1] |      | Mascot      |
| 1234.5732  | 1234.6449   | 0.0717  | 58    | 143        | 153      | AEERAEVAECK   |           |       |                  |      | Mascot      |
| 1277.6882  | 1277.6752   | -0.013  | -10   | 1          | 12       | MTGVTSLDAVKR  |           |       |                  |      | Mascot      |
| 1308.6178  | 1308.6257   | 0.0079  | 6     | 198        | 208      | EAETRAEFAER   |           |       |                  |      | Mascot      |
| 1434.7322  | 1434.7316   | -0.0006 | 0     | 216        | 228      | SIDDLLEEKLSAK |           |       |                  |      | Mascot      |
| 1493.7338  | 1493.6971   | -0.0367 | -25   | 105        | 116      | MEIQEMQLKEAK  |           |       | Oxidation (M)[1] |      | Mascot      |

39

ADP/ATP translocase 1 [Danio rerio]

gi|47550717

32667.2

9.74

8

39

0

Peptide Information

| Calc. Mass | Obsrv. Mass | ± da    | ± ppm | Start Seq. | End Seq. | Sequence  | Ion Score | C. I. | % Modification   | Rank | Result Type |
|------------|-------------|---------|-------|------------|----------|-----------|-----------|-------|------------------|------|-------------|
| 976.5825   | 976.4487    | -0.1338 | -137  | 97         | 105      | KIFLGGVDK |           |       |                  |      | Mascot      |
| 984.4423   | 984.395     | -0.0473 | -48   | 238        | 245      | MMMQSGRK  |           |       | Oxidation (M)[1] |      | Mascot      |
| 984.4423   | 984.395     | -0.0473 | -48   | 238        | 245      | MMMQSGRK  |           |       | Oxidation (M)[1] |      | Mascot      |
| 996.4536   | 996.5706    | 0.117   | 117   | 237        | 244      | RMMMQSGR  |           |       |                  |      | Mascot      |

|           |           |         |      |     |     |                             |        |
|-----------|-----------|---------|------|-----|-----|-----------------------------|--------|
| 1136.6786 | 1136.5454 | -0.1332 | -117 | 34  | 43  | LLLQVQHASK                  | Mascot |
| 1957.9728 | 1957.9656 | -0.0072 | -4   | 189 | 206 | AAYFGIYDTAKGMLPDPK          | Mascot |
| 1957.9728 | 1957.9656 | -0.0072 | -4   | 189 | 206 | AAYFGIYDTAKGMLPDPK          | Mascot |
| 2283.2053 | 2283.1199 | -0.0854 | -37  | 1   | 23  | MSDAAISFLKDFLAGGVA<br>AAISK | Mascot |
| 2284.2236 | 2284.1165 | -0.1071 | -47  | 73  | 92  | GNLANVIRYFPTQALNFA<br>FK    | Mascot |
| 2362.3127 | 2362.1213 | -0.1914 | -81  | 273 | 295 | GALSNVIRGAGGAFVLVL<br>YDEIK | Mascot |

40 PREDICTED: hypothetical protein LOC797378 [Danio rerio] gi|292622805 72531.1 6.46 4 39 0 32 81.467

Peptide Information

| Calc. Mass | Obsrv. Mass | ± da    | ± ppm | Start Seq. | End Seq. | Sequence              | Ion Score | C. I.  | % Modification      | Rank | Result Type |
|------------|-------------|---------|-------|------------|----------|-----------------------|-----------|--------|---------------------|------|-------------|
| 870.577    | 870.515     | -0.062  | -71   | 493        | 500      | VAIKVVNK              |           |        |                     |      | Mascot      |
| 882.4501   | 882.5435    | 0.0934  | 106   | 1          | 7        | MSTRPFK               |           |        | Oxidation (M)[1]    |      | Mascot      |
| 1287.7015  | 1287.6376   | -0.0639 | -50   | 566        | 577      | KNNGLLSESVAR          | 32        | 81.467 |                     |      | Mascot      |
| 1287.7015  | 1287.6376   | -0.0639 | -50   | 566        | 577      | KNNGLLSESVAR          |           |        |                     |      | Mascot      |
| 2224.9221  | 2225.0632   | 0.1411  | 63    | 51         | 68       | LSEMENTRDTMTSYEE<br>K |           |        | Oxidation (M)[4,12] |      | Mascot      |

41 novel protein similar to vertebrate tropomyosin 4 (TPM4) (zgc:63909) [Danio rerio]

gi|94732583 23433.8 4.6 7 39 0

Peptide Information

| Calc. Mass | Obsrv. Mass | ± da    | ± ppm | Start Seq. | End Seq. | Sequence      | Ion Score | C. I. | % Modification   | Rank | Result Type |
|------------|-------------|---------|-------|------------|----------|---------------|-----------|-------|------------------|------|-------------|
| 850.3975   | 850.5172    | 0.1197  | 141   | 54         | 60       | AMKDEEK       |           |       |                  |      | Mascot      |
| 960.5294   | 960.453     | -0.0764 | -80   | 49         | 56       | VIENRAMK      | 10        | 0     |                  |      | Mascot      |
| 960.5294   | 960.453     | -0.0764 | -80   | 49         | 56       | VIENRAMK      |           |       |                  |      | Mascot      |
| 976.5244   | 976.4487    | -0.0757 | -78   | 49         | 56       | VIENRAMK      |           |       | Oxidation (M)[7] |      | Mascot      |
| 1165.5592  | 1165.7144   | 0.1552  | 133   | 61         | 69       | MEIQEMQLK     |           |       | Oxidation (M)[1] |      | Mascot      |
| 1234.5732  | 1234.6449   | 0.0717  | 58    | 99         | 109      | AEERAIEVAECK  |           |       |                  |      | Mascot      |
| 1308.6178  | 1308.6257   | 0.0079  | 6     | 154        | 164      | EAETRAEFAER   |           |       |                  |      | Mascot      |
| 1434.7322  | 1434.7316   | -0.0006 | 0     | 172        | 184      | SIDDLLEKLSSAK |           |       |                  |      | Mascot      |
| 1493.7338  | 1493.6971   | -0.0367 | -25   | 61         | 72       | MEIQEMQLKEAK  |           |       | Oxidation (M)[1] |      | Mascot      |

42 PREDICTED: hypothetical protein LOC796277 [Danio rerio] gi|292622807 79431.9 5.54 4 39 0 32 81.467

Peptide Information

| Calc. Mass | Obsrv. Mass | ± da | ± ppm | Start Seq. | End Seq. | Sequence | Ion Score | C. I. | % Modification | Rank | Result Type |
|------------|-------------|------|-------|------------|----------|----------|-----------|-------|----------------|------|-------------|
|------------|-------------|------|-------|------------|----------|----------|-----------|-------|----------------|------|-------------|

|    |                                                                                                                |             |         |       |            |          |                       |           |       |        |                                          |                     |        |      |        |        |
|----|----------------------------------------------------------------------------------------------------------------|-------------|---------|-------|------------|----------|-----------------------|-----------|-------|--------|------------------------------------------|---------------------|--------|------|--------|--------|
|    | 870.577                                                                                                        | 870.515     | -0.062  | -71   | 565        | 572      | VAIKVVNK              |           |       |        |                                          |                     |        |      |        | Mascot |
|    | 882.4501                                                                                                       | 882.5435    | 0.0934  | 106   | 1          | 7        | MSTRPFK               |           |       |        |                                          | Oxidation (M)[1]    |        |      |        | Mascot |
|    | 1287.7015                                                                                                      | 1287.6376   | -0.0639 | -50   | 638        | 649      | KNNGLLSESVAR          | 32        |       | 81.467 |                                          |                     |        |      |        | Mascot |
|    | 1287.7015                                                                                                      | 1287.6376   | -0.0639 | -50   | 638        | 649      | KNNGLLSESVAR          |           |       |        |                                          |                     |        |      |        | Mascot |
|    | 2224.9221                                                                                                      | 2225.0632   | 0.1411  | 63    | 51         | 68       | LSEMENTRDTMTSYEE<br>K |           |       |        |                                          | Oxidation (M)[4,12] |        |      |        | Mascot |
| 43 | PREDICTED: serine/threonine-protein kinase pim-3-like gi 326675215 23705.1 8.34 2 39 0 32 81.467 [Danio rerio] |             |         |       |            |          |                       |           |       |        |                                          |                     |        |      |        |        |
|    | Peptide Information                                                                                            |             |         |       |            |          |                       |           |       |        |                                          |                     |        |      |        |        |
|    | Calc. Mass                                                                                                     | Obsrv. Mass | ± da    | ± ppm | Start Seq. | End Seq. | Sequence              | Ion Score | C. I. | %      | Modification                             | Rank                | Result | Type |        |        |
|    | 1287.7015                                                                                                      | 1287.6376   | -0.0639 | -50   | 44         | 55       | KNNGLLSESVAR          | 32        |       | 81.467 |                                          |                     |        |      | Mascot |        |
|    | 1287.7015                                                                                                      | 1287.6376   | -0.0639 | -50   | 44         | 55       | KNNGLLSESVAR          |           |       |        |                                          |                     |        |      | Mascot |        |
|    | 1364.7419                                                                                                      | 1364.6595   | -0.0824 | -60   | 184        | 195      | TGPVLEEIIIEHK         |           |       |        |                                          |                     |        |      | Mascot |        |
|    | 1364.7419                                                                                                      | 1364.6595   | -0.0824 | -60   | 184        | 195      | TGPVLEEIIIEHK         |           |       |        |                                          |                     |        |      | Mascot |        |
| 44 | ras-like protein Rnd3b [Danio rerio] gi 60459922 25130.6 6.99 7 39 0                                           |             |         |       |            |          |                       |           |       |        |                                          |                     |        |      |        |        |
|    | Peptide Information                                                                                            |             |         |       |            |          |                       |           |       |        |                                          |                     |        |      |        |        |
|    | Calc. Mass                                                                                                     | Obsrv. Mass | ± da    | ± ppm | Start Seq. | End Seq. | Sequence              | Ion Score | C. I. | %      | Modification                             | Rank                | Result | Type |        |        |
|    | 826.3797                                                                                                       | 826.4244    | 0.0447  | 54    | 218        | 224      | AKTCTVM               |           |       |        | Carbamidomethyl (C)[4], Oxidation (M)[7] |                     |        |      | Mascot |        |
|    | 992.5775                                                                                                       | 992.4415    | -0.136  | -137  | 23         | 31       | TSLNLFVAK             |           |       |        |                                          |                     |        |      | Mascot |        |
|    | 1048.4629                                                                                                      | 1048.5868   | 0.1239  | 118   | 2          | 9        | MDHHDDLK              |           |       |        | Oxidation (M)[1]                         |                     |        |      | Mascot |        |
|    | 1118.5874                                                                                                      | 1118.6486   | 0.0612  | 55    | 12         | 22       | IVVVGDTQCGK           |           |       |        |                                          |                     |        |      | Mascot |        |
|    | 1179.5034                                                                                                      | 1179.5699   | 0.0665  | 56    | 1          | 9        | MMDHHDDLK             |           |       |        | Oxidation (M)[1]                         |                     |        |      | Mascot |        |
|    | 1320.5936                                                                                                      | 1320.5471   | -0.0465 | -35   | 2          | 11       | MDHHDDLKCK            |           |       |        | Carbamidomethyl (C)[9]                   |                     |        |      | Mascot |        |
|    | 1323.5885                                                                                                      | 1323.639    | 0.0505  | 38    | 105        | 115      | GEIEEFCPNTK           |           |       |        | Carbamidomethyl (C)[7]                   |                     |        |      | Mascot |        |
| 45 | PREDICTED: myosin-Ic [Danio rerio] gi 326674254 122614.2 9.09 18 38 0                                          |             |         |       |            |          |                       |           |       |        |                                          |                     |        |      |        |        |
|    | Peptide Information                                                                                            |             |         |       |            |          |                       |           |       |        |                                          |                     |        |      |        |        |
|    | Calc. Mass                                                                                                     | Obsrv. Mass | ± da    | ± ppm | Start Seq. | End Seq. | Sequence              | Ion Score | C. I. | %      | Modification                             | Rank                | Result | Type |        |        |
|    | 826.4781                                                                                                       | 826.4244    | -0.0537 | -65   | 357        | 363      | EALTHKK               |           |       |        |                                          |                     |        |      | Mascot |        |
|    | 996.5104                                                                                                       | 996.5706    | 0.0602  | 60    | 616        | 623      | LMEILMSK              |           |       |        | Oxidation (M)[2,6]                       |                     |        |      | Mascot |        |
|    | 1045.5887                                                                                                      | 1045.5353   | -0.0534 | -51   | 695        | 704      | QVDGVSTLVK            |           |       |        |                                          |                     |        |      | Mascot |        |
|    | 1048.6223                                                                                                      | 1048.5868   | -0.0355 | -34   | 924        | 932      | MKYAVPVIK             |           |       |        |                                          |                     |        |      | Mascot |        |
|    | 1118.5762                                                                                                      | 1118.6486   | 0.0724  | 65    | 483        | 491      | IICDLVEEK             |           |       |        | Carbamidomethyl (C)[3]                   |                     |        |      | Mascot |        |



|    |                            |           |         |     |             |     |                   |      |   |    |   |                        |  |  |  |  |        |
|----|----------------------------|-----------|---------|-----|-------------|-----|-------------------|------|---|----|---|------------------------|--|--|--|--|--------|
|    | 1122.5581                  | 1122.4814 | -0.0767 | -68 | 855         | 863 | LCMQNMVRK         |      |   |    |   |                        |  |  |  |  | Mascot |
|    | 1136.6058                  | 1136.5454 | -0.0604 | -53 | 962         | 970 | QRIDYNSLK         |      |   |    |   |                        |  |  |  |  | Mascot |
|    | 1179.5796                  | 1179.5699 | -0.0097 | -8  | 855         | 863 | LCMQNMVRK         |      |   |    |   | Carbamidomethyl (C)[2] |  |  |  |  | Mascot |
|    | 1364.7056                  | 1364.6595 | -0.0461 | -34 | 727         | 738 | TLFATEDALEVR      |      |   |    |   |                        |  |  |  |  | Mascot |
|    | 1364.7056                  | 1364.6595 | -0.0461 | -34 | 727         | 738 | TLFATEDALEVR      |      |   |    |   |                        |  |  |  |  | Mascot |
|    | 1383.7743                  | 1383.6537 | -0.1206 | -87 | 642         | 652 | FDEVLRHQVK        |      |   |    |   |                        |  |  |  |  | Mascot |
|    | 1385.7172                  | 1385.6288 | -0.0884 | -64 | 740         | 751 | HSLATQLQSSWK      |      |   |    |   |                        |  |  |  |  | Mascot |
|    | 1434.6893                  | 1434.7316 | 0.0423  | 29  | 139         | 152 | DQCILISGESGAGK    |      |   |    |   | Carbamidomethyl (C)[3] |  |  |  |  | Mascot |
|    | 1492.8005                  | 1492.786  | -0.0145 | -10 | 727         | 739 | TLFATEDALEVRK     |      |   |    |   |                        |  |  |  |  | Mascot |
|    | 1493.8066                  | 1493.6971 | -0.1095 | -73 | 611         | 623 | NSLAKLMEILMSK     |      |   |    |   | Oxidation (M)[7]       |  |  |  |  | Mascot |
|    | 1660.8553                  | 1660.8142 | -0.0411 | -25 | 518         | 532 | LENTVGGAHFLTHK    |      |   |    |   |                        |  |  |  |  | Mascot |
|    | 1676.8424                  | 1676.8079 | -0.0345 | -21 | 624         | 637 | EPSYVRCIKPNDK     |      |   |    |   | Carbamidomethyl (C)[7] |  |  |  |  | Mascot |
|    | 1697.8064                  | 1697.8749 | 0.0685  | 40  | 867         | 879 | NINPEWKHQMEQK     |      |   |    |   | Oxidation (M)[10]      |  |  |  |  | Mascot |
|    | 1697.8064                  | 1697.8749 | 0.0685  | 40  | 867         | 879 | NINPEWKHQMEQK     |      |   |    |   | Oxidation (M)[10]      |  |  |  |  | Mascot |
|    | 1711.8757                  | 1711.8153 | -0.0604 | -35 | 616         | 629 | LMEILMSKEPSYVR    |      |   |    |   | Oxidation (M)[2]       |  |  |  |  | Mascot |
|    | 1846.86                    | 1846.7911 | -0.0689 | -37 | 368         | 384 | GEELMSPLNQEQAASAR |      |   |    |   | Oxidation (M)[5]       |  |  |  |  | Mascot |
| 46 | protein BTG3 [Danio rerio] |           |         |     | gi 55925203 |     | 18115.1           | 5.85 | 6 | 37 | 0 |                        |  |  |  |  |        |

Peptide Information

| Calc. Mass | Obsrv. Mass | ± da    | ± ppm | Start Seq. | End Seq. | Sequence             | Ion Score | C. I. | % | Modification               | Rank | Result Type |
|------------|-------------|---------|-------|------------|----------|----------------------|-----------|-------|---|----------------------------|------|-------------|
| 1136.6714  | 1136.5454   | -0.126  | -111  | 4          | 13       | EIAAVVFFLK           |           |       |   |                            |      | Mascot      |
| 1676.7771  | 1676.8079   | 0.0308  | 18    | 91         | 104      | ELTLWVDPGEVCCR       |           |       |   | Carbamidomethyl (C)[12]    |      | Mascot      |
| 2211.0208  | 2211.0493   | 0.0285  | 13    | 91         | 108      | ELTLWVDPGEVCCRYGEK   |           |       |   | Carbamidomethyl (C)[12,13] |      | Mascot      |
| 2224.9412  | 2225.0632   | 0.122   | 55    | 139        | 158      | VTSDYHSGSSSDEDSMLVHR |           |       |   | Oxidation (M)[16]          |      | Mascot      |
| 2300.1414  | 2300.1187   | -0.0227 | -10   | 85         | 104      | DLGLPKELTLWVDPGEVCCR |           |       |   | Carbamidomethyl (C)[18]    |      | Mascot      |
| 2362.0105  | 2362.1213   | 0.1108  | 47    | 105        | 125      | YGEKNHGFTVATFSSDDDDK |           |       |   |                            |      | Mascot      |

47 PREDICTED: ras association domain-containing protein gi|189537462 49870 4.96 4 37 0 33 84.936  
10 [Danio rerio]

Peptide Information

| Calc. Mass | Obsrv. Mass | ± da    | ± ppm | Start Seq. | End Seq. | Sequence  | Ion Score | C. I.  | % | Modification | Rank | Result Type |
|------------|-------------|---------|-------|------------|----------|-----------|-----------|--------|---|--------------|------|-------------|
| 850.4318   | 850.5172    | 0.0854  | 100   | 60         | 65       | WRGFER    |           |        |   |              |      | Mascot      |
| 960.4632   | 960.453     | -0.0102 | -11   | 184        | 191      | ELDGEIER  | 33        | 84.936 |   |              |      | Mascot      |
| 960.4632   | 960.453     | -0.0102 | -11   | 184        | 191      | ELDGEIER  |           |        |   |              |      | Mascot      |
| 992.5193   | 992.4415    | -0.0778 | -78   | 25         | 33       | RTTCADVVK |           |        |   |              |      | Mascot      |

|    |                                                                                                 |          |        |    |              |          |                |    |    |   |  |  |                                           |        |
|----|-------------------------------------------------------------------------------------------------|----------|--------|----|--------------|----------|----------------|----|----|---|--|--|-------------------------------------------|--------|
|    | 1796.8306                                                                                       | 1796.959 | 0.1284 | 71 | 1            | 14       | MEQEESKISVWVCR |    |    |   |  |  | Carbamidomethyl (C)[13], Oxidation (M)[1] | Mascot |
| 48 | PREDICTED: signal-induced proliferation-associated 1-like protein 2-like, partial [Danio rerio] |          |        |    | gi 326680992 | 100188.3 | 6.82           | 11 | 36 | 0 |  |  |                                           |        |

Peptide Information

| Calc. Mass | Obsrv. Mass | ± da    | ± ppm | Start Seq. | End Seq. | Sequence                | Ion Score | C. I. | % | Modification              | Rank | Result Type |
|------------|-------------|---------|-------|------------|----------|-------------------------|-----------|-------|---|---------------------------|------|-------------|
| 826.5032   | 826.4244    | -0.0788 | -95   | 546        | 552      | VPEQLLK                 |           |       |   |                           |      | Mascot      |
| 842.4406   | 842.4883    | 0.0477  | 57    | 51         | 57       | VTDWPPK                 |           |       |   |                           |      | Mascot      |
| 937.5101   | 937.4524    | -0.0577 | -62   | 759        | 765      | TRQEYLK                 |           |       |   |                           |      | Mascot      |
| 960.438    | 960.453     | 0.015   | 16    | 368        | 376      | NEIGGEGER               | 13        |       | 0 |                           |      | Mascot      |
| 960.438    | 960.453     | 0.015   | 16    | 368        | 376      | NEIGGEGER               |           |       |   |                           |      | Mascot      |
| 976.5798   | 976.4487    | -0.1311 | -134  | 103        | 110      | GLHPIRQR                |           |       |   |                           |      | Mascot      |
| 1287.5964  | 1287.6376   | 0.0412  | 32    | 478        | 487      | DKETAQNYR               |           |       |   |                           |      | Mascot      |
| 1287.5964  | 1287.6376   | 0.0412  | 32    | 478        | 487      | DKETAQNYR               |           |       |   |                           |      | Mascot      |
| 1383.7114  | 1383.6537   | -0.0577 | -42   | 233        | 244      | LKSESSETSLFR            |           |       |   |                           |      | Mascot      |
| 1455.705   | 1455.632    | -0.073  | -50   | 152        | 164      | QQLGNDGFFTMLR           |           |       |   |                           |      | Mascot      |
| 1516.7424  | 1516.6667   | -0.0757 | -50   | 30         | 44       | QEVGGKSNTPAMPK          |           |       |   | Oxidation (M)[13]         |      | Mascot      |
| 1796.8912  | 1796.959    | 0.0678  | 38    | 766        | 782      | DLAENFVSTTTVDSAVK       |           |       |   |                           |      | Mascot      |
| 2705.1541  | 2705.0928   | -0.0613 | -23   | 867        | 888      | IFYERGECEVMFSAHDNCGEDIR |           |       |   | Carbamidomethyl (C)[8,17] |      | Mascot      |

|    |                                                                                                                                      |              |         |     |   |  |    |        |
|----|--------------------------------------------------------------------------------------------------------------------------------------|--------------|---------|-----|---|--|----|--------|
| 49 | Chain A, Crystal Structure Of The Glycine 55 Arginine Mutant Of Zebrafish Liver Bile Acid-Binding Protein Complexed With Cholic Acid | gi 157836022 | 14094.4 | 9.1 | 1 |  | 26 | 26.048 |
|----|--------------------------------------------------------------------------------------------------------------------------------------|--------------|---------|-----|---|--|----|--------|

Peptide Information

| Calc. Mass | Obsrv. Mass | ± da    | ± ppm | Start Seq. | End Seq. | Sequence  | Ion Score | C. I.  | % | Modification | Rank | Result Type |
|------------|-------------|---------|-------|------------|----------|-----------|-----------|--------|---|--------------|------|-------------|
| 960.5294   | 960.453     | -0.0764 | -80   | 85         | 93       | LDGGKLVCR | 26        | 26.048 |   |              | 3    | Mascot      |

|    |                                            |              |          |      |   |  |    |        |
|----|--------------------------------------------|--------------|----------|------|---|--|----|--------|
| 50 | disrupted in schizophrenia 1 [Danio rerio] | gi 214010133 | 112147.1 | 5.07 | 1 |  | 25 | 11.294 |
|----|--------------------------------------------|--------------|----------|------|---|--|----|--------|

Peptide Information

| Calc. Mass | Obsrv. Mass | ± da    | ± ppm | Start Seq. | End Seq. | Sequence | Ion Score | C. I.  | % | Modification | Rank | Result Type |
|------------|-------------|---------|-------|------------|----------|----------|-----------|--------|---|--------------|------|-------------|
| 960.5359   | 960.453     | -0.0829 | -86   | 933        | 940      | ELTSLSLR | 25        | 11.294 |   |              | 4    | Mascot      |

|                |           |                        |                |                |                    |
|----------------|-----------|------------------------|----------------|----------------|--------------------|
| Gel Idx/Pos    | 239/J15   | Instr./Gel Origin      | BA2060/110707A | Process Status | Analysis Succeeded |
| Plate [#] Name | [1] 31496 | Instrument Sample Name |                | Spectra        | 11                 |

| Rank | Protein Name | Accession No. | Protein MW | Protein PI | Pep. Count | Protein Score | Protein Score C. I. % | Total Ion Score | Total Ion C. I. % |
|------|--------------|---------------|------------|------------|------------|---------------|-----------------------|-----------------|-------------------|
|------|--------------|---------------|------------|------------|------------|---------------|-----------------------|-----------------|-------------------|

|   |                                                                          |  |         |      |    |     |     |     |     |
|---|--------------------------------------------------------------------------|--|---------|------|----|-----|-----|-----|-----|
| 1 | nonspecific cytotoxic cell receptor protein 1 [Danio rerio] gi 169790804 |  | 27238.5 | 5.55 | 11 | 914 | 100 | 829 | 100 |
|---|--------------------------------------------------------------------------|--|---------|------|----|-----|-----|-----|-----|

Peptide Information

| Calc. Mass | Obsrv. Mass | ± da    | ± ppm | Start Seq. | End Seq. | Sequence                        | Ion Score | C. I. % | Modification                              | Rank | Result Type |
|------------|-------------|---------|-------|------------|----------|---------------------------------|-----------|---------|-------------------------------------------|------|-------------|
| 985.5366   | 985.5081    | -0.0285 | -29   | 202        | 208      | YIHFLHR                         | 43        | 98.839  |                                           |      | Mascot      |
| 985.5366   | 985.5081    | -0.0285 | -29   | 202        | 208      | YIHFLHR                         |           |         |                                           |      | Mascot      |
| 1038.5288  | 1038.5004   | -0.0284 | -27   | 151        | 158      | CIYQLDVK                        |           |         | Carbamidomethyl (C)[1]                    |      | Mascot      |
| 1239.6368  | 1239.6039   | -0.0329 | -27   | 30         | 39       | SVFETKPFER                      | 71        | 99.998  |                                           |      | Mascot      |
| 1239.6368  | 1239.6039   | -0.0329 | -27   | 30         | 39       | SVFETKPFER                      |           |         |                                           |      | Mascot      |
| 1404.6616  | 1404.6228   | -0.0388 | -28   | 211        | 221      | NQFMVEFFNTK                     |           |         |                                           |      | Mascot      |
| 1420.6565  | 1420.6182   | -0.0383 | -27   | 211        | 221      | NQFMVEFFNTK                     | 54        | 99.9    | Oxidation (M)[4]                          |      | Mascot      |
| 1420.6565  | 1420.6182   | -0.0383 | -27   | 211        | 221      | NQFMVEFFNTK                     |           |         | Oxidation (M)[4]                          |      | Mascot      |
| 1438.7035  | 1438.6646   | -0.0389 | -27   | 111        | 121      | WFTLEQCVDLK                     |           |         | Carbamidomethyl (C)[7]                    |      | Mascot      |
| 1438.7035  | 1438.6646   | -0.0389 | -27   | 111        | 121      | WFTLEQCVDLK                     | 79        | 100     | Carbamidomethyl (C)[7]                    |      | Mascot      |
| 1645.8407  | 1645.8535   | 0.0128  | 8     | 209        | 221      | LKNQFMVEFFNTK                   |           |         |                                           |      | Mascot      |
| 1661.8356  | 1661.791    | -0.0446 | -27   | 209        | 221      | LKNQFMVEFFNTK                   |           |         | Oxidation (M)[6]                          |      | Mascot      |
| 2336.9878  | 2336.9368   | -0.051  | -22   | 170        | 187      | QHTYNPEEDLECYSHW<br>K           | 114       | 100     | Carbamidomethyl (C)[12]                   |      | Mascot      |
| 2336.9878  | 2336.9368   | -0.051  | -22   | 170        | 187      | QHTYNPEEDLECYSHW<br>K           |           |         | Carbamidomethyl (C)[12]                   |      | Mascot      |
| 2428.0696  | 2428.0054   | -0.0642 | -26   | 9          | 29       | CDSEWQLGAHGVPMPD<br>TVDWK       |           |         | Carbamidomethyl (C)[1]                    |      | Mascot      |
| 2444.0645  | 2444.0154   | -0.0491 | -20   | 9          | 29       | CDSEWQLGAHGVPMPD<br>TVDWK       |           |         | Carbamidomethyl (C)[1], Oxidation (M)[14] |      | Mascot      |
| 2463.2527  | 2463.198    | -0.0547 | -22   | 40         | 61       | NLLQNPSPYGVNHTVPP<br>PEPHR      |           |         |                                           |      | Mascot      |
| 2463.2527  | 2463.198    | -0.0547 | -22   | 40         | 61       | NLLQNPSPYGVNHTVPP<br>PEPHR      | 158       | 100     |                                           |      | Mascot      |
| 2492.2205  | 2492.1611   | -0.0594 | -24   | 62         | 84       | SGIPPPSDRPPQLEPEGN<br>FSGWK     |           |         |                                           |      | Mascot      |
| 2492.2205  | 2492.1611   | -0.0594 | -24   | 62         | 84       | SGIPPPSDRPPQLEPEGN<br>FSGWK     | 114       | 100     |                                           |      | Mascot      |
| 2891.4719  | 2891.4106   | -0.0613 | -21   | 85         | 110      | TNTEVLPHYDTSGIPPGVVI<br>CQLPQHR | 196       | 100     | Carbamidomethyl (C)[20]                   |      | Mascot      |
| 2891.4719  | 2891.4106   | -0.0613 | -21   | 85         | 110      | TNTEVLPHYDTSGIPPGVVI<br>CQLPQHR |           |         | Carbamidomethyl (C)[20]                   |      | Mascot      |

|   |                                                             |             |         |      |    |     |     |     |     |
|---|-------------------------------------------------------------|-------------|---------|------|----|-----|-----|-----|-----|
| 2 | Nonspecific cytotoxic cell receptor protein 1 [Danio rerio] | gi 77748006 | 27210.5 | 5.55 | 10 | 823 | 100 | 751 | 100 |
|---|-------------------------------------------------------------|-------------|---------|------|----|-----|-----|-----|-----|

| Peptide Information |                                      |         |       |            |          |                                 |           |        |     |                                           |      |             |  |
|---------------------|--------------------------------------|---------|-------|------------|----------|---------------------------------|-----------|--------|-----|-------------------------------------------|------|-------------|--|
| Calc. Mass          | Obsrv. Mass                          | ± da    | ± ppm | Start Seq. | End Seq. | Sequence                        | Ion Score | C. I.  | %   | Modification                              | Rank | Result Type |  |
| 985.5366            | 985.5081                             | -0.0285 | -29   | 202        | 208      | YIHFLHR                         | 43        | 98.839 |     |                                           |      | Mascot      |  |
| 985.5366            | 985.5081                             | -0.0285 | -29   | 202        | 208      | YIHFLHR                         |           |        |     |                                           |      | Mascot      |  |
| 1038.5288           | 1038.5004                            | -0.0284 | -27   | 151        | 158      | CIYQLDVK                        |           |        |     | Carbamidomethyl (C)[1]                    |      | Mascot      |  |
| 1239.6368           | 1239.6039                            | -0.0329 | -27   | 30         | 39       | SVFETKPFER                      | 71        | 99.998 |     |                                           |      | Mascot      |  |
| 1239.6368           | 1239.6039                            | -0.0329 | -27   | 30         | 39       | SVFETKPFER                      |           |        |     |                                           |      | Mascot      |  |
| 1404.6616           | 1404.6228                            | -0.0388 | -28   | 211        | 221      | NQFMVEFFNTK                     |           |        |     |                                           |      | Mascot      |  |
| 1420.6565           | 1420.6182                            | -0.0383 | -27   | 211        | 221      | NQFMVEFFNTK                     | 54        | 99.9   |     | Oxidation (M)[4]                          |      | Mascot      |  |
| 1420.6565           | 1420.6182                            | -0.0383 | -27   | 211        | 221      | NQFMVEFFNTK                     |           |        |     | Oxidation (M)[4]                          |      | Mascot      |  |
| 1645.8407           | 1645.8535                            | 0.0128  | 8     | 209        | 221      | LKNQFMVEFFNTK                   |           |        |     |                                           |      | Mascot      |  |
| 1661.8356           | 1661.791                             | -0.0446 | -27   | 209        | 221      | LKNQFMVEFFNTK                   |           |        |     | Oxidation (M)[6]                          |      | Mascot      |  |
| 2336.9878           | 2336.9368                            | -0.051  | -22   | 170        | 187      | QHTYNPEEDLECYSHW<br>K           | 114       | 100    |     | Carbamidomethyl (C)[12]                   |      | Mascot      |  |
| 2336.9878           | 2336.9368                            | -0.051  | -22   | 170        | 187      | QHTYNPEEDLECYSHW<br>K           |           |        |     | Carbamidomethyl (C)[12]                   |      | Mascot      |  |
| 2428.0696           | 2428.0054                            | -0.0642 | -26   | 9          | 29       | CDSEWQLGAHGVPMPD<br>TVDWK       |           |        |     | Carbamidomethyl (C)[1]                    |      | Mascot      |  |
| 2444.0645           | 2444.0154                            | -0.0491 | -20   | 9          | 29       | CDSEWQLGAHGVPMPD<br>TVDWK       |           |        |     | Carbamidomethyl (C)[1], Oxidation (M)[14] |      | Mascot      |  |
| 2463.2527           | 2463.198                             | -0.0547 | -22   | 40         | 61       | NLLQNPSPYGVNHTVPP<br>PEPHR      |           |        |     |                                           |      | Mascot      |  |
| 2463.2527           | 2463.198                             | -0.0547 | -22   | 40         | 61       | NLLQNPSPYGVNHTVPP<br>PEPHR      | 158       | 100    |     |                                           |      | Mascot      |  |
| 2492.2205           | 2492.1611                            | -0.0594 | -24   | 62         | 84       | SGIPPPSDRPPQLEPEGN<br>FSGWK     |           |        |     |                                           |      | Mascot      |  |
| 2492.2205           | 2492.1611                            | -0.0594 | -24   | 62         | 84       | SGIPPPSDRPPQLEPEGN<br>FSGWK     | 114       | 100    |     |                                           |      | Mascot      |  |
| 2891.4719           | 2891.4106                            | -0.0613 | -21   | 85         | 110      | TNTEVLPHYDTSGIPPGVVI<br>CQLPQHR | 196       | 100    |     | Carbamidomethyl (C)[20]                   |      | Mascot      |  |
| 2891.4719           | 2891.4106                            | -0.0613 | -21   | 85         | 110      | TNTEVLPHYDTSGIPPGVVI<br>CQLPQHR |           |        |     | Carbamidomethyl (C)[20]                   |      | Mascot      |  |
| 3                   | NCC receptor protein 1 [Danio rerio] |         |       | gil6630992 |          | 27267.5                         | 5.55      | 10     | 788 | 100                                       | 716  | 100         |  |

| Peptide Information |             |         |       |            |                   |           |                      |                        |  |  |                  |
|---------------------|-------------|---------|-------|------------|-------------------|-----------|----------------------|------------------------|--|--|------------------|
| Calc. Mass          | Obsrv. Mass | ± da    | ± ppm | Start Seq. | End Sequence Seq. | Ion Score | C. I. % Modification |                        |  |  | Rank Result Type |
| 985.5366            | 985.5081    | -0.0285 | -29   | 202        | 208 YIHFLHR       | 43        | 98.839               |                        |  |  | Mascot           |
| 985.5366            | 985.5081    | -0.0285 | -29   | 202        | 208 YIHFLHR       |           |                      |                        |  |  | Mascot           |
| 1038.5288           | 1038.5004   | -0.0284 | -27   | 151        | 158 CIYQLDVK      |           |                      | Carbamidomethyl (C)[1] |  |  | Mascot           |
| 1239.6368           | 1239.6039   | -0.0329 | -27   | 30         | 39 SVFETKPFER     | 71        | 99.998               |                        |  |  | Mascot           |
| 1239.6368           | 1239.6039   | -0.0329 | -27   | 30         | 39 SVFETKPFER     |           |                      |                        |  |  | Mascot           |
| 1404.6616           | 1404.6228   | -0.0388 | -28   | 211        | 221 NQFMVEFFNTK   |           |                      |                        |  |  | Mascot           |
| 1420.6565           | 1420.6182   | -0.0383 | -27   | 211        | 221 NQFMVEFFNTK   | 54        | 99.9                 | Oxidation (M)[4]       |  |  | Mascot           |

|           |                              |         |     |     |              |                                |         |      |    |     |     |                                           |        |
|-----------|------------------------------|---------|-----|-----|--------------|--------------------------------|---------|------|----|-----|-----|-------------------------------------------|--------|
| 1420.6565 | 1420.6182                    | -0.0383 | -27 | 211 | 221          | NQFMVEFFNTK                    |         |      |    |     |     | Oxidation (M)[4]                          | Mascot |
| 1438.7035 | 1438.6646                    | -0.0389 | -27 | 111 | 121          | WFTLEQCVDLK                    |         |      |    |     |     | Carbamidomethyl (C)[7]                    | Mascot |
| 1438.7035 | 1438.6646                    | -0.0389 | -27 | 111 | 121          | WFTLEQCVDLK                    | 79      | 100  |    |     |     | Carbamidomethyl (C)[7]                    | Mascot |
| 1645.8407 | 1645.8535                    | 0.0128  | 8   | 209 | 221          | LKNQFMVEFFNTK                  |         |      |    |     |     |                                           | Mascot |
| 1661.8356 | 1661.791                     | -0.0446 | -27 | 209 | 221          | LKNQFMVEFFNTK                  |         |      |    |     |     | Oxidation (M)[6]                          | Mascot |
| 2428.0696 | 2428.0054                    | -0.0642 | -26 | 9   | 29           | CDSEWQLGAHGVPMPD<br>TVDWK      |         |      |    |     |     | Carbamidomethyl (C)[1]                    | Mascot |
| 2444.0645 | 2444.0154                    | -0.0491 | -20 | 9   | 29           | CDSEWQLGAHGVPMPD<br>TVDWK      |         |      |    |     |     | Carbamidomethyl (C)[1], Oxidation (M)[14] | Mascot |
| 2463.2527 | 2463.198                     | -0.0547 | -22 | 40  | 61           | NLLQNPSPYGVNHTVPP<br>PEPHR     |         |      |    |     |     |                                           | Mascot |
| 2463.2527 | 2463.198                     | -0.0547 | -22 | 40  | 61           | NLLQNPSPYGVNHTVPP<br>PEPHR     | 158     | 100  |    |     |     |                                           | Mascot |
| 2492.2205 | 2492.1611                    | -0.0594 | -24 | 62  | 84           | SGIPPPSDRPPQLEPEGN<br>FSGWK    |         |      |    |     |     |                                           | Mascot |
| 2492.2205 | 2492.1611                    | -0.0594 | -24 | 62  | 84           | SGIPPPSDRPPQLEPEGN<br>FSGWK    | 114     | 100  |    |     |     |                                           | Mascot |
| 2891.4719 | 2891.4106                    | -0.0613 | -21 | 85  | 110          | TNTEVLPYDTSGIPPGVVI<br>CQLPQHR | 196     | 100  |    |     |     | Carbamidomethyl (C)[20]                   | Mascot |
| 2891.4719 | 2891.4106                    | -0.0613 | -21 | 85  | 110          | TNTEVLPYDTSGIPPGVVI<br>CQLPQHR |         |      |    |     |     | Carbamidomethyl (C)[20]                   | Mascot |
| 4         | Nccrp1 protein [Danio rerio] |         |     |     | gi 120537856 |                                | 27254.5 | 5.55 | 11 | 717 | 100 | 633                                       | 100    |

Peptide Information

| Calc. Mass | Obsrv. Mass | ± da    | ± ppm | Start Seq. | End Seq. | Sequence                  | Ion Score | C. I.  | % Modification                            | Rank | Result Type |
|------------|-------------|---------|-------|------------|----------|---------------------------|-----------|--------|-------------------------------------------|------|-------------|
| 985.5366   | 985.5081    | -0.0285 | -29   | 202        | 208      | YIHFLHR                   | 43        | 98.839 |                                           |      | Mascot      |
| 985.5366   | 985.5081    | -0.0285 | -29   | 202        | 208      | YIHFLHR                   |           |        |                                           |      | Mascot      |
| 1038.5288  | 1038.5004   | -0.0284 | -27   | 151        | 158      | CIYQLDVK                  |           |        | Carbamidomethyl (C)[1]                    |      | Mascot      |
| 1239.6368  | 1239.6039   | -0.0329 | -27   | 30         | 39       | SVFETKPFER                | 71        | 99.998 |                                           |      | Mascot      |
| 1239.6368  | 1239.6039   | -0.0329 | -27   | 30         | 39       | SVFETKPFER                |           |        |                                           |      | Mascot      |
| 1404.6616  | 1404.6228   | -0.0388 | -28   | 211        | 221      | NQFMVEFFNTK               |           |        |                                           |      | Mascot      |
| 1420.6565  | 1420.6182   | -0.0383 | -27   | 211        | 221      | NQFMVEFFNTK               | 54        | 99.9   | Oxidation (M)[4]                          |      | Mascot      |
| 1420.6565  | 1420.6182   | -0.0383 | -27   | 211        | 221      | NQFMVEFFNTK               |           |        | Oxidation (M)[4]                          |      | Mascot      |
| 1438.7035  | 1438.6646   | -0.0389 | -27   | 111        | 121      | WFTLEQCVDLK               |           |        | Carbamidomethyl (C)[7]                    |      | Mascot      |
| 1438.7035  | 1438.6646   | -0.0389 | -27   | 111        | 121      | WFTLEQCVDLK               | 79        | 100    | Carbamidomethyl (C)[7]                    |      | Mascot      |
| 1645.8407  | 1645.8535   | 0.0128  | 8     | 209        | 221      | LKNQFMVEFFNTK             |           |        |                                           |      | Mascot      |
| 1661.8356  | 1661.791    | -0.0446 | -27   | 209        | 221      | LKNQFMVEFFNTK             |           |        | Oxidation (M)[6]                          |      | Mascot      |
| 2336.9878  | 2336.9368   | -0.051  | -22   | 170        | 187      | QHTYNPEEDLECYSTW<br>K     | 114       | 100    | Carbamidomethyl (C)[12]                   |      | Mascot      |
| 2336.9878  | 2336.9368   | -0.051  | -22   | 170        | 187      | QHTYNPEEDLECYSTW<br>K     |           |        | Carbamidomethyl (C)[12]                   |      | Mascot      |
| 2428.0696  | 2428.0054   | -0.0642 | -26   | 9          | 29       | CDSEWQLGAHGVPMPD<br>TVDWK |           |        | Carbamidomethyl (C)[1]                    |      | Mascot      |
| 2444.0645  | 2444.0154   | -0.0491 | -20   | 9          | 29       | CDSEWQLGAHGVPMPD<br>TVDWK |           |        | Carbamidomethyl (C)[1], Oxidation (M)[14] |      | Mascot      |

|   |                            |           |         |     |    |             |                                |      |     |                         |     |     |     |        |
|---|----------------------------|-----------|---------|-----|----|-------------|--------------------------------|------|-----|-------------------------|-----|-----|-----|--------|
|   | 2463.2527                  | 2463.198  | -0.0547 | -22 | 40 | 61          | NLLQNPSPYGVNHTVPP<br>PEPHR     |      |     |                         |     |     |     | Mascot |
|   | 2463.2527                  | 2463.198  | -0.0547 | -22 | 40 | 61          | NLLQNPSPYGVNHTVPP<br>PEPHR     | 158  | 100 |                         |     |     |     | Mascot |
|   | 2492.2205                  | 2492.1611 | -0.0594 | -24 | 62 | 84          | SGIPPPSDRPPQLEPEGN<br>FSGWK    |      |     |                         |     |     |     | Mascot |
|   | 2492.2205                  | 2492.1611 | -0.0594 | -24 | 62 | 84          | SGIPPPSDRPPQLEPEGN<br>FSGWK    | 114  | 100 |                         |     |     |     | Mascot |
|   | 2921.4827                  | 2921.4275 | -0.0552 | -19 | 85 | 110         | TNTEVLPYDTSGIPPSVVI<br>CQLPQHR |      |     | Carbamidomethyl (C)[20] |     |     |     | Mascot |
| 5 | Vtg1 protein [Danio rerio] |           |         |     |    | gi 63100501 | 36409.1                        | 9.23 | 6   | 242                     | 100 | 220 | 100 |        |

Peptide Information

| Calc. Mass | Obsrv. Mass | ± da    | ± ppm | Start Seq. | End Seq. | Sequence           | Ion Score | C. I. | % Modification | Rank | Result Type |
|------------|-------------|---------|-------|------------|----------|--------------------|-----------|-------|----------------|------|-------------|
| 960.4785   | 960.4528    | -0.0257 | -27   | 218        | 224      | LEVEWER            |           |       |                |      | Mascot      |
| 1287.6691  | 1287.6373   | -0.0318 | -25   | 205        | 217      | AEAGVLGEFPAAR      |           |       |                |      | Mascot      |
| 1364.6957  | 1364.6613   | -0.0344 | -25   | 239        | 250      | HILTAAYDTGFR       |           |       |                |      | Mascot      |
| 1642.9315  | 1642.8906   | -0.0409 | -25   | 121        | 135      | FLGNDIPPVFIIAR     | 98        | 100   |                |      | Mascot      |
| 1642.9315  | 1642.8906   | -0.0409 | -25   | 121        | 135      | FLGNDIPPVFIIAR     |           |       |                |      | Mascot      |
| 1826.9799  | 1826.9316   | -0.0483 | -26   | 143        | 158      | LLGYQLAAYFDKPTAR   |           |       |                |      | Mascot      |
| 1826.9799  | 1826.9316   | -0.0483 | -26   | 143        | 158      | LLGYQLAAYFDKPTAR   | 121       | 100   |                |      | Mascot      |
| 1958.0189  | 1957.9667   | -0.0522 | -27   | 254        | 271      | ATNSEKEIELTAALPSQR |           |       |                |      | Mascot      |

|   |                              |  |  |  |  |             |         |      |   |     |     |     |     |  |
|---|------------------------------|--|--|--|--|-------------|---------|------|---|-----|-----|-----|-----|--|
| 6 | vitellogenin 7 [Danio rerio] |  |  |  |  | gi 57864789 | 24318.7 | 8.37 | 4 | 237 | 100 | 220 | 100 |  |
|---|------------------------------|--|--|--|--|-------------|---------|------|---|-----|-----|-----|-----|--|

Peptide Information

| Calc. Mass | Obsrv. Mass | ± da    | ± ppm | Start Seq. | End Seq. | Sequence         | Ion Score | C. I. | % Modification | Rank | Result Type |
|------------|-------------|---------|-------|------------|----------|------------------|-----------|-------|----------------|------|-------------|
| 960.4785   | 960.4528    | -0.0257 | -27   | 113        | 119      | LEVEWER          |           |       |                |      | Mascot      |
| 1287.6691  | 1287.6373   | -0.0318 | -25   | 100        | 112      | AEAGVLGEFPAAR    |           |       |                |      | Mascot      |
| 1642.9315  | 1642.8906   | -0.0409 | -25   | 16         | 30       | FLGNDLPPVFIIAR   | 98        | 100   |                |      | Mascot      |
| 1642.9315  | 1642.8906   | -0.0409 | -25   | 16         | 30       | FLGNDLPPVFIIAR   |           |       |                |      | Mascot      |
| 1826.9799  | 1826.9316   | -0.0483 | -26   | 38         | 53       | LLGYQLAAYFDKPTAR |           |       |                |      | Mascot      |
| 1826.9799  | 1826.9316   | -0.0483 | -26   | 38         | 53       | LLGYQLAAYFDKPTAR | 121       | 100   |                |      | Mascot      |

|   |                            |  |  |  |  |              |          |      |   |     |     |     |     |  |
|---|----------------------------|--|--|--|--|--------------|----------|------|---|-----|-----|-----|-----|--|
| 7 | Vtg1 protein [Danio rerio] |  |  |  |  | gi 145337918 | 116565.5 | 9.07 | 9 | 233 | 100 | 220 | 100 |  |
|---|----------------------------|--|--|--|--|--------------|----------|------|---|-----|-----|-----|-----|--|

Peptide Information

| Calc. Mass | Obsrv. Mass | ± da    | ± ppm | Start Seq. | End Seq. | Sequence  | Ion Score | C. I. | % Modification | Rank | Result Type |
|------------|-------------|---------|-------|------------|----------|-----------|-----------|-------|----------------|------|-------------|
| 960.4785   | 960.4528    | -0.0257 | -27   | 964        | 970      | LEVEWER   |           |       |                |      | Mascot      |
| 1021.5676  | 1021.4751   | -0.0925 | -91   | 594        | 602      | ADILKGNKY |           |       |                |      | Mascot      |

|           |           |         |     |      |      |                    |     |     |  |  |  |  |  |  |  |  |        |
|-----------|-----------|---------|-----|------|------|--------------------|-----|-----|--|--|--|--|--|--|--|--|--------|
| 1038.5942 | 1038.5004 | -0.0938 | -90 | 390  | 399  | TGGIHEALLK         |     |     |  |  |  |  |  |  |  |  | Mascot |
| 1287.6691 | 1287.6373 | -0.0318 | -25 | 951  | 963  | AEAGVLGEFPAAR      |     |     |  |  |  |  |  |  |  |  | Mascot |
| 1364.6957 | 1364.6613 | -0.0344 | -25 | 985  | 996  | HILTAAYDTGFR       |     |     |  |  |  |  |  |  |  |  | Mascot |
| 1412.7494 | 1412.6802 | -0.0692 | -49 | 675  | 686  | TLCYAVPYIEIK       |     |     |  |  |  |  |  |  |  |  | Mascot |
| 1642.9315 | 1642.8906 | -0.0409 | -25 | 867  | 881  | FLGNDIPPVFIIAR     | 98  | 100 |  |  |  |  |  |  |  |  | Mascot |
| 1642.9315 | 1642.8906 | -0.0409 | -25 | 867  | 881  | FLGNDIPPVFIIAR     |     |     |  |  |  |  |  |  |  |  | Mascot |
| 1826.9799 | 1826.9316 | -0.0483 | -26 | 889  | 904  | LLGYQLAAYFDKPTAR   |     |     |  |  |  |  |  |  |  |  | Mascot |
| 1826.9799 | 1826.9316 | -0.0483 | -26 | 889  | 904  | LLGYQLAAYFDKPTAR   | 121 | 100 |  |  |  |  |  |  |  |  | Mascot |
| 1958.0189 | 1957.9667 | -0.0522 | -27 | 1000 | 1017 | ATNSEKEIELTAALPSQR |     |     |  |  |  |  |  |  |  |  | Mascot |

8

vitellogenin 1 [Danio rerio]

gi|166795887

149452.5

8.68

10

232

100

220

100

Peptide Information

| Calc. Mass | Obsrv. Mass | ± da    | ± ppm | Start Seq. | End Seq. | Sequence                   | Ion Score | C. I. | % Modification | Rank | Result Type |
|------------|-------------|---------|-------|------------|----------|----------------------------|-----------|-------|----------------|------|-------------|
| 960.4785   | 960.4528    | -0.0257 | -27   | 1258       | 1264     | LEVEWER                    |           |       |                |      | Mascot      |
| 1021.5676  | 1021.4751   | -0.0925 | -91   | 888        | 896      | ADILKGNKY                  |           |       |                |      | Mascot      |
| 1038.4707  | 1038.5004   | 0.0297  | 29    | 204        | 212      | CAECTERVK                  |           |       |                |      | Mascot      |
| 1287.6691  | 1287.6373   | -0.0318 | -25   | 1245       | 1257     | AEAGVLGEFPAAR              |           |       |                |      | Mascot      |
| 1364.6957  | 1364.6613   | -0.0344 | -25   | 1279       | 1290     | HILTAAYDTGFR               |           |       |                |      | Mascot      |
| 1412.7494  | 1412.6802   | -0.0692 | -49   | 969        | 980      | TLCYAVPYIEIK               |           |       |                |      | Mascot      |
| 1642.9315  | 1642.8906   | -0.0409 | -25   | 1161       | 1175     | FLGNDIPPVFIIAR             | 98        | 100   |                |      | Mascot      |
| 1642.9315  | 1642.8906   | -0.0409 | -25   | 1161       | 1175     | FLGNDIPPVFIIAR             |           |       |                |      | Mascot      |
| 1826.9799  | 1826.9316   | -0.0483 | -26   | 1183       | 1198     | LLGYQLAAYFDKPTAR           |           |       |                |      | Mascot      |
| 1826.9799  | 1826.9316   | -0.0483 | -26   | 1183       | 1198     | LLGYQLAAYFDKPTAR           | 121       | 100   |                |      | Mascot      |
| 1958.0189  | 1957.9667   | -0.0522 | -27   | 1294       | 1311     | ATNSEKEIELTAALPSQR         |           |       |                |      | Mascot      |
| 2233.2009  | 2233.0215   | -0.1794 | -80   | 593        | 614      | SLTRITAPDMAYVAGAAN<br>VAIK |           |       |                |      | Mascot      |

9

vitellogenin 1 [Danio rerio]

gi|21391472

127954.2

8.69

9

232

100

220

100

Peptide Information

| Calc. Mass | Obsrv. Mass | ± da    | ± ppm | Start Seq. | End Seq. | Sequence      | Ion Score | C. I. | % Modification | Rank | Result Type |
|------------|-------------|---------|-------|------------|----------|---------------|-----------|-------|----------------|------|-------------|
| 960.4785   | 960.4528    | -0.0257 | -27   | 1065       | 1071     | LEVEWER       |           |       |                |      | Mascot      |
| 1021.5676  | 1021.4751   | -0.0925 | -91   | 697        | 705      | ADILKGNKY     |           |       |                |      | Mascot      |
| 1038.4707  | 1038.5004   | 0.0297  | 29    | 13         | 21       | CAECTERVK     |           |       |                |      | Mascot      |
| 1287.6691  | 1287.6373   | -0.0318 | -25   | 1052       | 1064     | AEAGVLGEFPAAR |           |       |                |      | Mascot      |
| 1364.6957  | 1364.6613   | -0.0344 | -25   | 1086       | 1097     | HILTAAYDTGFR  |           |       |                |      | Mascot      |
| 1412.7494  | 1412.6802   | -0.0692 | -49   | 778        | 789      | TLCYAVPYIEIK  |           |       |                |      | Mascot      |

|    |                              |           |         |     |             |      |                    |     |     |     |     |     |     |  |        |
|----|------------------------------|-----------|---------|-----|-------------|------|--------------------|-----|-----|-----|-----|-----|-----|--|--------|
|    | 1642.9315                    | 1642.8906 | -0.0409 | -25 | 968         | 982  | FLGNDIPPVFALLAR    | 98  | 100 |     |     |     |     |  | Mascot |
|    | 1642.9315                    | 1642.8906 | -0.0409 | -25 | 968         | 982  | FLGNDIPPVFALLAR    |     |     |     |     |     |     |  | Mascot |
|    | 1826.9799                    | 1826.9316 | -0.0483 | -26 | 990         | 1005 | LLGYQLAAYFDKPTAR   |     |     |     |     |     |     |  | Mascot |
|    | 1826.9799                    | 1826.9316 | -0.0483 | -26 | 990         | 1005 | LLGYQLAAYFDKPTAR   | 121 | 100 |     |     |     |     |  | Mascot |
|    | 1958.0189                    | 1957.9667 | -0.0522 | -27 | 1101        | 1118 | ATNSEKEIELTAALPSQR |     |     |     |     |     |     |  | Mascot |
| 10 | vitellogenin 5 [Danio rerio] |           |         |     | gi 57864785 |      | 72820.8            | 9   | 6   | 231 | 100 | 220 | 100 |  |        |

Peptide Information

| Calc. Mass | Obsrv. Mass | ± da    | ± ppm | Start Seq. | End Seq. | Sequence         | Ion Score | C. I. | % Modification | Rank | Result Type |
|------------|-------------|---------|-------|------------|----------|------------------|-----------|-------|----------------|------|-------------|
| 960.4785   | 960.4528    | -0.0257 | -27   | 564        | 570      | LEVEWER          |           |       |                |      | Mascot      |
| 1021.5676  | 1021.4751   | -0.0925 | -91   | 197        | 205      | ADILKGNKY        |           |       |                |      | Mascot      |
| 1412.7494  | 1412.6802   | -0.0692 | -49   | 278        | 289      | TLCYAVPYIEIK     |           |       |                |      | Mascot      |
| 1642.9315  | 1642.8906   | -0.0409 | -25   | 467        | 481      | FLGNDIPPVFALLAR  | 98        | 100   |                |      | Mascot      |
| 1642.9315  | 1642.8906   | -0.0409 | -25   | 467        | 481      | FLGNDIPPVFALLAR  |           |       |                |      | Mascot      |
| 1681.7736  | 1681.9386   | 0.165   | 98    | 376        | 391      | NTPVSSESSSSSRNSR |           |       |                |      | Mascot      |
| 1826.9799  | 1826.9316   | -0.0483 | -26   | 489        | 504      | LLGYQLAAYFDKPTAR |           |       |                |      | Mascot      |
| 1826.9799  | 1826.9316   | -0.0483 | -26   | 489        | 504      | LLGYQLAAYFDKPTAR | 121       | 100   |                |      | Mascot      |

|    |                          |  |  |  |             |  |         |      |   |     |     |     |     |  |  |
|----|--------------------------|--|--|--|-------------|--|---------|------|---|-----|-----|-----|-----|--|--|
| 11 | Zgc:136383 [Danio rerio] |  |  |  | gi 92097636 |  | 28809.9 | 9.33 | 4 | 231 | 100 | 220 | 100 |  |  |
|----|--------------------------|--|--|--|-------------|--|---------|------|---|-----|-----|-----|-----|--|--|

Peptide Information

| Calc. Mass | Obsrv. Mass | ± da    | ± ppm | Start Seq. | End Seq. | Sequence         | Ion Score | C. I. | % Modification | Rank | Result Type |
|------------|-------------|---------|-------|------------|----------|------------------|-----------|-------|----------------|------|-------------|
| 960.4785   | 960.4528    | -0.0257 | -27   | 156        | 162      | LEVEWER          |           |       |                |      | Mascot      |
| 1045.5465  | 1045.5343   | -0.0122 | -12   | 246        | 253      | DFLSWIHK         |           |       |                |      | Mascot      |
| 1642.9315  | 1642.8906   | -0.0409 | -25   | 59         | 73       | FLGNDIPPVFALLAR  | 98        | 100   |                |      | Mascot      |
| 1642.9315  | 1642.8906   | -0.0409 | -25   | 59         | 73       | FLGNDIPPVFALLAR  |           |       |                |      | Mascot      |
| 1826.9799  | 1826.9316   | -0.0483 | -26   | 81         | 96       | LLGYQLAAYFDKPTAR |           |       |                |      | Mascot      |
| 1826.9799  | 1826.9316   | -0.0483 | -26   | 81         | 96       | LLGYQLAAYFDKPTAR | 121       | 100   |                |      | Mascot      |

|    |                              |  |  |  |             |  |         |      |   |     |     |     |     |  |  |
|----|------------------------------|--|--|--|-------------|--|---------|------|---|-----|-----|-----|-----|--|--|
| 12 | vitellogenin 6 [Danio rerio] |  |  |  | gi 57864787 |  | 38968.8 | 8.92 | 4 | 231 | 100 | 220 | 100 |  |  |
|----|------------------------------|--|--|--|-------------|--|---------|------|---|-----|-----|-----|-----|--|--|

Peptide Information

| Calc. Mass | Obsrv. Mass | ± da    | ± ppm | Start Seq. | End Seq. | Sequence        | Ion Score | C. I. | % Modification | Rank | Result Type |
|------------|-------------|---------|-------|------------|----------|-----------------|-----------|-------|----------------|------|-------------|
| 960.4785   | 960.4528    | -0.0257 | -27   | 255        | 261      | LEVEWER         |           |       |                |      | Mascot      |
| 1642.9315  | 1642.8906   | -0.0409 | -25   | 158        | 172      | FLGNDIPPVFALLAR | 98        | 100   |                |      | Mascot      |
| 1642.9315  | 1642.8906   | -0.0409 | -25   | 158        | 172      | FLGNDIPPVFALLAR |           |       |                |      | Mascot      |



|    |                              |           |           |         |     |     |             |                    |      |     |     |     |     |     |  |  |        |
|----|------------------------------|-----------|-----------|---------|-----|-----|-------------|--------------------|------|-----|-----|-----|-----|-----|--|--|--------|
|    |                              | 1826.9799 | 1826.9316 | -0.0483 | -26 | 180 | 195         | LLGYQLAAYFDKPTAR   |      |     |     |     |     |     |  |  | Mascot |
|    |                              | 1826.9799 | 1826.9316 | -0.0483 | -26 | 180 | 195         | LLGYQLAAYFDKPTAR   |      | 121 | 100 |     |     |     |  |  | Mascot |
|    |                              | 1958.0189 | 1957.9667 | -0.0522 | -27 | 291 | 308         | ATNSEKEIELTAALPSQR |      |     |     |     |     |     |  |  | Mascot |
| 13 | vitellogenin 1 [Danio rerio] |           |           |         |     |     | gi 94733730 | 149140.4           | 8.74 | 9   | 230 | 100 | 220 | 100 |  |  |        |

Peptide Information

| Calc. Mass | Obsrv. Mass | ± da    | ± ppm | Start Seq. | End Sequence Seq.       | Ion Score | C. I. % | Modification | Rank | Result Type |
|------------|-------------|---------|-------|------------|-------------------------|-----------|---------|--------------|------|-------------|
| 960.4785   | 960.4528    | -0.0257 | -27   | 1258       | 1264 LEVEWER            |           |         |              |      | Mascot      |
| 1021.5676  | 1021.4751   | -0.0925 | -91   | 888        | 896 ADILKGNKY           |           |         |              |      | Mascot      |
| 1038.4707  | 1038.5004   | 0.0297  | 29    | 204        | 212 CAECTERVK           |           |         |              |      | Mascot      |
| 1287.6691  | 1287.6373   | -0.0318 | -25   | 1245       | 1257 AEAGVLGEFPAAR      |           |         |              |      | Mascot      |
| 1364.6957  | 1364.6613   | -0.0344 | -25   | 1279       | 1290 HILTAAYDTGFR       |           |         |              |      | Mascot      |
| 1412.7494  | 1412.6802   | -0.0692 | -49   | 969        | 980 TLCYAVPYIEIK        |           |         |              |      | Mascot      |
| 1642.9315  | 1642.8906   | -0.0409 | -25   | 1161       | 1175 FLGNDIPPVFIIAR     | 98        | 100     |              |      | Mascot      |
| 1642.9315  | 1642.8906   | -0.0409 | -25   | 1161       | 1175 FLGNDIPPVFIIAR     |           |         |              |      | Mascot      |
| 1826.9799  | 1826.9316   | -0.0483 | -26   | 1183       | 1198 LLGYQLAAYFDKPTAR   |           |         |              |      | Mascot      |
| 1826.9799  | 1826.9316   | -0.0483 | -26   | 1183       | 1198 LLGYQLAAYFDKPTAR   | 121       | 100     |              |      | Mascot      |
| 1958.0189  | 1957.9667   | -0.0522 | -27   | 1294       | 1311 ATNSEKEIELTAALPSQR |           |         |              |      | Mascot      |

|    |                              |  |  |  |  |  |             |        |      |   |     |     |     |     |  |  |  |
|----|------------------------------|--|--|--|--|--|-------------|--------|------|---|-----|-----|-----|-----|--|--|--|
| 14 | vitellogenin 5 [Danio rerio] |  |  |  |  |  | gi 68448530 | 148868 | 8.77 | 8 | 230 | 100 | 220 | 100 |  |  |  |
|----|------------------------------|--|--|--|--|--|-------------|--------|------|---|-----|-----|-----|-----|--|--|--|

Peptide Information

| Calc. Mass | Obsrv. Mass | ± da    | ± ppm | Start Seq. | End Sequence Seq.                   | Ion Score | C. I. % | Modification | Rank | Result Type |
|------------|-------------|---------|-------|------------|-------------------------------------|-----------|---------|--------------|------|-------------|
| 960.4785   | 960.4528    | -0.0257 | -27   | 1258       | 1264 LEVEWER                        |           |         |              |      | Mascot      |
| 1021.5676  | 1021.4751   | -0.0925 | -91   | 888        | 896 ADILKGNKY                       |           |         |              |      | Mascot      |
| 1412.7494  | 1412.6802   | -0.0692 | -49   | 969        | 980 TLCYAVPYIEIK                    |           |         |              |      | Mascot      |
| 1642.9315  | 1642.8906   | -0.0409 | -25   | 1161       | 1175 FLGNDIPPVFIIAR                 | 98        | 100     |              |      | Mascot      |
| 1642.9315  | 1642.8906   | -0.0409 | -25   | 1161       | 1175 FLGNDIPPVFIIAR                 |           |         |              |      | Mascot      |
| 1681.7736  | 1681.9386   | 0.165   | 98    | 1067       | 1082 NTPVSSSESSSSRNSR               |           |         |              |      | Mascot      |
| 1826.9799  | 1826.9316   | -0.0483 | -26   | 1183       | 1198 LLGYQLAAYFDKPTAR               |           |         |              |      | Mascot      |
| 1826.9799  | 1826.9316   | -0.0483 | -26   | 1183       | 1198 LLGYQLAAYFDKPTAR               | 121       | 100     |              |      | Mascot      |
| 2800.4485  | 2800.3999   | -0.0486 | -17   | 446        | 471 HCTAVPTCPAELLRIPIEI<br>ATEAISK  |           |         |              |      | Mascot      |
| 2913.6382  | 2913.3945   | -0.2437 | -84   | 119        | 145 AFAPAGVSPTVMNLYRGI<br>LNILQLNLK |           |         |              |      | Mascot      |

|    |                              |  |  |  |  |  |             |         |      |   |     |     |     |     |  |  |  |
|----|------------------------------|--|--|--|--|--|-------------|---------|------|---|-----|-----|-----|-----|--|--|--|
| 15 | vitellogenin 4 [Danio rerio] |  |  |  |  |  | gi 57864783 | 31189.9 | 9.48 | 3 | 229 | 100 | 220 | 100 |  |  |  |
|----|------------------------------|--|--|--|--|--|-------------|---------|------|---|-----|-----|-----|-----|--|--|--|

Peptide Information

|    | Calc. Mass                                                              | Obsrv. Mass | ± da    | ± ppm | Start Seq. | End Sequence Seq.    |      | Ion Score | C. I. | % Modification | Rank | Result Type |
|----|-------------------------------------------------------------------------|-------------|---------|-------|------------|----------------------|------|-----------|-------|----------------|------|-------------|
|    | 960.4785                                                                | 960.4528    | -0.0257 | -27   | 182        | 188 LEVEWER          |      |           |       |                |      | Mascot      |
|    | 1642.9315                                                               | 1642.8906   | -0.0409 | -25   | 85         | 99 FLGNDIPPVFIIAR    |      | 98        | 100   |                |      | Mascot      |
|    | 1642.9315                                                               | 1642.8906   | -0.0409 | -25   | 85         | 99 FLGNDIPPVFIIAR    |      |           |       |                |      | Mascot      |
|    | 1826.9799                                                               | 1826.9316   | -0.0483 | -26   | 107        | 122 LLGYQLAAYFDKPTAR |      |           |       |                |      | Mascot      |
|    | 1826.9799                                                               | 1826.9316   | -0.0483 | -26   | 107        | 122 LLGYQLAAYFDKPTAR |      | 121       | 100   |                |      | Mascot      |
| 16 | novel protein similar to vitellogenin 1 (vg1) [Danio rerio] gi 94732723 |             |         |       |            | 147084.2             | 8.73 | 8         | 229   | 100            | 220  | 100         |

Peptide Information

|    | Calc. Mass                                   | Obsrv. Mass | ± da    | ± ppm | Start Seq.   | End Sequence Seq.             | Ion Score | C. I. | % Modification      | Rank | Result Type |     |     |
|----|----------------------------------------------|-------------|---------|-------|--------------|-------------------------------|-----------|-------|---------------------|------|-------------|-----|-----|
|    | 960.4785                                     | 960.4528    | -0.0257 | -27   | 1239         | 1245 LEVEWER                  |           |       |                     |      | Mascot      |     |     |
|    | 1021.5676                                    | 1021.4751   | -0.0925 | -91   | 888          | 896 ADILKGNKYK                |           |       |                     |      | Mascot      |     |     |
|    | 1038.5942                                    | 1038.5004   | -0.0938 | -90   | 684          | 693 TGGIHEALLK                |           |       |                     |      | Mascot      |     |     |
|    | 1287.6691                                    | 1287.6373   | -0.0318 | -25   | 1226         | 1238 AEAGVLGEFPAAR            |           |       |                     |      | Mascot      |     |     |
|    | 1642.9315                                    | 1642.8906   | -0.0409 | -25   | 1142         | 1156 FLGNDLPPVFIIAR           | 98        | 100   |                     |      | Mascot      |     |     |
|    | 1642.9315                                    | 1642.8906   | -0.0409 | -25   | 1142         | 1156 FLGNDLPPVFIIAR           |           |       |                     |      | Mascot      |     |     |
|    | 1645.8175                                    | 1645.8535   | 0.036   | 22    | 58           | 71 VLLSAMENTYLMK              |           |       | Oxidation (M)[6,13] |      | Mascot      |     |     |
|    | 1826.9799                                    | 1826.9316   | -0.0483 | -26   | 1164         | 1179 LLGYQLAAYFDKPTAR         |           |       |                     |      | Mascot      |     |     |
|    | 1826.9799                                    | 1826.9316   | -0.0483 | -26   | 1164         | 1179 LLGYQLAAYFDKPTAR         | 121       | 100   |                     |      | Mascot      |     |     |
|    | 2607.4028                                    | 2607.1541   | -0.2487 | -95   | 897          | 920 VETLPVELPEHIASASFET LAVVR |           |       |                     |      | Mascot      |     |     |
| 17 | hypothetical protein LOC678536 [Danio rerio] |             |         |       | gi 160420306 |                               | 148750.2  | 8.89  | 8                   | 229  | 100         | 220 | 100 |

Peptide Information

|  | Calc. Mass | Obsrv. Mass | ± da    | ± ppm | Start Seq. | End Sequence Seq.      | Ion Score | C. I. | % Modification | Rank | Result Type |
|--|------------|-------------|---------|-------|------------|------------------------|-----------|-------|----------------|------|-------------|
|  | 960.4785   | 960.4528    | -0.0257 | -27   | 1256       | 1262 LEVEWER           |           |       |                |      | Mascot      |
|  | 1021.5676  | 1021.4751   | -0.0925 | -91   | 888        | 896 ADILKGNKYK         |           |       |                |      | Mascot      |
|  | 1038.5942  | 1038.5004   | -0.0938 | -90   | 684        | 693 TGGIHEALLK         |           |       |                |      | Mascot      |
|  | 1045.5465  | 1045.5343   | -0.0122 | -12   | 1346       | 1353 DFLSWIHK          |           |       |                |      | Mascot      |
|  | 1412.7494  | 1412.6802   | -0.0692 | -49   | 969        | 980 TLCYAVPYIEIK       |           |       |                |      | Mascot      |
|  | 1642.9315  | 1642.8906   | -0.0409 | -25   | 1159       | 1173 FLGNDIPPVFIIAR    | 98        | 100   |                |      | Mascot      |
|  | 1642.9315  | 1642.8906   | -0.0409 | -25   | 1159       | 1173 FLGNDIPPVFIIAR    |           |       |                |      | Mascot      |
|  | 1826.9799  | 1826.9316   | -0.0483 | -26   | 1181       | 1196 LLGYQLAAYFDKPTAR  |           |       |                |      | Mascot      |
|  | 1826.9799  | 1826.9316   | -0.0483 | -26   | 1181       | 1196 LLGYQLAAYFDKPTAR  | 121       | 100   |                |      | Mascot      |
|  | 2233.2009  | 2233.0215   | -0.1794 | -80   | 593        | 614 SLTRITAPDMAYVAGAAN |           |       |                |      | Mascot      |

18 Vtg5 protein [Danio rerio] VAIK gi|148744685 27543.3 9.2 3 228 100 220 100

Peptide Information

| Calc. Mass | Obsrv. Mass | ± da    | ± ppm | Start Seq. | End Seq. | Sequence         | Ion Score | C. I. | % Modification | Rank | Result Type |
|------------|-------------|---------|-------|------------|----------|------------------|-----------|-------|----------------|------|-------------|
| 960.4785   | 960.4528    | -0.0257 | -27   | 144        | 150      | LEVEWER          |           |       |                |      | Mascot      |
| 1642.9315  | 1642.8906   | -0.0409 | -25   | 47         | 61       | FLGNDIPPVFALLAR  | 98        | 100   |                |      | Mascot      |
| 1642.9315  | 1642.8906   | -0.0409 | -25   | 47         | 61       | FLGNDIPPVFALLAR  |           |       |                |      | Mascot      |
| 1826.9799  | 1826.9316   | -0.0483 | -26   | 69         | 84       | LLGYQLAAYFDKPTAR |           |       |                |      | Mascot      |
| 1826.9799  | 1826.9316   | -0.0483 | -26   | 69         | 84       | LLGYQLAAYFDKPTAR | 121       | 100   |                |      | Mascot      |

19 novel protein similar to vitellogenin 1 (vg1) [Danio rerio] gi|94733731 149169.2 8.84 7 228 100 220 100

Peptide Information

| Calc. Mass | Obsrv. Mass | ± da    | ± ppm | Start Seq. | End Seq. | Sequence                        | Ion Score | C. I. | % Modification | Rank | Result Type |
|------------|-------------|---------|-------|------------|----------|---------------------------------|-----------|-------|----------------|------|-------------|
| 960.4785   | 960.4528    | -0.0257 | -27   | 1260       | 1266     | LEVEWER                         |           |       |                |      | Mascot      |
| 1021.5676  | 1021.4751   | -0.0925 | -91   | 892        | 900      | ADILKGNKYK                      |           |       |                |      | Mascot      |
| 1412.7494  | 1412.6802   | -0.0692 | -49   | 973        | 984      | TLCYAVPYIEIK                    |           |       |                |      | Mascot      |
| 1642.9315  | 1642.8906   | -0.0409 | -25   | 1163       | 1177     | FLGNDIPPVFALLAR                 | 98        | 100   |                |      | Mascot      |
| 1642.9315  | 1642.8906   | -0.0409 | -25   | 1163       | 1177     | FLGNDIPPVFALLAR                 |           |       |                |      | Mascot      |
| 1681.7736  | 1681.9386   | 0.165   | 98    | 1071       | 1086     | NTPVSSSESSSSSRNSR               |           |       |                |      | Mascot      |
| 1826.9799  | 1826.9316   | -0.0483 | -26   | 1185       | 1200     | LLGYQLAAYFDKPTAR                |           |       |                |      | Mascot      |
| 1826.9799  | 1826.9316   | -0.0483 | -26   | 1185       | 1200     | LLGYQLAAYFDKPTAR                | 121       | 100   |                |      | Mascot      |
| 2800.4485  | 2800.3999   | -0.0486 | -17   | 450        | 475      | HCTAVPTCPAELLRIPIHEI<br>ATEAISK |           |       |                |      | Mascot      |

20 vitellogenin 6 [Danio rerio] gi|303227889 150936.1 8.84 7 228 100 220 100

Peptide Information

| Calc. Mass | Obsrv. Mass | ± da    | ± ppm | Start Seq. | End Seq. | Sequence           | Ion Score | C. I. | % Modification | Rank | Result Type |
|------------|-------------|---------|-------|------------|----------|--------------------|-----------|-------|----------------|------|-------------|
| 960.4785   | 960.4528    | -0.0257 | -27   | 1276       | 1282     | LEVEWER            |           |       |                |      | Mascot      |
| 1021.5676  | 1021.4751   | -0.0925 | -91   | 899        | 907      | ADILKGNKYK         |           |       |                |      | Mascot      |
| 1412.7494  | 1412.6802   | -0.0692 | -49   | 980        | 991      | TLCYAVPYIEIK       |           |       |                |      | Mascot      |
| 1642.9315  | 1642.8906   | -0.0409 | -25   | 1179       | 1193     | FLGNDIPPVFALLAR    | 98        | 100   |                |      | Mascot      |
| 1642.9315  | 1642.8906   | -0.0409 | -25   | 1179       | 1193     | FLGNDIPPVFALLAR    |           |       |                |      | Mascot      |
| 1826.9799  | 1826.9316   | -0.0483 | -26   | 1201       | 1216     | LLGYQLAAYFDKPTAR   |           |       |                |      | Mascot      |
| 1826.9799  | 1826.9316   | -0.0483 | -26   | 1201       | 1216     | LLGYQLAAYFDKPTAR   | 121       | 100   |                |      | Mascot      |
| 1958.0189  | 1957.9667   | -0.0522 | -27   | 1312       | 1329     | ATNSEKEIELTAALPSQR |           |       |                |      | Mascot      |

|                     |                                  |             |         |       |              |          |                             |           |       |     |                     |      |        |        |  |        |
|---------------------|----------------------------------|-------------|---------|-------|--------------|----------|-----------------------------|-----------|-------|-----|---------------------|------|--------|--------|--|--------|
|                     | 2233.2009                        | 2233.0215   | -0.1794 | -80   | 604          | 625      | SLTRITAPDMAYVAGAAN<br>VAIK  |           |       |     |                     |      |        |        |  | Mascot |
| 21                  | vitellogenin 7 [Danio rerio]     |             |         |       | gi 156713467 |          | 148739.2                    | 8.76      | 9     | 228 | 100                 | 220  | 100    |        |  |        |
| Peptide Information |                                  |             |         |       |              |          |                             |           |       |     |                     |      |        |        |  |        |
|                     | Calc. Mass                       | Obsrv. Mass | ± da    | ± ppm | Start Seq.   | End Seq. | Sequence                    | Ion Score | C. I. | %   | Modification        | Rank | Result | Type   |  |        |
|                     | 960.4785                         | 960.4528    | -0.0257 | -27   | 1254         | 1260     | LEVEWER                     |           |       |     |                     |      |        | Mascot |  |        |
|                     | 1021.5676                        | 1021.4751   | -0.0925 | -91   | 888          | 896      | ADILKGNYK                   |           |       |     |                     |      |        | Mascot |  |        |
|                     | 1038.5942                        | 1038.5004   | -0.0938 | -90   | 684          | 693      | TGGIHEALLK                  |           |       |     |                     |      |        | Mascot |  |        |
|                     | 1287.6691                        | 1287.6373   | -0.0318 | -25   | 1241         | 1253     | AEAGVLGEFPAAR               |           |       |     |                     |      |        | Mascot |  |        |
|                     | 1347.7882                        | 1347.656    | -0.1322 | -98   | 1111         | 1122     | LSKTATIIEPFK                |           |       |     |                     |      |        | Mascot |  |        |
|                     | 1642.9315                        | 1642.8906   | -0.0409 | -25   | 1157         | 1171     | FLGNDLPPVFIIAR              | 98        | 100   |     |                     |      |        | Mascot |  |        |
|                     | 1642.9315                        | 1642.8906   | -0.0409 | -25   | 1157         | 1171     | FLGNDLPPVFIIAR              |           |       |     |                     |      |        | Mascot |  |        |
|                     | 1645.8175                        | 1645.8535   | 0.036   | 22    | 58           | 71       | VLLSAMENTYLMK               |           |       |     | Oxidation (M)[6,13] |      |        | Mascot |  |        |
|                     | 1826.9799                        | 1826.9316   | -0.0483 | -26   | 1179         | 1194     | LLGYQLAAYFDKPTAR            |           |       |     |                     |      |        | Mascot |  |        |
|                     | 1826.9799                        | 1826.9316   | -0.0483 | -26   | 1179         | 1194     | LLGYQLAAYFDKPTAR            | 121       | 100   |     |                     |      |        | Mascot |  |        |
|                     | 2607.4028                        | 2607.1541   | -0.2487 | -95   | 897          | 920      | VETLPVELPEHIASAFET<br>LAVVR |           |       |     |                     |      |        | Mascot |  |        |
| 22                  | Zgc:136383 protein [Danio rerio] |             |         |       | gi 159155252 |          | 123957.1                    | 8.78      | 8     | 227 | 100                 | 220  | 100    |        |  |        |
| Peptide Information |                                  |             |         |       |              |          |                             |           |       |     |                     |      |        |        |  |        |
|                     | Calc. Mass                       | Obsrv. Mass | ± da    | ± ppm | Start Seq.   | End Seq. | Sequence                    | Ion Score | C. I. | %   | Modification        | Rank | Result | Type   |  |        |
|                     | 960.4785                         | 960.4528    | -0.0257 | -27   | 1033         | 1039     | LEVEWER                     |           |       |     |                     |      |        | Mascot |  |        |
|                     | 1021.5676                        | 1021.4751   | -0.0925 | -91   | 665          | 673      | ADILKGNYK                   |           |       |     |                     |      |        | Mascot |  |        |
|                     | 1038.5942                        | 1038.5004   | -0.0938 | -90   | 461          | 470      | TGGIHEALLK                  |           |       |     |                     |      |        | Mascot |  |        |
|                     | 1045.5465                        | 1045.5343   | -0.0122 | -12   | 1123         | 1130     | DFLSWIHK                    |           |       |     |                     |      |        | Mascot |  |        |
|                     | 1412.7494                        | 1412.6802   | -0.0692 | -49   | 746          | 757      | TLCYAVPYIEIK                |           |       |     |                     |      |        | Mascot |  |        |
|                     | 1642.9315                        | 1642.8906   | -0.0409 | -25   | 936          | 950      | FLGNDIPPVFIIAR              | 98        | 100   |     |                     |      |        | Mascot |  |        |
|                     | 1642.9315                        | 1642.8906   | -0.0409 | -25   | 936          | 950      | FLGNDIPPVFIIAR              |           |       |     |                     |      |        | Mascot |  |        |
|                     | 1826.9799                        | 1826.9316   | -0.0483 | -26   | 958          | 973      | LLGYQLAAYFDKPTAR            |           |       |     |                     |      |        | Mascot |  |        |
|                     | 1826.9799                        | 1826.9316   | -0.0483 | -26   | 958          | 973      | LLGYQLAAYFDKPTAR            | 121       | 100   |     |                     |      |        | Mascot |  |        |
|                     | 2233.2009                        | 2233.0215   | -0.1794 | -80   | 370          | 391      | SLTRITAPDMAYVAGAAN<br>VAIK  |           |       |     |                     |      |        | Mascot |  |        |
| 23                  | Vtg6 protein [Danio rerio]       |             |         |       | gi 157422885 |          | 27937.4                     | 9.18      | 3     | 107 | 100                 | 98   | 100    |        |  |        |
| Peptide Information |                                  |             |         |       |              |          |                             |           |       |     |                     |      |        |        |  |        |
|                     | Calc. Mass                       | Obsrv. Mass | ± da    | ± ppm | Start Seq.   | End Seq. | Sequence                    | Ion Score | C. I. | %   | Modification        | Rank | Result | Type   |  |        |

|  |           |           |         |     |     |     |                    |    |     |  |  |  |  |  |  |  |        |
|--|-----------|-----------|---------|-----|-----|-----|--------------------|----|-----|--|--|--|--|--|--|--|--------|
|  | 960.4785  | 960.4528  | -0.0257 | -27 | 149 | 155 | LEVEWER            |    |     |  |  |  |  |  |  |  | Mascot |
|  | 1642.9315 | 1642.8906 | -0.0409 | -25 | 52  | 66  | FLGNDIPPVFIIAR     | 98 | 100 |  |  |  |  |  |  |  | Mascot |
|  | 1642.9315 | 1642.8906 | -0.0409 | -25 | 52  | 66  | FLGNDIPPVFIIAR     |    |     |  |  |  |  |  |  |  | Mascot |
|  | 1958.0189 | 1957.9667 | -0.0522 | -27 | 185 | 202 | ATNSEKEIELTAALPSQR |    |     |  |  |  |  |  |  |  | Mascot |

24 novel protein similar to vertebrate actin filament associated protein 1-like 1 (AFAP1L1, zgc:114084) gi|220678265 84328.3 8.16 13 45 0

#### Peptide Information

| Calc. Mass | Obsrv. Mass | ± da    | ± ppm | Start Seq. | End Seq. | Sequence                   | Ion Score | C. I. | % Modification         | Rank | Result Type |
|------------|-------------|---------|-------|------------|----------|----------------------------|-----------|-------|------------------------|------|-------------|
| 850.5145   | 850.5184    | 0.0039  | 5     | 383        | 389      | IISFSKR                    |           |       |                        |      | Mascot      |
| 960.4169   | 960.4528    | 0.0359  | 37    | 399        | 406      | SSFDHDPR                   |           |       |                        |      | Mascot      |
| 985.4785   | 985.5081    | 0.0296  | 30    | 420        | 426      | EHWCRVR                    |           |       |                        |      | Mascot      |
| 985.4785   | 985.5081    | 0.0296  | 30    | 420        | 426      | EHWCRVR                    |           |       |                        |      | Mascot      |
| 996.4819   | 996.5688    | 0.0869  | 87    | 133        | 140      | MPEYITSR                   |           |       |                        |      | Mascot      |
| 1122.6378  | 1122.4812   | -0.1566 | -139  | 389        | 398      | RKPPLPGDSR                 |           |       |                        |      | Mascot      |
| 1136.588   | 1136.5472   | -0.0408 | -36   | 407        | 416      | CGYVGVLVNR                 |           |       | Carbamidomethyl (C)[1] |      | Mascot      |
| 1645.7738  | 1645.8535   | 0.0797  | 48    | 21         | 34       | LLDHETLSCATEEK             |           |       | Carbamidomethyl (C)[9] |      | Mascot      |
| 1806.8882  | 1806.9026   | 0.0144  | 8     | 520        | 535      | TAARHSFLWATSTDSR           |           |       |                        |      | Mascot      |
| 2225.0979  | 2225.0686   | -0.0293 | -13   | 681        | 701      | SLAGGEMEAPTESKPAH<br>KTQR  |           |       |                        |      | Mascot      |
| 2231.2026  | 2231.0586   | -0.144  | -65   | 2          | 20       | EINSKPMELLVTELNMLL<br>K    |           |       | Oxidation (M)[7]       |      | Mascot      |
| 2337.0591  | 2336.9368   | -0.1223 | -52   | 64         | 84       | NGTSFVESLFETFDCDLG<br>DLK  |           |       |                        |      | Mascot      |
| 2337.0591  | 2336.9368   | -0.1223 | -52   | 64         | 84       | NGTSFVESLFETFDCDLG<br>DLK  |           |       |                        |      | Mascot      |
| 2363.1699  | 2363.1033   | -0.0666 | -28   | 44         | 63       | QLQPSVTAKDYMVNTS<br>VYR    |           |       |                        |      | Mascot      |
| 2607.1636  | 2607.1541   | -0.0095 | -4    | 699        | 720      | TQRTEAQYMESFLPVNC<br>ASEMR |           |       | Oxidation (M)[9]       |      | Mascot      |

25 sclerostin domain containing 1b [Danio rerio] gi|130496373 23304.6 9.57 7 44 0 14 0

#### Peptide Information

| Calc. Mass | Obsrv. Mass | ± da    | ± ppm | Start Seq. | End Seq. | Sequence    | Ion Score | C. I. | % Modification         | Rank | Result Type |
|------------|-------------|---------|-------|------------|----------|-------------|-----------|-------|------------------------|------|-------------|
| 804.3635   | 804.2559    | -0.1076 | -134  | 121        | 126      | DAQEWR      |           |       |                        |      | Mascot      |
| 850.4199   | 850.5184    | 0.0985  | 116   | 127        | 133      | CVTDRTR     |           |       |                        |      | Mascot      |
| 960.4645   | 960.4528    | -0.0117 | -12   | 120        | 126      | RDAQEWR     |           |       |                        |      | Mascot      |
| 1021.4731  | 1021.4751   | 0.002   | 2     | 139        | 147      | LQCQDGTTTR  |           |       |                        |      | Mascot      |
| 1239.6184  | 1239.6039   | -0.0145 | -12   | 151        | 161      | ITAVTSCTCKR | 14        | 0     | Carbamidomethyl (C)[9] |      | Mascot      |

|    |                                                                                            |           |         |      |     |             |                         |      |   |    |                         |        |   |
|----|--------------------------------------------------------------------------------------------|-----------|---------|------|-----|-------------|-------------------------|------|---|----|-------------------------|--------|---|
|    | 1239.6184                                                                                  | 1239.6039 | -0.0145 | -12  | 151 | 161         | ITAVTSCTCKR             |      |   |    | Carbamidomethyl (C)[7]  | Mascot |   |
|    | 1475.7233                                                                                  | 1475.7167 | -0.0066 | -4   | 148 | 160         | TYKITAVTSCTCK           |      |   |    | Carbamidomethyl (C)[10] | Mascot |   |
|    | 2320.1611                                                                                  | 2319.9097 | -0.2514 | -108 | 1   | 19          | MPLNTCEYQLLFLLCFLM<br>K |      |   |    |                         | Mascot |   |
|    | 2336.1562                                                                                  | 2335.9521 | -0.2041 | -87  | 1   | 19          | MPLNTCEYQLLFLLCFLM<br>K |      |   |    | Oxidation (M)[1]        | Mascot |   |
| 26 | novel protein similar to vertebrate sclerostin domain containing 1 (SOSTDC1) [Danio rerio] |           |         |      |     | gi 94732908 | 23389.6                 | 9.59 | 7 | 43 | 0                       | 14     | 0 |

#### Peptide Information

| Calc. Mass | Obsrv. Mass | ± da    | ± ppm | Start Seq. | End Seq. | Sequence                | Ion Score | C. I. | % Modification          | Rank | Result Type |
|------------|-------------|---------|-------|------------|----------|-------------------------|-----------|-------|-------------------------|------|-------------|
| 804.3635   | 804.2559    | -0.1076 | -134  | 121        | 126      | DAQEWR                  |           |       |                         |      | Mascot      |
| 850.4199   | 850.5184    | 0.0985  | 116   | 127        | 133      | CVTDRT                  |           |       |                         |      | Mascot      |
| 960.4645   | 960.4528    | -0.0117 | -12   | 120        | 126      | RDAQEWR                 |           |       |                         |      | Mascot      |
| 1021.4731  | 1021.4751   | 0.002   | 2     | 139        | 147      | LQCQDGTR                |           |       |                         |      | Mascot      |
| 1239.6184  | 1239.6039   | -0.0145 | -12   | 151        | 161      | ITAVTSCTCKR             | 14        | 0     | Carbamidomethyl (C)[9]  |      | Mascot      |
| 1239.6184  | 1239.6039   | -0.0145 | -12   | 151        | 161      | ITAVTSCTCKR             |           |       | Carbamidomethyl (C)[7]  |      | Mascot      |
| 1475.7233  | 1475.7167   | -0.0066 | -4    | 148        | 160      | TYKITAVTSCTCK           |           |       | Carbamidomethyl (C)[10] |      | Mascot      |
| 2320.1611  | 2319.9097   | -0.2514 | -108  | 1          | 19       | MPLNTCEYQLLFLLCFLM<br>K |           |       |                         |      | Mascot      |
| 2336.1562  | 2335.9521   | -0.2041 | -87   | 1          | 19       | MPLNTCEYQLLFLLCFLM<br>K |           |       | Oxidation (M)[1]        |      | Mascot      |

|    |                             |  |  |  |  |             |         |      |    |    |   |  |  |
|----|-----------------------------|--|--|--|--|-------------|---------|------|----|----|---|--|--|
| 27 | Stat3 protein [Danio rerio] |  |  |  |  | gi 28277427 | 48222.8 | 7.15 | 10 | 41 | 0 |  |  |
|----|-----------------------------|--|--|--|--|-------------|---------|------|----|----|---|--|--|

#### Peptide Information

| Calc. Mass | Obsrv. Mass | ± da    | ± ppm | Start Seq. | End Seq. | Sequence                       | Ion Score | C. I. | % Modification          | Rank | Result Type |
|------------|-------------|---------|-------|------------|----------|--------------------------------|-----------|-------|-------------------------|------|-------------|
| 1135.647   | 1135.5586   | -0.0884 | -78   | 384        | 393      | KFNILGTNTK                     |           |       |                         |      | Mascot      |
| 1136.5438  | 1136.5472   | 0.0034  | 3     | 154        | 162      | VQDMEQKMK                      |           |       |                         |      | Mascot      |
| 1364.7419  | 1364.6613   | -0.0806 | -59   | 285        | 295      | LEELQKQVSYK                    |           |       |                         |      | Mascot      |
| 1475.7522  | 1475.7167   | -0.0355 | -24   | 367        | 380      | VCIDKESGDVAAIR                 |           |       |                         |      | Mascot      |
| 1645.8115  | 1645.8535   | 0.042   | 26    | 1          | 13       | MAQWNQLQQLETR                  |           |       |                         |      | Mascot      |
| 1661.8064  | 1661.791    | -0.0154 | -9    | 1          | 13       | MAQWNQLQQLETR                  |           |       | Oxidation (M)[1]        |      | Mascot      |
| 1697.8462  | 1697.8773   | 0.0311  | 18    | 248        | 263      | QQIACIGGPPNICLDR               |           |       |                         |      | Mascot      |
| 2320.0955  | 2319.9097   | -0.1858 | -80   | 14         | 31       | YLEQLYHLYSDSPMELR              |           |       | Oxidation (M)[15]       |      | Mascot      |
| 2363.1006  | 2363.1033   | 0.0027  | 1     | 394        | 414      | VMNMEESNNGSLSAEFK<br>HLPL      |           |       | Oxidation (M)[2]        |      | Mascot      |
| 2607.3357  | 2607.1541   | -0.1816 | -70   | 320        | 341      | SAFVVERQPCMPMHPDR<br>PLVIK     |           |       | Carbamidomethyl (C)[10] |      | Mascot      |
| 2891.355   | 2891.4106   | 0.0556  | 19    | 385        | 410      | FNILGTNTKVMNMEESNN<br>GSLSAEFK |           |       | Oxidation (M)[11]       |      | Mascot      |
| 2891.355   | 2891.4106   | 0.0556  | 19    | 385        | 410      | FNILGTNTKVMNMEESNN<br>GSLSAEFK |           |       | Oxidation (M)[11]       |      | Mascot      |

28 serine/threonine-protein kinase 10 [Danio rerio] gi|41054729 113615.3 5.94 15 40 0

Peptide Information

| Calc. Mass | Obsrv. Mass | ± da    | ± ppm | Start Seq. | End Seq. | Sequence                     | Ion Score | C. I. % | Modification                                  | Rank | Result Type |
|------------|-------------|---------|-------|------------|----------|------------------------------|-----------|---------|-----------------------------------------------|------|-------------|
| 850.4781   | 850.5184    | 0.0403  | 47    | 51         | 57       | VYKAQNK                      |           |         |                                               |      | Mascot      |
| 1122.579   | 1122.4812   | -0.0978 | -87   | 676        | 684      | VEQEKAYQK                    |           |         |                                               |      | Mascot      |
| 1287.6401  | 1287.6373   | -0.0028 | -2    | 681        | 690      | AYQKFLDQMK                   |           |         | Oxidation (M)[9]                              |      | Mascot      |
| 1347.6433  | 1347.656    | 0.0127  | 9     | 489        | 500      | DPNGRMSVVSNR                 |           |         | Oxidation (M)[6]                              |      | Mascot      |
| 1412.6951  | 1412.6802   | -0.0149 | -11   | 920        | 930      | CHLLIENETQR                  |           |         | Carbamidomethyl (C)[1]                        |      | Mascot      |
| 1460.6951  | 1460.6465   | -0.0486 | -33   | 812        | 822      | EQEQLHYNLR                   |           |         |                                               |      | Mascot      |
| 1516.7489  | 1516.6652   | -0.0837 | -55   | 381        | 393      | TPLKEQEDNLSDK                |           |         |                                               |      | Mascot      |
| 1642.8217  | 1642.8906   | 0.0689  | 42    | 751        | 763      | HEISETERQCLK                 |           |         | Carbamidomethyl (C)[10]                       |      | Mascot      |
| 1642.8217  | 1642.8906   | 0.0689  | 42    | 751        | 763      | HEISETERQCLK                 |           |         | Carbamidomethyl (C)[10]                       |      | Mascot      |
| 2231.228   | 2231.0586   | -0.1694 | -76   | 161        | 182      | AGNILLTLDGDIKLADFGV<br>SAK   |           |         |                                               |      | Mascot      |
| 2320.0913  | 2319.9097   | -0.1816 | -78   | 501        | 522      | SSFAGDDAESLVSHNTG<br>RLSNR   |           |         |                                               |      | Mascot      |
| 2380.0867  | 2380.0215   | -0.0652 | -27   | 900        | 919      | EMLSQCDGNTRELQQLQ<br>NEK     |           |         | Oxidation (M)[2]                              |      | Mascot      |
| 2446.1289  | 2446.0217   | -0.1072 | -44   | 523        | 545      | YSDVASDSMDISLNLSGD<br>LSV NK |           |         | Oxidation (M)[9]                              |      | Mascot      |
| 2492.1006  | 2492.1611   | 0.0605  | 24    | 191        | 211      | DSFIGTPYWMAPEVVMC<br>ETMK    |           |         | Carbamidomethyl (C)[17]                       |      | Mascot      |
| 2492.1006  | 2492.1611   | 0.0605  | 24    | 191        | 211      | DSFIGTPYWMAPEVVMC<br>ETMK    |           |         | Carbamidomethyl (C)[17]                       |      | Mascot      |
| 2508.0955  | 2508.1553   | 0.0598  | 24    | 191        | 211      | DSFIGTPYWMAPEVVMC<br>ETMK    |           |         | Carbamidomethyl (C)[17], Oxidation (M)[10]    |      | Mascot      |
| 2524.0903  | 2524.1501   | 0.0598  | 24    | 191        | 211      | DSFIGTPYWMAPEVVMC<br>ETMK    |           |         | Carbamidomethyl (C)[17], Oxidation (M)[10,16] |      | Mascot      |
| 2530.2156  | 2530.127    | -0.0886 | -35   | 422        | 444      | STPTSEEDTKTVEASEPE<br>LPVQR  |           |         |                                               |      | Mascot      |
| 2607.175   | 2607.1541   | -0.0209 | -8    | 190        | 211      | RDSFIGTPYWMAPEVVM<br>CETMK   |           |         | Oxidation (M)[11]                             |      | Mascot      |

29 PREDICTED: diacylglycerol kinase beta-like, partial [Danio rerio] gi|326674321 85995.9 6.78 13 39 0

Peptide Information

| Calc. Mass | Obsrv. Mass | ± da    | ± ppm | Start Seq. | End Seq. | Sequence   | Ion Score | C. I. % | Modification           | Rank | Result Type |
|------------|-------------|---------|-------|------------|----------|------------|-----------|---------|------------------------|------|-------------|
| 842.4229   | 842.4872    | 0.0643  | 76    | 153        | 158      | LEFMFR     |           |         |                        |      | Mascot      |
| 960.5083   | 960.4528    | -0.0555 | -58   | 583        | 589      | FHIMREK    |           |         |                        |      | Mascot      |
| 1045.4264  | 1045.5343   | 0.1079  | 103   | 270        | 278      | QGLCCSFCK  |           |         | Carbamidomethyl (C)[4] |      | Mascot      |
| 1122.546   | 1122.4812   | -0.0648 | -58   | 97         | 106      | SSPSMTEKQK |           |         |                        |      | Mascot      |
| 1205.5619  | 1205.6876   | 0.1257  | 104   | 463        | 471      | SCRTVEYYK  |           |         | Carbamidomethyl (C)[2] |      | Mascot      |

|    |                                                                          |           |         |     |     |              |                             |      |                                              |        |   |
|----|--------------------------------------------------------------------------|-----------|---------|-----|-----|--------------|-----------------------------|------|----------------------------------------------|--------|---|
|    | 1661.7192                                                                | 1661.791  | 0.0718  | 43  | 349 | 363          | CASHVKPEDCGSLR              |      | Carbamidomethyl (C)[1]                       | Mascot |   |
|    | 2283.2488                                                                | 2283.1265 | -0.1223 | -54 | 115 | 135          | GSCPPLKVTSQSRPLSTV<br>QLK   |      | Carbamidomethyl (C)[3]                       | Mascot |   |
|    | 2284.0591                                                                | 2284.1243 | 0.0652  | 29  | 153 | 171          | LEFMFRLYDTDGNGFLD<br>SK     |      | Oxidation (M)[4]                             | Mascot |   |
|    | 2336.1711                                                                | 2335.9521 | -0.219  | -94 | 250 | 269          | HFSKPAYCNLCNMLIGL<br>GK     |      | Carbamidomethyl (C)[8,11]                    | Mascot |   |
|    | 2427.0334                                                                | 2426.9978 | -0.0356 | -15 | 737 | 757          | SLPMQIDGEPWMQSPCT<br>VSMT   |      | Carbamidomethyl (C)[16], Oxidation (M)[4,12] | Mascot |   |
|    | 2448.053                                                                 | 2448.1157 | 0.0627  | 26  | 303 | 322          | NTEIMHHFWVEGNCPSK<br>CDK    |      | Carbamidomethyl (C)[14], Oxidation (M)[5]    | Mascot |   |
|    | 2463.3074                                                                | 2463.198  | -0.1094 | -44 | 248 | 269          | LKHFSKPAYCNLCNMLI<br>GLGK   |      |                                              | Mascot |   |
|    | 2463.3074                                                                | 2463.198  | -0.1094 | -44 | 248 | 269          | LKHFSKPAYCNLCNMLI<br>GLGK   |      |                                              | Mascot |   |
|    | 2891.3821                                                                | 2891.4106 | 0.0285  | 10  | 45  | 67           | YNPEEKPEILNQVIYHCH<br>FEGFK |      | Carbamidomethyl (C)[17]                      | Mascot |   |
|    | 2891.3821                                                                | 2891.4106 | 0.0285  | 10  | 45  | 67           | YNPEEKPEILNQVIYHCH<br>FEGFK |      | Carbamidomethyl (C)[17]                      | Mascot |   |
| 30 | PREDICTED: actin filament-associated protein 1-like 1-like [Danio rerio] |           |         |     |     | gi 326673811 | 84171.2                     | 8.16 | 12                                           | 38     | 0 |

#### Peptide Information

| Calc. Mass | Obsrv. Mass | ± da    | ± ppm | Start Seq. | End Seq. | Sequence                   | Ion Score | C. I. | % Modification         | Rank | Result Type |
|------------|-------------|---------|-------|------------|----------|----------------------------|-----------|-------|------------------------|------|-------------|
| 850.5145   | 850.5184    | 0.0039  | 5     | 383        | 389      | IISFSKR                    |           |       |                        |      | Mascot      |
| 960.4169   | 960.4528    | 0.0359  | 37    | 399        | 406      | SSFHDHPR                   |           |       |                        |      | Mascot      |
| 985.4785   | 985.5081    | 0.0296  | 30    | 420        | 426      | EHWCVR                     |           |       |                        |      | Mascot      |
| 985.4785   | 985.5081    | 0.0296  | 30    | 420        | 426      | EHWCVR                     |           |       |                        |      | Mascot      |
| 996.4819   | 996.5688    | 0.0869  | 87    | 133        | 140      | MPEYITSR                   |           |       |                        |      | Mascot      |
| 1122.6378  | 1122.4812   | -0.1566 | -139  | 389        | 398      | RKPPLPGDSR                 |           |       |                        |      | Mascot      |
| 1136.588   | 1136.5472   | -0.0408 | -36   | 407        | 416      | CGYVGVVLR                  |           |       | Carbamidomethyl (C)[1] |      | Mascot      |
| 1645.7738  | 1645.8535   | 0.0797  | 48    | 21         | 34       | LLDHETLSCATEEK             |           |       | Carbamidomethyl (C)[9] |      | Mascot      |
| 1806.8882  | 1806.9026   | 0.0144  | 8     | 520        | 535      | TAARHSFLWATSTDSR           |           |       |                        |      | Mascot      |
| 2231.2026  | 2231.0586   | -0.144  | -65   | 2          | 20       | EINSKPMELLVTELNMLL<br>K    |           |       | Oxidation (M)[7]       |      | Mascot      |
| 2337.0591  | 2336.9368   | -0.1223 | -52   | 64         | 84       | NGTSFVESLFETFDCLG<br>DLK   |           |       |                        |      | Mascot      |
| 2337.0591  | 2336.9368   | -0.1223 | -52   | 64         | 84       | NGTSFVESLFETFDCLG<br>DLK   |           |       |                        |      | Mascot      |
| 2363.1699  | 2363.1033   | -0.0666 | -28   | 44         | 63       | QLQPSVTAKDYMVNTS<br>VYR    |           |       |                        |      | Mascot      |
| 2607.1636  | 2607.1541   | -0.0095 | -4    | 698        | 719      | TQRTEAQYMESFLPVNC<br>ASEMR |           |       | Oxidation (M)[9]       |      | Mascot      |

31 serine beta-lactamase-like protein LACTB, mitochondrial [Danio rerio]

gi|66472564 60331.9 9.05 10 38 0

#### Peptide Information

| Calc. Mass | Obsrv. Mass | ± da | ± ppm | Start Seq. | End Seq. | Sequence | Ion Score | C. I. | % Modification | Rank | Result Type |
|------------|-------------|------|-------|------------|----------|----------|-----------|-------|----------------|------|-------------|
|------------|-------------|------|-------|------------|----------|----------|-----------|-------|----------------|------|-------------|



[illegible]

### Peptide Information

| Calc. Mass | Obsrv. Mass | ± da    | ± ppm | Start Seq. | End Sequence                   | Ion Score | C. I. % | Modification     | Rank | Result Type |
|------------|-------------|---------|-------|------------|--------------------------------|-----------|---------|------------------|------|-------------|
| 985.5577   | 985.5081    | -0.0496 | -50   | 208        | 215 KVEGFIHR                   | 28        | 60.761  |                  |      | Mascot      |
| 985.5577   | 985.5081    | -0.0496 | -50   | 208        | 215 KVEGFIHR                   |           |         |                  |      | Mascot      |
| 1135.4935  | 1135.5586   | 0.0651  | 57    | 261        | 271 DPVKGMSAADE                |           |         | Oxidation (M)[6] |      | Mascot      |
| 2508.3232  | 2508.1553   | -0.1679 | -67   | 8          | 30 ILPVSVVEEYQVGQLYSV<br>AFASK |           |         |                  |      | Mascot      |

33 PREDICTED: putative ferric-chelate reductase 1-like,  
partial [Danio rerio]

### Peptide Information

| Calc. Mass | Obsrv. Mass | ± da    | ± ppm | Start Seq. | End Seq. | Sequence       | Ion Score | C. I. | % Modification | Rank | Result Type |
|------------|-------------|---------|-------|------------|----------|----------------|-----------|-------|----------------|------|-------------|
| 850.5508   | 850.5184    | -0.0324 | -38   | 495        | 501      | LVLQLHK        |           |       |                |      | Mascot      |
| 985.5366   | 985.5081    | -0.0285 | -29   | 375        | 381      | IWFQVHR        | 10        | 0     |                |      | Mascot      |
| 985.5366   | 985.5081    | -0.0285 | -29   | 375        | 381      | IWFQVHR        |           |       |                |      | Mascot      |
| 1205.5797  | 1205.6876   | 0.1079  | 90    | 274        | 283      | SIYTPQDPER     |           |       |                |      | Mascot      |
| 1412.8849  | 1412.6802   | -0.2047 | -145  | 495        | 506      | LVLQLHKHGVIR   |           |       |                |      | Mascot      |
| 1642.8435  | 1642.8906   | 0.0471  | 29    | 234        | 248      | VSVEAAYTTGRTPK |           |       |                |      | Mascot      |
| 1642.8435  | 1642.8906   | 0.0471  | 29    | 234        | 248      | VSVEAAYTTGRTPK |           |       |                |      | Mascot      |

|    |                                                                      |           |         |      |    |              |                               |      |   |    |   |  |  |        |
|----|----------------------------------------------------------------------|-----------|---------|------|----|--------------|-------------------------------|------|---|----|---|--|--|--------|
|    | 2380.1528                                                            | 2380.0215 | -0.1313 | -55  | 2  | 23           | PEHHSQPNTTASPYTLTV<br>NASK    |      |   |    |   |  |  | Mascot |
|    | 2446.3301                                                            | 2446.0217 | -0.3084 | -126 | 49 | 71           | DATNLDGLAIGSFTLVNL<br>KISQR   |      |   |    |   |  |  | Mascot |
|    | 2800.5547                                                            | 2800.3999 | -0.1548 | -55  | 99 | 123          | APSNSPLAVQFLATVLAH<br>YKVFWLK |      |   |    |   |  |  | Mascot |
| 34 | PREDICTED: putative ferric-chelate reductase 1-like<br>[Danio rerio] |           |         |      |    | gi 326664822 | 56054.6                       | 9.08 | 8 | 38 | 0 |  |  |        |

#### Peptide Information

| Calc. Mass | Obsrv. Mass | ± da    | ± ppm | Start Seq. | End Seq. | Sequence                      | Ion Score | C. I. | % Modification | Rank | Result Type |
|------------|-------------|---------|-------|------------|----------|-------------------------------|-----------|-------|----------------|------|-------------|
| 850.5508   | 850.5184    | -0.0324 | -38   | 495        | 501      | LVLQLHK                       |           |       |                |      | Mascot      |
| 985.5366   | 985.5081    | -0.0285 | -29   | 375        | 381      | IWFQVHR                       | 10        | 0     |                |      | Mascot      |
| 985.5366   | 985.5081    | -0.0285 | -29   | 375        | 381      | IWFQVHR                       |           |       |                |      | Mascot      |
| 1205.5797  | 1205.6876   | 0.1079  | 90    | 274        | 283      | SIYTPQDPER                    |           |       |                |      | Mascot      |
| 1412.8849  | 1412.6802   | -0.2047 | -145  | 495        | 506      | LVLQLHKHGVIR                  |           |       |                |      | Mascot      |
| 1642.8435  | 1642.8906   | 0.0471  | 29    | 234        | 248      | VSVEAAYTTGRITYPK              |           |       |                |      | Mascot      |
| 1642.8435  | 1642.8906   | 0.0471  | 29    | 234        | 248      | VSVEAAYTTGRITYPK              |           |       |                |      | Mascot      |
| 2380.1528  | 2380.0215   | -0.1313 | -55   | 2          | 23       | PEHHSQPNTTASPYTLTV<br>NASK    |           |       |                |      | Mascot      |
| 2446.3301  | 2446.0217   | -0.3084 | -126  | 49         | 71       | DATNLDGLAIGSFTLVNL<br>KISQR   |           |       |                |      | Mascot      |
| 2800.5547  | 2800.3999   | -0.1548 | -55   | 99         | 123      | APSNSPLAVQFLATVLAH<br>YKVFWLK |           |       |                |      | Mascot      |

35 hypothetical protein LOC100192222 [Danio rerio] gi|210147391 132770.8 9.72 15 37 0

#### Peptide Information

| Calc. Mass | Obsrv. Mass | ± da    | ± ppm | Start Seq. | End Seq. | Sequence                   | Ion Score | C. I. | % Modification         | Rank | Result Type |
|------------|-------------|---------|-------|------------|----------|----------------------------|-----------|-------|------------------------|------|-------------|
| 850.4199   | 850.5184    | 0.0985  | 116   | 1014       | 1021     | SKAGATCR                   |           |       | Carbamidomethyl (C)[7] |      | Mascot      |
| 882.4679   | 882.5428    | 0.0749  | 85    | 642        | 649      | EGPDIPVR                   |           |       |                        |      | Mascot      |
| 1038.5691  | 1038.5004   | -0.0687 | -66   | 641        | 649      | REGPDIPVR                  |           |       |                        |      | Mascot      |
| 1136.5881  | 1136.5472   | -0.0409 | -36   | 549        | 558      | LTEACPLHPR                 |           |       |                        |      | Mascot      |
| 1364.6641  | 1364.6613   | -0.0028 | -2    | 380        | 389      | AYHNCQIRFR                 |           |       | Carbamidomethyl (C)[5] |      | Mascot      |
| 1420.6759  | 1420.6182   | -0.0577 | -41   | 729        | 739      | KCHSFMVRPCR                |           |       | Carbamidomethyl (C)[2] |      | Mascot      |
| 1420.7478  | 1420.6182   | -0.1296 | -91   | 549        | 560      | LTEACPLHPRQR               |           |       |                        |      | Mascot      |
| 1438.7294  | 1438.6646   | -0.0648 | -45   | 615        | 626      | MNVDPHVMNLIR               |           |       |                        |      | Mascot      |
| 1438.7294  | 1438.6646   | -0.0648 | -45   | 615        | 626      | MNVDPHVMNLIR               |           |       |                        |      | Mascot      |
| 1790.9143  | 1790.8479   | -0.0664 | -37   | 249        | 266      | ADAGEGPSGEGIPPKRP<br>R     |           |       |                        |      | Mascot      |
| 1994.0706  | 1993.931    | -0.1396 | -70   | 773        | 790      | VNPWAGIEKPDLTVALDR         |           |       |                        |      | Mascot      |
| 2320.0342  | 2319.9097   | -0.1245 | -54   | 161        | 182      | FSCESCCKTSPGCHSVL<br>CHIPK |           |       |                        |      | Mascot      |

|    |                                |           |         |     |             |     |                                |      |   |    |   |    |                           |        |
|----|--------------------------------|-----------|---------|-----|-------------|-----|--------------------------------|------|---|----|---|----|---------------------------|--------|
|    | 2363.1594                      | 2363.1033 | -0.0561 | -24 | 561         | 580 | GFRQSPGCSENLELLQC<br>VLR       |      |   |    |   |    | Carbamidomethyl (C)[8,17] | Mascot |
|    | 2448.2881                      | 2448.1157 | -0.1724 | -70 | 273         | 296 | EPSEPPANPPILSPQPNL<br>PAGGLR   |      |   |    |   |    |                           | Mascot |
|    | 2492.2239                      | 2492.1611 | -0.0628 | -25 | 817         | 839 | LFYLADHGGAGDVMLQN<br>LDGTIR    |      |   |    |   |    | Oxidation (M)[14]         | Mascot |
|    | 2492.2239                      | 2492.1611 | -0.0628 | -25 | 817         | 839 | LFYLADHGGAGDVMLQN<br>LDGTIR    |      |   |    |   |    | Oxidation (M)[14]         | Mascot |
|    | 2800.3843                      | 2800.3999 | 0.0156  | 6   | 845         | 870 | WLHLPPSTCNGLLYARN<br>CNGGLGICK |      |   |    |   |    |                           | Mascot |
| 36 | odorant receptor [Danio rerio] |           |         |     | gi 83752490 |     | 35532.9                        | 9.16 | 2 | 37 | 0 | 31 | 80.06                     |        |

Peptide Information

| Calc. Mass | Obsrv. Mass | ± da    | ± ppm | Start Seq. | End Seq. | Sequence    | Ion Score | C. I. | % | Modification           | Rank | Result Type |
|------------|-------------|---------|-------|------------|----------|-------------|-----------|-------|---|------------------------|------|-------------|
| 985.5577   | 985.5081    | -0.0496 | -50   | 302        | 309      | LSNVFLHR    | 31        | 80.06 |   |                        |      | Mascot      |
| 985.5577   | 985.5081    | -0.0496 | -50   | 302        | 309      | LSNVFLHR    |           |       |   |                        |      | Mascot      |
| 1438.6494  | 1438.6646   | 0.0152  | 11    | 175        | 185      | YVFCEYASMIR |           |       |   | Carbamidomethyl (C)[4] |      | Mascot      |
| 1438.6494  | 1438.6646   | 0.0152  | 11    | 175        | 185      | YVFCEYASMIR |           |       |   | Carbamidomethyl (C)[4] |      | Mascot      |

|    |                                         |  |  |  |             |  |       |      |   |    |   |  |  |
|----|-----------------------------------------|--|--|--|-------------|--|-------|------|---|----|---|--|--|
| 37 | retinol-binding protein 2 [Danio rerio] |  |  |  | gi 23308503 |  | 15796 | 6.09 | 6 | 36 | 0 |  |  |
|----|-----------------------------------------|--|--|--|-------------|--|-------|------|---|----|---|--|--|

Peptide Information

| Calc. Mass | Obsrv. Mass | ± da    | ± ppm | Start Seq. | End Seq. | Sequence                  | Ion Score | C. I. | % | Modification           | Rank | Result Type |
|------------|-------------|---------|-------|------------|----------|---------------------------|-----------|-------|---|------------------------|------|-------------|
| 1021.5312  | 1021.4751   | -0.0561 | -55   | 23         | 31       | ALDIDFATR                 |           |       |   |                        |      | Mascot      |
| 1045.5612  | 1045.5343   | -0.0269 | -26   | 126        | 133      | VCHQVFKK                  |           |       |   | Carbamidomethyl (C)[2] |      | Mascot      |
| 1347.6725  | 1347.656    | -0.0165 | -12   | 89         | 99       | WDGDKLVCVQK               |           |       |   | Carbamidomethyl (C)[8] |      | Mascot      |
| 2448.2129  | 2448.1157   | -0.0972 | -40   | 106        | 125      | GWKQWIEGDLLHLEIHC<br>QDK  |           |       |   |                        |      | Mascot      |
| 2492.0381  | 2492.1611   | 0.123   | 49    | 2          | 22       | PADFNGTWEMLSNDNFE<br>DVMK |           |       |   | Oxidation (M)[10,20]   |      | Mascot      |
| 2492.0381  | 2492.1611   | 0.123   | 49    | 2          | 22       | PADFNGTWEMLSNDNFE<br>DVMK |           |       |   | Oxidation (M)[10,20]   |      | Mascot      |
| 2607.0837  | 2607.1541   | 0.0704  | 27    | 1          | 22       | MPADFNGTWEMLSDNF<br>EDVMK |           |       |   | Oxidation (M)[1]       |      | Mascot      |

|    |                             |  |  |  |             |  |         |      |    |    |   |  |  |
|----|-----------------------------|--|--|--|-------------|--|---------|------|----|----|---|--|--|
| 38 | Stat3 protein [Danio rerio] |  |  |  | gi 46249947 |  | 89982.4 | 5.95 | 12 | 36 | 0 |  |  |
|----|-----------------------------|--|--|--|-------------|--|---------|------|----|----|---|--|--|

Peptide Information

| Calc. Mass | Obsrv. Mass | ± da    | ± ppm | Start Seq. | End Seq. | Sequence       | Ion Score | C. I. | % | Modification | Rank | Result Type |
|------------|-------------|---------|-------|------------|----------|----------------|-----------|-------|---|--------------|------|-------------|
| 1135.647   | 1135.5586   | -0.0884 | -78   | 384        | 393      | KFNILGTNTK     |           |       |   |              |      | Mascot      |
| 1136.5438  | 1136.5472   | 0.0034  | 3     | 154        | 162      | VQDMEQKMK      |           |       |   |              |      | Mascot      |
| 1364.7419  | 1364.6613   | -0.0806 | -59   | 285        | 295      | LEELQQKVSYSK   |           |       |   |              |      | Mascot      |
| 1475.7522  | 1475.7167   | -0.0355 | -24   | 367        | 380      | VCIDKESGDVAAIR |           |       |   |              |      | Mascot      |

|    |                                            |           |         |     |     |              |                                |                         |   |    |   |  |        |
|----|--------------------------------------------|-----------|---------|-----|-----|--------------|--------------------------------|-------------------------|---|----|---|--|--------|
|    | 1645.8115                                  | 1645.8535 | 0.042   | 26  | 1   | 13           | MAQWNQLQQLETR                  |                         |   |    |   |  | Mascot |
|    | 1661.8064                                  | 1661.791  | -0.0154 | -9  | 1   | 13           | MAQWNQLQQLETR                  | Oxidation (M)[1]        |   |    |   |  | Mascot |
|    | 1697.8462                                  | 1697.8773 | 0.0311  | 18  | 248 | 263          | QQIACIGGPPNICLDR               |                         |   |    |   |  | Mascot |
|    | 1790.7319                                  | 1790.8479 | 0.116   | 65  | 770 | 786          | EGFAASTVSDMDTCRNA              | Oxidation (M)[11]       |   |    |   |  | Mascot |
|    | 2231.0811                                  | 2231.0586 | -0.0225 | -10 | 533 | 552          | LLGPCVNYSGCQITWAK<br>FCK       |                         |   |    |   |  | Mascot |
|    | 2284.0737                                  | 2284.1243 | 0.0506  | 22  | 713 | 733          | FICVTPTNSGNTSDLFPM<br>SPR      |                         |   |    |   |  | Mascot |
|    | 2320.0955                                  | 2319.9097 | -0.1858 | -80 | 14  | 31           | YLEQLYHLYSDSFPMELR             | Oxidation (M)[15]       |   |    |   |  | Mascot |
|    | 2607.3357                                  | 2607.1541 | -0.1816 | -70 | 320 | 341          | SAFVVERQPCMPMHPDR<br>PLVIK     | Carbamidomethyl (C)[10] |   |    |   |  | Mascot |
|    | 2891.355                                   | 2891.4106 | 0.0556  | 19  | 385 | 410          | FNILGTNTKVMNMEESNN<br>GSLSAEFK | Oxidation (M)[11]       |   |    |   |  | Mascot |
|    | 2891.355                                   | 2891.4106 | 0.0556  | 19  | 385 | 410          | FNILGTNTKVMNMEESNN<br>GSLSAEFK | Oxidation (M)[11]       |   |    |   |  | Mascot |
| 39 | zinc finger protein 347-like [Danio rerio] |           |         |     |     | gi 160333512 | 32838.9                        | 7.6                     | 9 | 36 | 0 |  |        |

#### Peptide Information

| Calc. Mass | Obsrv. Mass | ± da    | ± ppm | Start Seq. | End Seq. | Sequence                    | Ion Score | C. I. % | Modification               | Rank | Result Type |
|------------|-------------|---------|-------|------------|----------|-----------------------------|-----------|---------|----------------------------|------|-------------|
| 882.4791   | 882.5428    | 0.0637  | 72    | 91         | 97       | DLKDHVR                     |           |         |                            |      | Mascot      |
| 1136.5551  | 1136.5472   | -0.0079 | -7    | 187        | 196      | LLTCDQCGKR                  |           |         |                            |      | Mascot      |
| 1661.813   | 1661.791    | -0.022  | -13   | 35         | 48       | HEDPEQQTDLKPPK              |           |         |                            |      | Mascot      |
| 1697.7998  | 1697.8773   | 0.0775  | 46    | 238        | 252      | VHVAGSPYVCVHCGR             |           |         | Carbamidomethyl (C)[10,13] |      | Mascot      |
| 2319.9426  | 2319.9097   | -0.0329 | -14   | 68         | 89       | AANADTTSHFSCQECGM<br>GFSQK  |           |         |                            |      | Mascot      |
| 2335.9377  | 2335.9521   | 0.0144  | 6     | 68         | 89       | AANADTTSHFSCQECGM<br>GFSQK  |           |         | Oxidation (M)[17]          |      | Mascot      |
| 2363.0232  | 2363.1033   | 0.0801  | 34    | 49         | 67       | VEDEEDEFDFMTIVESK<br>R      |           |         | Oxidation (M)[12]          |      | Mascot      |
| 2463.198   | 2463.198    | 0       | 0     | 118        | 139      | DLQNHRTQHSIQPSICG<br>QCGK   |           |         |                            |      | Mascot      |
| 2463.198   | 2463.198    | 0       | 0     | 118        | 139      | DLQNHRTQHSIQPSICG<br>QCGK   |           |         |                            |      | Mascot      |
| 2492.0388  | 2492.1611   | 0.1223  | 49    | 68         | 90       | AANADTTSHFSCQECGM<br>GFSQKR |           |         | Oxidation (M)[17]          |      | Mascot      |
| 2492.0388  | 2492.1611   | 0.1223  | 49    | 67         | 89       | RAANADTTSHFSCQECG<br>MGFSQK |           |         | Oxidation (M)[18]          |      | Mascot      |

40 PREDICTED: hypothetical protein LOC100535533 [Danio rerio] gi|326671744 3229.6 9.19 4 34 0

#### Peptide Information

| Calc. Mass | Obsrv. Mass | ± da    | ± ppm | Start Seq. | End Seq. | Sequence     | Ion Score | C. I. % | Modification           | Rank | Result Type |
|------------|-------------|---------|-------|------------|----------|--------------|-----------|---------|------------------------|------|-------------|
| 996.4641   | 996.5688    | 0.1047  | 105   | 4          | 12       | AGPVFSCMK    |           |         | Carbamidomethyl (C)[7] |      | Mascot      |
| 1287.5894  | 1287.6373   | 0.0479  | 37    | 1          | 12       | MGKAGPVFSCMK |           |         | Oxidation (M)[1,11]    |      | Mascot      |
| 1364.674   | 1364.6613   | -0.0127 | -9    | 13         | 24       | HNGHAISMEIQK |           |         |                        |      | Mascot      |

1993.9912 1993.931 -0.0602 -30 13 30 HNGHAISMEIQKTGLWTA

Mascot

41 PREDICTED: GTPase IMAP family member 8-like  
[Danio rerio] gi|326665580 97738.9 5.64 10 34 0

Peptide Information

| Calc. Mass | Obsrv. Mass | ± da    | ± ppm | Start Seq. | End Seq. | Sequence                   | Ion Score | C. I. | % Modification   | Rank | Result Type |
|------------|-------------|---------|-------|------------|----------|----------------------------|-----------|-------|------------------|------|-------------|
| 1021.5524  | 1021.4751   | -0.0773 | -76   | 474        | 483      | SALTSQSVTK                 |           |       |                  |      | Mascot      |
| 1122.6041  | 1122.4812   | -0.1229 | -109  | 421        | 429      | YKAEIEELK                  |           |       |                  |      | Mascot      |
| 1239.7129  | 1239.6039   | -0.109  | -88   | 340        | 349      | HIIVLIMQEK                 | 9         | 0     | Oxidation (M)[7] |      | Mascot      |
| 1239.7129  | 1239.6039   | -0.109  | -88   | 340        | 349      | HIIVLIMQEK                 |           |       | Oxidation (M)[7] |      | Mascot      |
| 1438.6556  | 1438.6646   | 0.009   | 6     | 771        | 781      | ETREQAEQEYR                |           |       |                  |      | Mascot      |
| 1438.6556  | 1438.6646   | 0.009   | 6     | 771        | 781      | ETREQAEQEYR                |           |       |                  |      | Mascot      |
| 1516.79    | 1516.6652   | -0.1248 | -82   | 227        | 240      | KQNLNLVLCGSDGR             |           |       |                  |      | Mascot      |
| 2337.1643  | 2336.9368   | -0.2275 | -97   | 738        | 756      | TEMALEEQQQLIKYLEE K        |           |       |                  |      | Mascot      |
| 2337.1643  | 2336.9368   | -0.2275 | -97   | 738        | 756      | TEMALEEQQQLIKYLEE K        |           |       |                  |      | Mascot      |
| 2427.1472  | 2426.9978   | -0.1494 | -62   | 401        | 420      | GSFYTSFMLFQAQIEMER NK      |           |       |                  |      | Mascot      |
| 2492.2666  | 2492.1611   | -0.1055 | -42   | 601        | 621      | YHVFSNNEVKDLTQVSEL LEK     |           |       |                  |      | Mascot      |
| 2492.2666  | 2492.1611   | -0.1055 | -42   | 601        | 621      | YHVFSNNEVKDLTQVSEL LEK     |           |       |                  |      | Mascot      |
| 2514.1816  | 2514.1497   | -0.0319 | -13   | 140        | 160      | HLQMDLDAEEWPSSILQ QTEK     |           |       | Oxidation (M)[4] |      | Mascot      |
| 2921.446   | 2921.4275   | -0.0185 | -6    | 376        | 400      | QFVLGNSSQIPDLLQYVE NMVQENR |           |       |                  |      | Mascot      |

42 LIM and calponin homology domains-containing protein  
1 [Danio rerio] gi|168229244 114711.6 6.19 14 34 0

Peptide Information

| Calc. Mass | Obsrv. Mass | ± da    | ± ppm | Start Seq. | End Seq. | Sequence       | Ion Score | C. I. | % Modification   | Rank | Result Type |
|------------|-------------|---------|-------|------------|----------|----------------|-----------|-------|------------------|------|-------------|
| 842.473    | 842.4872    | 0.0142  | 17    | 515        | 522      | QQSLPAAK       |           |       |                  |      | Mascot      |
| 1021.5458  | 1021.4751   | -0.0707 | -69   | 568        | 577      | AATAGMRTVK     |           |       | Oxidation (M)[6] |      | Mascot      |
| 1045.6     | 1045.5343   | -0.0657 | -63   | 390        | 398      | RSVSQDLIK      |           |       |                  |      | Mascot      |
| 1287.6692  | 1287.6373   | -0.0319 | -25   | 759        | 768      | LKQEWQAQK      |           |       |                  |      | Mascot      |
| 1347.7783  | 1347.656    | -0.1223 | -91   | 140        | 150      | NVLITIYWLGR    |           |       |                  |      | Mascot      |
| 1404.6423  | 1404.6228   | -0.0195 | -14   | 539        | 552      | GIVGDAECVSDPSR |           |       |                  |      | Mascot      |
| 1412.7419  | 1412.6802   | -0.0617 | -44   | 664        | 676      | TVPQVGDVPEFPK  |           |       |                  |      | Mascot      |
| 1420.7655  | 1420.6182   | -0.1473 | -104  | 446        | 458      | ARTPEEAAVLHR   | 2         | 0     |                  |      | Mascot      |
| 1420.7655  | 1420.6182   | -0.1473 | -104  | 446        | 458      | ARTPEEAAVLHR   |           |       |                  |      | Mascot      |

|    |                                |           |         |     |              |      |                                  |      |   |    |                          |        |   |
|----|--------------------------------|-----------|---------|-----|--------------|------|----------------------------------|------|---|----|--------------------------|--------|---|
|    | 1516.601                       | 1516.6652 | 0.0642  | 42  | 191          | 202  | DSGYIDCWESER                     |      |   |    | Carbamidomethyl (C)[7]   | Mascot |   |
|    | 1790.8536                      | 1790.8479 | -0.0057 | -3  | 999          | 1012 | NGLLNCHQCYIRSR                   |      |   |    | Carbamidomethyl (C)[6,9] | Mascot |   |
|    | 2211.0381                      | 2211.0527 | 0.0146  | 7   | 847          | 867  | TESLQMTVSSPLQSCGS<br>VGQR        |      |   |    | Oxidation (M)[6]         | Mascot |   |
|    | 2231.0674                      | 2231.0586 | -0.0088 | -4  | 677          | 695  | VLEINPDETVTDQEKTD<br>E           |      |   |    |                          | Mascot |   |
|    | 2380.1594                      | 2380.0215 | -0.1379 | -58 | 846          | 867  | KTESLQMTVSSPLQSCG<br>SVGQR       |      |   |    | Carbamidomethyl (C)[16]  | Mascot |   |
|    | 2913.3496                      | 2913.3945 | 0.0449  | 15  | 915          | 942  | SDSIENIGPNPSTSPSFT<br>DTQAPPSPNR |      |   |    |                          | Mascot |   |
| 43 | phospholipase D1 [Danio rerio] |           |         |     | gi 231567352 |      | 117790.5                         | 9.22 | 9 | 33 | 0                        | 23     | 0 |

#### Peptide Information

| Calc. Mass | Obsrv. Mass | ± da    | ± ppm | Start Seq. | End Seq. | Sequence                  | Ion Score | C. I. | % Modification                                | Rank | Result Type |
|------------|-------------|---------|-------|------------|----------|---------------------------|-----------|-------|-----------------------------------------------|------|-------------|
| 985.4672   | 985.5081    | 0.0409  | 42    | 114        | 120      | HFMEIHR                   | 23        | 0     | Oxidation (M)[3]                              |      | Mascot      |
| 985.4672   | 985.5081    | 0.0409  | 42    | 114        | 120      | HFMEIHR                   |           |       | Oxidation (M)[3]                              |      | Mascot      |
| 1135.5226  | 1135.5586   | 0.036   | 32    | 2          | 11       | SDSVENLDTR                |           |       |                                               |      | Mascot      |
| 1347.7566  | 1347.656    | -0.1006 | -75   | 431        | 441      | KTLMHLHPNIK               |           |       | Oxidation (M)[4]                              |      | Mascot      |
| 1404.7402  | 1404.6228   | -0.1174 | -84   | 525        | 537      | SMVGDSVDLPKLK             |           |       | Oxidation (M)[2]                              |      | Mascot      |
| 1681.814   | 1681.9386   | 0.1246  | 74    | 556        | 571      | GLHHADSISSIDSTNK          |           |       |                                               |      | Mascot      |
| 1790.9119  | 1790.8479   | -0.064  | -36   | 624        | 639      | MPWHDISSVVHGKAAR          |           |       |                                               |      | Mascot      |
| 1806.9067  | 1806.9026   | -0.0041 | -2    | 624        | 639      | MPWHDISSVVHGKAAR          |           |       | Oxidation (M)[1]                              |      | Mascot      |
| 2210.9351  | 2211.0527   | 0.1176  | 53    | 230        | 247      | IPGMNCCGHNEVCYRWS<br>K    |           |       | Carbamidomethyl (C)[6,7]                      |      | Mascot      |
| 2283.9514  | 2284.1243   | 0.1729  | 76    | 230        | 247      | IPGMNCCGHNEVCYRWS<br>K    |           |       | Carbamidomethyl (C)[6,7,13], Oxidation (M)[4] |      | Mascot      |
| 2319.9585  | 2319.9097   | -0.0488 | -21   | 225        | 244      | SGGHRIPGMNCCGHNEV<br>CYR  |           |       | Carbamidomethyl (C)[11,12], Oxidation (M)[9]  |      | Mascot      |
| 2446.2937  | 2446.0217   | -0.272  | -111  | 410        | 430      | IFVMLYKEVELALGINSEY<br>SK |           |       |                                               |      | Mascot      |

44 actin filament-associated protein 1-like 1 [Danio rerio] gi|71834566 84113.2 8.28 11 33 0

#### Peptide Information

| Calc. Mass | Obsrv. Mass | ± da    | ± ppm | Start Seq. | End Seq. | Sequence   | Ion Score | C. I. | % Modification         | Rank | Result Type |
|------------|-------------|---------|-------|------------|----------|------------|-----------|-------|------------------------|------|-------------|
| 850.5145   | 850.5184    | 0.0039  | 5     | 383        | 389      | IISFSKR    |           |       |                        |      | Mascot      |
| 960.4169   | 960.4528    | 0.0359  | 37    | 399        | 406      | SSFHDHPR   |           |       |                        |      | Mascot      |
| 985.4785   | 985.5081    | 0.0296  | 30    | 420        | 426      | EHWCVR     |           |       |                        |      | Mascot      |
| 985.4785   | 985.5081    | 0.0296  | 30    | 420        | 426      | EHWCVR     |           |       |                        |      | Mascot      |
| 996.4819   | 996.5688    | 0.0869  | 87    | 133        | 140      | MPEYITSR   |           |       |                        |      | Mascot      |
| 1122.6378  | 1122.4812   | -0.1566 | -139  | 389        | 398      | RKPPLPGDSR |           |       |                        |      | Mascot      |
| 1136.588   | 1136.5472   | -0.0408 | -36   | 407        | 416      | CGYVGVLVNR |           |       | Carbamidomethyl (C)[1] |      | Mascot      |

|    |                                                      |           |         |     |     |              |                            |      |                        |    |        |
|----|------------------------------------------------------|-----------|---------|-----|-----|--------------|----------------------------|------|------------------------|----|--------|
|    | 1645.7738                                            | 1645.8535 | 0.0797  | 48  | 21  | 34           | LLDHETLSCATEEK             |      | Carbamidomethyl (C)[9] |    | Mascot |
|    | 2231.2026                                            | 2231.0586 | -0.144  | -65 | 2   | 20           | EINSKPMELLVTELNMLL<br>K    |      | Oxidation (M)[7]       |    | Mascot |
|    | 2337.0591                                            | 2336.9368 | -0.1223 | -52 | 64  | 84           | NGTSFVESLFETFDCDLG<br>DLK  |      |                        |    | Mascot |
|    | 2337.0591                                            | 2336.9368 | -0.1223 | -52 | 64  | 84           | NGTSFVESLFETFDCDLG<br>DLK  |      |                        |    | Mascot |
|    | 2363.1699                                            | 2363.1033 | -0.0666 | -28 | 44  | 63           | QLQPSVTAKDYMVNTS<br>VYR    |      |                        |    | Mascot |
|    | 2607.1636                                            | 2607.1541 | -0.0095 | -4  | 698 | 719          | TQRTEAQYMESFLPVNC<br>ASEMR |      | Oxidation (M)[9]       |    | Mascot |
| 45 | heparan sulfate 3-O-sulfotransferase 5 [Danio rerio] |           |         |     |     | gi 111609800 | 34931.4                    | 8.73 | 7                      | 33 | 0      |

Peptide Information

| Calc. Mass | Obsrv. Mass | ± da    | ± ppm | Start Seq. | End Seq. | Sequence                        | Ion Score | C. I. | % Modification         | Rank | Result Type |
|------------|-------------|---------|-------|------------|----------|---------------------------------|-----------|-------|------------------------|------|-------------|
| 960.5301   | 960.4528    | -0.0773 | -80   | 199        | 205      | WLELFPR                         |           |       |                        |      | Mascot      |
| 1045.5499  | 1045.5343   | -0.0156 | -15   | 129        | 137      | IWAMNPAVK                       |           |       | Oxidation (M)[4]       |      | Mascot      |
| 1697.7917  | 1697.8773   | 0.0856  | 50    | 81         | 93       | TEIHYFNLDENFR                   |           |       |                        |      | Mascot      |
| 2284.1138  | 2284.1243   | 0.0105  | 5     | 261        | 280      | CLDESKGRPHAPLSNEA<br>FQK        |           |       | Carbamidomethyl (C)[1] |      | Mascot      |
| 2446.3088  | 2446.0217   | -0.2871 | -117  | 206        | 226      | EQIHIVDGEALIRNPPEL<br>QK        |           |       |                        |      | Mascot      |
| 2448.259   | 2448.1157   | -0.1433 | -59   | 95         | 115      | GLDWYRSQMPITLPGQL<br>TVEK       |           |       | Oxidation (M)[9]       |      | Mascot      |
| 2913.5178  | 2913.3945   | -0.1233 | -42   | 101        | 127      | SQMPITLPGQLTVEKTPG<br>YFTAPPAPR |           |       | Oxidation (M)[3]       |      | Mascot      |

|    |                                 |  |  |  |  |              |          |      |   |    |   |
|----|---------------------------------|--|--|--|--|--------------|----------|------|---|----|---|
| 46 | LOC572492 protein [Danio rerio] |  |  |  |  | gi 161611818 | 118741.6 | 8.75 | 1 | 23 | 0 |
|----|---------------------------------|--|--|--|--|--------------|----------|------|---|----|---|

Peptide Information

| Calc. Mass | Obsrv. Mass | ± da   | ± ppm | Start Seq. | End Seq. | Sequence | Ion Score | C. I. | % Modification   | Rank | Result Type |
|------------|-------------|--------|-------|------------|----------|----------|-----------|-------|------------------|------|-------------|
| 985.4672   | 985.5081    | 0.0409 | 42    | 125        | 131      | HFMELEHR | 23        | 0     | Oxidation (M)[3] | 4    | Mascot      |

|    |                                                                                              |  |  |  |  |  |         |      |   |    |   |
|----|----------------------------------------------------------------------------------------------|--|--|--|--|--|---------|------|---|----|---|
| 47 | novel protein similar to vertebrate PR domain containing gi 56207863 4 (PRDM4) [Danio rerio] |  |  |  |  |  | 85449.4 | 6.05 | 1 | 22 | 0 |
|----|----------------------------------------------------------------------------------------------|--|--|--|--|--|---------|------|---|----|---|

Peptide Information

| Calc. Mass | Obsrv. Mass | ± da    | ± ppm | Start Seq. | End Seq. | Sequence | Ion Score | C. I. | % Modification         | Rank | Result Type |
|------------|-------------|---------|-------|------------|----------|----------|-----------|-------|------------------------|------|-------------|
| 985.5182   | 985.5081    | -0.0101 | -10   | 530        | 536      | RMCLLEHR | 22        | 0     | Carbamidomethyl (C)[3] | 5    | Mascot      |

|    |                                                                     |  |  |  |  |              |          |      |   |    |   |
|----|---------------------------------------------------------------------|--|--|--|--|--------------|----------|------|---|----|---|
| 48 | PREDICTED: serine/threonine-protein kinase LMTK1-like [Danio rerio] |  |  |  |  | gi 326672547 | 178589.8 | 4.52 | 1 | 21 | 0 |
|----|---------------------------------------------------------------------|--|--|--|--|--------------|----------|------|---|----|---|

Peptide Information

| Calc. Mass | Obsrv. Mass | ± da | ± ppm | Start Seq. | End Seq. | Sequence | Ion Score | C. I. | % Modification | Rank | Result Type |
|------------|-------------|------|-------|------------|----------|----------|-----------|-------|----------------|------|-------------|
|------------|-------------|------|-------|------------|----------|----------|-----------|-------|----------------|------|-------------|

|                     |                                                                                         |             |         |       |            |          |             |           |         |              |  |      |             |
|---------------------|-----------------------------------------------------------------------------------------|-------------|---------|-------|------------|----------|-------------|-----------|---------|--------------|--|------|-------------|
|                     | 1239.5123                                                                               | 1239.6039   | 0.0916  | 74    | 401        | 411      | GASEAEEDFER | 21        | 0       |              |  | 2    | Mascot      |
| 49                  | novel protein similar to DNA polymerases [Danio rerio] gi 27802860 160459.8 6.39 1 20 0 |             |         |       |            |          |             |           |         |              |  |      |             |
| Peptide Information |                                                                                         |             |         |       |            |          |             |           |         |              |  |      |             |
|                     | Calc. Mass                                                                              | Obsrv. Mass | ± da    | ± ppm | Start Seq. | End Seq. | Sequence    | Ion Score | C. I. % | Modification |  | Rank | Result Type |
|                     | 985.5213                                                                                | 985.5081    | -0.0132 | -13   | 202        | 209      | FNGLEIHR    | 20        | 0       |              |  | 6    | Mascot      |

|                     |                                                          |             |  |         |       |            |          |           |           |         |              |      |              |         |      |   |    |   |
|---------------------|----------------------------------------------------------|-------------|--|---------|-------|------------|----------|-----------|-----------|---------|--------------|------|--------------|---------|------|---|----|---|
| 50                  | mitochondrial inner membrane protein COX18 [Danio rerio] |             |  |         |       |            |          |           |           |         |              |      | gi 167555045 | 36385.1 | 9.64 | 1 | 20 | 0 |
| Peptide Information |                                                          |             |  |         |       |            |          |           |           |         |              |      |              |         |      |   |    |   |
| Calc. Mass          |                                                          | Obsrv. Mass |  | ± da    | ± ppm | Start Seq. | End Seq. | Sequence  | Ion Score | C. I. % | Modification | Rank | Result Type  |         |      |   |    |   |
| 985.5464            |                                                          | 985.5081    |  | -0.0383 | -39   | 310        | 318      | DIAAAFIHK | 20        | 0       |              | 7    | Mascot       |         |      |   |    |   |

|                |           |                        |                |                |                    |
|----------------|-----------|------------------------|----------------|----------------|--------------------|
| Gel Idx/Pos    | 240/J16   | Instr./Gel Origin      | BA2060/110707A | Process Status | Analysis Succeeded |
| Plate [#] Name | [1] 31496 | Instrument Sample Name |                | Spectra        | 11                 |

| Rank | Protein Name                  | Accession No. | Protein MW | Protein PI | Pep. Count | Protein Score | Protein Score C. I. % | Total Ion Score | Total Ion C. I. % |
|------|-------------------------------|---------------|------------|------------|------------|---------------|-----------------------|-----------------|-------------------|
| 1    | peroxiredoxin-4 [Danio rerio] | gi 148226847  | 29083.8    | 6.3        | 13         | 675           | 100                   | 574             | 100               |

|                     |            |             |         |       |            |          |                |           |         |                  |  |      |             |
|---------------------|------------|-------------|---------|-------|------------|----------|----------------|-----------|---------|------------------|--|------|-------------|
| Peptide Information |            |             |         |       |            |          |                |           |         |                  |  |      |             |
|                     | Calc. Mass | Obsrv. Mass | ± da    | ± ppm | Start Seq. | End Seq. | Sequence       | Ion Score | C. I. % | Modification     |  | Rank | Result Type |
|                     | 819.4207   | 819.406     | -0.0147 | -18   | 213        | 219      | SVDETLR        |           |         |                  |  |      | Mascot      |
|                     | 862.5032   | 862.4878    | -0.0154 | -18   | 190        | 197      | GLFIIDGK       |           |         |                  |  |      | Mascot      |
|                     | 1212.6259  | 1212.6027   | -0.0232 | -19   | 220        | 229      | LVQAFQYTDK     | 59        | 99.97   |                  |  |      | Mascot      |
|                     | 1212.6259  | 1212.6027   | -0.0232 | -19   | 220        | 229      | LVQAFQYTDK     |           |         |                  |  |      | Mascot      |
|                     | 1243.6464  | 1243.62     | -0.0264 | -21   | 202        | 212      | QITMNDLPVGR    | 49        | 99.669  |                  |  |      | Mascot      |
|                     | 1243.6464  | 1243.62     | -0.0264 | -21   | 202        | 212      | QITMNDLPVGR    |           |         |                  |  |      | Mascot      |
|                     | 1259.6412  | 1259.6196   | -0.0216 | -17   | 202        | 212      | QITMNDLPVGR    | 32        | 83.66   | Oxidation (M)[4] |  |      | Mascot      |
|                     | 1259.6412  | 1259.6196   | -0.0216 | -17   | 202        | 212      | QITMNDLPVGR    |           |         | Oxidation (M)[4] |  |      | Mascot      |
|                     | 1318.7114  | 1318.6866   | -0.0248 | -19   | 56         | 67       | VPVSDHSLHLSK   |           |         |                  |  |      | Mascot      |
|                     | 1464.842   | 1464.8146   | -0.0274 | -19   | 163        | 175      | IPLLSDLTHQISK  | 88        | 100     |                  |  |      | Mascot      |
|                     | 1464.842   | 1464.8146   | -0.0274 | -19   | 163        | 175      | IPLLSDLTHQISK  |           |         |                  |  |      | Mascot      |
|                     | 1649.7917  | 1649.7625   | -0.0292 | -18   | 176        | 189      | DYGVFLEDQGHTLR | 135       | 100     |                  |  |      | Mascot      |
|                     | 1649.7917  | 1649.7625   | -0.0292 | -18   | 176        | 189      | DYGVFLEDQGHTLR |           |         |                  |  |      | Mascot      |



|   |                                              |           |         |     |             |     |                                   |     |     |                         |        |  |  |  |  |  |        |
|---|----------------------------------------------|-----------|---------|-----|-------------|-----|-----------------------------------|-----|-----|-------------------------|--------|--|--|--|--|--|--------|
|   | 2081.0813                                    | 2081.0435 | -0.0378 | -18 | 70          | 88  | ISKPAPHWEGTAVINGEF<br>K           |     |     |                         |        |  |  |  |  |  | Mascot |
|   | 2233.2373                                    | 2233.0476 | -0.1897 | -85 | 155         | 175 | QGGLGPMKIPLSLDTHQ<br>ISK          |     |     |                         |        |  |  |  |  |  | Mascot |
|   | 2246.9558                                    | 2246.9182 | -0.0376 | -17 | 37          | 55  | EQECYNYAGGHVYPGEA<br>FR           | 131 | 100 | Carbamidomethyl (C)[4]  |        |  |  |  |  |  | Mascot |
|   | 2246.9558                                    | 2246.9182 | -0.0376 | -17 | 37          | 55  | EQECYNYAGGHVYPGEA<br>FR           |     |     | Carbamidomethyl (C)[4]  |        |  |  |  |  |  | Mascot |
|   | 2389.1604                                    | 2389.1238 | -0.0366 | -15 | 230         | 252 | HGEVCPAGWKPGSDTIIP<br>DPAGK       |     |     | Carbamidomethyl (C)[5]  |        |  |  |  |  |  | Mascot |
|   | 2389.1604                                    | 2389.1238 | -0.0366 | -15 | 230         | 252 | HGEVCPAGWKPGSDTIIP<br>DPAGK       | 112 | 100 | Carbamidomethyl (C)[5]  |        |  |  |  |  |  | Mascot |
|   | 2403.0571                                    | 2403.0271 | -0.03   | -12 | 36          | 55  | REQECYNYAGGHVYPGE<br>AFR          |     |     | Carbamidomethyl (C)[5]  |        |  |  |  |  |  | Mascot |
|   | 3439.6851                                    | 3439.6465 | -0.0386 | -11 | 124         | 153 | VHEFQAINAEVVCSDVS<br>QFTHLAWINTPR |     |     | Carbamidomethyl (C)[14] |        |  |  |  |  |  | Mascot |
| 2 | sorting nexin family member 27 [Danio rerio] |           |         |     | gi 41054611 |     | 64121.8                           | 5.8 | 14  | 55                      | 87.166 |  |  |  |  |  |        |

Peptide Information

| Calc. Mass | Obsrv. Mass | ± da    | ± ppm | Start Seq. | End Seq. | Sequence                     | Ion Score | C. I. | % Modification                            | Rank | Result Type |
|------------|-------------|---------|-------|------------|----------|------------------------------|-----------|-------|-------------------------------------------|------|-------------|
| 808.3618   | 808.3995    | 0.0377  | 47    | 540        | 546      | DNKNCSK                      |           |       |                                           |      | Mascot      |
| 842.5094   | 842.496     | -0.0134 | -16   | 121        | 127      | QVVDLIR                      |           |       |                                           |      | Mascot      |
| 1212.6736  | 1212.6027   | -0.0709 | -58   | 204        | 213      | EFAILHQNLIK                  |           |       |                                           |      | Mascot      |
| 1212.6736  | 1212.6027   | -0.0709 | -58   | 204        | 213      | EFAILHQNLIK                  |           |       |                                           |      | Mascot      |
| 1226.6316  | 1226.5967   | -0.0349 | -28   | 214        | 223      | REFANFAFPK                   |           |       |                                           |      | Mascot      |
| 1318.6613  | 1318.6866   | 0.0253  | 19    | 185        | 195      | FVYNYVMAGR                   |           |       |                                           |      | Mascot      |
| 1524.7726  | 1524.7633   | -0.0093 | -6    | 243        | 255      | GLEEYLEKVCSVR                |           |       |                                           |      | Mascot      |
| 1969.7731  | 1970.0437   | 0.2706  | 137   | 482        | 497      | WDTDEEGMAFCFEYAR             |           |       |                                           |      | Mascot      |
| 2225.0283  | 2225.0808   | 0.0525  | 24    | 24         | 47       | NGSGMSAGTCAGGLVAT<br>TVTSGPR |           |       | Carbamidomethyl (C)[10], Oxidation (M)[5] |      | Mascot      |
| 2225.0283  | 2225.0808   | 0.0525  | 24    | 24         | 47       | NGSGMSAGTCAGGLVAT<br>TVTSGPR |           |       | Carbamidomethyl (C)[10], Oxidation (M)[5] |      | Mascot      |
| 2229.0757  | 2228.908    | -0.1677 | -75   | 177        | 195      | HVEQSGEKFVYNYVMA<br>GR       |           |       | Oxidation (M)[16]                         |      | Mascot      |
| 2232.8743  | 2233.0476   | 0.1733  | 78    | 425        | 442      | TCEGYNEITFPHCSCDSR           |           |       | Carbamidomethyl (C)[2,13,15]              |      | Mascot      |
| 2269.0989  | 2268.8979   | -0.201  | -89   | 1          | 23       | MADVVEGDGTRSAAPSA<br>IHSAAR  |           |       |                                           |      | Mascot      |
| 2283.9321  | 2284.1343   | 0.2022  | 89    | 482        | 500      | WDTDEEGMAFCFEYARG<br>EK      |           |       |                                           |      | Mascot      |
| 2299.927   | 2300.1372   | 0.2102  | 91    | 482        | 500      | WDTDEEGMAFCFEYARG<br>EK      |           |       | Oxidation (M)[8]                          |      | Mascot      |
| 2388.9753  | 2389.1238   | 0.1485  | 62    | 425        | 443      | TCEGYNEITFPHCSCDSR<br>R      |           |       | Carbamidomethyl (C)[2,13,15]              |      | Mascot      |
| 2388.9753  | 2389.1238   | 0.1485  | 62    | 425        | 443      | TCEGYNEITFPHCSCDSR<br>R      |           |       | Carbamidomethyl (C)[2,13,15]              |      | Mascot      |
| 2403.3354  | 2403.0271   | -0.3083 | -128  | 106        | 127      | ILEVNGVNVGATHKQVV<br>DLIR    |           |       |                                           |      | Mascot      |

|   |                                                                 |  |  |  |              |  |         |      |   |    |        |  |  |  |  |  |  |
|---|-----------------------------------------------------------------|--|--|--|--------------|--|---------|------|---|----|--------|--|--|--|--|--|--|
| 3 | PREDICTED: polyadenylate-binding protein 2-B-like [Danio rerio] |  |  |  | gi 292616346 |  | 19006.2 | 6.43 | 8 | 53 | 75.545 |  |  |  |  |  |  |
|---|-----------------------------------------------------------------|--|--|--|--------------|--|---------|------|---|----|--------|--|--|--|--|--|--|

Peptide Information

| Calc. Mass | Obsrv. Mass | ± da    | ± ppm | Start Seq. | End Seq. | Sequence                      | Ion Score | C. I. % | Modification            | Rank | Result Type |
|------------|-------------|---------|-------|------------|----------|-------------------------------|-----------|---------|-------------------------|------|-------------|
| 808.4246   | 808.3995    | -0.0251 | -31   | 146        | 151      | GCRFIR                        |           |         | Carbamidomethyl (C)[2]  |      | Mascot      |
| 862.4781   | 862.4878    | 0.0097  | 11    | 66         | 72       | VTIPYNR                       |           |         |                         |      | Mascot      |
| 996.4832   | 996.5796    | 0.0964  | 97    | 141        | 148      | FNPFRGCR                      |           |         |                         |      | Mascot      |
| 1547.5989  | 1547.7916   | 0.1927  | 125   | 1          | 12       | MDESDMQYEVR                   |           |         | Oxidation (M)[1]        |      | Mascot      |
| 1739.9075  | 1739.8994   | -0.0081 | -5    | 113        | 127      | RTNIPGFSTTDVYLR               |           |         |                         |      | Mascot      |
| 1871.9075  | 1871.9116   | 0.0041  | 2     | 73         | 88       | FTGHPKGFAYIEFSR               |           |         |                         |      | Mascot      |
| 2389.0442  | 2389.1238   | 0.0796  | 33    | 13         | 31       | QFPYSPEALFFDMTHEER            |           |         | Oxidation (M)[14]       |      | Mascot      |
| 2389.0442  | 2389.1238   | 0.0796  | 33    | 13         | 31       | QFPYSPEALFFDMTHEER            |           |         | Oxidation (M)[14]       |      | Mascot      |
| 3337.5     | 3337.7021   | 0.2021  | 61    | 37         | 65       | RSIYVGNVDYGATADELEMYFNSCGHVNR |           |         | Carbamidomethyl (C)[24] |      | Mascot      |

4 cytoplasmic dynein 1 heavy chain 1 [Danio rerio] gi|112363126 532854.1 6.06 35 52 69.213

Peptide Information

| Calc. Mass | Obsrv. Mass | ± da    | ± ppm | Start Seq. | End Seq. | Sequence       | Ion Score | C. I. % | Modification           | Rank | Result Type |
|------------|-------------|---------|-------|------------|----------|----------------|-----------|---------|------------------------|------|-------------|
| 808.4788   | 808.3995    | -0.0793 | -98   | 451        | 457      | LSPAHRK        |           |         |                        |      | Mascot      |
| 816.3926   | 816.4921    | 0.0995  | 122   | 1844       | 1849     | FYFDPK         |           |         |                        |      | Mascot      |
| 819.4835   | 819.406     | -0.0775 | -95   | 2921       | 2926     | IDRIFR         |           |         |                        |      | Mascot      |
| 850.4087   | 850.5283    | 0.1196  | 141   | 59         | 65       | SALEQMR        |           |         | Oxidation (M)[6]       |      | Mascot      |
| 862.4338   | 862.4878    | 0.054   | 63    | 4636       | 4643     | GVAILCTE       |           |         | Carbamidomethyl (C)[6] |      | Mascot      |
| 870.4389   | 870.525     | 0.0861  | 99    | 656        | 662      | QLTAYMK        |           |         | Oxidation (M)[6]       |      | Mascot      |
| 922.5217   | 922.448     | -0.0737 | -80   | 4504       | 4511     | NIHVNLR        |           |         |                        |      | Mascot      |
| 1012.5785  | 1012.4557   | -0.1228 | -121  | 2323       | 2331     | LLTLPNGER      |           |         |                        |      | Mascot      |
| 1045.5272  | 1045.5464   | 0.0192  | 18    | 2836       | 2843     | LVEDEERR       |           |         |                        |      | Mascot      |
| 1165.6212  | 1165.7242   | 0.103   | 88    | 3438       | 3447     | DLEASIARYK     |           |         |                        |      | Mascot      |
| 1226.6317  | 1226.5967   | -0.035  | -29   | 4405       | 4413     | DPLFRFFER      |           |         |                        |      | Mascot      |
| 1243.5953  | 1243.62     | 0.0247  | 20    | 4203       | 4212     | KYEFGESDLR     |           |         |                        |      | Mascot      |
| 1243.5953  | 1243.62     | 0.0247  | 20    | 4203       | 4212     | KYEFGESDLR     |           |         |                        |      | Mascot      |
| 1259.7219  | 1259.6196   | -0.1023 | -81   | 3733       | 3742     | LQGEFQLRLR     | 3         | 0       |                        |      | Mascot      |
| 1259.7219  | 1259.6196   | -0.1023 | -81   | 3733       | 3742     | LQGEFQLRLR     |           |         |                        |      | Mascot      |
| 1318.6862  | 1318.6866   | 0.0004  | 0     | 3076       | 3087     | DRAATSPALFNR   |           |         |                        |      | Mascot      |
| 1464.7086  | 1464.8146   | 0.106   | 72    | 2442       | 2452     | MEHIMDFTRLR    |           |         | Oxidation (M)[1]       |      | Mascot      |
| 1464.7086  | 1464.8146   | 0.106   | 72    | 2442       | 2452     | MEHIMDFTRLR    |           |         | Oxidation (M)[1]       |      | Mascot      |
| 1671.8563  | 1671.7439   | -0.1124 | -67   | 2948       | 2961     | FVAWMNGLSVYQIK |           |         | Oxidation (M)[5]       |      | Mascot      |

|           |           |         |     |      |      |                           |                   |        |
|-----------|-----------|---------|-----|------|------|---------------------------|-------------------|--------|
| 1698.8737 | 1698.8284 | -0.0453 | -27 | 1544 | 1558 | WVYLEGIFTGSADIK           |                   | Mascot |
| 1739.9261 | 1739.8994 | -0.0267 | -15 | 4599 | 4612 | RNMVTLPPVYLNFR            | Oxidation (M)[3]  | Mascot |
| 1752.834  | 1752.8356 | 0.0016  | 1   | 2783 | 2796 | FTQDTQPHYIYSPR            |                   | Mascot |
| 1753.8351 | 1753.8267 | -0.0084 | -5  | 3544 | 3558 | TDIARTEYLSNADER           |                   | Mascot |
| 1969.9912 | 1970.0437 | 0.0525  | 27  | 2702 | 2719 | LERIQFVGACNPPTDPGR        |                   | Mascot |
| 2081.1099 | 2081.0435 | -0.0664 | -32 | 2340 | 2357 | IMFEVQDLKYAPLATVSR        |                   | Mascot |
| 2081.9531 | 2082.0354 | 0.0823  | 40  | 1130 | 1147 | FGQMLGNNMQDFHSQIS<br>K    |                   | Mascot |
| 2081.9531 | 2082.0354 | 0.0823  | 40  | 1130 | 1147 | FGQMLGNNMQDFHSQIS<br>K    |                   | Mascot |
| 2147.0767 | 2146.8823 | -0.1944 | -91 | 264  | 282  | DPASGTALQEISFWLNLE<br>R   |                   | Mascot |
| 2156.103  | 2155.9097 | -0.1933 | -90 | 981  | 997  | LYQEMFAWKMNILSLPR         | Oxidation (M)[5]  | Mascot |
| 2156.103  | 2155.9097 | -0.1933 | -90 | 981  | 997  | LYQEMFAWKMNILSLPR         | Oxidation (M)[5]  | Mascot |
| 2194.0828 | 2194.041  | -0.0418 | -19 | 3174 | 3190 | HYLDFINHYANLFNEKR         |                   | Mascot |
| 2210.9944 | 2211.0679 | 0.0735  | 33  | 531  | 550  | EVDGLDVSKEGMEAWEA<br>AMK  | Oxidation (M)[12] | Mascot |
| 2233.0627 | 2233.0476 | -0.0151 | -7  | 3561 | 3580 | WQANSLPADDLCTENAI<br>MLK  |                   | Mascot |
| 2247.1074 | 2246.9182 | -0.1892 | -84 | 1020 | 1040 | NALTRMPDGPSALEEAY<br>NAVK |                   | Mascot |
| 2247.1074 | 2246.9182 | -0.1892 | -84 | 1020 | 1040 | NALTRMPDGPSALEEAY<br>NAVK |                   | Mascot |
| 2254.156  | 2253.9939 | -0.1621 | -72 | 3279 | 3299 | QDLQVEPAVIEAQNVA<br>SIK   |                   | Mascot |
| 2261.04   | 2260.9285 | -0.1115 | -49 | 862  | 879  | SLETCMYEHKMFTEILNR        | Oxidation (M)[6]  | Mascot |
| 2268.9827 | 2268.8979 | -0.0848 | -37 | 411  | 428  | VMVACFEVFQWDEYE<br>K      | Oxidation (M)[2]  | Mascot |
| 2283.1624 | 2283.1389 | -0.0235 | -10 | 2004 | 2024 | QVKVSAEMAIFITMNP<br>AGY   |                   | Mascot |
| 2284.2561 | 2284.1343 | -0.1218 | -53 | 4504 | 4523 | NIHVNLRGLFVPEAYIT<br>AT   |                   | Mascot |
| 2299.1572 | 2299.1426 | -0.0146 | -6  | 2004 | 2024 | QVKVSAEMAIFITMNP<br>AGY   | Oxidation (M)[8]  | Mascot |
| 2389.1638 | 2389.1238 | -0.04   | -17 | 3561 | 3581 | WQANSLPADDLCTENAI<br>MLKR |                   | Mascot |
| 2389.1638 | 2389.1238 | -0.04   | -17 | 3561 | 3581 | WQANSLPADDLCTENAI<br>MLKR |                   | Mascot |

5

PREDICTED: polyadenylate-binding protein 2-B-like isoform 1 [Danio rerio]

gi|189521749

22247.9

5.85

7

42

0

| Peptide Information |             |         |       |            |          |                 |           |                        |                  |
|---------------------|-------------|---------|-------|------------|----------|-----------------|-----------|------------------------|------------------|
| Calc. Mass          | Obsrv. Mass | ± da    | ± ppm | Start Seq. | End Seq. | Sequence        | Ion Score | C. I. % Modification   | Rank Result Type |
| 808.4246            | 808.3995    | -0.0251 | -31   | 175        | 180      | GCRFIR          |           | Carbamidomethyl (C)[2] | Mascot           |
| 862.4781            | 862.4878    | 0.0097  | 11    | 95         | 101      | VTIPYNR         |           |                        | Mascot           |
| 996.4832            | 996.5796    | 0.0964  | 97    | 170        | 177      | FNPFRGCR        |           |                        | Mascot           |
| 1739.9075           | 1739.8994   | -0.0081 | -5    | 142        | 156      | RTNIPGFSTTDVYLR |           |                        | Mascot           |

|   |                             |           |        |    |              |     |                                   |      |   |    |   |  |                         |  |  |  |        |
|---|-----------------------------|-----------|--------|----|--------------|-----|-----------------------------------|------|---|----|---|--|-------------------------|--|--|--|--------|
|   | 1871.9075                   | 1871.9116 | 0.0041 | 2  | 102          | 117 | FTGHPKGFAYIEFSR                   |      |   |    |   |  |                         |  |  |  | Mascot |
|   | 2389.0442                   | 2389.1238 | 0.0796 | 33 | 42           | 60  | QFPYSPEALFFDMTHE<br>ER            |      |   |    |   |  | Oxidation (M)[14]       |  |  |  | Mascot |
|   | 2389.0442                   | 2389.1238 | 0.0796 | 33 | 42           | 60  | QFPYSPEALFFDMTHE<br>ER            |      |   |    |   |  | Oxidation (M)[14]       |  |  |  | Mascot |
|   | 3337.5                      | 3337.7021 | 0.2021 | 61 | 66           | 94  | RSIYVGNVDYGATADELE<br>MYFNSCGHVNR |      |   |    |   |  | Carbamidomethyl (C)[24] |  |  |  | Mascot |
| 6 | lft81 protein [Danio rerio] |           |        |    | gi 145337899 |     | 29908.3                           | 5.76 | 9 | 42 | 0 |  |                         |  |  |  |        |

#### Peptide Information

| Calc. Mass | Obsrv. Mass | ± da    | ± ppm | Start Seq. | End Seq. | Sequence                  | Ion Score | C. I. | % Modification         | Rank | Result Type |
|------------|-------------|---------|-------|------------|----------|---------------------------|-----------|-------|------------------------|------|-------------|
| 870.5519   | 870.525     | -0.0269 | -31   | 200        | 206      | VLRQQVK                   |           |       |                        |      | Mascot      |
| 1045.5636  | 1045.5464   | -0.0172 | -16   | 14         | 21       | TEEILRER                  |           |       |                        |      | Mascot      |
| 1212.7311  | 1212.6027   | -0.1284 | -106  | 85         | 95       | SALSPLIKDLR               |           |       |                        |      | Mascot      |
| 1212.7311  | 1212.6027   | -0.1284 | -106  | 85         | 95       | SALSPLIKDLR               |           |       |                        |      | Mascot      |
| 1318.6896  | 1318.6866   | -0.003  | -2    | 170        | 180      | ISQSM DVQVRR              |           |       |                        |      | Mascot      |
| 1524.7437  | 1524.7633   | 0.0196  | 13    | 221        | 232      | MWKDLETLLCEK              |           |       | Oxidation (M)[1]       |      | Mascot      |
| 1784.8231  | 1784.8805   | 0.0574  | 32    | 113        | 128      | AQYETCAAGLESNRSK          |           |       | Carbamidomethyl (C)[6] |      | Mascot      |
| 2082.0349  | 2082.0354   | 0.0005  | 0     | 37         | 55       | GISGYSDTQEELERVS<br>AIK   |           |       |                        |      | Mascot      |
| 2082.0349  | 2082.0354   | 0.0005  | 0     | 37         | 55       | GISGYSDTQEELERVS<br>AIK   |           |       |                        |      | Mascot      |
| 2225.0879  | 2225.0808   | -0.0071 | -3    | 147        | 163      | YHHINCEREIIESQIQR         |           |       | Carbamidomethyl (C)[6] |      | Mascot      |
| 2225.0879  | 2225.0808   | -0.0071 | -3    | 147        | 163      | YHHINCEREIIESQIQR         |           |       | Carbamidomethyl (C)[6] |      | Mascot      |
| 2283.1914  | 2283.1389   | -0.0525 | -23   | 234        | 254      | QCYLKAQSQAPIGHVIQD<br>VGK |           |       |                        |      | Mascot      |

7 novel protein similar to H.sapiens FBLIM1, filamin binding LIM protein 1 (FBLIM1, zgc:154176) [Dani

#### Peptide Information

| Calc. Mass | Obsrv. Mass | ± da    | ± ppm | Start Seq. | End Seq. | Sequence               | Ion Score | C. I. | % Modification             | Rank | Result Type |
|------------|-------------|---------|-------|------------|----------|------------------------|-----------|-------|----------------------------|------|-------------|
| 819.4028   | 819.406     | 0.0032  | 4     | 1          | 8        | MASAAPQK               |           |       | Oxidation (M)[1]           |      | Mascot      |
| 938.4512   | 938.4636    | 0.0124  | 13    | 285        | 292      | TCHSALIH               |           |       | Carbamidomethyl (C)[2]     |      | Mascot      |
| 1543.7897  | 1543.7686   | -0.0211 | -14   | 111        | 124      | QVSPCESAIVALNR         |           |       | Carbamidomethyl (C)[5]     |      | Mascot      |
| 1671.8846  | 1671.7439   | -0.1407 | -84   | 110        | 124      | KQVSPCESAIVALNR        |           |       | Carbamidomethyl (C)[6]     |      | Mascot      |
| 1871.9432  | 1871.9116   | -0.0316 | -17   | 50         | 67       | THVVS GVPAPRDP<br>CDPK |           |       |                            |      | Mascot      |
| 2051.8481  | 2052.0659   | 0.2178  | 106   | 93         | 110      | QQSDTHTHCSDVCGFCR<br>K |           |       |                            |      | Mascot      |
| 2080.9514  | 2081.0435   | 0.0921  | 44    | 179        | 195      | ALERAYHPPCFVCTTCR      |           |       | Carbamidomethyl (C)[10,13] |      | Mascot      |
| 2225.0332  | 2225.0808   | 0.0476  | 21    | 203        | 220      | FAQGEVGEVYCLQDYR<br>K  |           |       | Carbamidomethyl (C)[11]    |      | Mascot      |

|   |                                 |           |         |     |             |     |                                    |      |                         |    |        |
|---|---------------------------------|-----------|---------|-----|-------------|-----|------------------------------------|------|-------------------------|----|--------|
|   | 2225.0332                       | 2225.0808 | 0.0476  | 21  | 203         | 220 | FAQGEVGEVYCLQDYR<br>K              |      | Carbamidomethyl (C)[11] |    | Mascot |
|   | 2269.1055                       | 2268.8979 | -0.2076 | -91 | 69          | 92  | DLSGGPAEDGAVLRSA<br>P<br>SAGGQEK   |      |                         |    | Mascot |
|   | 2627.2856                       | 2627.3286 | 0.043   | 16  | 24          | 49  | ATVTPTAHGQHSPARA<br>Q<br>NTAPTGPCR |      |                         |    | Mascot |
| 8 | Zgc:85662 protein [Danio rerio] |           |         |     | gi 32766594 |     | 58091.1                            | 7.77 | 10                      | 39 | 0      |

#### Peptide Information

| Calc. Mass | Obsrv. Mass | ± da    | ± ppm | Start Seq. | End Seq. | Sequence                           | Ion Score | C. I. | % Modification    | Rank | Result Type |
|------------|-------------|---------|-------|------------|----------|------------------------------------|-----------|-------|-------------------|------|-------------|
| 856.5138   | 856.511     | -0.0028 | -3    | 214        | 221      | ESLLPVAK                           |           |       |                   |      | Mascot      |
| 1051.5419  | 1051.6919   | 0.15    | 143   | 307        | 316      | GGTLIQYDGK                         |           |       |                   |      | Mascot      |
| 1265.696   | 1265.6768   | -0.0192 | -15   | 489        | 500      | GTVIIIANHGDR                       |           |       |                   |      | Mascot      |
| 1318.6572  | 1318.6866   | 0.0294  | 22    | 393        | 404      | CFDNALGINVPR                       |           |       |                   |      | Mascot      |
| 1464.7693  | 1464.8146   | 0.0453  | 31    | 303        | 316      | ADVKGGLTIQYDGK                     |           |       |                   |      | Mascot      |
| 1464.7693  | 1464.8146   | 0.0453  | 31    | 303        | 316      | ADVKGGLTIQYDGK                     |           |       |                   |      | Mascot      |
| 1671.8337  | 1671.7439   | -0.0898 | -54   | 93         | 106      | INRPEDSIQPYDK                      |           |       |                   |      | Mascot      |
| 1969.9106  | 1970.0437   | 0.1331  | 68    | 24         | 40       | ELLSNSNGMAQFEVMR                   |           |       | Oxidation (M)[9]  |      | Mascot      |
| 2156.0981  | 2155.9097   | -0.1884 | -87   | 149        | 166      | NENTFLDLTVQQIEHLNK                 |           |       |                   |      | Mascot      |
| 2156.0981  | 2155.9097   | -0.1884 | -87   | 149        | 166      | NENTFLDLTVQQIEHLNK                 |           |       |                   |      | Mascot      |
| 2403.1021  | 2403.0271   | -0.075  | -31   | 167        | 187      | TYNADVPLVLMNSFNTD<br>EDTK          |           |       | Oxidation (M)[11] |      | Mascot      |
| 3439.709   | 3439.6465   | -0.0625 | -18   | 454        | 483      | VQEYITRFESIPDMLELD<br>HLTVSGDVTFGK |           |       |                   |      | Mascot      |

|   |                                              |  |  |  |             |  |         |      |   |    |   |
|---|----------------------------------------------|--|--|--|-------------|--|---------|------|---|----|---|
| 9 | hypothetical protein LOC445230 [Danio rerio] |  |  |  | gi 57525629 |  | 30002.4 | 9.55 | 8 | 39 | 0 |
|---|----------------------------------------------|--|--|--|-------------|--|---------|------|---|----|---|

#### Peptide Information

| Calc. Mass | Obsrv. Mass | ± da    | ± ppm | Start Seq. | End Seq. | Sequence                   | Ion Score | C. I. | % Modification     | Rank | Result Type |
|------------|-------------|---------|-------|------------|----------|----------------------------|-----------|-------|--------------------|------|-------------|
| 807.4107   | 807.3842    | -0.0265 | -33   | 17         | 22       | ENKFNR                     |           |       |                    |      | Mascot      |
| 850.5145   | 850.5283    | 0.0138  | 16    | 254        | 260      | RTVISFK                    |           |       |                    |      | Mascot      |
| 862.4451   | 862.4878    | 0.0427  | 50    | 233        | 240      | VITSPSCR                   |           |       |                    |      | Mascot      |
| 1543.6437  | 1543.7686   | 0.1249  | 81    | 104        | 115      | MMEDMNLNEEKK               |           |       | Oxidation (M)[1,2] |      | Mascot      |
| 1698.7201  | 1698.8284   | 0.1083  | 64    | 25         | 43       | GFGAGVSSQGGSSGDD<br>GEK    |           |       |                    |      | Mascot      |
| 1753.8538  | 1753.8267   | -0.0271 | -15   | 160        | 175      | SGATDERLFACLSLR            |           |       |                    |      | Mascot      |
| 2051.9626  | 2052.0659   | 0.1033  | 50    | 25         | 46       | GFGAGVSSQGGSSGDD<br>GEKKPK |           |       |                    |      | Mascot      |
| 2194.135   | 2194.041    | -0.094  | -43   | 140        | 159      | TGSLRSSSQISQPEFLSE<br>LK   |           |       |                    |      | Mascot      |

|    |                                 |  |  |  |              |  |       |      |   |    |   |
|----|---------------------------------|--|--|--|--------------|--|-------|------|---|----|---|
| 10 | Zgc:77614 protein [Danio rerio] |  |  |  | gi 169642093 |  | 19598 | 9.62 | 6 | 38 | 0 |
|----|---------------------------------|--|--|--|--------------|--|-------|------|---|----|---|

#### Peptide Information

|    | Calc. Mass                                       | Obsrv. Mass | ± da    | ± ppm | Start Seq.   | End Sequence Seq.                     | Ion Score | C. I. % | Modification           | Rank | Result Type |
|----|--------------------------------------------------|-------------|---------|-------|--------------|---------------------------------------|-----------|---------|------------------------|------|-------------|
|    | 936.5334                                         | 936.4772    | -0.0562 | -60   | 39           | 45 LKFCQLK                            |           |         | Carbamidomethyl (C)[4] |      | Mascot      |
|    | 1752.8235                                        | 1752.8356   | 0.0121  | 7     | 148          | 164 TSASGRAQGFPAAASCWR                |           |         |                        |      | Mascot      |
|    | 2095.9766                                        | 2095.99     | 0.0134  | 6     | 154          | 171 AQGFPAASCWRWTTQT<br>ER            |           |         |                        |      | Mascot      |
|    | 2254.1714                                        | 2253.9939   | -0.1775 | -79   | 12           | 31 LTYDSLQFEGLNISAGEL<br>KR           |           |         |                        |      | Mascot      |
|    | 2283.2441                                        | 2283.1389   | -0.1052 | -46   | 99           | 119 ADPSLLSLEQLLKTENLA<br>EAK         |           |         |                        |      | Mascot      |
|    | 3439.6296                                        | 3439.6465   | 0.0169  | 5     | 1            | 30 MSCVHYSFQSRLTYDSL<br>QFEGLNISAGELK |           |         | Oxidation (M)[1]       |      | Mascot      |
| 11 | PREDICTED: zinc finger protein 420 [Danio rerio] |             |         |       | gi 326675828 |                                       | 36783.8   | 9.17    | 11                     | 38   | 0           |

#### Peptide Information

|    | Calc. Mass               | Obsrv. Mass | ± da   | ± ppm | Start Seq.  | End Sequence Seq.                    | Ion Score | C. I. % | Modification               | Rank | Result Type |
|----|--------------------------|-------------|--------|-------|-------------|--------------------------------------|-----------|---------|----------------------------|------|-------------|
|    | 850.5145                 | 850.5283    | 0.0138 | 16    | 29          | 35 EIKPHVK                           |           |         |                            |      | Mascot      |
|    | 1012.4008                | 1012.4557   | 0.0549 | 54    | 60          | 69 NGCVCTQCGK                        |           |         |                            |      | Mascot      |
|    | 1649.7775                | 1649.7625   | -0.015 | -9    | 83          | 97 IHTGEKPFCTCTQCGK                  |           |         |                            |      | Mascot      |
|    | 1649.7775                | 1649.7625   | -0.015 | -9    | 83          | 97 IHTGEKPFCTCTQCGK                  |           |         |                            |      | Mascot      |
|    | 1752.8043                | 1752.8356   | 0.0313 | 18    | 167         | 181 VHTKEKPYSCSECGK                  |           |         | Carbamidomethyl (C)[10]    |      | Mascot      |
|    | 2081.9453                | 2082.0354   | 0.0901 | 43    | 201         | 218 EHMCLCQQTFTVTAQQL<br>K           |           |         | Oxidation (M)[3]           |      | Mascot      |
|    | 2081.9453                | 2082.0354   | 0.0901 | 43    | 201         | 218 EHMCLCQQTFTVTAQQL<br>K           |           |         | Oxidation (M)[3]           |      | Mascot      |
|    | 2146.9873                | 2146.8823   | -0.105 | -49   | 11          | 28 QEEAEELIDIEENEESK                 |           |         |                            |      | Mascot      |
|    | 2211.0432                | 2211.0679   | 0.0247 | 11    | 83          | 101 IHTGEKPFCTCTQCGKSFG<br>R         |           |         | Carbamidomethyl (C)[10,13] |      | Mascot      |
|    | 2229.054                 | 2228.908    | -0.146 | -65   | 275         | 293 AHERIHTGEKPYTCDQCL<br>K          |           |         |                            |      | Mascot      |
|    | 2283.0757                | 2283.1389   | 0.0632 | 28    | 111         | 129 IHTGERPFTCTQCGKSFT<br>R          |           |         | Carbamidomethyl (C)[10,13] |      | Mascot      |
|    | 2299.053                 | 2299.1426   | 0.0896 | 39    | 247         | 265 THQMIHTGEKPYKCSHC<br>NK          |           |         | Carbamidomethyl (C)[14]    |      | Mascot      |
|    | 3439.5374                | 3439.6465   | 0.1091 | 32    | 130         | 157 SYLLNLHMMIHTGERPH<br>NCDQCGKTFMR |           |         | Carbamidomethyl (C)[19]    |      | Mascot      |
| 12 | Zgc:113377 [Danio rerio] |             |        |       | gi 66910322 |                                      | 36776.6   | 9.05    | 11                         | 38   | 0           |

#### Peptide Information

|  | Calc. Mass | Obsrv. Mass | ± da   | ± ppm | Start Seq. | End Sequence Seq.   | Ion Score | C. I. % | Modification | Rank | Result Type |
|--|------------|-------------|--------|-------|------------|---------------------|-----------|---------|--------------|------|-------------|
|  | 850.5145   | 850.5283    | 0.0138 | 16    | 29         | 35 EIKPHVK          |           |         |              |      | Mascot      |
|  | 1012.4008  | 1012.4557   | 0.0549 | 54    | 60         | 69 NGCVCTQCGK       |           |         |              |      | Mascot      |
|  | 1649.7775  | 1649.7625   | -0.015 | -9    | 83         | 97 IHTGEKPFCTCTQCGK |           |         |              |      | Mascot      |

|           |           |         |     |     |     |                             |  |  |  |                                           |  |        |
|-----------|-----------|---------|-----|-----|-----|-----------------------------|--|--|--|-------------------------------------------|--|--------|
| 1649.7775 | 1649.7625 | -0.015  | -9  | 83  | 97  | IHTGEKPFTCTQCGK             |  |  |  |                                           |  | Mascot |
| 1752.8043 | 1752.8356 | 0.0313  | 18  | 167 | 181 | VHTKEKPYSCECGK              |  |  |  | Carbamidomethyl (C)[10]                   |  | Mascot |
| 2081.9453 | 2082.0354 | 0.0901  | 43  | 201 | 218 | EHMCLECQQTFVTAGQLK          |  |  |  | Oxidation (M)[3]                          |  | Mascot |
| 2081.9453 | 2082.0354 | 0.0901  | 43  | 201 | 218 | EHMCLECQQTFVTAGQLK          |  |  |  | Oxidation (M)[3]                          |  | Mascot |
| 2146.9944 | 2146.8823 | -0.1121 | -52 | 80  | 97  | HMRIHTGEKPFTCTQCGK          |  |  |  | Carbamidomethyl (C)[13], Oxidation (M)[2] |  | Mascot |
| 2211.0432 | 2211.0679 | 0.0247  | 11  | 83  | 101 | IHTGEKPFTCTQCGKSFGK         |  |  |  | Carbamidomethyl (C)[10,13]                |  | Mascot |
| 2283.0757 | 2283.1389 | 0.0632  | 28  | 111 | 129 | IHTGERPFTCTQCGKSFTK         |  |  |  | Carbamidomethyl (C)[10,13]                |  | Mascot |
| 2300.0369 | 2300.1372 | 0.1003  | 44  | 247 | 265 | THEMIHTGEKPYKCSHCNK         |  |  |  | Carbamidomethyl (C)[14]                   |  | Mascot |
| 2403.1409 | 2403.0271 | -0.1138 | -47 | 9   | 28  | IKQEEAEEQIDLIEENEESK        |  |  |  |                                           |  | Mascot |
| 3439.5374 | 3439.6465 | 0.1091  | 32  | 130 | 157 | SYLNLHMMIHTGERPHNCDQCGKTFMR |  |  |  | Carbamidomethyl (C)[19]                   |  | Mascot |

13 PREDICTED: titin [Danio rerio] gi|189523699 3645668 6.16 68 38 0

#### Peptide Information

| Calc. Mass | Obsrv. Mass | ± da    | ± ppm | Start Seq. | End Seq. | Sequence    | Ion Score | C. I. % | Modification           | Rank | Result Type |
|------------|-------------|---------|-------|------------|----------|-------------|-----------|---------|------------------------|------|-------------|
| 807.3882   | 807.3842    | -0.004  | -5    | 10412      | 10418    | EPATFDK     |           |         |                        |      | Mascot      |
| 808.373    | 808.3995    | 0.0265  | 33    | 1411       | 1416     | DTTRCR      |           |         | Carbamidomethyl (C)[5] |      | Mascot      |
| 816.4937   | 816.4921    | -0.0016 | -2    | 110        | 116      | LQSLTVR     |           |         |                        |      | Mascot      |
| 819.4094   | 819.406     | -0.0034 | -4    | 9872       | 9878     | EDEIVSK     |           |         |                        |      | Mascot      |
| 842.4981   | 842.496     | -0.0021 | -2    | 8812       | 8818     | EDILPKK     |           |         |                        |      | Mascot      |
| 850.5396   | 850.5283    | -0.0113 | -13   | 17926      | 17932    | FLLTKTK     |           |         |                        |      | Mascot      |
| 856.4886   | 856.511     | 0.0224  | 26    | 7306       | 7312     | LTLQEPR     |           |         |                        |      | Mascot      |
| 862.4814   | 862.4878    | 0.0064  | 7     | 27341      | 27348    | IVCSSVVR    |           |         |                        |      | Mascot      |
| 870.4203   | 870.525     | 0.1047  | 120   | 6908       | 6915     | LSDSGTYK    |           |         |                        |      | Mascot      |
| 882.4679   | 882.5526    | 0.0847  | 96    | 2876       | 2882     | YKVSTER     |           |         |                        |      | Mascot      |
| 922.4298   | 922.448     | 0.0182  | 20    | 16437      | 16443    | EDKLMDR     |           |         | Oxidation (M)[5]       |      | Mascot      |
| 936.4706   | 936.4772    | 0.0066  | 7     | 7707       | 7714     | ETTVEMVK    |           |         |                        |      | Mascot      |
| 938.4465   | 938.4636    | 0.0171  | 18    | 11230      | 11237    | YDIIDDGK    |           |         |                        |      | Mascot      |
| 996.591    | 996.5796    | -0.0114 | -11   | 9064       | 9072     | MKAVPLPPK   |           |         | Oxidation (M)[1]       |      | Mascot      |
| 1012.4516  | 1012.4557   | 0.0041  | 4     | 31401      | 31409    | FGEDSCKAR   |           |         |                        |      | Mascot      |
| 1045.5347  | 1045.5464   | 0.0117  | 11    | 7144       | 7153     | CQIGGTPEIK  |           |         |                        |      | Mascot      |
| 1051.6259  | 1051.6919   | 0.066   | 63    | 32375      | 32384    | SPIASPPRVK  |           |         |                        |      | Mascot      |
| 1165.6212  | 1165.7242   | 0.103   | 88    | 8759       | 8768     | ETFSVQVVTR  |           |         |                        |      | Mascot      |
| 1212.6119  | 1212.6027   | -0.0092 | -8    | 31175      | 31185    | VAYGGGYRNQK |           |         |                        |      | Mascot      |
| 1212.6848  | 1212.6027   | -0.0821 | -68   | 19390      | 19400    | GRPAPKATWTK |           |         |                        |      | Mascot      |

|           |           |         |      |       |       |                      |                                          |        |
|-----------|-----------|---------|------|-------|-------|----------------------|------------------------------------------|--------|
| 1226.6058 | 1226.5967 | -0.0091 | -7   | 31927 | 31937 | SHRVPCGQNTK          |                                          | Mascot |
| 1242.6113 | 1242.5913 | -0.02   | -16  | 25186 | 25195 | LTQGTEYQFR           |                                          | Mascot |
| 1243.7885 | 1243.62   | -0.1685 | -135 | 668   | 678   | IIKPVKPPSHK          |                                          | Mascot |
| 1243.7885 | 1243.62   | -0.1685 | -135 | 668   | 678   | IIKPVKPPSHK          |                                          | Mascot |
| 1259.6266 | 1259.6196 | -0.007  | -6   | 19551 | 19562 | ASEQPGPVAEFK         |                                          | Mascot |
| 1259.7722 | 1259.6196 | -0.1526 | -121 | 7759  | 7769  | GLLQAIEFLKK          |                                          | Mascot |
| 1265.6711 | 1265.6768 | 0.0057  | 5    | 17072 | 17083 | AMNPLFPPGPPK         |                                          | Mascot |
| 1318.675  | 1318.6866 | 0.0116  | 9    | 31642 | 31651 | LRDQYEIPER           |                                          | Mascot |
| 1457.7594 | 1457.7629 | 0.0035  | 2    | 1571  | 1583  | SLVEDSQLPEGRK        |                                          | Mascot |
| 1464.7766 | 1464.8146 | 0.038   | 26   | 26434 | 26446 | ITGYLIEMKDGP         |                                          | Mascot |
| 1464.7766 | 1464.8146 | 0.038   | 26   | 26434 | 26446 | ITGYLIEMKDGP         |                                          | Mascot |
| 1524.7913 | 1524.7633 | -0.028  | -18  | 13060 | 13072 | LCPDLLYRMSGLK        | Oxidation (M)[9]                         | Mascot |
| 1543.7784 | 1543.7686 | -0.0098 | -6   | 12056 | 12068 | KLVIHDLTDDSK         | Carbamidomethyl (C)[7]                   | Mascot |
| 1547.7787 | 1547.7916 | 0.0129  | 8    | 29396 | 29410 | GRPAPVCSWSFGGVK      |                                          | Mascot |
| 1591.8877 | 1591.7557 | -0.132  | -83  | 10183 | 10197 | GIMLTSSLHPLTPK       |                                          | Mascot |
| 1649.8051 | 1649.7625 | -0.0426 | -26  | 11334 | 11348 | DVTLDDTCQIKAEAK      |                                          | Mascot |
| 1649.8051 | 1649.7625 | -0.0426 | -26  | 11334 | 11348 | DVTLDDTCQIKAEAK      |                                          | Mascot |
| 1671.7828 | 1671.7439 | -0.0389 | -23  | 20158 | 20171 | LAENVMDCRYVASK       | Carbamidomethyl (C)[8], Oxidation (M)[6] | Mascot |
| 1698.8367 | 1698.8284 | -0.0083 | -5   | 21716 | 21730 | ITGYIVEMQGNSDK       | Oxidation (M)[8]                         | Mascot |
| 1739.9326 | 1739.8994 | -0.0332 | -19  | 28933 | 28947 | LKITGLLEGSDYQFR      |                                          | Mascot |
| 1752.8196 | 1752.8356 | 0.016   | 9    | 19503 | 19517 | AWTCVAPECPKTSFR      | Carbamidomethyl (C)[4]                   | Mascot |
| 1753.8174 | 1753.8267 | 0.0093  | 5    | 32576 | 32591 | RESAAVSSMHESFTSK     |                                          | Mascot |
| 1784.9137 | 1784.8805 | -0.0332 | -19  | 7770  | 7785  | EKELESGRPEGEIVGR     |                                          | Mascot |
| 1871.9395 | 1871.9116 | -0.0279 | -15  | 25563 | 25578 | LAWTLVYADMKATTCK     | Carbamidomethyl (C)[15]                  | Mascot |
| 1970.0454 | 1970.0437 | -0.0017 | -1   | 30697 | 30713 | GQEIINNTAYHQVIIR     |                                          | Mascot |
| 2052.0913 | 2052.0659 | -0.0254 | -12  | 26361 | 26378 | ATHFKVTNVNAGLIYEFK   |                                          | Mascot |
| 2081.1489 | 2081.0435 | -0.1054 | -51  | 19626 | 19645 | VKAINESAEGPPTELTILAK |                                          | Mascot |
| 2082.0422 | 2082.0354 | -0.0068 | -3   | 976   | 993   | KQDVITYVTEVTAMVQEPK  | Oxidation (M)[13]                        | Mascot |
| 2082.0422 | 2082.0354 | -0.0068 | -3   | 976   | 993   | KQDVITYVTEVTAMVQEPK  | Oxidation (M)[13]                        | Mascot |
| 2096.0579 | 2095.99   | -0.0679 | -32  | 10877 | 10895 | LQIIDVQLSDTGEYTCVAK  |                                          | Mascot |
| 2146.967  | 2146.8823 | -0.0847 | -39  | 1960  | 1977  | EKDTMVTFCETNEPFVK    |                                          | Mascot |
| 2156.0408 | 2155.9097 | -0.1311 | -61  | 15058 | 15076 | AVDPQGPPTSPEKFHYTER  |                                          | Mascot |
| 2156.0408 | 2155.9097 | -0.1311 | -61  | 15058 | 15076 | AVDPQGPPTSPEKFHYTER  |                                          | Mascot |
| 2194.0583 | 2194.041  | -0.0173 | -8   | 23824 | 23843 | VMAENEFGLPVETEESVK   | Oxidation (M)[2]                         | Mascot |
| 2211.0713 | 2211.0679 | -0.0034 | -2   | 29957 | 29976 | TPLCPPEPPSFPEIMDVTK  | Oxidation (M)[16]                        | Mascot |



|           |           |         |      |       |       |                                     |                                           |        |
|-----------|-----------|---------|------|-------|-------|-------------------------------------|-------------------------------------------|--------|
| 2225.0479 | 2225.0808 | 0.0329  | 15   | 18756 | 18774 | HPFDPPSEPLNCCVNKV<br>SK             | Carbamidomethyl (C)[12,13]                | Mascot |
| 2225.0479 | 2225.0808 | 0.0329  | 15   | 18756 | 18774 | HPFDPPSEPLNCCVNKV<br>SK             | Carbamidomethyl (C)[12,13]                | Mascot |
| 2229.1736 | 2228.908  | -0.2656 | -119 | 18429 | 18447 | ITNLTPGIEYYFRVMAVN<br>K             |                                           | Mascot |
| 2232.9575 | 2233.0476 | 0.0901  | 40   | 1525  | 1542  | MINEFGYCSLDYEVAYSR                  | Carbamidomethyl (C)[8], Oxidation (M)[1]  | Mascot |
| 2247.0247 | 2246.9182 | -0.1065 | -47  | 26327 | 26346 | EPSSDGGSVHFGYHLQM<br>KDR            |                                           | Mascot |
| 2247.1978 | 2246.9182 | -0.2796 | -124 | 24214 | 24235 | VFAENIAGISPSKVSSEV<br>VAR           |                                           | Mascot |
| 2254.0881 | 2253.9939 | -0.0942 | -42  | 2847  | 2865  | KAVFECELSEPNVQVTW<br>MK             | Oxidation (M)[18]                         | Mascot |
| 2261.0789 | 2260.9285 | -0.1504 | -67  | 6348  | 6366  | HKILQDENSMSLDIECLE<br>K             | Oxidation (M)[10]                         | Mascot |
| 2269.1716 | 2268.8979 | -0.2737 | -121 | 18247 | 18268 | VSAQNQVGMGRPANVK<br>DAVSPK          | Oxidation (M)[9]                          | Mascot |
| 2283.1284 | 2283.1389 | 0.0105  | 5    | 13772 | 13793 | VRAVNVAGESEPSEPSD<br>PVLCK          |                                           | Mascot |
| 2284.1389 | 2284.1343 | -0.0046 | -2   | 21385 | 21405 | ACDTIFQPGPPGNPRVLD<br>TTK           | Carbamidomethyl (C)[2]                    | Mascot |
| 2297.1516 | 2297.1538 | 0.0022  | 1    | 7038  | 7058  | NLSVEMGKSLILECTYAG<br>SPK           | Carbamidomethyl (C)[14]                   | Mascot |
| 2299.146  | 2299.1426 | -0.0034 | -1   | 15583 | 15602 | IFMDISADELLCVRAGTPF<br>K            | Carbamidomethyl (C)[12], Oxidation (M)[3] | Mascot |
| 2300.1113 | 2300.1372 | 0.0259  | 11   | 5471  | 5492  | GTDVVLEGTVSGSAPFEI<br>SCFK          | Carbamidomethyl (C)[20]                   | Mascot |
| 2389.0977 | 2389.1238 | 0.0261  | 11   | 12851 | 12871 | TWTLATDCADSTEYTVT<br>GLQR           | Carbamidomethyl (C)[8]                    | Mascot |
| 2389.0977 | 2389.1238 | 0.0261  | 11   | 12851 | 12871 | TWTLATDCADSTEYTVT<br>GLQR           | Carbamidomethyl (C)[8]                    | Mascot |
| 2403.1675 | 2403.0271 | -0.1404 | -58  | 25923 | 25945 | EVTKSSATITWDTPDNEG<br>GAPVK         |                                           | Mascot |
| 2627.2996 | 2627.3286 | 0.029   | 11   | 28525 | 28546 | IPCVECHYKVSTLIEGLEY<br>QFR          |                                           | Mascot |
| 3337.4834 | 3337.7021 | 0.2187  | 66   | 4869  | 4900  | DTGTYTCTAANEAGSSS<br>CSSSVTVQEPPVFK | Carbamidomethyl (C)[7,18]                 | Mascot |
| 3439.656  | 3439.6465 | -0.0095 | -3   | 15730 | 15759 | AWTVANATCASMFAVVS<br>NLLEGQDYFFRVR  | Carbamidomethyl (C)[9], Oxidation (M)[12] | Mascot |

14 collagen type XXVIII alpha 1 b precursor [Danio rerio] gi|225310541 81777.2 6.47 12 37 0

#### Peptide Information

| Calc. Mass | Obsrv. Mass | ± da    | ± ppm | Start Seq. | End Sequence Seq. | Ion Score      | C. I. % Modification     | Rank | Result Type |
|------------|-------------|---------|-------|------------|-------------------|----------------|--------------------------|------|-------------|
| 808.3691   | 808.3995    | 0.0304  | 38    | 428        | 435               | EICGCGVK       |                          |      | Mascot      |
| 870.5043   | 870.525     | 0.0207  | 24    | 1          | 9                 | TGIGLQGPK      |                          |      | Mascot      |
| 922.412    | 922.448     | 0.036   | 39    | 428        | 435               | EICGCGVK       | Carbamidomethyl (C)[3,5] |      | Mascot      |
| 938.5165   | 938.4636    | -0.0529 | -56   | 59         | 67                | GLEGPRGPR      |                          |      | Mascot      |
| 996.536    | 996.5796    | 0.0436  | 44    | 499        | 506               | YTTKQDIK       |                          |      | Mascot      |
| 1045.5823  | 1045.5464   | -0.0359 | -34   | 420        | 427               | DEIIRMIR       |                          |      | Mascot      |
| 1243.6277  | 1243.62     | -0.0077 | -6    | 181        | 194               | GAEGAAGVGIQGEK |                          |      | Mascot      |
| 1243.6277  | 1243.62     | -0.0077 | -6    | 181        | 194               | GAEGAAGVGIQGEK |                          |      | Mascot      |

|    |                                           |           |         |     |     |             |                              |      |   |    |   |    |   |  |  |  |  |                        |        |
|----|-------------------------------------------|-----------|---------|-----|-----|-------------|------------------------------|------|---|----|---|----|---|--|--|--|--|------------------------|--------|
|    | 1259.6842                                 | 1259.6196 | -0.0646 | -51 | 543 | 554         | VAIVITDGQTDK                 |      |   |    |   |    |   |  |  |  |  |                        | Mascot |
|    | 1259.6842                                 | 1259.6196 | -0.0646 | -51 | 543 | 554         | VAIVITDGQTDK                 |      |   |    |   |    |   |  |  |  |  |                        | Mascot |
|    | 1265.6163                                 | 1265.6768 | 0.0605  | 48  | 425 | 435         | MIREICGCGVK                  |      |   |    |   |    |   |  |  |  |  | Carbamidomethyl (C)[6] | Mascot |
|    | 1698.8228                                 | 1698.8284 | 0.0056  | 3   | 395 | 412         | GDMGDPGVSGQAGRPG<br>IK       |      |   |    |   |    |   |  |  |  |  |                        | Mascot |
|    | 2082.0574                                 | 2082.0354 | -0.022  | -11 | 172 | 194         | GEPGATGLRGAEGAAGV<br>GIQGEK  |      |   |    |   |    |   |  |  |  |  |                        | Mascot |
|    | 2082.0574                                 | 2082.0354 | -0.022  | -11 | 172 | 194         | GEPGATGLRGAEGAAGV<br>GIQGEK  |      |   |    |   |    |   |  |  |  |  |                        | Mascot |
|    | 2229.0715                                 | 2228.908  | -0.1635 | -73 | 357 | 379         | GDQQLQGVGTGPRGFPG<br>EGMPGSK |      |   |    |   |    |   |  |  |  |  |                        | Mascot |
|    | 2297.1421                                 | 2297.1538 | 0.0117  | 5   | 633 | 652         | ALIFNRINDFENGYGLNG<br>NR     |      |   |    |   |    |   |  |  |  |  |                        | Mascot |
| 15 | glutathione S-transferase M [Danio rerio] |           |         |     |     | gi 47086689 | 26045.6                      | 5.58 | 7 | 37 | 0 | 14 | 0 |  |  |  |  |                        |        |

### Peptide Information

| Calc. Mass | Obsrv. Mass | ± da    | ± ppm | Start Seq. | End Sequence Seq.  | Ion Score | C. I. % | Modification           | Rank | Result Type |
|------------|-------------|---------|-------|------------|--------------------|-----------|---------|------------------------|------|-------------|
| 850.4239   | 850.5283    | 0.1044  | 123   | 211        | 217 MAKWGNK        |           |         | Oxidation (M)[1]       |      | Mascot      |
| 936.4937   | 936.4772    | -0.0165 | -18   | 5          | 11 LAYWDIR         |           |         |                        |      | Mascot      |
| 1212.6007  | 1212.6027   | 0.002   | 2     | 136        | 145 QFSDFLGDRK     | 14        | 0       |                        |      | Mascot      |
| 1212.6007  | 1212.6027   | 0.002   | 2     | 136        | 145 QFSDFLGDRK     |           |         |                        |      | Mascot      |
| 1464.61    | 1464.8146   | 0.2046  | 140   | 32         | 43 FYTCGEAPNYDK    |           |         | Carbamidomethyl (C)[4] |      | Mascot      |
| 1464.61    | 1464.8146   | 0.2046  | 140   | 32         | 43 FYTCGEAPNYDK    |           |         | Carbamidomethyl (C)[4] |      | Mascot      |
| 1591.6476  | 1591.7557   | 0.1081  | 68    | 84         | 96 HNLCGETEEEEQMR  |           |         | Oxidation (M)[12]      |      | Mascot      |
| 1671.9329  | 1671.7439   | -0.189  | -113  | 5          | 18 LAYWDIRGLAQPIR  |           |         |                        |      | Mascot      |
| 1698.7979  | 1698.8284   | 0.0305  | 18    | 168        | 181 MFEPACLDDFKNLR |           |         |                        |      | Mascot      |

### Peptide Information

| Calc. Mass | Obsrv. Mass | ± da    | ± ppm | Start Seq. | End Seq. | Sequence     | Ion Score | C. I. % | Modification           | Rank | Result Type |
|------------|-------------|---------|-------|------------|----------|--------------|-----------|---------|------------------------|------|-------------|
| 819.4094   | 819.406     | -0.0034 | -4    | 328        | 334      | EILSDDK      |           |         |                        |      | Mascot      |
| 856.5502   | 856.511     | -0.0392 | -46   | 1319       | 1326     | GALIELLK     |           |         |                        |      | Mascot      |
| 870.577    | 870.525     | -0.052  | -60   | 1365       | 1371     | VLKEILR      |           |         |                        |      | Mascot      |
| 938.4764   | 938.4636    | -0.0128 | -14   | 887        | 893      | LCEIFTR      |           |         | Carbamidomethyl (C)[2] |      | Mascot      |
| 1165.6801  | 1165.7242   | 0.0441  | 38    | 1355       | 1364     | DHTIRALALR   |           |         |                        |      | Mascot      |
| 1243.6833  | 1243.62     | -0.0633 | -51   | 1117       | 1127     | LWGWGVDGLLK  |           |         |                        |      | Mascot      |
| 1243.6833  | 1243.62     | -0.0633 | -51   | 1117       | 1127     | LWGWGVDGLLK  |           |         |                        |      | Mascot      |
| 1318.6355  | 1318.6866   | 0.0511  | 39    | 738        | 749      | IPRPSMSQGCSR |           |         |                        |      | Mascot      |
| 1524.6953  | 1524.7633   | 0.068   | 45    | 507        | 518      | KCYWGFHGHFSR |           |         |                        |      | Mascot      |

|    |                                           |           |         |     |              |      |                       |      |   |    |   |    |                        |  |  |  |  |        |
|----|-------------------------------------------|-----------|---------|-----|--------------|------|-----------------------|------|---|----|---|----|------------------------|--|--|--|--|--------|
|    | 1547.6932                                 | 1547.7916 | 0.0984  | 64  | 1209         | 1224 | DDATGKEAASPGSDAR      |      |   |    |   |    |                        |  |  |  |  | Mascot |
|    | 1752.8295                                 | 1752.8356 | 0.0061  | 3   | 2            | 15   | EPNMEYCLTQVLQK        |      |   |    |   |    | Carbamidomethyl (C)[7] |  |  |  |  | Mascot |
|    | 1753.8214                                 | 1753.8267 | 0.0053  | 3   | 118          | 131  | IMEQSATPQYIWDR        |      |   |    |   |    | Oxidation (M)[2]       |  |  |  |  | Mascot |
|    | 1969.9283                                 | 1970.0437 | 0.1154  | 59  | 223          | 240  | FDEVQRSGNMILSSGSDK    |      |   |    |   |    |                        |  |  |  |  | Mascot |
|    | 2081.9265                                 | 2082.0354 | 0.1089  | 52  | 1073         | 1092 | NSSNTSNSSPSNTMGRTPAR  |      |   |    |   |    | Oxidation (M)[14]      |  |  |  |  | Mascot |
|    | 2081.9265                                 | 2082.0354 | 0.1089  | 52  | 1073         | 1092 | NSSNTSNSSPSNTMGRTPAR  |      |   |    |   |    | Oxidation (M)[14]      |  |  |  |  | Mascot |
|    | 2194.063                                  | 2194.041  | -0.022  | -10 | 2            | 19   | EPNMEYCLTQVLQKDVAR    |      |   |    |   |    | Carbamidomethyl (C)[7] |  |  |  |  | Mascot |
|    | 2225.207                                  | 2225.0808 | -0.1262 | -57 | 381          | 401  | SQVVREACITLGHLSLLGNK  |      |   |    |   |    |                        |  |  |  |  | Mascot |
|    | 2225.207                                  | 2225.0808 | -0.1262 | -57 | 381          | 401  | SQVVREACITLGHLSLLGNK  |      |   |    |   |    |                        |  |  |  |  | Mascot |
|    | 2254.1536                                 | 2253.9939 | -0.1597 | -71 | 402          | 422  | FDHGAESIMPTLLNLVPN    |      |   |    |   |    |                        |  |  |  |  | Mascot |
|    | 2284.0769                                 | 2284.1343 | 0.0574  | 25  | 1            | 19   | MEPNMEYCLTQVLQKDV     |      |   |    |   |    | Oxidation (M)[1]       |  |  |  |  | Mascot |
|    | 2300.072                                  | 2300.1372 | 0.0652  | 28  | 1            | 19   | MEPNMEYCLTQVLQKDV     |      |   |    |   |    | Oxidation (M)[1,5]     |  |  |  |  | Mascot |
|    | 2403.0994                                 | 2403.0271 | -0.0723 | -30 | 843          | 863  | QTEDVAEVLNHCASSNWSERK |      |   |    |   |    |                        |  |  |  |  | Mascot |
| 17 | glutathione S-transferase M [Danio rerio] |           |         |     | gi 220679252 |      | 26044.7               | 6.03 | 7 | 37 | 0 | 14 | 0                      |  |  |  |  |        |

#### Peptide Information

| Calc. Mass | Obsrv. Mass | ± da    | ± ppm | Start Seq. | End Seq. | Sequence       | Ion Score | C. I. | % | Modification           | Rank | Result Type |
|------------|-------------|---------|-------|------------|----------|----------------|-----------|-------|---|------------------------|------|-------------|
| 850.4239   | 850.5283    | 0.1044  | 123   | 211        | 217      | MAKWGNK        |           |       |   | Oxidation (M)[1]       |      | Mascot      |
| 936.4937   | 936.4772    | -0.0165 | -18   | 5          | 11       | LAYWDIR        |           |       |   |                        |      | Mascot      |
| 1212.6007  | 1212.6027   | 0.002   | 2     | 136        | 145      | QFSDFLGDRK     | 14        |       | 0 |                        |      | Mascot      |
| 1212.6007  | 1212.6027   | 0.002   | 2     | 136        | 145      | QFSDFLGDRK     |           |       |   |                        |      | Mascot      |
| 1464.61    | 1464.8146   | 0.2046  | 140   | 32         | 43       | FYTCGEAPNYDK   |           |       |   | Carbamidomethyl (C)[4] |      | Mascot      |
| 1464.61    | 1464.8146   | 0.2046  | 140   | 32         | 43       | FYTCGEAPNYDK   |           |       |   | Carbamidomethyl (C)[4] |      | Mascot      |
| 1591.6476  | 1591.7557   | 0.1081  | 68    | 84         | 96       | HNLCGETEEEQMR  |           |       |   | Oxidation (M)[12]      |      | Mascot      |
| 1671.9329  | 1671.7439   | -0.189  | -113  | 5          | 18       | LAYWDIRGLAQPIR |           |       |   |                        |      | Mascot      |
| 1698.7979  | 1698.8284   | 0.0305  | 18    | 168        | 181      | MFEPACLDDFKNLR |           |       |   |                        |      | Mascot      |

18 PREDICTED: DNA-directed RNA polymerase III subunit gi|326672679 155658.6 8.87 19 36 0  
RPC1 [Danio rerio]

#### Peptide Information

| Calc. Mass | Obsrv. Mass | ± da   | ± ppm | Start Seq. | End Seq. | Sequence | Ion Score | C. I. | % | Modification     | Rank | Result Type |
|------------|-------------|--------|-------|------------|----------|----------|-----------|-------|---|------------------|------|-------------|
| 816.4144   | 816.4921    | 0.0777 | 95    | 296        | 302      | HRMTGAK  |           |       |   | Oxidation (M)[3] |      | Mascot      |
| 856.4675   | 856.511     | 0.0435 | 51    | 817        | 823      | SLPHFQK  |           |       |   |                  |      | Mascot      |

|    |                                                         |             |           |         |      |      |      |                                   |  |                                                    |        |
|----|---------------------------------------------------------|-------------|-----------|---------|------|------|------|-----------------------------------|--|----------------------------------------------------|--------|
|    |                                                         | 862.4451    | 862.4878  | 0.0427  | 50   | 399  | 405  | ANIELMR                           |  | Oxidation (M)[6]                                   | Mascot |
|    |                                                         | 1045.6152   | 1045.5464 | -0.0688 | -66  | 131  | 139  | RPGLAYLQK                         |  |                                                    | Mascot |
|    |                                                         | 1165.6727   | 1165.7242 | 0.0515  | 44   | 661  | 669  | NNIFYILLR                         |  |                                                    | Mascot |
|    |                                                         | 1212.579    | 1212.6027 | 0.0237  | 20   | 865  | 874  | TAETGYMQRR                        |  |                                                    | Mascot |
|    |                                                         | 1212.579    | 1212.6027 | 0.0237  | 20   | 865  | 874  | TAETGYMQRR                        |  |                                                    | Mascot |
|    |                                                         | 1226.5205   | 1226.5967 | 0.0762  | 62   | 272  | 282  | SGTNEDDLTMK                       |  | Oxidation (M)[10]                                  | Mascot |
|    |                                                         | 1318.6711   | 1318.6866 | 0.0155  | 12   | 1183 | 1193 | SSMYVQLSLK                        |  |                                                    | Mascot |
|    |                                                         | 1464.6172   | 1464.8146 | 0.1974  | 135  | 670  | 682  | DWGQQEAADAMSR                     |  |                                                    | Mascot |
|    |                                                         | 1464.6172   | 1464.8146 | 0.1974  | 135  | 670  | 682  | DWGQQEAADAMSR                     |  |                                                    | Mascot |
|    |                                                         | 1698.8003   | 1698.8284 | 0.0281  | 17   | 878  | 891  | SLEDLCSQYDLTVR                    |  | Carbamidomethyl (C)[6]                             | Mascot |
|    |                                                         | 1739.9802   | 1739.8994 | -0.0808 | -46  | 214  | 228  | AQENLNPLVVLNLF                    |  |                                                    | Mascot |
|    |                                                         | 1753.8182   | 1753.8267 | 0.0085  | 5    | 15   | 29   | ISHICFGMKSSEQMR                   |  |                                                    | Mascot |
|    |                                                         | 1871.9392   | 1871.9116 | -0.0276 | -15  | 24   | 39   | SSEQMRQQAHQVVS                    |  | Oxidation (M)[5]                                   | Mascot |
|    |                                                         | 2247.0854   | 2246.9182 | -0.1672 | -74  | 1225 | 1245 | LLVEGDNMRSVMATHGV<br>NGSK         |  | Oxidation (M)[8,12]                                | Mascot |
|    |                                                         | 2247.0854   | 2246.9182 | -0.1672 | -74  | 1225 | 1245 | LLVEGDNMRSVMATHGV<br>NGSK         |  | Oxidation (M)[8,12]                                | Mascot |
|    |                                                         | 2261.2507   | 2260.9285 | -0.3222 | -142 | 599  | 618  | QIFSLILKPSKSCPVMANL<br>R          |  | Oxidation (M)[16]                                  | Mascot |
|    |                                                         | 2283.1221   | 2283.1389 | 0.0168  | 7    | 787  | 808  | GSFINISQMIACVGGQAIS<br>GSR        |  | Oxidation (M)[9]                                   | Mascot |
|    |                                                         | 2299.2698   | 2299.1426 | -0.1272 | -55  | 100  | 119  | AIVGILQMICKTCSHILLTK              |  | Carbamidomethyl (C)[10,13]                         | Mascot |
|    |                                                         | 2627.2671   | 2627.3286 | 0.0615  | 23   | 661  | 682  | NNIFYILLRDWGQQEAAD<br>AMSR        |  | Oxidation (M)[20]                                  | Mascot |
|    |                                                         | 3439.4368   | 3439.6465 | 0.2097  | 61   | 623  | 652  | QYCGKGEDLCANDSFVV<br>IHNSLMCGSMDK |  | Carbamidomethyl (C)[3,10], Oxidation<br>(M)[24,28] | Mascot |
| 19 | DNA replication complex GINS protein PSF3 [Danio rerio] | gi 50838828 |           | 24294.2 | 6.34 | 7    | 35   | 0                                 |  |                                                    |        |

Peptide Information

|    | Calc. Mass                                                                | Obsrv. Mass | ± da    | ± ppm | Start Seq. | End Seq.     | Sequence                | Ion Score | C. I. | % Modification   | Rank | Result Type |
|----|---------------------------------------------------------------------------|-------------|---------|-------|------------|--------------|-------------------------|-----------|-------|------------------|------|-------------|
|    | 807.3995                                                                  | 807.3842    | -0.0153 | -19   | 36         | 42           | TESAFPR                 |           |       |                  |      | Mascot      |
|    | 808.4199                                                                  | 808.3995    | -0.0204 | -25   | 163        | 168          | LDYLER                  |           |       |                  |      | Mascot      |
|    | 1524.7944                                                                 | 1524.7633   | -0.0311 | -20   | 93         | 106          | TVFGADPTVVDLYK          |           |       |                  |      | Mascot      |
|    | 1547.8176                                                                 | 1547.7916   | -0.026  | -17   | 189        | 202          | SSHLTASSLVINYR          |           |       |                  |      | Mascot      |
|    | 1591.7863                                                                 | 1591.7557   | -0.0306 | -19   | 173        | 186          | AGQSGLNNFQLWEK          |           |       |                  |      | Mascot      |
|    | 1752.8811                                                                 | 1752.8356   | -0.0455 | -26   | 61         | 74           | MEMPLWLAKGLYER          |           |       | Oxidation (M)[1] |      | Mascot      |
|    | 2146.9194                                                                 | 2146.8823   | -0.0371 | -17   | 144        | 162          | TMDSSQNAYNEDTSALV<br>ER |           |       | Oxidation (M)[2] |      | Mascot      |
| 20 | methenyltetrahydrofolate synthase domain-containing protein [Danio rerio] |             |         |       |            | gi 113679548 |                         | 43056.8   | 9.08  | 9                | 35   | 0           |

| Peptide Information |                                             |         |       |              |          |                         |           |         |                        |      |             |
|---------------------|---------------------------------------------|---------|-------|--------------|----------|-------------------------|-----------|---------|------------------------|------|-------------|
| Calc. Mass          | Obsrv. Mass                                 | ± da    | ± ppm | Start Seq.   | End Seq. | Sequence                | Ion Score | C. I. % | Modification           | Rank | Result Type |
| 862.4086            | 862.4878                                    | 0.0792  | 92    | 45           | 52       | GALEACNK                |           |         | Carbamidomethyl (C)[6] |      | Mascot      |
| 882.5407            | 882.5526                                    | 0.0119  | 13    | 86           | 93       | SLLVPTPR                |           |         |                        |      | Mascot      |
| 922.4662            | 922.448                                     | -0.0182 | -20   | 115          | 123      | VCSTSQGIK               |           |         |                        |      | Mascot      |
| 1242.6147           | 1242.5913                                   | -0.0234 | -19   | 67           | 77       | VDPDKPMEGVR             |           |         |                        |      | Mascot      |
| 1547.7887           | 1547.7916                                   | 0.0029  | 2     | 200          | 212      | HDLMVDFIITATR           |           |         | Oxidation (M)[4]       |      | Mascot      |
| 1649.9697           | 1649.7625                                   | -0.2072 | -126  | 324          | 337      | GLLREQEVVPLQIR          | 5         | 0       |                        |      | Mascot      |
| 1649.9697           | 1649.7625                                   | -0.2072 | -126  | 324          | 337      | GLLREQEVVPLQIR          |           |         |                        |      | Mascot      |
| 1671.9152           | 1671.7439                                   | -0.1713 | -102  | 220          | 233      | HPKPQGIIWSMLHK          |           |         |                        |      | Mascot      |
| 1872.0411           | 1871.9116                                   | -0.1295 | -69   | 200          | 215      | HDLMVDFIITATRVIK        |           |         |                        |      | Mascot      |
| 2389.2795           | 2389.1238                                   | -0.1557 | -65   | 45           | 66       | GALEACNKVAQLEIFIESA VVK |           |         | Carbamidomethyl (C)[6] |      | Mascot      |
| 2389.2795           | 2389.1238                                   | -0.1557 | -65   | 45           | 66       | GALEACNKVAQLEIFIESA VVK |           |         | Carbamidomethyl (C)[6] |      | Mascot      |
| 21                  | filamin-binding LIM protein 1 [Danio rerio] |         |       | gi 116267999 |          | 31699.8                 | 7.11      | 9       | 35                     | 0    |             |

| Peptide Information |                                                                                                    |         |       |            |             |                                |           |         |                            |    |   |      |             |
|---------------------|----------------------------------------------------------------------------------------------------|---------|-------|------------|-------------|--------------------------------|-----------|---------|----------------------------|----|---|------|-------------|
| Calc. Mass          | Obsrv. Mass                                                                                        | ± da    | ± ppm | Start Seq. | End Seq.    | Sequence                       | Ion Score | C. I. % | Modification               |    |   | Rank | Result Type |
| 819.4028            | 819.406                                                                                            | 0.0032  | 4     | 1          | 8           | MASAAPQK                       |           |         | Oxidation (M)[1]           |    |   |      | Mascot      |
| 938.4512            | 938.4636                                                                                           | 0.0124  | 13    | 285        | 292         | TCHSALIH                       |           |         | Carbamidomethyl (C)[2]     |    |   |      | Mascot      |
| 1543.7897           | 1543.7686                                                                                          | -0.0211 | -14   | 111        | 124         | QVSPCESAIVALNR                 |           |         | Carbamidomethyl (C)[5]     |    |   |      | Mascot      |
| 1671.8846           | 1671.7439                                                                                          | -0.1407 | -84   | 110        | 124         | KQVSPCESAIVALNR                |           |         | Carbamidomethyl (C)[6]     |    |   |      | Mascot      |
| 2051.8481           | 2052.0659                                                                                          | 0.2178  | 106   | 93         | 110         | QQSDTHTHCSDVCGFCR<br>K         |           |         |                            |    |   |      | Mascot      |
| 2080.9514           | 2081.0435                                                                                          | 0.0921  | 44    | 179        | 195         | ALERAYHPPCFVCTTCR              |           |         | Carbamidomethyl (C)[10,13] |    |   |      | Mascot      |
| 2225.0332           | 2225.0808                                                                                          | 0.0476  | 21    | 203        | 220         | FAQGEVGEVYCLQDYR<br>K          |           |         | Carbamidomethyl (C)[11]    |    |   |      | Mascot      |
| 2225.0332           | 2225.0808                                                                                          | 0.0476  | 21    | 203        | 220         | FAQGEVGEVYCLQDYR<br>K          |           |         | Carbamidomethyl (C)[11]    |    |   |      | Mascot      |
| 2269.1055           | 2268.8979                                                                                          | -0.2076 | -91   | 69         | 92          | DLSGGPAEDGAVLRSAP<br>SAGGQEK   |           |         |                            |    |   |      | Mascot      |
| 2627.2856           | 2627.3286                                                                                          | 0.043   | 16    | 24         | 49          | ATVTPTAHGQHSPARAQ<br>NTAPTGPCR |           |         |                            |    |   |      | Mascot      |
| 22                  | novel protein similar to vertebrate development and differentiation enhancing factor family (DDEF1 |         |       |            | gi 55251306 |                                | 113648.6  | 6.47    | 12                         | 34 | 0 | 5    | 0           |

| Peptide Information |             |        |       |            |          |          |           |       |                |      |             |
|---------------------|-------------|--------|-------|------------|----------|----------|-----------|-------|----------------|------|-------------|
| Calc. Mass          | Obsrv. Mass | ± da   | ± ppm | Start Seq. | End Seq. | Sequence | Ion Score | C. I. | % Modification | Rank | Result Type |
| 842.4916            | 842.496     | 0.0044 | 5     | 49         | 55       | SVLHKMK  |           |       |                |      | Mascot      |

|    |                                               |           |         |      |             |     |                          |      |   |    |                                           |  |                        |  |  |  |        |
|----|-----------------------------------------------|-----------|---------|------|-------------|-----|--------------------------|------|---|----|-------------------------------------------|--|------------------------|--|--|--|--------|
|    | 870.5771                                      | 870.525   | -0.0521 | -60  | 264         | 270 | KQLLQLK                  |      |   |    |                                           |  |                        |  |  |  | Mascot |
|    | 922.4298                                      | 922.448   | 0.0182  | 20   | 275         | 282 | SALQSECK                 |      |   |    |                                           |  | Carbamidomethyl (C)[7] |  |  |  | Mascot |
|    | 1212.6517                                     | 1212.6027 | -0.049  | -40  | 546         | 556 | LHALCDAVKSR              |      |   |    |                                           |  |                        |  |  |  | Mascot |
|    | 1212.6517                                     | 1212.6027 | -0.049  | -40  | 546         | 556 | LHALCDAVKSR              |      |   |    |                                           |  |                        |  |  |  | Mascot |
|    | 1243.5889                                     | 1243.62   | 0.0311  | 25   | 790         | 800 | GWSPPMENIGR              | 5    |   | 0  |                                           |  |                        |  |  |  | Mascot |
|    | 1243.5889                                     | 1243.62   | 0.0311  | 25   | 790         | 800 | GWSPPMENIGR              |      |   |    |                                           |  |                        |  |  |  | Mascot |
|    | 1259.5837                                     | 1259.6196 | 0.0359  | 29   | 790         | 800 | GWSPPMENIGR              | 3    |   | 0  | Oxidation (M)[6]                          |  |                        |  |  |  | Mascot |
|    | 1259.5837                                     | 1259.6196 | 0.0359  | 29   | 790         | 800 | GWSPPMENIGR              |      |   |    | Oxidation (M)[6]                          |  |                        |  |  |  | Mascot |
|    | 1265.6484                                     | 1265.6768 | 0.0284  | 22   | 905         | 916 | SPTRDAIGSFSK             |      |   |    |                                           |  |                        |  |  |  | Mascot |
|    | 1464.8057                                     | 1464.8146 | 0.0089  | 6    | 909         | 922 | DAIGSFSKIVSVNK           |      |   |    |                                           |  |                        |  |  |  | Mascot |
|    | 1464.8057                                     | 1464.8146 | 0.0089  | 6    | 909         | 922 | DAIGSFSKIVSVNK           |      |   |    |                                           |  |                        |  |  |  | Mascot |
|    | 1543.7434                                     | 1543.7686 | 0.0252  | 16   | 790         | 802 | GWSPPMENIGRQR            |      |   |    | Oxidation (M)[6]                          |  |                        |  |  |  | Mascot |
|    | 1753.7931                                     | 1753.8267 | 0.0336  | 19   | 20          | 34  | APTTSVFCTMAHCR           |      |   |    | Carbamidomethyl (C)[8], Oxidation (M)[11] |  |                        |  |  |  | Mascot |
|    | 2146.866                                      | 2146.8823 | 0.0163  | 8    | 620         | 637 | GSTALHYCCLTDNSECM<br>K   |      |   |    | Carbamidomethyl (C)[8,9,16]               |  |                        |  |  |  | Mascot |
|    | 2247.2053                                     | 2246.9182 | -0.2871 | -128 | 237         | 256 | VVDNLKPFMEKLATDLTA<br>NK |      |   |    |                                           |  |                        |  |  |  | Mascot |
|    | 2247.2053                                     | 2246.9182 | -0.2871 | -128 | 237         | 256 | VVDNLKPFMEKLATDLTA<br>NK |      |   |    |                                           |  |                        |  |  |  | Mascot |
|    | 2297.0642                                     | 2297.1538 | 0.0896  | 39   | 1           | 19  | MPDQLTVTEFVDITHEDY<br>K  |      |   |    | Oxidation (M)[1]                          |  |                        |  |  |  | Mascot |
| 23 | UDP-glucose pyrophosphorylase 2 [Danio rerio] |           |         |      | gi 47086583 |     | 54991.6                  | 7.25 | 9 | 34 | 0                                         |  |                        |  |  |  |        |

#### Peptide Information

|    | Calc. Mass                    | Obsrv. Mass | ± da    | ± ppm | Start Seq.  | End Sequence Seq. |                                    | Ion Score | C. I. | % Modification    | Rank | Result Type |
|----|-------------------------------|-------------|---------|-------|-------------|-------------------|------------------------------------|-----------|-------|-------------------|------|-------------|
|    | 856.5138                      | 856.511     | -0.0028 | -3    | 183         | 190               | ESLLPVAK                           |           |       |                   |      | Mascot      |
|    | 1051.5419                     | 1051.6919   | 0.15    | 143   | 276         | 285               | GGTLIQYDGK                         |           |       |                   |      | Mascot      |
|    | 1265.696                      | 1265.6768   | -0.0192 | -15   | 458         | 469               | GTVIIIANHGDR                       |           |       |                   |      | Mascot      |
|    | 1318.6572                     | 1318.6866   | 0.0294  | 22    | 362         | 373               | CFDNALGINVPR                       |           |       |                   |      | Mascot      |
|    | 1464.7693                     | 1464.8146   | 0.0453  | 31    | 272         | 285               | ADVKG GTLIQYDGK                    |           |       |                   |      | Mascot      |
|    | 1464.7693                     | 1464.8146   | 0.0453  | 31    | 272         | 285               | ADVKG GTLIQYDGK                    |           |       |                   |      | Mascot      |
|    | 1671.8337                     | 1671.7439   | -0.0898 | -54   | 62          | 75                | INRPEDSIQPYDK                      |           |       |                   |      | Mascot      |
|    | 2156.0981                     | 2155.9097   | -0.1884 | -87   | 118         | 135               | NENTFLDLTVQQIEHLNK                 |           |       |                   |      | Mascot      |
|    | 2156.0981                     | 2155.9097   | -0.1884 | -87   | 118         | 135               | NENTFLDLTVQQIEHLNK                 |           |       |                   |      | Mascot      |
|    | 2403.1021                     | 2403.0271   | -0.075  | -31   | 136         | 156               | TYNADVPLVLMNSFNTD<br>EDTK          |           |       | Oxidation (M)[11] |      | Mascot      |
|    | 3439.709                      | 3439.6465   | -0.0625 | -18   | 423         | 452               | VQEYITRFESIPDMLELD<br>HLTVSGDVTFGK |           |       |                   |      | Mascot      |
| 24 | Sh3bp4a protein [Danio rerio] |             |         |       | gi 66910395 |                   | 76175.4                            | 8.42      | 11    | 34                | 0    |             |

| Peptide Information |                                                   |         |       |              |          |                                    |           |       |                                           |      |             |
|---------------------|---------------------------------------------------|---------|-------|--------------|----------|------------------------------------|-----------|-------|-------------------------------------------|------|-------------|
| Calc. Mass          | Obsrv. Mass                                       | ± da    | ± ppm | Start Seq.   | End Seq. | Sequence                           | Ion Score | C. I. | % Modification                            | Rank | Result Type |
| 842.5822            | 842.496                                           | -0.0862 | -102  | 663          | 669      | LIKTVIR                            |           |       |                                           |      | Mascot      |
| 850.4338            | 850.5283                                          | 0.0945  | 111   | 387          | 393      | LSNMEIK                            |           |       | Oxidation (M)[4]                          |      | Mascot      |
| 870.4726            | 870.525                                           | 0.0524  | 60    | 1            | 7        | MAAHRIR                            |           |       | Oxidation (M)[1]                          |      | Mascot      |
| 1318.5984           | 1318.6866                                         | 0.0882  | 67    | 66           | 76       | DYCPSSFITLK                        |           |       | Carbamidomethyl (C)[3]                    |      | Mascot      |
| 1671.806            | 1671.7439                                         | -0.0621 | -37   | 461          | 474      | HVSFSSNVWNHMK                      |           |       |                                           |      | Mascot      |
| 2081.0188           | 2081.0435                                         | 0.0247  | 12    | 402          | 419      | VSVMTRTSPMAEIVCVR                  |           |       | Carbamidomethyl (C)[16], Oxidation (M)[4] |      | Mascot      |
| 2228.9282           | 2228.908                                          | -0.0202 | -9    | 117          | 138      | NSSLSDSGMIDNLGDCS<br>EEGAK         |           |       |                                           |      | Mascot      |
| 2261.1648           | 2260.9285                                         | -0.2363 | -105  | 485          | 504      | HIHPSFKTVVAIFGHDCAPK               |           |       | Carbamidomethyl (C)[17]                   |      | Mascot      |
| 2284.2368           | 2284.1343                                         | -0.1025 | -45   | 492          | 513      | TVVAIFGHDCAPKTLVSEVGK              |           |       |                                           |      | Mascot      |
| 2300.0686           | 2300.1372                                         | 0.0686  | 30    | 597          | 616      | DDQDCILAQFCVQTPQP<br>PPK           |           |       | Carbamidomethyl (C)[5]                    |      | Mascot      |
| 3337.6052           | 3337.7021                                         | 0.0969  | 29    | 298          | 327      | LARSCHDLESLGQNPWG<br>GQTQPVETNIVCK |           |       | Carbamidomethyl (C)[5]                    |      | Mascot      |
| 25                  | putative CMP-sialic acid synthetase [Danio rerio] |         |       | gi 114649512 |          | 48196.6                            | 7.59      | 10    | 34                                        | 0    |             |

| Peptide Information |                                                                 |         |       |              |          |                            |           |       |                                          |      |             |
|---------------------|-----------------------------------------------------------------|---------|-------|--------------|----------|----------------------------|-----------|-------|------------------------------------------|------|-------------|
| Calc. Mass          | Obsrv. Mass                                                     | ± da    | ± ppm | Start Seq.   | End Seq. | Sequence                   | Ion Score | C. I. | % Modification                           | Rank | Result Type |
| 842.473             | 842.496                                                         | 0.023   | 27    | 256          | 262      | DKPEVVR                    |           |       |                                          |      | Mascot      |
| 856.525             | 856.511                                                         | -0.014  | -16   | 39           | 47       | GGSKGIPLK                  |           |       |                                          |      | Mascot      |
| 882.577             | 882.5526                                                        | -0.0244 | -28   | 43           | 50       | GIPLKNIK                   |           |       |                                          |      | Mascot      |
| 1212.6986           | 1212.6027                                                       | -0.0959 | -79   | 404          | 413      | EFAEHILLK                  |           |       |                                          |      | Mascot      |
| 1212.6986           | 1212.6027                                                       | -0.0959 | -79   | 404          | 413      | EFAEHILLK                  |           |       |                                          |      | Mascot      |
| 1259.761            | 1259.6196                                                       | -0.1414 | -112  | 307          | 317      | VILLETYPK                  |           |       |                                          |      | Mascot      |
| 1259.761            | 1259.6196                                                       | -0.1414 | -112  | 307          | 317      | VILLETYPK                  |           |       |                                          |      | Mascot      |
| 1265.5725           | 1265.6768                                                       | 0.1043  | 82    | 418          | 427      | SQMEQDRICR                 |           |       |                                          |      | Mascot      |
| 2081.0154           | 2081.0435                                                       | 0.0281  | 14    | 121          | 138      | EVDVICNIQATSPCLHPK         |           |       | Carbamidomethyl (C)[6,14]                |      | Mascot      |
| 2146.9539           | 2146.8823                                                       | -0.0716 | -33   | 172          | 190      | GGDCSTEPMNLNPACRP<br>RR    |           |       | Carbamidomethyl (C)[4], Oxidation (M)[9] |      | Mascot      |
| 2193.9658           | 2194.041                                                        | 0.0752  | 34    | 190          | 207      | RQDWSGELCENGSEFYFA<br>K    |           |       | Carbamidomethyl (C)[9]                   |      | Mascot      |
| 2403.085            | 2403.0271                                                       | -0.0579 | -24   | 168          | 189      | EVEKGGDCSTEPMNLNP<br>ACRPR |           |       |                                          |      | Mascot      |
| 26                  | PREDICTED: e3 ubiquitin-protein ligase RBBP6-like [Danio rerio] |         |       | gi 326681299 |          | 19216.7                    | 9.47      | 6     | 34                                       | 0    |             |

| Peptide Information |             |      |       |       |     |          |     |       |                |      |             |
|---------------------|-------------|------|-------|-------|-----|----------|-----|-------|----------------|------|-------------|
| Calc. Mass          | Obsrv. Mass | ± da | ± ppm | Start | End | Sequence | Ion | C. I. | % Modification | Rank | Result Type |

|    |                          |           |         |     | Seq.        | Seq.                         | Score   |     |   |                           |   |        |
|----|--------------------------|-----------|---------|-----|-------------|------------------------------|---------|-----|---|---------------------------|---|--------|
|    | 936.5334                 | 936.4772  | -0.0562 | -60 | 39          | 45 LKFCQLK                   |         |     |   | Carbamidomethyl (C)[4]    |   | Mascot |
|    | 1752.8407                | 1752.8356 | -0.0051 | -3  | 128         | 144 AVMYQSSLCSTPAAAPR        |         |     |   |                           |   | Mascot |
|    | 1969.8755                | 1970.0437 | 0.1682  | 85  | 145         | 162 CTSASGRAQGFPAAASCR       |         |     |   | Carbamidomethyl (C)[1,16] |   | Mascot |
|    | 2095.9766                | 2095.99   | 0.0134  | 6   | 152         | 169 AQGFPAASCRWTTQT<br>ER    |         |     |   |                           |   | Mascot |
|    | 2254.1714                | 2253.9939 | -0.1775 | -79 | 12          | 31 LTYDSLQFEGLNISAGEL<br>KR  |         |     |   |                           |   | Mascot |
|    | 2283.2441                | 2283.1389 | -0.1052 | -46 | 99          | 119 ADPSLLSLEQLLKTNLA<br>EAK |         |     |   |                           |   | Mascot |
| 27 | Zgc:110331 [Danio rerio] |           |         |     | gi 62202266 |                              | 17382.1 | 8.3 | 6 | 34                        | 0 |        |

#### Peptide Information

|  | Calc. Mass | Obsrv. Mass | ± da    | ± ppm | Start Seq. | End Sequence Seq.             | Ion Score | C. I. % | Modification           | Rank | Result Type |
|--|------------|-------------|---------|-------|------------|-------------------------------|-----------|---------|------------------------|------|-------------|
|  | 819.5086   | 819.406     | -0.1026 | -125  | 79         | 85 IVNAKFK                    |           |         |                        |      | Mascot      |
|  | 882.5294   | 882.5526    | 0.0232  | 26    | 122        | 129 ELSLPPVK                  |           |         |                        |      | Mascot      |
|  | 1045.5636  | 1045.5464   | -0.0172 | -16   | 42         | 51 NVGSLDKNAK                 |           |         |                        |      | Mascot      |
|  | 1739.9836  | 1739.8994   | -0.0842 | -48   | 9          | 24 CAAPQILKTLAPTLR            |           |         | Carbamidomethyl (C)[1] |      | Mascot      |
|  | 2194.1611  | 2194.041    | -0.1201 | -55   | 122        | 141 ELSLPPVKLHCSMLAEDA<br>IK  |           |         |                        |      | Mascot      |
|  | 2247.1113  | 2246.9182   | -0.1931 | -86   | 84         | 104 FKTFGCGSAIASSSLATE<br>WVK |           |         | Carbamidomethyl (C)[6] |      | Mascot      |
|  | 2247.1113  | 2246.9182   | -0.1931 | -86   | 84         | 104 FKTFGCGSAIASSSLATE<br>WVK |           |         | Carbamidomethyl (C)[6] |      | Mascot      |

28 novel protein similar to follistatin-like 1 (fstl1, wu:fc25c04) [Danio rerio]

#### Peptide Information

|  | Calc. Mass | Obsrv. Mass | ± da    | ± ppm | Start Seq. | End Sequence Seq.            | Ion Score | C. I. % | Modification                 | Rank | Result Type |
|--|------------|-------------|---------|-------|------------|------------------------------|-----------|---------|------------------------------|------|-------------|
|  | 808.3617   | 808.3995    | 0.0378  | 47    | 43         | 50 SVCGSNGK                  |           |         | Carbamidomethyl (C)[3]       |      | Mascot      |
|  | 870.4315   | 870.525     | 0.0935  | 107   | 276        | 282 HQETVEK                  |           |         |                              |      | Mascot      |
|  | 1524.8016  | 1524.7633   | -0.0383 | -25   | 270        | 282 VAELNKHQETVEK            |           |         |                              |      | Mascot      |
|  | 2225.0947  | 2225.0808   | -0.0139 | -6    | 192        | 210 LSFDEFLNCLKPGFSPPE<br>K  |           |         | Carbamidomethyl (C)[9]       |      | Mascot      |
|  | 2225.0947  | 2225.0808   | -0.0139 | -6    | 192        | 210 LSFDEFLNCLKPGFSPPE<br>K  |           |         | Carbamidomethyl (C)[9]       |      | Mascot      |
|  | 2253.9607  | 2253.9939   | 0.0332  | 15    | 20         | 38 ECAVNEKGEPSCLCIEQC<br>K   |           |         | Carbamidomethyl (C)[2,12,14] |      | Mascot      |
|  | 2299.9661  | 2300.1372   | 0.1711  | 74    | 250        | 268 TPVFDTEGDQEMTEEEW<br>TR  |           |         |                              |      | Mascot      |
|  | 2388.9553  | 2389.1238   | 0.1685  | 71    | 212        | 231 CALEDETYEDGAETQVE<br>CNR |           |         | Carbamidomethyl (C)[1,18]    |      | Mascot      |
|  | 2388.9553  | 2389.1238   | 0.1685  | 71    | 212        | 231 CALEDETYEDGAETQVE<br>CNR |           |         | Carbamidomethyl (C)[1,18]    |      | Mascot      |



|    |                                                   |           |        |   |              |     |                           |      |    |    |   |  |        |
|----|---------------------------------------------------|-----------|--------|---|--------------|-----|---------------------------|------|----|----|---|--|--------|
|    | 2403.0076                                         | 2403.0271 | 0.0195 | 8 | 211          | 231 | KCALEDETYEDGAETQV<br>ECNR |      |    |    |   |  | Mascot |
| 29 | intraflagellar transport 81 homolog [Danio rerio] |           |        |   | gi 159570779 |     | 78814.9                   | 6.43 | 14 | 33 | 0 |  |        |

Peptide Information

| Calc. Mass | Obsrv. Mass | ± da    | ± ppm | Start Seq. | End Seq. | Sequence                  | Ion Score | C. I. % | Modification           | Rank | Result Type |
|------------|-------------|---------|-------|------------|----------|---------------------------|-----------|---------|------------------------|------|-------------|
| 807.3665   | 807.3842    | 0.0177  | 22    | 284        | 289      | ELENMR                    |           |         | Oxidation (M)[5]       |      | Mascot      |
| 819.3954   | 819.406     | 0.0106  | 13    | 380        | 386      | TSQAQER                   |           |         |                        |      | Mascot      |
| 870.5519   | 870.525     | -0.0269 | -31   | 616        | 622      | VLRQQVK                   |           |         |                        |      | Mascot      |
| 1045.5636  | 1045.5464   | -0.0172 | -16   | 430        | 437      | TEEILRER                  |           |         |                        |      | Mascot      |
| 1212.7311  | 1212.6027   | -0.1284 | -106  | 501        | 511      | SALSPLIKDLR               |           |         |                        |      | Mascot      |
| 1212.7311  | 1212.6027   | -0.1284 | -106  | 501        | 511      | SALSPLIKDLR               |           |         |                        |      | Mascot      |
| 1226.6124  | 1226.5967   | -0.0157 | -13   | 217        | 226      | EREESLAHQK                |           |         |                        |      | Mascot      |
| 1318.6896  | 1318.6866   | -0.003  | -2    | 586        | 596      | ISQSM DVQVRR              |           |         |                        |      | Mascot      |
| 1524.7437  | 1524.7633   | 0.0196  | 13    | 637        | 648      | MWKDLETLLLECK             |           |         | Oxidation (M)[1]       |      | Mascot      |
| 1547.7733  | 1547.7916   | 0.0183  | 12    | 367        | 379      | EELAAVERELNMK             |           |         | Oxidation (M)[12]      |      | Mascot      |
| 1784.8483  | 1784.8805   | 0.0322  | 18    | 157        | 172      | ECEQLKSSGFSTAEIR          |           |         |                        |      | Mascot      |
| 2082.0349  | 2082.0354   | 0.0005  | 0     | 453        | 471      | GISGYSDTQEELERVSAI<br>K   |           |         |                        |      | Mascot      |
| 2082.0349  | 2082.0354   | 0.0005  | 0     | 453        | 471      | GISGYSDTQEELERVSAI<br>K   |           |         |                        |      | Mascot      |
| 2225.0879  | 2225.0808   | -0.0071 | -3    | 563        | 579      | YHHINCEREIIESQIQR         |           |         | Carbamidomethyl (C)[6] |      | Mascot      |
| 2225.0879  | 2225.0808   | -0.0071 | -3    | 563        | 579      | YHHINCEREIIESQIQR         |           |         | Carbamidomethyl (C)[6] |      | Mascot      |
| 2233.1646  | 2233.0476   | -0.117  | -52   | 291        | 310      | VVQYLQKVASEPAMGQA<br>ELR  |           |         | Oxidation (M)[14]      |      | Mascot      |
| 2283.1914  | 2283.1389   | -0.0525 | -23   | 650        | 670      | QCYLKAQSQAPIGHVIQD<br>VGK |           |         |                        |      | Mascot      |

|    |                                                      |  |  |  |             |  |         |      |    |    |   |  |
|----|------------------------------------------------------|--|--|--|-------------|--|---------|------|----|----|---|--|
| 30 | truncated SH3 binding domain protein 4 [Danio rerio] |  |  |  | gi 33438222 |  | 84564.4 | 8.75 | 11 | 33 | 0 |  |
|----|------------------------------------------------------|--|--|--|-------------|--|---------|------|----|----|---|--|

Peptide Information

| Calc. Mass | Obsrv. Mass | ± da    | ± ppm | Start Seq. | End Seq. | Sequence                   | Ion Score | C. I. % | Modification                              | Rank | Result Type |
|------------|-------------|---------|-------|------------|----------|----------------------------|-----------|---------|-------------------------------------------|------|-------------|
| 842.5822   | 842.496     | -0.0862 | -102  | 634        | 640      | LIKTVIR                    |           |         |                                           |      | Mascot      |
| 850.4338   | 850.5283    | 0.0945  | 111   | 358        | 364      | LSNMEIK                    |           |         | Oxidation (M)[4]                          |      | Mascot      |
| 870.4726   | 870.525     | 0.0524  | 60    | 1          | 7        | MAAHRIR                    |           |         | Oxidation (M)[1]                          |      | Mascot      |
| 1318.5984  | 1318.6866   | 0.0882  | 67    | 66         | 76       | DYCPSSF TTK                |           |         | Carbamidomethyl (C)[3]                    |      | Mascot      |
| 1671.806   | 1671.7439   | -0.0621 | -37   | 432        | 445      | HVSFSSNVWNHMK              |           |         |                                           |      | Mascot      |
| 2081.0188  | 2081.0435   | 0.0247  | 12    | 373        | 390      | VSVMTRTESPMAEIVCVR         |           |         | Carbamidomethyl (C)[16], Oxidation (M)[4] |      | Mascot      |
| 2228.9282  | 2228.908    | -0.0202 | -9    | 117        | 138      | NSSLSDSGMIDNLGDCS<br>EEGAK |           |         |                                           |      | Mascot      |
| 2261.1648  | 2260.9285   | -0.2363 | -105  | 456        | 475      | HIHPSFKTVVAIFGHDC          |           |         | Carbamidomethyl (C)[17]                   |      | Mascot      |

|                     |                                                           | 2284.2368  | 2284.1343   | -0.1025 | -45   | 463        | 484          | PK<br>TVVAIFGHDCAPKTLVSEVGK        |                        |       |    |                          |      |        |      | Mascot |
|---------------------|-----------------------------------------------------------|------------|-------------|---------|-------|------------|--------------|------------------------------------|------------------------|-------|----|--------------------------|------|--------|------|--------|
|                     |                                                           | 2300.0686  | 2300.1372   | 0.0686  | 30    | 568        | 587          | DDQDCILAQFCVQTPQP<br>PPK           | Carbamidomethyl (C)[5] |       |    |                          |      |        |      | Mascot |
|                     |                                                           | 3337.6052  | 3337.7021   | 0.0969  | 29    | 269        | 298          | LARSCHDLESLGQNPGW<br>GQTQPVETNIVCK | Carbamidomethyl (C)[5] |       |    |                          |      |        |      | Mascot |
| 31                  | Znf12a protein [Danio rerio]                              |            |             |         |       |            | gi 62204424  | 34966.8                            | 6.39                   | 6     | 33 | 0                        | 17   | 0      |      |        |
| Peptide Information |                                                           |            |             |         |       |            |              |                                    |                        |       |    |                          |      |        |      |        |
|                     |                                                           | Calc. Mass | Obsrv. Mass | ± da    | ± ppm | Start Seq. | End Seq.     | Sequence                           | Ion Score              | C. I. | %  | Modification             | Rank | Result | Type |        |
|                     |                                                           | 936.5261   | 936.4772    | -0.0489 | -52   | 133        | 140          | APLTEHLR                           |                        |       |    |                          |      |        |      | Mascot |
|                     |                                                           | 1045.4077  | 1045.5464   | 0.1387  | 133   | 175        | 183          | AYSCQCEGK                          |                        |       |    | Carbamidomethyl (C)[4]   |      |        |      | Mascot |
|                     |                                                           | 1165.6688  | 1165.7242   | 0.0554  | 48    | 131        | 140          | TKAPLTEHLR                         |                        |       |    |                          |      |        |      | Mascot |
|                     |                                                           | 1649.741   | 1649.7625   | 0.0215  | 13    | 175        | 188          | AYSCQCEGKSFTLR                     | 17                     | 0     |    | Carbamidomethyl (C)[4]   |      |        |      | Mascot |
|                     |                                                           | 1649.741   | 1649.7625   | 0.0215  | 13    | 175        | 188          | AYSCQCEGKSFTLR                     |                        |       |    | Carbamidomethyl (C)[4]   |      |        |      | Mascot |
|                     |                                                           | 1698.7727  | 1698.8284   | 0.0557  | 33    | 113        | 127          | IHTGETPFSCRYCGK                    |                        |       |    |                          |      |        |      | Mascot |
|                     |                                                           | 2269.1943  | 2268.8979   | -0.2964 | -131  | 201        | 220          | HKPLLCSVCGKGFNSPV<br>QLK           |                        |       |    | Carbamidomethyl (C)[6,9] |      |        |      | Mascot |
| 32                  | hydroxysteroid dehydrogenase-like protein 2 [Danio rerio] |            |             |         |       |            | gi 41054573  | 44391.8                            | 7.08                   | 8     | 33 | 0                        |      |        |      |        |
| Peptide Information |                                                           |            |             |         |       |            |              |                                    |                        |       |    |                          |      |        |      |        |
|                     |                                                           | Calc. Mass | Obsrv. Mass | ± da    | ± ppm | Start Seq. | End Seq.     | Sequence                           | Ion Score              | C. I. | %  | Modification             | Rank | Result | Type |        |
|                     |                                                           | 807.4028   | 807.3842    | -0.0186 | -23   | 1          | 7            | MLQNTGK                            |                        |       |    | Oxidation (M)[1]         |      |        |      | Mascot |
|                     |                                                           | 870.577    | 870.525     | -0.052  | -60   | 21         | 29           | GIGKAIALK                          |                        |       |    |                          |      |        |      | Mascot |
|                     |                                                           | 936.5699   | 936.4772    | -0.0927 | -99   | 135        | 142          | LCIPHLLK                           |                        |       |    |                          |      |        |      | Mascot |
|                     |                                                           | 1226.6272  | 1226.5967   | -0.0305 | -25   | 381        | 391          | LKPTMAFMSGK                        |                        |       |    | Oxidation (M)[5]         |      |        |      | Mascot |
|                     |                                                           | 1242.6221  | 1242.5913   | -0.0308 | -25   | 381        | 391          | LKPTMAFMSGK                        |                        |       |    | Oxidation (M)[5,8]       |      |        |      | Mascot |
|                     |                                                           | 1243.7191  | 1243.62     | -0.0991 | -80   | 117        | 127          | KADLMLGINLR                        | 4                      | 0     |    |                          |      |        |      | Mascot |
|                     |                                                           | 1243.7191  | 1243.62     | -0.0991 | -80   | 117        | 127          | KADLMLGINLR                        |                        |       |    |                          |      |        |      | Mascot |
|                     |                                                           | 1259.714   | 1259.6196   | -0.0944 | -75   | 117        | 127          | KADLMLGINLR                        | 3                      | 0     |    | Oxidation (M)[5]         |      |        |      | Mascot |
|                     |                                                           | 1259.714   | 1259.6196   | -0.0944 | -75   | 117        | 127          | KADLMLGINLR                        |                        |       |    | Oxidation (M)[5]         |      |        |      | Mascot |
|                     |                                                           | 1457.7345  | 1457.7629   | 0.0284  | 19    | 221        | 233          | VEIMADAAYAIFK                      |                        |       |    | Oxidation (M)[4]         |      |        |      | Mascot |
|                     |                                                           | 1739.726   | 1739.8994   | 0.1734  | 100   | 173        | 187          | YGMSMCVLGMAEEFR                    |                        |       |    | Oxidation (M)[3]         |      |        |      | Mascot |
|                     |                                                           | 2082.0835  | 2082.0354   | -0.0481 | -23   | 1          | 20           | MLQNTGKLAGCTIFITGA<br>SR           |                        |       |    |                          |      |        |      | Mascot |
|                     |                                                           | 2082.0835  | 2082.0354   | -0.0481 | -23   | 1          | 20           | MLQNTGKLAGCTIFITGA<br>SR           |                        |       |    |                          |      |        |      | Mascot |
| 33                  | hypothetical protein LOC561983 [Danio rerio]              |            |             |         |       |            | gi 194579011 | 84504.1                            | 9.41                   | 11    | 33 | 0                        |      |        |      |        |

| Peptide Information |                                                           |         |       |              |          |                            |           |                        |                  |   |
|---------------------|-----------------------------------------------------------|---------|-------|--------------|----------|----------------------------|-----------|------------------------|------------------|---|
| Calc. Mass          | Obsrv. Mass                                               | ± da    | ± ppm | Start Seq.   | End Seq. | Sequence                   | Ion Score | C. I. % Modification   | Rank Result Type |   |
| 819.4107            | 819.406                                                   | -0.0047 | -6    | 462          | 469      | AFAPGSNR                   |           |                        | Mascot           |   |
| 850.5032            | 850.5283                                                  | 0.0251  | 30    | 275          | 282      | LELPPPGK                   |           |                        | Mascot           |   |
| 936.4897            | 936.4772                                                  | -0.0125 | -13   | 374          | 381      | GVYANKER                   |           |                        | Mascot           |   |
| 1318.6243           | 1318.6866                                                 | 0.0623  | 47    | 532          | 542      | QSMMQSKPEPR                |           |                        | Mascot           |   |
| 1784.9038           | 1784.8805                                                 | -0.0233 | -13   | 511          | 528      | QGSPTRPPSGGTGVSPF<br>R     |           |                        | Mascot           |   |
| 1969.9324           | 1970.0437                                                 | 0.1113  | 56    | 172          | 187      | QHLDNQEVYTSLYTMK           |           |                        | Mascot           |   |
| 2156.1221           | 2155.9097                                                 | -0.2124 | -99   | 133          | 151      | LLSGQRHTMHGFFVPGF<br>PK    |           |                        | Mascot           |   |
| 2156.1221           | 2155.9097                                                 | -0.2124 | -99   | 133          | 151      | LLSGQRHTMHGFFVPGF<br>PK    |           |                        | Mascot           |   |
| 2211.1113           | 2211.0679                                                 | -0.0434 | -20   | 170          | 187      | LKQHLDNQEVYTSLYTM<br>K     |           |                        | Mascot           |   |
| 2225.1084           | 2225.0808                                                 | -0.0276 | -12   | 614          | 634      | VAPAEISSQIDSAGEGVY<br>YLR  |           |                        | Mascot           |   |
| 2225.1084           | 2225.0808                                                 | -0.0276 | -12   | 614          | 634      | VAPAEISSQIDSAGEGVY<br>YLR  |           |                        | Mascot           |   |
| 2261.0503           | 2260.9285                                                 | -0.1218 | -54   | 584          | 603      | GSSNPSPKTMNNSYL<br>TYR     |           | Oxidation (M)[12]      | Mascot           |   |
| 2627.4153           | 2627.3286                                                 | -0.0867 | -33   | 205          | 226      | IWDIYILEGERVLTAMSYT<br>ILK |           |                        | Mascot           |   |
| 34                  | nitrogen fixation cluster-like [Danio rerio]              |         |       | gi 221307563 |          | 17420.2                    | 8.83      | 6                      | 33               | 0 |
| Peptide Information |                                                           |         |       |              |          |                            |           |                        |                  |   |
| Calc. Mass          | Obsrv. Mass                                               | ± da    | ± ppm | Start Seq.   | End Seq. | Sequence                   | Ion Score | C. I. % Modification   | Rank Result Type |   |
| 819.4756            | 819.406                                                   | -0.0696 | -85   | 1            | 8        | MAASLAKK                   |           |                        | Mascot           |   |
| 882.5294            | 882.5526                                                  | 0.0232  | 26    | 122          | 129      | ELSLPPVK                   |           |                        | Mascot           |   |
| 1045.5636           | 1045.5464                                                 | -0.0172 | -16   | 42           | 51       | NVGSLDKNAK                 |           |                        | Mascot           |   |
| 1739.9836           | 1739.8994                                                 | -0.0842 | -48   | 9            | 24       | CAAPQILKTL SAPTLR          |           | Carbamidomethyl (C)[1] | Mascot           |   |
| 2194.1611           | 2194.041                                                  | -0.1201 | -55   | 122          | 141      | ELSLPPVKLHCSMLAEDA<br>IK   |           |                        | Mascot           |   |
| 2247.1113           | 2246.9182                                                 | -0.1931 | -86   | 84           | 104      | FKTFGCGSAIASSSLATE<br>WVK  |           | Carbamidomethyl (C)[6] | Mascot           |   |
| 2247.1113           | 2246.9182                                                 | -0.1931 | -86   | 84           | 104      | FKTFGCGSAIASSSLATE<br>WVK  |           | Carbamidomethyl (C)[6] | Mascot           |   |
| 35                  | protein phosphatase 6, regulatory subunit 3 [Danio rerio] |         |       | gi 41054419  |          | 45739.5                    | 4.79      | 8                      | 33               | 0 |
| Peptide Information |                                                           |         |       |              |          |                            |           |                        |                  |   |
| Calc. Mass          | Obsrv. Mass                                               | ± da    | ± ppm | Start Seq.   | End Seq. | Sequence                   | Ion Score | C. I. % Modification   | Rank Result Type |   |
| 870.577             | 870.525                                                   | -0.052  | -60   | 127          | 134      | VLSILIGR                   |           |                        | Mascot           |   |

|  |           |           |         |      |     |     |                          |  |  |  |                                           |  |  |  |  |        |
|--|-----------|-----------|---------|------|-----|-----|--------------------------|--|--|--|-------------------------------------------|--|--|--|--|--------|
|  | 1265.6559 | 1265.6768 | 0.0209  | 17   | 146 | 155 | REDFVDLMIK               |  |  |  |                                           |  |  |  |  | Mascot |
|  | 1457.7166 | 1457.7629 | 0.0463  | 32   | 208 | 220 | HSNASQSLCEIIR            |  |  |  |                                           |  |  |  |  | Mascot |
|  | 1464.8209 | 1464.8146 | -0.0063 | -4   | 315 | 326 | DFHQLLLEPPKK             |  |  |  |                                           |  |  |  |  | Mascot |
|  | 1464.8209 | 1464.8146 | -0.0063 | -4   | 315 | 326 | DFHQLLLEPPKK             |  |  |  |                                           |  |  |  |  | Mascot |
|  | 1547.7006 | 1547.7916 | 0.091   | 59   | 195 | 207 | LVDMVQPSQDEDR            |  |  |  | Oxidation (M)[4]                          |  |  |  |  | Mascot |
|  | 2194.0444 | 2194.041  | -0.0034 | -2   | 77  | 95  | YPNISCELLTSDVGQIND<br>R  |  |  |  | Carbamidomethyl (C)[6]                    |  |  |  |  | Mascot |
|  | 2210.968  | 2211.0679 | 0.0999  | 45   | 20  | 38  | DDVTLTEVMDEEDVLQE<br>CK  |  |  |  |                                           |  |  |  |  | Mascot |
|  | 2283.9844 | 2284.1343 | 0.1499  | 66   | 20  | 38  | DDVTLTEVMDEEDVLQE<br>CK  |  |  |  | Carbamidomethyl (C)[18], Oxidation (M)[9] |  |  |  |  | Mascot |
|  | 2403.3494 | 2403.0271 | -0.3223 | -134 | 259 | 279 | EKNESAIVSVIQILLTFET<br>R |  |  |  |                                           |  |  |  |  | Mascot |

36 PREDICTED: hypothetical protein LOC100538139 [Danio rerio] gi|326676603 9036.6 9.13 4 32 0

#### Peptide Information

| Calc. Mass | Obsrv. Mass | ± da    | ± ppm | Start Seq. | End Seq. | Sequence               | Ion Score | C. I. % | Modification           | Rank | Result Type |
|------------|-------------|---------|-------|------------|----------|------------------------|-----------|---------|------------------------|------|-------------|
| 816.4362   | 816.4921    | 0.0559  | 68    | 41         | 46       | EKHFQK                 |           |         |                        |      | Mascot      |
| 1871.7938  | 1871.9116   | 0.1178  | 63    | 5          | 19       | CSSSQELYFYMLDNR        |           |         | Oxidation (M)[11]      |      | Mascot      |
| 2146.9573  | 2146.8823   | -0.075  | -35   | 5          | 21       | CSSSQELYFYMLDNRYK      |           |         |                        |      | Mascot      |
| 2269.0376  | 2268.8979   | -0.1397 | -62   | 2          | 19       | TVRCSSSQELYFYMLDN<br>R |           |         | Carbamidomethyl (C)[4] |      | Mascot      |

37 PREDICTED: histone acetyltransferase KAT2A [Danio rerio] gi|189516875 90565.6 9.09 12 32 0

#### Peptide Information

| Calc. Mass | Obsrv. Mass | ± da    | ± ppm | Start Seq. | End Seq. | Sequence                     | Ion Score | C. I. % | Modification           | Rank | Result Type |
|------------|-------------|---------|-------|------------|----------|------------------------------|-----------|---------|------------------------|------|-------------|
| 922.4992   | 922.448     | -0.0512 | -56   | 583        | 590      | QGFSKDIK                     |           |         |                        |      | Mascot      |
| 1212.6445  | 1212.6027   | -0.0418 | -34   | 646        | 655      | KVYPGLTCFK                   |           |         | Carbamidomethyl (C)[8] |      | Mascot      |
| 1212.6445  | 1212.6027   | -0.0418 | -34   | 646        | 655      | KVYPGLTCFK                   |           |         | Carbamidomethyl (C)[8] |      | Mascot      |
| 1543.7937  | 1543.7686   | -0.0251 | -16   | 271        | 283      | YETCQVFGRSLLK                |           |         |                        |      | Mascot      |
| 1591.84    | 1591.7557   | -0.0843 | -53   | 684        | 696      | ELKDPDLLYNMLK                |           |         |                        |      | Mascot      |
| 1649.9332  | 1649.7625   | -0.1707 | -103  | 656        | 670      | EGVRQIPVESIPGIR              |           |         |                        |      | Mascot      |
| 1649.9332  | 1649.7625   | -0.1707 | -103  | 656        | 670      | EGVRQIPVESIPGIR              |           |         |                        |      | Mascot      |
| 1698.8308  | 1698.8284   | -0.0024 | -1    | 704        | 717      | THPDAWPFMEPVKK               |           |         | Oxidation (M)[9]       |      | Mascot      |
| 1752.8217  | 1752.8356   | 0.0139  | 8     | 408        | 422      | VMGDIPMELVNEVMK              |           |         | Oxidation (M)[2,7,14]  |      | Mascot      |
| 2233.1194  | 2233.0476   | -0.0718 | -32   | 368        | 391      | GSSASALGVTGLDVASS<br>EPTIGEK |           |         |                        |      | Mascot      |
| 2284.1323  | 2284.1343   | 0.002   | 1     | 563        | 581      | HGILYFLTYADEYAIGYFK          |           |         |                        |      | Mascot      |
| 2389.2205  | 2389.1238   | -0.0967 | -40   | 368        | 392      | GSSASALGVTGLDVASS            |           |         |                        |      | Mascot      |

|                     |                                                                                                     | 2389.2205  | 2389.1238   | -0.0967 | -40   | 368        | 392         | EPTIGEKRR<br>GSSASALGVTGLDVASS<br>EPTIGEKRR |                         |           |       |                |  |      |        | Mascot |
|---------------------|-----------------------------------------------------------------------------------------------------|------------|-------------|---------|-------|------------|-------------|---------------------------------------------|-------------------------|-----------|-------|----------------|--|------|--------|--------|
|                     |                                                                                                     | 2627.2664  | 2627.3286   | 0.0622  | 24    | 85         | 108         | NPNPPTAARMELQQQAA<br>SLTETCR                |                         |           |       |                |  |      |        | Mascot |
|                     |                                                                                                     | 3337.6416  | 3337.7021   | 0.0605  | 18    | 517        | 546         | VIGGICFRMFPTQGFEIV<br>FCAVTSNEQVK           | Oxidation (M)[9]        |           |       |                |  |      |        | Mascot |
| 38                  | zf-FKH2=fork head gene product {forkhead domain, internal fragment} [zebrafishes, gastrula/early ne |            |             |         |       |            | gi 1245780  | 7620.9                                      | 9.69                    | 4         | 32    | 0              |  |      |        |        |
| Peptide Information |                                                                                                     |            |             |         |       |            |             |                                             |                         |           |       |                |  |      |        |        |
|                     |                                                                                                     | Calc. Mass | Obsrv. Mass | ± da    | ± ppm | Start Seq. | End Seq.    | Sequence                                    |                         | Ion Score | C. I. | % Modification |  | Rank | Result | Type   |
|                     |                                                                                                     | 1457.7356  | 1457.7629   | 0.0273  | 19    | 40         | 50          | QNQQRWQNSIR                                 |                         |           |       |                |  |      |        | Mascot |
|                     |                                                                                                     | 1591.8591  | 1591.7557   | -0.1034 | -65   | 21         | 32          | RLTLNEIYDWIR                                |                         |           |       |                |  |      |        | Mascot |
|                     |                                                                                                     | 2254.1611  | 2253.9939   | -0.1672 | -74   | 1          | 20          | KPPYSYISLICMAIQQSPA<br>K                    | Oxidation (M)[12]       |           |       |                |  |      |        | Mascot |
|                     |                                                                                                     | 2403.2495  | 2403.0271   | -0.2224 | -93   | 22         | 39          | LTLNEIYDWIRQLFPYYR                          |                         |           |       |                |  |      |        | Mascot |
| 39                  | Gcat protein [Danio rerio]                                                                          |            |             |         |       |            | gi 33604132 | 46995.1                                     | 7.24                    | 8         | 31    | 0              |  |      |        |        |
| Peptide Information |                                                                                                     |            |             |         |       |            |             |                                             |                         |           |       |                |  |      |        |        |
|                     |                                                                                                     | Calc. Mass | Obsrv. Mass | ± da    | ± ppm | Start Seq. | End Seq.    | Sequence                                    |                         | Ion Score | C. I. | % Modification |  | Rank | Result | Type   |
|                     |                                                                                                     | 936.4686   | 936.4772    | 0.0086  | 9     | 10         | 18          | TAAWGFGAR                                   |                         |           |       |                |  |      |        | Mascot |
|                     |                                                                                                     | 1243.5624  | 1243.62     | 0.0576  | 46    | 195        | 204         | HMDLNDLEEK                                  |                         |           |       |                |  |      |        | Mascot |
|                     |                                                                                                     | 1243.5624  | 1243.62     | 0.0576  | 46    | 195        | 204         | HMDLNDLEEK                                  |                         |           |       |                |  |      |        | Mascot |
|                     |                                                                                                     | 1259.5573  | 1259.6196   | 0.0623  | 49    | 195        | 204         | HMDLNDLEEK                                  | Oxidation (M)[2]        |           |       |                |  |      |        | Mascot |
|                     |                                                                                                     | 1259.5573  | 1259.6196   | 0.0623  | 49    | 195        | 204         | HMDLNDLEEK                                  | Oxidation (M)[2]        |           |       |                |  |      |        | Mascot |
|                     |                                                                                                     | 1753.9014  | 1753.8267   | -0.0747 | -43   | 66         | 81          | VITSKQGPHICVDGSR                            | Carbamidomethyl (C)[11] |           |       |                |  |      |        | Mascot |
|                     |                                                                                                     | 2052.0332  | 2052.0659   | 0.0327  | 16    | 112        | 130         | YGAGLSSVRFCIGTQDIH<br>K                     |                         |           |       |                |  |      |        | Mascot |
|                     |                                                                                                     | 2247.1836  | 2246.9182   | -0.2654 | -118  | 326        | 346         | AVELLASNEIAQSMAAK<br>TMR                    |                         |           |       |                |  |      |        | Mascot |
|                     |                                                                                                     | 2247.1836  | 2246.9182   | -0.2654 | -118  | 326        | 346         | AVELLASNEIAQSMAAK<br>TMR                    |                         |           |       |                |  |      |        | Mascot |
|                     |                                                                                                     | 2261.1804  | 2260.9285   | -0.2519 | -111  | 262        | 282         | GTDELLGVMDRVQIVNST<br>LGK                   | Oxidation (M)[9]        |           |       |                |  |      |        | Mascot |
|                     |                                                                                                     | 2283.198   | 2283.1389   | -0.0591 | -26   | 35         | 56          | AFAPAAPQAVQSVLEAEL<br>DSIR                  |                         |           |       |                |  |      |        | Mascot |
|                     |                                                                                                     | 2284.2771  | 2284.1343   | -0.1428 | -63   | 283        | 305         | ALGGAAGGYTVGPTALIE<br>LLRQR                 |                         |           |       |                |  |      |        | Mascot |
| 40                  | SH3 domain-binding protein 4-A [Danio rerio]                                                        |            |             |         |       |            | gi 45387913 | 104947.5                                    | 7.73                    | 12        | 31    | 0              |  |      |        |        |
| Peptide Information |                                                                                                     |            |             |         |       |            |             |                                             |                         |           |       |                |  |      |        |        |
|                     |                                                                                                     | Calc. Mass | Obsrv. Mass | ± da    | ± ppm | Start Seq. | End Seq.    | Sequence                                    |                         | Ion Score | C. I. | % Modification |  | Rank | Result | Type   |

|    |                                              |           |         |      |     |              |                                    |      |    |    |   |  |                                           |  |  |  |        |
|----|----------------------------------------------|-----------|---------|------|-----|--------------|------------------------------------|------|----|----|---|--|-------------------------------------------|--|--|--|--------|
|    | 842.5822                                     | 842.496   | -0.0862 | -102 | 634 | 640          | LIKTVIR                            |      |    |    |   |  |                                           |  |  |  | Mascot |
|    | 850.4338                                     | 850.5283  | 0.0945  | 111  | 358 | 364          | LSNMEIK                            |      |    |    |   |  | Oxidation (M)[4]                          |  |  |  | Mascot |
|    | 870.4726                                     | 870.525   | 0.0524  | 60   | 1   | 7            | MAHRIR                             |      |    |    |   |  | Oxidation (M)[1]                          |  |  |  | Mascot |
|    | 1045.4796                                    | 1045.5464 | 0.0668  | 64   | 762 | 770          | AELDSEPER                          |      |    |    |   |  |                                           |  |  |  | Mascot |
|    | 1318.5984                                    | 1318.6866 | 0.0882  | 67   | 66  | 76           | DYCPSSFTTLK                        |      |    |    |   |  | Carbamidomethyl (C)[3]                    |  |  |  | Mascot |
|    | 1671.806                                     | 1671.7439 | -0.0621 | -37  | 432 | 445          | HVSFSSNVWNHMK                      |      |    |    |   |  |                                           |  |  |  | Mascot |
|    | 2081.0188                                    | 2081.0435 | 0.0247  | 12   | 373 | 390          | VSVMTRTSPMAEIVCVR                  |      |    |    |   |  | Carbamidomethyl (C)[16], Oxidation (M)[4] |  |  |  | Mascot |
|    | 2228.9282                                    | 2228.908  | -0.0202 | -9   | 117 | 138          | NSSLSDSGMIDNLGDCS<br>EEGAK         |      |    |    |   |  |                                           |  |  |  | Mascot |
|    | 2261.1648                                    | 2260.9285 | -0.2363 | -105 | 456 | 475          | HIHPSFKTVVAIFGHDCAPK               |      |    |    |   |  | Carbamidomethyl (C)[17]                   |  |  |  | Mascot |
|    | 2284.2368                                    | 2284.1343 | -0.1025 | -45  | 463 | 484          | TVVAIFGHDCAPKTLVSEVGK              |      |    |    |   |  |                                           |  |  |  | Mascot |
|    | 2300.0686                                    | 2300.1372 | 0.0686  | 30   | 568 | 587          | DDQDCILAQFCVQTPQP<br>PPK           |      |    |    |   |  | Carbamidomethyl (C)[5]                    |  |  |  | Mascot |
|    | 3337.6052                                    | 3337.7021 | 0.0969  | 29   | 269 | 298          | LARSCHDLESLGQNPWG<br>GQTQPVETNIVCK |      |    |    |   |  | Carbamidomethyl (C)[5]                    |  |  |  | Mascot |
| 41 | nuclear receptor corepressor 1 [Danio rerio] |           |         |      |     | gi 158517898 | 266607.5                           | 8.47 | 22 | 31 | 0 |  |                                           |  |  |  |        |

#### Peptide Information

| Calc. Mass | Obsrv. Mass | ± da    | ± ppm | Start Seq. | End Seq. | Sequence          | Ion Score | C. I. % | Modification           | Rank | Result Type |
|------------|-------------|---------|-------|------------|----------|-------------------|-----------|---------|------------------------|------|-------------|
| 856.4457   | 856.511     | 0.0653  | 76    | 1257       | 1263     | MGHDLKR           |           |         |                        |      | Mascot      |
| 922.4992   | 922.448     | -0.0512 | -56   | 134        | 141      | KESQFGVK          |           |         |                        |      | Mascot      |
| 936.6028   | 936.4772    | -0.1256 | -134  | 277        | 283      | LILFFKR           |           |         |                        |      | Mascot      |
| 938.3884   | 938.4636    | 0.0752  | 80    | 1837       | 1844     | DDEVMSRR          |           |         |                        |      | Mascot      |
| 1012.5574  | 1012.4557   | -0.1017 | -100  | 438        | 445      | EKFVQHPK          |           |         |                        |      | Mascot      |
| 1243.5736  | 1243.62     | 0.0464  | 37    | 1263       | 1272     | RTYDIMEGSR        |           |         | Oxidation (M)[6]       |      | Mascot      |
| 1243.5736  | 1243.62     | 0.0464  | 37    | 1263       | 1272     | RTYDIMEGSR        |           |         | Oxidation (M)[6]       |      | Mascot      |
| 1265.5718  | 1265.6768   | 0.105   | 83    | 642        | 651      | WTEEMEIAK         |           |         |                        |      | Mascot      |
| 1318.6385  | 1318.6866   | 0.0481  | 36    | 98         | 108      | IENVSETHFSR       |           |         |                        |      | Mascot      |
| 1457.7343  | 1457.7629   | 0.0286  | 20    | 490        | 501      | NQQITRPSQEEK      |           |         |                        |      | Mascot      |
| 1464.7363  | 1464.8146   | 0.0783  | 53    | 164        | 175      | LSKEELIQSMDR      |           |         | Oxidation (M)[10]      |      | Mascot      |
| 1464.7363  | 1464.8146   | 0.0783  | 53    | 164        | 175      | LSKEELIQSMDR      |           |         | Oxidation (M)[10]      |      | Mascot      |
| 1524.6747  | 1524.7633   | 0.0886  | 58    | 1461       | 1474     | AQLSPGMYDDSNAR    |           |         |                        |      | Mascot      |
| 1547.7224  | 1547.7916   | 0.0692  | 45    | 1314       | 1327     | ASTEVYDEASKYGK    |           |         |                        |      | Mascot      |
| 1649.7377  | 1649.7625   | 0.0248  | 15    | 672        | 684      | SEAQCKNFYFNNK     |           |         | Carbamidomethyl (C)[5] |      | Mascot      |
| 1649.7377  | 1649.7625   | 0.0248  | 15    | 672        | 684      | SEAQCKNFYFNNK     |           |         | Carbamidomethyl (C)[5] |      | Mascot      |
| 1739.9299  | 1739.8994   | -0.0305 | -18   | 1737       | 1752     | GGPEQPVPRPGSRSFLR |           |         |                        |      | Mascot      |
| 1752.8481  | 1752.8356   | -0.0125 | -7    | 403        | 417      | VKFINMNGLMDDPMK   |           |         |                        |      | Mascot      |
| 1784.838   | 1784.8805   | 0.0425  | 24    | 403        | 417      | VKFINMNGLMDDPMK   |           |         | Oxidation (M)[6,10]    |      | Mascot      |

|    |                              |           |         |      |             |      |                             |      |   |    |   |                   |  |        |
|----|------------------------------|-----------|---------|------|-------------|------|-----------------------------|------|---|----|---|-------------------|--|--------|
|    | 2081.0735                    | 2081.0435 | -0.03   | -14  | 1441        | 1460 | HTSVVNSTSVLRSTHAEA<br>GK    |      |   |    |   |                   |  | Mascot |
|    | 2156.1558                    | 2155.9097 | -0.2461 | -114 | 1182        | 1203 | GGSTITQGTPALTQSNVAA<br>ELLK |      |   |    |   |                   |  | Mascot |
|    | 2156.1558                    | 2155.9097 | -0.2461 | -114 | 1182        | 1203 | GGSTITQGTPALTQSNVAA<br>ELLK |      |   |    |   |                   |  | Mascot |
|    | 2225.0513                    | 2225.0808 | 0.0295  | 13   | 384         | 401  | QMRQLSVIPPMYDSEQ<br>R       |      |   |    |   | Oxidation (M)[2]  |  | Mascot |
|    | 2225.0513                    | 2225.0808 | 0.0295  | 13   | 384         | 401  | QMRQLSVIPPMYDSEQ<br>R       |      |   |    |   | Oxidation (M)[2]  |  | Mascot |
|    | 2233.1836                    | 2233.0476 | -0.136  | -61  | 54          | 72   | RPSLLSEFHPGTERPPER<br>K     |      |   |    |   |                   |  | Mascot |
|    | 2261.1897                    | 2260.9285 | -0.2612 | -116 | 53          | 71   | RRPSLLSEFHPGTERPPE<br>R     |      |   |    |   |                   |  | Mascot |
|    | 2284.0549                    | 2284.1343 | 0.0794  | 35   | 2115        | 2135 | GRGLESYEPISPPQGYS<br>GMDK   |      |   |    |   | Oxidation (M)[19] |  | Mascot |
|    | 2300.0525                    | 2300.1372 | 0.0847  | 37   | 364         | 383  | SEHEISEIIDGLSEQENNE<br>K    |      |   |    |   |                   |  | Mascot |
| 42 | Gimap9 protein [Danio rerio] |           |         |      | gi 82524311 |      | 28897.6                     | 8.05 | 7 | 30 | 0 |                   |  |        |

#### Peptide Information

|  | Calc. Mass | Obsrv. Mass | ± da    | ± ppm | Start Seq. | End Seq. | Sequence                 | Ion Score | C. I. | % Modification          | Rank | Result Type |
|--|------------|-------------|---------|-------|------------|----------|--------------------------|-----------|-------|-------------------------|------|-------------|
|  | 1259.5759  | 1259.6196   | 0.0437  | 35    | 181        | 191      | IDSMKGCYTNK              |           |       |                         |      | Mascot      |
|  | 1259.5759  | 1259.6196   | 0.0437  | 35    | 181        | 191      | IDSMKGCYTNK              |           |       |                         |      | Mascot      |
|  | 1265.5956  | 1265.6768   | 0.0812  | 64    | 157        | 166      | CRGYHVFNNR               |           |       |                         |      | Mascot      |
|  | 1464.7904  | 1464.8146   | 0.0242  | 17    | 36         | 49       | KSLSAVTNTSSIEK           |           |       |                         |      | Mascot      |
|  | 1464.7904  | 1464.8146   | 0.0242  | 17    | 36         | 49       | KSLSAVTNTSSIEK           |           |       |                         |      | Mascot      |
|  | 1591.7723  | 1591.7557   | -0.0166 | -10   | 159        | 171      | GYHVFNNRSLNDR            |           |       |                         |      | Mascot      |
|  | 2052.0696  | 2052.0659   | -0.0037 | -2    | 121        | 137      | VLKHVILFTHGDECDR         |           |       | Carbamidomethyl (C)[15] |      | Mascot      |
|  | 2211.1597  | 2211.0679   | -0.0918 | -42   | 82         | 101      | SVYLSASGVHAFLFVVPF<br>DR |           |       |                         |      | Mascot      |
|  | 2403.1301  | 2403.0271   | -0.103  | -43   | 192        | 209      | MYEYAHNLNIFEWLWEKC<br>K  |           |       |                         |      | Mascot      |

43 novel NACHT domain containing protein [Danio rerio] gi|157886380 77579.9 6.27 10 30 0

#### Peptide Information

|  | Calc. Mass | Obsrv. Mass | ± da    | ± ppm | Start Seq. | End Seq. | Sequence      | Ion Score | C. I. | % Modification | Rank | Result Type |
|--|------------|-------------|---------|-------|------------|----------|---------------|-----------|-------|----------------|------|-------------|
|  | 808.4352   | 808.3995    | -0.0357 | -44   | 496        | 501      | QSLWFK        |           |       |                |      | Mascot      |
|  | 936.5301   | 936.4772    | -0.0529 | -56   | 495        | 501      | KQSLWFK       |           |       |                |      | Mascot      |
|  | 938.4135   | 938.4636    | 0.0501  | 53    | 226        | 233      | EMEISSDK      |           |       |                |      | Mascot      |
|  | 1243.7368  | 1243.62     | -0.1168 | -94   | 166        | 178      | GVAGIGKTVSVQK |           |       |                |      | Mascot      |
|  | 1243.7368  | 1243.62     | -0.1168 | -94   | 166        | 178      | GVAGIGKTVSVQK |           |       |                |      | Mascot      |
|  | 1318.6559  | 1318.6866   | 0.0307  | 23    | 363        | 374      | MLSEAETAEIPK  |           |       |                |      | Mascot      |

|    |                                              |           |         |     |              |     |                           |      |    |    |   |                        |  |  |  |  |        |
|----|----------------------------------------------|-----------|---------|-----|--------------|-----|---------------------------|------|----|----|---|------------------------|--|--|--|--|--------|
|    | 1970.0665                                    | 1970.0437 | -0.0228 | -12 | 324          | 341 | ISDQSLANTIISHLKSSR        |      |    |    |   |                        |  |  |  |  | Mascot |
|    | 2081.1099                                    | 2081.0435 | -0.0664 | -32 | 375          | 391 | TLTQMYTHFLILQTNIK         |      |    |    |   | Oxidation (M)[5]       |  |  |  |  | Mascot |
|    | 2096.0593                                    | 2095.99   | -0.0693 | -33 | 587          | 604 | SINLFHCLNELGDHSLVK        |      |    |    |   | Carbamidomethyl (C)[7] |  |  |  |  | Mascot |
|    | 2225.2839                                    | 2225.0808 | -0.2031 | -91 | 541          | 559 | FLLGLSVESHQILLQRLM<br>K   |      |    |    |   |                        |  |  |  |  | Mascot |
|    | 2225.2839                                    | 2225.0808 | -0.2031 | -91 | 541          | 559 | FLLGLSVESHQILLQRLM<br>K   |      |    |    |   |                        |  |  |  |  | Mascot |
|    | 2261.0576                                    | 2260.9285 | -0.1291 | -57 | 431          | 451 | ECGIDVAEASVYSGLCTQ<br>IFR |      |    |    |   |                        |  |  |  |  | Mascot |
| 44 | RecName: Full=SH3 domain-binding protein 4-A |           |         |     | gi 123888628 |     | 108383                    | 7.89 | 13 | 30 | 0 |                        |  |  |  |  |        |

#### Peptide Information

|  | Calc. Mass | Obsrv. Mass | ± da    | ± ppm | Start Seq. | End Seq. | Sequence                           | Ion Score | C. I. | % Modification                            | Rank | Result Type |
|--|------------|-------------|---------|-------|------------|----------|------------------------------------|-----------|-------|-------------------------------------------|------|-------------|
|  | 842.5822   | 842.496     | -0.0862 | -102  | 663        | 669      | LIKTVIR                            |           |       |                                           |      | Mascot      |
|  | 850.4338   | 850.5283    | 0.0945  | 111   | 387        | 393      | LSNMEIK                            |           |       | Oxidation (M)[4]                          |      | Mascot      |
|  | 870.4726   | 870.525     | 0.0524  | 60    | 1          | 7        | MAAHRIR                            |           |       | Oxidation (M)[1]                          |      | Mascot      |
|  | 1045.4796  | 1045.5464   | 0.0668  | 64    | 791        | 799      | AELDSEPER                          |           |       |                                           |      | Mascot      |
|  | 1318.5984  | 1318.6866   | 0.0882  | 67    | 66         | 76       | DYCPSSFTTLK                        |           |       | Carbamidomethyl (C)[3]                    |      | Mascot      |
|  | 1671.806   | 1671.7439   | -0.0621 | -37   | 461        | 474      | HVSFSSNVWNHMK                      |           |       |                                           |      | Mascot      |
|  | 1969.9578  | 1970.0437   | 0.0859  | 44    | 825        | 841      | ELMMALLKMDQCGLVAR                  |           |       | Oxidation (M)[3,4,9]                      |      | Mascot      |
|  | 2081.0188  | 2081.0435   | 0.0247  | 12    | 402        | 419      | VSMVTRTESPMAEIVCVR                 |           |       | Carbamidomethyl (C)[16], Oxidation (M)[4] |      | Mascot      |
|  | 2228.9282  | 2228.908    | -0.0202 | -9    | 117        | 138      | NSSLSDSGMIDNLGDCS<br>EEGAK         |           |       |                                           |      | Mascot      |
|  | 2261.1648  | 2260.9285   | -0.2363 | -105  | 485        | 504      | HIHPSFKTVVAIFGHDCAPK               |           |       | Carbamidomethyl (C)[17]                   |      | Mascot      |
|  | 2284.2368  | 2284.1343   | -0.1025 | -45   | 492        | 513      | TVVAIFGHDCAPKTLTLLVS<br>EVGK       |           |       |                                           |      | Mascot      |
|  | 2300.0686  | 2300.1372   | 0.0686  | 30    | 597        | 616      | DDQDCILAQFCVQTPQP<br>PPK           |           |       | Carbamidomethyl (C)[5]                    |      | Mascot      |
|  | 3337.6052  | 3337.7021   | 0.0969  | 29    | 298        | 327      | LARSCHDLESLGQNPGW<br>GQTQPVETNIVCK |           |       | Carbamidomethyl (C)[5]                    |      | Mascot      |

45 follistatin-like 1b [Danio rerio] gi|88900441 35185.6 5.16 8 30 0

#### Peptide Information

|  | Calc. Mass | Obsrv. Mass | ± da    | ± ppm | Start Seq. | End Seq. | Sequence                 | Ion Score | C. I. | % Modification               | Rank | Result Type |
|--|------------|-------------|---------|-------|------------|----------|--------------------------|-----------|-------|------------------------------|------|-------------|
|  | 808.3617   | 808.3995    | 0.0378  | 47    | 63         | 70       | SVCGSNGK                 |           |       | Carbamidomethyl (C)[3]       |      | Mascot      |
|  | 870.4315   | 870.525     | 0.0935  | 107   | 296        | 302      | HQETVEK                  |           |       |                              |      | Mascot      |
|  | 1524.8016  | 1524.7633   | -0.0383 | -25   | 290        | 302      | VAELNKHQETVEK            |           |       |                              |      | Mascot      |
|  | 2225.0947  | 2225.0808   | -0.0139 | -6    | 212        | 230      | LSFDEFNLNCLKPGFSPPE<br>K |           |       | Carbamidomethyl (C)[9]       |      | Mascot      |
|  | 2225.0947  | 2225.0808   | -0.0139 | -6    | 212        | 230      | LSFDEFNLNCLKPGFSPPE<br>K |           |       | Carbamidomethyl (C)[9]       |      | Mascot      |
|  | 2253.9607  | 2253.9939   | 0.0332  | 15    | 40         | 58       | ECAVNEKGEPSCLCIEQC       |           |       | Carbamidomethyl (C)[2,12,14] |      | Mascot      |



|  |           |           |        |    |     |     |                              |                           |  |  |  |  |  |  |  |  |        |
|--|-----------|-----------|--------|----|-----|-----|------------------------------|---------------------------|--|--|--|--|--|--|--|--|--------|
|  | 2299.9661 | 2300.1372 | 0.1711 | 74 | 270 | 288 | K<br>TPVFDTEGDQEMTEEEW<br>TR |                           |  |  |  |  |  |  |  |  | Mascot |
|  | 2388.9553 | 2389.1238 | 0.1685 | 71 | 232 | 251 | CALEDETYEDGAETQVE<br>CNR     | Carbamidomethyl (C)[1,18] |  |  |  |  |  |  |  |  | Mascot |
|  | 2388.9553 | 2389.1238 | 0.1685 | 71 | 232 | 251 | CALEDETYEDGAETQVE<br>CNR     | Carbamidomethyl (C)[1,18] |  |  |  |  |  |  |  |  | Mascot |
|  | 2403.0076 | 2403.0271 | 0.0195 | 8  | 231 | 251 | KCALEDETYEDGAETQV<br>ECNR    |                           |  |  |  |  |  |  |  |  | Mascot |

46 novel protein similar to vertebrate thyrotropin-releasing hormone degrading ectoenzyme (TRHDE) [Dan gi|169145900 102887 6.58 12 30 0

#### Peptide Information

| Calc. Mass | Obsrv. Mass | ± da    | ± ppm | Start Seq. | End Seq. | Sequence           | Ion Score | C. I. | % | Modification           | Rank | Result Type |
|------------|-------------|---------|-------|------------|----------|--------------------|-----------|-------|---|------------------------|------|-------------|
| 819.4147   | 819.406     | -0.0087 | -11   | 179        | 184      | FHYQPK             |           |       |   |                        |      | Mascot      |
| 850.4669   | 850.5283    | 0.0614  | 72    | 752        | 758      | ALYQLDK            |           |       |   |                        |      | Mascot      |
| 1165.6398  | 1165.7242   | 0.0844  | 72    | 194        | 202      | EMKPLRTYK          |           |       |   |                        |      | Mascot      |
| 1212.579   | 1212.6027   | 0.0237  | 20    | 221        | 230      | SSYMLNGERR         |           |       |   |                        |      | Mascot      |
| 1212.579   | 1212.6027   | 0.0237  | 20    | 221        | 230      | SSYMLNGERR         |           |       |   |                        |      | Mascot      |
| 1457.7134  | 1457.7629   | 0.0495  | 34    | 244        | 255      | KAFPCFDEPIYK       |           |       |   |                        |      | Mascot      |
| 1524.7661  | 1524.7633   | -0.0028 | -2    | 528        | 540      | MLANVMGQTLFQR      |           |       |   | Oxidation (M)[1]       |      | Mascot      |
| 1547.8064  | 1547.7916   | -0.0148 | -10   | 824        | 837      | QAVSLISDWISSNK     |           |       |   |                        |      | Mascot      |
| 1591.8518  | 1591.7557   | -0.0961 | -60   | 346        | 357      | LLQFYQDYFKVK       |           |       |   |                        |      | Mascot      |
| 1698.8922  | 1698.8284   | -0.0638 | -38   | 13         | 27       | ALSDQWADSVVVRPR    |           |       |   |                        |      | Mascot      |
| 1969.9912  | 1970.0437   | 0.0525  | 27    | 510        | 527      | LYLHDGNDCKPGGAALIR |           |       |   | Carbamidomethyl (C)[9] |      | Mascot      |
| 2081.0344  | 2081.0435   | 0.0091  | 4     | 820        | 837      | HCHRQAVSLISDWISSNK |           |       |   |                        |      | Mascot      |
| 2147.113   | 2146.8823   | -0.2307 | -107  | 763        | 780      | TLDHSLFSDYVLRQVEPK |           |       |   |                        |      | Mascot      |

47 PREDICTED: BAI1-associated protein 3-like [Danio rerio] gi|326666171 105052.3 6.11 10 30 0 14 0

#### Peptide Information

| Calc. Mass | Obsrv. Mass | ± da    | ± ppm | Start Seq. | End Seq. | Sequence        | Ion Score | C. I. | % | Modification     | Rank | Result Type |
|------------|-------------|---------|-------|------------|----------|-----------------|-----------|-------|---|------------------|------|-------------|
| 1045.6     | 1045.5464   | -0.0536 | -51   | 34         | 43       | SSVKEVLAGR      |           |       |   |                  |      | Mascot      |
| 1457.8032  | 1457.7629   | -0.0403 | -28   | 353        | 366      | LVVVVDAVCADVQK  |           |       |   |                  |      | Mascot      |
| 1464.7456  | 1464.8146   | 0.069   | 47    | 449        | 460      | MLALTGFHNWFK    |           |       |   |                  |      | Mascot      |
| 1464.7456  | 1464.8146   | 0.069   | 47    | 449        | 460      | MLALTGFHNWFK    |           |       |   |                  |      | Mascot      |
| 1591.8049  | 1591.7557   | -0.0492 | -31   | 531        | 543      | VYLGGLPREMDWR   |           |       |   |                  |      | Mascot      |
| 1649.7986  | 1649.7625   | -0.0361 | -22   | 169        | 183      | DTAMSKMASNVTIHK | 14        | 0     |   | Oxidation (M)[4] |      | Mascot      |
| 1649.7986  | 1649.7625   | -0.0361 | -22   | 169        | 183      | DTAMSKMASNVTIHK |           |       |   | Oxidation (M)[4] |      | Mascot      |

|  |           |           |         |      |     |     |                           |  |  |  |  |                                             |        |
|--|-----------|-----------|---------|------|-----|-----|---------------------------|--|--|--|--|---------------------------------------------|--------|
|  | 2155.9868 | 2155.9097 | -0.0771 | -36  | 309 | 326 | CELMLRSVGHMQSMAAF<br>R    |  |  |  |  | Carbamidomethyl (C)[1], Oxidation (M)[4,11] | Mascot |
|  | 2155.9868 | 2155.9097 | -0.0771 | -36  | 309 | 326 | CELMLRSVGHMQSMAAF<br>R    |  |  |  |  | Carbamidomethyl (C)[1], Oxidation (M)[4,11] | Mascot |
|  | 2194.093  | 2194.041  | -0.052  | -24  | 296 | 314 | QVFPCNNSAAIIRCELML<br>R   |  |  |  |  | Oxidation (M)[17]                           | Mascot |
|  | 2254.1025 | 2253.9939 | -0.1086 | -48  | 681 | 700 | FFHADGEGLLLEDLKSGD<br>YK  |  |  |  |  |                                             | Mascot |
|  | 2261.1958 | 2260.9285 | -0.2673 | -118 | 353 | 373 | LVVVVDAVCADVQKGQN<br>VYNK |  |  |  |  |                                             | Mascot |
|  | 2283.9678 | 2284.1343 | 0.1665  | 73   | 539 | 558 | EMDWRGVEQAMEESCG<br>LEGK  |  |  |  |  |                                             | Mascot |
|  | 2299.9626 | 2300.1372 | 0.1746  | 76   | 539 | 558 | EMDWRGVEQAMEESCG<br>LEGK  |  |  |  |  | Oxidation (M)[2]                            | Mascot |

48

PREDICTED: rho guanine nucleotide exchange factor 15 [Danio rerio]

gi|125831156

99248.4

6.04

12

30

0

| Peptide Information |             |         |       |            |          |                           |           |       |   |                                           |      |             |
|---------------------|-------------|---------|-------|------------|----------|---------------------------|-----------|-------|---|-------------------------------------------|------|-------------|
| Calc. Mass          | Obsrv. Mass | ± da    | ± ppm | Start Seq. | End Seq. | Sequence                  | Ion Score | C. I. | % | Modification                              | Rank | Result Type |
| 862.3974            | 862.4878    | 0.0904  | 105   | 430        | 436      | LSPEECK                   |           |       |   | Carbamidomethyl (C)[6]                    |      | Mascot      |
| 922.4515            | 922.448     | -0.0035 | -4    | 147        | 154      | EEPVSFSK                  |           |       |   |                                           |      | Mascot      |
| 1226.6237           | 1226.5967   | -0.027  | -22   | 327        | 337      | SGSNENIRPPR               |           |       |   |                                           |      | Mascot      |
| 1242.5208           | 1242.5913   | 0.0705  | 57    | 811        | 820      | TNEGWYEGMR                |           |       |   |                                           |      | Mascot      |
| 1649.6586           | 1649.7625   | 0.1039  | 63    | 93         | 106      | NCGCMCHQQRPGMK            |           |       |   | Carbamidomethyl (C)[2]                    |      | Mascot      |
| 1649.6586           | 1649.7625   | 0.1039  | 63    | 93         | 106      | NCGCMCHQQRPGMK            |           |       |   | Carbamidomethyl (C)[2]                    |      | Mascot      |
| 1969.9246           | 1970.0437   | 0.1191  | 60    | 626        | 641      | QMEELIQINGMLEFDK          |           |       |   | Oxidation (M)[2,11]                       |      | Mascot      |
| 2156.1821           | 2155.9097   | -0.2724 | -126  | 657        | 676      | QGEVLEVNKGGTFLGNL<br>RPK  |           |       |   |                                           |      | Mascot      |
| 2156.1821           | 2155.9097   | -0.2724 | -126  | 657        | 676      | QGEVLEVNKGGTFLGNL<br>RPK  |           |       |   |                                           |      | Mascot      |
| 2211.1035           | 2211.0679   | -0.0356 | -16   | 626        | 643      | QMEELIQINGMLEFDKLIK       |           |       |   | Oxidation (M)[2,11]                       |      | Mascot      |
| 2229.0601           | 2228.908    | -0.1521 | -68   | 624        | 641      | MKQMEELIQINGMLEFDK        |           |       |   | Oxidation (M)[1,4]                        |      | Mascot      |
| 2254.325            | 2253.9939   | -0.3311 | -147  | 677        | 695      | FTPVYLFLFNDLLVIAIKK       |           |       |   |                                           |      | Mascot      |
| 2283.2715           | 2283.1389   | -0.1326 | -58   | 259        | 279      | CPQIILPPSLARPASPLMP<br>PK |           |       |   | Carbamidomethyl (C)[1]                    |      | Mascot      |
| 2299.2664           | 2299.1426   | -0.1238 | -54   | 259        | 279      | CPQIILPPSLARPASPLMP<br>PK |           |       |   | Carbamidomethyl (C)[1], Oxidation (M)[18] |      | Mascot      |
| 2300.1074           | 2300.1372   | 0.0298  | 13    | 376        | 396      | NISKTSADFQMSSQITTS<br>PEK |           |       |   |                                           |      | Mascot      |

49

serine/arginine-rich splicing factor 7 [Danio rerio]

gi|71834670

20442.3

9.87

1

17

0

| Peptide Information |             |         |       |            |          |               |           |       |   |              |      |             |
|---------------------|-------------|---------|-------|------------|----------|---------------|-----------|-------|---|--------------|------|-------------|
| Calc. Mass          | Obsrv. Mass | ± da    | ± ppm | Start Seq. | End Seq. | Sequence      | Ion Score | C. I. | % | Modification | Rank | Result Type |
| 1649.9738           | 1649.7625   | -0.2113 | -128  | 133        | 145      | LIQRVTILYDFLR | 17        |       | 0 |              | 2    | Mascot      |

50

transmembrane protein 68 [Danio rerio]

gi|41053784

37982.1

7.21

1

16

0

| Peptide Information      |                               |               |            |            |                                     |               |                       |                                   |                   |             |
|--------------------------|-------------------------------|---------------|------------|------------|-------------------------------------|---------------|-----------------------|-----------------------------------|-------------------|-------------|
| Calc. Mass               | Obsrv. Mass                   | ± da          | ± ppm      | Start Seq. | End Sequence Seq.                   | Ion Score     | C. I. %               | Modification                      | Rank              | Result Type |
| 1212.6947                | 1212.6027                     | -0.092        | -76        | 298        | 308 VQQAVQALIDK                     | 16            | 0                     |                                   | 2                 | Mascot      |
| Gel Idx/Pos 241/J17      |                               |               |            |            | Instr./Gel Origin BA2060/110707A    |               |                       | Process Status Analysis Succeeded |                   |             |
| Plate [#] Name [1] 31496 |                               |               |            |            | Instrument Sample Name              |               |                       | Spectra 11                        |                   |             |
| Rank                     | Protein Name                  | Accession No. | Protein MW | Protein PI | Pep. Count                          | Protein Score | Protein Score C. I. % | Total Ion Score                   | Total Ion C. I. % |             |
| 1                        | peroxiredoxin-4 [Danio rerio] | gi 148226847  | 29083.8    | 6.3        | 13                                  | 565           | 100                   | 466                               | 100               |             |
| Peptide Information      |                               |               |            |            |                                     |               |                       |                                   |                   |             |
| Calc. Mass               | Obsrv. Mass                   | ± da          | ± ppm      | Start Seq. | End Sequence Seq.                   | Ion Score     | C. I. %               | Modification                      | Rank              | Result Type |
| 819.4207                 | 819.4066                      | -0.0141       | -17        | 213        | 219 SVDETLR                         |               |                       |                                   |                   | Mascot      |
| 862.5032                 | 862.4886                      | -0.0146       | -17        | 190        | 197 GLFIIDGK                        |               |                       |                                   |                   | Mascot      |
| 1212.6259                | 1212.605                      | -0.0209       | -17        | 220        | 229 LVQAFQYTDK                      |               |                       |                                   |                   | Mascot      |
| 1212.6259                | 1212.605                      | -0.0209       | -17        | 220        | 229 LVQAFQYTDK                      | 57            | 99.942                |                                   |                   | Mascot      |
| 1243.6464                | 1243.624                      | -0.0224       | -18        | 202        | 212 QITMNDLPVGR                     |               |                       |                                   |                   | Mascot      |
| 1243.6464                | 1243.624                      | -0.0224       | -18        | 202        | 212 QITMNDLPVGR                     | 48            | 99.549                |                                   |                   | Mascot      |
| 1259.6412                | 1259.6215                     | -0.0197       | -16        | 202        | 212 QITMNDLPVGR                     |               |                       | Oxidation (M)[4]                  |                   | Mascot      |
| 1259.6412                | 1259.6215                     | -0.0197       | -16        | 202        | 212 QITMNDLPVGR                     | 43            | 98.542                | Oxidation (M)[4]                  |                   | Mascot      |
| 1318.7114                | 1318.6877                     | -0.0237       | -18        | 56         | 67 VPVSDHSLHLSK                     |               |                       |                                   |                   | Mascot      |
| 1464.842                 | 1464.8177                     | -0.0243       | -17        | 163        | 175 IPLLSDLTHQISK                   |               |                       |                                   |                   | Mascot      |
| 1649.7917                | 1649.7689                     | -0.0228       | -14        | 176        | 189 DYGVFLEDQGHTLR                  | 127           | 100                   |                                   |                   | Mascot      |
| 1649.7917                | 1649.7689                     | -0.0228       | -14        | 176        | 189 DYGVFLEDQGHTLR                  |               |                       |                                   |                   | Mascot      |
| 2081.0813                | 2081.0522                     | -0.0291       | -14        | 70         | 88 ISKPAPHWEGTAVINGEF K             |               |                       |                                   |                   | Mascot      |
| 2233.2373                | 2233.0503                     | -0.187        | -84        | 155        | 175 QGGLGPMKIPLLSDLTHQ ISK          |               |                       |                                   |                   | Mascot      |
| 2246.9558                | 2246.9255                     | -0.0303       | -13        | 37         | 55 EQECYNYAGGHVYPGEA FR             | 125           | 100                   | Carbamidomethyl (C)[4]            |                   | Mascot      |
| 2246.9558                | 2246.9255                     | -0.0303       | -13        | 37         | 55 EQECYNYAGGHVYPGEA FR             |               |                       | Carbamidomethyl (C)[4]            |                   | Mascot      |
| 2389.1604                | 2389.135                      | -0.0254       | -11        | 230        | 252 HGEVCPAGWKPGSDTIIP DPAGK        | 109           | 100                   | Carbamidomethyl (C)[5]            |                   | Mascot      |
| 2389.1604                | 2389.135                      | -0.0254       | -11        | 230        | 252 HGEVCPAGWKPGSDTIIP DPAGK        |               |                       | Carbamidomethyl (C)[5]            |                   | Mascot      |
| 2403.0571                | 2403.1072                     | 0.0501        | 21         | 36         | 55 REQECYNYAGGHVYPGE AFR            |               |                       | Carbamidomethyl (C)[5]            |                   | Mascot      |
| 3439.6851                | 3439.6467                     | -0.0384       | -11        | 124        | 153 VHEFQAINAEVVACSVDS QFTHLAWINTPR |               |                       | Carbamidomethyl (C)[14]           |                   | Mascot      |

2 Gcat protein [Danio rerio] gi|33604132 46995.1 7.24 10 46 0

Peptide Information

| Calc. Mass | Obsrv. Mass | ± da    | ± ppm | Start Seq. | End Seq. | Sequence                    | Ion Score | C. I. % | Modification            | Rank | Result Type |
|------------|-------------|---------|-------|------------|----------|-----------------------------|-----------|---------|-------------------------|------|-------------|
| 936.4686   | 936.4787    | 0.0101  | 11    | 10         | 18       | TAAWGFGAR                   |           |         |                         |      | Mascot      |
| 964.5131   | 964.511     | -0.0021 | -2    | 2          | 9        | LLSEMSLR                    |           |         | Oxidation (M)[5]        |      | Mascot      |
| 1243.5624  | 1243.624    | 0.0616  | 50    | 195        | 204      | HMDLNDLEEK                  |           |         |                         |      | Mascot      |
| 1243.5624  | 1243.624    | 0.0616  | 50    | 195        | 204      | HMDLNDLEEK                  |           |         |                         |      | Mascot      |
| 1259.5573  | 1259.6215   | 0.0642  | 51    | 195        | 204      | HMDLNDLEEK                  |           |         | Oxidation (M)[2]        |      | Mascot      |
| 1259.5573  | 1259.6215   | 0.0642  | 51    | 195        | 204      | HMDLNDLEEK                  |           |         | Oxidation (M)[2]        |      | Mascot      |
| 1753.9014  | 1753.8351   | -0.0663 | -38   | 66         | 81       | VITSKQGPHICVDGSR            |           |         | Carbamidomethyl (C)[11] |      | Mascot      |
| 2000.1174  | 1999.9331   | -0.1843 | -92   | 283        | 303      | ALGGAAGGYTVGPTALIE<br>LLR   |           |         |                         |      | Mascot      |
| 2052.0332  | 2052.0703   | 0.0371  | 18    | 112        | 130      | YGAGLSSVRFCGTQDIH<br>K      |           |         |                         |      | Mascot      |
| 2247.1836  | 2246.9255   | -0.2581 | -115  | 326        | 346      | AVELLASNEIAQSMAAK<br>TMR    |           |         |                         |      | Mascot      |
| 2247.1836  | 2246.9255   | -0.2581 | -115  | 326        | 346      | AVELLASNEIAQSMAAK<br>TMR    |           |         |                         |      | Mascot      |
| 2261.1804  | 2260.938    | -0.2424 | -107  | 262        | 282      | GTDELLGVMDRVQIVNST<br>LGK   |           |         | Oxidation (M)[9]        |      | Mascot      |
| 2261.1804  | 2260.938    | -0.2424 | -107  | 262        | 282      | GTDELLGVMDRVQIVNST<br>LGK   |           |         | Oxidation (M)[9]        |      | Mascot      |
| 2283.198   | 2283.1521   | -0.0459 | -20   | 35         | 56       | AFAPAAPQAVQSVLEAEL<br>DSIR  |           |         |                         |      | Mascot      |
| 2284.2771  | 2284.1467   | -0.1304 | -57   | 283        | 305      | ALGGAAGGYTVGPTALIE<br>LLRQR |           |         |                         |      | Mascot      |

3 CLIP-associating protein 1 [Danio rerio] gi|169646251 168891.5 9.05 19 46 0

Peptide Information

| Calc. Mass | Obsrv. Mass | ± da    | ± ppm | Start Seq. | End Seq. | Sequence          | Ion Score | C. I. % | Modification           | Rank | Result Type |
|------------|-------------|---------|-------|------------|----------|-------------------|-----------|---------|------------------------|------|-------------|
| 819.4094   | 819.4066    | -0.0028 | -3    | 328        | 334      | EILSDDK           |           |         |                        |      | Mascot      |
| 848.4988   | 848.4784    | -0.0204 | -24   | 216        | 222      | LVVIFSR           |           |         |                        |      | Mascot      |
| 964.488    | 964.511     | 0.023   | 24    | 779        | 787      | ISASVNAMR         |           |         | Oxidation (M)[8]       |      | Mascot      |
| 1165.6801  | 1165.728    | 0.0479  | 41    | 1355       | 1364     | DHTIRALALR        |           |         |                        |      | Mascot      |
| 1226.7831  | 1226.5995   | -0.1836 | -150  | 1319       | 1329     | GALIELLKITR       |           |         |                        |      | Mascot      |
| 1243.6833  | 1243.624    | -0.0593 | -48   | 1117       | 1127     | LWGWGVDGLLK       |           |         |                        |      | Mascot      |
| 1243.6833  | 1243.624    | -0.0593 | -48   | 1117       | 1127     | LWGWGVDGLLK       |           |         |                        |      | Mascot      |
| 1318.6355  | 1318.6877   | 0.0522  | 40    | 738        | 749      | IPRPSMSQGCSR      |           |         |                        |      | Mascot      |
| 1728.9126  | 1728.9053   | -0.0073 | -4    | 788        | 804      | VLNTGTEVEAAVADALR |           |         |                        |      | Mascot      |
| 1752.8295  | 1752.8441   | 0.0146  | 8     | 2          | 15       | EPNMEYCLTQVLQK    |           |         | Carbamidomethyl (C)[7] |      | Mascot      |
| 1753.8214  | 1753.8351   | 0.0137  | 8     | 118        | 131      | IMEQSATPQYIWR     |           |         | Oxidation (M)[2]       |      | Mascot      |

|   |                                                  |           |         |      |             |         |                                     |    |                        |        |
|---|--------------------------------------------------|-----------|---------|------|-------------|---------|-------------------------------------|----|------------------------|--------|
|   | 1851.9044                                        | 1851.9003 | -0.0041 | -2   | 21          | 36      | LQMGPELIDYITDAEK                    |    | Oxidation (M)[3]       | Mascot |
|   | 1871.0068                                        | 1870.9608 | -0.046  | -25  | 771         | 787     | FGLIHQARISASVNAMR                   |    |                        | Mascot |
|   | 2081.9265                                        | 2082.0439 | 0.1174  | 56   | 1073        | 1092    | NSSNTSNSSPSNTMGRT<br>PAR            |    | Oxidation (M)[14]      | Mascot |
|   | 2081.9265                                        | 2082.0439 | 0.1174  | 56   | 1073        | 1092    | NSSNTSNSSPSNTMGRT<br>PAR            |    | Oxidation (M)[14]      | Mascot |
|   | 2194.063                                         | 2194.103  | 0.04    | 18   | 2           | 19      | EPNMEYCLTQVLQKDVA<br>R              |    | Carbamidomethyl (C)[7] | Mascot |
|   | 2225.207                                         | 2225.0933 | -0.1137 | -51  | 381         | 401     | SQVVREACITLGHLSLL<br>GNK            |    |                        | Mascot |
|   | 2225.207                                         | 2225.0933 | -0.1137 | -51  | 381         | 401     | SQVVREACITLGHLSLL<br>GNK            |    |                        | Mascot |
|   | 2284.0769                                        | 2284.1467 | 0.0698  | 31   | 1           | 19      | MEPNMEYCLTQVLQKDV<br>AR             |    | Oxidation (M)[1]       | Mascot |
|   | 2300.072                                         | 2300.1501 | 0.0781  | 34   | 1           | 19      | MEPNMEYCLTQVLQKDV<br>AR             |    | Oxidation (M)[1,5]     | Mascot |
|   | 2384.22                                          | 2383.9209 | -0.2991 | -125 | 145         | 167     | EGVCLCLISTLNTYGAQG<br>LTLSK         |    |                        | Mascot |
|   | 2403.0994                                        | 2403.1072 | 0.0078  | 3    | 843         | 863     | QTEDVAEVLNHCASSNW<br>SERK           |    |                        | Mascot |
|   | 3338.7485                                        | 3338.7375 | -0.011  | -3   | 50          | 80      | MVDGIATSWVNSSNFKL<br>ALLGMDLLSALVTR |    | Oxidation (M)[1]       | Mascot |
| 4 | cytochrome b-245, beta polypeptide [Danio rerio] |           |         |      | gi 41055433 | 64447.8 | 8.43                                | 11 | 44                     | 0      |

#### Peptide Information

| Calc. Mass | Obsrv. Mass | ± da    | ± ppm | Start Seq. | End Seq. | Sequence                            | Ion Score | C. I. % | Modification                               | Rank | Result Type |
|------------|-------------|---------|-------|------------|----------|-------------------------------------|-----------|---------|--------------------------------------------|------|-------------|
| 862.4781   | 862.4886    | 0.0105  | 12    | 151        | 157      | SYLNPIR                             |           |         |                                            |      | Mascot      |
| 882.4427   | 882.5541    | 0.1114  | 126   | 483        | 490      | DAEAAHLR                            |           |         |                                            |      | Mascot      |
| 1318.7188  | 1318.6877   | -0.0311 | -24   | 530        | 542      | VGVFLCGP TALGK                      |           |         | Carbamidomethyl (C)[6]                     |      | Mascot      |
| 1671.8021  | 1671.7496   | -0.0525 | -31   | 270        | 282      | WVVGPMFLYV CER                      |           |         | Carbamidomethyl (C)[11], Oxidation (M)[6]  |      | Mascot      |
| 1752.8262  | 1752.8441   | 0.0179  | 10    | 467        | 480      | NMSDFLSYNIYLTR                      |           |         | Oxidation (M)[2]                           |      | Mascot      |
| 1753.8835  | 1753.8351   | -0.0484 | -28   | 73         | 87       | NLLSFLRGS IQCCSR                    |           |         | Carbamidomethyl (C)[12]                    |      | Mascot      |
| 2233.1113  | 2233.0503   | -0.061  | -27   | 54         | 72       | APAACLNFNCMLILLPVC<br>R             |           |         | Carbamidomethyl (C)[5,10,18]               |      | Mascot      |
| 2389.157   | 2389.135    | -0.022  | -9    | 509        | 529      | YGKPNWDNEFS LIASQH<br>PGTK          |           |         |                                            |      | Mascot      |
| 2389.157   | 2389.135    | -0.022  | -9    | 509        | 529      | YGKPNWDNEFS LIASQH<br>PGTK          |           |         |                                            |      | Mascot      |
| 2501.228   | 2501.2166   | -0.0114 | -5    | 245        | 266      | FEKWGQNVTDCPV IFA<br>GNPPK          |           |         | Carbamidomethyl (C)[11]                    |      | Mascot      |
| 3338.7507  | 3338.7375   | -0.0132 | -4    | 43         | 72       | VILGHALSWARAPA ACLN<br>FNCMLILLPVCR |           |         | Carbamidomethyl (C)[16], Oxidation (M)[22] |      | Mascot      |
| 3453.8403  | 3453.6616   | -0.1787 | -52   | 96         | 124      | NITFHKL VAYMIAFHTAVH<br>IAHLFNFER   |           |         |                                            |      | Mascot      |

5 tudor domain-containing protein 3 [Danio rerio] gi|49227351 81728.7 9.03 13 41 0

#### Peptide Information

| Calc. Mass | Obsrv. Mass | ± da | ± ppm | Start Seq. | End Seq. | Sequence | Ion Score | C. I. % | Modification | Rank | Result Type |
|------------|-------------|------|-------|------------|----------|----------|-----------|---------|--------------|------|-------------|
|------------|-------------|------|-------|------------|----------|----------|-----------|---------|--------------|------|-------------|

|                                |                                 |            |             |         |       |            |             |                           |      |           |                                           |   |                         |  |      |        |        |
|--------------------------------|---------------------------------|------------|-------------|---------|-------|------------|-------------|---------------------------|------|-----------|-------------------------------------------|---|-------------------------|--|------|--------|--------|
|                                |                                 | 819.3591   | 819.4066    | 0.0475  | 58    | 474        | 480         | NESQDAR                   |      |           |                                           |   |                         |  |      |        | Mascot |
|                                |                                 | 842.4227   | 842.4985    | 0.0758  | 90    | 711        | 718         | GGDGQPRR                  |      |           |                                           |   |                         |  |      |        | Mascot |
|                                |                                 | 862.4305   | 862.4886    | 0.0581  | 67    | 529        | 536         | FSTPADPK                  |      |           |                                           |   |                         |  |      |        | Mascot |
|                                |                                 | 1133.5334  | 1133.5918   | 0.0584  | 52    | 472        | 480         | WKNESQDAR                 |      |           |                                           |   |                         |  |      |        | Mascot |
|                                |                                 | 1165.567   | 1165.728    | 0.161   | 138   | 529        | 538         | FSTPADPKMR                |      |           | Oxidation (M)[9]                          |   |                         |  |      |        | Mascot |
|                                |                                 | 1212.5531  | 1212.605    | 0.0519  | 43    | 568        | 577         | DFQDEGQFVK                |      |           |                                           |   |                         |  |      |        | Mascot |
|                                |                                 | 1212.5531  | 1212.605    | 0.0519  | 43    | 568        | 577         | DFQDEGQFVK                |      |           |                                           |   |                         |  |      |        | Mascot |
|                                |                                 | 1671.7207  | 1671.7496   | 0.0289  | 17    | 11         | 24          | EGWYLTDEGIEECK            |      |           |                                           |   |                         |  |      |        | Mascot |
|                                |                                 | 1728.7421  | 1728.9053   | 0.1632  | 94    | 11         | 24          | EGWYLTDEGIEECK            |      |           | Carbamidomethyl (C)[13]                   |   |                         |  |      |        | Mascot |
|                                |                                 | 1753.7883  | 1753.8351   | 0.0468  | 27    | 98         | 113         | VQMTDGHTACTGLEFK          |      |           | Oxidation (M)[3]                          |   |                         |  |      |        | Mascot |
|                                |                                 | 1851.96    | 1851.9003   | -0.0597 | -32   | 519        | 536         | IQSNGPAPPKFSTPADPK        |      |           |                                           |   |                         |  |      |        | Mascot |
|                                |                                 | 1870.9994  | 1870.9608   | -0.0386 | -21   | 331        | 347         | ANQPRAAPVEQSRPPPR         |      |           |                                           |   |                         |  |      |        | Mascot |
|                                |                                 | 2194.063   | 2194.103    | 0.04    | 18    | 98         | 117         | VQMTDGHTACTGLEFKQ<br>LSK  |      |           |                                           |   |                         |  |      |        | Mascot |
|                                |                                 | 2211.0354  | 2211.0776   | 0.0422  | 19    | 95         | 113         | MLRVQMTDGHTACTGLE<br>FK   |      |           | Carbamidomethyl (C)[13], Oxidation (M)[1] |   |                         |  |      |        | Mascot |
|                                |                                 | 2246.9758  | 2246.9255   | -0.0503 | -22   | 11         | 29          | EGWYLTDEGIEECKSSS<br>EK   |      |           | Carbamidomethyl (C)[13]                   |   |                         |  |      |        | Mascot |
|                                |                                 | 2246.9758  | 2246.9255   | -0.0503 | -22   | 11         | 29          | EGWYLTDEGIEECKSSS<br>EK   |      |           | Carbamidomethyl (C)[13]                   |   |                         |  |      |        | Mascot |
| 6                              | novel gene [Danio rerio]        |            |             |         |       |            | gi 55962596 | 45409.6                   | 7.22 | 9         | 40                                        | 0 |                         |  |      |        |        |
| <div>Peptide Information</div> |                                 |            |             |         |       |            |             |                           |      |           |                                           |   |                         |  |      |        |        |
|                                |                                 | Calc. Mass | Obsrv. Mass | ± da    | ± ppm | Start Seq. | End Seq.    | Sequence                  |      | Ion Score | C. I.                                     | % | Modification            |  | Rank | Result | Type   |
|                                |                                 | 842.5458   | 842.4985    | -0.0473 | -56   | 391        | 397         | KLIDVVR                   |      |           |                                           |   |                         |  |      |        | Mascot |
|                                |                                 | 848.4471   | 848.4784    | 0.0313  | 37    | 334        | 341         | EVGSSLTR                  |      |           |                                           |   |                         |  |      |        | Mascot |
|                                |                                 | 996.5109   | 996.5818    | 0.0709  | 71    | 136        | 143         | LHIDQNEK                  |      |           |                                           |   |                         |  |      |        | Mascot |
|                                |                                 | 1212.6769  | 1212.605    | -0.0719 | -59   | 161        | 171         | KIVGHSTMPVK               |      |           |                                           |   | Oxidation (M)[8]        |  |      |        | Mascot |
|                                |                                 | 1212.6769  | 1212.605    | -0.0719 | -59   | 161        | 171         | KIVGHSTMPVK               |      |           |                                           |   | Oxidation (M)[8]        |  |      |        | Mascot |
|                                |                                 | 1243.6477  | 1243.624    | -0.0237 | -19   | 47         | 56          | RFCAVHGIQR                |      |           |                                           |   | Carbamidomethyl (C)[3]  |  |      |        | Mascot |
|                                |                                 | 1243.6477  | 1243.624    | -0.0237 | -19   | 47         | 56          | RFCAVHGIQR                |      |           |                                           |   | Carbamidomethyl (C)[3]  |  |      |        | Mascot |
|                                |                                 | 1852.001   | 1851.9003   | -0.1007 | -54   | 298        | 315         | IPGIGVPNHLAHGGCPKK        |      |           |                                           |   | Carbamidomethyl (C)[15] |  |      |        | Mascot |
|                                |                                 | 1871.8778  | 1871.9338   | 0.056   | 30    | 144        | 160         | MVMFGVTHVAAVDGYSR         |      |           |                                           |   | Oxidation (M)[1,3]      |  |      |        | Mascot |
|                                |                                 | 1983.9779  | 1983.8622   | -0.1157 | -58   | 144        | 161         | MVMFGVTHVAAVDGYSR<br>K    |      |           |                                           |   | Oxidation (M)[1]        |  |      |        | Mascot |
|                                |                                 | 1999.9728  | 1999.9331   | -0.0397 | -20   | 144        | 161         | MVMFGVTHVAAVDGYSR<br>K    |      |           |                                           |   | Oxidation (M)[1,3]      |  |      |        | Mascot |
|                                |                                 | 2501.1587  | 2501.2166   | 0.0579  | 23    | 217        | 237         | NNTERQPYCQTPSTNNHI<br>VER |      |           |                                           |   |                         |  |      |        | Mascot |
| 7                              | Zgc:85662 protein [Danio rerio] |            |             |         |       |            | gi 32766594 | 58091.1                   | 7.77 | 10        | 39                                        | 0 |                         |  |      |        |        |

### Peptide Information

| Calc. Mass | Obsrv. Mass | ± da    | ± ppm | Start Seq. | End Seq. | Sequence                           | Ion Score | C. I. % | Modification      | Rank | Result Type |
|------------|-------------|---------|-------|------------|----------|------------------------------------|-----------|---------|-------------------|------|-------------|
| 1051.5419  | 1051.6981   | 0.1562  | 149   | 307        | 316      | GGTLIQYDGK                         |           |         |                   |      | Mascot      |
| 1279.8096  | 1279.7555   | -0.0541 | -42   | 317        | 327      | LRLLEIAQVPK                        |           |         |                   |      | Mascot      |
| 1318.6572  | 1318.6877   | 0.0305  | 23    | 393        | 404      | CFDNALGINVPR                       |           |         |                   |      | Mascot      |
| 1464.7693  | 1464.8177   | 0.0484  | 33    | 303        | 316      | ADVKGGLTIQYDGK                     |           |         |                   |      | Mascot      |
| 1514.8365  | 1514.7058   | -0.1307 | -86   | 80         | 92       | FLQVKGPSVEWPK                      |           |         |                   |      | Mascot      |
| 1671.8337  | 1671.7496   | -0.0841 | -50   | 93         | 106      | INRPPEDSIQPYDK                     |           |         |                   |      | Mascot      |
| 2156.0981  | 2155.917    | -0.1811 | -84   | 149        | 166      | NENTFLDLTVQQIEHLNK                 |           |         |                   |      | Mascot      |
| 2156.0981  | 2155.917    | -0.1811 | -84   | 149        | 166      | NENTFLDLTVQQIEHLNK                 |           |         |                   |      | Mascot      |
| 2403.1021  | 2403.1072   | 0.0051  | 2     | 167        | 187      | TYNADVPLVLMNSFNTD<br>EDTK          |           |         | Oxidation (M)[11] |      | Mascot      |
| 2705.3259  | 2705.134    | -0.1919 | -71   | 412        | 436      | TTSDLLVMSNLYSLDAG<br>SLTMSEK       |           |         | Oxidation (M)[9]  |      | Mascot      |
| 3439.709   | 3439.6467   | -0.0623 | -18   | 454        | 483      | VQEYITRFESIPDMLELD<br>HLTVSGDVTFGK |           |         |                   |      | Mascot      |

8 sorting nexin family member 27 [Danio rerio] gi|41054611 64121.8 5.8 11 38 0

### Peptide Information

| Calc. Mass | Obsrv. Mass | ± da    | ± ppm | Start Seq. | End Seq. | Sequence                     | Ion Score | C. I. % | Modification                              | Rank | Result Type |
|------------|-------------|---------|-------|------------|----------|------------------------------|-----------|---------|-------------------------------------------|------|-------------|
| 842.5094   | 842.4985    | -0.0109 | -13   | 121        | 127      | QVVDLIR                      |           |         |                                           |      | Mascot      |
| 1212.6736  | 1212.605    | -0.0686 | -57   | 204        | 213      | EFAILHQNLIK                  |           |         |                                           |      | Mascot      |
| 1212.6736  | 1212.605    | -0.0686 | -57   | 204        | 213      | EFAILHQNLIK                  |           |         |                                           |      | Mascot      |
| 1226.6316  | 1226.5995   | -0.0321 | -26   | 214        | 223      | REFANFAFPK                   |           |         |                                           |      | Mascot      |
| 1318.6613  | 1318.6877   | 0.0264  | 20    | 185        | 195      | FVYVNVYMAGR                  |           |         |                                           |      | Mascot      |
| 2225.0283  | 2225.0933   | 0.065   | 29    | 24         | 47       | NGSGMSAGTCAGGLVAT<br>TVTSGPR |           |         | Carbamidomethyl (C)[10], Oxidation (M)[5] |      | Mascot      |
| 2225.0283  | 2225.0933   | 0.065   | 29    | 24         | 47       | NGSGMSAGTCAGGLVAT<br>TVTSGPR |           |         | Carbamidomethyl (C)[10], Oxidation (M)[5] |      | Mascot      |
| 2229.0757  | 2228.9175   | -0.1582 | -71   | 177        | 195      | HVEQSGEKFVYVNYMA<br>GR       |           |         | Oxidation (M)[16]                         |      | Mascot      |
| 2232.8743  | 2233.0503   | 0.176   | 79    | 425        | 442      | TCEGYNEITFPHCSCDSR           |           |         | Carbamidomethyl (C)[2,13,15]              |      | Mascot      |
| 2269.0989  | 2268.9099   | -0.189  | -83   | 1          | 23       | MADVVEGDGTRSAAPSA<br>IHSAAR  |           |         |                                           |      | Mascot      |
| 2283.9321  | 2284.1467   | 0.2146  | 94    | 482        | 500      | WDTDEEGMAFCFEYARG<br>EK      |           |         |                                           |      | Mascot      |
| 2299.927   | 2300.1501   | 0.2231  | 97    | 482        | 500      | WDTDEEGMAFCFEYARG<br>EK      |           |         | Oxidation (M)[8]                          |      | Mascot      |
| 2388.9753  | 2389.135    | 0.1597  | 67    | 425        | 443      | TCEGYNEITFPHCSCDSR<br>R      |           |         | Carbamidomethyl (C)[2,13,15]              |      | Mascot      |
| 2388.9753  | 2389.135    | 0.1597  | 67    | 425        | 443      | TCEGYNEITFPHCSCDSR<br>R      |           |         | Carbamidomethyl (C)[2,13,15]              |      | Mascot      |
| 2403.3354  | 2403.1072   | -0.2282 | -95   | 106        | 127      | ILEVNGVNVGATHKQVV<br>DLIR    |           |         |                                           |      | Mascot      |

9 UDP-glucose pyrophosphorylase 2 [Danio rerio] gi|47086583 54991.6 7.25 10 38 0

Peptide Information

| Calc. Mass | Obsrv. Mass | ± da    | ± ppm | Start Seq. | End Seq. | Sequence                           | Ion Score | C. I. % | Modification      | Rank | Result Type |
|------------|-------------|---------|-------|------------|----------|------------------------------------|-----------|---------|-------------------|------|-------------|
| 1051.5419  | 1051.6981   | 0.1562  | 149   | 276        | 285      | GGTLIQYDGK                         |           |         |                   |      | Mascot      |
| 1279.8096  | 1279.7555   | -0.0541 | -42   | 286        | 296      | LRLLEIAQVPK                        |           |         |                   |      | Mascot      |
| 1318.6572  | 1318.6877   | 0.0305  | 23    | 362        | 373      | CFDNALGINVPR                       |           |         |                   |      | Mascot      |
| 1464.7693  | 1464.8177   | 0.0484  | 33    | 272        | 285      | ADVKG GTLIQYDGK                    |           |         |                   |      | Mascot      |
| 1514.8365  | 1514.7058   | -0.1307 | -86   | 49         | 61       | FLQVKGPSVEWPK                      |           |         |                   |      | Mascot      |
| 1671.8337  | 1671.7496   | -0.0841 | -50   | 62         | 75       | INRPPEDSIQPYDK                     |           |         |                   |      | Mascot      |
| 2156.0981  | 2155.917    | -0.1811 | -84   | 118        | 135      | NENTFLDLTVQQIEHLNK                 |           |         |                   |      | Mascot      |
| 2156.0981  | 2155.917    | -0.1811 | -84   | 118        | 135      | NENTFLDLTVQQIEHLNK                 |           |         |                   |      | Mascot      |
| 2403.1021  | 2403.1072   | 0.0051  | 2     | 136        | 156      | TYNADVPLVLMNSFNTD<br>EDTK          |           |         | Oxidation (M)[11] |      | Mascot      |
| 2705.3259  | 2705.134    | -0.1919 | -71   | 381        | 405      | TTSDLLLVMNSLYSLDAG<br>SLTMSEK      |           |         | Oxidation (M)[9]  |      | Mascot      |
| 3439.709   | 3439.6467   | -0.0623 | -18   | 423        | 452      | VQEYITRFESIPDMLELD<br>HLTVSGDVTFGK |           |         |                   |      | Mascot      |

10 hypothetical protein LOC493609 [Danio rerio] gi|56090176 25141.4 5.78 7 37 0

Peptide Information

| Calc. Mass | Obsrv. Mass | ± da    | ± ppm | Start Seq. | End Seq. | Sequence            | Ion Score | C. I. % | Modification           | Rank | Result Type |
|------------|-------------|---------|-------|------------|----------|---------------------|-----------|---------|------------------------|------|-------------|
| 1212.6597  | 1212.605    | -0.0547 | -45   | 77         | 86       | QRHDGAFLIR          |           |         |                        |      | Mascot      |
| 1212.6597  | 1212.605    | -0.0547 | -45   | 77         | 86       | QRHDGAFLIR          |           |         |                        |      | Mascot      |
| 1318.5779  | 1318.6877   | 0.1098  | 83    | 196        | 207      | GACHGQTGMFPR        |           |         | Carbamidomethyl (C)[3] |      | Mascot      |
| 1464.723   | 1464.8177   | 0.0947  | 65    | 125        | 136      | FNSLNSLV DYHR       |           |         |                        |      | Mascot      |
| 1504.823   | 1504.7722   | -0.0508 | -34   | 137        | 149      | STSVSRNQPIFLR       |           |         |                        |      | Mascot      |
| 1649.7693  | 1649.7689   | -0.0004 | 0     | 7          | 20       | YDFKATADELSFK       |           |         |                        |      | Mascot      |
| 1649.7693  | 1649.7689   | -0.0004 | 0     | 7          | 20       | YDFKATADELSFK       |           |         |                        |      | Mascot      |
| 2081.0007  | 2081.0522   | 0.0515  | 25    | 22         | 38       | GEILKVLNEECDQNWYK   |           |         |                        |      | Mascot      |
| 2082.0364  | 2082.0439   | 0.0075  | 4     | 125        | 142      | FNSLNSLV DYHRSTSVSR |           |         |                        |      | Mascot      |
| 2082.0364  | 2082.0439   | 0.0075  | 4     | 125        | 142      | FNSLNSLV DYHRSTSVSR |           |         |                        |      | Mascot      |

11 novel protein similar to vertebrate cytoplasmic linker associated protein 1 (CLASP1) [Danio rerio] gi|159569348 164674.4 8.99 18 37 0

Peptide Information

| Calc. Mass | Obsrv. Mass | ± da | ± ppm | Start Seq. | End Seq. | Sequence | Ion Score | C. I. % | Modification | Rank | Result Type |
|------------|-------------|------|-------|------------|----------|----------|-----------|---------|--------------|------|-------------|
|------------|-------------|------|-------|------------|----------|----------|-----------|---------|--------------|------|-------------|



|           |           |         |      |      |      |                                      |  |                        |  |        |
|-----------|-----------|---------|------|------|------|--------------------------------------|--|------------------------|--|--------|
| 819.4094  | 819.4066  | -0.0028 | -3   | 326  | 332  | EILSDDK                              |  |                        |  | Mascot |
| 848.4988  | 848.4784  | -0.0204 | -24  | 216  | 222  | LNIVFSR                              |  |                        |  | Mascot |
| 964.488   | 964.511   | 0.023   | 24   | 771  | 779  | ISASVNAMR                            |  | Oxidation (M)[8]       |  | Mascot |
| 1165.6801 | 1165.728  | 0.0479  | 41   | 1313 | 1322 | DHTIRALALR                           |  |                        |  | Mascot |
| 1226.7831 | 1226.5995 | -0.1836 | -150 | 1277 | 1287 | GALIELLKITR                          |  |                        |  | Mascot |
| 1243.6753 | 1243.624  | -0.0513 | -41  | 662  | 673  | AKVVSQSQPGSR                         |  |                        |  | Mascot |
| 1243.6753 | 1243.624  | -0.0513 | -41  | 662  | 673  | AKVVSQSQPGSR                         |  |                        |  | Mascot |
| 1318.6355 | 1318.6877 | 0.0522  | 40   | 730  | 741  | IPRPSMSQGCSR                         |  |                        |  | Mascot |
| 1728.9126 | 1728.9053 | -0.0073 | -4   | 780  | 796  | VLNTGTEVEAAVADALR                    |  |                        |  | Mascot |
| 1752.8295 | 1752.8441 | 0.0146  | 8    | 2    | 15   | EPNMEYCLTQVLQK                       |  | Carbamidomethyl (C)[7] |  | Mascot |
| 1753.8214 | 1753.8351 | 0.0137  | 8    | 118  | 131  | IMEQSATPQYIWDR                       |  | Oxidation (M)[2]       |  | Mascot |
| 1851.9044 | 1851.9003 | -0.0041 | -2   | 21   | 36   | LQMGPELIDYITDAEK                     |  | Oxidation (M)[3]       |  | Mascot |
| 1871.0068 | 1870.9608 | -0.046  | -25  | 763  | 779  | FGLIHQARISASVNAMR                    |  |                        |  | Mascot |
| 2194.063  | 2194.103  | 0.04    | 18   | 2    | 19   | EPNMEYCLTQVLQKDVA<br>R               |  | Carbamidomethyl (C)[7] |  | Mascot |
| 2225.207  | 2225.0933 | -0.1137 | -51  | 379  | 399  | SQVVREACITLGHLSLL<br>GNK             |  |                        |  | Mascot |
| 2225.207  | 2225.0933 | -0.1137 | -51  | 379  | 399  | SQVVREACITLGHLSLL<br>GNK             |  |                        |  | Mascot |
| 2284.0769 | 2284.1467 | 0.0698  | 31   | 1    | 19   | MEPNMEYCLTQVLQKDV<br>AR              |  | Oxidation (M)[1]       |  | Mascot |
| 2300.072  | 2300.1501 | 0.0781  | 34   | 1    | 19   | MEPNMEYCLTQVLQKDV<br>AR              |  | Oxidation (M)[1,5]     |  | Mascot |
| 2384.22   | 2383.9209 | -0.2991 | -125 | 145  | 167  | EGVCLCLISTLNTYGAQG<br>LTLSK          |  |                        |  | Mascot |
| 2403.0994 | 2403.1072 | 0.0078  | 3    | 835  | 855  | QTEDVAEVLNHCASSNW<br>SERK            |  |                        |  | Mascot |
| 3338.7485 | 3338.7375 | -0.011  | -3   | 50   | 80   | MVDGIATSWVNSSNFKL<br>ALLGMDLLSALVTTR |  | Oxidation (M)[1]       |  | Mascot |

12 SH3 domain-binding protein 4-A [Danio rerio] gi|45387913 104947.5 7.73 13 36 0

#### Peptide Information

| Calc. Mass | Obsrv. Mass | ± da    | ± ppm | Start Seq. | End Seq. | Sequence                   | Ion Score | C. I. % | Modification                              | Rank | Result Type |
|------------|-------------|---------|-------|------------|----------|----------------------------|-----------|---------|-------------------------------------------|------|-------------|
| 842.5822   | 842.4985    | -0.0837 | -99   | 634        | 640      | LIKTVIR                    |           |         |                                           |      | Mascot      |
| 850.4338   | 850.5291    | 0.0953  | 112   | 358        | 364      | LSNMEIK                    |           |         | Oxidation (M)[4]                          |      | Mascot      |
| 964.5205   | 964.511     | -0.0095 | -10   | 796        | 803      | ELMMALLK                   |           |         | Oxidation (M)[3]                          |      | Mascot      |
| 1045.4796  | 1045.5492   | 0.0696  | 67    | 762        | 770      | AELDSEPER                  |           |         |                                           |      | Mascot      |
| 1318.5984  | 1318.6877   | 0.0893  | 68    | 66         | 76       | DYCPSSFTTLK                |           |         | Carbamidomethyl (C)[3]                    |      | Mascot      |
| 1671.806   | 1671.7496   | -0.0564 | -34   | 432        | 445      | HVSFSSNVWNHMK              |           |         |                                           |      | Mascot      |
| 2081.0188  | 2081.0522   | 0.0334  | 16    | 373        | 390      | VSVMTRTESPMIEIVCVR         |           |         | Carbamidomethyl (C)[16], Oxidation (M)[4] |      | Mascot      |
| 2228.9282  | 2228.9175   | -0.0107 | -5    | 117        | 138      | NSSLSDSGMIDNLGDCS<br>EEGAK |           |         |                                           |      | Mascot      |
| 2261.1648  | 2260.938    | -0.2268 | -100  | 456        | 475      | HIHPSFKTVVAIFGHDC          |           |         | Carbamidomethyl (C)[17]                   |      | Mascot      |

|    |                                                                      |           |         |      |     |              |                                     |      |                         |    |        |
|----|----------------------------------------------------------------------|-----------|---------|------|-----|--------------|-------------------------------------|------|-------------------------|----|--------|
|    | 2261.1648                                                            | 2260.938  | -0.2268 | -100 | 456 | 475          | PK<br>HHPSFKTVVAIFGHDCA<br>PK       |      | Carbamidomethyl (C)[17] |    | Mascot |
|    | 2284.2368                                                            | 2284.1467 | -0.0901 | -39  | 463 | 484          | TVVAIFGHDCAPKTLVLS<br>EVGK          |      |                         |    | Mascot |
|    | 2300.0686                                                            | 2300.1501 | 0.0815  | 35   | 568 | 587          | DDQDCILAQFCVQTPQP<br>PPK            |      | Carbamidomethyl (C)[5]  |    | Mascot |
|    | 3337.6052                                                            | 3337.7129 | 0.1077  | 32   | 269 | 298          | LARSCHDLES LGQNPWG<br>GQTQPVETNIVCK |      | Carbamidomethyl (C)[5]  |    | Mascot |
|    | 3338.5496                                                            | 3338.7375 | 0.1879  | 56   | 856 | 884          | TGMVDSEAMWKPAYDFL<br>LTWAAQIGDSYR   |      | Oxidation (M)[3]        |    | Mascot |
| 13 | hypothetical protein LOC100145413 [Xenopus<br>(Silurana) tropicalis] |           |         |      |     | gi 187607099 | 39415.2                             | 9.16 | 11                      | 36 | 0      |

Peptide Information

|  | Calc. Mass | Obsrv. Mass | ± da    | ± ppm | Start Seq. | End Sequence Seq. | Ion Score                  | C. I. % | Modification               | Rank | Result Type |
|--|------------|-------------|---------|-------|------------|-------------------|----------------------------|---------|----------------------------|------|-------------|
|  | 848.5239   | 848.4784    | -0.0455 | -54   | 325        | 332               | FLLGLK                     |         |                            |      | Mascot      |
|  | 1649.7775  | 1649.7689   | -0.0086 | -5    | 141        | 155               | IHTGEKPFCTQCGK             |         |                            |      | Mascot      |
|  | 1649.7775  | 1649.7689   | -0.0086 | -5    | 141        | 155               | IHTGEKPFCTQCGK             |         |                            |      | Mascot      |
|  | 1752.8043  | 1752.8441   | 0.0398  | 23    | 225        | 239               | VHTKEKPYSCSECGK            |         | Carbamidomethyl (C)[10]    |      | Mascot      |
|  | 1753.84    | 1753.8351   | -0.0049 | -3    | 253        | 267               | IHAGVKEYLCFECGK            |         | Carbamidomethyl (C)[10]    |      | Mascot      |
|  | 1999.9952  | 1999.9331   | -0.0621 | -31   | 81         | 96                | IHMRIHTGEKPYTCTR           |         | Carbamidomethyl (C)[14]    |      | Mascot      |
|  | 2081.8911  | 2082.0439   | 0.1528  | 73    | 166        | 183               | HMMIHTGEKPFCTCEG<br>K      |         | Oxidation (M)[2,3]         |      | Mascot      |
|  | 2081.8911  | 2082.0439   | 0.1528  | 73    | 166        | 183               | HMMIHTGEKPFCTCEG<br>K      |         | Oxidation (M)[2,3]         |      | Mascot      |
|  | 2194.0559  | 2194.103    | 0.0471  | 21    | 259        | 276               | EYLCFECGKTFITEVGLK         |         | Carbamidomethyl (C)[4,7]   |      | Mascot      |
|  | 2211.1702  | 2211.0776   | -0.0926 | -42   | 184        | 202               | SFIQLSTLNLHMRIHAGE<br>K    |         | Oxidation (M)[12]          |      | Mascot      |
|  | 2229.0427  | 2228.9175   | -0.1252 | -56   | 203        | 220               | THICDQCSLTFYRASELK         |         | Carbamidomethyl (C)[4,7]   |      | Mascot      |
|  | 2389.0342  | 2389.135    | 0.1008  | 42    | 278        | 296               | QQMNHTGEKPYKCSHC<br>NNR    |         | Carbamidomethyl (C)[13,16] |      | Mascot      |
|  | 2389.0342  | 2389.135    | 0.1008  | 42    | 278        | 296               | QQMNHTGEKPYKCSHC<br>NNR    |         | Carbamidomethyl (C)[13,16] |      | Mascot      |
|  | 2501.1548  | 2501.2166   | 0.0618  | 25    | 113        | 134               | IHTGEKPYTCTQCGKSFG<br>QSSK |         | Carbamidomethyl (C)[10,13] |      | Mascot      |

|    |                                                           |  |  |  |  |              |         |      |   |    |   |
|----|-----------------------------------------------------------|--|--|--|--|--------------|---------|------|---|----|---|
| 14 | PREDICTED: thrombospondin-4-B-like, partial [Danio rerio] |  |  |  |  | gi 326668026 | 52577.5 | 5.21 | 9 | 35 | 0 |
|----|-----------------------------------------------------------|--|--|--|--|--------------|---------|------|---|----|---|

Peptide Information

|  | Calc. Mass | Obsrv. Mass | ± da   | ± ppm | Start Seq. | End Sequence Seq. | Ion Score   | C. I. % | Modification      | Rank | Result Type |
|--|------------|-------------|--------|-------|------------|-------------------|-------------|---------|-------------------|------|-------------|
|  | 882.5155   | 882.5541    | 0.0386 | 44    | 157        | 164               | SLPQGPKR    |         |                   |      | Mascot      |
|  | 964.4669   | 964.511     | 0.0441 | 46    | 329        | 337               | CVNTAPGFR   |         |                   |      | Mascot      |
|  | 1226.5834  | 1226.5995   | 0.0161 | 13    | 410        | 421               | TAGPDVPPMDR |         |                   |      | Mascot      |
|  | 1242.5784  | 1242.5988   | 0.0204 | 16    | 410        | 421               | TAGPDVPPMDR |         | Oxidation (M)[10] |      | Mascot      |

|    |                                                         |                     |             |         |       |            |                               |                                      |      |           |       |                                             |    |   |      |             |
|----|---------------------------------------------------------|---------------------|-------------|---------|-------|------------|-------------------------------|--------------------------------------|------|-----------|-------|---------------------------------------------|----|---|------|-------------|
|    |                                                         | 1279.6173           | 1279.7555   | 0.1382  | 108   | 220        | 230                           | VEAGPMFELMR                          |      |           |       |                                             |    |   |      | Mascot      |
|    |                                                         | 1752.8109           | 1752.8441   | 0.0332  | 19    | 463        | 477                           | DTDIDAYPDDILKCR                      |      |           |       |                                             |    |   |      | Mascot      |
|    |                                                         | 1851.8047           | 1851.9003   | 0.0956  | 52    | 329        | 343                           | CVNTAPGFRCEQCPR                      |      |           |       | Carbamidomethyl (C)[1,10,13]                |    |   |      | Mascot      |
|    |                                                         | 2052.0615           | 2052.0703   | 0.0088  | 4     | 47         | 64                            | AKNMDNVFILATLQMQSK                   |      |           |       |                                             |    |   |      | Mascot      |
|    |                                                         | 2081.9453           | 2082.0439   | 0.0986  | 47    | 274        | 292                           | KPSNCGPVGCFTQDLGV<br>EK              |      |           |       | Carbamidomethyl (C)[5]                      |    |   |      | Mascot      |
|    |                                                         | 2081.9453           | 2082.0439   | 0.0986  | 47    | 274        | 292                           | KPSNCGPVGCFTQDLGV<br>EK              |      |           |       | Carbamidomethyl (C)[5]                      |    |   |      | Mascot      |
|    |                                                         | 3338.502            | 3338.7375   | 0.2355  | 71    | 410        | 441                           | TAGPDVAPPMDRLCGNG<br>QPNPCDINAECVVER |      |           |       |                                             |    |   |      | Mascot      |
| 15 | PREDICTED: BAI1-associated protein 3-like [Danio rerio] |                     |             |         |       |            | gi 326666171                  | 105052.3                             | 6.11 | 12        | 35    | 0                                           | 15 | 0 |      |             |
|    |                                                         | Peptide Information |             |         |       |            |                               |                                      |      |           |       |                                             |    |   |      |             |
|    |                                                         | Calc. Mass          | Obsrv. Mass | ± da    | ± ppm | Start Seq. | End Sequence Seq.             |                                      |      | Ion Score | C. I. | % Modification                              |    |   | Rank | Result Type |
|    |                                                         | 1045.6              | 1045.5492   | -0.0508 | -49   | 34         | 43 SSVKEVLAGR                 |                                      |      |           |       |                                             |    |   |      | Mascot      |
|    |                                                         | 1106.6093           | 1106.5433   | -0.066  | -60   | 440        | 448 EYLPLKDTK                 |                                      |      |           |       |                                             |    |   |      | Mascot      |
|    |                                                         | 1133.5626           | 1133.5918   | 0.0292  | 26    | 381        | 389 VDFFSISYR                 |                                      |      |           |       |                                             |    |   |      | Mascot      |
|    |                                                         | 1457.8032           | 1457.7727   | -0.0305 | -21   | 353        | 366 LVVVVDVACADVQK            |                                      |      |           |       |                                             |    |   |      | Mascot      |
|    |                                                         | 1464.7456           | 1464.8177   | 0.0721  | 49    | 449        | 460 MLALTGFHNWFK              |                                      |      |           |       |                                             |    |   |      | Mascot      |
|    |                                                         | 1514.8247           | 1514.7058   | -0.1189 | -78   | 353        | 366 LVVVVDVACADVQK            |                                      |      |           |       | Carbamidomethyl (C)[9]                      |    |   |      | Mascot      |
|    |                                                         | 1649.7986           | 1649.7689   | -0.0297 | -18   | 169        | 183 DTAMSKMASNVTIHK           |                                      | 15   |           | 0     | Oxidation (M)[4]                            |    |   |      | Mascot      |
|    |                                                         | 1649.7986           | 1649.7689   | -0.0297 | -18   | 169        | 183 DTAMSKMASNVTIHK           |                                      |      |           |       | Oxidation (M)[4]                            |    |   |      | Mascot      |
|    |                                                         | 1870.7954           | 1870.9608   | 0.1654  | 88    | 282        | 295 LYCDYCLSQMKSMR            |                                      |      |           |       | Carbamidomethyl (C)[3,6], Oxidation (M)[10] |    |   |      | Mascot      |
|    |                                                         | 1983.8945           | 1983.8622   | -0.0323 | -16   | 315        | 332 SVGHMQSMAAFRAVCS<br>NR    |                                      |      |           |       | Oxidation (M)[5,8]                          |    |   |      | Mascot      |
|    |                                                         | 2155.9868           | 2155.917    | -0.0698 | -32   | 309        | 326 CELMLRSVGHMQSMAAF<br>R    |                                      |      |           |       | Carbamidomethyl (C)[1], Oxidation (M)[4,11] |    |   |      | Mascot      |
|    |                                                         | 2155.9868           | 2155.917    | -0.0698 | -32   | 309        | 326 CELMLRSVGHMQSMAAF<br>R    |                                      |      |           |       | Carbamidomethyl (C)[1], Oxidation (M)[4,11] |    |   |      | Mascot      |
|    |                                                         | 2194.093            | 2194.103    | 0.01    | 5     | 296        | 314 QVFPCNNSAIIRCELML<br>R    |                                      |      |           |       | Oxidation (M)[17]                           |    |   |      | Mascot      |
|    |                                                         | 2261.1958           | 2260.938    | -0.2578 | -114  | 353        | 373 LVVVVDVACADVQKGQN<br>VYNK |                                      |      |           |       |                                             |    |   |      | Mascot      |
|    |                                                         | 2261.1958           | 2260.938    | -0.2578 | -114  | 353        | 373 LVVVVDVACADVQKGQN<br>VYNK |                                      |      |           |       |                                             |    |   |      | Mascot      |
|    |                                                         | 2283.9678           | 2284.1467   | 0.1789  | 78    | 539        | 558 EMDWRGVEQAMEESCG<br>LEGK  |                                      |      |           |       |                                             |    |   |      | Mascot      |
|    |                                                         | 2299.9626           | 2300.1501   | 0.1875  | 82    | 539        | 558 EMDWRGVEQAMEESCG<br>LEGK  |                                      |      |           |       | Oxidation (M)[2]                            |    |   |      | Mascot      |

[illegible]

|    |                                                                                         |           |         |     |     |     |                      |  |  |                  |  |  |        |
|----|-----------------------------------------------------------------------------------------|-----------|---------|-----|-----|-----|----------------------|--|--|------------------|--|--|--------|
|    | 2224.9607                                                                               | 2225.0933 | 0.1326  | 60  | 230 | 249 | EGQVCELRCCTVYMGTYGR  |  |  |                  |  |  | Mascot |
|    | 2224.9607                                                                               | 2225.0933 | 0.1326  | 60  | 230 | 249 | EGQVCELRCCTVYMGTYGR  |  |  |                  |  |  | Mascot |
|    | 2261.1152                                                                               | 2260.938  | -0.1772 | -78 | 87  | 106 | VMDKINEMAEGITVIEAPER |  |  | Oxidation (M)[2] |  |  | Mascot |
|    | 2261.1152                                                                               | 2260.938  | -0.1772 | -78 | 87  | 106 | VMDKINEMAEGITVIEAPER |  |  | Oxidation (M)[2] |  |  | Mascot |
| 19 | PREDICTED: interferon-induced protein 44 [Danio rerio] gi 125802987 33292.1 8.16 7 33 0 |           |         |     |     |     |                      |  |  |                  |  |  |        |

#### Peptide Information

|  | Calc. Mass | Obsrv. Mass | ± da    | ± ppm | Start Seq. | End Seq. | Sequence              | Ion Score | C. I. | % Modification         | Rank | Result Type |
|--|------------|-------------|---------|-------|------------|----------|-----------------------|-----------|-------|------------------------|------|-------------|
|  | 1045.6074  | 1045.5492   | -0.0582 | -56   | 204        | 213      | GIAQVVMTK             |           |       |                        |      | Mascot      |
|  | 1498.7649  | 1498.7151   | -0.0498 | -33   | 64         | 76       | SSFINSINSVFQR         |           |       |                        |      | Mascot      |
|  | 1504.8403  | 1504.7722   | -0.0681 | -45   | 200        | 213      | ISDKGIAQVVMTK         |           |       | Oxidation (M)[12]      |      | Mascot      |
|  | 2000.0918  | 1999.9331   | -0.1587 | -79   | 204        | 222      | GIAQVVMTKVDEACPLVK    |           |       |                        |      | Mascot      |
|  | 2389.1711  | 2389.135    | -0.0361 | -15   | 236        | 256      | EKMELCSAHTGVPMTNIFPVK |           |       | Carbamidomethyl (C)[6] |      | Mascot      |
|  | 2389.1711  | 2389.135    | -0.0361 | -15   | 236        | 256      | EKMELCSAHTGVPMTNIFPVK |           |       | Carbamidomethyl (C)[6] |      | Mascot      |
|  | 2403.1365  | 2403.1072   | -0.0293 | -12   | 12         | 31       | QQPSSPELETPWRSFDWGQK  |           |       |                        |      | Mascot      |
|  | 2501.2056  | 2501.2166   | 0.011   | 4     | 108        | 129      | TSLPFVFFDIMGLEAEFHGSK |           |       |                        |      | Mascot      |

20 PREDICTED: ribosomal protein S6 kinase alpha-2-like [Danio rerio] gi|125834099 83167.2 8.78 11 33 0

#### Peptide Information

|  | Calc. Mass | Obsrv. Mass | ± da    | ± ppm | Start Seq. | End Seq. | Sequence              | Ion Score | C. I. | % Modification            | Rank | Result Type |
|--|------------|-------------|---------|-------|------------|----------|-----------------------|-----------|-------|---------------------------|------|-------------|
|  | 882.5771   | 882.5541    | -0.023  | -26   | 661        | 668      | LTAPLVLR              |           |       |                           |      | Mascot      |
|  | 1133.6599  | 1133.5918   | -0.0681 | -60   | 266        | 275      | ETMALILKAK            |           |       | Oxidation (M)[3]          |      | Mascot      |
|  | 1147.5994  | 1147.6296   | 0.0302  | 26    | 54         | 63       | ADPSQFELLK            |           |       |                           |      | Mascot      |
|  | 1165.698   | 1165.728    | 0.03    | 26    | 134        | 142      | LYLILDFLR             |           |       |                           |      | Mascot      |
|  | 1226.5609  | 1226.5995   | 0.0386  | 31    | 153        | 162      | EVMFTEEDVK            |           |       |                           |      | Mascot      |
|  | 1242.5558  | 1242.5988   | 0.043   | 35    | 153        | 162      | EVMFTEEDVK            |           |       | Oxidation (M)[3]          |      | Mascot      |
|  | 1504.7941  | 1504.7722   | -0.0219 | -15   | 432        | 444      | CVHRITSVEYAVK         |           |       |                           |      | Mascot      |
|  | 1638.7758  | 1638.8347   | 0.0589  | 36    | 631        | 646      | FALSGGNWDTVSDAAK      |           |       |                           |      | Mascot      |
|  | 1752.8875  | 1752.8441   | -0.0434 | -25   | 297        | 313      | NPSNRLGAGPDGVVEIK     |           |       |                           |      | Mascot      |
|  | 1871.8989  | 1871.9338   | 0.0349  | 19    | 503        | 518      | CFSEREASAVLCTITK      |           |       | Carbamidomethyl (C)[1,12] |      | Mascot      |
|  | 2081.0298  | 2081.0522   | 0.0224  | 11    | 626        | 646      | IGSGKFALSGGNWDTVSDAAK |           |       |                           |      | Mascot      |
|  | 2261.1296  | 2260.938    | -0.1916 | -85   | 532        | 551      | DLKPSNILYVDETDGPESIR  |           |       |                           |      | Mascot      |

|                     |                                              | 2261.1296  | 2260.938    | -0.1916 | -85   | 532        | 551      | DLKPSNILYVDETGDPEI<br>R           |           |       |    |                                            |      |        |      |        | Mascot |
|---------------------|----------------------------------------------|------------|-------------|---------|-------|------------|----------|-----------------------------------|-----------|-------|----|--------------------------------------------|------|--------|------|--------|--------|
| 21                  | hypothetical protein LOC402939 [Danio rerio] |            |             |         |       |            |          | gi 45387697                       | 40309.5   | 6.1   | 8  | 32                                         | 0    |        |      |        |        |
| Peptide Information |                                              |            |             |         |       |            |          |                                   |           |       |    |                                            |      |        |      |        |        |
|                     |                                              | Calc. Mass | Obsrv. Mass | ± da    | ± ppm | Start Seq. | End Seq. | Sequence                          | Ion Score | C. I. | %  | Modification                               | Rank | Result | Type |        |        |
|                     |                                              | 1242.6841  | 1242.5988   | -0.0853 | -69   | 344        | 353      | ILLDEFVTHR                        |           |       |    |                                            |      |        |      | Mascot |        |
|                     |                                              | 1243.647   | 1243.624    | -0.023  | -18   | 317        | 327      | TLKGSYFGGWK                       |           |       |    |                                            |      |        |      | Mascot |        |
|                     |                                              | 1243.647   | 1243.624    | -0.023  | -18   | 317        | 327      | TLKGSYFGGWK                       |           |       |    |                                            |      |        |      | Mascot |        |
|                     |                                              | 1279.61    | 1279.7555   | 0.1455  | 114   | 113        | 122      | TNLCSKNWEK                        |           |       |    | Carbamidomethyl (C)[4]                     |      |        |      | Mascot |        |
|                     |                                              | 1851.9052  | 1851.9003   | -0.0049 | -3    | 123        | 138      | TQQCLLADGTSRITCK                  |           |       |    | Carbamidomethyl (C)[4,15]                  |      |        |      | Mascot |        |
|                     |                                              | 1983.9625  | 1983.8622   | -0.1003 | -51   | 174        | 193      | VCLLGCGVSTGYGAAVN<br>TGK          |           |       |    | Carbamidomethyl (C)[2,6]                   |      |        |      | Mascot |        |
|                     |                                              | 2269.0586  | 2268.9099   | -0.1487 | -66   | 261        | 281      | ELTNGGVDYALECVGNV<br>GVMR         |           |       |    | Carbamidomethyl (C)[13], Oxidation (M)[20] |      |        |      | Mascot |        |
|                     |                                              | 2284.1133  | 2284.1467   | 0.0334  | 15    | 194        | 217      | VESGSTCAVFLGAVGL<br>AAVMGCK       |           |       |    | Carbamidomethyl (C)[7]                     |      |        |      | Mascot |        |
|                     |                                              | 2300.1082  | 2300.1501   | 0.0419  | 18    | 194        | 217      | VESGSTCAVFLGAVGL<br>AAVMGCK       |           |       |    | Carbamidomethyl (C)[7], Oxidation (M)[21]  |      |        |      | Mascot |        |
|                     |                                              | 3439.7202  | 3439.6467   | -0.0735 | -21   | 135        | 164      | ITCKNQVHQFIAISTFSE<br>YTVVPEDNVTK |           |       |    |                                            |      |        |      | Mascot |        |
| 22                  | Zgc:113377 [Danio rerio]                     |            |             |         |       |            |          | gi 66910322                       | 36776.6   | 9.05  | 10 | 32                                         | 0    |        |      |        |        |
| Peptide Information |                                              |            |             |         |       |            |          |                                   |           |       |    |                                            |      |        |      |        |        |
|                     |                                              | Calc. Mass | Obsrv. Mass | ± da    | ± ppm | Start Seq. | End Seq. | Sequence                          | Ion Score | C. I. | %  | Modification                               | Rank | Result | Type |        |        |
|                     |                                              | 850.5145   | 850.5291    | 0.0146  | 17    | 29         | 35       | EIKPHVK                           |           |       |    |                                            |      |        |      | Mascot |        |
|                     |                                              | 1649.7775  | 1649.7689   | -0.0086 | -5    | 83         | 97       | IHTGEKPFTCTQCGK                   |           |       |    |                                            |      |        |      | Mascot |        |
|                     |                                              | 1649.7775  | 1649.7689   | -0.0086 | -5    | 83         | 97       | IHTGEKPFTCTQCGK                   |           |       |    |                                            |      |        |      | Mascot |        |
|                     |                                              | 1752.8043  | 1752.8441   | 0.0398  | 23    | 167        | 181      | VHTKEKPYSCECGK                    |           |       |    | Carbamidomethyl (C)[10]                    |      |        |      | Mascot |        |
|                     |                                              | 2081.9453  | 2082.0439   | 0.0986  | 47    | 201        | 218      | EHMCLECQQTFTV<br>K                |           |       |    | Oxidation (M)[3]                           |      |        |      | Mascot |        |
|                     |                                              | 2081.9453  | 2082.0439   | 0.0986  | 47    | 201        | 218      | EHMCLECQQTFTV<br>K                |           |       |    | Oxidation (M)[3]                           |      |        |      | Mascot |        |
|                     |                                              | 2211.0432  | 2211.0776   | 0.0344  | 16    | 83         | 101      | IHTGEKPFTCTQCGKS<br>R             |           |       |    | Carbamidomethyl (C)[10,13]                 |      |        |      | Mascot |        |
|                     |                                              | 2283.0757  | 2283.1521   | 0.0764  | 33    | 111        | 129      | IHTGERPFTCTQCGKS<br>R             |           |       |    | Carbamidomethyl (C)[10,13]                 |      |        |      | Mascot |        |
|                     |                                              | 2300.0369  | 2300.1501   | 0.1132  | 49    | 247        | 265      | THEMIHTGEKPYKCS<br>NK             |           |       |    | Carbamidomethyl (C)[14]                    |      |        |      | Mascot |        |
|                     |                                              | 2403.1409  | 2403.1072   | -0.0337 | -14   | 9          | 28       | IKQEEAEEQIDLIEE<br>K              |           |       |    |                                            |      |        |      | Mascot |        |
|                     |                                              | 3338.5073  | 3338.7375   | 0.2302  | 69    | 126        | 153      | SFTRSYLNLHMMIHTGE<br>RPHNCDQCGK   |           |       |    |                                            |      |        |      | Mascot |        |
|                     |                                              | 3439.5374  | 3439.6467   | 0.1093  | 32    | 130        | 157      | SYLNLHMMIHTGERPH<br>NCDQCGKTFMR   |           |       |    | Carbamidomethyl (C)[19]                    |      |        |      | Mascot |        |
| 23                  | CTP synthase-like [Danio rerio]              |            |             |         |       |            |          | gi 162138974                      | 66469.8   | 6.14  | 10 | 32                                         | 0    |        |      |        |        |

### Peptide Information

| Calc. Mass                      | Obsrv. Mass | ± da    | ± ppm | Start Seq.   | End Seq. | Sequence                    | Ion Score | C. I. | % Modification         | Rank | Result Type |
|---------------------------------|-------------|---------|-------|--------------|----------|-----------------------------|-----------|-------|------------------------|------|-------------|
| 862.4265                        | 862.4886    | 0.0621  | 72    | 85           | 92       | DNNLTGK                     |           |       |                        |      | Mascot      |
| 964.5461                        | 964.511     | -0.0351 | -36   | 93           | 100      | IYQSVINK                    |           |       |                        |      | Mascot      |
| 1242.6875                       | 1242.5988   | -0.0887 | -71   | 206          | 217      | GLGLSPDLIVCR                |           |       |                        |      | Mascot      |
| 1279.6576                       | 1279.7555   | 0.0979  | 77    | 551          | 560      | LQNYLQKGCR                  |           |       | Carbamidomethyl (C)[9] |      | Mascot      |
| 1457.6907                       | 1457.7727   | 0.082   | 56    | 466          | 477      | KLYGDAEYVDER                |           |       |                        |      | Mascot      |
| 1504.9097                       | 1504.7722   | -0.1375 | -91   | 2            | 16       | KYILVTGGVISGIGK             |           |       |                        |      | Mascot      |
| 2051.9192                       | 2052.0703   | 0.1511  | 74    | 412          | 429      | NVLGWEDANSTFDPET<br>K       |           |       |                        |      | Mascot      |
| 2082.0696                       | 2082.0439   | -0.0257 | -12   | 393          | 411      | KPFLGVCLGMQLAVCEF<br>AR     |           |       |                        |      | Mascot      |
| 2082.0696                       | 2082.0439   | -0.0257 | -12   | 393          | 411      | KPFLGVCLGMQLAVCEF<br>AR     |           |       |                        |      | Mascot      |
| 2233.031                        | 2233.0503   | 0.0193  | 9     | 430          | 449      | HPVVIEMPEHNPGQMGG<br>TMR    |           |       | Oxidation (M)[7]       |      | Mascot      |
| 2705.2883                       | 2705.134    | -0.1543 | -57   | 230          | 252      | ISMFCHVEPEQVICIHDVS<br>SIYR |           |       |                        |      | Mascot      |
| thrombospondin 4a [Danio rerio] |             |         |       | gi 167555077 |          | 103995.7                    | 4.34      | 12    | 32                     | 0    |             |

### Peptide Information

| Calc. Mass | Obsrv. Mass | $\pm$ da | $\pm$ ppm | Start Seq. | End Seq. | Sequence                | Ion Score | C. I. | % Modification                           | Rank | Result Type |
|------------|-------------|----------|-----------|------------|----------|-------------------------|-----------|-------|------------------------------------------|------|-------------|
| 882.5155   | 882.5541    | 0.0386   | 44        | 157        | 164      | SLPQGPKR                |           |       |                                          |      | Mascot      |
| 964.4669   | 964.511     | 0.0441   | 46        | 323        | 331      | CVNTAPGFR               |           |       |                                          |      | Mascot      |
| 1226.5834  | 1226.5995   | 0.0161   | 13        | 404        | 415      | TAGPDVPPMDR             |           |       |                                          |      | Mascot      |
| 1242.5784  | 1242.5988   | 0.0204   | 16        | 404        | 415      | TAGPDVPPMDR             |           |       | Oxidation (M)[10]                        |      | Mascot      |
| 1279.6173  | 1279.7555   | 0.1382   | 108       | 214        | 224      | VEAGPMFELMR             |           |       |                                          |      | Mascot      |
| 1649.7345  | 1649.7689   | 0.0344   | 21        | 323        | 337      | CVNTAPGFRCEPCPR         |           |       |                                          |      | Mascot      |
| 1649.7345  | 1649.7689   | 0.0344   | 21        | 323        | 337      | CVNTAPGFRCEPCPR         |           |       |                                          |      | Mascot      |
| 1752.8109  | 1752.8441   | 0.0332   | 19        | 457        | 471      | DTDIDAYPDDILKCR         |           |       |                                          |      | Mascot      |
| 1837.8636  | 1837.9034   | 0.0398   | 22        | 705        | 720      | IDTCPENAEITLDFR         |           |       |                                          |      | Mascot      |
| 1870.733   | 1870.9608   | 0.2278   | 122       | 478        | 493      | DNCMFVPNSGQEDADR        |           |       | Carbamidomethyl (C)[3], Oxidation (M)[4] |      | Mascot      |
| 2052.0615  | 2052.0703   | 0.0088   | 4         | 47         | 64       | AKNMDNVFILATLQMYSK      |           |       |                                          |      | Mascot      |
| 2081.9453  | 2082.0439   | 0.0986   | 47        | 268        | 286      | KPSNCGPGVCFTQDLGV<br>EK |           |       | Carbamidomethyl (C)[5]                   |      | Mascot      |
| 2081.9453  | 2082.0439   | 0.0986   | 47        | 268        | 286      | KPSNCGPGVCFTQDLGV<br>EK |           |       | Carbamidomethyl (C)[5]                   |      | Mascot      |
| 2155.9495  | 2155.917    | -0.0325  | -15       | 530        | 548      | DLHGDACDNCIEIKNPQ<br>R  |           |       |                                          |      | Mascot      |
| 2155.9495  | 2155.917    | -0.0325  | -15       | 530        | 548      | DLHGDACDNCIEIKNPQ<br>R  |           |       |                                          |      | Mascot      |

|    |                                                |           |        |    |              |     |                                     |      |   |    |   |        |
|----|------------------------------------------------|-----------|--------|----|--------------|-----|-------------------------------------|------|---|----|---|--------|
|    | 3338.502                                       | 3338.7375 | 0.2355 | 71 | 404          | 435 | TAGPDVPPMDRLCGNG<br>QNPDCDINAECVVER |      |   |    |   | Mascot |
| 25 | beta-1,3-galactosyltransferase 6 [Danio rerio] |           |        |    | gi 113675498 |     | 38567.2                             | 8.52 | 7 | 32 | 0 |        |

Peptide Information

| Calc. Mass | Obsrv. Mass | ± da    | ± ppm | Start Seq. | End Seq. | Sequence                           | Ion Score | C. I. | % Modification   | Rank | Result Type |
|------------|-------------|---------|-------|------------|----------|------------------------------------|-----------|-------|------------------|------|-------------|
| 848.4545   | 848.4784    | 0.0239  | 28    | 305        | 311      | LCKEEVK                            |           |       |                  |      | Mascot      |
| 1045.4949  | 1045.5492   | 0.0543  | 52    | 268        | 275      | FDTEYKSR                           |           |       |                  |      | Mascot      |
| 1133.6282  | 1133.5918   | -0.0364 | -32   | 1          | 9        | MNLLRLVCR                          |           |       | Oxidation (M)[1] |      | Mascot      |
| 1871.928   | 1871.9338   | 0.0058  | 3     | 287        | 301      | QSLEDMLEKHQTLQR                    |           |       | Oxidation (M)[6] |      | Mascot      |
| 2269.1975  | 2268.9099   | -0.2876 | -127  | 243        | 262      | IWQSEDVSLGAWLAPVD<br>VKR           |           |       |                  |      | Mascot      |
| 3337.6238  | 3337.7129   | 0.0891  | 27    | 204        | 232      | WKESAWELCDYYLPYAL<br>GGGYVLSADLVR  |           |       |                  |      | Mascot      |
| 3453.7324  | 3453.6616   | -0.0708 | -20   | 94         | 123      | HDPEVLYWVFIGTEGLPA<br>EDLQNLATEQIR |           |       |                  |      | Mascot      |

|    |                                              |  |  |  |             |  |         |     |    |    |   |  |
|----|----------------------------------------------|--|--|--|-------------|--|---------|-----|----|----|---|--|
| 26 | hepatic triacylglycerol lipase [Danio rerio] |  |  |  | gi 41056195 |  | 57975.2 | 8.5 | 10 | 31 | 0 |  |
|----|----------------------------------------------|--|--|--|-------------|--|---------|-----|----|----|---|--|

Peptide Information

| Calc. Mass | Obsrv. Mass | ± da    | ± ppm | Start Seq. | End Seq. | Sequence                   | Ion Score | C. I. | % Modification                            | Rank | Result Type |
|------------|-------------|---------|-------|------------|----------|----------------------------|-----------|-------|-------------------------------------------|------|-------------|
| 996.5182   | 996.5818    | 0.0636  | 64    | 293        | 300      | DKQIMAYK                   |           |       |                                           |      | Mascot      |
| 1147.5413  | 1147.6296   | 0.0883  | 77    | 28         | 37       | ADTEPEARMK                 |           |       |                                           |      | Mascot      |
| 1753.8632  | 1753.8351   | -0.0281 | -16   | 344        | 356      | SHMPYKLFHYQFR              |           |       |                                           |      | Mascot      |
| 1984.0538  | 1983.8622   | -0.1916 | -97   | 135        | 151      | IVGQDIAHLLSWLEDFK          |           |       |                                           |      | Mascot      |
| 2095.9695  | 2095.9971   | 0.0276  | 13    | 416        | 432      | FTWEGNPVWANNWNTV<br>K      |           |       | Oxidation (M)[12]                         |      | Mascot      |
| 2233.2161  | 2233.0503   | -0.1658 | -74   | 213        | 232      | FVDAIHTFTLQRMGLSVG<br>IK   |           |       |                                           |      | Mascot      |
| 2260.9771  | 2260.938    | -0.0391 | -17   | 462        | 480      | TTFCPQTDEGMSIEMLQ<br>K     |           |       | Carbamidomethyl (C)[4], Oxidation (M)[11] |      | Mascot      |
| 2260.9771  | 2260.938    | -0.0391 | -17   | 462        | 480      | TTFCPQTDEGMSIEMLQ<br>K     |           |       | Carbamidomethyl (C)[4], Oxidation (M)[11] |      | Mascot      |
| 2384.21    | 2383.9209   | -0.2891 | -121  | 7          | 27       | IVLCFLMISQLTDGATFQ<br>GNR  |           |       | Carbamidomethyl (C)[4]                    |      | Mascot      |
| 2389.072   | 2389.135    | 0.063   | 26    | 461        | 480      | KTTFCPQTDEGMSIEMLQ<br>EK   |           |       | Carbamidomethyl (C)[5], Oxidation (M)[12] |      | Mascot      |
| 2389.072   | 2389.135    | 0.063   | 26    | 461        | 480      | KTTFCPQTDEGMSIEMLQ<br>EK   |           |       | Carbamidomethyl (C)[5], Oxidation (M)[12] |      | Mascot      |
| 2705.262   | 2705.134    | -0.128  | -47   | 462        | 484      | TTFCPQTDEGMSIEMLQ<br>KVFVR |           |       | Oxidation (M)[11]                         |      | Mascot      |

|    |                                                                     |  |  |  |              |  |         |      |   |    |   |  |
|----|---------------------------------------------------------------------|--|--|--|--------------|--|---------|------|---|----|---|--|
| 27 | PREDICTED: tyrosine-protein kinase FRK-like isoform 2 [Danio rerio] |  |  |  | gi 326676893 |  | 57668.8 | 5.29 | 9 | 31 | 0 |  |
|----|---------------------------------------------------------------------|--|--|--|--------------|--|---------|------|---|----|---|--|

Peptide Information

| Calc. Mass | Obsrv. Mass | ± da | ± ppm | Start Seq. | End Seq. | Sequence | Ion Score | C. I. | % Modification | Rank | Result Type |
|------------|-------------|------|-------|------------|----------|----------|-----------|-------|----------------|------|-------------|
|------------|-------------|------|-------|------------|----------|----------|-----------|-------|----------------|------|-------------|



|                     |                                           |             |         |       |              |          |                                     |           |       |    |                                             |      |        |        |  |  |        |
|---------------------|-------------------------------------------|-------------|---------|-------|--------------|----------|-------------------------------------|-----------|-------|----|---------------------------------------------|------|--------|--------|--|--|--------|
|                     | 848.4624                                  | 848.4784    | 0.016   | 19    | 374          | 381      | VADFGLAR                            |           |       |    |                                             |      |        |        |  |  | Mascot |
|                     | 862.4199                                  | 862.4886    | 0.0687  | 80    | 1            | 7        | MGDVRER                             |           |       |    |                                             |      |        |        |  |  | Mascot |
|                     | 1106.5874                                 | 1106.5433   | -0.0441 | -40   | 134          | 142      | MLISQENKK                           |           |       |    | Oxidation (M)[1]                            |      |        |        |  |  | Mascot |
|                     | 1212.5895                                 | 1212.605    | 0.0155  | 13    | 382          | 391      | VFQDNVYEAK                          |           |       |    |                                             |      |        |        |  |  | Mascot |
|                     | 1212.5895                                 | 1212.605    | 0.0155  | 13    | 382          | 391      | VFQDNVYEAK                          |           |       |    |                                             |      |        |        |  |  | Mascot |
|                     | 1457.7383                                 | 1457.7727   | 0.0344  | 24    | 174          | 186      | KLDNGGYLSTAR                        |           |       |    |                                             |      |        |        |  |  | Mascot |
|                     | 2081.0955                                 | 2081.0522   | -0.0433 | -21   | 49           | 66       | ELPPTPVLYVALYDYTAR                  |           |       |    |                                             |      |        |        |  |  | Mascot |
|                     | 2233.1394                                 | 2233.0503   | -0.0891 | -40   | 143          | 162      | GAFLIRNCESQPGELSLS<br>VR            |           |       |    | Carbamidomethyl (C)[8]                      |      |        |        |  |  | Mascot |
|                     | 2384.0364                                 | 2383.9209   | -0.1155 | -48   | 453          | 472      | MSSPPNCHKCLYDIMLD<br>CWK            |           |       |    |                                             |      |        |        |  |  | Mascot |
|                     | 3439.6555                                 | 3439.6467   | -0.0088 | -3    | 327          | 357      | GATLRMSDQIDMGAQVA<br>SGMAYLELQNYIHR |           |       |    |                                             |      |        |        |  |  | Mascot |
| 28                  | glutathione S-transferase M [Danio rerio] |             |         |       | gj 47086689  |          | 26045.6                             | 5.58      | 6     | 31 | 0                                           | 13   | 0      |        |  |  |        |
| Peptide Information |                                           |             |         |       |              |          |                                     |           |       |    |                                             |      |        |        |  |  |        |
|                     | Calc. Mass                                | Obsrv. Mass | ± da    | ± ppm | Start Seq.   | End Seq. | Sequence                            | Ion Score | C. I. | %  | Modification                                | Rank | Result | Type   |  |  |        |
|                     | 850.4239                                  | 850.5291    | 0.1052  | 124   | 211          | 217      | MAKWGNK                             |           |       |    | Oxidation (M)[1]                            |      |        | Mascot |  |  |        |
|                     | 936.4937                                  | 936.4787    | -0.015  | -16   | 5            | 11       | LAYWDIR                             |           |       |    |                                             |      |        | Mascot |  |  |        |
|                     | 1212.6007                                 | 1212.605    | 0.0043  | 4     | 136          | 145      | QFSDFLGDRK                          |           |       |    |                                             |      |        | Mascot |  |  |        |
|                     | 1212.6007                                 | 1212.605    | 0.0043  | 4     | 136          | 145      | QFSDFLGDRK                          | 13        |       | 0  |                                             |      |        | Mascot |  |  |        |
|                     | 1464.61                                   | 1464.8177   | 0.2077  | 142   | 32           | 43       | FYTCEAPNYDK                         |           |       |    | Carbamidomethyl (C)[4]                      |      |        | Mascot |  |  |        |
|                     | 1671.9329                                 | 1671.7496   | -0.1833 | -110  | 5            | 18       | LAYWDIRGLAQPIR                      |           |       |    |                                             |      |        | Mascot |  |  |        |
|                     | 1851.8582                                 | 1851.9003   | 0.0421  | 23    | 53           | 68       | LGMDFPNLPYLEDGDR                    |           |       |    |                                             |      |        | Mascot |  |  |        |
| 29                  | Gna11 protein [Danio rerio]               |             |         |       | gj 190339112 |          | 42105.3                             | 5.59      | 9     | 31 | 0                                           |      |        |        |  |  |        |
| Peptide Information |                                           |             |         |       |              |          |                                     |           |       |    |                                             |      |        |        |  |  |        |
|                     | Calc. Mass                                | Obsrv. Mass | ± da    | ± ppm | Start Seq.   | End Seq. | Sequence                            | Ion Score | C. I. | %  | Modification                                | Rank | Result | Type   |  |  |        |
|                     | 1165.6                                    | 1165.728    | 0.128   | 110   | 99           | 107      | IPFRFEDNK                           |           |       |    |                                             |      |        | Mascot |  |  |        |
|                     | 1226.6012                                 | 1226.5995   | -0.0017 | -1    | 149          | 158      | REYQLSDSTK                          |           |       |    |                                             |      |        | Mascot |  |  |        |
|                     | 1457.8573                                 | 1457.7727   | -0.0846 | -58   | 39           | 52       | ELKLLLLGTGESGK                      |           |       |    |                                             |      |        | Mascot |  |  |        |
|                     | 1504.739                                  | 1504.7722   | 0.0332  | 22    | 61           | 73       | IIHGTGYTDEDKR                       |           |       |    |                                             |      |        | Mascot |  |  |        |
|                     | 1752.6617                                 | 1752.8441   | 0.1824  | 104   | 2            | 16       | TLESMMACCMSEEAK                     |           |       |    | Carbamidomethyl (C)[8], Oxidation (M)[5,6]  |      |        | Mascot |  |  |        |
|                     | 1851.7124                                 | 1851.9003   | 0.1879  | 101   | 1            | 16       | MTLESMMACCMSEEAK                    |           |       |    | Carbamidomethyl (C)[9]                      |      |        | Mascot |  |  |        |
|                     | 2080.8364                                 | 2081.0522   | 0.2158  | 104   | 2            | 19       | TLESMMACCMSEEAKES<br>K              |           |       |    | Carbamidomethyl (C)[8], Oxidation (M)[5]    |      |        | Mascot |  |  |        |
|                     | 2268.8984                                 | 2268.9099   | 0.0115  | 5     | 1            | 19       | MTLESMMACCMSEEAKE<br>SK             |           |       |    | Carbamidomethyl (C)[9,10], Oxidation (M)[1] |      |        | Mascot |  |  |        |

Mascot

|    |                                           |              |         |      |   |    |   |    |   |
|----|-------------------------------------------|--------------|---------|------|---|----|---|----|---|
| 30 | glutathione S-transferase M [Danio rerio] | gi 220679252 | 26044.7 | 6.03 | 6 | 30 | 0 | 13 | 0 |
|----|-------------------------------------------|--------------|---------|------|---|----|---|----|---|

### Peptide Information

| Calc. Mass | Obsrv. Mass | ± da    | ± ppm | Start Seq. | End Seq. | Sequence         | Ion Score | C. I. % | Modification           | Rank | Result Type |
|------------|-------------|---------|-------|------------|----------|------------------|-----------|---------|------------------------|------|-------------|
| 850.4239   | 850.5291    | 0.1052  | 124   | 211        | 217      | MAKWGNK          |           |         | Oxidation (M)[1]       |      | Mascot      |
| 936.4937   | 936.4787    | -0.015  | -16   | 5          | 11       | LAYWDIR          |           |         |                        |      | Mascot      |
| 1212.6007  | 1212.605    | 0.0043  | 4     | 136        | 145      | QFSDFLGDRK       |           |         |                        |      | Mascot      |
| 1212.6007  | 1212.605    | 0.0043  | 4     | 136        | 145      | QFSDFLGDRK       | 13        | 0       |                        |      | Mascot      |
| 1464.61    | 1464.8177   | 0.2077  | 142   | 32         | 43       | FYTCGEAPNYDK     |           |         | Carbamidomethyl (C)[4] |      | Mascot      |
| 1671.9329  | 1671.7496   | -0.1833 | -110  | 5          | 18       | LAYWDIRGLAQPIR   |           |         |                        |      | Mascot      |
| 1851.8582  | 1851.9003   | 0.0421  | 23    | 53         | 68       | LGMDFPNLPYLEDGDR |           |         |                        |      | Mascot      |

|    |                                           |             |         |      |   |    |   |
|----|-------------------------------------------|-------------|---------|------|---|----|---|
| 31 | neutrophil cytosol factor 1 [Danio rerio] | gi 71834304 | 47855.1 | 8.57 | 9 | 30 | 0 |
|----|-------------------------------------------|-------------|---------|------|---|----|---|

### Peptide Information

| Calc. Mass | Obsrv. Mass | ± da    | ± ppm | Start Seq. | End Seq. | Sequence                | Ion Score | C. I. % | Modification                               | Rank | Result Type |
|------------|-------------|---------|-------|------------|----------|-------------------------|-----------|---------|--------------------------------------------|------|-------------|
| 996.5109   | 996.5818    | 0.0709  | 71    | 324        | 331      | ISQDSYRK                |           |         |                                            |      | Mascot      |
| 1212.5677  | 1212.605    | 0.0373  | 31    | 136        | 145      | NETFIMSTNR              |           |         |                                            |      | Mascot      |
| 1212.5677  | 1212.605    | 0.0373  | 31    | 136        | 145      | NETFIMSTNR              |           |         |                                            |      | Mascot      |
| 1226.635   | 1226.5995   | -0.0355 | -29   | 111        | 119      | CQLIRDFFK               |           |         | Carbamidomethyl (C)[1]                     |      | Mascot      |
| 1279.6906  | 1279.7555   | 0.0649  | 51    | 43         | 52       | RYPEVHTLHK              |           |         |                                            |      | Mascot      |
| 1837.8247  | 1837.9034   | 0.0787  | 43    | 270        | 284      | KGEETGFYPSMFLCR         |           |         | Carbamidomethyl (C)[14], Oxidation (M)[11] |      | Mascot      |
| 1851.9044  | 1851.9003   | -0.0041 | -2    | 53         | 68       | TLKEMFPIEAGDIDEK        |           |         | Oxidation (M)[5]                           |      | Mascot      |
| 2051.9202  | 2052.0703   | 0.1501  | 73    | 271        | 288      | GEETGFYPSMFLCRTGEK      |           |         |                                            |      | Mascot      |
| 2233.1758  | 2233.0503   | -0.1255 | -56   | 91         | 110      | QATLAEYCRSLNLPANISR     |           |         |                                            |      | Mascot      |
| 2705.3337  | 2705.134    | -0.1997 | -74   | 148        | 171      | SNTTSEITGPIMLETYRVIDYSK |           |         | Oxidation (M)[12]                          |      | Mascot      |

|    |                                                  |              |          |      |    |    |   |
|----|--------------------------------------------------|--------------|----------|------|----|----|---|
| 32 | cytoplasmic dynein 1 heavy chain 1 [Danio rerio] | gi 112363126 | 532854.1 | 6.06 | 30 | 30 | 0 |
|----|--------------------------------------------------|--------------|----------|------|----|----|---|

## Peptide Information

| Calc. Mass | Obsrv. Mass | ± da    | ± ppm | Start Seq. | End Seq. | Sequence | Ion Score | C. I. % | Modification           | Rank | Result Type |
|------------|-------------|---------|-------|------------|----------|----------|-----------|---------|------------------------|------|-------------|
| 819.4835   | 819.4066    | -0.0769 | -94   | 2921       | 2926     | IDRIFR   |           |         |                        |      | Mascot      |
| 850.4087   | 850.5291    | 0.1204  | 142   | 59         | 65       | SALEQMR  |           |         | Oxidation (M)[6]       |      | Mascot      |
| 862.4338   | 862.4886    | 0.0548  | 64    | 4636       | 4643     | GVAILCTE |           |         | Carbamidomethyl (C)[6] |      | Mascot      |
| 964.4734   | 964.511     | 0.0376  | 39    | 2694       | 2701     | TSDQTWVK |           |         |                        |      | Mascot      |

|           |           |         |      |      |      |                           |   |   |        |
|-----------|-----------|---------|------|------|------|---------------------------|---|---|--------|
| 1045.5272 | 1045.5492 | 0.022   | 21   | 2836 | 2843 | LVEDEERR                  |   |   | Mascot |
| 1106.5952 | 1106.5433 | -0.0519 | -47  | 2511 | 2519 | AELGEYIRR                 |   |   | Mascot |
| 1165.6212 | 1165.728  | 0.1068  | 92   | 3438 | 3447 | DLEASIARYK                |   |   | Mascot |
| 1226.6317 | 1226.5995 | -0.0322 | -26  | 4405 | 4413 | DPLFRFFER                 |   |   | Mascot |
| 1243.5953 | 1243.624  | 0.0287  | 23   | 4203 | 4212 | KYEFGESDLR                |   |   | Mascot |
| 1243.5953 | 1243.624  | 0.0287  | 23   | 4203 | 4212 | KYEFGESDLR                |   |   | Mascot |
| 1259.7219 | 1259.6215 | -0.1004 | -80  | 3733 | 3742 | LQGEFQLRLR                |   |   | Mascot |
| 1259.7219 | 1259.6215 | -0.1004 | -80  | 3733 | 3742 | LQGEFQLRLR                | 3 | 0 | Mascot |
| 1318.6862 | 1318.6877 | 0.0015  | 1    | 3076 | 3087 | DRAATSPALFNR              |   |   | Mascot |
| 1464.7086 | 1464.8177 | 0.1091  | 74   | 2442 | 2452 | MEHIMDFTRLR               |   |   | Mascot |
| 1514.7924 | 1514.7058 | -0.0866 | -57  | 1568 | 1580 | FQSISTEFLALMK             |   |   | Mascot |
| 1671.8563 | 1671.7496 | -0.1067 | -64  | 2948 | 2961 | FVAWMNGLSVYQIK            |   |   | Mascot |
| 1752.834  | 1752.8441 | 0.0101  | 6    | 2783 | 2796 | FTQDTQPHYISPR             |   |   | Mascot |
| 1753.8351 | 1753.8351 | 0       | 0    | 3544 | 3558 | TDIARTEYLSNADER           |   |   | Mascot |
| 1837.9741 | 1837.9034 | -0.0707 | -38  | 3873 | 3888 | GMLHQDHITFAVLLAR          |   |   | Mascot |
| 2081.1099 | 2081.0522 | -0.0577 | -28  | 2340 | 2357 | IMFEVQDLKYAPLATVSR        |   |   | Mascot |
| 2081.9531 | 2082.0439 | 0.0908  | 44   | 1130 | 1147 | FGQMLGNNMQDFHSQIS<br>K    |   |   | Mascot |
| 2081.9531 | 2082.0439 | 0.0908  | 44   | 1130 | 1147 | FGQMLGNNMQDFHSQIS<br>K    |   |   | Mascot |
| 2156.103  | 2155.917  | -0.186  | -86  | 981  | 997  | LYQEMFAWKMNILSLPR         |   |   | Mascot |
| 2156.103  | 2155.917  | -0.186  | -86  | 981  | 997  | LYQEMFAWKMNILSLPR         |   |   | Mascot |
| 2194.0928 | 2194.103  | 0.0102  | 5    | 3893 | 3911 | SLVSEPSFDAEFQHFLRG<br>K   |   |   | Mascot |
| 2210.9944 | 2211.0776 | 0.0832  | 38   | 531  | 550  | EVDGLDVSKEGMEAWEA<br>AMK  |   |   | Mascot |
| 2233.0627 | 2233.0503 | -0.0124 | -6   | 3561 | 3580 | WQANSLPADDLCTENAI<br>MLK  |   |   | Mascot |
| 2247.1074 | 2246.9255 | -0.1819 | -81  | 1020 | 1040 | NALTRMPDGPSALEEAY<br>NAVK |   |   | Mascot |
| 2247.1074 | 2246.9255 | -0.1819 | -81  | 1020 | 1040 | NALTRMPDGPSALEEAY<br>NAVK |   |   | Mascot |
| 2261.04   | 2260.938  | -0.102  | -45  | 862  | 879  | SLETCMYEHKMFTEILNR        |   |   | Mascot |
| 2261.04   | 2260.938  | -0.102  | -45  | 862  | 879  | SLETCMYEHKMFTEILNR        |   |   | Mascot |
| 2268.9827 | 2268.9099 | -0.0728 | -32  | 411  | 428  | VMVACFEVFQWDEYE<br>K      |   |   | Mascot |
| 2283.1624 | 2283.1521 | -0.0103 | -5   | 2004 | 2024 | QVKVSAEMAIFITMNPY<br>AGR  |   |   | Mascot |
| 2284.2561 | 2284.1467 | -0.1094 | -48  | 4504 | 4523 | NIHVNLGRLFVPEAYITAT<br>R  |   |   | Mascot |
| 2384.2642 | 2383.9209 | -0.3433 | -144 | 2046 | 2066 | QLIAQVMLYSQGFRTAET<br>LAK |   |   | Mascot |
| 2389.1638 | 2389.135  | -0.0288 | -12  | 3561 | 3581 | WQANSLPADDLCTENAI<br>MLKR |   |   | Mascot |
| 2389.1638 | 2389.135  | -0.0288 | -12  | 3561 | 3581 | WQANSLPADDLCTENAI<br>MLKR |   |   | Mascot |

33 PREDICTED: hypothetical protein LOC568145 [Danio rerio] gi|326676943 95196.5 9.11 11 30 0

Peptide Information

| Calc. Mass | Obsrv. Mass | ± da    | ± ppm | Start Seq. | End Seq. | Sequence                              | Ion Score | C. I. % | Modification                               | Rank | Result Type |
|------------|-------------|---------|-------|------------|----------|---------------------------------------|-----------|---------|--------------------------------------------|------|-------------|
| 848.4658   | 848.4784    | 0.0126  | 15    | 774        | 780      | KEMVGLR                               |           |         | Oxidation (M)[3]                           |      | Mascot      |
| 936.4164   | 936.4787    | 0.0623  | 67    | 261        | 268      | MPATEMPK                              |           |         | Oxidation (M)[1,6]                         |      | Mascot      |
| 1147.5486  | 1147.6296   | 0.081   | 71    | 259        | 268      | DKMPATEMPK                            |           |         |                                            |      | Mascot      |
| 1242.6801  | 1242.5988   | -0.0813 | -65   | 332        | 341      | LQLNEDNLKR                            |           |         |                                            |      | Mascot      |
| 1498.6917  | 1498.7151   | 0.0234  | 16    | 1          | 12       | MMEDEDLLLR                            |           |         | Oxidation (M)[1]                           |      | Mascot      |
| 1514.6865  | 1514.7058   | 0.0193  | 13    | 1          | 12       | MMEDEDLLLR                            |           |         | Oxidation (M)[1,2]                         |      | Mascot      |
| 1999.9377  | 1999.9331   | -0.0046 | -2    | 199        | 214      | CNGPCQNRPPFGYVK                       |           |         | Carbamidomethyl (C)[1,5]                   |      | Mascot      |
| 2194.1978  | 2194.103    | -0.0948 | -43   | 294        | 314      | GFVLGGNAQIPTNKIQS<br>PPK              |           |         |                                            |      | Mascot      |
| 2247.0137  | 2246.9255   | -0.0882 | -39   | 102        | 121      | MTLCAGVCSYEGRGGLC<br>SIR              |           |         | Carbamidomethyl (C)[4,8,17]                |      | Mascot      |
| 2247.0137  | 2246.9255   | -0.0882 | -39   | 102        | 121      | MTLCAGVCSYEGRGGLC<br>SIR              |           |         | Carbamidomethyl (C)[4,8,17]                |      | Mascot      |
| 2300.251   | 2300.1501   | -0.1009 | -44   | 286        | 307      | NIIPFSGRGFVLGGNAQIP<br>TNK            |           |         |                                            |      | Mascot      |
| 3337.6013  | 3337.7129   | 0.1116  | 33    | 775        | 801      | EMVGLRQQDMSLLCQL<br>WSLHESIQEYK       |           |         | Carbamidomethyl (C)[14], Oxidation (M)[2]  |      | Mascot      |
| 3453.7869  | 3453.6616   | -0.1253 | -36   | 684        | 717      | QSALFVNVTMNDKVGNG<br>AAGGVLACIEGLPLPK |           |         | Carbamidomethyl (C)[25], Oxidation (M)[10] |      | Mascot      |

34 methionine synthase [Danio rerio] gi|37620202 139615.6 5.26 14 30 0

Peptide Information

| Calc. Mass | Obsrv. Mass | ± da    | ± ppm | Start Seq. | End Seq. | Sequence                  | Ion Score | C. I. % | Modification            | Rank | Result Type |
|------------|-------------|---------|-------|------------|----------|---------------------------|-----------|---------|-------------------------|------|-------------|
| 964.5098   | 964.511     | 0.0012  | 1     | 716        | 725      | TVGDLFGAGK                |           |         |                         |      | Mascot      |
| 1147.647   | 1147.6296   | -0.0174 | -15   | 644        | 653      | LLLYAQNNAK                |           |         |                         |      | Mascot      |
| 1242.7052  | 1242.5988   | -0.1064 | -86   | 18         | 27       | LELTELQQR                 |           |         |                         |      | Mascot      |
| 1464.7693  | 1464.8177   | 0.0484  | 33    | 1231       | 1242     | ITKEQVEDYALR              |           |         |                         |      | Mascot      |
| 1638.8407  | 1638.8347   | -0.006  | -4    | 387        | 401      | LIMAGNYEEALSIK            |           |         | Oxidation (M)[3]        |      | Mascot      |
| 1728.95    | 1728.9053   | -0.0447 | -26   | 801        | 815      | VIDLGVMI PCDRILR          |           |         | Oxidation (M)[7]        |      | Mascot      |
| 1984.0143  | 1983.8622   | -0.1521 | -77   | 699        | 715      | YPRPLHVIEGPLMNGMK         |           |         | Oxidation (M)[13,16]    |      | Mascot      |
| 1999.9066  | 1999.9331   | 0.0265  | 13    | 1070       | 1087     | DSASSEPYLCVSDFVAP<br>R    |           |         | Carbamidomethyl (C)[10] |      | Mascot      |
| 2081.0774  | 2081.0522   | -0.0252 | -12   | 564        | 583      | ESLPGARVSGGLSNLSF<br>SFR  |           |         |                         |      | Mascot      |
| 2283.1663  | 2283.1521   | -0.0142 | -6    | 780        | 800      | GDVHDIGKNIVGVVLGCN<br>NFR |           |         | Carbamidomethyl (C)[17] |      | Mascot      |
| 2284.0107  | 2284.1467   | 0.136   | 60    | 603        | 623      | DGMDMGIVNAGNLPVYD<br>DIDK |           |         | Oxidation (M)[3,5]      |      | Mascot      |
| 2501.1614  | 2501.2166   | 0.0552  | 22    | 488        | 510      | RYGAAVVMAFDEDGQA          |           |         |                         |      | Mascot      |

|    |                                              |           |         |     |              |        |                                               |                           |        |   |
|----|----------------------------------------------|-----------|---------|-----|--------------|--------|-----------------------------------------------|---------------------------|--------|---|
|    | 3439.6946                                    | 3439.6467 | -0.0479 | -14 | 429          | 459    | TETDQK<br>FCNLIASEPDICKVPLCID<br>SSNFSVIEAGLK | Carbamidomethyl (C)[2,12] | Mascot |   |
|    | 3453.7854                                    | 3453.6616 | -0.1238 | -36 | 937          | 965    | GLHIDWFAQPKPVRPQF<br>LGTHVFDTYDLR             |                           | Mascot |   |
| 35 | RecName: Full=SH3 domain-binding protein 4-A |           |         |     | gi 123888628 | 108383 | 7.89                                          | 13                        | 30     | 0 |

#### Peptide Information

|  | Calc. Mass | Obsrv. Mass | ± da    | ± ppm | Start Seq. | End Seq. | Sequence                           | Ion Score | C. I. % | Modification                              | Rank | Result Type |
|--|------------|-------------|---------|-------|------------|----------|------------------------------------|-----------|---------|-------------------------------------------|------|-------------|
|  | 842.5822   | 842.4985    | -0.0837 | -99   | 663        | 669      | LIKTVIR                            |           |         |                                           |      | Mascot      |
|  | 850.4338   | 850.5291    | 0.0953  | 112   | 387        | 393      | LSNMEIK                            |           |         | Oxidation (M)[4]                          |      | Mascot      |
|  | 964.5205   | 964.511     | -0.0095 | -10   | 825        | 832      | ELMMALLK                           |           |         | Oxidation (M)[3]                          |      | Mascot      |
|  | 1045.4796  | 1045.5492   | 0.0696  | 67    | 791        | 799      | AELDSEPER                          |           |         |                                           |      | Mascot      |
|  | 1318.5984  | 1318.6877   | 0.0893  | 68    | 66         | 76       | DYCPSSFITLK                        |           |         | Carbamidomethyl (C)[3]                    |      | Mascot      |
|  | 1671.806   | 1671.7496   | -0.0564 | -34   | 461        | 474      | HVSFSSNVWNHMK                      |           |         |                                           |      | Mascot      |
|  | 2081.0188  | 2081.0522   | 0.0334  | 16    | 402        | 419      | VSVMTRTESMAEIVCVR                  |           |         | Carbamidomethyl (C)[16], Oxidation (M)[4] |      | Mascot      |
|  | 2228.9282  | 2228.9175   | -0.0107 | -5    | 117        | 138      | NSSLSDSGMIDNLGDCS<br>EEGAK         |           |         |                                           |      | Mascot      |
|  | 2261.1648  | 2260.938    | -0.2268 | -100  | 485        | 504      | HIHPSFKTVVAIFGHDCAPK               |           |         | Carbamidomethyl (C)[17]                   |      | Mascot      |
|  | 2261.1648  | 2260.938    | -0.2268 | -100  | 485        | 504      | HIHPSFKTVVAIFGHDCAPK               |           |         | Carbamidomethyl (C)[17]                   |      | Mascot      |
|  | 2284.2368  | 2284.1467   | -0.0901 | -39   | 492        | 513      | TVVAIFGHDCAPKTLVSEVGK              |           |         |                                           |      | Mascot      |
|  | 2300.0686  | 2300.1501   | 0.0815  | 35    | 597        | 616      | DDQDCILAQFCVQTPQP<br>PPK           |           |         | Carbamidomethyl (C)[5]                    |      | Mascot      |
|  | 3337.6052  | 3337.7129   | 0.1077  | 32    | 298        | 327      | LARSCHDLESGLQNPWG<br>GQTQPVETNIVCK |           |         | Carbamidomethyl (C)[5]                    |      | Mascot      |
|  | 3338.5496  | 3338.7375   | 0.1879  | 56    | 885        | 913      | TGMVDSEAMWKPAYDFL<br>LTWAAQIGDSYR  |           |         | Oxidation (M)[3]                          |      | Mascot      |

36 Fanconi anemia group F protein [Danio rerio] gi|148225150 37464 5.55 7 30 0

#### Peptide Information

|  | Calc. Mass | Obsrv. Mass | ± da    | ± ppm | Start Seq. | End Seq. | Sequence             | Ion Score | C. I. % | Modification            | Rank | Result Type |
|--|------------|-------------|---------|-------|------------|----------|----------------------|-----------|---------|-------------------------|------|-------------|
|  | 850.4821   | 850.5291    | 0.047   | 55    | 251        | 257      | LYWGALK              |           |         |                         |      | Mascot      |
|  | 862.4451   | 862.4886    | 0.0435  | 50    | 180        | 186      | CLLDSVR              |           |         | Carbamidomethyl (C)[1]  |      | Mascot      |
|  | 964.4846   | 964.511     | 0.0264  | 27    | 48         | 55       | YQSNPTVR             |           |         |                         |      | Mascot      |
|  | 1279.6124  | 1279.7555   | 0.1431  | 112   | 56         | 67       | SSLESGLTDTNR         |           |         |                         |      | Mascot      |
|  | 1498.7505  | 1498.7151   | -0.0354 | -24   | 131        | 143      | KSAFSLLCCTVNR        |           |         | Carbamidomethyl (C)[8]  |      | Mascot      |
|  | 2225.0793  | 2225.0933   | 0.014   | 6     | 48         | 67       | YQSNPTVRSSLESGLTDTNR |           |         |                         |      | Mascot      |
|  | 2225.0793  | 2225.0933   | 0.014   | 6     | 48         | 67       | YQSNPTVRSSLESGLTDTNR |           |         |                         |      | Mascot      |
|  | 2384.0862  | 2383.9209   | -0.1653 | -69   | 71         | 90       | ETFPSYSPVEFSELAQCQHK |           |         | Carbamidomethyl (C)[17] |      | Mascot      |

37 Fin bud initiation factor [Danio rerio] gi|62204463 23923.9 5.12 6 30 0

Peptide Information

| Calc. Mass | Obsrv. Mass | ± da    | ± ppm | Start Seq. | End Seq. | Sequence                  | Ion Score | C. I. % | Modification                              | Rank | Result Type |
|------------|-------------|---------|-------|------------|----------|---------------------------|-----------|---------|-------------------------------------------|------|-------------|
| 842.3898   | 842.4985    | 0.1087  | 129   | 54         | 59       | CQMLFK                    |           |         | Carbamidomethyl (C)[1], Oxidation (M)[3]  |      | Mascot      |
| 1464.6102  | 1464.8177   | 0.2075  | 142   | 54         | 64       | CQMLFKMMDNR               |           |         | Oxidation (M)[3,7,8]                      |      | Mascot      |
| 1498.7133  | 1498.7151   | 0.0018  | 1     | 142        | 153      | QSQENELKEEHK              |           |         |                                           |      | Mascot      |
| 1851.9894  | 1851.9003   | -0.0891 | -48   | 1          | 16       | MASPLFILIACLLSMR          |           |         | Carbamidomethyl (C)[11], Oxidation (M)[1] |      | Mascot      |
| 2229.092   | 2228.9175   | -0.1745 | -78   | 93         | 113      | VLEGIGKSISFDLDGEDS<br>YGK |           |         |                                           |      | Mascot      |
| 2283.0808  | 2283.1521   | 0.0713  | 31    | 66         | 84       | CTLDEDQDSVIRDDFTIIK       |           |         | Carbamidomethyl (C)[1]                    |      | Mascot      |

38 intraflagellar transport 81 homolog [Danio rerio] gi|159570779 78814.9 6.43 13 30 0

Peptide Information

| Calc. Mass | Obsrv. Mass | ± da    | ± ppm | Start Seq. | End Seq. | Sequence                  | Ion Score | C. I. % | Modification           | Rank | Result Type |
|------------|-------------|---------|-------|------------|----------|---------------------------|-----------|---------|------------------------|------|-------------|
| 819.3954   | 819.4066    | 0.0112  | 14    | 380        | 386      | TSQAQER                   |           |         |                        |      | Mascot      |
| 1045.5636  | 1045.5492   | -0.0144 | -14   | 430        | 437      | TEEILRER                  |           |         |                        |      | Mascot      |
| 1133.5698  | 1133.5918   | 0.022   | 19    | 231        | 239      | NQLFQAEQR                 |           |         |                        |      | Mascot      |
| 1212.7311  | 1212.605    | -0.1261 | -104  | 501        | 511      | SALSPLIKDLR               |           |         |                        |      | Mascot      |
| 1212.7311  | 1212.605    | -0.1261 | -104  | 501        | 511      | SALSPLIKDLR               |           |         |                        |      | Mascot      |
| 1226.6124  | 1226.5995   | -0.0129 | -11   | 217        | 226      | EREESLAHQK                |           |         |                        |      | Mascot      |
| 1318.6896  | 1318.6877   | -0.0019 | -1    | 586        | 596      | ISQSMQVQVRR               |           |         |                        |      | Mascot      |
| 1514.9165  | 1514.7058   | -0.2107 | -139  | 341        | 353      | LSLFRQQAIIIVR             |           |         |                        |      | Mascot      |
| 1784.8483  | 1784.8833   | 0.035   | 20    | 157        | 172      | ECEQLKSSGFSTAEIR          |           |         |                        |      | Mascot      |
| 1870.9504  | 1870.9608   | 0.0104  | 6     | 359        | 374      | VEELQEAREELAAVER          |           |         |                        |      | Mascot      |
| 2082.0349  | 2082.0439   | 0.009   | 4     | 453        | 471      | GISGYSDTQEELERVSAI<br>K   |           |         |                        |      | Mascot      |
| 2082.0349  | 2082.0439   | 0.009   | 4     | 453        | 471      | GISGYSDTQEELERVSAI<br>K   |           |         |                        |      | Mascot      |
| 2225.0879  | 2225.0933   | 0.0054  | 2     | 563        | 579      | YHHINCEREIIESQIQR         |           |         | Carbamidomethyl (C)[6] |      | Mascot      |
| 2225.0879  | 2225.0933   | 0.0054  | 2     | 563        | 579      | YHHINCEREIIESQIQR         |           |         | Carbamidomethyl (C)[6] |      | Mascot      |
| 2233.1646  | 2233.0503   | -0.1143 | -51   | 291        | 310      | VVQYLQKVASEPAMGQA<br>ELR  |           |         | Oxidation (M)[14]      |      | Mascot      |
| 2283.1914  | 2283.1521   | -0.0393 | -17   | 650        | 670      | QCYLKAQSQAPIGHVIQD<br>VGK |           |         |                        |      | Mascot      |

39 Ssfa2 protein [Danio rerio] gi|115313851 31579.7 5.91 7 30 0

Peptide Information

| Calc. Mass | Obsrv. Mass | ± da | ± ppm | Start Seq. | End Seq. | Sequence | Ion Score | C. I. % | Modification | Rank | Result Type |
|------------|-------------|------|-------|------------|----------|----------|-----------|---------|--------------|------|-------------|
|------------|-------------|------|-------|------------|----------|----------|-----------|---------|--------------|------|-------------|

|  |  |  |  |  |  |  |  |  |  |  |  |  |  |  |  |  |  |  |  |  |  |  |  |  |  |  |  |  |  |  |  |  |  |  |  |  |  |  |  |  |  |  |  |  |  |  |  |  |  |  |  |  |  |  |  |  |  |  |  |  |  |  |  |  |  |  |  |  |  |  |  |  |  |  |  |  |  |  |  |  |  |  |  |  |  |  |  |  |  |  |  |  |  |  |  |  |  |  |  |  |  |  |  |  |  |  |  |  |  |  |  |  |  |  |  |  |  |  |  |  |  |  |  |  |  |  |  |  |  |  |  |  |  |  |  |  |  |  |  |  |  |  |  |  |  |  |  |  |  |  |  |  |  |  |  |  |  |  |  |  |  |  |  |  |  |  |  |  |  |  |  |  |  |  |  |  |  |  |  |  |  |  |  |  |  |  |  |  |  |  |  |  |  |  |  |  |  |  |  |  |  |  |  |  |  |  |  |  |  |  |  |  |  |  |  |  |  |  |  |  |  |  |  |  |  |  |  |  |  |  |  |  |  |  |  |  |  |  |  |  |  |  |  |  |  |  |  |  |  |  |  |  |  |  |  |  |  |  |  |  |  |  |  |  |  |  |  |  |  |  |  |  |  |  |  |  |  |  |  |  |  |  |  |  |  |  |  |  |  |  |  |  |  |  |  |  |  |  |  |  |  |  |  |  |  |  |  |  |  |  |  |  |  |  |  |  |  |  |  |  |  |  |  |  |  |  |  |  |  |  |  |  |  |  |  |  |  |  |  |  |  |  |  |  |  |  |  |  |  |  |  |  |  |  |  |  |  |  |  |  |  |  |  |  |  |  |  |  |  |  |  |  |  |  |  |  |  |  |  |  |  |  |  |  |  |  |  |  |  |  |  |  |  |  |  |  |  |  |  |  |  |  |  |  |  |  |  |  |  |  |  |  |  |  |  |  |  |  |  |  |  |  |  |  |  |  |  |  |  |  |  |  |  |  |  |  |  |  |  |  |  |  |  |  |  |  |  |  |  |  |  |  |  |  |  |  |  |  |  |  |  |  |  |  |  |  |  |  |  |  |  |  |  |  |  |  |  |  |  |  |  |  |  |  |  |  |  |  |  |  |  |  |  |  |  |  |  |  |  |  |  |  |  |  |  |  |  |  |  |  |  |  |  |  |  |  |  |  |  |  |  |  |  |  |  |  |  |  |  |  |  |  |  |  |  |  |  |  |  |  |  |  |  |  |  |  |  |  |  |  |  |  |  |  |  |  |  |  |  |  |  |  |  |  |  |  |  |  |  |  |  |  |  |  |  |  |  |  |  |  |  |  |  |  |  |  |  |  |  |  |  |  |  |  |  |  |  |  |  |  |  |  |  |  |  |  |  |  |  |  |  |  |  |  |  |  |  |  |  |  |  |  |  |  |  |  |  |  |  |  |  |  |  |  |  |  |  |  |  |  |  |  |  |  |  |  |  |  |  |  |  |  |  |  |  |  |  |  |  |  |  |  |  |  |  |  |  |  |  |  |  |  |  |  |  |  |  |  |  |  |  |  |  |  |  |  |  |  |  |  |  |  |  |  |  |  |  |  |  |  |  |  |  |  |  |  |  |  |  |  |  |  |  |  |  |  |  |  |  |  |  |  |  |  |  |  |  |  |  |  |  |  |  |  |  |  |  |  |  |  |  |  |  |  |  |  |  |  |  |  |  |  |  |  |  |  |  |  |  |  |  |  |  |  |  |  |  |  |  |  |  |  |  |  |  |  |  |  |  |  |  |  |  |  |  |  |  |  |  |  |  |  |  |  |  |  |  |  |  |  |  |  |  |  |  |  |  |  |  |  |  |  |  |  |  |  |  |  |  |  |  |  |  |  |  |  |  |  |  |  |  |  |  |  |  |  |  |  |  |  |  |  |  |  |  |  |  |  |  |  |  |  |  |  |  |  |  |  |  |  |  |  |  |  |  |  |  |  |  |  |  |  |  |  |  |  |  |  |  |  |  |  |  |  |  |  |  |  |  |  |  |  |  |  |  |  |  |  |  |  |  |  |  |  |  |  |  |  |  |  |  |  |  |  |  |  |  |  |  |  |  |  |  |  |  |  |  |  |  |  |  |  |  |  |  |  |  |  |  |  |  |  |  |  |  |  |  |  |  |  |  |  |  |  |  |  |  |  |  |  |  |  |  |  |  |  |  |  |  |  |  |  |  |  |  |  |  |  |  |  |  |  |  |  |  |  |  |  |  |  |  |  |  |  |  |  |  |  |  |  |  |  |  |  |  |  |  |  |  |  |  |  |  |  |  |  |  |  |  |  |  |  |  |  |  |  |  |  |  |  |  |  |  |  |  |  |  |  |  |  |  |  |  |  |  |  |  |  |  |  |  |  |  |  |  |  |  |  |  |  |  |  |  |  |  |  |  |  |  |  |  |  |  |  |  |  |  |  |  |  |  |  |  |  |  |  |  |  |  |  |  |  |  |  |  |  |  |  |  |  |  |  |  |  |  |  |  |  |  |  |  |  |  |  |  |  |  |  |  |  |  |  |  |  |  |  |  |  |  |  |  |  |  |  |  |  |  |  |  |  |  |  |  |  |  |  |  |  |  |  |  |  |  |  |  |  |  |  |  |  |  |  |  |  |  |  |  |  |  |  |  |  |  |  |  |  |  |  |  |  |  |  |  |  |  |  |  |  |  |  |  |  |  |  |  |  |  |  |  |  |  |  |  |  |  |  |  |  |  |  |  |  |  |  |  |  |  |  |  |  |  |  |  |  |  |  |  |  |  |  |  |  |  |  |  |  |  |  |  |  |  |  |  |  |  |  |  |  |  |  |  |  |  |  |  |  |  |  |  |  |  |  |  |  |  |  |  |  |  |  |  |  |  |  |  |  |  |  |  |  |  |  |  |  |  |  |  |  |  |  |  |  |  |  |  |  |  |  |  |  |  |  |  |  |  |  |  |  |  |  |  |  |  |  |  |  |  |  |  |  |  |  |  |  |  |  |  |  |  |  |  |  |  |  |  |  |  |  |  |  |  |  |  |  |  |  |  |  |  |  |  |  |  |  |  |  |  |  |  |  |  |  |  |  |  |  |  |  |  |  |  |  |  |  |  |  |  |  |  |  |  |  |  |  |  |  |  |  |  |  |  |  |  |  |  |  |  |  |  |  |  |  |  |  |  |  |  |  |  |    |
|--|--|--|--|--|--|--|--|--|--|--|--|--|--|--|--|--|--|--|--|--|--|--|--|--|--|--|--|--|--|--|--|--|--|--|--|--|--|--|--|--|--|--|--|--|--|--|--|--|--|--|--|--|--|--|--|--|--|--|--|--|--|--|--|--|--|--|--|--|--|--|--|--|--|--|--|--|--|--|--|--|--|--|--|--|--|--|--|--|--|--|--|--|--|--|--|--|--|--|--|--|--|--|--|--|--|--|--|--|--|--|--|--|--|--|--|--|--|--|--|--|--|--|--|--|--|--|--|--|--|--|--|--|--|--|--|--|--|--|--|--|--|--|--|--|--|--|--|--|--|--|--|--|--|--|--|--|--|--|--|--|--|--|--|--|--|--|--|--|--|--|--|--|--|--|--|--|--|--|--|--|--|--|--|--|--|--|--|--|--|--|--|--|--|--|--|--|--|--|--|--|--|--|--|--|--|--|--|--|--|--|--|--|--|--|--|--|--|--|--|--|--|--|--|--|--|--|--|--|--|--|--|--|--|--|--|--|--|--|--|--|--|--|--|--|--|--|--|--|--|--|--|--|--|--|--|--|--|--|--|--|--|--|--|--|--|--|--|--|--|--|--|--|--|--|--|--|--|--|--|--|--|--|--|--|--|--|--|--|--|--|--|--|--|--|--|--|--|--|--|--|--|--|--|--|--|--|--|--|--|--|--|--|--|--|--|--|--|--|--|--|--|--|--|--|--|--|--|--|--|--|--|--|--|--|--|--|--|--|--|--|--|--|--|--|--|--|--|--|--|--|--|--|--|--|--|--|--|--|--|--|--|--|--|--|--|--|--|--|--|--|--|--|--|--|--|--|--|--|--|--|--|--|--|--|--|--|--|--|--|--|--|--|--|--|--|--|--|--|--|--|--|--|--|--|--|--|--|--|--|--|--|--|--|--|--|--|--|--|--|--|--|--|--|--|--|--|--|--|--|--|--|--|--|--|--|--|--|--|--|--|--|--|--|--|--|--|--|--|--|--|--|--|--|--|--|--|--|--|--|--|--|--|--|--|--|--|--|--|--|--|--|--|--|--|--|--|--|--|--|--|--|--|--|--|--|--|--|--|--|--|--|--|--|--|--|--|--|--|--|--|--|--|--|--|--|--|--|--|--|--|--|--|--|--|--|--|--|--|--|--|--|--|--|--|--|--|--|--|--|--|--|--|--|--|--|--|--|--|--|--|--|--|--|--|--|--|--|--|--|--|--|--|--|--|--|--|--|--|--|--|--|--|--|--|--|--|--|--|--|--|--|--|--|--|--|--|--|--|--|--|--|--|--|--|--|--|--|--|--|--|--|--|--|--|--|--|--|--|--|--|--|--|--|--|--|--|--|--|--|--|--|--|--|--|--|--|--|--|--|--|--|--|--|--|--|--|--|--|--|--|--|--|--|--|--|--|--|--|--|--|--|--|--|--|--|--|--|--|--|--|--|--|--|--|--|--|--|--|--|--|--|--|--|--|--|--|--|--|--|--|--|--|--|--|--|--|--|--|--|--|--|--|--|--|--|--|--|--|--|--|--|--|--|--|--|--|--|--|--|--|--|--|--|--|--|--|--|--|--|--|--|--|--|--|--|--|--|--|--|--|--|--|--|--|--|--|--|--|--|--|--|--|--|--|--|--|--|--|--|--|--|--|--|--|--|--|--|--|--|--|--|--|--|--|--|--|--|--|--|--|--|--|--|--|--|--|--|--|--|--|--|--|--|--|--|--|--|--|--|--|--|--|--|--|--|--|--|--|--|--|--|--|--|--|--|--|--|--|--|--|--|--|--|--|--|--|--|--|--|--|--|--|--|--|--|--|--|--|--|--|--|--|--|--|--|--|--|--|--|--|--|--|--|--|--|--|--|--|--|--|--|--|--|--|--|--|--|--|--|--|--|--|--|--|--|--|--|--|--|--|--|--|--|--|--|--|--|--|--|--|--|--|--|--|--|--|--|--|--|--|--|--|--|--|--|--|--|--|--|--|--|--|--|--|--|--|--|--|--|--|--|--|--|--|--|--|--|--|--|--|--|--|--|--|--|--|--|--|--|--|--|--|--|--|--|--|--|--|--|--|--|--|--|--|--|--|--|--|--|--|--|--|--|--|--|--|--|--|--|--|--|--|--|--|--|--|--|--|--|--|--|--|--|--|--|--|--|--|--|--|--|--|--|--|--|--|--|--|--|--|--|--|--|--|--|--|--|--|--|--|--|--|--|--|--|--|--|--|--|--|--|--|--|--|--|--|--|--|--|--|--|--|--|--|--|--|--|--|--|--|--|--|--|--|--|--|--|--|--|--|--|--|--|--|--|--|--|--|--|--|--|--|--|--|--|--|--|--|--|--|--|--|--|--|--|--|--|--|--|--|--|--|--|--|--|--|--|--|--|--|--|--|--|--|--|--|--|--|--|--|--|--|--|--|--|--|--|--|--|--|--|--|--|--|--|--|--|--|--|--|--|--|--|--|--|--|--|--|--|--|--|--|--|--|--|--|--|--|--|--|--|--|--|--|--|--|--|--|--|--|--|--|--|--|--|--|--|--|--|--|--|--|--|--|--|--|--|--|--|--|--|--|--|--|--|--|--|--|--|--|--|--|--|--|--|--|--|--|--|--|--|--|--|--|--|--|--|--|--|--|--|--|--|--|--|--|--|--|--|--|--|--|--|--|--|--|--|--|--|--|--|--|--|--|--|--|--|--|--|--|--|--|--|--|--|--|--|--|--|--|--|--|--|--|--|--|--|--|--|--|--|--|--|--|--|--|--|--|--|--|--|--|--|--|--|--|--|--|--|--|--|--|--|--|--|--|--|--|--|--|--|--|--|--|--|--|--|--|--|--|--|--|--|--|--|--|--|--|--|--|--|--|--|--|--|--|--|--|--|--|--|--|--|--|--|--|--|--|--|--|--|--|--|--|--|--|--|--|--|--|--|--|--|--|--|--|--|--|--|--|--|--|--|--|--|--|--|--|--|--|--|--|--|--|--|--|--|--|--|--|--|--|--|--|--|--|--|--|--|--|--|--|--|--|--|--|--|--|--|--|--|--|--|--|--|--|--|--|--|--|--|--|--|--|--|--|--|--|--|--|--|--|--|--|--|--|--|--|--|--|--|--|--|--|--|--|--|--|--|--|--|--|--|--|--|--|--|--|--|----|
|  |  |  |  |  |  |  |  |  |  |  |  |  |  |  |  |  |  |  |  |  |  |  |  |  |  |  |  |  |  |  |  |  |  |  |  |  |  |  |  |  |  |  |  |  |  |  |  |  |  |  |  |  |  |  |  |  |  |  |  |  |  |  |  |  |  |  |  |  |  |  |  |  |  |  |  |  |  |  |  |  |  |  |  |  |  |  |  |  |  |  |  |  |  |  |  |  |  |  |  |  |  |  |  |  |  |  |  |  |  |  |  |  |  |  |  |  |  |  |  |  |  |  |  |  |  |  |  |  |  |  |  |  |  |  |  |  |  |  |  |  |  |  |  |  |  |  |  |  |  |  |  |  |  |  |  |  |  |  |  |  |  |  |  |  |  |  |  |  |  |  |  |  |  |  |  |  |  |  |  |  |  |  |  |  |  |  |  |  |  |  |  |  |  |  |  |  |  |  |  |  |  |  |  |  |  |  |  |  |  |  |  |  |  |  |  |  |  |  |  |  |  |  |  |  |  |  |  |  |  |  |  |  |  |  |  |  |  |  |  |  |  |  |  |  |  |  |  |  |  |  |  |  |  |  |  |  |  |  |  |  |  |  |  |  |  |  |  |  |  |  |  |  |  |  |  |  |  |  |  |  |  |  |  |  |  |  |  |  |  |  |  |  |  |  |  |  |  |  |  |  |  |  |  |  |  |  |  |  |  |  |  |  |  |  |  |  |  |  |  |  |  |  |  |  |  |  |  |  |  |  |  |  |  |  |  |  |  |  |  |  |  |  |  |  |  |  |  |  |  |  |  |  |  |  |  |  |  |  |  |  |  |  |  |  |  |  |  |  |  |  |  |  |  |  |  |  |  |  |  |  |  |  |  |  |  |  |  |  |  |  |  |  |  |  |  |  |  |  |  |  |  |  |  |  |  |  |  |  |  |  |  |  |  |  |  |  |  |  |  |  |  |  |  |  |  |  |  |  |  |  |  |  |  |  |  |  |  |  |  |  |  |  |  |  |  |  |  |  |  |  |  |  |  |  |  |  |  |  |  |  |  |  |  |  |  |  |  |  |  |  |  |  |  |  |  |  |  |  |  |  |  |  |  |  |  |  |  |  |  |  |  |  |  |  |  |  |  |  |  |  |  |  |  |  |  |  |  |  |  |  |  |  |  |  |  |  |  |  |  |  |  |  |  |  |  |  |  |  |  |  |  |  |  |  |  |  |  |  |  |  |  |  |  |  |  |  |  |  |  |  |  |  |  |  |  |  |  |  |  |  |  |  |  |  |  |  |  |  |  |  |  |  |  |  |  |  |  |  |  |  |  |  |  |  |  |  |  |  |  |  |  |  |  |  |  |  |  |  |  |  |  |  |  |  |  |  |  |  |  |  |  |  |  |  |  |  |  |  |  |  |  |  |  |  |  |  |  |  |  |  |  |  |  |  |  |  |  |  |  |  |  |  |  |  |  |  |  |  |  |  |  |  |  |  |  |  |  |  |  |  |  |  |  |  |  |  |  |  |  |  |  |  |  |  |  |  |  |  |  |  |  |  |  |  |  |  |  |  |  |  |  |  |  |  |  |  |  |  |  |  |  |  |  |  |  |  |  |  |  |  |  |  |  |  |  |  |  |  |  |  |  |  |  |  |  |  |  |  |  |  |  |  |  |  |  |  |  |  |  |  |  |  |  |  |  |  |  |  |  |  |  |  |  |  |  |  |  |  |  |  |  |  |  |  |  |  |  |  |  |  |  |  |  |  |  |  |  |  |  |  |  |  |  |  |  |  |  |  |  |  |  |  |  |  |  |  |  |  |  |  |  |  |  |  |  |  |  |  |  |  |  |  |  |  |  |  |  |  |  |  |  |  |  |  |  |  |  |  |  |  |  |  |  |  |  |  |  |  |  |  |  |  |  |  |  |  |  |  |  |  |  |  |  |  |  |  |  |  |  |  |  |  |  |  |  |  |  |  |  |  |  |  |  |  |  |  |  |  |  |  |  |  |  |  |  |  |  |  |  |  |  |  |  |  |  |  |  |  |  |  |  |  |  |  |  |  |  |  |  |  |  |  |  |  |  |  |  |  |  |  |  |  |  |  |  |  |  |  |  |  |  |  |  |  |  |  |  |  |  |  |  |  |  |  |  |  |  |  |  |  |  |  |  |  |  |  |  |  |  |  |  |  |  |  |  |  |  |  |  |  |  |  |  |  |  |  |  |  |  |  |  |  |  |  |  |  |  |  |  |  |  |  |  |  |  |  |  |  |  |  |  |  |  |  |  |  |  |  |  |  |  |  |  |  |  |  |  |  |  |  |  |  |  |  |  |  |  |  |  |  |  |  |  |  |  |  |  |  |  |  |  |  |  |  |  |  |  |  |  |  |  |  |  |  |  |  |  |  |  |  |  |  |  |  |  |  |  |  |  |  |  |  |  |  |  |  |  |  |  |  |  |  |  |  |  |  |  |  |  |  |  |  |  |  |  |  |  |  |  |  |  |  |  |  |  |  |  |  |  |  |  |  |  |  |  |  |  |  |  |  |  |  |  |  |  |  |  |  |  |  |  |  |  |  |  |  |  |  |  |  |  |  |  |  |  |  |  |  |  |  |  |  |  |  |  |  |  |  |  |  |  |  |  |  |  |  |  |  |  |  |  |  |  |  |  |  |  |  |  |  |  |  |  |  |  |  |  |  |  |  |  |  |  |  |  |  |  |  |  |  |  |  |  |  |  |  |  |  |  |  |  |  |  |  |  |  |  |  |  |  |  |  |  |  |  |  |  |  |  |  |  |  |  |  |  |  |  |  |  |  |  |  |  |  |  |  |  |  |  |  |  |  |  |  |  |  |  |  |  |  |  |  |  |  |  |  |  |  |  |  |  |  |  |  |  |  |  |  |  |  |  |  |  |  |  |  |  |  |  |  |  |  |  |  |  |  |  |  |  |  |  |  |  |  |  |  |  |  |  |  |  |  |  |  |  |  |  |  |  |  |  |  |  |  |  |  |  |  |  |  |  |  |  |  |  |  |  |  |  |  |  |  |  |  |  |  |  |  |  |  |  |  |  |  |  |  |  |  |  |  |  |  |  |  |  |  |  |  |  |  |  |  |  |  |  |  |  |  |  |  |  |  |  |  |  |  |  |  |  |  |  |  |  |  |  |  |  |  |  |  |  |  |  |  |  |  |  |  |  | </ |
|--|--|--|--|--|--|--|--|--|--|--|--|--|--|--|--|--|--|--|--|--|--|--|--|--|--|--|--|--|--|--|--|--|--|--|--|--|--|--|--|--|--|--|--|--|--|--|--|--|--|--|--|--|--|--|--|--|--|--|--|--|--|--|--|--|--|--|--|--|--|--|--|--|--|--|--|--|--|--|--|--|--|--|--|--|--|--|--|--|--|--|--|--|--|--|--|--|--|--|--|--|--|--|--|--|--|--|--|--|--|--|--|--|--|--|--|--|--|--|--|--|--|--|--|--|--|--|--|--|--|--|--|--|--|--|--|--|--|--|--|--|--|--|--|--|--|--|--|--|--|--|--|--|--|--|--|--|--|--|--|--|--|--|--|--|--|--|--|--|--|--|--|--|--|--|--|--|--|--|--|--|--|--|--|--|--|--|--|--|--|--|--|--|--|--|--|--|--|--|--|--|--|--|--|--|--|--|--|--|--|--|--|--|--|--|--|--|--|--|--|--|--|--|--|--|--|--|--|--|--|--|--|--|--|--|--|--|--|--|--|--|--|--|--|--|--|--|--|--|--|--|--|--|--|--|--|--|--|--|--|--|--|--|--|--|--|--|--|--|--|--|--|--|--|--|--|--|--|--|--|--|--|--|--|--|--|--|--|--|--|--|--|--|--|--|--|--|--|--|--|--|--|--|--|--|--|--|--|--|--|--|--|--|--|--|--|--|--|--|--|--|--|--|--|--|--|--|--|--|--|--|--|--|--|--|--|--|--|--|--|--|--|--|--|--|--|--|--|--|--|--|--|--|--|--|--|--|--|--|--|--|--|--|--|--|--|--|--|--|--|--|--|--|--|--|--|--|--|--|--|--|--|--|--|--|--|--|--|--|--|--|--|--|--|--|--|--|--|--|--|--|--|--|--|--|--|--|--|--|--|--|--|--|--|--|--|--|--|--|--|--|--|--|--|--|--|--|--|--|--|--|--|--|--|--|--|--|--|--|--|--|--|--|--|--|--|--|--|--|--|--|--|--|--|--|--|--|--|--|--|--|--|--|--|--|--|--|--|--|--|--|--|--|--|--|--|--|--|--|--|--|--|--|--|--|--|--|--|--|--|--|--|--|--|--|--|--|--|--|--|--|--|--|--|--|--|--|--|--|--|--|--|--|--|--|--|--|--|--|--|--|--|--|--|--|--|--|--|--|--|--|--|--|--|--|--|--|--|--|--|--|--|--|--|--|--|--|--|--|--|--|--|--|--|--|--|--|--|--|--|--|--|--|--|--|--|--|--|--|--|--|--|--|--|--|--|--|--|--|--|--|--|--|--|--|--|--|--|--|--|--|--|--|--|--|--|--|--|--|--|--|--|--|--|--|--|--|--|--|--|--|--|--|--|--|--|--|--|--|--|--|--|--|--|--|--|--|--|--|--|--|--|--|--|--|--|--|--|--|--|--|--|--|--|--|--|--|--|--|--|--|--|--|--|--|--|--|--|--|--|--|--|--|--|--|--|--|--|--|--|--|--|--|--|--|--|--|--|--|--|--|--|--|--|--|--|--|--|--|--|--|--|--|--|--|--|--|--|--|--|--|--|--|--|--|--|--|--|--|--|--|--|--|--|--|--|--|--|--|--|--|--|--|--|--|--|--|--|--|--|--|--|--|--|--|--|--|--|--|--|--|--|--|--|--|--|--|--|--|--|--|--|--|--|--|--|--|--|--|--|--|--|--|--|--|--|--|--|--|--|--|--|--|--|--|--|--|--|--|--|--|--|--|--|--|--|--|--|--|--|--|--|--|--|--|--|--|--|--|--|--|--|--|--|--|--|--|--|--|--|--|--|--|--|--|--|--|--|--|--|--|--|--|--|--|--|--|--|--|--|--|--|--|--|--|--|--|--|--|--|--|--|--|--|--|--|--|--|--|--|--|--|--|--|--|--|--|--|--|--|--|--|--|--|--|--|--|--|--|--|--|--|--|--|--|--|--|--|--|--|--|--|--|--|--|--|--|--|--|--|--|--|--|--|--|--|--|--|--|--|--|--|--|--|--|--|--|--|--|--|--|--|--|--|--|--|--|--|--|--|--|--|--|--|--|--|--|--|--|--|--|--|--|--|--|--|--|--|--|--|--|--|--|--|--|--|--|--|--|--|--|--|--|--|--|--|--|--|--|--|--|--|--|--|--|--|--|--|--|--|--|--|--|--|--|--|--|--|--|--|--|--|--|--|--|--|--|--|--|--|--|--|--|--|--|--|--|--|--|--|--|--|--|--|--|--|--|--|--|--|--|--|--|--|--|--|--|--|--|--|--|--|--|--|--|--|--|--|--|--|--|--|--|--|--|--|--|--|--|--|--|--|--|--|--|--|--|--|--|--|--|--|--|--|--|--|--|--|--|--|--|--|--|--|--|--|--|--|--|--|--|--|--|--|--|--|--|--|--|--|--|--|--|--|--|--|--|--|--|--|--|--|--|--|--|--|--|--|--|--|--|--|--|--|--|--|--|--|--|--|--|--|--|--|--|--|--|--|--|--|--|--|--|--|--|--|--|--|--|--|--|--|--|--|--|--|--|--|--|--|--|--|--|--|--|--|--|--|--|--|--|--|--|--|--|--|--|--|--|--|--|--|--|--|--|--|--|--|--|--|--|--|--|--|--|--|--|--|--|--|--|--|--|--|--|--|--|--|--|--|--|--|--|--|--|--|--|--|--|--|--|--|--|--|--|--|--|--|--|--|--|--|--|--|--|--|--|--|--|--|--|--|--|--|--|--|--|--|--|--|--|--|--|--|--|--|--|--|--|--|--|--|--|--|--|--|--|--|--|--|--|--|--|--|--|--|--|--|--|--|--|--|--|--|--|--|--|--|--|--|--|--|--|--|--|--|--|--|--|--|--|--|--|--|--|--|--|--|--|--|--|--|--|--|--|--|--|--|--|--|--|--|--|--|--|--|--|--|--|--|--|--|--|--|--|--|--|--|--|--|--|--|--|--|--|--|--|--|--|--|--|--|--|--|--|--|--|--|--|--|--|--|--|--|--|--|--|--|--|--|--|--|--|--|--|--|--|--|--|--|--|--|--|--|--|--|--|--|--|--|--|--|--|--|--|--|--|--|--|--|--|--|--|--|--|--|--|--|--|--|--|--|--|--|--|--|--|--|--|--|--|--|--|--|--|--|--|--|--|--|----|

#### Peptide Information

| Calc. Mass | Obsrv. Mass | ± da    | ± ppm | Start Seq. | End Seq. | Sequence                    | Ion Score | C. I. | % Modification         | Rank | Result Type |
|------------|-------------|---------|-------|------------|----------|-----------------------------|-----------|-------|------------------------|------|-------------|
| 842.4882   | 842.4985    | 0.0103  | 12    | 271        | 277      | FIHVAQK                     |           |       |                        |      | Mascot      |
| 848.4625   | 848.4784    | 0.0159  | 19    | 678        | 684      | QHPPLEK                     |           |       |                        |      | Mascot      |
| 964.4999   | 964.511     | 0.0111  | 12    | 128        | 134      | QWISQFR                     |           |       |                        |      | Mascot      |
| 1165.5703  | 1165.728    | 0.1577  | 135   | 580        | 589      | DVVGMECLKR                  |           |       | Oxidation (M)[5]       |      | Mascot      |
| 1226.6575  | 1226.5995   | -0.058  | -47   | 119        | 127      | RPQICHFIR                   |           |       | Carbamidomethyl (C)[5] |      | Mascot      |
| 1243.5129  | 1243.624    | 0.1111  | 89    | 569        | 579      | DCGVNCHKHCK                 |           |       |                        |      | Mascot      |
| 1243.5129  | 1243.624    | 0.1111  | 89    | 569        | 579      | DCGVNCHKHCK                 |           |       |                        |      | Mascot      |
| 1279.5769  | 1279.7555   | 0.1786  | 140   | 33         | 43       | MTCPSAQEISR                 |           |       | Carbamidomethyl (C)[3] |      | Mascot      |
| 1851.8438  | 1851.9003   | 0.0565  | 31    | 513        | 528      | EEITSYFMRGMSVCAK            |           |       |                        |      | Mascot      |
| 2095.9165  | 2095.9971   | 0.0806  | 38    | 474        | 490      | NYDLNMDGYISLEEFK            |           |       | Oxidation (M)[6]       |      | Mascot      |
| 2284.2812  | 2284.1467   | -0.1345 | -59   | 433        | 454      | IQPVAPVKPPVVAEWGS<br>GVTPR  |           |       |                        |      | Mascot      |
| 2501.2024  | 2501.2166   | 0.0142  | 6     | 33         | 55       | MTCPSAQEISRALQSPPA<br>HASFR |           |       | Oxidation (M)[1]       |      | Mascot      |

41 methenyltetrahydrofolate synthase domain-containing protein [Danio rerio] gi|113679548 43056.8 9.08 8 30 0

#### Peptide Information

| Calc. Mass | Obsrv. Mass | ± da   | ± ppm | Start Seq. | End Seq. | Sequence | Ion Score | C. I. | % Modification         | Rank | Result Type |
|------------|-------------|--------|-------|------------|----------|----------|-----------|-------|------------------------|------|-------------|
| 862.4086   | 862.4886    | 0.08   | 93    | 45         | 52       | GALEACNK |           |       | Carbamidomethyl (C)[6] |      | Mascot      |
| 882.5407   | 882.5541    | 0.0134 | 15    | 86         | 93       | SLLVPTPR |           |       |                        |      | Mascot      |

|    |                                 |           |         |      |              |     |                            |      |   |    |   |                        |  |  |  |  |        |
|----|---------------------------------|-----------|---------|------|--------------|-----|----------------------------|------|---|----|---|------------------------|--|--|--|--|--------|
|    | 1242.6147                       | 1242.5988 | -0.0159 | -13  | 67           | 77  | VDPDKPMEGVR                |      |   |    |   |                        |  |  |  |  | Mascot |
|    | 1649.9697                       | 1649.7689 | -0.2008 | -122 | 324          | 337 | GLLREQEVVPLQIR             | 5    |   | 0  |   |                        |  |  |  |  | Mascot |
|    | 1649.9697                       | 1649.7689 | -0.2008 | -122 | 324          | 337 | GLLREQEVVPLQIR             |      |   |    |   |                        |  |  |  |  | Mascot |
|    | 1671.9152                       | 1671.7496 | -0.1656 | -99  | 220          | 233 | HPKPQGIIWSMLHK             |      |   |    |   |                        |  |  |  |  | Mascot |
|    | 1728.8915                       | 1728.9053 | 0.0138  | 8    | 255          | 269 | DVALKLIHAGEDEYR            |      |   |    |   |                        |  |  |  |  | Mascot |
|    | 1872.0411                       | 1871.9338 | -0.1073 | -57  | 200          | 215 | HDLMVDFIITATRVIK           |      |   |    |   |                        |  |  |  |  | Mascot |
|    | 2389.2795                       | 2389.135  | -0.1445 | -60  | 45           | 66  | GALEACNKVAQLEIFIESA<br>VVK |      |   |    |   | Carbamidomethyl (C)[6] |  |  |  |  | Mascot |
|    | 2389.2795                       | 2389.135  | -0.1445 | -60  | 45           | 66  | GALEACNKVAQLEIFIESA<br>VVK |      |   |    |   | Carbamidomethyl (C)[6] |  |  |  |  | Mascot |
| 42 | Zgc:77614 protein [Danio rerio] |           |         |      | gi 169642093 |     | 19598                      | 9.62 | 5 | 30 | 0 |                        |  |  |  |  |        |

#### Peptide Information

| Calc. Mass | Obsrv. Mass | ± da    | ± ppm | Start Seq. | End Seq. | Sequence                           | Ion Score | C. I. | % Modification         | Rank | Result Type |
|------------|-------------|---------|-------|------------|----------|------------------------------------|-----------|-------|------------------------|------|-------------|
| 936.5334   | 936.4787    | -0.0547 | -58   | 39         | 45       | LKFCQLK                            |           |       | Carbamidomethyl (C)[4] |      | Mascot      |
| 1752.8235  | 1752.8441   | 0.0206  | 12    | 148        | 164      | TSASGRAQGFPASCWR                   |           |       |                        |      | Mascot      |
| 2095.9766  | 2095.9971   | 0.0205  | 10    | 154        | 171      | AQGFPASCWRWTTQT<br>ER              |           |       |                        |      | Mascot      |
| 2283.2441  | 2283.1521   | -0.092  | -40   | 99         | 119      | ADPSLLSLEQLLK TENLA<br>EAK         |           |       |                        |      | Mascot      |
| 3439.6296  | 3439.6467   | 0.0171  | 5     | 1          | 30       | MSCVHYSFQSRLTYDSL<br>QFEGLNISAGELK |           |       | Oxidation (M)[1]       |      | Mascot      |

|    |                               |  |  |  |             |  |         |      |   |    |   |  |  |  |  |  |  |
|----|-------------------------------|--|--|--|-------------|--|---------|------|---|----|---|--|--|--|--|--|--|
| 43 | 5'-nucleotidase [Danio rerio] |  |  |  | gi 41055552 |  | 62976.9 | 6.22 | 9 | 30 | 0 |  |  |  |  |  |  |
|----|-------------------------------|--|--|--|-------------|--|---------|------|---|----|---|--|--|--|--|--|--|

#### Peptide Information

| Calc. Mass | Obsrv. Mass | ± da    | ± ppm | Start Seq. | End Seq. | Sequence                  | Ion Score | C. I. | % Modification            | Rank | Result Type |
|------------|-------------|---------|-------|------------|----------|---------------------------|-----------|-------|---------------------------|------|-------------|
| 936.4389   | 936.4787    | 0.0398  | 43    | 472        | 478      | VLCTQCR                   |           |       | Carbamidomethyl (C)[3,6]  |      | Mascot      |
| 1106.5323  | 1106.5433   | 0.011   | 10    | 39         | 48       | VEETNKDSGK                |           |       |                           |      | Mascot      |
| 1259.5837  | 1259.6215   | 0.0378  | 30    | 544        | 554      | FQFSSSCAGLR               |           |       | Carbamidomethyl (C)[7]    |      | Mascot      |
| 1259.5837  | 1259.6215   | 0.0378  | 30    | 544        | 554      | FQFSSSCAGLR               |           |       | Carbamidomethyl (C)[7]    |      | Mascot      |
| 1464.7198  | 1464.8177   | 0.0979  | 67    | 49         | 61       | CSKPPCFAGVSRR             |           |       | Carbamidomethyl (C)[1]    |      | Mascot      |
| 1638.7727  | 1638.8347   | 0.062   | 38    | 45         | 60       | DSGKCSKPPCFAGVSR          |           |       |                           |      | Mascot      |
| 1752.8156  | 1752.8441   | 0.0285  | 16    | 45         | 60       | DSGKCSKPPCFAGVSR          |           |       | Carbamidomethyl (C)[5,10] |      | Mascot      |
| 2080.9724  | 2081.0522   | 0.0798  | 38    | 354        | 371      | ECNLGNLICDAMVHHNIK        |           |       | Carbamidomethyl (C)[2]    |      | Mascot      |
| 2096.0779  | 2095.9971   | -0.0808 | -39   | 472        | 489      | VLCTQCRVPHYEPLVPN<br>K    |           |       |                           |      | Mascot      |
| 2384.1421  | 2383.9209   | -0.2212 | -93   | 352        | 371      | FRECNLGNLICDAMVHH<br>NIK  |           |       | Carbamidomethyl (C)[4]    |      | Mascot      |
| 2389.1353  | 2389.135    | -0.0003 | 0     | 372        | 392      | YADELQWNHVSSCILNG<br>GGIR |           |       | Carbamidomethyl (C)[13]   |      | Mascot      |
| 2389.1353  | 2389.135    | -0.0003 | 0     | 372        | 392      | YADELQWNHVSSCILNG<br>GGIR |           |       | Carbamidomethyl (C)[13]   |      | Mascot      |



44 Ndufa9 protein [Danio rerio] gi|46249713 42363.1 9.65 7 30 0

Peptide Information

| Calc. Mass | Obsrv. Mass | ± da    | ± ppm | Start Seq. | End Seq. | Sequence                   | Ion Score | C. I. | % Modification   | Rank | Result Type |
|------------|-------------|---------|-------|------------|----------|----------------------------|-----------|-------|------------------|------|-------------|
| 850.4781   | 850.5291    | 0.051   | 60    | 172        | 178      | SPSKYLR                    |           |       |                  |      | Mascot      |
| 1165.6034  | 1165.728    | 0.1246  | 107   | 72         | 81       | MGSQVVIPYR                 |           |       | Oxidation (M)[1] |      | Mascot      |
| 1649.8896  | 1649.7689   | -0.1207 | -73   | 137        | 150      | YEDVFVSIPLQIAR             |           |       |                  |      | Mascot      |
| 1649.8896  | 1649.7689   | -0.1207 | -73   | 137        | 150      | YEDVFVSIPLQIAR             |           |       |                  |      | Mascot      |
| 2082.1089  | 2082.0439   | -0.065  | -31   | 42         | 63       | GGRSSISGLAATVFGATG<br>FLGR |           |       |                  |      | Mascot      |
| 2082.1089  | 2082.0439   | -0.065  | -31   | 42         | 63       | GGRSSISGLAATVFGATG<br>FLGR |           |       |                  |      | Mascot      |
| 2156.1121  | 2155.917    | -0.1951 | -90   | 326        | 345      | YDPLPGLEDLGITPASIEQ<br>K   |           |       |                  |      | Mascot      |
| 2156.1121  | 2155.917    | -0.1951 | -90   | 326        | 345      | YDPLPGLEDLGITPASIEQ<br>K   |           |       |                  |      | Mascot      |
| 2261.178   | 2260.938    | -0.24   | -106  | 9          | 30       | CFISGTCSPVLLAAPVT<br>VQQR  |           |       |                  |      | Mascot      |
| 2261.178   | 2260.938    | -0.24   | -106  | 9          | 30       | CFISGTCSPVLLAAPVT<br>VQQR  |           |       |                  |      | Mascot      |
| 2389.2729  | 2389.135    | -0.1379 | -58   | 9          | 31       | CFISGTCSPVLLAAPVT<br>VQQRK |           |       |                  |      | Mascot      |
| 2389.2729  | 2389.135    | -0.1379 | -58   | 9          | 31       | CFISGTCSPVLLAAPVT<br>VQQRK |           |       |                  |      | Mascot      |

45 lft81 protein [Danio rerio] gi|145337899 29908.3 5.76 7 30 0

Peptide Information

| Calc. Mass | Obsrv. Mass | ± da    | ± ppm | Start Seq. | End Seq. | Sequence                  | Ion Score | C. I. | % Modification         | Rank | Result Type |
|------------|-------------|---------|-------|------------|----------|---------------------------|-----------|-------|------------------------|------|-------------|
| 1045.5636  | 1045.5492   | -0.0144 | -14   | 14         | 21       | TEEILRER                  |           |       |                        |      | Mascot      |
| 1212.7311  | 1212.605    | -0.1261 | -104  | 85         | 95       | SALSPLIKDLR               |           |       |                        |      | Mascot      |
| 1212.7311  | 1212.605    | -0.1261 | -104  | 85         | 95       | SALSPLIKDLR               |           |       |                        |      | Mascot      |
| 1318.6896  | 1318.6877   | -0.0019 | -1    | 170        | 180      | ISQSMQVQVRR               |           |       |                        |      | Mascot      |
| 1784.8231  | 1784.8833   | 0.0602  | 34    | 113        | 128      | AQYETCAAGLESNRSK          |           |       | Carbamidomethyl (C)[6] |      | Mascot      |
| 2082.0349  | 2082.0439   | 0.009   | 4     | 37         | 55       | GISGYSDTQEELERVSAI<br>K   |           |       |                        |      | Mascot      |
| 2082.0349  | 2082.0439   | 0.009   | 4     | 37         | 55       | GISGYSDTQEELERVSAI<br>K   |           |       |                        |      | Mascot      |
| 2225.0879  | 2225.0933   | 0.0054  | 2     | 147        | 163      | YHHINCEREIIESQIQR         |           |       | Carbamidomethyl (C)[6] |      | Mascot      |
| 2225.0879  | 2225.0933   | 0.0054  | 2     | 147        | 163      | YHHINCEREIIESQIQR         |           |       | Carbamidomethyl (C)[6] |      | Mascot      |
| 2283.1914  | 2283.1521   | -0.0393 | -17   | 234        | 254      | QCYLKAQSQAPIGHVIQD<br>VGK |           |       |                        |      | Mascot      |

46 Zgc:112399 [Danio rerio] gi|66267536 39455.2 9.11 10 29 0

Peptide Information

|    | Calc. Mass                    | Obsrv. Mass | ± da    | ± ppm | Start Seq.   | End Sequence Seq.           | Ion Score | C. I. % | Modification               | Rank | Result Type |
|----|-------------------------------|-------------|---------|-------|--------------|-----------------------------|-----------|---------|----------------------------|------|-------------|
|    | 848.5239                      | 848.4784    | -0.0455 | -54   | 325          | 332 FTLLGGLK                |           |         |                            |      | Mascot      |
|    | 1649.7775                     | 1649.7689   | -0.0086 | -5    | 141          | 155 IHTGEKPFTCTQCGK         |           |         |                            |      | Mascot      |
|    | 1649.7775                     | 1649.7689   | -0.0086 | -5    | 141          | 155 IHTGEKPFTCTQCGK         |           |         |                            |      | Mascot      |
|    | 1752.8043                     | 1752.8441   | 0.0398  | 23    | 225          | 239 VHTKEKPYSCECGK          |           |         | Carbamidomethyl (C)[10]    |      | Mascot      |
|    | 1753.84                       | 1753.8351   | -0.0049 | -3    | 253          | 267 IHAGVKEYLCFECGK         |           |         | Carbamidomethyl (C)[10]    |      | Mascot      |
|    | 1999.9952                     | 1999.9331   | -0.0621 | -31   | 81           | 96 IHMRIHTGEKPYTCTR         |           |         | Carbamidomethyl (C)[14]    |      | Mascot      |
|    | 2081.8911                     | 2082.0439   | 0.1528  | 73    | 166          | 183 HMMIHTGEKPFTCTECG K     |           |         | Oxidation (M)[2,3]         |      | Mascot      |
|    | 2081.8911                     | 2082.0439   | 0.1528  | 73    | 166          | 183 HMMIHTGEKPFTCTECG K     |           |         | Oxidation (M)[2,3]         |      | Mascot      |
|    | 2194.0559                     | 2194.103    | 0.0471  | 21    | 259          | 276 EYLCFECGKTFITEVGLK      |           |         | Carbamidomethyl (C)[4,7]   |      | Mascot      |
|    | 2211.1702                     | 2211.0776   | -0.0926 | -42   | 184          | 202 SFIQLSTLNLHMRIHAGE K    |           |         | Oxidation (M)[12]          |      | Mascot      |
|    | 2229.0427                     | 2228.9175   | -0.1252 | -56   | 203          | 220 THICDQCSTLFYRASELK      |           |         | Carbamidomethyl (C)[4,7]   |      | Mascot      |
|    | 2501.1548                     | 2501.2166   | 0.0618  | 25    | 113          | 134 IHTGEKPYTCTQCGKSFG QSSK |           |         | Carbamidomethyl (C)[10,13] |      | Mascot      |
| 47 | alpha-actinin-1 [Danio rerio] |             |         |       | gi 269973891 |                             | 104139.1  | 5.36    | 10                         | 29   | 0           |

Peptide Information

|    | Calc. Mass                    | Obsrv. Mass | ± da    | ± ppm | Start Seq.   | End Sequence Seq.                    | Ion Score | C. I. % | Modification           | Rank | Result Type |
|----|-------------------------------|-------------|---------|-------|--------------|--------------------------------------|-----------|---------|------------------------|------|-------------|
|    | 1106.584                      | 1106.5433   | -0.0407 | -37   | 851          | 859 NYILADELR                        |           |         |                        |      | Mascot      |
|    | 1133.5731                     | 1133.5918   | 0.0187  | 16    | 265          | 274 AETAANRICK                       |           |         | Carbamidomethyl (C)[9] |      | Mascot      |
|    | 1504.7101                     | 1504.7722   | 0.0621  | 41    | 861          | 873 ELPPDQAEYCIAR                    |           |         |                        |      | Mascot      |
|    | 1514.806                      | 1514.7058   | -0.1002 | -66   | 117          | 131 LVSIGAEIIVDGNK                   |           |         |                        |      | Mascot      |
|    | 1649.8129                     | 1649.7689   | -0.044  | -27   | 57           | 70 KAGTQIENIEEDFR                    | 7         | 0       |                        |      | Mascot      |
|    | 1649.8129                     | 1649.7689   | -0.044  | -27   | 57           | 70 KAGTQIENIEEDFR                    |           |         |                        |      | Mascot      |
|    | 1753.8252                     | 1753.8351   | 0.0099  | 6     | 446          | 460 KHEAFESDLAAHQDR                  |           |         |                        |      | Mascot      |
|    | 1852.0215                     | 1851.9003   | -0.1212 | -65   | 513          | 527 LLETIDQLYLEFAKR                  |           |         |                        |      | Mascot      |
|    | 2051.959                      | 2052.0703   | 0.1113  | 54    | 275          | 291 VLAVNQENEQLMEDYEK                |           |         |                        |      | Mascot      |
|    | 2080.979                      | 2081.0522   | 0.0732  | 35    | 311          | 327 VPENTMQAMQKKLEDFR                |           |         | Oxidation (M)[6]       |      | Mascot      |
|    | 3338.6143                     | 3338.7375   | 0.1232  | 37    | 783          | 813 ACLISLGFDIGNDAQGEA EFARIMSIVDPNR |           |         | Oxidation (M)[24]      |      | Mascot      |
| 48 | Ppp1r3b protein [Danio rerio] |             |         |       | gi 190337192 |                                      | 33606.4   | 5.74    | 7                      | 29   | 0           |

Peptide Information

|  | Calc. Mass | Obsrv. Mass | ± da    | ± ppm | Start Seq. | End Sequence Seq. | Ion Score | C. I. % | Modification | Rank | Result Type |
|--|------------|-------------|---------|-------|------------|-------------------|-----------|---------|--------------|------|-------------|
|  | 964.5461   | 964.511     | -0.0351 | -36   | 155        | 162 VKNISFEK      |           |         |              |      | Mascot      |

|           |           |         |     |     |     |                         |  |  |  |  |                           |  |  |  |  |  |        |
|-----------|-----------|---------|-----|-----|-----|-------------------------|--|--|--|--|---------------------------|--|--|--|--|--|--------|
| 1051.5782 | 1051.6981 | 0.1199  | 114 | 157 | 165 | NISFEKSVK               |  |  |  |  |                           |  |  |  |  |  | Mascot |
| 1752.8043 | 1752.8441 | 0.0398  | 23  | 24  | 39  | YSGPLQPCLNQCSSK         |  |  |  |  |                           |  |  |  |  |  | Mascot |
| 1983.9198 | 1983.8622 | -0.0576 | -29 | 130 | 145 | QRIENDHVCLEHCMLK        |  |  |  |  | Oxidation (M)[14]         |  |  |  |  |  | Mascot |
| 2081.9678 | 2082.0439 | 0.0761  | 37  | 130 | 145 | QRIENDHVCLEHCMLK        |  |  |  |  | Carbamidomethyl (C)[9,13] |  |  |  |  |  | Mascot |
| 2081.9678 | 2082.0439 | 0.0761  | 37  | 130 | 145 | QRIENDHVCLEHCMLK        |  |  |  |  | Carbamidomethyl (C)[9,13] |  |  |  |  |  | Mascot |
| 2095.99   | 2095.9971 | 0.0071  | 3   | 21  | 39  | ASKYSGPLQPCLNQCS<br>SK  |  |  |  |  | Carbamidomethyl (C)[11]   |  |  |  |  |  | Mascot |
| 2211.1001 | 2211.0776 | -0.0225 | -10 | 2   | 20  | PIELAMSLYLSSDEFLNP<br>R |  |  |  |  | Oxidation (M)[6]          |  |  |  |  |  | Mascot |
| 2284.0703 | 2284.1467 | 0.0764  | 33  | 168 | 185 | ITFDTWKNHTDVECQYVK      |  |  |  |  | Carbamidomethyl (C)[14]   |  |  |  |  |  | Mascot |

49 PREDICTED: actin-binding LIM protein 3-like [Danio rerio] gi|326673723 79710 8.72 11 29 0

#### Peptide Information

| Calc. Mass | Obsrv. Mass | ± da    | ± ppm | Start Seq. | End Seq. | Sequence                             | Ion Score | C. I. | % Modification                                   | Rank | Result Type |
|------------|-------------|---------|-------|------------|----------|--------------------------------------|-----------|-------|--------------------------------------------------|------|-------------|
| 842.473    | 842.4985    | 0.0255  | 30    | 656        | 662      | LPKDVDR                              |           |       |                                                  |      | Mascot      |
| 848.4373   | 848.4784    | 0.0411  | 48    | 2          | 9        | AVNQFGGR                             |           |       |                                                  |      | Mascot      |
| 1638.8169  | 1638.8347   | 0.0178  | 11    | 242        | 256      | VLEAGGKHYHPTCAR                      |           |       |                                                  |      | Mascot      |
| 1671.808   | 1671.7496   | -0.0584 | -35   | 199        | 213      | CQTCGLVLTGEYISK                      |           |       | Carbamidomethyl (C)[1]                           |      | Mascot      |
| 1728.8295  | 1728.9053   | 0.0758  | 44    | 199        | 213      | CQTCGLVLTGEYISK                      |           |       | Carbamidomethyl (C)[1,4]                         |      | Mascot      |
| 1871.8262  | 1871.9338   | 0.1076  | 57    | 102        | 119      | CDSCGDFISGEVVSALG<br>R               |           |       | Carbamidomethyl (C)[1]                           |      | Mascot      |
| 1983.9116  | 1983.8622   | -0.0494 | -25   | 85         | 101      | SGEYICTSDYQRLYGTK                    |           |       |                                                  |      | Mascot      |
| 2247.0676  | 2246.9255   | -0.1421 | -63   | 591        | 611      | SNFAAENDYISKSASLPG<br>YGR            |           |       |                                                  |      | Mascot      |
| 2247.0676  | 2246.9255   | -0.1421 | -63   | 591        | 611      | SNFAAENDYISKSASLPG<br>YGR            |           |       |                                                  |      | Mascot      |
| 2261.1443  | 2260.938    | -0.2063 | -91   | 297        | 319      | TSEASISPPGSSISSPSRV<br>ICAK          |           |       |                                                  |      | Mascot      |
| 2261.1443  | 2260.938    | -0.2063 | -91   | 297        | 319      | TSEASISPPGSSISSPSRV<br>ICAK          |           |       |                                                  |      | Mascot      |
| 2284.0305  | 2284.1467   | 0.1162  | 51    | 570        | 590      | SGSREMLHSMGHNNTVN<br>GSPR            |           |       | Oxidation (M)[6]                                 |      | Mascot      |
| 2300.0254  | 2300.1501   | 0.1247  | 54    | 570        | 590      | SGSREMLHSMGHNNTVN<br>GSPR            |           |       | Oxidation (M)[6,10]                              |      | Mascot      |
| 3338.4519  | 3338.7375   | 0.2856  | 86    | 102        | 132      | CDSCGDFISGEVVSALG<br>RTYHPQCFCVCSVCR |           |       |                                                  |      | Mascot      |
| 3439.4519  | 3439.6467   | 0.1948  | 57    | 260        | 287      | CQMMFTEGEEMLTGSE<br>VWHPVCKQASR      |           |       | Carbamidomethyl (C)[1,23], Oxidation (M)[3,4,11] |      | Mascot      |

50 serine/arginine-rich splicing factor 7 [Danio rerio] gi|71834670 20442.3 9.87 1 21 0

#### Peptide Information

| Calc. Mass | Obsrv. Mass | ± da    | ± ppm | Start Seq. | End Seq. | Sequence      | Ion Score | C. I. | % Modification | Rank | Result Type |
|------------|-------------|---------|-------|------------|----------|---------------|-----------|-------|----------------|------|-------------|
| 1649.9738  | 1649.7689   | -0.2049 | -124  | 133        | 145      | LIQRVTILYDFLR | 21        | 0     |                | 2    | Mascot      |

|                |           |                        |                |                |                    |
|----------------|-----------|------------------------|----------------|----------------|--------------------|
| Gel Idx/Pos    | 242/J18   | Instr./Gel Origin      | BA2060/110707A | Process Status | Analysis Succeeded |
| Plate [#] Name | [1] 31496 | Instrument Sample Name |                | Spectra        | 11                 |

| Rank | Protein Name | Accession No. | Protein MW | Protein PI | Pep. Count | Protein Score | Protein Score C. I. % | Total Ion Score | Total Ion C. I. % |
|------|--------------|---------------|------------|------------|------------|---------------|-----------------------|-----------------|-------------------|
|------|--------------|---------------|------------|------------|------------|---------------|-----------------------|-----------------|-------------------|

|   |                                                                |             |         |     |   |     |     |     |     |
|---|----------------------------------------------------------------|-------------|---------|-----|---|-----|-----|-----|-----|
| 1 | ubiquitin carboxyl-terminal hydrolase isozyme L1 [Danio rerio] | gi 41393111 | 24232.8 | 5.1 | 9 | 384 | 100 | 327 | 100 |
|---|----------------------------------------------------------------|-------------|---------|-----|---|-----|-----|-----|-----|

Peptide Information

| Calc. Mass | Obsrv. Mass | ± da    | ± ppm | Start Seq. | End Seq. | Sequence                              | Ion Score | C. I. % | Modification            | Rank | Result Type |
|------------|-------------|---------|-------|------------|----------|---------------------------------------|-----------|---------|-------------------------|------|-------------|
| 865.4413   | 865.4321    | -0.0092 | -11   | 168        | 174      | LYELDGR                               |           |         |                         |      | Mascot      |
| 865.4413   | 865.4321    | -0.0092 | -11   | 168        | 174      | LYELDGR                               | 44        | 98.852  |                         |      | Mascot      |
| 1395.6572  | 1395.6449   | -0.0123 | -9    | 112        | 124      | FLEATSGMSPAER                         |           |         |                         |      | Mascot      |
| 1395.6572  | 1395.6449   | -0.0123 | -9    | 112        | 124      | FLEATSGMSPAER                         | 59        | 99.965  |                         |      | Mascot      |
| 1411.6522  | 1411.6357   | -0.0165 | -12   | 112        | 124      | FLEATSGMSPAER                         |           |         | Oxidation (M)[8]        |      | Mascot      |
| 1411.6522  | 1411.6357   | -0.0165 | -12   | 112        | 124      | FLEATSGMSPAER                         | 24        | 0       | Oxidation (M)[8]        |      | Mascot      |
| 1558.757   | 1558.7402   | -0.0168 | -11   | 66         | 78       | QSVGDCKDVYFLK                         |           |         | Carbamidomethyl (C)[6]  |      | Mascot      |
| 1664.8544  | 1664.8387   | -0.0157 | -9    | 154        | 167      | VNFHFITFVNVDGR                        | 113       | 100     |                         |      | Mascot      |
| 1664.8544  | 1664.8387   | -0.0157 | -9    | 154        | 167      | VNFHFITFVNVDGR                        |           |         |                         |      | Mascot      |
| 1774.8502  | 1774.8724   | 0.0222  | 13    | 2          | 15       | EWKPMEINPEMLNK                        |           |         | Oxidation (M)[5]        |      | Mascot      |
| 2197.0706  | 2197.0498   | -0.0208 | -9    | 175        | 195      | IDGPVSHGPTKPDFVM DAAR                 |           |         |                         |      | Mascot      |
| 2197.0706  | 2197.0498   | -0.0208 | -9    | 175        | 195      | IDGPVSHGPTKPDFVM DAAR                 | 111       | 100     |                         |      | Mascot      |
| 2213.0654  | 2213.075    | 0.0096  | 4     | 175        | 195      | IDGPVSHGPTKPDFVM DAAR                 |           |         | Oxidation (M)[17]       |      | Mascot      |
| 2213.0654  | 2213.075    | 0.0096  | 4     | 175        | 195      | IDGPVSHGPTKPDFVM DAAR                 | 6         | 0       | Oxidation (M)[17]       |      | Mascot      |
| 2283.0305  | 2283.1528   | 0.1223  | 54    | 133        | 153      | AIQETHDAVADEGQCRP EADK                |           |         |                         |      | Mascot      |
| 2340.052   | 2340.0396   | -0.0124 | -5    | 133        | 153      | AIQETHDAVADEGQCRP EADK                |           |         | Carbamidomethyl (C)[15] |      | Mascot      |
| 3515.7183  | 3515.7007   | -0.0176 | -5    | 79         | 111      | QTVVNSCGTVGLVHAVA NNQDSIDFDNNSALKK    |           |         | Carbamidomethyl (C)[7]  |      | Mascot      |
| 3985.8884  | 3985.8918   | 0.0034  | 1     | 133        | 167      | AIQETHDAVADEGQCRP EADKVNHFHFITFVNVDGR |           |         | Carbamidomethyl (C)[15] |      | Mascot      |

|   |                                                 |             |         |     |   |     |     |     |     |
|---|-------------------------------------------------|-------------|---------|-----|---|-----|-----|-----|-----|
| 2 | ubiquitin C-terminal hydrolase L1 [Danio rerio] | gi 37722017 | 24231.9 | 5.2 | 8 | 261 | 100 | 214 | 100 |
|---|-------------------------------------------------|-------------|---------|-----|---|-----|-----|-----|-----|

Peptide Information

| Calc. Mass | Obsrv. Mass | ± da    | ± ppm | Start Seq. | End Seq. | Sequence | Ion Score | C. I. % | Modification | Rank | Result Type |
|------------|-------------|---------|-------|------------|----------|----------|-----------|---------|--------------|------|-------------|
| 865.4413   | 865.4321    | -0.0092 | -11   | 168        | 174      | LYELDGR  |           |         |              |      | Mascot      |

|   |                                               |           |         |     |             |     |                                         |      |        |                         |        |  |
|---|-----------------------------------------------|-----------|---------|-----|-------------|-----|-----------------------------------------|------|--------|-------------------------|--------|--|
|   | 865.4413                                      | 865.4321  | -0.0092 | -11 | 168         | 174 | LYELDGR                                 | 44   | 98.852 |                         | Mascot |  |
|   | 1395.6572                                     | 1395.6449 | -0.0123 | -9  | 112         | 124 | FLEATSGMSPAER                           |      |        |                         | Mascot |  |
|   | 1395.6572                                     | 1395.6449 | -0.0123 | -9  | 112         | 124 | FLEATSGMSPAER                           | 59   | 99.965 |                         | Mascot |  |
|   | 1411.6522                                     | 1411.6357 | -0.0165 | -12 | 112         | 124 | FLEATSGMSPAER                           |      |        | Oxidation (M)[8]        | Mascot |  |
|   | 1411.6522                                     | 1411.6357 | -0.0165 | -12 | 112         | 124 | FLEATSGMSPAER                           | 24   | 0      | Oxidation (M)[8]        | Mascot |  |
|   | 1558.757                                      | 1558.7402 | -0.0168 | -11 | 66          | 78  | QSVGDCKDVYFLK                           |      |        | Carbamidomethyl (C)[6]  | Mascot |  |
|   | 1774.8502                                     | 1774.8724 | 0.0222  | 13  | 2           | 15  | EWKPMEINPEMLNK                          |      |        | Oxidation (M)[5]        | Mascot |  |
|   | 2197.0706                                     | 2197.0498 | -0.0208 | -9  | 175         | 195 | IDGPVSHGPTKPDFVM<br>DAAR                |      |        |                         | Mascot |  |
|   | 2197.0706                                     | 2197.0498 | -0.0208 | -9  | 175         | 195 | IDGPVSHGPTKPDFVM<br>DAAR                | 111  | 100    |                         | Mascot |  |
|   | 2213.0654                                     | 2213.075  | 0.0096  | 4   | 175         | 195 | IDGPVSHGPTKPDFVM<br>DAAR                |      |        | Oxidation (M)[17]       | Mascot |  |
|   | 2213.0654                                     | 2213.075  | 0.0096  | 4   | 175         | 195 | IDGPVSHGPTKPDFVM<br>DAAR                | 6    | 0      | Oxidation (M)[17]       | Mascot |  |
|   | 2283.0305                                     | 2283.1528 | 0.1223  | 54  | 133         | 153 | AIQETHDAVADEGQCRP<br>EADK               |      |        |                         | Mascot |  |
|   | 2340.052                                      | 2340.0396 | -0.0124 | -5  | 133         | 153 | AIQETHDAVADEGQCRP<br>EADK               |      |        | Carbamidomethyl (C)[15] | Mascot |  |
|   | 3515.7183                                     | 3515.7007 | -0.0176 | -5  | 79          | 111 | QTVVNSCGTVGLVHAVA<br>NNQDSIDFDNNSALKK   |      |        | Carbamidomethyl (C)[7]  | Mascot |  |
|   | 3984.9045                                     | 3984.9224 | 0.0179  | 4   | 133         | 167 | AIQETHDAVADEGQCRP<br>EADKVNHFHITFVNVNGR |      |        | Carbamidomethyl (C)[15] | Mascot |  |
| 3 | histone acetyltransferase MYST2 [Danio rerio] |           |         |     | gi 47086769 |     | 65537.7                                 | 8.98 | 12     | 46                      | 0      |  |

Peptide Information

| Calc. Mass | Obsrv. Mass | ± da    | ± ppm | Start Seq. | End Seq. | Sequence                   | Ion Score | C. I. % | Modification                               | Rank | Result Type |
|------------|-------------|---------|-------|------------|----------|----------------------------|-----------|---------|--------------------------------------------|------|-------------|
| 850.4563   | 850.5319    | 0.0756  | 89    | 59         | 65       | MTRASLR                    |           |         | Oxidation (M)[1]                           |      | Mascot      |
| 865.3912   | 865.4321    | 0.0409  | 47    | 488        | 493      | YMYNFK                     |           |         |                                            |      | Mascot      |
| 865.3912   | 865.4321    | 0.0409  | 47    | 488        | 493      | YMYNFK                     |           |         |                                            |      | Mascot      |
| 1109.5472  | 1109.4812   | -0.066  | -59   | 360        | 370      | GATSVFEVDGK                |           |         |                                            |      | Mascot      |
| 1193.6677  | 1193.6022   | -0.0655 | -55   | 479        | 487      | SYWKEVLLR                  |           |         |                                            |      | Mascot      |
| 1395.7123  | 1395.6449   | -0.0674 | -48   | 374        | 384      | IYCQNLCLLAK                |           |         | Carbamidomethyl (C)[3,7]                   |      | Mascot      |
| 1395.7123  | 1395.6449   | -0.0674 | -48   | 374        | 384      | IYCQNLCLLAK                |           |         | Carbamidomethyl (C)[3,7]                   |      | Mascot      |
| 1434.7257  | 1434.7539   | 0.0282  | 20    | 284        | 296      | LQGQITEGSNMIK              |           |         | Oxidation (M)[11]                          |      | Mascot      |
| 1475.7715  | 1475.741    | -0.0305 | -21   | 483        | 493      | EVLLRYMYNFK                |           |         |                                            |      | Mascot      |
| 1541.7198  | 1541.7236   | 0.0038  | 2     | 145        | 159      | CPTPGCNSLGHLTGK            |           |         | Carbamidomethyl (C)[1]                     |      | Mascot      |
| 1963.9225  | 1963.8793   | -0.0432 | -22   | 145        | 162      | CPTPGCNSLGHLTGKHE<br>R     |           |         | Carbamidomethyl (C)[1]                     |      | Mascot      |
| 2232.9873  | 2233.0615   | 0.0742  | 33    | 303        | 319      | YELETWYHSPYPEEYAR          |           |         |                                            |      | Mascot      |
| 2367.093   | 2367.2341   | 0.1411  | 60    | 423        | 441      | NSFLNYNVSCILTMPQYM<br>R    |           |         | Carbamidomethyl (C)[10], Oxidation (M)[14] |      | Mascot      |
| 2584.1819  | 2584.1792   | -0.0027 | -1    | 160        | 181      | HERHFAISGCPLYHNLSA<br>DECK |           |         | Carbamidomethyl (C)[10]                    |      | Mascot      |

4      PREDICTED: transformation/transcription domain-associated protein [Danio rerio]      gi|326672350      433471.2      8.52      31      43      0

Peptide Information

| Calc. Mass | Obsrv. Mass | ± da    | ± ppm | Start Seq. | End Seq. | Sequence                | Ion Score | C. I. % | Modification                              | Rank | Result Type |
|------------|-------------|---------|-------|------------|----------|-------------------------|-----------|---------|-------------------------------------------|------|-------------|
| 865.4963   | 865.4321    | -0.0642 | -74   | 2260       | 2266     | LISVFMR                 |           |         |                                           |      | Mascot      |
| 865.5505   | 865.4321    | -0.1184 | -137  | 135        | 141      | IIIELHK                 |           |         |                                           |      | Mascot      |
| 882.5155   | 882.5566    | 0.0411  | 47    | 2182       | 2189     | AVHSLLSR                |           |         |                                           |      | Mascot      |
| 1045.5095  | 1045.5494   | 0.0399  | 38    | 3604       | 3612     | EVQGNMVP                |           |         | Oxidation (M)[6]                          |      | Mascot      |
| 1109.566   | 1109.4812   | -0.0848 | -76   | 548        | 557      | TITWGITSCK              |           |         |                                           |      | Mascot      |
| 1165.5817  | 1165.5758   | -0.0059 | -5    | 606        | 615      | VANCQTVRMK              |           |         | Oxidation (M)[9]                          |      | Mascot      |
| 1165.5817  | 1165.7302   | 0.1485  | 127   | 606        | 615      | VANCQTVRMK              |           |         | Oxidation (M)[9]                          |      | Mascot      |
| 1193.5337  | 1193.6022   | 0.0685  | 57    | 3264       | 3272     | CSRIMHMQR               |           |         | Oxidation (M)[5,7]                        |      | Mascot      |
| 1234.7054  | 1234.6652   | -0.0402 | -33   | 986        | 995      | WIPNVIISHR              |           |         |                                           |      | Mascot      |
| 1323.7168  | 1323.6616   | -0.0552 | -42   | 1226       | 1236     | SFHLVTHDLVR             |           |         |                                           |      | Mascot      |
| 1365.5861  | 1365.6262   | 0.0401  | 29    | 1452       | 1461     | FCDQMMQHLR              |           |         | Carbamidomethyl (C)[2]                    |      | Mascot      |
| 1434.7079  | 1434.7539   | 0.046   | 32    | 2466       | 2477     | QCTELLAVCER             |           |         | Carbamidomethyl (C)[2]                    |      | Mascot      |
| 1475.8217  | 1475.741    | -0.0807 | -55   | 1963       | 1975     | LGFTPSVTIEQRK           |           |         |                                           |      | Mascot      |
| 1493.7126  | 1493.7156   | 0.003   | 2     | 1311       | 1322     | LFTMDLNVMEHK            |           |         | Oxidation (M)[4]                          |      | Mascot      |
| 1638.8958  | 1638.8412   | -0.0546 | -33   | 443        | 455      | DILMRMLEVFVLK           |           |         | Oxidation (M)[4,6]                        |      | Mascot      |
| 1664.8287  | 1664.8387   | 0.01    | 6     | 1691       | 1704     | AFTGRFLCNMTFLK          |           |         | Oxidation (M)[10]                         |      | Mascot      |
| 1664.8287  | 1664.8387   | 0.01    | 6     | 1691       | 1704     | AFTGRFLCNMTFLK          |           |         | Oxidation (M)[10]                         |      | Mascot      |
| 1721.8501  | 1721.8553   | 0.0052  | 3     | 1691       | 1704     | AFTGRFLCNMTFLK          |           |         | Carbamidomethyl (C)[8], Oxidation (M)[10] |      | Mascot      |
| 1948.0096  | 1947.8925   | -0.1171 | -60   | 2          | 19       | SFVPTSPSTVVDQTTLMK      |           |         |                                           |      | Mascot      |
| 1964.0045  | 1963.8793   | -0.1252 | -64   | 2          | 19       | SFVPTSPSTVVDQTTLMK      |           |         | Oxidation (M)[17]                         |      | Mascot      |
| 1980.1099  | 1979.876    | -0.2339 | -118  | 3022       | 3038     | IHTIPTVPIVDCFQKIR       |           |         |                                           |      | Mascot      |
| 1980.1099  | 1979.876    | -0.2339 | -118  | 3022       | 3038     | IHTIPTVPIVDCFQKIR       |           |         |                                           |      | Mascot      |
| 2046.0801  | 2045.9739   | -0.1062 | -52   | 1356       | 1374     | IAALNALAACNYLPQSRE<br>K |           |         |                                           |      | Mascot      |
| 2197.0229  | 2197.0498   | 0.0269  | 12    | 2796       | 2813     | CSKELNQWEPLTEYGQS<br>K  |           |         | Carbamidomethyl (C)[1]                    |      | Mascot      |
| 2197.0229  | 2197.0498   | 0.0269  | 12    | 2796       | 2813     | CSKELNQWEPLTEYGQS<br>K  |           |         | Carbamidomethyl (C)[1]                    |      | Mascot      |
| 2211.0745  | 2211.0813   | 0.0068  | 3     | 1075       | 1094     | GMDPLVLIDAIACMAYEE<br>K |           |         | Oxidation (M)[2]                          |      | Mascot      |
| 2213.0703  | 2213.075    | 0.0047  | 2     | 3128       | 3146     | DRQPHLGVSITCYLHAC<br>R  |           |         | Carbamidomethyl (C)[13]                   |      | Mascot      |
| 2213.0703  | 2213.075    | 0.0047  | 2     | 3128       | 3146     | DRQPHLGVSITCYLHAC<br>R  |           |         | Carbamidomethyl (C)[13]                   |      | Mascot      |
| 2230.0769  | 2230.1218   | 0.0449  | 20    | 1323       | 1341     | VFYTELLNLCEAEDAALM<br>K |           |         | Carbamidomethyl (C)[10]                   |      | Mascot      |
| 2249.2322  | 2249.0403   | -0.1919 | -85   | 2579       | 2599     | TGALLNALVQLCHISTPLA     |           |         | Carbamidomethyl (C)[12]                   |      | Mascot      |

|   |                                                                             |                     |             |         |       |            |                                                    |                                             |                           |       |                                          |   |      |        |        |
|---|-----------------------------------------------------------------------------|---------------------|-------------|---------|-------|------------|----------------------------------------------------|---------------------------------------------|---------------------------|-------|------------------------------------------|---|------|--------|--------|
|   |                                                                             | 2283.0981           | 2283.1528   | 0.0547  | 24    | 3617       | 3634                                               | EK<br>EWALHTFPNATDYWTFR<br>K                |                           |       |                                          |   |      |        | Mascot |
|   |                                                                             | 2284.1384           | 2284.1531   | 0.0147  | 6     | 1175       | 1196                                               | ALLFVMMDLTGEVSNGA<br>VAMAK                  | Oxidation (M)[6]          |       |                                          |   |      |        | Mascot |
|   |                                                                             | 2297.0537           | 2297.166    | 0.1123  | 49    | 1696       | 1713                                               | FLCNMTFLKEYMEEEIPK                          | Oxidation (M)[5, 12]      |       |                                          |   |      |        | Mascot |
|   |                                                                             | 2340.2156           | 2340.0396   | -0.176  | -75   | 901        | 921                                                | LLYVVTEVQGPSIAEFT<br>DCK                    |                           |       |                                          |   |      |        | Mascot |
|   |                                                                             | 2367.2312           | 2367.2341   | 0.0029  | 1     | 1844       | 1864                                               | TCVDPACKYSGHLLLAHII<br>AK                   | Carbamidomethyl (C)[2, 7] |       |                                          |   |      |        | Mascot |
|   |                                                                             | 2369.0874           | 2368.9788   | -0.1086 | -46   | 2616       | 2637                                               | QQHALSGEMGPFLCSGS<br>HQAQR                  |                           |       |                                          |   |      |        | Mascot |
|   |                                                                             | 2584.2395           | 2584.1792   | -0.0603 | -23   | 1288       | 1310                                               | HQPANAQIGLMEGNTFC<br>TTLQPR                 | Carbamidomethyl (C)[17]   |       |                                          |   |      |        | Mascot |
|   |                                                                             | 3985.918            | 3985.8918   | -0.0262 | -7    | 1288       | 1322                                               | HQPANAQIGLMEGNTFC<br>TTLQPRLFTMDLNVMEH<br>K |                           |       |                                          |   |      |        | Mascot |
| 5 | calpain 5 [Danio rerio]                                                     |                     |             |         |       |            | gij 121583966                                      | 72751.2                                     | 6.28                      | 11    | 40                                       | 0 |      |        |        |
|   |                                                                             | Peptide Information |             |         |       |            |                                                    |                                             |                           |       |                                          |   |      |        |        |
|   |                                                                             | Calc. Mass          | Obsrv. Mass | ± da    | ± ppm | Start Seq. | End Sequence Seq.                                  |                                             | Ion Score                 | C. I. | % Modification                           |   | Rank | Result | Type   |
|   |                                                                             | 865.5366            | 865.4321    | -0.1045 | -121  | 218        | 224 VLKVHNR                                        |                                             |                           |       |                                          |   |      |        | Mascot |
|   |                                                                             | 865.5366            | 865.4321    | -0.1045 | -121  | 218        | 224 VLKVHNR                                        |                                             |                           |       |                                          |   |      |        | Mascot |
|   |                                                                             | 1062.6055           | 1062.6783   | 0.0728  | 69    | 428        | 435 VELNRIYR                                       |                                             |                           |       |                                          |   |      |        | Mascot |
|   |                                                                             | 1109.4891           | 1109.4812   | -0.0079 | -7    | 234        | 243 ATTQADMEAR                                     |                                             |                           |       | Oxidation (M)[7]                         |   |      |        | Mascot |
|   |                                                                             | 1411.7587           | 1411.6357   | -0.123  | -87   | 221        | 233 VHNRGGLISCSIR                                  |                                             |                           |       |                                          |   |      |        | Mascot |
|   |                                                                             | 1411.7587           | 1411.6357   | -0.123  | -87   | 221        | 233 VHNRGGLISCSIR                                  |                                             |                           |       |                                          |   |      |        | Mascot |
|   |                                                                             | 1558.7537           | 1558.7402   | -0.0135 | -9    | 100        | 111 VIPDWKDQEWDK                                   |                                             |                           |       |                                          |   |      |        | Mascot |
|   |                                                                             | 1638.6819           | 1638.8412   | 0.1593  | 97    | 290        | 303 GWNGAWSDSSEEWK                                 |                                             |                           |       |                                          |   |      |        | Mascot |
|   |                                                                             | 1979.9637           | 1979.876    | -0.0877 | -44   | 225        | 243 GGLISCSIRATTQADMEA<br>R                        |                                             |                           |       |                                          |   |      |        | Mascot |
|   |                                                                             | 1979.9637           | 1979.876    | -0.0877 | -44   | 225        | 243 GGLISCSIRATTQADMEA<br>R                        |                                             |                           |       |                                          |   |      |        | Mascot |
|   |                                                                             | 2367.1152           | 2367.2341   | 0.1189  | 50    | 106        | 124 DQEWDKNKPESYAGIFH<br>FR                        |                                             |                           |       |                                          |   |      |        | Mascot |
|   |                                                                             | 2383.9734           | 2383.9229   | -0.0505 | -21   | 313        | 332 LGVTVEDDGEFWMDFDD<br>FCK                       |                                             |                           |       | Oxidation (M)[13]                        |   |      |        | Mascot |
|   |                                                                             | 3515.7798           | 3515.7007   | -0.0791 | -22   | 584        | 614 NLLSDSFMGQVTNLNGDL<br>SDLQLHLTRLQDK            |                                             |                           |       | Oxidation (M)[8]                         |   |      |        | Mascot |
|   |                                                                             | 3984.7644           | 3984.9224   | 0.158   | 40    | 166        | 203 AYAKMCGCYEALDGGNT<br>ADALVDFTGGVSEPMDL<br>LEGK |                                             |                           |       | Carbamidomethyl (C)[6], Oxidation (M)[5] |   |      |        | Mascot |
| 6 | novel protein similar to vertebrate aldehyde oxidase 1 (AOX1) [Danio rerio] |                     |             |         |       |            | gij 148725253                                      | 144958.2                                    | 6.3                       | 14    | 40                                       | 0 | 9    | 0      |        |
|   |                                                                             | Peptide Information |             |         |       |            |                                                    |                                             |                           |       |                                          |   |      |        |        |
|   |                                                                             | Calc. Mass          | Obsrv. Mass | ± da    | ± ppm | Start Seq. | End Sequence Seq.                                  |                                             | Ion Score                 | C. I. | % Modification                           |   | Rank | Result | Type   |

|   |                                           |           |         |     |              |      |                           |      |    |                                          |   |   |   |  |  |  |  |  |        |
|---|-------------------------------------------|-----------|---------|-----|--------------|------|---------------------------|------|----|------------------------------------------|---|---|---|--|--|--|--|--|--------|
|   | 842.4665                                  | 842.5003  | 0.0338  | 40  | 790          | 796  | VTCHVKR                   |      |    |                                          |   |   |   |  |  |  |  |  | Mascot |
|   | 865.4018                                  | 865.4321  | 0.0303  | 35  | 1299         | 1306 | ACLACATR                  |      |    |                                          |   |   |   |  |  |  |  |  | Mascot |
|   | 865.4018                                  | 865.4321  | 0.0303  | 35  | 1299         | 1306 | ACLACATR                  | 9    | 0  | Carbamidomethyl (C)[2]                   |   |   |   |  |  |  |  |  | Mascot |
|   | 996.6564                                  | 996.5855  | -0.0709 | -71 | 993          | 1001 | RGISIIPIK                 |      |    |                                          |   |   |   |  |  |  |  |  | Mascot |
|   | 1051.5684                                 | 1051.701  | 0.1326  | 126 | 708          | 715  | ESFFLPRR                  |      |    |                                          |   |   |   |  |  |  |  |  | Mascot |
|   | 1179.5615                                 | 1179.5869 | 0.0254  | 22  | 1108         | 1116 | GTWQNWIMK                 |      |    | Oxidation (M)[8]                         |   |   |   |  |  |  |  |  | Mascot |
|   | 1179.5615                                 | 1179.5869 | 0.0254  | 22  | 1108         | 1116 | GTWQNWIMK                 |      |    | Oxidation (M)[8]                         |   |   |   |  |  |  |  |  | Mascot |
|   | 1320.6212                                 | 1320.5663 | -0.0549 | -42 | 220          | 230  | MAEDKDQSIQR               |      |    |                                          |   |   |   |  |  |  |  |  | Mascot |
|   | 1395.6433                                 | 1395.6449 | 0.0016  | 1   | 225          | 235  | DQSIQRFCGER               |      |    | Carbamidomethyl (C)[8]                   |   |   |   |  |  |  |  |  | Mascot |
|   | 1395.6433                                 | 1395.6449 | 0.0016  | 1   | 225          | 235  | DQSIQRFCGER               |      |    | Carbamidomethyl (C)[8]                   |   |   |   |  |  |  |  |  | Mascot |
|   | 1558.7935                                 | 1558.7402 | -0.0533 | -34 | 23           | 35   | NPDPETMLLPYLR             |      |    |                                          |   |   |   |  |  |  |  |  | Mascot |
|   | 1664.8094                                 | 1664.8387 | 0.0293  | 18  | 828          | 842  | CVLGERGEDMLITGGR          |      |    | Oxidation (M)[9]                         |   |   |   |  |  |  |  |  | Mascot |
|   | 1664.8094                                 | 1664.8387 | 0.0293  | 18  | 828          | 842  | CVLGERGEDMLITGGR          |      |    | Oxidation (M)[9]                         |   |   |   |  |  |  |  |  | Mascot |
|   | 1721.8308                                 | 1721.8553 | 0.0245  | 14  | 828          | 842  | CVLGERGEDMLITGGR          |      |    | Carbamidomethyl (C)[1], Oxidation (M)[9] |   |   |   |  |  |  |  |  | Mascot |
|   | 1979.9603                                 | 1979.876  | -0.0843 | -43 | 1023         | 1042 | DGSVLVSHGGAEMGGG<br>LHTK  |      |    |                                          |   |   |   |  |  |  |  |  | Mascot |
|   | 1979.9603                                 | 1979.876  | -0.0843 | -43 | 1023         | 1042 | DGSVLVSHGGAEMGGG<br>LHTK  |      |    |                                          |   |   |   |  |  |  |  |  | Mascot |
|   | 2167.041                                  | 2167.0413 | 0.0003  | 0   | 252          | 271  | ADYPQAPLVMGNTTIGLD<br>MK  |      |    | Oxidation (M)[10,19]                     |   |   |   |  |  |  |  |  | Mascot |
|   | 2213.0247                                 | 2213.075  | 0.0503  | 23  | 296          | 316  | SEGVCVGAGCSMSDLKS<br>VLEK |      |    | Carbamidomethyl (C)[5,10]                |   |   |   |  |  |  |  |  | Mascot |
|   | 2213.0247                                 | 2213.075  | 0.0503  | 23  | 296          | 316  | SEGVCVGAGCSMSDLKS<br>VLEK |      |    | Carbamidomethyl (C)[5,10]                |   |   |   |  |  |  |  |  | Mascot |
|   | 2297.1516                                 | 2297.166  | 0.0144  | 6   | 533          | 552  | DVIQMEVPQEMQSAIQPL<br>PK  |      |    | Oxidation (M)[5]                         |   |   |   |  |  |  |  |  | Mascot |
|   | 2340.1792                                 | 2340.0396 | -0.1396 | -60 | 200          | 219  | DDLLPLDPSQDLIFPEL<br>MR   |      |    | Oxidation (M)[19]                        |   |   |   |  |  |  |  |  | Mascot |
| 7 | PREDICTED: aldehyde oxidase [Danio rerio] |           |         |     | gi 326678456 |      | 147462.5                  | 6.32 | 14 | 39                                       | 0 | 9 | 0 |  |  |  |  |  |        |

Peptide Information

| Calc. Mass | Obsrv. Mass | ± da    | ± ppm | Start Seq. | End Seq. | Sequence    | Ion Score | C. I. | % Modification         | Rank | Result Type |
|------------|-------------|---------|-------|------------|----------|-------------|-----------|-------|------------------------|------|-------------|
| 842.4665   | 842.5003    | 0.0338  | 40    | 791        | 797      | VTCHVKR     |           |       |                        |      | Mascot      |
| 865.4018   | 865.4321    | 0.0303  | 35    | 1306       | 1313     | ACLACATR    |           |       | Carbamidomethyl (C)[2] |      | Mascot      |
| 865.4018   | 865.4321    | 0.0303  | 35    | 1306       | 1313     | ACLACATR    | 9         | 0     | Carbamidomethyl (C)[2] |      | Mascot      |
| 996.6564   | 996.5855    | -0.0709 | -71   | 1000       | 1008     | RGISIIPIK   |           |       |                        |      | Mascot      |
| 1051.5684  | 1051.701    | 0.1326  | 126   | 709        | 716      | ESFFLPRR    |           |       |                        |      | Mascot      |
| 1179.5615  | 1179.5869   | 0.0254  | 22    | 1115       | 1123     | GTWQNWIMK   |           |       | Oxidation (M)[8]       |      | Mascot      |
| 1179.5615  | 1179.5869   | 0.0254  | 22    | 1115       | 1123     | GTWQNWIMK   |           |       | Oxidation (M)[8]       |      | Mascot      |
| 1320.6212  | 1320.5663   | -0.0549 | -42   | 221        | 231      | MAEDKDQSIQR |           |       |                        |      | Mascot      |
| 1395.6433  | 1395.6449   | 0.0016  | 1     | 226        | 236      | DQSIQRFCGER |           |       | Carbamidomethyl (C)[8] |      | Mascot      |



|  |           |           |         |     |      |      |                          |  |                                          |        |
|--|-----------|-----------|---------|-----|------|------|--------------------------|--|------------------------------------------|--------|
|  | 1395.6433 | 1395.6449 | 0.0016  | 1   | 226  | 236  | DQSIQRF CGER             |  | Carbamidomethyl (C)[8]                   | Mascot |
|  | 1558.7935 | 1558.7402 | -0.0533 | -34 | 23   | 35   | NPDPETMLLPYLR            |  |                                          | Mascot |
|  | 1664.8094 | 1664.8387 | 0.0293  | 18  | 829  | 843  | CVL RGEDMLITGGR          |  | Oxidation (M)[9]                         | Mascot |
|  | 1664.8094 | 1664.8387 | 0.0293  | 18  | 829  | 843  | CVL RGEDMLITGGR          |  | Oxidation (M)[9]                         | Mascot |
|  | 1721.8308 | 1721.8553 | 0.0245  | 14  | 829  | 843  | CVL RGEDMLITGGR          |  | Carbamidomethyl (C)[1], Oxidation (M)[9] | Mascot |
|  | 1979.9603 | 1979.876  | -0.0843 | -43 | 1030 | 1049 | DGSVLVSHGGAEMGQG<br>LHTK |  |                                          | Mascot |
|  | 1979.9603 | 1979.876  | -0.0843 | -43 | 1030 | 1049 | DGSVLVSHGGAEMGQG<br>LHTK |  |                                          | Mascot |
|  | 2167.041  | 2167.0413 | 0.0003  | 0   | 253  | 272  | ADYPQAPLVMGNTTIGLD<br>MK |  | Oxidation (M)[10,19]                     | Mascot |
|  | 2213.0247 | 2213.075  | 0.0503  | 23  | 297  | 317  | SEGVCVGAGCSMDLKS<br>VLEK |  | Carbamidomethyl (C)[5,10]                | Mascot |
|  | 2213.0247 | 2213.075  | 0.0503  | 23  | 297  | 317  | SEGVCVGAGCSMDLKS<br>VLEK |  | Carbamidomethyl (C)[5,10]                | Mascot |
|  | 2297.1516 | 2297.166  | 0.0144  | 6   | 534  | 553  | DVIQMEVPQEMQSAIQPL<br>PK |  | Oxidation (M)[5]                         | Mascot |
|  | 2340.1792 | 2340.0396 | -0.1396 | -60 | 201  | 220  | DDLPLDPSQDLIFPEL<br>MR   |  | Oxidation (M)[19]                        | Mascot |

8 PREDICTED: hypothetical protein LOC100003217 [Danio rerio] gi|326678765 31640.9 5.2 9 38 0

#### Peptide Information

| Calc. Mass | Obsrv. Mass | ± da    | ± ppm | Start Seq. | End Seq. | Sequence               | Ion Score | C. I. % | Modification                                    | Rank | Result | Type |
|------------|-------------|---------|-------|------------|----------|------------------------|-----------|---------|-------------------------------------------------|------|--------|------|
| 842.4114   | 842.5003    | 0.0889  | 106   | 78         | 84       | SREAHDK                |           |         |                                                 |      | Mascot |      |
| 941.6141   | 941.4741    | -0.14   | -149  | 4          | 11       | IQVNIKVK               |           |         |                                                 |      | Mascot |      |
| 1193.5289  | 1193.6022   | 0.0733  | 61    | 53         | 62       | LCQECGLDAK             |           |         | Carbamidomethyl (C)[2,5]                        |      | Mascot |      |
| 1277.6704  | 1277.696    | 0.0256  | 20    | 208        | 218      | LICEMARQIGK            |           |         | Oxidation (M)[5]                                |      | Mascot |      |
| 1475.7887  | 1475.741    | -0.0477 | -32   | 66         | 77       | TDLLLRLSEEMR           |           |         |                                                 |      | Mascot |      |
| 1493.6835  | 1493.7156   | 0.0321  | 21    | 53         | 65       | LCQECGLDAKGSR          |           |         | Carbamidomethyl (C)[2,5]                        |      | Mascot |      |
| 1838.9792  | 1838.9012   | -0.078  | -42   | 36         | 52       | VADATYSMSLTGVIRR       |           |         |                                                 |      | Mascot |      |
| 2210.9482  | 2211.0813   | 0.1331  | 60    | 196        | 214      | DMDSHIGNACMKLICEMAR    |           |         | Carbamidomethyl (C)[10], Oxidation (M)[2]       |      | Mascot |      |
| 2283.9646  | 2284.1531   | 0.1885  | 83    | 196        | 214      | DMDSHIGNACMKLICEMAR    |           |         | Carbamidomethyl (C)[10,15], Oxidation (M)[2,11] |      | Mascot |      |
| 2584.1628  | 2584.1792   | 0.0164  | 6     | 186        | 207      | EEFWSLGLLRDMDSHIGNACMK |           |         | Oxidation (M)[12,21]                            |      | Mascot |      |

9 Pbx2 [Danio rerio] gi|7861936 18895.6 9.08 6 37 0

#### Peptide Information

| Calc. Mass | Obsrv. Mass | ± da    | ± ppm | Start Seq. | End Seq. | Sequence   | Ion Score | C. I. % | Modification           | Rank | Result | Type |
|------------|-------------|---------|-------|------------|----------|------------|-----------|---------|------------------------|------|--------|------|
| 1051.5782  | 1051.701    | 0.1228  | 117   | 133        | 141      | FSSIQTQLK  |           |         |                        |      | Mascot |      |
| 1179.6442  | 1179.5869   | -0.0573 | -49   | 1          | 10       | ALFSVLCEIK |           |         | Carbamidomethyl (C)[7] |      | Mascot |      |

|    |                                                                       |           |         |     |              |         |                          |    |    |                                          |        |
|----|-----------------------------------------------------------------------|-----------|---------|-----|--------------|---------|--------------------------|----|----|------------------------------------------|--------|
|    | 1179.6732                                                             | 1179.5869 | -0.0863 | -73 | 132          | 141     | KFSSIQTQLK               | 10 | 0  |                                          | Mascot |
|    | 1323.6395                                                             | 1323.6616 | 0.0221  | 17  | 142          | 152     | QSTCEAVMILR              |    |    | Carbamidomethyl (C)[4], Oxidation (M)[8] | Mascot |
|    | 1493.7563                                                             | 1493.7156 | -0.0407 | -27 | 142          | 154     | QSTCEAVMILRSR            |    |    |                                          | Mascot |
|    | 2283.1836                                                             | 2283.1528 | -0.0308 | -13 | 133          | 152     | FSSIQTQLKQSTCEAVMI<br>LR |    |    |                                          | Mascot |
|    | 2299.1785                                                             | 2299.1587 | -0.0198 | -9  | 133          | 152     | FSSIQTQLKQSTCEAVMI<br>LR |    |    | Oxidation (M)[17]                        | Mascot |
|    | 2340.2051                                                             | 2340.0396 | -0.1655 | -71 | 133          | 152     | FSSIQTQLKQSTCEAVMI<br>LR |    |    | Carbamidomethyl (C)[13]                  | Mascot |
| 10 | pleckstrin homology domain-containing family G member 7 [Danio rerio] |           |         |     | gi 113681918 | 49035.5 | 6.76                     | 9  | 37 | 0                                        |        |

#### Peptide Information

| Calc. Mass | Obsrv. Mass | ± da    | ± ppm | Start Seq. | End Seq. | Sequence                | Ion Score | C. I. % | Modification           | Rank | Result Type |
|------------|-------------|---------|-------|------------|----------|-------------------------|-----------|---------|------------------------|------|-------------|
| 1165.6034  | 1165.5758   | -0.0276 | -24   | 1          | 10       | MSLVDFLQGR              |           |         |                        |      | Mascot      |
| 1165.6034  | 1165.7302   | 0.1268  | 109   | 1          | 10       | MSLVDFLQGR              |           |         |                        |      | Mascot      |
| 1193.6313  | 1193.6022   | -0.0291 | -24   | 219        | 227      | WLDNYQKVK               |           |         |                        |      | Mascot      |
| 1320.6001  | 1320.5663   | -0.0338 | -26   | 61         | 70       | QCLQDIDSWR              |           |         | Carbamidomethyl (C)[2] |      | Mascot      |
| 1365.6289  | 1365.6262   | -0.0027 | -2    | 115        | 126      | AFSESICHCLQK            |           |         |                        |      | Mascot      |
| 1493.7239  | 1493.7156   | -0.0083 | -6    | 114        | 126      | KAFSESICHCLQK           |           |         |                        |      | Mascot      |
| 1638.8519  | 1638.8412   | -0.0107 | -7    | 1          | 14       | MSLVDFLQGRSELK          |           |         | Oxidation (M)[1]       |      | Mascot      |
| 1707.8986  | 1707.7494   | -0.1492 | -87   | 387        | 401      | AWMSEIEKAVSSLLK         |           |         | Oxidation (M)[3]       |      | Mascot      |
| 2183.1528  | 2183.0308   | -0.122  | -56   | 368        | 386      | YQQCIAVFVLQAQSESIK<br>K |           |         |                        |      | Mascot      |
| 2283.9646  | 2284.1531   | 0.1885  | 83    | 95         | 113      | EMWTDPDSCSTQSLHDL<br>FR |           |         | Oxidation (M)[2]       |      | Mascot      |

|    |                                                                              |  |  |  |              |          |      |    |    |   |  |
|----|------------------------------------------------------------------------------|--|--|--|--------------|----------|------|----|----|---|--|
| 11 | PREDICTED: transposon TX1 uncharacterized 149 kDa protein-like [Danio rerio] |  |  |  | gi 326674296 | 180436.7 | 7.83 | 21 | 36 | 0 |  |
|----|------------------------------------------------------------------------------|--|--|--|--------------|----------|------|----|----|---|--|

#### Peptide Information

| Calc. Mass | Obsrv. Mass | ± da    | ± ppm | Start Seq. | End Seq. | Sequence    | Ion Score | C. I. % | Modification             | Rank | Result Type |
|------------|-------------|---------|-------|------------|----------|-------------|-----------|---------|--------------------------|------|-------------|
| 850.4087   | 850.5319    | 0.1232  | 145   | 595        | 601      | DITQAMR     |           |         | Oxidation (M)[6]         |      | Mascot      |
| 996.493    | 996.5855    | 0.0925  | 93    | 564        | 571      | KQCFSDLR    |           |         |                          |      | Mascot      |
| 1045.5717  | 1045.5494   | -0.0223 | -21   | 662        | 669      | FFFSLEKK    |           |         |                          |      | Mascot      |
| 1062.5863  | 1062.6783   | 0.092   | 87    | 1313       | 1321     | DMELLKGLK   |           |         | Oxidation (M)[2]         |      | Mascot      |
| 1179.6455  | 1179.5869   | -0.0586 | -50   | 1218       | 1226     | VWRLFSLCR   |           |         |                          |      | Mascot      |
| 1179.6844  | 1179.5869   | -0.0975 | -83   | 855        | 864      | SILDNVHLIR  |           |         |                          |      | Mascot      |
| 1193.6711  | 1193.6022   | -0.0689 | -58   | 306        | 314      | RMQLYELIK   |           |         |                          |      | Mascot      |
| 1302.7239  | 1302.7031   | -0.0208 | -16   | 307        | 316      | MQLYELIKHK  |           |         |                          |      | Mascot      |
| 1320.5571  | 1320.5663   | 0.0092  | 7     | 87         | 97       | CFGCGQEGHLR |           |         | Carbamidomethyl (C)[1,4] |      | Mascot      |

|           |           |         |      |      |      |                            |  |  |                                           |  |  |  |        |
|-----------|-----------|---------|------|------|------|----------------------------|--|--|-------------------------------------------|--|--|--|--------|
| 1395.6573 | 1395.6449 | -0.0124 | -9   | 650  | 661  | YQNLQMDAPSK                |  |  |                                           |  |  |  | Mascot |
| 1395.6573 | 1395.6449 | -0.0124 | -9   | 650  | 661  | YQNLQMDAPSK                |  |  |                                           |  |  |  | Mascot |
| 1411.6522 | 1411.6357 | -0.0165 | -12  | 650  | 661  | YQNLQMDAPSK                |  |  | Oxidation (M)[7]                          |  |  |  | Mascot |
| 1411.6522 | 1411.6357 | -0.0165 | -12  | 650  | 661  | YQNLQMDAPSK                |  |  | Oxidation (M)[7]                          |  |  |  | Mascot |
| 1475.71   | 1475.741  | 0.031   | 21   | 583  | 594  | LFCQQYAFNVSR               |  |  |                                           |  |  |  | Mascot |
| 1541.7417 | 1541.7236 | -0.0181 | -12  | 1028 | 1040 | WEEGLPELPGQMR              |  |  |                                           |  |  |  | Mascot |
| 1638.7904 | 1638.8412 | 0.0508  | 31   | 648  | 661  | SRYQNLQMDAPSK              |  |  |                                           |  |  |  | Mascot |
| 1707.775  | 1707.7494 | -0.0256 | -15  | 1357 | 1370 | DVNLTMQKGTMYK              |  |  | Oxidation (M)[6,7,12]                     |  |  |  | Mascot |
| 1838.8265 | 1838.9012 | 0.0747  | 41   | 71   | 86   | VDGYDYVVFASSETMR           |  |  |                                           |  |  |  | Mascot |
| 1994.0642 | 1993.9424 | -0.1218 | -61  | 276  | 291  | IVFVFCYTLFLMGVIR           |  |  | Carbamidomethyl (C)[6], Oxidation (M)[12] |  |  |  | Mascot |
| 1994.0642 | 1993.9424 | -0.1218 | -61  | 276  | 291  | IVFVFCYTLFLMGVIR           |  |  | Carbamidomethyl (C)[6], Oxidation (M)[12] |  |  |  | Mascot |
| 2197.322  | 2197.0498 | -0.2722 | -124 | 1500 | 1518 | WQLINFLVGQAALILTR          |  |  |                                           |  |  |  | Mascot |
| 2197.322  | 2197.0498 | -0.2722 | -124 | 1500 | 1518 | WQLINFLVGQAALILTR          |  |  |                                           |  |  |  | Mascot |
| 2230.1299 | 2230.1218 | -0.0081 | -4   | 1202 | 1220 | NICLNGLPSFYCGLFKVW<br>R    |  |  |                                           |  |  |  | Mascot |
| 2249.1885 | 2249.0403 | -0.1482 | -66  | 1271 | 1291 | HVVDVAGTELNNVDAVT<br>NLLR  |  |  |                                           |  |  |  | Mascot |
| 2297.25   | 2297.166  | -0.084  | -37  | 1422 | 1443 | ILHGIVAVNAFISVVNSSV<br>DDK |  |  |                                           |  |  |  | Mascot |
| 2384.2754 | 2383.9229 | -0.3525 | -148 | 806  | 825  | GNLQEIKNWRPVSLLCD<br>LK    |  |  | Carbamidomethyl (C)[16]                   |  |  |  | Mascot |

12 hypothetical protein LOC368754 [Danio rerio] gi|52627185 31749.8 9.91 7 35 0

#### Peptide Information

| Calc. Mass | Obsrv. Mass | ± da    | ± ppm | Start Seq. | End Seq. | Sequence                               | Ion Score | C. I. | % Modification                                | Rank | Result Type |
|------------|-------------|---------|-------|------------|----------|----------------------------------------|-----------|-------|-----------------------------------------------|------|-------------|
| 842.4492   | 842.5003    | 0.0511  | 61    | 249        | 255      | HHAGHRK                                |           |       |                                               |      | Mascot      |
| 1179.5826  | 1179.5869   | 0.0043  | 4     | 173        | 183      | AFSAAPQMTQK                            |           |       |                                               |      | Mascot      |
| 1179.5826  | 1179.5869   | 0.0043  | 4     | 173        | 183      | AFSAAPQMTQK                            | 8         |       | 0                                             |      | Mascot      |
| 1434.7335  | 1434.7539   | 0.0204  | 14    | 80         | 92       | FKNTGLQDTSPAR                          |           |       |                                               |      | Mascot      |
| 1558.6373  | 1558.7402   | 0.1029  | 66    | 45         | 58       | NGSRDTGYTCPECR                         |           |       |                                               |      | Mascot      |
| 1664.8424  | 1664.8387   | -0.0037 | -2    | 173        | 187      | AFSAAPQMTQKLESR                        |           |       |                                               |      | Mascot      |
| 1664.8424  | 1664.8387   | -0.0037 | -2    | 173        | 187      | AFSAAPQMTQKLESR                        |           |       |                                               |      | Mascot      |
| 2248.9209  | 2249.0403   | 0.1194  | 53    | 151        | 169      | TAPGVCSQFCASCDEA<br>WR                 |           |       | Carbamidomethyl (C)[6,10,13]                  |      | Mascot      |
| 3984.8018  | 3984.9224   | 0.1206  | 30    | 5          | 39       | SLEDLPFTCPICLDALK<br>DPVTIPCGHNYCMSCIK |           |       | Carbamidomethyl (C)[10,13], Oxidation (M)[31] |      | Mascot      |

13 PREDICTED: dynein beta chain, ciliary [Danio rerio] gi|292614668 513650.8 5.75 29 35 0

#### Peptide Information

| Calc. Mass | Obsrv. Mass | ± da | ± ppm | Start Seq. | End Seq. | Sequence | Ion Score | C. I. | % Modification | Rank | Result Type |
|------------|-------------|------|-------|------------|----------|----------|-----------|-------|----------------|------|-------------|
|------------|-------------|------|-------|------------|----------|----------|-----------|-------|----------------|------|-------------|

|           |           |         |      |      |      |                           |                                           |        |
|-----------|-----------|---------|------|------|------|---------------------------|-------------------------------------------|--------|
| 850.4087  | 850.5319  | 0.1232  | 145  | 781  | 787  | STCDLVR                   | Carbamidomethyl (C)[3]                    | Mascot |
| 865.4811  | 865.4321  | -0.049  | -57  | 3201 | 3208 | ASKVVMSK                  | Oxidation (M)[6]                          | Mascot |
| 865.4811  | 865.4321  | -0.049  | -57  | 3201 | 3208 | ASKVVMSK                  | Oxidation (M)[6]                          | Mascot |
| 1045.4983 | 1045.5494 | 0.0511  | 49   | 3641 | 3649 | HTAAEIEMK                 | Oxidation (M)[8]                          | Mascot |
| 1109.4602 | 1109.4812 | 0.021   | 19   | 389  | 397  | MELEEGMDR                 |                                           | Mascot |
| 1165.5704 | 1165.5758 | 0.0054  | 5    | 4254 | 4262 | MNMLINEIR                 | Oxidation (M)[1,3]                        | Mascot |
| 1165.5704 | 1165.7302 | 0.1598  | 137  | 4254 | 4262 | MNMLINEIR                 | Oxidation (M)[1,3]                        | Mascot |
| 1179.5385 | 1179.5869 | 0.0484  | 41   | 3818 | 3827 | KMVESECPEK                |                                           | Mascot |
| 1179.5385 | 1179.5869 | 0.0484  | 41   | 3818 | 3827 | KMVESECPEK                |                                           | Mascot |
| 1193.6525 | 1193.6022 | -0.0503 | -42  | 1578 | 1587 | ALAEYLETKR                |                                           | Mascot |
| 1277.6671 | 1277.696  | 0.0289  | 23   | 2654 | 2664 | MSQNFLPTAIR               |                                           | Mascot |
| 1320.694  | 1320.5663 | -0.1277 | -97  | 231  | 242  | LMGSVLQRDSAK              | Oxidation (M)[2]                          | Mascot |
| 1323.5812 | 1323.6616 | 0.0804  | 61   | 13   | 23   | SYDGQEPDKER               |                                           | Mascot |
| 1365.6024 | 1365.6262 | 0.0238  | 17   | 3819 | 3829 | MVESECPEKEK               | Carbamidomethyl (C)[6]                    | Mascot |
| 1395.8141 | 1395.6449 | -0.1692 | -121 | 1134 | 1145 | LVDIMSHLKAIR              |                                           | Mascot |
| 1395.8141 | 1395.6449 | -0.1692 | -121 | 1134 | 1145 | LVDIMSHLKAIR              |                                           | Mascot |
| 1411.809  | 1411.6357 | -0.1733 | -123 | 1134 | 1145 | LVDIMSHLKAIR              | Oxidation (M)[5]                          | Mascot |
| 1411.809  | 1411.6357 | -0.1733 | -123 | 1134 | 1145 | LVDIMSHLKAIR              | 4 0 Oxidation (M)[5]                      | Mascot |
| 1493.7781 | 1493.7156 | -0.0625 | -42  | 1148 | 1159 | QMSTEQLFRPLK              | Oxidation (M)[2]                          | Mascot |
| 1541.8434 | 1541.7236 | -0.1198 | -78  | 704  | 717  | NHNIPKAAVSLYSK            |                                           | Mascot |
| 1638.7574 | 1638.8412 | 0.0838  | 51   | 3440 | 3453 | MSTQNATILTNCER            | Carbamidomethyl (C)[12]                   | Mascot |
| 1664.7367 | 1664.8387 | 0.102   | 61   | 2053 | 2065 | EDRSCPEEQVLMR             | Carbamidomethyl (C)[5], Oxidation (M)[12] | Mascot |
| 1664.7367 | 1664.8387 | 0.102   | 61   | 2053 | 2065 | EDRSCPEEQVLMR             | Carbamidomethyl (C)[5], Oxidation (M)[12] | Mascot |
| 1774.9122 | 1774.8724 | -0.0398 | -22  | 2177 | 2192 | AVTTDELFGFLHPATR          |                                           | Mascot |
| 1917.9453 | 1917.8788 | -0.0665 | -35  | 1507 | 1522 | TWAHLQSIFTNSEDIR          |                                           | Mascot |
| 1948.1418 | 1947.8925 | -0.2493 | -128 | 3454 | 3469 | WPLLIDPQLQGIKWLK          |                                           | Mascot |
| 1994.0853 | 1993.9424 | -0.1429 | -72  | 1286 | 1302 | SDIILVKAVWDMVMFVK         |                                           | Mascot |
| 1994.0853 | 1993.9424 | -0.1429 | -72  | 1286 | 1302 | SDIILVKAVWDMVMFVK         |                                           | Mascot |
| 2183.0703 | 2183.0308 | -0.0395 | -18  | 2918 | 2935 | ALGLLDTRENCWNFFIDR        |                                           | Mascot |
| 2197.0811 | 2197.0498 | -0.0313 | -14  | 3231 | 3248 | VIKDEYLSDPEFNPEFVR        |                                           | Mascot |
| 2197.0811 | 2197.0498 | -0.0313 | -14  | 3231 | 3248 | VIKDEYLSDPEFNPEFVR        |                                           | Mascot |
| 2230.1536 | 2230.1218 | -0.0318 | -14  | 303  | 321  | VNYAVMEAEDIDLHLKTL<br>R   |                                           | Mascot |
| 2283.2375 | 2283.1528 | -0.0847 | -37  | 3279 | 3299 | LCLAQANADLVEAAEKLE<br>IIR |                                           | Mascot |
| 2297.1924 | 2297.166  | -0.0264 | -11  | 1264 | 1282 | LQQTANLFEVSFPDYKQL<br>R   |                                           | Mascot |
| 2340.259  | 2340.0396 | -0.2194 | -94  | 3279 | 3299 | LCLAQANADLVEAAEKLE<br>IIR | Carbamidomethyl (C)[2]                    | Mascot |

|    |                                                        |           |         |      |             |         |                                       |   |    |   |  |                  |  |        |
|----|--------------------------------------------------------|-----------|---------|------|-------------|---------|---------------------------------------|---|----|---|--|------------------|--|--------|
|    | 2367.1133                                              | 2367.2341 | 0.1208  | 51   | 1632        | 1652    | EEKDNGELDPQTTIALGM<br>YSR             |   |    |   |  |                  |  | Mascot |
|    | 2384.2332                                              | 2383.9229 | -0.3103 | -130 | 2654        | 2672    | MSQNFLPTAIRFHYIFNLR                   |   |    |   |  | Oxidation (M)[1] |  | Mascot |
|    | 2584.188                                               | 2584.1792 | -0.0088 | -3   | 1875        | 1896    | DLGRSLGIMVYVFNCS<br>QMDYK             |   |    |   |  | Oxidation (M)[9] |  | Mascot |
|    | 3498.6768                                              | 3498.668  | -0.0088 | -3   | 3407        | 3439    | VPIPMSEGS DPISMLTDD<br>ATIAKWNNGLPGDK |   |    |   |  |                  |  | Mascot |
| 14 | 28S ribosomal protein S16, mitochondrial [Danio rerio] |           |         |      | gi 54400562 | 14603.7 | 9.67                                  | 5 | 34 | 0 |  |                  |  |        |

#### Peptide Information

| Calc. Mass | Obsrv. Mass | ± da    | ± ppm | Start Seq. | End Seq. | Sequence                  | Ion Score | C. I. | % Modification         | Rank | Result Type |
|------------|-------------|---------|-------|------------|----------|---------------------------|-----------|-------|------------------------|------|-------------|
| 1165.6588  | 1165.5758   | -0.083  | -71   | 11         | 20       | KYHGGHVIR                 |           |       |                        |      | Mascot      |
| 1165.6588  | 1165.7302   | 0.0714  | 61    | 11         | 20       | KYHGGHVIR                 |           |       |                        |      | Mascot      |
| 1302.7603  | 1302.7031   | -0.0572 | -44   | 1          | 11       | MVHLSSFLLKK               |           |       |                        |      | Mascot      |
| 1918.048   | 1917.8788   | -0.1692 | -88   | 73         | 89       | IKHWIACGAHTTKPVAK         |           |       | Carbamidomethyl (C)[7] |      | Mascot      |
| 2213.1787  | 2213.075    | -0.1037 | -47   | 90         | 109      | LLGLAGFFPLHPMTITEA<br>ER  |           |       |                        |      | Mascot      |
| 2213.1787  | 2213.075    | -0.1037 | -47   | 90         | 109      | LLGLAGFFPLHPMTITEA<br>ER  |           |       |                        |      | Mascot      |
| 2369.2798  | 2368.9788   | -0.301  | -127  | 90         | 110      | LLGLAGFFPLHPMTITEA<br>ERR |           |       |                        |      | Mascot      |

|    |                                                            |  |  |  |              |         |      |   |    |   |  |  |  |  |
|----|------------------------------------------------------------|--|--|--|--------------|---------|------|---|----|---|--|--|--|--|
| 15 | PREDICTED: hypothetical protein LOC100537922 [Danio rerio] |  |  |  | gi 326672557 | 45363.9 | 4.94 | 8 | 33 | 0 |  |  |  |  |
|----|------------------------------------------------------------|--|--|--|--------------|---------|------|---|----|---|--|--|--|--|

#### Peptide Information

| Calc. Mass | Obsrv. Mass | ± da    | ± ppm | Start Seq. | End Seq. | Sequence                         | Ion Score | C. I. | % Modification           | Rank | Result Type |
|------------|-------------|---------|-------|------------|----------|----------------------------------|-----------|-------|--------------------------|------|-------------|
| 1193.7616  | 1193.6022   | -0.1594 | -134  | 121        | 132      | KPIGGASPLLK                      |           |       |                          |      | Mascot      |
| 1664.8147  | 1664.8387   | 0.024   | 14    | 173        | 186      | IKCFGCGNFGHLVR                   |           |       | Carbamidomethyl (C)[3,6] |      | Mascot      |
| 1664.8147  | 1664.8387   | 0.024   | 14    | 173        | 186      | IKCFGCGNFGHLVR                   |           |       | Carbamidomethyl (C)[3,6] |      | Mascot      |
| 1917.9844  | 1917.8788   | -0.1056 | -55   | 159        | 174      | VDDFDYVVFITTDKIK                 |           |       |                          |      | Mascot      |
| 1964.15    | 1963.8793   | -0.2707 | -138  | 71         | 89       | GIILEGVLTVMPLSLPSK               |           |       |                          |      | Mascot      |
| 1979.8785  | 1979.876    | -0.0025 | -1    | 175        | 191      | CFGCGNFGHLVRNCPNK                |           |       | Carbamidomethyl (C)[1,4] |      | Mascot      |
| 1980.1449  | 1979.876    | -0.2689 | -136  | 71         | 89       | GIILEGVLTVMPLSLPSK               |           |       | Oxidation (M)[12]        |      | Mascot      |
| 2183.0801  | 2183.0308   | -0.0493 | -23   | 140        | 158      | SVYMIVNNDADLDLALNF<br>R          |           |       |                          |      | Mascot      |
| 2225.1487  | 2225.0955   | -0.0532 | -24   | 362        | 380      | GVLVNEYFPDVEQFVDK<br>VK          |           |       |                          |      | Mascot      |
| 2225.1487  | 2225.0955   | -0.0532 | -24   | 362        | 380      | GVLVNEYFPDVEQFVDK<br>VK          |           |       |                          |      | Mascot      |
| 3338.4224  | 3338.7371   | 0.3147  | 94    | 314        | 343      | VDMEDESESDSELS<br>SSLTSLSQSEFSSR |           |       |                          |      | Mascot      |

|    |                                                                                                     |  |  |  |             |          |      |    |    |   |  |  |  |  |
|----|-----------------------------------------------------------------------------------------------------|--|--|--|-------------|----------|------|----|----|---|--|--|--|--|
| 16 | RecName: Full=Contactin-1a; AltName: Full=F3/F11/contactin; AltName: Full=Neural cell recognition m |  |  |  | gi 55976512 | 114263.1 | 6.25 | 13 | 33 | 0 |  |  |  |  |
|----|-----------------------------------------------------------------------------------------------------|--|--|--|-------------|----------|------|----|----|---|--|--|--|--|

| Peptide Information |                                                 |         |       |             |          |                                    |           |         |                         |      |             |
|---------------------|-------------------------------------------------|---------|-------|-------------|----------|------------------------------------|-----------|---------|-------------------------|------|-------------|
| Calc. Mass          | Obsrv. Mass                                     | ± da    | ± ppm | Start Seq.  | End Seq. | Sequence                           | Ion Score | C. I. % | Modification            | Rank | Result Type |
| 865.489             | 865.4321                                        | -0.0569 | -66   | 918         | 925      | SPPSRPPK                           |           |         |                         |      | Mascot      |
| 865.489             | 865.4321                                        | -0.0569 | -66   | 918         | 925      | SPPSRPPK                           |           |         |                         |      | Mascot      |
| 1045.5173           | 1045.5494                                       | 0.0321  | 31    | 562         | 569      | DAQHYQRK                           |           |         |                         |      | Mascot      |
| 1062.5513           | 1062.6783                                       | 0.127   | 120   | 442         | 449      | VVFECRPR                           |           |         | Carbamidomethyl (C)[5]  |      | Mascot      |
| 1365.6857           | 1365.6262                                       | -0.0595 | -44   | 503         | 516      | ANSTGSL SITDATK                    |           |         |                         |      | Mascot      |
| 1434.7231           | 1434.7539                                       | 0.0308  | 21    | 1           | 12       | MIPEAFQPRAMK                       |           |         | Oxidation (M)[1]        |      | Mascot      |
| 1707.7683           | 1707.7494                                       | -0.0189 | -11   | 138         | 151      | VQFGYLD MFSTDER                    |           |         |                         |      | Mascot      |
| 2224.9749           | 2225.0955                                       | 0.1206  | 54    | 388         | 406      | FSRLGFEDSGMYQCVAE<br>NR            |           |         | Oxidation (M)[11]       |      | Mascot      |
| 2225.1772           | 2225.0955                                       | -0.0817 | -37   | 695         | 716      | VIATNTLTGTPPSEPSK<br>TTTR          |           |         |                         |      | Mascot      |
| 2230.0305           | 2230.1218                                       | 0.0913  | 41    | 114         | 134      | SKHAGNYTCVASNQYGS<br>VTSR          |           |         |                         |      | Mascot      |
| 2283.092            | 2283.1528                                       | 0.0608  | 27    | 594         | 614      | YSCTAQT PVDNTTASAE<br>VVR          |           |         | Carbamidomethyl (C)[3]  |      | Mascot      |
| 2284.2131           | 2284.1531                                       | -0.06   | -26   | 442         | 460      | VVFECRPR AAPRPNITW<br>SK           |           |         | Carbamidomethyl (C)[5]  |      | Mascot      |
| 2299.1426           | 2299.1587                                       | 0.0161  | 7     | 986         | 1007     | GEYLVEVRAHSEGGDGA<br>VAQVR         |           |         |                         |      | Mascot      |
| 3338.7102           | 3338.7371                                       | 0.0269  | 8     | 256         | 284      | SPDSWALLGQNVLTLECF<br>ALGNPIPIQRWR |           |         | Carbamidomethyl (C)[16] |      | Mascot      |
| 17                  | retinoic acid receptor RXR-beta-A [Danio rerio] |         |       | gi 24308520 |          | 48341.3                            | 7.53      | 8       | 32                      | 0    |             |

| Peptide Information |                                      |         |       |              |          |                                               |           |         |                                           |      |             |
|---------------------|--------------------------------------|---------|-------|--------------|----------|-----------------------------------------------|-----------|---------|-------------------------------------------|------|-------------|
| Calc. Mass          | Obsrv. Mass                          | ± da    | ± ppm | Start Seq.   | End Seq. | Sequence                                      | Ion Score | C. I. % | Modification                              | Rank | Result Type |
| 941.4365            | 941.4741                             | 0.0376  | 40    | 152          | 159      | CLAMGMKR                                      |           |         | Oxidation (M)[4,6]                        |      | Mascot      |
| 1234.683            | 1234.6652                            | -0.0178 | -14   | 237          | 246      | QLFTLVEWAK                                    |           |         |                                           |      | Mascot      |
| 1302.5242           | 1302.7031                            | 0.1789  | 137   | 103          | 113      | HYGVYSCEGCK                                   |           |         | Carbamidomethyl (C)[7]                    |      | Mascot      |
| 1323.6144           | 1323.6616                            | 0.0472  | 36    | 91           | 102      | LCAICGDRSSGK                                  |           |         | Carbamidomethyl (C)[2,5]                  |      | Mascot      |
| 1838.7988           | 1838.9012                            | 0.1024  | 56    | 103          | 117      | HYGVYSCEGCKGFFK                               |           |         | Carbamidomethyl (C)[7,10]                 |      | Mascot      |
| 2369.3074           | 2368.9788                            | -0.3286 | -139  | 348          | 369      | AIILFNPDAKGLSSPSEVE<br>LLR                    |           |         |                                           |      | Mascot      |
| 2501.2302           | 2501.2224                            | -0.0078 | -3    | 417          | 438      | LIGDTPIDTFLMEMLEAPH<br>QLT                    |           |         | Oxidation (M)[12]                         |      | Mascot      |
| 3985.8389           | 3985.8918                            | 0.0529  | 13    | 199          | 236      | ILEAEMAVEQKTELHADG<br>SSGGSSPNPVTNICQA<br>ADK |           |         | Carbamidomethyl (C)[33], Oxidation (M)[6] |      | Mascot      |
| 18                  | contactin-1a precursor [Danio rerio] |         |       | gi 136256388 |          | 114246.1                                      | 6.19      | 13      | 31                                        | 0    |             |

| Peptide Information |             |      |       |       |     |          |     |         |              |      |             |
|---------------------|-------------|------|-------|-------|-----|----------|-----|---------|--------------|------|-------------|
| Calc. Mass          | Obsrv. Mass | ± da | ± ppm | Start | End | Sequence | Ion | C. I. % | Modification | Rank | Result Type |

|    | Seq.                                               |           |         |     | Seq.        | Score |                            |                        |   |        |   |
|----|----------------------------------------------------|-----------|---------|-----|-------------|-------|----------------------------|------------------------|---|--------|---|
|    | 865.489                                            | 865.4321  | -0.0569 | -66 | 918         | 925   | SPPSRPPK                   |                        |   | Mascot |   |
|    | 865.489                                            | 865.4321  | -0.0569 | -66 | 918         | 925   | SPPSRPPK                   |                        |   | Mascot |   |
|    | 1045.5173                                          | 1045.5494 | 0.0321  | 31  | 562         | 569   | DAQHYQRK                   |                        |   | Mascot |   |
|    | 1062.5513                                          | 1062.6783 | 0.127   | 120 | 442         | 449   | VVFECRPR                   | Carbamidomethyl (C)[5] |   | Mascot |   |
|    | 1365.6857                                          | 1365.6262 | -0.0595 | -44 | 503         | 516   | ANSTGSL SITDATK            |                        |   | Mascot |   |
|    | 1434.7231                                          | 1434.7539 | 0.0308  | 21  | 1           | 12    | MIPEAFQPRAMK               | Oxidation (M)[1]       |   | Mascot |   |
|    | 1638.7581                                          | 1638.8412 | 0.0831  | 51  | 931         | 944   | MHYSGSSINIAWEK             | Oxidation (M)[1]       |   | Mascot |   |
|    | 1707.7683                                          | 1707.7494 | -0.0189 | -11 | 138         | 151   | VQFGYLD MFSTDER            |                        |   | Mascot |   |
|    | 2224.9749                                          | 2225.0955 | 0.1206  | 54  | 388         | 406   | FSRLGFEDSGMYQCVAE<br>NR    | Oxidation (M)[11]      |   | Mascot |   |
|    | 2225.1772                                          | 2225.0955 | -0.0817 | -37 | 695         | 716   | VIATNTLTGTPPSEPSK<br>TTTR  |                        |   | Mascot |   |
|    | 2230.0305                                          | 2230.1218 | 0.0913  | 41  | 114         | 134   | SKHAGNYTCVASNQYGS<br>VTSR  |                        |   | Mascot |   |
|    | 2283.092                                           | 2283.1528 | 0.0608  | 27  | 594         | 614   | YSCTAQT PVDNTTASAE<br>VVR  | Carbamidomethyl (C)[3] |   | Mascot |   |
|    | 2284.2131                                          | 2284.1531 | -0.06   | -26 | 442         | 460   | VVFECRPR AAPRPNITW<br>SK   | Carbamidomethyl (C)[5] |   | Mascot |   |
|    | 2299.1426                                          | 2299.1587 | 0.0161  | 7   | 986         | 1007  | GEYLVEVRAHSEGGDGA<br>VAQVR |                        |   | Mascot |   |
| 19 | gamma-soluble NSF attachment protein [Danio rerio] |           |         |     | gi 61806530 |       | 33925.8                    | 5.45                   | 8 | 31     | 0 |

Peptide Information

|    | Calc. Mass                                                 | Obsrv. Mass | ± da    | ± ppm | Start Seq.  | End Seq. | Sequence                    | Ion Score | C. I. | % Modification                            | Rank | Result Type |
|----|------------------------------------------------------------|-------------|---------|-------|-------------|----------|-----------------------------|-----------|-------|-------------------------------------------|------|-------------|
|    | 865.4413                                                   | 865.4321    | -0.0092 | -11   | 207         | 214      | ADYVAAQK                    |           |       |                                           |      | Mascot      |
|    | 865.4413                                                   | 865.4321    | -0.0092 | -11   | 207         | 214      | ADYVAAQK                    |           |       |                                           |      | Mascot      |
|    | 1045.5598                                                  | 1045.5494   | -0.0104 | -10   | 123         | 131      | LMEPLDLSK                   |           |       |                                           |      | Mascot      |
|    | 1277.5177                                                  | 1277.696    | 0.1783  | 140   | 185         | 194      | EMENYPTCYK                  |           |       |                                           |      | Mascot      |
|    | 1947.8939                                                  | 1947.8925   | -0.0014 | -1    | 252         | 267      | VCRSPLVTYMDNDYAK            |           |       | Carbamidomethyl (C)[2], Oxidation (M)[10] |      | Mascot      |
|    | 2183.1753                                                  | 2183.0308   | -0.1445 | -66   | 196         | 214      | CIAQVLVQLHRADYVAAQ<br>K     |           |       | Carbamidomethyl (C)[1]                    |      | Mascot      |
|    | 2225.022                                                   | 2225.0955   | 0.0735  | 33    | 21          | 39       | TSFMKWKPDYDSAASEY<br>AK     |           |       |                                           |      | Mascot      |
|    | 2225.022                                                   | 2225.0955   | 0.0735  | 33    | 21          | 39       | TSFMKWKPDYDSAASEY<br>AK     |           |       |                                           |      | Mascot      |
|    | 2299.1062                                                  | 2299.1587   | 0.0525  | 23    | 49          | 68       | QLEQAKDAYLQEAHA<br>NNR      |           |       |                                           |      | Mascot      |
|    | 2384.1221                                                  | 2383.9229   | -0.1992 | -84   | 100         | 122      | ASVMYVENGTPDTAAMA<br>LDRAGK |           |       | Oxidation (M)[4]                          |      | Mascot      |
| 20 | zinc finger CCHC domain-containing protein 9 [Danio rerio] |             |         |       | gi 38198649 | 28388.1  | 9.59                        | 7         | 31    | 0                                         |      |             |

Peptide Information

|  | Calc. Mass | Obsrv. Mass | ± da | ± ppm | Start | End | Sequence | Ion | C. I. % | Modification | Rank | Result Type |
|--|------------|-------------|------|-------|-------|-----|----------|-----|---------|--------------|------|-------------|
|--|------------|-------------|------|-------|-------|-----|----------|-----|---------|--------------|------|-------------|

| Seq. Seq. Score     |                                                                     |             |         |       |              |          |                                   |           |       |                                            |                  |
|---------------------|---------------------------------------------------------------------|-------------|---------|-------|--------------|----------|-----------------------------------|-----------|-------|--------------------------------------------|------------------|
|                     | 1475.6478                                                           | 1475.741    | 0.0932  | 63    | 147          | 158      | CGSTEHEIQRCR                      |           |       | Carbamidomethyl (C)[1]                     | Mascot           |
|                     | 1664.8966                                                           | 1664.8387   | -0.0579 | -35   | 81           | 95       | HTPVDLRGEVETALK                   |           |       |                                            | Mascot           |
|                     | 1664.8966                                                           | 1664.8387   | -0.0579 | -35   | 81           | 95       | HTPVDLRGEVETALK                   |           |       |                                            | Mascot           |
|                     | 1721.9293                                                           | 1721.8553   | -0.074  | -43   | 73           | 87       | QTGQTLQKHTPVDLR                   |           |       |                                            | Mascot           |
|                     | 1838.8014                                                           | 1838.9012   | 0.0998  | 54    | 58           | 72       | QHDNEDVNGFMEYLK                   |           |       |                                            | Mascot           |
|                     | 2196.9397                                                           | 2197.0498   | 0.1101  | 50    | 122          | 141      | KPGHGLADCPEANNDEE<br>MGR          |           |       | Carbamidomethyl (C)[9]                     | Mascot           |
|                     | 2196.9397                                                           | 2197.0498   | 0.1101  | 50    | 122          | 141      | KPGHGLADCPEANNDEE<br>MGR          |           |       | Carbamidomethyl (C)[9]                     | Mascot           |
|                     | 2212.9346                                                           | 2213.075    | 0.1404  | 63    | 122          | 141      | KPGHGLADCPEANNDEE<br>MGR          |           |       | Carbamidomethyl (C)[9], Oxidation (M)[18]  | Mascot           |
|                     | 2212.9346                                                           | 2213.075    | 0.1404  | 63    | 122          | 141      | KPGHGLADCPEANNDEE<br>MGR          |           |       | Carbamidomethyl (C)[9], Oxidation (M)[18]  | Mascot           |
|                     | 2299.0845                                                           | 2299.1587   | 0.0742  | 32    | 212          | 231      | DCPEHQNSTNSITLGRLS<br>NR          |           |       | Carbamidomethyl (C)[2]                     | Mascot           |
|                     | 3338.3862                                                           | 3338.7371   | 0.3509  | 105   | 113          | 141      | SNMICFNCRKPGHGLAD<br>CPEANNDEEMGR |           |       | Carbamidomethyl (C)[5,8], Oxidation (M)[3] | Mascot           |
| 21                  | pre-B-cell leukemia transcription factor 2 [Danio rerio]            |             |         |       | gi 18859217  | 44196.6  | 6.32                              | 7         | 31    | 0                                          |                  |
| Peptide Information |                                                                     |             |         |       |              |          |                                   |           |       |                                            |                  |
|                     | Calc. Mass                                                          | Obsrv. Mass | ± da    | ± ppm | Start Seq.   | End Seq. | Sequence                          | Ion Score | C. I. | % Modification                             | Rank Result Type |
|                     | 850.41                                                              | 850.5319    | 0.1219  | 143   | 85           | 91       | HALNCHR                           |           |       |                                            | Mascot           |
|                     | 1051.5782                                                           | 1051.701    | 0.1228  | 117   | 227          | 235      | FSSIQTQLK                         |           |       |                                            | Mascot           |
|                     | 1179.6732                                                           | 1179.5869   | -0.0863 | -73   | 226          | 235      | KFSSIQTQLK                        |           |       |                                            | Mascot           |
|                     | 1179.6732                                                           | 1179.5869   | -0.0863 | -73   | 226          | 235      | KFSSIQTQLK                        | 10        | 0     |                                            | Mascot           |
|                     | 1323.6395                                                           | 1323.6616   | 0.0221  | 17    | 236          | 246      | QSTCEAVMILR                       |           |       | Carbamidomethyl (C)[4], Oxidation (M)[8]   | Mascot           |
|                     | 1493.7563                                                           | 1493.7156   | -0.0407 | -27   | 236          | 248      | QSTCEAVMILRSR                     |           |       |                                            | Mascot           |
|                     | 2283.1836                                                           | 2283.1528   | -0.0308 | -13   | 227          | 246      | FSSIQTQLKQSTCEAVMI<br>LR          |           |       |                                            | Mascot           |
|                     | 2299.1785                                                           | 2299.1587   | -0.0198 | -9    | 227          | 246      | FSSIQTQLKQSTCEAVMI<br>LR          |           |       | Oxidation (M)[17]                          | Mascot           |
|                     | 2340.2051                                                           | 2340.0396   | -0.1655 | -71   | 227          | 246      | FSSIQTQLKQSTCEAVMI<br>LR          |           |       | Carbamidomethyl (C)[13]                    | Mascot           |
|                     | 2367.2246                                                           | 2367.2341   | 0.0095  | 4     | 85           | 104      | HALNCHRMKPALFSVLC<br>EIK          |           |       | Carbamidomethyl (C)[5]                     | Mascot           |
| 22                  | PREDICTED: hypothetical protein LOC100537788, partial [Danio rerio] |             |         |       | gi 326680782 | 28986.4  | 4.75                              | 7         | 30    | 0                                          |                  |
| Peptide Information |                                                                     |             |         |       |              |          |                                   |           |       |                                            |                  |
|                     | Calc. Mass                                                          | Obsrv. Mass | ± da    | ± ppm | Start Seq.   | End Seq. | Sequence                          | Ion Score | C. I. | % Modification                             | Rank Result Type |
|                     | 1193.5289                                                           | 1193.6022   | 0.0733  | 61    | 28           | 37       | LCQECGLDAK                        |           |       | Carbamidomethyl (C)[2,5]                   | Mascot           |
|                     | 1277.6704                                                           | 1277.696    | 0.0256  | 20    | 197          | 207      | LICEMARQIGK                       |           |       | Oxidation (M)[5]                           | Mascot           |



|    |                                                                    |           |         |     |     |              |                        |      |    |    |   |                                                 |  |  |  |  |        |
|----|--------------------------------------------------------------------|-----------|---------|-----|-----|--------------|------------------------|------|----|----|---|-------------------------------------------------|--|--|--|--|--------|
|    | 1475.7887                                                          | 1475.741  | -0.0477 | -32 | 41  | 52           | TDLLRLSEEMR            |      |    |    |   |                                                 |  |  |  |  | Mascot |
|    | 1493.6835                                                          | 1493.7156 | 0.0321  | 21  | 28  | 40           | LCQECGLDAKGSR          |      |    |    |   | Carbamidomethyl (C)[2,5]                        |  |  |  |  | Mascot |
|    | 1979.9708                                                          | 1979.876  | -0.0948 | -48 | 60  | 77           | VFEKIWAASGENPSSTEK     |      |    |    |   |                                                 |  |  |  |  | Mascot |
|    | 1979.9708                                                          | 1979.876  | -0.0948 | -48 | 60  | 77           | VFEKIWAASGENPSSTEK     |      |    |    |   |                                                 |  |  |  |  | Mascot |
|    | 2210.9482                                                          | 2211.0813 | 0.1331  | 60  | 185 | 203          | DMDSHIGNACMKLICEMAR    |      |    |    |   | Carbamidomethyl (C)[10], Oxidation (M)[2]       |  |  |  |  | Mascot |
|    | 2283.9646                                                          | 2284.1531 | 0.1885  | 83  | 185 | 203          | DMDSHIGNACMKLICEMAR    |      |    |    |   | Carbamidomethyl (C)[10,15], Oxidation (M)[2,11] |  |  |  |  | Mascot |
|    | 2584.1628                                                          | 2584.1792 | 0.0164  | 6   | 175 | 196          | EEFWSLGLLRDMDSHIGNACMK |      |    |    |   | Oxidation (M)[12,21]                            |  |  |  |  | Mascot |
| 23 | PREDICTED: LOW QUALITY PROTEIN: ryanodine receptor 2 [Danio rerio] |           |         |     |     | gi 189530774 | 552356.6               | 5.83 | 36 | 30 | 0 |                                                 |  |  |  |  |        |

Peptide Information

| Calc. Mass | Obsrv. Mass | ± da    | ± ppm | Start Seq. | End Seq. | Sequence          | Ion Score | C. I. | % | Modification           | Rank | Result Type |
|------------|-------------|---------|-------|------------|----------|-------------------|-----------|-------|---|------------------------|------|-------------|
| 996.5624   | 996.5855    | 0.0231  | 23    | 3510       | 3516     | LEIFYRR           |           |       |   |                        |      | Mascot      |
| 1045.5459  | 1045.5494   | 0.0035  | 3     | 75         | 83       | ALQEMLANR         |           |       |   |                        |      | Mascot      |
| 1051.5604  | 1051.701    | 0.1406  | 134   | 2440       | 2448     | AAMVLFLDR         |           |       |   | Oxidation (M)[3]       |      | Mascot      |
| 1062.5327  | 1062.6783   | 0.1456  | 137   | 1730       | 1738     | VERFPGSDR         |           |       |   |                        |      | Mascot      |
| 1109.599   | 1109.4812   | -0.1178 | -106  | 4108       | 4116     | QFIFDVVNK         |           |       |   |                        |      | Mascot      |
| 1165.567   | 1165.5758   | 0.0088  | 8     | 33         | 43       | LCLAAEGFGER       |           |       |   |                        |      | Mascot      |
| 1165.567   | 1165.7302   | 0.1632  | 140   | 33         | 43       | LCLAAEGFGER       |           |       |   |                        |      | Mascot      |
| 1179.6265  | 1179.5869   | -0.0396 | -34   | 2756       | 2765     | CMLVLGWTIK        |           |       |   | Oxidation (M)[2]       |      | Mascot      |
| 1179.6265  | 1179.5869   | -0.0396 | -34   | 2756       | 2765     | CMLVLGWTIK        |           |       |   | Oxidation (M)[2]       |      | Mascot      |
| 1277.6525  | 1277.696    | 0.0435  | 34    | 893        | 903      | IEQGWTYGPVK       |           |       |   |                        |      | Mascot      |
| 1302.7239  | 1302.7031   | -0.0208 | -16   | 908        | 918      | KVHLCCLVEFSK      |           |       |   |                        |      | Mascot      |
| 1320.6517  | 1320.5663   | -0.0854 | -65   | 2130       | 2139     | VFYQHNP LMR       |           |       |   | Oxidation (M)[9]       |      | Mascot      |
| 1323.7242  | 1323.6616   | -0.0626 | -47   | 3528       | 3537     | RPVWYKMLSK        |           |       |   | Oxidation (M)[7]       |      | Mascot      |
| 1365.6393  | 1365.6262   | -0.0131 | -10   | 3461       | 3471     | FAQRDTEDEV R      |           |       |   |                        |      | Mascot      |
| 1411.6014  | 1411.6357   | 0.0343  | 24    | 2110       | 2120     | MGKEEEECMIR       |           |       |   | Carbamidomethyl (C)[8] |      | Mascot      |
| 1411.754   | 1411.6357   | -0.1183 | -84   | 925        | 936      | IHTLQSS EDILR     |           |       |   |                        |      | Mascot      |
| 1558.7496  | 1558.7402   | -0.0094 | -6    | 3571       | 3583     | VWLKAENDSPEDR     |           |       |   |                        |      | Mascot      |
| 1638.8268  | 1638.8412   | 0.0144  | 9     | 621        | 634      | SNQHLCIDTLLPER    |           |       |   |                        |      | Mascot      |
| 1664.7948  | 1664.8387   | 0.0439  | 26    | 4256       | 4270     | DPTMVEAIGVQDAFR   |           |       |   | Oxidation (M)[4]       |      | Mascot      |
| 1664.7948  | 1664.8387   | 0.0439  | 26    | 4256       | 4270     | DPTMVEAIGVQDAFR   |           |       |   | Oxidation (M)[4]       |      | Mascot      |
| 1707.886   | 1707.7494   | -0.1366 | -80   | 1572       | 1584     | LCVQH LTHTRWTR    |           |       |   | Carbamidomethyl (C)[2] |      | Mascot      |
| 1774.8938  | 1774.8724   | -0.0214 | -12   | 2539       | 2554     | AQREAIQDC LLAVCGK |           |       |   | Carbamidomethyl (C)[9] |      | Mascot      |
| 1838.8     | 1838.9012   | 0.1012  | 55    | 1330       | 1345     | DPEDGEVD SDFELLMK |           |       |   |                        |      | Mascot      |

|           |           |         |     |      |      |                                      |                                               |  |  |  |  |        |
|-----------|-----------|---------|-----|------|------|--------------------------------------|-----------------------------------------------|--|--|--|--|--------|
| 1947.8943 | 1947.8925 | -0.0018 | -1  | 177  | 194  | YLHVSWTNGEGNDSGV<br>GR               |                                               |  |  |  |  | Mascot |
| 1979.8318 | 1979.876  | 0.0442  | 22  | 2168 | 2181 | MVAHCCRFLCYFCR                       | Carbamidomethyl (C)[5,6,10,13]                |  |  |  |  | Mascot |
| 1979.9716 | 1979.876  | -0.0956 | -48 | 828  | 843  | LELCHELTRNHTETQR                     |                                               |  |  |  |  | Mascot |
| 2166.9756 | 2167.0413 | 0.0657  | 30  | 3618 | 3635 | SKLEEDGLYMCYAEIMAK                   | Carbamidomethyl (C)[11], Oxidation (M)[10]    |  |  |  |  | Mascot |
| 2182.9705 | 2183.0308 | 0.0603  | 28  | 3618 | 3635 | SKLEEDGLYMCYAEIMAK                   | Carbamidomethyl (C)[11], Oxidation (M)[10,16] |  |  |  |  | Mascot |
| 2196.9246 | 2197.0498 | 0.1252  | 57  | 109  | 128  | HAYSDMYLCCLSTSGLS<br>SDK             | Oxidation (M)[6]                              |  |  |  |  | Mascot |
| 2197.0496 | 2197.0498 | 0.0002  | 0   | 3779 | 3796 | FLQLLCEGHNSDFQNYL<br>R               |                                               |  |  |  |  | Mascot |
| 2211.1018 | 2211.0813 | -0.0205 | -9  | 601  | 620  | NHKILDVLCSLCVCHGMA<br>VR             |                                               |  |  |  |  | Mascot |
| 2213.0259 | 2213.075  | 0.0491  | 22  | 3438 | 3458 | LLSVAMNGCCHGDQGLV<br>SHAK            | Carbamidomethyl (C)[9], Oxidation (M)[6]      |  |  |  |  | Mascot |
| 2213.0259 | 2213.075  | 0.0491  | 22  | 3438 | 3458 | LLSVAMNGCCHGDQGLV<br>SHAK            | Carbamidomethyl (C)[9], Oxidation (M)[6]      |  |  |  |  | Mascot |
| 2229.8894 | 2230.1218 | 0.2324  | 104 | 4721 | 4737 | CDDMLTCYMFHMYGVGR                    | Carbamidomethyl (C)[1,7], Oxidation (M)[4,9]  |  |  |  |  | Mascot |
| 2233.0884 | 2233.0615 | -0.0269 | -12 | 1898 | 1917 | VEAVISFSGDFVGHQLQED<br>QR            |                                               |  |  |  |  | Mascot |
| 2249.2024 | 2249.0403 | -0.1621 | -72 | 2517 | 2538 | SGPVDPELLQGVYLSKA<br>SGLTK           |                                               |  |  |  |  | Mascot |
| 2283.2324 | 2283.1528 | -0.0796 | -35 | 3360 | 3378 | LFSLVAEVFIFWAKSHNF<br>K              |                                               |  |  |  |  | Mascot |
| 2284.1182 | 2284.1531 | 0.0349  | 15  | 601  | 620  | NHKILDVLCSLCVCHGMA<br>VR             | Carbamidomethyl (C)[9], Oxidation (M)[17]     |  |  |  |  | Mascot |
| 2299.1499 | 2299.1587 | 0.0088  | 4   | 3472 | 3491 | AYIHSILQQDLGNSVDP<br>LR              | Carbamidomethyl (C)[12]                       |  |  |  |  | Mascot |
| 2367.2515 | 2367.2341 | -0.0174 | -7  | 1380 | 1400 | QELNTSHSSARLLEEVL<br>IEK             |                                               |  |  |  |  | Mascot |
| 2501.2944 | 2501.2224 | -0.072  | -29 | 3877 | 3897 | LWDAAVVGFLHVF AHMQM<br>KLSR          | Oxidation (M)[15]                             |  |  |  |  | Mascot |
| 3515.6643 | 3515.7007 | 0.0364  | 10  | 98   | 128  | TLLYGQAVLFRHAYS DM<br>YLCCLTSGLS SDK | Carbamidomethyl (C)[20], Oxidation (M)[17]    |  |  |  |  | Mascot |

24 PREDICTED: solute carrier family 15 member 5-like [Danio rerio] gi|125855224 64234.5 8.73 9 30 0

Peptide Information

| Calc. Mass | Obsrv. Mass | ± da    | ± ppm | Start Seq. | End Seq. | Sequence                 | Ion Score | C. I. % | Modification           | Rank | Result Type |
|------------|-------------|---------|-------|------------|----------|--------------------------|-----------|---------|------------------------|------|-------------|
| 941.379    | 941.4741    | 0.0951  | 101   | 264        | 270      | MCCLHYR                  |           |         | Oxidation (M)[1]       |      | Mascot      |
| 1365.6532  | 1365.6262   | -0.027  | -20   | 406        | 417      | DYPEVEQTLSGK             |           |         |                        |      | Mascot      |
| 1434.6504  | 1434.7539   | 0.1035  | 72    | 553        | 563      | TCLRFYDTMER              |           |         |                        |      | Mascot      |
| 1493.7482  | 1493.7156   | -0.0326 | -22   | 405        | 417      | KDYPEVEQTLSGK            |           |         |                        |      | Mascot      |
| 2045.9606  | 2045.9739   | 0.0133  | 7     | 167        | 184      | AILCPMAAYHLQSCDQPK       |           |         | Carbamidomethyl (C)[4] |      | Mascot      |
| 2183.0647  | 2183.0308   | -0.0339 | -16   | 285        | 304      | ENNGGCYSETSVENVKIL<br>VK |           |         |                        |      | Mascot      |
| 2233.1621  | 2233.0615   | -0.1006 | -45   | 1          | 19       | MLPIDVFDRPEHLLHGIC<br>K  |           |         |                        |      | Mascot      |
| 2249.157   | 2249.0403   | -0.1167 | -52   | 1          | 19       | MLPIDVFDRPEHLLHGIC<br>K  |           |         | Oxidation (M)[1]       |      | Mascot      |

|    |                             |           |         |     |              |     |                                      |      |   |    |   |                                                 |        |
|----|-----------------------------|-----------|---------|-----|--------------|-----|--------------------------------------|------|---|----|---|-------------------------------------------------|--------|
|    | 2284.1101                   | 2284.1531 | 0.043   | 19  | 317          | 336 | ACITQIPSGYYLQTMHSN<br>LK             |      |   |    |   | Oxidation (M)[15]                               | Mascot |
|    | 3986.0854                   | 3985.8918 | -0.1936 | -49 | 36           | 67  | LQVIICVLFVELFERFTFF<br>GIVCNMILFCTIK |      |   |    |   | Carbamidomethyl (C)[6,23,29], Oxidation (M)[25] | Mascot |
| 25 | ldh3a protein [Danio rerio] |           |         |     | gi 157423273 |     | 16736.4                              | 6.89 | 5 | 29 | 0 |                                                 |        |

Peptide Information

| Calc. Mass | Obsrv. Mass | ± da    | ± ppm | Start Seq. | End Seq. | Sequence           | Ion Score | C. I. | % Modification | Rank | Result | Type |
|------------|-------------|---------|-------|------------|----------|--------------------|-----------|-------|----------------|------|--------|------|
| 1109.5693  | 1109.4812   | -0.0881 | -79   | 7          | 17       | STVSCIMGAIK        |           |       |                |      | Mascot |      |
| 1411.6886  | 1411.6357   | -0.0529 | -37   | 118        | 129      | IETACFDTIRDK       |           |       |                |      | Mascot |      |
| 1411.6886  | 1411.6357   | -0.0529 | -37   | 118        | 129      | IETACFDTIRDK       |           |       |                |      | Mascot |      |
| 1707.8669  | 1707.7494   | -0.1175 | -69   | 2          | 17       | ANAWRSTVSCIMGAIK   |           |       |                |      | Mascot |      |
| 1838.9073  | 1838.9012   | -0.0061 | -3    | 1          | 17       | MANAWRSTVSCIMGAIK  |           |       |                |      | Mascot |      |
| 1917.9885  | 1917.8788   | -0.1097 | -57   | 7          | 24       | STVSCIMGAIKTQTPQPR |           |       |                |      | Mascot |      |

|    |                                        |  |  |  |             |  |         |      |   |    |   |  |  |
|----|----------------------------------------|--|--|--|-------------|--|---------|------|---|----|---|--|--|
| 26 | DNA repair protein XRCC3 [Danio rerio] |  |  |  | gi 61806653 |  | 38597.4 | 8.94 | 7 | 29 | 0 |  |  |
|----|----------------------------------------|--|--|--|-------------|--|---------|------|---|----|---|--|--|

Peptide Information

| Calc. Mass | Obsrv. Mass | ± da    | ± ppm | Start Seq. | End Seq. | Sequence                                      | Ion Score | C. I. | % Modification       | Rank | Result | Type |
|------------|-------------|---------|-------|------------|----------|-----------------------------------------------|-----------|-------|----------------------|------|--------|------|
| 941.4396   | 941.4741    | 0.0345  | 37    | 271        | 279      | CDYGLVGSK                                     |           |       |                      |      | Mascot |      |
| 1051.6007  | 1051.701    | 0.1003  | 95    | 49         | 58       | LHQAVAASVR                                    |           |       |                      |      | Mascot |      |
| 1179.6957  | 1179.5869   | -0.1088 | -92   | 49         | 59       | LHQAVAASVRK                                   |           |       |                      |      | Mascot |      |
| 1179.6957  | 1179.5869   | -0.1088 | -92   | 49         | 59       | LHQAVAASVRK                                   |           |       |                      |      | Mascot |      |
| 1277.7365  | 1277.696    | -0.0405 | -32   | 317        | 327      | LEVVFAPHLPR                                   |           |       |                      |      | Mascot |      |
| 1302.778   | 1302.7031   | -0.0749 | -57   | 209        | 220      | LLVDSVAALFR                                   |           |       |                      |      | Mascot |      |
| 2283.2827  | 2283.1528   | -0.1299 | -57   | 280        | 299      | VLPALGIWANQVMVRL<br>MLR                       |           |       | Oxidation (M)[14,18] |      | Mascot |      |
| 3985.05    | 3984.9224   | -0.1276 | -32   | 234        | 270      | HLLAFSSTLHRLSHTYAA<br>PVLGVNQVTDVVDGPNP<br>GR |           |       |                      |      | Mascot |      |

|    |                            |  |  |  |             |  |         |      |   |    |   |  |  |
|----|----------------------------|--|--|--|-------------|--|---------|------|---|----|---|--|--|
| 27 | Snd1 protein [Danio rerio] |  |  |  | gi 28839773 |  | 32151.3 | 8.24 | 7 | 29 | 0 |  |  |
|----|----------------------------|--|--|--|-------------|--|---------|------|---|----|---|--|--|

Peptide Information

| Calc. Mass | Obsrv. Mass | ± da    | ± ppm | Start Seq. | End Seq. | Sequence        | Ion Score | C. I. | % Modification                           | Rank | Result | Type |
|------------|-------------|---------|-------|------------|----------|-----------------|-----------|-------|------------------------------------------|------|--------|------|
| 1045.5459  | 1045.5494   | 0.0035  | 3     | 1          | 10       | MASAVPAQVR      |           |       | Oxidation (M)[1]                         |      | Mascot |      |
| 1193.6017  | 1193.6022   | 0.0005  | 0     | 235        | 244      | EGMVMVDIRK      |           |       | Oxidation (M)[3]                         |      | Mascot |      |
| 1234.6646  | 1234.6652   | 0.0006  | 0     | 26         | 36       | MVLSGCAIIVR     |           |       | Carbamidomethyl (C)[6], Oxidation (M)[1] |      | Mascot |      |
| 1558.9171  | 1558.7402   | -0.1769 | -113  | 22         | 36       | GIVKMVLSGCAIIVR |           |       |                                          |      | Mascot |      |
| 1664.806   | 1664.8387   | 0.0327  | 20    | 94         | 107      | EVCFTVENKTPQGR  |           |       | Carbamidomethyl (C)[3]                   |      | Mascot |      |

|    |                                                     |           |         |     |     |              |                           |      |   |    |   |    |   |  |  |                        |        |
|----|-----------------------------------------------------|-----------|---------|-----|-----|--------------|---------------------------|------|---|----|---|----|---|--|--|------------------------|--------|
|    | 1664.806                                            | 1664.8387 | 0.0327  | 20  | 94  | 107          | EVCFTVENKTPQGR            |      |   |    |   |    |   |  |  | Carbamidomethyl (C)[3] | Mascot |
|    | 1994.0129                                           | 1993.9424 | -0.0705 | -35 | 130 | 146          | VESPAKVHVFIIDYGNR         |      |   |    |   |    |   |  |  |                        | Mascot |
|    | 1994.0129                                           | 1993.9424 | -0.0705 | -35 | 130 | 146          | VESPAKVHVFIIDYGNR         |      |   |    |   |    |   |  |  |                        | Mascot |
|    | 2183.135                                            | 2183.0308 | -0.1042 | -48 | 1   | 21           | MASAVPAQVRSSQASAP<br>QLQR |      |   |    |   |    |   |  |  |                        | Mascot |
| 28 | PREDICTED: pappalysin-1-like, partial [Danio rerio] |           |         |     |     | gi 326668305 | 67040.5                   | 5.82 | 7 | 29 | 0 | 12 | 0 |  |  |                        |        |

#### Peptide Information

| Calc. Mass | Obsrv. Mass | ± da    | ± ppm | Start Seq. | End Seq. | Sequence                  | Ion Score | C. I. | % Modification               | Rank | Result Type |
|------------|-------------|---------|-------|------------|----------|---------------------------|-----------|-------|------------------------------|------|-------------|
| 865.3468   | 865.4321    | 0.0853  | 99    | 483        | 489      | QCTEDGR                   |           |       | Carbamidomethyl (C)[2]       |      | Mascot      |
| 865.3468   | 865.4321    | 0.0853  | 99    | 483        | 489      | QCTEDGR                   | 12        | 0     | Carbamidomethyl (C)[2]       |      | Mascot      |
| 1234.679   | 1234.6652   | -0.0138 | -11   | 256        | 267      | SEFVAISGVGLR              |           |       |                              |      | Mascot      |
| 1707.8127  | 1707.7494   | -0.0633 | -37   | 326        | 340      | CTVVCNCGYVLQIHR           |           |       |                              |      | Mascot      |
| 1721.8428  | 1721.8553   | 0.0125  | 7     | 554        | 568      | DGNWTGSFRLCPQLK           |           |       |                              |      | Mascot      |
| 1917.8833  | 1917.8788   | -0.0045 | -2    | 362        | 378      | WNKQVSCEPVDCGLPDK         |           |       |                              |      | Mascot      |
| 2183.0132  | 2183.0308   | 0.0176  | 8     | 341        | 360      | DDDIKSQTDSVTITCAD<br>R    |           |       |                              |      | Mascot      |
| 2584.0166  | 2584.1792   | 0.1626  | 63    | 44         | 66       | SLGEECDLNMNGDGC<br>SSHCKK |           |       | Carbamidomethyl (C)[6,17,21] |      | Mascot      |

|    |                       |  |  |  |  |            |         |      |   |    |   |  |  |  |  |  |  |
|----|-----------------------|--|--|--|--|------------|---------|------|---|----|---|--|--|--|--|--|--|
| 29 | annexin [Danio rerio] |  |  |  |  | gi 2760526 | 19821.2 | 5.63 | 5 | 29 | 0 |  |  |  |  |  |  |
|----|-----------------------|--|--|--|--|------------|---------|------|---|----|---|--|--|--|--|--|--|

#### Peptide Information

| Calc. Mass | Obsrv. Mass | ± da    | ± ppm | Start Seq. | End Seq. | Sequence                             | Ion Score | C. I. | % Modification    | Rank | Result Type |
|------------|-------------|---------|-------|------------|----------|--------------------------------------|-----------|-------|-------------------|------|-------------|
| 842.4042   | 842.5003    | 0.0961  | 114   | 70         | 75       | VFEETR                               |           |       |                   |      | Mascot      |
| 1411.7151  | 1411.6357   | -0.0794 | -56   | 105        | 116      | CARSVPLYFAER                         |           |       |                   |      | Mascot      |
| 1411.7151  | 1411.6357   | -0.0794 | -56   | 105        | 116      | CARSVPLYFAER                         |           |       |                   |      | Mascot      |
| 1541.9196  | 1541.7236   | -0.196  | -127  | 94         | 107      | SLQKILLAVVKCAR                       |           |       |                   |      | Mascot      |
| 1774.9196  | 1774.8724   | -0.0472 | -27   | 108        | 122      | SVPLYFAERLYAAMK                      |           |       | Oxidation (M)[14] |      | Mascot      |
| 3515.8413  | 3515.7007   | -0.1406 | -40   | 15         | 47       | MLVLLQASTQQGIQESL<br>IQSDAQALFAAGEQK |           |       |                   |      | Mascot      |

|    |                                                                |  |  |  |  |              |          |      |    |    |   |  |  |  |  |  |  |
|----|----------------------------------------------------------------|--|--|--|--|--------------|----------|------|----|----|---|--|--|--|--|--|--|
| 30 | PREDICTED: rho GTPase-activating protein 21-like [Danio rerio] |  |  |  |  | gi 326679516 | 203369.8 | 8.31 | 17 | 29 | 0 |  |  |  |  |  |  |
|----|----------------------------------------------------------------|--|--|--|--|--------------|----------|------|----|----|---|--|--|--|--|--|--|

#### Peptide Information

| Calc. Mass | Obsrv. Mass | ± da   | ± ppm | Start Seq. | End Seq. | Sequence | Ion Score | C. I. | % Modification | Rank | Result Type |
|------------|-------------|--------|-------|------------|----------|----------|-----------|-------|----------------|------|-------------|
| 850.4417   | 850.5319    | 0.0902 | 106   | 151        | 157      | VFSENVNR |           |       |                |      | Mascot      |
| 996.4971   | 996.5855    | 0.0884 | 89    | 867        | 874      | GHCLYLYK |           |       |                |      | Mascot      |
| 1045.5248  | 1045.5494   | 0.0246 | 24    | 298        | 305      | RLYMYGSR |           |       |                |      | Mascot      |

|           |           |         |     |      |      |                                     |                          |        |
|-----------|-----------|---------|-----|------|------|-------------------------------------|--------------------------|--------|
| 1193.5844 | 1193.6022 | 0.0178  | 15  | 1423 | 1432 | LSCSPGFNRR                          | Carbamidomethyl (C)[3]   | Mascot |
| 1234.6387 | 1234.6652 | 0.0265  | 21  | 328  | 339  | QKSASTTATPSR                        |                          | Mascot |
| 1434.6754 | 1434.7539 | 0.0785  | 55  | 367  | 380  | SASQERLGAECAR                       |                          | Mascot |
| 1475.6986 | 1475.741  | 0.0424  | 29  | 1003 | 1015 | ATSPHSPNKEHDR                       |                          | Mascot |
| 1541.7628 | 1541.7236 | -0.0392 | -25 | 898  | 910  | ACLIDISYSDTKR                       | Carbamidomethyl (C)[2]   | Mascot |
| 1638.9214 | 1638.8412 | -0.0802 | -49 | 1125 | 1138 | DLNVISSLLKSFFR                      |                          | Mascot |
| 1917.8945 | 1917.8788 | -0.0157 | -8  | 424  | 438  | ACCRTDTEEWLLVHK                     | Carbamidomethyl (C)[2,3] | Mascot |
| 1963.9906 | 1963.8793 | -0.1113 | -57 | 1413 | 1431 | TSSVLSPSPKLSCSPGFN<br>R             |                          | Mascot |
| 2045.9458 | 2045.9739 | 0.0281  | 14  | 1746 | 1762 | GDSQNMSIRDWIVSEHR                   | Oxidation (M)[6]         | Mascot |
| 2183.0825 | 2183.0308 | -0.0517 | -24 | 878  | 897  | DGQTNANSQIEEELPISI<br>K             |                          | Mascot |
| 2196.8994 | 2197.0498 | 0.1504  | 68  | 1219 | 1236 | TSEDNMTHMVTHMPDQY<br>K              | Oxidation (M)[6,9]       | Mascot |
| 2196.8994 | 2197.0498 | 0.1504  | 68  | 1219 | 1236 | TSEDNMTHMVTHMPDQY<br>K              | Oxidation (M)[6,9]       | Mascot |
| 2212.8945 | 2213.075  | 0.1805  | 82  | 1219 | 1236 | TSEDNMTHMVTHMPDQY<br>K              | Oxidation (M)[6,9,13]    | Mascot |
| 2212.8945 | 2213.075  | 0.1805  | 82  | 1219 | 1236 | TSEDNMTHMVTHMPDQY<br>K              | Oxidation (M)[6,9,13]    | Mascot |
| 2283.0723 | 2283.1528 | 0.0805  | 35  | 1707 | 1725 | HTMGQQRDFAELDVIHD<br>WR             |                          | Mascot |
| 2297.0137 | 2297.166  | 0.1523  | 66  | 1357 | 1376 | NNNPTQKQSHQSQEEDE<br>AGR            |                          | Mascot |
| 2299.0674 | 2299.1587 | 0.0913  | 40  | 1707 | 1725 | HTMGQQRDFAELDVIHD<br>WR             | Oxidation (M)[3]         | Mascot |
| 3338.5588 | 3338.7371 | 0.1783  | 53  | 1439 | 1470 | CSISDPSSQLDETTSDLG<br>TMSSGASVPTRPR |                          | Mascot |

31 PREDICTED: hypothetical protein LOC100330054 [Danio rerio] gi|326680669 21210.7 4.52 5 28 0

Peptide Information

| Calc. Mass | Obsrv. Mass | ± da    | ± ppm | Start Seq. | End Seq. | Sequence                             | Ion Score | C. I. % | Modification                                    | Rank | Result Type |
|------------|-------------|---------|-------|------------|----------|--------------------------------------|-----------|---------|-------------------------------------------------|------|-------------|
| 1277.6704  | 1277.696    | 0.0256  | 20    | 117        | 127      | LICEMARQIGK                          |           |         | Oxidation (M)[5]                                |      | Mascot      |
| 1838.9131  | 1838.9012   | -0.0119 | -6    | 142        | 158      | ETPNINIVNGLPEDADLK                   |           |         |                                                 |      | Mascot      |
| 2210.9482  | 2211.0813   | 0.1331  | 60    | 105        | 123      | DMDSHIGNACMKLICEMA<br>R              |           |         | Carbamidomethyl (C)[10], Oxidation (M)[2]       |      | Mascot      |
| 2283.9646  | 2284.1531   | 0.1885  | 83    | 105        | 123      | DMDSHIGNACMKLICEMA<br>R              |           |         | Carbamidomethyl (C)[10,15], Oxidation (M)[2,11] |      | Mascot      |
| 2584.1628  | 2584.1792   | 0.0164  | 6     | 95         | 116      | EEFWSLGLLRDMDSHIG<br>NACMK           |           |         | Oxidation (M)[12,21]                            |      | Mascot      |
| 3515.6399  | 3515.7007   | 0.0608  | 17    | 159        | 190      | DLLAFPAWTNANGPDHL<br>VVCENFLPSGSWDMV |           |         |                                                 |      | Mascot      |

32 PREDICTED: hypothetical protein LOC799338 [Danio rerio] gi|326667977 158597.6 6.54 14 28 0

Peptide Information

| Calc. Mass | Obsrv. Mass | ± da | ± ppm | Start | End | Sequence | Ion | C. I. % | Modification | Rank | Result Type |
|------------|-------------|------|-------|-------|-----|----------|-----|---------|--------------|------|-------------|
|------------|-------------|------|-------|-------|-----|----------|-----|---------|--------------|------|-------------|

|                     |                                         |             |         |       |             |          |                              |         |           |       |    | Seq.                   |  | Seq. |        | Score |        |  |                                          |        |  |
|---------------------|-----------------------------------------|-------------|---------|-------|-------------|----------|------------------------------|---------|-----------|-------|----|------------------------|--|------|--------|-------|--------|--|------------------------------------------|--------|--|
|                     | 941.593                                 | 941.4741    | -0.1189 | -126  | 478         | 485      | VALKFVHK                     |         |           |       |    |                        |  |      |        |       |        |  |                                          | Mascot |  |
|                     | 1165.5922                               | 1165.5758   | -0.0164 | -14   | 1081        | 1090     | FDDVMKPVAK                   |         |           |       |    |                        |  |      |        |       |        |  | Oxidation (M)[5]                         | Mascot |  |
|                     | 1165.5922                               | 1165.7302   | 0.138   | 118   | 1081        | 1090     | FDDVMKPVAK                   |         |           |       |    |                        |  |      |        |       |        |  | Oxidation (M)[5]                         | Mascot |  |
|                     | 1302.7012                               | 1302.7031   | 0.0019  | 1     | 941         | 951      | RVEDLSSDILR                  |         |           |       |    |                        |  |      |        |       |        |  |                                          | Mascot |  |
|                     | 1395.6475                               | 1395.6449   | -0.0026 | -2    | 1304        | 1314     | HQQCSLVDFYR                  |         |           |       |    |                        |  |      |        |       |        |  |                                          | Mascot |  |
|                     | 1395.6871                               | 1395.6449   | -0.0422 | -30   | 925         | 935      | KQEFMNVCLAR                  |         |           |       |    |                        |  |      |        |       |        |  | Carbamidomethyl (C)[8]                   | Mascot |  |
|                     | 1411.682                                | 1411.6357   | -0.0463 | -33   | 925         | 935      | KQEFMNVCLAR                  |         |           |       |    |                        |  |      |        |       |        |  | Carbamidomethyl (C)[8], Oxidation (M)[5] | Mascot |  |
|                     | 1411.682                                | 1411.6357   | -0.0463 | -33   | 925         | 935      | KQEFMNVCLAR                  | 4       |           | 0     |    |                        |  |      |        |       |        |  | Carbamidomethyl (C)[8], Oxidation (M)[5] | Mascot |  |
|                     | 1918.0756                               | 1917.8788   | -0.1968 | -103  | 584         | 600      | AVHEDNILVNPCTLQVK            |         |           |       |    |                        |  |      |        |       |        |  |                                          | Mascot |  |
|                     | 2167.0522                               | 2167.0413   | -0.0109 | -5    | 1287        | 1303     | LQLELIELQCDYECRGK            |         |           |       |    |                        |  |      |        |       |        |  | Carbamidomethyl (C)[10,14]               | Mascot |  |
|                     | 2182.8828                               | 2183.0308   | 0.148   | 68    | 348         | 367      | CEPTQFPDDSEEPSTSS<br>GGR     |         |           |       |    |                        |  |      |        |       |        |  | Carbamidomethyl (C)[1]                   | Mascot |  |
|                     | 2197.1545                               | 2197.0498   | -0.1047 | -48   | 636         | 655      | VCGIRPVHFALEENVTSV<br>AR     |         |           |       |    |                        |  |      |        |       |        |  |                                          | Mascot |  |
|                     | 2197.1545                               | 2197.0498   | -0.1047 | -48   | 636         | 655      | VCGIRPVHFALEENVTSV<br>AR     |         |           |       |    |                        |  |      |        |       |        |  |                                          | Mascot |  |
|                     | 2213.0576                               | 2213.075    | 0.0174  | 8     | 1004        | 1023     | GLTRGTDLFVSVCEAVD<br>DMK     |         |           |       |    |                        |  |      |        |       |        |  | Carbamidomethyl (C)[13]                  | Mascot |  |
|                     | 2213.0576                               | 2213.075    | 0.0174  | 8     | 1004        | 1023     | GLTRGTDLFVSVCEAVD<br>DMK     |         |           |       |    |                        |  |      |        |       |        |  | Carbamidomethyl (C)[13]                  | Mascot |  |
|                     | 2296.9807                               | 2297.166    | 0.1853  | 81    | 13          | 33       | GETSNCSRPEAENTSSG<br>SRDR    |         |           |       |    |                        |  |      |        |       |        |  | Carbamidomethyl (C)[6]                   | Mascot |  |
|                     | 2298.8875                               | 2299.1587   | 0.2712  | 118   | 180         | 199      | CEPSQFPDDNEEPSTSS<br>GCR     |         |           |       |    |                        |  |      |        |       |        |  | Carbamidomethyl (C)[1,19]                | Mascot |  |
|                     | 2340.125                                | 2340.0396   | -0.0854 | -36   | 1008        | 1028     | GTDLFVSVCEAVDDMKL<br>PWSK    |         |           |       |    |                        |  |      |        |       |        |  |                                          | Mascot |  |
|                     | 2584.0386                               | 2584.1792   | 0.1406  | 54    | 705         | 727      | SCQSPLEEPHSMDMYCDN<br>LSDTGR |         |           |       |    |                        |  |      |        |       |        |  |                                          | Mascot |  |
| 33                  | matrilin-3b [Danio rerio]               |             |         |       | gi 56797994 |          |                              | 38102   | 8.23      | 7     | 28 | 0                      |  |      |        |       |        |  |                                          |        |  |
| Peptide Information |                                         |             |         |       |             |          |                              |         |           |       |    |                        |  |      |        |       |        |  |                                          |        |  |
|                     | Calc. Mass                              | Obsrv. Mass | ± da    | ± ppm | Start Seq.  | End Seq. | Sequence                     |         | Ion Score | C. I. | %  | Modification           |  | Rank | Result | Type  |        |  |                                          |        |  |
|                     | 850.4451                                | 850.5319    | 0.0868  | 102   | 211         | 217      | AEMRSLK                      |         |           |       |    | Oxidation (M)[3]       |  |      |        |       | Mascot |  |                                          |        |  |
|                     | 1062.5579                               | 1062.6783   | 0.1204  | 113   | 79          | 87       | SVRPAEF EK                   |         |           |       |    |                        |  |      |        |       | Mascot |  |                                          |        |  |
|                     | 1323.5957                               | 1323.6616   | 0.0659  | 50    | 287         | 297      | TCSKQTNEEAR                  |         |           |       |    | Carbamidomethyl (C)[2] |  |      |        |       | Mascot |  |                                          |        |  |
|                     | 1411.7903                               | 1411.6357   | -0.1546 | -110  | 176         | 188      | VAIIVTDGRPQDK                |         |           |       |    |                        |  |      |        |       | Mascot |  |                                          |        |  |
|                     | 1411.7903                               | 1411.6357   | -0.1546 | -110  | 176         | 188      | VAIIVTDGRPQDK                |         |           |       |    |                        |  |      |        |       | Mascot |  |                                          |        |  |
|                     | 1918.0432                               | 1917.8788   | -0.1644 | -86   | 108         | 124      | VALVNYASTVNIEFHLK            |         |           |       |    |                        |  |      |        |       | Mascot |  |                                          |        |  |
|                     | 2046.1382                               | 2045.9739   | -0.1643 | -80   | 108         | 125      | VALVNYASTVNIEFHLKK           |         |           |       |    |                        |  |      |        |       | Mascot |  |                                          |        |  |
|                     | 2211.1326                               | 2211.0813   | -0.0513 | -23   | 88          | 107      | VKIFLSEMVNSLDIGSDAT<br>R     |         |           |       |    | Oxidation (M)[8]       |  |      |        |       | Mascot |  |                                          |        |  |
| 34                  | fermitin family homolog 1 [Danio rerio] |             |         |       | gi 82658266 |          |                              | 52137.6 | 8.67      | 9     | 28 | 0                      |  |      |        |       |        |  |                                          |        |  |

| Peptide Information |                                 |          |           |              |          |                                   |           |       |    |                        |                  |
|---------------------|---------------------------------|----------|-----------|--------------|----------|-----------------------------------|-----------|-------|----|------------------------|------------------|
| Calc. Mass          | Obsrv. Mass                     | $\pm$ da | $\pm$ ppm | Start Seq.   | End Seq. | Sequence                          | Ion Score | C. I. | %  | Modification           | Rank Result Type |
| 1109.5884           | 1109.4812                       | -0.1072  | -97       | 171          | 179      | EPGKICHLR                         |           |       |    | Carbamidomethyl (C)[6] | Mascot           |
| 1165.5558           | 1165.5758                       | 0.02     | 17        | 376          | 384      | EPLIECYNK                         |           |       |    | Carbamidomethyl (C)[6] | Mascot           |
| 1165.5558           | 1165.7302                       | 0.1744   | 150       | 376          | 384      | EPLIECYNK                         |           |       |    | Carbamidomethyl (C)[6] | Mascot           |
| 1411.7589           | 1411.6357                       | -0.1232  | -87       | 349          | 360      | FHPCPVLMGLIK                      |           |       |    | Carbamidomethyl (C)[4] | Mascot           |
| 1411.7589           | 1411.6357                       | -0.1232  | -87       | 349          | 360      | FHPCPVLMGLIK                      |           |       |    | Carbamidomethyl (C)[4] | Mascot           |
| 1434.741            | 1434.7539                       | 0.0129   | 9         | 376          | 386      | EPLIECYNKLR                       |           |       |    | Carbamidomethyl (C)[6] | Mascot           |
| 1541.5842           | 1541.7236                       | 0.1394   | 90        | 1            | 13       | MAECVNSDEESR                      |           |       |    | Carbamidomethyl (C)[4] | Mascot           |
| 1994.0449           | 1993.9424                       | -0.1025  | -51       | 198          | 215      | IIVFETCAGLVLGSMER                 |           |       |    | Carbamidomethyl (C)[7] | Mascot           |
| 1994.0449           | 1993.9424                       | -0.1025  | -51       | 198          | 215      | IIVFETCAGLVLGSMER                 |           |       |    | Carbamidomethyl (C)[7] | Mascot           |
| 2249.0286           | 2249.0403                       | 0.0117   | 5         | 285          | 303      | NSEAQSMEISLDPQEQM<br>RR           |           |       |    |                        | Mascot           |
| 2367.2676           | 2367.2341                       | -0.0335  | -14       | 339          | 360      | NADGLVIASRFHPCPVLM<br>GLIK        |           |       |    | Oxidation (M)[18]      | Mascot           |
| 3498.77             | 3498.668                        | -0.102   | -29       | 44           | 74       | QWFFMDNAVGLYGT<br>FEIVAGGSLKHKPVK |           |       |    |                        | Mascot           |
| 35                  | LOC560371 protein [Danio rerio] |          |           | gi 159155589 |          | 59848.1                           | 8.43      | 8     | 28 | 0                      |                  |

| Peptide Information |                                    |          |           |              |          |                                     |           |       |    |                        |                  |
|---------------------|------------------------------------|----------|-----------|--------------|----------|-------------------------------------|-----------|-------|----|------------------------|------------------|
| Calc. Mass          | Obsrv. Mass                        | $\pm$ da | $\pm$ ppm | Start Seq.   | End Seq. | Sequence                            | Ion Score | C. I. | %  | Modification           | Rank Result Type |
| 1277.5905           | 1277.696                           | 0.1055   | 83        | 448          | 457      | ILCYEKCYDK                          |           |       |    |                        | Mascot           |
| 1302.6536           | 1302.7031                          | 0.0495   | 38        | 460          | 470      | LNKDDNEIVDK                         |           |       |    |                        | Mascot           |
| 1964.1554           | 1963.8793                          | -0.2761  | -141      | 495          | 510      | AAVYNLFLLLWLMIR                     |           |       |    |                        | Mascot           |
| 1980.1503           | 1979.876                           | -0.2743  | -139      | 495          | 510      | AAVYNLFLLLWLMIR                     |           |       |    | Oxidation (M)[14]      | Mascot           |
| 1980.1503           | 1979.876                           | -0.2743  | -139      | 495          | 510      | AAVYNLFLLLWLMIR                     |           |       |    | Oxidation (M)[14]      | Mascot           |
| 1994.0198           | 1993.9424                          | -0.0774  | -39       | 73           | 90       | LAVGMVEKCSQANIQFQ<br>K              |           |       |    |                        | Mascot           |
| 1994.0198           | 1993.9424                          | -0.0774  | -39       | 73           | 90       | LAVGMVEKCSQANIQFQ<br>K              |           |       |    |                        | Mascot           |
| 2297.1516           | 2297.166                           | 0.0144   | 6         | 342          | 362      | DLQACVLSSVELQVLTGS<br>CFK           |           |       |    | Carbamidomethyl (C)[5] | Mascot           |
| 2384.1948           | 2383.9229                          | -0.2719  | -114      | 105          | 125      | DCTATATMEALLYKPIDR<br>VTR           |           |       |    | Oxidation (M)[8]       | Mascot           |
| 2584.301            | 2584.1792                          | -0.1218  | -47       | 292          | 313      | MNEQESCLLLNSPTIPFRI<br>HNK          |           |       |    |                        | Mascot           |
| 3984.9211           | 3984.9224                          | 0.0013   | 0         | 228          | 261      | WYIPLADLSFQTLDES<br>LPHVQTLAEHEIEMK |           |       |    |                        | Mascot           |
| 36                  | LRP2-binding protein [Danio rerio] |          |           | gi 148922942 |          | 38119.7                             | 5.7       | 6     | 28 | 0                      |                  |

| Peptide Information |             |          |           |       |     |          |     |       |   |              |                  |
|---------------------|-------------|----------|-----------|-------|-----|----------|-----|-------|---|--------------|------------------|
| Calc. Mass          | Obsrv. Mass | $\pm$ da | $\pm$ ppm | Start | End | Sequence | Ion | C. I. | % | Modification | Rank Result Type |

|    |                                                |           |         | Seq. | Seq.        | Score    |                                      |    |                        |                   |        |
|----|------------------------------------------------|-----------|---------|------|-------------|----------|--------------------------------------|----|------------------------|-------------------|--------|
|    | 1277.6346                                      | 1277.696  | 0.0614  | 48   | 291         | 301      | GIAIGMFYYAR                          |    | Oxidation (M)[6]       |                   | Mascot |
|    | 1365.6943                                      | 1365.6262 | -0.0681 | -50  | 261         | 272      | AAALGQRVCEYK                         |    | Carbamidomethyl (C)[9] |                   | Mascot |
|    | 1395.6685                                      | 1395.6449 | -0.0236 | -17  | 107         | 118      | EDLGRAVEYMGR                         |    |                        |                   | Mascot |
|    | 1395.6685                                      | 1395.6449 | -0.0236 | -17  | 107         | 118      | EDLGRAVEYMGR                         |    |                        |                   | Mascot |
|    | 1411.6635                                      | 1411.6357 | -0.0278 | -20  | 107         | 118      | EDLGRAVEYMGR                         |    | Oxidation (M)[10]      |                   | Mascot |
|    | 1411.6635                                      | 1411.6357 | -0.0278 | -20  | 107         | 118      | EDLGRAVEYMGR                         | 4  | 0                      | Oxidation (M)[10] | Mascot |
|    | 2167.0369                                      | 2167.0413 | 0.0044  | 2    | 1           | 19       | MDCSELDSTEKSKPSQL<br>LR              |    |                        |                   | Mascot |
|    | 2183.0317                                      | 2183.0308 | -0.0009 | 0    | 1           | 19       | MDCSELDSTEKSKPSQL<br>LR              |    | Oxidation (M)[1]       |                   | Mascot |
|    | 2233.0342                                      | 2233.0615 | 0.0273  | 12   | 112         | 131      | AVEYMGRVAFWDSSEA<br>GSVR             |    | Oxidation (M)[5]       |                   | Mascot |
|    | 3498.647                                       | 3498.668  | 0.021   | 6    | 193         | 224      | AFFWHSQACGNGSLESQ<br>AALGLMYLYGHGVQR |    |                        |                   | Mascot |
| 37 | oxysterol binding protein-like 7 [Danio rerio] |           |         |      | gi 54400360 | 100618.9 | 8.73                                 | 11 | 28                     | 0                 |        |

#### Peptide Information

| Calc. Mass | Obsrv. Mass | ± da    | ± ppm | Start Seq. | End Seq. | Sequence                                | Ion Score | C. I. | % Modification                           | Rank | Result Type |
|------------|-------------|---------|-------|------------|----------|-----------------------------------------|-----------|-------|------------------------------------------|------|-------------|
| 850.5145   | 850.5319    | 0.0174  | 20    | 715        | 721      | ITFVKSR                                 |           |       |                                          |      | Mascot      |
| 1051.5836  | 1051.701    | 0.1174  | 112   | 81         | 88       | WPLKGWHK                                |           |       |                                          |      | Mascot      |
| 1320.6035  | 1320.5663   | -0.0372 | -28   | 237        | 246      | CQMELNELQR                              |           |       | Carbamidomethyl (C)[1]                   |      | Mascot      |
| 1475.7345  | 1475.741    | 0.0065  | 4     | 340        | 351      | KLHQDICSMSLK                            |           |       | Carbamidomethyl (C)[7], Oxidation (M)[9] |      | Mascot      |
| 1664.8597  | 1664.8387   | -0.021  | -13   | 656        | 670      | SLEIMPTGMVNVTLK                         |           |       | Oxidation (M)[5,9]                       |      | Mascot      |
| 1664.871   | 1664.8387   | -0.0323 | -19   | 268        | 281      | MISMQNLSLDKPKK                          |           |       | Oxidation (M)[1,4]                       |      | Mascot      |
| 1964.0388  | 1963.8793   | -0.1595 | -81   | 147        | 162      | SQDLYFIWVTKLSAHR                        |           |       |                                          |      | Mascot      |
| 1980.0048  | 1979.876    | -0.1288 | -65   | 577        | 594      | MVYIAAFAISGYATAQFR                      |           |       |                                          |      | Mascot      |
| 1980.0048  | 1979.876    | -0.1288 | -65   | 577        | 594      | MVYIAAFAISGYATAQFR                      |           |       |                                          |      | Mascot      |
| 2167.1289  | 2167.0413   | -0.0876 | -40   | 652        | 670      | FWGKSLEIMPTGMVNVTLK                     |           |       | Oxidation (M)[9]                         |      | Mascot      |
| 2183.1064  | 2183.0308   | -0.0756 | -35   | 595        | 612      | NRYPKPFNPVLGETFECIR                     |           |       |                                          |      | Mascot      |
| 3984.7759  | 3984.9224   | 0.1465  | 37    | 44         | 78       | DWEVMDDCPADLTITAE<br>NIQDANTPGICEGYLMKR |           |       | Carbamidomethyl (C)[8]                   |      | Mascot      |

38 PREDICTED: NADH dehydrogenase [ubiquinone] 1 alpha subcomplex subunit 9, mitochondrial-like [Danio

#### Peptide Information

| Calc. Mass | Obsrv. Mass | ± da   | ± ppm | Start Seq. | End Seq. | Sequence  | Ion Score | C. I. | % Modification   | Rank | Result Type |
|------------|-------------|--------|-------|------------|----------|-----------|-----------|-------|------------------|------|-------------|
| 850.4781   | 850.5319    | 0.0538 | 63    | 178        | 184      | SPSKYLR   |           |       |                  |      | Mascot      |
| 1165.5571  | 1165.5758   | 0.0187 | 16    | 215        | 223      | FLNHFANMR |           |       | Oxidation (M)[8] |      | Mascot      |



|           |           |         |     |     |     |               |                  |        |
|-----------|-----------|---------|-----|-----|-----|---------------|------------------|--------|
| 1165.6034 | 1165.7302 | 0.1268  | 109 | 78  | 87  | MGSQVVIPYR    | Oxidation (M)[1] | Mascot |
| 1179.5752 | 1179.5869 | 0.0117  | 10  | 205 | 214 | ASELFGREDR    |                  | Mascot |
| 1179.5752 | 1179.5869 | 0.0117  | 10  | 205 | 214 | ASELFGREDR    |                  | Mascot |
| 1193.587  | 1193.6022 | 0.0152  | 13  | 195 | 204 | NEFPDAIMK     | Oxidation (M)[9] | Mascot |
| 1475.8151 | 1475.741  | -0.0741 | -50 | 75  | 87  | LGRMGSQVVIPYR |                  | Mascot |

39 PREDICTED: supervillin [Danio rerio] gi|326672283 147558.1 5.63 14 28 0

#### Peptide Information

| Calc. Mass | Obsrv. Mass | ± da    | ± ppm | Start Seq. | End Seq. | Sequence                   | Ion Score | C. I. % | Modification           | Rank | Result Type |
|------------|-------------|---------|-------|------------|----------|----------------------------|-----------|---------|------------------------|------|-------------|
| 842.5457   | 842.5003    | -0.0454 | -54   | 717        | 724      | KVAVQLGK                   |           |         |                        |      | Mascot      |
| 1109.5771  | 1109.4812   | -0.0959 | -86   | 989        | 997      | LFCVRGETK                  |           |         | Carbamidomethyl (C)[3] |      | Mascot      |
| 1179.5562  | 1179.5869   | 0.0307  | 26    | 385        | 394      | NSTIEVMEEK                 |           |         |                        |      | Mascot      |
| 1179.5674  | 1179.5869   | 0.0195  | 17    | 1058       | 1068     | EMGLNSNSSLK                |           |         |                        |      | Mascot      |
| 1193.595   | 1193.6022   | 0.0072  | 6     | 777        | 785      | EKFLDWAER                  |           |         |                        |      | Mascot      |
| 1411.6998  | 1411.6357   | -0.0641 | -45   | 596        | 607      | GSEMAQYIQTQR               |           |         |                        |      | Mascot      |
| 1411.6998  | 1411.6357   | -0.0641 | -45   | 596        | 607      | GSEMAQYIQTQR               |           |         |                        |      | Mascot      |
| 1434.7257  | 1434.7539   | 0.0282  | 20    | 934        | 947      | GTSALMTVELGNNK             |           |         |                        |      | Mascot      |
| 1493.8209  | 1493.7156   | -0.1053 | -70   | 786        | 798      | KPPKDEPVEEVK               |           |         |                        |      | Mascot      |
| 2213.1899  | 2213.075    | -0.1149 | -52   | 1016       | 1035     | ASLLLLGVQNGQLYLWH          |           |         |                        |      | Mascot      |
| 2213.1899  | 2213.075    | -0.1149 | -52   | 1016       | 1035     | GCK<br>ASLLLLGVQNGQLYLWH   |           |         |                        |      | Mascot      |
| 2248.9688  | 2249.0403   | 0.0715  | 32    | 157        | 175      | ELTVVDGNEEKNEEDEE          |           |         |                        |      | Mascot      |
| 2284.2092  | 2284.1531   | -0.0561 | -25   | 958        | 977      | DR<br>EPPCFLQLFLGGLVIHKG   |           |         | Carbamidomethyl (C)[4] |      | Mascot      |
| 2367.0847  | 2367.2341   | 0.1494  | 63    | 52         | 72       | CR<br>QDEKISHFQSFTAGQED    |           |         |                        |      | Mascot      |
| 2501.1135  | 2501.2224   | 0.1089  | 44    | 645        | 667      | ASNK<br>GAGEPGEDELYESAIIES |           |         |                        |      | Mascot      |
| 2584.1255  | 2584.1792   | 0.0537  | 21    | 1069       | 1090     | NCVYR<br>VNEMEEGTESKEFWDAL |           |         |                        |      | Mascot      |
|            |             |         |       |            |          | GNQDR                      |           |         |                        |      |             |

40 [Pyruvate dehydrogenase [lipoamide]] kinase isozyme 4, mitochondrial [Danio rerio] gi|192453580 46637.8 7.67 8 28 0

#### Peptide Information

| Calc. Mass | Obsrv. Mass | ± da    | ± ppm | Start Seq. | End Seq. | Sequence     | Ion Score | C. I. % | Modification | Rank | Result Type |
|------------|-------------|---------|-------|------------|----------|--------------|-----------|---------|--------------|------|-------------|
| 850.4855   | 850.5319    | 0.0464  | 55    | 3          | 9        | FAQIMLK      |           |         |              |      | Mascot      |
| 1109.621   | 1109.4812   | -0.1398 | -126  | 1          | 9        | MKFAQIMLK    |           |         |              |      | Mascot      |
| 1411.809   | 1411.6357   | -0.1733 | -123  | 55         | 66       | QELPVRLANIMK |           |         |              |      | Mascot      |
| 1411.809   | 1411.6357   | -0.1733 | -123  | 55         | 66       | QELPVRLANIMK |           |         |              |      | Mascot      |

|    |                                                |           |         |     |     |     |                                           |       |      |                         |    |   |  |        |
|----|------------------------------------------------|-----------|---------|-----|-----|-----|-------------------------------------------|-------|------|-------------------------|----|---|--|--------|
|    | 1664.8524                                      | 1664.8387 | -0.0137 | -8  | 277 | 291 | VSLGTEDLTIKMSDR                           |       |      |                         |    |   |  | Mascot |
|    | 1664.8524                                      | 1664.8387 | -0.0137 | -8  | 277 | 291 | VSLGTEDLTIKMSDR                           |       |      |                         |    |   |  | Mascot |
|    | 1947.9078                                      | 1947.8925 | -0.0153 | -8  | 210 | 225 | MLCDQYYLTSPEVEIK                          |       |      | Oxidation (M)[1]        |    |   |  | Mascot |
|    | 2284.085                                       | 2284.1531 | 0.0681  | 30  | 167 | 186 | MLMNQHTLIFDGSTNPAH<br>PK                  |       |      | Oxidation (M)[1,3]      |    |   |  | Mascot |
|    | 2369.1052                                      | 2368.9788 | -0.1264 | -53 | 35  | 54  | QFIDFGSANACEKTSFMF<br>LR                  |       |      | Carbamidomethyl (C)[11] |    |   |  | Mascot |
|    | 3984.9517                                      | 3984.9224 | -0.0293 | -7  | 167 | 202 | MLMNQHTLIFDGSTNPAH<br>PKHIGSIDPNCDDVVEVVR |       |      |                         |    |   |  | Mascot |
| 41 | ADP-ribosylation factor-like 13A [Danio rerio] |           |         |     |     |     | gi 41387122                               | 46496 | 9.86 | 8                       | 27 | 0 |  |        |

Peptide Information

| Calc. Mass | Obsrv. Mass | ± da    | ± ppm | Start Seq. | End Seq. | Sequence                 | Ion Score | C. I. | % Modification                              | Rank | Result Type |
|------------|-------------|---------|-------|------------|----------|--------------------------|-----------|-------|---------------------------------------------|------|-------------|
| 882.5519   | 882.5566    | 0.0047  | 5     | 15         | 21       | LQQPLRK                  |           |       |                                             |      | Mascot      |
| 1320.7634  | 1320.5663   | -0.1971 | -149  | 109        | 119      | ETLVDLLKHPR              |           |       |                                             |      | Mascot      |
| 1395.6395  | 1395.6449   | 0.0054  | 4     | 189        | 200      | AVCLDYPDLCAR             |           |       | Carbamidomethyl (C)[3]                      |      | Mascot      |
| 1395.6395  | 1395.6449   | 0.0054  | 4     | 189        | 200      | AVCLDYPDLCAR             |           |       | Carbamidomethyl (C)[3]                      |      | Mascot      |
| 1838.871   | 1838.9012   | 0.0302  | 16    | 189        | 203      | AVCLDYPDLCARVMR          |           |       | Carbamidomethyl (C)[3,10]                   |      | Mascot      |
| 1947.8833  | 1947.8925   | 0.0092  | 5     | 158        | 173      | SLCHIEPCSASMDLRR         |           |       | Carbamidomethyl (C)[3,8], Oxidation (M)[12] |      | Mascot      |
| 1963.988   | 1963.8793   | -0.1087 | -55   | 185        | 200      | WLLRAVCLDYPDLCAR         |           |       | Carbamidomethyl (C)[7]                      |      | Mascot      |
| 2299.2327  | 2299.1587   | -0.074  | -32   | 132        | 151      | QDKMNALLGNELIEILSLE<br>R |           |       |                                             |      | Mascot      |
| 2384.1309  | 2383.9229   | -0.208  | -87   | 2          | 20       | FNLMNSNCCSWVSKLQQP<br>LR |           |       | Carbamidomethyl (C)[7,8], Oxidation (M)[4]  |      | Mascot      |

|    |                                                         |  |  |  |  |  |              |         |      |   |    |   |  |  |
|----|---------------------------------------------------------|--|--|--|--|--|--------------|---------|------|---|----|---|--|--|
| 42 | PREDICTED: hypothetical protein LOC797100 [Danio rerio] |  |  |  |  |  | gi 326681404 | 37240.7 | 5.09 | 7 | 27 | 0 |  |  |
|----|---------------------------------------------------------|--|--|--|--|--|--------------|---------|------|---|----|---|--|--|

Peptide Information

| Calc. Mass | Obsrv. Mass | ± da    | ± ppm | Start Seq. | End Seq. | Sequence                   | Ion Score | C. I. | % Modification                                  | Rank | Result Type |
|------------|-------------|---------|-------|------------|----------|----------------------------|-----------|-------|-------------------------------------------------|------|-------------|
| 1193.5289  | 1193.6022   | 0.0733  | 61    | 89         | 98       | LCQECGLDAK                 |           |       | Carbamidomethyl (C)[2,5]                        |      | Mascot      |
| 1277.6704  | 1277.696    | 0.0256  | 20    | 257        | 267      | LICEMARQIGK                |           |       | Oxidation (M)[5]                                |      | Mascot      |
| 1475.7887  | 1475.741    | -0.0477 | -32   | 102        | 113      | TDLLRLRSEEMR               |           |       |                                                 |      | Mascot      |
| 1493.6835  | 1493.7156   | 0.0321  | 21    | 89         | 101      | LCQECGLDAKGSR              |           |       | Carbamidomethyl (C)[2,5]                        |      | Mascot      |
| 1774.7485  | 1774.8724   | 0.1239  | 70    | 315        | 330      | FVVCESCLPSGSWDMV           |           |       | Oxidation (M)[15]                               |      | Mascot      |
| 2210.9482  | 2211.0813   | 0.1331  | 60    | 245        | 263      | DMDSHIGNACMKLICEMA<br>R    |           |       | Carbamidomethyl (C)[10], Oxidation (M)[2]       |      | Mascot      |
| 2283.9646  | 2284.1531   | 0.1885  | 83    | 245        | 263      | DMDSHIGNACMKLICEMA<br>R    |           |       | Carbamidomethyl (C)[10,15], Oxidation (M)[2,11] |      | Mascot      |
| 2584.1628  | 2584.1792   | 0.0164  | 6     | 235        | 256      | EEFWSLGLLRDMDSHIG<br>NACMK |           |       | Oxidation (M)[12,21]                            |      | Mascot      |

|    |                                                                  |  |  |  |  |  |              |        |      |    |    |   |  |  |
|----|------------------------------------------------------------------|--|--|--|--|--|--------------|--------|------|----|----|---|--|--|
| 43 | PREDICTED: calcium-dependent secretion activator 1 [Danio rerio] |  |  |  |  |  | gi 326668734 | 142952 | 5.72 | 13 | 27 | 0 |  |  |
|----|------------------------------------------------------------------|--|--|--|--|--|--------------|--------|------|----|----|---|--|--|

| Peptide Information |                                                                |         |       |              |                             |           |       |                                           |      |             |  |
|---------------------|----------------------------------------------------------------|---------|-------|--------------|-----------------------------|-----------|-------|-------------------------------------------|------|-------------|--|
| Calc. Mass          | Obsrv. Mass                                                    | ± da    | ± ppm | Start Seq.   | End Sequence Seq.           | Ion Score | C. I. | % Modification                            | Rank | Result Type |  |
| 1045.5459           | 1045.5494                                                      | 0.0035  | 3     | 280          | 288 LQMADQIAR               |           |       |                                           |      | Mascot      |  |
| 1179.6343           | 1179.5869                                                      | -0.0474 | -40   | 578          | 586 ILWVQAMYP               |           |       |                                           |      | Mascot      |  |
| 1179.6343           | 1179.5869                                                      | -0.0474 | -40   | 578          | 586 ILWVQAMYP               |           |       |                                           |      | Mascot      |  |
| 1365.691            | 1365.6262                                                      | -0.0648 | -47   | 613          | 623 SWQIYADRAQK             |           |       |                                           |      | Mascot      |  |
| 1493.7166           | 1493.7156                                                      | -0.001  | -1    | 802          | 813 CLEQAAQINYQR            |           |       | Carbamidomethyl (C)[1]                    |      | Mascot      |  |
| 1541.757            | 1541.7236                                                      | -0.0334 | -22   | 760          | 772 YCFPFGRPEGALK           |           |       | Carbamidomethyl (C)[2]                    |      | Mascot      |  |
| 1664.8458           | 1664.8387                                                      | -0.0071 | -4    | 158          | 173 VAKMVQTGGLSALDCR        |           |       | Oxidation (M)[4]                          |      | Mascot      |  |
| 1664.8458           | 1664.8387                                                      | -0.0071 | -4    | 158          | 173 VAKMVQTGGLSALDCR        |           |       | Oxidation (M)[4]                          |      | Mascot      |  |
| 1721.8673           | 1721.8553                                                      | -0.012  | -7    | 158          | 173 VAKMVQTGGLSALDCR        |           |       | Carbamidomethyl (C)[15], Oxidation (M)[4] |      | Mascot      |  |
| 1838.9213           | 1838.9012                                                      | -0.0201 | -11   | 1029         | 1044 IPLSLCTMFNVMVDAK       |           |       | Carbamidomethyl (C)[6]                    |      | Mascot      |  |
| 2197.1174           | 2197.0498                                                      | -0.0676 | -31   | 1095         | 1113 ISRYDEGTLFSSFLSFTVK    |           |       |                                           |      | Mascot      |  |
| 2197.1174           | 2197.0498                                                      | -0.0676 | -31   | 1095         | 1113 ISRYDEGTLFSSFLSFTVK    |           |       |                                           |      | Mascot      |  |
| 2213.0767           | 2213.075                                                       | -0.0017 | -1    | 802          | 819 CLEQAAQINYQRITDYAR      |           |       | Carbamidomethyl (C)[1]                    |      | Mascot      |  |
| 2213.0767           | 2213.075                                                       | -0.0017 | -1    | 802          | 819 CLEQAAQINYQRITDYAR      |           |       | Carbamidomethyl (C)[1]                    |      | Mascot      |  |
| 2224.9397           | 2225.0955                                                      | 0.1558  | 70    | 1            | 20 MLDPSSEEEESDGIVEEE SR    |           |       |                                           |      | Mascot      |  |
| 2224.9397           | 2225.0955                                                      | 0.1558  | 70    | 1            | 20 MLDPSSEEEESDGIVEEE SR    |           |       |                                           |      | Mascot      |  |
| 2233.166            | 2233.0615                                                      | -0.1045 | -47   | 84           | 101 LQLYVFVMRCIAYPFNAK      |           |       | Carbamidomethyl (C)[10]                   |      | Mascot      |  |
| 2249.1609           | 2249.0403                                                      | -0.1206 | -54   | 84           | 101 LQLYVFVMRCIAYPFNAK      |           |       | Carbamidomethyl (C)[10], Oxidation (M)[8] |      | Mascot      |  |
| 2369.1475           | 2368.9788                                                      | -0.1687 | -71   | 310          | 331 SSVNQLMANLESMPVSK GGEFK |           |       | Oxidation (M)[7]                          |      | Mascot      |  |
| 2384.1658           | 2383.9229                                                      | -0.2429 | -102  | 1029         | 1049 IPLSLCTMFNVMVDAKDQ SAK |           |       | Carbamidomethyl (C)[6], Oxidation (M)[8]  |      | Mascot      |  |
| 44                  | PREDICTED: rho GTPase-activating protein 21-like [Danio rerio] |         |       | gi 326679518 |                             | 211650.9  | 8.29  | 17                                        | 27   | 0           |  |

#### Peptide Information

| Calc. Mass | Obsrv. Mass | $\pm$ da | $\pm$ ppm | Start Seq. | End Sequence Seq.  | Ion Score | C. I. | % Modification         | Rank | Result Type |
|------------|-------------|----------|-----------|------------|--------------------|-----------|-------|------------------------|------|-------------|
| 850.4417   | 850.5319    | 0.0902   | 106       | 225        | 231 VFSENV         |           |       |                        |      | Mascot      |
| 996.4971   | 996.5855    | 0.0884   | 89        | 941        | 948 GHCLYLYK       |           |       |                        |      | Mascot      |
| 1045.5248  | 1045.5494   | 0.0246   | 24        | 372        | 379 RLYMYGSR       |           |       |                        |      | Mascot      |
| 1193.5844  | 1193.6022   | 0.0178   | 15        | 1497       | 1506 LSCSPGFNRR    |           |       | Carbamidomethyl (C)[3] |      | Mascot      |
| 1234.6387  | 1234.6652   | 0.0265   | 21        | 402        | 413 QKSASTTATPSR   |           |       |                        |      | Mascot      |
| 1434.6754  | 1434.7539   | 0.0785   | 55        | 441        | 454 SASQERLGGAECAR |           |       |                        |      | Mascot      |

|           |           |         |     |      |      |                                       |  |  |  |                          |  |        |
|-----------|-----------|---------|-----|------|------|---------------------------------------|--|--|--|--------------------------|--|--------|
| 1475.6986 | 1475.741  | 0.0424  | 29  | 1077 | 1089 | ATSPHSPNKEHDR                         |  |  |  |                          |  | Mascot |
| 1541.7628 | 1541.7236 | -0.0392 | -25 | 972  | 984  | ACLIDISYSDTKR                         |  |  |  | Carbamidomethyl (C)[2]   |  | Mascot |
| 1638.9214 | 1638.8412 | -0.0802 | -49 | 1199 | 1212 | DLNVISSLLKSFFR                        |  |  |  |                          |  | Mascot |
| 1917.8945 | 1917.8788 | -0.0157 | -8  | 498  | 512  | ACCRTDTEEWLLVHK                       |  |  |  | Carbamidomethyl (C)[2,3] |  | Mascot |
| 1963.9906 | 1963.8793 | -0.1113 | -57 | 1487 | 1505 | TSSVLSPSPKLSCSPGFN<br>R               |  |  |  |                          |  | Mascot |
| 2045.9458 | 2045.9739 | 0.0281  | 14  | 1820 | 1836 | GDSQNMSIRDWIVSEHR                     |  |  |  | Oxidation (M)[6]         |  | Mascot |
| 2183.0825 | 2183.0308 | -0.0517 | -24 | 952  | 971  | DGQTNANSQIEEELPISI<br>K               |  |  |  |                          |  | Mascot |
| 2196.8994 | 2197.0498 | 0.1504  | 68  | 1293 | 1310 | TSEDNMTHMVTHMPDQY<br>K                |  |  |  | Oxidation (M)[6,9]       |  | Mascot |
| 2196.8994 | 2197.0498 | 0.1504  | 68  | 1293 | 1310 | TSEDNMTHMVTHMPDQY<br>K                |  |  |  | Oxidation (M)[6,9]       |  | Mascot |
| 2212.8945 | 2213.075  | 0.1805  | 82  | 1293 | 1310 | TSEDNMTHMVTHMPDQY<br>K                |  |  |  | Oxidation (M)[6,9,13]    |  | Mascot |
| 2212.8945 | 2213.075  | 0.1805  | 82  | 1293 | 1310 | TSEDNMTHMVTHMPDQY<br>K                |  |  |  | Oxidation (M)[6,9,13]    |  | Mascot |
| 2283.0723 | 2283.1528 | 0.0805  | 35  | 1781 | 1799 | HTMGGQRDFAELDVIHD<br>WR               |  |  |  |                          |  | Mascot |
| 2297.0137 | 2297.166  | 0.1523  | 66  | 1431 | 1450 | NNNPTQKQSHQSQEED<br>AGR               |  |  |  |                          |  | Mascot |
| 2299.0674 | 2299.1587 | 0.0913  | 40  | 1781 | 1799 | HTMGGQRDFAELDVIHD<br>WR               |  |  |  | Oxidation (M)[3]         |  | Mascot |
| 3338.5588 | 3338.7371 | 0.1783  | 53  | 1513 | 1544 | CSISDPSSQLDETTSDLG<br>TMSSGASVPRTTRPR |  |  |  |                          |  | Mascot |

45 PREDICTED: hypothetical protein LOC795173 [Danio rerio] gi|125838385 24950.6 8.87 6 27 0

#### Peptide Information

| Calc. Mass | Obsrv. Mass | ± da    | ± ppm | Start Seq. | End Seq. | Sequence                          | Ion Score | C. I. | % Modification    | Rank | Result Type |
|------------|-------------|---------|-------|------------|----------|-----------------------------------|-----------|-------|-------------------|------|-------------|
| 1323.6038  | 1323.6616   | 0.0578  | 44    | 129        | 139      | SDGCVIFYTYR                       |           |       |                   |      | Mascot      |
| 1411.6349  | 1411.6357   | 0.0008  | 1     | 177        | 187      | EDQNYHNLHNK                       |           |       |                   |      | Mascot      |
| 1411.6349  | 1411.6357   | 0.0008  | 1     | 177        | 187      | EDQNYHNLHNK                       |           |       |                   |      | Mascot      |
| 1541.8005  | 1541.7236   | -0.0769 | -50   | 191        | 203      | IAEHVPLYQCRGR                     |           |       |                   |      | Mascot      |
| 1638.7944  | 1638.8412   | 0.0468  | 29    | 105        | 118      | DAPYEHLLMNPPNK                    |           |       |                   |      | Mascot      |
| 1838.8126  | 1838.9012   | 0.0886  | 48    | 75         | 89       | DMSSDVRPYFQHDNK                   |           |       |                   |      | Mascot      |
| 3338.6475  | 3338.7371   | 0.0896  | 27    | 90         | 118      | EVYQGTELTAIVVHRDA<br>PYEHLMLNPPNK |           |       | Oxidation (M)[24] |      | Mascot      |

46 PREDICTED: hypothetical protein LOC100537950 [Danio rerio] gi|326676836 45410.9 5.02 7 27 0

#### Peptide Information

| Calc. Mass | Obsrv. Mass | ± da    | ± ppm | Start Seq. | End Seq. | Sequence       | Ion Score | C. I. | % Modification           | Rank | Result Type |
|------------|-------------|---------|-------|------------|----------|----------------|-----------|-------|--------------------------|------|-------------|
| 1193.7616  | 1193.6022   | -0.1594 | -134  | 121        | 132      | KIPIGGASPLLK   |           |       |                          |      | Mascot      |
| 1664.8147  | 1664.8387   | 0.024   | 14    | 173        | 186      | IKCFGCGNFGHLVR |           |       | Carbamidomethyl (C)[3,6] |      | Mascot      |

|    |                                                            |           |         |      |     |              |                                 |     |                          |    |        |
|----|------------------------------------------------------------|-----------|---------|------|-----|--------------|---------------------------------|-----|--------------------------|----|--------|
|    | 1664.8147                                                  | 1664.8387 | 0.024   | 14   | 173 | 186          | IKCFGCGNFGHLVR                  |     | Carbamidomethyl (C)[3,6] |    | Mascot |
|    | 1917.9844                                                  | 1917.8788 | -0.1056 | -55  | 159 | 174          | VDDFDYVVFITTDKIK                |     |                          |    | Mascot |
|    | 1964.15                                                    | 1963.8793 | -0.2707 | -138 | 71  | 89           | GIILEGVLTPVMPLSLPSK             |     |                          |    | Mascot |
|    | 1980.1449                                                  | 1979.876  | -0.2689 | -136 | 71  | 89           | GIILEGVLTPVMPLSLPSK             |     | Oxidation (M)[12]        |    | Mascot |
|    | 1980.1449                                                  | 1979.876  | -0.2689 | -136 | 71  | 89           | GIILEGVLTPVMPLSLPSK             |     | Oxidation (M)[12]        |    | Mascot |
|    | 2183.0801                                                  | 2183.0308 | -0.0493 | -23  | 140 | 158          | SVYMIVNNDADLDLALNFR             |     |                          |    | Mascot |
|    | 2225.1487                                                  | 2225.0955 | -0.0532 | -24  | 362 | 380          | GVLVNEYFPDVEQFVDKVK             |     |                          |    | Mascot |
|    | 2225.1487                                                  | 2225.0955 | -0.0532 | -24  | 362 | 380          | GVLVNEYFPDVEQFVDKVK             |     |                          |    | Mascot |
|    | 3338.4224                                                  | 3338.7371 | 0.3147  | 94   | 314 | 343          | VDMEDELESESDSELSDSLTLTSSQSEFSSR |     |                          |    | Mascot |
| 47 | PREDICTED: hypothetical protein LOC100002887 [Danio rerio] |           |         |      |     | gi 326671410 | 28495.6                         | 8.8 | 6                        | 27 | 0      |

#### Peptide Information

| Calc. Mass | Obsrv. Mass | ± da    | ± ppm | Start Seq. | End Seq. | Sequence                      | Ion Score | C. I. | % Modification         | Rank | Result Type |
|------------|-------------|---------|-------|------------|----------|-------------------------------|-----------|-------|------------------------|------|-------------|
| 1109.5884  | 1109.4812   | -0.1072 | -97   | 47         | 55       | LASFLRSCR                     |           |       | Carbamidomethyl (C)[8] |      | Mascot      |
| 1411.7726  | 1411.6357   | -0.1369 | -97   | 56         | 67       | KHLTISCLTPNK                  |           |       | Carbamidomethyl (C)[7] |      | Mascot      |
| 1411.7726  | 1411.6357   | -0.1369 | -97   | 56         | 67       | KHLTISCLTPNK                  |           |       | Carbamidomethyl (C)[7] |      | Mascot      |
| 1774.7435  | 1774.8724   | 0.1289  | 73    | 133        | 147      | KTTSYCGEQEEEEEGK              |           |       | Carbamidomethyl (C)[6] |      | Mascot      |
| 1917.7948  | 1917.8788   | 0.084   | 44    | 197        | 212      | MEEMMMEKEEEGGTIK              |           |       | Oxidation (M)[1]       |      | Mascot      |
| 1994.093   | 1993.9424   | -0.1506 | -76   | 98         | 114      | NSTIEHHQIIVTPVIHR             |           |       |                        |      | Mascot      |
| 1994.093   | 1993.9424   | -0.1506 | -76   | 98         | 114      | NSTIEHHQIIVTPVIHR             |           |       |                        |      | Mascot      |
| 3498.6282  | 3498.668    | 0.0398  | 11    | 68         | 97       | EIELENEEEEEQIDLPISPKGGADDDFLR |           |       |                        |      | Mascot      |

48 survival of motor neuron protein-interacting protein 1 [Danio rerio] gi|62955193 29013.8 5.44 6 26 0

#### Peptide Information

| Calc. Mass | Obsrv. Mass | ± da    | ± ppm | Start Seq. | End Seq. | Sequence               | Ion Score | C. I. | % Modification         | Rank | Result Type |
|------------|-------------|---------|-------|------------|----------|------------------------|-----------|-------|------------------------|------|-------------|
| 1193.6273  | 1193.6022   | -0.0251 | -21   | 84         | 93       | FSEVRQSVNK             |           |       |                        |      | Mascot      |
| 1234.6208  | 1234.6652   | 0.0444  | 36    | 215        | 225      | CSAVRANLESK            |           |       | Carbamidomethyl (C)[1] |      | Mascot      |
| 1434.6747  | 1434.7539   | 0.0792  | 55    | 135        | 147      | EEDGVNPGLDYVK          |           |       |                        |      | Mascot      |
| 1917.9885  | 1917.8788   | -0.1097 | -57   | 226        | 242      | DDRLSALNLMICIVAR       |           |       |                        |      | Mascot      |
| 2367.2012  | 2367.2341   | 0.0329  | 14    | 53         | 75       | KQSVNVSITGLAAPEGFSPSFK |           |       |                        |      | Mascot      |
| 2384.2131  | 2383.9229   | -0.2902 | -122  | 160        | 179      | LSQSTVSAVLEYLINWFER    |           |       |                        |      | Mascot      |

49 Zgc:136688 [Danio rerio] gi|49902960 48277.1 6.22 1 18 0

| Peptide Information |                                                                                  |       |       |            |                   |           |         |                        |      |             |
|---------------------|----------------------------------------------------------------------------------|-------|-------|------------|-------------------|-----------|---------|------------------------|------|-------------|
| Calc. Mass          | Obsrv. Mass                                                                      | ± da  | ± ppm | Start Seq. | End Sequence Seq. | Ion Score | C. I. % | Modification           | Rank | Result Type |
| 1179.5609           | 1179.5869                                                                        | 0.026 | 22    | 155        | 163 KMQEQLCSR     | 18        | 0       | Carbamidomethyl (C)[7] | 1    | Mascot      |
| 50                  | PREDICTED: potassium channel SKOR [Danio rerio] gi 326672803 52150.7 8.43 1 17 0 |       |       |            |                   |           |         |                        |      |             |

| Peptide Information |             |         |       |            |                   |           |         |              |      |             |
|---------------------|-------------|---------|-------|------------|-------------------|-----------|---------|--------------|------|-------------|
| Calc. Mass          | Obsrv. Mass | ± da    | ± ppm | Start Seq. | End Sequence Seq. | Ion Score | C. I. % | Modification | Rank | Result Type |
| 1179.6117           | 1179.5869   | -0.0248 | -21   | 81         | 90 STSHSYLTRK     | 17        | 0       |              | 2    | Mascot      |

|                |           |                        |                |                |                    |
|----------------|-----------|------------------------|----------------|----------------|--------------------|
| Gel Idx/Pos    | 243/J19   | Instr./Gel Origin      | BA2060/110707A | Process Status | Analysis Succeeded |
| Plate [#] Name | [1] 31496 | Instrument Sample Name |                | Spectra        | 11                 |

| Rank | Protein Name                               | Accession No. | Protein MW | Protein PI | Pep. Count | Protein Score | Protein Score C. I. % | Total Ion Score | Total Ion C. I. % |
|------|--------------------------------------------|---------------|------------|------------|------------|---------------|-----------------------|-----------------|-------------------|
| 1    | apolipoprotein A-I precursor [Danio rerio] | gi 18858281   | 30237.5    | 5.06       | 16         | 384           | 100                   | 269             | 100               |

| Peptide Information |             |         |       |            |                   |           |         |                    |      |             |
|---------------------|-------------|---------|-------|------------|-------------------|-----------|---------|--------------------|------|-------------|
| Calc. Mass          | Obsrv. Mass | ± da    | ± ppm | Start Seq. | End Sequence Seq. | Ion Score | C. I. % | Modification       | Rank | Result Type |
| 832.3948            | 832.3935    | -0.0013 | -2    | 131        | 136 HIDEYR        |           |         |                    |      | Mascot      |
| 858.4427            | 858.4422    | -0.0005 | -1    | 152        | 158 QNAEQLR       |           |         |                    |      | Mascot      |
| 866.4842            | 866.462     | -0.0222 | -26   | 115        | 121 SKLEPHR       |           |         |                    |      | Mascot      |
| 999.5655            | 999.5625    | -0.003  | -3    | 183        | 191 VVPMVEAVR     |           |         |                    |      | Mascot      |
| 1015.5604           | 1015.5523   | -0.0081 | -8    | 183        | 191 VVPMVEAVR     |           |         | Oxidation (M)[4]   |      | Mascot      |
| 1089.5323           | 1089.5281   | -0.0042 | -4    | 131        | 138 HIDEYREK      |           |         |                    |      | Mascot      |
| 1093.5194           | 1093.5179   | -0.0015 | -1    | 106        | 114 VMTDVEDLR     |           |         | Oxidation (M)[2]   |      | Mascot      |
| 1184.5074           | 1184.5033   | -0.0041 | -3    | 238        | 246 MEPYMNVR      |           |         | Oxidation (M)[1]   |      | Mascot      |
| 1189.6938           | 1189.6831   | -0.0107 | -9    | 34         | 44 AAALVYLNQVK    |           |         |                    |      | Mascot      |
| 1200.5023           | 1200.4988   | -0.0035 | -3    | 238        | 246 MEPYMNVR      |           |         | Oxidation (M)[1,5] |      | Mascot      |
| 1279.6754           | 1279.6721   | -0.0033 | -3    | 227        | 237 IAPHTQDLQTR   |           |         |                    |      | Mascot      |
| 1279.6754           | 1279.6721   | -0.0033 | -3    | 227        | 237 IAPHTQDLQTR   | 72        | 99.998  |                    |      | Mascot      |
| 1316.6879           | 1316.6709   | -0.017  | -13   | 159        | 169 AKLEPLMDDIR   |           |         | Oxidation (M)[7]   |      | Mascot      |
| 1419.6825           | 1419.6769   | -0.0056 | -4    | 247        | 258 TTFAQMYETIAK  |           |         | Oxidation (M)[6]   |      | Mascot      |
| 1565.7958           | 1565.7883   | -0.0075 | -5    | 139        | 151 LEPVFQEYSALNR |           |         |                    |      | Mascot      |
| 1565.7958           | 1565.7883   | -0.0075 | -5    | 139        | 151 LEPVFQEYSALNR | 101       | 100     |                    |      | Mascot      |

|   |                            |           |         |    |     |     |                 |         |      |    |     |                  |     |     |  |  |        |
|---|----------------------------|-----------|---------|----|-----|-----|-----------------|---------|------|----|-----|------------------|-----|-----|--|--|--------|
|   | 1644.7388                  | 1644.7345 | -0.0043 | -3 | 50  | 63  | ALDNLDTGTDYEYK  |         |      |    |     |                  |     |     |  |  | Mascot |
|   | 1668.9067                  | 1668.8925 | -0.0142 | -9 | 117 | 130 | LEPHRAELYTALQK  |         |      |    |     |                  |     |     |  |  | Mascot |
|   | 1822.9333                  | 1822.9247 | -0.0086 | -5 | 137 | 151 | EKLEPVFQEYSALNR |         |      |    |     |                  |     |     |  |  | Mascot |
|   | 1822.9333                  | 1822.9247 | -0.0086 | -5 | 137 | 151 | EKLEPVFQEYSALNR | 96      | 100  |    |     |                  |     |     |  |  | Mascot |
|   | 1886.9204                  | 1886.9117 | -0.0087 | -5 | 203 | 218 | TMAAPYAEYKEQLVK |         |      |    |     | Oxidation (M)[2] |     |     |  |  | Mascot |
| 2 | Apoa protein [Danio rerio] |           |         |    |     |     | gi 53733942     | 19735.1 | 5.31 | 14 | 368 | 100              | 269 | 100 |  |  |        |

Peptide Information

| Calc. Mass | Obsrv. Mass | ± da    | ± ppm | Start Seq. | End Seq. | Sequence        | Ion Score | C. I.  | % | Modification       | Rank | Result | Type   |
|------------|-------------|---------|-------|------------|----------|-----------------|-----------|--------|---|--------------------|------|--------|--------|
| 832.3948   | 832.3935    | -0.0013 | -2    | 36         | 41       | HIDEYR          |           |        |   |                    |      |        | Mascot |
| 858.4427   | 858.4422    | -0.0005 | -1    | 57         | 63       | QNAEQLR         |           |        |   |                    |      |        | Mascot |
| 866.4842   | 866.462     | -0.0222 | -26   | 20         | 26       | SKLEPHR         |           |        |   |                    |      |        | Mascot |
| 999.5655   | 999.5625    | -0.003  | -3    | 88         | 96       | VVPMVEAVR       |           |        |   |                    |      |        | Mascot |
| 1015.5604  | 1015.5523   | -0.0081 | -8    | 88         | 96       | VVPMVEAVR       |           |        |   | Oxidation (M)[4]   |      |        | Mascot |
| 1089.5323  | 1089.5281   | -0.0042 | -4    | 36         | 43       | HIDEYREK        |           |        |   |                    |      |        | Mascot |
| 1093.5194  | 1093.5179   | -0.0015 | -1    | 11         | 19       | VMTDVEDLR       |           |        |   | Oxidation (M)[2]   |      |        | Mascot |
| 1184.5074  | 1184.5033   | -0.0041 | -3    | 143        | 151      | MEPYMENVR       |           |        |   | Oxidation (M)[1]   |      |        | Mascot |
| 1200.5023  | 1200.4988   | -0.0035 | -3    | 143        | 151      | MEPYMENVR       |           |        |   | Oxidation (M)[1,5] |      |        | Mascot |
| 1279.6754  | 1279.6721   | -0.0033 | -3    | 132        | 142      | IAPHTQDLQTR     |           |        |   |                    |      |        | Mascot |
| 1279.6754  | 1279.6721   | -0.0033 | -3    | 132        | 142      | IAPHTQDLQTR     | 72        | 99.998 |   |                    |      |        | Mascot |
| 1316.6879  | 1316.6709   | -0.017  | -13   | 64         | 74       | AKLEPLMDDIR     |           |        |   | Oxidation (M)[7]   |      |        | Mascot |
| 1419.6825  | 1419.6769   | -0.0056 | -4    | 152        | 163      | TTFAQMYETIAK    |           |        |   | Oxidation (M)[6]   |      |        | Mascot |
| 1565.7958  | 1565.7883   | -0.0075 | -5    | 44         | 56       | LEPVFQEYSALNR   |           |        |   |                    |      |        | Mascot |
| 1565.7958  | 1565.7883   | -0.0075 | -5    | 44         | 56       | LEPVFQEYSALNR   | 101       | 100    |   |                    |      |        | Mascot |
| 1668.9067  | 1668.8925   | -0.0142 | -9    | 22         | 35       | LEPHRAELYTALQK  |           |        |   |                    |      |        | Mascot |
| 1822.9333  | 1822.9247   | -0.0086 | -5    | 42         | 56       | EKLEPVFQEYSALNR |           |        |   |                    |      |        | Mascot |
| 1822.9333  | 1822.9247   | -0.0086 | -5    | 42         | 56       | EKLEPVFQEYSALNR | 96        | 100    |   |                    |      |        | Mascot |
| 1886.9204  | 1886.9117   | -0.0087 | -5    | 108        | 123      | TMAAPYAEYKEQLVK |           |        |   | Oxidation (M)[2]   |      |        | Mascot |

|   |                                                                                       |  |  |  |  |  |             |         |      |   |     |     |     |     |  |  |  |
|---|---------------------------------------------------------------------------------------|--|--|--|--|--|-------------|---------|------|---|-----|-----|-----|-----|--|--|--|
| 3 | NADH dehydrogenase [ubiquinone] flavoprotein 2, mitochondrial precursor [Danio rerio] |  |  |  |  |  | gi 41152189 | 26578.3 | 5.44 | 7 | 281 | 100 | 247 | 100 |  |  |  |
|---|---------------------------------------------------------------------------------------|--|--|--|--|--|-------------|---------|------|---|-----|-----|-----|-----|--|--|--|

Peptide Information

| Calc. Mass | Obsrv. Mass | ± da    | ± ppm | Start Seq. | End Seq. | Sequence      | Ion Score | C. I. | % | Modification      | Rank | Result | Type   |
|------------|-------------|---------|-------|------------|----------|---------------|-----------|-------|---|-------------------|------|--------|--------|
| 1155.6554  | 1155.6482   | -0.0072 | -6    | 96         | 106      | VAEVLGIAPMR   |           |       |   |                   |      |        | Mascot |
| 1171.6503  | 1171.6464   | -0.0039 | -3    | 96         | 106      | VAEVLGIAPMR   |           |       |   | Oxidation (M)[10] |      |        | Mascot |
| 1338.7739  | 1338.7688   | -0.0051 | -4    | 71         | 83       | AAATIPVLDLAQR |           |       |   |                   |      |        | Mascot |

|   |                                                                                                   |           |         |     |     |     |                              |     |        |                        |  |  |        |
|---|---------------------------------------------------------------------------------------------------|-----------|---------|-----|-----|-----|------------------------------|-----|--------|------------------------|--|--|--------|
|   | 1338.7739                                                                                         | 1338.7688 | -0.0051 | -4  | 71  | 83  | AAATIPVLDLAQR                | 90  | 100    |                        |  |  | Mascot |
|   | 1483.7539                                                                                         | 1483.7457 | -0.0082 | -6  | 58  | 70  | VEAIINNYPEGHK                |     |        |                        |  |  | Mascot |
|   | 1639.8188                                                                                         | 1639.8311 | 0.0123  | 8   | 107 | 119 | VYEVATFYTMFLR                |     |        |                        |  |  | Mascot |
|   | 1639.855                                                                                          | 1639.8311 | -0.0239 | -15 | 57  | 70  | RVEAIINNYPEGHK               | 27  | 50.122 |                        |  |  | Mascot |
|   | 1655.8137                                                                                         | 1655.8046 | -0.0091 | -5  | 107 | 119 | VYEVATFYTMFLR                | 16  | 0      | Oxidation (M)[10]      |  |  | Mascot |
|   | 1655.8137                                                                                         | 1655.8046 | -0.0091 | -5  | 107 | 119 | VYEVATFYTMFLR                |     |        | Oxidation (M)[10]      |  |  | Mascot |
|   | 2382.1758                                                                                         | 2382.1633 | -0.0125 | -5  | 218 | 241 | FSCEPAGGLTSLTEPPPG<br>PGVGVR | 115 | 100    | Carbamidomethyl (C)[3] |  |  | Mascot |
|   | 2382.1758                                                                                         | 2382.1633 | -0.0125 | -5  | 218 | 241 | FSCEPAGGLTSLTEPPPG<br>PGVGVR |     |        | Carbamidomethyl (C)[3] |  |  | Mascot |
|   | 2395.0508                                                                                         | 2395.0476 | -0.0032 | -1  | 38  | 57  | DTPENNPDPTEFTPEN<br>MKR      |     |        | Oxidation (M)[18]      |  |  | Mascot |
| 4 | mitochondrial ATP synthase beta subunit [Danio rerio] gi 147905995 55779.4 5.19 3 151 100 144 100 |           |         |     |     |     |                              |     |        |                        |  |  |        |

#### Peptide Information

| Calc. Mass | Obsrv. Mass | ± da    | ± ppm | Start Seq. | End Seq. | Sequence                   | Ion Score | C. I. | % Modification | Rank | Result Type |
|------------|-------------|---------|-------|------------|----------|----------------------------|-----------|-------|----------------|------|-------------|
| 1988.0334  | 1988.0239   | -0.0095 | -5    | 385        | 403      | AIAELGIYPAVDPLDSTSR        | 144       | 100   |                |      | Mascot      |
| 1988.0334  | 1988.0239   | -0.0095 | -5    | 385        | 403      | AIAELGIYPAVDPLDSTSR        |           |       |                |      | Mascot      |
| 2225.2864  | 2225.1104   | -0.176  | -79   | 12         | 33       | VLSASKPSIELTKAVPAAL<br>SSR |           |       |                |      | Mascot      |
| 2225.2864  | 2225.1104   | -0.176  | -79   | 12         | 33       | VLSASKPSIELTKAVPAAL<br>SSR |           |       |                |      | Mascot      |
| 2291.1335  | 2291.1448   | 0.0113  | 5     | 237        | 256      | TREGNDLYHEMIESGVIS<br>LK   |           |       |                |      | Mascot      |

5 Zgc:111961 [Danio rerio] gi|159155102 55095.8 5.14 3 150 100 144 100

#### Peptide Information

| Calc. Mass | Obsrv. Mass | ± da    | ± ppm | Start Seq. | End Seq. | Sequence               | Ion Score | C. I. | % Modification   | Rank | Result Type |
|------------|-------------|---------|-------|------------|----------|------------------------|-----------|-------|------------------|------|-------------|
| 1845.88    | 1845.8774   | -0.0026 | -1    | 396        | 411      | IMDPNIVGTEHYDVAR       |           |       | Oxidation (M)[2] |      | Mascot      |
| 1988.0334  | 1988.0239   | -0.0095 | -5    | 377        | 395      | AIAELGIYPAVDPLDSTSR    | 144       | 100   |                  |      | Mascot      |
| 1988.0334  | 1988.0239   | -0.0095 | -5    | 377        | 395      | AIAELGIYPAVDPLDSTSR    |           |       |                  |      | Mascot      |
| 2005.0541  | 2005.0409   | -0.0132 | -7    | 452        | 469      | FLSQPFQVAEVFTGHLG<br>K |           |       |                  |      | Mascot      |

6 Zgc:163069 protein [Danio rerio] gi|116284212 29885.7 5.04 1 144 100 144 100

#### Peptide Information

| Calc. Mass | Obsrv. Mass | ± da    | ± ppm | Start Seq. | End Seq. | Sequence            | Ion Score | C. I. | % Modification | Rank | Result Type |
|------------|-------------|---------|-------|------------|----------|---------------------|-----------|-------|----------------|------|-------------|
| 1988.0334  | 1988.0239   | -0.0095 | -5    | 135        | 153      | AIAELGIYPAVDPLDSTSR | 144       | 100   |                |      | Mascot      |
| 1988.0334  | 1988.0239   | -0.0095 | -5    | 135        | 153      | AIAELGIYPAVDPLDSTSR |           |       |                |      | Mascot      |



7 PREDICTED: hypothetical protein LOC572344 [Danio rerio] gi|326674476 114472.4 4.94 17 50 60.338

Peptide Information

| Calc. Mass | Obsrv. Mass | ± da    | ± ppm | Start Seq. | End Seq. | Sequence                  | Ion Score | C. I. % | Modification                             | Rank | Result Type |
|------------|-------------|---------|-------|------------|----------|---------------------------|-----------|---------|------------------------------------------|------|-------------|
| 832.4046   | 832.3935    | -0.0111 | -13   | 199        | 205      | EQGELEK                   |           |         |                                          |      | Mascot      |
| 865.4851   | 865.4405    | -0.0446 | -52   | 36         | 42       | LLEICFK                   |           |         |                                          |      | Mascot      |
| 1045.5775  | 1045.5597   | -0.0178 | -17   | 313        | 321      | ISVLEDELK                 |           |         |                                          |      | Mascot      |
| 1155.5537  | 1155.6482   | 0.0945  | 82    | 825        | 833      | QMELLYCQK                 |           |         |                                          |      | Mascot      |
| 1171.5486  | 1171.6464   | 0.0978  | 83    | 825        | 833      | QMELLYCQK                 |           |         | Oxidation (M)[2]                         |      | Mascot      |
| 1357.7322  | 1357.6796   | -0.0526 | -39   | 366        | 377      | KAEVEALLAEER              |           |         |                                          |      | Mascot      |
| 1434.7335  | 1434.7635   | 0.03    | 21    | 813        | 824      | EHHLESLNQLK               |           |         |                                          |      | Mascot      |
| 1444.7529  | 1444.7759   | 0.023   | 16    | 739        | 751      | EELEGIVSELQAK             |           |         |                                          |      | Mascot      |
| 1475.7588  | 1475.7452   | -0.0136 | -9    | 556        | 568      | TEEENKVSEALVK             |           |         |                                          |      | Mascot      |
| 1565.8057  | 1565.7883   | -0.0174 | -11   | 596        | 608      | EYESVDNELKLVK             |           |         |                                          |      | Mascot      |
| 1565.8057  | 1565.7883   | -0.0174 | -11   | 596        | 608      | EYESVDNELKLVK             |           |         |                                          |      | Mascot      |
| 1639.7921  | 1639.8311   | 0.039   | 24    | 157        | 170      | ELAHEGDVRDELEK            |           |         |                                          |      | Mascot      |
| 1639.7921  | 1639.8311   | 0.039   | 24    | 157        | 170      | ELAHEGDVRDELEK            |           |         |                                          |      | Mascot      |
| 1644.8666  | 1644.7345   | -0.1321 | -80   | 329        | 342      | GEVLGPIMWEKLLK            |           |         | Oxidation (M)[8]                         |      | Mascot      |
| 1655.8673  | 1655.8046   | -0.0627 | -38   | 569        | 582      | IESLQTEILHLCEK            |           |         |                                          |      | Mascot      |
| 1655.8673  | 1655.8046   | -0.0627 | -38   | 569        | 582      | IESLQTEILHLCEK            |           |         |                                          |      | Mascot      |
| 1845.8218  | 1845.8774   | 0.0556  | 30    | 525        | 539      | NEACTMQQELNNHLK           |           |         | Carbamidomethyl (C)[4], Oxidation (M)[6] |      | Mascot      |
| 1988.0294  | 1988.0239   | -0.0055 | -3    | 245        | 262      | KIDELTEENGTLSAQLAR        |           |         |                                          |      | Mascot      |
| 1988.0294  | 1988.0239   | -0.0055 | -3    | 245        | 262      | KIDELTEENGTLSAQLAR        |           |         |                                          |      | Mascot      |
| 2283.1616  | 2283.1675   | 0.0059  | 3     | 263        | 282      | AEQEVAKLTVVHESAQT<br>EWK  |           |         |                                          |      | Mascot      |
| 2382.168   | 2382.1633   | -0.0047 | -2    | 825        | 844      | QMELLYCQKEEEIIASQQ<br>AK  |           |         |                                          |      | Mascot      |
| 2382.2949  | 2382.1633   | -0.1316 | -55   | 562        | 582      | VSEALVKIESLQTEILHLC<br>EK |           |         |                                          |      | Mascot      |

8 novel protein similar to vertebrate tropomyosin 4 (TPM4) (zgc:63909) [Danio rerio] gi|94732584 23517.9 4.6 8 43 0

Peptide Information

| Calc. Mass | Obsrv. Mass | ± da   | ± ppm | Start Seq. | End Seq. | Sequence   | Ion Score | C. I. % | Modification     | Rank | Result Type |
|------------|-------------|--------|-------|------------|----------|------------|-----------|---------|------------------|------|-------------|
| 866.3923   | 866.462     | 0.0697 | 80    | 54         | 60       | AMKDEEK    |           |         | Oxidation (M)[2] |      | Mascot      |
| 1015.5166  | 1015.5523   | 0.0357 | 35    | 1          | 10       | AEGDVAALNR |           |         |                  |      | Mascot      |
| 1093.4943  | 1093.5179   | 0.0236 | 22    | 39         | 48       | AADESERGMK |           |         |                  |      | Mascot      |

|   |                                                                                 |           |         |     |     |     |                  |          |      |    |    |   |                   |  |  |  |        |
|---|---------------------------------------------------------------------------------|-----------|---------|-----|-----|-----|------------------|----------|------|----|----|---|-------------------|--|--|--|--------|
|   | 1171.6178                                                                       | 1171.6464 | 0.0286  | 24  | 1   | 11  | AEGDVAALNRR      |          |      |    |    |   |                   |  |  |  | Mascot |
|   | 1234.5732                                                                       | 1234.6748 | 0.1016  | 82  | 99  | 109 | AEERAEVAECK      |          |      |    |    |   |                   |  |  |  | Mascot |
|   | 1493.7338                                                                       | 1493.7322 | -0.0016 | -1  | 61  | 72  | MEIQEMQLKEAK     |          |      |    |    |   | Oxidation (M)[1]  |  |  |  | Mascot |
|   | 1655.8962                                                                       | 1655.8046 | -0.0916 | -55 | 89  | 102 | LVILEGELERAEER   |          | 4    |    | 0  |   |                   |  |  |  | Mascot |
|   | 1655.8962                                                                       | 1655.8046 | -0.0916 | -55 | 89  | 102 | LVILEGELERAEER   |          |      |    |    |   |                   |  |  |  | Mascot |
|   | 1774.8164                                                                       | 1774.8722 | 0.0558  | 31  | 189 | 204 | AISEELDHALNDMTSL |          |      |    |    |   | Oxidation (M)[13] |  |  |  | Mascot |
| 9 | PREDICTED: transformation/transcription domain-associated protein [Danio rerio] |           |         |     |     |     | gi 326672350     | 433471.2 | 8.52 | 31 | 42 | 0 |                   |  |  |  |        |

Peptide Information

| Calc. Mass | Obsrv. Mass | ± da    | ± ppm | Start Seq. | End Seq. | Sequence       | Ion Score | C. I. | % Modification         | Rank | Result | Type   |
|------------|-------------|---------|-------|------------|----------|----------------|-----------|-------|------------------------|------|--------|--------|
| 832.4134   | 832.3935    | -0.0199 | -24   | 3257       | 3263     | ATAPMWR        |           |       |                        |      |        | Mascot |
| 865.4963   | 865.4405    | -0.0558 | -64   | 2260       | 2266     | LISVFMR        |           |       |                        |      |        | Mascot |
| 882.5155   | 882.5626    | 0.0471  | 53    | 2182       | 2189     | AVHSLLSR       |           |       |                        |      |        | Mascot |
| 1015.5894  | 1015.5523   | -0.0371 | -37   | 1428       | 1436     | SLTLNVVNR      |           |       |                        |      |        | Mascot |
| 1045.5095  | 1045.5597   | 0.0502  | 48    | 3604       | 3612     | EVQGNMVP       |           |       | Oxidation (M)[6]       |      |        | Mascot |
| 1089.5535  | 1089.5281   | -0.0254 | -23   | 1237       | 1246     | EVTSPNSTVR     |           |       |                        |      |        | Mascot |
| 1155.6844  | 1155.6482   | -0.0362 | -31   | 3506       | 3514     | EERVLQLLR      |           |       |                        |      |        | Mascot |
| 1165.5817  | 1165.7386   | 0.1569  | 135   | 606        | 615      | VANCQTVRMK     |           |       | Oxidation (M)[9]       |      |        | Mascot |
| 1171.6106  | 1171.6464   | 0.0358  | 31    | 558        | 568      | APGEAQFIPNK    |           |       |                        |      |        | Mascot |
| 1184.5955  | 1184.5033   | -0.0922 | -78   | 1558       | 1566     | MFMSFLKHK      |           |       | Oxidation (M)[1]       |      |        | Mascot |
| 1189.6609  | 1189.6831   | 0.0222  | 19    | 2876       | 2886     | LVEMASSLAIR    |           |       |                        |      |        | Mascot |
| 1200.5905  | 1200.4988   | -0.0917 | -76   | 1558       | 1566     | MFMSFLKHK      |           |       | Oxidation (M)[1,3]     |      |        | Mascot |
| 1234.7054  | 1234.6748   | -0.0306 | -25   | 986        | 995      | WIPNVIISHR     |           |       |                        |      |        | Mascot |
| 1316.5536  | 1316.6709   | 0.1173  | 89    | 2248       | 2259     | SACSNSSYIDR    |           |       |                        |      |        | Mascot |
| 1338.7562  | 1338.7688   | 0.0126  | 9     | 1893       | 1905     | QAMAILTPAVPAR  |           |       |                        |      |        | Mascot |
| 1338.7562  | 1338.7688   | 0.0126  | 9     | 1893       | 1905     | QAMAILTPAVPAR  | 1         |       | 0                      |      |        | Mascot |
| 1357.6859  | 1357.6796   | -0.0063 | -5    | 871        | 882      | NPAETISHVAYR   |           |       |                        |      |        | Mascot |
| 1419.6976  | 1419.6769   | -0.0207 | -15   | 2428       | 2439     | AKFFEVDASMK    |           |       |                        |      |        | Mascot |
| 1434.7079  | 1434.7635   | 0.0556  | 39    | 2466       | 2477     | QCTELLAVCER    |           |       | Carbamidomethyl (C)[2] |      |        | Mascot |
| 1475.8217  | 1475.7452   | -0.0765 | -52   | 1963       | 1975     | LGFTPSVTIEQRK  |           |       |                        |      |        | Mascot |
| 1493.7126  | 1493.7322   | 0.0196  | 13    | 1311       | 1322     | LFTMDLNVMEHK   |           |       | Oxidation (M)[4]       |      |        | Mascot |
| 1565.8759  | 1565.7883   | -0.0876 | -56   | 3590       | 3603     | GTQASHQVLRDILK |           |       |                        |      |        | Mascot |
| 1565.8759  | 1565.7883   | -0.0876 | -56   | 3590       | 3603     | GTQASHQVLRDILK |           |       |                        |      |        | Mascot |
| 1638.8958  | 1638.8502   | -0.0456 | -28   | 443        | 455      | DILMRMLEVFVLK  |           |       | Oxidation (M)[4,6]     |      |        | Mascot |
| 1639.8737  | 1639.8311   | -0.0426 | -26   | 1463       | 1476     | WMEVVVITHKGGQR |           |       |                        |      |        | Mascot |

|           |           |         |     |      |      |                            |                         |  |  |  |        |
|-----------|-----------|---------|-----|------|------|----------------------------|-------------------------|--|--|--|--------|
| 1639.8737 | 1639.8311 | -0.0426 | -26 | 1463 | 1476 | WMEVVVITHKGGQR             |                         |  |  |  | Mascot |
| 1655.8685 | 1655.8046 | -0.0639 | -39 | 1463 | 1476 | WMEVVVITHKGGQR             | Oxidation (M)[2]        |  |  |  | Mascot |
| 1655.8685 | 1655.8046 | -0.0639 | -39 | 1463 | 1476 | WMEVVVITHKGGQR             | Oxidation (M)[2]        |  |  |  | Mascot |
| 1822.9255 | 1822.9247 | -0.0008 | 0   | 686  | 701  | LPEMGSNVELSNLYLK           | Oxidation (M)[4]        |  |  |  | Mascot |
| 1822.9255 | 1822.9247 | -0.0008 | 0   | 686  | 701  | LPEMGSNVELSNLYLK           | Oxidation (M)[4]        |  |  |  | Mascot |
| 1845.964  | 1845.8774 | -0.0866 | -47 | 1356 | 1372 | IAALNALAACNYLPQSR          | Carbamidomethyl (C)[10] |  |  |  | Mascot |
| 2005.1805 | 2005.0409 | -0.1396 | -70 | 224  | 240  | VLAELPIIVLVMYQLYK          |                         |  |  |  | Mascot |
| 2197.0229 | 2197.0642 | 0.0413  | 19  | 2796 | 2813 | CSKELNQWEPLTEYGQS<br>K     | Carbamidomethyl (C)[1]  |  |  |  | Mascot |
| 2211.0977 | 2211.094  | -0.0037 | -2  | 619  | 637  | EVLEHFAGVFTMMNPLTF<br>K    |                         |  |  |  | Mascot |
| 2283.0981 | 2283.1675 | 0.0694  | 30  | 3617 | 3634 | EWALHTFPNATDYWTFR<br>K     |                         |  |  |  | Mascot |
| 2284.1384 | 2284.1633 | 0.0249  | 11  | 1175 | 1196 | ALLFVMMDLTGEVSNGA<br>VAMAK | Oxidation (M)[6]        |  |  |  | Mascot |
| 2291.2139 | 2291.1448 | -0.0691 | -30 | 1263 | 1282 | SVTIIMEPHKEVLQDMVP<br>PK   |                         |  |  |  | Mascot |
| 2300.1335 | 2300.1697 | 0.0362  | 16  | 1175 | 1196 | ALLFVMMDLTGEVSNGA<br>VAMAK | Oxidation (M)[6,7]      |  |  |  | Mascot |
| 2382.1831 | 2382.1633 | -0.0198 | -8  | 951  | 970  | QAWVEVIKFLVAMTSLED<br>NK   | Carbamidomethyl (C)[8]  |  |  |  | Mascot |
| 2382.1831 | 2382.1633 | -0.0198 | -8  | 951  | 970  | QAWVEVIKFLVAMTSLED<br>NK   | Carbamidomethyl (C)[8]  |  |  |  | Mascot |

10 PREDICTED: calcium and integrin-binding protein 1-like gi|326679996 21396.8 4.77 7 42 0  
[Danio rerio]

#### Peptide Information

| Calc. Mass | Obsrv. Mass | ± da    | ± ppm | Start Seq. | End Seq. | Sequence                  | Ion Score | C. I. % | Modification           | Rank | Result Type |
|------------|-------------|---------|-------|------------|----------|---------------------------|-----------|---------|------------------------|------|-------------|
| 858.5043   | 858.4422    | -0.0621 | -72   | 2          | 10       | GGTASKLPK                 |           |         |                        |      | Mascot      |
| 865.4083   | 865.4405    | 0.0322  | 37    | 141        | 147      | LTAEE MR                  |           |         | Oxidation (M)[6]       |      | Mascot      |
| 1277.6307  | 1277.702    | 0.0713  | 56    | 69         | 79       | ICHVFSTSDLR               |           |         |                        |      | Mascot      |
| 1338.7303  | 1338.7688   | 0.0385  | 29    | 177        | 188      | SPDFVSSFKIVL              |           |         |                        |      | Mascot      |
| 1338.7303  | 1338.7688   | 0.0385  | 29    | 177        | 188      | SPDFVSSFKIVL              |           |         |                        |      | Mascot      |
| 1483.6846  | 1483.7457   | 0.0611  | 41    | 41         | 53       | ENGPYSSRVSM EK            |           |         |                        |      | Mascot      |
| 1493.6901  | 1493.7322   | 0.0421  | 28    | 128        | 140      | LVNCLTGETDDTR             |           |         | Carbamidomethyl (C)[4] |      | Mascot      |
| 2283.0591  | 2283.1675   | 0.1084  | 47    | 128        | 147      | LVNCLTGETDDTRLTAE E<br>MR |           |         | Oxidation (M)[19]      |      | Mascot      |

11 tropomyosin alpha-4 chain isoform 2 [Danio rerio] gi|47085929 28484.4 4.63 9 42 0

#### Peptide Information

| Calc. Mass | Obsrv. Mass | ± da   | ± ppm | Start Seq. | End Seq. | Sequence   | Ion Score | C. I. % | Modification     | Rank | Result Type |
|------------|-------------|--------|-------|------------|----------|------------|-----------|---------|------------------|------|-------------|
| 866.3923   | 866.462     | 0.0697 | 80    | 98         | 104      | AMKDEEK    |           |         | Oxidation (M)[2] |      | Mascot      |
| 1015.5166  | 1015.5523   | 0.0357 | 35    | 45         | 54       | AEGDVAALNR |           |         |                  |      | Mascot      |

|  |           |           |         |     |     |     |                 |  |   |  |   |  |  |                  |  |  |        |
|--|-----------|-----------|---------|-----|-----|-----|-----------------|--|---|--|---|--|--|------------------|--|--|--------|
|  | 1093.4943 | 1093.5179 | 0.0236  | 22  | 83  | 92  | AADESERGMK      |  |   |  |   |  |  |                  |  |  | Mascot |
|  | 1171.6178 | 1171.6464 | 0.0286  | 24  | 45  | 55  | AEGDVAALNRR     |  |   |  |   |  |  |                  |  |  | Mascot |
|  | 1234.5732 | 1234.6748 | 0.1016  | 82  | 143 | 153 | AEERAEVAECK     |  |   |  |   |  |  |                  |  |  | Mascot |
|  | 1277.6882 | 1277.702  | 0.0138  | 11  | 1   | 12  | MTGVTSLDAPVKK   |  |   |  |   |  |  |                  |  |  | Mascot |
|  | 1434.7322 | 1434.7635 | 0.0313  | 22  | 216 | 228 | SIDDLLEEKLSAK   |  |   |  |   |  |  |                  |  |  | Mascot |
|  | 1493.7338 | 1493.7322 | -0.0016 | -1  | 105 | 116 | MEIQEMQLKEAK    |  |   |  |   |  |  | Oxidation (M)[1] |  |  | Mascot |
|  | 1655.8962 | 1655.8046 | -0.0916 | -55 | 133 | 146 | LVILEGELERAEEER |  | 4 |  | 0 |  |  |                  |  |  | Mascot |
|  | 1655.8962 | 1655.8046 | -0.0916 | -55 | 133 | 146 | LVILEGELERAEEER |  |   |  |   |  |  |                  |  |  | Mascot |

12 novel protein similar to vertebrate tropomyosin 4 (TPM4) (zgc:63909) [Danio rerio] gi|94732583 23433.8 4.6 8 42 0

#### Peptide Information

| Calc. Mass | Obsrv. Mass | ± da    | ± ppm | Start Seq. | End Seq. | Sequence        | Ion Score | C. I. | % Modification   | Rank | Result Type |
|------------|-------------|---------|-------|------------|----------|-----------------|-----------|-------|------------------|------|-------------|
| 866.3923   | 866.462     | 0.0697  | 80    | 54         | 60       | AMKDEEK         |           |       | Oxidation (M)[2] |      | Mascot      |
| 1015.5166  | 1015.5523   | 0.0357  | 35    | 1          | 10       | AEGDVAALNR      |           |       |                  |      | Mascot      |
| 1093.4943  | 1093.5179   | 0.0236  | 22    | 39         | 48       | AADESERGMK      |           |       |                  |      | Mascot      |
| 1171.6178  | 1171.6464   | 0.0286  | 24    | 1          | 11       | AEGDVAALNRR     |           |       |                  |      | Mascot      |
| 1234.5732  | 1234.6748   | 0.1016  | 82    | 99         | 109      | AEERAEVAECK     |           |       |                  |      | Mascot      |
| 1434.7322  | 1434.7635   | 0.0313  | 22    | 172        | 184      | SIDDLLEEKLSAK   |           |       |                  |      | Mascot      |
| 1493.7338  | 1493.7322   | -0.0016 | -1    | 61         | 72       | MEIQEMQLKEAK    |           |       | Oxidation (M)[1] |      | Mascot      |
| 1655.8962  | 1655.8046   | -0.0916 | -55   | 89         | 102      | LVILEGELERAEEER | 4         |       | 0                |      | Mascot      |
| 1655.8962  | 1655.8046   | -0.0916 | -55   | 89         | 102      | LVILEGELERAEEER |           |       |                  |      | Mascot      |

13 novel protein similar to vertebrate piccolo (presynaptic cytomatrix protein) (PCLO) [Danio rerio] gi|122890939 359570.7 5.95 28 42 0

#### Peptide Information

| Calc. Mass | Obsrv. Mass | ± da    | ± ppm | Start Seq. | End Seq. | Sequence   | Ion Score | C. I. | % Modification         | Rank | Result Type |
|------------|-------------|---------|-------|------------|----------|------------|-----------|-------|------------------------|------|-------------|
| 832.4046   | 832.3935    | -0.0111 | -13   | 16         | 22       | EPSEKDK    |           |       |                        |      | Mascot      |
| 842.4049   | 842.5062    | 0.1013  | 120   | 3226       | 3231     | VCRHDR     |           |       | Carbamidomethyl (C)[2] |      | Mascot      |
| 870.5771   | 870.5369    | -0.0402 | -46   | 2299       | 2305     | LLKQQLK    |           |       |                        |      | Mascot      |
| 913.5141   | 913.4963    | -0.0178 | -19   | 3190       | 3196     | NITYKFK    |           |       |                        |      | Mascot      |
| 913.5141   | 913.4963    | -0.0178 | -19   | 3190       | 3196     | NITYKFK    |           |       |                        |      | Mascot      |
| 999.4637   | 999.5625    | 0.0988  | 99    | 1316       | 1324     | AVCCDVVYK  |           |       |                        |      | Mascot      |
| 1045.5248  | 1045.5597   | 0.0349  | 33    | 1084       | 1092     | TPPPHPMPR  |           |       | Oxidation (M)[7]       |      | Mascot      |
| 1089.5786  | 1089.5281   | -0.0505 | -46   | 3007       | 3016     | EDSPKSSVIK |           |       |                        |      | Mascot      |
| 1155.5649  | 1155.6482   | 0.0833  | 72    | 1315       | 1324     | RAVCCDVVYK |           |       |                        |      | Mascot      |

|    |                                                              |           |           |         |     |              |         |                             |                                          |    |   |        |
|----|--------------------------------------------------------------|-----------|-----------|---------|-----|--------------|---------|-----------------------------|------------------------------------------|----|---|--------|
|    |                                                              | 1171.5796 | 1171.6464 | 0.0668  | 57  | 2644         | 2652    | FHYPPFHAR                   |                                          |    |   | Mascot |
|    |                                                              | 1316.7321 | 1316.6709 | -0.0612 | -46 | 2883         | 2894    | VYLLPGRGAENK                |                                          |    |   | Mascot |
|    |                                                              | 1338.6722 | 1338.7688 | 0.0966  | 72  | 2410         | 2420    | LMQDEITFGLR                 | Oxidation (M)[2]                         |    |   | Mascot |
|    |                                                              | 1338.7012 | 1338.7688 | 0.0676  | 50  | 2557         | 2570    | ASAGPLPPISADSR              |                                          |    |   | Mascot |
|    |                                                              | 1411.7791 | 1411.6505 | -0.1286 | -91 | 3            | 15      | EAAAPVKENELLK               |                                          |    |   | Mascot |
|    |                                                              | 1428.6238 | 1428.7797 | 0.1559  | 109 | 2456         | 2469    | SSLGEDSSYPGSGSR             |                                          |    |   | Mascot |
|    |                                                              | 1639.8472 | 1639.8311 | -0.0161 | -10 | 3176         | 3189    | TEGEHLVLEILQCR              |                                          |    |   | Mascot |
|    |                                                              | 1639.8472 | 1639.8311 | -0.0161 | -10 | 3176         | 3189    | TEGEHLVLEILQCR              |                                          |    |   | Mascot |
|    |                                                              | 1668.8374 | 1668.8925 | 0.0551  | 33  | 2407         | 2420    | SSRLMQDEITFGLR              | Oxidation (M)[5]                         |    |   | Mascot |
|    |                                                              | 1774.6378 | 1774.8722 | 0.2344  | 132 | 1706         | 1720    | MDSGCQTDEEDNTEK             | Carbamidomethyl (C)[5], Oxidation (M)[1] |    |   | Mascot |
|    |                                                              | 1822.7688 | 1822.9247 | 0.1559  | 86  | 2284         | 2298    | AQDEEDPMEEPFEK              | Oxidation (M)[8]                         |    |   | Mascot |
|    |                                                              | 1822.8501 | 1822.9247 | 0.0746  | 41  | 3071         | 3088    | AHLDDAAAMAEAGQQP<br>R       |                                          |    |   | Mascot |
|    |                                                              | 1845.9779 | 1845.8774 | -0.1005 | -54 | 1843         | 1859    | SPKVLYSPISPCVSPSK           | Carbamidomethyl (C)[12]                  |    |   | Mascot |
|    |                                                              | 1886.8735 | 1886.9117 | 0.0382  | 20  | 1420         | 1436    | TTGVCTGMTVPQYTQAR           | Carbamidomethyl (C)[5], Oxidation (M)[8] |    |   | Mascot |
|    |                                                              | 1988.0157 | 1988.0239 | 0.0082  | 4   | 1687         | 1704    | QMYPGEVLPEALVVTGE<br>R      |                                          |    |   | Mascot |
|    |                                                              | 1988.0157 | 1988.0239 | 0.0082  | 4   | 1687         | 1704    | QMYPGEVLPEALVVTGE<br>R      |                                          |    |   | Mascot |
|    |                                                              | 1993.947  | 1993.9583 | 0.0113  | 6   | 532          | 547     | KPLRSPDEVYEDMMQR            |                                          |    |   | Mascot |
|    |                                                              | 2005.0098 | 2005.0409 | 0.0311  | 16  | 2259         | 2277    | LLRHAAADVSSDYLGSSS<br>R     |                                          |    |   | Mascot |
|    |                                                              | 2196.9966 | 2197.0642 | 0.0676  | 31  | 125          | 143     | TIGDKGEIESPMDEEDFIR         | Oxidation (M)[12]                        |    |   | Mascot |
|    |                                                              | 2291.1853 | 2291.1448 | -0.0405 | -18 | 1685         | 1704    | FRQMYPGEVLPALVVT<br>GER     |                                          |    |   | Mascot |
|    |                                                              | 2382.1243 | 2382.1633 | 0.039   | 16  | 2744         | 2764    | LDINMLSDSDSSHDLHD<br>QVK    |                                          |    |   | Mascot |
|    |                                                              | 2382.2373 | 2382.1633 | -0.074  | -31 | 1363         | 1385    | GLGGIKPSMSDTNLAEA<br>GLFLYK |                                          |    |   | Mascot |
| 14 | PREDICTED: tRNA-dihydrouridine synthase 2-like [Danio rerio] |           |           |         |     | gi 292628574 | 56676.6 | 6.04                        | 12                                       | 41 | 0 |        |

| Calc. Mass | Obsrv. Mass | ± da    | ± ppm | Start Seq. | End Seq. | Sequence     | Ion Score | C. I. % | Modification     | Rank | Result Type |
|------------|-------------|---------|-------|------------|----------|--------------|-----------|---------|------------------|------|-------------|
| 842.473    | 842.5062    | 0.0332  | 39    | 436        | 443      | TLGLPEGR     |           |         |                  |      | Mascot      |
| 913.5287   | 913.4963    | -0.0324 | -35   | 19         | 26       | NILAPMVR     |           |         |                  |      | Mascot      |
| 913.5287   | 913.4963    | -0.0324 | -35   | 19         | 26       | NILAPMVR     |           |         |                  |      | Mascot      |
| 1045.4628  | 1045.5597   | 0.0969  | 93    | 288        | 295      | YCLCQMLR     |           |         | Oxidation (M)[6] |      | Mascot      |
| 1051.6007  | 1051.7067   | 0.106   | 101   | 180        | 190      | TGVAAIAVHGR  |           |         |                  |      | Mascot      |
| 1062.5538  | 1062.6842   | 0.1304  | 123   | 328        | 336      | TTAELESRR    |           |         |                  |      | Mascot      |
| 1201.7085  | 1201.5355   | -0.173  | -144  | 152        | 162      | GISKPVTCCKIR |           |         |                  |      | Mascot      |

|           |           |         |     |     |     |                           |                        |        |
|-----------|-----------|---------|-----|-----|-----|---------------------------|------------------------|--------|
| 1277.6041 | 1277.702  | 0.0979  | 77  | 129 | 141 | GGMGSALLSDPEK             | Oxidation (M)[3]       | Mascot |
| 1316.5908 | 1316.6709 | 0.0801  | 61  | 288 | 297 | YCLCQMLRDR                | Oxidation (M)[6]       | Mascot |
| 1338.7124 | 1338.7688 | 0.0564  | 42  | 444 | 455 | IGEEHSGLVNKR              |                        | Mascot |
| 1338.7124 | 1338.7688 | 0.0564  | 42  | 444 | 455 | IGEEHSGLVNKR              |                        | Mascot |
| 1357.6173 | 1357.6796 | 0.0623  | 46  | 288 | 297 | YCLCQMLRDR                | Carbamidomethyl (C)[2] | Mascot |
| 1419.7777 | 1419.6769 | -0.1008 | -71 | 423 | 435 | KFAEQAAALVCLR             |                        | Mascot |
| 1444.8257 | 1444.7759 | -0.0498 | -34 | 163 | 175 | ILSTIEDTVNLVK             |                        | Mascot |
| 2382.1316 | 2382.1633 | 0.0317  | 13  | 107 | 128 | LVENDVAADVNMGCPK<br>EYSTK |                        | Mascot |
| 2382.1316 | 2382.1633 | 0.0317  | 13  | 107 | 128 | LVENDVAADVNMGCPK<br>EYSTK |                        | Mascot |

15 PREDICTED: hypothetical protein LOC559994 [Danio rerio] gi|326677062 1030064.3 5.62 47 40 0

| Peptide Information |             |         |       |            |          |              |           |                        |                  |
|---------------------|-------------|---------|-------|------------|----------|--------------|-----------|------------------------|------------------|
| Calc. Mass          | Obsrv. Mass | ± da    | ± ppm | Start Seq. | End Seq. | Sequence     | Ion Score | C. I. % Modification   | Rank Result Type |
| 832.4563            | 832.3935    | -0.0628 | -75   | 1404       | 1410     | WALDSLK      |           |                        | Mascot           |
| 850.5185            | 850.5383    | 0.0198  | 23    | 8569       | 8575     | IKPFAFK      |           |                        | Mascot           |
| 858.3232            | 858.4422    | 0.119   | 139   | 8188       | 8194     | QGYCCER      |           |                        | Mascot           |
| 865.4084            | 865.4405    | 0.0321  | 37    | 4710       | 4717     | QGVMTSDK     |           |                        | Mascot           |
| 866.44              | 866.462     | 0.022   | 25    | 6867       | 6873     | MLESSRK      |           | Oxidation (M)[1]       | Mascot           |
| 870.5559            | 870.5369    | -0.019  | -22   | 1536       | 1542     | ALLLWVR      |           |                        | Mascot           |
| 882.4679            | 882.5626    | 0.0947  | 107   | 3102       | 3108     | NLHEELK      |           |                        | Mascot           |
| 913.4665            | 913.4963    | 0.0298  | 33    | 3566       | 3572     | ELFFETK      |           |                        | Mascot           |
| 913.4665            | 913.4963    | 0.0298  | 33    | 3566       | 3572     | ELFFETK      |           |                        | Mascot           |
| 999.6057            | 999.5625    | -0.0432 | -43   | 3432       | 3439     | QLQSLVRR     |           |                        | Mascot           |
| 1015.553            | 1015.5523   | -0.0007 | -1    | 5576       | 5584     | AEDNRLGIK    |           |                        | Mascot           |
| 1045.5636           | 1045.5597   | -0.0039 | -4    | 8277       | 8285     | DLEVRSAQK    |           |                        | Mascot           |
| 1062.536            | 1062.6842   | 0.1482  | 139   | 3153       | 3160     | TKCLEQQR     |           | Carbamidomethyl (C)[3] | Mascot           |
| 1089.5422           | 1089.5281   | -0.0141 | -13   | 7830       | 7838     | LQSEEDLQK    |           |                        | Mascot           |
| 1093.5282           | 1093.5179   | -0.0103 | -9    | 1656       | 1663     | EMKCWLQR     |           |                        | Mascot           |
| 1179.5674           | 1179.5941   | 0.0267  | 23    | 2826       | 2835     | DMDLLSQSVR   |           | Oxidation (M)[2]       | Mascot           |
| 1184.5953           | 1184.5033   | -0.092  | -78   | 324        | 333      | RANPPQQSMR   |           |                        | Mascot           |
| 1200.5531           | 1200.4988   | -0.0543 | -45   | 4900       | 4909     | SDEFALTDFR   |           |                        | Mascot           |
| 1234.6348           | 1234.6748   | 0.04    | 32    | 3360       | 3370     | EQCASLTELK   |           |                        | Mascot           |
| 1279.6504           | 1279.6721   | 0.0217  | 17    | 249        | 258      | ELYGKWMQPK   |           |                        | Mascot           |
| 1279.6562           | 1279.6721   | 0.0159  | 12    | 5890       | 5900     | TLKQDVTMSEK  |           |                        | Mascot           |
| 1316.6593           | 1316.6709   | 0.0116  | 9     | 3905       | 3916     | ISHTSIYHGSSK |           |                        | Mascot           |

|           |           |         |     |      |      |                            |                           |        |
|-----------|-----------|---------|-----|------|------|----------------------------|---------------------------|--------|
| 1357.7296 | 1357.6796 | -0.05   | -37 | 277  | 287  | MLSPELQVWVR                |                           | Mascot |
| 1411.6547 | 1411.6505 | -0.0042 | -3  | 5340 | 5353 | SADAEKSDSTSSVK             |                           | Mascot |
| 1419.7512 | 1419.6769 | -0.0743 | -52 | 3360 | 3371 | EQCASLTELK                 | Carbamidomethyl (C)[3]    | Mascot |
| 1428.6835 | 1428.7797 | 0.0962  | 67  | 3155 | 3165 | CLEQQRHCVQK                | Carbamidomethyl (C)[1]    | Mascot |
| 1434.8467 | 1434.7635 | -0.0832 | -58 | 8569 | 8580 | IKPFAFKLLSDR               |                           | Mascot |
| 1444.8522 | 1444.7759 | -0.0763 | -53 | 4568 | 4579 | FLLEKDIVKPSR               |                           | Mascot |
| 1475.7522 | 1475.7452 | -0.007  | -5  | 6801 | 6813 | QEAKILECSVAER              |                           | Mascot |
| 1483.6812 | 1483.7457 | 0.0645  | 43  | 8253 | 8265 | WKSFSGSDTPESR              |                           | Mascot |
| 1638.9438 | 1638.8502 | -0.0936 | -57 | 3297 | 3310 | HVLKEPTLPALQHR             |                           | Mascot |
| 1639.7744 | 1639.8311 | 0.0567  | 35  | 874  | 887  | NDETNVASYVIQMR             |                           | Mascot |
| 1639.7744 | 1639.8311 | 0.0567  | 35  | 874  | 887  | NDETNVASYVIQMR             |                           | Mascot |
| 1644.7347 | 1644.7345 | -0.0002 | 0   | 4256 | 4270 | SSAGTVEPEEQEPER            |                           | Mascot |
| 1655.7694 | 1655.8046 | 0.0352  | 21  | 874  | 887  | NDETNVASYVIQMR             | Oxidation (M)[13]         | Mascot |
| 1655.8938 | 1655.8046 | -0.0892 | -54 | 744  | 757  | AKYVATCLVQLFSR             | Carbamidomethyl (C)[7]    | Mascot |
| 1668.7687 | 1668.8925 | 0.1238  | 74  | 1724 | 1736 | AWDAMEERLQEYK              |                           | Mascot |
| 1886.9454 | 1886.9117 | -0.0337 | -18 | 2859 | 2875 | ESLESAESVLLSTTHQR          |                           | Mascot |
| 1987.9828 | 1988.0239 | 0.0411  | 21  | 413  | 430  | EMIALVDTGSDQTLVHMK         |                           | Mascot |
| 1987.9828 | 1988.0239 | 0.0411  | 21  | 413  | 430  | EMIALVDTGSDQTLVHMK         |                           | Mascot |
| 2005.0336 | 2005.0409 | 0.0073  | 4   | 5104 | 5121 | LSETVDTETLNLLQTEAK         |                           | Mascot |
| 2167.0295 | 2167.0569 | 0.0274  | 13  | 4410 | 4429 | VPDTTDTSLNVASTCSQS<br>KR   | Carbamidomethyl (C)[15]   | Mascot |
| 2183.0835 | 2183.05   | -0.0335 | -15 | 6163 | 6182 | GMDARWSAVLLATSTMA<br>ELK   | Oxidation (M)[2,16]       | Mascot |
| 2211.126  | 2211.094  | -0.032  | -14 | 8508 | 8526 | MSAAELQTTGVIYRLELC<br>R    | Carbamidomethyl (C)[18]   | Mascot |
| 2224.9873 | 2225.1104 | 0.1231  | 55  | 4312 | 4333 | VTDAETSSQIGACAEDNE<br>SGIK |                           | Mascot |
| 2224.9873 | 2225.1104 | 0.1231  | 55  | 4312 | 4333 | VTDAETSSQIGACAEDNE<br>SGIK |                           | Mascot |
| 2233.0012 | 2233.0696 | 0.0684  | 31  | 8235 | 8252 | DSTELEEWMRCAHEQLQ<br>K     |                           | Mascot |
| 2283.1333 | 2283.1675 | 0.0342  | 15  | 7195 | 7214 | ESPQICQDLQSLGHCRS<br>LR    |                           | Mascot |
| 2284.022  | 2284.1633 | 0.1413  | 62  | 3439 | 3458 | RVLDCDAPFESEADTL<br>MDR    |                           | Mascot |
| 2291.0366 | 2291.1448 | 0.1082  | 47  | 7455 | 7474 | CIHGHANSLKMMLDESE<br>GYR   |                           | Mascot |
| 2300.0168 | 2300.1697 | 0.1529  | 66  | 3439 | 3458 | RVLDCDAPFESEADTL<br>MDR    | Oxidation (M)[18]         | Mascot |
| 2382.1467 | 2382.1633 | 0.0166  | 7   | 7419 | 7438 | IPACLQDYEALLSSTNCW<br>LK   | Carbamidomethyl (C)[4,17] | Mascot |
| 2382.1467 | 2382.1633 | 0.0166  | 7   | 7419 | 7438 | IPACLQDYEALLSSTNCW<br>LK   | Carbamidomethyl (C)[4,17] | Mascot |
| 2395.2405 | 2395.0476 | -0.1929 | -81 | 2702 | 2722 | HFFDSPPKLQSQTSVTTL<br>HPK  |                           | Mascot |

| Peptide Information |                                                                 |         |       |              |          |                          |           |       |                         |      |             |
|---------------------|-----------------------------------------------------------------|---------|-------|--------------|----------|--------------------------|-----------|-------|-------------------------|------|-------------|
| Calc. Mass          | Obsrv. Mass                                                     | ± da    | ± ppm | Start Seq.   | End Seq. | Sequence                 | Ion Score | C. I. | % Modification          | Rank | Result Type |
| 832.4821            | 832.3935                                                        | -0.0886 | -106  | 722          | 728      | MRLIGSR                  |           |       |                         |      | Mascot      |
| 996.5182            | 996.5918                                                        | 0.0736  | 74    | 75           | 83       | DCPLVAPPK                |           |       | Carbamidomethyl (C)[2]  |      | Mascot      |
| 1045.516            | 1045.5597                                                       | 0.0437  | 42    | 98           | 106      | QTNITDEPK                |           |       |                         |      | Mascot      |
| 1155.5681           | 1155.6482                                                       | 0.0801  | 69    | 1043         | 1051     | DIDYTPYIR                |           |       |                         |      | Mascot      |
| 1165.6034           | 1165.7386                                                       | 0.1352  | 116   | 440          | 449      | FCEQAVTIVR               |           |       |                         |      | Mascot      |
| 1357.7507           | 1357.6796                                                       | -0.0711 | -52   | 377          | 388      | LPVVQIQTACK              |           |       | Carbamidomethyl (C)[11] |      | Mascot      |
| 1434.879            | 1434.7635                                                       | -0.1155 | -80   | 724          | 736      | LIGSREPLLLAR             |           |       |                         |      | Mascot      |
| 1444.7617           | 1444.7759                                                       | 0.0142  | 10    | 547          | 559      | EMQAAIVLQAGWK            |           |       |                         |      | Mascot      |
| 1638.842            | 1638.8502                                                       | 0.0082  | 5     | 750          | 762      | GYIIPNQKNIICR            |           |       | Carbamidomethyl (C)[12] |      | Mascot      |
| 1707.8846           | 1707.7631                                                       | -0.1215 | -71   | 436          | 449      | ESLRFCEQAVTIVR           |           |       | Carbamidomethyl (C)[6]  |      | Mascot      |
| 1845.8824           | 1845.8774                                                       | -0.005  | -3    | 191          | 208      | KDNSIANEGVESTAAPDK       |           |       |                         |      | Mascot      |
| 1887.0197           | 1886.9117                                                       | -0.108  | -57   | 75           | 91       | DCPLVAPPKTPPLPQWK        |           |       |                         |      | Mascot      |
| 1988.027            | 1988.0239                                                       | -0.0031 | -2    | 542          | 559      | QATDKEMQAAIVLQAGW<br>K   |           |       |                         |      | Mascot      |
| 1988.027            | 1988.0239                                                       | -0.0031 | -2    | 542          | 559      | QATDKEMQAAIVLQAGW<br>K   |           |       |                         |      | Mascot      |
| 2005                | 2005.0409                                                       | 0.0409  | 20    | 484          | 500      | VFSEAVYHMFSSALGRK        |           |       | Oxidation (M)[9]        |      | Mascot      |
| 2196.9358           | 2197.0642                                                       | 0.1284  | 58    | 1104         | 1121     | QMETCIGFQDTMDAYRQ<br>K   |           |       | Oxidation (M)[2,12]     |      | Mascot      |
| 2283.1875           | 2283.1675                                                       | -0.02   | -9    | 663          | 682      | MFSPIPVCILHVINNDTLE<br>K |           |       |                         |      | Mascot      |
| 17                  | euchromatic histone-lysine N-methyltransferase 1b [Danio rerio] |         |       | gi 289191301 |          | 140285.8                 | 6.16      | 17    | 39                      | 0    |             |

| Peptide Information |             |          |           |            |          |               |           |       |                                          |      |             |  |  |
|---------------------|-------------|----------|-----------|------------|----------|---------------|-----------|-------|------------------------------------------|------|-------------|--|--|
| Calc. Mass          | Obsrv. Mass | $\pm$ da | $\pm$ ppm | Start Seq. | End Seq. | Sequence      | Ion Score | C. I. | % Modification                           | Rank | Result Type |  |  |
| 866.4552            | 866.462     | 0.0068   | 8         | 1230       | 1236     | GKLFNCK       |           |       | Carbamidomethyl (C)[6]                   |      | Mascot      |  |  |
| 1171.6582           | 1171.6464   | -0.0118  | -10       | 965        | 974      | VWNALQANKK    |           |       |                                          |      | Mascot      |  |  |
| 1179.619            | 1179.5941   | -0.0249  | -21       | 932        | 941      | LDCVNLFLSR    |           |       |                                          |      | Mascot      |  |  |
| 1200.5499           | 1200.4988   | -0.0511  | -43       | 1232       | 1241     | LFNCKCGSSK    |           |       | Carbamidomethyl (C)[4,6]                 |      | Mascot      |  |  |
| 1201.4976           | 1201.5355   | 0.0379   | 32        | 1160       | 1169     | VGDMYCVDAR    |           |       | Carbamidomethyl (C)[6], Oxidation (M)[4] |      | Mascot      |  |  |
| 1279.7732           | 1279.6721   | -0.1011  | -79       | 865        | 875      | HVDQVKLLLSK   |           |       |                                          |      | Mascot      |  |  |
| 1279.7732           | 1279.6721   | -0.1011  | -79       | 865        | 875      | HVDQVKLLLSK   |           |       |                                          |      | Mascot      |  |  |
| 1316.7419           | 1316.6709   | -0.071   | -54       | 165        | 176      | AETETKNGIILK  |           |       |                                          |      | Mascot      |  |  |
| 1357.5057           | 1357.6796   | 0.1739   | 128       | 556        | 567      | HQCCPGCGFFCR  |           |       |                                          |      | Mascot      |  |  |
| 1483.6515           | 1483.7457   | 0.0942   | 63        | 511        | 523      | CMATESIDGQLSR |           |       | Carbamidomethyl (C)[1], Oxidation (M)[2] |      | Mascot      |  |  |



|           |           |         |     |      |      |                             |                                          |        |
|-----------|-----------|---------|-----|------|------|-----------------------------|------------------------------------------|--------|
| 1707.8258 | 1707.7631 | -0.0627 | -37 | 1019 | 1033 | YVPDSCVTSPNLIDK             | Carbamidomethyl (C)[6]                   | Mascot |
| 1845.9963 | 1845.8774 | -0.1189 | -64 | 188  | 203  | TMSRPASNQTLKLLNR            | Oxidation (M)[2]                         | Mascot |
| 1987.8215 | 1988.0239 | 0.2024  | 102 | 551  | 567  | TGMVKHQCCPGCGFFC<br>R       | Carbamidomethyl (C)[8,9]                 | Mascot |
| 1987.8215 | 1988.0239 | 0.2024  | 102 | 551  | 567  | TGMVKHQCCPGCGFFC<br>R       | Carbamidomethyl (C)[8,9]                 | Mascot |
| 2167.002  | 2167.0569 | 0.0549  | 25  | 910  | 928  | CDLNTMNIHGDSPLHIAS<br>R     | Carbamidomethyl (C)[1], Oxidation (M)[6] | Mascot |
| 2197.041  | 2197.0642 | 0.0232  | 11  | 511  | 530  | CMATESIDGQLSRCQSA<br>VLK    | Carbamidomethyl (C)[1]                   | Mascot |
| 2283.0557 | 2283.1675 | 0.1118  | 49  | 47   | 66   | TGPLREAIEQNGTYENM<br>DTK    | Oxidation (M)[17]                        | Mascot |
| 2291.1775 | 2291.1448 | -0.0327 | -14 | 734  | 753  | VLLMLVDGIDPNFKMESQ<br>NK    |                                          | Mascot |
| 2395.0837 | 2395.0476 | -0.0361 | -15 | 587  | 609  | TCASVLNGQSFCPHCGE<br>EVSKAK |                                          | Mascot |

18 novel protein [Danio rerio] gi|122890781 25209.1 6.27 7 39 0

#### Peptide Information

| Calc. Mass | Obsrv. Mass | ± da    | ± ppm | Start Seq. | End Seq. | Sequence                | Ion Score | C. I. % | Modification               | Rank | Result Type |
|------------|-------------|---------|-------|------------|----------|-------------------------|-----------|---------|----------------------------|------|-------------|
| 866.4366   | 866.462     | 0.0254  | 29    | 29         | 35       | DTTVFQR                 |           |         |                            |      | Mascot      |
| 999.5945   | 999.5625    | -0.032  | -32   | 1          | 9        | LQVSAVNIR               |           |         |                            |      | Mascot      |
| 1316.6317  | 1316.6709   | 0.0392  | 30    | 175        | 185      | RPDHFMFPGGR             |           |         |                            |      | Mascot      |
| 1444.7267  | 1444.7759   | 0.0492  | 34    | 174        | 185      | KRPDHFMFPGGR            |           |         |                            |      | Mascot      |
| 1707.7842  | 1707.7631   | -0.0211 | -12   | 186        | 199      | GPYHCICGRDFNR           |           |         | Carbamidomethyl (C)[5]     |      | Mascot      |
| 2197.0078  | 2197.0642   | 0.0564  | 26    | 10         | 28       | QQTQSSVNSEQDYLLCE<br>PK |           |         |                            |      | Mascot      |
| 2211.0544  | 2211.094    | 0.0396  | 18    | 209        | 226      | IHTGERPYTCSICARFR       |           |         | Carbamidomethyl (C)[10,13] |      | Mascot      |

19 PREDICTED: retrotransposable element Tf2 155 kDa protein type 1-like [Danio rerio] gi|326671833 129625.3 9.12 15 38 0

#### Peptide Information

| Calc. Mass | Obsrv. Mass | ± da    | ± ppm | Start Seq. | End Seq. | Sequence       | Ion Score | C. I. % | Modification     | Rank | Result Type |
|------------|-------------|---------|-------|------------|----------|----------------|-----------|---------|------------------|------|-------------|
| 832.4523   | 832.3935    | -0.0588 | -71   | 277        | 283      | LSAEERK        |           |         |                  |      | Mascot      |
| 882.4614   | 882.5626    | 0.1012  | 115   | 896        | 903      | LTCHPGVR       |           |         |                  |      | Mascot      |
| 999.5581   | 999.5625    | 0.0044  | 4     | 819        | 827      | NVKPDALSR      |           |         |                  |      | Mascot      |
| 1189.5994  | 1189.6831   | 0.0837  | 70    | 1060       | 1069     | ANQALEQMLR     |           |         | Oxidation (M)[8] |      | Mascot      |
| 1201.5848  | 1201.5355   | -0.0493 | -41   | 173        | 182      | SVSDYSIQFR     |           |         |                  |      | Mascot      |
| 1234.6538  | 1234.6748   | 0.021   | 17    | 412        | 422      | GRLYSLSGPER    |           |         |                  |      | Mascot      |
| 1357.6859  | 1357.6796   | -0.0063 | -5    | 626        | 637      | AVSNWPTPDSRK   |           |         |                  |      | Mascot      |
| 1428.7634  | 1428.7797   | 0.0163  | 11    | 807        | 818      | FNFILSYRPGSK   |           |         |                  |      | Mascot      |
| 1483.7977  | 1483.7457   | -0.052  | -35   | 868        | 881      | VPEGCPANLLFVPK |           |         |                  |      | Mascot      |

|           |           |         |     |     |     |                            |        |
|-----------|-----------|---------|-----|-----|-----|----------------------------|--------|
| 1565.7992 | 1565.7883 | -0.0109 | -7  | 414 | 427 | LYSLSGPERVAMDK             | Mascot |
| 1565.7992 | 1565.7883 | -0.0109 | -7  | 414 | 427 | LYSLSGPERVAMDK             | Mascot |
| 1655.8151 | 1655.8046 | -0.0105 | -6  | 642 | 654 | FLGFSNFYCRFVR              | Mascot |
| 1655.8151 | 1655.8046 | -0.0105 | -6  | 642 | 654 | FLGFSNFYCRFVR              | Mascot |
| 1668.8802 | 1668.8925 | 0.0123  | 7   | 655 | 670 | NYSQIAASLTALTSTK           | Mascot |
| 1822.9731 | 1822.9247 | -0.0484 | -27 | 423 | 439 | VAMDKYISDSLAAGLIR          | Mascot |
| 1822.9731 | 1822.9247 | -0.0484 | -27 | 423 | 439 | VAMDKYISDSLAAGLIR          | Mascot |
| 1994.0051 | 1993.9583 | -0.0468 | -23 | 686 | 703 | LKTCFSSAPVLSFPDPER         | Mascot |
| 2167.1101 | 2167.0569 | -0.0532 | -25 | 2   | 22  | DPADEDTVRAALAAQQGA<br>LLGR | Mascot |

20 PREDICTED: WD repeat- and FYVE domain-containing gij326673033 526148.3 6.32 31 37 0  
protein 4 [Danio rerio]

Peptide Information

| Calc. Mass | Obsrv. Mass | ± da    | ± ppm | Start Seq. | End Seq. | Sequence       | Ion Score | C. I. % | Modification                               | Rank | Result Type |
|------------|-------------|---------|-------|------------|----------|----------------|-----------|---------|--------------------------------------------|------|-------------|
| 850.5145   | 850.5383    | 0.0238  | 28    | 2616       | 2622     | RSFSLLK        |           |         |                                            |      | Mascot      |
| 866.3937   | 866.462     | 0.0683  | 79    | 1217       | 1222     | FCQQQR         |           |         | Carbamidomethyl (C)[2]                     |      | Mascot      |
| 1051.5492  | 1051.7067   | 0.1575  | 150   | 2205       | 2213     | DLGMIPYVK      |           |         | Oxidation (M)[4]                           |      | Mascot      |
| 1062.5435  | 1062.6842   | 0.1407  | 132   | 901        | 908      | IMLQELCR       |           |         | Carbamidomethyl (C)[7]                     |      | Mascot      |
| 1155.7096  | 1155.6482   | -0.0614 | -53   | 1005       | 1015     | LELTA AVLAVR   |           |         |                                            |      | Mascot      |
| 1171.509   | 1171.6464   | 0.1374  | 117   | 1321       | 1330     | KIMSDCCLCR     |           |         |                                            |      | Mascot      |
| 1179.6844  | 1179.5941   | -0.0903 | -77   | 1279       | 1288     | DQHIALLLR      |           |         |                                            |      | Mascot      |
| 1184.6534  | 1184.5033   | -0.1501 | -127  | 4307       | 4316     | QIFTKPHASR     |           |         |                                            |      | Mascot      |
| 1189.5443  | 1189.6831   | 0.1388  | 117   | 1076       | 1086     | SKENPADDASR    |           |         |                                            |      | Mascot      |
| 1200.6444  | 1200.4988   | -0.1456 | -121  | 4626       | 4635     | ELNRNQAISR     |           |         |                                            |      | Mascot      |
| 1234.6394  | 1234.6748   | 0.0354  | 29    | 901        | 909      | IMLQELCRR      |           |         | Carbamidomethyl (C)[7], Oxidation (M)[2]   |      | Mascot      |
| 1316.7606  | 1316.6709   | -0.0897 | -68   | 2258       | 2268     | LKQDLLQSIMK    |           |         |                                            |      | Mascot      |
| 1428.7667  | 1428.7797   | 0.013   | 9     | 2349       | 2361     | LGEALLHLGCFQK  |           |         |                                            |      | Mascot      |
| 1444.7365  | 1444.7759   | 0.0394  | 27    | 48         | 59       | AKQLVQE HFGCK  |           |         | Carbamidomethyl (C)[11]                    |      | Mascot      |
| 1483.7032  | 1483.7457   | 0.0425  | 29    | 389        | 400      | TQFLLCTMGQER   |           |         | Carbamidomethyl (C)[6]                     |      | Mascot      |
| 1565.6685  | 1565.7883   | 0.1198  | 77    | 35         | 47       | SCLYMPPELG YDK |           |         | Oxidation (M)[5]                           |      | Mascot      |
| 1565.6685  | 1565.7883   | 0.1198  | 77    | 35         | 47       | SCLYMPPELG YDK |           |         | Oxidation (M)[5]                           |      | Mascot      |
| 1638.6848  | 1638.8502   | 0.1654  | 101   | 35         | 47       | SCLYMPPELG YDK |           |         | Carbamidomethyl (C)[2], Oxidation (M)[5,6] |      | Mascot      |
| 1639.8043  | 1639.8311   | 0.0268  | 16    | 388        | 400      | RTQFLLCTMGQER  |           |         | Carbamidomethyl (C)[7]                     |      | Mascot      |
| 1639.8043  | 1639.8311   | 0.0268  | 16    | 388        | 400      | RTQFLLCTMGQER  |           |         | Carbamidomethyl (C)[7]                     |      | Mascot      |
| 1655.7992  | 1655.8046   | 0.0054  | 3     | 388        | 400      | RTQFLLCTMGQER  |           |         | Carbamidomethyl (C)[7], Oxidation (M)[9]   |      | Mascot      |
| 1655.7992  | 1655.8046   | 0.0054  | 3     | 388        | 400      | RTQFLLCTMGQER  |           |         | Carbamidomethyl (C)[7], Oxidation (M)[9]   |      | Mascot      |

|           |           |         |      |      |      |                           |                             |  |  |  |  |        |
|-----------|-----------|---------|------|------|------|---------------------------|-----------------------------|--|--|--|--|--------|
| 1823.1113 | 1822.9247 | -0.1866 | -102 | 999  | 1015 | TVTIPRLELTA AVLAVR        |                             |  |  |  |  | Mascot |
| 1823.1113 | 1822.9247 | -0.1866 | -102 | 999  | 1015 | TVTIPRLELTA AVLAVR        |                             |  |  |  |  | Mascot |
| 1887.0806 | 1886.9117 | -0.1689 | -90  | 1005 | 1021 | LELTA AVLAVRMDMLK         |                             |  |  |  |  | Mascot |
| 1988.0481 | 1988.0239 | -0.0242 | -12  | 1438 | 1455 | EALLTLNQTNIGGMLQKQ        | Oxidation (M)[14]           |  |  |  |  | Mascot |
| 1988.0481 | 1988.0239 | -0.0242 | -12  | 1438 | 1455 | EALLTLNQTNIGGMLQKQ        | Oxidation (M)[14]           |  |  |  |  | Mascot |
| 1993.9907 | 1993.9583 | -0.0324 | -16  | 2521 | 2537 | QIMCEFGLLSTLLTHCK         | Carbamidomethyl (C)[4]      |  |  |  |  | Mascot |
| 2166.9504 | 2167.0569 | 0.1065  | 49   | 3900 | 3919 | ADLYICEGFTLTSTGDVC<br>CR  |                             |  |  |  |  | Mascot |
| 2183.157  | 2183.05   | -0.107  | -49  | 2205 | 2222 | DLGMIPYVKIFLDVEQFR        |                             |  |  |  |  | Mascot |
| 2197.1885 | 2197.0642 | -0.1243 | -57  | 2792 | 2810 | HLIPGQWHHLCLVMAKGI<br>K   | Oxidation (M)[14]           |  |  |  |  | Mascot |
| 2224.9355 | 2225.1104 | 0.1749  | 79   | 257  | 274  | HLCFGCLSTSHMSRDCE<br>K    | Carbamidomethyl (C)[3,6,16] |  |  |  |  | Mascot |
| 2224.9355 | 2225.1104 | 0.1749  | 79   | 257  | 274  | HLCFGCLSTSHMSRDCE<br>K    | Carbamidomethyl (C)[3,6,16] |  |  |  |  | Mascot |
| 2233.0127 | 2233.0696 | 0.0569  | 25   | 3183 | 3201 | SWSFECLSCICPGFEVLQ<br>K   | Carbamidomethyl (C)[6]      |  |  |  |  | Mascot |
| 2283.1948 | 2283.1675 | -0.0273 | -12  | 2024 | 2043 | IIQSSFMRSSNTVICSQIL<br>R  |                             |  |  |  |  | Mascot |
| 2284.1389 | 2284.1633 | 0.0244  | 11   | 2349 | 2369 | LGEALLHLGCFQKGDVP<br>ESDR |                             |  |  |  |  | Mascot |
| 2291.1587 | 2291.1448 | -0.0139 | -6   | 1517 | 1536 | LSDDPNLEPLTPNHILL<br>MK   | Oxidation (M)[19]           |  |  |  |  | Mascot |
| 2300.1206 | 2300.1697 | 0.0491  | 21   | 910  | 927  | NYGWDETVPQELLHRWT<br>R    |                             |  |  |  |  | Mascot |
| 2382.1548 | 2382.1633 | 0.0085  | 4    | 925  | 942  | WTRWIEELEMLSNFEINR        | Oxidation (M)[10]           |  |  |  |  | Mascot |
| 2382.1548 | 2382.1633 | 0.0085  | 4    | 925  | 942  | WTRWIEELEMLSNFEINR        | Oxidation (M)[10]           |  |  |  |  | Mascot |

21

PREDICTED: NADH dehydrogenase [ubiquinone] 1 alpha subcomplex subunit 9, mitochondrial-like [Danio

gi|68437403

26034.6

9.74

7

37

0

Peptide Information

| Calc. Mass | Obsrv. Mass | ± da    | ± ppm | Start Seq. | End Seq. | Sequence                | Ion Score | C. I. % | Modification      | Rank | Result Type |
|------------|-------------|---------|-------|------------|----------|-------------------------|-----------|---------|-------------------|------|-------------|
| 850.4781   | 850.5383    | 0.0602  | 71    | 178        | 184      | SPSKYLR                 |           |         |                   |      | Mascot      |
| 1165.6034  | 1165.7386   | 0.1352  | 116   | 78         | 87       | MGSQVVIPYR              |           |         | Oxidation (M)[1]  |      | Mascot      |
| 1179.5752  | 1179.5941   | 0.0189  | 16    | 205        | 214      | ASELFGREDR              |           |         |                   |      | Mascot      |
| 1475.8151  | 1475.7452   | -0.0699 | -47   | 75         | 87       | LGRMGSQVVIPYR           |           |         |                   |      | Mascot      |
| 1565.7278  | 1565.7883   | 0.0605  | 39    | 212        | 223      | EDRFLNHFANMR            |           |         | Oxidation (M)[11] |      | Mascot      |
| 1565.7278  | 1565.7883   | 0.0605  | 39    | 212        | 223      | EDRFLNHFANMR            |           |         | Oxidation (M)[11] |      | Mascot      |
| 1845.9493  | 1845.8774   | -0.0719 | -39   | 51         | 69       | SSFSGLAATVFGATGFLG<br>R |           |         |                   |      | Mascot      |
| 2005.0059  | 2005.0409   | 0.035   | 17    | 187        | 204      | AVGEEAVRNEFPDAIMK       |           |         | Oxidation (M)[17] |      | Mascot      |

22

taln-1 [Danio rerio]

gi|57222259

270469.6

5.86

23

37

0

Peptide Information

|  | Calc. Mass | Obsrv. Mass | ± da    | ± ppm | Start Seq. | End Sequence Seq.               | Ion Score | C. I. % Modification    | Rank | Result Type |
|--|------------|-------------|---------|-------|------------|---------------------------------|-----------|-------------------------|------|-------------|
|  | 858.4791   | 858.4422    | -0.0369 | -43   | 1187       | 1194 AVSQALNR                   |           |                         |      | Mascot      |
|  | 865.3906   | 865.4405    | 0.0499  | 58    | 461        | 468 MGSMPQAK                    |           | Oxidation (M)[1]        |      | Mascot      |
|  | 1089.5687  | 1089.5281   | -0.0406 | -37   | 1456       | 1465 GLVDPSQFAR                 |           |                         |      | Mascot      |
|  | 1093.5493  | 1093.5179   | -0.0314 | -29   | 2206       | 2215 AVADMLRSCK                 |           |                         |      | Mascot      |
|  | 1165.6576  | 1165.7386   | 0.081   | 69    | 1615       | 1625 SLAVNPKDPPK                |           |                         |      | Mascot      |
|  | 1179.5422  | 1179.5941   | 0.0519  | 44    | 2441       | 2450 ADQDSQTMKR                 |           |                         |      | Mascot      |
|  | 1189.5232  | 1189.6831   | 0.1599  | 134   | 2002       | 2011 ENAETFADHR                 |           |                         |      | Mascot      |
|  | 1234.5811  | 1234.6748   | 0.0937  | 76    | 1541       | 1551 ALDGAFNQENR                |           |                         |      | Mascot      |
|  | 1316.6804  | 1316.6709   | -0.0095 | -7    | 2193       | 2204 QEDVIATANLSR               |           |                         |      | Mascot      |
|  | 1428.7917  | 1428.7797   | -0.012  | -8    | 1119       | 1132 DVAQALRSLASAAR             |           |                         |      | Mascot      |
|  | 1444.5753  | 1444.7759   | 0.2006  | 139   | 1145       | 1157 NAMLDCTGDVMDK              |           | Oxidation (M)[3,11]     |      | Mascot      |
|  | 1475.7886  | 1475.7452   | -0.0434 | -29   | 859        | 872 LLADATARMVEAAK              |           | Oxidation (M)[9]        |      | Mascot      |
|  | 1493.7628  | 1493.7322   | -0.0306 | -20   | 1601       | 1614 AMLESSTGLIQTAR             |           | Oxidation (M)[2]        |      | Mascot      |
|  | 1638.8077  | 1638.8502   | 0.0425  | 26    | 92         | 106 MLDGTVKTMVDDSK              |           |                         |      | Mascot      |
|  | 1639.7744  | 1639.8311   | 0.0567  | 35    | 1929       | 1943 AGALQCSPNDSYTKK            |           | Carbamidomethyl (C)[6]  |      | Mascot      |
|  | 1639.7744  | 1639.8311   | 0.0567  | 35    | 1929       | 1943 AGALQCSPNDSYTKK            |           | Carbamidomethyl (C)[6]  |      | Mascot      |
|  | 1655.8308  | 1655.8046   | -0.0262 | -16   | 1914       | 1928 QVTELGYTCTGLVSK            |           | Carbamidomethyl (C)[9]  |      | Mascot      |
|  | 1655.8308  | 1655.8046   | -0.0262 | -16   | 1914       | 1928 QVTELGYTCTGLVSK            |           | Carbamidomethyl (C)[9]  |      | Mascot      |
|  | 1668.9471  | 1668.8925   | -0.0546 | -33   | 255        | 268 HKPGFLDLKEFLPK              |           |                         |      | Mascot      |
|  | 1845.9561  | 1845.8774   | -0.0787 | -43   | 2488       | 2504 MVGGIAQIIAAQEMLR           |           | Oxidation (M)[1]        |      | Mascot      |
|  | 1987.9575  | 1988.0239   | 0.0664  | 33    | 1037       | 1054 AQEACGPLEIDNALTMR          |           | Carbamidomethyl (C)[5]  |      | Mascot      |
|  | 1987.9575  | 1988.0239   | 0.0664  | 33    | 1037       | 1054 AQEACGPLEIDNALTMR          |           | Carbamidomethyl (C)[5]  |      | Mascot      |
|  | 2004.963   | 2005.0409   | 0.0779  | 39    | 279        | 295 IFQAHKNCQNMTEIEAK           |           |                         |      | Mascot      |
|  | 2211.1865  | 2211.094    | -0.0925 | -42   | 2059       | 2080 LGAASLGSEDPETQVVLI<br>NAVK |           |                         |      | Mascot      |
|  | 2225.1846  | 2225.1104   | -0.0742 | -33   | 718        | 738 VVVAPTISSPVCQEQLIEA<br>GK   |           | Carbamidomethyl (C)[12] |      | Mascot      |
|  | 2225.1846  | 2225.1104   | -0.0742 | -33   | 718        | 738 VVVAPTISSPVCQEQLIEA<br>GK   |           | Carbamidomethyl (C)[12] |      | Mascot      |
|  | 2233.0952  | 2233.0696   | -0.0256 | -11   | 1337       | 1357 AVTDSINQLISMCTQQAP<br>GQK  |           |                         |      | Mascot      |

23 complement component c3b [Danio rerio] gi|220673392 182155.7 6.42 18 36 0

#### Peptide Information

|  | Calc. Mass | Obsrv. Mass | ± da   | ± ppm | Start Seq. | End Sequence Seq. | Ion Score | C. I. % Modification | Rank | Result Type |
|--|------------|-------------|--------|-------|------------|-------------------|-----------|----------------------|------|-------------|
|  | 865.4236   | 865.4405    | 0.0169 | 20    | 502        | 508 EMVPSFR       |           |                      |      | Mascot      |
|  | 870.4176   | 870.5369    | 0.1193 | 137   | 1603       | 1609 SAEHRDR      |           |                      |      | Mascot      |



|           |           |         |     |     |     |                   |  |  |  |                         |  |        |
|-----------|-----------|---------|-----|-----|-----|-------------------|--|--|--|-------------------------|--|--------|
| 1565.901  | 1565.7883 | -0.1127 | -72 | 180 | 193 | ALSQQRPPPLDTVLK   |  |  |  |                         |  | Mascot |
| 1565.901  | 1565.7883 | -0.1127 | -72 | 180 | 193 | ALSQQRPPPLDTVLK   |  |  |  |                         |  | Mascot |
| 1987.9291 | 1988.0239 | 0.0948  | 48  | 319 | 335 | ELYLQNHHSNTTTAAKC |  |  |  | Carbamidomethyl (C)[17] |  | Mascot |
| 1987.9291 | 1988.0239 | 0.0948  | 48  | 319 | 335 | ELYLQNHHSNTTTAAKC |  |  |  | Carbamidomethyl (C)[17] |  | Mascot |

25 RecName: Full=Thrombospondin-3a; Short=Thbs3a; gi|110825751 105523.1 4.41 13 36 0  
Flags: Precursor

#### Peptide Information

| Calc. Mass | Obsrv. Mass | ± da    | ± ppm | Start Seq. | End Seq. | Sequence               | Ion Score | C. I. % | Modification              | Rank | Result Type |
|------------|-------------|---------|-------|------------|----------|------------------------|-----------|---------|---------------------------|------|-------------|
| 866.4366   | 866.462     | 0.0254  | 29    | 104        | 110      | YVREDGK                |           |         |                           |      | Mascot      |
| 913.5101   | 913.4963    | -0.0138 | -15   | 686        | 693      | LISNPNQK               |           |         |                           |      | Mascot      |
| 913.5101   | 913.4963    | -0.0138 | -15   | 686        | 693      | LISNPNQK               |           |         |                           |      | Mascot      |
| 996.6022   | 996.5918    | -0.0104 | -10   | 954        | 961      | KQVLMHIK               |           |         |                           |      | Mascot      |
| 1179.5398  | 1179.5941   | 0.0543  | 46    | 279        | 288      | SRCQPNPCFK             |           |         |                           |      | Mascot      |
| 1234.646   | 1234.6748   | 0.0288  | 23    | 254        | 263      | EQVKEMSLVR             |           |         | Oxidation (M)[6]          |      | Mascot      |
| 1338.6801  | 1338.7688   | 0.0887  | 66    | 873        | 883      | NVGWLDKTSYR            |           |         |                           |      | Mascot      |
| 1338.6801  | 1338.7688   | 0.0887  | 66    | 873        | 883      | NVGWLDKTSYR            |           |         |                           |      | Mascot      |
| 1434.6934  | 1434.7635   | 0.0701  | 49    | 56         | 67       | TLSDVYVMSTFR           |           |         | Oxidation (M)[8]          |      | Mascot      |
| 1638.8949  | 1638.8502   | -0.0447 | -27   | 27         | 41       | QDVPVIDVLGLEDVK        |           |         |                           |      | Mascot      |
| 1639.8816  | 1639.8311   | -0.0505 | -31   | 884        | 896      | WQLSHRPQVG YIR         |           |         |                           |      | Mascot      |
| 1639.8816  | 1639.8311   | -0.0505 | -31   | 884        | 896      | WQLSHRPQVG YIR         |           |         |                           |      | Mascot      |
| 1655.7958  | 1655.8046   | 0.0088  | 5     | 404        | 418      | TGYVGNQTAGCFPRK        |           |         | Carbamidomethyl (C)[11]   |      | Mascot      |
| 1655.7958  | 1655.8046   | 0.0088  | 5     | 404        | 418      | TGYVGNQTAGCFPRK        |           |         | Carbamidomethyl (C)[11]   |      | Mascot      |
| 2233       | 2233.0696   | 0.0696  | 31    | 899        | 918      | LYEGSEM VADSDVVIDTS MR |           |         | Oxidation (M)[7]          |      | Mascot      |
| 2283.9363  | 2284.1633   | 0.227   | 99    | 419        | 438      | SCSSLSFNPCDANAHC V MQR |           |         | Carbamidomethyl (C)[2,10] |      | Mascot      |
| 2300.134   | 2300.1697   | 0.0357  | 16    | 139        | 157      | EYLSLELYVNCRLADSAQ R   |           |         | Carbamidomethyl (C)[11]   |      | Mascot      |

26 papilin b, proteoglycan-like sulfated glycoprotein [Danio rerio] gi|66472626 60158.6 8.23 10 36 0

#### Peptide Information

| Calc. Mass | Obsrv. Mass | ± da    | ± ppm | Start Seq. | End Seq. | Sequence     | Ion Score | C. I. % | Modification             | Rank | Result Type |
|------------|-------------|---------|-------|------------|----------|--------------|-----------|---------|--------------------------|------|-------------|
| 832.4344   | 832.3935    | -0.0409 | -49   | 266        | 273      | EVICVGGR     |           |         |                          |      | Mascot      |
| 1093.4764  | 1093.5179   | 0.0415  | 38    | 145        | 153      | DVCVEGVCR    |           |         | Carbamidomethyl (C)[3,8] |      | Mascot      |
| 1171.516   | 1171.6464   | 0.1304  | 111   | 56         | 67       | TDGGHNCVGPSK |           |         |                          |      | Mascot      |
| 1316.594   | 1316.6709   | 0.0769  | 58    | 476        | 486      | DVGPCYEYKSR  |           |         |                          |      | Mascot      |

|    |                                          |           |         |     |              |          |                            |                           |        |   |
|----|------------------------------------------|-----------|---------|-----|--------------|----------|----------------------------|---------------------------|--------|---|
|    | 1774.8574                                | 1774.8722 | 0.0148  | 8   | 215          | 230      | TSAMVDESHCIAKGLR           | Carbamidomethyl (C)[10]   | Mascot |   |
|    | 1845.8734                                | 1845.8774 | 0.004   | 2   | 438          | 453      | YGCCLDGITAALGYRR           | Carbamidomethyl (C)[3,4]  | Mascot |   |
|    | 2166.918                                 | 2167.0569 | 0.1389  | 64  | 454          | 475      | AGCPDSSYGDHSPSASV<br>CSLAR |                           | Mascot |   |
|    | 2225.0549                                | 2225.1104 | 0.0555  | 25  | 277          | 295      | LSEHHCSGLTRPQDTKA<br>CK    | Carbamidomethyl (C)[6,18] | Mascot |   |
|    | 2225.0549                                | 2225.1104 | 0.0555  | 25  | 277          | 295      | LSEHHCSGLTRPQDTKA<br>CK    | Carbamidomethyl (C)[6,18] | Mascot |   |
|    | 2232.9436                                | 2233.0696 | 0.126   | 56  | 83           | 100      | DFREEQCShFDQMTFQG<br>K     |                           | Mascot |   |
|    | 2395.084                                 | 2395.0476 | -0.0364 | -15 | 207          | 227      | TVYCVHERTSAMVDESH<br>CIAK  | Oxidation (M)[12]         | Mascot |   |
| 27 | PREDICTED: protein piccolo [Danio rerio] |           |         |     | gi 326666555 | 462397.7 | 6.2                        | 31                        | 35     | 0 |

Peptide Information

| Calc. Mass | Obsrv. Mass | ± da    | ± ppm | Start Seq. | End Seq. | Sequence              | Ion Score | C. I. % | Modification                             | Rank | Result Type |
|------------|-------------|---------|-------|------------|----------|-----------------------|-----------|---------|------------------------------------------|------|-------------|
| 832.4046   | 832.3935    | -0.0111 | -13   | 946        | 952      | EPSEKDK               |           |         |                                          |      | Mascot      |
| 842.4049   | 842.5062    | 0.1013  | 120   | 4237       | 4242     | VCRHDR                |           |         | Carbamidomethyl (C)[2]                   |      | Mascot      |
| 870.5771   | 870.5369    | -0.0402 | -46   | 3229       | 3235     | LLKQQLK               |           |         |                                          |      | Mascot      |
| 913.5141   | 913.4963    | -0.0178 | -19   | 4201       | 4207     | NITYKFK               |           |         |                                          |      | Mascot      |
| 913.5141   | 913.4963    | -0.0178 | -19   | 4201       | 4207     | NITYKFK               |           |         |                                          |      | Mascot      |
| 999.4637   | 999.5625    | 0.0988  | 99    | 2246       | 2254     | AVCCDVVYK             |           |         |                                          |      | Mascot      |
| 1045.5248  | 1045.5597   | 0.0349  | 33    | 2014       | 2022     | TPPPHPMPR             |           |         | Oxidation (M)[7]                         |      | Mascot      |
| 1089.5786  | 1089.5281   | -0.0505 | -46   | 3964       | 3973     | EDSPKSSVIK            |           |         |                                          |      | Mascot      |
| 1155.5649  | 1155.6482   | 0.0833  | 72    | 2245       | 2254     | RAVCCDVVYK            |           |         |                                          |      | Mascot      |
| 1171.5796  | 1171.6464   | 0.0668  | 57    | 3592       | 3600     | FHYPPHAR              |           |         |                                          |      | Mascot      |
| 1338.6722  | 1338.7688   | 0.0966  | 72    | 3340       | 3350     | LMQDEITFGLR           |           |         | Oxidation (M)[2]                         |      | Mascot      |
| 1338.7012  | 1338.7688   | 0.0676  | 50    | 3487       | 3500     | ASAGPLPPISADSR        |           |         |                                          |      | Mascot      |
| 1357.679   | 1357.6796   | 0.0006  | 0     | 348        | 361      | AAPAPGKAMCPLCK        |           |         |                                          |      | Mascot      |
| 1411.6014  | 1411.6505   | 0.0491  | 35    | 706        | 719      | VSGSEAQSCCPLCK        |           |         |                                          |      | Mascot      |
| 1428.6238  | 1428.7797   | 0.1559  | 109   | 3386       | 3399     | SSLGEDSSYPGSR         |           |         |                                          |      | Mascot      |
| 1638.9299  | 1638.8502   | -0.0797 | -49   | 4058       | 4071     | HHRHSVVGVTIQR         |           |         |                                          |      | Mascot      |
| 1639.8472  | 1639.8311   | -0.0161 | -10   | 4187       | 4200     | TEGEHLVLEILQCR        |           |         |                                          |      | Mascot      |
| 1639.8472  | 1639.8311   | -0.0161 | -10   | 4187       | 4200     | TEGEHLVLEILQCR        |           |         |                                          |      | Mascot      |
| 1644.918   | 1644.7345   | -0.1835 | -112  | 495        | 509      | RQQPPPLQKPSQSPK       |           |         |                                          |      | Mascot      |
| 1668.8374  | 1668.8925   | 0.0551  | 33    | 3337       | 3350     | SSRLMQDEITFGLR        |           |         | Oxidation (M)[5]                         |      | Mascot      |
| 1774.6378  | 1774.8722   | 0.2344  | 132   | 2636       | 2650     | MDSGCQTDEEDNTEK       |           |         | Carbamidomethyl (C)[5], Oxidation (M)[1] |      | Mascot      |
| 1822.7688  | 1822.9247   | 0.1559  | 86    | 3214       | 3228     | AQDEEDPMEEPFEK        |           |         | Oxidation (M)[8]                         |      | Mascot      |
| 1822.8501  | 1822.9247   | 0.0746  | 41    | 4028       | 4045     | AHLDDAAAMAEAGQQP<br>R |           |         |                                          |      | Mascot      |
| 1845.9779  | 1845.8774   | -0.1005 | -54   | 2773       | 2789     | SPKVLYSPIPCVSPSK      |           |         | Carbamidomethyl (C)[12]                  |      | Mascot      |

|    |                                |           |         |     |              |      |                             |      |                                          |        |   |
|----|--------------------------------|-----------|---------|-----|--------------|------|-----------------------------|------|------------------------------------------|--------|---|
|    | 1886.8735                      | 1886.9117 | 0.0382  | 20  | 2350         | 2366 | TTGVCTGMTVPQYTQAR           |      | Carbamidomethyl (C)[5], Oxidation (M)[8] | Mascot |   |
|    | 1988.0157                      | 1988.0239 | 0.0082  | 4   | 2617         | 2634 | QMYPGEVLPEALVVTGE<br>R      |      |                                          | Mascot |   |
|    | 1988.0157                      | 1988.0239 | 0.0082  | 4   | 2617         | 2634 | QMYPGEVLPEALVVTGE<br>R      |      |                                          | Mascot |   |
|    | 1993.947                       | 1993.9583 | 0.0113  | 6   | 1462         | 1477 | KPLRSPDEVYEDMMQR            |      |                                          | Mascot |   |
|    | 2005.0098                      | 2005.0409 | 0.0311  | 16  | 3189         | 3207 | LLRHAAADVSSDYLGS<br>R       |      |                                          | Mascot |   |
|    | 2196.9966                      | 2197.0642 | 0.0676  | 31  | 1055         | 1073 | TIGDKGEIESPMDEEDFIR         |      | Oxidation (M)[12]                        | Mascot |   |
|    | 2284.1826                      | 2284.1633 | -0.0193 | -8  | 47           | 68   | QLVAAMARAQSRPPETQ<br>AGGTK  |      | Oxidation (M)[6]                         | Mascot |   |
|    | 2291.1853                      | 2291.1448 | -0.0405 | -18 | 2615         | 2634 | FRQMYPGEVLPEALVVT<br>GER    |      |                                          | Mascot |   |
|    | 2382.1243                      | 2382.1633 | 0.039   | 16  | 3692         | 3712 | LDINMLSDSDSHLDLHD<br>QVK    |      |                                          | Mascot |   |
|    | 2382.2373                      | 2382.1633 | -0.074  | -31 | 2293         | 2315 | GLGGIKPSMSDTNLAEA<br>GLFLYK |      |                                          | Mascot |   |
| 28 | Si:dkey-246a16.3 [Danio rerio] |           |         |     | gi 134025086 |      | 84499.9                     | 6.06 | 12                                       | 35     | 0 |

#### Peptide Information

| Calc. Mass | Obsrv. Mass | ± da    | ± ppm | Start Seq. | End Seq. | Sequence                  | Ion Score | C. I. % | Modification                              | Rank | Result Type |
|------------|-------------|---------|-------|------------|----------|---------------------------|-----------|---------|-------------------------------------------|------|-------------|
| 865.4382   | 865.4405    | 0.0023  | 3     | 110        | 116      | CGMITKR                   |           |         | Carbamidomethyl (C)[1]                    |      | Mascot      |
| 1045.5571  | 1045.5597   | 0.0026  | 2     | 100        | 109      | AGAMPISSRR                |           |         |                                           |      | Mascot      |
| 1184.6633  | 1184.5033   | -0.16   | -135  | 428        | 438      | SIEGIPPTSRK               |           |         |                                           |      | Mascot      |
| 1189.6171  | 1189.6831   | 0.066   | 55    | 652        | 662      | DTGNRGS�IEK               |           |         |                                           |      | Mascot      |
| 1279.6542  | 1279.6721   | 0.0179  | 14    | 570        | 579      | HTTRFEVYAR                |           |         |                                           |      | Mascot      |
| 1279.6542  | 1279.6721   | 0.0179  | 14    | 570        | 579      | HTTRFEVYAR                |           |         |                                           |      | Mascot      |
| 1316.7606  | 1316.6709   | -0.0897 | -68   | 57         | 68       | LCLAQISNTLLK              |           |         |                                           |      | Mascot      |
| 1419.7148  | 1419.6769   | -0.0379 | -27   | 663        | 674      | NIESMAKEELQK              |           |         |                                           |      | Mascot      |
| 1428.635   | 1428.7797   | 0.1447  | 101   | 383        | 394      | HNELDVSEQSDR              |           |         |                                           |      | Mascot      |
| 1668.8236  | 1668.8925   | 0.0689  | 41    | 736        | 750      | HCTGTCTFKPPLPP            |           |         | Carbamidomethyl (C)[2]                    |      | Mascot      |
| 1987.8438  | 1988.0239   | 0.1801  | 91    | 607        | 623      | DVHEEESSTVEEMEPK          |           |         | Oxidation (M)[14]                         |      | Mascot      |
| 1987.8438  | 1988.0239   | 0.1801  | 91    | 607        | 623      | DVHEEESSTVEEMEPK          |           |         | Oxidation (M)[14]                         |      | Mascot      |
| 2283.1782  | 2283.1675   | -0.0107 | -5    | 302        | 321      | IPPLFPHPYGFPAFLC<br>QK    |           |         | Carbamidomethyl (C)[18]                   |      | Mascot      |
| 2291.0391  | 2291.1448   | 0.1057  | 46    | 1          | 21       | MESIPNQLPAGRDSSCS<br>PNSK |           |         | Carbamidomethyl (C)[16], Oxidation (M)[1] |      | Mascot      |

29 Unknown (protein for IMAGE:7251921) [Danio rerio] gi|148744663 44771.3 6.74 9 35 0

#### Peptide Information

| Calc. Mass | Obsrv. Mass | ± da   | ± ppm | Start Seq. | End Seq. | Sequence | Ion Score | C. I. % | Modification | Rank | Result Type |
|------------|-------------|--------|-------|------------|----------|----------|-----------|---------|--------------|------|-------------|
| 1015.5418  | 1015.5523   | 0.0105 | 10    | 21         | 29       | AEPITTQK |           |         |              |      | Mascot      |



|    |                             |           |         |     |     |     |                            |         |     |                           |    |   |  |        |
|----|-----------------------------|-----------|---------|-----|-----|-----|----------------------------|---------|-----|---------------------------|----|---|--|--------|
|    | 1338.5907                   | 1338.7688 | 0.1781  | 133 | 99  | 110 | SDVEETDSDIK                |         |     |                           |    |   |  | Mascot |
|    | 1338.5907                   | 1338.7688 | 0.1781  | 133 | 99  | 110 | SDVEETDSDIK                |         |     |                           |    |   |  | Mascot |
|    | 2197.0515                   | 2197.0642 | 0.0127  | 6   | 322 | 341 | CTGSELSLAECTIYNPTPI<br>K   |         |     | Carbamidomethyl (C)[1]    |    |   |  | Mascot |
|    | 2211.2029                   | 2211.094  | -0.1089 | -49 | 2   | 20  | RILCAFIFICVLQSASLEK        |         |     | Carbamidomethyl (C)[4]    |    |   |  | Mascot |
|    | 2283.083                    | 2283.1675 | 0.0845  | 37  | 268 | 287 | GKMLVCGSEWNIAAANV<br>FCR   |         |     | Carbamidomethyl (C)[6,19] |    |   |  | Mascot |
|    | 2283.9502                   | 2284.1633 | 0.2131  | 93  | 209 | 229 | ACTLDGAEFYSMCQTNAI<br>ACR  |         |     | Oxidation (M)[12]         |    |   |  | Mascot |
|    | 2291.1401                   | 2291.1448 | 0.0047  | 2   | 37  | 57  | IPPETNPEAAVEQTPDVN<br>LEK  |         |     |                           |    |   |  | Mascot |
|    | 2381.998                    | 2382.1633 | 0.1653  | 69  | 209 | 229 | ACTLDGAEFYSMCQTNAI<br>ACR  |         |     | Carbamidomethyl (C)[2,13] |    |   |  | Mascot |
|    | 2382.168                    | 2382.1633 | -0.0047 | -2  | 322 | 343 | CTGSELSLAECTIYNPTPI<br>KGK |         |     | Carbamidomethyl (C)[1]    |    |   |  | Mascot |
|    | 2395.1995                   | 2395.0476 | -0.1519 | -63 | 320 | 341 | VRCTGSELSLAECTIYNP<br>TPIK |         |     |                           |    |   |  | Mascot |
| 30 | novel protein [Danio rerio] |           |         |     |     |     | gi 169146109               | 64501.6 | 6.3 | 10                        | 34 | 0 |  |        |

#### Peptide Information

| Calc. Mass | Obsrv. Mass | ± da    | ± ppm | Start Seq. | End Seq. | Sequence                   | Ion Score | C. I. | % Modification                             | Rank | Result Type |
|------------|-------------|---------|-------|------------|----------|----------------------------|-----------|-------|--------------------------------------------|------|-------------|
| 996.5836   | 996.5918    | 0.0082  | 8     | 508        | 517      | SPGILSPGIR                 |           |       |                                            |      | Mascot      |
| 1045.5411  | 1045.5597   | 0.0186  | 18    | 118        | 126      | VIADLEEEK                  |           |       |                                            |      | Mascot      |
| 1179.5319  | 1179.5941   | 0.0622  | 53    | 92         | 101      | LVMAHCTNMK                 |           |       | Oxidation (M)[3,9]                         |      | Mascot      |
| 1201.6284  | 1201.5355   | -0.0929 | -77   | 235        | 244      | AQQIEARTER                 |           |       |                                            |      | Mascot      |
| 1493.6909  | 1493.7322   | 0.0413  | 28    | 92         | 103      | LVMAHCTNMKEK               |           |       | Carbamidomethyl (C)[6], Oxidation (M)[3,9] |      | Mascot      |
| 1639.869   | 1639.8311   | -0.0379 | -23   | 267        | 279      | YQELLEQFNSLKK              |           |       |                                            |      | Mascot      |
| 1639.869   | 1639.8311   | -0.0379 | -23   | 267        | 279      | YQELLEQFNSLKK              |           |       |                                            |      | Mascot      |
| 1707.749   | 1707.7631   | 0.0141  | 8     | 130        | 145      | AQDAAAGDDITDMLER           |           |       | Oxidation (M)[13]                          |      | Mascot      |
| 1994.1029  | 1993.9583   | -0.1446 | -73   | 497        | 517      | NLAAASSPTGKSPGILSP<br>GIR  |           |       |                                            |      | Mascot      |
| 2167.1604  | 2167.0569   | -0.1035 | -48   | 304        | 325      | ATSGITPPVSQVEADGKI<br>ATPK |           |       |                                            |      | Mascot      |
| 2395.29    | 2395.0476   | -0.2424 | -101  | 1          | 21       | MLLSILEGELEAQDVVIHT<br>LR  |           |       | Oxidation (M)[1]                           |      | Mascot      |

31 PREDICTED: neurogenic locus notch homolog protein 1-like [Danio rerio] gi|326677582 51895.6 5.21 9 34 0

#### Peptide Information

| Calc. Mass | Obsrv. Mass | ± da   | ± ppm | Start Seq. | End Seq. | Sequence   | Ion Score | C. I. | % Modification           | Rank | Result Type |
|------------|-------------|--------|-------|------------|----------|------------|-----------|-------|--------------------------|------|-------------|
| 866.397    | 866.462     | 0.065  | 75    | 1          | 7        | MKCASNR    |           |       | Carbamidomethyl (C)[3]   |      | Mascot      |
| 1171.4871  | 1171.6464   | 0.1593 | 136   | 47         | 56       | CDCVLGFSDR |           |       | Carbamidomethyl (C)[1]   |      | Mascot      |
| 1184.438   | 1184.5033   | 0.0653 | 55    | 409        | 417      | CEMDVNECK  |           |       | Carbamidomethyl (C)[1,8] |      | Mascot      |

|           |           |        |     |     |     |                      |                                            |        |
|-----------|-----------|--------|-----|-----|-----|----------------------|--------------------------------------------|--------|
| 1200.433  | 1200.4988 | 0.0658 | 55  | 409 | 417 | CEMDVNECK            | Carbamidomethyl (C)[1,8], Oxidation (M)[3] | Mascot |
| 1234.5343 | 1234.6748 | 0.1405 | 114 | 469 | 478 | INSFHCECPK           | Carbamidomethyl (C)[6]                     | Mascot |
| 1444.6096 | 1444.7759 | 0.1663 | 115 | 166 | 177 | CPPEYTGPHCQR         | Carbamidomethyl (C)[1]                     | Mascot |
| 1655.6611 | 1655.8046 | 0.1435 | 87  | 232 | 245 | CIDGINTYNCHCDK       | Carbamidomethyl (C)[1]                     | Mascot |
| 1655.6611 | 1655.8046 | 0.1435 | 87  | 232 | 245 | CIDGINTYNCHCDK       | Carbamidomethyl (C)[1]                     | Mascot |
| 1774.7855 | 1774.8722 | 0.0867 | 49  | 57  | 72  | LCLTPVNHACMNSPCR     | Oxidation (M)[11]                          | Mascot |
| 1845.8694 | 1845.8774 | 0.008  | 4   | 30  | 46  | NGGVCRPQMKGNEVG<br>K | Carbamidomethyl (C)[5], Oxidation (M)[9]   | Mascot |
| 1987.9034 | 1988.0239 | 0.1205 | 61  | 326 | 343 | TGLLCHLDDACISNPCQK   | Carbamidomethyl (C)[5]                     | Mascot |
| 1987.9034 | 1988.0239 | 0.1205 | 61  | 326 | 343 | TGLLCHLDDACISNPCQK   | Carbamidomethyl (C)[5]                     | Mascot |

32 PREDICTED: corepressor interacting with RBPJ 1, partial [Danio rerio] gi|326670450 18483 7.63 7 34 0

#### Peptide Information

| Calc. Mass | Obsrv. Mass | ± da   | ± ppm | Start Seq. | End Seq. | Sequence                    | Ion Score | C. I. % | Modification           | Rank | Result Type |
|------------|-------------|--------|-------|------------|----------|-----------------------------|-----------|---------|------------------------|------|-------------|
| 1062.5612  | 1062.6842   | 0.123  | 116   | 57         | 65       | LLMGDDRDK                   |           |         | Oxidation (M)[3]       |      | Mascot      |
| 1189.5492  | 1189.6831   | 0.1339 | 113   | 2          | 11       | GKSFANFMCK                  |           |         | Carbamidomethyl (C)[9] |      | Mascot      |
| 1279.5632  | 1279.6721   | 0.1089 | 85    | 1          | 11       | MGKSFANFMCK                 |           |         | Oxidation (M)[1]       |      | Mascot      |
| 1279.5632  | 1279.6721   | 0.1089 | 85    | 1          | 11       | MGKSFANFMCK                 |           |         | Oxidation (M)[1]       |      | Mascot      |
| 1338.5757  | 1338.7688   | 0.1931 | 144   | 128        | 138      | CHNWGHVNTDR                 |           |         |                        |      | Mascot      |
| 1338.5757  | 1338.7688   | 0.1931 | 144   | 128        | 138      | CHNWGHVNTDR                 |           |         |                        |      | Mascot      |
| 1428.7706  | 1428.7797   | 0.0091 | 6     | 113        | 124      | DQPFGIQVRNVR                |           |         |                        |      | Mascot      |
| 1822.9155  | 1822.9247   | 0.0092 | 5     | 64         | 80       | VKNGLNFMYEAPPGASK           |           |         |                        |      | Mascot      |
| 1822.9155  | 1822.9247   | 0.0092 | 5     | 64         | 80       | VKNGLNFMYEAPPGASK           |           |         |                        |      | Mascot      |
| 2283.0266  | 2283.1675   | 0.1409 | 62    | 139        | 161      | ECPLFGLSGINASSMAGD<br>EAGTV |           |         | Carbamidomethyl (C)[2] |      | Mascot      |

33 PREDICTED: cGMP-dependent protein kinase 1 [Danio rerio] gi|326676901 73240 8.78 11 34 0

#### Peptide Information

| Calc. Mass | Obsrv. Mass | ± da    | ± ppm | Start Seq. | End Seq. | Sequence           | Ion Score | C. I. % | Modification            | Rank | Result Type |
|------------|-------------|---------|-------|------------|----------|--------------------|-----------|---------|-------------------------|------|-------------|
| 1015.5643  | 1015.5523   | -0.012  | -12   | 154        | 162      | VTQAGRDLR          |           |         |                         |      | Mascot      |
| 1155.6527  | 1155.6482   | -0.0045 | -4    | 565        | 573      | LCRLRPGQR          |           |         | Carbamidomethyl (C)[2]  |      | Mascot      |
| 1419.7566  | 1419.6769   | -0.0797 | -56   | 391        | 402      | CDFIVRLHAAFK       |           |         |                         |      | Mascot      |
| 1434.7799  | 1434.7635   | -0.0164 | -11   | 88         | 100      | VQKTSSETSIQVK      |           |         |                         |      | Mascot      |
| 1483.8413  | 1483.7457   | -0.0956 | -64   | 600        | 612      | MGQLEAPTURLIR      |           |         |                         |      | Mascot      |
| 2005.0786  | 2005.0409   | -0.0377 | -19   | 452        | 468      | GILYRDLKPENMLDSK   |           |         |                         |      | Mascot      |
| 2197.1143  | 2197.0642   | -0.0501 | -23   | 163        | 181      | ILSPGDMFGELAILYNCK |           |         | Carbamidomethyl (C)[17] |      | Mascot      |

|           |           |         |     |     |     |                             |                         |        |
|-----------|-----------|---------|-----|-----|-----|-----------------------------|-------------------------|--------|
| 2225.1091 | 2225.1104 | 0.0013  | 1   | 39  | 56  | R<br>HLQALQERLDQLDCTTQ      | Carbamidomethyl (C)[14] | Mascot |
| 2225.1091 | 2225.1104 | 0.0013  | 1   | 39  | 56  | R<br>HLQALQERLDQLDCTTQ      | Carbamidomethyl (C)[14] | Mascot |
| 2284.0691 | 2284.1633 | 0.0942  | 41  | 111 | 129 | CR<br>LDEEQISMMVDLMKVLD     | Oxidation (M)[8]        | Mascot |
| 2300.0642 | 2300.1697 | 0.1055  | 46  | 111 | 129 | CR<br>LDEEQISMMVDLMKVLD     | Oxidation (M)[8,9]      | Mascot |
| 2382.1604 | 2382.1633 | 0.0029  | 1   | 137 | 159 | TQAGR<br>EGTEGDSMYIVAAGELKV |                         | Mascot |
| 2382.1604 | 2382.1633 | 0.0029  | 1   | 137 | 159 | TQAGR<br>EGTEGDSMYIVAAGELKV |                         | Mascot |
| 2395.2649 | 2395.0476 | -0.2173 | -91 | 69  | 90  | RVQK<br>AAVMAPEQVPEVLDITAN  | Oxidation (M)[4]        | Mascot |

34 PREDICTED: UPF0639 protein-like [Danio rerio] gi|326675781 53022.8 5.16 9 32 0

#### Peptide Information

| Calc. Mass | Obsrv. Mass | ± da    | ± ppm | Start Seq. | End Seq. | Sequence                  | Ion Score | C. I. | % Modification | Rank | Result Type |
|------------|-------------|---------|-------|------------|----------|---------------------------|-----------|-------|----------------|------|-------------|
| 882.4866   | 882.5626    | 0.076   | 86    | 443        | 449      | AYKIMTR                   |           |       |                |      | Mascot      |
| 1015.5795  | 1015.5523   | -0.0272 | -27   | 39         | 47       | RPFGRPSAK                 |           |       |                |      | Mascot      |
| 1062.5314  | 1062.6842   | 0.1528  | 144   | 247        | 255      | SLEELSQEK                 |           |       |                |      | Mascot      |
| 1419.6459  | 1419.6769   | 0.031   | 22    | 264        | 276      | ERGQDVAETGSDR             |           |       |                |      | Mascot      |
| 1444.792   | 1444.7759   | -0.0161 | -11   | 39         | 50       | RPFGRPSAKWSR              |           |       |                |      | Mascot      |
| 1493.6975  | 1493.7322   | 0.0347  | 23    | 171        | 182      | LMEETEELCLQR              |           |       |                |      | Mascot      |
| 2005.0236  | 2005.0409   | 0.0173  | 9     | 202        | 217      | FEEVVQELRTEQEQIK          |           |       |                |      | Mascot      |
| 2183.1792  | 2183.05     | -0.1292 | -59   | 76         | 95       | ER<br>YFNIHPKGVIPLGGCIVEA |           |       |                |      | Mascot      |
| 2283.219   | 2283.1675   | -0.0515 | -23   | 370        | 389      | ER<br>LKLAEEALQDLEQGLNTI  |           |       |                |      | Mascot      |

35 PREDICTED: tripartite motif-containing protein 59-like [Danio rerio] gi|125836979 39637.8 5.73 8 32 0 5 0

#### Peptide Information

| Calc. Mass | Obsrv. Mass | ± da    | ± ppm | Start Seq. | End Seq. | Sequence     | Ion Score | C. I. | % Modification | Rank | Result Type |
|------------|-------------|---------|-------|------------|----------|--------------|-----------|-------|----------------|------|-------------|
| 1045.5636  | 1045.5597   | -0.0039 | -4    | 174        | 182      | SEALVQKDR    |           |       |                |      | Mascot      |
| 1089.5609  | 1089.5281   | -0.0328 | -30   | 163        | 171      | LAEQLQMEK    |           |       |                |      | Mascot      |
| 1165.61    | 1165.7386   | 0.1286  | 110   | 131        | 140      | IDDLQTAYVK   |           |       |                |      | Mascot      |
| 1279.6464  | 1279.6721   | 0.0257  | 20    | 200        | 209      | KEQFMQALER   |           |       |                |      | Mascot      |
| 1279.6464  | 1279.6721   | 0.0257  | 20    | 200        | 209      | KEQFMQALER   |           |       |                |      | Mascot      |
| 1338.626   | 1338.7688   | 0.1428  | 107   | 322        | 333      | NTLAFCSPSGWR |           |       |                |      | Mascot      |
| 1338.626   | 1338.7688   | 0.1428  | 107   | 322        | 333      | NTLAFCSPSGWR | 0         | 0     |                |      | Mascot      |
| 1411.7441  | 1411.6505   | -0.0936 | -66   | 290        | 300      | HWTDTVTLRLR  |           |       |                |      | Mascot      |

|    |                                                                                 |           |        |    |             |        |                          |   |    |                        |        |
|----|---------------------------------------------------------------------------------|-----------|--------|----|-------------|--------|--------------------------|---|----|------------------------|--------|
|    | 1987.8815                                                                       | 1988.0239 | 0.1424 | 72 | 301         | 318    | DGPLPEISWHSESCSTS<br>R   | 5 | 0  |                        | Mascot |
|    | 1987.8815                                                                       | 1988.0239 | 0.1424 | 72 | 301         | 318    | DGPLPEISWHSESCSTS<br>R   |   |    |                        | Mascot |
|    | 2283.0281                                                                       | 2283.1675 | 0.1394 | 61 | 94          | 113    | SPSCPEHPGQPLNVYCV<br>QDR |   |    | Carbamidomethyl (C)[4] | Mascot |
| 36 | PREDICTED: cytochrome c oxidase subunit 8B,<br>mitochondrial-like [Danio rerio] |           |        |    | gi 68444759 | 7977.2 | 10.16                    | 4 | 32 | 0                      |        |

#### Peptide Information

| Calc. Mass | Obsrv. Mass | ± da    | ± ppm | Start Seq. | End Seq. | Sequence     | Ion Score | C. I. | % Modification   | Rank | Result Type |
|------------|-------------|---------|-------|------------|----------|--------------|-----------|-------|------------------|------|-------------|
| 865.4274   | 865.4405    | 0.0131  | 15    | 66         | 73       | HRPGAAQE     |           |       |                  |      | Mascot      |
| 913.5464   | 913.4963    | -0.0501 | -55   | 23         | 31       | ANITAKPAK    |           |       |                  |      | Mascot      |
| 913.5464   | 913.4963    | -0.0501 | -55   | 23         | 31       | ANITAKPAK    |           |       |                  |      | Mascot      |
| 1165.651   | 1165.7386   | 0.0876  | 75    | 7          | 16       | SFTLLRAAMR   |           |       |                  |      | Mascot      |
| 1428.7416  | 1428.7797   | 0.0381  | 27    | 1          | 12       | MSGFNRSFTLLR |           |       |                  |      | Mascot      |
| 1444.7366  | 1444.7759   | 0.0393  | 27    | 1          | 12       | MSGFNRSFTLLR |           |       | Oxidation (M)[1] |      | Mascot      |

37 eukaryotic translation initiation factor 4E [Danio rerio] gi|56090190 24998.3 5.66 7 32 0

#### Peptide Information

| Calc. Mass | Obsrv. Mass | ± da    | ± ppm | Start Seq. | End Seq. | Sequence                 | Ion Score | C. I. | % Modification          | Rank | Result Type |
|------------|-------------|---------|-------|------------|----------|--------------------------|-----------|-------|-------------------------|------|-------------|
| 858.4567   | 858.4422    | -0.0145 | -17   | 2          | 9        | ATAEPEIK                 |           |       |                         |      | Mascot      |
| 882.4791   | 882.5626    | 0.0835  | 95    | 173        | 180      | EAVTHIGR                 |           |       |                         |      | Mascot      |
| 1279.6429  | 1279.6721   | 0.0292  | 23    | 162        | 172      | IAIWTADYGNR              |           |       |                         |      | Mascot      |
| 1279.6429  | 1279.6721   | 0.0292  | 23    | 162        | 172      | IAIWTADYGNR              |           |       |                         |      | Mascot      |
| 1434.6893  | 1434.7635   | 0.0742  | 52    | 2          | 14       | ATAEPEIKSNSCK            |           |       | Carbamidomethyl (C)[12] |      | Mascot      |
| 1565.7297  | 1565.7883   | 0.0586  | 37    | 1          | 14       | MATAEPEIKSNSCK           |           |       | Carbamidomethyl (C)[13] |      | Mascot      |
| 1565.7297  | 1565.7883   | 0.0586  | 37    | 1          | 14       | MATAEPEIKSNSCK           |           |       | Carbamidomethyl (C)[13] |      | Mascot      |
| 1774.8999  | 1774.8722   | -0.0277 | -16   | 36         | 48       | HPLQNRWCLWFFK            |           |       |                         |      | Mascot      |
| 2167.0159  | 2167.0569   | 0.041   | 19    | 186        | 205      | LGVPNMNTIGYQSHADT<br>ATK |           |       | Oxidation (M)[5,7]      |      | Mascot      |

38 coiled-coil domain-containing protein 111 homolog [Danio rerio] gi|82658206 60125.6 5.26 9 32 0

#### Peptide Information

| Calc. Mass | Obsrv. Mass | ± da   | ± ppm | Start Seq. | End Seq. | Sequence | Ion Score | C. I. | % Modification         | Rank | Result Type |
|------------|-------------|--------|-------|------------|----------|----------|-----------|-------|------------------------|------|-------------|
| 999.4941   | 999.5625    | 0.0684 | 68    | 389        | 395      | WCHNVKR  |           |       | Carbamidomethyl (C)[2] |      | Mascot      |
| 1015.4196  | 1015.5523   | 0.1327 | 131   | 417        | 424      | CHDPECRR |           |       |                        |      | Mascot      |

|    |                                                                   |           |         |     |              |         |                          |   |    |   |                                             |  |  |        |
|----|-------------------------------------------------------------------|-----------|---------|-----|--------------|---------|--------------------------|---|----|---|---------------------------------------------|--|--|--------|
|    | 1089.541                                                          | 1089.5281 | -0.0129 | -12 | 387          | 394     | FRWCHNVK                 |   |    |   |                                             |  |  | Mascot |
|    | 1493.7845                                                         | 1493.7322 | -0.0523 | -35 | 227          | 239     | KTEENDLGFLTVK            |   |    |   |                                             |  |  | Mascot |
|    | 1639.953                                                          | 1639.8311 | -0.1219 | -74 | 396          | 409     | FHKSNNIIIVDLK            |   |    |   |                                             |  |  | Mascot |
|    | 1639.953                                                          | 1639.8311 | -0.1219 | -74 | 396          | 409     | FHKSNNIIIVDLK            |   |    |   |                                             |  |  | Mascot |
|    | 1644.8158                                                         | 1644.7345 | -0.0813 | -49 | 132          | 144     | MMVAKLIQYVCEK            |   |    |   | Carbamidomethyl (C)[11], Oxidation (M)[1,2] |  |  | Mascot |
|    | 2004.934                                                          | 2005.0409 | 0.1069  | 53  | 97           | 113     | HSLMHCYEIVLEGAVCK        |   |    |   | Carbamidomethyl (C)[6], Oxidation (M)[4]    |  |  | Mascot |
|    | 2167.1506                                                         | 2167.0569 | -0.0937 | -43 | 293          | 311     | DERIFLASLITNVSTGQR       |   |    |   |                                             |  |  | Mascot |
|    | 2382.1831                                                         | 2382.1633 | -0.0198 | -8  | 137          | 156     | LIQYVCEKLEEVYGLHCS<br>AK |   |    |   | Carbamidomethyl (C)[6]                      |  |  | Mascot |
|    | 2382.1831                                                         | 2382.1633 | -0.0198 | -8  | 137          | 156     | LIQYVCEKLEEVYGLHCS<br>AK |   |    |   | Carbamidomethyl (C)[6]                      |  |  | Mascot |
| 39 | hypothetical protein LOC100135261 [Xenopus (Silurana) tropicalis] |           |         |     | gi 166158023 | 42901.5 | 9.7                      | 8 | 32 | 0 |                                             |  |  |        |

#### Peptide Information

| Calc. Mass | Obsrv. Mass | ± da    | ± ppm | Start Seq. | End Seq. | Sequence         | Ion Score | C. I. | % Modification         | Rank | Result Type |
|------------|-------------|---------|-------|------------|----------|------------------|-----------|-------|------------------------|------|-------------|
| 850.4781   | 850.5383    | 0.0602  | 71    | 178        | 184      | SPSKYLR          |           |       |                        |      | Mascot      |
| 858.5155   | 858.4422    | -0.0733 | -85   | 352        | 358      | AIELTLLR         |           |       |                        |      | Mascot      |
| 1165.6034  | 1165.7386   | 0.1352  | 116   | 78         | 87       | MGSQVVIPYR       |           |       | Oxidation (M)[1]       |      | Mascot      |
| 1419.8318  | 1419.6769   | -0.1549 | -109  | 238        | 250      | TVKQPVHVVDVAK    |           |       |                        |      | Mascot      |
| 1475.8151  | 1475.7452   | -0.0699 | -47   | 75         | 87       | LGRMGSQVVIPYR    |           |       |                        |      | Mascot      |
| 1565.7278  | 1565.7883   | 0.0605  | 39    | 212        | 223      | EDRFLNHFANMR     |           |       | Oxidation (M)[11]      |      | Mascot      |
| 1565.9196  | 1565.7883   | -0.1313 | -84   | 2          | 16       | AAVTLICRPAGVLPK  |           |       | Carbamidomethyl (C)[7] |      | Mascot      |
| 1639.9386  | 1639.8311   | -0.1075 | -66   | 1          | 16       | MAAVTLICRPAGVLPK |           |       |                        |      | Mascot      |
| 1639.9386  | 1639.8311   | -0.1075 | -66   | 1          | 16       | MAAVTLICRPAGVLPK |           |       |                        |      | Mascot      |
| 1655.9335  | 1655.8046   | -0.1289 | -78   | 1          | 16       | MAAVTLICRPAGVLPK |           |       | Oxidation (M)[1]       |      | Mascot      |
| 1655.9335  | 1655.8046   | -0.1289 | -78   | 1          | 16       | MAAVTLICRPAGVLPK |           |       | Oxidation (M)[1]       |      | Mascot      |

40 novel protein similar to vertebrate low density lipoprotein-related protein 1B (deleted in tumors)

#### Peptide Information

| Calc. Mass | Obsrv. Mass | ± da    | ± ppm | Start Seq. | End Seq. | Sequence  | Ion Score | C. I. | % Modification                           | Rank | Result Type |
|------------|-------------|---------|-------|------------|----------|-----------|-----------|-------|------------------------------------------|------|-------------|
| 858.4679   | 858.4422    | -0.0257 | -30   | 2471       | 2477     | ILLDDNR   |           |       |                                          |      | Mascot      |
| 865.3906   | 865.4405    | 0.0499  | 58    | 1069       | 1075     | MCDPKAK   |           |       | Carbamidomethyl (C)[2], Oxidation (M)[1] |      | Mascot      |
| 913.5366   | 913.4963    | -0.0403 | -44   | 1388       | 1394     | QRHVVFVK  |           |       |                                          |      | Mascot      |
| 913.5366   | 913.4963    | -0.0403 | -44   | 1388       | 1394     | QRHVVFVK  |           |       |                                          |      | Mascot      |
| 996.4996   | 996.5918    | 0.0922  | 93    | 1801       | 1808     | VYDKDTQK  |           |       |                                          |      | Mascot      |
| 1015.5894  | 1015.5523   | -0.0371 | -37   | 1782       | 1790     | DGKNLTVLR |           |       |                                          |      | Mascot      |

|    |                                       |           |         |      |             |      |                           |      |    |    |   |  |                                           |        |
|----|---------------------------------------|-----------|---------|------|-------------|------|---------------------------|------|----|----|---|--|-------------------------------------------|--------|
|    | 1062.5975                             | 1062.6842 | 0.0867  | 82   | 1754        | 1764 | KATALAVMGGK               |      |    |    |   |  | Oxidation (M)[8]                          | Mascot |
|    | 1155.4882                             | 1155.6482 | 0.16    | 138  | 323         | 332  | CNMDGTNRTK                |      |    |    |   |  | Oxidation (M)[3]                          | Mascot |
|    | 1179.5786                             | 1179.5941 | 0.0155  | 13   | 1379        | 1389 | IEGASMSGKQR               |      |    |    |   |  | Oxidation (M)[6]                          | Mascot |
|    | 1189.6576                             | 1189.6831 | 0.0255  | 21   | 1253        | 1263 | GDYSLLVPGLR               |      |    |    |   |  |                                           | Mascot |
|    | 1200.6331                             | 1200.4988 | -0.1343 | -112 | 2468        | 2477 | GERILLDDNR                |      |    |    |   |  |                                           | Mascot |
|    | 1201.52                               | 1201.5355 | 0.0155  | 13   | 2868        | 2877 | NCHVNECLNR                |      |    |    |   |  |                                           | Mascot |
|    | 1234.5382                             | 1234.6748 | 0.1366  | 111  | 446         | 456  | THACSPDPHGR               |      |    |    |   |  | Carbamidomethyl (C)[4]                    | Mascot |
|    | 1316.5293                             | 1316.6709 | 0.1416  | 108  | 2519        | 2528 | MQYCENRNCR                |      |    |    |   |  |                                           | Mascot |
|    | 1428.6648                             | 1428.7797 | 0.1149  | 80   | 1499        | 1512 | QPQTVSPCAGNGGR            |      |    |    |   |  | Carbamidomethyl (C)[8]                    | Mascot |
|    | 1434.7118                             | 1434.7635 | 0.0517  | 36   | 1537        | 1549 | LSANNSTCQGVR              |      |    |    |   |  | Carbamidomethyl (C)[8]                    | Mascot |
|    | 1475.589                              | 1475.7452 | 0.1562  | 106  | 2515        | 2525 | SDEKMQYCENR               |      |    |    |   |  | Carbamidomethyl (C)[8], Oxidation (M)[5]  | Mascot |
|    | 1483.8307                             | 1483.7457 | -0.085  | -57  | 492         | 503  | KPKNELFLFYGK              |      |    |    |   |  |                                           | Mascot |
|    | 1493.7383                             | 1493.7322 | -0.0061 | -4   | 2352        | 2364 | LYFSDGSLGHIER             |      |    |    |   |  |                                           | Mascot |
|    | 1639.7302                             | 1639.8311 | 0.1009  | 62   | 1735        | 1749 | CNLDGSGLDVIDSMK           |      |    |    |   |  | Carbamidomethyl (C)[1], Oxidation (M)[14] | Mascot |
|    | 1639.7302                             | 1639.8311 | 0.1009  | 62   | 1735        | 1749 | CNLDGSGLDVIDSMK           |      |    |    |   |  | Carbamidomethyl (C)[1], Oxidation (M)[14] | Mascot |
|    | 1655.7377                             | 1655.8046 | 0.0669  | 40   | 147         | 160  | CACTDGFSLQANRR            | 4    | 0  |    |   |  | Carbamidomethyl (C)[1,3]                  | Mascot |
|    | 1655.7377                             | 1655.8046 | 0.0669  | 40   | 147         | 160  | CACTDGFSLQANRR            |      |    |    |   |  | Carbamidomethyl (C)[1,3]                  | Mascot |
|    | 1774.8475                             | 1774.8722 | 0.0247  | 14   | 458         | 473  | GGCSHICLLSHNYKSR          |      |    |    |   |  |                                           | Mascot |
|    | 1845.7014                             | 1845.8774 | 0.176   | 95   | 1053        | 1068 | DCEDGSDEFACEGAKR          |      |    |    |   |  | Carbamidomethyl (C)[2,11]                 | Mascot |
|    | 1988.1003                             | 1988.0239 | -0.0764 | -38  | 2373        | 2390 | YVIVKSGPGTFFGLAIYR        |      |    |    |   |  |                                           | Mascot |
|    | 1988.1003                             | 1988.0239 | -0.0764 | -38  | 2373        | 2390 | YVIVKSGPGTFFGLAIYR        |      |    |    |   |  |                                           | Mascot |
|    | 2182.928                              | 2183.05   | 0.122   | 56   | 1637        | 1654 | NMYWMSSDNETHINVAR         |      |    |    |   |  |                                           | Mascot |
|    | 2232.9546                             | 2233.0696 | 0.115   | 52   | 1682        | 1701 | MFWMDDGGTINMANMDG<br>SNIK |      |    |    |   |  |                                           | Mascot |
|    | 2382.2573                             | 2382.1633 | -0.094  | -39  | 2562        | 2583 | VCLPSTAVPMAPVFP<br>PGVIR  |      |    |    |   |  | Carbamidomethyl (C)[2]                    | Mascot |
|    | 2382.2573                             | 2382.1633 | -0.094  | -39  | 2562        | 2583 | VCLPSTAVPMAPVFP<br>PGVIR  |      |    |    |   |  | Carbamidomethyl (C)[2]                    | Mascot |
| 41 | dynammin-1-like protein [Danio rerio] |           |         |      | gi 41055508 |      | 77214.6                   | 6.16 | 11 | 31 | 0 |  |                                           |        |

| Peptide Information |             |         |       |            |          |             |           |       |   |                  |      |        |      |
|---------------------|-------------|---------|-------|------------|----------|-------------|-----------|-------|---|------------------|------|--------|------|
| Calc. Mass          | Obsrv. Mass | ± da    | ± ppm | Start Seq. | End Seq. | Sequence    | Ion Score | C. I. | % | Modification     | Rank | Result | Type |
| 996.6088            | 996.5918    | -0.017  | -17   | 2          | 10       | EALIPVINK   |           |       |   |                  |      | Mascot |      |
| 999.5581            | 999.5625    | 0.0044  | 4     | 422        | 429      | RLEEPSLR    |           |       |   |                  |      | Mascot |      |
| 1155.6368           | 1155.6482   | 0.0114  | 10    | 564        | 574      | LQSSIPASPQK |           |       |   |                  |      | Mascot |      |
| 1171.563            | 1171.6464   | 0.0834  | 71    | 99         | 107      | IYTDDEIR    |           |       |   |                  |      | Mascot |      |
| 1201.6357           | 1201.5355   | -0.1002 | -83   | 519        | 528      | MRELPTSVPR  |           |       |   | Oxidation (M)[1] |      | Mascot |      |
| 1419.8002           | 1419.6769   | -0.1233 | -87   | 287        | 297      | TLNRLLMHHIR |           |       |   | Oxidation (M)[7] |      | Mascot |      |

|    |                                                                                                   |           |         |     |     |     |                           |        |      |    |    |   |  |  |  |  |                        |        |
|----|---------------------------------------------------------------------------------------------------|-----------|---------|-----|-----|-----|---------------------------|--------|------|----|----|---|--|--|--|--|------------------------|--------|
|    | 1707.9023                                                                                         | 1707.7631 | -0.1392 | -82 | 117 | 132 | VSGNNKGISDEPIHLK          |        |      |    |    |   |  |  |  |  |                        | Mascot |
|    | 1774.9454                                                                                         | 1774.8722 | -0.0732 | -41 | 291 | 304 | LLMHHIRDCLPELK            |        |      |    |    |   |  |  |  |  | Carbamidomethyl (C)[9] | Mascot |
|    | 2197.074                                                                                          | 2197.0642 | -0.0098 | -4  | 423 | 440 | LEEPSLRCVELVHEEMQ<br>R    |        |      |    |    |   |  |  |  |  |                        | Mascot |
|    | 2284.27                                                                                           | 2284.1633 | -0.1067 | -47 | 397 | 417 | NATGPRPALFVPEVSFEL<br>LVK |        |      |    |    |   |  |  |  |  |                        | Mascot |
|    | 2300.0676                                                                                         | 2300.1697 | 0.1021  | 44  | 99  | 116 | IYTFDEIRQEIENETER         |        |      |    |    |   |  |  |  |  |                        | Mascot |
| 42 | novel protein similar to vertebrate piccolo (presynaptic cytomatrix protein) (PCLO) [Danio rerio] |           |         |     |     |     | gi 122890940              | 337249 | 5.79 | 25 | 31 | 0 |  |  |  |  |                        |        |

Peptide Information

|  | Calc. Mass | Obsrv. Mass | ± da    | ± ppm | Start Seq. | End Seq. | Sequence                | Ion Score | C. I. % | Modification                             | Rank | Result Type |
|--|------------|-------------|---------|-------|------------|----------|-------------------------|-----------|---------|------------------------------------------|------|-------------|
|  | 832.4046   | 832.3935    | -0.0111 | -13   | 16         | 22       | EPSEKDK                 |           |         |                                          |      | Mascot      |
|  | 870.5771   | 870.5369    | -0.0402 | -46   | 2299       | 2305     | LLKQQLK                 |           |         |                                          |      | Mascot      |
|  | 999.4637   | 999.5625    | 0.0988  | 99    | 1316       | 1324     | AVCCDVVYK               |           |         |                                          |      | Mascot      |
|  | 1045.5248  | 1045.5597   | 0.0349  | 33    | 1084       | 1092     | TPPPHPMPR               |           |         | Oxidation (M)[7]                         |      | Mascot      |
|  | 1089.5786  | 1089.5281   | -0.0505 | -46   | 3007       | 3016     | EDSPKSSVIK              |           |         |                                          |      | Mascot      |
|  | 1155.5649  | 1155.6482   | 0.0833  | 72    | 1315       | 1324     | RAVCCDVVYK              |           |         |                                          |      | Mascot      |
|  | 1171.5796  | 1171.6464   | 0.0668  | 57    | 2644       | 2652     | FHYPPPHAR               |           |         |                                          |      | Mascot      |
|  | 1316.7321  | 1316.6709   | -0.0612 | -46   | 2883       | 2894     | VYLLPGRGAENK            |           |         |                                          |      | Mascot      |
|  | 1338.6722  | 1338.7688   | 0.0966  | 72    | 2410       | 2420     | LMQDEITFGLR             |           |         | Oxidation (M)[2]                         |      | Mascot      |
|  | 1338.7012  | 1338.7688   | 0.0676  | 50    | 2557       | 2570     | ASAGPLPPISADSR          |           |         |                                          |      | Mascot      |
|  | 1411.7791  | 1411.6505   | -0.1286 | -91   | 3          | 15       | EEAAPVKENELLK           |           |         |                                          |      | Mascot      |
|  | 1428.6238  | 1428.7797   | 0.1559  | 109   | 2456       | 2469     | SSLGEDSSYPGSGR          |           |         |                                          |      | Mascot      |
|  | 1668.8374  | 1668.8925   | 0.0551  | 33    | 2407       | 2420     | SSRLMQDEITFGLR          |           |         | Oxidation (M)[5]                         |      | Mascot      |
|  | 1774.6378  | 1774.8722   | 0.2344  | 132   | 1706       | 1720     | MDSGCQTDEEDNTEK         |           |         | Carbamidomethyl (C)[5], Oxidation (M)[1] |      | Mascot      |
|  | 1822.7688  | 1822.9247   | 0.1559  | 86    | 2284       | 2298     | AQDEEDPMEEPFEK          |           |         | Oxidation (M)[8]                         |      | Mascot      |
|  | 1822.8501  | 1822.9247   | 0.0746  | 41    | 3071       | 3088     | AHLDDAAAMAEAGQQP<br>R   |           |         |                                          |      | Mascot      |
|  | 1845.9779  | 1845.8774   | -0.1005 | -54   | 1843       | 1859     | SPKVLYSPISPCVSPSK       |           |         | Carbamidomethyl (C)[12]                  |      | Mascot      |
|  | 1886.8735  | 1886.9117   | 0.0382  | 20    | 1420       | 1436     | TTGVCTGMTVPQYTQAR       |           |         | Carbamidomethyl (C)[5], Oxidation (M)[8] |      | Mascot      |
|  | 1988.0157  | 1988.0239   | 0.0082  | 4     | 1687       | 1704     | QMYPGEVLPALVVTGE<br>R   |           |         |                                          |      | Mascot      |
|  | 1988.0157  | 1988.0239   | 0.0082  | 4     | 1687       | 1704     | QMYPGEVLPALVVTGE<br>R   |           |         |                                          |      | Mascot      |
|  | 1993.947   | 1993.9583   | 0.0113  | 6     | 532        | 547      | KPLRSPDEVYEDMMQR        |           |         |                                          |      | Mascot      |
|  | 2005.0098  | 2005.0409   | 0.0311  | 16    | 2259       | 2277     | LLRHAAADVSSDYLGSSS<br>R |           |         |                                          |      | Mascot      |
|  | 2196.9966  | 2197.0642   | 0.0676  | 31    | 125        | 143      | TIGDKGEIESPMDEEDFIR     |           |         | Oxidation (M)[12]                        |      | Mascot      |
|  | 2291.1853  | 2291.1448   | -0.0405 | -18   | 1685       | 1704     | FRQMYPGEVLPALVVT<br>GER |           |         |                                          |      | Mascot      |

|    |                                 |            |             |         |       |             |                     |                             |           |         |                          |      |             |
|----|---------------------------------|------------|-------------|---------|-------|-------------|---------------------|-----------------------------|-----------|---------|--------------------------|------|-------------|
|    |                                 | 2382.1243  | 2382.1633   | 0.039   | 16    | 2744        | 2764                | LDINMLSDSDSSHLDLHDQVK       |           |         |                          |      | Mascot      |
|    |                                 | 2382.2373  | 2382.1633   | -0.074  | -31   | 1363        | 1385                | GLGGIKPSMSDTNLAEA<br>GLFLYK |           |         |                          |      | Mascot      |
| 43 | Wu:f47e11 protein [Danio rerio] |            |             |         |       | gj 68534254 | 58915.8             | 9.6                         | 12        | 31      | 0                        |      |             |
|    | Peptide Information             |            |             |         |       |             |                     |                             |           |         |                          |      |             |
|    |                                 | Calc. Mass | Obsrv. Mass | ± da    | ± ppm | Start Seq.  | End Sequence Seq.   |                             | Ion Score | C. I. % | Modification             | Rank | Result Type |
|    |                                 | 850.4417   | 850.5383    | 0.0966  | 114   | 358         | 364 NAETIFR         |                             |           |         |                          |      | Mascot      |
|    |                                 | 865.4447   | 865.4405    | -0.0042 | -5    | 4           | 12 MAASTGISK        |                             |           |         |                          |      | Mascot      |
|    |                                 | 913.5101   | 913.4963    | -0.0138 | -15   | 417         | 424 EAEKPLAR        |                             |           |         |                          |      | Mascot      |
|    |                                 | 913.5101   | 913.4963    | -0.0138 | -15   | 417         | 424 EAEKPLAR        |                             |           |         |                          |      | Mascot      |
|    |                                 | 1045.4545  | 1045.5597   | 0.1052  | 101   | 248         | 257 GSDSDQSPPR      |                             |           |         |                          |      | Mascot      |
|    |                                 | 1051.5604  | 1051.7067   | 0.1463  | 139   | 461         | 469 GVKEKPCYK       |                             |           |         |                          |      | Mascot      |
|    |                                 | 1093.5636  | 1093.5179   | -0.0457 | -42   | 358         | 366 NAETIFRDK       |                             |           |         |                          |      | Mascot      |
|    |                                 | 1155.5865  | 1155.6482   | 0.0617  | 53    | 310         | 320 TRSPDGQAAPR     |                             |           |         |                          |      | Mascot      |
|    |                                 | 1184.627   | 1184.5033   | -0.1237 | -104  | 265         | 275 GLDSDLSPPRK     |                             |           |         |                          |      | Mascot      |
|    |                                 | 1201.5557  | 1201.5355   | -0.0202 | -17   | 248         | 258 GSDSDQSPPRR     |                             |           |         |                          |      | Mascot      |
|    |                                 | 1234.5919  | 1234.6748   | 0.0829  | 67    | 441         | 451 EGDPMAAMLRK     |                             |           |         | Oxidation (M)[5]         |      | Mascot      |
|    |                                 | 1655.8096  | 1655.8046   | -0.005  | -3    | 293         | 308 RVQGQGGSDDLSPPR |                             | 3         | 0       |                          |      | Mascot      |
|    |                                 | 1655.8096  | 1655.8046   | -0.005  | -3    | 294         | 309 VQGQGGSDDLSPPRR |                             |           |         |                          |      | Mascot      |
| 44 | NP95 [Danio rerio]              |            |             |         |       | gj 49618893 | 87114.9             | 6.46                        | 12        | 31      | 0                        |      |             |
|    | Peptide Information             |            |             |         |       |             |                     |                             |           |         |                          |      |             |
|    |                                 | Calc. Mass | Obsrv. Mass | ± da    | ± ppm | Start Seq.  | End Sequence Seq.   |                             | Ion Score | C. I. % | Modification             | Rank | Result Type |
|    |                                 | 832.4498   | 832.3935    | -0.0563 | -68   | 1           | 6 MWIQVR            |                             |           |         |                          |      | Mascot      |
|    |                                 | 858.5043   | 858.4422    | -0.0621 | -72   | 25          | 31 VDELRVK          |                             |           |         |                          |      | Mascot      |
|    |                                 | 882.4944   | 882.5626    | 0.0682  | 77    | 43          | 48 QRLFYR           |                             |           |         |                          |      | Mascot      |
|    |                                 | 1171.6066  | 1171.6464   | 0.0398  | 34    | 12          | 21 ETHRVDSLK        |                             |           |         |                          |      | Mascot      |
|    |                                 | 1179.5398  | 1179.5941   | 0.0543  | 46    | 394         | 404 DWGKGMACVGR     |                             |           |         |                          |      | Mascot      |
|    |                                 | 1189.5275  | 1189.6831   | 0.1556  | 131   | 313         | 322 VCNCHVCGIK      |                             |           |         | Carbamidomethyl (C)[2,4] |      | Mascot      |
|    |                                 | 1279.5769  | 1279.6721   | 0.0952  | 74    | 293         | 304 SQSNGPECKVCK    |                             |           |         |                          |      | Mascot      |
|    |                                 | 1279.5769  | 1279.6721   | 0.0952  | 74    | 293         | 304 SQSNGPECKVCK    |                             |           |         |                          |      | Mascot      |
|    |                                 | 1316.6627  | 1316.6709   | 0.0082  | 6     | 505         | 517 ALALNCNAAVNDK   |                             |           |         |                          |      | Mascot      |
|    |                                 | 1338.6206  | 1338.7688   | 0.1482  | 111   | 641         | 652 SQSMEEKSSPTK    |                             |           |         |                          |      | Mascot      |
|    |                                 | 1338.6206  | 1338.7688   | 0.1482  | 111   | 641         | 652 SQSMEEKSSPTK    |                             |           |         |                          |      | Mascot      |
|    |                                 | 1428.6907  | 1428.7797   | 0.089   | 62    | 228         | 238 GYWYDAEIQRK     |                             |           |         |                          |      | Mascot      |



|    |                                  |           |         |     |             |     |                          |      |    |    |   |  |  |  |  |  |        |
|----|----------------------------------|-----------|---------|-----|-------------|-----|--------------------------|------|----|----|---|--|--|--|--|--|--------|
|    | 1475.686                         | 1475.7452 | 0.0592  | 40  | 624         | 636 | NEDDIEETPTKGK            |      |    |    |   |  |  |  |  |  | Mascot |
|    | 2211.1365                        | 2211.094  | -0.0425 | -19 | 599         | 618 | LGLTMQYPEGYLEAVAA<br>KEK |      |    |    |   |  |  |  |  |  | Mascot |
| 45 | Wu:fi47e11 protein [Danio rerio] |           |         |     | gi 94574412 |     | 58914.8                  | 9.66 | 12 | 31 | 0 |  |  |  |  |  |        |

Peptide Information

| Calc. Mass | Obsrv. Mass | ± da    | ± ppm | Start Seq. | End Seq. | Sequence         | Ion Score | C. I. | % Modification   | Rank | Result Type |
|------------|-------------|---------|-------|------------|----------|------------------|-----------|-------|------------------|------|-------------|
| 850.4417   | 850.5383    | 0.0966  | 114   | 358        | 364      | NAETIFR          |           |       |                  |      | Mascot      |
| 865.4447   | 865.4405    | -0.0042 | -5    | 4          | 12       | MAASTGISK        |           |       |                  |      | Mascot      |
| 913.5101   | 913.4963    | -0.0138 | -15   | 417        | 424      | EAEKPLAR         |           |       |                  |      | Mascot      |
| 913.5101   | 913.4963    | -0.0138 | -15   | 417        | 424      | EAEKPLAR         |           |       |                  |      | Mascot      |
| 1045.4545  | 1045.5597   | 0.1052  | 101   | 248        | 257      | GSDSDQSPPR       |           |       |                  |      | Mascot      |
| 1051.5604  | 1051.7067   | 0.1463  | 139   | 461        | 469      | GVKEKPCYK        |           |       |                  |      | Mascot      |
| 1093.5636  | 1093.5179   | -0.0457 | -42   | 358        | 366      | NAETIFRDK        |           |       |                  |      | Mascot      |
| 1155.5865  | 1155.6482   | 0.0617  | 53    | 310        | 320      | TRSPDGQAAPR      |           |       |                  |      | Mascot      |
| 1184.627   | 1184.5033   | -0.1237 | -104  | 265        | 275      | GLDSDLSPPRK      |           |       |                  |      | Mascot      |
| 1201.5557  | 1201.5355   | -0.0202 | -17   | 248        | 258      | GSDSDQSPPRR      |           |       |                  |      | Mascot      |
| 1234.5919  | 1234.6748   | 0.0829  | 67    | 441        | 451      | EGDPMAAMLRK      |           |       | Oxidation (M)[5] |      | Mascot      |
| 1655.8096  | 1655.8046   | -0.005  | -3    | 293        | 308      | RVQGGQGSDSDLSPPR | 3         |       | 0                |      | Mascot      |
| 1655.8096  | 1655.8046   | -0.005  | -3    | 294        | 309      | VQGGQGSDSDLSPPRR |           |       |                  |      | Mascot      |

|    |                              |  |  |  |             |  |         |      |   |    |   |  |  |  |  |  |  |
|----|------------------------------|--|--|--|-------------|--|---------|------|---|----|---|--|--|--|--|--|--|
| 46 | Ywhab1 protein [Danio rerio] |  |  |  | gi 56269288 |  | 32354.9 | 4.63 | 7 | 31 | 0 |  |  |  |  |  |  |
|----|------------------------------|--|--|--|-------------|--|---------|------|---|----|---|--|--|--|--|--|--|

Peptide Information

| Calc. Mass | Obsrv. Mass | ± da    | ± ppm | Start Seq. | End Seq. | Sequence        | Ion Score | C. I. | % Modification         | Rank | Result Type |
|------------|-------------|---------|-------|------------|----------|-----------------|-----------|-------|------------------------|------|-------------|
| 1015.553   | 1015.5523   | -0.0007 | -1    | 56         | 64       | AKLAEQAER       |           |       |                        |      | Mascot      |
| 1062.5538  | 1062.6842   | 0.1304  | 123   | 185        | 193      | RTTVENSQK       |           |       |                        |      | Mascot      |
| 1155.5527  | 1155.6482   | 0.0955  | 83    | 174        | 184      | YLSEVASGDSK     |           |       |                        |      | Mascot      |
| 1171.563   | 1171.6464   | 0.0834  | 71    | 194        | 203      | AYQDAFEISK      |           |       |                        |      | Mascot      |
| 1189.6609  | 1189.6831   | 0.0222  | 19    | 259        | 268      | DSTLIMQLLR      |           |       |                        |      | Mascot      |
| 1419.759   | 1419.6769   | -0.0821 | -58   | 103        | 114      | SSWRVISSIEQK    |           |       |                        |      | Mascot      |
| 1822.9442  | 1822.9247   | -0.0195 | -11   | 41         | 55       | YIPICIMDKSDLVQK |           |       | Carbamidomethyl (C)[5] |      | Mascot      |
| 1822.9442  | 1822.9247   | -0.0195 | -11   | 41         | 55       | YIPICIMDKSDLVQK |           |       | Carbamidomethyl (C)[5] |      | Mascot      |

|    |                                                                                           |  |  |  |              |  |         |      |   |    |   |  |  |  |  |  |  |
|----|-------------------------------------------------------------------------------------------|--|--|--|--------------|--|---------|------|---|----|---|--|--|--|--|--|--|
| 47 | PREDICTED: UDP-GlcNAc:betaGal<br>beta-1,3-N-acetylglucosaminyltransferase 2 [Danio rerio] |  |  |  | gi 125843963 |  | 48322.6 | 8.69 | 8 | 31 | 0 |  |  |  |  |  |  |
|----|-------------------------------------------------------------------------------------------|--|--|--|--------------|--|---------|------|---|----|---|--|--|--|--|--|--|



1

tubulin alpha-1C chain [Danio rerio]

gi|300244537

49937.5

4.97

7

561

100

537

100

Peptide Information

| Calc. Mass | Obsrv. Mass | ± da   | ± ppm | Start Seq. | End Seq. | Sequence                  | Ion Score | C. I.  | % Modification | Rank | Result Type |
|------------|-------------|--------|-------|------------|----------|---------------------------|-----------|--------|----------------|------|-------------|
| 1023.449   | 1023.458    | 0.009  | 9     | 97         | 105      | EDAANNYAR                 |           |        |                |      | Mascot      |
| 1085.6201  | 1085.6276   | 0.0075 | 7     | 113        | 121      | ELIDLVLDR                 | 69        | 99.997 |                |      | Mascot      |
| 1085.6201  | 1085.6276   | 0.0075 | 7     | 113        | 121      | ELIDLVLDR                 |           |        |                |      | Mascot      |
| 1244.7208  | 1244.7266   | 0.0058 | 5     | 327        | 338      | DVNAAIATIKTK              |           |        |                |      | Mascot      |
| 1410.7739  | 1410.7828   | 0.0089 | 6     | 85         | 96       | QLFHPEQLITGK              |           |        |                |      | Mascot      |
| 1410.7739  | 1410.7828   | 0.0089 | 6     | 85         | 96       | QLFHPEQLITGK              | 82        | 100    |                |      | Mascot      |
| 1701.9058  | 1701.9159   | 0.0101 | 6     | 65         | 79       | AVFVDLEPTVIDEVR           | 123       | 100    |                |      | Mascot      |
| 1701.9058  | 1701.9159   | 0.0101 | 6     | 65         | 79       | AVFVDLEPTVIDEVR           |           |        |                |      | Mascot      |
| 2007.8929  | 2007.9091   | 0.0162 | 8     | 41         | 60       | TIGGGDDSFNTFFSETGA<br>GK  |           |        |                |      | Mascot      |
| 2007.8929  | 2007.9091   | 0.0162 | 8     | 41         | 60       | TIGGGDDSFNTFFSETGA<br>GK  | 132       | 100    |                |      | Mascot      |
| 2415.2051  | 2415.2056   | 0.0005 | 0     | 85         | 105      | QLFHPEQLITGKEDAANN<br>YAR | 131       | 100    |                |      | Mascot      |
| 2415.2051  | 2415.2056   | 0.0005 | 0     | 85         | 105      | QLFHPEQLITGKEDAANN<br>YAR |           |        |                |      | Mascot      |

2

Tuba1 protein [Danio rerio]

gi|27503932

50117.6

4.94

7

561

100

537

100

Peptide Information

| Calc. Mass | Obsrv. Mass | ± da   | ± ppm | Start Seq. | End Seq. | Sequence                  | Ion Score | C. I.  | % Modification | Rank | Result Type |
|------------|-------------|--------|-------|------------|----------|---------------------------|-----------|--------|----------------|------|-------------|
| 1023.449   | 1023.458    | 0.009  | 9     | 97         | 105      | EDAANNYAR                 |           |        |                |      | Mascot      |
| 1085.6201  | 1085.6276   | 0.0075 | 7     | 113        | 121      | EIIDLVLDR                 | 69        | 99.997 |                |      | Mascot      |
| 1085.6201  | 1085.6276   | 0.0075 | 7     | 113        | 121      | EIIDLVLDR                 |           |        |                |      | Mascot      |
| 1244.7208  | 1244.7266   | 0.0058 | 5     | 327        | 338      | DVNAAIATIKTK              |           |        |                |      | Mascot      |
| 1410.7739  | 1410.7828   | 0.0089 | 6     | 85         | 96       | QLFHPEQLITGK              |           |        |                |      | Mascot      |
| 1410.7739  | 1410.7828   | 0.0089 | 6     | 85         | 96       | QLFHPEQLITGK              | 82        | 100    |                |      | Mascot      |
| 1701.9058  | 1701.9159   | 0.0101 | 6     | 65         | 79       | AVFVDLEPTVIDEVR           | 123       | 100    |                |      | Mascot      |
| 1701.9058  | 1701.9159   | 0.0101 | 6     | 65         | 79       | AVFVDLEPTVIDEVR           |           |        |                |      | Mascot      |
| 2007.8929  | 2007.9091   | 0.0162 | 8     | 41         | 60       | TIGGGDDSFNTFFSETGA<br>GK  |           |        |                |      | Mascot      |
| 2007.8929  | 2007.9091   | 0.0162 | 8     | 41         | 60       | TIGGGDDSFNTFFSETGA<br>GK  | 132       | 100    |                |      | Mascot      |
| 2415.2051  | 2415.2056   | 0.0005 | 0     | 85         | 105      | QLFHPEQLITGKEDAANN<br>YAR | 131       | 100    |                |      | Mascot      |
| 2415.2051  | 2415.2056   | 0.0005 | 0     | 85         | 105      | QLFHPEQLITGKEDAANN<br>YAR |           |        |                |      | Mascot      |

3

PREDICTED: tubulin alpha-1A chain isoform 1 [Danio rerio]

gi|125818111

50111.5

4.94

6

556

100

537

100

| Peptide Information |                               |             |        |       |             |          |                           |           |                      |     |     |     |        |             |
|---------------------|-------------------------------|-------------|--------|-------|-------------|----------|---------------------------|-----------|----------------------|-----|-----|-----|--------|-------------|
|                     | Calc. Mass                    | Obsrv. Mass | ± da   | ± ppm | Start Seq.  | End Seq. | Sequence                  | Ion Score | C. I. % Modification |     |     |     | Rank   | Result Type |
|                     | 1023.449                      | 1023.458    | 0.009  | 9     | 97          | 105      | EDAANNYAR                 |           |                      |     |     |     | Mascot |             |
|                     | 1085.6201                     | 1085.6276   | 0.0075 | 7     | 113         | 121      | EIIDLVLDR                 | 69        | 99.997               |     |     |     | Mascot |             |
|                     | 1085.6201                     | 1085.6276   | 0.0075 | 7     | 113         | 121      | EIIDLVLDR                 |           |                      |     |     |     | Mascot |             |
|                     | 1410.7739                     | 1410.7828   | 0.0089 | 6     | 85          | 96       | QLFHPEQLITGK              |           |                      |     |     |     | Mascot |             |
|                     | 1410.7739                     | 1410.7828   | 0.0089 | 6     | 85          | 96       | QLFHPEQLITGK              | 82        | 100                  |     |     |     | Mascot |             |
|                     | 1701.9058                     | 1701.9159   | 0.0101 | 6     | 65          | 79       | AVFVDLEPTVIDEVR           | 123       | 100                  |     |     |     | Mascot |             |
|                     | 1701.9058                     | 1701.9159   | 0.0101 | 6     | 65          | 79       | AVFVDLEPTVIDEVR           |           |                      |     |     |     | Mascot |             |
|                     | 2007.8929                     | 2007.9091   | 0.0162 | 8     | 41          | 60       | TIGGGDDSFNTFFSETGA<br>GK  |           |                      |     |     |     | Mascot |             |
|                     | 2007.8929                     | 2007.9091   | 0.0162 | 8     | 41          | 60       | TIGGGDDSFNTFFSETGA<br>GK  | 132       | 100                  |     |     |     | Mascot |             |
|                     | 2415.2051                     | 2415.2056   | 0.0005 | 0     | 85          | 105      | QLFHPEQLITGKEDAANN<br>YAR | 131       | 100                  |     |     |     | Mascot |             |
|                     | 2415.2051                     | 2415.2056   | 0.0005 | 0     | 85          | 105      | QLFHPEQLITGKEDAANN<br>YAR |           |                      |     |     |     | Mascot |             |
| 4                   | tubulin alpha 6 [Danio rerio] |             |        |       | gi 37595424 |          | 50002.4                   | 4.93      | 6                    | 555 | 100 | 537 | 100    |             |

| Peptide Information |                                       |             |        |       |             |          |                           |           |         |              |      |             |     |
|---------------------|---------------------------------------|-------------|--------|-------|-------------|----------|---------------------------|-----------|---------|--------------|------|-------------|-----|
|                     | Calc. Mass                            | Obsrv. Mass | ± da   | ± ppm | Start Seq.  | End Seq. | Sequence                  | Ion Score | C. I. % | Modification | Rank | Result Type |     |
|                     | 1023.449                              | 1023.458    | 0.009  | 9     | 97          | 105      | EDAANNYAR                 |           |         |              |      | Mascot      |     |
|                     | 1085.6201                             | 1085.6276   | 0.0075 | 7     | 113         | 121      | EIIDLVLDR                 | 69        | 99.997  |              |      | Mascot      |     |
|                     | 1085.6201                             | 1085.6276   | 0.0075 | 7     | 113         | 121      | EIIDLVLDR                 |           |         |              |      | Mascot      |     |
|                     | 1410.7739                             | 1410.7828   | 0.0089 | 6     | 85          | 96       | QLFHPEQLITGK              |           |         |              |      | Mascot      |     |
|                     | 1410.7739                             | 1410.7828   | 0.0089 | 6     | 85          | 96       | QLFHPEQLITGK              | 82        | 100     |              |      | Mascot      |     |
|                     | 1701.9058                             | 1701.9159   | 0.0101 | 6     | 65          | 79       | AVFVDLEPTVIDEVR           | 123       | 100     |              |      | Mascot      |     |
|                     | 1701.9058                             | 1701.9159   | 0.0101 | 6     | 65          | 79       | AVFVDLEPTVIDEVR           |           |         |              |      | Mascot      |     |
|                     | 2007.8929                             | 2007.9091   | 0.0162 | 8     | 41          | 60       | TIGGGDDSFNTFFSETGA<br>GK  |           |         |              |      | Mascot      |     |
|                     | 2007.8929                             | 2007.9091   | 0.0162 | 8     | 41          | 60       | TIGGGDDSFNTFFSETGA<br>GK  | 132       | 100     |              |      | Mascot      |     |
|                     | 2415.2051                             | 2415.2056   | 0.0005 | 0     | 85          | 105      | QLFHPEQLITGKEDAANN<br>YAR | 131       | 100     |              |      | Mascot      |     |
|                     | 2415.2051                             | 2415.2056   | 0.0005 | 0     | 85          | 105      | QLFHPEQLITGKEDAANN<br>YAR |           |         |              |      | Mascot      |     |
| 5                   | tubulin, alpha 8 like 3 [Danio rerio] |             |        |       | gi 54261795 |          | 50034.4                   | 4.93      | 6       | 432          | 100  | 414         | 100 |

| Peptide Information |             |      |       |            |                   |           |         |              |      |        |      |
|---------------------|-------------|------|-------|------------|-------------------|-----------|---------|--------------|------|--------|------|
| Calc. Mass          | Obsrv. Mass | ± da | ± ppm | Start Seq. | End Sequence Seq. | Ion Score | C. I. % | Modification | Rank | Result | Type |

|   |                                       |           |        |   |     |             |                           |      |        |     |     |     |     |  |  |  |        |
|---|---------------------------------------|-----------|--------|---|-----|-------------|---------------------------|------|--------|-----|-----|-----|-----|--|--|--|--------|
|   | 1023.449                              | 1023.458  | 0.009  | 9 | 97  | 105         | EDAANNYAR                 |      |        |     |     |     |     |  |  |  | Mascot |
|   | 1085.6201                             | 1085.6276 | 0.0075 | 7 | 113 | 121         | EIIDLVLDR                 | 69   | 99.997 |     |     |     |     |  |  |  | Mascot |
|   | 1085.6201                             | 1085.6276 | 0.0075 | 7 | 113 | 121         | EIIDLVLDR                 |      |        |     |     |     |     |  |  |  | Mascot |
|   | 1410.7739                             | 1410.7828 | 0.0089 | 6 | 85  | 96          | QLFHPEQLITGK              |      |        |     |     |     |     |  |  |  | Mascot |
|   | 1410.7739                             | 1410.7828 | 0.0089 | 6 | 85  | 96          | QLFHPEQLITGK              | 82   | 100    |     |     |     |     |  |  |  | Mascot |
|   | 1715.9214                             | 1715.9296 | 0.0082 | 5 | 65  | 79          | AIFVDLEPTVIDEVR           |      |        |     |     |     |     |  |  |  | Mascot |
|   | 2007.8929                             | 2007.9091 | 0.0162 | 8 | 41  | 60          | TIGGGDDSFNTFFSETGA<br>GK  |      |        |     |     |     |     |  |  |  | Mascot |
|   | 2007.8929                             | 2007.9091 | 0.0162 | 8 | 41  | 60          | TIGGGDDSFNTFFSETGA<br>GK  | 132  | 100    |     |     |     |     |  |  |  | Mascot |
|   | 2415.2051                             | 2415.2056 | 0.0005 | 0 | 85  | 105         | QLFHPEQLITGKEDAANN<br>YAR | 131  | 100    |     |     |     |     |  |  |  | Mascot |
|   | 2415.2051                             | 2415.2056 | 0.0005 | 0 | 85  | 105         | QLFHPEQLITGKEDAANN<br>YAR |      |        |     |     |     |     |  |  |  | Mascot |
| 6 | tubulin, alpha 8 like 4 [Danio rerio] |           |        |   |     | gi 41055710 | 49957.4                   | 4.97 | 5      | 428 | 100 | 414 | 100 |  |  |  |        |

#### Peptide Information

| Calc. Mass | Obsrv. Mass | ± da   | ± ppm | Start Seq. | End Seq. | Sequence                  | Ion Score | C. I.  | % Modification | Rank | Result | Type   |
|------------|-------------|--------|-------|------------|----------|---------------------------|-----------|--------|----------------|------|--------|--------|
| 1023.449   | 1023.458    | 0.009  | 9     | 97         | 105      | EDAANNYAR                 |           |        |                |      |        | Mascot |
| 1085.6201  | 1085.6276   | 0.0075 | 7     | 113        | 121      | EIIDLVLDR                 | 69        | 99.997 |                |      |        | Mascot |
| 1085.6201  | 1085.6276   | 0.0075 | 7     | 113        | 121      | EIIDLVLDR                 |           |        |                |      |        | Mascot |
| 1410.7739  | 1410.7828   | 0.0089 | 6     | 85         | 96       | QLFHPEQLITGK              |           |        |                |      |        | Mascot |
| 1410.7739  | 1410.7828   | 0.0089 | 6     | 85         | 96       | QLFHPEQLITGK              | 82        | 100    |                |      |        | Mascot |
| 2007.8929  | 2007.9091   | 0.0162 | 8     | 41         | 60       | TIGGGDDSFNTFFSETGA<br>GK  |           |        |                |      |        | Mascot |
| 2007.8929  | 2007.9091   | 0.0162 | 8     | 41         | 60       | TIGGGDDSFNTFFSETGA<br>GK  | 132       | 100    |                |      |        | Mascot |
| 2415.2051  | 2415.2056   | 0.0005 | 0     | 85         | 105      | QLFHPEQLITGKEDAANN<br>YAR | 131       | 100    |                |      |        | Mascot |
| 2415.2051  | 2415.2056   | 0.0005 | 0     | 85         | 105      | QLFHPEQLITGKEDAANN<br>YAR |           |        |                |      |        | Mascot |

7 hypothetical protein LOC641561 [Danio rerio] gi|83025060 49906.5 5.01 5 225 100 213 100

#### Peptide Information

| Calc. Mass | Obsrv. Mass | ± da   | ± ppm | Start Seq. | End Seq. | Sequence           | Ion Score | C. I. | % Modification | Rank | Result | Type   |
|------------|-------------|--------|-------|------------|----------|--------------------|-----------|-------|----------------|------|--------|--------|
| 1023.449   | 1023.458    | 0.009  | 9     | 97         | 105      | EDAANNYAR          |           |       |                |      |        | Mascot |
| 1244.7208  | 1244.7266   | 0.0058 | 5     | 327        | 338      | DVNAAIATIKTK       |           |       |                |      |        | Mascot |
| 1410.7739  | 1410.7828   | 0.0089 | 6     | 85         | 96       | QLFHPEQLITGK       |           |       |                |      |        | Mascot |
| 1410.7739  | 1410.7828   | 0.0089 | 6     | 85         | 96       | QLFHPEQLITGK       | 82        | 100   |                |      |        | Mascot |
| 1475.6415  | 1475.7621   | 0.1206 | 82    | 309        | 320      | HGKYMACCMLYR       |           |       |                |      |        | Mascot |
| 2415.2051  | 2415.2056   | 0.0005 | 0     | 85         | 105      | QLFHPEQLITGKEDAANN | 131       | 100   |                |      |        | Mascot |

|    |                                                |            |             |        |       |            |              |                           |         |      |           |       |     |              |     |      |             |        |
|----|------------------------------------------------|------------|-------------|--------|-------|------------|--------------|---------------------------|---------|------|-----------|-------|-----|--------------|-----|------|-------------|--------|
|    |                                                | 2415.2051  | 2415.2056   | 0.0005 | 0     | 85         | 105          | QLFHPEQLITGKEDAANN<br>YAR |         |      |           |       |     |              |     |      |             | Mascot |
| 8  | tubulin, alpha 7 like [Danio rerio]            |            |             |        |       |            | gi 50345118  |                           | 49845.5 | 5.06 | 4         | 222   | 100 | 213          | 100 |      |             |        |
|    | Peptide Information                            |            |             |        |       |            |              |                           |         |      |           |       |     |              |     |      |             |        |
|    |                                                | Calc. Mass | Obsrv. Mass | ± da   | ± ppm | Start Seq. | End Seq.     | Sequence                  |         |      | Ion Score | C. I. | %   | Modification |     | Rank | Result Type |        |
|    |                                                | 1023.449   | 1023.458    | 0.009  | 9     | 97         | 105          | EDAANNYAR                 |         |      |           |       |     |              |     |      | Mascot      |        |
|    |                                                | 1410.7739  | 1410.7828   | 0.0089 | 6     | 85         | 96           | QLFHPEQLITGK              |         |      |           |       |     |              |     |      | Mascot      |        |
|    |                                                | 1410.7739  | 1410.7828   | 0.0089 | 6     | 85         | 96           | QLFHPEQLITGK              |         |      | 82        |       | 100 |              |     |      | Mascot      |        |
|    |                                                | 1475.6415  | 1475.7621   | 0.1206 | 82    | 309        | 320          | HGKYMACCMLYR              |         |      |           |       |     |              |     |      | Mascot      |        |
|    |                                                | 2415.2051  | 2415.2056   | 0.0005 | 0     | 85         | 105          | QLFHPEQLITGKEDAANN<br>YAR |         |      | 131       |       | 100 |              |     |      | Mascot      |        |
|    |                                                | 2415.2051  | 2415.2056   | 0.0005 | 0     | 85         | 105          | QLFHPEQLITGKEDAANN<br>YAR |         |      |           |       |     |              |     |      | Mascot      |        |
| 9  | tubulin alpha 8-like 3b [Danio rerio]          |            |             |        |       |            | gi 269973893 |                           | 52877.9 | 5    | 4         | 222   | 100 | 213          | 100 |      |             |        |
|    | Peptide Information                            |            |             |        |       |            |              |                           |         |      |           |       |     |              |     |      |             |        |
|    |                                                | Calc. Mass | Obsrv. Mass | ± da   | ± ppm | Start Seq. | End Seq.     | Sequence                  |         |      | Ion Score | C. I. | %   | Modification |     | Rank | Result Type |        |
|    |                                                | 1023.449   | 1023.458    | 0.009  | 9     | 125        | 133          | EDAANNYAR                 |         |      |           |       |     |              |     |      | Mascot      |        |
|    |                                                | 1410.7739  | 1410.7828   | 0.0089 | 6     | 113        | 124          | QLFHPEQLITGK              |         |      |           |       |     |              |     |      | Mascot      |        |
|    |                                                | 1410.7739  | 1410.7828   | 0.0089 | 6     | 113        | 124          | QLFHPEQLITGK              |         |      | 82        |       | 100 |              |     |      | Mascot      |        |
|    |                                                | 1715.9214  | 1715.9296   | 0.0082 | 5     | 93         | 107          | AIFVDLEPTVIDEVR           |         |      |           |       |     |              |     |      | Mascot      |        |
|    |                                                | 2415.2051  | 2415.2056   | 0.0005 | 0     | 113        | 133          | QLFHPEQLITGKEDAANN<br>YAR |         |      | 131       |       | 100 |              |     |      | Mascot      |        |
|    |                                                | 2415.2051  | 2415.2056   | 0.0005 | 0     | 113        | 133          | QLFHPEQLITGKEDAANN<br>YAR |         |      |           |       |     |              |     |      | Mascot      |        |
| 10 | Unknown (protein for MGC:173992) [Danio rerio] |            |             |        |       |            | gi 157422920 |                           | 24667.1 | 6.3  | 3         | 216   | 100 | 205          | 100 |      |             |        |
|    | Peptide Information                            |            |             |        |       |            |              |                           |         |      |           |       |     |              |     |      |             |        |
|    |                                                | Calc. Mass | Obsrv. Mass | ± da   | ± ppm | Start Seq. | End Seq.     | Sequence                  |         |      | Ion Score | C. I. | %   | Modification |     | Rank | Result Type |        |
|    |                                                | 1244.7208  | 1244.7266   | 0.0058 | 5     | 158        | 169          | DVNAAIATIKTK              |         |      |           |       |     |              |     |      | Mascot      |        |
|    |                                                | 1410.7739  | 1410.7828   | 0.0089 | 6     | 85         | 96           | QLFHPEQLITGK              |         |      |           |       |     |              |     |      | Mascot      |        |
|    |                                                | 1410.7739  | 1410.7828   | 0.0089 | 6     | 85         | 96           | QLFHPEQLITGK              |         |      | 82        |       | 100 |              |     |      | Mascot      |        |
|    |                                                | 1701.9058  | 1701.9159   | 0.0101 | 6     | 65         | 79           | AVFVDLEPTVIDEVR           |         |      | 123       |       | 100 |              |     |      | Mascot      |        |
|    |                                                | 1701.9058  | 1701.9159   | 0.0101 | 6     | 65         | 79           | AVFVDLEPTVIDEVR           |         |      |           |       |     |              |     |      | Mascot      |        |
| 11 | tubulin alpha-1D chain [Danio rerio]           |            |             |        |       |            | gi 54261761  |                           | 50004.5 | 4.9  | 4         | 202   | 100 | 192          | 100 |      |             |        |
|    | Peptide Information                            |            |             |        |       |            |              |                           |         |      |           |       |     |              |     |      |             |        |

|    | Calc. Mass                                                        | Obsrv. Mass | ± da   | ± ppm | Start Seq. | End Sequence Seq.           | Ion Score | C. I.  | % Modification | Rank      | Result Type |
|----|-------------------------------------------------------------------|-------------|--------|-------|------------|-----------------------------|-----------|--------|----------------|-----------|-------------|
|    | 1023.449                                                          | 1023.458    | 0.009  | 9     | 97         | 105 EDAANNYAR               |           |        |                |           | Mascot      |
|    | 1085.6201                                                         | 1085.6276   | 0.0075 | 7     | 113        | 121 EIIDLVLDR               | 69        | 99.997 |                |           | Mascot      |
|    | 1085.6201                                                         | 1085.6276   | 0.0075 | 7     | 113        | 121 EIIDLVLDR               |           |        |                |           | Mascot      |
|    | 1701.9058                                                         | 1701.9159   | 0.0101 | 6     | 65         | 79 AVFVDLEPTVIDEVR          | 123       | 100    |                |           | Mascot      |
|    | 1701.9058                                                         | 1701.9159   | 0.0101 | 6     | 65         | 79 AVFVDLEPTVIDEVR          |           |        |                |           | Mascot      |
|    | 1993.8773                                                         | 1993.9789   | 0.1016 | 51    | 41         | 60 TVGGGDDSFNTFFSETG<br>AGK |           |        |                |           | Mascot      |
| 12 | PREDICTED: secretory phospholipase A2 receptor-like [Danio rerio] |             |        |       |            | gi 326677742                | 114529.8  | 4.98   | 10             | 54 83.466 | 35 91.454   |

#### Peptide Information

|    | Calc. Mass                                             | Obsrv. Mass | ± da    | ± ppm | Start Seq. | End Sequence Seq.            | Ion Score | C. I.  | % Modification                           | Rank | Result Type |
|----|--------------------------------------------------------|-------------|---------|-------|------------|------------------------------|-----------|--------|------------------------------------------|------|-------------|
|    | 1085.4755                                              | 1085.6276   | 0.1521  | 140   | 757        | 764 ELCVFMDR                 | 35        | 91.454 | Carbamidomethyl (C)[3], Oxidation (M)[6] |      | Mascot      |
|    | 1085.4755                                              | 1085.6276   | 0.1521  | 140   | 757        | 764 ELCVFMDR                 |           |        | Carbamidomethyl (C)[3], Oxidation (M)[6] |      | Mascot      |
|    | 1287.5892                                              | 1287.676    | 0.0868  | 67    | 80         | 89 WTLEDSDFFK                |           |        |                                          |      | Mascot      |
|    | 1288.5562                                              | 1288.6534   | 0.0972  | 75    | 390        | 399 TWTEACRYCR               |           |        |                                          |      | Mascot      |
|    | 1364.5865                                              | 1364.7062   | 0.1197  | 88    | 745        | 756 NFYHEPDNSGGK             |           |        |                                          |      | Mascot      |
|    | 1410.7111                                              | 1410.7828   | 0.0717  | 51    | 38         | 49 DKYTDLATIENK              |           |        |                                          |      | Mascot      |
|    | 1410.7111                                              | 1410.7828   | 0.0717  | 51    | 38         | 49 DKYTDLATIENK              |           |        |                                          |      | Mascot      |
|    | 1493.7747                                              | 1493.7378   | -0.0369 | -25   | 140        | 152 NASATYVVIYQHK            |           |        |                                          |      | Mascot      |
|    | 1623.7941                                              | 1623.8529   | 0.0588  | 36    | 417        | 429 ILERICTQSSCTR            |           |        | Carbamidomethyl (C)[6,11]                |      | Mascot      |
|    | 1851.8044                                              | 1851.9381   | 0.1337  | 72    | 332        | 346 DYRNWYHEPDNTGGK          |           |        |                                          |      | Mascot      |
|    | 1858.983                                               | 1858.8837   | -0.0993 | -53   | 939        | 953 IEQEVIIQLQEELMK          |           |        | Oxidation (M)[14]                        |      | Mascot      |
|    | 2415.0491                                              | 2415.2056   | 0.1565  | 65    | 745        | 764 NFYHEPDNSGGKELCVF<br>MDR |           |        | Carbamidomethyl (C)[15]                  |      | Mascot      |
|    | 2415.0491                                              | 2415.2056   | 0.1565  | 65    | 745        | 764 NFYHEPDNSGGKELCVF<br>MDR |           |        | Carbamidomethyl (C)[15]                  |      | Mascot      |
| 13 | acetylserotonin O-methyltransferase-like [Danio rerio] |             |         |       |            | gi 169154831                 | 70785.2   | 5.72   | 9                                        | 45 0 | 19 0        |

#### Peptide Information

|  | Calc. Mass | Obsrv. Mass | ± da    | ± ppm | Start Seq. | End Sequence Seq. | Ion Score | C. I. | % Modification   | Rank | Result Type |
|--|------------|-------------|---------|-------|------------|-------------------|-----------|-------|------------------|------|-------------|
|  | 1023.5105  | 1023.458    | -0.0525 | -51   | 344        | 351 QEEISVYR      |           |       |                  |      | Mascot      |
|  | 1085.6313  | 1085.6276   | -0.0037 | -3    | 25         | 34 LEILSNAGLR     | 19        | 0     |                  |      | Mascot      |
|  | 1085.6313  | 1085.6276   | -0.0037 | -3    | 25         | 34 LEILSNAGLR     |           |       |                  |      | Mascot      |
|  | 1277.677   | 1277.7148   | 0.0378  | 30    | 563        | 574 ALLQALSMTEGK  |           |       | Oxidation (M)[8] |      | Mascot      |
|  | 1392.6318  | 1392.7539   | 0.1221  | 88    | 406        | 416 EDVFQDVYYSK   |           |       |                  |      | Mascot      |

|           |           |         |     |     |     |                                    |  |  |                               |  |  |        |
|-----------|-----------|---------|-----|-----|-----|------------------------------------|--|--|-------------------------------|--|--|--------|
| 1516.7828 | 1516.717  | -0.0658 | -43 | 597 | 609 | HTDNLLDAMLFVK                      |  |  |                               |  |  | Mascot |
| 1623.7782 | 1623.8529 | 0.0747  | 46  | 617 | 632 | TLLGCSSASIAETAELE                  |  |  |                               |  |  | Mascot |
| 1638.9901 | 1638.8604 | -0.1297 | -79 | 329 | 343 | LLEAAVSLGLLERVR                    |  |  |                               |  |  | Mascot |
| 2211.1477 | 2211.1184 | -0.0293 | -13 | 467 | 485 | AHPELSVTIFDLPQVIEMR                |  |  | Oxidation (M)[18]             |  |  | Mascot |
| 3337.4519 | 3337.7576 | 0.3057  | 92  | 437 | 466 | DLATAFDLSCYKTACDIG<br>GCTGAMAYEFTK |  |  | Carbamidomethyl (C)[10,15,20] |  |  | Mascot |

14 PREDICTED: echinoderm microtubule associated protein like 6 [Danio rerio] gi|326672044 191942.5 7.32 19 45 0

#### Peptide Information

| Calc. Mass | Obsrv. Mass | ± da    | ± ppm | Start Seq. | End Seq. | Sequence                            | Ion Score | C. I. % | Modification            | Rank | Result Type |
|------------|-------------|---------|-------|------------|----------|-------------------------------------|-----------|---------|-------------------------|------|-------------|
| 842.4617   | 842.5182    | 0.0565  | 67    | 433        | 439      | EDLPQLK                             |           |         |                         |      | Mascot      |
| 850.4451   | 850.5499    | 0.1048  | 123   | 1228       | 1234     | QTMSVLR                             |           |         | Oxidation (M)[3]        |      | Mascot      |
| 996.5546   | 996.6024    | 0.0478  | 48    | 714        | 721      | CLKTYAIK                            |           |         | Carbamidomethyl (C)[1]  |      | Mascot      |
| 996.5546   | 996.6024    | 0.0478  | 48    | 714        | 721      | CLKTYAIK                            |           |         | Carbamidomethyl (C)[1]  |      | Mascot      |
| 1051.651   | 1051.7194   | 0.0684  | 65    | 1117       | 1126     | AAPLPDKLVK                          |           |         |                         |      | Mascot      |
| 1085.4972  | 1085.6276   | 0.1304  | 120   | 1684       | 1692     | LFDFPCSEK                           |           |         |                         |      | Mascot      |
| 1085.4972  | 1085.6276   | 0.1304  | 120   | 1684       | 1692     | LFDFPCSEK                           |           |         |                         |      | Mascot      |
| 1179.5575  | 1179.6073   | 0.0498  | 42    | 1269       | 1278     | WQEGSRVCSK                          |           |         |                         |      | Mascot      |
| 1320.6769  | 1320.5892   | -0.0877 | -66   | 176        | 187      | FWALCGNALTPK                        |           |         |                         |      | Mascot      |
| 1349.696   | 1349.7142   | 0.0182  | 13    | 927        | 937      | EQLFFEAPRGR                         |           |         |                         |      | Mascot      |
| 1410.7627  | 1410.7828   | 0.0201  | 14    | 982        | 994      | KLLATGDDFGFVK                       |           |         |                         |      | Mascot      |
| 1410.7627  | 1410.7828   | 0.0201  | 14    | 982        | 994      | KLLATGDDFGFVK                       |           |         |                         |      | Mascot      |
| 1535.8217  | 1535.7115   | -0.1102 | -72   | 529        | 541      | DPAIHVWDIQLK                        |           |         |                         |      | Mascot      |
| 1859.0425  | 1858.8837   | -0.1588 | -85   | 261        | 275      | LWDVDFKPIKIDLR                      |           |         |                         |      | Mascot      |
| 2008.0684  | 2007.9091   | -0.1593 | -79   | 1365       | 1382     | VVAKAHTGPVFTMYTTLR                  |           |         | Oxidation (M)[13]       |      | Mascot      |
| 2008.0684  | 2007.9091   | -0.1593 | -79   | 1365       | 1382     | VVAKAHTGPVFTMYTTLR                  |           |         | Oxidation (M)[13]       |      | Mascot      |
| 2095.0488  | 2095.1541   | 0.1053  | 50    | 296        | 313      | ILAGTQDSEIFEVMVRDR                  |           |         | Oxidation (M)[14]       |      | Mascot      |
| 2283.2019  | 2283.1895   | -0.0124 | -5    | 1285       | 1304     | IFVVEFRPDSDTQFVSVG<br>IK            |           |         |                         |      | Mascot      |
| 2283.2019  | 2283.1895   | -0.0124 | -5    | 1285       | 1304     | IFVVEFRPDSDTQFVSVG<br>IK            |           |         |                         |      | Mascot      |
| 2300.0764  | 2300.1904   | 0.114   | 50    | 1135       | 1153     | TVEELSLDHVFGYRGFD<br>CR             |           |         | Carbamidomethyl (C)[18] |      | Mascot      |
| 2398.24    | 2398.1816   | -0.0584 | -24   | 876        | 896      | YLAVASHDSFVDIYNVLT<br>SKR           |           |         |                         |      | Mascot      |
| 2415.1907  | 2415.2056   | 0.0149  | 6     | 351        | 370      | LWLSSEHTLIARCNMEEA<br>VR            |           |         | Carbamidomethyl (C)[13] |      | Mascot      |
| 2415.1907  | 2415.2056   | 0.0149  | 6     | 351        | 370      | LWLSSEHTLIARCNMEEA<br>VR            |           |         | Carbamidomethyl (C)[13] |      | Mascot      |
| 3338.6436  | 3338.7561   | 0.1125  | 34    | 949        | 979      | MEWATWTSVLGGTCEGI<br>WPTLSLVNASSLTK |           |         |                         |      | Mascot      |



|                     |                                                                                                    |             |         |       |              |          |                                             |           |       |    |                                          |      |             |
|---------------------|----------------------------------------------------------------------------------------------------|-------------|---------|-------|--------------|----------|---------------------------------------------|-----------|-------|----|------------------------------------------|------|-------------|
|                     | 3729.8438                                                                                          | 3729.9419   | 0.0981  | 26    | 765          | 799      | SGPMTLLVQGHMEGEV<br>WGLAAHPLLPICATVSDD<br>K |           |       |    | Carbamidomethyl (C)[28]                  |      | Mascot      |
| 15                  | meteorin [Danio rerio]                                                                             |             |         |       | gi 58000446  |          | 30960.5                                     | 8.54      | 8     | 41 | 0                                        |      |             |
| Peptide Information |                                                                                                    |             |         |       |              |          |                                             |           |       |    |                                          |      |             |
|                     | Calc. Mass                                                                                         | Obsrv. Mass | ± da    | ± ppm | Start Seq.   | End Seq. | Sequence                                    | Ion Score | C. I. | %  | Modification                             | Rank | Result Type |
|                     | 1023.5257                                                                                          | 1023.458    | -0.0677 | -66   | 211          | 219      | FALFPESGR                                   |           |       |    |                                          |      | Mascot      |
|                     | 1279.6793                                                                                          | 1279.7883   | 0.109   | 85    | 209          | 219      | QKFALFPESGR                                 |           |       |    |                                          |      | Mascot      |
|                     | 1349.6439                                                                                          | 1349.7142   | 0.0703  | 52    | 272          | 283      | QSLMIPCTLVND                                |           |       |    | Oxidation (M)[4]                         |      | Mascot      |
|                     | 1393.7587                                                                                          | 1393.755    | -0.0037 | -3    | 211          | 222      | FALFPESGRLTR                                |           |       |    |                                          |      | Mascot      |
|                     | 1393.7587                                                                                          | 1393.755    | -0.0037 | -3    | 211          | 222      | FALFPESGRLTR                                |           |       |    |                                          |      | Mascot      |
|                     | 1535.589                                                                                           | 1535.7115   | 0.1225  | 80    | 1            | 12       | MASYSEDQCSWR                                |           |       |    | Carbamidomethyl (C)[9], Oxidation (M)[1] |      | Mascot      |
|                     | 1790.8795                                                                                          | 1790.9036   | 0.0241  | 13    | 247          | 261      | VHFGEAWLGCAPRYK                             |           |       |    | Carbamidomethyl (C)[10]                  |      | Mascot      |
|                     | 2211.1492                                                                                          | 2211.1184   | -0.0308 | -14   | 109          | 128      | CFSALPGERPALFLQATP<br>HR                    |           |       |    |                                          |      | Mascot      |
|                     | 2306.0176                                                                                          | 2306.1606   | 0.143   | 62    | 1            | 21       | MASYSEDQCSWRGSGLSQAVK                       |           |       |    | Oxidation (M)[1]                         |      | Mascot      |
| 16                  | N-acetylserotonin O-methyltransferase-like protein [Danio rerio]                                   |             |         |       | gi 47087263  |          | 70740.2                                     | 5.78      | 8     | 39 | 0                                        | 19   | 0           |
| Peptide Information |                                                                                                    |             |         |       |              |          |                                             |           |       |    |                                          |      |             |
|                     | Calc. Mass                                                                                         | Obsrv. Mass | ± da    | ± ppm | Start Seq.   | End Seq. | Sequence                                    | Ion Score | C. I. | %  | Modification                             | Rank | Result Type |
|                     | 1023.5105                                                                                          | 1023.458    | -0.0525 | -51   | 344          | 351      | QEEISVYR                                    |           |       |    |                                          |      | Mascot      |
|                     | 1085.6313                                                                                          | 1085.6276   | -0.0037 | -3    | 25           | 34       | LEILSNAGLR                                  | 19        |       | 0  |                                          |      | Mascot      |
|                     | 1085.6313                                                                                          | 1085.6276   | -0.0037 | -3    | 25           | 34       | LEILSNAGLR                                  |           |       |    |                                          |      | Mascot      |
|                     | 1277.677                                                                                           | 1277.7148   | 0.0378  | 30    | 563          | 574      | ALLQALSMTEGK                                |           |       |    | Oxidation (M)[8]                         |      | Mascot      |
|                     | 1392.6318                                                                                          | 1392.7539   | 0.1221  | 88    | 406          | 416      | EDVFQDVYYSK                                 |           |       |    |                                          |      | Mascot      |
|                     | 1516.7828                                                                                          | 1516.717    | -0.0658 | -43   | 597          | 609      | HTDNLLDAMLFVK                               |           |       |    |                                          |      | Mascot      |
|                     | 1623.7782                                                                                          | 1623.8529   | 0.0747  | 46    | 617          | 632      | TLLGCSSASIETAELE                            |           |       |    |                                          |      | Mascot      |
|                     | 1638.9901                                                                                          | 1638.8604   | -0.1297 | -79   | 329          | 343      | LLEAAVSLGLLERVR                             |           |       |    |                                          |      | Mascot      |
|                     | 3337.4519                                                                                          | 3337.7576   | 0.3057  | 92    | 437          | 466      | DLATAFDLSCYKTACDIG<br>GCTGAMAYEFTK          |           |       |    | Carbamidomethyl (C)[10,15,20]            |      | Mascot      |
| 17                  | PREDICTED: calcium/calmodulin-dependent 3',5'-cyclic nucleotide phosphodiesterase 1C-like, partial |             |         |       | gi 326681376 |          | 45655.3                                     | 5.68      | 9     | 39 | 0                                        |      |             |
| Peptide Information |                                                                                                    |             |         |       |              |          |                                             |           |       |    |                                          |      |             |
|                     | Calc. Mass                                                                                         | Obsrv. Mass | ± da    | ± ppm | Start Seq.   | End Seq. | Sequence                                    | Ion Score | C. I. | %  | Modification                             | Rank | Result Type |
|                     | 864.4429                                                                                           | 864.5258    | 0.0829  | 96    | 104          | 110      | QMGLMLR                                     |           |       |    | Oxidation (M)[2]                         |      | Mascot      |

|    |                                    |           |         |     |             |     |                           |                         |    |    |   |  |        |
|----|------------------------------------|-----------|---------|-----|-------------|-----|---------------------------|-------------------------|----|----|---|--|--------|
|    | 1023.4642                          | 1023.458  | -0.0062 | -6  | 315         | 321 | DDWREFR                   |                         |    |    |   |  | Mascot |
|    | 1045.5823                          | 1045.5695 | -0.0128 | -12 | 37          | 44  | CLVKQLER                  | Carbamidomethyl (C)[1]  |    |    |   |  | Mascot |
|    | 1062.5691                          | 1062.699  | 0.1299  | 122 | 112         | 119 | TEEKPRFR                  |                         |    |    |   |  | Mascot |
|    | 1701.9323                          | 1701.9159 | -0.0164 | -10 | 18          | 30  | YLQPDQIEKIWLR             |                         |    |    |   |  | Mascot |
|    | 1701.9323                          | 1701.9159 | -0.0164 | -10 | 18          | 30  | YLQPDQIEKIWLR             |                         |    |    |   |  | Mascot |
|    | 2008.1001                          | 2007.9091 | -0.191  | -95 | 195         | 213 | IPVSALVSFVEALEVGYS<br>K   |                         |    |    |   |  | Mascot |
|    | 2008.1001                          | 2007.9091 | -0.191  | -95 | 195         | 213 | IPVSALVSFVEALEVGYS<br>K   |                         |    |    |   |  | Mascot |
|    | 2283.2634                          | 2283.1895 | -0.0739 | -32 | 193         | 213 | FKIPVSALVSFVEALEVG<br>YSK |                         |    |    |   |  | Mascot |
|    | 2283.2634                          | 2283.1895 | -0.0739 | -32 | 193         | 213 | FKIPVSALVSFVEALEVG<br>YSK |                         |    |    |   |  | Mascot |
|    | 2299.2583                          | 2299.1948 | -0.0635 | -28 | 195         | 215 | IPVSALVSFVEALEVGYS<br>KYK |                         |    |    |   |  | Mascot |
|    | 2306.134                           | 2306.1606 | 0.0266  | 12  | 322         | 341 | ALVVEMVLATDMSCHFQ<br>QVK  | Carbamidomethyl (C)[14] |    |    |   |  | Mascot |
| 18 | Sec23-like protein B [Danio rerio] |           |         |     | gi 37362184 |     | 86124.5                   | 7.23                    | 12 | 39 | 0 |  |        |

#### Peptide Information

| Calc. Mass | Obsrv. Mass | ± da    | ± ppm | Start Seq. | End Seq. | Sequence                            | Ion Score | C. I. | % Modification                           | Rank | Result Type |
|------------|-------------|---------|-------|------------|----------|-------------------------------------|-----------|-------|------------------------------------------|------|-------------|
| 1023.5258  | 1023.458    | -0.0678 | -66   | 251        | 259      | DPWPVPQGK                           |           |       |                                          |      | Mascot      |
| 1287.5762  | 1287.676    | 0.0998  | 78    | 82         | 91       | IWACNFCFQR                          |           |       |                                          |      | Mascot      |
| 1410.741   | 1410.7828   | 0.0418  | 30    | 402        | 414      | MAFGATLEVKTSR                       |           |       |                                          |      | Mascot      |
| 1410.741   | 1410.7828   | 0.0418  | 30    | 402        | 414      | MAFGATLEVKTSR                       |           |       |                                          |      | Mascot      |
| 1707.7683  | 1707.7819   | 0.0136  | 8     | 671        | 684      | KAGYQEMAEYENFK                      |           |       |                                          |      | Mascot      |
| 1715.936   | 1715.9296   | -0.0064 | -4    | 415        | 431      | ELKVSAGIGPCVSLNTK                   |           |       |                                          |      | Mascot      |
| 1790.9039  | 1790.9036   | -0.0003 | 0     | 64         | 79       | ANCKAVLNPLCQVDFR                    |           |       |                                          |      | Mascot      |
| 1840.7662  | 1840.9467   | 0.1805  | 98    | 432        | 449      | GPCVSDSEMVGVGTCQ<br>WK              |           |       |                                          |      | Mascot      |
| 2230.1245  | 2230.1917   | 0.0672  | 30    | 287        | 308      | VMLFTGGPPTQGPGMVV<br>GDELK          |           |       |                                          |      | Mascot      |
| 2283.126   | 2283.1895   | 0.0635  | 28    | 172        | 190      | MIQVHELSCCEGIAKSYVF<br>R            |           |       | Carbamidomethyl (C)[9], Oxidation (M)[1] |      | Mascot      |
| 2283.126   | 2283.1895   | 0.0635  | 28    | 172        | 190      | MIQVHELSCCEGIAKSYVF<br>R            |           |       | Carbamidomethyl (C)[9], Oxidation (M)[1] |      | Mascot      |
| 2306.0835  | 2306.1606   | 0.0771  | 33    | 588        | 606      | RSPFLQVFNNSPDESSY<br>YR             |           |       |                                          |      | Mascot      |
| 2398.1528  | 2398.1816   | 0.0288  | 12    | 364        | 385      | CLSNLTGGHIVMGDSFNT<br>SLFK          |           |       | Carbamidomethyl (C)[1]                   |      | Mascot      |
| 3338.5271  | 3338.7561   | 0.229   | 69    | 418        | 449      | VSGAIGPCVSLNTKGPCV<br>SDEMGVGGTCQWK |           |       | Carbamidomethyl (C)[8,17,29]             |      | Mascot      |

19 SH3 domain-binding protein 4-A [Danio rerio] gi|45387913 104947.5 7.73 14 38 0

#### Peptide Information

| Calc. Mass | Obsrv. Mass | ± da | ± ppm | Start Seq. | End Seq. | Sequence | Ion Score | C. I. | % Modification | Rank | Result Type |
|------------|-------------|------|-------|------------|----------|----------|-----------|-------|----------------|------|-------------|
|------------|-------------|------|-------|------------|----------|----------|-----------|-------|----------------|------|-------------|

|    |                                                            |                     |             |         |       |            |              |                                    |           |       |                                           |                                                    |      |        |      |        |        |
|----|------------------------------------------------------------|---------------------|-------------|---------|-------|------------|--------------|------------------------------------|-----------|-------|-------------------------------------------|----------------------------------------------------|------|--------|------|--------|--------|
|    |                                                            | 842.5822            | 842.5182    | -0.064  | -76   | 634        | 640          | LIKTVIR                            |           |       |                                           |                                                    |      |        |      |        | Mascot |
|    |                                                            | 850.4338            | 850.5499    | 0.1161  | 137   | 358        | 364          | LSNMEIK                            |           |       | Oxidation (M)[4]                          |                                                    |      |        |      |        | Mascot |
|    |                                                            | 870.4726            | 870.5475    | 0.0749  | 86    | 1          | 7            | MAAHRIR                            |           |       | Oxidation (M)[1]                          |                                                    |      |        |      |        | Mascot |
|    |                                                            | 1023.5655           | 1023.458    | -0.1075 | -105  | 625        | 633          | CITNLKFGK                          |           |       |                                           |                                                    |      |        |      |        | Mascot |
|    |                                                            | 1045.4796           | 1045.5695   | 0.0899  | 86    | 762        | 770          | AELDSEPER                          |           |       |                                           |                                                    |      |        |      |        | Mascot |
|    |                                                            | 1623.7723           | 1623.8529   | 0.0806  | 50    | 66         | 79           | DYCPSSFTTLKFSK                     |           |       |                                           |                                                    |      |        |      |        | Mascot |
|    |                                                            | 1671.806            | 1671.8976   | 0.0916  | 55    | 432        | 445          | HVSFSSNVWNHMK                      |           |       |                                           |                                                    |      |        |      |        | Mascot |
|    |                                                            | 1840.8237           | 1840.9467   | 0.123   | 67    | 379        | 394          | TESPMAEIVCVRSDCK                   |           |       | Carbamidomethyl (C)[10], Oxidation (M)[5] |                                                    |      |        |      |        | Mascot |
|    |                                                            | 2008.0024           | 2007.9091   | -0.0933 | -46   | 373        | 390          | VSVMTRTESPMAEIVCVR                 |           |       |                                           |                                                    |      |        |      |        | Mascot |
|    |                                                            | 2008.0024           | 2007.9091   | -0.0933 | -46   | 373        | 390          | VSVMTRTESPMAEIVCVR                 |           |       |                                           |                                                    |      |        |      |        | Mascot |
|    |                                                            | 2230.2417           | 2230.1917   | -0.05   | -22   | 813        | 831          | LIMDFVLLTTAVEVAPRW<br>R            |           |       |                                           |                                                    |      |        |      |        | Mascot |
|    |                                                            | 2284.2368           | 2284.1853   | -0.0515 | -23   | 463        | 484          | TVVAIFGHDCAPKTLVS<br>EVGK          |           |       |                                           |                                                    |      |        |      |        | Mascot |
|    |                                                            | 2300.0686           | 2300.1904   | 0.1218  | 53    | 568        | 587          | DDQDCILAQFCVQTPQP<br>PPK           |           |       | Carbamidomethyl (C)[5]                    |                                                    |      |        |      |        | Mascot |
|    |                                                            | 3337.6052           | 3337.7576   | 0.1524  | 46    | 269        | 298          | LARSCHDLESLGQNPWG<br>GQTQPVETNIVCK |           |       | Carbamidomethyl (C)[5]                    |                                                    |      |        |      |        | Mascot |
|    |                                                            | 3338.5496           | 3338.7561   | 0.2065  | 62    | 856        | 884          | TGMVDSEAMWKPAYDFL<br>LTWAAQIGDSYR  |           |       | Oxidation (M)[3]                          |                                                    |      |        |      |        | Mascot |
| 20 | PREDICTED: hypothetical protein LOC100002352 [Danio rerio] |                     |             |         |       |            | gi 326667104 | 28311.2                            | 4.72      | 8     | 38                                        | 0                                                  |      |        |      |        |        |
|    |                                                            | Peptide Information |             |         |       |            |              |                                    |           |       |                                           |                                                    |      |        |      |        |        |
|    |                                                            | Calc. Mass          | Obsrv. Mass | ± da    | ± ppm | Start Seq. | End Seq.     | Sequence                           | Ion Score | C. I. | %                                         | Modification                                       | Rank | Result | Type |        |        |
|    |                                                            | 1023.4887           | 1023.458    | -0.0307 | -30   | 47         | 54           | LSEEMRSR                           |           |       |                                           | Oxidation (M)[5]                                   |      |        |      | Mascot |        |
|    |                                                            | 1277.6704           | 1277.7148   | 0.0444  | 35    | 179        | 189          | LICEMARQIGK                        |           |       |                                           | Oxidation (M)[5]                                   |      |        |      | Mascot |        |
|    |                                                            | 1320.5493           | 1320.5892   | 0.0399  | 30    | 167        | 178          | DMNSHIGNACMK                       |           |       |                                           |                                                    |      |        |      | Mascot |        |
|    |                                                            | 1349.63             | 1349.7142   | 0.0842  | 62    | 27         | 37           | RLCQECGLDAK                        |           |       |                                           | Carbamidomethyl (C)[3,6]                           |      |        |      | Mascot |        |
|    |                                                            | 1393.5657           | 1393.755    | 0.1893  | 136   | 167        | 178          | DMNSHIGNACMK                       |           |       |                                           | Carbamidomethyl (C)[10], Oxidation (M)[2]          |      |        |      | Mascot |        |
|    |                                                            | 1393.5657           | 1393.755    | 0.1893  | 136   | 167        | 178          | DMNSHIGNACMK                       |           |       |                                           | Carbamidomethyl (C)[10], Oxidation (M)[2]          |      |        |      | Mascot |        |
|    |                                                            | 1475.7887           | 1475.7621   | -0.0266 | -18   | 41         | 52           | TDLLRLSEEMR                        |           |       |                                           |                                                    |      |        |      | Mascot |        |
|    |                                                            | 1493.6835           | 1493.7378   | 0.0543  | 36    | 28         | 40           | LCQECGLDAKGSR                      |           |       |                                           | Carbamidomethyl (C)[2,5]                           |      |        |      | Mascot |        |
|    |                                                            | 1858.7809           | 1858.8837   | 0.1028  | 55    | 237        | 252          | FVVCENCLPSGSWDMV                   |           |       |                                           | Carbamidomethyl (C)[4], Oxidation (M)[15]          |      |        |      | Mascot |        |
|    |                                                            | 2282.9807           | 2283.1895   | 0.2088  | 91    | 167        | 185          | DMNSHIGNACMKLICEM<br>R             |           |       |                                           | Carbamidomethyl (C)[10,15], Oxidation (M)[2,11]    |      |        |      | Mascot |        |
|    |                                                            | 2282.9807           | 2283.1895   | 0.2088  | 91    | 167        | 185          | DMNSHIGNACMKLICEM<br>R             |           |       |                                           | Carbamidomethyl (C)[10,15], Oxidation (M)[2,11]    |      |        |      | Mascot |        |
|    |                                                            | 2298.9756           | 2299.1948   | 0.2192  | 95    | 167        | 185          | DMNSHIGNACMKLICEM<br>R             |           |       |                                           | Carbamidomethyl (C)[10,15], Oxidation (M)[2,11,17] |      |        |      | Mascot |        |
| 21 | PREDICTED: e3 ubiquitin-protein ligase BRE1A [Danio rerio] |                     |             |         |       |            | gi 189527718 | 115551                             | 5.66      | 17    | 37                                        | 0                                                  |      |        |      |        |        |

| Peptide Information |                                 |          |           |             |          |                                        |           |         |                          |      |             |
|---------------------|---------------------------------|----------|-----------|-------------|----------|----------------------------------------|-----------|---------|--------------------------|------|-------------|
| Calc. Mass          | Obsrv. Mass                     | $\pm$ da | $\pm$ ppm | Start Seq.  | End Seq. | Sequence                               | Ion Score | C. I. % | Modification             | Rank | Result Type |
| 842.5206            | 842.5182                        | -0.0024  | -3        | 61          | 67       | ALQIKNR                                |           |         |                          |      | Mascot      |
| 960.4744            | 960.4806                        | 0.0062   | 6         | 720         | 726      | ELEERER                                |           |         |                          |      | Mascot      |
| 1045.5823           | 1045.5695                       | -0.0128  | -12       | 786         | 793      | LMQQLREK                               |           |         |                          |      | Mascot      |
| 1062.5426           | 1062.699                        | 0.1564   | 147       | 707         | 715      | TKSEAEELR                              |           |         |                          |      | Mascot      |
| 1287.6791           | 1287.676                        | -0.0031  | -2        | 743         | 753      | SVEEQIDILNK                            |           |         |                          |      | Mascot      |
| 1393.6284           | 1393.755                        | 0.1266   | 91        | 107         | 116      | YWNQFDEHVR                             |           |         |                          |      | Mascot      |
| 1393.6284           | 1393.755                        | 0.1266   | 91        | 107         | 116      | YWNQFDEHVR                             |           |         |                          |      | Mascot      |
| 1432.7278           | 1432.7507                       | 0.0229   | 16        | 900         | 911      | EEVIENSISREK                           |           |         |                          |      | Mascot      |
| 1475.6268           | 1475.7621                       | 0.1353   | 92        | 975         | 985      | CFHVFCEFCVK                            |           |         | Carbamidomethyl (C)[1,6] |      | Mascot      |
| 1638.7826           | 1638.8604                       | 0.0778   | 47        | 317         | 332      | VCGEASSVCGTITINK                       |           |         | Carbamidomethyl (C)[2]   |      | Mascot      |
| 1707.7478           | 1707.7819                       | 0.0341   | 20        | 995         | 1009     | CPKCNAAFGANDFHR                        |           |         | Carbamidomethyl (C)[1]   |      | Mascot      |
| 1826.8514           | 1826.9823                       | 0.1309   | 72        | 139         | 155      | SLKPGTPEPDGDSNQER                      |           |         |                          |      | Mascot      |
| 1851.905            | 1851.9381                       | 0.0331   | 18        | 317         | 333      | VCGEASSVCGTITINKR                      |           |         | Carbamidomethyl (C)[2,9] |      | Mascot      |
| 1858.7871           | 1858.8837                       | 0.0966   | 52        | 122         | 138      | CDQSGSEPVESQPPEGR                      |           |         | Carbamidomethyl (C)[1]   |      | Mascot      |
| 2095.0535           | 2095.1541                       | 0.1006   | 48        | 485         | 501      | EMRHLISTLQTHNQMK                       |           |         |                          |      | Mascot      |
| 2299.0918           | 2299.1948                       | 0.103    | 45        | 243         | 262      | LCQLTDGLQKSHMTS<br>ESR                 |           |         |                          |      | Mascot      |
| 2300.1816           | 2300.1904                       | 0.0088   | 4         | 222         | 242      | DGGLWDVAVRLNALLTG<br>MNER              |           |         |                          |      | Mascot      |
| 3729.7395           | 3729.9419                       | 0.2024   | 54        | 160         | 194      | GQQGEGVSSFLATLASS<br>TSEEIDAEQERVESSCK |           |         | Carbamidomethyl (C)[34]  |      | Mascot      |
| 22                  | LOC402838 protein [Danio rerio] |          |           | gi 27882353 |          | 64909.8                                | 5.17      | 10      | 37                       | 0    |             |

| Peptide Information |             |          |           |            |          |                        |           |         |                          |      |             |
|---------------------|-------------|----------|-----------|------------|----------|------------------------|-----------|---------|--------------------------|------|-------------|
| Calc. Mass          | Obsrv. Mass | $\pm$ da | $\pm$ ppm | Start Seq. | End Seq. | Sequence               | Ion Score | C. I. % | Modification             | Rank | Result Type |
| 842.5206            | 842.5182    | -0.0024  | -3        | 30         | 36       | ALQIKNR                |           |         |                          |      | Mascot      |
| 1393.7169           | 1393.755    | 0.0381   | 27        | 2          | 16       | STGSGGSTAVETVIK        |           |         |                          |      | Mascot      |
| 1393.7169           | 1393.755    | 0.0381   | 27        | 2          | 16       | STGSGGSTAVETVIK        |           |         |                          |      | Mascot      |
| 1638.7826           | 1638.8604   | 0.0778   | 47        | 286        | 301      | VCGEASSVCGTITINK       |           |         | Carbamidomethyl (C)[2]   |      | Mascot      |
| 1826.8514           | 1826.9823   | 0.1309   | 72        | 108        | 124      | SLKPGTPEPDGDSNQER      |           |         |                          |      | Mascot      |
| 1851.905            | 1851.9381   | 0.0331   | 18        | 286        | 302      | VCGEASSVCGTITINKR      |           |         | Carbamidomethyl (C)[2,9] |      | Mascot      |
| 1858.7871           | 1858.8837   | 0.0966   | 52        | 91         | 107      | CDQSGSEPVESQPPEGR      |           |         | Carbamidomethyl (C)[1]   |      | Mascot      |
| 2095.0535           | 2095.1541   | 0.1006   | 48        | 454        | 470      | EMRHLISTLQTHNQMK       |           |         |                          |      | Mascot      |
| 2299.0918           | 2299.1948   | 0.103    | 45        | 212        | 231      | LCQLTDGLQKSHMTS<br>ESR |           |         |                          |      | Mascot      |



25 PREDICTED: hypothetical protein LOC100535533 gi|326671744 3229.6 9.19 4 35 0  
[Danio rerio]

Peptide Information

| Calc. Mass | Obsrv. Mass | ± da    | ± ppm | Start Seq. | End Seq. | Sequence           | Ion Score | C. I. % | Modification           | Rank | Result Type |
|------------|-------------|---------|-------|------------|----------|--------------------|-----------|---------|------------------------|------|-------------|
| 996.4641   | 996.6024    | 0.1383  | 139   | 4          | 12       | AGPVFSCMK          |           |         | Carbamidomethyl (C)[7] |      | Mascot      |
| 996.4641   | 996.6024    | 0.1383  | 139   | 4          | 12       | AGPVFSCMK          |           |         | Carbamidomethyl (C)[7] |      | Mascot      |
| 1287.5894  | 1287.676    | 0.0866  | 67    | 1          | 12       | MGKAGPVFSCMK       |           |         | Oxidation (M)[1,11]    |      | Mascot      |
| 1364.674   | 1364.7062   | 0.0322  | 24    | 13         | 24       | HNGHAISMEIQK       |           |         |                        |      | Mascot      |
| 1993.9912  | 1993.9789   | -0.0123 | -6    | 13         | 30       | HNGHAISMEIQKTGLWTA |           |         |                        |      | Mascot      |

26 RecName: Full=SH3 domain-binding protein 4-A gi|123888628 108383 7.89 14 34 0

Peptide Information

| Calc. Mass | Obsrv. Mass | ± da    | ± ppm | Start Seq. | End Seq. | Sequence                           | Ion Score | C. I. % | Modification                              | Rank | Result Type |
|------------|-------------|---------|-------|------------|----------|------------------------------------|-----------|---------|-------------------------------------------|------|-------------|
| 842.5822   | 842.5182    | -0.064  | -76   | 663        | 669      | LIKTIVIR                           |           |         |                                           |      | Mascot      |
| 850.4338   | 850.5499    | 0.1161  | 137   | 387        | 393      | LSNMEIK                            |           |         | Oxidation (M)[4]                          |      | Mascot      |
| 870.4726   | 870.5475    | 0.0749  | 86    | 1          | 7        | MAAHRIR                            |           |         | Oxidation (M)[1]                          |      | Mascot      |
| 1023.5655  | 1023.458    | -0.1075 | -105  | 654        | 662      | CITNLKFGK                          |           |         |                                           |      | Mascot      |
| 1045.4796  | 1045.5695   | 0.0899  | 86    | 791        | 799      | AELDSEPER                          |           |         |                                           |      | Mascot      |
| 1623.7723  | 1623.8529   | 0.0806  | 50    | 66         | 79       | DYCPSSFTTLKFSK                     |           |         |                                           |      | Mascot      |
| 1671.806   | 1671.8976   | 0.0916  | 55    | 461        | 474      | HVSFSSNVWNHMK                      |           |         |                                           |      | Mascot      |
| 1840.8237  | 1840.9467   | 0.123   | 67    | 408        | 423      | TESPMAEIVCVRSCK                    |           |         | Carbamidomethyl (C)[10], Oxidation (M)[5] |      | Mascot      |
| 2008.0024  | 2007.9091   | -0.0933 | -46   | 402        | 419      | VSVMTRTESPMAEIVCVR                 |           |         |                                           |      | Mascot      |
| 2008.0024  | 2007.9091   | -0.0933 | -46   | 402        | 419      | VSVMTRTESPMAEIVCVR                 |           |         |                                           |      | Mascot      |
| 2230.2417  | 2230.1917   | -0.05   | -22   | 842        | 860      | LIMDFVLLTTAVEVAPRW<br>R            |           |         |                                           |      | Mascot      |
| 2284.2368  | 2284.1853   | -0.0515 | -23   | 492        | 513      | TVVAIFGHDCAPKTLVS<br>EVGK          |           |         |                                           |      | Mascot      |
| 2300.0686  | 2300.1904   | 0.1218  | 53    | 597        | 616      | DDQDCILAQFCVQTPQP<br>PPK           |           |         | Carbamidomethyl (C)[5]                    |      | Mascot      |
| 3337.6052  | 3337.7576   | 0.1524  | 46    | 298        | 327      | LARSCHDLESLGQNPWG<br>GQTQPVETNIVCK |           |         | Carbamidomethyl (C)[5]                    |      | Mascot      |
| 3338.5496  | 3338.7561   | 0.2065  | 62    | 885        | 913      | TGMVDSEAMWKPAYDFL<br>LTWAAQIGDSYR  |           |         | Oxidation (M)[3]                          |      | Mascot      |

27 PREDICTED: tetratricopeptide repeat protein 23-like gi|326676038 8822.5 10.02 5 34 0  
[Danio rerio]

Peptide Information

| Calc. Mass | Obsrv. Mass | ± da | ± ppm | Start Seq. | End Seq. | Sequence | Ion Score | C. I. % | Modification | Rank | Result Type |
|------------|-------------|------|-------|------------|----------|----------|-----------|---------|--------------|------|-------------|
|------------|-------------|------|-------|------------|----------|----------|-----------|---------|--------------|------|-------------|

|           |           |         |     |    |    |                        |                    |        |
|-----------|-----------|---------|-----|----|----|------------------------|--------------------|--------|
| 1393.6324 | 1393.755  | 0.1226  | 88  | 1  | 11 | MTQGHMRHAHR            | Oxidation (M)[1,6] | Mascot |
| 1393.6324 | 1393.755  | 0.1226  | 88  | 1  | 11 | MTQGHMRHAHR            | Oxidation (M)[1,6] | Mascot |
| 1535.7258 | 1535.7115 | -0.0143 | -9  | 37 | 50 | SVDMLSQSPEVSEK         |                    | Mascot |
| 1707.8218 | 1707.7819 | -0.0399 | -23 | 37 | 51 | SVDMLSQSPEVSEKR        | Oxidation (M)[4]   | Mascot |
| 1790.9258 | 1790.9036 | -0.0222 | -12 | 16 | 30 | CFEIQSLLYGPQHKK        |                    | Mascot |
| 2007.9652 | 2007.9091 | -0.0561 | -28 | 33 | 50 | ATQRSVDMLSQSPEVSE<br>K | Oxidation (M)[8]   | Mascot |
| 2007.9652 | 2007.9091 | -0.0561 | -28 | 33 | 50 | ATQRSVDMLSQSPEVSE<br>K | Oxidation (M)[8]   | Mascot |

28 PREDICTED: DNA repair and recombination protein  
RAD54B [Danio rerio] gi|189529831 130627.4 7.85 16 34 0

#### Peptide Information

| Calc. Mass | Obsrv. Mass | ± da    | ± ppm | Start Seq. | End Seq. | Sequence                      | Ion Score | C. I. % Modification    | Rank | Result Type |
|------------|-------------|---------|-------|------------|----------|-------------------------------|-----------|-------------------------|------|-------------|
| 983.5156   | 983.5491    | 0.0335  | 34    | 135        | 142      | ILEEHTNK                      |           |                         |      | Mascot      |
| 1051.6007  | 1051.7194   | 0.1187  | 113   | 143        | 151      | HAVIVDKNR                     |           |                         |      | Mascot      |
| 1062.6418  | 1062.699    | 0.0572  | 54    | 786        | 794      | LTGVFTLRR                     |           |                         |      | Mascot      |
| 1085.6387  | 1085.6276   | -0.0111 | -10   | 622        | 632      | ALVVCPSGLVK                   |           |                         |      | Mascot      |
| 1085.6387  | 1085.6276   | -0.0111 | -10   | 622        | 632      | ALVVCPSGLVK                   |           |                         |      | Mascot      |
| 1277.6228  | 1277.7148   | 0.092   | 72    | 584        | 596      | CGAILADEMGLGK                 |           |                         |      | Mascot      |
| 1279.6178  | 1279.7883   | 0.1705  | 133   | 160        | 170      | YNSFGGERPPR                   |           |                         |      | Mascot      |
| 1320.7052  | 1320.5892   | -0.116  | -88   | 707        | 719      | TAGALTALSCTRR                 |           |                         |      | Mascot      |
| 1393.6892  | 1393.755    | 0.0658  | 47    | 774        | 785      | CIGEERAAELFR                  |           |                         |      | Mascot      |
| 1393.6892  | 1393.755    | 0.0658  | 47    | 774        | 785      | CIGEERAAELFR                  |           |                         |      | Mascot      |
| 1493.7594  | 1493.7378   | -0.0216 | -14   | 795        | 806      | TQEINQYLSEK                   |           |                         |      | Mascot      |
| 1516.7754  | 1516.717    | -0.0584 | -39   | 1060       | 1072     | KAEHISFSAEELR                 |           |                         |      | Mascot      |
| 1671.8597  | 1671.8976   | 0.0379  | 23    | 211        | 224      | IMEMIPQLFHIGDK                |           |                         |      | Mascot      |
| 1827.0236  | 1826.9823   | -0.0413 | -23   | 128        | 142      | LVQPHIRILEEHTNK               |           |                         |      | Mascot      |
| 1840.9163  | 1840.9467   | 0.0304  | 17    | 382        | 396      | LAHYYSVIWCKASSR               |           | Carbamidomethyl (C)[10] |      | Mascot      |
| 1851.8827  | 1851.9381   | 0.0554  | 30    | 432        | 449      | ASELESLCEGQTLMTVGG<br>K       |           |                         |      | Mascot      |
| 2501.1135  | 2501.2566   | 0.1431  | 57    | 101        | 122      | SMPDFPEPEESARSSNF<br>TLSEK    |           | Oxidation (M)[2]        |      | Mascot      |
| 3337.7249  | 3337.7576   | 0.0327  | 10    | 795        | 821      | TQEINQYLSEKIEWTVFC<br>KPTLQIR |           |                         |      | Mascot      |

29 ADP/ATP translocase 2 [Danio rerio] gi|27545251 32742.1 9.78 7 33 0

#### Peptide Information

| Calc. Mass | Obsrv. Mass | ± da | ± ppm | Start Seq. | End Seq. | Sequence | Ion Score | C. I. % Modification | Rank | Result Type |
|------------|-------------|------|-------|------------|----------|----------|-----------|----------------------|------|-------------|
|------------|-------------|------|-------|------------|----------|----------|-----------|----------------------|------|-------------|

|    |                                                              |           |         |     |     |     |                                      |         |      |    |    |                         |  |  |  |  |        |
|----|--------------------------------------------------------------|-----------|---------|-----|-----|-----|--------------------------------------|---------|------|----|----|-------------------------|--|--|--|--|--------|
|    | 996.4536                                                     | 996.6024  | 0.1488  | 149 | 237 | 244 | RMMMQSGR                             |         |      |    |    |                         |  |  |  |  | Mascot |
|    | 996.4536                                                     | 996.6024  | 0.1488  | 149 | 237 | 244 | RMMMQSGR                             |         |      |    |    |                         |  |  |  |  | Mascot |
|    | 1287.6912                                                    | 1287.676  | -0.0152 | -12 | 53  | 63  | GIMDCVVRIPK                          |         |      |    |    | Carbamidomethyl (C)[5]  |  |  |  |  | Mascot |
|    | 1707.8481                                                    | 1707.7819 | -0.0662 | -39 | 148 | 163 | AGAEREFSGLGNCLVK                     |         |      |    |    | Carbamidomethyl (C)[13] |  |  |  |  | Mascot |
|    | 1715.788                                                     | 1715.9296 | 0.1416  | 83  | 246 | 260 | GADIMYSGTIDCWRK                      |         |      |    |    |                         |  |  |  |  | Mascot |
|    | 2284.2236                                                    | 2284.1853 | -0.0383 | -17 | 73  | 92  | GNLANVIRYFPTQALNFA<br>FK             |         |      |    |    |                         |  |  |  |  | Mascot |
|    | 2299.2002                                                    | 2299.1948 | -0.0054 | -2  | 1   | 23  | MSETAISFAKDFLAGGIA<br>AAISK          |         |      |    |    |                         |  |  |  |  | Mascot |
|    | 3514.7                                                       | 3514.8047 | 0.1047  | 30  | 107 | 138 | TQFWRYFAGNLASGGAA<br>GATSLCFVYPLDFAR |         |      |    |    | Carbamidomethyl (C)[23] |  |  |  |  | Mascot |
| 30 | PREDICTED: tRNA-dihydrouridine synthase 2-like [Danio rerio] |           |         |     |     |     | gi 292628574                         | 56676.6 | 6.04 | 11 | 33 | 0                       |  |  |  |  |        |

#### Peptide Information

| Calc. Mass | Obsrv. Mass | ± da    | ± ppm | Start Seq. | End Seq. | Sequence                   | Ion Score | C. I. | % Modification         | Rank | Result Type |
|------------|-------------|---------|-------|------------|----------|----------------------------|-----------|-------|------------------------|------|-------------|
| 842.473    | 842.5182    | 0.0452  | 54    | 436        | 443      | TLGLPEGR                   |           |       |                        |      | Mascot      |
| 1045.4628  | 1045.5695   | 0.1067  | 102   | 288        | 295      | YCLCQMLR                   |           |       | Oxidation (M)[6]       |      | Mascot      |
| 1051.6007  | 1051.7194   | 0.1187  | 113   | 180        | 190      | TGVAIAIVHGR                |           |       |                        |      | Mascot      |
| 1062.5538  | 1062.699    | 0.1452  | 137   | 328        | 336      | TTAELESRR                  |           |       |                        |      | Mascot      |
| 1277.6041  | 1277.7148   | 0.1107  | 87    | 129        | 141      | GGMGSALLSDPEK              |           |       | Oxidation (M)[3]       |      | Mascot      |
| 1316.5908  | 1316.6674   | 0.0766  | 58    | 288        | 297      | YCLCQMLRDR                 |           |       | Oxidation (M)[6]       |      | Mascot      |
| 1349.6519  | 1349.7142   | 0.0623  | 46    | 89         | 100      | VVFQMGTDAPER               |           |       |                        |      | Mascot      |
| 1432.6415  | 1432.7507   | 0.1092  | 76    | 1          | 12       | MMKVMMANTVGR               |           |       | Oxidation (M)[1,2,5,6] |      | Mascot      |
| 2299.1387  | 2299.1948   | 0.0561  | 24    | 259        | 278      | QQGALSVDQVMQEYITY<br>AVR   |           |       |                        |      | Mascot      |
| 2384.1484  | 2383.9722   | -0.1762 | -74   | 237        | 258      | ESTGASSVMLARAAMWN<br>PSVFR |           |       | Oxidation (M)[9]       |      | Mascot      |
| 2398.1265  | 2398.1816   | 0.0551  | 23    | 107        | 128      | LVENDVAADVNMGCPK<br>EYSTK  |           |       | Oxidation (M)[13]      |      | Mascot      |

|    |                                                           |  |  |  |  |  |              |         |      |   |    |   |  |  |  |  |  |
|----|-----------------------------------------------------------|--|--|--|--|--|--------------|---------|------|---|----|---|--|--|--|--|--|
| 31 | PREDICTED: lysosomal thioesterase PPT2-like [Danio rerio] |  |  |  |  |  | gi 189529027 | 32977.1 | 9.45 | 7 | 32 | 0 |  |  |  |  |  |
|----|-----------------------------------------------------------|--|--|--|--|--|--------------|---------|------|---|----|---|--|--|--|--|--|

#### Peptide Information

| Calc. Mass | Obsrv. Mass | ± da    | ± ppm | Start Seq. | End Seq. | Sequence         | Ion Score | C. I. | % Modification | Rank | Result Type |
|------------|-------------|---------|-------|------------|----------|------------------|-----------|-------|----------------|------|-------------|
| 1085.6499  | 1085.6276   | -0.0223 | -21   | 81         | 89       | KAIKPIMER        |           |       |                |      | Mascot      |
| 1085.6499  | 1085.6276   | -0.0223 | -21   | 81         | 89       | KAIKPIMER        |           |       |                |      | Mascot      |
| 1316.7249  | 1316.6674   | -0.0575 | -44   | 137        | 147      | YISKFFPSLSK      |           |       |                |      | Mascot      |
| 1701.8563  | 1701.9159   | 0.0596  | 35    | 92         | 107      | DGVHLICFAQGGLICR | 1         |       | 0              |      | Mascot      |
| 1701.8563  | 1701.9159   | 0.0596  | 35    | 92         | 107      | DGVHLICFAQGGLICR |           |       |                |      | Mascot      |
| 1707.7795  | 1707.7819   | 0.0024  | 1     | 163        | 176      | SSCSYWKDPHQIEK   |           |       |                |      | Mascot      |



|    |                                             |           |         |     |              |     |                           |      |                        |    |        |
|----|---------------------------------------------|-----------|---------|-----|--------------|-----|---------------------------|------|------------------------|----|--------|
|    | 1790.849                                    | 1790.9036 | 0.0546  | 30  | 148          | 162 | STLYNACYTTQGQKR           |      | Carbamidomethyl (C)[7] |    | Mascot |
|    | 1841.0208                                   | 1840.9467 | -0.0741 | -40 | 177          | 192 | YLKYSVFLAPLNGEVK          |      |                        |    | Mascot |
|    | 2384.1592                                   | 2383.9722 | -0.187  | -78 | 141          | 161 | FFPSLSKSTLYNACYTTQ<br>GQK |      |                        |    | Mascot |
| 32 | PREDICTED: protein NLRC3-like [Danio rerio] |           |         |     | gi 326680819 |     | 81089.1                   | 7.57 | 12                     | 32 | 0      |

#### Peptide Information

| Calc. Mass | Obsrv. Mass | ± da    | ± ppm | Start Seq. | End Seq. | Sequence                  | Ion Score | C. I. % | Modification                              | Rank | Result Type |
|------------|-------------|---------|-------|------------|----------|---------------------------|-----------|---------|-------------------------------------------|------|-------------|
| 983.4502   | 983.5491    | 0.0989  | 101   | 522        | 529      | DCGIDIYK                  |           |         | Carbamidomethyl (C)[2]                    |      | Mascot      |
| 1045.5459  | 1045.5695   | 0.0236  | 23    | 11         | 19       | NMLQQLGNK                 |           |         |                                           |      | Mascot      |
| 1062.5803  | 1062.699    | 0.1187  | 112   | 473        | 480      | FQIQQSRR                  |           |         |                                           |      | Mascot      |
| 1364.7103  | 1364.7062   | -0.0041 | -3    | 9          | 19       | FRNMLQQLGNK               |           |         | Oxidation (M)[4]                          |      | Mascot      |
| 1392.7191  | 1392.7539   | 0.0348  | 25    | 317        | 328      | VLFIELDGLDECR             |           |         |                                           |      | Mascot      |
| 1410.7198  | 1410.7828   | 0.063   | 45    | 462        | 472      | TLTQMYTHFLR               |           |         |                                           |      | Mascot      |
| 1410.7198  | 1410.7828   | 0.063   | 45    | 462        | 472      | TLTQMYTHFLR               |           |         |                                           |      | Mascot      |
| 1826.8953  | 1826.9823   | 0.087   | 48    | 143        | 158      | DSTQAAAYQLEMNKLK          |           |         | Oxidation (M)[12]                         |      | Mascot      |
| 1840.9148  | 1840.9467   | 0.0319  | 17    | 225        | 240      | QIEAASRPAEQDEQIR          |           |         |                                           |      | Mascot      |
| 2143.999   | 2144.1206   | 0.1216  | 57    | 176        | 192      | ESWYIPHHMTHHNGKNR         |           |         |                                           |      | Mascot      |
| 2298.1812  | 2298.2004   | 0.0192  | 8     | 462        | 479      | TLTQMYTHFLRFQIQQSR        |           |         |                                           |      | Mascot      |
| 2306.1008  | 2306.1606   | 0.0598  | 26    | 511        | 529      | NNVIFYESDLKDCGIDIYK       |           |         | Carbamidomethyl (C)[13]                   |      | Mascot      |
| 2415.1028  | 2415.2056   | 0.1028  | 43    | 522        | 542      | DCGIDIYKASVYSGMCTQ<br>IFK |           |         | Carbamidomethyl (C)[2], Oxidation (M)[15] |      | Mascot      |
| 2415.1028  | 2415.2056   | 0.1028  | 43    | 522        | 542      | DCGIDIYKASVYSGMCTQ<br>IFK |           |         | Carbamidomethyl (C)[2], Oxidation (M)[15] |      | Mascot      |

|    |                                 |  |  |  |              |  |         |      |   |    |   |
|----|---------------------------------|--|--|--|--------------|--|---------|------|---|----|---|
| 33 | Zgc:55557 protein [Danio rerio] |  |  |  | gi 158253754 |  | 25038.8 | 8.63 | 6 | 32 | 0 |
|----|---------------------------------|--|--|--|--------------|--|---------|------|---|----|---|

#### Peptide Information

| Calc. Mass | Obsrv. Mass | ± da   | ± ppm | Start Seq. | End Seq. | Sequence                  | Ion Score | C. I. % | Modification                             | Rank | Result Type |
|------------|-------------|--------|-------|------------|----------|---------------------------|-----------|---------|------------------------------------------|------|-------------|
| 850.4417   | 850.5499    | 0.1082 | 127   | 105        | 111      | EFKEAAR                   |           |         |                                          |      | Mascot      |
| 1279.7368  | 1279.7883   | 0.0515 | 40    | 43         | 54       | SVYRIISVGGTK              |           |         |                                          |      | Mascot      |
| 1410.676   | 1410.7828   | 0.1068 | 76    | 70         | 81       | TSQKFGQWADSR              |           |         |                                          |      | Mascot      |
| 1410.676   | 1410.7828   | 0.1068 | 76    | 70         | 81       | TSQKFGQWADSR              |           |         |                                          |      | Mascot      |
| 1715.7211  | 1715.9296   | 0.2085 | 122   | 164        | 177      | SADMEQTTEKEQMR            |           |         | Oxidation (M)[4,13]                      |      | Mascot      |
| 2230.0366  | 2230.1917   | 0.1551 | 70    | 179        | 198      | MLSEGSICEVNSEAELFS<br>LR  |           |         | Oxidation (M)[1]                         |      | Mascot      |
| 2415.1531  | 2415.2056   | 0.0525 | 22    | 178        | 198      | KMLSEGSICEVNSEAELF<br>SLR |           |         | Carbamidomethyl (C)[9], Oxidation (M)[2] |      | Mascot      |
| 2415.1531  | 2415.2056   | 0.0525 | 22    | 178        | 198      | KMLSEGSICEVNSEAELF<br>SLR |           |         | Carbamidomethyl (C)[9], Oxidation (M)[2] |      | Mascot      |

34 PREDICTED: CBP80/20-dependent translation initiation factor-like [Danio rerio] gi|326677542 71302.3 6.06 5 31 0 22 0

Peptide Information

| Calc. Mass | Obsrv. Mass | ± da   | ± ppm | Start Seq. | End Seq. | Sequence                | Ion Score | C. I. | % Modification             | Rank | Result Type |
|------------|-------------|--------|-------|------------|----------|-------------------------|-----------|-------|----------------------------|------|-------------|
| 1062.5426  | 1062.699    | 0.1564 | 147   | 329        | 337      | NTKETENVK               |           |       |                            |      | Mascot      |
| 1393.672   | 1393.755    | 0.083  | 60    | 291        | 302      | QIGPHHGYSQNR            |           |       |                            |      | Mascot      |
| 1393.7355  | 1393.755    | 0.0195 | 14    | 368        | 380      | TESGKICLLQSSK           |           |       |                            |      | Mascot      |
| 1410.7196  | 1410.7828   | 0.0632 | 45    | 221        | 237      | QQRLPGGGGGGGGAGG<br>K   |           |       |                            |      | Mascot      |
| 1410.7196  | 1410.7828   | 0.0632 | 45    | 221        | 237      | QQRLPGGGGGGGGAGG<br>K   | 22        | 0     |                            |      | Mascot      |
| 2211.1047  | 2211.1184   | 0.0137 | 6     | 523        | 541      | SSAGEPFRVLVCPYISCL<br>R |           |       | Carbamidomethyl (C)[12,17] |      | Mascot      |

35 truncated SH3 binding domain protein 4 [Danio rerio] gi|33438222 84564.4 8.75 11 31 0

Peptide Information

| Calc. Mass | Obsrv. Mass | ± da    | ± ppm | Start Seq. | End Seq. | Sequence                             | Ion Score | C. I. | % Modification                            | Rank | Result Type |
|------------|-------------|---------|-------|------------|----------|--------------------------------------|-----------|-------|-------------------------------------------|------|-------------|
| 842.5822   | 842.5182    | -0.064  | -76   | 634        | 640      | LIKTVIR                              |           |       |                                           |      | Mascot      |
| 850.4338   | 850.5499    | 0.1161  | 137   | 358        | 364      | LSNMEIK                              |           |       | Oxidation (M)[4]                          |      | Mascot      |
| 870.4726   | 870.5475    | 0.0749  | 86    | 1          | 7        | MAHRIR                               |           |       | Oxidation (M)[1]                          |      | Mascot      |
| 1023.5655  | 1023.458    | -0.1075 | -105  | 625        | 633      | CITNLKFGK                            |           |       |                                           |      | Mascot      |
| 1623.7723  | 1623.8529   | 0.0806  | 50    | 66         | 79       | DYCPSSFITLKFSK                       |           |       |                                           |      | Mascot      |
| 1671.806   | 1671.8976   | 0.0916  | 55    | 432        | 445      | HVSFSSNVWNHMK                        |           |       |                                           |      | Mascot      |
| 1840.8237  | 1840.9467   | 0.123   | 67    | 379        | 394      | TESPMIEIVCRSDCK                      |           |       | Carbamidomethyl (C)[10], Oxidation (M)[5] |      | Mascot      |
| 2008.0024  | 2007.9091   | -0.0933 | -46   | 373        | 390      | VSMTRTESPMIEIVCR                     |           |       |                                           |      | Mascot      |
| 2008.0024  | 2007.9091   | -0.0933 | -46   | 373        | 390      | VSMTRTESPMIEIVCR                     |           |       |                                           |      | Mascot      |
| 2284.2368  | 2284.1853   | -0.0515 | -23   | 463        | 484      | TVVAIFGHDCAPKTLVS<br>EVGK            |           |       |                                           |      | Mascot      |
| 2300.0686  | 2300.1904   | 0.1218  | 53    | 568        | 587      | DDQDCILAQFCVQTPQP<br>PPK             |           |       | Carbamidomethyl (C)[5]                    |      | Mascot      |
| 3337.6052  | 3337.7576   | 0.1524  | 46    | 269        | 298      | LARSCHDLES LGQNP GW<br>GQTQPVETNIVCK |           |       | Carbamidomethyl (C)[5]                    |      | Mascot      |

36 PREDICTED: zinc finger protein 420 isoform 2 [Danio rerio] gi|326678086 70371 9.08 13 31 0

Peptide Information

| Calc. Mass | Obsrv. Mass | ± da    | ± ppm | Start Seq. | End Seq. | Sequence | Ion Score | C. I. | % Modification | Rank | Result Type |
|------------|-------------|---------|-------|------------|----------|----------|-----------|-------|----------------|------|-------------|
| 842.5206   | 842.5182    | -0.0024 | -3    | 25         | 31       | QRQGLLK  |           |       |                |      | Mascot      |
| 864.4798   | 864.5258    | 0.046   | 53    | 591        | 597      | HRSVHTK  |           |       |                |      | Mascot      |

|    |                                                 |           |        |     |              |         |                             |   |                         |        |
|----|-------------------------------------------------|-----------|--------|-----|--------------|---------|-----------------------------|---|-------------------------|--------|
|    | 1045.536                                        | 1045.5695 | 0.0335 | 32  | 134          | 141     | FHCARNLK                    |   | Carbamidomethyl (C)[3]  | Mascot |
|    | 1393.5723                                       | 1393.755  | 0.1827 | 131 | 32           | 43      | DSEKMSDPEPCR                |   |                         | Mascot |
|    | 1393.5723                                       | 1393.755  | 0.1827 | 131 | 32           | 43      | DSEKMSDPEPCR                |   |                         | Mascot |
|    | 1623.806                                        | 1623.8529 | 0.0469 | 29  | 105          | 117     | SFSQKYNLNVHMR               |   |                         | Mascot |
|    | 1671.7729                                       | 1671.8976 | 0.1247 | 75  | 538          | 552     | VHTGEKPFACHTCGK             |   | Carbamidomethyl (C)[10] | Mascot |
|    | 1851.8477                                       | 1851.9381 | 0.0904 | 49  | 276          | 291     | CSSHLNEHMIHTGEK             |   | Oxidation (M)[9]        | Mascot |
|    | 2144.0125                                       | 2144.1206 | 0.1081 | 50  | 367          | 384     | HQRIHTGEKPYTCTQCG<br>K      |   | Carbamidomethyl (C)[13] | Mascot |
|    | 2211.0798                                       | 2211.1184 | 0.0386 | 17  | 450          | 468     | IHLRVHTNEKPYSCPECG<br>K     |   |                         | Mascot |
|    | 2230.0605                                       | 2230.1917 | 0.1312 | 59  | 276          | 294     | CSSHLNEHMIHTGEKTH<br>R      |   |                         | Mascot |
|    | 2283.0579                                       | 2283.1895 | 0.1316 | 58  | 227          | 245     | HQMIHTGEKPYKSHCD<br>LR      |   |                         | Mascot |
|    | 2283.0579                                       | 2283.1895 | 0.1316 | 58  | 227          | 245     | HQMIHTGEKPYKSHCD<br>LR      |   |                         | Mascot |
|    | 2298.0906                                       | 2298.2004 | 0.1098 | 48  | 478          | 496     | LHQHVHTGVREFVCFEC<br>EK     |   |                         | Mascot |
|    | 2299.053                                        | 2299.1948 | 0.1418 | 62  | 227          | 245     | HQMIHTGEKPYKSHCD<br>LR      |   | Oxidation (M)[3]        | Mascot |
|    | 2415.1997                                       | 2415.2056 | 0.0059 | 2   | 2            | 24      | TSALTRSFSVESSELSSA<br>AISER |   |                         | Mascot |
|    | 2415.1997                                       | 2415.2056 | 0.0059 | 2   | 2            | 24      | TSALTRSFSVESSELSSA<br>AISER |   |                         | Mascot |
| 37 | hypothetical protein LOC100191015 [Danio rerio] |           |        |     | gi 209863095 | 44412.9 | 9.4                         | 8 | 31                      | 0      |

#### Peptide Information

| Calc. Mass | Obsrv. Mass | ± da    | ± ppm | Start Seq. | End Seq. | Sequence                  | Ion Score | C. I. | % Modification          | Rank | Result Type |
|------------|-------------|---------|-------|------------|----------|---------------------------|-----------|-------|-------------------------|------|-------------|
| 996.5373   | 996.6024    | 0.0651  | 65    | 282        | 288      | QRIFNYR                   |           |       |                         |      | Mascot      |
| 996.5373   | 996.6024    | 0.0651  | 65    | 282        | 288      | QRIFNYR                   |           |       |                         |      | Mascot      |
| 1023.5118  | 1023.458    | -0.0538 | -53   | 34         | 41       | HQLGEFHR                  |           |       |                         |      | Mascot      |
| 1287.6764  | 1287.676    | -0.0004 | 0     | 362        | 373      | VGSNNATREAIR              |           |       |                         |      | Mascot      |
| 1475.6802  | 1475.7621   | 0.0819  | 55    | 176        | 188      | APDNSGSLFYNYK             |           |       |                         |      | Mascot      |
| 1493.8335  | 1493.7378   | -0.0957 | -64   | 22         | 33       | RSVWVHEILQAR              |           |       |                         |      | Mascot      |
| 1993.9834  | 1993.9789   | -0.0045 | -2    | 309        | 326      | MYRGAIEISPANVDACVK        |           |       | Carbamidomethyl (C)[16] |      | Mascot      |
| 2211.1743  | 2211.1184   | -0.0559 | -25   | 294        | 311      | LIVENTFGILTAQWRMYR        |           |       |                         |      | Mascot      |
| 2398.1714  | 2398.1816   | 0.0102  | 4     | 374        | 394      | VRETFTSYFSTEGAVPW<br>QPVP |           |       |                         |      | Mascot      |

38 novel NACHT domain containing protein [Danio rerio] gi|148726000 74983.9 6.01 10 31 0

#### Peptide Information

| Calc. Mass | Obsrv. Mass | ± da   | ± ppm | Start Seq. | End Seq. | Sequence | Ion Score | C. I. | % Modification | Rank | Result Type |
|------------|-------------|--------|-------|------------|----------|----------|-----------|-------|----------------|------|-------------|
| 882.4791   | 882.574     | 0.0949 | 108   | 587        | 593      | EIQSHLR  |           |       |                |      | Mascot      |

|    |                                         |           |         |     |             |     |                         |      |   |                  |   |  |        |
|----|-----------------------------------------|-----------|---------|-----|-------------|-----|-------------------------|------|---|------------------|---|--|--------|
|    | 1045.5272                               | 1045.5695 | 0.0423  | 40  | 537         | 545 | GLLTQQDDR               |      |   |                  |   |  | Mascot |
|    | 1062.5803                               | 1062.699  | 0.1187  | 112 | 382         | 389 | FQIQQSRR                |      |   |                  |   |  | Mascot |
|    | 1244.6593                               | 1244.7266 | 0.0673  | 54  | 558         | 568 | QKLEGNLSAER             |      |   |                  |   |  | Mascot |
|    | 1349.673                                | 1349.7142 | 0.0412  | 31  | 492         | 502 | NRDESMIDLLK             |      |   | Oxidation (M)[6] |   |  | Mascot |
|    | 1392.7191                               | 1392.7539 | 0.0348  | 25  | 226         | 237 | VLFIELDGLDECR           |      |   |                  |   |  | Mascot |
|    | 1410.7198                               | 1410.7828 | 0.063   | 45  | 371         | 381 | TLTQMYTHFLR             |      |   |                  |   |  | Mascot |
|    | 1410.7198                               | 1410.7828 | 0.063   | 45  | 371         | 381 | TLTQMYTHFLR             |      |   |                  |   |  | Mascot |
|    | 2144.0981                               | 2144.1206 | 0.0225  | 10  | 503         | 521 | TAVDKALESENGHLDLYL<br>R |      |   |                  |   |  | Mascot |
|    | 2211.2092                               | 2211.1184 | -0.0908 | -41 | 33          | 51  | SIITEAALDLTLFFLREMK     |      |   |                  |   |  | Mascot |
|    | 2298.1812                               | 2298.2004 | 0.0192  | 8   | 371         | 388 | TLTQMYTHFLRFQIQQSR      |      |   |                  |   |  | Mascot |
| 39 | ubiquitin-like protein 4A [Danio rerio] |           |         |     | gi 41053523 |     | 17309                   | 5.95 | 5 | 30               | 0 |  |        |

Peptide Information

| Calc. Mass | Obsrv. Mass | ± da    | ± ppm | Start Seq. | End Seq. | Sequence                   | Ion Score | C. I. % | Modification           | Rank | Result Type |
|------------|-------------|---------|-------|------------|----------|----------------------------|-----------|---------|------------------------|------|-------------|
| 996.522    | 996.6024    | 0.0804  | 81    | 47         | 55       | GKALADEHR                  |           |         |                        |      | Mascot      |
| 996.522    | 996.6024    | 0.0804  | 81    | 47         | 55       | GKALADEHR                  |           |         |                        |      | Mascot      |
| 1179.5892  | 1179.6073   | 0.0181  | 15    | 56         | 66       | LSDYSIGPEAK                |           |         |                        |      | Mascot      |
| 1349.6001  | 1349.7142   | 0.1141  | 85    | 12         | 22       | ECNVQVTENEK                |           |         | Carbamidomethyl (C)[2] |      | Mascot      |
| 2384.2932  | 2383.9722   | -0.321  | -135  | 56         | 77       | LSDYSIGPEAKLNLVVRP<br>AGER |           |         |                        |      | Mascot      |
| 2501.3101  | 2501.2566   | -0.0535 | -21   | 1          | 22       | MILTVKPLQGKECNVQVT<br>ENEK |           |         |                        |      | Mascot      |

40 Sh3bp4a protein [Danio rerio] gi|66910395 76175.4 8.42 11 30 0

Peptide Information

| Calc. Mass | Obsrv. Mass | ± da    | ± ppm | Start Seq. | End Seq. | Sequence                  | Ion Score | C. I. % | Modification                              | Rank | Result Type |
|------------|-------------|---------|-------|------------|----------|---------------------------|-----------|---------|-------------------------------------------|------|-------------|
| 842.5822   | 842.5182    | -0.064  | -76   | 663        | 669      | LIKTVIR                   |           |         |                                           |      | Mascot      |
| 850.4338   | 850.5499    | 0.1161  | 137   | 387        | 393      | LSNMEIK                   |           |         | Oxidation (M)[4]                          |      | Mascot      |
| 870.4726   | 870.5475    | 0.0749  | 86    | 1          | 7        | MAHRIR                    |           |         | Oxidation (M)[1]                          |      | Mascot      |
| 1023.5655  | 1023.458    | -0.1075 | -105  | 654        | 662      | CITNLKFGK                 |           |         |                                           |      | Mascot      |
| 1623.7723  | 1623.8529   | 0.0806  | 50    | 66         | 79       | DYCPSSFTTLKFSK            |           |         |                                           |      | Mascot      |
| 1671.806   | 1671.8976   | 0.0916  | 55    | 461        | 474      | HVSFSSNVWNHMK             |           |         |                                           |      | Mascot      |
| 1840.8237  | 1840.9467   | 0.123   | 67    | 408        | 423      | TESPMAEIVCVRSCK           |           |         | Carbamidomethyl (C)[10], Oxidation (M)[5] |      | Mascot      |
| 2008.0024  | 2007.9091   | -0.0933 | -46   | 402        | 419      | VSMVTRTESPMAEIVCVR        |           |         |                                           |      | Mascot      |
| 2008.0024  | 2007.9091   | -0.0933 | -46   | 402        | 419      | VSMVTRTESPMAEIVCVR        |           |         |                                           |      | Mascot      |
| 2284.2368  | 2284.1853   | -0.0515 | -23   | 492        | 513      | TVVAIFGHDCAPKLLVS<br>EVGK |           |         |                                           |      | Mascot      |

|    |                                                  |           |        |    |             |     |                                    |      |    |    |   |                        |        |
|----|--------------------------------------------------|-----------|--------|----|-------------|-----|------------------------------------|------|----|----|---|------------------------|--------|
|    | 2300.0686                                        | 2300.1904 | 0.1218 | 53 | 597         | 616 | DDQDCILAQFCVQTPQP<br>PPK           |      |    |    |   | Carbamidomethyl (C)[5] | Mascot |
|    | 3337.6052                                        | 3337.7576 | 0.1524 | 46 | 298         | 327 | LARSCHDLESLGQNPBW<br>GQTQPVETNIVCK |      |    |    |   | Carbamidomethyl (C)[5] | Mascot |
| 41 | choline transporter-like protein 2 [Danio rerio] |           |        |    | gi 38564419 |     | 79124.8                            | 8.66 | 10 | 30 | 0 |                        |        |

#### Peptide Information

| Calc. Mass | Obsrv. Mass | ± da    | ± ppm | Start Seq. | End Seq. | Sequence                              | Ion Score | C. I. | % Modification                                  | Rank | Result Type |
|------------|-------------|---------|-------|------------|----------|---------------------------------------|-----------|-------|-------------------------------------------------|------|-------------|
| 864.4573   | 864.5258    | 0.0685  | 79    | 525        | 532      | GAENKFAK                              |           |       |                                                 |      | Mascot      |
| 1023.4485  | 1023.458    | 0.0095  | 9     | 1          | 8        | MDMEEKPK                              |           |       | Oxidation (M)[1]                                |      | Mascot      |
| 1320.6001  | 1320.5892   | -0.0109 | -8    | 389        | 399      | VFNETECVHSR                           |           |       |                                                 |      | Mascot      |
| 1393.6603  | 1393.755    | 0.0947  | 68    | 478        | 490      | DMPAFPLCASLGR                         |           |       | Oxidation (M)[2]                                |      | Mascot      |
| 1393.6603  | 1393.755    | 0.0947  | 68    | 478        | 490      | DMPAFPLCASLGR                         |           |       | Oxidation (M)[2]                                |      | Mascot      |
| 1707.8887  | 1707.7819   | -0.1068 | -63   | 152        | 166      | LCPAYLVSSNPFLQR                       |           |       |                                                 |      | Mascot      |
| 1790.9041  | 1790.9036   | -0.0005 | 0     | 478        | 493      | DMPAFPLCASLGRSLR                      |           |       | Carbamidomethyl (C)[8]                          |      | Mascot      |
| 1851.9172  | 1851.9381   | 0.0209  | 11    | 76         | 89       | LEKQPFLFYFNMMK                        |           |       | Oxidation (M)[12]                               |      | Mascot      |
| 1858.8826  | 1858.8837   | 0.0011  | 1     | 59         | 75       | KVIYPTDSMGQFCGQGK                     |           |       |                                                 |      | Mascot      |
| 2501.0649  | 2501.2566   | 0.1917  | 77    | 414        | 434      | SDCPHSQCLFAFYGGET<br>PYHK             |           |       | Carbamidomethyl (C)[3,8]                        |      | Mascot      |
| 3730.0005  | 3729.9419   | -0.0586 | -16   | 249        | 281      | FLAGVMVWVWMLMVVAVI<br>AYGIAHCSIKYVSLK |           |       | Carbamidomethyl (C)[25], Oxidation (M)[6,10,13] |      | Mascot      |

|    |                             |  |  |  |              |  |         |      |   |    |   |  |  |
|----|-----------------------------|--|--|--|--------------|--|---------|------|---|----|---|--|--|
| 42 | novel protein [Danio rerio] |  |  |  | gi 148725934 |  | 20790.5 | 5.31 | 6 | 29 | 0 |  |  |
|----|-----------------------------|--|--|--|--------------|--|---------|------|---|----|---|--|--|

#### Peptide Information

| Calc. Mass | Obsrv. Mass | ± da    | ± ppm | Start Seq. | End Seq. | Sequence                  | Ion Score | C. I. | % Modification                             | Rank | Result Type |
|------------|-------------|---------|-------|------------|----------|---------------------------|-----------|-------|--------------------------------------------|------|-------------|
| 842.3937   | 842.5182    | 0.1245  | 148   | 18         | 24       | HINCAER                   |           |       |                                            |      | Mascot      |
| 864.4131   | 864.5258    | 0.1127  | 130   | 2          | 8        | EEVSCLK                   |           |       | Carbamidomethyl (C)[5]                     |      | Mascot      |
| 960.5472   | 960.4806    | -0.0666 | -69   | 45         | 52       | IRQEISSK                  |           |       |                                            |      | Mascot      |
| 1051.6007  | 1051.7194   | 0.1187  | 113   | 161        | 168      | HQELQRLK                  |           |       |                                            |      | Mascot      |
| 1179.6112  | 1179.6073   | -0.0039 | -3    | 1          | 10       | MEEVSCLKLK                |           |       |                                            |      | Mascot      |
| 2415.1755  | 2415.2056   | 0.0301  | 12    | 25         | 44       | QHKAESVNVNLISELQEQM<br>CR |           |       | Carbamidomethyl (C)[19], Oxidation (M)[18] |      | Mascot      |
| 2415.1755  | 2415.2056   | 0.0301  | 12    | 25         | 44       | QHKAESVNVNLISELQEQM<br>CR |           |       | Carbamidomethyl (C)[19], Oxidation (M)[18] |      | Mascot      |

|    |                                                            |  |  |  |              |  |         |      |   |    |   |  |  |
|----|------------------------------------------------------------|--|--|--|--------------|--|---------|------|---|----|---|--|--|
| 43 | PREDICTED: hypothetical protein LOC100535042 [Danio rerio] |  |  |  | gi 326678194 |  | 27705.3 | 6.97 | 6 | 29 | 0 |  |  |
|----|------------------------------------------------------------|--|--|--|--------------|--|---------|------|---|----|---|--|--|

#### Peptide Information

| Calc. Mass | Obsrv. Mass | ± da | ± ppm | Start Seq. | End Seq. | Sequence | Ion Score | C. I. | % Modification | Rank | Result Type |
|------------|-------------|------|-------|------------|----------|----------|-----------|-------|----------------|------|-------------|
|------------|-------------|------|-------|------------|----------|----------|-----------|-------|----------------|------|-------------|

|    |                                         |           |         |     |              |     |                         |     |   |    |   |                  |        |
|----|-----------------------------------------|-----------|---------|-----|--------------|-----|-------------------------|-----|---|----|---|------------------|--------|
|    | 864.4607                                | 864.5258  | 0.0651  | 75  | 102          | 108 | EVSVKMR                 |     |   |    |   | Oxidation (M)[6] | Mascot |
|    | 1320.7006                               | 1320.5892 | -0.1114 | -84 | 109          | 121 | NSVTLSSGVSELK           |     |   |    |   |                  | Mascot |
|    | 1392.7006                               | 1392.7539 | 0.0533  | 38  | 130          | 142 | FGDGLTIAEINK            |     |   |    |   |                  | Mascot |
|    | 1623.837                                | 1623.8529 | 0.0159  | 10  | 107          | 121 | MRNSVTLSSGVSELK         |     |   |    |   | Oxidation (M)[1] | Mascot |
|    | 1701.8707                               | 1701.9159 | 0.0452  | 27  | 174          | 188 | AEHAGVYERWSLVGK         |     |   |    |   |                  | Mascot |
|    | 1701.8707                               | 1701.9159 | 0.0452  | 27  | 174          | 188 | AEHAGVYERWSLVGK         |     |   |    |   |                  | Mascot |
|    | 2007.9779                               | 2007.9091 | -0.0688 | -34 | 191          | 209 | FFLTGVSVHCCGPTEAAI<br>R |     |   |    |   |                  | Mascot |
|    | 2007.9779                               | 2007.9091 | -0.0688 | -34 | 191          | 209 | FFLTGVSVHCCGPTEAAI<br>R |     |   |    |   |                  | Mascot |
| 44 | lectin, mannose-binding 2 [Danio rerio] |           |         |     | gi 215983104 |     | 40223.1                 | 6.7 | 7 | 29 | 0 |                  |        |

#### Peptide Information

| Calc. Mass | Obsrv. Mass | ± da    | ± ppm | Start Seq. | End Seq. | Sequence                               | Ion Score | C. I. | % Modification         | Rank | Result Type |
|------------|-------------|---------|-------|------------|----------|----------------------------------------|-----------|-------|------------------------|------|-------------|
| 842.4375   | 842.5182    | 0.0807  | 96    | 20         | 26       | KMPVCHK                                |           |       |                        |      | Mascot      |
| 1535.7482  | 1535.7115   | -0.0367 | -24   | 194        | 207      | STELGGCSVEVRNK                         |           |       | Carbamidomethyl (C)[7] |      | Mascot      |
| 1707.7894  | 1707.7819   | -0.0075 | -4    | 222        | 235      | LTIMVDVDDQNDWK                         |           |       | Oxidation (M)[4]       |      | Mascot      |
| 1840.8435  | 1840.9467   | 0.1032  | 56    | 124        | 138      | NLHGDGFAMWYTKER                        |           |       | Oxidation (M)[9]       |      | Mascot      |
| 2211.054   | 2211.1184   | 0.0644  | 29    | 171        | 190      | SFPYISAMVNNGLPYEH<br>GK                |           |       |                        |      | Mascot      |
| 2415.0479  | 2415.2056   | 0.1577  | 65    | 271        | 289      | MYQLMVEHTLEEDSQD<br>WTK                |           |       | Oxidation (M)[1,5]     |      | Mascot      |
| 2415.0479  | 2415.2056   | 0.1577  | 65    | 271        | 289      | MYQLMVEHTLEEDSQD<br>WTK                |           |       | Oxidation (M)[1,5]     |      | Mascot      |
| 3729.7522  | 3729.9419   | 0.1897  | 51    | 236        | 270      | ECVDIGGVRLPTGYFGA<br>SAATGDLSDNHDIISMK |           |       | Carbamidomethyl (C)[2] |      | Mascot      |

|    |                                         |  |  |  |             |  |         |   |   |    |        |  |  |
|----|-----------------------------------------|--|--|--|-------------|--|---------|---|---|----|--------|--|--|
| 45 | novel protein (zgc:77721) [Danio rerio] |  |  |  | gi 94733612 |  | 52714.6 | 9 | 1 | 29 | 69.042 |  |  |
|----|-----------------------------------------|--|--|--|-------------|--|---------|---|---|----|--------|--|--|

#### Peptide Information

| Calc. Mass | Obsrv. Mass | ± da   | ± ppm | Start Seq. | End Seq. | Sequence  | Ion Score | C. I.  | % Modification | Rank | Result Type |
|------------|-------------|--------|-------|------------|----------|-----------|-----------|--------|----------------|------|-------------|
| 1085.5837  | 1085.6276   | 0.0439 | 40    | 18         | 26       | ELTPEILDR | 29        | 69.042 |                | 4    | Mascot      |

|    |                                                  |  |  |  |              |  |         |      |   |    |   |  |  |
|----|--------------------------------------------------|--|--|--|--------------|--|---------|------|---|----|---|--|--|
| 46 | PREDICTED: transcription factor EB [Danio rerio] |  |  |  | gi 125829340 |  | 55373.3 | 6.18 | 1 | 19 | 0 |  |  |
|----|--------------------------------------------------|--|--|--|--------------|--|---------|------|---|----|---|--|--|

#### Peptide Information

| Calc. Mass | Obsrv. Mass | ± da   | ± ppm | Start Seq. | End Seq. | Sequence        | Ion Score | C. I. | % Modification | Rank | Result Type |
|------------|-------------|--------|-------|------------|----------|-----------------|-----------|-------|----------------|------|-------------|
| 1701.884   | 1701.9159   | 0.0319 | 19    | 267        | 281      | ELGTMIPKTNLDLVR | 19        | 0     |                | 2    | Mascot      |

|    |                                                       |  |  |  |              |  |          |      |   |    |   |  |  |
|----|-------------------------------------------------------|--|--|--|--------------|--|----------|------|---|----|---|--|--|
| 47 | PREDICTED: TBC1 domain family member 2B [Danio rerio] |  |  |  | gi 326680312 |  | 109264.9 | 5.83 | 1 | 17 | 0 |  |  |
|----|-------------------------------------------------------|--|--|--|--------------|--|----------|------|---|----|---|--|--|

#### Peptide Information

|  | Calc. Mass | Obsrv. Mass | ± da    | ± ppm | Start Seq. | End Sequence Seq. |  | Ion Score | C. I. % | Modification |  | Rank | Result Type |
|--|------------|-------------|---------|-------|------------|-------------------|--|-----------|---------|--------------|--|------|-------------|
|  | 1085.6565  | 1085.6276   | -0.0289 | -27   | 488        | 496 EIIELTVLR     |  | 19        | 0       |              |  | 6    | Mascot      |

48 PREDICTED: tricarboxylate transport protein, mitochondrial [Danio rerio] gi|326669808 37300 9.25 1 16 0

Peptide Information

|  | Calc. Mass | Obsrv. Mass | ± da   | ± ppm | Start Seq. | End Sequence Seq. |  | Ion Score | C. I. % | Modification |  | Rank | Result Type |
|--|------------|-------------|--------|-------|------------|-------------------|--|-----------|---------|--------------|--|------|-------------|
|  | 1085.6426  | 1085.6276   | -0.015 | -14   | 195        | 203 EIIRTQGIR     |  | 16        | 0       |              |  | 7    | Mascot      |

49 PREDICTED: zinc finger protein 595-like [Danio rerio] gi|326668051 59316.6 9.8 1 15 0

Peptide Information

|  | Calc. Mass | Obsrv. Mass | ± da   | ± ppm | Start Seq. | End Sequence Seq. |  | Ion Score | C. I. % | Modification |  | Rank | Result Type |
|--|------------|-------------|--------|-------|------------|-------------------|--|-----------|---------|--------------|--|------|-------------|
|  | 1085.6062  | 1085.6276   | 0.0214 | 20    | 467        | 475 ARQVLDIR      |  | 15        | 0       |              |  | 8    | Mascot      |

50 solute carrier family 25, member 1 [Danio rerio] gi|41055086 39386.5 9.66 1 14 0

Peptide Information

|  | Calc. Mass | Obsrv. Mass | ± da   | ± ppm | Start Seq. | End Sequence Seq. |  | Ion Score | C. I. % | Modification |  | Rank | Result Type |
|--|------------|-------------|--------|-------|------------|-------------------|--|-----------|---------|--------------|--|------|-------------|
|  | 1085.6062  | 1085.6276   | 0.0214 | 20    | 218        | 226 EIIRDQGV      |  | 14        | 0       |              |  | 9    | Mascot      |

|                |           |                        |                |                |                    |
|----------------|-----------|------------------------|----------------|----------------|--------------------|
| Gel Idx/Pos    | 245/J21   | Instr./Gel Origin      | BA2060/110707A | Process Status | Analysis Succeeded |
| Plate [#] Name | [1] 31496 | Instrument Sample Name |                | Spectra        | 11                 |

| Rank | Protein Name               | Accession No. | Protein MW | Protein PI | Pep. Count | Protein Score | Protein Score C. I. % | Total Ion Score | Total Ion C. I. % |
|------|----------------------------|---------------|------------|------------|------------|---------------|-----------------------|-----------------|-------------------|
| 1    | Vtg1 protein [Danio rerio] | gi 63100501   | 36409.1    | 9.23       | 9          | 383           | 100                   | 341             | 100               |

Peptide Information

|  | Calc. Mass | Obsrv. Mass | ± da    | ± ppm | Start Seq. | End Sequence Seq. |  | Ion Score | C. I. % | Modification |  | Rank | Result Type |
|--|------------|-------------|---------|-------|------------|-------------------|--|-----------|---------|--------------|--|------|-------------|
|  | 826.4457   | 826.4445    | -0.0012 | -1    | 198        | 204 QYAVFAK       |  |           |         |              |  |      | Mascot      |
|  | 960.4785   | 960.4761    | -0.0024 | -2    | 218        | 224 LEVEWER       |  |           |         |              |  |      | Mascot      |
|  | 960.4785   | 960.4761    | -0.0024 | -2    | 218        | 224 LEVEWER       |  | 48        | 99.529  |              |  |      | Mascot      |
|  | 1077.58    | 1077.5089   | -0.0711 | -66   | 21         | 30 SAARFSSVPR     |  |           |         |              |  |      | Mascot      |
|  | 1118.682   | 1118.6503   | -0.0317 | -28   | 225        | 234 LPIIVTTYAK    |  |           |         |              |  |      | Mascot      |
|  | 1287.6691  | 1287.6692   | 0.0001  | 0     | 205        | 217 AEAGVLGEFPAAR |  | 101       | 100     |              |  |      | Mascot      |

|           |           |         |    |     |     |                    |     |     |  |  |  |  |  |  |  |  |        |
|-----------|-----------|---------|----|-----|-----|--------------------|-----|-----|--|--|--|--|--|--|--|--|--------|
| 1287.6691 | 1287.6692 | 0.0001  | 0  | 205 | 217 | AEAGVLGEFPAAR      |     |     |  |  |  |  |  |  |  |  | Mascot |
| 1327.7216 | 1327.7382 | 0.0166  | 13 | 260 | 271 | EIELTAALPSQR       |     |     |  |  |  |  |  |  |  |  | Mascot |
| 1364.6957 | 1364.6943 | -0.0014 | -1 | 239 | 250 | HILTAAYDTGFR       | 83  | 100 |  |  |  |  |  |  |  |  | Mascot |
| 1364.6957 | 1364.6943 | -0.0014 | -1 | 239 | 250 | HILTAAYDTGFR       |     |     |  |  |  |  |  |  |  |  | Mascot |
| 1826.9799 | 1826.9792 | -0.0007 | 0  | 143 | 158 | LLGYQLAAYFDKPTAR   |     |     |  |  |  |  |  |  |  |  | Mascot |
| 1826.9799 | 1826.9792 | -0.0007 | 0  | 143 | 158 | LLGYQLAAYFDKPTAR   | 111 | 100 |  |  |  |  |  |  |  |  | Mascot |
| 1958.0189 | 1958.0155 | -0.0034 | -2 | 254 | 271 | ATNSEKEIELTAALPSQR |     |     |  |  |  |  |  |  |  |  | Mascot |

2 vitellogenin 1 [Danio rerio] gi|94733730 149140.4 8.74 16 380 100 342 100

| Peptide Information |             |         |       |            |          |                          |           |        |   |                  |      |             |
|---------------------|-------------|---------|-------|------------|----------|--------------------------|-----------|--------|---|------------------|------|-------------|
| Calc. Mass          | Obsrv. Mass | ± da    | ± ppm | Start Seq. | End Seq. | Sequence                 | Ion Score | C. I.  | % | Modification     | Rank | Result Type |
| 826.4457            | 826.4445    | -0.0012 | -1    | 1238       | 1244     | QYAVFAK                  |           |        |   |                  |      | Mascot      |
| 960.4785            | 960.4761    | -0.0024 | -2    | 1258       | 1264     | LEVEWER                  |           |        |   |                  |      | Mascot      |
| 960.4785            | 960.4761    | -0.0024 | -2    | 1258       | 1264     | LEVEWER                  | 48        | 99.529 |   |                  |      | Mascot      |
| 983.5995            | 983.5398    | -0.0597 | -61   | 878        | 887      | TIAPGKVAAR               |           |        |   |                  |      | Mascot      |
| 983.5995            | 983.5398    | -0.0597 | -61   | 878        | 887      | TIAPGKVAAR               |           |        |   |                  |      | Mascot      |
| 1088.5405           | 1088.5459   | 0.0054  | 5     | 415        | 424      | MTASLATHEK               |           |        |   |                  |      | Mascot      |
| 1118.682            | 1118.6503   | -0.0317 | -28   | 1265       | 1274     | LPIIVTTYAK               |           |        |   |                  |      | Mascot      |
| 1257.6031           | 1257.6921   | 0.089   | 71    | 828        | 837      | LESMTYEQLK               |           |        |   | Oxidation (M)[4] |      | Mascot      |
| 1287.6691           | 1287.6692   | 0.0001  | 0     | 1245       | 1257     | AEAGVLGEFPAAR            | 101       | 100    |   |                  |      | Mascot      |
| 1287.6691           | 1287.6692   | 0.0001  | 0     | 1245       | 1257     | AEAGVLGEFPAAR            |           |        |   |                  |      | Mascot      |
| 1327.7216           | 1327.7382   | 0.0166  | 13    | 1300       | 1311     | EIELTAALPSQR             |           |        |   |                  |      | Mascot      |
| 1364.6957           | 1364.6943   | -0.0014 | -1    | 1279       | 1290     | HILTAAYDTGFR             | 83        | 100    |   |                  |      | Mascot      |
| 1364.6957           | 1364.6943   | -0.0014 | -1    | 1279       | 1290     | HILTAAYDTGFR             |           |        |   |                  |      | Mascot      |
| 1382.7889           | 1382.7772   | -0.0117 | -8    | 303        | 315      | ISDAPAQIVEVLK            |           |        |   |                  |      | Mascot      |
| 1715.8997           | 1715.9199   | 0.0202  | 12    | 597        | 614      | ITAPDMASVAGAANVAIK       |           |        |   | Oxidation (M)[6] |      | Mascot      |
| 1826.9799           | 1826.9792   | -0.0007 | 0     | 1183       | 1198     | LLGYQLAAYFDKPTAR         |           |        |   |                  |      | Mascot      |
| 1826.9799           | 1826.9792   | -0.0007 | 0     | 1183       | 1198     | LLGYQLAAYFDKPTAR         | 111       | 100    |   |                  |      | Mascot      |
| 1958.0189           | 1958.0155   | -0.0034 | -2    | 1294       | 1311     | ATNSEKEIELTAALPSQR       |           |        |   |                  |      | Mascot      |
| 2041.943            | 2042.0739   | 0.1309  | 64    | 146        | 163      | KTQNIYEMQEAGAQGVCR       |           |        |   | Oxidation (M)[8] |      | Mascot      |
| 2249.2725           | 2249.0615   | -0.211  | -94   | 425        | 445      | FATIPALREVVMLGYGSLIAK    |           |        |   |                  |      | Mascot      |
| 2531.4231           | 2531.248    | -0.1751 | -69   | 95         | 118      | LTSALAAQLQIPIKFEYANGVVGK |           |        |   |                  |      | Mascot      |

3 vitellogenin 1 [Danio rerio] gi|166795887 149452.5 8.68 16 379 100 342 100

Peptide Information



|   | Calc. Mass                 | Obsrv. Mass | ± da    | ± ppm | Start Seq.   | End Sequence Seq.                |      | Ion Score | C. I. % Modification |                   |     |     | Rank | Result Type |
|---|----------------------------|-------------|---------|-------|--------------|----------------------------------|------|-----------|----------------------|-------------------|-----|-----|------|-------------|
|   | 826.4457                   | 826.4445    | -0.0012 | -1    | 1238         | 1244 QYAVFAK                     |      |           |                      |                   |     |     |      | Mascot      |
|   | 960.4785                   | 960.4761    | -0.0024 | -2    | 1258         | 1264 LEVEWER                     |      |           |                      |                   |     |     |      | Mascot      |
|   | 960.4785                   | 960.4761    | -0.0024 | -2    | 1258         | 1264 LEVEWER                     |      | 48        | 99.529               |                   |     |     |      | Mascot      |
|   | 983.5995                   | 983.5398    | -0.0597 | -61   | 878          | 887 TIAPGKVAAR                   |      |           |                      |                   |     |     |      | Mascot      |
|   | 983.5995                   | 983.5398    | -0.0597 | -61   | 878          | 887 TIAPGKVAAR                   |      |           |                      |                   |     |     |      | Mascot      |
|   | 1088.5405                  | 1088.5459   | 0.0054  | 5     | 415          | 424 MTASLATHEK                   |      |           |                      |                   |     |     |      | Mascot      |
|   | 1118.682                   | 1118.6503   | -0.0317 | -28   | 1265         | 1274 LPIIVTTYAK                  |      |           |                      |                   |     |     |      | Mascot      |
|   | 1257.6031                  | 1257.6921   | 0.089   | 71    | 828          | 837 LESMTYEQLK                   |      |           |                      | Oxidation (M)[4]  |     |     |      | Mascot      |
|   | 1287.6691                  | 1287.6692   | 0.0001  | 0     | 1245         | 1257 AEAGVLGEFPAAR               |      | 101       | 100                  |                   |     |     |      | Mascot      |
|   | 1287.6691                  | 1287.6692   | 0.0001  | 0     | 1245         | 1257 AEAGVLGEFPAAR               |      |           |                      |                   |     |     |      | Mascot      |
|   | 1327.7216                  | 1327.7382   | 0.0166  | 13    | 1300         | 1311 EIELTAALPSQR                |      |           |                      |                   |     |     |      | Mascot      |
|   | 1364.6957                  | 1364.6943   | -0.0014 | -1    | 1279         | 1290 HILTAAYDTGFR                |      | 83        | 100                  |                   |     |     |      | Mascot      |
|   | 1364.6957                  | 1364.6943   | -0.0014 | -1    | 1279         | 1290 HILTAAYDTGFR                |      |           |                      |                   |     |     |      | Mascot      |
|   | 1382.7889                  | 1382.7772   | -0.0117 | -8    | 303          | 315 ISDAPAQIVEVLK                |      |           |                      |                   |     |     |      | Mascot      |
|   | 1638.8485                  | 1638.9172   | 0.0687  | 42    | 668          | 683 TYLAGAAADVVEFGVR             |      |           |                      |                   |     |     |      | Mascot      |
|   | 1826.9799                  | 1826.9792   | -0.0007 | 0     | 1183         | 1198 LLGYQLAAYFDKPTAR            |      |           |                      |                   |     |     |      | Mascot      |
|   | 1826.9799                  | 1826.9792   | -0.0007 | 0     | 1183         | 1198 LLGYQLAAYFDKPTAR            |      | 111       | 100                  |                   |     |     |      | Mascot      |
|   | 1958.0189                  | 1958.0155   | -0.0034 | -2    | 1294         | 1311 ATNSEKEIELTAALPSQR          |      |           |                      |                   |     |     |      | Mascot      |
|   | 2041.943                   | 2042.0739   | 0.1309  | 64    | 146          | 163 KTQNIYEMQEAGAQQGVC<br>R      |      |           |                      | Oxidation (M)[8]  |     |     |      | Mascot      |
|   | 2233.2009                  | 2233.0791   | -0.1218 | -55   | 593          | 614 SLTRITAPDMAYVAGAAN<br>VAIK   |      |           |                      |                   |     |     |      | Mascot      |
|   | 2249.1958                  | 2249.0615   | -0.1343 | -60   | 593          | 614 SLTRITAPDMAYVAGAAN<br>VAIK   |      |           |                      | Oxidation (M)[10] |     |     |      | Mascot      |
|   | 2531.4231                  | 2531.248    | -0.1751 | -69   | 95           | 118 LTSALAAQLQIPIKFEYAN<br>GVVGK |      |           |                      |                   |     |     |      | Mascot      |
| 4 | Vtg1 protein [Danio rerio] |             |         |       | gi 145337918 | 116565.5                         | 9.07 | 14        | 379                  | 100               | 342 | 100 |      |             |

Peptide Information

|  | Calc. Mass | Obsrv. Mass | ± da    | ± ppm | Start Seq. | End Sequence Seq. | Ion Score | C. I.  | % Modification | Rank | Result Type |
|--|------------|-------------|---------|-------|------------|-------------------|-----------|--------|----------------|------|-------------|
|  | 826.4457   | 826.4445    | -0.0012 | -1    | 944        | 950 QYAVFAK       |           |        |                |      | Mascot      |
|  | 960.4785   | 960.4761    | -0.0024 | -2    | 964        | 970 LEVEWER       |           |        |                |      | Mascot      |
|  | 960.4785   | 960.4761    | -0.0024 | -2    | 964        | 970 LEVEWER       | 48        | 99.529 |                |      | Mascot      |
|  | 983.5995   | 983.5398    | -0.0597 | -61   | 584        | 593 TIAPGKVAAR    |           |        |                |      | Mascot      |
|  | 983.5995   | 983.5398    | -0.0597 | -61   | 584        | 593 TIAPGKVAAR    |           |        |                |      | Mascot      |
|  | 1088.5405  | 1088.5459   | 0.0054  | 5     | 121        | 130 MTASLATHEK    |           |        |                |      | Mascot      |
|  | 1118.682   | 1118.6503   | -0.0317 | -28   | 971        | 980 LPIIVTTYAK    |           |        |                |      | Mascot      |



6 vitellogenin 7 [Danio rerio] gi|57864789 24318.7 8.37 5 284 100 260 100

Peptide Information

| Calc. Mass | Obsrv. Mass | ± da    | ± ppm | Start Seq. | End Sequence Seq.   | Ion Score | C. I. % | Modification | Rank | Result Type |
|------------|-------------|---------|-------|------------|---------------------|-----------|---------|--------------|------|-------------|
| 826.4457   | 826.4445    | -0.0012 | -1    | 93         | 99 QYAVFAK          |           |         |              |      | Mascot      |
| 960.4785   | 960.4761    | -0.0024 | -2    | 113        | 119 LEVEWER         |           |         |              |      | Mascot      |
| 960.4785   | 960.4761    | -0.0024 | -2    | 113        | 119 LEVEWER         | 48        | 99.529  |              |      | Mascot      |
| 1118.6238  | 1118.6503   | 0.0265  | 24    | 68         | 78 KICADGALLSK      |           |         |              |      | Mascot      |
| 1287.6691  | 1287.6692   | 0.0001  | 0     | 100        | 112 AEAGVLGEFPAAR   | 101       | 100     |              |      | Mascot      |
| 1287.6691  | 1287.6692   | 0.0001  | 0     | 100        | 112 AEAGVLGEFPAAR   |           |         |              |      | Mascot      |
| 1826.9799  | 1826.9792   | -0.0007 | 0     | 38         | 53 LLGYQLAAYFDKPTAR |           |         |              |      | Mascot      |
| 1826.9799  | 1826.9792   | -0.0007 | 0     | 38         | 53 LLGYQLAAYFDKPTAR | 111       | 100     |              |      | Mascot      |

7 vitellogenin 7 [Danio rerio] gi|156713467 148739.2 8.76 9 265 100 260 100

Peptide Information

| Calc. Mass | Obsrv. Mass | ± da    | ± ppm | Start Seq. | End Sequence Seq.             | Ion Score | C. I. % | Modification     | Rank | Result Type |
|------------|-------------|---------|-------|------------|-------------------------------|-----------|---------|------------------|------|-------------|
| 826.4457   | 826.4445    | -0.0012 | -1    | 1234       | 1240 QYAVFAK                  |           |         |                  |      | Mascot      |
| 960.4785   | 960.4761    | -0.0024 | -2    | 1254       | 1260 LEVEWER                  |           |         |                  |      | Mascot      |
| 960.4785   | 960.4761    | -0.0024 | -2    | 1254       | 1260 LEVEWER                  | 48        | 99.529  |                  |      | Mascot      |
| 983.5995   | 983.5398    | -0.0597 | -61   | 878        | 887 TIAPGKVAAR                |           |         |                  |      | Mascot      |
| 983.5995   | 983.5398    | -0.0597 | -61   | 878        | 887 TIAPGKVAAR                |           |         |                  |      | Mascot      |
| 1118.6238  | 1118.6503   | 0.0265  | 24    | 1209       | 1219 KICADGALLSK              |           |         |                  |      | Mascot      |
| 1287.6691  | 1287.6692   | 0.0001  | 0     | 1241       | 1253 AEAGVLGEFPAAR            | 101       | 100     |                  |      | Mascot      |
| 1287.6691  | 1287.6692   | 0.0001  | 0     | 1241       | 1253 AEAGVLGEFPAAR            |           |         |                  |      | Mascot      |
| 1715.8997  | 1715.9199   | 0.0202  | 12    | 597        | 614 ITAPDMASVAGAANVAIK        |           |         | Oxidation (M)[6] |      | Mascot      |
| 1826.9799  | 1826.9792   | -0.0007 | 0     | 1179       | 1194 LLGYQLAAYFDKPTAR         |           |         |                  |      | Mascot      |
| 1826.9799  | 1826.9792   | -0.0007 | 0     | 1179       | 1194 LLGYQLAAYFDKPTAR         | 111       | 100     |                  |      | Mascot      |
| 2230.1682  | 2230.1951   | 0.0269  | 12    | 597        | 618 ITAPDMASVAGAANVAIK LMNR   |           |         | Oxidation (M)[6] |      | Mascot      |
| 2531.4231  | 2531.248    | -0.1751 | -69   | 95         | 118 LTSALAAQLQIPIKFEYAN GVVGK |           |         |                  |      | Mascot      |

8 novel protein similar to vitellogenin 1 (vg1) [Danio rerio] gi|94732723 147084.2 8.73 9 263 100 260 100

Peptide Information

| Calc. Mass | Obsrv. Mass | ± da    | ± ppm | Start Seq. | End Sequence Seq. | Ion Score | C. I. % | Modification | Rank | Result Type |
|------------|-------------|---------|-------|------------|-------------------|-----------|---------|--------------|------|-------------|
| 826.4457   | 826.4445    | -0.0012 | -1    | 1219       | 1225 QYAVFAK      |           |         |              |      | Mascot      |

|           |           |         |     |      |      |                              |     |        |  |  |  |                  |  |  |        |
|-----------|-----------|---------|-----|------|------|------------------------------|-----|--------|--|--|--|------------------|--|--|--------|
| 960.4785  | 960.4761  | -0.0024 | -2  | 1239 | 1245 | LEVEWER                      |     |        |  |  |  |                  |  |  | Mascot |
| 960.4785  | 960.4761  | -0.0024 | -2  | 1239 | 1245 | LEVEWER                      | 48  | 99.529 |  |  |  |                  |  |  | Mascot |
| 983.5995  | 983.5398  | -0.0597 | -61 | 878  | 887  | TIAPGKVAAR                   |     |        |  |  |  |                  |  |  | Mascot |
| 983.5995  | 983.5398  | -0.0597 | -61 | 878  | 887  | TIAPGKVAAR                   |     |        |  |  |  |                  |  |  | Mascot |
| 1118.6238 | 1118.6503 | 0.0265  | 24  | 1194 | 1204 | KICADGALLSK                  |     |        |  |  |  |                  |  |  | Mascot |
| 1287.6691 | 1287.6692 | 0.0001  | 0   | 1226 | 1238 | AEAGVLGEFPAAR                | 101 | 100    |  |  |  |                  |  |  | Mascot |
| 1287.6691 | 1287.6692 | 0.0001  | 0   | 1226 | 1238 | AEAGVLGEFPAAR                |     |        |  |  |  |                  |  |  | Mascot |
| 1715.8997 | 1715.9199 | 0.0202  | 12  | 597  | 614  | ITAPDMASVAGAANVAIK           |     |        |  |  |  | Oxidation (M)[6] |  |  | Mascot |
| 1826.9799 | 1826.9792 | -0.0007 | 0   | 1164 | 1179 | LLGYQLAAYFDKPTAR             |     |        |  |  |  |                  |  |  | Mascot |
| 1826.9799 | 1826.9792 | -0.0007 | 0   | 1164 | 1179 | LLGYQLAAYFDKPTAR             | 111 | 100    |  |  |  |                  |  |  | Mascot |
| 2230.1682 | 2230.1951 | 0.0269  | 12  | 597  | 618  | ITAPDMASVAGAANVAIK<br>LMNR   |     |        |  |  |  | Oxidation (M)[6] |  |  | Mascot |
| 2531.4231 | 2531.248  | -0.1751 | -69 | 95   | 118  | LTSALAAQLQIPIKFEYAN<br>GVVGK |     |        |  |  |  |                  |  |  | Mascot |

9
Zgc:136383 [Danio rerio]
gi|92097636
28809.9
9.33
7
188
100
159
100

Peptide Information

| Calc. Mass | Obsrv. Mass | ± da    | ± ppm | Start Seq. | End Sequence Seq.   | Ion Score | C. I.  | % Modification    | Rank | Result | Type   |
|------------|-------------|---------|-------|------------|---------------------|-----------|--------|-------------------|------|--------|--------|
| 826.4457   | 826.4445    | -0.0012 | -1    | 136        | 142 QYAVFAK         |           |        |                   |      |        | Mascot |
| 960.4785   | 960.4761    | -0.0024 | -2    | 156        | 162 LEVEWER         |           |        |                   |      |        | Mascot |
| 960.4785   | 960.4761    | -0.0024 | -2    | 156        | 162 LEVEWER         | 48        | 99.529 |                   |      |        | Mascot |
| 1045.5465  | 1045.5605   | 0.014   | 13    | 246        | 253 DFLSWIHK        |           |        |                   |      |        | Mascot |
| 1118.5986  | 1118.6503   | 0.0517  | 46    | 217        | 225 IPEITMSRR       |           |        | Oxidation (M)[6]  |      |        | Mascot |
| 1326.6511  | 1326.7534   | 0.1023  | 77    | 124        | 135 VTAKFSWGAECK    |           |        |                   |      |        | Mascot |
| 1715.9473  | 1715.9199   | -0.0274 | -16   | 210        | 224 SLNVIARIPETMSR  |           |        | Oxidation (M)[13] |      |        | Mascot |
| 1826.9799  | 1826.9792   | -0.0007 | 0     | 81         | 96 LLGYQLAAYFDKPTAR |           |        |                   |      |        | Mascot |
| 1826.9799  | 1826.9792   | -0.0007 | 0     | 81         | 96 LLGYQLAAYFDKPTAR | 111       | 100    |                   |      |        | Mascot |

10
vitellogenin 6 [Danio rerio]
gi|303227889
150936.1
8.84
14
186
100
159
100

Peptide Information

| Calc. Mass | Obsrv. Mass | ± da    | ± ppm | Start Seq. | End Sequence Seq. | Ion Score | C. I.  | % Modification | Rank | Result | Type   |
|------------|-------------|---------|-------|------------|-------------------|-----------|--------|----------------|------|--------|--------|
| 826.4457   | 826.4445    | -0.0012 | -1    | 1256       | 1262 QYAVFAK      |           |        |                |      |        | Mascot |
| 864.4461   | 864.499     | 0.0529  | 61    | 98         | 105 DSFVPATK      |           |        |                |      |        | Mascot |
| 960.4785   | 960.4761    | -0.0024 | -2    | 1276       | 1282 LEVEWER      |           |        |                |      |        | Mascot |
| 960.4785   | 960.4761    | -0.0024 | -2    | 1276       | 1282 LEVEWER      | 48        | 99.529 |                |      |        | Mascot |
| 983.5995   | 983.5398    | -0.0597 | -61   | 889        | 898 TIAPGKVAAR    |           |        |                |      |        | Mascot |
| 983.5995   | 983.5398    | -0.0597 | -61   | 889        | 898 TIAPGKVAAR    |           |        |                |      |        | Mascot |

|           |                                                                                                          |         |     |      |      |                              |     |     |  |  |  |  |                         |  |  |  |        |
|-----------|----------------------------------------------------------------------------------------------------------|---------|-----|------|------|------------------------------|-----|-----|--|--|--|--|-------------------------|--|--|--|--------|
| 1015.5781 | 1015.5256                                                                                                | -0.0525 | -52 | 695  | 704  | TGGINEALLK                   |     |     |  |  |  |  |                         |  |  |  | Mascot |
| 1257.6031 | 1257.6921                                                                                                | 0.089   | 71  | 839  | 848  | LESMTYEQLK                   |     |     |  |  |  |  | Oxidation (M)[4]        |  |  |  | Mascot |
| 1326.6511 | 1326.7534                                                                                                | 0.1023  | 77  | 1244 | 1255 | VTAKFSWGAECK                 |     |     |  |  |  |  |                         |  |  |  | Mascot |
| 1327.7216 | 1327.7382                                                                                                | 0.0166  | 13  | 1318 | 1329 | EIELTAALPSQR                 |     |     |  |  |  |  |                         |  |  |  | Mascot |
| 1638.8485 | 1638.9172                                                                                                | 0.0687  | 42  | 679  | 694  | TYLAGAAADVVEFGVR             |     |     |  |  |  |  |                         |  |  |  | Mascot |
| 1715.7727 | 1715.9199                                                                                                | 0.1472  | 86  | 206  | 220  | DVGLAYTERCAECTK              |     |     |  |  |  |  | Carbamidomethyl (C)[10] |  |  |  | Mascot |
| 1826.9799 | 1826.9792                                                                                                | -0.0007 | 0   | 1201 | 1216 | LLGYQLAAYFDKPTAR             |     |     |  |  |  |  |                         |  |  |  | Mascot |
| 1826.9799 | 1826.9792                                                                                                | -0.0007 | 0   | 1201 | 1216 | LLGYQLAAYFDKPTAR             | 111 | 100 |  |  |  |  |                         |  |  |  | Mascot |
| 1958.0189 | 1958.0155                                                                                                | -0.0034 | -2  | 1312 | 1329 | ATNSEKEIELTAALPSQR           |     |     |  |  |  |  |                         |  |  |  | Mascot |
| 2233.2009 | 2233.0791                                                                                                | -0.1218 | -55 | 604  | 625  | SLTRITAPDMAYVAGAAN<br>VAIK   |     |     |  |  |  |  |                         |  |  |  | Mascot |
| 2249.1958 | 2249.0615                                                                                                | -0.1343 | -60 | 604  | 625  | SLTRITAPDMAYVAGAAN<br>VAIK   |     |     |  |  |  |  | Oxidation (M)[10]       |  |  |  | Mascot |
| 2531.4231 | 2531.248                                                                                                 | -0.1751 | -69 | 106  | 129  | LTSALAAQLQIPIKFEYAN<br>GVVGK |     |     |  |  |  |  |                         |  |  |  | Mascot |
| 11        | novel protein similar to vitellogenin 1 (vg1) [Danio rerio] gi 94733734 149808.5 8.83 14 184 100 159 100 |         |     |      |      |                              |     |     |  |  |  |  |                         |  |  |  |        |

#### Peptide Information

| Calc. Mass | Obsrv. Mass | ± da    | ± ppm | Start Seq. | End Seq. | Sequence                     | Ion Score | C. I. % | Modification            | Rank | Result Type |
|------------|-------------|---------|-------|------------|----------|------------------------------|-----------|---------|-------------------------|------|-------------|
| 826.4457   | 826.4445    | -0.0012 | -1    | 1245       | 1251     | QYAVFAK                      |           |         |                         |      | Mascot      |
| 864.4461   | 864.499     | 0.0529  | 61    | 91         | 98       | DSFVPATK                     |           |         |                         |      | Mascot      |
| 960.4785   | 960.4761    | -0.0024 | -2    | 1265       | 1271     | LEVEWER                      |           |         |                         |      | Mascot      |
| 960.4785   | 960.4761    | -0.0024 | -2    | 1265       | 1271     | LEVEWER                      | 48        | 99.529  |                         |      | Mascot      |
| 983.5995   | 983.5398    | -0.0597 | -61   | 882        | 891      | TIAPGKVAAR                   |           |         |                         |      | Mascot      |
| 983.5995   | 983.5398    | -0.0597 | -61   | 882        | 891      | TIAPGKVAAR                   |           |         |                         |      | Mascot      |
| 1015.5781  | 1015.5256   | -0.0525 | -52   | 688        | 697      | TGGINEALLK                   |           |         |                         |      | Mascot      |
| 1257.6031  | 1257.6921   | 0.089   | 71    | 832        | 841      | LESMTYEQLK                   |           |         | Oxidation (M)[4]        |      | Mascot      |
| 1326.6511  | 1326.7534   | 0.1023  | 77    | 1233       | 1244     | VTAKFSWGAECK                 |           |         |                         |      | Mascot      |
| 1327.7216  | 1327.7382   | 0.0166  | 13    | 1307       | 1318     | EIELTAALPSQR                 |           |         |                         |      | Mascot      |
| 1638.8485  | 1638.9172   | 0.0687  | 42    | 672        | 687      | TYLAGAAADVVEFGVR             |           |         |                         |      | Mascot      |
| 1715.7727  | 1715.9199   | 0.1472  | 86    | 199        | 213      | DVGLAYTERCAECTK              |           |         | Carbamidomethyl (C)[10] |      | Mascot      |
| 1826.9799  | 1826.9792   | -0.0007 | 0     | 1190       | 1205     | LLGYQLAAYFDKPTAR             |           |         |                         |      | Mascot      |
| 1826.9799  | 1826.9792   | -0.0007 | 0     | 1190       | 1205     | LLGYQLAAYFDKPTAR             | 111       | 100     |                         |      | Mascot      |
| 1958.0189  | 1958.0155   | -0.0034 | -2    | 1301       | 1318     | ATNSEKEIELTAALPSQR           |           |         |                         |      | Mascot      |
| 2233.2009  | 2233.0791   | -0.1218 | -55   | 597        | 618      | SLTRITAPDMAYVAGAAN<br>VAIK   |           |         |                         |      | Mascot      |
| 2249.1958  | 2249.0615   | -0.1343 | -60   | 597        | 618      | SLTRITAPDMAYVAGAAN<br>VAIK   |           |         | Oxidation (M)[10]       |      | Mascot      |
| 2531.4231  | 2531.248    | -0.1751 | -69   | 99         | 122      | LTSALAAQLQIPIKFEYAN<br>GVVGK |           |         |                         |      | Mascot      |

12

vitellogenin 6 [Danio rerio]

gi|57864787

38968.8

8.92

6

179

100

159

100

| Peptide Information |             |         |       |            |                        |           |        |                |                  |
|---------------------|-------------|---------|-------|------------|------------------------|-----------|--------|----------------|------------------|
| Calc. Mass          | Obsrv. Mass | ± da    | ± ppm | Start Seq. | End Sequence Seq.      | Ion Score | C. I.  | % Modification | Rank Result Type |
| 826.4457            | 826.4445    | -0.0012 | -1    | 235        | 241 QYAVFAK            |           |        |                | Mascot           |
| 960.4785            | 960.4761    | -0.0024 | -2    | 255        | 261 LEVEWER            |           |        |                | Mascot           |
| 960.4785            | 960.4761    | -0.0024 | -2    | 255        | 261 LEVEWER            | 48        | 99.529 |                | Mascot           |
| 1326.6511           | 1326.7534   | 0.1023  | 77    | 223        | 234 VTAKFSWGAECK       |           |        |                | Mascot           |
| 1327.7216           | 1327.7382   | 0.0166  | 13    | 297        | 308 EIELTAALPSQR       |           |        |                | Mascot           |
| 1826.9799           | 1826.9792   | -0.0007 | 0     | 180        | 195 LLGYQLAAYFDKPTAR   |           |        |                | Mascot           |
| 1826.9799           | 1826.9792   | -0.0007 | 0     | 180        | 195 LLGYQLAAYFDKPTAR   | 111       | 100    |                | Mascot           |
| 1958.0189           | 1958.0155   | -0.0034 | -2    | 291        | 308 ATNSEKEIELTAALPSQR |           |        |                | Mascot           |

13

vitellogenin 5 [Danio rerio]

gi|68448530

148868

8.77

12

178

100

159

100

| Peptide Information |             |         |       |            |                                  |           |        |                                           |                  |
|---------------------|-------------|---------|-------|------------|----------------------------------|-----------|--------|-------------------------------------------|------------------|
| Calc. Mass          | Obsrv. Mass | ± da    | ± ppm | Start Seq. | End Sequence Seq.                | Ion Score | C. I.  | % Modification                            | Rank Result Type |
| 826.4457            | 826.4445    | -0.0012 | -1    | 1238       | 1244 QYAVFAK                     |           |        |                                           | Mascot           |
| 960.4785            | 960.4761    | -0.0024 | -2    | 1258       | 1264 LEVEWER                     |           |        |                                           | Mascot           |
| 960.4785            | 960.4761    | -0.0024 | -2    | 1258       | 1264 LEVEWER                     | 48        | 99.529 |                                           | Mascot           |
| 983.5995            | 983.5398    | -0.0597 | -61   | 878        | 887 TIAPGKVAAR                   |           |        |                                           | Mascot           |
| 983.5995            | 983.5398    | -0.0597 | -61   | 878        | 887 TIAPGKVAAR                   |           |        |                                           | Mascot           |
| 1015.5781           | 1015.5256   | -0.0525 | -52   | 684        | 693 TGGINEALLK                   |           |        |                                           | Mascot           |
| 1257.6031           | 1257.6921   | 0.089   | 71    | 828        | 837 LESMTYEQLK                   |           |        | Oxidation (M)[4]                          | Mascot           |
| 1326.7124           | 1326.7534   | 0.041   | 31    | 1009       | 1021 AAISRAEGPAVER               |           |        |                                           | Mascot           |
| 1715.8997           | 1715.9199   | 0.0202  | 12    | 597        | 614 ITAPDMASVAGAANVAIK           |           |        | Oxidation (M)[6]                          | Mascot           |
| 1826.9799           | 1826.9792   | -0.0007 | 0     | 1183       | 1198 LLGYQLAAYFDKPTAR            |           |        |                                           | Mascot           |
| 1826.9799           | 1826.9792   | -0.0007 | 0     | 1183       | 1198 LLGYQLAAYFDKPTAR            | 111       | 100    |                                           | Mascot           |
| 1840.8938           | 1840.9486   | 0.0548  | 30    | 72         | 86 LMDPLLYEYAGTWPR               |           |        | Oxidation (M)[2]                          | Mascot           |
| 2041.943            | 2042.0739   | 0.1309  | 64    | 146        | 163 KTQNIYEMQEAGAQQGVC<br>R      |           |        | Oxidation (M)[8]                          | Mascot           |
| 2362.1926           | 2362.1865   | -0.0061 | -3    | 597        | 619 ITAPDMASVAGAANVAIK<br>LMNCK  |           |        | Carbamidomethyl (C)[22], Oxidation (M)[6] | Mascot           |
| 2531.4231           | 2531.248    | -0.1751 | -69   | 95         | 118 LTSALAAQLQIPIKFEYAN<br>GVVGK |           |        |                                           | Mascot           |

14

vitellogenin 4 [Danio rerio]

gi|57864783

31189.9

9.48

6

178

100

159

100

| Peptide Information |             |      |       |       |              |     |       |                |                  |
|---------------------|-------------|------|-------|-------|--------------|-----|-------|----------------|------------------|
| Calc. Mass          | Obsrv. Mass | ± da | ± ppm | Start | End Sequence | Ion | C. I. | % Modification | Rank Result Type |

|  |           |           |         | Seq. | Seq. | Score |                  |     |        |                   |        |
|--|-----------|-----------|---------|------|------|-------|------------------|-----|--------|-------------------|--------|
|  | 826.4457  | 826.4445  | -0.0012 | -1   | 162  | 168   | QYAVFAK          |     |        |                   | Mascot |
|  | 960.4785  | 960.4761  | -0.0024 | -2   | 182  | 188   | LEVEWER          |     |        |                   | Mascot |
|  | 960.4785  | 960.4761  | -0.0024 | -2   | 182  | 188   | LEVEWER          | 48  | 99.529 |                   | Mascot |
|  | 1118.5986 | 1118.6503 | 0.0517  | 46   | 243  | 251   | IPEITMSRR        |     |        | Oxidation (M)[6]  | Mascot |
|  | 1326.6511 | 1326.7534 | 0.1023  | 77   | 150  | 161   | VTAKFSWGAECK     |     |        |                   | Mascot |
|  | 1715.9473 | 1715.9199 | -0.0274 | -16  | 236  | 250   | SLNVIARIPEITMSR  |     |        | Oxidation (M)[13] | Mascot |
|  | 1826.9799 | 1826.9792 | -0.0007 | 0    | 107  | 122   | LLGYQLAAYFDKPTAR |     |        |                   | Mascot |
|  | 1826.9799 | 1826.9792 | -0.0007 | 0    | 107  | 122   | LLGYQLAAYFDKPTAR | 111 | 100    |                   | Mascot |

15 novel protein similar to vitellogenin 1 (vg1) [Danio rerio] gi|94733731 149169.2 8.84 12 177 100 159 100

#### Peptide Information

| Calc. Mass | Obsrv. Mass | ± da    | ± ppm | Start Seq. | End Seq. | Sequence                     | Ion Score | C. I.  | % Modification                            | Rank | Result Type |
|------------|-------------|---------|-------|------------|----------|------------------------------|-----------|--------|-------------------------------------------|------|-------------|
| 826.4457   | 826.4445    | -0.0012 | -1    | 1240       | 1246     | QYAVFAK                      |           |        |                                           |      | Mascot      |
| 960.4785   | 960.4761    | -0.0024 | -2    | 1260       | 1266     | LEVEWER                      |           |        |                                           |      | Mascot      |
| 960.4785   | 960.4761    | -0.0024 | -2    | 1260       | 1266     | LEVEWER                      | 48        | 99.529 |                                           |      | Mascot      |
| 983.5995   | 983.5398    | -0.0597 | -61   | 882        | 891      | TIAPGKVAAR                   |           |        |                                           |      | Mascot      |
| 983.5995   | 983.5398    | -0.0597 | -61   | 882        | 891      | TIAPGKVAAR                   |           |        |                                           |      | Mascot      |
| 1015.5781  | 1015.5256   | -0.0525 | -52   | 688        | 697      | TGGINEALLK                   |           |        |                                           |      | Mascot      |
| 1257.6031  | 1257.6921   | 0.089   | 71    | 832        | 841      | LESMTYEQLK                   |           |        | Oxidation (M)[4]                          |      | Mascot      |
| 1326.7124  | 1326.7534   | 0.041   | 31    | 1013       | 1025     | AAISRAEGPAVER                |           |        |                                           |      | Mascot      |
| 1715.8997  | 1715.9199   | 0.0202  | 12    | 601        | 618      | ITAPDMASVAGAANVAIK           |           |        | Oxidation (M)[6]                          |      | Mascot      |
| 1826.9799  | 1826.9792   | -0.0007 | 0     | 1185       | 1200     | LLGYQLAAYFDKPTAR             |           |        |                                           |      | Mascot      |
| 1826.9799  | 1826.9792   | -0.0007 | 0     | 1185       | 1200     | LLGYQLAAYFDKPTAR             | 111       | 100    |                                           |      | Mascot      |
| 1840.8938  | 1840.9486   | 0.0548  | 30    | 76         | 90       | LMDPLLYEYAGTWPR              |           |        | Oxidation (M)[2]                          |      | Mascot      |
| 2041.943   | 2042.0739   | 0.1309  | 64    | 150        | 167      | KTQNIYEMQEAGAQQGVC<br>R      |           |        | Oxidation (M)[8]                          |      | Mascot      |
| 2362.1926  | 2362.1865   | -0.0061 | -3    | 601        | 623      | ITAPDMASVAGAANVAIK<br>LMNCK  |           |        | Carbamidomethyl (C)[22], Oxidation (M)[6] |      | Mascot      |
| 2531.4231  | 2531.248    | -0.1751 | -69   | 99         | 122      | LTSALAAQLQIPIKFEYAN<br>GVVGK |           |        |                                           |      | Mascot      |

16 Zgc:136383 protein [Danio rerio] gi|125857991 148644.2 8.93 13 176 100 159 100

#### Peptide Information

| Calc. Mass | Obsrv. Mass | ± da    | ± ppm | Start Seq. | End Seq. | Sequence | Ion Score | C. I. | % Modification | Rank | Result Type |
|------------|-------------|---------|-------|------------|----------|----------|-----------|-------|----------------|------|-------------|
| 826.4457   | 826.4445    | -0.0012 | -1    | 1235       | 1241     | QYAVFAK  |           |       |                |      | Mascot      |
| 864.4461   | 864.499     | 0.0529  | 61    | 86         | 93       | DSFVPATK |           |       |                |      | Mascot      |

|    |                                  |           |         |     |              |      |                              |      |        |     |     |     |                   |  |  |  |        |
|----|----------------------------------|-----------|---------|-----|--------------|------|------------------------------|------|--------|-----|-----|-----|-------------------|--|--|--|--------|
|    | 960.4785                         | 960.4761  | -0.0024 | -2  | 1255         | 1261 | LEVEWER                      |      |        |     |     |     |                   |  |  |  | Mascot |
|    | 960.4785                         | 960.4761  | -0.0024 | -2  | 1255         | 1261 | LEVEWER                      | 48   | 99.529 |     |     |     |                   |  |  |  | Mascot |
|    | 983.5995                         | 983.5398  | -0.0597 | -61 | 877          | 886  | TIAPGKVAAR                   |      |        |     |     |     |                   |  |  |  | Mascot |
|    | 983.5995                         | 983.5398  | -0.0597 | -61 | 877          | 886  | TIAPGKVAAR                   |      |        |     |     |     |                   |  |  |  | Mascot |
|    | 1045.5465                        | 1045.5605 | 0.014   | 13  | 1345         | 1352 | DFLSWIHK                     |      |        |     |     |     |                   |  |  |  | Mascot |
|    | 1118.5986                        | 1118.6503 | 0.0517  | 46  | 1316         | 1324 | IPEITMSRR                    |      |        |     |     |     | Oxidation (M)[6]  |  |  |  | Mascot |
|    | 1257.6031                        | 1257.6921 | 0.089   | 71  | 827          | 836  | LESMTYEQLK                   |      |        |     |     |     | Oxidation (M)[4]  |  |  |  | Mascot |
|    | 1326.6511                        | 1326.7534 | 0.1023  | 77  | 1223         | 1234 | VTAKFSWGAECK                 |      |        |     |     |     |                   |  |  |  | Mascot |
|    | 1382.7889                        | 1382.7772 | -0.0117 | -8  | 302          | 314  | ISDAPAQIVEVLK                |      |        |     |     |     |                   |  |  |  | Mascot |
|    | 1715.9473                        | 1715.9199 | -0.0274 | -16 | 1309         | 1323 | SLNVIARPEITMSR               |      |        |     |     |     | Oxidation (M)[13] |  |  |  | Mascot |
|    | 1826.9799                        | 1826.9792 | -0.0007 | 0   | 1180         | 1195 | LLGYQLAAYFDKPTAR             |      |        |     |     |     |                   |  |  |  | Mascot |
|    | 1826.9799                        | 1826.9792 | -0.0007 | 0   | 1180         | 1195 | LLGYQLAAYFDKPTAR             | 111  | 100    |     |     |     |                   |  |  |  | Mascot |
|    | 2233.2009                        | 2233.0791 | -0.1218 | -55 | 592          | 613  | SLTRITAPDMAYVAGAAN<br>VAIK   |      |        |     |     |     |                   |  |  |  | Mascot |
|    | 2249.1958                        | 2249.0615 | -0.1343 | -60 | 592          | 613  | SLTRITAPDMAYVAGAAN<br>VAIK   |      |        |     |     |     | Oxidation (M)[10] |  |  |  | Mascot |
|    | 2531.4231                        | 2531.248  | -0.1751 | -69 | 94           | 117  | LTSALAAQLQIPIKFEYAN<br>GVVGK |      |        |     |     |     |                   |  |  |  | Mascot |
| 17 | Zgc:136383 protein [Danio rerio] |           |         |     | gi 159155252 |      | 123957.1                     | 8.78 | 11     | 176 | 100 | 159 | 100               |  |  |  |        |

Peptide Information

| Calc. Mass | Obsrv. Mass | ± da    | ± ppm | Start Seq. | End Seq. | Sequence                   | Ion Score | C. I.  | % Modification    | Rank | Result Type |
|------------|-------------|---------|-------|------------|----------|----------------------------|-----------|--------|-------------------|------|-------------|
| 826.4457   | 826.4445    | -0.0012 | -1    | 1013       | 1019     | QYAVFAK                    |           |        |                   |      | Mascot      |
| 960.4785   | 960.4761    | -0.0024 | -2    | 1033       | 1039     | LEVEWER                    |           |        |                   |      | Mascot      |
| 960.4785   | 960.4761    | -0.0024 | -2    | 1033       | 1039     | LEVEWER                    | 48        | 99.529 |                   |      | Mascot      |
| 983.5995   | 983.5398    | -0.0597 | -61   | 655        | 664      | TIAPGKVAAR                 |           |        |                   |      | Mascot      |
| 983.5995   | 983.5398    | -0.0597 | -61   | 655        | 664      | TIAPGKVAAR                 |           |        |                   |      | Mascot      |
| 1045.5465  | 1045.5605   | 0.014   | 13    | 1123       | 1130     | DFLSWIHK                   |           |        |                   |      | Mascot      |
| 1118.5986  | 1118.6503   | 0.0517  | 46    | 1094       | 1102     | IPEITMSRR                  |           |        | Oxidation (M)[6]  |      | Mascot      |
| 1257.6031  | 1257.6921   | 0.089   | 71    | 605        | 614      | LESMTYEQLK                 |           |        | Oxidation (M)[4]  |      | Mascot      |
| 1326.6511  | 1326.7534   | 0.1023  | 77    | 1001       | 1012     | VTAKFSWGAECK               |           |        |                   |      | Mascot      |
| 1382.7889  | 1382.7772   | -0.0117 | -8    | 80         | 92       | ISDAPAQIVEVLK              |           |        |                   |      | Mascot      |
| 1715.9473  | 1715.9199   | -0.0274 | -16   | 1087       | 1101     | SLNVIARPEITMSR             |           |        | Oxidation (M)[13] |      | Mascot      |
| 1826.9799  | 1826.9792   | -0.0007 | 0     | 958        | 973      | LLGYQLAAYFDKPTAR           |           |        |                   |      | Mascot      |
| 1826.9799  | 1826.9792   | -0.0007 | 0     | 958        | 973      | LLGYQLAAYFDKPTAR           | 111       | 100    |                   |      | Mascot      |
| 2233.2009  | 2233.0791   | -0.1218 | -55   | 370        | 391      | SLTRITAPDMAYVAGAAN<br>VAIK |           |        |                   |      | Mascot      |
| 2249.1958  | 2249.0615   | -0.1343 | -60   | 370        | 391      | SLTRITAPDMAYVAGAAN<br>VAIK |           |        | Oxidation (M)[10] |      | Mascot      |



18    hypothetical protein LOC678536 [Danio rerio]                    gi|160420306                    148750.2    8.89    13    175    100    159    100

| Peptide Information |             |         |       |            |          |                              |           |         |                   |                  |
|---------------------|-------------|---------|-------|------------|----------|------------------------------|-----------|---------|-------------------|------------------|
| Calc. Mass          | Obsrv. Mass | ± da    | ± ppm | Start Seq. | End Seq. | Sequence                     | Ion Score | C. I. % | Modification      | Rank Result Type |
| 826.4457            | 826.4445    | -0.0012 | -1    | 1236       | 1242     | QYAVFAK                      |           |         |                   | Mascot           |
| 864.4461            | 864.499     | 0.0529  | 61    | 87         | 94       | DSFVPATK                     |           |         |                   | Mascot           |
| 960.4785            | 960.4761    | -0.0024 | -2    | 1256       | 1262     | LEVEWER                      |           |         |                   | Mascot           |
| 960.4785            | 960.4761    | -0.0024 | -2    | 1256       | 1262     | LEVEWER                      | 48        | 99.529  |                   | Mascot           |
| 983.5995            | 983.5398    | -0.0597 | -61   | 878        | 887      | TIAPGKVAAR                   |           |         |                   | Mascot           |
| 983.5995            | 983.5398    | -0.0597 | -61   | 878        | 887      | TIAPGKVAAR                   |           |         |                   | Mascot           |
| 1045.5465           | 1045.5605   | 0.014   | 13    | 1346       | 1353     | DFLSWIHK                     |           |         |                   | Mascot           |
| 1118.5986           | 1118.6503   | 0.0517  | 46    | 1317       | 1325     | IPEITMSRR                    |           |         | Oxidation (M)[6]  | Mascot           |
| 1257.6031           | 1257.6921   | 0.089   | 71    | 828        | 837      | LESMTYEQLK                   |           |         | Oxidation (M)[4]  | Mascot           |
| 1326.6511           | 1326.7534   | 0.1023  | 77    | 1224       | 1235     | VTAKFSWGAECK                 |           |         |                   | Mascot           |
| 1382.7889           | 1382.7772   | -0.0117 | -8    | 303        | 315      | ISDAPAQIVEVLK                |           |         |                   | Mascot           |
| 1715.9473           | 1715.9199   | -0.0274 | -16   | 1310       | 1324     | SLNVIARPEITMSR               |           |         | Oxidation (M)[13] | Mascot           |
| 1826.9799           | 1826.9792   | -0.0007 | 0     | 1181       | 1196     | LLGYQLAAYFDKPTAR             |           |         |                   | Mascot           |
| 1826.9799           | 1826.9792   | -0.0007 | 0     | 1181       | 1196     | LLGYQLAAYFDKPTAR             | 111       | 100     |                   | Mascot           |
| 2233.2009           | 2233.0791   | -0.1218 | -55   | 593        | 614      | SLTRITAPDMAYVAGAAN<br>VAIK   |           |         |                   | Mascot           |
| 2249.1958           | 2249.0615   | -0.1343 | -60   | 593        | 614      | SLTRITAPDMAYVAGAAN<br>VAIK   |           |         | Oxidation (M)[10] | Mascot           |
| 2531.4231           | 2531.248    | -0.1751 | -69   | 95         | 118      | LTSALAAQLQIPIKFEYAN<br>GVVGK |           |         |                   | Mascot           |

19    vitellogenin 5 [Danio rerio]                    gi|57864785                    72820.8    9    6    170    100    159    100

| Peptide Information |             |         |       |            |          |                  |           |         |                  |                  |
|---------------------|-------------|---------|-------|------------|----------|------------------|-----------|---------|------------------|------------------|
| Calc. Mass          | Obsrv. Mass | ± da    | ± ppm | Start Seq. | End Seq. | Sequence         | Ion Score | C. I. % | Modification     | Rank Result Type |
| 826.4457            | 826.4445    | -0.0012 | -1    | 544        | 550      | QYAVFAK          |           |         |                  | Mascot           |
| 960.4785            | 960.4761    | -0.0024 | -2    | 564        | 570      | LEVEWER          |           |         |                  | Mascot           |
| 960.4785            | 960.4761    | -0.0024 | -2    | 564        | 570      | LEVEWER          | 48        | 99.529  |                  | Mascot           |
| 983.5995            | 983.5398    | -0.0597 | -61   | 187        | 196      | TIAPGKVAAR       |           |         |                  | Mascot           |
| 983.5995            | 983.5398    | -0.0597 | -61   | 187        | 196      | TIAPGKVAAR       |           |         |                  | Mascot           |
| 1257.6031           | 1257.6921   | 0.089   | 71    | 137        | 146      | LESMTYEQLK       |           |         | Oxidation (M)[4] | Mascot           |
| 1326.7124           | 1326.7534   | 0.041   | 31    | 318        | 330      | AAISRAEGPAVER    |           |         |                  | Mascot           |
| 1826.9799           | 1826.9792   | -0.0007 | 0     | 489        | 504      | LLGYQLAAYFDKPTAR |           |         |                  | Mascot           |
| 1826.9799           | 1826.9792   | -0.0007 | 0     | 489        | 504      | LLGYQLAAYFDKPTAR | 111       | 100     |                  | Mascot           |

20 Vtg5 protein [Danio rerio] gi|148744685 27543.3 9.2 3 166 100 159 100

Peptide Information

| Calc. Mass | Obsrv. Mass | ± da    | ± ppm | Start Seq. | End Seq. | Sequence         | Ion Score | C. I.  | % Modification | Rank | Result | Type |
|------------|-------------|---------|-------|------------|----------|------------------|-----------|--------|----------------|------|--------|------|
| 826.4457   | 826.4445    | -0.0012 | -1    | 124        | 130      | QYAVFAK          |           |        |                |      | Mascot |      |
| 960.4785   | 960.4761    | -0.0024 | -2    | 144        | 150      | LEVEWER          |           |        |                |      | Mascot |      |
| 960.4785   | 960.4761    | -0.0024 | -2    | 144        | 150      | LEVEWER          | 48        | 99.529 |                |      | Mascot |      |
| 1826.9799  | 1826.9792   | -0.0007 | 0     | 69         | 84       | LLGYQLAAYFDKPTAR |           |        |                |      | Mascot |      |
| 1826.9799  | 1826.9792   | -0.0007 | 0     | 69         | 84       | LLGYQLAAYFDKPTAR | 111       | 100    |                |      | Mascot |      |

21 mediator of RNA polymerase II transcription subunit 18 [Danio rerio] gi|41056143 23274 5.97 5 137 100 112 100

Peptide Information

| Calc. Mass | Obsrv. Mass | ± da    | ± ppm | Start Seq. | End Seq. | Sequence               | Ion Score | C. I.  | % Modification                            | Rank | Result | Type |
|------------|-------------|---------|-------|------------|----------|------------------------|-----------|--------|-------------------------------------------|------|--------|------|
| 1129.6112  | 1129.6097   | -0.0015 | -1    | 62         | 71       | GQQGNPFILR             | 65        | 99.992 |                                           |      | Mascot |      |
| 1129.6112  | 1129.6097   | -0.0015 | -1    | 62         | 71       | GQQGNPFILR             |           |        |                                           |      | Mascot |      |
| 1419.7743  | 1419.7725   | -0.0018 | -1    | 75         | 86       | SLLDPSVPWHLR           |           |        |                                           |      | Mascot |      |
| 1419.7743  | 1419.7725   | -0.0018 | -1    | 75         | 86       | SLLDPSVPWHLR           | 46        | 99.333 |                                           |      | Mascot |      |
| 1638.9214  | 1638.9172   | -0.0042 | -3    | 188        | 201      | SFAEQLKPLVHLEK         |           |        |                                           |      | Mascot |      |
| 2395.0806  | 2395.0928   | 0.0122  | 5     | 104        | 124      | NCVDVAASHSLPDFLNE MGFR |           |        | Carbamidomethyl (C)[2], Oxidation (M)[18] |      | Mascot |      |
| 2496.1421  | 2496.28     | 0.1379  | 55    | 41         | 61       | GLCDNMEPESFADHEL VYLLK |           |        | Carbamidomethyl (C)[3], Oxidation (M)[6]  |      | Mascot |      |

22 grpE protein homolog 1, mitochondrial [Danio rerio] gi|82658254 23861.5 7.71 9 104 100 51 99.758

Peptide Information

| Calc. Mass | Obsrv. Mass | ± da    | ± ppm | Start Seq. | End Seq. | Sequence        | Ion Score | C. I.  | % Modification         | Rank | Result | Type |
|------------|-------------|---------|-------|------------|----------|-----------------|-----------|--------|------------------------|------|--------|------|
| 1002.5214  | 1002.5165   | -0.0049 | -5    | 81         | 89       | ALADTENLR       |           |        |                        |      | Mascot |      |
| 1085.5448  | 1085.5427   | -0.0021 | -2    | 101        | 109      | LYGIQGFCK       |           |        | Carbamidomethyl (C)[8] |      | Mascot |      |
| 1088.5782  | 1088.5459   | -0.0323 | -30   | 2          | 10       | ANWCVRAIR       |           |        |                        |      | Mascot |      |
| 1152.7463  | 1152.7451   | -0.0012 | -1    | 205        | 215      | TLRPALVG VVK    |           |        |                        |      | Mascot |      |
| 1152.7463  | 1152.7451   | -0.0012 | -1    | 205        | 215      | TLRPALVG VVK    | 51        | 99.758 |                        |      | Mascot |      |
| 1257.6936  | 1257.6921   | -0.0015 | -1    | 110        | 120      | DLLEVADILEK     |           |        |                        |      | Mascot |      |
| 1546.7959  | 1546.7904   | -0.0055 | -4    | 65         | 77       | TQLEEQLKD VTDK  |           |        |                        |      | Mascot |      |
| 1750.9044  | 1750.9111   | 0.0067  | 4     | 139        | 153      | NLYDGLVMTEVQIQK |           |        |                        |      | Mascot |      |
| 1766.8993  | 1766.9076   | 0.0083  | 5     | 139        | 153      | NLYDGLVMTEVQIQK |           |        | Oxidation (M)[8]       |      | Mascot |      |

|    |                                              |           |        |   |             |     |                              |      |   |    |        |    |        |  |  |  |        |
|----|----------------------------------------------|-----------|--------|---|-------------|-----|------------------------------|------|---|----|--------|----|--------|--|--|--|--------|
|    | 1971.9235                                    | 1971.9252 | 0.0017 | 1 | 170         | 186 | FDPYEHEAVFHAPVEGK            |      |   |    |        |    |        |  |  |  | Mascot |
|    | 2697.2942                                    | 2697.3069 | 0.0127 | 5 | 163         | 186 | LSPDGQKFDPYEHEAVF<br>HAPVEGK |      |   |    |        |    |        |  |  |  | Mascot |
| 23 | proteasome subunit beta type-4 [Danio rerio] |           |        |   | gi 62955575 |     | 24030.2                      | 5.65 | 8 | 86 | 99.989 | 33 | 87.199 |  |  |  |        |

#### Peptide Information

|  | Calc. Mass | Obsrv. Mass | ± da    | ± ppm | Start Seq. | End Seq. | Sequence                       | Ion Score | C. I.  | % | Modification      | Rank | Result Type |
|--|------------|-------------|---------|-------|------------|----------|--------------------------------|-----------|--------|---|-------------------|------|-------------|
|  | 960.5723   | 960.4761    | -0.0962 | -100  | 2          | 11       | VTGTSVLGVK                     |           |        |   |                   |      | Mascot      |
|  | 960.5723   | 960.4761    | -0.0962 | -100  | 2          | 11       | VTGTSVLGVK                     |           |        |   |                   |      | Mascot      |
|  | 983.5421   | 983.5398    | -0.0023 | -2    | 83         | 90       | AIHSWLTR                       | 33        | 87.199 |   |                   |      | Mascot      |
|  | 983.5421   | 983.5398    | -0.0023 | -2    | 83         | 90       | AIHSWLTR                       |           |        |   |                   |      | Mascot      |
|  | 1382.7711  | 1382.7772   | 0.0061  | 4     | 1          | 13       | MVTGTSVLGVKFK                  |           |        |   | Oxidation (M)[1]  |      | Mascot      |
|  | 1750.9155  | 1750.9111   | -0.0044 | -3    | 14         | 31       | GGVIAADMLGSYGSLAR              |           |        |   |                   |      | Mascot      |
|  | 1766.9105  | 1766.9076   | -0.0029 | -2    | 14         | 31       | GGVIAADMLGSYGSLAR              |           |        |   | Oxidation (M)[9]  |      | Mascot      |
|  | 2042.0739  | 2042.0739   | 0       | 0     | 12         | 31       | FKGGVIAADMLGSYGSL<br>AR        |           |        |   | Oxidation (M)[11] |      | Mascot      |
|  | 2192.0505  | 2192.0576   | 0.0071  | 3     | 41         | 60       | VNNSTILGASGDYADYQY<br>LK       |           |        |   |                   |      | Mascot      |
|  | 2496.2954  | 2496.28     | -0.0154 | -6    | 124        | 147      | LGVA YEAPT VATGFGAYL<br>AQPLMR |           |        |   |                   |      | Mascot      |
|  | 2512.2903  | 2512.3005   | 0.0102  | 4     | 124        | 147      | LGVA YEAPT VATGFGAYL<br>AQPLMR |           |        |   | Oxidation (M)[23] |      | Mascot      |
|  | 2515.2385  | 2515.2927   | 0.0542  | 22    | 61         | 82       | QII EQMVIDEELLGDGHS<br>YTPK    |           |        |   |                   |      | Mascot      |
|  | 2531.2334  | 2531.248    | 0.0146  | 6     | 61         | 82       | QII EQMVIDEELLGDGHS<br>YTPK    |           |        |   | Oxidation (M)[6]  |      | Mascot      |

|    |                           |  |  |  |             |  |         |      |   |    |        |    |        |  |  |  |  |
|----|---------------------------|--|--|--|-------------|--|---------|------|---|----|--------|----|--------|--|--|--|--|
| 24 | cytohesin-1 [Danio rerio] |  |  |  | gi 47550685 |  | 46452.5 | 5.48 | 8 | 69 | 99.465 | 30 | 70.384 |  |  |  |  |
|----|---------------------------|--|--|--|-------------|--|---------|------|---|----|--------|----|--------|--|--|--|--|

#### Peptide Information

|  | Calc. Mass | Obsrv. Mass | ± da    | ± ppm | Start Seq. | End Seq. | Sequence                    | Ion Score | C. I.  | % | Modification       | Rank | Result Type |
|--|------------|-------------|---------|-------|------------|----------|-----------------------------|-----------|--------|---|--------------------|------|-------------|
|  | 983.5097   | 983.5398    | 0.0301  | 31    | 149        | 155      | QFLWSFR                     | 31        | 79.898 |   |                    |      | Mascot      |
|  | 983.5097   | 983.5398    | 0.0301  | 31    | 149        | 155      | QFLWSFR                     |           |        |   |                    |      | Mascot      |
|  | 1015.4335  | 1015.5256   | 0.0921  | 91    | 166        | 173      | MMEAF AQR                   |           |        |   | Oxidation (M)[1,2] |      | Mascot      |
|  | 1094.5476  | 1094.5358   | -0.0118 | -11   | 112        | 121      | TAIGDYLGER                  |           |        |   |                    |      | Mascot      |
|  | 1129.5848  | 1129.6097   | 0.0249  | 22    | 30         | 38       | QELLDDIQR                   | 7         | 0      |   |                    |      | Mascot      |
|  | 1129.5848  | 1129.6097   | 0.0249  | 22    | 30         | 38       | QELLDDIQR                   |           |        |   |                    |      | Mascot      |
|  | 1257.6797  | 1257.6921   | 0.0124  | 10    | 29         | 38       | KQELLDDIQR                  |           |        |   |                    |      | Mascot      |
|  | 2249.0779  | 2249.0615   | -0.0164 | -7    | 41         | 60       | DEIAEVTSEIENLGSTEER<br>K    |           |        |   |                    |      | Mascot      |
|  | 2362.1619  | 2362.1865   | 0.0246  | 10    | 39         | 59       | LKDEIAEVTSEIENLGSTE<br>ER   |           |        |   |                    |      | Mascot      |
|  | 2512.2048  | 2512.3005   | 0.0957  | 38    | 5          | 26       | SEDGVVPDDLTP EEQKE<br>LENIR |           |        |   |                    |      | Mascot      |

25 Cytohesin 1 [Danio rerio] gi|115313031 46509.5 5.48 8 69 99.386 30 70.384

Peptide Information

| Calc. Mass | Obsrv. Mass | ± da    | ± ppm | Start Seq. | End Seq. | Sequence                | Ion Score | C. I.  | % Modification     | Rank | Result Type |
|------------|-------------|---------|-------|------------|----------|-------------------------|-----------|--------|--------------------|------|-------------|
| 983.5097   | 983.5398    | 0.0301  | 31    | 149        | 155      | QFLWSFR                 | 31        | 79.898 |                    |      | Mascot      |
| 983.5097   | 983.5398    | 0.0301  | 31    | 149        | 155      | QFLWSFR                 |           |        |                    |      | Mascot      |
| 1015.4335  | 1015.5256   | 0.0921  | 91    | 166        | 173      | MMEFAQR                 |           |        | Oxidation (M)[1,2] |      | Mascot      |
| 1094.5476  | 1094.5358   | -0.0118 | -11   | 112        | 121      | TAIGDYLGER              |           |        |                    |      | Mascot      |
| 1129.5848  | 1129.6097   | 0.0249  | 22    | 30         | 38       | QELLDDIQR               | 7         | 0      |                    |      | Mascot      |
| 1129.5848  | 1129.6097   | 0.0249  | 22    | 30         | 38       | QELLDDIQR               |           |        |                    |      | Mascot      |
| 1257.6797  | 1257.6921   | 0.0124  | 10    | 29         | 38       | KQELLDDIQR              |           |        |                    |      | Mascot      |
| 2249.0779  | 2249.0615   | -0.0164 | -7    | 41         | 60       | DEIAEVTSEIENLGSTEER     |           |        |                    |      | Mascot      |
| 2362.1619  | 2362.1865   | 0.0246  | 10    | 39         | 59       | LKDEIAEVTSEIENLGSTEER   |           |        |                    |      | Mascot      |
| 2512.2048  | 2512.3005   | 0.0957  | 38    | 5          | 26       | SEDGVVPDDLTPPEEQKELENIR |           |        |                    |      | Mascot      |

26 Vtg6 protein [Danio rerio] gi|157422885 27937.4 9.18 5 65 98.593 48 99.529

Peptide Information

| Calc. Mass | Obsrv. Mass | ± da    | ± ppm | Start Seq. | End Seq. | Sequence           | Ion Score | C. I.  | % Modification | Rank | Result Type |
|------------|-------------|---------|-------|------------|----------|--------------------|-----------|--------|----------------|------|-------------|
| 826.4457   | 826.4445    | -0.0012 | -1    | 129        | 135      | QYAVFAK            |           |        |                |      | Mascot      |
| 960.4785   | 960.4761    | -0.0024 | -2    | 149        | 155      | LEVEWER            |           |        |                |      | Mascot      |
| 960.4785   | 960.4761    | -0.0024 | -2    | 149        | 155      | LEVEWER            | 48        | 99.529 |                |      | Mascot      |
| 1326.6511  | 1326.7534   | 0.1023  | 77    | 117        | 128      | VTAKFSWGAECK       |           |        |                |      | Mascot      |
| 1327.7216  | 1327.7382   | 0.0166  | 13    | 191        | 202      | EIELTAALPSQR       |           |        |                |      | Mascot      |
| 1958.0189  | 1958.0155   | -0.0034 | -2    | 185        | 202      | ATNSEKEIELTAALPSQR |           |        |                |      | Mascot      |

27 novel protein similar to vertebrate proteasome (prosome, macropain) subunit, beta type, 4 (PSMB4) [ gi|157886055 28400.4 6.01 6 64 98.187 33 87.199

Peptide Information

| Calc. Mass | Obsrv. Mass | ± da    | ± ppm | Start Seq. | End Seq. | Sequence            | Ion Score | C. I.  | % Modification    | Rank | Result Type |
|------------|-------------|---------|-------|------------|----------|---------------------|-----------|--------|-------------------|------|-------------|
| 983.5421   | 983.5398    | -0.0023 | -2    | 124        | 131      | AIHSWLTR            | 33        | 87.199 |                   |      | Mascot      |
| 983.5421   | 983.5398    | -0.0023 | -2    | 124        | 131      | AIHSWLTR            |           |        |                   |      | Mascot      |
| 1750.9155  | 1750.9111   | -0.0044 | -3    | 55         | 72       | GGVIAADMLGSYGSLAR   |           |        |                   |      | Mascot      |
| 1766.9105  | 1766.9076   | -0.0029 | -2    | 55         | 72       | GGVIAADMLGSYGSLAR   |           |        | Oxidation (M)[9]  |      | Mascot      |
| 2042.0739  | 2042.0739   | 0       | 0     | 53         | 72       | FKGGVIAADMLGSYGSLAR |           |        | Oxidation (M)[11] |      | Mascot      |

|    |                                                                                          |           |         |    |     |     |                                |  |  |  |              |                   |      |    |    |        |  |        |
|----|------------------------------------------------------------------------------------------|-----------|---------|----|-----|-----|--------------------------------|--|--|--|--------------|-------------------|------|----|----|--------|--|--------|
|    | 2192.0505                                                                                | 2192.0576 | 0.0071  | 3  | 82  | 101 | VNNSTILGASGDYADYQY<br>LK       |  |  |  |              |                   |      |    |    |        |  | Mascot |
|    | 2496.2954                                                                                | 2496.28   | -0.0154 | -6 | 165 | 188 | LGVA YEAP TVATGFGAYL<br>AQPLMR |  |  |  |              |                   |      |    |    |        |  | Mascot |
|    | 2512.2903                                                                                | 2512.3005 | 0.0102  | 4  | 165 | 188 | LGVA YEAP TVATGFGAYL<br>AQPLMR |  |  |  |              | Oxidation (M)[23] |      |    |    |        |  | Mascot |
|    | 2515.2385                                                                                | 2515.2927 | 0.0542  | 22 | 102 | 123 | QIIEQMVIDEELLGDGHS<br>YTPK     |  |  |  |              |                   |      |    |    |        |  | Mascot |
|    | 2531.2334                                                                                | 2531.248  | 0.0146  | 6  | 102 | 123 | QIIEQMVIDEELLGDGHS<br>YTPK     |  |  |  |              | Oxidation (M)[6]  |      |    |    |        |  | Mascot |
| 28 | PREDICTED: structural maintenance of chromosomes protein 1B-like isoform 1 [Danio rerio] |           |         |    |     |     |                                |  |  |  | gi 125855523 | 141682.3          | 7.11 | 21 | 63 | 97.966 |  |        |

Peptide Information

| Calc. Mass | Obsrv. Mass | ± da    | ± ppm | Start Seq. | End Seq. | Sequence                | Ion Score | C. I. | % Modification                             | Rank | Result Type |
|------------|-------------|---------|-------|------------|----------|-------------------------|-----------|-------|--------------------------------------------|------|-------------|
| 870.577    | 870.5363    | -0.0407 | -47   | 172        | 179      | LAVLQKAK                |           |       |                                            |      | Mascot      |
| 960.4996   | 960.4761    | -0.0235 | -24   | 501        | 508      | DEVLESLR                |           |       |                                            |      | Mascot      |
| 960.4996   | 960.4761    | -0.0235 | -24   | 501        | 508      | DEVLESLR                | 3         |       | 0                                          |      | Mascot      |
| 983.5883   | 983.5398    | -0.0485 | -49   | 1020       | 1028     | APNLKALEK               | 2         |       | 0                                          |      | Mascot      |
| 983.5883   | 983.5398    | -0.0485 | -49   | 1020       | 1028     | APNLKALEK               |           |       |                                            |      | Mascot      |
| 1015.5782  | 1015.5256   | -0.0526 | -52   | 801        | 808      | LQQELEKK                |           |       |                                            |      | Mascot      |
| 1045.5636  | 1045.5605   | -0.0031 | -3    | 338        | 345      | RELTELER                |           |       |                                            |      | Mascot      |
| 1077.4807  | 1077.5089   | 0.0282  | 26    | 1225       | 1233     | DENATDREK               |           |       |                                            |      | Mascot      |
| 1118.594   | 1118.6503   | 0.0563  | 50    | 840        | 848      | IEETIEKEK               |           |       |                                            |      | Mascot      |
| 1129.6323  | 1129.6097   | -0.0226 | -20   | 896        | 905      | ALTGLQERNK              |           |       |                                            |      | Mascot      |
| 1129.6323  | 1129.6097   | -0.0226 | -20   | 896        | 905      | ALTGLQERNK              |           |       |                                            |      | Mascot      |
| 1165.6068  | 1165.7454   | 0.1386  | 119   | 683        | 692      | LSSEMRALMK              |           |       |                                            |      | Mascot      |
| 1274.674   | 1274.6094   | -0.0646 | -51   | 339        | 348      | ELTELERAWK              |           |       |                                            |      | Mascot      |
| 1307.7504  | 1307.6226   | -0.1278 | -98   | 519        | 529      | LVELCQPIHKK             |           |       |                                            |      | Mascot      |
| 1364.7719  | 1364.6943   | -0.0776 | -57   | 519        | 529      | LVELCQPIHKK             |           |       | Carbamidomethyl (C)[5]                     |      | Mascot      |
| 1364.7719  | 1364.6943   | -0.0776 | -57   | 519        | 529      | LVELCQPIHKK             |           |       | Carbamidomethyl (C)[5]                     |      | Mascot      |
| 1382.6798  | 1382.7772   | 0.0974  | 70    | 98         | 110      | ISGESSEYLVNGK           |           |       |                                            |      | Mascot      |
| 1638.7601  | 1638.9172   | 0.1571  | 96    | 990        | 1003     | MLTEESEVEAMLEK          |           |       |                                            |      | Mascot      |
| 1826.9172  | 1826.9792   | 0.062   | 34    | 1174       | 1188     | MMSRESCQIIVISLK         |           |       | Carbamidomethyl (C)[7], Oxidation (M)[1,2] |      | Mascot      |
| 1826.9172  | 1826.9792   | 0.062   | 34    | 1174       | 1188     | MMSRESCQIIVISLK         |           |       | Carbamidomethyl (C)[7], Oxidation (M)[1,2] |      | Mascot      |
| 1957.918   | 1958.0155   | 0.0975  | 50    | 132        | 149      | NCLVYQGAVESIAMMNA<br>K  |           |       | Oxidation (M)[14]                          |      | Mascot      |
| 1972.0103  | 1971.9252   | -0.0851 | -43   | 593        | 609      | MVVDVVQCSQNAPQLKR       |           |       | Carbamidomethyl (C)[8]                     |      | Mascot      |
| 2192.1055  | 2192.0576   | -0.0479 | -22   | 415        | 433      | SEIQGNIKHSQTHLEDISR     |           |       |                                            |      | Mascot      |
| 2225.1052  | 2225.1208   | 0.0156  | 7     | 610        | 628      | VIQYVCGNSLVCETLKDA<br>R |           |       | Carbamidomethyl (C)[6,12]                  |      | Mascot      |
| 2225.1052  | 2225.1208   | 0.0156  | 7     | 610        | 628      | VIQYVCGNSLVCETLKDA      |           |       | Carbamidomethyl (C)[6,12]                  |      | Mascot      |

|           |           |        |    |      |      |                               |                                              |        |
|-----------|-----------|--------|----|------|------|-------------------------------|----------------------------------------------|--------|
| 2230.0664 | 2230.1951 | 0.1287 | 58 | 130  | 149  | R<br>AKNCLVYQGAVESIAMM<br>NAK | Carbamidomethyl (C)[4], Oxidation (M)[16,17] | Mascot |
| 2284.0881 | 2284.1758 | 0.0877 | 38 | 132  | 151  | NCLVYQGAVESIAMMNA<br>KER      | Carbamidomethyl (C)[2]                       | Mascot |
| 2300.0833 | 2300.1768 | 0.0935 | 41 | 132  | 151  | NCLVYQGAVESIAMMNA<br>KER      | Carbamidomethyl (C)[2], Oxidation (M)[14]    | Mascot |
| 2496.238  | 2496.28   | 0.042  | 17 | 1065 | 1084 | FHLFSQCFEHVSVIDQI<br>YK       | Carbamidomethyl (C)[7]                       | Mascot |

29 PREDICTED: structural maintenance of chromosomes protein 1B-like [Danio rerio] gi|292628155 123493.8 8.42 18 54 83.081

Peptide Information

| Calc. Mass | Obsrv. Mass | ± da    | ± ppm | Start Seq. | End Seq. | Sequence                 | Ion Score | C. I. % | Modification                                 | Rank | Result Type |
|------------|-------------|---------|-------|------------|----------|--------------------------|-----------|---------|----------------------------------------------|------|-------------|
| 870.577    | 870.5363    | -0.0407 | -47   | 172        | 179      | LAVLQKAK                 |           |         |                                              |      | Mascot      |
| 960.4996   | 960.4761    | -0.0235 | -24   | 501        | 508      | DEVLESRLR                |           |         |                                              |      | Mascot      |
| 960.4996   | 960.4761    | -0.0235 | -24   | 501        | 508      | DEVLESRLR                | 3         | 0       |                                              |      | Mascot      |
| 983.5883   | 983.5398    | -0.0485 | -49   | 864        | 872      | APNLKALEK                | 2         | 0       |                                              |      | Mascot      |
| 983.5883   | 983.5398    | -0.0485 | -49   | 864        | 872      | APNLKALEK                |           |         |                                              |      | Mascot      |
| 1045.5636  | 1045.5605   | -0.0031 | -3    | 338        | 345      | RELTELER                 |           |         |                                              |      | Mascot      |
| 1077.4807  | 1077.5089   | 0.0282  | 26    | 1069       | 1077     | DENATDREK                |           |         |                                              |      | Mascot      |
| 1165.6068  | 1165.7454   | 0.1386  | 119   | 683        | 692      | LSSEMRALMK               |           |         |                                              |      | Mascot      |
| 1274.674   | 1274.6094   | -0.0646 | -51   | 339        | 348      | ELTELERAWK               |           |         |                                              |      | Mascot      |
| 1307.7504  | 1307.6226   | -0.1278 | -98   | 519        | 529      | LVELCQPIHKK              |           |         |                                              |      | Mascot      |
| 1364.7719  | 1364.6943   | -0.0776 | -57   | 519        | 529      | LVELCQPIHKK              |           |         | Carbamidomethyl (C)[5]                       |      | Mascot      |
| 1364.7719  | 1364.6943   | -0.0776 | -57   | 519        | 529      | LVELCQPIHKK              |           |         | Carbamidomethyl (C)[5]                       |      | Mascot      |
| 1382.6798  | 1382.7772   | 0.0974  | 70    | 98         | 110      | ISGESSEYLVNGK            |           |         |                                              |      | Mascot      |
| 1638.7601  | 1638.9172   | 0.1571  | 96    | 834        | 847      | MLTEESEVEAMLEK           |           |         |                                              |      | Mascot      |
| 1826.9172  | 1826.9792   | 0.062   | 34    | 1018       | 1032     | MMSRESCQIIVISLK          |           |         | Carbamidomethyl (C)[7], Oxidation (M)[1,2]   |      | Mascot      |
| 1826.9172  | 1826.9792   | 0.062   | 34    | 1018       | 1032     | MMSRESCQIIVISLK          |           |         | Carbamidomethyl (C)[7], Oxidation (M)[1,2]   |      | Mascot      |
| 1957.918   | 1958.0155   | 0.0975  | 50    | 132        | 149      | NCLVYQGAVESIAMMNA<br>K   |           |         | Oxidation (M)[14]                            |      | Mascot      |
| 1972.0103  | 1971.9252   | -0.0851 | -43   | 593        | 609      | MVVDVVQCSQNAPQLKR        |           |         | Carbamidomethyl (C)[8]                       |      | Mascot      |
| 2192.1055  | 2192.0576   | -0.0479 | -22   | 415        | 433      | SEIQGNIKHSQTHLEDISR      |           |         |                                              |      | Mascot      |
| 2225.1052  | 2225.1208   | 0.0156  | 7     | 610        | 628      | VIQYVCGNSLVCETLKDA<br>R  |           |         | Carbamidomethyl (C)[6,12]                    |      | Mascot      |
| 2225.1052  | 2225.1208   | 0.0156  | 7     | 610        | 628      | VIQYVCGNSLVCETLKDA<br>R  |           |         | Carbamidomethyl (C)[6,12]                    |      | Mascot      |
| 2230.0664  | 2230.1951   | 0.1287  | 58    | 130        | 149      | AKNCLVYQGAVESIAMM<br>NAK |           |         | Carbamidomethyl (C)[4], Oxidation (M)[16,17] |      | Mascot      |
| 2284.0881  | 2284.1758   | 0.0877  | 38    | 132        | 151      | NCLVYQGAVESIAMMNA<br>KER |           |         | Carbamidomethyl (C)[2]                       |      | Mascot      |
| 2300.0833  | 2300.1768   | 0.0935  | 41    | 132        | 151      | NCLVYQGAVESIAMMNA<br>KER |           |         | Carbamidomethyl (C)[2], Oxidation (M)[14]    |      | Mascot      |
| 2496.238   | 2496.28     | 0.042   | 17    | 909        | 928      | FHLFSQCFEHVSVIDQI        |           |         | Carbamidomethyl (C)[7]                       |      | Mascot      |

30      novel protein similar to human titin (TTN) [Danio rerio]      YK  
gi|94732358      2437518.2      5.95      64      52      73.186

Peptide Information

| Calc. Mass | Obsrv. Mass | ± da    | ± ppm | Start Seq. | End Seq. | Sequence     | Ion Score | C. I. % | Modification           | Rank | Result Type |
|------------|-------------|---------|-------|------------|----------|--------------|-----------|---------|------------------------|------|-------------|
| 826.4669   | 826.4445    | -0.0224 | -27   | 21022      | 21028    | LTSYKSK      |           |         |                        |      | Mascot      |
| 842.4478   | 842.5087    | 0.0609  | 72    | 14643      | 14649    | RDLPEGR      |           |         |                        |      | Mascot      |
| 850.4668   | 850.5414    | 0.0746  | 88    | 11818      | 11824    | FTVENLK      |           |         |                        |      | Mascot      |
| 856.4999   | 856.5221    | 0.0222  | 26    | 9129       | 9136     | RANSAPLK     |           |         |                        |      | Mascot      |
| 864.4825   | 864.499     | 0.0165  | 19    | 14124      | 14130    | FEVKDVK      |           |         |                        |      | Mascot      |
| 870.5658   | 870.5363    | -0.0295 | -34   | 6408       | 6415     | LIEGLVVK     |           |         |                        |      | Mascot      |
| 882.4791   | 882.5657    | 0.0866  | 98    | 7328       | 7334     | KEEHAIR      |           |         |                        |      | Mascot      |
| 911.4846   | 911.3981    | -0.0865 | -95   | 10200      | 10206    | NSIVWHR      |           |         |                        |      | Mascot      |
| 960.4632   | 960.4761    | 0.0129  | 13    | 957        | 965      | DGNEITPSK    |           |         |                        |      | Mascot      |
| 960.4996   | 960.4761    | -0.0235 | -24   | 8299       | 8306     | LDEILSDR     | 14        | 0       |                        |      | Mascot      |
| 983.4904   | 983.5398    | 0.0494  | 50    | 14745      | 14752    | DGHEIERK     |           |         |                        |      | Mascot      |
| 983.6248   | 983.5398    | -0.085  | -86   | 1422       | 1429     | ILIIQDLR     |           |         |                        |      | Mascot      |
| 991.4955   | 991.463     | -0.0325 | -33   | 6275       | 6283     | VAAENQFGR    |           |         |                        |      | Mascot      |
| 996.5359   | 996.5957    | 0.0598  | 60    | 3662       | 3669     | LSYEQTKK     |           |         |                        |      | Mascot      |
| 1015.524   | 1015.5256   | 0.0016  | 2     | 4153       | 4161     | QPLEVAACK    |           |         | Carbamidomethyl (C)[8] |      | Mascot      |
| 1051.6146  | 1051.712    | 0.0974  | 93    | 10946      | 10955    | VSEKPLPPGK   |           |         |                        |      | Mascot      |
| 1085.6466  | 1085.5427   | -0.1039 | -96   | 20523      | 20531    | VIWLKNGQK    |           |         |                        |      | Mascot      |
| 1088.5371  | 1088.5459   | 0.0088  | 8     | 18012      | 18020    | YALQYSSTR    |           |         |                        |      | Mascot      |
| 1094.6093  | 1094.5358   | -0.0735 | -67   | 14558      | 14566    | TLIKDTEFK    |           |         |                        |      | Mascot      |
| 1118.6489  | 1118.6503   | 0.0014  | 1     | 7804       | 7813     | IIMTELVTA    |           |         |                        |      | Mascot      |
| 1129.5596  | 1129.6097   | 0.0501  | 44    | 6774       | 6784     | ASNKVG DGEPR | 10        | 0       |                        |      | Mascot      |
| 1129.6212  | 1129.6097   | -0.0115 | -10   | 1004       | 1012     | LNIEERDIK    |           |         |                        |      | Mascot      |
| 1152.583   | 1152.7451   | 0.1621  | 141   | 12791      | 12799    | QKVT DVCFR   |           |         | Carbamidomethyl (C)[7] |      | Mascot      |
| 1152.583   | 1152.7451   | 0.1621  | 141   | 12791      | 12799    | QKVT DVCFR   | 3         | 0       | Carbamidomethyl (C)[7] |      | Mascot      |
| 1165.6324  | 1165.7454   | 0.113   | 97    | 5141       | 5149     | ITNYTIERR    |           |         |                        |      | Mascot      |
| 1211.7106  | 1211.7114   | 0.0008  | 1     | 5565       | 5575     | QNAV VNNLVK  |           |         |                        |      | Mascot      |
| 1257.699   | 1257.6921   | -0.0069 | -5    | 2506       | 2515     | SIFLLWEPPR   |           |         |                        |      | Mascot      |
| 1274.5933  | 1274.6094   | 0.0161  | 13    | 11495      | 11505    | STDSYTCLTVK  |           |         | Carbamidomethyl (C)[7] |      | Mascot      |
| 1279.7256  | 1279.7507   | 0.0251  | 20    | 15857      | 15867    | LNTGTYELKIK  |           |         |                        |      | Mascot      |
| 1287.6328  | 1287.6692   | 0.0364  | 28    | 7033       | 7042     | KPK EADEWER  |           |         |                        |      | Mascot      |
| 1287.6328  | 1287.6692   | 0.0364  | 28    | 7033       | 7042     | KPK EADEWER  |           |         |                        |      | Mascot      |

|           |           |         |     |       |       |                              |                                            |        |
|-----------|-----------|---------|-----|-------|-------|------------------------------|--------------------------------------------|--------|
| 1307.6147 | 1307.6226 | 0.0079  | 6   | 555   | 565   | EVSLDDTCQIK                  | Carbamidomethyl (C)[8]                     | Mascot |
| 1325.7358 | 1325.7559 | 0.0201  | 15  | 5424  | 5435  | EKMVIHAGGVIR                 | Oxidation (M)[3]                           | Mascot |
| 1325.7358 | 1325.7559 | 0.0201  | 15  | 5424  | 5435  | EKMVIHAGGVIR                 | Oxidation (M)[3]                           | Mascot |
| 1326.7528 | 1326.7534 | 0.0006  | 0   | 7025  | 7035  | NLAYHVEKKPK                  |                                            | Mascot |
| 1327.6892 | 1327.7382 | 0.049   | 37  | 17636 | 17647 | YFLSLENVAGSK                 |                                            | Mascot |
| 1364.6804 | 1364.6943 | 0.0139  | 10  | 759   | 769   | DEARFEIELSR                  |                                            | Mascot |
| 1364.6804 | 1364.6943 | 0.0139  | 10  | 759   | 769   | DEARFEIELSR                  |                                            | Mascot |
| 1382.7678 | 1382.7772 | 0.0094  | 7   | 5123  | 5134  | AEQITLSWLPPK                 |                                            | Mascot |
| 1419.7478 | 1419.7725 | 0.0247  | 17  | 14882 | 14894 | FGLGEALESEIVR                |                                            | Mascot |
| 1419.7743 | 1419.7725 | -0.0018 | -1  | 16496 | 16507 | LGHNHVHLELPYK                |                                            | Mascot |
| 1546.8125 | 1546.7904 | -0.0221 | -14 | 8356  | 8367  | LIEGHEYQFRVR                 |                                            | Mascot |
| 1627.8789 | 1627.7954 | -0.0835 | -51 | 20892 | 20906 | SLGDLSDEELLPPVK              |                                            | Mascot |
| 1638.7944 | 1638.9172 | 0.1228  | 75  | 11699 | 11711 | VTSLMENHLYEFR                |                                            | Mascot |
| 1715.9149 | 1715.9199 | 0.005   | 3   | 18012 | 18026 | YALQYSSTRAMAIK               |                                            | Mascot |
| 1750.8892 | 1750.9111 | 0.0219  | 13  | 19342 | 19357 | EMDEVTAKLGTATLK              | Oxidation (M)[2]                           | Mascot |
| 1816.8964 | 1816.9244 | 0.028   | 15  | 5705  | 5719  | DELEPPTIELDFRDK              |                                            | Mascot |
| 1826.8412 | 1826.9792 | 0.138   | 76  | 5849  | 5864  | DMWTTVTSTATTCK               | Oxidation (M)[2]                           | Mascot |
| 1826.9622 | 1826.9792 | 0.017   | 9   | 6952  | 6966  | LVKAPLVQNCYFFR               |                                            | Mascot |
| 1840.944  | 1840.9486 | 0.0046  | 2   | 3819  | 3835  | IGEVTSSTVALSWHEPK            |                                            | Mascot |
| 1957.9601 | 1958.0155 | 0.0554  | 28  | 11905 | 11922 | ESAIETSSSYTSLVIDK            |                                            | Mascot |
| 1972.0056 | 1971.9252 | -0.0804 | -41 | 549   | 565   | HTLEIKEVSLDDTCQIK            |                                            | Mascot |
| 2042.095  | 2042.0739 | -0.0211 | -10 | 8872  | 8889  | ELSVLAKDINVLPSCDLR           | Carbamidomethyl (C)[15]                    | Mascot |
| 2191.9998 | 2192.0576 | 0.0578  | 26  | 11796 | 11814 | AAEEIQEQWTMCTPPTG<br>VK      | Carbamidomethyl (C)[12], Oxidation (M)[11] | Mascot |
| 2211.1147 | 2211.1077 | -0.007  | -3  | 15930 | 15948 | VVWSVISEAMESRMVTV<br>QK      | Oxidation (M)[10,14]                       | Mascot |
| 2230.0808 | 2230.1951 | 0.1143  | 51  | 9022  | 9041  | DSITNMWTVSSSVVTNS<br>FR      |                                            | Mascot |
| 2233.0076 | 2233.0791 | 0.0715  | 32  | 13895 | 13914 | VSAENETGVGECSDL<br>FYR       | Carbamidomethyl (C)[12]                    | Mascot |
| 2249.2175 | 2249.0615 | -0.156  | -69 | 671   | 690   | DIKVVKPIYGVELFDGETA<br>R     |                                            | Mascot |
| 2283.0269 | 2283.1763 | 0.1494  | 65  | 1430  | 1450  | MDDAGEYHCKLPASSETT<br>GTLK   | Oxidation (M)[1]                           | Mascot |
| 2284.0583 | 2284.1758 | 0.1175  | 51  | 9228  | 9248  | ANTVNVIDCAYTVADLQE<br>GCK    | Carbamidomethyl (C)[9]                     | Mascot |
| 2298.1348 | 2298.1748 | 0.04    | 17  | 3285  | 3306  | DPDSAPTIDVATQDIVVV<br>EGEK   |                                            | Mascot |
| 2300.1616 | 2300.1768 | 0.0152  | 7   | 11905 | 11925 | ESAIETSSSYTSLVIDKV<br>SR     |                                            | Mascot |
| 2362.1165 | 2362.1865 | 0.07    | 30  | 18711 | 18731 | VAAANRYGTGEYLQSEV<br>VMCK    | Carbamidomethyl (C)[20], Oxidation (M)[19] | Mascot |
| 2395.2188 | 2395.0928 | -0.126  | -53 | 5554  | 5575  | AWTSCSYTAGRQNAVVN<br>NLVLK   |                                            | Mascot |
| 2496.2625 | 2496.28   | 0.0175  | 7   | 15650 | 15673 | VTNICPGMIYEFKVAEEN<br>AAGIGK |                                            | Mascot |



|    |                             |           |         |     |             |       |                              |      |    |    |        |  |  |                         |        |
|----|-----------------------------|-----------|---------|-----|-------------|-------|------------------------------|------|----|----|--------|--|--|-------------------------|--------|
|    | 2512.2573                   | 2512.3005 | 0.0432  | 17  | 15650       | 15673 | VTNICPGMIYEFKVAEN<br>AAGIGK  |      |    |    |        |  |  | Oxidation (M)[8]        | Mascot |
|    | 2515.241                    | 2515.2927 | 0.0517  | 21  | 4759        | 4782  | HTLPVDSDISSDTSVV<br>TIPESK   |      |    |    |        |  |  |                         | Mascot |
|    | 2531.1904                   | 2531.248  | 0.0576  | 23  | 12431       | 12454 | ISEGFVARPCDPPGTPE<br>AVCVSK  |      |    |    |        |  |  | Carbamidomethyl (C)[11] | Mascot |
|    | 2697.3328                   | 2697.3069 | -0.0259 | -10 | 735         | 758   | VSQSGEELPISFVMPLSD<br>VQVYEK |      |    |    |        |  |  | Oxidation (M)[14]       | Mascot |
| 31 | novel protein [Danio rerio] |           |         |     | gi 56207698 |       | 61957.1                      | 9.81 | 12 | 51 | 63.828 |  |  |                         |        |

Peptide Information

| Calc. Mass | Obsrv. Mass | ± da    | ± ppm | Start Seq. | End Seq. | Sequence                     | Ion Score | C. I. | % | Modification           | Rank | Result | Type |
|------------|-------------|---------|-------|------------|----------|------------------------------|-----------|-------|---|------------------------|------|--------|------|
| 960.5109   | 960.4761    | -0.0348 | -36   | 236        | 244      | AGLSITDQR                    |           |       |   |                        |      | Mascot |      |
| 960.5109   | 960.4761    | -0.0348 | -36   | 236        | 244      | AGLSITDQR                    |           |       |   |                        |      | Mascot |      |
| 1085.5698  | 1085.5427   | -0.0271 | -25   | 297        | 306      | QINSIGSPNR                   |           |       |   |                        |      | Mascot |      |
| 1088.5458  | 1088.5459   | 0.0001  | 0     | 381        | 388      | LYHHFICR                     |           |       |   |                        |      | Mascot |      |
| 1118.6204  | 1118.6503   | 0.0299  | 27    | 274        | 284      | SFIGVLSPNGK                  |           |       |   |                        |      | Mascot |      |
| 1165.6437  | 1165.7454   | 0.1017  | 87    | 542        | 551      | QINQARSHVL                   |           |       |   |                        |      | Mascot |      |
| 1382.6699  | 1382.7772   | 0.1073  | 78    | 459        | 469      | HFQLTDLHEDK                  |           |       |   |                        |      | Mascot |      |
| 2042.0963  | 2042.0739   | -0.0224 | -11   | 475        | 493      | GVLLQCPSPGFLRGTGN<br>LR      |           |       |   | Carbamidomethyl (C)[6] |      | Mascot |      |
| 2233.1096  | 2233.0791   | -0.0305 | -14   | 159        | 179      | NSVDVSGVTDQSAWIDV<br>ALTR    |           |       |   |                        |      | Mascot |      |
| 2249.0906  | 2249.0615   | -0.0291 | -13   | 138        | 157      | LKSSPLNISYESSACFYS<br>PR     |           |       |   |                        |      | Mascot |      |
| 2300.1228  | 2300.1768   | 0.054   | 23    | 408        | 429      | ESFQSPGFSSSSMSALA<br>LTPLR   |           |       |   |                        |      | Mascot |      |
| 2362.2461  | 2362.1865   | -0.0596 | -25   | 236        | 257      | AGLSITDQRETSIISQLSS<br>LDK   |           |       |   |                        |      | Mascot |      |
| 2515.2498  | 2515.2927   | 0.0429  | 17    | 408        | 431      | ESFQSPGFSSSSMSALA<br>LTPLRAK |           |       |   | Oxidation (M)[13]      |      | Mascot |      |

|    |                                                        |  |  |  |              |  |          |      |    |    |       |    |   |  |  |
|----|--------------------------------------------------------|--|--|--|--------------|--|----------|------|----|----|-------|----|---|--|--|
| 32 | ribosome biogenesis protein BMS1 homolog [Danio rerio] |  |  |  | gi 302191608 |  | 139916.2 | 5.26 | 14 | 47 | 13.23 | 22 | 0 |  |  |
|----|--------------------------------------------------------|--|--|--|--------------|--|----------|------|----|----|-------|----|---|--|--|

Peptide Information

| Calc. Mass | Obsrv. Mass | ± da    | ± ppm | Start Seq. | End Seq. | Sequence   | Ion Score | C. I. | % | Modification           | Rank | Result | Type |
|------------|-------------|---------|-------|------------|----------|------------|-----------|-------|---|------------------------|------|--------|------|
| 826.3763   | 826.4445    | 0.0682  | 83    | 684        | 690      | DCFVTGK    |           |       |   | Carbamidomethyl (C)[2] |      | Mascot |      |
| 960.5148   | 960.4761    | -0.0387 | -40   | 596        | 603      | WKEGLAEK   |           |       |   |                        |      | Mascot |      |
| 960.5148   | 960.4761    | -0.0387 | -40   | 596        | 603      | WKEGLAEK   | 22        |       | 0 |                        |      | Mascot |      |
| 1015.6298  | 1015.5256   | -0.1042 | -103  | 1113       | 1121     | ALPFKSKPK  |           |       |   |                        |      | Mascot |      |
| 1051.5717  | 1051.712    | 0.1403  | 133   | 102        | 109      | CLIKNFTR   |           |       |   | Carbamidomethyl (C)[1] |      | Mascot |      |
| 1077.4596  | 1077.5089   | 0.0493  | 46    | 422        | 429      | EWDENTQR   |           |       |   |                        |      | Mascot |      |
| 1085.6215  | 1085.5427   | -0.0788 | -73   | 1014       | 1023     | ALRTPPGAFR |           |       |   |                        |      | Mascot |      |

|           |           |         |      |      |      |                            |                                           |        |
|-----------|-----------|---------|------|------|------|----------------------------|-------------------------------------------|--------|
| 1094.6608 | 1094.5358 | -0.125  | -114 | 967  | 975  | LKLIGYPYK                  |                                           | Mascot |
| 1325.7688 | 1325.7559 | -0.0129 | -10  | 880  | 890  | DPLILSLGWRR                |                                           | Mascot |
| 1325.7688 | 1325.7559 | -0.0129 | -10  | 880  | 890  | DPLILSLGWRR                |                                           | Mascot |
| 1364.7532 | 1364.6943 | -0.0589 | -43  | 996  | 1008 | FEGASIRTVSGIK              |                                           | Mascot |
| 1364.7532 | 1364.6943 | -0.0589 | -43  | 996  | 1008 | FEGASIRTVSGIK              |                                           | Mascot |
| 1419.6572 | 1419.7725 | 0.1153  | 81   | 351  | 363  | DAVYIDMPSGHAK              | Oxidation (M)[7]                          | Mascot |
| 1419.6572 | 1419.7725 | 0.1153  | 81   | 351  | 363  | DAVYIDMPSGHAK              | Oxidation (M)[7]                          | Mascot |
| 1627.8942 | 1627.7954 | -0.0988 | -61  | 1147 | 1161 | VAALLDALTTVYSYK            |                                           | Mascot |
| 2283.1108 | 2283.1763 | 0.0655  | 29   | 128  | 146  | RLTFIECNNDINSMIDLAK        | Carbamidomethyl (C)[7], Oxidation (M)[14] | Mascot |
| 2283.9675 | 2284.1758 | 0.2083  | 91   | 774  | 792  | ERFDAQYDDGDATYFDD<br>LK    |                                           | Mascot |
| 2515.2949 | 2515.2927 | -0.0022 | -1   | 1049 | 1070 | LYNPVTSLLMPVGQKHT<br>WSGMR |                                           | Mascot |
| 2531.2898 | 2531.248  | -0.0418 | -17  | 1049 | 1070 | LYNPVTSLLMPVGQKHT<br>WSGMR | Oxidation (M)[10]                         | Mascot |

### Peptide Information

|           |           |         |     |       |       |                         |    |                                            |                                  |
|-----------|-----------|---------|-----|-------|-------|-------------------------|----|--------------------------------------------|----------------------------------|
| 1118.6489 | 1118.6503 | 0.0014  | 1   | 7882  | 7891  | IIMTELVTA               |    |                                            | Mascot                           |
| 1129.5596 | 1129.6097 | 0.0501  | 44  | 6852  | 6862  | ASNKVGGEPR              | 10 | 0                                          | Mascot                           |
| 1129.6212 | 1129.6097 | -0.0115 | -10 | 1082  | 1090  | LNIEERDIK               |    |                                            | Mascot                           |
| 1152.583  | 1152.7451 | 0.1621  | 141 | 12869 | 12877 | QKVTDVCFR               |    | Carbamidomethyl (C)[7]                     | Mascot                           |
| 1152.583  | 1152.7451 | 0.1621  | 141 | 12869 | 12877 | QKVTDVCFR               | 3  | 0                                          | Carbamidomethyl (C)[7]<br>Mascot |
| 1165.6324 | 1165.7454 | 0.113   | 97  | 5219  | 5227  | ITNYTIERR               |    |                                            | Mascot                           |
| 1211.7106 | 1211.7114 | 0.0008  | 1   | 5643  | 5653  | QNAVNNLVK               |    |                                            | Mascot                           |
| 1257.699  | 1257.6921 | -0.0069 | -5  | 2584  | 2593  | SIFLLWEPPR              |    |                                            | Mascot                           |
| 1274.5933 | 1274.6094 | 0.0161  | 13  | 11573 | 11583 | STDSYTCLTVK             |    | Carbamidomethyl (C)[7]                     | Mascot                           |
| 1279.7256 | 1279.7507 | 0.0251  | 20  | 15935 | 15945 | LNTGTYELKIK             |    |                                            | Mascot                           |
| 1287.6328 | 1287.6692 | 0.0364  | 28  | 7111  | 7120  | KPKEADEWER              |    |                                            | Mascot                           |
| 1287.6328 | 1287.6692 | 0.0364  | 28  | 7111  | 7120  | KPKEADEWER              |    |                                            | Mascot                           |
| 1307.6147 | 1307.6226 | 0.0079  | 6   | 633   | 643   | EVSLDDTCQIK             |    | Carbamidomethyl (C)[8]                     | Mascot                           |
| 1325.7358 | 1325.7559 | 0.0201  | 15  | 5502  | 5513  | EKMVIHAGGVIR            |    | Oxidation (M)[3]                           | Mascot                           |
| 1325.7358 | 1325.7559 | 0.0201  | 15  | 5502  | 5513  | EKMVIHAGGVIR            |    | Oxidation (M)[3]                           | Mascot                           |
| 1326.7528 | 1326.7534 | 0.0006  | 0   | 7103  | 7113  | NLAYHVEKKPK             |    |                                            | Mascot                           |
| 1327.6892 | 1327.7382 | 0.049   | 37  | 17714 | 17725 | YFLSLENVAGSK            |    |                                            | Mascot                           |
| 1364.6804 | 1364.6943 | 0.0139  | 10  | 837   | 847   | DEARFEIELSR             |    |                                            | Mascot                           |
| 1364.6804 | 1364.6943 | 0.0139  | 10  | 837   | 847   | DEARFEIELSR             |    |                                            | Mascot                           |
| 1382.7678 | 1382.7772 | 0.0094  | 7   | 5201  | 5212  | AEQITLSWLPPK            |    |                                            | Mascot                           |
| 1419.7478 | 1419.7725 | 0.0247  | 17  | 14960 | 14972 | FGLGEALESEIVR           |    |                                            | Mascot                           |
| 1419.7743 | 1419.7725 | -0.0018 | -1  | 16574 | 16585 | LGHNHLELPYK             |    |                                            | Mascot                           |
| 1546.8125 | 1546.7904 | -0.0221 | -14 | 8434  | 8445  | LIEGHEYQFRVR            |    |                                            | Mascot                           |
| 1627.8789 | 1627.7954 | -0.0835 | -51 | 21064 | 21078 | SLGDLSEELLPPVK          |    |                                            | Mascot                           |
| 1638.7944 | 1638.9172 | 0.1228  | 75  | 11777 | 11789 | VTSLMENHLYEFR           |    |                                            | Mascot                           |
| 1715.9149 | 1715.9199 | 0.005   | 3   | 18090 | 18104 | YALQYSSTRAMAIK          |    |                                            | Mascot                           |
| 1750.8892 | 1750.9111 | 0.0219  | 13  | 19514 | 19529 | EMDEVTAQLGQTATLK        |    | Oxidation (M)[2]                           | Mascot                           |
| 1816.8964 | 1816.9244 | 0.028   | 15  | 5783  | 5797  | DELEPTIELDFRDK          |    |                                            | Mascot                           |
| 1826.8412 | 1826.9792 | 0.138   | 76  | 5927  | 5942  | DMWTTVTSATTKTHCK        |    | Oxidation (M)[2]                           | Mascot                           |
| 1826.9622 | 1826.9792 | 0.017   | 9   | 7030  | 7044  | LVKAPLVQNCEYFFR         |    |                                            | Mascot                           |
| 1840.944  | 1840.9486 | 0.0046  | 2   | 3897  | 3913  | IGEVTSSTVALSWHEPK       |    |                                            | Mascot                           |
| 1957.9601 | 1958.0155 | 0.0554  | 28  | 11983 | 12000 | ESAQIETSSSYTSLVIDK      |    |                                            | Mascot                           |
| 1972.0056 | 1971.9252 | -0.0804 | -41 | 627   | 643   | HTLEIKEVSLDDTCQIK       |    |                                            | Mascot                           |
| 2042.095  | 2042.0739 | -0.0211 | -10 | 8950  | 8967  | ELSVLAKDINVLPSCDLR      |    | Carbamidomethyl (C)[15]                    | Mascot                           |
| 2191.9998 | 2192.0576 | 0.0578  | 26  | 11874 | 11892 | AAEEIQEQWTMCTPPTG<br>VK |    | Carbamidomethyl (C)[12], Oxidation (M)[11] | Mascot                           |
| 2211.1147 | 2211.1077 | -0.007  | -3  | 16008 | 16026 | VVWSVISEAMESRMVTV<br>QK |    | Oxidation (M)[10,14]                       | Mascot                           |

|    |                             |           |         |     |             |       |                               |                                            |    |    |   |  |  |  |  |  |        |
|----|-----------------------------|-----------|---------|-----|-------------|-------|-------------------------------|--------------------------------------------|----|----|---|--|--|--|--|--|--------|
|    | 2230.0808                   | 2230.1951 | 0.1143  | 51  | 9100        | 9119  | DSITNMWVTVSSSVVTNS<br>FR      |                                            |    |    |   |  |  |  |  |  | Mascot |
|    | 2233.0076                   | 2233.0791 | 0.0715  | 32  | 13973       | 13992 | VSAENETGVGECSDL<br>SLFYR      | Carbamidomethyl (C)[12]                    |    |    |   |  |  |  |  |  | Mascot |
|    | 2249.2175                   | 2249.0615 | -0.156  | -69 | 749         | 768   | DIKVVKPIYGVELFDGE<br>TAR      |                                            |    |    |   |  |  |  |  |  | Mascot |
|    | 2283.0269                   | 2283.1763 | 0.1494  | 65  | 1508        | 1528  | MDDAGEYHCKLPASETT<br>GTLK     | Oxidation (M)[1]                           |    |    |   |  |  |  |  |  | Mascot |
|    | 2284.0583                   | 2284.1758 | 0.1175  | 51  | 9306        | 9326  | ANTVNVIDCAYTVADLQE<br>GCK     | Carbamidomethyl (C)[9]                     |    |    |   |  |  |  |  |  | Mascot |
|    | 2298.1348                   | 2298.1748 | 0.04    | 17  | 3363        | 3384  | DPDSAPTIDVATQDIVVV<br>EGEK    |                                            |    |    |   |  |  |  |  |  | Mascot |
|    | 2300.1616                   | 2300.1768 | 0.0152  | 7   | 11983       | 12003 | ESAQIETSSSYTSLVIDKV<br>SR     |                                            |    |    |   |  |  |  |  |  | Mascot |
|    | 2362.1165                   | 2362.1865 | 0.07    | 30  | 18883       | 18903 | VAAANRYGTGEYLQSEV<br>VMCK     | Carbamidomethyl (C)[20], Oxidation (M)[19] |    |    |   |  |  |  |  |  | Mascot |
|    | 2395.2188                   | 2395.0928 | -0.126  | -53 | 5632        | 5653  | AWTSCSYTAGRQNAVVN<br>NLVLK    |                                            |    |    |   |  |  |  |  |  | Mascot |
|    | 2496.2625                   | 2496.28   | 0.0175  | 7   | 15728       | 15751 | VTNICPGMIYEFKVA<br>AEN AAGIGK |                                            |    |    |   |  |  |  |  |  | Mascot |
|    | 2512.2573                   | 2512.3005 | 0.0432  | 17  | 15728       | 15751 | VTNICPGMIYEFKVA<br>AEN AAGIGK | Oxidation (M)[8]                           |    |    |   |  |  |  |  |  | Mascot |
|    | 2515.241                    | 2515.2927 | 0.0517  | 21  | 4837        | 4860  | HTLPVDSDISSD<br>TTSVV TIPSCK  |                                            |    |    |   |  |  |  |  |  | Mascot |
|    | 2697.3328                   | 2697.3069 | -0.0259 | -10 | 813         | 836   | VSQSGEELPISFV<br>MPLSD VQVYEK | Oxidation (M)[14]                          |    |    |   |  |  |  |  |  | Mascot |
| 34 | novel protein [Danio rerio] |           |         |     | gi 56207697 |       | 60239                         | 9.48                                       | 11 | 45 | 0 |  |  |  |  |  |        |

| Peptide Information |             |         |       |            |          |                              |           |       |   |                        |      |        |        |  |  |  |  |
|---------------------|-------------|---------|-------|------------|----------|------------------------------|-----------|-------|---|------------------------|------|--------|--------|--|--|--|--|
| Calc. Mass          | Obsrv. Mass | ± da    | ± ppm | Start Seq. | End Seq. | Sequence                     | Ion Score | C. I. | % | Modification           | Rank | Result | Type   |  |  |  |  |
| 960.5109            | 960.4761    | -0.0348 | -36   | 260        | 268      | AGLSITDQR                    |           |       |   |                        |      |        | Mascot |  |  |  |  |
| 960.5109            | 960.4761    | -0.0348 | -36   | 260        | 268      | AGLSITDQR                    |           |       |   |                        |      |        | Mascot |  |  |  |  |
| 1085.5698           | 1085.5427   | -0.0271 | -25   | 321        | 330      | QINSIGSPNR                   |           |       |   |                        |      |        | Mascot |  |  |  |  |
| 1088.5458           | 1088.5459   | 0.0001  | 0     | 405        | 412      | LYHHFICR                     |           |       |   |                        |      |        | Mascot |  |  |  |  |
| 1118.6204           | 1118.6503   | 0.0299  | 27    | 298        | 308      | SFIGVLSPNGK                  |           |       |   |                        |      |        | Mascot |  |  |  |  |
| 1382.6699           | 1382.7772   | 0.1073  | 78    | 483        | 493      | HFQLTDLHEDK                  |           |       |   |                        |      |        | Mascot |  |  |  |  |
| 2042.0963           | 2042.0739   | -0.0224 | -11   | 499        | 517      | GVLLQCPSPGFLRGTGN<br>LR      |           |       |   | Carbamidomethyl (C)[6] |      |        | Mascot |  |  |  |  |
| 2233.1096           | 2233.0791   | -0.0305 | -14   | 183        | 203      | NSVDVSGVTDQSAWIDV<br>ALTR    |           |       |   |                        |      |        | Mascot |  |  |  |  |
| 2249.0906           | 2249.0615   | -0.0291 | -13   | 162        | 181      | LKSSPLNISYESSACFYS<br>PR     |           |       |   |                        |      |        | Mascot |  |  |  |  |
| 2300.1228           | 2300.1768   | 0.054   | 23    | 432        | 453      | ESFQSPGFSSSSMSALA<br>LTPLR   |           |       |   |                        |      |        | Mascot |  |  |  |  |
| 2362.2461           | 2362.1865   | -0.0596 | -25   | 260        | 281      | AGLSITDQRETSIISQLSS<br>LDK   |           |       |   |                        |      |        | Mascot |  |  |  |  |
| 2515.2498           | 2515.2927   | 0.0429  | 17    | 432        | 455      | ESFQSPGFSSSSMSALA<br>LTPLRAK |           |       |   | Oxidation (M)[13]      |      |        | Mascot |  |  |  |  |

|    |                                                                     |  |  |  |              |  |         |      |   |    |   |    |        |  |  |  |  |
|----|---------------------------------------------------------------------|--|--|--|--------------|--|---------|------|---|----|---|----|--------|--|--|--|--|
| 35 | PREDICTED: serine/threonine-protein kinase pim-3-like [Danio rerio] |  |  |  | gi 326675215 |  | 23705.1 | 8.34 | 4 | 44 | 0 | 28 | 58.576 |  |  |  |  |
|----|---------------------------------------------------------------------|--|--|--|--------------|--|---------|------|---|----|---|----|--------|--|--|--|--|

| Peptide Information |                                                  |             |         |       |              |          |               |           |         |              |                  |
|---------------------|--------------------------------------------------|-------------|---------|-------|--------------|----------|---------------|-----------|---------|--------------|------------------|
|                     | Calc. Mass                                       | Obsrv. Mass | ± da    | ± ppm | Start Seq.   | End Seq. | Sequence      | Ion Score | C. I. % | Modification | Rank Result Type |
|                     | 991.4843                                         | 991.463     | -0.0213 | -21   | 120          | 127      | LQEGEPYR      |           |         |              | Mascot           |
|                     | 1211.6531                                        | 1211.7114   | 0.0583  | 48    | 110          | 119      | SPYLGVTRYR    |           |         |              | Mascot           |
|                     | 1287.7015                                        | 1287.6692   | -0.0323 | -25   | 44           | 55       | KNNGLLSESVAR  | 28        | 58.576  |              | Mascot           |
|                     | 1287.7015                                        | 1287.6692   | -0.0323 | -25   | 44           | 55       | KNNGLLSESVAR  |           |         |              | Mascot           |
|                     | 1364.7419                                        | 1364.6943   | -0.0476 | -35   | 184          | 195      | TGPVLEEIIIEHK |           |         |              | Mascot           |
|                     | 1364.7419                                        | 1364.6943   | -0.0476 | -35   | 184          | 195      | TGPVLEEIIIEHK |           |         |              | Mascot           |
| 36                  | serine/threonine-protein kinase 33 [Danio rerio] |             |         |       | gi 136255681 | 54885.7  | 9.11          | 12        | 44      | 0            |                  |

| Peptide Information |                                              |         |       |              |          |                             |           |         |                        |      |             |
|---------------------|----------------------------------------------|---------|-------|--------------|----------|-----------------------------|-----------|---------|------------------------|------|-------------|
| Calc. Mass          | Obsrv. Mass                                  | ± da    | ± ppm | Start Seq.   | End Seq. | Sequence                    | Ion Score | C. I. % | Modification           | Rank | Result Type |
| 870.4832            | 870.5363                                     | 0.0531  | 61    | 47           | 53       | IYSFGRK                     |           |         |                        |      | Mascot      |
| 911.3862            | 911.3981                                     | 0.0119  | 13    | 19           | 25       | MACQWTR                     |           |         | Oxidation (M)[1]       |      | Mascot      |
| 996.4897            | 996.5957                                     | 0.106   | 106   | 487          | 495      | STNPAFGFR                   |           |         |                        |      | Mascot      |
| 1015.608            | 1015.5256                                    | -0.0824 | -81   | 288          | 295      | NVIRCLLK                    |           |         | Carbamidomethyl (C)[5] |      | Mascot      |
| 1077.5898           | 1077.5089                                    | -0.0809 | -75   | 401          | 411      | LSASSSNGVKK                 |           |         |                        |      | Mascot      |
| 1152.5752           | 1152.7451                                    | 0.1699  | 147   | 261          | 269      | ERLSEMIMK                   |           |         | Oxidation (M)[6]       |      | Mascot      |
| 1152.5752           | 1152.7451                                    | 0.1699  | 147   | 261          | 269      | ERLSEMIMK                   |           |         | Oxidation (M)[6]       |      | Mascot      |
| 1257.662            | 1257.6921                                    | 0.0301  | 24    | 91           | 100      | HLEREVSIMK                  |           |         | Oxidation (M)[9]       |      | Mascot      |
| 1627.7706           | 1627.7954                                    | 0.0248  | 15    | 120          | 133      | MYLVTELCEGGDLK              |           |         | Carbamidomethyl (C)[8] |      | Mascot      |
| 1638.8446           | 1638.9172                                    | 0.0726  | 44    | 33           | 46       | VPHTRIEDESIQK               |           |         |                        |      | Mascot      |
| 1751.0214           | 1750.9111                                    | -0.1103 | -63   | 149          | 163      | HIKSLSEAIVYLHK              |           |         |                        |      | Mascot      |
| 2225.1191           | 2225.1208                                    | 0.0017  | 1     | 120          | 138      | MYLVTELCEGGDLKDLL QK        |           |         | Carbamidomethyl (C)[8] |      | Mascot      |
| 2225.1191           | 2225.1208                                    | 0.0017  | 1     | 120          | 138      | MYLVTELCEGGDLKDLL QK        |           |         | Carbamidomethyl (C)[8] |      | Mascot      |
| 2362.1843           | 2362.1865                                    | 0.0022  | 1     | 447          | 471      | ASSILGSSSLKPPSSEAPA AASNSSR |           |         |                        |      | Mascot      |
| 37                  | hypothetical protein LOC572032 [Danio rerio] |         |       | gi 130501553 |          | 75267.4                     | 9.23      | 12      | 44                     | 0    |             |

| Peptide Information |             |         |       |            |          |            |           |         |              |      |             |
|---------------------|-------------|---------|-------|------------|----------|------------|-----------|---------|--------------|------|-------------|
| Calc. Mass          | Obsrv. Mass | ± da    | ± ppm | Start Seq. | End Seq. | Sequence   | Ion Score | C. I. % | Modification | Rank | Result Type |
| 960.5109            | 960.4761    | -0.0348 | -36   | 344        | 352      | AGLSITDQR  |           |         |              |      | Mascot      |
| 960.5109            | 960.4761    | -0.0348 | -36   | 344        | 352      | AGLSITDQR  |           |         |              |      | Mascot      |
| 1085.5698           | 1085.5427   | -0.0271 | -25   | 405        | 414      | QINSIGSPNR |           |         |              |      | Mascot      |

|    |                                            |           |         |     |             |     |                              |     |   |    |   |                        |  |  |  |  |        |
|----|--------------------------------------------|-----------|---------|-----|-------------|-----|------------------------------|-----|---|----|---|------------------------|--|--|--|--|--------|
|    | 1088.5458                                  | 1088.5459 | 0.0001  | 0   | 489         | 496 | LYHHFICR                     |     |   |    |   |                        |  |  |  |  | Mascot |
|    | 1118.6204                                  | 1118.6503 | 0.0299  | 27  | 382         | 392 | SFIGVLSPNGK                  |     |   |    |   |                        |  |  |  |  | Mascot |
|    | 1382.6699                                  | 1382.7772 | 0.1073  | 78  | 567         | 577 | HFQLTDLHEDK                  |     |   |    |   |                        |  |  |  |  | Mascot |
|    | 1826.8854                                  | 1826.9792 | 0.0938  | 51  | 11          | 25  | NNDVFRNTMEAIFQK              |     |   |    |   |                        |  |  |  |  | Mascot |
|    | 1826.8854                                  | 1826.9792 | 0.0938  | 51  | 11          | 25  | NNDVFRNTMEAIFQK              |     |   |    |   |                        |  |  |  |  | Mascot |
|    | 2042.0963                                  | 2042.0739 | -0.0224 | -11 | 583         | 601 | GVLLQCPSPGFLRGNTN<br>LR      |     |   |    |   | Carbamidomethyl (C)[6] |  |  |  |  | Mascot |
|    | 2233.1096                                  | 2233.0791 | -0.0305 | -14 | 267         | 287 | NSVDVSGVTDQSAWIDV<br>ALTR    |     |   |    |   |                        |  |  |  |  | Mascot |
|    | 2249.0906                                  | 2249.0615 | -0.0291 | -13 | 246         | 265 | LKSSPLNISYESSACFYS<br>PR     |     |   |    |   |                        |  |  |  |  | Mascot |
|    | 2300.1228                                  | 2300.1768 | 0.054   | 23  | 516         | 537 | ESFQSPGFSSSSMSALA<br>LTPLR   |     |   |    |   |                        |  |  |  |  | Mascot |
|    | 2362.2461                                  | 2362.1865 | -0.0596 | -25 | 344         | 365 | AGLSITDQRETSIISQLSS<br>LDK   |     |   |    |   |                        |  |  |  |  | Mascot |
|    | 2515.2498                                  | 2515.2927 | 0.0429  | 17  | 516         | 539 | ESFQSPGFSSSSMSALA<br>LTPLRAK |     |   |    |   | Oxidation (M)[13]      |  |  |  |  | Mascot |
| 38 | AP-3 complex subunit sigma-2 [Danio rerio] |           |         |     | gi 50540146 |     | 21897.1                      | 5.1 | 7 | 43 | 0 |                        |  |  |  |  |        |

#### Peptide Information

| Calc. Mass | Obsrv. Mass | ± da    | ± ppm | Start Seq. | End Seq. | Sequence          | Ion Score | C. I. | % | Modification      | Rank | Result Type |
|------------|-------------|---------|-------|------------|----------|-------------------|-----------|-------|---|-------------------|------|-------------|
| 960.5148   | 960.4761    | -0.0387 | -40   | 34         | 41       | ETFHLVSK          |           |       |   |                   |      | Mascot      |
| 960.5148   | 960.4761    | -0.0387 | -40   | 34         | 41       | ETFHLVSK          |           |       |   |                   |      | Mascot      |
| 1015.5166  | 1015.5256   | 0.009   | 9     | 150        | 160      | SEGGLSAAPAR       |           |       |   |                   |      | Mascot      |
| 1419.6896  | 1419.7725   | 0.0829  | 58    | 147        | 160      | MEKSEGGLSAAPAR    |           |       |   | Oxidation (M)[1]  |      | Mascot      |
| 1419.6896  | 1419.7725   | 0.0829  | 58    | 147        | 160      | MEKSEGGLSAAPAR    |           |       |   | Oxidation (M)[1]  |      | Mascot      |
| 1638.8995  | 1638.9172   | 0.0177  | 11    | 161        | 175      | AVSAVKNMNLPEIPR   |           |       |   |                   |      | Mascot      |
| 1841.0167  | 1840.9486   | -0.0681 | -37   | 176        | 192      | NINIGDINIKVPSLSPF |           |       |   |                   |      | Mascot      |
| 1971.8649  | 1971.9252   | 0.0603  | 31    | 100        | 115      | CFENVCELDLIFHMDK  |           |       |   | Oxidation (M)[14] |      | Mascot      |
| 2362.2012  | 2362.1865   | -0.0147 | -6    | 16         | 33       | LIRFYQYFAEDMQQIIR |           |       |   |                   |      | Mascot      |

39 PREDICTED: cytohesin-3 [Danio rerio] gi|189525884 46368.6 5.84 4 42 0 31 79.898

#### Peptide Information

| Calc. Mass | Obsrv. Mass | ± da    | ± ppm | Start Seq. | End Seq. | Sequence            | Ion Score | C. I.  | % | Modification            | Rank | Result Type |
|------------|-------------|---------|-------|------------|----------|---------------------|-----------|--------|---|-------------------------|------|-------------|
| 983.5097   | 983.5398    | 0.0301  | 31    | 148        | 154      | QFLWSFR             | 31        | 79.898 |   |                         |      | Mascot      |
| 983.5097   | 983.5398    | 0.0301  | 31    | 148        | 154      | QFLWSFR             |           |        |   |                         |      | Mascot      |
| 1002.5101  | 1002.5165   | 0.0064  | 6     | 30         | 37       | ELLDDIER            |           |        |   |                         |      | Mascot      |
| 1326.6293  | 1326.7534   | 0.1241  | 94    | 162        | 172      | IDRMMEAYAAR         |           |        |   |                         |      | Mascot      |
| 2300.1987  | 2300.1768   | -0.0219 | -10   | 38         | 56       | LKLEISEVMTEIEHLTCVR |           |        |   | Carbamidomethyl (C)[17] |      | Mascot      |

40 novel protein [Danio rerio] gi|148725634 88547.7 5.1 11 41 0

| Peptide Information |                                                         |         |       |              |                             |           |                      |    |   |                        |                  |
|---------------------|---------------------------------------------------------|---------|-------|--------------|-----------------------------|-----------|----------------------|----|---|------------------------|------------------|
| Calc. Mass          | Obsrv. Mass                                             | ± da    | ± ppm | Start Seq.   | End Sequence Seq.           | Ion Score | C. I. % Modification |    |   |                        | Rank Result Type |
| 842.5345            | 842.5087                                                | -0.0258 | -31   | 588          | 595 IIASPLTK                |           |                      |    |   |                        | Mascot           |
| 864.3953            | 864.499                                                 | 0.1037  | 120   | 40           | 46 MLSCPEK                  |           |                      |    |   | Carbamidomethyl (C)[4] | Mascot           |
| 870.4791            | 870.5363                                                | 0.0572  | 66    | 199          | 205 ETSRHIK                 |           |                      |    |   |                        | Mascot           |
| 960.4744            | 960.4761                                                | 0.0017  | 2     | 485          | 494 SSGPSLAGER              |           |                      |    |   |                        | Mascot           |
| 960.4744            | 960.4761                                                | 0.0017  | 2     | 485          | 494 SSGPSLAGER              | 11        |                      | 0  |   |                        | Mascot           |
| 1129.6576           | 1129.6097                                               | -0.0479 | -42   | 621          | 630 VVDGIRTELK              |           |                      |    |   |                        | Mascot           |
| 1129.6576           | 1129.6097                                               | -0.0479 | -42   | 621          | 630 VVDGIRTELK              |           |                      |    |   |                        | Mascot           |
| 1211.6493           | 1211.7114                                               | 0.0621  | 51    | 474          | 484 VFSFATCPIVK             |           |                      |    |   |                        | Mascot           |
| 1327.762            | 1327.7382                                               | -0.0238 | -18   | 700          | 712 SVSFPPPAVLISK           |           |                      |    |   |                        | Mascot           |
| 1382.7162           | 1382.7772                                               | 0.061   | 44    | 184          | 196 ASLNIEGVPPPEEK          |           |                      |    |   |                        | Mascot           |
| 1957.9688           | 1958.0155                                               | 0.0467  | 24    | 94           | 109 EMKELTTQVNVYSFPR        |           |                      |    |   | Oxidation (M)[2]       | Mascot           |
| 2192.175            | 2192.0576                                               | -0.1174 | -54   | 49           | 68 FVWTALGDKPIFATPKTG<br>DK |           |                      |    |   |                        | Mascot           |
| 2210.948            | 2211.1077                                               | 0.1597  | 72    | 357          | 375 LSDTGMFVCEAFNEYGS<br>QR |           |                      |    |   | Carbamidomethyl (C)[9] | Mascot           |
| 41                  | PREDICTED: hypothetical protein LOC797378 [Danio rerio] |         |       | gi 292622805 | 72531.1                     | 6.46      | 6                    | 41 | 0 | 28                     | 58.576           |

| Peptide Information |                                                             |         |       |              |                               |           |                      |        |   |                        |                  |
|---------------------|-------------------------------------------------------------|---------|-------|--------------|-------------------------------|-----------|----------------------|--------|---|------------------------|------------------|
| Calc. Mass          | Obsrv. Mass                                                 | ± da    | ± ppm | Start Seq.   | End Sequence Seq.             | Ion Score | C. I. % Modification |        |   |                        | Rank Result Type |
| 870.577             | 870.5363                                                    | -0.0407 | -47   | 493          | 500 VAIKVVNK                  |           |                      |        |   |                        | Mascot           |
| 882.4501            | 882.5657                                                    | 0.1156  | 131   | 1            | 7 MSTRPFK                     |           |                      |        |   | Oxidation (M)[1]       | Mascot           |
| 1094.5952           | 1094.5358                                                   | -0.0594 | -54   | 87           | 97 VSGGGKSYALR                |           |                      |        |   |                        | Mascot           |
| 1287.7015           | 1287.6692                                                   | -0.0323 | -25   | 566          | 577 KNNGLLSSEVAR              | 28        |                      | 58.576 |   |                        | Mascot           |
| 1287.7015           | 1287.6692                                                   | -0.0323 | -25   | 566          | 577 KNNGLLSSEVAR              |           |                      |        |   |                        | Mascot           |
| 2224.9221           | 2225.1208                                                   | 0.1987  | 89    | 51           | 68 LSEMENTRDTEMTSYEE<br>K     |           |                      |        |   | Oxidation (M)[4,12]    | Mascot           |
| 2224.9221           | 2225.1208                                                   | 0.1987  | 89    | 51           | 68 LSEMENTRDTEMTSYEE<br>K     |           |                      |        |   | Oxidation (M)[4,12]    | Mascot           |
| 2496.2664           | 2496.28                                                     | 0.0136  | 5     | 590          | 610 CLEHGIEHESIHKENILVN<br>PK |           |                      |        |   | Carbamidomethyl (C)[1] | Mascot           |
| 42                  | PREDICTED: dedicator of cytokinesis protein 7 [Danio rerio] |         |       | gi 292612128 | 236179.1                      | 6.42      | 16                   | 41     | 0 | 20                     | 0                |

| Peptide Information |             |      |       |            |                   |           |                      |  |  |  |                  |
|---------------------|-------------|------|-------|------------|-------------------|-----------|----------------------|--|--|--|------------------|
| Calc. Mass          | Obsrv. Mass | ± da | ± ppm | Start Seq. | End Sequence Seq. | Ion Score | C. I. % Modification |  |  |  | Rank Result Type |

|    |                                              |           |         |      |             |      |                          |      |   |    |   |                        |        |  |  |  |        |
|----|----------------------------------------------|-----------|---------|------|-------------|------|--------------------------|------|---|----|---|------------------------|--------|--|--|--|--------|
|    | 856.4597                                     | 856.5221  | 0.0624  | 73   | 247         | 254  | CAIPEVPK                 |      |   |    |   |                        |        |  |  |  | Mascot |
|    | 960.5148                                     | 960.4761  | -0.0387 | -40  | 531         | 538  | EVLEFPAR                 |      |   |    |   |                        |        |  |  |  | Mascot |
|    | 960.5148                                     | 960.4761  | -0.0387 | -40  | 531         | 538  | EVLEFPAR                 | 22   | 0 |    |   |                        |        |  |  |  | Mascot |
|    | 991.4189                                     | 991.463   | 0.0441  | 44   | 593         | 600  | SSCAEFYK                 |      |   |    |   | Carbamidomethyl (C)[3] |        |  |  |  | Mascot |
|    | 1094.4895                                    | 1094.5358 | 0.0463  | 42   | 210         | 218  | TAAEEMDRR                |      |   |    |   | Oxidation (M)[6]       |        |  |  |  | Mascot |
|    | 1165.6146                                    | 1165.7454 | 0.1308  | 112  | 1736        | 1745 | ILCPIHEANR               |      |   |    |   |                        |        |  |  |  | Mascot |
|    | 1287.6692                                    | 1287.6692 | 0       | 0    | 1014        | 1023 | YHKDVELVER               |      |   |    |   |                        |        |  |  |  | Mascot |
|    | 1287.6692                                    | 1287.6692 | 0       | 0    | 1014        | 1023 | YHKDVELVER               |      |   |    |   |                        |        |  |  |  | Mascot |
|    | 1364.6991                                    | 1364.6943 | -0.0048 | -4   | 1506        | 1517 | SHASASLYLLMR             |      |   |    |   | Oxidation (M)[11]      |        |  |  |  | Mascot |
|    | 1364.6991                                    | 1364.6943 | -0.0048 | -4   | 1506        | 1517 | SHASASLYLLMR             |      |   |    |   | Oxidation (M)[11]      |        |  |  |  | Mascot |
|    | 1715.8309                                    | 1715.9199 | 0.089   | 52   | 467         | 480  | LSDEDLYKFLADMR           |      |   |    |   |                        |        |  |  |  | Mascot |
|    | 1817.02                                      | 1816.9244 | -0.0956 | -53  | 1429        | 1445 | TVVMSELKESVLGGVLR        |      |   |    |   |                        |        |  |  |  | Mascot |
|    | 1826.8126                                    | 1826.9792 | 0.1666  | 91   | 129         | 143  | YQCYSTLQTPHNSER          |      |   |    |   |                        |        |  |  |  | Mascot |
|    | 1826.8126                                    | 1826.9792 | 0.1666  | 91   | 129         | 143  | YQCYSTLQTPHNSER          |      |   |    |   |                        |        |  |  |  | Mascot |
|    | 2041.9727                                    | 2042.0739 | 0.1012  | 50   | 1757        | 1773 | LQDAFNKVYNQSSGWER        |      |   |    |   |                        |        |  |  |  | Mascot |
|    | 2192.0918                                    | 2192.0576 | -0.0342 | -16  | 1615        | 1633 | GYQNSPDLRLTLWLNMA<br>GK  |      |   |    |   |                        |        |  |  |  | Mascot |
|    | 2225.1304                                    | 2225.1208 | -0.0096 | -4   | 917         | 936  | MSAYIETTSLCPSRQIA<br>K   |      |   |    |   | Oxidation (M)[1]       |        |  |  |  | Mascot |
|    | 2225.1304                                    | 2225.1208 | -0.0096 | -4   | 917         | 936  | MSAYIETTSLCPSRQIA<br>K   |      |   |    |   | Oxidation (M)[1]       |        |  |  |  | Mascot |
|    | 2230.0996                                    | 2230.1951 | 0.0955  | 43   | 1597        | 1614 | EHQQDPEMLIDLMYRIAK       |      |   |    |   |                        |        |  |  |  | Mascot |
|    | 2298.2209                                    | 2298.1748 | -0.0461 | -20  | 727         | 744  | FFTLVYVLEEYSFPFRLK       |      |   |    |   |                        |        |  |  |  | Mascot |
|    | 2395.3523                                    | 2395.0928 | -0.2595 | -108 | 324         | 344  | SAIFSITYPSPEIFLVKLE<br>K |      |   |    |   |                        |        |  |  |  | Mascot |
| 43 | hypothetical protein LOC325586 [Danio rerio] |           |         |      | gi 41152419 |      | 46600.6                  | 5.66 | 4 | 41 | 0 | 30                     | 70.384 |  |  |  |        |

Peptide Information

| Calc. Mass | Obsrv. Mass | ± da    | ± ppm | Start Seq. | End Seq. | Sequence                | Ion Score | C. I.  | % Modification     | Rank | Result | Type   |
|------------|-------------|---------|-------|------------|----------|-------------------------|-----------|--------|--------------------|------|--------|--------|
| 983.5097   | 983.5398    | 0.0301  | 31    | 149        | 155      | QFLWSFR                 | 31        | 79.898 |                    |      |        | Mascot |
| 983.5097   | 983.5398    | 0.0301  | 31    | 149        | 155      | QFLWSFR                 |           |        |                    |      |        | Mascot |
| 1015.4335  | 1015.5256   | 0.0921  | 91    | 166        | 173      | MMEFAQR                 |           |        | Oxidation (M)[1,2] |      |        | Mascot |
| 1094.5476  | 1094.5358   | -0.0118 | -11   | 112        | 121      | TAIGDYLGER              |           |        |                    |      |        | Mascot |
| 2211.085   | 2211.1077   | 0.0227  | 10    | 1          | 19       | MVLKSDDEIVPHDLTPEE<br>K |           |        | Oxidation (M)[1]   |      |        | Mascot |

|    |                       |  |  |  |              |  |           |      |    |    |   |  |  |  |  |  |  |
|----|-----------------------|--|--|--|--------------|--|-----------|------|----|----|---|--|--|--|--|--|--|
| 44 | titin b [Danio rerio] |  |  |  | gi 110005908 |  | 3198243.8 | 5.99 | 68 | 41 | 0 |  |  |  |  |  |  |
|----|-----------------------|--|--|--|--------------|--|-----------|------|----|----|---|--|--|--|--|--|--|

Peptide Information

| Calc. Mass | Obsrv. Mass | ± da | ± ppm | Start Seq. | End Seq. | Sequence | Ion Score | C. I. | % Modification | Rank | Result | Type |
|------------|-------------|------|-------|------------|----------|----------|-----------|-------|----------------|------|--------|------|
|------------|-------------|------|-------|------------|----------|----------|-----------|-------|----------------|------|--------|------|



|           |           |         |     |       |       |              |    |                          |        |
|-----------|-----------|---------|-----|-------|-------|--------------|----|--------------------------|--------|
| 826.4669  | 826.4445  | -0.0224 | -27 | 27840 | 27846 | LTSYKSK      |    |                          | Mascot |
| 842.4478  | 842.5087  | 0.0609  | 72  | 21461 | 21467 | RDLPEGR      |    |                          | Mascot |
| 850.4893  | 850.5414  | 0.0521  | 61  | 1620  | 1626  | YVVSARR      |    |                          | Mascot |
| 856.4999  | 856.5221  | 0.0222  | 26  | 15947 | 15954 | RANSAPLK     |    |                          | Mascot |
| 864.4825  | 864.499   | 0.0165  | 19  | 20942 | 20948 | FEVKDVK      |    |                          | Mascot |
| 870.5267  | 870.5363  | 0.0096  | 11  | 1808  | 1814  | QRLAINR      |    |                          | Mascot |
| 882.4791  | 882.5657  | 0.0866  | 98  | 14146 | 14152 | KEEHAIR      |    |                          | Mascot |
| 911.4468  | 911.3981  | -0.0487 | -53 | 5423  | 5431  | YVPSSGSSK    |    |                          | Mascot |
| 960.4632  | 960.4761  | 0.0129  | 13  | 7775  | 7783  | DGNEITPSK    |    |                          | Mascot |
| 960.4996  | 960.4761  | -0.0235 | -24 | 15117 | 15124 | LDEILSDR     | 14 | 0                        | Mascot |
| 983.4904  | 983.5398  | 0.0494  | 50  | 21563 | 21570 | DGHEIERK     |    |                          | Mascot |
| 983.6248  | 983.5398  | -0.085  | -86 | 8240  | 8247  | ILIIQDLR     |    |                          | Mascot |
| 991.4955  | 991.463   | -0.0325 | -33 | 13093 | 13101 | VAAENQFGR    |    |                          | Mascot |
| 996.536   | 996.5957  | 0.0597  | 60  | 2513  | 2520  | LTITETYR     |    |                          | Mascot |
| 1002.4713 | 1002.5165 | 0.0452  | 45  | 5375  | 5382  | MYGITDFR     |    |                          | Mascot |
| 1015.524  | 1015.5256 | 0.0016  | 2   | 10971 | 10979 | QPLEVAACK    |    | Carbamidomethyl (C)[8]   | Mascot |
| 1051.6146 | 1051.712  | 0.0974  | 93  | 17764 | 17773 | VSEKPLPPGK   |    |                          | Mascot |
| 1077.4769 | 1077.5089 | 0.032   | 30  | 6452  | 6460  | DEISEEPMK    |    |                          | Mascot |
| 1085.6201 | 1085.5427 | -0.0774 | -71 | 5331  | 5340  | ESGPEVVKLK   |    |                          | Mascot |
| 1088.5371 | 1088.5459 | 0.0088  | 8   | 24830 | 24838 | YALQYSSTR    |    |                          | Mascot |
| 1094.5112 | 1094.5358 | 0.0246  | 22  | 1518  | 1527  | NNAEIFSGDK   |    |                          | Mascot |
| 1118.6489 | 1118.6503 | 0.0014  | 1   | 14622 | 14631 | IIMTELVTA    |    |                          | Mascot |
| 1129.5596 | 1129.6097 | 0.0501  | 44  | 13592 | 13602 | ASNKVGGEPR   | 10 | 0                        | Mascot |
| 1129.6212 | 1129.6097 | -0.0115 | -10 | 7822  | 7830  | LNIEERDIK    |    |                          | Mascot |
| 1152.583  | 1152.7451 | 0.1621  | 141 | 19609 | 19617 | QKVTDVCFR    |    | Carbamidomethyl (C)[7]   | Mascot |
| 1152.583  | 1152.7451 | 0.1621  | 141 | 19609 | 19617 | QKVTDVCFR    | 3  | 0 Carbamidomethyl (C)[7] | Mascot |
| 1165.6324 | 1165.7454 | 0.113   | 97  | 11959 | 11967 | ITNYTIERR    |    |                          | Mascot |
| 1211.7106 | 1211.7114 | 0.0008  | 1   | 12383 | 12393 | QNAVNNLVLK   |    |                          | Mascot |
| 1257.699  | 1257.6921 | -0.0069 | -5  | 9324  | 9333  | SIFLLWEPPR   |    |                          | Mascot |
| 1274.5933 | 1274.6094 | 0.0161  | 13  | 18313 | 18323 | STDSYTCLTVK  |    | Carbamidomethyl (C)[7]   | Mascot |
| 1279.7256 | 1279.7507 | 0.0251  | 20  | 6359  | 6369  | EPEIPQPTLKK  |    |                          | Mascot |
| 1287.6328 | 1287.6692 | 0.0364  | 28  | 13851 | 13860 | KPKEADEWER   |    |                          | Mascot |
| 1287.6328 | 1287.6692 | 0.0364  | 28  | 13851 | 13860 | KPKEADEWER   |    |                          | Mascot |
| 1307.6147 | 1307.6226 | 0.0079  | 6   | 7356  | 7366  | EVSLDDTCQIK  |    | Carbamidomethyl (C)[8]   | Mascot |
| 1325.6254 | 1325.7559 | 0.1305  | 98  | 6025  | 6035  | TDEISEMKQTK  |    | Oxidation (M)[7]         | Mascot |
| 1325.7358 | 1325.7559 | 0.0201  | 15  | 12242 | 12253 | EKMVIHAGGVIR |    | Oxidation (M)[3]         | Mascot |
| 1326.7528 | 1326.7534 | 0.0006  | 0   | 13843 | 13853 | NLAYHVEKKPK  |    |                          | Mascot |

|           |           |         |     |       |       |                                  |        |
|-----------|-----------|---------|-----|-------|-------|----------------------------------|--------|
| 1327.6892 | 1327.7382 | 0.049   | 37  | 24454 | 24465 | YFLSLENVAGSK                     | Mascot |
| 1364.6804 | 1364.6943 | 0.0139  | 10  | 7577  | 7587  | DEARFEIELSR                      | Mascot |
| 1364.7096 | 1364.6943 | -0.0153 | -11 | 5233  | 5243  | LDNLFFIEEPK                      | Mascot |
| 1382.7678 | 1382.7772 | 0.0094  | 7   | 11941 | 11952 | AEQITLSWLPPK                     | Mascot |
| 1419.7478 | 1419.7725 | 0.0247  | 17  | 21700 | 21712 | FGLGEALESEIVR                    | Mascot |
| 1419.7743 | 1419.7725 | -0.0018 | -1  | 23314 | 23325 | LGHNVHLELPYK                     | Mascot |
| 1546.7716 | 1546.7904 | 0.0188  | 12  | 4304  | 4317  | KICNMESNIGNPVK                   | Mascot |
| 1627.8789 | 1627.7954 | -0.0835 | -51 | 27710 | 27724 | SLGDLSDEELLLPVK                  | Mascot |
| 1638.7944 | 1638.9172 | 0.1228  | 75  | 18517 | 18529 | VTSLMENHLYEFR                    | Mascot |
| 1715.9149 | 1715.9199 | 0.005   | 3   | 24830 | 24844 | YALQYSSTRAMAIK                   | Mascot |
| 1750.9221 | 1750.9111 | -0.011  | -6  | 1088  | 1103  | FGVDQTSATLIVKDEK                 | Mascot |
| 1816.8964 | 1816.9244 | 0.028   | 15  | 12523 | 12537 | DELEPPTIELDFRDK                  | Mascot |
| 1826.8412 | 1826.9792 | 0.138   | 76  | 12667 | 12682 | DMWTTVTSTATTHTCK                 | Mascot |
| 1826.9622 | 1826.9792 | 0.017   | 9   | 13770 | 13784 | LVKAPLVQNCYFFR                   | Mascot |
| 1840.944  | 1840.9486 | 0.0046  | 2   | 10637 | 10653 | IGEVTSSTVALSWHEPK                | Mascot |
| 1957.9865 | 1958.0155 | 0.029   | 15  | 1313  | 1329  | TQEGYYEAITAVELKSR                | Mascot |
| 1972.0056 | 1971.9252 | -0.0804 | -41 | 7350  | 7366  | HTLEIKEVSLDDTCQIK                | Mascot |
| 2042.095  | 2042.0739 | -0.0211 | -10 | 15690 | 15707 | ELSVLAKDINVLPSCDLR               | Mascot |
| 2191.9998 | 2192.0576 | 0.0578  | 26  | 18614 | 18632 | AAEEIQEQWTMCTPPTG<br>VK          | Mascot |
| 2211.1147 | 2211.1077 | -0.007  | -3  | 22748 | 22766 | VVWSVISEAMESRMVTV<br>QK          | Mascot |
| 2230.0808 | 2230.1951 | 0.1143  | 51  | 15840 | 15859 | DSITNMWTVTSSSVVTNS<br>FR         | Mascot |
| 2233.0076 | 2233.0791 | 0.0715  | 32  | 20713 | 20732 | VSAENETGVGECSDL<br>FYR           | Mascot |
| 2249.137  | 2249.0615 | -0.0755 | -34 | 6014  | 6032  | QKPEPSFELIKTDEISEMK              | Mascot |
| 2283.0269 | 2283.1763 | 0.1494  | 65  | 8248  | 8268  | MDDAGEYHCKLPASETT<br>GTLK        | Mascot |
| 2284.0583 | 2284.1758 | 0.1175  | 51  | 16046 | 16066 | ANTVNVVIDCAYTVADLQE<br>GCK       | Mascot |
| 2298.1348 | 2298.1748 | 0.04    | 17  | 10103 | 10124 | DPDSAPTIDVATQDIVVV<br>EGEK       | Mascot |
| 2300.1616 | 2300.1768 | 0.0152  | 7   | 18723 | 18743 | ESAQIETSSSYTSLVIDKV<br>SR        | Mascot |
| 2362.1165 | 2362.1865 | 0.07    | 30  | 25529 | 25549 | VAAANRYGTGEYLQSEV<br>VMCK        | Mascot |
| 2395.0911 | 2395.0928 | 0.0017  | 1   | 5543  | 5562  | QSATFECELSFDNAVVT<br>WYK         | Mascot |
| 2496.2625 | 2496.28   | 0.0175  | 7   | 22468 | 22491 | VTNICPGMIYEFKVA<br>AEN<br>AAGIGK | Mascot |
| 2512.2573 | 2512.3005 | 0.0432  | 17  | 22468 | 22491 | VTNICPGMIYEFKVA<br>AEN<br>AAGIGK | Mascot |
| 2515.2925 | 2515.2927 | 0.0002  | 0   | 2111  | 2134  | DVTSLLGATASFELSLSH<br>DDIPVK     | Mascot |
| 2531.248  | 2531.248  | 0       | 0   | 2422  | 2445  | LMIQTVRMSDAGEYSVV<br>AGASVSK     | Mascot |

|                     |                                          |             |         |       |              |          |                              |           |        |    |                    |      |        |        |  |  |        |
|---------------------|------------------------------------------|-------------|---------|-------|--------------|----------|------------------------------|-----------|--------|----|--------------------|------|--------|--------|--|--|--------|
|                     | 2697.4207                                | 2697.3069   | -0.1138 | -42   | 18875        | 18899    | LSVVDVTKTSVLSWEKP<br>IHDGGSR |           |        |    |                    |      |        |        |  |  | Mascot |
| 45                  | PREDICTED: cytohesin-2 [Danio rerio]     |             |         |       | gi 326674650 |          | 46666.9                      | 5.9       | 4      | 40 | 0                  | 30   | 70.384 |        |  |  |        |
| Peptide Information |                                          |             |         |       |              |          |                              |           |        |    |                    |      |        |        |  |  |        |
| Calc. Mass          |                                          | Obsrv. Mass | ± da    | ± ppm | Start Seq.   | End Seq. | Sequence                     | Ion Score | C. I.  | %  | Modification       | Rank | Result | Type   |  |  |        |
| 983.5097            |                                          | 983.5398    | 0.0301  | 31    | 149          | 155      | QFLWSFR                      | 31        | 79.898 |    |                    |      |        | Mascot |  |  |        |
| 983.5097            |                                          | 983.5398    | 0.0301  | 31    | 149          | 155      | QFLWSFR                      |           |        |    |                    |      |        | Mascot |  |  |        |
| 1015.4335           |                                          | 1015.5256   | 0.0921  | 91    | 166          | 173      | MMEAFAQR                     |           |        |    | Oxidation (M)[1,2] |      |        | Mascot |  |  |        |
| 1094.5476           |                                          | 1094.5358   | -0.0118 | -11   | 112          | 121      | TAIGDYLGER                   |           |        |    |                    |      |        | Mascot |  |  |        |
| 1826.8918           |                                          | 1826.9792   | 0.0874  | 48    | 112          | 127      | TAIGDYLGERDDFNIK             |           |        |    |                    |      |        | Mascot |  |  |        |
| 1826.8918           |                                          | 1826.9792   | 0.0874  | 48    | 112          | 127      | TAIGDYLGERDDFNIK             |           |        |    |                    |      |        | Mascot |  |  |        |
| 46                  | novel protein (zgc:136584) [Danio rerio] |             |         |       | gi 220678751 |          | 21233.8                      | 5.66      | 7      | 40 | 0                  |      |        |        |  |  |        |
| Peptide Information |                                          |             |         |       |              |          |                              |           |        |    |                    |      |        |        |  |  |        |
| Calc. Mass          |                                          | Obsrv. Mass | ± da    | ± ppm | Start Seq.   | End Seq. | Sequence                     | Ion Score | C. I.  | %  | Modification       | Rank | Result | Type   |  |  |        |
| 870.4614            |                                          | 870.5363    | 0.0749  | 86    | 48           | 54       | ALHDKMR                      |           |        |    |                    |      |        | Mascot |  |  |        |
| 1274.6885           |                                          | 1274.6094   | -0.0791 | -62   | 9            | 20       | CVSALLNGITQR                 |           |        |    |                    |      |        | Mascot |  |  |        |
| 1327.6865           |                                          | 1327.7382   | 0.0517  | 39    | 124          | 134      | WRVDLHTSASR                  |           |        |    |                    |      |        | Mascot |  |  |        |
| 1627.8108           |                                          | 1627.7954   | -0.0154 | -9    | 175          | 188      | MAELQESIDSIVHR               |           |        |    |                    |      |        | Mascot |  |  |        |
| 2211.0022           |                                          | 2211.1077   | 0.1055  | 48    | 35           | 52       | NELYAEMTEDEFRALHD<br>K       |           |        |    |                    |      |        | Mascot |  |  |        |
| 2283.092            |                                          | 2283.1763   | 0.0843  | 37    | 59           | 79       | SIASADMDQAQLEAFLTA<br>QTR    |           |        |    | Oxidation (M)[7]   |      |        | Mascot |  |  |        |
| 2395.1921           |                                          | 2395.0928   | -0.0993 | -41   | 59           | 80       | SIASADMDQAQLEAFLTA<br>QTRK   |           |        |    |                    |      |        | Mascot |  |  |        |
| 47                  | PREDICTED: titin [Danio rerio]           |             |         |       | gi 189523697 |          | 3199053                      | 5.99      | 67     | 40 | 0                  |      |        |        |  |  |        |
| Peptide Information |                                          |             |         |       |              |          |                              |           |        |    |                    |      |        |        |  |  |        |
| Calc. Mass          |                                          | Obsrv. Mass | ± da    | ± ppm | Start Seq.   | End Seq. | Sequence                     | Ion Score | C. I.  | %  | Modification       | Rank | Result | Type   |  |  |        |
| 826.4669            |                                          | 826.4445    | -0.0224 | -27   | 27841        | 27847    | LTSYKSK                      |           |        |    |                    |      |        | Mascot |  |  |        |
| 842.4478            |                                          | 842.5087    | 0.0609  | 72    | 21462        | 21468    | RDLPEGR                      |           |        |    |                    |      |        | Mascot |  |  |        |
| 850.4893            |                                          | 850.5414    | 0.0521  | 61    | 1620         | 1626     | YVVSARR                      |           |        |    |                    |      |        | Mascot |  |  |        |
| 856.4999            |                                          | 856.5221    | 0.0222  | 26    | 15948        | 15955    | RANSAPLK                     |           |        |    |                    |      |        | Mascot |  |  |        |
| 864.4825            |                                          | 864.499     | 0.0165  | 19    | 20943        | 20949    | FEVKDVK                      |           |        |    |                    |      |        | Mascot |  |  |        |
| 870.5267            |                                          | 870.5363    | 0.0096  | 11    | 1808         | 1814     | QRLAINR                      |           |        |    |                    |      |        | Mascot |  |  |        |
| 882.4791            |                                          | 882.5657    | 0.0866  | 98    | 14147        | 14153    | KEEHAIR                      |           |        |    |                    |      |        | Mascot |  |  |        |
| 911.4468            |                                          | 911.3981    | -0.0487 | -53   | 5424         | 5432     | YVPSSGSSK                    |           |        |    |                    |      |        | Mascot |  |  |        |

|           |           |         |     |       |       |                |    |                        |                               |
|-----------|-----------|---------|-----|-------|-------|----------------|----|------------------------|-------------------------------|
| 960.4567  | 960.4761  | 0.0194  | 20  | 23100 | 23108 | VQDTPAACR      |    |                        | Mascot                        |
| 960.4996  | 960.4761  | -0.0235 | -24 | 15118 | 15125 | LDEILSDR       | 14 | 0                      | Mascot                        |
| 983.4904  | 983.5398  | 0.0494  | 50  | 21564 | 21571 | DGHEIERK       |    |                        | Mascot                        |
| 983.6248  | 983.5398  | -0.085  | -86 | 8241  | 8248  | ILIIQDLR       |    |                        | Mascot                        |
| 991.4955  | 991.463   | -0.0325 | -33 | 13094 | 13102 | VAAENQFGR      |    |                        | Mascot                        |
| 996.536   | 996.5957  | 0.0597  | 60  | 2513  | 2520  | LTITETYSR      |    |                        | Mascot                        |
| 1002.4713 | 1002.5165 | 0.0452  | 45  | 5376  | 5383  | MYGITDFR       |    |                        | Mascot                        |
| 1015.524  | 1015.5256 | 0.0016  | 2   | 10972 | 10980 | QPLEVAACK      |    | Carbamidomethyl (C)[8] | Mascot                        |
| 1051.6146 | 1051.712  | 0.0974  | 93  | 17765 | 17774 | VSEKPLPPGK     |    |                        | Mascot                        |
| 1077.4769 | 1077.5089 | 0.032   | 30  | 6453  | 6461  | DEISEEPMK      |    |                        | Mascot                        |
| 1085.6201 | 1085.5427 | -0.0774 | -71 | 5332  | 5341  | ESGPEVVKLK     |    |                        | Mascot                        |
| 1088.5371 | 1088.5459 | 0.0088  | 8   | 24831 | 24839 | YALQYSSTR      |    |                        | Mascot                        |
| 1094.5112 | 1094.5358 | 0.0246  | 22  | 1518  | 1527  | NNAEIFSGDK     |    |                        | Mascot                        |
| 1118.6489 | 1118.6503 | 0.0014  | 1   | 14623 | 14632 | IIMTELVTA      |    |                        | Mascot                        |
| 1129.5596 | 1129.6097 | 0.0501  | 44  | 13593 | 13603 | ASNKVGDEPR     | 10 | 0                      | Mascot                        |
| 1129.6212 | 1129.6097 | -0.0115 | -10 | 7823  | 7831  | LNIEERDIK      |    |                        | Mascot                        |
| 1152.583  | 1152.7451 | 0.1621  | 141 | 19610 | 19618 | QKVTDVCFR      |    | Carbamidomethyl (C)[7] | Mascot                        |
| 1152.583  | 1152.7451 | 0.1621  | 141 | 19610 | 19618 | QKVTDVCFR      | 3  | 0                      | Carbamidomethyl (C)[7] Mascot |
| 1165.6324 | 1165.7454 | 0.113   | 97  | 11960 | 11968 | ITNYTIERR      |    |                        | Mascot                        |
| 1211.7106 | 1211.7114 | 0.0008  | 1   | 12384 | 12394 | QNAVNNLVK      |    |                        | Mascot                        |
| 1257.699  | 1257.6921 | -0.0069 | -5  | 9325  | 9334  | SIFLLWEPPR     |    |                        | Mascot                        |
| 1274.5933 | 1274.6094 | 0.0161  | 13  | 18314 | 18324 | STDSYTCLTVK    |    | Carbamidomethyl (C)[7] | Mascot                        |
| 1279.7256 | 1279.7507 | 0.0251  | 20  | 6360  | 6370  | EPEIQPTLKK     |    |                        | Mascot                        |
| 1287.6328 | 1287.6692 | 0.0364  | 28  | 13852 | 13861 | KPKEADEWER     |    |                        | Mascot                        |
| 1287.6328 | 1287.6692 | 0.0364  | 28  | 13852 | 13861 | KPKEADEWER     |    |                        | Mascot                        |
| 1307.6147 | 1307.6226 | 0.0079  | 6   | 7357  | 7367  | EVSLDDTCQIK    |    | Carbamidomethyl (C)[8] | Mascot                        |
| 1325.7358 | 1325.7559 | 0.0201  | 15  | 12243 | 12254 | EKMVIHAGGVIR   |    | Oxidation (M)[3]       | Mascot                        |
| 1325.7358 | 1325.7559 | 0.0201  | 15  | 12243 | 12254 | EKMVIHAGGVIR   |    | Oxidation (M)[3]       | Mascot                        |
| 1326.7528 | 1326.7534 | 0.0006  | 0   | 13844 | 13854 | NLAYHVEKKPK    |    |                        | Mascot                        |
| 1327.6892 | 1327.7382 | 0.049   | 37  | 24455 | 24466 | YFLSLENVAGSK   |    |                        | Mascot                        |
| 1364.6804 | 1364.6943 | 0.0139  | 10  | 7578  | 7588  | DEARFEIELSR    |    |                        | Mascot                        |
| 1364.7096 | 1364.6943 | -0.0153 | -11 | 5234  | 5244  | LDNLFFIEEPK    |    |                        | Mascot                        |
| 1382.7678 | 1382.7772 | 0.0094  | 7   | 11942 | 11953 | AEQITLSWLPPK   |    |                        | Mascot                        |
| 1419.7478 | 1419.7725 | 0.0247  | 17  | 21701 | 21713 | FGLGEALESEIVR  |    |                        | Mascot                        |
| 1419.7743 | 1419.7725 | -0.0018 | -1  | 23315 | 23326 | LGHNHLELPYK    |    |                        | Mascot                        |
| 1546.7716 | 1546.7904 | 0.0188  | 12  | 4305  | 4318  | KICNMESNIGNPVK |    |                        | Mascot                        |

|           |                                     |         |     |             |       |                               |      |   |    |                                            |  |  |        |
|-----------|-------------------------------------|---------|-----|-------------|-------|-------------------------------|------|---|----|--------------------------------------------|--|--|--------|
| 1627.8789 | 1627.7954                           | -0.0835 | -51 | 27711       | 27725 | SLGDLSDEELLPPVK               |      |   |    |                                            |  |  | Mascot |
| 1638.9061 | 1638.9172                           | 0.0111  | 7   | 5355        | 5368  | DIDIVELLRNVDPK                |      |   |    |                                            |  |  | Mascot |
| 1715.9149 | 1715.9199                           | 0.005   | 3   | 24831       | 24845 | YALQYSSTRAMAIK                |      |   |    |                                            |  |  | Mascot |
| 1750.9221 | 1750.9111                           | -0.011  | -6  | 1088        | 1103  | FGVDQTSATLIVKDEK              |      |   |    |                                            |  |  | Mascot |
| 1816.8964 | 1816.9244                           | 0.028   | 15  | 12524       | 12538 | DELEPPTIELDFRDK               |      |   |    |                                            |  |  | Mascot |
| 1826.8412 | 1826.9792                           | 0.138   | 76  | 12668       | 12683 | DMWTTVTSTATTHTCK              |      |   |    | Oxidation (M)[2]                           |  |  | Mascot |
| 1826.9622 | 1826.9792                           | 0.017   | 9   | 13771       | 13785 | LVKAPLVQCEYFFR                |      |   |    |                                            |  |  | Mascot |
| 1840.944  | 1840.9486                           | 0.0046  | 2   | 10638       | 10654 | IGEVTSSTVALSWHEPK             |      |   |    |                                            |  |  | Mascot |
| 1957.9865 | 1958.0155                           | 0.029   | 15  | 1313        | 1329  | TQEGYYEAITAVELKSR             |      |   |    |                                            |  |  | Mascot |
| 1972.0056 | 1971.9252                           | -0.0804 | -41 | 7351        | 7367  | HTLEIKEVSLDDTCQIK             |      |   |    |                                            |  |  | Mascot |
| 2042.095  | 2042.0739                           | -0.0211 | -10 | 15691       | 15708 | ELSVLAKDINVLPSCDLR            |      |   |    | Carbamidomethyl (C)[15]                    |  |  | Mascot |
| 2191.9998 | 2192.0576                           | 0.0578  | 26  | 18615       | 18633 | AAEEIQEQWTMCTPPTG<br>VK       |      |   |    | Carbamidomethyl (C)[12], Oxidation (M)[11] |  |  | Mascot |
| 2211.1147 | 2211.1077                           | -0.007  | -3  | 22749       | 22767 | VVWSVISEAMESRMVTV<br>QK       |      |   |    | Oxidation (M)[10,14]                       |  |  | Mascot |
| 2230.0808 | 2230.1951                           | 0.1143  | 51  | 15841       | 15860 | DSITNMWVTVSSSVVTNS<br>FR      |      |   |    |                                            |  |  | Mascot |
| 2233.0076 | 2233.0791                           | 0.0715  | 32  | 20714       | 20733 | VSAENETGVGECSDLSL<br>FYR      |      |   |    | Carbamidomethyl (C)[12]                    |  |  | Mascot |
| 2249.2175 | 2249.0615                           | -0.156  | -69 | 7473        | 7492  | DIKVVKPIYGVELFDGETA<br>R      |      |   |    |                                            |  |  | Mascot |
| 2283.0269 | 2283.1763                           | 0.1494  | 65  | 8249        | 8269  | MDDAGEYHCKLPASETT<br>GTLK     |      |   |    | Oxidation (M)[1]                           |  |  | Mascot |
| 2284.0583 | 2284.1758                           | 0.1175  | 51  | 16047       | 16067 | ANTVNVIDCAYTVADLQE<br>GCK     |      |   |    | Carbamidomethyl (C)[9]                     |  |  | Mascot |
| 2298.1348 | 2298.1748                           | 0.04    | 17  | 10104       | 10125 | DPDSAPTIDVATQDIVVV<br>EGEK    |      |   |    |                                            |  |  | Mascot |
| 2300.1616 | 2300.1768                           | 0.0152  | 7   | 18724       | 18744 | ESAIQETSSSYTSLVIDKV<br>SR     |      |   |    |                                            |  |  | Mascot |
| 2362.1165 | 2362.1865                           | 0.07    | 30  | 25530       | 25550 | VAAANRYGTGEYLQSEV<br>VMCK     |      |   |    | Carbamidomethyl (C)[20], Oxidation (M)[19] |  |  | Mascot |
| 2395.0911 | 2395.0928                           | 0.0017  | 1   | 5544        | 5563  | QSATFECELSFDNAVVT<br>WYK      |      |   |    | Carbamidomethyl (C)[7]                     |  |  | Mascot |
| 2496.2625 | 2496.28                             | 0.0175  | 7   | 22469       | 22492 | VTNICPGMIYEFKVAEN<br>AAGIGK   |      |   |    |                                            |  |  | Mascot |
| 2512.2573 | 2512.3005                           | 0.0432  | 17  | 22469       | 22492 | VTNICPGMIYEFKVAEN<br>AAGIGK   |      |   |    | Oxidation (M)[8]                           |  |  | Mascot |
| 2515.2925 | 2515.2927                           | 0.0002  | 0   | 2111        | 2134  | DVTSLLGATASFELSLSH<br>DDIPVK  |      |   |    |                                            |  |  | Mascot |
| 2531.248  | 2531.248                            | 0       | 0   | 2422        | 2445  | LMIQTVRMSDAGEYSVV<br>AGASVSK  |      |   |    | Oxidation (M)[2,8]                         |  |  | Mascot |
| 2697.4207 | 2697.3069                           | -0.1138 | -42 | 18876       | 18900 | LSVVDVTKTSVSLSWEKP<br>IHDGGSR |      |   |    |                                            |  |  | Mascot |
| 48        | ADP/ATP translocase 2 [Danio rerio] |         |     | gi 27545251 |       | 32742.1                       | 9.78 | 9 | 40 | 0                                          |  |  |        |

Peptide Information

| Calc. Mass | Obsrv. Mass | ± da   | ± ppm | Start Seq. | End Seq. | Sequence | Ion Score | C. I. % | Modification | Rank | Result | Type |
|------------|-------------|--------|-------|------------|----------|----------|-----------|---------|--------------|------|--------|------|
| 856.4998   | 856.5221    | 0.0223 | 26    | 73         | 80       | GNLANVIR |           |         |              |      | Mascot |      |
| 996.4536   | 996.5957    | 0.1421 | 143   | 237        | 244      | RMMMQSGR |           |         |              |      | Mascot |      |

|    |                                                    |           |         |     |     |              |                      |                        |   |    |   |    |        |        |
|----|----------------------------------------------------|-----------|---------|-----|-----|--------------|----------------------|------------------------|---|----|---|----|--------|--------|
|    | 1094.5841                                          | 1094.5358 | -0.0483 | -44 | 44  | 52           | QITADKQYK            |                        |   |    |   |    |        | Mascot |
|    | 1287.6912                                          | 1287.6692 | -0.022  | -17 | 53  | 63           | GIMDCVVRIPK          | Carbamidomethyl (C)[5] |   |    |   |    |        | Mascot |
|    | 1287.6912                                          | 1287.6692 | -0.022  | -17 | 53  | 63           | GIMDCVVRIPK          | Carbamidomethyl (C)[5] |   |    |   |    |        | Mascot |
|    | 1327.6497                                          | 1327.7382 | 0.0885  | 67  | 50  | 60           | QYKGIMDCVVR          | Oxidation (M)[6]       |   |    |   |    |        | Mascot |
|    | 1627.84                                            | 1627.7954 | -0.0446 | -27 | 281 | 295          | GMGGAFLVLVLYDELK     | Oxidation (M)[2]       |   |    |   |    |        | Mascot |
|    | 1715.788                                           | 1715.9199 | 0.1319  | 77  | 246 | 260          | GADIMYSGTIDCWRL      |                        |   |    |   |    |        | Mascot |
|    | 1957.9728                                          | 1958.0155 | 0.0427  | 22  | 189 | 206          | AAYFGIYDTAKGMLPDPK   |                        |   |    |   |    |        | Mascot |
|    | 2284.2236                                          | 2284.1758 | -0.0478 | -21 | 73  | 92           | GNLANVIRYFPTQALNFAFK |                        |   |    |   |    |        | Mascot |
| 49 | PREDICTED: cytohesin-3-like, partial [Danio rerio] |           |         |     |     | q j326666259 | 69955.2              | 8.96                   | 4 | 39 | 0 | 31 | 79.898 |        |

| Calc. Mass | Obsrv. Mass | ± da    | ± ppm | Start Seq. | End Sequence Seq. | Ion Score | C. I. % Modification | Rank | Result Type |
|------------|-------------|---------|-------|------------|-------------------|-----------|----------------------|------|-------------|
| 983.5097   | 983.5398    | 0.0301  | 31    | 354        | 360 QFLWSFR       | 31        | 79.898               |      | Mascot      |
| 983.5097   | 983.5398    | 0.0301  | 31    | 354        | 360 QFLWSFR       |           |                      |      | Mascot      |
| 1002.5101  | 1002.5165   | 0.0064  | 6     | 236        | 243 ELLDDIER      |           |                      |      | Mascot      |
| 1015.6258  | 1015.5256   | -0.1002 | -99   | 116        | 124 VSNVKVLTR     |           |                      |      | Mascot      |
| 1326.6293  | 1326.7534   | 0.1241  | 94    | 368        | 378 IDRMMEAFASR   |           |                      |      | Mascot      |

| Calc. Mass | Obsrv. Mass | ± da   | ± ppm | Start Seq. | End Sequence | Ion Score | C. I. % Modification | Rank | Result Type |
|------------|-------------|--------|-------|------------|--------------|-----------|----------------------|------|-------------|
| 983.5097   | 983.5398    | 0.0301 | 31    | 150        | 156 QFLWSFR  | 31        | 79.898               | 2    | Mascot      |

| Rank | Protein Name                  | Accession No. | Protein MW | Protein PI | Pep. Count | Protein Score | Protein Score C. I. % | Total Ion Score | Total Ion C. I. % |
|------|-------------------------------|---------------|------------|------------|------------|---------------|-----------------------|-----------------|-------------------|
| 1    | peroxiredoxin-1 [Danio rerio] | gi 61806512   | 21975.2    | 6.42       | 15         | 760           | 100                   | 617             | 100               |

| Calc. Mass | Obsrv. Mass | $\pm$ da | $\pm$ ppm | Start Seq. | End Seq. | Sequence | Ion Score | C. I. % | Modification | Rank | Result Type |
|------------|-------------|----------|-----------|------------|----------|----------|-----------|---------|--------------|------|-------------|
| 833.4363   | 833.4318    | -0.0045  | -5        | 152        | 158      | SIDETLR  | 46        | 99.314  |              |      | Mascot      |
| 833.4363   | 833.4318    | -0.0045  | -5        | 152        | 158      | SIDETLR  |           |         |              |      | Mascot      |
| 920.5087   | 920.5007    | -0.008   | -9        | 129        | 136      | GLFIIDDK |           |         |              |      | Mascot      |

|           |           |         |     |     |     |                          |     |        |                           |  |        |
|-----------|-----------|---------|-----|-----|-----|--------------------------|-----|--------|---------------------------|--|--------|
| 952.437   | 952.427   | -0.01   | -10 | 121 | 128 | EDEGIAYR                 |     |        |                           |  | Mascot |
| 1196.631  | 1196.6222 | -0.0088 | -7  | 159 | 168 | LVQAFQFTDK               |     |        |                           |  | Mascot |
| 1196.631  | 1196.6222 | -0.0088 | -7  | 159 | 168 | LVQAFQFTDK               | 77  | 100    |                           |  | Mascot |
| 1225.6899 | 1225.6821 | -0.0078 | -6  | 141 | 151 | QITINDLPVGR              |     |        |                           |  | Mascot |
| 1225.6899 | 1225.6821 | -0.0078 | -6  | 141 | 151 | QITINDLPVGR              | 98  | 100    |                           |  | Mascot |
| 1244.6481 | 1244.6156 | -0.0325 | -26 | 182 | 192 | DTIKPDVNQSK              |     |        |                           |  | Mascot |
| 1291.61   | 1291.6036 | -0.0064 | -5  | 19  | 30  | AVMPDGGQFGDVR            | 94  | 100    |                           |  | Mascot |
| 1291.61   | 1291.6036 | -0.0064 | -5  | 19  | 30  | AVMPDGGQFGDVR            |     |        |                           |  | Mascot |
| 1307.6049 | 1307.5983 | -0.0066 | -5  | 19  | 30  | AVMPDGGQFGDVR            | 66  | 99.993 | Oxidation (M)[3]          |  | Mascot |
| 1307.6049 | 1307.5983 | -0.0066 | -5  | 19  | 30  | AVMPDGGQFGDVR            |     |        | Oxidation (M)[3]          |  | Mascot |
| 1359.7994 | 1359.7915 | -0.0079 | -6  | 129 | 140 | GLFIIDDKGILR             |     |        |                           |  | Mascot |
| 1422.6947 | 1422.6852 | -0.0095 | -7  | 169 | 181 | HGEVCPAGWKPGK            |     |        | Carbamidomethyl (C)[5]    |  | Mascot |
| 1627.7961 | 1627.7859 | -0.0102 | -6  | 115 | 128 | DYGVLKEDEGIAYR           |     |        |                           |  | Mascot |
| 1627.7961 | 1627.7859 | -0.0102 | -6  | 115 | 128 | DYGVLKEDEGIAYR           | 123 | 100    |                           |  | Mascot |
| 1737.9316 | 1737.906  | -0.0256 | -15 | 94  | 110 | QGGLGPMNVPLVADTLR        |     |        |                           |  | Mascot |
| 1753.9265 | 1753.917  | -0.0095 | -5  | 94  | 110 | QGGLGPMNVPLVADTLR        |     |        | Oxidation (M)[7]          |  | Mascot |
| 1753.9265 | 1753.917  | -0.0095 | -5  | 94  | 110 | QGGLGPMNVPLVADTLR        | 102 | 100    | Oxidation (M)[7]          |  | Mascot |
| 1866.0265 | 1866.0149 | -0.0116 | -6  | 93  | 110 | KQGGLGPMNVPLVADTLR       |     |        |                           |  | Mascot |
| 1882.0215 | 1882.0129 | -0.0086 | -5  | 93  | 110 | KQGGLGPMNVPLVADTLR       |     |        | Oxidation (M)[8]          |  | Mascot |
| 1882.0215 | 1882.0129 | -0.0086 | -5  | 93  | 110 | KQGGLGPMNVPLVADTLR       | 75  | 100    | Oxidation (M)[8]          |  | Mascot |
| 2458.1641 | 2458.1487 | -0.0154 | -6  | 69  | 89  | INCEIIGASVDSHFCHLA WTK   |     |        | Carbamidomethyl (C)[3,15] |  | Mascot |
| 2472.2163 | 2472.1631 | -0.0532 | -22 | 68  | 89  | KINCEIIGASVDSHFCHLA WTK  |     |        |                           |  | Mascot |
| 2586.259  | 2586.249  | -0.01   | -4  | 68  | 89  | KINCEIIGASVDSHFCHLA WTK  |     |        | Carbamidomethyl (C)[4,16] |  | Mascot |
| 2600.3079 | 2600.2476 | -0.0603 | -23 | 159 | 181 | LVQAFQFTDKHGEVCPA GWKPGK |     |        | Carbamidomethyl (C)[15]   |  | Mascot |

### Peptide Information

|   |                               |           |         |     |             |     |                             |      |        |                           |     |        |     |
|---|-------------------------------|-----------|---------|-----|-------------|-----|-----------------------------|------|--------|---------------------------|-----|--------|-----|
|   | 1196.631                      | 1196.6222 | -0.0088 | -7  | 159         | 168 | LVQAFQFTDK                  | 77   | 100    |                           |     | Mascot |     |
|   | 1225.6899                     | 1225.6821 | -0.0078 | -6  | 141         | 151 | QITINDLPVGR                 |      |        |                           |     | Mascot |     |
|   | 1225.6899                     | 1225.6821 | -0.0078 | -6  | 141         | 151 | QITINDLPVGR                 | 98   | 100    |                           |     | Mascot |     |
|   | 1244.6481                     | 1244.6156 | -0.0325 | -26 | 182         | 192 | DTIKPDVNQSK                 |      |        |                           |     | Mascot |     |
|   | 1291.61                       | 1291.6036 | -0.0064 | -5  | 19          | 30  | AVMPDGQFGDVR                | 94   | 100    |                           |     | Mascot |     |
|   | 1291.61                       | 1291.6036 | -0.0064 | -5  | 19          | 30  | AVMPDGQFGDVR                |      |        |                           |     | Mascot |     |
|   | 1307.6049                     | 1307.5983 | -0.0066 | -5  | 19          | 30  | AVMPDGQFGDVR                | 66   | 99.993 | Oxidation (M)[3]          |     | Mascot |     |
|   | 1307.6049                     | 1307.5983 | -0.0066 | -5  | 19          | 30  | AVMPDGQFGDVR                |      |        | Oxidation (M)[3]          |     | Mascot |     |
|   | 1359.7994                     | 1359.7915 | -0.0079 | -6  | 129         | 140 | GLFIIDDKGILR                |      |        |                           |     | Mascot |     |
|   | 1422.6947                     | 1422.6852 | -0.0095 | -7  | 169         | 181 | HGEVCPAGWKPGK               |      |        | Carbamidomethyl (C)[5]    |     | Mascot |     |
|   | 1627.7961                     | 1627.7859 | -0.0102 | -6  | 115         | 128 | DYGVLKEDEGIAYR              |      |        |                           |     | Mascot |     |
|   | 1627.7961                     | 1627.7859 | -0.0102 | -6  | 115         | 128 | DYGVLKEDEGIAYR              | 123  | 100    |                           |     | Mascot |     |
|   | 1737.9316                     | 1737.906  | -0.0256 | -15 | 94          | 110 | QGGLGPMNVPLVADTLR           |      |        |                           |     | Mascot |     |
|   | 1753.9265                     | 1753.917  | -0.0095 | -5  | 94          | 110 | QGGLGPMNVPLVADTLR           |      |        | Oxidation (M)[7]          |     | Mascot |     |
|   | 1753.9265                     | 1753.917  | -0.0095 | -5  | 94          | 110 | QGGLGPMNVPLVADTLR           | 102  | 100    | Oxidation (M)[7]          |     | Mascot |     |
|   | 1866.0265                     | 1866.0149 | -0.0116 | -6  | 93          | 110 | KQGGLGPMNVPLVADTL<br>R      |      |        |                           |     | Mascot |     |
|   | 1882.0215                     | 1882.0129 | -0.0086 | -5  | 93          | 110 | KQGGLGPMNVPLVADTL<br>R      |      |        | Oxidation (M)[8]          |     | Mascot |     |
|   | 1882.0215                     | 1882.0129 | -0.0086 | -5  | 93          | 110 | KQGGLGPMNVPLVADTL<br>R      | 75   | 100    | Oxidation (M)[8]          |     | Mascot |     |
|   | 2458.1641                     | 2458.1487 | -0.0154 | -6  | 69          | 89  | INCEIIGASVDSHFCHLA<br>WTK   |      |        | Carbamidomethyl (C)[3,15] |     | Mascot |     |
|   | 2472.2163                     | 2472.1631 | -0.0532 | -22 | 68          | 89  | KINCEIIGASVDSHFCHLA<br>WTK  |      |        |                           |     | Mascot |     |
|   | 2586.259                      | 2586.249  | -0.01   | -4  | 68          | 89  | KINCEIIGASVDSHFCHLA<br>WTK  |      |        | Carbamidomethyl (C)[4,16] |     | Mascot |     |
|   | 2600.3079                     | 2600.2476 | -0.0603 | -23 | 159         | 181 | LVQAFQFTDKHGEVCPA<br>GWKPGK |      |        | Carbamidomethyl (C)[15]   |     | Mascot |     |
| 3 | peroxiredoxin-2 [Danio rerio] |           |         |     | gi 50539996 |     | 21837.2                     | 5.93 | 3      | 233                       | 100 | 221    | 100 |

Peptide Information

| Calc. Mass | Obsrv. Mass | ± da    | ± ppm | Start Seq. | End Seq. | Sequence       | Ion Score | C. I. | % Modification | Rank | Result Type |
|------------|-------------|---------|-------|------------|----------|----------------|-----------|-------|----------------|------|-------------|
| 952.437    | 952.427     | -0.01   | -10   | 120        | 127      | EDEGIAYR       |           |       |                |      | Mascot      |
| 1225.6899  | 1225.6821   | -0.0078 | -6    | 140        | 150      | QITINDLPVGR    |           |       |                |      | Mascot      |
| 1225.6899  | 1225.6821   | -0.0078 | -6    | 140        | 150      | QITINDLPVGR    | 98        | 100   |                |      | Mascot      |
| 1627.7961  | 1627.7859   | -0.0102 | -6    | 114        | 127      | DYGVLKEDEGIAYR |           |       |                |      | Mascot      |
| 1627.7961  | 1627.7859   | -0.0102 | -6    | 114        | 127      | DYGVLKEDEGIAYR | 123       | 100   |                |      | Mascot      |

|   |                                                  |  |  |  |              |  |          |      |    |    |       |  |  |
|---|--------------------------------------------------|--|--|--|--------------|--|----------|------|----|----|-------|--|--|
| 4 | PREDICTED: coagulation factor VIII [Danio rerio] |  |  |  | gi 326673255 |  | 189715.5 | 6.26 | 22 | 63 | 97.87 |  |  |
|---|--------------------------------------------------|--|--|--|--------------|--|----------|------|----|----|-------|--|--|

Peptide Information

| Calc. Mass | Obsrv. Mass | ± da | ± ppm | Start | End | Sequence | Ion | C. I. | % Modification | Rank | Result Type |
|------------|-------------|------|-------|-------|-----|----------|-----|-------|----------------|------|-------------|
|------------|-------------|------|-------|-------|-----|----------|-----|-------|----------------|------|-------------|



|   |                                              |           |         | Seq. | Seq.         | Score   |                                  |                                            |           |
|---|----------------------------------------------|-----------|---------|------|--------------|---------|----------------------------------|--------------------------------------------|-----------|
|   | 833.4475                                     | 833.4318  | -0.0157 | -19  | 564          | 570     | SQSLDKR                          |                                            | Mascot    |
|   | 833.4475                                     | 833.4318  | -0.0157 | -19  | 564          | 570     | SQSLDKR                          |                                            | Mascot    |
|   | 842.4631                                     | 842.5048  | 0.0417  | 49   | 1552         | 1558    | ANAWRPK                          |                                            | Mascot    |
|   | 850.4199                                     | 850.5382  | 0.1183  | 139  | 707          | 713     | ERGMSVR                          | Oxidation (M)[4]                           | Mascot    |
|   | 864.4937                                     | 864.4883  | -0.0054 | -6   | 51           | 58      | KFASGVQK                         |                                            | Mascot    |
|   | 920.4319                                     | 920.5007  | 0.0688  | 75   | 194          | 201     | TDALTEDR                         |                                            | Mascot    |
|   | 1043.5632                                    | 1043.5184 | -0.0448 | -43  | 1650         | 1658    | GWVNDIALR                        |                                            | Mascot    |
|   | 1218.6047                                    | 1218.603  | -0.0017 | -1   | 742          | 752     | NFPNPRGTMGK                      |                                            | Mascot    |
|   | 1225.5154                                    | 1225.6821 | 0.1667  | 136  | 1145         | 1155    | QGPSASEFDCK                      | Carbamidomethyl (C)[10]                    | Mascot    |
|   | 1225.5154                                    | 1225.6821 | 0.1667  | 136  | 1145         | 1155    | QGPSASEFDCK                      | Carbamidomethyl (C)[10]                    | Mascot    |
|   | 1289.6848                                    | 1289.5952 | -0.0896 | -69  | 910          | 920     | ELWSVGKTNQK                      |                                            | Mascot    |
|   | 1307.6299                                    | 1307.5983 | -0.0316 | -24  | 763          | 774     | NRTVTDSGSNTR                     | 3 0                                        | Mascot    |
|   | 1307.6299                                    | 1307.5983 | -0.0316 | -24  | 763          | 774     | NRTVTDSGSNTR                     |                                            | Mascot    |
|   | 1313.7535                                    | 1313.5842 | -0.1693 | -129 | 452          | 463     | TTGRTLIGPELR                     |                                            | Mascot    |
|   | 1422.6166                                    | 1422.6852 | 0.0686  | 48   | 924          | 936     | AMSDNEVEDSGR                     |                                            | Mascot    |
|   | 1438.6115                                    | 1438.6874 | 0.0759  | 53   | 924          | 936     | AMSDNEVEDSGR                     | Oxidation (M)[2]                           | Mascot    |
|   | 1707.9025                                    | 1707.8699 | -0.0326 | -19  | 1519         | 1534    | RSIPNSSISASSFLNK                 |                                            | Mascot    |
|   | 1707.9064                                    | 1707.8699 | -0.0365 | -21  | 1240         | 1255    | FAAINGYVSETLPGLR                 |                                            | Mascot    |
|   | 1720.8978                                    | 1720.8965 | -0.0013 | -1   | 508          | 522     | SLAVPPGEIMTYLWK                  | Oxidation (M)[10]                          | Mascot    |
|   | 1729.7222                                    | 1729.8479 | 0.1257  | 73   | 958          | 973     | YSEMGLEPASNSSDDK                 |                                            | Mascot    |
|   | 1735.9517                                    | 1735.9041 | -0.0476 | -27  | 205          | 219     | VPEFILLLSVFDESK                  |                                            | Mascot    |
|   | 2224.9373                                    | 2225.1084 | 0.1711  | 77   | 958          | 977     | YSEMGLEPASNSSDDKM<br>YGK         | Oxidation (M)[4]                           | Mascot    |
|   | 2233.1216                                    | 2233.0732 | -0.0484 | -22  | 1334         | 1352    | AKLLVYNPQCNPIGMQ<br>SR           | Carbamidomethyl (C)[10], Oxidation (M)[16] | Mascot    |
|   | 2586.396                                     | 2586.249  | -0.147  | -57  | 540          | 563     | IYQSTLDPARDVASGLVG<br>PLIICK     | Carbamidomethyl (C)[23]                    | Mascot    |
|   | 3337.5356                                    | 3337.751  | 0.2154  | 65   | 1413         | 1440    | TSMGLSEFFTILYSISYSN<br>DQENWSVYR |                                            | Mascot    |
|   | 3338.4753                                    | 3338.7383 | 0.263   | 79   | 355          | 383     | HTNDDEEDEDNMFVS<br>VFKQGGPISVLR  | Oxidation (M)[14]                          | Mascot    |
| 5 | hypothetical protein LOC562814 [Danio rerio] |           |         |      | gi 148222512 | 52400.1 | 6.42                             | 12                                         | 49 47.716 |

Peptide Information

| Calc. Mass | Obsrv. Mass | ± da    | ± ppm | Start Seq. | End Sequence Seq. | Ion Score  | C. I. % Modification   | Rank Result Type |
|------------|-------------|---------|-------|------------|-------------------|------------|------------------------|------------------|
| 864.4825   | 864.4883    | 0.0058  | 7     | 153        | 159               | IKAEFEK    |                        | Mascot           |
| 924.4495   | 924.3996    | -0.0499 | -54   | 98         | 104               | LFCLIEDK   | Carbamidomethyl (C)[3] | Mascot           |
| 1165.6285  | 1165.738    | 0.1095  | 94    | 96         | 104               | LKLFCLIEDK | Carbamidomethyl (C)[5] | Mascot           |

|   |                               |           |         |      |             |     |                    |      |    |    |        |                           |  |        |
|---|-------------------------------|-----------|---------|------|-------------|-----|--------------------|------|----|----|--------|---------------------------|--|--------|
|   | 1247.6115                     | 1247.6447 | 0.0332  | 27   | 188         | 198 | DEEEATITALR        |      |    |    |        |                           |  | Mascot |
|   | 1291.6245                     | 1291.6036 | -0.0209 | -16  | 45          | 54  | TTLECPVCRR         |      |    |    |        | Carbamidomethyl (C)[5,8]  |  | Mascot |
|   | 1291.6245                     | 1291.6036 | -0.0209 | -16  | 45          | 54  | TTLECPVCRR         |      |    |    |        | Carbamidomethyl (C)[5,8]  |  | Mascot |
|   | 1307.6447                     | 1307.5983 | -0.0464 | -35  | 43          | 53  | TKTTLECPVCR        | 8    | 0  |    |        | Carbamidomethyl (C)[10]   |  | Mascot |
|   | 1307.6447                     | 1307.5983 | -0.0464 | -35  | 43          | 53  | TKTTLECPVCR        |      |    |    |        | Carbamidomethyl (C)[7]    |  | Mascot |
|   | 1329.7161                     | 1329.5754 | -0.1407 | -106 | 155         | 165 | AEFEKTVQHIK        |      |    |    |        |                           |  | Mascot |
|   | 1422.741                      | 1422.6852 | -0.0558 | -39  | 55          | 67  | LSSHDPNCLVLK       |      |    |    |        |                           |  | Mascot |
|   | 1735.7738                     | 1735.9041 | 0.1303  | 75   | 395         | 408 | QDLECVRVLDLDCDR    |      |    |    |        | Carbamidomethyl (C)[5]    |  | Mascot |
|   | 1865.8381                     | 1866.0149 | 0.1768  | 95   | 105         | 121 | QPACVVCATSQQHDNHK  |      |    |    |        |                           |  | Mascot |
|   | 2019.9353                     | 2020.0632 | 0.1279  | 63   | 188         | 204 | DEEEATITALREEEEQK  |      |    |    |        |                           |  | Mascot |
|   | 2210.9805                     | 2211.0928 | 0.1123  | 51   | 78          | 95  | NERCSSFVEEICSLHSEK |      |    |    |        | Carbamidomethyl (C)[4,12] |  | Mascot |
| 6 | Igfbp2b protein [Danio rerio] |           |         |      | gi 41351181 |     | 30714.9            | 6.59 | 11 | 48 | 35.677 |                           |  |        |

#### Peptide Information

| Calc. Mass | Obsrv. Mass | ± da    | ± ppm | Start Seq. | End Seq. | Sequence                | Ion Score | C. I. | % Modification                | Rank | Result Type |
|------------|-------------|---------|-------|------------|----------|-------------------------|-----------|-------|-------------------------------|------|-------------|
| 842.3824   | 842.5048    | 0.1224  | 145   | 227        | 233      | MSVNGYR                 |           |       | Oxidation (M)[1]              |      | Mascot      |
| 1242.5718  | 1242.5426   | -0.0292 | -23   | 224        | 233      | QCKMSVNGYR              |           |       | Carbamidomethyl (C)[2]        |      | Mascot      |
| 1244.5753  | 1244.6156   | 0.0403  | 32    | 106        | 117      | VDTEPSGSAEPR            |           |       |                               |      | Mascot      |
| 1422.5381  | 1422.6852   | 0.1471  | 103   | 52         | 63       | EPGCGCCPVCAR            |           |       | Carbamidomethyl (C)[4,6,7,10] |      | Mascot      |
| 1436.7969  | 1436.6986   | -0.0983 | -68   | 148        | 159      | ESAVLQHRQQLK            |           |       |                               |      | Mascot      |
| 1729.7455  | 1729.8479   | 0.1024  | 59    | 22         | 35       | SEMVFRCPSCTAER          |           |       | Carbamidomethyl (C)[7,10]     |      | Mascot      |
| 1737.7969  | 1737.906    | 0.1091  | 63    | 36         | 51       | QAACPMLTETCGEIVR        |           |       | Oxidation (M)[6]              |      | Mascot      |
| 2284.2004  | 2284.1594   | -0.041  | -18   | 82         | 101      | CYPKPDSELPLELLVQGLGR    |           |       | Carbamidomethyl (C)[1]        |      | Mascot      |
| 2300.0977  | 2300.1614   | 0.0637  | 28    | 198        | 216      | DNRTPLEDLYSLHIPNCDK     |           |       | Carbamidomethyl (C)[17]       |      | Mascot      |
| 2367.1155  | 2367.1467   | 0.0312  | 13    | 234        | 254      | GECWCVNPHGTGRPMPT       |           |       | Oxidation (M)[14]             |      | Mascot      |
| 2600.3323  | 2600.2476   | -0.0847 | -33   | 82         | 104      | CYPKPDSELPLELLVQGLGRCGR |           |       | Carbamidomethyl (C)[1]        |      | Mascot      |

7 PREDICTED: zinc finger protein 462-like [Danio rerio] gi|326677484 268652 6.82 28 47 19.022

#### Peptide Information

| Calc. Mass | Obsrv. Mass | ± da   | ± ppm | Start Seq. | End Seq. | Sequence | Ion Score | C. I. | % Modification         | Rank | Result Type |
|------------|-------------|--------|-------|------------|----------|----------|-----------|-------|------------------------|------|-------------|
| 833.361    | 833.4318    | 0.0708 | 85    | 1583       | 1588     | YFCSTR   |           |       | Carbamidomethyl (C)[3] |      | Mascot      |
| 833.361    | 833.4318    | 0.0708 | 85    | 1583       | 1588     | YFCSTR   |           |       | Carbamidomethyl (C)[3] |      | Mascot      |
| 842.473    | 842.5048    | 0.0318 | 38    | 1340       | 1346     | QLPQQTK  |           |       |                        |      | Mascot      |
| 850.4417   | 850.5382    | 0.0965 | 113   | 2262       | 2268     | NYELVGR  |           |       |                        |      | Mascot      |

|           |           |         |     |      |      |                                     |  |  |  |  |  |                                           |        |
|-----------|-----------|---------|-----|------|------|-------------------------------------|--|--|--|--|--|-------------------------------------------|--------|
| 920.418   | 920.5007  | 0.0827  | 90  | 670  | 677  | DRDSSNAR                            |  |  |  |  |  |                                           | Mascot |
| 952.4742  | 952.427   | -0.0472 | -50 | 1960 | 1966 | CKLCPEFK                            |  |  |  |  |  | Carbamidomethyl (C)[1,4]                  | Mascot |
| 1043.5745 | 1043.5184 | -0.0561 | -54 | 1627 | 1635 | GLAAHYQKR                           |  |  |  |  |  |                                           | Mascot |
| 1045.4884 | 1045.5547 | 0.0663  | 63  | 1492 | 1500 | QGYGAYRCK                           |  |  |  |  |  |                                           | Mascot |
| 1218.6953 | 1218.603  | -0.0923 | -76 | 2259 | 2268 | VIRNYELVGR                          |  |  |  |  |  |                                           | Mascot |
| 1225.5492 | 1225.6821 | 0.1329  | 108 | 2162 | 2170 | CPFCLYHTK                           |  |  |  |  |  | Carbamidomethyl (C)[1,4]                  | Mascot |
| 1225.5492 | 1225.6821 | 0.1329  | 108 | 2162 | 2170 | CPFCLYHTK                           |  |  |  |  |  | Carbamidomethyl (C)[1,4]                  | Mascot |
| 1242.4878 | 1242.5426 | 0.0548  | 44  | 2    | 12   | EGLQCDGCDFR                         |  |  |  |  |  |                                           | Mascot |
| 1244.6481 | 1244.6156 | -0.0325 | -26 | 626  | 636  | IDEIANNLQSK                         |  |  |  |  |  |                                           | Mascot |
| 1291.5782 | 1291.6036 | 0.0254  | 20  | 1438 | 1447 | CRHCPYVNSR                          |  |  |  |  |  | Carbamidomethyl (C)[1]                    | Mascot |
| 1291.6501 | 1291.6036 | -0.0465 | -36 | 777  | 787  | SARSVSTHYQR                         |  |  |  |  |  |                                           | Mascot |
| 1307.6888 | 1307.5983 | -0.0905 | -69 | 2173 | 2183 | SSMIDHIVLHR                         |  |  |  |  |  |                                           | Mascot |
| 1307.6888 | 1307.5983 | -0.0905 | -69 | 2173 | 2183 | SSMIDHIVLHR                         |  |  |  |  |  |                                           | Mascot |
| 1323.6838 | 1323.589  | -0.0948 | -72 | 2173 | 2183 | SSMIDHIVLHR                         |  |  |  |  |  | Oxidation (M)[3]                          | Mascot |
| 1329.6542 | 1329.5754 | -0.0788 | -59 | 532  | 543  | CSLCNFSTITLK                        |  |  |  |  |  |                                           | Mascot |
| 1359.6262 | 1359.7915 | 0.1653  | 122 | 1519 | 1529 | YHNQPAAHMFK                         |  |  |  |  |  | Oxidation (M)[9]                          | Mascot |
| 1497.6534 | 1497.715  | 0.0616  | 41  | 460  | 472  | CDSCPFLCTNPLK                       |  |  |  |  |  | Carbamidomethyl (C)[1]                    | Mascot |
| 1582.7972 | 1582.7434 | -0.0538 | -34 | 117  | 129  | YFRSSSLLSEHTR                       |  |  |  |  |  |                                           | Mascot |
| 1627.8182 | 1627.7859 | -0.0323 | -20 | 1989 | 2003 | CVSCVFSAVSISQLK                     |  |  |  |  |  | Carbamidomethyl (C)[1]                    | Mascot |
| 1627.8182 | 1627.7859 | -0.0323 | -20 | 1989 | 2003 | CVSCVFSAVSISQLK                     |  |  |  |  |  | Carbamidomethyl (C)[1]                    | Mascot |
| 1689.7334 | 1689.924  | 0.1906  | 113 | 427  | 439  | FQCPFCFLTMHR                        |  |  |  |  |  | Carbamidomethyl (C)[3], Oxidation (M)[11] | Mascot |
| 1707.7432 | 1707.8699 | 0.1267  | 74  | 1259 | 1272 | HPEHNVDYTYMASK                      |  |  |  |  |  | Oxidation (M)[11]                         | Mascot |
| 1707.7795 | 1707.8699 | 0.0904  | 53  | 1636 | 1650 | HDIDAYYTHCLAASK                     |  |  |  |  |  |                                           | Mascot |
| 1737.8701 | 1737.906  | 0.0359  | 21  | 2173 | 2186 | SSMIDHIVLHREER                      |  |  |  |  |  | Oxidation (M)[3]                          | Mascot |
| 1769.9037 | 1769.9021 | -0.0016 | -1  | 532  | 546  | CSLCNFSTITLKGLR                     |  |  |  |  |  | Carbamidomethyl (C)[1,4]                  | Mascot |
| 1863.8806 | 1863.9814 | 0.1008  | 54  | 1635 | 1650 | RHDIDAYYTHCLAASK                    |  |  |  |  |  |                                           | Mascot |
| 2472.2034 | 2472.1631 | -0.0403 | -16 | 342  | 364  | IPNSTGSSILSERSTFAMS<br>DISR         |  |  |  |  |  | Oxidation (M)[18]                         | Mascot |
| 3337.5085 | 3337.751  | 0.2425  | 73  | 1540 | 1569 | DDLVAECSTSSQPEVPE<br>VCDYNVPISEVAK  |  |  |  |  |  | Carbamidomethyl (C)[7,19]                 | Mascot |
| 3338.6619 | 3338.7383 | 0.0764  | 23  | 1989 | 2018 | CVSCVFSAVSISQLKEHS<br>LQEHGETLTLLHR |  |  |  |  |  |                                           | Mascot |

8

PREDICTED: protein QN1 homolog [Danio rerio]

gi|68385147

155728.8

5.89

8

47

19.022

37

94.211

| Peptide Information |             |         |       |            |                   |           |                      |  |                  |
|---------------------|-------------|---------|-------|------------|-------------------|-----------|----------------------|--|------------------|
| Calc. Mass          | Obsrv. Mass | ± da    | ± ppm | Start Seq. | End Sequence Seq. | Ion Score | C. I. % Modification |  | Rank Result Type |
| 833.4363            | 833.4318    | -0.0045 | -5    | 416        | 422 SISEEIR       | 37        | 94.211               |  | Mascot           |
| 833.4363            | 833.4318    | -0.0045 | -5    | 416        | 422 SISEEIR       |           |                      |  | Mascot           |

|   |                                                                                    |              |         |      |    |    |   |
|---|------------------------------------------------------------------------------------|--------------|---------|------|----|----|---|
| 9 | RecName: Full=Acyl-CoA synthetase family member 2, mitochondrial; Flags: Precursor | gjl123914455 | 67470.3 | 8.42 | 13 | 45 | 0 |
|---|------------------------------------------------------------------------------------|--------------|---------|------|----|----|---|

| Calc. Mass | Obsrv. Mass | ± da    | ± ppm | Start Seq. | End Seq. | Sequence                   | Ion Score | C. I. % | Modification                             | Rank | Result Type |
|------------|-------------|---------|-------|------------|----------|----------------------------|-----------|---------|------------------------------------------|------|-------------|
| 842.5458   | 842.5048    | -0.041  | -49   | 5          | 11       | ILLTNLR                    |           |         |                                          |      | Mascot      |
| 850.4451   | 850.5382    | 0.0931  | 109   | 470        | 476      | TRECITK                    |           |         |                                          |      | Mascot      |
| 864.4243   | 864.4883    | 0.064   | 74    | 472        | 478      | ECITKDR                    |           |         |                                          |      | Mascot      |
| 1218.5969  | 1218.603    | 0.0061  | 5     | 164        | 174      | VQCNAAVVCPTK               |           |         | Carbamidomethyl (C)[3]                   |      | Mascot      |
| 1289.6704  | 1289.5952   | -0.0752 | -58   | 163        | 174      | KVQCNAVVCPTK               |           |         |                                          |      | Mascot      |
| 1291.7402  | 1291.6036   | -0.1366 | -106  | 1          | 11       | MSSKILLTNLR                |           |         | Oxidation (M)[1]                         |      | Mascot      |
| 1291.7402  | 1291.6036   | -0.1366 | -106  | 1          | 11       | MSSKILLTNLR                |           |         | Oxidation (M)[1]                         |      | Mascot      |
| 1436.7388  | 1436.6986   | -0.0402 | -28   | 164        | 176      | VQCNAAVVCPTKFK             |           |         |                                          |      | Mascot      |
| 1454.7672  | 1454.6755   | -0.0917 | -63   | 421        | 434      | IVTVGCISPHEAK              |           |         |                                          |      | Mascot      |
| 1582.8621  | 1582.7434   | -0.1187 | -75   | 420        | 434      | KIVTVGCISPHEAK             |           |         |                                          |      | Mascot      |
| 1729.7771  | 1729.8479   | 0.0708  | 41    | 551        | 565      | EGQECTVEEIKAYCK            |           |         |                                          |      | Mascot      |
| 1865.772   | 1866.0149   | 0.2429  | 130   | 456        | 469      | GYCVMLEYWQDEEK             |           |         | Carbamidomethyl (C)[3], Oxidation (M)[5] |      | Mascot      |
| 2211.1689  | 2211.0928   | -0.0761 | -34   | 435        | 455      | VDPPTTGEIVPLGAQGEL<br>MIR  |           |         | Oxidation (M)[19]                        |      | Mascot      |
| 2480.1545  | 2480.126    | -0.0285 | -11   | 341        | 362      | CTFVYGTPMTYIDMLGQP<br>DLAK |           |         | Oxidation (M)[10]                        |      | Mascot      |

| Calc. Mass | Obsrv. Mass | ± da    | ± ppm | Start Seq. | End Seq. | Sequence | Ion Score | C. I. % | Modification           | Rank | Result Type |
|------------|-------------|---------|-------|------------|----------|----------|-----------|---------|------------------------|------|-------------|
| 833.4297   | 833.4318    | 0.0021  | 3     | 3753       | 3759     | CISANLR  | 9         | 0       | Carbamidomethyl (C)[1] |      | Mascot      |
| 833.4297   | 833.4318    | 0.0021  | 3     | 3753       | 3759     | CISANLR  |           |         | Carbamidomethyl (C)[1] |      | Mascot      |
| 842.4114   | 842.5048    | 0.0934  | 111   | 2312       | 2318     | HTVDQSR  |           |         |                        |      | Mascot      |
| 864.4937   | 864.4883    | -0.0054 | -6    | 2015       | 2022     | AIAVHPEK |           |         |                        |      | Mascot      |

|    |                                                |           |           |         |     |            |         |                                           |    |    |   |  |                                            |  |        |
|----|------------------------------------------------|-----------|-----------|---------|-----|------------|---------|-------------------------------------------|----|----|---|--|--------------------------------------------|--|--------|
|    |                                                | 882.4355  | 882.5599  | 0.1244  | 141 | 4064       | 4070    | LYWADSK                                   |    |    |   |  |                                            |  | Mascot |
|    |                                                | 920.4869  | 920.5007  | 0.0138  | 15  | 4358       | 4365    | LQTGITCK                                  |    |    |   |  | Carbamidomethyl (C)[7]                     |  | Mascot |
|    |                                                | 1043.4615 | 1043.5184 | 0.0569  | 55  | 3538       | 3545    | TCEPYQFR                                  |    |    |   |  |                                            |  | Mascot |
|    |                                                | 1045.5272 | 1045.5547 | 0.0275  | 26  | 2082       | 2090    | INLETGENR                                 |    |    |   |  |                                            |  | Mascot |
|    |                                                | 1242.5605 | 1242.5426 | -0.0179 | -14 | 1223       | 1232    | TCQIQSFCAK                                |    |    |   |  | Carbamidomethyl (C)[2,8]                   |  | Mascot |
|    |                                                | 1244.5333 | 1244.6156 | 0.0823  | 66  | 2559       | 2568    | QAYCANRMCK                                |    |    |   |  | Carbamidomethyl (C)[4]                     |  | Mascot |
|    |                                                | 1247.5144 | 1247.6447 | 0.1303  | 104 | 4150       | 4159    | QPEMTNPCDR                                |    |    |   |  | Carbamidomethyl (C)[8]                     |  | Mascot |
|    |                                                | 1307.5354 | 1307.5983 | 0.0629  | 48  | 101        | 112     | LCDGVPDCTDGR                              | 24 | 0  |   |  | Carbamidomethyl (C)[2]                     |  | Mascot |
|    |                                                | 1307.5354 | 1307.5983 | 0.0629  | 48  | 101        | 112     | LCDGVPDCTDGR                              |    |    |   |  | Carbamidomethyl (C)[2]                     |  | Mascot |
|    |                                                | 1313.5323 | 1313.5842 | 0.0519  | 40  | 2709       | 2718    | CIPMSWTC DK                               |    |    |   |  | Carbamidomethyl (C)[1,8], Oxidation (M)[4] |  | Mascot |
|    |                                                | 1329.6104 | 1329.5754 | -0.035  | -26 | 515        | 527     | SGFSLGSDGKSKC                             |    |    |   |  | Carbamidomethyl (C)[12]                    |  | Mascot |
|    |                                                | 1436.6409 | 1436.6986 | 0.0577  | 40  | 3831       | 3843    | QFGVCSHVCNNTK                             |    |    |   |  |                                            |  | Mascot |
|    |                                                | 1438.7406 | 1438.6874 | -0.0532 | -37 | 3423       | 3435    | CSHPSRCIPGILR                             |    |    |   |  |                                            |  | Mascot |
|    |                                                | 1497.6461 | 1497.715  | 0.0689  | 46  | 4148       | 4159    | YKQPEMTNPCDR                              |    |    |   |  | Oxidation (M)[6]                           |  | Mascot |
|    |                                                | 1707.8734 | 1707.8699 | -0.0035 | -2  | 688        | 703     | KAWMDGSNAGILLTSK                          |    |    |   |  | Oxidation (M)[4]                           |  | Mascot |
|    |                                                | 1707.8734 | 1707.8699 | -0.0035 | -2  | 688        | 703     | KAWMDGSNAGILLTSK                          |    |    |   |  | Oxidation (M)[4]                           |  | Mascot |
|    |                                                | 1720.8105 | 1720.8965 | 0.086   | 50  | 813        | 829     | ANNGGCSSLCLLTPTGR                         |    |    |   |  | Carbamidomethyl (C)[6]                     |  | Mascot |
|    |                                                | 1729.8867 | 1729.8479 | -0.0388 | -22 | 2279       | 2294    | TIVDNVGSVEGLAYHR                          |    |    |   |  |                                            |  | Mascot |
|    |                                                | 1863.9176 | 1863.9814 | 0.0638  | 34  | 760        | 774     | NFLFWNEYRGGGIYK                           |    |    |   |  |                                            |  | Mascot |
|    |                                                | 1881.8105 | 1882.0129 | 0.2024  | 108 | 2803       | 2820    | DCPDGGDEGLKAGCVFN<br>K                    |    |    |   |  | Carbamidomethyl (C)[2]                     |  | Mascot |
|    |                                                | 1881.8105 | 1882.0129 | 0.2024  | 108 | 2803       | 2820    | DCPDGGDEGLKAGCVFN<br>K                    |    |    |   |  | Carbamidomethyl (C)[2]                     |  | Mascot |
|    |                                                | 2299.8979 | 2300.1614 | 0.2635  | 115 | 2879       | 2897    | NWACDGEFD CRDQSDE<br>APK                  |    |    |   |  | Carbamidomethyl (C)[4, 10]                 |  | Mascot |
|    |                                                | 2367.1658 | 2367.1467 | -0.0191 | -8  | 3657       | 3676    | VCLLQEFQCNNTLCKPLS<br>WK                  |    |    |   |  |                                            |  | Mascot |
|    |                                                | 2458.1125 | 2458.1487 | 0.0362  | 15  | 1884       | 1905    | SGQQSC EGMGSFLLYSV<br>HEGIR               |    |    |   |  | Carbamidomethyl (C)[6], Oxidation (M)[9]   |  | Mascot |
|    |                                                | 3337.2886 | 3337.751  | 0.4624  | 139 | 875        | 903     | WKCDGDNDCLDNSDET P<br>DL CNQH T C P A D R |    |    |   |  | Carbamidomethyl (C)[3]                     |  | Mascot |
| 11 | WD repeat-containing protein mio [Danio rerio] |           |           |         |     | q 41152065 | 98118.4 | 7.47                                      | 15 | 44 | 0 |  |                                            |  |        |

### Peptide Information

| Calc. Mass | Obsrv. Mass | ± da    | ± ppm | Start Seq. | End Seq. | Sequence     | Ion Score | C. I. | % Modification   | Rank | Result Type |
|------------|-------------|---------|-------|------------|----------|--------------|-----------|-------|------------------|------|-------------|
| 850.4451   | 850.5382    | 0.0931  | 109   | 392        | 398      | DIATKMR      |           |       | Oxidation (M)[6] |      | Mascot      |
| 1043.5381  | 1043.5184   | -0.0197 | -19   | 716        | 723      | RAEFDIHR     |           |       |                  |      | Mascot      |
| 1307.681   | 1307.5983   | -0.0827 | -63   | 577        | 587      | EMCSSLRLQLK  |           |       |                  |      | Mascot      |
| 1307.681   | 1307.5983   | -0.0827 | -63   | 577        | 587      | EMCSSLRLQLK  |           |       |                  |      | Mascot      |
| 1323.6759  | 1323.589    | -0.0869 | -66   | 577        | 587      | EMCSSLRLQLK  |           |       | Oxidation (M)[2] |      | Mascot      |
| 1329.7161  | 1329.5754   | -0.1407 | -106  | 152        | 163      | FSPEAVPAEKVR |           |       |                  |      | Mascot      |

|    |                                                                           |           |         |     |     |              |                              |      |   |    |   |    |        |  |                                                  |        |
|----|---------------------------------------------------------------------------|-----------|---------|-----|-----|--------------|------------------------------|------|---|----|---|----|--------|--|--------------------------------------------------|--------|
|    | 1436.5603                                                                 | 1436.6986 | 0.1383  | 96  | 848 | 860          | DHSECPVSACTCK                |      |   |    |   |    |        |  | Carbamidomethyl (C)[5]                           | Mascot |
|    | 1497.6937                                                                 | 1497.715  | 0.0213  | 14  | 572 | 583          | NSLWREMCSSLR                 |      |   |    |   |    |        |  | Oxidation (M)[7]                                 | Mascot |
|    | 1582.7972                                                                 | 1582.7434 | -0.0538 | -34 | 227 | 240          | AIQGVTVDPHFQDR               |      |   |    |   |    |        |  |                                                  | Mascot |
|    | 1689.9316                                                                 | 1689.924  | -0.0076 | -4  | 281 | 295          | MGLLATLTRDSNIIR              |      |   |    |   |    |        |  | Oxidation (M)[1]                                 | Mascot |
|    | 1736.783                                                                  | 1736.8921 | 0.1091  | 63  | 861 | 876          | CMQLDTTGNLVPDSVS             |      |   |    |   |    |        |  | Carbamidomethyl (C)[1]                           | Mascot |
|    | 1753.8907                                                                 | 1753.917  | 0.0263  | 15  | 241 | 255          | VASYFEGQVAIWDLR              |      |   |    |   |    |        |  |                                                  | Mascot |
|    | 1753.8907                                                                 | 1753.917  | 0.0263  | 15  | 241 | 255          | VASYFEGQVAIWDLR              | 3    |   | 0  |   |    |        |  |                                                  | Mascot |
|    | 1881.9857                                                                 | 1882.0129 | 0.0272  | 14  | 241 | 256          | VASYFEGQVAIWDLRK             |      |   |    |   |    |        |  |                                                  | Mascot |
|    | 1881.9857                                                                 | 1882.0129 | 0.0272  | 14  | 241 | 256          | VASYFEGQVAIWDLRK             |      |   |    |   |    |        |  |                                                  | Mascot |
|    | 2225.094                                                                  | 2225.1084 | 0.0144  | 6   | 672 | 692          | TGDVQTASFCMLKGSPG<br>EVLK    |      |   |    |   |    |        |  | Carbamidomethyl (C)[10]                          | Mascot |
|    | 2458.1567                                                                 | 2458.1487 | -0.008  | -3  | 318 | 339          | GVQPCSESISSFAWHPS<br>AQNR    |      |   |    |   |    |        |  | Carbamidomethyl (C)[5]                           | Mascot |
|    | 2480.196                                                                  | 2480.126  | -0.07   | -28 | 66  | 87           | CVAWYPKHEPECLLAGV<br>HTNGR   |      |   |    |   |    |        |  |                                                  | Mascot |
|    | 2600.1282                                                                 | 2600.2476 | 0.1194  | 46  | 788 | 811          | CALCLMNMGTPVSSCPG<br>TGKADEK |      |   |    |   |    |        |  | Carbamidomethyl (C)[1,4,15], Oxidation<br>(M)[6] | Mascot |
| 12 | novel protein similar to vertebrate peroxiredoxin 3 (PRDX3) [Danio rerio] |           |         |     |     | gi 157885981 | 30321                        | 9.41 | 3 | 43 | 0 | 34 | 87.876 |  |                                                  |        |

Peptide Information

| Calc. Mass | Obsrv. Mass | ± da    | ± ppm | Start Seq. | End Seq. | Sequence     | Ion Score | C. I.  | % | Modification | Rank | Result | Type |
|------------|-------------|---------|-------|------------|----------|--------------|-----------|--------|---|--------------|------|--------|------|
| 833.4363   | 833.4318    | -0.0045 | -5    | 234        | 240      | SVEETLR      | 34        | 87.876 |   |              |      | Mascot |      |
| 833.4363   | 833.4318    | -0.0045 | -5    | 234        | 240      | SVEETLR      |           |        |   |              |      | Mascot |      |
| 1313.7576  | 1313.5842   | -0.1734 | -132  | 211        | 222      | GLFIIDPNGIVR |           |        |   |              |      | Mascot |      |
| 1359.709   | 1359.7915   | 0.0825  | 61    | 2          | 12       | RLYVSSTFMQK  |           |        |   |              |      | Mascot |      |

13 SH3 domain-binding protein 4-A [Danio rerio] gi|45387913 104947.5 7.73 15 43 0

Peptide Information

| Calc. Mass | Obsrv. Mass | ± da    | ± ppm | Start Seq. | End Seq. | Sequence     | Ion Score | C. I. | % | Modification           | Rank | Result | Type |
|------------|-------------|---------|-------|------------|----------|--------------|-----------|-------|---|------------------------|------|--------|------|
| 842.5822   | 842.5048    | -0.0774 | -92   | 634        | 640      | LIKTVIR      |           |       |   |                        |      | Mascot |      |
| 850.4338   | 850.5382    | 0.1044  | 123   | 358        | 364      | LSNMEIK      |           |       |   | Oxidation (M)[4]       |      | Mascot |      |
| 1045.4796  | 1045.5547   | 0.0751  | 72    | 762        | 770      | AELDSEPER    |           |       |   |                        |      | Mascot |      |
| 1218.6398  | 1218.603    | -0.0368 | -30   | 347        | 357      | CSTVSPVVEIK  |           |       |   | Carbamidomethyl (C)[1] |      | Mascot |      |
| 1323.6283  | 1323.589    | -0.0393 | -30   | 778        | 788      | LKEDCLNMETK  |           |       |   |                        |      | Mascot |      |
| 1359.6111  | 1359.7915   | 0.1804  | 133   | 843        | 853      | QQMEAYEAPHR  |           |       |   |                        |      | Mascot |      |
| 1438.7797  | 1438.6874   | -0.0923 | -64   | 792        | 803      | SFQKELMMALLK |           |       |   |                        |      | Mascot |      |
| 1454.7745  | 1454.6755   | -0.099  | -68   | 792        | 803      | SFQKELMMALLK |           |       |   | Oxidation (M)[7]       |      | Mascot |      |

|  |           |           |         |     |     |     |                                     |  |  |  |  |  |                            |  |  |        |
|--|-----------|-----------|---------|-----|-----|-----|-------------------------------------|--|--|--|--|--|----------------------------|--|--|--------|
|  | 1720.8037 | 1720.8965 | 0.0928  | 54  | 247 | 260 | APSPEQFQNREDFR                      |  |  |  |  |  |                            |  |  | Mascot |
|  | 1881.8503 | 1882.0129 | 0.1626  | 86  | 379 | 394 | TESPMAEIVCVRS DCK                   |  |  |  |  |  | Carbamidomethyl (C)[10,15] |  |  | Mascot |
|  | 1881.8503 | 1882.0129 | 0.1626  | 86  | 379 | 394 | TESPMAEIVCVRS DCK                   |  |  |  |  |  | Carbamidomethyl (C)[10,15] |  |  | Mascot |
|  | 1904.0166 | 1903.9933 | -0.0233 | -12 | 796 | 812 | ELMMALLKIDCQGLVAR                   |  |  |  |  |  |                            |  |  | Mascot |
|  | 2019.9963 | 2020.0632 | 0.0669  | 33  | 668 | 683 | GQLWTKEWYIGYYQGK                    |  |  |  |  |  |                            |  |  | Mascot |
|  | 2284.2368 | 2284.1594 | -0.0774 | -34 | 463 | 484 | TVVAIFGHDCAPKTL LVS<br>EVGK         |  |  |  |  |  |                            |  |  | Mascot |
|  | 2300.0686 | 2300.1614 | 0.0928  | 40  | 568 | 587 | DDQDCILAQFCVQTPQP<br>PPK            |  |  |  |  |  | Carbamidomethyl (C)[5]     |  |  | Mascot |
|  | 3337.6052 | 3337.751  | 0.1458  | 44  | 269 | 298 | LARSCHDLESLGQNP GW<br>GQTQPVETNIVCK |  |  |  |  |  | Carbamidomethyl (C)[5]     |  |  | Mascot |
|  | 3338.5496 | 3338.7383 | 0.1887  | 57  | 856 | 884 | TGMVDSEAMWKPAYDF L<br>LTWAAQIGDSYR  |  |  |  |  |  | Oxidation (M)[3]           |  |  | Mascot |

14 PREDICTED: GTPase IMAP family member 4-like [Danio rerio] gi|326665932 30887 9.23 2 40 0 34 88.555

#### Peptide Information

| Calc. Mass | Obsrv. Mass | ± da    | ± ppm | Start Seq. | End Seq. | Sequence    | Ion Score | C. I.  | % | Modification | Rank | Result Type |
|------------|-------------|---------|-------|------------|----------|-------------|-----------|--------|---|--------------|------|-------------|
| 833.4363   | 833.4318    | -0.0045 | -5    | 2          | 8        | TVSEELR     | 34        | 88.555 |   |              |      | Mascot      |
| 833.4363   | 833.4318    | -0.0045 | -5    | 2          | 8        | TVSEELR     |           |        |   |              |      | Mascot      |
| 1043.6095  | 1043.5184   | -0.0911 | -87   | 183        | 192      | VETLVAIN GK |           |        |   |              |      | Mascot      |

15 Prdx3 protein [Danio rerio] gi|60688276 26849.1 8.89 2 40 0 34 87.876

#### Peptide Information

| Calc. Mass | Obsrv. Mass | ± da    | ± ppm | Start Seq. | End Seq. | Sequence     | Ion Score | C. I.  | % | Modification | Rank | Result Type |
|------------|-------------|---------|-------|------------|----------|--------------|-----------|--------|---|--------------|------|-------------|
| 833.4363   | 833.4318    | -0.0045 | -5    | 203        | 209      | SVEETLR      | 34        | 87.876 |   |              |      | Mascot      |
| 833.4363   | 833.4318    | -0.0045 | -5    | 203        | 209      | SVEETLR      |           |        |   |              |      | Mascot      |
| 1313.7576  | 1313.5842   | -0.1734 | -132  | 180        | 191      | GLFIIDPNGIVR |           |        |   |              |      | Mascot      |

16 PREDICTED: primary ciliary dyskinesia protein 1 [Danio rerio] gi|292609517 93496 9.18 9 40 0 7 0

#### Peptide Information

| Calc. Mass | Obsrv. Mass | ± da    | ± ppm | Start Seq. | End Seq. | Sequence   | Ion Score | C. I. | % | Modification       | Rank | Result Type |
|------------|-------------|---------|-------|------------|----------|------------|-----------|-------|---|--------------------|------|-------------|
| 833.4628   | 833.4318    | -0.031  | -37   | 459        | 465      | LFQQAAR    |           |       |   |                    |      | Mascot      |
| 833.4879   | 833.4318    | -0.0561 | -67   | 219        | 225      | VTFTPLR    | 16        | 0     |   |                    |      | Mascot      |
| 1043.552   | 1043.5184   | -0.0336 | -32   | 282        | 290      | YPTLTSHPK  |           |       |   |                    |      | Mascot      |
| 1291.6497  | 1291.6036   | -0.0461 | -36   | 327        | 336      | MLLQPQDKMR |           |       |   | Oxidation (M)[1,9] |      | Mascot      |
| 1291.6497  | 1291.6036   | -0.0461 | -36   | 327        | 336      | MLLQPQDKMR |           |       |   | Oxidation (M)[1,9] |      | Mascot      |

|    |                                                                                                         |           |         |     |     |     |                  |   |  |  |  |  |                  |                  |  |  |        |
|----|---------------------------------------------------------------------------------------------------------|-----------|---------|-----|-----|-----|------------------|---|--|--|--|--|------------------|------------------|--|--|--------|
|    | 1323.6726                                                                                               | 1323.589  | -0.0836 | -63 | 536 | 547 | HVPAKTPEADMK     |   |  |  |  |  |                  |                  |  |  | Mascot |
|    | 1436.8108                                                                                               | 1436.6986 | -0.1122 | -78 | 32  | 44  | TIATVPNHLETK     |   |  |  |  |  |                  |                  |  |  | Mascot |
|    | 1720.7732                                                                                               | 1720.8965 | 0.1233  | 72  | 487 | 501 | TRSQQGNESDLDEK   |   |  |  |  |  |                  |                  |  |  | Mascot |
|    | 1736.9615                                                                                               | 1736.8921 | -0.0694 | -40 | 713 | 728 | FPSMALKSLSNISTLK |   |  |  |  |  |                  |                  |  |  | Mascot |
|    | 1737.8364                                                                                               | 1737.906  | 0.0696  | 40  | 770 | 784 | LTPEMVEAEFSLSER  |   |  |  |  |  |                  |                  |  |  | Mascot |
|    | 1753.8313                                                                                               | 1753.917  | 0.0857  | 49  | 770 | 784 | LTPEMVEAEFSLSER  |   |  |  |  |  | Oxidation (M)[5] |                  |  |  | Mascot |
|    | 1753.8313                                                                                               | 1753.917  | 0.0857  | 49  | 770 | 784 | LTPEMVEAEFSLSER  | 7 |  |  |  |  | 0                | Oxidation (M)[5] |  |  | Mascot |
| 17 | insulin-like growth factor-binding protein 2-A precursor [Danio rerio] gi 18858891 30743.9 6.59 10 40 0 |           |         |     |     |     |                  |   |  |  |  |  |                  |                  |  |  |        |

#### Peptide Information

| Calc. Mass | Obsrv. Mass | ± da    | ± ppm | Start Seq. | End Seq. | Sequence                | Ion Score | C. I. | % Modification                | Rank | Result Type |
|------------|-------------|---------|-------|------------|----------|-------------------------|-----------|-------|-------------------------------|------|-------------|
| 842.3824   | 842.5048    | 0.1224  | 145   | 227        | 233      | MSVNGYR                 |           |       | Oxidation (M)[1]              |      | Mascot      |
| 1242.5718  | 1242.5426   | -0.0292 | -23   | 224        | 233      | QCKMSVNGYR              |           |       | Carbamidomethyl (C)[2]        |      | Mascot      |
| 1422.5381  | 1422.6852   | 0.1471  | 103   | 52         | 63       | EPGCGCCPVCAR            |           |       | Carbamidomethyl (C)[4,6,7,10] |      | Mascot      |
| 1436.7969  | 1436.6986   | -0.0983 | -68   | 148        | 159      | ESAVLQHRQQLK            |           |       |                               |      | Mascot      |
| 1729.7455  | 1729.8479   | 0.1024  | 59    | 22         | 35       | SEMVFRCPSCTAER          |           |       | Carbamidomethyl (C)[7,10]     |      | Mascot      |
| 1737.7969  | 1737.906    | 0.1091  | 63    | 36         | 51       | QAACPMLTETCGEIVR        |           |       | Oxidation (M)[6]              |      | Mascot      |
| 2284.2004  | 2284.1594   | -0.041  | -18   | 82         | 101      | CYPKPDSELPLELLVQGLGR    |           |       | Carbamidomethyl (C)[1]        |      | Mascot      |
| 2300.0977  | 2300.1614   | 0.0637  | 28    | 198        | 216      | DNRTPLEDLYSLHIPNCDK     |           |       | Carbamidomethyl (C)[17]       |      | Mascot      |
| 2367.1155  | 2367.1467   | 0.0312  | 13    | 234        | 254      | GECWCVNPHTRPMPPT SPLIR  |           |       | Oxidation (M)[14]             |      | Mascot      |
| 2600.3323  | 2600.2476   | -0.0847 | -33   | 82         | 104      | CYPKPDSELPLELLVQGLGRCGR |           |       | Carbamidomethyl (C)[1]        |      | Mascot      |

18 PREDICTED: histone acetyltransferase KAT2A [Danio rerio] gi|189516875 90565.6 9.09 12 39 0

#### Peptide Information

| Calc. Mass | Obsrv. Mass | ± da    | ± ppm | Start Seq. | End Seq. | Sequence      | Ion Score | C. I. | % Modification           | Rank | Result Type |
|------------|-------------|---------|-------|------------|----------|---------------|-----------|-------|--------------------------|------|-------------|
| 864.476    | 864.4883    | 0.0123  | 14    | 517        | 524      | VIGGICFR      |           |       |                          |      | Mascot      |
| 1208.6997  | 1208.656    | -0.0437 | -36   | 660        | 670      | QIPVESIPGIR   |           |       |                          |      | Mascot      |
| 1208.6997  | 1208.656    | -0.0437 | -36   | 660        | 670      | QIPVESIPGIR   |           |       |                          |      | Mascot      |
| 1225.7416  | 1225.6821   | -0.0595 | -49   | 309        | 318      | RTLILTHFPK    |           |       |                          |      | Mascot      |
| 1225.7416  | 1225.6821   | -0.0595 | -49   | 309        | 318      | RTLILTHFPK    | 5         |       | 0                        |      | Mascot      |
| 1313.7463  | 1313.5842   | -0.1621 | -123  | 617        | 627      | IPYTELSHIK    |           |       |                          |      | Mascot      |
| 1323.5569  | 1323.589    | 0.0321  | 24    | 74         | 84       | ANDACKCNGWK   |           |       | Carbamidomethyl (C)[5,7] |      | Mascot      |
| 1329.6216  | 1329.5754   | -0.0462 | -35   | 1          | 13       | MADPAAQSSAQPR |           |       |                          |      | Mascot      |



|    |                                                                       |           |         |      |     |     |                                    |         |      |    |    |   |                        |        |
|----|-----------------------------------------------------------------------|-----------|---------|------|-----|-----|------------------------------------|---------|------|----|----|---|------------------------|--------|
|    | 1582.7543                                                             | 1582.7434 | -0.0109 | -7   | 80  | 93  | CNGWKNPNPPTAAR                     |         |      |    |    |   | Carbamidomethyl (C)[1] | Mascot |
|    | 1649.9332                                                             | 1649.7684 | -0.1648 | -100 | 656 | 670 | EGVRQIPVESIPGIR                    |         |      |    |    |   |                        | Mascot |
|    | 1720.8318                                                             | 1720.8965 | 0.0647  | 38   | 408 | 422 | VMGDIPMELVNEVMK                    |         |      |    |    |   | Oxidation (M)[2]       | Mascot |
|    | 1736.8268                                                             | 1736.8921 | 0.0653  | 38   | 408 | 422 | VMGDIPMELVNEVMK                    |         |      |    |    |   | Oxidation (M)[2,7]     | Mascot |
|    | 2233.1194                                                             | 2233.0732 | -0.0462 | -21  | 368 | 391 | GSSASALGVTGLDVASS<br>EPTIGEK       |         |      |    |    |   |                        | Mascot |
|    | 2284.1323                                                             | 2284.1594 | 0.0271  | 12   | 563 | 581 | HGILYFLTYADEYAIGYFK                |         |      |    |    |   |                        | Mascot |
|    | 3337.6416                                                             | 3337.751  | 0.1094  | 33   | 517 | 546 | VIGGICFRMFPTQGFTEIV<br>FCAVTSNEQVK |         |      |    |    |   | Oxidation (M)[9]       | Mascot |
| 19 | 52 kDa repressor of the inhibitor of the protein kinase [Danio rerio] |           |         |      |     |     | gi 50540428                        | 85891.2 | 5.47 | 13 | 39 | 0 |                        |        |

#### Peptide Information

| Calc. Mass | Obsrv. Mass | ± da    | ± ppm | Start Seq. | End Seq. | Sequence         | Ion Score | C. I. | % Modification                              | Rank | Result Type |
|------------|-------------|---------|-------|------------|----------|------------------|-----------|-------|---------------------------------------------|------|-------------|
| 920.52     | 920.5007    | -0.0193 | -21   | 152        | 158      | DLREFLK          |           |       |                                             |      | Mascot      |
| 1045.6252  | 1045.5547   | -0.0705 | -67   | 337        | 345      | VITSQLKEK        |           |       |                                             |      | Mascot      |
| 1196.6462  | 1196.6222   | -0.024  | -20   | 668        | 677      | FFPNVNAFLK       |           |       |                                             |      | Mascot      |
| 1196.6462  | 1196.6222   | -0.024  | -20   | 668        | 677      | FFPNVNAFLK       |           |       |                                             |      | Mascot      |
| 1289.7059  | 1289.5952   | -0.1107 | -86   | 118        | 128      | RLESSIEQLSK      |           |       |                                             |      | Mascot      |
| 1307.5619  | 1307.5983   | 0.0364  | 28    | 2          | 12       | PNFCAAPNCTR      |           |       | Carbamidomethyl (C)[4,9]                    |      | Mascot      |
| 1307.5619  | 1307.5983   | 0.0364  | 28    | 2          | 12       | PNFCAAPNCTR      |           |       | Carbamidomethyl (C)[4,9]                    |      | Mascot      |
| 1436.7058  | 1436.6986   | -0.0072 | -5    | 599        | 611      | CLSLVPAVMGQMR    |           |       | Oxidation (M)[9,12]                         |      | Mascot      |
| 1438.6024  | 1438.6874   | 0.085   | 59    | 1          | 12       | MPNFCAAPNCTR     |           |       | Carbamidomethyl (C)[5,10]                   |      | Mascot      |
| 1454.5973  | 1454.6755   | 0.0782  | 54    | 1          | 12       | MPNFCAAPNCTR     |           |       | Carbamidomethyl (C)[5,10], Oxidation (M)[1] |      | Mascot      |
| 1497.7729  | 1497.715    | -0.0579 | -39   | 322        | 336      | GQAYAGSGILGTKMK  |           |       | Oxidation (M)[14]                           |      | Mascot      |
| 1582.6923  | 1582.7434   | 0.0511  | 32    | 1          | 13       | MPNFCAAPNCTRK    |           |       | Carbamidomethyl (C)[5,10], Oxidation (M)[1] |      | Mascot      |
| 1627.7819  | 1627.7859   | 0.004   | 2     | 726        | 738      | TDLEEMVQCYLKR    |           |       |                                             |      | Mascot      |
| 1627.7819  | 1627.7859   | 0.004   | 2     | 726        | 738      | TDLEEMVQCYLKR    |           |       |                                             |      | Mascot      |
| 1736.8247  | 1736.8921   | 0.0674  | 39    | 61         | 74       | HFEPAMICKTSPYR   |           |       | Carbamidomethyl (C)[8]                      |      | Mascot      |
| 1753.8901  | 1753.917    | 0.0269  | 15    | 699        | 713      | LQAYLTDTAVSQRCK  |           |       | Carbamidomethyl (C)[14]                     |      | Mascot      |
| 1753.8901  | 1753.917    | 0.0269  | 15    | 699        | 713      | LQAYLTDTAVSQRCK  |           |       | Carbamidomethyl (C)[14]                     |      | Mascot      |
| 1881.9229  | 1882.0129   | 0.09    | 48    | 555        | 570      | QQTPTDIEIQAESFFK |           |       |                                             |      | Mascot      |
| 1881.9229  | 1882.0129   | 0.09    | 48    | 555        | 570      | QQTPTDIEIQAESFFK | 3         |       | 0                                           |      | Mascot      |

20 B-cell CLL/lymphoma 6a, genome duplicate b [Danio rerio]

gi|153791185 63627.1 8.78 11 39 0

#### Peptide Information

| Calc. Mass | Obsrv. Mass | ± da | ± ppm | Start Seq. | End Seq. | Sequence | Ion Score | C. I. | % Modification | Rank | Result Type |
|------------|-------------|------|-------|------------|----------|----------|-----------|-------|----------------|------|-------------|
|------------|-------------|------|-------|------------|----------|----------|-----------|-------|----------------|------|-------------|

|    |                                                                                          |            |             |         |       |            |              |                          |           |                                          |                        |                  |
|----|------------------------------------------------------------------------------------------|------------|-------------|---------|-------|------------|--------------|--------------------------|-----------|------------------------------------------|------------------------|------------------|
|    |                                                                                          | 924.3913   | 924.3996    | 0.0083  | 9     | 2          | 10           | SCAADGCIK                |           | Carbamidomethyl (C)[2]                   | Mascot                 |                  |
|    |                                                                                          | 952.4702   | 952.427     | -0.0432 | -45   | 129        | 136          | GLCMKQTR                 |           | Oxidation (M)[4]                         | Mascot                 |                  |
|    |                                                                                          | 1043.4437  | 1043.5184   | 0.0747  | 72    | 414        | 421          | CQAMFHYK                 |           | Oxidation (M)[4]                         | Mascot                 |                  |
|    |                                                                                          | 1242.5969  | 1242.5426   | -0.0543 | -44   | 124        | 133          | FIDSRGLCMK               |           | Carbamidomethyl (C)[8], Oxidation (M)[9] | Mascot                 |                  |
|    |                                                                                          | 1247.6525  | 1247.6447   | -0.0078 | -6    | 134        | 143          | QTRTEMLVNR               |           |                                          | Mascot                 |                  |
|    |                                                                                          | 1289.6385  | 1289.5952   | -0.0433 | -34   | 14         | 24           | HAGDVLNFNR               |           |                                          | Mascot                 |                  |
|    |                                                                                          | 1422.6278  | 1422.6852   | 0.0574  | 40    | 349        | 360          | GQDNRSTDECIK             |           | Carbamidomethyl (C)[10]                  | Mascot                 |                  |
|    |                                                                                          | 1735.8367  | 1735.9041   | 0.0674  | 39    | 468        | 482          | CETCSSRFVQVAHLR          |           |                                          | Mascot                 |                  |
|    |                                                                                          | 1863.8629  | 1863.9814   | 0.1185  | 64    | 414        | 429          | CQAMFHYKGNPLSSHK         |           | Oxidation (M)[4]                         | Mascot                 |                  |
|    |                                                                                          | 1881.8582  | 1882.0129   | 0.1547  | 82    | 459        | 474          | IHSGEKPYKCETCSSR         |           | Carbamidomethyl (C)[10]                  | Mascot                 |                  |
|    |                                                                                          | 1881.8582  | 1882.0129   | 0.1547  | 82    | 459        | 474          | IHSGEKPYKCETCSSR         |           | Carbamidomethyl (C)[10]                  | Mascot                 |                  |
|    |                                                                                          | 2020.0206  | 2020.0632   | 0.0426  | 21    | 209        | 227          | TTVIAHQHSLPESGTSA<br>R   |           |                                          | Mascot                 |                  |
| 21 | novel protein [Danio rerio]                                                              |            |             |         |       |            | gj 169146661 | 90814.1                  | 9.64      | 15                                       | 39                     | 0                |
|    | Peptide Information                                                                      |            |             |         |       |            |              |                          |           |                                          |                        |                  |
|    |                                                                                          | Calc. Mass | Obsrv. Mass | ± da    | ± ppm | Start Seq. | End Seq.     | Sequence                 | Ion Score | C. I.                                    | % Modification         | Rank Result Type |
|    |                                                                                          | 952.5574   | 952.427     | -0.1304 | -137  | 140        | 148          | GLNIHSLAK                |           |                                          |                        | Mascot           |
|    |                                                                                          | 996.4719   | 996.592     | 0.1201  | 121   | 619        | 625          | YWICQAR                  |           |                                          | Carbamidomethyl (C)[4] | Mascot           |
|    |                                                                                          | 1045.5272  | 1045.5547   | 0.0275  | 26    | 665        | 674          | QSQQGSPVSK               |           |                                          |                        | Mascot           |
|    |                                                                                          | 1165.6073  | 1165.738    | 0.1307  | 112   | 351        | 360          | IQSHNPVTNR               |           |                                          |                        | Mascot           |
|    |                                                                                          | 1196.6013  | 1196.6222   | 0.0209  | 17    | 340        | 350          | DVSCMITKATK              |           |                                          |                        | Mascot           |
|    |                                                                                          | 1196.6013  | 1196.6222   | 0.0209  | 17    | 340        | 350          | DVSCMITKATK              |           |                                          |                        | Mascot           |
|    |                                                                                          | 1242.6549  | 1242.5426   | -0.1123 | -90   | 395        | 405          | INQKPNSATNR              |           |                                          |                        | Mascot           |
|    |                                                                                          | 1244.6593  | 1244.6156   | -0.0437 | -35   | 522        | 531          | LTEAQEERLR               |           |                                          |                        | Mascot           |
|    |                                                                                          | 1313.692   | 1313.5842   | -0.1078 | -82   | 451        | 463          | ASNAAASTKLHSR            |           |                                          |                        | Mascot           |
|    |                                                                                          | 1329.6467  | 1329.5754   | -0.0713 | -54   | 467        | 478          | SCVLPQTTSEHK             |           |                                          |                        | Mascot           |
|    |                                                                                          | 1707.8044  | 1707.8699   | 0.0655  | 38    | 726        | 741          | SQQGAEPGQVDGHEIR         |           |                                          |                        | Mascot           |
|    |                                                                                          | 1707.8044  | 1707.8699   | 0.0655  | 38    | 726        | 741          | SQQGAEPGQVDGHEIR         |           |                                          |                        | Mascot           |
|    |                                                                                          | 1736.0177  | 1735.9041   | -0.1136 | -65   | 88         | 103          | GKPVTNKPAVNNQKIK         |           |                                          |                        | Mascot           |
|    |                                                                                          | 1736.8411  | 1736.8921   | 0.051   | 29    | 806        | 820          | DCVQVKLVYPEEVES          |           |                                          |                        | Mascot           |
|    |                                                                                          | 1863.9055  | 1863.9814   | 0.0759  | 41    | 725        | 741          | RSQQGAEPGQVDGHEIR        |           |                                          |                        | Mascot           |
|    |                                                                                          | 2020.0531  | 2020.0632   | 0.0101  | 5     | 217        | 235          | SQKSSLVSICGPSHSVYI<br>K  |           |                                          |                        | Mascot           |
|    |                                                                                          | 2367.1211  | 2367.1467   | 0.0256  | 11    | 786        | 805          | DDSQPQSSPLYVYRENE<br>ALR |           |                                          |                        | Mascot           |
| 22 | novel protein similar to vertebrate ankyrin 2, neuronal (ANK2, zgc:101738) [Danio rerio] |            |             |         |       |            | gj 123231889 | 388387.3                 | 5.76      | 26                                       | 39                     | 0                |

# Peptide Information

| Calc. Mass | Obsrv. Mass | ± da    | ± ppm | Start Seq. | End Seq. | Sequence                    | Ion Score | C. I. % | Modification           | Rank | Result Type |
|------------|-------------|---------|-------|------------|----------|-----------------------------|-----------|---------|------------------------|------|-------------|
| 833.3934   | 833.4318    | 0.0384  | 46    | 479        | 486      | NGAMVDAR                    | 6         | 0       |                        |      | Mascot      |
| 833.3934   | 833.4318    | 0.0384  | 46    | 479        | 486      | NGAMVDAR                    |           |         |                        |      | Mascot      |
| 842.4954   | 842.5048    | 0.0094  | 11    | 17         | 24       | LNGLGGRR                    |           |         |                        |      | Mascot      |
| 864.5011   | 864.4883    | -0.0128 | -15   | 737        | 743      | MVNFLK                      |           |         |                        |      | Mascot      |
| 920.4618   | 920.5007    | 0.0389  | 42    | 2305       | 2311     | CDLTQRK                     |           |         | Carbamidomethyl (C)[1] |      | Mascot      |
| 924.4243   | 924.3996    | -0.0247 | -27   | 2459       | 2465     | FNQECVK                     |           |         | Carbamidomethyl (C)[5] |      | Mascot      |
| 952.4709   | 952.427     | -0.0439 | -46   | 1276       | 1282     | FWLIDCR                     |           |         |                        |      | Mascot      |
| 1043.5051  | 1043.5184   | 0.0133  | 13    | 1883       | 1890     | SHVCKQER                    |           |         | Carbamidomethyl (C)[4] |      | Mascot      |
| 1083.5428  | 1083.5464   | 0.0036  | 3     | 1738       | 1746     | VEEEQKGHK                   |           |         |                        |      | Mascot      |
| 1196.5001  | 1196.6222   | 0.1221  | 102   | 2602       | 2611     | AETDSWNSMR                  |           |         |                        |      | Mascot      |
| 1196.5001  | 1196.6222   | 0.1221  | 102   | 2602       | 2611     | AETDSWNSMR                  |           |         |                        |      | Mascot      |
| 1218.6113  | 1218.603    | -0.0083 | -7    | 3386       | 3395     | FEEEPVGGRK                  |           |         |                        |      | Mascot      |
| 1225.5365  | 1225.6821   | 0.1456  | 119   | 1546       | 1556     | SGTCEKEESAK                 |           |         | Carbamidomethyl (C)[4] |      | Mascot      |
| 1225.5365  | 1225.6821   | 0.1456  | 119   | 1546       | 1556     | SGTCEKEESAK                 |           |         | Carbamidomethyl (C)[4] |      | Mascot      |
| 1244.5874  | 1244.6156   | 0.0282  | 23    | 2049       | 2058     | SESMCIPHRK                  |           |         | Carbamidomethyl (C)[5] |      | Mascot      |
| 1247.6776  | 1247.6447   | -0.0329 | -26   | 3399       | 3409     | VVKTMVVQGDR                 |           |         | Oxidation (M)[5]       |      | Mascot      |
| 1307.626   | 1307.5983   | -0.0277 | -21   | 3149       | 3160     | EGKNASENSLMK                |           |         |                        |      | Mascot      |
| 1307.626   | 1307.5983   | -0.0277 | -21   | 3149       | 3160     | EGKNASENSLMK                |           |         |                        |      | Mascot      |
| 1313.677   | 1313.5842   | -0.0928 | -71   | 2014       | 2025     | VSVSFAEMKTK                 |           |         |                        |      | Mascot      |
| 1323.6208  | 1323.589    | -0.0318 | -24   | 3149       | 3160     | EGKNASENSLMK                |           |         | Oxidation (M)[11]      |      | Mascot      |
| 1329.6719  | 1329.5754   | -0.0965 | -73   | 2014       | 2025     | VSVSFAEMKTK                 |           |         | Oxidation (M)[9]       |      | Mascot      |
| 1436.7413  | 1436.6986   | -0.0427 | -30   | 3152       | 3164     | NASENSLMKTLTK               |           |         |                        |      | Mascot      |
| 1438.692   | 1438.6874   | -0.0046 | -3    | 881        | 893      | FSLEGGRSDSLDR               |           |         |                        |      | Mascot      |
| 1454.6832  | 1454.6755   | -0.0077 | -5    | 2325       | 2336     | IKTFDEMEQDAK                |           |         |                        |      | Mascot      |
| 1582.8409  | 1582.7434   | -0.0975 | -62   | 3052       | 3064     | MPFPEDPLVIRPR               |           |         | Oxidation (M)[1]       |      | Mascot      |
| 1649.7653  | 1649.7684   | 0.0031  | 2     | 2370       | 2384     | HETSSVDDVGFIK               |           |         |                        |      | Mascot      |
| 1903.9681  | 1903.9933   | 0.0252  | 13    | 3410       | 3427     | MEKLIGDPSLSSDLPSAK          |           |         | Oxidation (M)[1]       |      | Mascot      |
| 2233.1824  | 2233.0732   | -0.1092 | -49   | 533        | 554      | EGHLDVTTVLLEAGAAHS<br>LATK  |           |         |                        |      | Mascot      |
| 2283.1211  | 2283.167    | 0.0459  | 20    | 204        | 224      | DDTKSAALLLQNDHNAD<br>VQSK   |           |         |                        |      | Mascot      |
| 2367.186   | 2367.1467   | -0.0393 | -17   | 634        | 654      | NQMEIATTLQYGAETNI<br>QTK    |           |         |                        |      | Mascot      |
| 2458.2573  | 2458.1487   | -0.1086 | -44   | 2026       | 2048     | IEQASEATVHPALSKAV<br>DEPTK  |           |         |                        |      | Mascot      |
| 2472.2539  | 2472.1631   | -0.0908 | -37   | 1472       | 1494     | DSPALASPDLLSDVSEMK<br>QDLIK |           |         |                        |      | Mascot      |

23 RecName: Full=SH3 domain-binding protein 4-A gi|123888628 108383 7.89 15 38 0

Peptide Information

| Calc. Mass | Obsrv. Mass | ± da    | ± ppm | Start Seq. | End Sequence Seq.                       | Ion Score | C. I. % Modification       | Rank | Result Type |
|------------|-------------|---------|-------|------------|-----------------------------------------|-----------|----------------------------|------|-------------|
| 842.5822   | 842.5048    | -0.0774 | -92   | 663        | 669 LIKT VIR                            |           |                            |      | Mascot      |
| 850.4338   | 850.5382    | 0.1044  | 123   | 387        | 393 LSNMEIK                             |           | Oxidation (M)[4]           |      | Mascot      |
| 1045.4796  | 1045.5547   | 0.0751  | 72    | 791        | 799 AELDSEPER                           |           |                            |      | Mascot      |
| 1218.6398  | 1218.603    | -0.0368 | -30   | 376        | 386 CSTVSPVVEIK                         |           | Carbamidomethyl (C)[1]     |      | Mascot      |
| 1323.6283  | 1323.589    | -0.0393 | -30   | 807        | 817 LKEDCLNMETK                         |           |                            |      | Mascot      |
| 1359.6111  | 1359.7915   | 0.1804  | 133   | 872        | 882 QQMEAYEAPHR                         |           |                            |      | Mascot      |
| 1438.7797  | 1438.6874   | -0.0923 | -64   | 821        | 832 SFQKELMMALLK                        |           |                            |      | Mascot      |
| 1454.7745  | 1454.6755   | -0.099  | -68   | 821        | 832 SFQKELMMALLK                        |           | Oxidation (M)[7]           |      | Mascot      |
| 1720.8037  | 1720.8965   | 0.0928  | 54    | 276        | 289 APSPEQFQNRDFR                       |           |                            |      | Mascot      |
| 1881.8503  | 1882.0129   | 0.1626  | 86    | 408        | 423 TESPMAEIVCVRSDCK                    |           | Carbamidomethyl (C)[10,15] |      | Mascot      |
| 1881.8503  | 1882.0129   | 0.1626  | 86    | 408        | 423 TESPMAEIVCVRSDCK                    |           | Carbamidomethyl (C)[10,15] |      | Mascot      |
| 1904.0562  | 1903.9933   | -0.0629 | -33   | 842        | 858 LIMDFVLLTTAVEVAPR                   |           | Oxidation (M)[3]           |      | Mascot      |
| 2019.9963  | 2020.0632   | 0.0669  | 33    | 697        | 712 GQLWTKEWYIGYYQGK                    |           |                            |      | Mascot      |
| 2284.2368  | 2284.1594   | -0.0774 | -34   | 492        | 513 TVVAIFGHDCAPKTL LVS<br>EVGK         |           |                            |      | Mascot      |
| 2300.0686  | 2300.1614   | 0.0928  | 40    | 597        | 616 DDQDCILAQFCVQTPQP<br>PPK            |           | Carbamidomethyl (C)[5]     |      | Mascot      |
| 3337.6052  | 3337.751    | 0.1458  | 44    | 298        | 327 LARSCHDLES LGQNPGW<br>GQTQPVETNIVCK |           | Carbamidomethyl (C)[5]     |      | Mascot      |
| 3338.5496  | 3338.7383   | 0.1887  | 57    | 885        | 913 TGMVDSEAMWKPAYDFL<br>LTWAAQIGDSYR   |           | Oxidation (M)[3]           |      | Mascot      |

24 PREDICTED: brefeldin A-inhibited guanine nucleotide-exchange protein 1 [Danio rerio] gi|326679672 207943.5 5.5 19 38 0

Peptide Information

| Calc. Mass | Obsrv. Mass | ± da    | ± ppm | Start Seq. | End Sequence Seq. | Ion Score | C. I. % Modification   | Rank | Result Type |
|------------|-------------|---------|-------|------------|-------------------|-----------|------------------------|------|-------------|
| 864.3992   | 864.4883    | 0.0891  | 103   | 219        | 224 QMERER        |           | Oxidation (M)[2]       |      | Mascot      |
| 882.4567   | 882.5599    | 0.1032  | 117   | 1079       | 1086 EGFITSTK     |           |                        |      | Mascot      |
| 920.4869   | 920.5007    | 0.0138  | 15    | 801        | 807 IDRLMEK       |           | Oxidation (M)[5]       |      | Mascot      |
| 1196.598   | 1196.6222   | 0.0242  | 20    | 477        | 486 TNEMFINAIK    |           | Oxidation (M)[4]       |      | Mascot      |
| 1196.598   | 1196.6222   | 0.0242  | 20    | 477        | 486 TNEMFINAIK    |           | Oxidation (M)[4]       |      | Mascot      |
| 1218.6477  | 1218.603    | -0.0447 | -37   | 1137       | 1147 LDGNAIVDFVR  |           |                        |      | Mascot      |
| 1244.5472  | 1244.6156   | 0.0684  | 55    | 1525       | 1534 TCNCMLDIFK   |           | Carbamidomethyl (C)[2] |      | Mascot      |
| 1289.6769  | 1289.5952   | -0.0817 | -63   | 35         | 45 KACEVALEEIK    |           | Carbamidomethyl (C)[3] |      | Mascot      |
| 1313.7535  | 1313.5842   | -0.1693 | -129  | 586        | 597 LVNDLSKIAQGR  |           |                        |      | Mascot      |

|  |           |           |         |     |      |      |                        |   |  |   |  |  |                        |  |  |  |        |
|--|-----------|-----------|---------|-----|------|------|------------------------|---|--|---|--|--|------------------------|--|--|--|--------|
|  | 1323.7056 | 1323.589  | -0.1166 | -88 | 1223 | 1233 | FLEKGELANFR            |   |  |   |  |  |                        |  |  |  | Mascot |
|  | 1497.7617 | 1497.715  | -0.0467 | -31 | 437  | 450  | LSMKPLSDGPPDPK         |   |  |   |  |  | Oxidation (M)[3]       |  |  |  | Mascot |
|  | 1627.6541 | 1627.7859 | 0.1318  | 81  | 1365 | 1378 | DYTSDDMNVAPEDR         |   |  |   |  |  |                        |  |  |  | Mascot |
|  | 1627.6541 | 1627.7859 | 0.1318  | 81  | 1365 | 1378 | DYTSDDMNVAPEDR         | 3 |  | 0 |  |  |                        |  |  |  | Mascot |
|  | 1649.8217 | 1649.7684 | -0.0533 | -32 | 1351 | 1364 | HCAKYVSDRPQAFK         |   |  |   |  |  |                        |  |  |  | Mascot |
|  | 1689.8475 | 1689.924  | 0.0765  | 45  | 1501 | 1516 | SGTNCLENVVILNGEK       |   |  |   |  |  |                        |  |  |  | Mascot |
|  | 1720.8574 | 1720.8965 | 0.0391  | 23  | 1436 | 1449 | IFDNMKLPEQQTEK         |   |  |   |  |  |                        |  |  |  | Mascot |
|  | 1729.9517 | 1729.8479 | -0.1038 | -60 | 1052 | 1067 | CISQLELAQLIGTGVK       |   |  |   |  |  | Carbamidomethyl (C)[1] |  |  |  | Mascot |
|  | 1735.9346 | 1735.9041 | -0.0305 | -18 | 984  | 998  | CAIRIACIFSILQR         |   |  |   |  |  |                        |  |  |  | Mascot |
|  | 1736.8524 | 1736.8921 | 0.0397  | 23  | 1436 | 1449 | IFDNMKLPEQQTEK         |   |  |   |  |  | Oxidation (M)[5]       |  |  |  | Mascot |
|  | 1737.7894 | 1737.906  | 0.1166  | 67  | 209  | 222  | MENQALQEAKQMER         |   |  |   |  |  | Oxidation (M)[1,12]    |  |  |  | Mascot |
|  | 2019.9851 | 2020.0632 | 0.0781  | 39  | 1261 | 1278 | CIAQMVNSQAGNIRSGW<br>K |   |  |   |  |  | Carbamidomethyl (C)[1] |  |  |  | Mascot |
|  | 2211.0095 | 2211.0928 | 0.0833  | 38  | 762  | 779  | INKEVMYAYVDQMDFQG<br>K |   |  |   |  |  | Oxidation (M)[6,13]    |  |  |  | Mascot |

25 PREDICTED: hypothetical protein LOC100536404 [Danio rerio] gi|326672922 38438.2 9.03 9 38 0

#### Peptide Information

| Calc. Mass | Obsrv. Mass | ± da    | ± ppm | Start Seq. | End Seq. | Sequence                      | Ion Score | C. I. | % Modification                             | Rank | Result Type |
|------------|-------------|---------|-------|------------|----------|-------------------------------|-----------|-------|--------------------------------------------|------|-------------|
| 882.4904   | 882.5599    | 0.0695  | 79    | 331        | 338      | SQVHAGKR                      |           |       |                                            |      | Mascot      |
| 920.5159   | 920.5007    | -0.0152 | -17   | 18         | 25       | STSTQLRK                      |           |       |                                            |      | Mascot      |
| 1043.5051  | 1043.5184   | 0.0133  | 13    | 41         | 49       | NPAMAPDRR                     |           |       | Oxidation (M)[4]                           |      | Mascot      |
| 1218.5684  | 1218.603    | 0.0346  | 28    | 75         | 84       | WCEAAVQAQR                    |           |       | Carbamidomethyl (C)[2]                     |      | Mascot      |
| 1707.652   | 1707.8699   | 0.2179  | 128   | 270        | 282      | CEEMEEQCVQHGR                 |           |       | Carbamidomethyl (C)[1,8], Oxidation (M)[4] |      | Mascot      |
| 1707.652   | 1707.8699   | 0.2179  | 128   | 270        | 282      | CEEMEEQCVQHGR                 |           |       | Carbamidomethyl (C)[1,8], Oxidation (M)[4] |      | Mascot      |
| 1863.7531  | 1863.9814   | 0.2283  | 122   | 268        | 282      | GRCEEMEEQCVQHGR               |           |       | Carbamidomethyl (C)[3], Oxidation (M)[6]   |      | Mascot      |
| 2458.2554  | 2458.1487   | -0.1067 | -43   | 26         | 48       | LLSAAQHCSLPGRPRNP<br>AMAPDR   |           |       |                                            |      | Mascot      |
| 2480.2673  | 2480.126    | -0.1413 | -57   | 291        | 311      | LQLDQHCQASSQVLQ<br>LLSR       |           |       | Carbamidomethyl (C)[8]                     |      | Mascot      |
| 2600.332   | 2600.2476   | -0.0844 | -32   | 1          | 24       | MGNLSLNSTHLGSLRPSR<br>STSTQLR |           |       |                                            |      | Mascot      |

26 PREDICTED: DENN domain-containing protein 3 [Danio rerio] gi|292624018 144865.7 8.13 14 38 0

#### Peptide Information

| Calc. Mass | Obsrv. Mass | ± da   | ± ppm | Start Seq. | End Seq. | Sequence | Ion Score | C. I. | % Modification | Rank | Result Type |
|------------|-------------|--------|-------|------------|----------|----------|-----------|-------|----------------|------|-------------|
| 833.4185   | 833.4318    | 0.0133 | 16    | 509        | 515      | IMTESPR  | 4         |       | 0              |      | Mascot      |

|    |                                                      |           |         |     |             |      |                                 |      |   |    |   |                                          |                          |  |  |  |        |
|----|------------------------------------------------------|-----------|---------|-----|-------------|------|---------------------------------|------|---|----|---|------------------------------------------|--------------------------|--|--|--|--------|
|    | 833.4185                                             | 833.4318  | 0.0133  | 16  | 509         | 515  | IMTESPR                         |      |   |    |   |                                          |                          |  |  |  | Mascot |
|    | 952.4781                                             | 952.427   | -0.0511 | -54 | 1094        | 1101 | QFRVSCGR                        |      |   |    |   |                                          |                          |  |  |  | Mascot |
|    | 1165.6252                                            | 1165.738  | 0.1128  | 97  | 286         | 295  | VVFLSTDWAK                      |      |   |    |   |                                          |                          |  |  |  | Mascot |
|    | 1196.5221                                            | 1196.6222 | 0.1001  | 84  | 1187        | 1196 | DCAAVTCMIR                      |      |   |    |   |                                          | Carbamidomethyl (C)[2,7] |  |  |  | Mascot |
|    | 1196.5221                                            | 1196.6222 | 0.1001  | 84  | 1187        | 1196 | DCAAVTCMIR                      |      |   |    |   |                                          | Carbamidomethyl (C)[2,7] |  |  |  | Mascot |
|    | 1218.7092                                            | 1218.603  | -0.1062 | -87 | 738         | 748  | LFEALTGQVK                      |      |   |    |   |                                          |                          |  |  |  | Mascot |
|    | 1247.6525                                            | 1247.6447 | -0.0078 | -6  | 496         | 505  | MQLNIRSETR                      |      |   |    |   |                                          |                          |  |  |  | Mascot |
|    | 1289.6631                                            | 1289.5952 | -0.0679 | -53 | 516         | 525  | RPTMEEINRK                      |      |   |    |   |                                          | Oxidation (M)[4]         |  |  |  | Mascot |
|    | 1291.6133                                            | 1291.6036 | -0.0097 | -8  | 536         | 547  | LGMSMPNLADSR                    | 7    |   |    | 0 |                                          |                          |  |  |  | Mascot |
|    | 1291.6133                                            | 1291.6036 | -0.0097 | -8  | 536         | 547  | LGMSMPNLADSR                    |      |   |    |   |                                          |                          |  |  |  | Mascot |
|    | 1307.6083                                            | 1307.5983 | -0.01   | -8  | 536         | 547  | LGMSMPNLADSR                    | 7    |   |    | 0 | Oxidation (M)[5]                         |                          |  |  |  | Mascot |
|    | 1307.6083                                            | 1307.5983 | -0.01   | -8  | 536         | 547  | LGMSMPNLADSR                    |      |   |    |   | Oxidation (M)[3]                         |                          |  |  |  | Mascot |
|    | 1323.6031                                            | 1323.589  | -0.0141 | -11 | 536         | 547  | LGMSMPNLADSR                    |      |   |    |   | Oxidation (M)[3,5]                       |                          |  |  |  | Mascot |
|    | 1735.7965                                            | 1735.9041 | 0.1076  | 62  | 194         | 207  | DCLSCFLFQMKTSR                  |      |   |    |   | Carbamidomethyl (C)[2]                   |                          |  |  |  | Mascot |
|    | 1769.9446                                            | 1769.9021 | -0.0425 | -24 | 472         | 485  | VLDTHIFHSFLRER                  |      |   |    |   |                                          |                          |  |  |  | Mascot |
|    | 1903.8182                                            | 1903.9933 | 0.1751  | 92  | 1102        | 1117 | LQSMHVHNGMLWCCGR                |      |   |    |   | Oxidation (M)[4,10]                      |                          |  |  |  | Mascot |
|    | 2472.2632                                            | 2472.1631 | -0.1001 | -40 | 174         | 193  | LYTTFSICVISKYPYINAL<br>R        |      |   |    |   | Carbamidomethyl (C)[8]                   |                          |  |  |  | Mascot |
|    | 2600.3528                                            | 2600.2476 | -0.1052 | -40 | 649         | 671  | TDMEIFPAQLLNTLVEAL<br>PVEEK     |      |   |    |   |                                          |                          |  |  |  | Mascot |
|    | 3338.7693                                            | 3338.7383 | -0.031  | -9  | 296         | 322  | LTLVSECFMIFIHPLRWQ<br>HPFVPVLSR |      |   |    |   | Carbamidomethyl (C)[7], Oxidation (M)[9] |                          |  |  |  | Mascot |
| 27 | probable tRNA(His) guanylyltransferase [Danio rerio] |           |         |     | gi 55925403 |      | 31541.4                         | 5.93 | 7 | 37 | 0 |                                          |                          |  |  |  |        |

Peptide Information

|    | Calc. Mass                                              | Obsrv. Mass | ± da    | ± ppm | Start Seq.   | End Sequence Seq. |                                   | Ion Score | C. I. % Modification |                  |   |    | Rank  | Result Type |
|----|---------------------------------------------------------|-------------|---------|-------|--------------|-------------------|-----------------------------------|-----------|----------------------|------------------|---|----|-------|-------------|
|    | 952.5322                                                | 952.427     | -0.1052 | -110  | 28           | 35                | LDGRNLHK                          |           |                      |                  |   |    |       | Mascot      |
|    | 1208.6171                                               | 1208.656    | 0.0389  | 32    | 139          | 147               | NVRDYLSWR                         |           |                      |                  |   |    |       | Mascot      |
|    | 1208.6171                                               | 1208.656    | 0.0389  | 32    | 139          | 147               | NVRDYLSWR                         |           |                      |                  |   |    |       | Mascot      |
|    | 1225.5518                                               | 1225.6821   | 0.1303  | 106   | 11           | 20                | NFELDDTCLR                        |           |                      |                  |   |    |       | Mascot      |
|    | 1225.5518                                               | 1225.6821   | 0.1303  | 106   | 11           | 20                | NFELDDTCLR                        |           |                      |                  |   |    |       | Mascot      |
|    | 1307.6888                                               | 1307.5983   | -0.0905 | -69   | 21           | 31                | NCYIVVRLDGR                       | 4         |                      | 0                |   |    |       | Mascot      |
|    | 1307.6888                                               | 1307.5983   | -0.0905 | -69   | 21           | 31                | NCYIVVRLDGR                       |           |                      |                  |   |    |       | Mascot      |
|    | 1720.9116                                               | 1720.8965   | -0.0151 | -9    | 209          | 223               | GTTLIWEKVNETTTK                   |           |                      |                  |   |    |       | Mascot      |
|    | 2211.0579                                               | 2211.0928   | 0.0349  | 16    | 96           | 113               | LMTHVTSQFSSSFVFW<br>K             |           |                      | Oxidation (M)[2] |   |    |       | Mascot      |
|    | 3337.6223                                               | 3337.751    | 0.1287  | 39    | 179          | 207               | LNGTLATDKNEILFSEFNI<br>NYNNESSVYK |           |                      |                  |   |    |       | Mascot      |
| 28 | PREDICTED: hypothetical protein LOC337635 [Danio rerio] |             |         |       | gi 292609503 |                   | 30915.8                           | 8.75      | 3                    | 37               | 0 | 27 | 45.97 |             |

| Peptide Information |                                                 |         |       |              |          |              |           |         |              |      |             |
|---------------------|-------------------------------------------------|---------|-------|--------------|----------|--------------|-----------|---------|--------------|------|-------------|
| Calc. Mass          | Obsrv. Mass                                     | ± da    | ± ppm | Start Seq.   | End Seq. | Sequence     | Ion Score | C. I. % | Modification | Rank | Result Type |
| 833.4363            | 833.4318                                        | -0.0045 | -5    | 186          | 192      | DSLTELRL     | 27        | 45.97   |              |      | Mascot      |
| 833.4363            | 833.4318                                        | -0.0045 | -5    | 186          | 192      | DSLTELRL     |           |         |              |      | Mascot      |
| 1196.7109           | 1196.6222                                       | -0.0887 | -74   | 7            | 17       | VSGSLHRLTVK  |           |         |              |      | Mascot      |
| 1196.7109           | 1196.6222                                       | -0.0887 | -74   | 7            | 17       | VSGSLHRLTVK  |           |         |              |      | Mascot      |
| 1436.7141           | 1436.6986                                       | -0.0155 | -11   | 56           | 67       | HNIRHYSSSAHK |           |         |              |      | Mascot      |
| 29                  | FAD-linked sulfhydryl oxidase ALR [Danio rerio] |         |       | gi 147901598 | 21559.3  | 5.99         | 6         | 36      | 0            |      |             |

| Peptide Information |                             |         |       |             |          |                                    |           |         |                                          |      |             |
|---------------------|-----------------------------|---------|-------|-------------|----------|------------------------------------|-----------|---------|------------------------------------------|------|-------------|
| Calc. Mass          | Obsrv. Mass                 | ± da    | ± ppm | Start Seq.  | End Seq. | Sequence                           | Ion Score | C. I. % | Modification                             | Rank | Result Type |
| 920.5022            | 920.5007                    | -0.0015 | -2    | 54          | 60       | SWMKLQK                            |           |         |                                          |      | Mascot      |
| 1208.5729           | 1208.656                    | 0.0831  | 69    | 167         | 176      | LGKPEFDCSR                         |           |         | Carbamidomethyl (C)[8]                   |      | Mascot      |
| 1208.5729           | 1208.656                    | 0.0831  | 69    | 167         | 176      | LGKPEFDCSR                         |           |         | Carbamidomethyl (C)[8]                   |      | Mascot      |
| 1225.5817           | 1225.6821                   | 0.1004  | 82    | 44          | 53       | KPCRACTDFK                         |           |         | Carbamidomethyl (C)[3]                   |      | Mascot      |
| 1225.5817           | 1225.6821                   | 0.1004  | 82    | 44          | 53       | KPCRACTDFK                         |           |         | Carbamidomethyl (C)[3]                   |      | Mascot      |
| 1289.5653           | 1289.5952                   | 0.0299  | 23    | 48          | 57       | ACTDFKSWMK                         |           |         | Carbamidomethyl (C)[2], Oxidation (M)[9] |      | Mascot      |
| 1707.8119           | 1707.8699                   | 0.058   | 34    | 167         | 180      | LGKPEFDCSRVDER                     |           |         | Carbamidomethyl (C)[8]                   |      | Mascot      |
| 1707.8119           | 1707.8699                   | 0.058   | 34    | 167         | 180      | LGKPEFDCSRVDER                     |           |         | Carbamidomethyl (C)[8]                   |      | Mascot      |
| 3338.6643           | 3338.7383                   | 0.074   | 22    | 61          | 90       | QASSASVQESRPVEELK<br>PVECPLDREELGR |           |         |                                          |      | Mascot      |
| 30                  | novel protein [Danio rerio] |         |       | gi 94733886 |          | 42254.6                            | 7.97      | 10      | 36                                       | 0    |             |

| Peptide Information |             |         |       |            |          |                   |           |         |                                             |      |             |
|---------------------|-------------|---------|-------|------------|----------|-------------------|-----------|---------|---------------------------------------------|------|-------------|
| Calc. Mass          | Obsrv. Mass | ± da    | ± ppm | Start Seq. | End Seq. | Sequence          | Ion Score | C. I. % | Modification                                | Rank | Result Type |
| 996.4996            | 996.592     | 0.0924  | 93    | 125        | 132      | LETFTETR          |           |         |                                             |      | Mascot      |
| 1083.4744           | 1083.5464   | 0.072   | 66    | 223        | 233      | CGLCSGSGMIR       |           |         |                                             |      | Mascot      |
| 1225.5411           | 1225.6821   | 0.141   | 115   | 193        | 203      | SACSKCVNSGR       |           |         | Carbamidomethyl (C)[3,6]                    |      | Mascot      |
| 1225.5411           | 1225.6821   | 0.141   | 115   | 193        | 203      | SACSKCVNSGR       |           |         | Carbamidomethyl (C)[3,6]                    |      | Mascot      |
| 1247.6492           | 1247.6447   | -0.0045 | -4    | 66         | 76       | QPEAPPRAPER       |           |         |                                             |      | Mascot      |
| 1323.5569           | 1323.589    | 0.0321  | 24    | 321        | 331      | EHQAQFCTTCR       |           |         |                                             |      | Mascot      |
| 1422.5923           | 1422.6852   | 0.0929  | 65    | 234        | 246      | CHSCGGVGSITCK     |           |         | Carbamidomethyl (C)[1,4,12]                 |      | Mascot      |
| 1497.6719           | 1497.715    | 0.0431  | 29    | 221        | 233      | QRCGLCSGSGMIR     |           |         | Carbamidomethyl (C)[3,6], Oxidation (M)[11] |      | Mascot      |
| 1649.7305           | 1649.7684   | 0.0379  | 23    | 183        | 197      | GCHSCLNLRGSACSK   |           |         | Carbamidomethyl (C)[2,5]                    |      | Mascot      |
| 2019.8616           | 2020.0632   | 0.2016  | 100   | 234        | 253      | CHSCGGVGSITCKTCQG |           |         | Carbamidomethyl (C)[1]                      |      | Mascot      |

|    |                                                                                                     |          |         |    |             |          |                                  |    |                         |   |        |
|----|-----------------------------------------------------------------------------------------------------|----------|---------|----|-------------|----------|----------------------------------|----|-------------------------|---|--------|
|    | 2480.1404                                                                                           | 2480.126 | -0.0144 | -6 | 310         | 331      | HGK<br>SVNAVSESAREHQAQF<br>CTTCR |    | Carbamidomethyl (C)[18] |   | Mascot |
| 31 | novel protein similar to vertebrate spectrin repeat containing, nuclear envelope 1 (SYNE1) [Danio r |          |         |    | gi 94734023 | 931467.7 | 5.2                              | 41 | 36                      | 0 |        |

| Peptide Information |             |         |       |            |          |               |           |       |                                          |                  |
|---------------------|-------------|---------|-------|------------|----------|---------------|-----------|-------|------------------------------------------|------------------|
| Calc. Mass          | Obsrv. Mass | ± da    | ± ppm | Start Seq. | End Seq. | Sequence      | Ion Score | C. I. | % Modification                           | Rank Result Type |
| 833.4185            | 833.4318    | 0.0133  | 16    | 3641       | 3647     | CVLDDLR       | 16        | 0     |                                          | Mascot           |
| 833.441             | 833.4318    | -0.0092 | -11   | 6330       | 6336     | LGAMNRR       |           |       | Oxidation (M)[4]                         | Mascot           |
| 842.4366            | 842.5048    | 0.0682  | 81    | 7008       | 7015     | GITASHEK      |           |       |                                          | Mascot           |
| 850.4781            | 850.5382    | 0.0601  | 71    | 281        | 287      | SYLALQR       |           |       |                                          | Mascot           |
| 920.4981            | 920.5007    | 0.0026  | 3     | 7708       | 7715     | GSLNMVKR      |           |       | Oxidation (M)[5]                         | Mascot           |
| 924.4529            | 924.3996    | -0.0533 | -58   | 4472       | 4479     | MMELTTAK      |           |       |                                          | Mascot           |
| 952.459             | 952.427     | -0.032  | -34   | 4116       | 4122     | QIECKMK       |           |       | Carbamidomethyl (C)[4], Oxidation (M)[6] | Mascot           |
| 996.5472            | 996.592     | 0.0448  | 45    | 2986       | 2993     | ETQLQHLK      |           |       |                                          | Mascot           |
| 1043.5956           | 1043.5184   | -0.0772 | -74   | 1395       | 1403     | ERGTQLALR     |           |       |                                          | Mascot           |
| 1196.5807           | 1196.6222   | 0.0415  | 35    | 2591       | 2602     | AHGLWDGQGAGK  |           |       |                                          | Mascot           |
| 1196.5807           | 1196.6222   | 0.0415  | 35    | 2591       | 2602     | AHGLWDGQGAGK  |           |       |                                          | Mascot           |
| 1208.6858           | 1208.656    | -0.0298 | -25   | 3535       | 3544     | ARQVDLTHLR    |           |       |                                          | Mascot           |
| 1208.6858           | 1208.656    | -0.0298 | -25   | 3535       | 3544     | ARQVDLTHLR    |           |       |                                          | Mascot           |
| 1218.6412           | 1218.603    | -0.0382 | -31   | 3565       | 3574     | LRCSWDLGR     |           |       |                                          | Mascot           |
| 1225.5769           | 1225.6821   | 0.1052  | 86    | 160        | 169      | AFMQDVEEIK    |           |       | Oxidation (M)[3]                         | Mascot           |
| 1225.6146           | 1225.6821   | 0.0675  | 55    | 3176       | 3184     | YKGQMQLR      |           |       | Oxidation (M)[5]                         | Mascot           |
| 1242.6001           | 1242.5426   | -0.0575 | -46   | 3067       | 3077     | TFSDWLSTASK   |           |       |                                          | Mascot           |
| 1244.7296           | 1244.6156   | -0.114  | -92   | 8070       | 8079     | CQPFLLRVLR    |           |       |                                          | Mascot           |
| 1247.6477           | 1247.6447   | -0.003  | -2    | 2000       | 2010     | LEKLESTEGNK   |           |       |                                          | Mascot           |
| 1289.6266           | 1289.5952   | -0.0314 | -24   | 2238       | 2248     | ELLERGACEGR   |           |       | Carbamidomethyl (C)[8]                   | Mascot           |
| 1291.6675           | 1291.6036   | -0.0639 | -49   | 4864       | 4874     | LAEERTTCLQK   |           |       |                                          | Mascot           |
| 1291.6675           | 1291.6036   | -0.0639 | -49   | 4864       | 4874     | LAEERTTCLQK   |           |       |                                          | Mascot           |
| 1307.583            | 1307.5983   | 0.0153  | 12    | 5760       | 5769     | NVNEEVCKCR    | 4         | 0     | Carbamidomethyl (C)[7,9]                 | Mascot           |
| 1307.583            | 1307.5983   | 0.0153  | 12    | 5760       | 5769     | NVNEEVCKCR    |           |       | Carbamidomethyl (C)[7,9]                 | Mascot           |
| 1323.5957           | 1323.589    | -0.0067 | -5    | 8027       | 8039     | GKCSVSDPGSSSR |           |       | Carbamidomethyl (C)[3]                   | Mascot           |
| 1436.6686           | 1436.6986   | 0.03    | 21    | 3336       | 3348     | EKGEELSGCSEK  |           |       |                                          | Mascot           |
| 1454.6733           | 1454.6755   | 0.0022  | 2     | 1573       | 1584     | DLSAYSPVWTCR  |           |       | Carbamidomethyl (C)[11]                  | Mascot           |
| 1497.6858           | 1497.715    | 0.0292  | 19    | 7702       | 7714     | LMDDCRGSLNMVK |           |       | Oxidation (M)[2]                         | Mascot           |
| 1627.8398           | 1627.7859   | -0.0539 | -33   | 7253       | 7265     | LNQQQDLQRDIEK |           |       |                                          | Mascot           |



|           |                                                      |         |     |              |      |                              |      |    |    |   |   |  |  |  |  |  |        |
|-----------|------------------------------------------------------|---------|-----|--------------|------|------------------------------|------|----|----|---|---|--|--|--|--|--|--------|
| 1627.8439 | 1627.7859                                            | -0.058  | -36 | 2841         | 2853 | AEELVLLHQEYQR                |      |    |    |   |   |  |  |  |  |  | Mascot |
| 1649.7874 | 1649.7684                                            | -0.019  | -12 | 5801         | 5814 | LLDTVLEQQCDGMK               |      |    |    |   |   |  |  |  |  |  | Mascot |
| 1707.8105 | 1707.8699                                            | 0.0594  | 35  | 7130         | 7144 | VSQNGEVSIEEMIEK              |      |    |    |   |   |  |  |  |  |  | Mascot |
| 1707.8105 | 1707.8699                                            | 0.0594  | 35  | 7130         | 7144 | VSQNGEVSIEEMIEK              |      |    |    |   |   |  |  |  |  |  | Mascot |
| 1729.902  | 1729.8479                                            | -0.0541 | -31 | 6014         | 6027 | RGVELEGILEWWSR               |      |    |    |   |   |  |  |  |  |  | Mascot |
| 1738.0333 | 1737.906                                             | -0.1273 | -73 | 1753         | 1767 | RSQILGLLQEALLQR              |      |    |    |   |   |  |  |  |  |  | Mascot |
| 1753.9191 | 1753.917                                             | -0.0021 | -1  | 4854         | 4868 | LTELHAQTSRLAEER              |      |    |    |   |   |  |  |  |  |  | Mascot |
| 1753.9191 | 1753.917                                             | -0.0021 | -1  | 4854         | 4868 | LTELHAQTSRLAEER              |      |    | 3  |   | 0 |  |  |  |  |  | Mascot |
| 1775.9551 | 1775.894                                             | -0.0611 | -34 | 413          | 427  | QWKDIQAEAPALLR               |      |    |    |   |   |  |  |  |  |  | Mascot |
| 1863.9004 | 1863.9814                                            | 0.081   | 43  | 7145         | 7160 | LTKDCQEEISVVEENK             |      |    |    |   |   |  |  |  |  |  | Mascot |
| 1865.8997 | 1866.0149                                            | 0.1152  | 62  | 24           | 38   | SVRSMLEEVQCNWLR              |      |    |    |   |   |  |  |  |  |  | Mascot |
| 1903.9695 | 1903.9933                                            | 0.0238  | 13  | 3281         | 3295 | DLQEIERWLLQMSSR              |      |    |    |   |   |  |  |  |  |  | Mascot |
| 2019.9288 | 2020.0632                                            | 0.1344  | 67  | 4150         | 4166 | EQLDRLESIEADAMER             |      |    |    |   |   |  |  |  |  |  | Mascot |
| 2198.9871 | 2199.0032                                            | 0.0161  | 7   | 4453         | 4470 | SFQDETDDVIRQMNDIEK           |      |    |    |   |   |  |  |  |  |  | Mascot |
| 2211.0632 | 2211.0928                                            | 0.0296  | 13  | 3751         | 3771 | LLAETMTDASSLSCLGLNER         |      |    |    |   |   |  |  |  |  |  | Mascot |
| 2284.0796 | 2284.1594                                            | 0.0798  | 35  | 3751         | 3771 | LLAETMTDASSLSCLGLNER         |      |    |    |   |   |  |  |  |  |  | Mascot |
| 2367.1643 | 2367.1467                                            | -0.0176 | -7  | 3751         | 3772 | LLAETMTDASSLSCLGLNERR        |      |    |    |   |   |  |  |  |  |  | Mascot |
| 2600.3752 | 2600.2476                                            | -0.1276 | -49 | 3037         | 3057 | YHALLLIQIETLKQLQEE           |      |    |    |   |   |  |  |  |  |  | Mascot |
| 3338.3164 | 3338.7383                                            | 0.4219  | 126 | 7680         | 7707 | YSLQQTGDSMDAHDTSYMGYMRLMDDCR |      |    |    |   |   |  |  |  |  |  | Mascot |
| 32        | cytoskeleton associated protein 2-like [Danio rerio] |         |     | gi 187607996 |      | 86172.8                      | 9.71 | 14 | 36 | 0 |   |  |  |  |  |  |        |

### Peptide Information

| Calc. Mass | Obsrv. Mass | ± da    | ± ppm | Start Seq. | End Seq. | Sequence        | Ion Score | C. I. % | Modification           | Rank | Result Type |
|------------|-------------|---------|-------|------------|----------|-----------------|-----------|---------|------------------------|------|-------------|
| 952.5574   | 952.427     | -0.1304 | -137  | 97         | 105      | GLNIHSLAK       |           |         |                        |      | Mascot      |
| 996.4719   | 996.592     | 0.1201  | 121   | 576        | 582      | YWICQAR         |           |         | Carbamidomethyl (C)[4] |      | Mascot      |
| 1045.5537  | 1045.5547   | 0.001   | 1     | 164        | 173      | AQPASHVAHK      |           |         |                        |      | Mascot      |
| 1165.6073  | 1165.738    | 0.1307  | 112   | 308        | 317      | IQSHNPVTNR      |           |         |                        |      | Mascot      |
| 1196.6013  | 1196.6222   | 0.0209  | 17    | 297        | 307      | DVSCMITKATK     |           |         |                        |      | Mascot      |
| 1196.6013  | 1196.6222   | 0.0209  | 17    | 297        | 307      | DVSCMITKATK     |           |         |                        |      | Mascot      |
| 1242.6549  | 1242.5426   | -0.1123 | -90   | 352        | 362      | INQKPNSATNR     |           |         |                        |      | Mascot      |
| 1244.6593  | 1244.6156   | -0.0437 | -35   | 479        | 488      | LTEAQEERLR      |           |         |                        |      | Mascot      |
| 1582.8336  | 1582.7434   | -0.0902 | -57   | 444        | 457      | SNHTKPAVQFQTPK  |           |         |                        |      | Mascot      |
| 1707.8044  | 1707.8699   | 0.0655  | 38    | 683        | 698      | SQQAEPGQVDGHEIR |           |         |                        |      | Mascot      |
| 1707.8044  | 1707.8699   | 0.0655  | 38    | 683        | 698      | SQQAEPGQVDGHEIR |           |         |                        |      | Mascot      |
| 1720.948   | 1720.8965   | -0.0515 | -30   | 218        | 232      | LTEWNIKTTTATLK  |           |         |                        |      | Mascot      |

|    |                                                                            |           |        |    |              |         |                          |    |    |   |  |  |  |  |  |  |        |
|----|----------------------------------------------------------------------------|-----------|--------|----|--------------|---------|--------------------------|----|----|---|--|--|--|--|--|--|--------|
|    | 1736.8411                                                                  | 1736.8921 | 0.051  | 29 | 763          | 777     | DCVQVKLVYPEEVES          |    |    |   |  |  |  |  |  |  | Mascot |
|    | 1863.9055                                                                  | 1863.9814 | 0.0759 | 41 | 682          | 698     | RSQQGAEPGQVDGHEIR        |    |    |   |  |  |  |  |  |  | Mascot |
|    | 2020.0531                                                                  | 2020.0632 | 0.0101 | 5  | 174          | 192     | SQKSSLVSICGPSHSVYI<br>K  |    |    |   |  |  |  |  |  |  | Mascot |
|    | 2367.1211                                                                  | 2367.1467 | 0.0256 | 11 | 743          | 762     | DDSQPQSSPLYVYRENE<br>ALR |    |    |   |  |  |  |  |  |  | Mascot |
| 33 | acyl-CoA synthetase family member 2, mitochondrial precursor [Danio rerio] |           |        |    | gi 218563680 | 67530.2 | 8.23                     | 11 | 35 | 0 |  |  |  |  |  |  |        |

#### Peptide Information

| Calc. Mass | Obsrv. Mass | ± da    | ± ppm | Start Seq. | End Seq. | Sequence                   | Ion Score | C. I. | % | Modification                             | Rank | Result | Type   |
|------------|-------------|---------|-------|------------|----------|----------------------------|-----------|-------|---|------------------------------------------|------|--------|--------|
| 842.5458   | 842.5048    | -0.041  | -49   | 5          | 11       | ILLTNLR                    |           |       |   |                                          |      |        | Mascot |
| 850.4451   | 850.5382    | 0.0931  | 109   | 470        | 476      | TRECITK                    |           |       |   |                                          |      |        | Mascot |
| 864.4243   | 864.4883    | 0.064   | 74    | 472        | 478      | ECITKDR                    |           |       |   |                                          |      |        | Mascot |
| 1218.5969  | 1218.603    | 0.0061  | 5     | 164        | 174      | VQCNAVVCPTK                |           |       |   | Carbamidomethyl (C)[3]                   |      |        | Mascot |
| 1289.6704  | 1289.5952   | -0.0752 | -58   | 163        | 174      | KVQCNAVVCPTK               |           |       |   |                                          |      |        | Mascot |
| 1291.7402  | 1291.6036   | -0.1366 | -106  | 1          | 11       | MSSKILLTNLR                |           |       |   | Oxidation (M)[1]                         |      |        | Mascot |
| 1291.7402  | 1291.6036   | -0.1366 | -106  | 1          | 11       | MSSKILLTNLR                |           |       |   | Oxidation (M)[1]                         |      |        | Mascot |
| 1436.7388  | 1436.6986   | -0.0402 | -28   | 164        | 176      | VQCNAVVCPTKFK              |           |       |   |                                          |      |        | Mascot |
| 1729.7771  | 1729.8479   | 0.0708  | 41    | 551        | 565      | EGQECTVEEIKAYCK            |           |       |   |                                          |      |        | Mascot |
| 1865.772   | 1866.0149   | 0.2429  | 130   | 456        | 469      | GYCVMLEYWQDEEK             |           |       |   | Carbamidomethyl (C)[3], Oxidation (M)[5] |      |        | Mascot |
| 2211.1689  | 2211.0928   | -0.0761 | -34   | 435        | 455      | VVDPTTGEIVPLGAQGEL<br>MIR  |           |       |   | Oxidation (M)[19]                        |      |        | Mascot |
| 2480.1545  | 2480.126    | -0.0285 | -11   | 341        | 362      | CTFVYGTPTMYIDMLGQP<br>DLAK |           |       |   | Oxidation (M)[10]                        |      |        | Mascot |

|    |                            |  |  |  |             |         |      |   |    |   |    |        |  |
|----|----------------------------|--|--|--|-------------|---------|------|---|----|---|----|--------|--|
| 34 | mitoferrin-2 [Danio rerio] |  |  |  | gi 47085863 | 41496.6 | 8.41 | 3 | 35 | 0 | 27 | 46.956 |  |
|----|----------------------------|--|--|--|-------------|---------|------|---|----|---|----|--------|--|

#### Peptide Information

| Calc. Mass | Obsrv. Mass | ± da    | ± ppm | Start Seq. | End Seq. | Sequence       | Ion Score | C. I.  | % | Modification        | Rank | Result | Type   |
|------------|-------------|---------|-------|------------|----------|----------------|-----------|--------|---|---------------------|------|--------|--------|
| 1323.6626  | 1323.589    | -0.0736 | -56   | 116        | 125      | YRNVMDALWR     |           |        |   |                     |      |        | Mascot |
| 1436.7137  | 1436.6986   | -0.0151 | -11   | 118        | 128      | NVMDALWRIMR    |           |        |   | Oxidation (M)[3,10] |      |        | Mascot |
| 1627.8816  | 1627.7859   | -0.0957 | -59   | 311        | 324      | HITGLGHAFRTVYR |           |        |   |                     |      |        | Mascot |
| 1627.8816  | 1627.7859   | -0.0957 | -59   | 311        | 324      | HITGLGHAFRTVYR | 27        | 46.956 |   |                     |      |        | Mascot |

|    |                                            |  |  |  |              |         |      |   |    |   |    |        |  |
|----|--------------------------------------------|--|--|--|--------------|---------|------|---|----|---|----|--------|--|
| 35 | PREDICTED: mitoferrin-2-like [Danio rerio] |  |  |  | gi 326673115 | 43966.9 | 8.88 | 3 | 35 | 0 | 27 | 46.956 |  |
|----|--------------------------------------------|--|--|--|--------------|---------|------|---|----|---|----|--------|--|

#### Peptide Information

| Calc. Mass | Obsrv. Mass | ± da | ± ppm | Start Seq. | End Seq. | Sequence | Ion Score | C. I. | % | Modification | Rank | Result | Type |
|------------|-------------|------|-------|------------|----------|----------|-----------|-------|---|--------------|------|--------|------|
|------------|-------------|------|-------|------------|----------|----------|-----------|-------|---|--------------|------|--------|------|

|    |                                                                                                    |           |         |     |              |     |                |     |        |    |   |  |  |  |  |                     |        |
|----|----------------------------------------------------------------------------------------------------|-----------|---------|-----|--------------|-----|----------------|-----|--------|----|---|--|--|--|--|---------------------|--------|
|    | 1323.6626                                                                                          | 1323.589  | -0.0736 | -56 | 136          | 145 | YRNVMDALWR     |     |        |    |   |  |  |  |  |                     | Mascot |
|    | 1436.7137                                                                                          | 1436.6986 | -0.0151 | -11 | 138          | 148 | NVMDALWRIMR    |     |        |    |   |  |  |  |  | Oxidation (M)[3,10] | Mascot |
|    | 1627.8816                                                                                          | 1627.7859 | -0.0957 | -59 | 331          | 344 | HITGLGHAFRTVYR |     |        |    |   |  |  |  |  |                     | Mascot |
|    | 1627.8816                                                                                          | 1627.7859 | -0.0957 | -59 | 331          | 344 | HITGLGHAFRTVYR | 27  | 46.956 |    |   |  |  |  |  |                     | Mascot |
| 36 | PREDICTED: general transcription factor II-I repeat domain-containing protein 2-like [Danio rerio] |           |         |     | gi 292619751 |     | 71093.5        | 8.6 | 11     | 35 | 0 |  |  |  |  |                     |        |

#### Peptide Information

| Calc. Mass | Obsrv. Mass | ± da    | ± ppm | Start Seq. | End Seq. | Sequence                 | Ion Score | C. I. | % | Modification                              | Rank | Result Type |
|------------|-------------|---------|-------|------------|----------|--------------------------|-----------|-------|---|-------------------------------------------|------|-------------|
| 920.5312   | 920.5007    | -0.0305 | -33   | 90         | 96       | QTQLFRK                  |           |       |   |                                           |      | Mascot      |
| 1045.6     | 1045.5547   | -0.0453 | -43   | 149        | 157      | SVKDLQLSR                |           |       |   |                                           |      | Mascot      |
| 1225.6437  | 1225.6821   | 0.0384  | 31    | 57         | 67       | HFTSLHSAVAR              |           |       |   |                                           |      | Mascot      |
| 1225.6437  | 1225.6821   | 0.0384  | 31    | 57         | 67       | HFTSLHSAVAR              |           |       |   |                                           |      | Mascot      |
| 1313.7576  | 1313.5842   | -0.1734 | -132  | 539        | 549      | IVPVERYPNVK              |           |       |   |                                           |      | Mascot      |
| 1329.6467  | 1329.5754   | -0.0713 | -54   | 606        | 616      | IVETKECQVSH              |           |       |   | Carbamidomethyl (C)[7]                    |      | Mascot      |
| 1707.9138  | 1707.8699   | -0.0439 | -26   | 411        | 425      | MLPDLVQSVFAFVNK          |           |       |   |                                           |      | Mascot      |
| 1707.9138  | 1707.8699   | -0.0439 | -26   | 411        | 425      | MLPDLVQSVFAFVNK          |           |       |   |                                           |      | Mascot      |
| 1775.9901  | 1775.894    | -0.0961 | -54   | 590        | 604      | ELLRVATTEYKPDLK          |           |       |   |                                           |      | Mascot      |
| 2199.0713  | 2199.0032   | -0.0681 | -31   | 555        | 573      | LLSMFGSTYVCESLFSTL K     |           |       |   | Carbamidomethyl (C)[11], Oxidation (M)[4] |      | Mascot      |
| 2233.1499  | 2233.0732   | -0.0767 | -34   | 437        | 456      | DYTHFPTLLKASGQAEV VK     |           |       |   |                                           |      | Mascot      |
| 2472.3125  | 2472.1631   | -0.1494 | -60   | 244        | 267      | ANLQLSKLTAIVTDGAPA MLGSR |           |       |   | Oxidation (M)[19]                         |      | Mascot      |
| 2480.2781  | 2480.126    | -0.1521 | -61   | 327        | 347      | NLIDELDEDLPDLLFHR AVR    |           |       |   |                                           |      | Mascot      |

|    |                                                                                                     |  |  |  |              |  |         |      |   |    |   |    |      |  |  |  |  |
|----|-----------------------------------------------------------------------------------------------------|--|--|--|--------------|--|---------|------|---|----|---|----|------|--|--|--|--|
| 37 | novel protein similar to vertebrate catenin (cadherin-associated protein), delta 2 (neural plakophi |  |  |  | gi 169145624 |  | 29464.9 | 6.77 | 3 | 35 | 0 | 25 | 3.92 |  |  |  |  |
|----|-----------------------------------------------------------------------------------------------------|--|--|--|--------------|--|---------|------|---|----|---|----|------|--|--|--|--|

#### Peptide Information

| Calc. Mass | Obsrv. Mass | ± da    | ± ppm | Start Seq. | End Seq. | Sequence      | Ion Score | C. I. | % | Modification           | Rank | Result Type |
|------------|-------------|---------|-------|------------|----------|---------------|-----------|-------|---|------------------------|------|-------------|
| 833.4363   | 833.4318    | -0.0045 | -5    | 207        | 213      | TTDVEIR       | 25        | 3.92  |   |                        |      | Mascot      |
| 833.4363   | 833.4318    | -0.0045 | -5    | 207        | 213      | TTDVEIR       |           |       |   |                        |      | Mascot      |
| 1307.7318  | 1307.5983   | -0.1335 | -102  | 59         | 71       | SGPALPPEATLVR |           |       |   |                        |      | Mascot      |
| 1307.7318  | 1307.5983   | -0.1335 | -102  | 59         | 71       | SGPALPPEATLVR |           |       |   |                        |      | Mascot      |
| 1438.8311  | 1438.6874   | -0.1437 | -100  | 193        | 205      | NCGGIPALVRLLR |           |       |   | Carbamidomethyl (C)[2] |      | Mascot      |

|    |                                                                                         |  |  |  |             |  |         |      |   |    |   |  |  |  |  |  |  |
|----|-----------------------------------------------------------------------------------------|--|--|--|-------------|--|---------|------|---|----|---|--|--|--|--|--|--|
| 38 | PREDICTED: transmembrane anterior posterior transformation protein 1-like [Danio rerio] |  |  |  | gi 68438091 |  | 65724.7 | 7.52 | 8 | 34 | 0 |  |  |  |  |  |  |
|----|-----------------------------------------------------------------------------------------|--|--|--|-------------|--|---------|------|---|----|---|--|--|--|--|--|--|

#### Peptide Information

|    | Calc. Mass                 | Obsrv. Mass | ± da    | ± ppm | Start Seq.   | End Sequence Seq.             | Ion Score | C. I. % | Modification                             | Rank | Result Type |
|----|----------------------------|-------------|---------|-------|--------------|-------------------------------|-----------|---------|------------------------------------------|------|-------------|
|    | 833.5243                   | 833.4318    | -0.0925 | -111  | 136          | 142 TLLAFLR                   | 15        | 0       |                                          |      | Mascot      |
|    | 833.5243                   | 833.4318    | -0.0925 | -111  | 136          | 142 TLLAFLR                   |           |         |                                          |      | Mascot      |
|    | 1043.4648                  | 1043.5184   | 0.0536  | 51    | 75           | 82 FMCAELTR                   |           |         | Carbamidomethyl (C)[3], Oxidation (M)[2] |      | Mascot      |
|    | 1289.6704                  | 1289.5952   | -0.0752 | -58   | 143          | 155 LLTIPCCGLGGSR             |           |         |                                          |      | Mascot      |
|    | 1323.582                   | 1323.589    | 0.007   | 5     | 25           | 35 CSWAPERMSK                 |           |         |                                          |      | Mascot      |
|    | 1720.9276                  | 1720.8965   | -0.0311 | -18   | 499          | 513 MHRPTASITKQPTPR           |           |         |                                          |      | Mascot      |
|    | 1736.9225                  | 1736.8921   | -0.0304 | -18   | 499          | 513 MHRPTASITKQPTPR           |           |         | Oxidation (M)[1]                         |      | Mascot      |
|    | 2199.0671                  | 2199.0032   | -0.0639 | -29   | 36           | 55 TNILTTMTETLGCIENPA<br>VK   |           |         |                                          |      | Mascot      |
|    | 2225.1997                  | 2225.1084   | -0.0913 | -41   | 192          | 210 GQSVIKLYIIYNMLEVADR       |           |         |                                          |      | Mascot      |
|    | 2283.3694                  | 2283.167    | -0.2024 | -89   | 404          | 424 MGFIPLPLAVLLIRVVMSS<br>VK |           |         |                                          |      | Mascot      |
| 39 | Evlb protein [Danio rerio] |             |         |       | gi 160774007 |                               | 39996.2   | 8.77    | 8                                        | 34   | 0           |

#### Peptide Information

|    | Calc. Mass                                                                               | Obsrv. Mass | ± da    | ± ppm | Start Seq.   | End Sequence Seq.  | Ion Score | C. I. % | Modification                             | Rank | Result Type |
|----|------------------------------------------------------------------------------------------|-------------|---------|-------|--------------|--------------------|-----------|---------|------------------------------------------|------|-------------|
|    | 1043.548                                                                                 | 1043.5184   | -0.0296 | -28   | 361          | 369 HELSRISTT      |           |         |                                          |      | Mascot      |
|    | 1225.53                                                                                  | 1225.6821   | 0.1521  | 124   | 1            | 10 MSEQSICQAR      |           |         | Carbamidomethyl (C)[7], Oxidation (M)[1] |      | Mascot      |
|    | 1225.53                                                                                  | 1225.6821   | 0.1521  | 124   | 1            | 10 MSEQSICQAR      |           |         | Carbamidomethyl (C)[7], Oxidation (M)[1] |      | Mascot      |
|    | 1247.5498                                                                                | 1247.6447   | 0.0949  | 76    | 290          | 301 DESQNNAADGVK   |           |         |                                          |      | Mascot      |
|    | 1329.6658                                                                                | 1329.5754   | -0.0904 | -68   | 302          | 312 KPWDRANSAER    |           |         |                                          |      | Mascot      |
|    | 1359.6461                                                                                | 1359.7915   | 0.1454  | 107   | 11           | 22 ASVMVYDDTSKK    |           |         | Oxidation (M)[4]                         |      | Mascot      |
|    | 1627.9067                                                                                | 1627.7859   | -0.1208 | -74   | 22           | 35 KWVPIKPGQQGFSR  |           |         |                                          |      | Mascot      |
|    | 1627.9067                                                                                | 1627.7859   | -0.1208 | -74   | 22           | 35 KWVPIKPGQQGFSR  |           |         |                                          |      | Mascot      |
|    | 1707.7247                                                                                | 1707.8699   | 0.1452  | 85    | 140          | 152 QMEMQQMQAHIER  |           |         | Oxidation (M)[2,4,7]                     |      | Mascot      |
|    | 1707.7247                                                                                | 1707.8699   | 0.1452  | 85    | 140          | 152 QMEMQQMQAHIER  |           |         | Oxidation (M)[2,4,7]                     |      | Mascot      |
|    | 1863.8258                                                                                | 1863.9814   | 0.1556  | 83    | 139          | 152 RQMEMQQMQAHIER |           |         | Oxidation (M)[3,5,8]                     |      | Mascot      |
| 40 | PREDICTED: NACHT, LRR and PYD domains-containing protein 14-like isoform 1 [Danio rerio] |             |         |       | gi 189535642 |                    | 109378.5  | 5.69    | 11                                       | 34   | 0 10 0      |

#### Peptide Information

|  | Calc. Mass | Obsrv. Mass | ± da    | ± ppm | Start Seq. | End Sequence Seq. | Ion Score | C. I. % | Modification | Rank | Result Type |
|--|------------|-------------|---------|-------|------------|-------------------|-----------|---------|--------------|------|-------------|
|  | 952.5461   | 952.427     | -0.1191 | -125  | 501        | 508 EEIIAHIK      |           |         |              |      | Mascot      |
|  | 1045.5272  | 1045.5547   | 0.0275  | 26    | 488        | 496 GLLTQQDDR     |           |         |              |      | Mascot      |

|    |                                              |           |         |      |             |     |                            |     |   |    |   |                           |        |
|----|----------------------------------------------|-----------|---------|------|-------------|-----|----------------------------|-----|---|----|---|---------------------------|--------|
|    | 1083.4313                                    | 1083.5464 | 0.1151  | 106  | 873         | 881 | GGDECWFGR                  |     |   |    |   | Carbamidomethyl (C)[5]    | Mascot |
|    | 1208.6997                                    | 1208.656  | -0.0437 | -36  | 501         | 510 | EEIIAHIKQK                 |     |   |    |   |                           | Mascot |
|    | 1208.6997                                    | 1208.656  | -0.0437 | -36  | 501         | 510 | EEIIAHIKQK                 |     |   |    |   |                           | Mascot |
|    | 1247.7106                                    | 1247.6447 | -0.0659 | -53  | 473         | 483 | FLLGLSLQSNR                |     |   |    |   |                           | Mascot |
|    | 1291.7555                                    | 1291.6036 | -0.1519 | -118 | 600         | 610 | ALLQFCKLTVR                | 10  |   | 0  |   |                           | Mascot |
|    | 1291.7555                                    | 1291.6036 | -0.1519 | -118 | 600         | 610 | ALLQFCKLTVR                |     |   |    |   |                           | Mascot |
|    | 1313.6519                                    | 1313.5842 | -0.0677 | -52  | 77          | 87  | HQSLEIQVECK                |     |   |    |   |                           | Mascot |
|    | 1323.6473                                    | 1323.589  | -0.0583 | -44  | 580         | 589 | FQRSDECLIR                 |     |   |    |   | Carbamidomethyl (C)[7]    | Mascot |
|    | 1735.8511                                    | 1735.9041 | 0.053   | 31   | 817         | 830 | RVLENQPYDPHPDR             |     |   |    |   |                           | Mascot |
|    | 1865.891                                     | 1866.0149 | 0.1239  | 66   | 438         | 453 | TQAENSRDESMIDLLK           |     |   |    |   | Oxidation (M)[11]         | Mascot |
|    | 2367.1755                                    | 2367.1467 | -0.0288 | -12  | 607         | 627 | LTVRSCELSLSSALQSSNC<br>VLR |     |   |    |   | Carbamidomethyl (C)[6,18] | Mascot |
| 41 | proteasome subunit beta type-2 [Danio rerio] |           |         |      | gi 50540284 |     | 22571.6                    | 6.1 | 6 | 34 | 0 |                           |        |

Peptide Information

| Calc. Mass | Obsrv. Mass | ± da    | ± ppm | Start Seq. | End Seq. | Sequence                  | Ion Score | C. I. | % | Modification           | Rank | Result Type |
|------------|-------------|---------|-------|------------|----------|---------------------------|-----------|-------|---|------------------------|------|-------------|
| 864.4573   | 864.4883    | 0.031   | 36    | 87         | 93       | NLADYLR                   |           |       |   |                        |      | Mascot      |
| 882.4753   | 882.5599    | 0.0846  | 96    | 35         | 41       | MFKLSEK                   |           |       |   |                        |      | Mascot      |
| 1083.5582  | 1083.5464   | -0.0118 | -11   | 146        | 153      | YYRPDLTR                  |           |       |   |                        |      | Mascot      |
| 1776.0417  | 1775.894    | -0.1477 | -83   | 171        | 185      | FILNLPSTVRLIDK            |           |       |   |                        |      | Mascot      |
| 2020.0651  | 2020.0632   | -0.0019 | -1    | 127        | 145      | APFAAHGYGAFTLSILD<br>R    |           |       |   |                        |      | Mascot      |
| 2367.2263  | 2367.1467   | -0.0796 | -34   | 42         | 62       | ILLLCVGEAGDTVQFAEYI<br>QK |           |       |   | Carbamidomethyl (C)[5] |      | Mascot      |

|    |                                              |  |  |  |              |  |         |      |   |    |   |    |        |
|----|----------------------------------------------|--|--|--|--------------|--|---------|------|---|----|---|----|--------|
| 42 | myotubularin-related protein 2 [Danio rerio] |  |  |  | gi 117606281 |  | 71078.3 | 7.94 | 5 | 34 | 0 | 28 | 54.195 |
|----|----------------------------------------------|--|--|--|--------------|--|---------|------|---|----|---|----|--------|

Peptide Information

| Calc. Mass | Obsrv. Mass | ± da    | ± ppm | Start Seq. | End Seq. | Sequence     | Ion Score | C. I.  | % | Modification | Rank | Result Type |
|------------|-------------|---------|-------|------------|----------|--------------|-----------|--------|---|--------------|------|-------------|
| 833.4363   | 833.4318    | -0.0045 | -5    | 29         | 35       | LSDELTR      | 30        | 68.909 |   |              |      | Mascot      |
| 833.4363   | 833.4318    | -0.0045 | -5    | 29         | 35       | LSDELTR      |           |        |   |              |      | Mascot      |
| 864.5189   | 864.4883    | -0.0306 | -35   | 573        | 579      | YKELLAK      |           |        |   |              |      | Mascot      |
| 952.5172   | 952.427     | -0.0902 | -95   | 150        | 157      | SVFEVLMK     |           |        |   |              |      | Mascot      |
| 1242.6338  | 1242.5426   | -0.0912 | -73   | 193        | 202      | RQGLPNESWR   |           |        |   |              |      | Mascot      |
| 1289.6696  | 1289.5952   | -0.0744 | -58   | 24         | 35       | SSGPKLSDELTR |           |        |   |              |      | Mascot      |

|    |                              |  |  |  |             |  |         |      |   |    |   |  |  |
|----|------------------------------|--|--|--|-------------|--|---------|------|---|----|---|--|--|
| 43 | Znfl2a protein [Danio rerio] |  |  |  | gi 62204424 |  | 34966.8 | 6.39 | 9 | 33 | 0 |  |  |
|----|------------------------------|--|--|--|-------------|--|---------|------|---|----|---|--|--|

Peptide Information

| Calc. Mass | Obsrv. Mass | ± da | ± ppm | Start | End | Sequence | Ion | C. I. | % | Modification | Rank | Result Type |
|------------|-------------|------|-------|-------|-----|----------|-----|-------|---|--------------|------|-------------|
|------------|-------------|------|-------|-------|-----|----------|-----|-------|---|--------------|------|-------------|

|    |                                                            | Seq.      |         | Seq. |              | Score |                  |                         |        |    |   |
|----|------------------------------------------------------------|-----------|---------|------|--------------|-------|------------------|-------------------------|--------|----|---|
|    | 833.4297                                                   | 833.4318  | 0.0021  | 3    | 243          | 249   | QVSCQLQR         |                         | Mascot |    |   |
|    | 833.4297                                                   | 833.4318  | 0.0021  | 3    | 243          | 249   | QVSCQLQR         |                         | Mascot |    |   |
|    | 1045.4077                                                  | 1045.5547 | 0.147   | 141  | 175          | 183   | AYSCQECGK        | Carbamidomethyl (C)[4]  | Mascot |    |   |
|    | 1165.6688                                                  | 1165.738  | 0.0692  | 59   | 131          | 140   | TKAPLTEHLR       |                         | Mascot |    |   |
|    | 1247.5837                                                  | 1247.6447 | 0.061   | 49   | 113          | 123   | IHTGETPFSCR      |                         | Mascot |    |   |
|    | 1323.6686                                                  | 1323.589  | -0.0796 | -60  | 96           | 108   | QCGKSLTSSGSLR    |                         | Mascot |    |   |
|    | 1582.8013                                                  | 1582.7434 | -0.0579 | -37  | 189          | 200   | QYYTTHLKTHYK     |                         | Mascot |    |   |
|    | 1649.741                                                   | 1649.7684 | 0.0274  | 17   | 175          | 188   | AYSCQECGKSFTLR   | Carbamidomethyl (C)[4]  | Mascot |    |   |
|    | 1735.8246                                                  | 1735.9041 | 0.0795  | 46   | 290          | 306   | TTNPTAANTPSHTPQP |                         | Mascot |    |   |
|    | 1775.8567                                                  | 1775.894  | 0.0373  | 21   | 141          | 155   | IHTGEKPFQCSLCQK  | Carbamidomethyl (C)[10] | Mascot |    |   |
| 44 | PREDICTED: hypothetical protein LOC100537922 [Danio rerio] |           |         |      | gi 326672557 |       | 45363.9          | 4.94                    | 8      | 33 | 0 |

#### Peptide Information

| Calc. Mass | Obsrv. Mass | ± da    | ± ppm | Start Seq. | End Seq. | Sequence                        | Ion Score | C. I. | % Modification         | Rank | Result Type |
|------------|-------------|---------|-------|------------|----------|---------------------------------|-----------|-------|------------------------|------|-------------|
| 864.5301   | 864.4883    | -0.0418 | -48   | 352        | 358      | LFLRSTK                         |           |       |                        |      | Mascot      |
| 1247.5183  | 1247.6447   | 0.1264  | 101   | 381        | 391      | GFMAEGCFSNK                     |           |       | Carbamidomethyl (C)[7] |      | Mascot      |
| 1291.7229  | 1291.6036   | -0.1193 | -92   | 10         | 21       | GLSSLTHRHGVK                    |           |       |                        |      | Mascot      |
| 1291.7229  | 1291.6036   | -0.1193 | -92   | 10         | 21       | GLSSLTHRHGVK                    |           |       |                        |      | Mascot      |
| 1737.7723  | 1737.906    | 0.1337  | 77    | 381        | 395      | GFMAEGCFSNKEVYR                 |           |       |                        |      | Mascot      |
| 1753.7672  | 1753.917    | 0.1498  | 85    | 381        | 395      | GFMAEGCFSNKEVYR                 |           |       | Oxidation (M)[3]       |      | Mascot      |
| 1753.7672  | 1753.917    | 0.1498  | 85    | 381        | 395      | GFMAEGCFSNKEVYR                 |           |       | Oxidation (M)[3]       |      | Mascot      |
| 1865.8356  | 1866.0149   | 0.1793  | 96    | 175        | 191      | CFGCGNFGHLVRNCPNK               |           |       |                        |      | Mascot      |
| 2199.075   | 2199.0032   | -0.0718 | -33   | 140        | 158      | SVYMIVNNDADLDLALNFR             |           |       | Oxidation (M)[4]       |      | Mascot      |
| 2225.1487  | 2225.1084   | -0.0403 | -18   | 362        | 380      | GVLVNEYFPDVEQFVDKVK             |           |       |                        |      | Mascot      |
| 3338.4224  | 3338.7383   | 0.3159  | 95    | 314        | 343      | VDMEDELESESDSELSDSSLTSLSQSEFSSR |           |       |                        |      | Mascot      |

45 conserved oligomeric Golgi complex subunit 2 [Danio rerio] gi|47087011 82297.4 6.05 11 33 0

#### Peptide Information

| Calc. Mass | Obsrv. Mass | ± da    | ± ppm | Start Seq. | End Seq. | Sequence  | Ion Score | C. I. | % Modification   | Rank | Result Type |
|------------|-------------|---------|-------|------------|----------|-----------|-----------|-------|------------------|------|-------------|
| 864.4495   | 864.4883    | 0.0388  | 45    | 649        | 655      | KMEESLK   |           |       |                  |      | Mascot      |
| 920.4506   | 920.5007    | 0.0501  | 54    | 36         | 42       | VQLEEMR   |           |       | Oxidation (M)[6] |      | Mascot      |
| 1045.5598  | 1045.5547   | -0.0051 | -5    | 517        | 525      | IPDISEMIK |           |       |                  |      | Mascot      |

|    |                                                                              |           |         |      |              |     |                         |      |   |                                           |   |  |        |
|----|------------------------------------------------------------------------------|-----------|---------|------|--------------|-----|-------------------------|------|---|-------------------------------------------|---|--|--------|
|    | 1218.6729                                                                    | 1218.603  | -0.0699 | -57  | 502          | 512 | QLVFIAADVDK             |      |   |                                           |   |  | Mascot |
|    | 1244.6919                                                                    | 1244.6156 | -0.0763 | -61  | 517          | 527 | IPDISEMIKAK             |      |   |                                           |   |  | Mascot |
|    | 1307.6677                                                                    | 1307.5983 | -0.0694 | -53  | 274          | 283 | LLEFVPHHCR              | 4    | 0 | Carbamidomethyl (C)[9]                    |   |  | Mascot |
|    | 1307.6677                                                                    | 1307.5983 | -0.0694 | -53  | 274          | 283 | LLEFVPHHCR              |      |   | Carbamidomethyl (C)[9]                    |   |  | Mascot |
|    | 1422.8427                                                                    | 1422.6852 | -0.1575 | -111 | 80           | 92  | ALNQLSIPLGQLR           |      |   |                                           |   |  | Mascot |
|    | 1689.9369                                                                    | 1689.924  | -0.0129 | -8   | 274          | 286 | LLEFVPHHCRLLR           |      |   | Carbamidomethyl (C)[9]                    |   |  | Mascot |
|    | 1737.8137                                                                    | 1737.906  | 0.0923  | 53   | 663          | 680 | TTTTSTVGVNAGPSDDS<br>K  |      |   |                                           |   |  | Mascot |
|    | 1753.8322                                                                    | 1753.917  | 0.0848  | 48   | 1            | 15  | MMTLPKAPDSLCLFDK        |      |   | Carbamidomethyl (C)[12]                   |   |  | Mascot |
|    | 1753.8322                                                                    | 1753.917  | 0.0848  | 48   | 1            | 15  | MMTLPKAPDSLCLFDK        | 3    | 0 | Carbamidomethyl (C)[12]                   |   |  | Mascot |
|    | 1769.827                                                                     | 1769.9021 | 0.0751  | 42   | 1            | 15  | MMTLPKAPDSLCLFDK        |      |   | Carbamidomethyl (C)[12], Oxidation (M)[1] |   |  | Mascot |
|    | 1865.9087                                                                    | 1866.0149 | 0.1062  | 57   | 662          | 680 | KTTTTSTVGVNAGPSDD<br>SK |      |   |                                           |   |  | Mascot |
| 46 | PREDICTED: sodium channel protein type 2 subunit<br>alpha-like [Danio rerio] |           |         |      | gi 326670825 |     | 34934.5                 | 9.46 | 7 | 33                                        | 0 |  |        |

Peptide Information

| Calc. Mass | Obsrv. Mass | ± da    | ± ppm | Start Seq. | End Seq. | Sequence        | Ion Score | C. I. | % Modification         | Rank | Result Type |
|------------|-------------|---------|-------|------------|----------|-----------------|-----------|-------|------------------------|------|-------------|
| 1225.7878  | 1225.6821   | -0.1057 | -86   | 209        | 220      | ALKTISVVPGLK    |           |       |                        |      | Mascot      |
| 1225.7878  | 1225.6821   | -0.1057 | -86   | 209        | 220      | ALKTISVVPGLK    | 3         | 0     |                        |      | Mascot      |
| 1307.5896  | 1307.5983   | 0.0087  | 7     | 299        | 311      | KDALICGNSSDAG   |           |       | Carbamidomethyl (C)[6] |      | Mascot      |
| 1307.5896  | 1307.5983   | 0.0087  | 7     | 299        | 311      | KDALICGNSSDAG   |           |       | Carbamidomethyl (C)[6] |      | Mascot      |
| 1359.699   | 1359.7915   | 0.0925  | 68    | 163        | 173      | GFCVGRFTFLR     |           |       | Carbamidomethyl (C)[3] |      | Mascot      |
| 1438.726   | 1438.6874   | -0.0386 | -27   | 2          | 14       | AHMFTPPGPQSLR   |           |       |                        |      | Mascot      |
| 1454.7209  | 1454.6755   | -0.0454 | -31   | 2          | 14       | AHMFTPPGPQSLR   |           |       | Oxidation (M)[3]       |      | Mascot      |
| 1582.8159  | 1582.7434   | -0.0725 | -46   | 2          | 15       | AHMFTPPGPQSLRK  |           |       | Oxidation (M)[3]       |      | Mascot      |
| 1729.8512  | 1729.8479   | -0.0033 | -2    | 1          | 15       | MAHMFTPPGPQSLRK |           |       | Oxidation (M)[1,4]     |      | Mascot      |
| 1769.8494  | 1769.9021   | 0.0527  | 30    | 284        | 298      | DYINNPSNQYFLPGK |           |       |                        |      | Mascot      |

47 hypothetical protein LOC100006266 [Danio rerio] gi|131888980 33568.4 9.21 6 33 0

Peptide Information

| Calc. Mass | Obsrv. Mass | ± da    | ± ppm | Start Seq. | End Seq. | Sequence     | Ion Score | C. I. | % Modification            | Rank | Result Type |
|------------|-------------|---------|-------|------------|----------|--------------|-----------|-------|---------------------------|------|-------------|
| 833.474    | 833.4318    | -0.0422 | -51   | 129        | 135      | SLHAHLR      | 18        | 0     |                           |      | Mascot      |
| 833.474    | 833.4318    | -0.0422 | -51   | 129        | 135      | SLHAHLR      |           |       |                           |      | Mascot      |
| 850.4417   | 850.5382    | 0.0965  | 113   | 282        | 288      | NPHEQIL      |           |       |                           |      | Mascot      |
| 1313.6129  | 1313.5842   | -0.0287 | -22   | 89         | 99       | CVHCGKTFAYK  |           |       | Carbamidomethyl (C)[1]    |      | Mascot      |
| 1497.646   | 1497.715    | 0.069   | 46    | 27         | 38       | NEKSFACPQCEK |           |       | Carbamidomethyl (C)[7,10] |      | Mascot      |

|    |                                                                                                        |           |         |    |     |     |                           |  |  |  |  |  |  |                        |        |
|----|--------------------------------------------------------------------------------------------------------|-----------|---------|----|-----|-----|---------------------------|--|--|--|--|--|--|------------------------|--------|
|    | 1582.7465                                                                                              | 1582.7434 | -0.0031 | -2 | 193 | 206 | HIGVKDHICSECGK            |  |  |  |  |  |  | Carbamidomethyl (C)[9] | Mascot |
|    | 2480.0903                                                                                              | 2480.126  | 0.0357  | 14 | 108 | 128 | IHTGEQPYMCNQCEKSF<br>THAR |  |  |  |  |  |  |                        | Mascot |
| 48 | PREDICTED: e3 ubiquitin-protein ligase BRE1A [Danio rerio]<br>gi 189527718 115551 5.66 9 33 0 25 2.359 |           |         |    |     |     |                           |  |  |  |  |  |  |                        |        |

#### Peptide Information

| Calc. Mass | Obsrv. Mass | ± da    | ± ppm | Start Seq. | End Sequence Seq.             | Ion Score | C. I. % | Modification           | Rank | Result Type |
|------------|-------------|---------|-------|------------|-------------------------------|-----------|---------|------------------------|------|-------------|
| 833.3999   | 833.4318    | 0.0319  | 38    | 709        | 715 SEAEELR                   | 25        | 2.359   |                        |      | Mascot      |
| 833.3999   | 833.4318    | 0.0319  | 38    | 709        | 715 SEAEELR                   |           |         |                        |      | Mascot      |
| 842.5206   | 842.5048    | -0.0158 | -19   | 61         | 67 ALQIKNR                    |           |         |                        |      | Mascot      |
| 1045.5823  | 1045.5547   | -0.0276 | -26   | 786        | 793 LMQQLREK                  |           |         |                        |      | Mascot      |
| 1247.6412  | 1247.6447   | 0.0035  | 3     | 232        | 242 LNALLTGMNER               |           |         | Oxidation (M)[8]       |      | Mascot      |
| 1497.8132  | 1497.715    | -0.0982 | -66   | 511        | 522 LREAQQELNQLR              |           |         |                        |      | Mascot      |
| 1707.7478  | 1707.8699   | 0.1221  | 71    | 995        | 1009 CPKCNAAFGANDFHR          |           |         | Carbamidomethyl (C)[1] |      | Mascot      |
| 1707.7478  | 1707.8699   | 0.1221  | 71    | 995        | 1009 CPKCNAAFGANDFHR          |           |         | Carbamidomethyl (C)[1] |      | Mascot      |
| 1729.781   | 1729.8479   | 0.0669  | 39    | 429        | 442 QLDHMEDEVSLQR             |           |         | Oxidation (M)[5]       |      | Mascot      |
| 1737.8622  | 1737.906    | 0.0438  | 25    | 317        | 333 VCGEASSVCGTITINKR         |           |         |                        |      | Mascot      |
| 2300.1816  | 2300.1614   | -0.0202 | -9    | 222        | 242 DGGLWDVAVRLNALLTG<br>MNER |           |         |                        |      | Mascot      |

|    |                                                                        |  |  |  |  |  |  |  |  |  |  |  |  |  |  |
|----|------------------------------------------------------------------------|--|--|--|--|--|--|--|--|--|--|--|--|--|--|
| 49 | tektin 2 (testicular) [Danio rerio]<br>gi 94733681 48602.7 5.71 8 32 0 |  |  |  |  |  |  |  |  |  |  |  |  |  |  |
|----|------------------------------------------------------------------------|--|--|--|--|--|--|--|--|--|--|--|--|--|--|

#### Peptide Information

| Calc. Mass | Obsrv. Mass | ± da    | ± ppm | Start Seq. | End Sequence Seq.             | Ion Score | C. I. % | Modification                              | Rank | Result Type |
|------------|-------------|---------|-------|------------|-------------------------------|-----------|---------|-------------------------------------------|------|-------------|
| 833.4111   | 833.4318    | 0.0207  | 25    | 241        | 247 ENNSITR                   | 4         | 0       |                                           |      | Mascot      |
| 833.4111   | 833.4318    | 0.0207  | 25    | 241        | 247 ENNSITR                   |           |         |                                           |      | Mascot      |
| 952.492    | 952.427     | -0.065  | -68   | 259        | 266 MSVEFALR                  |           |         |                                           |      | Mascot      |
| 1045.5789  | 1045.5547   | -0.0242 | -23   | 68         | 75 INDITRWK                   |           |         |                                           |      | Mascot      |
| 1218.6147  | 1218.603    | -0.0117 | -10   | 231        | 240 EEMQVSVQIR                |           |         |                                           |      | Mascot      |
| 1323.7379  | 1323.589    | -0.1489 | -112  | 356        | 367 LAQAQHSLSLQSLK            |           |         |                                           |      | Mascot      |
| 2211.0261  | 2211.0928   | 0.0667  | 30    | 268        | 284 RTHHEEQAHHDMQWQL<br>K     |           |         |                                           |      | Mascot      |
| 2283.1365  | 2283.167    | 0.0305  | 13    | 2          | 22 ATLSSKPASRYSVSDWA<br>TNNK  |           |         |                                           |      | Mascot      |
| 2600.116   | 2600.2476   | 0.1316  | 51    | 80         | 101 ACAQEVDDEMDALTLK<br>EEMER |           |         | Carbamidomethyl (C)[2], Oxidation (M)[10] |      | Mascot      |

|    |                                                                                                                     |  |  |  |  |  |  |  |  |  |  |  |  |  |  |
|----|---------------------------------------------------------------------------------------------------------------------|--|--|--|--|--|--|--|--|--|--|--|--|--|--|
| 50 | PREDICTED: LOW QUALITY PROTEIN: myotubularin-related protein 13 [Danio rerio]<br>gi 292616467 206253.7 6.29 18 32 0 |  |  |  |  |  |  |  |  |  |  |  |  |  |  |
|----|---------------------------------------------------------------------------------------------------------------------|--|--|--|--|--|--|--|--|--|--|--|--|--|--|

#### Peptide Information



| Calc. Mass          |                            | Obsrv. Mass | ± da | ± ppm | Start Seq. | End Sequence Seq.      | Ion Score  | C. I. % Modification      |                | Rank          | Result Type           |                    |                   |
|---------------------|----------------------------|-------------|------|-------|------------|------------------------|------------|---------------------------|----------------|---------------|-----------------------|--------------------|-------------------|
| 833.4661            | 833.4318                   | -0.0343     | -41  | 1054  | 1061       | AGKITMGR               |            |                           |                |               | Mascot                |                    |                   |
| 833.4661            | 833.4318                   | -0.0343     | -41  | 1054  | 1061       | AGKITMGR               |            |                           |                |               | Mascot                |                    |                   |
| 920.5927            | 920.5007                   | -0.092      | -100 | 869   | 876        | LPPIQKPK               |            |                           |                |               | Mascot                |                    |                   |
| 1083.5834           | 1083.5464                  | -0.037      | -34  | 1807  | 1815       | AFFDLKTNK              |            |                           |                |               | Mascot                |                    |                   |
| 1218.6147           | 1218.603                   | -0.0117     | -10  | 716   | 726        | TAMDLAAEQLR            |            |                           |                |               | Mascot                |                    |                   |
| 1242.663            | 1242.5426                  | -0.1204     | -97  | 366   | 375        | LFAQLFQGYR             |            |                           |                |               | Mascot                |                    |                   |
| 1291.7092           | 1291.6036                  | -0.1056     | -82  | 1179  | 1188       | LPVVCWKHPR             |            | Carbamidomethyl (C)[5]    |                |               | Mascot                |                    |                   |
| 1291.7092           | 1291.6036                  | -0.1056     | -82  | 1179  | 1188       | LPVVCWKHPR             |            | Carbamidomethyl (C)[5]    |                |               | Mascot                |                    |                   |
| 1438.5427           | 1438.6874                  | 0.1447      | 101  | 1769  | 1779       | YYETDEDTSCR            |            | Carbamidomethyl (C)[10]   |                |               | Mascot                |                    |                   |
| 1454.7678           | 1454.6755                  | -0.0923     | -63  | 254   | 265        | YSYPYIPVLPSR           |            |                           |                |               | Mascot                |                    |                   |
| 1735.9602           | 1735.9041                  | -0.0561     | -32  | 1274  | 1290       | FIQHPAVGDVGARLAGK      |            |                           |                |               | Mascot                |                    |                   |
| 1753.9305           | 1753.917                   | -0.0135     | -8   | 554   | 568        | LEVVRTCIGFIFDNK        |            |                           |                |               | Mascot                |                    |                   |
| 1753.9305           | 1753.917                   | -0.0135     | -8   | 554   | 568        | LEVVRTCIGFIFDNK        |            |                           |                |               | Mascot                |                    |                   |
| 1775.7462           | 1775.894                   | 0.1478      | 83   | 1355  | 1371       | ACAPSAMSSDTEDSFLK      |            | Oxidation (M)[7]          |                |               | Mascot                |                    |                   |
| 1881.9089           | 1882.0129                  | 0.104       | 55   | 1722  | 1737       | AATLYNQFTPKNEDNR       |            |                           |                |               | Mascot                |                    |                   |
| 1881.9089           | 1882.0129                  | 0.104       | 55   | 1722  | 1737       | AATLYNQFTPKNEDNR       |            |                           |                |               | Mascot                |                    |                   |
| 2199.042            | 2199.0032                  | -0.0388     | -18  | 1352  | 1371       | LLRACAPSAMSSDTEDSFLK   |            | Carbamidomethyl (C)[5]    |                |               | Mascot                |                    |                   |
| 2225.0808           | 2225.1084                  | 0.0276      | 12   | 1816  | 1834       | RVYNFCAADAPSAQLWIDK    |            | Carbamidomethyl (C)[6]    |                |               | Mascot                |                    |                   |
| 2283.2239           | 2283.167                   | -0.0569     | -25  | 959   | 977        | KITIQNQLQQNMQEGLQLR    |            |                           |                |               | Mascot                |                    |                   |
| 2300.1956           | 2300.1614                  | -0.0342     | -15  | 1323  | 1343       | GLKLDPALNCELVPVEFADTR  |            |                           |                |               | Mascot                |                    |                   |
| 2367.249            | 2367.1467                  | -0.1023     | -43  | 306   | 325        | IPECIHLSQLPELLHNTQK    |            | Carbamidomethyl (C)[4]    |                |               | Mascot                |                    |                   |
| 2600.2158           | 2600.2476                  | 0.0318      | 12   | 425   | 446        | GPPYRACDLFDELVALDVDCFK |            | Carbamidomethyl (C)[7,20] |                |               | Mascot                |                    |                   |
| Gel Idx/Pos         |                            | 247/J23     |      |       |            | Instr./Gel Origin      |            |                           | BA2060/110707A |               | Process Status        | Analysis Succeeded |                   |
| Plate [#] Name      |                            | [1] 31496   |      |       |            | Instrument Sample Name |            |                           |                |               | Spectra               | 11                 |                   |
| Rank                | Protein Name               |             |      |       |            | Accession No.          | Protein MW | Protein PI                | Pep. Count     | Protein Score | Protein Score C. I. % | Total Ion Score    | Total Ion C. I. % |
| 1                   | Vtg1 protein [Danio rerio] |             |      |       |            | gi 63100501            | 36409.1    | 9.23                      | 13             | 592           | 100                   | 514                | 100               |
| Peptide Information |                            |             |      |       |            |                        |            |                           |                |               |                       |                    |                   |
| Calc. Mass          |                            | Obsrv. Mass | ± da | ± ppm | Start Seq. | End Sequence Seq.      | Ion Score  | C. I. % Modification      |                | Rank          | Result Type           |                    |                   |
| 826.4457            | 826.4503                   | 0.0046      | 6    | 198   | 204        | QYAVFAK                |            |                           |                |               | Mascot                |                    |                   |

|           |           |         |     |     |     |                    |     |        |                         |        |
|-----------|-----------|---------|-----|-----|-----|--------------------|-----|--------|-------------------------|--------|
| 960.4785  | 960.4794  | 0.0009  | 1   | 218 | 224 | LEVEWER            | 45  | 99.139 |                         | Mascot |
| 960.4785  | 960.4794  | 0.0009  | 1   | 218 | 224 | LEVEWER            |     |        |                         | Mascot |
| 976.5322  | 976.474   | -0.0582 | -60 | 25  | 32  | FSSVPRQR           |     |        |                         | Mascot |
| 984.4243  | 984.4249  | 0.0006  | 1   | 190 | 197 | FSWGAECK           |     |        | Carbamidomethyl (C)[7]  | Mascot |
| 984.4243  | 984.4249  | 0.0006  | 1   | 190 | 197 | FSWGAECK           | 41  | 97.871 | Carbamidomethyl (C)[7]  | Mascot |
| 1118.682  | 1118.6837 | 0.0017  | 2   | 225 | 234 | LPIIVTTYAK         | 68  | 99.996 |                         | Mascot |
| 1118.682  | 1118.6837 | 0.0017  | 2   | 225 | 234 | LPIIVTTYAK         |     |        |                         | Mascot |
| 1287.6691 | 1287.673  | 0.0039  | 3   | 205 | 217 | AEAGVLGEFPAAR      | 112 | 100    |                         | Mascot |
| 1287.6691 | 1287.673  | 0.0039  | 3   | 205 | 217 | AEAGVLGEFPAAR      |     |        |                         | Mascot |
| 1364.6957 | 1364.6969 | 0.0012  | 1   | 239 | 250 | HILTAAYDTGFR       |     |        |                         | Mascot |
| 1364.6957 | 1364.6969 | 0.0012  | 1   | 239 | 250 | HILTAAYDTGFR       | 110 | 100    |                         | Mascot |
| 1369.6569 | 1369.7288 | 0.0719  | 52  | 186 | 197 | VTGKFSWGAECK       |     |        | Carbamidomethyl (C)[11] | Mascot |
| 1676.8523 | 1676.861  | 0.0087  | 5   | 159 | 173 | VQLIVSSIAENDNMK    |     |        | Oxidation (M)[14]       | Mascot |
| 1796.9078 | 1797.0122 | 0.1044  | 58  | 239 | 253 | HILTAAYDTGFRFER    |     |        |                         | Mascot |
| 1826.9799 | 1826.9792 | -0.0007 | 0   | 143 | 158 | LLGYQLAAYFDKPTAR   |     |        |                         | Mascot |
| 1826.9799 | 1826.9792 | -0.0007 | 0   | 143 | 158 | LLGYQLAAYFDKPTAR   | 139 | 100    |                         | Mascot |
| 1958.0189 | 1958.0194 | 0.0005  | 0   | 254 | 271 | ATNSEKEIELTAALPSQR |     |        |                         | Mascot |
| 2060.1426 | 2060.1394 | -0.0032 | -2  | 218 | 234 | LEVEWERLPIIVTTYAK  |     |        |                         | Mascot |

2 vitellogenin 1 [Danio rerio] gi|166795887 149452.5 8.68 17 555 100 515 100

Peptide Information

| Calc. Mass | Obsrv. Mass | ± da    | ± ppm | Start Seq. | End Seq. | Sequence      | Ion Score | C. I. % | Modification           | Rank | Result Type |
|------------|-------------|---------|-------|------------|----------|---------------|-----------|---------|------------------------|------|-------------|
| 826.4457   | 826.4503    | 0.0046  | 6     | 1238       | 1244     | QYAVFAK       |           |         |                        |      | Mascot      |
| 960.4785   | 960.4794    | 0.0009  | 1     | 1258       | 1264     | LEVEWER       | 45        | 99.139  |                        |      | Mascot      |
| 960.4785   | 960.4794    | 0.0009  | 1     | 1258       | 1264     | LEVEWER       |           |         |                        |      | Mascot      |
| 984.4243   | 984.4249    | 0.0006  | 1     | 1230       | 1237     | FSWGAECK      |           |         | Carbamidomethyl (C)[7] |      | Mascot      |
| 984.4243   | 984.4249    | 0.0006  | 1     | 1230       | 1237     | FSWGAECK      | 41        | 97.871  | Carbamidomethyl (C)[7] |      | Mascot      |
| 992.5015   | 992.467     | -0.0345 | -35   | 615        | 622      | LMNCKLDR      |           |         |                        |      | Mascot      |
| 992.5015   | 992.467     | -0.0345 | -35   | 615        | 622      | LMNCKLDR      |           |         |                        |      | Mascot      |
| 1118.682   | 1118.6837   | 0.0017  | 2     | 1265       | 1274     | LPIIVTTYAK    | 68        | 99.996  |                        |      | Mascot      |
| 1118.682   | 1118.6837   | 0.0017  | 2     | 1265       | 1274     | LPIIVTTYAK    |           |         |                        |      | Mascot      |
| 1287.6691  | 1287.673    | 0.0039  | 3     | 1245       | 1257     | AEAGVLGEFPAAR | 112       | 100     |                        |      | Mascot      |
| 1287.6691  | 1287.673    | 0.0039  | 3     | 1245       | 1257     | AEAGVLGEFPAAR |           |         |                        |      | Mascot      |
| 1364.6957  | 1364.6969   | 0.0012  | 1     | 1279       | 1290     | HILTAAYDTGFR  |           |         |                        |      | Mascot      |
| 1364.6957  | 1364.6969   | 0.0012  | 1     | 1279       | 1290     | HILTAAYDTGFR  | 110       | 100     |                        |      | Mascot      |
| 1369.7032  | 1369.7288   | 0.0256  | 19    | 828        | 838      | LESMTYEQLKK   |           |         |                        |      | Mascot      |

|           |           |         |     |      |      |                                     |     |  |     |  |  |  |  |  |  |  |  |  |        |
|-----------|-----------|---------|-----|------|------|-------------------------------------|-----|--|-----|--|--|--|--|--|--|--|--|--|--------|
| 1382.7889 | 1382.7717 | -0.0172 | -12 | 303  | 315  | ISDAPAQIVEVLK                       |     |  |     |  |  |  |  |  |  |  |  |  | Mascot |
| 1676.8523 | 1676.861  | 0.0087  | 5   | 1199 | 1213 | VQLIVSSIAENDNMK                     |     |  |     |  |  |  |  |  |  |  |  |  | Mascot |
| 1796.9078 | 1797.0122 | 0.1044  | 58  | 1279 | 1293 | HILTAAYDTGFRFER                     |     |  |     |  |  |  |  |  |  |  |  |  | Mascot |
| 1826.9799 | 1826.9792 | -0.0007 | 0   | 1183 | 1198 | LLGYQLAAYFDKPTAR                    |     |  |     |  |  |  |  |  |  |  |  |  | Mascot |
| 1826.9799 | 1826.9792 | -0.0007 | 0   | 1183 | 1198 | LLGYQLAAYFDKPTAR                    | 139 |  | 100 |  |  |  |  |  |  |  |  |  | Mascot |
| 1958.0189 | 1958.0194 | 0.0005  | 0   | 1294 | 1311 | ATNSEKEIELTAALPSQR                  |     |  |     |  |  |  |  |  |  |  |  |  | Mascot |
| 2060.1426 | 2060.1394 | -0.0032 | -2  | 1258 | 1274 | LEVEWERLPIIVTTYAK                   |     |  |     |  |  |  |  |  |  |  |  |  | Mascot |
| 2233.2009 | 2233.0803 | -0.1206 | -54 | 593  | 614  | SLTRITAPDMAYVAGAAN<br>VAIK          |     |  |     |  |  |  |  |  |  |  |  |  | Mascot |
| 2249.1958 | 2249.0649 | -0.1309 | -58 | 593  | 614  | SLTRITAPDMAYVAGAAN<br>VAIK          |     |  |     |  |  |  |  |  |  |  |  |  | Mascot |
| 2299.2292 | 2299.1763 | -0.0529 | -23 | 1039 | 1058 | QINIIDDDTPEGQAFLLKL<br>R            |     |  |     |  |  |  |  |  |  |  |  |  | Mascot |
| 3338.6421 | 3338.7573 | 0.1152  | 35  | 930  | 961  | SIPLVPELSLQNSQASYA<br>GDLSEMSSVASVR |     |  |     |  |  |  |  |  |  |  |  |  | Mascot |

3 Vtg1 protein [Danio rerio] g||145337918 116565.5 9.07 15 554 100 515 100

#### Peptide Information

| Calc. Mass | Obsrv. Mass | ± da    | ± ppm | Start Seq. | End Seq. | Sequence                   | Ion Score | C. I.  | % Modification         | Rank | Result Type |
|------------|-------------|---------|-------|------------|----------|----------------------------|-----------|--------|------------------------|------|-------------|
| 826.4457   | 826.4503    | 0.0046  | 6     | 944        | 950      | QYAVFAK                    |           |        |                        |      | Mascot      |
| 960.4785   | 960.4794    | 0.0009  | 1     | 964        | 970      | LEVEWER                    | 45        | 99.139 |                        |      | Mascot      |
| 960.4785   | 960.4794    | 0.0009  | 1     | 964        | 970      | LEVEWER                    |           |        |                        |      | Mascot      |
| 984.4243   | 984.4249    | 0.0006  | 1     | 936        | 943      | FSWGAECK                   |           |        | Carbamidomethyl (C)[7] |      | Mascot      |
| 984.4243   | 984.4249    | 0.0006  | 1     | 936        | 943      | FSWGAECK                   | 41        | 97.871 | Carbamidomethyl (C)[7] |      | Mascot      |
| 1118.682   | 1118.6837   | 0.0017  | 2     | 971        | 980      | LPIIVTTYAK                 | 68        | 99.996 |                        |      | Mascot      |
| 1118.682   | 1118.6837   | 0.0017  | 2     | 971        | 980      | LPIIVTTYAK                 |           |        |                        |      | Mascot      |
| 1287.6691  | 1287.673    | 0.0039  | 3     | 951        | 963      | AEAGVLGEFPAAR              | 112       | 100    |                        |      | Mascot      |
| 1287.6691  | 1287.673    | 0.0039  | 3     | 951        | 963      | AEAGVLGEFPAAR              |           |        |                        |      | Mascot      |
| 1364.6957  | 1364.6969   | 0.0012  | 1     | 985        | 996      | HILTAAYDTGFR               |           |        |                        |      | Mascot      |
| 1364.6957  | 1364.6969   | 0.0012  | 1     | 985        | 996      | HILTAAYDTGFR               | 110       | 100    |                        |      | Mascot      |
| 1369.7032  | 1369.7288   | 0.0256  | 19    | 534        | 544      | LESMTYEQLKK                |           |        |                        |      | Mascot      |
| 1382.7889  | 1382.7717   | -0.0172 | -12   | 9          | 21       | ISDAPAQIVEVLK              |           |        |                        |      | Mascot      |
| 1676.8523  | 1676.861    | 0.0087  | 5     | 905        | 919      | VQLIVSSIAENDNMK            |           |        | Oxidation (M)[14]      |      | Mascot      |
| 1796.9078  | 1797.0122   | 0.1044  | 58    | 985        | 999      | HILTAAYDTGFRFER            |           |        |                        |      | Mascot      |
| 1826.9799  | 1826.9792   | -0.0007 | 0     | 889        | 904      | LLGYQLAAYFDKPTAR           |           |        |                        |      | Mascot      |
| 1826.9799  | 1826.9792   | -0.0007 | 0     | 889        | 904      | LLGYQLAAYFDKPTAR           | 139       | 100    |                        |      | Mascot      |
| 1958.0189  | 1958.0194   | 0.0005  | 0     | 1000       | 1017     | ATNSEKEIELTAALPSQR         |           |        |                        |      | Mascot      |
| 2060.1426  | 2060.1394   | -0.0032 | -2    | 964        | 980      | LEVEWERLPIIVTTYAK          |           |        |                        |      | Mascot      |
| 2249.2725  | 2249.0649   | -0.2076 | -92   | 131        | 151      | FATIPALREVVM LGYGSLI<br>AK |           |        |                        |      | Mascot      |

2299.2292

2299.1763

-0.0529

-23

745

764

QINIIDDDTPEGQAFLLKL  
R

Mascot

4

vitellogenin 1 [Danio rerio]

gi|21391472

127954.2

8.69

15

551

100

515

100

Peptide Information

| Calc. Mass | Obsrv. Mass | $\pm$ da | $\pm$ ppm | Start Seq. | End Seq. | Sequence                  | Ion Score | C. I.  | % Modification         | Rank | Result Type |
|------------|-------------|----------|-----------|------------|----------|---------------------------|-----------|--------|------------------------|------|-------------|
| 826.4457   | 826.4503    | 0.0046   | 6         | 1045       | 1051     | QYAVFAK                   |           |        |                        |      | Mascot      |
| 960.4785   | 960.4794    | 0.0009   | 1         | 1065       | 1071     | LEVEWER                   | 45        | 99.139 |                        |      | Mascot      |
| 960.4785   | 960.4794    | 0.0009   | 1         | 1065       | 1071     | LEVEWER                   |           |        |                        |      | Mascot      |
| 984.4243   | 984.4249    | 0.0006   | 1         | 1037       | 1044     | FSWGAECK                  |           |        | Carbamidomethyl (C)[7] |      | Mascot      |
| 984.4243   | 984.4249    | 0.0006   | 1         | 1037       | 1044     | FSWGAECK                  | 41        | 97.871 | Carbamidomethyl (C)[7] |      | Mascot      |
| 1118.682   | 1118.6837   | 0.0017   | 2         | 1072       | 1081     | LPIIVTTYAK                | 68        | 99.996 |                        |      | Mascot      |
| 1118.682   | 1118.6837   | 0.0017   | 2         | 1072       | 1081     | LPIIVTTYAK                |           |        |                        |      | Mascot      |
| 1287.6691  | 1287.673    | 0.0039   | 3         | 1052       | 1064     | AEAGVLGEFPAAR             | 112       | 100    |                        |      | Mascot      |
| 1287.6691  | 1287.673    | 0.0039   | 3         | 1052       | 1064     | AEAGVLGEFPAAR             |           |        |                        |      | Mascot      |
| 1364.6957  | 1364.6969   | 0.0012   | 1         | 1086       | 1097     | HILTAAYDTGFR              |           |        |                        |      | Mascot      |
| 1364.6957  | 1364.6969   | 0.0012   | 1         | 1086       | 1097     | HILTAAYDTGFR              | 110       | 100    |                        |      | Mascot      |
| 1369.7032  | 1369.7288   | 0.0256   | 19        | 637        | 647      | LESMTYEQLKK               |           |        |                        |      | Mascot      |
| 1382.7889  | 1382.7717   | -0.0172  | -12       | 112        | 124      | ISDAPAQIVEVLK             |           |        |                        |      | Mascot      |
| 1676.8523  | 1676.861    | 0.0087   | 5         | 1006       | 1020     | VQLIVSSIAENDNMK           |           |        | Oxidation (M)[14]      |      | Mascot      |
| 1796.9078  | 1797.0122   | 0.1044   | 58        | 1086       | 1100     | HILTAAYDTGFRFER           |           |        |                        |      | Mascot      |
| 1826.9799  | 1826.9792   | -0.0007  | 0         | 990        | 1005     | LLGYQLAAYFDKPTAR          |           |        |                        |      | Mascot      |
| 1826.9799  | 1826.9792   | -0.0007  | 0         | 990        | 1005     | LLGYQLAAYFDKPTAR          | 139       | 100    |                        |      | Mascot      |
| 1958.0189  | 1958.0194   | 0.0005   | 0         | 1101       | 1118     | ATNSEKEIELTAALPSQR        |           |        |                        |      | Mascot      |
| 2060.1426  | 2060.1394   | -0.0032  | -2        | 1065       | 1081     | LEVEWERLPIIVTTYAK         |           |        |                        |      | Mascot      |
| 2249.2725  | 2249.0649   | -0.2076  | -92       | 234        | 254      | FATIPALREVVMLGYGSLI<br>AK |           |        |                        |      | Mascot      |
| 2299.2292  | 2299.1763   | -0.0529  | -23       | 848        | 867      | QINIIDDDTPEGQAFLLKL<br>R  |           |        |                        |      | Mascot      |

5

vitellogenin 1 [Danio rerio]

gi|94733730

149140.4

8.74

15

544

100

515

100

Peptide Information

| Calc. Mass | Obsrv. Mass | $\pm$ da | $\pm$ ppm | Start Seq. | End Seq. | Sequence | Ion Score | C. I.  | % Modification         | Rank | Result Type |
|------------|-------------|----------|-----------|------------|----------|----------|-----------|--------|------------------------|------|-------------|
| 826.4457   | 826.4503    | 0.0046   | 6         | 1238       | 1244     | QYAVFAK  |           |        |                        |      | Mascot      |
| 960.4785   | 960.4794    | 0.0009   | 1         | 1258       | 1264     | LEVEWER  | 45        | 99.139 |                        |      | Mascot      |
| 960.4785   | 960.4794    | 0.0009   | 1         | 1258       | 1264     | LEVEWER  |           |        |                        |      | Mascot      |
| 984.4243   | 984.4249    | 0.0006   | 1         | 1230       | 1237     | FSWGAECK |           |        | Carbamidomethyl (C)[7] |      | Mascot      |

|           |           |         |     |      |      |                           |     |        |                        |        |
|-----------|-----------|---------|-----|------|------|---------------------------|-----|--------|------------------------|--------|
| 984.4243  | 984.4249  | 0.0006  | 1   | 1230 | 1237 | FSWGAECK                  | 41  | 97.871 | Carbamidomethyl (C)[7] | Mascot |
| 1118.682  | 1118.6837 | 0.0017  | 2   | 1265 | 1274 | LPIIVTTYAK                | 68  | 99.996 |                        | Mascot |
| 1118.682  | 1118.6837 | 0.0017  | 2   | 1265 | 1274 | LPIIVTTYAK                |     |        |                        | Mascot |
| 1287.6691 | 1287.673  | 0.0039  | 3   | 1245 | 1257 | AEAGVLGEFPAAR             | 112 | 100    |                        | Mascot |
| 1287.6691 | 1287.673  | 0.0039  | 3   | 1245 | 1257 | AEAGVLGEFPAAR             |     |        |                        | Mascot |
| 1364.6957 | 1364.6969 | 0.0012  | 1   | 1279 | 1290 | HILTAAYDTGFR              |     |        |                        | Mascot |
| 1364.6957 | 1364.6969 | 0.0012  | 1   | 1279 | 1290 | HILTAAYDTGFR              | 110 | 100    |                        | Mascot |
| 1369.7032 | 1369.7288 | 0.0256  | 19  | 828  | 838  | LESMTYEQLKK               |     |        |                        | Mascot |
| 1382.7889 | 1382.7717 | -0.0172 | -12 | 303  | 315  | ISDAPAQIVEVLK             |     |        |                        | Mascot |
| 1676.8523 | 1676.861  | 0.0087  | 5   | 1199 | 1213 | VQLIVSSIAENDNMK           |     |        | Oxidation (M)[14]      | Mascot |
| 1796.9078 | 1797.0122 | 0.1044  | 58  | 1279 | 1293 | HILTAAYDTGFRFER           |     |        |                        | Mascot |
| 1826.9799 | 1826.9792 | -0.0007 | 0   | 1183 | 1198 | LLGYQLAAYFDKPTAR          |     |        |                        | Mascot |
| 1826.9799 | 1826.9792 | -0.0007 | 0   | 1183 | 1198 | LLGYQLAAYFDKPTAR          | 139 | 100    |                        | Mascot |
| 1958.0189 | 1958.0194 | 0.0005  | 0   | 1294 | 1311 | ATNSEKEIELTAALPSQR        |     |        |                        | Mascot |
| 2060.1426 | 2060.1394 | -0.0032 | -2  | 1258 | 1274 | LEVEWERLPIIVTTYAK         |     |        |                        | Mascot |
| 2249.2725 | 2249.0649 | -0.2076 | -92 | 425  | 445  | FATIPALREVVMLGYGSLI<br>AK |     |        |                        | Mascot |
| 2299.2292 | 2299.1763 | -0.0529 | -23 | 1039 | 1058 | QINIIDDDTPEGQAFLLKL<br>R  |     |        |                        | Mascot |

6 vitellogenin 7 [Danio rerio] gi|57864789 24318.7 8.37 9 466 100 404 100

| Peptide Information |             |         |       |            |                                       |           |        |                         |                  |
|---------------------|-------------|---------|-------|------------|---------------------------------------|-----------|--------|-------------------------|------------------|
| Calc. Mass          | Obsrv. Mass | ± da    | ± ppm | Start Seq. | End Sequence Seq.                     | Ion Score | C. I.  | % Modification          | Rank Result Type |
| 826.4457            | 826.4503    | 0.0046  | 6     | 93         | 99 QYAVFAK                            |           |        |                         | Mascot           |
| 960.4785            | 960.4794    | 0.0009  | 1     | 113        | 119 LEVEWER                           | 45        | 99.139 |                         | Mascot           |
| 960.4785            | 960.4794    | 0.0009  | 1     | 113        | 119 LEVEWER                           |           |        |                         | Mascot           |
| 984.4243            | 984.4249    | 0.0006  | 1     | 85         | 92 FSWGAECK                           |           |        | Carbamidomethyl (C)[7]  | Mascot           |
| 984.4243            | 984.4249    | 0.0006  | 1     | 85         | 92 FSWGAECK                           | 41        | 97.871 | Carbamidomethyl (C)[7]  | Mascot           |
| 1118.682            | 1118.6837   | 0.0017  | 2     | 120        | 129 LPIIVTTYAK                        | 68        | 99.996 |                         | Mascot           |
| 1118.682            | 1118.6837   | 0.0017  | 2     | 120        | 129 LPIIVTTYAK                        |           |        |                         | Mascot           |
| 1287.6691           | 1287.673    | 0.0039  | 3     | 100        | 112 AEAGVLGEFPAAR                     | 112       | 100    |                         | Mascot           |
| 1287.6691           | 1287.673    | 0.0039  | 3     | 100        | 112 AEAGVLGEFPAAR                     |           |        |                         | Mascot           |
| 1369.6569           | 1369.7288   | 0.0719  | 52    | 81         | 92 VTGKFSWGAECK                       |           |        | Carbamidomethyl (C)[11] | Mascot           |
| 1826.9799           | 1826.9792   | -0.0007 | 0     | 38         | 53 LLGYQLAAYFDKPTAR                   |           |        |                         | Mascot           |
| 1826.9799           | 1826.9792   | -0.0007 | 0     | 38         | 53 LLGYQLAAYFDKPTAR                   | 139       | 100    |                         | Mascot           |
| 2060.1426           | 2060.1394   | -0.0032 | -2    | 113        | 129 LEVEWERLPIIVTTYAK                 |           |        |                         | Mascot           |
| 3337.7539           | 3337.7449   | -0.009  | -3    | 38         | 67 LLGYQLAAYFDKPTARVQ<br>LIASSIAENDNR |           |        |                         | Mascot           |

7

vitellogenin 7 [Danio rerio]

gi|156713467

148739.2

8.76

12

414

100

404

100

| Peptide Information |             |         |       |            |          |                                    |           |         |                         |      |             |
|---------------------|-------------|---------|-------|------------|----------|------------------------------------|-----------|---------|-------------------------|------|-------------|
| Calc. Mass          | Obsrv. Mass | ± da    | ± ppm | Start Seq. | End Seq. | Sequence                           | Ion Score | C. I. % | Modification            | Rank | Result Type |
| 826.4457            | 826.4503    | 0.0046  | 6     | 1234       | 1240     | QYAVFAK                            |           |         |                         |      | Mascot      |
| 960.4785            | 960.4794    | 0.0009  | 1     | 1254       | 1260     | LEVEWER                            | 45        | 99.139  |                         |      | Mascot      |
| 960.4785            | 960.4794    | 0.0009  | 1     | 1254       | 1260     | LEVEWER                            |           |         |                         |      | Mascot      |
| 984.4243            | 984.4249    | 0.0006  | 1     | 1226       | 1233     | FSWGAECK                           |           |         | Carbamidomethyl (C)[7]  |      | Mascot      |
| 984.4243            | 984.4249    | 0.0006  | 1     | 1226       | 1233     | FSWGAECK                           | 41        | 97.871  | Carbamidomethyl (C)[7]  |      | Mascot      |
| 1109.4818           | 1109.4979   | 0.0161  | 15    | 1087       | 1097     | SHSTSSSSSSR                        |           |         |                         |      | Mascot      |
| 1118.682            | 1118.6837   | 0.0017  | 2     | 1261       | 1270     | LPIIVTTYAK                         | 68        | 99.996  |                         |      | Mascot      |
| 1118.682            | 1118.6837   | 0.0017  | 2     | 1261       | 1270     | LPIIVTTYAK                         |           |         |                         |      | Mascot      |
| 1287.6691           | 1287.673    | 0.0039  | 3     | 1241       | 1253     | AEAGVLGEFPAAR                      | 112       | 100     |                         |      | Mascot      |
| 1287.6691           | 1287.673    | 0.0039  | 3     | 1241       | 1253     | AEAGVLGEFPAAR                      |           |         |                         |      | Mascot      |
| 1347.7882           | 1347.7307   | -0.0575 | -43   | 1111       | 1122     | LSKTATIEPFK                        |           |         |                         |      | Mascot      |
| 1369.6569           | 1369.7288   | 0.0719  | 52    | 1222       | 1233     | VTGKFSWGAECK                       |           |         | Carbamidomethyl (C)[11] |      | Mascot      |
| 1796.9581           | 1797.0122   | 0.0541  | 30    | 342        | 356      | LSTLDKFEAIWAQFK                    |           |         |                         |      | Mascot      |
| 1826.9799           | 1826.9792   | -0.0007 | 0     | 1179       | 1194     | LLGYQLAAYFDKPTAR                   |           |         |                         |      | Mascot      |
| 1826.9799           | 1826.9792   | -0.0007 | 0     | 1179       | 1194     | LLGYQLAAYFDKPTAR                   | 139       | 100     |                         |      | Mascot      |
| 2060.1426           | 2060.1394   | -0.0032 | -2    | 1254       | 1270     | LEVEWERLPIIVTTYAK                  |           |         |                         |      | Mascot      |
| 3337.7539           | 3337.7449   | -0.009  | -3    | 1179       | 1208     | LLGYQLAAYFDKPTARVQ<br>LIASSIAENDNR |           |         |                         |      | Mascot      |

8

novel protein similar to vitellogenin 1 (vg1) [Danio rerio]

gi|94732723

147084.2

8.73

11

410

100

404

100

| Peptide Information |             |        |       |            |          |               |           |         |                        |      |             |
|---------------------|-------------|--------|-------|------------|----------|---------------|-----------|---------|------------------------|------|-------------|
| Calc. Mass          | Obsrv. Mass | ± da   | ± ppm | Start Seq. | End Seq. | Sequence      | Ion Score | C. I. % | Modification           | Rank | Result Type |
| 826.4457            | 826.4503    | 0.0046 | 6     | 1219       | 1225     | QYAVFAK       |           |         |                        |      | Mascot      |
| 960.4785            | 960.4794    | 0.0009 | 1     | 1239       | 1245     | LEVEWER       | 45        | 99.139  |                        |      | Mascot      |
| 960.4785            | 960.4794    | 0.0009 | 1     | 1239       | 1245     | LEVEWER       |           |         |                        |      | Mascot      |
| 984.4243            | 984.4249    | 0.0006 | 1     | 1211       | 1218     | FSWGAECK      |           |         | Carbamidomethyl (C)[7] |      | Mascot      |
| 984.4243            | 984.4249    | 0.0006 | 1     | 1211       | 1218     | FSWGAECK      | 41        | 97.871  | Carbamidomethyl (C)[7] |      | Mascot      |
| 1109.4818           | 1109.4979   | 0.0161 | 15    | 1087       | 1097     | SHSTSSSSSSR   |           |         |                        |      | Mascot      |
| 1118.682            | 1118.6837   | 0.0017 | 2     | 1246       | 1255     | LPIIVTTYAK    | 68        | 99.996  |                        |      | Mascot      |
| 1118.682            | 1118.6837   | 0.0017 | 2     | 1246       | 1255     | LPIIVTTYAK    |           |         |                        |      | Mascot      |
| 1287.6691           | 1287.673    | 0.0039 | 3     | 1226       | 1238     | AEAGVLGEFPAAR | 112       | 100     |                        |      | Mascot      |
| 1287.6691           | 1287.673    | 0.0039 | 3     | 1226       | 1238     | AEAGVLGEFPAAR |           |         |                        |      | Mascot      |

|    |                              |            |             |         |       |              |                     |                                    |           |                        |                         |                         |      |             |
|----|------------------------------|------------|-------------|---------|-------|--------------|---------------------|------------------------------------|-----------|------------------------|-------------------------|-------------------------|------|-------------|
|    |                              | 1369.6569  | 1369.7288   | 0.0719  | 52    | 1207         | 1218                | VTGKFSWGAECK                       |           |                        |                         | Carbamidomethyl (C)[11] |      | Mascot      |
|    |                              | 1796.9581  | 1797.0122   | 0.0541  | 30    | 342          | 356                 | LSTLDKFEAIWAQFK                    |           |                        |                         |                         |      | Mascot      |
|    |                              | 1826.9799  | 1826.9792   | -0.0007 | 0     | 1164         | 1179                | LLGYQLAAYFDKPTAR                   |           |                        |                         |                         |      | Mascot      |
|    |                              | 1826.9799  | 1826.9792   | -0.0007 | 0     | 1164         | 1179                | LLGYQLAAYFDKPTAR                   | 139       | 100                    |                         |                         |      | Mascot      |
|    |                              | 2060.1426  | 2060.1394   | -0.0032 | -2    | 1239         | 1255                | LEVEWERLPIIVTTYAK                  |           |                        |                         |                         |      | Mascot      |
|    |                              | 3337.7539  | 3337.7449   | -0.009  | -3    | 1164         | 1193                | LLGYQLAAYFDKPTARVQ<br>LIASSIAENDNR |           |                        |                         |                         |      | Mascot      |
| 9  | Zgc:136383 [Danio rerio]     |            |             |         |       | gi 92097636  | 28809.9             | 9.33                               | 7         | 255                    | 100                     | 226                     | 100  |             |
|    | Peptide Information          |            |             |         |       |              |                     |                                    |           |                        |                         |                         |      |             |
|    |                              | Calc. Mass | Obsrv. Mass | ± da    | ± ppm | Start Seq.   | End Sequence Seq.   |                                    | Ion Score | C. I.                  | % Modification          |                         | Rank | Result Type |
|    |                              | 826.4457   | 826.4503    | 0.0046  | 6     | 136          | 142 QYAVFAK         |                                    |           |                        |                         |                         |      | Mascot      |
|    |                              | 960.4785   | 960.4794    | 0.0009  | 1     | 156          | 162 LEVEWER         | 45                                 | 99.139    |                        |                         |                         |      | Mascot      |
|    |                              | 960.4785   | 960.4794    | 0.0009  | 1     | 156          | 162 LEVEWER         |                                    |           |                        |                         |                         |      | Mascot      |
|    |                              | 984.4243   | 984.4249    | 0.0006  | 1     | 128          | 135 FSWGAECK        |                                    |           |                        | Carbamidomethyl (C)[7]  |                         |      | Mascot      |
|    |                              | 984.4243   | 984.4249    | 0.0006  | 1     | 128          | 135 FSWGAECK        | 41                                 | 97.871    | Carbamidomethyl (C)[7] |                         |                         |      | Mascot      |
|    |                              | 1045.5465  | 1045.5681   | 0.0216  | 21    | 246          | 253 DFLSWIHK        |                                    |           |                        |                         |                         |      | Mascot      |
|    |                              | 1118.5986  | 1118.6837   | 0.0851  | 76    | 217          | 225 IPEITMSRR       |                                    |           |                        | Oxidation (M)[6]        |                         |      | Mascot      |
|    |                              | 1118.5986  | 1118.6837   | 0.0851  | 76    | 217          | 225 IPEITMSRR       |                                    |           |                        | Oxidation (M)[6]        |                         |      | Mascot      |
|    |                              | 1676.7653  | 1676.861    | 0.0957  | 57    | 1            | 15 MLPLSSSMSSSRMSK  |                                    |           |                        | Oxidation (M)[1,8,13]   |                         |      | Mascot      |
|    |                              | 1826.9799  | 1826.9792   | -0.0007 | 0     | 81           | 96 LLGYQLAAYFDKPTAR |                                    |           |                        |                         |                         |      | Mascot      |
|    |                              | 1826.9799  | 1826.9792   | -0.0007 | 0     | 81           | 96 LLGYQLAAYFDKPTAR | 139                                | 100       |                        |                         |                         |      | Mascot      |
| 10 | Vtg5 protein [Danio rerio]   |            |             |         |       | gi 148744685 | 27543.3             | 9.2                                | 6         | 249                    | 100                     | 226                     | 100  |             |
|    | Peptide Information          |            |             |         |       |              |                     |                                    |           |                        |                         |                         |      |             |
|    |                              | Calc. Mass | Obsrv. Mass | ± da    | ± ppm | Start Seq.   | End Sequence Seq.   |                                    | Ion Score | C. I.                  | % Modification          |                         | Rank | Result Type |
|    |                              | 826.4457   | 826.4503    | 0.0046  | 6     | 124          | 130 QYAVFAK         |                                    |           |                        |                         |                         |      | Mascot      |
|    |                              | 960.4785   | 960.4794    | 0.0009  | 1     | 144          | 150 LEVEWER         | 45                                 | 99.139    |                        |                         |                         |      | Mascot      |
|    |                              | 960.4785   | 960.4794    | 0.0009  | 1     | 144          | 150 LEVEWER         |                                    |           |                        |                         |                         |      | Mascot      |
|    |                              | 984.4243   | 984.4249    | 0.0006  | 1     | 116          | 123 FSWGAECK        |                                    |           |                        | Carbamidomethyl (C)[7]  |                         |      | Mascot      |
|    |                              | 984.4243   | 984.4249    | 0.0006  | 1     | 116          | 123 FSWGAECK        | 41                                 | 97.871    | Carbamidomethyl (C)[7] |                         |                         |      | Mascot      |
|    |                              | 1369.6569  | 1369.7288   | 0.0719  | 52    | 112          | 123 VTGKFSWGAECK    |                                    |           |                        | Carbamidomethyl (C)[11] |                         |      | Mascot      |
|    |                              | 1376.7069  | 1376.6899   | -0.017  | -12   | 165          | 176 HILNAAYNTGFR    |                                    |           |                        |                         |                         |      | Mascot      |
|    |                              | 1826.9799  | 1826.9792   | -0.0007 | 0     | 69           | 84 LLGYQLAAYFDKPTAR |                                    |           |                        |                         |                         |      | Mascot      |
|    |                              | 1826.9799  | 1826.9792   | -0.0007 | 0     | 69           | 84 LLGYQLAAYFDKPTAR | 139                                | 100       |                        |                         |                         |      | Mascot      |
| 11 | vitellogenin 6 [Danio rerio] |            |             |         |       | gi 57864787  | 38968.8             | 8.92                               | 6         | 247                    | 100                     | 226                     | 100  |             |

| Peptide Information |                                  |             |         |       |              |          |                          |           |         |                        |      |             |     |
|---------------------|----------------------------------|-------------|---------|-------|--------------|----------|--------------------------|-----------|---------|------------------------|------|-------------|-----|
|                     | Calc. Mass                       | Obsrv. Mass | ± da    | ± ppm | Start Seq.   | End Seq. | Sequence                 | Ion Score | C. I. % | Modification           | Rank | Result Type |     |
|                     | 826.4457                         | 826.4503    | 0.0046  | 6     | 235          | 241      | QYAVFAK                  |           |         |                        |      | Mascot      |     |
|                     | 960.4785                         | 960.4794    | 0.0009  | 1     | 255          | 261      | LEVEWER                  | 45        | 99.139  |                        |      | Mascot      |     |
|                     | 960.4785                         | 960.4794    | 0.0009  | 1     | 255          | 261      | LEVEWER                  |           |         |                        |      | Mascot      |     |
|                     | 984.4243                         | 984.4249    | 0.0006  | 1     | 227          | 234      | FSWGAECK                 |           |         | Carbamidomethyl (C)[7] |      | Mascot      |     |
|                     | 984.4243                         | 984.4249    | 0.0006  | 1     | 227          | 234      | FSWGAECK                 | 41        | 97.871  | Carbamidomethyl (C)[7] |      | Mascot      |     |
|                     | 1826.9799                        | 1826.9792   | -0.0007 | 0     | 180          | 195      | LLGYQLAAYFDKPTAR         |           |         |                        |      | Mascot      |     |
|                     | 1826.9799                        | 1826.9792   | -0.0007 | 0     | 180          | 195      | LLGYQLAAYFDKPTAR         | 139       | 100     |                        |      | Mascot      |     |
|                     | 1958.0189                        | 1958.0194   | 0.0005  | 0     | 291          | 308      | ATNSEKEIELTAALPSQR       |           |         |                        |      | Mascot      |     |
|                     | 2299.2292                        | 2299.1763   | -0.0529 | -23   | 31           | 50       | QINIIDDDTPEGQAFLLKL<br>R |           |         |                        |      | Mascot      |     |
| 12                  | Zgc:136383 protein [Danio rerio] |             |         |       | gi 125857991 |          | 148644.2                 | 8.93      | 13      | 242                    | 100  | 226         | 100 |

| Peptide Information |             |         |       |            |          |                            |           |        |                        |                  |
|---------------------|-------------|---------|-------|------------|----------|----------------------------|-----------|--------|------------------------|------------------|
| Calc. Mass          | Obsrv. Mass | ± da    | ± ppm | Start Seq. | End Seq. | Sequence                   | Ion Score | C. I.  | % Modification         | Rank Result Type |
| 826.4457            | 826.4503    | 0.0046  | 6     | 1235       | 1241     | QYAVFAK                    |           |        |                        | Mascot           |
| 864.4461            | 864.4877    | 0.0416  | 48    | 86         | 93       | DSFVPATK                   |           |        |                        | Mascot           |
| 960.4785            | 960.4794    | 0.0009  | 1     | 1255       | 1261     | LEVEWER                    | 45        | 99.139 |                        | Mascot           |
| 960.4785            | 960.4794    | 0.0009  | 1     | 1255       | 1261     | LEVEWER                    |           |        |                        | Mascot           |
| 984.4243            | 984.4249    | 0.0006  | 1     | 1227       | 1234     | FSWGAECK                   |           |        | Carbamidomethyl (C)[7] | Mascot           |
| 984.4243            | 984.4249    | 0.0006  | 1     | 1227       | 1234     | FSWGAECK                   | 41        | 97.871 | Carbamidomethyl (C)[7] | Mascot           |
| 992.5015            | 992.467     | -0.0345 | -35   | 614        | 621      | LMNCKLDR                   |           |        |                        | Mascot           |
| 992.5015            | 992.467     | -0.0345 | -35   | 614        | 621      | LMNCKLDR                   |           |        |                        | Mascot           |
| 1045.5465           | 1045.5681   | 0.0216  | 21    | 1345       | 1352     | DFLSWIHK                   |           |        |                        | Mascot           |
| 1118.5986           | 1118.6837   | 0.0851  | 76    | 1316       | 1324     | IPEITMSRR                  |           |        | Oxidation (M)[6]       | Mascot           |
| 1118.5986           | 1118.6837   | 0.0851  | 76    | 1316       | 1324     | IPEITMSRR                  |           |        | Oxidation (M)[6]       | Mascot           |
| 1369.7032           | 1369.7288   | 0.0256  | 19    | 827        | 837      | LESMTYEQLKK                |           |        |                        | Mascot           |
| 1382.7889           | 1382.7717   | -0.0172 | -12   | 302        | 314      | ISDAPAQIVEVLK              |           |        |                        | Mascot           |
| 1796.8928           | 1797.0122   | 0.1194  | 66    | 71         | 85       | LMDPLLYEYAGTWPK            |           |        |                        | Mascot           |
| 1826.9799           | 1826.9792   | -0.0007 | 0     | 1180       | 1195     | LLGYQLAAYFDKPTAR           |           |        |                        | Mascot           |
| 1826.9799           | 1826.9792   | -0.0007 | 0     | 1180       | 1195     | LLGYQLAAYFDKPTAR           | 139       | 100    |                        | Mascot           |
| 2233.2009           | 2233.0803   | -0.1206 | -54   | 592        | 613      | SLTRITAPDMAYVAGAAN<br>VAIK |           |        |                        | Mascot           |
| 2249.1958           | 2249.0649   | -0.1309 | -58   | 592        | 613      | SLTRITAPDMAYVAGAAN<br>VAIK |           |        | Oxidation (M)[10]      | Mascot           |
| 2299.2292           | 2299.1763   | -0.0529 | -23   | 1038       | 1057     | QINIIDDDTPEGQAFLLKL        |           |        |                        | Mascot           |



13

Zgc:136383 protein [Danio rerio]

R

gi|159155252

123957.1

8.78

11

242

100

226

100

| Peptide Information |             |         |       |            |          |                            |           |        |   |                        |                  |
|---------------------|-------------|---------|-------|------------|----------|----------------------------|-----------|--------|---|------------------------|------------------|
| Calc. Mass          | Obsrv. Mass | ± da    | ± ppm | Start Seq. | End Seq. | Sequence                   | Ion Score | C. I.  | % | Modification           | Rank Result Type |
| 826.4457            | 826.4503    | 0.0046  | 6     | 1013       | 1019     | QYAVFAK                    |           |        |   |                        | Mascot           |
| 960.4785            | 960.4794    | 0.0009  | 1     | 1033       | 1039     | LEVEWER                    | 45        | 99.139 |   |                        | Mascot           |
| 960.4785            | 960.4794    | 0.0009  | 1     | 1033       | 1039     | LEVEWER                    |           |        |   |                        | Mascot           |
| 984.4243            | 984.4249    | 0.0006  | 1     | 1005       | 1012     | FSWGAECK                   |           |        |   | Carbamidomethyl (C)[7] | Mascot           |
| 984.4243            | 984.4249    | 0.0006  | 1     | 1005       | 1012     | FSWGAECK                   | 41        | 97.871 |   | Carbamidomethyl (C)[7] | Mascot           |
| 992.5015            | 992.467     | -0.0345 | -35   | 392        | 399      | LMNCKLDR                   |           |        |   |                        | Mascot           |
| 992.5015            | 992.467     | -0.0345 | -35   | 392        | 399      | LMNCKLDR                   |           |        |   |                        | Mascot           |
| 1045.5465           | 1045.5681   | 0.0216  | 21    | 1123       | 1130     | DFLSWIHK                   |           |        |   |                        | Mascot           |
| 1118.5986           | 1118.6837   | 0.0851  | 76    | 1094       | 1102     | IPEITMSRR                  |           |        |   | Oxidation (M)[6]       | Mascot           |
| 1118.5986           | 1118.6837   | 0.0851  | 76    | 1094       | 1102     | IPEITMSRR                  |           |        |   | Oxidation (M)[6]       | Mascot           |
| 1369.7032           | 1369.7288   | 0.0256  | 19    | 605        | 615      | LESMTYEQLKK                |           |        |   |                        | Mascot           |
| 1382.7889           | 1382.7717   | -0.0172 | -12   | 80         | 92       | ISDAPAQIVEVLK              |           |        |   |                        | Mascot           |
| 1826.9799           | 1826.9792   | -0.0007 | 0     | 958        | 973      | LLGYQLAAYFDKPTAR           |           |        |   |                        | Mascot           |
| 1826.9799           | 1826.9792   | -0.0007 | 0     | 958        | 973      | LLGYQLAAYFDKPTAR           | 139       | 100    |   |                        | Mascot           |
| 2233.2009           | 2233.0803   | -0.1206 | -54   | 370        | 391      | SLTRITAPDMAYVAGAAN<br>VAIK |           |        |   |                        | Mascot           |
| 2249.1958           | 2249.0649   | -0.1309 | -58   | 370        | 391      | SLTRITAPDMAYVAGAAN<br>VAIK |           |        |   | Oxidation (M)[10]      | Mascot           |
| 2299.2292           | 2299.1763   | -0.0529 | -23   | 816        | 835      | QINIIDDDTPEGQAFLKL<br>R    |           |        |   |                        | Mascot           |

14

hypothetical protein LOC678536 [Danio rerio]

gi|160420306

148750.2

8.89

13

241

100

226

100

| Peptide Information |             |         |       |            |          |          |           |        |   |                        |                  |
|---------------------|-------------|---------|-------|------------|----------|----------|-----------|--------|---|------------------------|------------------|
| Calc. Mass          | Obsrv. Mass | ± da    | ± ppm | Start Seq. | End Seq. | Sequence | Ion Score | C. I.  | % | Modification           | Rank Result Type |
| 826.4457            | 826.4503    | 0.0046  | 6     | 1236       | 1242     | QYAVFAK  |           |        |   |                        | Mascot           |
| 864.4461            | 864.4877    | 0.0416  | 48    | 87         | 94       | DSFVPATK |           |        |   |                        | Mascot           |
| 960.4785            | 960.4794    | 0.0009  | 1     | 1256       | 1262     | LEVEWER  | 45        | 99.139 |   |                        | Mascot           |
| 960.4785            | 960.4794    | 0.0009  | 1     | 1256       | 1262     | LEVEWER  |           |        |   |                        | Mascot           |
| 984.4243            | 984.4249    | 0.0006  | 1     | 1228       | 1235     | FSWGAECK |           |        |   | Carbamidomethyl (C)[7] | Mascot           |
| 984.4243            | 984.4249    | 0.0006  | 1     | 1228       | 1235     | FSWGAECK | 41        | 97.871 |   | Carbamidomethyl (C)[7] | Mascot           |
| 992.5015            | 992.467     | -0.0345 | -35   | 615        | 622      | LMNCKLDR |           |        |   |                        | Mascot           |
| 992.5015            | 992.467     | -0.0345 | -35   | 615        | 622      | LMNCKLDR |           |        |   |                        | Mascot           |
| 1045.5465           | 1045.5681   | 0.0216  | 21    | 1346       | 1353     | DFLSWIHK |           |        |   |                        | Mascot           |

|    |                              |           |         |     |              |      |                            |          |      |    |     |     |                   |        |
|----|------------------------------|-----------|---------|-----|--------------|------|----------------------------|----------|------|----|-----|-----|-------------------|--------|
|    | 1118.5986                    | 1118.6837 | 0.0851  | 76  | 1317         | 1325 | IPEITMSRR                  |          |      |    |     |     | Oxidation (M)[6]  | Mascot |
|    | 1118.5986                    | 1118.6837 | 0.0851  | 76  | 1317         | 1325 | IPEITMSRR                  |          |      |    |     |     | Oxidation (M)[6]  | Mascot |
|    | 1369.7032                    | 1369.7288 | 0.0256  | 19  | 828          | 838  | LESMTYEQLKK                |          |      |    |     |     |                   | Mascot |
|    | 1382.7889                    | 1382.7717 | -0.0172 | -12 | 303          | 315  | ISDAPAQIVEVLK              |          |      |    |     |     |                   | Mascot |
|    | 1796.8928                    | 1797.0122 | 0.1194  | 66  | 72           | 86   | LMDPLLYEYAGTWPK            |          |      |    |     |     |                   | Mascot |
|    | 1826.9799                    | 1826.9792 | -0.0007 | 0   | 1181         | 1196 | LLGYQLAAYFDKPTAR           |          |      |    |     |     |                   | Mascot |
|    | 1826.9799                    | 1826.9792 | -0.0007 | 0   | 1181         | 1196 | LLGYQLAAYFDKPTAR           | 139      | 100  |    |     |     |                   | Mascot |
|    | 2233.2009                    | 2233.0803 | -0.1206 | -54 | 593          | 614  | SLTRITAPDMAYVAGAAN<br>VAIK |          |      |    |     |     |                   | Mascot |
|    | 2249.1958                    | 2249.0649 | -0.1309 | -58 | 593          | 614  | SLTRITAPDMAYVAGAAN<br>VAIK |          |      |    |     |     | Oxidation (M)[10] | Mascot |
|    | 2299.2292                    | 2299.1763 | -0.0529 | -23 | 1039         | 1058 | QINIIDDDTPEGQAFLLKL<br>R   |          |      |    |     |     |                   | Mascot |
| 15 | vitellogenin 6 [Danio rerio] |           |         |     | gi 303227889 |      |                            | 150936.1 | 8.84 | 11 | 241 | 100 | 226               | 100    |

Peptide Information

| Calc. Mass | Obsrv. Mass | ± da    | ± ppm | Start Seq. | End Seq. | Sequence                   | Ion Score | C. I.  | % Modification         | Rank | Result Type |
|------------|-------------|---------|-------|------------|----------|----------------------------|-----------|--------|------------------------|------|-------------|
| 826.4457   | 826.4503    | 0.0046  | 6     | 1256       | 1262     | QYAVFAK                    |           |        |                        |      | Mascot      |
| 864.4461   | 864.4877    | 0.0416  | 48    | 98         | 105      | DSFVPATK                   |           |        |                        |      | Mascot      |
| 960.4785   | 960.4794    | 0.0009  | 1     | 1276       | 1282     | LEVEWER                    | 45        | 99.139 |                        |      | Mascot      |
| 960.4785   | 960.4794    | 0.0009  | 1     | 1276       | 1282     | LEVEWER                    |           |        |                        |      | Mascot      |
| 984.4243   | 984.4249    | 0.0006  | 1     | 1248       | 1255     | FSWGAECK                   |           |        | Carbamidomethyl (C)[7] |      | Mascot      |
| 984.4243   | 984.4249    | 0.0006  | 1     | 1248       | 1255     | FSWGAECK                   | 41        | 97.871 | Carbamidomethyl (C)[7] |      | Mascot      |
| 992.5015   | 992.467     | -0.0345 | -35   | 626        | 633      | LMNCKLDR                   |           |        |                        |      | Mascot      |
| 992.5015   | 992.467     | -0.0345 | -35   | 626        | 633      | LMNCKLDR                   |           |        |                        |      | Mascot      |
| 1369.7032  | 1369.7288   | 0.0256  | 19    | 839        | 849      | LESMTYEQLKK                |           |        |                        |      | Mascot      |
| 1796.8928  | 1797.0122   | 0.1194  | 66    | 83         | 97       | LMDPLLYEYAGTWPK            |           |        |                        |      | Mascot      |
| 1826.9799  | 1826.9792   | -0.0007 | 0     | 1201       | 1216     | LLGYQLAAYFDKPTAR           |           |        |                        |      | Mascot      |
| 1826.9799  | 1826.9792   | -0.0007 | 0     | 1201       | 1216     | LLGYQLAAYFDKPTAR           | 139       | 100    |                        |      | Mascot      |
| 1958.0189  | 1958.0194   | 0.0005  | 0     | 1312       | 1329     | ATNSEKEIELTAALPSQR         |           |        |                        |      | Mascot      |
| 2233.2009  | 2233.0803   | -0.1206 | -54   | 604        | 625      | SLTRITAPDMAYVAGAAN<br>VAIK |           |        |                        |      | Mascot      |
| 2249.1958  | 2249.0649   | -0.1309 | -58   | 604        | 625      | SLTRITAPDMAYVAGAAN<br>VAIK |           |        | Oxidation (M)[10]      |      | Mascot      |
| 2299.2292  | 2299.1763   | -0.0529 | -23   | 1050       | 1069     | QINIIDDDTPEGQAFLLKL<br>R   |           |        |                        |      | Mascot      |

16 novel protein similar to vitellogenin 1 (vg1) [Danio rerio] gi|94733734 149808.5 8.83 11 239 100 226 100

Peptide Information

| Calc. Mass | Obsrv. Mass | ± da | ± ppm | Start Seq. | End Seq. | Sequence | Ion Score | C. I. | % Modification | Rank | Result Type |
|------------|-------------|------|-------|------------|----------|----------|-----------|-------|----------------|------|-------------|
|------------|-------------|------|-------|------------|----------|----------|-----------|-------|----------------|------|-------------|

[illegible]

| Peptide Information |             |      |       |            |              |           |       |                |  | Rank | Result Type |
|---------------------|-------------|------|-------|------------|--------------|-----------|-------|----------------|--|------|-------------|
| Calc. Mass          | Obsrv. Mass | ± da | ± ppm | Start Seq. | End Sequence | Ion Score | C. I. | % Modification |  |      |             |

|    |                              |           |         |     |     |     |                          |        |        |                        |     |                        |     |     |  |  |        |
|----|------------------------------|-----------|---------|-----|-----|-----|--------------------------|--------|--------|------------------------|-----|------------------------|-----|-----|--|--|--------|
|    | 826.4457                     | 826.4503  | 0.0046  | 6   | 544 | 550 | QYAVFAK                  |        |        |                        |     |                        |     |     |  |  | Mascot |
|    | 960.4785                     | 960.4794  | 0.0009  | 1   | 564 | 570 | LEVEWER                  | 45     | 99.139 |                        |     |                        |     |     |  |  | Mascot |
|    | 960.4785                     | 960.4794  | 0.0009  | 1   | 564 | 570 | LEVEWER                  |        |        |                        |     |                        |     |     |  |  | Mascot |
|    | 984.4243                     | 984.4249  | 0.0006  | 1   | 536 | 543 | FSWGAECK                 |        |        |                        |     | Carbamidomethyl (C)[7] |     |     |  |  | Mascot |
|    | 984.4243                     | 984.4249  | 0.0006  | 1   | 536 | 543 | FSWGAECK                 | 41     | 97.871 | Carbamidomethyl (C)[7] |     |                        |     |     |  |  | Mascot |
|    | 1369.7032                    | 1369.7288 | 0.0256  | 19  | 137 | 147 | LESMTYEQLKK              |        |        |                        |     |                        |     |     |  |  | Mascot |
|    | 1376.7069                    | 1376.6899 | -0.017  | -12 | 585 | 596 | HILNAAAYNTGFR            |        |        |                        |     |                        |     |     |  |  | Mascot |
|    | 1826.9799                    | 1826.9792 | -0.0007 | 0   | 489 | 504 | LLGYQLAAYFDKPTAR         |        |        |                        |     |                        |     |     |  |  | Mascot |
|    | 1826.9799                    | 1826.9792 | -0.0007 | 0   | 489 | 504 | LLGYQLAAYFDKPTAR         | 139    | 100    |                        |     |                        |     |     |  |  | Mascot |
|    | 2299.2292                    | 2299.1763 | -0.0529 | -23 | 348 | 367 | QINIIDDDTPEGQAFLLKL<br>R |        |        |                        |     |                        |     |     |  |  | Mascot |
| 19 | vitellogenin 5 [Danio rerio] |           |         |     |     |     | gi 68448530              | 148868 | 8.77   | 9                      | 232 | 100                    | 226 | 100 |  |  |        |

Peptide Information

| Calc. Mass | Obsrv. Mass | ± da    | ± ppm | Start Seq. | End Seq. | Sequence                    | Ion Score | C. I.  | % Modification                            | Rank | Result Type |
|------------|-------------|---------|-------|------------|----------|-----------------------------|-----------|--------|-------------------------------------------|------|-------------|
| 826.4457   | 826.4503    | 0.0046  | 6     | 1238       | 1244     | QYAVFAK                     |           |        |                                           |      | Mascot      |
| 960.4785   | 960.4794    | 0.0009  | 1     | 1258       | 1264     | LEVEWER                     | 45        | 99.139 |                                           |      | Mascot      |
| 960.4785   | 960.4794    | 0.0009  | 1     | 1258       | 1264     | LEVEWER                     |           |        |                                           |      | Mascot      |
| 984.4243   | 984.4249    | 0.0006  | 1     | 1230       | 1237     | FSWGAECK                    |           |        | Carbamidomethyl (C)[7]                    |      | Mascot      |
| 984.4243   | 984.4249    | 0.0006  | 1     | 1230       | 1237     | FSWGAECK                    | 41        | 97.871 | Carbamidomethyl (C)[7]                    |      | Mascot      |
| 992.5015   | 992.467     | -0.0345 | -35   | 615        | 622      | LMNCKLDR                    |           |        |                                           |      | Mascot      |
| 992.5015   | 992.467     | -0.0345 | -35   | 615        | 622      | LMNCKLDR                    |           |        |                                           |      | Mascot      |
| 1369.7032  | 1369.7288   | 0.0256  | 19    | 828        | 838      | LESMTYEQLKK                 |           |        |                                           |      | Mascot      |
| 1376.7069  | 1376.6899   | -0.017  | -12   | 1279       | 1290     | HILNAAAYNTGFR               |           |        |                                           |      | Mascot      |
| 1826.9799  | 1826.9792   | -0.0007 | 0     | 1183       | 1198     | LLGYQLAAYFDKPTAR            |           |        |                                           |      | Mascot      |
| 1826.9799  | 1826.9792   | -0.0007 | 0     | 1183       | 1198     | LLGYQLAAYFDKPTAR            | 139       | 100    |                                           |      | Mascot      |
| 2299.2292  | 2299.1763   | -0.0529 | -23   | 1039       | 1058     | QINIIDDDTPEGQAFLLKL<br>R    |           |        |                                           |      | Mascot      |
| 2362.1926  | 2362.186    | -0.0066 | -3    | 597        | 619      | ITAPDMASVAGAANVAIK<br>LMNCK |           |        | Carbamidomethyl (C)[22], Oxidation (M)[6] |      | Mascot      |
| 2362.1926  | 2362.186    | -0.0066 | -3    | 597        | 619      | ITAPDMASVAGAANVAIK<br>LMNCK |           |        | Carbamidomethyl (C)[22], Oxidation (M)[6] |      | Mascot      |

20 novel protein similar to vitellogenin 1 (vg1) [Danio rerio] gi|94733731 149169.2 8.84 9 230 100 226 100

Peptide Information

| Calc. Mass | Obsrv. Mass | ± da   | ± ppm | Start Seq. | End Seq. | Sequence | Ion Score | C. I.  | % Modification | Rank | Result Type |
|------------|-------------|--------|-------|------------|----------|----------|-----------|--------|----------------|------|-------------|
| 826.4457   | 826.4503    | 0.0046 | 6     | 1240       | 1246     | QYAVFAK  |           |        |                |      | Mascot      |
| 960.4785   | 960.4794    | 0.0009 | 1     | 1260       | 1266     | LEVEWER  | 45        | 99.139 |                |      | Mascot      |

|    |                            |           |           |         |     |              |         |                             |     |        |                        |                                           |     |  |  |        |        |
|----|----------------------------|-----------|-----------|---------|-----|--------------|---------|-----------------------------|-----|--------|------------------------|-------------------------------------------|-----|--|--|--------|--------|
| 21 | Vtg6 protein [Danio rerio] | 960.4785  | 960.4794  | 0.0009  | 1   | 1260         | 1266    | LEVEWER                     |     |        |                        |                                           |     |  |  |        | Mascot |
|    |                            | 984.4243  | 984.4249  | 0.0006  | 1   | 1232         | 1239    | FSWGAECK                    |     |        |                        |                                           |     |  |  |        | Mascot |
|    |                            | 984.4243  | 984.4249  | 0.0006  | 1   | 1232         | 1239    | FSWGAECK                    | 41  | 97.871 | Carbamidomethyl (C)[7] |                                           |     |  |  | Mascot |        |
|    |                            | 992.5015  | 992.467   | -0.0345 | -35 | 619          | 626     | LMNCKLDR                    |     |        |                        |                                           |     |  |  | Mascot |        |
|    |                            | 992.5015  | 992.467   | -0.0345 | -35 | 619          | 626     | LMNCKLDR                    |     |        |                        |                                           |     |  |  | Mascot |        |
|    |                            | 1369.7032 | 1369.7288 | 0.0256  | 19  | 832          | 842     | LESMTYEQLKK                 |     |        |                        |                                           |     |  |  | Mascot |        |
|    |                            | 1376.7069 | 1376.6899 | -0.017  | -12 | 1281         | 1292    | HILNAAYNTGFR                |     |        |                        |                                           |     |  |  | Mascot |        |
|    |                            | 1826.9799 | 1826.9792 | -0.0007 | 0   | 1185         | 1200    | LLGYQLAAYFDKPTAR            |     |        |                        |                                           |     |  |  | Mascot |        |
|    |                            | 1826.9799 | 1826.9792 | -0.0007 | 0   | 1185         | 1200    | LLGYQLAAYFDKPTAR            | 139 | 100    |                        |                                           |     |  |  | Mascot |        |
|    |                            | 2299.2292 | 2299.1763 | -0.0529 | -23 | 1043         | 1062    | QINIIDDDTPEGQAFLLKL<br>R    |     |        |                        |                                           |     |  |  | Mascot |        |
|    |                            | 2362.1926 | 2362.186  | -0.0066 | -3  | 601          | 623     | ITAPDMASVAGAANVAIK<br>LMNCK |     |        |                        | Carbamidomethyl (C)[22], Oxidation (M)[6] |     |  |  | Mascot |        |
|    |                            | 2362.1926 | 2362.186  | -0.0066 | -3  | 601          | 623     | ITAPDMASVAGAANVAIK<br>LMNCK |     |        |                        | Carbamidomethyl (C)[22], Oxidation (M)[6] |     |  |  | Mascot |        |
| 21 | Vtg6 protein [Danio rerio] |           |           |         |     | gi 157422885 | 27937.4 | 9.18                        | 4   | 98     | 100                    | 86                                        | 100 |  |  |        |        |

### Peptide Information

| Calc. Mass | Obsrv. Mass | ± da   | ± ppm | Start Seq. | End Seq. | Sequence           | Ion Score | C. I.  | % Modification         | Rank | Result Type |
|------------|-------------|--------|-------|------------|----------|--------------------|-----------|--------|------------------------|------|-------------|
| 826.4457   | 826.4503    | 0.0046 | 6     | 129        | 135      | QYAVFAK            |           |        |                        |      | Mascot      |
| 960.4785   | 960.4794    | 0.0009 | 1     | 149        | 155      | LEVEWER            | 45        | 99.139 |                        |      | Mascot      |
| 960.4785   | 960.4794    | 0.0009 | 1     | 149        | 155      | LEVEWER            |           |        |                        |      | Mascot      |
| 984.4243   | 984.4249    | 0.0006 | 1     | 121        | 128      | FSWGAECK           |           |        | Carbamidomethyl (C)[7] |      | Mascot      |
| 984.4243   | 984.4249    | 0.0006 | 1     | 121        | 128      | FSWGAECK           | 41        | 97.871 | Carbamidomethyl (C)[7] |      | Mascot      |
| 1958.0189  | 1958.0194   | 0.0005 | 0     | 185        | 202      | ATNSEKEIELTAALPSQR |           |        |                        |      | Mascot      |

|    |                                                                                |             |          |      |    |    |        |
|----|--------------------------------------------------------------------------------|-------------|----------|------|----|----|--------|
| 22 | ATPase, Ca++ transporting, cardiac muscle, fast twitch<br>1 like [Danio rerio] | gj117606266 | 108861.1 | 5.05 | 16 | 53 | 76.102 |
|----|--------------------------------------------------------------------------------|-------------|----------|------|----|----|--------|

### Peptide Information

| Calc. Mass | Obsrv. Mass | ± da    | ± ppm | Start Seq. | End Seq. | Sequence    | Ion Score | C. I. % | Modification     | Rank | Result Type |
|------------|-------------|---------|-------|------------|----------|-------------|-----------|---------|------------------|------|-------------|
| 826.381    | 826.4503    | 0.0693  | 84    | 669        | 675      | RACCFAR     |           |         |                  |      | Mascot      |
| 960.5546   | 960.4794    | -0.0752 | -78   | 540        | 547      | DKIMNVIK    |           |         |                  |      | Mascot      |
| 960.5546   | 960.4794    | -0.0752 | -78   | 540        | 547      | DKIMNVIK    |           |         |                  |      | Mascot      |
| 976.5495   | 976.474     | -0.0755 | -77   | 540        | 547      | DKIMNVIK    |           |         | Oxidation (M)[4] |      | Mascot      |
| 982.4186   | 982.456     | 0.0374  | 38    | 121        | 128      | EYEPEMGK    |           |         |                  |      | Mascot      |
| 1006.5237  | 1006.4045   | -0.1192 | -118  | 618        | 626      | VIMITGDNK   |           |         | Oxidation (M)[3] |      | Mascot      |
| 1045.5524  | 1045.5681   | 0.0157  | 15    | 111        | 120      | NAESAIEALK  |           |         |                  |      | Mascot      |
| 1234.646   | 1234.6877   | 0.0417  | 34    | 602        | 612      | KEVTGSIELCR |           |         |                  |      | Mascot      |

|    |                                                                |           |         |     |              |     |                       |      |    |    |        |  |                            |  |  |  |        |
|----|----------------------------------------------------------------|-----------|---------|-----|--------------|-----|-----------------------|------|----|----|--------|--|----------------------------|--|--|--|--------|
|    | 1287.709                                                       | 1287.673  | -0.036  | -28 | 558          | 569 | CLALATRDSPLK          |      |    |    |        |  |                            |  |  |  | Mascot |
|    | 1287.709                                                       | 1287.673  | -0.036  | -28 | 558          | 569 | CLALATRDSPLK          |      |    |    |        |  |                            |  |  |  | Mascot |
|    | 1347.6296                                                      | 1347.7307 | 0.1011  | 75  | 670          | 681 | ACCFARVEPSHK          |      |    |    |        |  |                            |  |  |  | Mascot |
|    | 1364.7361                                                      | 1364.6969 | -0.0392 | -29 | 823          | 833 | EPLISGWLFFR           |      |    |    |        |  |                            |  |  |  | Mascot |
|    | 1364.7361                                                      | 1364.6969 | -0.0392 | -29 | 823          | 833 | EPLISGWLFFR           |      |    |    |        |  |                            |  |  |  | Mascot |
|    | 1369.627                                                       | 1369.7288 | 0.1018  | 74  | 36           | 47  | YGYNELPAEEGK          |      |    |    |        |  |                            |  |  |  | Mascot |
|    | 1434.741                                                       | 1434.7723 | 0.0313  | 22  | 509          | 521 | MFVKGAPEGVIDR         |      |    |    |        |  | Oxidation (M)[1]           |  |  |  | Mascot |
|    | 1676.9159                                                      | 1676.861  | -0.0549 | -33 | 820          | 833 | SPKEPLISGWLFFR        |      |    |    |        |  |                            |  |  |  | Mascot |
|    | 1838.8875                                                      | 1838.9092 | 0.0217  | 12  | 335          | 352 | SLPSVETLGCTSVICSDK    |      |    |    |        |  |                            |  |  |  | Mascot |
|    | 1957.9501                                                      | 1958.0194 | 0.0693  | 35  | 636          | 653 | IGIFSEDEDVTGKAYTGR    |      |    |    |        |  |                            |  |  |  | Mascot |
|    | 2299.113                                                       | 2299.1763 | 0.0633  | 28  | 437          | 456 | VGEATETALCCLVEKMNVFK  |      |    |    |        |  | Carbamidomethyl (C)[10,11] |  |  |  | Mascot |
|    | 2362.073                                                       | 2362.186  | 0.113   | 48  | 581          | 601 | FADYETDLTFVGCVGMLDPPR |      |    |    |        |  | Oxidation (M)[16]          |  |  |  | Mascot |
|    | 2362.073                                                       | 2362.186  | 0.113   | 48  | 581          | 601 | FADYETDLTFVGCVGMLDPPR |      |    |    |        |  | Oxidation (M)[16]          |  |  |  | Mascot |
| 23 | PREDICTED: rho GTPase-activating protein 21-like [Danio rerio] |           |         |     | gi 326679518 |     | 211650.9              | 8.29 | 22 | 47 | 19.022 |  |                            |  |  |  |        |

Peptide Information

| Calc. Mass | Obsrv. Mass | ± da    | ± ppm | Start Seq. | End Seq. | Sequence           | Ion Score | C. I. % | Modification           | Rank | Result Type |
|------------|-------------|---------|-------|------------|----------|--------------------|-----------|---------|------------------------|------|-------------|
| 826.4893   | 826.4503    | -0.039  | -47   | 652        | 658      | EVIRPGR            |           |         |                        |      | Mascot      |
| 850.4417   | 850.541     | 0.0993  | 117   | 225        | 231      | VFSENVVR           |           |         |                        |      | Mascot      |
| 976.4886   | 976.474     | -0.0146 | -15   | 1917       | 1923     | SRFYQYL            |           |         |                        |      | Mascot      |
| 992.5007   | 992.467     | -0.0337 | -34   | 1719       | 1728     | STSSLSAPSR         |           |         |                        |      | Mascot      |
| 992.5007   | 992.467     | -0.0337 | -34   | 1719       | 1728     | STSSLSAPSR         |           |         |                        |      | Mascot      |
| 996.4971   | 996.5963    | 0.0992  | 100   | 941        | 948      | GHCLYLYK           |           |         |                        |      | Mascot      |
| 1016.4869  | 1016.4167   | -0.0702 | -69   | 1479       | 1486     | NSFFMKDK           |           |         |                        |      | Mascot      |
| 1045.5248  | 1045.5681   | 0.0433  | 41    | 372        | 379      | RLYMYGSR           |           |         |                        |      | Mascot      |
| 1211.5626  | 1211.7123   | 0.1497  | 124   | 1476       | 1484     | EHRNSFFMK          |           |         | Oxidation (M)[8]       |      | Mascot      |
| 1234.6387  | 1234.6877   | 0.049   | 40    | 402        | 413      | QKSASTTATPSR       |           |         |                        |      | Mascot      |
| 1279.6793  | 1279.7549   | 0.0756  | 59    | 2          | 12       | SFLFSSQAKHK        |           |         |                        |      | Mascot      |
| 1369.6304  | 1369.7288   | 0.0984  | 72    | 1039       | 1050     | EYNTLMSPPSSK       |           |         | Oxidation (M)[6]       |      | Mascot      |
| 1386.6694  | 1386.679    | 0.0096  | 7     | 447        | 458      | LGGAECARNWPR       |           |         | Carbamidomethyl (C)[6] |      | Mascot      |
| 1434.6754  | 1434.7723   | 0.0969  | 68    | 441        | 454      | SASQERLGGAECAR     |           |         |                        |      | Mascot      |
| 1475.6986  | 1475.7582   | 0.0596  | 40    | 1077       | 1089     | ATSPHSPNKEHDR      |           |         |                        |      | Mascot      |
| 1808.9501  | 1808.9325   | -0.0176 | -10   | 459        | 476      | SASQDALPSTPTGVPKPR |           |         |                        |      | Mascot      |
| 1908.9086  | 1908.8206   | -0.088  | -46   | 1224       | 1239     | YADFIDGNRIEDPVER   |           |         |                        |      | Mascot      |

|  |           |           |         |     |      |      |                                       |  |  |  |  |  |  |  |  |  |                   |        |
|--|-----------|-----------|---------|-----|------|------|---------------------------------------|--|--|--|--|--|--|--|--|--|-------------------|--------|
|  | 1957.9647 | 1958.0194 | 0.0547  | 28  | 1168 | 1185 | VPGNNAAISIMQEELNNK                    |  |  |  |  |  |  |  |  |  | Oxidation (M)[11] | Mascot |
|  | 2283.0723 | 2283.1689 | 0.0966  | 42  | 1781 | 1799 | HTMGGQRDFAELDVIHD<br>WR               |  |  |  |  |  |  |  |  |  |                   | Mascot |
|  | 2297.0137 | 2297.1631 | 0.1494  | 65  | 1431 | 1450 | NNNPTQKQSHQSQEED<br>AGR               |  |  |  |  |  |  |  |  |  |                   | Mascot |
|  | 2299.0674 | 2299.1763 | 0.1089  | 47  | 1781 | 1799 | HTMGGQRDFAELDVIHD<br>WR               |  |  |  |  |  |  |  |  |  | Oxidation (M)[3]  | Mascot |
|  | 2362.2263 | 2362.186  | -0.0403 | -17 | 455  | 476  | NWPRSASQDALPSTPTG<br>VPKPR            |  |  |  |  |  |  |  |  |  |                   | Mascot |
|  | 2362.2263 | 2362.186  | -0.0403 | -17 | 455  | 476  | NWPRSASQDALPSTPTG<br>VPKPR            |  |  |  |  |  |  |  |  |  |                   | Mascot |
|  | 2368.1826 | 2368.2502 | 0.0676  | 29  | 1121 | 1142 | KPSPGVTFGVRLDDCPP<br>AQNNR            |  |  |  |  |  |  |  |  |  |                   | Mascot |
|  | 3338.5588 | 3338.7573 | 0.1985  | 59  | 1513 | 1544 | CSISDPSSQLDETTSDLG<br>TMSSGASVPRTTRPR |  |  |  |  |  |  |  |  |  |                   | Mascot |

24

PREDICTED: serine/threonine-protein kinase pim-3-like

gi|326675215

23705.1

8.34

4

46

0

31

76.329

[Danio rerio]

Peptide Information

| Calc. Mass | Obsrv. Mass | ± da    | ± ppm | Start Seq. | End Seq. | Sequence      | Ion Score | C. I.  | % Modification | Rank | Result Type |
|------------|-------------|---------|-------|------------|----------|---------------|-----------|--------|----------------|------|-------------|
| 1211.6531  | 1211.7123   | 0.0592  | 49    | 110        | 119      | SPYLGVTRYR    |           |        |                |      | Mascot      |
| 1287.7015  | 1287.673    | -0.0285 | -22   | 44         | 55       | KNNGLLSSEVAR  | 31        | 76.329 |                |      | Mascot      |
| 1287.7015  | 1287.673    | -0.0285 | -22   | 44         | 55       | KNNGLLSSEVAR  |           |        |                |      | Mascot      |
| 1347.7015  | 1347.7307   | 0.0292  | 22    | 120        | 130      | LQEGEPYRSIR   |           |        |                |      | Mascot      |
| 1364.7419  | 1364.6969   | -0.045  | -33   | 184        | 195      | TGPVLEEIIIEHK |           |        |                |      | Mascot      |
| 1364.7419  | 1364.6969   | -0.045  | -33   | 184        | 195      | TGPVLEEIIIEHK |           |        |                |      | Mascot      |

25

PREDICTED: rho GTPase-activating protein 21-like

gi|326679516

203369.8

8.31

21

45

0

[Danio rerio]

Peptide Information

| Calc. Mass | Obsrv. Mass | ± da    | ± ppm | Start Seq. | End Seq. | Sequence     | Ion Score | C. I. | % Modification   | Rank | Result Type |
|------------|-------------|---------|-------|------------|----------|--------------|-----------|-------|------------------|------|-------------|
| 826.4893   | 826.4503    | -0.039  | -47   | 578        | 584      | EVIRPGR      |           |       |                  |      | Mascot      |
| 850.4417   | 850.541     | 0.0993  | 117   | 151        | 157      | VFSENV       |           |       |                  |      | Mascot      |
| 976.4886   | 976.474     | -0.0146 | -15   | 1843       | 1849     | SRFYQYL      |           |       |                  |      | Mascot      |
| 992.5007   | 992.467     | -0.0337 | -34   | 1645       | 1654     | STSSLSAPSR   |           |       |                  |      | Mascot      |
| 992.5007   | 992.467     | -0.0337 | -34   | 1645       | 1654     | STSSLSAPSR   |           |       |                  |      | Mascot      |
| 996.4971   | 996.5963    | 0.0992  | 100   | 867        | 874      | GHCLYLYK     |           |       |                  |      | Mascot      |
| 1016.4869  | 1016.4167   | -0.0702 | -69   | 1405       | 1412     | NSFFMKDK     |           |       |                  |      | Mascot      |
| 1045.5248  | 1045.5681   | 0.0433  | 41    | 298        | 305      | RLYMYGSR     |           |       |                  |      | Mascot      |
| 1211.5626  | 1211.7123   | 0.1497  | 124   | 1402       | 1410     | EHRNSFFMK    |           |       | Oxidation (M)[8] |      | Mascot      |
| 1234.6387  | 1234.6877   | 0.049   | 40    | 328        | 339      | QKSASTTATPSR |           |       |                  |      | Mascot      |

|    |                                                                                       |           |         |     |      |      |                                  |      |                        |        |   |    |   |
|----|---------------------------------------------------------------------------------------|-----------|---------|-----|------|------|----------------------------------|------|------------------------|--------|---|----|---|
|    | 1369.6304                                                                             | 1369.7288 | 0.0984  | 72  | 965  | 976  | EYNTLMSPSSK                      |      | Oxidation (M)[6]       | Mascot |   |    |   |
|    | 1386.6694                                                                             | 1386.679  | 0.0096  | 7   | 373  | 384  | LGGAECARNWPR                     |      | Carbamidomethyl (C)[6] | Mascot |   |    |   |
|    | 1434.6754                                                                             | 1434.7723 | 0.0969  | 68  | 367  | 380  | SASQERLGGAECAR                   |      |                        | Mascot |   |    |   |
|    | 1475.6986                                                                             | 1475.7582 | 0.0596  | 40  | 1003 | 1015 | ATSPHSPNKEHDR                    |      |                        | Mascot |   |    |   |
|    | 1808.9501                                                                             | 1808.9325 | -0.0176 | -10 | 385  | 402  | SASQDALPSTPTGVPKPR               |      |                        | Mascot |   |    |   |
|    | 1908.9086                                                                             | 1908.8206 | -0.088  | -46 | 1150 | 1165 | YADFIDGNRIEDPVER                 |      |                        | Mascot |   |    |   |
|    | 1957.9647                                                                             | 1958.0194 | 0.0547  | 28  | 1094 | 1111 | VPGNNAAISIMQEELNNK               |      | Oxidation (M)[11]      | Mascot |   |    |   |
|    | 2283.0723                                                                             | 2283.1689 | 0.0966  | 42  | 1707 | 1725 | HTMGGQRDFAELDVIHDWR              |      |                        | Mascot |   |    |   |
|    | 2297.0137                                                                             | 2297.1631 | 0.1494  | 65  | 1357 | 1376 | NNNPTQKQSHQSQEEDAGR              |      |                        | Mascot |   |    |   |
|    | 2299.0674                                                                             | 2299.1763 | 0.1089  | 47  | 1707 | 1725 | HTMGGQRDFAELDVIHDWR              |      | Oxidation (M)[3]       | Mascot |   |    |   |
|    | 2362.2263                                                                             | 2362.186  | -0.0403 | -17 | 381  | 402  | NWPRSASQDALPSTPTGVPKPR           |      |                        | Mascot |   |    |   |
|    | 2362.2263                                                                             | 2362.186  | -0.0403 | -17 | 381  | 402  | NWPRSASQDALPSTPTGVPKPR           |      |                        | Mascot |   |    |   |
|    | 2368.1826                                                                             | 2368.2502 | 0.0676  | 29  | 1047 | 1068 | KPSPGVTFGVRLDDCPPAQNNR           |      |                        | Mascot |   |    |   |
|    | 3338.5588                                                                             | 3338.7573 | 0.1985  | 59  | 1439 | 1470 | CSISDPSSQLDETTSDLGTMSSGASVPRTRPR |      |                        | Mascot |   |    |   |
| 26 | PREDICTED: WD repeat- and FYVE domain-containing gi 326673033 protein 4 [Danio rerio] |           |         |     |      |      | 526148.3                         | 6.32 | 30                     | 44     | 0 | 18 | 0 |

Peptide Information

| Calc. Mass | Obsrv. Mass | ± da    | ± ppm | Start Seq. | End Seq. | Sequence      | Ion Score | C. I. % | Modification                             | Rank | Result Type |
|------------|-------------|---------|-------|------------|----------|---------------|-----------|---------|------------------------------------------|------|-------------|
| 801.4716   | 801.3556    | -0.116  | -145  | 4367       | 4373     | DVLVVEK       |           |         |                                          |      | Mascot      |
| 809.3723   | 809.4208    | 0.0485  | 60    | 1217       | 1222     | FCQQQR        |           |         |                                          |      | Mascot      |
| 850.5145   | 850.541     | 0.0265  | 31    | 2616       | 2622     | RSFSLLK       |           |         |                                          |      | Mascot      |
| 992.5444   | 992.467     | -0.0774 | -78   | 3995       | 4003     | LCSVVSSLK     |           |         | Carbamidomethyl (C)[2]                   |      | Mascot      |
| 992.5444   | 992.467     | -0.0774 | -78   | 3995       | 4003     | LCSVVSSLK     |           |         | Carbamidomethyl (C)[2]                   |      | Mascot      |
| 1006.506   | 1006.4045   | -0.1015 | -101  | 4283       | 4291     | ASMKDPVMK     |           |         |                                          |      | Mascot      |
| 1016.4829  | 1016.4167   | -0.0662 | -65   | 1173       | 1180     | MLQEQSHK      |           |         | Oxidation (M)[1]                         |      | Mascot      |
| 1109.6538  | 1109.4979   | -0.1559 | -140  | 1300       | 1308     | NHILSTLRR     |           |         |                                          |      | Mascot      |
| 1118.5225  | 1118.6837   | 0.1612  | 144   | 3764       | 3773     | GWVQDTAEGR    |           |         |                                          |      | Mascot      |
| 1118.5225  | 1118.6837   | 0.1612  | 144   | 3764       | 3773     | GWVQDTAEGR    |           |         |                                          |      | Mascot      |
| 1179.6844  | 1179.6044   | -0.08   | -68   | 1279       | 1288     | DQHIALLLR     |           |         |                                          |      | Mascot      |
| 1211.7041  | 1211.7123   | 0.0082  | 7     | 2728       | 2737     | LLTVVRHMSR    |           |         |                                          |      | Mascot      |
| 1234.6394  | 1234.6877   | 0.0483  | 39    | 901        | 909      | IMLQELCRR     |           |         | Carbamidomethyl (C)[7], Oxidation (M)[2] |      | Mascot      |
| 1287.6903  | 1287.673    | -0.0173 | -13   | 2455       | 2467     | APSVSVVSIESGR | 18        | 0       |                                          |      | Mascot      |
| 1287.6903  | 1287.673    | -0.0173 | -13   | 2455       | 2467     | APSVSVVSIESGR |           |         |                                          |      | Mascot      |
| 1308.7747  | 1308.6965   | -0.0782 | -60   | 1482       | 1492     | RILSSVLHQQK   |           |         |                                          |      | Mascot      |



|           |           |         |     |      |      |                                  |                                              |        |
|-----------|-----------|---------|-----|------|------|----------------------------------|----------------------------------------------|--------|
| 1309.7157 | 1309.6603 | -0.0554 | -42 | 4620 | 4629 | HLVLCRELNR                       | Carbamidomethyl (C)[5]                       | Mascot |
| 1320.6464 | 1320.5852 | -0.0612 | -46 | 4090 | 4101 | DLSKPMGAQTEK                     | Oxidation (M)[6]                             | Mascot |
| 1382.7175 | 1382.7717 | 0.0542  | 39  | 4652 | 4664 | THGTLVGDWGR                      |                                              | Mascot |
| 1386.5745 | 1386.679  | 0.1045  | 75  | 1322 | 1331 | IMSDCCLCRR                       | Carbamidomethyl (C)[5,6,8], Oxidation (M)[2] | Mascot |
| 1839.0044 | 1838.9092 | -0.0952 | -52 | 2811 | 2828 | KSCLTVVYLNATAIGTGK               |                                              | Mascot |
| 1908.8513 | 1908.8206 | -0.0307 | -16 | 255  | 270  | EKHLFCGCLSTSHMSR                 | Carbamidomethyl (C)[5], Oxidation (M)[14]    | Mascot |
| 1958.0276 | 1958.0194 | -0.0082 | -4  | 2717 | 2733 | FSSACESHVRLTVVR                  | Carbamidomethyl (C)[5]                       | Mascot |
| 1993.9907 | 1993.9703 | -0.0204 | -10 | 2521 | 2537 | QIMCEFGLLSTLLTHCK                | Carbamidomethyl (C)[4]                       | Mascot |
| 2060.0593 | 2060.1394 | 0.0801  | 39  | 1988 | 2005 | TELKVAICVSNPQPSNFR               | Carbamidomethyl (C)[8]                       | Mascot |
| 2076.1025 | 2076.1096 | 0.0071  | 3   | 1537 | 1554 | GKPSLPPGLFEHHDLYIR               |                                              | Mascot |
| 2224.9355 | 2225.1248 | 0.1893  | 85  | 257  | 274  | HLCFGCLSTSHMSRDCE<br>K           | Carbamidomethyl (C)[3,6,16]                  | Mascot |
| 2224.9355 | 2225.1248 | 0.1893  | 85  | 257  | 274  | HLCFGCLSTSHMSRDCE<br>K           | Carbamidomethyl (C)[3,6,16]                  | Mascot |
| 2233.0127 | 2233.0803 | 0.0676  | 30  | 3183 | 3201 | SWSFECLSCICPGFEVLQ<br>K          | Carbamidomethyl (C)[6]                       | Mascot |
| 2283.1948 | 2283.1689 | -0.0259 | -11 | 2024 | 2043 | IIQSSFMRSSNTVICSQIL<br>R         |                                              | Mascot |
| 2284.1389 | 2284.165  | 0.0261  | 11  | 2349 | 2369 | LGEALLHLGCFQKGDVP<br>ESDR        |                                              | Mascot |
| 2299.1772 | 2299.1763 | -0.0009 | 0   | 2789 | 2807 | CAKHLIPGQWHHLCLVM<br>AK          | Carbamidomethyl (C)[1,14]                    | Mascot |
| 2399.1167 | 2399.0737 | -0.043  | -18 | 3723 | 3741 | SHIQMMHSENDRAIQW<br>LR           | Oxidation (M)[5]                             | Mascot |
| 3337.6045 | 3337.7449 | 0.1404  | 42  | 3638 | 3666 | EGQVSMADVSPWEEQ<br>ATKSWQLFIDSQK |                                              | Mascot |

27 novel protein similar to vertebrate trinucleotide repeat containing 15 (TNRC15, zgc:111944) [Danio

gi|169154899 152175.1 5.54 13 44 0

#### Peptide Information

| Calc. Mass | Obsrv. Mass | ± da    | ± ppm | Start Seq. | End Sequence Seq.    | Ion Score | C. I. % | Modification           | Rank | Result Type |
|------------|-------------|---------|-------|------------|----------------------|-----------|---------|------------------------|------|-------------|
| 801.4213   | 801.3556    | -0.0657 | -82   | 923        | 928 QQELQR           |           |         |                        |      | Mascot      |
| 842.4478   | 842.5078    | 0.06    | 71    | 110        | 119 GGGTVAGAPR       |           |         |                        |      | Mascot      |
| 960.4744   | 960.4794    | 0.005   | 5     | 985        | 991 LEEERER          | 20        | 0       |                        |      | Mascot      |
| 960.4744   | 960.4794    | 0.005   | 5     | 985        | 991 LEEERER          |           |         |                        |      | Mascot      |
| 996.5359   | 996.5963    | 0.0604  | 61    | 1285       | 1293 FETVTSGKK       |           |         |                        |      | Mascot      |
| 1006.5316  | 1006.4045   | -0.1271 | -126  | 658        | 665 QQYALQQK         |           |         |                        |      | Mascot      |
| 1045.5272  | 1045.5681   | 0.0409  | 39    | 908        | 915 QQQEEQKK         |           |         |                        |      | Mascot      |
| 1347.5898  | 1347.7307   | 0.1409  | 105   | 203        | 212 FIHAECDNWR       |           |         | Carbamidomethyl (C)[6] |      | Mascot      |
| 1475.6848  | 1475.7582   | 0.0734  | 50    | 202        | 212 KFIHAECDNWR      |           |         | Carbamidomethyl (C)[7] |      | Mascot      |
| 1796.8634  | 1797.0122   | 0.1488  | 83    | 1238       | 1252 QNDNQKPKQQGQQQK |           |         |                        |      | Mascot      |
| 1808.8635  | 1808.9325   | 0.069   | 38    | 1          | 15 MAETQTLNFGPEWLR   |           |         | Oxidation (M)[1]       |      | Mascot      |

|           |           |         |     |     |     |                          |                                          |        |
|-----------|-----------|---------|-----|-----|-----|--------------------------|------------------------------------------|--------|
| 1826.8234 | 1826.9792 | 0.1558  | 85  | 594 | 608 | RGCDMEFQPLGEMIK          | Carbamidomethyl (C)[3], Oxidation (M)[6] | Mascot |
| 1826.8234 | 1826.9792 | 0.1558  | 85  | 594 | 608 | RGCDMEFQPLGEMIK          | Carbamidomethyl (C)[3], Oxidation (M)[6] | Mascot |
| 1838.9541 | 1838.9092 | -0.0449 | -24 | 93  | 109 | NFSMSVNSAAVLRRLTGR       | Oxidation (M)[4]                         | Mascot |
| 2297.1731 | 2297.1631 | -0.01   | -4  | 894 | 914 | LEEEAAAAAALLRQQQ<br>EEQK |                                          | Mascot |

28 PREDICTED: serine/threonine-protein kinase ATR  
[Danio rerio] gi|292610566 298997.8 7.68 25 43 0

#### Peptide Information

| Calc. Mass | Obsrv. Mass | ± da    | ± ppm | Start Seq. | End Seq. | Sequence                | Ion Score | C. I. % | Modification             | Rank | Result Type |
|------------|-------------|---------|-------|------------|----------|-------------------------|-----------|---------|--------------------------|------|-------------|
| 801.4464   | 801.3556    | -0.0908 | -113  | 1317       | 1323     | NQDALLK                 |           |         |                          |      | Mascot      |
| 882.5407   | 882.5666    | 0.0259  | 29    | 1304       | 1311     | IHALTSLK                |           |         |                          |      | Mascot      |
| 960.5546   | 960.4794    | -0.0752 | -78   | 1803       | 1811     | LGQMLLAAK               |           |         | Oxidation (M)[4]         |      | Mascot      |
| 960.5546   | 960.4794    | -0.0752 | -78   | 1803       | 1811     | LGQMLLAAK               |           |         | Oxidation (M)[4]         |      | Mascot      |
| 996.6199   | 996.5963    | -0.0236 | -24   | 1898       | 1906     | AKEPVLALR               |           |         |                          |      | Mascot      |
| 1006.5051  | 1006.4045   | -0.1006 | -100  | 703        | 711      | LQDSSTEVK               |           |         |                          |      | Mascot      |
| 1109.4966  | 1109.4979   | 0.0013  | 1     | 455        | 463      | TQPMQVDMK               |           |         | Oxidation (M)[4,8]       |      | Mascot      |
| 1179.6337  | 1179.6044   | -0.0293 | -25   | 1177       | 1186     | MMTTLRTGLR              |           |         |                          |      | Mascot      |
| 1211.6235  | 1211.7123   | 0.0888  | 73    | 1177       | 1186     | MMTTLRTGLR              |           |         | Oxidation (M)[1,2]       |      | Mascot      |
| 1277.6656  | 1277.7037   | 0.0381  | 30    | 1550       | 1560     | EVTEEIMAVLK             |           |         | Oxidation (M)[7]         |      | Mascot      |
| 1287.6224  | 1287.673    | 0.0506  | 39    | 1513       | 1522     | VFNCCSFIK               |           |         | Carbamidomethyl (C)[4,5] |      | Mascot      |
| 1287.7267  | 1287.673    | -0.0537 | -42   | 869        | 880      | NTLILTGEIGR             | 4         | 0       |                          |      | Mascot      |
| 1309.7223  | 1309.6603   | -0.062  | -47   | 2587       | 2597     | AKTHVLDIEQR             |           |         |                          |      | Mascot      |
| 1320.6287  | 1320.5852   | -0.0435 | -33   | 453        | 463      | DKTQPMQVDMK             |           |         |                          |      | Mascot      |
| 1347.7235  | 1347.7307   | 0.0072  | 5     | 2533       | 2543     | QACEVILRLMR             |           |         | Oxidation (M)[10]        |      | Mascot      |
| 1382.7205  | 1382.7717   | 0.0512  | 37    | 1152       | 1163     | KMALNSLSMLMK            |           |         | Oxidation (M)[2]         |      | Mascot      |
| 1386.6544  | 1386.679    | 0.0246  | 18    | 1037       | 1048     | YIFSHLVCSCSK            |           |         |                          |      | Mascot      |
| 1434.7375  | 1434.7723   | 0.0348  | 24    | 1049       | 1059     | EELERAFHYLK             |           |         |                          |      | Mascot      |
| 1475.6327  | 1475.7582   | 0.1255  | 85    | 113        | 125      | IAACECEDLHMK            |           |         | Oxidation (M)[12]        |      | Mascot      |
| 1493.757   | 1493.7354   | -0.0216 | -14   | 1653       | 1664     | AVMHFESFIREK            |           |         |                          |      | Mascot      |
| 1796.9141  | 1797.0122   | 0.0981  | 55    | 1153       | 1168     | MALNSLSMLKLMGPK         |           |         | Oxidation (M)[1,7]       |      | Mascot      |
| 1808.9186  | 1808.9325   | 0.0139  | 8     | 1507       | 1522     | HELAGKVFNCCSFIK         |           |         |                          |      | Mascot      |
| 1848.8433  | 1848.9583   | 0.115   | 62    | 1981       | 1996     | GVQQCFPDDQTLTDPK        |           |         | Carbamidomethyl (C)[5]   |      | Mascot      |
| 1909.0112  | 1908.8206   | -0.1906 | -100  | 163        | 178      | NLMTRPSPQWPVVVER        |           |         |                          |      | Mascot      |
| 1994.0011  | 1993.9703   | -0.0308 | -15   | 902        | 920      | SNPVSAAYTEIQALATC<br>R  |           |         |                          |      | Mascot      |
| 2249.1052  | 2249.0649   | -0.0403 | -18   | 466        | 484      | SEVWAAVDCRLEELLTQ<br>MR |           |         |                          |      | Mascot      |
| 2297.166   | 2297.1631   | -0.0029 | -1    | 569        | 589      | ILDAVLYLSNNLFAANSES     |           |         |                          |      | Mascot      |

29      PREDICTED: tetratricopeptide repeat protein 34-like      DK  
 [Danio rerio]      gi|326679115      119668.1      7.99      17      43      0

Peptide Information

| Calc. Mass | Obsrv. Mass | ± da    | ± ppm | Start Seq. | End Seq. | Sequence             | Ion Score | C. I. % | Modification               | Rank | Result Type |
|------------|-------------|---------|-------|------------|----------|----------------------|-----------|---------|----------------------------|------|-------------|
| 882.4791   | 882.5666    | 0.0875  | 99    | 126        | 133      | QTPQPVGGR            |           |         |                            |      | Mascot      |
| 960.4897   | 960.4794    | -0.0103 | -11   | 847        | 854      | QVFGQEPR             |           |         |                            |      | Mascot      |
| 960.4897   | 960.4794    | -0.0103 | -11   | 847        | 854      | QVFGQEPR             |           |         |                            |      | Mascot      |
| 976.5686   | 976.474     | -0.0946 | -97   | 941        | 947      | LQYLRQR              |           |         |                            |      | Mascot      |
| 996.4791   | 996.5963    | 0.1172  | 118   | 656        | 663      | HCHTASKR             |           |         | Carbamidomethyl (C)[2]     |      | Mascot      |
| 1109.5739  | 1109.4979   | -0.076  | -68   | 189        | 197      | AFYQQLSPR            |           |         |                            |      | Mascot      |
| 1118.5259  | 1118.6837   | 0.1578  | 141   | 1076       | 1085     | REVSGPCTVN           |           |         | Carbamidomethyl (C)[7]     |      | Mascot      |
| 1118.5259  | 1118.6837   | 0.1578  | 141   | 1076       | 1085     | REVSGPCTVN           |           |         | Carbamidomethyl (C)[7]     |      | Mascot      |
| 1165.6252  | 1165.7491   | 0.1239  | 106   | 1050       | 1059     | AWFLTETGLK           |           |         |                            |      | Mascot      |
| 1179.6302  | 1179.6044   | -0.0258 | -22   | 1028       | 1036     | QRLAEMYLR            |           |         |                            |      | Mascot      |
| 1279.6528  | 1279.7549   | 0.1021  | 80    | 241        | 252      | ELQAAELFSSGK         |           |         |                            |      | Mascot      |
| 1308.6881  | 1308.6965   | 0.0084  | 6     | 700        | 710      | ARCYALLGQWK          |           |         |                            |      | Mascot      |
| 1364.6957  | 1364.6969   | 0.0012  | 1     | 430        | 440      | GYSRLFIEDHK          |           |         |                            |      | Mascot      |
| 1364.6957  | 1364.6969   | 0.0012  | 1     | 430        | 440      | GYSRLFIEDHK          |           |         |                            |      | Mascot      |
| 1369.7144  | 1369.7288   | 0.0144  | 11    | 143        | 155      | ALACLLSDPQNPK        |           |         |                            |      | Mascot      |
| 1493.8435  | 1493.7354   | -0.1081 | -72   | 177        | 188      | ERQTQHVELIHK         |           |         |                            |      | Mascot      |
| 1909.0331  | 1908.8206   | -0.2125 | -111  | 189        | 204      | AFYQQLSPRYPIQGK      |           |         |                            |      | Mascot      |
| 1994.0201  | 1993.9703   | -0.0498 | -25   | 836        | 854      | GDVNAAGAHKQVFGQEPR   |           |         |                            |      | Mascot      |
| 2299.1797  | 2299.1763   | -0.0034 | -1    | 490        | 508      | LQLQDAAVTVRCLVPWNCR  |           |         | Carbamidomethyl (C)[12,18] |      | Mascot      |
| 2362.1277  | 2362.186    | 0.0583  | 25    | 801        | 820      | EEHLREAFLISGALMNTDCR |           |         | Carbamidomethyl (C)[19]    |      | Mascot      |
| 2362.1277  | 2362.186    | 0.0583  | 25    | 801        | 820      | EEHLREAFLISGALMNTDCR |           |         | Carbamidomethyl (C)[19]    |      | Mascot      |

30      immunoglobulin mu heavy chain [Danio rerio]      gi|51559382      24154.7      8.14      7      42      0

Peptide Information

| Calc. Mass | Obsrv. Mass | ± da    | ± ppm | Start Seq. | End Seq. | Sequence | Ion Score | C. I. % | Modification | Rank | Result Type |
|------------|-------------|---------|-------|------------|----------|----------|-----------|---------|--------------|------|-------------|
| 801.4253   | 801.3556    | -0.0697 | -87   | 174        | 180      | WKDPAGK  |           |         |              |      | Mascot      |
| 864.4097   | 864.4877    | 0.078   | 90    | 208        | 214      | SDWIDTK  |           |         |              |      | Mascot      |
| 992.5047   | 992.467     | -0.0377 | -38   | 207        | 214      | KSDWIDTK |           |         |              |      | Mascot      |
| 992.5047   | 992.467     | -0.0377 | -38   | 207        | 214      | KSDWIDTK |           |         |              |      | Mascot      |

|    |                                     |           |        |    |             |     |                                   |      |   |    |                        |        |
|----|-------------------------------------|-----------|--------|----|-------------|-----|-----------------------------------|------|---|----|------------------------|--------|
|    | 1320.5776                           | 1320.5852 | 0.0076 | 6  | 103         | 113 | TEDTAVYYCAK                       |      |   |    | Carbamidomethyl (C)[9] | Mascot |
|    | 1363.6106                           | 1363.7021 | 0.0915 | 67 | 114         | 124 | WSGFAFDYWGK                       |      |   |    |                        | Mascot |
|    | 2362.1343                           | 2362.186  | 0.0517 | 22 | 83          | 102 | FTVSRDDSSQLYLQMN<br>NLK           |      |   |    | Oxidation (M)[16]      | Mascot |
|    | 2362.1343                           | 2362.186  | 0.0517 | 22 | 83          | 102 | FTVSRDDSSQLYLQMN<br>NLK           |      |   |    | Oxidation (M)[16]      | Mascot |
|    | 3337.6851                           | 3337.7449 | 0.0598 | 18 | 59          | 87  | ALEWIAYISTQSSPIYYSQ<br>SVQGRFTVSR |      |   |    |                        | Mascot |
| 31 | ADP/ATP translocase 1 [Danio rerio] |           |        |    | gi 47550717 |     | 32667.2                           | 9.74 | 8 | 40 | 0                      |        |

#### Peptide Information

|  | Calc. Mass | Obsrv. Mass | ± da    | ± ppm | Start Seq. | End Seq. | Sequence                    | Ion Score | C. I. % | Modification         | Rank | Result Type |
|--|------------|-------------|---------|-------|------------|----------|-----------------------------|-----------|---------|----------------------|------|-------------|
|  | 976.5825   | 976.474     | -0.1085 | -111  | 97         | 105      | KIFLGGVDK                   |           |         |                      |      | Mascot      |
|  | 984.4423   | 984.4249    | -0.0174 | -18   | 238        | 245      | MMMQSGRK                    |           |         | Oxidation (M)[1]     |      | Mascot      |
|  | 984.4423   | 984.4249    | -0.0174 | -18   | 238        | 245      | MMMQSGRK                    |           |         | Oxidation (M)[1]     |      | Mascot      |
|  | 996.4536   | 996.5963    | 0.1427  | 143   | 237        | 244      | RMMMQSGR                    |           |         |                      |      | Mascot      |
|  | 1016.4321  | 1016.4167   | -0.0154 | -15   | 238        | 245      | MMMQSGRK                    |           |         | Oxidation (M)[1,2,3] |      | Mascot      |
|  | 1363.842   | 1363.7021   | -0.1399 | -103  | 32         | 43       | VKLLLQVQHASK                |           |         |                      |      | Mascot      |
|  | 1957.9728  | 1958.0194   | 0.0466  | 24    | 189        | 206      | AAYFGIYDTAKGMLPDPK          |           |         |                      |      | Mascot      |
|  | 2283.2053  | 2283.1689   | -0.0364 | -16   | 1          | 23       | MSDAAISFLKDFLAGGVA<br>AAISK |           |         |                      |      | Mascot      |
|  | 2284.2236  | 2284.165    | -0.0586 | -26   | 73         | 92       | GNLANVIRYFPTQALNFA<br>FK    |           |         |                      |      | Mascot      |
|  | 2299.2002  | 2299.1763   | -0.0239 | -10   | 1          | 23       | MSDAAISFLKDFLAGGVA<br>AAISK |           |         | Oxidation (M)[1]     |      | Mascot      |
|  | 2362.3127  | 2362.186    | -0.1267 | -54   | 273        | 295      | GALSNVIRGAGGAFVLVL<br>YDEIK |           |         |                      |      | Mascot      |
|  | 2362.3127  | 2362.186    | -0.1267 | -54   | 273        | 295      | GALSNVIRGAGGAFVLVL<br>YDEIK |           |         |                      |      | Mascot      |

32 tropomyosin alpha-4 chain isoform 2 [Danio rerio] gi|47085929 28484.4 4.63 8 40 0

#### Peptide Information

|  | Calc. Mass | Obsrv. Mass | ± da    | ± ppm | Start Seq. | End Seq. | Sequence     | Ion Score | C. I. % | Modification     | Rank | Result Type |
|--|------------|-------------|---------|-------|------------|----------|--------------|-----------|---------|------------------|------|-------------|
|  | 960.5294   | 960.4794    | -0.05   | -52   | 93         | 100      | VIENRAMK     | 9         | 0       |                  |      | Mascot      |
|  | 960.5294   | 960.4794    | -0.05   | -52   | 93         | 100      | VIENRAMK     |           |         |                  |      | Mascot      |
|  | 976.5244   | 976.474     | -0.0504 | -52   | 93         | 100      | VIENRAMK     |           |         | Oxidation (M)[7] |      | Mascot      |
|  | 1109.4891  | 1109.4979   | 0.0088  | 8     | 83         | 92       | AADESERGMK   |           |         | Oxidation (M)[9] |      | Mascot      |
|  | 1234.5732  | 1234.6877   | 0.1145  | 93    | 143        | 153      | AEERAEEVAECK |           |         |                  |      | Mascot      |
|  | 1277.6882  | 1277.7037   | 0.0155  | 12    | 1          | 12       | MTGVTS�DAVKR |           |         |                  |      | Mascot      |
|  | 1308.6178  | 1308.6965   | 0.0787  | 60    | 198        | 208      | EAETRAEFAER  |           |         |                  |      | Mascot      |
|  | 1382.6798  | 1382.7717   | 0.0919  | 66    | 170        | 181      | SLEAQAEKYSEK |           |         |                  |      | Mascot      |

|    |                                                                                    |           |        |    |             |     |               |     |   |    |   |  |                  |  |  |        |
|----|------------------------------------------------------------------------------------|-----------|--------|----|-------------|-----|---------------|-----|---|----|---|--|------------------|--|--|--------|
|    | 1434.7322                                                                          | 1434.7723 | 0.0401 | 28 | 216         | 228 | SIDDLEEKLSSAK |     |   |    |   |  |                  |  |  | Mascot |
|    | 1493.7338                                                                          | 1493.7354 | 0.0016 | 1  | 105         | 116 | MEIQEMQLKEAK  |     |   |    |   |  | Oxidation (M)[1] |  |  | Mascot |
| 33 | novel protein similar to vertebrate tropomyosin 4 (TPM4) (zgc:63909) [Danio rerio] |           |        |    | gi 94732584 |     | 23517.9       | 4.6 | 7 | 40 | 0 |  |                  |  |  |        |

#### Peptide Information

| Calc. Mass | Obsrv. Mass | ± da    | ± ppm | Start Seq. | End Seq. | Sequence         | Ion Score | C. I. | % Modification   | Rank | Result Type |
|------------|-------------|---------|-------|------------|----------|------------------|-----------|-------|------------------|------|-------------|
| 960.5294   | 960.4794    | -0.05   | -52   | 49         | 56       | VIENRAMK         | 9         | 0     |                  |      | Mascot      |
| 960.5294   | 960.4794    | -0.05   | -52   | 49         | 56       | VIENRAMK         |           |       |                  |      | Mascot      |
| 976.5244   | 976.474     | -0.0504 | -52   | 49         | 56       | VIENRAMK         |           |       | Oxidation (M)[7] |      | Mascot      |
| 1109.4891  | 1109.4979   | 0.0088  | 8     | 39         | 48       | AADESERGMK       |           |       | Oxidation (M)[9] |      | Mascot      |
| 1234.5732  | 1234.6877   | 0.1145  | 93    | 99         | 109      | AEERAEVAECK      |           |       |                  |      | Mascot      |
| 1308.6178  | 1308.6965   | 0.0787  | 60    | 154        | 164      | EAETRAEFAER      |           |       |                  |      | Mascot      |
| 1382.6798  | 1382.7717   | 0.0919  | 66    | 126        | 137      | SLEAQAEKYSEK     |           |       |                  |      | Mascot      |
| 1493.7338  | 1493.7354   | 0.0016  | 1     | 61         | 72       | MEIQEMQLKEAK     |           |       | Oxidation (M)[1] |      | Mascot      |
| 1908.9436  | 1908.8206   | -0.123  | -64   | 169        | 184      | LEKSIDDLEDELYAQK |           |       |                  |      | Mascot      |

|    |                              |  |  |  |              |  |         |      |   |    |   |    |       |  |  |  |
|----|------------------------------|--|--|--|--------------|--|---------|------|---|----|---|----|-------|--|--|--|
| 34 | Hook homolog 1 [Danio rerio] |  |  |  | gi 190339684 |  | 83123.4 | 5.24 | 8 | 40 | 0 | 35 | 90.98 |  |  |  |
|----|------------------------------|--|--|--|--------------|--|---------|------|---|----|---|----|-------|--|--|--|

#### Peptide Information

| Calc. Mass | Obsrv. Mass | ± da    | ± ppm | Start Seq. | End Seq. | Sequence      | Ion Score | C. I. | % Modification   | Rank | Result Type |
|------------|-------------|---------|-------|------------|----------|---------------|-----------|-------|------------------|------|-------------|
| 809.3458   | 809.4208    | 0.075   | 93    | 587        | 592      | KDEDMR        |           |       | Oxidation (M)[5] |      | Mascot      |
| 842.5458   | 842.5078    | -0.038  | -45   | 636        | 642      | KIALER        |           |       |                  |      | Mascot      |
| 960.4996   | 960.4794    | -0.0202 | -21   | 323        | 330      | LEDLSDLR      | 35        | 90.98 |                  |      | Mascot      |
| 960.4996   | 960.4794    | -0.0202 | -21   | 323        | 330      | LEDLSDLR      |           |       |                  |      | Mascot      |
| 976.488    | 976.474     | -0.014  | -14   | 643        | 650      | ECEQAKLR      |           |       |                  |      | Mascot      |
| 992.5081   | 992.467     | -0.0411 | -41   | 332        | 339      | QMKALEEK      |           |       | Oxidation (M)[2] |      | Mascot      |
| 992.5081   | 992.467     | -0.0411 | -41   | 332        | 339      | QMKALEEK      |           |       | Oxidation (M)[2] |      | Mascot      |
| 1165.5956  | 1165.7491   | 0.1535  | 132   | 577        | 586      | MDELMAALKK    |           |       | Oxidation (M)[1] |      | Mascot      |
| 1363.6335  | 1363.7021   | 0.0686  | 50    | 282        | 293      | NDELTSLAEEESR |           |       |                  |      | Mascot      |
| 1364.6614  | 1364.6969   | 0.0355  | 26    | 177        | 188      | ALEDLTEVMAEK  |           |       | Oxidation (M)[9] |      | Mascot      |
| 1364.6614  | 1364.6969   | 0.0355  | 26    | 177        | 188      | ALEDLTEVMAEK  |           |       | Oxidation (M)[9] |      | Mascot      |

|    |                                                                                    |  |  |  |             |  |         |     |   |    |   |  |  |  |  |  |
|----|------------------------------------------------------------------------------------|--|--|--|-------------|--|---------|-----|---|----|---|--|--|--|--|--|
| 35 | novel protein similar to vertebrate tropomyosin 4 (TPM4) (zgc:63909) [Danio rerio] |  |  |  | gi 94732583 |  | 23433.8 | 4.6 | 7 | 39 | 0 |  |  |  |  |  |
|----|------------------------------------------------------------------------------------|--|--|--|-------------|--|---------|-----|---|----|---|--|--|--|--|--|

#### Peptide Information

| Calc. Mass | Obsrv. Mass | ± da | ± ppm | Start Seq. | End Seq. | Sequence | Ion Score | C. I. | % Modification | Rank | Result Type |
|------------|-------------|------|-------|------------|----------|----------|-----------|-------|----------------|------|-------------|
|------------|-------------|------|-------|------------|----------|----------|-----------|-------|----------------|------|-------------|

|    |                                                          |           |         |     |             |           |               |    |    |                  |    |        |
|----|----------------------------------------------------------|-----------|---------|-----|-------------|-----------|---------------|----|----|------------------|----|--------|
|    |                                                          |           |         |     |             |           |               |    |    |                  |    |        |
|    | 960.5294                                                 | 960.4794  | -0.05   | -52 | 49          | 56        | VIENRAMK      | 9  | 0  |                  |    | Mascot |
|    | 960.5294                                                 | 960.4794  | -0.05   | -52 | 49          | 56        | VIENRAMK      |    |    |                  |    | Mascot |
|    | 976.5244                                                 | 976.474   | -0.0504 | -52 | 49          | 56        | VIENRAMK      |    |    | Oxidation (M)[7] |    | Mascot |
|    | 1109.4891                                                | 1109.4979 | 0.0088  | 8   | 39          | 48        | AADESERGMK    |    |    | Oxidation (M)[9] |    | Mascot |
|    | 1234.5732                                                | 1234.6877 | 0.1145  | 93  | 99          | 109       | AEERAEVAECK   |    |    |                  |    | Mascot |
|    | 1308.6178                                                | 1308.6965 | 0.0787  | 60  | 154         | 164       | EAETRAEFAER   |    |    |                  |    | Mascot |
|    | 1382.6798                                                | 1382.7717 | 0.0919  | 66  | 126         | 137       | SLEAQAEKYSEK  |    |    |                  |    | Mascot |
|    | 1434.7322                                                | 1434.7723 | 0.0401  | 28  | 172         | 184       | SIDDLLEKLSSAK |    |    |                  |    | Mascot |
|    | 1493.7338                                                | 1493.7354 | 0.0016  | 1   | 61          | 72        | MEIQEMQLKEAK  |    |    | Oxidation (M)[1] |    | Mascot |
| 36 | novel protein similar to human titin (TTN) [Danio rerio] |           |         |     | gi 94732358 | 2437518.2 | 5.95          | 60 | 39 | 0                | 19 | 0      |

#### Peptide Information

| Calc. Mass | Obsrv. Mass | ± da    | ± ppm | Start Seq. | End Sequence Seq. | Ion Score  | C. I. | % Modification | Rank             | Result Type |
|------------|-------------|---------|-------|------------|-------------------|------------|-------|----------------|------------------|-------------|
| 801.3447   | 801.3556    | 0.0109  | 14    | 1257       | 1263              | TYTCDAK    |       |                |                  | Mascot      |
| 809.4515   | 809.4208    | -0.0307 | -38   | 1956       | 1961              | TEYRLK     |       |                |                  | Mascot      |
| 826.4669   | 826.4503    | -0.0166 | -20   | 21022      | 21028             | LTSYKSK    |       |                |                  | Mascot      |
| 842.4478   | 842.5078    | 0.06    | 71    | 14643      | 14649             | RDLPEGR    |       |                |                  | Mascot      |
| 850.4668   | 850.541     | 0.0742  | 87    | 11818      | 11824             | FTVENLK    |       |                |                  | Mascot      |
| 864.4825   | 864.4877    | 0.0052  | 6     | 14124      | 14130             | FEVKDKV    |       |                |                  | Mascot      |
| 882.4791   | 882.5666    | 0.0875  | 99    | 7328       | 7334              | KEEHAIR    |       |                |                  | Mascot      |
| 960.4632   | 960.4794    | 0.0162  | 17    | 957        | 965               | DGNEITPSK  |       |                |                  | Mascot      |
| 960.4996   | 960.4794    | -0.0202 | -21   | 8299       | 8306              | LDEILSDR   | 23    | 0              |                  | Mascot      |
| 976.5648   | 976.474     | -0.0908 | -93   | 18486      | 18493             | WMKVATLK   |       |                |                  | Mascot      |
| 982.441    | 982.456     | 0.015   | 15    | 16436      | 16443             | HCEHEVTK   |       |                |                  | Mascot      |
| 984.4818   | 984.4249    | -0.0569 | -58   | 15718      | 15725             | ITGYMVER   |       |                | Oxidation (M)[5] | Mascot      |
| 984.4818   | 984.4249    | -0.0569 | -58   | 15718      | 15725             | ITGYMVER   |       |                | Oxidation (M)[5] | Mascot      |
| 992.4294   | 992.467     | 0.0376  | 38    | 2060       | 2066              | DNMYFFR    |       |                |                  | Mascot      |
| 992.4294   | 992.467     | 0.0376  | 38    | 2060       | 2066              | DNMYFFR    |       |                |                  | Mascot      |
| 996.5359   | 996.5963    | 0.0604  | 61    | 3662       | 3669              | LSYEQTKK   |       |                |                  | Mascot      |
| 1016.5047  | 1016.4167   | -0.088  | -87   | 2091       | 2099              | FDVPDAPQK  |       |                |                  | Mascot      |
| 1051.6146  | 1051.7118   | 0.0972  | 92    | 10946      | 10955             | VSEKPLPPGK |       |                |                  | Mascot      |
| 1109.5409  | 1109.4979   | -0.043  | -39   | 2038       | 2046              | KTWTMATDR  |       |                |                  | Mascot      |
| 1118.6681  | 1118.6837   | 0.0156  | 14    | 2025       | 2033              | ILAYVVERR  |       |                |                  | Mascot      |
| 1118.6681  | 1118.6837   | 0.0156  | 14    | 2025       | 2033              | ILAYVVERR  |       |                |                  | Mascot      |
| 1165.6324  | 1165.7491   | 0.1167  | 100   | 5141       | 5149              | ITNYTIERR  |       |                |                  | Mascot      |

|           |           |         |     |       |       |                           |                         |        |
|-----------|-----------|---------|-----|-------|-------|---------------------------|-------------------------|--------|
| 1179.6078 | 1179.6044 | -0.0034 | -3  | 17597 | 17605 | ISWKLEEMK                 | Oxidation (M)[8]        | Mascot |
| 1211.7106 | 1211.7123 | 0.0017  | 1   | 5565  | 5575  | QNAVVNNLVLK               |                         | Mascot |
| 1277.6348 | 1277.7037 | 0.0689  | 54  | 5034  | 5044  | GCPFPTLTWQK               |                         | Mascot |
| 1279.7256 | 1279.7549 | 0.0293  | 23  | 15857 | 15867 | LNTGTYELKIK               |                         | Mascot |
| 1287.6328 | 1287.673  | 0.0402  | 31  | 7033  | 7042  | KPKEADEWER                |                         | Mascot |
| 1287.7089 | 1287.673  | -0.0359 | -28 | 11103 | 11113 | ELNLVIKEACR               |                         | Mascot |
| 1308.6464 | 1308.6965 | 0.0501  | 38  | 21769 | 21780 | DNAVISITSNMK              | Oxidation (M)[11]       | Mascot |
| 1309.6854 | 1309.6603 | -0.0251 | -19 | 5761  | 5772  | NTLTTMCLGIVK              | Oxidation (M)[6]        | Mascot |
| 1325.7358 | 1325.7599 | 0.0241  | 18  | 5424  | 5435  | EKMVIHAGGVIR              | Oxidation (M)[3]        | Mascot |
| 1325.7358 | 1325.7599 | 0.0241  | 18  | 5424  | 5435  | EKMVIHAGGVIR              | Oxidation (M)[3]        | Mascot |
| 1347.705  | 1347.7307 | 0.0257  | 19  | 3670  | 3681  | GETALMVRDAIR              | Oxidation (M)[6]        | Mascot |
| 1363.6787 | 1363.7021 | 0.0234  | 17  | 1861  | 1871  | YQMISEGKVHR               | Oxidation (M)[3]        | Mascot |
| 1364.6804 | 1364.6969 | 0.0165  | 12  | 759   | 769   | DEARFEIELSR               |                         | Mascot |
| 1364.6804 | 1364.6969 | 0.0165  | 12  | 759   | 769   | DEARFEIELSR               |                         | Mascot |
| 1369.7434 | 1369.7288 | -0.0146 | -11 | 13125 | 13137 | TASKASEVPQPVR             |                         | Mascot |
| 1382.7678 | 1382.7717 | 0.0039  | 3   | 5123  | 5134  | AEQITLSWLPPK              |                         | Mascot |
| 1386.6747 | 1386.679  | 0.0043  | 3   | 21293 | 21304 | IEETTETAVHEK              |                         | Mascot |
| 1434.7852 | 1434.7723 | -0.0129 | -9  | 7329  | 7340  | EEHAIRWAPVVK              |                         | Mascot |
| 1475.7601 | 1475.7582 | -0.0019 | -1  | 19309 | 19321 | VFAENETGISRPR             |                         | Mascot |
| 1676.8602 | 1676.861  | 0.0008  | 0   | 17412 | 17426 | TWTEAAPKSTQTS LR          |                         | Mascot |
| 1707.8547 | 1707.764  | -0.0907 | -53 | 9007  | 9021  | DDGGSEVINYLEKR            |                         | Mascot |
| 1796.984  | 1797.0122 | 0.0282  | 16  | 20487 | 20501 | LLQRPPEFTLPLCNR           |                         | Mascot |
| 1808.9177 | 1808.9325 | 0.0148  | 8   | 9394  | 9410  | VTLTWTAPHEDGGSPIK         |                         | Mascot |
| 1826.8412 | 1826.9792 | 0.138   | 76  | 5849  | 5864  | DMWTTVTSTATTHTCK          | Oxidation (M)[2]        | Mascot |
| 1826.9622 | 1826.9792 | 0.017   | 9   | 6952  | 6966  | LVKAPLVQNCEYFFR           |                         | Mascot |
| 1838.8271 | 1838.9092 | 0.0821  | 45  | 5776  | 5792  | GHSWKYCVTVENCTGAR         | Carbamidomethyl (C)[7]  | Mascot |
| 1848.9702 | 1848.9583 | -0.0119 | -6  | 10099 | 10114 | ETTSQSWVELSLIIR           |                         | Mascot |
| 1908.9008 | 1908.8206 | -0.0802 | -42 | 599   | 614   | DEVTFDCELSRDVPVK          | Carbamidomethyl (C)[7]  | Mascot |
| 1957.9601 | 1958.0194 | 0.0593  | 30  | 11905 | 11922 | ESAQIETSSSYTSLVIDK        |                         | Mascot |
| 2060.0447 | 2060.1394 | 0.0947  | 46  | 17877 | 17895 | WSVPLNDGGSPITGYIVE<br>R   |                         | Mascot |
| 2076.1123 | 2076.1096 | -0.0027 | -1  | 12734 | 12752 | DPFIHPGSPQIIEVTNIAK       |                         | Mascot |
| 2211.1147 | 2211.1042 | -0.0105 | -5  | 15930 | 15948 | VVWSVISEAMESRMVTV<br>QK   | Oxidation (M)[10,14]    | Mascot |
| 2233.0076 | 2233.0803 | 0.0727  | 33  | 13895 | 13914 | VSAENETGVGECSDL<br>SLFYR  | Carbamidomethyl (C)[12] | Mascot |
| 2249.2175 | 2249.0649 | -0.1526 | -68 | 671   | 690   | DIKVVKPIYGVELFDGETA<br>R  |                         | Mascot |
| 2283.0269 | 2283.1689 | 0.142   | 62  | 1430  | 1450  | MDDAGEYHCKLPASETT<br>GTLK | Oxidation (M)[1]        | Mascot |

|    |                                      |           |         |     |              |       |                                    |      |   |    |   |    |       |  |  |                                            |        |
|----|--------------------------------------|-----------|---------|-----|--------------|-------|------------------------------------|------|---|----|---|----|-------|--|--|--------------------------------------------|--------|
|    | 2284.0583                            | 2284.165  | 0.1067  | 47  | 9228         | 9248  | ANTVNVVIDCAYTVADLQE<br>GCK         |      |   |    |   |    |       |  |  | Carbamidomethyl (C)[9]                     | Mascot |
|    | 2297.1382                            | 2297.1631 | 0.0249  | 11  | 5165         | 5182  | ERLYTIENLMPGHEYIFR                 |      |   |    |   |    |       |  |  | Oxidation (M)[10]                          | Mascot |
|    | 2299.1196                            | 2299.1763 | 0.0567  | 25  | 928          | 947   | LQDYTAVEKDEVLMCE<br>VSK            |      |   |    |   |    |       |  |  |                                            | Mascot |
|    | 2362.1165                            | 2362.186  | 0.0695  | 29  | 18711        | 18731 | VAAANRYGTGEYLQSEV<br>VMCK          |      |   |    |   |    |       |  |  | Carbamidomethyl (C)[20], Oxidation (M)[19] | Mascot |
|    | 2362.1165                            | 2362.186  | 0.0695  | 29  | 18711        | 18731 | VAAANRYGTGEYLQSEV<br>VMCK          |      |   |    |   |    |       |  |  | Carbamidomethyl (C)[20], Oxidation (M)[19] | Mascot |
|    | 2368.1965                            | 2368.2502 | 0.0537  | 23  | 11414        | 11436 | VIARNAAGVFSDPSYSTG<br>PIMAK        |      |   |    |   |    |       |  |  | Oxidation (M)[21]                          | Mascot |
|    | 2399.2864                            | 2399.0737 | -0.2127 | -89 | 1661         | 1681  | VNRPNVTQWMKAGQEI<br>TLSK           |      |   |    |   |    |       |  |  |                                            | Mascot |
|    | 3337.5527                            | 3337.7449 | 0.1922  | 58  | 11839        | 11869 | LGVGEHADVAGPICPED<br>KTEEPDLIDAEFR |      |   |    |   |    |       |  |  |                                            | Mascot |
|    | 3338.5608                            | 3338.7573 | 0.1965  | 59  | 15242        | 15269 | AWVCVSSNCHSLTYKVE<br>DLQEGAIYYFR   |      |   |    |   |    |       |  |  | Carbamidomethyl (C)[4]                     | Mascot |
| 37 | protein Hook homolog 1 [Danio rerio] |           |         |     | gi 113676708 |       | 83063.4                            | 5.24 | 8 | 39 | 0 | 35 | 90.98 |  |  |                                            |        |

#### Peptide Information

| Calc. Mass | Obsrv. Mass | ± da    | ± ppm | Start Seq. | End Seq. | Sequence     | Ion Score | C. I. | % | Modification     | Rank | Result | Type |
|------------|-------------|---------|-------|------------|----------|--------------|-----------|-------|---|------------------|------|--------|------|
| 809.3458   | 809.4208    | 0.075   | 93    | 587        | 592      | KDEDMR       |           |       |   | Oxidation (M)[5] |      | Mascot |      |
| 842.5458   | 842.5078    | -0.038  | -45   | 636        | 642      | KIIALER      |           |       |   |                  |      | Mascot |      |
| 960.4996   | 960.4794    | -0.0202 | -21   | 323        | 330      | LEDLSDLR     | 35        | 90.98 |   |                  |      | Mascot |      |
| 960.4996   | 960.4794    | -0.0202 | -21   | 323        | 330      | LEDLSDLR     |           |       |   |                  |      | Mascot |      |
| 976.488    | 976.474     | -0.014  | -14   | 643        | 650      | ECEQAKLR     |           |       |   |                  |      | Mascot |      |
| 992.5081   | 992.467     | -0.0411 | -41   | 332        | 339      | QMKALEEK     |           |       |   | Oxidation (M)[2] |      | Mascot |      |
| 992.5081   | 992.467     | -0.0411 | -41   | 332        | 339      | QMKALEEK     |           |       |   | Oxidation (M)[2] |      | Mascot |      |
| 1165.5956  | 1165.7491   | 0.1535  | 132   | 577        | 586      | MDELMAALKK   |           |       |   | Oxidation (M)[1] |      | Mascot |      |
| 1363.6335  | 1363.7021   | 0.0686  | 50    | 282        | 293      | NDELTSLAESR  |           |       |   |                  |      | Mascot |      |
| 1364.6614  | 1364.6969   | 0.0355  | 26    | 177        | 188      | ALEDLTEVMAEK |           |       |   | Oxidation (M)[9] |      | Mascot |      |
| 1364.6614  | 1364.6969   | 0.0355  | 26    | 177        | 188      | ALEDLTEVMAEK |           |       |   | Oxidation (M)[9] |      | Mascot |      |

38 PREDICTED: desmoplakin [Danio rerio] gi|326664664 287023.8 6.6 24 39 0

#### Peptide Information

| Calc. Mass | Obsrv. Mass | ± da    | ± ppm | Start Seq. | End Seq. | Sequence  | Ion Score | C. I. | % | Modification     | Rank | Result | Type |
|------------|-------------|---------|-------|------------|----------|-----------|-----------|-------|---|------------------|------|--------|------|
| 864.388    | 864.4877    | 0.0997  | 115   | 250        | 256      | DDLMSQR   |           |       |   |                  |      | Mascot |      |
| 882.5043   | 882.5666    | 0.0623  | 71    | 1885       | 1891     | DIEHKLK   |           |       |   |                  |      | Mascot |      |
| 960.4857   | 960.4794    | -0.0063 | -7    | 242        | 249      | SQEVDRAR  |           |       |   |                  |      | Mascot |      |
| 960.4857   | 960.4794    | -0.0063 | -7    | 242        | 249      | SQEVDRAR  |           |       |   |                  |      | Mascot |      |
| 982.4622   | 982.456     | -0.0062 | -6    | 1          | 9        | MSLSGSQTR |           |       |   | Oxidation (M)[1] |      | Mascot |      |





|           |           |         |     |       |       |                  |    |                   |        |
|-----------|-----------|---------|-----|-------|-------|------------------|----|-------------------|--------|
| 882.4791  | 882.5666  | 0.0875  | 99  | 7406  | 7412  | KEEHAIR          |    |                   | Mascot |
| 960.4996  | 960.4794  | -0.0202 | -21 | 8377  | 8384  | LDEILSDR         | 23 | 0                 | Mascot |
| 960.4996  | 960.4794  | -0.0202 | -21 | 8377  | 8384  | LDEILSDR         |    |                   | Mascot |
| 976.5648  | 976.474   | -0.0908 | -93 | 18658 | 18665 | WMKVATLK         |    |                   | Mascot |
| 982.441   | 982.456   | 0.015   | 15  | 16514 | 16521 | HCEHEVTK         |    |                   | Mascot |
| 984.4818  | 984.4249  | -0.0569 | -58 | 15796 | 15803 | ITGYMVER         |    | Oxidation (M)[5]  | Mascot |
| 984.4818  | 984.4249  | -0.0569 | -58 | 15796 | 15803 | ITGYMVER         |    | Oxidation (M)[5]  | Mascot |
| 992.4294  | 992.467   | 0.0376  | 38  | 2138  | 2144  | DNMYFFR          |    |                   | Mascot |
| 992.4294  | 992.467   | 0.0376  | 38  | 2138  | 2144  | DNMYFFR          |    |                   | Mascot |
| 996.5359  | 996.5963  | 0.0604  | 61  | 3740  | 3747  | LSYEQTKK         |    |                   | Mascot |
| 1016.5047 | 1016.4167 | -0.088  | -87 | 2169  | 2177  | FDVPDAPQK        |    |                   | Mascot |
| 1051.6146 | 1051.7118 | 0.0972  | 92  | 11024 | 11033 | VSEKPLPPGK       |    |                   | Mascot |
| 1109.5409 | 1109.4979 | -0.043  | -39 | 2116  | 2124  | KTWTMATDR        |    |                   | Mascot |
| 1118.6681 | 1118.6837 | 0.0156  | 14  | 2103  | 2111  | ILAYVVERR        |    |                   | Mascot |
| 1118.6681 | 1118.6837 | 0.0156  | 14  | 2103  | 2111  | ILAYVVERR        |    |                   | Mascot |
| 1165.6324 | 1165.7491 | 0.1167  | 100 | 5219  | 5227  | ITNYTIERR        |    |                   | Mascot |
| 1179.6078 | 1179.6044 | -0.0034 | -3  | 17675 | 17683 | ISWKLEEMK        |    | Oxidation (M)[8]  | Mascot |
| 1211.7106 | 1211.7123 | 0.0017  | 1   | 5643  | 5653  | QNAVNNLVLK       |    |                   | Mascot |
| 1277.6348 | 1277.7037 | 0.0689  | 54  | 5112  | 5122  | GCPFPTLTWQK      |    |                   | Mascot |
| 1279.7256 | 1279.7549 | 0.0293  | 23  | 15935 | 15945 | LNTGTIELKIK      |    |                   | Mascot |
| 1287.6328 | 1287.673  | 0.0402  | 31  | 7111  | 7120  | KPKEADEWER       |    |                   | Mascot |
| 1287.7089 | 1287.673  | -0.0359 | -28 | 11181 | 11191 | ELNLVIKEACR      |    |                   | Mascot |
| 1308.6464 | 1308.6965 | 0.0501  | 38  | 21941 | 21952 | DNAVISITSNMK     |    | Oxidation (M)[11] | Mascot |
| 1309.6854 | 1309.6603 | -0.0251 | -19 | 5839  | 5850  | NLTMTMCLGIVK     |    | Oxidation (M)[6]  | Mascot |
| 1325.7358 | 1325.7599 | 0.0241  | 18  | 5502  | 5513  | EKMVIHAGGVIR     |    | Oxidation (M)[3]  | Mascot |
| 1325.7358 | 1325.7599 | 0.0241  | 18  | 5502  | 5513  | EKMVIHAGGVIR     |    | Oxidation (M)[3]  | Mascot |
| 1347.705  | 1347.7307 | 0.0257  | 19  | 3748  | 3759  | GETALMVRDAIR     |    | Oxidation (M)[6]  | Mascot |
| 1363.6787 | 1363.7021 | 0.0234  | 17  | 1939  | 1949  | YQMISEGKVHR      |    | Oxidation (M)[3]  | Mascot |
| 1364.6804 | 1364.6969 | 0.0165  | 12  | 837   | 847   | DEARFEIELSR      |    |                   | Mascot |
| 1364.6804 | 1364.6969 | 0.0165  | 12  | 837   | 847   | DEARFEIELSR      |    |                   | Mascot |
| 1369.7111 | 1369.7288 | 0.0177  | 13  | 3858  | 3868  | EYIFRVTAENK      |    |                   | Mascot |
| 1382.7678 | 1382.7717 | 0.0039  | 3   | 5201  | 5212  | AEQITLSWLPPK     |    |                   | Mascot |
| 1386.6747 | 1386.679  | 0.0043  | 3   | 21465 | 21476 | IEETTETAVHEK     |    |                   | Mascot |
| 1434.7852 | 1434.7723 | -0.0129 | -9  | 7407  | 7418  | EEHAIRWAPVVK     |    |                   | Mascot |
| 1475.7601 | 1475.7582 | -0.0019 | -1  | 19481 | 19493 | VFAENETGISRPR    |    |                   | Mascot |
| 1676.8602 | 1676.861  | 0.0008  | 0   | 17490 | 17504 | TWTEAAPKSTQTSRLR |    |                   | Mascot |

|           |           |         |     |       |       |                                    |  |  |  |  |  |  |                                            |  |  |  |  |  |        |
|-----------|-----------|---------|-----|-------|-------|------------------------------------|--|--|--|--|--|--|--------------------------------------------|--|--|--|--|--|--------|
| 1707.8547 | 1707.764  | -0.0907 | -53 | 9085  | 9099  | DDGGSEVINYLEKR                     |  |  |  |  |  |  |                                            |  |  |  |  |  | Mascot |
| 1796.984  | 1797.0122 | 0.0282  | 16  | 20659 | 20673 | LLQRPPEFTLPLCNR                    |  |  |  |  |  |  |                                            |  |  |  |  |  | Mascot |
| 1808.9177 | 1808.9325 | 0.0148  | 8   | 9472  | 9488  | VTLTWTAPHEDGGSPIK                  |  |  |  |  |  |  |                                            |  |  |  |  |  | Mascot |
| 1826.8412 | 1826.9792 | 0.138   | 76  | 5927  | 5942  | DMWTTVTSATTKTHCK                   |  |  |  |  |  |  | Oxidation (M)[2]                           |  |  |  |  |  | Mascot |
| 1826.9622 | 1826.9792 | 0.017   | 9   | 7030  | 7044  | LVKAPLVQNCEYFFR                    |  |  |  |  |  |  |                                            |  |  |  |  |  | Mascot |
| 1838.8271 | 1838.9092 | 0.0821  | 45  | 5854  | 5870  | GHSCHKYCVTVENCTGAR                 |  |  |  |  |  |  | Carbamidomethyl (C)[7]                     |  |  |  |  |  | Mascot |
| 1848.9702 | 1848.9583 | -0.0119 | -6  | 10177 | 10192 | ETTSQSWVELSLIIR                    |  |  |  |  |  |  |                                            |  |  |  |  |  | Mascot |
| 1908.9008 | 1908.8206 | -0.0802 | -42 | 677   | 692   | DEVTFDCELSRDVPVK                   |  |  |  |  |  |  | Carbamidomethyl (C)[7]                     |  |  |  |  |  | Mascot |
| 1957.9601 | 1958.0194 | 0.0593  | 30  | 11983 | 12000 | ESAQIETSSSYTSLVIDK                 |  |  |  |  |  |  |                                            |  |  |  |  |  | Mascot |
| 2060.0447 | 2060.1394 | 0.0947  | 46  | 17955 | 17973 | WSVPLNDGGSPITGYIVE<br>R            |  |  |  |  |  |  |                                            |  |  |  |  |  | Mascot |
| 2076.1123 | 2076.1096 | -0.0027 | -1  | 12812 | 12830 | DPFIHPGSPQIIEVTNIAK                |  |  |  |  |  |  |                                            |  |  |  |  |  | Mascot |
| 2211.1147 | 2211.1042 | -0.0105 | -5  | 16008 | 16026 | VVWSVISEAMESRMVTV<br>QK            |  |  |  |  |  |  | Oxidation (M)[10,14]                       |  |  |  |  |  | Mascot |
| 2233.0076 | 2233.0803 | 0.0727  | 33  | 13973 | 13992 | VSAENETGVGECSDL<br>FYR             |  |  |  |  |  |  | Carbamidomethyl (C)[12]                    |  |  |  |  |  | Mascot |
| 2249.2175 | 2249.0649 | -0.1526 | -68 | 749   | 768   | DIKVVKPIYGVELFDGETA<br>R           |  |  |  |  |  |  |                                            |  |  |  |  |  | Mascot |
| 2283.0269 | 2283.1689 | 0.142   | 62  | 1508  | 1528  | MDDAGEYHCKLPASETT<br>GTLK          |  |  |  |  |  |  | Oxidation (M)[1]                           |  |  |  |  |  | Mascot |
| 2284.0583 | 2284.165  | 0.1067  | 47  | 9306  | 9326  | ANTVNVIDCAYTVADLQE<br>GCK          |  |  |  |  |  |  | Carbamidomethyl (C)[9]                     |  |  |  |  |  | Mascot |
| 2297.1382 | 2297.1631 | 0.0249  | 11  | 5243  | 5260  | ERLYTIENLMPGHEYIFR                 |  |  |  |  |  |  | Oxidation (M)[10]                          |  |  |  |  |  | Mascot |
| 2299.1196 | 2299.1763 | 0.0567  | 25  | 1006  | 1025  | LQDYTAVEKDEVLMCE<br>VSK            |  |  |  |  |  |  |                                            |  |  |  |  |  | Mascot |
| 2362.1165 | 2362.186  | 0.0695  | 29  | 18883 | 18903 | VAAANRYGTGEYLGSEV<br>VMCK          |  |  |  |  |  |  | Carbamidomethyl (C)[20], Oxidation (M)[19] |  |  |  |  |  | Mascot |
| 2362.1165 | 2362.186  | 0.0695  | 29  | 18883 | 18903 | VAAANRYGTGEYLGSEV<br>VMCK          |  |  |  |  |  |  | Carbamidomethyl (C)[20], Oxidation (M)[19] |  |  |  |  |  | Mascot |
| 2368.1965 | 2368.2502 | 0.0537  | 23  | 11492 | 11514 | VIARNAAGVFSDPSYSTG<br>PIMAK        |  |  |  |  |  |  | Oxidation (M)[21]                          |  |  |  |  |  | Mascot |
| 2399.2864 | 2399.0737 | -0.2127 | -89 | 1739  | 1759  | VNRPNVTVQWMKAGQEI<br>TLCK          |  |  |  |  |  |  |                                            |  |  |  |  |  | Mascot |
| 3337.5527 | 3337.7449 | 0.1922  | 58  | 11917 | 11947 | LGVGEHADVAGPICPED<br>KTEEPDLIDAEFR |  |  |  |  |  |  |                                            |  |  |  |  |  | Mascot |
| 3338.5608 | 3338.7573 | 0.1965  | 59  | 15320 | 15347 | AWVCVSSNCHSLTYKVE<br>DLQEGAIYYFR   |  |  |  |  |  |  | Carbamidomethyl (C)[4]                     |  |  |  |  |  | Mascot |

40

PREDICTED: SAM and SH3 domain-containing protein 1-like [Danio rerio]

gi|125841197

113422.1

5.36

8

38

0

23

0

| Peptide Information |             |         |       |            |          |            |           |       |                |      |             |
|---------------------|-------------|---------|-------|------------|----------|------------|-----------|-------|----------------|------|-------------|
| Calc. Mass          | Obsrv. Mass | ± da    | ± ppm | Start Seq. | End Seq. | Sequence   | Ion Score | C. I. | % Modification | Rank | Result Type |
| 850.4628            | 850.541     | 0.0782  | 92    | 904        | 911      | LVSTSTSR   |           |       |                |      | Mascot      |
| 984.4686            | 984.4249    | -0.0437 | -44   | 130        | 136      | SFWQNFR    |           |       |                |      | Mascot      |
| 984.4686            | 984.4249    | -0.0437 | -44   | 130        | 136      | SFWQNFR    | 23        | 0     |                |      | Mascot      |
| 1118.5801           | 1118.6837   | 0.1036  | 93    | 68         | 77       | RVTQEAETGK |           |       |                |      | Mascot      |
| 1118.5801           | 1118.6837   | 0.1036  | 93    | 68         | 77       | RVTQEAETGK |           |       |                |      | Mascot      |

|    |                                     |           |        |    |             |     |                                    |      |   |    |   |                        |  |        |
|----|-------------------------------------|-----------|--------|----|-------------|-----|------------------------------------|------|---|----|---|------------------------|--|--------|
|    | 1165.6364                           | 1165.7491 | 0.1127 | 97 | 968         | 977 | YGVPFSLVQR                         |      |   |    |   |                        |  | Mascot |
|    | 1277.6656                           | 1277.7037 | 0.0381 | 30 | 938         | 948 | MASLEILVEEK                        |      |   |    |   | Oxidation (M)[1]       |  | Mascot |
|    | 1347.5997                           | 1347.7307 | 0.131  | 97 | 385         | 396 | TCSFGGFDLTSR                       |      |   |    |   | Carbamidomethyl (C)[2] |  | Mascot |
|    | 2362.0422                           | 2362.186  | 0.1438 | 61 | 492         | 515 | SSLSGQSSMSGQTVSTT<br>DSSASNR       |      |   |    |   |                        |  | Mascot |
|    | 2362.0422                           | 2362.186  | 0.1438 | 61 | 492         | 515 | SSLSGQSSMSGQTVSTT<br>DSSASNR       |      |   |    |   |                        |  | Mascot |
|    | 3337.6018                           | 3337.7449 | 0.1431 | 43 | 724         | 754 | ATHLSRSSSGFESSHLSS<br>PEFPIPLCHSSR |      |   |    |   |                        |  | Mascot |
| 41 | ADP/ATP translocase 2 [Danio rerio] |           |        |    | gi 27545251 |     | 32742.1                            | 9.78 | 8 | 38 | 0 |                        |  |        |

Peptide Information

|  | Calc. Mass | Obsrv. Mass | ± da    | ± ppm | Start Seq. | End Seq. | Sequence                    | Ion Score | C. I. | % | Modification            | Rank | Result Type |
|--|------------|-------------|---------|-------|------------|----------|-----------------------------|-----------|-------|---|-------------------------|------|-------------|
|  | 984.4423   | 984.4249    | -0.0174 | -18   | 238        | 245      | MMMQSGRK                    |           |       |   | Oxidation (M)[1]        |      | Mascot      |
|  | 984.4423   | 984.4249    | -0.0174 | -18   | 238        | 245      | MMMQSGRK                    |           |       |   | Oxidation (M)[1]        |      | Mascot      |
|  | 996.4536   | 996.5963    | 0.1427  | 143   | 237        | 244      | RMMMQSGR                    |           |       |   |                         |      | Mascot      |
|  | 1016.4321  | 1016.4167   | -0.0154 | -15   | 238        | 245      | MMMQSGRK                    |           |       |   | Oxidation (M)[1,2,3]    |      | Mascot      |
|  | 1287.6912  | 1287.673    | -0.0182 | -14   | 53         | 63       | GIMDCVVRIPK                 |           |       |   | Carbamidomethyl (C)[5]  |      | Mascot      |
|  | 1287.6912  | 1287.673    | -0.0182 | -14   | 53         | 63       | GIMDCVVRIPK                 |           |       |   | Carbamidomethyl (C)[5]  |      | Mascot      |
|  | 1363.842   | 1363.7021   | -0.1399 | -103  | 32         | 43       | VKLLQLVQHASK                |           |       |   |                         |      | Mascot      |
|  | 1707.8481  | 1707.764    | -0.0841 | -49   | 148        | 163      | AGAEREFSGLGNCLVK            |           |       |   | Carbamidomethyl (C)[13] |      | Mascot      |
|  | 1957.9728  | 1958.0194   | 0.0466  | 24    | 189        | 206      | AAYFGIYDTAKGMLPDPK          |           |       |   |                         |      | Mascot      |
|  | 2284.2236  | 2284.165    | -0.0586 | -26   | 73         | 92       | GNLANVIRYFPTQALNFA<br>FK    |           |       |   |                         |      | Mascot      |
|  | 2299.2002  | 2299.1763   | -0.0239 | -10   | 1          | 23       | MSETAISFAKDFLAGGIA<br>AAISK |           |       |   |                         |      | Mascot      |

42 novel protein [Danio rerio] gi|148725934 20790.5 5.31 7 37 0

Peptide Information

|  | Calc. Mass | Obsrv. Mass | ± da    | ± ppm | Start Seq. | End Seq. | Sequence                 | Ion Score | C. I. | % | Modification            | Rank | Result Type |
|--|------------|-------------|---------|-------|------------|----------|--------------------------|-----------|-------|---|-------------------------|------|-------------|
|  | 842.3937   | 842.5078    | 0.1141  | 135   | 18         | 24       | HINCAER                  |           |       |   |                         |      | Mascot      |
|  | 864.4131   | 864.4877    | 0.0746  | 86    | 2          | 8        | EEVSCLK                  |           |       |   | Carbamidomethyl (C)[5]  |      | Mascot      |
|  | 960.5472   | 960.4794    | -0.0678 | -71   | 45         | 52       | IRQEISSK                 |           |       |   |                         |      | Mascot      |
|  | 960.5472   | 960.4794    | -0.0678 | -71   | 45         | 52       | IRQEISSK                 |           |       |   |                         |      | Mascot      |
|  | 1051.6007  | 1051.7118   | 0.1111  | 106   | 161        | 168      | HQELQRLK                 |           |       |   |                         |      | Mascot      |
|  | 1179.6112  | 1179.6044   | -0.0068 | -6    | 1          | 10       | MEEVSCLKLK               |           |       |   |                         |      | Mascot      |
|  | 1848.9558  | 1848.9583   | 0.0025  | 1     | 110        | 125      | VTQAEIMTLQQLLNCK         |           |       |   | Oxidation (M)[7]        |      | Mascot      |
|  | 2399.1807  | 2399.0737   | -0.107  | -45   | 25         | 44       | QHKAESVVNLISELQEQM<br>CR |           |       |   | Carbamidomethyl (C)[19] |      | Mascot      |

43 SAM and SH3 domain containing 1 [Danio rerio] gi|113678490 130952.2 6.29 11 37 0 23 0

Peptide Information

| Calc. Mass | Obsrv. Mass | ± da    | ± ppm | Start Seq. | End Seq. | Sequence                 | Ion Score | C. I. | % Modification   | Rank | Result Type |
|------------|-------------|---------|-------|------------|----------|--------------------------|-----------|-------|------------------|------|-------------|
| 850.4451   | 850.541     | 0.0959  | 113   | 452        | 458      | SVKETMR                  |           |       |                  |      | Mascot      |
| 976.517    | 976.474     | -0.043  | -44   | 805        | 814      | KGSAAQTSR                |           |       |                  |      | Mascot      |
| 984.4686   | 984.4249    | -0.0437 | -44   | 134        | 140      | SFWQNFR                  |           |       |                  |      | Mascot      |
| 984.4686   | 984.4249    | -0.0437 | -44   | 134        | 140      | SFWQNFR                  | 23        | 0     |                  |      | Mascot      |
| 1045.4983  | 1045.5681   | 0.0698  | 67    | 1047       | 1055     | MHSEGIDLK                |           |       | Oxidation (M)[1] |      | Mascot      |
| 1277.6195  | 1277.7037   | 0.0842  | 66    | 759        | 769      | SPDYPTLPMTR              |           |       |                  |      | Mascot      |
| 1347.6825  | 1347.7307   | 0.0482  | 36    | 1036       | 1046     | MLDLETLLDR               |           |       |                  |      | Mascot      |
| 1363.6774  | 1363.7021   | 0.0247  | 18    | 1036       | 1046     | MLDLETLLDR               |           |       | Oxidation (M)[1] |      | Mascot      |
| 1808.9316  | 1808.9325   | 0.0009  | 0     | 602        | 616      | FIYVDVLAEEEEKPK          |           |       |                  |      | Mascot      |
| 2297.1045  | 2297.1631   | 0.0586  | 26    | 1076       | 1095     | YSEDFQQPAKDVASSLDQIR     |           |       |                  |      | Mascot      |
| 2362.0422  | 2362.186    | 0.1438  | 61    | 508        | 531      | SSLSGGQSSMSGQTVSTTDSASNR |           |       |                  |      | Mascot      |
| 2362.1707  | 2362.186    | 0.0153  | 6     | 759        | 779      | SPDYPTLPMTRSTEALQ        |           |       |                  |      | Mascot      |
| 2399.2461  | 2399.0737   | -0.1724 | -72   | 575        | 596      | GDVIDIISKPPMGTMWGLLNNK   |           |       |                  |      | Mascot      |

44 iron-sulfur cluster assembly enzyme [Danio rerio] gi|54261801 17796.2 8.7 4 37 0 20 0

Peptide Information

| Calc. Mass | Obsrv. Mass | ± da    | ± ppm | Start Seq. | End Seq. | Sequence              | Ion Score | C. I. | % Modification                            | Rank | Result Type |
|------------|-------------|---------|-------|------------|----------|-----------------------|-----------|-------|-------------------------------------------|------|-------------|
| 960.5083   | 960.4794    | -0.0289 | -30   | 1          | 9        | MALAAAAWR             |           |       |                                           |      | Mascot      |
| 960.5359   | 960.4794    | -0.0565 | -59   | 107        | 115      | GKSIDALK              | 22        | 0     |                                           |      | Mascot      |
| 976.5032   | 976.474     | -0.0292 | -30   | 1          | 9        | MALAAAAWR             |           |       | Oxidation (M)[1]                          |      | Mascot      |
| 1045.5636  | 1045.5681   | 0.0045  | 4     | 44         | 53       | NVGSLDKNAK            |           |       |                                           |      | Mascot      |
| 2283.1545  | 2283.1689   | 0.0144  | 6     | 124        | 143      | ELCLPPVKLHCSMLAEDIAIK |           |       | Carbamidomethyl (C)[3], Oxidation (M)[13] |      | Mascot      |

45 PREDICTED: dedicator of cytokinesis protein 7 [Danio rerio] gi|292612128 236179.1 6.42 14 37 0 22 0

Peptide Information

| Calc. Mass | Obsrv. Mass | ± da    | ± ppm | Start Seq. | End Seq. | Sequence | Ion Score | C. I. | % Modification | Rank | Result Type |
|------------|-------------|---------|-------|------------|----------|----------|-----------|-------|----------------|------|-------------|
| 801.3712   | 801.3556    | -0.0156 | -19   | 1781       | 1787     | VGFGYGR  |           |       |                |      | Mascot      |
| 960.5148   | 960.4794    | -0.0354 | -37   | 531        | 538      | EVLEFPAR | 23        | 0     |                |      | Mascot      |
| 960.5148   | 960.4794    | -0.0354 | -37   | 531        | 538      | EVLEFPAR |           |       |                |      | Mascot      |

|  |           |           |         |     |      |      |                          |  |  |  |  |  |                         |  |  |  |  |        |
|--|-----------|-----------|---------|-----|------|------|--------------------------|--|--|--|--|--|-------------------------|--|--|--|--|--------|
|  | 982.4727  | 982.456   | -0.0167 | -17 | 467  | 474  | LSDEDLYK                 |  |  |  |  |  |                         |  |  |  |  | Mascot |
|  | 1016.5007 | 1016.4167 | -0.084  | -83 | 1831 | 1839 | DSNPVDKNK                |  |  |  |  |  |                         |  |  |  |  | Mascot |
|  | 1165.6146 | 1165.7491 | 0.1345  | 115 | 1736 | 1745 | ILCPIHEANR               |  |  |  |  |  |                         |  |  |  |  | Mascot |
|  | 1287.6692 | 1287.673  | 0.0038  | 3   | 1014 | 1023 | YHKDVELVER               |  |  |  |  |  |                         |  |  |  |  | Mascot |
|  | 1287.6692 | 1287.673  | 0.0038  | 3   | 1014 | 1023 | YHKDVELVER               |  |  |  |  |  |                         |  |  |  |  | Mascot |
|  | 1308.6147 | 1308.6965 | 0.0818  | 63  | 376  | 386  | LRAQAEQMCSR              |  |  |  |  |  | Oxidation (M)[8]        |  |  |  |  | Mascot |
|  | 1309.6283 | 1309.6603 | 0.032   | 24  | 1518 | 1528 | QNFEIGNNFAR              |  |  |  |  |  |                         |  |  |  |  | Mascot |
|  | 1364.6991 | 1364.6969 | -0.0022 | -2  | 1506 | 1517 | SHASASLYLLMR             |  |  |  |  |  | Oxidation (M)[11]       |  |  |  |  | Mascot |
|  | 1364.6991 | 1364.6969 | -0.0022 | -2  | 1506 | 1517 | SHASASLYLLMR             |  |  |  |  |  | Oxidation (M)[11]       |  |  |  |  | Mascot |
|  | 1386.661  | 1386.679  | 0.018   | 13  | 612  | 622  | SPEFYEEVKMK              |  |  |  |  |  |                         |  |  |  |  | Mascot |
|  | 1676.8822 | 1676.861  | -0.0212 | -13 | 759  | 774  | ASMAALKGALLDTCVR         |  |  |  |  |  | Carbamidomethyl (C)[14] |  |  |  |  | Mascot |
|  | 1826.8126 | 1826.9792 | 0.1666  | 91  | 129  | 143  | YQCYSTLQTPHNSER          |  |  |  |  |  |                         |  |  |  |  | Mascot |
|  | 1826.8126 | 1826.9792 | 0.1666  | 91  | 129  | 143  | YQCYSTLQTPHNSER          |  |  |  |  |  |                         |  |  |  |  | Mascot |
|  | 2225.1304 | 2225.1248 | -0.0056 | -3  | 917  | 936  | MSAYIETTSLLCPPSRQIA<br>K |  |  |  |  |  | Oxidation (M)[1]        |  |  |  |  | Mascot |
|  | 2225.1304 | 2225.1248 | -0.0056 | -3  | 917  | 936  | MSAYIETTSLLCPPSRQIA<br>K |  |  |  |  |  | Oxidation (M)[1]        |  |  |  |  | Mascot |
|  | 2368.2434 | 2368.2502 | 0.0068  | 3   | 270  | 289  | FEIEIEPIFGSLALYDVRE<br>K |  |  |  |  |  |                         |  |  |  |  | Mascot |

46

PERQ amino acid-rich with GYF domain-containing protein 2 [Danio rerio]

gi|71834468

152961.4

5.47

12

36

0

| Peptide Information |             |         |       |            |          |                  |           |       |                                             |      |             |
|---------------------|-------------|---------|-------|------------|----------|------------------|-----------|-------|---------------------------------------------|------|-------------|
| Calc. Mass          | Obsrv. Mass | ± da    | ± ppm | Start Seq. | End Seq. | Sequence         | Ion Score | C. I. | % Modification                              | Rank | Result Type |
| 801.4213            | 801.3556    | -0.0657 | -82   | 923        | 928      | QQELQR           |           |       |                                             |      | Mascot      |
| 842.4478            | 842.5078    | 0.06    | 71    | 110        | 119      | GGGTVAGAPR       |           |       |                                             |      | Mascot      |
| 960.4744            | 960.4794    | 0.005   | 5     | 985        | 991      | LEEERER          | 20        | 0     |                                             |      | Mascot      |
| 960.4744            | 960.4794    | 0.005   | 5     | 985        | 991      | LEEERER          |           |       |                                             |      | Mascot      |
| 996.5359            | 996.5963    | 0.0604  | 61    | 1291       | 1299     | FETVTSGKK        |           |       |                                             |      | Mascot      |
| 1006.5316           | 1006.4045   | -0.1271 | -126  | 658        | 665      | QQYALQKK         |           |       |                                             |      | Mascot      |
| 1045.5021           | 1045.5681   | 0.066   | 63    | 827        | 834      | EQEEAQRR         |           |       |                                             |      | Mascot      |
| 1347.5898           | 1347.7307   | 0.1409  | 105   | 203        | 212      | FIHAECDNWR       |           |       | Carbamidomethyl (C)[6]                      |      | Mascot      |
| 1475.6848           | 1475.7582   | 0.0734  | 50    | 202        | 212      | KFIHAECDNWR      |           |       | Carbamidomethyl (C)[7]                      |      | Mascot      |
| 1796.8634           | 1797.0122   | 0.1488  | 83    | 1245       | 1259     | QNDNQKPKQQGQQQK  |           |       |                                             |      | Mascot      |
| 1808.8635           | 1808.9325   | 0.069   | 38    | 1          | 15       | MAETQTLNFGPEWLR  |           |       | Oxidation (M)[1]                            |      | Mascot      |
| 1826.8597           | 1826.9792   | 0.1195  | 65    | 594        | 608      | RGCVEMFQPLGEMIK  |           |       | Carbamidomethyl (C)[3], Oxidation (M)[6,13] |      | Mascot      |
| 1826.8597           | 1826.9792   | 0.1195  | 65    | 594        | 608      | RGCVEMFQPLGEMIK  |           |       | Carbamidomethyl (C)[3], Oxidation (M)[6,13] |      | Mascot      |
| 1838.9541           | 1838.9092   | -0.0449 | -24   | 93         | 109      | NFSMSVNSAAVRLTGR |           |       | Oxidation (M)[4]                            |      | Mascot      |

47 PREDICTED: hypothetical protein LOC100536975 gi|326679271 234171 8.98 23 36 0  
[Danio rerio]

Peptide Information

| Calc. Mass | Obsrv. Mass | ± da    | ± ppm | Start Seq. | End Sequence Seq.              | Ion Score | C. I. % Modification      | Rank | Result Type |
|------------|-------------|---------|-------|------------|--------------------------------|-----------|---------------------------|------|-------------|
| 850.4205   | 850.541     | 0.1205  | 142   | 201        | 207 AEFARW                     |           |                           |      | Mascot      |
| 864.4131   | 864.4877    | 0.0746  | 86    | 1          | 8 MAEEALGK                     |           | Oxidation (M)[1]          |      | Mascot      |
| 996.5624   | 996.5963    | 0.0339  | 34    | 173        | 180 WIPAPERK                   |           |                           |      | Mascot      |
| 1006.5217  | 1006.4045   | -0.1172 | -116  | 201        | 208 AEFARWR                    |           |                           |      | Mascot      |
| 1118.6567  | 1118.6837   | 0.027   | 24    | 1003       | 1013 KGVFAALGDIK               |           |                           |      | Mascot      |
| 1118.6567  | 1118.6837   | 0.027   | 24    | 1004       | 1014 GVFAALGDIKK               |           |                           |      | Mascot      |
| 1165.5887  | 1165.7491   | 0.1604  | 138   | 1450       | 1458 YSVEEWPKK                 |           |                           |      | Mascot      |
| 1211.6266  | 1211.7123   | 0.0857  | 71    | 1132       | 1142 NEVVDPSQVPK               |           |                           |      | Mascot      |
| 1287.6903  | 1287.673    | -0.0173 | -13   | 278        | 288 KIQLVDSVDDR                |           |                           |      | Mascot      |
| 1287.6903  | 1287.673    | -0.0173 | -13   | 278        | 288 KIQLVDSVDDR                |           |                           |      | Mascot      |
| 1308.7383  | 1308.6965   | -0.0418 | -32   | 719        | 729 IDLLISHREGK                |           |                           |      | Mascot      |
| 1325.7113  | 1325.7599   | 0.0486  | 37    | 1284       | 1294 FHRSLTPPGWK               |           |                           |      | Mascot      |
| 1325.7113  | 1325.7599   | 0.0486  | 37    | 1284       | 1294 FHRSLTPPGWK               |           |                           |      | Mascot      |
| 1347.7002  | 1347.7307   | 0.0305  | 23    | 1819       | 1830 LETSELEEKA                |           |                           |      | Mascot      |
| 1364.7307  | 1364.6969   | -0.0338 | -25   | 38         | 48 LIESELKEEFK                 |           |                           |      | Mascot      |
| 1364.7307  | 1364.6969   | -0.0338 | -25   | 38         | 48 LIESELKEEFK                 |           |                           |      | Mascot      |
| 1376.7467  | 1376.6899   | -0.0568 | -41   | 1347       | 1359 AEICGAVFAARLR             |           |                           |      | Mascot      |
| 1382.5927  | 1382.7717   | 0.179   | 129   | 447        | 460 DSTEAGCIVCGAEK             |           |                           |      | Mascot      |
| 1493.8984  | 1493.7354   | -0.163  | -109  | 644        | 657 ITLVVHGVGKMAIR             |           |                           |      | Mascot      |
| 1796.7512  | 1797.0122   | 0.261   | 145   | 823        | 838 WDSIGTACEPKCGGCR           |           | Carbamidomethyl (C)[8,12] |      | Mascot      |
| 1827.002   | 1826.9792   | -0.0228 | -12   | 1644       | 1660 AVPIPCSAWVSMLLAR          |           |                           |      | Mascot      |
| 1827.0334  | 1826.9792   | -0.0542 | -30   | 1143       | 1158 ESISQSKTIILPNQLR          |           |                           |      | Mascot      |
| 1838.783   | 1838.9092   | 0.1262  | 69    | 839        | 855 CGNCQPGGKEMTLAEER          |           | Oxidation (M)[11]         |      | Mascot      |
| 2211.0215  | 2211.1042   | 0.0827  | 37    | 816        | 833 EFIDWWKWDSIGTACEP<br>K     |           |                           |      | Mascot      |
| 2299.1758  | 2299.1763   | 0.0005  | 0     | 1049       | 1069 VNIGDRPAGCIAQLAMRE<br>TAR |           | Carbamidomethyl (C)[10]   |      | Mascot      |
| 2368.1238  | 2368.2502   | 0.1264  | 53    | 1763       | 1783 AIHTDIVSDQSAEGFMLA<br>YQR |           | Oxidation (M)[16]         |      | Mascot      |

48 lysosomal cofactor/neurotrophic factor prosaposin gi|17985369 57393.6 4.86 5 36 0 24 0  
[Danio rerio]

Peptide Information

| Calc. Mass | Obsrv. Mass | ± da | ± ppm | Start Seq. | End Sequence Seq. | Ion Score | C. I. % Modification | Rank | Result Type |
|------------|-------------|------|-------|------------|-------------------|-----------|----------------------|------|-------------|
|------------|-------------|------|-------|------------|-------------------|-----------|----------------------|------|-------------|

|           |           |         |     |     |     |                  |    |   |  |                          |        |
|-----------|-----------|---------|-----|-----|-----|------------------|----|---|--|--------------------------|--------|
| 992.4539  | 992.467   | 0.0131  | 13  | 58  | 65  | TVPCDLCK         |    |   |  | Carbamidomethyl (C)[4,7] | Mascot |
| 992.4539  | 992.467   | 0.0131  | 13  | 58  | 65  | TVPCDLCK         |    |   |  | Carbamidomethyl (C)[4,7] | Mascot |
| 1045.4302 | 1045.5681 | 0.1379  | 132 | 508 | 515 | CNALDHCR         |    |   |  | Carbamidomethyl (C)[1,7] | Mascot |
| 1287.7493 | 1287.673  | -0.0763 | -59 | 279 | 290 | SIPAVKMFPVK      | 24 | 0 |  |                          | Mascot |
| 1287.7493 | 1287.673  | -0.0763 | -59 | 279 | 290 | SIPAVKMFPVK      |    |   |  |                          | Mascot |
| 1382.598  | 1382.7717 | 0.1737  | 126 | 397 | 409 | QHFAAGGFCDVCK    |    |   |  |                          | Mascot |
| 1838.8717 | 1838.9092 | 0.0375  | 20  | 485 | 500 | LLGLNQCSWGPAYWCK |    |   |  |                          | Mascot |

49 zinc finger CCHC domain-containing protein 9 [Danio rerio] gi|38198649 28388.1 9.59 8 36 0

Peptide Information

| Calc. Mass | Obsrv. Mass | ± da    | ± ppm | Start Seq. | End Seq. | Sequence                         | Ion Score | C. I. % | Modification                               | Rank | Result Type |
|------------|-------------|---------|-------|------------|----------|----------------------------------|-----------|---------|--------------------------------------------|------|-------------|
| 801.3559   | 801.3556    | -0.0003 | 0     | 185        | 191      | ACPDNPK                          |           |         | Carbamidomethyl (C)[2]                     |      | Mascot      |
| 1279.5922  | 1279.7549   | 0.1627  | 127   | 173        | 184      | CFVCGQTGHLSK                     |           |         |                                            |      | Mascot      |
| 1325.6195  | 1325.7599   | 0.1404  | 106   | 161        | 172      | VDPAMGNYPYAK                     |           |         |                                            |      | Mascot      |
| 1325.6195  | 1325.7599   | 0.1404  | 106   | 161        | 172      | VDPAMGNYPYAK                     |           |         |                                            |      | Mascot      |
| 1475.6478  | 1475.7582   | 0.1104  | 75    | 147        | 158      | CGSTEHEIQRCR                     |           |         | Carbamidomethyl (C)[1]                     |      | Mascot      |
| 1808.8167  | 1808.9325   | 0.1158  | 64    | 142        | 156      | GICYRCGSTEHEIQR                  |           |         | Carbamidomethyl (C)[3]                     |      | Mascot      |
| 1838.8014  | 1838.9092   | 0.1078  | 59    | 58         | 72       | QHDNEDVNGFMEYLK                  |           |         |                                            |      | Mascot      |
| 2299.0845  | 2299.1763   | 0.0918  | 40    | 212        | 231      | DCPEHQNSTNSITLGRLS<br>NR         |           |         | Carbamidomethyl (C)[2]                     |      | Mascot      |
| 3338.3862  | 3338.7573   | 0.3711  | 111   | 113        | 141      | SNMICFNCRKPGHGLAD<br>CPEANDEEMGR |           |         | Carbamidomethyl (C)[5,8], Oxidation (M)[3] |      | Mascot      |

50 PREDICTED: hypothetical protein LOC796277 [Danio rerio] gi|292622807 79431.9 5.54 1 31 76.329

Peptide Information

| Calc. Mass | Obsrv. Mass | ± da    | ± ppm | Start Seq. | End Seq. | Sequence     | Ion Score | C. I. % | Modification | Rank | Result Type |
|------------|-------------|---------|-------|------------|----------|--------------|-----------|---------|--------------|------|-------------|
| 1287.7015  | 1287.673    | -0.0285 | -22   | 638        | 649      | KNNGLLSESVAR | 31        | 76.329  |              | 2    | Mascot      |

|                |           |                        |                |                |                    |
|----------------|-----------|------------------------|----------------|----------------|--------------------|
| Gel Idx/Pos    | 248/J24   | Instr./Gel Origin      | BA2060/110707A | Process Status | Analysis Succeeded |
| Plate [#] Name | [1] 31496 | Instrument Sample Name |                | Spectra        | 11                 |

| Rank | Protein Name               | Accession No. | Protein MW | Protein PI | Pep. Count | Protein Score | Protein Score C. I. % | Total Ion Score | Total Ion C. I. % |
|------|----------------------------|---------------|------------|------------|------------|---------------|-----------------------|-----------------|-------------------|
| 1    | Vtg1 protein [Danio rerio] | gi 63100501   | 36409.1    | 9.23       | 11         | 649           | 100                   | 589             | 100               |

Peptide Information



| Calc. Mass | Obsrv. Mass | $\pm$ da | $\pm$ ppm | Start Seq. | End Seq. | Sequence           | Ion Score | C. I.  | % Modification         | Rank | Result Type |
|------------|-------------|----------|-----------|------------|----------|--------------------|-----------|--------|------------------------|------|-------------|
| 826.4457   | 826.4424    | -0.0033  | -4        | 198        | 204      | QYAVFAK            |           |        |                        |      | Mascot      |
| 960.4785   | 960.4742    | -0.0043  | -4        | 218        | 224      | LEVEWER            | 49        | 99.691 |                        |      | Mascot      |
| 960.4785   | 960.4742    | -0.0043  | -4        | 218        | 224      | LEVEWER            |           |        |                        |      | Mascot      |
| 984.4243   | 984.4195    | -0.0048  | -5        | 190        | 197      | FSWGAECK           | 52        | 99.808 | Carbamidomethyl (C)[7] |      | Mascot      |
| 984.4243   | 984.4195    | -0.0048  | -5        | 190        | 197      | FSWGAECK           |           |        | Carbamidomethyl (C)[7] |      | Mascot      |
| 998.5669   | 998.4368    | -0.1301  | -130      | 13         | 20       | VWPEQVLK           |           |        |                        |      | Mascot      |
| 1118.682   | 1118.6768   | -0.0052  | -5        | 225        | 234      | LPIIVTTYAK         |           |        |                        |      | Mascot      |
| 1287.6691  | 1287.6693   | 0.0002   | 0         | 205        | 217      | AEAGVLGEFPAAR      | 112       | 100    |                        |      | Mascot      |
| 1287.6691  | 1287.6693   | 0.0002   | 0         | 205        | 217      | AEAGVLGEFPAAR      |           |        |                        |      | Mascot      |
| 1327.7216  | 1327.7329   | 0.0113   | 9         | 260        | 271      | EIELTAALPSQR       |           |        |                        |      | Mascot      |
| 1364.6957  | 1364.6938   | -0.0019  | -1        | 239        | 250      | HILTAAYDTGFR       | 107       | 100    |                        |      | Mascot      |
| 1364.6957  | 1364.6938   | -0.0019  | -1        | 239        | 250      | HILTAAYDTGFR       |           |        |                        |      | Mascot      |
| 1676.8523  | 1676.8547   | 0.0024   | 1         | 159        | 173      | VQLIVSSIAENDNMK    |           |        | Oxidation (M)[14]      |      | Mascot      |
| 1826.9799  | 1826.9786   | -0.0013  | -1        | 143        | 158      | LLGYQLAAYFDKPTAR   | 139       | 100    |                        |      | Mascot      |
| 1826.9799  | 1826.9786   | -0.0013  | -1        | 143        | 158      | LLGYQLAAYFDKPTAR   |           |        |                        |      | Mascot      |
| 1958.0189  | 1958.0151   | -0.0038  | -2        | 254        | 271      | ATNSEKEIELTAALPSQR | 132       | 100    |                        |      | Mascot      |
| 1958.0189  | 1958.0151   | -0.0038  | -2        | 254        | 271      | ATNSEKEIELTAALPSQR |           |        |                        |      | Mascot      |

2 vitellogenin 1 [Danio rerio] gi|166795887 149452.5 8.68 15 619 100 589 100

#### Peptide Information

| Calc. Mass | Obsrv. Mass | $\pm$ da | $\pm$ ppm | Start Seq. | End Seq. | Sequence      | Ion Score | C. I.  | % Modification         | Rank | Result Type |
|------------|-------------|----------|-----------|------------|----------|---------------|-----------|--------|------------------------|------|-------------|
| 826.4457   | 826.4424    | -0.0033  | -4        | 1238       | 1244     | QYAVFAK       |           |        |                        |      | Mascot      |
| 960.4785   | 960.4742    | -0.0043  | -4        | 1258       | 1264     | LEVEWER       | 49        | 99.691 |                        |      | Mascot      |
| 960.4785   | 960.4742    | -0.0043  | -4        | 1258       | 1264     | LEVEWER       |           |        |                        |      | Mascot      |
| 984.4243   | 984.4195    | -0.0048  | -5        | 1230       | 1237     | FSWGAECK      | 52        | 99.808 | Carbamidomethyl (C)[7] |      | Mascot      |
| 984.4243   | 984.4195    | -0.0048  | -5        | 1230       | 1237     | FSWGAECK      |           |        | Carbamidomethyl (C)[7] |      | Mascot      |
| 992.5015   | 992.4612    | -0.0403  | -41       | 615        | 622      | LMNCKLDR      |           |        |                        |      | Mascot      |
| 1088.5405  | 1088.5405   | 0        | 0         | 415        | 424      | MTASLATHEK    |           |        |                        |      | Mascot      |
| 1118.682   | 1118.6768   | -0.0052  | -5        | 1265       | 1274     | LPIIVTTYAK    |           |        |                        |      | Mascot      |
| 1287.6691  | 1287.6693   | 0.0002   | 0         | 1245       | 1257     | AEAGVLGEFPAAR | 112       | 100    |                        |      | Mascot      |
| 1287.6691  | 1287.6693   | 0.0002   | 0         | 1245       | 1257     | AEAGVLGEFPAAR |           |        |                        |      | Mascot      |
| 1327.7216  | 1327.7329   | 0.0113   | 9         | 1300       | 1311     | EIELTAALPSQR  |           |        |                        |      | Mascot      |
| 1364.6957  | 1364.6938   | -0.0019  | -1        | 1279       | 1290     | HILTAAYDTGFR  | 107       | 100    |                        |      | Mascot      |
| 1364.6957  | 1364.6938   | -0.0019  | -1        | 1279       | 1290     | HILTAAYDTGFR  |           |        |                        |      | Mascot      |

|           |           |         |     |      |      |                            |  |     |  |     |  |  |                   |  |  |  |        |
|-----------|-----------|---------|-----|------|------|----------------------------|--|-----|--|-----|--|--|-------------------|--|--|--|--------|
| 1382.7889 | 1382.7771 | -0.0118 | -9  | 303  | 315  | ISDAPAQIVEVLK              |  |     |  |     |  |  |                   |  |  |  | Mascot |
| 1382.7889 | 1382.7771 | -0.0118 | -9  | 303  | 315  | ISDAPAQIVEVLK              |  |     |  |     |  |  |                   |  |  |  | Mascot |
| 1638.8485 | 1638.8556 | 0.0071  | 4   | 668  | 683  | TYLAGAAADVVEFGVR           |  |     |  |     |  |  |                   |  |  |  | Mascot |
| 1676.8523 | 1676.8547 | 0.0024  | 1   | 1199 | 1213 | VQLIVSSIAENDNMK            |  |     |  |     |  |  | Oxidation (M)[14] |  |  |  | Mascot |
| 1826.9799 | 1826.9786 | -0.0013 | -1  | 1183 | 1198 | LLGYQLAAYFDKPTAR           |  | 139 |  | 100 |  |  |                   |  |  |  | Mascot |
| 1826.9799 | 1826.9786 | -0.0013 | -1  | 1183 | 1198 | LLGYQLAAYFDKPTAR           |  |     |  |     |  |  |                   |  |  |  | Mascot |
| 1958.0189 | 1958.0151 | -0.0038 | -2  | 1294 | 1311 | ATNSEKEIELTAALPSQR         |  | 132 |  | 100 |  |  |                   |  |  |  | Mascot |
| 1958.0189 | 1958.0151 | -0.0038 | -2  | 1294 | 1311 | ATNSEKEIELTAALPSQR         |  |     |  |     |  |  |                   |  |  |  | Mascot |
| 2233.2009 | 2233.0706 | -0.1303 | -58 | 593  | 614  | SLTRITAPDMAYVAGAAN<br>VAIK |  |     |  |     |  |  |                   |  |  |  | Mascot |

3 Vtg1 protein [Danio rerio] gi|145337918 116565.5 9.07 12 611 100 589 100

#### Peptide Information

| Calc. Mass | Obsrv. Mass | ± da    | ± ppm | Start Seq. | End Seq. | Sequence           | Ion Score | C. I. | %      | Modification           | Rank | Result Type |
|------------|-------------|---------|-------|------------|----------|--------------------|-----------|-------|--------|------------------------|------|-------------|
| 826.4457   | 826.4424    | -0.0033 | -4    | 944        | 950      | QYAVFAK            |           |       |        |                        |      | Mascot      |
| 960.4785   | 960.4742    | -0.0043 | -4    | 964        | 970      | LEVEWER            | 49        |       | 99.691 |                        |      | Mascot      |
| 960.4785   | 960.4742    | -0.0043 | -4    | 964        | 970      | LEVEWER            |           |       |        |                        |      | Mascot      |
| 984.4243   | 984.4195    | -0.0048 | -5    | 936        | 943      | FSWGAECK           | 52        |       | 99.808 | Carbamidomethyl (C)[7] |      | Mascot      |
| 984.4243   | 984.4195    | -0.0048 | -5    | 936        | 943      | FSWGAECK           |           |       |        | Carbamidomethyl (C)[7] |      | Mascot      |
| 1088.5405  | 1088.5405   | 0       | 0     | 121        | 130      | MTASLATHEK         |           |       |        |                        |      | Mascot      |
| 1118.682   | 1118.6768   | -0.0052 | -5    | 971        | 980      | LPIIVTTYAK         |           |       |        |                        |      | Mascot      |
| 1287.6691  | 1287.6693   | 0.0002  | 0     | 951        | 963      | AEAGVLGEFPAAR      | 112       |       | 100    |                        |      | Mascot      |
| 1287.6691  | 1287.6693   | 0.0002  | 0     | 951        | 963      | AEAGVLGEFPAAR      |           |       |        |                        |      | Mascot      |
| 1327.7216  | 1327.7329   | 0.0113  | 9     | 1006       | 1017     | EIELTAALPSQR       |           |       |        |                        |      | Mascot      |
| 1364.6957  | 1364.6938   | -0.0019 | -1    | 985        | 996      | HILTAAYDTGFR       | 107       |       | 100    |                        |      | Mascot      |
| 1364.6957  | 1364.6938   | -0.0019 | -1    | 985        | 996      | HILTAAYDTGFR       |           |       |        |                        |      | Mascot      |
| 1382.7889  | 1382.7771   | -0.0118 | -9    | 9          | 21       | ISDAPAQIVEVLK      |           |       |        |                        |      | Mascot      |
| 1382.7889  | 1382.7771   | -0.0118 | -9    | 9          | 21       | ISDAPAQIVEVLK      |           |       |        |                        |      | Mascot      |
| 1676.8523  | 1676.8547   | 0.0024  | 1     | 905        | 919      | VQLIVSSIAENDNMK    |           |       |        | Oxidation (M)[14]      |      | Mascot      |
| 1826.9799  | 1826.9786   | -0.0013 | -1    | 889        | 904      | LLGYQLAAYFDKPTAR   | 139       |       | 100    |                        |      | Mascot      |
| 1826.9799  | 1826.9786   | -0.0013 | -1    | 889        | 904      | LLGYQLAAYFDKPTAR   |           |       |        |                        |      | Mascot      |
| 1958.0189  | 1958.0151   | -0.0038 | -2    | 1000       | 1017     | ATNSEKEIELTAALPSQR | 132       |       | 100    |                        |      | Mascot      |
| 1958.0189  | 1958.0151   | -0.0038 | -2    | 1000       | 1017     | ATNSEKEIELTAALPSQR |           |       |        |                        |      | Mascot      |

4 vitellogenin 1 [Danio rerio] gi|21391472 127954.2 8.69 12 609 100 589 100

#### Peptide Information

| Calc. Mass | Obsrv. Mass | ± da | ± ppm | Start | End | Sequence | Ion | C. I. | % | Modification | Rank | Result Type |
|------------|-------------|------|-------|-------|-----|----------|-----|-------|---|--------------|------|-------------|
|------------|-------------|------|-------|-------|-----|----------|-----|-------|---|--------------|------|-------------|

|   |                              |           |         | Seq. | Seq.        | Score |                    |      |        |                        |     |     |        |
|---|------------------------------|-----------|---------|------|-------------|-------|--------------------|------|--------|------------------------|-----|-----|--------|
|   | 826.4457                     | 826.4424  | -0.0033 | -4   | 1045        | 1051  | QYAVFAK            |      |        |                        |     |     | Mascot |
|   | 960.4785                     | 960.4742  | -0.0043 | -4   | 1065        | 1071  | LEVEWER            | 49   | 99.691 |                        |     |     | Mascot |
|   | 960.4785                     | 960.4742  | -0.0043 | -4   | 1065        | 1071  | LEVEWER            |      |        |                        |     |     | Mascot |
|   | 984.4243                     | 984.4195  | -0.0048 | -5   | 1037        | 1044  | FSWGAECK           | 52   | 99.808 | Carbamidomethyl (C)[7] |     |     | Mascot |
|   | 984.4243                     | 984.4195  | -0.0048 | -5   | 1037        | 1044  | FSWGAECK           |      |        | Carbamidomethyl (C)[7] |     |     | Mascot |
|   | 1088.5405                    | 1088.5405 | 0       | 0    | 224         | 233   | MTASLATHEK         |      |        |                        |     |     | Mascot |
|   | 1118.682                     | 1118.6768 | -0.0052 | -5   | 1072        | 1081  | LPIIVTTYAK         |      |        |                        |     |     | Mascot |
|   | 1287.6691                    | 1287.6693 | 0.0002  | 0    | 1052        | 1064  | AEAGVLGEFPAAR      | 112  | 100    |                        |     |     | Mascot |
|   | 1287.6691                    | 1287.6693 | 0.0002  | 0    | 1052        | 1064  | AEAGVLGEFPAAR      |      |        |                        |     |     | Mascot |
|   | 1327.7216                    | 1327.7329 | 0.0113  | 9    | 1107        | 1118  | EIELTAALPSQR       |      |        |                        |     |     | Mascot |
|   | 1364.6957                    | 1364.6938 | -0.0019 | -1   | 1086        | 1097  | HILTAAYDTGFR       | 107  | 100    |                        |     |     | Mascot |
|   | 1364.6957                    | 1364.6938 | -0.0019 | -1   | 1086        | 1097  | HILTAAYDTGFR       |      |        |                        |     |     | Mascot |
|   | 1382.7889                    | 1382.7771 | -0.0118 | -9   | 112         | 124   | ISDAPAQIVEVLK      |      |        |                        |     |     | Mascot |
|   | 1382.7889                    | 1382.7771 | -0.0118 | -9   | 112         | 124   | ISDAPAQIVEVLK      |      |        |                        |     |     | Mascot |
|   | 1676.8523                    | 1676.8547 | 0.0024  | 1    | 1006        | 1020  | VQLIVSSIAENDNMK    |      |        | Oxidation (M)[14]      |     |     | Mascot |
|   | 1826.9799                    | 1826.9786 | -0.0013 | -1   | 990         | 1005  | LLGYQLAAYFDKPTAR   | 139  | 100    |                        |     |     | Mascot |
|   | 1826.9799                    | 1826.9786 | -0.0013 | -1   | 990         | 1005  | LLGYQLAAYFDKPTAR   |      |        |                        |     |     | Mascot |
|   | 1958.0189                    | 1958.0151 | -0.0038 | -2   | 1101        | 1118  | ATNSEKEIELTAALPSQR | 132  | 100    |                        |     |     | Mascot |
|   | 1958.0189                    | 1958.0151 | -0.0038 | -2   | 1101        | 1118  | ATNSEKEIELTAALPSQR |      |        |                        |     |     | Mascot |
| 5 | vitellogenin 1 [Danio rerio] |           |         |      | gi 94733730 |       | 149140.4           | 8.74 | 12     | 606                    | 100 | 589 | 100    |

#### Peptide Information

| Calc. Mass | Obsrv. Mass | ± da    | ± ppm | Start Seq. | End Sequence Seq. | Ion Score     | C. I. % | Modification | Rank                   | Result Type |
|------------|-------------|---------|-------|------------|-------------------|---------------|---------|--------------|------------------------|-------------|
| 826.4457   | 826.4424    | -0.0033 | -4    | 1238       | 1244              | QYAVFAK       |         |              |                        | Mascot      |
| 960.4785   | 960.4742    | -0.0043 | -4    | 1258       | 1264              | LEVEWER       | 49      | 99.691       |                        | Mascot      |
| 960.4785   | 960.4742    | -0.0043 | -4    | 1258       | 1264              | LEVEWER       |         |              |                        | Mascot      |
| 984.4243   | 984.4195    | -0.0048 | -5    | 1230       | 1237              | FSWGAECK      | 52      | 99.808       | Carbamidomethyl (C)[7] | Mascot      |
| 984.4243   | 984.4195    | -0.0048 | -5    | 1230       | 1237              | FSWGAECK      |         |              | Carbamidomethyl (C)[7] | Mascot      |
| 1088.5405  | 1088.5405   | 0       | 0     | 415        | 424               | MTASLATHEK    |         |              |                        | Mascot      |
| 1118.682   | 1118.6768   | -0.0052 | -5    | 1265       | 1274              | LPIIVTTYAK    |         |              |                        | Mascot      |
| 1287.6691  | 1287.6693   | 0.0002  | 0     | 1245       | 1257              | AEAGVLGEFPAAR | 112     | 100          |                        | Mascot      |
| 1287.6691  | 1287.6693   | 0.0002  | 0     | 1245       | 1257              | AEAGVLGEFPAAR |         |              |                        | Mascot      |
| 1327.7216  | 1327.7329   | 0.0113  | 9     | 1300       | 1311              | EIELTAALPSQR  |         |              |                        | Mascot      |
| 1364.6957  | 1364.6938   | -0.0019 | -1    | 1279       | 1290              | HILTAAYDTGFR  | 107     | 100          |                        | Mascot      |

|   |                              |           |         |    |             |      |                    |      |   |     |     |                   |     |  |  |        |
|---|------------------------------|-----------|---------|----|-------------|------|--------------------|------|---|-----|-----|-------------------|-----|--|--|--------|
|   | 1364.6957                    | 1364.6938 | -0.0019 | -1 | 1279        | 1290 | HILTAAYDTGFR       |      |   |     |     |                   |     |  |  | Mascot |
|   | 1382.7889                    | 1382.7771 | -0.0118 | -9 | 303         | 315  | ISDAPAQIVEVLK      |      |   |     |     |                   |     |  |  | Mascot |
|   | 1382.7889                    | 1382.7771 | -0.0118 | -9 | 303         | 315  | ISDAPAQIVEVLK      |      |   |     |     |                   |     |  |  | Mascot |
|   | 1676.8523                    | 1676.8547 | 0.0024  | 1  | 1199        | 1213 | VQLIVSSIAENDNMK    |      |   |     |     | Oxidation (M)[14] |     |  |  | Mascot |
|   | 1826.9799                    | 1826.9786 | -0.0013 | -1 | 1183        | 1198 | LLGYQLAAYFDKPTAR   | 139  |   | 100 |     |                   |     |  |  | Mascot |
|   | 1826.9799                    | 1826.9786 | -0.0013 | -1 | 1183        | 1198 | LLGYQLAAYFDKPTAR   |      |   |     |     |                   |     |  |  | Mascot |
|   | 1958.0189                    | 1958.0151 | -0.0038 | -2 | 1294        | 1311 | ATNSEKEIELTAALPSQR | 132  |   | 100 |     |                   |     |  |  | Mascot |
|   | 1958.0189                    | 1958.0151 | -0.0038 | -2 | 1294        | 1311 | ATNSEKEIELTAALPSQR |      |   |     |     |                   |     |  |  | Mascot |
| 6 | vitellogenin 6 [Danio rerio] |           |         |    | gi 57864787 |      | 38968.8            | 8.92 | 7 | 399 | 100 | 372               | 100 |  |  |        |

Peptide Information

| Calc. Mass | Obsrv. Mass | ± da    | ± ppm | Start Seq. | End Seq. | Sequence           | Ion Score | C. I.  | %                      | Modification | Rank | Result | Type   |
|------------|-------------|---------|-------|------------|----------|--------------------|-----------|--------|------------------------|--------------|------|--------|--------|
| 826.4457   | 826.4424    | -0.0033 | -4    | 235        | 241      | QYAVFAK            |           |        |                        |              |      |        | Mascot |
| 960.4785   | 960.4742    | -0.0043 | -4    | 255        | 261      | LEVEWER            | 49        | 99.691 |                        |              |      |        | Mascot |
| 960.4785   | 960.4742    | -0.0043 | -4    | 255        | 261      | LEVEWER            |           |        |                        |              |      |        | Mascot |
| 984.4243   | 984.4195    | -0.0048 | -5    | 227        | 234      | FSWGAECK           | 52        | 99.808 | Carbamidomethyl (C)[7] |              |      |        | Mascot |
| 984.4243   | 984.4195    | -0.0048 | -5    | 227        | 234      | FSWGAECK           |           |        | Carbamidomethyl (C)[7] |              |      |        | Mascot |
| 1193.6348  | 1193.6091   | -0.0257 | -22   | 115        | 124      | TATIMEPFRK         |           |        |                        |              |      |        | Mascot |
| 1327.7216  | 1327.7329   | 0.0113  | 9     | 297        | 308      | EIELTAALPSQR       |           |        |                        |              |      |        | Mascot |
| 1826.9799  | 1826.9786   | -0.0013 | -1    | 180        | 195      | LLGYQLAAYFDKPTAR   | 139       | 100    |                        |              |      |        | Mascot |
| 1826.9799  | 1826.9786   | -0.0013 | -1    | 180        | 195      | LLGYQLAAYFDKPTAR   |           |        |                        |              |      |        | Mascot |
| 1958.0189  | 1958.0151   | -0.0038 | -2    | 291        | 308      | ATNSEKEIELTAALPSQR | 132       | 100    |                        |              |      |        | Mascot |
| 1958.0189  | 1958.0151   | -0.0038 | -2    | 291        | 308      | ATNSEKEIELTAALPSQR |           |        |                        |              |      |        | Mascot |

|   |                              |  |  |  |             |  |         |      |   |     |     |     |     |  |  |  |
|---|------------------------------|--|--|--|-------------|--|---------|------|---|-----|-----|-----|-----|--|--|--|
| 7 | vitellogenin 7 [Danio rerio] |  |  |  | gi 57864789 |  | 24318.7 | 8.37 | 7 | 395 | 100 | 352 | 100 |  |  |  |
|---|------------------------------|--|--|--|-------------|--|---------|------|---|-----|-----|-----|-----|--|--|--|

Peptide Information

| Calc. Mass | Obsrv. Mass | ± da    | ± ppm | Start Seq. | End Seq. | Sequence      | Ion Score | C. I.  | %                      | Modification | Rank | Result | Type   |
|------------|-------------|---------|-------|------------|----------|---------------|-----------|--------|------------------------|--------------|------|--------|--------|
| 826.4457   | 826.4424    | -0.0033 | -4    | 93         | 99       | QYAVFAK       |           |        |                        |              |      |        | Mascot |
| 960.4785   | 960.4742    | -0.0043 | -4    | 113        | 119      | LEVEWER       | 49        | 99.691 |                        |              |      |        | Mascot |
| 960.4785   | 960.4742    | -0.0043 | -4    | 113        | 119      | LEVEWER       |           |        |                        |              |      |        | Mascot |
| 984.4243   | 984.4195    | -0.0048 | -5    | 85         | 92       | FSWGAECK      | 52        | 99.808 | Carbamidomethyl (C)[7] |              |      |        | Mascot |
| 984.4243   | 984.4195    | -0.0048 | -5    | 85         | 92       | FSWGAECK      |           |        | Carbamidomethyl (C)[7] |              |      |        | Mascot |
| 1118.682   | 1118.6768   | -0.0052 | -5    | 120        | 129      | LPIIVTTYAK    |           |        |                        |              |      |        | Mascot |
| 1287.6691  | 1287.6693   | 0.0002  | 0     | 100        | 112      | AEAGVLGEFPAAR | 112       | 100    |                        |              |      |        | Mascot |
| 1287.6691  | 1287.6693   | 0.0002  | 0     | 100        | 112      | AEAGVLGEFPAAR |           |        |                        |              |      |        | Mascot |

|   |                              |           |         |    |              |    |                                    |      |     |     |     |     |     |        |
|---|------------------------------|-----------|---------|----|--------------|----|------------------------------------|------|-----|-----|-----|-----|-----|--------|
|   | 1826.9799                    | 1826.9786 | -0.0013 | -1 | 38           | 53 | LLGYQLAAYFDKPTAR                   | 139  | 100 |     |     |     |     | Mascot |
|   | 1826.9799                    | 1826.9786 | -0.0013 | -1 | 38           | 53 | LLGYQLAAYFDKPTAR                   |      |     |     |     |     |     | Mascot |
|   | 3337.7539                    | 3337.7556 | 0.0017  | 1  | 38           | 67 | LLGYQLAAYFDKPTARVQ<br>LIASSIAENDNR |      |     |     |     |     |     | Mascot |
| 8 | vitellogenin 6 [Danio rerio] |           |         |    | gi 303227889 |    | 150936.1                           | 8.84 | 10  | 383 | 100 | 372 | 100 |        |

Peptide Information

| Calc. Mass | Obsrv. Mass | ± da    | ± ppm | Start Seq. | End Seq. | Sequence                   | Ion Score | C. I.  | % Modification         | Rank | Result Type |
|------------|-------------|---------|-------|------------|----------|----------------------------|-----------|--------|------------------------|------|-------------|
| 826.4457   | 826.4424    | -0.0033 | -4    | 1256       | 1262     | QYAVFAK                    |           |        |                        |      | Mascot      |
| 960.4785   | 960.4742    | -0.0043 | -4    | 1276       | 1282     | LEVEWER                    | 49        | 99.691 |                        |      | Mascot      |
| 960.4785   | 960.4742    | -0.0043 | -4    | 1276       | 1282     | LEVEWER                    |           |        |                        |      | Mascot      |
| 984.4243   | 984.4195    | -0.0048 | -5    | 1248       | 1255     | FSWGAECK                   | 52        | 99.808 | Carbamidomethyl (C)[7] |      | Mascot      |
| 984.4243   | 984.4195    | -0.0048 | -5    | 1248       | 1255     | FSWGAECK                   |           |        | Carbamidomethyl (C)[7] |      | Mascot      |
| 992.5015   | 992.4612    | -0.0403 | -41   | 626        | 633      | LMNCKLDR                   |           |        |                        |      | Mascot      |
| 1193.6348  | 1193.6091   | -0.0257 | -22   | 1136       | 1145     | TATIMEPFRK                 |           |        |                        |      | Mascot      |
| 1327.7216  | 1327.7329   | 0.0113  | 9     | 1318       | 1329     | EIELTAALPSQR               |           |        |                        |      | Mascot      |
| 1638.8485  | 1638.8556   | 0.0071  | 4     | 679        | 694      | TYLAGAAADVVEFGVR           |           |        |                        |      | Mascot      |
| 1826.9799  | 1826.9786   | -0.0013 | -1    | 1201       | 1216     | LLGYQLAAYFDKPTAR           | 139       | 100    |                        |      | Mascot      |
| 1826.9799  | 1826.9786   | -0.0013 | -1    | 1201       | 1216     | LLGYQLAAYFDKPTAR           |           |        |                        |      | Mascot      |
| 1958.0189  | 1958.0151   | -0.0038 | -2    | 1312       | 1329     | ATNSEKEIELTAALPSQR         | 132       | 100    |                        |      | Mascot      |
| 1958.0189  | 1958.0151   | -0.0038 | -2    | 1312       | 1329     | ATNSEKEIELTAALPSQR         |           |        |                        |      | Mascot      |
| 2233.2009  | 2233.0706   | -0.1303 | -58   | 604        | 625      | SLTRITAPDMAYVAGAAN<br>VAIK |           |        |                        |      | Mascot      |

|   |                                                             |  |  |  |             |  |          |      |    |     |     |     |     |  |
|---|-------------------------------------------------------------|--|--|--|-------------|--|----------|------|----|-----|-----|-----|-----|--|
| 9 | novel protein similar to vitellogenin 1 (vg1) [Danio rerio] |  |  |  | gi 94733734 |  | 149808.5 | 8.83 | 10 | 382 | 100 | 372 | 100 |  |
|---|-------------------------------------------------------------|--|--|--|-------------|--|----------|------|----|-----|-----|-----|-----|--|

Peptide Information

| Calc. Mass | Obsrv. Mass | ± da    | ± ppm | Start Seq. | End Seq. | Sequence         | Ion Score | C. I.  | % Modification         | Rank | Result Type |
|------------|-------------|---------|-------|------------|----------|------------------|-----------|--------|------------------------|------|-------------|
| 826.4457   | 826.4424    | -0.0033 | -4    | 1245       | 1251     | QYAVFAK          |           |        |                        |      | Mascot      |
| 960.4785   | 960.4742    | -0.0043 | -4    | 1265       | 1271     | LEVEWER          | 49        | 99.691 |                        |      | Mascot      |
| 960.4785   | 960.4742    | -0.0043 | -4    | 1265       | 1271     | LEVEWER          |           |        |                        |      | Mascot      |
| 984.4243   | 984.4195    | -0.0048 | -5    | 1237       | 1244     | FSWGAECK         | 52        | 99.808 | Carbamidomethyl (C)[7] |      | Mascot      |
| 984.4243   | 984.4195    | -0.0048 | -5    | 1237       | 1244     | FSWGAECK         |           |        | Carbamidomethyl (C)[7] |      | Mascot      |
| 992.5015   | 992.4612    | -0.0403 | -41   | 619        | 626      | LMNCKLDR         |           |        |                        |      | Mascot      |
| 1193.6348  | 1193.6091   | -0.0257 | -22   | 1125       | 1134     | TATIMEPFRK       |           |        |                        |      | Mascot      |
| 1327.7216  | 1327.7329   | 0.0113  | 9     | 1307       | 1318     | EIELTAALPSQR     |           |        |                        |      | Mascot      |
| 1638.8485  | 1638.8556   | 0.0071  | 4     | 672        | 687      | TYLAGAAADVVEFGVR |           |        |                        |      | Mascot      |
| 1826.9799  | 1826.9786   | -0.0013 | -1    | 1190       | 1205     | LLGYQLAAYFDKPTAR | 139       | 100    |                        |      | Mascot      |

|    |                              |           |           |         |     |      |              |                            |      |     |     |     |     |     |  |        |
|----|------------------------------|-----------|-----------|---------|-----|------|--------------|----------------------------|------|-----|-----|-----|-----|-----|--|--------|
|    |                              | 1826.9799 | 1826.9786 | -0.0013 | -1  | 1190 | 1205         | LLGYQLAAYFDKPTAR           |      |     |     |     |     |     |  | Mascot |
|    |                              | 1958.0189 | 1958.0151 | -0.0038 | -2  | 1301 | 1318         | ATNSEKEIELTAALPSQR         | 132  | 100 |     |     |     |     |  | Mascot |
|    |                              | 1958.0189 | 1958.0151 | -0.0038 | -2  | 1301 | 1318         | ATNSEKEIELTAALPSQR         |      |     |     |     |     |     |  | Mascot |
|    |                              | 2233.2009 | 2233.0706 | -0.1303 | -58 | 597  | 618          | SLTRITAPDMAYVAGAAN<br>VAIK |      |     |     |     |     |     |  | Mascot |
| 10 | vitellogenin 7 [Danio rerio] |           |           |         |     |      | gi 156713467 | 148739.2                   | 8.76 | 9   | 358 | 100 | 352 | 100 |  |        |

#### Peptide Information

| Calc. Mass | Obsrv. Mass | ± da    | ± ppm | Start Seq. | End Seq. | Sequence                           | Ion Score | C. I. % | Modification           | Rank | Result Type |
|------------|-------------|---------|-------|------------|----------|------------------------------------|-----------|---------|------------------------|------|-------------|
| 826.4457   | 826.4424    | -0.0033 | -4    | 1234       | 1240     | QYAVFAK                            |           |         |                        |      | Mascot      |
| 960.4785   | 960.4742    | -0.0043 | -4    | 1254       | 1260     | LEVEWER                            | 49        | 99.691  |                        |      | Mascot      |
| 960.4785   | 960.4742    | -0.0043 | -4    | 1254       | 1260     | LEVEWER                            |           |         |                        |      | Mascot      |
| 984.4243   | 984.4195    | -0.0048 | -5    | 1226       | 1233     | FSWGAECK                           | 52        | 99.808  | Carbamidomethyl (C)[7] |      | Mascot      |
| 984.4243   | 984.4195    | -0.0048 | -5    | 1226       | 1233     | FSWGAECK                           |           |         | Carbamidomethyl (C)[7] |      | Mascot      |
| 1109.4818  | 1109.4917   | 0.0099  | 9     | 1087       | 1097     | SHSTSSSSSSR                        |           |         |                        |      | Mascot      |
| 1118.682   | 1118.6768   | -0.0052 | -5    | 1261       | 1270     | LPIIVTTYAK                         |           |         |                        |      | Mascot      |
| 1193.6083  | 1193.6091   | 0.0008  | 1     | 828        | 837      | LESMTLDQLK                         |           |         | Oxidation (M)[4]       |      | Mascot      |
| 1287.6691  | 1287.6693   | 0.0002  | 0     | 1241       | 1253     | AEAGVLGEFPAAR                      | 112       | 100     |                        |      | Mascot      |
| 1287.6691  | 1287.6693   | 0.0002  | 0     | 1241       | 1253     | AEAGVLGEFPAAR                      |           |         |                        |      | Mascot      |
| 1826.9799  | 1826.9786   | -0.0013 | -1    | 1179       | 1194     | LLGYQLAAYFDKPTAR                   | 139       | 100     |                        |      | Mascot      |
| 1826.9799  | 1826.9786   | -0.0013 | -1    | 1179       | 1194     | LLGYQLAAYFDKPTAR                   |           |         |                        |      | Mascot      |
| 3337.7539  | 3337.7556   | 0.0017  | 1     | 1179       | 1208     | LLGYQLAAYFDKPTARVQ<br>LIASSIAENDNR |           |         |                        |      | Mascot      |

|    |                                                             |             |          |      |   |     |     |     |     |  |  |
|----|-------------------------------------------------------------|-------------|----------|------|---|-----|-----|-----|-----|--|--|
| 11 | novel protein similar to vitellogenin 1 (vg1) [Danio rerio] | gi 94732723 | 147084.2 | 8.73 | 9 | 357 | 100 | 352 | 100 |  |  |
|----|-------------------------------------------------------------|-------------|----------|------|---|-----|-----|-----|-----|--|--|

#### Peptide Information

| Calc. Mass | Obsrv. Mass | ± da    | ± ppm | Start Seq. | End Seq. | Sequence      | Ion Score | C. I. % | Modification           | Rank | Result Type |
|------------|-------------|---------|-------|------------|----------|---------------|-----------|---------|------------------------|------|-------------|
| 826.4457   | 826.4424    | -0.0033 | -4    | 1219       | 1225     | QYAVFAK       |           |         |                        |      | Mascot      |
| 960.4785   | 960.4742    | -0.0043 | -4    | 1239       | 1245     | LEVEWER       | 49        | 99.691  |                        |      | Mascot      |
| 960.4785   | 960.4742    | -0.0043 | -4    | 1239       | 1245     | LEVEWER       |           |         |                        |      | Mascot      |
| 984.4243   | 984.4195    | -0.0048 | -5    | 1211       | 1218     | FSWGAECK      | 52        | 99.808  | Carbamidomethyl (C)[7] |      | Mascot      |
| 984.4243   | 984.4195    | -0.0048 | -5    | 1211       | 1218     | FSWGAECK      |           |         | Carbamidomethyl (C)[7] |      | Mascot      |
| 1109.4818  | 1109.4917   | 0.0099  | 9     | 1087       | 1097     | SHSTSSSSSSR   |           |         |                        |      | Mascot      |
| 1118.682   | 1118.6768   | -0.0052 | -5    | 1246       | 1255     | LPIIVTTYAK    |           |         |                        |      | Mascot      |
| 1193.6083  | 1193.6091   | 0.0008  | 1     | 828        | 837      | LESMTLDQLK    |           |         | Oxidation (M)[4]       |      | Mascot      |
| 1287.6691  | 1287.6693   | 0.0002  | 0     | 1226       | 1238     | AEAGVLGEFPAAR | 112       | 100     |                        |      | Mascot      |

|    |                              |            |             |         |       |              |          |                                    |           |        |     |                        |     |     |      |        |        |
|----|------------------------------|------------|-------------|---------|-------|--------------|----------|------------------------------------|-----------|--------|-----|------------------------|-----|-----|------|--------|--------|
|    |                              | 1287.6691  | 1287.6693   | 0.0002  | 0     | 1226         | 1238     | AEAGVLGEFPAAR                      |           |        |     |                        |     |     |      |        | Mascot |
|    |                              | 1826.9799  | 1826.9786   | -0.0013 | -1    | 1164         | 1179     | LLGYQLAAYFDKPTAR                   | 139       | 100    |     |                        |     |     |      |        | Mascot |
|    |                              | 1826.9799  | 1826.9786   | -0.0013 | -1    | 1164         | 1179     | LLGYQLAAYFDKPTAR                   |           |        |     |                        |     |     |      |        | Mascot |
|    |                              | 3337.7539  | 3337.7556   | 0.0017  | 1     | 1164         | 1193     | LLGYQLAAYFDKPTARVQ<br>LIASSIAENDNR |           |        |     |                        |     |     |      |        | Mascot |
| 12 | Zgc:136383 [Danio rerio]     |            |             |         |       | gi 92097636  |          | 28809.9                            | 9.33      | 8      | 276 | 100                    | 240 | 100 |      |        |        |
|    | Peptide Information          |            |             |         |       |              |          |                                    |           |        |     |                        |     |     |      |        |        |
|    |                              | Calc. Mass | Obsrv. Mass | ± da    | ± ppm | Start Seq.   | End Seq. | Sequence                           | Ion Score | C. I.  | %   | Modification           |     |     | Rank | Result | Type   |
|    |                              | 826.4457   | 826.4424    | -0.0033 | -4    | 136          | 142      | QYAVFAK                            |           |        |     |                        |     |     |      |        | Mascot |
|    |                              | 960.4785   | 960.4742    | -0.0043 | -4    | 156          | 162      | LEVEWER                            | 49        | 99.691 |     |                        |     |     |      |        | Mascot |
|    |                              | 960.4785   | 960.4742    | -0.0043 | -4    | 156          | 162      | LEVEWER                            |           |        |     |                        |     |     |      |        | Mascot |
|    |                              | 984.4243   | 984.4195    | -0.0048 | -5    | 128          | 135      | FSWGAECK                           | 52        | 99.808 |     | Carbamidomethyl (C)[7] |     |     |      |        | Mascot |
|    |                              | 984.4243   | 984.4195    | -0.0048 | -5    | 128          | 135      | FSWGAECK                           |           |        |     | Carbamidomethyl (C)[7] |     |     |      |        | Mascot |
|    |                              | 1045.5465  | 1045.5583   | 0.0118  | 11    | 246          | 253      | DFLSWIHK                           |           |        |     |                        |     |     |      |        | Mascot |
|    |                              | 1118.5986  | 1118.6768   | 0.0782  | 70    | 217          | 225      | IPEITMSRR                          |           |        |     | Oxidation (M)[6]       |     |     |      |        | Mascot |
|    |                              | 1193.6348  | 1193.6091   | -0.0257 | -22   | 16           | 25       | TATIMEPFRK                         |           |        |     |                        |     |     |      |        | Mascot |
|    |                              | 1676.7653  | 1676.8547   | 0.0894  | 53    | 1            | 15       | MLPLSSSMSSSRMSK                    |           |        |     | Oxidation (M)[1,8,13]  |     |     |      |        | Mascot |
|    |                              | 1826.9799  | 1826.9786   | -0.0013 | -1    | 81           | 96       | LLGYQLAAYFDKPTAR                   | 139       | 100    |     |                        |     |     |      |        | Mascot |
|    |                              | 1826.9799  | 1826.9786   | -0.0013 | -1    | 81           | 96       | LLGYQLAAYFDKPTAR                   |           |        |     |                        |     |     |      |        | Mascot |
| 13 | Vtg6 protein [Danio rerio]   |            |             |         |       | gi 157422885 |          | 27937.4                            | 9.18      | 7      | 262 | 100                    | 233 | 100 |      |        |        |
|    | Peptide Information          |            |             |         |       |              |          |                                    |           |        |     |                        |     |     |      |        |        |
|    |                              | Calc. Mass | Obsrv. Mass | ± da    | ± ppm | Start Seq.   | End Seq. | Sequence                           | Ion Score | C. I.  | %   | Modification           |     |     | Rank | Result | Type   |
|    |                              | 826.4457   | 826.4424    | -0.0033 | -4    | 129          | 135      | QYAVFAK                            |           |        |     |                        |     |     |      |        | Mascot |
|    |                              | 913.423    | 913.4474    | 0.0244  | 27    | 1            | 8        | MSSSRMSK                           |           |        |     |                        |     |     |      |        | Mascot |
|    |                              | 960.4785   | 960.4742    | -0.0043 | -4    | 149          | 155      | LEVEWER                            | 49        | 99.691 |     |                        |     |     |      |        | Mascot |
|    |                              | 960.4785   | 960.4742    | -0.0043 | -4    | 149          | 155      | LEVEWER                            |           |        |     |                        |     |     |      |        | Mascot |
|    |                              | 984.4243   | 984.4195    | -0.0048 | -5    | 121          | 128      | FSWGAECK                           | 52        | 99.808 |     | Carbamidomethyl (C)[7] |     |     |      |        | Mascot |
|    |                              | 984.4243   | 984.4195    | -0.0048 | -5    | 121          | 128      | FSWGAECK                           |           |        |     | Carbamidomethyl (C)[7] |     |     |      |        | Mascot |
|    |                              | 1193.6348  | 1193.6091   | -0.0257 | -22   | 9            | 18       | TATIMEPFRK                         |           |        |     |                        |     |     |      |        | Mascot |
|    |                              | 1327.7216  | 1327.7329   | 0.0113  | 9     | 191          | 202      | EIELTAALPSQR                       |           |        |     |                        |     |     |      |        | Mascot |
|    |                              | 1958.0189  | 1958.0151   | -0.0038 | -2    | 185          | 202      | ATNSEKEIELTAALPSQR                 | 132       | 100    |     |                        |     |     |      |        | Mascot |
|    |                              | 1958.0189  | 1958.0151   | -0.0038 | -2    | 185          | 202      | ATNSEKEIELTAALPSQR                 |           |        |     |                        |     |     |      |        | Mascot |
| 14 | vitellogenin 4 [Danio rerio] |            |             |         |       | gi 57864783  |          | 31189.9                            | 9.48      | 6      | 259 | 100                    | 240 | 100 |      |        |        |

| Peptide Information        |                                  |             |         |              |              |          |                  |           |        |                        |              |      |             |
|----------------------------|----------------------------------|-------------|---------|--------------|--------------|----------|------------------|-----------|--------|------------------------|--------------|------|-------------|
| Calc. Mass                 |                                  | Obsrv. Mass | ± da    | ± ppm        | Start Seq.   | End Seq. | Sequence         | Ion Score | C. I.  | %                      | Modification | Rank | Result Type |
| 15                         | 826.4457                         | 826.4424    | -0.0033 | -4           | 162          | 168      | QYAVFAK          |           |        |                        |              |      | Mascot      |
|                            | 960.4785                         | 960.4742    | -0.0043 | -4           | 182          | 188      | LEVEWER          | 49        | 99.691 |                        |              |      | Mascot      |
|                            | 960.4785                         | 960.4742    | -0.0043 | -4           | 182          | 188      | LEVEWER          |           |        |                        |              |      | Mascot      |
|                            | 984.4243                         | 984.4195    | -0.0048 | -5           | 154          | 161      | FSWGAECK         | 52        | 99.808 | Carbamidomethyl (C)[7] |              |      | Mascot      |
|                            | 984.4243                         | 984.4195    | -0.0048 | -5           | 154          | 161      | FSWGAECK         |           |        | Carbamidomethyl (C)[7] |              |      | Mascot      |
|                            | 1118.5986                        | 1118.6768   | 0.0782  | 70           | 243          | 251      | IPEITMSRR        |           |        | Oxidation (M)[6]       |              |      | Mascot      |
|                            | 1193.6348                        | 1193.6091   | -0.0257 | -22          | 42           | 51       | TATIMEPFRK       |           |        |                        |              |      | Mascot      |
|                            | 1826.9799                        | 1826.9786   | -0.0013 | -1           | 107          | 122      | LLGYQLAAYFDKPTAR | 139       | 100    |                        |              |      | Mascot      |
|                            | 1826.9799                        | 1826.9786   | -0.0013 | -1           | 107          | 122      | LLGYQLAAYFDKPTAR |           |        |                        |              |      | Mascot      |
| Vtg5 protein [Danio rerio] |                                  |             |         | gi 148744685 |              | 27543.3  | 9.2              | 5         | 258    | 100                    | 240          | 100  |             |
| Peptide Information        |                                  |             |         |              |              |          |                  |           |        |                        |              |      |             |
| Calc. Mass                 |                                  | Obsrv. Mass | ± da    | ± ppm        | Start Seq.   | End Seq. | Sequence         | Ion Score | C. I.  | %                      | Modification | Rank | Result Type |
|                            | 826.4457                         | 826.4424    | -0.0033 | -4           | 124          | 130      | QYAVFAK          |           |        |                        |              |      | Mascot      |
|                            | 960.4785                         | 960.4742    | -0.0043 | -4           | 144          | 150      | LEVEWER          | 49        | 99.691 |                        |              |      | Mascot      |
|                            | 960.4785                         | 960.4742    | -0.0043 | -4           | 144          | 150      | LEVEWER          |           |        |                        |              |      | Mascot      |
|                            | 984.4243                         | 984.4195    | -0.0048 | -5           | 116          | 123      | FSWGAECK         | 52        | 99.808 | Carbamidomethyl (C)[7] |              |      | Mascot      |
|                            | 984.4243                         | 984.4195    | -0.0048 | -5           | 116          | 123      | FSWGAECK         |           |        | Carbamidomethyl (C)[7] |              |      | Mascot      |
|                            | 1376.7069                        | 1376.6925   | -0.0144 | -10          | 165          | 176      | HILNAAyntGFR     |           |        |                        |              |      | Mascot      |
|                            | 1826.9799                        | 1826.9786   | -0.0013 | -1           | 69           | 84       | LLGYQLAAYFDKPTAR | 139       | 100    |                        |              |      | Mascot      |
|                            | 1826.9799                        | 1826.9786   | -0.0013 | -1           | 69           | 84       | LLGYQLAAYFDKPTAR |           |        |                        |              |      | Mascot      |
|                            | Zgc:136383 protein [Danio rerio] |             |         |              | gi 159155252 |          | 123957.1         | 8.78      | 11     | 252                    | 100          | 240  | 100         |
| Peptide Information        |                                  |             |         |              |              |          |                  |           |        |                        |              |      |             |
| Calc. Mass                 |                                  | Obsrv. Mass | ± da    | ± ppm        | Start Seq.   | End Seq. | Sequence         | Ion Score | C. I.  | %                      | Modification | Rank | Result Type |
|                            | 826.4457                         | 826.4424    | -0.0033 | -4           | 1013         | 1019     | QYAVFAK          |           |        |                        |              |      | Mascot      |
|                            | 960.4785                         | 960.4742    | -0.0043 | -4           | 1033         | 1039     | LEVEWER          | 49        | 99.691 |                        |              |      | Mascot      |
|                            | 960.4785                         | 960.4742    | -0.0043 | -4           | 1033         | 1039     | LEVEWER          |           |        |                        |              |      | Mascot      |
|                            | 984.4243                         | 984.4195    | -0.0048 | -5           | 1005         | 1012     | FSWGAECK         | 52        | 99.808 | Carbamidomethyl (C)[7] |              |      | Mascot      |
|                            | 984.4243                         | 984.4195    | -0.0048 | -5           | 1005         | 1012     | FSWGAECK         |           |        | Carbamidomethyl (C)[7] |              |      | Mascot      |
|                            | 992.5015                         | 992.4612    | -0.0403 | -41          | 392          | 399      | LMNCKLDR         |           |        |                        |              |      | Mascot      |
|                            | 1045.5465                        | 1045.5583   | 0.0118  | 11           | 1123         | 1130     | DFLSWIHK         |           |        |                        |              |      | Mascot      |



|    |                              |           |         |     |             |      |                            |     |   |     |     |     |                  |  |        |
|----|------------------------------|-----------|---------|-----|-------------|------|----------------------------|-----|---|-----|-----|-----|------------------|--|--------|
|    | 1118.5986                    | 1118.6768 | 0.0782  | 70  | 1094        | 1102 | IPEITMSRR                  |     |   |     |     |     | Oxidation (M)[6] |  | Mascot |
|    | 1193.6348                    | 1193.6091 | -0.0257 | -22 | 893         | 902  | TATIMEPFRK                 |     |   |     |     |     |                  |  | Mascot |
|    | 1381.619                     | 1381.7281 | 0.1091  | 79  | 844         | 857  | NAPVSESSSSSSSR             |     |   |     |     |     |                  |  | Mascot |
|    | 1382.7889                    | 1382.7771 | -0.0118 | -9  | 80          | 92   | ISDAPAQIVEVLK              |     |   |     |     |     |                  |  | Mascot |
|    | 1382.7889                    | 1382.7771 | -0.0118 | -9  | 80          | 92   | ISDAPAQIVEVLK              |     |   |     |     |     |                  |  | Mascot |
|    | 1826.9799                    | 1826.9786 | -0.0013 | -1  | 958         | 973  | LLGYQLAAYFDKPTAR           | 139 |   | 100 |     |     |                  |  | Mascot |
|    | 1826.9799                    | 1826.9786 | -0.0013 | -1  | 958         | 973  | LLGYQLAAYFDKPTAR           |     |   |     |     |     |                  |  | Mascot |
|    | 2233.2009                    | 2233.0706 | -0.1303 | -58 | 370         | 391  | SLTRITAPDMAYVAGAAN<br>VAIK |     |   |     |     |     |                  |  | Mascot |
| 17 | vitellogenin 5 [Danio rerio] |           |         |     | gi 57864785 |      | 72820.8                    | 9   | 6 | 247 | 100 | 240 | 100              |  |        |

Peptide Information

| Calc. Mass | Obsrv. Mass | ± da    | ± ppm | Start Seq. | End Seq. | Sequence         | Ion Score | C. I.  | %                      | Modification | Rank | Result | Type   |
|------------|-------------|---------|-------|------------|----------|------------------|-----------|--------|------------------------|--------------|------|--------|--------|
| 826.4457   | 826.4424    | -0.0033 | -4    | 544        | 550      | QYAVFAK          |           |        |                        |              |      |        | Mascot |
| 960.4785   | 960.4742    | -0.0043 | -4    | 564        | 570      | LEVEWER          | 49        | 99.691 |                        |              |      |        | Mascot |
| 960.4785   | 960.4742    | -0.0043 | -4    | 564        | 570      | LEVEWER          |           |        |                        |              |      |        | Mascot |
| 984.4243   | 984.4195    | -0.0048 | -5    | 536        | 543      | FSWGAECK         | 52        | 99.808 | Carbamidomethyl (C)[7] |              |      |        | Mascot |
| 984.4243   | 984.4195    | -0.0048 | -5    | 536        | 543      | FSWGAECK         |           |        | Carbamidomethyl (C)[7] |              |      |        | Mascot |
| 1069.5021  | 1069.5568   | 0.0547  | 51    | 230        | 238      | NIENHSAER        |           |        |                        |              |      |        | Mascot |
| 1376.7069  | 1376.6925   | -0.0144 | -10   | 585        | 596      | HILNAAyntGFR     |           |        |                        |              |      |        | Mascot |
| 1826.9799  | 1826.9786   | -0.0013 | -1    | 489        | 504      | LLGYQLAAYFDKPTAR | 139       | 100    |                        |              |      |        | Mascot |
| 1826.9799  | 1826.9786   | -0.0013 | -1    | 489        | 504      | LLGYQLAAYFDKPTAR |           |        |                        |              |      |        | Mascot |

|    |                                              |  |  |  |              |  |          |      |    |     |     |     |     |  |  |
|----|----------------------------------------------|--|--|--|--------------|--|----------|------|----|-----|-----|-----|-----|--|--|
| 18 | hypothetical protein LOC678536 [Danio rerio] |  |  |  | gi 160420306 |  | 148750.2 | 8.89 | 11 | 246 | 100 | 240 | 100 |  |  |
|----|----------------------------------------------|--|--|--|--------------|--|----------|------|----|-----|-----|-----|-----|--|--|

Peptide Information

| Calc. Mass | Obsrv. Mass | ± da    | ± ppm | Start Seq. | End Seq. | Sequence       | Ion Score | C. I.  | %                      | Modification     | Rank | Result | Type   |
|------------|-------------|---------|-------|------------|----------|----------------|-----------|--------|------------------------|------------------|------|--------|--------|
| 826.4457   | 826.4424    | -0.0033 | -4    | 1236       | 1242     | QYAVFAK        |           |        |                        |                  |      |        | Mascot |
| 960.4785   | 960.4742    | -0.0043 | -4    | 1256       | 1262     | LEVEWER        | 49        | 99.691 |                        |                  |      |        | Mascot |
| 960.4785   | 960.4742    | -0.0043 | -4    | 1256       | 1262     | LEVEWER        |           |        |                        |                  |      |        | Mascot |
| 984.4243   | 984.4195    | -0.0048 | -5    | 1228       | 1235     | FSWGAECK       | 52        | 99.808 | Carbamidomethyl (C)[7] |                  |      |        | Mascot |
| 984.4243   | 984.4195    | -0.0048 | -5    | 1228       | 1235     | FSWGAECK       |           |        | Carbamidomethyl (C)[7] |                  |      |        | Mascot |
| 992.5015   | 992.4612    | -0.0403 | -41   | 615        | 622      | LMNCKLDR       |           |        |                        |                  |      |        | Mascot |
| 1045.5465  | 1045.5583   | 0.0118  | 11    | 1346       | 1353     | DFLSWIHK       |           |        |                        |                  |      |        | Mascot |
| 1118.5986  | 1118.6768   | 0.0782  | 70    | 1317       | 1325     | IPEITMSRR      |           |        |                        | Oxidation (M)[6] |      |        | Mascot |
| 1193.6348  | 1193.6091   | -0.0257 | -22   | 1116       | 1125     | TATIMEPFRK     |           |        |                        |                  |      |        | Mascot |
| 1381.619   | 1381.7281   | 0.1091  | 79    | 1067       | 1080     | NAPVSESSSSSSSR |           |        |                        |                  |      |        | Mascot |

|    |                                                                                                          |           |         |     |      |      |                            |     |     |  |  |  |  |  |  |        |
|----|----------------------------------------------------------------------------------------------------------|-----------|---------|-----|------|------|----------------------------|-----|-----|--|--|--|--|--|--|--------|
|    | 1382.7889                                                                                                | 1382.7771 | -0.0118 | -9  | 303  | 315  | ISDAPAQIVEVLK              |     |     |  |  |  |  |  |  | Mascot |
|    | 1382.7889                                                                                                | 1382.7771 | -0.0118 | -9  | 303  | 315  | ISDAPAQIVEVLK              |     |     |  |  |  |  |  |  | Mascot |
|    | 1826.9799                                                                                                | 1826.9786 | -0.0013 | -1  | 1181 | 1196 | LLGYQLAAYFDKPTAR           | 139 | 100 |  |  |  |  |  |  | Mascot |
|    | 1826.9799                                                                                                | 1826.9786 | -0.0013 | -1  | 1181 | 1196 | LLGYQLAAYFDKPTAR           |     |     |  |  |  |  |  |  | Mascot |
|    | 2233.2009                                                                                                | 2233.0706 | -0.1303 | -58 | 593  | 614  | SLTRITAPDMAYVAGAAN<br>VAIK |     |     |  |  |  |  |  |  | Mascot |
| 19 | novel protein similar to vitellogenin 1 (vg1) [Danio rerio] gi 94733733 149143.4 8.92 11 245 100 240 100 |           |         |     |      |      |                            |     |     |  |  |  |  |  |  |        |

#### Peptide Information

| Calc. Mass | Obsrv. Mass | ± da    | ± ppm | Start Seq. | End Seq. | Sequence                   | Ion Score | C. I.  | % Modification         | Rank | Result Type |
|------------|-------------|---------|-------|------------|----------|----------------------------|-----------|--------|------------------------|------|-------------|
| 826.4457   | 826.4424    | -0.0033 | -4    | 1240       | 1246     | QYAVFAK                    |           |        |                        |      | Mascot      |
| 960.4785   | 960.4742    | -0.0043 | -4    | 1260       | 1266     | LEVEWER                    | 49        | 99.691 |                        |      | Mascot      |
| 960.4785   | 960.4742    | -0.0043 | -4    | 1260       | 1266     | LEVEWER                    |           |        |                        |      | Mascot      |
| 984.4243   | 984.4195    | -0.0048 | -5    | 1232       | 1239     | FSWGAECK                   | 52        | 99.808 | Carbamidomethyl (C)[7] |      | Mascot      |
| 984.4243   | 984.4195    | -0.0048 | -5    | 1232       | 1239     | FSWGAECK                   |           |        | Carbamidomethyl (C)[7] |      | Mascot      |
| 992.5015   | 992.4612    | -0.0403 | -41   | 619        | 626      | LMNCKLDR                   |           |        |                        |      | Mascot      |
| 1045.5465  | 1045.5583   | 0.0118  | 11    | 1350       | 1357     | DFLSWIHK                   |           |        |                        |      | Mascot      |
| 1118.5986  | 1118.6768   | 0.0782  | 70    | 1321       | 1329     | IPEITMSRR                  |           |        | Oxidation (M)[6]       |      | Mascot      |
| 1193.6348  | 1193.6091   | -0.0257 | -22   | 1120       | 1129     | TATIMEPFRK                 |           |        |                        |      | Mascot      |
| 1381.619   | 1381.7281   | 0.1091  | 79    | 1071       | 1084     | NAPVSSESSSSSR              |           |        |                        |      | Mascot      |
| 1382.7889  | 1382.7771   | -0.0118 | -9    | 307        | 319      | ISDAPAQIVEVLK              |           |        |                        |      | Mascot      |
| 1382.7889  | 1382.7771   | -0.0118 | -9    | 307        | 319      | ISDAPAQIVEVLK              |           |        |                        |      | Mascot      |
| 1826.9799  | 1826.9786   | -0.0013 | -1    | 1185       | 1200     | LLGYQLAAYFDKPTAR           | 139       | 100    |                        |      | Mascot      |
| 1826.9799  | 1826.9786   | -0.0013 | -1    | 1185       | 1200     | LLGYQLAAYFDKPTAR           |           |        |                        |      | Mascot      |
| 2233.2009  | 2233.0706   | -0.1303 | -58   | 597        | 618      | SLTRITAPDMAYVAGAAN<br>VAIK |           |        |                        |      | Mascot      |

20 vitellogenin 5 [Danio rerio] gi|68448530 148868 8.77 8 243 100 240 100

#### Peptide Information

| Calc. Mass | Obsrv. Mass | ± da    | ± ppm | Start Seq. | End Seq. | Sequence     | Ion Score | C. I.  | % Modification         | Rank | Result Type |
|------------|-------------|---------|-------|------------|----------|--------------|-----------|--------|------------------------|------|-------------|
| 826.4457   | 826.4424    | -0.0033 | -4    | 1238       | 1244     | QYAVFAK      |           |        |                        |      | Mascot      |
| 960.4785   | 960.4742    | -0.0043 | -4    | 1258       | 1264     | LEVEWER      | 49        | 99.691 |                        |      | Mascot      |
| 960.4785   | 960.4742    | -0.0043 | -4    | 1258       | 1264     | LEVEWER      |           |        |                        |      | Mascot      |
| 984.4243   | 984.4195    | -0.0048 | -5    | 1230       | 1237     | FSWGAECK     | 52        | 99.808 | Carbamidomethyl (C)[7] |      | Mascot      |
| 984.4243   | 984.4195    | -0.0048 | -5    | 1230       | 1237     | FSWGAECK     |           |        | Carbamidomethyl (C)[7] |      | Mascot      |
| 992.5015   | 992.4612    | -0.0403 | -41   | 615        | 622      | LMNCKLDR     |           |        |                        |      | Mascot      |
| 1376.7069  | 1376.6925   | -0.0144 | -10   | 1279       | 1290     | HILNAAyntGFR |           |        |                        |      | Mascot      |

|    |                                                                         |           |         |    |      |      |                             |      |     |                                           |     |     |        |
|----|-------------------------------------------------------------------------|-----------|---------|----|------|------|-----------------------------|------|-----|-------------------------------------------|-----|-----|--------|
|    | 1826.9799                                                               | 1826.9786 | -0.0013 | -1 | 1183 | 1198 | LLGYQLAAYFDKPTAR            | 139  | 100 |                                           |     |     | Mascot |
|    | 1826.9799                                                               | 1826.9786 | -0.0013 | -1 | 1183 | 1198 | LLGYQLAAYFDKPTAR            |      |     |                                           |     |     | Mascot |
|    | 1840.8938                                                               | 1840.9373 | 0.0435  | 24 | 72   | 86   | LMGPLLYEYAGTWPR             |      |     | Oxidation (M)[2]                          |     |     | Mascot |
|    | 2362.1926                                                               | 2362.1821 | -0.0105 | -4 | 597  | 619  | ITAPDMASVAGAANVAIK<br>LMNCK |      |     | Carbamidomethyl (C)[22], Oxidation (M)[6] |     |     | Mascot |
|    | 2362.1926                                                               | 2362.1821 | -0.0105 | -4 | 597  | 619  | ITAPDMASVAGAANVAIK<br>LMNCK |      |     | Carbamidomethyl (C)[22], Oxidation (M)[6] |     |     | Mascot |
| 21 | novel protein similar to vitellogenin 1 (vg1) [Danio rerio] gi 94733731 |           |         |    |      |      | 149169.2                    | 8.84 | 8   | 241                                       | 100 | 240 | 100    |

#### Peptide Information

| Calc. Mass | Obsrv. Mass | ± da    | ± ppm | Start Seq. | End Seq. | Sequence                    | Ion Score | C. I.  | %                                         | Modification | Rank | Result | Type |
|------------|-------------|---------|-------|------------|----------|-----------------------------|-----------|--------|-------------------------------------------|--------------|------|--------|------|
| 826.4457   | 826.4424    | -0.0033 | -4    | 1240       | 1246     | QYAVFAK                     |           |        |                                           |              |      | Mascot |      |
| 960.4785   | 960.4742    | -0.0043 | -4    | 1260       | 1266     | LEVEWER                     | 49        | 99.691 |                                           |              |      | Mascot |      |
| 960.4785   | 960.4742    | -0.0043 | -4    | 1260       | 1266     | LEVEWER                     |           |        |                                           |              |      | Mascot |      |
| 984.4243   | 984.4195    | -0.0048 | -5    | 1232       | 1239     | FSWGAECK                    | 52        | 99.808 | Carbamidomethyl (C)[7]                    |              |      | Mascot |      |
| 984.4243   | 984.4195    | -0.0048 | -5    | 1232       | 1239     | FSWGAECK                    |           |        | Carbamidomethyl (C)[7]                    |              |      | Mascot |      |
| 992.5015   | 992.4612    | -0.0403 | -41   | 619        | 626      | LMNCKLDR                    |           |        |                                           |              |      | Mascot |      |
| 1376.7069  | 1376.6925   | -0.0144 | -10   | 1281       | 1292     | HILNAAYNTGFR                |           |        |                                           |              |      | Mascot |      |
| 1826.9799  | 1826.9786   | -0.0013 | -1    | 1185       | 1200     | LLGYQLAAYFDKPTAR            | 139       | 100    |                                           |              |      | Mascot |      |
| 1826.9799  | 1826.9786   | -0.0013 | -1    | 1185       | 1200     | LLGYQLAAYFDKPTAR            |           |        |                                           |              |      | Mascot |      |
| 1840.8938  | 1840.9373   | 0.0435  | 24    | 76         | 90       | LMGPLLYEYAGTWPR             |           |        | Oxidation (M)[2]                          |              |      | Mascot |      |
| 2362.1926  | 2362.1821   | -0.0105 | -4    | 601        | 623      | ITAPDMASVAGAANVAIK<br>LMNCK |           |        | Carbamidomethyl (C)[22], Oxidation (M)[6] |              |      | Mascot |      |
| 2362.1926  | 2362.1821   | -0.0105 | -4    | 601        | 623      | ITAPDMASVAGAANVAIK<br>LMNCK |           |        | Carbamidomethyl (C)[22], Oxidation (M)[6] |              |      | Mascot |      |

|    |                                                                                          |  |  |  |  |  |          |      |    |    |        |  |  |
|----|------------------------------------------------------------------------------------------|--|--|--|--|--|----------|------|----|----|--------|--|--|
| 22 | ATPase, Ca++ transporting, cardiac muscle, fast twitch 1 like [Danio rerio] gi 117606266 |  |  |  |  |  | 108861.1 | 5.05 | 16 | 54 | 81.449 |  |  |
|----|------------------------------------------------------------------------------------------|--|--|--|--|--|----------|------|----|----|--------|--|--|

#### Peptide Information

| Calc. Mass | Obsrv. Mass | ± da    | ± ppm | Start Seq. | End Seq. | Sequence   | Ion Score | C. I. | %                | Modification | Rank | Result | Type |
|------------|-------------|---------|-------|------------|----------|------------|-----------|-------|------------------|--------------|------|--------|------|
| 826.381    | 826.4424    | 0.0614  | 74    | 669        | 675      | RACCFAR    |           |       |                  |              |      | Mascot |      |
| 911.4944   | 911.3965    | -0.0979 | -107  | 676        | 683      | VEPSHKSK   |           |       |                  |              |      | Mascot |      |
| 913.4737   | 913.4474    | -0.0263 | -29   | 513        | 521      | GAPEGVIDR  |           |       |                  |              |      | Mascot |      |
| 960.5546   | 960.4742    | -0.0804 | -84   | 540        | 547      | DKIMNVIK   |           |       |                  |              |      | Mascot |      |
| 960.5546   | 960.4742    | -0.0804 | -84   | 540        | 547      | DKIMNVIK   |           |       |                  |              |      | Mascot |      |
| 982.4186   | 982.4495    | 0.0309  | 31    | 121        | 128      | EYEPENMGK  |           |       |                  |              |      | Mascot |      |
| 998.4135   | 998.4368    | 0.0233  | 23    | 121        | 128      | EYEPENMGK  |           |       | Oxidation (M)[6] |              |      | Mascot |      |
| 1045.5524  | 1045.5583   | 0.0059  | 6     | 111        | 120      | NAESAIEALK |           |       |                  |              |      | Mascot |      |

|    |                                         |           |         |     |             |     |                           |      |   |                        |        |  |        |
|----|-----------------------------------------|-----------|---------|-----|-------------|-----|---------------------------|------|---|------------------------|--------|--|--------|
|    | 1165.5735                               | 1165.7374 | 0.1639  | 141 | 253         | 262 | LDEFGEQLSK                |      |   |                        |        |  | Mascot |
|    | 1234.646                                | 1234.6774 | 0.0314  | 25  | 602         | 612 | KEVTGSIELCR               |      |   |                        |        |  | Mascot |
|    | 1287.709                                | 1287.6693 | -0.0397 | -31 | 558         | 569 | CLALATRDSPK               |      |   |                        |        |  | Mascot |
|    | 1287.709                                | 1287.6693 | -0.0397 | -31 | 558         | 569 | CLALATRDSPK               |      |   |                        |        |  | Mascot |
|    | 1364.7361                               | 1364.6938 | -0.0423 | -31 | 823         | 833 | EPLISGWLFRR               |      |   |                        |        |  | Mascot |
|    | 1364.7361                               | 1364.6938 | -0.0423 | -31 | 823         | 833 | EPLISGWLFRR               |      |   |                        |        |  | Mascot |
|    | 1404.6511                               | 1404.7502 | 0.0991  | 71  | 670         | 681 | ACCFARVEPSHK              |      |   | Carbamidomethyl (C)[2] |        |  | Mascot |
|    | 1434.741                                | 1434.7615 | 0.0205  | 14  | 509         | 521 | MFVKGAPEGVIDR             |      |   | Oxidation (M)[1]       |        |  | Mascot |
|    | 1676.9159                               | 1676.8547 | -0.0612 | -36 | 820         | 833 | SPKEPLISGWLFRR            |      |   |                        |        |  | Mascot |
|    | 1838.8875                               | 1838.9198 | 0.0323  | 18  | 335         | 352 | SLPSVETLGCTSVICSDK        |      |   |                        |        |  | Mascot |
|    | 1957.9501                               | 1958.0151 | 0.065   | 33  | 636         | 653 | IGIFSEDEDVTGKAYTGR        |      |   |                        |        |  | Mascot |
|    | 1957.9501                               | 1958.0151 | 0.065   | 33  | 636         | 653 | IGIFSEDEDVTGKAYTGR        |      |   |                        |        |  | Mascot |
|    | 2362.073                                | 2362.1821 | 0.1091  | 46  | 581         | 601 | FADYETDLTFVGCVGML<br>DPPR |      |   | Oxidation (M)[16]      |        |  | Mascot |
|    | 2362.073                                | 2362.1821 | 0.1091  | 46  | 581         | 601 | FADYETDLTFVGCVGML<br>DPPR |      |   | Oxidation (M)[16]      |        |  | Mascot |
| 23 | 25 kDa heat shock protein [Danio rerio] |           |         |     | gi 56554759 |     | 22360                     | 6.52 | 8 | 52                     | 73.186 |  |        |

#### Peptide Information

| Calc. Mass | Obsrv. Mass | ± da    | ± ppm | Start Seq. | End Seq. | Sequence         | Ion Score | C. I. | % Modification   | Rank | Result Type |
|------------|-------------|---------|-------|------------|----------|------------------|-----------|-------|------------------|------|-------------|
| 897.4651   | 897.4583    | -0.0068 | -8    | 6          | 12       | IPFSFMR          |           |       |                  |      | Mascot      |
| 911.4006   | 911.3965    | -0.0041 | -4    | 21         | 27       | DWYQGSR          |           |       |                  |      | Mascot      |
| 913.46     | 913.4474    | -0.0126 | -14   | 6          | 12       | IPFSFMR          |           |       | Oxidation (M)[6] |      | Mascot      |
| 960.4533   | 960.4742    | 0.0209  | 22    | 136        | 143      | DEHGFISR         |           |       |                  |      | Mascot      |
| 960.4533   | 960.4742    | 0.0209  | 22    | 136        | 143      | DEHGFISR         |           |       |                  |      | Mascot      |
| 991.4631   | 991.4587    | -0.0044 | -4    | 13         | 20       | SPSWDPFR         |           |       |                  |      | Mascot      |
| 1069.5612  | 1069.5568   | -0.0044 | -4    | 5          | 12       | RIPFSFMR         |           |       | Oxidation (M)[7] |      | Mascot      |
| 1088.5483  | 1088.5405   | -0.0078 | -7    | 135        | 143      | KDEHGFISR        |           |       |                  |      | Mascot      |
| 1840.944   | 1840.9373   | -0.0067 | -4    | 104        | 119      | ISLDVNHFSPEELNVK |           |       |                  |      | Mascot      |
| 1883.8459  | 1883.8407   | -0.0052 | -3    | 13         | 27       | SPSWDPFRDWYQGSR  |           |       |                  |      | Mascot      |

24 novel protein similar to vertebrate NifU-like N-terminal domain containing (NIFUN) [Danio rerio] gi|37606130 17748.2 8.87 6 51 63.828

#### Peptide Information

| Calc. Mass | Obsrv. Mass | ± da    | ± ppm | Start Seq. | End Seq. | Sequence  | Ion Score | C. I. | % Modification | Rank | Result Type |
|------------|-------------|---------|-------|------------|----------|-----------|-----------|-------|----------------|------|-------------|
| 913.4447   | 913.4474    | 0.0027  | 3     | 10         | 18       | CASSALFSK |           |       |                |      | Mascot      |
| 960.5359   | 960.4742    | -0.0617 | -64   | 107        | 115      | GKSIDALK  | 21        | 0     |                |      | Mascot      |

|    |                                                   |           |         |     |     |     |                       |         |     |   |    |        |                                           |  |  |  |        |
|----|---------------------------------------------------|-----------|---------|-----|-----|-----|-----------------------|---------|-----|---|----|--------|-------------------------------------------|--|--|--|--------|
|    | 960.5359                                          | 960.4742  | -0.0617 | -64 | 107 | 115 | GKSIDEALK             |         |     |   |    |        |                                           |  |  |  | Mascot |
|    | 1045.5636                                         | 1045.5583 | -0.0053 | -5  | 44  | 53  | NVGSLDKNAK            |         |     |   |    |        |                                           |  |  |  | Mascot |
|    | 1069.5459                                         | 1069.5568 | 0.0109  | 10  | 9   | 18  | RCASSALFSK            |         |     |   |    |        |                                           |  |  |  | Mascot |
|    | 1346.6443                                         | 1346.6887 | 0.0444  | 33  | 132 | 143 | LHCSMLAEDA            |         |     |   |    |        | Oxidation (M)[5]                          |  |  |  | Mascot |
|    | 2283.1545                                         | 2283.167  | 0.0125  | 5   | 124 | 143 | ELCLPPVKLHCSMLAEDIAIK |         |     |   |    |        | Carbamidomethyl (C)[3], Oxidation (M)[13] |  |  |  | Mascot |
| 25 | iron-sulfur cluster assembly enzyme [Danio rerio] |           |         |     |     |     | gi 54261801           | 17796.2 | 8.7 | 6 | 49 | 43.977 |                                           |  |  |  |        |

#### Peptide Information

| Calc. Mass | Obsrv. Mass | ± da    | ± ppm | Start Seq. | End Seq. | Sequence              | Ion Score | C. I. | % | Modification                              | Rank | Result Type |
|------------|-------------|---------|-------|------------|----------|-----------------------|-----------|-------|---|-------------------------------------------|------|-------------|
| 913.4447   | 913.4474    | 0.0027  | 3     | 10         | 18       | CASSALFSK             |           |       |   |                                           |      | Mascot      |
| 960.5083   | 960.4742    | -0.0341 | -36   | 1          | 9        | MALAAAAWR             |           |       |   |                                           |      | Mascot      |
| 960.5359   | 960.4742    | -0.0617 | -64   | 107        | 115      | GKSIDEALK             | 21        |       | 0 |                                           |      | Mascot      |
| 1045.5636  | 1045.5583   | -0.0053 | -5    | 44         | 53       | NVGSLDKNAK            |           |       |   |                                           |      | Mascot      |
| 1346.6443  | 1346.6887   | 0.0444  | 33    | 132        | 143      | LHCSMLAEDA            |           |       |   | Oxidation (M)[5]                          |      | Mascot      |
| 2283.1545  | 2283.167    | 0.0125  | 5     | 124        | 143      | ELCLPPVKLHCSMLAEDIAIK |           |       |   | Carbamidomethyl (C)[3], Oxidation (M)[13] |      | Mascot      |

|    |                                                                          |  |  |  |  |  |              |          |      |    |    |       |    |   |  |  |  |
|----|--------------------------------------------------------------------------|--|--|--|--|--|--------------|----------|------|----|----|-------|----|---|--|--|--|
| 26 | PREDICTED: WD repeat- and FYVE domain-containing protein 4 [Danio rerio] |  |  |  |  |  | gi 326673033 | 526148.3 | 6.32 | 29 | 47 | 9.141 | 22 | 0 |  |  |  |
|----|--------------------------------------------------------------------------|--|--|--|--|--|--------------|----------|------|----|----|-------|----|---|--|--|--|

#### Peptide Information

| Calc. Mass | Obsrv. Mass | ± da    | ± ppm | Start Seq. | End Seq. | Sequence      | Ion Score | C. I. | % | Modification                             | Rank | Result Type |
|------------|-------------|---------|-------|------------|----------|---------------|-----------|-------|---|------------------------------------------|------|-------------|
| 809.3723   | 809.4143    | 0.042   | 52    | 1217       | 1222     | FCQQQR        |           |       |   |                                          |      | Mascot      |
| 850.5145   | 850.5385    | 0.024   | 28    | 2616       | 2622     | RSFSLLK       |           |       |   |                                          |      | Mascot      |
| 991.469    | 991.4587    | -0.0103 | -10   | 1808       | 1816     | KENSDDSPK     |           |       |   |                                          |      | Mascot      |
| 992.5444   | 992.4612    | -0.0832 | -84   | 3995       | 4003     | LCSVVSSLK     |           |       |   | Carbamidomethyl (C)[2]                   |      | Mascot      |
| 1088.6245  | 1088.5405   | -0.084  | -77   | 2977       | 2985     | MKVQLISNR     |           |       |   |                                          |      | Mascot      |
| 1109.6538  | 1109.4917   | -0.1621 | -146  | 1300       | 1308     | NHILSTLRR     |           |       |   |                                          |      | Mascot      |
| 1118.5225  | 1118.6768   | 0.1543  | 138   | 3764       | 3773     | GWVQDTAEGR    |           |       |   |                                          |      | Mascot      |
| 1179.6844  | 1179.5999   | -0.0845 | -72   | 1279       | 1288     | DQHIALLLR     |           |       |   |                                          |      | Mascot      |
| 1211.7041  | 1211.7106   | 0.0065  | 5     | 2728       | 2737     | LLTVVRHMSR    |           |       |   |                                          |      | Mascot      |
| 1211.7041  | 1211.7106   | 0.0065  | 5     | 2728       | 2737     | LLTVVRHMSR    |           |       |   |                                          |      | Mascot      |
| 1234.6394  | 1234.6774   | 0.038   | 31    | 901        | 909      | IMLQELCRR     |           |       |   | Carbamidomethyl (C)[7], Oxidation (M)[2] |      | Mascot      |
| 1287.6903  | 1287.6693   | -0.021  | -16   | 2455       | 2467     | APSVSVVSIESGR | 22        |       | 0 |                                          |      | Mascot      |
| 1287.6903  | 1287.6693   | -0.021  | -16   | 2455       | 2467     | APSVSVVSIESGR |           |       |   |                                          |      | Mascot      |
| 1308.7747  | 1308.657    | -0.1177 | -90   | 1482       | 1492     | RILSSVLHQQK   |           |       |   |                                          |      | Mascot      |
| 1309.7157  | 1309.6526   | -0.0631 | -48   | 4620       | 4629     | HLVLCRELNR    |           |       |   | Carbamidomethyl (C)[5]                   |      | Mascot      |

|           |           |         |      |      |      |                                  |  |                                              |  |        |
|-----------|-----------|---------|------|------|------|----------------------------------|--|----------------------------------------------|--|--------|
| 1316.7606 | 1316.5662 | -0.1944 | -148 | 2258 | 2268 | LKQDLLQSIMK                      |  |                                              |  | Mascot |
| 1320.6464 | 1320.5803 | -0.0661 | -50  | 4090 | 4101 | DLSKPMGAQTEK                     |  | Oxidation (M)[6]                             |  | Mascot |
| 1382.6846 | 1382.7771 | 0.0925  | 67   | 294  | 306  | SDTASMHKAHVAK                    |  |                                              |  | Mascot |
| 1382.7175 | 1382.7771 | 0.0596  | 43   | 4652 | 4664 | THGTLLVGDAWGR                    |  |                                              |  | Mascot |
| 1386.5745 | 1386.6737 | 0.0992  | 72   | 1322 | 1331 | IMSDCCLCRR                       |  | Carbamidomethyl (C)[5,6,8], Oxidation (M)[2] |  | Mascot |
| 1545.7366 | 1545.7322 | -0.0044 | -3   | 654  | 666  | SLRVEFDCSASFK                    |  | Carbamidomethyl (C)[8]                       |  | Mascot |
| 1638.6848 | 1638.8556 | 0.1708  | 104  | 35   | 47   | SCLYMPPELG YDK                   |  | Carbamidomethyl (C)[2], Oxidation (M)[5,6]   |  | Mascot |
| 1839.0044 | 1838.9198 | -0.0846 | -46  | 2811 | 2828 | KSCLVTVYLNATAIGTGK               |  |                                              |  | Mascot |
| 1958.0276 | 1958.0151 | -0.0125 | -6   | 2717 | 2733 | FSSACESHVRLTTVVR                 |  | Carbamidomethyl (C)[5]                       |  | Mascot |
| 1958.0276 | 1958.0151 | -0.0125 | -6   | 2717 | 2733 | FSSACESHVRLTTVVR                 |  | Carbamidomethyl (C)[5]                       |  | Mascot |
| 1993.9907 | 1993.9648 | -0.0259 | -13  | 2521 | 2537 | QIMCEFGLLSTLLTHCK                |  | Carbamidomethyl (C)[4]                       |  | Mascot |
| 2076.1025 | 2076.1216 | 0.0191  | 9    | 1537 | 1554 | GKPSLPPGLFEHHDLYIR               |  |                                              |  | Mascot |
| 2224.9355 | 2225.1177 | 0.1822  | 82   | 257  | 274  | HLCFGCLSTSHMSRDCE<br>K           |  | Carbamidomethyl (C)[3,6,16]                  |  | Mascot |
| 2233.0127 | 2233.0706 | 0.0579  | 26   | 3183 | 3201 | SWSFECLSCICPGFEVLQ<br>K          |  | Carbamidomethyl (C)[6]                       |  | Mascot |
| 2283.1948 | 2283.167  | -0.0278 | -12  | 2024 | 2043 | IIQSSFMRSSNTVICSQIL<br>R         |  |                                              |  | Mascot |
| 2284.1389 | 2284.1748 | 0.0359  | 16   | 2349 | 2369 | LGEALLHLGCFQKGDVP<br>ESDR        |  |                                              |  | Mascot |
| 3337.6045 | 3337.7556 | 0.1511  | 45   | 3638 | 3666 | EGQVSMADVSPWEEQ<br>ATKSWQLFIDSQK |  |                                              |  | Mascot |

27 RecName: Full=SH3 domain-binding protein 4-A gi|123888628 108383 7.89 16 46 0.375

#### Peptide Information

| Calc. Mass | Obsrv. Mass | ± da    | ± ppm | Start Seq. | End Seq. | Sequence      | Ion Score | C. I. % | Modification     | Rank | Result Type |
|------------|-------------|---------|-------|------------|----------|---------------|-----------|---------|------------------|------|-------------|
| 826.4781   | 826.4424    | -0.0357 | -43   | 41         | 48       | VPSPSALR      |           |         |                  |      | Mascot      |
| 842.5822   | 842.5054    | -0.0768 | -91   | 663        | 669      | LIKTVIR       |           |         |                  |      | Mascot      |
| 850.4338   | 850.5385    | 0.1047  | 123   | 387        | 393      | LSNMEIK       |           |         | Oxidation (M)[4] |      | Mascot      |
| 897.4689   | 897.4583    | -0.0106 | -12   | 290        | 296      | TAWLNHR       |           |         |                  |      | Mascot      |
| 982.539    | 982.4495    | -0.0895 | -91   | 574        | 581      | LIYMISSR      |           |         |                  |      | Mascot      |
| 984.507    | 984.4195    | -0.0875 | -89   | 394        | 401      | SFITLEMK      |           |         | Oxidation (M)[7] |      | Mascot      |
| 984.507    | 984.4195    | -0.0875 | -89   | 394        | 401      | SFITLEMK      |           |         | Oxidation (M)[7] |      | Mascot      |
| 992.4651   | 992.4612    | -0.0039 | -4    | 833        | 841      | MDCQGLVAR     |           |         |                  |      | Mascot      |
| 998.5339   | 998.4368    | -0.0971 | -97   | 574        | 581      | LIYMISSR      |           |         | Oxidation (M)[4] |      | Mascot      |
| 1045.4796  | 1045.5583   | 0.0787  | 75    | 791        | 799      | AELDSEPER     |           |         |                  |      | Mascot      |
| 1107.5793  | 1107.5398   | -0.0395 | -36   | 49         | 59       | LAPSTSFGTAR   |           |         |                  |      | Mascot      |
| 1346.6885  | 1346.6887   | 0.0002  | 0     | 762        | 772      | TILMENLGNWR   |           |         |                  |      | Mascot      |
| 1357.6932  | 1357.7161   | 0.0229  | 17    | 492        | 504      | TVVAIFGHDCAPK |           |         |                  |      | Mascot      |
| 1434.7158  | 1434.7615   | 0.0457  | 32    | 914        | 925      | DVIHELHMLDR   |           |         |                  |      | Mascot      |

|           |           |        |     |     |     |                                   |                                           |        |
|-----------|-----------|--------|-----|-----|-----|-----------------------------------|-------------------------------------------|--------|
| 1840.8237 | 1840.9373 | 0.1136 | 62  | 408 | 423 | TESPMAEIVCVRSDCK                  | Carbamidomethyl (C)[10], Oxidation (M)[5] | Mascot |
| 1957.9939 | 1958.0151 | 0.0212 | 11  | 60  | 76  | EVVAIKDYCPSSFTTLK                 | Carbamidomethyl (C)[9]                    | Mascot |
| 1957.9939 | 1958.0151 | 0.0212 | 11  | 60  | 76  | EVVAIKDYCPSSFTTLK                 | Carbamidomethyl (C)[9]                    | Mascot |
| 2284.2368 | 2284.1748 | -0.062 | -27 | 492 | 513 | TVVAIFGHDCAPKLLVS<br>EVGK         |                                           | Mascot |
| 3337.6052 | 3337.7556 | 0.1504 | 45  | 298 | 327 | LARSDHLESLGQNPWG<br>GQTQPVETNIVCK | Carbamidomethyl (C)[5]                    | Mascot |

28 PREDICTED: serine/threonine-protein kinase pim-3-like gi|326675215 23705.1 8.34 4 46 0 30 73.535  
[Danio rerio]

#### Peptide Information

| Calc. Mass | Obsrv. Mass | ± da    | ± ppm | Start Seq. | End Seq. | Sequence    | Ion Score | C. I. % | Modification | Rank | Result Type |
|------------|-------------|---------|-------|------------|----------|-------------|-----------|---------|--------------|------|-------------|
| 991.4843   | 991.4587    | -0.0256 | -26   | 120        | 127      | LQEGEPYR    |           |         |              |      | Mascot      |
| 1211.6531  | 1211.7106   | 0.0575  | 47    | 110        | 119      | SPYLGVTRYR  |           |         |              |      | Mascot      |
| 1211.6531  | 1211.7106   | 0.0575  | 47    | 110        | 119      | SPYLGVTRYR  |           |         |              |      | Mascot      |
| 1287.7015  | 1287.6693   | -0.0322 | -25   | 44         | 55       | KNNGLLESVAR | 30        | 73.535  |              |      | Mascot      |
| 1287.7015  | 1287.6693   | -0.0322 | -25   | 44         | 55       | KNNGLLESVAR |           |         |              |      | Mascot      |
| 1364.7419  | 1364.6938   | -0.0481 | -35   | 184        | 195      | TGPVLEEIIHK |           |         |              |      | Mascot      |
| 1364.7419  | 1364.6938   | -0.0481 | -35   | 184        | 195      | TGPVLEEIIHK |           |         |              |      | Mascot      |

29 ATP-dependent RNA helicase DDX1 [Danio rerio] gi|309243086 82361.6 6.62 12 46 0

#### Peptide Information

| Calc. Mass | Obsrv. Mass | ± da    | ± ppm | Start Seq. | End Seq. | Sequence      | Ion Score | C. I. % | Modification             | Rank | Result Type |
|------------|-------------|---------|-------|------------|----------|---------------|-----------|---------|--------------------------|------|-------------|
| 960.4897   | 960.4742    | -0.0155 | -16   | 452        | 458      | NDKLWER       | 19        | 0       |                          |      | Mascot      |
| 960.4897   | 960.4742    | -0.0155 | -16   | 452        | 458      | NDKLWER       |           |         |                          |      | Mascot      |
| 1109.4833  | 1109.4917   | 0.0084  | 8     | 91         | 98       | WQMNPFR       |           |         | Oxidation (M)[3]         |      | Mascot      |
| 1118.5629  | 1118.6768   | 0.1139  | 102   | 163        | 173      | YGFGFGGTGKK   |           |         |                          |      | Mascot      |
| 1165.6034  | 1165.7374   | 0.134   | 115   | 568        | 577      | FLICTDVAAR    |           |         | Carbamidomethyl (C)[4]   |      | Mascot      |
| 1320.7118  | 1320.5803   | -0.1315 | -100  | 269        | 281      | SSQTGSAKVTQVK |           |         |                          |      | Mascot      |
| 1325.6704  | 1325.7539   | 0.0835  | 63    | 506        | 516      | MDQAIIFCR TK  |           |         |                          |      | Mascot      |
| 1325.6947  | 1325.7539   | 0.0592  | 45    | 657        | 667      | ELLSDIEHLK    |           |         |                          |      | Mascot      |
| 1364.6184  | 1364.6938   | 0.0754  | 55    | 668        | 678      | CTITQCEPDIK   |           |         | Carbamidomethyl (C)[1,6] |      | Mascot      |
| 1364.6184  | 1364.6938   | 0.0754  | 55    | 668        | 678      | CTITQCEPDIK   |           |         | Carbamidomethyl (C)[1,6] |      | Mascot      |
| 1382.6919  | 1382.7771   | 0.0852  | 62    | 506        | 516      | MDQAIIFCR TK  |           |         | Carbamidomethyl (C)[8]   |      | Mascot      |
| 1382.6919  | 1382.7771   | 0.0852  | 62    | 506        | 516      | MDQAIIFCR TK  |           |         | Carbamidomethyl (C)[8]   |      | Mascot      |
| 1386.7239  | 1386.6737   | -0.0502 | -36   | 422        | 432      | IMHFPTWVDLK   |           |         |                          |      | Mascot      |
| 1434.6947  | 1434.7615   | 0.0668  | 47    | 624        | 634      | EKVWYHVCASR   |           |         | Carbamidomethyl (C)[8]   |      | Mascot      |

|    |                                |           |         |     |              |     |                   |      |    |    |   |    |   |                        |        |
|----|--------------------------------|-----------|---------|-----|--------------|-----|-------------------|------|----|----|---|----|---|------------------------|--------|
|    | 1838.9469                      | 1838.9198 | -0.0271 | -15 | 224          | 239 | SQPFVFASCVLKNAELK |      |    |    |   |    |   | Carbamidomethyl (C)[8] | Mascot |
|    | 1840.8799                      | 1840.9373 | 0.0574  | 31  | 83           | 98  | TGGAVFSKWQMNPFDR  |      |    |    |   |    |   |                        | Mascot |
| 30 | PREDICTED: titin [Danio rerio] |           |         |     | gi 189523697 |     | 3199053           | 5.99 | 63 | 46 | 0 | 10 | 0 |                        |        |

Peptide Information

| Calc. Mass | Obsrv. Mass | ± da    | ± ppm | Start Seq. | End Sequence Seq.  | Ion Score | C. I. | % Modification                           | Rank | Result Type |
|------------|-------------|---------|-------|------------|--------------------|-----------|-------|------------------------------------------|------|-------------|
| 809.4151   | 809.4143    | -0.0008 | -1    | 6326       | 6331 EYKDVR        |           |       |                                          |      | Mascot      |
| 826.4669   | 826.4424    | -0.0245 | -30   | 27841      | 27847 LTSYKSK      |           |       |                                          |      | Mascot      |
| 842.4478   | 842.5054    | 0.0576  | 68    | 21462      | 21468 RDLPEGR      |           |       |                                          |      | Mascot      |
| 850.4893   | 850.5385    | 0.0492  | 58    | 1620       | 1626 YVVSARR       |           |       |                                          |      | Mascot      |
| 882.4791   | 882.5623    | 0.0832  | 94    | 14147      | 14153 KEEHAIR      |           |       |                                          |      | Mascot      |
| 897.4498   | 897.4583    | 0.0085  | 9     | 15062      | 15068 EFKMSQK      |           |       |                                          |      | Mascot      |
| 911.4468   | 911.3965    | -0.0503 | -55   | 5424       | 5432 YVPSSGSSK     |           |       |                                          |      | Mascot      |
| 913.4447   | 913.4474    | 0.0027  | 3     | 15062      | 15068 EFKMSQK      |           |       | Oxidation (M)[4]                         |      | Mascot      |
| 960.4567   | 960.4742    | 0.0175  | 18    | 23100      | 23108 VQDTPAACR    |           |       |                                          |      | Mascot      |
| 960.4996   | 960.4742    | -0.0254 | -26   | 15118      | 15125 LDEILSDR     | 21        | 0     |                                          |      | Mascot      |
| 982.441    | 982.4495    | 0.0085  | 9     | 23255      | 23262 HCEHEVTK     |           |       |                                          |      | Mascot      |
| 984.4818   | 984.4195    | -0.0623 | -63   | 22537      | 22544 ITGYMVER     |           |       | Oxidation (M)[5]                         |      | Mascot      |
| 984.4818   | 984.4195    | -0.0623 | -63   | 22537      | 22544 ITGYMVER     |           |       | Oxidation (M)[5]                         |      | Mascot      |
| 991.4955   | 991.4587    | -0.0368 | -37   | 13094      | 13102 VAAENQFGR    |           |       |                                          |      | Mascot      |
| 992.4294   | 992.4612    | 0.0318  | 32    | 8879       | 8885 DNMYFFR       |           |       |                                          |      | Mascot      |
| 996.536    | 996.5937    | 0.0577  | 58    | 2513       | 2520 LTITETYS      |           |       |                                          |      | Mascot      |
| 998.4359   | 998.4368    | 0.0009  | 1     | 27392      | 27400 FGDDSCAR     |           |       |                                          |      | Mascot      |
| 1069.5887  | 1069.5568   | -0.0319 | -30   | 10291      | 10299 NPVIEEQK     |           |       |                                          |      | Mascot      |
| 1088.5371  | 1088.5405   | 0.0034  | 3     | 24831      | 24839 YALQYSSTR    |           |       |                                          |      | Mascot      |
| 1107.5292  | 1107.5398   | 0.0106  | 10    | 27619      | 27627 HFVPFSDMK    |           |       |                                          |      | Mascot      |
| 1109.5409  | 1109.4917   | -0.0492 | -44   | 8857       | 8865 KTWMTATDR     |           |       |                                          |      | Mascot      |
| 1118.6681  | 1118.6768   | 0.0087  | 8     | 8844       | 8852 ILAYVVERR     |           |       |                                          |      | Mascot      |
| 1165.6324  | 1165.7374   | 0.105   | 90    | 11960      | 11968 ITNYTIERR    |           |       |                                          |      | Mascot      |
| 1179.6078  | 1179.5999   | -0.0079 | -7    | 24416      | 24424 ISWKLEEMK    |           |       | Oxidation (M)[8]                         |      | Mascot      |
| 1193.6129  | 1193.6091   | -0.0038 | -3    | 5111       | 5120 SNVAVMCLRK    |           |       | Carbamidomethyl (C)[7], Oxidation (M)[6] |      | Mascot      |
| 1211.7106  | 1211.7106   | 0       | 0     | 12384      | 12394 QNAVNNLVLK   | 14        | 0     |                                          |      | Mascot      |
| 1211.7106  | 1211.7106   | 0       | 0     | 12384      | 12394 QNAVNNLVLK   |           |       |                                          |      | Mascot      |
| 1287.6328  | 1287.6693   | 0.0365  | 28    | 13852      | 13861 KPKEADEWER   |           |       |                                          |      | Mascot      |
| 1287.6328  | 1287.6693   | 0.0365  | 28    | 13852      | 13861 KPKEADEWER   |           |       |                                          |      | Mascot      |
| 1308.6464  | 1308.657    | 0.0106  | 8     | 28588      | 28599 DNAVISITSNMK |           |       | Oxidation (M)[11]                        |      | Mascot      |



|           |           |         |      |       |       |                         |                                           |        |
|-----------|-----------|---------|------|-------|-------|-------------------------|-------------------------------------------|--------|
| 1309.6854 | 1309.6526 | -0.0328 | -25  | 12580 | 12591 | NLTMTMCLGIVK            | Oxidation (M)[6]                          | Mascot |
| 1316.6382 | 1316.5662 | -0.072  | -55  | 22177 | 22186 | ENGYYFFVR               |                                           | Mascot |
| 1320.7456 | 1320.5803 | -0.1653 | -125 | 1709  | 1719  | IHMVIDKVTHK             |                                           | Mascot |
| 1325.7358 | 1325.7539 | 0.0181  | 14   | 12243 | 12254 | EKMVIHAGGVIR            | Oxidation (M)[3]                          | Mascot |
| 1325.7358 | 1325.7539 | 0.0181  | 14   | 12243 | 12254 | EKMVIHAGGVIR            | Oxidation (M)[3]                          | Mascot |
| 1327.6892 | 1327.7329 | 0.0437  | 33   | 24455 | 24466 | YFLSLENVAGSK            |                                           | Mascot |
| 1346.691  | 1346.6887 | -0.0023 | -2   | 4965  | 4976  | TLTDQSLQQGQK            |                                           | Mascot |
| 1357.6958 | 1357.7161 | 0.0203  | 15   | 1104  | 1115  | SLVEETQLPEGR            |                                           | Mascot |
| 1364.6804 | 1364.6938 | 0.0134  | 10   | 7578  | 7588  | DEARFEIELSR             |                                           | Mascot |
| 1364.7096 | 1364.6938 | -0.0158 | -12  | 5234  | 5244  | LDNLFFIEEPK             |                                           | Mascot |
| 1376.6475 | 1376.6925 | 0.045   | 33   | 6624  | 6635  | SPRSDDKPEMSK            |                                           | Mascot |
| 1381.7587 | 1381.7281 | -0.0306 | -22  | 27760 | 27771 | FELSALRHPSPK            |                                           | Mascot |
| 1382.7678 | 1382.7771 | 0.0093  | 7    | 11942 | 11953 | AEQITLSWLPPK            |                                           | Mascot |
| 1382.8002 | 1382.7771 | -0.0231 | -17  | 5915  | 5927  | AAVQPSEKKPVTK           |                                           | Mascot |
| 1386.6747 | 1386.6737 | -0.001  | -1   | 28112 | 28123 | IEETTETAVHEK            |                                           | Mascot |
| 1404.7402 | 1404.7502 | 0.01    | 7    | 6440  | 6452  | AEESVMPKLSVAK           | Oxidation (M)[6]                          | Mascot |
| 1425.722  | 1425.786  | 0.064   | 45   | 9755  | 9767  | VAEDVPTTEHSLK           |                                           | Mascot |
| 1434.741  | 1434.7615 | 0.0205  | 14   | 1892  | 1904  | GTHYSLTVLNAMK           |                                           | Mascot |
| 1475.7601 | 1475.752  | -0.0081 | -5   | 26128 | 26140 | VFAENETGISRPR           |                                           | Mascot |
| 1493.8257 | 1493.7335 | -0.0922 | -62  | 63    | 77    | AVLMIPAVTAAHSGR         |                                           | Mascot |
| 1545.74   | 1545.7322 | -0.0078 | -5   | 21520 | 21532 | DNVDPPRIMMDVK           | Oxidation (M)[9]                          | Mascot |
| 1638.9061 | 1638.8556 | -0.0505 | -31  | 5355  | 5368  | DIDIVELLRNVDPK          |                                           | Mascot |
| 1676.8602 | 1676.8547 | -0.0055 | -3   | 24231 | 24245 | TWTEAAPKSTQTSLR         |                                           | Mascot |
| 1707.8547 | 1707.7715 | -0.0832 | -49  | 15826 | 15840 | DDGGSEVINYLEKR          |                                           | Mascot |
| 1826.8412 | 1826.9786 | 0.1374  | 75   | 12668 | 12683 | DMWTTVTSTATTHTCK        | Oxidation (M)[2]                          | Mascot |
| 1826.9622 | 1826.9786 | 0.0164  | 9    | 13771 | 13785 | LVKAPLVQNCEYFFR         |                                           | Mascot |
| 1838.8271 | 1838.9198 | 0.0927  | 50   | 12595 | 12611 | GHSGKYCVTVENCTGAR       | Carbamidomethyl (C)[7]                    | Mascot |
| 1840.944  | 1840.9373 | -0.0067 | -4   | 10638 | 10654 | IGEVTSSTVALSWHEPK       |                                           | Mascot |
| 1848.9702 | 1848.9532 | -0.017  | -9   | 16918 | 16933 | ETTSQSWVELSLIIR         |                                           | Mascot |
| 1883.8627 | 1883.8407 | -0.022  | -12  | 12668 | 12683 | DMWTTVTSTATTHTCK        | Carbamidomethyl (C)[15], Oxidation (M)[2] | Mascot |
| 1957.9865 | 1958.0151 | 0.0286  | 15   | 1313  | 1329  | TQEGYYEAITAVELKSR       |                                           | Mascot |
| 1957.9865 | 1958.0151 | 0.0286  | 15   | 1313  | 1329  | TQEGYYEAITAVELKSR       |                                           | Mascot |
| 2076.1123 | 2076.1216 | 0.0093  | 4    | 19553 | 19571 | DPFIHPGSPQIIEVTNIAK     |                                           | Mascot |
| 2211.1147 | 2211.1042 | -0.0105 | -5   | 22749 | 22767 | VVWSVISEAMESRMVTV<br>QK | Oxidation (M)[10,14]                      | Mascot |
| 2233.0076 | 2233.0706 | 0.063   | 28   | 20714 | 20733 | VSAENETGVGECSDL<br>FYR  | Carbamidomethyl (C)[12]                   | Mascot |
| 2283.0269 | 2283.167  | 0.1401  | 61   | 8249  | 8269  | MDDAGEYHCKLPASETT       | Oxidation (M)[1]                          | Mascot |

|           |           |         |     |       |       |                                    |                                            |        |
|-----------|-----------|---------|-----|-------|-------|------------------------------------|--------------------------------------------|--------|
| 2284.0583 | 2284.1748 | 0.1165  | 51  | 16047 | 16067 | GTLK<br>ANTVNVVIDCAYTVADLQE<br>GCK | Carbamidomethyl (C)[9]                     | Mascot |
| 2362.1165 | 2362.1821 | 0.0656  | 28  | 25530 | 25550 | VAAANRYGTGEYLQSEV<br>VMCK          | Carbamidomethyl (C)[20], Oxidation (M)[19] | Mascot |
| 2362.1165 | 2362.1821 | 0.0656  | 28  | 25530 | 25550 | VAAANRYGTGEYLQSEV<br>VMCK          | Carbamidomethyl (C)[20], Oxidation (M)[19] | Mascot |
| 2872.4587 | 2872.3855 | -0.0732 | -25 | 24519 | 24544 | ESGSTAWQLINSSVKNTT<br>FHVSHLTK     |                                            | Mascot |
| 3337.5527 | 3337.7556 | 0.2029  | 61  | 18658 | 18688 | LGVGEHADVAGPICPED<br>KTEEPDLIDAEFR |                                            | Mascot |

31 signal-induced proliferation-associated 1-like protein 2 [Danio rerio] gi|320089557 184671.6 6.48 16 46 0

#### Peptide Information

| Calc. Mass | Obsrv. Mass | ± da    | ± ppm | Start Seq. | End Seq. | Sequence          | Ion Score | C. I. % | Modification           | Rank | Result Type |
|------------|-------------|---------|-------|------------|----------|-------------------|-----------|---------|------------------------|------|-------------|
| 809.4151   | 809.4143    | -0.0008 | -1    | 242        | 248      | GETSIFR           |           |         |                        |      | Mascot      |
| 826.5032   | 826.4424    | -0.0608 | -74   | 552        | 558      | VPEQLLK           |           |         |                        |      | Mascot      |
| 911.4403   | 911.3965    | -0.0438 | -48   | 48         | 55       | DGICPPPR          |           |         | Carbamidomethyl (C)[4] |      | Mascot      |
| 960.438    | 960.4742    | 0.0362  | 38    | 369        | 377      | NEIGGEGER         | 19        | 0       |                        |      | Mascot      |
| 960.438    | 960.4742    | 0.0362  | 38    | 369        | 377      | NEIGGEGER         |           |         |                        |      | Mascot      |
| 982.5138   | 982.4495    | -0.0643 | -65   | 47         | 55       | KDGICPPPR         |           |         |                        |      | Mascot      |
| 1045.4983  | 1045.5583   | 0.06    | 57    | 1143       | 1153     | SAGSPCVPEAK       |           |         |                        |      | Mascot      |
| 1088.5331  | 1088.5405   | 0.0074  | 7     | 369        | 378      | NEIGGEGERK        |           |         |                        |      | Mascot      |
| 1107.4259  | 1107.5398   | 0.1139  | 103   | 346        | 356      | ACTDPDEGDGK       |           |         |                        |      | Mascot      |
| 1179.5674  | 1179.5999   | 0.0325  | 28    | 1362       | 1372     | LSISCQSQGEK       |           |         |                        |      | Mascot      |
| 1193.7365  | 1193.6091   | -0.1274 | -107  | 1438       | 1448     | GKIPLVVQSPR       |           |         |                        |      | Mascot      |
| 1287.6791  | 1287.6693   | -0.0098 | -8    | 506        | 518      | GSILEDAPSTAK      |           |         |                        |      | Mascot      |
| 1287.6791  | 1287.6693   | -0.0098 | -8    | 506        | 518      | GSILEDAPSTAK      |           |         |                        |      | Mascot      |
| 1309.6052  | 1309.6526   | 0.0474  | 36    | 1333       | 1344     | CSKNSSSIDPSK      |           |         | Carbamidomethyl (C)[1] |      | Mascot      |
| 1316.6593  | 1316.5662   | -0.0931 | -71   | 559        | 569      | LDQQGLSYQHK       |           |         |                        |      | Mascot      |
| 1364.7798  | 1364.6938   | -0.086  | -63   | 1154       | 1164     | WHIPSTKILNR       |           |         |                        |      | Mascot      |
| 1364.7798  | 1364.6938   | -0.086  | -63   | 1154       | 1164     | WHIPSTKILNR       |           |         |                        |      | Mascot      |
| 1493.7264  | 1493.7335   | 0.0071  | 5     | 1360       | 1372     | EKLSISCQSQGEK     |           |         | Carbamidomethyl (C)[7] |      | Mascot      |
| 1957.9952  | 1958.0151   | 0.0199  | 10    | 1004       | 1020     | VPIMEYKTLGTGPGWHR |           |         | Oxidation (M)[4]       |      | Mascot      |
| 1957.9952  | 1958.0151   | 0.0199  | 10    | 1004       | 1020     | VPIMEYKTLGTGPGWHR |           |         | Oxidation (M)[4]       |      | Mascot      |

32 SH3 domain-binding protein 4-A [Danio rerio] gi|45387913 104947.5 7.73 15 46 0

#### Peptide Information

| Calc. Mass | Obsrv. Mass | ± da | ± ppm | Start Seq. | End Seq. | Sequence | Ion Score | C. I. % | Modification | Rank | Result Type |
|------------|-------------|------|-------|------------|----------|----------|-----------|---------|--------------|------|-------------|
|------------|-------------|------|-------|------------|----------|----------|-----------|---------|--------------|------|-------------|

|    |                                                                                                  |           |         |     |     |     |                                    |  |  |  |  |                                           |  |  |  |  |  |  |        |
|----|--------------------------------------------------------------------------------------------------|-----------|---------|-----|-----|-----|------------------------------------|--|--|--|--|-------------------------------------------|--|--|--|--|--|--|--------|
|    | 826.4781                                                                                         | 826.4424  | -0.0357 | -43 | 41  | 48  | VPSPSALR                           |  |  |  |  |                                           |  |  |  |  |  |  | Mascot |
|    | 842.5822                                                                                         | 842.5054  | -0.0768 | -91 | 634 | 640 | LIKTVIR                            |  |  |  |  |                                           |  |  |  |  |  |  | Mascot |
|    | 850.4338                                                                                         | 850.5385  | 0.1047  | 123 | 358 | 364 | LSNMEIK                            |  |  |  |  | Oxidation (M)[4]                          |  |  |  |  |  |  | Mascot |
|    | 897.4689                                                                                         | 897.4583  | -0.0106 | -12 | 261 | 267 | TAWLNHR                            |  |  |  |  |                                           |  |  |  |  |  |  | Mascot |
|    | 982.539                                                                                          | 982.4495  | -0.0895 | -91 | 545 | 552 | LIYMISSR                           |  |  |  |  |                                           |  |  |  |  |  |  | Mascot |
|    | 984.507                                                                                          | 984.4195  | -0.0875 | -89 | 365 | 372 | SFITLEMK                           |  |  |  |  | Oxidation (M)[7]                          |  |  |  |  |  |  | Mascot |
|    | 984.507                                                                                          | 984.4195  | -0.0875 | -89 | 365 | 372 | SFITLEMK                           |  |  |  |  | Oxidation (M)[7]                          |  |  |  |  |  |  | Mascot |
|    | 998.5339                                                                                         | 998.4368  | -0.0971 | -97 | 545 | 552 | LIYMISSR                           |  |  |  |  | Oxidation (M)[4]                          |  |  |  |  |  |  | Mascot |
|    | 1045.4796                                                                                        | 1045.5583 | 0.0787  | 75  | 762 | 770 | AELDSEPER                          |  |  |  |  |                                           |  |  |  |  |  |  | Mascot |
|    | 1107.5793                                                                                        | 1107.5398 | -0.0395 | -36 | 49  | 59  | LAPSTSFGTAR                        |  |  |  |  |                                           |  |  |  |  |  |  | Mascot |
|    | 1346.6885                                                                                        | 1346.6887 | 0.0002  | 0   | 733 | 743 | TILMENLGNWR                        |  |  |  |  |                                           |  |  |  |  |  |  | Mascot |
|    | 1357.6932                                                                                        | 1357.7161 | 0.0229  | 17  | 463 | 475 | TVVAIFGHDCAPK                      |  |  |  |  |                                           |  |  |  |  |  |  | Mascot |
|    | 1434.7158                                                                                        | 1434.7615 | 0.0457  | 32  | 885 | 896 | DVIHELHMLDR                        |  |  |  |  |                                           |  |  |  |  |  |  | Mascot |
|    | 1840.8237                                                                                        | 1840.9373 | 0.1136  | 62  | 379 | 394 | TESPMAEIVCVRSDCK                   |  |  |  |  | Carbamidomethyl (C)[10], Oxidation (M)[5] |  |  |  |  |  |  | Mascot |
|    | 1957.9939                                                                                        | 1958.0151 | 0.0212  | 11  | 60  | 76  | EVVAIKDYCPSSFRTLK                  |  |  |  |  | Carbamidomethyl (C)[9]                    |  |  |  |  |  |  | Mascot |
|    | 1957.9939                                                                                        | 1958.0151 | 0.0212  | 11  | 60  | 76  | EVVAIKDYCPSSFRTLK                  |  |  |  |  | Carbamidomethyl (C)[9]                    |  |  |  |  |  |  | Mascot |
|    | 2284.2368                                                                                        | 2284.1748 | -0.062  | -27 | 463 | 484 | TVVAIFGHDCAPKTLVS<br>EVGK          |  |  |  |  |                                           |  |  |  |  |  |  | Mascot |
|    | 3337.6052                                                                                        | 3337.7556 | 0.1504  | 45  | 269 | 298 | LARSCHDLESLGQNPWG<br>GQTQPVETNIVCK |  |  |  |  | Carbamidomethyl (C)[5]                    |  |  |  |  |  |  | Mascot |
| 33 | PREDICTED: zinc finger protein 271-like [Danio rerio] gi 326675814 34998.3 9.18 7 46 0 33 86.387 |           |         |     |     |     |                                    |  |  |  |  |                                           |  |  |  |  |  |  |        |

#### Peptide Information

|  | Calc. Mass | Obsrv. Mass | ± da    | ± ppm | Start Seq. | End Seq. | Sequence               | Ion Score | C. I. | % Modification          | Rank | Result Type |
|--|------------|-------------|---------|-------|------------|----------|------------------------|-----------|-------|-------------------------|------|-------------|
|  | 984.493    | 984.4195    | -0.0735 | -75   | 224        | 232      | FSVSGGMKR              | 35        | 90.76 | Oxidation (M)[7]        |      | Mascot      |
|  | 984.493    | 984.4195    | -0.0735 | -75   | 224        | 232      | FSVSGGMKR              |           |       | Oxidation (M)[7]        |      | Mascot      |
|  | 991.3972   | 991.4587    | 0.0615  | 62    | 1          | 8        | MSDPEPCR               |           |       | Carbamidomethyl (C)[7]  |      | Mascot      |
|  | 1107.627   | 1107.5398   | -0.0872 | -79   | 167        | 175      | SFTRITNLR              |           |       |                         |      | Mascot      |
|  | 1118.5953  | 1118.6768   | 0.0815  | 73    | 251        | 259      | RFSQPENLK              |           |       |                         |      | Mascot      |
|  | 1287.5344  | 1287.6693   | 0.1349  | 105   | 156        | 166      | EKPYSCECGK             |           |       | Carbamidomethyl (C)[6]  |      | Mascot      |
|  | 1287.5344  | 1287.6693   | 0.1349  | 105   | 156        | 166      | EKPYSCECGK             |           |       | Carbamidomethyl (C)[6]  |      | Mascot      |
|  | 1493.7971  | 1493.7335   | -0.0636 | -43   | 205        | 216      | HQRIHTGEKPYK           |           |       |                         |      | Mascot      |
|  | 2284.1101  | 2284.1748   | 0.0647  | 28    | 36         | 54       | KTYHLLTEEKPFCTQCG<br>K |           |       | Carbamidomethyl (C)[14] |      | Mascot      |

34 titin b [Danio rerio] gi|110005908 3198243.8 5.99 63 45 0 10 0

#### Peptide Information

|  | Calc. Mass | Obsrv. Mass | ± da | ± ppm | Start Seq. | End Seq. | Sequence | Ion Score | C. I. | % Modification | Rank | Result Type |
|--|------------|-------------|------|-------|------------|----------|----------|-----------|-------|----------------|------|-------------|
|--|------------|-------------|------|-------|------------|----------|----------|-----------|-------|----------------|------|-------------|

|           |           |         |      |       |       |              |    |   |                                          |        |
|-----------|-----------|---------|------|-------|-------|--------------|----|---|------------------------------------------|--------|
| 809.4151  | 809.4143  | -0.0008 | -1   | 6325  | 6330  | EYKDVR       |    |   |                                          | Mascot |
| 826.4669  | 826.4424  | -0.0245 | -30  | 27840 | 27846 | LTSYKSK      |    |   |                                          | Mascot |
| 842.4478  | 842.5054  | 0.0576  | 68   | 21461 | 21467 | RDLPEGR      |    |   |                                          | Mascot |
| 850.4893  | 850.5385  | 0.0492  | 58   | 1620  | 1626  | YVVSARR      |    |   |                                          | Mascot |
| 882.4791  | 882.5623  | 0.0832  | 94   | 14146 | 14152 | KEEHAIR      |    |   |                                          | Mascot |
| 897.4498  | 897.4583  | 0.0085  | 9    | 15061 | 15067 | EFKMSQK      |    |   |                                          | Mascot |
| 911.4468  | 911.3965  | -0.0503 | -55  | 5423  | 5431  | YVPSSGSSK    |    |   |                                          | Mascot |
| 913.4447  | 913.4474  | 0.0027  | 3    | 15061 | 15067 | EFKMSQK      |    |   | Oxidation (M)[4]                         | Mascot |
| 960.4632  | 960.4742  | 0.011   | 11   | 7775  | 7783  | DGNEITPSK    |    |   |                                          | Mascot |
| 960.4996  | 960.4742  | -0.0254 | -26  | 15117 | 15124 | LDEILSDR     | 21 | 0 |                                          | Mascot |
| 982.441   | 982.4495  | 0.0085  | 9    | 23254 | 23261 | HCEHEVTK     |    |   |                                          | Mascot |
| 984.4818  | 984.4195  | -0.0623 | -63  | 22536 | 22543 | ITGYMVER     |    |   | Oxidation (M)[5]                         | Mascot |
| 984.4818  | 984.4195  | -0.0623 | -63  | 22536 | 22543 | ITGYMVER     |    |   | Oxidation (M)[5]                         | Mascot |
| 991.4955  | 991.4587  | -0.0368 | -37  | 13093 | 13101 | VAAENQFGR    |    |   |                                          | Mascot |
| 992.4294  | 992.4612  | 0.0318  | 32   | 8878  | 8884  | DNMYFFR      |    |   |                                          | Mascot |
| 996.536   | 996.5937  | 0.0577  | 58   | 2513  | 2520  | LTITETYR     |    |   |                                          | Mascot |
| 998.4359  | 998.4368  | 0.0009  | 1    | 27391 | 27399 | FGDSDCKAR    |    |   |                                          | Mascot |
| 1069.5887 | 1069.5568 | -0.0319 | -30  | 10290 | 10298 | NPVIEEQK     |    |   |                                          | Mascot |
| 1088.5371 | 1088.5405 | 0.0034  | 3    | 24830 | 24838 | YALQYSSTR    |    |   |                                          | Mascot |
| 1107.5292 | 1107.5398 | 0.0106  | 10   | 27618 | 27626 | HFVPFSDMK    |    |   |                                          | Mascot |
| 1109.5409 | 1109.4917 | -0.0492 | -44  | 8856  | 8864  | KTWTMATDR    |    |   |                                          | Mascot |
| 1118.6681 | 1118.6768 | 0.0087  | 8    | 8843  | 8851  | ILAYVVERR    |    |   |                                          | Mascot |
| 1165.6324 | 1165.7374 | 0.105   | 90   | 11959 | 11967 | ITNYTIERR    |    |   |                                          | Mascot |
| 1179.6078 | 1179.5999 | -0.0079 | -7   | 24415 | 24423 | ISWKLEEMK    |    |   | Oxidation (M)[8]                         | Mascot |
| 1193.6129 | 1193.6091 | -0.0038 | -3   | 5110  | 5119  | SNVAVMCLRK   |    |   | Carbamidomethyl (C)[7], Oxidation (M)[6] | Mascot |
| 1211.7106 | 1211.7106 | 0       | 0    | 12383 | 12393 | QNAVNNLVLK   | 14 | 0 |                                          | Mascot |
| 1211.7106 | 1211.7106 | 0       | 0    | 12383 | 12393 | QNAVNNLVLK   |    |   |                                          | Mascot |
| 1287.6328 | 1287.6693 | 0.0365  | 28   | 13851 | 13860 | KPKEADEWER   |    |   |                                          | Mascot |
| 1287.6328 | 1287.6693 | 0.0365  | 28   | 13851 | 13860 | KPKEADEWER   |    |   |                                          | Mascot |
| 1308.6464 | 1308.657  | 0.0106  | 8    | 28587 | 28598 | DNAVISITSNMK |    |   | Oxidation (M)[11]                        | Mascot |
| 1309.6305 | 1309.6526 | 0.0221  | 17   | 6025  | 6035  | TDEISEMKQTK  |    |   |                                          | Mascot |
| 1316.6382 | 1316.5662 | -0.072  | -55  | 22176 | 22185 | ENGEYFFRVR   |    |   |                                          | Mascot |
| 1320.7456 | 1320.5803 | -0.1653 | -125 | 1709  | 1719  | IHMVIDKVTHK  |    |   |                                          | Mascot |
| 1325.6254 | 1325.7539 | 0.1285  | 97   | 6025  | 6035  | TDEISEMKQTK  |    |   | Oxidation (M)[7]                         | Mascot |
| 1325.7358 | 1325.7539 | 0.0181  | 14   | 12242 | 12253 | EKMVIHAGGVIR |    |   | Oxidation (M)[3]                         | Mascot |
| 1327.6892 | 1327.7329 | 0.0437  | 33   | 24454 | 24465 | YFLSLENVAGSK |    |   |                                          | Mascot |

|           |           |         |     |       |       |                                |                                            |        |
|-----------|-----------|---------|-----|-------|-------|--------------------------------|--------------------------------------------|--------|
| 1346.691  | 1346.6887 | -0.0023 | -2  | 4964  | 4975  | TLTDQSLQQGQK                   |                                            | Mascot |
| 1357.6958 | 1357.7161 | 0.0203  | 15  | 1104  | 1115  | SLVEETQLPEGR                   |                                            | Mascot |
| 1364.6804 | 1364.6938 | 0.0134  | 10  | 7577  | 7587  | DEARFEIELSR                    |                                            | Mascot |
| 1364.7096 | 1364.6938 | -0.0158 | -12 | 5233  | 5243  | LDNLFFIEEPK                    |                                            | Mascot |
| 1376.7784 | 1376.6925 | -0.0859 | -62 | 5521  | 5532  | LTVLADQIQFTK                   |                                            | Mascot |
| 1381.7587 | 1381.7281 | -0.0306 | -22 | 27759 | 27770 | FELSALRHPSPK                   |                                            | Mascot |
| 1382.7678 | 1382.7771 | 0.0093  | 7   | 11941 | 11952 | AEQITLSWLPPK                   |                                            | Mascot |
| 1382.8002 | 1382.7771 | -0.0231 | -17 | 5914  | 5926  | AAVQPSEKKPVTK                  |                                            | Mascot |
| 1386.6747 | 1386.6737 | -0.001  | -1  | 28111 | 28122 | IEETTETAVHEK                   |                                            | Mascot |
| 1404.7402 | 1404.7502 | 0.01    | 7   | 6439  | 6451  | AEESVMPKLSVAK                  | Oxidation (M)[6]                           | Mascot |
| 1425.722  | 1425.786  | 0.064   | 45  | 9754  | 9766  | VAEDVPTTEHSLK                  |                                            | Mascot |
| 1434.741  | 1434.7615 | 0.0205  | 14  | 1892  | 1904  | GTHYSLTVLNAMK                  |                                            | Mascot |
| 1475.7601 | 1475.752  | -0.0081 | -5  | 26127 | 26139 | VFAENETGISRPR                  |                                            | Mascot |
| 1493.8257 | 1493.7335 | -0.0922 | -62 | 63    | 77    | AVLMIPAVTAAHSGR                |                                            | Mascot |
| 1545.74   | 1545.7322 | -0.0078 | -5  | 21519 | 21531 | DNVDPPRIMMDVK                  | Oxidation (M)[9]                           | Mascot |
| 1638.7944 | 1638.8556 | 0.0612  | 37  | 18517 | 18529 | VTSLMENHLYEFR                  |                                            | Mascot |
| 1676.8602 | 1676.8547 | -0.0055 | -3  | 24230 | 24244 | TWTEAAPKSTQTSLR                |                                            | Mascot |
| 1707.8547 | 1707.7715 | -0.0832 | -49 | 15825 | 15839 | DDGGSEVINYLEKR                 |                                            | Mascot |
| 1826.8412 | 1826.9786 | 0.1374  | 75  | 12667 | 12682 | DMWTTVTSTATTHTCK               | Oxidation (M)[2]                           | Mascot |
| 1826.9622 | 1826.9786 | 0.0164  | 9   | 13770 | 13784 | LVKAPLVQNCYFFR                 |                                            | Mascot |
| 1838.8271 | 1838.9198 | 0.0927  | 50  | 12594 | 12610 | GHSWKYCVTVENCTGAR              | Carbamidomethyl (C)[7]                     | Mascot |
| 1840.944  | 1840.9373 | -0.0067 | -4  | 10637 | 10653 | IGEVTSSSTVALSWHEPK             |                                            | Mascot |
| 1848.9602 | 1848.9532 | -0.007  | -4  | 5081  | 5096  | VSGSQPLSVIWKDNR                |                                            | Mascot |
| 1883.8627 | 1883.8407 | -0.022  | -12 | 12667 | 12682 | DMWTTVTSTATTHTCK               | Carbamidomethyl (C)[15], Oxidation (M)[2]  | Mascot |
| 1957.9865 | 1958.0151 | 0.0286  | 15  | 1313  | 1329  | TQEGYYEAITAVELKSR              |                                            | Mascot |
| 1957.9865 | 1958.0151 | 0.0286  | 15  | 1313  | 1329  | TQEGYYEAITAVELKSR              |                                            | Mascot |
| 2076.1123 | 2076.1216 | 0.0093  | 4   | 19552 | 19570 | DPFIHPGSPQIIEVTNIAK            |                                            | Mascot |
| 2211.1147 | 2211.1042 | -0.0105 | -5  | 22748 | 22766 | VVWSVISEAMESRMVTV<br>QK        | Oxidation (M)[10,14]                       | Mascot |
| 2233.0076 | 2233.0706 | 0.063   | 28  | 20713 | 20732 | VSAENETGVGECSDL<br>FYR         | Carbamidomethyl (C)[12]                    | Mascot |
| 2283.0269 | 2283.167  | 0.1401  | 61  | 8248  | 8268  | MDDAGEYHCKLPASETT<br>GTLK      | Oxidation (M)[1]                           | Mascot |
| 2284.0583 | 2284.1748 | 0.1165  | 51  | 16046 | 16066 | ANTVNNVIDCAYTVADLQE<br>GCK     | Carbamidomethyl (C)[9]                     | Mascot |
| 2362.1165 | 2362.1821 | 0.0656  | 28  | 25529 | 25549 | VAAANRYGTGEYLQSEV<br>VMCK      | Carbamidomethyl (C)[20], Oxidation (M)[19] | Mascot |
| 2362.1165 | 2362.1821 | 0.0656  | 28  | 25529 | 25549 | VAAANRYGTGEYLQSEV<br>VMCK      | Carbamidomethyl (C)[20], Oxidation (M)[19] | Mascot |
| 2872.4587 | 2872.3855 | -0.0732 | -25 | 24518 | 24543 | ESGSTAWQLINSSVKNTT<br>FHVSHLTK |                                            | Mascot |
| 3337.5527 | 3337.7556 | 0.2029  | 61  | 18657 | 18687 | LGVGEHADVAGPICPED              |                                            | Mascot |

35

titin-like [Danio rerio]

KTEEPDLDDAEFR

gi|169154862

2457022

5.92

56

45

0

10

0

| Peptide Information |             |         |       |            |          |              |           |         |                   |        |                  |        |
|---------------------|-------------|---------|-------|------------|----------|--------------|-----------|---------|-------------------|--------|------------------|--------|
| Calc. Mass          | Obsrv. Mass | ± da    | ± ppm | Start Seq. | End Seq. | Sequence     | Ion Score | C. I. % | Modification      | Rank   | Result Type      |        |
| 809.4515            | 809.4143    | -0.0372 | -46   | 2034       | 2039     | TEYRLK       | 21        | 0       |                   |        | Mascot           |        |
| 826.4669            | 826.4424    | -0.0245 | -30   | 21194      | 21200    | LTSYKSK      |           |         |                   |        |                  | Mascot |
| 842.4478            | 842.5054    | 0.0576  | 68    | 14721      | 14727    | RDLPEGR      |           |         |                   |        |                  | Mascot |
| 850.4668            | 850.5385    | 0.0717  | 84    | 11896      | 11902    | FTVENLK      |           |         |                   |        |                  | Mascot |
| 882.4791            | 882.5623    | 0.0832  | 94    | 7406       | 7412     | KEEHAIR      |           |         |                   |        |                  | Mascot |
| 897.4498            | 897.4583    | 0.0085  | 9     | 8321       | 8327     | EFKMSQK      |           |         |                   |        |                  | Mascot |
| 911.4846            | 911.3965    | -0.0881 | -97   | 10278      | 10284    | NSIVWHR      |           |         |                   |        |                  | Mascot |
| 913.4447            | 913.4474    | 0.0027  | 3     | 8321       | 8327     | EFKMSQK      |           |         |                   |        | Oxidation (M)[4] | Mascot |
| 960.4567            | 960.4742    | 0.0175  | 18    | 16359      | 16367    | VQDTPAACR    |           |         |                   |        |                  | Mascot |
| 960.4996            | 960.4742    | -0.0254 | -26   | 8377       | 8384     | LDEILSDR     |           |         |                   |        |                  | Mascot |
| 982.441             | 982.4495    | 0.0085  | 9     | 16514      | 16521    | HCEHEVTK     |           |         |                   | Mascot |                  |        |
| 984.4818            | 984.4195    | -0.0623 | -63   | 15796      | 15803    | ITGYMVER     |           |         | Oxidation (M)[5]  | Mascot |                  |        |
| 984.4818            | 984.4195    | -0.0623 | -63   | 15796      | 15803    | ITGYMVER     |           |         | Oxidation (M)[5]  | Mascot |                  |        |
| 991.4955            | 991.4587    | -0.0368 | -37   | 6353       | 6361     | VAAENQFGR    |           |         |                   | Mascot |                  |        |
| 992.4294            | 992.4612    | 0.0318  | 32    | 2138       | 2144     | DNMYFFR      |           |         |                   | Mascot |                  |        |
| 996.5359            | 996.5937    | 0.0578  | 58    | 3740       | 3747     | LSYEQTKK     |           |         |                   | Mascot |                  |        |
| 998.4359            | 998.4368    | 0.0009  | 1     | 20745      | 20753    | FGDDSCAR     |           |         |                   | Mascot |                  |        |
| 1069.5887           | 1069.5568   | -0.0319 | -30   | 3550       | 3558     | NPVIEEQK     |           |         |                   | Mascot |                  |        |
| 1088.5371           | 1088.5405   | 0.0034  | 3     | 18090      | 18098    | YALQYSSTR    |           |         |                   | Mascot |                  |        |
| 1107.5292           | 1107.5398   | 0.0106  | 10    | 20972      | 20980    | HFVPFSDMK    |           |         |                   | Mascot |                  |        |
| 1109.5409           | 1109.4917   | -0.0492 | -44   | 2116       | 2124     | KTWTMATDR    |           |         |                   | Mascot |                  |        |
| 1118.6681           | 1118.6768   | 0.0087  | 8     | 2103       | 2111     | ILAYVVERR    |           |         |                   | Mascot |                  |        |
| 1165.6324           | 1165.7374   | 0.105   | 90    | 5219       | 5227     | ITNYTIERR    |           |         |                   | Mascot |                  |        |
| 1179.6078           | 1179.5999   | -0.0079 | -7    | 17675      | 17683    | ISWKLEEMK    |           |         | Oxidation (M)[8]  | Mascot |                  |        |
| 1193.6459           | 1193.6091   | -0.0368 | -31   | 17322      | 17332    | FRICAVNSVGK  |           |         |                   | Mascot |                  |        |
| 1211.7106           | 1211.7106   | 0       | 0     | 5643       | 5653     | QNAVNNLVLK   | 14        | 0       |                   | Mascot |                  |        |
| 1211.7106           | 1211.7106   | 0       | 0     | 5643       | 5653     | QNAVNNLVLK   |           |         |                   | Mascot |                  |        |
| 1287.6328           | 1287.6693   | 0.0365  | 28    | 7111       | 7120     | KPKEADEWER   |           |         |                   | Mascot |                  |        |
| 1287.6328           | 1287.6693   | 0.0365  | 28    | 7111       | 7120     | KPKEADEWER   |           |         |                   | Mascot |                  |        |
| 1308.6464           | 1308.657    | 0.0106  | 8     | 21941      | 21952    | DNAVISITSNMK |           |         | Oxidation (M)[11] | Mascot |                  |        |
| 1309.6854           | 1309.6526   | -0.0328 | -25   | 5839       | 5850     | NLTMTMCLGIVK |           |         | Oxidation (M)[6]  | Mascot |                  |        |

|           |           |         |     |       |       |                                            |                                            |        |
|-----------|-----------|---------|-----|-------|-------|--------------------------------------------|--------------------------------------------|--------|
| 1316.6382 | 1316.5662 | -0.072  | -55 | 15436 | 15445 | ENGEYFFRVR                                 |                                            | Mascot |
| 1325.7358 | 1325.7539 | 0.0181  | 14  | 5502  | 5513  | EKMVIHAGGVIR                               | Oxidation (M)[3]                           | Mascot |
| 1325.7358 | 1325.7539 | 0.0181  | 14  | 5502  | 5513  | EKMVIHAGGVIR                               | Oxidation (M)[3]                           | Mascot |
| 1327.6892 | 1327.7329 | 0.0437  | 33  | 17714 | 17725 | YFLSLENVAGSK                               |                                            | Mascot |
| 1357.6456 | 1357.7161 | 0.0705  | 52  | 2615  | 2626  | WEACGDPIPELK                               |                                            | Mascot |
| 1364.6804 | 1364.6938 | 0.0134  | 10  | 837   | 847   | DEARFEIELSR                                |                                            | Mascot |
| 1364.6804 | 1364.6938 | 0.0134  | 10  | 837   | 847   | DEARFEIELSR                                |                                            | Mascot |
| 1381.7587 | 1381.7281 | -0.0306 | -22 | 21113 | 21124 | FELSALRHPSPK                               |                                            | Mascot |
| 1382.7678 | 1382.7771 | 0.0093  | 7   | 5201  | 5212  | AEQITLSWLPPK                               |                                            | Mascot |
| 1382.7678 | 1382.7771 | 0.0093  | 7   | 5201  | 5212  | AEQITLSWLPPK                               |                                            | Mascot |
| 1386.6747 | 1386.6737 | -0.001  | -1  | 21465 | 21476 | IEETTETAVHEK                               |                                            | Mascot |
| 1425.722  | 1425.786  | 0.064   | 45  | 3014  | 3026  | VAEDVPTTEHSLK                              |                                            | Mascot |
| 1434.7852 | 1434.7615 | -0.0237 | -17 | 7407  | 7418  | EEHAIRWAPVVK                               |                                            | Mascot |
| 1475.7601 | 1475.752  | -0.0081 | -5  | 19481 | 19493 | VFAENETGISRPR                              |                                            | Mascot |
| 1545.74   | 1545.7322 | -0.0078 | -5  | 14779 | 14791 | DNVDPPRIMMDVK                              | Oxidation (M)[9]                           | Mascot |
| 1638.7944 | 1638.8556 | 0.0612  | 37  | 11777 | 11789 | VTSLMENHLYEFR                              |                                            | Mascot |
| 1676.8602 | 1676.8547 | -0.0055 | -3  | 17490 | 17504 | TWTEAAPKSTQTS LR                           |                                            | Mascot |
| 1707.8547 | 1707.7715 | -0.0832 | -49 | 9085  | 9099  | DDGGSEVINYLEKR                             |                                            | Mascot |
| 1826.8412 | 1826.9786 | 0.1374  | 75  | 5927  | 5942  | DMWTTVTSATTKTHCK                           | Oxidation (M)[2]                           | Mascot |
| 1826.9622 | 1826.9786 | 0.0164  | 9   | 7030  | 7044  | LVKAPLVQNCYFFR                             |                                            | Mascot |
| 1838.8271 | 1838.9198 | 0.0927  | 50  | 5854  | 5870  | GHS GK YC V T V E N C T G A R              | Carbamidomethyl (C)[7]                     | Mascot |
| 1840.944  | 1840.9373 | -0.0067 | -4  | 3897  | 3913  | IGEVTSSTVALSWHEPK                          |                                            | Mascot |
| 1848.9702 | 1848.9532 | -0.017  | -9  | 10177 | 10192 | ETTSQSWVELS LIIR                           |                                            | Mascot |
| 1883.8627 | 1883.8407 | -0.022  | -12 | 5927  | 5942  | DMWTTVTSATTKTHCK                           | Carbamidomethyl (C)[15], Oxidation (M)[2]  | Mascot |
| 1957.9601 | 1958.0151 | 0.055   | 28  | 11983 | 12000 | ESAQIETSSSYTSLVIDK                         |                                            | Mascot |
| 1957.9601 | 1958.0151 | 0.055   | 28  | 11983 | 12000 | ESAQIETSSSYTSLVIDK                         |                                            | Mascot |
| 2076.1123 | 2076.1216 | 0.0093  | 4   | 12812 | 12830 | DPFIHPGSPQIIEVTNIAK                        |                                            | Mascot |
| 2211.1147 | 2211.1042 | -0.0105 | -5  | 16008 | 16026 | VVWSVISEAMESRMVTV<br>QK                    | Oxidation (M)[10,14]                       | Mascot |
| 2233.0076 | 2233.0706 | 0.063   | 28  | 13973 | 13992 | VSAENETGVGECSDL SL<br>FYR                  | Carbamidomethyl (C)[12]                    | Mascot |
| 2283.0269 | 2283.167  | 0.1401  | 61  | 1508  | 1528  | MDDAGEYHCKLPASETT<br>GTLK                  | Oxidation (M)[1]                           | Mascot |
| 2284.0583 | 2284.1748 | 0.1165  | 51  | 9306  | 9326  | ANTVNVIDCAYTVADLQE<br>GCK                  | Carbamidomethyl (C)[9]                     | Mascot |
| 2362.1165 | 2362.1821 | 0.0656  | 28  | 18883 | 18903 | VAAANRYGTGEY LQSEV<br>VMCK                 | Carbamidomethyl (C)[20], Oxidation (M)[19] | Mascot |
| 2362.1165 | 2362.1821 | 0.0656  | 28  | 18883 | 18903 | VAAANRYGTGEY LQSEV<br>VMCK                 | Carbamidomethyl (C)[20], Oxidation (M)[19] | Mascot |
| 2872.4587 | 2872.3855 | -0.0732 | -25 | 17778 | 17803 | ESGSTAWQLINSSVKNTT<br>FHVSHLTK             |                                            | Mascot |
| 3337.5527 | 3337.7556 | 0.2029  | 61  | 11917 | 11947 | LGVGEHADVAGPICPED<br>KTEEPDL D I D A E F R |                                            | Mascot |

36 novel protein similar to human titin (TTN) [Danio rerio] gi|94732358 2437518.2 5.95 56 45 0 10 0

Peptide Information

| Calc. Mass | Obsrv. Mass | ± da    | ± ppm | Start Seq. | End Seq. | Sequence     | Ion Score | C. I. | % Modification    | Rank | Result Type |
|------------|-------------|---------|-------|------------|----------|--------------|-----------|-------|-------------------|------|-------------|
| 809.4515   | 809.4143    | -0.0372 | -46   | 1956       | 1961     | TEYRLK       |           |       |                   |      | Mascot      |
| 826.4669   | 826.4424    | -0.0245 | -30   | 21022      | 21028    | LTSYKSK      |           |       |                   |      | Mascot      |
| 842.4478   | 842.5054    | 0.0576  | 68    | 14643      | 14649    | RDLPEGR      |           |       |                   |      | Mascot      |
| 850.4668   | 850.5385    | 0.0717  | 84    | 11818      | 11824    | FTVENLK      |           |       |                   |      | Mascot      |
| 882.4791   | 882.5623    | 0.0832  | 94    | 7328       | 7334     | KEEHAIR      |           |       |                   |      | Mascot      |
| 897.4498   | 897.4583    | 0.0085  | 9     | 8243       | 8249     | EFKMSQK      |           |       |                   |      | Mascot      |
| 911.4846   | 911.3965    | -0.0881 | -97   | 10200      | 10206    | NSIVWHR      |           |       |                   |      | Mascot      |
| 913.4447   | 913.4474    | 0.0027  | 3     | 8243       | 8249     | EFKMSQK      |           |       | Oxidation (M)[4]  |      | Mascot      |
| 960.4632   | 960.4742    | 0.011   | 11    | 957        | 965      | DGNEITPSK    |           |       |                   |      | Mascot      |
| 960.4996   | 960.4742    | -0.0254 | -26   | 8299       | 8306     | LDEILSDR     | 21        | 0     |                   |      | Mascot      |
| 982.441    | 982.4495    | 0.0085  | 9     | 16436      | 16443    | HCEHEVTK     |           |       |                   |      | Mascot      |
| 984.4818   | 984.4195    | -0.0623 | -63   | 15718      | 15725    | ITGYMVER     |           |       | Oxidation (M)[5]  |      | Mascot      |
| 984.4818   | 984.4195    | -0.0623 | -63   | 15718      | 15725    | ITGYMVER     |           |       | Oxidation (M)[5]  |      | Mascot      |
| 991.4955   | 991.4587    | -0.0368 | -37   | 6275       | 6283     | VAAENQFGR    |           |       |                   |      | Mascot      |
| 992.4294   | 992.4612    | 0.0318  | 32    | 2060       | 2066     | DNMYFFR      |           |       |                   |      | Mascot      |
| 996.5359   | 996.5937    | 0.0578  | 58    | 3662       | 3669     | LSYEQTKK     |           |       |                   |      | Mascot      |
| 998.4359   | 998.4368    | 0.0009  | 1     | 20573      | 20581    | FGDSDCKAR    |           |       |                   |      | Mascot      |
| 1069.5887  | 1069.5568   | -0.0319 | -30   | 3472       | 3480     | NPVIEEQK     |           |       |                   |      | Mascot      |
| 1088.5371  | 1088.5405   | 0.0034  | 3     | 18012      | 18020    | YALQYSSTR    |           |       |                   |      | Mascot      |
| 1107.5292  | 1107.5398   | 0.0106  | 10    | 20800      | 20808    | HFVPFSDMK    |           |       |                   |      | Mascot      |
| 1109.5409  | 1109.4917   | -0.0492 | -44   | 2038       | 2046     | KTWTMATDR    |           |       |                   |      | Mascot      |
| 1118.6681  | 1118.6768   | 0.0087  | 8     | 2025       | 2033     | ILAYVVERR    |           |       |                   |      | Mascot      |
| 1165.6324  | 1165.7374   | 0.105   | 90    | 5141       | 5149     | ITNYTIERR    |           |       |                   |      | Mascot      |
| 1179.6078  | 1179.5999   | -0.0079 | -7    | 17597      | 17605    | ISWKLEEMK    |           |       | Oxidation (M)[8]  |      | Mascot      |
| 1193.6459  | 1193.6091   | -0.0368 | -31   | 17244      | 17254    | FRICAVNSVGK  |           |       |                   |      | Mascot      |
| 1211.7106  | 1211.7106   | 0       | 0     | 5565       | 5575     | QNAVNNLVLK   | 14        | 0     |                   |      | Mascot      |
| 1211.7106  | 1211.7106   | 0       | 0     | 5565       | 5575     | QNAVNNLVLK   |           |       |                   |      | Mascot      |
| 1287.6328  | 1287.6693   | 0.0365  | 28    | 7033       | 7042     | KPKEADEWER   |           |       |                   |      | Mascot      |
| 1287.6328  | 1287.6693   | 0.0365  | 28    | 7033       | 7042     | KPKEADEWER   |           |       |                   |      | Mascot      |
| 1308.6464  | 1308.657    | 0.0106  | 8     | 21769      | 21780    | DNAVISITSNMK |           |       | Oxidation (M)[11] |      | Mascot      |
| 1309.6854  | 1309.6526   | -0.0328 | -25   | 5761       | 5772     | NLTMTCLGIVK  |           |       | Oxidation (M)[6]  |      | Mascot      |
| 1316.6382  | 1316.5662   | -0.072  | -55   | 15358      | 15367    | ENGEYFFVR    |           |       |                   |      | Mascot      |



|           |           |         |     |       |       |                                    |                                            |        |
|-----------|-----------|---------|-----|-------|-------|------------------------------------|--------------------------------------------|--------|
| 1325.7358 | 1325.7539 | 0.0181  | 14  | 5424  | 5435  | EKMVIHAGGVIR                       | Oxidation (M)[3]                           | Mascot |
| 1325.7358 | 1325.7539 | 0.0181  | 14  | 5424  | 5435  | EKMVIHAGGVIR                       | Oxidation (M)[3]                           | Mascot |
| 1327.6892 | 1327.7329 | 0.0437  | 33  | 17636 | 17647 | YFLSLENVAGSK                       |                                            | Mascot |
| 1357.6456 | 1357.7161 | 0.0705  | 52  | 2537  | 2548  | WEACGDPIPELK                       |                                            | Mascot |
| 1364.6804 | 1364.6938 | 0.0134  | 10  | 759   | 769   | DEARFEIELSR                        |                                            | Mascot |
| 1364.6804 | 1364.6938 | 0.0134  | 10  | 759   | 769   | DEARFEIELSR                        |                                            | Mascot |
| 1381.7587 | 1381.7281 | -0.0306 | -22 | 20941 | 20952 | FELSALRHPSPK                       |                                            | Mascot |
| 1382.7678 | 1382.7771 | 0.0093  | 7   | 5123  | 5134  | AEQITLSWLPPK                       |                                            | Mascot |
| 1382.7678 | 1382.7771 | 0.0093  | 7   | 5123  | 5134  | AEQITLSWLPPK                       |                                            | Mascot |
| 1386.6747 | 1386.6737 | -0.001  | -1  | 21293 | 21304 | IEETTETAVHEK                       |                                            | Mascot |
| 1425.722  | 1425.786  | 0.064   | 45  | 2936  | 2948  | VAEDVPTTEHSLK                      |                                            | Mascot |
| 1434.7852 | 1434.7615 | -0.0237 | -17 | 7329  | 7340  | EEHAIRWAPVVK                       |                                            | Mascot |
| 1475.7601 | 1475.752  | -0.0081 | -5  | 19309 | 19321 | VFAENETGISRPR                      |                                            | Mascot |
| 1545.74   | 1545.7322 | -0.0078 | -5  | 14701 | 14713 | DNVDPPRIMMDVK                      | Oxidation (M)[9]                           | Mascot |
| 1638.7944 | 1638.8556 | 0.0612  | 37  | 11699 | 11711 | VTSLMENHLYEFR                      |                                            | Mascot |
| 1676.8602 | 1676.8547 | -0.0055 | -3  | 17412 | 17426 | TWTEAAPKSTQTS LR                   |                                            | Mascot |
| 1707.8547 | 1707.7715 | -0.0832 | -49 | 9007  | 9021  | DDGGSEVINYLEKR                     |                                            | Mascot |
| 1826.8412 | 1826.9786 | 0.1374  | 75  | 5849  | 5864  | DMWTTVTSTATTHTCK                   | Oxidation (M)[2]                           | Mascot |
| 1826.9622 | 1826.9786 | 0.0164  | 9   | 6952  | 6966  | LVKAPLVQNCEYFFR                    |                                            | Mascot |
| 1838.8271 | 1838.9198 | 0.0927  | 50  | 5776  | 5792  | GHS GK YC V T V E N C T G A R      | Carbamidomethyl (C)[7]                     | Mascot |
| 1840.944  | 1840.9373 | -0.0067 | -4  | 3819  | 3835  | IGEVTSSTVALSWHEPK                  |                                            | Mascot |
| 1848.9702 | 1848.9532 | -0.017  | -9  | 10099 | 10114 | ETTSQSWVELSLIIR                    |                                            | Mascot |
| 1883.8627 | 1883.8407 | -0.022  | -12 | 5849  | 5864  | DMWTTVTSTATTHTCK                   | Carbamidomethyl (C)[15], Oxidation (M)[2]  | Mascot |
| 1957.9601 | 1958.0151 | 0.055   | 28  | 11905 | 11922 | ESAQIETSSSYTSLVIDK                 |                                            | Mascot |
| 1957.9601 | 1958.0151 | 0.055   | 28  | 11905 | 11922 | ESAQIETSSSYTSLVIDK                 |                                            | Mascot |
| 2076.1123 | 2076.1216 | 0.0093  | 4   | 12734 | 12752 | DPFIHPGSPQIIEVTNIAK                |                                            | Mascot |
| 2211.1147 | 2211.1042 | -0.0105 | -5  | 15930 | 15948 | VVWSVISEAMESRMVTV<br>QK            | Oxidation (M)[10,14]                       | Mascot |
| 2233.0076 | 2233.0706 | 0.063   | 28  | 13895 | 13914 | VSAENETGVGECSDLSL<br>FYR           | Carbamidomethyl (C)[12]                    | Mascot |
| 2283.0269 | 2283.167  | 0.1401  | 61  | 1430  | 1450  | MDDAGEYHCKLPASETT<br>GTLK          | Oxidation (M)[1]                           | Mascot |
| 2284.0583 | 2284.1748 | 0.1165  | 51  | 9228  | 9248  | ANTVNVIDCAYTVADLQE<br>GCK          | Carbamidomethyl (C)[9]                     | Mascot |
| 2362.1165 | 2362.1821 | 0.0656  | 28  | 18711 | 18731 | VAAANRYGTGEYLQSEV<br>VMCK          | Carbamidomethyl (C)[20], Oxidation (M)[19] | Mascot |
| 2362.1165 | 2362.1821 | 0.0656  | 28  | 18711 | 18731 | VAAANRYGTGEYLQSEV<br>VMCK          | Carbamidomethyl (C)[20], Oxidation (M)[19] | Mascot |
| 2872.4587 | 2872.3855 | -0.0732 | -25 | 17700 | 17725 | ESGSTAWQLINSSVKNTT<br>FHVSHLTK     |                                            | Mascot |
| 3337.5527 | 3337.7556 | 0.2029  | 61  | 11839 | 11869 | LGVGEHADVAGPICPED<br>KTEEPDLIDAEFR |                                            | Mascot |

| Peptide Information |                                                                                    |             |         |       |             |          |                       |           |         |                  |                  |
|---------------------|------------------------------------------------------------------------------------|-------------|---------|-------|-------------|----------|-----------------------|-----------|---------|------------------|------------------|
|                     | Calc. Mass                                                                         | Obsrv. Mass | ± da    | ± ppm | Start Seq.  | End Seq. | Sequence              | Ion Score | C. I. % | Modification     | Rank Result Type |
|                     | 897.4651                                                                           | 897.4583    | -0.0068 | -8    | 6           | 12       | IPFSFMR               |           |         |                  | Mascot           |
|                     | 911.4006                                                                           | 911.3965    | -0.0041 | -4    | 21          | 27       | DWYQGSR               |           |         |                  | Mascot           |
|                     | 913.46                                                                             | 913.4474    | -0.0126 | -14   | 6           | 12       | IPFSFMR               |           |         | Oxidation (M)[6] | Mascot           |
|                     | 960.4533                                                                           | 960.4742    | 0.0209  | 22    | 136         | 143      | DEHGFISR              |           |         |                  | Mascot           |
|                     | 960.4533                                                                           | 960.4742    | 0.0209  | 22    | 136         | 143      | DEHGFISR              |           |         |                  | Mascot           |
|                     | 1069.5612                                                                          | 1069.5568   | -0.0044 | -4    | 5           | 12       | RIPFSFMR              |           |         | Oxidation (M)[7] | Mascot           |
|                     | 1088.5483                                                                          | 1088.5405   | -0.0078 | -7    | 135         | 143      | KDEHGFISR             |           |         |                  | Mascot           |
|                     | 1840.944                                                                           | 1840.9373   | -0.0067 | -4    | 104         | 119      | ISLDVNHFSPEELNVK      |           |         |                  | Mascot           |
|                     | 1883.8804                                                                          | 1883.8407   | -0.0397 | -21   | 87          | 103      | QLSSGMSEVKQTGDSW<br>K |           |         | Oxidation (M)[6] | Mascot           |
| 38                  | novel protein similar to vertebrate tropomyosin 4 (TPM4) (zgc:63909) [Danio rerio] |             |         |       | gi 94732583 | 23433.8  | 4.6                   | 7         | 43      | 0                |                  |

| Peptide Information |                               |             |         |       |             |          |               |           |         |                  |                  |
|---------------------|-------------------------------|-------------|---------|-------|-------------|----------|---------------|-----------|---------|------------------|------------------|
|                     | Calc. Mass                    | Obsrv. Mass | ± da    | ± ppm | Start Seq.  | End Seq. | Sequence      | Ion Score | C. I. % | Modification     | Rank Result Type |
| 39                  | 960.5294                      | 960.4742    | -0.0552 | -57   | 49          | 56       | VIENRAMK      | 12        | 0       |                  | Mascot           |
|                     | 960.5294                      | 960.4742    | -0.0552 | -57   | 49          | 56       | VIENRAMK      |           |         |                  | Mascot           |
|                     | 1109.4891                     | 1109.4917   | 0.0026  | 2     | 39          | 48       | AADESERGMK    |           |         | Oxidation (M)[9] | Mascot           |
|                     | 1234.5732                     | 1234.6774   | 0.1042  | 84    | 99          | 109      | AEERAEVAECK   |           |         |                  | Mascot           |
|                     | 1308.6178                     | 1308.657    | 0.0392  | 30    | 154         | 164      | EAETRAEFAER   |           |         |                  | Mascot           |
|                     | 1382.6798                     | 1382.7771   | 0.0973  | 70    | 126         | 137      | SLEAQAEKYSEK  |           |         |                  | Mascot           |
|                     | 1382.6798                     | 1382.7771   | 0.0973  | 70    | 126         | 137      | SLEAQAEKYSEK  |           |         |                  | Mascot           |
|                     | 1434.7322                     | 1434.7615   | 0.0293  | 20    | 172         | 184      | SIDDLLEKLSSAK |           |         |                  | Mascot           |
|                     | 1493.7338                     | 1493.7335   | -0.0003 | 0     | 61          | 72       | MEIQEMQLKEAK  |           |         | Oxidation (M)[1] | Mascot           |
| 39                  | Sh3bp4a protein [Danio rerio] |             |         |       | gi 66910395 |          | 76175.4       | 8.42      | 12      | 42               | 0                |

| Peptide Information |             |         |       |            |          |          |           |         |                  |                  |
|---------------------|-------------|---------|-------|------------|----------|----------|-----------|---------|------------------|------------------|
| Calc. Mass          | Obsrv. Mass | ± da    | ± ppm | Start Seq. | End Seq. | Sequence | Ion Score | C. I. % | Modification     | Rank Result Type |
| 826.4781            | 826.4424    | -0.0357 | -43   | 41         | 48       | VSPSPALR |           |         |                  | Mascot           |
| 842.5822            | 842.5054    | -0.0768 | -91   | 663        | 669      | LIKTVIR  |           |         |                  | Mascot           |
| 850.4338            | 850.5385    | 0.1047  | 123   | 387        | 393      | LSNMEIK  |           |         | Oxidation (M)[4] | Mascot           |
| 897.4689            | 897.4583    | -0.0106 | -12   | 290        | 296      | TAWLNHR  |           |         |                  | Mascot           |
| 982.539             | 982.4495    | -0.0895 | -91   | 574        | 581      | LIYMISSR |           |         |                  | Mascot           |

|           |           |         |     |     |     |                                |                                           |        |
|-----------|-----------|---------|-----|-----|-----|--------------------------------|-------------------------------------------|--------|
| 984.507   | 984.4195  | -0.0875 | -89 | 394 | 401 | SFITLEMK                       | Oxidation (M)[7]                          | Mascot |
| 984.507   | 984.4195  | -0.0875 | -89 | 394 | 401 | SFITLEMK                       | Oxidation (M)[7]                          | Mascot |
| 998.5339  | 998.4368  | -0.0971 | -97 | 574 | 581 | LIYMISSR                       | Oxidation (M)[4]                          | Mascot |
| 1107.5793 | 1107.5398 | -0.0395 | -36 | 49  | 59  | LAPSTSFGTAR                    |                                           | Mascot |
| 1357.6932 | 1357.7161 | 0.0229  | 17  | 492 | 504 | TVVAIFGHDCAPK                  |                                           | Mascot |
| 1840.8237 | 1840.9373 | 0.1136  | 62  | 408 | 423 | TESPMAEIVCVRSDCK               | Carbamidomethyl (C)[10], Oxidation (M)[5] | Mascot |
| 1957.9939 | 1958.0151 | 0.0212  | 11  | 60  | 76  | EVVAIKDYCPSSFRTLK              | Carbamidomethyl (C)[9]                    | Mascot |
| 1957.9939 | 1958.0151 | 0.0212  | 11  | 60  | 76  | EVVAIKDYCPSSFRTLK              | Carbamidomethyl (C)[9]                    | Mascot |
| 2284.2368 | 2284.1748 | -0.062  | -27 | 492 | 513 | TVVAIFGHDCAPKTLVSEVGK          |                                           | Mascot |
| 3337.6052 | 3337.7556 | 0.1504  | 45  | 298 | 327 | LARSCHDLESLGQNPQWGGTQPVETNIVCK | Carbamidomethyl (C)[5]                    | Mascot |

40 PREDICTED: microtubule-actin cross-linking factor 1, isoforms 1/2/3/5-like [Danio rerio] gi|326674648 241937 5.5 20 42 0

#### Peptide Information

| Calc. Mass | Obsrv. Mass | ± da    | ± ppm | Start Seq. | End Seq. | Sequence        | Ion Score | C. I. | % Modification         | Rank | Result Type |
|------------|-------------|---------|-------|------------|----------|-----------------|-----------|-------|------------------------|------|-------------|
| 826.3512   | 826.4424    | 0.0912  | 110   | 27         | 32       | ECYQQR          |           |       |                        |      | Mascot      |
| 960.5472   | 960.4742    | -0.073  | -76   | 206        | 214      | DGRSTLALK       | 2         | 0     |                        |      | Mascot      |
| 960.5472   | 960.4742    | -0.073  | -76   | 206        | 214      | DGRSTLALK       |           |       |                        |      | Mascot      |
| 991.4778   | 991.4587    | -0.0191 | -19   | 1232       | 1239     | MHAYTNVR        |           |       |                        |      | Mascot      |
| 996.5182   | 996.5937    | 0.0755  | 76    | 531        | 538      | FNIEKMAK        |           |       | Oxidation (M)[6]       |      | Mascot      |
| 1069.5386  | 1069.5568   | 0.0182  | 17    | 1899       | 1907     | DQDGRITHK       |           |       |                        |      | Mascot      |
| 1088.6609  | 1088.5405   | -0.1204 | -111  | 2005       | 2013     | ILRSTLMVR       |           |       |                        |      | Mascot      |
| 1193.6749  | 1193.6091   | -0.0658 | -55   | 1853       | 1861     | LEEHLQRLR       |           |       |                        |      | Mascot      |
| 1211.6014  | 1211.7106   | 0.1092  | 90    | 669        | 678      | DTEEQHLAIR      | 12        | 0     |                        |      | Mascot      |
| 1211.6014  | 1211.7106   | 0.1092  | 90    | 669        | 678      | DTEEQHLAIR      |           |       |                        |      | Mascot      |
| 1308.7271  | 1308.657    | -0.0701 | -54   | 1540       | 1550     | DLVNNLIDKHK     |           |       |                        |      | Mascot      |
| 1309.6456  | 1309.6526   | 0.007   | 5     | 1012       | 1021     | EQLCDLKEFK      |           |       | Carbamidomethyl (C)[4] |      | Mascot      |
| 1325.7939  | 1325.7539   | -0.04   | -30   | 800        | 810      | WLLNLLDLAVR     |           |       |                        |      | Mascot      |
| 1325.7939  | 1325.7539   | -0.04   | -30   | 800        | 810      | WLLNLLDLAVR     |           |       |                        |      | Mascot      |
| 1364.6917  | 1364.6938   | 0.0021  | 2     | 105        | 116      | RSPLSQYGSVDR    |           |       |                        |      | Mascot      |
| 1364.6917  | 1364.6938   | 0.0021  | 2     | 106        | 117      | SPLSQYGSVDRR    |           |       |                        |      | Mascot      |
| 1382.6919  | 1382.7771   | 0.0852  | 62    | 1448       | 1458     | SKRPMYEACLK     |           |       | Carbamidomethyl (C)[9] |      | Mascot      |
| 1382.6919  | 1382.7771   | 0.0852  | 62    | 1448       | 1458     | SKRPMYEACLK     |           |       | Carbamidomethyl (C)[9] |      | Mascot      |
| 1386.6504  | 1386.6737   | 0.0233  | 17    | 387        | 397      | LQQCAHELMK      |           |       | Carbamidomethyl (C)[4] |      | Mascot      |
| 1676.8563  | 1676.8547   | -0.0016 | -1    | 1734       | 1748     | ILDWICAAEDSLSLK |           |       |                        |      | Mascot      |

|    |                                                      |           |         |    |      |             |                                  |      |    |                                          |   |  |        |
|----|------------------------------------------------------|-----------|---------|----|------|-------------|----------------------------------|------|----|------------------------------------------|---|--|--------|
|    | 1840.9333                                            | 1840.9373 | 0.004   | 2  | 355  | 371         | SAERAMLHLQEATGQAK                |      |    |                                          |   |  | Mascot |
|    | 1957.947                                             | 1958.0151 | 0.0681  | 35 | 381  | 397         | SADLGKLQQCAHELMEK                |      |    | Carbamidomethyl (C)[10]                  |   |  | Mascot |
|    | 1957.947                                             | 1958.0151 | 0.0681  | 35 | 381  | 397         | SADLGKLQQCAHELMEK                |      |    | Carbamidomethyl (C)[10]                  |   |  | Mascot |
|    | 2076.1375                                            | 2076.1216 | -0.0159 | -8 | 1636 | 1653        | VLKYGVLPPEEEALLAFR               |      |    |                                          |   |  | Mascot |
|    | 3337.5862                                            | 3337.7556 | 0.1694  | 51 | 1303 | 1331        | MGKCEETINTLSAPSFLD<br>TICSQLQEHR |      |    | Carbamidomethyl (C)[4], Oxidation (M)[1] |   |  | Mascot |
| 41 | truncated SH3 binding domain protein 4 [Danio rerio] |           |         |    |      | gi 33438222 | 84564.4                          | 8.75 | 12 | 40                                       | 0 |  |        |

Peptide Information

|  | Calc. Mass | Obsrv. Mass | ± da    | ± ppm | Start Seq. | End Seq. | Sequence                            | Ion Score | C. I. | % Modification                            | Rank | Result Type |
|--|------------|-------------|---------|-------|------------|----------|-------------------------------------|-----------|-------|-------------------------------------------|------|-------------|
|  | 826.4781   | 826.4424    | -0.0357 | -43   | 41         | 48       | VPSPSALR                            |           |       |                                           |      | Mascot      |
|  | 842.5822   | 842.5054    | -0.0768 | -91   | 634        | 640      | LIKTVIR                             |           |       |                                           |      | Mascot      |
|  | 850.4338   | 850.5385    | 0.1047  | 123   | 358        | 364      | LSNMEIK                             |           |       | Oxidation (M)[4]                          |      | Mascot      |
|  | 897.4689   | 897.4583    | -0.0106 | -12   | 261        | 267      | TAWLNHR                             |           |       |                                           |      | Mascot      |
|  | 982.539    | 982.4495    | -0.0895 | -91   | 545        | 552      | LIYMISSR                            |           |       |                                           |      | Mascot      |
|  | 984.507    | 984.4195    | -0.0875 | -89   | 365        | 372      | SFITLEMK                            |           |       | Oxidation (M)[7]                          |      | Mascot      |
|  | 984.507    | 984.4195    | -0.0875 | -89   | 365        | 372      | SFITLEMK                            |           |       | Oxidation (M)[7]                          |      | Mascot      |
|  | 998.5339   | 998.4368    | -0.0971 | -97   | 545        | 552      | LIYMISSR                            |           |       | Oxidation (M)[4]                          |      | Mascot      |
|  | 1107.5793  | 1107.5398   | -0.0395 | -36   | 49         | 59       | LAPSTSFGTAR                         |           |       |                                           |      | Mascot      |
|  | 1357.6932  | 1357.7161   | 0.0229  | 17    | 463        | 475      | TVVAIFGHDCAPK                       |           |       |                                           |      | Mascot      |
|  | 1840.8237  | 1840.9373   | 0.1136  | 62    | 379        | 394      | TESPM AEIVCVRSDCK                   |           |       | Carbamidomethyl (C)[10], Oxidation (M)[5] |      | Mascot      |
|  | 1957.9939  | 1958.0151   | 0.0212  | 11    | 60         | 76       | EVVAIKDYCPSSFTTLK                   |           |       | Carbamidomethyl (C)[9]                    |      | Mascot      |
|  | 1957.9939  | 1958.0151   | 0.0212  | 11    | 60         | 76       | EVVAIKDYCPSSFTTLK                   |           |       | Carbamidomethyl (C)[9]                    |      | Mascot      |
|  | 2284.2368  | 2284.1748   | -0.062  | -27   | 463        | 484      | TVVAIFGHDCAPKTL LVS<br>EVGK         |           |       |                                           |      | Mascot      |
|  | 3337.6052  | 3337.7556   | 0.1504  | 45    | 269        | 298      | LARSCHDLESLGQNP GW<br>GQTQPVETNIVCK |           |       | Carbamidomethyl (C)[5]                    |      | Mascot      |

|    |                                                          |  |  |  |  |              |         |      |    |    |   |  |  |
|----|----------------------------------------------------------|--|--|--|--|--------------|---------|------|----|----|---|--|--|
| 42 | PREDICTED: histone acetyltransferase KAT2A [Danio rerio] |  |  |  |  | gi 189516875 | 90565.6 | 9.09 | 13 | 40 | 0 |  |  |
|----|----------------------------------------------------------|--|--|--|--|--------------|---------|------|----|----|---|--|--|

Peptide Information

|  | Calc. Mass | Obsrv. Mass | ± da    | ± ppm | Start Seq. | End Seq. | Sequence  | Ion Score | C. I. | % Modification         | Rank | Result Type |
|--|------------|-------------|---------|-------|------------|----------|-----------|-----------|-------|------------------------|------|-------------|
|  | 826.4669   | 826.4424    | -0.0245 | -30   | 302        | 308      | DKLPPEK   |           |       |                        |      | Mascot      |
|  | 897.4498   | 897.4583    | 0.0085  | 9     | 66         | 73       | LGVFSSCK  |           |       | Carbamidomethyl (C)[7] |      | Mascot      |
|  | 960.5373   | 960.4742    | -0.0631 | -66   | 52         | 59       | AQVRSFPR  |           |       |                        |      | Mascot      |
|  | 960.5373   | 960.4742    | -0.0631 | -66   | 52         | 59       | AQVRSFPR  |           |       |                        |      | Mascot      |
|  | 992.5603   | 992.4612    | -0.0991 | -100  | 782        | 788      | FFYFKLK   |           |       |                        |      | Mascot      |
|  | 1069.6405  | 1069.5568   | -0.0837 | -78   | 310        | 318      | TLILTHFPK |           |       |                        |      | Mascot      |

|    |                                              |           |         |     |             |     |                                    |      |    |    |   |                                          |   |  |  |  |  |        |
|----|----------------------------------------------|-----------|---------|-----|-------------|-----|------------------------------------|------|----|----|---|------------------------------------------|---|--|--|--|--|--------|
|    | 1107.5873                                    | 1107.5398 | -0.0475 | -43 | 156         | 163 | QVYFYLFK                           |      |    |    |   |                                          |   |  |  |  |  | Mascot |
|    | 1118.5437                                    | 1118.6768 | 0.1331  | 119 | 445         | 453 | DETARLEER                          |      |    |    |   |                                          |   |  |  |  |  | Mascot |
|    | 1327.7467                                    | 1327.7329 | -0.0138 | -10 | 393         | 404 | KLPEALTLEDAK                       |      |    |    |   |                                          |   |  |  |  |  | Mascot |
|    | 1346.6636                                    | 1346.6887 | 0.0251  | 19  | 220         | 229 | MFLLCCLNYWK                        |      |    |    |   | Oxidation (M)[1]                         |   |  |  |  |  | Mascot |
|    | 2233.1194                                    | 2233.0706 | -0.0488 | -22 | 368         | 391 | GSSASALGVTGLDVASS<br>EPTIGEK       |      |    |    |   |                                          |   |  |  |  |  | Mascot |
|    | 2284.1323                                    | 2284.1748 | 0.0425  | 19  | 563         | 581 | HGILYFLTYADEYAIGYFK                |      |    |    |   |                                          |   |  |  |  |  | Mascot |
|    | 2362.1721                                    | 2362.1821 | 0.01    | 4   | 220         | 237 | MFLLCCLNYWKLETPSQF<br>R            |      |    |    |   | Carbamidomethyl (C)[5], Oxidation (M)[1] |   |  |  |  |  | Mascot |
|    | 2362.1721                                    | 2362.1821 | 0.01    | 4   | 220         | 237 | MFLLCCLNYWKLETPSQF<br>R            |      |    |    |   | Carbamidomethyl (C)[5], Oxidation (M)[1] |   |  |  |  |  | Mascot |
|    | 3337.6416                                    | 3337.7556 | 0.114   | 34  | 517         | 546 | VIGGICFRMFPTQGFTEIV<br>FCAVTSNEQVK |      |    |    |   | Oxidation (M)[9]                         |   |  |  |  |  | Mascot |
| 43 | hypothetical protein LOC407982 [Danio rerio] |           |         |     | gi 47551335 |     | 119415.8                           | 5.22 | 13 | 40 | 0 | 23                                       | 0 |  |  |  |  |        |

Peptide Information

| Calc. Mass | Obsrv. Mass | ± da    | ± ppm | Start Seq. | End Seq. | Sequence        | Ion Score | C. I. | % Modification   | Rank | Result Type |
|------------|-------------|---------|-------|------------|----------|-----------------|-----------|-------|------------------|------|-------------|
| 960.5248   | 960.4742    | -0.0506 | -53   | 596        | 603      | ITEELDLK        | 23        | 0     |                  |      | Mascot      |
| 960.5248   | 960.4742    | -0.0506 | -53   | 596        | 603      | ITEELDLK        |           |       |                  |      | Mascot      |
| 991.4764   | 991.4587    | -0.0177 | -18   | 201        | 208      | VEELMQDK        |           |       |                  |      | Mascot      |
| 1107.535   | 1107.5398   | 0.0048  | 4     | 192        | 200      | TELESLMER       |           |       |                  |      | Mascot      |
| 1309.7263  | 1309.6526   | -0.0737 | -56   | 978        | 987      | KFYQLELVNR      |           |       |                  |      | Mascot      |
| 1320.6827  | 1320.5803   | -0.1024 | -78   | 961        | 971      | EMVSERETLVK     |           |       |                  |      | Mascot      |
| 1325.6556  | 1325.7539   | 0.0983  | 74    | 274        | 284      | SELHRAQEEAR     |           |       |                  |      | Mascot      |
| 1325.6556  | 1325.7539   | 0.0983  | 74    | 274        | 284      | SELHRAQEEAR     |           |       |                  |      | Mascot      |
| 1327.6423  | 1327.7329   | 0.0906  | 68    | 821        | 831      | CKEHEQDLLGR     |           |       |                  |      | Mascot      |
| 1346.5967  | 1346.6887   | 0.092   | 68    | 429        | 439      | AKYEEEMSCLK     |           |       | Oxidation (M)[7] |      | Mascot      |
| 1386.7084  | 1386.6737   | -0.0347 | -25   | 455        | 466      | VQQESVRNAAER    |           |       |                  |      | Mascot      |
| 1545.8271  | 1545.7322   | -0.0949 | -61   | 236        | 248      | TQQLTTENLLAWK   |           |       |                  |      | Mascot      |
| 1638.7363  | 1638.8556   | 0.1193  | 73    | 639        | 651      | DLEMMAARESWQR   |           |       | Oxidation (M)[4] |      | Mascot      |
| 1826.9429  | 1826.9786   | 0.0357  | 20    | 186        | 200      | LAELHRTELESLMER | 2         | 0     |                  |      | Mascot      |
| 1826.9429  | 1826.9786   | 0.0357  | 20    | 186        | 200      | LAELHRTELESLMER |           |       |                  |      | Mascot      |
| 1838.9396  | 1838.9198   | -0.0198 | -11   | 136        | 150      | LRTFSQVQAQFEQEK |           |       |                  |      | Mascot      |

44 PREDICTED: g2/M phase-specific E3 ubiquitin-protein ligase-like, partial [Danio rerio] gi|326680912 55309.6 5.35 10 39 0

Peptide Information

| Calc. Mass | Obsrv. Mass | ± da | ± ppm | Start Seq. | End Seq. | Sequence | Ion Score | C. I. | % Modification | Rank | Result Type |
|------------|-------------|------|-------|------------|----------|----------|-----------|-------|----------------|------|-------------|
|------------|-------------|------|-------|------------|----------|----------|-----------|-------|----------------|------|-------------|

|  |           |           |         |     |     |     |                       |  |                                           |        |
|--|-----------|-----------|---------|-----|-----|-----|-----------------------|--|-------------------------------------------|--------|
|  | 984.4818  | 984.4195  | -0.0623 | -63 | 40  | 47  | IYIGSMER              |  | Oxidation (M)[6]                          | Mascot |
|  | 984.4818  | 984.4195  | -0.0623 | -63 | 40  | 47  | IYIGSMER              |  | Oxidation (M)[6]                          | Mascot |
|  | 992.5305  | 992.4612  | -0.0693 | -70 | 202 | 209 | IIRTSCSR              |  | Carbamidomethyl (C)[6]                    | Mascot |
|  | 1045.4845 | 1045.5583 | 0.0738  | 71  | 480 | 488 | GLNIIFYCC             |  |                                           | Mascot |
|  | 1088.5735 | 1088.5405 | -0.033  | -30 | 105 | 114 | NIPGTNTPFK            |  |                                           | Mascot |
|  | 1320.5447 | 1320.5803 | 0.0356  | 27  | 2   | 12  | TETSSVDCFMK           |  | Carbamidomethyl (C)[8], Oxidation (M)[10] | Mascot |
|  | 1325.6843 | 1325.7539 | 0.0696  | 53  | 259 | 269 | EFLTLLMDCLK           |  |                                           | Mascot |
|  | 1325.6843 | 1325.7539 | 0.0696  | 53  | 259 | 269 | EFLTLLMDCLK           |  |                                           | Mascot |
|  | 1382.7058 | 1382.7771 | 0.0713  | 52  | 259 | 269 | EFLTLLMDCLK           |  | Carbamidomethyl (C)[9]                    | Mascot |
|  | 1382.7058 | 1382.7771 | 0.0713  | 52  | 259 | 269 | EFLTLLMDCLK           |  | Carbamidomethyl (C)[9]                    | Mascot |
|  | 1404.6827 | 1404.7502 | 0.0675  | 48  | 228 | 239 | ASYDPLHDMLVK          |  | Oxidation (M)[9]                          | Mascot |
|  | 1840.7719 | 1840.9373 | 0.1654  | 90  | 240 | 257 | FTDDEGSTEDAVDTGGPK    |  |                                           | Mascot |
|  | 2233.1035 | 2233.0706 | -0.0329 | -15 | 282 | 300 | FLTFNNAAVREDEYFLAGR   |  |                                           | Mascot |
|  | 2283.2344 | 2283.167  | -0.0674 | -30 | 59  | 78  | RLPLEVETNWTSEQVLIA GK |  |                                           | Mascot |

45 PREDICTED: ras association domain-containing protein gi|189537462 49870 4.96 3 39 0 32 80.96  
10 [Danio rerio]

#### Peptide Information

| Calc. Mass | Obsrv. Mass | ± da    | ± ppm | Start Seq. | End Seq. | Sequence  | Ion Score | C. I. | % Modification | Rank | Result Type |
|------------|-------------|---------|-------|------------|----------|-----------|-----------|-------|----------------|------|-------------|
| 850.4318   | 850.5385    | 0.1067  | 125   | 60         | 65       | WRGFER    |           |       |                |      | Mascot      |
| 960.4632   | 960.4742    | 0.011   | 11    | 184        | 191      | ELDGEIER  | 32        | 80.96 |                |      | Mascot      |
| 960.4632   | 960.4742    | 0.011   | 11    | 184        | 191      | ELDGEIER  |           |       |                |      | Mascot      |
| 992.5193   | 992.4612    | -0.0581 | -59   | 25         | 33       | RTTCADVVK |           |       |                |      | Mascot      |

46 solute carrier family 25 (mitochondrial carrier: glutamate), member 22 [Danio rerio]

#### Peptide Information

| Calc. Mass | Obsrv. Mass | ± da    | ± ppm | Start Seq. | End Seq. | Sequence        | Ion Score | C. I. | % Modification                            | Rank | Result Type |
|------------|-------------|---------|-------|------------|----------|-----------------|-----------|-------|-------------------------------------------|------|-------------|
| 850.4417   | 850.5385    | 0.0968  | 114   | 40         | 46       | QGQQVYK         |           |       |                                           |      | Mascot      |
| 960.5294   | 960.4742    | -0.0552 | -57   | 151        | 159      | LAANTVLCR       | 17        | 0     |                                           |      | Mascot      |
| 960.5294   | 960.4742    | -0.0552 | -57   | 151        | 159      | LAANTVLCR       |           |       |                                           |      | Mascot      |
| 1118.5874  | 1118.6768   | 0.0894  | 80    | 1          | 10       | MSQQISLPAK      |           |       | Oxidation (M)[1]                          |      | Mascot      |
| 1193.5909  | 1193.6091   | 0.0182  | 15    | 160        | 170      | SYNVVPNSSAR     |           |       |                                           |      | Mascot      |
| 1826.9139  | 1826.9786   | 0.0647  | 35    | 40         | 54       | QGQQVYKSMIDCLIK |           |       | Carbamidomethyl (C)[12], Oxidation (M)[9] |      | Mascot      |
| 1826.9139  | 1826.9786   | 0.0647  | 35    | 40         | 54       | QGQQVYKSMIDCLIK |           |       | Carbamidomethyl (C)[12], Oxidation (M)[9] |      | Mascot      |

|    |                                           |           |        |    |              |     |                            |      |   |    |   |  |  |  |  |  |        |
|----|-------------------------------------------|-----------|--------|----|--------------|-----|----------------------------|------|---|----|---|--|--|--|--|--|--------|
|    | 2362.123                                  | 2362.1821 | 0.0591 | 25 | 257          | 278 | LQSLSKGANEDTYSGIVD<br>CFSK |      |   |    |   |  |  |  |  |  | Mascot |
|    | 2362.123                                  | 2362.1821 | 0.0591 | 25 | 257          | 278 | LQSLSKGANEDTYSGIVD<br>CFSK |      |   |    |   |  |  |  |  |  | Mascot |
| 47 | PREDICTED: si:ch211-218c6.8 [Danio rerio] |           |        |    | gi 189531608 |     | 22656.2                    | 4.75 | 6 | 38 | 0 |  |  |  |  |  |        |

Peptide Information

| Calc. Mass | Obsrv. Mass | ± da    | ± ppm | Start Seq. | End Seq. | Sequence       | Ion Score | C. I. | % Modification     | Rank | Result Type |
|------------|-------------|---------|-------|------------|----------|----------------|-----------|-------|--------------------|------|-------------|
| 842.5709   | 842.5054    | -0.0655 | -78   | 83         | 89       | LVELLKK        |           |       |                    |      | Mascot      |
| 960.5108   | 960.4742    | -0.0366 | -38   | 22         | 29       | RENSDVLK       | 7         | 0     |                    |      | Mascot      |
| 960.5108   | 960.4742    | -0.0366 | -38   | 22         | 29       | RENSDVLK       |           |       |                    |      | Mascot      |
| 1107.4922  | 1107.5398   | 0.0476  | 43    | 154        | 162      | AMDQLPMNR      |           |       | Oxidation (M)[2,7] |      | Mascot      |
| 1320.6219  | 1320.5803   | -0.0416 | -32   | 100        | 110      | EDHAFFADLQK    |           |       |                    |      | Mascot      |
| 1376.6774  | 1376.6925   | 0.0151  | 11    | 152        | 162      | LRAMDQLPMNR    |           |       | Oxidation (M)[4,9] |      | Mascot      |
| 1404.5549  | 1404.7502   | 0.1953  | 139   | 188        | 200      | AFGVGDDDDDEEVH |           |       |                    |      | Mascot      |

|    |                              |  |  |  |              |  |         |      |   |  |    |        |  |  |  |  |  |
|----|------------------------------|--|--|--|--------------|--|---------|------|---|--|----|--------|--|--|--|--|--|
| 48 | Hook homolog 1 [Danio rerio] |  |  |  | gi 190339684 |  | 83123.4 | 5.24 | 1 |  | 34 | 88.206 |  |  |  |  |  |
|----|------------------------------|--|--|--|--------------|--|---------|------|---|--|----|--------|--|--|--|--|--|

Peptide Information

| Calc. Mass | Obsrv. Mass | ± da    | ± ppm | Start Seq. | End Seq. | Sequence | Ion Score | C. I.  | % Modification | Rank | Result Type |
|------------|-------------|---------|-------|------------|----------|----------|-----------|--------|----------------|------|-------------|
| 960.4996   | 960.4742    | -0.0254 | -26   | 323        | 330      | LEDLSDLR | 34        | 88.206 |                | 2    | Mascot      |

|    |                                                         |  |  |  |              |  |         |      |   |  |    |        |  |  |  |  |  |
|----|---------------------------------------------------------|--|--|--|--------------|--|---------|------|---|--|----|--------|--|--|--|--|--|
| 49 | PREDICTED: hypothetical protein LOC796277 [Danio rerio] |  |  |  | gi 292622807 |  | 79431.9 | 5.54 | 1 |  | 30 | 73.535 |  |  |  |  |  |
|----|---------------------------------------------------------|--|--|--|--------------|--|---------|------|---|--|----|--------|--|--|--|--|--|

Peptide Information

| Calc. Mass | Obsrv. Mass | ± da    | ± ppm | Start Seq. | End Seq. | Sequence     | Ion Score | C. I.  | % Modification | Rank | Result Type |
|------------|-------------|---------|-------|------------|----------|--------------|-----------|--------|----------------|------|-------------|
| 1287.7015  | 1287.6693   | -0.0322 | -25   | 638        | 649      | KNNGLLSESVAR | 30        | 73.535 |                | 2    | Mascot      |

|    |                                               |  |  |  |              |  |         |      |   |  |    |       |  |  |  |  |  |
|----|-----------------------------------------------|--|--|--|--------------|--|---------|------|---|--|----|-------|--|--|--|--|--|
| 50 | PREDICTED: protein IWS1 homolog [Danio rerio] |  |  |  | gi 326674520 |  | 86977.8 | 4.61 | 1 |  | 24 | 0.535 |  |  |  |  |  |
|----|-----------------------------------------------|--|--|--|--------------|--|---------|------|---|--|----|-------|--|--|--|--|--|

Peptide Information

| Calc. Mass | Obsrv. Mass | ± da   | ± ppm | Start Seq. | End Seq. | Sequence   | Ion Score | C. I. | % Modification | Rank | Result Type |
|------------|-------------|--------|-------|------------|----------|------------|-----------|-------|----------------|------|-------------|
| 1211.6492  | 1211.7106   | 0.0614 | 51    | 670        | 679      | DLDDQIAPRR | 24        | 0.535 |                | 1    | Mascot      |

|                |           |                        |                |  |  |  |                |                    |  |
|----------------|-----------|------------------------|----------------|--|--|--|----------------|--------------------|--|
| Gel Idx/Pos    | 249/K1    | Instr./Gel Origin      | BA2060/110707A |  |  |  | Process Status | Analysis Succeeded |  |
| Plate [#] Name | [1] 31496 | Instrument Sample Name |                |  |  |  | Spectra        | 11                 |  |

| Rank | Protein Name               | Accession No. | Protein MW | Protein PI | Pep. Count | Protein Score | Protein Score C. I. % | Total Ion Score | Total Ion C. I. % |
|------|----------------------------|---------------|------------|------------|------------|---------------|-----------------------|-----------------|-------------------|
| 1    | Vtg1 protein [Danio rerio] | gi 63100501   | 36409.1    | 9.23       | 8          | 387           | 100                   | 349             | 100               |

Peptide Information

| Calc. Mass | Obsrv. Mass | ± da    | ± ppm | Start Seq. | End Seq. | Sequence           | Ion Score | C. I. % | Modification           | Rank | Result Type |
|------------|-------------|---------|-------|------------|----------|--------------------|-----------|---------|------------------------|------|-------------|
| 960.4785   | 960.4747    | -0.0038 | -4    | 218        | 224      | LEVEWER            | 42        | 98.281  |                        |      | Mascot      |
| 960.4785   | 960.4747    | -0.0038 | -4    | 218        | 224      | LEVEWER            |           |         |                        |      | Mascot      |
| 984.4243   | 984.42      | -0.0043 | -4    | 190        | 197      | FSWGAECK           |           |         | Carbamidomethyl (C)[7] |      | Mascot      |
| 1287.6691  | 1287.6666   | -0.0025 | -2    | 205        | 217      | AEAGVLGEFPAAR      |           |         |                        |      | Mascot      |
| 1287.6691  | 1287.6666   | -0.0025 | -2    | 205        | 217      | AEAGVLGEFPAAR      | 121       | 100     |                        |      | Mascot      |
| 1364.6957  | 1364.6929   | -0.0028 | -2    | 239        | 250      | HILTAAYDTGFR       |           |         |                        |      | Mascot      |
| 1364.6957  | 1364.6929   | -0.0028 | -2    | 239        | 250      | HILTAAYDTGFR       | 53        | 99.856  |                        |      | Mascot      |
| 1796.9078  | 1796.9534   | 0.0456  | 25    | 239        | 253      | HILTAAYDTGFRFER    |           |         |                        |      | Mascot      |
| 1826.9799  | 1826.9766   | -0.0033 | -2    | 143        | 158      | LLGYQLAAYFDKPTAR   | 135       | 100     |                        |      | Mascot      |
| 1826.9799  | 1826.9766   | -0.0033 | -2    | 143        | 158      | LLGYQLAAYFDKPTAR   |           |         |                        |      | Mascot      |
| 1958.0189  | 1958.0162   | -0.0027 | -1    | 254        | 271      | ATNSEKEIELTAALPSQR |           |         |                        |      | Mascot      |
| 2060.1426  | 2060.1409   | -0.0017 | -1    | 218        | 234      | LEVEWERLPIIVTTYAK  |           |         |                        |      | Mascot      |

|   |                              |              |          |      |    |     |     |     |     |
|---|------------------------------|--------------|----------|------|----|-----|-----|-----|-----|
| 2 | vitellogenin 1 [Danio rerio] | gi 166795887 | 149452.5 | 8.68 | 13 | 372 | 100 | 351 | 100 |
|---|------------------------------|--------------|----------|------|----|-----|-----|-----|-----|

Peptide Information

| Calc. Mass | Obsrv. Mass | ± da    | ± ppm | Start Seq. | End Seq. | Sequence      | Ion Score | C. I. % | Modification           | Rank | Result Type |
|------------|-------------|---------|-------|------------|----------|---------------|-----------|---------|------------------------|------|-------------|
| 960.4785   | 960.4747    | -0.0038 | -4    | 1258       | 1264     | LEVEWER       | 42        | 98.281  |                        |      | Mascot      |
| 960.4785   | 960.4747    | -0.0038 | -4    | 1258       | 1264     | LEVEWER       |           |         |                        |      | Mascot      |
| 984.4243   | 984.42      | -0.0043 | -4    | 1230       | 1237     | FSWGAECK      |           |         | Carbamidomethyl (C)[7] |      | Mascot      |
| 1088.5405  | 1088.5442   | 0.0037  | 3     | 415        | 424      | MTASLATHEK    |           |         |                        |      | Mascot      |
| 1287.6691  | 1287.6666   | -0.0025 | -2    | 1245       | 1257     | AEAGVLGEFPAAR |           |         |                        |      | Mascot      |
| 1287.6691  | 1287.6666   | -0.0025 | -2    | 1245       | 1257     | AEAGVLGEFPAAR | 121       | 100     |                        |      | Mascot      |
| 1359.6508  | 1359.6165   | -0.0343 | -25   | 184        | 194      | DLSHCQERIMK   |           |         |                        |      | Mascot      |
| 1364.6957  | 1364.6929   | -0.0028 | -2    | 1279       | 1290     | HILTAAYDTGFR  |           |         |                        |      | Mascot      |
| 1364.6957  | 1364.6929   | -0.0028 | -2    | 1279       | 1290     | HILTAAYDTGFR  | 53        | 99.856  |                        |      | Mascot      |
| 1382.7889  | 1382.7759   | -0.013  | -9    | 303        | 315      | ISDAPAQIVEVLK |           |         |                        |      | Mascot      |



|           |           |         |     |      |      |                            |     |     |  |  |  |  |  |  |  |  |        |
|-----------|-----------|---------|-----|------|------|----------------------------|-----|-----|--|--|--|--|--|--|--|--|--------|
| 1382.7889 | 1382.7759 | -0.013  | -9  | 303  | 315  | ISDAPAQIVEVLK              |     |     |  |  |  |  |  |  |  |  | Mascot |
| 1638.8485 | 1638.8563 | 0.0078  | 5   | 668  | 683  | TYLAGAAADVVEFGVR           |     |     |  |  |  |  |  |  |  |  | Mascot |
| 1796.9078 | 1796.9534 | 0.0456  | 25  | 1279 | 1293 | HILTAAYDTGFRFER            |     |     |  |  |  |  |  |  |  |  | Mascot |
| 1826.9799 | 1826.9766 | -0.0033 | -2  | 1183 | 1198 | LLGYQLAAYFDKPTAR           | 135 | 100 |  |  |  |  |  |  |  |  | Mascot |
| 1826.9799 | 1826.9766 | -0.0033 | -2  | 1183 | 1198 | LLGYQLAAYFDKPTAR           |     |     |  |  |  |  |  |  |  |  | Mascot |
| 1958.0189 | 1958.0162 | -0.0027 | -1  | 1294 | 1311 | ATNSEKEIELTAALPSQR         |     |     |  |  |  |  |  |  |  |  | Mascot |
| 2060.1426 | 2060.1409 | -0.0017 | -1  | 1258 | 1274 | LEVEWERLPIIVTTYAK          |     |     |  |  |  |  |  |  |  |  | Mascot |
| 2233.2009 | 2233.0815 | -0.1194 | -53 | 593  | 614  | SLTRITAPDMAYVAGAAN<br>VAIK |     |     |  |  |  |  |  |  |  |  | Mascot |

3 Vtg1 protein [Danio rerio] gi|145337918 116565.5 9.07 10 365 100 351 100

#### Peptide Information

| Calc. Mass | Obsrv. Mass | ± da    | ± ppm | Start Seq. | End Seq. | Sequence           | Ion Score | C. I.  | % Modification         | Rank | Result Type |
|------------|-------------|---------|-------|------------|----------|--------------------|-----------|--------|------------------------|------|-------------|
| 960.4785   | 960.4747    | -0.0038 | -4    | 964        | 970      | LEVEWER            | 42        | 98.281 |                        |      | Mascot      |
| 960.4785   | 960.4747    | -0.0038 | -4    | 964        | 970      | LEVEWER            |           |        |                        |      | Mascot      |
| 984.4243   | 984.42      | -0.0043 | -4    | 936        | 943      | FSWGAECK           |           |        | Carbamidomethyl (C)[7] |      | Mascot      |
| 1088.5405  | 1088.5442   | 0.0037  | 3     | 121        | 130      | MTASLATHEK         |           |        |                        |      | Mascot      |
| 1287.6691  | 1287.6666   | -0.0025 | -2    | 951        | 963      | AEAGVLGEFPAAR      |           |        |                        |      | Mascot      |
| 1287.6691  | 1287.6666   | -0.0025 | -2    | 951        | 963      | AEAGVLGEFPAAR      | 121       | 100    |                        |      | Mascot      |
| 1364.6957  | 1364.6929   | -0.0028 | -2    | 985        | 996      | HILTAAYDTGFR       |           |        |                        |      | Mascot      |
| 1364.6957  | 1364.6929   | -0.0028 | -2    | 985        | 996      | HILTAAYDTGFR       | 53        | 99.856 |                        |      | Mascot      |
| 1382.7889  | 1382.7759   | -0.013  | -9    | 9          | 21       | ISDAPAQIVEVLK      |           |        |                        |      | Mascot      |
| 1382.7889  | 1382.7759   | -0.013  | -9    | 9          | 21       | ISDAPAQIVEVLK      |           |        |                        |      | Mascot      |
| 1796.9078  | 1796.9534   | 0.0456  | 25    | 985        | 999      | HILTAAYDTGFRFER    |           |        |                        |      | Mascot      |
| 1826.9799  | 1826.9766   | -0.0033 | -2    | 889        | 904      | LLGYQLAAYFDKPTAR   | 135       | 100    |                        |      | Mascot      |
| 1826.9799  | 1826.9766   | -0.0033 | -2    | 889        | 904      | LLGYQLAAYFDKPTAR   |           |        |                        |      | Mascot      |
| 1958.0189  | 1958.0162   | -0.0027 | -1    | 1000       | 1017     | ATNSEKEIELTAALPSQR |           |        |                        |      | Mascot      |
| 2060.1426  | 2060.1409   | -0.0017 | -1    | 964        | 980      | LEVEWERLPIIVTTYAK  |           |        |                        |      | Mascot      |

4 vitellogenin 1 [Danio rerio] gi|94733730 149140.4 8.74 11 365 100 351 100

#### Peptide Information

| Calc. Mass | Obsrv. Mass | ± da    | ± ppm | Start Seq. | End Seq. | Sequence   | Ion Score | C. I.  | % Modification         | Rank | Result Type |
|------------|-------------|---------|-------|------------|----------|------------|-----------|--------|------------------------|------|-------------|
| 960.4785   | 960.4747    | -0.0038 | -4    | 1258       | 1264     | LEVEWER    | 42        | 98.281 |                        |      | Mascot      |
| 960.4785   | 960.4747    | -0.0038 | -4    | 1258       | 1264     | LEVEWER    |           |        |                        |      | Mascot      |
| 984.4243   | 984.42      | -0.0043 | -4    | 1230       | 1237     | FSWGAECK   |           |        | Carbamidomethyl (C)[7] |      | Mascot      |
| 1088.5405  | 1088.5442   | 0.0037  | 3     | 415        | 424      | MTASLATHEK |           |        |                        |      | Mascot      |

|           |           |         |     |      |      |                    |     |        |  |  |  |  |        |
|-----------|-----------|---------|-----|------|------|--------------------|-----|--------|--|--|--|--|--------|
| 1287.6691 | 1287.6666 | -0.0025 | -2  | 1245 | 1257 | AEAGVLGEFPAAR      |     |        |  |  |  |  | Mascot |
| 1287.6691 | 1287.6666 | -0.0025 | -2  | 1245 | 1257 | AEAGVLGEFPAAR      | 121 | 100    |  |  |  |  | Mascot |
| 1359.6508 | 1359.6165 | -0.0343 | -25 | 184  | 194  | DLSHCQERIMK        |     |        |  |  |  |  | Mascot |
| 1364.6957 | 1364.6929 | -0.0028 | -2  | 1279 | 1290 | HILTAAYDTGFR       |     |        |  |  |  |  | Mascot |
| 1364.6957 | 1364.6929 | -0.0028 | -2  | 1279 | 1290 | HILTAAYDTGFR       | 53  | 99.856 |  |  |  |  | Mascot |
| 1382.7889 | 1382.7759 | -0.013  | -9  | 303  | 315  | ISDAPAQIVEVLK      |     |        |  |  |  |  | Mascot |
| 1382.7889 | 1382.7759 | -0.013  | -9  | 303  | 315  | ISDAPAQIVEVLK      |     |        |  |  |  |  | Mascot |
| 1796.9078 | 1796.9534 | 0.0456  | 25  | 1279 | 1293 | HILTAAYDTGFRFER    |     |        |  |  |  |  | Mascot |
| 1826.9799 | 1826.9766 | -0.0033 | -2  | 1183 | 1198 | LLGYQLAAYFDKPTAR   | 135 | 100    |  |  |  |  | Mascot |
| 1826.9799 | 1826.9766 | -0.0033 | -2  | 1183 | 1198 | LLGYQLAAYFDKPTAR   |     |        |  |  |  |  | Mascot |
| 1958.0189 | 1958.0162 | -0.0027 | -1  | 1294 | 1311 | ATNSEKEIELTAALPSQR |     |        |  |  |  |  | Mascot |
| 2060.1426 | 2060.1409 | -0.0017 | -1  | 1258 | 1274 | LEVEWERLPIIVTTYAK  |     |        |  |  |  |  | Mascot |

5 vitellogenin 1 [Danio rerio] gi|21391472 127954.2 8.69 10 363 100 351 100

| Peptide Information |             |         |       |            |          |                    |           |        |   |                        |      |             |
|---------------------|-------------|---------|-------|------------|----------|--------------------|-----------|--------|---|------------------------|------|-------------|
| Calc. Mass          | Obsrv. Mass | ± da    | ± ppm | Start Seq. | End Seq. | Sequence           | Ion Score | C. I.  | % | Modification           | Rank | Result Type |
| 960.4785            | 960.4747    | -0.0038 | -4    | 1065       | 1071     | LEVEWER            | 42        | 98.281 |   |                        |      | Mascot      |
| 960.4785            | 960.4747    | -0.0038 | -4    | 1065       | 1071     | LEVEWER            |           |        |   |                        |      | Mascot      |
| 984.4243            | 984.42      | -0.0043 | -4    | 1037       | 1044     | FSWGAECK           |           |        |   | Carbamidomethyl (C)[7] |      | Mascot      |
| 1088.5405           | 1088.5442   | 0.0037  | 3     | 224        | 233      | MTASLATHEK         |           |        |   |                        |      | Mascot      |
| 1287.6691           | 1287.6666   | -0.0025 | -2    | 1052       | 1064     | AEAGVLGEFPAAR      |           |        |   |                        |      | Mascot      |
| 1287.6691           | 1287.6666   | -0.0025 | -2    | 1052       | 1064     | AEAGVLGEFPAAR      | 121       | 100    |   |                        |      | Mascot      |
| 1364.6957           | 1364.6929   | -0.0028 | -2    | 1086       | 1097     | HILTAAYDTGFR       |           |        |   |                        |      | Mascot      |
| 1364.6957           | 1364.6929   | -0.0028 | -2    | 1086       | 1097     | HILTAAYDTGFR       | 53        | 99.856 |   |                        |      | Mascot      |
| 1382.7889           | 1382.7759   | -0.013  | -9    | 112        | 124      | ISDAPAQIVEVLK      |           |        |   |                        |      | Mascot      |
| 1382.7889           | 1382.7759   | -0.013  | -9    | 112        | 124      | ISDAPAQIVEVLK      |           |        |   |                        |      | Mascot      |
| 1796.9078           | 1796.9534   | 0.0456  | 25    | 1086       | 1100     | HILTAAYDTGFRFER    |           |        |   |                        |      | Mascot      |
| 1826.9799           | 1826.9766   | -0.0033 | -2    | 990        | 1005     | LLGYQLAAYFDKPTAR   | 135       | 100    |   |                        |      | Mascot      |
| 1826.9799           | 1826.9766   | -0.0033 | -2    | 990        | 1005     | LLGYQLAAYFDKPTAR   |           |        |   |                        |      | Mascot      |
| 1958.0189           | 1958.0162   | -0.0027 | -1    | 1101       | 1118     | ATNSEKEIELTAALPSQR |           |        |   |                        |      | Mascot      |
| 2060.1426           | 2060.1409   | -0.0017 | -1    | 1065       | 1081     | LEVEWERLPIIVTTYAK  |           |        |   |                        |      | Mascot      |

6 vitellogenin 7 [Danio rerio] gi|57864789 24318.7 8.37 5 322 100 298 100

| Peptide Information |             |      |       |            |          |          |           |       |   |              |      |             |
|---------------------|-------------|------|-------|------------|----------|----------|-----------|-------|---|--------------|------|-------------|
| Calc. Mass          | Obsrv. Mass | ± da | ± ppm | Start Seq. | End Seq. | Sequence | Ion Score | C. I. | % | Modification | Rank | Result Type |

|   |                              |           |         |    |              |     |                   |      |        |                        |     |     |     |        |
|---|------------------------------|-----------|---------|----|--------------|-----|-------------------|------|--------|------------------------|-----|-----|-----|--------|
|   | 960.4785                     | 960.4747  | -0.0038 | -4 | 113          | 119 | LEVEWER           | 42   | 98.281 |                        |     |     |     | Mascot |
|   | 960.4785                     | 960.4747  | -0.0038 | -4 | 113          | 119 | LEVEWER           |      |        |                        |     |     |     | Mascot |
|   | 984.4243                     | 984.42    | -0.0043 | -4 | 85           | 92  | FSWGAECK          |      |        | Carbamidomethyl (C)[7] |     |     |     | Mascot |
|   | 1287.6691                    | 1287.6666 | -0.0025 | -2 | 100          | 112 | AEAGVLGEFPAAR     |      |        |                        |     |     |     | Mascot |
|   | 1287.6691                    | 1287.6666 | -0.0025 | -2 | 100          | 112 | AEAGVLGEFPAAR     | 121  | 100    |                        |     |     |     | Mascot |
|   | 1826.9799                    | 1826.9766 | -0.0033 | -2 | 38           | 53  | LLGYQLAAYFDKPTAR  | 135  | 100    |                        |     |     |     | Mascot |
|   | 1826.9799                    | 1826.9766 | -0.0033 | -2 | 38           | 53  | LLGYQLAAYFDKPTAR  |      |        |                        |     |     |     | Mascot |
|   | 2060.1426                    | 2060.1409 | -0.0017 | -1 | 113          | 129 | LEVEWERLPIIVTTYAK |      |        |                        |     |     |     | Mascot |
| 7 | vitellogenin 7 [Danio rerio] |           |         |    | gi 156713467 |     | 148739.2          | 8.76 | 9      | 302                    | 100 | 298 | 100 |        |

#### Peptide Information

| Calc. Mass | Obsrv. Mass | ± da    | ± ppm | Start Seq. | End Seq. | Sequence          | Ion Score | C. I.  | % Modification         | Rank | Result Type |
|------------|-------------|---------|-------|------------|----------|-------------------|-----------|--------|------------------------|------|-------------|
| 960.4785   | 960.4747    | -0.0038 | -4    | 1254       | 1260     | LEVEWER           | 42        | 98.281 |                        |      | Mascot      |
| 960.4785   | 960.4747    | -0.0038 | -4    | 1254       | 1260     | LEVEWER           |           |        |                        |      | Mascot      |
| 984.4243   | 984.42      | -0.0043 | -4    | 1226       | 1233     | FSWGAECK          |           |        | Carbamidomethyl (C)[7] |      | Mascot      |
| 1109.4818  | 1109.4904   | 0.0086  | 8     | 1087       | 1097     | SHSTSSSSSSSR      |           |        |                        |      | Mascot      |
| 1193.6083  | 1193.5951   | -0.0132 | -11   | 828        | 837      | LESMTLDQLK        |           |        | Oxidation (M)[4]       |      | Mascot      |
| 1193.6083  | 1193.5951   | -0.0132 | -11   | 828        | 837      | LESMTLDQLK        |           |        | Oxidation (M)[4]       |      | Mascot      |
| 1287.6691  | 1287.6666   | -0.0025 | -2    | 1241       | 1253     | AEAGVLGEFPAAR     |           |        |                        |      | Mascot      |
| 1287.6691  | 1287.6666   | -0.0025 | -2    | 1241       | 1253     | AEAGVLGEFPAAR     | 121       | 100    |                        |      | Mascot      |
| 1359.6508  | 1359.6165   | -0.0343 | -25   | 184        | 194      | DLSHCQERIMK       |           |        |                        |      | Mascot      |
| 1796.9581  | 1796.9534   | -0.0047 | -3    | 342        | 356      | LSTLDKFEAIWAQFK   |           |        |                        |      | Mascot      |
| 1826.9799  | 1826.9766   | -0.0033 | -2    | 1179       | 1194     | LLGYQLAAYFDKPTAR  | 135       | 100    |                        |      | Mascot      |
| 1826.9799  | 1826.9766   | -0.0033 | -2    | 1179       | 1194     | LLGYQLAAYFDKPTAR  |           |        |                        |      | Mascot      |
| 2060.1426  | 2060.1409   | -0.0017 | -1    | 1254       | 1270     | LEVEWERLPIIVTTYAK |           |        |                        |      | Mascot      |

|   |                                                             |  |  |  |             |  |          |      |   |     |     |     |     |  |
|---|-------------------------------------------------------------|--|--|--|-------------|--|----------|------|---|-----|-----|-----|-----|--|
| 8 | novel protein similar to vitellogenin 1 (vg1) [Danio rerio] |  |  |  | gi 94732723 |  | 147084.2 | 8.73 | 9 | 301 | 100 | 298 | 100 |  |
|---|-------------------------------------------------------------|--|--|--|-------------|--|----------|------|---|-----|-----|-----|-----|--|

#### Peptide Information

| Calc. Mass | Obsrv. Mass | ± da    | ± ppm | Start Seq. | End Seq. | Sequence     | Ion Score | C. I.  | % Modification         | Rank | Result Type |
|------------|-------------|---------|-------|------------|----------|--------------|-----------|--------|------------------------|------|-------------|
| 960.4785   | 960.4747    | -0.0038 | -4    | 1239       | 1245     | LEVEWER      | 42        | 98.281 |                        |      | Mascot      |
| 960.4785   | 960.4747    | -0.0038 | -4    | 1239       | 1245     | LEVEWER      |           |        |                        |      | Mascot      |
| 984.4243   | 984.42      | -0.0043 | -4    | 1211       | 1218     | FSWGAECK     |           |        | Carbamidomethyl (C)[7] |      | Mascot      |
| 1109.4818  | 1109.4904   | 0.0086  | 8     | 1087       | 1097     | SHSTSSSSSSSR |           |        |                        |      | Mascot      |
| 1193.6083  | 1193.5951   | -0.0132 | -11   | 828        | 837      | LESMTLDQLK   |           |        | Oxidation (M)[4]       |      | Mascot      |
| 1193.6083  | 1193.5951   | -0.0132 | -11   | 828        | 837      | LESMTLDQLK   |           |        | Oxidation (M)[4]       |      | Mascot      |

|  |           |           |         |     |      |      |                   |     |     |  |  |  |  |  |  |        |
|--|-----------|-----------|---------|-----|------|------|-------------------|-----|-----|--|--|--|--|--|--|--------|
|  | 1287.6691 | 1287.6666 | -0.0025 | -2  | 1226 | 1238 | AEAGVLGEFPAAR     |     |     |  |  |  |  |  |  | Mascot |
|  | 1287.6691 | 1287.6666 | -0.0025 | -2  | 1226 | 1238 | AEAGVLGEFPAAR     | 121 | 100 |  |  |  |  |  |  | Mascot |
|  | 1359.6508 | 1359.6165 | -0.0343 | -25 | 184  | 194  | DLSHCQERIMK       |     |     |  |  |  |  |  |  | Mascot |
|  | 1796.9581 | 1796.9534 | -0.0047 | -3  | 342  | 356  | LSTLDKFEAIWAQFK   |     |     |  |  |  |  |  |  | Mascot |
|  | 1826.9799 | 1826.9766 | -0.0033 | -2  | 1164 | 1179 | LLGYQLAAYFDKPTAR  | 135 | 100 |  |  |  |  |  |  | Mascot |
|  | 1826.9799 | 1826.9766 | -0.0033 | -2  | 1164 | 1179 | LLGYQLAAYFDKPTAR  |     |     |  |  |  |  |  |  | Mascot |
|  | 2060.1426 | 2060.1409 | -0.0017 | -1  | 1239 | 1255 | LEVEWERLPIIVTTYAK |     |     |  |  |  |  |  |  | Mascot |

9 hypothetical protein LOC327615 [Danio rerio] gi|70778934 24931.7 6.29 9 225 100 165 100

Peptide Information

| Calc. Mass | Obsrv. Mass | ± da    | ± ppm | Start Seq. | End Seq. | Sequence                   | Ion Score | C. I.  | % Modification | Rank | Result Type |
|------------|-------------|---------|-------|------------|----------|----------------------------|-----------|--------|----------------|------|-------------|
| 902.4842   | 902.4831    | -0.0011 | -1    | 132        | 138      | SLHQVYR                    |           |        |                |      | Mascot      |
| 1024.5825  | 1024.5802   | -0.0023 | -2    | 63         | 70       | EILFAYR                    |           |        |                |      | Mascot      |
| 1024.5825  | 1024.5802   | -0.0023 | -2    | 63         | 70       | EILFAYR                    | 58        | 99.955 |                |      | Mascot      |
| 1058.5516  | 1058.5474   | -0.0042 | -4    | 87         | 95       | FSVYIQSSK                  |           |        |                |      | Mascot      |
| 1142.5225  | 1142.5199   | -0.0026 | -2    | 189        | 197      | AVYYNQDNR                  |           |        |                |      | Mascot      |
| 1142.5225  | 1142.5199   | -0.0026 | -2    | 189        | 197      | AVYYNQDNR                  | 63        | 99.985 |                |      | Mascot      |
| 1193.595   | 1193.5951   | 0.0001  | 0     | 200        | 209      | GNVFDWNTIK                 | 44        | 98.88  |                |      | Mascot      |
| 1193.595   | 1193.5951   | 0.0001  | 0     | 200        | 209      | GNVFDWNTIK                 |           |        |                |      | Mascot      |
| 1359.6176  | 1359.6165   | -0.0011 | -1    | 71         | 81       | TPDDDELNVWR                |           |        |                |      | Mascot      |
| 1556.8207  | 1556.8214   | 0.0007  | 0     | 23         | 36       | TLLFPTATDTSYVK             |           |        |                |      | Mascot      |
| 2152.2085  | 2152.0466   | -0.1619 | -75   | 2          | 22       | LLFFCLLSVTLAAAEVGLS<br>GK  |           |        |                |      | Mascot      |
| 2283.249   | 2283.1819   | -0.0671 | -29   | 1          | 22       | MLLFFCLLSVTLAAAEVG<br>LSGK |           |        |                |      | Mascot      |

10 Zgc:136383 [Danio rerio] gi|92097636 28809.9 9.33 5 193 100 177 100

Peptide Information

| Calc. Mass | Obsrv. Mass | ± da    | ± ppm | Start Seq. | End Seq. | Sequence         | Ion Score | C. I.  | % Modification         | Rank | Result Type |
|------------|-------------|---------|-------|------------|----------|------------------|-----------|--------|------------------------|------|-------------|
| 960.4785   | 960.4747    | -0.0038 | -4    | 156        | 162      | LEVEWER          | 42        | 98.281 |                        |      | Mascot      |
| 960.4785   | 960.4747    | -0.0038 | -4    | 156        | 162      | LEVEWER          |           |        |                        |      | Mascot      |
| 984.4243   | 984.42      | -0.0043 | -4    | 128        | 135      | FSWGAECK         |           |        | Carbamidomethyl (C)[7] |      | Mascot      |
| 1045.5465  | 1045.5621   | 0.0156  | 15    | 246        | 253      | DFLSWIHK         |           |        |                        |      | Mascot      |
| 1193.6348  | 1193.5951   | -0.0397 | -33   | 16         | 25       | TATIMEPFRK       |           |        |                        |      | Mascot      |
| 1193.6348  | 1193.5951   | -0.0397 | -33   | 16         | 25       | TATIMEPFRK       |           |        |                        |      | Mascot      |
| 1826.9799  | 1826.9766   | -0.0033 | -2    | 81         | 96       | LLGYQLAAYFDKPTAR | 135       | 100    |                        |      | Mascot      |
| 1826.9799  | 1826.9766   | -0.0033 | -2    | 81         | 96       | LLGYQLAAYFDKPTAR |           |        |                        |      | Mascot      |

11 vitellogenin 6 [Danio rerio] gi|57864787 38968.8 8.92 5 193 100 177 100

Peptide Information

| Calc. Mass | Obsrv. Mass | ± da    | ± ppm | Start Seq. | End Seq. | Sequence           | Ion Score | C. I.  | % Modification         | Rank | Result Type |
|------------|-------------|---------|-------|------------|----------|--------------------|-----------|--------|------------------------|------|-------------|
| 960.4785   | 960.4747    | -0.0038 | -4    | 255        | 261      | LEVEWER            | 42        | 98.281 |                        |      | Mascot      |
| 960.4785   | 960.4747    | -0.0038 | -4    | 255        | 261      | LEVEWER            |           |        |                        |      | Mascot      |
| 984.4243   | 984.42      | -0.0043 | -4    | 227        | 234      | FSWGAECK           |           |        | Carbamidomethyl (C)[7] |      | Mascot      |
| 1193.6348  | 1193.5951   | -0.0397 | -33   | 115        | 124      | TATIMEPFRK         |           |        |                        |      | Mascot      |
| 1193.6348  | 1193.5951   | -0.0397 | -33   | 115        | 124      | TATIMEPFRK         |           |        |                        |      | Mascot      |
| 1826.9799  | 1826.9766   | -0.0033 | -2    | 180        | 195      | LLGYQLAAYFDKPTAR   | 135       | 100    |                        |      | Mascot      |
| 1826.9799  | 1826.9766   | -0.0033 | -2    | 180        | 195      | LLGYQLAAYFDKPTAR   |           |        |                        |      | Mascot      |
| 1958.0189  | 1958.0162   | -0.0027 | -1    | 291        | 308      | ATNSEKEIELTAALPSQR |           |        |                        |      | Mascot      |

12 vitellogenin 4 [Danio rerio] gi|57864783 31189.9 9.48 5 192 100 177 100

Peptide Information

| Calc. Mass | Obsrv. Mass | ± da    | ± ppm | Start Seq. | End Seq. | Sequence         | Ion Score | C. I.  | % Modification         | Rank | Result Type |
|------------|-------------|---------|-------|------------|----------|------------------|-----------|--------|------------------------|------|-------------|
| 960.4785   | 960.4747    | -0.0038 | -4    | 182        | 188      | LEVEWER          | 42        | 98.281 |                        |      | Mascot      |
| 960.4785   | 960.4747    | -0.0038 | -4    | 182        | 188      | LEVEWER          |           |        |                        |      | Mascot      |
| 984.4243   | 984.42      | -0.0043 | -4    | 154        | 161      | FSWGAECK         |           |        | Carbamidomethyl (C)[7] |      | Mascot      |
| 1193.6348  | 1193.5951   | -0.0397 | -33   | 42         | 51       | TATIMEPFRK       |           |        |                        |      | Mascot      |
| 1193.6348  | 1193.5951   | -0.0397 | -33   | 42         | 51       | TATIMEPFRK       |           |        |                        |      | Mascot      |
| 1359.7518  | 1359.6165   | -0.1353 | -100  | 224        | 235      | EIELTAALPFQK     |           |        |                        |      | Mascot      |
| 1826.9799  | 1826.9766   | -0.0033 | -2    | 107        | 122      | LLGYQLAAYFDKPTAR | 135       | 100    |                        |      | Mascot      |
| 1826.9799  | 1826.9766   | -0.0033 | -2    | 107        | 122      | LLGYQLAAYFDKPTAR |           |        |                        |      | Mascot      |

13 novel protein similar to vitellogenin 1 (vg1) [Danio rerio] gi|94733734 149808.5 8.83 10 190 100 177 100

Peptide Information

| Calc. Mass | Obsrv. Mass | ± da    | ± ppm | Start Seq. | End Seq. | Sequence   | Ion Score | C. I.  | % Modification         | Rank | Result Type |
|------------|-------------|---------|-------|------------|----------|------------|-----------|--------|------------------------|------|-------------|
| 902.5458   | 902.4831    | -0.0627 | -69   | 429        | 436      | FVSIPALR   |           |        |                        |      | Mascot      |
| 960.4785   | 960.4747    | -0.0038 | -4    | 1265       | 1271     | LEVEWER    | 42        | 98.281 |                        |      | Mascot      |
| 960.4785   | 960.4747    | -0.0038 | -4    | 1265       | 1271     | LEVEWER    |           |        |                        |      | Mascot      |
| 984.4243   | 984.42      | -0.0043 | -4    | 1237       | 1244     | FSWGAECK   |           |        | Carbamidomethyl (C)[7] |      | Mascot      |
| 1193.6348  | 1193.5951   | -0.0397 | -33   | 1125       | 1134     | TATIMEPFRK |           |        |                        |      | Mascot      |
| 1193.6348  | 1193.5951   | -0.0397 | -33   | 1125       | 1134     | TATIMEPFRK |           |        |                        |      | Mascot      |

|    |                                  |           |         |     |              |      |                            |      |     |     |     |     |     |  |  |        |
|----|----------------------------------|-----------|---------|-----|--------------|------|----------------------------|------|-----|-----|-----|-----|-----|--|--|--------|
|    | 1359.6508                        | 1359.6165 | -0.0343 | -25 | 188          | 198  | DLSHCQERIMK                |      |     |     |     |     |     |  |  | Mascot |
|    | 1638.8485                        | 1638.8563 | 0.0078  | 5   | 672          | 687  | TYLAGAAADVVEFGVR           |      |     |     |     |     |     |  |  | Mascot |
|    | 1796.8928                        | 1796.9534 | 0.0606  | 34  | 76           | 90   | LMDPLLYEYAGTWPK            |      |     |     |     |     |     |  |  | Mascot |
|    | 1826.9799                        | 1826.9766 | -0.0033 | -2  | 1190         | 1205 | LLGYQLAAYFDKPTAR           |      | 135 | 100 |     |     |     |  |  | Mascot |
|    | 1826.9799                        | 1826.9766 | -0.0033 | -2  | 1190         | 1205 | LLGYQLAAYFDKPTAR           |      |     |     |     |     |     |  |  | Mascot |
|    | 1958.0189                        | 1958.0162 | -0.0027 | -1  | 1301         | 1318 | ATNSEKEIELTAALPSQR         |      |     |     |     |     |     |  |  | Mascot |
|    | 2233.2009                        | 2233.0815 | -0.1194 | -53 | 597          | 618  | SLTRITAPDMAYVAGAAN<br>VAIK |      |     |     |     |     |     |  |  | Mascot |
| 14 | Zgc:136383 protein [Danio rerio] |           |         |     | gi 125857991 |      | 148644.2                   | 8.93 | 10  | 185 | 100 | 177 | 100 |  |  |        |

#### Peptide Information

|  | Calc. Mass | Obsrv. Mass | ± da    | ± ppm | Start Seq. | End Seq. | Sequence                   | Ion Score | C. I.  | % Modification         | Rank | Result Type |
|--|------------|-------------|---------|-------|------------|----------|----------------------------|-----------|--------|------------------------|------|-------------|
|  | 960.4785   | 960.4747    | -0.0038 | -4    | 1255       | 1261     | LEVEWER                    | 42        | 98.281 |                        |      | Mascot      |
|  | 960.4785   | 960.4747    | -0.0038 | -4    | 1255       | 1261     | LEVEWER                    |           |        |                        |      | Mascot      |
|  | 984.4243   | 984.42      | -0.0043 | -4    | 1227       | 1234     | FSWGAECK                   |           |        | Carbamidomethyl (C)[7] |      | Mascot      |
|  | 1045.5465  | 1045.5621   | 0.0156  | 15    | 1345       | 1352     | DFLSWIHK                   |           |        |                        |      | Mascot      |
|  | 1193.6348  | 1193.5951   | -0.0397 | -33   | 1115       | 1124     | TATIMEPFRK                 |           |        |                        |      | Mascot      |
|  | 1193.6348  | 1193.5951   | -0.0397 | -33   | 1115       | 1124     | TATIMEPFRK                 |           |        |                        |      | Mascot      |
|  | 1359.6508  | 1359.6165   | -0.0343 | -25   | 183        | 193      | DLSHCQERIMK                |           |        |                        |      | Mascot      |
|  | 1382.7889  | 1382.7759   | -0.013  | -9    | 302        | 314      | ISDAPAQIVEVLK              |           |        |                        |      | Mascot      |
|  | 1382.7889  | 1382.7759   | -0.013  | -9    | 302        | 314      | ISDAPAQIVEVLK              |           |        |                        |      | Mascot      |
|  | 1796.8928  | 1796.9534   | 0.0606  | 34    | 71         | 85       | LMDPLLYEYAGTWPK            |           |        |                        |      | Mascot      |
|  | 1826.9799  | 1826.9766   | -0.0033 | -2    | 1180       | 1195     | LLGYQLAAYFDKPTAR           | 135       | 100    |                        |      | Mascot      |
|  | 1826.9799  | 1826.9766   | -0.0033 | -2    | 1180       | 1195     | LLGYQLAAYFDKPTAR           |           |        |                        |      | Mascot      |
|  | 2233.2009  | 2233.0815   | -0.1194 | -53   | 592        | 613      | SLTRITAPDMAYVAGAAN<br>VAIK |           |        |                        |      | Mascot      |
|  | 2384.3071  | 2383.9509   | -0.3562 | -149  | 1035       | 1055     | LLKQINIIDDDTPEGQAF<br>LK   |           |        |                        |      | Mascot      |

|    |                            |  |  |  |              |  |         |     |   |     |     |     |     |  |  |  |
|----|----------------------------|--|--|--|--------------|--|---------|-----|---|-----|-----|-----|-----|--|--|--|
| 15 | Vtg5 protein [Danio rerio] |  |  |  | gi 148744685 |  | 27543.3 | 9.2 | 3 | 185 | 100 | 177 | 100 |  |  |  |
|----|----------------------------|--|--|--|--------------|--|---------|-----|---|-----|-----|-----|-----|--|--|--|

#### Peptide Information

|  | Calc. Mass | Obsrv. Mass | ± da    | ± ppm | Start Seq. | End Seq. | Sequence         | Ion Score | C. I.  | % Modification         | Rank | Result Type |
|--|------------|-------------|---------|-------|------------|----------|------------------|-----------|--------|------------------------|------|-------------|
|  | 960.4785   | 960.4747    | -0.0038 | -4    | 144        | 150      | LEVEWER          | 42        | 98.281 |                        |      | Mascot      |
|  | 960.4785   | 960.4747    | -0.0038 | -4    | 144        | 150      | LEVEWER          |           |        |                        |      | Mascot      |
|  | 984.4243   | 984.42      | -0.0043 | -4    | 116        | 123      | FSWGAECK         |           |        | Carbamidomethyl (C)[7] |      | Mascot      |
|  | 1826.9799  | 1826.9766   | -0.0033 | -2    | 69         | 84       | LLGYQLAAYFDKPTAR | 135       | 100    |                        |      | Mascot      |
|  | 1826.9799  | 1826.9766   | -0.0033 | -2    | 69         | 84       | LLGYQLAAYFDKPTAR |           |        |                        |      | Mascot      |

16 vitellogenin 5 [Danio rerio] gi|57864785 72820.8 9 4 185 100 177 100

Peptide Information

| Calc. Mass | Obsrv. Mass | ± da    | ± ppm | Start Seq. | End Seq. | Sequence         | Ion Score | C. I. % | Modification           | Rank | Result Type |
|------------|-------------|---------|-------|------------|----------|------------------|-----------|---------|------------------------|------|-------------|
| 960.4785   | 960.4747    | -0.0038 | -4    | 564        | 570      | LEVEWER          | 42        | 98.281  |                        |      | Mascot      |
| 960.4785   | 960.4747    | -0.0038 | -4    | 564        | 570      | LEVEWER          |           |         |                        |      | Mascot      |
| 984.4243   | 984.42      | -0.0043 | -4    | 536        | 543      | FSWGAECK         |           |         | Carbamidomethyl (C)[7] |      | Mascot      |
| 1069.5021  | 1069.5587   | 0.0566  | 53    | 230        | 238      | NIENHSAER        |           |         |                        |      | Mascot      |
| 1826.9799  | 1826.9766   | -0.0033 | -2    | 489        | 504      | LLGYQLAAYFDKPTAR | 135       | 100     |                        |      | Mascot      |
| 1826.9799  | 1826.9766   | -0.0033 | -2    | 489        | 504      | LLGYQLAAYFDKPTAR |           |         |                        |      | Mascot      |

17 hypothetical protein LOC678536 [Danio rerio] gi|160420306 148750.2 8.89 10 184 100 177 100

Peptide Information

| Calc. Mass | Obsrv. Mass | ± da    | ± ppm | Start Seq. | End Seq. | Sequence                    | Ion Score | C. I. % | Modification           | Rank | Result Type |
|------------|-------------|---------|-------|------------|----------|-----------------------------|-----------|---------|------------------------|------|-------------|
| 960.4785   | 960.4747    | -0.0038 | -4    | 1256       | 1262     | LEVEWER                     | 42        | 98.281  |                        |      | Mascot      |
| 960.4785   | 960.4747    | -0.0038 | -4    | 1256       | 1262     | LEVEWER                     |           |         |                        |      | Mascot      |
| 984.4243   | 984.42      | -0.0043 | -4    | 1228       | 1235     | FSWGAECK                    |           |         | Carbamidomethyl (C)[7] |      | Mascot      |
| 1045.5465  | 1045.5621   | 0.0156  | 15    | 1346       | 1353     | DFLSWIHK                    |           |         |                        |      | Mascot      |
| 1193.6348  | 1193.5951   | -0.0397 | -33   | 1116       | 1125     | TATIMEPFRK                  |           |         |                        |      | Mascot      |
| 1193.6348  | 1193.5951   | -0.0397 | -33   | 1116       | 1125     | TATIMEPFRK                  |           |         |                        |      | Mascot      |
| 1359.6508  | 1359.6165   | -0.0343 | -25   | 184        | 194      | DLSHCQERIMK                 |           |         |                        |      | Mascot      |
| 1382.7889  | 1382.7759   | -0.013  | -9    | 303        | 315      | ISDAPAQIVEVLK               |           |         |                        |      | Mascot      |
| 1382.7889  | 1382.7759   | -0.013  | -9    | 303        | 315      | ISDAPAQIVEVLK               |           |         |                        |      | Mascot      |
| 1796.8928  | 1796.9534   | 0.0606  | 34    | 72         | 86       | LMDPLLYEYAGTWPK             |           |         |                        |      | Mascot      |
| 1826.9799  | 1826.9766   | -0.0033 | -2    | 1181       | 1196     | LLGYQLAAYFDKPTAR            | 135       | 100     |                        |      | Mascot      |
| 1826.9799  | 1826.9766   | -0.0033 | -2    | 1181       | 1196     | LLGYQLAAYFDKPTAR            |           |         |                        |      | Mascot      |
| 2233.2009  | 2233.0815   | -0.1194 | -53   | 593        | 614      | SLTRITAPDMAYVAGAAAN<br>VAIK |           |         |                        |      | Mascot      |
| 2384.3071  | 2383.9509   | -0.3562 | -149  | 1036       | 1056     | LLKQINIIDDDTPEGQAFL<br>LK   |           |         |                        |      | Mascot      |

18 Zgc:136383 protein [Danio rerio] gi|159155252 123957.1 8.78 8 184 100 177 100

Peptide Information

| Calc. Mass | Obsrv. Mass | ± da    | ± ppm | Start Seq. | End Seq. | Sequence | Ion Score | C. I. % | Modification | Rank | Result Type |
|------------|-------------|---------|-------|------------|----------|----------|-----------|---------|--------------|------|-------------|
| 960.4785   | 960.4747    | -0.0038 | -4    | 1033       | 1039     | LEVEWER  | 42        | 98.281  |              |      | Mascot      |
| 960.4785   | 960.4747    | -0.0038 | -4    | 1033       | 1039     | LEVEWER  |           |         |              |      | Mascot      |

|    |                                                                         |           |         |      |      |      |                            |          |      |   |     |     |                        |        |
|----|-------------------------------------------------------------------------|-----------|---------|------|------|------|----------------------------|----------|------|---|-----|-----|------------------------|--------|
|    | 984.4243                                                                | 984.42    | -0.0043 | -4   | 1005 | 1012 | FSWGAECK                   |          |      |   |     |     | Carbamidomethyl (C)[7] | Mascot |
|    | 1045.5465                                                               | 1045.5621 | 0.0156  | 15   | 1123 | 1130 | DFLSWIHK                   |          |      |   |     |     |                        | Mascot |
|    | 1193.6348                                                               | 1193.5951 | -0.0397 | -33  | 893  | 902  | TATIMEPFRK                 |          |      |   |     |     |                        | Mascot |
|    | 1193.6348                                                               | 1193.5951 | -0.0397 | -33  | 893  | 902  | TATIMEPFRK                 |          |      |   |     |     |                        | Mascot |
|    | 1382.7889                                                               | 1382.7759 | -0.013  | -9   | 80   | 92   | ISDAPAQIVEVLK              |          |      |   |     |     |                        | Mascot |
|    | 1382.7889                                                               | 1382.7759 | -0.013  | -9   | 80   | 92   | ISDAPAQIVEVLK              |          |      |   |     |     |                        | Mascot |
|    | 1826.9799                                                               | 1826.9766 | -0.0033 | -2   | 958  | 973  | LLGYQLAAYFDKPTAR           | 135      | 100  |   |     |     |                        | Mascot |
|    | 1826.9799                                                               | 1826.9766 | -0.0033 | -2   | 958  | 973  | LLGYQLAAYFDKPTAR           |          |      |   |     |     |                        | Mascot |
|    | 2233.2009                                                               | 2233.0815 | -0.1194 | -53  | 370  | 391  | SLTRITAPDMAYVAGAAN<br>VAIK |          |      |   |     |     |                        | Mascot |
|    | 2384.3071                                                               | 2383.9509 | -0.3562 | -149 | 813  | 833  | LLKQINIIDDDTPEGQAFL<br>LK  |          |      |   |     |     |                        | Mascot |
| 19 | novel protein similar to vitellogenin 1 (vg1) [Danio rerio] gi 94733731 |           |         |      |      |      |                            | 149169.2 | 8.84 | 6 | 177 | 100 | 177                    | 100    |

#### Peptide Information

| Calc. Mass | Obsrv. Mass | ± da    | ± ppm | Start Seq. | End Seq. | Sequence                    | Ion Score | C. I.  | % | Modification                              | Rank | Result Type |
|------------|-------------|---------|-------|------------|----------|-----------------------------|-----------|--------|---|-------------------------------------------|------|-------------|
| 960.4785   | 960.4747    | -0.0038 | -4    | 1260       | 1266     | LEVEWER                     | 42        | 98.281 |   |                                           |      | Mascot      |
| 960.4785   | 960.4747    | -0.0038 | -4    | 1260       | 1266     | LEVEWER                     |           |        |   |                                           |      | Mascot      |
| 984.4243   | 984.42      | -0.0043 | -4    | 1232       | 1239     | FSWGAECK                    |           |        |   | Carbamidomethyl (C)[7]                    |      | Mascot      |
| 1359.6508  | 1359.6165   | -0.0343 | -25   | 188        | 198      | DLSHCQERIMK                 |           |        |   |                                           |      | Mascot      |
| 1826.9799  | 1826.9766   | -0.0033 | -2    | 1185       | 1200     | LLGYQLAAYFDKPTAR            | 135       | 100    |   |                                           |      | Mascot      |
| 1826.9799  | 1826.9766   | -0.0033 | -2    | 1185       | 1200     | LLGYQLAAYFDKPTAR            |           |        |   |                                           |      | Mascot      |
| 1840.8938  | 1840.9392   | 0.0454  | 25    | 76         | 90       | LMDPLLYEYAGTWPR             |           |        |   | Oxidation (M)[2]                          |      | Mascot      |
| 2362.1926  | 2362.1829   | -0.0097 | -4    | 601        | 623      | ITAPDMASVAGAANVAIK<br>LMNCK |           |        |   | Carbamidomethyl (C)[22], Oxidation (M)[6] |      | Mascot      |

|    |                                                                            |  |  |  |  |  |  |         |      |   |     |     |     |     |
|----|----------------------------------------------------------------------------|--|--|--|--|--|--|---------|------|---|-----|-----|-----|-----|
| 20 | novel pentaxin family domain containing protein [Danio rerio] gi 126540681 |  |  |  |  |  |  | 25217.9 | 5.61 | 4 | 138 | 100 | 121 | 100 |
|----|----------------------------------------------------------------------------|--|--|--|--|--|--|---------|------|---|-----|-----|-----|-----|

#### Peptide Information

| Calc. Mass | Obsrv. Mass | ± da    | ± ppm | Start Seq. | End Seq. | Sequence  | Ion Score | C. I.  | % | Modification | Rank | Result Type |
|------------|-------------|---------|-------|------------|----------|-----------|-----------|--------|---|--------------|------|-------------|
| 902.4842   | 902.4831    | -0.0011 | -1    | 135        | 141      | SLHQVYR   |           |        |   |              |      | Mascot      |
| 1024.5825  | 1024.5802   | -0.0023 | -2    | 66         | 73       | EILFAYR   |           |        |   |              |      | Mascot      |
| 1024.5825  | 1024.5802   | -0.0023 | -2    | 66         | 73       | EILFAYR   | 58        | 99.955 |   |              |      | Mascot      |
| 1058.5854  | 1058.5474   | -0.038  | -36   | 134        | 141      | RSLHQVYR  |           |        |   |              |      | Mascot      |
| 1142.5225  | 1142.5199   | -0.0026 | -2    | 192        | 200      | AVYYNQDNR |           |        |   |              |      | Mascot      |
| 1142.5225  | 1142.5199   | -0.0026 | -2    | 192        | 200      | AVYYNQDNR | 63        | 99.985 |   |              |      | Mascot      |

|    |                                                     |  |  |  |  |  |  |       |      |   |     |     |    |        |
|----|-----------------------------------------------------|--|--|--|--|--|--|-------|------|---|-----|-----|----|--------|
| 21 | 25 kDa heat shock protein [Danio rerio] gi 56554759 |  |  |  |  |  |  | 22360 | 6.52 | 8 | 105 | 100 | 50 | 99.699 |
|----|-----------------------------------------------------|--|--|--|--|--|--|-------|------|---|-----|-----|----|--------|



| Peptide Information |                                                   |             |         |       |              |                            |      |           |         |                  |                  |
|---------------------|---------------------------------------------------|-------------|---------|-------|--------------|----------------------------|------|-----------|---------|------------------|------------------|
|                     | Calc. Mass                                        | Obsrv. Mass | ± da    | ± ppm | Start Seq.   | End Sequence Seq.          |      | Ion Score | C. I. % | Modification     | Rank Result Type |
|                     | 897.4651                                          | 897.4606    | -0.0045 | -5    | 6            | 12 IPFSFMR                 |      |           |         |                  | Mascot           |
|                     | 911.4006                                          | 911.3969    | -0.0037 | -4    | 21           | 27 DWYQGSR                 |      |           |         |                  | Mascot           |
|                     | 913.46                                            | 913.4553    | -0.0047 | -5    | 6            | 12 IPFSFMR                 |      |           |         | Oxidation (M)[6] | Mascot           |
|                     | 960.4533                                          | 960.4747    | 0.0214  | 22    | 136          | 143 DEHGFISR               |      | 2         | 0       |                  | Mascot           |
|                     | 960.4533                                          | 960.4747    | 0.0214  | 22    | 136          | 143 DEHGFISR               |      |           |         |                  | Mascot           |
|                     | 991.4631                                          | 991.4583    | -0.0048 | -5    | 13           | 20 SPSWDPFR                |      |           |         |                  | Mascot           |
|                     | 1069.5612                                         | 1069.5587   | -0.0025 | -2    | 5            | 12 RIPFSFMR                |      |           |         | Oxidation (M)[7] | Mascot           |
|                     | 1088.5483                                         | 1088.5442   | -0.0041 | -4    | 135          | 143 KDEHGFISR              |      |           |         |                  | Mascot           |
|                     | 1840.944                                          | 1840.9392   | -0.0048 | -3    | 104          | 119 ISLDVNHFSPEELNVK       |      |           |         |                  | Mascot           |
|                     | 1883.8459                                         | 1883.8416   | -0.0043 | -2    | 13           | 27 SPSWDPFRDWYQGSR         |      |           |         |                  | Mascot           |
|                     | 1883.8459                                         | 1883.8416   | -0.0043 | -2    | 13           | 27 SPSWDPFRDWYQGSR         |      | 52        | 99.796  |                  | Mascot           |
| 22                  | Unknown (protein for IMAGE:7242112) [Danio rerio] |             |         |       | gi 53734153  | 26224.4                    | 5.91 | 5         | 81      | 99.965           | 58 99.955        |
| Peptide Information |                                                   |             |         |       |              |                            |      |           |         |                  |                  |
|                     | Calc. Mass                                        | Obsrv. Mass | ± da    | ± ppm | Start Seq.   | End Sequence Seq.          |      | Ion Score | C. I. % | Modification     | Rank Result Type |
|                     | 1024.5825                                         | 1024.5802   | -0.0023 | -2    | 75           | 82 EIILFAYR                |      |           |         |                  | Mascot           |
|                     | 1024.5825                                         | 1024.5802   | -0.0023 | -2    | 75           | 82 EIILFAYR                |      | 58        | 99.955  |                  | Mascot           |
|                     | 1179.5792                                         | 1179.6014   | 0.0222  | 19    | 212          | 221 GNVFDWNSIK             |      |           |         |                  | Mascot           |
|                     | 1359.6539                                         | 1359.6165   | -0.0374 | -28   | 83           | 93 TPETDELNVWR             |      |           |         |                  | Mascot           |
|                     | 1556.8207                                         | 1556.8214   | 0.0007  | 0     | 35           | 48 TLLFPTATDTSYVK          |      |           |         |                  | Mascot           |
|                     | 2283.249                                          | 2283.1819   | -0.0671 | -29   | 13           | 34 MLLFFCLLSVTLAAAEVG LSGK |      |           |         |                  | Mascot           |
| 23                  | hypothetical protein LOC751795 [Danio rerio]      |             |         |       | gi 113951771 | 25418.8                    | 4.86 | 4         | 80      | 99.953           | 63 99.985        |
| Peptide Information |                                                   |             |         |       |              |                            |      |           |         |                  |                  |
|                     | Calc. Mass                                        | Obsrv. Mass | ± da    | ± ppm | Start Seq.   | End Sequence Seq.          |      | Ion Score | C. I. % | Modification     | Rank Result Type |
|                     | 902.4842                                          | 902.4831    | -0.0011 | -1    | 135          | 141 SLHQVYR                |      |           |         |                  | Mascot           |
|                     | 1024.5673                                         | 1024.5802   | 0.0129  | 13    | 90           | 98 VSLYIQSSK               |      |           |         |                  | Mascot           |
|                     | 1024.5673                                         | 1024.5802   | 0.0129  | 13    | 90           | 98 VSLYIQSSK               |      |           |         |                  | Mascot           |
|                     | 1058.5854                                         | 1058.5474   | -0.038  | -36   | 134          | 141 RSLHQVYR               |      |           |         |                  | Mascot           |
|                     | 1142.5225                                         | 1142.5199   | -0.0026 | -2    | 192          | 200 AVYYNQDNR              |      |           |         |                  | Mascot           |
|                     | 1142.5225                                         | 1142.5199   | -0.0026 | -2    | 192          | 200 AVYYNQDNR              |      | 63        | 99.985  |                  | Mascot           |
| 24                  | Zgc:152809 protein [Danio rerio]                  |             |         |       | gi 63102481  | 23889.9                    | 4.94 | 4         | 79      | 99.949           | 63 99.985        |

| Peptide Information |                                                 |             |         |       |               |                   |         |           |         |              |                  |
|---------------------|-------------------------------------------------|-------------|---------|-------|---------------|-------------------|---------|-----------|---------|--------------|------------------|
|                     | Calc. Mass                                      | Obsrv. Mass | ± da    | ± ppm | Start Seq.    | End Sequence Seq. |         | Ion Score | C. I. % | Modification | Rank Result Type |
|                     | 902.4842                                        | 902.4831    | -0.0011 | -1    | 121           | 127 SLHQVYR       |         |           |         |              | Mascot           |
|                     | 1024.5673                                       | 1024.5802   | 0.0129  | 13    | 76            | 84 VSLYIQSSK      |         |           |         |              | Mascot           |
|                     | 1024.5673                                       | 1024.5802   | 0.0129  | 13    | 76            | 84 VSLYIQSSK      |         |           |         |              | Mascot           |
|                     | 1058.5854                                       | 1058.5474   | -0.038  | -36   | 120           | 127 RSLHQVYR      |         |           |         |              | Mascot           |
|                     | 1142.5225                                       | 1142.5199   | -0.0026 | -2    | 178           | 186 AVYYNQDNR     |         |           |         |              | Mascot           |
|                     | 1142.5225                                       | 1142.5199   | -0.0026 | -2    | 178           | 186 AVYYNQDNR     |         | 63        | 99.985  |              | Mascot           |
| 25                  | Zgc:152809 protein [Danio rerio]                |             |         |       | gij 51858942  |                   | 26440.3 | 5.21      | 4       | 79 99.948    | 63 99.985        |
| Peptide Information |                                                 |             |         |       |               |                   |         |           |         |              |                  |
|                     | Calc. Mass                                      | Obsrv. Mass | ± da    | ± ppm | Start Seq.    | End Sequence Seq. |         | Ion Score | C. I. % | Modification | Rank Result Type |
|                     | 902.4842                                        | 902.4831    | -0.0011 | -1    | 144           | 150 SLHQVYR       |         |           |         |              | Mascot           |
|                     | 1024.5673                                       | 1024.5802   | 0.0129  | 13    | 99            | 107 VSLYIQSSK     |         |           |         |              | Mascot           |
|                     | 1024.5673                                       | 1024.5802   | 0.0129  | 13    | 99            | 107 VSLYIQSSK     |         |           |         |              | Mascot           |
|                     | 1058.5854                                       | 1058.5474   | -0.038  | -36   | 143           | 150 RSLHQVYR      |         |           |         |              | Mascot           |
|                     | 1142.5225                                       | 1142.5199   | -0.0026 | -2    | 201           | 209 AVYYNQDNR     |         |           |         |              | Mascot           |
|                     | 1142.5225                                       | 1142.5199   | -0.0026 | -2    | 201           | 209 AVYYNQDNR     |         | 63        | 99.985  |              | Mascot           |
| 26                  | hypothetical protein LOC100141336 [Danio rerio] |             |         |       | gij 168823478 |                   | 24942.7 | 5.78      | 4       | 75 99.862    | 58 99.955        |
| Peptide Information |                                                 |             |         |       |               |                   |         |           |         |              |                  |
|                     | Calc. Mass                                      | Obsrv. Mass | ± da    | ± ppm | Start Seq.    | End Sequence Seq. |         | Ion Score | C. I. % | Modification | Rank Result Type |
|                     | 902.4842                                        | 902.4831    | -0.0011 | -1    | 133           | 139 SLHQVYR       |         |           |         |              | Mascot           |
|                     | 1024.5825                                       | 1024.5802   | -0.0023 | -2    | 64            | 71 EIILFAYR       |         |           |         |              | Mascot           |
|                     | 1024.5825                                       | 1024.5802   | -0.0023 | -2    | 64            | 71 EIILFAYR       |         | 58        | 99.955  |              | Mascot           |
|                     | 1058.5516                                       | 1058.5474   | -0.0042 | -4    | 88            | 96 FSVYIQSSK      |         |           |         |              | Mascot           |
|                     | 1359.6176                                       | 1359.6165   | -0.0011 | -1    | 72            | 82 TPDDDELNVWR    |         |           |         |              | Mascot           |
| 27                  | Zgc:136389 [Danio rerio]                        |             |         |       | gij 133777702 |                   | 25346.8 | 5.18      | 3       | 74 99.823    | 63 99.985        |
| Peptide Information |                                                 |             |         |       |               |                   |         |           |         |              |                  |
|                     | Calc. Mass                                      | Obsrv. Mass | ± da    | ± ppm | Start Seq.    | End Sequence Seq. |         | Ion Score | C. I. % | Modification | Rank Result Type |
|                     | 902.4842                                        | 902.4831    | -0.0011 | -1    | 135           | 141 SLHQVYR       |         |           |         |              | Mascot           |

|    |                                 |           |         |     |             |     |           |      |        |    |        |    |        |        |
|----|---------------------------------|-----------|---------|-----|-------------|-----|-----------|------|--------|----|--------|----|--------|--------|
|    | 1058.5854                       | 1058.5474 | -0.038  | -36 | 134         | 141 | RSLHQVYR  |      |        |    |        |    |        | Mascot |
|    | 1142.5225                       | 1142.5199 | -0.0026 | -2  | 192         | 200 | AVYYNQDNR |      |        |    |        |    |        | Mascot |
|    | 1142.5225                       | 1142.5199 | -0.0026 | -2  | 192         | 200 | AVYYNQDNR | 63   | 99.985 |    |        |    |        | Mascot |
| 28 | LOC570524 protein [Danio rerio] |           |         |     | gi 62204912 |     | 26469.4   | 5.55 | 1      | 63 | 97.718 | 63 | 99.985 |        |

Peptide Information

| Calc. Mass | Obsrv. Mass | ± da    | ± ppm | Start Seq. | End Seq. | Sequence  | Ion Score | C. I. % | Modification | Rank | Result Type |
|------------|-------------|---------|-------|------------|----------|-----------|-----------|---------|--------------|------|-------------|
| 1142.5225  | 1142.5199   | -0.0026 | -2    | 202        | 210      | AVYYNQDNR |           |         |              |      | Mascot      |
| 1142.5225  | 1142.5199   | -0.0026 | -2    | 202        | 210      | AVYYNQDNR | 63        | 99.985  |              |      | Mascot      |

|    |                            |  |  |  |              |  |         |      |   |    |        |    |        |  |
|----|----------------------------|--|--|--|--------------|--|---------|------|---|----|--------|----|--------|--|
| 29 | Vtg6 protein [Danio rerio] |  |  |  | gi 157422885 |  | 27937.4 | 9.18 | 5 | 59 | 93.997 | 42 | 98.281 |  |
|----|----------------------------|--|--|--|--------------|--|---------|------|---|----|--------|----|--------|--|

Peptide Information

| Calc. Mass | Obsrv. Mass | ± da    | ± ppm | Start Seq. | End Seq. | Sequence           | Ion Score | C. I. % | Modification           | Rank | Result Type |
|------------|-------------|---------|-------|------------|----------|--------------------|-----------|---------|------------------------|------|-------------|
| 913.423    | 913.4553    | 0.0323  | 35    | 1          | 8        | MSSSRMSK           |           |         |                        |      | Mascot      |
| 960.4785   | 960.4747    | -0.0038 | -4    | 149        | 155      | LEVEWER            | 42        | 98.281  |                        |      | Mascot      |
| 960.4785   | 960.4747    | -0.0038 | -4    | 149        | 155      | LEVEWER            |           |         |                        |      | Mascot      |
| 984.4243   | 984.42      | -0.0043 | -4    | 121        | 128      | FSWGAECK           |           |         | Carbamidomethyl (C)[7] |      | Mascot      |
| 1193.6348  | 1193.5951   | -0.0397 | -33   | 9          | 18       | TATIMEPFRK         |           |         |                        |      | Mascot      |
| 1193.6348  | 1193.5951   | -0.0397 | -33   | 9          | 18       | TATIMEPFRK         |           |         |                        |      | Mascot      |
| 1958.0189  | 1958.0162   | -0.0027 | -1    | 185        | 202      | ATNSEKEIELTAALPSQR |           |         |                        |      | Mascot      |

|    |                                         |  |  |  |              |  |         |      |   |    |        |    |       |  |
|----|-----------------------------------------|--|--|--|--------------|--|---------|------|---|----|--------|----|-------|--|
| 30 | Si:ch211-234p6.12 protein [Danio rerio] |  |  |  | gi 158253488 |  | 25010.6 | 4.76 | 3 | 56 | 88.295 | 44 | 98.88 |  |
|----|-----------------------------------------|--|--|--|--------------|--|---------|------|---|----|--------|----|-------|--|

Peptide Information

| Calc. Mass | Obsrv. Mass | ± da    | ± ppm | Start Seq. | End Seq. | Sequence                   | Ion Score | C. I. % | Modification | Rank | Result Type |
|------------|-------------|---------|-------|------------|----------|----------------------------|-----------|---------|--------------|------|-------------|
| 1193.595   | 1193.5951   | 0.0001  | 0     | 201        | 210      | GNVFDWNTIK                 | 44        | 98.88   |              |      | Mascot      |
| 1193.595   | 1193.5951   | 0.0001  | 0     | 201        | 210      | GNVFDWNTIK                 |           |         |              |      | Mascot      |
| 1849.0581  | 1848.9543   | -0.1038 | -56   | 57         | 71       | LELLVDREVILFAYR            |           |         |              |      | Mascot      |
| 2362.3489  | 2362.1829   | -0.166  | -70   | 1          | 23       | MLVLFCLLSLTLAATEV<br>GLGGK |           |         |              |      | Mascot      |

|    |                                                                     |  |  |  |              |  |         |      |   |    |        |    |        |  |
|----|---------------------------------------------------------------------|--|--|--|--------------|--|---------|------|---|----|--------|----|--------|--|
| 31 | PREDICTED: serine/threonine-protein kinase pim-3-like [Danio rerio] |  |  |  | gi 326675215 |  | 23705.1 | 8.34 | 6 | 56 | 87.458 | 26 | 16.363 |  |
|----|---------------------------------------------------------------------|--|--|--|--------------|--|---------|------|---|----|--------|----|--------|--|

Peptide Information

| Calc. Mass | Obsrv. Mass | ± da   | ± ppm | Start Seq. | End Seq. | Sequence | Ion Score | C. I. % | Modification | Rank | Result Type |
|------------|-------------|--------|-------|------------|----------|----------|-----------|---------|--------------|------|-------------|
| 991.4843   | 991.4583    | -0.026 | -26   | 120        | 127      | LQEGEPYR |           |         |              |      | Mascot      |

|    |                                     |             |         |      |   |    |        |
|----|-------------------------------------|-------------|---------|------|---|----|--------|
| 32 | heat shock protein 25 [Danio rerio] | gi 52078122 | 22344.1 | 6.52 | 8 | 54 | 83.081 |
|----|-------------------------------------|-------------|---------|------|---|----|--------|

| Calc. Mass | Obsrv. Mass | ± da    | ± ppm | Start Seq. | End Seq. | Sequence              | Ion Score | C. I. | % Modification   | Rank | Result Type |
|------------|-------------|---------|-------|------------|----------|-----------------------|-----------|-------|------------------|------|-------------|
| 897.4651   | 897.4606    | -0.0045 | -5    | 6          | 12       | IPFSFMR               |           |       |                  |      | Mascot      |
| 911.4006   | 911.3969    | -0.0037 | -4    | 21         | 27       | DWYQGSR               |           |       |                  |      | Mascot      |
| 913.46     | 913.4553    | -0.0047 | -5    | 6          | 12       | IPFSFMR               |           |       | Oxidation (M)[6] |      | Mascot      |
| 960.4533   | 960.4747    | 0.0214  | 22    | 136        | 143      | DEHGFISR              | 2         | 0     |                  |      | Mascot      |
| 960.4533   | 960.4747    | 0.0214  | 22    | 136        | 143      | DEHGFISR              |           |       |                  |      | Mascot      |
| 1069.5612  | 1069.5587   | -0.0025 | -2    | 5          | 12       | RIPFSFMR              |           |       | Oxidation (M)[7] |      | Mascot      |
| 1088.5483  | 1088.5442   | -0.0041 | -4    | 135        | 143      | KDEHGFISR             |           |       |                  |      | Mascot      |
| 1840.944   | 1840.9392   | -0.0048 | -3    | 104        | 119      | ISLDVNHFSPEELNVK      |           |       |                  |      | Mascot      |
| 1883.8804  | 1883.8416   | -0.0388 | -21   | 87         | 103      | QLSSGMSEVKQTGDSW<br>K |           |       | Oxidation (M)[6] |      | Mascot      |
| 1883.9261  | 1883.8416   | -0.0845 | -45   | 6          | 20       | IPFSFMRTPSWDPFR       |           |       |                  |      | Mascot      |

|    |                                                 |              |         |      |   |    |        |    |       |
|----|-------------------------------------------------|--------------|---------|------|---|----|--------|----|-------|
| 33 | hypothetical protein LOC100141350 [Danio rerio] | qil168823510 | 25044.6 | 4.76 | 2 | 51 | 63.828 | 44 | 98.88 |
|----|-------------------------------------------------|--------------|---------|------|---|----|--------|----|-------|

| Calc. Mass | Obsrv. Mass | ± da    | ± ppm | Start Seq. | End Seq. | Sequence        | Ion Score | C. I. % | Modification | Rank | Result Type |
|------------|-------------|---------|-------|------------|----------|-----------------|-----------|---------|--------------|------|-------------|
| 1193.595   | 1193.5951   | 0.0001  | 0     | 201        | 210      | GNVFDWNTIK      | 44        | 98.88   |              |      | Mascot      |
| 1193.595   | 1193.5951   | 0.0001  | 0     | 201        | 210      | GNVFDWNTIK      |           |         |              |      | Mascot      |
| 1849.0581  | 1848.9543   | -0.1038 | -56   | 57         | 71       | LELLVDREVILFAYR |           |         |              |      | Mascot      |

|    |                                                               |              |         |      |   |    |   |    |       |
|----|---------------------------------------------------------------|--------------|---------|------|---|----|---|----|-------|
| 34 | novel pentaxin family domain containing protein [Danio rerio] | gi 126540682 | 25000.6 | 4.81 | 1 | 44 | 0 | 44 | 98.88 |
|----|---------------------------------------------------------------|--------------|---------|------|---|----|---|----|-------|

| Calc. Mass | Obsrv. Mass | ± da   | ± ppm | Start Seq. | End Seq. | Sequence   | Ion Score | C. I. % | Modification | Rank | Result Type |
|------------|-------------|--------|-------|------------|----------|------------|-----------|---------|--------------|------|-------------|
| 1193.595   | 1193.5951   | 0.0001 | 0     | 201        | 210      | GNVFDWNTIK | 44        | 98.88   |              |      | Mascot      |

Mascot

Mascot

| Calc. Mass | Obsrv. Mass | ± da    | ± ppm | Start Seq. | End Seq. | Sequence             | Ion Score | C. I. | % Modification                            | Rank | Result Type |
|------------|-------------|---------|-------|------------|----------|----------------------|-----------|-------|-------------------------------------------|------|-------------|
| 913.4447   | 913.4553    | 0.0106  | 12    | 10         | 18       | CASSALFSK            |           |       |                                           |      | Mascot      |
| 960.5359   | 960.4747    | -0.0612 | -64   | 107        | 115      | GKSIDEALK            | 21        | 0     |                                           |      | Mascot      |
| 960.5359   | 960.4747    | -0.0612 | -64   | 107        | 115      | GKSIDEALK            |           |       |                                           |      | Mascot      |
| 1045.5636  | 1045.5621   | -0.0015 | -1    | 44         | 53       | NVGSLDKNAK           |           |       |                                           |      | Mascot      |
| 1069.5459  | 1069.5587   | 0.0128  | 12    | 9          | 18       | RCASSALFSK           |           |       |                                           |      | Mascot      |
| 2283.1545  | 2283.1819   | 0.0274  | 12    | 124        | 143      | ELCLPPVKLHCSMLAEDAIK |           |       | Carbamidomethyl (C)[3], Oxidation (M)[13] |      | Mascot      |

Mascot

| Calc. Mass | Obsrv. Mass | ± da    | ± ppm | Start Seq. | End Sequence Seq.    | Ion Score | C. I. % Modification | Rank                     | Result Type |
|------------|-------------|---------|-------|------------|----------------------|-----------|----------------------|--------------------------|-------------|
| 842.5206   | 842.5062    | -0.0144 | -17   | 61         | 67 ALQIKNR           | 18        | 0                    |                          | Mascot      |
| 960.4744   | 960.4747    | 0.0003  | 0     | 720        | 726 ELEERER          |           |                      | Mascot                   |             |
| 960.4744   | 960.4747    | 0.0003  | 0     | 720        | 726 ELEERER          |           |                      | Mascot                   |             |
| 984.4818   | 984.42      | -0.0618 | -63   | 460        | 466 KEYEMLR          |           |                      | Oxidation (M)[5]         | Mascot      |
| 991.524    | 991.4583    | -0.0657 | -66   | 208        | 215 NMVDQLKK         |           |                      | Oxidation (M)[2]         | Mascot      |
| 1045.5823  | 1045.5621   | -0.0202 | -19   | 786        | 793 LMQQLREK         |           |                      | Mascot                   |             |
| 1058.559   | 1058.5474   | -0.0116 | -11   | 886        | 894 TQLEGVQQR        |           |                      | Mascot                   |             |
| 1287.6791  | 1287.6666   | -0.0125 | -10   | 743        | 753 SVEEQIDILNK      |           |                      | Mascot                   |             |
| 1287.6791  | 1287.6666   | -0.0125 | -10   | 743        | 753 SVEEQIDILNK      |           |                      | Mascot                   |             |
| 1325.6155  | 1325.7542   | 0.1387  | 105   | 794        | 804 DDANFKLMSER      |           |                      | Mascot                   |             |
| 1325.6155  | 1325.7542   | 0.1387  | 105   | 794        | 804 DDANFKLMSER      |           |                      | Mascot                   |             |
| 1475.6268  | 1475.7551   | 0.1283  | 87    | 975        | 985 CFHVFCECVK       |           |                      | Carbamidomethyl (C)[1,6] | Mascot      |
| 1556.8643  | 1556.8214   | -0.0429 | -28   | 741        | 753 IRSVEEQIDILNK    |           |                      | Mascot                   |             |
| 1638.7826  | 1638.8563   | 0.0737  | 45    | 317        | 332 VCGEASSVCGTITINK |           |                      | Carbamidomethyl (C)[2]   | Mascot      |
| 1707.7478  | 1707.7684   | 0.0206  | 12    | 995        | 1009 CPKCNAAFGANDFHR |           |                      | Carbamidomethyl (C)[1]   | Mascot      |
| 1826.8514  | 1826.9766   | 0.1252  | 69    | 139        | 155 SLKPGTPEPDGDSNQR |           |                      | Mascot                   |             |
| 1826.8514  | 1826.9766   | 0.1252  | 69    | 139        | 155 SLKPGTPEPDGDSNQR | Mascot    |                      |                          |             |
| 1883.9821  | 1883.8416   | -0.1405 | -75   | 69         | 84 LGEALDQRQVIEDEL   | Mascot    |                      |                          |             |

|    |                           |           |         |     |              |     |                        |      |   |    |   |  |  |  |  |  |  |        |
|----|---------------------------|-----------|---------|-----|--------------|-----|------------------------|------|---|----|---|--|--|--|--|--|--|--------|
|    | 1883.9821                 | 1883.8416 | -0.1405 | -75 | 69           | 84  | LGEALDQRQVIEDEL        |      |   |    |   |  |  |  |  |  |  | Mascot |
|    | 1957.8668                 | 1958.0162 | 0.1494  | 76  | 121          | 138 | RCDQSGSEPVESQPPEG<br>R |      |   |    |   |  |  |  |  |  |  | Mascot |
| 37 | Dci protein [Danio rerio] |           |         |     | gi 126631574 |     | 34144.4                | 8.58 | 9 | 43 | 0 |  |  |  |  |  |  |        |

#### Peptide Information

|  | Calc. Mass | Obsrv. Mass | ± da    | ± ppm | Start Seq. | End Seq. | Sequence                     | Ion Score | C. I. | % Modification                | Rank | Result Type |
|--|------------|-------------|---------|-------|------------|----------|------------------------------|-----------|-------|-------------------------------|------|-------------|
|  | 991.4989   | 991.4583    | -0.0406 | -41   | 93         | 100      | LELDRSCR                     |           |       |                               |      | Mascot      |
|  | 996.4965   | 996.5927    | 0.0962  | 97    | 260        | 267      | QISKSMR                      |           |       | Oxidation (M)[6]              |      | Mascot      |
|  | 1142.5688  | 1142.5199   | -0.0489 | -43   | 47         | 56       | NDYSTSSKIK                   |           |       |                               |      | Mascot      |
|  | 1142.5688  | 1142.5199   | -0.0489 | -43   | 47         | 56       | NDYSTSSKIK                   |           |       |                               |      | Mascot      |
|  | 1320.636   | 1320.5797   | -0.0563 | -43   | 297        | 307      | SLGMYMAMLLK                  |           |       | Oxidation (M)[4,6,8]          |      | Mascot      |
|  | 1359.7413  | 1359.6165   | -0.1248 | -92   | 98         | 110      | SCRGVITSAQPK                 |           |       |                               |      | Mascot      |
|  | 1472.7267  | 1472.809    | 0.0823  | 56    | 279        | 291      | EADTTNFVSFITK                |           |       |                               |      | Mascot      |
|  | 2211.1589  | 2211.1016   | -0.0573 | -26   | 240        | 259      | VLSTAAETMTKWLAI<br>PDHAR     |           |       |                               |      | Mascot      |
|  | 2501.2466  | 2501.252    | 0.0054  | 2     | 19         | 41       | FTHPGFLSLLSGNSSHG<br>RSCALR  |           |       | Carbamidomethyl (C)[20]       |      | Mascot      |
|  | 2584.1775  | 2584.2065   | 0.029   | 11    | 149        | 172      | VTIAAINGNSPAGGCLLA<br>MCCDYR |           |       | Carbamidomethyl (C)[15,20,21] |      | Mascot      |

|    |                             |  |  |  |              |  |          |      |    |    |   |  |  |  |  |  |  |  |
|----|-----------------------------|--|--|--|--------------|--|----------|------|----|----|---|--|--|--|--|--|--|--|
| 38 | novel protein [Danio rerio] |  |  |  | gi 148725802 |  | 117860.5 | 8.97 | 15 | 42 | 0 |  |  |  |  |  |  |  |
|----|-----------------------------|--|--|--|--------------|--|----------|------|----|----|---|--|--|--|--|--|--|--|

#### Peptide Information

|  | Calc. Mass | Obsrv. Mass | ± da    | ± ppm | Start Seq. | End Seq. | Sequence                   | Ion Score | C. I. | % Modification           | Rank | Result Type |
|--|------------|-------------|---------|-------|------------|----------|----------------------------|-----------|-------|--------------------------|------|-------------|
|  | 960.5472   | 960.4747    | -0.0725 | -75   | 29         | 36       | KLSLETNR                   |           |       |                          |      | Mascot      |
|  | 960.5472   | 960.4747    | -0.0725 | -75   | 29         | 36       | KLSLETNR                   |           |       |                          |      | Mascot      |
|  | 1024.5309  | 1024.5802   | 0.0493  | 48    | 143        | 152      | ALSAAEAYTK                 |           |       |                          |      | Mascot      |
|  | 1024.5309  | 1024.5802   | 0.0493  | 48    | 143        | 152      | ALSAAEAYTK                 |           |       |                          |      | Mascot      |
|  | 1069.4652  | 1069.5587   | 0.0935  | 87    | 901        | 909      | QAMESNMVK                  |           |       | Oxidation (M)[3,7]       |      | Mascot      |
|  | 1088.512   | 1088.5442   | 0.0322  | 30    | 47         | 54       | QWDVQEQR                   |           |       |                          |      | Mascot      |
|  | 1193.5038  | 1193.5951   | 0.0913  | 76    | 810        | 819      | CGENGICLDR                 |           |       | Carbamidomethyl (C)[1,7] |      | Mascot      |
|  | 1193.5765  | 1193.5951   | 0.0186  | 16    | 900        | 909      | RQAMESNMVK                 |           |       |                          |      | Mascot      |
|  | 1434.6067  | 1434.765    | 0.1583  | 110   | 309        | 321      | DQSQAFAHGCQK               |           |       |                          |      | Mascot      |
|  | 1493.7529  | 1493.7321   | -0.0208 | -14   | 14         | 24       | EVLLQEQRYSR                |           |       | Carbamidomethyl (C)[10]  |      | Mascot      |
|  | 1707.8707  | 1707.7684   | -0.1023 | -60   | 127        | 142      | SCTPSPKPSGGARHLR           |           |       | Carbamidomethyl (C)[2]   |      | Mascot      |
|  | 1778.8854  | 1778.8264   | -0.059  | -33   | 393        | 408      | YAKHSSVMQTSPLTGR           |           |       | Oxidation (M)[8]         |      | Mascot      |
|  | 1848.959   | 1848.9543   | -0.0047 | -3    | 360        | 376      | TQALPDTPLEFSSLT            |           |       |                          |      | Mascot      |
|  | 2362.2183  | 2362.1829   | -0.0354 | -15   | 243        | 264      | LQESNCLPSPLRPSHPTS<br>SIAK |           |       |                          |      | Mascot      |

|    |                                                   |           |         |     |     |     |                                 |         |     |   |    |   |                   |        |
|----|---------------------------------------------------|-----------|---------|-----|-----|-----|---------------------------------|---------|-----|---|----|---|-------------------|--------|
|    | 2369.0422                                         | 2369.0056 | -0.0366 | -15 | 322 | 341 | ELTQQDLVANSEHMTND<br>NDR        |         |     |   |    |   | Oxidation (M)[14] | Mascot |
|    | 2501.2393                                         | 2501.252  | 0.0127  | 5   | 64  | 84  | HQQVQEATENFQRAHLP<br>PSQR       |         |     |   |    |   |                   | Mascot |
|    | 3052.3411                                         | 3052.6172 | 0.2761  | 90  | 215 | 242 | SHDTPPVCSSQQSTTCA<br>QSFYNPLDNP |         |     |   |    |   |                   | Mascot |
| 39 | iron-sulfur cluster assembly enzyme [Danio rerio] |           |         |     |     |     | gi 54261801                     | 17796.2 | 8.7 | 5 | 42 | 0 | 20                | 0      |

#### Peptide Information

| Calc. Mass | Obsrv. Mass | ± da    | ± ppm | Start Seq. | End Seq. | Sequence                 | Ion Score | C. I. | % Modification                            | Rank | Result Type |
|------------|-------------|---------|-------|------------|----------|--------------------------|-----------|-------|-------------------------------------------|------|-------------|
| 913.4447   | 913.4553    | 0.0106  | 12    | 10         | 18       | CASSALFSK                |           |       |                                           |      | Mascot      |
| 960.5083   | 960.4747    | -0.0336 | -35   | 1          | 9        | MALAAAAWR                |           |       |                                           |      | Mascot      |
| 960.5359   | 960.4747    | -0.0612 | -64   | 107        | 115      | GKSIDALK                 | 21        |       | 0                                         |      | Mascot      |
| 1045.5636  | 1045.5621   | -0.0015 | -1    | 44         | 53       | NVGSCLKNAK               |           |       |                                           |      | Mascot      |
| 2283.1545  | 2283.1819   | 0.0274  | 12    | 124        | 143      | ELCLPPVKLHCSMLAEDA<br>IK |           |       | Carbamidomethyl (C)[3], Oxidation (M)[13] |      | Mascot      |

|    |                                                                                          |  |  |  |  |  |             |         |      |   |    |   |  |
|----|------------------------------------------------------------------------------------------|--|--|--|--|--|-------------|---------|------|---|----|---|--|
| 40 | novel protein similar to vertebrate jumping translocation breakpoint (JTB) [Danio rerio] |  |  |  |  |  | gi 94734166 | 17809.2 | 8.78 | 8 | 42 | 0 |  |
|----|------------------------------------------------------------------------------------------|--|--|--|--|--|-------------|---------|------|---|----|---|--|

#### Peptide Information

| Calc. Mass | Obsrv. Mass | ± da    | ± ppm | Start Seq. | End Seq. | Sequence                    | Ion Score | C. I. | % Modification                              | Rank | Result Type |
|------------|-------------|---------|-------|------------|----------|-----------------------------|-----------|-------|---------------------------------------------|------|-------------|
| 911.4217   | 911.3969    | -0.0248 | -27   | 99         | 105      | SNRDEYK                     |           |       |                                             |      | Mascot      |
| 1088.5703  | 1088.5442   | -0.0261 | -24   | 12         | 20       | IPMSCLRPR                   |           |       | Oxidation (M)[3]                            |      | Mascot      |
| 1211.533   | 1211.7124   | 0.1794  | 148   | 2          | 11       | CIRVMESDCR                  |           |       |                                             |      | Mascot      |
| 1325.5759  | 1325.7542   | 0.1783  | 135   | 2          | 11       | CIRVMESDCR                  |           |       | Carbamidomethyl (C)[1,9]                    |      | Mascot      |
| 1325.5759  | 1325.7542   | 0.1783  | 135   | 2          | 11       | CIRVMESDCR                  |           |       | Carbamidomethyl (C)[1,9]                    |      | Mascot      |
| 1472.6113  | 1472.809    | 0.1977  | 134   | 1          | 11       | MCIRVMESDCR                 |           |       | Carbamidomethyl (C)[2,10], Oxidation (M)[1] |      | Mascot      |
| 1838.8816  | 1838.9181   | 0.0365  | 20    | 54         | 69       | AMTAPCWQLEEFVAK             |           |       | Oxidation (M)[2]                            |      | Mascot      |
| 1908.8911  | 1908.8069   | -0.0842 | -44   | 5          | 20       | VMESDCRIPMSCLRPR            |           |       | Oxidation (M)[2]                            |      | Mascot      |
| 2566.3044  | 2566.2761   | -0.0283 | -11   | 47         | 69       | TAVAVTKAMTAPCWQLE<br>EFVAK  |           |       | Carbamidomethyl (C)[13], Oxidation (M)[9]   |      | Mascot      |
| 2584.2456  | 2584.2065   | -0.0391 | -15   | 70         | 93       | ECSVCEGLQLKTIPACSQ<br>TGFIK |           |       |                                             |      | Mascot      |

|    |                                                                  |  |  |  |  |  |              |        |      |    |    |   |  |
|----|------------------------------------------------------------------|--|--|--|--|--|--------------|--------|------|----|----|---|--|
| 41 | PREDICTED: calcium-dependent secretion activator 1 [Danio rerio] |  |  |  |  |  | gi 326668736 | 141178 | 5.62 | 18 | 42 | 0 |  |
|----|------------------------------------------------------------------|--|--|--|--|--|--------------|--------|------|----|----|---|--|

#### Peptide Information

| Calc. Mass | Obsrv. Mass | ± da    | ± ppm | Start Seq. | End Seq. | Sequence | Ion Score | C. I. | % Modification | Rank | Result Type |
|------------|-------------|---------|-------|------------|----------|----------|-----------|-------|----------------|------|-------------|
| 902.5305   | 902.4831    | -0.0474 | -53   | 760        | 767      | ATLSLLER |           |       |                |      | Mascot      |
| 913.4672   | 913.4553    | -0.0119 | -13   | 977        | 983      | HLDNRMK  |           |       |                |      | Mascot      |

|    |                                              |           |         |      |              |      |                        |                                          |   |    |   |  |        |
|----|----------------------------------------------|-----------|---------|------|--------------|------|------------------------|------------------------------------------|---|----|---|--|--------|
|    | 991.4699                                     | 991.4583  | -0.0116 | -12  | 481          | 488  | MDKPQNMK               |                                          |   |    |   |  | Mascot |
|    | 1007.4648                                    | 1007.5144 | 0.0496  | 49   | 481          | 488  | MDKPQNMK               | Oxidation (M)[1]                         |   |    |   |  | Mascot |
|    | 1045.5459                                    | 1045.5621 | 0.0162  | 15   | 280          | 288  | LQMADQIAR              |                                          |   |    |   |  | Mascot |
|    | 1058.5729                                    | 1058.5474 | -0.0255 | -24  | 186          | 195  | SLPEIDGLSK             |                                          |   |    |   |  | Mascot |
|    | 1069.4652                                    | 1069.5587 | 0.0935  | 87   | 1219         | 1228 | EGGMQGISMK             | Oxidation (M)[4,9]                       |   |    |   |  | Mascot |
|    | 1088.5331                                    | 1088.5442 | 0.0111  | 10   | 73           | 80   | LQREEEER               |                                          |   |    |   |  | Mascot |
|    | 1179.6343                                    | 1179.6014 | -0.0329 | -28  | 578          | 586  | ILWVQAMYP              |                                          |   |    |   |  | Mascot |
|    | 1472.6759                                    | 1472.809  | 0.1331  | 90   | 383          | 395  | IVYCTMEVEGGQK          | Oxidation (M)[6]                         |   |    |   |  | Mascot |
|    | 1493.7166                                    | 1493.7321 | 0.0155  | 10   | 789          | 800  | CLEQAAQINYQR           | Carbamidomethyl (C)[1]                   |   |    |   |  | Mascot |
|    | 1545.9363                                    | 1545.7324 | -0.2039 | -132 | 1071         | 1084 | FVAILESVLAKISR         |                                          |   |    |   |  | Mascot |
|    | 1838.9213                                    | 1838.9181 | -0.0032 | -2   | 1016         | 1031 | IPLSLCTMFNMVMDAK       | Carbamidomethyl (C)[6]                   |   |    |   |  | Mascot |
|    | 1840.9003                                    | 1840.9392 | 0.0389  | 21   | 1085         | 1100 | YDEGTLFSSFLSFTVK       |                                          |   |    |   |  | Mascot |
|    | 2152.0525                                    | 2152.0466 | -0.0059 | -3   | 377          | 395  | SLAPNRIVYCTMEVEGGQK    | Carbamidomethyl (C)[10]                  |   |    |   |  | Mascot |
|    | 2224.9397                                    | 2225.1174 | 0.1777  | 80   | 1            | 20   | MLDPSSSEESDGIVEEESR    |                                          |   |    |   |  | Mascot |
|    | 2233.166                                     | 2233.0815 | -0.0845 | -38  | 84           | 101  | LQLYVFMRCIAYPFNAK      | Carbamidomethyl (C)[10]                  |   |    |   |  | Mascot |
|    | 2369.1475                                    | 2369.0056 | -0.1419 | -60  | 310          | 331  | SSVNQLMANLESMPVSKGGEFK | Oxidation (M)[7]                         |   |    |   |  | Mascot |
|    | 2384.1658                                    | 2383.9509 | -0.2149 | -90  | 1016         | 1036 | IPLSLCTMFNMVMDAKDQSAK  | Carbamidomethyl (C)[6], Oxidation (M)[8] |   |    |   |  | Mascot |
| 42 | hypothetical protein LOC560832 [Danio rerio] |           |         |      | gi 154091038 |      | 17537.8                | 8.34                                     | 8 | 42 | 0 |  |        |

Peptide Information

| Calc. Mass | Obsrv. Mass | ± da    | ± ppm | Start Seq. | End Seq. | Sequence                | Ion Score | C. I. | % Modification                              | Rank | Result Type |
|------------|-------------|---------|-------|------------|----------|-------------------------|-----------|-------|---------------------------------------------|------|-------------|
| 911.4217   | 911.3969    | -0.0248 | -27   | 99         | 105      | SNRDEYK                 |           |       |                                             |      | Mascot      |
| 1088.5703  | 1088.5442   | -0.0261 | -24   | 12         | 20       | IPMSCLRPR               |           |       | Oxidation (M)[3]                            |      | Mascot      |
| 1211.533   | 1211.7124   | 0.1794  | 148   | 2          | 11       | CIRVMESDCR              |           |       |                                             |      | Mascot      |
| 1325.5759  | 1325.7542   | 0.1783  | 135   | 2          | 11       | CIRVMESDCR              |           |       | Carbamidomethyl (C)[1,9]                    |      | Mascot      |
| 1325.5759  | 1325.7542   | 0.1783  | 135   | 2          | 11       | CIRVMESDCR              |           |       | Carbamidomethyl (C)[1,9]                    |      | Mascot      |
| 1472.6113  | 1472.809    | 0.1977  | 134   | 1          | 11       | MCIRVMESDCR             |           |       | Carbamidomethyl (C)[2,10], Oxidation (M)[1] |      | Mascot      |
| 1838.8816  | 1838.9181   | 0.0365  | 20    | 54         | 69       | AMTAPCWQLEEFVAK         |           |       | Oxidation (M)[2]                            |      | Mascot      |
| 1908.8911  | 1908.8069   | -0.0842 | -44   | 5          | 20       | VMESDCRIPMSCLRPR        |           |       | Oxidation (M)[2]                            |      | Mascot      |
| 2566.3044  | 2566.2761   | -0.0283 | -11   | 47         | 69       | TAVAVTKAMTAPCWQLEEFVAK  |           |       | Carbamidomethyl (C)[13], Oxidation (M)[9]   |      | Mascot      |
| 2584.2456  | 2584.2065   | -0.0391 | -15   | 70         | 93       | ECSVCEGLQLKTIPACSQTGFIK |           |       |                                             |      | Mascot      |

43 PREDICTED: calcium-dependent secretion activator 1 [Danio rerio] gi|326668734 142952 5.72 18 41 0

Peptide Information



|  | Calc. Mass | Obsrv. Mass | $\pm$ da | $\pm$ ppm | Start Seq. | End Sequence Seq.           | Ion Score | C. I. % | Modification                             | Rank | Result Type |
|--|------------|-------------|----------|-----------|------------|-----------------------------|-----------|---------|------------------------------------------|------|-------------|
|  | 902.5305   | 902.4831    | -0.0474  | -53       | 773        | 780 ATLSLLER                |           |         |                                          |      | Mascot      |
|  | 913.4672   | 913.4553    | -0.0119  | -13       | 990        | 996 HLDNRMK                 |           |         |                                          |      | Mascot      |
|  | 991.4699   | 991.4583    | -0.0116  | -12       | 481        | 488 MDKPQNMK                |           |         |                                          |      | Mascot      |
|  | 1007.4648  | 1007.5144   | 0.0496   | 49        | 481        | 488 MDKPQNMK                |           |         | Oxidation (M)[1]                         |      | Mascot      |
|  | 1045.5459  | 1045.5621   | 0.0162   | 15        | 280        | 288 LQMADQIAR               |           |         |                                          |      | Mascot      |
|  | 1058.5729  | 1058.5474   | -0.0255  | -24       | 186        | 195 SLPEIDGLSK              |           |         |                                          |      | Mascot      |
|  | 1069.4652  | 1069.5587   | 0.0935   | 87        | 1232       | 1241 EGGMQGISMK             |           |         | Oxidation (M)[4,9]                       |      | Mascot      |
|  | 1088.5331  | 1088.5442   | 0.0111   | 10        | 73         | 80 LQREEEER                 |           |         |                                          |      | Mascot      |
|  | 1179.6343  | 1179.6014   | -0.0329  | -28       | 578        | 586 ILWVQAMYP               |           |         |                                          |      | Mascot      |
|  | 1472.6759  | 1472.809    | 0.1331   | 90        | 383        | 395 IVYCTMEVEGGQK           |           |         | Oxidation (M)[6]                         |      | Mascot      |
|  | 1493.7166  | 1493.7321   | 0.0155   | 10        | 802        | 813 CLEQAAQINYQR            |           |         | Carbamidomethyl (C)[1]                   |      | Mascot      |
|  | 1545.9363  | 1545.7324   | -0.2039  | -132      | 1084       | 1097 FVAILESVLAKISR         |           |         |                                          |      | Mascot      |
|  | 1838.9213  | 1838.9181   | -0.0032  | -2        | 1029       | 1044 IPLSLCTMFNVMDAK        |           |         | Carbamidomethyl (C)[6]                   |      | Mascot      |
|  | 1840.9003  | 1840.9392   | 0.0389   | 21        | 1098       | 1113 YDEGTLFSSFLSFTVK       |           |         |                                          |      | Mascot      |
|  | 2152.0525  | 2152.0466   | -0.0059  | -3        | 377        | 395 SLAPNRIVYCTMEVEGG QK    |           |         | Carbamidomethyl (C)[10]                  |      | Mascot      |
|  | 2224.9397  | 2225.1174   | 0.1777   | 80        | 1          | 20 MLDPSSEEEESDGIVEEE SR    |           |         |                                          |      | Mascot      |
|  | 2233.166   | 2233.0815   | -0.0845  | -38       | 84         | 101 LQLYVFVMRCIAYPFNAK      |           |         | Carbamidomethyl (C)[10]                  |      | Mascot      |
|  | 2369.1475  | 2369.0056   | -0.1419  | -60       | 310        | 331 SSVNQLMANLESMPVSK GGEFK |           |         | Oxidation (M)[7]                         |      | Mascot      |
|  | 2384.1658  | 2383.9509   | -0.2149  | -90       | 1029       | 1049 IPLSLCTMFNVMDAKDQ SAK  |           |         | Carbamidomethyl (C)[6], Oxidation (M)[8] |      | Mascot      |

44 Hook homolog 1 [Danio rerio] gi|190339684 83123.4 5.24 1 31 77.95

#### Peptide Information

| Calc. Mass | Obsrv. Mass | $\pm$ da | $\pm$ ppm | Start Seq. | End Sequence Seq. | Ion Score | C. I. % | Modification | Rank | Result Type |
|------------|-------------|----------|-----------|------------|-------------------|-----------|---------|--------------|------|-------------|
| 960.4996   | 960.4747    | -0.0249  | -26       | 323        | 330 LEDLSDLR      | 31        | 77.95   |              | 2    | Mascot      |

45 PREDICTED: ras association domain-containing protein gi|189537462 49870 4.96 1 27 34.174  
10 [Danio rerio]

#### Peptide Information

| Calc. Mass | Obsrv. Mass | $\pm$ da | $\pm$ ppm | Start Seq. | End Sequence Seq. | Ion Score | C. I. % | Modification | Rank | Result Type |
|------------|-------------|----------|-----------|------------|-------------------|-----------|---------|--------------|------|-------------|
| 960.4632   | 960.4747    | 0.0115   | 12        | 184        | 191 ELDGEIER      | 27        | 34.174  |              | 3    | Mascot      |

46 PREDICTED: hypothetical protein LOC796277 [Danio rerio] gi|292622807 79431.9 5.54 1 26 16.363

| Peptide Information |                                                                         |             |         |       |            |                   |         |           |                      |                  |
|---------------------|-------------------------------------------------------------------------|-------------|---------|-------|------------|-------------------|---------|-----------|----------------------|------------------|
|                     | Calc. Mass                                                              | Obsrv. Mass | ± da    | ± ppm | Start Seq. | End Sequence Seq. |         | Ion Score | C. I. % Modification | Rank Result Type |
|                     | 1287.7015                                                               | 1287.6666   | -0.0349 | -27   | 638        | 649 KNNGLLESVAR   |         | 26        | 16.363               | 2 Mascot         |
| 47                  | novel protein similar to H.sapiens testis-specific kinase [Danio rerio] |             |         |       |            | gi 220677994      | 29501.1 | 6.33      | 1                    | 22 0             |

| Peptide Information |                                            |             |         |       |            |                   |          |           |                      |                  |
|---------------------|--------------------------------------------|-------------|---------|-------|------------|-------------------|----------|-----------|----------------------|------------------|
|                     | Calc. Mass                                 | Obsrv. Mass | ± da    | ± ppm | Start Seq. | End Sequence Seq. |          | Ion Score | C. I. % Modification | Rank Result Type |
|                     | 960.5546                                   | 960.4747    | -0.0799 | -83   | 44         | 52 ITGQVMALK      |          | 22        | 0                    | 4 Mascot         |
| 48                  | disrupted in schizophrenia 1 [Danio rerio] |             |         |       |            | gi 214010133      | 112147.1 | 5.07      | 1                    | 21 0             |

| Peptide Information |                                                                          |             |         |       |            |                   |          |           |                      |                  |
|---------------------|--------------------------------------------------------------------------|-------------|---------|-------|------------|-------------------|----------|-----------|----------------------|------------------|
|                     | Calc. Mass                                                               | Obsrv. Mass | ± da    | ± ppm | Start Seq. | End Sequence Seq. |          | Ion Score | C. I. % Modification | Rank Result Type |
|                     | 960.5359                                                                 | 960.4747    | -0.0612 | -64   | 933        | 940 ELTSLER       |          | 21        | 0                    | 5 Mascot         |
| 49                  | PREDICTED: WD repeat- and FYVE domain-containing protein 4 [Danio rerio] |             |         |       |            | gi 326673033      | 526148.2 | 6.32      | 1                    | 21 0             |

| Peptide Information |                                         |             |         |       |            |                    |         |           |                      |                  |
|---------------------|-----------------------------------------|-------------|---------|-------|------------|--------------------|---------|-----------|----------------------|------------------|
|                     | Calc. Mass                              | Obsrv. Mass | ± da    | ± ppm | Start Seq. | End Sequence Seq.  |         | Ion Score | C. I. % Modification | Rank Result Type |
|                     | 1287.6903                               | 1287.6666   | -0.0237 | -18   | 2455       | 2467 APSVSVVSIESGR |         | 21        | 0                    | 3 Mascot         |
| 50                  | growth hormone receptor b [Danio rerio] |             |         |       |            | gi 194399720       | 62504.7 | 4.69      | 1                    | 21 0             |

| Peptide Information |            |             |         |       |            |                   |  |           |                      |                  |
|---------------------|------------|-------------|---------|-------|------------|-------------------|--|-----------|----------------------|------------------|
|                     | Calc. Mass | Obsrv. Mass | ± da    | ± ppm | Start Seq. | End Sequence Seq. |  | Ion Score | C. I. % Modification | Rank Result Type |
|                     | 960.4819   | 960.4747    | -0.0072 | -7    | 447        | 454 LAMIPDER      |  | 21        | 0 Oxidation (M)[3]   | 7 Mascot         |

|                |           |                        |                |                |                    |
|----------------|-----------|------------------------|----------------|----------------|--------------------|
| Gel Idx/Pos    | 250/K2    | Instr./Gel Origin      | BA2060/110707A | Process Status | Analysis Succeeded |
| Plate [#] Name | [1] 31496 | Instrument Sample Name |                | Spectra        | 11                 |

| Rank | Protein Name               | Accession No. | Protein MW | Protein PI | Pep. Count | Protein Score | Protein Score C. I. % | Total Ion Score | Total Ion C. I. % |
|------|----------------------------|---------------|------------|------------|------------|---------------|-----------------------|-----------------|-------------------|
| 1    | Vtg1 protein [Danio rerio] | gi 63100501   | 36409.1    | 9.23       | 8          | 421           | 100                   | 384             | 100               |

| Peptide Information |            |             |      |       |       |              |  |     |                      |                  |
|---------------------|------------|-------------|------|-------|-------|--------------|--|-----|----------------------|------------------|
|                     | Calc. Mass | Obsrv. Mass | ± da | ± ppm | Start | End Sequence |  | Ion | C. I. % Modification | Rank Result Type |

|  |           |           |         | Seq. | Seq. | Score |                    |     |        |                        |        |
|--|-----------|-----------|---------|------|------|-------|--------------------|-----|--------|------------------------|--------|
|  | 960.4785  | 960.47    | -0.0085 | -9   | 218  | 224   | LEVEWER            | 41  | 97.385 |                        | Mascot |
|  | 960.4785  | 960.47    | -0.0085 | -9   | 218  | 224   | LEVEWER            |     |        |                        | Mascot |
|  | 984.4243  | 984.419   | -0.0053 | -5   | 190  | 197   | FSWGAECK           |     |        | Carbamidomethyl (C)[7] | Mascot |
|  | 1118.682  | 1118.675  | -0.007  | -6   | 225  | 234   | LPIIVTTYAK         |     |        |                        | Mascot |
|  | 1287.6691 | 1287.6616 | -0.0075 | -6   | 205  | 217   | AEAGVLGEFPAAR      |     |        |                        | Mascot |
|  | 1287.6691 | 1287.6616 | -0.0075 | -6   | 205  | 217   | AEAGVLGEFPAAR      | 115 | 100    |                        | Mascot |
|  | 1327.7216 | 1327.7388 | 0.0172  | 13   | 260  | 271   | EIELTAALPSQR       |     |        |                        | Mascot |
|  | 1364.6957 | 1364.6876 | -0.0081 | -6   | 239  | 250   | HILTAAYDTGFR       |     |        |                        | Mascot |
|  | 1364.6957 | 1364.6876 | -0.0081 | -6   | 239  | 250   | HILTAAYDTGFR       | 97  | 100    |                        | Mascot |
|  | 1826.9799 | 1826.9703 | -0.0096 | -5   | 143  | 158   | LLGYQLAAYFDKPTAR   | 133 | 100    |                        | Mascot |
|  | 1826.9799 | 1826.9703 | -0.0096 | -5   | 143  | 158   | LLGYQLAAYFDKPTAR   |     |        |                        | Mascot |
|  | 1958.0189 | 1958.0054 | -0.0135 | -7   | 254  | 271   | ATNSEKEIELTAALPSQR |     |        |                        | Mascot |

2 vitellogenin 1 [Danio rerio] gi|166795887 149452.5 8.68 15 419 100 385 100

Peptide Information

| Calc. Mass | Obsrv. Mass | ± da    | ± ppm | Start Seq. | End Sequence Seq. | Ion Score                      | C. I. % | Modification | Rank                   | Result Type |
|------------|-------------|---------|-------|------------|-------------------|--------------------------------|---------|--------------|------------------------|-------------|
| 960.4785   | 960.47      | -0.0085 | -9    | 1258       | 1264              | LEVEWER                        | 41      | 97.385       |                        | Mascot      |
| 960.4785   | 960.47      | -0.0085 | -9    | 1258       | 1264              | LEVEWER                        |         |              |                        | Mascot      |
| 984.4243   | 984.419     | -0.0053 | -5    | 1230       | 1237              | FSWGAECK                       |         |              | Carbamidomethyl (C)[7] | Mascot      |
| 1088.5405  | 1088.5405   | 0       | 0     | 415        | 424               | MTASLATHEK                     |         |              |                        | Mascot      |
| 1088.5405  | 1088.5405   | 0       | 0     | 415        | 424               | MTASLATHEK                     |         |              |                        | Mascot      |
| 1118.682   | 1118.675    | -0.007  | -6    | 1265       | 1274              | LPIIVTTYAK                     |         |              |                        | Mascot      |
| 1287.6691  | 1287.6616   | -0.0075 | -6    | 1245       | 1257              | AEAGVLGEFPAAR                  |         |              |                        | Mascot      |
| 1287.6691  | 1287.6616   | -0.0075 | -6    | 1245       | 1257              | AEAGVLGEFPAAR                  | 115     | 100          |                        | Mascot      |
| 1327.7216  | 1327.7388   | 0.0172  | 13    | 1300       | 1311              | EIELTAALPSQR                   |         |              |                        | Mascot      |
| 1364.6957  | 1364.6876   | -0.0081 | -6    | 1279       | 1290              | HILTAAYDTGFR                   |         |              |                        | Mascot      |
| 1364.6957  | 1364.6876   | -0.0081 | -6    | 1279       | 1290              | HILTAAYDTGFR                   | 97      | 100          |                        | Mascot      |
| 1382.7889  | 1382.7712   | -0.0177 | -13   | 303        | 315               | ISDAPAQIVEVLK                  |         |              |                        | Mascot      |
| 1638.8485  | 1638.8528   | 0.0043  | 3     | 668        | 683               | TYLAGAAADVVEFGVR               |         |              |                        | Mascot      |
| 1826.9799  | 1826.9703   | -0.0096 | -5    | 1183       | 1198              | LLGYQLAAYFDKPTAR               | 133     | 100          |                        | Mascot      |
| 1826.9799  | 1826.9703   | -0.0096 | -5    | 1183       | 1198              | LLGYQLAAYFDKPTAR               |         |              |                        | Mascot      |
| 1865.9867  | 1865.9209   | -0.0658 | -35   | 666        | 683               | ARTYLAGAAADVVEFGV<br>R         |         |              |                        | Mascot      |
| 1958.0189  | 1958.0054   | -0.0135 | -7    | 1294       | 1311              | ATNSEKEIELTAALPSQR             |         |              |                        | Mascot      |
| 2233.2009  | 2233.0735   | -0.1274 | -57   | 593        | 614               | SLTRITAPDMAYVAGAA<br>N<br>VAIK |         |              |                        | Mascot      |

|   |                              |           |         |     |             |      |                                     |      |    |     |     |     |                   |  |  |  |        |
|---|------------------------------|-----------|---------|-----|-------------|------|-------------------------------------|------|----|-----|-----|-----|-------------------|--|--|--|--------|
|   | 2299.2292                    | 2299.1743 | -0.0549 | -24 | 1039        | 1058 | QINIIDDDTPEGQAFLLKL<br>R            |      |    |     |     |     |                   |  |  |  | Mascot |
|   | 3338.6421                    | 3338.7556 | 0.1135  | 34  | 930         | 961  | SIPLVPELSLQNSQASYA<br>GDLSEMSSVASVR |      |    |     |     |     | Oxidation (M)[25] |  |  |  | Mascot |
| 3 | vitellogenin 1 [Danio rerio] |           |         |     | gi 21391472 |      | 127954.2                            | 8.69 | 12 | 407 | 100 | 385 | 100               |  |  |  |        |

Peptide Information

| Calc. Mass | Obsrv. Mass | ± da    | ± ppm | Start Seq. | End Seq. | Sequence                 | Ion Score | C. I.  | % Modification         | Rank | Result Type |
|------------|-------------|---------|-------|------------|----------|--------------------------|-----------|--------|------------------------|------|-------------|
| 960.4785   | 960.47      | -0.0085 | -9    | 1065       | 1071     | LEVEWER                  | 41        | 97.385 |                        |      | Mascot      |
| 960.4785   | 960.47      | -0.0085 | -9    | 1065       | 1071     | LEVEWER                  |           |        |                        |      | Mascot      |
| 984.4243   | 984.419     | -0.0053 | -5    | 1037       | 1044     | FSWGAECK                 |           |        | Carbamidomethyl (C)[7] |      | Mascot      |
| 1023.5105  | 1023.447    | -0.0635 | -62   | 4          | 12       | DVGLAYTER                |           |        |                        |      | Mascot      |
| 1088.5405  | 1088.5405   | 0       | 0     | 224        | 233      | MTASLATHEK               |           |        |                        |      | Mascot      |
| 1088.5405  | 1088.5405   | 0       | 0     | 224        | 233      | MTASLATHEK               |           |        |                        |      | Mascot      |
| 1118.682   | 1118.675    | -0.007  | -6    | 1072       | 1081     | LPIIVTTYAK               |           |        |                        |      | Mascot      |
| 1287.6691  | 1287.6616   | -0.0075 | -6    | 1052       | 1064     | AEAGVLGEFPAAR            |           |        |                        |      | Mascot      |
| 1287.6691  | 1287.6616   | -0.0075 | -6    | 1052       | 1064     | AEAGVLGEFPAAR            | 115       | 100    |                        |      | Mascot      |
| 1327.7216  | 1327.7388   | 0.0172  | 13    | 1107       | 1118     | EIELTAALPSQR             |           |        |                        |      | Mascot      |
| 1364.6957  | 1364.6876   | -0.0081 | -6    | 1086       | 1097     | HILTAAYDTGFR             |           |        |                        |      | Mascot      |
| 1364.6957  | 1364.6876   | -0.0081 | -6    | 1086       | 1097     | HILTAAYDTGFR             | 97        | 100    |                        |      | Mascot      |
| 1382.7889  | 1382.7712   | -0.0177 | -13   | 112        | 124      | ISDAPAQIVEVLK            |           |        |                        |      | Mascot      |
| 1826.9799  | 1826.9703   | -0.0096 | -5    | 990        | 1005     | LLGYQLAAYFDKPTAR         | 133       | 100    |                        |      | Mascot      |
| 1826.9799  | 1826.9703   | -0.0096 | -5    | 990        | 1005     | LLGYQLAAYFDKPTAR         |           |        |                        |      | Mascot      |
| 1958.0189  | 1958.0054   | -0.0135 | -7    | 1101       | 1118     | ATNSEKEIELTAALPSQR       |           |        |                        |      | Mascot      |
| 2299.2292  | 2299.1743   | -0.0549 | -24   | 848        | 867      | QINIIDDDTPEGQAFLLKL<br>R |           |        |                        |      | Mascot      |

|   |                            |  |  |  |              |  |          |      |    |     |     |     |     |  |  |  |  |
|---|----------------------------|--|--|--|--------------|--|----------|------|----|-----|-----|-----|-----|--|--|--|--|
| 4 | Vtg1 protein [Danio rerio] |  |  |  | gi 145337918 |  | 116565.5 | 9.07 | 11 | 403 | 100 | 385 | 100 |  |  |  |  |
|---|----------------------------|--|--|--|--------------|--|----------|------|----|-----|-----|-----|-----|--|--|--|--|

Peptide Information

| Calc. Mass | Obsrv. Mass | ± da    | ± ppm | Start Seq. | End Seq. | Sequence      | Ion Score | C. I.  | % Modification         | Rank | Result Type |
|------------|-------------|---------|-------|------------|----------|---------------|-----------|--------|------------------------|------|-------------|
| 960.4785   | 960.47      | -0.0085 | -9    | 964        | 970      | LEVEWER       | 41        | 97.385 |                        |      | Mascot      |
| 960.4785   | 960.47      | -0.0085 | -9    | 964        | 970      | LEVEWER       |           |        |                        |      | Mascot      |
| 984.4243   | 984.419     | -0.0053 | -5    | 936        | 943      | FSWGAECK      |           |        | Carbamidomethyl (C)[7] |      | Mascot      |
| 1088.5405  | 1088.5405   | 0       | 0     | 121        | 130      | MTASLATHEK    |           |        |                        |      | Mascot      |
| 1088.5405  | 1088.5405   | 0       | 0     | 121        | 130      | MTASLATHEK    |           |        |                        |      | Mascot      |
| 1118.682   | 1118.675    | -0.007  | -6    | 971        | 980      | LPIIVTTYAK    |           |        |                        |      | Mascot      |
| 1287.6691  | 1287.6616   | -0.0075 | -6    | 951        | 963      | AEAGVLGEFPAAR |           |        |                        |      | Mascot      |

|           |           |         |     |      |      |                          |     |     |  |        |
|-----------|-----------|---------|-----|------|------|--------------------------|-----|-----|--|--------|
| 1287.6691 | 1287.6616 | -0.0075 | -6  | 951  | 963  | AEAGVLGEFPAAR            | 115 | 100 |  | Mascot |
| 1327.7216 | 1327.7388 | 0.0172  | 13  | 1006 | 1017 | EIELTAALPSQR             |     |     |  | Mascot |
| 1364.6957 | 1364.6876 | -0.0081 | -6  | 985  | 996  | HILTAAYDTGFR             |     |     |  | Mascot |
| 1364.6957 | 1364.6876 | -0.0081 | -6  | 985  | 996  | HILTAAYDTGFR             | 97  | 100 |  | Mascot |
| 1382.7889 | 1382.7712 | -0.0177 | -13 | 9    | 21   | ISDAPAQIVEVLK            |     |     |  | Mascot |
| 1826.9799 | 1826.9703 | -0.0096 | -5  | 889  | 904  | LLGYQLAAYFDKPTAR         | 133 | 100 |  | Mascot |
| 1826.9799 | 1826.9703 | -0.0096 | -5  | 889  | 904  | LLGYQLAAYFDKPTAR         |     |     |  | Mascot |
| 1958.0189 | 1958.0054 | -0.0135 | -7  | 1000 | 1017 | ATNSEKEIELTAALPSQR       |     |     |  | Mascot |
| 2299.2292 | 2299.1743 | -0.0549 | -24 | 745  | 764  | QINIIDDDTPEGQAFLLKL<br>R |     |     |  | Mascot |

5 vitellogenin 1 [Danio rerio] gi|94733730 149140.4 8.74 12 402 100 385 100

Peptide Information

| Calc. Mass | Obsrv. Mass | ± da    | ± ppm | Start Seq. | End Seq. | Sequence                 | Ion Score | C. I.  | % Modification         | Rank | Result Type |
|------------|-------------|---------|-------|------------|----------|--------------------------|-----------|--------|------------------------|------|-------------|
| 960.4785   | 960.47      | -0.0085 | -9    | 1258       | 1264     | LEVEWER                  | 41        | 97.385 |                        |      | Mascot      |
| 960.4785   | 960.47      | -0.0085 | -9    | 1258       | 1264     | LEVEWER                  |           |        |                        |      | Mascot      |
| 984.4243   | 984.419     | -0.0053 | -5    | 1230       | 1237     | FSWGAECK                 |           |        | Carbamidomethyl (C)[7] |      | Mascot      |
| 1023.5105  | 1023.447    | -0.0635 | -62   | 195        | 203      | DVGLAYTER                |           |        |                        |      | Mascot      |
| 1088.5405  | 1088.5405   | 0       | 0     | 415        | 424      | MTASLATHEK               |           |        |                        |      | Mascot      |
| 1088.5405  | 1088.5405   | 0       | 0     | 415        | 424      | MTASLATHEK               |           |        |                        |      | Mascot      |
| 1118.682   | 1118.675    | -0.007  | -6    | 1265       | 1274     | LPIIVTTYAK               |           |        |                        |      | Mascot      |
| 1287.6691  | 1287.6616   | -0.0075 | -6    | 1245       | 1257     | AEAGVLGEFPAAR            |           |        |                        |      | Mascot      |
| 1287.6691  | 1287.6616   | -0.0075 | -6    | 1245       | 1257     | AEAGVLGEFPAAR            | 115       | 100    |                        |      | Mascot      |
| 1327.7216  | 1327.7388   | 0.0172  | 13    | 1300       | 1311     | EIELTAALPSQR             |           |        |                        |      | Mascot      |
| 1364.6957  | 1364.6876   | -0.0081 | -6    | 1279       | 1290     | HILTAAYDTGFR             |           |        |                        |      | Mascot      |
| 1364.6957  | 1364.6876   | -0.0081 | -6    | 1279       | 1290     | HILTAAYDTGFR             | 97        | 100    |                        |      | Mascot      |
| 1382.7889  | 1382.7712   | -0.0177 | -13   | 303        | 315      | ISDAPAQIVEVLK            |           |        |                        |      | Mascot      |
| 1826.9799  | 1826.9703   | -0.0096 | -5    | 1183       | 1198     | LLGYQLAAYFDKPTAR         | 133       | 100    |                        |      | Mascot      |
| 1826.9799  | 1826.9703   | -0.0096 | -5    | 1183       | 1198     | LLGYQLAAYFDKPTAR         |           |        |                        |      | Mascot      |
| 1958.0189  | 1958.0054   | -0.0135 | -7    | 1294       | 1311     | ATNSEKEIELTAALPSQR       |           |        |                        |      | Mascot      |
| 2299.2292  | 2299.1743   | -0.0549 | -24   | 1039       | 1058     | QINIIDDDTPEGQAFLLKL<br>R |           |        |                        |      | Mascot      |

6 25 kDa heat shock protein [Danio rerio] gi|56554759 22360 6.52 10 395 100 318 100

Peptide Information

| Calc. Mass | Obsrv. Mass | ± da    | ± ppm | Start Seq. | End Seq. | Sequence | Ion Score | C. I. | % Modification | Rank | Result Type |
|------------|-------------|---------|-------|------------|----------|----------|-----------|-------|----------------|------|-------------|
| 897.4651   | 897.4584    | -0.0067 | -7    | 6          | 12       | IPFSFMR  |           |       |                |      | Mascot      |

|   |                              |           |         |    |             |     |                                        |      |        |                        |     |     |     |        |
|---|------------------------------|-----------|---------|----|-------------|-----|----------------------------------------|------|--------|------------------------|-----|-----|-----|--------|
|   | 911.4006                     | 911.3931  | -0.0075 | -8 | 21          | 27  | DWYQGSR                                | 33   | 85.663 |                        |     |     |     | Mascot |
|   | 911.4006                     | 911.3931  | -0.0075 | -8 | 21          | 27  | DWYQGSR                                |      |        |                        |     |     |     | Mascot |
|   | 913.46                       | 913.4514  | -0.0086 | -9 | 6           | 12  | IPFSFMR                                |      |        | Oxidation (M)[6]       |     |     |     | Mascot |
|   | 960.4533                     | 960.47    | 0.0167  | 17 | 136         | 143 | DEHGFISR                               |      |        |                        |     |     |     | Mascot |
|   | 960.4533                     | 960.47    | 0.0167  | 17 | 136         | 143 | DEHGFISR                               |      |        |                        |     |     |     | Mascot |
|   | 991.4631                     | 991.4547  | -0.0084 | -8 | 13          | 20  | SPSWDPFR                               | 53   | 99.837 |                        |     |     |     | Mascot |
|   | 991.4631                     | 991.4547  | -0.0084 | -8 | 13          | 20  | SPSWDPFR                               |      |        |                        |     |     |     | Mascot |
|   | 1069.5612                    | 1069.5527 | -0.0085 | -8 | 5           | 12  | RIPFSFMR                               |      |        | Oxidation (M)[7]       |     |     |     | Mascot |
|   | 1088.5483                    | 1088.5405 | -0.0078 | -7 | 135         | 143 | KDEHGFISR                              | 69   | 99.996 |                        |     |     |     | Mascot |
|   | 1088.5483                    | 1088.5405 | -0.0078 | -7 | 135         | 143 | KDEHGFISR                              |      |        |                        |     |     |     | Mascot |
|   | 1333.6998                    | 1333.6947 | -0.0051 | -4 | 148         | 159 | KYTLP PGVDSEK                          |      |        |                        |     |     |     | Mascot |
|   | 1840.944                     | 1840.9342 | -0.0098 | -5 | 104         | 119 | ISLDVNHFSPEELNVK                       | 108  | 100    |                        |     |     |     | Mascot |
|   | 1840.944                     | 1840.9342 | -0.0098 | -5 | 104         | 119 | ISLDVNHFSPEELNVK                       |      |        |                        |     |     |     | Mascot |
|   | 1883.8459                    | 1883.8339 | -0.012  | -6 | 13          | 27  | SPSWDPFRDWYQGSR                        |      |        |                        |     |     |     | Mascot |
|   | 1883.8459                    | 1883.8339 | -0.012  | -6 | 13          | 27  | SPSWDPFRDWYQGSR                        | 57   | 99.934 |                        |     |     |     | Mascot |
|   | 3467.8818                    | 3467.9175 | 0.0357  | 10 | 160         | 192 | ISSCLSPEGVLTVEAPLP<br>KPAIQAPEVNIPV NK |      |        | Carbamidomethyl (C)[4] |     |     |     | Mascot |
| 7 | vitellogenin 7 [Danio rerio] |           |         |    | gi 57864789 |     | 24318.7                                | 8.37 | 6      | 322                    | 100 | 289 | 100 |        |

Peptide Information

| Calc. Mass | Obsrv. Mass | ± da    | ± ppm | Start Seq. | End Seq. | Sequence                           | Ion Score | C. I.  | % Modification         | Rank | Result | Type   |
|------------|-------------|---------|-------|------------|----------|------------------------------------|-----------|--------|------------------------|------|--------|--------|
| 960.4785   | 960.47      | -0.0085 | -9    | 113        | 119      | LEVEWER                            | 41        | 97.385 |                        |      |        | Mascot |
| 960.4785   | 960.47      | -0.0085 | -9    | 113        | 119      | LEVEWER                            |           |        |                        |      |        | Mascot |
| 984.4243   | 984.419     | -0.0053 | -5    | 85         | 92       | FSWGAECK                           |           |        | Carbamidomethyl (C)[7] |      |        | Mascot |
| 1118.682   | 1118.675    | -0.007  | -6    | 120        | 129      | LPIIVTTYAK                         |           |        |                        |      |        | Mascot |
| 1287.6691  | 1287.6616   | -0.0075 | -6    | 100        | 112      | AEAGVLGEFPAAR                      |           |        |                        |      |        | Mascot |
| 1287.6691  | 1287.6616   | -0.0075 | -6    | 100        | 112      | AEAGVLGEFPAAR                      | 115       | 100    |                        |      |        | Mascot |
| 1826.9799  | 1826.9703   | -0.0096 | -5    | 38         | 53       | LLGYQLAAYFDKPTAR                   | 133       | 100    |                        |      |        | Mascot |
| 1826.9799  | 1826.9703   | -0.0096 | -5    | 38         | 53       | LLGYQLAAYFDKPTAR                   |           |        |                        |      |        | Mascot |
| 3337.7539  | 3337.7432   | -0.0107 | -3    | 38         | 67       | LLGYQLAAYFDKPTARVQ<br>LIASSIAENDNR |           |        |                        |      |        | Mascot |

|   |                              |  |  |  |              |  |          |      |   |     |     |     |     |  |
|---|------------------------------|--|--|--|--------------|--|----------|------|---|-----|-----|-----|-----|--|
| 8 | vitellogenin 7 [Danio rerio] |  |  |  | gi 156713467 |  | 148739.2 | 8.76 | 7 | 298 | 100 | 289 | 100 |  |
|---|------------------------------|--|--|--|--------------|--|----------|------|---|-----|-----|-----|-----|--|

Peptide Information

| Calc. Mass | Obsrv. Mass | ± da    | ± ppm | Start Seq. | End Seq. | Sequence | Ion Score | C. I.  | % Modification | Rank | Result | Type   |
|------------|-------------|---------|-------|------------|----------|----------|-----------|--------|----------------|------|--------|--------|
| 960.4785   | 960.47      | -0.0085 | -9    | 1254       | 1260     | LEVEWER  | 41        | 97.385 |                |      |        | Mascot |

|   |                                     |           |         |     |             |      |                                    |      |     |     |     |                        |     |  |  |        |
|---|-------------------------------------|-----------|---------|-----|-------------|------|------------------------------------|------|-----|-----|-----|------------------------|-----|--|--|--------|
|   | 960.4785                            | 960.47    | -0.0085 | -9  | 1254        | 1260 | LEVEWER                            |      |     |     |     |                        |     |  |  | Mascot |
|   | 984.4243                            | 984.419   | -0.0053 | -5  | 1226        | 1233 | FSWGAECK                           |      |     |     |     | Carbamidomethyl (C)[7] |     |  |  | Mascot |
|   | 1118.682                            | 1118.675  | -0.007  | -6  | 1261        | 1270 | LPIIVTTYAK                         |      |     |     |     |                        |     |  |  | Mascot |
|   | 1287.6691                           | 1287.6616 | -0.0075 | -6  | 1241        | 1253 | AEAGVLGEFPAAR                      |      |     |     |     |                        |     |  |  | Mascot |
|   | 1287.6691                           | 1287.6616 | -0.0075 | -6  | 1241        | 1253 | AEAGVLGEFPAAR                      |      | 115 | 100 |     |                        |     |  |  | Mascot |
|   | 1333.7145                           | 1333.6947 | -0.0198 | -15 | 828         | 838  | LESMTLDQLKR                        |      |     |     |     |                        |     |  |  | Mascot |
|   | 1826.9799                           | 1826.9703 | -0.0096 | -5  | 1179        | 1194 | LLGYQLAAYFDKPTAR                   |      | 133 | 100 |     |                        |     |  |  | Mascot |
|   | 1826.9799                           | 1826.9703 | -0.0096 | -5  | 1179        | 1194 | LLGYQLAAYFDKPTAR                   |      |     |     |     |                        |     |  |  | Mascot |
|   | 3337.7539                           | 3337.7432 | -0.0107 | -3  | 1179        | 1208 | LLGYQLAAYFDKPTARVQ<br>LIASSIAENDNR |      |     |     |     |                        |     |  |  | Mascot |
| 9 | heat shock protein 25 [Danio rerio] |           |         |     | gi 52078122 |      | 22344.1                            | 6.52 | 10  | 287 | 100 | 210                    | 100 |  |  |        |

#### Peptide Information

| Calc. Mass | Obsrv. Mass | $\pm$ da | $\pm$ ppm | Start Seq. | End Seq. | Sequence                              | Ion Score | C. I.  | % Modification         | Rank | Result Type |
|------------|-------------|----------|-----------|------------|----------|---------------------------------------|-----------|--------|------------------------|------|-------------|
| 897.4651   | 897.4584    | -0.0067  | -7        | 6          | 12       | IPFSFMR                               |           |        |                        |      | Mascot      |
| 911.4006   | 911.3931    | -0.0075  | -8        | 21         | 27       | DWYQGSR                               | 33        | 85.663 |                        |      | Mascot      |
| 911.4006   | 911.3931    | -0.0075  | -8        | 21         | 27       | DWYQGSR                               |           |        |                        |      | Mascot      |
| 913.46     | 913.4514    | -0.0086  | -9        | 6          | 12       | IPFSFMR                               |           |        | Oxidation (M)[6]       |      | Mascot      |
| 960.4533   | 960.47      | 0.0167   | 17        | 136        | 143      | DEHGFISR                              |           |        |                        |      | Mascot      |
| 960.4533   | 960.47      | 0.0167   | 17        | 136        | 143      | DEHGFISR                              |           |        |                        |      | Mascot      |
| 1069.5612  | 1069.5527   | -0.0085  | -8        | 5          | 12       | RIPFSFMR                              |           |        | Oxidation (M)[7]       |      | Mascot      |
| 1088.5483  | 1088.5405   | -0.0078  | -7        | 135        | 143      | KDEHGFISR                             | 69        | 99.996 |                        |      | Mascot      |
| 1088.5483  | 1088.5405   | -0.0078  | -7        | 135        | 143      | KDEHGFISR                             |           |        |                        |      | Mascot      |
| 1333.6998  | 1333.6947   | -0.0051  | -4        | 148        | 159      | KYTLPPGVDSEK                          |           |        |                        |      | Mascot      |
| 1840.944   | 1840.9342   | -0.0098  | -5        | 104        | 119      | ISLDVNHFSPEELNVK                      | 108       | 100    |                        |      | Mascot      |
| 1840.944   | 1840.9342   | -0.0098  | -5        | 104        | 119      | ISLDVNHFSPEELNVK                      |           |        |                        |      | Mascot      |
| 1883.8804  | 1883.8339   | -0.0465  | -25       | 87         | 103      | QLSSGMSEVKQTGDSW<br>K                 |           |        | Oxidation (M)[6]       |      | Mascot      |
| 1883.9261  | 1883.8339   | -0.0922  | -49       | 6          | 20       | IPFSFMRTPSWDPFR                       |           |        |                        |      | Mascot      |
| 1899.921   | 1899.8328   | -0.0882  | -46       | 6          | 20       | IPFSFMRTPSWDPFR                       |           |        | Oxidation (M)[6]       |      | Mascot      |
| 3467.8818  | 3467.9175   | 0.0357   | 10        | 160        | 192      | ISSCLSPEGVLTVEAPLP<br>KPAIQAPEVNIPVVK |           |        | Carbamidomethyl (C)[4] |      | Mascot      |

|    |                              |  |  |  |             |  |         |      |   |     |     |     |     |  |  |  |
|----|------------------------------|--|--|--|-------------|--|---------|------|---|-----|-----|-----|-----|--|--|--|
| 10 | vitellogenin 6 [Danio rerio] |  |  |  | gi 57864787 |  | 38968.8 | 8.92 | 6 | 196 | 100 | 174 | 100 |  |  |  |
|----|------------------------------|--|--|--|-------------|--|---------|------|---|-----|-----|-----|-----|--|--|--|

#### Peptide Information

| Calc. Mass | Obsrv. Mass | $\pm$ da | $\pm$ ppm | Start Seq. | End Seq. | Sequence | Ion Score | C. I.  | % Modification | Rank | Result Type |
|------------|-------------|----------|-----------|------------|----------|----------|-----------|--------|----------------|------|-------------|
| 960.4785   | 960.47      | -0.0085  | -9        | 255        | 261      | LEVEWER  | 41        | 97.385 |                |      | Mascot      |
| 960.4785   | 960.47      | -0.0085  | -9        | 255        | 261      | LEVEWER  |           |        |                |      | Mascot      |

|           |           |         |     |     |     |                          |     |     |  |                        |        |
|-----------|-----------|---------|-----|-----|-----|--------------------------|-----|-----|--|------------------------|--------|
| 984.4243  | 984.419   | -0.0053 | -5  | 227 | 234 | FSWGAECK                 |     |     |  | Carbamidomethyl (C)[7] | Mascot |
| 1327.7216 | 1327.7388 | 0.0172  | 13  | 297 | 308 | EIELTAALPSQR             |     |     |  |                        | Mascot |
| 1826.9799 | 1826.9703 | -0.0096 | -5  | 180 | 195 | LLGYQLAAYFDKPTAR         | 133 | 100 |  |                        | Mascot |
| 1826.9799 | 1826.9703 | -0.0096 | -5  | 180 | 195 | LLGYQLAAYFDKPTAR         |     |     |  |                        | Mascot |
| 1958.0189 | 1958.0054 | -0.0135 | -7  | 291 | 308 | ATNSEKEIELTAALPSQR       |     |     |  |                        | Mascot |
| 2299.2292 | 2299.1743 | -0.0549 | -24 | 31  | 50  | QINIIDDDTPEGQAFLLKL<br>R |     |     |  |                        | Mascot |

11 Zgc:136383 [Danio rerio] gi|92097636 28809.9 9.33 5 190 100 174 100

#### Peptide Information

| Calc. Mass | Obsrv. Mass | ± da    | ± ppm | Start Seq. | End Sequence Seq. | Ion Score        | C. I. % | Modification           | Rank | Result Type |
|------------|-------------|---------|-------|------------|-------------------|------------------|---------|------------------------|------|-------------|
| 960.4785   | 960.47      | -0.0085 | -9    | 156        | 162               | LEVEWER          | 41      | 97.385                 |      | Mascot      |
| 960.4785   | 960.47      | -0.0085 | -9    | 156        | 162               | LEVEWER          |         |                        |      | Mascot      |
| 984.4243   | 984.419     | -0.0053 | -5    | 128        | 135               | FSWGAECK         |         | Carbamidomethyl (C)[7] |      | Mascot      |
| 1045.5465  | 1045.5554   | 0.0089  | 9     | 246        | 253               | DFLSWIHK         |         |                        |      | Mascot      |
| 1118.5986  | 1118.675    | 0.0764  | 68    | 217        | 225               | IPEITMSRR        |         | Oxidation (M)[6]       |      | Mascot      |
| 1826.9799  | 1826.9703   | -0.0096 | -5    | 81         | 96                | LLGYQLAAYFDKPTAR | 133     | 100                    |      | Mascot      |
| 1826.9799  | 1826.9703   | -0.0096 | -5    | 81         | 96                | LLGYQLAAYFDKPTAR |         |                        |      | Mascot      |

12 vitellogenin 6 [Danio rerio] gi|303227889 150936.1 8.84 11 188 100 174 100

#### Peptide Information

| Calc. Mass | Obsrv. Mass | ± da    | ± ppm | Start Seq. | End Sequence Seq. | Ion Score                  | C. I. % | Modification           | Rank | Result Type |
|------------|-------------|---------|-------|------------|-------------------|----------------------------|---------|------------------------|------|-------------|
| 864.4461   | 864.4876    | 0.0415  | 48    | 98         | 105               | DSFVPATK                   |         |                        |      | Mascot      |
| 960.4785   | 960.47      | -0.0085 | -9    | 1276       | 1282              | LEVEWER                    | 41      | 97.385                 |      | Mascot      |
| 960.4785   | 960.47      | -0.0085 | -9    | 1276       | 1282              | LEVEWER                    |         |                        |      | Mascot      |
| 984.4243   | 984.419     | -0.0053 | -5    | 1248       | 1255              | FSWGAECK                   |         | Carbamidomethyl (C)[7] |      | Mascot      |
| 1023.5105  | 1023.447    | -0.0635 | -62   | 206        | 214               | DVGLAYTER                  |         |                        |      | Mascot      |
| 1327.7216  | 1327.7388   | 0.0172  | 13    | 1318       | 1329              | EIELTAALPSQR               |         |                        |      | Mascot      |
| 1638.8485  | 1638.8528   | 0.0043  | 3     | 679        | 694               | TYLAGAAADVVEFGVR           |         |                        |      | Mascot      |
| 1826.9799  | 1826.9703   | -0.0096 | -5    | 1201       | 1216              | LLGYQLAAYFDKPTAR           | 133     | 100                    |      | Mascot      |
| 1826.9799  | 1826.9703   | -0.0096 | -5    | 1201       | 1216              | LLGYQLAAYFDKPTAR           |         |                        |      | Mascot      |
| 1865.9867  | 1865.9209   | -0.0658 | -35   | 677        | 694               | ARTYLAGAAADVVEFGV<br>R     |         |                        |      | Mascot      |
| 1958.0189  | 1958.0054   | -0.0135 | -7    | 1312       | 1329              | ATNSEKEIELTAALPSQR         |         |                        |      | Mascot      |
| 2233.2009  | 2233.0735   | -0.1274 | -57   | 604        | 625               | SLTRITAPDMAYVAGAAN<br>VAIK |         |                        |      | Mascot      |
| 2299.2292  | 2299.1743   | -0.0549 | -24   | 1050       | 1069              | QINIIDDDTPEGQAFLLKL<br>R   |         |                        |      | Mascot      |



13    novel protein similar to vitellogenin 1 (vg1) [Danio rerio]    gi|94733734    149808.5    8.83    11    187    100    174    100

Peptide Information

| Calc. Mass | Obsrv. Mass | ± da    | ± ppm | Start Seq. | End Seq. | Sequence                   | Ion Score | C. I.  | % Modification         | Rank | Result Type |
|------------|-------------|---------|-------|------------|----------|----------------------------|-----------|--------|------------------------|------|-------------|
| 864.4461   | 864.4876    | 0.0415  | 48    | 91         | 98       | DSFVPATK                   |           |        |                        |      | Mascot      |
| 960.4785   | 960.47      | -0.0085 | -9    | 1265       | 1271     | LEVEWER                    | 41        | 97.385 |                        |      | Mascot      |
| 960.4785   | 960.47      | -0.0085 | -9    | 1265       | 1271     | LEVEWER                    |           |        |                        |      | Mascot      |
| 984.4243   | 984.419     | -0.0053 | -5    | 1237       | 1244     | FSWGAECK                   |           |        | Carbamidomethyl (C)[7] |      | Mascot      |
| 1023.5105  | 1023.447    | -0.0635 | -62   | 199        | 207      | DVGLAYTER                  |           |        |                        |      | Mascot      |
| 1327.7216  | 1327.7388   | 0.0172  | 13    | 1307       | 1318     | EIELTAALPSQR               |           |        |                        |      | Mascot      |
| 1638.8485  | 1638.8528   | 0.0043  | 3     | 672        | 687      | TYLAGAAADVVEFGVR           |           |        |                        |      | Mascot      |
| 1826.9799  | 1826.9703   | -0.0096 | -5    | 1190       | 1205     | LLGYQLAAYFDKPTAR           | 133       | 100    |                        |      | Mascot      |
| 1826.9799  | 1826.9703   | -0.0096 | -5    | 1190       | 1205     | LLGYQLAAYFDKPTAR           |           |        |                        |      | Mascot      |
| 1865.9867  | 1865.9209   | -0.0658 | -35   | 670        | 687      | ARTYLAGAAADVVEFGV<br>R     |           |        |                        |      | Mascot      |
| 1958.0189  | 1958.0054   | -0.0135 | -7    | 1301       | 1318     | ATNSEKEIELTAALPSQR         |           |        |                        |      | Mascot      |
| 2233.2009  | 2233.0735   | -0.1274 | -57   | 597        | 618      | SLTRITAPDMAYVAGAAN<br>VAIK |           |        |                        |      | Mascot      |
| 2299.2292  | 2299.1743   | -0.0549 | -24   | 1043       | 1062     | QINIIDDDTPEGQAFLLKL<br>R   |           |        |                        |      | Mascot      |

14    Vtg5 protein [Danio rerio]    gi|148744685    27543.3    9.2    4    185    100    174    100

Peptide Information

| Calc. Mass | Obsrv. Mass | ± da    | ± ppm | Start Seq. | End Seq. | Sequence         | Ion Score | C. I.  | % Modification         | Rank | Result Type |
|------------|-------------|---------|-------|------------|----------|------------------|-----------|--------|------------------------|------|-------------|
| 807.4722   | 807.3793    | -0.0929 | -115  | 198        | 204      | SLTFIAR          |           |        |                        |      | Mascot      |
| 960.4785   | 960.47      | -0.0085 | -9    | 144        | 150      | LEVEWER          | 41        | 97.385 |                        |      | Mascot      |
| 960.4785   | 960.47      | -0.0085 | -9    | 144        | 150      | LEVEWER          |           |        |                        |      | Mascot      |
| 984.4243   | 984.419     | -0.0053 | -5    | 116        | 123      | FSWGAECK         |           |        | Carbamidomethyl (C)[7] |      | Mascot      |
| 1826.9799  | 1826.9703   | -0.0096 | -5    | 69         | 84       | LLGYQLAAYFDKPTAR | 133       | 100    |                        |      | Mascot      |
| 1826.9799  | 1826.9703   | -0.0096 | -5    | 69         | 84       | LLGYQLAAYFDKPTAR |           |        |                        |      | Mascot      |

15    vitellogenin 5 [Danio rerio]    gi|57864785    72820.8    9    5    183    100    174    100

Peptide Information

| Calc. Mass | Obsrv. Mass | ± da    | ± ppm | Start Seq. | End Seq. | Sequence | Ion Score | C. I.  | % Modification         | Rank | Result Type |
|------------|-------------|---------|-------|------------|----------|----------|-----------|--------|------------------------|------|-------------|
| 960.4785   | 960.47      | -0.0085 | -9    | 564        | 570      | LEVEWER  | 41        | 97.385 |                        |      | Mascot      |
| 960.4785   | 960.47      | -0.0085 | -9    | 564        | 570      | LEVEWER  |           |        |                        |      | Mascot      |
| 984.4243   | 984.419     | -0.0053 | -5    | 536        | 543      | FSWGAECK |           |        | Carbamidomethyl (C)[7] |      | Mascot      |

|    |                              |           |         |     |             |     |                          |      |     |     |     |     |     |  |  |  |        |
|----|------------------------------|-----------|---------|-----|-------------|-----|--------------------------|------|-----|-----|-----|-----|-----|--|--|--|--------|
|    | 1069.5021                    | 1069.5527 | 0.0506  | 47  | 230         | 238 | NIENHSAER                |      |     |     |     |     |     |  |  |  | Mascot |
|    | 1826.9799                    | 1826.9703 | -0.0096 | -5  | 489         | 504 | LLGYQLAAYFDKPTAR         | 133  | 100 |     |     |     |     |  |  |  | Mascot |
|    | 1826.9799                    | 1826.9703 | -0.0096 | -5  | 489         | 504 | LLGYQLAAYFDKPTAR         |      |     |     |     |     |     |  |  |  | Mascot |
|    | 2299.2292                    | 2299.1743 | -0.0549 | -24 | 348         | 367 | QINIIDDDTPEGQAFLLKL<br>R |      |     |     |     |     |     |  |  |  | Mascot |
| 16 | vitellogenin 4 [Danio rerio] |           |         |     | gi 57864783 |     | 31189.9                  | 9.48 | 4   | 183 | 100 | 174 | 100 |  |  |  |        |

#### Peptide Information

| Calc. Mass | Obsrv. Mass | ± da    | ± ppm | Start Seq. | End Seq. | Sequence         | Ion Score | C. I. % | Modification           | Rank | Result | Type   |
|------------|-------------|---------|-------|------------|----------|------------------|-----------|---------|------------------------|------|--------|--------|
| 960.4785   | 960.47      | -0.0085 | -9    | 182        | 188      | LEVEWER          | 41        | 97.385  |                        |      |        | Mascot |
| 960.4785   | 960.47      | -0.0085 | -9    | 182        | 188      | LEVEWER          |           |         |                        |      |        | Mascot |
| 984.4243   | 984.419     | -0.0053 | -5    | 154        | 161      | FSWGAECK         |           |         | Carbamidomethyl (C)[7] |      |        | Mascot |
| 1118.5986  | 1118.675    | 0.0764  | 68    | 243        | 251      | IPEITMSRR        |           |         | Oxidation (M)[6]       |      |        | Mascot |
| 1826.9799  | 1826.9703   | -0.0096 | -5    | 107        | 122      | LLGYQLAAYFDKPTAR | 133       | 100     |                        |      |        | Mascot |
| 1826.9799  | 1826.9703   | -0.0096 | -5    | 107        | 122      | LLGYQLAAYFDKPTAR |           |         |                        |      |        | Mascot |

|    |                                                             |  |  |  |             |  |          |      |   |     |     |     |     |  |  |  |  |
|----|-------------------------------------------------------------|--|--|--|-------------|--|----------|------|---|-----|-----|-----|-----|--|--|--|--|
| 17 | novel protein similar to vitellogenin 1 (vg1) [Danio rerio] |  |  |  | gi 94733731 |  | 149169.2 | 8.84 | 7 | 182 | 100 | 174 | 100 |  |  |  |  |
|----|-------------------------------------------------------------|--|--|--|-------------|--|----------|------|---|-----|-----|-----|-----|--|--|--|--|

#### Peptide Information

| Calc. Mass | Obsrv. Mass | ± da    | ± ppm | Start Seq. | End Seq. | Sequence                     | Ion Score | C. I. % | Modification                              | Rank | Result | Type   |
|------------|-------------|---------|-------|------------|----------|------------------------------|-----------|---------|-------------------------------------------|------|--------|--------|
| 960.4785   | 960.47      | -0.0085 | -9    | 1260       | 1266     | LEVEWER                      | 41        | 97.385  |                                           |      |        | Mascot |
| 960.4785   | 960.47      | -0.0085 | -9    | 1260       | 1266     | LEVEWER                      |           |         |                                           |      |        | Mascot |
| 984.4243   | 984.419     | -0.0053 | -5    | 1232       | 1239     | FSWGAECK                     |           |         | Carbamidomethyl (C)[7]                    |      |        | Mascot |
| 1023.5105  | 1023.447    | -0.0635 | -62   | 199        | 207      | DVGLAYTER                    |           |         |                                           |      |        | Mascot |
| 1826.9799  | 1826.9703   | -0.0096 | -5    | 1185       | 1200     | LLGYQLAAYFDKPTAR             | 133       | 100     |                                           |      |        | Mascot |
| 1826.9799  | 1826.9703   | -0.0096 | -5    | 1185       | 1200     | LLGYQLAAYFDKPTAR             |           |         |                                           |      |        | Mascot |
| 1840.8938  | 1840.9342   | 0.0404  | 22    | 76         | 90       | LMDPLLYEYAGTWPR              |           |         | Oxidation (M)[2]                          |      |        | Mascot |
| 1840.8938  | 1840.9342   | 0.0404  | 22    | 76         | 90       | LMDPLLYEYAGTWPR              |           |         | Oxidation (M)[2]                          |      |        | Mascot |
| 2299.2292  | 2299.1743   | -0.0549 | -24   | 1043       | 1062     | QINIIDDDTPEGQAFLLKL<br>R     |           |         |                                           |      |        | Mascot |
| 2362.1926  | 2362.1738   | -0.0188 | -8    | 601        | 623      | ITAPDMASVAGAAANVAIK<br>LMNCK |           |         | Carbamidomethyl (C)[22], Oxidation (M)[6] |      |        | Mascot |

|    |                                                             |  |  |  |             |  |          |      |    |     |     |     |     |  |  |  |  |
|----|-------------------------------------------------------------|--|--|--|-------------|--|----------|------|----|-----|-----|-----|-----|--|--|--|--|
| 18 | novel protein similar to vitellogenin 1 (vg1) [Danio rerio] |  |  |  | gi 94733733 |  | 149143.4 | 8.92 | 10 | 181 | 100 | 174 | 100 |  |  |  |  |
|----|-------------------------------------------------------------|--|--|--|-------------|--|----------|------|----|-----|-----|-----|-----|--|--|--|--|

#### Peptide Information

| Calc. Mass | Obsrv. Mass | ± da   | ± ppm | Start Seq. | End Seq. | Sequence | Ion Score | C. I. % | Modification | Rank | Result | Type   |
|------------|-------------|--------|-------|------------|----------|----------|-----------|---------|--------------|------|--------|--------|
| 864.4461   | 864.4876    | 0.0415 | 48    | 91         | 98       | DSFVPATK |           |         |              |      |        | Mascot |

|           |           |         |     |      |      |                            |     |        |                        |  |  |  |        |
|-----------|-----------|---------|-----|------|------|----------------------------|-----|--------|------------------------|--|--|--|--------|
| 960.4785  | 960.47    | -0.0085 | -9  | 1260 | 1266 | LEVEWER                    | 41  | 97.385 |                        |  |  |  | Mascot |
| 960.4785  | 960.47    | -0.0085 | -9  | 1260 | 1266 | LEVEWER                    |     |        |                        |  |  |  | Mascot |
| 984.4243  | 984.419   | -0.0053 | -5  | 1232 | 1239 | FSWGAECK                   |     |        | Carbamidomethyl (C)[7] |  |  |  | Mascot |
| 1023.5105 | 1023.447  | -0.0635 | -62 | 199  | 207  | DVGLAYTER                  |     |        |                        |  |  |  | Mascot |
| 1045.5465 | 1045.5554 | 0.0089  | 9   | 1350 | 1357 | DFLSWIHK                   |     |        |                        |  |  |  | Mascot |
| 1118.5986 | 1118.675  | 0.0764  | 68  | 1321 | 1329 | IPEITMSRR                  |     |        | Oxidation (M)[6]       |  |  |  | Mascot |
| 1382.7889 | 1382.7712 | -0.0177 | -13 | 307  | 319  | ISDAPAQIVEVLK              |     |        |                        |  |  |  | Mascot |
| 1826.9799 | 1826.9703 | -0.0096 | -5  | 1185 | 1200 | LLGYQLAAYFDKPTAR           | 133 | 100    |                        |  |  |  | Mascot |
| 1826.9799 | 1826.9703 | -0.0096 | -5  | 1185 | 1200 | LLGYQLAAYFDKPTAR           |     |        |                        |  |  |  | Mascot |
| 2233.2009 | 2233.0735 | -0.1274 | -57 | 597  | 618  | SLTRITAPDMAYVAGAAN<br>VAIK |     |        |                        |  |  |  | Mascot |
| 2299.2292 | 2299.1743 | -0.0549 | -24 | 1043 | 1062 | QINIIDDDTPEGQAFLLKL<br>R   |     |        |                        |  |  |  | Mascot |

19

hypothetical protein LOC678536 [Danio rerio]

gi|160420306

148750.2

8.89

10

180

100

174

100

Peptide Information

| Calc. Mass | Obsrv. Mass | ± da    | ± ppm | Start Seq. | End Seq. | Sequence                   | Ion Score | C. I.  | % Modification         | Rank | Result Type |
|------------|-------------|---------|-------|------------|----------|----------------------------|-----------|--------|------------------------|------|-------------|
| 864.4461   | 864.4876    | 0.0415  | 48    | 87         | 94       | DSFVPATK                   |           |        |                        |      | Mascot      |
| 960.4785   | 960.47      | -0.0085 | -9    | 1256       | 1262     | LEVEWER                    | 41        | 97.385 |                        |      | Mascot      |
| 960.4785   | 960.47      | -0.0085 | -9    | 1256       | 1262     | LEVEWER                    |           |        |                        |      | Mascot      |
| 984.4243   | 984.419     | -0.0053 | -5    | 1228       | 1235     | FSWGAECK                   |           |        | Carbamidomethyl (C)[7] |      | Mascot      |
| 1023.5105  | 1023.447    | -0.0635 | -62   | 195        | 203      | DVGLAYTER                  |           |        |                        |      | Mascot      |
| 1045.5465  | 1045.5554   | 0.0089  | 9     | 1346       | 1353     | DFLSWIHK                   |           |        |                        |      | Mascot      |
| 1118.5986  | 1118.675    | 0.0764  | 68    | 1317       | 1325     | IPEITMSRR                  |           |        | Oxidation (M)[6]       |      | Mascot      |
| 1382.7889  | 1382.7712   | -0.0177 | -13   | 303        | 315      | ISDAPAQIVEVLK              |           |        |                        |      | Mascot      |
| 1826.9799  | 1826.9703   | -0.0096 | -5    | 1181       | 1196     | LLGYQLAAYFDKPTAR           | 133       | 100    |                        |      | Mascot      |
| 1826.9799  | 1826.9703   | -0.0096 | -5    | 1181       | 1196     | LLGYQLAAYFDKPTAR           |           |        |                        |      | Mascot      |
| 2233.2009  | 2233.0735   | -0.1274 | -57   | 593        | 614      | SLTRITAPDMAYVAGAAN<br>VAIK |           |        |                        |      | Mascot      |
| 2299.2292  | 2299.1743   | -0.0549 | -24   | 1039       | 1058     | QINIIDDDTPEGQAFLLKL<br>R   |           |        |                        |      | Mascot      |

20

Zgc:136383 protein [Danio rerio]

gi|159155252

123957.1

8.78

8

180

100

174

100

Peptide Information

| Calc. Mass | Obsrv. Mass | ± da    | ± ppm | Start Seq. | End Seq. | Sequence | Ion Score | C. I.  | % Modification         | Rank | Result Type |
|------------|-------------|---------|-------|------------|----------|----------|-----------|--------|------------------------|------|-------------|
| 960.4785   | 960.47      | -0.0085 | -9    | 1033       | 1039     | LEVEWER  | 41        | 97.385 |                        |      | Mascot      |
| 960.4785   | 960.47      | -0.0085 | -9    | 1033       | 1039     | LEVEWER  |           |        |                        |      | Mascot      |
| 984.4243   | 984.419     | -0.0053 | -5    | 1005       | 1012     | FSWGAECK |           |        | Carbamidomethyl (C)[7] |      | Mascot      |

|    |                            |           |         |     |              |      |                            |      |     |     |        |    |        |  |  |                  |        |
|----|----------------------------|-----------|---------|-----|--------------|------|----------------------------|------|-----|-----|--------|----|--------|--|--|------------------|--------|
|    | 1045.5465                  | 1045.5554 | 0.0089  | 9   | 1123         | 1130 | DFLSWIHK                   |      |     |     |        |    |        |  |  |                  | Mascot |
|    | 1118.5986                  | 1118.675  | 0.0764  | 68  | 1094         | 1102 | IPEITMSRR                  |      |     |     |        |    |        |  |  | Oxidation (M)[6] | Mascot |
|    | 1382.7889                  | 1382.7712 | -0.0177 | -13 | 80           | 92   | ISDAPAQIVEVLK              |      |     |     |        |    |        |  |  |                  | Mascot |
|    | 1826.9799                  | 1826.9703 | -0.0096 | -5  | 958          | 973  | LLGYQLAAYFDKPTAR           |      | 133 | 100 |        |    |        |  |  |                  | Mascot |
|    | 1826.9799                  | 1826.9703 | -0.0096 | -5  | 958          | 973  | LLGYQLAAYFDKPTAR           |      |     |     |        |    |        |  |  |                  | Mascot |
|    | 2233.2009                  | 2233.0735 | -0.1274 | -57 | 370          | 391  | SLTRITAPDMAYVAGAAN<br>VAIK |      |     |     |        |    |        |  |  |                  | Mascot |
|    | 2299.2292                  | 2299.1743 | -0.0549 | -24 | 816          | 835  | QINIIDDDTPEGQAFLKL<br>R    |      |     |     |        |    |        |  |  |                  | Mascot |
| 21 | Vtg6 protein [Danio rerio] |           |         |     | gi 157422885 |      | 27937.4                    | 9.18 | 5   | 57  | 91.714 | 41 | 97.385 |  |  |                  |        |

Peptide Information

| Calc. Mass | Obsrv. Mass | ± da    | ± ppm | Start Seq. | End Seq. | Sequence           | Ion Score | C. I.  | % Modification         | Rank | Result Type |
|------------|-------------|---------|-------|------------|----------|--------------------|-----------|--------|------------------------|------|-------------|
| 913.423    | 913.4514    | 0.0284  | 31    | 1          | 8        | MSSSRMSK           |           |        |                        |      | Mascot      |
| 960.4785   | 960.47      | -0.0085 | -9    | 149        | 155      | LEVEWER            | 41        | 97.385 |                        |      | Mascot      |
| 960.4785   | 960.47      | -0.0085 | -9    | 149        | 155      | LEVEWER            |           |        |                        |      | Mascot      |
| 984.4243   | 984.419     | -0.0053 | -5    | 121        | 128      | FSWGAECK           |           |        | Carbamidomethyl (C)[7] |      | Mascot      |
| 1327.7216  | 1327.7388   | 0.0172  | 13    | 191        | 202      | EIELTAALPSQR       |           |        |                        |      | Mascot      |
| 1958.0189  | 1958.0054   | -0.0135 | -7    | 185        | 202      | ATNSEKEIELTAALPSQR |           |        |                        |      | Mascot      |

|    |                                                            |  |  |  |              |  |        |      |    |    |        |  |  |  |  |  |  |
|----|------------------------------------------------------------|--|--|--|--------------|--|--------|------|----|----|--------|--|--|--|--|--|--|
| 22 | PREDICTED: hypothetical protein LOC100538307 [Danio rerio] |  |  |  | gi 326667461 |  | 234046 | 8.95 | 27 | 55 | 85.928 |  |  |  |  |  |  |
|----|------------------------------------------------------------|--|--|--|--------------|--|--------|------|----|----|--------|--|--|--|--|--|--|

Peptide Information

| Calc. Mass | Obsrv. Mass | ± da    | ± ppm | Start Seq. | End Seq. | Sequence    | Ion Score | C. I. | % Modification   | Rank | Result Type |
|------------|-------------|---------|-------|------------|----------|-------------|-----------|-------|------------------|------|-------------|
| 807.4722   | 807.3793    | -0.0929 | -115  | 572        | 578      | AFTNKVK     |           |       |                  |      | Mascot      |
| 850.4205   | 850.5349    | 0.1144  | 135   | 201        | 207      | AEFAWAR     |           |       |                  |      | Mascot      |
| 864.4131   | 864.4876    | 0.0745  | 86    | 1          | 8        | MAEEALGK    |           |       | Oxidation (M)[1] |      | Mascot      |
| 991.4439   | 991.4547    | 0.0108  | 11    | 1568       | 1575     | DQDSNERK    |           |       |                  |      | Mascot      |
| 991.4876   | 991.4547    | -0.0329 | -33   | 93         | 101      | KAVEECNAK   |           |       |                  |      | Mascot      |
| 996.5624   | 996.5899    | 0.0275  | 28    | 173        | 180      | WIPAPERK    |           |       |                  |      | Mascot      |
| 1013.4944  | 1013.4352   | -0.0592 | -58   | 1365       | 1372     | HGRMEVER    |           |       |                  |      | Mascot      |
| 1023.4934  | 1023.447    | -0.0464 | -45   | 816        | 822      | EFIDWWK     |           |       |                  |      | Mascot      |
| 1088.5483  | 1088.5405   | -0.0078 | -7    | 259        | 266      | RDWENLQK    |           |       |                  |      | Mascot      |
| 1088.5483  | 1088.5405   | -0.0078 | -7    | 259        | 266      | RDWENLQK    |           |       |                  |      | Mascot      |
| 1118.6567  | 1118.675    | 0.0183  | 16    | 1004       | 1014     | GVFAALGDIKK |           |       |                  |      | Mascot      |
| 1165.5887  | 1165.7374   | 0.1487  | 128   | 1450       | 1458     | YSVEEWPKK   |           |       |                  |      | Mascot      |
| 1211.6266  | 1211.7084   | 0.0818  | 68    | 1132       | 1142     | NEVVDPSQVPK |           |       |                  |      | Mascot      |

|           |           |         |      |      |      |                           |                         |        |
|-----------|-----------|---------|------|------|------|---------------------------|-------------------------|--------|
| 1287.6903 | 1287.6616 | -0.0287 | -22  | 278  | 288  | KIQLVDSVDDR               |                         | Mascot |
| 1287.6903 | 1287.6616 | -0.0287 | -22  | 278  | 288  | KIQLVDSVDDR               |                         | Mascot |
| 1320.653  | 1320.5724 | -0.0806 | -61  | 1819 | 1830 | LETSELEAEATK              |                         | Mascot |
| 1325.7113 | 1325.7494 | 0.0381  | 29   | 1284 | 1294 | FHRSLTPPGWK               |                         | Mascot |
| 1325.7113 | 1325.7494 | 0.0381  | 29   | 1284 | 1294 | FHRSLTPPGWK               |                         | Mascot |
| 1364.6475 | 1364.6876 | 0.0401  | 29   | 189  | 199  | LKECSNELESR               | Carbamidomethyl (C)[4]  | Mascot |
| 1364.7307 | 1364.6876 | -0.0431 | -32  | 38   | 48   | LIESELKEEFK               |                         | Mascot |
| 1382.5927 | 1382.7712 | 0.1785  | 129  | 447  | 460  | DSTEAGCIVCGAEK            |                         | Mascot |
| 1493.8984 | 1493.723  | -0.1754 | -117 | 644  | 657  | ITLVVHGVGKMAIR            |                         | Mascot |
| 1823.9272 | 1823.9175 | -0.0097 | -5   | 1815 | 1830 | FLDKLETSELEAEATK          |                         | Mascot |
| 1827.0334 | 1826.9703 | -0.0631 | -35  | 1143 | 1158 | ESISQSKTIILPNQLR          |                         | Mascot |
| 1827.0334 | 1826.9703 | -0.0631 | -35  | 1143 | 1158 | ESISQSKTIILPNQLR          |                         | Mascot |
| 1838.783  | 1838.9    | 0.117   | 64   | 839  | 855  | CGNCQPGGKEMTLAEER         | Oxidation (M)[11]       | Mascot |
| 1840.9525 | 1840.9342 | -0.0183 | -10  | 1839 | 1856 | IHPASSPHRNGAAEAAVR        |                         | Mascot |
| 1840.9525 | 1840.9342 | -0.0183 | -10  | 1839 | 1856 | IHPASSPHRNGAAEAAVR        |                         | Mascot |
| 1997.1074 | 1997.0564 | -0.051  | -26  | 1643 | 1660 | IAPVILPCSAWVSMLLAR        | Carbamidomethyl (C)[8]  | Mascot |
| 2211.0215 | 2211.0981 | 0.0766  | 35   | 816  | 833  | EFIDWWKWDSIGTACEP<br>K    |                         | Mascot |
| 2299.1758 | 2299.1743 | -0.0015 | -1   | 1049 | 1069 | VNIGDRPAGCIAQLAMRE<br>TAR | Carbamidomethyl (C)[10] | Mascot |
| 2300.1956 | 2300.1643 | -0.0313 | -14  | 671  | 691  | TPEGTVKAHQLICYGLEEI<br>AK |                         | Mascot |

23

PREDICTED: hypothetical protein LOC100538192 [Danio rerio]

gi|326664724

234026

9.01

26

48

37.141

| Peptide Information |             |         |       |            |          |             |           |         |                  |      |             |
|---------------------|-------------|---------|-------|------------|----------|-------------|-----------|---------|------------------|------|-------------|
| Calc. Mass          | Obsrv. Mass | ± da    | ± ppm | Start Seq. | End Seq. | Sequence    | Ion Score | C. I. % | Modification     | Rank | Result Type |
| 807.4722            | 807.3793    | -0.0929 | -115  | 572        | 578      | AFTNKVK     |           |         |                  |      | Mascot      |
| 850.4205            | 850.5349    | 0.1144  | 135   | 201        | 207      | AEFAWAR     |           |         |                  |      | Mascot      |
| 864.4131            | 864.4876    | 0.0745  | 86    | 1          | 8        | MAEEALGK    |           |         | Oxidation (M)[1] |      | Mascot      |
| 991.4439            | 991.4547    | 0.0108  | 11    | 1568       | 1575     | DQDSNERK    |           |         |                  |      | Mascot      |
| 991.4876            | 991.4547    | -0.0329 | -33   | 93         | 101      | KAVEECNAK   |           |         |                  |      | Mascot      |
| 996.5624            | 996.5899    | 0.0275  | 28    | 173        | 180      | WIPAPERK    |           |         |                  |      | Mascot      |
| 1013.4944           | 1013.4352   | -0.0592 | -58   | 1365       | 1372     | HGRMEVER    |           |         |                  |      | Mascot      |
| 1023.4934           | 1023.447    | -0.0464 | -45   | 816        | 822      | EFIDWWK     |           |         |                  |      | Mascot      |
| 1088.5483           | 1088.5405   | -0.0078 | -7    | 259        | 266      | RDWENLQK    |           |         |                  |      | Mascot      |
| 1088.5483           | 1088.5405   | -0.0078 | -7    | 259        | 266      | RDWENLQK    |           |         |                  |      | Mascot      |
| 1118.6567           | 1118.675    | 0.0183  | 16    | 1004       | 1014     | GVFAALGDIKK |           |         |                  |      | Mascot      |
| 1165.5887           | 1165.7374   | 0.1487  | 128   | 1450       | 1458     | YSVEEWPKK   |           |         |                  |      | Mascot      |

|    |                                                   |           |         |      |             |      |                           |     |   |    |        |                         |  |  |  |  |        |
|----|---------------------------------------------------|-----------|---------|------|-------------|------|---------------------------|-----|---|----|--------|-------------------------|--|--|--|--|--------|
|    | 1211.6266                                         | 1211.7084 | 0.0818  | 68   | 1132        | 1142 | NEVVDPSQVPK               |     |   |    |        |                         |  |  |  |  | Mascot |
|    | 1287.6903                                         | 1287.6616 | -0.0287 | -22  | 278         | 288  | KIQLVDSVDDR               |     |   |    |        |                         |  |  |  |  | Mascot |
|    | 1287.6903                                         | 1287.6616 | -0.0287 | -22  | 278         | 288  | KIQLVDSVDDR               |     |   |    |        |                         |  |  |  |  | Mascot |
|    | 1320.653                                          | 1320.5724 | -0.0806 | -61  | 1819        | 1830 | LETSELEAEATK              |     |   |    |        |                         |  |  |  |  | Mascot |
|    | 1325.7113                                         | 1325.7494 | 0.0381  | 29   | 1284        | 1294 | FHRSLTPPGWK               |     |   |    |        |                         |  |  |  |  | Mascot |
|    | 1325.7113                                         | 1325.7494 | 0.0381  | 29   | 1284        | 1294 | FHRSLTPPGWK               |     |   |    |        |                         |  |  |  |  | Mascot |
|    | 1364.6475                                         | 1364.6876 | 0.0401  | 29   | 189         | 199  | LKECSNELESR               |     |   |    |        | Carbamidomethyl (C)[4]  |  |  |  |  | Mascot |
|    | 1364.7307                                         | 1364.6876 | -0.0431 | -32  | 38          | 48   | LIESELKEEFK               |     |   |    |        |                         |  |  |  |  | Mascot |
|    | 1382.5927                                         | 1382.7712 | 0.1785  | 129  | 447         | 460  | DSTEAGCIVCGAEK            |     |   |    |        |                         |  |  |  |  | Mascot |
|    | 1493.8984                                         | 1493.723  | -0.1754 | -117 | 644         | 657  | ITLVVHGVGKMAIR            |     |   |    |        |                         |  |  |  |  | Mascot |
|    | 1823.9272                                         | 1823.9175 | -0.0097 | -5   | 1815        | 1830 | FLDKLETSELEAEATK          |     |   |    |        |                         |  |  |  |  | Mascot |
|    | 1840.9525                                         | 1840.9342 | -0.0183 | -10  | 1839        | 1856 | IHPASSPHRNGAAEAAVR        |     |   |    |        |                         |  |  |  |  | Mascot |
|    | 1840.9525                                         | 1840.9342 | -0.0183 | -10  | 1839        | 1856 | IHPASSPHRNGAAEAAVR        |     |   |    |        |                         |  |  |  |  | Mascot |
|    | 1997.1074                                         | 1997.0564 | -0.051  | -26  | 1643        | 1660 | IAPILPCSAWVSMILLAR        |     |   |    |        | Carbamidomethyl (C)[8]  |  |  |  |  | Mascot |
|    | 2211.0215                                         | 2211.0981 | 0.0766  | 35   | 816         | 833  | EFIDWWKWDSIGTACEP<br>K    |     |   |    |        |                         |  |  |  |  | Mascot |
|    | 2247.1074                                         | 2247.0872 | -0.0202 | -9   | 1900        | 1919 | EDCVEYVNPNSLLGRS<br>GPK   |     |   |    |        | Carbamidomethyl (C)[3]  |  |  |  |  | Mascot |
|    | 2299.1758                                         | 2299.1743 | -0.0015 | -1   | 1049        | 1069 | VNIGDRPAGCIAQLAMRE<br>TAR |     |   |    |        | Carbamidomethyl (C)[10] |  |  |  |  | Mascot |
|    | 2300.1956                                         | 2300.1643 | -0.0313 | -14  | 671         | 691  | TPEGTVKAHQLICYGLEEI<br>AK |     |   |    |        |                         |  |  |  |  | Mascot |
| 24 | iron-sulfur cluster assembly enzyme [Danio rerio] |           |         |      | gi 54261801 |      | 17796.2                   | 8.7 | 7 | 47 | 19.022 |                         |  |  |  |  |        |

Peptide Information

| Calc. Mass | Obsrv. Mass | ± da    | ± ppm | Start Seq. | End Seq. | Sequence                  | Ion Score | C. I. | % | Modification                              | Rank | Result Type |
|------------|-------------|---------|-------|------------|----------|---------------------------|-----------|-------|---|-------------------------------------------|------|-------------|
| 913.4447   | 913.4514    | 0.0067  | 7     | 10         | 18       | CASSALFSK                 |           |       |   |                                           |      | Mascot      |
| 960.5083   | 960.47      | -0.0383 | -40   | 1          | 9        | MALAAAAWR                 |           |       |   |                                           |      | Mascot      |
| 960.5359   | 960.47      | -0.0659 | -69   | 107        | 115      | GKSIDEALK                 | 10        |       | 0 |                                           |      | Mascot      |
| 1045.5636  | 1045.5554   | -0.0082 | -8    | 44         | 53       | NVGSLDKNAK                |           |       |   |                                           |      | Mascot      |
| 1862.9252  | 1862.9155   | -0.0097 | -5    | 19         | 34       | SMSLPPELRPACSYHKK         |           |       |   | Oxidation (M)[2]                          |      | Mascot      |
| 2247.1113  | 2247.0872   | -0.0241 | -11   | 86         | 106      | FKTFGCGSAIASSSLATE<br>WVK |           |       |   | Carbamidomethyl (C)[6]                    |      | Mascot      |
| 2283.1545  | 2283.1677   | 0.0132  | 6     | 124        | 143      | ELCLPPVKLHCSMLAEDA<br>IK  |           |       |   | Carbamidomethyl (C)[3], Oxidation (M)[13] |      | Mascot      |

25 PREDICTED: serine/threonine-protein kinase pim-3-like [Danio rerio] gi|326675215 23705.1 8.34 4 47 4.859 31 74.031

Peptide Information

| Calc. Mass | Obsrv. Mass | ± da | ± ppm | Start Seq. | End Seq. | Sequence | Ion Score | C. I. | % | Modification | Rank | Result Type |
|------------|-------------|------|-------|------------|----------|----------|-----------|-------|---|--------------|------|-------------|
|------------|-------------|------|-------|------------|----------|----------|-----------|-------|---|--------------|------|-------------|

|           |           |         |     |     |     |              |  |  |    |        |  |  |        |
|-----------|-----------|---------|-----|-----|-----|--------------|--|--|----|--------|--|--|--------|
| 991.4843  | 991.4547  | -0.0296 | -30 | 120 | 127 | LQEGEPYR     |  |  |    |        |  |  | Mascot |
| 991.4843  | 991.4547  | -0.0296 | -30 | 120 | 127 | LQEGEPYR     |  |  |    |        |  |  | Mascot |
| 1211.6531 | 1211.7084 | 0.0553  | 46  | 110 | 119 | SPYLGVTRYR   |  |  |    |        |  |  | Mascot |
| 1287.7015 | 1287.6616 | -0.0399 | -31 | 44  | 55  | KNNGLLSESVAR |  |  |    |        |  |  | Mascot |
| 1287.7015 | 1287.6616 | -0.0399 | -31 | 44  | 55  | KNNGLLSESVAR |  |  | 31 | 74.031 |  |  | Mascot |
| 1364.7419 | 1364.6876 | -0.0543 | -40 | 184 | 195 | TGPVLEEIIHK  |  |  |    |        |  |  | Mascot |
| 1364.7419 | 1364.6876 | -0.0543 | -40 | 184 | 195 | TGPVLEEIIHK  |  |  |    |        |  |  | Mascot |

26 novel protein similar to vertebrate leucine-zipper-like transcription regulator 1 (LZTR1) [Danio re  
gi|169145720 88951.8 5.93 13 47 4.859

#### Peptide Information

| Calc. Mass | Obsrv. Mass | ± da    | ± ppm | Start Seq. | End Seq. | Sequence                                | Ion Score | C. I. % | Modification                             | Rank | Result Type |
|------------|-------------|---------|-------|------------|----------|-----------------------------------------|-----------|---------|------------------------------------------|------|-------------|
| 850.4893   | 850.5349    | 0.0456  | 54    | 571        | 577      | KQPPPPR                                 |           |         |                                          |      | Mascot      |
| 897.3956   | 897.4584    | 0.0628  | 70    | 1          | 8        | FPGAMSK                                 |           |         | Carbamidomethyl (C)[7]                   |      | Mascot      |
| 913.3906   | 913.4514    | 0.0608  | 67    | 1          | 8        | FPGAMSK                                 |           |         | Carbamidomethyl (C)[7], Oxidation (M)[5] |      | Mascot      |
| 991.5432   | 991.4547    | -0.0885 | -89   | 261        | 269      | GSPPPPQRR                               |           |         |                                          |      | Mascot      |
| 991.5432   | 991.4547    | -0.0885 | -89   | 261        | 269      | GSPPPPQRR                               |           |         |                                          |      | Mascot      |
| 1013.3914  | 1013.4352   | 0.0438  | 43    | 771        | 779      | QCTEMSSDI                               |           |         |                                          |      | Mascot      |
| 1088.5557  | 1088.5405   | -0.0152 | -14   | 535        | 543      | EHCLNFVVK                               | 2         | 0       |                                          |      | Mascot      |
| 1088.5557  | 1088.5405   | -0.0152 | -14   | 535        | 543      | EHCLNFVVK                               |           |         |                                          |      | Mascot      |
| 1333.6569  | 1333.6947   | 0.0378  | 28    | 544        | 554      | ESHFNQVIMTK                             |           |         |                                          |      | Mascot      |
| 1382.6852  | 1382.7712   | 0.086   | 62    | 173        | 184      | LWIFAGYDGNAR                            |           |         |                                          |      | Mascot      |
| 1475.7939  | 1475.7458   | -0.0481 | -33   | 730        | 741      | HCLHIIVHQFTK                            |           |         |                                          |      | Mascot      |
| 1493.7781  | 1493.723    | -0.0551 | -37   | 77         | 88       | NMLNDLLRFDVK                            |           |         | Oxidation (M)[2]                         |      | Mascot      |
| 1865.8422  | 1865.9209   | 0.0787  | 42    | 89         | 105      | DCSWCRAFTTGTTPAPR                       |           |         |                                          |      | Mascot      |
| 2211.0652  | 2211.0981   | 0.0329  | 15    | 369        | 385      | LWENRQFCDFEFILGER                       |           |         | Carbamidomethyl (C)[8]                   |      | Mascot      |
| 2225.1018  | 2225.1101   | 0.0083  | 4     | 65         | 84       | DAIYVFGDNGKNMLND<br>LLR                 |           |         |                                          |      | Mascot      |
| 3467.8369  | 3467.9175   | 0.0806  | 23    | 596        | 627      | AYLEGAGHEFCDIILLD<br>G<br>HPRPAHKAILAAR |           |         |                                          |      | Mascot      |

27 ATPase, Ca++ transporting, cardiac muscle, fast twitch 1 like [Danio rerio]  
gi|117606266 108861.1 5.05 16 46 0

#### Peptide Information

| Calc. Mass | Obsrv. Mass | ± da    | ± ppm | Start Seq. | End Seq. | Sequence | Ion Score | C. I. % | Modification | Rank | Result Type |
|------------|-------------|---------|-------|------------|----------|----------|-----------|---------|--------------|------|-------------|
| 911.4944   | 911.3931    | -0.1013 | -111  | 676        | 683      | VEPSHKSK |           |         |              |      | Mascot      |
| 911.4944   | 911.3931    | -0.1013 | -111  | 676        | 683      | VEPSHKSK |           |         |              |      | Mascot      |

|           |           |         |     |     |     |                                     |  |  |                            |  |  |        |
|-----------|-----------|---------|-----|-----|-----|-------------------------------------|--|--|----------------------------|--|--|--------|
| 913.4737  | 913.4514  | -0.0223 | -24 | 513 | 521 | GAPEGVIDR                           |  |  |                            |  |  | Mascot |
| 960.5546  | 960.47    | -0.0846 | -88 | 540 | 547 | DKIMNVIK                            |  |  |                            |  |  | Mascot |
| 960.5546  | 960.47    | -0.0846 | -88 | 540 | 547 | DKIMNVIK                            |  |  |                            |  |  | Mascot |
| 1013.505  | 1013.4352 | -0.0698 | -69 | 482 | 489 | NFTLEFSR                            |  |  |                            |  |  | Mascot |
| 1023.4993 | 1023.447  | -0.0523 | -51 | 389 | 397 | YTPEGEVTK                           |  |  |                            |  |  | Mascot |
| 1045.5524 | 1045.5554 | 0.003   | 3   | 111 | 120 | NAESAIEALK                          |  |  |                            |  |  | Mascot |
| 1165.5735 | 1165.7374 | 0.1639  | 141 | 253 | 262 | LDEFGEQLSK                          |  |  |                            |  |  | Mascot |
| 1234.646  | 1234.6725 | 0.0265  | 21  | 602 | 612 | KEVTGSIELCR                         |  |  |                            |  |  | Mascot |
| 1287.709  | 1287.6616 | -0.0474 | -37 | 558 | 569 | CLALATRDSPLK                        |  |  |                            |  |  | Mascot |
| 1287.709  | 1287.6616 | -0.0474 | -37 | 558 | 569 | CLALATRDSPLK                        |  |  |                            |  |  | Mascot |
| 1364.7361 | 1364.6876 | -0.0485 | -36 | 823 | 833 | EPLISGWLFFR                         |  |  |                            |  |  | Mascot |
| 1364.7361 | 1364.6876 | -0.0485 | -36 | 823 | 833 | EPLISGWLFFR                         |  |  |                            |  |  | Mascot |
| 1434.741  | 1434.7517 | 0.0107  | 7   | 509 | 521 | MFVKGAPEGVIDR                       |  |  | Oxidation (M)[1]           |  |  | Mascot |
| 1838.8875 | 1838.9    | 0.0125  | 7   | 335 | 352 | SLPSVETLGCTSVICSDK                  |  |  |                            |  |  | Mascot |
| 1957.9501 | 1958.0054 | 0.0553  | 28  | 636 | 653 | IGIFSEDEDVTGKAYTGR                  |  |  |                            |  |  | Mascot |
| 2299.113  | 2299.1743 | 0.0613  | 27  | 437 | 456 | VGEATETALCLVEKMN<br>VFK             |  |  | Carbamidomethyl (C)[10,11] |  |  | Mascot |
| 2362.073  | 2362.1738 | 0.1008  | 43  | 581 | 601 | FADYETDLTFVGCVGML<br>DPPR           |  |  | Oxidation (M)[16]          |  |  | Mascot |
| 3467.5649 | 3467.9175 | 0.3526  | 102 | 402 | 432 | VDCSQYDGLVELATICAL<br>CNDSSLDYNETKK |  |  | Carbamidomethyl (C)[3]     |  |  | Mascot |

28 PREDICTED: hypothetical protein LOC100007481 gi|326664865 157182.2 8.05 17 46 0  
[Danio rerio]

#### Peptide Information

| Calc. Mass | Obsrv. Mass | ± da    | ± ppm | Start Seq. | End Seq. | Sequence   | Ion Score | C. I. | % Modification         | Rank | Result Type |
|------------|-------------|---------|-------|------------|----------|------------|-----------|-------|------------------------|------|-------------|
| 864.4607   | 864.4876    | 0.0269  | 31    | 883        | 889      | VSVKEMR    |           |       | Oxidation (M)[6]       |      | Mascot      |
| 882.4719   | 882.5576    | 0.0857  | 97    | 684        | 690      | QFAEFLK    |           |       |                        |      | Mascot      |
| 943.4843   | 943.3997    | -0.0846 | -90   | 178        | 185      | TKDDIHSK   |           |       |                        |      | Mascot      |
| 960.4824   | 960.47      | -0.0124 | -13   | 569        | 576      | AVEGFFYK   |           |       |                        |      | Mascot      |
| 960.4996   | 960.47      | -0.0296 | -31   | 1271       | 1278     | DIVTVEER   | 12        | 0     |                        |      | Mascot      |
| 984.4454   | 984.419     | -0.0264 | -27   | 290        | 297      | VFSEEMAR   |           |       | Oxidation (M)[6]       |      | Mascot      |
| 991.5458   | 991.4547    | -0.0911 | -92   | 710        | 717      | VPDEKYLK   |           |       |                        |      | Mascot      |
| 991.5458   | 991.4547    | -0.0911 | -92   | 710        | 717      | VPDEKYLK   |           |       |                        |      | Mascot      |
| 1045.5173  | 1045.5554   | 0.0381  | 36    | 874        | 882      | QGSQSFVHR  |           |       |                        |      | Mascot      |
| 1088.5272  | 1088.5405   | 0.0133  | 12    | 282        | 289      | QFWLSHDR   |           |       |                        |      | Mascot      |
| 1088.5272  | 1088.5405   | 0.0133  | 12    | 282        | 289      | QFWLSHDR   |           |       |                        |      | Mascot      |
| 1118.551   | 1118.675    | 0.124   | 111   | 206        | 215      | CEDGLQVAVK |           |       | Carbamidomethyl (C)[1] |      | Mascot      |
| 1234.7155  | 1234.6725   | -0.043  | -35   | 919        | 928      | LIRYLSDNIK |           |       |                        |      | Mascot      |



|           |           |         |     |      |      |                         |  |  |  |                                            |  |        |
|-----------|-----------|---------|-----|------|------|-------------------------|--|--|--|--------------------------------------------|--|--------|
| 1475.7682 | 1475.7458 | -0.0224 | -15 | 931  | 942  | EYGHFQLPLPFK            |  |  |  |                                            |  | Mascot |
| 1489.7072 | 1489.8271 | 0.1199  | 80  | 1078 | 1089 | EVHCCLVMAKAR            |  |  |  | Carbamidomethyl (C)[4,5], Oxidation (M)[8] |  | Mascot |
| 1545.6783 | 1545.7278 | 0.0495  | 32  | 191  | 205  | KMGQGCGCSVYEGTR         |  |  |  | Oxidation (M)[2]                           |  | Mascot |
| 1865.9691 | 1865.9209 | -0.0482 | -26 | 857  | 873  | TALGWSIIGLCNPHLDR       |  |  |  |                                            |  | Mascot |
| 1883.8853 | 1883.8339 | -0.0514 | -27 | 267  | 281  | YIMVLEWPSPCINMR         |  |  |  | Oxidation (M)[3,14]                        |  | Mascot |
| 1883.8853 | 1883.8339 | -0.0514 | -27 | 267  | 281  | YIMVLEWPSPCINMR         |  |  |  | Oxidation (M)[3,14]                        |  | Mascot |
| 2299.1062 | 2299.1743 | 0.0681  | 30  | 665  | 683  | WNRIVVEELDMTGDYPS<br>FK |  |  |  |                                            |  | Mascot |

29 PREDICTED: g2/M phase-specific E3 ubiquitin-protein  
ligase-like, partial [Danio rerio] gi|326680912 55309.6 5.35 11 46 0

#### Peptide Information

| Calc. Mass | Obsrv. Mass | ± da    | ± ppm | Start Seq. | End Seq. | Sequence                 | Ion Score | C. I. | % Modification                            | Rank | Result Type |
|------------|-------------|---------|-------|------------|----------|--------------------------|-----------|-------|-------------------------------------------|------|-------------|
| 807.4511   | 807.3793    | -0.0718 | -89   | 465        | 470      | ILGYWR                   |           |       |                                           |      | Mascot      |
| 984.4818   | 984.419     | -0.0628 | -64   | 40         | 47       | IYIGSMER                 |           |       | Oxidation (M)[6]                          |      | Mascot      |
| 1045.4845  | 1045.5554   | 0.0709  | 68    | 480        | 488      | GLNIIFYCC                |           |       |                                           |      | Mascot      |
| 1088.5735  | 1088.5405   | -0.033  | -30   | 105        | 114      | NIPGTNTPFK               |           |       |                                           |      | Mascot      |
| 1088.5735  | 1088.5405   | -0.033  | -30   | 105        | 114      | NIPGTNTPFK               |           |       |                                           |      | Mascot      |
| 1320.5447  | 1320.5724   | 0.0277  | 21    | 2          | 12       | TETSSVDCFMK              |           |       | Carbamidomethyl (C)[8], Oxidation (M)[10] |      | Mascot      |
| 1325.6843  | 1325.7494   | 0.0651  | 49    | 259        | 269      | EFLTLLMDCLK              |           |       |                                           |      | Mascot      |
| 1325.6843  | 1325.7494   | 0.0651  | 49    | 259        | 269      | EFLTLLMDCLK              |           |       |                                           |      | Mascot      |
| 1333.7012  | 1333.6947   | -0.0065 | -5    | 215        | 226      | ANIWDGAVRGFK             |           |       |                                           |      | Mascot      |
| 1382.7058  | 1382.7712   | 0.0654  | 47    | 259        | 269      | EFLTLLMDCLK              |           |       | Carbamidomethyl (C)[9]                    |      | Mascot      |
| 1840.7719  | 1840.9342   | 0.1623  | 88    | 240        | 257      | FTDDEGSTEDAVDTGGP<br>K   |           |       |                                           |      | Mascot      |
| 1840.7719  | 1840.9342   | 0.1623  | 88    | 240        | 257      | FTDDEGSTEDAVDTGGP<br>K   |           |       |                                           |      | Mascot      |
| 1996.873   | 1997.0564   | 0.1834  | 92    | 240        | 258      | FTDDEGSTEDAVDTGGP<br>KR  |           |       |                                           |      | Mascot      |
| 2233.1035  | 2233.0735   | -0.03   | -13   | 282        | 300      | FLTFNNAVREDEYFLAG<br>R   |           |       |                                           |      | Mascot      |
| 2283.2344  | 2283.1677   | -0.0667 | -29   | 59         | 78       | RLPLEVETNWTSEQVLIA<br>GK |           |       |                                           |      | Mascot      |

30 PREDICTED: e3 ubiquitin-protein ligase BRE1A [Danio rerio] gi|189527718 115551 5.66 15 45 0

#### Peptide Information

| Calc. Mass | Obsrv. Mass | ± da    | ± ppm | Start Seq. | End Seq. | Sequence | Ion Score | C. I. | % Modification | Rank | Result Type |
|------------|-------------|---------|-------|------------|----------|----------|-----------|-------|----------------|------|-------------|
| 842.5206   | 842.5034    | -0.0172 | -20   | 61         | 67       | ALQIKNR  |           |       |                |      | Mascot      |
| 960.4744   | 960.47      | -0.0044 | -5    | 720        | 726      | ELEERER  | 15        |       | 0              |      | Mascot      |

|    |                                                   |           |         |     |              |     |                           |      |   |    |   |                          |  |  |        |
|----|---------------------------------------------------|-----------|---------|-----|--------------|-----|---------------------------|------|---|----|---|--------------------------|--|--|--------|
|    | 960.4744                                          | 960.47    | -0.0044 | -5  | 720          | 726 | ELEERER                   |      |   |    |   |                          |  |  | Mascot |
|    | 984.4818                                          | 984.419   | -0.0628 | -64 | 460          | 466 | KEYEMLR                   |      |   |    |   | Oxidation (M)[5]         |  |  | Mascot |
|    | 991.524                                           | 991.4547  | -0.0693 | -70 | 208          | 215 | NMVDQLKK                  |      |   |    |   | Oxidation (M)[2]         |  |  | Mascot |
|    | 991.524                                           | 991.4547  | -0.0693 | -70 | 208          | 215 | NMVDQLKK                  |      |   |    |   | Oxidation (M)[2]         |  |  | Mascot |
|    | 1045.5823                                         | 1045.5554 | -0.0269 | -26 | 786          | 793 | LMQQLREK                  |      |   |    |   |                          |  |  | Mascot |
|    | 1287.6791                                         | 1287.6616 | -0.0175 | -14 | 743          | 753 | SVEEQIDILNK               |      |   |    |   |                          |  |  | Mascot |
|    | 1287.6791                                         | 1287.6616 | -0.0175 | -14 | 743          | 753 | SVEEQIDILNK               |      |   |    |   |                          |  |  | Mascot |
|    | 1325.6155                                         | 1325.7494 | 0.1339  | 101 | 794          | 804 | DDANFKLMSEK               |      |   |    |   |                          |  |  | Mascot |
|    | 1325.6155                                         | 1325.7494 | 0.1339  | 101 | 794          | 804 | DDANFKLMSEK               |      |   |    |   |                          |  |  | Mascot |
|    | 1327.744                                          | 1327.7388 | -0.0052 | -4  | 886          | 896 | TQLEGVQQLR                |      |   |    |   |                          |  |  | Mascot |
|    | 1475.6268                                         | 1475.7458 | 0.119   | 81  | 975          | 985 | CFHVFCEFCVK               |      |   |    |   | Carbamidomethyl (C)[1,6] |  |  | Mascot |
|    | 1638.7826                                         | 1638.8528 | 0.0702  | 43  | 317          | 332 | VCGEASSVCGTITINK          |      |   |    |   | Carbamidomethyl (C)[2]   |  |  | Mascot |
|    | 1826.8514                                         | 1826.9703 | 0.1189  | 65  | 139          | 155 | SLKPGTPEPDGDSNQER         |      |   |    |   |                          |  |  | Mascot |
|    | 1826.8514                                         | 1826.9703 | 0.1189  | 65  | 139          | 155 | SLKPGTPEPDGDSNQER         |      |   |    |   |                          |  |  | Mascot |
|    | 1883.9821                                         | 1883.8339 | -0.1482 | -79 | 69           | 84  | LGEALDQRQVIEDELK          |      |   |    |   |                          |  |  | Mascot |
|    | 1883.9821                                         | 1883.8339 | -0.1482 | -79 | 69           | 84  | LGEALDQRQVIEDELK          |      |   |    |   |                          |  |  | Mascot |
|    | 1957.8668                                         | 1958.0054 | 0.1386  | 71  | 121          | 138 | RCDQSGSEPVESQPPEG<br>R    |      |   |    |   |                          |  |  | Mascot |
|    | 2299.0918                                         | 2299.1743 | 0.0825  | 36  | 243          | 262 | LCQLTDGLQQKHSMTS<br>ESR   |      |   |    |   |                          |  |  | Mascot |
|    | 2300.1816                                         | 2300.1643 | -0.0173 | -8  | 222          | 242 | DGGLWDVAVRLNALLTG<br>MNER |      |   |    |   |                          |  |  | Mascot |
| 31 | fin bud initiation factor precursor [Danio rerio] |           |         |     | gi 224922848 |     | 24213.1                   | 5.12 | 8 | 44 | 0 |                          |  |  |        |

Peptide Information

|    | Calc. Mass                                                 | Obsrv. Mass | ± da    | ± ppm | Start Seq.   | End Sequence Seq. |                     | Ion Score | C. I. | % Modification                           | Rank | Result Type |
|----|------------------------------------------------------------|-------------|---------|-------|--------------|-------------------|---------------------|-----------|-------|------------------------------------------|------|-------------|
|    | 842.3898                                                   | 842.5034    | 0.1136  | 135   | 57           | 62                | CQMLFK              |           |       | Carbamidomethyl (C)[1], Oxidation (M)[3] |      | Mascot      |
|    | 911.4655                                                   | 911.3931    | -0.0724 | -79   | 203          | 209               | LKNDYMK             |           |       |                                          |      | Mascot      |
|    | 911.4655                                                   | 911.3931    | -0.0724 | -79   | 203          | 209               | LKNDYMK             |           |       |                                          |      | Mascot      |
|    | 913.4962                                                   | 913.4514    | -0.0448 | -49   | 195          | 202               | SHGTRLKR            |           |       |                                          |      | Mascot      |
|    | 1007.5519                                                  | 1007.4515   | -0.1004 | -100  | 81           | 88                | DDFTIIKR            |           |       |                                          |      | Mascot      |
|    | 1088.6198                                                  | 1088.5405   | -0.0793 | -73   | 174          | 183               | ETLDISLGLK          |           |       |                                          |      | Mascot      |
|    | 1088.6198                                                  | 1088.5405   | -0.0793 | -73   | 174          | 183               | ETLDISLGLK          |           |       |                                          |      | Mascot      |
|    | 1489.6418                                                  | 1489.8271   | 0.1853  | 124   | 57           | 67                | CQMLFKMMDNR         |           |       | Carbamidomethyl (C)[1], Oxidation (M)[3] |      | Mascot      |
|    | 1994.0636                                                  | 1993.9551   | -0.1085 | -54   | 2            | 19                | GTMASPLFILIACLLSMR  |           |       | Carbamidomethyl (C)[13]                  |      | Mascot      |
|    | 2283.0808                                                  | 2283.1677   | 0.0869  | 38    | 69           | 87                | CTLDEDQDSVIRDDFTIIK |           |       | Carbamidomethyl (C)[1]                   |      | Mascot      |
| 32 | PREDICTED: hypothetical protein LOC100536975 [Danio rerio] |             |         |       | gi 326679271 |                   | 234171              | 8.98      | 25    | 44                                       | 0    |             |

# Peptide Information

| Calc. Mass | Obsrv. Mass | ± da    | ± ppm | Start Seq. | End Sequence Seq.           | Ion Score | C. I. % Modification                      | Rank | Result Type |
|------------|-------------|---------|-------|------------|-----------------------------|-----------|-------------------------------------------|------|-------------|
| 807.4722   | 807.3793    | -0.0929 | -115  | 572        | 578 AFTNKVK                 |           |                                           |      | Mascot      |
| 850.4205   | 850.5349    | 0.1144  | 135   | 201        | 207 AEFAR                   |           |                                           |      | Mascot      |
| 864.4131   | 864.4876    | 0.0745  | 86    | 1          | 8 MAEEALGK                  |           | Oxidation (M)[1]                          |      | Mascot      |
| 991.4439   | 991.4547    | 0.0108  | 11    | 1568       | 1575 DQDSNERK               |           |                                           |      | Mascot      |
| 991.4876   | 991.4547    | -0.0329 | -33   | 93         | 101 KAVEECNAK               |           |                                           |      | Mascot      |
| 996.5624   | 996.5899    | 0.0275  | 28    | 173        | 180 WIPAPERK                |           |                                           |      | Mascot      |
| 1013.4944  | 1013.4352   | -0.0592 | -58   | 1365       | 1372 HGRMEVER               |           |                                           |      | Mascot      |
| 1023.4934  | 1023.447    | -0.0464 | -45   | 816        | 822 EFIDWWK                 |           |                                           |      | Mascot      |
| 1088.5483  | 1088.5405   | -0.0078 | -7    | 259        | 266 RDWENLQK                |           |                                           |      | Mascot      |
| 1088.5483  | 1088.5405   | -0.0078 | -7    | 259        | 266 RDWENLQK                |           |                                           |      | Mascot      |
| 1118.6567  | 1118.675    | 0.0183  | 16    | 1004       | 1014 GVFAALGDIKK            |           |                                           |      | Mascot      |
| 1165.5887  | 1165.7374   | 0.1487  | 128   | 1450       | 1458 YSVEEWPKK              |           |                                           |      | Mascot      |
| 1211.6266  | 1211.7084   | 0.0818  | 68    | 1132       | 1142 NEVVDPSQVPK            |           |                                           |      | Mascot      |
| 1287.6903  | 1287.6616   | -0.0287 | -22   | 278        | 288 KIQLVDSVDDR             |           |                                           |      | Mascot      |
| 1287.6903  | 1287.6616   | -0.0287 | -22   | 278        | 288 KIQLVDSVDDR             |           |                                           |      | Mascot      |
| 1325.7113  | 1325.7494   | 0.0381  | 29    | 1284       | 1294 FHRSLTPPGWK            |           |                                           |      | Mascot      |
| 1325.7113  | 1325.7494   | 0.0381  | 29    | 1284       | 1294 FHRSLTPPGWK            |           |                                           |      | Mascot      |
| 1364.6475  | 1364.6876   | 0.0401  | 29    | 189        | 199 LKECSNELESR             |           | Carbamidomethyl (C)[4]                    |      | Mascot      |
| 1364.7307  | 1364.6876   | -0.0431 | -32   | 38         | 48 LIESELKEEFK              |           |                                           |      | Mascot      |
| 1382.5927  | 1382.7712   | 0.1785  | 129   | 447        | 460 DSTEAGCIVCGAEK          |           |                                           |      | Mascot      |
| 1493.8984  | 1493.723    | -0.1754 | -117  | 644        | 657 ITLVVHGVGKMAIR          |           |                                           |      | Mascot      |
| 1827.002   | 1826.9703   | -0.0317 | -17   | 1644       | 1660 AVPIPCSAWVSMLLAR       |           |                                           |      | Mascot      |
| 1827.0334  | 1826.9703   | -0.0631 | -35   | 1143       | 1158 ESISQSKTIILPNQLR       |           |                                           |      | Mascot      |
| 1838.783   | 1838.9      | 0.117   | 64    | 839        | 855 CGNCQPGGKEMTLAEER       |           | Oxidation (M)[11]                         |      | Mascot      |
| 1840.9525  | 1840.9342   | -0.0183 | -10   | 1839       | 1856 IHPASSPHRNGAAEAAR      |           |                                           |      | Mascot      |
| 1840.9525  | 1840.9342   | -0.0183 | -10   | 1839       | 1856 IHPASSPHRNGAAEAAR      |           |                                           |      | Mascot      |
| 1884.0234  | 1883.8339   | -0.1895 | -101  | 1644       | 1660 AVPIPCSAWVSMLLAR       |           | Carbamidomethyl (C)[7]                    |      | Mascot      |
| 1884.0234  | 1883.8339   | -0.1895 | -101  | 1644       | 1660 AVPIPCSAWVSMLLAR       |           | Carbamidomethyl (C)[7]                    |      | Mascot      |
| 1900.0183  | 1899.8328   | -0.1855 | -98   | 1644       | 1660 AVPIPCSAWVSMLLAR       |           | Carbamidomethyl (C)[7], Oxidation (M)[13] |      | Mascot      |
| 2211.0215  | 2211.0981   | 0.0766  | 35    | 816        | 833 EFIDWWKWD SIGTACEPK     |           |                                           |      | Mascot      |
| 2299.1758  | 2299.1743   | -0.0015 | -1    | 1049       | 1069 VNIGDRPAGCIAQLAMRE TAR |           | Carbamidomethyl (C)[10]                   |      | Mascot      |
| 2300.1956  | 2300.1643   | -0.0313 | -14   | 671        | 691 TPEGTVKAHQICYLEEI AK    |           |                                           |      | Mascot      |

domain containing (NIFUN) [Danio rerio]

| Peptide Information                 |             |         |       |             |          |                        |           |       |                                           |      |        |        |  |
|-------------------------------------|-------------|---------|-------|-------------|----------|------------------------|-----------|-------|-------------------------------------------|------|--------|--------|--|
| Calc. Mass                          | Obsrv. Mass | ± da    | ± ppm | Start Seq.  | End Seq. | Sequence               | Ion Score | C. I. | % Modification                            | Rank | Result | Type   |  |
| 913.4447                            | 913.4514    | 0.0067  | 7     | 10          | 18       | CASSALFSK              |           |       |                                           |      |        | Mascot |  |
| 960.5359                            | 960.47      | -0.0659 | -69   | 107         | 115      | GKSIDEALK              | 10        |       | 0                                         |      |        | Mascot |  |
| 960.5359                            | 960.47      | -0.0659 | -69   | 107         | 115      | GKSIDEALK              |           |       |                                           |      |        | Mascot |  |
| 1045.5636                           | 1045.5554   | -0.0082 | -8    | 44          | 53       | NVGSLDKNAK             |           |       |                                           |      |        | Mascot |  |
| 1069.5459                           | 1069.5527   | 0.0068  | 6     | 9           | 18       | RCASSALFSK             |           |       |                                           |      |        | Mascot |  |
| 2247.1113                           | 2247.0872   | -0.0241 | -11   | 86          | 106      | FKTFGCGSAIASSSLATE WVK |           |       | Carbamidomethyl (C)[6]                    |      |        | Mascot |  |
| 2283.1545                           | 2283.1677   | 0.0132  | 6     | 124         | 143      | ELCLPPVKLHCSMLAEDA IK  |           |       | Carbamidomethyl (C)[3], Oxidation (M)[13] |      |        | Mascot |  |
| KIAA0650-like protein [Danio rerio] |             |         |       | gi 57164644 |          | 131026.7               | 7.89      | 12    | 42                                        | 0    | 21     | 0      |  |

| Peptide Information                                                    |             |         |       |              |          |                         |           |       |                           |                  |
|------------------------------------------------------------------------|-------------|---------|-------|--------------|----------|-------------------------|-----------|-------|---------------------------|------------------|
| Calc. Mass                                                             | Obsrv. Mass | ± da    | ± ppm | Start Seq.   | End Seq. | Sequence                | Ion Score | C. I. | % Modification            | Rank Result Type |
| 850.5508                                                               | 850.5349    | -0.0159 | -19   | 906          | 913      | VAHLALVK                |           |       |                           | Mascot           |
| 897.4689                                                               | 897.4584    | -0.0105 | -12   | 199          | 205      | FNIPNHR                 |           |       |                           | Mascot           |
| 913.5464                                                               | 913.4514    | -0.095  | -104  | 1058         | 1065     | APSIEKLR                |           |       |                           | Mascot           |
| 960.5472                                                               | 960.47      | -0.0772 | -80   | 813          | 820      | DRLSQTIK                |           |       |                           | Mascot           |
| 960.5472                                                               | 960.47      | -0.0772 | -80   | 813          | 820      | DRLSQTIK                |           |       |                           | Mascot           |
| 984.4454                                                               | 984.419     | -0.0264 | -27   | 556          | 563      | LCVEYDSR                |           |       |                           | Mascot           |
| 991.4665                                                               | 991.4547    | -0.0118 | -12   | 890          | 897      | CTVPDPFR                | 21        | 0     | Carbamidomethyl (C)[1]    | Mascot           |
| 991.4665                                                               | 991.4547    | -0.0118 | -12   | 890          | 897      | CTVPDPFR                |           |       | Carbamidomethyl (C)[1]    | Mascot           |
| 996.5359                                                               | 996.5899    | 0.054   | 54    | 1            | 9        | TSFSIKEGK               |           |       |                           | Mascot           |
| 1051.6398                                                              | 1051.7042   | 0.0644  | 61    | 696          | 704      | TLLYSLTLK               |           |       |                           | Mascot           |
| 1069.6477                                                              | 1069.5527   | -0.095  | -89   | 213          | 221      | QLRVLPSTR               |           |       |                           | Mascot           |
| 1165.5782                                                              | 1165.7374   | 0.1592  | 137   | 1047         | 1057     | CNGKFGGLQNK             |           |       |                           | Mascot           |
| 1234.65                                                                | 1234.6725   | 0.0225  | 18    | 510          | 521      | ACFVLEAISGPK            |           |       |                           | Mascot           |
| 1862.9099                                                              | 1862.9155   | 0.0056  | 3     | 602          | 620      | GLASGSCPPAAASTLKC<br>SK |           |       | Carbamidomethyl (C)[7,17] | Mascot           |
| PREDICTED: cGMP-dependent protein kinase 1-like, partial [Danio rerio] |             |         |       | gi 326670354 |          | 42074.6                 | 5.56      | 9     | 41                        | 0                |

| Peptide Information |             |      |       |            |          |          |           |       |                |                  |
|---------------------|-------------|------|-------|------------|----------|----------|-----------|-------|----------------|------------------|
| Calc. Mass          | Obsrv. Mass | ± da | ± ppm | Start Seq. | End Seq. | Sequence | Ion Score | C. I. | % Modification | Rank Result Type |

|    |                                                                          |           |           |         |      |     |     |                            |          |      |    |    |                   |    |   |  |  |  |        |
|----|--------------------------------------------------------------------------|-----------|-----------|---------|------|-----|-----|----------------------------|----------|------|----|----|-------------------|----|---|--|--|--|--------|
|    |                                                                          | 943.5319  | 943.3997  | -0.1322 | -140 | 15  | 21  | IEELRQR                    |          |      |    |    |                   |    |   |  |  |  | Mascot |
|    |                                                                          | 960.4744  | 960.47    | -0.0044 | -5   | 284 | 292 | VTEGLDNGR                  |          |      |    |    |                   |    |   |  |  |  | Mascot |
|    |                                                                          | 960.4744  | 960.47    | -0.0044 | -5   | 284 | 292 | VTEGLDNGR                  |          |      |    |    |                   |    |   |  |  |  | Mascot |
|    |                                                                          | 984.522   | 984.419   | -0.103  | -105 | 353 | 361 | QAIQSPGQR                  |          |      |    |    |                   |    |   |  |  |  | Mascot |
|    |                                                                          | 1069.5524 | 1069.5527 | 0.0003  | 0    | 339 | 348 | SDSSSKFALK                 |          |      |    |    |                   |    |   |  |  |  | Mascot |
|    |                                                                          | 1088.5695 | 1088.5405 | -0.029  | -27  | 283 | 292 | KVTEGLDNGR                 |          |      |    |    |                   |    |   |  |  |  | Mascot |
|    |                                                                          | 1088.5695 | 1088.5405 | -0.029  | -27  | 284 | 293 | VTEGLDNGRK                 |          |      |    |    |                   |    |   |  |  |  | Mascot |
|    |                                                                          | 1638.7648 | 1638.8528 | 0.088   | 54   | 232 | 246 | QCVGEDSVMVCVLTR            |          |      |    |    |                   |    |   |  |  |  | Mascot |
|    |                                                                          | 1840.882  | 1840.9342 | 0.0522  | 28   | 127 | 142 | DQLQCLVDSAYPTMLK           |          |      |    |    | Oxidation (M)[14] |    |   |  |  |  | Mascot |
|    |                                                                          | 1840.882  | 1840.9342 | 0.0522  | 28   | 127 | 142 | DQLQCLVDSAYPTMLK           |          |      |    |    | Oxidation (M)[14] |    |   |  |  |  | Mascot |
|    |                                                                          | 2247.1145 | 2247.0872 | -0.0273 | -12  | 49  | 70  | LRLSSAPGVSTATAGMD<br>QGQQR |          |      |    |    | Oxidation (M)[16] |    |   |  |  |  | Mascot |
| 36 | PREDICTED: WD repeat- and FYVE domain-containing protein 4 [Danio rerio] |           |           |         |      |     |     | gi 326673033               | 526148.3 | 6.32 | 29 | 41 | 0                 | 17 | 0 |  |  |  |        |

|    |                                        |           |         |     |      |             |                                    |      |   |    |   |                             |  |  |  |        |
|----|----------------------------------------|-----------|---------|-----|------|-------------|------------------------------------|------|---|----|---|-----------------------------|--|--|--|--------|
|    | 1823.8633                              | 1823.9175 | 0.0542  | 30  | 12   | 26          | ASKSDCLYYLEQFTR                    |      |   |    |   |                             |  |  |  | Mascot |
|    | 1839.0044                              | 1838.9    | -0.1044 | -57 | 2811 | 2828        | KSCLVTVYLNATAIGTGK                 |      |   |    |   |                             |  |  |  | Mascot |
|    | 1866.0154                              | 1865.9209 | -0.0945 | -51 | 1591 | 1607        | NLKP GDIV IIMDPTAPR                |      |   |    |   | Oxidation (M)[11]           |  |  |  | Mascot |
|    | 1958.0276                              | 1958.0054 | -0.0222 | -11 | 2717 | 2733        | FSSACESHVRLT TVVR                  |      |   |    |   | Carbamidomethyl (C)[5]      |  |  |  | Mascot |
|    | 1993.9907                              | 1993.9551 | -0.0356 | -18 | 2521 | 2537        | QIMCEFGLLSTLLTHCK                  |      |   |    |   | Carbamidomethyl (C)[4]      |  |  |  | Mascot |
|    | 2224.9355                              | 2225.1101 | 0.1746  | 78  | 257  | 274         | HL CFGCLSTSHMSRDCE<br>K            |      |   |    |   | Carbamidomethyl (C)[3,6,16] |  |  |  | Mascot |
|    | 2233.0127                              | 2233.0735 | 0.0608  | 27  | 3183 | 3201        | SWSFECLSCICPGFEVLQ<br>K            |      |   |    |   | Carbamidomethyl (C)[6]      |  |  |  | Mascot |
|    | 2283.1948                              | 2283.1677 | -0.0271 | -12 | 2024 | 2043        | IIQSSFMRSSNTVICSQIL<br>R           |      |   |    |   |                             |  |  |  | Mascot |
|    | 2284.1389                              | 2284.168  | 0.0291  | 13  | 2349 | 2369        | LGEALLHLGCFQKGD PV<br>ESDR         |      |   |    |   |                             |  |  |  | Mascot |
|    | 2299.1772                              | 2299.1743 | -0.0029 | -1  | 2789 | 2807        | CAKHLIPGQWHHLCLVM<br>AK            |      |   |    |   | Carbamidomethyl (C)[1,14]   |  |  |  | Mascot |
|    | 2300.1206                              | 2300.1643 | 0.0437  | 19  | 910  | 927         | NYGWDETVPQELLHRWT<br>R             |      |   |    |   |                             |  |  |  | Mascot |
|    | 3337.6045                              | 3337.7432 | 0.1387  | 42  | 3638 | 3666        | EGQVSMADV SPLWEEQ<br>ATKSWQLFIDSQK |      |   |    |   |                             |  |  |  | Mascot |
| 37 | homeobox protein Hox-C1a [Danio rerio] |           |         |     |      | gi 18858843 | 34195.5                            | 8.59 | 8 | 40 | 0 |                             |  |  |  |        |

Peptide Information

| Calc. Mass | Obsrv. Mass | ± da    | ± ppm | Start Seq. | End Seq. | Sequence                            | Ion Score | C. I. | % Modification         | Rank | Result Type |
|------------|-------------|---------|-------|------------|----------|-------------------------------------|-----------|-------|------------------------|------|-------------|
| 807.3995   | 807.3793    | -0.0202 | -25   | 143        | 149      | TYDGPVR                             |           |       |                        |      | Mascot      |
| 850.4087   | 850.5349    | 0.1262  | 148   | 196        | 202      | CSDRELK                             |           |       |                        |      | Mascot      |
| 991.4778   | 991.4547    | -0.0231 | -23   | 17         | 25       | GYHATGVMR                           |           |       |                        |      | Mascot      |
| 991.4778   | 991.4547    | -0.0231 | -23   | 17         | 25       | GYHATGVMR                           |           |       |                        |      | Mascot      |
| 1007.4727  | 1007.4515   | -0.0212 | -21   | 17         | 25       | GYHATGVMR                           |           |       | Oxidation (M)[8]       |      | Mascot      |
| 1839.0334  | 1838.9      | -0.1334 | -73   | 245        | 260      | RIEIANPLQLSETQVK                    |           |       |                        |      | Mascot      |
| 1865.8619  | 1865.9209   | 0.059   | 32    | 276        | 293      | EGLAQGLMLISGCDEDS<br>K              |           |       |                        |      | Mascot      |
| 1993.9569  | 1993.9551   | -0.0018 | -1    | 276        | 294      | EGLAQGLMLISGCDEDS<br>KK             |           |       |                        |      | Mascot      |
| 2247.0459  | 2247.0872   | 0.0413  | 18    | 123        | 142      | TFSSAHCELGPNNTQT<br>EVR             |           |       | Carbamidomethyl (C)[7] |      | Mascot      |
| 3467.6033  | 3467.9175   | 0.3142  | 91    | 150        | 180      | HSAVEDDNTGHGALNTL<br>NETLHSGKTFEWMR |           |       |                        |      | Mascot      |

38 Si:dkey-98f17.2 protein [Danio rerio] gi|161611480 88692.7 5.92 12 40 0

Peptide Information

| Calc. Mass | Obsrv. Mass | ± da    | ± ppm | Start Seq. | End Seq. | Sequence  | Ion Score | C. I. | % Modification | Rank | Result Type |
|------------|-------------|---------|-------|------------|----------|-----------|-----------|-------|----------------|------|-------------|
| 850.4893   | 850.5349    | 0.0456  | 54    | 568        | 574      | KQQPPPR   |           |       |                |      | Mascot      |
| 991.5432   | 991.4547    | -0.0885 | -89   | 258        | 266      | GSPPPPQRR |           |       |                |      | Mascot      |
| 991.5432   | 991.4547    | -0.0885 | -89   | 258        | 266      | GSPPPPQRR |           |       |                |      | Mascot      |

|           |           |         |     |     |     |                                      |   |   |  |  |  |                        |  |  |  |  |        |
|-----------|-----------|---------|-----|-----|-----|--------------------------------------|---|---|--|--|--|------------------------|--|--|--|--|--------|
| 1013.3914 | 1013.4352 | 0.0438  | 43  | 768 | 776 | QCTEMSSDI                            |   |   |  |  |  |                        |  |  |  |  | Mascot |
| 1088.5557 | 1088.5405 | -0.0152 | -14 | 532 | 540 | EHCLNFVVK                            | 2 | 0 |  |  |  |                        |  |  |  |  | Mascot |
| 1088.5557 | 1088.5405 | -0.0152 | -14 | 532 | 540 | EHCLNFVVK                            |   |   |  |  |  |                        |  |  |  |  | Mascot |
| 1333.6569 | 1333.6947 | 0.0378  | 28  | 541 | 551 | ESHFNQVIMTK                          |   |   |  |  |  |                        |  |  |  |  | Mascot |
| 1382.6852 | 1382.7712 | 0.086   | 62  | 169 | 180 | LWIFAGYDGNAR                         |   |   |  |  |  |                        |  |  |  |  | Mascot |
| 1475.7939 | 1475.7458 | -0.0481 | -33 | 727 | 738 | HCLHIIVHQFTK                         |   |   |  |  |  |                        |  |  |  |  | Mascot |
| 1493.7781 | 1493.723  | -0.0551 | -37 | 73  | 84  | NMLNDLLRFDVK                         |   |   |  |  |  | Oxidation (M)[2]       |  |  |  |  | Mascot |
| 1865.8422 | 1865.9209 | 0.0787  | 42  | 85  | 101 | DCSWCRAFTTGTTPAPR                    |   |   |  |  |  |                        |  |  |  |  | Mascot |
| 2211.0652 | 2211.0981 | 0.0329  | 15  | 366 | 382 | LWENRQFCDFEFILGER                    |   |   |  |  |  | Carbamidomethyl (C)[8] |  |  |  |  | Mascot |
| 2225.1018 | 2225.1101 | 0.0083  | 4   | 61  | 80  | DAIVVFGDNGKNMLND<br>LLR              |   |   |  |  |  |                        |  |  |  |  | Mascot |
| 3467.8369 | 3467.9175 | 0.0806  | 23  | 593 | 624 | AYLEGAGHEFCDIILLLDG<br>HPRPAHKAILAAR |   |   |  |  |  |                        |  |  |  |  | Mascot |

39 PREDICTED: hypothetical protein LOC797378 [Danio rerio] gi|292622805 72531.1 6.46 4 38 0 31 74.031

#### Peptide Information

| Calc. Mass | Obsrv. Mass | ± da    | ± ppm | Start Seq. | End Seq. | Sequence              | Ion Score | C. I.  | % Modification         | Rank | Result Type |
|------------|-------------|---------|-------|------------|----------|-----------------------|-----------|--------|------------------------|------|-------------|
| 882.4501   | 882.5576    | 0.1075  | 122   | 1          | 7        | MSTRPFK               |           |        | Oxidation (M)[1]       |      | Mascot      |
| 1024.5132  | 1024.5726   | 0.0594  | 58    | 8          | 16       | FLAGIESCK             |           |        | Carbamidomethyl (C)[8] |      | Mascot      |
| 1287.7015  | 1287.6616   | -0.0399 | -31   | 566        | 577      | KNNGLLSESVAR          |           |        |                        |      | Mascot      |
| 1287.7015  | 1287.6616   | -0.0399 | -31   | 566        | 577      | KNNGLLSESVAR          | 31        | 74.031 |                        |      | Mascot      |
| 2224.9221  | 2225.1101   | 0.188   | 84    | 51         | 68       | LSEMENTRDTMTSYEE<br>K |           |        | Oxidation (M)[4,12]    |      | Mascot      |

40 novel protein similar to retinol saturase (all-trans-retinol 13,14-reductase) (retsat, zgc:123334) gi|169154572 67886.6 7.85 12 38 0

#### Peptide Information

| Calc. Mass | Obsrv. Mass | ± da    | ± ppm | Start Seq. | End Seq. | Sequence         | Ion Score | C. I. | % Modification                            | Rank | Result Type |
|------------|-------------|---------|-------|------------|----------|------------------|-----------|-------|-------------------------------------------|------|-------------|
| 850.4516   | 850.5349    | 0.0833  | 98    | 236        | 243      | TSTSEVVK         |           |       |                                           |      | Mascot      |
| 984.5295   | 984.419     | -0.1105 | -112  | 171        | 178      | QMEAHLKK         |           |       |                                           |      | Mascot      |
| 991.579    | 991.4547    | -0.1243 | -125  | 201        | 208      | VRLLCMLK         |           |       | Oxidation (M)[6]                          |      | Mascot      |
| 991.579    | 991.4547    | -0.1243 | -125  | 201        | 208      | VRLLCMLK         |           |       | Oxidation (M)[6]                          |      | Mascot      |
| 1024.5165  | 1024.5726   | 0.0561  | 55    | 193        | 200      | IMKICSEK         |           |       | Carbamidomethyl (C)[5], Oxidation (M)[2]  |      | Mascot      |
| 1333.7699  | 1333.6947   | -0.0752 | -56   | 304        | 316      | HGGKVLVNAPVSR    |           |       |                                           |      | Mascot      |
| 1823.9949  | 1823.9175   | -0.0774 | -42   | 448        | 463      | FPGQSRMVIHTLVNPK |           |       |                                           |      | Mascot      |
| 1838.8577  | 1838.9      | 0.0423  | 23    | 485        | 498      | MRFANHLFDWACVR   |           |       | Carbamidomethyl (C)[12], Oxidation (M)[1] |      | Mascot      |
| 1840.9156  | 1840.9342   | 0.0186  | 10    | 266        | 281      | NSSCMIDALLHHSKR  |           |       | Oxidation (M)[5]                          |      | Mascot      |

|    |                                        |           |         |     |              |     |                                 |      |    |    |   |  |  |                                            |        |
|----|----------------------------------------|-----------|---------|-----|--------------|-----|---------------------------------|------|----|----|---|--|--|--------------------------------------------|--------|
|    | 1840.9156                              | 1840.9342 | 0.0186  | 10  | 266          | 281 | NSSCMIDALLLHHSKR                |      |    |    |   |  |  | Oxidation (M)[5]                           | Mascot |
|    | 2211.1248                              | 2211.0981 | -0.0267 | -12 | 1            | 16  | MWWILLFLEWFVDWAR                |      |    |    |   |  |  |                                            | Mascot |
|    | 2282.9944                              | 2283.1677 | 0.1733  | 76  | 404          | 422 | LYKGNNVDEMMEEFASDK              |      |    |    |   |  |  |                                            | Mascot |
|    | 2298.9893                              | 2299.1743 | 0.185   | 80  | 404          | 422 | LYKGNNVDEMMEEFASDK              |      |    |    |   |  |  | Oxidation (M)[10]                          | Mascot |
|    | 3337.5615                              | 3337.7432 | 0.1817  | 54  | 552          | 582 | NLYLSGQDIFTAGYSGALHGGFLCASTVMDR |      |    |    |   |  |  | Carbamidomethyl (C)[24], Oxidation (M)[29] | Mascot |
|    | 3338.6799                              | 3338.7556 | 0.0757  | 23  | 1            | 25  | MWWILLFLEWFVDWARGTFWYLFGR       |      |    |    |   |  |  |                                            | Mascot |
| 41 | Si:dkeyp-117h8.4 protein [Danio rerio] |           |         |     | gi 158253430 |     | 74521.1                         | 9.27 | 11 | 38 | 0 |  |  |                                            |        |

#### Peptide Information

| Calc. Mass | Obsrv. Mass | ± da    | ± ppm | Start Seq. | End Seq. | Sequence                   | Ion Score | C. I. | % | Modification | Rank | Result Type |
|------------|-------------|---------|-------|------------|----------|----------------------------|-----------|-------|---|--------------|------|-------------|
| 864.4825   | 864.4876    | 0.0051  | 6     | 654        | 660      | LQYSLLQ                    |           |       |   |              |      | Mascot      |
| 943.5206   | 943.3997    | -0.1209 | -128  | 405        | 413      | QINSIGSPK                  |           |       |   |              |      | Mascot      |
| 960.5109   | 960.47      | -0.0409 | -43   | 344        | 352      | AGLSITDQR                  |           |       |   |              |      | Mascot      |
| 960.5109   | 960.47      | -0.0409 | -43   | 344        | 352      | AGLSITDQR                  |           |       |   |              |      | Mascot      |
| 1088.5458  | 1088.5405   | -0.0053 | -5    | 489        | 496      | LYHHFICR                   |           |       |   |              |      | Mascot      |
| 1088.5458  | 1088.5405   | -0.0053 | -5    | 489        | 496      | LYHHFICR                   |           |       |   |              |      | Mascot      |
| 1118.6204  | 1118.675    | 0.0546  | 49    | 382        | 392      | SFIGVLSPNGK                |           |       |   |              |      | Mascot      |
| 1142.5551  | 1142.5176   | -0.0375 | -33   | 1          | 9        | MPLYTDQFK                  |           |       |   |              |      | Mascot      |
| 1382.6699  | 1382.7712   | 0.1013  | 73    | 567        | 577      | HFQLTDLHEDK                |           |       |   |              |      | Mascot      |
| 1826.8854  | 1826.9703   | 0.0849  | 46    | 11         | 25       | NNDVFRNTMEAFQK             |           |       |   |              |      | Mascot      |
| 1826.8854  | 1826.9703   | 0.0849  | 46    | 11         | 25       | NNDVFRNTMEAFQK             |           |       |   |              |      | Mascot      |
| 2233.1096  | 2233.0735   | -0.0361 | -16   | 267        | 287      | NSVDVSGVTDQSAWIDV<br>ALTR  |           |       |   |              |      | Mascot      |
| 2300.1228  | 2300.1643   | 0.0415  | 18    | 516        | 537      | ESFQSPGFSSSSMSALA<br>LTPLR |           |       |   |              |      | Mascot      |
| 2362.2461  | 2362.1738   | -0.0723 | -31   | 344        | 365      | AGLSITDQRETSIISQLSS<br>LDK |           |       |   |              |      | Mascot      |

|    |                                                         |  |  |  |              |  |         |      |   |    |   |    |        |  |
|----|---------------------------------------------------------|--|--|--|--------------|--|---------|------|---|----|---|----|--------|--|
| 42 | PREDICTED: hypothetical protein LOC796277 [Danio rerio] |  |  |  | gi 292622807 |  | 79431.9 | 5.54 | 4 | 38 | 0 | 31 | 74.031 |  |
|----|---------------------------------------------------------|--|--|--|--------------|--|---------|------|---|----|---|----|--------|--|

#### Peptide Information

| Calc. Mass | Obsrv. Mass | ± da    | ± ppm | Start Seq. | End Seq. | Sequence          | Ion Score | C. I.  | % | Modification           | Rank | Result Type |
|------------|-------------|---------|-------|------------|----------|-------------------|-----------|--------|---|------------------------|------|-------------|
| 882.4501   | 882.5576    | 0.1075  | 122   | 1          | 7        | MSTRPFK           |           |        |   | Oxidation (M)[1]       |      | Mascot      |
| 1024.5132  | 1024.5726   | 0.0594  | 58    | 8          | 16       | FLAGIESCK         |           |        |   | Carbamidomethyl (C)[8] |      | Mascot      |
| 1287.7015  | 1287.6616   | -0.0399 | -31   | 638        | 649      | KNNGLLSSESVAR     |           |        |   |                        |      | Mascot      |
| 1287.7015  | 1287.6616   | -0.0399 | -31   | 638        | 649      | KNNGLLSSESVAR     | 31        | 74.031 |   |                        |      | Mascot      |
| 2224.9221  | 2225.1101   | 0.188   | 84    | 51         | 68       | LSEMENTRDTEMTSYEE |           |        |   | Oxidation (M)[4,12]    |      | Mascot      |



43 T-box protein [Danio rerio] K  
gi|5524273 73654.4 8.87 11 37 0

Peptide Information

| Calc. Mass | Obsrv. Mass | ± da    | ± ppm | Start Seq. | End Seq. | Sequence               | Ion Score | C. I. % | Modification           | Rank | Result Type |
|------------|-------------|---------|-------|------------|----------|------------------------|-----------|---------|------------------------|------|-------------|
| 942.5618   | 942.4211    | -0.1407 | -149  | 373        | 380      | EKPIAEKK               |           |         |                        |      | Mascot      |
| 943.4666   | 943.3997    | -0.0669 | -71   | 157        | 164      | ADPEMPKR               |           |         |                        |      | Mascot      |
| 991.5492   | 991.4547    | -0.0945 | -95   | 100        | 108      | LGTEMVITK              |           |         |                        |      | Mascot      |
| 991.5492   | 991.4547    | -0.0945 | -95   | 100        | 108      | LGTEMVITK              |           |         |                        |      | Mascot      |
| 1007.5441  | 1007.4515   | -0.0926 | -92   | 100        | 108      | LGTEMVITK              |           |         | Oxidation (M)[5]       |      | Mascot      |
| 1088.516   | 1088.5405   | 0.0245  | 23    | 92         | 99       | DLWDQFHK               |           |         |                        |      | Mascot      |
| 1088.5443  | 1088.5405   | -0.0038 | -3    | 633        | 643      | SGASQRNGSPK            |           |         |                        |      | Mascot      |
| 1325.7688  | 1325.7494   | -0.0194 | -15   | 213        | 223      | FHIVRANDILK            |           |         |                        |      | Mascot      |
| 1325.7688  | 1325.7494   | -0.0194 | -15   | 213        | 223      | FHIVRANDILK            |           |         |                        |      | Mascot      |
| 1382.6481  | 1382.7712   | 0.1231  | 89    | 620        | 632      | CGSREASPVPDHK          |           |         |                        |      | Mascot      |
| 1475.7021  | 1475.7458   | 0.0437  | 30    | 151        | 163      | WMVAGKADPEMPK          |           |         | Oxidation (M)[2]       |      | Mascot      |
| 1840.8932  | 1840.9342   | 0.041   | 22    | 277        | 291      | QLTLPSLRMYEDQCK        |           |         | Oxidation (M)[9]       |      | Mascot      |
| 1840.8932  | 1840.9342   | 0.041   | 22    | 277        | 291      | QLTLPSLRMYEDQCK        |           |         | Oxidation (M)[9]       |      | Mascot      |
| 1862.845   | 1862.9155   | 0.0705  | 38    | 349        | 366      | CGGSSSPAPEPSSPFRS<br>R |           |         | Carbamidomethyl (C)[1] |      | Mascot      |
| 2232.8518  | 2233.0735   | 0.2217  | 99    | 331        | 348      | DDKTCTDSEHEMDHQND<br>R |           |         | Carbamidomethyl (C)[5] |      | Mascot      |

44 Fin bud initiation factor [Danio rerio] gi|62204463 23923.9 5.12 7 36 0

Peptide Information

| Calc. Mass | Obsrv. Mass | ± da    | ± ppm | Start Seq. | End Seq. | Sequence            | Ion Score | C. I. % | Modification                             | Rank | Result Type |
|------------|-------------|---------|-------|------------|----------|---------------------|-----------|---------|------------------------------------------|------|-------------|
| 842.3898   | 842.5034    | 0.1136  | 135   | 54         | 59       | CQMLFK              |           |         | Carbamidomethyl (C)[1], Oxidation (M)[3] |      | Mascot      |
| 911.4655   | 911.3931    | -0.0724 | -79   | 200        | 206      | LKNDYMK             |           |         |                                          |      | Mascot      |
| 911.4655   | 911.3931    | -0.0724 | -79   | 200        | 206      | LKNDYMK             |           |         |                                          |      | Mascot      |
| 913.4962   | 913.4514    | -0.0448 | -49   | 192        | 199      | SHGTRLR             |           |         |                                          |      | Mascot      |
| 1007.5519  | 1007.4515   | -0.1004 | -100  | 78         | 85       | DDFTIIR             |           |         |                                          |      | Mascot      |
| 1088.6198  | 1088.5405   | -0.0793 | -73   | 171        | 180      | ETLDISLGLK          |           |         |                                          |      | Mascot      |
| 1088.6198  | 1088.5405   | -0.0793 | -73   | 171        | 180      | ETLDISLGLK          |           |         |                                          |      | Mascot      |
| 1489.6418  | 1489.8271   | 0.1853  | 124   | 54         | 64       | CQMLFKMMDNR         |           |         | Carbamidomethyl (C)[1], Oxidation (M)[3] |      | Mascot      |
| 2283.0808  | 2283.1677   | 0.0869  | 38    | 66         | 84       | CTLDEDQDSVIRDDFTIIR |           |         | Carbamidomethyl (C)[1]                   |      | Mascot      |

45 PREDICTED: ras association domain-containing protein gi|189537462 49870 4.96 1 27 42.791  
10 [Danio rerio]

| Peptide Information |                                                              |             |         |       |            |                   |          |           |         |                  |                  |
|---------------------|--------------------------------------------------------------|-------------|---------|-------|------------|-------------------|----------|-----------|---------|------------------|------------------|
|                     | Calc. Mass                                                   | Obsrv. Mass | ± da    | ± ppm | Start Seq. | End Sequence Seq. |          | Ion Score | C. I. % | Modification     | Rank Result Type |
|                     | 960.4632                                                     | 960.47      | 0.0068  | 7     | 184        | 191 ELDGEIER      |          | 27        | 42.791  |                  | 2 Mascot         |
| 46                  | Hook homolog 1 [Danio rerio]                                 |             |         |       |            | gi 190339684      | 83123.4  | 5.24      | 1       | 26               | 31.062           |
| Peptide Information |                                                              |             |         |       |            |                   |          |           |         |                  |                  |
|                     | Calc. Mass                                                   | Obsrv. Mass | ± da    | ± ppm | Start Seq. | End Sequence Seq. |          | Ion Score | C. I. % | Modification     | Rank Result Type |
|                     | 960.4996                                                     | 960.47      | -0.0296 | -31   | 323        | 330 LEDLSDLR      |          | 26        | 31.062  |                  | 3 Mascot         |
| 47                  | rho guanine nucleotide exchange factor 16 [Danio rerio]      |             |         |       |            | gi 181329850      | 69172.6  | 6.51      | 1       | 24               | 0                |
| Peptide Information |                                                              |             |         |       |            |                   |          |           |         |                  |                  |
|                     | Calc. Mass                                                   | Obsrv. Mass | ± da    | ± ppm | Start Seq. | End Sequence Seq. |          | Ion Score | C. I. % | Modification     | Rank Result Type |
|                     | 960.4268                                                     | 960.47      | 0.0432  | 45    | 44         | 51 LDSPEDER       |          | 24        | 0       |                  | 4 Mascot         |
| 48                  | PREDICTED: stromal interaction molecule 2-like [Danio rerio] |             |         |       |            | gi 326663880      | 113350.4 | 5.9       | 1       | 23               | 0                |
| Peptide Information |                                                              |             |         |       |            |                   |          |           |         |                  |                  |
|                     | Calc. Mass                                                   | Obsrv. Mass | ± da    | ± ppm | Start Seq. | End Sequence Seq. |          | Ion Score | C. I. % | Modification     | Rank Result Type |
|                     | 1088.5154                                                    | 1088.5405   | 0.0251  | 23    | 694        | 702 KDHMDSISR     |          | 24        | 0       |                  | 2 Mascot         |
| 49                  | growth hormone receptor b [Danio rerio]                      |             |         |       |            | gi 194399720      | 62504.7  | 4.69      | 1       | 23               | 0                |
| Peptide Information |                                                              |             |         |       |            |                   |          |           |         |                  |                  |
|                     | Calc. Mass                                                   | Obsrv. Mass | ± da    | ± ppm | Start Seq. | End Sequence Seq. |          | Ion Score | C. I. % | Modification     | Rank Result Type |
|                     | 960.4819                                                     | 960.47      | -0.0119 | -12   | 447        | 454 LAMIPDER      |          | 23        | 0       | Oxidation (M)[3] | 5 Mascot         |
| 50                  | ATP-binding cassette sub-family G member 5 [Danio rerio]     |             |         |       |            | gi 192451463      | 73138.7  | 8.64      | 1       | 22               | 0                |
| Peptide Information |                                                              |             |         |       |            |                   |          |           |         |                  |                  |
|                     | Calc. Mass                                                   | Obsrv. Mass | ± da    | ± ppm | Start Seq. | End Sequence Seq. |          | Ion Score | C. I. % | Modification     | Rank Result Type |
|                     | 991.5175                                                     | 991.4547    | -0.0628 | -63   | 386        | 393 DRMGILMR      |          | 22        | 0       |                  | 2 Mascot         |

|                |           |                        |                |                |                    |
|----------------|-----------|------------------------|----------------|----------------|--------------------|
| Gel Idx/Pos    | 251/K3    | Instr./Gel Origin      | BA2060/110707A | Process Status | Analysis Succeeded |
| Plate [#] Name | [1] 31496 | Instrument Sample Name |                | Spectra        | 11                 |

| Rank | Protein Name               | Accession No. | Protein MW | Protein PI | Pep. Count | Protein Score | Protein Score C. I. % | Total Ion Score | Total Ion C. I. % |
|------|----------------------------|---------------|------------|------------|------------|---------------|-----------------------|-----------------|-------------------|
| 1    | Vtg1 protein [Danio rerio] | gi 63100501   | 36409.1    | 9.23       | 16         | 777           | 100                   | 664             | 100               |

Peptide Information

| Calc. Mass | Obsrv. Mass | ± da    | ± ppm | Start Seq. | End Seq. | Sequence                   | Ion Score | C. I. % | Modification                               | Rank | Result Type |
|------------|-------------|---------|-------|------------|----------|----------------------------|-----------|---------|--------------------------------------------|------|-------------|
| 826.4457   | 826.4489    | 0.0032  | 4     | 198        | 204      | QYAVFAK                    |           |         |                                            |      | Mascot      |
| 960.4785   | 960.4805    | 0.002   | 2     | 218        | 224      | LEVEWER                    | 47        | 99.352  |                                            |      | Mascot      |
| 960.4785   | 960.4805    | 0.002   | 2     | 218        | 224      | LEVEWER                    |           |         |                                            |      | Mascot      |
| 976.5322   | 976.4746    | -0.0576 | -59   | 25         | 32       | FSSVPRQR                   |           |         |                                            |      | Mascot      |
| 984.4243   | 984.4247    | 0.0004  | 0     | 190        | 197      | FSWGAECK                   |           |         | Carbamidomethyl (C)[7]                     |      | Mascot      |
| 984.4243   | 984.4247    | 0.0004  | 0     | 190        | 197      | FSWGAECK                   | 51        | 99.79   | Carbamidomethyl (C)[7]                     |      | Mascot      |
| 998.5669   | 998.4405    | -0.1264 | -127  | 13         | 20       | VWPEQVLK                   |           |         |                                            |      | Mascot      |
| 1118.682   | 1118.6837   | 0.0017  | 2     | 225        | 234      | LPIIVTTYAK                 |           |         |                                            |      | Mascot      |
| 1118.682   | 1118.6837   | 0.0017  | 2     | 225        | 234      | LPIIVTTYAK                 | 73        | 99.998  |                                            |      | Mascot      |
| 1287.6691  | 1287.673    | 0.0039  | 3     | 205        | 217      | AEAGVLGEFPAAR              | 112       | 100     |                                            |      | Mascot      |
| 1287.6691  | 1287.673    | 0.0039  | 3     | 205        | 217      | AEAGVLGEFPAAR              |           |         |                                            |      | Mascot      |
| 1364.6957  | 1364.6995   | 0.0038  | 3     | 239        | 250      | HILTAAYDTGFR               |           |         |                                            |      | Mascot      |
| 1364.6957  | 1364.6995   | 0.0038  | 3     | 239        | 250      | HILTAAYDTGFR               | 99        | 100     |                                            |      | Mascot      |
| 1369.6569  | 1369.7268   | 0.0699  | 51    | 186        | 197      | VTGKFSWGAECK               |           |         | Carbamidomethyl (C)[11]                    |      | Mascot      |
| 1380.7528  | 1380.7196   | -0.0332 | -24   | 31         | 41       | QRIPTVMNLHR                |           |         | Oxidation (M)[7]                           |      | Mascot      |
| 1660.8574  | 1660.8605   | 0.0031  | 2     | 159        | 173      | VQLIVSSIAENDNMK            |           |         |                                            |      | Mascot      |
| 1676.8523  | 1676.8582   | 0.0059  | 4     | 159        | 173      | VQLIVSSIAENDNMK            |           |         | Oxidation (M)[14]                          |      | Mascot      |
| 1796.9078  | 1796.9141   | 0.0063  | 4     | 239        | 253      | HILTAAYDTGFRFER            |           |         |                                            |      | Mascot      |
| 1826.9799  | 1826.9823   | 0.0024  | 1     | 143        | 158      | LLGYQLAAYFDKPTAR           | 135       | 100     |                                            |      | Mascot      |
| 1826.9799  | 1826.9823   | 0.0024  | 1     | 143        | 158      | LLGYQLAAYFDKPTAR           |           |         |                                            |      | Mascot      |
| 1958.0189  | 1958.0229   | 0.004   | 2     | 254        | 271      | ATNSEKEIELTAALPSQR         |           |         |                                            |      | Mascot      |
| 1958.0189  | 1958.0229   | 0.004   | 2     | 254        | 271      | ATNSEKEIELTAALPSQR         | 149       | 100     |                                            |      | Mascot      |
| 2060.1426  | 2060.1394   | -0.0032 | -2    | 218        | 234      | LEVEWERLPIIVTTYAK          |           |         |                                            |      | Mascot      |
| 2705.3848  | 2705.1614   | -0.2234 | -83   | 159        | 183      | VQLIVSSIAENDNMKICAD GALLSK |           |         | Carbamidomethyl (C)[17], Oxidation (M)[14] |      | Mascot      |

|                     |                              |              |          |      |    |     |     |     |     |
|---------------------|------------------------------|--------------|----------|------|----|-----|-----|-----|-----|
| 2                   | vitellogenin 1 [Danio rerio] | gi 166795887 | 149452.5 | 8.68 | 20 | 728 | 100 | 664 | 100 |
| Peptide Information |                              |              |          |      |    |     |     |     |     |

| Calc. Mass                   | Obsrv. Mass | ± da    | ± ppm | Start Seq.  | End Seq. | Sequence                            | Ion Score | C. I.  | % Modification                             | Rank | Result Type |     |
|------------------------------|-------------|---------|-------|-------------|----------|-------------------------------------|-----------|--------|--------------------------------------------|------|-------------|-----|
| 826.4457                     | 826.4489    | 0.0032  | 4     | 1238        | 1244     | QYAVFAK                             |           |        |                                            |      | Mascot      |     |
| 960.4785                     | 960.4805    | 0.002   | 2     | 1258        | 1264     | LEVEWER                             | 47        | 99.352 |                                            |      | Mascot      |     |
| 960.4785                     | 960.4805    | 0.002   | 2     | 1258        | 1264     | LEVEWER                             |           |        |                                            |      | Mascot      |     |
| 984.4243                     | 984.4247    | 0.0004  | 0     | 1230        | 1237     | FSWGAECK                            |           |        | Carbamidomethyl (C)[7]                     |      | Mascot      |     |
| 984.4243                     | 984.4247    | 0.0004  | 0     | 1230        | 1237     | FSWGAECK                            | 51        | 99.79  | Carbamidomethyl (C)[7]                     |      | Mascot      |     |
| 992.5015                     | 992.4683    | -0.0332 | -33   | 615         | 622      | LMNCKLDR                            |           |        |                                            |      | Mascot      |     |
| 992.5015                     | 992.4683    | -0.0332 | -33   | 615         | 622      | LMNCKLDR                            |           |        |                                            |      | Mascot      |     |
| 1088.5405                    | 1088.549    | 0.0085  | 8     | 415         | 424      | MTASLATHEK                          |           |        |                                            |      | Mascot      |     |
| 1118.682                     | 1118.6837   | 0.0017  | 2     | 1265        | 1274     | LPIIVTTYAK                          |           |        |                                            |      | Mascot      |     |
| 1118.682                     | 1118.6837   | 0.0017  | 2     | 1265        | 1274     | LPIIVTTYAK                          | 73        | 99.998 |                                            |      | Mascot      |     |
| 1287.6691                    | 1287.673    | 0.0039  | 3     | 1245        | 1257     | AEAGVLGEFPAAR                       | 112       | 100    |                                            |      | Mascot      |     |
| 1287.6691                    | 1287.673    | 0.0039  | 3     | 1245        | 1257     | AEAGVLGEFPAAR                       |           |        |                                            |      | Mascot      |     |
| 1364.6957                    | 1364.6995   | 0.0038  | 3     | 1279        | 1290     | HILTAAYDTGFR                        |           |        |                                            |      | Mascot      |     |
| 1364.6957                    | 1364.6995   | 0.0038  | 3     | 1279        | 1290     | HILTAAYDTGFR                        | 99        | 100    |                                            |      | Mascot      |     |
| 1369.7032                    | 1369.7268   | 0.0236  | 17    | 828         | 838      | LESMTYEQLKK                         |           |        |                                            |      | Mascot      |     |
| 1375.6458                    | 1375.7407   | 0.0949  | 69    | 184         | 194      | DLSHCQERIMK                         |           |        | Oxidation (M)[10]                          |      | Mascot      |     |
| 1382.7889                    | 1382.7812   | -0.0077 | -6    | 303         | 315      | ISDAPAQIVEVLK                       |           |        |                                            |      | Mascot      |     |
| 1382.7889                    | 1382.7812   | -0.0077 | -6    | 303         | 315      | ISDAPAQIVEVLK                       |           |        |                                            |      | Mascot      |     |
| 1660.8574                    | 1660.8605   | 0.0031  | 2     | 1199        | 1213     | VQLIVSSIAENDNMK                     |           |        |                                            |      | Mascot      |     |
| 1676.8523                    | 1676.8582   | 0.0059  | 4     | 1199        | 1213     | VQLIVSSIAENDNMK                     |           |        | Oxidation (M)[14]                          |      | Mascot      |     |
| 1796.9078                    | 1796.9141   | 0.0063  | 4     | 1279        | 1293     | HILTAAYDTGFRFER                     |           |        |                                            |      | Mascot      |     |
| 1826.9799                    | 1826.9823   | 0.0024  | 1     | 1183        | 1198     | LLGYQLAAYFDKPTAR                    | 135       | 100    |                                            |      | Mascot      |     |
| 1826.9799                    | 1826.9823   | 0.0024  | 1     | 1183        | 1198     | LLGYQLAAYFDKPTAR                    |           |        |                                            |      | Mascot      |     |
| 1958.0189                    | 1958.0229   | 0.004   | 2     | 1294        | 1311     | ATNSEKEIELTAALPSQR                  |           |        |                                            |      | Mascot      |     |
| 1958.0189                    | 1958.0229   | 0.004   | 2     | 1294        | 1311     | ATNSEKEIELTAALPSQR                  | 149       | 100    |                                            |      | Mascot      |     |
| 2001.0573                    | 2001.0725   | 0.0152  | 8     | 54          | 71       | VSSKVLISATTENTYLMK                  |           |        | Oxidation (M)[17]                          |      | Mascot      |     |
| 2060.1426                    | 2060.1394   | -0.0032 | -2    | 1258        | 1274     | LEVEWERLPIIVTTYAK                   |           |        |                                            |      | Mascot      |     |
| 2233.2009                    | 2233.0769   | -0.124  | -56   | 593         | 614      | SLTRITAPDMAYVAGAAN<br>VAIK          |           |        |                                            |      | Mascot      |     |
| 2705.3848                    | 2705.1614   | -0.2234 | -83   | 1199        | 1223     | VQLIVSSIAENDNMKICAD<br>GALLSK       |           |        | Carbamidomethyl (C)[17], Oxidation (M)[14] |      | Mascot      |     |
| 3338.6421                    | 3338.7483   | 0.1062  | 32    | 930         | 961      | SIPLVPELSLQNSQASYA<br>GDLSEMSSVASVR |           |        | Oxidation (M)[25]                          |      | Mascot      |     |
| vitellogenin 1 [Danio rerio] |             |         |       | gi 94733730 |          | 149140.4                            | 8.74      | 17     | 707                                        | 100  | 664         | 100 |

Peptide Information

| Calc. Mass | Obsrv. Mass | ± da | ± ppm | Start Seq. | End Sequence Seq. | Ion Score | C. I. | % Modification | Rank | Result Type |
|------------|-------------|------|-------|------------|-------------------|-----------|-------|----------------|------|-------------|
|------------|-------------|------|-------|------------|-------------------|-----------|-------|----------------|------|-------------|

|   |                            |           |         |     |              |      |                               |      |        |     |     |     |     |  |  |  |  |                                            |        |
|---|----------------------------|-----------|---------|-----|--------------|------|-------------------------------|------|--------|-----|-----|-----|-----|--|--|--|--|--------------------------------------------|--------|
|   | 826.4457                   | 826.4489  | 0.0032  | 4   | 1238         | 1244 | QYAVFAK                       |      |        |     |     |     |     |  |  |  |  |                                            | Mascot |
|   | 960.4785                   | 960.4805  | 0.002   | 2   | 1258         | 1264 | LEVEWER                       | 47   | 99.352 |     |     |     |     |  |  |  |  |                                            | Mascot |
|   | 960.4785                   | 960.4805  | 0.002   | 2   | 1258         | 1264 | LEVEWER                       |      |        |     |     |     |     |  |  |  |  |                                            | Mascot |
|   | 984.4243                   | 984.4247  | 0.0004  | 0   | 1230         | 1237 | FSWGAECK                      |      |        |     |     |     |     |  |  |  |  | Carbamidomethyl (C)[7]                     | Mascot |
|   | 984.4243                   | 984.4247  | 0.0004  | 0   | 1230         | 1237 | FSWGAECK                      | 51   | 99.79  |     |     |     |     |  |  |  |  | Carbamidomethyl (C)[7]                     | Mascot |
|   | 1088.5405                  | 1088.549  | 0.0085  | 8   | 415          | 424  | MTASLATHEK                    |      |        |     |     |     |     |  |  |  |  |                                            | Mascot |
|   | 1118.682                   | 1118.6837 | 0.0017  | 2   | 1265         | 1274 | LPIIVTTYAK                    |      |        |     |     |     |     |  |  |  |  |                                            | Mascot |
|   | 1118.682                   | 1118.6837 | 0.0017  | 2   | 1265         | 1274 | LPIIVTTYAK                    | 73   | 99.998 |     |     |     |     |  |  |  |  |                                            | Mascot |
|   | 1287.6691                  | 1287.673  | 0.0039  | 3   | 1245         | 1257 | AEAGVLGEFPAAR                 | 112  | 100    |     |     |     |     |  |  |  |  |                                            | Mascot |
|   | 1287.6691                  | 1287.673  | 0.0039  | 3   | 1245         | 1257 | AEAGVLGEFPAAR                 |      |        |     |     |     |     |  |  |  |  |                                            | Mascot |
|   | 1364.6957                  | 1364.6995 | 0.0038  | 3   | 1279         | 1290 | HILTAAYDTGFR                  |      |        |     |     |     |     |  |  |  |  |                                            | Mascot |
|   | 1364.6957                  | 1364.6995 | 0.0038  | 3   | 1279         | 1290 | HILTAAYDTGFR                  | 99   | 100    |     |     |     |     |  |  |  |  |                                            | Mascot |
|   | 1369.7032                  | 1369.7268 | 0.0236  | 17  | 828          | 838  | LESMTYEQLKK                   |      |        |     |     |     |     |  |  |  |  |                                            | Mascot |
|   | 1375.6458                  | 1375.7407 | 0.0949  | 69  | 184          | 194  | DLSHCQERIMK                   |      |        |     |     |     |     |  |  |  |  | Oxidation (M)[10]                          | Mascot |
|   | 1382.7889                  | 1382.7812 | -0.0077 | -6  | 303          | 315  | ISDAPAQIVEVLK                 |      |        |     |     |     |     |  |  |  |  |                                            | Mascot |
|   | 1382.7889                  | 1382.7812 | -0.0077 | -6  | 303          | 315  | ISDAPAQIVEVLK                 |      |        |     |     |     |     |  |  |  |  |                                            | Mascot |
|   | 1660.8574                  | 1660.8605 | 0.0031  | 2   | 1199         | 1213 | VQLIVSSIAENDNMK               |      |        |     |     |     |     |  |  |  |  |                                            | Mascot |
|   | 1676.8523                  | 1676.8582 | 0.0059  | 4   | 1199         | 1213 | VQLIVSSIAENDNMK               |      |        |     |     |     |     |  |  |  |  | Oxidation (M)[14]                          | Mascot |
|   | 1796.9078                  | 1796.9141 | 0.0063  | 4   | 1279         | 1293 | HILTAAYDTGFRFER               |      |        |     |     |     |     |  |  |  |  |                                            | Mascot |
|   | 1826.9799                  | 1826.9823 | 0.0024  | 1   | 1183         | 1198 | LLGYQLAAYFDKPTAR              | 135  | 100    |     |     |     |     |  |  |  |  |                                            | Mascot |
|   | 1826.9799                  | 1826.9823 | 0.0024  | 1   | 1183         | 1198 | LLGYQLAAYFDKPTAR              |      |        |     |     |     |     |  |  |  |  |                                            | Mascot |
|   | 1958.0189                  | 1958.0229 | 0.004   | 2   | 1294         | 1311 | ATNSEKEIELTAALPSQR            |      |        |     |     |     |     |  |  |  |  |                                            | Mascot |
|   | 1958.0189                  | 1958.0229 | 0.004   | 2   | 1294         | 1311 | ATNSEKEIELTAALPSQR            | 149  | 100    |     |     |     |     |  |  |  |  |                                            | Mascot |
|   | 2001.0573                  | 2001.0725 | 0.0152  | 8   | 54           | 71   | VSSKVLISATTENTYLMK            |      |        |     |     |     |     |  |  |  |  | Oxidation (M)[17]                          | Mascot |
|   | 2060.1426                  | 2060.1394 | -0.0032 | -2  | 1258         | 1274 | LEVEWERLPIIVTTYAK             |      |        |     |     |     |     |  |  |  |  |                                            | Mascot |
|   | 2705.3848                  | 2705.1614 | -0.2234 | -83 | 1199         | 1223 | VQLIVSSIAENDNMKICAD<br>GALLSK |      |        |     |     |     |     |  |  |  |  | Carbamidomethyl (C)[17], Oxidation (M)[14] | Mascot |
| 4 | Vtg1 protein [Danio rerio] |           |         |     | gi 145337918 |      | 116565.5                      | 9.07 | 15     | 706 | 100 | 664 | 100 |  |  |  |  |                                            |        |

|           |           |         |     |      |      |                     |     |                                            |  |        |
|-----------|-----------|---------|-----|------|------|---------------------|-----|--------------------------------------------|--|--------|
| 1088.5405 | 1088.549  | 0.0085  | 8   | 121  | 130  | MTASLATHEK          |     |                                            |  | Mascot |
| 1118.682  | 1118.6837 | 0.0017  | 2   | 971  | 980  | LPIIVTTYAK          |     |                                            |  | Mascot |
| 1118.682  | 1118.6837 | 0.0017  | 2   | 971  | 980  | LPIIVTTYAK          | 73  | 99.998                                     |  | Mascot |
| 1287.6691 | 1287.673  | 0.0039  | 3   | 951  | 963  | AEAGVLGEFPAAR       | 112 | 100                                        |  | Mascot |
| 1287.6691 | 1287.673  | 0.0039  | 3   | 951  | 963  | AEAGVLGEFPAAR       |     |                                            |  | Mascot |
| 1364.6957 | 1364.6995 | 0.0038  | 3   | 985  | 996  | HILTAAYDTGFR        |     |                                            |  | Mascot |
| 1364.6957 | 1364.6995 | 0.0038  | 3   | 985  | 996  | HILTAAYDTGFR        | 99  | 100                                        |  | Mascot |
| 1369.7032 | 1369.7268 | 0.0236  | 17  | 534  | 544  | LESMTYEQ LKK        |     |                                            |  | Mascot |
| 1382.7889 | 1382.7812 | -0.0077 | -6  | 9    | 21   | ISDAPAQIVEVLK       |     |                                            |  | Mascot |
| 1382.7889 | 1382.7812 | -0.0077 | -6  | 9    | 21   | ISDAPAQIVEVLK       |     |                                            |  | Mascot |
| 1660.8574 | 1660.8605 | 0.0031  | 2   | 905  | 919  | VQLIVSSIAENDNMK     |     |                                            |  | Mascot |
| 1676.8523 | 1676.8582 | 0.0059  | 4   | 905  | 919  | VQLIVSSIAENDNMK     |     | Oxidation (M)[14]                          |  | Mascot |
| 1796.9078 | 1796.9141 | 0.0063  | 4   | 985  | 999  | HILTAAYDTGFRFER     |     |                                            |  | Mascot |
| 1826.9799 | 1826.9823 | 0.0024  | 1   | 889  | 904  | LLGYQLAAYFDKPTAR    | 135 | 100                                        |  | Mascot |
| 1826.9799 | 1826.9823 | 0.0024  | 1   | 889  | 904  | LLGYQLAAYFDKPTAR    |     |                                            |  | Mascot |
| 1958.0189 | 1958.0229 | 0.004   | 2   | 1000 | 1017 | ATNSEKEIELTAALPSQR  |     |                                            |  | Mascot |
| 1958.0189 | 1958.0229 | 0.004   | 2   | 1000 | 1017 | ATNSEKEIELTAALPSQR  | 149 | 100                                        |  | Mascot |
| 2060.1426 | 2060.1394 | -0.0032 | -2  | 964  | 980  | LEVEWERLPIIVTTYAK   |     |                                            |  | Mascot |
| 2705.3848 | 2705.1614 | -0.2234 | -83 | 905  | 929  | VQLIVSSIAENDNMKICAD |     | Carbamidomethyl (C)[17], Oxidation (M)[14] |  | Mascot |

### Peptide Information

|   |                              |           |         |     |      |      |                               |         |      |   |     |     |                                            |     |  |  |        |
|---|------------------------------|-----------|---------|-----|------|------|-------------------------------|---------|------|---|-----|-----|--------------------------------------------|-----|--|--|--------|
|   | 1369.7032                    | 1369.7268 | 0.0236  | 17  | 637  | 647  | LESMTYEQLKK                   |         |      |   |     |     |                                            |     |  |  | Mascot |
|   | 1382.7889                    | 1382.7812 | -0.0077 | -6  | 112  | 124  | ISDAPAQIVEVLK                 |         |      |   |     |     |                                            |     |  |  | Mascot |
|   | 1382.7889                    | 1382.7812 | -0.0077 | -6  | 112  | 124  | ISDAPAQIVEVLK                 |         |      |   |     |     |                                            |     |  |  | Mascot |
|   | 1660.8574                    | 1660.8605 | 0.0031  | 2   | 1006 | 1020 | VQLIVSSIAENDNMK               |         |      |   |     |     |                                            |     |  |  | Mascot |
|   | 1676.8523                    | 1676.8582 | 0.0059  | 4   | 1006 | 1020 | VQLIVSSIAENDNMK               |         |      |   |     |     | Oxidation (M)[14]                          |     |  |  | Mascot |
|   | 1796.9078                    | 1796.9141 | 0.0063  | 4   | 1086 | 1100 | HILTAAYDTGFRFER               |         |      |   |     |     |                                            |     |  |  | Mascot |
|   | 1826.9799                    | 1826.9823 | 0.0024  | 1   | 990  | 1005 | LLGYQLAAYFDKPTAR              |         | 135  |   | 100 |     |                                            |     |  |  | Mascot |
|   | 1826.9799                    | 1826.9823 | 0.0024  | 1   | 990  | 1005 | LLGYQLAAYFDKPTAR              |         |      |   |     |     |                                            |     |  |  | Mascot |
|   | 1958.0189                    | 1958.0229 | 0.004   | 2   | 1101 | 1118 | ATNSEKEIELTAALPSQR            |         |      |   |     |     |                                            |     |  |  | Mascot |
|   | 1958.0189                    | 1958.0229 | 0.004   | 2   | 1101 | 1118 | ATNSEKEIELTAALPSQR            |         | 149  |   | 100 |     |                                            |     |  |  | Mascot |
|   | 2060.1426                    | 2060.1394 | -0.0032 | -2  | 1065 | 1081 | LEVEWERLPIIVTTYAK             |         |      |   |     |     |                                            |     |  |  | Mascot |
|   | 2705.3848                    | 2705.1614 | -0.2234 | -83 | 1006 | 1030 | VQLIVSSIAENDNMKICAD<br>GALLSK |         |      |   |     |     | Carbamidomethyl (C)[17], Oxidation (M)[14] |     |  |  | Mascot |
| 6 | vitellogenin 7 [Danio rerio] |           |         |     |      |      | gi 57864789                   | 24318.7 | 8.37 | 8 | 466 | 100 | 415                                        | 100 |  |  |        |

Peptide Information

| Calc. Mass | Obsrv. Mass | ± da    | ± ppm | Start Seq. | End Seq. | Sequence          | Ion Score | C. I.  | % | Modification            | Rank | Result | Type   |
|------------|-------------|---------|-------|------------|----------|-------------------|-----------|--------|---|-------------------------|------|--------|--------|
| 826.4457   | 826.4489    | 0.0032  | 4     | 93         | 99       | QYAVFAK           |           |        |   |                         |      |        | Mascot |
| 960.4785   | 960.4805    | 0.002   | 2     | 113        | 119      | LEVEWER           | 47        | 99.352 |   |                         |      |        | Mascot |
| 960.4785   | 960.4805    | 0.002   | 2     | 113        | 119      | LEVEWER           |           |        |   |                         |      |        | Mascot |
| 984.4243   | 984.4247    | 0.0004  | 0     | 85         | 92       | FSWGAECK          |           |        |   | Carbamidomethyl (C)[7]  |      |        | Mascot |
| 984.4243   | 984.4247    | 0.0004  | 0     | 85         | 92       | FSWGAECK          | 51        | 99.79  |   | Carbamidomethyl (C)[7]  |      |        | Mascot |
| 1118.682   | 1118.6837   | 0.0017  | 2     | 120        | 129      | LPIIVTTYAK        |           |        |   |                         |      |        | Mascot |
| 1118.682   | 1118.6837   | 0.0017  | 2     | 120        | 129      | LPIIVTTYAK        | 73        | 99.998 |   |                         |      |        | Mascot |
| 1287.6691  | 1287.673    | 0.0039  | 3     | 100        | 112      | AEAGVLGEFPAAR     | 112       | 100    |   |                         |      |        | Mascot |
| 1287.6691  | 1287.673    | 0.0039  | 3     | 100        | 112      | AEAGVLGEFPAAR     |           |        |   |                         |      |        | Mascot |
| 1369.6569  | 1369.7268   | 0.0699  | 51    | 81         | 92       | VTGKFSWGAECK      |           |        |   | Carbamidomethyl (C)[11] |      |        | Mascot |
| 1826.9799  | 1826.9823   | 0.0024  | 1     | 38         | 53       | LLGYQLAAYFDKPTAR  | 135       | 100    |   |                         |      |        | Mascot |
| 1826.9799  | 1826.9823   | 0.0024  | 1     | 38         | 53       | LLGYQLAAYFDKPTAR  |           |        |   |                         |      |        | Mascot |
| 2060.1426  | 2060.1394   | -0.0032 | -2    | 113        | 129      | LEVEWERLPIIVTTYAK |           |        |   |                         |      |        | Mascot |

|   |                              |  |  |  |  |  |              |          |      |    |     |     |     |     |  |  |  |
|---|------------------------------|--|--|--|--|--|--------------|----------|------|----|-----|-----|-----|-----|--|--|--|
| 7 | vitellogenin 7 [Danio rerio] |  |  |  |  |  | gi 156713467 | 148739.2 | 8.76 | 11 | 421 | 100 | 415 | 100 |  |  |  |
|---|------------------------------|--|--|--|--|--|--------------|----------|------|----|-----|-----|-----|-----|--|--|--|

Peptide Information

| Calc. Mass | Obsrv. Mass | ± da   | ± ppm | Start Seq. | End Seq. | Sequence | Ion Score | C. I.  | % | Modification | Rank | Result | Type   |
|------------|-------------|--------|-------|------------|----------|----------|-----------|--------|---|--------------|------|--------|--------|
| 826.4457   | 826.4489    | 0.0032 | 4     | 1234       | 1240     | QYAVFAK  |           |        |   |              |      |        | Mascot |
| 960.4785   | 960.4805    | 0.002  | 2     | 1254       | 1260     | LEVEWER  | 47        | 99.352 |   |              |      |        | Mascot |

|           |           |         |     |      |      |                   |     |        |                         |  |  |  |  |  |  |  |  |        |
|-----------|-----------|---------|-----|------|------|-------------------|-----|--------|-------------------------|--|--|--|--|--|--|--|--|--------|
| 960.4785  | 960.4805  | 0.002   | 2   | 1254 | 1260 | LEVEWER           |     |        |                         |  |  |  |  |  |  |  |  | Mascot |
| 984.4243  | 984.4247  | 0.0004  | 0   | 1226 | 1233 | FSWGAECK          |     |        |                         |  |  |  |  |  |  |  |  | Mascot |
| 984.4243  | 984.4247  | 0.0004  | 0   | 1226 | 1233 | FSWGAECK          | 51  | 99.79  | Carbamidomethyl (C)[7]  |  |  |  |  |  |  |  |  | Mascot |
| 1118.682  | 1118.6837 | 0.0017  | 2   | 1261 | 1270 | LPIIVTTYAK        |     |        |                         |  |  |  |  |  |  |  |  | Mascot |
| 1118.682  | 1118.6837 | 0.0017  | 2   | 1261 | 1270 | LPIIVTTYAK        | 73  | 99.998 |                         |  |  |  |  |  |  |  |  | Mascot |
| 1287.6691 | 1287.673  | 0.0039  | 3   | 1241 | 1253 | AEAGVLGEFPAAR     | 112 | 100    |                         |  |  |  |  |  |  |  |  | Mascot |
| 1287.6691 | 1287.673  | 0.0039  | 3   | 1241 | 1253 | AEAGVLGEFPAAR     |     |        |                         |  |  |  |  |  |  |  |  | Mascot |
| 1347.7882 | 1347.7352 | -0.053  | -39 | 1111 | 1122 | LSKTATIIIEPFK     |     |        |                         |  |  |  |  |  |  |  |  | Mascot |
| 1369.6569 | 1369.7268 | 0.0699  | 51  | 1222 | 1233 | VTGKFSWGAECK      |     |        | Carbamidomethyl (C)[11] |  |  |  |  |  |  |  |  | Mascot |
| 1375.6458 | 1375.7407 | 0.0949  | 69  | 184  | 194  | DLSHCQERIMK       |     |        | Oxidation (M)[10]       |  |  |  |  |  |  |  |  | Mascot |
| 1796.8928 | 1796.9141 | 0.0213  | 12  | 72   | 86   | LMDPLLYEYAGTWPK   |     |        |                         |  |  |  |  |  |  |  |  | Mascot |
| 1826.9799 | 1826.9823 | 0.0024  | 1   | 1179 | 1194 | LLGYQLAAYFDKPTAR  | 135 | 100    |                         |  |  |  |  |  |  |  |  | Mascot |
| 1826.9799 | 1826.9823 | 0.0024  | 1   | 1179 | 1194 | LLGYQLAAYFDKPTAR  |     |        |                         |  |  |  |  |  |  |  |  | Mascot |
| 2060.1426 | 2060.1394 | -0.0032 | -2  | 1254 | 1270 | LEVEWERLPIIVTTYAK |     |        |                         |  |  |  |  |  |  |  |  | Mascot |

8
novel protein similar to vitellogenin 1 (vg1) [Danio rerio]
gi|94732723
147084.2
8.73
11
419
100
415
100

| Peptide Information |             |         |       |            |          |                   |           |         |                         |      |        |        |
|---------------------|-------------|---------|-------|------------|----------|-------------------|-----------|---------|-------------------------|------|--------|--------|
| Calc. Mass          | Obsrv. Mass | ± da    | ± ppm | Start Seq. | End Seq. | Sequence          | Ion Score | C. I. % | Modification            | Rank | Result | Type   |
| 826.4457            | 826.4489    | 0.0032  | 4     | 1219       | 1225     | QYAVFAK           |           |         |                         |      |        | Mascot |
| 960.4785            | 960.4805    | 0.002   | 2     | 1239       | 1245     | LEVEWER           | 47        | 99.352  |                         |      |        | Mascot |
| 960.4785            | 960.4805    | 0.002   | 2     | 1239       | 1245     | LEVEWER           |           |         |                         |      |        | Mascot |
| 984.4243            | 984.4247    | 0.0004  | 0     | 1211       | 1218     | FSWGAECK          |           |         | Carbamidomethyl (C)[7]  |      |        | Mascot |
| 984.4243            | 984.4247    | 0.0004  | 0     | 1211       | 1218     | FSWGAECK          | 51        | 99.79   | Carbamidomethyl (C)[7]  |      |        | Mascot |
| 1118.682            | 1118.6837   | 0.0017  | 2     | 1246       | 1255     | LPIIVTTYAK        |           |         |                         |      |        | Mascot |
| 1118.682            | 1118.6837   | 0.0017  | 2     | 1246       | 1255     | LPIIVTTYAK        | 73        | 99.998  |                         |      |        | Mascot |
| 1287.6691           | 1287.673    | 0.0039  | 3     | 1226       | 1238     | AEAGVLGEFPAAR     | 112       | 100     |                         |      |        | Mascot |
| 1287.6691           | 1287.673    | 0.0039  | 3     | 1226       | 1238     | AEAGVLGEFPAAR     |           |         |                         |      |        | Mascot |
| 1369.6569           | 1369.7268   | 0.0699  | 51    | 1207       | 1218     | VTGKFSWGAECK      |           |         | Carbamidomethyl (C)[11] |      |        | Mascot |
| 1375.6458           | 1375.7407   | 0.0949  | 69    | 184        | 194      | DLSHCQERIMK       |           |         | Oxidation (M)[10]       |      |        | Mascot |
| 1660.7119           | 1660.8605   | 0.1486  | 89    | 1123       | 1138     | DTSSGSAAASFEQMQK  |           |         | Oxidation (M)[14]       |      |        | Mascot |
| 1796.8928           | 1796.9141   | 0.0213  | 12    | 72         | 86       | LMDPLLYEYAGTWPK   |           |         |                         |      |        | Mascot |
| 1826.9799           | 1826.9823   | 0.0024  | 1     | 1164       | 1179     | LLGYQLAAYFDKPTAR  | 135       | 100     |                         |      |        | Mascot |
| 1826.9799           | 1826.9823   | 0.0024  | 1     | 1164       | 1179     | LLGYQLAAYFDKPTAR  |           |         |                         |      |        | Mascot |
| 2060.1426           | 2060.1394   | -0.0032 | -2    | 1239       | 1255     | LEVEWERLPIIVTTYAK |           |         |                         |      |        | Mascot |

9
vitellogenin 6 [Danio rerio]
gi|57864787
38968.8
8.92
6
403
100
382
100



Peptide Information

| Calc. Mass | Obsrv. Mass | ± da   | ± ppm | Start Seq. | End Seq. | Sequence           | Ion Score | C. I.  | % Modification         | Rank | Result Type |
|------------|-------------|--------|-------|------------|----------|--------------------|-----------|--------|------------------------|------|-------------|
| 826.4457   | 826.4489    | 0.0032 | 4     | 235        | 241      | QYAVFAK            |           |        |                        |      | Mascot      |
| 960.4785   | 960.4805    | 0.002  | 2     | 255        | 261      | LEVEWER            | 47        | 99.352 |                        |      | Mascot      |
| 960.4785   | 960.4805    | 0.002  | 2     | 255        | 261      | LEVEWER            |           |        |                        |      | Mascot      |
| 984.4243   | 984.4247    | 0.0004 | 0     | 227        | 234      | FSWGAECK           |           |        | Carbamidomethyl (C)[7] |      | Mascot      |
| 984.4243   | 984.4247    | 0.0004 | 0     | 227        | 234      | FSWGAECK           | 51        | 99.79  | Carbamidomethyl (C)[7] |      | Mascot      |
| 1660.7119  | 1660.8605   | 0.1486 | 89    | 139        | 154      | DTSSGSAASFEQMQK    |           |        | Oxidation (M)[14]      |      | Mascot      |
| 1826.9799  | 1826.9823   | 0.0024 | 1     | 180        | 195      | LLGYQLAAYFDKPTAR   | 135       | 100    |                        |      | Mascot      |
| 1826.9799  | 1826.9823   | 0.0024 | 1     | 180        | 195      | LLGYQLAAYFDKPTAR   |           |        |                        |      | Mascot      |
| 1958.0189  | 1958.0229   | 0.004  | 2     | 291        | 308      | ATNSEKEIELTAALPSQR |           |        |                        |      | Mascot      |
| 1958.0189  | 1958.0229   | 0.004  | 2     | 291        | 308      | ATNSEKEIELTAALPSQR | 149       | 100    |                        |      | Mascot      |

10 vitellogenin 6 [Danio rerio] gi|303227889 150936.1 8.84 11 395 100 382 100

Peptide Information

| Calc. Mass | Obsrv. Mass | ± da    | ± ppm | Start Seq. | End Seq. | Sequence                    | Ion Score | C. I.  | % Modification         | Rank | Result Type |
|------------|-------------|---------|-------|------------|----------|-----------------------------|-----------|--------|------------------------|------|-------------|
| 826.4457   | 826.4489    | 0.0032  | 4     | 1256       | 1262     | QYAVFAK                     |           |        |                        |      | Mascot      |
| 960.4785   | 960.4805    | 0.002   | 2     | 1276       | 1282     | LEVEWER                     | 47        | 99.352 |                        |      | Mascot      |
| 960.4785   | 960.4805    | 0.002   | 2     | 1276       | 1282     | LEVEWER                     |           |        |                        |      | Mascot      |
| 984.4243   | 984.4247    | 0.0004  | 0     | 1248       | 1255     | FSWGAECK                    |           |        | Carbamidomethyl (C)[7] |      | Mascot      |
| 984.4243   | 984.4247    | 0.0004  | 0     | 1248       | 1255     | FSWGAECK                    | 51        | 99.79  | Carbamidomethyl (C)[7] |      | Mascot      |
| 992.5015   | 992.4683    | -0.0332 | -33   | 626        | 633      | LMNCKLDR                    |           |        |                        |      | Mascot      |
| 992.5015   | 992.4683    | -0.0332 | -33   | 626        | 633      | LMNCKLDR                    |           |        |                        |      | Mascot      |
| 1369.7032  | 1369.7268   | 0.0236  | 17    | 839        | 849      | LESMTYEQLKK                 |           |        |                        |      | Mascot      |
| 1375.6458  | 1375.7407   | 0.0949  | 69    | 195        | 205      | DLSHCQERIMK                 |           |        | Oxidation (M)[10]      |      | Mascot      |
| 1660.7119  | 1660.8605   | 0.1486  | 89    | 1160       | 1175     | DTSSGSAASFEQMQK             |           |        | Oxidation (M)[14]      |      | Mascot      |
| 1796.8928  | 1796.9141   | 0.0213  | 12    | 83         | 97       | LMDPLLYEYAGTWPK             |           |        |                        |      | Mascot      |
| 1826.9799  | 1826.9823   | 0.0024  | 1     | 1201       | 1216     | LLGYQLAAYFDKPTAR            | 135       | 100    |                        |      | Mascot      |
| 1826.9799  | 1826.9823   | 0.0024  | 1     | 1201       | 1216     | LLGYQLAAYFDKPTAR            |           |        |                        |      | Mascot      |
| 1958.0189  | 1958.0229   | 0.004   | 2     | 1312       | 1329     | ATNSEKEIELTAALPSQR          |           |        |                        |      | Mascot      |
| 1958.0189  | 1958.0229   | 0.004   | 2     | 1312       | 1329     | ATNSEKEIELTAALPSQR          | 149       | 100    |                        |      | Mascot      |
| 2233.2009  | 2233.0769   | -0.124  | -56   | 604        | 625      | SLTRITAPDMAYVAGAAAN<br>VAIK |           |        |                        |      | Mascot      |

11 novel protein similar to vitellogenin 1 (vg1) [Danio rerio] gi|94733734 149808.5 8.83 11 394 100 382 100

Peptide Information

| Calc. Mass | Obsrv. Mass | ± da    | ± ppm | Start Seq. | End Seq. | Sequence                   | Ion Score | C. I.  | % Modification         | Rank | Result Type |
|------------|-------------|---------|-------|------------|----------|----------------------------|-----------|--------|------------------------|------|-------------|
| 826.4457   | 826.4489    | 0.0032  | 4     | 1245       | 1251     | QYAVFAK                    |           |        |                        |      | Mascot      |
| 960.4785   | 960.4805    | 0.002   | 2     | 1265       | 1271     | LEVEWER                    | 47        | 99.352 |                        |      | Mascot      |
| 960.4785   | 960.4805    | 0.002   | 2     | 1265       | 1271     | LEVEWER                    |           |        |                        |      | Mascot      |
| 984.4243   | 984.4247    | 0.0004  | 0     | 1237       | 1244     | FSWGAECK                   |           |        | Carbamidomethyl (C)[7] |      | Mascot      |
| 984.4243   | 984.4247    | 0.0004  | 0     | 1237       | 1244     | FSWGAECK                   | 51        | 99.79  | Carbamidomethyl (C)[7] |      | Mascot      |
| 992.5015   | 992.4683    | -0.0332 | -33   | 619        | 626      | LMNCKLDR                   |           |        |                        |      | Mascot      |
| 992.5015   | 992.4683    | -0.0332 | -33   | 619        | 626      | LMNCKLDR                   |           |        |                        |      | Mascot      |
| 1369.7032  | 1369.7268   | 0.0236  | 17    | 832        | 842      | LESMTYEQLKK                |           |        |                        |      | Mascot      |
| 1375.6458  | 1375.7407   | 0.0949  | 69    | 188        | 198      | DLSHCQERIMK                |           |        | Oxidation (M)[10]      |      | Mascot      |
| 1660.7119  | 1660.8605   | 0.1486  | 89    | 1149       | 1164     | DTSSGSAAASFEQMQK           |           |        | Oxidation (M)[14]      |      | Mascot      |
| 1796.8928  | 1796.9141   | 0.0213  | 12    | 76         | 90       | LMDPLLYEYAGTWPK            |           |        |                        |      | Mascot      |
| 1826.9799  | 1826.9823   | 0.0024  | 1     | 1190       | 1205     | LLGYQLAAYFDKPTAR           | 135       | 100    |                        |      | Mascot      |
| 1826.9799  | 1826.9823   | 0.0024  | 1     | 1190       | 1205     | LLGYQLAAYFDKPTAR           |           |        |                        |      | Mascot      |
| 1958.0189  | 1958.0229   | 0.004   | 2     | 1301       | 1318     | ATNSEKEIELTAALPSQR         |           |        |                        |      | Mascot      |
| 1958.0189  | 1958.0229   | 0.004   | 2     | 1301       | 1318     | ATNSEKEIELTAALPSQR         | 149       | 100    |                        |      | Mascot      |
| 2233.2009  | 2233.0769   | -0.124  | -56   | 597        | 618      | SLTRITAPDMAYVAGAAN<br>VAIK |           |        |                        |      | Mascot      |

12 Vtg5 protein [Danio rerio] gi|148744685 27543.3 9.2 8 272 100 233 100

#### Peptide Information

| Calc. Mass | Obsrv. Mass | ± da    | ± ppm | Start Seq. | End Seq. | Sequence         | Ion Score | C. I.  | % Modification          | Rank | Result Type |
|------------|-------------|---------|-------|------------|----------|------------------|-----------|--------|-------------------------|------|-------------|
| 826.4457   | 826.4489    | 0.0032  | 4     | 124        | 130      | QYAVFAK          |           |        |                         |      | Mascot      |
| 960.4785   | 960.4805    | 0.002   | 2     | 144        | 150      | LEVEWER          | 47        | 99.352 |                         |      | Mascot      |
| 960.4785   | 960.4805    | 0.002   | 2     | 144        | 150      | LEVEWER          |           |        |                         |      | Mascot      |
| 984.4243   | 984.4247    | 0.0004  | 0     | 116        | 123      | FSWGAECK         |           |        | Carbamidomethyl (C)[7]  |      | Mascot      |
| 984.4243   | 984.4247    | 0.0004  | 0     | 116        | 123      | FSWGAECK         | 51        | 99.79  | Carbamidomethyl (C)[7]  |      | Mascot      |
| 1369.6569  | 1369.7268   | 0.0699  | 51    | 112        | 123      | VTGKFSWGAECK     |           |        | Carbamidomethyl (C)[11] |      | Mascot      |
| 1376.7069  | 1376.7115   | 0.0046  | 3     | 165        | 176      | HILNAAAYNTGFR    |           |        |                         |      | Mascot      |
| 1660.7119  | 1660.8605   | 0.1486  | 89    | 28         | 43       | DTSSGSAAASFEQMQK |           |        | Oxidation (M)[14]       |      | Mascot      |
| 1763.901   | 1763.8062   | -0.0948 | -54   | 162        | 176      | VCKHILNAAAYNTGFR |           |        | Carbamidomethyl (C)[2]  |      | Mascot      |
| 1826.9799  | 1826.9823   | 0.0024  | 1     | 69         | 84       | LLGYQLAAYFDKPTAR | 135       | 100    |                         |      | Mascot      |
| 1826.9799  | 1826.9823   | 0.0024  | 1     | 69         | 84       | LLGYQLAAYFDKPTAR |           |        |                         |      | Mascot      |

13 Vtg6 protein [Danio rerio] gi|157422885 27937.4 9.18 6 271 100 247 100

#### Peptide Information

|    | Calc. Mass               | Obsrv. Mass | ± da   | ± ppm | Start Seq.  | End Sequence Seq.      |         | Ion Score | C. I.  | % Modification         | Rank | Result Type |     |
|----|--------------------------|-------------|--------|-------|-------------|------------------------|---------|-----------|--------|------------------------|------|-------------|-----|
|    | 826.4457                 | 826.4489    | 0.0032 | 4     | 129         | 135 QYAVFAK            |         |           |        |                        |      | Mascot      |     |
|    | 913.423                  | 913.4518    | 0.0288 | 32    | 1           | 8 MSSSRMSK             |         |           |        |                        |      | Mascot      |     |
|    | 960.4785                 | 960.4805    | 0.002  | 2     | 149         | 155 LEVEWER            |         | 47        | 99.352 |                        |      | Mascot      |     |
|    | 960.4785                 | 960.4805    | 0.002  | 2     | 149         | 155 LEVEWER            |         |           |        |                        |      | Mascot      |     |
|    | 984.4243                 | 984.4247    | 0.0004 | 0     | 121         | 128 FSWGAECK           |         |           |        | Carbamidomethyl (C)[7] |      | Mascot      |     |
|    | 984.4243                 | 984.4247    | 0.0004 | 0     | 121         | 128 FSWGAECK           |         | 51        | 99.79  | Carbamidomethyl (C)[7] |      | Mascot      |     |
|    | 1660.7119                | 1660.8605   | 0.1486 | 89    | 33          | 48 DTSSGSAASFEQMQR     |         |           |        | Oxidation (M)[14]      |      | Mascot      |     |
|    | 1958.0189                | 1958.0229   | 0.004  | 2     | 185         | 202 ATNSEKEIELTAALPSQR |         |           |        |                        |      | Mascot      |     |
|    | 1958.0189                | 1958.0229   | 0.004  | 2     | 185         | 202 ATNSEKEIELTAALPSQR |         | 149       | 100    |                        |      | Mascot      |     |
| 14 | Zgc:136383 [Danio rerio] |             |        |       | gi 92097636 |                        | 28809.9 | 9.33      | 6      | 256                    | 100  | 233         | 100 |

#### Peptide Information

|    | Calc. Mass                   | Obsrv. Mass | ± da   | ± ppm | Start Seq.  | End Sequence Seq.   |         | Ion Score | C. I.  | % Modification         | Rank | Result Type |     |
|----|------------------------------|-------------|--------|-------|-------------|---------------------|---------|-----------|--------|------------------------|------|-------------|-----|
|    | 826.4457                     | 826.4489    | 0.0032 | 4     | 136         | 142 QYAVFAK         |         |           |        |                        |      | Mascot      |     |
|    | 960.4785                     | 960.4805    | 0.002  | 2     | 156         | 162 LEVEWER         |         | 47        | 99.352 |                        |      | Mascot      |     |
|    | 960.4785                     | 960.4805    | 0.002  | 2     | 156         | 162 LEVEWER         |         |           |        |                        |      | Mascot      |     |
|    | 984.4243                     | 984.4247    | 0.0004 | 0     | 128         | 135 FSWGAECK        |         |           |        | Carbamidomethyl (C)[7] |      | Mascot      |     |
|    | 984.4243                     | 984.4247    | 0.0004 | 0     | 128         | 135 FSWGAECK        |         | 51        | 99.79  | Carbamidomethyl (C)[7] |      | Mascot      |     |
|    | 1118.5986                    | 1118.6837   | 0.0851 | 76    | 217         | 225 IPEITMSRR       |         |           |        | Oxidation (M)[6]       |      | Mascot      |     |
|    | 1118.5986                    | 1118.6837   | 0.0851 | 76    | 217         | 225 IPEITMSRR       |         |           |        | Oxidation (M)[6]       |      | Mascot      |     |
|    | 1660.7703                    | 1660.8605   | 0.0902 | 54    | 1           | 15 MLPLSSSMSSSRMSK  |         |           |        | Oxidation (M)[1,8]     |      | Mascot      |     |
|    | 1676.7653                    | 1676.8582   | 0.0929 | 55    | 1           | 15 MLPLSSSMSSSRMSK  |         |           |        | Oxidation (M)[1,8,13]  |      | Mascot      |     |
|    | 1826.9799                    | 1826.9823   | 0.0024 | 1     | 81          | 96 LLGYQLAAYFDKPTAR |         | 135       | 100    |                        |      | Mascot      |     |
|    | 1826.9799                    | 1826.9823   | 0.0024 | 1     | 81          | 96 LLGYQLAAYFDKPTAR |         |           |        |                        |      | Mascot      |     |
| 15 | vitellogenin 5 [Danio rerio] |             |        |       | gi 57864785 |                     | 72820.8 | 9         | 9      | 253                    | 100  | 233         | 100 |

#### Peptide Information

|  | Calc. Mass | Obsrv. Mass | ± da   | ± ppm | Start Seq. | End Sequence Seq. | Ion Score | C. I.  | % Modification         | Rank | Result Type |
|--|------------|-------------|--------|-------|------------|-------------------|-----------|--------|------------------------|------|-------------|
|  | 826.4457   | 826.4489    | 0.0032 | 4     | 544        | 550 QYAVFAK       |           |        |                        |      | Mascot      |
|  | 960.4785   | 960.4805    | 0.002  | 2     | 564        | 570 LEVEWER       | 47        | 99.352 |                        |      | Mascot      |
|  | 960.4785   | 960.4805    | 0.002  | 2     | 564        | 570 LEVEWER       |           |        |                        |      | Mascot      |
|  | 984.4243   | 984.4247    | 0.0004 | 0     | 536        | 543 FSWGAECK      |           |        | Carbamidomethyl (C)[7] |      | Mascot      |
|  | 984.4243   | 984.4247    | 0.0004 | 0     | 536        | 543 FSWGAECK      | 51        | 99.79  | Carbamidomethyl (C)[7] |      | Mascot      |

|           |           |         |     |     |     |                  |  |     |     |  |  |                        |  |  |  |  |        |
|-----------|-----------|---------|-----|-----|-----|------------------|--|-----|-----|--|--|------------------------|--|--|--|--|--------|
| 1069.5021 | 1069.5614 | 0.0593  | 55  | 230 | 238 | NIENHSAER        |  |     |     |  |  |                        |  |  |  |  | Mascot |
| 1369.7032 | 1369.7268 | 0.0236  | 17  | 137 | 147 | LESMTYEQLKK      |  |     |     |  |  |                        |  |  |  |  | Mascot |
| 1376.7069 | 1376.7115 | 0.0046  | 3   | 585 | 596 | HILNAAYNTGFR     |  |     |     |  |  |                        |  |  |  |  | Mascot |
| 1660.7119 | 1660.8605 | 0.1486  | 89  | 448 | 463 | DTSSGSAAASFEQMQK |  |     |     |  |  | Oxidation (M)[14]      |  |  |  |  | Mascot |
| 1763.901  | 1763.8062 | -0.0948 | -54 | 582 | 596 | VCKHILNAAYNTGFR  |  |     |     |  |  | Carbamidomethyl (C)[2] |  |  |  |  | Mascot |
| 1826.9799 | 1826.9823 | 0.0024  | 1   | 489 | 504 | LLGYQLAAYFDKPTAR |  | 135 | 100 |  |  |                        |  |  |  |  | Mascot |
| 1826.9799 | 1826.9823 | 0.0024  | 1   | 489 | 504 | LLGYQLAAYFDKPTAR |  |     |     |  |  |                        |  |  |  |  | Mascot |

16 vitellogenin 4 [Danio rerio] gi|57864783 31189.9 9.48 6 253 100 233 100

#### Peptide Information

| Calc. Mass | Obsrv. Mass | ± da   | ± ppm | Start Seq. | End Seq. | Sequence         | Ion Score | C. I.  | % | Modification           | Rank | Result | Type   |
|------------|-------------|--------|-------|------------|----------|------------------|-----------|--------|---|------------------------|------|--------|--------|
| 826.4457   | 826.4489    | 0.0032 | 4     | 162        | 168      | QYAVFAK          |           |        |   |                        |      |        | Mascot |
| 960.4785   | 960.4805    | 0.002  | 2     | 182        | 188      | LEVEWER          | 47        | 99.352 |   |                        |      |        | Mascot |
| 960.4785   | 960.4805    | 0.002  | 2     | 182        | 188      | LEVEWER          |           |        |   |                        |      |        | Mascot |
| 984.4243   | 984.4247    | 0.0004 | 0     | 154        | 161      | FSWGAECK         |           |        |   | Carbamidomethyl (C)[7] |      |        | Mascot |
| 984.4243   | 984.4247    | 0.0004 | 0     | 154        | 161      | FSWGAECK         | 51        | 99.79  |   | Carbamidomethyl (C)[7] |      |        | Mascot |
| 1118.5986  | 1118.6837   | 0.0851 | 76    | 243        | 251      | IPEITMSRR        |           |        |   | Oxidation (M)[6]       |      |        | Mascot |
| 1118.5986  | 1118.6837   | 0.0851 | 76    | 243        | 251      | IPEITMSRR        |           |        |   | Oxidation (M)[6]       |      |        | Mascot |
| 1660.7119  | 1660.8605   | 0.1486 | 89    | 66         | 81       | DTSSGSAAASFEQMQK |           |        |   | Oxidation (M)[14]      |      |        | Mascot |
| 1826.9799  | 1826.9823   | 0.0024 | 1     | 107        | 122      | LLGYQLAAYFDKPTAR | 135       | 100    |   |                        |      |        | Mascot |
| 1826.9799  | 1826.9823   | 0.0024 | 1     | 107        | 122      | LLGYQLAAYFDKPTAR |           |        |   |                        |      |        | Mascot |

17 Zgc:136383 protein [Danio rerio] gi|159155252 123957.1 8.78 11 252 100 233 100

#### Peptide Information

| Calc. Mass | Obsrv. Mass | ± da    | ± ppm | Start Seq. | End Seq. | Sequence  | Ion Score | C. I.  | % | Modification           | Rank | Result | Type   |
|------------|-------------|---------|-------|------------|----------|-----------|-----------|--------|---|------------------------|------|--------|--------|
| 808.3406   | 808.4616    | 0.121   | 150   | 54         | 59       | ADYMHR    |           |        |   | Oxidation (M)[4]       |      |        | Mascot |
| 826.4457   | 826.4489    | 0.0032  | 4     | 1013       | 1019     | QYAVFAK   |           |        |   |                        |      |        | Mascot |
| 960.4785   | 960.4805    | 0.002   | 2     | 1033       | 1039     | LEVEWER   | 47        | 99.352 |   |                        |      |        | Mascot |
| 960.4785   | 960.4805    | 0.002   | 2     | 1033       | 1039     | LEVEWER   |           |        |   |                        |      |        | Mascot |
| 984.4243   | 984.4247    | 0.0004  | 0     | 1005       | 1012     | FSWGAECK  |           |        |   | Carbamidomethyl (C)[7] |      |        | Mascot |
| 984.4243   | 984.4247    | 0.0004  | 0     | 1005       | 1012     | FSWGAECK  | 51        | 99.79  |   | Carbamidomethyl (C)[7] |      |        | Mascot |
| 992.5015   | 992.4683    | -0.0332 | -33   | 392        | 399      | LMNCKLDR  |           |        |   |                        |      |        | Mascot |
| 992.5015   | 992.4683    | -0.0332 | -33   | 392        | 399      | LMNCKLDR  |           |        |   |                        |      |        | Mascot |
| 1118.5986  | 1118.6837   | 0.0851  | 76    | 1094       | 1102     | IPEITMSRR |           |        |   | Oxidation (M)[6]       |      |        | Mascot |
| 1118.5986  | 1118.6837   | 0.0851  | 76    | 1094       | 1102     | IPEITMSRR |           |        |   | Oxidation (M)[6]       |      |        | Mascot |

|    |                                  |           |         |     |     |              |                            |      |     |     |     |     |     |  |  |  |                   |  |        |
|----|----------------------------------|-----------|---------|-----|-----|--------------|----------------------------|------|-----|-----|-----|-----|-----|--|--|--|-------------------|--|--------|
|    | 1369.7032                        | 1369.7268 | 0.0236  | 17  | 605 | 615          | LESMTYEQLKK                |      |     |     |     |     |     |  |  |  |                   |  | Mascot |
|    | 1382.7889                        | 1382.7812 | -0.0077 | -6  | 80  | 92           | ISDAPAQIVEVLK              |      |     |     |     |     |     |  |  |  |                   |  | Mascot |
|    | 1382.7889                        | 1382.7812 | -0.0077 | -6  | 80  | 92           | ISDAPAQIVEVLK              |      |     |     |     |     |     |  |  |  |                   |  | Mascot |
|    | 1660.7119                        | 1660.8605 | 0.1486  | 89  | 917 | 932          | DTSSGSAASFEQMQK            |      |     |     |     |     |     |  |  |  | Oxidation (M)[14] |  | Mascot |
|    | 1826.9799                        | 1826.9823 | 0.0024  | 1   | 958 | 973          | LLGYQLAAYFDKPTAR           |      | 135 |     | 100 |     |     |  |  |  |                   |  | Mascot |
|    | 1826.9799                        | 1826.9823 | 0.0024  | 1   | 958 | 973          | LLGYQLAAYFDKPTAR           |      |     |     |     |     |     |  |  |  |                   |  | Mascot |
|    | 2233.2009                        | 2233.0769 | -0.124  | -56 | 370 | 391          | SLTRITAPDMAYVAGAAN<br>VAIK |      |     |     |     |     |     |  |  |  |                   |  | Mascot |
| 18 | Zgc:136383 protein [Danio rerio] |           |         |     |     | gi 125857991 | 148644.2                   | 8.93 | 13  | 248 | 100 | 233 | 100 |  |  |  |                   |  |        |

| Calc. Mass | Obsrv. Mass | ± da    | ± ppm | Start Seq. | End Seq. | Sequence                    | Ion Score | C. I. % | Modification           | Rank | Result Type |
|------------|-------------|---------|-------|------------|----------|-----------------------------|-----------|---------|------------------------|------|-------------|
| 808.3406   | 808.4616    | 0.121   | 150   | 276        | 281      | ADYMHHR                     |           |         | Oxidation (M)[4]       |      | Mascot      |
| 826.4457   | 826.4489    | 0.0032  | 4     | 1235       | 1241     | QYAVFAK                     |           |         |                        |      | Mascot      |
| 960.4785   | 960.4805    | 0.002   | 2     | 1255       | 1261     | LEVEWER                     | 47        | 99.352  |                        |      | Mascot      |
| 960.4785   | 960.4805    | 0.002   | 2     | 1255       | 1261     | LEVEWER                     |           |         |                        |      | Mascot      |
| 984.4243   | 984.4247    | 0.0004  | 0     | 1227       | 1234     | FSWGAECK                    |           |         | Carbamidomethyl (C)[7] |      | Mascot      |
| 984.4243   | 984.4247    | 0.0004  | 0     | 1227       | 1234     | FSWGAECK                    | 51        | 99.79   | Carbamidomethyl (C)[7] |      | Mascot      |
| 992.5015   | 992.4683    | -0.0332 | -33   | 614        | 621      | LMNCKLDR                    |           |         |                        |      | Mascot      |
| 992.5015   | 992.4683    | -0.0332 | -33   | 614        | 621      | LMNCKLDR                    |           |         |                        |      | Mascot      |
| 1118.5986  | 1118.6837   | 0.0851  | 76    | 1316       | 1324     | IPEITMSRR                   |           |         | Oxidation (M)[6]       |      | Mascot      |
| 1118.5986  | 1118.6837   | 0.0851  | 76    | 1316       | 1324     | IPEITMSRR                   |           |         | Oxidation (M)[6]       |      | Mascot      |
| 1369.7032  | 1369.7268   | 0.0236  | 17    | 827        | 837      | LESMTYEQLKK                 |           |         |                        |      | Mascot      |
| 1375.6458  | 1375.7407   | 0.0949  | 69    | 183        | 193      | DLSHCQERIMK                 |           |         | Oxidation (M)[10]      |      | Mascot      |
| 1382.7889  | 1382.7812   | -0.0077 | -6    | 302        | 314      | ISDAPAQIVEVLK               |           |         |                        |      | Mascot      |
| 1382.7889  | 1382.7812   | -0.0077 | -6    | 302        | 314      | ISDAPAQIVEVLK               |           |         |                        |      | Mascot      |
| 1660.7119  | 1660.8605   | 0.1486  | 89    | 1139       | 1154     | DTSSGSAAASFEQMQK            |           |         | Oxidation (M)[14]      |      | Mascot      |
| 1796.8928  | 1796.9141   | 0.0213  | 12    | 71         | 85       | LMDPLLYEYAGTWPK             |           |         |                        |      | Mascot      |
| 1826.9799  | 1826.9823   | 0.0024  | 1     | 1180       | 1195     | LLGYQLAAYFDKPTAR            | 135       | 100     |                        |      | Mascot      |
| 1826.9799  | 1826.9823   | 0.0024  | 1     | 1180       | 1195     | LLGYQLAAYFDKPTAR            |           |         |                        |      | Mascot      |
| 2233.2009  | 2233.0769   | -0.124  | -56   | 592        | 613      | SLTRITAPDMAYVAGAAAN<br>VAIK |           |         |                        |      | Mascot      |

| Calc. Mass | Obsrv. Mass | ± da | ± ppm | Start Seq. | End Sequence | Ion Score | C. I. % | Modification | Rank | Result Type |
|------------|-------------|------|-------|------------|--------------|-----------|---------|--------------|------|-------------|
|------------|-------------|------|-------|------------|--------------|-----------|---------|--------------|------|-------------|



|    |                                                             |           |         |    |      |      |                             |          |      |                                           |     |     |     |        |
|----|-------------------------------------------------------------|-----------|---------|----|------|------|-----------------------------|----------|------|-------------------------------------------|-----|-----|-----|--------|
|    | 1826.9799                                                   | 1826.9823 | 0.0024  | 1  | 1183 | 1198 | LLGYQLAAYFDKPTAR            | 135      | 100  |                                           |     |     |     | Mascot |
|    | 1826.9799                                                   | 1826.9823 | 0.0024  | 1  | 1183 | 1198 | LLGYQLAAYFDKPTAR            |          |      |                                           |     |     |     | Mascot |
|    | 1840.8938                                                   | 1840.9474 | 0.0536  | 29 | 72   | 86   | LMDPLLYEYAGTWPR             |          |      | Oxidation (M)[2]                          |     |     |     | Mascot |
|    | 2362.1926                                                   | 2362.188  | -0.0046 | -2 | 597  | 619  | ITAPDMASVAGAANVAIK<br>LMNCK |          |      | Carbamidomethyl (C)[22], Oxidation (M)[6] |     |     |     | Mascot |
| 21 | novel protein similar to vitellogenin 1 (vg1) [Danio rerio] |           |         |    |      |      | gi 94733731                 | 149169.2 | 8.84 | 12                                        | 244 | 100 | 233 | 100    |

#### Peptide Information

|  | Calc. Mass | Obsrv. Mass | ± da    | ± ppm | Start Seq. | End Seq. | Sequence                    | Ion Score | C. I.  | % | Modification                              | Rank | Result Type |
|--|------------|-------------|---------|-------|------------|----------|-----------------------------|-----------|--------|---|-------------------------------------------|------|-------------|
|  | 826.4457   | 826.4489    | 0.0032  | 4     | 1240       | 1246     | QYAVFAK                     |           |        |   |                                           |      | Mascot      |
|  | 960.4785   | 960.4805    | 0.002   | 2     | 1260       | 1266     | LEVEWER                     | 47        | 99.352 |   |                                           |      | Mascot      |
|  | 960.4785   | 960.4805    | 0.002   | 2     | 1260       | 1266     | LEVEWER                     |           |        |   |                                           |      | Mascot      |
|  | 984.4243   | 984.4247    | 0.0004  | 0     | 1232       | 1239     | FSWGAECK                    |           |        |   | Carbamidomethyl (C)[7]                    |      | Mascot      |
|  | 984.4243   | 984.4247    | 0.0004  | 0     | 1232       | 1239     | FSWGAECK                    | 51        | 99.79  |   | Carbamidomethyl (C)[7]                    |      | Mascot      |
|  | 992.5015   | 992.4683    | -0.0332 | -33   | 619        | 626      | LMNCKLDR                    |           |        |   |                                           |      | Mascot      |
|  | 992.5015   | 992.4683    | -0.0332 | -33   | 619        | 626      | LMNCKLDR                    |           |        |   |                                           |      | Mascot      |
|  | 1369.7032  | 1369.7268   | 0.0236  | 17    | 832        | 842      | LESMTYEQLKK                 |           |        |   |                                           |      | Mascot      |
|  | 1375.6458  | 1375.7407   | 0.0949  | 69    | 188        | 198      | DLSHCQERIMK                 |           |        |   | Oxidation (M)[10]                         |      | Mascot      |
|  | 1376.7069  | 1376.7115   | 0.0046  | 3     | 1281       | 1292     | HILNAAYNTGFR                |           |        |   |                                           |      | Mascot      |
|  | 1660.7119  | 1660.8605   | 0.1486  | 89    | 1144       | 1159     | DTSSGSAAASFEQMQK            |           |        |   | Oxidation (M)[14]                         |      | Mascot      |
|  | 1763.901   | 1763.8062   | -0.0948 | -54   | 1278       | 1292     | VCKHILNAAYNTGFR             |           |        |   | Carbamidomethyl (C)[2]                    |      | Mascot      |
|  | 1824.8989  | 1824.9679   | 0.069   | 38    | 76         | 90       | LMDPLLYEYAGTWPR             |           |        |   |                                           |      | Mascot      |
|  | 1826.9799  | 1826.9823   | 0.0024  | 1     | 1185       | 1200     | LLGYQLAAYFDKPTAR            | 135       | 100    |   |                                           |      | Mascot      |
|  | 1826.9799  | 1826.9823   | 0.0024  | 1     | 1185       | 1200     | LLGYQLAAYFDKPTAR            |           |        |   |                                           |      | Mascot      |
|  | 1840.8938  | 1840.9474   | 0.0536  | 29    | 76         | 90       | LMDPLLYEYAGTWPR             |           |        |   | Oxidation (M)[2]                          |      | Mascot      |
|  | 2362.1926  | 2362.188    | -0.0046 | -2    | 601        | 623      | ITAPDMASVAGAANVAIK<br>LMNCK |           |        |   | Carbamidomethyl (C)[22], Oxidation (M)[6] |      | Mascot      |

|    |                                                                     |  |  |  |  |  |              |         |      |   |    |        |    |        |
|----|---------------------------------------------------------------------|--|--|--|--|--|--------------|---------|------|---|----|--------|----|--------|
| 22 | PREDICTED: serine/threonine-protein kinase pim-3-like [Danio rerio] |  |  |  |  |  | gi 326675215 | 23705.1 | 8.34 | 5 | 57 | 91.323 | 35 | 91.151 |
|----|---------------------------------------------------------------------|--|--|--|--|--|--------------|---------|------|---|----|--------|----|--------|

#### Peptide Information

|  | Calc. Mass | Obsrv. Mass | ± da    | ± ppm | Start Seq. | End Seq. | Sequence     | Ion Score | C. I.  | % | Modification | Rank | Result Type |
|--|------------|-------------|---------|-------|------------|----------|--------------|-----------|--------|---|--------------|------|-------------|
|  | 991.4843   | 991.465     | -0.0193 | -19   | 120        | 127      | LQEGEPYR     |           |        |   |              |      | Mascot      |
|  | 1211.6531  | 1211.7159   | 0.0628  | 52    | 110        | 119      | SPYLGVTRYR   |           |        |   |              |      | Mascot      |
|  | 1287.7015  | 1287.673    | -0.0285 | -22   | 44         | 55       | KNNGLLSESVAR | 35        | 91.151 |   |              |      | Mascot      |
|  | 1287.7015  | 1287.673    | -0.0285 | -22   | 44         | 55       | KNNGLLSESVAR |           |        |   |              |      | Mascot      |
|  | 1347.7015  | 1347.7352   | 0.0337  | 25    | 120        | 130      | LQEGEPYRSIR  |           |        |   |              |      | Mascot      |

|           |           |         |     |     |     |               |        |
|-----------|-----------|---------|-----|-----|-----|---------------|--------|
| 1364.7419 | 1364.6995 | -0.0424 | -31 | 184 | 195 | TGPVLEEIIIEHK | Mascot |
| 1364.7419 | 1364.6995 | -0.0424 | -31 | 184 | 195 | TGPVLEEIIIEHK | Mascot |

23 heat shock protein 25 [Danio rerio] gi|52078122 22344.1 6.52 8 52 70.598

#### Peptide Information

| Calc. Mass | Obsrv. Mass | ± da    | ± ppm | Start Seq. | End Seq. | Sequence              | Ion Score | C. I. | % Modification   | Rank | Result Type |
|------------|-------------|---------|-------|------------|----------|-----------------------|-----------|-------|------------------|------|-------------|
| 911.4006   | 911.4038    | 0.0032  | 4     | 21         | 27       | DWYQGSR               |           |       |                  |      | Mascot      |
| 913.46     | 913.4518    | -0.0082 | -9    | 6          | 12       | IPFSFMR               |           |       | Oxidation (M)[6] |      | Mascot      |
| 960.4533   | 960.4805    | 0.0272  | 28    | 136        | 143      | DEHGFISR              |           |       |                  |      | Mascot      |
| 960.4533   | 960.4805    | 0.0272  | 28    | 136        | 143      | DEHGFISR              |           |       |                  |      | Mascot      |
| 1069.5612  | 1069.5614   | 0.0002  | 0     | 5          | 12       | RIPFSFMR              |           |       | Oxidation (M)[7] |      | Mascot      |
| 1088.5483  | 1088.549    | 0.0007  | 1     | 135        | 143      | KDEHGFISR             |           |       |                  |      | Mascot      |
| 1840.944   | 1840.9474   | 0.0034  | 2     | 104        | 119      | ISLDVNHFSPEELNVK      |           |       |                  |      | Mascot      |
| 1883.8804  | 1883.8453   | -0.0351 | -19   | 87         | 103      | QLSSGMSEVKQTGDSW<br>K |           |       | Oxidation (M)[6] |      | Mascot      |
| 1899.921   | 1899.8562   | -0.0648 | -34   | 6          | 20       | IPFSFMRTPSWDPFR       |           |       | Oxidation (M)[6] |      | Mascot      |

24 25 kDa heat shock protein [Danio rerio] gi|56554759 22360 6.52 8 52 69.914

#### Peptide Information

| Calc. Mass | Obsrv. Mass | ± da    | ± ppm | Start Seq. | End Seq. | Sequence         | Ion Score | C. I. | % Modification   | Rank | Result Type |
|------------|-------------|---------|-------|------------|----------|------------------|-----------|-------|------------------|------|-------------|
| 911.4006   | 911.4038    | 0.0032  | 4     | 21         | 27       | DWYQGSR          |           |       |                  |      | Mascot      |
| 913.46     | 913.4518    | -0.0082 | -9    | 6          | 12       | IPFSFMR          |           |       | Oxidation (M)[6] |      | Mascot      |
| 960.4533   | 960.4805    | 0.0272  | 28    | 136        | 143      | DEHGFISR         |           |       |                  |      | Mascot      |
| 960.4533   | 960.4805    | 0.0272  | 28    | 136        | 143      | DEHGFISR         |           |       |                  |      | Mascot      |
| 991.4631   | 991.465     | 0.0019  | 2     | 13         | 20       | SPSWDPFR         |           |       |                  |      | Mascot      |
| 1069.5612  | 1069.5614   | 0.0002  | 0     | 5          | 12       | RIPFSFMR         |           |       | Oxidation (M)[7] |      | Mascot      |
| 1088.5483  | 1088.549    | 0.0007  | 1     | 135        | 143      | KDEHGFISR        |           |       |                  |      | Mascot      |
| 1840.944   | 1840.9474   | 0.0034  | 2     | 104        | 119      | ISLDVNHFSPEELNVK |           |       |                  |      | Mascot      |
| 1883.8459  | 1883.8453   | -0.0006 | 0     | 13         | 27       | SPSWDPFRDWYQGSR  |           |       |                  |      | Mascot      |

25 Hook homolog 1 [Danio rerio] gi|190339684 83123.4 5.24 12 51 66.243 33 86.576

#### Peptide Information

| Calc. Mass | Obsrv. Mass | ± da    | ± ppm | Start Seq. | End Seq. | Sequence | Ion Score | C. I. | % Modification   | Rank | Result Type |
|------------|-------------|---------|-------|------------|----------|----------|-----------|-------|------------------|------|-------------|
| 809.3458   | 809.4243    | 0.0785  | 97    | 587        | 592      | KDEDMR   |           |       | Oxidation (M)[5] |      | Mascot      |
| 842.5458   | 842.5125    | -0.0333 | -40   | 636        | 642      | KIIALER  |           |       |                  |      | Mascot      |



|    |                                      |           |         |     |              |         |                   |    |                  |        |        |        |
|----|--------------------------------------|-----------|---------|-----|--------------|---------|-------------------|----|------------------|--------|--------|--------|
|    | 960.4996                             | 960.4805  | -0.0191 | -20 | 323          | 330     | LEDLSDLR          | 33 | 86.576           |        | Mascot |        |
|    | 960.4996                             | 960.4805  | -0.0191 | -20 | 323          | 330     | LEDLSDLR          |    |                  |        | Mascot |        |
|    | 976.488                              | 976.4746  | -0.0134 | -14 | 643          | 650     | ECEQAKLR          |    |                  |        | Mascot |        |
|    | 992.5081                             | 992.4683  | -0.0398 | -40 | 332          | 339     | QMKALEEK          |    | Oxidation (M)[2] |        | Mascot |        |
|    | 992.5081                             | 992.4683  | -0.0398 | -40 | 332          | 339     | QMKALEEK          |    | Oxidation (M)[2] |        | Mascot |        |
|    | 1088.5946                            | 1088.549  | -0.0456 | -42 | 322          | 330     | KLEDLSDLR         |    |                  |        | Mascot |        |
|    | 1165.5956                            | 1165.7485 | 0.1529  | 131 | 577          | 586     | MDELMAALKK        |    | Oxidation (M)[1] |        | Mascot |        |
|    | 1363.6335                            | 1363.7062 | 0.0727  | 53  | 282          | 293     | NDELTSLAEESR      |    |                  |        | Mascot |        |
|    | 1364.6614                            | 1364.6995 | 0.0381  | 28  | 177          | 188     | ALEDLTEVMAEK      |    | Oxidation (M)[9] |        | Mascot |        |
|    | 1364.6614                            | 1364.6995 | 0.0381  | 28  | 177          | 188     | ALEDLTEVMAEK      |    | Oxidation (M)[9] |        | Mascot |        |
|    | 1375.6812                            | 1375.7407 | 0.0595  | 43  | 414          | 424     | DTLRETNEELR       |    |                  |        | Mascot |        |
|    | 1825.0006                            | 1824.9679 | -0.0327 | -18 | 656          | 670     | LIVTAWYNKSLNFQK   |    |                  |        | Mascot |        |
|    | 2000.9415                            | 2001.0725 | 0.131   | 65  | 542          | 558     | LDAHMQVLNEAQDEIMK |    | Oxidation (M)[5] |        | Mascot |        |
| 26 | protein Hook homolog 1 [Danio rerio] |           |         |     | gi 113676708 | 83063.4 | 5.24              | 12 | 50               | 60.338 | 33     | 86.576 |

#### Peptide Information

| Calc. Mass | Obsrv. Mass | ± da    | ± ppm | Start Seq. | End Seq. | Sequence          | Ion Score | C. I.  | % Modification   | Rank | Result Type |
|------------|-------------|---------|-------|------------|----------|-------------------|-----------|--------|------------------|------|-------------|
| 809.3458   | 809.4243    | 0.0785  | 97    | 587        | 592      | KDEDMR            |           |        | Oxidation (M)[5] |      | Mascot      |
| 842.5458   | 842.5125    | -0.0333 | -40   | 636        | 642      | KIALER            |           |        |                  |      | Mascot      |
| 960.4996   | 960.4805    | -0.0191 | -20   | 323        | 330      | LEDLSDLR          | 33        | 86.576 |                  |      | Mascot      |
| 960.4996   | 960.4805    | -0.0191 | -20   | 323        | 330      | LEDLSDLR          |           |        |                  |      | Mascot      |
| 976.488    | 976.4746    | -0.0134 | -14   | 643        | 650      | ECEQAKLR          |           |        |                  |      | Mascot      |
| 992.5081   | 992.4683    | -0.0398 | -40   | 332        | 339      | QMKALEEK          |           |        | Oxidation (M)[2] |      | Mascot      |
| 992.5081   | 992.4683    | -0.0398 | -40   | 332        | 339      | QMKALEEK          |           |        | Oxidation (M)[2] |      | Mascot      |
| 1088.5946  | 1088.549    | -0.0456 | -42   | 322        | 330      | KLEDLSDLR         |           |        |                  |      | Mascot      |
| 1165.5956  | 1165.7485   | 0.1529  | 131   | 577        | 586      | MDELMAALKK        |           |        | Oxidation (M)[1] |      | Mascot      |
| 1363.6335  | 1363.7062   | 0.0727  | 53    | 282        | 293      | NDELTSLAEESR      |           |        |                  |      | Mascot      |
| 1364.6614  | 1364.6995   | 0.0381  | 28    | 177        | 188      | ALEDLTEVMAEK      |           |        | Oxidation (M)[9] |      | Mascot      |
| 1364.6614  | 1364.6995   | 0.0381  | 28    | 177        | 188      | ALEDLTEVMAEK      |           |        | Oxidation (M)[9] |      | Mascot      |
| 1375.6812  | 1375.7407   | 0.0595  | 43    | 414        | 424      | DTLRETNEELR       |           |        |                  |      | Mascot      |
| 1825.0006  | 1824.9679   | -0.0327 | -18   | 656        | 670      | LIVTAWYNKSLNFQK   |           |        |                  |      | Mascot      |
| 2000.9415  | 2001.0725   | 0.131   | 65    | 542        | 558      | LDAHMQVLNEAQDEIMK |           |        | Oxidation (M)[5] |      | Mascot      |

27 novel protein similar to human titin (TTN) [Danio rerio] gi|94732358 2437518.2 5.95 61 45 0

#### Peptide Information

| Calc. Mass | Obsrv. Mass | ± da | ± ppm | Start | End | Sequence | Ion | C. I. | % Modification | Rank | Result Type |
|------------|-------------|------|-------|-------|-----|----------|-----|-------|----------------|------|-------------|
|------------|-------------|------|-------|-------|-----|----------|-----|-------|----------------|------|-------------|

|           |           |         | Seq. | Seq.  | Score |              |        |
|-----------|-----------|---------|------|-------|-------|--------------|--------|
| 808.4423  | 808.4616  | 0.0193  | 24   | 6027  | 6033  | VPRHDGK      | Mascot |
| 809.4515  | 809.4243  | -0.0272 | -34  | 1956  | 1961  | TEYRLK       | Mascot |
| 826.4669  | 826.4489  | -0.018  | -22  | 21022 | 21028 | LTSYKSK      | Mascot |
| 842.4478  | 842.5125  | 0.0647  | 77   | 14643 | 14649 | RDLPEGR      | Mascot |
| 882.4791  | 882.5686  | 0.0895  | 101  | 7328  | 7334  | KEEHAIR      | Mascot |
| 911.4846  | 911.4038  | -0.0808 | -89  | 10200 | 10206 | NSIVWHR      | Mascot |
| 913.4447  | 913.4518  | 0.0071  | 8    | 8243  | 8249  | EFKMSQK      | Mascot |
| 960.4632  | 960.4805  | 0.0173  | 18   | 957   | 965   | DGNEITPSK    | Mascot |
| 960.4996  | 960.4805  | -0.0191 | -20  | 8299  | 8306  | LDEILSDR     | Mascot |
| 976.5648  | 976.4746  | -0.0902 | -92  | 18486 | 18493 | WMKVATLK     | Mascot |
| 982.4774  | 982.4593  | -0.0181 | -18  | 19660 | 19666 | NYCLEKR      | Mascot |
| 984.4818  | 984.4247  | -0.0571 | -58  | 15718 | 15725 | ITGYMVER     | Mascot |
| 984.4818  | 984.4247  | -0.0571 | -58  | 15718 | 15725 | ITGYMVER     | Mascot |
| 991.4955  | 991.465   | -0.0305 | -31  | 6275  | 6283  | VAAENQFGR    | Mascot |
| 992.4294  | 992.4683  | 0.0389  | 39   | 2060  | 2066  | DNMYFFR      | Mascot |
| 992.4294  | 992.4683  | 0.0389  | 39   | 2060  | 2066  | DNMYFFR      | Mascot |
| 998.4359  | 998.4405  | 0.0046  | 5    | 20573 | 20581 | FGDDSCKAR    | Mascot |
| 1016.5047 | 1016.4159 | -0.0888 | -87  | 2091  | 2099  | FDVPDAPQK    | Mascot |
| 1069.5887 | 1069.5614 | -0.0273 | -26  | 3472  | 3480  | NPVIEEQK     | Mascot |
| 1088.5371 | 1088.549  | 0.0119  | 11   | 18012 | 18020 | YALQYSSTR    | Mascot |
| 1118.6681 | 1118.6837 | 0.0156  | 14   | 2025  | 2033  | ILAYVVERR    | Mascot |
| 1118.6681 | 1118.6837 | 0.0156  | 14   | 2025  | 2033  | ILAYVVERR    | Mascot |
| 1165.6324 | 1165.7485 | 0.1161  | 100  | 5141  | 5149  | ITNYTIERR    | Mascot |
| 1211.7106 | 1211.7159 | 0.0053  | 4    | 5565  | 5575  | QNAVNNLVLK   | Mascot |
| 1287.6328 | 1287.673  | 0.0402  | 31   | 7033  | 7042  | KPKEADEWER   | Mascot |
| 1287.7089 | 1287.673  | -0.0359 | -28  | 11103 | 11113 | ELNLVIKEACR  | Mascot |
| 1308.6464 | 1308.7278 | 0.0814  | 62   | 21769 | 21780 | DNAVISITSNMK | Mascot |
| 1309.6854 | 1309.6619 | -0.0235 | -18  | 5761  | 5772  | NTLTTMCLGIVK | Mascot |
| 1313.8038 | 1313.7499 | -0.0539 | -41  | 14716 | 14727 | DVVLKSGEILK  | Mascot |
| 1325.7358 | 1325.76   | 0.0242  | 18   | 5424  | 5435  | EKMVIHAGGVIR | Mascot |
| 1325.7358 | 1325.76   | 0.0242  | 18   | 5424  | 5435  | EKMVIHAGGVIR | Mascot |
| 1347.705  | 1347.7352 | 0.0302  | 22   | 3670  | 3681  | GETALMVRDAIR | Mascot |
| 1363.6787 | 1363.7062 | 0.0275  | 20   | 1861  | 1871  | YQMISEGKVHR  | Mascot |
| 1364.6804 | 1364.6995 | 0.0191  | 14   | 759   | 769   | DEARFEIELSR  | Mascot |
| 1364.6804 | 1364.6995 | 0.0191  | 14   | 759   | 769   | DEARFEIELSR  | Mascot |



# Peptide Information

| Calc. Mass | Obsrv. Mass | ± da    | ± ppm | Start Seq. | End Sequence Seq.  | Ion Score | C. I. % Modification   | Rank | Result Type |
|------------|-------------|---------|-------|------------|--------------------|-----------|------------------------|------|-------------|
| 808.4423   | 808.4616    | 0.0193  | 24    | 6105       | 6111 VPRHDGK       |           |                        |      | Mascot      |
| 809.4515   | 809.4243    | -0.0272 | -34   | 2034       | 2039 TEYRLK        |           |                        |      | Mascot      |
| 826.4669   | 826.4489    | -0.018  | -22   | 21194      | 21200 LTSYKSK      |           |                        |      | Mascot      |
| 842.4478   | 842.5125    | 0.0647  | 77    | 14721      | 14727 RDLPEGR      |           |                        |      | Mascot      |
| 882.4791   | 882.5686    | 0.0895  | 101   | 7406       | 7412 KEEHAIR       |           |                        |      | Mascot      |
| 911.4846   | 911.4038    | -0.0808 | -89   | 10278      | 10284 NSIVWHR      |           |                        |      | Mascot      |
| 913.4447   | 913.4518    | 0.0071  | 8     | 8321       | 8327 EFKMSQK       |           | Oxidation (M)[4]       |      | Mascot      |
| 960.4996   | 960.4805    | -0.0191 | -20   | 8377       | 8384 LDEILSDR      | 20        | 0                      |      | Mascot      |
| 960.4996   | 960.4805    | -0.0191 | -20   | 8377       | 8384 LDEILSDR      |           |                        |      | Mascot      |
| 976.5648   | 976.4746    | -0.0902 | -92   | 18658      | 18665 WMKVATLK     |           |                        |      | Mascot      |
| 982.4774   | 982.4593    | -0.0181 | -18   | 19832      | 19838 NYCLEKR      |           | Carbamidomethyl (C)[3] |      | Mascot      |
| 984.4818   | 984.4247    | -0.0571 | -58   | 15796      | 15803 ITGYMVER     |           | Oxidation (M)[5]       |      | Mascot      |
| 984.4818   | 984.4247    | -0.0571 | -58   | 15796      | 15803 ITGYMVER     |           | Oxidation (M)[5]       |      | Mascot      |
| 991.4955   | 991.465     | -0.0305 | -31   | 6353       | 6361 VAAENQFGR     |           |                        |      | Mascot      |
| 992.4294   | 992.4683    | 0.0389  | 39    | 2138       | 2144 DNMYFFR       |           |                        |      | Mascot      |
| 992.4294   | 992.4683    | 0.0389  | 39    | 2138       | 2144 DNMYFFR       |           |                        |      | Mascot      |
| 998.4359   | 998.4405    | 0.0046  | 5     | 20745      | 20753 FGDDSCAR     |           |                        |      | Mascot      |
| 1016.5047  | 1016.4159   | -0.0888 | -87   | 2169       | 2177 FDVPDAPQK     |           |                        |      | Mascot      |
| 1069.5887  | 1069.5614   | -0.0273 | -26   | 3550       | 3558 NPVIEEQK      |           |                        |      | Mascot      |
| 1088.5371  | 1088.549    | 0.0119  | 11    | 18090      | 18098 YALQYSSTR    |           |                        |      | Mascot      |
| 1118.6681  | 1118.6837   | 0.0156  | 14    | 2103       | 2111 ILAYVVERR     |           |                        |      | Mascot      |
| 1118.6681  | 1118.6837   | 0.0156  | 14    | 2103       | 2111 ILAYVVERR     |           |                        |      | Mascot      |
| 1165.6324  | 1165.7485   | 0.1161  | 100   | 5219       | 5227 ITNYTIERR     |           |                        |      | Mascot      |
| 1211.7106  | 1211.7159   | 0.0053  | 4     | 5643       | 5653 QNAVNNLVLK    |           |                        |      | Mascot      |
| 1287.6328  | 1287.673    | 0.0402  | 31    | 7111       | 7120 KPKEADEWER    |           |                        |      | Mascot      |
| 1287.7089  | 1287.673    | -0.0359 | -28   | 11181      | 11191 ELNLVIKEACR  |           |                        |      | Mascot      |
| 1308.6464  | 1308.7278   | 0.0814  | 62    | 21941      | 21952 DNAVISITSNMK |           | Oxidation (M)[11]      |      | Mascot      |
| 1309.6854  | 1309.6619   | -0.0235 | -18   | 5839       | 5850 NTLTTMCLGIVK  |           | Oxidation (M)[6]       |      | Mascot      |
| 1313.8038  | 1313.7499   | -0.0539 | -41   | 14794      | 14805 DVVLIKSGEILK |           |                        |      | Mascot      |
| 1325.7358  | 1325.76     | 0.0242  | 18    | 5502       | 5513 EKMVIHAGGVIR  |           | Oxidation (M)[3]       |      | Mascot      |
| 1325.7358  | 1325.76     | 0.0242  | 18    | 5502       | 5513 EKMVIHAGGVIR  |           | Oxidation (M)[3]       |      | Mascot      |
| 1347.705   | 1347.7352   | 0.0302  | 22    | 3748       | 3759 GETALMVRDAIR  |           | Oxidation (M)[6]       |      | Mascot      |
| 1363.6787  | 1363.7062   | 0.0275  | 20    | 1939       | 1949 YQMISEGKVHR   |           | Oxidation (M)[3]       |      | Mascot      |

|           |           |         |     |       |       |                            |                                            |        |
|-----------|-----------|---------|-----|-------|-------|----------------------------|--------------------------------------------|--------|
| 1364.6804 | 1364.6995 | 0.0191  | 14  | 837   | 847   | DEARFEIELSR                |                                            | Mascot |
| 1364.6804 | 1364.6995 | 0.0191  | 14  | 837   | 847   | DEARFEIELSR                |                                            | Mascot |
| 1369.7111 | 1369.7268 | 0.0157  | 11  | 3858  | 3868  | EYIFRVTAENK                |                                            | Mascot |
| 1375.7579 | 1375.7407 | -0.0172 | -13 | 17627 | 17638 | EAFSSVIIKEPR               |                                            | Mascot |
| 1382.7678 | 1382.7812 | 0.0134  | 10  | 5201  | 5212  | AEQITLSWLPPK               |                                            | Mascot |
| 1382.7678 | 1382.7812 | 0.0134  | 10  | 5201  | 5212  | AEQITLSWLPPK               |                                            | Mascot |
| 1386.6747 | 1386.6804 | 0.0057  | 4   | 21465 | 21476 | IEETTETAVHEK               |                                            | Mascot |
| 1545.74   | 1545.7358 | -0.0042 | -3  | 14779 | 14791 | DNVDPPRIMMDVK              | Oxidation (M)[9]                           | Mascot |
| 1584.8744 | 1584.8798 | 0.0054  | 3   | 2705  | 2717  | WTKADLVLKPEER              |                                            | Mascot |
| 1660.8574 | 1660.8605 | 0.0031  | 2   | 5143  | 5157  | LVADDSCLLIQQK              | Carbamidomethyl (C)[7]                     | Mascot |
| 1676.8602 | 1676.8582 | -0.002  | -1  | 17490 | 17504 | TWTEAAPKSTQTSR             |                                            | Mascot |
| 1763.7979 | 1763.8062 | 0.0083  | 5   | 18889 | 18903 | YGTGEYLQSEVVMCK            | Carbamidomethyl (C)[14]                    | Mascot |
| 1796.9429 | 1796.9141 | -0.0288 | -16 | 13128 | 13144 | DSVTLVWEPLIDGAK            |                                            | Mascot |
| 1809.0017 | 1808.9633 | -0.0384 | -21 | 14806 | 14822 | INADIAGRPLPVASWTK          |                                            | Mascot |
| 1824.949  | 1824.9679 | 0.0189  | 10  | 10504 | 10521 | KDGGFILTATNVGGFAK          |                                            | Mascot |
| 1825.8749 | 1825.9609 | 0.086   | 47  | 5923  | 5938  | DVNRDMWTTVTSATTK           |                                            | Mascot |
| 1826.8412 | 1826.9823 | 0.1411  | 77  | 5927  | 5942  | DMWTTVTSATTKTHCK           | Oxidation (M)[2]                           | Mascot |
| 1826.9622 | 1826.9823 | 0.0201  | 11  | 7030  | 7044  | LVKAPLVQNCEYFFR            |                                            | Mascot |
| 1840.944  | 1840.9474 | 0.0034  | 2   | 3897  | 3913  | IGEVTSSTVALSWHEPK          |                                            | Mascot |
| 1848.9702 | 1848.9592 | -0.011  | -6  | 10177 | 10192 | ETTSQSWVELSLIIR            |                                            | Mascot |
| 1864.9188 | 1864.9285 | 0.0097  | 5   | 15386 | 15402 | NSITIAWSKPEFDGGSR          |                                            | Mascot |
| 1870.9268 | 1870.942  | 0.0152  | 8   | 6832  | 6847  | FCAFRVPGLNEGIEYR           |                                            | Mascot |
| 1883.8627 | 1883.8453 | -0.0174 | -9  | 5927  | 5942  | DMWTTVTSATTKTHCK           | Carbamidomethyl (C)[15], Oxidation (M)[2]  | Mascot |
| 1899.9116 | 1899.8562 | -0.0554 | -29 | 15755 | 15772 | TSEEVLAIDACDPPANVR         |                                            | Mascot |
| 1957.9601 | 1958.0229 | 0.0628  | 32  | 11983 | 12000 | ESAQIETSSSYTSLVIDK         |                                            | Mascot |
| 1957.9601 | 1958.0229 | 0.0628  | 32  | 11983 | 12000 | ESAQIETSSSYTSLVIDK         |                                            | Mascot |
| 2001.0188 | 2001.0725 | 0.0537  | 27  | 13615 | 13631 | DHIKIQWTKPQYDGGSK          |                                            | Mascot |
| 2060.0447 | 2060.1394 | 0.0947  | 46  | 17955 | 17973 | WSVPLNDGGSPITGYIVER        |                                            | Mascot |
| 2076.1123 | 2076.1316 | 0.0193  | 9   | 12812 | 12830 | DPFIHPGSPQIIEVTNIAK        |                                            | Mascot |
| 2178.144  | 2178.2019 | 0.0579  | 27  | 3160  | 3179  | DTFTTPGPPYALTVEVS<br>KR    |                                            | Mascot |
| 2211.1147 | 2211.1074 | -0.0073 | -3  | 16008 | 16026 | VVWSVISEAMESRMVTV<br>QK    | Oxidation (M)[10, 14]                      | Mascot |
| 2233.0076 | 2233.0769 | 0.0693  | 31  | 13973 | 13992 | VSAENETGVGECSDL<br>FYR     | Carbamidomethyl (C)[12]                    | Mascot |
| 2283.0269 | 2283.1848 | 0.1579  | 69  | 1508  | 1528  | MDDAGEYHCKLPASETT<br>GTLK  | Oxidation (M)[1]                           | Mascot |
| 2284.0583 | 2284.1743 | 0.116   | 51  | 9306  | 9326  | ANTVNNVIDCAYTVADLQE<br>GCK | Carbamidomethyl (C)[9]                     | Mascot |
| 2362.1165 | 2362.188  | 0.0715  | 30  | 18883 | 18903 | VAAANRYGTGEYLQSEV          | Carbamidomethyl (C)[20], Oxidation (M)[19] | Mascot |

|    |                                                                                                    |           |        |    |       |       |                                          |      |    |    |   |                        |        |
|----|----------------------------------------------------------------------------------------------------|-----------|--------|----|-------|-------|------------------------------------------|------|----|----|---|------------------------|--------|
|    | 3338.5608                                                                                          | 3338.7483 | 0.1875 | 56 | 15320 | 15347 | VMCK<br>AWVCVSSNCHSLTYKVE<br>DLQEGAIYYFR |      |    |    |   | Carbamidomethyl (C)[4] | Mascot |
| 29 | PREDICTED: transposon TX1 uncharacterized 149 kDa gi 326664779 protein-like, partial [Danio rerio] |           |        |    |       |       |                                          |      |    |    |   |                        |        |
|    |                                                                                                    |           |        |    |       |       | 131029.7                                 | 9.39 | 18 | 43 | 0 |                        |        |

| Peptide Information |             |         |       |            |          |                             |           |       |   |                         |      |        |      |
|---------------------|-------------|---------|-------|------------|----------|-----------------------------|-----------|-------|---|-------------------------|------|--------|------|
| Calc. Mass          | Obsrv. Mass | ± da    | ± ppm | Start Seq. | End Seq. | Sequence                    | Ion Score | C. I. | % | Modification            | Rank | Result | Type |
| 809.3973            | 809.4243    | 0.027   | 33    | 179        | 184      | LVDCFR                      |           |       |   | Carbamidomethyl (C)[4]  |      | Mascot |      |
| 882.4468            | 882.5686    | 0.1218  | 138   | 50         | 55       | YTKWER                      |           |       |   |                         |      | Mascot |      |
| 911.379             | 911.4038    | 0.0248  | 27    | 369        | 375      | CTCYFFK                     |           |       |   |                         |      | Mascot |      |
| 960.522             | 960.4805    | -0.0415 | -43   | 88         | 96       | GSTVIRDGR                   |           |       |   |                         |      | Mascot |      |
| 960.522             | 960.4805    | -0.0415 | -43   | 88         | 96       | GSTVIRDGR                   |           |       |   |                         |      | Mascot |      |
| 991.4989            | 991.465     | -0.0339 | -34   | 882        | 890      | ENKTAAMAR                   |           |       |   |                         |      | Mascot |      |
| 1088.5371           | 1088.549    | 0.0119  | 11    | 770        | 778      | ENWNDILGK                   |           |       |   |                         |      | Mascot |      |
| 1211.5514           | 1211.7159   | 0.1645  | 136   | 709        | 718      | AMDLDWFGR                   |           |       |   |                         |      | Mascot |      |
| 1309.7046           | 1309.6619   | -0.0427 | -33   | 1110       | 1120     | RMIATTLQGYR                 |           |       |   |                         |      | Mascot |      |
| 1325.6995           | 1325.76     | 0.0605  | 46    | 1110       | 1120     | RMIATTLQGYR                 |           |       |   | Oxidation (M)[2]        |      | Mascot |      |
| 1325.6995           | 1325.76     | 0.0605  | 46    | 1110       | 1120     | RMIATTLQGYR                 |           |       |   | Oxidation (M)[2]        |      | Mascot |      |
| 1375.6899           | 1375.7407   | 0.0508  | 37    | 179        | 189      | LVDCFRTHQR                  |           |       |   |                         |      | Mascot |      |
| 1376.826            | 1376.7115   | -0.1145 | -83   | 22         | 33       | AQSILSLLKTFR                |           |       |   |                         |      | Mascot |      |
| 1472.7644           | 1472.8101   | 0.0457  | 31    | 1039       | 1051     | TGPLYHQYLPAGR               |           |       |   |                         |      | Mascot |      |
| 1660.8087           | 1660.8605   | 0.0518  | 31    | 885        | 898      | TAAMARFWMGSYLR              |           |       |   |                         |      | Mascot |      |
| 1676.8036           | 1676.8582   | 0.0546  | 33    | 885        | 898      | TAAMARFWMGSYLR              |           |       |   | Oxidation (M)[4]        |      | Mascot |      |
| 1796.9014           | 1796.9141   | 0.0127  | 7     | 1024       | 1038     | HLLWECGAARDLWAR             |           |       |   |                         |      | Mascot |      |
| 1826.9357           | 1826.9823   | 0.0466  | 26    | 436        | 451      | NCAVLSQDFTVLEIFK            |           |       |   |                         |      | Mascot |      |
| 1827.0026           | 1826.9823   | -0.0203 | -11   | 609        | 624      | MGFPGKFIWVGLLYK             |           |       |   |                         |      | Mascot |      |
| 1883.9572           | 1883.8453   | -0.1119 | -59   | 436        | 451      | NCAVLSQDFTVLEIFK            |           |       |   | Carbamidomethyl (C)[2]  |      | Mascot |      |
| 1899.9534           | 1899.8562   | -0.0972 | -51   | 1052       | 1068     | AQMDYHLFIHGVGGQGVK          |           |       |   |                         |      | Mascot |      |
| 2225.051            | 2225.1199   | 0.0689  | 31    | 541        | 560      | MSMVLEDVIHPDQACAV<br>PGR    |           |       |   | Carbamidomethyl (C)[15] |      | Mascot |      |
| 2705.314            | 2705.1614   | -0.1526 | -56   | 729        | 751      | SEAQLFGPWDNIQPEGL<br>DMVFRR |           |       |   |                         |      | Mascot |      |

|    |                                                         |  |  |  |  |  |           |         |      |   |    |   |    |        |
|----|---------------------------------------------------------|--|--|--|--|--|-----------|---------|------|---|----|---|----|--------|
| 30 | PREDICTED: hypothetical protein LOC797378 [Danio rerio] |  |  |  |  |  |           |         |      |   |    |   |    |        |
|    |                                                         |  |  |  |  |  | 292622805 | 72531.1 | 6.46 | 4 | 43 | 0 | 35 | 91.151 |

| Peptide Information |             |        |       |            |          |          |           |       |   |                  |      |        |      |
|---------------------|-------------|--------|-------|------------|----------|----------|-----------|-------|---|------------------|------|--------|------|
| Calc. Mass          | Obsrv. Mass | ± da   | ± ppm | Start Seq. | End Seq. | Sequence | Ion Score | C. I. | % | Modification     | Rank | Result | Type |
| 882.4501            | 882.5686    | 0.1185 | 134   | 1          | 7        | MSTRPFK  |           |       |   | Oxidation (M)[1] |      | Mascot |      |

|    |                                                         |           |         |     |              |         |                        |    |        |                     |    |        |
|----|---------------------------------------------------------|-----------|---------|-----|--------------|---------|------------------------|----|--------|---------------------|----|--------|
|    | 1287.7015                                               | 1287.673  | -0.0285 | -22 | 566          | 577     | KNNGLLSESVAR           | 35 | 91.151 |                     |    | Mascot |
|    | 1287.7015                                               | 1287.673  | -0.0285 | -22 | 566          | 577     | KNNGLLSESVAR           |    |        |                     |    | Mascot |
|    | 2177.9326                                               | 2178.2019 | 0.2693  | 124 | 102          | 119     | VSEMENTRDTEMTSFQE<br>K |    |        | Oxidation (M)[4]    |    | Mascot |
|    | 2224.9221                                               | 2225.1199 | 0.1978  | 89  | 51           | 68      | LSEMENTRDTEMTSYEE<br>K |    |        | Oxidation (M)[4,12] |    | Mascot |
| 31 | PREDICTED: hypothetical protein LOC796277 [Danio rerio] |           |         |     | gi 292622807 | 79431.9 | 5.54                   | 4  | 42     | 0                   | 35 | 91.151 |

#### Peptide Information

| Calc. Mass | Obsrv. Mass | ± da    | ± ppm | Start Seq. | End Seq. | Sequence                  | Ion Score | C. I.  | % | Modification        | Rank | Result Type |
|------------|-------------|---------|-------|------------|----------|---------------------------|-----------|--------|---|---------------------|------|-------------|
| 882.4501   | 882.5686    | 0.1185  | 134   | 1          | 7        | MSTRPFK                   |           |        |   | Oxidation (M)[1]    |      | Mascot      |
| 1287.7015  | 1287.673    | -0.0285 | -22   | 638        | 649      | KNNGLLSESVAR              | 35        | 91.151 |   |                     |      | Mascot      |
| 1287.7015  | 1287.673    | -0.0285 | -22   | 638        | 649      | KNNGLLSESVAR              |           |        |   |                     |      | Mascot      |
| 2178.0269  | 2178.2019   | 0.175   | 80    | 280        | 300      | AAELENTRDAADTEASSS<br>ALR |           |        |   |                     |      | Mascot      |
| 2224.9221  | 2225.1199   | 0.1978  | 89    | 51         | 68       | LSEMENTRDTEMTSYEE<br>K    |           |        |   | Oxidation (M)[4,12] |      | Mascot      |

32 iron-sulfur cluster assembly enzyme [Danio rerio] gi|54261801 17796.2 8.7 5 42 0

#### Peptide Information

| Calc. Mass | Obsrv. Mass | ± da    | ± ppm | Start Seq. | End Seq. | Sequence                 | Ion Score | C. I. | % | Modification                              | Rank | Result Type |
|------------|-------------|---------|-------|------------|----------|--------------------------|-----------|-------|---|-------------------------------------------|------|-------------|
| 913.4447   | 913.4518    | 0.0071  | 8     | 10         | 18       | CASSALFSK                |           |       |   |                                           |      | Mascot      |
| 960.5083   | 960.4805    | -0.0278 | -29   | 1          | 9        | MALAAAAWR                |           |       |   |                                           |      | Mascot      |
| 960.5359   | 960.4805    | -0.0554 | -58   | 107        | 115      | GKSIDALK                 | 20        | 0     |   |                                           |      | Mascot      |
| 976.5032   | 976.4746    | -0.0286 | -29   | 1          | 9        | MALAAAAWR                |           |       |   | Oxidation (M)[1]                          |      | Mascot      |
| 1870.9302  | 1870.942    | 0.0118  | 6     | 1          | 18       | MALAAAAWRCASSALFS<br>K   |           |       |   | Oxidation (M)[1]                          |      | Mascot      |
| 2283.1545  | 2283.1848   | 0.0303  | 13    | 124        | 143      | ELCLPPVKLHCSMLAEDA<br>IK |           |       |   | Carbamidomethyl (C)[3], Oxidation (M)[13] |      | Mascot      |

33 ATPase, Ca++ transporting, cardiac muscle, fast twitch 1 like [Danio rerio] gi|117606266 108861.1 5.05 14 41 0

#### Peptide Information

| Calc. Mass | Obsrv. Mass | ± da    | ± ppm | Start Seq. | End Seq. | Sequence  | Ion Score | C. I. | % | Modification | Rank | Result Type |
|------------|-------------|---------|-------|------------|----------|-----------|-----------|-------|---|--------------|------|-------------|
| 826.381    | 826.4489    | 0.0679  | 82    | 669        | 675      | RACCFAR   |           |       |   |              |      | Mascot      |
| 911.4944   | 911.4038    | -0.0906 | -99   | 676        | 683      | VEPSHKSK  |           |       |   |              |      | Mascot      |
| 913.4737   | 913.4518    | -0.0219 | -24   | 513        | 521      | GAPEGVIDR |           |       |   |              |      | Mascot      |
| 960.5546   | 960.4805    | -0.0741 | -77   | 540        | 547      | DKIMNVIK  |           |       |   |              |      | Mascot      |

|    |                                                       |              |         |      |     |     |                           |                   |        |  |  |  |        |
|----|-------------------------------------------------------|--------------|---------|------|-----|-----|---------------------------|-------------------|--------|--|--|--|--------|
|    | 960.5546                                              | 960.4805     | -0.0741 | -77  | 540 | 547 | DKIMNVIK                  |                   |        |  |  |  | Mascot |
|    | 976.5495                                              | 976.4746     | -0.0749 | -77  | 540 | 547 | DKIMNVIK                  | Oxidation (M)[4]  |        |  |  |  | Mascot |
|    | 982.4186                                              | 982.4593     | 0.0407  | 41   | 121 | 128 | EYEPENMGK                 |                   |        |  |  |  | Mascot |
|    | 998.4135                                              | 998.4405     | 0.027   | 27   | 121 | 128 | EYEPENMGK                 | Oxidation (M)[6]  |        |  |  |  | Mascot |
|    | 1006.5237                                             | 1006.399     | -0.1247 | -124 | 618 | 626 | VIMITGDNK                 | Oxidation (M)[3]  |        |  |  |  | Mascot |
|    | 1287.709                                              | 1287.673     | -0.036  | -28  | 558 | 569 | CLALATRDSPK               |                   |        |  |  |  | Mascot |
|    | 1287.709                                              | 1287.673     | -0.036  | -28  | 558 | 569 | CLALATRDSPK               |                   |        |  |  |  | Mascot |
|    | 1347.6296                                             | 1347.7352    | 0.1056  | 78   | 670 | 681 | ACCFARVEPSHK              |                   |        |  |  |  | Mascot |
|    | 1364.7361                                             | 1364.6995    | -0.0366 | -27  | 823 | 833 | EPLISGWLFRR               |                   |        |  |  |  | Mascot |
|    | 1364.7361                                             | 1364.6995    | -0.0366 | -27  | 823 | 833 | EPLISGWLFRR               |                   |        |  |  |  | Mascot |
|    | 1369.627                                              | 1369.7268    | 0.0998  | 73   | 36  | 47  | YGYNELPAEEGK              |                   |        |  |  |  | Mascot |
|    | 1375.725                                              | 1375.7407    | 0.0157  | 11   | 711 | 725 | AEIGIAMSGTAVAK            |                   |        |  |  |  | Mascot |
|    | 1676.9159                                             | 1676.8582    | -0.0577 | -34  | 820 | 833 | SPKEPLISGWLFRR            |                   |        |  |  |  | Mascot |
|    | 1957.9501                                             | 1958.0229    | 0.0728  | 37   | 636 | 653 | IGIFSEDEDVTGKAYTGR        |                   |        |  |  |  | Mascot |
|    | 1957.9501                                             | 1958.0229    | 0.0728  | 37   | 636 | 653 | IGIFSEDEDVTGKAYTGR        |                   |        |  |  |  | Mascot |
|    | 2362.073                                              | 2362.188     | 0.115   | 49   | 581 | 601 | FADYETDLTFVGCVGML<br>DPPR | Oxidation (M)[16] |        |  |  |  | Mascot |
| 34 | PREDICTED: zinc finger protein 271-like [Danio rerio] | gi 326675814 | 34998.3 | 9.18 | 5   | 41  | 0                         | 33                | 85.305 |  |  |  |        |



|  |           |           |         |     |     |     |                 |  |  |  |  |  |  |  |  |  |        |
|--|-----------|-----------|---------|-----|-----|-----|-----------------|--|--|--|--|--|--|--|--|--|--------|
|  | 1006.4952 | 1006.399  | -0.0962 | -96 | 71  | 79  | GPQYGTVER       |  |  |  |  |  |  |  |  |  | Mascot |
|  | 1309.5916 | 1309.6619 | 0.0703  | 54  | 80  | 90  | AWCALMTEAEK     |  |  |  |  |  |  |  |  |  | Mascot |
|  | 1325.5864 | 1325.76   | 0.1736  | 131 | 80  | 90  | AWCALMTEAEK     |  |  |  |  |  |  |  |  |  | Mascot |
|  | 1325.5864 | 1325.76   | 0.1736  | 131 | 80  | 90  | AWCALMTEAEK     |  |  |  |  |  |  |  |  |  | Mascot |
|  | 1376.7321 | 1376.7115 | -0.0206 | -15 | 116 | 127 | DAYHKQIGGFK     |  |  |  |  |  |  |  |  |  | Mascot |
|  | 1380.5736 | 1380.7196 | 0.146   | 106 | 460 | 470 | LSEEDQGWCK      |  |  |  |  |  |  |  |  |  | Mascot |
|  | 1382.691  | 1382.7812 | 0.0902  | 65  | 379 | 391 | HEEAVAQTAAVEK   |  |  |  |  |  |  |  |  |  | Mascot |
|  | 1382.691  | 1382.7812 | 0.0902  | 65  | 379 | 391 | HEEAVAQTAAVEK   |  |  |  |  |  |  |  |  |  | Mascot |
|  | 1660.7772 | 1660.8605 | 0.0833  | 50  | 171 | 185 | ENSSKLDNSNPEAQK |  |  |  |  |  |  |  |  |  | Mascot |
|  | 1676.7665 | 1676.8582 | 0.0917  | 55  | 35  | 48  | LCNDLMSCLHERAR  |  |  |  |  |  |  |  |  |  | Mascot |

36 WASH complex subunit strumpellin [Danio rerio] gi|41055722 133513.6 6.58 16 40 0

#### Peptide Information

| Calc. Mass | Obsrv. Mass | ± da    | ± ppm | Start Seq. | End Seq. | Sequence             | Ion Score | C. I. | % Modification          | Rank | Result Type |
|------------|-------------|---------|-------|------------|----------|----------------------|-----------|-------|-------------------------|------|-------------|
| 809.3392   | 809.4243    | 0.0851  | 105   | 1059       | 1065     | SQGMACR              |           |       | Carbamidomethyl (C)[6]  |      | Mascot      |
| 960.5083   | 960.4805    | -0.0278 | -29   | 530        | 536      | FLHQMIR              |           |       | Oxidation (M)[5]        |      | Mascot      |
| 960.5294   | 960.4805    | -0.0489 | -51   | 951        | 958      | VGQMQLR              | 1         | 0     | Oxidation (M)[4]        |      | Mascot      |
| 982.5463   | 982.4593    | -0.087  | -89   | 879        | 886      | LLCFMIVK             |           |       | Oxidation (M)[5]        |      | Mascot      |
| 1016.5444  | 1016.4159   | -0.1285 | -126  | 732        | 740      | AKPSELMPK            |           |       | Oxidation (M)[7]        |      | Mascot      |
| 1069.6364  | 1069.5614   | -0.075  | -70   | 22         | 31       | GNAIIAELLR           |           |       |                         |      | Mascot      |
| 1088.6034  | 1088.549    | -0.0544 | -50   | 529        | 536      | KFLHQMIR             |           |       | Oxidation (M)[6]        |      | Mascot      |
| 1211.5396  | 1211.7159   | 0.1763  | 146   | 1105       | 1114     | SIMEQCTSQK           |           |       | Carbamidomethyl (C)[6]  |      | Mascot      |
| 1287.6903  | 1287.673    | -0.0173 | -13   | 394        | 404      | QIKDQVINDSK          |           |       |                         |      | Mascot      |
| 1287.6903  | 1287.673    | -0.0173 | -13   | 394        | 404      | QIKDQVINDSK          |           |       |                         |      | Mascot      |
| 1382.7024  | 1382.7812   | 0.0788  | 57    | 940        | 950      | IWSPYLESIMK          |           |       | Oxidation (M)[10]       |      | Mascot      |
| 1382.7024  | 1382.7812   | 0.0788  | 57    | 940        | 950      | IWSPYLESIMK          |           |       | Oxidation (M)[10]       |      | Mascot      |
| 1676.9292  | 1676.8582   | -0.071  | -42   | 626        | 640      | VLQIIPESMFTSLAK      |           |       |                         |      | Mascot      |
| 1763.8751  | 1763.8062   | -0.0689 | -39   | 1142       | 1156     | VAEAHVPSFIFDEFRR     |           |       |                         |      | Mascot      |
| 1824.9054  | 1824.9679   | 0.0625  | 34    | 754        | 768      | SFEYIQDYVSIYGLK      |           |       |                         |      | Mascot      |
| 1870.9116  | 1870.942    | 0.0304  | 16    | 811        | 826      | YPSVDESATFIGRLCR     |           |       | Carbamidomethyl (C)[15] |      | Mascot      |
| 2283.1035  | 2283.1848   | 0.0813  | 36    | 1115       | 1134     | IPDMPSDVVGALMFLEDYVR |           |       | Oxidation (M)[4]        |      | Mascot      |
| 2362.2368  | 2362.188    | -0.0488 | -21   | 1          | 21       | MVDFLAENNLGQAILRIVSR |           |       |                         |      | Mascot      |

37 PREDICTED: microtubule-actin cross-linking factor 1, isoforms 1/2/3/5-like [Danio rerio] gi|326674648 241937 5.5 24 40 0

#### Peptide Information

|  | Calc. Mass | Obsrv. Mass | ± da    | ± ppm | Start Seq. | End Sequence Seq.         | Ion Score | C. I. % Modification |  |                         |  | Rank | Result Type |
|--|------------|-------------|---------|-------|------------|---------------------------|-----------|----------------------|--|-------------------------|--|------|-------------|
|  | 808.4562   | 808.4616    | 0.0054  | 7     | 1023       | 1028 ELYQKK               |           |                      |  |                         |  |      | Mascot      |
|  | 826.3512   | 826.4489    | 0.0977  | 118   | 27         | 32 ECYQQR                 |           |                      |  |                         |  |      | Mascot      |
|  | 960.5472   | 960.4805    | -0.0667 | -69   | 206        | 214 DGRSTLALK             | 2         | 0                    |  |                         |  |      | Mascot      |
|  | 960.5472   | 960.4805    | -0.0667 | -69   | 206        | 214 DGRSTLALK             |           |                      |  |                         |  |      | Mascot      |
|  | 976.5574   | 976.4746    | -0.0828 | -85   | 1551       | 1558 VFQREL GK            |           |                      |  |                         |  |      | Mascot      |
|  | 991.4778   | 991.465     | -0.0128 | -13   | 1232       | 1239 MHAYTNVR             |           |                      |  |                         |  |      | Mascot      |
|  | 1006.4444  | 1006.399    | -0.0454 | -45   | 1972       | 1980 QVQCNCNPK            |           |                      |  |                         |  |      | Mascot      |
|  | 1069.5386  | 1069.5614   | 0.0228  | 21    | 1899       | 1907 DQDGRITHK            |           |                      |  |                         |  |      | Mascot      |
|  | 1088.6609  | 1088.549    | -0.1119 | -103  | 2005       | 2013 ILRSTLMVR            |           |                      |  |                         |  |      | Mascot      |
|  | 1211.6014  | 1211.7159   | 0.1145  | 95    | 669        | 678 DTEEQHLAIR            |           |                      |  |                         |  |      | Mascot      |
|  | 1308.7271  | 1308.7278   | 0.0007  | 1     | 1540       | 1550 DLVNNLIDKHK          |           |                      |  |                         |  |      | Mascot      |
|  | 1309.6456  | 1309.6619   | 0.0163  | 12    | 1012       | 1021 EQLCDLKEFK           |           |                      |  | Carbamidomethyl (C)[4]  |  |      | Mascot      |
|  | 1325.7939  | 1325.76     | -0.0339 | -26   | 800        | 810 WLLNLLDLAVR           |           |                      |  |                         |  |      | Mascot      |
|  | 1325.7939  | 1325.76     | -0.0339 | -26   | 800        | 810 WLLNLLDLAVR           |           |                      |  |                         |  |      | Mascot      |
|  | 1347.7128  | 1347.7352   | 0.0224  | 17    | 1981       | 1991 RFQVEQISANR          |           |                      |  |                         |  |      | Mascot      |
|  | 1363.7692  | 1363.7062   | -0.063  | -46   | 633        | 644 ESIAEHKPLIAR          |           |                      |  |                         |  |      | Mascot      |
|  | 1364.6917  | 1364.6995   | 0.0078  | 6     | 106        | 117 SPLSQYGSVDRR          |           |                      |  |                         |  |      | Mascot      |
|  | 1364.6917  | 1364.6995   | 0.0078  | 6     | 105        | 116 RSPLSQYGSVDR          |           |                      |  |                         |  |      | Mascot      |
|  | 1382.6919  | 1382.7812   | 0.0893  | 65    | 1448       | 1458 SKRPMYEACLK          |           |                      |  | Carbamidomethyl (C)[9]  |  |      | Mascot      |
|  | 1382.6919  | 1382.7812   | 0.0893  | 65    | 1448       | 1458 SKRPMYEACLK          |           |                      |  | Carbamidomethyl (C)[9]  |  |      | Mascot      |
|  | 1386.6504  | 1386.6804   | 0.03    | 22    | 387        | 397 LQQCAHELM EK          |           |                      |  | Carbamidomethyl (C)[4]  |  |      | Mascot      |
|  | 1584.7573  | 1584.8798   | 0.1225  | 77    | 1525       | 1539 AEPQLAEDVPVCGEK      |           |                      |  |                         |  |      | Mascot      |
|  | 1676.8563  | 1676.8582   | 0.0019  | 1     | 1734       | 1748 ILDWICAAEDSLSLK      |           |                      |  |                         |  |      | Mascot      |
|  | 1840.9333  | 1840.9474   | 0.0141  | 8     | 355        | 371 SAERAMLHLQEATGQAK     |           |                      |  |                         |  |      | Mascot      |
|  | 1957.947   | 1958.0229   | 0.0759  | 39    | 381        | 397 SADLGKLQQCAHELM EK    |           |                      |  | Carbamidomethyl (C)[10] |  |      | Mascot      |
|  | 1957.947   | 1958.0229   | 0.0759  | 39    | 381        | 397 SADLGKLQQCAHELM EK    |           |                      |  | Carbamidomethyl (C)[10] |  |      | Mascot      |
|  | 2001.0498  | 2001.0725   | 0.0227  | 11    | 1424       | 1440 EIAVSQEEIKQLTEQK     |           |                      |  |                         |  |      | Mascot      |
|  | 2076.1375  | 2076.1316   | -0.0059 | -3    | 1636       | 1653 VLKYGVLP EEE EALLAFR |           |                      |  |                         |  |      | Mascot      |

38 PREDICTED: microtubule-actin cross-linking factor 1, gi|326676746 611122.1 5.33 28 39 0 22 0  
isoforms 1/2/3/5 [Danio rerio]

Peptide Information

|  | Calc. Mass | Obsrv. Mass | ± da   | ± ppm | Start Seq. | End Sequence Seq. | Ion Score | C. I. % Modification |  |  |  | Rank | Result Type |
|--|------------|-------------|--------|-------|------------|-------------------|-----------|----------------------|--|--|--|------|-------------|
|  | 808.3658   | 808.4616    | 0.0958 | 119   | 4667       | 4673 WDTVCGK      |           |                      |  |  |  |      | Mascot      |

|           |                                     |         |      |             |      |                            |      |   |    |                        |  |        |
|-----------|-------------------------------------|---------|------|-------------|------|----------------------------|------|---|----|------------------------|--|--------|
| 882.4427  | 882.5686                            | 0.1259  | 143  | 3953        | 3959 | EQLAEHR                    |      |   |    |                        |  | Mascot |
| 913.4196  | 913.4518                            | 0.0322  | 35   | 817         | 823  | RQYTC DK                   |      |   |    |                        |  | Mascot |
| 960.4744  | 960.4805                            | 0.0061  | 6    | 2222        | 2229 | LESNVNER                   | 22   | 0 |    |                        |  | Mascot |
| 960.4744  | 960.4805                            | 0.0061  | 6    | 2222        | 2229 | LESNVNER                   |      |   |    |                        |  | Mascot |
| 976.5421  | 976.4746                            | -0.0675 | -69  | 3776        | 3784 | VKTDSL SAR                 |      |   |    |                        |  | Mascot |
| 1006.5237 | 1006.399                            | -0.1247 | -124 | 3631        | 3639 | ELKCVSAEK                  |      |   |    |                        |  | Mascot |
| 1069.6364 | 1069.5614                           | -0.075  | -70  | 3162        | 3171 | LADLQALLGR                 |      |   |    |                        |  | Mascot |
| 1088.5695 | 1088.549                            | -0.0205 | -19  | 1170        | 1179 | SLQAAESQVR                 |      |   |    |                        |  | Mascot |
| 1165.6953 | 1165.7485                           | 0.0532  | 46   | 4875        | 4883 | HWITIIRAR                  |      |   |    |                        |  | Mascot |
| 1287.5997 | 1287.673                            | 0.0733  | 57   | 3570        | 3581 | SRYAEMTAGSSK               |      |   |    |                        |  | Mascot |
| 1287.5997 | 1287.673                            | 0.0733  | 57   | 3570        | 3581 | SRYAEMTAGSSK               |      |   |    |                        |  | Mascot |
| 1309.6205 | 1309.6619                           | 0.0414  | 32   | 975         | 985  | NISSWSLDTMR                |      |   |    |                        |  | Mascot |
| 1313.7172 | 1313.7499                           | 0.0327  | 25   | 3114        | 3125 | EGSSPDLLALRR               |      |   |    |                        |  | Mascot |
| 1325.6155 | 1325.76                             | 0.1445  | 109  | 975         | 985  | NISSWSLDTMR                |      |   |    | Oxidation (M)[10]      |  | Mascot |
| 1325.6155 | 1325.76                             | 0.1445  | 109  | 975         | 985  | NISSWSLDTMR                | 3    | 0 |    | Oxidation (M)[10]      |  | Mascot |
| 1347.7015 | 1347.7352                           | 0.0337  | 25   | 5157        | 5167 | RFQVEQIGENK                |      |   |    |                        |  | Mascot |
| 1363.6635 | 1363.7062                           | 0.0427  | 31   | 3319        | 3330 | GTVEMIRAEGER               |      |   |    | Oxidation (M)[5]       |  | Mascot |
| 1375.7328 | 1375.7407                           | 0.0079  | 6    | 3191        | 3201 | QQLQEFAVER                 |      |   |    |                        |  | Mascot |
| 1380.6866 | 1380.7196                           | 0.033   | 24   | 3676        | 3686 | YRQADETITQR                |      |   |    |                        |  | Mascot |
| 1660.9116 | 1660.8605                           | -0.0511 | -31  | 2077        | 2092 | QGSVDATLDSVSKLLK           |      |   |    |                        |  | Mascot |
| 1676.7367 | 1676.8582                           | 0.1215  | 72   | 3098        | 3112 | SELENHGGECTMLR             |      |   |    |                        |  | Mascot |
| 1809.0956 | 1808.9633                           | -0.1323 | -73  | 4541        | 4556 | QDVVLIKNLLSVQAR            |      |   |    |                        |  | Mascot |
| 1840.995  | 1840.9474                           | -0.0476 | -26  | 3924        | 3939 | MDPLLETLEGAVQRLR           |      |   |    |                        |  | Mascot |
| 1848.8326 | 1848.9592                           | 0.1266  | 68   | 3098        | 3113 | SELENHGGECTMLRR            |      |   |    | Oxidation (M)[13]      |  | Mascot |
| 1864.8932 | 1864.9285                           | 0.0353  | 19   | 4943        | 4957 | TLITEHQVFMEEMTR            |      |   |    |                        |  | Mascot |
| 1884.0337 | 1883.8453                           | -0.1884 | -100 | 1432        | 1448 | VGQVSDLLGWVKGLQER          |      |   |    |                        |  | Mascot |
| 2001.0763 | 2001.0725                           | -0.0038 | -2   | 2973        | 2989 | SQQELLNSVQPQVVYLR          |      |   |    |                        |  | Mascot |
| 2211.1301 | 2211.1074                           | -0.0227 | -10  | 5184        | 5203 | STVMVRVGGGWALDE<br>FLVK    |      |   |    | Oxidation (M)[4]       |  | Mascot |
| 2225.1382 | 2225.1199                           | -0.0183 | -8   | 1119        | 1137 | RCVSFFEEKPTSSSPVL<br>R     |      |   |    | Carbamidomethyl (C)[2] |  | Mascot |
| 2233.0593 | 2233.0769                           | 0.0176  | 8    | 2458        | 2476 | QLEDIDSRWTNANQTAS<br>QR    |      |   |    |                        |  | Mascot |
| 2705.3174 | 2705.1614                           | -0.156  | -58  | 684         | 705  | CLESLRAFVSHCTEELIW<br>LNER |      |   |    | Carbamidomethyl (C)[1] |  | Mascot |
| 39        | ADP/ATP translocase 1 [Danio rerio] |         |      | gi 47550717 |      | 32667.2                    | 9.74 | 8 | 39 | 0                      |  |        |

Peptide Information

| Calc. Mass | Obsrv. Mass | ± da | ± ppm | Start Seq. | End Seq. | Sequence | Ion Score | C. I. | % Modification | Rank | Result Type |
|------------|-------------|------|-------|------------|----------|----------|-----------|-------|----------------|------|-------------|
|------------|-------------|------|-------|------------|----------|----------|-----------|-------|----------------|------|-------------|

|           |           |         |      |     |     |                             |                      |        |
|-----------|-----------|---------|------|-----|-----|-----------------------------|----------------------|--------|
| 976.5825  | 976.4746  | -0.1079 | -110 | 97  | 105 | KIFLGGVDK                   |                      | Mascot |
| 984.4423  | 984.4247  | -0.0176 | -18  | 238 | 245 | MMMQSGRK                    | Oxidation (M)[1]     | Mascot |
| 984.4423  | 984.4247  | -0.0176 | -18  | 238 | 245 | MMMQSGRK                    | Oxidation (M)[1]     | Mascot |
| 998.4941  | 998.4405  | -0.0536 | -54  | 264 | 272 | DEGGKAFFK                   |                      | Mascot |
| 1016.4321 | 1016.4159 | -0.0162 | -16  | 238 | 245 | MMMQSGRK                    | Oxidation (M)[1,2,3] | Mascot |
| 1363.842  | 1363.7062 | -0.1358 | -100 | 32  | 43  | VKLLQVQHASK                 |                      | Mascot |
| 1957.9728 | 1958.0229 | 0.0501  | 26   | 189 | 206 | AAYFGIYDTAKGMLPDPK          |                      | Mascot |
| 1957.9728 | 1958.0229 | 0.0501  | 26   | 189 | 206 | AAYFGIYDTAKGMLPDPK          |                      | Mascot |
| 2283.2053 | 2283.1848 | -0.0205 | -9   | 1   | 23  | MSDAAISFLKDFLAGGVA<br>AAISK |                      | Mascot |
| 2284.2236 | 2284.1743 | -0.0493 | -22  | 73  | 92  | GNLANVIRYFPTQALNFA<br>FK    |                      | Mascot |
| 2362.3127 | 2362.188  | -0.1247 | -53  | 273 | 295 | GALSNVIRGAGGAFVLVL<br>YDEIK |                      | Mascot |

### Peptide Information

|           |           |         |     |       |       |                   |                                |
|-----------|-----------|---------|-----|-------|-------|-------------------|--------------------------------|
| 1118.6681 | 1118.6837 | 0.0156  | 14  | 8843  | 8851  | ILAYVVERR         | Mascot                         |
| 1118.6681 | 1118.6837 | 0.0156  | 14  | 8843  | 8851  | ILAYVVERR         | Mascot                         |
| 1165.6324 | 1165.7485 | 0.1161  | 100 | 11959 | 11967 | ITNYTIERR         | Mascot                         |
| 1211.7106 | 1211.7159 | 0.0053  | 4   | 12383 | 12393 | QNAVNNLVLK        | Mascot                         |
| 1287.6328 | 1287.673  | 0.0402  | 31  | 13851 | 13860 | KPKEADEWER        | Mascot                         |
| 1287.7089 | 1287.673  | -0.0359 | -28 | 17921 | 17931 | ELNLVIKEACR       | Mascot                         |
| 1308.6464 | 1308.7278 | 0.0814  | 62  | 28587 | 28598 | DNAVISITSNMK      | Oxidation (M)[11] Mascot       |
| 1309.6854 | 1309.6619 | -0.0235 | -18 | 12579 | 12590 | NLTMTMCLGIVK      | Oxidation (M)[6] Mascot        |
| 1313.8038 | 1313.7499 | -0.0539 | -41 | 21534 | 21545 | DVVLKSGEILK       | Mascot                         |
| 1325.6254 | 1325.76   | 0.1346  | 102 | 6025  | 6035  | TDEISEMKQTK       | Oxidation (M)[7] Mascot        |
| 1325.7358 | 1325.76   | 0.0242  | 18  | 12242 | 12253 | EKMVIHAGGVIR      | Oxidation (M)[3] Mascot        |
| 1347.705  | 1347.7352 | 0.0302  | 22  | 10488 | 10499 | GETALMVRDAIR      | Oxidation (M)[6] Mascot        |
| 1363.6787 | 1363.7062 | 0.0275  | 20  | 8679  | 8689  | YQMISEGKVHR       | Oxidation (M)[3] Mascot        |
| 1364.7096 | 1364.6995 | -0.0101 | -7  | 5233  | 5243  | LDNLFFIEEPK       | Mascot                         |
| 1364.7096 | 1364.6995 | -0.0101 | -7  | 5233  | 5243  | LDNLFFIEEPK       | Mascot                         |
| 1369.7322 | 1369.7268 | -0.0054 | -4  | 5779  | 5789  | EIEIPQEKIDR       | Mascot                         |
| 1375.7579 | 1375.7407 | -0.0172 | -13 | 24367 | 24378 | EAFFSVIIKEPR      | Mascot                         |
| 1376.7784 | 1376.7115 | -0.0669 | -49 | 5521  | 5532  | LTVLADQIQFTK      | Mascot                         |
| 1380.7052 | 1380.7196 | 0.0144  | 10  | 4758  | 4770  | CHAQVVAVTEPAR     | Mascot                         |
| 1382.7678 | 1382.7812 | 0.0134  | 10  | 11941 | 11952 | AEQITLSWLPPK      | Mascot                         |
| 1382.8002 | 1382.7812 | -0.019  | -14 | 5914  | 5926  | AAVQPSEKKPVTK     | Mascot                         |
| 1386.6747 | 1386.6804 | 0.0057  | 4   | 28111 | 28122 | IEETTETAVHEK      | Mascot                         |
| 1472.7301 | 1472.8101 | 0.08    | 54  | 5611  | 5623  | STAELYLSGKEMK     | Oxidation (M)[12] Mascot       |
| 1545.74   | 1545.7358 | -0.0042 | -3  | 21519 | 21531 | DNVDPPRIMMDVK     | Oxidation (M)[9] Mascot        |
| 1584.8744 | 1584.8798 | 0.0054  | 3   | 9445  | 9457  | WTKADLVLPKPEER    | Mascot                         |
| 1660.8574 | 1660.8605 | 0.0031  | 2   | 11883 | 11897 | LVADDSCLLIQQK     | Carbamidomethyl (C)[7] Mascot  |
| 1676.8602 | 1676.8582 | -0.002  | -1  | 24230 | 24244 | TWTEAAPKSTQTSLR   | Mascot                         |
| 1763.7979 | 1763.8062 | 0.0083  | 5   | 25535 | 25549 | YGTGEYLQSEVVMCK   | Carbamidomethyl (C)[14] Mascot |
| 1796.9429 | 1796.9141 | -0.0288 | -16 | 19868 | 19884 | DSVTLVWEPLIDGGAK  | Mascot                         |
| 1809.0017 | 1808.9633 | -0.0384 | -21 | 21546 | 21562 | INADIAGRPLPVASWTK | Mascot                         |
| 1824.949  | 1824.9679 | 0.0189  | 10  | 17244 | 17261 | KDGGFILTATNVGGFAK | Mascot                         |
| 1825.9589 | 1825.9609 | 0.002   | 1   | 1699  | 1715  | NGQAISASNKIHMVIDK | Mascot                         |
| 1826.8412 | 1826.9823 | 0.1411  | 77  | 12667 | 12682 | DMWTTVTSTATTCK    | Oxidation (M)[2] Mascot        |
| 1826.9622 | 1826.9823 | 0.0201  | 11  | 13770 | 13784 | LVKAPLVQNCEYFFR   | Mascot                         |
| 1840.944  | 1840.9474 | 0.0034  | 2   | 10637 | 10653 | IGEVTSSTVALSWHEPK | Mascot                         |
| 1848.9602 | 1848.9592 | -0.001  | -1  | 5081  | 5096  | VSGSQPLSVIYKDNR   | Mascot                         |
| 1864.9188 | 1864.9285 | 0.0097  | 5   | 22126 | 22142 | NSITIAWSKPEFDGGSR | Mascot                         |

|           |           |         |    |       |       |                              |                                            |        |
|-----------|-----------|---------|----|-------|-------|------------------------------|--------------------------------------------|--------|
| 1870.9545 | 1870.942  | -0.0125 | -7 | 1312  | 1327  | RTQEGYYEAITAVELK             |                                            | Mascot |
| 1883.8627 | 1883.8453 | -0.0174 | -9 | 12667 | 12682 | DMWTTVTTSATTKTHCK            | Carbamidomethyl (C)[15], Oxidation (M)[2]  | Mascot |
| 1899.8276 | 1899.8562 | 0.0286  | 15 | 8516  | 8533  | DCSLADEGEYTVVAGADK           | Carbamidomethyl (C)[2]                     | Mascot |
| 1957.9865 | 1958.0229 | 0.0364  | 19 | 1313  | 1329  | TQEGYYEAITAVELKSR            |                                            | Mascot |
| 1957.9865 | 1958.0229 | 0.0364  | 19 | 1313  | 1329  | TQEGYYEAITAVELKSR            |                                            | Mascot |
| 2001.0188 | 2001.0725 | 0.0537  | 27 | 20355 | 20371 | DHIKIQWTKPQYDGGSK            |                                            | Mascot |
| 2060.0447 | 2060.1394 | 0.0947  | 46 | 24695 | 24713 | WSVPLNDGGSPITGYIVER          |                                            | Mascot |
| 2076.1123 | 2076.1316 | 0.0193  | 9  | 19552 | 19570 | DPFIHPGSPQIIEVTNIAK          |                                            | Mascot |
| 2178.144  | 2178.2019 | 0.0579  | 27 | 9900  | 9919  | DTFTTPGPPYALTVEVSKR          |                                            | Mascot |
| 2211.1147 | 2211.1074 | -0.0073 | -3 | 22748 | 22766 | VVWSVISEAMESRMVTVQK          | Oxidation (M)[10,14]                       | Mascot |
| 2233.0076 | 2233.0769 | 0.0693  | 31 | 20713 | 20732 | VSAENETGVGECSDLSEFYR         | Carbamidomethyl (C)[12]                    | Mascot |
| 2283.0269 | 2283.1848 | 0.1579  | 69 | 8248  | 8268  | MDDAGEYHCKLPASETTGTLK        | Oxidation (M)[1]                           | Mascot |
| 2284.0583 | 2284.1743 | 0.116   | 51 | 16046 | 16066 | ANTVNVIDCAYTVADLQEGCK        | Carbamidomethyl (C)[9]                     | Mascot |
| 2362.1165 | 2362.188  | 0.0715  | 30 | 25529 | 25549 | VAAANRYGTGEYLGSEVMCK         | Carbamidomethyl (C)[20], Oxidation (M)[19] | Mascot |
| 3338.5608 | 3338.7483 | 0.1875  | 56 | 22060 | 22087 | AWVCVSSNCHSLTYKVELDQEGAIYYFR | Carbamidomethyl (C)[4]                     | Mascot |

41 PREDICTED: hypothetical protein LOC100536975 gi|326679271 234171 8.98 23 39 0  
[Danio rerio]

#### Peptide Information

| Calc. Mass | Obsrv. Mass | ± da    | ± ppm | Start Seq. | End Seq. | Sequence     | Ion Score | C. I. % Modification | Rank | Result Type |
|------------|-------------|---------|-------|------------|----------|--------------|-----------|----------------------|------|-------------|
| 991.4439   | 991.465     | 0.0211  | 21    | 1568       | 1575     | DQDSNERK     |           |                      |      | Mascot      |
| 1006.5217  | 1006.399    | -0.1227 | -122  | 201        | 208      | AEFAWARR     |           |                      |      | Mascot      |
| 1088.5483  | 1088.549    | 0.0007  | 1     | 259        | 266      | RDWENLQK     |           |                      |      | Mascot      |
| 1118.6567  | 1118.6837   | 0.027   | 24    | 1004       | 1014     | GVFAALGDIKK  |           |                      |      | Mascot      |
| 1118.6567  | 1118.6837   | 0.027   | 24    | 1003       | 1013     | KGVFAALGDIK  |           |                      |      | Mascot      |
| 1165.5887  | 1165.7485   | 0.1598  | 137   | 1450       | 1458     | YSVEEWPKK    |           |                      |      | Mascot      |
| 1211.6266  | 1211.7159   | 0.0893  | 74    | 1132       | 1142     | NEVVDPSQVPK  |           |                      |      | Mascot      |
| 1287.6903  | 1287.673    | -0.0173 | -13   | 278        | 288      | KIQLVDSVDDR  |           |                      |      | Mascot      |
| 1287.6903  | 1287.673    | -0.0173 | -13   | 278        | 288      | KIQLVDSVDDR  |           |                      |      | Mascot      |
| 1308.7383  | 1308.7278   | -0.0105 | -8    | 719        | 729      | IDLLISHREGR  |           |                      |      | Mascot      |
| 1325.7113  | 1325.76     | 0.0487  | 37    | 1284       | 1294     | FHRSLTPPGWK  |           |                      |      | Mascot      |
| 1325.7113  | 1325.76     | 0.0487  | 37    | 1284       | 1294     | FHRSLTPPGWK  |           |                      |      | Mascot      |
| 1347.7002  | 1347.7352   | 0.035   | 26    | 1819       | 1830     | LETSELEEKAAK |           |                      |      | Mascot      |
| 1364.7307  | 1364.6995   | -0.0312 | -23   | 38         | 48       | LIESELKEEFK  |           |                      |      | Mascot      |

|    |                                |             |           |         |            |          |              |                              |           |       |    |                        |                                           |      |        |      |  |  |        |
|----|--------------------------------|-------------|-----------|---------|------------|----------|--------------|------------------------------|-----------|-------|----|------------------------|-------------------------------------------|------|--------|------|--|--|--------|
|    |                                | 1364.7307   | 1364.6995 | -0.0312 | -23        | 38       | 48           | LIESELKEEFK                  |           |       |    |                        |                                           |      |        |      |  |  | Mascot |
|    |                                | 1375.748    | 1375.7407 | -0.0073 | -5         | 1937     | 1947         | VIQGEVNKFWR                  |           |       |    |                        |                                           |      |        |      |  |  | Mascot |
|    |                                | 1376.7467   | 1376.7115 | -0.0352 | -26        | 1347     | 1359         | AEICGAVFAARLR                |           |       |    |                        |                                           |      |        |      |  |  | Mascot |
|    |                                | 1382.5927   | 1382.7812 | 0.1885  | 136        | 447      | 460          | DSTEAGCIVCGAEK               |           |       |    |                        |                                           |      |        |      |  |  | Mascot |
|    |                                | 1382.5927   | 1382.7812 | 0.1885  | 136        | 447      | 460          | DSTEAGCIVCGAEK               |           |       |    |                        |                                           |      |        |      |  |  | Mascot |
|    |                                | 1763.922    | 1763.8062 | -0.1158 | -66        | 1619     | 1634         | LAVYRENSGLLVCGGR             |           |       |    |                        | Carbamidomethyl (C)[13]                   |      |        |      |  |  | Mascot |
|    |                                | 1796.7512   | 1796.9141 | 0.1629  | 91         | 823      | 838          | WDSIGTACEPKCGGCR             |           |       |    |                        | Carbamidomethyl (C)[8, 12]                |      |        |      |  |  | Mascot |
|    |                                | 1827.002    | 1826.9823 | -0.0197 | -11        | 1644     | 1660         | AVPILPCSAWVSMLLAR            |           |       |    |                        |                                           |      |        |      |  |  | Mascot |
|    |                                | 1827.0334   | 1826.9823 | -0.0511 | -28        | 1143     | 1158         | ESISQSKTIILPNQLR             |           |       |    |                        |                                           |      |        |      |  |  | Mascot |
|    |                                | 1840.9525   | 1840.9474 | -0.0051 | -3         | 1839     | 1856         | IHPASSPHRNGAAEAAR            |           |       |    |                        |                                           |      |        |      |  |  | Mascot |
|    |                                | 1864.9382   | 1864.9285 | -0.0097 | -5         | 1747     | 1762         | VHLKVWGIVYCCMASR             |           |       |    |                        |                                           |      |        |      |  |  | Mascot |
|    |                                | 1884.0234   | 1883.8453 | -0.1781 | -95        | 1644     | 1660         | AVPILPCSAWVSMLLAR            |           |       |    |                        | Carbamidomethyl (C)[7]                    |      |        |      |  |  | Mascot |
|    |                                | 1900.0183   | 1899.8562 | -0.1621 | -85        | 1644     | 1660         | AVPILPCSAWVSMLLAR            |           |       |    |                        | Carbamidomethyl (C)[7], Oxidation (M)[13] |      |        |      |  |  | Mascot |
|    |                                | 2211.0215   | 2211.1074 | 0.0859  | 39         | 816      | 833          | EFIDWWKWDISGTACEP<br>K       |           |       |    |                        |                                           |      |        |      |  |  | Mascot |
|    |                                | 2705.3855   | 2705.1614 | -0.2241 | -83        | 1164     | 1187         | ALGTGYLVEEDKLYIMASI<br>NFSVR |           |       |    |                        | Oxidation (M)[16]                         |      |        |      |  |  | Mascot |
| 42 | PREDICTED: titin [Danio rerio] |             |           |         |            |          | gil189523697 | 3199053                      | 5.99      | 64    | 39 | 0                      |                                           |      |        |      |  |  |        |
|    | Peptide Information            |             |           |         |            |          |              |                              |           |       |    |                        |                                           |      |        |      |  |  |        |
|    | Calc. Mass                     | Obsrv. Mass | ± da      | ± ppm   | Start Seq. | End Seq. | Sequence     |                              | Ion Score | C. I. | %  | Modification           |                                           | Rank | Result | Type |  |  |        |
|    | 808.4562                       | 808.4616    | 0.0054    | 7       | 5252       | 5259     | GTATFIAK     |                              |           |       |    |                        |                                           |      |        |      |  |  | Mascot |
|    | 809.4151                       | 809.4243    | 0.0092    | 11      | 6326       | 6331     | EYKDVR       |                              |           |       |    |                        |                                           |      |        |      |  |  | Mascot |
|    | 826.4669                       | 826.4489    | -0.018    | -22     | 27841      | 27847    | LTSYKSK      |                              |           |       |    |                        |                                           |      |        |      |  |  | Mascot |
|    | 842.4478                       | 842.5125    | 0.0647    | 77      | 21462      | 21468    | RDLPEGR      |                              |           |       |    |                        |                                           |      |        |      |  |  | Mascot |
|    | 882.4791                       | 882.5686    | 0.0895    | 101     | 14147      | 14153    | KEEHAIR      |                              |           |       |    |                        |                                           |      |        |      |  |  | Mascot |
|    | 911.4468                       | 911.4038    | -0.043    | -47     | 5424       | 5432     | YVPSSGSSK    |                              |           |       |    |                        |                                           |      |        |      |  |  | Mascot |
|    | 913.4447                       | 913.4518    | 0.0071    | 8       | 15062      | 15068    | EFKMSQK      |                              |           |       |    | Oxidation (M)[4]       |                                           |      |        |      |  |  | Mascot |
|    | 960.4996                       | 960.4805    | -0.0191   | -20     | 15118      | 15125    | LDEILSDR     |                              | 20        |       | 0  |                        |                                           |      |        |      |  |  | Mascot |
|    | 960.4996                       | 960.4805    | -0.0191   | -20     | 15118      | 15125    | LDEILSDR     |                              |           |       |    |                        |                                           |      |        |      |  |  | Mascot |
|    | 976.5032                       | 976.4746    | -0.0286   | -29     | 5152       | 5158     | IQWMKDR      |                              |           |       |    |                        |                                           |      |        |      |  |  | Mascot |
|    | 982.4774                       | 982.4593    | -0.0181   | -18     | 26479      | 26485    | NYCLEKR      |                              |           |       |    | Carbamidomethyl (C)[3] |                                           |      |        |      |  |  | Mascot |
|    | 984.4818                       | 984.4247    | -0.0571   | -58     | 22537      | 22544    | ITGYMVER     |                              |           |       |    | Oxidation (M)[5]       |                                           |      |        |      |  |  | Mascot |
|    | 984.4818                       | 984.4247    | -0.0571   | -58     | 22537      | 22544    | ITGYMVER     |                              |           |       |    | Oxidation (M)[5]       |                                           |      |        |      |  |  | Mascot |
|    | 991.4955                       | 991.465     | -0.0305   | -31     | 13094      | 13102    | VAAENQFGR    |                              |           |       |    |                        |                                           |      |        |      |  |  | Mascot |
|    | 992.4982                       | 992.4683    | -0.0299   | -30     | 5152       | 5158     | IQWMKDR      |                              |           |       |    | Oxidation (M)[4]       |                                           |      |        |      |  |  | Mascot |
|    | 992.5015                       | 992.4683    | -0.0332   | -33     | 5111       | 5119     | SNVAVMCLR    |                              |           |       |    |                        |                                           |      |        |      |  |  | Mascot |
|    | 998.4359                       | 998.4405    | 0.0046    | 5       | 27392      | 27400    | FGDDSCAR     |                              |           |       |    |                        |                                           |      |        |      |  |  | Mascot |

|           |           |         |     |       |       |                    |                         |        |
|-----------|-----------|---------|-----|-------|-------|--------------------|-------------------------|--------|
| 1016.5047 | 1016.4159 | -0.0888 | -87 | 8910  | 8918  | FDVPDAPQK          |                         | Mascot |
| 1069.5887 | 1069.5614 | -0.0273 | -26 | 10291 | 10299 | NPVIIIEQK          |                         | Mascot |
| 1088.5371 | 1088.549  | 0.0119  | 11  | 24831 | 24839 | YALQYSSTR          |                         | Mascot |
| 1118.6681 | 1118.6837 | 0.0156  | 14  | 8844  | 8852  | ILAYVVERR          |                         | Mascot |
| 1118.6681 | 1118.6837 | 0.0156  | 14  | 8844  | 8852  | ILAYVVERR          |                         | Mascot |
| 1165.6324 | 1165.7485 | 0.1161  | 100 | 11960 | 11968 | ITNYTIERR          |                         | Mascot |
| 1211.7106 | 1211.7159 | 0.0053  | 4   | 12384 | 12394 | QNAVNNLVLK         |                         | Mascot |
| 1287.6328 | 1287.673  | 0.0402  | 31  | 13852 | 13861 | KPKEADEWER         |                         | Mascot |
| 1287.7089 | 1287.673  | -0.0359 | -28 | 17922 | 17932 | ELNLVIKEACR        |                         | Mascot |
| 1308.6464 | 1308.7278 | 0.0814  | 62  | 28588 | 28599 | DNAVISITSNMK       | Oxidation (M)[11]       | Mascot |
| 1309.6854 | 1309.6619 | -0.0235 | -18 | 12580 | 12591 | NTLTMCLGIVK        | Oxidation (M)[6]        | Mascot |
| 1313.8038 | 1313.7499 | -0.0539 | -41 | 21535 | 21546 | DVVLKSGEILK        |                         | Mascot |
| 1325.7358 | 1325.76   | 0.0242  | 18  | 12243 | 12254 | EKMVIHAGGVIR       | Oxidation (M)[3]        | Mascot |
| 1325.7358 | 1325.76   | 0.0242  | 18  | 12243 | 12254 | EKMVIHAGGVIR       | Oxidation (M)[3]        | Mascot |
| 1347.705  | 1347.7352 | 0.0302  | 22  | 10489 | 10500 | GETALMVRDAIR       | Oxidation (M)[6]        | Mascot |
| 1363.6787 | 1363.7062 | 0.0275  | 20  | 8680  | 8690  | YQMISEGKVHR        | Oxidation (M)[3]        | Mascot |
| 1364.7096 | 1364.6995 | -0.0101 | -7  | 5234  | 5244  | LDNLFFIEEPK        |                         | Mascot |
| 1364.7096 | 1364.6995 | -0.0101 | -7  | 5234  | 5244  | LDNLFFIEEPK        |                         | Mascot |
| 1369.7322 | 1369.7268 | -0.0054 | -4  | 5780  | 5790  | EIEIPQEKLDK        |                         | Mascot |
| 1375.7579 | 1375.7407 | -0.0172 | -13 | 24368 | 24379 | EAFSSVIIKEPR       |                         | Mascot |
| 1376.7454 | 1376.7115 | -0.0339 | -25 | 4585  | 4596  | KLTDLSIPMSQK       | Oxidation (M)[9]        | Mascot |
| 1380.7052 | 1380.7196 | 0.0144  | 10  | 4759  | 4771  | CHAQVVAVTEPAR      |                         | Mascot |
| 1382.7678 | 1382.7812 | 0.0134  | 10  | 11942 | 11953 | AEQITLSWLPPK       |                         | Mascot |
| 1382.8002 | 1382.7812 | -0.019  | -14 | 5915  | 5927  | AAVQPSEKKPVTK      |                         | Mascot |
| 1386.6747 | 1386.6804 | 0.0057  | 4   | 28112 | 28123 | IEETTETAVHEK       |                         | Mascot |
| 1472.7301 | 1472.8101 | 0.08    | 54  | 5612  | 5624  | STAELYLSGKEMK      | Oxidation (M)[12]       | Mascot |
| 1545.74   | 1545.7358 | -0.0042 | -3  | 21520 | 21532 | DNVDPPRIMMDVK      | Oxidation (M)[9]        | Mascot |
| 1584.8744 | 1584.8798 | 0.0054  | 3   | 9446  | 9458  | WTKADLVLKPEER      |                         | Mascot |
| 1660.8574 | 1660.8605 | 0.0031  | 2   | 11884 | 11898 | LVADDSCLLIQGK      | Carbamidomethyl (C)[7]  | Mascot |
| 1676.8602 | 1676.8582 | -0.002  | -1  | 24231 | 24245 | TWTEAAPKSTQTSLR    |                         | Mascot |
| 1763.7979 | 1763.8062 | 0.0083  | 5   | 25536 | 25550 | YGTGEYLQSEVVMCK    | Carbamidomethyl (C)[14] | Mascot |
| 1796.9429 | 1796.9141 | -0.0288 | -16 | 19869 | 19885 | DSVTLVWEPLIDGGAK   |                         | Mascot |
| 1809.0017 | 1808.9633 | -0.0384 | -21 | 21547 | 21563 | INADIAGRPLPVASWTK  |                         | Mascot |
| 1824.949  | 1824.9679 | 0.0189  | 10  | 17245 | 17262 | KDGGEFILTATNVGGFAK |                         | Mascot |
| 1825.9589 | 1825.9609 | 0.002   | 1   | 1699  | 1715  | NGQAISASNKIHVIDK   |                         | Mascot |
| 1826.8412 | 1826.9823 | 0.1411  | 77  | 12668 | 12683 | DMWTTVTSATTKTHCK   | Oxidation (M)[2]        | Mascot |



|    |                                                                                    |           |         |     |              |          |                                  |    |    |   |  |  |                                            |  |  |  |        |
|----|------------------------------------------------------------------------------------|-----------|---------|-----|--------------|----------|----------------------------------|----|----|---|--|--|--------------------------------------------|--|--|--|--------|
|    | 1826.9622                                                                          | 1826.9823 | 0.0201  | 11  | 13771        | 13785    | LVKAPLVQNCEYFFR                  |    |    |   |  |  |                                            |  |  |  | Mascot |
|    | 1840.944                                                                           | 1840.9474 | 0.0034  | 2   | 10638        | 10654    | IGEVTSSTVALSWHEPK                |    |    |   |  |  |                                            |  |  |  | Mascot |
|    | 1848.9702                                                                          | 1848.9592 | -0.011  | -6  | 16918        | 16933    | ETTSQSWVELSLIIR                  |    |    |   |  |  |                                            |  |  |  | Mascot |
|    | 1864.9188                                                                          | 1864.9285 | 0.0097  | 5   | 22127        | 22143    | NSITIAWSKPEFDGGSR                |    |    |   |  |  |                                            |  |  |  | Mascot |
|    | 1870.9545                                                                          | 1870.942  | -0.0125 | -7  | 1312         | 1327     | RTQEGYYEAITAVELK                 |    |    |   |  |  |                                            |  |  |  | Mascot |
|    | 1883.8627                                                                          | 1883.8453 | -0.0174 | -9  | 12668        | 12683    | DMWTTVTTSATTKTHCK                |    |    |   |  |  | Carbamidomethyl (C)[15], Oxidation (M)[2]  |  |  |  | Mascot |
|    | 1899.9116                                                                          | 1899.8562 | -0.0554 | -29 | 22496        | 22513    | TSEEVLAIDACDPPANVR               |    |    |   |  |  |                                            |  |  |  | Mascot |
|    | 1957.9865                                                                          | 1958.0229 | 0.0364  | 19  | 1313         | 1329     | TQEGYYEAITAVELKSR                |    |    |   |  |  |                                            |  |  |  | Mascot |
|    | 1957.9865                                                                          | 1958.0229 | 0.0364  | 19  | 1313         | 1329     | TQEGYYEAITAVELKSR                |    |    |   |  |  |                                            |  |  |  | Mascot |
|    | 2001.0188                                                                          | 2001.0725 | 0.0537  | 27  | 20356        | 20372    | DHIKIQWTKPQYDGGSK                |    |    |   |  |  |                                            |  |  |  | Mascot |
|    | 2060.0447                                                                          | 2060.1394 | 0.0947  | 46  | 24696        | 24714    | WSVPLNDGGSPITGYIVE<br>R          |    |    |   |  |  |                                            |  |  |  | Mascot |
|    | 2076.1123                                                                          | 2076.1316 | 0.0193  | 9   | 19553        | 19571    | DPFIHPGSPQIIEVTNIAK              |    |    |   |  |  |                                            |  |  |  | Mascot |
|    | 2178.144                                                                           | 2178.2019 | 0.0579  | 27  | 9901         | 9920     | DTFTTPGPPYALTVEVS<br>KR          |    |    |   |  |  |                                            |  |  |  | Mascot |
|    | 2211.1147                                                                          | 2211.1074 | -0.0073 | -3  | 22749        | 22767    | VVWSVISEAMESRMVTV<br>QK          |    |    |   |  |  | Oxidation (M)[10,14]                       |  |  |  | Mascot |
|    | 2233.0076                                                                          | 2233.0769 | 0.0693  | 31  | 20714        | 20733    | VSAENETGVGECSDL<br>FYR           |    |    |   |  |  | Carbamidomethyl (C)[12]                    |  |  |  | Mascot |
|    | 2283.0269                                                                          | 2283.1848 | 0.1579  | 69  | 8249         | 8269     | MDDAGEYHCKLPASETT<br>GTLK        |    |    |   |  |  | Oxidation (M)[1]                           |  |  |  | Mascot |
|    | 2284.0583                                                                          | 2284.1743 | 0.116   | 51  | 16047        | 16067    | ANTVNVIDCAYTVADLQE<br>GCK        |    |    |   |  |  | Carbamidomethyl (C)[9]                     |  |  |  | Mascot |
|    | 2362.1165                                                                          | 2362.188  | 0.0715  | 30  | 25530        | 25550    | VAAANRYGTGEYLQSEV<br>VMCK        |    |    |   |  |  | Carbamidomethyl (C)[20], Oxidation (M)[19] |  |  |  | Mascot |
|    | 3338.5608                                                                          | 3338.7483 | 0.1875  | 56  | 22061        | 22088    | AWVCVSSNCHSLTYKVE<br>DLQEGAIYYFR |    |    |   |  |  | Carbamidomethyl (C)[4]                     |  |  |  | Mascot |
| 43 | PREDICTED: retrotransposable element Tf2 155 kDa protein type 1-like [Danio rerio] |           |         |     | gi 326680732 | 128413.4 | 9.38                             | 15 | 38 | 0 |  |  |                                            |  |  |  |        |

Peptide Information

| Calc. Mass | Obsrv. Mass | ± da    | ± ppm | Start Seq. | End Seq. | Sequence      | Ion Score | C. I. % | Modification           | Rank | Result | Type   |
|------------|-------------|---------|-------|------------|----------|---------------|-----------|---------|------------------------|------|--------|--------|
| 809.4039   | 809.4243    | 0.0204  | 25    | 115        | 121      | AFSDELK       |           |         |                        |      |        | Mascot |
| 960.4897   | 960.4805    | -0.0092 | -10   | 300        | 306      | EYHDLKR       |           |         |                        |      |        | Mascot |
| 960.4897   | 960.4805    | -0.0092 | -10   | 300        | 306      | EYHDLKR       |           |         |                        |      |        | Mascot |
| 982.4886   | 982.4593    | -0.0293 | -30   | 821        | 829      | VACHPGVSR     |           |         | Carbamidomethyl (C)[3] |      |        | Mascot |
| 1287.6051  | 1287.673    | 0.0679  | 53    | 655        | 664      | IHPCAYFSHR    |           |         | Carbamidomethyl (C)[4] |      |        | Mascot |
| 1287.6051  | 1287.673    | 0.0679  | 53    | 655        | 664      | IHPCAYFSHR    |           |         | Carbamidomethyl (C)[4] |      |        | Mascot |
| 1308.6907  | 1308.7278   | 0.0371  | 28    | 937        | 948      | IHGLPTDVVSDR  |           |         |                        |      |        | Mascot |
| 1313.6228  | 1313.7499   | 0.1271  | 97    | 849        | 861      | DFVLACSVCAASK |           |         |                        |      |        | Mascot |
| 1369.7699  | 1369.7268   | -0.0431 | -31   | 423        | 433      | LDLRNAYHLVR   |           |         |                        |      |        | Mascot |
| 1375.7004  | 1375.7407   | 0.0403  | 29    | 95         | 106      | AALWGTTWENK   |           |         |                        |      |        | Mascot |
| 1376.7045  | 1376.7115   | 0.007   | 5     | 836        | 845      | QRFWWPVMAR    |           |         |                        |      |        | Mascot |

|    |                                                                   |           |         |      |      |      |                               |      |   |    |   |                                          |        |                  |  |  |        |
|----|-------------------------------------------------------------------|-----------|---------|------|------|------|-------------------------------|------|---|----|---|------------------------------------------|--------|------------------|--|--|--------|
|    | 1545.7755                                                         | 1545.7358 | -0.0397 | -26  | 2    | 15   | DPASTSEIQEILSR                |      |   |    |   |                                          |        |                  |  |  | Mascot |
|    | 1676.816                                                          | 1676.8582 | 0.0422  | 25   | 1    | 15   | MDPASTSEIQEILSR               |      |   |    |   |                                          |        |                  |  |  | Mascot |
|    | 1884.0411                                                         | 1883.8453 | -0.1958 | -104 | 611  | 628  | LKGCFSAPILIAPDPSR             |      |   |    |   |                                          |        |                  |  |  | Mascot |
|    | 2225.0122                                                         | 2225.1199 | 0.1077  | 48   | 257  | 277  | AGGLCMYCGVGGHFVAL<br>CPAK     |      |   |    |   | Carbamidomethyl (C)[5,8,18]              |        |                  |  |  | Mascot |
|    | 2283.0652                                                         | 2283.1848 | 0.1196  | 52   | 256  | 277  | RAGGLCMYCGVGGHFV<br>ALCPAK    |      |   |    |   | Carbamidomethyl (C)[6], Oxidation (M)[7] |        |                  |  |  | Mascot |
|    | 2705.4106                                                         | 2705.1614 | -0.2492 | -92  | 1125 | 1149 | IINPVAALLVEFAGCSLVE<br>VFSDEL |      |   |    |   | Carbamidomethyl (C)[15]                  |        |                  |  |  | Mascot |
| 44 | PREDICTED: ras association domain-containing protein gi 189537462 |           |         |      |      |      | 49870                         | 4.96 | 3 | 38 | 0 | 31                                       | 77.359 | 10 [Danio rerio] |  |  |        |

#### Peptide Information

| Calc. Mass | Obsrv. Mass | ± da   | ± ppm | Start Seq. | End Seq. | Sequence       | Ion Score | C. I.  | % Modification                            | Rank | Result Type |
|------------|-------------|--------|-------|------------|----------|----------------|-----------|--------|-------------------------------------------|------|-------------|
| 960.4632   | 960.4805    | 0.0173 | 18    | 184        | 191      | ELDGEIER       | 31        | 77.359 |                                           |      | Mascot      |
| 960.4632   | 960.4805    | 0.0173 | 18    | 184        | 191      | ELDGEIER       |           |        |                                           |      | Mascot      |
| 992.5193   | 992.4683    | -0.051 | -51   | 25         | 33       | RTTCADVVK      |           |        |                                           |      | Mascot      |
| 992.5193   | 992.4683    | -0.051 | -51   | 25         | 33       | RTTCADVVK      |           |        |                                           |      | Mascot      |
| 1796.8306  | 1796.9141   | 0.0835 | 46    | 1          | 14       | MEQEESKISVWVCR |           |        | Carbamidomethyl (C)[13], Oxidation (M)[1] |      | Mascot      |

|    |                                              |  |  |  |  |  |              |         |      |   |    |   |               |  |  |  |  |
|----|----------------------------------------------|--|--|--|--|--|--------------|---------|------|---|----|---|---------------|--|--|--|--|
| 45 | PREDICTED: hypothetical protein LOC100536930 |  |  |  |  |  | gi 326667028 | 38180.8 | 5.39 | 7 | 37 | 0 | [Danio rerio] |  |  |  |  |
|----|----------------------------------------------|--|--|--|--|--|--------------|---------|------|---|----|---|---------------|--|--|--|--|

#### Peptide Information

| Calc. Mass | Obsrv. Mass | ± da    | ± ppm | Start Seq. | End Seq. | Sequence       | Ion Score | C. I. | % Modification         | Rank | Result Type |
|------------|-------------|---------|-------|------------|----------|----------------|-----------|-------|------------------------|------|-------------|
| 809.4152   | 809.4243    | 0.0091  | 11    | 102        | 108      | TLDASFR        |           |       |                        |      | Mascot      |
| 911.4556   | 911.4038    | -0.0518 | -57   | 137        | 143      | RFFCPNK        |           |       |                        |      | Mascot      |
| 960.4493   | 960.4805    | 0.0312  | 32    | 166        | 174      | QTQGGGEQR      | 8         | 0     |                        |      | Mascot      |
| 960.4493   | 960.4805    | 0.0312  | 32    | 166        | 174      | QTQGGGEQR      |           |       |                        |      | Mascot      |
| 1088.5443  | 1088.549    | 0.0047  | 4     | 166        | 175      | QTQGGGEQRK     |           |       |                        |      | Mascot      |
| 1313.761   | 1313.7499   | -0.0111 | -8    | 72         | 83       | TIPLGCKNVALK   |           |       | Carbamidomethyl (C)[6] |      | Mascot      |
| 1369.6569  | 1369.7268   | 0.0699  | 51    | 91         | 101      | QVYMFLNSPDR    |           |       |                        |      | Mascot      |
| 1584.7428  | 1584.8798   | 0.137   | 86    | 283        | 296      | VGVEVSDYFPDTEK |           |       |                        |      | Mascot      |

|    |                                                                                                  |  |  |  |  |  |             |         |      |   |    |   |  |  |  |  |  |
|----|--------------------------------------------------------------------------------------------------|--|--|--|--|--|-------------|---------|------|---|----|---|--|--|--|--|--|
| 46 | novel protein similar to vertebrate NifU-like N-terminal domain containing (NIFUN) [Danio rerio] |  |  |  |  |  | gi 37606130 | 17748.2 | 8.87 | 4 | 37 | 0 |  |  |  |  |  |
|----|--------------------------------------------------------------------------------------------------|--|--|--|--|--|-------------|---------|------|---|----|---|--|--|--|--|--|

#### Peptide Information

| Calc. Mass | Obsrv. Mass | ± da | ± ppm | Start Seq. | End Seq. | Sequence | Ion Score | C. I. | % Modification | Rank | Result Type |
|------------|-------------|------|-------|------------|----------|----------|-----------|-------|----------------|------|-------------|
|------------|-------------|------|-------|------------|----------|----------|-----------|-------|----------------|------|-------------|

|    |                                        |           |         |     |     |              |                      |      |    |    |   |  |  |  |  |                                           |        |
|----|----------------------------------------|-----------|---------|-----|-----|--------------|----------------------|------|----|----|---|--|--|--|--|-------------------------------------------|--------|
|    | 913.4447                               | 913.4518  | 0.0071  | 8   | 10  | 18           | CASSALFSK            |      |    |    |   |  |  |  |  |                                           | Mascot |
|    | 960.5359                               | 960.4805  | -0.0554 | -58 | 107 | 115          | GKSIDEALK            | 20   | 0  |    |   |  |  |  |  |                                           | Mascot |
|    | 960.5359                               | 960.4805  | -0.0554 | -58 | 107 | 115          | GKSIDEALK            |      |    |    |   |  |  |  |  |                                           | Mascot |
|    | 1069.5459                              | 1069.5614 | 0.0155  | 14  | 9   | 18           | RCASSALFSK           |      |    |    |   |  |  |  |  |                                           | Mascot |
|    | 2283.1545                              | 2283.1848 | 0.0303  | 13  | 124 | 143          | ELCLPPVKLHCSMLAEDIAK |      |    |    |   |  |  |  |  | Carbamidomethyl (C)[3], Oxidation (M)[13] | Mascot |
| 47 | transcription factor p65 [Danio rerio] |           |         |     |     | gi 319738646 | 51046                | 9.08 | 10 | 36 | 0 |  |  |  |  |                                           |        |

Peptide Information

| Calc. Mass | Obsrv. Mass | ± da    | ± ppm | Start Seq. | End Seq. | Sequence          | Ion Score | C. I. | % | Modification           | Rank | Result Type |
|------------|-------------|---------|-------|------------|----------|-------------------|-----------|-------|---|------------------------|------|-------------|
| 992.4465   | 992.4683    | 0.0218  | 22    | 123        | 131      | DVGEAVSCR         |           |       |   | Carbamidomethyl (C)[8] |      | Mascot      |
| 992.4689   | 992.4683    | -0.0006 | -1    | 198        | 206      | VNRNSGSCR         |           |       |   |                        |      | Mascot      |
| 1347.6321  | 1347.7352   | 0.1031  | 77    | 37         | 49       | CEGRSAGSIPGEK     |           |       |   | Carbamidomethyl (C)[1] |      | Mascot      |
| 1380.6179  | 1380.7196   | 0.1017  | 74    | 96         | 106      | HGYEADLQER        |           |       |   |                        |      | Mascot      |
| 1382.662   | 1382.7812   | 0.1192  | 86    | 396        | 407      | YLQAMSVDSPK       |           |       |   | Oxidation (M)[5]       |      | Mascot      |
| 1382.662   | 1382.7812   | 0.1192  | 86    | 396        | 407      | YLQAMSVDSPK       |           |       |   | Oxidation (M)[5]       |      | Mascot      |
| 1584.8744  | 1584.8798   | 0.0054  | 3     | 408        | 423      | AVPVLPPSGTVSTGR   |           |       |   |                        |      | Mascot      |
| 1660.7887  | 1660.8605   | 0.0718  | 43    | 381        | 395      | MEPSPLPASSSDIWK   |           |       |   | Oxidation (M)[1]       |      | Mascot      |
| 1676.7949  | 1676.8582   | 0.0633  | 38    | 253        | 266      | TPPYCDNLTEPLR     |           |       |   | Carbamidomethyl (C)[5] |      | Mascot      |
| 1870.8422  | 1870.942    | 0.0998  | 53    | 201        | 217      | NSGSCRGGDEIFLLCDK |           |       |   | Carbamidomethyl (C)[5] |      | Mascot      |
| 1899.9122  | 1899.8562   | -0.056  | -29   | 221        | 235      | EDIEVRFFLDSEWK    |           |       |   |                        |      | Mascot      |

|    |                                                                          |  |  |  |  |              |          |      |   |  |    |   |  |  |  |  |  |
|----|--------------------------------------------------------------------------|--|--|--|--|--------------|----------|------|---|--|----|---|--|--|--|--|--|
| 48 | PREDICTED: WD repeat- and FYVE domain-containing protein 4 [Danio rerio] |  |  |  |  | gi 326673033 | 526148.2 | 6.32 | 1 |  | 24 | 0 |  |  |  |  |  |
|----|--------------------------------------------------------------------------|--|--|--|--|--------------|----------|------|---|--|----|---|--|--|--|--|--|

Peptide Information

| Calc. Mass | Obsrv. Mass | ± da    | ± ppm | Start Seq. | End Seq. | Sequence      | Ion Score | C. I. | % | Modification | Rank | Result Type |
|------------|-------------|---------|-------|------------|----------|---------------|-----------|-------|---|--------------|------|-------------|
| 1287.6903  | 1287.673    | -0.0173 | -13   | 2455       | 2467     | APSVSVVSIESGR | 24        |       | 0 |              | 3    | Mascot      |

|    |                                                                |  |  |  |  |              |          |      |   |  |    |   |  |  |  |  |  |
|----|----------------------------------------------------------------|--|--|--|--|--------------|----------|------|---|--|----|---|--|--|--|--|--|
| 49 | PREDICTED: uncharacterized protein C9orf174-like [Danio rerio] |  |  |  |  | gi 326668020 | 114568.7 | 5.74 | 1 |  | 23 | 0 |  |  |  |  |  |
|----|----------------------------------------------------------------|--|--|--|--|--------------|----------|------|---|--|----|---|--|--|--|--|--|

Peptide Information

| Calc. Mass | Obsrv. Mass | ± da    | ± ppm | Start Seq. | End Seq. | Sequence | Ion Score | C. I. | % | Modification | Rank | Result Type |
|------------|-------------|---------|-------|------------|----------|----------|-----------|-------|---|--------------|------|-------------|
| 960.5109   | 960.4805    | -0.0304 | -32   | 98         | 105      | KNSDIIDR | 23        |       | 0 |              | 4    | Mascot      |

|    |                                                    |  |  |  |  |              |          |      |   |  |    |   |  |  |  |  |  |
|----|----------------------------------------------------|--|--|--|--|--------------|----------|------|---|--|----|---|--|--|--|--|--|
| 50 | transcription elongation factor SPT5 [Danio rerio] |  |  |  |  | gi 229577145 | 120318.3 | 5.09 | 1 |  | 23 | 0 |  |  |  |  |  |
|----|----------------------------------------------------|--|--|--|--|--------------|----------|------|---|--|----|---|--|--|--|--|--|

Peptide Information

| Calc. Mass | Obsrv. Mass | ± da    | ± ppm | Start Seq. | End Sequence Seq. | Ion Score | C. I. % | Modification | Rank | Result Type |
|------------|-------------|---------|-------|------------|-------------------|-----------|---------|--------------|------|-------------|
| 960.5472   | 960.4805    | -0.0667 | -69   | 748        | 756 LTTVGGKER     | 23        | 0       |              | 5    | Mascot      |

|                |           |                        |                |                |                    |
|----------------|-----------|------------------------|----------------|----------------|--------------------|
| Gel Idx/Pos    | 252/K4    | Instr./Gel Origin      | BA2060/110707A | Process Status | Analysis Succeeded |
| Plate [#] Name | [1] 31496 | Instrument Sample Name |                | Spectra        | 11                 |

| Rank | Protein Name                                           | Accession No. | Protein MW | Protein PI | Pep. Count | Protein Score | Protein Score C. I. % | Total Ion Score | Total Ion C. I. % |
|------|--------------------------------------------------------|---------------|------------|------------|------------|---------------|-----------------------|-----------------|-------------------|
| 1    | phosphatidylethanolamine binding protein [Danio rerio] | gi 54312133   | 20848.3    | 6.31       | 8          | 434           | 100                   | 378             | 100               |

#### Peptide Information

| Calc. Mass | Obsrv. Mass | ± da    | ± ppm | Start Seq. | End Sequence Seq.               | Ion Score | C. I. % | Modification                              | Rank | Result Type |
|------------|-------------|---------|-------|------------|---------------------------------|-----------|---------|-------------------------------------------|------|-------------|
| 921.504    | 921.4865    | -0.0175 | -19   | 180        | 187 LYEQLAGK                    |           |         |                                           |      | Mascot      |
| 1225.5946  | 1225.6703   | 0.0757  | 62    | 29         | 39 YDSVEIDSLGK                  |           |         |                                           |      | Mascot      |
| 1407.7532  | 1407.7223   | -0.0309 | -22   | 83         | 93 EWHHFLVNVK                   |           |         |                                           |      | Mascot      |
| 1566.7468  | 1566.7186   | -0.0282 | -18   | 63         | 76 LYTLAMTDPDAPSR               |           |         | Oxidation (M)[6]                          |      | Mascot      |
| 2012.8688  | 2012.9399   | 0.0711  | 35    | 94         | 113 GNDVSSGCVMSDYVGA GPPK       |           |         | Carbamidomethyl (C)[8], Oxidation (M)[10] |      | Mascot      |
| 2103.9805  | 2103.947    | -0.0335 | -16   | 120        | 136 YVWLVEQSGNISCTER            |           |         | Carbamidomethyl (C)[14]                   |      | Mascot      |
| 2103.9805  | 2103.947    | -0.0335 | -16   | 120        | 136 YVWLVEQSGNISCTER            | 164       | 100     | Carbamidomethyl (C)[14]                   |      | Mascot      |
| 2689.2344  | 2689.1975   | -0.0369 | -14   | 40         | 62 VCTPTQVQNRPTSIEWE GCDPSK     | 49        | 99.716  | Carbamidomethyl (C)[2,19]                 |      | Mascot      |
| 2689.2344  | 2689.1975   | -0.0369 | -14   | 40         | 62 VCTPTQVQNRPTSIEWE GCDPSK     |           |         | Carbamidomethyl (C)[2,19]                 |      | Mascot      |
| 2933.5505  | 2933.5264   | -0.0241 | -8    | 2          | 28 PVDINEWTGSLALTEVEE PPAKPLTVK | 165       | 100     |                                           |      | Mascot      |
| 2933.5505  | 2933.5264   | -0.0241 | -8    | 2          | 28 PVDINEWTGSLALTEVEE PPAKPLTVK |           |         |                                           |      | Mascot      |

|   |                         |             |         |      |   |     |     |     |     |
|---|-------------------------|-------------|---------|------|---|-----|-----|-----|-----|
| 2 | Zgc:56033 [Danio rerio] | gi 29126917 | 20749.3 | 6.31 | 9 | 396 | 100 | 329 | 100 |
|---|-------------------------|-------------|---------|------|---|-----|-----|-----|-----|

#### Peptide Information

| Calc. Mass | Obsrv. Mass | ± da    | ± ppm | Start Seq. | End Sequence Seq.         | Ion Score | C. I. % | Modification                              | Rank | Result Type |
|------------|-------------|---------|-------|------------|---------------------------|-----------|---------|-------------------------------------------|------|-------------|
| 921.504    | 921.4865    | -0.0175 | -19   | 180        | 187 LYEQLAGK              |           |         |                                           |      | Mascot      |
| 1225.5946  | 1225.6703   | 0.0757  | 62    | 29         | 39 YDSVEIDSLGK            |           |         |                                           |      | Mascot      |
| 1566.7468  | 1566.7186   | -0.0282 | -18   | 63         | 76 LYTLAMTDPDAPSR         |           |         | Oxidation (M)[6]                          |      | Mascot      |
| 2012.8688  | 2012.9399   | 0.0711  | 35    | 94         | 113 GNDVSSGCVMSDYVGA GPPK |           |         | Carbamidomethyl (C)[8], Oxidation (M)[10] |      | Mascot      |
| 2103.9805  | 2103.947    | -0.0335 | -16   | 120        | 136 YVWLVEQSGNISCTER      |           |         | Carbamidomethyl (C)[14]                   |      | Mascot      |
| 2103.9805  | 2103.947    | -0.0335 | -16   | 120        | 136 YVWLVEQSGNISCTER      | 164       | 100     | Carbamidomethyl (C)[14]                   |      | Mascot      |
| 2443.1387  | 2443.1145   | -0.0242 | -10   | 158        | 179 YGLGAPLAGSCFQAEWD     |           |         | Carbamidomethyl (C)[11]                   |      | Mascot      |

|   |                                                                  |           |         |     |     |             |                                      |      |     |     |     |                           |        |
|---|------------------------------------------------------------------|-----------|---------|-----|-----|-------------|--------------------------------------|------|-----|-----|-----|---------------------------|--------|
|   | 2571.2336                                                        | 2571.2007 | -0.0329 | -13 | 157 | 179         | NYVPK<br>KYGLGAPLAGSCFQAEW<br>DNYVPK |      |     |     |     | Carbamidomethyl (C)[12]   | Mascot |
|   | 2675.2188                                                        | 2675.1672 | -0.0516 | -19 | 40  | 62          | VCTPTQVQNRPTSVEWE<br>GCDPSK          |      |     |     |     | Carbamidomethyl (C)[2,19] | Mascot |
|   | 2933.5505                                                        | 2933.5264 | -0.0241 | -8  | 2   | 28          | PVDINEWTGSLALTEVEE<br>PPAKPLTVK      | 165  | 100 |     |     |                           | Mascot |
|   | 2933.5505                                                        | 2933.5264 | -0.0241 | -8  | 2   | 28          | PVDINEWTGSLALTEVEE<br>PPAKPLTVK      |      |     |     |     |                           | Mascot |
| 3 | superoxide dismutase [Mn], mitochondrial precursor [Danio rerio] |           |         |     |     | gi 41152470 | 24992.7                              | 8.29 | 6   | 146 | 100 | 115                       | 100    |

Peptide Information

| Calc. Mass | Obsrv. Mass | ± da    | ± ppm | Start Seq. | End Seq. | Sequence                   | Ion Score | C. I. | % Modification | Rank | Result Type |
|------------|-------------|---------|-------|------------|----------|----------------------------|-----------|-------|----------------|------|-------------|
| 990.5366   | 990.5233    | -0.0133 | -13   | 197        | 204      | NVRPDYVK                   |           |       |                |      | Mascot      |
| 1715.85    | 1715.8234   | -0.0266 | -16   | 205        | 218      | AIWNVNWENVSER              | 115       | 100   |                |      | Mascot      |
| 1715.85    | 1715.8234   | -0.0266 | -16   | 205        | 218      | AIWNVNWENVSER              |           |       |                |      | Mascot      |
| 1768.8613  | 1768.8323   | -0.029  | -16   | 56         | 70       | HHATYVNNLNVTEEK            |           |       |                |      | Mascot      |
| 2064.0549  | 2064.0337   | -0.0212 | -10   | 137        | 156      | ISAATVAVQGSGWGWLG<br>FEK   |           |       |                |      | Mascot      |
| 2321.1924  | 2321.1194   | -0.073  | -31   | 135        | 156      | EKISAATVAVQGSGWGW<br>LGFEK |           |       |                |      | Mascot      |
| 2572.2791  | 2572.2273   | -0.0518 | -20   | 56         | 77       | HHATYVNNLNVTEEKYQ<br>EALAK |           |       |                |      | Mascot      |

|   |                                                                                |  |  |  |  |              |          |      |    |    |   |  |  |
|---|--------------------------------------------------------------------------------|--|--|--|--|--------------|----------|------|----|----|---|--|--|
| 4 | PREDICTED: NACHT, LRR and PYD domains-containing protein 12-like [Danio rerio] |  |  |  |  | gi 326664473 | 117737.1 | 6.42 | 16 | 38 | 0 |  |  |
|---|--------------------------------------------------------------------------------|--|--|--|--|--------------|----------|------|----|----|---|--|--|

Peptide Information

| Calc. Mass | Obsrv. Mass | ± da    | ± ppm | Start Seq. | End Seq. | Sequence                    | Ion Score | C. I. | % Modification         | Rank | Result Type |
|------------|-------------|---------|-------|------------|----------|-----------------------------|-----------|-------|------------------------|------|-------------|
| 848.4875   | 848.5133    | 0.0258  | 30    | 356        | 362      | LAFEQLK                     |           |       |                        |      | Mascot      |
| 870.4315   | 870.5181    | 0.0866  | 99    | 143        | 150      | DGDVSLHK                    |           |       |                        |      | Mascot      |
| 921.5073   | 921.4865    | -0.0208 | -23   | 348        | 355      | DMISKLAK                    |           |       | Oxidation (M)[2]       |      | Mascot      |
| 1279.6052  | 1279.7588   | 0.1536  | 120   | 5          | 15       | EDDDFLGEVLK                 |           |       |                        |      | Mascot      |
| 1306.6348  | 1306.7334   | 0.0986  | 75    | 1023       | 1034     | VDGESVFICQIP                |           |       |                        |      | Mascot      |
| 1334.6732  | 1334.871    | 0.1978  | 148   | 707        | 717      | LLQGMENTEKR                 |           |       | Oxidation (M)[5]       |      | Mascot      |
| 1407.7002  | 1407.7223   | 0.0221  | 16    | 5          | 16       | EDDDFLGEVLKK                |           |       |                        |      | Mascot      |
| 1731.8395  | 1731.8127   | -0.0268 | -15   | 691        | 706      | ELDLSGNDLQDSGLQK            |           |       |                        |      | Mascot      |
| 2013.0331  | 2012.9399   | -0.0932 | -46   | 839        | 856      | TLKTDPMGDHLMKPGIM<br>K      |           |       |                        |      | Mascot      |
| 2120.0691  | 2119.9622   | -0.1069 | -50   | 73         | 90       | SEDKPIDCNEIFNLLKGK          |           |       | Carbamidomethyl (C)[8] |      | Mascot      |
| 2443.417   | 2443.1145   | -0.3025 | -124  | 478        | 499      | FLLGISLESNQKLLIGILNE<br>TK  |           |       |                        |      | Mascot      |
| 2598.3306  | 2598.2024   | -0.1282 | -49   | 561        | 583      | SNCSALVYVLLMSQEVLD<br>KFNPK |           |       |                        |      | Mascot      |

|   |                                                  |           |         |     |             |     |                                   |                                                |   |    |   |  |        |
|---|--------------------------------------------------|-----------|---------|-----|-------------|-----|-----------------------------------|------------------------------------------------|---|----|---|--|--------|
|   | 2675.2214                                        | 2675.1672 | -0.0542 | -20 | 371         | 394 | EDLEACGINADEEFTGLC<br>TEIFKK      |                                                |   |    |   |  | Mascot |
|   | 2703.2793                                        | 2703.2061 | -0.0732 | -27 | 427         | 448 | LEKDMNWSVSDLMFFLE<br>DSRPK        | Oxidation (M)[5]                               |   |    |   |  | Mascot |
|   | 3324.6458                                        | 3324.6646 | 0.0188  | 6   | 724         | 751 | VLMILWCNLTEMSCQQL<br>SPILSSNSVLR  | Carbamidomethyl (C)[7,14], Oxidation (M)[3,12] |   |    |   |  | Mascot |
|   | 3338.698                                         | 3338.7202 | 0.0222  | 7   | 723         | 751 | KVLMILWCNLTEMSCQQ<br>LSPILSSNSVLR | Oxidation (M)[4,13]                            |   |    |   |  | Mascot |
| 5 | purine nucleoside phosphorylase 4a [Danio rerio] |           |         |     | gi 50344860 |     | 31789.9                           | 6.79                                           | 8 | 37 | 0 |  |        |

#### Peptide Information

| Calc. Mass | Obsrv. Mass | ± da    | ± ppm | Start Seq. | End Seq. | Sequence                      | Ion Score | C. I. % | Modification           | Rank | Result Type |
|------------|-------------|---------|-------|------------|----------|-------------------------------|-----------|---------|------------------------|------|-------------|
| 850.4161   | 850.5295    | 0.1134  | 133   | 175        | 181      | MALDICK                       |           |         | Carbamidomethyl (C)[6] |      | Mascot      |
| 850.4161   | 850.5295    | 0.1134  | 133   | 175        | 181      | MALDICK                       |           |         | Carbamidomethyl (C)[6] |      | Mascot      |
| 921.4896   | 921.4865    | -0.0031 | -3    | 174        | 181      | KMALDICK                      |           |         |                        |      | Mascot      |
| 990.5981   | 990.5233    | -0.0748 | -76   | 70         | 78       | LVFGELK GK                    |           |         |                        |      | Mascot      |
| 1306.5481  | 1306.7334   | 0.1853  | 142   | 5          | 14       | DQICHEDYQR                    |           |         |                        |      | Mascot      |
| 1715.7555  | 1715.8234   | 0.0679  | 40    | 2          | 14       | HSKDQICHEDYQR                 |           |         | Carbamidomethyl (C)[7] |      | Mascot      |
| 1715.7555  | 1715.8234   | 0.0679  | 40    | 2          | 14       | HSKDQICHEDYQR                 |           |         | Carbamidomethyl (C)[7] |      | Mascot      |
| 2229.9661  | 2230.1809   | 0.2148  | 96    | 79         | 97       | TCVCMQGRFHM YEGHSL<br>SK      |           |         | Oxidation (M)[5]       |      | Mascot      |
| 2298.158   | 2298.1436   | -0.0144 | -6    | 214        | 236      | LGVDVAGMSTAPEVLVA<br>SHCGIR   |           |         | Oxidation (M)[8]       |      | Mascot      |
| 2689.3481  | 2689.1975   | -0.1506 | -56   | 136        | 160      | DHINFPGLAGLNPLNGPN<br>DEKFGPR |           |         |                        |      | Mascot      |
| 2689.3481  | 2689.1975   | -0.1506 | -56   | 136        | 160      | DHINFPGLAGLNPLNGPN<br>DEKFGPR |           |         |                        |      | Mascot      |

6 SH3 domain-binding protein 4-A [Danio rerio] gi|45387913 104947.5 7.73 13 34 0

#### Peptide Information

| Calc. Mass | Obsrv. Mass | ± da    | ± ppm | Start Seq. | End Seq. | Sequence                | Ion Score | C. I. % | Modification                              | Rank | Result Type |
|------------|-------------|---------|-------|------------|----------|-------------------------|-----------|---------|-------------------------------------------|------|-------------|
| 842.5822   | 842.4933    | -0.0889 | -106  | 634        | 640      | LIKT VIR                |           |         |                                           |      | Mascot      |
| 850.4338   | 850.5295    | 0.0957  | 113   | 358        | 364      | LSNMEIK                 |           |         | Oxidation (M)[4]                          |      | Mascot      |
| 850.4338   | 850.5295    | 0.0957  | 113   | 358        | 364      | LSNMEIK                 |           |         | Oxidation (M)[4]                          |      | Mascot      |
| 870.4726   | 870.5181    | 0.0455  | 52    | 1          | 7        | MAAHRIR                 |           |         | Oxidation (M)[1]                          |      | Mascot      |
| 1045.4796  | 1045.5455   | 0.0659  | 63    | 762        | 770      | AELDSEPER               |           |         |                                           |      | Mascot      |
| 1306.6102  | 1306.7334   | 0.1232  | 94    | 674        | 683      | EWYIGYYQGK              |           |         |                                           |      | Mascot      |
| 1407.6606  | 1407.7223   | 0.0617  | 44    | 379        | 390      | TESPMAEIVCVR            |           |         | Carbamidomethyl (C)[10], Oxidation (M)[5] |      | Mascot      |
| 2064.0259  | 2064.0337   | 0.0078  | 4     | 744        | 761      | AFADALSYVNLPLTYFCR      |           |         |                                           |      | Mascot      |
| 2118.1958  | 2117.9585   | -0.2373 | -112  | 607        | 624      | IILSPLAITTKYPQFQER      |           |         |                                           |      | Mascot      |
| 2230.2417  | 2230.1809   | -0.0608 | -27   | 813        | 831      | LIMDFVLLTTAVEVAPRW<br>R |           |         |                                           |      | Mascot      |

|  |           |           |         |     |     |     |                                    |  |  |  |  |  |                        |  |  |  |        |
|--|-----------|-----------|---------|-----|-----|-----|------------------------------------|--|--|--|--|--|------------------------|--|--|--|--------|
|  | 2284.2368 | 2284.1421 | -0.0947 | -41 | 463 | 484 | TVVAIFGHDCAPKTLVS<br>EVGK          |  |  |  |  |  |                        |  |  |  | Mascot |
|  | 2300.0686 | 2300.1487 | 0.0801  | 35  | 568 | 587 | DDQDCILAQFCVQTPQP<br>PPK           |  |  |  |  |  | Carbamidomethyl (C)[5] |  |  |  | Mascot |
|  | 3337.6052 | 3337.7405 | 0.1353  | 41  | 269 | 298 | LARSCHDLESLGQNPBW<br>GQTQPVETNIVCK |  |  |  |  |  | Carbamidomethyl (C)[5] |  |  |  | Mascot |
|  | 3338.5496 | 3338.7202 | 0.1706  | 51  | 856 | 884 | TGMVDSEAMWKPAYDFL<br>LTWAAQIGDSYR  |  |  |  |  |  | Oxidation (M)[3]       |  |  |  | Mascot |

7 PREDICTED: 25-hydroxycholesterol  
7-alpha-hydroxylase-like [Danio rerio] gi|125806840 58546.6 6.65 9 32 0 3 0

#### Peptide Information

| Calc. Mass | Obsrv. Mass | ± da    | ± ppm | Start Seq. | End Seq. | Sequence                          | Ion Score | C. I. | % Modification          | Rank | Result Type |
|------------|-------------|---------|-------|------------|----------|-----------------------------------|-----------|-------|-------------------------|------|-------------|
| 868.4774   | 868.5345    | 0.0571  | 66    | 28         | 35       | DGEPLIK                           |           |       |                         |      | Mascot      |
| 996.5724   | 996.5809    | 0.0085  | 9     | 27         | 35       | KDGEPLIK                          | 3         | 0     |                         |      | Mascot      |
| 996.5724   | 996.5809    | 0.0085  | 9     | 27         | 35       | KDGEPLIK                          |           |       |                         |      | Mascot      |
| 1165.567   | 1165.7273   | 0.1603  | 138   | 358        | 366      | VVQEDFCLR                         |           |       | Carbamidomethyl (C)[7]  |      | Mascot      |
| 1165.567   | 1165.7273   | 0.1603  | 138   | 358        | 366      | VVQEDFCLR                         |           |       | Carbamidomethyl (C)[7]  |      | Mascot      |
| 2249.2151  | 2249.033    | -0.1821 | -81   | 74         | 92       | YITFIMNPLQYPSVIKHGK               |           |       |                         |      | Mascot      |
| 2321.051   | 2321.1194   | 0.0684  | 29    | 428        | 448      | MPFGSGATQCPRFFAM<br>NELK          |           |       | Oxidation (M)[1,17]     |      | Mascot      |
| 2571.2263  | 2571.2007   | -0.0256 | -10   | 93         | 114      | QLDFHTFSDSASRTFDY<br>PPIR         |           |       |                         |      | Mascot      |
| 2703.5193  | 2703.2061   | -0.3132 | -116  | 2          | 24       | LEYLLTILLGFISVLLLYS<br>CGR        |           |       | Carbamidomethyl (C)[21] |      | Mascot      |
| 2933.6394  | 2933.5264   | -0.113  | -39   | 1          | 25       | MLEYLLTILLGFISVLLLYS<br>FCGRR     |           |       |                         |      | Mascot      |
| 2933.6394  | 2933.5264   | -0.113  | -39   | 1          | 25       | MLEYLLTILLGFISVLLLYS<br>FCGRR     |           |       |                         |      | Mascot      |
| 3337.729   | 3337.7405   | 0.0115  | 3     | 61         | 89       | EHGDDFTVLIAGRYITFIM<br>NPLQYPSVIK |           |       |                         |      | Mascot      |

8 recoverin [Danio rerio] gi|71834632 23361.7 5.08 6 32 0

#### Peptide Information

| Calc. Mass | Obsrv. Mass | ± da    | ± ppm | Start Seq. | End Seq. | Sequence                    | Ion Score | C. I. | % Modification    | Rank | Result Type |
|------------|-------------|---------|-------|------------|----------|-----------------------------|-----------|-------|-------------------|------|-------------|
| 868.4715   | 868.5345    | 0.063   | 73    | 155        | 161      | IWAFFGK                     |           |       |                   |      | Mascot      |
| 990.5036   | 990.3658    | -0.1378 | -139  | 38         | 46       | ECPSGRITK                   |           |       |                   |      | Mascot      |
| 990.5036   | 990.5233    | 0.0197  | 20    | 38         | 46       | ECPSGRITK                   |           |       |                   |      | Mascot      |
| 1133.6201  | 1133.701    | 0.0809  | 71    | 185        | 193      | LIQYDEPKK                   |           |       |                   |      | Mascot      |
| 1566.7468  | 1566.7186   | -0.0282 | -18   | 167        | 180      | IGEGEFIQGV MENK             |           |       | Oxidation (M)[11] |      | Mascot      |
| 2064.043   | 2064.0337   | -0.0093 | -5    | 167        | 184      | IGEGEFIQGV MENKDILR         |           |       | Oxidation (M)[11] |      | Mascot      |
| 2675.2505  | 2675.1672   | -0.0833 | -31   | 128        | 150      | SIFNMVPVEDQKNLPDDE<br>NTPEK |           |       | Oxidation (M)[5]  |      | Mascot      |

9 Prmt6 protein [Danio rerio] gi|34849512 39007.6 5.22 7 31 0

Peptide Information

| Calc. Mass | Obsrv. Mass | ± da    | ± ppm | Start Seq. | End Seq. | Sequence                       | Ion Score | C. I. % | Modification            | Rank | Result Type |
|------------|-------------|---------|-------|------------|----------|--------------------------------|-----------|---------|-------------------------|------|-------------|
| 921.4094   | 921.4865    | 0.0771  | 84    | 97         | 103      | LNQMEDR                        |           |         | Oxidation (M)[4]        |      | Mascot      |
| 1062.6194  | 1062.675    | 0.0556  | 52    | 270        | 279      | ALVLSTSPFK                     |           |         |                         |      | Mascot      |
| 1737.703   | 1737.8065   | 0.1035  | 60    | 184        | 198      | GQYGVDMSCMTDFAR                |           |         | Carbamidomethyl (C)[9]  |      | Mascot      |
| 2104.1218  | 2103.947    | -0.1748 | -83   | 56         | 77       | VVLDVGAGTGVLSLFCA<br>QAGAR     |           |         |                         |      | Mascot      |
| 2104.1218  | 2103.947    | -0.1748 | -83   | 56         | 77       | VVLDVGAGTGVLSLFCA<br>QAGAR     |           |         |                         |      | Mascot      |
| 2571.2615  | 2571.2007   | -0.0608 | -24   | 200        | 222      | CIMNKDITVNPVTVEDVL<br>SHPCK    |           |         | Oxidation (M)[3]        |      | Mascot      |
| 2675.4185  | 2675.1672   | -0.2513 | -94   | 51         | 77       | SIEGKVVDVGAGTGVLS<br>LFCAQAGAR |           |         | Carbamidomethyl (C)[21] |      | Mascot      |
| 2689.1731  | 2689.1975   | 0.0244  | 9     | 176        | 198      | LDFWSTVKGQYGVDMSC<br>MTDFAR    |           |         | Oxidation (M)[15,18]    |      | Mascot      |
| 2689.1731  | 2689.1975   | 0.0244  | 9     | 176        | 198      | LDFWSTVKGQYGVDMSC<br>MTDFAR    |           |         | Oxidation (M)[15,18]    |      | Mascot      |

10

PREDICTED: NACHT, LRR and PYD domains-containing protein 12 [Danio rerio]

gi|292621731 149261.8 5.29 15 31 0

Peptide Information

| Calc. Mass | Obsrv. Mass | ± da    | ± ppm | Start Seq. | End Seq. | Sequence                  | Ion Score | C. I. % | Modification              | Rank | Result Type |
|------------|-------------|---------|-------|------------|----------|---------------------------|-----------|---------|---------------------------|------|-------------|
| 842.4114   | 842.4933    | 0.0819  | 97    | 1214       | 1220     | SNSEHLR                   |           |         |                           |      | Mascot      |
| 864.5777   | 864.4991    | -0.0786 | -91   | 133        | 139      | KILVVHR                   |           |         |                           |      | Mascot      |
| 868.4635   | 868.5345    | 0.071   | 82    | 1043       | 1049     | SNLEHLR                   |           |         |                           |      | Mascot      |
| 870.5593   | 870.5181    | -0.0412 | -47   | 1011       | 1017     | KLLPMIR                   |           |         |                           |      | Mascot      |
| 990.5288   | 990.5233    | -0.0055 | -6    | 551        | 558      | EINLMKDK                  |           |         |                           |      | Mascot      |
| 1448.7494  | 1448.9067   | 0.1573  | 109   | 1307       | 1317     | TLYICEYVFKL               |           |         | Carbamidomethyl (C)[5]    |      | Mascot      |
| 1715.9115  | 1715.8234   | -0.0881 | -51   | 537        | 550      | ENQDVQLIFPLPFR            |           |         |                           |      | Mascot      |
| 1715.9115  | 1715.8234   | -0.0881 | -51   | 537        | 550      | ENQDVQLIFPLPFR            |           |         |                           |      | Mascot      |
| 2102.0488  | 2101.9658   | -0.083  | -39   | 166        | 184      | LLLPNGQFEMGHVGGV<br>FR    |           |         | Oxidation (M)[10]         |      | Mascot      |
| 2118.0681  | 2117.9585   | -0.1096 | -52   | 1250       | 1270     | LGLSNCGLTDEGCAALAL<br>ALR |           |         | Carbamidomethyl (C)[6]    |      | Mascot      |
| 2225.2839  | 2225.0859   | -0.198  | -89   | 890        | 908      | FLLGLSVESHQILLQRLM<br>K   |           |         |                           |      | Mascot      |
| 2225.2839  | 2225.0859   | -0.198  | -89   | 890        | 908      | FLLGLSVESHQILLQRLM<br>K   |           |         |                           |      | Mascot      |
| 2284.0181  | 2284.1421   | 0.124   | 54    | 380        | 400      | SDLSSVHQKSTESESSC<br>VSMR |           |         |                           |      | Mascot      |
| 2300.0129  | 2300.1487   | 0.1358  | 59    | 380        | 400      | SDLSSVHQKSTESESSC<br>VSMR |           |         | Oxidation (M)[20]         |      | Mascot      |
| 2465.0232  | 2465.0767   | 0.0535  | 22    | 278        | 297      | DFCSADQEELLETLDNYS<br>CR  |           |         | Carbamidomethyl (C)[3,19] |      | Mascot      |
| 2598.4111  | 2598.2024   | -0.2087 | -80   | 316        | 337      | TLIQEPAYVLEQWACILG        |           |         | Carbamidomethyl (C)[15]   |      | Mascot      |



|    |                                                               |           |         |     |              |     |                                     |      |   |    |   |  |  |        |
|----|---------------------------------------------------------------|-----------|---------|-----|--------------|-----|-------------------------------------|------|---|----|---|--|--|--------|
|    | 2675.269                                                      | 2675.1672 | -0.1018 | -38 | 254          | 276 | PLRK<br>SDLIENFLKYVSENECALL<br>ESCR |      |   |    |   |  |  | Mascot |
|    | 3338.6072                                                     | 3338.7202 | 0.113   | 34  | 780          | 809 | ECGIDVAEALVYSGGLCTQ<br>IFREEFGLYQGK |      |   |    |   |  |  | Mascot |
| 11 | PREDICTED: hypothetical protein LOC100534830<br>[Danio rerio] |           |         |     | gi 326670669 |     | 37117.2                             | 6.56 | 7 | 30 | 0 |  |  |        |

Peptide Information

| Calc. Mass | Obsrv. Mass | ± da    | ± ppm | Start Seq. | End Seq. | Sequence                  | Ion Score | C. I. | % Modification   | Rank | Result Type |
|------------|-------------|---------|-------|------------|----------|---------------------------|-----------|-------|------------------|------|-------------|
| 838.4893   | 838.5268    | 0.0375  | 45    | 319        | 327      | IAHGAKGGK                 |           |       |                  |      | Mascot      |
| 996.5123   | 996.5809    | 0.0686  | 69    | 51         | 57       | WVWKFCCK                  |           |       |                  |      | Mascot      |
| 996.5123   | 996.5809    | 0.0686  | 69    | 51         | 57       | WVWKFCCK                  |           |       |                  |      | Mascot      |
| 1225.6787  | 1225.6703   | -0.0084 | -7    | 58         | 69       | GPSTPNITITPK              |           |       |                  |      | Mascot      |
| 1306.6671  | 1306.7334   | 0.0663  | 51    | 261        | 271      | TLVDTMNLVER               |           |       | Oxidation (M)[6] |      | Mascot      |
| 1731.8774  | 1731.8127   | -0.0647 | -37   | 147        | 160      | LCYFIKDLEPATYR            |           |       |                  |      | Mascot      |
| 2283.2068  | 2283.1499   | -0.0569 | -25   | 9          | 27       | CLQLSWLTAAIPWRPDE<br>RK   |           |       |                  |      | Mascot      |
| 2283.2068  | 2283.1499   | -0.0569 | -25   | 9          | 27       | CLQLSWLTAAIPWRPDE<br>RK   |           |       |                  |      | Mascot      |
| 2571.1609  | 2571.2007   | 0.0398  | 15    | 240        | 260      | MPLDAEVSPWWDDTFYE<br>RGTR |           |       |                  |      | Mascot      |

|    |                                                                                                                     |  |  |  |  |  |         |      |   |    |   |  |  |  |
|----|---------------------------------------------------------------------------------------------------------------------|--|--|--|--|--|---------|------|---|----|---|--|--|--|
| 12 | RecName: Full=Protein arginine N-methyltransferase 6; gi 239977077<br>AltName: Full=Histone-arginine N-methyltransf |  |  |  |  |  | 39225.7 | 5.22 | 7 | 30 | 0 |  |  |  |
|----|---------------------------------------------------------------------------------------------------------------------|--|--|--|--|--|---------|------|---|----|---|--|--|--|

Peptide Information

| Calc. Mass | Obsrv. Mass | ± da    | ± ppm | Start Seq. | End Seq. | Sequence                       | Ion Score | C. I. | % Modification          | Rank | Result Type |
|------------|-------------|---------|-------|------------|----------|--------------------------------|-----------|-------|-------------------------|------|-------------|
| 921.4094   | 921.4865    | 0.0771  | 84    | 99         | 105      | LNQMEDR                        |           |       | Oxidation (M)[4]        |      | Mascot      |
| 1062.6194  | 1062.675    | 0.0556  | 52    | 272        | 281      | ALVLSTSPFK                     |           |       |                         |      | Mascot      |
| 1737.703   | 1737.8065   | 0.1035  | 60    | 186        | 200      | GQYGVDMSCMTDFAR                |           |       | Carbamidomethyl (C)[9]  |      | Mascot      |
| 2104.1218  | 2103.947    | -0.1748 | -83   | 58         | 79       | VVLDVGAGTGVLSLFCA<br>QAGAR     |           |       |                         |      | Mascot      |
| 2104.1218  | 2103.947    | -0.1748 | -83   | 58         | 79       | VVLDVGAGTGVLSLFCA<br>QAGAR     |           |       |                         |      | Mascot      |
| 2571.2615  | 2571.2007   | -0.0608 | -24   | 202        | 224      | CIMNKDITVNPVTVEDVL<br>SHPCK    |           |       | Oxidation (M)[3]        |      | Mascot      |
| 2675.4185  | 2675.1672   | -0.2513 | -94   | 53         | 79       | SIEGKVVDVGAGTGVLS<br>LFCAQAGAR |           |       | Carbamidomethyl (C)[21] |      | Mascot      |
| 2689.1731  | 2689.1975   | 0.0244  | 9     | 178        | 200      | LDFWSTVKGQYGVDMSC<br>MTDFAR    |           |       | Oxidation (M)[15,18]    |      | Mascot      |
| 2689.1731  | 2689.1975   | 0.0244  | 9     | 178        | 200      | LDFWSTVKGQYGVDMSC<br>MTDFAR    |           |       | Oxidation (M)[15,18]    |      | Mascot      |

|    |                             |  |  |  |             |  |       |     |   |    |   |  |  |  |
|----|-----------------------------|--|--|--|-------------|--|-------|-----|---|----|---|--|--|--|
| 13 | Prmt6 protein [Danio rerio] |  |  |  | gi 45709074 |  | 39755 | 5.3 | 7 | 30 | 0 |  |  |  |
|----|-----------------------------|--|--|--|-------------|--|-------|-----|---|----|---|--|--|--|

Peptide Information

| Calc. Mass | Obsrv. Mass | ± da    | ± ppm | Start Seq. | End Seq. | Sequence                         | Ion Score | C. I. | % Modification          | Rank | Result Type |
|------------|-------------|---------|-------|------------|----------|----------------------------------|-----------|-------|-------------------------|------|-------------|
| 921.4094   | 921.4865    | 0.0771  | 84    | 104        | 110      | LNQMEDR                          |           |       | Oxidation (M)[4]        |      | Mascot      |
| 1062.6194  | 1062.675    | 0.0556  | 52    | 277        | 286      | ALVLSTSPFK                       |           |       |                         |      | Mascot      |
| 1737.703   | 1737.8065   | 0.1035  | 60    | 191        | 205      | GQYGVDMSCMTDFAR                  |           |       | Carbamidomethyl (C)[9]  |      | Mascot      |
| 2104.1218  | 2103.947    | -0.1748 | -83   | 63         | 84       | VVLDVGAGTGVLSLFCA<br>QAGAR       |           |       |                         |      | Mascot      |
| 2104.1218  | 2103.947    | -0.1748 | -83   | 63         | 84       | VVLDVGAGTGVLSLFCA<br>QAGAR       |           |       |                         |      | Mascot      |
| 2571.2615  | 2571.2007   | -0.0608 | -24   | 207        | 229      | CIMNKDITVNPVTVEDVL<br>SHPCK      |           |       | Oxidation (M)[3]        |      | Mascot      |
| 2675.4185  | 2675.1672   | -0.2513 | -94   | 58         | 84       | SIEGKVVLVDVGAGTGVLS<br>LFCAQAGAR |           |       | Carbamidomethyl (C)[21] |      | Mascot      |
| 2689.1731  | 2689.1975   | 0.0244  | 9     | 183        | 205      | LDFWSTVKGQYGVDMSC<br>MTDFAR      |           |       | Oxidation (M)[15,18]    |      | Mascot      |
| 2689.1731  | 2689.1975   | 0.0244  | 9     | 183        | 205      | LDFWSTVKGQYGVDMSC<br>MTDFAR      |           |       | Oxidation (M)[15,18]    |      | Mascot      |

14 N-acetyltransferase 10 [Danio rerio] gi|41055301 115791.1 8.67 13 30 0

#### Peptide Information

| Calc. Mass | Obsrv. Mass | ± da    | ± ppm | Start Seq. | End Seq. | Sequence                   | Ion Score | C. I. | % Modification         | Rank | Result Type |
|------------|-------------|---------|-------|------------|----------|----------------------------|-----------|-------|------------------------|------|-------------|
| 921.4788   | 921.4865    | 0.0077  | 8     | 523        | 530      | ASEAFLQR                   |           |       |                        |      | Mascot      |
| 990.5578   | 990.5233    | -0.0345 | -35   | 590        | 598      | QSILSSLSR                  |           |       |                        |      | Mascot      |
| 996.5836   | 996.5809    | -0.0027 | -3    | 981        | 990      | AGHTAIVSIK                 |           |       |                        |      | Mascot      |
| 996.5836   | 996.5809    | -0.0027 | -3    | 981        | 990      | AGHTAIVSIK                 |           |       |                        |      | Mascot      |
| 1045.6516  | 1045.5455   | -0.1061 | -101  | 356        | 364      | AVVRVNIFK                  |           |       |                        |      | Mascot      |
| 1279.6616  | 1279.7588   | 0.0972  | 76    | 53         | 62       | ARPSVLWCYK                 |           |       | Carbamidomethyl (C)[8] |      | Mascot      |
| 1306.7365  | 1306.7334   | -0.0031 | -2    | 269        | 279      | FIEAISEKTLR                |           |       |                        |      | Mascot      |
| 1334.6813  | 1334.871    | 0.1897  | 142   | 777        | 787      | FLSLMSFQFSK                |           |       |                        |      | Mascot      |
| 1407.7566  | 1407.7223   | -0.0343 | -24   | 53         | 63       | ARPSVLWCYKK                |           |       | Carbamidomethyl (C)[8] |      | Mascot      |
| 1448.8108  | 1448.9067   | 0.0959  | 66    | 788        | 800      | FSSTLALNILQNK              |           |       |                        |      | Mascot      |
| 1763.9578  | 1763.8048   | -0.153  | -87   | 708        | 723      | LDYLGVSYGSLTPQPLK          |           |       |                        |      | Mascot      |
| 2120.1387  | 2119.9622   | -0.1765 | -83   | 705        | 723      | AERLDYLGVSYGSLTPQPL<br>K   |           |       |                        |      | Mascot      |
| 2225.2004  | 2225.0859   | -0.1145 | -51   | 708        | 726      | LDYLGVSYGSLTPQPLKF<br>WK   |           |       |                        |      | Mascot      |
| 2225.2004  | 2225.0859   | -0.1145 | -51   | 708        | 726      | LDYLGVSYGSLTPQPLKF<br>WK   |           |       |                        |      | Mascot      |
| 2703.3643  | 2703.2061   | -0.1582 | -59   | 833        | 854      | NMVDYHLIMDMIPVIARM<br>HFLK |           |       | Oxidation (M)[2]       |      | Mascot      |

15 24-hydroxycholesterol 7-alpha-hydroxylase [Danio rerio] gi|71834522 52830 7.64 8 29 0

#### Peptide Information

| Calc. Mass | Obsrv. Mass | ± da | ± ppm | Start | End | Sequence | Ion | C. I. | % Modification | Rank | Result Type |
|------------|-------------|------|-------|-------|-----|----------|-----|-------|----------------|------|-------------|
|------------|-------------|------|-------|-------|-----|----------|-----|-------|----------------|------|-------------|

|                     |                                                  |             |         |       |            |              |                                  |      |           |                         | Seq.                                       | Seq. | Score |        |      |        |
|---------------------|--------------------------------------------------|-------------|---------|-------|------------|--------------|----------------------------------|------|-----------|-------------------------|--------------------------------------------|------|-------|--------|------|--------|
|                     | 1165.7205                                        | 1165.7273   | 0.0068  | 6     | 220        | 228          | HWLLSLLRK                        |      |           |                         |                                            |      |       |        |      | Mascot |
|                     | 1165.7205                                        | 1165.7273   | 0.0068  | 6     | 220        | 228          | HWLLSLLRK                        |      |           |                         |                                            |      |       |        |      | Mascot |
|                     | 1306.6759                                        | 1306.7334   | 0.0575  | 44    | 326        | 335          | WCIMEAIRLR                       |      |           | Oxidation (M)[4]        |                                            |      |       |        |      | Mascot |
|                     | 1407.7629                                        | 1407.7223   | -0.0406 | -29   | 394        | 407          | NVLEGFVAFGGGK                    |      |           |                         |                                            |      |       |        |      | Mascot |
|                     | 1715.9109                                        | 1715.8234   | -0.0875 | -51   | 294        | 308          | IVMDQINSVLGRQDK                  |      |           |                         |                                            |      |       |        |      | Mascot |
|                     | 1715.9109                                        | 1715.8234   | -0.0875 | -51   | 294        | 308          | IVMDQINSVLGRQDK                  |      |           |                         |                                            |      |       |        |      | Mascot |
|                     | 1731.9058                                        | 1731.8127   | -0.0931 | -54   | 294        | 308          | IVMDQINSVLGRQDK                  |      |           | Oxidation (M)[3]        |                                            |      |       |        |      | Mascot |
|                     | 1768.9493                                        | 1768.8323   | -0.117  | -66   | 214        | 227          | EWSNSKHWLLSLLR                   |      |           |                         |                                            |      |       |        |      | Mascot |
|                     | 2120.0706                                        | 2119.9622   | -0.1084 | -51   | 394        | 413          | NVLEGFVAFGGGKNQC<br>PGR          |      |           | Carbamidomethyl (C)[17] |                                            |      |       |        |      | Mascot |
|                     | 2572.2317                                        | 2572.2273   | -0.0044 | -2    | 164        | 187          | SVMYPSVMSNLLGRCNS<br>PSSALSR     |      |           | Oxidation (M)[3]        |                                            |      |       |        |      | Mascot |
|                     | 2675.5244                                        | 2675.1672   | -0.3572 | -134  | 1          | 23           | MEWITLILTVSVVISFHL<br>FGK        |      |           | Oxidation (M)[1]        |                                            |      |       |        |      | Mascot |
| 16                  | PREDICTED: coagulation factor VIII [Danio rerio] |             |         |       |            | gi 326673255 | 189715.5                         | 6.26 | 16        | 29                      | 0                                          |      |       |        |      |        |
| Peptide Information |                                                  |             |         |       |            |              |                                  |      |           |                         |                                            |      |       |        |      |        |
|                     | Calc. Mass                                       | Obsrv. Mass | ± da    | ± ppm | Start Seq. | End Seq.     | Sequence                         |      | Ion Score | C. I.                   | % Modification                             |      | Rank  | Result | Type |        |
|                     | 801.4365                                         | 801.341     | -0.0955 | -119  | 288        | 293          | VFDHKKR                          |      |           |                         |                                            |      |       |        |      | Mascot |
|                     | 842.4631                                         | 842.4933    | 0.0302  | 36    | 1552       | 1558         | ANAWRPK                          |      |           |                         |                                            |      |       |        |      | Mascot |
|                     | 850.4199                                         | 850.5295    | 0.1096  | 129   | 707        | 713          | ERGMSVR                          |      |           |                         | Oxidation (M)[4]                           |      |       |        |      | Mascot |
|                     | 850.4199                                         | 850.5295    | 0.1096  | 129   | 707        | 713          | ERGMSVR                          |      |           |                         | Oxidation (M)[4]                           |      |       |        |      | Mascot |
|                     | 864.4937                                         | 864.4991    | 0.0054  | 6     | 51         | 58           | KFASGVQK                         |      |           |                         |                                            |      |       |        |      | Mascot |
|                     | 1062.5499                                        | 1062.675    | 0.1251  | 118   | 896        | 904          | NISMVEIEK                        |      |           |                         |                                            |      |       |        |      | Mascot |
|                     | 1225.5154                                        | 1225.6703   | 0.1549  | 126   | 1145       | 1155         | QGPSASEFDCK                      |      |           |                         | Carbamidomethyl (C)[10]                    |      |       |        |      | Mascot |
|                     | 1566.7064                                        | 1566.7186   | 0.0122  | 8     | 924        | 937          | AMSDNEVLEDGRK                    |      |           |                         | Oxidation (M)[2]                           |      |       |        |      | Mascot |
|                     | 2012.9712                                        | 2012.9399   | -0.0313 | -16   | 1358       | 1374         | QITASDYYGDWKPELAR                |      |           |                         |                                            |      |       |        |      | Mascot |
|                     | 2064.0774                                        | 2064.0337   | -0.0437 | -21   | 1535       | 1551         | WLLSWSPDLARIHQEGR                |      |           |                         |                                            |      |       |        |      | Mascot |
|                     | 2120.0183                                        | 2119.9622   | -0.0561 | -26   | 1500       | 1518         | IELLGCDLNCSLPLGME<br>R           |      |           |                         | Carbamidomethyl (C)[6]                     |      |       |        |      | Mascot |
|                     | 2224.9373                                        | 2225.0859   | 0.1486  | 67    | 958        | 977          | YSEMGLEPASNSSDDKM<br>YGK         |      |           |                         | Oxidation (M)[4]                           |      |       |        |      | Mascot |
|                     | 2224.9373                                        | 2225.0859   | 0.1486  | 67    | 958        | 977          | YSEMGLEPASNSSDDKM<br>YGK         |      |           |                         | Oxidation (M)[4]                           |      |       |        |      | Mascot |
|                     | 2233.1216                                        | 2233.0483   | -0.0733 | -33   | 1334       | 1352         | AKLLVYNPQCNPIGMQ<br>SR           |      |           |                         | Carbamidomethyl (C)[10], Oxidation (M)[16] |      |       |        |      | Mascot |
|                     | 2249.1084                                        | 2249.033    | -0.0754 | -34   | 1441       | 1460         | GNSTKPYVVSNFINSSET<br>LK         |      |           |                         |                                            |      |       |        |      | Mascot |
|                     | 2955.4517                                        | 2955.5      | 0.0483  | 16    | 233        | 259          | KTSSTNQYHTINGYINSTL<br>PGLSVCEK  |      |           |                         |                                            |      |       |        |      | Mascot |
|                     | 3337.5356                                        | 3337.7405   | 0.2049  | 61    | 1413       | 1440         | TSMGLSEFFTILYSISYSN<br>DQENWSVYR |      |           |                         |                                            |      |       |        |      | Mascot |

|                     |                                                        |             |         |       |              |          |                                     |           |       |    |                                                 |                   |             |
|---------------------|--------------------------------------------------------|-------------|---------|-------|--------------|----------|-------------------------------------|-----------|-------|----|-------------------------------------------------|-------------------|-------------|
|                     | 3338.4753                                              | 3338.7202   | 0.2449  | 73    | 355          | 383      | HTNDDEEEDDEDNMFSV<br>VFKQGGPISVLR   |           |       |    |                                                 | Oxidation (M)[14] | Mascot      |
| 17                  | novel protein [Danio rerio]                            |             |         |       | gi 220679564 |          | 9886.7                              | 8.37      | 5     | 29 | 0                                               |                   |             |
| Peptide Information |                                                        |             |         |       |              |          |                                     |           |       |    |                                                 |                   |             |
|                     | Calc. Mass                                             | Obsrv. Mass | ± da    | ± ppm | Start Seq.   | End Seq. | Sequence                            | Ion Score | C. I. | %  | Modification                                    | Rank              | Result Type |
|                     | 864.4218                                               | 864.4991    | 0.0773  | 89    | 33           | 38       | WLMVCR                              |           |       |    | Carbamidomethyl (C)[5]                          |                   | Mascot      |
|                     | 1731.839                                               | 1731.8127   | -0.0263 | -15   | 57           | 69       | SASLEYFWHLWHR                       |           |       |    |                                                 |                   | Mascot      |
|                     | 2571.033                                               | 2571.2007   | 0.1677  | 65    | 2            | 23       | IPEYSMSSAASSDMCPY<br>MPVCR          |           |       |    | Carbamidomethyl (C)[15,21], Oxidation (M)[6,14] |                   | Mascot      |
|                     | 2572.0356                                              | 2572.2273   | 0.1917  | 75    | 1            | 23       | MIPEYSMSSAASSDMCP<br>YMPVCR         |           |       |    | Oxidation (M)[1]                                |                   | Mascot      |
|                     | 3338.4255                                              | 3338.7202   | 0.2947  | 88    | 2            | 32       | IPEYSMSSAASSDMCPY<br>MPVCRSAVPGSSDR |           |       |    | Carbamidomethyl (C)[15]                         |                   | Mascot      |
| 18                  | 39S ribosomal protein L13, mitochondrial [Danio rerio] |             |         |       | gi 66472680  |          | 20769.7                             | 9.74      | 6     | 29 | 0                                               |                   |             |
| Peptide Information |                                                        |             |         |       |              |          |                                     |           |       |    |                                                 |                   |             |
|                     | Calc. Mass                                             | Obsrv. Mass | ± da    | ± ppm | Start Seq.   | End Seq. | Sequence                            | Ion Score | C. I. | %  | Modification                                    | Rank              | Result Type |
|                     | 838.4022                                               | 838.5268    | 0.1246  | 149   | 119          | 124      | RTMMQR                              |           |       |    | Oxidation (M)[3]                                |                   | Mascot      |
|                     | 850.4273                                               | 850.5295    | 0.1022  | 120   | 31           | 38       | IASMCAVR                            |           |       |    |                                                 |                   | Mascot      |
|                     | 850.4273                                               | 850.5295    | 0.1022  | 120   | 31           | 38       | IASMCAVR                            |           |       |    |                                                 |                   | Mascot      |
|                     | 1165.575                                               | 1165.7273   | 0.1523  | 131   | 7            | 16       | SAQQWATFAR                          |           |       |    |                                                 |                   | Mascot      |
|                     | 1165.575                                               | 1165.7273   | 0.1523  | 131   | 7            | 16       | SAQQWATFAR                          |           |       |    |                                                 |                   | Mascot      |
|                     | 1747.9775                                              | 1747.8071   | -0.1704 | -97   | 99           | 114      | DSTAIKLAVYGMLPR                     |           |       |    |                                                 |                   | Mascot      |
|                     | 1763.9578                                              | 1763.8048   | -0.153  | -87   | 125          | 139      | LHLFPDDVLPEDILK                     |           |       |    |                                                 |                   | Mascot      |
|                     | 2443.2361                                              | 2443.1145   | -0.1216 | -50   | 120          | 139      | TMMQRLHLFPDDVLPEDI<br>LK            |           |       |    | Oxidation (M)[2,3]                              |                   | Mascot      |
| 19                  | protein arginine N-methyltransferase 6 [Danio rerio]   |             |         |       | gi 255652853 |          | 39900                               | 5.3       | 7     | 29 | 0                                               |                   |             |
| Peptide Information |                                                        |             |         |       |              |          |                                     |           |       |    |                                                 |                   |             |
|                     | Calc. Mass                                             | Obsrv. Mass | ± da    | ± ppm | Start Seq.   | End Seq. | Sequence                            | Ion Score | C. I. | %  | Modification                                    | Rank              | Result Type |
|                     | 921.4094                                               | 921.4865    | 0.0771  | 84    | 105          | 111      | LNQMEDR                             |           |       |    | Oxidation (M)[4]                                |                   | Mascot      |
|                     | 1062.6194                                              | 1062.675    | 0.0556  | 52    | 278          | 287      | ALVLSTSPFK                          |           |       |    |                                                 |                   | Mascot      |
|                     | 1737.703                                               | 1737.8065   | 0.1035  | 60    | 192          | 206      | GQYGVDMSCMTDFAR                     |           |       |    | Carbamidomethyl (C)[9]                          |                   | Mascot      |
|                     | 2104.1218                                              | 2103.947    | -0.1748 | -83   | 64           | 85       | VVLVDVGAGTGVLSLFCA<br>QAGAR         |           |       |    |                                                 |                   | Mascot      |
|                     | 2104.1218                                              | 2103.947    | -0.1748 | -83   | 64           | 85       | VVLVDVGAGTGVLSLFCA<br>QAGAR         |           |       |    |                                                 |                   | Mascot      |
|                     | 2571.2615                                              | 2571.2007   | -0.0608 | -24   | 208          | 230      | CIMNKDITVNPVTVEDVL<br>SHPCK         |           |       |    | Oxidation (M)[3]                                |                   | Mascot      |
|                     | 2675.4185                                              | 2675.1672   | -0.2513 | -94   | 59           | 85       | SIEGKVVLVDVGAGTGVLS                 |           |       |    | Carbamidomethyl (C)[21]                         |                   | Mascot      |

|    |                                                             |             |           |        |   |     |     |                                          |  |  |  |                      |        |
|----|-------------------------------------------------------------|-------------|-----------|--------|---|-----|-----|------------------------------------------|--|--|--|----------------------|--------|
|    |                                                             | 2689.1731   | 2689.1975 | 0.0244 | 9 | 184 | 206 | LFCAQAGAR<br>LDFWSTVKGQYGVDMSC<br>MTDFAR |  |  |  | Oxidation (M)[15,18] | Mascot |
|    |                                                             | 2689.1731   | 2689.1975 | 0.0244 | 9 | 184 | 206 | LDFWSTVKGQYGVDMSC<br>MTDFAR              |  |  |  | Oxidation (M)[15,18] | Mascot |
| 20 | N(6)-adenine-specific DNA methyltransferase 2 [Danio rerio] | gi 46309537 | 18902.4   | 5.21   | 5 | 29  | 0   |                                          |  |  |  |                      |        |

#### Peptide Information

| Calc. Mass | Obsrv. Mass | ± da    | ± ppm | Start Seq. | End Seq. | Sequence                 | Ion Score | C. I. | % Modification         | Rank | Result Type |
|------------|-------------|---------|-------|------------|----------|--------------------------|-----------|-------|------------------------|------|-------------|
| 1279.6715  | 1279.7588   | 0.0873  | 68    | 28         | 39       | IACLSAPSVYQK             |           |       |                        |      | Mascot      |
| 1407.7114  | 1407.7223   | 0.0109  | 8     | 48         | 60       | SDGVSAVLLEFDR            |           |       |                        |      | Mascot      |
| 2101.9807  | 2101.9658   | -0.0149 | -7    | 139        | 155      | MCSFLPRHNHNLANEFR        |           |       | Oxidation (M)[1]       |      | Mascot      |
| 2120.0981  | 2119.9622   | -0.1359 | -64   | 42         | 60       | QLESVRSQGVSAVLLEFD<br>R  |           |       |                        |      | Mascot      |
| 2225.2031  | 2225.0859   | -0.1172 | -53   | 119        | 138      | ILLCTGAIMEEHAGKLLDL<br>K |           |       | Carbamidomethyl (C)[4] |      | Mascot      |
| 2225.2031  | 2225.0859   | -0.1172 | -53   | 119        | 138      | ILLCTGAIMEEHAGKLLDL<br>K |           |       | Carbamidomethyl (C)[4] |      | Mascot      |

|    |                             |             |         |   |    |    |   |  |  |  |  |  |  |
|----|-----------------------------|-------------|---------|---|----|----|---|--|--|--|--|--|--|
| 21 | Fgfr4 protein [Danio rerio] | gi 66267492 | 99657.1 | 6 | 11 | 29 | 0 |  |  |  |  |  |  |
|----|-----------------------------|-------------|---------|---|----|----|---|--|--|--|--|--|--|

#### Peptide Information

| Calc. Mass | Obsrv. Mass | ± da    | ± ppm | Start Seq. | End Seq. | Sequence                        | Ion Score | C. I. | % Modification                            | Rank | Result Type |
|------------|-------------|---------|-------|------------|----------|---------------------------------|-----------|-------|-------------------------------------------|------|-------------|
| 870.425    | 870.5181    | 0.0931  | 107   | 502        | 508      | MQVHPSR                         |           |       | Oxidation (M)[1]                          |      | Mascot      |
| 1045.5636  | 1045.5455   | -0.0181 | -17   | 21         | 30       | SITSGEPRAK                      |           |       |                                           |      | Mascot      |
| 1448.8147  | 1448.9067   | 0.092   | 64    | 404        | 416      | YGPDGIPYVKIVK                   |           |       |                                           |      | Mascot      |
| 2012.9589  | 2012.9399   | -0.019  | -9    | 623        | 639      | DLADLISEMELMKVMDK               |           |       | Oxidation (M)[9,12]                       |      | Mascot      |
| 2102.1392  | 2101.9658   | -0.1734 | -82   | 37         | 56       | HILTPGYPENATVLVGGH<br>VK        |           |       |                                           |      | Mascot      |
| 2104.02    | 2103.947    | -0.073  | -35   | 698        | 716      | DLVSCAYQVARGMEYLA<br>SK         |           |       |                                           |      | Mascot      |
| 2104.02    | 2103.947    | -0.073  | -35   | 698        | 716      | DLVSCAYQVARGMEYLA<br>SK         |           |       |                                           |      | Mascot      |
| 2120.0151  | 2119.9622   | -0.0529 | -25   | 698        | 716      | DLVSCAYQVARGMEYLA<br>SK         |           |       | Oxidation (M)[13]                         |      | Mascot      |
| 2232.9946  | 2233.0483   | 0.0537  | 24    | 814        | 831      | EGHRMDKPSNCTHELYM<br>K          |           |       | Carbamidomethyl (C)[11]                   |      | Mascot      |
| 2248.9895  | 2249.033    | 0.0435  | 19    | 814        | 831      | EGHRMDKPSNCTHELYM<br>K          |           |       | Carbamidomethyl (C)[11], Oxidation (M)[5] |      | Mascot      |
| 2299.2375  | 2299.1448   | -0.0927 | -40   | 2          | 20       | LSILKVFIACFMELVCSR              |           |       | Carbamidomethyl (C)[11,17]                |      | Mascot      |
| 2572.272   | 2572.2273   | -0.0447 | -17   | 7          | 28       | VFIAICFMELVCSRSITSG<br>EPR      |           |       | Carbamidomethyl (C)[6,12]                 |      | Mascot      |
| 2598.2908  | 2598.2024   | -0.0884 | -34   | 676        | 697      | RPPGMDYTFDVTKVPEE<br>QLTFK      |           |       |                                           |      | Mascot      |
| 2933.4204  | 2933.5264   | 0.106   | 36    | 186        | 211      | TQIRAAVMEIADVITYEDS<br>GVYVCMLR |           |       |                                           |      | Mascot      |
| 2933.4204  | 2933.5264   | 0.106   | 36    | 186        | 211      | TQIRAAVMEIADVITYEDS             |           |       |                                           |      | Mascot      |

22      GVYVCMLR  
 RecName: Full=Contactin-1a; AltName: Full=F3/F11/contactin; AltName: Full=Neural cell recognition m  
 gi|55976512      114263.1      6.25      12      28      0

| Peptide Information |             |         |       |            |          |                                     |           |         |                         |      |             |
|---------------------|-------------|---------|-------|------------|----------|-------------------------------------|-----------|---------|-------------------------|------|-------------|
| Calc. Mass          | Obsrv. Mass | ± da    | ± ppm | Start Seq. | End Seq. | Sequence                            | Ion Score | C. I. % | Modification            | Rank | Result Type |
| 856.5111            | 856.5146    | 0.0035  | 4     | 434        | 441      | LLGARNGR                            |           |         |                         |      | Mascot      |
| 1045.5173           | 1045.5455   | 0.0282  | 27    | 562        | 569      | DAQHYQRK                            |           |         |                         |      | Mascot      |
| 1062.5513           | 1062.675    | 0.1237  | 116   | 442        | 449      | VVFECRPR                            |           |         | Carbamidomethyl (C)[5]  |      | Mascot      |
| 1407.8318           | 1407.7223   | -0.1095 | -78   | 918        | 930      | SPPSRPPKIISTK                       |           |         |                         |      | Mascot      |
| 2224.9749           | 2225.0859   | 0.111   | 50    | 388        | 406      | FSRLGFEDSGMYQCVAE<br>NR             |           |         | Oxidation (M)[11]       |      | Mascot      |
| 2225.1772           | 2225.0859   | -0.0913 | -41   | 695        | 716      | VIATNTLTGTGPPSEPSK<br>TTTR          |           |         |                         |      | Mascot      |
| 2230.0305           | 2230.1809   | 0.1504  | 67    | 114        | 134      | SKHAGNYTCVASNQYGS<br>VTSR           |           |         |                         |      | Mascot      |
| 2283.092            | 2283.1499   | 0.0579  | 25    | 594        | 614      | YSCTAQTTPVDNTTASAE<br>VVR           |           |         | Carbamidomethyl (C)[3]  |      | Mascot      |
| 2283.092            | 2283.1499   | 0.0579  | 25    | 594        | 614      | YSCTAQTTPVDNTTASAE<br>VVR           |           |         | Carbamidomethyl (C)[3]  |      | Mascot      |
| 2284.2131           | 2284.1421   | -0.071  | -31   | 442        | 460      | VVFECRPRAAPRPNITW<br>SK             |           |         | Carbamidomethyl (C)[5]  |      | Mascot      |
| 2299.1426           | 2299.1448   | 0.0022  | 1     | 986        | 1007     | GEYLVVRAHSEGGDGA<br>VAQVR           |           |         |                         |      | Mascot      |
| 2571.2581           | 2571.2007   | -0.0574 | -22   | 570        | 593      | MDSASGTSSSELLITHQ<br>LRHAGR         |           |         | Oxidation (M)[1]        |      | Mascot      |
| 3338.7102           | 3338.7202   | 0.01    | 3     | 256        | 284      | SPDSWALLGQNVLTLECF<br>ALGNPIPIQIRWR |           |         | Carbamidomethyl (C)[16] |      | Mascot      |

23      novel NACHT domain containing protein [Danio rerio]      gi|148725674      78996.7      5.72      10      28      0

| Peptide Information |             |         |       |            |          |                             |           |         |                        |                  |
|---------------------|-------------|---------|-------|------------|----------|-----------------------------|-----------|---------|------------------------|------------------|
| Calc. Mass          | Obsrv. Mass | ± da    | ± ppm | Start Seq. | End Seq. | Sequence                    | Ion Score | C. I. % | Modification           | Rank Result Type |
| 921.4424            | 921.4865    | 0.0441  | 48    | 44         | 50       | NELENFR                     |           |         |                        | Mascot           |
| 969.4346            | 969.544     | 0.1094  | 113   | 468        | 475      | DCGIDVYK                    |           |         | Carbamidomethyl (C)[2] | Mascot           |
| 990.5366            | 990.5233    | -0.0133 | -13   | 449        | 456      | LAFQQLDR                    |           |         |                        | Mascot           |
| 1045.5272           | 1045.5455   | 0.0183  | 18    | 574        | 582      | GLLTQQDDR                   |           |         |                        | Mascot           |
| 1062.5803           | 1062.675    | 0.0947  | 89    | 419        | 426      | FQIQQSRR                    |           |         |                        | Mascot           |
| 1306.6671           | 1306.7334   | 0.0663  | 51    | 529        | 539      | SRDESMIDLLK                 |           |         |                        | Mascot           |
| 2211.2092           | 2211.0725   | -0.1367 | -62   | 70         | 88       | SIITEAALDLTLFFLREMK         |           |         |                        | Mascot           |
| 2298.1812           | 2298.1436   | -0.0376 | -16   | 408        | 425      | TLTQMYTHFLRFQIQQSR          |           |         |                        | Mascot           |
| 2571.2395           | 2571.2007   | -0.0388 | -15   | 86         | 107      | EMKQDQAADTLQGELFF<br>TNQLK  |           |         | Oxidation (M)[2]       | Mascot           |
| 2598.2869           | 2598.2024   | -0.0845 | -33   | 89         | 111      | QDQAADTLQGELFFTNQ<br>LKCSLK |           |         |                        | Mascot           |

24    PREDICTED: zinc finger protein 41 [Danio rerio]                      gi|326680510                      48832.9                      9.3                      10                      28                      0

Peptide Information

| Calc. Mass | Obsrv. Mass | ± da    | ± ppm | Start Seq. | End Seq. | Sequence                      | Ion Score | C. I. % | Modification                             | Rank | Result Type |
|------------|-------------|---------|-------|------------|----------|-------------------------------|-----------|---------|------------------------------------------|------|-------------|
| 882.4501   | 882.5524    | 0.1023  | 116   | 181        | 187      | CELSFRK                       |           |         |                                          |      | Mascot      |
| 990.4752   | 990.3658    | -0.1094 | -110  | 217        | 224      | QTFNSHTR                      |           |         |                                          |      | Mascot      |
| 990.4752   | 990.5233    | 0.0481  | 49    | 217        | 224      | QTFNSHTR                      |           |         |                                          |      | Mascot      |
| 1448.6951  | 1448.9067   | 0.2116  | 146   | 169        | 180      | IHTGEKPYSCTR                  |           |         | Carbamidomethyl (C)[10]                  |      | Mascot      |
| 1731.6746  | 1731.8127   | 0.1381  | 80    | 399        | 412      | AYACSQCGMSFMYR                |           |         | Carbamidomethyl (C)[4,7]                 |      | Mascot      |
| 1747.9308  | 1747.8071   | -0.1237 | -71   | 3          | 17       | LLPPCDAIMKMAFIK               |           |         | Carbamidomethyl (C)[5]                   |      | Mascot      |
| 1763.9257  | 1763.8048   | -0.1209 | -69   | 3          | 17       | LLPPCDAIMKMAFIK               |           |         | Carbamidomethyl (C)[5], Oxidation (M)[9] |      | Mascot      |
| 2103.9333  | 2103.947    | 0.0137  | 7     | 225        | 244      | NHTGEKPHTCAQCGSSF<br>ATK      |           |         |                                          |      | Mascot      |
| 2103.9333  | 2103.947    | 0.0137  | 7     | 225        | 244      | NHTGEKPHTCAQCGSSF<br>ATK      |           |         |                                          |      | Mascot      |
| 2233.0891  | 2233.0483   | -0.0408 | -18   | 197        | 216      | IHTGEKPYLCAQCGLSFT<br>HK      |           |         |                                          |      | Mascot      |
| 2283.0757  | 2283.1499   | 0.0742  | 33    | 113        | 131      | VHTGEKPYRCSQCGLSF<br>TR       |           |         | Carbamidomethyl (C)[10,13]               |      | Mascot      |
| 2283.0757  | 2283.1499   | 0.0742  | 33    | 113        | 131      | VHTGEKPYRCSQCGLSF<br>TR       |           |         | Carbamidomethyl (C)[10,13]               |      | Mascot      |
| 2298.9763  | 2299.1448   | 0.1685  | 73    | 393        | 412      | IHTGEKAYACSQCGMSF<br>MYR      |           |         | Oxidation (M)[15]                        |      | Mascot      |
| 2955.4465  | 2955.5      | 0.0535  | 18    | 329        | 354      | TALNSHVRHNAVKPYTC<br>SHCGQSFK |           |         | Carbamidomethyl (C)[18]                  |      | Mascot      |

25    Zgc:153813 protein [Danio rerio]                      gi|71679669                      99735.2                      5.54                      11                      28                      0

Peptide Information

| Calc. Mass | Obsrv. Mass | ± da    | ± ppm | Start Seq. | End Seq. | Sequence                 | Ion Score | C. I. % | Modification                              | Rank | Result Type |
|------------|-------------|---------|-------|------------|----------|--------------------------|-----------|---------|-------------------------------------------|------|-------------|
| 842.473    | 842.4933    | 0.0203  | 24    | 831        | 840      | SGGAAAAPLK               |           |         |                                           |      | Mascot      |
| 848.426    | 848.5133    | 0.0873  | 103   | 153        | 159      | YPVENAR                  |           |         |                                           |      | Mascot      |
| 864.4573   | 864.4991    | 0.0418  | 48    | 5          | 11       | FNTVDIR                  |           |         |                                           |      | Mascot      |
| 1133.5698  | 1133.701    | 0.1312  | 116   | 151        | 159      | ERYPVENAR                |           |         |                                           |      | Mascot      |
| 1165.5847  | 1165.7273   | 0.1426  | 122   | 137        | 146      | FRTAEAEVDK               |           |         |                                           |      | Mascot      |
| 1165.5847  | 1165.7273   | 0.1426  | 122   | 137        | 146      | FRTAEAEVDK               |           |         |                                           |      | Mascot      |
| 1731.8405  | 1731.8127   | -0.0278 | -16   | 382        | 398      | MVTEAQAAGDPVACAIK        |           |         | Carbamidomethyl (C)[14]                   |      | Mascot      |
| 1747.8353  | 1747.8071   | -0.0282 | -16   | 382        | 398      | MVTEAQAAGDPVACAIK        |           |         | Carbamidomethyl (C)[14], Oxidation (M)[1] |      | Mascot      |
| 1763.965   | 1763.8048   | -0.1602 | -91   | 437        | 453      | AVLVLDIDINLSAHANAK       |           |         |                                           |      | Mascot      |
| 2102.062   | 2101.9658   | -0.0962 | -46   | 382        | 401      | MVTEAQAAGDPVACAIK<br>ELK |           |         | Carbamidomethyl (C)[14]                   |      | Mascot      |
| 2118.0569  | 2117.9585   | -0.0984 | -46   | 382        | 401      | MVTEAQAAGDPVACAIK<br>ELK |           |         | Carbamidomethyl (C)[14], Oxidation (M)[1] |      | Mascot      |

|    |                                                |           |         |    |              |     |                            |      |   |    |                                           |        |
|----|------------------------------------------------|-----------|---------|----|--------------|-----|----------------------------|------|---|----|-------------------------------------------|--------|
|    | 2443.0701                                      | 2443.1145 | 0.0444  | 18 | 58           | 77  | IHCTEFDWPKNMMPSGF<br>AMK   |      |   |    | Carbamidomethyl (C)[3], Oxidation (M)[12] | Mascot |
|    | 2572.2122                                      | 2572.2273 | 0.0151  | 6  | 768          | 790 | TAHTDTPQESQVNT<br>DTQVKK   |      |   |    |                                           | Mascot |
|    | 2689.2126                                      | 2689.1975 | -0.0151 | -6 | 287          | 308 | YVEFESFNKAVDEFFSQ<br>MESQK |      |   |    |                                           | Mascot |
|    | 2689.2126                                      | 2689.1975 | -0.0151 | -6 | 287          | 308 | YVEFESFNKAVDEFFSQ<br>MESQK |      |   |    |                                           | Mascot |
| 26 | beta-1,3-galactosyltransferase 6 [Danio rerio] |           |         |    | gi 113675498 |     | 38567.2                    | 8.52 | 7 | 28 | 0                                         |        |

#### Peptide Information

| Calc. Mass | Obsrv. Mass | ± da   | ± ppm | Start Seq. | End Seq. | Sequence                          | Ion Score | C. I. % | Modification            | Rank | Result Type |
|------------|-------------|--------|-------|------------|----------|-----------------------------------|-----------|---------|-------------------------|------|-------------|
| 848.4545   | 848.5133    | 0.0588 | 69    | 305        | 311      | LCKEEVK                           |           |         |                         |      | Mascot      |
| 1045.4949  | 1045.5455   | 0.0506 | 48    | 268        | 275      | FDTEYKSR                          |           |         |                         |      | Mascot      |
| 1133.6282  | 1133.701    | 0.0728 | 64    | 1          | 9        | MNLLRLVCR                         |           |         | Oxidation (M)[1]        |      | Mascot      |
| 1306.6572  | 1306.7334   | 0.0762 | 58    | 276        | 286      | GCSNKYLVTHK                       |           |         | Carbamidomethyl (C)[2]  |      | Mascot      |
| 2101.947   | 2101.9658   | 0.0188 | 9     | 314        | 330      | LSYIYDWSVPPSQCCQR                 |           |         | Carbamidomethyl (C)[14] |      | Mascot      |
| 2230.042   | 2230.1809   | 0.1389 | 62    | 314        | 331      | LSYIYDWSVPPSQCCQR<br>K            |           |         | Carbamidomethyl (C)[14] |      | Mascot      |
| 3337.6238  | 3337.7405   | 0.1167 | 35    | 204        | 232      | WKESAWELCDYYLPYAL<br>GGGYVLSADLVR |           |         |                         |      | Mascot      |

|    |                                                                     |  |  |  |              |  |         |      |   |    |   |  |
|----|---------------------------------------------------------------------|--|--|--|--------------|--|---------|------|---|----|---|--|
| 27 | PREDICTED: hypothetical protein LOC100535504, partial [Danio rerio] |  |  |  | gi 326667405 |  | 50191.8 | 7.03 | 8 | 27 | 0 |  |
|----|---------------------------------------------------------------------|--|--|--|--------------|--|---------|------|---|----|---|--|

#### Peptide Information

| Calc. Mass | Obsrv. Mass | ± da    | ± ppm | Start Seq. | End Seq. | Sequence                  | Ion Score | C. I. % | Modification                                     | Rank | Result Type |
|------------|-------------|---------|-------|------------|----------|---------------------------|-----------|---------|--------------------------------------------------|------|-------------|
| 801.4478   | 801.341     | -0.1068 | -133  | 366        | 371      | RSHFVR                    |           |         |                                                  |      | Mascot      |
| 850.4127   | 850.5295    | 0.1168  | 137   | 47         | 53       | IEGPCFK                   |           |         | Carbamidomethyl (C)[5]                           |      | Mascot      |
| 850.4127   | 850.5295    | 0.1168  | 137   | 47         | 53       | IEGPCFK                   |           |         | Carbamidomethyl (C)[5]                           |      | Mascot      |
| 868.5502   | 868.5345    | -0.0157 | -18   | 435        | 443      | VVPLSLAGL                 |           |         |                                                  |      | Mascot      |
| 1062.5764  | 1062.675    | 0.0986  | 93    | 47         | 55       | IEGPCFKIR                 |           |         |                                                  |      | Mascot      |
| 1715.7257  | 1715.8234   | 0.0977  | 57    | 182        | 194      | FCVTDEDFQYYTK             |           |         | Carbamidomethyl (C)[2]                           |      | Mascot      |
| 1715.7257  | 1715.8234   | 0.0977  | 57    | 182        | 194      | FCVTDEDFQYYTK             |           |         | Carbamidomethyl (C)[2]                           |      | Mascot      |
| 1747.7019  | 1747.8071   | 0.1052  | 60    | 8          | 21       | CYCSPCCSNKQK              |           |         | Carbamidomethyl (C)[1,3,7]                       |      | Mascot      |
| 2283.8743  | 2284.1421   | 0.2678  | 117   | 1          | 19       | MAQSSCKCYSPCCSN<br>NK     |           |         | Carbamidomethyl (C)[6,8,10,14]                   |      | Mascot      |
| 2299.8691  | 2300.1487   | 0.2796  | 122   | 1          | 19       | MAQSSCKCYSPCCSN<br>NK     |           |         | Carbamidomethyl (C)[6,8,10,14], Oxidation (M)[1] |      | Mascot      |
| 2465.1885  | 2465.0767   | -0.1118 | -45   | 90         | 110      | FFWNDWVGKGTDEIPLS<br>VNPR |           |         |                                                  |      | Mascot      |

|    |                                                                                                   |  |  |  |              |  |         |      |   |    |   |  |
|----|---------------------------------------------------------------------------------------------------|--|--|--|--------------|--|---------|------|---|----|---|--|
| 28 | novel protein similar to vertebrate arginyl-tRNA synthetase-like (RARSL, zgc:63702) [Danio rerio] |  |  |  | gi 220673255 |  | 67264.7 | 8.55 | 9 | 27 | 0 |  |
|----|---------------------------------------------------------------------------------------------------|--|--|--|--------------|--|---------|------|---|----|---|--|



| Peptide Information |                                                                                                      | Calc. Mass | Obsrv. Mass | ± da    | ± ppm | Start Seq. | End Sequence Seq.              | Ion Score | C. I. % | Modification           | Rank | Result Type |
|---------------------|------------------------------------------------------------------------------------------------------|------------|-------------|---------|-------|------------|--------------------------------|-----------|---------|------------------------|------|-------------|
|                     |                                                                                                      | 801.3858   | 801.341     | -0.0448 | -56   | 424        | 429 MIHNMR                     |           |         |                        |      | Mascot      |
|                     |                                                                                                      | 856.4246   | 856.5146    | 0.09    | 105   | 2          | 7 ACFFRR                       |           |         | Carbamidomethyl (C)[2] |      | Mascot      |
|                     |                                                                                                      | 921.4312   | 921.4865    | 0.0553  | 60    | 107        | 115 SDPDGFGVK                  |           |         |                        |      | Mascot      |
|                     |                                                                                                      | 990.5101   | 990.3658    | -0.1443 | -146  | 315        | 324 GTGVVDLSDK                 |           |         |                        |      | Mascot      |
|                     |                                                                                                      | 990.5101   | 990.5233    | 0.0132  | 13    | 315        | 324 GTGVVDLSDK                 |           |         |                        |      | Mascot      |
|                     |                                                                                                      | 1062.5592  | 1062.675    | 0.1158  | 109   | 241        | 249 SAAAHFFRR                  |           |         |                        |      | Mascot      |
|                     |                                                                                                      | 1165.7052  | 1165.7273   | 0.0221  | 19    | 514        | 523 SVSLLQHLLR                 |           |         |                        |      | Mascot      |
|                     |                                                                                                      | 1165.7052  | 1165.7273   | 0.0221  | 19    | 514        | 523 SVSLLQHLLR                 |           |         |                        |      | Mascot      |
|                     |                                                                                                      | 1768.9197  | 1768.8323   | -0.0874 | -49   | 572        | 587 LCLFSSVRSVLANGMR           |           |         | Oxidation (M)[15]      |      | Mascot      |
|                     |                                                                                                      | 2572.3503  | 2572.2273   | -0.123  | -48   | 436        | 458 ELEDPEVTAERIGISALIV QDFK   |           |         |                        |      | Mascot      |
|                     |                                                                                                      | 2689.4243  | 2689.1975   | -0.2268 | -84   | 472        | 495 VLQAQGDGTGVFLQYTHA RLCSLLR |           |         |                        |      | Mascot      |
|                     |                                                                                                      | 2689.4243  | 2689.1975   | -0.2268 | -84   | 472        | 495 VLQAQGDGTGVFLQYTHA RLCSLLR |           |         |                        |      | Mascot      |
| 29                  | novel protein similar to vertebrate ADAM metalloproteinase with thrombospondin type 1 motif, 7 (ADAM |            |             |         |       |            | gi 148726085                   | 57496     | 5.5     | 8                      | 27   | 0           |

| Peptide Information |                                                                                    | Calc. Mass | Obsrv. Mass | ± da    | ± ppm | Start Seq. | End Sequence Seq.              | Ion Score | C. I. % | Modification                 | Rank | Result Type |
|---------------------|------------------------------------------------------------------------------------|------------|-------------|---------|-------|------------|--------------------------------|-----------|---------|------------------------------|------|-------------|
|                     |                                                                                    | 856.3981   | 856.5146    | 0.1165  | 136   | 303        | 309 YCTGERK                    |           |         |                              |      | Mascot      |
|                     |                                                                                    | 1051.6146  | 1051.6984   | 0.0838  | 80    | 21         | 29 LILLHGEEK                   |           |         |                              |      | Mascot      |
|                     |                                                                                    | 1051.6146  | 1051.6984   | 0.0838  | 80    | 21         | 29 LILLHGEEK                   |           |         |                              |      | Mascot      |
|                     |                                                                                    | 1407.6759  | 1407.7223   | 0.0464  | 33    | 248        | 259 WCISGECVIVGK               |           |         | Carbamidomethyl (C)[2,7]     |      | Mascot      |
|                     |                                                                                    | 2102.1868  | 2101.9658   | -0.221  | -105  | 1          | 20 VAGIFHDASIGNAIHIVLV R       |           |         |                              |      | Mascot      |
|                     |                                                                                    | 2284.0518  | 2284.1421   | 0.0903  | 40    | 389        | 410 NICVNGVCKEVGCDFFGIN SNAK   |           |         |                              |      | Mascot      |
|                     |                                                                                    | 2300.1855  | 2300.1487   | -0.0368 | -16   | 30         | 49 GLKIIHHADTTLSFCTW QK        |           |         |                              |      | Mascot      |
|                     |                                                                                    | 2689.2749  | 2689.1975   | -0.0774 | -29   | 138        | 160 QPFIMSRQLQYDSSPLT WSSCSK   |           |         |                              |      | Mascot      |
|                     |                                                                                    | 2689.2749  | 2689.1975   | -0.0774 | -29   | 138        | 160 QPFIMSRQLQYDSSPLT WSSCSK   |           |         |                              |      | Mascot      |
|                     |                                                                                    | 2955.2786  | 2955.5      | 0.2214  | 75    | 72         | 97 DVCAGMNQPCETLGLSH LSGMCQPHR |           |         | Carbamidomethyl (C)[3,10,22] |      | Mascot      |
| 30                  | novel protein similar to Rho GTPase activating protein 12 (arhgap12) [Danio rerio] |            |             |         |       |            | gi 169158589                   | 54559.8   | 6.64    | 8                            | 27   | 0           |

Peptide Information

| Calc. Mass | Obsrv. Mass | ± da    | ± ppm | Start Seq. | End Seq. | Sequence                      | Ion Score | C. I. | % Modification         | Rank | Result Type |
|------------|-------------|---------|-------|------------|----------|-------------------------------|-----------|-------|------------------------|------|-------------|
| 870.4176   | 870.5181    | 0.1005  | 115   | 254        | 260      | HTDERGR                       |           |       |                        |      | Mascot      |
| 1407.6652  | 1407.7223   | 0.0571  | 41    | 259        | 270      | GRLYYYSADGSR                  |           |       |                        |      | Mascot      |
| 1566.7944  | 1566.7186   | -0.0758 | -48   | 59         | 73       | SPCPSPSSTALLPPR               |           |       | Carbamidomethyl (C)[3] |      | Mascot      |
| 1715.8096  | 1715.8234   | 0.0138  | 8     | 313        | 326      | TQRHSIYSHETNDK                |           |       |                        |      | Mascot      |
| 1715.8096  | 1715.8234   | 0.0138  | 8     | 313        | 326      | TQRHSIYSHETNDK                |           |       |                        |      | Mascot      |
| 2012.9833  | 2012.9399   | -0.0434 | -22   | 85         | 102      | HLPPAQMNTPGSLPCF<br>R         |           |       |                        |      | Mascot      |
| 2063.9709  | 2064.0337   | 0.0628  | 30    | 261        | 277      | LYYYSADGSRSEWELPK             |           |       |                        |      | Mascot      |
| 2298.228   | 2298.1436   | -0.0844 | -37   | 370        | 388      | KNWTSYWTVLQGSLLIFN<br>K       |           |       |                        |      | Mascot      |
| 2703.301   | 2703.2061   | -0.0949 | -35   | 186        | 210      | ISQSSTPPLPSSSPIHTNG<br>DWETHK |           |       |                        |      | Mascot      |

31 PREDICTED: dynein heavy chain 1, axonemal [Danio rerio] gi|326671940 313752.7 5.5 21 27 0

#### Peptide Information

| Calc. Mass | Obsrv. Mass | ± da    | ± ppm | Start Seq. | End Seq. | Sequence                 | Ion Score | C. I. | % Modification          | Rank | Result Type |
|------------|-------------|---------|-------|------------|----------|--------------------------|-----------|-------|-------------------------|------|-------------|
| 856.5614   | 856.5146    | -0.0468 | -55   | 2303       | 2310     | GIKANLLK                 |           |       |                         |      | Mascot      |
| 990.5037   | 990.3658    | -0.1379 | -139  | 1765       | 1772     | DNRLDVMK                 |           |       |                         |      | Mascot      |
| 990.5037   | 990.5233    | 0.0196  | 20    | 1765       | 1772     | DNRLDVMK                 |           |       |                         |      | Mascot      |
| 1045.604   | 1045.5455   | -0.0585 | -56   | 1959       | 1967     | LEYVPVAVR                |           |       |                         |      | Mascot      |
| 1062.5863  | 1062.675    | 0.0887  | 83    | 493        | 502      | LCLSSGEIHK               |           |       |                         |      | Mascot      |
| 1165.5922  | 1165.7273   | 0.1351  | 116   | 2770       | 2780     | QGVALICALDY              |           |       |                         |      | Mascot      |
| 1165.5922  | 1165.7273   | 0.1351  | 116   | 2770       | 2780     | QGVALICALDY              |           |       |                         |      | Mascot      |
| 1225.5365  | 1225.6703   | 0.1338  | 109   | 457        | 467      | DGASSMEQEKK              |           |       | Oxidation (M)[6]        |      | Mascot      |
| 1279.6715  | 1279.7588   | 0.0873  | 68    | 962        | 973      | VFQGILMAEAGK             |           |       | Oxidation (M)[7]        |      | Mascot      |
| 1448.7856  | 1448.9067   | 0.1211  | 84    | 2260       | 2271     | LIENIDPDKVHR             |           |       |                         |      | Mascot      |
| 1731.8153  | 1731.8127   | -0.0026 | -2    | 294        | 307      | RENPDMMNEELICLR          |           |       |                         |      | Mascot      |
| 1747.8102  | 1747.8071   | -0.0031 | -2    | 294        | 307      | RENPDMMNEELICLR          |           |       | Oxidation (M)[6]        |      | Mascot      |
| 1763.936   | 1763.8048   | -0.1312 | -74   | 962        | 977      | VFQGILMAEAGKIENK         |           |       | Oxidation (M)[7]        |      | Mascot      |
| 2013.066   | 2012.9399   | -0.1261 | -63   | 2038       | 2054     | LMFAFLLCARILTNSDK        |           |       | Carbamidomethyl (C)[8]  |      | Mascot      |
| 2064.0293  | 2064.0337   | 0.0044  | 2     | 2705       | 2721     | ELYTEMAVIWMVPVPIR        |           |       | Oxidation (M)[6]        |      | Mascot      |
| 2104.0403  | 2103.947    | -0.0933 | -44   | 1391       | 1409     | EDTVVAEETRVAVQAEE<br>TK  |           |       |                         |      | Mascot      |
| 2104.0403  | 2103.947    | -0.0933 | -44   | 1391       | 1409     | EDTVVAEETRVAVQAEE<br>TK  |           |       |                         |      | Mascot      |
| 2211.1248  | 2211.0725   | -0.0523 | -24   | 578        | 597      | ESIKEVITSMDSNLTCSLL<br>K |           |       |                         |      | Mascot      |
| 2230.1438  | 2230.1809   | 0.0371  | 17    | 974        | 990      | IENKIQLQLWYHESCR         |           |       | Carbamidomethyl (C)[16] |      | Mascot      |

|    |                              |           |         |     |             |      |                                  |      |                                            |        |   |
|----|------------------------------|-----------|---------|-----|-------------|------|----------------------------------|------|--------------------------------------------|--------|---|
|    | 2284.1411                    | 2284.1421 | 0.001   | 0   | 578         | 597  | ESIKEVITSMDSNLTCSSLK             |      | Carbamidomethyl (C)[16], Oxidation (M)[10] | Mascot |   |
|    | 2298.1772                    | 2298.1436 | -0.0336 | -15 | 770         | 788  | LLKNMPAEYITHFLMFSA<br>R          |      | Oxidation (M)[5]                           | Mascot |   |
|    | 2299.0798                    | 2299.1448 | 0.065   | 28  | 2311        | 2330 | TYASVTEDFITCKTAEF<br>K           |      | Carbamidomethyl (C)[13]                    | Mascot |   |
|    | 2300.1301                    | 2300.1487 | 0.0186  | 8   | 2527        | 2545 | YPVMYEESMNTVLVQEV<br>R           |      |                                            | Mascot |   |
|    | 2571.2554                    | 2571.2007 | -0.0547 | -21 | 862         | 885  | NLVDINFACAMGPPGGG<br>RNPITQR     |      | Carbamidomethyl (C)[9], Oxidation (M)[11]  | Mascot |   |
|    | 2689.2563                    | 2689.1975 | -0.0588 | -22 | 2215        | 2240 | MNAISLGQGQGPSAEVM<br>MHSAMEKGK   |      |                                            | Mascot |   |
|    | 2689.2563                    | 2689.1975 | -0.0588 | -22 | 2215        | 2240 | MNAISLGQGQGPSAEVM<br>MHSAMEKGK   |      |                                            | Mascot |   |
|    | 3337.751                     | 3337.7405 | -0.0105 | -3  | 906         | 934  | IFSTILGSWMQKTPMKP<br>FCKPLVDATIR |      |                                            | Mascot |   |
| 32 | archain 1 like [Danio rerio] |           |         |     | gi 42543996 |      | 56687.2                          | 5.66 | 8                                          | 27     | 0 |

Peptide Information

| Calc. Mass | Obsrv. Mass | ± da    | ± ppm | Start Seq. | End Seq. | Sequence                     | Ion Score | C. I. % | Modification                             | Rank | Result Type |
|------------|-------------|---------|-------|------------|----------|------------------------------|-----------|---------|------------------------------------------|------|-------------|
| 990.485    | 990.3658    | -0.1192 | -120  | 149        | 156      | ETQEREAK                     |           |         |                                          |      | Mascot      |
| 990.485    | 990.5233    | 0.0383  | 39    | 149        | 156      | ETQEREAK                     |           |         |                                          |      | Mascot      |
| 1045.6074  | 1045.5455   | -0.0619 | -59   | 2          | 11       | VLLAAAVCTK                   |           |         | Carbamidomethyl (C)[8]                   |      | Mascot      |
| 1448.7963  | 1448.9067   | 0.1104  | 76    | 1          | 14       | MVLLAAAVCTKAGK               |           |         | Carbamidomethyl (C)[9], Oxidation (M)[1] |      | Mascot      |
| 1763.8738  | 1763.8048   | -0.069  | -39   | 498        | 512      | FSSETSFVVDKYEIL              |           |         |                                          |      | Mascot      |
| 2102.1606  | 2101.9658   | -0.1948 | -93   | 56         | 72       | YVYQPLEKLYMVLITTK            |           |         |                                          |      | Mascot      |
| 2104.1218  | 2103.947    | -0.1748 | -83   | 263        | 280      | VLQPPVNMESVHLRVEE<br>K       |           |         |                                          |      | Mascot      |
| 2104.1218  | 2103.947    | -0.1748 | -83   | 263        | 280      | VLQPPVNMESVHLRVEE<br>K       |           |         |                                          |      | Mascot      |
| 2118.1555  | 2117.9585   | -0.197  | -93   | 56         | 72       | YVYQPLEKLYMVLITTK            |           |         | Oxidation (M)[11]                        |      | Mascot      |
| 2120.1167  | 2119.9622   | -0.1545 | -73   | 263        | 280      | VLQPPVNMESVHLRVEE<br>K       |           |         | Oxidation (M)[8]                         |      | Mascot      |
| 2211.1113  | 2211.0725   | -0.0388 | -18   | 478        | 497      | NFCDIQVAKVTYVEGGSP<br>VK     |           |         | Carbamidomethyl (C)[3]                   |      | Mascot      |
| 2465.2561  | 2465.0767   | -0.1794 | -73   | 281        | 303      | ISLTCGRDGGGLQNMEVL<br>GMITLK |           |         | Oxidation (M)[14]                        |      | Mascot      |

33 caveolin-1 isoform a [Danio rerio] gi|47086737 20639.4 5.84 5 27 0

Peptide Information

| Calc. Mass | Obsrv. Mass | ± da   | ± ppm | Start Seq. | End Seq. | Sequence           | Ion Score | C. I. % | Modification                              | Rank | Result Type |
|------------|-------------|--------|-------|------------|----------|--------------------|-----------|---------|-------------------------------------------|------|-------------|
| 1225.6357  | 1225.6703   | 0.0346 | 28    | 169        | 179      | CFSNVRVTATK        |           |         |                                           |      | Mascot      |
| 1279.6641  | 1279.7588   | 0.0947 | 74    | 58         | 68       | DPKHLNDDEVK        |           |         |                                           |      | Mascot      |
| 1747.7922  | 1747.8071   | 0.0149 | 9     | 7          | 21       | DGTPEEEYAHSPFIR    |           |         |                                           |      | Mascot      |
| 2233.0127  | 2233.0483   | 0.0356 | 16    | 150        | 168      | VYSICVHTFCDPLFEAMG |           |         | Carbamidomethyl (C)[5], Oxidation (M)[17] |      | Mascot      |

2284.0518

2284.1421

0.0903

40

2

K

TSGYKDGTPPEEEYAHSP

FIR

Mascot

34

PREDICTED: LOW QUALITY PROTEIN: ryanodine receptor 2 [Danio rerio]

gi|189530774

552356.6

5.83

30

27

0

| Peptide Information |             |         |       |            |          |                           |           |       |                                              | Rank | Result Type |
|---------------------|-------------|---------|-------|------------|----------|---------------------------|-----------|-------|----------------------------------------------|------|-------------|
| Calc. Mass          | Obsrv. Mass | ± da    | ± ppm | Start Seq. | End Seq. | Sequence                  | Ion Score | C. I. | % Modification                               |      |             |
| 801.4464            | 801.341     | -0.1054 | -132  | 470        | 477      | QGDIGALK                  |           |       |                                              |      | Mascot      |
| 838.4603            | 838.5268    | 0.0665  | 79    | 1372       | 1377     | QRFMLK                    |           |       | Oxidation (M)[4]                             |      | Mascot      |
| 848.4777            | 848.5133    | 0.0356  | 42    | 3528       | 3533     | RPVWYK                    |           |       |                                              |      | Mascot      |
| 921.49              | 921.4865    | -0.0035 | -4    | 1074       | 1081     | SVGAERFR                  |           |       |                                              |      | Mascot      |
| 996.468             | 996.5809    | 0.1129  | 113   | 1563       | 1571     | NANPQCPPR                 |           |       |                                              |      | Mascot      |
| 996.5624            | 996.5809    | 0.0185  | 19    | 3510       | 3516     | LEIYFRR                   |           |       |                                              |      | Mascot      |
| 1045.5459           | 1045.5455   | -0.0004 | 0     | 75         | 83       | ALQEMLANR                 |           |       |                                              |      | Mascot      |
| 1051.5604           | 1051.6984   | 0.138   | 131   | 2440       | 2448     | AAMVLFLDR                 |           |       | Oxidation (M)[3]                             |      | Mascot      |
| 1051.5604           | 1051.6984   | 0.138   | 131   | 2440       | 2448     | AAMVLFLDR                 |           |       | Oxidation (M)[3]                             |      | Mascot      |
| 1062.5327           | 1062.675    | 0.1423  | 134   | 1730       | 1738     | VERFPGSDR                 |           |       |                                              |      | Mascot      |
| 1165.567            | 1165.7273   | 0.1603  | 138   | 33         | 43       | LCLAAEGFGER               |           |       |                                              |      | Mascot      |
| 1165.567            | 1165.7273   | 0.1603  | 138   | 33         | 43       | LCLAAEGFGER               |           |       |                                              |      | Mascot      |
| 1279.7157           | 1279.7588   | 0.0431  | 34    | 2896       | 2906     | FAYGLIQQALR               |           |       |                                              |      | Mascot      |
| 1306.7339           | 1306.7334   | -0.0005 | 0     | 734        | 744      | RVSSPNQHLLR               |           |       |                                              |      | Mascot      |
| 1566.8625           | 1566.7186   | -0.1439 | -92   | 1760       | 1773     | IDLDSPEIPLDVLK            |           |       |                                              |      | Mascot      |
| 1715.7733           | 1715.8234   | 0.0501  | 29    | 515        | 529      | EAGECWEGVLNAFYK           |           |       |                                              |      | Mascot      |
| 1715.7733           | 1715.8234   | 0.0501  | 29    | 515        | 529      | EAGECWEGVLNAFYK           |           |       |                                              |      | Mascot      |
| 1731.9462           | 1731.8127   | -0.1335 | -77   | 4298       | 4312     | DPQLLTDFGLCLKR            |           |       |                                              |      | Mascot      |
| 1747.7719           | 1747.8071   | 0.0352  | 20    | 4863       | 4875     | CWEFFPVGDCFRK             |           |       | Carbamidomethyl (C)[1,10]                    |      | Mascot      |
| 2012.8722           | 2012.9399   | 0.0677  | 34    | 2113       | 2129     | EEEECMIRGLGDIMNNK         |           |       | Oxidation (M)[6,14]                          |      | Mascot      |
| 2103.9004           | 2103.947    | 0.0466  | 22    | 1468       | 1486     | RSSCYMVCAAEGSSLSH<br>SR   |           |       | Carbamidomethyl (C)[4], Oxidation (M)[6]     |      | Mascot      |
| 2103.9004           | 2103.947    | 0.0466  | 22    | 1468       | 1486     | RSSCYMVCAAEGSSLSH<br>SR   |           |       | Carbamidomethyl (C)[4], Oxidation (M)[6]     |      | Mascot      |
| 2125.949            | 2125.9348   | -0.0142 | -7    | 3618       | 3635     | SKLEEDGLYMCYAEIMAK        |           |       | Oxidation (M)[10,16]                         |      | Mascot      |
| 2211.1018           | 2211.0725   | -0.0293 | -13   | 601        | 620      | NHKILDVLCSLCVCHGMA<br>VR  |           |       |                                              |      | Mascot      |
| 2229.8894           | 2230.1809   | 0.2915  | 131   | 4721       | 4737     | CDDMLTCYMFHMYGVGR         |           |       | Carbamidomethyl (C)[1,7], Oxidation (M)[4,9] |      | Mascot      |
| 2233.0884           | 2233.0483   | -0.0401 | -18   | 1898       | 1917     | VEAVISFSGDFVGHQLQED<br>QR |           |       |                                              |      | Mascot      |
| 2249.2024           | 2249.033    | -0.1694 | -75   | 2517       | 2538     | SGPVDELLQGVYLSKA<br>SGLTK |           |       |                                              |      | Mascot      |
| 2283.2324           | 2283.1499   | -0.0825 | -36   | 3360       | 3378     | LFSLVAEVFIFWAKSHNF<br>K   |           |       |                                              |      | Mascot      |

|  |           |           |         |     |      |      |                                      |  |  |  |  |                                           |  |        |
|--|-----------|-----------|---------|-----|------|------|--------------------------------------|--|--|--|--|-------------------------------------------|--|--------|
|  | 2283.2324 | 2283.1499 | -0.0825 | -36 | 3360 | 3378 | LFSLVAEVFIFWAKSHNF<br>K              |  |  |  |  |                                           |  | Mascot |
|  | 2284.1182 | 2284.1421 | 0.0239  | 10  | 601  | 620  | NHKILDVLCSLCVCHGMA<br>VR             |  |  |  |  | Carbamidomethyl (C)[9], Oxidation (M)[17] |  | Mascot |
|  | 2299.1499 | 2299.1448 | -0.0051 | -2  | 3472 | 3491 | AYIHSILQQDLCGNSVDP<br>LR             |  |  |  |  | Carbamidomethyl (C)[12]                   |  | Mascot |
|  | 2300.2068 | 2300.1487 | -0.0581 | -25 | 3106 | 3125 | ILSSLYILGTCSGSFIERQ<br>R             |  |  |  |  | Carbamidomethyl (C)[11]                   |  | Mascot |
|  | 2443.1453 | 2443.1145 | -0.0308 | -13 | 75   | 96   | ALQEMLANREDLCTASH<br>EAAGR           |  |  |  |  | Carbamidomethyl (C)[13]                   |  | Mascot |
|  | 2675.3782 | 2675.1672 | -0.211  | -79 | 2493 | 2516 | YLCVAVLPILLSKYSSLLC<br>ESSSSR        |  |  |  |  | Carbamidomethyl (C)[3]                    |  | Mascot |
|  | 2955.6357 | 2955.5    | -0.1357 | -46 | 4415 | 4438 | NFYNMRLALFLAFAINF<br>LLFYK           |  |  |  |  |                                           |  | Mascot |
|  | 3324.6416 | 3324.6646 | 0.023   | 7   | 3030 | 3060 | GSIGSFEEAAAEDLELMV<br>ENVTL DGLNRAQK |  |  |  |  |                                           |  | Mascot |

35 NADH dehydrogenase (ubiquinone) 1 alpha subcomplex, 12 [Danio rerio] gi|74315939 16958.4 9.39 5 27 0

#### Peptide Information

| Calc. Mass | Obsrv. Mass | ± da   | ± ppm | Start Seq. | End Seq. | Sequence                | Ion Score | C. I. | % Modification     | Rank | Result Type |
|------------|-------------|--------|-------|------------|----------|-------------------------|-----------|-------|--------------------|------|-------------|
| 882.4501   | 882.5524    | 0.1023 | 116   | 2          | 9        | AGYATLMR                |           |       |                    |      | Mascot      |
| 1045.4805  | 1045.5455   | 0.065  | 62    | 1          | 9        | MAGYATLMR               |           |       | Oxidation (M)[1,8] |      | Mascot      |
| 1133.6466  | 1133.701    | 0.0544 | 48    | 134        | 142      | KIHEWVPPK               |           |       |                    |      | Mascot      |
| 2101.947   | 2101.9658   | 0.0188 | 9     | 90         | 107      | WLHCMTDDPPTTHPPEP<br>K  |           |       |                    |      | Mascot      |
| 2117.9419  | 2117.9585   | 0.0166 | 8     | 90         | 107      | WLHCMTDDPPTTHPPEP<br>K  |           |       | Oxidation (M)[5]   |      | Mascot      |
| 2230.042   | 2230.1809   | 0.1389 | 62    | 90         | 108      | WLHCMTDDPPTTHPPEP<br>KK |           |       |                    |      | Mascot      |

36 RecName: Full=SH3 domain-binding protein 4-A gi|123888628 108383 7.89 13 27 0

#### Peptide Information

| Calc. Mass | Obsrv. Mass | ± da    | ± ppm | Start Seq. | End Seq. | Sequence                | Ion Score | C. I. | % Modification                            | Rank | Result Type |
|------------|-------------|---------|-------|------------|----------|-------------------------|-----------|-------|-------------------------------------------|------|-------------|
| 842.5822   | 842.4933    | -0.0889 | -106  | 663        | 669      | LIKTVIR                 |           |       |                                           |      | Mascot      |
| 850.4338   | 850.5295    | 0.0957  | 113   | 387        | 393      | LSNMEIK                 |           |       | Oxidation (M)[4]                          |      | Mascot      |
| 850.4338   | 850.5295    | 0.0957  | 113   | 387        | 393      | LSNMEIK                 |           |       | Oxidation (M)[4]                          |      | Mascot      |
| 870.4726   | 870.5181    | 0.0455  | 52    | 1          | 7        | MAHRIR                  |           |       | Oxidation (M)[1]                          |      | Mascot      |
| 1045.4796  | 1045.5455   | 0.0659  | 63    | 791        | 799      | AELDSEPER               |           |       |                                           |      | Mascot      |
| 1306.6102  | 1306.7334   | 0.1232  | 94    | 703        | 712      | EWYIGYYQGK              |           |       |                                           |      | Mascot      |
| 1407.6606  | 1407.7223   | 0.0617  | 44    | 408        | 419      | TESPM AEIVCVR           |           |       | Carbamidomethyl (C)[10], Oxidation (M)[5] |      | Mascot      |
| 2064.0259  | 2064.0337   | 0.0078  | 4     | 773        | 790      | AFADALSYVNLPLTYFCR      |           |       |                                           |      | Mascot      |
| 2118.1958  | 2117.9585   | -0.2373 | -112  | 636        | 653      | IILSPLAITTKYPQFQER      |           |       |                                           |      | Mascot      |
| 2230.2417  | 2230.1809   | -0.0608 | -27   | 842        | 860      | LIMDFVLLTTAVEVAPRW<br>R |           |       |                                           |      | Mascot      |

|    |                             |           |         |     |              |     |                                    |                        |   |    |   |  |        |
|----|-----------------------------|-----------|---------|-----|--------------|-----|------------------------------------|------------------------|---|----|---|--|--------|
|    | 2284.2368                   | 2284.1421 | -0.0947 | -41 | 492          | 513 | TVVAIFGHDCAPKTLVSEVGK              |                        |   |    |   |  | Mascot |
|    | 2300.0686                   | 2300.1487 | 0.0801  | 35  | 597          | 616 | DDQDCILAQFCVQTPQP<br>PPK           | Carbamidomethyl (C)[5] |   |    |   |  | Mascot |
|    | 3337.6052                   | 3337.7405 | 0.1353  | 41  | 298          | 327 | LARSCHDLESLGQNPWG<br>GQTQPVETNIVCK | Carbamidomethyl (C)[5] |   |    |   |  | Mascot |
|    | 3338.5496                   | 3338.7202 | 0.1706  | 51  | 885          | 913 | TGMVDSEAMWKPAYDFL<br>LTWAAQIGDSYR  | Oxidation (M)[3]       |   |    |   |  | Mascot |
| 37 | CD4-2 protein [Danio rerio] |           |         |     | gi 205830379 |     | 44578                              | 9.15                   | 7 | 26 | 0 |  |        |

Peptide Information

| Calc. Mass | Obsrv. Mass | ± da    | ± ppm | Start Seq. | End Seq. | Sequence                      | Ion Score | C. I. | % Modification         | Rank | Result Type |
|------------|-------------|---------|-------|------------|----------|-------------------------------|-----------|-------|------------------------|------|-------------|
| 2103.8682  | 2103.947    | 0.0788  | 37    | 362        | 378      | DYCQCNRCTSSSFTLR              |           |       | Carbamidomethyl (C)[3] |      | Mascot      |
| 2103.8682  | 2103.947    | 0.0788  | 37    | 362        | 378      | DYCQCNRCTSSSFTLR              |           |       | Carbamidomethyl (C)[3] |      | Mascot      |
| 2233.0051  | 2233.0483   | 0.0432  | 19    | 264        | 283      | VQSSFAGKFMCEVEFEH<br>GGK      |           |       | Oxidation (M)[10]      |      | Mascot      |
| 2284.2004  | 2284.1421   | -0.0583 | -26   | 194        | 214      | EDIELPCFLPRVQSQSVL<br>GGK     |           |       |                        |      | Mascot      |
| 2321.2822  | 2321.1194   | -0.1628 | -70   | 173        | 193      | LSVTLTVVANHQINIVEVS<br>ER     |           |       |                        |      | Mascot      |
| 2572.4094  | 2572.2273   | -0.1821 | -71   | 2          | 25       | IFFLLLALSVSSGVCDVLY<br>KEAGK  |           |       |                        |      | Mascot      |
| 2598.3748  | 2598.2024   | -0.1724 | -66   | 194        | 216      | EDIELPCFLPRVQSQSVL<br>GGKWK   |           |       |                        |      | Mascot      |
| 2703.45    | 2703.2061   | -0.2439 | -90   | 1          | 25       | MIFFLLLALSVSSGVCDVL<br>YKEAGK |           |       |                        |      | Mascot      |

38 PREDICTED: calcium/calmodulin-dependent 3',5'-cyclic nucleotide phosphodiesterase 1C-like, partial gi|326681376 45655.3 5.68 8 26 0

Peptide Information

| Calc. Mass | Obsrv. Mass | ± da    | ± ppm | Start Seq. | End Seq. | Sequence                  | Ion Score | C. I. | % Modification         | Rank | Result Type |
|------------|-------------|---------|-------|------------|----------|---------------------------|-----------|-------|------------------------|------|-------------|
| 848.4481   | 848.5133    | 0.0652  | 77    | 104        | 110      | QMGLMLR                   |           |       |                        |      | Mascot      |
| 856.5515   | 856.5146    | -0.0369 | -43   | 27         | 32       | IWLRLR                    |           |       |                        |      | Mascot      |
| 864.4429   | 864.4991    | 0.0562  | 65    | 104        | 110      | QMGLMLR                   |           |       | Oxidation (M)[2]       |      | Mascot      |
| 1045.5823  | 1045.5455   | -0.0368 | -35   | 37         | 44       | CLVKQLER                  |           |       | Carbamidomethyl (C)[1] |      | Mascot      |
| 1062.5691  | 1062.675    | 0.1059  | 100   | 112        | 119      | TEEKPRFR                  |           |       |                        |      | Mascot      |
| 1133.5837  | 1133.701    | 0.1173  | 103   | 18         | 26       | YLQPDQIEK                 |           |       |                        |      | Mascot      |
| 2249.1128  | 2249.033    | -0.0798 | -35   | 322        | 341      | ALVVEMVLATDMSCHFQ<br>QVK  |           |       |                        |      | Mascot      |
| 2283.2634  | 2283.1499   | -0.1135 | -50   | 193        | 213      | FKIPVSALVSFVEALEVG<br>YSK |           |       |                        |      | Mascot      |
| 2283.2634  | 2283.1499   | -0.1135 | -50   | 193        | 213      | FKIPVSALVSFVEALEVG<br>YSK |           |       |                        |      | Mascot      |
| 2299.2583  | 2299.1448   | -0.1135 | -49   | 195        | 215      | IPVSALVSFVEALEVGYS<br>KYK |           |       |                        |      | Mascot      |

39 fascin 2A [Danio rerio] gi|184186129 54837.1 5.91 8 26 0

| Peptide Information |                                                                                                     |         |       |            |                           |           |         |                                              |      |             |
|---------------------|-----------------------------------------------------------------------------------------------------|---------|-------|------------|---------------------------|-----------|---------|----------------------------------------------|------|-------------|
| Calc. Mass          | Obsrv. Mass                                                                                         | ± da    | ± ppm | Start Seq. | End Sequence Seq.         | Ion Score | C. I. % | Modification                                 | Rank | Result Type |
| 921.4458            | 921.4865                                                                                            | 0.0407  | 44    | 33         | 41 INASGNSMK              |           |         |                                              |      | Mascot      |
| 996.493             | 996.5809                                                                                            | 0.0879  | 88    | 186        | 193 TCDNRFLK              |           |         |                                              |      | Mascot      |
| 996.493             | 996.5809                                                                                            | 0.0879  | 88    | 186        | 193 TCDNRFLK              |           |         |                                              |      | Mascot      |
| 1165.6034           | 1165.7273                                                                                           | 0.1239  | 106   | 88         | 97 FLIVMQSDGR             |           |         |                                              |      | Mascot      |
| 1165.6034           | 1165.7273                                                                                           | 0.1239  | 106   | 88         | 97 FLIVMQSDGR             |           |         |                                              |      | Mascot      |
| 2104.0742           | 2103.947                                                                                            | -0.1272 | -60   | 198        | 216 LVMEHGPNTSFTLELKSG K  |           |         | Oxidation (M)[3]                             |      | Mascot      |
| 2104.0742           | 2103.947                                                                                            | -0.1272 | -60   | 198        | 216 LVMEHGPNTSFTLELKSG K  |           |         | Oxidation (M)[3]                             |      | Mascot      |
| 2120.0505           | 2119.9622                                                                                           | -0.0883 | -42   | 354        | 373 NGQLAAVSDSLGEDEQF VLK |           |         |                                              |      | Mascot      |
| 2230.1172           | 2230.1809                                                                                           | 0.0637  | 29    | 194        | 213 NDGKLVMEHGPNTSFTL ELK |           |         |                                              |      | Mascot      |
| 2283.2205           | 2283.1499                                                                                           | -0.0706 | -31   | 2          | 22 STNGISAALKLQFGLINHE NR |           |         |                                              |      | Mascot      |
| 2283.2205           | 2283.1499                                                                                           | -0.0706 | -31   | 2          | 22 STNGISAALKLQFGLINHE NR |           |         |                                              |      | Mascot      |
| 2571.1272           | 2571.2007                                                                                           | 0.0735  | 29    | 77         | 97 CEEEVPTDCRFLIVMQS DGR  |           |         | Carbamidomethyl (C)[1,10], Oxidation (M)[16] |      | Mascot      |
| 40                  | novel protein similar to methylenetetrahydrofolate dehydrogenase (NADP+ dependent), methenyltetrahy |         |       |            | gij56316149               | 13572     | 5.27    | 4                                            | 26   | 0           |

| Peptide Information |                                                 |        |       |              |          |                                   |           |         |                      |      |             |
|---------------------|-------------------------------------------------|--------|-------|--------------|----------|-----------------------------------|-----------|---------|----------------------|------|-------------|
| Calc. Mass          | Obsrv. Mass                                     | ± da   | ± ppm | Start Seq.   | End Seq. | Sequence                          | Ion Score | C. I. % | Modification         | Rank | Result Type |
| 1279.6464           | 1279.7588                                       | 0.1124 | 88    | 54           | 64       | THLSLSHMPEK                       |           |         |                      |      | Mascot      |
| 1407.7413           | 1407.7223                                       | -0.019 | -13   | 54           | 65       | THLSLSHMPEKK                      |           |         |                      |      | Mascot      |
| 1747.9741           | 1747.8071                                       | -0.167 | -96   | 1            | 14       | FLYNLQDPIVEKIR                    |           |         |                      |      | Mascot      |
| 3324.585            | 3324.6646                                       | 0.0796 | 24    | 36           | 64       | IDYYNQGGFGALPICMAK<br>THLSLSHMPEK |           |         | Oxidation (M)[16,26] |      | Mascot      |
| 41                  | methyltransferase-like protein 13 [Danio rerio] |        |       | gi 217416336 |          | 75976.5                           | 5.99      | 9       | 26                   | 0    |             |

| Peptide Information |             |         |       |            |          |                  |           |         |                        |      |             |  |
|---------------------|-------------|---------|-------|------------|----------|------------------|-----------|---------|------------------------|------|-------------|--|
| Calc. Mass          | Obsrv. Mass | ± da    | ± ppm | Start Seq. | End Seq. | Sequence         | Ion Score | C. I. % | Modification           | Rank | Result Type |  |
| 864.4032            | 864.4991    | 0.0959  | 111   | 504        | 510      | DFVPCAR          |           |         | Carbamidomethyl (C)[5] |      | Mascot      |  |
| 1062.6306           | 1062.675    | 0.0444  | 42    | 589        | 597      | KVYSLLSPR        |           |         |                        |      | Mascot      |  |
| 1133.5771           | 1133.701    | 0.1239  | 109   | 242        | 250      | QAYNLMLHK        |           |         | Oxidation (M)[6]       |      | Mascot      |  |
| 1165.6221           | 1165.7273   | 0.1052  | 90    | 598        | 607      | GLFMLNLVCR       |           |         |                        |      | Mascot      |  |
| 1165.6221           | 1165.7273   | 0.1052  | 90    | 598        | 607      | GLFMLNLVCR       |           |         |                        |      | Mascot      |  |
| 2126.0149           | 2125.9348   | -0.0801 | -38   | 304        | 323      | ESDWLYGSAEGRQLAS |           |         |                        |      | Mascot      |  |

|    |                                                                         |           |         |     |     |             |                                    |      |   |                                                    |   |  |        |
|----|-------------------------------------------------------------------------|-----------|---------|-----|-----|-------------|------------------------------------|------|---|----------------------------------------------------|---|--|--------|
|    | 2283.1826                                                               | 2283.1499 | -0.0327 | -14 | 536 | 556         | SAK<br>LKVTLGDLGHITTESE<br>GER     |      |   |                                                    |   |  | Mascot |
|    | 2283.1826                                                               | 2283.1499 | -0.0327 | -14 | 536 | 556         | LKVTLGDLGHITTESE<br>GER            |      |   |                                                    |   |  | Mascot |
|    | 2300.1226                                                               | 2300.1487 | 0.0261  | 11  | 52  | 72          | VLVVGCGNSELSEQLYD<br>VGYR          |      |   |                                                    |   |  | Mascot |
|    | 2571.2581                                                               | 2571.2007 | -0.0574 | -22 | 73  | 94          | QLTNIDISETVSHMNQR<br>NAER          |      |   | Oxidation (M)[15]                                  |   |  | Mascot |
|    | 3337.5254                                                               | 3337.7405 | 0.2151  | 64  | 453 | 482         | SVDRGFLCCTHHEVMVA<br>GLAMLGMDAINNK |      |   | Carbamidomethyl (C)[8], Oxidation<br>(M)[15,21,24] |   |  | Mascot |
| 42 | Acyl-Coenzyme A dehydrogenase, C-4 to C-12 straight chain [Danio rerio] |           |         |     |     | gi 63101323 | 46101.2                            | 8.28 | 7 | 26                                                 | 0 |  |        |

Peptide Information

| Calc. Mass | Obsrv. Mass | ± da    | ± ppm | Start Seq. | End Seq. | Sequence                        | Ion Score | C. I. % | Modification              | Rank | Result Type |
|------------|-------------|---------|-------|------------|----------|---------------------------------|-----------|---------|---------------------------|------|-------------|
| 868.4232   | 868.5345    | 0.1113  | 128   | 275        | 282      | IAMGAFDK                        |           |         | Oxidation (M)[3]          |      | Mascot      |
| 1306.7153  | 1306.7334   | 0.0181  | 14    | 73         | 83       | SGEYPFPLIKR                     |           |         |                           |      | Mascot      |
| 1715.7628  | 1715.8234   | 0.0606  | 35    | 338        | 351      | MAYQRAAWEVDMGR                  |           |         | Oxidation (M)[1,12]       |      | Mascot      |
| 1715.7628  | 1715.8234   | 0.0606  | 35    | 338        | 351      | MAYQRAAWEVDMGR                  |           |         | Oxidation (M)[1,12]       |      | Mascot      |
| 1737.913   | 1737.8065   | -0.1065 | -61   | 17         | 34       | FQGTSAQASAKAATASL<br>K          |           |         |                           |      | Mascot      |
| 2299.2339  | 2299.1448   | -0.0891 | -39   | 275        | 297      | IAMGAFDKTRPPVAAGAT<br>GLAQR     |           |         |                           |      | Mascot      |
| 2572.1438  | 2572.2273   | 0.0835  | 32    | 152        | 176      | MTEEPLMCAYCVTEPGA<br>GSDVAGIK   |           |         |                           |      | Mascot      |
| 2955.3718  | 2955.5      | 0.1282  | 43    | 152        | 178      | MTEEPLMCAYCVTEPGA<br>GSDVAGIKIR |           |         | Carbamidomethyl (C)[8,11] |      | Mascot      |

43 Zgc:153297 [Danio rerio] gi|116284267 22464.2 9.51 5 26 0

Peptide Information

| Calc. Mass | Obsrv. Mass | ± da    | ± ppm | Start Seq. | End Seq. | Sequence                     | Ion Score | C. I. % | Modification                             | Rank | Result Type |
|------------|-------------|---------|-------|------------|----------|------------------------------|-----------|---------|------------------------------------------|------|-------------|
| 868.5039   | 868.5345    | 0.0306  | 35    | 42         | 48       | SRFALFK                      |           |         |                                          |      | Mascot      |
| 969.4756   | 969.544     | 0.0684  | 71    | 140        | 146      | FACRIMR                      |           |         | Carbamidomethyl (C)[3], Oxidation (M)[6] |      | Mascot      |
| 1306.6387  | 1306.7334   | 0.0947  | 72    | 76         | 86       | DQHSISYTLR                   |           |         |                                          |      | Mascot      |
| 2443.1858  | 2443.1145   | -0.0713 | -29   | 176        | 197      | WKTS DGQMDGLTTNGVL<br>VMHPR  |           |         |                                          |      | Mascot      |
| 2465.293   | 2465.0767   | -0.2163 | -88   | 52         | 75       | SNGVKPSTVHVACTPQA<br>AKAISNK |           |         | Carbamidomethyl (C)[13]                  |      | Mascot      |

44 G patch domain-containing protein 3 [Danio rerio] gi|123708207 75827.4 5.33 9 26 0

Peptide Information

| Calc. Mass | Obsrv. Mass | ± da   | ± ppm | Start Seq. | End Seq. | Sequence | Ion Score | C. I. % | Modification | Rank | Result Type |
|------------|-------------|--------|-------|------------|----------|----------|-----------|---------|--------------|------|-------------|
| 864.4686   | 864.4991    | 0.0305 | 35    | 19         | 25       | FRSADLR  |           |         |              |      | Mascot      |



|    |                                              |           |         |     |             |     |                                    |     |   |                         |   |  |  |        |
|----|----------------------------------------------|-----------|---------|-----|-------------|-----|------------------------------------|-----|---|-------------------------|---|--|--|--------|
|    | 1715.8823                                    | 1715.8234 | -0.0589 | -34 | 550         | 564 | LRDGLTNTHIGSFER                    |     |   |                         |   |  |  | Mascot |
|    | 1715.8823                                    | 1715.8234 | -0.0589 | -34 | 550         | 564 | LRDGLTNTHIGSFER                    |     |   |                         |   |  |  | Mascot |
|    | 1763.8671                                    | 1763.8048 | -0.0623 | -35 | 463         | 477 | HEALHEDITAQERSK                    |     |   |                         |   |  |  | Mascot |
|    | 2012.9745                                    | 2012.9399 | -0.0346 | -17 | 1           | 18  | MAASEEVTYFVNNIPGR                  |     |   | Oxidation (M)[1]        |   |  |  | Mascot |
|    | 2125.9854                                    | 2125.9348 | -0.0506 | -24 | 366         | 384 | QDMSITSCKIQDTPTASQ<br>R            |     |   | Oxidation (M)[3]        |   |  |  | Mascot |
|    | 2229.981                                     | 2230.1809 | 0.1999  | 90  | 26          | 43  | NYFSQFIESGGFACFHYR                 |     |   | Carbamidomethyl (C)[14] |   |  |  | Mascot |
|    | 2233.1016                                    | 2233.0483 | -0.0533 | -24 | 385         | 404 | KDTPPTSCIIQETPTTSQT<br>K           |     |   | Carbamidomethyl (C)[8]  |   |  |  | Mascot |
|    | 2300.1492                                    | 2300.1487 | -0.0005 | 0   | 1           | 20  | MAASEEVTYFVNNIPGR<br>FR            |     |   |                         |   |  |  | Mascot |
|    | 3324.4214                                    | 3324.6646 | 0.2432  | 73  | 577         | 606 | QGWWDGEGLGNSQMG<br>MAEALEDEGQHPHCK |     |   | Carbamidomethyl (C)[29] |   |  |  | Mascot |
| 45 | proteasome subunit beta type-2 [Danio rerio] |           |         |     | gi 50540284 |     | 22571.6                            | 6.1 | 5 | 25                      | 0 |  |  |        |

#### Peptide Information

| Calc. Mass | Obsrv. Mass | ± da    | ± ppm | Start Seq. | End Seq. | Sequence    | Ion Score | C. I. | % Modification | Rank | Result Type |
|------------|-------------|---------|-------|------------|----------|-------------|-----------|-------|----------------|------|-------------|
| 848.4182   | 848.5133    | 0.0951  | 112   | 163        | 169      | CLEELNK     |           |       |                |      | Mascot      |
| 864.4573   | 864.4991    | 0.0418  | 48    | 87         | 93       | NLADYLR     |           |       |                |      | Mascot      |
| 882.4753   | 882.5524    | 0.0771  | 87    | 35         | 41       | MFKLSEK     |           |       |                |      | Mascot      |
| 1051.5717  | 1051.6984   | 0.1267  | 120   | 63         | 70       | NVQLYKMR    |           |       |                |      | Mascot      |
| 1051.5717  | 1051.6984   | 0.1267  | 120   | 63         | 70       | NVQLYKMR    |           |       |                |      | Mascot      |
| 1306.7518  | 1306.7334   | -0.0184 | -14   | 171        | 181      | FILNLPSFTVR |           |       |                |      | Mascot      |

46 hypothetical protein LOC559906 [Danio rerio] gi|198282017 48541.8 5.61 9 25 0

#### Peptide Information

| Calc. Mass | Obsrv. Mass | ± da    | ± ppm | Start Seq. | End Seq. | Sequence                 | Ion Score | C. I. | % Modification            | Rank | Result Type |
|------------|-------------|---------|-------|------------|----------|--------------------------|-----------|-------|---------------------------|------|-------------|
| 882.4349   | 882.5524    | 0.1175  | 133   | 1          | 8        | MSSSLSVR                 |           |       | Oxidation (M)[1]          |      | Mascot      |
| 969.504    | 969.544     | 0.04    | 41    | 200        | 206      | EELYFLR                  |           |       |                           |      | Mascot      |
| 990.485    | 990.3658    | -0.1192 | -120  | 283        | 291      | GAQSELTERR               |           |       |                           |      | Mascot      |
| 990.485    | 990.5233    | 0.0383  | 39    | 283        | 291      | GAQSELTERR               |           |       |                           |      | Mascot      |
| 1051.5419  | 1051.6984   | 0.1565  | 149   | 246        | 254      | SQYEGIVQK                |           |       |                           |      | Mascot      |
| 1051.5419  | 1051.6984   | 0.1565  | 149   | 246        | 254      | SQYEGIVQK                |           |       |                           |      | Mascot      |
| 1062.5499  | 1062.675    | 0.1251  | 118   | 142        | 150      | IMLEIDNAK                |           |       | Oxidation (M)[2]          |      | Mascot      |
| 1279.6641  | 1279.7588   | 0.0947  | 74    | 351        | 360      | NKTDYEQLLR               |           |       |                           |      | Mascot      |
| 1768.901   | 1768.8323   | -0.0687 | -39   | 9          | 24       | SLSLGRQPSFSSMSLR         |           |       | Oxidation (M)[13]         |      | Mascot      |
| 2298.0601  | 2298.1436   | 0.0835  | 36    | 115        | 134      | GHDIDSMMAQAHALEQE<br>VRK |           |       | Oxidation (M)[7,8]        |      | Mascot      |
| 2299.0151  | 2299.1448   | 0.1297  | 56    | 160        | 178      | WETESAMCQSVERDCV         |           |       | Carbamidomethyl (C)[8,15] |      | Mascot      |

47 ribosome production factor 2 homolog [Danio rerio] gi|47550781 35438.5 10 6 25 0

ALK

Peptide Information

| Calc. Mass | Obsrv. Mass | ± da    | ± ppm | Start Seq. | End Seq. | Sequence                 | Ion Score | C. I. % | Modification                                | Rank | Result Type |
|------------|-------------|---------|-------|------------|----------|--------------------------|-----------|---------|---------------------------------------------|------|-------------|
| 850.5396   | 850.5295    | -0.0101 | -12   | 197        | 203      | SYKVLLK                  |           |         |                                             |      | Mascot      |
| 850.5396   | 850.5295    | -0.0101 | -12   | 197        | 203      | SYKVLLK                  |           |         |                                             |      | Mascot      |
| 856.4523   | 856.5146    | 0.0623  | 73    | 2          | 9        | SHTDGIVK                 |           |         |                                             |      | Mascot      |
| 2283.0784  | 2283.1499   | 0.0715  | 31    | 135        | 154      | CPEGTKPMLVFAGDLFE TDR    |           |         | Carbamidomethyl (C)[1]                      |      | Mascot      |
| 2283.0784  | 2283.1499   | 0.0715  | 31    | 135        | 154      | CPEGTKPMLVFAGDLFE TDR    |           |         | Carbamidomethyl (C)[1]                      |      | Mascot      |
| 2298.2427  | 2298.1436   | -0.0991 | -43   | 177        | 196      | LAGLEHVLHFTALEGKIY MR    |           |         |                                             |      | Mascot      |
| 2299.0732  | 2299.1448   | 0.0716  | 31    | 135        | 154      | CPEGTKPMLVFAGDLFE TDR    |           |         | Carbamidomethyl (C)[1], Oxidation (M)[8]    |      | Mascot      |
| 2689.2307  | 2689.1975   | -0.0332 | -12   | 132        | 154      | MDKCPEGTKPMLVFAGD LFETDR |           |         | Carbamidomethyl (C)[4], Oxidation (M)[1,11] |      | Mascot      |
| 2689.2307  | 2689.1975   | -0.0332 | -12   | 132        | 154      | MDKCPEGTKPMLVFAGD LFETDR |           |         | Carbamidomethyl (C)[4], Oxidation (M)[1,11] |      | Mascot      |
| 2933.4211  | 2933.5264   | 0.1053  | 36    | 108        | 131      | MFDHVLDMFELGIENFR SLTDIK |           |         | Oxidation (M)[1]                            |      | Mascot      |
| 2933.4211  | 2933.5264   | 0.1053  | 36    | 108        | 131      | MFDHVLDMFELGIENFR SLTDIK |           |         | Oxidation (M)[1]                            |      | Mascot      |

48 PREDICTED: RNA exonuclease 4-like [Danio rerio] gi|292625185 47613.9 9.79 7 25 0

Peptide Information

| Calc. Mass | Obsrv. Mass | ± da    | ± ppm | Start Seq. | End Seq. | Sequence                | Ion Score | C. I. % | Modification                               | Rank | Result Type |
|------------|-------------|---------|-------|------------|----------|-------------------------|-----------|---------|--------------------------------------------|------|-------------|
| 864.4825   | 864.4991    | 0.0166  | 19    | 269        | 275      | YVKPTEK                 |           |         |                                            |      | Mascot      |
| 996.522    | 996.5809    | 0.0589  | 59    | 105        | 112      | DSHKPEKR                |           |         |                                            |      | Mascot      |
| 996.522    | 996.5809    | 0.0589  | 59    | 105        | 112      | DSHKPEKR                |           |         |                                            |      | Mascot      |
| 1045.5061  | 1045.5455   | 0.0394  | 38    | 224        | 232      | EHAPEGVTR               |           |         |                                            |      | Mascot      |
| 1747.8326  | 1747.8071   | -0.0255 | -15   | 27         | 41       | SYKGDTWFFATEPAK         |           |         |                                            |      | Mascot      |
| 2298.9907  | 2299.1448   | 0.1541  | 67    | 50         | 69       | SANPFIMPPTDGQDYSC NWR   |           |         |                                            |      | Mascot      |
| 2443.0806  | 2443.1145   | 0.0339  | 14    | 50         | 70       | SANPFIMPPTDGQDYSC NWRK  |           |         | Oxidation (M)[7]                           |      | Mascot      |
| 2572.1628  | 2572.2273   | 0.0645  | 25    | 224        | 246      | EHAPEGVTRAVAMDCM VGVGYK |           |         | Carbamidomethyl (C)[15], Oxidation (M)[13] |      | Mascot      |

49 hydroxymethylbilane synthase a [Danio rerio] gi|41056087 38994.5 7.01 7 25 0

Peptide Information

| Calc. Mass | Obsrv. Mass | ± da | ± ppm | Start Seq. | End Seq. | Sequence | Ion Score | C. I. % | Modification | Rank | Result Type |
|------------|-------------|------|-------|------------|----------|----------|-----------|---------|--------------|------|-------------|
|------------|-------------|------|-------|------------|----------|----------|-----------|---------|--------------|------|-------------|

|    |                                            |           |         |      |              |     |                                    |      |   |    |   |                                           |        |
|----|--------------------------------------------|-----------|---------|------|--------------|-----|------------------------------------|------|---|----|---|-------------------------------------------|--------|
|    | 848.477                                    | 848.5133  | 0.0363  | 43   | 18           | 24  | VIRMGTR                            |      |   |    |   | Oxidation (M)[4]                          | Mascot |
|    | 921.4359                                   | 921.4865  | 0.0506  | 55   | 193          | 199 | RMGWESR                            |      |   |    |   |                                           | Mascot |
|    | 1045.6                                     | 1045.5455 | -0.0545 | -52  | 343          | 352 | GAKDILTAR                          |      |   |    |   |                                           | Mascot |
|    | 1448.7644                                  | 1448.9067 | 0.1423  | 98   | 155          | 165 | RFPQLEFENIR                        |      |   |    |   |                                           | Mascot |
|    | 2118.1726                                  | 2117.9585 | -0.2141 | -101 | 49           | 68  | LEIVAMSTIGDKILDALS<br>K            |      |   |    |   |                                           | Mascot |
|    | 2211.0017                                  | 2211.0725 | 0.0708  | 32   | 291          | 309 | DTMQTCVELDNKVNES<br>QR             |      |   |    |   |                                           | Mascot |
|    | 2284.0181                                  | 2284.1421 | 0.124   | 54   | 291          | 309 | DTMQTCVELDNKVNES<br>QR             |      |   |    |   | Carbamidomethyl (C)[6], Oxidation (M)[3]  | Mascot |
|    | 3324.5808                                  | 3324.6646 | 0.0838  | 25   | 194          | 223 | MGWESRISQVLGPEDCM<br>YAVGQGALAVEVR |      |   |    |   | Carbamidomethyl (C)[16], Oxidation (M)[1] | Mascot |
| 50 | PREDICTED: olfactomedin-like [Danio rerio] |           |         |      | gi 292628104 |     | 52216.8                            | 6.53 | 8 | 25 | 0 |                                           |        |

Peptide Information

| Calc. Mass | Obsrv. Mass | ± da    | ± ppm | Start Seq. | End Seq. | Sequence                      | Ion Score | C. I. % | Modification            | Rank | Result Type |
|------------|-------------|---------|-------|------------|----------|-------------------------------|-----------|---------|-------------------------|------|-------------|
| 996.4897   | 996.5809    | 0.0912  | 92    | 204        | 212      | SYISGAWGR                     |           |         |                         |      | Mascot      |
| 996.4897   | 996.5809    | 0.0912  | 92    | 204        | 212      | SYISGAWGR                     |           |         |                         |      | Mascot      |
| 1448.7236  | 1448.9067   | 0.1831  | 126   | 19         | 31       | VPGLQKTDSCLCK                 |           |         | Carbamidomethyl (C)[10] |      | Mascot      |
| 2101.9536  | 2101.9658   | 0.0122  | 6     | 269        | 286      | SGSTILYNNTVYYQCYDK            |           |         |                         |      | Mascot      |
| 2125.947   | 2125.9348   | -0.0122 | -6    | 304        | 321      | LDGAGIDNKFPFCYYSR             |           |         | Carbamidomethyl (C)[13] |      | Mascot      |
| 2300.167   | 2300.1487   | -0.0183 | -8    | 333        | 352      | DAVWVIYATEENHGNIILS<br>R      |           |         |                         |      | Mascot      |
| 2572.0908  | 2572.2273   | 0.1365  | 53    | 313        | 332      | FPFCYYSRWDWDIDLEA<br>DR       |           |         | Carbamidomethyl (C)[4]  |      | Mascot      |
| 2598.5381  | 2598.2024   | -0.3357 | -129  | 2          | 24       | FFNLLLLTVIVTVEAQRVP<br>GLQK   |           |         |                         |      | Mascot      |
| 2933.3994  | 2933.5264   | 0.127   | 43    | 25         | 49       | TDSCCLKINSSIWTFFAV<br>QFMEVTR |           |         | Carbamidomethyl (C)[4]  |      | Mascot      |
| 2933.3994  | 2933.5264   | 0.127   | 43    | 25         | 49       | TDSCCLKINSSIWTFFAV<br>QFMEVTR |           |         | Carbamidomethyl (C)[4]  |      | Mascot      |

|                |           |                        |                |                |                    |
|----------------|-----------|------------------------|----------------|----------------|--------------------|
| Gel Idx/Pos    | 253/K5    | Instr./Gel Origin      | BA2060/110707A | Process Status | Analysis Succeeded |
| Plate [#] Name | [1] 31496 | Instrument Sample Name |                | Spectra        | 11                 |

| Rank | Protein Name                 | Accession No. | Protein MW | Protein PI | Pep. Count | Protein Score | Protein Score C. I. % | Total Ion Score | Total Ion C. I. % |
|------|------------------------------|---------------|------------|------------|------------|---------------|-----------------------|-----------------|-------------------|
| 1    | vitellogenin 1 [Danio rerio] | gi 166795887  | 149452.5   | 8.68       | 11         | 317           | 100                   | 299             | 100               |

Peptide Information

| Calc. Mass | Obsrv. Mass | ± da    | ± ppm | Start Seq. | End Seq. | Sequence      | Ion Score | C. I. % | Modification | Rank | Result Type |
|------------|-------------|---------|-------|------------|----------|---------------|-----------|---------|--------------|------|-------------|
| 960.4785   | 960.4697    | -0.0088 | -9    | 1258       | 1264     | LEVEWER       |           |         |              |      | Mascot      |
| 1287.6691  | 1287.6586   | -0.0105 | -8    | 1245       | 1257     | AEAGVLGEFPAAR | 63        | 99.986  |              |      | Mascot      |



|   |                              |           |         | Seq. | Seq.         | Score |                              |      |        |                  |     |     |        |
|---|------------------------------|-----------|---------|------|--------------|-------|------------------------------|------|--------|------------------|-----|-----|--------|
|   | 960.4785                     | 960.4697  | -0.0088 | -9   | 1258         | 1264  | LEVEWER                      |      |        |                  |     |     | Mascot |
|   | 1287.6691                    | 1287.6586 | -0.0105 | -8   | 1245         | 1257  | AEAGVLGEFPAAR                | 63   | 99.986 |                  |     |     | Mascot |
|   | 1287.6691                    | 1287.6586 | -0.0105 | -8   | 1245         | 1257  | AEAGVLGEFPAAR                |      |        |                  |     |     | Mascot |
|   | 1364.6957                    | 1364.6819 | -0.0138 | -10  | 1279         | 1290  | HILTAAYDTGFR                 |      |        |                  |     |     | Mascot |
|   | 1382.7889                    | 1382.7646 | -0.0243 | -18  | 303          | 315   | ISDAPAQIVEVLK                |      |        |                  |     |     | Mascot |
|   | 1515.7478                    | 1515.7322 | -0.0156 | -10  | 733          | 745   | VFGQEVAYVNFDK                |      |        |                  |     |     | Mascot |
|   | 1515.7478                    | 1515.7322 | -0.0156 | -10  | 733          | 745   | VFGQEVAYVNFDK                | 64   | 99.99  |                  |     |     | Mascot |
|   | 1739.936                     | 1739.9227 | -0.0133 | -8   | 746          | 761   | TIIEEAIPMATGPKPR             |      |        | Oxidation (M)[9] |     |     | Mascot |
|   | 1826.9799                    | 1826.9619 | -0.018  | -10  | 1183         | 1198  | LLGYQLAAYFDKPTAR             |      |        |                  |     |     | Mascot |
|   | 1826.9799                    | 1826.9619 | -0.018  | -10  | 1183         | 1198  | LLGYQLAAYFDKPTAR             | 78   | 100    |                  |     |     | Mascot |
|   | 2174.1968                    | 2174.1628 | -0.034  | -16  | 770          | 789   | ALQEGVAFQYAKPLLAEE<br>VR     |      |        |                  |     |     | Mascot |
|   | 2627.3716                    | 2627.3318 | -0.0398 | -15  | 897          | 920   | VEALPVELPEHIASASFET<br>YAVVR | 94   | 100    |                  |     |     | Mascot |
|   | 2627.3716                    | 2627.3318 | -0.0398 | -15  | 897          | 920   | VEALPVELPEHIASASFET<br>YAVVR |      |        |                  |     |     | Mascot |
| 4 | vitellogenin 7 [Danio rerio] |           |         |      | gi 156713467 |       | 148739.2                     | 8.76 | 8      | 215              | 100 | 205 | 100    |

Peptide Information

| Calc. Mass | Obsrv. Mass | ± da    | ± ppm | Start Seq. | End Seq. | Sequence                           | Ion Score | C. I.  | % Modification   | Rank | Result Type |
|------------|-------------|---------|-------|------------|----------|------------------------------------|-----------|--------|------------------|------|-------------|
| 960.4785   | 960.4697    | -0.0088 | -9    | 1254       | 1260     | LEVEWER                            |           |        |                  |      | Mascot      |
| 1109.4818  | 1109.4816   | -0.0002 | 0     | 1087       | 1097     | SHSTSSSSSSSR                       |           |        |                  |      | Mascot      |
| 1287.6691  | 1287.6586   | -0.0105 | -8    | 1241       | 1253     | AEAGVLGEFPAAR                      | 63        | 99.986 |                  |      | Mascot      |
| 1287.6691  | 1287.6586   | -0.0105 | -8    | 1241       | 1253     | AEAGVLGEFPAAR                      |           |        |                  |      | Mascot      |
| 1515.7478  | 1515.7322   | -0.0156 | -10   | 733        | 745      | VFGQEVAYVNFDK                      |           |        |                  |      | Mascot      |
| 1515.7478  | 1515.7322   | -0.0156 | -10   | 733        | 745      | VFGQEVAYVNFDK                      | 64        | 99.99  |                  |      | Mascot      |
| 1753.9517  | 1753.9365   | -0.0152 | -9    | 746        | 761      | TIIEEAIPMVSGPKPR                   |           |        | Oxidation (M)[9] |      | Mascot      |
| 1826.9799  | 1826.9619   | -0.018  | -10   | 1179       | 1194     | LLGYQLAAYFDKPTAR                   |           |        |                  |      | Mascot      |
| 1826.9799  | 1826.9619   | -0.018  | -10   | 1179       | 1194     | LLGYQLAAYFDKPTAR                   | 78        | 100    |                  |      | Mascot      |
| 2174.1968  | 2174.1628   | -0.034  | -16   | 770        | 789      | ALQEGVAFQYAKPLLAEE<br>VR           |           |        |                  |      | Mascot      |
| 3337.7539  | 3337.7136   | -0.0403 | -12   | 1179       | 1208     | LLGYQLAAYFDKPTARVQ<br>LIASSIAENDNR |           |        |                  |      | Mascot      |

5 vitellogenin 1 [Danio rerio] gi|21391472 127954.2 8.69 8 215 100 205 100

Peptide Information

| Calc. Mass | Obsrv. Mass | ± da | ± ppm | Start Seq. | End Seq. | Sequence | Ion Score | C. I. | % Modification | Rank | Result Type |
|------------|-------------|------|-------|------------|----------|----------|-----------|-------|----------------|------|-------------|
|------------|-------------|------|-------|------------|----------|----------|-----------|-------|----------------|------|-------------|

|   |                              |                     |             |         |       |             |                   |                                |           |        |                  |              |     |      |        |        |
|---|------------------------------|---------------------|-------------|---------|-------|-------------|-------------------|--------------------------------|-----------|--------|------------------|--------------|-----|------|--------|--------|
|   |                              | 960.4785            | 960.4697    | -0.0088 | -9    | 1065        | 1071              | LEVEWER                        |           |        |                  |              |     |      |        | Mascot |
|   |                              | 1287.6691           | 1287.6586   | -0.0105 | -8    | 1052        | 1064              | AEAGVLGEFPAAR                  | 63        | 99.986 |                  |              |     |      |        | Mascot |
|   |                              | 1287.6691           | 1287.6586   | -0.0105 | -8    | 1052        | 1064              | AEAGVLGEFPAAR                  |           |        |                  |              |     |      |        | Mascot |
|   |                              | 1364.6957           | 1364.6819   | -0.0138 | -10   | 1086        | 1097              | HILTAAYDTGFR                   |           |        |                  |              |     |      |        | Mascot |
|   |                              | 1382.7889           | 1382.7646   | -0.0243 | -18   | 112         | 124               | ISDAPAQIVEVLK                  |           |        |                  |              |     |      |        | Mascot |
|   |                              | 1515.7478           | 1515.7322   | -0.0156 | -10   | 542         | 554               | VFGQEVAYVNFDK                  |           |        |                  |              |     |      |        | Mascot |
|   |                              | 1515.7478           | 1515.7322   | -0.0156 | -10   | 542         | 554               | VFGQEVAYVNFDK                  | 64        | 99.99  |                  |              |     |      |        | Mascot |
|   |                              | 1739.936            | 1739.9227   | -0.0133 | -8    | 555         | 570               | TIIEEAIPMATGPKPR               |           |        | Oxidation (M)[9] |              |     |      |        | Mascot |
|   |                              | 1826.9799           | 1826.9619   | -0.018  | -10   | 990         | 1005              | LLGYQLAAYFDKPTAR               |           |        |                  |              |     |      |        | Mascot |
|   |                              | 1826.9799           | 1826.9619   | -0.018  | -10   | 990         | 1005              | LLGYQLAAYFDKPTAR               | 78        | 100    |                  |              |     |      |        | Mascot |
|   |                              | 2174.1968           | 2174.1628   | -0.034  | -16   | 579         | 598               | ALQEGVAFQYAKPLAAEVR            |           |        |                  |              |     |      |        | Mascot |
| 6 | vitellogenin 7 [Danio rerio] |                     |             |         |       | gi 57864789 |                   | 24318.7                        | 8.37      | 4      | 159              | 100          | 141 | 100  |        |        |
|   |                              | Peptide Information |             |         |       |             |                   |                                |           |        |                  |              |     |      |        |        |
|   |                              | Calc. Mass          | Obsrv. Mass | ± da    | ± ppm | Start Seq.  | End Sequence Seq. |                                | Ion Score | C. I.  | %                | Modification |     | Rank | Result | Type   |
|   |                              | 960.4785            | 960.4697    | -0.0088 | -9    | 113         | 119               | LEVEWER                        |           |        |                  |              |     |      |        | Mascot |
|   |                              | 1287.6691           | 1287.6586   | -0.0105 | -8    | 100         | 112               | AEAGVLGEFPAAR                  | 63        | 99.986 |                  |              |     |      |        | Mascot |
|   |                              | 1287.6691           | 1287.6586   | -0.0105 | -8    | 100         | 112               | AEAGVLGEFPAAR                  |           |        |                  |              |     |      |        | Mascot |
|   |                              | 1826.9799           | 1826.9619   | -0.018  | -10   | 38          | 53                | LLGYQLAAYFDKPTAR               |           |        |                  |              |     |      |        | Mascot |
|   |                              | 1826.9799           | 1826.9619   | -0.018  | -10   | 38          | 53                | LLGYQLAAYFDKPTAR               | 78        | 100    |                  |              |     |      |        | Mascot |
|   |                              | 3337.7539           | 3337.7136   | -0.0403 | -12   | 38          | 67                | LLGYQLAAYFDKPTARVQLIASSIAENDNR |           |        |                  |              |     |      |        | Mascot |
| 7 | vitellogenin 5 [Danio rerio] |                     |             |         |       | gi 57864785 |                   | 72820.8                        | 9         | 6      | 154              | 100          | 142 | 100  |        |        |
|   |                              | Peptide Information |             |         |       |             |                   |                                |           |        |                  |              |     |      |        |        |
|   |                              | Calc. Mass          | Obsrv. Mass | ± da    | ± ppm | Start Seq.  | End Sequence Seq. |                                | Ion Score | C. I.  | %                | Modification |     | Rank | Result | Type   |
|   |                              | 960.4785            | 960.4697    | -0.0088 | -9    | 564         | 570               | LEVEWER                        |           |        |                  |              |     |      |        | Mascot |
|   |                              | 1324.5975           | 1324.6721   | 0.0746  | 56    | 376         | 388               | NTPVSSSESSSSSR                 |           |        |                  |              |     |      |        | Mascot |
|   |                              | 1515.7478           | 1515.7322   | -0.0156 | -10   | 42          | 54                | VFGQEVAYVNFDK                  |           |        |                  |              |     |      |        | Mascot |
|   |                              | 1515.7478           | 1515.7322   | -0.0156 | -10   | 42          | 54                | VFGQEVAYVNFDK                  | 64        | 99.99  |                  |              |     |      |        | Mascot |
|   |                              | 1753.9517           | 1753.9365   | -0.0152 | -9    | 55          | 70                | SIIEEAIPMTGPKPR                |           |        | Oxidation (M)[9] |              |     |      |        | Mascot |
|   |                              | 1826.9799           | 1826.9619   | -0.018  | -10   | 489         | 504               | LLGYQLAAYFDKPTAR               |           |        |                  |              |     |      |        | Mascot |
|   |                              | 1826.9799           | 1826.9619   | -0.018  | -10   | 489         | 504               | LLGYQLAAYFDKPTAR               | 78        | 100    |                  |              |     |      |        | Mascot |
|   |                              | 2577.3923           | 2577.3474   | -0.0449 | -17   | 206         | 229               | VEALPVELPEHIASASFETLAVVR       |           |        |                  |              |     |      |        | Mascot |
| 8 | Vtg1 protein [Danio rerio]   |                     |             |         |       | gi 63100501 |                   | 36409.1                        | 9.23      | 4      | 151              | 100          | 141 | 100  |        |        |

| Peptide Information |                                  |             |         |       |               |                   |                            |           |         |              |                  |     |     |
|---------------------|----------------------------------|-------------|---------|-------|---------------|-------------------|----------------------------|-----------|---------|--------------|------------------|-----|-----|
|                     | Calc. Mass                       | Obsrv. Mass | ± da    | ± ppm | Start Seq.    | End Sequence Seq. |                            | Ion Score | C. I. % | Modification | Rank Result Type |     |     |
| 9                   | 960.4785                         | 960.4697    | -0.0088 | -9    | 218           | 224               | LEVEWER                    |           |         |              | Mascot           |     |     |
|                     | 1287.6691                        | 1287.6586   | -0.0105 | -8    | 205           | 217               | AEAGVLGEFPAAR              | 63        | 99.986  |              | Mascot           |     |     |
|                     | 1287.6691                        | 1287.6586   | -0.0105 | -8    | 205           | 217               | AEAGVLGEFPAAR              |           |         |              | Mascot           |     |     |
|                     | 1364.6957                        | 1364.6819   | -0.0138 | -10   | 239           | 250               | HILTAAYDTGFR               |           |         |              | Mascot           |     |     |
|                     | 1826.9799                        | 1826.9619   | -0.018  | -10   | 143           | 158               | LLGYQLAAYFDKPTAR           |           |         |              | Mascot           |     |     |
|                     | 1826.9799                        | 1826.9619   | -0.018  | -10   | 143           | 158               | LLGYQLAAYFDKPTAR           | 78        | 100     |              | Mascot           |     |     |
|                     | vitellogenin 6 [Danio rerio]     |             |         |       | gij 303227889 |                   | 150936.1                   | 8.84      | 7       | 150          | 100              | 142 | 100 |
| Peptide Information |                                  |             |         |       |               |                   |                            |           |         |              |                  |     |     |
|                     | Calc. Mass                       | Obsrv. Mass | ± da    | ± ppm | Start Seq.    | End Sequence Seq. |                            | Ion Score | C. I. % | Modification | Rank Result Type |     |     |
|                     | 960.4785                         | 960.4697    | -0.0088 | -9    | 1276          | 1282              | LEVEWER                    |           |         |              | Mascot           |     |     |
|                     | 1515.7478                        | 1515.7322   | -0.0156 | -10   | 744           | 756               | VFGQEVAYVNFDK              |           |         |              | Mascot           |     |     |
|                     | 1515.7478                        | 1515.7322   | -0.0156 | -10   | 744           | 756               | VFGQEVAYVNFDK              | 64        | 99.99   |              | Mascot           |     |     |
|                     | 1638.8485                        | 1638.8428   | -0.0057 | -3    | 679           | 694               | TYLAGAAADVVEFGVR           |           |         |              | Mascot           |     |     |
|                     | 1638.8485                        | 1638.8428   | -0.0057 | -3    | 679           | 694               | TYLAGAAADVVEFGVR           |           |         |              | Mascot           |     |     |
|                     | 1826.9799                        | 1826.9619   | -0.018  | -10   | 1201          | 1216              | LLGYQLAAYFDKPTAR           |           |         |              | Mascot           |     |     |
|                     | 1826.9799                        | 1826.9619   | -0.018  | -10   | 1201          | 1216              | LLGYQLAAYFDKPTAR           | 78        | 100     |              | Mascot           |     |     |
|                     | 2174.1968                        | 2174.1628   | -0.034  | -16   | 781           | 800               | ALQEGVAFQYAKPLLAEE<br>VR   |           |         |              | Mascot           |     |     |
|                     | 2194.0469                        | 2194.043    | -0.0039 | -2    | 1070          | 1090              | EILDTEAKNAPVSSESS<br>SSR   |           |         |              | Mascot           |     |     |
|                     | 2233.2009                        | 2233.052    | -0.1489 | -67   | 604           | 625               | SLTRITAPDMAYVAGAAN<br>VAIK |           |         |              | Mascot           |     |     |
| 10                  | Zgc:136383 protein [Danio rerio] |             |         |       | gij 159155252 |                   | 123957.1                   | 8.78      | 6       | 150          | 100              | 142 | 100 |
| Peptide Information |                                  |             |         |       |               |                   |                            |           |         |              |                  |     |     |
|                     | Calc. Mass                       | Obsrv. Mass | ± da    | ± ppm | Start Seq.    | End Sequence Seq. |                            | Ion Score | C. I. % | Modification | Rank Result Type |     |     |
|                     | 960.4785                         | 960.4697    | -0.0088 | -9    | 1033          | 1039              | LEVEWER                    |           |         |              | Mascot           |     |     |
|                     | 1045.5465                        | 1045.5553   | 0.0088  | 8     | 1123          | 1130              | DFLSWIHK                   |           |         |              | Mascot           |     |     |
|                     | 1382.7889                        | 1382.7646   | -0.0243 | -18   | 80            | 92                | ISDAPAQIVEVLK              |           |         |              | Mascot           |     |     |
|                     | 1515.7478                        | 1515.7322   | -0.0156 | -10   | 510           | 522               | VFGQEVAYVNFDK              |           |         |              | Mascot           |     |     |
|                     | 1515.7478                        | 1515.7322   | -0.0156 | -10   | 510           | 522               | VFGQEVAYVNFDK              | 64        | 99.99   |              | Mascot           |     |     |
|                     | 1826.9799                        | 1826.9619   | -0.018  | -10   | 958           | 973               | LLGYQLAAYFDKPTAR           |           |         |              | Mascot           |     |     |
|                     | 1826.9799                        | 1826.9619   | -0.018  | -10   | 958           | 973               | LLGYQLAAYFDKPTAR           | 78        | 100     |              | Mascot           |     |     |

|                     |                                                                                                                 |             |         |       |            |          |                              |           |       |   |                        |      |        |        |  |        |
|---------------------|-----------------------------------------------------------------------------------------------------------------|-------------|---------|-------|------------|----------|------------------------------|-----------|-------|---|------------------------|------|--------|--------|--|--------|
|                     | 2233.2009                                                                                                       | 2233.052    | -0.1489 | -67   | 370        | 391      | SLTRITAPDMAYVAGAAN<br>VAIK   |           |       |   |                        |      |        |        |  | Mascot |
| 11                  | novel protein similar to vitellogenin 1 (vg1) [Danio rerio] gi 94733731 149169.2 8.84 6 142 100 142 100         |             |         |       |            |          |                              |           |       |   |                        |      |        |        |  |        |
| Peptide Information |                                                                                                                 |             |         |       |            |          |                              |           |       |   |                        |      |        |        |  |        |
|                     | Calc. Mass                                                                                                      | Obsrv. Mass | ± da    | ± ppm | Start Seq. | End Seq. | Sequence                     | Ion Score | C. I. | % | Modification           | Rank | Result | Type   |  |        |
|                     | 960.4785                                                                                                        | 960.4697    | -0.0088 | -9    | 1260       | 1266     | LEVEWER                      |           |       |   |                        |      |        | Mascot |  |        |
|                     | 1324.5975                                                                                                       | 1324.6721   | 0.0746  | 56    | 1071       | 1083     | NTPVSSSESSSSSR               |           |       |   |                        |      |        | Mascot |  |        |
|                     | 1515.7478                                                                                                       | 1515.7322   | -0.0156 | -10   | 737        | 749      | VFGQEVAYVNFDK                |           |       |   |                        |      |        | Mascot |  |        |
|                     | 1515.7478                                                                                                       | 1515.7322   | -0.0156 | -10   | 737        | 749      | VFGQEVAYVNFDK                | 64        | 99.99 |   |                        |      |        | Mascot |  |        |
|                     | 1753.9517                                                                                                       | 1753.9365   | -0.0152 | -9    | 750        | 765      | SIIEEAIPMTVGPKPR             |           |       |   | Oxidation (M)[9]       |      |        | Mascot |  |        |
|                     | 1826.9799                                                                                                       | 1826.9619   | -0.018  | -10   | 1185       | 1200     | LLGYQLAAYFDKPTAR             |           |       |   |                        |      |        | Mascot |  |        |
|                     | 1826.9799                                                                                                       | 1826.9619   | -0.018  | -10   | 1185       | 1200     | LLGYQLAAYFDKPTAR             | 78        | 100   |   |                        |      |        | Mascot |  |        |
|                     | 2577.3923                                                                                                       | 2577.3474   | -0.0449 | -17   | 901        | 924      | VEALPVELPEHIASASFET<br>LAVVR |           |       |   |                        |      |        | Mascot |  |        |
| 12                  | Zgc:136383 protein [Danio rerio] gi 125857991 148644.2 8.93 6 142 100 142 100                                   |             |         |       |            |          |                              |           |       |   |                        |      |        |        |  |        |
| Peptide Information |                                                                                                                 |             |         |       |            |          |                              |           |       |   |                        |      |        |        |  |        |
|                     | Calc. Mass                                                                                                      | Obsrv. Mass | ± da    | ± ppm | Start Seq. | End Seq. | Sequence                     | Ion Score | C. I. | % | Modification           | Rank | Result | Type   |  |        |
|                     | 960.4785                                                                                                        | 960.4697    | -0.0088 | -9    | 1255       | 1261     | LEVEWER                      |           |       |   |                        |      |        | Mascot |  |        |
|                     | 1045.5465                                                                                                       | 1045.5553   | 0.0088  | 8     | 1345       | 1352     | DFLSWIHK                     |           |       |   |                        |      |        | Mascot |  |        |
|                     | 1382.7889                                                                                                       | 1382.7646   | -0.0243 | -18   | 302        | 314      | ISDAPAQIVEVLK                |           |       |   |                        |      |        | Mascot |  |        |
|                     | 1515.7478                                                                                                       | 1515.7322   | -0.0156 | -10   | 732        | 744      | VFGQEVAYVNFDK                |           |       |   |                        |      |        | Mascot |  |        |
|                     | 1515.7478                                                                                                       | 1515.7322   | -0.0156 | -10   | 732        | 744      | VFGQEVAYVNFDK                | 64        | 99.99 |   |                        |      |        | Mascot |  |        |
|                     | 1826.9799                                                                                                       | 1826.9619   | -0.018  | -10   | 1180       | 1195     | LLGYQLAAYFDKPTAR             |           |       |   |                        |      |        | Mascot |  |        |
|                     | 1826.9799                                                                                                       | 1826.9619   | -0.018  | -10   | 1180       | 1195     | LLGYQLAAYFDKPTAR             | 78        | 100   |   |                        |      |        | Mascot |  |        |
|                     | 2233.2009                                                                                                       | 2233.052    | -0.1489 | -67   | 592        | 613      | SLTRITAPDMAYVAGAAN<br>VAIK   |           |       |   |                        |      |        | Mascot |  |        |
| 13                  | thioredoxin-dependent peroxide reductase, mitochondrial [Danio rerio] gi 65301457 26904.1 9.17 5 101 100 78 100 |             |         |       |            |          |                              |           |       |   |                        |      |        |        |  |        |
| Peptide Information |                                                                                                                 |             |         |       |            |          |                              |           |       |   |                        |      |        |        |  |        |
|                     | Calc. Mass                                                                                                      | Obsrv. Mass | ± da    | ± ppm | Start Seq. | End Seq. | Sequence                     | Ion Score | C. I. | % | Modification           | Rank | Result | Type   |  |        |
|                     | 1313.7576                                                                                                       | 1313.7443   | -0.0133 | -10   | 180        | 191      | GLFIIDPNGIVR                 |           |       |   |                        |      |        | Mascot |  |        |
|                     | 1472.8107                                                                                                       | 1472.793    | -0.0177 | -12   | 166        | 179      | DYGVLLLEGPGIALR              | 78        | 100   |   |                        |      |        | Mascot |  |        |
|                     | 1472.8107                                                                                                       | 1472.793    | -0.0177 | -12   | 166        | 179      | DYGVLLLEGPGIALR              |           |       |   |                        |      |        | Mascot |  |        |
|                     | 2174.1208                                                                                                       | 2174.1628   | 0.042   | 19    | 35         | 55       | APQPLACIAAQKACFSIS<br>AAR    |           |       |   | Carbamidomethyl (C)[7] |      |        | Mascot |  |        |



|    |                                                                           |           |         |     |              |     |                                  |      |   |    |     |    |                         |        |
|----|---------------------------------------------------------------------------|-----------|---------|-----|--------------|-----|----------------------------------|------|---|----|-----|----|-------------------------|--------|
|    | 2191.0276                                                                 | 2191.0083 | -0.0193 | -9  | 213          | 231 | AFQFVETHGEVCPASWT<br>PK          |      |   |    |     |    | Carbamidomethyl (C)[12] | Mascot |
|    | 3380.5864                                                                 | 3380.5308 | -0.0556 | -16 | 114          | 143 | ANEFHDVNCVVGVSV<br>SHFTHLAWTNTPR |      |   |    |     |    | Carbamidomethyl (C)[9]  | Mascot |
| 14 | novel protein similar to vertebrate peroxiredoxin 3 (PRDX3) [Danio rerio] |           |         |     | gi 157885981 |     | 30321                            | 9.41 | 5 | 99 | 100 | 78 | 100                     |        |

#### Peptide Information

| Calc. Mass | Obsrv. Mass | ± da    | ± ppm | Start Seq. | End Seq. | Sequence                         | Ion Score | C. I. | %   | Modification            | Rank | Result Type |
|------------|-------------|---------|-------|------------|----------|----------------------------------|-----------|-------|-----|-------------------------|------|-------------|
| 1313.7576  | 1313.7443   | -0.0133 | -10   | 211        | 222      | GLFIIDPNGIVR                     |           |       |     |                         |      | Mascot      |
| 1472.8107  | 1472.793    | -0.0177 | -12   | 197        | 210      | DYGVLLLEPGIALR                   | 78        |       | 100 |                         |      | Mascot      |
| 1472.8107  | 1472.793    | -0.0177 | -12   | 197        | 210      | DYGVLLLEPGIALR                   |           |       |     |                         |      | Mascot      |
| 2174.1208  | 2174.1628   | 0.042   | 19    | 66         | 86       | APQPLACIAAQKACFSIS<br>AAR        |           |       |     | Carbamidomethyl (C)[7]  |      | Mascot      |
| 2191.0276  | 2191.0083   | -0.0193 | -9    | 244        | 262      | AFQFVETHGEVCPASWT<br>PK          |           |       |     | Carbamidomethyl (C)[12] |      | Mascot      |
| 3380.5864  | 3380.5308   | -0.0556 | -16   | 145        | 174      | ANEFHDVNCVVGVSV<br>SHFTHLAWTNTPR |           |       |     | Carbamidomethyl (C)[9]  |      | Mascot      |

|    |                                                                           |  |  |  |              |  |         |      |   |    |        |    |     |  |
|----|---------------------------------------------------------------------------|--|--|--|--------------|--|---------|------|---|----|--------|----|-----|--|
| 15 | novel protein similar to vertebrate peroxiredoxin 3 (PRDX3) [Danio rerio] |  |  |  | gi 157885982 |  | 25858.7 | 9.99 | 3 | 90 | 99.995 | 78 | 100 |  |
|----|---------------------------------------------------------------------------|--|--|--|--------------|--|---------|------|---|----|--------|----|-----|--|

#### Peptide Information

| Calc. Mass | Obsrv. Mass | ± da    | ± ppm | Start Seq. | End Seq. | Sequence                         | Ion Score | C. I. | %   | Modification           | Rank | Result Type |
|------------|-------------|---------|-------|------------|----------|----------------------------------|-----------|-------|-----|------------------------|------|-------------|
| 1472.8107  | 1472.793    | -0.0177 | -12   | 197        | 210      | DYGVLLLEPGIALR                   | 78        |       | 100 |                        |      | Mascot      |
| 1472.8107  | 1472.793    | -0.0177 | -12   | 197        | 210      | DYGVLLLEPGIALR                   |           |       |     |                        |      | Mascot      |
| 2174.1208  | 2174.1628   | 0.042   | 19    | 66         | 86       | APQPLACIAAQKACFSIS<br>AAR        |           |       |     | Carbamidomethyl (C)[7] |      | Mascot      |
| 3380.5864  | 3380.5308   | -0.0556 | -16   | 145        | 174      | ANEFHDVNCVVGVSV<br>SHFTHLAWTNTPR |           |       |     | Carbamidomethyl (C)[9] |      | Mascot      |

|    |                              |  |  |  |             |  |         |      |   |    |        |    |     |  |
|----|------------------------------|--|--|--|-------------|--|---------|------|---|----|--------|----|-----|--|
| 16 | vitellogenin 6 [Danio rerio] |  |  |  | gi 57864787 |  | 38968.8 | 8.92 | 4 | 90 | 99.995 | 78 | 100 |  |
|----|------------------------------|--|--|--|-------------|--|---------|------|---|----|--------|----|-----|--|

#### Peptide Information

| Calc. Mass | Obsrv. Mass | ± da    | ± ppm | Start Seq. | End Seq. | Sequence                | Ion Score | C. I. | %   | Modification | Rank | Result Type |
|------------|-------------|---------|-------|------------|----------|-------------------------|-----------|-------|-----|--------------|------|-------------|
| 960.4785   | 960.4697    | -0.0088 | -9    | 255        | 261      | LEVEWER                 |           |       |     |              |      | Mascot      |
| 1324.7332  | 1324.6721   | -0.0611 | -46   | 1          | 13       | VAVARAEGPAVER           |           |       |     |              |      | Mascot      |
| 1826.9799  | 1826.9619   | -0.018  | -10   | 180        | 195      | LLGYQLAAYFDKPTAR        |           |       |     |              |      | Mascot      |
| 1826.9799  | 1826.9619   | -0.018  | -10   | 180        | 195      | LLGYQLAAYFDKPTAR        | 78        |       | 100 |              |      | Mascot      |
| 2194.0469  | 2194.043    | -0.0039 | -2    | 51         | 71       | EILDTEAKNAPVSSSS<br>SSR |           |       |     |              |      | Mascot      |

|    |                          |  |  |  |             |  |         |      |   |    |        |    |     |  |
|----|--------------------------|--|--|--|-------------|--|---------|------|---|----|--------|----|-----|--|
| 17 | Zgc:136383 [Danio rerio] |  |  |  | gi 92097636 |  | 28809.9 | 9.33 | 4 | 89 | 99.994 | 78 | 100 |  |
|----|--------------------------|--|--|--|-------------|--|---------|------|---|----|--------|----|-----|--|

### Peptide Information

|    |                            | Calc. Mass | Obsrv. Mass | ± da    | ± ppm | Start Seq.  | End Sequence Seq.   | Ion Score | C. I. % Modification |                    |        | Rank | Result Type |  |
|----|----------------------------|------------|-------------|---------|-------|-------------|---------------------|-----------|----------------------|--------------------|--------|------|-------------|--|
|    |                            |            |             |         |       |             |                     |           |                      |                    |        |      |             |  |
| 18 | Vtg5 protein [Danio rerio] | 960.4785   | 960.4697    | -0.0088 | -9    | 156         | 162 LEVEWER         |           |                      |                    |        |      | Mascot      |  |
|    |                            | 1045.5465  | 1045.5553   | 0.0088  | 8     | 246         | 253 DFLSWIHK        |           |                      |                    |        |      | Mascot      |  |
|    |                            | 1314.6028  | 1314.7384   | 0.1356  | 103   | 1           | 12 MLPLSSSMSSSR     |           |                      | Oxidation (M)[1,8] |        |      | Mascot      |  |
|    |                            | 1826.9799  | 1826.9619   | -0.018  | -10   | 81          | 96 LLGYQLAAYFDKPTAR |           |                      |                    |        |      | Mascot      |  |
|    |                            | 1826.9799  | 1826.9619   | -0.018  | -10   | 81          | 96 LLGYQLAAYFDKPTAR | 78        | 100                  |                    |        |      | Mascot      |  |
| 18 | Vtg5 protein [Danio rerio] |            |             |         |       | qj148744685 | 27543.3             | 9.2       | 2                    | 84                 | 99.983 | 78   | 100         |  |

### Peptide Information

|    | Calc. Mass                   | Obsrv. Mass | ± da    | ± ppm | Start Seq.  | End Sequence Seq. |                  | Ion Score | C. I. | % Modification |        | Rank | Result Type |
|----|------------------------------|-------------|---------|-------|-------------|-------------------|------------------|-----------|-------|----------------|--------|------|-------------|
|    | 960.4785                     | 960.4697    | -0.0088 | -9    | 144         | 150               | LEVEWER          |           |       |                |        |      | Mascot      |
|    | 1826.9799                    | 1826.9619   | -0.018  | -10   | 69          | 84                | LLGYQLAAYFDKPTAR |           |       |                |        |      | Mascot      |
|    | 1826.9799                    | 1826.9619   | -0.018  | -10   | 69          | 84                | LLGYQLAAYFDKPTAR | 78        | 100   |                |        |      | Mascot      |
| 19 | vitellogenin 4 [Danio rerio] |             |         |       | gi 57864783 |                   | 31189.9          | 9.48      | 2     | 84             | 99.981 | 78   | 100         |

### Peptide Information

|    | Calc. Mass                                                                    | Obsrv. Mass | ± da    | ± ppm | Start Seq.   | End Sequence |                  | Ion Score | C. I. | % Modification | Rank | Result Type |
|----|-------------------------------------------------------------------------------|-------------|---------|-------|--------------|--------------|------------------|-----------|-------|----------------|------|-------------|
|    | 960.4785                                                                      | 960.4697    | -0.0088 | -9    | 182          | 188          | LEVEWER          |           |       |                |      | Mascot      |
|    | 1826.9799                                                                     | 1826.9619   | -0.018  | -10   | 107          | 122          | LLGYQLAAYFDKPTAR |           |       |                |      | Mascot      |
|    | 1826.9799                                                                     | 1826.9619   | -0.018  | -10   | 107          | 122          | LLGYQLAAYFDKPTAR | 78        | 100   |                |      | Mascot      |
| 20 | novel protein similar to vertebrate complement component 3 (C3) [Danio rerio] |             |         |       | gi 169153736 | 187400.5     | 8.04             | 20        | 47    | 7.024          |      |             |

### Peptide Information

|  | Calc. Mass | Obsrv. Mass | ± da    | ± ppm | Start Seq. | End Sequence | Ion Score     | C. I. % | Modification     | Rank | Result Type |
|--|------------|-------------|---------|-------|------------|--------------|---------------|---------|------------------|------|-------------|
|  | 842.5206   | 842.5032    | -0.0174 | -21   | 516        | 523          | GKIIQAGR      |         |                  |      | Mascot      |
|  | 1179.619   | 1179.5881   | -0.0309 | -26   | 137        | 146          | AEKVMPSFR     |         | Oxidation (M)[5] |      | Mascot      |
|  | 1179.619   | 1179.5881   | -0.0309 | -26   | 137        | 146          | AEKVMPSFR     |         | Oxidation (M)[5] |      | Mascot      |
|  | 1313.7535  | 1313.7443   | -0.0092 | -7    | 958        | 970          | GGGAGQQLIQVKK |         |                  |      | Mascot      |
|  | 1320.7463  | 1320.5728   | -0.1735 | -131  | 824        | 833          | VWKPFFIDLR    |         |                  |      | Mascot      |
|  | 1324.6249  | 1324.6721   | 0.0472  | 36    | 1595       | 1605         | MFLSHASCRT    |         | Oxidation (M)[1] |      | Mascot      |
|  | 1338.7562  | 1338.6912   | -0.065  | -49   | 1377       | 1387         | DIHRLCVIEK    |         |                  |      | Mascot      |
|  | 1364.7065  | 1364.6819   | -0.0246 | -18   | 711        | 721          | MIPEMPKLYAR   |         | Oxidation (M)[1] |      | Mascot      |

|           |           |         |     |      |      |                                  |                            |        |
|-----------|-----------|---------|-----|------|------|----------------------------------|----------------------------|--------|
| 1472.6475 | 1472.793  | 0.1455  | 99  | 1500 | 1511 | SCSRFYSPPEDK                     | Carbamidomethyl (C)[2]     | Mascot |
| 1472.6475 | 1472.793  | 0.1455  | 99  | 1500 | 1511 | SCSRFYSPPEDK                     | Carbamidomethyl (C)[2]     | Mascot |
| 1475.7965 | 1475.7472 | -0.0493 | -33 | 1467 | 1478 | EAEIISFRLNQR                     |                            | Mascot |
| 1515.8451 | 1515.7322 | -0.1129 | -74 | 862  | 875  | STPSVNVVMVILEK                   |                            | Mascot |
| 1515.8451 | 1515.7322 | -0.1129 | -74 | 862  | 875  | STPSVNVVMVILEK                   |                            | Mascot |
| 1626.8308 | 1626.889  | 0.0582  | 36  | 28   | 41   | TVWGPNMQQIEPVK                   |                            | Mascot |
| 1638.7944 | 1638.8428 | 0.0484  | 30  | 1101 | 1114 | VFSMAHSFINVNEK                   | Oxidation (M)[4]           | Mascot |
| 1638.7944 | 1638.8428 | 0.0484  | 30  | 1101 | 1114 | VFSMAHSFINVNEK                   | Oxidation (M)[4]           | Mascot |
| 1739.9214 | 1739.9227 | 0.0013  | 1   | 327  | 342  | AYPDINSLLGSTVYVK                 |                            | Mascot |
| 1838.8827 | 1838.9028 | 0.0201  | 11  | 1543 | 1558 | EQRNAAVCNGLHHAYR                 |                            | Mascot |
| 2174.0256 | 2174.1628 | 0.1372  | 63  | 694  | 710  | DQLEYDYMEEMVLLRAR                |                            | Mascot |
| 2233.1533 | 2233.052  | -0.1013 | -45 | 911  | 932  | TGELPLQVTAVAASFMG<br>QDAVK       |                            | Mascot |
| 2300.1484 | 2300.1521 | 0.0037  | 2   | 1013 | 1033 | EDSLAALIRMPGGCVEQ<br>NLAR        | Carbamidomethyl (C)[14]    | Mascot |
| 2577.283  | 2577.3474 | 0.0644  | 25  | 1610 | 1633 | EGQEYLIGIPITDVWNAG<br>STVSNK     |                            | Mascot |
| 2584.1443 | 2584.1567 | 0.0124  | 5   | 1504 | 1524 | FYSPPEDKQLDQICEG<br>DVCR         | Carbamidomethyl (C)[15,20] | Mascot |
| 3073.5952 | 3073.4746 | -0.1206 | -39 | 1606 | 1633 | LNLREGQEYLIGIPITDV<br>WNAGSTVSNK |                            | Mascot |

21 Pbx2 [Danio rerio] gi|7861936 18895.6 9.08 7 44 0 8 0

#### Peptide Information

| Calc. Mass | Obsrv. Mass | ± da    | ± ppm | Start Seq. | End Seq. | Sequence                 | Ion Score | C. I. % | Modification                             | Rank | Result Type |
|------------|-------------|---------|-------|------------|----------|--------------------------|-----------|---------|------------------------------------------|------|-------------|
| 1051.5782  | 1051.7041   | 0.1259  | 120   | 133        | 141      | FSSIQTQLK                |           |         |                                          |      | Mascot      |
| 1179.6442  | 1179.5881   | -0.0561 | -48   | 1          | 10       | ALFSVLCEIK               |           |         | Carbamidomethyl (C)[7]                   |      | Mascot      |
| 1179.6732  | 1179.5881   | -0.0851 | -72   | 132        | 141      | KFSSIQTQLK               | 10        | 0       |                                          |      | Mascot      |
| 1323.6395  | 1323.6609   | 0.0214  | 16    | 142        | 152      | QSTCEAVMILR              |           |         | Carbamidomethyl (C)[4], Oxidation (M)[8] |      | Mascot      |
| 1382.7573  | 1382.7646   | 0.0073  | 5     | 121        | 131      | EIERMVALIHR              |           |         | Oxidation (M)[5]                         |      | Mascot      |
| 1493.7563  | 1493.7196   | -0.0367 | -25   | 142        | 154      | QSTCEAVMILRSR            |           |         |                                          |      | Mascot      |
| 2283.1836  | 2283.1509   | -0.0327 | -14   | 133        | 152      | FSSIQTQLKQSTCEAVMI<br>LR |           |         |                                          |      | Mascot      |
| 2283.1836  | 2283.1509   | -0.0327 | -14   | 133        | 152      | FSSIQTQLKQSTCEAVMI<br>LR |           |         |                                          |      | Mascot      |

22 calpain 1, large subunit [Danio rerio] gi|47087455 80004.8 5.66 12 42 0

#### Peptide Information

| Calc. Mass | Obsrv. Mass | ± da    | ± ppm | Start Seq. | End Seq. | Sequence | Ion Score | C. I. % | Modification | Rank | Result Type |
|------------|-------------|---------|-------|------------|----------|----------|-----------|---------|--------------|------|-------------|
| 960.4969   | 960.4697    | -0.0272 | -28   | 42         | 49       | AQSQQSRR |           |         |              |      | Mascot      |

|           |           |         |      |     |     |                                    |                                            |        |
|-----------|-----------|---------|------|-----|-----|------------------------------------|--------------------------------------------|--------|
| 1164.4659 | 1164.5541 | 0.0882  | 76   | 622 | 631 | SGTMSSYEMR                         | Oxidation (M)[4]                           | Mascot |
| 1164.4659 | 1164.5541 | 0.0882  | 76   | 622 | 631 | SGTMSSYEMR                         | Oxidation (M)[4]                           | Mascot |
| 1287.7419 | 1287.6586 | -0.0833 | -65  | 224 | 235 | KAPADLFSIIGR                       |                                            | Mascot |
| 1287.7419 | 1287.6586 | -0.0833 | -65  | 224 | 235 | KAPADLFSIIGR                       |                                            | Mascot |
| 1323.5854 | 1323.6609 | 0.0755  | 57   | 1   | 12  | MEPICATGMAAR                       | Carbamidomethyl (C)[5], Oxidation (M)[1]   | Mascot |
| 1493.895  | 1493.7196 | -0.1754 | -117 | 641 | 652 | LNNHLFQLILR                        |                                            | Mascot |
| 1626.7699 | 1626.889  | 0.1191  | 73   | 381 | 393 | NYPATFWNNPQFK                      |                                            | Mascot |
| 1889.764  | 1890.0187 | 0.2547  | 135  | 616 | 631 | DHDVDKSGTMSSYEMR                   | Oxidation (M)[10,15]                       | Mascot |
| 2501.2527 | 2501.2122 | -0.0405 | -16  | 394 | 416 | VALKHPDSPGQSECSFL<br>VALMQK        | Oxidation (M)[21]                          | Mascot |
| 2566.334  | 2566.2559 | -0.0781 | -30  | 170 | 192 | LLFVHSAEGGEFWSALLE<br>KAYAK        |                                            | Mascot |
| 2627.4436 | 2627.3318 | -0.1118 | -43  | 543 | 566 | QLAGADMEISVTELQTL<br>NRRIAK        |                                            | Mascot |
| 2627.4436 | 2627.3318 | -0.1118 | -43  | 543 | 566 | QLAGADMEISVTELQTL<br>NRRIAK        |                                            | Mascot |
| 3057.4219 | 3057.4905 | 0.0686  | 22   | 653 | 677 | YTEEDLSVDFDNFVSCLV<br>RLETMFK      | Carbamidomethyl (C)[16]                    | Mascot |
| 3073.4167 | 3073.4746 | 0.0579  | 19   | 653 | 677 | YTEEDLSVDFDNFVSCLV<br>RLETMFK      | Carbamidomethyl (C)[16], Oxidation (M)[23] | Mascot |
| 3380.4277 | 3380.5308 | 0.1031  | 30   | 193 | 223 | LNGCYEALSGGSTCEGF<br>EDFTGGVTMYELK | Carbamidomethyl (C)[4], Oxidation (M)[27]  | Mascot |

23 PREDICTED: nipped-B-like protein-like [Danio rerio] gi|326667611 67985.1 6.31 11 39 0

#### Peptide Information

| Calc. Mass | Obsrv. Mass | ± da    | ± ppm | Start Seq. | End Seq. | Sequence                         | Ion Score | C. I. % | Modification                              | Rank | Result Type |
|------------|-------------|---------|-------|------------|----------|----------------------------------|-----------|---------|-------------------------------------------|------|-------------|
| 868.4046   | 868.525     | 0.1204  | 139   | 360        | 367      | YSPSESAK                         |           |         |                                           |      | Mascot      |
| 960.5359   | 960.4697    | -0.0662 | -69   | 7          | 14       | LSKQEDLK                         |           |         |                                           |      | Mascot      |
| 996.4971   | 996.5889    | 0.0918  | 92    | 98         | 105      | YTGFIHMK                         |           |         |                                           |      | Mascot      |
| 1179.6957  | 1179.5881   | -0.1076 | -91   | 577        | 586      | LNHKVAQTLR                       |           |         |                                           |      | Mascot      |
| 1179.6957  | 1179.5881   | -0.1076 | -91   | 577        | 586      | LNHKVAQTLR                       |           |         |                                           |      | Mascot      |
| 1320.7634  | 1320.5728   | -0.1906 | -144  | 581        | 592      | VAQTLRSLYAAK                     |           |         |                                           |      | Mascot      |
| 1323.7855  | 1323.6609   | -0.1246 | -94   | 513        | 523      | DRPQIARVIQK                      |           |         |                                           |      | Mascot      |
| 1338.7852  | 1338.6912   | -0.094  | -70   | 289        | 299      | VRKPKPTEDIR                      |           |         |                                           |      | Mascot      |
| 1839.0011  | 1838.9028   | -0.0983 | -53   | 156        | 171      | RAFLISLLNLFDDSSK                 |           |         |                                           |      | Mascot      |
| 2369.0356  | 2368.9788   | -0.0568 | -24   | 133        | 152      | QDESNSAQCSHLYSMVR<br>ANR         |           |         | Carbamidomethyl (C)[9], Oxidation (M)[15] |      | Mascot      |
| 2501.2639  | 2501.2122   | -0.0517 | -21   | 106        | 129      | AVAGMKMSYQVQQAUF<br>GSAGSVIR     |           |         | Oxidation (M)[5]                          |      | Mascot      |
| 3057.498   | 3057.4905   | -0.0075 | -2    | 482        | 510      | RTGDSADLLSANMNESV<br>SALDIIAHCPC |           |         | Oxidation (M)[13]                         |      | Mascot      |

24 ubiquitin-like protein 4A [Danio rerio] gi|41053523 17309 5.95 6 39 0

#### Peptide Information

|  | Calc. Mass | Obsrv. Mass | $\pm$ da | $\pm$ ppm | Start Seq. | End Seq. | Sequence                   | Ion Score | C. I. | % Modification | Rank | Result Type |
|--|------------|-------------|----------|-----------|------------|----------|----------------------------|-----------|-------|----------------|------|-------------|
|  | 996.522    | 996.5889    | 0.0669   | 67        | 47         | 55       | GKALADEHR                  |           |       |                |      | Mascot      |
|  | 1179.5892  | 1179.5881   | -0.0011  | -1        | 56         | 66       | LSDYSIGPEAK                |           |       |                |      | Mascot      |
|  | 1179.5892  | 1179.5881   | -0.0011  | -1        | 56         | 66       | LSDYSIGPEAK                |           |       |                |      | Mascot      |
|  | 1515.8125  | 1515.7322   | -0.0803  | -53       | 130        | 142      | QLSLDDIERLASR              |           |       |                |      | Mascot      |
|  | 1515.8529  | 1515.7322   | -0.1207  | -80       | 92         | 106      | GGSGVWQLLSTVLAK            |           |       |                |      | Mascot      |
|  | 1739.9398  | 1739.9227   | -0.0171  | -10       | 28         | 42       | ELVSERLNIPASQQR            |           |       |                |      | Mascot      |
|  | 2501.3101  | 2501.2122   | -0.0979  | -39       | 1          | 22       | MILTVKPLQGKECNVQVT<br>ENEK |           |       |                |      | Mascot      |

25 PREDICTED: e3 ubiquitin-protein ligase UBR4 [Danio rerio] gi|189535964 569318.2 5.73 32 38 0 7 0

#### Peptide Information

|  | Calc. Mass | Obsrv. Mass | $\pm$ da | $\pm$ ppm | Start Seq. | End Seq. | Sequence        | Ion Score | C. I. | % Modification         | Rank | Result Type |
|--|------------|-------------|----------|-----------|------------|----------|-----------------|-----------|-------|------------------------|------|-------------|
|  | 842.477    | 842.5032    | 0.0262   | 31        | 1546       | 1551     | KYLYQK          |           |       |                        |      | Mascot      |
|  | 868.4046   | 868.525     | 0.1204   | 139       | 3649       | 3655     | SINYDEK         |           |       |                        |      | Mascot      |
|  | 882.5631   | 882.56      | -0.0031  | -4        | 2678       | 2684     | VLRPRNK         |           |       |                        |      | Mascot      |
|  | 960.4785   | 960.4697    | -0.0088  | -9        | 4664       | 4671     | NLDADVWK        |           |       |                        |      | Mascot      |
|  | 1051.651   | 1051.7041   | 0.0531   | 50        | 3983       | 3992     | LIKPPAPTSK      |           |       |                        |      | Mascot      |
|  | 1109.599   | 1109.4816   | -0.1174  | -106      | 1027       | 1035     | VSTYVNWIK       |           |       |                        |      | Mascot      |
|  | 1179.746   | 1179.5881   | -0.1579  | -134      | 3983       | 3993     | LIKPPAPTSKK     |           |       |                        |      | Mascot      |
|  | 1179.746   | 1179.5881   | -0.1579  | -134      | 3983       | 3993     | LIKPPAPTSKK     |           |       |                        |      | Mascot      |
|  | 1234.6942  | 1234.6671   | -0.0271  | -22       | 764        | 773      | VWERFVGTLK      |           |       |                        |      | Mascot      |
|  | 1277.6154  | 1277.6959   | 0.0805   | 63        | 4039       | 4049     | CQETVSKPSNK     |           |       | Carbamidomethyl (C)[1] |      | Mascot      |
|  | 1287.5668  | 1287.6586   | 0.0918   | 71        | 1707       | 1718     | RSPSSGMSSTMK    | 9         | 0     | Oxidation (M)[7,11]    |      | Mascot      |
|  | 1287.5668  | 1287.6586   | 0.0918   | 71        | 1707       | 1718     | RSPSSGMSSTMK    |           |       | Oxidation (M)[7,11]    |      | Mascot      |
|  | 1302.7164  | 1302.7024   | -0.014   | -11       | 4091       | 4102     | QVLFTPATQAAR    |           |       |                        |      | Mascot      |
|  | 1313.6453  | 1313.7443   | 0.099    | 75        | 1874       | 1885     | VAMCVLSSPHGR    |           |       | Carbamidomethyl (C)[4] |      | Mascot      |
|  | 1314.6333  | 1314.7384   | 0.1051   | 80        | 3258       | 3267     | TINWQKFCMK      |           |       | Oxidation (M)[9]       |      | Mascot      |
|  | 1338.6215  | 1338.6912   | 0.0697   | 52        | 1661       | 1673     | MVDGVGVCTVCAK   |           |       | Carbamidomethyl (C)[8] |      | Mascot      |
|  | 1382.8365  | 1382.7646   | -0.0719  | -52       | 3525       | 3537     | LIGSHTISKVTVK   |           |       |                        |      | Mascot      |
|  | 1434.614   | 1434.7549   | 0.1409   | 98        | 4388       | 4399     | VWCPTNEGEPMR    |           |       | Oxidation (M)[11]      |      | Mascot      |
|  | 1472.8066  | 1472.793    | -0.0136  | -9        | 1552       | 1565     | NVVEKVTANVSQ GK |           |       |                        |      | Mascot      |
|  | 1472.8066  | 1472.793    | -0.0136  | -9        | 1552       | 1565     | NVVEKVTANVSQ GK |           |       |                        |      | Mascot      |
|  | 1475.7853  | 1475.7472   | -0.0381  | -26       | 4822       | 4833     | VSLEEFENKPRK    |           |       |                        |      | Mascot      |
|  | 1515.8278  | 1515.7322   | -0.0956  | -63       | 158        | 170      | ELPSPVNP ELRHK  |           |       |                        |      | Mascot      |

|    |                                                                               |           |         |     |              |      |                                      |      |    |    |   |  |                                              |  |  |  |        |
|----|-------------------------------------------------------------------------------|-----------|---------|-----|--------------|------|--------------------------------------|------|----|----|---|--|----------------------------------------------|--|--|--|--------|
|    | 1515.8278                                                                     | 1515.7322 | -0.0956 | -63 | 158          | 170  | ELPSPVNPELRHK                        |      |    |    |   |  |                                              |  |  |  | Mascot |
|    | 1626.9182                                                                     | 1626.889  | -0.0292 | -18 | 111          | 125  | HLILLIKGLCTGCSR                      |      |    |    |   |  |                                              |  |  |  | Mascot |
|    | 1826.8776                                                                     | 1826.9619 | 0.0843  | 46  | 364          | 379  | CLEIYEMIGQAISNSR                     |      |    |    |   |  |                                              |  |  |  | Mascot |
|    | 1826.8776                                                                     | 1826.9619 | 0.0843  | 46  | 364          | 379  | CLEIYEMIGQAISNSR                     |      |    |    |   |  |                                              |  |  |  | Mascot |
|    | 1993.7891                                                                     | 1993.949  | 0.1599  | 80  | 1647         | 1660 | EFMNQHWYHCHTCK                       |      |    |    |   |  | Carbamidomethyl (C)[10,13], Oxidation (M)[3] |  |  |  | Mascot |
|    | 2150.1414                                                                     | 2150.0425 | -0.0989 | -46 | 2378         | 2398 | LSIFIGASVDPAGVTMLD<br>SIK            |      |    |    |   |  | Oxidation (M)[16]                            |  |  |  | Mascot |
|    | 2283.1284                                                                     | 2283.1509 | 0.0225  | 10  | 218          | 238  | MKNAFISQNVSSLQELG<br>GSEK            |      |    |    |   |  | Oxidation (M)[1]                             |  |  |  | Mascot |
|    | 2283.1284                                                                     | 2283.1509 | 0.0225  | 10  | 218          | 238  | MKNAFISQNVSSLQELG<br>GSEK            |      |    |    |   |  | Oxidation (M)[1]                             |  |  |  | Mascot |
|    | 2298.0896                                                                     | 2298.1667 | 0.0771  | 34  | 4435         | 4456 | MAGVMAQCGGLECMLN<br>RLSGIK           |      |    |    |   |  | Oxidation (M)[1]                             |  |  |  | Mascot |
|    | 2501.1179                                                                     | 2501.2122 | 0.0943  | 38  | 4786         | 4806 | QMEELIEEPGLTCCICRE<br>GYK            |      |    |    |   |  | Carbamidomethyl (C)[13]                      |  |  |  | Mascot |
|    | 2566.2383                                                                     | 2566.2559 | 0.0176  | 7   | 4781         | 4802 | TSLKQMEELIEEPGLTC<br>CICR            |      |    |    |   |  | Carbamidomethyl (C)[18]                      |  |  |  | Mascot |
|    | 2577.208                                                                      | 2577.3474 | 0.1394  | 54  | 1566         | 1588 | HASMLECACHIISYLADV<br>MNALR          |      |    |    |   |  | Oxidation (M)[4]                             |  |  |  | Mascot |
|    | 2584.3943                                                                     | 2584.1567 | -0.2376 | -92 | 625          | 647  | KDPELFLSLASSILNFITTS<br>MLK          |      |    |    |   |  | Oxidation (M)[21]                            |  |  |  | Mascot |
|    | 2593.2029                                                                     | 2593.3604 | 0.1575  | 61  | 1566         | 1588 | HASMLECACHIISYLADV<br>MNALR          |      |    |    |   |  | Oxidation (M)[4,19]                          |  |  |  | Mascot |
|    | 2627.3926                                                                     | 2627.3318 | -0.0608 | -23 | 4176         | 4199 | EIAHLLALEEATLSTDQQ<br>GYALK          |      |    |    |   |  |                                              |  |  |  | Mascot |
|    | 2627.3926                                                                     | 2627.3318 | -0.0608 | -23 | 4176         | 4199 | EIAHLLALEEATLSTDQQ<br>GYALK          |      |    |    |   |  |                                              |  |  |  | Mascot |
|    | 3052.3638                                                                     | 3052.5837 | 0.2199  | 72  | 3668         | 3692 | YARFDFMLYAKPCCAVID<br>PIENEEDR       |      |    |    |   |  | Carbamidomethyl (C)[13]                      |  |  |  | Mascot |
|    | 3337.5908                                                                     | 3337.7136 | 0.1228  | 37  | 3818         | 3848 | ALSVLGCGHTSSTKCYG<br>CASAVTGHCHITLLR |      |    |    |   |  | Carbamidomethyl (C)[7,15,18,26]              |  |  |  | Mascot |
| 26 | novel protein similar to vertebrate complement component 3 (C3) [Danio rerio] |           |         |     | gi 169153737 |      | 179718.7                             | 7.16 | 18 | 38 | 0 |  |                                              |  |  |  |        |

Peptide Information

| Calc. Mass | Obsrv. Mass | ± da    | ± ppm | Start Seq. | End Seq. | Sequence       | Ion Score | C. I. % | Modification           | Rank | Result Type |
|------------|-------------|---------|-------|------------|----------|----------------|-----------|---------|------------------------|------|-------------|
| 842.5206   | 842.5032    | -0.0174 | -21   | 527        | 534      | GKIIQAGR       |           |         |                        |      | Mascot      |
| 1277.677   | 1277.6959   | 0.0189  | 15    | 302        | 312      | LTSMKQIDDVK    |           |         |                        |      | Mascot      |
| 1313.7535  | 1313.7443   | -0.0092 | -7    | 930        | 942      | GGSAQQLIQVKK   |           |         |                        |      | Mascot      |
| 1320.7463  | 1320.5728   | -0.1735 | -131  | 796        | 805      | VWKPFFIDLR     |           |         |                        |      | Mascot      |
| 1324.6249  | 1324.6721   | 0.0472  | 36    | 1529       | 1539     | MFLSHASCRTTR   |           |         | Oxidation (M)[1]       |      | Mascot      |
| 1338.7562  | 1338.6912   | -0.065  | -49   | 1339       | 1349     | DIHRLCVIEK     |           |         |                        |      | Mascot      |
| 1472.6475  | 1472.793    | 0.1455  | 99    | 1462       | 1473     | SCSRFYSPPEDK   |           |         | Carbamidomethyl (C)[2] |      | Mascot      |
| 1472.6475  | 1472.793    | 0.1455  | 99    | 1462       | 1473     | SCSRFYSPPEDK   |           |         | Carbamidomethyl (C)[2] |      | Mascot      |
| 1515.8451  | 1515.7322   | -0.1129 | -74   | 834        | 847      | STPSVNVVMVILEK |           |         |                        |      | Mascot      |
| 1515.8451  | 1515.7322   | -0.1129 | -74   | 834        | 847      | STPSVNVVMVILEK |           |         |                        |      | Mascot      |

|    |                                                                                           |           |         |     |      |      |                             |                            |    |    |   |  |        |
|----|-------------------------------------------------------------------------------------------|-----------|---------|-----|------|------|-----------------------------|----------------------------|----|----|---|--|--------|
|    | 1626.8308                                                                                 | 1626.889  | 0.0582  | 36  | 28   | 41   | TVWGPNMQQIEPVK              |                            |    |    |   |  | Mascot |
|    | 1638.7944                                                                                 | 1638.8428 | 0.0484  | 30  | 1063 | 1076 | VFSMAHSFINVNEK              | Oxidation (M)[4]           |    |    |   |  | Mascot |
|    | 1638.7944                                                                                 | 1638.8428 | 0.0484  | 30  | 1063 | 1076 | VFSMAHSFINVNEK              | Oxidation (M)[4]           |    |    |   |  | Mascot |
|    | 1739.9214                                                                                 | 1739.9227 | 0.0013  | 1   | 338  | 353  | AYPDINSLLGSTVYVK            |                            |    |    |   |  | Mascot |
|    | 2191.1687                                                                                 | 2191.0083 | -0.1604 | -73 | 1    | 19   | MLLQLLWATLLCQICDG<br>K      | Oxidation (M)[1]           |    |    |   |  | Mascot |
|    | 2211.2244                                                                                 | 2211.0798 | -0.1446 | -65 | 493  | 513  | VVVGGSISVQAYIKSSLP<br>NHR   |                            |    |    |   |  | Mascot |
|    | 2233.1533                                                                                 | 2233.052  | -0.1013 | -45 | 883  | 904  | TGELPLQVTAVAASFMG<br>QDAVK  |                            |    |    |   |  | Mascot |
|    | 2300.1484                                                                                 | 2300.1521 | 0.0037  | 2   | 975  | 995  | EDSLAALIRMPGGCVEQ<br>NLAR   | Carbamidomethyl (C)[14]    |    |    |   |  | Mascot |
|    | 2577.283                                                                                  | 2577.3474 | 0.0644  | 25  | 1544 | 1567 | EGQEYLVIPITDVWNAG<br>STVSNK |                            |    |    |   |  | Mascot |
|    | 2584.1443                                                                                 | 2584.1567 | 0.0124  | 5   | 1466 | 1486 | FYSPPEDKQQLDQICEG<br>DVCR   | Carbamidomethyl (C)[15,20] |    |    |   |  | Mascot |
|    | 2888.5347                                                                                 | 2888.3589 | -0.1758 | -61 | 1    | 24   | MLLQLLWATLLCQICDG<br>KAFPQR | Carbamidomethyl (C)[13,16] |    |    |   |  | Mascot |
| 27 | PREDICTED: transposon TX1 uncharacterized 149 kDa gi 326664772 protein-like [Danio rerio] |           |         |     |      |      |                             |                            |    |    |   |  |        |
|    |                                                                                           |           |         |     |      |      | 131122                      | 9.55                       | 17 | 38 | 0 |  |        |

#### Peptide Information

| Calc. Mass | Obsrv. Mass | ± da    | ± ppm | Start Seq. | End Seq. | Sequence                 | Ion Score | C. I. % | Modification                              | Rank | Result Type |
|------------|-------------|---------|-------|------------|----------|--------------------------|-----------|---------|-------------------------------------------|------|-------------|
| 868.3981   | 868.525     | 0.1269  | 146   | 576        | 582      | DAICYAR                  |           |         | Carbamidomethyl (C)[4]                    |      | Mascot      |
| 1045.5499  | 1045.5553   | 0.0054  | 5     | 913        | 921      | CPVAFNLPK                |           |         | Carbamidomethyl (C)[1]                    |      | Mascot      |
| 1051.5935  | 1051.7041   | 0.1106  | 105   | 824        | 831      | FFLLNLER                 |           |         |                                           |      | Mascot      |
| 1062.667   | 1062.6866   | 0.0196  | 18    | 537        | 545      | LFTKILATR                |           |         |                                           |      | Mascot      |
| 1164.6007  | 1164.5541   | -0.0466 | -40   | 879        | 888      | YAVTPSRENK               |           |         |                                           |      | Mascot      |
| 1164.6007  | 1164.5541   | -0.0466 | -40   | 879        | 888      | YAVTPSRENK               |           |         |                                           |      | Mascot      |
| 1324.7372  | 1324.6721   | -0.0651 | -49   | 860        | 871      | GLPDLHLFLGSR             |           |         |                                           |      | Mascot      |
| 1364.6726  | 1364.6819   | 0.0093  | 7     | 346        | 357      | NEMSVLSEIQSK             |           |         |                                           |      | Mascot      |
| 1382.8042  | 1382.7646   | -0.0396 | -29   | 27         | 38       | AQSILSFLKTFK             |           |         |                                           |      | Mascot      |
| 1434.6981  | 1434.7549   | 0.0568  | 40    | 184        | 194      | LVDCFKTMHQR              |           |         | Carbamidomethyl (C)[4]                    |      | Mascot      |
| 1475.8251  | 1475.7472   | -0.0779 | -53   | 168        | 180      | LDKTSVLLQGMVR            |           |         | Oxidation (M)[11]                         |      | Mascot      |
| 1493.8145  | 1493.7196   | -0.0949 | -64   | 171        | 183      | TSVLLQGMVRDFK            |           |         |                                           |      | Mascot      |
| 2150.0151  | 2150.0425   | 0.0274  | 13    | 1008       | 1027     | GMAKTSICPRPGCSSPE<br>TVR |           |         | Carbamidomethyl (C)[8], Oxidation (M)[2]  |      | Mascot      |
| 2191.0417  | 2191.0083   | -0.0334 | -15   | 1008       | 1027     | GMAKTSICPRPGCSSPE<br>TVR |           |         | Carbamidomethyl (C)[8,13]                 |      | Mascot      |
| 2225.051   | 2225.0925   | 0.0415  | 19    | 546        | 565      | MSMVLEDVIHPDQACAV<br>PGR |           |         | Carbamidomethyl (C)[15]                   |      | Mascot      |
| 2225.051   | 2225.0925   | 0.0415  | 19    | 546        | 565      | MSMVLEDVIHPDQACAV<br>PGR |           |         | Carbamidomethyl (C)[15]                   |      | Mascot      |
| 2300.1445  | 2300.1521   | 0.0076  | 3     | 327        | 345      | YFNLLNEGLDFNDEIKEV<br>K  |           |         |                                           |      | Mascot      |
| 2369.1411  | 2368.9788   | -0.1623 | -69   | 546        | 566      | MSMVLEDVIHPDQACAV        |           |         | Carbamidomethyl (C)[15], Oxidation (M)[1] |      | Mascot      |

|    |                                                                                                     |           |         |     |      |              |                                    |      |   |    |                         |        |
|----|-----------------------------------------------------------------------------------------------------|-----------|---------|-----|------|--------------|------------------------------------|------|---|----|-------------------------|--------|
|    | 2584.2878                                                                                           | 2584.1567 | -0.1311 | -51 | 1028 | 1049         | PGRK<br>HLLWECGAARDLWAATG<br>PLYQR |      |   |    | Carbamidomethyl (C)[6]  | Mascot |
|    | 3380.8511                                                                                           | 3380.5308 | -0.3203 | -95 | 129  | 158          | HELLVDLQPHILGRAPLIL<br>AGDFNCILTNK |      |   |    | Carbamidomethyl (C)[25] | Mascot |
| 28 | PREDICTED: serine/threonine-protein phosphatase 6 regulatory ankyrin repeat subunit C-like [Danio r |           |         |     |      | gi 326671533 | 11978.2                            | 6.02 | 5 | 38 | 0                       |        |

#### Peptide Information

| Calc. Mass | Obsrv. Mass | ± da    | ± ppm | Start Seq. | End Seq. | Sequence                       | Ion Score | C. I. | % Modification         | Rank | Result Type |
|------------|-------------|---------|-------|------------|----------|--------------------------------|-----------|-------|------------------------|------|-------------|
| 1493.7594  | 1493.7196   | -0.0398 | -27   | 101        | 114      | NGVSLHLLTEEPQG                 |           |       |                        |      | Mascot      |
| 2150.0547  | 2150.0425   | -0.0122 | -6    | 46         | 67       | GATVLAVDEDGHTPALA<br>CAPNK     |           |       |                        |      | Mascot      |
| 2211.0632  | 2211.0798   | 0.0166  | 8     | 2          | 21       | CALLMLAETDDTSLISST<br>NR       |           |       | Carbamidomethyl (C)[1] |      | Mascot      |
| 2577.2976  | 2577.3474   | 0.0498  | 19    | 46         | 71       | GATVLAVDEDGHTPALA<br>CAPNKEVAK |           |       |                        |      | Mascot      |
| 2584.5298  | 2584.1567   | -0.3731 | -144  | 22         | 45       | ALQTPHLIAARNGLVTVV<br>EVLLTR   |           |       |                        |      | Mascot      |

29 feline sarcoma oncogene [Danio rerio] gi|315468037 94604.1 6.3 14 38 0

#### Peptide Information

| Calc. Mass | Obsrv. Mass | ± da    | ± ppm | Start Seq. | End Seq. | Sequence                          | Ion Score | C. I. | % Modification         | Rank | Result Type |
|------------|-------------|---------|-------|------------|----------|-----------------------------------|-----------|-------|------------------------|------|-------------|
| 960.4857   | 960.4697    | -0.016  | -17   | 361        | 368      | RNALEDSR                          |           |       |                        |      | Mascot      |
| 996.4744   | 996.5889    | 0.1145  | 115   | 160        | 167      | YQEASKDR                          |           |       |                        |      | Mascot      |
| 1164.6372  | 1164.5541   | -0.0831 | -71   | 148        | 157      | QLVRDATYAK                        |           |       |                        |      | Mascot      |
| 1164.6372  | 1164.5541   | -0.0831 | -71   | 148        | 157      | QLVRDATYAK                        |           |       |                        |      | Mascot      |
| 1179.6117  | 1179.5881   | -0.0236 | -20   | 598        | 607      | ENLPAEHKNK                        |           |       |                        |      | Mascot      |
| 1179.6117  | 1179.5881   | -0.0236 | -20   | 598        | 607      | ENLPAEHKNK                        |           |       |                        |      | Mascot      |
| 1277.6273  | 1277.6959   | 0.0686  | 54    | 730        | 740      | WTAPEALNYGR                       |           |       |                        |      | Mascot      |
| 1314.6359  | 1314.7384   | 0.1025  | 78    | 94         | 105      | HSDDLMLVGPLSK                     |           |       | Oxidation (M)[6]       |      | Mascot      |
| 1324.6426  | 1324.6721   | 0.0295  | 22    | 595        | 605      | ACRENLP AEHK                      |           |       | Carbamidomethyl (C)[2] |      | Mascot      |
| 1338.6913  | 1338.6912   | -0.0001 | 0     | 574        | 585      | GNFGEVFSGRLR                      |           |       |                        |      | Mascot      |
| 1889.8673  | 1890.0187   | 0.1514  | 80    | 2          | 18       | GFAEDLWCPQGHAAALMK                |           |       | Oxidation (M)[16]      |      | Mascot      |
| 2191.0349  | 2191.0083   | -0.0266 | -12   | 488        | 506      | ESQGKQEYVLSVHWGG<br>QCR           |           |       |                        |      | Mascot      |
| 2369.2573  | 2368.9788   | -0.2785 | -118  | 634        | 653      | QPIYIMELVQGGDFLTFL<br>R           |           |       | Oxidation (M)[7]       |      | Mascot      |
| 2888.197   | 2888.3589   | 0.1619  | 56    | 786        | 809      | MPAPNNCPDEIYLMCQ<br>CWQYDPR       |           |       |                        |      | Mascot      |
| 3073.3132  | 3073.4746   | 0.1614  | 53    | 786        | 810      | MPAPNNCPDEIYLMCQ<br>CWQYDPRK      |           |       | Carbamidomethyl (C)[7] |      | Mascot      |
| 3337.6509  | 3337.7136   | 0.0627  | 19    | 229        | 257      | EILQEYFDLSSLIQDEVVS<br>VHTEMANALK |           |       | Oxidation (M)[24]      |      | Mascot      |



30 novel nacht domain containing protein [Danio rerio] gi|148725675 84079.5 6.54 12 37 0

Peptide Information

| Calc. Mass | Obsrv. Mass | ± da    | ± ppm | Start Seq. | End Sequence Seq.                 | Ion Score | C. I. % Modification   | Rank | Result Type |
|------------|-------------|---------|-------|------------|-----------------------------------|-----------|------------------------|------|-------------|
| 1045.5272  | 1045.5553   | 0.0281  | 27    | 622        | 630 GLLTQQDDR                     |           |                        |      | Mascot      |
| 1062.5803  | 1062.6866   | 0.1063  | 100   | 464        | 471 FQIQQSRR                      |           |                        |      | Mascot      |
| 1277.7212  | 1277.6959   | -0.0253 | -20   | 607        | 617 FLLSLSLQSNR                   |           |                        |      | Mascot      |
| 1313.6519  | 1313.7443   | 0.0924  | 70    | 208        | 218 HQSLEIQVECK                   |           |                        |      | Mascot      |
| 1323.6473  | 1323.6609   | 0.0136  | 10    | 714        | 723 FQRSDECLIR                    |           | Carbamidomethyl (C)[7] |      | Mascot      |
| 1338.694   | 1338.6912   | -0.0028 | -2    | 286        | 296 DLITQFFPETK                   |           |                        |      | Mascot      |
| 1434.6755  | 1434.7549   | 0.0794  | 55    | 521        | 533 ASVYSGMCTQIFK                 |           |                        |      | Mascot      |
| 1870.9181  | 1870.8822   | -0.0359 | -19   | 67         | 82 SFTDNLQSIFQNLESK               |           |                        |      | Mascot      |
| 2210.9543  | 2211.0798   | 0.1255  | 57    | 45         | 64 ASSAQSVESDSDGET<br>HRR         |           |                        |      | Mascot      |
| 2298.1812  | 2298.1667   | -0.0145 | -6    | 453        | 470 TLTQMYTHFLRFQIQSR             |           |                        |      | Mascot      |
| 2577.2976  | 2577.3474   | 0.0498  | 19    | 134        | 156 QDQAADTLQGELLFNNQ<br>LKCSLK   |           |                        |      | Mascot      |
| 2888.5264  | 2888.3589   | -0.1675 | -58   | 593        | 617 ALESENGHLDLYLRFLLS<br>LSLQSNR |           |                        |      | Mascot      |

31 cytochrome P450, family 3, subfamily C, polypeptide 4 [Danio rerio] gi|117606234 57914.4 8.46 10 36 0

Peptide Information

| Calc. Mass | Obsrv. Mass | ± da    | ± ppm | Start Seq. | End Sequence Seq.                     | Ion Score | C. I. % Modification     | Rank | Result Type |
|------------|-------------|---------|-------|------------|---------------------------------------|-----------|--------------------------|------|-------------|
| 882.4753   | 882.56      | 0.0847  | 96    | 236        | 243 MGVTLFSK                          |           |                          |      | Mascot      |
| 1165.7052  | 1165.7386   | 0.0334  | 29    | 373        | 382 LLPTAPRLER                        |           |                          |      | Mascot      |
| 1179.6005  | 1179.5881   | -0.0124 | -11   | 263        | 272 ESEGRVDFLK                        |           |                          |      | Mascot      |
| 1179.6005  | 1179.5881   | -0.0124 | -11   | 263        | 272 ESEGRVDFLK                        |           |                          |      | Mascot      |
| 1287.5166  | 1287.6586   | 0.142   | 110   | 55         | 65 GLCNFDMECAK                        |           | Carbamidomethyl (C)[3]   |      | Mascot      |
| 1287.5166  | 1287.6586   | 0.142   | 110   | 55         | 65 GLCNFDMECAK                        |           | Carbamidomethyl (C)[3]   |      | Mascot      |
| 1313.6637  | 1313.7443   | 0.0806  | 61    | 67         | 77 YGKVGWIYDGR                        |           |                          |      | Mascot      |
| 1323.6289  | 1323.6609   | 0.032   | 24    | 244        | 254 SAMDFFYSVLK                       |           | Oxidation (M)[3]         |      | Mascot      |
| 1338.6722  | 1338.6912   | 0.019   | 14    | 466        | 476 LLQNFSVETCK                       |           | Carbamidomethyl (C)[10]  |      | Mascot      |
| 1472.6331  | 1472.793    | 0.1599  | 109   | 55         | 66 GLCNFDMECAKK                       |           | Carbamidomethyl (C)[3,9] |      | Mascot      |
| 1472.6331  | 1472.793    | 0.1599  | 109   | 55         | 66 GLCNFDMECAKK                       |           | Carbamidomethyl (C)[3,9] |      | Mascot      |
| 2593.3218  | 2593.3604   | 0.0386  | 15    | 338        | 359 LVEEIDKNFPLDTPITYDA<br>LMR        |           |                          |      | Mascot      |
| 3380.6992  | 3380.5308   | -0.1684 | -50   | 35         | 65 LGIPGPRPWPFGTLLSY<br>AKGLCNFDMECAK |           |                          |      | Mascot      |

32 PREDICTED: corepressor interacting with RBPJ 1, partial [Danio rerio] gi|326670450 18483 7.63 7 36 0 3 0

Peptide Information

| Calc. Mass | Obsrv. Mass | ± da    | ± ppm | Start Seq. | End Seq. | Sequence                    | Ion Score | C. I. % | Modification            | Rank | Result Type |
|------------|-------------|---------|-------|------------|----------|-----------------------------|-----------|---------|-------------------------|------|-------------|
| 1062.5612  | 1062.6866   | 0.1254  | 118   | 57         | 65       | LLMGDDRVK                   |           |         | Oxidation (M)[3]        |      | Mascot      |
| 1320.5897  | 1320.5728   | -0.0169 | -13   | 1          | 11       | MGKSFANFMCK                 |           |         | Carbamidomethyl (C)[10] |      | Mascot      |
| 1338.5757  | 1338.6912   | 0.1155  | 86    | 128        | 138      | CHNWGHVNTDR                 |           |         |                         |      | Mascot      |
| 1382.662   | 1382.7646   | 0.1026  | 74    | 38         | 48       | QQEELMQAYVK                 |           |         | Oxidation (M)[6]        |      | Mascot      |
| 1739.7853  | 1739.9227   | 0.1374  | 79    | 125        | 138      | CIKCHNWGHVNTDR              |           |         | Carbamidomethyl (C)[1]  |      | Mascot      |
| 1838.9105  | 1838.9028   | -0.0077 | -4    | 64         | 80       | VKNGLNFMYEAPPGASK           |           |         | Oxidation (M)[8]        |      | Mascot      |
| 2283.0266  | 2283.1509   | 0.1243  | 54    | 139        | 161      | ECPLFGLSGINASSMAGD<br>EAGTV | 3         | 0       | Carbamidomethyl (C)[2]  |      | Mascot      |
| 2283.0266  | 2283.1509   | 0.1243  | 54    | 139        | 161      | ECPLFGLSGINASSMAGD<br>EAGTV |           |         | Carbamidomethyl (C)[2]  |      | Mascot      |

33 complement component 3-like isoform 1 [Danio rerio] gi|153792045 188748 7.66 18 36 0

Peptide Information

| Calc. Mass | Obsrv. Mass | ± da    | ± ppm | Start Seq. | End Seq. | Sequence                     | Ion Score | C. I. % | Modification            | Rank | Result Type |
|------------|-------------|---------|-------|------------|----------|------------------------------|-----------|---------|-------------------------|------|-------------|
| 842.5206   | 842.5032    | -0.0174 | -21   | 516        | 523      | GKIIQAGR                     |           |         |                         |      | Mascot      |
| 960.4719   | 960.4697    | -0.0022 | -2    | 28         | 35       | TVWGPNNMR                    |           |         |                         |      | Mascot      |
| 1313.7535  | 1313.7443   | -0.0092 | -7    | 958        | 970      | GGSAQQLIQVKK                 |           |         |                         |      | Mascot      |
| 1320.7463  | 1320.5728   | -0.1735 | -131  | 824        | 833      | VWKPFIDLRL                   |           |         |                         |      | Mascot      |
| 1324.6249  | 1324.6721   | 0.0472  | 36    | 1607       | 1617     | MFLSHASCRTTR                 |           |         | Oxidation (M)[1]        |      | Mascot      |
| 1364.7065  | 1364.6819   | -0.0246 | -18   | 711        | 721      | MIEMPPLYAR                   |           |         | Oxidation (M)[1]        |      | Mascot      |
| 1472.6475  | 1472.793    | 0.1455  | 99    | 1490       | 1501     | SCSRFYSPPEDK                 |           |         | Carbamidomethyl (C)[2]  |      | Mascot      |
| 1472.6475  | 1472.793    | 0.1455  | 99    | 1490       | 1501     | SCSRFYSPPEDK                 |           |         | Carbamidomethyl (C)[2]  |      | Mascot      |
| 1475.7965  | 1475.7472   | -0.0493 | -33   | 1457       | 1468     | EAEIISFRLNQR                 |           |         |                         |      | Mascot      |
| 1515.8451  | 1515.7322   | -0.1129 | -74   | 862        | 875      | STPSVNVVMVILEK               |           |         |                         |      | Mascot      |
| 1515.8451  | 1515.7322   | -0.1129 | -74   | 862        | 875      | STPSVNVVMVILEK               |           |         |                         |      | Mascot      |
| 1739.9214  | 1739.9227   | 0.0013  | 1     | 327        | 342      | AYPDINSLLGSTVYVK             |           |         |                         |      | Mascot      |
| 1838.8047  | 1838.9028   | 0.0981  | 53    | 632        | 649      | VWEVVDQADMGCTAGG<br>GK       |           |         | Oxidation (M)[10]       |      | Mascot      |
| 2191.1687  | 2191.0083   | -0.1604 | -73   | 1          | 19       | MLLQLLLWATLLCQICDG<br>K      |           |         | Oxidation (M)[1]        |      | Mascot      |
| 2233.1533  | 2233.052    | -0.1013 | -45   | 911        | 932      | TGELPLQVTAVAASFMG<br>QDAVK   |           |         |                         |      | Mascot      |
| 2300.1484  | 2300.1521   | 0.0037  | 2     | 1003       | 1023     | EDSLAALIRMPGGCVEQ<br>NLAR    |           |         | Carbamidomethyl (C)[14] |      | Mascot      |
| 2577.283   | 2577.3474   | 0.0644  | 25    | 1622       | 1645     | EGQEYLVIGPITDVWNAG<br>STVSNK |           |         |                         |      | Mascot      |

|    |                                                                  |           |         |     |             |         |                                  |   |                            |        |
|----|------------------------------------------------------------------|-----------|---------|-----|-------------|---------|----------------------------------|---|----------------------------|--------|
|    | 2584.1443                                                        | 2584.1567 | 0.0124  | 5   | 1494        | 1514    | FYSPPEDKQQLDQICEG<br>DVCR        |   | Carbamidomethyl (C)[15,20] | Mascot |
|    | 2888.5347                                                        | 2888.3589 | -0.1758 | -61 | 1           | 24      | MLLQLLLWATLLCQICDG<br>KAFFQR     |   | Carbamidomethyl (C)[13,16] | Mascot |
|    | 3073.5952                                                        | 3073.4746 | -0.1206 | -39 | 1618        | 1645    | LNLREGQEYLVIGPITDV<br>WNAGSTVSNK |   |                            | Mascot |
| 34 | developmentally-regulated GTP-binding protein 1<br>[Danio rerio] |           |         |     | gi 41053317 | 40440.7 | 8.83                             | 8 | 36                         | 0      |

#### Peptide Information

| Calc. Mass | Obsrv. Mass | ± da    | ± ppm | Start Seq. | End Seq. | Sequence                         | Ion Score | C. I. | % Modification          | Rank | Result Type |
|------------|-------------|---------|-------|------------|----------|----------------------------------|-----------|-------|-------------------------|------|-------------|
| 1109.599   | 1109.4816   | -0.1174 | -106  | 334        | 343      | YALVWGSSVK                       |           |       |                         |      | Mascot      |
| 1179.5681  | 1179.5881   | 0.02    | 17    | 275        | 283      | WNFDDLLEK                        |           |       |                         |      | Mascot      |
| 1179.5681  | 1179.5881   | 0.02    | 17    | 275        | 283      | WNFDDLLEK                        |           |       |                         |      | Mascot      |
| 1287.7644  | 1287.6586   | -0.1058 | -82   | 22         | 33       | ATAHHLGLLKAR                     |           |       |                         |      | Mascot      |
| 1287.7644  | 1287.6586   | -0.1058 | -82   | 22         | 33       | ATAHHLGLLKAR                     |           |       |                         |      | Mascot      |
| 1302.764   | 1302.7024   | -0.0616 | -47   | 20         | 31       | NKATAHHLGLLK                     |           |       |                         |      | Mascot      |
| 1324.7333  | 1324.6721   | -0.0612 | -46   | 238        | 248      | VYIPCIYVLNK                      |           |       |                         |      | Mascot      |
| 2174.3093  | 2174.1628   | -0.1465 | -67   | 140        | 158      | TCNLILIVLDVLKPLGHKK              |           |       | Carbamidomethyl (C)[2]  |      | Mascot      |
| 2584.2878  | 2584.1567   | -0.1311 | -51   | 263        | 283      | IPHCVPISAHHRWNFDDL<br>LEK        |           |       | Carbamidomethyl (C)[4]  |      | Mascot      |
| 3052.5295  | 3052.5837   | 0.0542  | 18    | 222        | 248      | SDATADDLIDVVEGNRVY<br>IPCIIYVLNK |           |       | Carbamidomethyl (C)[21] |      | Mascot      |

|    |                                        |  |  |  |             |         |      |    |    |   |
|----|----------------------------------------|--|--|--|-------------|---------|------|----|----|---|
| 35 | protein kinase C, beta a [Danio rerio] |  |  |  | gi 41053359 | 76070.4 | 6.76 | 13 | 35 | 0 |
|----|----------------------------------------|--|--|--|-------------|---------|------|----|----|---|

#### Peptide Information

| Calc. Mass | Obsrv. Mass | ± da    | ± ppm | Start Seq. | End Seq. | Sequence          | Ion Score | C. I. | % Modification           | Rank | Result Type |
|------------|-------------|---------|-------|------------|----------|-------------------|-----------|-------|--------------------------|------|-------------|
| 1109.5837  | 1109.4816   | -0.1021 | -92   | 358        | 367      | KGSDELYAVK        |           |       |                          |      | Mascot      |
| 1302.6116  | 1302.7024   | 0.0908  | 70    | 128        | 137      | CLNCLMNIHK        |           |       | Carbamidomethyl (C)[1,4] |      | Mascot      |
| 1320.7014  | 1320.5728   | -0.1286 | -97   | 563        | 574      | EAVAICKGLMTK      |           |       | Carbamidomethyl (C)[6]   |      | Mascot      |
| 1338.5768  | 1338.6912   | 0.1144  | 85    | 2          | 14       | TESSDSGKEGAR      |           |       |                          |      | Mascot      |
| 1626.8746  | 1626.889    | 0.0144  | 9     | 333        | 346      | MKLADFNFMVLGK     |           |       |                          |      | Mascot      |
| 1638.7811  | 1638.8428   | 0.0617  | 38    | 592        | 603      | EHAFFRFVDWER      |           |       |                          |      | Mascot      |
| 1638.7811  | 1638.8428   | 0.0617  | 38    | 592        | 603      | EHAFFRFVDWER      |           |       |                          |      | Mascot      |
| 1739.7814  | 1739.9227   | 0.1413  | 81    | 59         | 72       | QGFQCQVCCFVVHK    |           |       | Carbamidomethyl (C)[5,8] |      | Mascot      |
| 1826.9316  | 1826.9619   | 0.0303  | 17    | 462        | 477      | DLKLDNVMLDSEGHK   |           |       |                          |      | Mascot      |
| 1826.9316  | 1826.9619   | 0.0303  | 17    | 462        | 477      | DLKLDNVMLDSEGHK   |           |       |                          |      | Mascot      |
| 1838.8611  | 1838.9028   | 0.0417  | 23    | 59         | 73       | QGFQCQVCCFVVHKR   |           |       | Carbamidomethyl (C)[5]   |      | Mascot      |
| 1993.9205  | 1993.949    | 0.0285  | 14    | 372        | 388      | DVVIQDDDVECTMVEKR |           |       |                          |      | Mascot      |

|    |                                              |           |         |     |              |     |                                 |     |                  |    |        |
|----|----------------------------------------------|-----------|---------|-----|--------------|-----|---------------------------------|-----|------------------|----|--------|
|    | 2584.2461                                    | 2584.1567 | -0.0894 | -35 | 412          | 433 | LYFVMEYISGGDLMFQIQ<br>QTGK      |     | Oxidation (M)[5] |    | Mascot |
|    | 3057.4761                                    | 3057.4905 | 0.0144  | 5   | 273          | 299 | ILACEEGVFFNVVPYVDE<br>EEGNKELSK |     |                  |    | Mascot |
|    | 3073.3489                                    | 3073.4746 | 0.1257  | 41  | 246          | 272 | GTRNDYMGSMSEFISEL<br>MNQSVDGWFK |     | Oxidation (M)[7] |    | Mascot |
| 36 | hypothetical protein LOC792509 [Danio rerio] |           |         |     | gi 181330474 |     | 178755.9                        | 6.5 | 18               | 35 | 0      |

#### Peptide Information

| Calc. Mass | Obsrv. Mass | ± da    | ± ppm | Start Seq. | End Seq. | Sequence                     | Ion Score | C. I. | % Modification             | Rank | Result Type |
|------------|-------------|---------|-------|------------|----------|------------------------------|-----------|-------|----------------------------|------|-------------|
| 842.5206   | 842.5032    | -0.0174 | -21   | 444        | 451      | GKIIQAGR                     |           |       |                            |      | Mascot      |
| 960.446    | 960.4697    | 0.0237  | 25    | 1457       | 1464     | EDFAFFGK                     |           |       |                            |      | Mascot      |
| 1302.7338  | 1302.7024   | -0.0314 | -24   | 797        | 808      | STPSVVMVILEK                 |           |       |                            |      | Mascot      |
| 1313.7535  | 1313.7443   | -0.0092 | -7    | 891        | 903      | GGSAQQLIQVKK                 |           |       |                            |      | Mascot      |
| 1320.7463  | 1320.5728   | -0.1735 | -131  | 759        | 768      | VWKPFIDLR                    |           |       |                            |      | Mascot      |
| 1324.6249  | 1324.6721   | 0.0472  | 36    | 1517       | 1527     | MFLSHASCRR                   |           |       | Oxidation (M)[1]           |      | Mascot      |
| 1338.7562  | 1338.6912   | -0.065  | -49   | 1299       | 1309     | DIHRLCVIEK                   |           |       |                            |      | Mascot      |
| 1472.6475  | 1472.793    | 0.1455  | 99    | 1422       | 1433     | SCSRFYSPPEK                  |           |       | Carbamidomethyl (C)[2]     |      | Mascot      |
| 1472.6475  | 1472.793    | 0.1455  | 99    | 1422       | 1433     | SCSRFYSPPEK                  |           |       | Carbamidomethyl (C)[2]     |      | Mascot      |
| 1475.7965  | 1475.7472   | -0.0493 | -33   | 1389       | 1400     | EAEIISFRLNQR                 |           |       |                            |      | Mascot      |
| 1739.9214  | 1739.9227   | 0.0013  | 1     | 326        | 341      | AYPDINSLLGSTVYVK             |           |       |                            |      | Mascot      |
| 1753.953   | 1753.9365   | -0.0165 | -9    | 28         | 41       | TVWRPNMRQIEPVK               |           |       |                            |      | Mascot      |
| 1838.8827  | 1838.9028   | 0.0201  | 11    | 1465       | 1480     | EQRNAAVCNGLHHAYR             |           |       |                            |      | Mascot      |
| 2191.1687  | 2191.0083   | -0.1604 | -73   | 1          | 19       | MLLQLLLWATLLCQICDG<br>K      |           |       | Oxidation (M)[1]           |      | Mascot      |
| 2233.1533  | 2233.052    | -0.1013 | -45   | 844        | 865      | TGELPLQVTAVAASFMG<br>QDAVK   |           |       |                            |      | Mascot      |
| 2300.1484  | 2300.1521   | 0.0037  | 2     | 936        | 956      | EDSLAALIRMPGGCVEQ<br>NLAR    |           |       | Carbamidomethyl (C)[14]    |      | Mascot      |
| 2577.283   | 2577.3474   | 0.0644  | 25    | 1532       | 1555     | EGQEYLIGPITDVWNAG<br>STVSNK  |           |       |                            |      | Mascot      |
| 2584.1443  | 2584.1567   | 0.0124  | 5     | 1426       | 1446     | FYSPPEDKQQLDQICEG<br>DVCR    |           |       | Carbamidomethyl (C)[15,20] |      | Mascot      |
| 2888.5347  | 2888.3589   | -0.1758 | -61   | 1          | 24       | MLLQLLLWATLLCQICDG<br>KAFFQR |           |       | Carbamidomethyl (C)[13,16] |      | Mascot      |

|    |                                                            |  |  |  |              |  |        |      |   |    |   |
|----|------------------------------------------------------------|--|--|--|--------------|--|--------|------|---|----|---|
| 37 | PREDICTED: hypothetical protein LOC100535533 [Danio rerio] |  |  |  | gi 326671744 |  | 3229.6 | 9.19 | 4 | 35 | 0 |
|----|------------------------------------------------------------|--|--|--|--------------|--|--------|------|---|----|---|

#### Peptide Information

| Calc. Mass | Obsrv. Mass | ± da   | ± ppm | Start Seq. | End Seq. | Sequence     | Ion Score | C. I. | % Modification         | Rank | Result Type |
|------------|-------------|--------|-------|------------|----------|--------------|-----------|-------|------------------------|------|-------------|
| 996.4641   | 996.5889    | 0.1248 | 125   | 4          | 12       | AGPVFSCMK    |           |       | Carbamidomethyl (C)[7] |      | Mascot      |
| 1287.5894  | 1287.6586   | 0.0692 | 54    | 1          | 12       | MGKAGPVFSCMK |           |       | Oxidation (M)[1,11]    |      | Mascot      |
| 1287.5894  | 1287.6586   | 0.0692 | 54    | 1          | 12       | MGKAGPVFSCMK |           |       | Oxidation (M)[1,11]    |      | Mascot      |

|    |                                        |           |         |     |              |    |                    |      |    |    |   |  |  |  |  |  |        |
|----|----------------------------------------|-----------|---------|-----|--------------|----|--------------------|------|----|----|---|--|--|--|--|--|--------|
|    | 1364.674                               | 1364.6819 | 0.0079  | 6   | 13           | 24 | HNGHAISMEIQK       |      |    |    |   |  |  |  |  |  | Mascot |
|    | 1993.9912                              | 1993.949  | -0.0422 | -21 | 13           | 30 | HNGHAISMEIQKTGLWTA |      |    |    |   |  |  |  |  |  | Mascot |
| 38 | PREDICTED: gelsolin-like [Danio rerio] |           |         |     | gi 326668568 |    | 79933.9            | 6.95 | 11 | 35 | 0 |  |  |  |  |  |        |

#### Peptide Information

| Calc. Mass | Obsrv. Mass | ± da    | ± ppm | Start Seq. | End Seq. | Sequence               | Ion Score | C. I. | % Modification         | Rank | Result Type |
|------------|-------------|---------|-------|------------|----------|------------------------|-----------|-------|------------------------|------|-------------|
| 1164.499   | 1164.5541   | 0.0551  | 47    | 707        | 715      | MWDTDPLDR              |           |       | Oxidation (M)[1]       |      | Mascot      |
| 1164.499   | 1164.5541   | 0.0551  | 47    | 707        | 715      | MWDTDPLDR              |           |       | Oxidation (M)[1]       |      | Mascot      |
| 1382.7573  | 1382.7646   | 0.0073  | 5     | 485        | 497      | GKPMIIHLGGTSR          |           |       | Oxidation (M)[4]       |      | Mascot      |
| 1472.641   | 1472.793    | 0.152   | 103   | 167        | 178      | DIYQWCGSKCNR           |           |       |                        |      | Mascot      |
| 1472.641   | 1472.793    | 0.152   | 103   | 167        | 178      | DIYQWCGSKCNR           |           |       |                        |      | Mascot      |
| 1515.7954  | 1515.7322   | -0.0632 | -42   | 430        | 441      | EQHIIYTWQGLK           |           |       |                        |      | Mascot      |
| 1515.7954  | 1515.7322   | -0.0632 | -42   | 430        | 441      | EQHIIYTWQGLK           |           |       |                        |      | Mascot      |
| 1626.8043  | 1626.889    | 0.0847  | 52    | 442        | 456      | CTQDELTASAFITVK        |           |       |                        |      | Mascot      |
| 2174.1128  | 2174.1628   | 0.05    | 23    | 92         | 110      | EVQNNESVTLGYFKTGIK     |           |       |                        |      | Mascot      |
| 2194.0332  | 2194.043    | 0.0098  | 4     | 267        | 285      | QELLNPSCYILDNGLDSK     |           |       | Carbamidomethyl (C)[9] |      | Mascot      |
| 2233.1533  | 2233.052    | -0.1013 | -45   | 522        | 541      | AVEVEPCASKLNTNDVFV LK  |           |       | Carbamidomethyl (C)[7] |      | Mascot      |
| 2283.0823  | 2283.1509   | 0.0686  | 30    | 111        | 131      | YKQGGVSSGFNHVVSNE MNTK |           |       |                        |      | Mascot      |
| 2283.0823  | 2283.1509   | 0.0686  | 30    | 111        | 131      | YKQGGVSSGFNHVVSNE MNTK |           |       |                        |      | Mascot      |
| 2298.199   | 2298.1667   | -0.0323 | -14   | 532        | 550      | LNTNDVFVLKFPEGMFLWK    |           |       |                        |      | Mascot      |
| 2369.1482  | 2368.9788   | -0.1694 | -72   | 542        | 563      | FPEGMFLWKGVGASDEEIAAAK |           |       | Oxidation (M)[5]       |      | Mascot      |

|    |                                                              |  |  |  |              |  |          |      |    |    |   |  |  |  |  |  |  |
|----|--------------------------------------------------------------|--|--|--|--------------|--|----------|------|----|----|---|--|--|--|--|--|--|
| 39 | PREDICTED: serine/threonine-protein kinase ATR [Danio rerio] |  |  |  | gi 292610566 |  | 298997.8 | 7.68 | 25 | 34 | 0 |  |  |  |  |  |  |
|----|--------------------------------------------------------------|--|--|--|--------------|--|----------|------|----|----|---|--|--|--|--|--|--|

#### Peptide Information

| Calc. Mass | Obsrv. Mass | ± da    | ± ppm | Start Seq. | End Seq. | Sequence   | Ion Score | C. I. | % Modification     | Rank | Result Type |
|------------|-------------|---------|-------|------------|----------|------------|-----------|-------|--------------------|------|-------------|
| 882.5407   | 882.56      | 0.0193  | 22    | 1304       | 1311     | IHALTSLK   |           |       |                    |      | Mascot      |
| 960.5546   | 960.4697    | -0.0849 | -88   | 1803       | 1811     | LGQMLLA AK |           |       | Oxidation (M)[4]   |      | Mascot      |
| 996.6199   | 996.5889    | -0.031  | -31   | 1898       | 1906     | AKEPVLALR  |           |       |                    |      | Mascot      |
| 1109.4966  | 1109.4816   | -0.015  | -14   | 455        | 463      | TQPMQVDMK  |           |       | Oxidation (M)[4,8] |      | Mascot      |
| 1164.525   | 1164.5541   | 0.0291  | 25    | 2320       | 2328     | FYTMMCKPK  |           |       | Oxidation (M)[4]   |      | Mascot      |
| 1164.6194  | 1164.5541   | -0.0653 | -56   | 1028       | 1036     | REMLINNFK  |           |       |                    |      | Mascot      |
| 1179.6337  | 1179.5881   | -0.0456 | -39   | 1177       | 1186     | MMTTLRTGLR |           |       |                    |      | Mascot      |
| 1179.6337  | 1179.5881   | -0.0456 | -39   | 1177       | 1186     | MMTTLRTGLR |           |       |                    |      | Mascot      |

|           |           |         |     |      |      |                                |                                          |        |
|-----------|-----------|---------|-----|------|------|--------------------------------|------------------------------------------|--------|
| 1277.6656 | 1277.6959 | 0.0303  | 24  | 1550 | 1560 | EVTEEIMAVLK                    | Oxidation (M)[7]                         | Mascot |
| 1287.6224 | 1287.6586 | 0.0362  | 28  | 1513 | 1522 | VFNCCSFIK                      | Carbamidomethyl (C)[4,5]                 | Mascot |
| 1287.7267 | 1287.6586 | -0.0681 | -53 | 869  | 880  | NTLILTTGEIGR                   |                                          | Mascot |
| 1302.5266 | 1302.7024 | 0.1758  | 135 | 94   | 104  | NSENSCTDFTK                    | Carbamidomethyl (C)[6]                   | Mascot |
| 1313.8191 | 1313.7443 | -0.0748 | -57 | 996  | 1007 | TLQVLLPFLAAK                   |                                          | Mascot |
| 1320.6287 | 1320.5728 | -0.0559 | -42 | 453  | 463  | DKTQPMQVDMK                    |                                          | Mascot |
| 1323.7155 | 1323.6609 | -0.0546 | -41 | 2395 | 2406 | EKGIYVSGTELK                   |                                          | Mascot |
| 1324.7008 | 1324.6721 | -0.0287 | -22 | 658  | 668  | SSVYRWALQSK                    |                                          | Mascot |
| 1382.7205 | 1382.7646 | 0.0441  | 32  | 1152 | 1163 | KMALNSLSMLMK                   | Oxidation (M)[2]                         | Mascot |
| 1434.7375 | 1434.7549 | 0.0174  | 12  | 1049 | 1059 | EELERAFHYLK                    |                                          | Mascot |
| 1475.6327 | 1475.7472 | 0.1145  | 78  | 113  | 125  | IAACPECEDLHMK                  | Oxidation (M)[12]                        | Mascot |
| 1493.757  | 1493.7196 | -0.0374 | -25 | 1653 | 1664 | AVMHFESFIREK                   |                                          | Mascot |
| 1739.7979 | 1739.9227 | 0.1248  | 72  | 1114 | 1128 | EITTPGCMADYLQPK                | Carbamidomethyl (C)[7], Oxidation (M)[8] | Mascot |
| 1994.0011 | 1993.949  | -0.0521 | -26 | 902  | 920  | SNPVSVAAYTEIQALATC<br>R        |                                          | Mascot |
| 2150.012  | 2150.0425 | 0.0305  | 14  | 2169 | 2186 | VFLAYPQQAMWMMTAV<br>SK         | Oxidation (M)[10,12,13]                  | Mascot |
| 2174.0984 | 2174.1628 | 0.0644  | 30  | 58   | 76   | SSSEPACVMLLDFVQHII<br>K        | Carbamidomethyl (C)[7]                   | Mascot |
| 2191.1104 | 2191.0083 | -0.1021 | -47 | 2363 | 2381 | TYAVIPLNEECGIIIEWVNK           |                                          | Mascot |
| 2888.5007 | 2888.3589 | -0.1418 | -49 | 522  | 547  | SSESSVVAQLIWLKPQML<br>AQVVESCR |                                          | Mascot |

40 novel protein [Danio rerio] gi|148725299 82126.8 6.15 11 34 0

#### Peptide Information

| Calc. Mass | Obsrv. Mass | ± da    | ± ppm | Start Seq. | End Seq. | Sequence                      | Ion Score | C. I. % | Modification           | Rank | Result Type |
|------------|-------------|---------|-------|------------|----------|-------------------------------|-----------|---------|------------------------|------|-------------|
| 1045.5272  | 1045.5553   | 0.0281  | 27    | 600        | 608      | GLLTQQDDR                     |           |         |                        |      | Mascot      |
| 1062.5803  | 1062.6866   | 0.1063  | 100   | 442        | 449      | FQIQQSRR                      |           |         |                        |      | Mascot      |
| 1234.7041  | 1234.6671   | -0.037  | -30   | 613        | 622      | EEIIAYIKQK                    |           |         |                        |      | Mascot      |
| 1277.7212  | 1277.6959   | -0.0253 | -20   | 585        | 595      | FLLSLSLQSNR                   |           |         |                        |      | Mascot      |
| 1313.6519  | 1313.7443   | 0.0924  | 70    | 186        | 196      | HQSLEIQVECK                   |           |         |                        |      | Mascot      |
| 1323.6473  | 1323.6609   | 0.0136  | 10    | 692        | 701      | FQRSDECLIR                    |           |         | Carbamidomethyl (C)[7] |      | Mascot      |
| 1870.9181  | 1870.8822   | -0.0359 | -19   | 45         | 60       | SFTDNLQSIFQNLESK              |           |         |                        |      | Mascot      |
| 2211.2092  | 2211.0798   | -0.1294 | -59   | 93         | 111      | SIITEAALDLTLFFLREMK           |           |         |                        |      | Mascot      |
| 2298.1812  | 2298.1667   | -0.0145 | -6    | 431        | 448      | TLTQMYTHFLRFQIQQSR            |           |         |                        |      | Mascot      |
| 2577.1699  | 2577.3474   | 0.1775  | 69    | 19         | 41       | EETPSSVRSVEYEAADL<br>GDETHR   |           |         |                        |      | Mascot      |
| 2888.5264  | 2888.3589   | -0.1675 | -58   | 571        | 595      | ALESENGHLDLYLRFLLS<br>LSLQSNR |           |         |                        |      | Mascot      |

41 interleukin 4/13B [Danio rerio] gi|193788073 13301.7 8.6 6 33 0

### Peptide Information

| Calc. Mass | Obsrv. Mass | ± da    | ± ppm | Start Seq. | End Seq. | Sequence                | Ion Score | C. I. | % Modification         | Rank | Result Type |
|------------|-------------|---------|-------|------------|----------|-------------------------|-----------|-------|------------------------|------|-------------|
| 1179.6224  | 1179.5881   | -0.0343 | -29   | 54         | 64       | KTLCQAGMALK             |           |       | Oxidation (M)[8]       |      | Mascot      |
| 1179.6224  | 1179.5881   | -0.0343 | -29   | 54         | 64       | KTLCQAGMALK             |           |       | Oxidation (M)[8]       |      | Mascot      |
| 1277.6704  | 1277.6959   | 0.0255  | 20    | 55         | 66       | TLCQAGMALKGK            |           |       | Carbamidomethyl (C)[3] |      | Mascot      |
| 1313.8038  | 1313.7443   | -0.0595 | -45   | 1          | 12       | LTLVPVSESKLK            |           |       |                        |      | Mascot      |
| 1314.5718  | 1314.7384   | 0.1666  | 127   | 108        | 118      | ACCHYLYSAQR             |           |       |                        |      | Mascot      |
| 1472.641   | 1472.793    | 0.152   | 103   | 108        | 119      | ACCHYLYSAQRT            |           |       | Carbamidomethyl (C)[2] |      | Mascot      |
| 1472.641   | 1472.793    | 0.152   | 103   | 108        | 119      | ACCHYLYSAQRT            |           |       | Carbamidomethyl (C)[2] |      | Mascot      |
| 2300.0903  | 2300.1521   | 0.0618  | 27    | 36         | 54       | MDLDQFIPDIYETGHYSK<br>K |           |       |                        |      | Mascot      |

42 PREDICTED: disco-interacting protein 2 homolog C [Danio rerio]

gi|189536803 170745 7.39 16 33 0

### Peptide Information

| Calc. Mass | Obsrv. Mass | ± da    | ± ppm | Start Seq. | End Seq. | Sequence                            | Ion Score | C. I. | % Modification                            | Rank | Result Type |
|------------|-------------|---------|-------|------------|----------|-------------------------------------|-----------|-------|-------------------------------------------|------|-------------|
| 882.4501   | 882.56      | 0.1099  | 125   | 581        | 587      | VCQYK GK                            |           |       | Carbamidomethyl (C)[2]                    |      | Mascot      |
| 996.4852   | 996.5889    | 0.1037  | 104   | 1014       | 1021     | IATMLMER                            |           |       | Oxidation (M)[4,6]                        |      | Mascot      |
| 1045.5887  | 1045.5553   | -0.0334 | -32   | 1242       | 1251     | GLGLQTESLK                          |           |       |                                           |      | Mascot      |
| 1165.567   | 1165.7386   | 0.1716  | 147   | 1166       | 1174     | LQCELYPSR                           |           |       | Carbamidomethyl (C)[3]                    |      | Mascot      |
| 1234.6022  | 1234.6671   | 0.0649  | 53    | 1423       | 1433     | RTELT DASGER                        |           |       |                                           |      | Mascot      |
| 1324.6599  | 1324.6721   | 0.0122  | 9     | 1011       | 1021     | AEKIATMLMER                         |           |       | Oxidation (M)[7,9]                        |      | Mascot      |
| 1338.6757  | 1338.6912   | 0.0155  | 12    | 1081       | 1092     | SACVMTTQIISK                        |           |       | Carbamidomethyl (C)[3]                    |      | Mascot      |
| 1382.8042  | 1382.7646   | -0.0396 | -29   | 1273       | 1284     | IALTQSFSKLFK                        |           |       |                                           |      | Mascot      |
| 1493.7781  | 1493.7196   | -0.0585 | -39   | 1163       | 1174     | SIKLQCELYPSR                        |           |       | Carbamidomethyl (C)[6]                    |      | Mascot      |
| 1626.6848  | 1626.889    | 0.2042  | 126   | 1228       | 1241     | DTFCSYSVMELCTK                      |           |       |                                           |      | Mascot      |
| 2211.1074  | 2211.0798   | -0.0276 | -12   | 676        | 695      | GVLSMQGLSYGVIRVDS<br>EER            |           |       | Oxidation (M)[5]                          |      | Mascot      |
| 2283.092   | 2283.1509   | 0.0589  | 26    | 236        | 257      | YGNAELMETGDGVPVSS<br>RVS AK         |           |       | Oxidation (M)[7]                          |      | Mascot      |
| 2283.092   | 2283.1509   | 0.0589  | 26    | 236        | 257      | YGNAELMETGDGVPVSS<br>RVS AK         |           |       | Oxidation (M)[7]                          |      | Mascot      |
| 2577.2112  | 2577.3474   | 0.1362  | 53    | 2          | 24       | NVMEKSYELWEAGVGE<br>GMHG PLK        |           |       | Oxidation (M)[3]                          |      | Mascot      |
| 2593.2061  | 2593.3604   | 0.1543  | 60    | 2          | 24       | NVMEKSYELWEAGVGE<br>GMHG PLK        |           |       | Oxidation (M)[3,18]                       |      | Mascot      |
| 2888.3594  | 2888.3589   | -0.0005 | 0     | 616        | 641      | MLVVADGSNPWISSCD<br>AFLNVFQSK       |           |       | Carbamidomethyl (C)[16], Oxidation (M)[1] |      | Mascot      |
| 3073.5444  | 3073.4746   | -0.0698 | -23   | 421        | 451      | DAGSQIGFLLGSCGVT<br>VALTSDACHKGLPK  |           |       |                                           |      | Mascot      |
| 3338.7341  | 3338.7002   | -0.0339 | -10   | 1121       | 1151     | KPPQLYKPSNPDTLAYLD<br>FSVSTTGMLAGVK |           |       |                                           |      | Mascot      |

43 hypothetical protein LOC406311 [Danio rerio] gi|57526722 36648.1 5.5 7 33 0

Peptide Information

| Calc. Mass | Obsrv. Mass | ± da    | ± ppm | Start Seq. | End Seq. | Sequence                        | Ion Score | C. I. | % Modification                            | Rank | Result Type |
|------------|-------------|---------|-------|------------|----------|---------------------------------|-----------|-------|-------------------------------------------|------|-------------|
| 1109.5408  | 1109.4816   | -0.0592 | -53   | 146        | 153      | EKLQECFR                        |           |       | Carbamidomethyl (C)[6]                    |      | Mascot      |
| 1165.6212  | 1165.7386   | 0.1174  | 101   | 63         | 72       | VQGEYTLTVR                      |           |       |                                           |      | Mascot      |
| 2194.0088  | 2194.043    | 0.0342  | 16    | 22         | 39       | EPSDLLQDAEWYWADIS<br>R          |           |       |                                           |      | Mascot      |
| 2300.1047  | 2300.1521   | 0.0474  | 21    | 1          | 21       | MSRVSPAGTVNSTDDHL<br>QTQR       |           |       |                                           |      | Mascot      |
| 2593.3086  | 2593.3604   | 0.0518  | 20    | 89         | 110      | FGFSEPLTFSSVPELISFY<br>RNR      |           |       |                                           |      | Mascot      |
| 3057.5349  | 3057.4905   | -0.0444 | -15   | 111        | 137      | SLVHYNTSLDVTLAYPVT<br>HCNTDLPVK |           |       | Carbamidomethyl (C)[20]                   |      | Mascot      |
| 3380.5774  | 3380.5308   | -0.0466 | -14   | 179        | 206      | KAFEDISMTEISKQCYS<br>QENFQNTLQK |           |       | Carbamidomethyl (C)[16], Oxidation (M)[8] |      | Mascot      |

44 protein EURL homolog [Danio rerio] gi|66472644 31687.9 6.47 7 32 0

Peptide Information

| Calc. Mass | Obsrv. Mass | ± da   | ± ppm | Start Seq. | End Seq. | Sequence                            | Ion Score | C. I. | % Modification             | Rank | Result Type |
|------------|-------------|--------|-------|------------|----------|-------------------------------------|-----------|-------|----------------------------|------|-------------|
| 1234.6174  | 1234.6671   | 0.0497 | 40    | 78         | 88       | ASHSTYEGVKR                         |           |       |                            |      | Mascot      |
| 1277.6484  | 1277.6959   | 0.0475 | 37    | 76         | 87       | AKASHSTYEGVK                        |           |       |                            |      | Mascot      |
| 1338.6332  | 1338.6912   | 0.058  | 43    | 194        | 204      | HSGHSREELMR                         |           |       |                            |      | Mascot      |
| 1382.7322  | 1382.7646   | 0.0324 | 23    | 119        | 130      | QILCHTQQAGR                         |           |       |                            |      | Mascot      |
| 1753.8915  | 1753.9365   | 0.045  | 26    | 115        | 129      | WGAQKILCHTQQAGR                     |           |       | Carbamidomethyl (C)[8]     |      | Mascot      |
| 2593.1182  | 2593.3604   | 0.2422 | 93    | 2          | 22       | EEEEHFVNIDLNDNICS<br>CK             |           |       | Carbamidomethyl (C)[17,20] |      | Mascot      |
| 3338.6282  | 3338.7002   | 0.072  | 22    | 23         | 53       | LETDTGTLSFCHVCFELSI<br>EGISSATLLHSK |           |       |                            |      | Mascot      |

45 Zgc:136688 [Danio rerio] gi|49902960 48277.1 6.22 1 18 0

Peptide Information

| Calc. Mass | Obsrv. Mass | ± da   | ± ppm | Start Seq. | End Seq. | Sequence  | Ion Score | C. I. | % Modification         | Rank | Result Type |
|------------|-------------|--------|-------|------------|----------|-----------|-----------|-------|------------------------|------|-------------|
| 1179.5609  | 1179.5881   | 0.0272 | 23    | 155        | 163      | KMQEQLCSR | 18        | 0     | Carbamidomethyl (C)[7] | 1    | Mascot      |

46 talin-1 [Danio rerio] gi|57222259 270467 5.86 1 16 0

Peptide Information

| Calc. Mass | Obsrv. Mass | ± da   | ± ppm | Start Seq. | End Seq. | Sequence   | Ion Score | C. I. | % Modification | Rank | Result Type |
|------------|-------------|--------|-------|------------|----------|------------|-----------|-------|----------------|------|-------------|
| 1179.5422  | 1179.5881   | 0.0459 | 39    | 2441       | 2450     | ADQDSQTMKR | 16        | 0     |                | 2    | Mascot      |



| 47                  | novel protein containing multiple scavenger receptor cysteine-rich (SRCR) domains similar to vertebrate deleted in malignant brain tumors 1 (DMBT1) [Danio rerio] | gi 55962439 | 527116.6 | 5.11       | 1                 |             | 15        | 0       |              |      |             |
|---------------------|-------------------------------------------------------------------------------------------------------------------------------------------------------------------|-------------|----------|------------|-------------------|-------------|-----------|---------|--------------|------|-------------|
| Peptide Information |                                                                                                                                                                   |             |          |            |                   |             |           |         |              |      |             |
| Calc. Mass          | Obsrv. Mass                                                                                                                                                       | ± da        | ± ppm    | Start Seq. | End Sequence Seq. |             | Ion Score | C. I. % | Modification | Rank | Result Type |
| 1179.5939           | 1179.5881                                                                                                                                                         | -0.0058     | -5       | 3417       | 3427              | LVNGFNLCSGR | 15        | 0       |              | 3    | Mascot      |

|                     |                                                         |             |  |        |       |            |                   |             |  |           |              |                |      |   |  |      |             |  |
|---------------------|---------------------------------------------------------|-------------|--|--------|-------|------------|-------------------|-------------|--|-----------|--------------|----------------|------|---|--|------|-------------|--|
| 48                  | PREDICTED: hypothetical protein LOC796632 [Danio rerio] |             |  |        |       |            |                   |             |  |           | gi 326680236 | 80853.4        | 8.42 | 1 |  | 13   | 0           |  |
| Peptide Information |                                                         |             |  |        |       |            |                   |             |  |           |              |                |      |   |  |      |             |  |
| Calc. Mass          |                                                         | Obsrv. Mass |  | ± da   | ± ppm | Start Seq. | End Sequence Seq. |             |  | Ion Score | C. I.        | % Modification |      |   |  | Rank | Result Type |  |
| 1179.5674           |                                                         | 1179.5881   |  | 0.0207 | 18    | 301        | 311               | ESSLEVLSCGR |  | 13        |              | 0              |      |   |  | 4    | Mascot      |  |

| 49                  | Ect2 protein [Danio rerio] | gi 66911847 | 109863.6 | 8.59   | 1     | 12         | 0                 |           |         |              |      |             |
|---------------------|----------------------------|-------------|----------|--------|-------|------------|-------------------|-----------|---------|--------------|------|-------------|
| Peptide Information |                            |             |          |        |       |            |                   |           |         |              |      |             |
| Calc. Mass          |                            | Obsrv. Mass |          | ± da   | ± ppm | Start Seq. | End Sequence Seq. | Ion Score | C. I. % | Modification | Rank | Result Type |
| 1472.7856           |                            | 1472.793    |          | 0.0074 | 5     | 211        | 223 DFDSAKVTHLIAR | 12        | 0       |              | 2    | Mascot      |

|                                |                                                    |             |  |         |       |            |                   |  |  |           |                          |       |      |   |      |             |   |
|--------------------------------|----------------------------------------------------|-------------|--|---------|-------|------------|-------------------|--|--|-----------|--------------------------|-------|------|---|------|-------------|---|
| 50                             | PREDICTED: PHD finger protein 1-like [Danio rerio] |             |  |         |       |            |                   |  |  |           | gi 326675234             | 53292 | 8.13 | 1 |      | 12          | 0 |
| <div>Peptide Information</div> |                                                    |             |  |         |       |            |                   |  |  |           |                          |       |      |   |      |             |   |
| Calc. Mass                     |                                                    | Obsrv. Mass |  | ± da    | ± ppm | Start Seq. | End Sequence Seq. |  |  | Ion Score | C. I. % Modification     |       |      |   | Rank | Result Type |   |
| 1179.6302                      |                                                    | 1179.5881   |  | -0.0421 | -36   | 106        | 115 QCVFAVATKR    |  |  | 12        | 0 Carbamidomethyl (C)[2] |       |      |   | 5    | Mascot      |   |

|                |           |                        |                |                |                    |
|----------------|-----------|------------------------|----------------|----------------|--------------------|
| Gel Idx/Pos    | 254/K6    | Instr./Gel Origin      | BA2060/110707A | Process Status | Analysis Succeeded |
| Plate [#] Name | [1] 31496 | Instrument Sample Name |                | Spectra        | 11                 |

| Rank                | Protein Name               | Accession No. | Protein MW | Protein PI | Pep. Count | Protein Score     | Protein Score C. I. % | Total Ion Score | Total Ion C. I. % |                  |
|---------------------|----------------------------|---------------|------------|------------|------------|-------------------|-----------------------|-----------------|-------------------|------------------|
| 1                   | Vtg1 protein [Danio rerio] | gi 145337918  | 116565.5   | 9.07       | 8          | 335               | 100                   | 321             | 100               |                  |
| Peptide Information |                            |               |            |            |            |                   |                       |                 |                   |                  |
| Calc. Mass          |                            | Obsrv. Mass   | ± da       | ± ppm      | Start Seq. | End Sequence Seq. | Ion Score             | C. I. %         | Modification      | Rank Result Type |
| 1070.4861           |                            | 1070.4873     | 0.0012     | 1          | 627        | 635 NIEDHSAER     | 23                    | 0               |                   | Mascot           |

|           |                              |         |      |     |             |                                  |          |        |                  |     |     |     |     |  |  |  |        |
|-----------|------------------------------|---------|------|-----|-------------|----------------------------------|----------|--------|------------------|-----|-----|-----|-----|--|--|--|--------|
| 1070.4861 | 1070.4873                    | 0.0012  | 1    | 627 | 635         | NIEDHSAER                        |          |        |                  |     |     |     |     |  |  |  | Mascot |
| 1379.7603 | 1379.7087                    | -0.0516 | -37  | 139 | 151         | EVVMLGYGSLIAK                    |          |        |                  |     |     |     |     |  |  |  | Mascot |
| 1515.7478 | 1515.7042                    | -0.0436 | -29  | 439 | 451         | VFGQEVAYVNFDK                    | 67       | 99.995 |                  |     |     |     |     |  |  |  | Mascot |
| 1515.7478 | 1515.7042                    | -0.0436 | -29  | 439 | 451         | VFGQEVAYVNFDK                    |          |        |                  |     |     |     |     |  |  |  | Mascot |
| 1723.9412 | 1723.8914                    | -0.0498 | -29  | 452 | 467         | TIIEEAIPMATGPKPR                 |          |        |                  |     |     |     |     |  |  |  | Mascot |
| 1739.936  | 1739.8898                    | -0.0462 | -27  | 452 | 467         | TIIEEAIPMATGPKPR                 | 26       | 34.193 | Oxidation (M)[9] |     |     |     |     |  |  |  | Mascot |
| 1739.936  | 1739.8898                    | -0.0462 | -27  | 452 | 467         | TIIEEAIPMATGPKPR                 |          |        | Oxidation (M)[9] |     |     |     |     |  |  |  | Mascot |
| 2174.1968 | 2174.0664                    | -0.1304 | -60  | 476 | 495         | ALQEGVAFQYAKPLLAAE<br>VR         | 35       | 90.554 |                  |     |     |     |     |  |  |  | Mascot |
| 2174.1968 | 2174.0664                    | -0.1304 | -60  | 476 | 495         | ALQEGVAFQYAKPLLAAE<br>VR         |          |        |                  |     |     |     |     |  |  |  | Mascot |
| 2187.1624 | 2186.9268                    | -0.2356 | -108 | 303 | 324         | ITAPDMASVAGAANVAIK<br>LMSR       |          |        |                  |     |     |     |     |  |  |  | Mascot |
| 2627.3716 | 2627.2959                    | -0.0757 | -29  | 603 | 626         | VEALPVELPEHIASASFET<br>YAVVR     |          |        |                  |     |     |     |     |  |  |  | Mascot |
| 2627.3716 | 2627.2959                    | -0.0757 | -29  | 603 | 626         | VEALPVELPEHIASASFET<br>YAVVR     | 171      | 100    |                  |     |     |     |     |  |  |  | Mascot |
| 3089.5942 | 3089.5261                    | -0.0681 | -22  | 599 | 626         | GNYKVEALPVELPEHIAS<br>ASFETYAVVR |          |        |                  |     |     |     |     |  |  |  | Mascot |
| 2         | vitellogenin 1 [Danio rerio] |         |      |     | gi 94733730 |                                  | 149140.4 | 8.74   | 8                | 332 | 100 | 321 | 100 |  |  |  |        |

Peptide Information

| Calc. Mass | Obsrv. Mass | ± da    | ± ppm | Start Seq. | End Seq. | Sequence                         | Ion Score | C. I.  | % Modification   | Rank | Result Type |
|------------|-------------|---------|-------|------------|----------|----------------------------------|-----------|--------|------------------|------|-------------|
| 1070.4861  | 1070.4873   | 0.0012  | 1     | 921        | 929      | NIEDHSAER                        | 23        | 0      |                  |      | Mascot      |
| 1070.4861  | 1070.4873   | 0.0012  | 1     | 921        | 929      | NIEDHSAER                        |           |        |                  |      | Mascot      |
| 1379.7603  | 1379.7087   | -0.0516 | -37   | 433        | 445      | EVVMLGYGSLIAK                    |           |        |                  |      | Mascot      |
| 1515.7478  | 1515.7042   | -0.0436 | -29   | 733        | 745      | VFGQEVAYVNFDK                    | 67        | 99.995 |                  |      | Mascot      |
| 1515.7478  | 1515.7042   | -0.0436 | -29   | 733        | 745      | VFGQEVAYVNFDK                    |           |        |                  |      | Mascot      |
| 1723.9412  | 1723.8914   | -0.0498 | -29   | 746        | 761      | TIIEEAIPMATGPKPR                 |           |        |                  |      | Mascot      |
| 1739.936   | 1739.8898   | -0.0462 | -27   | 746        | 761      | TIIEEAIPMATGPKPR                 | 26        | 34.193 | Oxidation (M)[9] |      | Mascot      |
| 1739.936   | 1739.8898   | -0.0462 | -27   | 746        | 761      | TIIEEAIPMATGPKPR                 |           |        | Oxidation (M)[9] |      | Mascot      |
| 2174.1968  | 2174.0664   | -0.1304 | -60   | 770        | 789      | ALQEGVAFQYAKPLLAAE<br>VR         | 35        | 90.554 |                  |      | Mascot      |
| 2174.1968  | 2174.0664   | -0.1304 | -60   | 770        | 789      | ALQEGVAFQYAKPLLAAE<br>VR         |           |        |                  |      | Mascot      |
| 2187.1624  | 2186.9268   | -0.2356 | -108  | 597        | 618      | ITAPDMASVAGAANVAIK<br>LMSR       |           |        |                  |      | Mascot      |
| 2627.3716  | 2627.2959   | -0.0757 | -29   | 897        | 920      | VEALPVELPEHIASASFET<br>YAVVR     |           |        |                  |      | Mascot      |
| 2627.3716  | 2627.2959   | -0.0757 | -29   | 897        | 920      | VEALPVELPEHIASASFET<br>YAVVR     | 171       | 100    |                  |      | Mascot      |
| 3089.5942  | 3089.5261   | -0.0681 | -22   | 893        | 920      | GNYKVEALPVELPEHIAS<br>ASFETYAVVR |           |        |                  |      | Mascot      |

|   |                              |  |  |  |              |  |          |      |    |     |     |     |     |  |  |  |  |
|---|------------------------------|--|--|--|--------------|--|----------|------|----|-----|-----|-----|-----|--|--|--|--|
| 3 | vitellogenin 1 [Danio rerio] |  |  |  | gi 166795887 |  | 149452.5 | 8.68 | 11 | 316 | 100 | 297 | 100 |  |  |  |  |
|---|------------------------------|--|--|--|--------------|--|----------|------|----|-----|-----|-----|-----|--|--|--|--|

| Peptide Information |                                              |         |       |              |                                      |           |         |                   |      |             |     |     |
|---------------------|----------------------------------------------|---------|-------|--------------|--------------------------------------|-----------|---------|-------------------|------|-------------|-----|-----|
| Calc. Mass          | Obsrv. Mass                                  | ± da    | ± ppm | Start Seq.   | End Sequence Seq.                    | Ion Score | C. I. % | Modification      | Rank | Result Type |     |     |
| 1070.4861           | 1070.4873                                    | 0.0012  | 1     | 921          | 929 NIEDHSAER                        | 23        | 0       |                   |      | Mascot      |     |     |
| 1070.4861           | 1070.4873                                    | 0.0012  | 1     | 921          | 929 NIEDHSAER                        |           |         |                   |      | Mascot      |     |     |
| 1379.7603           | 1379.7087                                    | -0.0516 | -37   | 433          | 445 EVVMLGYGSLIAK                    |           |         |                   |      | Mascot      |     |     |
| 1515.7478           | 1515.7042                                    | -0.0436 | -29   | 733          | 745 VFGQEVAYVNFDK                    | 67        | 99.995  |                   |      | Mascot      |     |     |
| 1515.7478           | 1515.7042                                    | -0.0436 | -29   | 733          | 745 VFGQEVAYVNFDK                    |           |         |                   |      | Mascot      |     |     |
| 1767.9673           | 1767.9131                                    | -0.0542 | -31   | 746          | 761 TIIEEAIPMTGPKPR                  |           |         | Oxidation (M)[9]  |      | Mascot      |     |     |
| 2174.1968           | 2174.0664                                    | -0.1304 | -60   | 770          | 789 ALQEGVAFQYAKPLLAEE VR            | 35        | 90.554  |                   |      | Mascot      |     |     |
| 2174.1968           | 2174.0664                                    | -0.1304 | -60   | 770          | 789 ALQEGVAFQYAKPLLAEE VR            |           |         |                   |      | Mascot      |     |     |
| 2187.2173           | 2186.9268                                    | -0.2905 | -133  | 713          | 732 ALTNWKALPTDKPLASAY VK            |           |         |                   |      | Mascot      |     |     |
| 2193.2676           | 2193.0059                                    | -0.2617 | -119  | 746          | 765 TIIEEAIPMTGPKPRALL K             |           |         | Oxidation (M)[9]  |      | Mascot      |     |     |
| 2233.2009           | 2233.0232                                    | -0.1777 | -80   | 593          | 614 SLTRITAPDMAYVAGAAN VAIK          |           |         |                   |      | Mascot      |     |     |
| 2627.3716           | 2627.2959                                    | -0.0757 | -29   | 897          | 920 VEALPVELPEHIASASFET YAVVR        |           |         |                   |      | Mascot      |     |     |
| 2627.3716           | 2627.2959                                    | -0.0757 | -29   | 897          | 920 VEALPVELPEHIASASFET YAVVR        | 171       | 100     |                   |      | Mascot      |     |     |
| 3089.5942           | 3089.5261                                    | -0.0681 | -22   | 893          | 920 GNYKVEALPVELPEHIAS ASFETYAVVR    |           |         |                   |      | Mascot      |     |     |
| 3338.6421           | 3338.668                                     | 0.0259  | 8     | 930          | 961 SIPLVPELSLQNSQASYA GDLSEMSSVASVR |           |         | Oxidation (M)[25] |      | Mascot      |     |     |
| 4                   | hypothetical protein LOC564835 [Danio rerio] |         |       | gi 157787177 |                                      | 38057.1   | 6.2     | 5                 | 231  | 100         | 215 | 100 |

| Peptide Information |                                |             |         |       |             |                               |         |           |         |                          |      |             |     |
|---------------------|--------------------------------|-------------|---------|-------|-------------|-------------------------------|---------|-----------|---------|--------------------------|------|-------------|-----|
|                     | Calc. Mass                     | Obsrv. Mass | ± da    | ± ppm | Start Seq.  | End Sequence Seq.             |         | Ion Score | C. I. % | Modification             | Rank | Result Type |     |
|                     | 1017.5727                      | 1017.5414   | -0.0313 | -31   | 224         | 232 ITGFVDIPR                 |         |           |         |                          |      | Mascot      |     |
|                     | 1346.6448                      | 1346.6342   | -0.0106 | -8    | 38          | 48 SYHEDVEVGRR                |         |           |         |                          |      | Mascot      |     |
|                     | 1498.7173                      | 1498.6754   | -0.0419 | -28   | 196         | 208 GLDSEQSYPYLAR             |         | 93        | 100     |                          |      | Mascot      |     |
|                     | 1498.7173                      | 1498.6754   | -0.0419 | -28   | 196         | 208 GLDSEQSYPYLAR             |         |           |         |                          |      | Mascot      |     |
|                     | 2174.0989                      | 2174.0664   | -0.0325 | -15   | 277         | 297 LDHAVLVVGYGYQGADV<br>AGNR |         | 122       | 100     |                          |      | Mascot      |     |
|                     | 2174.0989                      | 2174.0664   | -0.0325 | -15   | 277         | 297 LDHAVLVVGYGYQGADV<br>AGNR |         |           |         |                          |      | Mascot      |     |
|                     | 2278.0015                      | 2277.9395   | -0.062  | -27   | 135         | 154 QCGSCWSFSSTGALEG<br>QLFR  |         |           |         | Carbamidomethyl (C)[2,5] |      | Mascot      |     |
| 5                   | cathepsin L, 1 b [Danio rerio] |             |         |       | gi 18858809 |                               | 38005.1 | 5.99      | 4       | 228                      | 100  | 215         | 100 |

| Peptide Information |             |      |       |            |                   |           |                      |  |  |                  |
|---------------------|-------------|------|-------|------------|-------------------|-----------|----------------------|--|--|------------------|
| Calc. Mass          | Obsrv. Mass | ± da | ± ppm | Start Seq. | End Sequence Seq. | Ion Score | C. I. % Modification |  |  | Rank Result Type |

|   |                                              |           |           |         |     |     |              |                           |      |     |                          |     |     |     |  |  |        |
|---|----------------------------------------------|-----------|-----------|---------|-----|-----|--------------|---------------------------|------|-----|--------------------------|-----|-----|-----|--|--|--------|
|   |                                              | 1346.6448 | 1346.6342 | -0.0106 | -8  | 38  | 48           | SYHEDVEVGRR               |      |     |                          |     |     |     |  |  | Mascot |
|   |                                              | 1498.7173 | 1498.6754 | -0.0419 | -28 | 196 | 208          | GLDSEQSYPYLAR             | 93   | 100 |                          |     |     |     |  |  | Mascot |
|   |                                              | 1498.7173 | 1498.6754 | -0.0419 | -28 | 196 | 208          | GLDSEQSYPYLAR             |      |     |                          |     |     |     |  |  | Mascot |
|   |                                              | 2174.0989 | 2174.0664 | -0.0325 | -15 | 277 | 297          | LDHAVLVVGYGYQGADV<br>AGNR | 122  | 100 |                          |     |     |     |  |  | Mascot |
|   |                                              | 2174.0989 | 2174.0664 | -0.0325 | -15 | 277 | 297          | LDHAVLVVGYGYQGADV<br>AGNR |      |     |                          |     |     |     |  |  | Mascot |
|   |                                              | 2278.0015 | 2277.9395 | -0.062  | -27 | 135 | 154          | QCGSCWSFSSTGALEG<br>QLFR  |      |     | Carbamidomethyl (C)[2,5] |     |     |     |  |  | Mascot |
| 6 | hypothetical protein LOC567623 [Danio rerio] |           |           |         |     |     | gi 162138968 | 37987.1                   | 6.31 | 4   | 227                      | 100 | 215 | 100 |  |  |        |

Peptide Information

| Calc. Mass | Obsrv. Mass | ± da    | ± ppm | Start Seq. | End Seq. | Sequence                  | Ion Score | C. I. | %   | Modification             | Rank | Result Type |
|------------|-------------|---------|-------|------------|----------|---------------------------|-----------|-------|-----|--------------------------|------|-------------|
| 1346.6448  | 1346.6342   | -0.0106 | -8    | 38         | 48       | SYHEDVEVGRR               |           |       |     |                          |      | Mascot      |
| 1498.7173  | 1498.6754   | -0.0419 | -28   | 196        | 208      | GLDSEQSYPYLAR             | 93        |       | 100 |                          |      | Mascot      |
| 1498.7173  | 1498.6754   | -0.0419 | -28   | 196        | 208      | GLDSEQSYPYLAR             |           |       |     |                          |      | Mascot      |
| 2174.0989  | 2174.0664   | -0.0325 | -15   | 277        | 297      | LDHAVLVVGYGYQGADV<br>AGNR | 122       |       | 100 |                          |      | Mascot      |
| 2174.0989  | 2174.0664   | -0.0325 | -15   | 277        | 297      | LDHAVLVVGYGYQGADV<br>AGNR |           |       |     |                          |      | Mascot      |
| 2278.0015  | 2277.9395   | -0.062  | -27   | 135        | 154      | QCGSCWSFSSTGALEG<br>QLFR  |           |       |     | Carbamidomethyl (C)[2,5] |      | Mascot      |

7 hypothetical protein LOC563390 [Danio rerio] gi|156739275 38057.1 6.31 4 227 100 215 100

Peptide Information

| Calc. Mass | Obsrv. Mass | ± da    | ± ppm | Start Seq. | End Seq. | Sequence                  | Ion Score | C. I. | %   | Modification             | Rank | Result Type |
|------------|-------------|---------|-------|------------|----------|---------------------------|-----------|-------|-----|--------------------------|------|-------------|
| 1017.5727  | 1017.5414   | -0.0313 | -31   | 224        | 232      | ITGFVDIPR                 |           |       |     |                          |      | Mascot      |
| 1498.7173  | 1498.6754   | -0.0419 | -28   | 196        | 208      | GLDSEQSYPYLAR             | 93        |       | 100 |                          |      | Mascot      |
| 1498.7173  | 1498.6754   | -0.0419 | -28   | 196        | 208      | GLDSEQSYPYLAR             |           |       |     |                          |      | Mascot      |
| 2174.0989  | 2174.0664   | -0.0325 | -15   | 276        | 296      | LDHAVLVVGYGYQGADV<br>AGNR | 122       |       | 100 |                          |      | Mascot      |
| 2174.0989  | 2174.0664   | -0.0325 | -15   | 276        | 296      | LDHAVLVVGYGYQGADV<br>AGNR |           |       |     |                          |      | Mascot      |
| 2278.0015  | 2277.9395   | -0.062  | -27   | 135        | 154      | QCGSCWSFSSTGALEG<br>QLFR  |           |       |     | Carbamidomethyl (C)[2,5] |      | Mascot      |

8 PREDICTED: cathepsin L1-like [Danio rerio] gi|326672302 37980.1 6.45 4 226 100 215 100

Peptide Information

| Calc. Mass | Obsrv. Mass | ± da    | ± ppm | Start Seq. | End Seq. | Sequence    | Ion Score | C. I. | % | Modification | Rank | Result Type |
|------------|-------------|---------|-------|------------|----------|-------------|-----------|-------|---|--------------|------|-------------|
| 1346.6448  | 1346.6342   | -0.0106 | -8    | 38         | 48       | SYHEDVEVGRR |           |       |   |              |      | Mascot      |

|   |                              |           |         |     |             |     |                           |      |     |                          |     |     |        |
|---|------------------------------|-----------|---------|-----|-------------|-----|---------------------------|------|-----|--------------------------|-----|-----|--------|
|   | 1498.7173                    | 1498.6754 | -0.0419 | -28 | 196         | 208 | GLDSEQSYYPYLAR            | 93   | 100 |                          |     |     | Mascot |
|   | 1498.7173                    | 1498.6754 | -0.0419 | -28 | 196         | 208 | GLDSEQSYYPYLAR            |      |     |                          |     |     | Mascot |
|   | 2174.0989                    | 2174.0664 | -0.0325 | -15 | 276         | 296 | LDHAVLVVGYGYQGADV<br>AGNR | 122  | 100 |                          |     |     | Mascot |
|   | 2174.0989                    | 2174.0664 | -0.0325 | -15 | 276         | 296 | LDHAVLVVGYGYQGADV<br>AGNR |      |     |                          |     |     | Mascot |
|   | 2278.0015                    | 2277.9395 | -0.062  | -27 | 135         | 154 | QCGSCWSFSSTGALEG<br>QLFR  |      |     | Carbamidomethyl (C)[2,5] |     |     | Mascot |
| 9 | vitellogenin 1 [Danio rerio] |           |         |     | gi 21391472 |     | 127954.2                  | 8.69 | 6   | 159                      | 100 | 151 | 100    |

Peptide Information

| Calc. Mass | Obsrv. Mass | ± da    | ± ppm | Start Seq. | End Seq. | Sequence                  | Ion Score | C. I.  | %                | Modification | Rank | Result Type |
|------------|-------------|---------|-------|------------|----------|---------------------------|-----------|--------|------------------|--------------|------|-------------|
| 1070.4861  | 1070.4873   | 0.0012  | 1     | 730        | 738      | NIEDHSAER                 | 23        |        | 0                |              |      | Mascot      |
| 1070.4861  | 1070.4873   | 0.0012  | 1     | 730        | 738      | NIEDHSAER                 |           |        |                  |              |      | Mascot      |
| 1379.7603  | 1379.7087   | -0.0516 | -37   | 242        | 254      | EVVMLGYGSLIAK             |           |        |                  |              |      | Mascot      |
| 1515.7478  | 1515.7042   | -0.0436 | -29   | 542        | 554      | VFGQEVAYVNFDK             | 67        | 99.995 |                  |              |      | Mascot      |
| 1515.7478  | 1515.7042   | -0.0436 | -29   | 542        | 554      | VFGQEVAYVNFDK             |           |        |                  |              |      | Mascot      |
| 1723.9412  | 1723.8914   | -0.0498 | -29   | 555        | 570      | TIIEEAIPMATGPKPR          |           |        |                  |              |      | Mascot      |
| 1739.936   | 1739.8898   | -0.0462 | -27   | 555        | 570      | TIIEEAIPMATGPKPR          | 26        | 34.193 | Oxidation (M)[9] |              |      | Mascot      |
| 1739.936   | 1739.8898   | -0.0462 | -27   | 555        | 570      | TIIEEAIPMATGPKPR          |           |        | Oxidation (M)[9] |              |      | Mascot      |
| 2174.1968  | 2174.0664   | -0.1304 | -60   | 579        | 598      | ALQEGVAFQYAKPLLAEE<br>VR  | 35        | 90.554 |                  |              |      | Mascot      |
| 2174.1968  | 2174.0664   | -0.1304 | -60   | 579        | 598      | ALQEGVAFQYAKPLLAEE<br>VR  |           |        |                  |              |      | Mascot      |
| 2187.1624  | 2186.9268   | -0.2356 | -108  | 406        | 427      | ITAPDMSVAGAANVAIK<br>LMSR |           |        |                  |              |      | Mascot      |

|    |                              |  |  |  |              |  |          |      |   |     |     |     |     |
|----|------------------------------|--|--|--|--------------|--|----------|------|---|-----|-----|-----|-----|
| 10 | vitellogenin 6 [Danio rerio] |  |  |  | gi 303227889 |  | 150936.1 | 8.84 | 9 | 136 | 100 | 125 | 100 |
|----|------------------------------|--|--|--|--------------|--|----------|------|---|-----|-----|-----|-----|

Peptide Information

| Calc. Mass | Obsrv. Mass | ± da    | ± ppm | Start Seq. | End Seq. | Sequence                 | Ion Score | C. I.  | %                | Modification | Rank | Result Type |
|------------|-------------|---------|-------|------------|----------|--------------------------|-----------|--------|------------------|--------------|------|-------------|
| 864.4461   | 864.4685    | 0.0224  | 26    | 98         | 105      | DSFVPATK                 |           |        |                  |              |      | Mascot      |
| 1070.4861  | 1070.4873   | 0.0012  | 1     | 932        | 940      | NIEDHSAER                | 23        |        | 0                |              |      | Mascot      |
| 1070.4861  | 1070.4873   | 0.0012  | 1     | 932        | 940      | NIEDHSAER                |           |        |                  |              |      | Mascot      |
| 1379.7603  | 1379.7087   | -0.0516 | -37   | 444        | 456      | EVVMLGYGSLIAK            |           |        |                  |              |      | Mascot      |
| 1515.7478  | 1515.7042   | -0.0436 | -29   | 744        | 756      | VFGQEVAYVNFDK            | 67        | 99.995 |                  |              |      | Mascot      |
| 1515.7478  | 1515.7042   | -0.0436 | -29   | 744        | 756      | VFGQEVAYVNFDK            |           |        |                  |              |      | Mascot      |
| 1767.9673  | 1767.9131   | -0.0542 | -31   | 757        | 772      | TIIEEAIPMTGPKPR          |           |        | Oxidation (M)[9] |              |      | Mascot      |
| 2174.1968  | 2174.0664   | -0.1304 | -60   | 781        | 800      | ALQEGVAFQYAKPLLAEE<br>VR | 35        | 90.554 |                  |              |      | Mascot      |
| 2174.1968  | 2174.0664   | -0.1304 | -60   | 781        | 800      | ALQEGVAFQYAKPLLAEE<br>VR |           |        |                  |              |      | Mascot      |

|    |                              |           |         |      |              |     |                            |      |   |     |     |     |                  |  |  |  |        |
|----|------------------------------|-----------|---------|------|--------------|-----|----------------------------|------|---|-----|-----|-----|------------------|--|--|--|--------|
|    | 2187.2173                    | 2186.9268 | -0.2905 | -133 | 724          | 743 | ALTNWKALPTDKPLASAY<br>VK   |      |   |     |     |     |                  |  |  |  | Mascot |
|    | 2193.2676                    | 2193.0059 | -0.2617 | -119 | 757          | 776 | TIIEEAIPMTGPKPRALL<br>K    |      |   |     |     |     | Oxidation (M)[9] |  |  |  | Mascot |
|    | 2233.2009                    | 2233.0232 | -0.1777 | -80  | 604          | 625 | SLTRITAPDMAYVAGAAN<br>VAIK |      |   |     |     |     |                  |  |  |  | Mascot |
| 11 | vitellogenin 7 [Danio rerio] |           |         |      | gi 156713467 |     | 148739.2                   | 8.76 | 7 | 133 | 100 | 125 | 100              |  |  |  |        |

Peptide Information

| Calc. Mass | Obsrv. Mass | ± da    | ± ppm | Start Seq. | End Seq. | Sequence                | Ion Score | C. I.  | % Modification   | Rank | Result Type |
|------------|-------------|---------|-------|------------|----------|-------------------------|-----------|--------|------------------|------|-------------|
| 1070.4861  | 1070.4873   | 0.0012  | 1     | 921        | 929      | NIEDHSAER               | 23        | 0      |                  |      | Mascot      |
| 1070.4861  | 1070.4873   | 0.0012  | 1     | 921        | 929      | NIEDHSAER               |           |        |                  |      | Mascot      |
| 1263.5118  | 1263.6743   | 0.1625  | 129   | 1098       | 1110     | SSSSSSSSMSSSR           |           |        |                  |      | Mascot      |
| 1379.7603  | 1379.7087   | -0.0516 | -37   | 433        | 445      | EVVMLGYGSLIAK           |           |        |                  |      | Mascot      |
| 1515.7478  | 1515.7042   | -0.0436 | -29   | 733        | 745      | VFGQEVAYVNFDK           | 67        | 99.995 |                  |      | Mascot      |
| 1515.7478  | 1515.7042   | -0.0436 | -29   | 733        | 745      | VFGQEVAYVNFDK           |           |        |                  |      | Mascot      |
| 1537.7467  | 1537.6821   | -0.0646 | -42   | 981        | 994      | GCVEVHSYNAAFIK          |           |        |                  |      | Mascot      |
| 1753.9517  | 1753.897    | -0.0547 | -31   | 746        | 761      | TIIEEAIPMVSGPKPR        |           |        | Oxidation (M)[9] |      | Mascot      |
| 2174.1968  | 2174.0664   | -0.1304 | -60   | 770        | 789      | ALQEGVAFQYAKPLAAE<br>VR | 35        | 90.554 |                  |      | Mascot      |
| 2174.1968  | 2174.0664   | -0.1304 | -60   | 770        | 789      | ALQEGVAFQYAKPLAAE<br>VR |           |        |                  |      | Mascot      |

|    |                                                             |  |  |  |             |  |          |      |   |     |     |     |     |  |  |  |  |
|----|-------------------------------------------------------------|--|--|--|-------------|--|----------|------|---|-----|-----|-----|-----|--|--|--|--|
| 12 | novel protein similar to vitellogenin 1 (vg1) [Danio rerio] |  |  |  | gi 94732723 |  | 147084.2 | 8.73 | 6 | 125 | 100 | 125 | 100 |  |  |  |  |
|----|-------------------------------------------------------------|--|--|--|-------------|--|----------|------|---|-----|-----|-----|-----|--|--|--|--|

Peptide Information

| Calc. Mass | Obsrv. Mass | ± da    | ± ppm | Start Seq. | End Seq. | Sequence                | Ion Score | C. I.  | % Modification   | Rank | Result Type |
|------------|-------------|---------|-------|------------|----------|-------------------------|-----------|--------|------------------|------|-------------|
| 1070.4861  | 1070.4873   | 0.0012  | 1     | 921        | 929      | NIEDHSAER               | 23        | 0      |                  |      | Mascot      |
| 1070.4861  | 1070.4873   | 0.0012  | 1     | 921        | 929      | NIEDHSAER               |           |        |                  |      | Mascot      |
| 1263.5118  | 1263.6743   | 0.1625  | 129   | 1098       | 1110     | SSSSSSSSMSSSR           |           |        |                  |      | Mascot      |
| 1379.7603  | 1379.7087   | -0.0516 | -37   | 433        | 445      | EVVMLGYGSLIAK           |           |        |                  |      | Mascot      |
| 1515.7478  | 1515.7042   | -0.0436 | -29   | 733        | 745      | VFGQEVAYVNFDK           | 67        | 99.995 |                  |      | Mascot      |
| 1515.7478  | 1515.7042   | -0.0436 | -29   | 733        | 745      | VFGQEVAYVNFDK           |           |        |                  |      | Mascot      |
| 1753.9517  | 1753.897    | -0.0547 | -31   | 746        | 761      | TIIEEAIPMVSGPKPR        |           |        | Oxidation (M)[9] |      | Mascot      |
| 2174.1968  | 2174.0664   | -0.1304 | -60   | 770        | 789      | ALQEGVAFQYAKPLAAE<br>VR | 35        | 90.554 |                  |      | Mascot      |
| 2174.1968  | 2174.0664   | -0.1304 | -60   | 770        | 789      | ALQEGVAFQYAKPLAAE<br>VR |           |        |                  |      | Mascot      |

|    |                                              |  |  |  |              |  |          |      |    |     |     |    |     |  |  |  |  |
|----|----------------------------------------------|--|--|--|--------------|--|----------|------|----|-----|-----|----|-----|--|--|--|--|
| 13 | hypothetical protein LOC678536 [Danio rerio] |  |  |  | gi 160420306 |  | 148750.2 | 8.89 | 12 | 110 | 100 | 91 | 100 |  |  |  |  |
|----|----------------------------------------------|--|--|--|--------------|--|----------|------|----|-----|-----|----|-----|--|--|--|--|

Peptide Information

| Calc. Mass | Obsrv. Mass | ± da | ± ppm | Start Seq. | End Seq. | Sequence | Ion Score | C. I. | % Modification | Rank | Result Type |
|------------|-------------|------|-------|------------|----------|----------|-----------|-------|----------------|------|-------------|
|------------|-------------|------|-------|------------|----------|----------|-----------|-------|----------------|------|-------------|

[illegible]

| Peptide Information |             |      |       |            |                   |           |         |              |                  |
|---------------------|-------------|------|-------|------------|-------------------|-----------|---------|--------------|------------------|
| Calc. Mass          | Obsrv. Mass | ± da | ± ppm | Start Seq. | End Sequence Seq. | Ion Score | C. I. % | Modification | Rank Result Type |

|    |                              |           |         |     |     |             |                               |      |     |     |                          |    |     |  |  |        |
|----|------------------------------|-----------|---------|-----|-----|-------------|-------------------------------|------|-----|-----|--------------------------|----|-----|--|--|--------|
|    | 1346.6448                    | 1346.6342 | -0.0106 | -8  | 38  | 48          | SYHEDVEVGRR                   |      |     |     |                          |    |     |  |  | Mascot |
|    | 1498.7173                    | 1498.6754 | -0.0419 | -28 | 196 | 208         | GLDSEQSYPYLAR                 | 93   | 100 |     |                          |    |     |  |  | Mascot |
|    | 1498.7173                    | 1498.6754 | -0.0419 | -28 | 196 | 208         | GLDSEQSYPYLAR                 |      |     |     |                          |    |     |  |  | Mascot |
|    | 2278.0015                    | 2277.9395 | -0.062  | -27 | 135 | 154         | QCGSCWSFSSTGALEG<br>QLFR      |      |     |     | Carbamidomethyl (C)[2,5] |    |     |  |  | Mascot |
|    | 2721.3049                    | 2721.2354 | -0.0695 | -26 | 271 | 296         | ACTSQLDHAFLVVGYY<br>QGADVAGNR |      |     |     | Carbamidomethyl (C)[2]   |    |     |  |  | Mascot |
| 16 | vitellogenin 5 [Danio rerio] |           |         |     |     | gi 68448530 | 148868                        | 8.77 | 8   | 100 | 100                      | 91 | 100 |  |  |        |

#### Peptide Information

| Calc. Mass | Obsrv. Mass | ± da    | ± ppm | Start Seq. | End Seq. | Sequence                     | Ion Score | C. I.  | % Modification    | Rank | Result | Type   |
|------------|-------------|---------|-------|------------|----------|------------------------------|-----------|--------|-------------------|------|--------|--------|
| 1070.4861  | 1070.4873   | 0.0012  | 1     | 921        | 929      | NIEDHSAER                    | 23        | 0      |                   |      |        | Mascot |
| 1070.4861  | 1070.4873   | 0.0012  | 1     | 921        | 929      | NIEDHSAER                    |           |        |                   |      |        | Mascot |
| 1324.5975  | 1324.6494   | 0.0519  | 39    | 1067       | 1079     | NTPVSESSSSSR                 |           |        |                   |      |        | Mascot |
| 1324.5975  | 1324.6494   | 0.0519  | 39    | 1067       | 1079     | NTPVSESSSSSR                 |           |        |                   |      |        | Mascot |
| 1379.7603  | 1379.7087   | -0.0516 | -37   | 433        | 445      | EVVMLGYGLIAK                 |           |        |                   |      |        | Mascot |
| 1515.7478  | 1515.7042   | -0.0436 | -29   | 733        | 745      | VFGQEVAYVNFDK                | 67        | 99.995 |                   |      |        | Mascot |
| 1515.7478  | 1515.7042   | -0.0436 | -29   | 733        | 745      | VFGQEVAYVNFDK                |           |        |                   |      |        | Mascot |
| 1753.9517  | 1753.897    | -0.0547 | -31   | 746        | 761      | SIIEEAIPMTGPKPR              |           |        | Oxidation (M)[9]  |      |        | Mascot |
| 1840.8938  | 1840.8896   | -0.0042 | -2    | 72         | 86       | LMDPLLYEYAGTWPR              |           |        | Oxidation (M)[2]  |      |        | Mascot |
| 2278.2     | 2277.9395   | -0.2605 | -114  | 283        | 302      | GSLQYELASEILQTPQL<br>MK      |           |        | Oxidation (M)[19] |      |        | Mascot |
| 2577.3923  | 2577.3262   | -0.0661 | -26   | 897        | 920      | VEALPVELPEHIASASFET<br>LAVVR |           |        |                   |      |        | Mascot |

17 novel protein similar to vitellogenin 1 (vg1) [Danio rerio] gi|94733731 149169.2 8.84 7 99 100 91 100

#### Peptide Information

| Calc. Mass | Obsrv. Mass | ± da    | ± ppm | Start Seq. | End Seq. | Sequence            | Ion Score | C. I.  | % Modification   | Rank | Result | Type   |
|------------|-------------|---------|-------|------------|----------|---------------------|-----------|--------|------------------|------|--------|--------|
| 1070.4861  | 1070.4873   | 0.0012  | 1     | 925        | 933      | NIEDHSAER           | 23        | 0      |                  |      |        | Mascot |
| 1070.4861  | 1070.4873   | 0.0012  | 1     | 925        | 933      | NIEDHSAER           |           |        |                  |      |        | Mascot |
| 1324.5975  | 1324.6494   | 0.0519  | 39    | 1071       | 1083     | NTPVSESSSSSR        |           |        |                  |      |        | Mascot |
| 1324.5975  | 1324.6494   | 0.0519  | 39    | 1071       | 1083     | NTPVSESSSSSR        |           |        |                  |      |        | Mascot |
| 1379.7603  | 1379.7087   | -0.0516 | -37   | 437        | 449      | EVVMLGYGLIAK        |           |        |                  |      |        | Mascot |
| 1515.7478  | 1515.7042   | -0.0436 | -29   | 737        | 749      | VFGQEVAYVNFDK       | 67        | 99.995 |                  |      |        | Mascot |
| 1515.7478  | 1515.7042   | -0.0436 | -29   | 737        | 749      | VFGQEVAYVNFDK       |           |        |                  |      |        | Mascot |
| 1753.9517  | 1753.897    | -0.0547 | -31   | 750        | 765      | SIIEEAIPMTGPKPR     |           |        | Oxidation (M)[9] |      |        | Mascot |
| 1840.8938  | 1840.8896   | -0.0042 | -2    | 76         | 90       | LMDPLLYEYAGTWPR     |           |        | Oxidation (M)[2] |      |        | Mascot |
| 2577.3923  | 2577.3262   | -0.0661 | -26   | 901        | 924      | VEALPVELPEHIASASFET |           |        |                  |      |        | Mascot |



18 vitellogenin 5 [Danio rerio] LAVVR gi|57864785 72820.8 9 4 75 99.846 67 99.995

Peptide Information

| Calc. Mass | Obsrv. Mass | ± da    | ± ppm | Start Seq. | End Seq. | Sequence                     | Ion Score | C. I.  | % Modification   | Rank | Result Type |
|------------|-------------|---------|-------|------------|----------|------------------------------|-----------|--------|------------------|------|-------------|
| 1324.5975  | 1324.6494   | 0.0519  | 39    | 376        | 388      | NTPVSSSESSSSSR               |           |        |                  |      | Mascot      |
| 1324.5975  | 1324.6494   | 0.0519  | 39    | 376        | 388      | NTPVSSSESSSSSR               |           |        |                  |      | Mascot      |
| 1515.7478  | 1515.7042   | -0.0436 | -29   | 42         | 54       | VFGQEVAYVNFDK                | 67        | 99.995 |                  |      | Mascot      |
| 1515.7478  | 1515.7042   | -0.0436 | -29   | 42         | 54       | VFGQEVAYVNFDK                |           |        |                  |      | Mascot      |
| 1753.9517  | 1753.897    | -0.0547 | -31   | 55         | 70       | SIIEEAIPMTGPKPR              |           |        | Oxidation (M)[9] |      | Mascot      |
| 2577.3923  | 2577.3262   | -0.0661 | -26   | 206        | 229      | VEALPVELPEHIASASFET<br>LAVVR |           |        |                  |      | Mascot      |

19 PREDICTED: chondroitin sulfate N-acetylgalactosaminyltransferase 1-like [Danio rerio] gi|326671029 62803.2 9.11 10 52 68.496 19 0

Peptide Information

| Calc. Mass | Obsrv. Mass | ± da    | ± ppm | Start Seq. | End Seq. | Sequence                       | Ion Score | C. I. | % Modification         | Rank | Result Type |
|------------|-------------|---------|-------|------------|----------|--------------------------------|-----------|-------|------------------------|------|-------------|
| 868.4634   | 868.5009    | 0.0375  | 43    | 151        | 158      | AEVHTGVR                       | 19        | 0     |                        |      | Mascot      |
| 868.4634   | 868.5009    | 0.0375  | 43    | 151        | 158      | AEVHTGVR                       |           |       |                        |      | Mascot      |
| 1280.6151  | 1280.7035   | 0.0884  | 69    | 114        | 125      | GMQDSLEKSTGK                   |           |       |                        |      | Mascot      |
| 1324.5449  | 1324.6494   | 0.1045  | 79    | 443        | 453      | DFGFGMTCQYR                    |           |       |                        |      | Mascot      |
| 1324.5449  | 1324.6494   | 0.1045  | 79    | 443        | 453      | DFGFGMTCQYR                    |           |       |                        |      | Mascot      |
| 1379.6219  | 1379.7087   | 0.0868  | 63    | 122        | 135      | STGKGMGGDVAEDR                 |           |       |                        |      | Mascot      |
| 1475.7714  | 1475.7114   | -0.06   | -41   | 84         | 95       | EEQHRQHIALSK                   |           |       |                        |      | Mascot      |
| 1491.6897  | 1491.6094   | -0.0803 | -54   | 503        | 514      | RCADELPDQYK                    |           |       | Carbamidomethyl (C)[2] |      | Mascot      |
| 1537.7402  | 1537.6821   | -0.0581 | -38   | 301        | 312      | QFMHNFREVCVK                   |           |       |                        |      | Mascot      |
| 1553.7351  | 1553.6711   | -0.064  | -41   | 301        | 312      | QFMHNFREVCVK                   |           |       | Oxidation (M)[3]       |      | Mascot      |
| 1753.9119  | 1753.897    | -0.0149 | -8    | 223        | 238      | ASKVYTPSDFIEGLAR               |           |       |                        |      | Mascot      |
| 2174.1245  | 2174.0664   | -0.0581 | -27   | 48         | 73       | AGGMALAGGPSRPGGV<br>GGAPVGPAGR |           |       |                        |      | Mascot      |
| 2174.1245  | 2174.0664   | -0.0581 | -27   | 48         | 73       | AGGMALAGGPSRPGGV<br>GGAPVGPAGR |           |       |                        |      | Mascot      |
| 2577.3704  | 2577.3262   | -0.0442 | -17   | 276        | 298      | SELVETSHMPINIVLPLSQ<br>RADK    |           |       |                        |      | Mascot      |

20 ubiquitin-like protein 4A [Danio rerio] gi|41053523 17309 5.95 7 48 27.828

Peptide Information

| Calc. Mass | Obsrv. Mass | ± da | ± ppm | Start Seq. | End Seq. | Sequence | Ion Score | C. I. | % Modification | Rank | Result Type |
|------------|-------------|------|-------|------------|----------|----------|-----------|-------|----------------|------|-------------|
|------------|-------------|------|-------|------------|----------|----------|-----------|-------|----------------|------|-------------|

|    |                          |           |         |      |             |     |                 |     |   |    |   |  |  |  |  |  |        |
|----|--------------------------|-----------|---------|------|-------------|-----|-----------------|-----|---|----|---|--|--|--|--|--|--------|
|    | 996.522                  | 996.5663  | 0.0443  | 44   | 47          | 55  | GKALADEHR       |     |   |    |   |  |  |  |  |  | Mascot |
|    | 1096.7089                | 1096.5602 | -0.1487 | -136 | 2           | 11  | ILTVKPLQGK      |     |   |    |   |  |  |  |  |  | Mascot |
|    | 1179.5892                | 1179.5649 | -0.0243 | -21  | 56          | 66  | LSDYSIGPEAK     |     |   |    |   |  |  |  |  |  | Mascot |
|    | 1292.5787                | 1292.6201 | 0.0414  | 32   | 12          | 22  | ECNVQVTENEK     |     |   |    |   |  |  |  |  |  | Mascot |
|    | 1515.8125                | 1515.7042 | -0.1083 | -71  | 130         | 142 | QLSLDDIERLASR   |     |   |    |   |  |  |  |  |  | Mascot |
|    | 1515.8529                | 1515.7042 | -0.1487 | -98  | 92          | 106 | GGSGVWQLLSTVLAK |     |   |    |   |  |  |  |  |  | Mascot |
|    | 1739.9398                | 1739.8898 | -0.05   | -29  | 28          | 42  | ELVSERLNIPASQQR |     |   |    |   |  |  |  |  |  | Mascot |
|    | 1739.9398                | 1739.8898 | -0.05   | -29  | 28          | 42  | ELVSERLNIPASQQR |     |   |    |   |  |  |  |  |  | Mascot |
| 21 | Zgc:110331 [Danio rerio] |           |         |      | gi 62202266 |     | 17382.1         | 8.3 | 7 | 43 | 0 |  |  |  |  |  |        |

#### Peptide Information

| Calc. Mass | Obsrv. Mass | ± da    | ± ppm | Start Seq. | End Seq. | Sequence                  | Ion Score | C. I. | % Modification                             | Rank | Result Type |
|------------|-------------|---------|-------|------------|----------|---------------------------|-----------|-------|--------------------------------------------|------|-------------|
| 882.5294   | 882.5394    | 0.01    | 11    | 122        | 129      | ELSLPPVK                  |           |       |                                            |      | Mascot      |
| 1045.5636  | 1045.5315   | -0.0321 | -31   | 42         | 51       | NVGSLDKNAK                |           |       |                                            |      | Mascot      |
| 1346.6443  | 1346.6342   | -0.0101 | -8    | 130        | 141      | LHCSMLAEDAİK              |           |       | Oxidation (M)[5]                           |      | Mascot      |
| 1515.7285  | 1515.7042   | -0.0243 | -16   | 151        | 164      | QEGEPVEETAVART            |           |       |                                            |      | Mascot      |
| 1515.7285  | 1515.7042   | -0.0243 | -16   | 151        | 164      | QEGEPVEETAVART            |           |       |                                            |      | Mascot      |
| 1739.9836  | 1739.8898   | -0.0938 | -54   | 9          | 24       | CAAPQILKTL SAPTLR         |           |       | Carbamidomethyl (C)[1]                     |      | Mascot      |
| 1739.9836  | 1739.8898   | -0.0938 | -54   | 9          | 24       | CAAPQILKTL SAPTLR         |           |       | Carbamidomethyl (C)[1]                     |      | Mascot      |
| 2247.1113  | 2247.0151   | -0.0962 | -43   | 84         | 104      | FKTFGCGSAIASSSLATE<br>WVK |           |       | Carbamidomethyl (C)[6]                     |      | Mascot      |
| 2267.1775  | 2267.0332   | -0.1443 | -64   | 122        | 141      | ELSLPPVKLHCSMLAEDA<br>İK  |           |       | Carbamidomethyl (C)[11], Oxidation (M)[13] |      | Mascot      |

22 ATP synthase subunit gamma, mitochondrial [Danio rerio] gi|41152375 32113.8 9.43 8 40 0

#### Peptide Information

| Calc. Mass | Obsrv. Mass | ± da    | ± ppm | Start Seq. | End Seq. | Sequence    | Ion Score | C. I. | % Modification         | Rank | Result Type |
|------------|-------------|---------|-------|------------|----------|-------------|-----------|-------|------------------------|------|-------------|
| 840.476    | 840.365     | -0.111  | -132  | 143        | 149      | HILLNCK     |           |       |                        |      | Mascot      |
| 864.4937   | 864.4685    | -0.0252 | -29   | 266        | 272      | LTLTFNR     |           |       |                        |      | Mascot      |
| 890.5569   | 890.4963    | -0.0606 | -68   | 132        | 138      | LRGLLYR     |           |       |                        |      | Mascot      |
| 996.5294   | 996.5663    | 0.0369  | 37    | 45         | 53       | MVAAAKYSR   |           |       |                        |      | Mascot      |
| 999.5621   | 999.469     | -0.0931 | -93   | 185        | 192      | FRSVISYK    |           |       |                        |      | Mascot      |
| 999.5621   | 999.469     | -0.0931 | -93   | 185        | 192      | FRSVISYK    |           |       |                        |      | Mascot      |
| 1096.611   | 1096.5602   | -0.0508 | -46   | 86         | 95       | HLIIGVSSDR  |           |       |                        |      | Mascot      |
| 1263.699   | 1263.6743   | -0.0247 | -20   | 139        | 149      | THGKHILLNCK |           |       |                        |      | Mascot      |
| 1338.7311  | 1338.6633   | -0.0678 | -51   | 143        | 153      | HILLNCKEVGR |           |       | Carbamidomethyl (C)[6] |      | Mascot      |

23 Lrprrc protein [Danio rerio] gi|141795258 108135.4 5.27 15 39 0

Peptide Information

| Calc. Mass | Obsrv. Mass | ± da    | ± ppm | Start Seq. | End Seq. | Sequence                | Ion Score | C. I. % | Modification                             | Rank | Result Type |
|------------|-------------|---------|-------|------------|----------|-------------------------|-----------|---------|------------------------------------------|------|-------------|
| 864.4283   | 864.4685    | 0.0402  | 47    | 525        | 531      | AEAIWMK                 |           |         | Oxidation (M)[6]                         |      | Mascot      |
| 890.473    | 890.4963    | 0.0233  | 26    | 402        | 408      | QYNQLPK                 |           |         |                                          |      | Mascot      |
| 1045.5524  | 1045.5315   | -0.0209 | -20   | 646        | 655      | GNIEDAISVK              |           |         |                                          |      | Mascot      |
| 1096.5092  | 1096.5602   | 0.051   | 47    | 98         | 106      | FQNVENMAK               |           |         | Oxidation (M)[7]                         |      | Mascot      |
| 1164.5466  | 1164.5322   | -0.0144 | -12   | 515        | 523      | LCKETNDWR               |           |         |                                          |      | Mascot      |
| 1164.6736  | 1164.5322   | -0.1414 | -121  | 224        | 234      | AEGKPAHLTLK             |           |         |                                          |      | Mascot      |
| 1179.5562  | 1179.5649   | 0.0087  | 7     | 722        | 731      | DIQEVEAMTK              |           |         | Oxidation (M)[8]                         |      | Mascot      |
| 1292.7684  | 1292.6201   | -0.1483 | -115  | 224        | 235      | AEGKPAHLTLKK            |           |         |                                          |      | Mascot      |
| 1346.6733  | 1346.6342   | -0.0391 | -29   | 698        | 709      | ADQMPSQLAIR             |           |         | Oxidation (M)[4]                         |      | Mascot      |
| 1363.6821  | 1363.7131   | 0.031   | 23    | 683        | 693      | CQMKDSVQVLR             |           |         | Carbamidomethyl (C)[1]                   |      | Mascot      |
| 1379.677   | 1379.7087   | 0.0317  | 23    | 683        | 693      | CQMKDSVQVLR             |           |         | Carbamidomethyl (C)[1], Oxidation (M)[3] |      | Mascot      |
| 1448.7488  | 1448.8805   | 0.1317  | 91    | 865        | 876      | VMSLMELIPDIR            |           |         | Oxidation (M)[2,5]                       |      | Mascot      |
| 1514.8325  | 1514.708    | -0.1245 | -82   | 175        | 187      | NILESHHVPELVK           |           |         |                                          |      | Mascot      |
| 1841.0392  | 1840.8896   | -0.1496 | -81   | 172        | 187      | GIRNILESHHVPELVK        |           |         |                                          |      | Mascot      |
| 2225.0508  | 2225.0549   | 0.0041  | 2     | 923        | 941      | LYRDSGEPVPFEPAESF<br>R  |           |         |                                          |      | Mascot      |
| 2261.0498  | 2260.9248   | -0.125  | -55   | 188        | 206      | EALTLVDKTDMMTEVMM<br>FR |           |         | Oxidation (M)[12]                        |      | Mascot      |

24 PREDICTED: coronin-2B [Danio rerio] gi|292627941 53560.2 7.91 10 39 0

Peptide Information

| Calc. Mass | Obsrv. Mass | ± da    | ± ppm | Start Seq. | End Seq. | Sequence                | Ion Score | C. I. % | Modification                             | Rank | Result Type |
|------------|-------------|---------|-------|------------|----------|-------------------------|-----------|---------|------------------------------------------|------|-------------|
| 850.4161   | 850.5162    | 0.1001  | 118   | 316        | 322      | SLCVMPK                 |           |         | Carbamidomethyl (C)[3], Oxidation (M)[5] |      | Mascot      |
| 856.3948   | 856.4987    | 0.1039  | 121   | 2          | 8        | SWSSAYR                 |           |         |                                          |      | Mascot      |
| 882.5519   | 882.5394    | -0.0125 | -14   | 199        | 205      | LRIIDPR                 |           |         |                                          |      | Mascot      |
| 1346.6191  | 1346.6342   | 0.0151  | 11    | 78         | 89       | VCGHQGSVMDIK            |           |         | Carbamidomethyl (C)[2], Oxidation (M)[9] |      | Mascot      |
| 1379.677   | 1379.7087   | 0.0317  | 23    | 209        | 219      | VLQESCCKSLR             |           |         | Carbamidomethyl (C)[6,7]                 |      | Mascot      |
| 1723.9636  | 1723.8914   | -0.0722 | -42   | 120        | 134      | NLTEALMILIGHSR          |           |         |                                          |      | Mascot      |
| 1739.9585  | 1739.8898   | -0.0687 | -39   | 119        | 133      | RNLTEALMILIGHSR         |           |         | Oxidation (M)[8]                         |      | Mascot      |
| 1739.9585  | 1739.8898   | -0.0687 | -39   | 120        | 134      | NLTEALMILIGHSR          |           |         | Oxidation (M)[7]                         |      | Mascot      |
| 2173.9529  | 2174.0664   | 0.1135  | 52    | 90         | 108      | WSPFMDNIIASSSEDCTV<br>R |           |         | Oxidation (M)[5]                         |      | Mascot      |
| 2173.9529  | 2174.0664   | 0.1135  | 52    | 90         | 108      | WSPFMDNIIASSSEDCTV<br>R |           |         | Oxidation (M)[5]                         |      | Mascot      |

|    |                                                                                                  |           |         |     |             |         |                              |   |                                           |        |
|----|--------------------------------------------------------------------------------------------------|-----------|---------|-----|-------------|---------|------------------------------|---|-------------------------------------------|--------|
|    | 2211.0435                                                                                        | 2211.0432 | -0.0003 | 0   | 71          | 89      | VDPHYPRVCGHQGSVM<br>DIK      |   | Carbamidomethyl (C)[9], Oxidation (M)[16] | Mascot |
|    | 2436.376                                                                                         | 2436.1438 | -0.2322 | -95 | 47          | 70      | FLAVVTESAGGGAFIGVPL<br>HKPGR |   |                                           | Mascot |
| 25 | novel protein similar to vertebrate flavoprotein<br>oxidoreductase MICAL3 (MICAL3) [Danio rerio] |           |         |     | gi 94732107 | 22219.5 | 5.83                         | 7 | 39                                        | 0      |

#### Peptide Information

| Calc. Mass | Obsrv. Mass | ± da    | ± ppm | Start Seq. | End Seq. | Sequence           | Ion Score | C. I. % | Modification           | Rank | Result Type |
|------------|-------------|---------|-------|------------|----------|--------------------|-----------|---------|------------------------|------|-------------|
| 1148.5504  | 1148.6537   | 0.1033  | 90    | 126        | 135      | EMSVVVEPDK         |           |         | Oxidation (M)[2]       |      | Mascot      |
| 1179.6078  | 1179.5649   | -0.0429 | -36   | 115        | 125      | EFGISPIMTGK        |           |         |                        |      | Mascot      |
| 1279.6528  | 1279.7412   | 0.0884  | 69    | 63         | 74       | GVSVDLTTSWK        |           |         |                        |      | Mascot      |
| 1723.8333  | 1723.8914   | 0.0581  | 34    | 50         | 62       | LLNWCQRQTGYR       |           |         | Carbamidomethyl (C)[5] |      | Mascot      |
| 1739.8486  | 1739.8898   | 0.0412  | 24    | 86         | 99       | YRPDLIDFESLDEK     |           |         |                        |      | Mascot      |
| 1739.8486  | 1739.8898   | 0.0412  | 24    | 86         | 99       | YRPDLIDFESLDEK     |           |         |                        |      | Mascot      |
| 1753.8239  | 1753.897    | 0.0731  | 42    | 151        | 166      | DTVPPGENQNLSPEEK   |           |         |                        |      | Mascot      |
| 2211.0815  | 2211.0432   | -0.0383 | -17   | 86         | 103      | YRPDLIDFESLDEKDVEK |           |         |                        |      | Mascot      |

|    |                                                                                  |  |  |  |             |         |      |    |    |   |
|----|----------------------------------------------------------------------------------|--|--|--|-------------|---------|------|----|----|---|
| 26 | novel protein similar to cytochrome P450, family 2,<br>subfamily J [Danio rerio] |  |  |  | gi 55251120 | 56628.2 | 6.49 | 10 | 37 | 0 |
|----|----------------------------------------------------------------------------------|--|--|--|-------------|---------|------|----|----|---|

#### Peptide Information

| Calc. Mass | Obsrv. Mass | ± da    | ± ppm | Start Seq. | End Seq. | Sequence                    | Ion Score | C. I. % | Modification            | Rank | Result Type |
|------------|-------------|---------|-------|------------|----------|-----------------------------|-----------|---------|-------------------------|------|-------------|
| 868.4046   | 868.5009    | 0.0963  | 111   | 467        | 474      | FSATEGEK                    |           |         |                         |      | Mascot      |
| 868.4046   | 868.5009    | 0.0963  | 111   | 467        | 474      | FSATEGEK                    |           |         |                         |      | Mascot      |
| 999.5543   | 999.469     | -0.0853 | -85   | 205        | 212      | TMLKYISK                    |           |         | Oxidation (M)[2]        |      | Mascot      |
| 999.5543   | 999.469     | -0.0853 | -85   | 205        | 212      | TMLKYISK                    |           |         | Oxidation (M)[2]        |      | Mascot      |
| 1045.5459  | 1045.5315   | -0.0144 | -14   | 443        | 451      | VCLGEQIAR                   |           |         | Carbamidomethyl (C)[2]  |      | Mascot      |
| 1070.4976  | 1070.4873   | -0.0103 | -10   | 432        | 441      | DAFMFPSAGK                  |           |         |                         |      | Mascot      |
| 1070.4976  | 1070.4873   | -0.0103 | -10   | 432        | 441      | DAFMFPSAGK                  |           |         |                         |      | Mascot      |
| 1263.6467  | 1263.6743   | 0.0276  | 22    | 160        | 169      | FLLEEIDEQK                  |           |         |                         |      | Mascot      |
| 1280.6191  | 1280.7035   | 0.0844  | 66    | 382        | 392      | DTTLGECFIPK                 |           |         | Carbamidomethyl (C)[7]  |      | Mascot      |
| 1338.6028  | 1338.6633   | 0.0605  | 45    | 149        | 159      | TMELAICEESR                 |           |         | Carbamidomethyl (C)[7]  |      | Mascot      |
| 1514.7921  | 1514.708    | -0.0841 | -56   | 332        | 344      | VQEEIDRVIGNSR               |           |         |                         |      | Mascot      |
| 1677.8628  | 1677.7529   | -0.1099 | -65   | 378        | 392      | VAARDTTLGECFIPK             |           |         | Carbamidomethyl (C)[11] |      | Mascot      |
| 2627.3867  | 2627.2959   | -0.0908 | -35   | 33         | 56       | NPPKYPPSPFSVPLLGN<br>FNVDSK |           |         |                         |      | Mascot      |
| 2627.3867  | 2627.2959   | -0.0908 | -35   | 33         | 56       | NPPKYPPSPFSVPLLGN<br>FNVDSK |           |         |                         |      | Mascot      |

|    |                                                        |  |  |  |             |         |      |    |    |   |
|----|--------------------------------------------------------|--|--|--|-------------|---------|------|----|----|---|
| 27 | cytochrome P450, family 2, subfamily N, polypeptide 13 |  |  |  | gi 55925283 | 56594.1 | 6.45 | 10 | 36 | 0 |
|----|--------------------------------------------------------|--|--|--|-------------|---------|------|----|----|---|

[Danio rerio]

| Peptide Information |                             |         |       |              |                             |           |         |                         |      |        |        |
|---------------------|-----------------------------|---------|-------|--------------|-----------------------------|-----------|---------|-------------------------|------|--------|--------|
| Calc. Mass          | Obsrv. Mass                 | ± da    | ± ppm | Start Seq.   | End Sequence Seq.           | Ion Score | C. I. % | Modification            | Rank | Result | Type   |
| 868.4046            | 868.5009                    | 0.0963  | 111   | 467          | 474 FSATEGEK                |           |         |                         |      |        | Mascot |
| 868.4046            | 868.5009                    | 0.0963  | 111   | 467          | 474 FSATEGEK                |           |         |                         |      |        | Mascot |
| 999.5543            | 999.469                     | -0.0853 | -85   | 205          | 212 TMLKYISK                |           |         | Oxidation (M)[2]        |      |        | Mascot |
| 999.5543            | 999.469                     | -0.0853 | -85   | 205          | 212 TMLKYISK                |           |         | Oxidation (M)[2]        |      |        | Mascot |
| 1045.5459           | 1045.5315                   | -0.0144 | -14   | 443          | 451 VCLGEQIAR               |           |         | Carbamidomethyl (C)[2]  |      |        | Mascot |
| 1070.4976           | 1070.4873                   | -0.0103 | -10   | 432          | 441 DAFMPFSAGK              |           |         |                         |      |        | Mascot |
| 1070.4976           | 1070.4873                   | -0.0103 | -10   | 432          | 441 DAFMPFSAGK              |           |         |                         |      |        | Mascot |
| 1263.6467           | 1263.6743                   | 0.0276  | 22    | 160          | 169 FLLEEIDEQK              |           |         |                         |      |        | Mascot |
| 1280.6191           | 1280.7035                   | 0.0844  | 66    | 382          | 392 DTTLGECFIPK             |           |         | Carbamidomethyl (C)[7]  |      |        | Mascot |
| 1338.6028           | 1338.6633                   | 0.0605  | 45    | 149          | 159 TMELAICEESR             |           |         | Carbamidomethyl (C)[7]  |      |        | Mascot |
| 1514.7921           | 1514.708                    | -0.0841 | -56   | 332          | 344 VQEEIDRVIGNSR           |           |         |                         |      |        | Mascot |
| 1677.8628           | 1677.7529                   | -0.1099 | -65   | 378          | 392 VAARDTTLGECFIPK         |           |         | Carbamidomethyl (C)[11] |      |        | Mascot |
| 2627.3867           | 2627.2959                   | -0.0908 | -35   | 33           | 56 NPPKYPPSPFSVPLLGNIFNVDSK |           |         |                         |      |        | Mascot |
| 2627.3867           | 2627.2959                   | -0.0908 | -35   | 33           | 56 NPPKYPPSPFSVPLLGNIFNVDSK |           |         |                         |      |        | Mascot |
| 28                  | novel protein [Danio rerio] |         |       | gi 220678974 |                             | 29629.7   | 9.23    | 9                       | 36   | 0      |        |

| Peptide Information |             |         |       |            |                         |           |         |                                           |      |        |        |
|---------------------|-------------|---------|-------|------------|-------------------------|-----------|---------|-------------------------------------------|------|--------|--------|
| Calc. Mass          | Obsrv. Mass | ± da    | ± ppm | Start Seq. | End Sequence Seq.       | Ion Score | C. I. % | Modification                              | Rank | Result | Type   |
| 999.4386            | 999.469     | 0.0304  | 30    | 74         | 81 FTCVQCGK             |           |         | Carbamidomethyl (C)[3,6]                  |      |        | Mascot |
| 999.4386            | 999.469     | 0.0304  | 30    | 74         | 81 FTCVQCGK             |           |         | Carbamidomethyl (C)[3,6]                  |      |        | Mascot |
| 1070.5121           | 1070.4873   | -0.0248 | -23   | 73         | 81 KFTCVQCGK            |           |         | Carbamidomethyl (C)[4]                    |      |        | Mascot |
| 1070.5121           | 1070.4873   | -0.0248 | -23   | 73         | 81 KFTCVQCGK            |           |         | Carbamidomethyl (C)[4]                    |      |        | Mascot |
| 1324.6943           | 1324.6494   | -0.0449 | -34   | 145        | 154 FNEHMKIHIR          |           |         |                                           |      |        | Mascot |
| 1324.6943           | 1324.6494   | -0.0449 | -34   | 145        | 154 FNEHMKIHIR          |           |         |                                           |      |        | Mascot |
| 1448.7236           | 1448.8805   | 0.1569  | 108   | 1          | 11 MEIEEKPCRIK          |           |         | Carbamidomethyl (C)[8], Oxidation (M)[1]  |      |        | Mascot |
| 1677.736            | 1677.7529   | 0.0169  | 10    | 213        | 225 SFSCDQCEKTFRLR      |           |         | Carbamidomethyl (C)[4,7]                  |      |        | Mascot |
| 1753.7784           | 1753.897    | 0.1186  | 68    | 179        | 193 FHSEERPFCVCSQCGK    |           |         |                                           |      |        | Mascot |
| 1840.858            | 1840.8896   | 0.0316  | 17    | 123        | 137 IHTGERPFICEHCGK     |           |         | Carbamidomethyl (C)[10,13]                |      |        | Mascot |
| 2233.0864           | 2233.0232   | -0.0632 | -28   | 120        | 137 HVRIHTGERPFICEHCGK  |           |         | Carbamidomethyl (C)[13,16]                |      |        | Mascot |
| 2261.0371           | 2260.9248   | -0.1123 | -50   | 91         | 109 VHMRIHTGERPFTCTDCGK |           |         | Carbamidomethyl (C)[14], Oxidation (M)[3] |      |        | Mascot |

29 novel protein (im:7150924) [Danio rerio] gi|220678255 161869.2 6.04 19 35 0

Peptide Information

| Calc. Mass | Obsrv. Mass | ± da    | ± ppm | Start Seq. | End Sequence Seq.              | Ion Score | C. I. % | Modification                             | Rank | Result Type |
|------------|-------------|---------|-------|------------|--------------------------------|-----------|---------|------------------------------------------|------|-------------|
| 864.4283   | 864.4685    | 0.0402  | 47    | 1011       | 1017 AEAIWMK                   |           |         | Oxidation (M)[6]                         |      | Mascot      |
| 890.473    | 890.4963    | 0.0233  | 26    | 888        | 894 QYNQLPK                    |           |         |                                          |      | Mascot      |
| 922.4814   | 922.4324    | -0.049  | -53   | 1          | 8 PSLFSLCR                     |           |         |                                          |      | Mascot      |
| 1045.5524  | 1045.5315   | -0.0209 | -20   | 1132       | 1141 GNIEDAISVK                |           |         |                                          |      | Mascot      |
| 1070.5265  | 1070.4873   | -0.0392 | -37   | 200        | 207 TYLQNEFR                   |           |         |                                          |      | Mascot      |
| 1070.5265  | 1070.4873   | -0.0392 | -37   | 200        | 207 TYLQNEFR                   |           |         |                                          |      | Mascot      |
| 1096.5092  | 1096.5602   | 0.051   | 47    | 584        | 592 FQNVENMAK                  |           |         | Oxidation (M)[7]                         |      | Mascot      |
| 1164.5466  | 1164.5322   | -0.0144 | -12   | 1001       | 1009 LCKETNDWR                 |           |         |                                          |      | Mascot      |
| 1164.6736  | 1164.5322   | -0.1414 | -121  | 710        | 720 AEGKPAHLTLK                |           |         |                                          |      | Mascot      |
| 1179.5562  | 1179.5649   | 0.0087  | 7     | 1208       | 1217 DIQEVEAMTK                |           |         | Oxidation (M)[8]                         |      | Mascot      |
| 1292.7684  | 1292.6201   | -0.1483 | -115  | 710        | 721 AEGKPAHLTLKK               |           |         |                                          |      | Mascot      |
| 1346.6733  | 1346.6342   | -0.0391 | -29   | 1184       | 1195 ADQMPSQLAIR               |           |         | Oxidation (M)[4]                         |      | Mascot      |
| 1363.6821  | 1363.7131   | 0.031   | 23    | 1169       | 1179 CQMKDSVQVLR               |           |         | Carbamidomethyl (C)[1]                   |      | Mascot      |
| 1379.677   | 1379.7087   | 0.0317  | 23    | 1169       | 1179 CQMKDSVQVLR               |           |         | Carbamidomethyl (C)[1], Oxidation (M)[3] |      | Mascot      |
| 1448.7488  | 1448.8805   | 0.1317  | 91    | 1351       | 1362 VMSLMELIPDIR              |           |         | Oxidation (M)[2,5]                       |      | Mascot      |
| 1514.8325  | 1514.708    | -0.1245 | -82   | 661        | 673 NILESHHVPELVK              |           |         |                                          |      | Mascot      |
| 1537.8308  | 1537.6821   | -0.1487 | -97   | 132        | 143 TLLHIFHDICR                |           |         | Carbamidomethyl (C)[11]                  |      | Mascot      |
| 1841.0392  | 1840.8896   | -0.1496 | -81   | 658        | 673 GIRNILESHHVPELVK           |           |         |                                          |      | Mascot      |
| 2225.0508  | 2225.0549   | 0.0041  | 2     | 1409       | 1427 LYRDSGEPVPFEEPAESF<br>R   |           |         |                                          |      | Mascot      |
| 2261.0498  | 2260.9248   | -0.125  | -55   | 674        | 692 EALTLDKTDMMTEVMM<br>FR     |           |         | Oxidation (M)[12]                        |      | Mascot      |
| 2625.4089  | 2625.2791   | -0.1298 | -49   | 464        | 485 AESLPIKPHYFLPLFAHH<br>HKDK |           |         |                                          |      | Mascot      |

30 laminin alpha 1 [Danio rerio] gi|61744143 334156.2 5.77 21 35 0 13 0

Peptide Information

| Calc. Mass | Obsrv. Mass | ± da    | ± ppm | Start Seq. | End Sequence Seq. | Ion Score | C. I. % | Modification                             | Rank | Result Type |
|------------|-------------|---------|-------|------------|-------------------|-----------|---------|------------------------------------------|------|-------------|
| 842.5206   | 842.4858    | -0.0348 | -41   | 2393       | 2399 IALQRNK      |           |         |                                          |      | Mascot      |
| 856.402    | 856.4987    | 0.0967  | 113   | 1778       | 1784 THNNQSR      |           |         |                                          |      | Mascot      |
| 922.4345   | 922.4324    | -0.0021 | -2    | 3028       | 3034 GCMRNLR      |           |         | Carbamidomethyl (C)[2], Oxidation (M)[3] |      | Mascot      |
| 999.3835   | 999.469     | 0.0855  | 86    | 1482       | 1489 CEEGYEGR     |           |         | Carbamidomethyl (C)[1]                   |      | Mascot      |
| 999.3835   | 999.469     | 0.0855  | 86    | 1482       | 1489 CEEGYEGR     | 13        | 0       | Carbamidomethyl (C)[1]                   |      | Mascot      |
| 1070.4142  | 1070.4873   | 0.0731  | 68    | 2294       | 2302 QGECGGCFR    |           |         | Carbamidomethyl (C)[4,7]                 |      | Mascot      |

|    |                                              |           |         |      |              |      |                              |      |   |    |   |  |                                           |  |  |  |        |
|----|----------------------------------------------|-----------|---------|------|--------------|------|------------------------------|------|---|----|---|--|-------------------------------------------|--|--|--|--------|
|    | 1070.5953                                    | 1070.4873 | -0.108  | -101 | 255          | 263  | DVDPIVTRR                    |      |   |    |   |  |                                           |  |  |  | Mascot |
|    | 1263.6112                                    | 1263.6743 | 0.0631  | 50   | 2327         | 2337 | SMSTSVVMFFK                  |      |   |    |   |  |                                           |  |  |  | Mascot |
|    | 1279.6061                                    | 1279.7412 | 0.1351  | 106  | 2327         | 2337 | SMSTSVVMFFK                  |      |   |    |   |  | Oxidation (M)[2]                          |  |  |  | Mascot |
|    | 1280.6229                                    | 1280.7035 | 0.0806  | 63   | 1286         | 1296 | STQEHALTEHK                  |      |   |    |   |  |                                           |  |  |  | Mascot |
|    | 1324.6864                                    | 1324.6494 | -0.037  | -28  | 2451         | 2462 | QVVARSFVGCМК                 |      |   |    |   |  |                                           |  |  |  | Mascot |
|    | 1324.6864                                    | 1324.6494 | -0.037  | -28  | 2451         | 2462 | QVVARSFVGCМК                 |      |   |    |   |  |                                           |  |  |  | Mascot |
|    | 1379.739                                     | 1379.7087 | -0.0303 | -22  | 2052         | 2062 | YSTQRTNQLLR                  |      |   |    |   |  |                                           |  |  |  | Mascot |
|    | 1498.6447                                    | 1498.6754 | 0.0307  | 20   | 972          | 985  | CQCITGVTGDKCDR               |      |   |    |   |  |                                           |  |  |  | Mascot |
|    | 1498.6447                                    | 1498.6754 | 0.0307  | 20   | 972          | 985  | CQCITGVTGDKCDR               |      |   |    |   |  |                                           |  |  |  | Mascot |
|    | 1514.8114                                    | 1514.708  | -0.1034 | -68  | 110          | 121  | QFHWVTVTDLR                  |      |   |    |   |  |                                           |  |  |  | Mascot |
|    | 1553.8645                                    | 1553.6711 | -0.1934 | -124 | 2003         | 2016 | NLPEGSRAEILQVK               |      |   |    |   |  |                                           |  |  |  | Mascot |
|    | 1560.838                                     | 1560.8362 | -0.0018 | -1   | 1271         | 1285 | LVIYTDASAPANGIR              |      |   |    |   |  |                                           |  |  |  | Mascot |
|    | 1753.8789                                    | 1753.897  | 0.0181  | 10   | 240          | 254  | TLNADLMTLSYRDPK              |      |   |    |   |  | Oxidation (M)[7]                          |  |  |  | Mascot |
|    | 1840.7159                                    | 1840.8896 | 0.1737  | 94   | 1086         | 1101 | NFPQCSACDCNPNGTR             |      |   |    |   |  | Carbamidomethyl (C)[5,8]                  |  |  |  | Mascot |
|    | 2173.7786                                    | 2174.0664 | 0.2878  | 132  | 461          | 480  | CECSLDGSHNTDPCMEC<br>VCK     |      |   |    |   |  |                                           |  |  |  | Mascot |
|    | 2173.7786                                    | 2174.0664 | 0.2878  | 132  | 461          | 480  | CECSLDGSHNTDPCMEC<br>VCK     |      |   |    |   |  |                                           |  |  |  | Mascot |
|    | 2211.1914                                    | 2211.0432 | -0.1482 | -67  | 1959         | 1979 | AALLKNHTDGLMLNVS<br>AVTSR    |      |   |    |   |  |                                           |  |  |  | Mascot |
|    | 2232.9365                                    | 2233.0232 | 0.0867  | 39   | 1531         | 1548 | CECKPGVRGHLCDQCEE<br>R       |      |   |    |   |  | Carbamidomethyl (C)[1,3,12]               |  |  |  | Mascot |
|    | 2246.7949                                    | 2247.0151 | 0.2202  | 98   | 461          | 480  | CECSLDGSHNTDPCMEC<br>VCK     |      |   |    |   |  | Carbamidomethyl (C)[1], Oxidation (M)[15] |  |  |  | Mascot |
|    | 2278.0364                                    | 2277.9395 | -0.0969 | -43  | 2983         | 3003 | CSVRSVNTENPHSSSTS<br>AETK    |      |   |    |   |  | Carbamidomethyl (C)[1]                    |  |  |  | Mascot |
|    | 2721.1814                                    | 2721.2354 | 0.054   | 20   | 1361         | 1385 | LVEICECPPGYAGLSCQE<br>CAPGYR |      |   |    |   |  |                                           |  |  |  | Mascot |
| 31 | hypothetical protein LOC566247 [Danio rerio] |           |         |      | gi 224496088 |      | 20456.5                      | 8.24 | 6 | 35 | 0 |  |                                           |  |  |  |        |

Peptide Information

| Calc. Mass | Obsrv. Mass | ± da    | ± ppm | Start Seq. | End Seq. | Sequence         | Ion Score | C. I. | % Modification         | Rank | Result Type |
|------------|-------------|---------|-------|------------|----------|------------------|-----------|-------|------------------------|------|-------------|
| 868.5865   | 868.5009    | -0.0856 | -99   | 28         | 35       | ALLILPTK         |           |       |                        |      | Mascot      |
| 868.5865   | 868.5009    | -0.0856 | -99   | 28         | 35       | ALLILPTK         |           |       |                        |      | Mascot      |
| 922.3934   | 922.4324    | 0.039   | 42    | 177        | 184      | GCDIQDKS         |           |       | Carbamidomethyl (C)[2] |      | Mascot      |
| 996.6815   | 996.5663    | -0.1152 | -116  | 27         | 35       | KALLILPTK        |           |       |                        |      | Mascot      |
| 1148.5365  | 1148.6537   | 0.1172  | 102   | 129        | 138      | VNADQCLSNK       |           |       | Carbamidomethyl (C)[6] |      | Mascot      |
| 1753.988   | 1753.897    | -0.091  | -52   | 28         | 43       | ALLILPTKSSAHEMVK |           |       | Oxidation (M)[14]      |      | Mascot      |
| 1840.9064  | 1840.8896   | -0.0168 | -9    | 163        | 176      | IPCLYHNHLSFFR    |           |       | Carbamidomethyl (C)[3] |      | Mascot      |

|    |                                     |  |  |  |             |  |         |      |    |    |   |  |  |  |  |  |  |
|----|-------------------------------------|--|--|--|-------------|--|---------|------|----|----|---|--|--|--|--|--|--|
| 32 | FLJ22611-like protein [Danio rerio] |  |  |  | gi 21105474 |  | 61570.7 | 8.74 | 11 | 35 | 0 |  |  |  |  |  |  |
|----|-------------------------------------|--|--|--|-------------|--|---------|------|----|----|---|--|--|--|--|--|--|

| Peptide Information |             |          |           |            |          |                         |           |       |                          |      |             |
|---------------------|-------------|----------|-----------|------------|----------|-------------------------|-----------|-------|--------------------------|------|-------------|
| Calc. Mass          | Obsrv. Mass | $\pm$ da | $\pm$ ppm | Start Seq. | End Seq. | Sequence                | Ion Score | C. I. | % Modification           | Rank | Result Type |
| 864.4573            | 864.4685    | 0.0112   | 13        | 247        | 253      | QAQIYNK                 |           |       |                          |      | Mascot      |
| 870.462             | 870.5146    | 0.0526   | 60        | 333        | 338      | AFWYKR                  |           |       |                          |      | Mascot      |
| 999.5403            | 999.469     | -0.0713  | -71       | 130        | 137      | VQSLKHCK                |           |       | Carbamidomethyl (C)[7]   |      | Mascot      |
| 999.5403            | 999.469     | -0.0713  | -71       | 130        | 137      | VQSLKHCK                |           |       | Carbamidomethyl (C)[7]   |      | Mascot      |
| 1148.6283           | 1148.6537   | 0.0254   | 22        | 503        | 512      | QNSKKPGPHR              |           |       |                          |      | Mascot      |
| 1164.5322           | 1164.5322   | 0        | 0         | 295        | 304      | VPCCSLCGLR              |           |       | Carbamidomethyl (C)[3,4] |      | Mascot      |
| 1164.5322           | 1164.5322   | 0        | 0         | 295        | 304      | VPCCSLCGLR              |           |       | Carbamidomethyl (C)[3,4] |      | Mascot      |
| 1263.6038           | 1263.6743   | 0.0705   | 56        | 268        | 277      | YYTEKSITCR              |           |       |                          |      | Mascot      |
| 1292.6272           | 1292.6201   | -0.0071  | -5        | 294        | 304      | KVPCCSLCGLR             |           |       | Carbamidomethyl (C)[4,5] |      | Mascot      |
| 1338.5995           | 1338.6633   | 0.0638   | 48        | 234        | 244      | GQEQMWTVSEK             |           |       | Oxidation (M)[5]         |      | Mascot      |
| 1553.7126           | 1553.6711   | -0.0415  | -27       | 2          | 15       | FLWSPEASSVPCK           |           |       |                          |      | Mascot      |
| 2174.0698           | 2174.0664   | -0.0034  | -2        | 16         | 33       | SEFINRALLEMFGFQER       |           |       |                          |      | Mascot      |
| 2174.0698           | 2174.0664   | -0.0034  | -2        | 16         | 33       | SEFINRALLEMFGFQER       |           |       |                          |      | Mascot      |
| 2246.9827           | 2247.0151   | 0.0324   | 14        | 339        | 357      | CHRCGMTGHFIDACPQI<br>WR |           |       | Oxidation (M)[6]         |      | Mascot      |

33 PREDICTED: discoidin domain-containing receptor 2 gi|326668701 98298 5.24 12 35 0  
[Danio rerio]

| Peptide Information |             |          |           |            |          |                       |           |       |                                                 |      |             |
|---------------------|-------------|----------|-----------|------------|----------|-----------------------|-----------|-------|-------------------------------------------------|------|-------------|
| Calc. Mass          | Obsrv. Mass | $\pm$ da | $\pm$ ppm | Start Seq. | End Seq. | Sequence              | Ion Score | C. I. | % Modification                                  | Rank | Result Type |
| 840.3958            | 840.365     | -0.0308  | -37       | 133        | 139      | YSRDGSR               |           |       |                                                 |      | Mascot      |
| 890.3849            | 890.4963    | 0.1114   | 125       | 2          | 9        | GQDEEQGK              |           |       |                                                 |      | Mascot      |
| 1017.5377           | 1017.5414   | 0.0037   | 4         | 140        | 146      | WISWRNR               |           |       |                                                 |      | Mascot      |
| 1045.5071           | 1045.5315   | 0.0244   | 23        | 833        | 840      | LMLSCWHR              |           |       |                                                 |      | Mascot      |
| 1164.5037           | 1164.5322   | 0.0285   | 24        | 296        | 304      | VHCNNMFSR             |           |       | Carbamidomethyl (C)[3]                          |      | Mascot      |
| 1164.5037           | 1164.5322   | 0.0285   | 24        | 296        | 304      | VHCNNMFSR             |           |       | Carbamidomethyl (C)[3]                          |      | Mascot      |
| 1179.6005           | 1179.5649   | -0.0356  | -30       | 556        | 565      | DVAVEEFSRK            |           |       |                                                 |      | Mascot      |
| 1263.5834           | 1263.6743   | 0.0909   | 72        | 296        | 305      | VHCNNMFSRR            |           |       |                                                 |      | Mascot      |
| 1279.5782           | 1279.7412   | 0.163    | 127       | 296        | 305      | VHCNNMFSRR            |           |       | Oxidation (M)[6]                                |      | Mascot      |
| 1515.7625           | 1515.7042   | -0.0583  | -38       | 727        | 739      | NFTIKIADFGMSR         |           |       | Oxidation (M)[11]                               |      | Mascot      |
| 1515.7625           | 1515.7042   | -0.0583  | -38       | 727        | 739      | NFTIKIADFGMSR         |           |       | Oxidation (M)[11]                               |      | Mascot      |
| 1784.7587           | 1784.8633   | 0.1046   | 59        | 177        | 190      | FMPVIDHSMNVCMR        |           |       | Carbamidomethyl (C)[12], Oxidation (M)[2,9,13]  |      | Mascot      |
| 2186.9966           | 2186.9268   | -0.0698  | -32       | 174        | 190      | FVRFMFVIDHSMNVCMR     |           |       | Carbamidomethyl (C)[15], Oxidation (M)[5,12,16] |      | Mascot      |
| 2577.6694           | 2577.3262   | -0.3432  | -133      | 412        | 434      | ILIGCLVAIFILVAIIVILWR |           |       |                                                 |      | Mascot      |



|    |                                                                                           |           |        |    |             |     |                             |      |    |    |   |                         |        |
|----|-------------------------------------------------------------------------------------------|-----------|--------|----|-------------|-----|-----------------------------|------|----|----|---|-------------------------|--------|
|    | 2627.1211                                                                                 | 2627.2959 | 0.1748 | 67 | 573         | 595 | LGEGQFGEVHLCEAEGM<br>QDFMDK |      |    |    |   | Carbamidomethyl (C)[12] | Mascot |
|    | 2627.1211                                                                                 | 2627.2959 | 0.1748 | 67 | 573         | 595 | LGEGQFGEVHLCEAEGM<br>QDFMDK |      |    |    |   | Carbamidomethyl (C)[12] | Mascot |
| 34 | dolichyl-diphosphooligosaccharide--protein<br>glycosyltransferase subunit 1 [Danio rerio] |           |        |    | gi 37497110 |     | 67585.9                     | 6.33 | 10 | 34 | 0 |                         |        |

#### Peptide Information

| Calc. Mass | Obsrv. Mass | ± da    | ± ppm | Start Seq. | End Seq. | Sequence                  | Ion Score | C. I. | % Modification    | Rank | Result Type |
|------------|-------------|---------|-------|------------|----------|---------------------------|-----------|-------|-------------------|------|-------------|
| 868.525    | 868.5009    | -0.0241 | -28   | 363        | 370      | LILPEGAR                  |           |       |                   |      | Mascot      |
| 868.525    | 868.5009    | -0.0241 | -28   | 363        | 370      | LILPEGAR                  |           |       |                   |      | Mascot      |
| 890.4326   | 890.4963    | 0.0637  | 72    | 499        | 507      | DTGALNSGR                 |           |       |                   |      | Mascot      |
| 999.4676   | 999.469     | 0.0014  | 1     | 486        | 493      | HMDEVVNR                  |           |       |                   |      | Mascot      |
| 999.4676   | 999.469     | 0.0014  | 1     | 486        | 493      | HMDEVVNR                  |           |       |                   |      | Mascot      |
| 1070.5588  | 1070.4873   | -0.0715 | -67   | 93         | 102      | EKTVHGGQSGK               |           |       |                   |      | Mascot      |
| 1070.5588  | 1070.4873   | -0.0715 | -67   | 93         | 102      | EKTVHGGQSGK               |           |       |                   |      | Mascot      |
| 1292.6191  | 1292.6201   | 0.001   | 1     | 196        | 206      | DIPPFQDVMK                |           |       | Oxidation (M)[10] |      | Mascot      |
| 1346.7274  | 1346.6342   | -0.0932 | -69   | 516        | 527      | TLTNDITALQTR              |           |       |                   |      | Mascot      |
| 1363.6635  | 1363.7131   | 0.0496  | 36    | 551        | 562      | DLVCRSSLDAER              |           |       |                   |      | Mascot      |
| 1514.8788  | 1514.708    | -0.1708 | -113  | 466        | 479      | VASITEQVLTLVNK            |           |       |                   |      | Mascot      |
| 1515.8237  | 1515.7042   | -0.1195 | -79   | 43         | 56       | ITAEIQLANRGSSR            |           |       |                   |      | Mascot      |
| 1515.8237  | 1515.7042   | -0.1195 | -79   | 43         | 56       | ITAEIQLANRGSSR            |           |       |                   |      | Mascot      |
| 2436.3035  | 2436.1438   | -0.1597 | -66   | 122        | 142      | VETVFSHVLKPFPTHITQ<br>AER |           |       |                   |      | Mascot      |

|    |                                        |  |  |  |              |  |         |      |    |    |   |  |  |
|----|----------------------------------------|--|--|--|--------------|--|---------|------|----|----|---|--|--|
| 35 | Si:ch211-63j24.3 protein [Danio rerio] |  |  |  | gi 197245556 |  | 65858.3 | 9.06 | 12 | 34 | 0 |  |  |
|----|----------------------------------------|--|--|--|--------------|--|---------|------|----|----|---|--|--|

#### Peptide Information

| Calc. Mass | Obsrv. Mass | ± da    | ± ppm | Start Seq. | End Seq. | Sequence    | Ion Score | C. I. | % Modification     | Rank | Result Type |
|------------|-------------|---------|-------|------------|----------|-------------|-----------|-------|--------------------|------|-------------|
| 856.4457   | 856.4987    | 0.053   | 62    | 128        | 134      | DMHLKGR     |           |       |                    |      | Mascot      |
| 870.577    | 870.5146    | -0.0624 | -72   | 161        | 167      | LLEVKLKLR   |           |       |                    |      | Mascot      |
| 1017.5826  | 1017.5414   | -0.0412 | -40   | 276        | 284      | LVSDTLLEK   |           |       |                    |      | Mascot      |
| 1051.5604  | 1051.6808   | 0.1204  | 114   | 418        | 426      | CLEYLAALR   |           |       |                    |      | Mascot      |
| 1148.5088  | 1148.6537   | 0.1449  | 126   | 185        | 192      | WHMEMSRR    |           |       | Oxidation (M)[3]   |      | Mascot      |
| 1164.5038  | 1164.5322   | 0.0284  | 24    | 185        | 192      | WHMEMSRR    |           |       | Oxidation (M)[3,5] |      | Mascot      |
| 1164.5038  | 1164.5322   | 0.0284  | 24    | 185        | 192      | WHMEMSRR    |           |       | Oxidation (M)[3,5] |      | Mascot      |
| 1165.6576  | 1165.7109   | 0.0533  | 46    | 266        | 275      | IVSYSERALK  |           |       |                    |      | Mascot      |
| 1292.7395  | 1292.6201   | -0.1194 | -92   | 416        | 426      | IKCLEYLAALR |           |       |                    |      | Mascot      |

|    |                                              |           |         |      |              |     |                               |      |   |    |                    |  |  |        |
|----|----------------------------------------------|-----------|---------|------|--------------|-----|-------------------------------|------|---|----|--------------------|--|--|--------|
|    | 1324.6604                                    | 1324.6494 | -0.011  | -8   | 527          | 538 | EDVTANAQHALR                  |      |   |    |                    |  |  | Mascot |
|    | 1324.6604                                    | 1324.6494 | -0.011  | -8   | 527          | 538 | EDVTANAQHALR                  |      |   |    |                    |  |  | Mascot |
|    | 1363.5972                                    | 1363.7131 | 0.1159  | 85   | 569          | 582 | DGSDVGEAGEADGKK               |      |   |    |                    |  |  | Mascot |
|    | 1537.754                                     | 1537.6821 | -0.0719 | -47  | 237          | 249 | RPDSPDDRHHIMAK                |      |   |    |                    |  |  | Mascot |
|    | 1553.7489                                    | 1553.6711 | -0.0778 | -50  | 237          | 249 | RPDSPDDRHHIMAK                |      |   |    | Oxidation (M)[11]  |  |  | Mascot |
|    | 2267.2766                                    | 2267.0332 | -0.2434 | -107 | 216          | 236 | MAPPPLMGRSPVPPPL<br>PVR       |      |   |    | Oxidation (M)[1,7] |  |  | Mascot |
|    | 2577.4683                                    | 2577.3262 | -0.1421 | -55  | 48           | 72  | APAVVSKPSTSAVVKME<br>EVKPPVVK |      |   |    |                    |  |  | Mascot |
| 36 | nitrogen fixation cluster-like [Danio rerio] |           |         |      | gi 221307563 |     | 17420.2                       | 8.83 | 6 | 33 | 0                  |  |  |        |

#### Peptide Information

| Calc. Mass | Obsrv. Mass | ± da    | ± ppm | Start Seq. | End Seq. | Sequence                  | Ion Score | C. I. | % Modification                             | Rank | Result Type |
|------------|-------------|---------|-------|------------|----------|---------------------------|-----------|-------|--------------------------------------------|------|-------------|
| 882.5294   | 882.5394    | 0.01    | 11    | 122        | 129      | ELSLPPVK                  |           |       |                                            |      | Mascot      |
| 1045.5636  | 1045.5315   | -0.0321 | -31   | 42         | 51       | NVGSLDKNAK                |           |       |                                            |      | Mascot      |
| 1346.6443  | 1346.6342   | -0.0101 | -8    | 130        | 141      | LHCSMLAEDAIAK             |           |       | Oxidation (M)[5]                           |      | Mascot      |
| 1739.9836  | 1739.8898   | -0.0938 | -54   | 9          | 24       | CAAPQILKTLAPTTLR          |           |       | Carbamidomethyl (C)[1]                     |      | Mascot      |
| 1739.9836  | 1739.8898   | -0.0938 | -54   | 9          | 24       | CAAPQILKTLAPTTLR          |           |       | Carbamidomethyl (C)[1]                     |      | Mascot      |
| 2247.1113  | 2247.0151   | -0.0962 | -43   | 84         | 104      | FKTFGCGSAIASSSLATE<br>WVK |           |       | Carbamidomethyl (C)[6]                     |      | Mascot      |
| 2267.1775  | 2267.0332   | -0.1443 | -64   | 122        | 141      | ELSLPPVKLHCSMLAEDA<br>IK  |           |       | Carbamidomethyl (C)[11], Oxidation (M)[13] |      | Mascot      |

|    |                                                                      |  |  |  |              |  |         |      |   |    |   |  |  |  |
|----|----------------------------------------------------------------------|--|--|--|--------------|--|---------|------|---|----|---|--|--|--|
| 37 | PREDICTED: WD repeat and SOCS box-containing protein 2 [Danio rerio] |  |  |  | gi 292613638 |  | 45733.1 | 8.52 | 8 | 33 | 0 |  |  |  |
|----|----------------------------------------------------------------------|--|--|--|--------------|--|---------|------|---|----|---|--|--|--|

#### Peptide Information

| Calc. Mass | Obsrv. Mass | ± da    | ± ppm | Start Seq. | End Seq. | Sequence                        | Ion Score | C. I. | % Modification         | Rank | Result Type |
|------------|-------------|---------|-------|------------|----------|---------------------------------|-----------|-------|------------------------|------|-------------|
| 1017.6203  | 1017.5414   | -0.0789 | -78   | 351        | 359      | VPHLVPSLR                       |           |       |                        |      | Mascot      |
| 1070.5015  | 1070.4873   | -0.0142 | -13   | 222        | 229      | HLTYDHER                        |           |       |                        |      | Mascot      |
| 1070.5015  | 1070.4873   | -0.0142 | -13   | 222        | 229      | HLTYDHER                        |           |       |                        |      | Mascot      |
| 1096.6514  | 1096.5602   | -0.0912 | -83   | 59         | 67       | LLPWPLTTR                       |           |       |                        |      | Mascot      |
| 1498.6631  | 1498.6754   | 0.0123  | 8     | 28         | 40       | LYGTPDCETWSAR                   |           |       |                        |      | Mascot      |
| 1498.6631  | 1498.6754   | 0.0123  | 8     | 28         | 40       | LYGTPDCETWSAR                   |           |       |                        |      | Mascot      |
| 2187.0513  | 2186.9268   | -0.1245 | -57   | 22         | 40       | AAHRPRLYGTPDCETWS<br>AR         |           |       |                        |      | Mascot      |
| 2233.259   | 2233.0232   | -0.2358 | -106  | 364        | 383      | VALRFSISTYQVEALPLPT<br>K        |           |       |                        |      | Mascot      |
| 2267.1741  | 2267.0332   | -0.1409 | -62   | 2          | 21       | CAPPQAYNVKEPPELLAE<br>LK        |           |       | Carbamidomethyl (C)[1] |      | Mascot      |
| 3089.5593  | 3089.5261   | -0.0332 | -11   | 41         | 67       | FSPDGSYFAWSMGFGVI<br>KLLPWPLTTR |           |       | Oxidation (M)[12]      |      | Mascot      |

|    |                                                 |  |  |  |              |  |          |      |    |    |   |  |  |  |
|----|-------------------------------------------------|--|--|--|--------------|--|----------|------|----|----|---|--|--|--|
| 38 | PREDICTED: non-receptor tyrosine-protein kinase |  |  |  | gi 326666158 |  | 131488.6 | 6.79 | 14 | 33 | 0 |  |  |  |
|----|-------------------------------------------------|--|--|--|--------------|--|----------|------|----|----|---|--|--|--|

TYK2-like [Danio rerio]

| Peptide Information |                                |         |       |             |                              |           |         |                        |                  |
|---------------------|--------------------------------|---------|-------|-------------|------------------------------|-----------|---------|------------------------|------------------|
| Calc. Mass          | Obsrv. Mass                    | ± da    | ± ppm | Start Seq.  | End Sequence Seq.            | Ion Score | C. I. % | Modification           | Rank Result Type |
| 850.4668            | 850.5162                       | 0.0494  | 58    | 1013        | 1020 IGDFGLTK                |           |         |                        | Mascot           |
| 922.4814            | 922.4324                       | -0.049  | -53   | 206         | 213 CIPLSFSR                 |           |         |                        | Mascot           |
| 996.4753            | 996.5663                       | 0.091   | 91    | 1108        | 1116 LPCPPGCPR               |           |         | Carbamidomethyl (C)[3] | Mascot           |
| 1070.4935           | 1070.4873                      | -0.0062 | -6    | 34          | 42 DGERCLSYK                 |           |         |                        | Mascot           |
| 1070.4935           | 1070.4873                      | -0.0062 | -6    | 34          | 42 DGERCLSYK                 |           |         |                        | Mascot           |
| 1148.5946           | 1148.6537                      | 0.0591  | 51    | 443         | 452 EVEEGAFLVR               |           |         |                        | Mascot           |
| 1338.6405           | 1338.6633                      | 0.0228  | 17    | 1105        | 1116 NERLPCPPGCPR            |           |         |                        | Mascot           |
| 1491.8026           | 1491.6094                      | -0.1932 | -130  | 1152        | 1164 QPSSLQLAQLNHR           |           |         |                        | Mascot           |
| 1498.8165           | 1498.6754                      | -0.1411 | -94   | 679         | 691 AHVSPQWKFTVAK            |           |         |                        | Mascot           |
| 1498.8165           | 1498.6754                      | -0.1411 | -94   | 679         | 691 AHVSPQWKFTVAK            |           |         |                        | Mascot           |
| 1560.7111           | 1560.8362                      | 0.1251  | 80    | 907         | 920 QEGDGSSLHVSWMK           |           |         |                        | Mascot           |
| 1677.958            | 1677.7529                      | -0.2051 | -122  | 705         | 719 LVHGNVCGKNILVVR          |           |         | Carbamidomethyl (C)[7] | Mascot           |
| 1739.965            | 1739.8898                      | -0.0752 | -43   | 997         | 1012 DLAARNVLENEGVVK         |           |         |                        | Mascot           |
| 1739.965            | 1739.8898                      | -0.0752 | -43   | 997         | 1012 DLAARNVLENEGVVK         |           |         |                        | Mascot           |
| 1767.8226           | 1767.9131                      | 0.0905  | 51    | 1082        | 1097 FSDMMGTVHGQMTVVK        |           |         |                        | Mascot           |
| 2233.1399           | 2233.0232                      | -0.1167 | -52   | 13          | 33 AGTSKGQSEGPGVHVFL FWTK    |           |         |                        | Mascot           |
| 2627.3748           | 2627.2959                      | -0.0789 | -30   | 419         | 441 VVLSESNDLHGPLMDEF VLQKLK |           |         | Oxidation (M)[14]      | Mascot           |
| 2627.3748           | 2627.2959                      | -0.0789 | -30   | 419         | 441 VVLSESNDLHGPLMDEF VLQKLK |           |         | Oxidation (M)[14]      | Mascot           |
| 39                  | lamin B receptor [Danio rerio] |         |       | gi 56207454 |                              | 70231.7   | 9.49    | 10                     | 33 0             |

| Peptide Information |             |         |       |            |                   |           |         |                  |                  |
|---------------------|-------------|---------|-------|------------|-------------------|-----------|---------|------------------|------------------|
| Calc. Mass          | Obsrv. Mass | ± da    | ± ppm | Start Seq. | End Sequence Seq. | Ion Score | C. I. % | Modification     | Rank Result Type |
| 840.392             | 840.365     | -0.027  | -32   | 27         | 33 VMSFDNK        |           |         |                  | Mascot           |
| 850.5032            | 850.5162    | 0.013   | 15    | 382        | 388 IKSFDIK       |           |         |                  | Mascot           |
| 856.3868            | 856.4987    | 0.1119  | 131   | 27         | 33 VMSFDNK        |           |         | Oxidation (M)[2] | Mascot           |
| 1070.5814           | 1070.4873   | -0.0941 | -88   | 80         | 89 SSARSPGRPR     |           |         |                  | Mascot           |
| 1070.5814           | 1070.4873   | -0.0941 | -88   | 80         | 89 SSARSPGRPR     |           |         |                  | Mascot           |
| 1164.6008           | 1164.5322   | -0.0686 | -59   | 518        | 528 NPSPDAVSHLK   |           |         |                  | Mascot           |
| 1164.6008           | 1164.5322   | -0.0686 | -59   | 518        | 528 NPSPDAVSHLK   |           |         |                  | Mascot           |
| 1292.6957           | 1292.6201   | -0.0756 | -58   | 517        | 528 KNPSDAVSHLK   |           |         |                  | Mascot           |
| 1363.5988           | 1363.7131   | 0.1143  | 84    | 598        | 608 KYGSAWEEYCK   |           |         |                  | Mascot           |

|    |                                      |           |         |     |              |     |                           |      |   |    |   |    |                   |        |
|----|--------------------------------------|-----------|---------|-----|--------------|-----|---------------------------|------|---|----|---|----|-------------------|--------|
|    | 1560.7952                            | 1560.8362 | 0.041   | 26  | 2            | 15  | PPARFQIGDVTVMGR           |      |   |    |   |    | Oxidation (M)[12] | Mascot |
|    | 1784.968                             | 1784.8633 | -0.1047 | -59 | 36           | 50  | LYTVIYKDGTELELK           |      |   |    |   |    |                   | Mascot |
|    | 2193.032                             | 2193.0059 | -0.0261 | -12 | 16           | 33  | WPGSNLYYEKVMMSFDN<br>K    |      |   |    |   |    | Oxidation (M)[13] | Mascot |
|    | 2233.0579                            | 2233.0232 | -0.0347 | -16 | 150          | 170 | AAPVVTEETETETESQNT<br>GGR |      |   |    |   |    |                   | Mascot |
| 40 | RNA-binding protein 45 [Danio rerio] |           |         |     | gi 188528716 |     | 52052                     | 6.69 | 7 | 33 | 0 | 13 | 0                 |        |

#### Peptide Information

| Calc. Mass | Obsrv. Mass | ± da    | ± ppm | Start Seq. | End Seq. | Sequence       | Ion Score | C. I. % | Modification                             | Rank | Result Type |
|------------|-------------|---------|-------|------------|----------|----------------|-----------|---------|------------------------------------------|------|-------------|
| 850.4265   | 850.5162    | 0.0897  | 105   | 144        | 151      | NKTTGDSK       |           |         |                                          |      | Mascot      |
| 868.4015   | 868.5009    | 0.0994  | 114   | 235        | 241      | CLMVSSR        | 13        | 0       | Carbamidomethyl (C)[1], Oxidation (M)[3] |      | Mascot      |
| 868.4015   | 868.5009    | 0.0994  | 114   | 235        | 241      | CLMVSSR        |           |         | Carbamidomethyl (C)[1], Oxidation (M)[3] |      | Mascot      |
| 870.4753   | 870.5146    | 0.0393  | 45    | 450        | 457      | VMLADPPK       |           |         |                                          |      | Mascot      |
| 890.5127   | 890.4963    | -0.0164 | -18   | 442        | 449      | VVNGVKMK       |           |         | Oxidation (M)[7]                         |      | Mascot      |
| 1263.6116  | 1263.6743   | 0.0627  | 50    | 293        | 303      | LNGFEYPPGNNR   |           |         |                                          |      | Mascot      |
| 1338.6172  | 1338.6633   | 0.0461  | 34    | 304        | 315      | LSVSFVDDGEDR   |           |         |                                          |      | Mascot      |
| 1537.6193  | 1537.6821   | 0.0628  | 41    | 67         | 80       | SSQACTAMEEMHGR |           |         |                                          |      | Mascot      |
| 1553.6141  | 1553.6711   | 0.057   | 37    | 67         | 80       | SSQACTAMEEMHGR |           |         | Oxidation (M)[8]                         |      | Mascot      |

|    |                          |  |  |  |              |  |          |      |   |  |    |   |  |
|----|--------------------------|--|--|--|--------------|--|----------|------|---|--|----|---|--|
| 41 | stabilin-1 [Danio rerio] |  |  |  | gi 307344645 |  | 277672.3 | 5.86 | 1 |  | 17 | 0 |  |
|----|--------------------------|--|--|--|--------------|--|----------|------|---|--|----|---|--|

#### Peptide Information

| Calc. Mass | Obsrv. Mass | ± da   | ± ppm | Start Seq. | End Seq. | Sequence | Ion Score | C. I. % | Modification | Rank | Result Type |
|------------|-------------|--------|-------|------------|----------|----------|-----------|---------|--------------|------|-------------|
| 868.4345   | 868.5009    | 0.0664 | 76    | 648        | 655      | ISFGSCVR | 17        | 0       |              | 2    | Mascot      |

|    |                                              |  |  |  |              |  |          |      |   |  |    |   |  |
|----|----------------------------------------------|--|--|--|--------------|--|----------|------|---|--|----|---|--|
| 42 | hypothetical protein LOC555595 [Danio rerio] |  |  |  | gi 320202999 |  | 113405.4 | 9.01 | 1 |  | 15 | 0 |  |
|----|----------------------------------------------|--|--|--|--------------|--|----------|------|---|--|----|---|--|

#### Peptide Information

| Calc. Mass | Obsrv. Mass | ± da   | ± ppm | Start Seq. | End Seq. | Sequence | Ion Score | C. I. % | Modification | Rank | Result Type |
|------------|-------------|--------|-------|------------|----------|----------|-----------|---------|--------------|------|-------------|
| 868.4634   | 868.5009    | 0.0375 | 43    | 688        | 694      | EAEKHVR  | 17        | 0       |              | 2    | Mascot      |

|    |                                                                                    |  |  |  |              |  |          |      |   |  |    |   |  |
|----|------------------------------------------------------------------------------------|--|--|--|--------------|--|----------|------|---|--|----|---|--|
| 43 | PREDICTED: retrotransposable element Tf2 155 kDa protein type 1-like [Danio rerio] |  |  |  | gi 326678715 |  | 151921.2 | 9.26 | 1 |  | 14 | 0 |  |
|----|------------------------------------------------------------------------------------|--|--|--|--------------|--|----------|------|---|--|----|---|--|

#### Peptide Information

| Calc. Mass | Obsrv. Mass | ± da   | ± ppm | Start Seq. | End Seq. | Sequence | Ion Score | C. I. % | Modification | Rank | Result Type |
|------------|-------------|--------|-------|------------|----------|----------|-----------|---------|--------------|------|-------------|
| 868.4457   | 868.5009    | 0.0552 | 64    | 878        | 885      | ISCHPGVR | 14        | 0       |              | 4    | Mascot      |

44 2-oxo-4-hydroxy-4-carboxy-5-ureidoimidazoline  
decarboxylase [Danio rerio] gi|122114553 19730.1 5.63 1 14 0

Peptide Information

| Calc. Mass | Obsrv. Mass | ± da    | ± ppm | Start Seq. | End Seq. | Sequence     | Ion Score | C. I. % | Modification            | Rank | Result Type |
|------------|-------------|---------|-------|------------|----------|--------------|-----------|---------|-------------------------|------|-------------|
| 1498.7623  | 1498.6754   | -0.0869 | -58   | 113        | 124      | ERFGFPFVICAR | 14        | 0       | Carbamidomethyl (C)[10] | 2    | Mascot      |

45 laminin subunit alpha-1 [Danio rerio] gi|77993334 335488.1 5.65 1 13 0

Peptide Information

| Calc. Mass | Obsrv. Mass | ± da   | ± ppm | Start Seq. | End Seq. | Sequence | Ion Score | C. I. % | Modification           | Rank | Result Type |
|------------|-------------|--------|-------|------------|----------|----------|-----------|---------|------------------------|------|-------------|
| 999.3835   | 999.469     | 0.0855 | 86    | 1482       | 1489     | CEEGYEGR | 13        | 0       | Carbamidomethyl (C)[1] | 1    | Mascot      |

46 NADH dehydrogenase [ubiquinone] 1 beta subcomplex  
subunit 6 [Danio rerio] gi|41387136 15017.9 9.15 1 13 0

Peptide Information

| Calc. Mass | Obsrv. Mass | ± da    | ± ppm | Start Seq. | End Seq. | Sequence   | Ion Score | C. I. % | Modification | Rank | Result Type |
|------------|-------------|---------|-------|------------|----------|------------|-----------|---------|--------------|------|-------------|
| 1070.588   | 1070.4873   | -0.1007 | -94   | 64         | 73       | AYFAGVTTLK | 13        | 0       |              | 2    | Mascot      |

47 LOC569234 protein [Danio rerio] gi|166796343 69947.9 8.63 1 13 0

Peptide Information

| Calc. Mass | Obsrv. Mass | ± da    | ± ppm | Start Seq. | End Seq. | Sequence  | Ion Score | C. I. % | Modification | Rank | Result Type |
|------------|-------------|---------|-------|------------|----------|-----------|-----------|---------|--------------|------|-------------|
| 1164.6736  | 1164.5322   | -0.1414 | -121  | 624        | 633      | VNSFLSRLK | 13        | 0       |              | 1    | Mascot      |

48 titin b [Danio rerio] gi|110005908 3197663 5.99 1 11 0

Peptide Information

| Calc. Mass | Obsrv. Mass | ± da    | ± ppm | Start Seq. | End Seq. | Sequence    | Ion Score | C. I. % | Modification | Rank | Result Type |
|------------|-------------|---------|-------|------------|----------|-------------|-----------|---------|--------------|------|-------------|
| 1070.6428  | 1070.4873   | -0.1555 | -145  | 19771      | 19781    | GIVVRAGGSVR | 11        | 0       |              | 3    | Mascot      |

49 Zgc:110243 protein [Danio rerio] gi|182889638 28999.9 9.27 1 11 0

Peptide Information

| Calc. Mass | Obsrv. Mass | ± da    | ± ppm | Start Seq. | End Seq. | Sequence      | Ion Score | C. I. % | Modification | Rank | Result Type |
|------------|-------------|---------|-------|------------|----------|---------------|-----------|---------|--------------|------|-------------|
| 1498.7617  | 1498.6754   | -0.0863 | -58   | 59         | 71       | GLIEACHRLEMAR | 11        | 0       |              | 3    | Mascot      |

50 39S ribosomal protein L20, mitochondrial [Danio rerio] gi|113679419 17280.4 11.64 1 11 0

| Peptide Information      |                            |               |            |            |                                  |               |                       |                                   |                   |             |
|--------------------------|----------------------------|---------------|------------|------------|----------------------------------|---------------|-----------------------|-----------------------------------|-------------------|-------------|
| Calc. Mass               | Obsrv. Mass                | ± da          | ± ppm      | Start Seq. | End Sequence Seq.                | Ion Score     | C. I. %               | Modification                      | Rank              | Result Type |
| 868.4345                 | 868.5009                   | 0.0664        | 76         | 38         | 44 CYSLAVR                       | 11            | 0                     | Carbamidomethyl (C)[1]            | 6                 | Mascot      |
| Gel Idx/Pos 255/K7       |                            |               |            |            | Instr./Gel Origin BA2060/110707A |               |                       | Process Status Analysis Succeeded |                   |             |
| Plate [#] Name [1] 31496 |                            |               |            |            | Instrument Sample Name           |               |                       | Spectra 11                        |                   |             |
| Rank                     | Protein Name               | Accession No. | Protein MW | Protein PI | Pep. Count                       | Protein Score | Protein Score C. I. % | Total Ion Score                   | Total Ion C. I. % |             |
| 1                        | Vtg1 protein [Danio rerio] | gi 63100501   | 36409.1    | 9.23       | 15                               | 845           | 100                   | 742                               | 100               |             |
| Peptide Information      |                            |               |            |            |                                  |               |                       |                                   |                   |             |
| Calc. Mass               | Obsrv. Mass                | ± da          | ± ppm      | Start Seq. | End Sequence Seq.                | Ion Score     | C. I. %               | Modification                      | Rank              | Result Type |
| 826.4457                 | 826.4253                   | -0.0204       | -25        | 198        | 204 QYAVFAK                      |               |                       |                                   |                   | Mascot      |
| 960.4785                 | 960.45                     | -0.0285       | -30        | 218        | 224 LEVEWER                      | 45            | 99.09                 |                                   |                   | Mascot      |
| 960.4785                 | 960.45                     | -0.0285       | -30        | 218        | 224 LEVEWER                      |               |                       |                                   |                   | Mascot      |
| 976.5322                 | 976.4453                   | -0.0869       | -89        | 25         | 32 FSSVPRQR                      |               |                       |                                   |                   | Mascot      |
| 984.4243                 | 984.3965                   | -0.0278       | -28        | 190        | 197 FSWGAECK                     | 56            | 99.929                | Carbamidomethyl (C)[7]            |                   | Mascot      |
| 984.4243                 | 984.3965                   | -0.0278       | -28        | 190        | 197 FSWGAECK                     |               |                       | Carbamidomethyl (C)[7]            |                   | Mascot      |
| 1118.682                 | 1118.65                    | -0.032        | -29        | 225        | 234 LPIIVTTYAK                   | 73            | 99.999                |                                   |                   | Mascot      |
| 1118.682                 | 1118.65                    | -0.032        | -29        | 225        | 234 LPIIVTTYAK                   |               |                       |                                   |                   | Mascot      |
| 1287.6691                | 1287.6315                  | -0.0376       | -29        | 205        | 217 AEAGVLGEFPAAR                | 118           | 100                   |                                   |                   | Mascot      |
| 1287.6691                | 1287.6315                  | -0.0376       | -29        | 205        | 217 AEAGVLGEFPAAR                |               |                       |                                   |                   | Mascot      |
| 1327.7216                | 1327.6887                  | -0.0329       | -25        | 260        | 271 EIELTAALPSQR                 |               |                       |                                   |                   | Mascot      |
| 1327.7216                | 1327.6887                  | -0.0329       | -25        | 260        | 271 EIELTAALPSQR                 | 71            | 99.998                |                                   |                   | Mascot      |
| 1364.6957                | 1364.6575                  | -0.0382       | -28        | 239        | 250 HILTAAYDTGFR                 | 100           | 100                   |                                   |                   | Mascot      |
| 1364.6957                | 1364.6575                  | -0.0382       | -28        | 239        | 250 HILTAAYDTGFR                 |               |                       |                                   |                   | Mascot      |
| 1380.7528                | 1380.6836                  | -0.0692       | -50        | 31         | 41 QRIPTVMNLHR                   |               |                       | Oxidation (M)[7]                  |                   | Mascot      |
| 1660.8574                | 1660.8141                  | -0.0433       | -26        | 159        | 173 VQLIVSSIAENDNMK              |               |                       |                                   |                   | Mascot      |
| 1676.8523                | 1676.8071                  | -0.0452       | -27        | 159        | 173 VQLIVSSIAENDNMK              |               |                       | Oxidation (M)[14]                 |                   | Mascot      |
| 1796.9078                | 1796.8547                  | -0.0531       | -30        | 239        | 253 HILTAAYDTGFRFER              |               |                       |                                   |                   | Mascot      |
| 1826.9799                | 1826.9274                  | -0.0525       | -29        | 143        | 158 LLGYQLAAYFDKPTAR             |               |                       |                                   |                   | Mascot      |
| 1826.9799                | 1826.9274                  | -0.0525       | -29        | 143        | 158 LLGYQLAAYFDKPTAR             | 139           | 100                   |                                   |                   | Mascot      |
| 1958.0189                | 1957.9636                  | -0.0553       | -28        | 254        | 271 ATNSEKEIELTAALPSQR           |               |                       |                                   |                   | Mascot      |
| 1958.0189                | 1957.9636                  | -0.0553       | -28        | 254        | 271 ATNSEKEIELTAALPSQR           | 141           | 100                   |                                   |                   | Mascot      |

|   |                              |           |         |      |              |     |                          |      |    |     |     |     |     |        |
|---|------------------------------|-----------|---------|------|--------------|-----|--------------------------|------|----|-----|-----|-----|-----|--------|
|   | 2060.1426                    | 2060.0837 | -0.0589 | -29  | 218          | 234 | LEVEWERLPIIVTTYAK        |      |    |     |     |     |     | Mascot |
|   | 2269.1975                    | 2268.9675 | -0.23   | -101 | 139          | 158 | ADQKLLGYQLAAYFDKPT<br>AR |      |    |     |     |     |     | Mascot |
| 2 | vitellogenin 1 [Danio rerio] |           |         |      | gi 166795887 |     | 149452.5                 | 8.68 | 18 | 786 | 100 | 742 | 100 |        |

Peptide Information

| Calc. Mass | Obsrv. Mass | ± da    | ± ppm | Start Seq. | End Seq. | Sequence                     | Ion Score | C. I. % | Modification           | Rank | Result | Type |
|------------|-------------|---------|-------|------------|----------|------------------------------|-----------|---------|------------------------|------|--------|------|
| 826.4457   | 826.4253    | -0.0204 | -25   | 1238       | 1244     | QYAVFAK                      |           |         |                        |      | Mascot |      |
| 960.4785   | 960.45      | -0.0285 | -30   | 1258       | 1264     | LEVEWER                      | 45        | 99.09   |                        |      | Mascot |      |
| 960.4785   | 960.45      | -0.0285 | -30   | 1258       | 1264     | LEVEWER                      |           |         |                        |      | Mascot |      |
| 984.4243   | 984.3965    | -0.0278 | -28   | 1230       | 1237     | FSWGAECK                     | 56        | 99.929  | Carbamidomethyl (C)[7] |      | Mascot |      |
| 984.4243   | 984.3965    | -0.0278 | -28   | 1230       | 1237     | FSWGAECK                     |           |         | Carbamidomethyl (C)[7] |      | Mascot |      |
| 992.5015   | 992.4393    | -0.0622 | -63   | 615        | 622      | LMNCKLDR                     |           |         |                        |      | Mascot |      |
| 1118.682   | 1118.65     | -0.032  | -29   | 1265       | 1274     | LPIIVTTYAK                   | 73        | 99.999  |                        |      | Mascot |      |
| 1118.682   | 1118.65     | -0.032  | -29   | 1265       | 1274     | LPIIVTTYAK                   |           |         |                        |      | Mascot |      |
| 1287.6691  | 1287.6315   | -0.0376 | -29   | 1245       | 1257     | AEAGVLGEFPAAR                | 118       | 100     |                        |      | Mascot |      |
| 1287.6691  | 1287.6315   | -0.0376 | -29   | 1245       | 1257     | AEAGVLGEFPAAR                |           |         |                        |      | Mascot |      |
| 1327.7216  | 1327.6887   | -0.0329 | -25   | 1300       | 1311     | EIELTAALPSQR                 |           |         |                        |      | Mascot |      |
| 1327.7216  | 1327.6887   | -0.0329 | -25   | 1300       | 1311     | EIELTAALPSQR                 | 71        | 99.998  |                        |      | Mascot |      |
| 1364.6957  | 1364.6575   | -0.0382 | -28   | 1279       | 1290     | HILTAAYDTGFR                 | 100       | 100     |                        |      | Mascot |      |
| 1364.6957  | 1364.6575   | -0.0382 | -28   | 1279       | 1290     | HILTAAYDTGFR                 |           |         |                        |      | Mascot |      |
| 1382.7889  | 1382.7399   | -0.049  | -35   | 303        | 315      | ISDAPAQIVEVLK                |           |         |                        |      | Mascot |      |
| 1382.7889  | 1382.7399   | -0.049  | -35   | 303        | 315      | ISDAPAQIVEVLK                |           |         |                        |      | Mascot |      |
| 1660.8574  | 1660.8141   | -0.0433 | -26   | 1199       | 1213     | VQLIVSSIAENDNMK              |           |         |                        |      | Mascot |      |
| 1676.8523  | 1676.8071   | -0.0452 | -27   | 1199       | 1213     | VQLIVSSIAENDNMK              |           |         | Oxidation (M)[14]      |      | Mascot |      |
| 1796.8928  | 1796.8547   | -0.0381 | -21   | 72         | 86       | LMDPLLYEYAGTWPK              |           |         |                        |      | Mascot |      |
| 1826.9799  | 1826.9274   | -0.0525 | -29   | 1183       | 1198     | LLGYQLAAYFDKPTAR             |           |         |                        |      | Mascot |      |
| 1826.9799  | 1826.9274   | -0.0525 | -29   | 1183       | 1198     | LLGYQLAAYFDKPTAR             | 139       | 100     |                        |      | Mascot |      |
| 1862.1262  | 1861.9109   | -0.2153 | -116  | 363        | 379      | RWLLDALPAVGTPVLIK            |           |         |                        |      | Mascot |      |
| 1958.0189  | 1957.9636   | -0.0553 | -28   | 1294       | 1311     | ATNSEKEIELTAALPSQR           |           |         |                        |      | Mascot |      |
| 1958.0189  | 1957.9636   | -0.0553 | -28   | 1294       | 1311     | ATNSEKEIELTAALPSQR           | 141       | 100     |                        |      | Mascot |      |
| 2001.0573  | 2001.0215   | -0.0358 | -18   | 54         | 71       | VSSKVLISATTENTYLMK           |           |         | Oxidation (M)[17]      |      | Mascot |      |
| 2060.1426  | 2060.0837   | -0.0589 | -29   | 1258       | 1274     | LEVEWERLPIIVTTYAK            |           |         |                        |      | Mascot |      |
| 2269.1975  | 2268.9675   | -0.23   | -101  | 1179       | 1198     | ADQKLLGYQLAAYFDKPT<br>AR     |           |         |                        |      | Mascot |      |
| 2365.2075  | 2365.1101   | -0.0974 | -41   | 597        | 619      | ITAPDMAYVAGAAANVAIK<br>LMNCK |           |         |                        |      | Mascot |      |

|   |                            |  |  |  |              |  |          |      |    |     |     |     |     |  |
|---|----------------------------|--|--|--|--------------|--|----------|------|----|-----|-----|-----|-----|--|
| 3 | Vtg1 protein [Danio rerio] |  |  |  | gi 145337918 |  | 116565.5 | 9.07 | 15 | 782 | 100 | 742 | 100 |  |
|---|----------------------------|--|--|--|--------------|--|----------|------|----|-----|-----|-----|-----|--|

| Peptide Information |                              |         |       |             |                          |           |         |                        |      |        |         |
|---------------------|------------------------------|---------|-------|-------------|--------------------------|-----------|---------|------------------------|------|--------|---------|
| Calc. Mass          | Obsrv. Mass                  | ± da    | ± ppm | Start Seq.  | End Sequence Seq.        | Ion Score | C. I. % | Modification           | Rank | Result | Type    |
| 826.4457            | 826.4253                     | -0.0204 | -25   | 944         | 950 QYAVFAK              |           |         |                        |      |        | Mascot  |
| 960.4785            | 960.45                       | -0.0285 | -30   | 964         | 970 LEVEWER              | 45        | 99.09   |                        |      |        | Mascot  |
| 960.4785            | 960.45                       | -0.0285 | -30   | 964         | 970 LEVEWER              |           |         |                        |      |        | Mascot  |
| 984.4243            | 984.3965                     | -0.0278 | -28   | 936         | 943 FSWGAECK             | 56        | 99.929  | Carbamidomethyl (C)[7] |      |        | Mascot  |
| 984.4243            | 984.3965                     | -0.0278 | -28   | 936         | 943 FSWGAECK             |           |         | Carbamidomethyl (C)[7] |      |        | Mascot  |
| 1118.682            | 1118.65                      | -0.032  | -29   | 971         | 980 LPIIVTTYAK           | 73        | 99.999  |                        |      |        | Mascot  |
| 1118.682            | 1118.65                      | -0.032  | -29   | 971         | 980 LPIIVTTYAK           |           |         |                        |      |        | Mascot  |
| 1287.6691           | 1287.6315                    | -0.0376 | -29   | 951         | 963 AEAGVLGEFPAAR        | 118       | 100     |                        |      |        | Mascot  |
| 1287.6691           | 1287.6315                    | -0.0376 | -29   | 951         | 963 AEAGVLGEFPAAR        |           |         |                        |      |        | Mascot  |
| 1327.7216           | 1327.6887                    | -0.0329 | -25   | 1006        | 1017 EIELTAALPSQR        |           |         |                        |      |        | Mascot  |
| 1327.7216           | 1327.6887                    | -0.0329 | -25   | 1006        | 1017 EIELTAALPSQR        | 71        | 99.998  |                        |      |        | Mascot  |
| 1364.6957           | 1364.6575                    | -0.0382 | -28   | 985         | 996 HILTAAYDTGFR         | 100       | 100     |                        |      |        | Mascot  |
| 1364.6957           | 1364.6575                    | -0.0382 | -28   | 985         | 996 HILTAAYDTGFR         |           |         |                        |      |        | Mascot  |
| 1382.7889           | 1382.7399                    | -0.049  | -35   | 9           | 21 ISDAPAQIVEVLK         |           |         |                        |      |        | Mascot  |
| 1382.7889           | 1382.7399                    | -0.049  | -35   | 9           | 21 ISDAPAQIVEVLK         |           |         |                        |      |        | Mascot  |
| 1660.8574           | 1660.8141                    | -0.0433 | -26   | 905         | 919 VQLIVSSIAENDNMK      |           |         |                        |      |        | Mascot  |
| 1676.8523           | 1676.8071                    | -0.0452 | -27   | 905         | 919 VQLIVSSIAENDNMK      |           |         | Oxidation (M)[14]      |      |        | Mascot  |
| 1796.9078           | 1796.8547                    | -0.0531 | -30   | 985         | 999 HILTAAYDTGFRFER      |           |         |                        |      |        | Mascot  |
| 1826.9799           | 1826.9274                    | -0.0525 | -29   | 889         | 904 LLGYQLAAYFDKPTAR     |           |         |                        |      |        | Mascot  |
| 1826.9799           | 1826.9274                    | -0.0525 | -29   | 889         | 904 LLGYQLAAYFDKPTAR     | 139       | 100     |                        |      |        | Mascot  |
| 1862.1262           | 1861.9109                    | -0.2153 | -116  | 69          | 85 RWLLDALPAVGTPVIK      |           |         |                        |      |        | Mascot  |
| 1958.0189           | 1957.9636                    | -0.0553 | -28   | 1000        | 1017 ATNSEKEIELTAALPSQR  |           |         |                        |      |        | Mascot  |
| 1958.0189           | 1957.9636                    | -0.0553 | -28   | 1000        | 1017 ATNSEKEIELTAALPSQR  | 141       | 100     |                        |      |        | Mascot  |
| 2060.1426           | 2060.0837                    | -0.0589 | -29   | 964         | 980 LEVEWERLPIIVTTYAK    |           |         |                        |      |        | Mascot  |
| 2269.1975           | 2268.9675                    | -0.23   | -101  | 885         | 904 ADQKLLGYQLAAYFDKPTAR |           |         |                        |      |        | Mascot  |
| 4                   | vitellogenin 1 [Danio rerio] |         |       | gi 21391472 |                          | 127954.2  | 8.69    | 15                     | 779  | 100    | 742 100 |

| Peptide Information |             |         |       |            |                   |           |                      |  |  |  |                  |
|---------------------|-------------|---------|-------|------------|-------------------|-----------|----------------------|--|--|--|------------------|
| Calc. Mass          | Obsrv. Mass | ± da    | ± ppm | Start Seq. | End Sequence Seq. | Ion Score | C. I. % Modification |  |  |  | Rank Result Type |
| 826.4457            | 826.4253    | -0.0204 | -25   | 1045       | 1051 QYAVFAK      |           |                      |  |  |  | Mascot           |
| 960.4785            | 960.45      | -0.0285 | -30   | 1065       | 1071 LEVEWER      | 45        | 99.09                |  |  |  | Mascot           |
| 960.4785            | 960.45      | -0.0285 | -30   | 1065       | 1071 LEVEWER      |           |                      |  |  |  | Mascot           |



|           |           |         |      |      |      |                      |     |        |                        |        |
|-----------|-----------|---------|------|------|------|----------------------|-----|--------|------------------------|--------|
| 984.4243  | 984.3965  | -0.0278 | -28  | 1037 | 1044 | FSWGAECK             | 56  | 99.929 | Carbamidomethyl (C)[7] | Mascot |
| 984.4243  | 984.3965  | -0.0278 | -28  | 1037 | 1044 | FSWGAECK             |     |        | Carbamidomethyl (C)[7] | Mascot |
| 1118.682  | 1118.65   | -0.032  | -29  | 1072 | 1081 | LPIIVTTYAK           | 73  | 99.999 |                        | Mascot |
| 1118.682  | 1118.65   | -0.032  | -29  | 1072 | 1081 | LPIIVTTYAK           |     |        |                        | Mascot |
| 1287.6691 | 1287.6315 | -0.0376 | -29  | 1052 | 1064 | AEAGVLGEFPAAR        | 118 | 100    |                        | Mascot |
| 1287.6691 | 1287.6315 | -0.0376 | -29  | 1052 | 1064 | AEAGVLGEFPAAR        |     |        |                        | Mascot |
| 1327.7216 | 1327.6887 | -0.0329 | -25  | 1107 | 1118 | EIELTAALPSQR         |     |        |                        | Mascot |
| 1327.7216 | 1327.6887 | -0.0329 | -25  | 1107 | 1118 | EIELTAALPSQR         | 71  | 99.998 |                        | Mascot |
| 1364.6957 | 1364.6575 | -0.0382 | -28  | 1086 | 1097 | HILTAAYDTGFR         | 100 | 100    |                        | Mascot |
| 1364.6957 | 1364.6575 | -0.0382 | -28  | 1086 | 1097 | HILTAAYDTGFR         |     |        |                        | Mascot |
| 1382.7889 | 1382.7399 | -0.049  | -35  | 112  | 124  | ISDAPAQIVEVLK        |     |        |                        | Mascot |
| 1382.7889 | 1382.7399 | -0.049  | -35  | 112  | 124  | ISDAPAQIVEVLK        |     |        |                        | Mascot |
| 1660.8574 | 1660.8141 | -0.0433 | -26  | 1006 | 1020 | VQLIVSSIAENDNMK      |     |        |                        | Mascot |
| 1676.8523 | 1676.8071 | -0.0452 | -27  | 1006 | 1020 | VQLIVSSIAENDNMK      |     |        | Oxidation (M)[14]      | Mascot |
| 1796.9078 | 1796.8547 | -0.0531 | -30  | 1086 | 1100 | HILTAAYDTGFRFER      |     |        |                        | Mascot |
| 1826.9799 | 1826.9274 | -0.0525 | -29  | 990  | 1005 | LLGYQLAAYFDKPTAR     |     |        |                        | Mascot |
| 1826.9799 | 1826.9274 | -0.0525 | -29  | 990  | 1005 | LLGYQLAAYFDKPTAR     | 139 | 100    |                        | Mascot |
| 1862.1262 | 1861.9109 | -0.2153 | -116 | 172  | 188  | RWLLDALPAVGTPVIK     |     |        |                        | Mascot |
| 1958.0189 | 1957.9636 | -0.0553 | -28  | 1101 | 1118 | ATNSEKEIELTAALPSQR   |     |        |                        | Mascot |
| 1958.0189 | 1957.9636 | -0.0553 | -28  | 1101 | 1118 | ATNSEKEIELTAALPSQR   | 141 | 100    |                        | Mascot |
| 2060.1426 | 2060.0837 | -0.0589 | -29  | 1065 | 1081 | LEVEWERLPIIVTTYAK    |     |        |                        | Mascot |
| 2269.1975 | 2268.9675 | -0.23   | -101 | 986  | 1005 | ADQKLLGYQLAAYFDKPTAR |     |        |                        | Mascot |

5 vitellogenin 1 [Danio rerio] gi|94733730 149140.4 8.74 16 775 100 742 100

| Peptide Information |             |         |       |            |                   |               |         |              |                        |
|---------------------|-------------|---------|-------|------------|-------------------|---------------|---------|--------------|------------------------|
| Calc. Mass          | Obsrv. Mass | ± da    | ± ppm | Start Seq. | End Sequence Seq. | Ion Score     | C. I. % | Modification | Rank Result Type       |
| 826.4457            | 826.4253    | -0.0204 | -25   | 1238       | 1244              | QYAVFAK       |         |              | Mascot                 |
| 960.4785            | 960.45      | -0.0285 | -30   | 1258       | 1264              | LEVEWER       | 45      | 99.09        | Mascot                 |
| 960.4785            | 960.45      | -0.0285 | -30   | 1258       | 1264              | LEVEWER       |         |              | Mascot                 |
| 984.4243            | 984.3965    | -0.0278 | -28   | 1230       | 1237              | FSWGAECK      | 56      | 99.929       | Carbamidomethyl (C)[7] |
| 984.4243            | 984.3965    | -0.0278 | -28   | 1230       | 1237              | FSWGAECK      |         |              | Carbamidomethyl (C)[7] |
| 1118.682            | 1118.65     | -0.032  | -29   | 1265       | 1274              | LPIIVTTYAK    | 73      | 99.999       |                        |
| 1118.682            | 1118.65     | -0.032  | -29   | 1265       | 1274              | LPIIVTTYAK    |         |              |                        |
| 1287.6691           | 1287.6315   | -0.0376 | -29   | 1245       | 1257              | AEAGVLGEFPAAR | 118     | 100          |                        |
| 1287.6691           | 1287.6315   | -0.0376 | -29   | 1245       | 1257              | AEAGVLGEFPAAR |         |              |                        |
| 1327.7216           | 1327.6887   | -0.0329 | -25   | 1300       | 1311              | EIELTAALPSQR  |         |              |                        |

|   |                              | 1327.7216  | 1327.6887   | -0.0329 | -25   | 1300       | 1311              | EIELTAALPSQR         | 71        | 99.998 |                        |     |     |     |      | Mascot      |
|---|------------------------------|------------|-------------|---------|-------|------------|-------------------|----------------------|-----------|--------|------------------------|-----|-----|-----|------|-------------|
|   |                              | 1364.6957  | 1364.6575   | -0.0382 | -28   | 1279       | 1290              | HILTAAYDTGFR         | 100       | 100    |                        |     |     |     |      | Mascot      |
|   |                              | 1364.6957  | 1364.6575   | -0.0382 | -28   | 1279       | 1290              | HILTAAYDTGFR         |           |        |                        |     |     |     |      | Mascot      |
|   |                              | 1382.7889  | 1382.7399   | -0.049  | -35   | 303        | 315               | ISDAPAQIVEVLK        |           |        |                        |     |     |     |      | Mascot      |
|   |                              | 1382.7889  | 1382.7399   | -0.049  | -35   | 303        | 315               | ISDAPAQIVEVLK        |           |        |                        |     |     |     |      | Mascot      |
|   |                              | 1660.8574  | 1660.8141   | -0.0433 | -26   | 1199       | 1213              | VQLIVSSIAENDNMK      |           |        |                        |     |     |     |      | Mascot      |
|   |                              | 1676.8523  | 1676.8071   | -0.0452 | -27   | 1199       | 1213              | VQLIVSSIAENDNMK      |           |        | Oxidation (M)[14]      |     |     |     |      | Mascot      |
|   |                              | 1796.8928  | 1796.8547   | -0.0381 | -21   | 72         | 86                | LMDPLLYEYAGTWPK      |           |        |                        |     |     |     |      | Mascot      |
|   |                              | 1826.9799  | 1826.9274   | -0.0525 | -29   | 1183       | 1198              | LLGYQLAAYFDKPTAR     |           |        |                        |     |     |     |      | Mascot      |
|   |                              | 1826.9799  | 1826.9274   | -0.0525 | -29   | 1183       | 1198              | LLGYQLAAYFDKPTAR     | 139       | 100    |                        |     |     |     |      | Mascot      |
|   |                              | 1862.1262  | 1861.9109   | -0.2153 | -116  | 363        | 379               | RWLLDALPAVGTPVIK     |           |        |                        |     |     |     |      | Mascot      |
|   |                              | 1958.0189  | 1957.9636   | -0.0553 | -28   | 1294       | 1311              | ATNSEKEIELTAALPSQR   |           |        |                        |     |     |     |      | Mascot      |
|   |                              | 1958.0189  | 1957.9636   | -0.0553 | -28   | 1294       | 1311              | ATNSEKEIELTAALPSQR   | 141       | 100    |                        |     |     |     |      | Mascot      |
|   |                              | 2001.0573  | 2001.0215   | -0.0358 | -18   | 54         | 71                | VSSKVLISATTENTYLMK   |           |        | Oxidation (M)[17]      |     |     |     |      | Mascot      |
|   |                              | 2060.1426  | 2060.0837   | -0.0589 | -29   | 1258       | 1274              | LEVEWERLPIIVTTYAK    |           |        |                        |     |     |     |      | Mascot      |
|   |                              | 2269.1975  | 2268.9675   | -0.23   | -101  | 1179       | 1198              | ADQKLLGYQLAAYFDKPTAR |           |        |                        |     |     |     |      | Mascot      |
| 6 | vitellogenin 6 [Danio rerio] |            |             |         |       |            | gi 57864787       | 38968.8              | 8.92      | 9      | 496                    | 100 | 453 | 100 |      |             |
|   | Peptide Information          |            |             |         |       |            |                   |                      |           |        |                        |     |     |     |      |             |
|   |                              | Calc. Mass | Obsrv. Mass | ± da    | ± ppm | Start Seq. | End Sequence Seq. |                      | Ion Score | C. I.  | % Modification         |     |     |     | Rank | Result Type |
|   |                              | 826.4457   | 826.4253    | -0.0204 | -25   | 235        | 241               | QYAVFAK              |           |        |                        |     |     |     |      | Mascot      |
|   |                              | 960.4785   | 960.45      | -0.0285 | -30   | 255        | 261               | LEVEWER              | 45        | 99.09  |                        |     |     |     |      | Mascot      |
|   |                              | 960.4785   | 960.45      | -0.0285 | -30   | 255        | 261               | LEVEWER              |           |        |                        |     |     |     |      | Mascot      |
|   |                              | 984.4243   | 984.3965    | -0.0278 | -28   | 227        | 234               | FSWGAECK             | 56        | 99.929 | Carbamidomethyl (C)[7] |     |     |     |      | Mascot      |
|   |                              | 984.4243   | 984.3965    | -0.0278 | -28   | 227        | 234               | FSWGAECK             |           |        | Carbamidomethyl (C)[7] |     |     |     |      | Mascot      |
|   |                              | 1326.6511  | 1326.7177   | 0.0666  | 50    | 223        | 234               | VTAKFSWGAECK         |           |        |                        |     |     |     |      | Mascot      |
|   |                              | 1327.7216  | 1327.6887   | -0.0329 | -25   | 297        | 308               | EIELTAALPSQR         |           |        |                        |     |     |     |      | Mascot      |
|   |                              | 1327.7216  | 1327.6887   | -0.0329 | -25   | 297        | 308               | EIELTAALPSQR         | 71        | 99.998 |                        |     |     |     |      | Mascot      |
|   |                              | 1660.7119  | 1660.8141   | 0.1022  | 62    | 139        | 154               | DTSSGSAASFEQMQK      |           |        | Oxidation (M)[14]      |     |     |     |      | Mascot      |
|   |                              | 1826.9799  | 1826.9274   | -0.0525 | -29   | 180        | 195               | LLGYQLAAYFDKPTAR     |           |        |                        |     |     |     |      | Mascot      |
|   |                              | 1826.9799  | 1826.9274   | -0.0525 | -29   | 180        | 195               | LLGYQLAAYFDKPTAR     | 139       | 100    |                        |     |     |     |      | Mascot      |
|   |                              | 1958.0189  | 1957.9636   | -0.0553 | -28   | 291        | 308               | ATNSEKEIELTAALPSQR   |           |        |                        |     |     |     |      | Mascot      |
|   |                              | 1958.0189  | 1957.9636   | -0.0553 | -28   | 291        | 308               | ATNSEKEIELTAALPSQR   | 141       | 100    |                        |     |     |     |      | Mascot      |
|   |                              | 2269.1975  | 2268.9675   | -0.23   | -101  | 176        | 195               | ADQKLLGYQLAAYFDKPTAR |           |        |                        |     |     |     |      | Mascot      |
| 7 | vitellogenin 7 [Danio rerio] |            |             |         |       |            | gi 57864789       | 24318.7              | 8.37      | 8      | 480                    | 100 | 429 | 100 |      |             |

Peptide Information

| Calc. Mass | Obsrv. Mass | ± da    | ± ppm | Start Seq. | End Sequence Seq.     | Ion Score | C. I. % | Modification           | Rank | Result Type |
|------------|-------------|---------|-------|------------|-----------------------|-----------|---------|------------------------|------|-------------|
| 826.4457   | 826.4253    | -0.0204 | -25   | 93         | 99 QYAVFAK            |           |         |                        |      | Mascot      |
| 960.4785   | 960.45      | -0.0285 | -30   | 113        | 119 LEVEWER           | 45        | 99.09   |                        |      | Mascot      |
| 960.4785   | 960.45      | -0.0285 | -30   | 113        | 119 LEVEWER           |           |         |                        |      | Mascot      |
| 984.4243   | 984.3965    | -0.0278 | -28   | 85         | 92 FSWGAECK           | 56        | 99.929  | Carbamidomethyl (C)[7] |      | Mascot      |
| 984.4243   | 984.3965    | -0.0278 | -28   | 85         | 92 FSWGAECK           |           |         | Carbamidomethyl (C)[7] |      | Mascot      |
| 1118.6238  | 1118.65     | 0.0262  | 23    | 68         | 78 KICADGALLSK        |           |         |                        |      | Mascot      |
| 1118.682   | 1118.65     | -0.032  | -29   | 120        | 129 LPIIVTTYAK        | 73        | 99.999  |                        |      | Mascot      |
| 1287.6691  | 1287.6315   | -0.0376 | -29   | 100        | 112 AEAGVLGEFPAAR     | 118       | 100     |                        |      | Mascot      |
| 1287.6691  | 1287.6315   | -0.0376 | -29   | 100        | 112 AEAGVLGEFPAAR     |           |         |                        |      | Mascot      |
| 1826.9799  | 1826.9274   | -0.0525 | -29   | 38         | 53 LLGYQLAAYFDKPTAR   |           |         |                        |      | Mascot      |
| 1826.9799  | 1826.9274   | -0.0525 | -29   | 38         | 53 LLGYQLAAYFDKPTAR   | 139       | 100     |                        |      | Mascot      |
| 2060.1426  | 2060.0837   | -0.0589 | -29   | 113        | 129 LEVEWERLPIIVTTYAK |           |         |                        |      | Mascot      |

8 vitellogenin 6 [Danio rerio] gi|303227889 150936.1 8.84 13 473 100 453 100

Peptide Information

| Calc. Mass | Obsrv. Mass | ± da    | ± ppm | Start Seq. | End Sequence Seq.       | Ion Score | C. I. % | Modification           | Rank | Result Type |
|------------|-------------|---------|-------|------------|-------------------------|-----------|---------|------------------------|------|-------------|
| 826.4457   | 826.4253    | -0.0204 | -25   | 1256       | 1262 QYAVFAK            |           |         |                        |      | Mascot      |
| 960.4785   | 960.45      | -0.0285 | -30   | 1276       | 1282 LEVEWER            | 45        | 99.09   |                        |      | Mascot      |
| 960.4785   | 960.45      | -0.0285 | -30   | 1276       | 1282 LEVEWER            |           |         |                        |      | Mascot      |
| 984.4243   | 984.3965    | -0.0278 | -28   | 1248       | 1255 FSWGAECK           | 56        | 99.929  | Carbamidomethyl (C)[7] |      | Mascot      |
| 984.4243   | 984.3965    | -0.0278 | -28   | 1248       | 1255 FSWGAECK           |           |         | Carbamidomethyl (C)[7] |      | Mascot      |
| 992.5015   | 992.4393    | -0.0622 | -63   | 626        | 633 LMNCKLDR            |           |         |                        |      | Mascot      |
| 1326.6511  | 1326.7177   | 0.0666  | 50    | 1244       | 1255 VTAKFSWGAECK       |           |         |                        |      | Mascot      |
| 1327.7216  | 1327.6887   | -0.0329 | -25   | 1318       | 1329 EIELTAALPSQR       |           |         |                        |      | Mascot      |
| 1327.7216  | 1327.6887   | -0.0329 | -25   | 1318       | 1329 EIELTAALPSQR       | 71        | 99.998  |                        |      | Mascot      |
| 1660.7119  | 1660.8141   | 0.1022  | 62    | 1160       | 1175 DTSSGSAASFEQMQK    |           |         | Oxidation (M)[14]      |      | Mascot      |
| 1796.8928  | 1796.8547   | -0.0381 | -21   | 83         | 97 LMDPLLYEYAGTWPK      |           |         |                        |      | Mascot      |
| 1826.9799  | 1826.9274   | -0.0525 | -29   | 1201       | 1216 LLGYQLAAYFDKPTAR   |           |         |                        |      | Mascot      |
| 1826.9799  | 1826.9274   | -0.0525 | -29   | 1201       | 1216 LLGYQLAAYFDKPTAR   | 139       | 100     |                        |      | Mascot      |
| 1862.1262  | 1861.9109   | -0.2153 | -116  | 374        | 390 RWLLDALPAVGTPVIK    |           |         |                        |      | Mascot      |
| 1958.0189  | 1957.9636   | -0.0553 | -28   | 1312       | 1329 ATNSEKEIELTAALPSQR |           |         |                        |      | Mascot      |
| 1958.0189  | 1957.9636   | -0.0553 | -28   | 1312       | 1329 ATNSEKEIELTAALPSQR | 141       | 100     |                        |      | Mascot      |

|   |                                                                                                          |           |         |      |      |      |                             |  |  |  |  |  |  |  |  |  |        |
|---|----------------------------------------------------------------------------------------------------------|-----------|---------|------|------|------|-----------------------------|--|--|--|--|--|--|--|--|--|--------|
|   | 2269.1975                                                                                                | 2268.9675 | -0.23   | -101 | 1197 | 1216 | ADQKLLGYQLAAYFDKPT<br>AR    |  |  |  |  |  |  |  |  |  | Mascot |
|   | 2365.2075                                                                                                | 2365.1101 | -0.0974 | -41  | 608  | 630  | ITAPDMAYVAGAANVAIK<br>LMNCK |  |  |  |  |  |  |  |  |  | Mascot |
| 9 | novel protein similar to vitellogenin 1 (vg1) [Danio rerio] gi 94733734 149808.5 8.83 13 471 100 453 100 |           |         |      |      |      |                             |  |  |  |  |  |  |  |  |  |        |

#### Peptide Information

| Calc. Mass | Obsrv. Mass | ± da    | ± ppm | Start Seq. | End Sequence Seq.               | Ion Score | C. I. % | Modification           | Rank | Result Type |
|------------|-------------|---------|-------|------------|---------------------------------|-----------|---------|------------------------|------|-------------|
| 826.4457   | 826.4253    | -0.0204 | -25   | 1245       | 1251 QYAVFAK                    |           |         |                        |      | Mascot      |
| 960.4785   | 960.45      | -0.0285 | -30   | 1265       | 1271 LEVEWER                    | 45        | 99.09   |                        |      | Mascot      |
| 960.4785   | 960.45      | -0.0285 | -30   | 1265       | 1271 LEVEWER                    |           |         |                        |      | Mascot      |
| 984.4243   | 984.3965    | -0.0278 | -28   | 1237       | 1244 FSWGAECK                   | 56        | 99.929  | Carbamidomethyl (C)[7] |      | Mascot      |
| 984.4243   | 984.3965    | -0.0278 | -28   | 1237       | 1244 FSWGAECK                   |           |         | Carbamidomethyl (C)[7] |      | Mascot      |
| 992.5015   | 992.4393    | -0.0622 | -63   | 619        | 626 LMNCKLDR                    |           |         |                        |      | Mascot      |
| 1326.6511  | 1326.7177   | 0.0666  | 50    | 1233       | 1244 VTAKFSWGAECK               |           |         |                        |      | Mascot      |
| 1327.7216  | 1327.6887   | -0.0329 | -25   | 1307       | 1318 EIELTAALPSQR               |           |         |                        |      | Mascot      |
| 1327.7216  | 1327.6887   | -0.0329 | -25   | 1307       | 1318 EIELTAALPSQR               | 71        | 99.998  |                        |      | Mascot      |
| 1660.7119  | 1660.8141   | 0.1022  | 62    | 1149       | 1164 DTSSGSAAASFEQMQK           |           |         | Oxidation (M)[14]      |      | Mascot      |
| 1796.8928  | 1796.8547   | -0.0381 | -21   | 76         | 90 LMDPLLYEYAGTWPK              |           |         |                        |      | Mascot      |
| 1826.9799  | 1826.9274   | -0.0525 | -29   | 1190       | 1205 LLGYQLAAYFDKPTAR           |           |         |                        |      | Mascot      |
| 1826.9799  | 1826.9274   | -0.0525 | -29   | 1190       | 1205 LLGYQLAAYFDKPTAR           | 139       | 100     |                        |      | Mascot      |
| 1862.1262  | 1861.9109   | -0.2153 | -116  | 367        | 383 RWLLDALPAVGTPVIK            |           |         |                        |      | Mascot      |
| 1958.0189  | 1957.9636   | -0.0553 | -28   | 1301       | 1318 ATNSEKEIELTAALPSQR         |           |         |                        |      | Mascot      |
| 1958.0189  | 1957.9636   | -0.0553 | -28   | 1301       | 1318 ATNSEKEIELTAALPSQR         | 141       | 100     |                        |      | Mascot      |
| 2269.1975  | 2268.9675   | -0.23   | -101  | 1186       | 1205 ADQKLLGYQLAAYFDKPT<br>AR   |           |         |                        |      | Mascot      |
| 2365.2075  | 2365.1101   | -0.0974 | -41   | 601        | 623 ITAPDMAYVAGAANVAIK<br>LMNCK |           |         |                        |      | Mascot      |

|    |                                                                            |  |  |  |  |  |  |  |  |  |  |  |  |  |  |  |  |
|----|----------------------------------------------------------------------------|--|--|--|--|--|--|--|--|--|--|--|--|--|--|--|--|
| 10 | vitellogenin 7 [Danio rerio] gi 156713467 148739.2 8.76 11 433 100 429 100 |  |  |  |  |  |  |  |  |  |  |  |  |  |  |  |  |
|----|----------------------------------------------------------------------------|--|--|--|--|--|--|--|--|--|--|--|--|--|--|--|--|

#### Peptide Information

| Calc. Mass | Obsrv. Mass | ± da    | ± ppm | Start Seq. | End Sequence Seq. | Ion Score | C. I. % | Modification           | Rank | Result Type |
|------------|-------------|---------|-------|------------|-------------------|-----------|---------|------------------------|------|-------------|
| 826.4457   | 826.4253    | -0.0204 | -25   | 1234       | 1240 QYAVFAK      |           |         |                        |      | Mascot      |
| 960.4785   | 960.45      | -0.0285 | -30   | 1254       | 1260 LEVEWER      | 45        | 99.09   |                        |      | Mascot      |
| 960.4785   | 960.45      | -0.0285 | -30   | 1254       | 1260 LEVEWER      |           |         |                        |      | Mascot      |
| 984.4243   | 984.3965    | -0.0278 | -28   | 1226       | 1233 FSWGAECK     | 56        | 99.929  | Carbamidomethyl (C)[7] |      | Mascot      |
| 984.4243   | 984.3965    | -0.0278 | -28   | 1226       | 1233 FSWGAECK     |           |         | Carbamidomethyl (C)[7] |      | Mascot      |
| 1118.6238  | 1118.65     | 0.0262  | 23    | 1209       | 1219 KICADGALLSK  |           |         |                        |      | Mascot      |

|           |           |         |      |      |      |                   |     |        |  |  |  |  |        |
|-----------|-----------|---------|------|------|------|-------------------|-----|--------|--|--|--|--|--------|
| 1118.682  | 1118.65   | -0.032  | -29  | 1261 | 1270 | LPIIVTTYAK        | 73  | 99.999 |  |  |  |  | Mascot |
| 1287.6691 | 1287.6315 | -0.0376 | -29  | 1241 | 1253 | AEAGVLGEFPAAR     | 118 | 100    |  |  |  |  | Mascot |
| 1287.6691 | 1287.6315 | -0.0376 | -29  | 1241 | 1253 | AEAGVLGEFPAAR     |     |        |  |  |  |  | Mascot |
| 1347.7882 | 1347.5968 | -0.1914 | -142 | 1111 | 1122 | LSKTATIIPEFK      |     |        |  |  |  |  | Mascot |
| 1796.8928 | 1796.8547 | -0.0381 | -21  | 72   | 86   | LMDPLLYEYAGTWPK   |     |        |  |  |  |  | Mascot |
| 1826.9799 | 1826.9274 | -0.0525 | -29  | 1179 | 1194 | LLGYQLAAYFDKPTAR  |     |        |  |  |  |  | Mascot |
| 1826.9799 | 1826.9274 | -0.0525 | -29  | 1179 | 1194 | LLGYQLAAYFDKPTAR  | 139 | 100    |  |  |  |  | Mascot |
| 1862.1262 | 1861.9109 | -0.2153 | -116 | 363  | 379  | RWLLDALPAVGTPVLIK |     |        |  |  |  |  | Mascot |
| 2060.1426 | 2060.0837 | -0.0589 | -29  | 1254 | 1270 | LEVEWERLPIIVTTYAK |     |        |  |  |  |  | Mascot |

11 novel protein similar to vitellogenin 1 (vg1) [Danio rerio] gi|94732723 147084.2 8.73 11 432 100 429 100

#### Peptide Information

| Calc. Mass | Obsrv. Mass | ± da    | ± ppm | Start Seq. | End Seq. | Sequence          | Ion Score | C. I. % | Modification           | Rank | Result Type |
|------------|-------------|---------|-------|------------|----------|-------------------|-----------|---------|------------------------|------|-------------|
| 826.4457   | 826.4253    | -0.0204 | -25   | 1219       | 1225     | QYAVFAK           |           |         |                        |      | Mascot      |
| 960.4785   | 960.45      | -0.0285 | -30   | 1239       | 1245     | LEVEWER           | 45        | 99.09   |                        |      | Mascot      |
| 960.4785   | 960.45      | -0.0285 | -30   | 1239       | 1245     | LEVEWER           |           |         |                        |      | Mascot      |
| 984.4243   | 984.3965    | -0.0278 | -28   | 1211       | 1218     | FSWGAECK          | 56        | 99.929  | Carbamidomethyl (C)[7] |      | Mascot      |
| 984.4243   | 984.3965    | -0.0278 | -28   | 1211       | 1218     | FSWGAECK          |           |         | Carbamidomethyl (C)[7] |      | Mascot      |
| 1118.6238  | 1118.65     | 0.0262  | 23    | 1194       | 1204     | KICADGALLSK       |           |         |                        |      | Mascot      |
| 1118.682   | 1118.65     | -0.032  | -29   | 1246       | 1255     | LPIIVTTYAK        | 73        | 99.999  |                        |      | Mascot      |
| 1287.6691  | 1287.6315   | -0.0376 | -29   | 1226       | 1238     | AEAGVLGEFPAAR     | 118       | 100     |                        |      | Mascot      |
| 1287.6691  | 1287.6315   | -0.0376 | -29   | 1226       | 1238     | AEAGVLGEFPAAR     |           |         |                        |      | Mascot      |
| 1660.7119  | 1660.8141   | 0.1022  | 62    | 1123       | 1138     | DTSSGSAASFEQMQK   |           |         | Oxidation (M)[14]      |      | Mascot      |
| 1796.8928  | 1796.8547   | -0.0381 | -21   | 72         | 86       | LMDPLLYEYAGTWPK   |           |         |                        |      | Mascot      |
| 1826.9799  | 1826.9274   | -0.0525 | -29   | 1164       | 1179     | LLGYQLAAYFDKPTAR  |           |         |                        |      | Mascot      |
| 1826.9799  | 1826.9274   | -0.0525 | -29   | 1164       | 1179     | LLGYQLAAYFDKPTAR  | 139       | 100     |                        |      | Mascot      |
| 1862.1262  | 1861.9109   | -0.2153 | -116  | 363        | 379      | RWLLDALPAVGTPVLIK |           |         |                        |      | Mascot      |
| 2060.1426  | 2060.0837   | -0.0589 | -29   | 1239       | 1255     | LEVEWERLPIIVTTYAK |           |         |                        |      | Mascot      |

12 Vtg6 protein [Danio rerio] gi|157422885 27937.4 9.18 7 345 100 314 100

#### Peptide Information

| Calc. Mass | Obsrv. Mass | ± da    | ± ppm | Start Seq. | End Seq. | Sequence | Ion Score | C. I. % | Modification | Rank | Result Type |
|------------|-------------|---------|-------|------------|----------|----------|-----------|---------|--------------|------|-------------|
| 826.4457   | 826.4253    | -0.0204 | -25   | 129        | 135      | QYAVFAK  |           |         |              |      | Mascot      |
| 960.4785   | 960.45      | -0.0285 | -30   | 149        | 155      | LEVEWER  | 45        | 99.09   |              |      | Mascot      |
| 960.4785   | 960.45      | -0.0285 | -30   | 149        | 155      | LEVEWER  |           |         |              |      | Mascot      |

|    |                            |           |         |     |              |     |                    |     |        |                        |        |     |     |
|----|----------------------------|-----------|---------|-----|--------------|-----|--------------------|-----|--------|------------------------|--------|-----|-----|
|    | 984.4243                   | 984.3965  | -0.0278 | -28 | 121          | 128 | FSWGAECK           | 56  | 99.929 | Carbamidomethyl (C)[7] | Mascot |     |     |
|    | 984.4243                   | 984.3965  | -0.0278 | -28 | 121          | 128 | FSWGAECK           |     |        | Carbamidomethyl (C)[7] | Mascot |     |     |
|    | 1326.6511                  | 1326.7177 | 0.0666  | 50  | 117          | 128 | VTAKFSWGAECK       |     |        |                        | Mascot |     |     |
|    | 1327.7216                  | 1327.6887 | -0.0329 | -25 | 191          | 202 | EIELTAALPSQR       |     |        |                        | Mascot |     |     |
|    | 1327.7216                  | 1327.6887 | -0.0329 | -25 | 191          | 202 | EIELTAALPSQR       | 71  | 99.998 |                        | Mascot |     |     |
|    | 1660.7119                  | 1660.8141 | 0.1022  | 62  | 33           | 48  | DTSSGSAASFEQMQK    |     |        | Oxidation (M)[14]      | Mascot |     |     |
|    | 1958.0189                  | 1957.9636 | -0.0553 | -28 | 185          | 202 | ATNSEKEIELTAALPSQR |     |        |                        | Mascot |     |     |
|    | 1958.0189                  | 1957.9636 | -0.0553 | -28 | 185          | 202 | ATNSEKEIELTAALPSQR | 141 | 100    |                        | Mascot |     |     |
| 13 | Vtg5 protein [Danio rerio] |           |         |     | gi 148744685 |     | 27543.3            | 9.2 | 8      | 281                    | 100    | 240 | 100 |

#### Peptide Information

| Calc. Mass | Obsrv. Mass | ± da    | ± ppm | Start Seq. | End Seq. | Sequence             | Ion Score | C. I.  | % | Modification           | Rank | Result Type |
|------------|-------------|---------|-------|------------|----------|----------------------|-----------|--------|---|------------------------|------|-------------|
| 826.4457   | 826.4253    | -0.0204 | -25   | 124        | 130      | QYAVFAK              |           |        |   |                        |      | Mascot      |
| 960.4785   | 960.45      | -0.0285 | -30   | 144        | 150      | LEVEWER              | 45        | 99.09  |   |                        |      | Mascot      |
| 960.4785   | 960.45      | -0.0285 | -30   | 144        | 150      | LEVEWER              |           |        |   |                        |      | Mascot      |
| 984.4243   | 984.3965    | -0.0278 | -28   | 116        | 123      | FSWGAECK             | 56        | 99.929 |   | Carbamidomethyl (C)[7] |      | Mascot      |
| 984.4243   | 984.3965    | -0.0278 | -28   | 116        | 123      | FSWGAECK             |           |        |   | Carbamidomethyl (C)[7] |      | Mascot      |
| 1376.7069  | 1376.6591   | -0.0478 | -35   | 165        | 176      | HILNAAyntGFR         |           |        |   |                        |      | Mascot      |
| 1660.7119  | 1660.8141   | 0.1022  | 62    | 28         | 43       | DTSSGSAASFEQMQK      |           |        |   | Oxidation (M)[14]      |      | Mascot      |
| 1763.901   | 1763.7534   | -0.1476 | -84   | 162        | 176      | VCKHILNAAyntGFR      |           |        |   | Carbamidomethyl (C)[2] |      | Mascot      |
| 1826.9799  | 1826.9274   | -0.0525 | -29   | 69         | 84       | LLGYQLAAYFDKPTAR     |           |        |   |                        |      | Mascot      |
| 1826.9799  | 1826.9274   | -0.0525 | -29   | 69         | 84       | LLGYQLAAYFDKPTAR     | 139       | 100    |   |                        |      | Mascot      |
| 2269.1975  | 2268.9675   | -0.23   | -101  | 65         | 84       | ADQKLLGYQLAAYFDKPTAR |           |        |   |                        |      | Mascot      |

|    |                          |  |  |  |             |  |         |      |   |     |     |     |     |
|----|--------------------------|--|--|--|-------------|--|---------|------|---|-----|-----|-----|-----|
| 14 | Zgc:136383 [Danio rerio] |  |  |  | gi 92097636 |  | 28809.9 | 9.33 | 8 | 279 | 100 | 240 | 100 |
|----|--------------------------|--|--|--|-------------|--|---------|------|---|-----|-----|-----|-----|

#### Peptide Information

| Calc. Mass | Obsrv. Mass | ± da    | ± ppm | Start Seq. | End Seq. | Sequence     | Ion Score | C. I.  | % | Modification           | Rank | Result Type |
|------------|-------------|---------|-------|------------|----------|--------------|-----------|--------|---|------------------------|------|-------------|
| 826.4457   | 826.4253    | -0.0204 | -25   | 136        | 142      | QYAVFAK      |           |        |   |                        |      | Mascot      |
| 960.4785   | 960.45      | -0.0285 | -30   | 156        | 162      | LEVEWER      | 45        | 99.09  |   |                        |      | Mascot      |
| 960.4785   | 960.45      | -0.0285 | -30   | 156        | 162      | LEVEWER      |           |        |   |                        |      | Mascot      |
| 984.4243   | 984.3965    | -0.0278 | -28   | 128        | 135      | FSWGAECK     | 56        | 99.929 |   | Carbamidomethyl (C)[7] |      | Mascot      |
| 984.4243   | 984.3965    | -0.0278 | -28   | 128        | 135      | FSWGAECK     |           |        |   | Carbamidomethyl (C)[7] |      | Mascot      |
| 1118.5986  | 1118.65     | 0.0514  | 46    | 217        | 225      | IPEITMSRR    |           |        |   | Oxidation (M)[6]       |      | Mascot      |
| 1118.5986  | 1118.65     | 0.0514  | 46    | 217        | 225      | IPEITMSRR    |           |        |   | Oxidation (M)[6]       |      | Mascot      |
| 1326.6511  | 1326.7177   | 0.0666  | 50    | 124        | 135      | VTAKFSWGAECK |           |        |   |                        |      | Mascot      |

|    |                              |           |         |      |    |             |                      |      |     |     |     |     |                       |        |
|----|------------------------------|-----------|---------|------|----|-------------|----------------------|------|-----|-----|-----|-----|-----------------------|--------|
|    | 1660.7703                    | 1660.8141 | 0.0438  | 26   | 1  | 15          | MLPLSSSMSSSRMSK      |      |     |     |     |     | Oxidation (M)[1,8]    | Mascot |
|    | 1676.7653                    | 1676.8071 | 0.0418  | 25   | 1  | 15          | MLPLSSSMSSSRMSK      |      |     |     |     |     | Oxidation (M)[1,8,13] | Mascot |
|    | 1826.9799                    | 1826.9274 | -0.0525 | -29  | 81 | 96          | LLGYQLAAYFDKPTAR     |      |     |     |     |     |                       | Mascot |
|    | 1826.9799                    | 1826.9274 | -0.0525 | -29  | 81 | 96          | LLGYQLAAYFDKPTAR     | 139  | 100 |     |     |     |                       | Mascot |
|    | 2269.1975                    | 2268.9675 | -0.23   | -101 | 77 | 96          | ADQKLLGYQLAAYFDKPTAR |      |     |     |     |     |                       | Mascot |
| 15 | vitellogenin 4 [Danio rerio] |           |         |      |    | gi 57864783 | 31189.9              | 9.48 | 8   | 276 | 100 | 240 | 100                   |        |

#### Peptide Information

| Calc. Mass | Obsrv. Mass | ± da    | ± ppm | Start Seq. | End Seq. | Sequence             | Ion Score | C. I.  | % Modification         | Rank | Result Type |
|------------|-------------|---------|-------|------------|----------|----------------------|-----------|--------|------------------------|------|-------------|
| 826.4457   | 826.4253    | -0.0204 | -25   | 162        | 168      | QYAVFAK              |           |        |                        |      | Mascot      |
| 960.4785   | 960.45      | -0.0285 | -30   | 182        | 188      | LEVEWER              | 45        | 99.09  |                        |      | Mascot      |
| 960.4785   | 960.45      | -0.0285 | -30   | 182        | 188      | LEVEWER              |           |        |                        |      | Mascot      |
| 984.4243   | 984.3965    | -0.0278 | -28   | 154        | 161      | FSWGAECK             | 56        | 99.929 | Carbamidomethyl (C)[7] |      | Mascot      |
| 984.4243   | 984.3965    | -0.0278 | -28   | 154        | 161      | FSWGAECK             |           |        | Carbamidomethyl (C)[7] |      | Mascot      |
| 1118.5986  | 1118.65     | 0.0514  | 46    | 243        | 251      | IPEITMSRR            |           |        | Oxidation (M)[6]       |      | Mascot      |
| 1118.5986  | 1118.65     | 0.0514  | 46    | 243        | 251      | IPEITMSRR            |           |        | Oxidation (M)[6]       |      | Mascot      |
| 1326.6511  | 1326.7177   | 0.0666  | 50    | 150        | 161      | VTAKFSWGAECK         |           |        |                        |      | Mascot      |
| 1660.7119  | 1660.8141   | 0.1022  | 62    | 66         | 81       | DTSSGSAAASFEQMQK     |           |        | Oxidation (M)[14]      |      | Mascot      |
| 1826.9799  | 1826.9274   | -0.0525 | -29   | 107        | 122      | LLGYQLAAYFDKPTAR     |           |        |                        |      | Mascot      |
| 1826.9799  | 1826.9274   | -0.0525 | -29   | 107        | 122      | LLGYQLAAYFDKPTAR     | 139       | 100    |                        |      | Mascot      |
| 2269.1975  | 2268.9675   | -0.23   | -101  | 103        | 122      | ADQKLLGYQLAAYFDKPTAR |           |        |                        |      | Mascot      |

|    |                                  |  |  |  |  |              |          |      |    |     |     |     |     |  |
|----|----------------------------------|--|--|--|--|--------------|----------|------|----|-----|-----|-----|-----|--|
| 16 | Zgc:136383 protein [Danio rerio] |  |  |  |  | gi 159155252 | 123957.1 | 8.78 | 14 | 272 | 100 | 240 | 100 |  |
|----|----------------------------------|--|--|--|--|--------------|----------|------|----|-----|-----|-----|-----|--|

#### Peptide Information

| Calc. Mass | Obsrv. Mass | ± da    | ± ppm | Start Seq. | End Seq. | Sequence     | Ion Score | C. I.  | % Modification         | Rank | Result Type |
|------------|-------------|---------|-------|------------|----------|--------------|-----------|--------|------------------------|------|-------------|
| 808.3406   | 808.4396    | 0.099   | 122   | 54         | 59       | ADYMHHR      |           |        | Oxidation (M)[4]       |      | Mascot      |
| 826.4457   | 826.4253    | -0.0204 | -25   | 1013       | 1019     | QYAVFAK      |           |        |                        |      | Mascot      |
| 960.4785   | 960.45      | -0.0285 | -30   | 1033       | 1039     | LEVEWER      | 45        | 99.09  |                        |      | Mascot      |
| 960.4785   | 960.45      | -0.0285 | -30   | 1033       | 1039     | LEVEWER      |           |        |                        |      | Mascot      |
| 984.4243   | 984.3965    | -0.0278 | -28   | 1005       | 1012     | FSWGAECK     | 56        | 99.929 | Carbamidomethyl (C)[7] |      | Mascot      |
| 984.4243   | 984.3965    | -0.0278 | -28   | 1005       | 1012     | FSWGAECK     |           |        | Carbamidomethyl (C)[7] |      | Mascot      |
| 992.5015   | 992.4393    | -0.0622 | -63   | 392        | 399      | LMNCKLDR     |           |        |                        |      | Mascot      |
| 1118.5986  | 1118.65     | 0.0514  | 46    | 1094       | 1102     | IPEITMSRR    |           |        | Oxidation (M)[6]       |      | Mascot      |
| 1118.5986  | 1118.65     | 0.0514  | 46    | 1094       | 1102     | IPEITMSRR    |           |        | Oxidation (M)[6]       |      | Mascot      |
| 1326.6511  | 1326.7177   | 0.0666  | 50    | 1001       | 1012     | VTAKFSWGAECK |           |        |                        |      | Mascot      |

|    |                                  |           |         |      |              |          |                            |                   |     |     |     |     |        |
|----|----------------------------------|-----------|---------|------|--------------|----------|----------------------------|-------------------|-----|-----|-----|-----|--------|
|    | 1381.619                         | 1381.6997 | 0.0807  | 58   | 844          | 857      | NAPVSSSESSSSSR             |                   |     |     |     |     | Mascot |
|    | 1382.7889                        | 1382.7399 | -0.049  | -35  | 80           | 92       | ISDAPAQIVEVLK              |                   |     |     |     |     | Mascot |
|    | 1382.7889                        | 1382.7399 | -0.049  | -35  | 80           | 92       | ISDAPAQIVEVLK              |                   |     |     |     |     | Mascot |
|    | 1660.7119                        | 1660.8141 | 0.1022  | 62   | 917          | 932      | DTSSGSAAASFEQMVK           | Oxidation (M)[14] |     |     |     |     | Mascot |
|    | 1826.9799                        | 1826.9274 | -0.0525 | -29  | 958          | 973      | LLGYQLAAYFDKPTAR           |                   |     |     |     |     | Mascot |
|    | 1826.9799                        | 1826.9274 | -0.0525 | -29  | 958          | 973      | LLGYQLAAYFDKPTAR           | 139               | 100 |     |     |     | Mascot |
|    | 1862.1262                        | 1861.9109 | -0.2153 | -116 | 140          | 156      | RWLLDALPAVGTPVIHK          |                   |     |     |     |     | Mascot |
|    | 2269.1975                        | 2268.9675 | -0.23   | -101 | 954          | 973      | ADQKLLGYQLAAYFDKPT<br>AR   |                   |     |     |     |     | Mascot |
|    | 2365.2075                        | 2365.1101 | -0.0974 | -41  | 374          | 396      | ITAPDMAYVAGANVAIK<br>LMNCK |                   |     |     |     |     | Mascot |
| 17 | Zgc:136383 protein [Danio rerio] |           |         |      | gi 125857991 | 148644.2 | 8.93                       | 15                | 263 | 100 | 240 | 100 |        |



| Peptide Information |                              |         |       |             |          |                         |           |        |   |                        |      |        |      |
|---------------------|------------------------------|---------|-------|-------------|----------|-------------------------|-----------|--------|---|------------------------|------|--------|------|
| Calc. Mass          | Obsrv. Mass                  | ± da    | ± ppm | Start Seq.  | End Seq. | Sequence                | Ion Score | C. I.  | % | Modification           | Rank | Result | Type |
| 808.3406            | 808.4396                     | 0.099   | 122   | 277         | 282      | ADYMHHR                 |           |        |   | Oxidation (M)[4]       |      | Mascot |      |
| 826.4457            | 826.4253                     | -0.0204 | -25   | 1236        | 1242     | QYAVFAK                 |           |        |   |                        |      | Mascot |      |
| 960.4785            | 960.45                       | -0.0285 | -30   | 1256        | 1262     | LEVEWER                 | 45        | 99.09  |   |                        |      | Mascot |      |
| 960.4785            | 960.45                       | -0.0285 | -30   | 1256        | 1262     | LEVEWER                 |           |        |   |                        |      | Mascot |      |
| 984.4243            | 984.3965                     | -0.0278 | -28   | 1228        | 1235     | FSWGAECK                | 56        | 99.929 |   | Carbamidomethyl (C)[7] |      | Mascot |      |
| 984.4243            | 984.3965                     | -0.0278 | -28   | 1228        | 1235     | FSWGAECK                |           |        |   | Carbamidomethyl (C)[7] |      | Mascot |      |
| 992.5015            | 992.4393                     | -0.0622 | -63   | 615         | 622      | LMNCKLDR                |           |        |   |                        |      | Mascot |      |
| 1118.5986           | 1118.65                      | 0.0514  | 46    | 1317        | 1325     | IPEITMSRR               |           |        |   | Oxidation (M)[6]       |      | Mascot |      |
| 1118.5986           | 1118.65                      | 0.0514  | 46    | 1317        | 1325     | IPEITMSRR               |           |        |   | Oxidation (M)[6]       |      | Mascot |      |
| 1326.6511           | 1326.7177                    | 0.0666  | 50    | 1224        | 1235     | VTAKFSWGAECK            |           |        |   |                        |      | Mascot |      |
| 1381.619            | 1381.6997                    | 0.0807  | 58    | 1067        | 1080     | NAPVSSSSSSSR            |           |        |   |                        |      | Mascot |      |
| 1382.7889           | 1382.7399                    | -0.049  | -35   | 303         | 315      | ISDAPAQIVEVLK           |           |        |   |                        |      | Mascot |      |
| 1382.7889           | 1382.7399                    | -0.049  | -35   | 303         | 315      | ISDAPAQIVEVLK           |           |        |   |                        |      | Mascot |      |
| 1660.7119           | 1660.8141                    | 0.1022  | 62    | 1140        | 1155     | DTSSGSAASFEQMQK         |           |        |   | Oxidation (M)[14]      |      | Mascot |      |
| 1796.8928           | 1796.8547                    | -0.0381 | -21   | 72          | 86       | LMDPLLYEYAGTWPK         |           |        |   |                        |      | Mascot |      |
| 1826.9799           | 1826.9274                    | -0.0525 | -29   | 1181        | 1196     | LLGYQLAAYFDKPTAR        |           |        |   |                        |      | Mascot |      |
| 1826.9799           | 1826.9274                    | -0.0525 | -29   | 1181        | 1196     | LLGYQLAAYFDKPTAR        | 139       | 100    |   |                        |      | Mascot |      |
| 1862.1262           | 1861.9109                    | -0.2153 | -116  | 363         | 379      | RWLLDALPAVGTPVIK        |           |        |   |                        |      | Mascot |      |
| 2269.1975           | 2268.9675                    | -0.23   | -101  | 1177        | 1196     | ADQKLLGYQLAAYFDKPTAR    |           |        |   |                        |      | Mascot |      |
| 2365.2075           | 2365.1101                    | -0.0974 | -41   | 597         | 619      | ITAPDMAYVAGAANVAIKLMNCK |           |        |   |                        |      | Mascot |      |
| 19                  | vitellogenin 5 [Danio rerio] |         |       | gi 57864785 |          |                         | 72820.8   | 9      | 9 | 261                    | 100  | 240    | 100  |

| Peptide Information |             |         |       |            |          |                 |           |        |   |                        |                  |
|---------------------|-------------|---------|-------|------------|----------|-----------------|-----------|--------|---|------------------------|------------------|
| Calc. Mass          | Obsrv. Mass | ± da    | ± ppm | Start Seq. | End Seq. | Sequence        | Ion Score | C. I.  | % | Modification           | Rank Result Type |
| 826.4457            | 826.4253    | -0.0204 | -25   | 544        | 550      | QYAVFAK         |           |        |   |                        | Mascot           |
| 960.4785            | 960.45      | -0.0285 | -30   | 564        | 570      | LEVEWER         | 45        | 99.09  |   |                        | Mascot           |
| 960.4785            | 960.45      | -0.0285 | -30   | 564        | 570      | LEVEWER         |           |        |   |                        | Mascot           |
| 984.4243            | 984.3965    | -0.0278 | -28   | 536        | 543      | FSWGAECK        | 56        | 99.929 |   | Carbamidomethyl (C)[7] | Mascot           |
| 984.4243            | 984.3965    | -0.0278 | -28   | 536        | 543      | FSWGAECK        |           |        |   | Carbamidomethyl (C)[7] | Mascot           |
| 1326.7124           | 1326.7177   | 0.0053  | 4     | 318        | 330      | AAISRAEGPAVER   |           |        |   |                        | Mascot           |
| 1376.7069           | 1376.6591   | -0.0478 | -35   | 585        | 596      | HILNAAyntGFR    |           |        |   |                        | Mascot           |
| 1660.7119           | 1660.8141   | 0.1022  | 62    | 448        | 463      | DTSSGSAASFEQMQK |           |        |   | Oxidation (M)[14]      | Mascot           |

|    |                              |           |         |      |             |     |                      |      |     |     |                        |        |     |
|----|------------------------------|-----------|---------|------|-------------|-----|----------------------|------|-----|-----|------------------------|--------|-----|
|    | 1763.901                     | 1763.7534 | -0.1476 | -84  | 582         | 596 | VCKHILNAAAYNTGFR     |      |     |     | Carbamidomethyl (C)[2] | Mascot |     |
|    | 1826.9799                    | 1826.9274 | -0.0525 | -29  | 489         | 504 | LLGYQLAAYFDKPTAR     |      |     |     |                        | Mascot |     |
|    | 1826.9799                    | 1826.9274 | -0.0525 | -29  | 489         | 504 | LLGYQLAAYFDKPTAR     | 139  | 100 |     |                        | Mascot |     |
|    | 2269.1975                    | 2268.9675 | -0.23   | -101 | 485         | 504 | ADQKLLGYQLAAYFDKPTAR |      |     |     |                        | Mascot |     |
| 20 | vitellogenin 5 [Danio rerio] |           |         |      | gi 68448530 |     | 148868               | 8.77 | 13  | 258 | 100                    | 240    | 100 |

Peptide Information

| Calc. Mass | Obsrv. Mass | ± da    | ± ppm | Start Seq. | End Seq. | Sequence                 | Ion Score | C. I.  | % Modification                            | Rank | Result Type |
|------------|-------------|---------|-------|------------|----------|--------------------------|-----------|--------|-------------------------------------------|------|-------------|
| 826.4457   | 826.4253    | -0.0204 | -25   | 1238       | 1244     | QYAVFAK                  |           |        |                                           |      | Mascot      |
| 960.4785   | 960.45      | -0.0285 | -30   | 1258       | 1264     | LEVEWER                  | 45        | 99.09  |                                           |      | Mascot      |
| 960.4785   | 960.45      | -0.0285 | -30   | 1258       | 1264     | LEVEWER                  |           |        |                                           |      | Mascot      |
| 984.4243   | 984.3965    | -0.0278 | -28   | 1230       | 1237     | FSWGAECK                 | 56        | 99.929 | Carbamidomethyl (C)[7]                    |      | Mascot      |
| 984.4243   | 984.3965    | -0.0278 | -28   | 1230       | 1237     | FSWGAECK                 |           |        | Carbamidomethyl (C)[7]                    |      | Mascot      |
| 992.5015   | 992.4393    | -0.0622 | -63   | 615        | 622      | LMNCKLDR                 |           |        |                                           |      | Mascot      |
| 1326.7124  | 1326.7177   | 0.0053  | 4     | 1009       | 1021     | AAISRAEGPAVER            |           |        |                                           |      | Mascot      |
| 1376.7069  | 1376.6591   | -0.0478 | -35   | 1279       | 1290     | HILNAAAYNTGFR            |           |        |                                           |      | Mascot      |
| 1660.7119  | 1660.8141   | 0.1022  | 62    | 1142       | 1157     | DTSSGSAASFEQMQK          |           |        | Oxidation (M)[14]                         |      | Mascot      |
| 1763.901   | 1763.7534   | -0.1476 | -84   | 1276       | 1290     | VCKHILNAAAYNTGFR         |           |        | Carbamidomethyl (C)[2]                    |      | Mascot      |
| 1824.8989  | 1824.9114   | 0.0125  | 7     | 72         | 86       | LMDLLYIEYAGTWPR          |           |        |                                           |      | Mascot      |
| 1826.9799  | 1826.9274   | -0.0525 | -29   | 1183       | 1198     | LLGYQLAAYFDKPTAR         |           |        |                                           |      | Mascot      |
| 1826.9799  | 1826.9274   | -0.0525 | -29   | 1183       | 1198     | LLGYQLAAYFDKPTAR         | 139       | 100    |                                           |      | Mascot      |
| 1862.1262  | 1861.9109   | -0.2153 | -116  | 363        | 379      | RWLLDALPAVGTPVIK         |           |        |                                           |      | Mascot      |
| 2269.1975  | 2268.9675   | -0.23   | -101  | 1179       | 1198     | ADQKLLGYQLAAYFDKPTAR     |           |        |                                           |      | Mascot      |
| 2362.1926  | 2362.1145   | -0.0781 | -33   | 597        | 619      | ITAPDMASVAGAAANVAIKLMNCK |           |        | Carbamidomethyl (C)[22], Oxidation (M)[6] |      | Mascot      |

|    |                                                             |  |  |  |             |  |          |      |    |     |     |     |     |
|----|-------------------------------------------------------------|--|--|--|-------------|--|----------|------|----|-----|-----|-----|-----|
| 21 | novel protein similar to vitellogenin 1 (vg1) [Danio rerio] |  |  |  | gi 94733731 |  | 149169.2 | 8.84 | 13 | 255 | 100 | 240 | 100 |
|----|-------------------------------------------------------------|--|--|--|-------------|--|----------|------|----|-----|-----|-----|-----|

Peptide Information

| Calc. Mass | Obsrv. Mass | ± da    | ± ppm | Start Seq. | End Seq. | Sequence      | Ion Score | C. I.  | % Modification         | Rank | Result Type |
|------------|-------------|---------|-------|------------|----------|---------------|-----------|--------|------------------------|------|-------------|
| 826.4457   | 826.4253    | -0.0204 | -25   | 1240       | 1246     | QYAVFAK       |           |        |                        |      | Mascot      |
| 960.4785   | 960.45      | -0.0285 | -30   | 1260       | 1266     | LEVEWER       | 45        | 99.09  |                        |      | Mascot      |
| 960.4785   | 960.45      | -0.0285 | -30   | 1260       | 1266     | LEVEWER       |           |        |                        |      | Mascot      |
| 984.4243   | 984.3965    | -0.0278 | -28   | 1232       | 1239     | FSWGAECK      | 56        | 99.929 | Carbamidomethyl (C)[7] |      | Mascot      |
| 984.4243   | 984.3965    | -0.0278 | -28   | 1232       | 1239     | FSWGAECK      |           |        | Carbamidomethyl (C)[7] |      | Mascot      |
| 992.5015   | 992.4393    | -0.0622 | -63   | 619        | 626      | LMNCKLDR      |           |        |                        |      | Mascot      |
| 1326.7124  | 1326.7177   | 0.0053  | 4     | 1013       | 1025     | AAISRAEGPAVER |           |        |                        |      | Mascot      |

|    |                                |           |         |      |              |      |                          |      |     |     |        |    |                                           |  |  |  |        |
|----|--------------------------------|-----------|---------|------|--------------|------|--------------------------|------|-----|-----|--------|----|-------------------------------------------|--|--|--|--------|
|    | 1376.7069                      | 1376.6591 | -0.0478 | -35  | 1281         | 1292 | HILNAAYNTGFR             |      |     |     |        |    |                                           |  |  |  | Mascot |
|    | 1660.7119                      | 1660.8141 | 0.1022  | 62   | 1144         | 1159 | DTSSGSAASFEQMQK          |      |     |     |        |    | Oxidation (M)[14]                         |  |  |  | Mascot |
|    | 1763.901                       | 1763.7534 | -0.1476 | -84  | 1278         | 1292 | VCKHILNAAYNTGFR          |      |     |     |        |    | Carbamidomethyl (C)[2]                    |  |  |  | Mascot |
|    | 1824.8989                      | 1824.9114 | 0.0125  | 7    | 76           | 90   | LMDPLLYEYAGTWPR          |      |     |     |        |    |                                           |  |  |  | Mascot |
|    | 1826.9799                      | 1826.9274 | -0.0525 | -29  | 1185         | 1200 | LLGYQLAAYFDKPTAR         |      |     |     |        |    |                                           |  |  |  | Mascot |
|    | 1826.9799                      | 1826.9274 | -0.0525 | -29  | 1185         | 1200 | LLGYQLAAYFDKPTAR         |      | 139 | 100 |        |    |                                           |  |  |  | Mascot |
|    | 1862.1262                      | 1861.9109 | -0.2153 | -116 | 367          | 383  | RWLLDALPAVGTPVLIK        |      |     |     |        |    |                                           |  |  |  | Mascot |
|    | 2269.1975                      | 2268.9675 | -0.23   | -101 | 1181         | 1200 | ADQKLLGYQLAAYFDKPTAR     |      |     |     |        |    |                                           |  |  |  | Mascot |
|    | 2362.1926                      | 2362.1145 | -0.0781 | -33  | 601          | 623  | ITAPDMASVAGAAANVAIKLMNCK |      |     |     |        |    | Carbamidomethyl (C)[22], Oxidation (M)[6] |  |  |  | Mascot |
| 22 | PREDICTED: titin [Danio rerio] |           |         |      | gi 189523697 |      | 3199053                  | 5.99 | 69  | 56  | 88.022 | 31 | 75.933                                    |  |  |  |        |

Peptide Information

| Calc. Mass | Obsrv. Mass | ± da    | ± ppm | Start Seq. | End Seq. | Sequence    | Ion Score | C. I. | % Modification           | Rank | Result Type |
|------------|-------------|---------|-------|------------|----------|-------------|-----------|-------|--------------------------|------|-------------|
| 808.4423   | 808.4396    | -0.0027 | -3    | 12846      | 12852    | VPRHDGK     |           |       |                          |      | Mascot      |
| 809.4151   | 809.3976    | -0.0175 | -22   | 6326       | 6331     | EYKDVR      |           |       |                          |      | Mascot      |
| 826.4669   | 826.4253    | -0.0416 | -50   | 27841      | 27847    | LTSYKSK     |           |       |                          |      | Mascot      |
| 842.4478   | 842.485     | 0.0372  | 44    | 21462      | 21468    | RDLPEGR     |           |       |                          |      | Mascot      |
| 882.4791   | 882.5414    | 0.0623  | 71    | 14147      | 14153    | KEEHAIR     |           |       |                          |      | Mascot      |
| 960.4567   | 960.45      | -0.0067 | -7    | 23100      | 23108    | VQDTPAACR   |           |       |                          |      | Mascot      |
| 960.4996   | 960.45      | -0.0496 | -52   | 15118      | 15125    | LDEILSDR    | 22        |       | 0                        |      | Mascot      |
| 976.5032   | 976.4453    | -0.0579 | -59   | 5152       | 5158     | IQWMKDR     |           |       |                          |      | Mascot      |
| 982.4397   | 982.4254    | -0.0143 | -15   | 6026       | 6033     | TEEISEMK    |           |       | Oxidation (M)[7]         |      | Mascot      |
| 984.4818   | 984.3965    | -0.0853 | -87   | 22537      | 22544    | ITGYMVER    |           |       | Oxidation (M)[5]         |      | Mascot      |
| 984.4818   | 984.3965    | -0.0853 | -87   | 22537      | 22544    | ITGYMVER    |           |       | Oxidation (M)[5]         |      | Mascot      |
| 992.4294   | 992.4393    | 0.0099  | 10    | 8879       | 8885     | DNMYFFR     |           |       |                          |      | Mascot      |
| 996.536    | 996.5658    | 0.0298  | 30    | 2513       | 2520     | LTITETYSR   |           |       |                          |      | Mascot      |
| 1000.4338  | 1000.3927   | -0.0411 | -41   | 10778      | 10784    | CTEFRCK     |           |       | Carbamidomethyl (C)[1,6] |      | Mascot      |
| 1016.5047  | 1016.3883   | -0.1164 | -115  | 8910       | 8918     | FDVPDAPQK   |           |       |                          |      | Mascot      |
| 1118.6489  | 1118.65     | 0.0011  | 1     | 14623      | 14632    | IIMTELVTAKE |           |       |                          |      | Mascot      |
| 1118.6681  | 1118.65     | -0.0181 | -16   | 8844       | 8852     | ILAYVVERR   |           |       |                          |      | Mascot      |
| 1165.6324  | 1165.7117   | 0.0793  | 68    | 11960      | 11968    | ITNYTIERR   |           |       |                          |      | Mascot      |
| 1211.6631  | 1211.681    | 0.0179  | 15    | 5888       | 5898     | QVTPKSEPTPK |           |       |                          |      | Mascot      |
| 1211.7106  | 1211.681    | -0.0296 | -24   | 12384      | 12394    | QNAVNNLVLEK | 17        |       | 0                        |      | Mascot      |
| 1287.6328  | 1287.6315   | -0.0013 | -1    | 13852      | 13861    | KPKEADEWER  |           |       |                          |      | Mascot      |
| 1287.6328  | 1287.6315   | -0.0013 | -1    | 13852      | 13861    | KPKEADEWER  |           |       |                          |      | Mascot      |

|           |           |         |     |       |       |                   |                         |        |
|-----------|-----------|---------|-----|-------|-------|-------------------|-------------------------|--------|
| 1309.6854 | 1309.613  | -0.0724 | -55 | 12580 | 12591 | NTLTTMCLGIVK      | Oxidation (M)[6]        | Mascot |
| 1325.6519 | 1325.5896 | -0.0623 | -47 | 15554 | 15565 | KAWSNVTTSTCK      |                         | Mascot |
| 1325.7358 | 1325.7178 | -0.018  | -14 | 12243 | 12254 | EKMVIHAGGVIR      | Oxidation (M)[3]        | Mascot |
| 1326.7528 | 1326.7177 | -0.0351 | -26 | 13844 | 13854 | NLAYHVEKKPK       |                         | Mascot |
| 1327.6675 | 1327.6887 | 0.0212  | 16  | 20501 | 20511 | YASITIKDCTR       | Carbamidomethyl (C)[9]  | Mascot |
| 1327.6892 | 1327.6887 | -0.0005 | 0   | 24455 | 24466 | YFLSLENAVAGSK     |                         | Mascot |
| 1347.6838 | 1347.5968 | -0.087  | -65 | 8680  | 8690  | YQMISEGKVHR       |                         | Mascot |
| 1364.6804 | 1364.6575 | -0.0229 | -17 | 7578  | 7588  | DEARFEIELSR       |                         | Mascot |
| 1364.7096 | 1364.6575 | -0.0521 | -38 | 5234  | 5244  | LDNLFFIEEPK       |                         | Mascot |
| 1376.6475 | 1376.6591 | 0.0116  | 8   | 6624  | 6635  | SPRSDDKPEMSK      |                         | Mascot |
| 1380.7052 | 1380.6836 | -0.0216 | -16 | 4759  | 4771  | CHAQVAVTEPAR      |                         | Mascot |
| 1381.6515 | 1381.6997 | 0.0482  | 35  | 15467 | 15478 | TTDSDLVCVEK       | Carbamidomethyl (C)[9]  | Mascot |
| 1382.7678 | 1382.7399 | -0.0279 | -20 | 11942 | 11953 | AEQITLSWLPPK      |                         | Mascot |
| 1382.8002 | 1382.7399 | -0.0603 | -44 | 5915  | 5927  | AAVQPSEKKPVTK     |                         | Mascot |
| 1387.6675 | 1387.6556 | -0.0119 | -9  | 9768  | 9778  | GLMEKQEYSFR       |                         | Mascot |
| 1396.7869 | 1396.6976 | -0.0893 | -64 | 375   | 387   | EQVMPPTIVAALK     |                         | Mascot |
| 1404.7402 | 1404.7152 | -0.025  | -18 | 6440  | 6452  | AEESVMPKLSVAK     | Oxidation (M)[6]        | Mascot |
| 1420.8093 | 1420.684  | -0.1253 | -88 | 2418  | 2428  | FLQRLMIQTVR       | Oxidation (M)[6]        | Mascot |
| 1425.722  | 1425.745  | 0.023   | 16  | 9755  | 9767  | VAEDVPTTEHSLK     |                         | Mascot |
| 1438.7424 | 1438.808  | 0.0656  | 46  | 4072  | 4085  | ASSYPLSSAIVSEK    |                         | Mascot |
| 1453.8737 | 1453.7578 | -0.1159 | -80 | 4776  | 4788  | LTDVAIPVTQKLR     |                         | Mascot |
| 1495.8114 | 1495.8157 | 0.0043  | 3   | 28743 | 28756 | IEAAPRDISIEPGK    |                         | Mascot |
| 1553.7706 | 1553.6989 | -0.0717 | -46 | 9926  | 9939  | WEPPNSDGGRPITK    |                         | Mascot |
| 1584.8228 | 1584.8269 | 0.0041  | 3   | 205   | 218   | TKTFVSTSEISQTR    |                         | Mascot |
| 1660.7999 | 1660.8141 | 0.0142  | 9   | 15555 | 15569 | AWSNVTTSTCKTSFK   |                         | Mascot |
| 1676.8385 | 1676.8071 | -0.0314 | -19 | 14594 | 14609 | VAARNMGSSSLPTETR  |                         | Mascot |
| 1763.7979 | 1763.7534 | -0.0445 | -25 | 25536 | 25550 | YGTGEYLQSEVVMCK   | Carbamidomethyl (C)[14] | Mascot |
| 1796.9429 | 1796.8547 | -0.0882 | -49 | 19869 | 19885 | DSVTLVWEPPLIDGAK  |                         | Mascot |
| 1808.9177 | 1808.9109 | -0.0068 | -4  | 16213 | 16229 | VTLTWTAPHEDGGSPIK |                         | Mascot |
| 1809.9456 | 1809.9116 | -0.034  | -19 | 18044 | 18059 | SPILVSECIVAQYPYK  |                         | Mascot |
| 1824.949  | 1824.9114 | -0.0376 | -21 | 17245 | 17262 | KDGGFILTATNVGGFAK |                         | Mascot |
| 1826.8412 | 1826.9274 | 0.0862  | 47  | 12668 | 12683 | DMWTTVTSTATTHTCK  | Oxidation (M)[2]        | Mascot |
| 1826.9218 | 1826.9274 | 0.0056  | 3   | 13877 | 13890 | CIENQIQFRVQTK     | Carbamidomethyl (C)[1]  | Mascot |
| 1842.8293 | 1842.9148 | 0.0855  | 46  | 7849  | 7863  | FETEISEEDVHGHWK   |                         | Mascot |
| 1848.9702 | 1848.9019 | -0.0683 | -37 | 16918 | 16933 | ETTSQSWVELSSLIR   |                         | Mascot |
| 1861.9211 | 1861.9109 | -0.0102 | -5  | 6431  | 6447  | IEVAATDQKAEESVMPK | Oxidation (M)[15]       | Mascot |
| 1864.9148 | 1864.8792 | -0.0356 | -19 | 20184 | 20200 | RDTTESTWQTVAGSVAR |                         | Mascot |

|    |                       |           |           |         |     |              |           |                           |                                            |        |        |    |       |
|----|-----------------------|-----------|-----------|---------|-----|--------------|-----------|---------------------------|--------------------------------------------|--------|--------|----|-------|
| 23 | titin b [Danio rerio] | 1883.8627 | 1883.7921 | -0.0706 | -37 | 12668        | 12683     | DMWTTVTSATTKTHCK          | Carbamidomethyl (C)[15], Oxidation (M)[2]  | Mascot |        |    |       |
|    |                       | 1957.9601 | 1957.9636 | 0.0035  | 2   | 18724        | 18741     | ESAQIETSSSYTSLVIDK        |                                            | Mascot |        |    |       |
|    |                       | 1957.9865 | 1957.9636 | -0.0229 | -12 | 1313         | 1329      | TQEGYYEAITAVELKSR         |                                            | Mascot |        |    |       |
|    |                       | 2001.0188 | 2001.0215 | 0.0027  | 1   | 20356        | 20372     | DHIKIQWTKPQYDGGSK         |                                            | Mascot |        |    |       |
|    |                       | 2060.0447 | 2060.0837 | 0.039   | 19  | 24696        | 24714     | WSVPLNDGGSPITGYIVE<br>R   |                                            | Mascot |        |    |       |
|    |                       | 2076.0647 | 2076.071  | 0.0063  | 3   | 9861         | 9878      | DTKYTVTPLSEGSLYVFR        |                                            | Mascot |        |    |       |
|    |                       | 2211.0928 | 2211.0469 | -0.0459 | -21 | 26728        | 26747     | FGIDQQTVELDVADVPDP<br>PR  |                                            | Mascot |        |    |       |
|    |                       | 2269.1394 | 2268.9675 | -0.1719 | -76 | 24196        | 24216     | EVMRGALTIVWEPPTND<br>GGAR |                                            | Mascot |        |    |       |
|    |                       | 2283.0269 | 2283.1182 | 0.0913  | 40  | 8249         | 8269      | MDDAGEYHCKLPASETT<br>GTLK | Oxidation (M)[1]                           | Mascot |        |    |       |
|    |                       | 2284.0583 | 2284.1077 | 0.0494  | 22  | 16047        | 16067     | ANTVNVIDCAYTVADLQE<br>GCK | Carbamidomethyl (C)[9]                     | Mascot |        |    |       |
|    |                       | 2325.1279 | 2325.0952 | -0.0327 | -14 | 5443         | 5462      | DITDQTTQLNKEAVFECEI<br>K  | Mascot                                     |        |        |    |       |
|    |                       | 2362.1165 | 2362.1145 | -0.002  | -1  | 25530        | 25550     | VAAANRYGTGEYLQSEV<br>VMCK | Carbamidomethyl (C)[20], Oxidation (M)[19] | Mascot |        |    |       |
|    |                       | 2365.3391 | 2365.1101 | -0.229  | -97 | 18985        | 19004     | DLQVEIPVFGRPKPKVQ<br>WTK  | Mascot                                     |        |        |    |       |
| 23 | titin b [Danio rerio] |           |           |         |     | gi 110005908 | 3198243.8 | 5.99                      | 68                                         | 55     | 85.264 | 30 | 73.35 |

Peptide Information

| Calc. Mass | Obsrv. Mass | ± da    | ± ppm | Start Seq. | End Seq. | Sequence    | Ion Score | C. I. | % Modification           | Rank | Result Type |
|------------|-------------|---------|-------|------------|----------|-------------|-----------|-------|--------------------------|------|-------------|
| 808.4423   | 808.4396    | -0.0027 | -3    | 12845      | 12851    | VPRHDGK     |           |       |                          |      | Mascot      |
| 809.4151   | 809.3976    | -0.0175 | -22   | 6325       | 6330     | EYKDVR      |           |       |                          |      | Mascot      |
| 826.4669   | 826.4253    | -0.0416 | -50   | 27840      | 27846    | LTSYKSK     |           |       |                          |      | Mascot      |
| 842.4478   | 842.485     | 0.0372  | 44    | 21461      | 21467    | RDLPEGR     |           |       |                          |      | Mascot      |
| 882.4791   | 882.5414    | 0.0623  | 71    | 14146      | 14152    | KEEHAIR     |           |       |                          |      | Mascot      |
| 960.4567   | 960.45      | -0.0067 | -7    | 23099      | 23107    | VQDTPAACR   |           |       |                          |      | Mascot      |
| 960.4996   | 960.45      | -0.0496 | -52   | 15117      | 15124    | LDEILSDR    | 22        | 0     |                          |      | Mascot      |
| 976.5032   | 976.4453    | -0.0579 | -59   | 5151       | 5157     | IQWMKDR     |           |       |                          |      | Mascot      |
| 982.441    | 982.4254    | -0.0156 | -16   | 23254      | 23261    | HCEHEVTK    |           |       |                          |      | Mascot      |
| 984.4818   | 984.3965    | -0.0853 | -87   | 22536      | 22543    | ITGYMVER    |           |       | Oxidation (M)[5]         |      | Mascot      |
| 984.4818   | 984.3965    | -0.0853 | -87   | 22536      | 22543    | ITGYMVER    |           |       | Oxidation (M)[5]         |      | Mascot      |
| 992.4294   | 992.4393    | 0.0099  | 10    | 8878       | 8884     | DNMYFFR     |           |       |                          |      | Mascot      |
| 996.536    | 996.5658    | 0.0298  | 30    | 2513       | 2520     | LTITETYSR   |           |       |                          |      | Mascot      |
| 1000.4338  | 1000.3927   | -0.0411 | -41   | 10777      | 10783    | CTEFRCK     |           |       | Carbamidomethyl (C)[1,6] |      | Mascot      |
| 1016.5047  | 1016.3883   | -0.1164 | -115  | 8909       | 8917     | FDVPDAPQK   |           |       |                          |      | Mascot      |
| 1118.6489  | 1118.65     | 0.0011  | 1     | 14622      | 14631    | IIMTELVTAKE |           |       |                          |      | Mascot      |
| 1118.6681  | 1118.65     | -0.0181 | -16   | 8843       | 8851     | ILAYVVERR   |           |       |                          |      | Mascot      |

|           |           |         |     |       |       |                   |    |                         |        |
|-----------|-----------|---------|-----|-------|-------|-------------------|----|-------------------------|--------|
| 1165.6324 | 1165.7117 | 0.0793  | 68  | 11959 | 11967 | ITNYTIERR         |    |                         | Mascot |
| 1211.6631 | 1211.681  | 0.0179  | 15  | 5887  | 5897  | QVTPKSEPTPK       |    |                         | Mascot |
| 1211.7106 | 1211.681  | -0.0296 | -24 | 12383 | 12393 | QNAVNNLVLK        | 17 | 0                       | Mascot |
| 1287.6328 | 1287.6315 | -0.0013 | -1  | 13851 | 13860 | KPKEADEWER        |    |                         | Mascot |
| 1287.6328 | 1287.6315 | -0.0013 | -1  | 13851 | 13860 | KPKEADEWER        |    |                         | Mascot |
| 1309.6305 | 1309.613  | -0.0175 | -13 | 6025  | 6035  | TDEISEMKQTK       |    |                         | Mascot |
| 1325.6254 | 1325.5896 | -0.0358 | -27 | 6025  | 6035  | TDEISEMKQTK       |    | Oxidation (M)[7]        | Mascot |
| 1325.7358 | 1325.7178 | -0.018  | -14 | 12242 | 12253 | EKMVIHAGGVIR      |    | Oxidation (M)[3]        | Mascot |
| 1326.7528 | 1326.7177 | -0.0351 | -26 | 13843 | 13853 | NLAYHVEKKPK       |    |                         | Mascot |
| 1327.6675 | 1327.6887 | 0.0212  | 16  | 20500 | 20510 | YASITIKDCTR       |    | Carbamidomethyl (C)[9]  | Mascot |
| 1327.6892 | 1327.6887 | -0.0005 | 0   | 24454 | 24465 | YFLSLENVAGSK      |    |                         | Mascot |
| 1347.6838 | 1347.5968 | -0.087  | -65 | 8679  | 8689  | YQMISEGKVHR       |    |                         | Mascot |
| 1364.6362 | 1364.6575 | 0.0213  | 16  | 6623  | 6634  | SPKSDDKPEMSK      |    | Oxidation (M)[10]       | Mascot |
| 1364.7096 | 1364.6575 | -0.0521 | -38 | 5233  | 5243  | LDNLFFIEEPK       |    |                         | Mascot |
| 1376.7784 | 1376.6591 | -0.1193 | -87 | 5521  | 5532  | LTVLADQIQFTK      |    |                         | Mascot |
| 1380.7052 | 1380.6836 | -0.0216 | -16 | 4758  | 4770  | CHAQVVAVTEPAR     |    |                         | Mascot |
| 1381.6515 | 1381.6997 | 0.0482  | 35  | 15466 | 15477 | TTDSDLVCVEK       |    | Carbamidomethyl (C)[9]  | Mascot |
| 1382.7678 | 1382.7399 | -0.0279 | -20 | 11941 | 11952 | AEQITLSWLPPK      |    |                         | Mascot |
| 1382.8002 | 1382.7399 | -0.0603 | -44 | 5914  | 5926  | AAVQPSEKKPVTK     |    |                         | Mascot |
| 1387.6675 | 1387.6556 | -0.0119 | -9  | 9767  | 9777  | GLMEKQEYSFR       |    |                         | Mascot |
| 1396.7869 | 1396.6976 | -0.0893 | -64 | 375   | 387   | EQVMPPTIVAALK     |    |                         | Mascot |
| 1404.7402 | 1404.7152 | -0.025  | -18 | 6439  | 6451  | AEESVMPKLSVAK     |    | Oxidation (M)[6]        | Mascot |
| 1420.8093 | 1420.684  | -0.1253 | -88 | 2418  | 2428  | FLQRLMIQTVR       |    | Oxidation (M)[6]        | Mascot |
| 1425.722  | 1425.745  | 0.023   | 16  | 9754  | 9766  | VAEDVPTTEHSLK     |    |                         | Mascot |
| 1438.7424 | 1438.808  | 0.0656  | 46  | 4072  | 4085  | ASSYPLSSAVISEK    |    |                         | Mascot |
| 1453.8737 | 1453.7578 | -0.1159 | -80 | 4775  | 4787  | LTDVAIPVTQKLR     |    |                         | Mascot |
| 1495.8114 | 1495.8157 | 0.0043  | 3   | 28742 | 28755 | IEAAPRDISIEPGK    |    |                         | Mascot |
| 1553.7706 | 1553.6989 | -0.0717 | -46 | 9925  | 9938  | WEPPNSDGGRPITK    |    |                         | Mascot |
| 1584.8228 | 1584.8269 | 0.0041  | 3   | 205   | 218   | TKTFVSTSEISQTR    |    |                         | Mascot |
| 1660.7999 | 1660.8141 | 0.0142  | 9   | 15554 | 15568 | AWSNVTTSTKTSFK    |    |                         | Mascot |
| 1676.8385 | 1676.8071 | -0.0314 | -19 | 14593 | 14608 | VAARNMGSSLPTETR   |    |                         | Mascot |
| 1763.7979 | 1763.7534 | -0.0445 | -25 | 25535 | 25549 | YGTGEYLQSEVVMCK   |    | Carbamidomethyl (C)[14] | Mascot |
| 1796.9429 | 1796.8547 | -0.0882 | -49 | 19868 | 19884 | DSVTLWEPPLIDGGAK  |    |                         | Mascot |
| 1808.9177 | 1808.9109 | -0.0068 | -4  | 16212 | 16228 | VTLTWTAPHEDGGSPIK |    |                         | Mascot |
| 1809.9456 | 1809.9116 | -0.034  | -19 | 18043 | 18058 | SPILVSECIVAQYPYK  |    |                         | Mascot |
| 1824.949  | 1824.9114 | -0.0376 | -21 | 17244 | 17261 | KDGGFILTATNVGGFAK |    |                         | Mascot |

|    |                              |           |         |     |              |       |                           |      |                                            |        |        |    |        |
|----|------------------------------|-----------|---------|-----|--------------|-------|---------------------------|------|--------------------------------------------|--------|--------|----|--------|
|    | 1826.8412                    | 1826.9274 | 0.0862  | 47  | 12667        | 12682 | DMWTTVTSATTKTHCK          |      | Oxidation (M)[2]                           | Mascot |        |    |        |
|    | 1826.9218                    | 1826.9274 | 0.0056  | 3   | 13876        | 13889 | CIENQIQFRVQTK             |      | Carbamidomethyl (C)[1]                     | Mascot |        |    |        |
|    | 1842.8293                    | 1842.9148 | 0.0855  | 46  | 7848         | 7862  | FETEISEEDVHGHWK           |      |                                            | Mascot |        |    |        |
|    | 1848.9602                    | 1848.9019 | -0.0583 | -32 | 5081         | 5096  | VSGSQPLSVIWKDNR           |      |                                            | Mascot |        |    |        |
|    | 1861.9211                    | 1861.9109 | -0.0102 | -5  | 6430         | 6446  | IEVAATDQKAEESVMPK         |      | Oxidation (M)[15]                          | Mascot |        |    |        |
|    | 1864.9148                    | 1864.8792 | -0.0356 | -19 | 20183        | 20199 | RDTTESTWQTVAGSVAR         |      |                                            | Mascot |        |    |        |
|    | 1883.8627                    | 1883.7921 | -0.0706 | -37 | 12667        | 12682 | DMWTTVTSATTKTHCK          |      | Carbamidomethyl (C)[15], Oxidation (M)[2]  | Mascot |        |    |        |
|    | 1957.9601                    | 1957.9636 | 0.0035  | 2   | 18723        | 18740 | ESAQIETSSSYTSLVIDK        |      |                                            | Mascot |        |    |        |
|    | 1957.9865                    | 1957.9636 | -0.0229 | -12 | 1313         | 1329  | TQEGYYEAITAVELKSR         |      |                                            | Mascot |        |    |        |
|    | 2001.0188                    | 2001.0215 | 0.0027  | 1   | 20355        | 20371 | DHIKIQWTKPKYDGGSK         |      |                                            | Mascot |        |    |        |
|    | 2060.0447                    | 2060.0837 | 0.039   | 19  | 24695        | 24713 | WSVPLNDGGSPITGYIVE<br>R   |      |                                            | Mascot |        |    |        |
|    | 2076.0647                    | 2076.071  | 0.0063  | 3   | 9860         | 9877  | DTKYTVTPLSEGSLYVFR        |      |                                            | Mascot |        |    |        |
|    | 2211.0928                    | 2211.0469 | -0.0459 | -21 | 26727        | 26746 | FGIDQQTVELDVADVPDP<br>PR  |      |                                            | Mascot |        |    |        |
|    | 2269.1394                    | 2268.9675 | -0.1719 | -76 | 24195        | 24215 | EVMRGALTIVWEPPTND<br>GGAR |      |                                            | Mascot |        |    |        |
|    | 2283.0269                    | 2283.1182 | 0.0913  | 40  | 8248         | 8268  | MDDAGEYHCKLPASETT<br>GTLK |      | Oxidation (M)[1]                           | Mascot |        |    |        |
|    | 2284.0583                    | 2284.1077 | 0.0494  | 22  | 16046        | 16066 | ANTVNVIDCAYTVADLQE<br>GCK |      | Carbamidomethyl (C)[9]                     | Mascot |        |    |        |
|    | 2325.1279                    | 2325.0952 | -0.0327 | -14 | 5442         | 5461  | DITDQTTQLNKEAVFECEI<br>K  |      |                                            | Mascot |        |    |        |
|    | 2362.1165                    | 2362.1145 | -0.002  | -1  | 25529        | 25549 | VAAANRYGTGEYLQSEV<br>VMCK |      | Carbamidomethyl (C)[20], Oxidation (M)[19] | Mascot |        |    |        |
|    | 2365.3391                    | 2365.1101 | -0.229  | -97 | 18984        | 19003 | DLQVEIPVFGRPKPKVQ<br>WTK  |      |                                            | Mascot |        |    |        |
| 24 | Hook homolog 1 [Danio rerio] |           |         |     | gi 190339684 |       | 83123.4                   | 5.24 | 12                                         | 52     | 74.392 | 34 | 87.811 |

| Peptide Information |             |         |       |            |          |                 |           |        |   |                  |      |        |      |
|---------------------|-------------|---------|-------|------------|----------|-----------------|-----------|--------|---|------------------|------|--------|------|
| Calc. Mass          | Obsrv. Mass | ± da    | ± ppm | Start Seq. | End Seq. | Sequence        | Ion Score | C. I.  | % | Modification     | Rank | Result | Type |
| 809.3458            | 809.3976    | 0.0518  | 64    | 587        | 592      | KDEDMR          |           |        |   | Oxidation (M)[5] |      | Mascot |      |
| 842.5458            | 842.485     | -0.0608 | -72   | 636        | 642      | KIIALER         |           |        |   |                  |      | Mascot |      |
| 960.4996            | 960.45      | -0.0496 | -52   | 323        | 330      | LEDLSDLR        | 34        | 87.811 |   |                  |      | Mascot |      |
| 960.4996            | 960.45      | -0.0496 | -52   | 323        | 330      | LEDLSDLR        |           |        |   |                  |      | Mascot |      |
| 976.488             | 976.4453    | -0.0427 | -44   | 643        | 650      | ECEQAKLR        |           |        |   |                  |      | Mascot |      |
| 992.5081            | 992.4393    | -0.0688 | -69   | 332        | 339      | QMKALEEK        |           |        |   | Oxidation (M)[2] |      | Mascot |      |
| 1000.4767           | 1000.3927   | -0.084  | -84   | 266        | 273      | IHC EELEK       |           |        |   |                  |      | Mascot |      |
| 1165.5956           | 1165.7117   | 0.1161  | 100   | 577        | 586      | MDELMAALKK      |           |        |   | Oxidation (M)[1] |      | Mascot |      |
| 1364.6614           | 1364.6575   | -0.0039 | -3    | 177        | 188      | ALEDLTEVMAEK    |           |        |   | Oxidation (M)[9] |      | Mascot |      |
| 1364.6614           | 1364.6575   | -0.0039 | -3    | 177        | 188      | ALEDLTEVMAEK    |           |        |   | Oxidation (M)[9] |      | Mascot |      |
| 1825.0006           | 1824.9114   | -0.0892 | -49   | 656        | 670      | LIVTAWYNKSLNFQK |           |        |   |                  |      | Mascot |      |

|    |                                                                                                    |           |         |     |     |     |                      |          |      |    |    |        |                  |  |  |  |        |
|----|----------------------------------------------------------------------------------------------------|-----------|---------|-----|-----|-----|----------------------|----------|------|----|----|--------|------------------|--|--|--|--------|
|    | 1842.9556                                                                                          | 1842.9148 | -0.0408 | -22 | 510 | 524 | ERISELQQQVEDLQK      |          |      |    |    |        |                  |  |  |  | Mascot |
|    | 2000.9415                                                                                          | 2001.0215 | 0.08    | 40  | 542 | 558 | LDAHMVQLNEAQDEIMK    |          |      |    |    |        | Oxidation (M)[5] |  |  |  | Mascot |
|    | 2365.2659                                                                                          | 2365.1101 | -0.1558 | -66 | 6   | 26  | TVLCESLIWLQTFKTAAPCK |          |      |    |    |        |                  |  |  |  | Mascot |
| 25 | novel protein similar to vertebrate dynein, cytoplasmic, heavy polypeptide 1 (DNCH1) [Danio rerio] |           |         |     |     |     | gi 123226055         | 489371.7 | 5.72 | 32 | 52 | 74.392 |                  |  |  |  |        |

| Peptide Information |             |         |       |            |          |                 |           |       |   |                        |      |             |
|---------------------|-------------|---------|-------|------------|----------|-----------------|-----------|-------|---|------------------------|------|-------------|
| Calc. Mass          | Obsrv. Mass | ± da    | ± ppm | Start Seq. | End Seq. | Sequence        | Ion Score | C. I. | % | Modification           | Rank | Result Type |
| 808.4199            | 808.4396    | 0.0197  | 24    | 2805       | 2811     | SNYVTPK         |           |       |   |                        |      | Mascot      |
| 809.4086            | 809.3976    | -0.011  | -14   | 3626       | 3631     | CFRLDR          |           |       |   |                        |      | Mascot      |
| 882.5117            | 882.5414    | 0.0297  | 34    | 1864       | 1870     | KMTVLYK         |           |       |   |                        |      | Mascot      |
| 960.4866            | 960.45      | -0.0366 | -38   | 1409       | 1416     | RCCLVPNR        |           |       |   |                        |      | Mascot      |
| 960.4996            | 960.45      | -0.0496 | -52   | 3382       | 3389     | DLEDLLR         | 20        |       | 0 |                        |      | Mascot      |
| 992.5258            | 992.4393    | -0.0865 | -87   | 1719       | 1727     | TESTKDLAK       |           |       |   |                        |      | Mascot      |
| 996.5512            | 996.5658    | 0.0146  | 15    | 2192       | 2199     | QKFDAFIK        |           |       |   |                        |      | Mascot      |
| 1016.5258           | 1016.3883   | -0.1375 | -135  | 948        | 956      | SPNTLEDLK       |           |       |   |                        |      | Mascot      |
| 1211.6201           | 1211.681    | 0.0609  | 50    | 4219       | 4228     | TPVYTSMRR       |           |       |   |                        |      | Mascot      |
| 1211.6201           | 1211.681    | 0.0609  | 50    | 4219       | 4228     | TPVYTSMRR       |           |       |   |                        |      | Mascot      |
| 1287.6653           | 1287.6315   | -0.0338 | -26   | 2420       | 2429     | LTFCTLELYK      |           |       |   | Carbamidomethyl (C)[4] |      | Mascot      |
| 1287.6653           | 1287.6315   | -0.0338 | -26   | 2420       | 2429     | LTFCTLELYK      |           |       |   | Carbamidomethyl (C)[4] |      | Mascot      |
| 1309.7726           | 1309.613    | -0.1596 | -122  | 2430       | 2441     | TIKDLPTPSK      |           |       |   |                        |      | Mascot      |
| 1326.6246           | 1326.7177   | 0.0931  | 70    | 93         | 103      | ADSFIMQELEK     |           |       |   | Oxidation (M)[6]       |      | Mascot      |
| 1327.7328           | 1327.6887   | -0.0441 | -33   | 3293       | 3305     | GAEGRQVVVLGDK   |           |       |   |                        |      | Mascot      |
| 1327.7328           | 1327.6887   | -0.0441 | -33   | 3293       | 3305     | GAEGRQVVVLGDK   |           |       |   |                        |      | Mascot      |
| 1376.797            | 1376.6591   | -0.1379 | -100  | 2353       | 2365     | LIKDLGFIAAMGK   |           |       |   |                        |      | Mascot      |
| 1381.7369           | 1381.6997   | -0.0372 | -27   | 1595       | 1605     | MHQINDLVKR      |           |       |   |                        |      | Mascot      |
| 1382.8253           | 1382.7399   | -0.0854 | -62   | 1184       | 1195     | ESLPLLLDLKNK    | 1         |       | 0 |                        |      | Mascot      |
| 1382.8253           | 1382.7399   | -0.0854 | -62   | 1184       | 1195     | ESLPLLLDLKNK    |           |       |   |                        |      | Mascot      |
| 1387.7627           | 1387.6556   | -0.1071 | -77   | 888        | 898      | QPMVKHEHIR      |           |       |   |                        |      | Mascot      |
| 1404.7205           | 1404.7152   | -0.0053 | -4    | 4087       | 4097     | SLGNWMIHFKR     |           |       |   | Oxidation (M)[6]       |      | Mascot      |
| 1420.7365           | 1420.684    | -0.0525 | -37   | 2356       | 2370     | DLGFIAAMGKAGGGR |           |       |   |                        |      | Mascot      |
| 1453.7389           | 1453.7578   | 0.0189  | 13    | 691        | 704      | MESLIMGTSTGKAK  |           |       |   |                        |      | Mascot      |
| 1495.7284           | 1495.8157   | 0.0873  | 58    | 2309       | 2320     | LLVFMDDLNMPR    |           |       |   | Oxidation (M)[5,10]    |      | Mascot      |
| 1553.7152           | 1553.6989   | -0.0163 | -10   | 1253       | 1265     | GVKEVEETWDSMK   |           |       |   | Oxidation (M)[12]      |      | Mascot      |
| 1796.8683           | 1796.8547   | -0.0136 | -8    | 3795       | 3809     | ISHDKLMNCAHPAFR |           |       |   | Carbamidomethyl (C)[9] |      | Mascot      |
| 1826.9535           | 1826.9274   | -0.0261 | -14   | 1027       | 1041     | KTFAEITLNQIEEYK |           |       |   |                        |      | Mascot      |



|    |                                      |           |         |     |              |      |                            |      |    |    |        |                                          |        |  |  |  |        |
|----|--------------------------------------|-----------|---------|-----|--------------|------|----------------------------|------|----|----|--------|------------------------------------------|--------|--|--|--|--------|
|    | 1826.9535                            | 1826.9274 | -0.0261 | -14 | 1027         | 1041 | KTFAEITLNQIEEYK            |      |    |    |        |                                          |        |  |  |  | Mascot |
|    | 1861.9767                            | 1861.9109 | -0.0658 | -35 | 3428         | 3444 | TAVDIDTLRDGYRPAAK          |      |    |    |        |                                          |        |  |  |  | Mascot |
|    | 2001.011                             | 2001.0215 | 0.0105  | 5   | 4228         | 4245 | RNAMGVGLVFEADLYTT<br>K     |      |    |    |        | Oxidation (M)[4]                         |        |  |  |  | Mascot |
|    | 2060.0151                            | 2060.0837 | 0.0686  | 33  | 478          | 496  | KSLLMVNSYGTVCADS<br>TR     |      |    |    |        | Oxidation (M)[6]                         |        |  |  |  | Mascot |
|    | 2211.1677                            | 2211.0469 | -0.1208 | -55 | 3721         | 3737 | GQWLMLQNCHELLVKWL<br>R     |      |    |    |        | Carbamidomethyl (C)[9], Oxidation (M)[5] |        |  |  |  | Mascot |
|    | 2225.0801                            | 2225.0564 | -0.0237 | -11 | 479          | 498  | SLLVMVNSYGTVCADST<br>RHR   |      |    |    |        | Oxidation (M)[5]                         |        |  |  |  | Mascot |
|    | 2268.0957                            | 2267.978  | -0.1177 | -52 | 3010         | 3030 | NLNTSLEEMQGISKAGS<br>GMLR  |      |    |    |        | Oxidation (M)[9,19]                      |        |  |  |  | Mascot |
|    | 2269.146                             | 2268.9675 | -0.1785 | -79 | 3199         | 3219 | WGSEGLPPDELSVQNGI<br>LTTR  |      |    |    |        |                                          |        |  |  |  | Mascot |
|    | 2365.1626                            | 2365.1101 | -0.0525 | -22 | 2870         | 2891 | TSACEILLEEICANTAVAE<br>EKK |      |    |    |        |                                          |        |  |  |  | Mascot |
| 26 | protein Hook homolog 1 [Danio rerio] |           |         |     | gi 113676708 |      | 83063.4                    | 5.24 | 12 | 52 | 70.598 | 34                                       | 87.811 |  |  |  |        |

#### Peptide Information

|  | Calc. Mass | Obsrv. Mass | ± da    | ± ppm | Start Seq. | End Seq. | Sequence                 | Ion Score | C. I.  | % | Modification     | Rank | Result Type |
|--|------------|-------------|---------|-------|------------|----------|--------------------------|-----------|--------|---|------------------|------|-------------|
|  | 809.3458   | 809.3976    | 0.0518  | 64    | 587        | 592      | KDEDMR                   |           |        |   | Oxidation (M)[5] |      | Mascot      |
|  | 842.5458   | 842.485     | -0.0608 | -72   | 636        | 642      | KIIALER                  |           |        |   |                  |      | Mascot      |
|  | 960.4996   | 960.45      | -0.0496 | -52   | 323        | 330      | LEDLSDLR                 | 34        | 87.811 |   |                  |      | Mascot      |
|  | 960.4996   | 960.45      | -0.0496 | -52   | 323        | 330      | LEDLSDLR                 |           |        |   |                  |      | Mascot      |
|  | 976.488    | 976.4453    | -0.0427 | -44   | 643        | 650      | ECEQAKLR                 |           |        |   |                  |      | Mascot      |
|  | 992.5081   | 992.4393    | -0.0688 | -69   | 332        | 339      | QMKALEEK                 |           |        |   | Oxidation (M)[2] |      | Mascot      |
|  | 1000.4767  | 1000.3927   | -0.084  | -84   | 266        | 273      | IHC EELEK                |           |        |   |                  |      | Mascot      |
|  | 1165.5956  | 1165.7117   | 0.1161  | 100   | 577        | 586      | MDELMAALKK               |           |        |   | Oxidation (M)[1] |      | Mascot      |
|  | 1364.6614  | 1364.6575   | -0.0039 | -3    | 177        | 188      | ALEDLTEVMAEK             |           |        |   | Oxidation (M)[9] |      | Mascot      |
|  | 1364.6614  | 1364.6575   | -0.0039 | -3    | 177        | 188      | ALEDLTEVMAEK             |           |        |   | Oxidation (M)[9] |      | Mascot      |
|  | 1825.0006  | 1824.9114   | -0.0892 | -49   | 656        | 670      | LIVTAWYNKSLNFQK          |           |        |   |                  |      | Mascot      |
|  | 1842.9556  | 1842.9148   | -0.0408 | -22   | 510        | 524      | ERISELQQQVEDLQK          |           |        |   |                  |      | Mascot      |
|  | 2000.9415  | 2001.0215   | 0.08    | 40    | 542        | 558      | LDAHMVQLNEAQDEIMK        |           |        |   | Oxidation (M)[5] |      | Mascot      |
|  | 2365.2659  | 2365.1101   | -0.1558 | -66   | 6          | 26       | TVLCESLIWLQTFKTAAP<br>CK |           |        |   |                  |      | Mascot      |

27 PREDICTED: serine/threonine-protein kinase pim-3-like [Danio rerio] gi|326675215 23705.1 8.34 4 51 61.241 35 90.839

#### Peptide Information

|  | Calc. Mass | Obsrv. Mass | ± da   | ± ppm | Start Seq. | End Seq. | Sequence   | Ion Score | C. I. | % | Modification | Rank | Result Type |
|--|------------|-------------|--------|-------|------------|----------|------------|-----------|-------|---|--------------|------|-------------|
|  | 1211.6531  | 1211.681    | 0.0279 | 23    | 110        | 119      | SPYLGVTRYR |           |       |   |              |      | Mascot      |
|  | 1211.6531  | 1211.681    | 0.0279 | 23    | 110        | 119      | SPYLGVTRYR |           |       |   |              |      | Mascot      |

|           |           |         |     |     |     |               |    |        |        |
|-----------|-----------|---------|-----|-----|-----|---------------|----|--------|--------|
| 1287.7015 | 1287.6315 | -0.07   | -54 | 44  | 55  | KNNGLLSESVAR  | 35 | 90.839 | Mascot |
| 1287.7015 | 1287.6315 | -0.07   | -54 | 44  | 55  | KNNGLLSESVAR  |    |        | Mascot |
| 1347.7015 | 1347.5968 | -0.1047 | -78 | 120 | 130 | LQEGEPYRSIR   |    |        | Mascot |
| 1364.7419 | 1364.6575 | -0.0844 | -62 | 184 | 195 | TGPVLEEIIIEHK |    |        | Mascot |
| 1364.7419 | 1364.6575 | -0.0844 | -62 | 184 | 195 | TGPVLEEIIIEHK |    |        | Mascot |

28 PREDICTED: dynein heavy chain 10, axonemal [Danio gii|292613807 523441.5 5.56 34 48 27.828  
 rerio]

Peptide Information

| Calc. Mass | Obsrv. Mass | ± da    | ± ppm | Start Seq. | End Seq. | Sequence        | Ion Score | C. I. | % Modification         | Rank | Result Type |
|------------|-------------|---------|-------|------------|----------|-----------------|-----------|-------|------------------------|------|-------------|
| 808.4199   | 808.4396    | 0.0197  | 24    | 3102       | 3108     | SNYVTPK         |           |       |                        |      | Mascot      |
| 809.4086   | 809.3976    | -0.011  | -14   | 3923       | 3928     | CFRLDR          |           |       |                        |      | Mascot      |
| 882.5117   | 882.5414    | 0.0297  | 34    | 2074       | 2080     | KMTVLYK         |           |       |                        |      | Mascot      |
| 960.4866   | 960.45      | -0.0366 | -38   | 1619       | 1626     | RCCLVPNR        |           |       |                        |      | Mascot      |
| 960.4996   | 960.45      | -0.0496 | -52   | 3679       | 3686     | DLEDLLR         | 20        | 0     |                        |      | Mascot      |
| 992.5258   | 992.4393    | -0.0865 | -87   | 1929       | 1937     | TESTKDLAK       |           |       |                        |      | Mascot      |
| 996.5512   | 996.5658    | 0.0146  | 15    | 2449       | 2456     | QKFDAFIK        |           |       |                        |      | Mascot      |
| 1016.5258  | 1016.3883   | -0.1375 | -135  | 1187       | 1195     | SPNTLEDLK       |           |       |                        |      | Mascot      |
| 1211.58    | 1211.681    | 0.101   | 83    | 2176       | 2185     | YIMMPSQVDK      |           |       |                        |      | Mascot      |
| 1211.6201  | 1211.681    | 0.0609  | 50    | 4516       | 4525     | TPVYTTSMRR      |           |       |                        |      | Mascot      |
| 1287.6653  | 1287.6315   | -0.0338 | -26   | 2717       | 2726     | LTFCTLELYK      |           |       | Carbamidomethyl (C)[4] |      | Mascot      |
| 1287.6653  | 1287.6315   | -0.0338 | -26   | 2717       | 2726     | LTFCTLELYK      |           |       | Carbamidomethyl (C)[4] |      | Mascot      |
| 1309.7726  | 1309.613    | -0.1596 | -122  | 2727       | 2738     | TIKDLPTPSK      |           |       |                        |      | Mascot      |
| 1326.6246  | 1326.7177   | 0.0931  | 70    | 399        | 409      | ADSFIMQELEK     |           |       | Oxidation (M)[6]       |      | Mascot      |
| 1327.7328  | 1327.6887   | -0.0441 | -33   | 3590       | 3602     | GAEGRQVVVLGDK   |           |       |                        |      | Mascot      |
| 1327.7328  | 1327.6887   | -0.0441 | -33   | 3590       | 3602     | GAEGRQVVVLGDK   |           |       |                        |      | Mascot      |
| 1376.797   | 1376.6591   | -0.1379 | -100  | 2650       | 2662     | LIKDLGFIAAMGK   |           |       |                        |      | Mascot      |
| 1381.7369  | 1381.6997   | -0.0372 | -27   | 1805       | 1815     | MHQQINDLVKR     |           |       |                        |      | Mascot      |
| 1382.8253  | 1382.7399   | -0.0854 | -62   | 1419       | 1430     | ESLPLLLDLKNK    | 1         | 0     |                        |      | Mascot      |
| 1382.8253  | 1382.7399   | -0.0854 | -62   | 1419       | 1430     | ESLPLLLDLKNK    |           |       |                        |      | Mascot      |
| 1387.7627  | 1387.6556   | -0.1071 | -77   | 1127       | 1137     | QPMVKHEHIR      |           |       |                        |      | Mascot      |
| 1404.7205  | 1404.7152   | -0.0053 | -4    | 4384       | 4394     | SLGNWMIHFKR     |           |       | Oxidation (M)[6]       |      | Mascot      |
| 1420.7365  | 1420.684    | -0.0525 | -37   | 2653       | 2667     | DLGFIAAMGKAGGGR |           |       |                        |      | Mascot      |
| 1453.7389  | 1453.7578   | 0.0189  | 13    | 930        | 943      | MESLIMGTSTGKAK  |           |       |                        |      | Mascot      |
| 1495.7284  | 1495.8157   | 0.0873  | 58    | 2606       | 2617     | LLVFMDDLNMPR    |           |       | Oxidation (M)[5,10]    |      | Mascot      |
| 1553.7152  | 1553.6989   | -0.0163 | -10   | 1488       | 1500     | GVKEVEETWDSMK   |           |       | Oxidation (M)[12]      |      | Mascot      |

|    |                          |           |         |     |              |         |                            |                                          |    |   |    |        |
|----|--------------------------|-----------|---------|-----|--------------|---------|----------------------------|------------------------------------------|----|---|----|--------|
|    | 1584.7938                | 1584.8269 | 0.0331  | 21  | 728          | 742     | SLLMVNSYGTGSEK             |                                          |    |   |    | Mascot |
|    | 1796.8683                | 1796.8547 | -0.0136 | -8  | 4092         | 4106    | ISHDKLMNCAHPAFR            | Carbamidomethyl (C)[9]                   |    |   |    | Mascot |
|    | 1826.9535                | 1826.9274 | -0.0261 | -14 | 1266         | 1280    | KTFAEITLNQIEEYK            |                                          |    |   |    | Mascot |
|    | 1826.9535                | 1826.9274 | -0.0261 | -14 | 1266         | 1280    | KTFAEITLNQIEEYK            |                                          |    |   |    | Mascot |
|    | 1861.9767                | 1861.9109 | -0.0658 | -35 | 3725         | 3741    | TAVDIDTLRDGYRPAAK          |                                          |    |   |    | Mascot |
|    | 2001.011                 | 2001.0215 | 0.0105  | 5   | 4525         | 4542    | RNAMGVGLVFADLYTT<br>K      | Oxidation (M)[4]                         |    |   |    | Mascot |
|    | 2211.1677                | 2211.0469 | -0.1208 | -55 | 4018         | 4034    | GQWLMLQNCHLLVKWL<br>R      | Carbamidomethyl (C)[9], Oxidation (M)[5] |    |   |    | Mascot |
|    | 2225.1667                | 2225.0564 | -0.1103 | -50 | 1196         | 1214    | FVLVTITDIRDMSLSVEM<br>R    |                                          |    |   |    | Mascot |
|    | 2268.0957                | 2267.978  | -0.1177 | -52 | 3307         | 3327    | NLNTSLEEMQGISKAGS<br>GMLR  | Oxidation (M)[9,19]                      |    |   |    | Mascot |
|    | 2269.146                 | 2268.9675 | -0.1785 | -79 | 3496         | 3516    | WGSEGLPPDELSVQNGI<br>LTTR  |                                          |    |   |    | Mascot |
|    | 2283.2058                | 2283.1182 | -0.0876 | -38 | 44           | 62      | HFLNVVTEEEVALTLFFF<br>K    |                                          |    |   |    | Mascot |
|    | 2365.1626                | 2365.1101 | -0.0525 | -22 | 3167         | 3188    | TSACEILLEEICANTAVAE<br>EKK |                                          |    |   |    | Mascot |
| 29 | titin-like [Danio rerio] |           |         |     | gi 169154862 | 2457022 | 5.92                       | 58                                       | 46 | 0 | 31 | 78.755 |

| Calc. Mass | Obsrv. Mass | ± da    | ± ppm | Start Seq. | End Seq. | Sequence  | Ion Score | C. I. % | Modification             | Rank   | Result Type |
|------------|-------------|---------|-------|------------|----------|-----------|-----------|---------|--------------------------|--------|-------------|
| 808.4423   | 808.4396    | -0.0027 | -3    | 6105       | 6111     | VPRHDGK   | 22        | 0       |                          |        | Mascot      |
| 809.4515   | 809.3976    | -0.0539 | -67   | 2034       | 2039     | TEYRLK    |           |         | Mascot                   |        |             |
| 826.4669   | 826.4253    | -0.0416 | -50   | 21194      | 21200    | LTSYKSK   |           |         | Mascot                   |        |             |
| 842.4478   | 842.485     | 0.0372  | 44    | 14721      | 14727    | RDLPEGR   |           |         | Mascot                   |        |             |
| 882.4791   | 882.5414    | 0.0623  | 71    | 7406       | 7412     | KEEHAIR   |           |         | Mascot                   |        |             |
| 960.4567   | 960.45      | -0.0067 | -7    | 16359      | 16367    | VQDTPAACR |           |         | Mascot                   |        |             |
| 960.4996   | 960.45      | -0.0496 | -52   | 8377       | 8384     | LDEILSDR  |           |         | Mascot                   |        |             |
| 976.5648   | 976.4453    | -0.1195 | -122  | 18658      | 18665    | WMKVATLK  |           |         | Mascot                   |        |             |
| 982.441    | 982.4254    | -0.0156 | -16   | 16514      | 16521    | HCEHEVTK  |           |         | Mascot                   |        |             |
| 984.4818   | 984.3965    | -0.0853 | -87   | 15796      | 15803    | ITGYMVER  |           |         | Oxidation (M)[5]         | Mascot |             |
| 984.4818   | 984.3965    | -0.0853 | -87   | 15796      | 15803    | ITGYMVER  |           |         | Oxidation (M)[5]         | Mascot |             |
| 992.4294   | 992.4393    | 0.0099  | 10    | 2138       | 2144     | DNMYFFR   |           |         | Mascot                   |        |             |
| 996.5359   | 996.5658    | 0.0299  | 30    | 3740       | 3747     | LSYEQTKK  |           |         | Mascot                   |        |             |
| 1000.4338  | 1000.3927   | -0.0411 | -41   | 4037       | 4043     | CTEFRCK   |           |         | Carbamidomethyl (C)[1,6] | Mascot |             |
| 1016.5047  | 1016.3883   | -0.1164 | -115  | 2169       | 2177     | FDVPDAPQK |           |         | Mascot                   |        |             |
| 1118.6489  | 1118.65     | 0.0011  | 1     | 7882       | 7891     | IIMTELVTA | Mascot    |         |                          |        |             |
| 1118.6681  | 1118.65     | -0.0181 | -16   | 2103       | 2111     | ILAYVVERR | Mascot    |         |                          |        |             |
| 1165.6324  | 1165.7117   | 0.0793  | 68    | 5219       | 5227     | ITNYTIERR | Mascot    |         |                          |        |             |

|           |           |         |     |       |       |                    |    |                                           |        |
|-----------|-----------|---------|-----|-------|-------|--------------------|----|-------------------------------------------|--------|
| 1211.7106 | 1211.681  | -0.0296 | -24 | 5643  | 5653  | QNAVVNNLVLK        |    |                                           | Mascot |
| 1211.7106 | 1211.681  | -0.0296 | -24 | 5643  | 5653  | QNAVVNNLVLK        | 17 | 0                                         | Mascot |
| 1287.6328 | 1287.6315 | -0.0013 | -1  | 7111  | 7120  | KPKEADEWER         |    |                                           | Mascot |
| 1287.6328 | 1287.6315 | -0.0013 | -1  | 7111  | 7120  | KPKEADEWER         |    |                                           | Mascot |
| 1309.6854 | 1309.613  | -0.0724 | -55 | 5839  | 5850  | NLTMTMCLGIVK       |    | Oxidation (M)[6]                          | Mascot |
| 1325.6519 | 1325.5896 | -0.0623 | -47 | 8813  | 8824  | KAWSNVTTSCTK       |    |                                           | Mascot |
| 1325.7358 | 1325.7178 | -0.018  | -14 | 5502  | 5513  | EKMVIHAGGVIR       |    | Oxidation (M)[3]                          | Mascot |
| 1326.7528 | 1326.7177 | -0.0351 | -26 | 7103  | 7113  | NLAYHVEKKPK        |    |                                           | Mascot |
| 1327.6675 | 1327.6887 | 0.0212  | 16  | 13760 | 13770 | YASITIKDCTR        |    | Carbamidomethyl (C)[9]                    | Mascot |
| 1327.6892 | 1327.6887 | -0.0005 | 0   | 17714 | 17725 | YFLSLENVAGSK       |    |                                           | Mascot |
| 1347.6838 | 1347.5968 | -0.087  | -65 | 1939  | 1949  | YQMISEGKVHR        |    |                                           | Mascot |
| 1364.6804 | 1364.6575 | -0.0229 | -17 | 837   | 847   | DEARFEIELSR        |    |                                           | Mascot |
| 1364.6804 | 1364.6575 | -0.0229 | -17 | 837   | 847   | DEARFEIELSR        |    |                                           | Mascot |
| 1381.6515 | 1381.6997 | 0.0482  | 35  | 8726  | 8737  | TTDRTLVCVEK        |    | Carbamidomethyl (C)[9]                    | Mascot |
| 1382.7678 | 1382.7399 | -0.0279 | -20 | 5201  | 5212  | AEQITLSWLPPK       |    |                                           | Mascot |
| 1382.7678 | 1382.7399 | -0.0279 | -20 | 5201  | 5212  | AEQITLSWLPPK       |    |                                           | Mascot |
| 1387.6675 | 1387.6556 | -0.0119 | -9  | 3027  | 3037  | GLMEKQEYSFR        |    |                                           | Mascot |
| 1425.722  | 1425.745  | 0.023   | 16  | 3014  | 3026  | VAEDVPTTEHSLK      |    |                                           | Mascot |
| 1495.8114 | 1495.8157 | 0.0043  | 3   | 22096 | 22109 | IEAAPRDISIEPGK     |    |                                           | Mascot |
| 1553.7706 | 1553.6989 | -0.0717 | -46 | 3185  | 3198  | WEPPNSDGGRPITK     |    |                                           | Mascot |
| 1584.8228 | 1584.8269 | 0.0041  | 3   | 7045  | 7060  | VSAENKIGAGPPTESK   |    |                                           | Mascot |
| 1660.7999 | 1660.8141 | 0.0142  | 9   | 8814  | 8828  | AWSNVTTSCTKTSFK    |    |                                           | Mascot |
| 1676.8385 | 1676.8071 | -0.0314 | -19 | 7853  | 7868  | VAARNSMGSSLPTETR   |    |                                           | Mascot |
| 1763.7979 | 1763.7534 | -0.0445 | -25 | 18889 | 18903 | YGTGEYLQSEVVMCK    |    | Carbamidomethyl (C)[14]                   | Mascot |
| 1796.9429 | 1796.8547 | -0.0882 | -49 | 13128 | 13144 | DSVTLVWEPPLIDGGAK  |    |                                           | Mascot |
| 1808.9177 | 1808.9109 | -0.0068 | -4  | 9472  | 9488  | VTLTWTAPHEDGGSPIK  |    |                                           | Mascot |
| 1809.9456 | 1809.9116 | -0.034  | -19 | 11303 | 11318 | SPILVSECIVAQYPYK   |    |                                           | Mascot |
| 1824.949  | 1824.9114 | -0.0376 | -21 | 10504 | 10521 | KDGGFILTATNVGGFAK  |    |                                           | Mascot |
| 1826.8412 | 1826.9274 | 0.0862  | 47  | 5927  | 5942  | DMWTTVTSATTKTHCK   |    | Oxidation (M)[2]                          | Mascot |
| 1826.9218 | 1826.9274 | 0.0056  | 3   | 7136  | 7149  | CIENQIQFRVQTK      |    | Carbamidomethyl (C)[1]                    | Mascot |
| 1842.8293 | 1842.9148 | 0.0855  | 46  | 1108  | 1122  | FETEISEEDVHGHWK    |    |                                           | Mascot |
| 1848.9702 | 1848.9019 | -0.0683 | -37 | 10177 | 10192 | ETTSQSWVELSLIIR    |    |                                           | Mascot |
| 1861.9337 | 1861.9109 | -0.0228 | -12 | 1950  | 1964  | LQVCEIRPRDQGEYR    |    |                                           | Mascot |
| 1864.9148 | 1864.8792 | -0.0356 | -19 | 13443 | 13459 | RDTTESTWQTVAGSVAR  |    |                                           | Mascot |
| 1883.8627 | 1883.7921 | -0.0706 | -37 | 5927  | 5942  | DMWTTVTSATTKTHCK   |    | Carbamidomethyl (C)[15], Oxidation (M)[2] | Mascot |
| 1957.9601 | 1957.9636 | 0.0035  | 2   | 11983 | 12000 | ESAQIETSSSYTSLVIDK |    |                                           | Mascot |
| 1957.9601 | 1957.9636 | 0.0035  | 2   | 11983 | 12000 | ESAQIETSSSYTSLVIDK |    |                                           | Mascot |

|           |           |         |     |       |       |                             |                                                      |
|-----------|-----------|---------|-----|-------|-------|-----------------------------|------------------------------------------------------|
| 2001.0188 | 2001.0215 | 0.0027  | 1   | 13615 | 13631 | DHIKIQWTKPQYDGGSK           | Mascot                                               |
| 2060.0447 | 2060.0837 | 0.039   | 19  | 17955 | 17973 | WSVPLNDGGSPITGYIVE<br>R     | Mascot                                               |
| 2076.0647 | 2076.071  | 0.0063  | 3   | 3120  | 3137  | DTKYTVTPLSEGSLYVFR          | Mascot                                               |
| 2211.0928 | 2211.0469 | -0.0459 | -21 | 20081 | 20100 | FGIDQQTVELDVADVPDP<br>PR    | Mascot                                               |
| 2269.1394 | 2268.9675 | -0.1719 | -76 | 17455 | 17475 | EVMRGALTIVWEPPTND<br>GGAR   | Mascot                                               |
| 2283.0269 | 2283.1182 | 0.0913  | 40  | 1508  | 1528  | MDDAGEYHCKLPASETT<br>GTLK   | Oxidation (M)[1]<br>Mascot                           |
| 2284.0583 | 2284.1077 | 0.0494  | 22  | 9306  | 9326  | ANTVNVVIDCAYTVADLQE<br>GCK  | Carbamidomethyl (C)[9]<br>Mascot                     |
| 2325.1868 | 2325.0952 | -0.0916 | -39 | 10408 | 10430 | VIARNSAGAVSNPSEPSD<br>PIICK | Mascot                                               |
| 2362.1165 | 2362.1145 | -0.002  | -1  | 18883 | 18903 | VAAANRYGTGEYLQSEV<br>VMCK   | Carbamidomethyl (C)[20], Oxidation (M)[19]<br>Mascot |
| 2365.3391 | 2365.1101 | -0.229  | -97 | 12244 | 12263 | DLQVEIPVFGRPKPKVQ<br>WTK    | Mascot                                               |

30 novel protein similar to human titin (TTN) [Danio rerio] gi|94732358 2437518.2 5.95 58 46 0 31 76.476

### Peptide Information

| Calc. Mass | Obsrv. Mass | ± da    | ± ppm | Start Seq. | End Seq. | Sequence    | Ion Score | C. I. % | Modification             | Rank | Result Type |
|------------|-------------|---------|-------|------------|----------|-------------|-----------|---------|--------------------------|------|-------------|
| 808.4423   | 808.4396    | -0.0027 | -3    | 6027       | 6033     | VPRHDGK     |           |         |                          |      | Mascot      |
| 809.4515   | 809.3976    | -0.0539 | -67   | 1956       | 1961     | TEYRLK      |           |         |                          |      | Mascot      |
| 826.4669   | 826.4253    | -0.0416 | -50   | 21022      | 21028    | LTSYKSK     |           |         |                          |      | Mascot      |
| 842.4478   | 842.485     | 0.0372  | 44    | 14643      | 14649    | RDLPEGR     |           |         |                          |      | Mascot      |
| 882.4791   | 882.5414    | 0.0623  | 71    | 7328       | 7334     | KEEHAIR     |           |         |                          |      | Mascot      |
| 960.4567   | 960.45      | -0.0067 | -7    | 16281      | 16289    | VQDTPAACR   |           |         |                          |      | Mascot      |
| 960.4996   | 960.45      | -0.0496 | -52   | 8299       | 8306     | LDEILSDR    | 22        | 0       |                          |      | Mascot      |
| 976.5648   | 976.4453    | -0.1195 | -122  | 18486      | 18493    | WMKVATLK    |           |         |                          |      | Mascot      |
| 982.441    | 982.4254    | -0.0156 | -16   | 16436      | 16443    | HCEHEVTK    |           |         |                          |      | Mascot      |
| 984.4818   | 984.3965    | -0.0853 | -87   | 15718      | 15725    | ITGYMVER    |           |         | Oxidation (M)[5]         |      | Mascot      |
| 984.4818   | 984.3965    | -0.0853 | -87   | 15718      | 15725    | ITGYMVER    |           |         | Oxidation (M)[5]         |      | Mascot      |
| 992.4294   | 992.4393    | 0.0099  | 10    | 2060       | 2066     | DNMYFFR     |           |         |                          |      | Mascot      |
| 996.5359   | 996.5658    | 0.0299  | 30    | 3662       | 3669     | LSYEQTKK    |           |         |                          |      | Mascot      |
| 1000.4338  | 1000.3927   | -0.0411 | -41   | 3959       | 3965     | CTEFRCK     |           |         | Carbamidomethyl (C)[1,6] |      | Mascot      |
| 1016.5047  | 1016.3883   | -0.1164 | -115  | 2091       | 2099     | FDVPDAPQK   |           |         |                          |      | Mascot      |
| 1118.6489  | 1118.65     | 0.0011  | 1     | 7804       | 7813     | IIMTELVTA   |           |         |                          |      | Mascot      |
| 1118.6681  | 1118.65     | -0.0181 | -16   | 2025       | 2033     | ILAYVVERR   |           |         |                          |      | Mascot      |
| 1165.6324  | 1165.7117   | 0.0793  | 68    | 5141       | 5149     | ITNYTIERR   |           |         |                          |      | Mascot      |
| 1211.7106  | 1211.681    | -0.0296 | -24   | 5565       | 5575     | QNAVVNVLVLK |           |         |                          |      | Mascot      |
| 1211.7106  | 1211.681    | -0.0296 | -24   | 5565       | 5575     | QNAVVNVLVLK | 17        | 0       |                          |      | Mascot      |

|           |           |         |     |       |       |                    |                                           |        |
|-----------|-----------|---------|-----|-------|-------|--------------------|-------------------------------------------|--------|
| 1287.6328 | 1287.6315 | -0.0013 | -1  | 7033  | 7042  | KPKEADEWER         |                                           | Mascot |
| 1287.6328 | 1287.6315 | -0.0013 | -1  | 7033  | 7042  | KPKEADEWER         |                                           | Mascot |
| 1309.6854 | 1309.613  | -0.0724 | -55 | 5761  | 5772  | NTLTTMCLGIVK       | Oxidation (M)[6]                          | Mascot |
| 1325.6519 | 1325.5896 | -0.0623 | -47 | 8735  | 8746  | KAWSNVTTSTCTK      |                                           | Mascot |
| 1325.7358 | 1325.7178 | -0.018  | -14 | 5424  | 5435  | EKMVIHAGGVIR       | Oxidation (M)[3]                          | Mascot |
| 1326.7528 | 1326.7177 | -0.0351 | -26 | 7025  | 7035  | NLAYHVEKKPK        |                                           | Mascot |
| 1327.6675 | 1327.6887 | 0.0212  | 16  | 13682 | 13692 | YASITIKDCTR        | Carbamidomethyl (C)[9]                    | Mascot |
| 1327.6892 | 1327.6887 | -0.0005 | 0   | 17636 | 17647 | YFLSLENVAGSK       |                                           | Mascot |
| 1347.6838 | 1347.5968 | -0.087  | -65 | 1861  | 1871  | YQMISEGKVHR        |                                           | Mascot |
| 1364.6804 | 1364.6575 | -0.0229 | -17 | 759   | 769   | DEARFEIELSR        |                                           | Mascot |
| 1364.6804 | 1364.6575 | -0.0229 | -17 | 759   | 769   | DEARFEIELSR        |                                           | Mascot |
| 1381.6515 | 1381.6997 | 0.0482  | 35  | 8648  | 8659  | TTDRTLVCVEK        | Carbamidomethyl (C)[9]                    | Mascot |
| 1382.7678 | 1382.7399 | -0.0279 | -20 | 5123  | 5134  | AEQITLSWLPPK       |                                           | Mascot |
| 1382.7678 | 1382.7399 | -0.0279 | -20 | 5123  | 5134  | AEQITLSWLPPK       |                                           | Mascot |
| 1387.6675 | 1387.6556 | -0.0119 | -9  | 2949  | 2959  | GLMEKQEYSFR        |                                           | Mascot |
| 1425.722  | 1425.745  | 0.023   | 16  | 2936  | 2948  | VAEDVPTTEHSLK      |                                           | Mascot |
| 1495.8114 | 1495.8157 | 0.0043  | 3   | 21924 | 21937 | IEAAPRDISIEPGK     |                                           | Mascot |
| 1553.7706 | 1553.6989 | -0.0717 | -46 | 3107  | 3120  | WEPPNSDGGRPITK     |                                           | Mascot |
| 1584.8228 | 1584.8269 | 0.0041  | 3   | 6967  | 6982  | VSAENKIGAGPPTESK   |                                           | Mascot |
| 1660.7999 | 1660.8141 | 0.0142  | 9   | 8736  | 8750  | AWSNVTTSTCTKTSFK   |                                           | Mascot |
| 1676.8385 | 1676.8071 | -0.0314 | -19 | 7775  | 7790  | VAARNSMGSSLPTETR   |                                           | Mascot |
| 1763.7979 | 1763.7534 | -0.0445 | -25 | 18717 | 18731 | YGTGEYLQSEVVMCK    | Carbamidomethyl (C)[14]                   | Mascot |
| 1796.9429 | 1796.8547 | -0.0882 | -49 | 13050 | 13066 | DSVTLVWEPLIDGGA    |                                           | Mascot |
| 1808.9177 | 1808.9109 | -0.0068 | -4  | 9394  | 9410  | VTLTWTAPHEDGGSPIK  |                                           | Mascot |
| 1809.9456 | 1809.9116 | -0.034  | -19 | 11225 | 11240 | SPILVSECIVAQYPYK   |                                           | Mascot |
| 1824.949  | 1824.9114 | -0.0376 | -21 | 10426 | 10443 | KDGGEFILTATNVGGFAK |                                           | Mascot |
| 1826.8412 | 1826.9274 | 0.0862  | 47  | 5849  | 5864  | DMWTTVTSTATTKTHCK  | Oxidation (M)[2]                          | Mascot |
| 1826.9218 | 1826.9274 | 0.0056  | 3   | 7058  | 7071  | CIENQIYQFRVQTK     | Carbamidomethyl (C)[1]                    | Mascot |
| 1842.8293 | 1842.9148 | 0.0855  | 46  | 1030  | 1044  | FETEISEEDVHGHWK    |                                           | Mascot |
| 1848.9702 | 1848.9019 | -0.0683 | -37 | 10099 | 10114 | ETTSQSWVELSLIIR    |                                           | Mascot |
| 1861.9337 | 1861.9109 | -0.0228 | -12 | 1872  | 1886  | LQVCEIRPRDQGEYR    |                                           | Mascot |
| 1864.9148 | 1864.8792 | -0.0356 | -19 | 13365 | 13381 | RDTTESTWQTVAGSVAR  |                                           | Mascot |
| 1883.8627 | 1883.7921 | -0.0706 | -37 | 5849  | 5864  | DMWTTVTSTATTKTHCK  | Carbamidomethyl (C)[15], Oxidation (M)[2] | Mascot |
| 1957.9601 | 1957.9636 | 0.0035  | 2   | 11905 | 11922 | ESAQIETSSSYTSLVIDK |                                           | Mascot |
| 1957.9601 | 1957.9636 | 0.0035  | 2   | 11905 | 11922 | ESAQIETSSSYTSLVIDK |                                           | Mascot |
| 2001.0188 | 2001.0215 | 0.0027  | 1   | 13537 | 13553 | DHIKIQWTKPQYDGGSK  |                                           | Mascot |

|           |           |         |     |       |       |                             |  |  |  |                                            |  |        |
|-----------|-----------|---------|-----|-------|-------|-----------------------------|--|--|--|--------------------------------------------|--|--------|
| 2060.0447 | 2060.0837 | 0.039   | 19  | 17877 | 17895 | WSVPLNDGGSPITGYIVE<br>R     |  |  |  |                                            |  | Mascot |
| 2076.0647 | 2076.071  | 0.0063  | 3   | 3042  | 3059  | DTKYTVTPLSEGSLYVFR          |  |  |  |                                            |  | Mascot |
| 2211.0928 | 2211.0469 | -0.0459 | -21 | 19909 | 19928 | FGIDQQTVELDVADVPDP<br>PR    |  |  |  |                                            |  | Mascot |
| 2269.1394 | 2268.9675 | -0.1719 | -76 | 17377 | 17397 | EVMRGALTIVWEPPTND<br>GGAR   |  |  |  |                                            |  | Mascot |
| 2283.0269 | 2283.1182 | 0.0913  | 40  | 1430  | 1450  | MDDAGEYHCKLPASETT<br>GTLK   |  |  |  | Oxidation (M)[1]                           |  | Mascot |
| 2284.0583 | 2284.1077 | 0.0494  | 22  | 9228  | 9248  | ANTVNVIDCAYTVADLQE<br>GCK   |  |  |  | Carbamidomethyl (C)[9]                     |  | Mascot |
| 2325.1868 | 2325.0952 | -0.0916 | -39 | 10330 | 10352 | VLARNSAGAVSNPSEPS<br>DPIICK |  |  |  |                                            |  | Mascot |
| 2362.1165 | 2362.1145 | -0.002  | -1  | 18711 | 18731 | VAAANRYGTGEYLVQSEV<br>VMCK  |  |  |  | Carbamidomethyl (C)[20], Oxidation (M)[19] |  | Mascot |
| 2365.3391 | 2365.1101 | -0.229  | -97 | 12166 | 12185 | DLQVEIPVFGRPKPKVQ<br>WTK    |  |  |  |                                            |  | Mascot |

31 protein kinase C and casein kinase substrate in neurons gij46309505 56018.8 4.83 9 44 0  
2 [Danio rerio]

#### Peptide Information

| Calc. Mass | Obsrv. Mass | ± da    | ± ppm | Start Seq. | End Seq. | Sequence        | Ion Score | C. I. | % Modification                           | Rank | Result Type |
|------------|-------------|---------|-------|------------|----------|-----------------|-----------|-------|------------------------------------------|------|-------------|
| 960.5261   | 960.45      | -0.0761 | -79   | 64         | 70       | WRQTIEK         | 17        | 0     |                                          |      | Mascot      |
| 960.5261   | 960.45      | -0.0761 | -79   | 64         | 70       | WRQTIEK         |           |       |                                          |      | Mascot      |
| 1006.4952  | 1006.3708   | -0.1244 | -124  | 71         | 79       | GPQYGTVER       |           |       |                                          |      | Mascot      |
| 1309.5916  | 1309.613    | 0.0214  | 16    | 80         | 90       | AWCALMTEAEK     |           |       | Carbamidomethyl (C)[3]                   |      | Mascot      |
| 1325.5864  | 1325.5896   | 0.0032  | 2     | 80         | 90       | AWCALMTEAEK     |           |       | Carbamidomethyl (C)[3], Oxidation (M)[6] |      | Mascot      |
| 1325.5864  | 1325.7178   | 0.1314  | 99    | 80         | 90       | AWCALMTEAEK     |           |       | Carbamidomethyl (C)[3], Oxidation (M)[6] |      | Mascot      |
| 1376.7321  | 1376.6591   | -0.073  | -53   | 116        | 127      | DAYHKQIGGFK     |           |       |                                          |      | Mascot      |
| 1380.5736  | 1380.6836   | 0.11    | 80    | 460        | 470      | LSEEDQGWCK      |           |       | Carbamidomethyl (C)[10]                  |      | Mascot      |
| 1381.7031  | 1381.6997   | -0.0034 | -2    | 100        | 111      | AALMAEDFEKIK    |           |       | Oxidation (M)[4]                         |      | Mascot      |
| 1382.691   | 1382.7399   | 0.0489  | 35    | 379        | 391      | HEEAVAQTAAVEK   |           |       |                                          |      | Mascot      |
| 1382.691   | 1382.7399   | 0.0489  | 35    | 379        | 391      | HEEAVAQTAAVEK   |           |       |                                          |      | Mascot      |
| 1660.7772  | 1660.8141   | 0.0369  | 22    | 171        | 185      | ENSSKLDNSNPEAQK |           |       |                                          |      | Mascot      |
| 1676.7665  | 1676.8071   | 0.0406  | 24    | 35         | 48       | LCNDLMSCLHERAR  |           |       | Oxidation (M)[6]                         |      | Mascot      |

32 PREDICTED: hypothetical protein LOC797378 [Danio rerio] gij292622805 72531.1 6.46 4 42 0 35 90.839

#### Peptide Information

| Calc. Mass | Obsrv. Mass | ± da   | ± ppm | Start Seq. | End Seq. | Sequence     | Ion Score | C. I.  | % Modification   | Rank | Result Type |
|------------|-------------|--------|-------|------------|----------|--------------|-----------|--------|------------------|------|-------------|
| 882.4501   | 882.5414    | 0.0913 | 103   | 1          | 7        | MSTRPFK      |           |        | Oxidation (M)[1] |      | Mascot      |
| 1287.7015  | 1287.6315   | -0.07  | -54   | 566        | 577      | KNNGLLSESVAR | 35        | 90.839 |                  |      | Mascot      |

|           |           |        |     |     |     |                        |  |  |  |  |                     |  |        |
|-----------|-----------|--------|-----|-----|-----|------------------------|--|--|--|--|---------------------|--|--------|
| 1287.7015 | 1287.6315 | -0.07  | -54 | 566 | 577 | KNNGLLSESVAR           |  |  |  |  |                     |  | Mascot |
| 1381.5994 | 1381.6997 | 0.1003 | 73  | 504 | 514 | SFGYWYTMNGR            |  |  |  |  |                     |  | Mascot |
| 2224.9221 | 2225.0564 | 0.1343 | 60  | 51  | 68  | LSEMENTRDTEMTSYEE<br>K |  |  |  |  | Oxidation (M)[4,12] |  | Mascot |

33 PREDICTED: hypothetical protein LOC796277 [Danio rerio] gi|292622807 79431.9 5.54 4 42 0 35 90.839

#### Peptide Information

| Calc. Mass | Obsrv. Mass | ± da   | ± ppm | Start Seq. | End Seq. | Sequence               | Ion Score | C. I.  | % Modification      | Rank | Result Type |
|------------|-------------|--------|-------|------------|----------|------------------------|-----------|--------|---------------------|------|-------------|
| 882.4501   | 882.5414    | 0.0913 | 103   | 1          | 7        | MSTRPFK                |           |        | Oxidation (M)[1]    |      | Mascot      |
| 1287.7015  | 1287.6315   | -0.07  | -54   | 638        | 649      | KNNGLLSESVAR           | 35        | 90.839 |                     |      | Mascot      |
| 1287.7015  | 1287.6315   | -0.07  | -54   | 638        | 649      | KNNGLLSESVAR           |           |        |                     |      | Mascot      |
| 1381.5994  | 1381.6997   | 0.1003 | 73    | 576        | 586      | SFGYWYTMNGR            |           |        |                     |      | Mascot      |
| 2224.9221  | 2225.0564   | 0.1343 | 60    | 51         | 68       | LSEMENTRDTEMTSYEE<br>K |           |        | Oxidation (M)[4,12] |      | Mascot      |

34 PREDICTED: dual oxidase 1, partial [Danio rerio] gi|326680379 162265.6 7.47 17 40 0

#### Peptide Information

| Calc. Mass | Obsrv. Mass | ± da    | ± ppm | Start Seq. | End Seq. | Sequence          | Ion Score | C. I. | % Modification         | Rank | Result Type |
|------------|-------------|---------|-------|------------|----------|-------------------|-----------|-------|------------------------|------|-------------|
| 809.4127   | 809.3976    | -0.0151 | -19   | 1369       | 1374     | FKFHCK            |           |       |                        |      | Mascot      |
| 996.5182   | 996.5658    | 0.0476  | 48    | 1420       | 1427     | FDLRTTML          |           |       |                        |      | Mascot      |
| 1006.4635  | 1006.3708   | -0.0927 | -92   | 327        | 333      | NRTCHYR           |           |       | Carbamidomethyl (C)[4] |      | Mascot      |
| 1211.6935  | 1211.681    | -0.0125 | -10   | 1375       | 1383     | KVYFLWVTR         |           |       |                        |      | Mascot      |
| 1211.6935  | 1211.681    | -0.0125 | -10   | 1375       | 1383     | KVYFLWVTR         |           |       |                        |      | Mascot      |
| 1309.6536  | 1309.613    | -0.0406 | -31   | 414        | 424      | DFGLPSYNQIR       |           |       |                        |      | Mascot      |
| 1326.6226  | 1326.7177   | 0.0951  | 72    | 493        | 502      | NADRFWFENK        |           |       |                        |      | Mascot      |
| 1376.6951  | 1376.6591   | -0.036  | -26   | 775        | 785      | TREALQCELTR       |           |       | Carbamidomethyl (C)[7] |      | Mascot      |
| 1380.6907  | 1380.6836   | -0.0071 | -5    | 4          | 15       | GAYSAITWEVQR      |           |       |                        |      | Mascot      |
| 1381.645   | 1381.6997   | 0.0547  | 40    | 731        | 742      | SEKEMLCDAVTR      |           |       |                        |      | Mascot      |
| 1382.7216  | 1382.7399   | 0.0183  | 13    | 533        | 543      | GDIQRSVFFWK       |           |       |                        |      | Mascot      |
| 1382.7216  | 1382.7399   | 0.0183  | 13    | 533        | 543      | GDIQRSVFFWK       |           |       |                        |      | Mascot      |
| 1404.6729  | 1404.7152   | 0.0423  | 30    | 391        | 401      | DYMYGPLRFSR       |           |       |                        |      | Mascot      |
| 1420.6677  | 1420.684    | 0.0163  | 11    | 391        | 401      | DYMYGPLRFSR       |           |       | Oxidation (M)[3]       |      | Mascot      |
| 1438.6665  | 1438.808    | 0.1415  | 98    | 731        | 742      | SEKEMLCDAVTR      |           |       | Carbamidomethyl (C)[7] |      | Mascot      |
| 1453.7838  | 1453.7578   | -0.026  | -18   | 748        | 759      | IVETFFKHAFSK      |           |       |                        |      | Mascot      |
| 1584.8025  | 1584.8269   | 0.0244  | 15    | 100        | 113      | AGCPPEFMHIKVQK    |           |       |                        |      | Mascot      |
| 1861.9     | 1861.9109   | 0.0109  | 6     | 425        | 441      | EALSMAPVNSFEDINPK |           |       |                        |      | Mascot      |



|  |           |           |         |     |      |      |                          |  |  |  |                   |  |        |
|--|-----------|-----------|---------|-----|------|------|--------------------------|--|--|--|-------------------|--|--------|
|  | 2060.0708 | 2060.0837 | 0.0129  | 6   | 1047 | 1065 | GSAAAI SFLFPYMLLTVC<br>R |  |  |  |                   |  | Mascot |
|  | 2076.0657 | 2076.071  | 0.0053  | 3   | 1047 | 1065 | GSAAAI SFLFPYMLLTVC<br>R |  |  |  | Oxidation (M)[13] |  | Mascot |
|  | 2211.075  | 2211.0469 | -0.0281 | -13 | 381  | 398  | EDNIIVEDLRDYMGPLR        |  |  |  |                   |  | Mascot |
|  | 2365.1475 | 2365.1101 | -0.0374 | -16 | 1129 | 1147 | VFSNNGSELPWKWTFWF<br>FK  |  |  |  |                   |  | Mascot |

35 PREDICTED: microtubule-actin cross-linking factor 1, isoforms 1/2/3/5-like [Danio rerio] gi|326674648 241937 5.5 18 39 0

Peptide Information

| Calc. Mass | Obsrv. Mass | ± da    | ± ppm | Start Seq. | End Seq. | Sequence            | Ion Score | C. I. % | Modification            | Rank | Result Type |
|------------|-------------|---------|-------|------------|----------|---------------------|-----------|---------|-------------------------|------|-------------|
| 808.4562   | 808.4396    | -0.0166 | -21   | 1023       | 1028     | ELYQKK              |           |         |                         |      | Mascot      |
| 826.3512   | 826.4253    | 0.0741  | 90    | 27         | 32       | ECYQQR              |           |         |                         |      | Mascot      |
| 960.5472   | 960.45      | -0.0972 | -101  | 206        | 214      | DGRSTLALK           | 3         | 0       |                         |      | Mascot      |
| 960.5472   | 960.45      | -0.0972 | -101  | 206        | 214      | DGRSTLALK           |           |         |                         |      | Mascot      |
| 976.5574   | 976.4453    | -0.1121 | -115  | 1551       | 1558     | VFQREL GK           |           |         |                         |      | Mascot      |
| 996.5182   | 996.5658    | 0.0476  | 48    | 531        | 538      | FNIEKMAK            |           |         | Oxidation (M)[6]        |      | Mascot      |
| 1006.4444  | 1006.3708   | -0.0736 | -73   | 1972       | 1980     | QV SQCNCPK          |           |         |                         |      | Mascot      |
| 1211.6014  | 1211.681    | 0.0796  | 66    | 669        | 678      | DTEEQHLAIR          |           |         |                         |      | Mascot      |
| 1211.6014  | 1211.681    | 0.0796  | 66    | 669        | 678      | DTEEQHLAIR          | 13        | 0       |                         |      | Mascot      |
| 1309.6456  | 1309.613    | -0.0326 | -25   | 1012       | 1021     | EQLCDLKEFK          |           |         | Carbamidomethyl (C)[4]  |      | Mascot      |
| 1325.6704  | 1325.5896   | -0.0808 | -61   | 1448       | 1458     | SKRPMYEACLK         |           |         |                         |      | Mascot      |
| 1325.6704  | 1325.7178   | 0.0474  | 36    | 1448       | 1458     | SKRPMYEACLK         |           |         |                         |      | Mascot      |
| 1347.7128  | 1347.5968   | -0.116  | -86   | 1981       | 1991     | RFQVEQISANR         |           |         |                         |      | Mascot      |
| 1364.6917  | 1364.6575   | -0.0342 | -25   | 105        | 116      | RSPLSQYGSVDR        |           |         |                         |      | Mascot      |
| 1364.6917  | 1364.6575   | -0.0342 | -25   | 106        | 117      | SPLSQYGSVDRR        |           |         |                         |      | Mascot      |
| 1382.6919  | 1382.7399   | 0.048   | 35    | 1448       | 1458     | SKRPMYEACLK         |           |         | Carbamidomethyl (C)[9]  |      | Mascot      |
| 1382.6919  | 1382.7399   | 0.048   | 35    | 1448       | 1458     | SKRPMYEACLK         |           |         | Carbamidomethyl (C)[9]  |      | Mascot      |
| 1438.7397  | 1438.808    | 0.0683  | 47    | 667        | 678      | ARDTEEQHLAIR        |           |         |                         |      | Mascot      |
| 1584.7573  | 1584.8269   | 0.0696  | 44    | 1525       | 1539     | AEPQLAEDVPVCGEK     |           |         |                         |      | Mascot      |
| 1676.8563  | 1676.8071   | -0.0492 | -29   | 1734       | 1748     | ILDWICAAEDSLSLK     |           |         |                         |      | Mascot      |
| 1957.947   | 1957.9636   | 0.0166  | 8     | 381        | 397      | SADLGKLQQCAHELMEK   |           |         | Carbamidomethyl (C)[10] |      | Mascot      |
| 1957.947   | 1957.9636   | 0.0166  | 8     | 381        | 397      | SADLGKLQQCAHELMEK   |           |         | Carbamidomethyl (C)[10] |      | Mascot      |
| 2001.0498  | 2001.0215   | -0.0283 | -14   | 1424       | 1440     | EIAVSQEEIKQLTEQK    |           |         |                         |      | Mascot      |
| 2076.1375  | 2076.071    | -0.0665 | -32   | 1636       | 1653     | VLKYGVLPEEEEEALLAFR |           |         |                         |      | Mascot      |

36 PREDICTED: hypothetical protein LOC100536975 gi|326679271 234171 8.98 23 39 0

Peptide Information

| Calc. Mass | Obsrv. Mass | ± da    | ± ppm | Start Seq. | End Sequence Seq.      | Ion Score | C. I. % Modification      | Rank | Result Type |
|------------|-------------|---------|-------|------------|------------------------|-----------|---------------------------|------|-------------|
| 996.5624   | 996.5658    | 0.0034  | 3     | 173        | 180 WIPAPERK           |           |                           |      | Mascot      |
| 1118.6567  | 1118.65     | -0.0067 | -6    | 1003       | 1013 KGVFAALGDIK       |           |                           |      | Mascot      |
| 1118.6567  | 1118.65     | -0.0067 | -6    | 1004       | 1014 GVFAALGDIKK       |           |                           |      | Mascot      |
| 1165.5887  | 1165.7117   | 0.123   | 106   | 1450       | 1458 YSVEEWPKK         |           |                           |      | Mascot      |
| 1211.6266  | 1211.681    | 0.0544  | 45    | 1132       | 1142 NEVVDPSQVPK       |           |                           |      | Mascot      |
| 1211.6266  | 1211.681    | 0.0544  | 45    | 1132       | 1142 NEVVDPSQVPK       |           |                           |      | Mascot      |
| 1287.6903  | 1287.6315   | -0.0588 | -46   | 278        | 288 KIQLVDSVDDR        |           |                           |      | Mascot      |
| 1287.6903  | 1287.6315   | -0.0588 | -46   | 278        | 288 KIQLVDSVDDR        |           |                           |      | Mascot      |
| 1325.7113  | 1325.5896   | -0.1217 | -92   | 1284       | 1294 FHRS�TPPGWK       |           |                           |      | Mascot      |
| 1325.7113  | 1325.7178   | 0.0065  | 5     | 1284       | 1294 FHRS�TPPGWK       |           |                           |      | Mascot      |
| 1326.6147  | 1326.7177   | 0.103   | 78    | 1015       | 1024 MYNSVWLEER        |           |                           |      | Mascot      |
| 1347.7002  | 1347.5968   | -0.1034 | -77   | 1819       | 1830 LETSELEEKAAK      |           |                           |      | Mascot      |
| 1364.6475  | 1364.6575   | 0.01    | 7     | 189        | 199 LKECSNELESR        |           | Carbamidomethyl (C)[4]    |      | Mascot      |
| 1364.7307  | 1364.6575   | -0.0732 | -54   | 38         | 48 LIESELKEEFK         |           |                           |      | Mascot      |
| 1376.7467  | 1376.6591   | -0.0876 | -64   | 1347       | 1359 AEICGAVFAARLR     |           |                           |      | Mascot      |
| 1382.5927  | 1382.7399   | 0.1472  | 106   | 447        | 460 DSTEAGCIVCGAEK     |           |                           |      | Mascot      |
| 1382.5927  | 1382.7399   | 0.1472  | 106   | 447        | 460 DSTEAGCIVCGAEK     |           |                           |      | Mascot      |
| 1387.632   | 1387.6556   | 0.0236  | 17    | 1751       | 1762 VWGIVYCCMASR      |           |                           |      | Mascot      |
| 1396.5337  | 1396.6976   | 0.1639  | 117   | 834        | 847 CGGCRCGNCQPGGK     |           | Carbamidomethyl (C)[1]    |      | Mascot      |
| 1404.8434  | 1404.7152   | -0.1282 | -91   | 715        | 726 RPKIDLLISHR        |           |                           |      | Mascot      |
| 1438.7424  | 1438.808    | 0.0656  | 46    | 1537       | 1548 LVDEEKYSNLTK      |           |                           |      | Mascot      |
| 1453.5552  | 1453.7578   | 0.2026  | 139   | 834        | 847 CGGCRCGNCQPGGK     |           | Carbamidomethyl (C)[1,4]  |      | Mascot      |
| 1763.922   | 1763.7534   | -0.1686 | -96   | 1619       | 1634 LAVYRENSGLLVCGGR  |           | Carbamidomethyl (C)[13]   |      | Mascot      |
| 1796.7512  | 1796.8547   | 0.1035  | 58    | 823        | 838 WDSIGTACEPKCGGCR   |           | Carbamidomethyl (C)[8,12] |      | Mascot      |
| 1827.002   | 1826.9274   | -0.0746 | -41   | 1644       | 1660 AVPIPCSAWVSMLLAR  |           |                           |      | Mascot      |
| 1827.0334  | 1826.9274   | -0.106  | -58   | 1143       | 1158 ESISQSKTIILPNQLR  |           |                           |      | Mascot      |
| 1842.9968  | 1842.9148   | -0.082  | -44   | 1644       | 1660 AVPIPCSAWVSMLLAR  |           | Oxidation (M)[13]         |      | Mascot      |
| 1864.9109  | 1864.8792   | -0.0317 | -17   | 1900       | 1915 EDCVEYVTPNSLLGR   |           | Carbamidomethyl (C)[3]    |      | Mascot      |
| 1884.0234  | 1883.7921   | -0.2313 | -123  | 1644       | 1660 AVPIPCSAWVSMLLAR  |           | Carbamidomethyl (C)[7]    |      | Mascot      |
| 2211.0215  | 2211.0469   | 0.0254  | 11    | 816        | 833 EFIDWWKWDSIGTACEPK |           |                           |      | Mascot      |
| 2268.043   | 2267.978    | -0.065  | -29   | 816        | 833 EFIDWWKWDSIGTACEPK |           | Carbamidomethyl (C)[15]   |      | Mascot      |

37 PREDICTED: ras association domain-containing protein gi|189537462 49870 4.96 3 39 0 31 79.538  
10 [Danio rerio]

### Peptide Information

| Calc. Mass | Obsrv. Mass | ± da    | ± ppm | Start Seq. | End Sequence Seq. | Ion Score | C. I. % | Modification                              | Rank | Result Type |
|------------|-------------|---------|-------|------------|-------------------|-----------|---------|-------------------------------------------|------|-------------|
| 960.4632   | 960.45      | -0.0132 | -14   | 184        | 191 ELDGEIER      | 31        | 79.538  |                                           |      | Mascot      |
| 960.4632   | 960.45      | -0.0132 | -14   | 184        | 191 ELDGEIER      |           |         |                                           |      | Mascot      |
| 992.5193   | 992.4393    | -0.08   | -81   | 25         | 33 RTTCADVVK      |           |         |                                           |      | Mascot      |
| 1796.8306  | 1796.8547   | 0.0241  | 13    | 1          | 14 MEQEESKISVWVCR |           |         | Carbamidomethyl (C)[13], Oxidation (M)[1] |      | Mascot      |

38 PREDICTED: extended synaptotagmin-1 [Danio rerio] gi|292627058 120956.1 5.99 9 39 0 24 0

### Peptide Information

| Calc. Mass | Obsrv. Mass | ± da    | ± ppm | Start Seq. | End Sequence Seq.           | Ion Score | C. I. % | Modification     | Rank | Result Type |
|------------|-------------|---------|-------|------------|-----------------------------|-----------|---------|------------------|------|-------------|
| 996.5546   | 996.5658    | 0.0112  | 11    | 574        | 581 IYITAMLR                |           |         | Oxidation (M)[6] |      | Mascot      |
| 1000.5421  | 1000.3927   | -0.1494 | -149  | 449        | 457 NQNITVPSK               |           |         |                  |      | Mascot      |
| 1211.7358  | 1211.681    | -0.0548 | -45   | 144        | 154 LLVETIAPSIR             |           |         |                  |      | Mascot      |
| 1211.7358  | 1211.681    | -0.0548 | -45   | 144        | 154 LLVETIAPSIR             | 26        | 28.722  |                  |      | Mascot      |
| 1347.7631  | 1347.5968   | -0.1663 | -123  | 316        | 327 IHLLEAENLPAK            |           |         |                  |      | Mascot      |
| 1404.7482  | 1404.7152   | -0.033  | -23   | 155        | 167 ATSAHLQTLSTFK           |           |         |                  |      | Mascot      |
| 1420.7067  | 1420.684    | -0.0227 | -16   | 712        | 723 DIDQDDFLGRVK            |           |         |                  |      | Mascot      |
| 1826.9971  | 1826.9274   | -0.0697 | -38   | 442        | 457 LSEVLERNQNITVPSK        |           |         |                  |      | Mascot      |
| 1826.9971  | 1826.9274   | -0.0697 | -38   | 442        | 457 LSEVLERNQNITVPSK        |           |         |                  |      | Mascot      |
| 1861.9629  | 1861.9109   | -0.052  | -28   | 882        | 897 WFSLNGAMPESQILLR        |           |         |                  |      | Mascot      |
| 2060.0771  | 2060.0837   | 0.0066  | 3     | 155        | 173 ATSAHLQTLSTFKVDLGD<br>R |           |         |                  |      | Mascot      |

39 PREDICTED: protein IWS1 homolog [Danio rerio] gi|326674520 86977.8 4.61 8 38 0 26 30.505

### Peptide Information

| Calc. Mass | Obsrv. Mass | ± da    | ± ppm | Start Seq. | End Sequence Seq.      | Ion Score | C. I. % | Modification      | Rank | Result Type |
|------------|-------------|---------|-------|------------|------------------------|-----------|---------|-------------------|------|-------------|
| 1006.4323  | 1006.3708   | -0.0615 | -61   | 208        | 216 ALNSDEDDK          |           |         |                   |      | Mascot      |
| 1211.6492  | 1211.681    | 0.0318  | 26    | 670        | 679 DLDQQIAPRR         |           |         |                   |      | Mascot      |
| 1211.6492  | 1211.681    | 0.0318  | 26    | 670        | 679 DLDQQIAPRR         | 26        | 30.505  |                   |      | Mascot      |
| 1347.5547  | 1347.5968   | 0.0421  | 31    | 240        | 252 ALGSDDDEDEGPK      |           |         |                   |      | Mascot      |
| 1381.7031  | 1381.6997   | -0.0034 | -2    | 567        | 579 ETFIDSGVMAAIK      |           |         |                   |      | Mascot      |
| 1387.6812  | 1387.6556   | -0.0256 | -18   | 208        | 219 ALNSDEDDKRPK       |           |         |                   |      | Mascot      |
| 1584.8843  | 1584.8269   | -0.0574 | -36   | 602        | 615 ILQELPSVSQETLK     |           |         |                   |      | Mascot      |
| 1660.741   | 1660.8141   | 0.0731  | 44    | 269        | 282 ALSDDDDERPKR       |           |         |                   |      | Mascot      |
| 1957.9059  | 1957.9636   | 0.0577  | 29    | 510        | 528 DGGTFISDADDVVSAMIT |           |         | Oxidation (M)[16] |      | Mascot      |

|    |                                                   |           |        |    |     |             |                              |     |   |    |   |                   |   |        |
|----|---------------------------------------------------|-----------|--------|----|-----|-------------|------------------------------|-----|---|----|---|-------------------|---|--------|
|    | 1957.9059                                         | 1957.9636 | 0.0577 | 29 | 510 | 528         | K<br>DGGTFISDADDVVSAMIT<br>K |     |   |    |   | Oxidation (M)[16] |   | Mascot |
| 40 | iron-sulfur cluster assembly enzyme [Danio rerio] |           |        |    |     | gi 54261801 | 17796.2                      | 8.7 | 4 | 38 | 0 | 22                | 0 |        |

Peptide Information

| Calc. Mass | Obsrv. Mass | ± da    | ± ppm | Start Seq. | End Seq. | Sequence             | Ion Score | C. I. | % Modification                            | Rank | Result Type |
|------------|-------------|---------|-------|------------|----------|----------------------|-----------|-------|-------------------------------------------|------|-------------|
| 960.5083   | 960.45      | -0.0583 | -61   | 1          | 9        | MALAAAAWR            |           |       |                                           |      | Mascot      |
| 960.5359   | 960.45      | -0.0859 | -89   | 107        | 115      | GKSIDEALK            | 24        | 0     |                                           |      | Mascot      |
| 976.5032   | 976.4453    | -0.0579 | -59   | 1          | 9        | MALAAAAWR            |           |       | Oxidation (M)[1]                          |      | Mascot      |
| 1387.6708  | 1387.6556   | -0.0152 | -11   | 132        | 143      | LHCSMLAEDAIK         |           |       | Carbamidomethyl (C)[3]                    |      | Mascot      |
| 2283.1545  | 2283.1182   | -0.0363 | -16   | 124        | 143      | ELCLPPVKLHCSMLAEDAIK |           |       | Carbamidomethyl (C)[3], Oxidation (M)[13] |      | Mascot      |

|    |                                                                                                      |  |  |  |  |              |         |      |    |    |   |  |
|----|------------------------------------------------------------------------------------------------------|--|--|--|--|--------------|---------|------|----|----|---|--|
| 41 | novel protein similar to H.sapiens SPEN, spen homolog, transcriptional regulator (Drosophila) (SPEN) |  |  |  |  | gi 220672753 | 78472.8 | 9.24 | 11 | 38 | 0 |  |
|----|------------------------------------------------------------------------------------------------------|--|--|--|--|--------------|---------|------|----|----|---|--|

Peptide Information

| Calc. Mass | Obsrv. Mass | ± da    | ± ppm | Start Seq. | End Seq. | Sequence             | Ion Score | C. I. | % Modification   | Rank | Result Type |
|------------|-------------|---------|-------|------------|----------|----------------------|-----------|-------|------------------|------|-------------|
| 809.39     | 809.3976    | 0.0076  | 9     | 126        | 131      | EGRYER               |           |       |                  |      | Mascot      |
| 992.4835   | 992.4393    | -0.0442 | -45   | 355        | 362      | DGLFHEFK             |           |       |                  |      | Mascot      |
| 1006.5078  | 1006.3708   | -0.137  | -136  | 228        | 234      | TYHHHRR              |           |       |                  |      | Mascot      |
| 1118.5298  | 1118.65     | 0.1202  | 107   | 235        | 244      | SRSSHSSQSR           |           |       |                  |      | Mascot      |
| 1118.5298  | 1118.65     | 0.1202  | 107   | 235        | 244      | SRSSHSSQSR           |           |       |                  |      | Mascot      |
| 1211.6492  | 1211.681    | 0.0318  | 26    | 265        | 276      | SALSPSRGPPSR         |           |       |                  |      | Mascot      |
| 1211.6492  | 1211.681    | 0.0318  | 26    | 265        | 276      | SALSPSRGPPSR         | 9         | 0     |                  |      | Mascot      |
| 1309.6859  | 1309.613    | -0.0729 | -56   | 251        | 263      | STGQTPKAAHSPK        |           |       |                  |      | Mascot      |
| 1387.7804  | 1387.6556   | -0.1248 | -90   | 336        | 347      | SFGIRVQNLPTR         |           |       |                  |      | Mascot      |
| 1396.689   | 1396.6976   | 0.0086  | 6     | 498        | 509      | MDGEYLG TNRLK        |           |       |                  |      | Mascot      |
| 1420.7291  | 1420.684    | -0.0451 | -32   | 245        | 257      | HPSPQRSTGQTPK        |           |       |                  |      | Mascot      |
| 1842.9609  | 1842.9148   | -0.0461 | -25   | 7          | 21       | HLWVG NLP EHVREEK    |           |       |                  |      | Mascot      |
| 2211.1589  | 2211.0469   | -0.112  | -51   | 553        | 572      | LKGMALVLYNNTDFAQAAVR |           |       | Oxidation (M)[4] |      | Mascot      |

|    |                                                   |  |  |  |  |              |         |      |   |    |   |  |
|----|---------------------------------------------------|--|--|--|--|--------------|---------|------|---|----|---|--|
| 42 | peptidoglycan recognition protein 6 [Danio rerio] |  |  |  |  | gi 113675724 | 55457.4 | 5.92 | 7 | 37 | 0 |  |
|----|---------------------------------------------------|--|--|--|--|--------------|---------|------|---|----|---|--|

Peptide Information

| Calc. Mass | Obsrv. Mass | ± da   | ± ppm | Start Seq. | End Seq. | Sequence | Ion Score | C. I. | % Modification         | Rank | Result Type |
|------------|-------------|--------|-------|------------|----------|----------|-----------|-------|------------------------|------|-------------|
| 882.4138   | 882.5414    | 0.1276 | 145   | 12         | 18       | KCQDQFK  |           |       | Carbamidomethyl (C)[2] |      | Mascot      |

|           |           |         |      |     |     |               |    |   |                                          |        |
|-----------|-----------|---------|------|-----|-----|---------------|----|---|------------------------------------------|--------|
| 960.4897  | 960.45    | -0.0397 | -41  | 484 | 490 | QIQTWER       | 20 | 0 |                                          | Mascot |
| 960.4897  | 960.45    | -0.0397 | -41  | 484 | 490 | QIQTWER       |    |   |                                          | Mascot |
| 982.4741  | 982.4254  | -0.0487 | -50  | 462 | 469 | SYSLYGHR      |    |   |                                          | Mascot |
| 1016.5119 | 1016.3883 | -0.1236 | -122 | 298 | 305 | NLNQDERK      |    |   |                                          | Mascot |
| 1309.6868 | 1309.613  | -0.0738 | -56  | 1   | 11  | MGRQFISVCLR   |    |   |                                          | Mascot |
| 1325.6816 | 1325.5896 | -0.092  | -69  | 1   | 11  | MGRQFISVCLR   |    |   | Oxidation (M)[1]                         | Mascot |
| 1325.6816 | 1325.7178 | 0.0362  | 27   | 1   | 11  | MGRQFISVCLR   |    |   | Oxidation (M)[1]                         | Mascot |
| 1326.7375 | 1326.7177 | -0.0198 | -15  | 260 | 271 | LDDAAPRLISQK  |    |   |                                          | Mascot |
| 1382.7031 | 1382.7399 | 0.0368  | 27   | 1   | 11  | MGRQFISVCLR   |    |   | Carbamidomethyl (C)[9], Oxidation (M)[1] | Mascot |
| 1382.7031 | 1382.7399 | 0.0368  | 27   | 1   | 11  | MGRQFISVCLR   |    |   | Carbamidomethyl (C)[9], Oxidation (M)[1] | Mascot |
| 1425.6604 | 1425.745  | 0.0846  | 59   | 21  | 33  | ASSEANTQSDFIR |    |   |                                          | Mascot |

43    PREDICTED: DNA repair protein RAD50 [Danio rerio]    gi|326670885    153569    7.48    15    36    0    17    0

#### Peptide Information

| Calc. Mass | Obsrv. Mass | ± da    | ± ppm | Start Seq. | End Seq. | Sequence          | Ion Score | C. I. | % Modification         | Rank | Result Type |
|------------|-------------|---------|-------|------------|----------|-------------------|-----------|-------|------------------------|------|-------------|
| 960.5043   | 960.45      | -0.0543 | -57   | 321        | 327      | RLVECQR           |           |       | Carbamidomethyl (C)[5] |      | Mascot      |
| 960.5043   | 960.45      | -0.0543 | -57   | 321        | 327      | RLVECQR           |           |       | Carbamidomethyl (C)[5] |      | Mascot      |
| 982.4518   | 982.4254    | -0.0264 | -27   | 536        | 543      | AQMDMMKK          |           |       |                        |      | Mascot      |
| 1118.58    | 1118.65     | 0.07    | 63    | 865        | 874      | SSVNEIRGEK        |           |       |                        |      | Mascot      |
| 1118.58    | 1118.65     | 0.07    | 63    | 865        | 874      | SSVNEIRGEK        |           |       |                        |      | Mascot      |
| 1287.7267  | 1287.6315   | -0.0952 | -74   | 220        | 230      | AQEIRELLSTK       | 17        | 0     |                        |      | Mascot      |
| 1287.7267  | 1287.6315   | -0.0952 | -74   | 220        | 230      | AQEIRELLSTK       |           |       |                        |      | Mascot      |
| 1325.7172  | 1325.5896   | -0.1276 | -96   | 244        | 254      | IEGQIDPLERR       |           |       |                        |      | Mascot      |
| 1325.7172  | 1325.7178   | 0.0006  | 0     | 244        | 254      | IEGQIDPLERR       |           |       |                        |      | Mascot      |
| 1347.6499  | 1347.5968   | -0.0531 | -39   | 1167       | 1179     | SDVDENASAGVKR     |           |       |                        |      | Mascot      |
| 1364.6838  | 1364.6575   | -0.0263 | -19   | 127        | 138      | VSLSSKCAEIDR      |           |       | Carbamidomethyl (C)[7] |      | Mascot      |
| 1364.6838  | 1364.6575   | -0.0263 | -19   | 127        | 138      | VSLSSKCAEIDR      |           |       | Carbamidomethyl (C)[7] |      | Mascot      |
| 1404.7338  | 1404.7152   | -0.0186 | -13   | 1186       | 1198     | VVMVKGDAALDMR     |           |       |                        |      | Mascot      |
| 1420.7286  | 1420.684    | -0.0446 | -31   | 1186       | 1198     | VVMVKGDAALDMR     |           |       | Oxidation (M)[3]       |      | Mascot      |
| 1425.7008  | 1425.745    | 0.0442  | 31    | 575        | 585      | ELEDWIYSKSR       |           |       |                        |      | Mascot      |
| 1438.7393  | 1438.808    | 0.0687  | 48    | 1108       | 1119     | MIVMRTTELANK      |           |       | Oxidation (M)[1,4]     |      | Mascot      |
| 1553.7992  | 1553.6989   | -0.1003 | -65   | 7          | 20       | MSILGVRSGVEDK     |           |       | Oxidation (M)[1]       |      | Mascot      |
| 1861.9918  | 1861.9109   | -0.0809 | -43   | 559        | 574      | HNEELVSLLGHPNKK   |           |       |                        |      | Mascot      |
| 1884.0073  | 1883.7921   | -0.2152 | -114  | 910        | 926      | EQASPLAATLEKLQKEK |           |       |                        |      | Mascot      |
| 1957.9171  | 1957.9636   | 0.0465  | 24    | 977        | 992      | ETELQEMDKQLHEAEK  |           |       |                        |      | Mascot      |
| 1957.9171  | 1957.9636   | 0.0465  | 24    | 977        | 992      | ETELQEMDKQLHEAEK  |           |       |                        |      | Mascot      |

2365.07642365.11010.033714625644YEERLFNVCGSQDFQSDLSK

Mascot

44CLIP-associating protein 1 [Danio rerio]gi|169646251168891.59.0516360

Peptide Information

| Calc. Mass | Obsrv. Mass | ± da    | ± ppm | Start Seq. | End Seq. | Sequence             | Ion Score | C. I. | % Modification         | Rank | Result Type |
|------------|-------------|---------|-------|------------|----------|----------------------|-----------|-------|------------------------|------|-------------|
| 960.438    | 960.45      | 0.012   | 12    | 1215       | 1224     | EAASPGSDAR           | 4         | 0     |                        |      | Mascot      |
| 960.438    | 960.45      | 0.012   | 12    | 1215       | 1224     | EAASPGSDAR           |           |       |                        |      | Mascot      |
| 1165.6801  | 1165.7117   | 0.0316  | 27    | 1355       | 1364     | DHTIRALALR           |           |       |                        |      | Mascot      |
| 1211.5573  | 1211.681    | 0.1237  | 102   | 229        | 240      | SGNMILSSGSDK         |           |       | Oxidation (M)[4]       |      | Mascot      |
| 1211.5573  | 1211.681    | 0.1237  | 102   | 229        | 240      | SGNMILSSGSDK         |           |       | Oxidation (M)[4]       |      | Mascot      |
| 1325.524   | 1325.5896   | 0.0656  | 49    | 241        | 252      | NFDEDSVDGGR          |           |       |                        |      | Mascot      |
| 1325.8151  | 1325.7178   | -0.0973 | -73   | 863        | 874      | KEGLLGQLNLLK         |           |       |                        |      | Mascot      |
| 1382.7175  | 1382.7399   | 0.0224  | 16    | 335        | 345      | QDWEHRVTALK          |           |       |                        |      | Mascot      |
| 1382.7175  | 1382.7399   | 0.0224  | 16    | 335        | 345      | QDWEHRVTALK          |           |       |                        |      | Mascot      |
| 1396.6003  | 1396.6976   | 0.0973  | 70    | 508        | 518      | CYWGFHGHFSR          |           |       |                        |      | Mascot      |
| 1420.7026  | 1420.684    | -0.0186 | -13   | 598        | 611      | SDIDVNAASSAKSR       |           |       |                        |      | Mascot      |
| 1453.6218  | 1453.7578   | 0.136   | 94    | 508        | 518      | CYWGFHGHFSR          |           |       | Carbamidomethyl (C)[1] |      | Mascot      |
| 1553.7845  | 1553.6989   | -0.0856 | -55   | 304        | 317      | AFEDVPAVQIYSSK       |           |       |                        |      | Mascot      |
| 1809.8685  | 1809.9116   | 0.0431  | 24    | 642        | 659      | RQSSGSAVSANSTVTDSR   |           |       |                        |      | Mascot      |
| 1826.8485  | 1826.9274   | 0.0789  | 43    | 1          | 15       | MEPNMEYCLTQVLQK      |           |       |                        |      | Mascot      |
| 1826.8485  | 1826.9274   | 0.0789  | 43    | 1          | 15       | MEPNMEYCLTQVLQK      |           |       |                        |      | Mascot      |
| 1842.8435  | 1842.9148   | 0.0713  | 39    | 1          | 15       | MEPNMEYCLTQVLQK      |           |       | Oxidation (M)[1]       |      | Mascot      |
| 1861.9952  | 1861.9109   | -0.0843 | -45   | 168        | 184      | IVPHICNLLGDPTSQVR    |           |       |                        |      | Mascot      |
| 1864.8922  | 1864.8792   | -0.013  | -7    | 285        | 303      | AAGKDGASAGALDEEDFIK  |           |       |                        |      | Mascot      |
| 1883.87    | 1883.7921   | -0.0779 | -41   | 1          | 15       | MEPNMEYCLTQVLQK      |           |       | Carbamidomethyl (C)[8] |      | Mascot      |
| 2001.0222  | 2001.0215   | -0.0007 | 0     | 349        | 366      | SLLMAGATEHEGFIQQLR   |           |       |                        |      | Mascot      |
| 2225.207   | 2225.0564   | -0.1506 | -68   | 381        | 401      | SQVVREACITLGHLSLLGNK |           |       |                        |      | Mascot      |
| 2268.082   | 2267.978    | -0.104  | -46   | 1          | 19       | MEPNMEYCLTQVLQKDVAR  |           |       |                        |      | Mascot      |
| 2284.0769  | 2284.1077   | 0.0308  | 13    | 1          | 19       | MEPNMEYCLTQVLQKDVAR  |           |       | Oxidation (M)[1]       |      | Mascot      |
| 2325.1035  | 2325.0952   | -0.0083 | -4    | 1          | 19       | MEPNMEYCLTQVLQKDVAR  |           |       | Carbamidomethyl (C)[8] |      | Mascot      |

45novel protein similar to human titin (TTN) [Danio rerio]gi|2956177521131536.4662360

Peptide Information

| Calc. Mass | Obsrv. Mass | ± da | ± ppm | Start Seq. | End Seq. | Sequence | Ion Score | C. I. | % Modification | Rank | Result Type |
|------------|-------------|------|-------|------------|----------|----------|-----------|-------|----------------|------|-------------|
|------------|-------------|------|-------|------------|----------|----------|-----------|-------|----------------|------|-------------|

|           |           |         |      |       |       |               |   |                          |        |
|-----------|-----------|---------|------|-------|-------|---------------|---|--------------------------|--------|
| 808.4352  | 808.4396  | 0.0044  | 5    | 13053 | 13058 | SLQWFK        |   |                          | Mascot |
| 809.4264  | 809.3976  | -0.0288 | -36  | 16637 | 16643 | TNAGRYK       |   |                          | Mascot |
| 826.4781  | 826.4253  | -0.0528 | -64  | 18636 | 18642 | SPEPRIK       |   |                          | Mascot |
| 842.5094  | 842.485   | -0.0244 | -29  | 1522  | 1529  | LSIPGVTR      |   |                          | Mascot |
| 882.4315  | 882.5414  | 0.1099  | 125  | 12144 | 12151 | DGSSFTLR      |   |                          | Mascot |
| 960.4454  | 960.45    | 0.0046  | 5    | 4022  | 4031  | CGPGPATETK    |   |                          | Mascot |
| 960.5148  | 960.45    | -0.0648 | -67  | 1607  | 1614  | AEWVQVTK      |   |                          | Mascot |
| 982.4727  | 982.4254  | -0.0473 | -48  | 18042 | 18049 | EEEEYATK      |   |                          | Mascot |
| 984.4857  | 984.3965  | -0.0892 | -91  | 3912  | 3920  | EATRADHGK     |   |                          | Mascot |
| 984.4857  | 984.3965  | -0.0892 | -91  | 3912  | 3920  | EATRADHGK     |   |                          | Mascot |
| 992.4828  | 992.4393  | -0.0435 | -44  | 17582 | 17589 | CKVVSedr      |   | Carbamidomethyl (C)[1]   | Mascot |
| 996.5373  | 996.5658  | 0.0285  | 29   | 670   | 676   | QYQFRVR       |   |                          | Mascot |
| 1000.5032 | 1000.3927 | -0.1105 | -110 | 15622 | 15629 | WMNVAHVK      |   | Oxidation (M)[2]         | Mascot |
| 1006.4799 | 1006.3708 | -0.1091 | -108 | 5964  | 5973  | GDVTLSDSGR    |   |                          | Mascot |
| 1016.4757 | 1016.3883 | -0.0874 | -86  | 4099  | 4106  | ETFFMVDK      |   |                          | Mascot |
| 1118.5477 | 1118.65   | 0.1023  | 91   | 2114  | 2123  | LSWDTSGPQK    |   |                          | Mascot |
| 1118.6429 | 1118.65   | 0.0071  | 6    | 17667 | 17676 | AGHRIKDPK     |   |                          | Mascot |
| 1165.6211 | 1165.7117 | 0.0906  | 78   | 14756 | 14766 | VSAENKFGVSK   |   |                          | Mascot |
| 1211.5507 | 1211.681  | 0.1303  | 108  | 9452  | 9462  | CSKTSEGCiAR   | 1 | 0 Carbamidomethyl (C)[1] | Mascot |
| 1211.6677 | 1211.681  | 0.0133  | 11   | 9976  | 9987  | KGIVVHAGGSMR  |   |                          | Mascot |
| 1287.625  | 1287.6315 | 0.0065  | 5    | 12413 | 12423 | DQLEAPEINMK   |   |                          | Mascot |
| 1287.7783 | 1287.6315 | -0.1468 | -114 | 6735  | 6746  | SGASIRIFVPIK  |   |                          | Mascot |
| 1309.7263 | 1309.613  | -0.1133 | -87  | 15146 | 15155 | LIKNNEYIFR    |   |                          | Mascot |
| 1325.6888 | 1325.5896 | -0.0992 | -75  | 16403 | 16412 | EILGYWIEFR    |   |                          | Mascot |
| 1325.6888 | 1325.7178 | 0.029   | 22   | 16403 | 16412 | EILGYWIEFR    |   |                          | Mascot |
| 1326.7164 | 1326.7177 | 0.0013  | 1    | 2225  | 2235  | VPVQYDKHVNK   |   |                          | Mascot |
| 1327.7004 | 1327.6887 | -0.0117 | -9   | 1120  | 1131  | TFTVYGVREGAK  |   |                          | Mascot |
| 1327.7004 | 1327.6887 | -0.0117 | -9   | 1120  | 1131  | TFTVYGVREGAK  |   |                          | Mascot |
| 1347.6361 | 1347.5968 | -0.0393 | -29  | 16578 | 16589 | EKYYAGCGTSLR  |   |                          | Mascot |
| 1364.6012 | 1364.6575 | 0.0563  | 41   | 252   | 263   | SGKTSGPDCHYR  |   | Carbamidomethyl (C)[9]   | Mascot |
| 1364.6012 | 1364.6575 | 0.0563  | 41   | 252   | 263   | SGKTSGPDCHYR  |   | Carbamidomethyl (C)[9]   | Mascot |
| 1380.6907 | 1380.6836 | -0.0071 | -5   | 6613  | 6625  | DIAYPPGPPSNPR |   |                          | Mascot |
| 1381.707  | 1381.6997 | -0.0073 | -5   | 14367 | 14378 | YTLsLENNsGRK  |   |                          | Mascot |
| 1382.6924 | 1382.7399 | 0.0475  | 34   | 1107  | 1117  | DWSRATERPHK   |   |                          | Mascot |
| 1382.6924 | 1382.7399 | 0.0475  | 34   | 1107  | 1117  | DWSRATERPHK   |   |                          | Mascot |
| 1387.6675 | 1387.6556 | -0.0119 | -9   | 65    | 75    | GLMEKQEYSFR   |   |                          | Mascot |

|           |           |         |     |       |       |                            |                                           |        |
|-----------|-----------|---------|-----|-------|-------|----------------------------|-------------------------------------------|--------|
| 1396.7617 | 1396.6976 | -0.0641 | -46 | 13650 | 13661 | IVCSSVVRTTFK               | Carbamidomethyl (C)[3]                    | Mascot |
| 1404.7078 | 1404.7152 | 0.0074  | 5   | 8135  | 8146  | ETTRVNTEVAER               |                                           | Mascot |
| 1420.689  | 1420.684  | -0.005  | -4  | 9117  | 9128  | DQDKWSLCAQVK               |                                           | Mascot |
| 1425.7333 | 1425.745  | 0.0117  | 8   | 1530  | 1542  | LDKGYTVVTASNR              |                                           | Mascot |
| 1438.7689 | 1438.808  | 0.0391  | 27  | 6857  | 6868  | KAYSVITTNWQK               |                                           | Mascot |
| 1453.7468 | 1453.7578 | 0.011   | 8   | 11580 | 11591 | MNRGLITETQFK               | Oxidation (M)[1]                          | Mascot |
| 1495.8154 | 1495.8157 | 0.0003  | 0   | 13762 | 13774 | VIGLIEGLEYSFR              |                                           | Mascot |
| 1553.7594 | 1553.6989 | -0.0605 | -39 | 9689  | 9702  | HDGGSISYYVIQK              |                                           | Mascot |
| 1584.8236 | 1584.8269 | 0.0033  | 2   | 4315  | 4329  | MGTGPPMESRPIAK             |                                           | Mascot |
| 1676.8788 | 1676.8071 | -0.0717 | -43 | 9743  | 9757  | YGVGEPLSRAVIMR             |                                           | Mascot |
| 1763.9109 | 1763.7534 | -0.1575 | -89 | 13642 | 13657 | ETSQAAWKIVCSSVVR           |                                           | Mascot |
| 1796.8094 | 1796.8547 | 0.0453  | 25  | 5030  | 5045  | HPFDPPSEPLNCCVNK           |                                           | Mascot |
| 1808.925  | 1808.9109 | -0.0141 | -8  | 4092  | 4106  | LHEGVLKETFFMVDK            | Oxidation (M)[12]                         | Mascot |
| 1809.9017 | 1809.9116 | 0.0099  | 5   | 11643 | 11659 | TSVSLSWTKPEFDGGAK          |                                           | Mascot |
| 1824.9602 | 1824.9114 | -0.0488 | -27 | 15838 | 15853 | LVEGTEYVFRVAATNR           |                                           | Mascot |
| 1826.9507 | 1826.9274 | -0.0233 | -13 | 5147  | 5163  | SSVSLVWSRPKHDGGSK          |                                           | Mascot |
| 1826.9507 | 1826.9274 | -0.0233 | -13 | 5147  | 5163  | SSVSLVWSRPKHDGGSK          |                                           | Mascot |
| 1842.9232 | 1842.9148 | -0.0084 | -5  | 2216  | 2231  | APQDKPDDKVPVQYDK           |                                           | Mascot |
| 1848.8949 | 1848.9019 | 0.007   | 4   | 6858  | 6872  | AYSVITTNWQKCSYK            | Carbamidomethyl (C)[12]                   | Mascot |
| 1862.0422 | 1861.9109 | -0.1313 | -71 | 10791 | 10806 | LSWTVVEPKIAISYK            |                                           | Mascot |
| 1864.8937 | 1864.8792 | -0.0145 | -8  | 14153 | 14167 | HRVTNLTEGNEYEFR            |                                           | Mascot |
| 1883.8667 | 1883.7921 | -0.0746 | -40 | 16031 | 16046 | ICEYTLTHMPQGAeyK           |                                           | Mascot |
| 2060.1685 | 2060.0837 | -0.0848 | -41 | 3258  | 3276  | IATCTVLVLDKPGPVQHL<br>R    |                                           | Mascot |
| 2075.9775 | 2076.071  | 0.0935  | 45  | 13462 | 13478 | CQCEVTELKELSEVYFR          |                                           | Mascot |
| 2211.0713 | 2211.0469 | -0.0244 | -11 | 16266 | 16285 | TPLCPPPEPSPFPEIMDV<br>TK   | Oxidation (M)[16]                         | Mascot |
| 2225.0479 | 2225.0564 | 0.0085  | 4   | 5030  | 5048  | HPFDPPSEPLNCCVNV<br>SK     | Carbamidomethyl (C)[12,13]                | Mascot |
| 2268.0422 | 2267.978  | -0.0642 | -28 | 4280  | 4298  | MVWSTYSASLVNVCNV<br>TR     | Carbamidomethyl (C)[15], Oxidation (M)[1] | Mascot |
| 2269.1716 | 2268.9675 | -0.2041 | -90 | 4521  | 4542  | VSAQNQVGMGRPANVK<br>DAVSPK | Oxidation (M)[9]                          | Mascot |
| 2283.1284 | 2283.1182 | -0.0102 | -4  | 76    | 97    | VRAVNVAGESEPSEPSD<br>PVLCK |                                           | Mascot |
| 2284.1389 | 2284.1077 | -0.0312 | -14 | 7694  | 7714  | ACDTIFQPGPPGNPRVLD<br>TTK  | Carbamidomethyl (C)[2]                    | Mascot |
| 2325.0938 | 2325.0952 | 0.0014  | 1   | 5026  | 5045  | MIARHPFDPPSEPLNCCV<br>NK   | Carbamidomethyl (C)[16]                   | Mascot |
| 2365.1248 | 2365.1101 | -0.0147 | -6  | 14802 | 14821 | WDVPYHDGGSQVTGYWI<br>EKK   |                                           | Mascot |

46 PREDICTED: LOW QUALITY PROTEIN: afadin [Danio rerio] gi|326677257 206863.2 5.77 14 36 0



| Calc. Mass | Obsrv. Mass | ± da    | ± ppm | Start Seq. | End Seq. | Sequence                   | Ion Score | C. I. | % Modification          | Rank | Result Type |
|------------|-------------|---------|-------|------------|----------|----------------------------|-----------|-------|-------------------------|------|-------------|
| 842.459    | 842.485     | 0.026   | 31    | 352        | 358      | GRKPDNR                    |           |       |                         |      | Mascot      |
| 882.4355   | 882.5414    | 0.1059  | 120   | 1400       | 1405     | WYEKEK                     |           |       |                         |      | Mascot      |
| 960.4455   | 960.45      | 0.0045  | 5     | 129        | 136      | NENDIMPK                   |           |       |                         |      | Mascot      |
| 960.4744   | 960.45      | -0.0244 | -25   | 1408       | 1414     | LEEERER                    | 19        | 0     |                         |      | Mascot      |
| 976.4404   | 976.4453    | 0.0049  | 5     | 129        | 136      | NENDIMPK                   |           |       | Oxidation (M)[6]        |      | Mascot      |
| 1016.5119  | 1016.3883   | -0.1236 | -122  | 1587       | 1594     | ARLQDEER                   |           |       |                         |      | Mascot      |
| 1325.7358  | 1325.5896   | -0.1462 | -110  | 994        | 1006     | KHNGMGLSIVAAK              |           |       |                         |      | Mascot      |
| 1325.7358  | 1325.7178   | -0.018  | -14   | 994        | 1006     | KHNGMGLSIVAAK              |           |       |                         |      | Mascot      |
| 1327.66    | 1327.6887   | 0.0287  | 22    | 407        | 418      | LQHSVTEVGSDR               |           |       |                         |      | Mascot      |
| 1327.66    | 1327.6887   | 0.0287  | 22    | 407        | 418      | LQHSVTEVGSDR               |           |       |                         |      | Mascot      |
| 1438.696   | 1438.808    | 0.112   | 78    | 90         | 101      | YSLYEVHVSGER               |           |       |                         |      | Mascot      |
| 1660.77    | 1660.8141   | 0.0441  | 27    | 1487       | 1501     | EELSASDSLSPDPWK            |           |       |                         |      | Mascot      |
| 1824.7527  | 1824.9114   | 0.1587  | 87    | 1253       | 1268     | SQEELCDMPGGYPGER           |           |       | Carbamidomethyl (C)[6]  |      | Mascot      |
| 1848.9636  | 1848.9019   | -0.0617 | -33   | 553        | 568      | GLVKPMIRGEQQDFSK           |           |       | Oxidation (M)[6]        |      | Mascot      |
| 1861.8208  | 1861.9109   | 0.0901  | 48    | 838        | 852      | YSMQDVQNINNTCFK            |           |       | Carbamidomethyl (C)[13] |      | Mascot      |
| 2225.0945  | 2225.0564   | -0.0381 | -17   | 569        | 588      | HDGRSQDGPELTLPASIE<br>FR   |           |       |                         |      | Mascot      |
| 2284.2256  | 2284.1077   | -0.1179 | -52   | 1032       | 1053     | LAAGDQLLSVDGRSLVG<br>LSQER |           |       |                         |      | Mascot      |

47 PREDICTED: hypothetical protein LOC558830 [Danio rerio] gi|189523591 117229.9 9.86 16 36 0

#### Peptide Information

| Calc. Mass | Obsrv. Mass | ± da    | ± ppm | Start Seq. | End Seq. | Sequence      | Ion Score | C. I. | % Modification           | Rank | Result Type |
|------------|-------------|---------|-------|------------|----------|---------------|-----------|-------|--------------------------|------|-------------|
| 808.4167   | 808.4396    | 0.0229  | 28    | 750        | 756      | VMKCATR       |           |       |                          |      | Mascot      |
| 842.3751   | 842.485     | 0.1099  | 130   | 18         | 24       | HSADEQR       |           |       |                          |      | Mascot      |
| 882.4791   | 882.5414    | 0.0623  | 71    | 620        | 626      | LHKNQDK       |           |       |                          |      | Mascot      |
| 984.4502   | 984.3965    | -0.0537 | -55   | 975        | 983      | GPHACLQCR     |           |       |                          |      | Mascot      |
| 984.4502   | 984.3965    | -0.0537 | -55   | 975        | 983      | GPHACLQCR     |           |       |                          |      | Mascot      |
| 1006.4556  | 1006.3708   | -0.0848 | -84   | 1034       | 1041     | CRQCIAAQ      |           |       | Carbamidomethyl (C)[1,4] |      | Mascot      |
| 1165.5881  | 1165.7117   | 0.1236  | 106   | 128        | 138      | SVCSDVSLISR   |           |       |                          |      | Mascot      |
| 1287.7379  | 1287.6315   | -0.1064 | -83   | 951        | 961      | SVLLESIRQSR   |           |       |                          |      | Mascot      |
| 1287.7379  | 1287.6315   | -0.1064 | -83   | 951        | 961      | SVLLESIRQSR   |           |       |                          |      | Mascot      |
| 1364.6587  | 1364.6575   | -0.0012 | -1    | 669        | 681      | RNTVCSSQGTPSK |           |       |                          |      | Mascot      |
| 1364.6587  | 1364.6575   | -0.0012 | -1    | 669        | 681      | RNTVCSSQGTPSK |           |       |                          |      | Mascot      |

|           |           |         |     |     |     |                   |                         |        |
|-----------|-----------|---------|-----|-----|-----|-------------------|-------------------------|--------|
| 1376.6702 | 1376.6591 | -0.0111 | -8  | 245 | 256 | MWPALEACSAIK      | Carbamidomethyl (C)[8]  | Mascot |
| 1380.723  | 1380.6836 | -0.0394 | -29 | 656 | 668 | DSSGSAILQPIHR     |                         | Mascot |
| 1382.6733 | 1382.7399 | 0.0666  | 48  | 139 | 150 | MVESHSHEVLSK      |                         | Mascot |
| 1382.6733 | 1382.7399 | 0.0666  | 48  | 139 | 150 | MVESHSHEVLSK      |                         | Mascot |
| 1553.7958 | 1553.6989 | -0.0969 | -62 | 58  | 70  | GFVQYREVLAEDK     |                         | Mascot |
| 1763.8567 | 1763.7534 | -0.1033 | -59 | 984 | 998 | ASYRDCDALIMHQIK   |                         | Mascot |
| 1808.98   | 1808.9109 | -0.0691 | -38 | 697 | 713 | VATTMSRHKPGPTGKPK | Oxidation (M)[5]        | Mascot |
| 1861.9436 | 1861.9109 | -0.0327 | -18 | 602 | 618 | SRSLLQTDSSAIDCPIR |                         | Mascot |
| 1864.9585 | 1864.8792 | -0.0793 | -43 | 151 | 166 | LNSQREAGLFCDITLK  | Carbamidomethyl (C)[11] | Mascot |

48 epoxide hydrolase 2 [Danio rerio] gi|56693357 61852.6 6.11 10 36 0

#### Peptide Information

| Calc. Mass | Obsrv. Mass | ± da    | ± ppm | Start Seq. | End Seq. | Sequence                   | Ion Score | C. I. % | Modification      | Rank | Result Type |
|------------|-------------|---------|-------|------------|----------|----------------------------|-----------|---------|-------------------|------|-------------|
| 982.5064   | 982.4254    | -0.081  | -82   | 43         | 51       | LGSDNALHR                  |           |         |                   |      | Mascot      |
| 992.5087   | 992.4393    | -0.0694 | -70   | 158        | 165      | IPEPDFFK                   |           |         |                   |      | Mascot      |
| 1387.7164  | 1387.6556   | -0.0608 | -44   | 472        | 481      | NWRWMVSRPR                 |           |         |                   |      | Mascot      |
| 1495.8632  | 1495.8157   | -0.0475 | -32   | 537        | 548      | ILISWLKETHQK               |           |         |                   |      | Mascot      |
| 1553.803   | 1553.6989   | -0.1041 | -67   | 38         | 51       | NVETKLGSDNALHR             |           |         |                   |      | Mascot      |
| 1824.8507  | 1824.9114   | 0.0607  | 33    | 57         | 72       | TTLAQMIPEFDAECQK           |           |         |                   |      | Mascot      |
| 2076.0947  | 2076.071    | -0.0237 | -11   | 272        | 290      | YQIPALADAGFRVLAPDM<br>K    |           |         |                   |      | Mascot      |
| 2225.113   | 2225.0564   | -0.0566 | -25   | 417        | 438      | LSPAGVCQRGGLFVGSP<br>DDPPR |           |         |                   |      | Mascot      |
| 2268.2056  | 2267.978    | -0.2276 | -100  | 496        | 516      | DPVLLPAFATGMENLIPN<br>LSR  |           |         |                   |      | Mascot      |
| 2284.2004  | 2284.1077   | -0.0927 | -41   | 496        | 516      | DPVLLPAFATGMENLIPN<br>LSR  |           |         | Oxidation (M)[12] |      | Mascot      |
| 2365.0813  | 2365.1101   | 0.0288  | 12    | 517        | 536      | GHIIECGHWTQMERPAE<br>LNK   |           |         |                   |      | Mascot      |

49 novel protein similar to vertebrate ankyrin repeat domain 12 (ANKRD12) [Danio rerio]

gi|220672679 222305 6.25 20 35 0

#### Peptide Information

| Calc. Mass | Obsrv. Mass | ± da    | ± ppm | Start Seq. | End Seq. | Sequence  | Ion Score | C. I. % | Modification                             | Rank | Result Type |
|------------|-------------|---------|-------|------------|----------|-----------|-----------|---------|------------------------------------------|------|-------------|
| 808.4159   | 808.4396    | 0.0237  | 29    | 160        | 167      | IASSSTSR  |           |         |                                          |      | Mascot      |
| 809.4008   | 809.3976    | -0.0032 | -4    | 1927       | 1932     | TCLLMR    |           |         | Carbamidomethyl (C)[2], Oxidation (M)[5] |      | Mascot      |
| 882.4791   | 882.5414    | 0.0623  | 71    | 1840       | 1846     | LQHSIER   |           |         |                                          |      | Mascot      |
| 960.5359   | 960.45      | -0.0859 | -89   | 37         | 45       | SELLGKEGK |           |         |                                          |      | Mascot      |
| 960.5359   | 960.45      | -0.0859 | -89   | 37         | 45       | SELLGKEGK |           |         |                                          |      | Mascot      |

|    |                                            |           |           |         |      |             |          |                         |   |   |                            |       |        |
|----|--------------------------------------------|-----------|-----------|---------|------|-------------|----------|-------------------------|---|---|----------------------------|-------|--------|
|    |                                            | 982.4332  | 982.4254  | -0.0078 | -8   | 399         | 407      | SDQSM LACK              |   |   |                            |       | Mascot |
|    |                                            | 1016.5118 | 1016.3883 | -0.1235 | -121 | 480         | 487      | NKENQEVR                |   |   |                            |       | Mascot |
|    |                                            | 1118.5186 | 1118.65   | 0.1314  | 117  | 738         | 747      | HSTSSSNKDR              |   |   |                            |       | Mascot |
|    |                                            | 1118.5186 | 1118.65   | 0.1314  | 117  | 738         | 747      | HSTSSSNKDR              |   |   |                            |       | Mascot |
|    |                                            | 1211.6201 | 1211.681  | 0.0609  | 50   | 179         | 189      | GETPLHMAAIR             | 6 | 0 | Oxidation (M)[7]           |       | Mascot |
|    |                                            | 1211.6453 | 1211.681  | 0.0357  | 29   | 1085        | 1094     | TSFERMLS LK             |   |   |                            |       | Mascot |
|    |                                            | 1287.6288 | 1287.6315 | 0.0027  | 2    | 440         | 451      | SVSVDGHKTDSR            |   |   |                            |       | Mascot |
|    |                                            | 1287.6288 | 1287.6315 | 0.0027  | 2    | 440         | 451      | SVSVDGHKTDSR            |   |   |                            |       | Mascot |
|    |                                            | 1325.634  | 1325.5896 | -0.0444 | -33  | 1826        | 1835     | EMFKQQEMVR              |   |   |                            |       | Mascot |
|    |                                            | 1325.634  | 1325.7178 | 0.0838  | 63   | 1826        | 1835     | EMFKQQEMVR              |   |   |                            |       | Mascot |
|    |                                            | 1327.6167 | 1327.6887 | 0.072   | 54   | 129         | 139      | QMALVMQMTAR             |   |   | Oxidation (M)[2,6,8]       |       | Mascot |
|    |                                            | 1327.6167 | 1327.6887 | 0.072   | 54   | 129         | 139      | QMALVMQMTAR             |   |   | Oxidation (M)[2,6,8]       |       | Mascot |
|    |                                            | 1376.738  | 1376.6591 | -0.0789 | -57  | 1169        | 1181     | DATSVRTL SDAK           |   |   |                            |       | Mascot |
|    |                                            | 1382.6403 | 1382.7399 | 0.0996  | 72   | 395         | 407      | QGSKSDQSMLACK           |   |   |                            |       | Mascot |
|    |                                            | 1382.6403 | 1382.7399 | 0.0996  | 72   | 395         | 407      | QGSKSDQSMLACK           |   |   |                            |       | Mascot |
|    |                                            | 1438.7114 | 1438.808  | 0.0966  | 67   | 1758        | 1768     | ANPYEYLHIR              |   |   |                            |       | Mascot |
|    |                                            | 1796.8695 | 1796.8547 | -0.0148 | -8   | 1137        | 1152     | SSSTSTEPCLTKELTR        |   |   | Carbamidomethyl (C)[9]     |       | Mascot |
|    |                                            | 1824.9927 | 1824.9114 | -0.0813 | -45  | 1717        | 1733     | ASPLAQANLTAQQVREK       |   |   |                            |       | Mascot |
|    |                                            | 1848.8835 | 1848.9019 | 0.0184  | 10   | 852         | 867      | SEHLADKPELHNSTD R       |   |   |                            |       | Mascot |
|    |                                            | 2076.0469 | 2076.071  | 0.0241  | 12   | 850         | 867      | VKSEHLADKPELHNSTD R     |   |   |                            |       | Mascot |
|    |                                            | 2362.0762 | 2362.1145 | 0.0383  | 16   | 1495        | 1516     | IGEHVTKTDCASTPSPST ASCR |   |   | Carbamidomethyl (C)[10,21] |       | Mascot |
| 50 | disrupted in schizophrenia 1 [Danio rerio] |           |           |         |      | q 214010133 | 112147.1 | 5.07                    | 1 |   | 25                         | 7.327 |        |

|   |                            |           |         |     |              |      |                                  |      |       |                  |     |                        |     |  |  |  |        |
|---|----------------------------|-----------|---------|-----|--------------|------|----------------------------------|------|-------|------------------|-----|------------------------|-----|--|--|--|--------|
|   | 880.4231                   | 880.4886  | 0.0655  | 74  | 1079         | 1086 | NSRSSSSR                         |      |       |                  |     |                        |     |  |  |  | Mascot |
|   | 1070.4861                  | 1070.4473 | -0.0388 | -36 | 921          | 929  | NIEDHSAER                        | 74   | 100   |                  |     |                        |     |  |  |  | Mascot |
|   | 1070.4861                  | 1070.4473 | -0.0388 | -36 | 921          | 929  | NIEDHSAER                        |      |       |                  |     |                        |     |  |  |  | Mascot |
|   | 1241.6083                  | 1241.5652 | -0.0431 | -35 | 828          | 837  | LESMTYEQLK                       |      |       |                  |     |                        |     |  |  |  | Mascot |
|   | 1257.6031                  | 1257.5604 | -0.0427 | -34 | 828          | 837  | LESMTYEQLK                       |      |       |                  |     | Oxidation (M)[4]       |     |  |  |  | Mascot |
|   | 1360.6703                  | 1360.63   | -0.0403 | -30 | 694          | 706  | SPAADESADRITK                    |      |       |                  |     |                        |     |  |  |  | Mascot |
|   | 1416.6722                  | 1416.7604 | 0.0882  | 62  | 184          | 194  | DLSHCQERIMK                      |      |       |                  |     | Carbamidomethyl (C)[5] |     |  |  |  | Mascot |
|   | 1486.8087                  | 1486.736  | -0.0727 | -49 | 270          | 282  | TPVVPKADYMPR                     |      |       |                  |     |                        |     |  |  |  | Mascot |
|   | 1487.8468                  | 1487.7902 | -0.0566 | -38 | 719          | 732  | ALPTDKPLASAYLK                   |      |       |                  |     |                        |     |  |  |  | Mascot |
|   | 1515.7478                  | 1515.6962 | -0.0516 | -34 | 733          | 745  | VFGQEVAYVNFDK                    | 105  | 100   |                  |     |                        |     |  |  |  | Mascot |
|   | 1515.7478                  | 1515.6962 | -0.0516 | -34 | 733          | 745  | VFGQEVAYVNFDK                    |      |       |                  |     |                        |     |  |  |  | Mascot |
|   | 1723.9412                  | 1723.8816 | -0.0596 | -35 | 746          | 761  | TIIEEAIPMATGPKPR                 |      |       |                  |     |                        |     |  |  |  | Mascot |
|   | 1723.9412                  | 1723.8816 | -0.0596 | -35 | 746          | 761  | TIIEEAIPMATGPKPR                 | 120  | 100   |                  |     |                        |     |  |  |  | Mascot |
|   | 1739.936                   | 1739.8815 | -0.0545 | -31 | 746          | 761  | TIIEEAIPMATGPKPR                 |      |       |                  |     | Oxidation (M)[9]       |     |  |  |  | Mascot |
|   | 1739.936                   | 1739.8815 | -0.0545 | -31 | 746          | 761  | TIIEEAIPMATGPKPR                 | 35   | 92.59 | Oxidation (M)[9] |     |                        |     |  |  |  | Mascot |
|   | 2174.1968                  | 2174.1145 | -0.0823 | -38 | 770          | 789  | ALQEGVAFQYAKPLLAAE<br>VR         | 165  | 100   |                  |     |                        |     |  |  |  | Mascot |
|   | 2174.1968                  | 2174.1145 | -0.0823 | -38 | 770          | 789  | ALQEGVAFQYAKPLLAAE<br>VR         |      |       |                  |     |                        |     |  |  |  | Mascot |
|   | 2627.3716                  | 2627.2815 | -0.0901 | -34 | 897          | 920  | VEALPVELPEHIASASFET<br>YAVVR     | 189  | 100   |                  |     |                        |     |  |  |  | Mascot |
|   | 2627.3716                  | 2627.2815 | -0.0901 | -34 | 897          | 920  | VEALPVELPEHIASASFET<br>YAVVR     |      |       |                  |     |                        |     |  |  |  | Mascot |
|   | 3089.5942                  | 3089.4919 | -0.1023 | -33 | 893          | 920  | GNYKVEALPVELPEHIAS<br>ASFETYAVVR |      |       |                  |     |                        |     |  |  |  | Mascot |
| 2 | Vtg1 protein [Danio rerio] |           |         |     | gi 145337918 |      | 116565.5                         | 9.07 | 10    | 673              | 100 | 652                    | 100 |  |  |  |        |

#### Peptide Information

|  | Calc. Mass | Obsrv. Mass | ± da    | ± ppm | Start Seq. | End Seq. | Sequence         | Ion Score | C. I. | % Modification   | Rank | Result Type |
|--|------------|-------------|---------|-------|------------|----------|------------------|-----------|-------|------------------|------|-------------|
|  | 880.4231   | 880.4886    | 0.0655  | 74    | 785        | 792      | NSRSSSSR         |           |       |                  |      | Mascot      |
|  | 1070.4861  | 1070.4473   | -0.0388 | -36   | 627        | 635      | NIEDHSAER        | 74        | 100   |                  |      | Mascot      |
|  | 1070.4861  | 1070.4473   | -0.0388 | -36   | 627        | 635      | NIEDHSAER        |           |       |                  |      | Mascot      |
|  | 1241.6083  | 1241.5652   | -0.0431 | -35   | 534        | 543      | LESMTYEQLK       |           |       |                  |      | Mascot      |
|  | 1257.6031  | 1257.5604   | -0.0427 | -34   | 534        | 543      | LESMTYEQLK       |           |       | Oxidation (M)[4] |      | Mascot      |
|  | 1360.6703  | 1360.63     | -0.0403 | -30   | 400        | 412      | SPAADESADRITK    |           |       |                  |      | Mascot      |
|  | 1487.8468  | 1487.7902   | -0.0566 | -38   | 425        | 438      | ALPTDKPLASAYLK   |           |       |                  |      | Mascot      |
|  | 1515.7478  | 1515.6962   | -0.0516 | -34   | 439        | 451      | VFGQEVAYVNFDK    | 105       | 100   |                  |      | Mascot      |
|  | 1515.7478  | 1515.6962   | -0.0516 | -34   | 439        | 451      | VFGQEVAYVNFDK    |           |       |                  |      | Mascot      |
|  | 1723.9412  | 1723.8816   | -0.0596 | -35   | 452        | 467      | TIIEEAIPMATGPKPR |           |       |                  |      | Mascot      |

|           |           |         |     |     |     |                                  |     |       |                  |        |
|-----------|-----------|---------|-----|-----|-----|----------------------------------|-----|-------|------------------|--------|
| 1723.9412 | 1723.8816 | -0.0596 | -35 | 452 | 467 | TIIEEAIPMATGPKPR                 | 120 | 100   |                  | Mascot |
| 1739.936  | 1739.8815 | -0.0545 | -31 | 452 | 467 | TIIEEAIPMATGPKPR                 |     |       | Oxidation (M)[9] | Mascot |
| 1739.936  | 1739.8815 | -0.0545 | -31 | 452 | 467 | TIIEEAIPMATGPKPR                 | 35  | 92.59 | Oxidation (M)[9] | Mascot |
| 2174.1968 | 2174.1145 | -0.0823 | -38 | 476 | 495 | ALQEGVAFQYAKPLLAEE<br>VR         | 165 | 100   |                  | Mascot |
| 2174.1968 | 2174.1145 | -0.0823 | -38 | 476 | 495 | ALQEGVAFQYAKPLLAEE<br>VR         |     |       |                  | Mascot |
| 2627.3716 | 2627.2815 | -0.0901 | -34 | 603 | 626 | VEALPVELPEHIASASFET<br>YAVVR     | 189 | 100   |                  | Mascot |
| 2627.3716 | 2627.2815 | -0.0901 | -34 | 603 | 626 | VEALPVELPEHIASASFET<br>YAVVR     |     |       |                  | Mascot |
| 3089.5942 | 3089.4919 | -0.1023 | -33 | 599 | 626 | GNYKVEALPVELPEHIAS<br>ASFETYAVVR |     |       |                  | Mascot |

3 vitellogenin 1 [Danio rerio] gi|166795887 149452.5 8.68 11 551 100 533 100

#### Peptide Information

| Calc. Mass | Obsrv. Mass | ± da    | ± ppm | Start Seq. | End Seq. | Sequence                         | Ion Score | C. I. | % Modification         | Rank | Result Type |
|------------|-------------|---------|-------|------------|----------|----------------------------------|-----------|-------|------------------------|------|-------------|
| 880.4231   | 880.4886    | 0.0655  | 74    | 1079       | 1086     | NSRSSSSR                         |           |       |                        |      | Mascot      |
| 1070.4861  | 1070.4473   | -0.0388 | -36   | 921        | 929      | NIEDHSAER                        | 74        | 100   |                        |      | Mascot      |
| 1070.4861  | 1070.4473   | -0.0388 | -36   | 921        | 929      | NIEDHSAER                        |           |       |                        |      | Mascot      |
| 1241.6083  | 1241.5652   | -0.0431 | -35   | 828        | 837      | LESMTYEQLK                       |           |       |                        |      | Mascot      |
| 1257.6031  | 1257.5604   | -0.0427 | -34   | 828        | 837      | LESMTYEQLK                       |           |       | Oxidation (M)[4]       |      | Mascot      |
| 1416.6722  | 1416.7604   | 0.0882  | 62    | 184        | 194      | DLSHCQERIMK                      |           |       | Carbamidomethyl (C)[5] |      | Mascot      |
| 1486.8087  | 1486.736    | -0.0727 | -49   | 270        | 282      | TPVVPKADYMPR                     |           |       |                        |      | Mascot      |
| 1515.7478  | 1515.6962   | -0.0516 | -34   | 733        | 745      | VFGQEVAYVNFDK                    | 105       | 100   |                        |      | Mascot      |
| 1515.7478  | 1515.6962   | -0.0516 | -34   | 733        | 745      | VFGQEVAYVNFDK                    |           |       |                        |      | Mascot      |
| 1751.9724  | 1751.9039   | -0.0685 | -39   | 746        | 761      | TIIEEAIPMTGPKPR                  |           |       |                        |      | Mascot      |
| 1767.9673  | 1767.9034   | -0.0639 | -36   | 746        | 761      | TIIEEAIPMTGPKPR                  |           |       | Oxidation (M)[9]       |      | Mascot      |
| 2174.1968  | 2174.1145   | -0.0823 | -38   | 770        | 789      | ALQEGVAFQYAKPLLAEE<br>VR         | 165       | 100   |                        |      | Mascot      |
| 2174.1968  | 2174.1145   | -0.0823 | -38   | 770        | 789      | ALQEGVAFQYAKPLLAEE<br>VR         |           |       |                        |      | Mascot      |
| 2233.2009  | 2233.0156   | -0.1853 | -83   | 593        | 614      | SLTRITAPDMAYVAGAAN<br>VAIK       |           |       |                        |      | Mascot      |
| 2627.3716  | 2627.2815   | -0.0901 | -34   | 897        | 920      | VEALPVELPEHIASASFET<br>YAVVR     | 189       | 100   |                        |      | Mascot      |
| 2627.3716  | 2627.2815   | -0.0901 | -34   | 897        | 920      | VEALPVELPEHIASASFET<br>YAVVR     |           |       |                        |      | Mascot      |
| 3089.5942  | 3089.4919   | -0.1023 | -33   | 893        | 920      | GNYKVEALPVELPEHIAS<br>ASFETYAVVR |           |       |                        |      | Mascot      |

4 vitellogenin 1 [Danio rerio] gi|21391472 127954.2 8.69 9 479 100 465 100

#### Peptide Information

| Calc. Mass | Obsrv. Mass | ± da | ± ppm | Start Seq. | End Seq. | Sequence | Ion Score | C. I. | % Modification | Rank | Result Type |
|------------|-------------|------|-------|------------|----------|----------|-----------|-------|----------------|------|-------------|
|------------|-------------|------|-------|------------|----------|----------|-----------|-------|----------------|------|-------------|

|   |                                                                                                          |           |         |     |     |     |                          |     |       |                  |  |                  |  |  |  |  |        |
|---|----------------------------------------------------------------------------------------------------------|-----------|---------|-----|-----|-----|--------------------------|-----|-------|------------------|--|------------------|--|--|--|--|--------|
|   | 880.4231                                                                                                 | 880.4886  | 0.0655  | 74  | 888 | 895 | NSRSSSSR                 |     |       |                  |  |                  |  |  |  |  | Mascot |
|   | 1070.4861                                                                                                | 1070.4473 | -0.0388 | -36 | 730 | 738 | NIEDHSAER                | 74  | 100   |                  |  |                  |  |  |  |  | Mascot |
|   | 1070.4861                                                                                                | 1070.4473 | -0.0388 | -36 | 730 | 738 | NIEDHSAER                |     |       |                  |  |                  |  |  |  |  | Mascot |
|   | 1241.6083                                                                                                | 1241.5652 | -0.0431 | -35 | 637 | 646 | LESMTYEQLK               |     |       |                  |  |                  |  |  |  |  | Mascot |
|   | 1257.6031                                                                                                | 1257.5604 | -0.0427 | -34 | 637 | 646 | LESMTYEQLK               |     |       |                  |  | Oxidation (M)[4] |  |  |  |  | Mascot |
|   | 1360.6703                                                                                                | 1360.63   | -0.0403 | -30 | 503 | 515 | SPAADESADRIK             |     |       |                  |  |                  |  |  |  |  | Mascot |
|   | 1486.8087                                                                                                | 1486.736  | -0.0727 | -49 | 79  | 91  | TPVVPIKADYMPR            |     |       |                  |  |                  |  |  |  |  | Mascot |
|   | 1487.8468                                                                                                | 1487.7902 | -0.0566 | -38 | 528 | 541 | ALPTDKPLASAYLK           |     |       |                  |  |                  |  |  |  |  | Mascot |
|   | 1515.7478                                                                                                | 1515.6962 | -0.0516 | -34 | 542 | 554 | VFGQEVAYVNFDK            | 105 | 100   |                  |  |                  |  |  |  |  | Mascot |
|   | 1515.7478                                                                                                | 1515.6962 | -0.0516 | -34 | 542 | 554 | VFGQEVAYVNFDK            |     |       |                  |  |                  |  |  |  |  | Mascot |
|   | 1723.9412                                                                                                | 1723.8816 | -0.0596 | -35 | 555 | 570 | TIIEEAIPMATGPKPR         |     |       |                  |  |                  |  |  |  |  | Mascot |
|   | 1723.9412                                                                                                | 1723.8816 | -0.0596 | -35 | 555 | 570 | TIIEEAIPMATGPKPR         | 120 | 100   |                  |  |                  |  |  |  |  | Mascot |
|   | 1739.936                                                                                                 | 1739.8815 | -0.0545 | -31 | 555 | 570 | TIIEEAIPMATGPKPR         |     |       |                  |  | Oxidation (M)[9] |  |  |  |  | Mascot |
|   | 1739.936                                                                                                 | 1739.8815 | -0.0545 | -31 | 555 | 570 | TIIEEAIPMATGPKPR         | 35  | 92.59 | Oxidation (M)[9] |  |                  |  |  |  |  | Mascot |
|   | 2174.1968                                                                                                | 2174.1145 | -0.0823 | -38 | 579 | 598 | ALQEGVAFQYAKPLLAEE<br>VR | 165 | 100   |                  |  |                  |  |  |  |  | Mascot |
|   | 2174.1968                                                                                                | 2174.1145 | -0.0823 | -38 | 579 | 598 | ALQEGVAFQYAKPLLAEE<br>VR |     |       |                  |  |                  |  |  |  |  | Mascot |
| 5 | novel protein similar to vitellogenin 1 (vg1) [Danio rerio] gi 94732723 147084.2 8.73 13 368 100 344 100 |           |         |     |     |     |                          |     |       |                  |  |                  |  |  |  |  |        |

#### Peptide Information

| Calc. Mass | Obsrv. Mass | ± da    | ± ppm | Start Seq. | End Seq. | Sequence                 | Ion Score | C. I. | % Modification          | Rank | Result Type |
|------------|-------------|---------|-------|------------|----------|--------------------------|-----------|-------|-------------------------|------|-------------|
| 880.4231   | 880.4886    | 0.0655  | 74    | 1079       | 1086     | NSRSSSSR                 |           |       |                         |      | Mascot      |
| 1070.4861  | 1070.4473   | -0.0388 | -36   | 921        | 929      | NIEDHSAER                | 74        | 100   |                         |      | Mascot      |
| 1070.4861  | 1070.4473   | -0.0388 | -36   | 921        | 929      | NIEDHSAER                |           |       |                         |      | Mascot      |
| 1416.6722  | 1416.7604   | 0.0882  | 62    | 184        | 194      | DLSHCQERIMK              |           |       | Carbamidomethyl (C)[5]  |      | Mascot      |
| 1486.8087  | 1486.736    | -0.0727 | -49   | 270        | 282      | TPVVPIKADYMPR            |           |       |                         |      | Mascot      |
| 1501.8373  | 1501.7494   | -0.0879 | -59   | 719        | 732      | ALPTDRPLASAYVK           |           |       |                         |      | Mascot      |
| 1515.7478  | 1515.6962   | -0.0516 | -34   | 733        | 745      | VFGQEVAYVNFDK            | 105       | 100   |                         |      | Mascot      |
| 1515.7478  | 1515.6962   | -0.0516 | -34   | 733        | 745      | VFGQEVAYVNFDK            |           |       |                         |      | Mascot      |
| 1529.7917  | 1529.712    | -0.0797 | -52   | 1180       | 1193     | VQLIASSIAENDNR           |           |       |                         |      | Mascot      |
| 1737.8992  | 1737.8981   | -0.0011 | -1    | 119        | 134      | VFAPAGVSPVTVMNLYR        |           |       | Oxidation (M)[12]       |      | Mascot      |
| 1753.9517  | 1753.8953   | -0.0564 | -32   | 746        | 761      | TIIEEAIPMVSGPKPR         |           |       | Oxidation (M)[9]        |      | Mascot      |
| 2174.1968  | 2174.1145   | -0.0823 | -38   | 770        | 789      | ALQEGVAFQYAKPLLAEE<br>VR | 165       | 100   |                         |      | Mascot      |
| 2174.1968  | 2174.1145   | -0.0823 | -38   | 770        | 789      | ALQEGVAFQYAKPLLAEE<br>VR |           |       |                         |      | Mascot      |
| 2201.9875  | 2202.0251   | 0.0376  | 17    | 192        | 210      | IMKDVGLAYTESPECTE<br>R   |           |       | Carbamidomethyl (C)[13] |      | Mascot      |

|   |                              |           |         |     |              |     |                               |      |    |     |     |     |                  |        |
|---|------------------------------|-----------|---------|-----|--------------|-----|-------------------------------|------|----|-----|-----|-----|------------------|--------|
|   | 2561.4192                    | 2561.2615 | -0.1577 | -62 | 552          | 576 | MVACIVLFEAKPSVALVS<br>SLAGALR |      |    |     |     |     | Oxidation (M)[1] | Mascot |
|   | 2607.4028                    | 2607.3181 | -0.0847 | -32 | 897          | 920 | VETLPVELPEHIASASFET<br>LAVVR  |      |    |     |     |     |                  | Mascot |
| 6 | vitellogenin 7 [Danio rerio] |           |         |     | gi 156713467 |     | 148739.2                      | 8.76 | 13 | 367 | 100 | 344 | 100              |        |

| Peptide Information |             |         |       |            |          |                              |           |       |   |                         |      |        |      |
|---------------------|-------------|---------|-------|------------|----------|------------------------------|-----------|-------|---|-------------------------|------|--------|------|
| Calc. Mass          | Obsrv. Mass | ± da    | ± ppm | Start Seq. | End Seq. | Sequence                     | Ion Score | C. I. | % | Modification            | Rank | Result | Type |
| 880.4231            | 880.4886    | 0.0655  | 74    | 1079       | 1086     | NSRSSSSR                     |           |       |   |                         |      | Mascot |      |
| 1070.4861           | 1070.4473   | -0.0388 | -36   | 921        | 929      | NIEDHSAER                    | 74        | 100   |   |                         |      | Mascot |      |
| 1070.4861           | 1070.4473   | -0.0388 | -36   | 921        | 929      | NIEDHSAER                    |           |       |   |                         |      | Mascot |      |
| 1416.6722           | 1416.7604   | 0.0882  | 62    | 184        | 194      | DLSHCQERIMK                  |           |       |   | Carbamidomethyl (C)[5]  |      | Mascot |      |
| 1486.8087           | 1486.736    | -0.0727 | -49   | 270        | 282      | TPVVPIKADYMPR                |           |       |   |                         |      | Mascot |      |
| 1501.8373           | 1501.7494   | -0.0879 | -59   | 719        | 732      | ALPTDRPLASAYVK               |           |       |   |                         |      | Mascot |      |
| 1515.7478           | 1515.6962   | -0.0516 | -34   | 733        | 745      | VFGQEVAYVNFDK                | 105       | 100   |   |                         |      | Mascot |      |
| 1515.7478           | 1515.6962   | -0.0516 | -34   | 733        | 745      | VFGQEVAYVNFDK                |           |       |   |                         |      | Mascot |      |
| 1529.7917           | 1529.712    | -0.0797 | -52   | 1195       | 1208     | VQLIASSIAENDNR               |           |       |   |                         |      | Mascot |      |
| 1537.7467           | 1537.6732   | -0.0735 | -48   | 981        | 994      | GCVEVHSYNAAFIK               |           |       |   |                         |      | Mascot |      |
| 1737.8992           | 1737.8981   | -0.0011 | -1    | 119        | 134      | VFAPAGVSPTVMNLYR             |           |       |   | Oxidation (M)[12]       |      | Mascot |      |
| 1753.9517           | 1753.8953   | -0.0564 | -32   | 746        | 761      | TIIEEAIPMVSQPKPR             |           |       |   | Oxidation (M)[9]        |      | Mascot |      |
| 2174.1968           | 2174.1145   | -0.0823 | -38   | 770        | 789      | ALQEGVAFQYAKPLAAE<br>VR      | 165       | 100   |   |                         |      | Mascot |      |
| 2174.1968           | 2174.1145   | -0.0823 | -38   | 770        | 789      | ALQEGVAFQYAKPLAAE<br>VR      |           |       |   |                         |      | Mascot |      |
| 2201.9875           | 2202.0251   | 0.0376  | 17    | 192        | 210      | IMKDVGLAYTESPECTE<br>R       |           |       |   | Carbamidomethyl (C)[13] |      | Mascot |      |
| 2607.4028           | 2607.3181   | -0.0847 | -32   | 897        | 920      | VETLPVELPEHIASASFET<br>LAVVR |           |       |   |                         |      | Mascot |      |

|   |                              |  |  |  |             |  |        |      |    |     |     |     |     |
|---|------------------------------|--|--|--|-------------|--|--------|------|----|-----|-----|-----|-----|
| 7 | vitellogenin 5 [Danio rerio] |  |  |  | gi 68448530 |  | 148868 | 8.77 | 11 | 358 | 100 | 341 | 100 |
|---|------------------------------|--|--|--|-------------|--|--------|------|----|-----|-----|-----|-----|

| Peptide Information |             |         |       |            |          |                |           |       |   |                        |      |        |      |
|---------------------|-------------|---------|-------|------------|----------|----------------|-----------|-------|---|------------------------|------|--------|------|
| Calc. Mass          | Obsrv. Mass | ± da    | ± ppm | Start Seq. | End Seq. | Sequence       | Ion Score | C. I. | % | Modification           | Rank | Result | Type |
| 1070.4861           | 1070.4473   | -0.0388 | -36   | 921        | 929      | NIEDHSAER      | 74        | 100   |   |                        |      | Mascot |      |
| 1070.4861           | 1070.4473   | -0.0388 | -36   | 921        | 929      | NIEDHSAER      |           |       |   |                        |      | Mascot |      |
| 1241.6083           | 1241.5652   | -0.0431 | -35   | 828        | 837      | LESMTYEQLK     |           |       |   |                        |      | Mascot |      |
| 1257.6031           | 1257.5604   | -0.0427 | -34   | 828        | 837      | LESMTYEQLK     |           |       |   | Oxidation (M)[4]       |      | Mascot |      |
| 1324.5975           | 1324.6425   | 0.045   | 34    | 1067       | 1079     | NTPVSSSESSSSSR |           |       |   |                        |      | Mascot |      |
| 1324.5975           | 1324.6425   | 0.045   | 34    | 1067       | 1079     | NTPVSSSESSSSSR |           |       |   |                        |      | Mascot |      |
| 1416.6722           | 1416.7604   | 0.0882  | 62    | 184        | 194      | DLSHCQERIMK    |           |       |   | Carbamidomethyl (C)[5] |      | Mascot |      |
| 1486.8087           | 1486.736    | -0.0727 | -49   | 270        | 282      | TPVVPIKADYMPR  |           |       |   |                        |      | Mascot |      |

|   |                                                             |           |         |      |     |             |                              |      |     |                   |     |     |        |
|---|-------------------------------------------------------------|-----------|---------|------|-----|-------------|------------------------------|------|-----|-------------------|-----|-----|--------|
|   | 1515.7478                                                   | 1515.6962 | -0.0516 | -34  | 733 | 745         | VFGQEVAYVNFDK                | 105  | 100 |                   |     |     | Mascot |
|   | 1515.7478                                                   | 1515.6962 | -0.0516 | -34  | 733 | 745         | VFGQEVAYVNFDK                |      |     |                   |     |     | Mascot |
|   | 1549.8373                                                   | 1549.7819 | -0.0554 | -36  | 719 | 732         | ALPTDRPLASAYFK               |      |     |                   |     |     | Mascot |
|   | 1737.9568                                                   | 1737.8981 | -0.0587 | -34  | 746 | 761         | SIIEEAIPMTGPKPR              |      |     |                   |     |     | Mascot |
|   | 1753.9517                                                   | 1753.8953 | -0.0564 | -32  | 746 | 761         | SIIEEAIPMTGPKPR              |      |     | Oxidation (M)[9]  |     |     | Mascot |
|   | 2188.2124                                                   | 2188.1277 | -0.0847 | -39  | 770 | 789         | ALQEGIAFQYAKPLAAE<br>VR      |      |     |                   |     |     | Mascot |
|   | 2278.2                                                      | 2277.9265 | -0.2735 | -120 | 283 | 302         | GSLQYELASEILQTPQL<br>MK      |      |     | Oxidation (M)[19] |     |     | Mascot |
|   | 2577.3923                                                   | 2577.3083 | -0.084  | -33  | 897 | 920         | VEALPVELPEHIASASFET<br>LAVVR |      |     |                   |     |     | Mascot |
|   | 2577.3923                                                   | 2577.3083 | -0.084  | -33  | 897 | 920         | VEALPVELPEHIASASFET<br>LAVVR | 162  | 100 |                   |     |     | Mascot |
| 8 | novel protein similar to vitellogenin 1 (vg1) [Danio rerio] |           |         |      |     | gi 94733731 | 149169.2                     | 8.84 | 11  | 358               | 100 | 341 | 100    |

Peptide Information

| Calc. Mass | Obsrv. Mass | ± da    | ± ppm | Start Seq. | End Seq. | Sequence                     | Ion Score | C. I. | % Modification         | Rank | Result Type |
|------------|-------------|---------|-------|------------|----------|------------------------------|-----------|-------|------------------------|------|-------------|
| 1070.4861  | 1070.4473   | -0.0388 | -36   | 925        | 933      | NIEDHSAER                    | 74        | 100   |                        |      | Mascot      |
| 1070.4861  | 1070.4473   | -0.0388 | -36   | 925        | 933      | NIEDHSAER                    |           |       |                        |      | Mascot      |
| 1241.6083  | 1241.5652   | -0.0431 | -35   | 832        | 841      | LESMTYEQLK                   |           |       |                        |      | Mascot      |
| 1257.6031  | 1257.5604   | -0.0427 | -34   | 832        | 841      | LESMTYEQLK                   |           |       | Oxidation (M)[4]       |      | Mascot      |
| 1324.5975  | 1324.6425   | 0.045   | 34    | 1071       | 1083     | NTPVSSESSSSSR                |           |       |                        |      | Mascot      |
| 1324.5975  | 1324.6425   | 0.045   | 34    | 1071       | 1083     | NTPVSSESSSSSR                |           |       |                        |      | Mascot      |
| 1416.6722  | 1416.7604   | 0.0882  | 62    | 188        | 198      | DLSHCQERIMK                  |           |       | Carbamidomethyl (C)[5] |      | Mascot      |
| 1486.8087  | 1486.736    | -0.0727 | -49   | 274        | 286      | TPVVPKADYMPR                 |           |       |                        |      | Mascot      |
| 1515.7478  | 1515.6962   | -0.0516 | -34   | 737        | 749      | VFGQEVAYVNFDK                | 105       | 100   |                        |      | Mascot      |
| 1515.7478  | 1515.6962   | -0.0516 | -34   | 737        | 749      | VFGQEVAYVNFDK                |           |       |                        |      | Mascot      |
| 1549.8373  | 1549.7819   | -0.0554 | -36   | 723        | 736      | ALPTDRPLASAYFK               |           |       |                        |      | Mascot      |
| 1737.8992  | 1737.8981   | -0.0011 | -1    | 123        | 138      | VFAPAGVSPTVMNLYR             |           |       | Oxidation (M)[12]      |      | Mascot      |
| 1753.9517  | 1753.8953   | -0.0564 | -32   | 750        | 765      | SIIEEAIPMTGPKPR              |           |       | Oxidation (M)[9]       |      | Mascot      |
| 2188.2124  | 2188.1277   | -0.0847 | -39   | 774        | 793      | ALQEGIAFQYAKPLAAE<br>VR      |           |       |                        |      | Mascot      |
| 2577.3923  | 2577.3083   | -0.084  | -33   | 901        | 924      | VEALPVELPEHIASASFET<br>LAVVR |           |       |                        |      | Mascot      |
| 2577.3923  | 2577.3083   | -0.084  | -33   | 901        | 924      | VEALPVELPEHIASASFET<br>LAVVR | 162       | 100   |                        |      | Mascot      |

|   |                              |  |  |  |  |              |          |      |   |     |     |     |     |
|---|------------------------------|--|--|--|--|--------------|----------|------|---|-----|-----|-----|-----|
| 9 | vitellogenin 6 [Danio rerio] |  |  |  |  | gi 303227889 | 150936.1 | 8.84 | 8 | 354 | 100 | 344 | 100 |
|---|------------------------------|--|--|--|--|--------------|----------|------|---|-----|-----|-----|-----|

Peptide Information

| Calc. Mass | Obsrv. Mass | ± da | ± ppm | Start Seq. | End Seq. | Sequence | Ion Score | C. I. | % Modification | Rank | Result Type |
|------------|-------------|------|-------|------------|----------|----------|-----------|-------|----------------|------|-------------|
|------------|-------------|------|-------|------------|----------|----------|-----------|-------|----------------|------|-------------|



|    |                              |           |         |     |             |     |                            |     |     |                        |        |     |     |
|----|------------------------------|-----------|---------|-----|-------------|-----|----------------------------|-----|-----|------------------------|--------|-----|-----|
|    | 1070.4861                    | 1070.4473 | -0.0388 | -36 | 932         | 940 | NIEDHSAER                  | 74  | 100 |                        | Mascot |     |     |
|    | 1070.4861                    | 1070.4473 | -0.0388 | -36 | 932         | 940 | NIEDHSAER                  |     |     |                        | Mascot |     |     |
|    | 1241.6083                    | 1241.5652 | -0.0431 | -35 | 839         | 848 | LESMTYEQLK                 |     |     |                        | Mascot |     |     |
|    | 1257.6031                    | 1257.5604 | -0.0427 | -34 | 839         | 848 | LESMTYEQLK                 |     |     | Oxidation (M)[4]       | Mascot |     |     |
|    | 1416.6722                    | 1416.7604 | 0.0882  | 62  | 195         | 205 | DLSHCQERIMK                |     |     | Carbamidomethyl (C)[5] | Mascot |     |     |
|    | 1486.8087                    | 1486.736  | -0.0727 | -49 | 281         | 293 | TPVVPIKADYMPR              |     |     |                        | Mascot |     |     |
|    | 1515.7478                    | 1515.6962 | -0.0516 | -34 | 744         | 756 | VFGQEVAYVNFDK              | 105 | 100 |                        | Mascot |     |     |
|    | 1515.7478                    | 1515.6962 | -0.0516 | -34 | 744         | 756 | VFGQEVAYVNFDK              |     |     |                        | Mascot |     |     |
|    | 1751.9724                    | 1751.9039 | -0.0685 | -39 | 757         | 772 | TIIEEAIPMTGPKPR            |     |     |                        | Mascot |     |     |
|    | 1767.9673                    | 1767.9034 | -0.0639 | -36 | 757         | 772 | TIIEEAIPMTGPKPR            |     |     | Oxidation (M)[9]       | Mascot |     |     |
|    | 2174.1968                    | 2174.1145 | -0.0823 | -38 | 781         | 800 | ALQEGVAFQYAKPLLAEE<br>VR   | 165 | 100 |                        | Mascot |     |     |
|    | 2174.1968                    | 2174.1145 | -0.0823 | -38 | 781         | 800 | ALQEGVAFQYAKPLLAEE<br>VR   |     |     |                        | Mascot |     |     |
|    | 2233.2009                    | 2233.0156 | -0.1853 | -83 | 604         | 625 | SLTRITAPDMAYVAGAAN<br>VAIK |     |     |                        | Mascot |     |     |
| 10 | vitellogenin 5 [Danio rerio] |           |         |     | gi 57864785 |     | 72820.8                    | 9   | 7   | 284                    | 100    | 267 | 100 |

#### Peptide Information

| Calc. Mass | Obsrv. Mass | ± da    | ± ppm | Start Seq. | End Seq. | Sequence                     | Ion Score | C. I. | % | Modification     | Rank | Result Type |
|------------|-------------|---------|-------|------------|----------|------------------------------|-----------|-------|---|------------------|------|-------------|
| 1241.6083  | 1241.5652   | -0.0431 | -35   | 137        | 146      | LESMTYEQLK                   |           |       |   |                  |      | Mascot      |
| 1257.6031  | 1257.5604   | -0.0427 | -34   | 137        | 146      | LESMTYEQLK                   |           |       |   | Oxidation (M)[4] |      | Mascot      |
| 1324.5975  | 1324.6425   | 0.045   | 34    | 376        | 388      | NTPVSSESSSSSR                |           |       |   |                  |      | Mascot      |
| 1324.5975  | 1324.6425   | 0.045   | 34    | 376        | 388      | NTPVSSESSSSSR                |           |       |   |                  |      | Mascot      |
| 1515.7478  | 1515.6962   | -0.0516 | -34   | 42         | 54       | VFGQEVAYVNFDK                | 105       | 100   |   |                  |      | Mascot      |
| 1515.7478  | 1515.6962   | -0.0516 | -34   | 42         | 54       | VFGQEVAYVNFDK                |           |       |   |                  |      | Mascot      |
| 1549.8373  | 1549.7819   | -0.0554 | -36   | 28         | 41       | ALPTDRPLASAYFK               |           |       |   |                  |      | Mascot      |
| 1737.9568  | 1737.8981   | -0.0587 | -34   | 55         | 70       | SIIEEAIPMTGPKPR              |           |       |   |                  |      | Mascot      |
| 1753.9517  | 1753.8953   | -0.0564 | -32   | 55         | 70       | SIIEEAIPMTGPKPR              |           |       |   | Oxidation (M)[9] |      | Mascot      |
| 2188.2124  | 2188.1277   | -0.0847 | -39   | 79         | 98       | ALQEGIAFQYAKPLLAEE<br>VR     |           |       |   |                  |      | Mascot      |
| 2577.3923  | 2577.3083   | -0.084  | -33   | 206        | 229      | VEALPVELPEHIASASFET<br>LAVVR |           |       |   |                  |      | Mascot      |
| 2577.3923  | 2577.3083   | -0.084  | -33   | 206        | 229      | VEALPVELPEHIASASFET<br>LAVVR | 162       | 100   |   |                  |      | Mascot      |

11 Zgc:136383 protein [Danio rerio] gi|159155252 123957.1 8.78 8 191 100 180 100

#### Peptide Information

| Calc. Mass | Obsrv. Mass | ± da    | ± ppm | Start Seq. | End Seq. | Sequence | Ion Score | C. I. | % | Modification | Rank | Result Type |
|------------|-------------|---------|-------|------------|----------|----------|-----------|-------|---|--------------|------|-------------|
| 890.5094   | 890.4722    | -0.0372 | -42   | 202        | 209      | FSTVPALR |           |       |   |              |      | Mascot      |

|    |                                              |           |         |     |     |              |                              |      |     |                  |     |     |        |
|----|----------------------------------------------|-----------|---------|-----|-----|--------------|------------------------------|------|-----|------------------|-----|-----|--------|
|    | 1070.4861                                    | 1070.4473 | -0.0388 | -36 | 698 | 706          | NIEDHSAER                    | 74   | 100 |                  |     |     | Mascot |
|    | 1070.4861                                    | 1070.4473 | -0.0388 | -36 | 698 | 706          | NIEDHSAER                    |      |     |                  |     |     | Mascot |
|    | 1241.6083                                    | 1241.5652 | -0.0431 | -35 | 605 | 614          | LESMTYEQLK                   |      |     |                  |     |     | Mascot |
|    | 1257.6031                                    | 1257.5604 | -0.0427 | -34 | 605 | 614          | LESMTYEQLK                   |      |     | Oxidation (M)[4] |     |     | Mascot |
|    | 1515.7478                                    | 1515.6962 | -0.0516 | -34 | 510 | 522          | VFGQEVAYVNFDK                | 105  | 100 |                  |     |     | Mascot |
|    | 1515.7478                                    | 1515.6962 | -0.0516 | -34 | 510 | 522          | VFGQEVAYVNFDK                |      |     |                  |     |     | Mascot |
|    | 1737.9568                                    | 1737.8981 | -0.0587 | -34 | 523 | 538          | TIIEEAIPMVAGPKPR             |      |     | Oxidation (M)[9] |     |     | Mascot |
|    | 2188.2124                                    | 2188.1277 | -0.0847 | -39 | 547 | 566          | ALQEGIAFQYAKPLLAEE<br>VR     |      |     |                  |     |     | Mascot |
|    | 2233.2009                                    | 2233.0156 | -0.1853 | -83 | 370 | 391          | SLTRITAPDMAYVAGAAN<br>VAIK   |      |     |                  |     |     | Mascot |
|    | 2563.3765                                    | 2563.2959 | -0.0806 | -31 | 674 | 697          | VEALPVDLPEHIASASFE<br>TLAVVR |      |     |                  |     |     | Mascot |
| 12 | hypothetical protein LOC678536 [Danio rerio] |           |         |     |     | gi 160420306 | 148750.2                     | 8.89 | 9   | 191              | 100 | 180 | 100    |

Peptide Information

|  | Calc. Mass | Obsrv. Mass | ± da    | ± ppm | Start Seq. | End Seq. | Sequence                     | Ion Score | C. I. | % Modification         | Rank | Result Type |
|--|------------|-------------|---------|-------|------------|----------|------------------------------|-----------|-------|------------------------|------|-------------|
|  | 890.5094   | 890.4722    | -0.0372 | -42   | 425        | 432      | FSTVPALR                     |           |       |                        |      | Mascot      |
|  | 1070.4861  | 1070.4473   | -0.0388 | -36   | 921        | 929      | NIEDHSAER                    | 74        | 100   |                        |      | Mascot      |
|  | 1070.4861  | 1070.4473   | -0.0388 | -36   | 921        | 929      | NIEDHSAER                    |           |       |                        |      | Mascot      |
|  | 1241.6083  | 1241.5652   | -0.0431 | -35   | 828        | 837      | LESMTYEQLK                   |           |       |                        |      | Mascot      |
|  | 1257.6031  | 1257.5604   | -0.0427 | -34   | 828        | 837      | LESMTYEQLK                   |           |       | Oxidation (M)[4]       |      | Mascot      |
|  | 1416.6722  | 1416.7604   | 0.0882  | 62    | 184        | 194      | DLSHCQERIMK                  |           |       | Carbamidomethyl (C)[5] |      | Mascot      |
|  | 1515.7478  | 1515.6962   | -0.0516 | -34   | 733        | 745      | VFGQEVAYVNFDK                | 105       | 100   |                        |      | Mascot      |
|  | 1515.7478  | 1515.6962   | -0.0516 | -34   | 733        | 745      | VFGQEVAYVNFDK                |           |       |                        |      | Mascot      |
|  | 1751.9724  | 1751.9039   | -0.0685 | -39   | 746        | 761      | TIIEEAIPMTGPKPR              |           |       |                        |      | Mascot      |
|  | 1767.9673  | 1767.9034   | -0.0639 | -36   | 746        | 761      | TIIEEAIPMTGPKPR              |           |       | Oxidation (M)[9]       |      | Mascot      |
|  | 2188.2124  | 2188.1277   | -0.0847 | -39   | 770        | 789      | ALQEGIAFQYAKPLLAEE<br>VR     |           |       |                        |      | Mascot      |
|  | 2233.2009  | 2233.0156   | -0.1853 | -83   | 593        | 614      | SLTRITAPDMAYVAGAAN<br>VAIK   |           |       |                        |      | Mascot      |
|  | 2563.3765  | 2563.2959   | -0.0806 | -31   | 897        | 920      | VEALPVDLPEHIASASFE<br>TLAVVR |           |       |                        |      | Mascot      |

|    |                                                                    |  |  |  |  |              |         |      |   |    |       |    |   |
|----|--------------------------------------------------------------------|--|--|--|--|--------------|---------|------|---|----|-------|----|---|
| 13 | UDP glucuronosyltransferase 5 family, polypeptide A4 [Danio rerio] |  |  |  |  | gi 294610624 | 60011.8 | 8.17 | 9 | 47 | 7.024 | 18 | 0 |
|----|--------------------------------------------------------------------|--|--|--|--|--------------|---------|------|---|----|-------|----|---|

Peptide Information

|  | Calc. Mass | Obsrv. Mass | ± da    | ± ppm | Start Seq. | End Seq. | Sequence | Ion Score | C. I. | % Modification | Rank | Result Type |
|--|------------|-------------|---------|-------|------------|----------|----------|-----------|-------|----------------|------|-------------|
|  | 868.4999   | 868.4923    | -0.0076 | -9    | 49         | 56       | GHSITVVR | 18        | 0     |                |      | Mascot      |
|  | 868.4999   | 868.4923    | -0.0076 | -9    | 49         | 56       | GHSITVVR |           |       |                |      | Mascot      |

|    |                                              |           |         |      |              |     |                            |         |      |   |                   |   |    |   |  |  |        |
|----|----------------------------------------------|-----------|---------|------|--------------|-----|----------------------------|---------|------|---|-------------------|---|----|---|--|--|--------|
|    | 890.5345                                     | 890.4722  | -0.0623 | -70  | 421          | 428 | AVFLEALK                   |         |      |   |                   |   |    |   |  |  | Mascot |
|    | 1051.5354                                    | 1051.6758 | 0.1404  | 134  | 1            | 9   | MTHPSTHLK                  |         |      |   |                   |   |    |   |  |  | Mascot |
|    | 1067.5303                                    | 1067.6178 | 0.0875  | 82   | 1            | 9   | MTHPSTHLK                  |         |      |   | Oxidation (M)[1]  |   |    |   |  |  | Mascot |
|    | 1486.7584                                    | 1486.736  | -0.0224 | -15  | 446          | 457 | LHHDQPMKPLDR               |         |      |   |                   |   |    |   |  |  | Mascot |
|    | 1553.8297                                    | 1553.6481 | -0.1816 | -117 | 458          | 469 | AIFWIEFVMRNK               |         |      |   |                   |   |    |   |  |  | Mascot |
|    | 1723.9199                                    | 1723.8816 | -0.0383 | -22  | 25           | 39  | LLVVPVDGSHWINMK            |         |      |   | Oxidation (M)[14] |   |    |   |  |  | Mascot |
|    | 1723.9199                                    | 1723.8816 | -0.0383 | -22  | 25           | 39  | LLVVPVDGSHWINMK            |         |      |   | Oxidation (M)[14] |   |    |   |  |  | Mascot |
|    | 2188.1694                                    | 2188.1277 | -0.0417 | -19  | 20           | 39  | SHAGKLLVVPVDGSHWINMK       |         |      |   |                   |   |    |   |  |  | Mascot |
|    | 2225.2297                                    | 2225.0374 | -0.1923 | -86  | 1            | 19  | MTHPSTHLKFLLLCVLSR         |         |      |   | Oxidation (M)[1]  |   |    |   |  |  | Mascot |
|    | 3089.4814                                    | 3089.4919 | 0.0105  | 3    | 116          | 141 | FTEIHQEICKMTATMFENVTLMNTLK |         |      |   | Oxidation (M)[11] |   |    |   |  |  | Mascot |
| 14 | hypothetical protein LOC567623 [Danio rerio] |           |         |      | gi 162138968 |     |                            | 37987.1 | 6.31 | 8 | 45                | 0 | 11 | 0 |  |  |        |

#### Peptide Information

| Calc. Mass | Obsrv. Mass | ± da    | ± ppm | Start Seq. | End Seq. | Sequence                 | Ion Score | C. I. | % Modification           | Rank | Result Type |
|------------|-------------|---------|-------|------------|----------|--------------------------|-----------|-------|--------------------------|------|-------------|
| 1186.5634  | 1186.5034   | -0.06   | -51   | 320        | 330      | DKNNHCGVATK              |           |       |                          |      | Mascot      |
| 1346.6448  | 1346.6198   | -0.025  | -19   | 38         | 48       | SYHEDVEVGRR              |           |       |                          |      | Mascot      |
| 1430.6594  | 1430.7507   | 0.0913  | 64    | 89         | 100      | QAMNGYKHDPNR             |           |       |                          |      | Mascot      |
| 1498.7173  | 1498.6686   | -0.0487 | -32   | 196        | 208      | GLDSEQSYPYLAR            |           |       |                          |      | Mascot      |
| 1727.8096  | 1727.7126   | -0.097  | -56   | 33         | 47       | SQHGKSYHEDVEVGR          |           |       |                          |      | Mascot      |
| 2174.0989  | 2174.1145   | 0.0156  | 7     | 277        | 297      | LDHAVLVVGYGYQGADVAGNR    | 11        | 0     |                          |      | Mascot      |
| 2174.0989  | 2174.1145   | 0.0156  | 7     | 277        | 297      | LDHAVLVVGYGYQGADVAGNR    |           |       |                          |      | Mascot      |
| 2278.0015  | 2277.9265   | -0.075  | -33   | 135        | 154      | QCGSCWSFSSTGALEGQLFR     |           |       | Carbamidomethyl (C)[2,5] |      | Mascot      |
| 2649.1819  | 2649.2666   | 0.0847  | 32    | 132        | 154      | DQKQCGSCWSFSSTGAL EGQLFR |           |       | Carbamidomethyl (C)[5,8] |      | Mascot      |

15 cathepsin L, 1 b [Danio rerio] gi|18858809 38005.1 5.99 7 41 0 11 0

#### Peptide Information

| Calc. Mass | Obsrv. Mass | ± da    | ± ppm | Start Seq. | End Seq. | Sequence              | Ion Score | C. I. | % Modification | Rank | Result Type |
|------------|-------------|---------|-------|------------|----------|-----------------------|-----------|-------|----------------|------|-------------|
| 1186.5634  | 1186.5034   | -0.06   | -51   | 320        | 330      | DKNNHCGVATK           |           |       |                |      | Mascot      |
| 1346.6448  | 1346.6198   | -0.025  | -19   | 38         | 48       | SYHEDVEVGRR           |           |       |                |      | Mascot      |
| 1498.7173  | 1498.6686   | -0.0487 | -32   | 196        | 208      | GLDSEQSYPYLAR         |           |       |                |      | Mascot      |
| 1727.8096  | 1727.7126   | -0.097  | -56   | 33         | 47       | SQHGKSYHEDVEVGR       |           |       |                |      | Mascot      |
| 2174.0989  | 2174.1145   | 0.0156  | 7     | 277        | 297      | LDHAVLVVGYGYQGADVAGNR | 11        | 0     |                |      | Mascot      |
| 2174.0989  | 2174.1145   | 0.0156  | 7     | 277        | 297      | LDHAVLVVGYGYQGADV     |           |       |                |      | Mascot      |

|    |                                                                                            |           |        |     |     |     |                                  |  |  |  |  |  |                          |        |
|----|--------------------------------------------------------------------------------------------|-----------|--------|-----|-----|-----|----------------------------------|--|--|--|--|--|--------------------------|--------|
|    | 2278.0015                                                                                  | 2277.9265 | -0.075 | -33 | 135 | 154 | AGNR<br>QCGSCWSFSSTGALEG<br>QLFR |  |  |  |  |  | Carbamidomethyl (C)[2,5] | Mascot |
|    | 2649.1819                                                                                  | 2649.2666 | 0.0847 | 32  | 132 | 154 | DQKQCGSCWSFSSTGAL<br>EGQLFR      |  |  |  |  |  | Carbamidomethyl (C)[5,8] | Mascot |
| 16 | PREDICTED: cathepsin L1-like isoform 1 [Danio rerio] gi 189525868 37946.1 6.14 7 40 0 11 0 |           |        |     |     |     |                                  |  |  |  |  |  |                          |        |

#### Peptide Information

| Calc. Mass | Obsrv. Mass | ± da    | ± ppm | Start Seq. | End Seq. | Sequence                    | Ion Score | C. I. | % Modification           | Rank | Result Type |
|------------|-------------|---------|-------|------------|----------|-----------------------------|-----------|-------|--------------------------|------|-------------|
| 1186.5634  | 1186.5034   | -0.06   | -51   | 320        | 330      | DKNNHCGVATK                 |           |       |                          |      | Mascot      |
| 1346.6448  | 1346.6198   | -0.025  | -19   | 38         | 48       | SYHEDVEVGRR                 |           |       |                          |      | Mascot      |
| 1498.7173  | 1498.6686   | -0.0487 | -32   | 196        | 208      | GLDSEQSYPYLAR               |           |       |                          |      | Mascot      |
| 1727.8096  | 1727.7126   | -0.097  | -56   | 33         | 47       | SQHGKSYHEDVEVGR             |           |       |                          |      | Mascot      |
| 2174.0989  | 2174.1145   | 0.0156  | 7     | 277        | 297      | LDHAVLVVGYGYQGADV<br>AGNR   | 11        | 0     |                          |      | Mascot      |
| 2174.0989  | 2174.1145   | 0.0156  | 7     | 277        | 297      | LDHAVLVVGYGYQGADV<br>AGNR   |           |       |                          |      | Mascot      |
| 2278.0015  | 2277.9265   | -0.075  | -33   | 135        | 154      | QCGSCWSFSSTGALEG<br>QLFR    |           |       | Carbamidomethyl (C)[2,5] |      | Mascot      |
| 2649.1819  | 2649.2666   | 0.0847  | 32    | 132        | 154      | DQKQCGSCWSFSSTGAL<br>EGQLFR |           |       | Carbamidomethyl (C)[5,8] |      | Mascot      |

17 PREDICTED: interferon-induced guanylate-binding protein 1-like [Danio rerio]

gi|326675865 83627.1 5.6 13 38 0

#### Peptide Information

| Calc. Mass | Obsrv. Mass | ± da    | ± ppm | Start Seq. | End Seq. | Sequence          | Ion Score | C. I. | % Modification           | Rank | Result Type |
|------------|-------------|---------|-------|------------|----------|-------------------|-----------|-------|--------------------------|------|-------------|
| 842.4114   | 842.4785    | 0.0671  | 80    | 382        | 389      | DGHTVTGR          |           |       |                          |      | Mascot      |
| 890.4213   | 890.4722    | 0.0509  | 57    | 496        | 503      | ENDQASVK          |           |       |                          |      | Mascot      |
| 1051.5895  | 1051.6758   | 0.0863  | 82    | 151        | 159      | TGKSYLLNR         |           |       |                          |      | Mascot      |
| 1416.8461  | 1416.7604   | -0.0857 | -60   | 555        | 566      | AEVVLQEFLKLK      |           |       |                          |      | Mascot      |
| 1470.702   | 1470.7328   | 0.0308  | 21    | 179        | 190      | GIWMWCVPHPTK      |           |       | Oxidation (M)[4]         |      | Mascot      |
| 1478.7494  | 1478.7483   | -0.0011 | -1    | 314        | 325      | VMEFNLPRECIK      |           |       |                          |      | Mascot      |
| 1498.6917  | 1498.6686   | -0.0231 | -15   | 667        | 678      | ADLMKQEMEEFK      |           |       |                          |      | Mascot      |
| 1514.6865  | 1514.6902   | 0.0037  | 2     | 667        | 678      | ADLMKQEMEEFK      |           |       | Oxidation (M)[4]         |      | Mascot      |
| 1537.6492  | 1537.6732   | 0.024   | 16    | 709        | 719      | MMMEQHRQQMR       |           |       | Oxidation (M)[1,2]       |      | Mascot      |
| 1549.7025  | 1549.7819   | 0.0794  | 51    | 367        | 378      | FCTCVYEKSEVK      |           |       | Carbamidomethyl (C)[2,4] |      | Mascot      |
| 1553.644   | 1553.6481   | 0.0041  | 3     | 709        | 719      | MMMEQHRQQMR       |           |       | Oxidation (M)[1,2,3]     |      | Mascot      |
| 1703.8058  | 1703.9121   | 0.1063  | 62    | 458        | 472      | LSQSATQTFMAESFR   |           |       |                          |      | Mascot      |
| 1737.8258  | 1737.8981   | 0.0723  | 42    | 720        | 736      | EIQRSSGGGSGLLCSVM |           |       | Carbamidomethyl (C)[14]  |      | Mascot      |
| 1753.8867  | 1753.8953   | 0.0086  | 5     | 443        | 457      | AFPLELEQVSAEHQR   |           |       |                          |      | Mascot      |
| 2577.2441  | 2577.3083   | 0.0642  | 25    | 522        | 543      | QGFYAKPGGYDVFCRDL |           |       | Carbamidomethyl (C)[14]  |      | Mascot      |

|                     |                                                                                          | 2577.2441  | 2577.3083   | 0.0642  | 25    | 522        | EDIVK<br>QGFYAKPGGYDVFCRDL<br>EDIVK |         |      |           |       | Carbamidomethyl (C)[14]  |    | Mascot           |
|---------------------|------------------------------------------------------------------------------------------|------------|-------------|---------|-------|------------|-------------------------------------|---------|------|-----------|-------|--------------------------|----|------------------|
| 18                  | PREDICTED: chondroitin sulfate<br>N-acetylgalactosaminyltransferase 1-like [Danio rerio] |            |             |         |       |            | gi 326671029                        | 62803.2 | 9.11 | 8         | 38    | 0                        | 16 | 0                |
| Peptide Information |                                                                                          |            |             |         |       |            |                                     |         |      |           |       |                          |    |                  |
|                     |                                                                                          | Calc. Mass | Obsrv. Mass | ± da    | ± ppm | Start Seq. | End Sequence Seq.                   |         |      | Ion Score | C. I. | % Modification           |    | Rank Result Type |
|                     |                                                                                          | 868.4634   | 868.4923    | 0.0289  | 33    | 151        | 158 AEVHTGVR                        |         |      | 16        | 0     |                          |    | Mascot           |
|                     |                                                                                          | 868.4634   | 868.4923    | 0.0289  | 33    | 151        | 158 AEVHTGVR                        |         |      |           |       |                          |    | Mascot           |
|                     |                                                                                          | 1324.5449  | 1324.6425   | 0.0976  | 74    | 443        | 453 DFGFGMTCQYR                     |         |      |           |       |                          |    | Mascot           |
|                     |                                                                                          | 1324.5449  | 1324.6425   | 0.0976  | 74    | 443        | 453 DFGFGMTCQYR                     |         |      |           |       |                          |    | Mascot           |
|                     |                                                                                          | 1416.7018  | 1416.7604   | 0.0586  | 41    | 468        | 479 GWGGEDVHLYRK                    |         |      |           |       |                          |    | Mascot           |
|                     |                                                                                          | 1537.7402  | 1537.6732   | -0.067  | -44   | 301        | 312 QFMHNFREVCVK                    |         |      |           |       |                          |    | Mascot           |
|                     |                                                                                          | 1553.7351  | 1553.6481   | -0.087  | -56   | 301        | 312 QFMHNFREVCVK                    |         |      |           |       | Oxidation (M)[3]         |    | Mascot           |
|                     |                                                                                          | 1737.8073  | 1737.8981   | 0.0908  | 52    | 327        | 341 DQMNEVKGTELETSR                 |         |      |           |       | Oxidation (M)[3]         |    | Mascot           |
|                     |                                                                                          | 1753.9119  | 1753.8953   | -0.0166 | -9    | 223        | 238 ASKVYTPSDFIEGLAR                |         |      |           |       |                          |    | Mascot           |
|                     |                                                                                          | 2174.1245  | 2174.1145   | -0.01   | -5    | 48         | 73 AGGMALAGGPSRPGGV<br>GGAPVGPAGR   |         |      |           |       |                          |    | Mascot           |
|                     |                                                                                          | 2174.1245  | 2174.1145   | -0.01   | -5    | 48         | 73 AGGMALAGGPSRPGGV<br>GGAPVGPAGR   |         |      |           |       |                          |    | Mascot           |
|                     |                                                                                          | 2577.3704  | 2577.3083   | -0.0621 | -24   | 276        | 298 SELVETSHMPINIVLPLSQ<br>RADK     |         |      |           |       |                          |    | Mascot           |
|                     |                                                                                          | 2577.3704  | 2577.3083   | -0.0621 | -24   | 276        | 298 SELVETSHMPINIVLPLSQ<br>RADK     |         |      |           |       |                          |    | Mascot           |
| 19                  | hypothetical protein LOC564979 [Danio rerio]                                             |            |             |         |       |            | gi 157311713                        | 38002.1 | 6.31 | 7         | 37    | 0                        | 11 | 0                |
| Peptide Information |                                                                                          |            |             |         |       |            |                                     |         |      |           |       |                          |    |                  |
|                     |                                                                                          | Calc. Mass | Obsrv. Mass | ± da    | ± ppm | Start Seq. | End Sequence Seq.                   |         |      | Ion Score | C. I. | % Modification           |    | Rank Result Type |
|                     |                                                                                          | 1346.6448  | 1346.6198   | -0.025  | -19   | 38         | 48 SYHEDVEVGRR                      |         |      |           |       |                          |    | Mascot           |
|                     |                                                                                          | 1430.6594  | 1430.7507   | 0.0913  | 64    | 89         | 100 QAMNGYKHDPNR                    |         |      |           |       |                          |    | Mascot           |
|                     |                                                                                          | 1498.7173  | 1498.6686   | -0.0487 | -32   | 196        | 208 GLDSEQSYPYLAR                   |         |      |           |       |                          |    | Mascot           |
|                     |                                                                                          | 1727.8096  | 1727.7126   | -0.097  | -56   | 33         | 47 SQHGKSYHEDVEVGR                  |         |      |           |       |                          |    | Mascot           |
|                     |                                                                                          | 2174.0989  | 2174.1145   | 0.0156  | 7     | 277        | 297 LDHAVLVVGYGYQGADV<br>AGNR       |         |      | 11        | 0     |                          |    | Mascot           |
|                     |                                                                                          | 2174.0989  | 2174.1145   | 0.0156  | 7     | 277        | 297 LDHAVLVVGYGYQGADV<br>AGNR       |         |      |           |       |                          |    | Mascot           |
|                     |                                                                                          | 2278.0015  | 2277.9265   | -0.075  | -33   | 135        | 154 QCGSCWSFSSTGALEG<br>QLFR        |         |      |           |       | Carbamidomethyl (C)[2,5] |    | Mascot           |
|                     |                                                                                          | 2649.1819  | 2649.2666   | 0.0847  | 32    | 132        | 154 DQKQCGSCWSFSSTGAL<br>EQQLFR     |         |      |           |       | Carbamidomethyl (C)[5,8] |    | Mascot           |
| 20                  | hypothetical protein LOC564906 [Danio rerio]                                             |            |             |         |       |            | gi 156739281                        | 38003.1 | 6.31 | 7         | 37    | 0                        | 11 | 0                |

| Peptide Information |                                                                   |         |       |            |             |                             |           |       |                          |                  |
|---------------------|-------------------------------------------------------------------|---------|-------|------------|-------------|-----------------------------|-----------|-------|--------------------------|------------------|
| Calc. Mass          | Obsrv. Mass                                                       | ± da    | ± ppm | Start Seq. | End Seq.    | Sequence                    | Ion Score | C. I. | % Modification           | Rank Result Type |
| 1346.6448           | 1346.6198                                                         | -0.025  | -19   | 38         | 48          | SYHEDVEVGRR                 |           |       |                          | Mascot           |
| 1430.6594           | 1430.7507                                                         | 0.0913  | 64    | 89         | 100         | QAMNGYKHDPNR                |           |       |                          | Mascot           |
| 1498.7173           | 1498.6686                                                         | -0.0487 | -32   | 196        | 208         | GLDSEQSYPYLAR               |           |       |                          | Mascot           |
| 1727.8096           | 1727.7126                                                         | -0.097  | -56   | 33         | 47          | SQHGKSYHEDVEVGR             |           |       |                          | Mascot           |
| 2174.0989           | 2174.1145                                                         | 0.0156  | 7     | 276        | 296         | LDHAVLVVGYGYQGADV<br>AGNR   | 11        | 0     |                          | Mascot           |
| 2174.0989           | 2174.1145                                                         | 0.0156  | 7     | 276        | 296         | LDHAVLVVGYGYQGADV<br>AGNR   |           |       |                          | Mascot           |
| 2278.0015           | 2277.9265                                                         | -0.075  | -33   | 135        | 154         | QCGSCWSFSSTGALEG<br>QLFR    |           |       | Carbamidomethyl (C)[2,5] | Mascot           |
| 2649.1819           | 2649.2666                                                         | 0.0847  | 32    | 132        | 154         | DQKQCGSCWSFSSTGAL<br>EGQLFR |           |       | Carbamidomethyl (C)[5,8] | Mascot           |
| 21                  | propionyl-CoA carboxylase beta chain, mitochondrial [Danio rerio] |         |       |            | gi 47086189 | 60751.7                     | 7.54      | 10    | 36                       | 0                |

| Peptide Information |                                    |         |       |            |             |                               |           |       |                        |                  |
|---------------------|------------------------------------|---------|-------|------------|-------------|-------------------------------|-----------|-------|------------------------|------------------|
| Calc. Mass          | Obsrv. Mass                        | ± da    | ± ppm | Start Seq. | End Seq.    | Sequence                      | Ion Score | C. I. | % Modification         | Rank Result Type |
| 882.4866            | 882.5331                           | 0.0465  | 53    | 2          | 8           | ATYKLMR                       |           |       |                        | Mascot           |
| 1292.6515           | 1292.6134                          | -0.0381 | -29   | 377        | 389         | VASGCLDINSSVK                 |           |       |                        | Mascot           |
| 1324.5951           | 1324.6425                          | 0.0474  | 36    | 300        | 311         | DSAPVVECHDPR                  |           |       |                        | Mascot           |
| 1324.5951           | 1324.6425                          | 0.0474  | 36    | 300        | 311         | DSAPVVECHDPR                  |           |       |                        | Mascot           |
| 1360.5144           | 1360.63                            | 0.1156  | 85    | 106        | 117         | CSDFGMEADQNK                  |           |       | Oxidation (M)[6]       | Mascot           |
| 1470.7845           | 1470.7328                          | -0.0517 | -35   | 363        | 376         | MNGRTVGIVGNQPK                |           |       |                        | Mascot           |
| 1486.7794           | 1486.736                           | -0.0434 | -29   | 363        | 376         | MNGRTVGIVGNQPK                |           |       | Oxidation (M)[1]       | Mascot           |
| 1675.8511           | 1675.8807                          | 0.0296  | 18    | 118        | 133         | YPGDSVVTGQGRINGR              |           |       |                        | Mascot           |
| 1745.8527           | 1745.8713                          | 0.0186  | 11    | 329        | 343         | AYDMLDIVHGIVDER               |           |       |                        | Mascot           |
| 1751.774            | 1751.9039                          | 0.1299  | 74    | 543        | 557         | QTNPCFRAFHNSICG               |           |       | Carbamidomethyl (C)[5] | Mascot           |
| 1761.8477           | 1761.858                           | 0.0103  | 6     | 329        | 343         | AYDMLDIVHGIVDER               |           |       | Oxidation (M)[4]       | Mascot           |
| 2561.2883           | 2561.2615                          | -0.0268 | -10   | 157        | 181         | ICKIMDQAMLVGAPVIGL<br>NDSGGAR |           |       | Oxidation (M)[5,9]     | Mascot           |
| 2577.0979           | 2577.3083                          | 0.2104  | 82    | 106        | 129         | CSDFGMEADQNKYPGD<br>SVVTGQGR  |           |       | Oxidation (M)[6]       | Mascot           |
| 2577.0979           | 2577.3083                          | 0.2104  | 82    | 106        | 129         | CSDFGMEADQNKYPGD<br>SVVTGQGR  |           |       | Oxidation (M)[6]       | Mascot           |
| 22                  | ephrin-B2a precursor [Danio rerio] |         |       |            | gi 18858593 | 36700.6                       | 8.32      | 8     | 35                     | 0                |

| Peptide Information |             |      |       |            |          |          |           |       |                |                  |
|---------------------|-------------|------|-------|------------|----------|----------|-----------|-------|----------------|------------------|
| Calc. Mass          | Obsrv. Mass | ± da | ± ppm | Start Seq. | End Seq. | Sequence | Ion Score | C. I. | % Modification | Rank Result Type |

|    |                                     |           |         |     |              |     |                              |      |                        |    |        |   |   |
|----|-------------------------------------|-----------|---------|-----|--------------|-----|------------------------------|------|------------------------|----|--------|---|---|
|    | 880.3981                            | 880.4886  | 0.0905  | 103 | 1            | 7   | MGDSLWR                      |      | Oxidation (M)[1]       |    | Mascot |   |   |
|    | 882.4786                            | 882.5331  | 0.0545  | 62  | 154          | 160 | SMKIIMK                      |      | Oxidation (M)[2,6]     |    | Mascot |   |   |
|    | 890.4222                            | 890.4722  | 0.05    | 56  | 55           | 61  | MDIVCPR                      |      | Carbamidomethyl (C)[5] |    | Mascot |   |   |
|    | 1067.5044                           | 1067.6178 | 0.1134  | 106 | 173          | 181 | DYPTSYPPK                    |      |                        |    | Mascot |   |   |
|    | 1723.9412                           | 1723.8816 | -0.0596 | -35 | 157          | 172 | IIMKVGQNPSDPISPK             |      |                        |    | Mascot |   |   |
|    | 1723.9412                           | 1723.8816 | -0.0596 | -35 | 157          | 172 | IIMKVGQNPSDPISPK             |      |                        |    | Mascot |   |   |
|    | 1739.936                            | 1739.8815 | -0.0545 | -31 | 157          | 172 | IIMKVGQNPSDPISPK             |      | Oxidation (M)[3]       |    | Mascot |   |   |
|    | 1739.936                            | 1739.8815 | -0.0545 | -31 | 157          | 172 | IIMKVGQNPSDPISPK             |      | Oxidation (M)[3]       |    | Mascot |   |   |
|    | 2278.0188                           | 2277.9265 | -0.0923 | -41 | 55           | 74  | MDIVCPRVEGGSMEGVE<br>YYK     |      | Oxidation (M)[1]       |    | Mascot |   |   |
|    | 2561.3254                           | 2561.2615 | -0.0639 | -25 | 39           | 61  | FVPGQGLVLYPQIGDKM<br>DIVCPR  |      | Oxidation (M)[17]      |    | Mascot |   |   |
|    | 2610.1333                           | 2610.3101 | 0.1768  | 68  | 128          | 151 | DYYIISTSNGTMEGLDNQ<br>EGGVCK |      | Oxidation (M)[12]      |    | Mascot |   |   |
| 23 | PREDICTED: coronin-2B [Danio rerio] |           |         |     | gi 292627941 |     | 53560.2                      | 7.91 | 9                      | 34 | 0      | 3 | 0 |

#### Peptide Information

| Calc. Mass | Obsrv. Mass | ± da    | ± ppm | Start Seq. | End Seq. | Sequence                    | Ion Score | C. I. | % Modification                            | Rank | Result Type |
|------------|-------------|---------|-------|------------|----------|-----------------------------|-----------|-------|-------------------------------------------|------|-------------|
| 882.5519   | 882.5331    | -0.0188 | -21   | 199        | 205      | LRIIDPR                     |           |       |                                           |      | Mascot      |
| 1346.6191  | 1346.6198   | 0.0007  | 1     | 78         | 89       | VCGHQGSVMDIK                |           |       | Carbamidomethyl (C)[2], Oxidation (M)[9]  |      | Mascot      |
| 1416.7338  | 1416.7604   | 0.0266  | 19    | 310        | 322      | SAAPQKSLCVMPK               |           |       | Carbamidomethyl (C)[9]                    |      | Mascot      |
| 1501.8082  | 1501.7494   | -0.0588 | -39   | 157        | 169      | ILMWNLEEGVAVK               |           |       |                                           |      | Mascot      |
| 1723.9636  | 1723.8816   | -0.082  | -48   | 120        | 134      | NLTEALMILIGHSR              |           |       |                                           |      | Mascot      |
| 1723.9636  | 1723.8816   | -0.082  | -48   | 119        | 133      | RNLTEALMILIGHSR             | 5         | 0     |                                           |      | Mascot      |
| 1739.9585  | 1739.8815   | -0.077  | -44   | 120        | 134      | NLTEALMILIGHSR              |           |       | Oxidation (M)[7]                          |      | Mascot      |
| 1739.9585  | 1739.8815   | -0.077  | -44   | 119        | 133      | RNLTEALMILIGHSR             |           |       | Oxidation (M)[8]                          |      | Mascot      |
| 2173.9529  | 2174.1145   | 0.1616  | 74    | 90         | 108      | WSPFMDNIIASSSEDCTV<br>R     |           |       | Oxidation (M)[5]                          |      | Mascot      |
| 2173.9529  | 2174.1145   | 0.1616  | 74    | 90         | 108      | WSPFMDNIIASSSEDCTV<br>R     |           |       | Oxidation (M)[5]                          |      | Mascot      |
| 2211.0435  | 2211.0303   | -0.0132 | -6    | 71         | 89       | VDPHYPRVCGHQGSVM<br>DIK     |           |       | Carbamidomethyl (C)[9], Oxidation (M)[16] |      | Mascot      |
| 2609.2639  | 2609.3152   | 0.0513  | 20    | 134        | 156      | RVGLIEWHPTCSGILFSA<br>GYDCK |           |       | Carbamidomethyl (C)[11]                   |      | Mascot      |

24 heart and neural crest derivatives expressed transcript 2 [Danio rerio] gi|122890476 22939.4 9.11 6 34 0

#### Peptide Information

| Calc. Mass | Obsrv. Mass | ± da    | ± ppm | Start Seq. | End Seq. | Sequence    | Ion Score | C. I. | % Modification | Rank | Result Type |
|------------|-------------|---------|-------|------------|----------|-------------|-----------|-------|----------------|------|-------------|
| 842.4955   | 842.4785    | -0.017  | -20   | 89         | 95       | RPTANRK     |           |       |                |      | Mascot      |
| 1186.5773  | 1186.5034   | -0.0739 | -62   | 112        | 122      | ECIPNVPADTK |           |       |                |      | Mascot      |

|    |                                                                    |           |         |     |     |     |                              |         |      |   |    |   |                         |   |  |        |
|----|--------------------------------------------------------------------|-----------|---------|-----|-----|-----|------------------------------|---------|------|---|----|---|-------------------------|---|--|--------|
|    | 1514.7883                                                          | 1514.6902 | -0.0981 | -65 | 112 | 125 | ECIPNVPADTKLSK               |         |      |   |    |   |                         |   |  | Mascot |
|    | 1745.903                                                           | 1745.8713 | -0.0317 | -18 | 131 | 145 | LATSYIAYLMDILDK              |         |      |   |    |   | Oxidation (M)[10]       |   |  | Mascot |
|    | 2561.2664                                                          | 2561.2615 | -0.0049 | -2  | 100 | 122 | TQSINSAFAELRECIPNVP<br>ADTK  |         |      |   |    |   | Carbamidomethyl (C)[14] |   |  | Mascot |
|    | 2577.2205                                                          | 2577.3083 | 0.0878  | 34  | 2   | 25  | SLVGGFPHHPVMHHDGY<br>SFAAASR |         |      |   |    |   |                         |   |  | Mascot |
|    | 2577.2205                                                          | 2577.3083 | 0.0878  | 34  | 2   | 25  | SLVGGFPHHPVMHHDGY<br>SFAAASR |         |      |   |    |   |                         |   |  | Mascot |
| 25 | UDP glucuronosyltransferase 5 family, polypeptide A3 [Danio rerio] |           |         |     |     |     | gi 294610630                 | 59748.5 | 7.33 | 6 | 33 | 0 | 18                      | 0 |  |        |

#### Peptide Information

| Calc. Mass | Obsrv. Mass | ± da    | ± ppm | Start Seq. | End Seq. | Sequence          | Ion Score | C. I. | % Modification              | Rank | Result Type |
|------------|-------------|---------|-------|------------|----------|-------------------|-----------|-------|-----------------------------|------|-------------|
| 868.4999   | 868.4923    | -0.0076 | -9    | 48         | 55       | GHSITVVR          | 18        | 0     |                             |      | Mascot      |
| 868.4999   | 868.4923    | -0.0076 | -9    | 48         | 55       | GHSITVVR          |           |       |                             |      | Mascot      |
| 890.5345   | 890.4722    | -0.0623 | -70   | 420        | 427      | AVFLEALK          |           |       |                             |      | Mascot      |
| 1486.7584  | 1486.736    | -0.0224 | -15   | 445        | 456      | LHHDQPMKPLDR      |           |       |                             |      | Mascot      |
| 1553.8297  | 1553.6481   | -0.1816 | -117  | 457        | 468      | AIFWIEFVMRNK      |           |       |                             |      | Mascot      |
| 1723.9199  | 1723.8816   | -0.0383 | -22   | 24         | 38       | LLVVPVEGSHWVNMK   |           |       | Oxidation (M)[14]           |      | Mascot      |
| 1723.9199  | 1723.8816   | -0.0383 | -22   | 24         | 38       | LLVVPVEGSHWVNMK   |           |       | Oxidation (M)[14]           |      | Mascot      |
| 2232.9941  | 2233.0156   | 0.0215  | 10    | 202        | 218      | MTFSQRVMNMMTYIMIR |           |       | Oxidation (M)[1,8,10,11,15] |      | Mascot      |

|    |                                                           |  |  |  |  |  |              |         |      |   |    |   |  |  |  |  |
|----|-----------------------------------------------------------|--|--|--|--|--|--------------|---------|------|---|----|---|--|--|--|--|
| 26 | PREDICTED: tyrosine-protein kinase CSK-like [Danio rerio] |  |  |  |  |  | gi 326680263 | 34320.7 | 8.63 | 8 | 33 | 0 |  |  |  |  |
|----|-----------------------------------------------------------|--|--|--|--|--|--------------|---------|------|---|----|---|--|--|--|--|

#### Peptide Information

| Calc. Mass | Obsrv. Mass | ± da    | ± ppm | Start Seq. | End Seq. | Sequence                | Ion Score | C. I. | % Modification                            | Rank | Result Type |
|------------|-------------|---------|-------|------------|----------|-------------------------|-----------|-------|-------------------------------------------|------|-------------|
| 1360.5837  | 1360.63     | 0.0463  | 34    | 58         | 69       | GEFGDVMVGDYR            |           |       | Oxidation (M)[7]                          |      | Mascot      |
| 1486.8046  | 1486.736    | -0.0686 | -46   | 13         | 25       | DADGLCTRLIKPK           |           |       | Carbamidomethyl (C)[6]                    |      | Mascot      |
| 1529.7052  | 1529.712    | 0.0068  | 4     | 58         | 71       | GEFGDVMVGDYRGK          |           |       |                                           |      | Mascot      |
| 1553.7264  | 1553.6481   | -0.0783 | -50   | 26         | 39       | IMEGTVAAQDEFSR          |           |       |                                           |      | Mascot      |
| 1727.9286  | 1727.7126   | -0.216  | -125  | 168        | 183      | DLAARNVLVSEDNIAK        |           |       |                                           |      | Mascot      |
| 1751.8018  | 1751.9039   | 0.1021  | 58    | 5          | 20       | DGVTHYTKDADGLCTR        |           |       |                                           |      | Mascot      |
| 2187.9758  | 2188.1277   | 0.1519  | 69    | 256        | 274      | GKMDSPDGCPPVYDI<br>MK   |           |       | Carbamidomethyl (C)[10], Oxidation (M)[4] |      | Mascot      |
| 2278.1787  | 2277.9265   | -0.2522 | -111  | 114        | 133      | GSLYIVTEYMAKGLVDY<br>LR |           |       |                                           |      | Mascot      |

|    |                              |  |  |  |  |  |             |         |      |    |    |   |  |  |  |  |
|----|------------------------------|--|--|--|--|--|-------------|---------|------|----|----|---|--|--|--|--|
| 27 | Znf622 protein [Danio rerio] |  |  |  |  |  | gi 46249981 | 53184.6 | 5.65 | 10 | 33 | 0 |  |  |  |  |
|----|------------------------------|--|--|--|--|--|-------------|---------|------|----|----|---|--|--|--|--|

#### Peptide Information

| Calc. Mass | Obsrv. Mass | ± da | ± ppm | Start | End | Sequence | Ion | C. I. | % Modification | Rank | Result Type |
|------------|-------------|------|-------|-------|-----|----------|-----|-------|----------------|------|-------------|
|------------|-------------|------|-------|-------|-----|----------|-----|-------|----------------|------|-------------|



|    |                          |           | Seq.    |      | Seq.         |     | Score                      |      |   |    |   |                        |        |        |
|----|--------------------------|-----------|---------|------|--------------|-----|----------------------------|------|---|----|---|------------------------|--------|--------|
|    | 868.4635                 | 868.4923  | 0.0288  | 33   | 105          | 111 | HQQAEEKK                   |      |   |    |   |                        |        | Mascot |
|    | 868.4635                 | 868.4923  | 0.0288  | 33   | 105          | 111 | HQQAEEKK                   |      |   |    |   |                        |        | Mascot |
|    | 890.4954                 | 890.4722  | -0.0232 | -26  | 388          | 394 | QRFGVQR                    |      |   |    |   |                        |        | Mascot |
|    | 1051.5208                | 1051.6758 | 0.155   | 147  | 414          | 423 | ALGWTGDFGK                 |      |   |    |   |                        |        | Mascot |
|    | 1164.5643                | 1164.5232 | -0.0411 | -35  | 22           | 31  | VQFSDGEVQR                 | 4    |   | 0  |   |                        |        | Mascot |
|    | 1164.5643                | 1164.5232 | -0.0411 | -35  | 22           | 31  | VQFSDGEVQR                 |      |   |    |   |                        |        | Mascot |
|    | 1360.7808                | 1360.63   | -0.1508 | -111 | 395          | 407 | ALVPAHNQKAVGR              |      |   |    |   |                        |        | Mascot |
|    | 1470.7375                | 1470.7328 | -0.0047 | -3   | 411          | 423 | QYKALGWTGDFGK              |      |   |    |   |                        |        | Mascot |
|    | 1703.8058                | 1703.9121 | 0.1063  | 62   | 47           | 61  | VADMPPVTAENFQER            |      |   |    |   |                        |        | Mascot |
|    | 1739.7983                | 1739.8815 | 0.0832  | 48   | 90           | 104 | FSTDNAYTNHIQSNK            |      |   |    |   |                        |        | Mascot |
|    | 1739.7983                | 1739.8815 | 0.0832  | 48   | 90           | 104 | FSTDNAYTNHIQSNK            |      |   |    |   |                        |        | Mascot |
|    | 1761.7848                | 1761.858  | 0.0732  | 42   | 343          | 358 | DGVDVEMKDGELPDDK           |      |   |    |   |                        |        | Mascot |
|    | 2625.1714                | 2625.2866 | 0.1152  | 44   | 314          | 335 | SHCKLFTDGDAALEFADF<br>YDFR |      |   |    |   | Carbamidomethyl (C)[3] |        | Mascot |
| 28 | Zgc:171831 [Danio rerio] |           |         |      | gi 213624822 |     | 79943.7                    | 4.77 | 2 | 33 | 0 | 33                     | 86.422 |        |

#### Peptide Information

| Calc. Mass | Obsrv. Mass | ± da    | ± ppm | Start Seq. | End Sequence Seq. | Ion Score     | C. I. % | Modification | Rank                   | Result Type |
|------------|-------------|---------|-------|------------|-------------------|---------------|---------|--------------|------------------------|-------------|
| 1164.6228  | 1164.5232   | -0.0996 | -86   | 135        | 144               | TCIVKMGVTR    | 33      | 86.422       | Carbamidomethyl (C)[2] | Mascot      |
| 1164.6228  | 1164.5232   | -0.0996 | -86   | 135        | 144               | TCIVKMGVTR    |         |              | Carbamidomethyl (C)[2] | Mascot      |
| 1515.8754  | 1515.6962   | -0.1792 | -118  | 360        | 372               | QPLLPPRKPGEQR |         |              |                        | Mascot      |
| 1515.8754  | 1515.6962   | -0.1792 | -118  | 360        | 372               | QPLLPPRKPGEQR |         |              |                        | Mascot      |

29 PREDICTED: b- and T-lymphocyte attenuator-like [Danio rerio]

#### Peptide Information

| Calc. Mass | Obsrv. Mass | ± da   | ± ppm | Start Seq. | End Sequence Seq. | Ion Score                  | C. I. % | Modification           | Rank | Result Type |
|------------|-------------|--------|-------|------------|-------------------|----------------------------|---------|------------------------|------|-------------|
| 868.408    | 868.4923    | 0.0843 | 97    | 199        | 205               | SKTEEMK                    |         | Oxidation (M)[6]       |      | Mascot      |
| 868.408    | 868.4923    | 0.0843 | 97    | 201        | 207               | TEEMKSK                    |         | Oxidation (M)[4]       |      | Mascot      |
| 882.4138   | 882.5331    | 0.1193 | 135   | 76         | 82                | LYGQNCK                    |         | Carbamidomethyl (C)[6] |      | Mascot      |
| 996.5472   | 996.5591    | 0.0119 | 12    | 83         | 91                | ALNHSDVIK                  |         |                        |      | Mascot      |
| 1751.8971  | 1751.9039   | 0.0068 | 4     | 68         | 82                | IPVISWCKLYGQNCK            |         |                        |      | Mascot      |
| 2561.2705  | 2561.2615   | -0.009 | -4    | 206        | 227               | SKNQYMETQSSDLLPPP<br>LPYPR |         |                        |      | Mascot      |
| 2577.2654  | 2577.3083   | 0.0429 | 17    | 206        | 227               | SKNQYMETQSSDLLPPP<br>LPYPR |         | Oxidation (M)[6]       |      | Mascot      |

|    |                                         |           |        |    |              |     |                             |      |   |    |   |  |                  |  |        |
|----|-----------------------------------------|-----------|--------|----|--------------|-----|-----------------------------|------|---|----|---|--|------------------|--|--------|
|    | 2577.2654                               | 2577.3083 | 0.0429 | 17 | 206          | 227 | SKNQYMETQSSDLLPPP<br>LPYPR  |      |   |    |   |  | Oxidation (M)[6] |  | Mascot |
|    | 2607.2031                               | 2607.3181 | 0.115  | 44 | 98           | 120 | TENEGMAFLIFQNVSIED<br>AGSYR |      |   |    |   |  | Oxidation (M)[6] |  | Mascot |
| 30 | RecName: Full=Sodium channel modifier 1 |           |        |    | gi 126360403 |     | 28734.4                     | 9.18 | 7 | 32 | 0 |  |                  |  |        |

Peptide Information

| Calc. Mass | Obsrv. Mass | ± da    | ± ppm | Start Seq. | End Seq. | Sequence                   | Ion Score | C. I. | % | Modification                              | Rank | Result | Type |
|------------|-------------|---------|-------|------------|----------|----------------------------|-----------|-------|---|-------------------------------------------|------|--------|------|
| 1067.4963  | 1067.6178   | 0.1215  | 114   | 135        | 144      | ASERSESSSK                 |           |       |   |                                           |      | Mascot |      |
| 1257.6005  | 1257.5604   | -0.0401 | -32   | 148        | 158      | NDLANSHLSMR                |           |       |   |                                           |      | Mascot |      |
| 1487.77    | 1487.7902   | 0.0202  | 14    | 6          | 18       | EGDDQSQLNILKK              |           |       |   |                                           |      | Mascot |      |
| 1514.7809  | 1514.6902   | -0.0907 | -60   | 102        | 115      | QEPSSSAPLLTQTR             |           |       |   |                                           |      | Mascot |      |
| 1515.7761  | 1515.6962   | -0.0799 | -53   | 5          | 17       | REGDDQSQLNILK              |           |       |   |                                           |      | Mascot |      |
| 1515.7761  | 1515.6962   | -0.0799 | -53   | 5          | 17       | REGDDQSQLNILK              |           |       |   |                                           |      | Mascot |      |
| 2625.0669  | 2625.2866   | 0.2197  | 84    | 227        | 249      | DENVEFDSDEEPTLLPP<br>CSESS |           |       |   | Carbamidomethyl (C)[19]                   |      | Mascot |      |
| 2649.2734  | 2649.2666   | -0.0068 | -3    | 42         | 63       | YSCLVCSHRPVFDTVDM<br>LVVHR |           |       |   | Carbamidomethyl (C)[3], Oxidation (M)[17] |      | Mascot |      |

|    |                                                                                               |  |  |  |              |  |         |      |   |    |   |    |   |
|----|-----------------------------------------------------------------------------------------------|--|--|--|--------------|--|---------|------|---|----|---|----|---|
| 31 | novel protein similar to protein tyrosine phosphatase, receptor type, U (ptpru) [Danio rerio] |  |  |  | gi 220673248 |  | 84494.5 | 7.29 | 8 | 32 | 0 | 15 | 0 |
|----|-----------------------------------------------------------------------------------------------|--|--|--|--------------|--|---------|------|---|----|---|----|---|

Peptide Information

| Calc. Mass | Obsrv. Mass | ± da    | ± ppm | Start Seq. | End Seq. | Sequence                 | Ion Score | C. I. | % | Modification                             | Rank | Result | Type |
|------------|-------------|---------|-------|------------|----------|--------------------------|-----------|-------|---|------------------------------------------|------|--------|------|
| 880.4159   | 880.4886    | 0.0727  | 83    | 189        | 195      | GEQDLR                   |           |       |   |                                          |      | Mascot |      |
| 1164.583   | 1164.5232   | -0.0598 | -51   | 150        | 158      | TDPFLMERR                | 15        |       | 0 |                                          |      | Mascot |      |
| 1164.583   | 1164.5232   | -0.0598 | -51   | 150        | 158      | TDPFLMERR                |           |       |   |                                          |      | Mascot |      |
| 1324.7041  | 1324.6425   | -0.0616 | -47   | 718        | 728      | VNINKAVMTYR              |           |       |   | Oxidation (M)[8]                         |      | Mascot |      |
| 1324.7041  | 1324.6425   | -0.0616 | -47   | 718        | 728      | VNINKAVMTYR              |           |       |   | Oxidation (M)[8]                         |      | Mascot |      |
| 1338.6722  | 1338.6577   | -0.0145 | -11   | 147        | 157      | SVKTDPFIMER              |           |       |   | Oxidation (M)[9]                         |      | Mascot |      |
| 1487.823   | 1487.7902   | -0.0328 | -22   | 176        | 188      | RLVAWFQVGGAQR            |           |       |   |                                          |      | Mascot |      |
| 1553.7302  | 1553.6481   | -0.0821 | -53   | 357        | 373      | YSTATGGGAGGNATVR         |           |       |   |                                          |      | Mascot |      |
| 2202.1118  | 2202.0251   | -0.0867 | -39   | 312        | 330      | CAEPMRPLRGLTATEIQS<br>R  |           |       |   | Carbamidomethyl (C)[1], Oxidation (M)[5] |      | Mascot |      |
| 2211.2034  | 2211.0303   | -0.1731 | -78   | 389        | 408      | DLPPFHTVHVRLALANPE<br>GK |           |       |   |                                          |      | Mascot |      |

|    |                             |  |  |  |             |  |         |      |   |    |   |  |  |  |
|----|-----------------------------|--|--|--|-------------|--|---------|------|---|----|---|--|--|--|
| 32 | Scnm1 protein [Danio rerio] |  |  |  | gi 60552836 |  | 31375.8 | 9.45 | 7 | 32 | 0 |  |  |  |
|----|-----------------------------|--|--|--|-------------|--|---------|------|---|----|---|--|--|--|

Peptide Information

| Calc. Mass | Obsrv. Mass | ± da | ± ppm | Start Seq. | End Seq. | Sequence | Ion Score | C. I. | % | Modification | Rank | Result | Type |
|------------|-------------|------|-------|------------|----------|----------|-----------|-------|---|--------------|------|--------|------|
|------------|-------------|------|-------|------------|----------|----------|-----------|-------|---|--------------|------|--------|------|

|  |           |           |         |     |     |     |                            |  |  |  |  |  |                                           |  |  |  |        |
|--|-----------|-----------|---------|-----|-----|-----|----------------------------|--|--|--|--|--|-------------------------------------------|--|--|--|--------|
|  | 1067.4963 | 1067.6178 | 0.1215  | 114 | 156 | 165 | ASERSESSSK                 |  |  |  |  |  |                                           |  |  |  | Mascot |
|  | 1487.77   | 1487.7902 | 0.0202  | 14  | 27  | 39  | EGDDQSQLNILKK              |  |  |  |  |  |                                           |  |  |  | Mascot |
|  | 1514.7809 | 1514.6902 | -0.0907 | -60 | 123 | 136 | QEPSSSAPLLTQTR             |  |  |  |  |  |                                           |  |  |  | Mascot |
|  | 1515.7761 | 1515.6962 | -0.0799 | -53 | 26  | 38  | REGDDQSQLNILK              |  |  |  |  |  |                                           |  |  |  | Mascot |
|  | 1515.7761 | 1515.6962 | -0.0799 | -53 | 26  | 38  | REGDDQSQLNILK              |  |  |  |  |  |                                           |  |  |  | Mascot |
|  | 1739.8395 | 1739.8815 | 0.042   | 24  | 166 | 179 | EHRNDLANFHLSMR             |  |  |  |  |  |                                           |  |  |  | Mascot |
|  | 1739.8395 | 1739.8815 | 0.042   | 24  | 166 | 179 | EHRNDLANFHLSMR             |  |  |  |  |  |                                           |  |  |  | Mascot |
|  | 2625.0669 | 2625.2866 | 0.2197  | 84  | 248 | 270 | DENVEFDSDEEPTLLPP<br>CSESS |  |  |  |  |  | Carbamidomethyl (C)[19]                   |  |  |  | Mascot |
|  | 2649.2734 | 2649.2666 | -0.0068 | -3  | 63  | 84  | YSCLVCSHRPVFDTVDM<br>LVVHR |  |  |  |  |  | Carbamidomethyl (C)[3], Oxidation (M)[17] |  |  |  | Mascot |

33 UDP glucuronosyltransferase 5 family, polypeptide A2 [Danio rerio] gi|115529319 59861.6 7.73 6 32 0 18 0

#### Peptide Information

| Calc. Mass | Obsrv. Mass | ± da    | ± ppm | Start Seq. | End Seq. | Sequence          | Ion Score | C. I. | % Modification              | Rank | Result Type |
|------------|-------------|---------|-------|------------|----------|-------------------|-----------|-------|-----------------------------|------|-------------|
| 868.4999   | 868.4923    | -0.0076 | -9    | 48         | 55       | GHSITVVR          | 18        | 0     |                             |      | Mascot      |
| 868.4999   | 868.4923    | -0.0076 | -9    | 48         | 55       | GHSITVVR          |           |       |                             |      | Mascot      |
| 890.5345   | 890.4722    | -0.0623 | -70   | 420        | 427      | AVFLEALK          |           |       |                             |      | Mascot      |
| 1486.7584  | 1486.736    | -0.0224 | -15   | 445        | 456      | LHHDQPMKPLDR      |           |       |                             |      | Mascot      |
| 1553.8297  | 1553.6481   | -0.1816 | -117  | 457        | 468      | AIFWIEFVMRNK      |           |       |                             |      | Mascot      |
| 1723.9199  | 1723.8816   | -0.0383 | -22   | 24         | 38       | LLVVPVEGSHWVNMK   |           |       | Oxidation (M)[14]           |      | Mascot      |
| 1723.9199  | 1723.8816   | -0.0383 | -22   | 24         | 38       | LLVVPVEGSHWVNMK   |           |       | Oxidation (M)[14]           |      | Mascot      |
| 2232.9941  | 2233.0156   | 0.0215  | 10    | 202        | 218      | MTFSQVRVMNMTYIMIR |           |       | Oxidation (M)[1,8,10,11,15] |      | Mascot      |

34 immunoglobulin mu heavy chain [Danio rerio] gi|51559357 23906.6 8.05 6 32 0

#### Peptide Information

| Calc. Mass | Obsrv. Mass | ± da    | ± ppm | Start Seq. | End Seq. | Sequence                   | Ion Score | C. I. | % Modification         | Rank | Result Type |
|------------|-------------|---------|-------|------------|----------|----------------------------|-----------|-------|------------------------|------|-------------|
| 1070.5088  | 1070.4473   | -0.0615 | -57   | 50         | 57       | STNMYWIR                   |           |       |                        |      | Mascot      |
| 1070.5088  | 1070.4473   | -0.0615 | -57   | 50         | 57       | STNMYWIR                   |           |       |                        |      | Mascot      |
| 1486.7212  | 1486.736    | 0.0148  | 10    | 182        | 194      | DLSDVQYPAFGK               |           |       |                        |      | Mascot      |
| 1751.8163  | 1751.9039   | 0.0876  | 50    | 63         | 76       | GLEWIIYYSDSDK              |           |       |                        |      | Mascot      |
| 2225.03    | 2225.0374   | 0.0074  | 3     | 39         | 57       | LSCACSGFTLRSTNMYWI<br>R    |           |       | Oxidation (M)[15]      |      | Mascot      |
| 2233.0811  | 2233.0156   | -0.0655 | -29   | 58         | 76       | QAPGKGLEWIIYYSDSD<br>K     |           |       |                        |      | Mascot      |
| 2609.0925  | 2609.3152   | 0.2227  | 85    | 104        | 125      | TEDSAVYYCATQGNAYF<br>DYWGK |           |       | Carbamidomethyl (C)[9] |      | Mascot      |

35 PREDICTED: steroid 21-hydroxylase-like [Danio rerio] gi|326674810 59886.3 8.87 9 32 0

### Peptide Information

| Calc. Mass | Obsrv. Mass | $\pm$ da | $\pm$ ppm | Start Seq. | End Seq. | Sequence                    | Ion Score | C. I. % | Modification                             | Rank | Result Type |
|------------|-------------|----------|-----------|------------|----------|-----------------------------|-----------|---------|------------------------------------------|------|-------------|
| 1067.6068  | 1067.6178   | 0.011    | 10        | 160        | 168      | RVTHSALQR                   |           |         |                                          |      | Mascot      |
| 1338.7627  | 1338.6577   | -0.105   | -78       | 300        | 312      | FSKGGTLTSSLLK               |           |         |                                          |      | Mascot      |
| 1529.6797  | 1529.712    | 0.0323   | 21        | 367        | 378      | VYEELCCMLDVR                |           |         | Carbamidomethyl (C)[6]                   |      | Mascot      |
| 1537.8116  | 1537.6732   | -0.1384  | -90       | 388        | 400      | LPYLCALISEMLR               |           |         | Oxidation (M)[11]                        |      | Mascot      |
| 1675.8795  | 1675.8807   | 0.0012   | 1         | 286        | 299      | VRQIVQISTESCQK              |           |         | Carbamidomethyl (C)[12]                  |      | Mascot      |
| 1745.8751  | 1745.8713   | -0.0038  | -2        | 181        | 195      | QAQHLCCQLRDYSGK             |           |         |                                          |      | Mascot      |
| 2225.1343  | 2225.0374   | -0.0969  | -44       | 161        | 180      | VTLSALQRCCTDSLHSEI<br>EK    |           |         |                                          |      | Mascot      |
| 2561.3425  | 2561.2615   | -0.081   | -32       | 100        | 122      | LNCGSTTMVVLNNSEIIR<br>EALVK |           |         | Carbamidomethyl (C)[3]                   |      | Mascot      |
| 2577.3374  | 2577.3083   | -0.0291  | -11       | 100        | 122      | LNCGSTTMVVLNNSEIIR<br>EALVK |           |         | Carbamidomethyl (C)[3], Oxidation (M)[8] |      | Mascot      |
| 2577.3374  | 2577.3083   | -0.0291  | -11       | 100        | 122      | LNCGSTTMVVLNNSEIIR<br>EALVK |           |         | Carbamidomethyl (C)[3], Oxidation (M)[8] |      | Mascot      |
| 2627.522   | 2627.2815   | -0.2405  | -92       | 2          | 23       | CFSVSVVLLLFILWMLV<br>VKFR   |           |         | Oxidation (M)[16]                        |      | Mascot      |
| 2627.522   | 2627.2815   | -0.2405  | -92       | 2          | 23       | CFSVSVVLLLFILWMLV<br>VKFR   |           |         | Oxidation (M)[16]                        |      | Mascot      |

36 PREDICTED: hypothetical protein LOC100537461 [Danio rerio]

gi|326679433 2946.5 8.31 3 32 0

### Peptide Information

| Calc. Mass | Obsrv. Mass | $\pm$ da | $\pm$ ppm | Start Seq. | End Seq. | Sequence                    | Ion Score | C. I. % | Modification     | Rank | Result Type |
|------------|-------------|----------|-----------|------------|----------|-----------------------------|-----------|---------|------------------|------|-------------|
| 890.5168   | 890.4722    | -0.0446  | -50       | 4          | 10       | WIISMIK                     |           |         |                  |      | Mascot      |
| 1675.7955  | 1675.8807   | 0.0852   | 51        | 11         | 27       | AGSSLMNLSGGAEQKP            |           |         |                  |      | Mascot      |
| 2563.2893  | 2563.2959   | 0.0066   | 3         | 4          | 27       | WIISMIKAGSSLMNLSGG<br>AEQKP |           |         | Oxidation (M)[5] |      | Mascot      |

37 PREDICTED: zinc finger protein 622 [Danio rerio]

gi|292610913 56305.1 5.71 10 32 0

### Peptide Information

| Calc. Mass | Obsrv. Mass | $\pm$ da | $\pm$ ppm | Start Seq. | End Seq. | Sequence      | Ion Score | C. I. % | Modification | Rank | Result Type |
|------------|-------------|----------|-----------|------------|----------|---------------|-----------|---------|--------------|------|-------------|
| 868.4635   | 868.4923    | 0.0288   | 33        | 134        | 140      | HQQAEEKK      |           |         |              |      | Mascot      |
| 868.4635   | 868.4923    | 0.0288   | 33        | 134        | 140      | HQQAEEKK      |           |         |              |      | Mascot      |
| 890.4954   | 890.4722    | -0.0232  | -26       | 417        | 423      | QRFGVQR       |           |         |              |      | Mascot      |
| 1051.5208  | 1051.6758   | 0.155    | 147       | 443        | 452      | ALGWTGDFGK    |           |         |              |      | Mascot      |
| 1164.5643  | 1164.5232   | -0.0411  | -35       | 51         | 60       | VQFSDGEVQR    | 4         | 0       |              |      | Mascot      |
| 1164.5643  | 1164.5232   | -0.0411  | -35       | 51         | 60       | VQFSDGEVQR    |           |         |              |      | Mascot      |
| 1360.7808  | 1360.63     | -0.1508  | -111      | 424        | 436      | ALVPAHNQKAVGR |           |         |              |      | Mascot      |



|    | Calc. Mass                                   | Obsrv. Mass | ± da    | ± ppm | Start Seq.   | End Sequence Seq.     |         | Ion Score | C. I. | % Modification              | Rank | Result Type |   |
|----|----------------------------------------------|-------------|---------|-------|--------------|-----------------------|---------|-----------|-------|-----------------------------|------|-------------|---|
|    | 868.4999                                     | 868.4923    | -0.0076 | -9    | 48           | 55 GHSITVVR           |         | 18        | 0     |                             |      | Mascot      |   |
|    | 868.4999                                     | 868.4923    | -0.0076 | -9    | 48           | 55 GHSITVVR           |         |           |       |                             |      | Mascot      |   |
|    | 890.5345                                     | 890.4722    | -0.0623 | -70   | 420          | 427 AVFLEALK          |         |           |       |                             |      | Mascot      |   |
|    | 1486.7584                                    | 1486.736    | -0.0224 | -15   | 445          | 456 LHHDQPMKPLDR      |         |           |       |                             |      | Mascot      |   |
|    | 1553.8297                                    | 1553.6481   | -0.1816 | -117  | 457          | 468 AIFWIEFVMRNK      |         |           |       |                             |      | Mascot      |   |
|    | 1723.9199                                    | 1723.8816   | -0.0383 | -22   | 24           | 38 LLVVPVEGSHWVNMK    |         |           |       | Oxidation (M)[14]           |      | Mascot      |   |
|    | 1723.9199                                    | 1723.8816   | -0.0383 | -22   | 24           | 38 LLVVPVEGSHWVNMK    |         |           |       | Oxidation (M)[14]           |      | Mascot      |   |
|    | 2232.9941                                    | 2233.0156   | 0.0215  | 10    | 202          | 218 MTFSQRVMNMMTYIMIR |         |           |       | Oxidation (M)[1,8,10,11,15] |      | Mascot      |   |
| 40 | hypothetical protein LOC564835 [Danio rerio] |             |         |       | gi 157787177 |                       | 38057.1 | 6.2       | 6     | 31                          | 0    | 11          | 0 |

#### Peptide Information

|    | Calc. Mass                   | Obsrv. Mass | ± da    | ± ppm | Start Seq.  | End Sequence Seq.               |         | Ion Score | C. I. | % Modification           | Rank | Result Type |
|----|------------------------------|-------------|---------|-------|-------------|---------------------------------|---------|-----------|-------|--------------------------|------|-------------|
|    | 1346.6448                    | 1346.6198   | -0.025  | -19   | 38          | 48 SYHEDVEVGRR                  |         |           |       |                          |      | Mascot      |
|    | 1498.7173                    | 1498.6686   | -0.0487 | -32   | 196         | 208 GLDSEQSYPYLAR               |         |           |       |                          |      | Mascot      |
|    | 1727.8096                    | 1727.7126   | -0.097  | -56   | 33          | 47 SQHGKSYHEDVEVGR              |         |           |       |                          |      | Mascot      |
|    | 2174.0989                    | 2174.1145   | 0.0156  | 7     | 277         | 297 LDHAVLVVGYGYQGADV<br>AGNR   |         | 11        | 0     |                          |      | Mascot      |
|    | 2174.0989                    | 2174.1145   | 0.0156  | 7     | 277         | 297 LDHAVLVVGYGYQGADV<br>AGNR   |         |           |       |                          |      | Mascot      |
|    | 2278.0015                    | 2277.9265   | -0.075  | -33   | 135         | 154 QCGSCWSFSSTGALEG<br>QLFR    |         |           |       | Carbamidomethyl (C)[2,5] |      | Mascot      |
|    | 2649.1819                    | 2649.2666   | 0.0847  | 32    | 132         | 154 DQKQCGSCWSFSSTGAL<br>EQQLFR |         |           |       | Carbamidomethyl (C)[5,8] |      | Mascot      |
| 41 | Znf622 protein [Danio rerio] |             |         |       | gi 33286946 |                                 | 53829.8 | 5.88      | 10    | 31                       | 0    |             |

#### Peptide Information

|  | Calc. Mass | Obsrv. Mass | ± da    | ± ppm | Start Seq. | End Sequence Seq.  | Ion Score | C. I. | % Modification | Rank | Result Type |
|--|------------|-------------|---------|-------|------------|--------------------|-----------|-------|----------------|------|-------------|
|  | 868.4635   | 868.4923    | 0.0288  | 33    | 113        | 119 HQQAEKK        |           |       |                |      | Mascot      |
|  | 868.4635   | 868.4923    | 0.0288  | 33    | 113        | 119 HQQAEKK        |           |       |                |      | Mascot      |
|  | 890.4954   | 890.4722    | -0.0232 | -26   | 394        | 400 QRFGVQR        |           |       |                |      | Mascot      |
|  | 1051.5208  | 1051.6758   | 0.155   | 147   | 420        | 429 ALGWTGDFGK     |           |       |                |      | Mascot      |
|  | 1164.5643  | 1164.5232   | -0.0411 | -35   | 30         | 39 VQFSDGEVQR      | 4         | 0     |                |      | Mascot      |
|  | 1164.5643  | 1164.5232   | -0.0411 | -35   | 30         | 39 VQFSDGEVQR      |           |       |                |      | Mascot      |
|  | 1360.7808  | 1360.63     | -0.1508 | -111  | 401        | 413 ALVPAHNQKAVGR  |           |       |                |      | Mascot      |
|  | 1470.7375  | 1470.7328   | -0.0047 | -3    | 417        | 429 QYKALGWTGDFGK  |           |       |                |      | Mascot      |
|  | 1703.8058  | 1703.9121   | 0.1063  | 62    | 55         | 69 VADMPPVTAENFQER |           |       |                |      | Mascot      |

|           |           |        |    |     |     |                            |  |  |  |                        |  |        |
|-----------|-----------|--------|----|-----|-----|----------------------------|--|--|--|------------------------|--|--------|
| 1739.7983 | 1739.8815 | 0.0832 | 48 | 98  | 112 | FSTDNAYTNHIQSNK            |  |  |  |                        |  | Mascot |
| 1739.7983 | 1739.8815 | 0.0832 | 48 | 98  | 112 | FSTDNAYTNHIQSNK            |  |  |  |                        |  | Mascot |
| 1761.7848 | 1761.858  | 0.0732 | 42 | 349 | 364 | DGVDVEMKDGELPDDK           |  |  |  |                        |  | Mascot |
| 2625.1714 | 2625.2866 | 0.1152 | 44 | 320 | 341 | SHCKLFTDGDAALEFADF<br>YDFR |  |  |  | Carbamidomethyl (C)[3] |  | Mascot |

42 propionyl Coenzyme A carboxylase, beta polypeptide [Danio rerio] gi|169158963 60643.8 7.96 9 31 0

#### Peptide Information

| Calc. Mass | Obsrv. Mass | ± da    | ± ppm | Start Seq. | End Seq. | Sequence                      | Ion Score | C. I. % | Modification       | Rank | Result Type |
|------------|-------------|---------|-------|------------|----------|-------------------------------|-----------|---------|--------------------|------|-------------|
| 882.4866   | 882.5331    | 0.0465  | 53    | 2          | 8        | ATYKLMR                       |           |         |                    |      | Mascot      |
| 1292.6515  | 1292.6134   | -0.0381 | -29   | 377        | 389      | VASGCLDINSSVK                 |           |         |                    |      | Mascot      |
| 1324.5951  | 1324.6425   | 0.0474  | 36    | 300        | 311      | DSAPVVECHDPR                  |           |         |                    |      | Mascot      |
| 1324.5951  | 1324.6425   | 0.0474  | 36    | 300        | 311      | DSAPVVECHDPR                  |           |         |                    |      | Mascot      |
| 1360.5144  | 1360.63     | 0.1156  | 85    | 106        | 117      | CSDFGMEADQNK                  |           |         | Oxidation (M)[6]   |      | Mascot      |
| 1470.7845  | 1470.7328   | -0.0517 | -35   | 363        | 376      | MNGRTVGIVGNQPK                |           |         |                    |      | Mascot      |
| 1486.7794  | 1486.736    | -0.0434 | -29   | 363        | 376      | MNGRTVGIVGNQPK                |           |         | Oxidation (M)[1]   |      | Mascot      |
| 1675.8511  | 1675.8807   | 0.0296  | 18    | 118        | 133      | YPGDSVVTGQGRINGR              |           |         |                    |      | Mascot      |
| 1745.8527  | 1745.8713   | 0.0186  | 11    | 329        | 343      | AYDMLDIVHGIVDER               |           |         |                    |      | Mascot      |
| 1761.8477  | 1761.858    | 0.0103  | 6     | 329        | 343      | AYDMLDIVHGIVDER               |           |         | Oxidation (M)[4]   |      | Mascot      |
| 2561.2883  | 2561.2615   | -0.0268 | -10   | 157        | 181      | ICKIMDQAMLVGAPVIGL<br>NDSGGAR |           |         | Oxidation (M)[5,9] |      | Mascot      |
| 2577.0979  | 2577.3083   | 0.2104  | 82    | 106        | 129      | CSDFGMEADQNKYPGD<br>SVVTGQGR  |           |         | Oxidation (M)[6]   |      | Mascot      |
| 2577.0979  | 2577.3083   | 0.2104  | 82    | 106        | 129      | CSDFGMEADQNKYPGD<br>SVVTGQGR  |           |         | Oxidation (M)[6]   |      | Mascot      |

43 PREDICTED: putative uncharacterized zinc finger protein 814 [Danio rerio] gi|189533627 40815.3 9.34 10 31 0

#### Peptide Information

| Calc. Mass | Obsrv. Mass | ± da    | ± ppm | Start Seq. | End Seq. | Sequence      | Ion Score | C. I. % | Modification             | Rank | Result Type |
|------------|-------------|---------|-------|------------|----------|---------------|-----------|---------|--------------------------|------|-------------|
| 999.4386   | 999.464     | 0.0254  | 25    | 74         | 81       | FTCVQCQCK     |           |         | Carbamidomethyl (C)[3,6] |      | Mascot      |
| 1070.5121  | 1070.4473   | -0.0648 | -61   | 73         | 81       | KFTCVQCQCK    |           |         | Carbamidomethyl (C)[4]   |      | Mascot      |
| 1070.5121  | 1070.4473   | -0.0648 | -61   | 73         | 81       | KFTCVQCQCK    |           |         | Carbamidomethyl (C)[4]   |      | Mascot      |
| 1241.6493  | 1241.5652   | -0.0841 | -68   | 347        | 356      | HKSCCLIVPK    |           |         | Carbamidomethyl (C)[4,5] |      | Mascot      |
| 1324.6943  | 1324.6425   | -0.0518 | -39   | 145        | 154      | FNEHMKIHIR    |           |         |                          |      | Mascot      |
| 1324.6943  | 1324.6425   | -0.0518 | -39   | 145        | 154      | FNEHMKIHIR    |           |         |                          |      | Mascot      |
| 1487.8217  | 1487.7902   | -0.0315 | -21   | 334        | 346      | SFSQLDSLKVHVK |           |         |                          |      | Mascot      |
| 1529.6875  | 1529.712    | 0.0245  | 16    | 74         | 86       | FTCVQCCKSYEHK |           |         |                          |      | Mascot      |

|           |           |         |     |     |     |                         |                                           |        |
|-----------|-----------|---------|-----|-----|-----|-------------------------|-------------------------------------------|--------|
| 1723.7712 | 1723.8816 | 0.1104  | 64  | 263 | 277 | IHTGVRPYMCSDCGK         | Carbamidomethyl (C)[10]                   | Mascot |
| 1723.7712 | 1723.8816 | 0.1104  | 64  | 263 | 277 | IHTGVRPYMCSDCGK         | Carbamidomethyl (C)[10]                   | Mascot |
| 1739.7662 | 1739.8815 | 0.1153  | 66  | 263 | 277 | IHTGVRPYMCSDCGK         | Carbamidomethyl (C)[10], Oxidation (M)[9] | Mascot |
| 1739.7662 | 1739.8815 | 0.1153  | 66  | 263 | 277 | IHTGVRPYMCSDCGK         | Carbamidomethyl (C)[10], Oxidation (M)[9] | Mascot |
| 1753.7784 | 1753.8953 | 0.1169  | 67  | 179 | 193 | FHSEERPFVCSQCGK         |                                           | Mascot |
| 2188.0208 | 2188.1277 | 0.1069  | 49  | 91  | 109 | VHMRIHTGERPFTCTDC<br>GK |                                           | Mascot |
| 2233.0864 | 2233.0156 | -0.0708 | -32 | 120 | 137 | HVRIHTGERPFICEHCGK      | Carbamidomethyl (C)[13,16]                | Mascot |

44 novel kinesin motor domain containing protein [Danio rerio] gi|94732475 84412.6 6.01 11 31 0

#### Peptide Information

| Calc. Mass | Obsrv. Mass | ± da    | ± ppm | Start Seq. | End Seq. | Sequence                    | Ion Score | C. I. % | Modification              | Rank | Result Type |
|------------|-------------|---------|-------|------------|----------|-----------------------------|-----------|---------|---------------------------|------|-------------|
| 996.507    | 996.5591    | 0.0521  | 52    | 395        | 402      | LMTFELDK                    |           |         |                           |      | Mascot      |
| 1051.567   | 1051.6758   | 0.1088  | 103   | 462        | 470      | LLFSEVSEK                   |           |         |                           |      | Mascot      |
| 1186.6426  | 1186.5034   | -0.1392 | -117  | 578        | 588      | LNLVDLAGSER                 |           |         |                           |      | Mascot      |
| 1292.59    | 1292.6134   | 0.0234  | 18    | 117        | 126      | LCDDEDTLRR                  |           |         | Carbamidomethyl (C)[2]    |      | Mascot      |
| 1362.6971  | 1362.5961   | -0.101  | -74   | 675        | 687      | TVEIGPSSSSRR                |           |         |                           |      | Mascot      |
| 1498.8588  | 1498.6686   | -0.1902 | -127  | 578        | 591      | LNLVDLAGSERIAK              |           |         |                           |      | Mascot      |
| 1501.8333  | 1501.7494   | -0.0839 | -56   | 207        | 221      | AVGGGNTEVTLRLSK             |           |         |                           |      | Mascot      |
| 1553.7781  | 1553.6481   | -0.13   | -84   | 295        | 306      | RQVQDFPYMLEK                |           |         |                           |      | Mascot      |
| 1739.8771  | 1739.8815   | 0.0044  | 3     | 720        | 737      | ASSAGSTLSSTSKTPTR           |           |         |                           |      | Mascot      |
| 1739.8771  | 1739.8815   | 0.0044  | 3     | 720        | 737      | ASSAGSTLSSTSKTPTR           |           |         |                           |      | Mascot      |
| 2188.1389  | 2188.1277   | -0.0112 | -5    | 601        | 620      | EAQCINKSLSALGDVINS<br>L R   |           |         | Carbamidomethyl (C)[4]    |      | Mascot      |
| 2627.2048  | 2627.2815   | 0.0767  | 29    | 25         | 47       | TSHTQTSCSAARCPHSQ<br>DVEVLR |           |         | Carbamidomethyl (C)[8,13] |      | Mascot      |
| 2627.2048  | 2627.2815   | 0.0767  | 29    | 25         | 47       | TSHTQTSCSAARCPHSQ<br>DVEVLR |           |         | Carbamidomethyl (C)[8,13] |      | Mascot      |

45 PREDICTED: circularly permuted Ras protein 1-like [Danio rerio] gi|292615916 64939.5 5.86 1 22 0

#### Peptide Information

| Calc. Mass | Obsrv. Mass | ± da    | ± ppm | Start Seq. | End Seq. | Sequence  | Ion Score | C. I. % | Modification | Rank | Result Type |
|------------|-------------|---------|-------|------------|----------|-----------|-----------|---------|--------------|------|-------------|
| 1164.5756  | 1164.5232   | -0.0524 | -45   | 483        | 491      | VESFQQRDR | 22        | 0       |              | 2    | Mascot      |

46 PREDICTED: hypothetical protein LOC572219 [Danio rerio] gi|292613753 117863.8 9.16 1 21 0

#### Peptide Information

| Calc. Mass | Obsrv. Mass | ± da | ± ppm | Start | End | Sequence | Ion | C. I. % | Modification | Rank | Result Type |
|------------|-------------|------|-------|-------|-----|----------|-----|---------|--------------|------|-------------|
|------------|-------------|------|-------|-------|-----|----------|-----|---------|--------------|------|-------------|



|    |                                           |          |         | Seq. | Seq.         |               | Score |   |  |    |   |          |
|----|-------------------------------------------|----------|---------|------|--------------|---------------|-------|---|--|----|---|----------|
|    | 868.525                                   | 868.4923 | -0.0327 | -38  | 777          | 784 VGVLPLDLR | 21    | 0 |  |    |   | 1 Mascot |
| 47 | sodium/hydrogen exchanger 2 [Danio rerio] |          |         |      | gi 166197714 | 85316.8       | 8.27  | 1 |  | 21 | 0 |          |

Peptide Information

|    | Calc. Mass                                                                                           | Obsrv. Mass | ± da    | ± ppm | Start Seq.  | End Sequence Seq. |     | Ion Score | C. I. % | Modification |   | Rank Result Type |
|----|------------------------------------------------------------------------------------------------------|-------------|---------|-------|-------------|-------------------|-----|-----------|---------|--------------|---|------------------|
|    | 1070.6066                                                                                            | 1070.4473   | -0.1593 | -149  | 588         | 596 HTTIRSSLR     |     | 21        | 0       |              |   | 2 Mascot         |
| 48 | novel protein similar to human and mouse scavenger receptor class A, member 3 (SCARA3) [Danio rerio] |             |         |       | gi 56206722 | 62992.7           | 6.1 | 1         |         | 19           | 0 |                  |

Peptide Information

|    | Calc. Mass                       | Obsrv. Mass | ± da    | ± ppm | Start Seq.   | End Sequence Seq. |      | Ion Score | C. I. % | Modification |   | Rank Result Type |
|----|----------------------------------|-------------|---------|-------|--------------|-------------------|------|-----------|---------|--------------|---|------------------|
|    | 1164.5929                        | 1164.5232   | -0.0697 | -60   | 73           | 82 QMSKVEESVK     |      | 19        | 0       |              |   | 3 Mascot         |
| 49 | Zgc:153649 protein [Danio rerio] |             |         |       | gi 116487947 | 59919.8           | 8.13 | 1         |         | 18           | 0 |                  |

Peptide Information

|    | Calc. Mass                                             | Obsrv. Mass | ± da    | ± ppm | Start Seq.   | End Sequence Seq. |       | Ion Score | C. I. % | Modification |   | Rank Result Type |
|----|--------------------------------------------------------|-------------|---------|-------|--------------|-------------------|-------|-----------|---------|--------------|---|------------------|
|    | 868.4999                                               | 868.4923    | -0.0076 | -9    | 48           | 55 GHSITVVR       |       | 18        | 0       |              |   | 2 Mascot         |
| 50 | 39S ribosomal protein L20, mitochondrial [Danio rerio] |             |         |       | gi 113679419 | 17280.4           | 11.64 | 1         |         | 18           | 0 |                  |

Peptide Information

|  | Calc. Mass | Obsrv. Mass | ± da   | ± ppm | Start Seq. | End Sequence Seq. |  | Ion Score | C. I. % | Modification           |  | Rank Result Type |
|--|------------|-------------|--------|-------|------------|-------------------|--|-----------|---------|------------------------|--|------------------|
|  | 868.4345   | 868.4923    | 0.0578 | 67    | 38         | 44 CYSLAVR        |  | 18        | 0       | Carbamidomethyl (C)[1] |  | 3 Mascot         |

|                |           |                        |                |                |                    |
|----------------|-----------|------------------------|----------------|----------------|--------------------|
| Gel Idx/Pos    | 257/K9    | Instr./Gel Origin      | BA2060/110707A | Process Status | Analysis Succeeded |
| Plate [#] Name | [1] 31496 | Instrument Sample Name |                | Spectra        | 11                 |

| Rank | Protein Name                 | Accession No. | Protein MW | Protein PI | Pep. Count | Protein Score | Protein Score C. I. % | Total Ion Score | Total Ion C. I. % |
|------|------------------------------|---------------|------------|------------|------------|---------------|-----------------------|-----------------|-------------------|
| 1    | vitellogenin 7 [Danio rerio] | gi 57864789   | 24318.7    | 8.37       | 16         | 711           | 100                   | 564             | 100               |

Peptide Information

|  | Calc. Mass | Obsrv. Mass | ± da | ± ppm | Start Seq. | End Sequence Seq. |  | Ion Score | C. I. % | Modification |  | Rank Result Type |
|--|------------|-------------|------|-------|------------|-------------------|--|-----------|---------|--------------|--|------------------|
|--|------------|-------------|------|-------|------------|-------------------|--|-----------|---------|--------------|--|------------------|

|           |           |         |     |     |     |                    |     |                               |        |
|-----------|-----------|---------|-----|-----|-----|--------------------|-----|-------------------------------|--------|
| 826.4457  | 826.4082  | -0.0375 | -45 | 93  | 99  | QYAVFAK            |     |                               | Mascot |
| 831.4318  | 831.3849  | -0.0469 | -56 | 31  | 37  | AVRDDQK            |     |                               | Mascot |
| 855.4359  | 855.3989  | -0.037  | -43 | 167 | 173 | SFDFIAR            |     |                               | Mascot |
| 855.4359  | 855.3989  | -0.037  | -43 | 167 | 173 | SFDFIAR            | 54  | 99.893                        | Mascot |
| 900.421   | 900.3813  | -0.0397 | -44 | 138 | 145 | AAYDTGFR           |     |                               | Mascot |
| 900.421   | 900.3813  | -0.0397 | -44 | 138 | 145 | AAYDTGFR           | 60  | 99.969                        | Mascot |
| 960.4785  | 960.4356  | -0.0429 | -45 | 113 | 119 | LEVEWER            |     |                               | Mascot |
| 960.4785  | 960.4356  | -0.0429 | -45 | 113 | 119 | LEVEWER            | 45  | 99.107                        | Mascot |
| 984.4243  | 984.3802  | -0.0441 | -45 | 85  | 92  | FSWGAECK           |     | Carbamidomethyl (C)[7]        | Mascot |
| 984.4243  | 984.3802  | -0.0441 | -45 | 85  | 92  | FSWGAECK           | 45  | 99.091 Carbamidomethyl (C)[7] | Mascot |
| 1118.6238 | 1118.6349 | 0.0111  | 10  | 68  | 78  | KICADGALLSK        |     |                               | Mascot |
| 1287.6691 | 1287.616  | -0.0531 | -41 | 100 | 112 | AEAGVLGEFPAAR      | 112 | 100                           | Mascot |
| 1287.6691 | 1287.616  | -0.0531 | -41 | 100 | 112 | AEAGVLGEFPAAR      |     |                               | Mascot |
| 1332.6331 | 1332.5768 | -0.0563 | -42 | 138 | 148 | AAYDTGFRFER        |     |                               | Mascot |
| 1529.7917 | 1529.7269 | -0.0648 | -42 | 54  | 67  | VQLIASSIAENDNR     |     |                               | Mascot |
| 1529.7917 | 1529.7269 | -0.0648 | -42 | 54  | 67  | VQLIASSIAENDNR     | 110 | 100                           | Mascot |
| 1642.9315 | 1642.8578 | -0.0737 | -45 | 16  | 30  | FLGNDLPPVFIIAR     |     |                               | Mascot |
| 1657.8867 | 1657.8132 | -0.0735 | -44 | 54  | 68  | VQLIASSIAENDNRK    |     |                               | Mascot |
| 1826.9799 | 1826.8995 | -0.0804 | -44 | 38  | 53  | LLGYQLAAYFDKPTAR   | 139 | 100                           | Mascot |
| 1826.9799 | 1826.8995 | -0.0804 | -44 | 38  | 53  | LLGYQLAAYFDKPTAR   |     |                               | Mascot |
| 1930.0127 | 1929.9294 | -0.0833 | -43 | 149 | 166 | ATNSEKEIELTAALPSQK |     |                               | Mascot |
| 2060.1426 | 2060.0459 | -0.0967 | -47 | 113 | 129 | LEVEWERLPPIVTTYAK  |     |                               | Mascot |
| 3337.7539 | 3337.6064 | -0.1475 | -44 | 38  | 67  | LLGYQLAAYFDKPTARVQ |     |                               | Mascot |

### Peptide Information

|           |           |         |     |      |      |                                    |     |        |  |                        |        |
|-----------|-----------|---------|-----|------|------|------------------------------------|-----|--------|--|------------------------|--------|
| 984.4243  | 984.3802  | -0.0441 | -45 | 1226 | 1233 | FSWGAECK                           |     |        |  | Carbamidomethyl (C)[7] | Mascot |
| 984.4243  | 984.3802  | -0.0441 | -45 | 1226 | 1233 | FSWGAECK                           | 45  | 99.091 |  | Carbamidomethyl (C)[7] | Mascot |
| 1118.6238 | 1118.6349 | 0.0111  | 10  | 1209 | 1219 | KICADGALLSK                        |     |        |  |                        | Mascot |
| 1287.6691 | 1287.616  | -0.0531 | -41 | 1241 | 1253 | AEAGVLGEFPAAR                      | 112 | 100    |  |                        | Mascot |
| 1287.6691 | 1287.616  | -0.0531 | -41 | 1241 | 1253 | AEAGVLGEFPAAR                      |     |        |  |                        | Mascot |
| 1332.6331 | 1332.5768 | -0.0563 | -42 | 1279 | 1289 | AAYDTGFRFER                        |     |        |  |                        | Mascot |
| 1347.7882 | 1347.6812 | -0.107  | -79 | 1111 | 1122 | LSKTATIIIEPFK                      |     |        |  |                        | Mascot |
| 1529.7917 | 1529.7269 | -0.0648 | -42 | 1195 | 1208 | VQLIASSIAENDNR                     |     |        |  |                        | Mascot |
| 1529.7917 | 1529.7269 | -0.0648 | -42 | 1195 | 1208 | VQLIASSIAENDNR                     | 110 | 100    |  |                        | Mascot |
| 1642.9315 | 1642.8578 | -0.0737 | -45 | 1157 | 1171 | FLGNDLPPVFIIAR                     |     |        |  |                        | Mascot |
| 1657.8867 | 1657.8132 | -0.0735 | -44 | 1195 | 1209 | VQLIASSIAENDNRK                    |     |        |  |                        | Mascot |
| 1826.9799 | 1826.8995 | -0.0804 | -44 | 1179 | 1194 | LLGYQLAAYFDKPTAR                   | 139 | 100    |  |                        | Mascot |
| 1826.9799 | 1826.8995 | -0.0804 | -44 | 1179 | 1194 | LLGYQLAAYFDKPTAR                   |     |        |  |                        | Mascot |
| 1930.0127 | 1929.9294 | -0.0833 | -43 | 1290 | 1307 | ATNSEKEIELTAALPSQK                 |     |        |  |                        | Mascot |
| 2060.1426 | 2060.0459 | -0.0967 | -47 | 1254 | 1270 | LEVEWERLPIIVTTYAK                  |     |        |  |                        | Mascot |
| 3337.7539 | 3337.6064 | -0.1475 | -44 | 1179 | 1208 | LLGYQLAAYFDKPTARVQ<br>LIASSIAENDNR |     |        |  |                        | Mascot |

3 novel protein similar to vitellogenin 1 (vg1) [Danio rerio] gi|94732723 147084.2 8.73 17 594 100 564 100

#### Peptide Information

| Calc. Mass | Obsrv. Mass | ± da    | ± ppm | Start Seq. | End Sequence Seq.  | Ion Score | C. I.  | % Modification         | Rank | Result Type |
|------------|-------------|---------|-------|------------|--------------------|-----------|--------|------------------------|------|-------------|
| 821.4628   | 821.4199    | -0.0429 | -52   | 545        | 551 ALHPEVR        |           |        |                        |      | Mascot      |
| 826.4457   | 826.4082    | -0.0375 | -45   | 1219       | 1225 QYAVFAK       |           |        |                        |      | Mascot      |
| 831.4318   | 831.3849    | -0.0469 | -56   | 1157       | 1163 AVRDDQK       |           |        |                        |      | Mascot      |
| 855.4359   | 855.3989    | -0.037  | -43   | 1293       | 1299 SFDFIAR       |           |        |                        |      | Mascot      |
| 855.4359   | 855.3989    | -0.037  | -43   | 1293       | 1299 SFDFIAR       | 54        | 99.893 |                        |      | Mascot      |
| 900.421    | 900.3813    | -0.0397 | -44   | 1264       | 1271 AAYDTGFR      |           |        |                        |      | Mascot      |
| 900.421    | 900.3813    | -0.0397 | -44   | 1264       | 1271 AAYDTGFR      | 60        | 99.969 |                        |      | Mascot      |
| 960.4785   | 960.4356    | -0.0429 | -45   | 1239       | 1245 LEVEWER       |           |        |                        |      | Mascot      |
| 960.4785   | 960.4356    | -0.0429 | -45   | 1239       | 1245 LEVEWER       | 45        | 99.107 |                        |      | Mascot      |
| 984.4243   | 984.3802    | -0.0441 | -45   | 1211       | 1218 FSWGAECK      |           |        | Carbamidomethyl (C)[7] |      | Mascot      |
| 984.4243   | 984.3802    | -0.0441 | -45   | 1211       | 1218 FSWGAECK      | 45        | 99.091 | Carbamidomethyl (C)[7] |      | Mascot      |
| 1118.6238  | 1118.6349   | 0.0111  | 10    | 1194       | 1204 KICADGALLSK   |           |        |                        |      | Mascot      |
| 1287.6691  | 1287.616    | -0.0531 | -41   | 1226       | 1238 AEAGVLGEFPAAR | 112       | 100    |                        |      | Mascot      |
| 1287.6691  | 1287.616    | -0.0531 | -41   | 1226       | 1238 AEAGVLGEFPAAR |           |        |                        |      | Mascot      |
| 1332.6331  | 1332.5768   | -0.0563 | -42   | 1264       | 1274 AAYDTGFRFER   |           |        |                        |      | Mascot      |

|           |           |         |     |      |      |                                    |     |     |  |  |  |  |  |  |  |        |
|-----------|-----------|---------|-----|------|------|------------------------------------|-----|-----|--|--|--|--|--|--|--|--------|
| 1529.7917 | 1529.7269 | -0.0648 | -42 | 1180 | 1193 | VQLIASSIAENDNR                     |     |     |  |  |  |  |  |  |  | Mascot |
| 1529.7917 | 1529.7269 | -0.0648 | -42 | 1180 | 1193 | VQLIASSIAENDNR                     | 110 | 100 |  |  |  |  |  |  |  | Mascot |
| 1642.9315 | 1642.8578 | -0.0737 | -45 | 1142 | 1156 | FLGNDLPPVFIIAR                     |     |     |  |  |  |  |  |  |  | Mascot |
| 1657.8867 | 1657.8132 | -0.0735 | -44 | 1180 | 1194 | VQLIASSIAENDNRK                    |     |     |  |  |  |  |  |  |  | Mascot |
| 1826.9799 | 1826.8995 | -0.0804 | -44 | 1164 | 1179 | LLGYQLAAYFDKPTAR                   | 139 | 100 |  |  |  |  |  |  |  | Mascot |
| 1826.9799 | 1826.8995 | -0.0804 | -44 | 1164 | 1179 | LLGYQLAAYFDKPTAR                   |     |     |  |  |  |  |  |  |  | Mascot |
| 1930.0127 | 1929.9294 | -0.0833 | -43 | 1275 | 1292 | ATNSEKEIELTAALPSQK                 |     |     |  |  |  |  |  |  |  | Mascot |
| 2060.1426 | 2060.0459 | -0.0967 | -47 | 1239 | 1255 | LEVEWERLPIIVTTYAK                  |     |     |  |  |  |  |  |  |  | Mascot |
| 3337.7539 | 3337.6064 | -0.1475 | -44 | 1164 | 1193 | LLGYQLAAYFDKPTARVQ<br>LIASSIAENDNR |     |     |  |  |  |  |  |  |  | Mascot |

4 Vtg1 protein [Danio rerio] gi|63100501 36409.1 9.23 12 479 100 407 100

Peptide Information

| Calc. Mass | Obsrv. Mass | ± da    | ± ppm | Start Seq. | End Seq. | Sequence                      | Ion Score | C. I.  | % Modification                             | Rank | Result Type |
|------------|-------------|---------|-------|------------|----------|-------------------------------|-----------|--------|--------------------------------------------|------|-------------|
| 826.4457   | 826.4082    | -0.0375 | -45   | 198        | 204      | QYAVFAK                       |           |        |                                            |      | Mascot      |
| 960.4785   | 960.4356    | -0.0429 | -45   | 218        | 224      | LEVEWER                       |           |        |                                            |      | Mascot      |
| 960.4785   | 960.4356    | -0.0429 | -45   | 218        | 224      | LEVEWER                       | 45        | 99.107 |                                            |      | Mascot      |
| 976.5322   | 976.4303    | -0.1019 | -104  | 25         | 32       | FSSVPRQR                      |           |        |                                            |      | Mascot      |
| 984.4243   | 984.3802    | -0.0441 | -45   | 190        | 197      | FSWGAECK                      |           |        | Carbamidomethyl (C)[7]                     |      | Mascot      |
| 984.4243   | 984.3802    | -0.0441 | -45   | 190        | 197      | FSWGAECK                      | 45        | 99.091 | Carbamidomethyl (C)[7]                     |      | Mascot      |
| 1118.682   | 1118.6349   | -0.0471 | -42   | 225        | 234      | LPIIVTTYAK                    |           |        |                                            |      | Mascot      |
| 1287.6691  | 1287.616    | -0.0531 | -41   | 205        | 217      | AEAGVLGEFPAAR                 | 112       | 100    |                                            |      | Mascot      |
| 1287.6691  | 1287.616    | -0.0531 | -41   | 205        | 217      | AEAGVLGEFPAAR                 |           |        |                                            |      | Mascot      |
| 1364.6957  | 1364.6395   | -0.0562 | -41   | 239        | 250      | HILTAAYDTGFR                  | 68        | 99.996 |                                            |      | Mascot      |
| 1364.6957  | 1364.6395   | -0.0562 | -41   | 239        | 250      | HILTAAYDTGFR                  |           |        |                                            |      | Mascot      |
| 1642.9315  | 1642.8578   | -0.0737 | -45   | 121        | 135      | FLGNDIPPVFIIAR                |           |        |                                            |      | Mascot      |
| 1826.9799  | 1826.8995   | -0.0804 | -44   | 143        | 158      | LLGYQLAAYFDKPTAR              | 139       | 100    |                                            |      | Mascot      |
| 1826.9799  | 1826.8995   | -0.0804 | -44   | 143        | 158      | LLGYQLAAYFDKPTAR              |           |        |                                            |      | Mascot      |
| 1958.0189  | 1957.928    | -0.0909 | -46   | 254        | 271      | ATNSEKEIELTAALPSQR            |           |        |                                            |      | Mascot      |
| 2060.1426  | 2060.0459   | -0.0967 | -47   | 218        | 234      | LEVEWERLPIIVTTYAK             |           |        |                                            |      | Mascot      |
| 2705.3848  | 2705.04     | -0.3448 | -127  | 159        | 183      | VQLIVSSIAENDNMKICAD<br>GALLSK |           |        | Carbamidomethyl (C)[17], Oxidation (M)[14] |      | Mascot      |

5 vitellogenin 1 [Danio rerio] gi|21391472 127954.2 8.69 14 443 100 409 100

Peptide Information

| Calc. Mass | Obsrv. Mass | ± da    | ± ppm | Start Seq. | End Seq. | Sequence | Ion Score | C. I. | % Modification | Rank | Result Type |
|------------|-------------|---------|-------|------------|----------|----------|-----------|-------|----------------|------|-------------|
| 821.4628   | 821.4199    | -0.0429 | -52   | 354        | 360      | ALHPEVR  |           |       |                |      | Mascot      |

|   |                              |           |           |         |      |      |              |                               |      |        |                                            |     |     |        |
|---|------------------------------|-----------|-----------|---------|------|------|--------------|-------------------------------|------|--------|--------------------------------------------|-----|-----|--------|
|   |                              | 826.4457  | 826.4082  | -0.0375 | -45  | 1045 | 1051         | QYAVFAK                       |      |        |                                            |     |     | Mascot |
|   |                              | 960.4785  | 960.4356  | -0.0429 | -45  | 1065 | 1071         | LEVEWER                       |      |        |                                            |     |     | Mascot |
|   |                              | 960.4785  | 960.4356  | -0.0429 | -45  | 1065 | 1071         | LEVEWER                       | 45   | 99.107 |                                            |     |     | Mascot |
|   |                              | 984.4243  | 984.3802  | -0.0441 | -45  | 1037 | 1044         | FSWGAECK                      |      |        | Carbamidomethyl (C)[7]                     |     |     | Mascot |
|   |                              | 984.4243  | 984.3802  | -0.0441 | -45  | 1037 | 1044         | FSWGAECK                      | 45   | 99.091 | Carbamidomethyl (C)[7]                     |     |     | Mascot |
|   |                              | 1118.682  | 1118.6349 | -0.0471 | -42  | 1072 | 1081         | LPIIVTTYAK                    |      |        |                                            |     |     | Mascot |
|   |                              | 1287.6691 | 1287.616  | -0.0531 | -41  | 1052 | 1064         | AEAGVLGEFPAAR                 | 112  | 100    |                                            |     |     | Mascot |
|   |                              | 1287.6691 | 1287.616  | -0.0531 | -41  | 1052 | 1064         | AEAGVLGEFPAAR                 |      |        |                                            |     |     | Mascot |
|   |                              | 1364.6957 | 1364.6395 | -0.0562 | -41  | 1086 | 1097         | HILTAAYDTGFR                  | 68   | 99.996 |                                            |     |     | Mascot |
|   |                              | 1364.6957 | 1364.6395 | -0.0562 | -41  | 1086 | 1097         | HILTAAYDTGFR                  |      |        |                                            |     |     | Mascot |
|   |                              | 1382.7889 | 1382.7214 | -0.0675 | -49  | 112  | 124          | ISDAPAQIVEVLK                 |      |        |                                            |     |     | Mascot |
|   |                              | 1382.7889 | 1382.7214 | -0.0675 | -49  | 112  | 124          | ISDAPAQIVEVLK                 |      |        |                                            |     |     | Mascot |
|   |                              | 1642.9315 | 1642.8578 | -0.0737 | -45  | 968  | 982          | FLGNDIPPVFIIAR                |      |        |                                            |     |     | Mascot |
|   |                              | 1826.9799 | 1826.8995 | -0.0804 | -44  | 990  | 1005         | LLGYQLAAYFDKPTAR              | 139  | 100    |                                            |     |     | Mascot |
|   |                              | 1826.9799 | 1826.8995 | -0.0804 | -44  | 990  | 1005         | LLGYQLAAYFDKPTAR              |      |        |                                            |     |     | Mascot |
|   |                              | 1929.8429 | 1929.9294 | 0.0865  | 45   | 4    | 19           | DVGLAYTERCAECTER              |      |        | Carbamidomethyl (C)[10,13]                 |     |     | Mascot |
|   |                              | 1958.0189 | 1957.928  | -0.0909 | -46  | 1101 | 1118         | ATNSEKEIELTAALPSQR            |      |        |                                            |     |     | Mascot |
|   |                              | 2060.1426 | 2060.0459 | -0.0967 | -47  | 1065 | 1081         | LEVEWERLPIIIVTTYAK            |      |        |                                            |     |     | Mascot |
|   |                              | 2705.3848 | 2705.04   | -0.3448 | -127 | 1006 | 1030         | VQLIVSSIAENDNMKICAD<br>GALLSK |      |        | Carbamidomethyl (C)[17], Oxidation (M)[14] |     |     | Mascot |
| 6 | vitellogenin 1 [Danio rerio] |           |           |         |      |      | gi 166795887 | 149452.5                      | 8.68 | 16     | 441                                        | 100 | 409 | 100    |

### Peptide Information

| Calc. Mass | Obsrv. Mass | ± da    | ± ppm | Start Seq. | End Seq. | Sequence      | Ion Score | C. I. % | Modification           | Rank | Result Type |
|------------|-------------|---------|-------|------------|----------|---------------|-----------|---------|------------------------|------|-------------|
| 821.4628   | 821.4199    | -0.0429 | -52   | 545        | 551      | ALHPEVR       |           |         |                        |      | Mascot      |
| 826.4457   | 826.4082    | -0.0375 | -45   | 1238       | 1244     | QYAVFAK       |           |         |                        |      | Mascot      |
| 960.4785   | 960.4356    | -0.0429 | -45   | 1258       | 1264     | LEVEWER       |           |         |                        |      | Mascot      |
| 960.4785   | 960.4356    | -0.0429 | -45   | 1258       | 1264     | LEVEWER       | 45        | 99.107  |                        |      | Mascot      |
| 984.4243   | 984.3802    | -0.0441 | -45   | 1230       | 1237     | FSWGAECK      |           |         | Carbamidomethyl (C)[7] |      | Mascot      |
| 984.4243   | 984.3802    | -0.0441 | -45   | 1230       | 1237     | FSWGAECK      | 45        | 99.091  | Carbamidomethyl (C)[7] |      | Mascot      |
| 992.5015   | 992.4224    | -0.0791 | -80   | 615        | 622      | LMNCKLDR      |           |         |                        |      | Mascot      |
| 1118.682   | 1118.6349   | -0.0471 | -42   | 1265       | 1274     | LPIIVTTYAK    |           |         |                        |      | Mascot      |
| 1287.6691  | 1287.616    | -0.0531 | -41   | 1245       | 1257     | AEAGVLGEFPAAR | 112       | 100     |                        |      | Mascot      |
| 1287.6691  | 1287.616    | -0.0531 | -41   | 1245       | 1257     | AEAGVLGEFPAAR |           |         |                        |      | Mascot      |
| 1364.6957  | 1364.6395   | -0.0562 | -41   | 1279       | 1290     | HILTAAYDTGFR  | 68        | 99.996  |                        |      | Mascot      |
| 1364.6957  | 1364.6395   | -0.0562 | -41   | 1279       | 1290     | HILTAAYDTGFR  |           |         |                        |      | Mascot      |

|   |                            |           |         |      |              |      |                               |      |     |     |     |                                            |     |  |  |  |  |        |
|---|----------------------------|-----------|---------|------|--------------|------|-------------------------------|------|-----|-----|-----|--------------------------------------------|-----|--|--|--|--|--------|
|   | 1382.7889                  | 1382.7214 | -0.0675 | -49  | 303          | 315  | ISDAPAQIVEVLK                 |      |     |     |     |                                            |     |  |  |  |  | Mascot |
|   | 1382.7889                  | 1382.7214 | -0.0675 | -49  | 303          | 315  | ISDAPAQIVEVLK                 |      |     |     |     |                                            |     |  |  |  |  | Mascot |
|   | 1638.8485                  | 1638.7854 | -0.0631 | -39  | 668          | 683  | TYLAGAAADVVEFGVR              |      |     |     |     |                                            |     |  |  |  |  | Mascot |
|   | 1642.9315                  | 1642.8578 | -0.0737 | -45  | 1161         | 1175 | FLGNDIPPVFIIAR                |      |     |     |     |                                            |     |  |  |  |  | Mascot |
|   | 1826.9799                  | 1826.8995 | -0.0804 | -44  | 1183         | 1198 | LLGYQLAAYFDKPTAR              |      | 139 | 100 |     |                                            |     |  |  |  |  | Mascot |
|   | 1826.9799                  | 1826.8995 | -0.0804 | -44  | 1183         | 1198 | LLGYQLAAYFDKPTAR              |      |     |     |     |                                            |     |  |  |  |  | Mascot |
|   | 1958.0189                  | 1957.928  | -0.0909 | -46  | 1294         | 1311 | ATNSEKEIELTAALPSQR            |      |     |     |     |                                            |     |  |  |  |  | Mascot |
|   | 2060.1426                  | 2060.0459 | -0.0967 | -47  | 1258         | 1274 | LEVEWERLPIIVTTYAK             |      |     |     |     |                                            |     |  |  |  |  | Mascot |
|   | 2233.2009                  | 2232.9822 | -0.2187 | -98  | 593          | 614  | SLTRITAPDMAYVAGAAN<br>VAIK    |      |     |     |     |                                            |     |  |  |  |  | Mascot |
|   | 2705.3848                  | 2705.04   | -0.3448 | -127 | 1199         | 1223 | VQLIVSSIAENDNMKICAD<br>GALLSK |      |     |     |     | Carbamidomethyl (C)[17], Oxidation (M)[14] |     |  |  |  |  | Mascot |
| 7 | Vtg1 protein [Danio rerio] |           |         |      | gi 145337918 |      | 116565.5                      | 9.07 | 13  | 437 | 100 | 409                                        | 100 |  |  |  |  |        |

Peptide Information

|   | Calc. Mass                   | Obsrv. Mass | ± da    | ± ppm | Start Seq.  | End Sequence Seq.                 |          | Ion Score | C. I.  | %   | Modification                               | Rank | Result Type |
|---|------------------------------|-------------|---------|-------|-------------|-----------------------------------|----------|-----------|--------|-----|--------------------------------------------|------|-------------|
|   | 821.4628                     | 821.4199    | -0.0429 | -52   | 251         | 257 ALHPEVR                       |          |           |        |     |                                            |      | Mascot      |
|   | 826.4457                     | 826.4082    | -0.0375 | -45   | 944         | 950 QYAVFAK                       |          |           |        |     |                                            |      | Mascot      |
|   | 960.4785                     | 960.4356    | -0.0429 | -45   | 964         | 970 LEVEWER                       |          |           |        |     |                                            |      | Mascot      |
|   | 960.4785                     | 960.4356    | -0.0429 | -45   | 964         | 970 LEVEWER                       |          | 45        | 99.107 |     |                                            |      | Mascot      |
|   | 984.4243                     | 984.3802    | -0.0441 | -45   | 936         | 943 FSWGAECK                      |          |           |        |     | Carbamidomethyl (C)[7]                     |      | Mascot      |
|   | 984.4243                     | 984.3802    | -0.0441 | -45   | 936         | 943 FSWGAECK                      |          | 45        | 99.091 |     | Carbamidomethyl (C)[7]                     |      | Mascot      |
|   | 1118.682                     | 1118.6349   | -0.0471 | -42   | 971         | 980 LPIIVTTYAK                    |          |           |        |     |                                            |      | Mascot      |
|   | 1287.6691                    | 1287.616    | -0.0531 | -41   | 951         | 963 AEAGVLGEFPAAR                 |          | 112       | 100    |     |                                            |      | Mascot      |
|   | 1287.6691                    | 1287.616    | -0.0531 | -41   | 951         | 963 AEAGVLGEFPAAR                 |          |           |        |     |                                            |      | Mascot      |
|   | 1364.6957                    | 1364.6395   | -0.0562 | -41   | 985         | 996 HILTAAYDTGFR                  |          | 68        | 99.996 |     |                                            |      | Mascot      |
|   | 1364.6957                    | 1364.6395   | -0.0562 | -41   | 985         | 996 HILTAAYDTGFR                  |          |           |        |     |                                            |      | Mascot      |
|   | 1382.7889                    | 1382.7214   | -0.0675 | -49   | 9           | 21 ISDAPAQIVEVLK                  |          |           |        |     |                                            |      | Mascot      |
|   | 1382.7889                    | 1382.7214   | -0.0675 | -49   | 9           | 21 ISDAPAQIVEVLK                  |          |           |        |     |                                            |      | Mascot      |
|   | 1642.9315                    | 1642.8578   | -0.0737 | -45   | 867         | 881 FLGNDIPPVFIIAR                |          |           |        |     |                                            |      | Mascot      |
|   | 1826.9799                    | 1826.8995   | -0.0804 | -44   | 889         | 904 LLGYQLAAYFDKPTAR              |          | 139       | 100    |     |                                            |      | Mascot      |
|   | 1826.9799                    | 1826.8995   | -0.0804 | -44   | 889         | 904 LLGYQLAAYFDKPTAR              |          |           |        |     |                                            |      | Mascot      |
|   | 1958.0189                    | 1957.928    | -0.0909 | -46   | 1000        | 1017 ATNSEKEIELTAALPSQR           |          |           |        |     |                                            |      | Mascot      |
|   | 2060.1426                    | 2060.0459   | -0.0967 | -47   | 964         | 980 LEVEWERLPIIVTTYAK             |          |           |        |     |                                            |      | Mascot      |
|   | 2705.3848                    | 2705.04     | -0.3448 | -127  | 905         | 929 VQLIVSSIAENDNMKICAD<br>GALLSK |          |           |        |     | Carbamidomethyl (C)[17], Oxidation (M)[14] |      | Mascot      |
| 8 | vitellogenin 1 [Danio rerio] |             |         |       | gi 94733730 |                                   | 149140.4 | 8.74      | 14     | 429 | 100                                        | 409  | 100         |

| Peptide Information |                          |             |         |       |             |          |                               |           |        |                                            |      |             |     |
|---------------------|--------------------------|-------------|---------|-------|-------------|----------|-------------------------------|-----------|--------|--------------------------------------------|------|-------------|-----|
| Calc. Mass          |                          | Obsrv. Mass | ± da    | ± ppm | Start Seq.  | End Seq. | Sequence                      | Ion Score | C. I.  | % Modification                             | Rank | Result Type |     |
|                     | 821.4628                 | 821.4199    | -0.0429 | -52   | 545         | 551      | ALHPEVR                       |           |        |                                            |      | Mascot      |     |
|                     | 826.4457                 | 826.4082    | -0.0375 | -45   | 1238        | 1244     | QYAVFAK                       |           |        |                                            |      | Mascot      |     |
|                     | 960.4785                 | 960.4356    | -0.0429 | -45   | 1258        | 1264     | LEVEWER                       |           |        |                                            |      | Mascot      |     |
|                     | 960.4785                 | 960.4356    | -0.0429 | -45   | 1258        | 1264     | LEVEWER                       | 45        | 99.107 |                                            |      | Mascot      |     |
|                     | 984.4243                 | 984.3802    | -0.0441 | -45   | 1230        | 1237     | FSWGAECK                      |           |        | Carbamidomethyl (C)[7]                     |      | Mascot      |     |
|                     | 984.4243                 | 984.3802    | -0.0441 | -45   | 1230        | 1237     | FSWGAECK                      | 45        | 99.091 | Carbamidomethyl (C)[7]                     |      | Mascot      |     |
|                     | 1118.682                 | 1118.6349   | -0.0471 | -42   | 1265        | 1274     | LPIIVTTYAK                    |           |        |                                            |      | Mascot      |     |
|                     | 1287.6691                | 1287.616    | -0.0531 | -41   | 1245        | 1257     | AEAGVLGEFPAAR                 | 112       | 100    |                                            |      | Mascot      |     |
|                     | 1287.6691                | 1287.616    | -0.0531 | -41   | 1245        | 1257     | AEAGVLGEFPAAR                 |           |        |                                            |      | Mascot      |     |
|                     | 1364.6957                | 1364.6395   | -0.0562 | -41   | 1279        | 1290     | HILTAAYDTGFR                  | 68        | 99.996 |                                            |      | Mascot      |     |
|                     | 1364.6957                | 1364.6395   | -0.0562 | -41   | 1279        | 1290     | HILTAAYDTGFR                  |           |        |                                            |      | Mascot      |     |
|                     | 1382.7889                | 1382.7214   | -0.0675 | -49   | 303         | 315      | ISDAPAQIVEVLK                 |           |        |                                            |      | Mascot      |     |
|                     | 1382.7889                | 1382.7214   | -0.0675 | -49   | 303         | 315      | ISDAPAQIVEVLK                 |           |        |                                            |      | Mascot      |     |
|                     | 1642.9315                | 1642.8578   | -0.0737 | -45   | 1161        | 1175     | FLGNDIPPVFIIAR                |           |        |                                            |      | Mascot      |     |
|                     | 1826.9799                | 1826.8995   | -0.0804 | -44   | 1183        | 1198     | LLGYQLAAYFDKPTAR              | 139       | 100    |                                            |      | Mascot      |     |
|                     | 1826.9799                | 1826.8995   | -0.0804 | -44   | 1183        | 1198     | LLGYQLAAYFDKPTAR              |           |        |                                            |      | Mascot      |     |
|                     | 1929.8429                | 1929.9294   | 0.0865  | 45    | 195         | 210      | DVGLAYTERCAECTER              |           |        | Carbamidomethyl (C)[10,13]                 |      | Mascot      |     |
|                     | 1958.0189                | 1957.928    | -0.0909 | -46   | 1294        | 1311     | ATNSEKEIELTAALPSQR            |           |        |                                            |      | Mascot      |     |
|                     | 2060.1426                | 2060.0459   | -0.0967 | -47   | 1258        | 1274     | LEVEWERLPIIVTTYAK             |           |        |                                            |      | Mascot      |     |
|                     | 2705.3848                | 2705.04     | -0.3448 | -127  | 1199        | 1223     | VQLIVSSIAENDNMKICAD<br>GALLSK |           |        | Carbamidomethyl (C)[17], Oxidation (M)[14] |      | Mascot      |     |
| 9                   | Zgc:136383 [Danio rerio] |             |         |       | gil92097636 |          | 28809.9                       | 9.33      | 11     | 294                                        | 100  | 229         | 100 |

| Peptide Information |             |         |       |            |          |               |           |        |                        |                  |
|---------------------|-------------|---------|-------|------------|----------|---------------|-----------|--------|------------------------|------------------|
| Calc. Mass          | Obsrv. Mass | ± da    | ± ppm | Start Seq. | End Seq. | Sequence      | Ion Score | C. I.  | % Modification         | Rank Result Type |
| 826.4457            | 826.4082    | -0.0375 | -45   | 136        | 142      | QYAVFAK       |           |        |                        | Mascot           |
| 960.4785            | 960.4356    | -0.0429 | -45   | 156        | 162      | LEVEWER       |           |        |                        | Mascot           |
| 960.4785            | 960.4356    | -0.0429 | -45   | 156        | 162      | LEVEWER       | 45        | 99.107 |                        | Mascot           |
| 984.4243            | 984.3802    | -0.0441 | -45   | 128        | 135      | FSWGAECK      |           |        | Carbamidomethyl (C)[7] | Mascot           |
| 984.4243            | 984.3802    | -0.0441 | -45   | 128        | 135      | FSWGAECK      | 45        | 99.091 | Carbamidomethyl (C)[7] | Mascot           |
| 1045.5465           | 1045.5189   | -0.0276 | -26   | 246        | 253      | DFLSWIHK      |           |        |                        | Mascot           |
| 1118.5986           | 1118.6349   | 0.0363  | 32    | 217        | 225      | IPEITMSRR     |           |        | Oxidation (M)[6]       | Mascot           |
| 1303.6641           | 1303.6075   | -0.0566 | -43   | 143        | 155      | AEAGVLGEYPAAR |           |        |                        | Mascot           |
| 1403.6953           | 1403.6321   | -0.0632 | -45   | 177        | 188      | YILNAAYDTGFR  |           |        |                        | Mascot           |

|           |           |         |     |     |     |                    |     |     |  |                     |        |
|-----------|-----------|---------|-----|-----|-----|--------------------|-----|-----|--|---------------------|--------|
| 1529.7299 | 1529.7269 | -0.003  | -2  | 2   | 15  | LPLSSSMSSSRMSK     |     |     |  | Oxidation (M)[7,12] | Mascot |
| 1529.7299 | 1529.7269 | -0.003  | -2  | 2   | 15  | LPLSSSMSSSRMSK     |     |     |  | Oxidation (M)[7,12] | Mascot |
| 1642.9315 | 1642.8578 | -0.0737 | -45 | 59  | 73  | FLGNDIPPVFIIAR     |     |     |  |                     | Mascot |
| 1826.9799 | 1826.8995 | -0.0804 | -44 | 81  | 96  | LLGYQLAAYFDKPTAR   | 139 | 100 |  |                     | Mascot |
| 1826.9799 | 1826.8995 | -0.0804 | -44 | 81  | 96  | LLGYQLAAYFDKPTAR   |     |     |  |                     | Mascot |
| 1930.0127 | 1929.9294 | -0.0833 | -43 | 192 | 209 | ATNSEKEIELTAALPSQK |     |     |  |                     | Mascot |

10 Vtg5 protein [Danio rerio] gi|148744685 27543.3 9.2 8 269 100 229 100

#### Peptide Information

| Calc. Mass | Obsrv. Mass | ± da    | ± ppm | Start Seq. | End Seq. | Sequence           | Ion Score | C. I.  | % Modification         | Rank | Result Type |
|------------|-------------|---------|-------|------------|----------|--------------------|-----------|--------|------------------------|------|-------------|
| 826.4457   | 826.4082    | -0.0375 | -45   | 124        | 130      | QYAVFAK            |           |        |                        |      | Mascot      |
| 960.4785   | 960.4356    | -0.0429 | -45   | 144        | 150      | LEVEWER            |           |        |                        |      | Mascot      |
| 960.4785   | 960.4356    | -0.0429 | -45   | 144        | 150      | LEVEWER            | 45        | 99.107 |                        |      | Mascot      |
| 984.4243   | 984.3802    | -0.0441 | -45   | 116        | 123      | FSWGAECK           |           |        | Carbamidomethyl (C)[7] |      | Mascot      |
| 984.4243   | 984.3802    | -0.0441 | -45   | 116        | 123      | FSWGAECK           | 45        | 99.091 | Carbamidomethyl (C)[7] |      | Mascot      |
| 1303.6641  | 1303.6075   | -0.0566 | -43   | 131        | 143      | AEAGVLGEYPAAR      |           |        |                        |      | Mascot      |
| 1376.7069  | 1376.6483   | -0.0586 | -43   | 165        | 176      | HILNAAYNTGFR       |           |        |                        |      | Mascot      |
| 1642.9315  | 1642.8578   | -0.0737 | -45   | 47         | 61       | FLGNDIPPVFIIAR     |           |        |                        |      | Mascot      |
| 1826.9799  | 1826.8995   | -0.0804 | -44   | 69         | 84       | LLGYQLAAYFDKPTAR   | 139       | 100    |                        |      | Mascot      |
| 1826.9799  | 1826.8995   | -0.0804 | -44   | 69         | 84       | LLGYQLAAYFDKPTAR   |           |        |                        |      | Mascot      |
| 1930.0127  | 1929.9294   | -0.0833 | -43   | 180        | 197      | ATNSEKEIELTAALPSQK |           |        |                        |      | Mascot      |

11 vitellogenin 6 [Danio rerio] gi|57864787 38968.8 8.92 8 263 100 229 100

#### Peptide Information

| Calc. Mass | Obsrv. Mass | ± da    | ± ppm | Start Seq. | End Seq. | Sequence         | Ion Score | C. I.  | % Modification         | Rank | Result Type |
|------------|-------------|---------|-------|------------|----------|------------------|-----------|--------|------------------------|------|-------------|
| 826.4457   | 826.4082    | -0.0375 | -45   | 235        | 241      | QYAVFAK          |           |        |                        |      | Mascot      |
| 960.4785   | 960.4356    | -0.0429 | -45   | 255        | 261      | LEVEWER          |           |        |                        |      | Mascot      |
| 960.4785   | 960.4356    | -0.0429 | -45   | 255        | 261      | LEVEWER          | 45        | 99.107 |                        |      | Mascot      |
| 984.4243   | 984.3802    | -0.0441 | -45   | 227        | 234      | FSWGAECK         |           |        | Carbamidomethyl (C)[7] |      | Mascot      |
| 984.4243   | 984.3802    | -0.0441 | -45   | 227        | 234      | FSWGAECK         | 45        | 99.091 | Carbamidomethyl (C)[7] |      | Mascot      |
| 1303.6641  | 1303.6075   | -0.0566 | -43   | 242        | 254      | AEAGVLGEYPAAR    |           |        |                        |      | Mascot      |
| 1400.6627  | 1400.605    | -0.0577 | -41   | 276        | 287      | CILNAAYDTGFR     |           |        | Carbamidomethyl (C)[1] |      | Mascot      |
| 1642.9315  | 1642.8578   | -0.0737 | -45   | 158        | 172      | FLGNDIPPVFIIAR   |           |        |                        |      | Mascot      |
| 1826.9799  | 1826.8995   | -0.0804 | -44   | 180        | 195      | LLGYQLAAYFDKPTAR | 139       | 100    |                        |      | Mascot      |
| 1826.9799  | 1826.8995   | -0.0804 | -44   | 180        | 195      | LLGYQLAAYFDKPTAR |           |        |                        |      | Mascot      |



|    |                              |           |          |         |     |     |             |                    |        |   |     |     |     |     |
|----|------------------------------|-----------|----------|---------|-----|-----|-------------|--------------------|--------|---|-----|-----|-----|-----|
|    | vitellogenin 4 [Danio rerio] | 1958.0189 | 1957.928 | -0.0909 | -46 | 291 | 308         | ATNSEKEIELTAALPSQR | Mascot |   |     |     |     |     |
| 12 |                              |           |          |         |     |     | gil57864783 | 31189.9            | 9.48   | 8 | 262 | 100 | 229 | 100 |

### Peptide Information

| Calc. Mass | Obsrv. Mass | ± da    | ± ppm | Start Seq. | End Seq. | Sequence         | Ion Score | C. I.  | % Modification         | Rank | Result Type |
|------------|-------------|---------|-------|------------|----------|------------------|-----------|--------|------------------------|------|-------------|
| 826.4457   | 826.4082    | -0.0375 | -45   | 162        | 168      | QYAVFAK          |           |        |                        |      | Mascot      |
| 960.4785   | 960.4356    | -0.0429 | -45   | 182        | 188      | LEVEWER          |           |        |                        |      | Mascot      |
| 960.4785   | 960.4356    | -0.0429 | -45   | 182        | 188      | LEVEWER          | 45        | 99.107 |                        |      | Mascot      |
| 984.4243   | 984.3802    | -0.0441 | -45   | 154        | 161      | FSWGAECK         |           |        | Carbamidomethyl (C)[7] |      | Mascot      |
| 984.4243   | 984.3802    | -0.0441 | -45   | 154        | 161      | FSWGAECK         | 45        | 99.091 | Carbamidomethyl (C)[7] |      | Mascot      |
| 1118.5986  | 1118.6349   | 0.0363  | 32    | 243        | 251      | IPEITMSRR        |           |        | Oxidation (M)[6]       |      | Mascot      |
| 1303.6641  | 1303.6075   | -0.0566 | -43   | 169        | 181      | AEAGVLGEYPAAR    |           |        |                        |      | Mascot      |
| 1403.6953  | 1403.6321   | -0.0632 | -45   | 203        | 214      | YILNAAYDTGFR     |           |        |                        |      | Mascot      |
| 1642.9315  | 1642.8578   | -0.0737 | -45   | 85         | 99       | FLGNDIPPVFIIAR   |           |        |                        |      | Mascot      |
| 1826.9799  | 1826.8995   | -0.0804 | -44   | 107        | 122      | LLGYQLAAYFDKPTAR | 139       | 100    |                        |      | Mascot      |
| 1826.9799  | 1826.8995   | -0.0804 | -44   | 107        | 122      | LLGYQLAAYFDKPTAR |           |        |                        |      | Mascot      |

|    |                                  |              |          |      |    |     |     |     |     |
|----|----------------------------------|--------------|----------|------|----|-----|-----|-----|-----|
| 13 | Zqc:136383 protein [Danio rerio] | qil159155252 | 123957.1 | 8.78 | 15 | 259 | 100 | 229 | 100 |
|----|----------------------------------|--------------|----------|------|----|-----|-----|-----|-----|

### Peptide Information

| Calc. Mass | Obsrv. Mass | ± da    | ± ppm | Start Seq. | End Seq. | Sequence       | Ion Score | C. I.  | % Modification         | Rank | Result Type |
|------------|-------------|---------|-------|------------|----------|----------------|-----------|--------|------------------------|------|-------------|
| 821.4628   | 821.4199    | -0.0429 | -52   | 322        | 328      | ALHPEVR        |           |        |                        |      | Mascot      |
| 826.4457   | 826.4082    | -0.0375 | -45   | 1013       | 1019     | QYAVFAK        |           |        |                        |      | Mascot      |
| 960.4785   | 960.4356    | -0.0429 | -45   | 1033       | 1039     | LEVEWER        |           |        |                        |      | Mascot      |
| 960.4785   | 960.4356    | -0.0429 | -45   | 1033       | 1039     | LEVEWER        | 45        | 99.107 |                        |      | Mascot      |
| 984.4243   | 984.3802    | -0.0441 | -45   | 1005       | 1012     | FSWGAECK       |           |        | Carbamidomethyl (C)[7] |      | Mascot      |
| 984.4243   | 984.3802    | -0.0441 | -45   | 1005       | 1012     | FSWGAECK       | 45        | 99.091 | Carbamidomethyl (C)[7] |      | Mascot      |
| 992.5015   | 992.4224    | -0.0791 | -80   | 392        | 399      | LMNCKLDR       |           |        |                        |      | Mascot      |
| 1045.5465  | 1045.5189   | -0.0276 | -26   | 1123       | 1130     | DFLSWIHK       |           |        |                        |      | Mascot      |
| 1118.5986  | 1118.6349   | 0.0363  | 32    | 1094       | 1102     | IPEITMSRR      |           |        | Oxidation (M)[6]       |      | Mascot      |
| 1303.6641  | 1303.6075   | -0.0566 | -43   | 1020       | 1032     | AEAGVLGEYPAAR  |           |        |                        |      | Mascot      |
| 1381.619   | 1381.6799   | 0.0609  | 44    | 844        | 857      | NAPVSSSSSSSSSR |           |        |                        |      | Mascot      |
| 1382.7889  | 1382.7214   | -0.0675 | -49   | 80         | 92       | ISDAPAQIVEVLK  |           |        |                        |      | Mascot      |
| 1382.7889  | 1382.7214   | -0.0675 | -49   | 80         | 92       | ISDAPAQIVEVLK  |           |        |                        |      | Mascot      |
| 1403.6953  | 1403.6321   | -0.0632 | -45   | 1054       | 1065     | YILNAAYDTGFR   |           |        |                        |      | Mascot      |
| 1642.9315  | 1642.8578   | -0.0737 | -45   | 936        | 950      | FLGNDIPPVFAIAR |           |        |                        |      | Mascot      |

|    |                                  |           |         |     |              |      |                            |      |     |     |     |     |     |  |        |
|----|----------------------------------|-----------|---------|-----|--------------|------|----------------------------|------|-----|-----|-----|-----|-----|--|--------|
|    | 1826.9799                        | 1826.8995 | -0.0804 | -44 | 958          | 973  | LLGYQLAAYFDKPTAR           | 139  | 100 |     |     |     |     |  | Mascot |
|    | 1826.9799                        | 1826.8995 | -0.0804 | -44 | 958          | 973  | LLGYQLAAYFDKPTAR           |      |     |     |     |     |     |  | Mascot |
|    | 1930.0127                        | 1929.9294 | -0.0833 | -43 | 1069         | 1086 | ATNSEKEIELTAALPSQK         |      |     |     |     |     |     |  | Mascot |
|    | 2233.2009                        | 2232.9822 | -0.2187 | -98 | 370          | 391  | SLTRITAPDMAYVAGAAN<br>VAIK |      |     |     |     |     |     |  | Mascot |
| 14 | Zgc:136383 protein [Danio rerio] |           |         |     | gi 125857991 |      | 148644.2                   | 8.93 | 16  | 253 | 100 | 229 | 100 |  |        |

Peptide Information

|  | Calc. Mass | Obsrv. Mass | ± da    | ± ppm | Start Seq. | End Seq. | Sequence                   | Ion Score | C. I.  | % | Modification           | Rank | Result | Type   |
|--|------------|-------------|---------|-------|------------|----------|----------------------------|-----------|--------|---|------------------------|------|--------|--------|
|  | 821.4628   | 821.4199    | -0.0429 | -52   | 544        | 550      | ALHPEVR                    |           |        |   |                        |      |        | Mascot |
|  | 826.4457   | 826.4082    | -0.0375 | -45   | 1235       | 1241     | QYAVFAK                    |           |        |   |                        |      |        | Mascot |
|  | 864.4461   | 864.4466    | 0.0005  | 1     | 86         | 93       | DSFVPATK                   |           |        |   |                        |      |        | Mascot |
|  | 960.4785   | 960.4356    | -0.0429 | -45   | 1255       | 1261     | LEVEWER                    |           |        |   |                        |      |        | Mascot |
|  | 960.4785   | 960.4356    | -0.0429 | -45   | 1255       | 1261     | LEVEWER                    | 45        | 99.107 |   |                        |      |        | Mascot |
|  | 984.4243   | 984.3802    | -0.0441 | -45   | 1227       | 1234     | FSWGAECK                   |           |        |   | Carbamidomethyl (C)[7] |      |        | Mascot |
|  | 984.4243   | 984.3802    | -0.0441 | -45   | 1227       | 1234     | FSWGAECK                   | 45        | 99.091 |   | Carbamidomethyl (C)[7] |      |        | Mascot |
|  | 992.5015   | 992.4224    | -0.0791 | -80   | 614        | 621      | LMNCKLDR                   |           |        |   |                        |      |        | Mascot |
|  | 1045.5465  | 1045.5189   | -0.0276 | -26   | 1345       | 1352     | DFLSWIHK                   |           |        |   |                        |      |        | Mascot |
|  | 1118.5986  | 1118.6349   | 0.0363  | 32    | 1316       | 1324     | IPEITMSRR                  |           |        |   | Oxidation (M)[6]       |      |        | Mascot |
|  | 1303.6641  | 1303.6075   | -0.0566 | -43   | 1242       | 1254     | AEAGVLGEYPAAR              |           |        |   |                        |      |        | Mascot |
|  | 1381.619   | 1381.6799   | 0.0609  | 44    | 1066       | 1079     | NAPVSSSSSSSSSR             |           |        |   |                        |      |        | Mascot |
|  | 1382.7889  | 1382.7214   | -0.0675 | -49   | 302        | 314      | ISDAPAQIVEVLK              |           |        |   |                        |      |        | Mascot |
|  | 1382.7889  | 1382.7214   | -0.0675 | -49   | 302        | 314      | ISDAPAQIVEVLK              |           |        |   |                        |      |        | Mascot |
|  | 1403.6953  | 1403.6321   | -0.0632 | -45   | 1276       | 1287     | YILNAAYDTGFR               |           |        |   |                        |      |        | Mascot |
|  | 1642.9315  | 1642.8578   | -0.0737 | -45   | 1158       | 1172     | FLGNDIPPVFIIAR             |           |        |   |                        |      |        | Mascot |
|  | 1826.9799  | 1826.8995   | -0.0804 | -44   | 1180       | 1195     | LLGYQLAAYFDKPTAR           | 139       | 100    |   |                        |      |        | Mascot |
|  | 1826.9799  | 1826.8995   | -0.0804 | -44   | 1180       | 1195     | LLGYQLAAYFDKPTAR           |           |        |   |                        |      |        | Mascot |
|  | 1930.0127  | 1929.9294   | -0.0833 | -43   | 1291       | 1308     | ATNSEKEIELTAALPSQK         |           |        |   |                        |      |        | Mascot |
|  | 2233.2009  | 2232.9822   | -0.2187 | -98   | 592        | 613      | SLTRITAPDMAYVAGAAN<br>VAIK |           |        |   |                        |      |        | Mascot |

|    |                                              |  |  |  |              |  |          |      |    |     |     |     |     |  |  |
|----|----------------------------------------------|--|--|--|--------------|--|----------|------|----|-----|-----|-----|-----|--|--|
| 15 | hypothetical protein LOC678536 [Danio rerio] |  |  |  | gi 160420306 |  | 148750.2 | 8.89 | 16 | 252 | 100 | 229 | 100 |  |  |
|----|----------------------------------------------|--|--|--|--------------|--|----------|------|----|-----|-----|-----|-----|--|--|

Peptide Information

|  | Calc. Mass | Obsrv. Mass | ± da    | ± ppm | Start Seq. | End Seq. | Sequence | Ion Score | C. I. | % | Modification | Rank | Result | Type   |
|--|------------|-------------|---------|-------|------------|----------|----------|-----------|-------|---|--------------|------|--------|--------|
|  | 821.4628   | 821.4199    | -0.0429 | -52   | 545        | 551      | ALHPEVR  |           |       |   |              |      |        | Mascot |
|  | 826.4457   | 826.4082    | -0.0375 | -45   | 1236       | 1242     | QYAVFAK  |           |       |   |              |      |        | Mascot |

|    |                              |           |           |         |     |              |          |                            |     |        |                        |     |     |        |
|----|------------------------------|-----------|-----------|---------|-----|--------------|----------|----------------------------|-----|--------|------------------------|-----|-----|--------|
|    |                              | 864.4461  | 864.4466  | 0.0005  | 1   | 87           | 94       | DSFVPATK                   |     |        |                        |     |     | Mascot |
|    |                              | 960.4785  | 960.4356  | -0.0429 | -45 | 1256         | 1262     | LEVEWER                    |     |        |                        |     |     | Mascot |
|    |                              | 960.4785  | 960.4356  | -0.0429 | -45 | 1256         | 1262     | LEVEWER                    | 45  | 99.107 |                        |     |     | Mascot |
|    |                              | 984.4243  | 984.3802  | -0.0441 | -45 | 1228         | 1235     | FSWGAECK                   |     |        | Carbamidomethyl (C)[7] |     |     | Mascot |
|    |                              | 984.4243  | 984.3802  | -0.0441 | -45 | 1228         | 1235     | FSWGAECK                   | 45  | 99.091 | Carbamidomethyl (C)[7] |     |     | Mascot |
|    |                              | 992.5015  | 992.4224  | -0.0791 | -80 | 615          | 622      | LMNCKLDR                   |     |        |                        |     |     | Mascot |
|    |                              | 1045.5465 | 1045.5189 | -0.0276 | -26 | 1346         | 1353     | DFLSWIHK                   |     |        |                        |     |     | Mascot |
|    |                              | 1118.5986 | 1118.6349 | 0.0363  | 32  | 1317         | 1325     | IPEITMSRR                  |     |        | Oxidation (M)[6]       |     |     | Mascot |
|    |                              | 1303.6641 | 1303.6075 | -0.0566 | -43 | 1243         | 1255     | AEAGVLGEYPAAR              |     |        |                        |     |     | Mascot |
|    |                              | 1381.619  | 1381.6799 | 0.0609  | 44  | 1067         | 1080     | NAPVSSSESSSSSR             |     |        |                        |     |     | Mascot |
|    |                              | 1382.7889 | 1382.7214 | -0.0675 | -49 | 303          | 315      | ISDAPAQIVEVLK              |     |        |                        |     |     | Mascot |
|    |                              | 1382.7889 | 1382.7214 | -0.0675 | -49 | 303          | 315      | ISDAPAQIVEVLK              |     |        |                        |     |     | Mascot |
|    |                              | 1403.6953 | 1403.6321 | -0.0632 | -45 | 1277         | 1288     | YLNAAYDTGFR                |     |        |                        |     |     | Mascot |
|    |                              | 1642.9315 | 1642.8578 | -0.0737 | -45 | 1159         | 1173     | FLGNDIPPVFALLR             |     |        |                        |     |     | Mascot |
|    |                              | 1826.9799 | 1826.8995 | -0.0804 | -44 | 1181         | 1196     | LLGYQLAAYFDKPTAR           | 139 | 100    |                        |     |     | Mascot |
|    |                              | 1826.9799 | 1826.8995 | -0.0804 | -44 | 1181         | 1196     | LLGYQLAAYFDKPTAR           |     |        |                        |     |     | Mascot |
|    |                              | 1930.0127 | 1929.9294 | -0.0833 | -43 | 1292         | 1309     | ATNSEKEIELTAALPSQK         |     |        |                        |     |     | Mascot |
|    |                              | 2233.2009 | 2232.9822 | -0.2187 | -98 | 593          | 614      | SLTRITAPDMAYVAGAAN<br>VAIK |     |        |                        |     |     | Mascot |
| 16 | vitellogenin 6 [Danio rerio] |           |           |         |     | gi 303227889 | 150936.1 | 8.84                       | 13  | 247    | 100                    | 229 | 100 |        |

|    |                                                                                                          |           |         |     |      |      |                            |  |  |  |  |  |  |  |  |  |        |
|----|----------------------------------------------------------------------------------------------------------|-----------|---------|-----|------|------|----------------------------|--|--|--|--|--|--|--|--|--|--------|
|    | 1958.0189                                                                                                | 1957.928  | -0.0909 | -46 | 1312 | 1329 | ATNSEKEIELTAALPSQR         |  |  |  |  |  |  |  |  |  | Mascot |
|    | 2233.2009                                                                                                | 2232.9822 | -0.2187 | -98 | 604  | 625  | SLTRITAPDMAYVAGAAN<br>VAIK |  |  |  |  |  |  |  |  |  | Mascot |
| 17 | novel protein similar to vitellogenin 1 (vg1) [Danio rerio] gi 94733734 149808.5 8.83 13 246 100 229 100 |           |         |     |      |      |                            |  |  |  |  |  |  |  |  |  |        |

Peptide Information

| Calc. Mass | Obsrv. Mass | ± da    | ± ppm | Start Seq. | End Seq. | Sequence                   | Ion Score | C. I.  | % Modification         | Rank | Result Type |
|------------|-------------|---------|-------|------------|----------|----------------------------|-----------|--------|------------------------|------|-------------|
| 821.4628   | 821.4199    | -0.0429 | -52   | 549        | 555      | ALHPEVR                    |           |        |                        |      | Mascot      |
| 826.4457   | 826.4082    | -0.0375 | -45   | 1245       | 1251     | QYAVFAK                    |           |        |                        |      | Mascot      |
| 864.4461   | 864.4466    | 0.0005  | 1     | 91         | 98       | DSFVPATK                   |           |        |                        |      | Mascot      |
| 960.4785   | 960.4356    | -0.0429 | -45   | 1265       | 1271     | LEVEWER                    |           |        |                        |      | Mascot      |
| 960.4785   | 960.4356    | -0.0429 | -45   | 1265       | 1271     | LEVEWER                    | 45        | 99.107 |                        |      | Mascot      |
| 984.4243   | 984.3802    | -0.0441 | -45   | 1237       | 1244     | FSWGAECK                   |           |        | Carbamidomethyl (C)[7] |      | Mascot      |
| 984.4243   | 984.3802    | -0.0441 | -45   | 1237       | 1244     | FSWGAECK                   | 45        | 99.091 | Carbamidomethyl (C)[7] |      | Mascot      |
| 992.5015   | 992.4224    | -0.0791 | -80   | 619        | 626      | LMNCKLDR                   |           |        |                        |      | Mascot      |
| 1303.6641  | 1303.6075   | -0.0566 | -43   | 1252       | 1264     | AEAGVLGEYPAAR              |           |        |                        |      | Mascot      |
| 1400.6627  | 1400.605    | -0.0577 | -41   | 1286       | 1297     | CILNAAYDTGFR               |           |        | Carbamidomethyl (C)[1] |      | Mascot      |
| 1638.8485  | 1638.7854   | -0.0631 | -39   | 672        | 687      | TYLAGAAADVVEFGVR           |           |        |                        |      | Mascot      |
| 1642.9315  | 1642.8578   | -0.0737 | -45   | 1168       | 1182     | FLGNDIPPVFIIAR             |           |        |                        |      | Mascot      |
| 1826.9799  | 1826.8995   | -0.0804 | -44   | 1190       | 1205     | LLGYQLAAYFDKPTAR           | 139       | 100    |                        |      | Mascot      |
| 1826.9799  | 1826.8995   | -0.0804 | -44   | 1190       | 1205     | LLGYQLAAYFDKPTAR           |           |        |                        |      | Mascot      |
| 1958.0189  | 1957.928    | -0.0909 | -46   | 1301       | 1318     | ATNSEKEIELTAALPSQR         |           |        |                        |      | Mascot      |
| 2233.2009  | 2232.9822   | -0.2187 | -98   | 597        | 618      | SLTRITAPDMAYVAGAAN<br>VAIK |           |        |                        |      | Mascot      |

|    |                                                                      |  |  |  |  |  |  |  |  |  |  |  |  |  |  |  |  |
|----|----------------------------------------------------------------------|--|--|--|--|--|--|--|--|--|--|--|--|--|--|--|--|
| 18 | vitellogenin 5 [Danio rerio] gi 57864785 72820.8 9 8 243 100 229 100 |  |  |  |  |  |  |  |  |  |  |  |  |  |  |  |  |
|----|----------------------------------------------------------------------|--|--|--|--|--|--|--|--|--|--|--|--|--|--|--|--|

Peptide Information

| Calc. Mass | Obsrv. Mass | ± da    | ± ppm | Start Seq. | End Seq. | Sequence       | Ion Score | C. I.  | % Modification         | Rank | Result Type |
|------------|-------------|---------|-------|------------|----------|----------------|-----------|--------|------------------------|------|-------------|
| 826.4457   | 826.4082    | -0.0375 | -45   | 544        | 550      | QYAVFAK        |           |        |                        |      | Mascot      |
| 960.4785   | 960.4356    | -0.0429 | -45   | 564        | 570      | LEVEWER        |           |        |                        |      | Mascot      |
| 960.4785   | 960.4356    | -0.0429 | -45   | 564        | 570      | LEVEWER        | 45        | 99.107 |                        |      | Mascot      |
| 984.4243   | 984.3802    | -0.0441 | -45   | 536        | 543      | FSWGAECK       |           |        | Carbamidomethyl (C)[7] |      | Mascot      |
| 984.4243   | 984.3802    | -0.0441 | -45   | 536        | 543      | FSWGAECK       | 45        | 99.091 | Carbamidomethyl (C)[7] |      | Mascot      |
| 1303.6641  | 1303.6075   | -0.0566 | -43   | 551        | 563      | AEAGVLGEYPAAR  |           |        |                        |      | Mascot      |
| 1376.7069  | 1376.6483   | -0.0586 | -43   | 585        | 596      | HILNAAYNTGFR   |           |        |                        |      | Mascot      |
| 1642.9315  | 1642.8578   | -0.0737 | -45   | 467        | 481      | FLGNDIPPVFIIAR |           |        |                        |      | Mascot      |

|    |                              |           |         |     |             |     |                    |      |     |     |     |     |     |        |
|----|------------------------------|-----------|---------|-----|-------------|-----|--------------------|------|-----|-----|-----|-----|-----|--------|
|    | 1826.9799                    | 1826.8995 | -0.0804 | -44 | 489         | 504 | LLGYQLAAYFDKPTAR   | 139  | 100 |     |     |     |     | Mascot |
|    | 1826.9799                    | 1826.8995 | -0.0804 | -44 | 489         | 504 | LLGYQLAAYFDKPTAR   |      |     |     |     |     |     | Mascot |
|    | 1930.0127                    | 1929.9294 | -0.0833 | -43 | 600         | 617 | ATNSEKEIELTAALPSQK |      |     |     |     |     |     | Mascot |
| 19 | vitellogenin 5 [Danio rerio] |           |         |     | gi 68448530 |     | 148868             | 8.77 | 10  | 234 | 100 | 229 | 100 |        |

Peptide Information

| Calc. Mass | Obsrv. Mass | ± da    | ± ppm | Start Seq. | End Seq. | Sequence           | Ion Score | C. I. % | Modification           | Rank | Result Type |
|------------|-------------|---------|-------|------------|----------|--------------------|-----------|---------|------------------------|------|-------------|
| 821.4628   | 821.4199    | -0.0429 | -52   | 545        | 551      | ALHPEVR            |           |         |                        |      | Mascot      |
| 826.4457   | 826.4082    | -0.0375 | -45   | 1238       | 1244     | QYAVFAK            |           |         |                        |      | Mascot      |
| 960.4785   | 960.4356    | -0.0429 | -45   | 1258       | 1264     | LEVEWER            |           |         |                        |      | Mascot      |
| 960.4785   | 960.4356    | -0.0429 | -45   | 1258       | 1264     | LEVEWER            | 45        | 99.107  |                        |      | Mascot      |
| 984.4243   | 984.3802    | -0.0441 | -45   | 1230       | 1237     | FSWGAECK           |           |         | Carbamidomethyl (C)[7] |      | Mascot      |
| 984.4243   | 984.3802    | -0.0441 | -45   | 1230       | 1237     | FSWGAECK           | 45        | 99.091  | Carbamidomethyl (C)[7] |      | Mascot      |
| 992.5015   | 992.4224    | -0.0791 | -80   | 615        | 622      | LMNCKLDR           |           |         |                        |      | Mascot      |
| 1303.6641  | 1303.6075   | -0.0566 | -43   | 1245       | 1257     | AEAGVLGEYPAAR      |           |         |                        |      | Mascot      |
| 1376.7069  | 1376.6483   | -0.0586 | -43   | 1279       | 1290     | HILNAAyntGFR       |           |         |                        |      | Mascot      |
| 1642.9315  | 1642.8578   | -0.0737 | -45   | 1161       | 1175     | FLGNDIPPVFaiiAR    |           |         |                        |      | Mascot      |
| 1826.9799  | 1826.8995   | -0.0804 | -44   | 1183       | 1198     | LLGYQLAAYFDKPTAR   | 139       | 100     |                        |      | Mascot      |
| 1826.9799  | 1826.8995   | -0.0804 | -44   | 1183       | 1198     | LLGYQLAAYFDKPTAR   |           |         |                        |      | Mascot      |
| 1930.0127  | 1929.9294   | -0.0833 | -43   | 1294       | 1311     | ATNSEKEIELTAALPSQK |           |         |                        |      | Mascot      |

|    |                                                             |  |  |  |             |  |          |      |    |     |     |     |     |  |
|----|-------------------------------------------------------------|--|--|--|-------------|--|----------|------|----|-----|-----|-----|-----|--|
| 20 | novel protein similar to vitellogenin 1 (vg1) [Danio rerio] |  |  |  | gi 94733731 |  | 149169.2 | 8.84 | 10 | 232 | 100 | 229 | 100 |  |
|----|-------------------------------------------------------------|--|--|--|-------------|--|----------|------|----|-----|-----|-----|-----|--|

Peptide Information

| Calc. Mass | Obsrv. Mass | ± da    | ± ppm | Start Seq. | End Seq. | Sequence         | Ion Score | C. I. % | Modification           | Rank | Result Type |
|------------|-------------|---------|-------|------------|----------|------------------|-----------|---------|------------------------|------|-------------|
| 821.4628   | 821.4199    | -0.0429 | -52   | 549        | 555      | ALHPEVR          |           |         |                        |      | Mascot      |
| 826.4457   | 826.4082    | -0.0375 | -45   | 1240       | 1246     | QYAVFAK          |           |         |                        |      | Mascot      |
| 960.4785   | 960.4356    | -0.0429 | -45   | 1260       | 1266     | LEVEWER          |           |         |                        |      | Mascot      |
| 960.4785   | 960.4356    | -0.0429 | -45   | 1260       | 1266     | LEVEWER          | 45        | 99.107  |                        |      | Mascot      |
| 984.4243   | 984.3802    | -0.0441 | -45   | 1232       | 1239     | FSWGAECK         |           |         | Carbamidomethyl (C)[7] |      | Mascot      |
| 984.4243   | 984.3802    | -0.0441 | -45   | 1232       | 1239     | FSWGAECK         | 45        | 99.091  | Carbamidomethyl (C)[7] |      | Mascot      |
| 992.5015   | 992.4224    | -0.0791 | -80   | 619        | 626      | LMNCKLDR         |           |         |                        |      | Mascot      |
| 1303.6641  | 1303.6075   | -0.0566 | -43   | 1247       | 1259     | AEAGVLGEYPAAR    |           |         |                        |      | Mascot      |
| 1376.7069  | 1376.6483   | -0.0586 | -43   | 1281       | 1292     | HILNAAyntGFR     |           |         |                        |      | Mascot      |
| 1642.9315  | 1642.8578   | -0.0737 | -45   | 1163       | 1177     | FLGNDIPPVFaiiAR  |           |         |                        |      | Mascot      |
| 1826.9799  | 1826.8995   | -0.0804 | -44   | 1185       | 1200     | LLGYQLAAYFDKPTAR | 139       | 100     |                        |      | Mascot      |

|    |                            |           |         |     |              |      |                    |      |   |     |     |    |     |  |  |  |        |
|----|----------------------------|-----------|---------|-----|--------------|------|--------------------|------|---|-----|-----|----|-----|--|--|--|--------|
|    | 1826.9799                  | 1826.8995 | -0.0804 | -44 | 1185         | 1200 | LLGYQLAAYFDKPTAR   |      |   |     |     |    |     |  |  |  | Mascot |
|    | 1930.0127                  | 1929.9294 | -0.0833 | -43 | 1296         | 1313 | ATNSEKEIELTAALPSQK |      |   |     |     |    |     |  |  |  | Mascot |
| 21 | Vtg6 protein [Danio rerio] |           |         |     | gi 157422885 |      | 27937.4            | 9.18 | 7 | 120 | 100 | 90 | 100 |  |  |  |        |

Peptide Information

| Calc. Mass | Obsrv. Mass | ± da    | ± ppm | Start Seq. | End Seq. | Sequence           | Ion Score | C. I.  | % Modification         | Rank | Result Type |
|------------|-------------|---------|-------|------------|----------|--------------------|-----------|--------|------------------------|------|-------------|
| 826.4457   | 826.4082    | -0.0375 | -45   | 129        | 135      | QYAVFAK            |           |        |                        |      | Mascot      |
| 960.4785   | 960.4356    | -0.0429 | -45   | 149        | 155      | LEVEWER            |           |        |                        |      | Mascot      |
| 960.4785   | 960.4356    | -0.0429 | -45   | 149        | 155      | LEVEWER            | 45        | 99.107 |                        |      | Mascot      |
| 984.4243   | 984.3802    | -0.0441 | -45   | 121        | 128      | FSWGAECK           |           |        | Carbamidomethyl (C)[7] |      | Mascot      |
| 984.4243   | 984.3802    | -0.0441 | -45   | 121        | 128      | FSWGAECK           | 45        | 99.091 | Carbamidomethyl (C)[7] |      | Mascot      |
| 1303.6641  | 1303.6075   | -0.0566 | -43   | 136        | 148      | AEAGVLGEYPAAR      |           |        |                        |      | Mascot      |
| 1400.6627  | 1400.605    | -0.0577 | -41   | 170        | 181      | CILNAAYDTGFR       |           |        | Carbamidomethyl (C)[1] |      | Mascot      |
| 1642.9315  | 1642.8578   | -0.0737 | -45   | 52         | 66       | FLGNDIPPVFAIAR     |           |        |                        |      | Mascot      |
| 1958.0189  | 1957.928    | -0.0909 | -46   | 185        | 202      | ATNSEKEIELTAALPSQR |           |        |                        |      | Mascot      |

|    |                                                     |  |  |  |              |  |         |      |    |    |        |  |  |  |  |  |  |
|----|-----------------------------------------------------|--|--|--|--------------|--|---------|------|----|----|--------|--|--|--|--|--|--|
| 22 | Rho guanine exchange factor betaPix B [Danio rerio] |  |  |  | gi 109745507 |  | 90350.1 | 8.42 | 15 | 52 | 69.914 |  |  |  |  |  |  |
|----|-----------------------------------------------------|--|--|--|--------------|--|---------|------|----|----|--------|--|--|--|--|--|--|

Peptide Information

| Calc. Mass | Obsrv. Mass | ± da    | ± ppm | Start Seq. | End Seq. | Sequence            | Ion Score | C. I. | % Modification         | Rank | Result Type |
|------------|-------------|---------|-------|------------|----------|---------------------|-----------|-------|------------------------|------|-------------|
| 831.4821   | 831.3849    | -0.0972 | -117  | 725        | 731      | IIVEETK             |           |       |                        |      | Mascot      |
| 982.4662   | 982.4127    | -0.0535 | -54   | 239        | 247      | AIESANFCK           |           |       |                        |      | Mascot      |
| 992.506    | 992.4224    | -0.0836 | -84   | 147        | 153      | HKFNQYR             |           |       |                        |      | Mascot      |
| 1006.4622  | 1006.3539   | -0.1083 | -108  | 63         | 70       | DECLSNIR            |           |       | Carbamidomethyl (C)[3] |      | Mascot      |
| 1279.6715  | 1279.7277   | 0.0562  | 44    | 391        | 400      | YPTLLKEMER          |           |       |                        |      | Mascot      |
| 1332.6688  | 1332.5768   | -0.092  | -69   | 421        | 431      | NLSAQCEVRK          |           |       | Carbamidomethyl (C)[6] |      | Mascot      |
| 1347.7631  | 1347.6812   | -0.0819 | -61   | 267        | 277      | ELQNLLSVYLR         |           |       |                        |      | Mascot      |
| 1403.6736  | 1403.6321   | -0.0415 | -30   | 522        | 533      | HAFEISGNMIER        |           |       |                        |      | Mascot      |
| 1529.6941  | 1529.7269   | 0.0328  | 21    | 712        | 724      | ESGPHMLFPPEEK       |           |       |                        |      | Mascot      |
| 1529.6941  | 1529.7269   | 0.0328  | 21    | 712        | 724      | ESGPHMLFPPEEK       |           |       |                        |      | Mascot      |
| 1638.8711  | 1638.7854   | -0.0857 | -52   | 48         | 61       | LRPGSVHTIYQDPR      |           |       |                        |      | Mascot      |
| 1657.7891  | 1657.8132   | 0.0241  | 15    | 711        | 724      | KESGPHMLFPPEEK      |           |       |                        |      | Mascot      |
| 1860.9484  | 1860.8838   | -0.0646 | -35   | 154        | 170      | SLDMSSENSAPQVLVKAR  |           |       | Oxidation (M)[4]       |      | Mascot      |
| 1870.9149  | 1870.8452   | -0.0697 | -37   | 415        | 430      | SMTLFKNLSAQCEVR     |           |       | Oxidation (M)[2]       |      | Mascot      |
| 2060.0554  | 2060.0459   | -0.0095 | -5    | 495        | 513      | MSGFIYQGKLPLTGMSVSK |           |       | Oxidation (M)[1]       |      | Mascot      |
| 2076.0503  | 2076.0422   | -0.0081 | -4    | 495        | 513      | MSGFIYQGKLPLTGMSV   |           |       | Oxidation (M)[1,15]    |      | Mascot      |

|    |                                                                     | 2283.1914 | 2283.0718 | -0.1196 | -52 | 317 | 336          | SK<br>VSDSQQRIGGFFLSLLTQ<br>MR |         |      |   |    |   |    |        | Mascot |
|----|---------------------------------------------------------------------|-----------|-----------|---------|-----|-----|--------------|--------------------------------|---------|------|---|----|---|----|--------|--------|
| 23 | PREDICTED: serine/threonine-protein kinase pim-3-like [Danio rerio] |           |           |         |     |     | gi 326675215 |                                | 23705.1 | 8.34 | 4 | 45 | 0 | 30 | 71.965 |        |

|    | Calc. Mass                                                               | Obsrv. Mass | ± da    | ± ppm | Start Seq. | End Sequence Seq.                     | Ion Score | C. I. % Modification |                             |    | Rank | Result Type |   |
|----|--------------------------------------------------------------------------|-------------|---------|-------|------------|---------------------------------------|-----------|----------------------|-----------------------------|----|------|-------------|---|
|    | 831.4431                                                                 | 831.3849    | -0.0582 | -70   | 1861       | 1867 SRDQLGR                          |           |                      |                             |    |      | Mascot      |   |
|    | 864.4131                                                                 | 864.4466    | 0.0335  | 39    | 1769       | 1776 CGVSELEK                         |           |                      |                             |    |      | Mascot      |   |
|    | 877.4373                                                                 | 877.3747    | -0.0626 | -71   | 689        | 696 ASERASEK                          |           |                      |                             |    |      | Mascot      |   |
|    | 900.5148                                                                 | 900.3813    | -0.1335 | -148  | 693        | 701 ASEKGPALK                         |           |                      |                             |    |      | Mascot      |   |
|    | 900.5148                                                                 | 900.3813    | -0.1335 | -148  | 693        | 701 ASEKGPALK                         |           |                      |                             |    |      | Mascot      |   |
|    | 976.5132                                                                 | 976.4303    | -0.0829 | -85   | 1344       | 1351 EDISIMIR                         |           |                      |                             |    |      | Mascot      |   |
|    | 982.4298                                                                 | 982.4127    | -0.0171 | -17   | 2018       | 2025 FNPNMSEK                         |           |                      | Oxidation (M)[5]            |    |      | Mascot      |   |
|    | 984.493                                                                  | 984.3802    | -0.1128 | -115  | 2038       | 2045 CFLSSRSK                         |           |                      | Carbamidomethyl (C)[1]      |    |      | Mascot      |   |
|    | 984.493                                                                  | 984.3802    | -0.1128 | -115  | 2038       | 2045 CFLSSRSK                         |           |                      | Carbamidomethyl (C)[1]      |    |      | Mascot      |   |
|    | 992.5081                                                                 | 992.4224    | -0.0857 | -86   | 1344       | 1351 EDISIMIR                         |           |                      | Oxidation (M)[6]            |    |      | Mascot      |   |
|    | 1051.524                                                                 | 1051.6666   | 0.1426  | 136   | 1184       | 1192 TGVEVPFMR                        |           |                      | Oxidation (M)[8]            |    |      | Mascot      |   |
|    | 1279.6462                                                                | 1279.7277   | 0.0815  | 64    | 998        | 1008 DFAARCGEILK                      |           |                      | Carbamidomethyl (C)[6]      |    |      | Mascot      |   |
|    | 1287.6804                                                                | 1287.616    | -0.0644 | -50   | 551        | 561 DAHLIPDHTIR                       |           |                      |                             |    |      | Mascot      |   |
|    | 1287.6804                                                                | 1287.616    | -0.0644 | -50   | 551        | 561 DAHLIPDHTIR                       |           |                      |                             |    |      | Mascot      |   |
|    | 1376.6838                                                                | 1376.6483   | -0.0355 | -26   | 1769       | 1780 CGVSELEKEGLR                     |           |                      | Carbamidomethyl (C)[1]      |    |      | Mascot      |   |
|    | 1377.7559                                                                | 1377.6504   | -0.1055 | -77   | 2026       | 2037 EAAAFMIKVIER                     |           |                      |                             |    |      | Mascot      |   |
|    | 1382.6733                                                                | 1382.7214   | 0.0481  | 35    | 499        | 509 KSQPSMYEQLR                       |           |                      | Oxidation (M)[6]            |    |      | Mascot      |   |
|    | 1382.6733                                                                | 1382.7214   | 0.0481  | 35    | 499        | 509 KSQPSMYEQLR                       |           |                      | Oxidation (M)[6]            |    |      | Mascot      |   |
|    | 1400.746                                                                 | 1400.605    | -0.141  | -101  | 312        | 323 TFSDPLYVAIFK                      |           |                      |                             |    |      | Mascot      |   |
|    | 1439.8291                                                                | 1439.7211   | -0.108  | -75   | 576        | 587 VMEPILQILQQK                      |           |                      |                             |    |      | Mascot      |   |
|    | 1495.692                                                                 | 1495.7876   | 0.0956  | 64    | 1193       | 1205 EMAGAWQMTVDLK                    |           |                      | Oxidation (M)[2]            |    |      | Mascot      |   |
|    | 1529.7166                                                                | 1529.7269   | 0.0103  | 7     | 849        | 860 SQESDRFQVMFR                      |           |                      |                             |    |      | Mascot      |   |
|    | 1529.7166                                                                | 1529.7269   | 0.0103  | 7     | 849        | 860 SQESDRFQVMFR                      |           |                      |                             |    |      | Mascot      |   |
|    | 1638.7648                                                                | 1638.7854   | 0.0206  | 13    | 870        | 884 DKSGMMQCVIAGDK                    |           |                      | Carbamidomethyl (C)[8]      |    |      | Mascot      |   |
|    | 1642.8331                                                                | 1642.8578   | 0.0247  | 15    | 885        | 898 VFDVFLQMMADKAK                    |           |                      |                             |    |      | Mascot      |   |
|    | 2225.2078                                                                | 2225.0168   | -0.191  | -86   | 1499       | 1518 DNVNLAWSIAPYLALQLP<br>AR         |           |                      |                             |    |      | Mascot      |   |
|    | 2283.0857                                                                | 2283.0718   | -0.0139 | -6    | 500        | 518 SQPSMYEQLRDISINN<br>IC R          |           |                      | Oxidation (M)[5]            |    |      | Mascot      |   |
|    | 3337.5432                                                                | 3337.6064   | 0.0632  | 19    | 377        | 405 LRCQANAACVDLMVWAV<br>TEEQGAENLCTK |           |                      | Carbamidomethyl (C)[3,9,27] |    |      | Mascot      |   |
| 26 | PREDICTED: WD repeat- and FYVE domain-containing protein 4 [Danio rerio] |             |         |       |            | gi 326673033                          | 526148.3  | 6.32                 | 30                          | 44 | 0    | 17          | 0 |

Peptide Information

| Calc. Mass | Obsrv. Mass | ± da | ± ppm | Start Seq. | End Sequence Seq. | Ion Score | C. I. | % Modification | Rank | Result Type |
|------------|-------------|------|-------|------------|-------------------|-----------|-------|----------------|------|-------------|
|------------|-------------|------|-------|------------|-------------------|-----------|-------|----------------|------|-------------|



|           |           |         |      |      |      |                                  |    |  |   |                                            |  |        |
|-----------|-----------|---------|------|------|------|----------------------------------|----|--|---|--------------------------------------------|--|--------|
| 809.3723  | 809.3831  | 0.0108  | 13   | 1217 | 1222 | FCQQQR                           |    |  |   |                                            |  | Mascot |
| 821.4484  | 821.4199  | -0.0285 | -35  | 1476 | 1481 | MIRMVR                           |    |  |   | Oxidation (M)[1]                           |  | Mascot |
| 850.5145  | 850.5012  | -0.0133 | -16  | 2616 | 2622 | RSFSLLK                          |    |  |   |                                            |  | Mascot |
| 992.5444  | 992.4224  | -0.122  | -123 | 3995 | 4003 | LCSVVSSLK                        |    |  |   | Carbamidomethyl (C)[2]                     |  | Mascot |
| 1000.488  | 1000.3777 | -0.1103 | -110 | 1173 | 1180 | MLQEQSHK                         |    |  |   |                                            |  | Mascot |
| 1016.4829 | 1016.3719 | -0.111  | -109 | 1173 | 1180 | MLQEQSHK                         |    |  |   | Oxidation (M)[1]                           |  | Mascot |
| 1051.5492 | 1051.6666 | 0.1174  | 112  | 2205 | 2213 | DLGMIPYVK                        |    |  |   | Oxidation (M)[4]                           |  | Mascot |
| 1062.5435 | 1062.6484 | 0.1049  | 99   | 901  | 908  | IMLQELCR                         |    |  |   | Carbamidomethyl (C)[7]                     |  | Mascot |
| 1118.5225 | 1118.6349 | 0.1124  | 100  | 3764 | 3773 | GWVQDTAEGR                       |    |  |   |                                            |  | Mascot |
| 1211.6466 | 1211.6608 | 0.0142  | 12   | 4617 | 4625 | WERHLVLCR                        |    |  |   |                                            |  | Mascot |
| 1287.6903 | 1287.616  | -0.0743 | -58  | 2455 | 2467 | APSVSVVSIESGR                    | 17 |  | 0 |                                            |  | Mascot |
| 1287.6903 | 1287.616  | -0.0743 | -58  | 2455 | 2467 | APSVSVVSIESGR                    |    |  |   |                                            |  | Mascot |
| 1309.7157 | 1309.5947 | -0.121  | -92  | 4620 | 4629 | HLVLCRELNR                       |    |  |   | Carbamidomethyl (C)[5]                     |  | Mascot |
| 1332.7556 | 1332.5768 | -0.1788 | -134 | 2258 | 2268 | LKQDLLQSIMK                      |    |  |   | Oxidation (M)[10]                          |  | Mascot |
| 1365.7273 | 1365.6589 | -0.0684 | -50  | 1310 | 1321 | YWITGANSAYRK                     |    |  |   |                                            |  | Mascot |
| 1377.7155 | 1377.6504 | -0.0651 | -47  | 2032 | 2043 | SSNTVICSQILR                     |    |  |   | Carbamidomethyl (C)[7]                     |  | Mascot |
| 1382.6846 | 1382.7214 | 0.0368  | 27   | 294  | 306  | SDTASMHKAHVAK                    |    |  |   |                                            |  | Mascot |
| 1382.7175 | 1382.7214 | 0.0039  | 3    | 4652 | 4664 | THGTLLVGDAWGR                    |    |  |   |                                            |  | Mascot |
| 1403.8409 | 1403.6321 | -0.2088 | -149 | 1797 | 1808 | SLYLFVALPPRK                     |    |  |   |                                            |  | Mascot |
| 1529.8474 | 1529.7269 | -0.1205 | -79  | 2468 | 2481 | IYGNFTILHPGAVK                   |    |  |   |                                            |  | Mascot |
| 1529.8474 | 1529.7269 | -0.1205 | -79  | 2468 | 2481 | IYGNFTILHPGAVK                   |    |  |   |                                            |  | Mascot |
| 1638.6848 | 1638.7854 | 0.1006  | 61   | 35   | 47   | SCLYMPPELGIDK                    |    |  |   | Carbamidomethyl (C)[2], Oxidation (M)[5,6] |  | Mascot |
| 1642.8832 | 1642.8578 | -0.0254 | -15  | 4352 | 4366 | EVSLGPVGQIVCKEK                  |    |  |   | Carbamidomethyl (C)[12]                    |  | Mascot |
| 1657.8121 | 1657.8132 | 0.0011  | 1    | 601  | 612  | FLQNEHFFKEYR                     |    |  |   |                                            |  | Mascot |
| 1839.0044 | 1838.8474 | -0.157  | -85  | 2811 | 2828 | KSCLVTVYLNATAIGTGK               |    |  |   |                                            |  | Mascot |
| 1958.0276 | 1957.928  | -0.0996 | -51  | 2717 | 2733 | FSSACESHVPRLTTVVR                |    |  |   | Carbamidomethyl (C)[5]                     |  | Mascot |
| 2060.0593 | 2060.0459 | -0.0134 | -7   | 1988 | 2005 | TELKVAICVSNPQPSNFR               |    |  |   | Carbamidomethyl (C)[8]                     |  | Mascot |
| 2076.1025 | 2076.0422 | -0.0603 | -29  | 1537 | 1554 | GKPSLPPGLFEHHDLYIR               |    |  |   |                                            |  | Mascot |
| 2224.9355 | 2225.0168 | 0.0813  | 37   | 257  | 274  | HLCFGCLSTSHMSRDCE<br>K           |    |  |   | Carbamidomethyl (C)[3,6,16]                |  | Mascot |
| 2233.0127 | 2232.9822 | -0.0305 | -14  | 3183 | 3201 | SWSFECLSCICPGFEVLQ<br>K          |    |  |   | Carbamidomethyl (C)[6]                     |  | Mascot |
| 2283.1948 | 2283.0718 | -0.123  | -54  | 2024 | 2043 | IIQSSFMRSSNTVICSQIL<br>R         |    |  |   |                                            |  | Mascot |
| 2284.1389 | 2284.0703 | -0.0686 | -30  | 2349 | 2369 | LGEALLHLGCFQKGDV<br>ESDR         |    |  |   |                                            |  | Mascot |
| 3337.6045 | 3337.6064 | 0.0019  | 1    | 3638 | 3666 | EGQVSMADVSPWEEQ<br>ATKSWQLFIDSQK |    |  |   |                                            |  | Mascot |

27    PREDICTED: dual oxidase 1, partial [Danio rerio]    gi|326680379    162265.6    7.47    18    44    0

Peptide Information

|                     |                                                   | Calc. Mass | Obsrv. Mass | ± da    | ± ppm | Start Seq. | End Sequence Seq.              | Ion Score | C. I. | % Modification                            | Rank | Result Type |
|---------------------|---------------------------------------------------|------------|-------------|---------|-------|------------|--------------------------------|-----------|-------|-------------------------------------------|------|-------------|
|                     |                                                   | 809.4127   | 809.3831    | -0.0296 | -37   | 1369       | 1374 FKFHCK                    |           |       |                                           |      | Mascot      |
|                     |                                                   | 850.4273   | 850.5012    | 0.0739  | 87    | 1066       | 1072 NLITMCR                   |           |       |                                           |      | Mascot      |
|                     |                                                   | 877.4811   | 877.3747    | -0.1064 | -121  | 915        | 922 GMEVLGKK                   |           |       | Oxidation (M)[2]                          |      | Mascot      |
|                     |                                                   | 996.5182   | 996.5529    | 0.0347  | 35    | 1420       | 1427 FDLRTTML                  |           |       |                                           |      | Mascot      |
|                     |                                                   | 1006.4635  | 1006.3539   | -0.1096 | -109  | 327        | 333 NRTCHYR                    |           |       | Carbamidomethyl (C)[4]                    |      | Mascot      |
|                     |                                                   | 1062.5248  | 1062.6484   | 0.1236  | 116   | 777        | 785 EALQCELTR                  |           |       |                                           |      | Mascot      |
|                     |                                                   | 1211.6935  | 1211.6608   | -0.0327 | -27   | 1375       | 1383 KVFVLVWTR                 |           |       |                                           |      | Mascot      |
|                     |                                                   | 1309.6536  | 1309.5947   | -0.0589 | -45   | 414        | 424 DFGLPSYNQIR                |           |       |                                           |      | Mascot      |
|                     |                                                   | 1376.6951  | 1376.6483   | -0.0468 | -34   | 775        | 785 TREALQCELTR                |           |       | Carbamidomethyl (C)[7]                    |      | Mascot      |
|                     |                                                   | 1381.645   | 1381.6799   | 0.0349  | 25    | 731        | 742 SEKEMLCDAVTR               |           |       |                                           |      | Mascot      |
|                     |                                                   | 1382.7216  | 1382.7214   | -0.0002 | 0     | 533        | 543 GDIQRSVFFWK                |           |       |                                           |      | Mascot      |
|                     |                                                   | 1382.7216  | 1382.7214   | -0.0002 | 0     | 533        | 543 GDIQRSVFFWK                |           |       |                                           |      | Mascot      |
|                     |                                                   | 1400.5675  | 1400.605    | 0.0375  | 27    | 565        | 576 AFSMSYFDDSSK               |           |       | Oxidation (M)[4]                          |      | Mascot      |
|                     |                                                   | 1404.6729  | 1404.6597   | -0.0132 | -9    | 391        | 401 DYMYGPLRFSR                |           |       |                                           |      | Mascot      |
|                     |                                                   | 1638.6931  | 1638.7854   | 0.0923  | 56    | 16         | 28 YDGWYNNLADHDR               |           |       |                                           |      | Mascot      |
|                     |                                                   | 1657.8188  | 1657.8132   | -0.0056 | -3    | 100        | 113 AGCPPEFMHIKVQK             |           |       | Carbamidomethyl (C)[3], Oxidation (M)[8]  |      | Mascot      |
|                     |                                                   | 2060.0708  | 2060.0459   | -0.0249 | -12   | 1047       | 1065 GSAAAI SFLFPYMLLTVC R     |           |       |                                           |      | Mascot      |
|                     |                                                   | 2076.0657  | 2076.0422   | -0.0235 | -11   | 1047       | 1065 GSAAAI SFLFPYMLLTVC R     |           |       | Oxidation (M)[13]                         |      | Mascot      |
|                     |                                                   | 2211.075   | 2211.0063   | -0.0687 | -31   | 381        | 398 EDNIIVDLRDYMYGPLR          |           |       |                                           |      | Mascot      |
|                     |                                                   | 2705.3743  | 2705.04     | -0.3343 | -124  | 786        | 810 AEFASVLGLKSDSLFVES MFTLADK |           |       |                                           |      | Mascot      |
| 28                  | iron-sulfur cluster assembly enzyme [Danio rerio] |            |             |         |       |            | gi 54261801                    | 17796.2   | 8.7   | 6                                         | 44   | 0           |
| Peptide Information |                                                   |            |             |         |       |            |                                |           |       |                                           |      |             |
|                     |                                                   | Calc. Mass | Obsrv. Mass | ± da    | ± ppm | Start Seq. | End Sequence Seq.              | Ion Score | C. I. | % Modification                            | Rank | Result Type |
|                     |                                                   | 960.5083   | 960.4356    | -0.0727 | -76   | 1          | 9 MALAAAAWR                    |           |       |                                           |      | Mascot      |
|                     |                                                   | 960.5359   | 960.4356    | -0.1003 | -104  | 107        | 115 GKSIDEALK                  | 15        |       | 0                                         |      | Mascot      |
|                     |                                                   | 976.5032   | 976.4303    | -0.0729 | -75   | 1          | 9 MALAAAAWR                    |           |       | Oxidation (M)[1]                          |      | Mascot      |
|                     |                                                   | 1045.5636  | 1045.5189   | -0.0447 | -43   | 44         | 53 NVGSLDKNAK                  |           |       |                                           |      | Mascot      |
|                     |                                                   | 1403.6658  | 1403.6321   | -0.0337 | -24   | 132        | 143 LHCSMLAEDA IK              |           |       | Carbamidomethyl (C)[3], Oxidation (M)[5]  |      | Mascot      |
|                     |                                                   | 1870.9302  | 1870.8452   | -0.085  | -45   | 1          | 18 MALAAAAWRCASSALFS K         |           |       | Oxidation (M)[1]                          |      | Mascot      |
|                     |                                                   | 2283.1545  | 2283.0718   | -0.0827 | -36   | 124        | 143 ELCLPPVKLHCSMLAEDA IK      |           |       | Carbamidomethyl (C)[3], Oxidation (M)[13] |      | Mascot      |
| 29                  | hypothetical protein LOC393502 [Danio rerio]      |            |             |         |       |            | gi 41056197                    | 70203.6   | 5.68  | 8                                         | 42   | 0 19 0      |

| Peptide Information |                                         |             |         |       |              |          |                                    |           |         |                     |      |             |   |
|---------------------|-----------------------------------------|-------------|---------|-------|--------------|----------|------------------------------------|-----------|---------|---------------------|------|-------------|---|
|                     | Calc. Mass                              | Obsrv. Mass | ± da    | ± ppm | Start Seq.   | End Seq. | Sequence                           | Ion Score | C. I. % | Modification        | Rank | Result Type |   |
|                     | 809.4338                                | 809.3831    | -0.0507 | -63   | 394          | 399      | MLDFKR                             |           |         |                     |      | Mascot      |   |
|                     | 855.4545                                | 855.3989    | -0.0556 | -65   | 37           | 43       | MAFFALR                            |           |         |                     |      | Mascot      |   |
|                     | 855.4545                                | 855.3989    | -0.0556 | -65   | 37           | 43       | MAFFALR                            | 19        | 0       |                     |      | Mascot      |   |
|                     | 960.5182                                | 960.4356    | -0.0826 | -86   | 605          | 612      | SMDLPLLR                           |           |         | Oxidation (M)[2]    |      | Mascot      |   |
|                     | 960.5182                                | 960.4356    | -0.0826 | -86   | 605          | 612      | SMDLPLLR                           |           |         | Oxidation (M)[2]    |      | Mascot      |   |
|                     | 1211.6055                               | 1211.6608   | 0.0553  | 46    | 613          | 623      | FSSLVPSDGFR                        |           |         |                     |      | Mascot      |   |
|                     | 1325.7172                               | 1325.7015   | -0.0157 | -12   | 204          | 215      | TTPSNQLPKPSR                       |           |         |                     |      | Mascot      |   |
|                     | 1325.7172                               | 1325.7015   | -0.0157 | -12   | 204          | 215      | TTPSNQLPKPSR                       |           |         |                     |      | Mascot      |   |
|                     | 1400.6876                               | 1400.605    | -0.0826 | -59   | 277          | 290      | RNAETAPAVSDGGR                     |           |         |                     |      | Mascot      |   |
|                     | 2283.2932                               | 2283.0718   | -0.2214 | -97   | 123          | 142      | TARYVSISNTLQVVLLVH<br>NR           |           |         |                     |      | Mascot      |   |
|                     | 3337.5828                               | 3337.6064   | 0.0236  | 7     | 314          | 342      | SVSMPVLSDIQPKLHFMS<br>TEDASYHQTTTR |           |         | Oxidation (M)[4,17] |      | Mascot      |   |
| 30                  | novel protein (zgc:66455) [Danio rerio] |             |         |       | gi 220678753 |          | 71145.1                            | 5.89      | 8       | 42                  | 0    | 19          | 0 |

| Peptide Information |                                                         |         |       |            |              |                                    |           |         |                     |      |        |        |
|---------------------|---------------------------------------------------------|---------|-------|------------|--------------|------------------------------------|-----------|---------|---------------------|------|--------|--------|
| Calc. Mass          | Obsrv. Mass                                             | ± da    | ± ppm | Start Seq. | End Seq.     | Sequence                           | Ion Score | C. I. % | Modification        | Rank | Result | Type   |
| 809.4338            | 809.3831                                                | -0.0507 | -63   | 401        | 406          | MLDFKR                             |           |         |                     |      |        | Mascot |
| 855.4545            | 855.3989                                                | -0.0556 | -65   | 44         | 50           | MAFFALR                            |           |         |                     |      |        | Mascot |
| 855.4545            | 855.3989                                                | -0.0556 | -65   | 44         | 50           | MAFFALR                            | 19        | 0       |                     |      |        | Mascot |
| 960.5182            | 960.4356                                                | -0.0826 | -86   | 612        | 619          | SMDLPLLR                           |           |         | Oxidation (M)[2]    |      |        | Mascot |
| 960.5182            | 960.4356                                                | -0.0826 | -86   | 612        | 619          | SMDLPLLR                           |           |         | Oxidation (M)[2]    |      |        | Mascot |
| 1211.6055           | 1211.6608                                               | 0.0553  | 46    | 620        | 630          | FSSLVPSDGFR                        |           |         |                     |      |        | Mascot |
| 1325.7172           | 1325.7015                                               | -0.0157 | -12   | 211        | 222          | TTPSNQLPKPSR                       |           |         |                     |      |        | Mascot |
| 1325.7172           | 1325.7015                                               | -0.0157 | -12   | 211        | 222          | TTPSNQLPKPSR                       |           |         |                     |      |        | Mascot |
| 1400.6876           | 1400.605                                                | -0.0826 | -59   | 284        | 297          | RNAETAPAVSDGGR                     |           |         |                     |      |        | Mascot |
| 2283.2932           | 2283.0718                                               | -0.2214 | -97   | 130        | 149          | TARYVSISNTLQVVLLVH<br>NR           |           |         |                     |      |        | Mascot |
| 3337.5828           | 3337.6064                                               | 0.0236  | 7     | 321        | 349          | SVSMPVLSDIQPKLHFMS<br>TEDASYHQTTTR |           |         | Oxidation (M)[4,17] |      |        | Mascot |
| 31                  | PREDICTED: hypothetical protein LOC556086 [Danio rerio] |         |       |            | gi 292621054 | 227627.3                           | 6.14      | 17      | 42                  | 0    | 24     | 1.666  |

| Peptide Information |             |        |       |            |          |          |           |       |                |                  |
|---------------------|-------------|--------|-------|------------|----------|----------|-----------|-------|----------------|------------------|
| Calc. Mass          | Obsrv. Mass | ± da   | ± ppm | Start Seq. | End Seq. | Sequence | Ion Score | C. I. | % Modification | Rank Result Type |
| 850.3983            | 850.5012    | 0.1029 | 121   | 1289       | 1296     | CMIPVCGK |           |       |                | Mascot           |

|    |                                    |           |         |      |             |         |                      |    |       |                                           |        |
|----|------------------------------------|-----------|---------|------|-------------|---------|----------------------|----|-------|-------------------------------------------|--------|
|    | 900.4057                           | 900.3813  | -0.0244 | -27  | 1770        | 1777    | NQPPSDDK             |    |       |                                           | Mascot |
|    | 900.4057                           | 900.3813  | -0.0244 | -27  | 1770        | 1777    | NQPPSDDK             |    |       |                                           | Mascot |
|    | 984.4277                           | 984.3802  | -0.0475 | -48  | 1264        | 1270    | FICQECK              |    |       | Carbamidomethyl (C)[3,6]                  | Mascot |
|    | 984.4277                           | 984.3802  | -0.0475 | -48  | 1264        | 1270    | FICQECK              | 24 | 1.666 | Carbamidomethyl (C)[3,6]                  | Mascot |
|    | 1006.4995                          | 1006.3539 | -0.1456 | -145 | 1288        | 1296    | RCMIPVCGK            |    |       |                                           | Mascot |
|    | 1045.5901                          | 1045.5189 | -0.0712 | -68  | 1632        | 1640    | TLSRGWGLR            |    |       |                                           | Mascot |
|    | 1062.5977                          | 1062.6484 | 0.0507  | 48   | 468         | 476     | KMIQSQSIK            |    |       |                                           | Mascot |
|    | 1309.6495                          | 1309.5947 | -0.0548 | -42  | 64          | 74      | ESTSNYSPLRR          |    |       |                                           | Mascot |
|    | 1381.6819                          | 1381.6799 | -0.002  | -1   | 1109        | 1120    | QHKTNP EEGSVR        |    |       |                                           | Mascot |
|    | 1404.5559                          | 1404.6597 | 0.1038  | 74   | 1495        | 1506    | CFPYMEGDANNK         |    |       | Oxidation (M)[5]                          | Mascot |
|    | 1439.8468                          | 1439.7211 | -0.1257 | -87  | 1565        | 1577    | VLIITADLSEIPR        |    |       |                                           | Mascot |
|    | 1638.6986                          | 1638.7854 | 0.0868  | 53   | 1058        | 1072    | SPSCATSLETEPCEK      |    |       | Carbamidomethyl (C)[4]                    | Mascot |
|    | 1657.8829                          | 1657.8132 | -0.0697 | -42  | 1089        | 1103    | VLDCAIEGESVKIPK      |    |       | Carbamidomethyl (C)[4]                    | Mascot |
|    | 1838.9164                          | 1838.8474 | -0.069  | -38  | 886         | 904     | SSDVSAAVTDVCAKG TISK |    |       |                                           | Mascot |
|    | 1860.98                            | 1860.8838 | -0.0962 | -52  | 521         | 536     | IDESLQVELEKELSTK     |    |       |                                           | Mascot |
|    | 1870.9003                          | 1870.8452 | -0.0551 | -29  | 1734        | 1750    | GVELTFNYNLECLGNGK    |    |       |                                           | Mascot |
|    | 1929.9673                          | 1929.9294 | -0.0379 | -20  | 1817        | 1833    | KPGCPKVYHADCLNLSK    |    |       | Carbamidomethyl (C)[4]                    | Mascot |
|    | 2282.9336                          | 2283.0718 | 0.1382  | 61   | 1696        | 1714    | GNESRFMNHSCQPNCET QK |    |       | Carbamidomethyl (C)[11], Oxidation (M)[7] | Mascot |
| 32 | Ribosomal protein S5 [Danio rerio] |           |         |      | gi 37748051 | 22858.1 | 9.65                 | 7  | 41    | 0                                         |        |

### Peptide Information

| Calc. Mass | Obsrv. Mass | ± da    | ± ppm | Start Seq. | End Seq. | Sequence           | Ion Score | C. I. % | Modification            | Rank | Result Type |
|------------|-------------|---------|-------|------------|----------|--------------------|-----------|---------|-------------------------|------|-------------|
| 1211.4966  | 1211.6608   | 0.1642  | 136   | 72         | 81       | VTNSMMMHGR         |           |         | Oxidation (M)[5,6,7]    |      | Mascot      |
| 1657.8955  | 1657.8132   | -0.0823 | -50   | 146        | 159      | RVNQAIWLLCTGAR     |           |         | Carbamidomethyl (C)[10] |      | Mascot      |
| 1826.8806  | 1826.8995   | 0.0189  | 10    | 2          | 18       | AEDWEAAPAVAETPEIK  |           |         |                         |      | Mascot      |
| 1826.8806  | 1826.8995   | 0.0189  | 10    | 2          | 18       | AEDWEAAPAVAETPEIK  |           |         |                         |      | Mascot      |
| 1930.0314  | 1929.9294   | -0.102  | -53   | 165        | 182      | NIKTIAECLADELINAAK |           |         |                         |      | Mascot      |
| 1957.9211  | 1957.928    | 0.0069  | 4     | 1          | 18       | MAEDWEAAPAVAETPEIK |           |         |                         |      | Mascot      |
| 2059.9656  | 2060.0459   | 0.0803  | 39    | 64         | 81       | AQCPIVERVTNSMMMHGR |           |         |                         |      | Mascot      |
| 2076.0806  | 2076.0422   | -0.0384 | -18   | 147        | 164      | VNQAIWLLCTGAREAAFR |           |         | Carbamidomethyl (C)[9]  |      | Mascot      |

|    |                              |              |          |      |    |    |   |
|----|------------------------------|--------------|----------|------|----|----|---|
| 33 | Dual oxidase 1 [Danio rerio] | gi 115391856 | 171607.2 | 7.37 | 18 | 41 | 0 |
|----|------------------------------|--------------|----------|------|----|----|---|

### Peptide Information

| Calc. Mass | Obsrv. Mass | ± da | ± ppm | Start Seq. | End Sequence Seq. | Ion Score | C. I. % | Modification | Rank | Result | Type |
|------------|-------------|------|-------|------------|-------------------|-----------|---------|--------------|------|--------|------|
|------------|-------------|------|-------|------------|-------------------|-----------|---------|--------------|------|--------|------|

|    |                                                       |           |         |      |      |      |                               |       |      |                                          |    |   |        |
|----|-------------------------------------------------------|-----------|---------|------|------|------|-------------------------------|-------|------|------------------------------------------|----|---|--------|
|    | 809.4127                                              | 809.3831  | -0.0296 | -37  | 1366 | 1371 | FKFHCK                        |       |      |                                          |    |   | Mascot |
|    | 850.4273                                              | 850.5012  | 0.0739  | 87   | 1063 | 1069 | NLITMCR                       |       |      |                                          |    |   | Mascot |
|    | 877.4811                                              | 877.3747  | -0.1064 | -121 | 912  | 919  | GMEVLGKK                      |       |      | Oxidation (M)[2]                         |    |   | Mascot |
|    | 1006.4635                                             | 1006.3539 | -0.1096 | -109 | 324  | 330  | NRTCHYR                       |       |      | Carbamidomethyl (C)[4]                   |    |   | Mascot |
|    | 1062.5248                                             | 1062.6484 | 0.1236  | 116  | 774  | 782  | EALQCELTR                     |       |      |                                          |    |   | Mascot |
|    | 1211.6935                                             | 1211.6608 | -0.0327 | -27  | 1372 | 1380 | KVYFLWVTR                     |       |      |                                          |    |   | Mascot |
|    | 1309.6536                                             | 1309.5947 | -0.0589 | -45  | 411  | 421  | DFGLPSYNQIR                   |       |      |                                          |    |   | Mascot |
|    | 1365.6249                                             | 1365.6589 | 0.034   | 25   | 1484 | 1494 | NVEKACQQMNK                   |       |      | Carbamidomethyl (C)[6], Oxidation (M)[9] |    |   | Mascot |
|    | 1376.6951                                             | 1376.6483 | -0.0468 | -34  | 772  | 782  | TREALQCELTR                   |       |      | Carbamidomethyl (C)[7]                   |    |   | Mascot |
|    | 1381.645                                              | 1381.6799 | 0.0349  | 25   | 728  | 739  | SEKEMLCDAVTR                  |       |      |                                          |    |   | Mascot |
|    | 1382.7216                                             | 1382.7214 | -0.0002 | 0    | 530  | 540  | GDIQRSVFFWK                   |       |      |                                          |    |   | Mascot |
|    | 1382.7216                                             | 1382.7214 | -0.0002 | 0    | 530  | 540  | GDIQRSVFFWK                   |       |      |                                          |    |   | Mascot |
|    | 1400.5675                                             | 1400.605  | 0.0375  | 27   | 562  | 573  | AFSMSYFDDSSK                  |       |      | Oxidation (M)[4]                         |    |   | Mascot |
|    | 1404.6729                                             | 1404.6597 | -0.0132 | -9   | 388  | 398  | DYMYGPLRFSR                   |       |      |                                          |    |   | Mascot |
|    | 1638.6931                                             | 1638.7854 | 0.0923  | 56   | 13   | 25   | YDGWYNNLADHDR                 |       |      |                                          |    |   | Mascot |
|    | 1657.8188                                             | 1657.8132 | -0.0056 | -3   | 97   | 110  | AGCPPEFMHIKVQK                |       |      | Carbamidomethyl (C)[3], Oxidation (M)[8] |    |   | Mascot |
|    | 2060.0708                                             | 2060.0459 | -0.0249 | -12  | 1044 | 1062 | GSAAAI SFLFPYMLLTVC<br>R      |       |      |                                          |    |   | Mascot |
|    | 2076.0657                                             | 2076.0422 | -0.0235 | -11  | 1044 | 1062 | GSAAAI SFLFPYMLLTVC<br>R      |       |      | Oxidation (M)[13]                        |    |   | Mascot |
|    | 2211.075                                              | 2211.0063 | -0.0687 | -31  | 378  | 395  | EDNIIVDLRDYMYGPLR             |       |      |                                          |    |   | Mascot |
|    | 2705.3743                                             | 2705.04   | -0.3343 | -124 | 783  | 807  | AEFASVLGLKSDSLFVES<br>MFTLADK |       |      |                                          |    |   | Mascot |
| 34 | nuclear receptor 2C2-associated protein [Danio rerio] |           |         |      |      |      | gi 113673092                  | 16120 | 5.02 | 6                                        | 41 | 0 |        |

Peptide Information

| Calc. Mass | Obsrv. Mass | ± da    | ± ppm | Start Seq. | End Seq. | Sequence                 | Ion Score | C. I. | % Modification         | Rank | Result Type |
|------------|-------------|---------|-------|------------|----------|--------------------------|-----------|-------|------------------------|------|-------------|
| 821.4515   | 821.4199    | -0.0316 | -38   | 21         | 27       | DVKQFGK                  |           |       |                        |      | Mascot      |
| 1365.6427  | 1365.6589   | 0.0162  | 12    | 2          | 13       | AESLICNSTQSR             |           |       | Carbamidomethyl (C)[6] |      | Mascot      |
| 1376.8036  | 1376.6483   | -0.1553 | -113  | 128        | 139      | IIVYTL DILGEK            |           |       |                        |      | Mascot      |
| 1439.6617  | 1439.7211   | 0.0594  | 41    | 1          | 13       | MAESLICNSTQSR            |           |       |                        |      | Mascot      |
| 1638.8597  | 1638.7854   | -0.0743 | -45   | 59         | 73       | VSEVRLQFQGGFSGK          |           |       |                        |      | Mascot      |
| 2211.0857  | 2211.0063   | -0.0794 | -36   | 1          | 20       | MAESLICNSTQSRVSSVL<br>NR |           |       | Oxidation (M)[1]       |      | Mascot      |

35 ATPase, Ca++ transporting, cardiac muscle, fast twitch 1 like [Danio rerio] gi|117606266 108861.1 5.05 14 40 0

Peptide Information

| Calc. Mass | Obsrv. Mass | ± da | ± ppm | Start Seq. | End Seq. | Sequence | Ion Score | C. I. | % Modification | Rank | Result Type |
|------------|-------------|------|-------|------------|----------|----------|-----------|-------|----------------|------|-------------|
|------------|-------------|------|-------|------------|----------|----------|-----------|-------|----------------|------|-------------|

[illegible]

| Calc. Mass | Obsrv. Mass | ± da    | ± ppm | Start Seq. | End Sequence             | Ion Score | C. I. % Modification   | Rank | Result Type |
|------------|-------------|---------|-------|------------|--------------------------|-----------|------------------------|------|-------------|
| 831.4821   | 831.3849    | -0.0972 | -117  | 569        | 575 IIVEETK              |           |                        |      | Mascot      |
| 982.4662   | 982.4127    | -0.0535 | -54   | 83         | 91 AIESANFCK             |           |                        |      | Mascot      |
| 1279.6715  | 1279.7277   | 0.0562  | 44    | 235        | 244 YPTLLKEMER           |           |                        |      | Mascot      |
| 1332.6688  | 1332.5768   | -0.092  | -69   | 265        | 275 NLSAQCQEV RK         |           | Carbamidomethyl (C)[6] |      | Mascot      |
| 1347.7631  | 1347.6812   | -0.0819 | -61   | 111        | 121 ELQNLLSVYLR          |           |                        |      | Mascot      |
| 1403.6736  | 1403.6321   | -0.0415 | -30   | 366        | 377 HAFEISGNMIER         |           |                        |      | Mascot      |
| 1529.6941  | 1529.7269   | 0.0328  | 21    | 556        | 568 ESGPHMLFP EEEK       |           |                        |      | Mascot      |
| 1529.8104  | 1529.7269   | -0.0835 | -55   | 1          | 14 MSENSAPQVLVKAR        |           |                        |      | Mascot      |
| 1657.7891  | 1657.8132   | 0.0241  | 15    | 555        | 568 KESGPHMLFP EEEK      |           |                        |      | Mascot      |
| 1870.9149  | 1870.8452   | -0.0697 | -37   | 259        | 274 SMTLFKNLSAQCQEV R    |           | Oxidation (M)[2]       |      | Mascot      |
| 2060.0554  | 2060.0459   | -0.0095 | -5    | 339        | 357 MSGFIYQGKLPLTGMSV SK |           | Oxidation (M)[1]       |      | Mascot      |
| 2076.0503  | 2076.0422   | -0.0081 | -4    | 339        | 357 MSGFIYQGKLPLTGMSV    |           | Oxidation (M)[1,15]    |      | Mascot      |

2283.1914

2283.0718

-0.1196

-52

161

SK

VSDSQQRIGGFFLSLLTQ

MR

Mascot

37

four and a half LIM domains [Danio rerio]

gi|40363543

31943.8

8.88

12

40

0

Peptide Information

| Calc. Mass | Obsrv. Mass | ± da    | ± ppm | Start Seq. | End Seq. | Sequence         | Ion Score | C. I. | % Modification             | Rank | Result Type |
|------------|-------------|---------|-------|------------|----------|------------------|-----------|-------|----------------------------|------|-------------|
| 826.3004   | 826.4082    | 0.1078  | 130   | 161        | 166      | QCACCK           |           |       | Carbamidomethyl (C)[2,4,5] |      | Mascot      |
| 877.405    | 877.3747    | -0.0303 | -35   | 200        | 206      | FTSHEEK          |           |       |                            |      | Mascot      |
| 976.488    | 976.4303    | -0.0577 | -59   | 23         | 30       | DEKQVCVR         |           |       |                            |      | Mascot      |
| 992.4215   | 992.4224    | 0.0009  | 1     | 207        | 214      | VYCVDCYK         |           |       |                            |      | Mascot      |
| 996.46     | 996.5529    | 0.0929  | 93    | 87         | 95       | ILCGTCSSR        |           |       | Carbamidomethyl (C)[3]     |      | Mascot      |
| 1006.3868  | 1006.3539   | -0.0329 | -33   | 5          | 11       | SNCFYCR          |           |       | Carbamidomethyl (C)[3,6]   |      | Mascot      |
| 1211.5659  | 1211.6608   | 0.0949  | 78    | 26         | 34       | QVCVRCFDK        |           |       | Carbamidomethyl (C)[3,6]   |      | Mascot      |
| 1303.5341  | 1303.6075   | 0.0734  | 56    | 35         | 45       | FCANTCTECRR      |           |       |                            |      | Mascot      |
| 1325.5936  | 1325.7015   | 0.1079  | 81    | 84         | 95       | DDRILCGTCSSR     |           |       |                            |      | Mascot      |
| 1325.5936  | 1325.7015   | 0.1079  | 81    | 84         | 95       | DDRILCGTCSSR     |           |       |                            |      | Mascot      |
| 1382.6151  | 1382.7214   | 0.1063  | 77    | 84         | 95       | DDRILCGTCSSR     |           |       | Carbamidomethyl (C)[6]     |      | Mascot      |
| 1382.6151  | 1382.7214   | 0.1063  | 77    | 84         | 95       | DDRILCGTCSSR     |           |       | Carbamidomethyl (C)[6]     |      | Mascot      |
| 1439.677   | 1439.7211   | 0.0441  | 31    | 220        | 233      | KCSGCQNPITGFVK   |           |       |                            |      | Mascot      |
| 1529.6412  | 1529.7269   | 0.0857  | 56    | 60         | 70       | YWHSDCFRCAK      |           |       | Carbamidomethyl (C)[6,9]   |      | Mascot      |
| 1529.6412  | 1529.7269   | 0.0857  | 56    | 60         | 70       | YWHSDCFRCAK      |           |       | Carbamidomethyl (C)[6,9]   |      | Mascot      |
| 1838.8312  | 1838.8474   | 0.0162  | 9     | 264        | 279      | FVAHSGHIYCSDCSKK |           |       | Carbamidomethyl (C)[10]    |      | Mascot      |

38

PREDICTED: NUAK family SNF1-like kinase 1-like [Danio rerio]

gi|68404856

68532.7

8.84

10

40

0

17

0

Peptide Information

| Calc. Mass | Obsrv. Mass | ± da    | ± ppm | Start Seq. | End Seq. | Sequence     | Ion Score | C. I. | % Modification   | Rank | Result Type |
|------------|-------------|---------|-------|------------|----------|--------------|-----------|-------|------------------|------|-------------|
| 960.4567   | 960.4356    | -0.0211 | -22   | 314        | 322      | DNGSPMLAR    |           |       |                  |      | Mascot      |
| 960.4567   | 960.4356    | -0.0211 | -22   | 314        | 322      | DNGSPMLAR    | 18        | 0     |                  |      | Mascot      |
| 976.433    | 976.4303    | -0.0027 | -3    | 264        | 272      | EPSQSSDAR    |           |       |                  |      | Mascot      |
| 992.506    | 992.4224    | -0.0836 | -84   | 146        | 152      | ETRHFFR      |           |       |                  |      | Mascot      |
| 996.5584   | 996.5529    | -0.0055 | -6    | 68         | 76       | HSGREVAIK    |           |       |                  |      | Mascot      |
| 1006.4911  | 1006.3539   | -0.1372 | -136  | 381        | 388      | TRTSEEQR     |           |       |                  |      | Mascot      |
| 1347.666   | 1347.6812   | 0.0152  | 11    | 277        | 286      | WMLMVNPERR   |           |       | Oxidation (M)[2] |      | Mascot      |
| 1377.7161  | 1377.6504   | -0.0657 | -48   | 186        | 197      | IADFGLSNLYHK |           |       |                  |      | Mascot      |
| 1400.6804  | 1400.605    | -0.0754 | -54   | 130        | 140      | GELYDYISERR  |           |       |                  |      | Mascot      |

|    |                                       |           |         |     |              |     |                          |      |    |    |   |                         |        |
|----|---------------------------------------|-----------|---------|-----|--------------|-----|--------------------------|------|----|----|---|-------------------------|--------|
|    | 1929.995                              | 1929.9294 | -0.0656 | -34 | 170          | 185 | DLKLENVLLDENCNIK         |      |    |    |   | Carbamidomethyl (C)[13] | Mascot |
|    | 2282.9871                             | 2283.0718 | 0.0847  | 37  | 521          | 540 | EESDTITNSSFCSTEWPP<br>PR |      |    |    |   |                         | Mascot |
| 39 | Transferrin receptor 1a [Danio rerio] |           |         |     | gi 190337022 |     | 84943                    | 6.38 | 12 | 39 | 0 |                         |        |

#### Peptide Information

| Calc. Mass | Obsrv. Mass | ± da    | ± ppm | Start Seq. | End Seq. | Sequence                  | Ion Score | C. I. % | Modification            | Rank | Result Type |
|------------|-------------|---------|-------|------------|----------|---------------------------|-----------|---------|-------------------------|------|-------------|
| 809.3787   | 809.3831    | 0.0044  | 5     | 394        | 400      | GYLDADR                   |           |         |                         |      | Mascot      |
| 821.4437   | 821.4199    | -0.0238 | -29   | 431        | 437      | TITDMIK                   |           |         |                         |      | Mascot      |
| 842.4842   | 842.4701    | -0.0141 | -17   | 66         | 72       | LNQRSPK                   |           |         |                         |      | Mascot      |
| 960.5472   | 960.4356    | -0.1116 | -116  | 662        | 671      | AASALTSAIR                |           |         |                         |      | Mascot      |
| 960.5472   | 960.4356    | -0.1116 | -116  | 662        | 671      | AASALTSAIR                |           |         |                         |      | Mascot      |
| 976.4634   | 976.4303    | -0.0331 | -34   | 409        | 417      | DAWGPGFAR                 |           |         |                         |      | Mascot      |
| 1045.5935  | 1045.5189   | -0.0746 | -71   | 683        | 690      | IINNRMIR                  |           |         | Oxidation (M)[7]        |      | Mascot      |
| 1279.6165  | 1279.7277   | 0.1112  | 87    | 731        | 742      | GGLESADIDQFK              |           |         |                         |      | Mascot      |
| 1325.5096  | 1325.7015   | 0.1919  | 145   | 672        | 682      | NSDLDDMEQCR               |           |         |                         |      | Mascot      |
| 1325.5096  | 1325.7015   | 0.1919  | 145   | 672        | 682      | NSDLDDMEQCR               |           |         |                         |      | Mascot      |
| 1382.5311  | 1382.7214   | 0.1903  | 138   | 672        | 682      | NSDLDDMEQCR               |           |         | Carbamidomethyl (C)[10] |      | Mascot      |
| 1382.5311  | 1382.7214   | 0.1903  | 138   | 672        | 682      | NSDLDDMEQCR               |           |         | Carbamidomethyl (C)[10] |      | Mascot      |
| 1403.7529  | 1403.6321   | -0.1208 | -86   | 691        | 703      | VEGSLSPYVSPR              |           |         |                         |      | Mascot      |
| 1827.0222  | 1826.8995   | -0.1227 | -67   | 369        | 384      | DDITVEVNNVLVQKK           |           |         |                         |      | Mascot      |
| 1827.0222  | 1826.8995   | -0.1227 | -67   | 369        | 384      | DDITVEVNNVLVQKK           |           |         |                         |      | Mascot      |
| 1957.8848  | 1957.928    | 0.0432  | 22    | 352        | 368      | EWSDGMLADTQYLLGDK         |           |         | Oxidation (M)[6]        |      | Mascot      |
| 2283.0339  | 2283.0718   | 0.0379  | 17    | 662        | 682      | AASALTSAIRNSDLDDME<br>QCR |           |         | Oxidation (M)[17]       |      | Mascot      |

|    |                                           |  |  |  |              |  |         |      |    |    |   |  |  |
|----|-------------------------------------------|--|--|--|--------------|--|---------|------|----|----|---|--|--|
| 40 | Four and a half LIM domains [Danio rerio] |  |  |  | gi 166797040 |  | 31996.8 | 8.94 | 12 | 39 | 0 |  |  |
|----|-------------------------------------------|--|--|--|--------------|--|---------|------|----|----|---|--|--|

#### Peptide Information

| Calc. Mass | Obsrv. Mass | ± da    | ± ppm | Start Seq. | End Seq. | Sequence  | Ion Score | C. I. % | Modification               | Rank | Result Type |
|------------|-------------|---------|-------|------------|----------|-----------|-----------|---------|----------------------------|------|-------------|
| 826.3004   | 826.4082    | 0.1078  | 130   | 161        | 166      | QCACCK    |           |         | Carbamidomethyl (C)[2,4,5] |      | Mascot      |
| 877.405    | 877.3747    | -0.0303 | -35   | 200        | 206      | FTSHEEK   |           |         |                            |      | Mascot      |
| 976.488    | 976.4303    | -0.0577 | -59   | 23         | 30       | DEKQVCVR  |           |         |                            |      | Mascot      |
| 992.4215   | 992.4224    | 0.0009  | 1     | 207        | 214      | VYCVDCYK  |           |         |                            |      | Mascot      |
| 996.46     | 996.5529    | 0.0929  | 93    | 87         | 95       | ILCGTCSSR |           |         | Carbamidomethyl (C)[3]     |      | Mascot      |
| 1006.3868  | 1006.3539   | -0.0329 | -33   | 5          | 11       | SNCFYCR   |           |         | Carbamidomethyl (C)[3,6]   |      | Mascot      |
| 1211.5659  | 1211.6608   | 0.0949  | 78    | 26         | 34       | QVCVRCFDK |           |         | Carbamidomethyl (C)[3,6]   |      | Mascot      |



|  |           |           |        |    |     |     |                  |  |  |  |                          |  |        |
|--|-----------|-----------|--------|----|-----|-----|------------------|--|--|--|--------------------------|--|--------|
|  | 1303.5341 | 1303.6075 | 0.0734 | 56 | 35  | 45  | FCANTCTECRR      |  |  |  |                          |  | Mascot |
|  | 1325.5936 | 1325.7015 | 0.1079 | 81 | 84  | 95  | DDRILCGTCSSR     |  |  |  |                          |  | Mascot |
|  | 1325.5936 | 1325.7015 | 0.1079 | 81 | 84  | 95  | DDRILCGTCSSR     |  |  |  |                          |  | Mascot |
|  | 1382.6151 | 1382.7214 | 0.1063 | 77 | 84  | 95  | DDRILCGTCSSR     |  |  |  | Carbamidomethyl (C)[6]   |  | Mascot |
|  | 1382.6151 | 1382.7214 | 0.1063 | 77 | 84  | 95  | DDRILCGTCSSR     |  |  |  | Carbamidomethyl (C)[6]   |  | Mascot |
|  | 1439.677  | 1439.7211 | 0.0441 | 31 | 220 | 233 | KCSGCGNPITGFGK   |  |  |  |                          |  | Mascot |
|  | 1529.6412 | 1529.7269 | 0.0857 | 56 | 60  | 70  | YWHSDCFRCAK      |  |  |  | Carbamidomethyl (C)[6,9] |  | Mascot |
|  | 1529.6412 | 1529.7269 | 0.0857 | 56 | 60  | 70  | YWHSDCFRCAK      |  |  |  | Carbamidomethyl (C)[6,9] |  | Mascot |
|  | 1838.8312 | 1838.8474 | 0.0162 | 9  | 264 | 279 | FVAHSGHIYCSDCSKK |  |  |  | Carbamidomethyl (C)[10]  |  | Mascot |

41 novel protein similar to vertebrate fuse-binding protein-interacting repressor (SIAHBP1) [Danio rerio] gi|169154387 26020.2 7.75 7 39 0

#### Peptide Information

| Calc. Mass | Obsrv. Mass | ± da    | ± ppm | Start Seq. | End Seq. | Sequence                           | Ion Score | C. I. % | Modification                             | Rank | Result Type |
|------------|-------------|---------|-------|------------|----------|------------------------------------|-----------|---------|------------------------------------------|------|-------------|
| 821.4304   | 821.4199    | -0.0105 | -13   | 230        | 236      | HKGYGFI                            |           |         |                                          |      | Mascot      |
| 850.4273   | 850.5012    | 0.0739  | 87    | 88         | 94       | ALAIMCR                            |           |         | Carbamidomethyl (C)[6], Oxidation (M)[5] |      | Mascot      |
| 877.4924   | 877.3747    | -0.1177 | -134  | 216        | 223      | IKSCSLAR                           |           |         |                                          |      | Mascot      |
| 1118.5922  | 1118.6349   | 0.0427  | 38    | 86         | 94       | QRALAIMCR                          |           |         | Carbamidomethyl (C)[8]                   |      | Mascot      |
| 1381.6669  | 1381.6799   | 0.013   | 9     | 121        | 132      | SIDMSWDSVTLK                       |           |         |                                          |      | Mascot      |
| 1495.8188  | 1495.7876   | -0.0312 | -21   | 31         | 43       | YAMEQSIKSVLVK                      |           |         |                                          |      | Mascot      |
| 3337.6343  | 3337.6064   | -0.0279 | -8    | 133        | 162      | HKGFAFVEYEVPEAAQL<br>ALEQMNSVMLGGR |           |         | Oxidation (M)[22]                        |      | Mascot      |

42 PREDICTED: pericentrin [Danio rerio] gi|326668478 491858 4.98 35 39 0

#### Peptide Information

| Calc. Mass | Obsrv. Mass | ± da    | ± ppm | Start Seq. | End Seq. | Sequence | Ion Score | C. I. % | Modification     | Rank | Result Type |
|------------|-------------|---------|-------|------------|----------|----------|-----------|---------|------------------|------|-------------|
| 809.3094   | 809.3831    | 0.0737  | 91    | 1          | 6        | MDQDER   |           |         | Oxidation (M)[1] |      | Mascot      |
| 821.3458   | 821.4199    | 0.0741  | 90    | 3863       | 3868     | EEQMERE  |           |         |                  |      | Mascot      |
| 826.4417   | 826.4082    | -0.0335 | -41   | 1450       | 1456     | LSDNHIK  |           |         |                  |      | Mascot      |
| 831.4319   | 831.3849    | -0.047  | -57   | 2085       | 2091     | QDLQTAR  |           |         |                  |      | Mascot      |
| 842.4995   | 842.4701    | -0.0294 | -35   | 15         | 21       | AKLAHFR  |           |         |                  |      | Mascot      |
| 850.4087   | 850.5012    | 0.0925  | 109   | 2129       | 2136     | TPSSMTAR |           |         |                  |      | Mascot      |
| 855.3954   | 855.3989    | 0.0035  | 4     | 3881       | 3887     | QEHANEK  |           |         |                  |      | Mascot      |
| 855.3954   | 855.3989    | 0.0035  | 4     | 3881       | 3887     | QEHANEK  |           |         |                  |      | Mascot      |
| 864.3581   | 864.4466    | 0.0885  | 102   | 1982       | 1988     | EESDQEK  |           |         |                  |      | Mascot      |
| 877.4083   | 877.3747    | -0.0336 | -38   | 3585       | 3591     | AELEEMR  |           |         |                  |      | Mascot      |

|    |                              |           |           |         |      |              |         |                               |    |    |   |                         |        |  |        |
|----|------------------------------|-----------|-----------|---------|------|--------------|---------|-------------------------------|----|----|---|-------------------------|--------|--|--------|
|    |                              | 882.5155  | 882.5292  | 0.0137  | 16   | 3606         | 3612    | SEIHKLR                       |    |    |   |                         |        |  | Mascot |
|    |                              | 900.4495  | 900.3813  | -0.0682 | -76  | 1407         | 1414    | SSMTLAYK                      |    |    |   |                         |        |  | Mascot |
|    |                              | 900.4495  | 900.3813  | -0.0682 | -76  | 1407         | 1414    | SSMTLAYK                      | 1  | 0  |   |                         |        |  | Mascot |
|    |                              | 984.4745  | 984.3802  | -0.0943 | -96  | 680          | 687     | THEQDNLK                      |    |    |   |                         |        |  | Mascot |
|    |                              | 984.4745  | 984.3802  | -0.0943 | -96  | 680          | 687     | THEQDNLK                      |    |    |   |                         |        |  | Mascot |
|    |                              | 992.4643  | 992.4224  | -0.0419 | -42  | 3074         | 3082    | EGLSNSTER                     |    |    |   |                         |        |  | Mascot |
|    |                              | 1000.4442 | 1000.3777 | -0.0665 | -66  | 3753         | 3761    | QESASAHDR                     |    |    |   |                         |        |  | Mascot |
|    |                              | 1045.4908 | 1045.5189 | 0.0281  | 27   | 1472         | 1480    | QAEEVNER                      |    |    |   |                         |        |  | Mascot |
|    |                              | 1118.551  | 1118.6349 | 0.0839  | 75   | 224          | 232     | EQECLAQK                      |    |    |   | Carbamidomethyl (C)[4]  |        |  | Mascot |
|    |                              | 1211.5651 | 1211.6608 | 0.0957  | 79   | 3799         | 3809    | QAEEAEQEAHK                   |    |    |   |                         |        |  | Mascot |
|    |                              | 1309.5875 | 1309.5947 | 0.0072  | 5    | 2064         | 2074    | QEGDNLMAMLR                   |    |    |   | Oxidation (M)[7,9]      |        |  | Mascot |
|    |                              | 1332.6827 | 1332.5768 | -0.1059 | -79  | 3842         | 3853    | AAQLQVELDAMK                  |    |    |   | Oxidation (M)[11]       |        |  | Mascot |
|    |                              | 1347.6433 | 1347.6812 | 0.0379  | 28   | 3174         | 3184    | RLDCSEERPSR                   |    |    |   |                         |        |  | Mascot |
|    |                              | 1376.7897 | 1376.6483 | -0.1414 | -103 | 960          | 970     | QISLIQVYER                    |    |    |   |                         |        |  | Mascot |
|    |                              | 1377.7122 | 1377.6504 | -0.0618 | -45  | 3600         | 3610    | HQEELKSEIHK                   |    |    |   |                         |        |  | Mascot |
|    |                              | 1400.7056 | 1400.605  | -0.1006 | -72  | 1428         | 1438    | YYKDIDQLNTK                   |    |    |   |                         |        |  | Mascot |
|    |                              | 1403.7642 | 1403.6321 | -0.1321 | -94  | 669          | 679     | RIQFEEVINQK                   |    |    |   |                         |        |  | Mascot |
|    |                              | 1404.6648 | 1404.6597 | -0.0051 | -4   | 3174         | 3184    | RLDCSEERPSR                   |    |    |   | Carbamidomethyl (C)[4]  |        |  | Mascot |
|    |                              | 1529.8104 | 1529.7269 | -0.0835 | -55  | 3840         | 3853    | GRAAQLQVELDAMK                |    |    |   |                         |        |  | Mascot |
|    |                              | 1529.8104 | 1529.7269 | -0.0835 | -55  | 3840         | 3853    | GRAAQLQVELDAMK                |    |    |   |                         |        |  | Mascot |
|    |                              | 1638.881  | 1638.7854 | -0.0956 | -58  | 2528         | 2541    | TVTQLEQELQKGHK                |    |    |   |                         |        |  | Mascot |
|    |                              | 1642.8582 | 1642.8578 | -0.0004 | 0    | 3975         | 3988    | HTISCLERDLQSLK                |    |    |   |                         |        |  | Mascot |
|    |                              | 1657.8326 | 1657.8132 | -0.0194 | -12  | 2046         | 2059    | GAEMETLESLLHRR                |    |    |   | Oxidation (M)[4]        |        |  | Mascot |
|    |                              | 1860.9774 | 1860.8838 | -0.0936 | -50  | 3687         | 3702    | ITSSNLRSELQIEQSR              |    |    |   |                         |        |  | Mascot |
|    |                              | 1870.9504 | 1870.8452 | -0.1052 | -56  | 1303         | 1317    | QEIQEQNEVELENLR               |    |    |   |                         |        |  | Mascot |
|    |                              | 1929.9875 | 1929.9294 | -0.0581 | -30  | 2282         | 2297    | ATLEEVLQQKETQEQR              |    |    |   |                         |        |  | Mascot |
|    |                              | 1958.0553 | 1957.928  | -0.1273 | -65  | 2623         | 2638    | EEEVRQLTLQLELTTR              |    |    |   |                         |        |  | Mascot |
|    |                              | 2060.052  | 2060.0459 | -0.0061 | -3   | 1431         | 1447    | DIDQLNTKHAHELEQLR             |    |    |   |                         |        |  | Mascot |
|    |                              | 2284.1013 | 2284.0703 | -0.031  | -14  | 3955         | 3974    | ENSEFSECLAALSEEKISL<br>K      |    |    |   | Carbamidomethyl (C)[8]  |        |  | Mascot |
|    |                              | 2705.0938 | 2705.04   | -0.0538 | -20  | 1354         | 1378    | TGDASFLSEGNCEDDNS<br>DAMAEITR |    |    |   | Carbamidomethyl (C)[12] |        |  | Mascot |
| 43 | Hook homolog 1 [Danio rerio] |           |           |         |      | gi 190339684 | 83123.4 | 5.24                          | 11 | 38 | 0 | 25                      | 11.752 |  |        |

### Peptide Information

| Calc. Mass | Obsrv. Mass | ± da    | ± ppm | Start Seq. | End Seq. | Sequence | Ion Score | C. I. | % Modification   | Rank | Result Type |
|------------|-------------|---------|-------|------------|----------|----------|-----------|-------|------------------|------|-------------|
| 809.3458   | 809.3831    | 0.0373  | 46    | 587        | 592      | KDEDMR   |           |       | Oxidation (M)[5] |      | Mascot      |
| 842.5458   | 842.4701    | -0.0757 | -90   | 636        | 642      | KIIALER  |           |       |                  |      | Mascot      |

|           |           |         |     |     |     |               |    |        |                  |  |  |        |
|-----------|-----------|---------|-----|-----|-----|---------------|----|--------|------------------|--|--|--------|
| 960.4996  | 960.4356  | -0.064  | -67 | 323 | 330 | LEDLSDLR      |    |        |                  |  |  | Mascot |
| 960.4996  | 960.4356  | -0.064  | -67 | 323 | 330 | LEDLSDLR      | 25 | 11.752 |                  |  |  | Mascot |
| 976.488   | 976.4303  | -0.0577 | -59 | 643 | 650 | ECEQAKLR      |    |        |                  |  |  | Mascot |
| 992.5081  | 992.4224  | -0.0857 | -86 | 332 | 339 | QMKALEEK      |    |        | Oxidation (M)[2] |  |  | Mascot |
| 1000.4767 | 1000.3777 | -0.099  | -99 | 266 | 273 | IHCEELEK      |    |        |                  |  |  | Mascot |
| 1165.5956 | 1165.6945 | 0.0989  | 85  | 577 | 586 | MDELMAALKK    |    |        | Oxidation (M)[1] |  |  | Mascot |
| 1364.6614 | 1364.6395 | -0.0219 | -16 | 177 | 188 | ALEDLTEVMAEK  |    |        | Oxidation (M)[9] |  |  | Mascot |
| 1364.6614 | 1364.6395 | -0.0219 | -16 | 177 | 188 | ALEDLTEVMAEK  |    |        | Oxidation (M)[9] |  |  | Mascot |
| 1365.7372 | 1365.6589 | -0.0783 | -57 | 309 | 320 | AVKLEASVETYSR |    |        |                  |  |  | Mascot |
| 1377.7155 | 1377.6504 | -0.0651 | -47 | 703 | 715 | RTMSINVPASSSK |    |        |                  |  |  | Mascot |
| 1439.7311 | 1439.7211 | -0.01   | -7  | 665 | 676 | SLNFQKMAIESR  |    |        | Oxidation (M)[7] |  |  | Mascot |

44 nipped-B like b [Danio rerio] gi|333777886 267955.6 6.41 18 38 0

### Peptide Information

| Calc. Mass | Obsrv. Mass | ± da    | ± ppm | Start Seq. | End Seq. | Sequence        | Ion Score | C. I. | % Modification          | Rank | Result Type |
|------------|-------------|---------|-------|------------|----------|-----------------|-----------|-------|-------------------------|------|-------------|
| 842.5345   | 842.4701    | -0.0644 | -76   | 801        | 807      | LLNILEK         |           |       |                         |      | Mascot      |
| 855.4795   | 855.3989    | -0.0806 | -94   | 2297       | 2303     | DRPQIAR         |           |       |                         |      | Mascot      |
| 855.4795   | 855.3989    | -0.0806 | -94   | 2297       | 2303     | DRPQIAR         | 15        | 0     |                         |      | Mascot      |
| 864.4243   | 864.4466    | 0.0223  | 26    | 1132       | 1138     | QTEMALR         |           |       | Oxidation (M)[4]        |      | Mascot      |
| 960.5359   | 960.4356    | -0.1003 | -104  | 1788       | 1795     | LSKQEDLK        |           |       |                         |      | Mascot      |
| 960.5359   | 960.4356    | -0.1003 | -104  | 1788       | 1795     | LSKQEDLK        |           |       |                         |      | Mascot      |
| 976.5607   | 976.4303    | -0.1304 | -134  | 784        | 792      | IKAMGITSR       |           |       |                         |      | Mascot      |
| 992.5557   | 992.4224    | -0.1333 | -134  | 784        | 792      | IKAMGITSR       |           |       | Oxidation (M)[4]        |      | Mascot      |
| 996.4971   | 996.5529    | 0.0558  | 56    | 1879       | 1886     | YTGFIHMK        |           |       |                         |      | Mascot      |
| 1000.4734  | 1000.3777   | -0.0957 | -96   | 2132       | 2140     | NLYGFSDGK       |           |       |                         |      | Mascot      |
| 1006.4985  | 1006.3539   | -0.1446 | -144  | 1161       | 1168     | MDQKAIER        |           |       | Oxidation (M)[1]        |      | Mascot      |
| 1279.7004  | 1279.7277   | 0.0273  | 21    | 1744       | 1754     | TLYNGLLSDKR     |           |       |                         |      | Mascot      |
| 1303.6488  | 1303.6075   | -0.0413 | -32   | 772        | 783      | QQLNELGSESAK    |           |       |                         |      | Mascot      |
| 1325.663   | 1325.7015   | 0.0385  | 29    | 46         | 57       | VAEDVGHLGCR     |           |       | Carbamidomethyl (C)[11] |      | Mascot      |
| 1325.663   | 1325.7015   | 0.0385  | 29    | 46         | 57       | VAEDVGHLGCR     |           |       | Carbamidomethyl (C)[11] |      | Mascot      |
| 1332.7191  | 1332.5768   | -0.1423 | -107  | 1462       | 1473     | ILNITDVVSACK    |           |       | Carbamidomethyl (C)[11] |      | Mascot      |
| 1400.738   | 1400.605    | -0.133  | -95   | 1866       | 1877     | NKADQQLVEIDK    |           |       |                         |      | Mascot      |
| 1403.7926  | 1403.6321   | -0.1605 | -114  | 1461       | 1473     | KILNITDVVSACK   |           |       |                         |      | Mascot      |
| 1529.7428  | 1529.7269   | -0.0159 | -10   | 476        | 489      | HRPEGRHGDGGAQR  |           |       |                         |      | Mascot      |
| 1529.7428  | 1529.7269   | -0.0159 | -10   | 476        | 489      | HRPEGRHGDGGAQR  |           |       |                         |      | Mascot      |
| 1838.9047  | 1838.8474   | -0.0573 | -31   | 1635       | 1649     | FVWACFNRYYGALTK |           |       |                         |      | Mascot      |

|    |                                                                                       |           |        |      |      |      |                              |  |  |  |       |                  |   |    |   |    |        |
|----|---------------------------------------------------------------------------------------|-----------|--------|------|------|------|------------------------------|--|--|--|-------|------------------|---|----|---|----|--------|
|    | 1848.7925                                                                             | 1848.8801 | 0.0876 | 47   | 421  | 437  | VEDDCMGMPIPASEAQR            |  |  |  |       |                  |   |    |   |    | Mascot |
|    | 1864.7874                                                                             | 1864.8551 | 0.0677 | 36   | 421  | 437  | VEDDCMGMPIPASEAQR            |  |  |  |       | Oxidation (M)[6] |   |    |   |    | Mascot |
|    | 2705.438                                                                              | 2705.04   | -0.398 | -147 | 1720 | 1743 | CKAIIGLGFLFIMHPSQMF<br>VPEVK |  |  |  |       |                  |   |    |   |    | Mascot |
| 45 | PREDICTED: ras association domain-containing protein gi 189537462<br>10 [Danio rerio] |           |        |      |      |      |                              |  |  |  | 49870 | 4.96             | 3 | 38 | 0 | 30 | 75.071 |

#### Peptide Information

| Calc. Mass | Obsrv. Mass | ± da    | ± ppm | Start Seq. | End Seq. | Sequence  | Ion Score | C. I. | % Modification | Rank | Result Type |
|------------|-------------|---------|-------|------------|----------|-----------|-----------|-------|----------------|------|-------------|
| 850.4318   | 850.5012    | 0.0694  | 82    | 60         | 65       | WRGFER    |           |       |                |      | Mascot      |
| 960.4632   | 960.4356    | -0.0276 | -29   | 184        | 191      | ELDGEIER  |           |       |                |      | Mascot      |
| 960.4632   | 960.4356    | -0.0276 | -29   | 184        | 191      | ELDGEIER  | 30        |       | 75.071         |      | Mascot      |
| 992.5193   | 992.4224    | -0.0969 | -98   | 25         | 33       | RTTCADVVK |           |       |                |      | Mascot      |

|    |                                                               |  |  |  |  |  |  |  |  |  |              |        |      |    |    |   |  |
|----|---------------------------------------------------------------|--|--|--|--|--|--|--|--|--|--------------|--------|------|----|----|---|--|
| 46 | PREDICTED: hypothetical protein LOC100536975<br>[Danio rerio] |  |  |  |  |  |  |  |  |  | gi 326679271 | 234171 | 8.98 | 23 | 37 | 0 |  |
|----|---------------------------------------------------------------|--|--|--|--|--|--|--|--|--|--------------|--------|------|----|----|---|--|

#### Peptide Information

| Calc. Mass | Obsrv. Mass | ± da    | ± ppm | Start Seq. | End Seq. | Sequence       | Ion Score | C. I. | % Modification         | Rank | Result Type |
|------------|-------------|---------|-------|------------|----------|----------------|-----------|-------|------------------------|------|-------------|
| 831.4821   | 831.3849    | -0.0972 | -117  | 38         | 44       | LIESELK        |           |       |                        |      | Mascot      |
| 850.4205   | 850.5012    | 0.0807  | 95    | 201        | 207      | AEFAWAR        |           |       |                        |      | Mascot      |
| 855.4318   | 855.3989    | -0.0329 | -38   | 181        | 187      | DLESHVR        |           |       |                        |      | Mascot      |
| 855.4318   | 855.3989    | -0.0329 | -38   | 181        | 187      | DLESHVR        |           |       |                        |      | Mascot      |
| 864.4131   | 864.4466    | 0.0335  | 39    | 1          | 8        | MAEEALGK       |           |       | Oxidation (M)[1]       |      | Mascot      |
| 996.5624   | 996.5529    | -0.0095 | -10   | 173        | 180      | WIPAPERK       |           |       |                        |      | Mascot      |
| 1118.6567  | 1118.6349   | -0.0218 | -19   | 1004       | 1014     | GVFAALGDIKK    |           |       |                        |      | Mascot      |
| 1165.5887  | 1165.6945   | 0.1058  | 91    | 1450       | 1458     | YSVEEWPKK      |           |       |                        |      | Mascot      |
| 1211.6266  | 1211.6608   | 0.0342  | 28    | 1132       | 1142     | NEVVDPSQVPK    |           |       |                        |      | Mascot      |
| 1287.6903  | 1287.616    | -0.0743 | -58   | 278        | 288      | KIQLVDSVDDR    |           |       |                        |      | Mascot      |
| 1287.6903  | 1287.616    | -0.0743 | -58   | 278        | 288      | KIQLVDSVDDR    |           |       |                        |      | Mascot      |
| 1325.7113  | 1325.7015   | -0.0098 | -7    | 1284       | 1294     | FHRSLTPPGWK    |           |       |                        |      | Mascot      |
| 1325.7113  | 1325.7015   | -0.0098 | -7    | 1284       | 1294     | FHRSLTPPGWK    |           |       |                        |      | Mascot      |
| 1347.7002  | 1347.6812   | -0.019  | -14   | 1819       | 1830     | LETSELEEKAAK   |           |       |                        |      | Mascot      |
| 1364.6475  | 1364.6395   | -0.008  | -6    | 189        | 199      | LKECSNELESR    |           |       | Carbamidomethyl (C)[4] |      | Mascot      |
| 1364.7307  | 1364.6395   | -0.0912 | -67   | 38         | 48       | LIESELKEEFK    |           |       |                        |      | Mascot      |
| 1376.7467  | 1376.6483   | -0.0984 | -71   | 1347       | 1359     | AEICGAVFAARLR  |           |       |                        |      | Mascot      |
| 1382.5927  | 1382.7214   | 0.1287  | 93    | 447        | 460      | DSTEAGCIVCGAEK |           |       |                        |      | Mascot      |

|    |                                                         |           |         |      |      |              |                              |      |   |                        |    |        |        |
|----|---------------------------------------------------------|-----------|---------|------|------|--------------|------------------------------|------|---|------------------------|----|--------|--------|
|    | 1382.5927                                               | 1382.7214 | 0.1287  | 93   | 447  | 460          | DSTEAGCIVCGAEK               |      |   |                        |    |        | Mascot |
|    | 1403.6268                                               | 1403.6321 | 0.0053  | 4    | 1751 | 1762         | VWGIVYCCMASR                 |      |   | Oxidation (M)[9]       |    |        | Mascot |
|    | 1404.8434                                               | 1404.6597 | -0.1837 | -131 | 715  | 726          | RPGKIDLLISHR                 |      |   |                        |    |        | Mascot |
|    | 1439.614                                                | 1439.7211 | 0.1071  | 74   | 447  | 460          | DSTEAGCIVCGAEK               |      |   | Carbamidomethyl (C)[7] |    |        | Mascot |
|    | 1827.002                                                | 1826.8995 | -0.1025 | -56  | 1644 | 1660         | AVPILPCSAVWSMLLAR            |      |   |                        |    |        | Mascot |
|    | 1827.0334                                               | 1826.8995 | -0.1339 | -73  | 1143 | 1158         | ESISQSKTIILPNQLR             |      |   |                        |    |        | Mascot |
|    | 1838.783                                                | 1838.8474 | 0.0644  | 35   | 839  | 855          | CGNCQPPGGKEMTLAEER           |      |   | Oxidation (M)[11]      |    |        | Mascot |
|    | 1864.9109                                               | 1864.8551 | -0.0558 | -30  | 1900 | 1915         | EDCVEYVTPNSLLGR              |      |   | Carbamidomethyl (C)[3] |    |        | Mascot |
|    | 2211.0215                                               | 2211.0063 | -0.0152 | -7   | 816  | 833          | EFIDWWKWDSIGTACEP<br>K       |      |   |                        |    |        | Mascot |
|    | 2705.3855                                               | 2705.04   | -0.3455 | -128 | 1164 | 1187         | ALGTGYLVEEDKLYIMASI<br>NFSVR |      |   | Oxidation (M)[16]      |    |        | Mascot |
| 47 | PREDICTED: hypothetical protein LOC796277 [Danio rerio] |           |         |      |      | gi 292622807 | 79431.9                      | 5.54 | 1 |                        | 30 | 71.965 |        |

Peptide Information

| Calc. Mass | Obsrv. Mass | ± da    | ± ppm | Start Seq. | End Seq. | Sequence     | Ion Score | C. I.  | % Modification | Rank | Result Type |
|------------|-------------|---------|-------|------------|----------|--------------|-----------|--------|----------------|------|-------------|
| 1287.7015  | 1287.616    | -0.0855 | -66   | 638        | 649      | KNNGLLSESVAR | 30        | 71.965 |                | 2    | Mascot      |

|    |                             |  |  |  |  |              |         |      |   |  |    |        |  |
|----|-----------------------------|--|--|--|--|--------------|---------|------|---|--|----|--------|--|
| 48 | novel protein [Danio rerio] |  |  |  |  | gi 122890957 | 47990.1 | 5.99 | 1 |  | 27 | 42.627 |  |
|----|-----------------------------|--|--|--|--|--------------|---------|------|---|--|----|--------|--|

Peptide Information

| Calc. Mass | Obsrv. Mass | ± da    | ± ppm | Start Seq. | End Seq. | Sequence | Ion Score | C. I.  | % Modification   | Rank | Result Type |
|------------|-------------|---------|-------|------------|----------|----------|-----------|--------|------------------|------|-------------|
| 855.4392   | 855.3989    | -0.0403 | -47   | 330        | 336      | VSYMLAR  | 27        | 42.627 | Oxidation (M)[4] | 2    | Mascot      |

|    |                                      |  |  |  |  |              |         |      |   |  |    |        |  |
|----|--------------------------------------|--|--|--|--|--------------|---------|------|---|--|----|--------|--|
| 49 | protein Hook homolog 1 [Danio rerio] |  |  |  |  | gi 113676708 | 83063.4 | 5.24 | 1 |  | 25 | 11.752 |  |
|----|--------------------------------------|--|--|--|--|--------------|---------|------|---|--|----|--------|--|

Peptide Information

| Calc. Mass | Obsrv. Mass | ± da   | ± ppm | Start Seq. | End Seq. | Sequence | Ion Score | C. I.  | % Modification | Rank | Result Type |
|------------|-------------|--------|-------|------------|----------|----------|-----------|--------|----------------|------|-------------|
| 960.4996   | 960.4356    | -0.064 | -67   | 323        | 330      | LEDLSDLR | 25        | 11.752 |                | 3    | Mascot      |

|    |                                       |  |  |  |  |             |         |      |   |  |    |       |  |
|----|---------------------------------------|--|--|--|--|-------------|---------|------|---|--|----|-------|--|
| 50 | adiponectin receptor 1a [Danio rerio] |  |  |  |  | gi 50540002 | 16095.1 | 6.09 | 1 |  | 25 | 3.015 |  |
|----|---------------------------------------|--|--|--|--|-------------|---------|------|---|--|----|-------|--|

Peptide Information

| Calc. Mass | Obsrv. Mass | ± da    | ± ppm | Start Seq. | End Seq. | Sequence | Ion Score | C. I. | % Modification | Rank | Result Type |
|------------|-------------|---------|-------|------------|----------|----------|-----------|-------|----------------|------|-------------|
| 900.4396   | 900.3813    | -0.0583 | -65   | 84         | 91       | ACFGSIFR | 25        | 3.015 |                | 2    | Mascot      |

|                |           |                        |                |                |                    |
|----------------|-----------|------------------------|----------------|----------------|--------------------|
| Gel Idx/Pos    | 258/K10   | Instr./Gel Origin      | BA2060/110707A | Process Status | Analysis Succeeded |
| Plate [#] Name | [1] 31496 | Instrument Sample Name |                | Spectra        | 11                 |

| Rank | Protein Name | Accession No. | Protein MW | Protein PI | Pep. Count | Protein Score | Protein Score C. I. % | Total Ion Score | Total Ion C. I. % |
|------|--------------|---------------|------------|------------|------------|---------------|-----------------------|-----------------|-------------------|
|------|--------------|---------------|------------|------------|------------|---------------|-----------------------|-----------------|-------------------|

|   |                                              |              |         |      |   |     |     |     |     |
|---|----------------------------------------------|--------------|---------|------|---|-----|-----|-----|-----|
| 1 | hypothetical protein LOC564906 [Danio rerio] | gi 156739281 | 38003.1 | 6.31 | 8 | 548 | 100 | 513 | 100 |
|---|----------------------------------------------|--------------|---------|------|---|-----|-----|-----|-----|

Peptide Information

| Calc. Mass | Obsrv. Mass | ± da    | ± ppm | Start Seq. | End Seq. | Sequence                 | Ion Score | C. I. % | Modification                                 | Rank | Result Type |
|------------|-------------|---------|-------|------------|----------|--------------------------|-----------|---------|----------------------------------------------|------|-------------|
| 1017.5727  | 1017.5201   | -0.0526 | -52   | 224        | 232      | ITGFVDIPR                | 71        | 99.998  |                                              |      | Mascot      |
| 1017.5727  | 1017.5201   | -0.0526 | -52   | 224        | 232      | ITGFVDIPR                |           |         |                                              |      | Mascot      |
| 1222.5487  | 1222.4867   | -0.062  | -51   | 302        | 311      | NSWSDKWGDK               |           |         |                                              |      | Mascot      |
| 1346.6448  | 1346.6012   | -0.0436 | -32   | 38         | 48       | SYHEDVEVGRR              |           |         |                                              |      | Mascot      |
| 1498.7173  | 1498.645    | -0.0723 | -48   | 196        | 208      | GLDSEQSYPYLAR            | 106       | 100     |                                              |      | Mascot      |
| 1498.7173  | 1498.645    | -0.0723 | -48   | 196        | 208      | GLDSEQSYPYLAR            |           |         |                                              |      | Mascot      |
| 1938.8507  | 1938.7604   | -0.0903 | -47   | 319        | 335      | DKNNHCGIATMASYP LM       |           |         | Carbamidomethyl (C)[6], Oxidation (M)[11]    |      | Mascot      |
| 1954.8456  | 1954.7512   | -0.0944 | -48   | 319        | 335      | DKNNHCGIATMASYP LM       |           |         | Carbamidomethyl (C)[6], Oxidation (M)[11,17] |      | Mascot      |
| 2174.0989  | 2173.9995   | -0.0994 | -46   | 276        | 296      | LDHAVLVVGYGYQGADV AGNR   |           |         |                                              |      | Mascot      |
| 2174.0989  | 2173.9995   | -0.0994 | -46   | 276        | 296      | LDHAVLVVGYGYQGADV AGNR   | 152       | 100     |                                              |      | Mascot      |
| 2278.0015  | 2277.8945   | -0.107  | -47   | 135        | 154      | QCGSCWSFSSTGALEG QLFR    | 183       | 100     | Carbamidomethyl (C)[2,5]                     |      | Mascot      |
| 2278.0015  | 2277.8945   | -0.107  | -47   | 135        | 154      | QCGSCWSFSSTGALEG QLFR    |           |         | Carbamidomethyl (C)[2,5]                     |      | Mascot      |
| 2649.1819  | 2649.2053   | 0.0234  | 9     | 132        | 154      | DQKQCGSCWSFSSTGAL EGQLFR |           |         | Carbamidomethyl (C)[5,8]                     |      | Mascot      |

|   |                                              |              |         |      |   |     |     |     |     |
|---|----------------------------------------------|--------------|---------|------|---|-----|-----|-----|-----|
| 2 | hypothetical protein LOC569326 [Danio rerio] | gi 156739289 | 37972.2 | 6.45 | 8 | 547 | 100 | 513 | 100 |
|---|----------------------------------------------|--------------|---------|------|---|-----|-----|-----|-----|

Peptide Information

| Calc. Mass | Obsrv. Mass | ± da    | ± ppm | Start Seq. | End Seq. | Sequence           | Ion Score | C. I. % | Modification                                 | Rank | Result Type |
|------------|-------------|---------|-------|------------|----------|--------------------|-----------|---------|----------------------------------------------|------|-------------|
| 1017.5727  | 1017.5201   | -0.0526 | -52   | 224        | 232      | ITGFVDIPR          | 71        | 99.998  |                                              |      | Mascot      |
| 1017.5727  | 1017.5201   | -0.0526 | -52   | 224        | 232      | ITGFVDIPR          |           |         |                                              |      | Mascot      |
| 1222.5487  | 1222.4867   | -0.062  | -51   | 302        | 311      | NSWSDKWGDK         |           |         |                                              |      | Mascot      |
| 1346.6448  | 1346.6012   | -0.0436 | -32   | 38         | 48       | SYHEDVEVGRR        |           |         |                                              |      | Mascot      |
| 1498.7173  | 1498.645    | -0.0723 | -48   | 196        | 208      | GLDSEQSYPYLAR      | 106       | 100     |                                              |      | Mascot      |
| 1498.7173  | 1498.645    | -0.0723 | -48   | 196        | 208      | GLDSEQSYPYLAR      |           |         |                                              |      | Mascot      |
| 1938.8507  | 1938.7604   | -0.0903 | -47   | 319        | 335      | DKNNHCGIATMASYP LM |           |         | Carbamidomethyl (C)[6], Oxidation (M)[11]    |      | Mascot      |
| 1954.8456  | 1954.7512   | -0.0944 | -48   | 319        | 335      | DKNNHCGIATMASYP LM |           |         | Carbamidomethyl (C)[6], Oxidation (M)[11,17] |      | Mascot      |

|   |                                              |           |         |     |              |     |                             |      |     |                          |     |     |     |  |        |
|---|----------------------------------------------|-----------|---------|-----|--------------|-----|-----------------------------|------|-----|--------------------------|-----|-----|-----|--|--------|
|   | 2174.0989                                    | 2173.9995 | -0.0994 | -46 | 276          | 296 | LDHAVLVVGYGYQGADV<br>AGNR   |      |     |                          |     |     |     |  | Mascot |
|   | 2174.0989                                    | 2173.9995 | -0.0994 | -46 | 276          | 296 | LDHAVLVVGYGYQGADV<br>AGNR   | 152  | 100 |                          |     |     |     |  | Mascot |
|   | 2278.0015                                    | 2277.8945 | -0.107  | -47 | 135          | 154 | QCGSCWSFSSTGALEG<br>QLFR    | 183  | 100 | Carbamidomethyl (C)[2,5] |     |     |     |  | Mascot |
|   | 2278.0015                                    | 2277.8945 | -0.107  | -47 | 135          | 154 | QCGSCWSFSSTGALEG<br>QLFR    |      |     | Carbamidomethyl (C)[2,5] |     |     |     |  | Mascot |
|   | 2649.1819                                    | 2649.2053 | 0.0234  | 9   | 132          | 154 | DQKQCGSCWSFSSTGAL<br>EGQLFR |      |     | Carbamidomethyl (C)[5,8] |     |     |     |  | Mascot |
| 3 | hypothetical protein LOC564979 [Danio rerio] |           |         |     | gi 157311713 |     | 38002.1                     | 6.31 | 7   | 541                      | 100 | 513 | 100 |  |        |

#### Peptide Information

|  | Calc. Mass | Obsrv. Mass | ± da    | ± ppm | Start Seq. | End Seq. | Sequence                    | Ion Score | C. I.  | % Modification           | Rank | Result Type |
|--|------------|-------------|---------|-------|------------|----------|-----------------------------|-----------|--------|--------------------------|------|-------------|
|  | 1017.5727  | 1017.5201   | -0.0526 | -52   | 224        | 232      | ITGFVDIPR                   | 71        | 99.998 |                          |      | Mascot      |
|  | 1017.5727  | 1017.5201   | -0.0526 | -52   | 224        | 232      | ITGFVDIPR                   |           |        |                          |      | Mascot      |
|  | 1222.5487  | 1222.4867   | -0.062  | -51   | 303        | 312      | NSWSDKWGDK                  |           |        |                          |      | Mascot      |
|  | 1346.6448  | 1346.6012   | -0.0436 | -32   | 38         | 48       | SYHEDVEVGRR                 |           |        |                          |      | Mascot      |
|  | 1498.7173  | 1498.645    | -0.0723 | -48   | 196        | 208      | GLDSEQSYPYLAR               | 106       | 100    |                          |      | Mascot      |
|  | 1498.7173  | 1498.645    | -0.0723 | -48   | 196        | 208      | GLDSEQSYPYLAR               |           |        |                          |      | Mascot      |
|  | 2174.0989  | 2173.9995   | -0.0994 | -46   | 277        | 297      | LDHAVLVVGYGYQGADV<br>AGNR   |           |        |                          |      | Mascot      |
|  | 2174.0989  | 2173.9995   | -0.0994 | -46   | 277        | 297      | LDHAVLVVGYGYQGADV<br>AGNR   | 152       | 100    |                          |      | Mascot      |
|  | 2278.0015  | 2277.8945   | -0.107  | -47   | 135        | 154      | QCGSCWSFSSTGALEG<br>QLFR    | 183       | 100    | Carbamidomethyl (C)[2,5] |      | Mascot      |
|  | 2278.0015  | 2277.8945   | -0.107  | -47   | 135        | 154      | QCGSCWSFSSTGALEG<br>QLFR    |           |        | Carbamidomethyl (C)[2,5] |      | Mascot      |
|  | 2649.1819  | 2649.2053   | 0.0234  | 9     | 132        | 154      | DQKQCGSCWSFSSTGAL<br>EGQLFR |           |        | Carbamidomethyl (C)[5,8] |      | Mascot      |

|   |                                              |  |  |  |              |  |         |      |   |     |     |     |     |  |  |
|---|----------------------------------------------|--|--|--|--------------|--|---------|------|---|-----|-----|-----|-----|--|--|
| 4 | hypothetical protein LOC563390 [Danio rerio] |  |  |  | gi 156739275 |  | 38057.1 | 6.31 | 7 | 541 | 100 | 513 | 100 |  |  |
|---|----------------------------------------------|--|--|--|--------------|--|---------|------|---|-----|-----|-----|-----|--|--|

#### Peptide Information

|  | Calc. Mass | Obsrv. Mass | ± da    | ± ppm | Start Seq. | End Seq. | Sequence                  | Ion Score | C. I.  | % Modification                               | Rank | Result Type |
|--|------------|-------------|---------|-------|------------|----------|---------------------------|-----------|--------|----------------------------------------------|------|-------------|
|  | 1017.5727  | 1017.5201   | -0.0526 | -52   | 224        | 232      | ITGFVDIPR                 | 71        | 99.998 |                                              |      | Mascot      |
|  | 1017.5727  | 1017.5201   | -0.0526 | -52   | 224        | 232      | ITGFVDIPR                 |           |        |                                              |      | Mascot      |
|  | 1222.5487  | 1222.4867   | -0.062  | -51   | 302        | 311      | NSWSDKWGDK                |           |        |                                              |      | Mascot      |
|  | 1498.7173  | 1498.645    | -0.0723 | -48   | 196        | 208      | GLDSEQSYPYLAR             | 106       | 100    |                                              |      | Mascot      |
|  | 1498.7173  | 1498.645    | -0.0723 | -48   | 196        | 208      | GLDSEQSYPYLAR             |           |        |                                              |      | Mascot      |
|  | 1938.8507  | 1938.7604   | -0.0903 | -47   | 319        | 335      | DKNNHCGIATMASYPLM         |           |        | Carbamidomethyl (C)[6], Oxidation (M)[11]    |      | Mascot      |
|  | 1954.8456  | 1954.7512   | -0.0944 | -48   | 319        | 335      | DKNNHCGIATMASYPLM         |           |        | Carbamidomethyl (C)[6], Oxidation (M)[11,17] |      | Mascot      |
|  | 2174.0989  | 2173.9995   | -0.0994 | -46   | 276        | 296      | LDHAVLVVGYGYQGADV<br>AGNR |           |        |                                              |      | Mascot      |
|  | 2174.0989  | 2173.9995   | -0.0994 | -46   | 276        | 296      | LDHAVLVVGYGYQGADV         | 152       | 100    |                                              |      | Mascot      |

|   |                                       |           |        |     |     |              |                                  |      |     |                          |        |     |     |
|---|---------------------------------------|-----------|--------|-----|-----|--------------|----------------------------------|------|-----|--------------------------|--------|-----|-----|
|   | 2278.0015                             | 2277.8945 | -0.107 | -47 | 135 | 154          | AGNR<br>QCGSCWSFSSTGALEG<br>QLFR | 183  | 100 | Carbamidomethyl (C)[2,5] | Mascot |     |     |
|   | 2278.0015                             | 2277.8945 | -0.107 | -47 | 135 | 154          | QCGSCWSFSSTGALEG<br>QLFR         |      |     | Carbamidomethyl (C)[2,5] | Mascot |     |     |
|   | 2649.1819                             | 2649.2053 | 0.0234 | 9   | 132 | 154          | DQKQCGSCWSFSSTGAL<br>EGQLFR      |      |     | Carbamidomethyl (C)[5,8] | Mascot |     |     |
| 5 | PREDICTED: cathepsin L1 [Danio rerio] |           |        |     |     | gi 189525870 | 38017.2                          | 6.36 | 7   | 529                      | 100    | 502 | 100 |

#### Peptide Information

| Calc. Mass | Obsrv. Mass | ± da    | ± ppm | Start Seq. | End Seq. | Sequence                       | Ion Score | C. I. | % Modification                               | Rank | Result Type |
|------------|-------------|---------|-------|------------|----------|--------------------------------|-----------|-------|----------------------------------------------|------|-------------|
| 1222.5487  | 1222.4867   | -0.062  | -51   | 302        | 311      | NSWSDKWGDK                     |           |       |                                              |      | Mascot      |
| 1346.6448  | 1346.6012   | -0.0436 | -32   | 38         | 48       | SYHEDVEVGRR                    |           |       |                                              |      | Mascot      |
| 1498.7173  | 1498.645    | -0.0723 | -48   | 196        | 208      | GLDSEQSYPYLAR                  | 106       | 100   |                                              |      | Mascot      |
| 1498.7173  | 1498.645    | -0.0723 | -48   | 196        | 208      | GLDSEQSYPYLAR                  |           |       |                                              |      | Mascot      |
| 1938.8507  | 1938.7604   | -0.0903 | -47   | 319        | 335      | DKNNHCGIATMASYPLM              |           |       | Carbamidomethyl (C)[6], Oxidation (M)[11]    |      | Mascot      |
| 1954.8456  | 1954.7512   | -0.0944 | -48   | 319        | 335      | DKNNHCGIATMASYPLM              |           |       | Carbamidomethyl (C)[6], Oxidation (M)[11,17] |      | Mascot      |
| 2278.0015  | 2277.8945   | -0.107  | -47   | 135        | 154      | QCGSCWSFSSTGALEG<br>QLFR       | 183       | 100   | Carbamidomethyl (C)[2,5]                     |      | Mascot      |
| 2278.0015  | 2277.8945   | -0.107  | -47   | 135        | 154      | QCGSCWSFSSTGALEG<br>QLFR       |           |       | Carbamidomethyl (C)[2,5]                     |      | Mascot      |
| 2649.1819  | 2649.2053   | 0.0234  | 9     | 132        | 154      | DQKQCGSCWSFSSTGAL<br>EGQLFR    |           |       | Carbamidomethyl (C)[5,8]                     |      | Mascot      |
| 2721.3049  | 2721.1875   | -0.1174 | -43   | 271        | 296      | ACTSQLDHAVLVVGYGY<br>QGADVAGNR |           |       | Carbamidomethyl (C)[2]                       |      | Mascot      |
| 2721.3049  | 2721.1875   | -0.1174 | -43   | 271        | 296      | ACTSQLDHAVLVVGYGY<br>QGADVAGNR | 212       | 100   | Carbamidomethyl (C)[2]                       |      | Mascot      |

|   |                                |  |  |  |  |             |         |      |   |     |     |     |     |
|---|--------------------------------|--|--|--|--|-------------|---------|------|---|-----|-----|-----|-----|
| 6 | Cathepsin L, 1 b [Danio rerio] |  |  |  |  | gi 81294188 | 37990.1 | 5.99 | 7 | 473 | 100 | 442 | 100 |
|---|--------------------------------|--|--|--|--|-------------|---------|------|---|-----|-----|-----|-----|

#### Peptide Information

| Calc. Mass | Obsrv. Mass | ± da    | ± ppm | Start Seq. | End Seq. | Sequence                    | Ion Score | C. I. | % Modification                               | Rank | Result Type |
|------------|-------------|---------|-------|------------|----------|-----------------------------|-----------|-------|----------------------------------------------|------|-------------|
| 1222.5487  | 1222.4867   | -0.062  | -51   | 303        | 312      | NSWSDKWGDK                  |           |       |                                              |      | Mascot      |
| 1346.6448  | 1346.6012   | -0.0436 | -32   | 38         | 48       | SYHEDVEVGRR                 |           |       |                                              |      | Mascot      |
| 1498.7173  | 1498.645    | -0.0723 | -48   | 196        | 208      | GLDSEQSYPYLAR               | 106       | 100   |                                              |      | Mascot      |
| 1498.7173  | 1498.645    | -0.0723 | -48   | 196        | 208      | GLDSEQSYPYLAR               |           |       |                                              |      | Mascot      |
| 2174.0989  | 2173.9995   | -0.0994 | -46   | 277        | 297      | LDHAVLVVGYGYQGADV<br>AGNR   |           |       |                                              |      | Mascot      |
| 2174.0989  | 2173.9995   | -0.0994 | -46   | 277        | 297      | LDHAVLVVGYGYQGADV<br>AGNR   | 152       | 100   |                                              |      | Mascot      |
| 2278.0015  | 2277.8945   | -0.107  | -47   | 135        | 154      | QCGSCWSFSSTGALEG<br>QLFR    | 183       | 100   | Carbamidomethyl (C)[2,5]                     |      | Mascot      |
| 2278.0015  | 2277.8945   | -0.107  | -47   | 135        | 154      | QCGSCWSFSSTGALEG<br>QLFR    |           |       | Carbamidomethyl (C)[2,5]                     |      | Mascot      |
| 2649.1819  | 2649.2053   | 0.0234  | 9     | 132        | 154      | DQKQCGSCWSFSSTGAL<br>EGQLFR |           |       | Carbamidomethyl (C)[5,8]                     |      | Mascot      |
| 3845.7712  | 3845.6292   | -0.142  | -37   | 159        | 192      | LISMSEQLNVDCSRPQG           |           |       | Carbamidomethyl (C)[12,21], Oxidation (M)[4] |      | Mascot      |



|                     |                                              | 3861.7661  | 3861.6509   | -0.1152 | -30   | 159          | 192      | NQGCNGGLMDLAFQYVK<br>LISMSEQNLVDCSRPQG<br>NQGCNGGLMDLAFQYVK |      |           |       |     |                                                 | Carbamidomethyl (C)[12,21], Oxidation (M)[4,26] | Mascot      |
|---------------------|----------------------------------------------|------------|-------------|---------|-------|--------------|----------|-------------------------------------------------------------|------|-----------|-------|-----|-------------------------------------------------|-------------------------------------------------|-------------|
| 7                   | hypothetical protein LOC567623 [Danio rerio] |            |             |         |       | gi 162138968 |          | 37987.1                                                     | 6.31 | 7         | 471   | 100 | 442                                             | 100                                             |             |
| Peptide Information |                                              |            |             |         |       |              |          |                                                             |      |           |       |     |                                                 |                                                 |             |
|                     |                                              | Calc. Mass | Obsrv. Mass | ± da    | ± ppm | Start Seq.   | End Seq. | Sequence                                                    |      | Ion Score | C. I. | %   | Modification                                    | Rank                                            | Result Type |
|                     |                                              | 1222.5487  | 1222.4867   | -0.062  | -51   | 303          | 312      | NSWSDKWGDK                                                  |      |           |       |     |                                                 |                                                 | Mascot      |
|                     |                                              | 1346.6448  | 1346.6012   | -0.0436 | -32   | 38           | 48       | SYHEDVEVGRR                                                 |      |           |       |     |                                                 |                                                 | Mascot      |
|                     |                                              | 1498.7173  | 1498.645    | -0.0723 | -48   | 196          | 208      | GLDSEQSYPYLAR                                               |      | 106       | 100   |     |                                                 |                                                 | Mascot      |
|                     |                                              | 1498.7173  | 1498.645    | -0.0723 | -48   | 196          | 208      | GLDSEQSYPYLAR                                               |      |           |       |     |                                                 |                                                 | Mascot      |
|                     |                                              | 2174.0989  | 2173.9995   | -0.0994 | -46   | 277          | 297      | LDHAVLVVGYGYQGADV<br>AGNR                                   |      |           |       |     |                                                 |                                                 | Mascot      |
|                     |                                              | 2174.0989  | 2173.9995   | -0.0994 | -46   | 277          | 297      | LDHAVLVVGYGYQGADV<br>AGNR                                   |      | 152       | 100   |     |                                                 |                                                 | Mascot      |
|                     |                                              | 2278.0015  | 2277.8945   | -0.107  | -47   | 135          | 154      | QCGSCWSFSSTGALEG<br>QLFR                                    |      | 183       | 100   |     | Carbamidomethyl (C)[2,5]                        |                                                 | Mascot      |
|                     |                                              | 2278.0015  | 2277.8945   | -0.107  | -47   | 135          | 154      | QCGSCWSFSSTGALEG<br>QLFR                                    |      |           |       |     | Carbamidomethyl (C)[2,5]                        |                                                 | Mascot      |
|                     |                                              | 2649.1819  | 2649.2053   | 0.0234  | 9     | 132          | 154      | DQKQCGSCWSFSSTGAL<br>EGQLFR                                 |      |           |       |     | Carbamidomethyl (C)[5,8]                        |                                                 | Mascot      |
|                     |                                              | 3845.7712  | 3845.6292   | -0.142  | -37   | 159          | 192      | LISMSEQNLVDCSRPQG<br>NQGCNGGLMDLAFQYVK                      |      |           |       |     | Carbamidomethyl (C)[12,21], Oxidation (M)[4]    |                                                 | Mascot      |
|                     |                                              | 3861.7661  | 3861.6509   | -0.1152 | -30   | 159          | 192      | LISMSEQNLVDCSRPQG<br>NQGCNGGLMDLAFQYVK                      |      |           |       |     | Carbamidomethyl (C)[12,21], Oxidation (M)[4,26] |                                                 | Mascot      |
| 8                   | PREDICTED: cathepsin L1-like [Danio rerio]   |            |             |         |       | gi 326672297 |          | 38038.1                                                     | 6.25 | 7         | 469   | 100 | 442                                             | 100                                             |             |
| Peptide Information |                                              |            |             |         |       |              |          |                                                             |      |           |       |     |                                                 |                                                 |             |
|                     |                                              | Calc. Mass | Obsrv. Mass | ± da    | ± ppm | Start Seq.   | End Seq. | Sequence                                                    |      | Ion Score | C. I. | %   | Modification                                    | Rank                                            | Result Type |
|                     |                                              | 1222.5487  | 1222.4867   | -0.062  | -51   | 303          | 312      | NSWSDKWGDK                                                  |      |           |       |     |                                                 |                                                 | Mascot      |
|                     |                                              | 1346.6448  | 1346.6012   | -0.0436 | -32   | 38           | 48       | SYHEDVEVGRR                                                 |      |           |       |     |                                                 |                                                 | Mascot      |
|                     |                                              | 1498.7173  | 1498.645    | -0.0723 | -48   | 196          | 208      | GLDSEQSYPYLAR                                               |      | 106       | 100   |     |                                                 |                                                 | Mascot      |
|                     |                                              | 1498.7173  | 1498.645    | -0.0723 | -48   | 196          | 208      | GLDSEQSYPYLAR                                               |      |           |       |     |                                                 |                                                 | Mascot      |
|                     |                                              | 1938.8507  | 1938.7604   | -0.0903 | -47   | 320          | 336      | DKNNHCGIATMASYP LM                                          |      |           |       |     | Carbamidomethyl (C)[6], Oxidation (M)[11]       |                                                 | Mascot      |
|                     |                                              | 1954.8456  | 1954.7512   | -0.0944 | -48   | 320          | 336      | DKNNHCGIATMASYP LM                                          |      |           |       |     | Carbamidomethyl (C)[6], Oxidation (M)[11,17]    |                                                 | Mascot      |
|                     |                                              | 2174.0989  | 2173.9995   | -0.0994 | -46   | 277          | 297      | LDHAVLVVGYGYQGADV<br>AGNR                                   |      |           |       |     |                                                 |                                                 | Mascot      |
|                     |                                              | 2174.0989  | 2173.9995   | -0.0994 | -46   | 277          | 297      | LDHAVLVVGYGYQGADV<br>AGNR                                   |      | 152       | 100   |     |                                                 |                                                 | Mascot      |
|                     |                                              | 2278.0015  | 2277.8945   | -0.107  | -47   | 135          | 154      | QCGSCWSFSSTGALEG<br>QLFR                                    |      | 183       | 100   |     | Carbamidomethyl (C)[2,5]                        |                                                 | Mascot      |
|                     |                                              | 2278.0015  | 2277.8945   | -0.107  | -47   | 135          | 154      | QCGSCWSFSSTGALEG<br>QLFR                                    |      |           |       |     | Carbamidomethyl (C)[2,5]                        |                                                 | Mascot      |
|                     |                                              | 2649.1819  | 2649.2053   | 0.0234  | 9     | 132          | 154      | DQKQCGSCWSFSSTGAL<br>EGQLFR                                 |      |           |       |     | Carbamidomethyl (C)[5,8]                        |                                                 | Mascot      |
| 9                   | PREDICTED: cathepsin L1-like [Danio rerio]   |            |             |         |       | gi 326672302 |          | 37980.1                                                     | 6.45 | 7         | 468   | 100 | 442                                             | 100                                             |             |

### Peptide Information

| Calc. Mass | Obsrv. Mass | ± da    | ± ppm | Start Seq. | End Seq. | Sequence                 | Ion Score | C. I. | % Modification                               | Rank | Result Type |
|------------|-------------|---------|-------|------------|----------|--------------------------|-----------|-------|----------------------------------------------|------|-------------|
| 1222.5487  | 1222.4867   | -0.062  | -51   | 302        | 311      | NSWSDKWGDK               |           |       |                                              |      | Mascot      |
| 1346.6448  | 1346.6012   | -0.0436 | -32   | 38         | 48       | SYHEDVEVGRR              |           |       |                                              |      | Mascot      |
| 1498.7173  | 1498.645    | -0.0723 | -48   | 196        | 208      | GLDSEQSYPYLAR            | 106       | 100   |                                              |      | Mascot      |
| 1498.7173  | 1498.645    | -0.0723 | -48   | 196        | 208      | GLDSEQSYPYLAR            |           |       |                                              |      | Mascot      |
| 1938.8507  | 1938.7604   | -0.0903 | -47   | 319        | 335      | DKNNHCGIATMASYP LM       |           |       | Carbamidomethyl (C)[6], Oxidation (M)[11]    |      | Mascot      |
| 1954.8456  | 1954.7512   | -0.0944 | -48   | 319        | 335      | DKNNHCGIATMASYP LM       |           |       | Carbamidomethyl (C)[6], Oxidation (M)[11,17] |      | Mascot      |
| 2174.0989  | 2173.9995   | -0.0994 | -46   | 276        | 296      | LDHAVLVVGYGYQGADV AGNR   |           |       |                                              |      | Mascot      |
| 2174.0989  | 2173.9995   | -0.0994 | -46   | 276        | 296      | LDHAVLVVGYGYQGADV AGNR   | 152       | 100   |                                              |      | Mascot      |
| 2278.0015  | 2277.8945   | -0.107  | -47   | 135        | 154      | QCGSCWSFSSTGALEG QLFR    | 183       | 100   | Carbamidomethyl (C)[2,5]                     |      | Mascot      |
| 2278.0015  | 2277.8945   | -0.107  | -47   | 135        | 154      | QCGSCWSFSSTGALEG QLFR    |           |       | Carbamidomethyl (C)[2,5]                     |      | Mascot      |
| 2649.1819  | 2649.2053   | 0.0234  | 9     | 132        | 154      | DQKQCGSCWSFSSTGAL EGQLFR |           |       | Carbamidomethyl (C)[5,8]                     |      | Mascot      |

10 cathepsin L, 1 b [Danio rerio] gi|18858809 38005.1 5.99 6 466 100 442 100

### Peptide Information

| Calc. Mass | Obsrv. Mass | ± da    | ± ppm | Start Seq. | End Seq. | Sequence                 | Ion Score | C. I. | % Modification           | Rank | Result Type |
|------------|-------------|---------|-------|------------|----------|--------------------------|-----------|-------|--------------------------|------|-------------|
| 1222.5487  | 1222.4867   | -0.062  | -51   | 303        | 312      | NSWSDKWGDK               |           |       |                          |      | Mascot      |
| 1346.6448  | 1346.6012   | -0.0436 | -32   | 38         | 48       | SYHEDVEVGRR              |           |       |                          |      | Mascot      |
| 1498.7173  | 1498.645    | -0.0723 | -48   | 196        | 208      | GLDSEQSYPYLAR            | 106       | 100   |                          |      | Mascot      |
| 1498.7173  | 1498.645    | -0.0723 | -48   | 196        | 208      | GLDSEQSYPYLAR            |           |       |                          |      | Mascot      |
| 2174.0989  | 2173.9995   | -0.0994 | -46   | 277        | 297      | LDHAVLVVGYGYQGADV AGNR   |           |       |                          |      | Mascot      |
| 2174.0989  | 2173.9995   | -0.0994 | -46   | 277        | 297      | LDHAVLVVGYGYQGADV AGNR   | 152       | 100   |                          |      | Mascot      |
| 2278.0015  | 2277.8945   | -0.107  | -47   | 135        | 154      | QCGSCWSFSSTGALEG QLFR    | 183       | 100   | Carbamidomethyl (C)[2,5] |      | Mascot      |
| 2278.0015  | 2277.8945   | -0.107  | -47   | 135        | 154      | QCGSCWSFSSTGALEG QLFR    |           |       | Carbamidomethyl (C)[2,5] |      | Mascot      |
| 2649.1819  | 2649.2053   | 0.0234  | 9     | 132        | 154      | DQKQCGSCWSFSSTGAL EGQLFR |           |       | Carbamidomethyl (C)[5,8] |      | Mascot      |

11 PREDICTED: cathepsin L1-like isoform 1 [Danio rerio] gi|189525868 37946.1 6.14 6 465 100 442 100

### Peptide Information

| Calc. Mass | Obsrv. Mass | ± da   | ± ppm | Start Seq. | End Seq. | Sequence   | Ion Score | C. I. | % Modification | Rank | Result Type |
|------------|-------------|--------|-------|------------|----------|------------|-----------|-------|----------------|------|-------------|
| 1222.5487  | 1222.4867   | -0.062 | -51   | 303        | 312      | NSWSDKWGDK |           |       |                |      | Mascot      |

|    |                              |           |         |     |     |              |                             |      |     |                          |     |     |     |  |  |  |        |
|----|------------------------------|-----------|---------|-----|-----|--------------|-----------------------------|------|-----|--------------------------|-----|-----|-----|--|--|--|--------|
|    | 1346.6448                    | 1346.6012 | -0.0436 | -32 | 38  | 48           | SYHEDVEVGRR                 |      |     |                          |     |     |     |  |  |  | Mascot |
|    | 1498.7173                    | 1498.645  | -0.0723 | -48 | 196 | 208          | GLDSEQSYPYLAR               | 106  | 100 |                          |     |     |     |  |  |  | Mascot |
|    | 1498.7173                    | 1498.645  | -0.0723 | -48 | 196 | 208          | GLDSEQSYPYLAR               |      |     |                          |     |     |     |  |  |  | Mascot |
|    | 2174.0989                    | 2173.9995 | -0.0994 | -46 | 277 | 297          | LDHAVLVVGYGYQGADV<br>AGNR   |      |     |                          |     |     |     |  |  |  | Mascot |
|    | 2174.0989                    | 2173.9995 | -0.0994 | -46 | 277 | 297          | LDHAVLVVGYGYQGADV<br>AGNR   | 152  | 100 |                          |     |     |     |  |  |  | Mascot |
|    | 2278.0015                    | 2277.8945 | -0.107  | -47 | 135 | 154          | QCGSCWSFSSTGALEG<br>QLFR    | 183  | 100 | Carbamidomethyl (C)[2,5] |     |     |     |  |  |  | Mascot |
|    | 2278.0015                    | 2277.8945 | -0.107  | -47 | 135 | 154          | QCGSCWSFSSTGALEG<br>QLFR    |      |     | Carbamidomethyl (C)[2,5] |     |     |     |  |  |  | Mascot |
|    | 2649.1819                    | 2649.2053 | 0.0234  | 9   | 132 | 154          | DQKQCGSCWSFSSTGAL<br>EQQLFR |      |     | Carbamidomethyl (C)[5,8] |     |     |     |  |  |  | Mascot |
| 12 | vitellogenin 1 [Danio rerio] |           |         |     |     | gi 166795887 | 149452.5                    | 8.68 | 8   | 256                      | 100 | 243 | 100 |  |  |  |        |

#### Peptide Information

| Calc. Mass | Obsrv. Mass | ± da    | ± ppm | Start Seq. | End Seq. | Sequence                         | Ion Score | C. I. | % | Modification            | Rank | Result | Type   |
|------------|-------------|---------|-------|------------|----------|----------------------------------|-----------|-------|---|-------------------------|------|--------|--------|
| 1070.4861  | 1070.4818   | -0.0043 | -4    | 921        | 929      | NIEDHSAER                        |           |       |   |                         |      |        | Mascot |
| 1070.4861  | 1070.4818   | -0.0043 | -4    | 921        | 929      | NIEDHSAER                        | 3         | 0     |   |                         |      |        | Mascot |
| 1515.7478  | 1515.6729   | -0.0749 | -49   | 733        | 745      | VFGQEVAYVNFDK                    |           |       |   |                         |      |        | Mascot |
| 1515.7478  | 1515.6729   | -0.0749 | -49   | 733        | 745      | VFGQEVAYVNFDK                    | 79        | 100   |   |                         |      |        | Mascot |
| 1767.9673  | 1767.8766   | -0.0907 | -51   | 746        | 761      | TIIEEAIPMTGPKPR                  |           |       |   | Oxidation (M)[9]        |      |        | Mascot |
| 1954.8745  | 1954.7512   | -0.1233 | -63   | 147        | 163      | TQNIYEMQEAGAQGVCR                |           |       |   | Carbamidomethyl (C)[16] |      |        | Mascot |
| 2174.1968  | 2173.9995   | -0.1973 | -91   | 770        | 789      | ALQEGVAFQYAKPLLAEE<br>VR         |           |       |   |                         |      |        | Mascot |
| 2174.1968  | 2173.9995   | -0.1973 | -91   | 770        | 789      | ALQEGVAFQYAKPLLAEE<br>VR         | 5         | 0     |   |                         |      |        | Mascot |
| 2233.2009  | 2232.9709   | -0.23   | -103  | 593        | 614      | SLTRITAPDMAYVAGAAN<br>VAIK       |           |       |   |                         |      |        | Mascot |
| 2627.3716  | 2627.2556   | -0.116  | -44   | 897        | 920      | VEALPVELPEHIASASFET<br>YAVVR     | 159       | 100   |   |                         |      |        | Mascot |
| 2627.3716  | 2627.2556   | -0.116  | -44   | 897        | 920      | VEALPVELPEHIASASFET<br>YAVVR     |           |       |   |                         |      |        | Mascot |
| 3089.5942  | 3089.4661   | -0.1281 | -41   | 893        | 920      | GNYKVEALPVELPEHIAS<br>ASFETYAVVR |           |       |   |                         |      |        | Mascot |

|                     |                            |             |         |       |              |                      |          |      |           |       |     |              |     |      |        |        |
|---------------------|----------------------------|-------------|---------|-------|--------------|----------------------|----------|------|-----------|-------|-----|--------------|-----|------|--------|--------|
| 13                  | Vtg1 protein [Danio rerio] |             |         |       | gi 145337918 |                      | 116565.5 | 9.07 | 7         | 256   | 100 | 242          | 100 |      |        |        |
| Peptide Information |                            |             |         |       |              |                      |          |      |           |       |     |              |     |      |        |        |
| Calc. Mass          |                            | Obsrv. Mass | ± da    | ± ppm | Start Seq.   | End Sequence Seq.    |          |      | Ion Score | C. I. | %   | Modification |     | Rank | Result | Type   |
| 1070.4861           |                            | 1070.4818   | -0.0043 | -4    | 627          | 635 NIEDHSAER        |          |      |           |       |     |              |     |      |        | Mascot |
| 1070.4861           |                            | 1070.4818   | -0.0043 | -4    | 627          | 635 NIEDHSAER        |          | 3    |           | 0     |     |              |     |      |        | Mascot |
| 1515.7478           |                            | 1515.6729   | -0.0749 | -49   | 439          | 451 VFGQEVAYVNFDK    |          |      |           |       |     |              |     |      |        | Mascot |
| 1515.7478           |                            | 1515.6729   | -0.0749 | -49   | 439          | 451 VFGQEVAYVNFDK    |          | 79   |           | 100   |     |              |     |      |        | Mascot |
| 1723.9412           |                            | 1723.8583   | -0.0829 | -48   | 452          | 467 TIIEEAIPMATGPKPR |          |      |           |       |     |              |     |      |        | Mascot |

|    |                              |           |         |      |             |     |                                  |      |   |     |     |     |                  |  |        |
|----|------------------------------|-----------|---------|------|-------------|-----|----------------------------------|------|---|-----|-----|-----|------------------|--|--------|
|    | 1739.936                     | 1739.8535 | -0.0825 | -47  | 452         | 467 | TIIEEAIPMATGPKPR                 |      |   |     |     |     | Oxidation (M)[9] |  | Mascot |
|    | 2174.1968                    | 2173.9995 | -0.1973 | -91  | 476         | 495 | ALQEGVAFQYAKPLLAEE<br>VR         |      |   |     |     |     |                  |  | Mascot |
|    | 2174.1968                    | 2173.9995 | -0.1973 | -91  | 476         | 495 | ALQEGVAFQYAKPLLAEE<br>VR         | 5    |   | 0   |     |     |                  |  | Mascot |
|    | 2187.1624                    | 2186.8879 | -0.2745 | -126 | 303         | 324 | ITAPDMASVAGAANVAIK<br>LMSR       |      |   |     |     |     |                  |  | Mascot |
|    | 2203.1572                    | 2202.9031 | -0.2541 | -115 | 303         | 324 | ITAPDMASVAGAANVAIK<br>LMSR       |      |   |     |     |     | Oxidation (M)[6] |  | Mascot |
|    | 2627.3716                    | 2627.2556 | -0.116  | -44  | 603         | 626 | VEALPVELPEHIASASFET<br>YAVVR     | 159  |   | 100 |     |     |                  |  | Mascot |
|    | 2627.3716                    | 2627.2556 | -0.116  | -44  | 603         | 626 | VEALPVELPEHIASASFET<br>YAVVR     |      |   |     |     |     |                  |  | Mascot |
|    | 3089.5942                    | 3089.4661 | -0.1281 | -41  | 599         | 626 | GNYKVEALPVELPEHIAS<br>ASFETYAVVR |      |   |     |     |     |                  |  | Mascot |
| 14 | vitellogenin 1 [Danio rerio] |           |         |      | gi 94733730 |     | 149140.4                         | 8.74 | 8 | 255 | 100 | 242 | 100              |  |        |

Peptide Information

| Calc. Mass | Obsrv. Mass | ± da    | ± ppm | Start Seq. | End Seq. | Sequence                         | Ion Score | C. I. | % Modification          | Rank | Result Type |
|------------|-------------|---------|-------|------------|----------|----------------------------------|-----------|-------|-------------------------|------|-------------|
| 1070.4861  | 1070.4818   | -0.0043 | -4    | 921        | 929      | NIEDHSAER                        |           |       |                         |      | Mascot      |
| 1070.4861  | 1070.4818   | -0.0043 | -4    | 921        | 929      | NIEDHSAER                        | 3         |       | 0                       |      | Mascot      |
| 1515.7478  | 1515.6729   | -0.0749 | -49   | 733        | 745      | VFGQEVAYVNFDK                    |           |       |                         |      | Mascot      |
| 1515.7478  | 1515.6729   | -0.0749 | -49   | 733        | 745      | VFGQEVAYVNFDK                    | 79        |       | 100                     |      | Mascot      |
| 1723.9412  | 1723.8583   | -0.0829 | -48   | 746        | 761      | TIIEEAIPMATGPKPR                 |           |       |                         |      | Mascot      |
| 1739.936   | 1739.8535   | -0.0825 | -47   | 746        | 761      | TIIEEAIPMATGPKPR                 |           |       | Oxidation (M)[9]        |      | Mascot      |
| 1954.8745  | 1954.7512   | -0.1233 | -63   | 147        | 163      | TQNIYEMQEAGAQQVCR                |           |       | Carbamidomethyl (C)[16] |      | Mascot      |
| 2174.1968  | 2173.9995   | -0.1973 | -91   | 770        | 789      | ALQEGVAFQYAKPLLAEE<br>VR         |           |       |                         |      | Mascot      |
| 2174.1968  | 2173.9995   | -0.1973 | -91   | 770        | 789      | ALQEGVAFQYAKPLLAEE<br>VR         | 5         |       | 0                       |      | Mascot      |
| 2187.1624  | 2186.8879   | -0.2745 | -126  | 597        | 618      | ITAPDMASVAGAANVAIK<br>LMSR       |           |       |                         |      | Mascot      |
| 2203.1572  | 2202.9031   | -0.2541 | -115  | 597        | 618      | ITAPDMASVAGAANVAIK<br>LMSR       |           |       | Oxidation (M)[6]        |      | Mascot      |
| 2627.3716  | 2627.2556   | -0.116  | -44   | 897        | 920      | VEALPVELPEHIASASFET<br>YAVVR     | 159       |       | 100                     |      | Mascot      |
| 2627.3716  | 2627.2556   | -0.116  | -44   | 897        | 920      | VEALPVELPEHIASASFET<br>YAVVR     |           |       |                         |      | Mascot      |
| 3089.5942  | 3089.4661   | -0.1281 | -41   | 893        | 920      | GNYKVEALPVELPEHIAS<br>ASFETYAVVR |           |       |                         |      | Mascot      |

|    |                              |  |  |  |              |  |          |      |   |    |     |    |     |  |  |
|----|------------------------------|--|--|--|--------------|--|----------|------|---|----|-----|----|-----|--|--|
| 15 | vitellogenin 7 [Danio rerio] |  |  |  | gi 156713467 |  | 148739.2 | 8.76 | 8 | 97 | 100 | 84 | 100 |  |  |
|----|------------------------------|--|--|--|--------------|--|----------|------|---|----|-----|----|-----|--|--|

Peptide Information

| Calc. Mass | Obsrv. Mass | ± da    | ± ppm | Start Seq. | End Seq. | Sequence  | Ion Score | C. I. | % Modification | Rank | Result Type |
|------------|-------------|---------|-------|------------|----------|-----------|-----------|-------|----------------|------|-------------|
| 1070.4861  | 1070.4818   | -0.0043 | -4    | 921        | 929      | NIEDHSAER |           |       |                |      | Mascot      |
| 1070.4861  | 1070.4818   | -0.0043 | -4    | 921        | 929      | NIEDHSAER | 3         |       | 0              |      | Mascot      |

|    |                                                                                                          |           |         |     |      |      |                                    |    |     |  |                   |  |  |  |  |        |
|----|----------------------------------------------------------------------------------------------------------|-----------|---------|-----|------|------|------------------------------------|----|-----|--|-------------------|--|--|--|--|--------|
|    | 1515.7478                                                                                                | 1515.6729 | -0.0749 | -49 | 733  | 745  | VFGQEVAYVNFDK                      |    |     |  |                   |  |  |  |  | Mascot |
|    | 1515.7478                                                                                                | 1515.6729 | -0.0749 | -49 | 733  | 745  | VFGQEVAYVNFDK                      | 79 | 100 |  |                   |  |  |  |  | Mascot |
|    | 1537.7467                                                                                                | 1537.6478 | -0.0989 | -64 | 981  | 994  | GCVEVHSYNAAFIK                     |    |     |  |                   |  |  |  |  | Mascot |
|    | 1737.8992                                                                                                | 1737.8748 | -0.0244 | -14 | 119  | 134  | VFAPAGVSPTVMNLYR                   |    |     |  | Oxidation (M)[12] |  |  |  |  | Mascot |
|    | 1753.9517                                                                                                | 1753.8682 | -0.0835 | -48 | 746  | 761  | TIIEEAIPMVSGPKPR                   |    |     |  | Oxidation (M)[9]  |  |  |  |  | Mascot |
|    | 2174.1968                                                                                                | 2173.9995 | -0.1973 | -91 | 770  | 789  | ALQEGVAFQYAKPLLAEE<br>VR           |    |     |  |                   |  |  |  |  | Mascot |
|    | 2174.1968                                                                                                | 2173.9995 | -0.1973 | -91 | 770  | 789  | ALQEGVAFQYAKPLLAEE<br>VR           | 5  | 0   |  |                   |  |  |  |  | Mascot |
|    | 2607.4028                                                                                                | 2607.2961 | -0.1067 | -41 | 897  | 920  | VETLPVELPEHIASASFET<br>LAVVR       |    |     |  |                   |  |  |  |  | Mascot |
|    | 3337.7539                                                                                                | 3337.6672 | -0.0867 | -26 | 1179 | 1208 | LLGYQLAAYFDKPTARVQ<br>LIASSIAENDNR |    |     |  |                   |  |  |  |  | Mascot |
| 16 | novel protein similar to vitellogenin 1 (vg1) [Danio rerio] gi 94732723 147084.2 8.73 7 96 99.999 84 100 |           |         |     |      |      |                                    |    |     |  |                   |  |  |  |  |        |

Peptide Information

| Calc. Mass | Obsrv. Mass | ± da    | ± ppm | Start Seq. | End Seq. | Sequence                           | Ion Score | C. I. | % | Modification      | Rank | Result Type |
|------------|-------------|---------|-------|------------|----------|------------------------------------|-----------|-------|---|-------------------|------|-------------|
| 1070.4861  | 1070.4818   | -0.0043 | -4    | 921        | 929      | NIEDHSAER                          |           |       |   |                   |      | Mascot      |
| 1070.4861  | 1070.4818   | -0.0043 | -4    | 921        | 929      | NIEDHSAER                          | 3         | 0     |   |                   |      | Mascot      |
| 1515.7478  | 1515.6729   | -0.0749 | -49   | 733        | 745      | VFGQEVAYVNFDK                      |           |       |   |                   |      | Mascot      |
| 1515.7478  | 1515.6729   | -0.0749 | -49   | 733        | 745      | VFGQEVAYVNFDK                      | 79        | 100   |   |                   |      | Mascot      |
| 1737.8992  | 1737.8748   | -0.0244 | -14   | 119        | 134      | VFAPAGVSPTVMNLYR                   |           |       |   | Oxidation (M)[12] |      | Mascot      |
| 1753.9517  | 1753.8682   | -0.0835 | -48   | 746        | 761      | TIIEEAIPMVSGPKPR                   |           |       |   | Oxidation (M)[9]  |      | Mascot      |
| 2174.1968  | 2173.9995   | -0.1973 | -91   | 770        | 789      | ALQEGVAFQYAKPLLAEE<br>VR           |           |       |   |                   |      | Mascot      |
| 2174.1968  | 2173.9995   | -0.1973 | -91   | 770        | 789      | ALQEGVAFQYAKPLLAEE<br>VR           | 5         | 0     |   |                   |      | Mascot      |
| 2607.4028  | 2607.2961   | -0.1067 | -41   | 897        | 920      | VETLPVELPEHIASASFET<br>LAVVR       |           |       |   |                   |      | Mascot      |
| 3337.7539  | 3337.6672   | -0.0867 | -26   | 1164       | 1193     | LLGYQLAAYFDKPTARVQ<br>LIASSIAENDNR |           |       |   |                   |      | Mascot      |

17 vitellogenin 5 [Danio rerio] gi|68448530 148868 8.77 9 92 99.997 79 100

Peptide Information

| Calc. Mass | Obsrv. Mass | ± da    | ± ppm | Start Seq. | End Seq. | Sequence      | Ion Score | C. I. | % | Modification | Rank | Result Type |
|------------|-------------|---------|-------|------------|----------|---------------|-----------|-------|---|--------------|------|-------------|
| 1015.5781  | 1015.4449   | -0.1332 | -131  | 684        | 693      | TGGINEALLK    |           |       |   |              |      | Mascot      |
| 1070.4861  | 1070.4818   | -0.0043 | -4    | 921        | 929      | NIEDHSAER     |           |       |   |              |      | Mascot      |
| 1070.4861  | 1070.4818   | -0.0043 | -4    | 921        | 929      | NIEDHSAER     | 3         | 0     |   |              |      | Mascot      |
| 1324.5975  | 1324.624    | 0.0265  | 20    | 1067       | 1079     | NTPVSESSSSSR  |           |       |   |              |      | Mascot      |
| 1515.7478  | 1515.6729   | -0.0749 | -49   | 733        | 745      | VFGQEVAYVNFDK |           |       |   |              |      | Mascot      |
| 1515.7478  | 1515.6729   | -0.0749 | -49   | 733        | 745      | VFGQEVAYVNFDK | 79        | 100   |   |              |      | Mascot      |

|           |           |         |      |     |     |                              |  |  |  |  |                         |  |  |        |
|-----------|-----------|---------|------|-----|-----|------------------------------|--|--|--|--|-------------------------|--|--|--------|
| 1549.8373 | 1549.7631 | -0.0742 | -48  | 719 | 732 | ALPTDRPLASAYFK               |  |  |  |  |                         |  |  | Mascot |
| 1737.9568 | 1737.8748 | -0.082  | -47  | 746 | 761 | SIIEEAIPMTGPKPR              |  |  |  |  |                         |  |  | Mascot |
| 1753.9517 | 1753.8682 | -0.0835 | -48  | 746 | 761 | SIIEEAIPMTGPKPR              |  |  |  |  | Oxidation (M)[9]        |  |  | Mascot |
| 1954.8745 | 1954.7512 | -0.1233 | -63  | 147 | 163 | TQNIYEMQEAGAQQGVCR           |  |  |  |  | Carbamidomethyl (C)[16] |  |  | Mascot |
| 2278.2    | 2277.8945 | -0.3055 | -134 | 283 | 302 | GSLQYELASEILQTPLQL<br>MK     |  |  |  |  | Oxidation (M)[19]       |  |  | Mascot |
| 2278.2    | 2277.8945 | -0.3055 | -134 | 283 | 302 | GSLQYELASEILQTPLQL<br>MK     |  |  |  |  | Oxidation (M)[19]       |  |  | Mascot |
| 2577.3923 | 2577.2839 | -0.1084 | -42  | 897 | 920 | VEALPVELPEHIASASFET<br>LAVVR |  |  |  |  |                         |  |  | Mascot |

18 novel protein similar to vitellogenin 1 (vg1) [Danio rerio] gi|94733731 149169.2 8.84 9 91 99.997 79 100

#### Peptide Information

| Calc. Mass | Obsrv. Mass | ± da    | ± ppm | Start Seq. | End Seq. | Sequence                     | Ion Score | C. I. | % Modification          | Rank | Result Type |
|------------|-------------|---------|-------|------------|----------|------------------------------|-----------|-------|-------------------------|------|-------------|
| 1015.5781  | 1015.4449   | -0.1332 | -131  | 688        | 697      | TGGINEALLK                   |           |       |                         |      | Mascot      |
| 1070.4861  | 1070.4818   | -0.0043 | -4    | 925        | 933      | NIEDHSAER                    |           |       |                         |      | Mascot      |
| 1070.4861  | 1070.4818   | -0.0043 | -4    | 925        | 933      | NIEDHSAER                    | 3         |       | 0                       |      | Mascot      |
| 1324.5975  | 1324.624    | 0.0265  | 20    | 1071       | 1083     | NTPVSESSSSSR                 |           |       |                         |      | Mascot      |
| 1515.7478  | 1515.6729   | -0.0749 | -49   | 737        | 749      | VFGQEVAYVNFDK                |           |       |                         |      | Mascot      |
| 1515.7478  | 1515.6729   | -0.0749 | -49   | 737        | 749      | VFGQEVAYVNFDK                | 79        |       | 100                     |      | Mascot      |
| 1549.8373  | 1549.7631   | -0.0742 | -48   | 723        | 736      | ALPTDRPLASAYFK               |           |       |                         |      | Mascot      |
| 1737.8992  | 1737.8748   | -0.0244 | -14   | 123        | 138      | VFAPAGVSPTVMNLYR             |           |       | Oxidation (M)[12]       |      | Mascot      |
| 1753.9517  | 1753.8682   | -0.0835 | -48   | 750        | 765      | SIIEEAIPMTGPKPR              |           |       | Oxidation (M)[9]        |      | Mascot      |
| 1954.8745  | 1954.7512   | -0.1233 | -63   | 151        | 167      | TQNIYEMQEAGAQQGVCR           |           |       | Carbamidomethyl (C)[16] |      | Mascot      |
| 2577.3923  | 2577.2839   | -0.1084 | -42   | 901        | 924      | VEALPVELPEHIASASFET<br>LAVVR |           |       |                         |      | Mascot      |

19 Zgc:136383 protein [Danio rerio] gi|159155252 123957.1 8.78 7 90 99.996 79 100

#### Peptide Information

| Calc. Mass | Obsrv. Mass | ± da    | ± ppm | Start Seq. | End Seq. | Sequence                    | Ion Score | C. I. | % Modification   | Rank | Result Type |
|------------|-------------|---------|-------|------------|----------|-----------------------------|-----------|-------|------------------|------|-------------|
| 1045.5465  | 1045.509    | -0.0375 | -36   | 1123       | 1130     | DFLSWIHK                    |           |       |                  |      | Mascot      |
| 1070.4861  | 1070.4818   | -0.0043 | -4    | 698        | 706      | NIEDHSAER                   |           |       |                  |      | Mascot      |
| 1070.4861  | 1070.4818   | -0.0043 | -4    | 698        | 706      | NIEDHSAER                   | 3         |       | 0                |      | Mascot      |
| 1102.6038  | 1102.4674   | -0.1364 | -124  | 1094       | 1102     | IPEITMSRR                   |           |       |                  |      | Mascot      |
| 1515.7478  | 1515.6729   | -0.0749 | -49   | 510        | 522      | VFGQEVAYVNFDK               |           |       |                  |      | Mascot      |
| 1515.7478  | 1515.6729   | -0.0749 | -49   | 510        | 522      | VFGQEVAYVNFDK               | 79        |       | 100              |      | Mascot      |
| 1737.9568  | 1737.8748   | -0.082  | -47   | 523        | 538      | TIIEEAIPMVAGPKPR            |           |       | Oxidation (M)[9] |      | Mascot      |
| 2233.2009  | 2232.9709   | -0.23   | -103  | 370        | 391      | SLTRITAPDMAYVAGAAAN<br>VAIK |           |       |                  |      | Mascot      |

|    |                                              |           |         |     |              |     |                              |      |   |    |        |    |     |  |  |  |  |        |
|----|----------------------------------------------|-----------|---------|-----|--------------|-----|------------------------------|------|---|----|--------|----|-----|--|--|--|--|--------|
|    | 2563.3765                                    | 2563.2632 | -0.1133 | -44 | 674          | 697 | VEALPVDLPEHIASASFE<br>TLAVVR |      |   |    |        |    |     |  |  |  |  | Mascot |
| 20 | hypothetical protein LOC678536 [Danio rerio] |           |         |     | gi 160420306 |     | 148750.2                     | 8.89 | 7 | 89 | 99.995 | 79 | 100 |  |  |  |  |        |

Peptide Information

| Calc. Mass | Obsrv. Mass | ± da    | ± ppm | Start Seq. | End Seq. | Sequence                     | Ion Score | C. I. | %   | Modification     | Rank | Result | Type   |
|------------|-------------|---------|-------|------------|----------|------------------------------|-----------|-------|-----|------------------|------|--------|--------|
| 1045.5465  | 1045.509    | -0.0375 | -36   | 1346       | 1353     | DFLSWIHK                     |           |       |     |                  |      |        | Mascot |
| 1070.4861  | 1070.4818   | -0.0043 | -4    | 921        | 929      | NIEDHSAER                    |           |       |     |                  |      |        | Mascot |
| 1070.4861  | 1070.4818   | -0.0043 | -4    | 921        | 929      | NIEDHSAER                    | 3         |       | 0   |                  |      |        | Mascot |
| 1102.6038  | 1102.4674   | -0.1364 | -124  | 1317       | 1325     | IPEITMSRR                    |           |       |     |                  |      |        | Mascot |
| 1515.7478  | 1515.6729   | -0.0749 | -49   | 733        | 745      | VFGQEVAYVNFDK                |           |       |     |                  |      |        | Mascot |
| 1515.7478  | 1515.6729   | -0.0749 | -49   | 733        | 745      | VFGQEVAYVNFDK                | 79        |       | 100 |                  |      |        | Mascot |
| 1767.9673  | 1767.8766   | -0.0907 | -51   | 746        | 761      | TIIEEAIPMTGPKPR              |           |       |     | Oxidation (M)[9] |      |        | Mascot |
| 2233.2009  | 2232.9709   | -0.23   | -103  | 593        | 614      | SLTRITAPDMAYVAGAAN<br>VAIK   |           |       |     |                  |      |        | Mascot |
| 2563.3765  | 2563.2632   | -0.1133 | -44   | 897        | 920      | VEALPVDLPEHIASASFE<br>TLAVVR |           |       |     |                  |      |        | Mascot |

|    |                              |  |  |  |             |  |         |   |   |    |        |    |     |  |  |  |  |  |
|----|------------------------------|--|--|--|-------------|--|---------|---|---|----|--------|----|-----|--|--|--|--|--|
| 21 | vitellogenin 5 [Danio rerio] |  |  |  | gi 57864785 |  | 72820.8 | 9 | 5 | 88 | 99.992 | 79 | 100 |  |  |  |  |  |
|----|------------------------------|--|--|--|-------------|--|---------|---|---|----|--------|----|-----|--|--|--|--|--|

Peptide Information

| Calc. Mass | Obsrv. Mass | ± da    | ± ppm | Start Seq. | End Seq. | Sequence                     | Ion Score | C. I. | %   | Modification     | Rank | Result | Type   |
|------------|-------------|---------|-------|------------|----------|------------------------------|-----------|-------|-----|------------------|------|--------|--------|
| 1324.5975  | 1324.624    | 0.0265  | 20    | 376        | 388      | NTPVSSESSSSSR                |           |       |     |                  |      |        | Mascot |
| 1515.7478  | 1515.6729   | -0.0749 | -49   | 42         | 54       | VFGQEVAYVNFDK                |           |       |     |                  |      |        | Mascot |
| 1515.7478  | 1515.6729   | -0.0749 | -49   | 42         | 54       | VFGQEVAYVNFDK                | 79        |       | 100 |                  |      |        | Mascot |
| 1549.8373  | 1549.7631   | -0.0742 | -48   | 28         | 41       | ALPTDRPLASAYFK               |           |       |     |                  |      |        | Mascot |
| 1737.9568  | 1737.8748   | -0.082  | -47   | 55         | 70       | SIIEEAIPMTGPKPR              |           |       |     |                  |      |        | Mascot |
| 1753.9517  | 1753.8682   | -0.0835 | -48   | 55         | 70       | SIIEEAIPMTGPKPR              |           |       |     | Oxidation (M)[9] |      |        | Mascot |
| 2577.3923  | 2577.2839   | -0.1084 | -42   | 206        | 229      | VEALPVELPEHIASASFET<br>LAVVR |           |       |     |                  |      |        | Mascot |

|    |                              |  |  |  |             |  |          |      |   |    |       |    |     |  |  |  |  |  |
|----|------------------------------|--|--|--|-------------|--|----------|------|---|----|-------|----|-----|--|--|--|--|--|
| 22 | vitellogenin 1 [Danio rerio] |  |  |  | gi 21391472 |  | 127954.2 | 8.69 | 5 | 87 | 99.99 | 84 | 100 |  |  |  |  |  |
|----|------------------------------|--|--|--|-------------|--|----------|------|---|----|-------|----|-----|--|--|--|--|--|

Peptide Information

| Calc. Mass | Obsrv. Mass | ± da    | ± ppm | Start Seq. | End Seq. | Sequence         | Ion Score | C. I. | %   | Modification | Rank | Result | Type   |
|------------|-------------|---------|-------|------------|----------|------------------|-----------|-------|-----|--------------|------|--------|--------|
| 1070.4861  | 1070.4818   | -0.0043 | -4    | 730        | 738      | NIEDHSAER        |           |       |     |              |      |        | Mascot |
| 1070.4861  | 1070.4818   | -0.0043 | -4    | 730        | 738      | NIEDHSAER        | 3         |       | 0   |              |      |        | Mascot |
| 1515.7478  | 1515.6729   | -0.0749 | -49   | 542        | 554      | VFGQEVAYVNFDK    |           |       |     |              |      |        | Mascot |
| 1515.7478  | 1515.6729   | -0.0749 | -49   | 542        | 554      | VFGQEVAYVNFDK    | 79        |       | 100 |              |      |        | Mascot |
| 1723.9412  | 1723.8583   | -0.0829 | -48   | 555        | 570      | TIIEEAIPMATGPKPR |           |       |     |              |      |        | Mascot |

|    |                              |           |         |      |     |              |                            |      |   |    |       |    |                  |        |
|----|------------------------------|-----------|---------|------|-----|--------------|----------------------------|------|---|----|-------|----|------------------|--------|
|    | 1739.936                     | 1739.8535 | -0.0825 | -47  | 555 | 570          | TIIEEAIPMATGPKPR           |      |   |    |       |    | Oxidation (M)[9] | Mascot |
|    | 2174.1968                    | 2173.9995 | -0.1973 | -91  | 579 | 598          | ALQEGVAFQYAKPLLAEE<br>VR   |      |   |    |       |    |                  | Mascot |
|    | 2174.1968                    | 2173.9995 | -0.1973 | -91  | 579 | 598          | ALQEGVAFQYAKPLLAEE<br>VR   | 5    |   | 0  |       |    |                  | Mascot |
|    | 2187.1624                    | 2186.8879 | -0.2745 | -126 | 406 | 427          | ITAPDMASVAGAANVAIK<br>LMSR |      |   |    |       |    |                  | Mascot |
|    | 2203.1572                    | 2202.9031 | -0.2541 | -115 | 406 | 427          | ITAPDMASVAGAANVAIK<br>LMSR |      |   |    |       |    | Oxidation (M)[6] | Mascot |
| 23 | vitellogenin 6 [Danio rerio] |           |         |      |     | gi 303227889 | 150936.1                   | 8.84 | 6 | 87 | 99.99 | 84 | 100              |        |

Peptide Information

|  | Calc. Mass | Obsrv. Mass | ± da    | ± ppm | Start Seq. | End Seq. | Sequence                   | Ion Score | C. I. | % Modification   | Rank | Result Type |
|--|------------|-------------|---------|-------|------------|----------|----------------------------|-----------|-------|------------------|------|-------------|
|  | 1015.5781  | 1015.4449   | -0.1332 | -131  | 695        | 704      | TGGINEALLK                 |           |       |                  |      | Mascot      |
|  | 1070.4861  | 1070.4818   | -0.0043 | -4    | 932        | 940      | NIEDHSAER                  |           |       |                  |      | Mascot      |
|  | 1070.4861  | 1070.4818   | -0.0043 | -4    | 932        | 940      | NIEDHSAER                  | 3         |       | 0                |      | Mascot      |
|  | 1515.7478  | 1515.6729   | -0.0749 | -49   | 744        | 756      | VFGQEVAYVNFDK              |           |       |                  |      | Mascot      |
|  | 1515.7478  | 1515.6729   | -0.0749 | -49   | 744        | 756      | VFGQEVAYVNFDK              | 79        |       | 100              |      | Mascot      |
|  | 1767.9673  | 1767.8766   | -0.0907 | -51   | 757        | 772      | TIIEEAIPMTGPKPR            |           |       | Oxidation (M)[9] |      | Mascot      |
|  | 2174.1968  | 2173.9995   | -0.1973 | -91   | 781        | 800      | ALQEGVAFQYAKPLLAEE<br>VR   |           |       |                  |      | Mascot      |
|  | 2174.1968  | 2173.9995   | -0.1973 | -91   | 781        | 800      | ALQEGVAFQYAKPLLAEE<br>VR   | 5         |       | 0                |      | Mascot      |
|  | 2233.2009  | 2232.9709   | -0.23   | -103  | 604        | 625      | SLTRITAPDMAYVAGAAN<br>VAIK |           |       |                  |      | Mascot      |

24 PREDICTED: zinc finger protein 569-like [Danio rerio] gi|326678767 45438 9.7 13 41 0

Peptide Information

|  | Calc. Mass | Obsrv. Mass | ± da    | ± ppm | Start Seq. | End Seq. | Sequence                 | Ion Score | C. I. | % Modification          | Rank | Result Type |
|--|------------|-------------|---------|-------|------------|----------|--------------------------|-----------|-------|-------------------------|------|-------------|
|  | 882.4059   | 882.5227    | 0.1168  | 132   | 1          | 7        | MTENLMK                  |           |       | Oxidation (M)[1]        |      | Mascot      |
|  | 1017.4128  | 1017.5201   | 0.1073  | 105   | 110        | 118      | SYTCQQCGK                |           |       |                         |      | Mascot      |
|  | 1017.4128  | 1017.5201   | 0.1073  | 105   | 110        | 118      | SYTCQQCGK                |           |       |                         |      | Mascot      |
|  | 1086.5071  | 1086.4794   | -0.0277 | -25   | 49         | 58       | SKLGCNFSCK               |           |       |                         |      | Mascot      |
|  | 1265.6532  | 1265.5886   | -0.0646 | -51   | 184        | 193      | IHMRIHTGER               |           |       | Oxidation (M)[3]        |      | Mascot      |
|  | 1498.6769  | 1498.645    | -0.0319 | -21   | 8          | 19       | EQTHQQNEIDEK             |           |       |                         |      | Mascot      |
|  | 1498.6769  | 1498.645    | -0.0319 | -21   | 8          | 19       | EQTHQQNEIDEK             |           |       |                         |      | Mascot      |
|  | 1707.736   | 1707.6974   | -0.0386 | -23   | 188        | 202      | IHTGERSCTCQQCGK          |           |       | Carbamidomethyl (C)[8]  |      | Mascot      |
|  | 1723.7778  | 1723.8583   | 0.0805  | 47    | 272        | 286      | IHTGEKPYTCTECGK          |           |       | Carbamidomethyl (C)[10] |      | Mascot      |
|  | 1767.7902  | 1767.8766   | 0.0864  | 49    | 104        | 118      | IHTGERSYTCQQCGK          |           |       | Carbamidomethyl (C)[10] |      | Mascot      |
|  | 2278.0266  | 2277.8945   | -0.1321 | -58   | 80         | 99       | EQPYTCEQCGKSFGQIQ<br>GFK |           |       |                         |      | Mascot      |



|    |                                                                                                               |           |         |     |     |     |                             |  |  |  |  |  |                                           |  |  |  |        |
|----|---------------------------------------------------------------------------------------------------------------|-----------|---------|-----|-----|-----|-----------------------------|--|--|--|--|--|-------------------------------------------|--|--|--|--------|
|    | 2278.0266                                                                                                     | 2277.8945 | -0.1321 | -58 | 80  | 99  | EQPYTCEQCGKSFGQIQ<br>GFK    |  |  |  |  |  |                                           |  |  |  | Mascot |
|    | 2283.0896                                                                                                     | 2283.075  | -0.0146 | -6  | 160 | 179 | VHTGEKPYTCEQCGKIFS<br>QK    |  |  |  |  |  |                                           |  |  |  | Mascot |
|    | 2294.0693                                                                                                     | 2293.8799 | -0.1894 | -83 | 272 | 291 | IHTGEKPYTCTECGKSFA<br>HK    |  |  |  |  |  | Carbamidomethyl (C)[10]                   |  |  |  | Mascot |
|    | 2577.1755                                                                                                     | 2577.2839 | 0.1084  | 42  | 324 | 346 | NHMNGHTGTIVFTCDQC<br>GKSLTR |  |  |  |  |  | Carbamidomethyl (C)[14]                   |  |  |  | Mascot |
|    | 2627.2024                                                                                                     | 2627.2556 | 0.0532  | 20  | 292 | 314 | STLNHHMRTHTGEKPFA<br>CAQCGK |  |  |  |  |  | Carbamidomethyl (C)[18], Oxidation (M)[7] |  |  |  | Mascot |
|    | 2627.2024                                                                                                     | 2627.2556 | 0.0532  | 20  | 292 | 314 | STLNHHMRTHTGEKPFA<br>CAQCGK |  |  |  |  |  | Carbamidomethyl (C)[18], Oxidation (M)[7] |  |  |  | Mascot |
| 25 | sodium channel, voltage-gated, type VIII, alpha b [Danio g 113675683 222400.8 5.54 10 39 0 30 77.227<br>erio] |           |         |     |     |     |                             |  |  |  |  |  |                                           |  |  |  |        |

Peptide Information

| Calc. Mass | Obsrv. Mass | ± da    | ± ppm | Start Seq. | End Seq. | Sequence                   | Ion Score | C. I.  | % Modification                 | Rank | Result Type |
|------------|-------------|---------|-------|------------|----------|----------------------------|-----------|--------|--------------------------------|------|-------------|
| 1017.5033  | 1017.5201   | 0.0168  | 17    | 881        | 889      | IAESCELP                   | 30        | 77.227 |                                |      | Mascot      |
| 1017.5033  | 1017.5201   | 0.0168  | 17    | 881        | 889      | IAESCELP                   |           |        |                                |      | Mascot      |
| 1031.3995  | 1031.4419   | 0.0424  | 41    | 335        | 343      | CPEGYTCMK                  |           |        |                                |      | Mascot      |
| 1045.4908  | 1045.509    | 0.0182  | 17    | 1901       | 1910     | LENGGGNQE                  |           |        |                                |      | Mascot      |
| 1265.5393  | 1265.5886   | 0.0493  | 39    | 593        | 604      | SSYSGYSQGSSR               |           |        |                                |      | Mascot      |
| 1324.5872  | 1324.624    | 0.0368  | 28    | 1830       | 1841     | VLGDSGDLMMR                |           |        | Oxidation (M)[10]              |      | Mascot      |
| 1677.8918  | 1677.7216   | -0.1702 | -101  | 1869       | 1882     | QEEVSAIVIQRSYR             |           |        |                                |      | Mascot      |
| 2196.115   | 2195.9766   | -0.1384 | -63   | 535        | 554      | KASIMNQSLLSIPGSPFM<br>SR   |           |        | Oxidation (M)[5, 18]           |      | Mascot      |
| 2225.165   | 2225.0193   | -0.1457 | -65   | 699        | 716      | FANTFLIWECCPIWIKI          |           |        |                                |      | Mascot      |
| 2283.0669  | 2283.075    | 0.0081  | 4     | 1029       | 1051     | CGDLNYPKNGNGTSGI<br>GSSVGK |           |        | Carbamidomethyl (C)[1]         |      | Mascot      |
| 3089.4333  | 3089.4661   | 0.0328  | 11    | 692        | 714      | CPPCWYKFANTFLIWE<br>CPIWIK |           |        | Carbamidomethyl (C)[1,4,17,18] |      | Mascot      |

|                     |                                                 |             |         |       |              |          |                              |           |       |                         |      |             |  |        |  |
|---------------------|-------------------------------------------------|-------------|---------|-------|--------------|----------|------------------------------|-----------|-------|-------------------------|------|-------------|--|--------|--|
| 26                  | hypothetical protein LOC100037310 [Danio rerio] |             |         |       | gi 147900003 |          | 27825.6                      | 8.46      | 7     | 37                      | 0    |             |  |        |  |
| Peptide Information |                                                 |             |         |       |              |          |                              |           |       |                         |      |             |  |        |  |
| Calc. Mass          |                                                 | Obsrv. Mass | ± da    | ± ppm | Start Seq.   | End Seq. | Sequence                     | Ion Score | C. I. | % Modification          | Rank | Result Type |  |        |  |
| 842.4189            |                                                 | 842.4659    | 0.047   | 56    | 2            | 9        | AAPHSTMK                     |           |       |                         |      |             |  | Mascot |  |
| 1031.5956           |                                                 | 1031.4419   | -0.1537 | -149  | 108          | 117      | RVAATSVATR                   |           |       |                         |      |             |  | Mascot |  |
| 1292.7395           |                                                 | 1292.5969   | -0.1426 | -110  | 147          | 157      | IKFLTDGMLVR                  |           |       |                         |      |             |  | Mascot |  |
| 1320.5273           |                                                 | 1320.521    | -0.0063 | -5    | 136          | 146      | FDDCSDPHATR                  |           |       | Carbamidomethyl (C)[4]  |      |             |  | Mascot |  |
| 1718.7656           |                                                 | 1718.8257   | 0.0601  | 35    | 214          | 228      | FQDFFNLNESGDASK              |           |       |                         |      |             |  | Mascot |  |
| 2096.0588           |                                                 | 2095.8804   | -0.1784 | -85   | 149          | 166      | FLTDGMLVREMMSDPLL<br>K       |           |       |                         |      |             |  | Mascot |  |
| 2721.2473           |                                                 | 2721.1875   | -0.0598 | -22   | 123          | 146      | GAFLGHEVGYTIRFDDCS<br>DPHATR |           |       | Carbamidomethyl (C)[17] |      |             |  | Mascot |  |

|    |                                               |           |         |     |              |         |                              |   |    |   |                         |        |
|----|-----------------------------------------------|-----------|---------|-----|--------------|---------|------------------------------|---|----|---|-------------------------|--------|
|    | 2721.2473                                     | 2721.1875 | -0.0598 | -22 | 123          | 146     | GAFLGHEVGYTIRFDDCS<br>DPHATR |   |    |   | Carbamidomethyl (C)[17] | Mascot |
| 27 | KDEL motif-containing protein 2 [Danio rerio] |           |         |     | gi 148922833 | 59478.5 | 8.4                          | 5 | 36 | 0 | 13                      | 0      |

Peptide Information

| Calc. Mass | Obsrv. Mass | ± da    | ± ppm | Start Seq. | End Sequence Seq. | Ion Score | C. I. % | Modification | Rank | Result Type |
|------------|-------------|---------|-------|------------|-------------------|-----------|---------|--------------|------|-------------|
| 868.5073   | 868.4819    | -0.0254 | -29   | 1          | 7 MILHINK         |           |         |              |      | Mascot      |
| 999.4894   | 999.4486    | -0.0408 | -41   | 472        | 479 VFQTYADR      | 13        | 0       |              |      | Mascot      |
| 999.4894   | 999.4486    | -0.0408 | -41   | 472        | 479 VFQTYADR      |           |         |              |      | Mascot      |
| 1015.4593  | 1015.4449   | -0.0144 | -14   | 465        | 471 LYCYYYK       |           |         |              |      | Mascot      |
| 1017.5839  | 1017.5201   | -0.0638 | -63   | 95         | 103 IHVPAPLDR     | 14        | 0       |              |      | Mascot      |
| 1017.5839  | 1017.5201   | -0.0638 | -63   | 95         | 103 IHVPAPLDR     |           |         |              |      | Mascot      |
| 1086.5579  | 1086.4794   | -0.0785 | -72   | 215        | 223 SLGRYTDFK     |           |         |              |      | Mascot      |

|    |                                                  |  |  |  |             |         |       |   |    |   |  |
|----|--------------------------------------------------|--|--|--|-------------|---------|-------|---|----|---|--|
| 28 | mitochondrial uncoupling protein 3 [Danio rerio] |  |  |  | gi 37681967 | 33714.6 | 10.02 | 8 | 35 | 0 |  |
|----|--------------------------------------------------|--|--|--|-------------|---------|-------|---|----|---|--|

Peptide Information

| Calc. Mass | Obsrv. Mass | ± da    | ± ppm | Start Seq. | End Sequence Seq.              | Ion Score | C. I. % | Modification         | Rank | Result Type |
|------------|-------------|---------|-------|------------|--------------------------------|-----------|---------|----------------------|------|-------------|
| 882.4283   | 882.5227    | 0.0944  | 107   | 296        | 302 RAMMVSR                    |           |         | Oxidation (M)[3,4]   |      | Mascot      |
| 996.4713   | 996.5441    | 0.0728  | 73    | 297        | 304 AMMVSRNR                   |           |         | Oxidation (M)[2,3]   |      | Mascot      |
| 1070.6317  | 1070.4818   | -0.1499 | -140  | 39         | 47 VRLQIQGEK                   |           |         |                      |      | Mascot      |
| 1070.6317  | 1070.4818   | -0.1499 | -140  | 39         | 47 VRLQIQGEK                   |           |         |                      |      | Mascot      |
| 1520.775   | 1520.6222   | -0.1528 | -100  | 143        | 155 FQAQMNQLQGVGRR             |           |         | Oxidation (M)[5]     |      | Mascot      |
| 1677.9608  | 1677.7216   | -0.2392 | -143  | 1          | 16 MVGLKPSDVPPLTVK             |           |         |                      |      | Mascot      |
| 1739.8567  | 1739.8535   | -0.0032 | -2    | 60         | 75 GVFGTISTMMRTEGPR            |           |         |                      |      | Mascot      |
| 2196.0708  | 2195.9766   | -0.0942 | -43   | 119        | 140 ILAGCTTGAMAVSMAQP<br>TDVVK |           |         | Oxidation (M)[10,14] |      | Mascot      |
| 2211.1702  | 2211.0051   | -0.1651 | -75   | 76         | 95 SLYNGLVAGLQRQMAFA<br>SIR    |           |         | Oxidation (M)[14]    |      | Mascot      |

|    |                                                            |  |  |  |              |         |     |    |    |   |  |
|----|------------------------------------------------------------|--|--|--|--------------|---------|-----|----|----|---|--|
| 29 | PREDICTED: oocyte zinc finger protein XICOF6 [Danio rerio] |  |  |  | gi 326680598 | 40266.1 | 9.1 | 11 | 34 | 0 |  |
|----|------------------------------------------------------------|--|--|--|--------------|---------|-----|----|----|---|--|

Peptide Information

| Calc. Mass | Obsrv. Mass | ± da    | ± ppm | Start Seq. | End Sequence Seq.  | Ion Score | C. I. % | Modification           | Rank | Result Type |
|------------|-------------|---------|-------|------------|--------------------|-----------|---------|------------------------|------|-------------|
| 1520.6984  | 1520.6222   | -0.0762 | -50   | 261        | 273 LFSCTQCGKSFSR  |           |         | Carbamidomethyl (C)[4] |      | Mascot      |
| 1536.7158  | 1536.5989   | -0.1169 | -76   | 106        | 118 SSSLNHHMMIHAR  |           |         | Oxidation (M)[8]       |      | Mascot      |
| 1549.6635  | 1549.7631   | 0.0996  | 64    | 214        | 226 CFSQSSSLNHHMR  |           |         | Oxidation (M)[12]      |      | Mascot      |
| 1677.8199  | 1677.7216   | -0.0983 | -59   | 171        | 185 IHTGEKPFCTCRGK |           |         |                        |      | Mascot      |

|    |                             |           |         |     |              |     |                                  |                                                     |   |    |   |  |        |
|----|-----------------------------|-----------|---------|-----|--------------|-----|----------------------------------|-----------------------------------------------------|---|----|---|--|--------|
|    | 2170.0645                   | 2169.8655 | -0.199  | -92 | 139          | 157 | QHTRIHIGDKPFTCTQCG<br>K          |                                                     |   |    |   |  | Mascot |
|    | 2174.0051                   | 2173.9995 | -0.0056 | -3  | 196          | 213 | HMRVHTGEKPFTCTQCG<br>K           | Carbamidomethyl (C)[13,16]                          |   |    |   |  | Mascot |
|    | 2174.0051                   | 2173.9995 | -0.0056 | -3  | 196          | 213 | HMRVHTGEKPFTCTQCG<br>K           | Carbamidomethyl (C)[13,16]                          |   |    |   |  | Mascot |
|    | 2187.062                    | 2186.8879 | -0.1741 | -80 | 83           | 101 | IHMRIHTGEKPFTCTQCG<br>K          |                                                     |   |    |   |  | Mascot |
|    | 2203.0205                   | 2202.9031 | -0.1174 | -53 | 279          | 297 | EHMRIHTGEKPFTCTQC<br>GK          |                                                     |   |    |   |  | Mascot |
|    | 2211.0435                   | 2211.0051 | -0.0384 | -17 | 87           | 105 | IHTGEKPFTCTQCGKSFN<br>R          | Carbamidomethyl (C)[10]                             |   |    |   |  | Mascot |
|    | 2284.1074                   | 2284.0698 | -0.0376 | -16 | 139          | 157 | QHTRIHIGDKPFTCTQCG<br>K          | Carbamidomethyl (C)[14,17]                          |   |    |   |  | Mascot |
|    | 2743.2683                   | 2743.1721 | -0.0962 | -35 | 106          | 129 | SSSLNHHMMIHAREKPFT<br>CTQCGK     |                                                     |   |    |   |  | Mascot |
|    | 3337.4717                   | 3337.6672 | 0.1955  | 59  | 199          | 226 | VHTGEKPFTCTQCGKCF<br>SQSSSLNHHMR | Carbamidomethyl (C)[10,13,16], Oxidation<br>(M)[27] |   |    |   |  | Mascot |
| 30 | novel protein [Danio rerio] |           |         |     | gi 169146287 |     | 32427.4                          | 6.55                                                | 8 | 34 | 0 |  |        |

#### Peptide Information

| Calc. Mass | Obsrv. Mass | ± da    | ± ppm | Start Seq. | End Seq. | Sequence                 | Ion Score | C. I. % | Modification                                          | Rank | Result Type |
|------------|-------------|---------|-------|------------|----------|--------------------------|-----------|---------|-------------------------------------------------------|------|-------------|
| 868.4457   | 868.4819    | 0.0362  | 42    | 246        | 252      | RVCSTFR                  |           |         |                                                       |      | Mascot      |
| 1092.6047  | 1092.4591   | -0.1456 | -133  | 221        | 230      | SLVVLYGDAR               |           |         |                                                       |      | Mascot      |
| 1338.6038  | 1338.6365   | 0.0327  | 24    | 12         | 24       | AIALMMNPSCGCK            |           |         |                                                       |      | Mascot      |
| 1549.7428  | 1549.7631   | 0.0203  | 13    | 91         | 102      | ELVSRMDQDVWR             |           |         | Oxidation (M)[6]                                      |      | Mascot      |
| 1737.8267  | 1737.8748   | 0.0481  | 28    | 12         | 27       | AIALMMNPSCGCKGIR         |           |         | Carbamidomethyl (C)[10], Oxidation (M)[5]             |      | Mascot      |
| 1753.8215  | 1753.8682   | 0.0467  | 27    | 12         | 27       | AIALMMNPSCGCKGIR         |           |         | Carbamidomethyl (C)[10], Oxidation (M)[5,6]           |      | Mascot      |
| 2195.9487  | 2195.9766   | 0.0279  | 13    | 6          | 24       | ATHNCKAIALMMNPSCG<br>CK  |           |         | Carbamidomethyl (C)[5,16,18], Oxidation<br>(M)[11,12] |      | Mascot      |
| 2278.1865  | 2277.8945   | -0.292  | -128  | 44         | 62       | NDLIHYDFIYDPVLKSAVR      |           |         |                                                       |      | Mascot      |
| 2278.1865  | 2277.8945   | -0.292  | -128  | 44         | 62       | NDLIHYDFIYDPVLKSAVR      |           |         |                                                       |      | Mascot      |
| 2283.1074  | 2283.075    | -0.0324 | -14   | 247        | 266      | VCSTFRELSAEFLPGGQ<br>QEK |           |         | Carbamidomethyl (C)[2]                                |      | Mascot      |

31 sorting nexin family member 27 [Danio rerio] gi|41054611 64121.8 5.8 10 34 0

#### Peptide Information

| Calc. Mass | Obsrv. Mass | ± da    | ± ppm | Start Seq. | End Seq. | Sequence          | Ion Score | C. I. % | Modification                              | Rank | Result Type |
|------------|-------------|---------|-------|------------|----------|-------------------|-----------|---------|-------------------------------------------|------|-------------|
| 842.5094   | 842.4659    | -0.0435 | -52   | 121        | 127      | QVVDLIR           |           |         |                                           |      | Mascot      |
| 1070.5305  | 1070.4818   | -0.0487 | -45   | 215        | 223      | EFANFAFPK         |           |         |                                           |      | Mascot      |
| 1070.5305  | 1070.4818   | -0.0487 | -45   | 215        | 223      | EFANFAFPK         |           |         |                                           |      | Mascot      |
| 1292.6368  | 1292.5969   | -0.0399 | -31   | 547        | 557      | DEYLPVETQK        |           |         |                                           |      | Mascot      |
| 1478.859   | 1478.7294   | -0.1296 | -88   | 445        | 457      | GHVITAISIRHFK     |           |         |                                           |      | Mascot      |
| 2225.0283  | 2225.0193   | -0.009  | -4    | 24         | 47       | NGSGMSAGTCAGGLVAT |           |         | Carbamidomethyl (C)[10], Oxidation (M)[5] |      | Mascot      |

|    |                                                                                |                     |             |         |       |            |          |                                        |                    |           |         |                            |   |      |             |                              |        |
|----|--------------------------------------------------------------------------------|---------------------|-------------|---------|-------|------------|----------|----------------------------------------|--------------------|-----------|---------|----------------------------|---|------|-------------|------------------------------|--------|
|    |                                                                                | 2232.8743           | 2232.9709   | 0.0966  | 43    | 425        | 442      | TVTSGPR                                | TCEGYNEITFPHCSCDSR |           |         |                            |   |      |             | Carbamidomethyl (C)[2,13,15] | Mascot |
|    |                                                                                | 2283.9321           | 2284.0698   | 0.1377  | 60    | 482        | 500      | WDTDEEGMAFCFEYARG<br>EK                |                    |           |         |                            |   |      |             |                              | Mascot |
|    |                                                                                | 2299.927            | 2299.8782   | -0.0488 | -21   | 482        | 500      | WDTDEEGMAFCFEYARG<br>EK                |                    |           |         |                            |   |      |             | Oxidation (M)[8]             | Mascot |
|    |                                                                                | 2577.2871           | 2577.2839   | -0.0032 | -1    | 24         | 50       | NGSGMSAGTCAGGLVAT<br>TVTSGPRLVR        |                    |           |         |                            |   |      |             | Carbamidomethyl (C)[10]      | Mascot |
|    |                                                                                | 3089.5876           | 3089.4661   | -0.1215 | -39   | 337        | 363      | LAPNEFPHKLYVQNYTSA<br>VPGTCLTLR        |                    |           |         |                            |   |      |             | Carbamidomethyl (C)[23]      | Mascot |
|    |                                                                                | 3845.7732           | 3845.6292   | -0.144  | -37   | 256        | 289      | VIGESDIMQEFLSESDEN<br>YNGVSDVELRIAMPDK |                    |           |         |                            |   |      |             | Oxidation (M)[8]             | Mascot |
|    |                                                                                | 3861.7681           | 3861.6509   | -0.1172 | -30   | 256        | 289      | VIGESDIMQEFLSESDEN<br>YNGVSDVELRIAMPDK |                    |           |         |                            |   |      |             | Oxidation (M)[8,31]          | Mascot |
| 32 | PREDICTED: putative uncharacterized zinc finger protein 814-like [Danio rerio] |                     |             |         |       |            |          | gij292610426                           | 61962.5            | 9.03      | 15      | 34                         | 0 |      |             |                              |        |
|    |                                                                                | Peptide Information |             |         |       |            |          |                                        |                    |           |         |                            |   |      |             |                              |        |
|    |                                                                                | Calc. Mass          | Obsrv. Mass | ± da    | ± ppm | Start Seq. | End Seq. | Sequence                               |                    | Ion Score | C. I. % | Modification               |   | Rank | Result Type |                              |        |
|    |                                                                                | 996.5472            | 996.5441    | -0.0031 | -3    | 350        | 358      | IHTGEKPSK                              |                    |           |         |                            |   |      |             | Mascot                       |        |
|    |                                                                                | 999.5258            | 999.4486    | -0.0772 | -77   | 310        | 317      | FTDRGYIK                               |                    |           |         |                            |   |      |             | Mascot                       |        |
|    |                                                                                | 999.5258            | 999.4486    | -0.0772 | -77   | 310        | 317      | FTDRGYIK                               |                    |           |         |                            |   |      |             | Mascot                       |        |
|    |                                                                                | 1015.4335           | 1015.4449   | 0.0114  | 11    | 440        | 448      | LHECPEGCK                              |                    |           |         |                            |   |      |             | Mascot                       |        |
|    |                                                                                | 1031.5632           | 1031.4419   | -0.1213 | -118  | 337        | 345      | SFTHKGNLK                              |                    |           |         |                            |   |      |             | Mascot                       |        |
|    |                                                                                | 1045.5789           | 1045.509    | -0.0699 | -67   | 365        | 373      | SFTHKGQLK                              |                    |           |         |                            |   |      |             | Mascot                       |        |
|    |                                                                                | 1164.5127           | 1164.5085   | -0.0042 | -4    | 37         | 46       | EERQESSDGK                             |                    |           |         |                            |   |      |             | Mascot                       |        |
|    |                                                                                | 1515.8754           | 1515.6729   | -0.2025 | -134  | 346        | 358      | IHIRHTGEKPSK                           |                    |           |         |                            |   |      |             | Mascot                       |        |
|    |                                                                                | 1515.8754           | 1515.6729   | -0.2025 | -134  | 346        | 358      | IHIRHTGEKPSK                           |                    |           |         |                            |   |      |             | Mascot                       |        |
|    |                                                                                | 1520.7638           | 1520.6222   | -0.1416 | -93   | 490        | 502      | LHTDERPHVCSVK                          |                    |           |         |                            |   |      |             | Mascot                       |        |
|    |                                                                                | 1718.7625           | 1718.8257   | 0.0632  | 37    | 154        | 168      | LHTEDGPFCGQCGK                         |                    |           |         | Carbamidomethyl (C)[10,13] |   |      |             | Mascot                       |        |
|    |                                                                                | 1723.8295           | 1723.8583   | 0.0288  | 17    | 182        | 196      | IHYAGKPFTCELCGK                        |                    |           |         | Carbamidomethyl (C)[10]    |   |      |             | Mascot                       |        |
|    |                                                                                | 1753.7771           | 1753.8682   | 0.0911  | 52    | 528        | 543      | EQTEELLGQCPFLCGS                       |                    |           |         |                            |   |      |             | Mascot                       |        |
|    |                                                                                | 2170.0103           | 2169.8655   | -0.1448 | -67   | 319        | 336      | HMRSHTEKPFICPQCG<br>K                  |                    |           |         | Carbamidomethyl (C)[13,16] |   |      |             | Mascot                       |        |
|    |                                                                                | 2174.0303           | 2173.9995   | -0.0308 | -14   | 458        | 476      | MHLLIHSGERPFSCDKC<br>GK                |                    |           |         | Oxidation (M)[1]           |   |      |             | Mascot                       |        |
|    |                                                                                | 2174.0303           | 2173.9995   | -0.0308 | -14   | 458        | 476      | MHLLIHSGERPFSCDKC<br>GK                |                    |           |         | Oxidation (M)[1]           |   |      |             | Mascot                       |        |
|    |                                                                                | 2203.0496           | 2202.9031   | -0.1465 | -66   | 402        | 420      | THSRTHSGVKPYSLQC<br>GK                 |                    |           |         | Carbamidomethyl (C)[14,17] |   |      |             | Mascot                       |        |
|    |                                                                                | 2225.0703           | 2225.0193   | -0.051  | -23   | 206        | 224      | IHTRIHTGEKPYTCSHCG<br>K                |                    |           |         | Carbamidomethyl (C)[14]    |   |      |             | Mascot                       |        |
| 33 | PREDICTED: myomesin-2 [Danio rerio]                                            |                     |             |         |       |            |          | gij326671673                           | 164417.3           | 8.26      | 16      | 34                         | 0 |      |             |                              |        |

|  |           |           | Seq.    |      | Seq. |      | Score                              |  |                        |        |
|--|-----------|-----------|---------|------|------|------|------------------------------------|--|------------------------|--------|
|  | 842.3899  | 842.4659  | 0.076   | 90   | 1212 | 1217 | LQCYMK                             |  | Carbamidomethyl (C)[3] | Mascot |
|  | 1017.5033 | 1017.5201 | 0.0168  | 17   | 283  | 291  | DDALLMPSR                          |  |                        | Mascot |
|  | 1017.5727 | 1017.5201 | -0.0526 | -52  | 121  | 129  | APDFLVSLR                          |  |                        | Mascot |
|  | 1086.5619 | 1086.4794 | -0.0825 | -76  | 1121 | 1128 | ETKFTWFK                           |  |                        | Mascot |
|  | 1092.554  | 1092.4591 | -0.0949 | -87  | 103  | 111  | EVKGMMPLR                          |  | Oxidation (M)[5,6]     | Mascot |
|  | 1515.6785 | 1515.6729 | -0.0056 | -4   | 529  | 540  | SPRYPVYDMEDK                       |  | Oxidation (M)[9]       | Mascot |
|  | 1515.6785 | 1515.6729 | -0.0056 | -4   | 529  | 540  | SPRYPVYDMEDK                       |  | Oxidation (M)[9]       | Mascot |
|  | 1520.7699 | 1520.6222 | -0.1477 | -97  | 1309 | 1322 | VMGGLPDVVTIMEK                     |  | Oxidation (M)[2,12]    | Mascot |
|  | 1549.8584 | 1549.7631 | -0.0953 | -61  | 1060 | 1074 | AKSQSSLVLVGDAFK                    |  |                        | Mascot |
|  | 1677.7723 | 1677.7216 | -0.0507 | -30  | 392  | 405  | DWVQCNDSPVKVCK                     |  | Carbamidomethyl (C)[5] | Mascot |
|  | 1707.8853 | 1707.6974 | -0.1879 | -110 | 631  | 645  | FVVHGLTPGDTYVFR                    |  |                        | Mascot |
|  | 2095.9355 | 2095.8804 | -0.0551 | -26  | 1278 | 1295 | NFDLSGQAYTDAYAEFQ<br>R             |  |                        | Mascot |
|  | 2278.1326 | 2277.8945 | -0.2381 | -105 | 502  | 520  | APWYWLIEKCVGDSDIW<br>QR            |  |                        | Mascot |
|  | 2278.1326 | 2277.8945 | -0.2381 | -105 | 502  | 520  | APWYWLIEKCVGDSDIW<br>QR            |  |                        | Mascot |
|  | 2284.0229 | 2284.0698 | 0.0469  | 21   | 1240 | 1259 | MRIGGTSEMAWMQICEP<br>TDK           |  |                        | Mascot |
|  | 2294.1431 | 2293.8799 | -0.2632 | -115 | 435  | 456  | MSSGVTTGEVESDVEVIK<br>IEGK         |  |                        | Mascot |
|  | 2300.0178 | 2299.8782 | -0.1396 | -61  | 1240 | 1259 | MRIGGTSEMAWMQICEP<br>TDK           |  | Oxidation (M)[1]       | Mascot |
|  | 3089.5823 | 3089.4661 | -0.1162 | -38  | 1182 | 1211 | VFEDIINAIASIAGSSASDL<br>VLQCTPEGIR |  |                        | Mascot |
|  | 3337.6211 | 3337.6672 | 0.0461  | 14   | 599  | 627  | HATNLLGYYVDASVVG<br>KDWFCNHRPYK    |  |                        | Mascot |

34 PREDICTED: diacylglycerol kinase beta-like, partial  
[Danio rerio]

gi|326674321 85995.9 6.78 11 34 0

#### Peptide Information

| Calc. Mass | Obsrv. Mass | ± da    | ± ppm | Start Seq. | End Seq. | Sequence          | Ion Score | C. I. % | Modification             | Rank | Result Type |
|------------|-------------|---------|-------|------------|----------|-------------------|-----------|---------|--------------------------|------|-------------|
| 842.4229   | 842.4659    | 0.043   | 51    | 153        | 158      | LEFMFR            |           |         |                          |      | Mascot      |
| 1045.4264  | 1045.509    | 0.0826  | 79    | 270        | 278      | QGLCCSFCK         |           |         | Carbamidomethyl (C)[4]   |      | Mascot      |
| 1102.4479  | 1102.4674   | 0.0195  | 18    | 270        | 278      | QGLCCSFCK         |           |         | Carbamidomethyl (C)[4,5] |      | Mascot      |
| 1222.562   | 1222.4867   | -0.0753 | -62   | 94         | 104      | DPKSSPSMTEK       |           |         | Oxidation (M)[8]         |      | Mascot      |
| 1707.8007  | 1707.6974   | -0.1033 | -60   | 534        | 547      | DVQDSSEVMLDRWK    |           |         |                          |      | Mascot      |
| 1718.7407  | 1718.8257   | 0.085   | 49    | 349        | 363      | CASHVKPECDGSLR    |           |         | Carbamidomethyl (C)[1,9] |      | Mascot      |
| 1723.7955  | 1723.8583   | 0.0628  | 36    | 534        | 547      | DVQDSSEVMLDRWK    |           |         | Oxidation (M)[9]         |      | Mascot      |
| 1938.9299  | 1938.7604   | -0.1695 | -87   | 136        | 152      | DMICYLSLLEGGRPEDK |           |         |                          |      | Mascot      |
| 1954.9248  | 1954.7512   | -0.1736 | -89   | 136        | 152      | DMICYLSLLEGGRPEDK |           |         | Oxidation (M)[2]         |      | Mascot      |

|    |                                                                    |           |         |     |     |     |                              |       |                                              |        |    |   |
|----|--------------------------------------------------------------------|-----------|---------|-----|-----|-----|------------------------------|-------|----------------------------------------------|--------|----|---|
|    | 2283.2488                                                          | 2283.075  | -0.1738 | -76 | 115 | 135 | GSCPPLKVTSQSRPLSTV<br>QLK    |       | Carbamidomethyl (C)[3]                       | Mascot |    |   |
|    | 2284.0591                                                          | 2284.0698 | 0.0107  | 5   | 153 | 171 | LEFMFRLYDTDGNGLD<br>SK       |       | Oxidation (M)[4]                             | Mascot |    |   |
|    | 2577.3501                                                          | 2577.2839 | -0.0662 | -26 | 248 | 269 | LKHFSKPAYCNLCNMLI<br>GLGK    |       | Carbamidomethyl (C)[10,13]                   | Mascot |    |   |
|    | 2627.2925                                                          | 2627.2556 | -0.0369 | -14 | 472 | 493 | TLCCPLAFSLSFNEVLFY<br>FLDK   |       | Carbamidomethyl (C)[3]                       | Mascot |    |   |
|    | 2627.2925                                                          | 2627.2556 | -0.0369 | -14 | 472 | 493 | TLCCPLAFSLSFNEVLFY<br>FLDK   |       | Carbamidomethyl (C)[3]                       | Mascot |    |   |
|    | 2743.2083                                                          | 2743.1721 | -0.0362 | -13 | 734 | 757 | TSKSLPMQIDGEPWMQS<br>PCTVSMT |       | Carbamidomethyl (C)[19], Oxidation (M)[7,15] | Mascot |    |   |
| 35 | eukaryotic translation initiation factor 3 subunit L [Danio rerio] |           |         |     |     |     | gi 47085877                  | 67950 | 6.02                                         | 10     | 34 | 0 |

#### Peptide Information

| Calc. Mass | Obsrv. Mass | ± da    | ± ppm | Start Seq. | End Seq. | Sequence                     | Ion Score | C. I. % | Modification     | Rank | Result Type |
|------------|-------------|---------|-------|------------|----------|------------------------------|-----------|---------|------------------|------|-------------|
| 882.4501   | 882.5227    | 0.0726  | 82    | 393        | 399      | YGDKMLR                      |           |         |                  |      | Mascot      |
| 1017.5363  | 1017.5201   | -0.0162 | -16   | 437        | 444      | EPFQQQLK                     |           |         |                  |      | Mascot      |
| 1017.5363  | 1017.5201   | -0.0162 | -16   | 437        | 444      | EPFQQQLK                     |           |         |                  |      | Mascot      |
| 1498.8337  | 1498.645    | -0.1887 | -126  | 461        | 473      | SFLKLYTTPVAK                 |           |         |                  |      | Mascot      |
| 1498.8337  | 1498.645    | -0.1887 | -126  | 461        | 473      | SFLKLYTTPVAK                 |           |         |                  |      | Mascot      |
| 1520.8108  | 1520.6222   | -0.1886 | -124  | 279        | 291      | LHSLLDYYQAIK                 |           |         |                  |      | Mascot      |
| 1723.8644  | 1723.8583   | -0.0061 | -4    | 558        | 574      | KMPLNTGASISSSTSR             |           |         |                  |      | Mascot      |
| 1739.8593  | 1739.8535   | -0.0058 | -3    | 558        | 574      | KMPLNTGASISSSTSR             |           |         | Oxidation (M)[2] |      | Mascot      |
| 1767.8541  | 1767.8766   | 0.0225  | 13    | 559        | 576      | MPLNTGASISSSTSRAT            |           |         |                  |      | Mascot      |
| 2096.165   | 2095.8804   | -0.2846 | -136  | 328        | 344      | YQDAIRVFANILLYIQR            |           |         |                  |      | Mascot      |
| 2233.0667  | 2232.9709   | -0.0958 | -43   | 400        | 418      | MQKGDLQVFEELFSFAC<br>PK      |           |         | Oxidation (M)[1] |      | Mascot      |
| 2563.2571  | 2563.2632   | 0.0061  | 2     | 465        | 486      | LYTTMPVAKLAGFLDMSE<br>QEFR   |           |         | Oxidation (M)[5] |      | Mascot      |
| 3089.5632  | 3089.4661   | -0.0971 | -31   | 37         | 60       | QYEHQQTYHVIPEVIKNF<br>LQYFHK |           |         |                  |      | Mascot      |

|    |                                                                                  |  |  |  |  |  |             |         |      |   |    |   |
|----|----------------------------------------------------------------------------------|--|--|--|--|--|-------------|---------|------|---|----|---|
| 36 | PREDICTED: probable alpha-ketoglutarate-dependent dioxygenase ABH4 [Danio rerio] |  |  |  |  |  | gi 68372246 | 35897.4 | 6.76 | 8 | 33 | 0 |
|----|----------------------------------------------------------------------------------|--|--|--|--|--|-------------|---------|------|---|----|---|

#### Peptide Information

| Calc. Mass | Obsrv. Mass | ± da    | ± ppm | Start Seq. | End Seq. | Sequence         | Ion Score | C. I. % | Modification                              | Rank | Result Type |
|------------|-------------|---------|-------|------------|----------|------------------|-----------|---------|-------------------------------------------|------|-------------|
| 868.4457   | 868.4819    | 0.0362  | 42    | 278        | 284      | RVCSTFR          |           |         |                                           |      | Mascot      |
| 1092.6047  | 1092.4591   | -0.1456 | -133  | 253        | 262      | SLVVLYGDAR       |           |         |                                           |      | Mascot      |
| 1338.6038  | 1338.6365   | 0.0327  | 24    | 44         | 56       | AIALMMNPSCGCK    |           |         |                                           |      | Mascot      |
| 1549.7428  | 1549.7631   | 0.0203  | 13    | 123        | 134      | ELVSRMDQDVWR     |           |         | Oxidation (M)[6]                          |      | Mascot      |
| 1737.8267  | 1737.8748   | 0.0481  | 28    | 44         | 59       | AIALMMNPSCGCKGIR |           |         | Carbamidomethyl (C)[10], Oxidation (M)[5] |      | Mascot      |

|    |                                                 |           |         |      |     |     |                      |         |      |   |    |   |                                                    |        |
|----|-------------------------------------------------|-----------|---------|------|-----|-----|----------------------|---------|------|---|----|---|----------------------------------------------------|--------|
|    | 1753.8215                                       | 1753.8682 | 0.0467  | 27   | 44  | 59  | AIALMMNPSCGCKGIR     |         |      |   |    |   | Carbamidomethyl (C)[10], Oxidation (M)[5,6]        | Mascot |
|    | 2195.9487                                       | 2195.9766 | 0.0279  | 13   | 38  | 56  | ATHNCKAIALMMNPSCGCK  |         |      |   |    |   | Carbamidomethyl (C)[5,16,18], Oxidation (M)[11,12] | Mascot |
|    | 2278.1865                                       | 2277.8945 | -0.292  | -128 | 76  | 94  | NDLIHYDFIYDPVLKSAVR  |         |      |   |    |   |                                                    | Mascot |
|    | 2278.1865                                       | 2277.8945 | -0.292  | -128 | 76  | 94  | NDLIHYDFIYDPVLKSAVR  |         |      |   |    |   |                                                    | Mascot |
|    | 2283.1074                                       | 2283.075  | -0.0324 | -14  | 279 | 298 | VCSTFRELSAEFLPGGQKEK |         |      |   |    |   | Carbamidomethyl (C)[2]                             | Mascot |
| 37 | coiled-coil domain containing 90B [Danio rerio] |           |         |      |     |     | gi 261337154         | 29320.4 | 8.27 | 5 | 33 | 0 | 12                                                 | 0      |

#### Peptide Information

| Calc. Mass | Obsrv. Mass | ± da    | ± ppm | Start Seq. | End Seq. | Sequence                 | Ion Score | C. I. | % Modification      | Rank | Result Type |
|------------|-------------|---------|-------|------------|----------|--------------------------|-----------|-------|---------------------|------|-------------|
| 999.4716   | 999.4486    | -0.023  | -23   | 2          | 9        | SSWGIFMR                 | 12        | 0     | Oxidation (M)[7]    |      | Mascot      |
| 999.4716   | 999.4486    | -0.023  | -23   | 2          | 9        | SSWGIFMR                 |           |       | Oxidation (M)[7]    |      | Mascot      |
| 2186.9944  | 2186.8879   | -0.1065 | -49   | 192        | 210      | MEFQKMNADIESEAVETSK      |           |       |                     |      | Mascot      |
| 2202.9893  | 2202.9031   | -0.0862 | -39   | 192        | 210      | MEFQKMNADIESEAVETSK      |           |       | Oxidation (M)[1]    |      | Mascot      |
| 2577.2913  | 2577.2839   | -0.0074 | -3    | 100        | 122      | DMVTGAHQEIALQQIMAHLDAIR  |           |       | Oxidation (M)[2]    |      | Mascot      |
| 2607.3826  | 2607.2961   | -0.0865 | -33   | 228        | 250      | LETVRYLAACIFTCLAIALGFYR  |           |       |                     |      | Mascot      |
| 2721.3811  | 2721.1875   | -0.1936 | -71   | 100        | 123      | DMVTGAHQEIALQQIMAHLDAIRK |           |       | Oxidation (M)[2,16] |      | Mascot      |
| 2721.3811  | 2721.1875   | -0.1936 | -71   | 100        | 123      | DMVTGAHQEIALQQIMAHLDAIRK |           |       | Oxidation (M)[2,16] |      | Mascot      |

|    |                                                                      |  |  |  |  |  |              |         |      |   |    |   |  |  |
|----|----------------------------------------------------------------------|--|--|--|--|--|--------------|---------|------|---|----|---|--|--|
| 38 | PREDICTED: WD repeat and SOCS box-containing protein 2 [Danio rerio] |  |  |  |  |  | gi 292613638 | 45733.1 | 8.52 | 7 | 33 | 0 |  |  |
|----|----------------------------------------------------------------------|--|--|--|--|--|--------------|---------|------|---|----|---|--|--|

#### Peptide Information

| Calc. Mass | Obsrv. Mass | ± da    | ± ppm | Start Seq. | End Seq. | Sequence                    | Ion Score | C. I. | % Modification    | Rank | Result Type |
|------------|-------------|---------|-------|------------|----------|-----------------------------|-----------|-------|-------------------|------|-------------|
| 1017.6203  | 1017.5201   | -0.1002 | -98   | 351        | 359      | VPHLVPSLR                   | 4         | 0     |                   |      | Mascot      |
| 1017.6203  | 1017.5201   | -0.1002 | -98   | 351        | 359      | VPHLVPSLR                   |           |       |                   |      | Mascot      |
| 1070.5015  | 1070.4818   | -0.0197 | -18   | 222        | 229      | HLTYDHER                    |           |       |                   |      | Mascot      |
| 1070.5015  | 1070.4818   | -0.0197 | -18   | 222        | 229      | HLTYDHER                    |           |       |                   |      | Mascot      |
| 1478.863   | 1478.7294   | -0.1336 | -90   | 348        | 359      | FWKVPHLVPSLR                |           |       |                   |      | Mascot      |
| 1498.6631  | 1498.645    | -0.0181 | -12   | 28         | 40       | LYGTPDCETWSAR               | 3         | 0     |                   |      | Mascot      |
| 1498.6631  | 1498.645    | -0.0181 | -12   | 28         | 40       | LYGTPDCETWSAR               |           |       |                   |      | Mascot      |
| 2187.0513  | 2186.8879   | -0.1634 | -75   | 22         | 40       | AAHRPRLYGTPDCETWSAR         |           |       |                   |      | Mascot      |
| 2233.259   | 2232.9709   | -0.2881 | -129  | 364        | 383      | VALRFSISTYQVEALPLPTK        |           |       |                   |      | Mascot      |
| 3089.5593  | 3089.4661   | -0.0932 | -30   | 41         | 67       | FSPDGSYFAWSMGFGVIKLLPWPLTTR |           |       | Oxidation (M)[12] |      | Mascot      |

|    |                               |  |  |  |  |  |             |         |      |   |    |   |  |  |
|----|-------------------------------|--|--|--|--|--|-------------|---------|------|---|----|---|--|--|
| 39 | proenkephalin-A [Danio rerio] |  |  |  |  |  | gi 41152480 | 26116.8 | 5.64 | 8 | 33 | 0 |  |  |
|----|-------------------------------|--|--|--|--|--|-------------|---------|------|---|----|---|--|--|

| Peptide Information                                               |            |             |         |       |            |          |                           |           |         |                                             |                  |
|-------------------------------------------------------------------|------------|-------------|---------|-------|------------|----------|---------------------------|-----------|---------|---------------------------------------------|------------------|
|                                                                   | Calc. Mass | Obsrv. Mass | ± da    | ± ppm | Start Seq. | End Seq. | Sequence                  | Ion Score | C. I. % | Modification                                | Rank Result Type |
| 40                                                                | 999.4386   | 999.4486    | 0.01    | 10    | 25         | 32       | DCALCVYR                  |           |         | Carbamidomethyl (C)[2]                      | Mascot           |
|                                                                   | 999.4386   | 999.4486    | 0.01    | 10    | 25         | 32       | DCALCVYR                  |           |         | Carbamidomethyl (C)[2]                      | Mascot           |
|                                                                   | 1324.6864  | 1324.624    | -0.0624 | -47   | 25         | 35       | DCALCVYRLLR               |           |         |                                             | Mascot           |
|                                                                   | 1515.65    | 1515.6729   | 0.0229  | 15    | 20         | 32       | AECGRDCALCVYR             |           |         | Carbamidomethyl (C)[3]                      | Mascot           |
|                                                                   | 1515.65    | 1515.6729   | 0.0229  | 15    | 20         | 32       | AECGRDCALCVYR             |           |         | Carbamidomethyl (C)[3]                      | Mascot           |
|                                                                   | 1707.7531  | 1707.6974   | -0.0557 | -33   | 213        | 227      | TWEEGGETALPDMQK           |           |         | Oxidation (M)[13]                           | Mascot           |
|                                                                   | 2096.0491  | 2095.8804   | -0.1687 | -80   | 2          | 19       | MNSWWTVALSACLVL<br>R      |           |         | Oxidation (M)[1]                            | Mascot           |
|                                                                   | 2211.0945  | 2211.0051   | -0.0894 | -40   | 1          | 19       | MMNSWWTVALSACLVL<br>MVR   |           |         |                                             | Mascot           |
|                                                                   | 2284.0432  | 2284.0698   | 0.0266  | 12    | 36         | 56       | QTDIDTLACTLECEGSVD<br>SRK |           |         |                                             | Mascot           |
|                                                                   | 2300.1057  | 2299.8782   | -0.2275 | -99   | 1          | 19       | MMNSWWTVALSACLVL<br>MVR   |           |         | Carbamidomethyl (C)[13], Oxidation (M)[1,2] | Mascot           |
|                                                                   | 2743.3008  | 2743.1721   | -0.1287 | -47   | 1          | 24       | MMNSWWTVALSACLVL<br>MVR   |           |         | Oxidation (M)[1]                            | Mascot           |
|                                                                   |            |             |         |       |            |          | AECEGR                    |           |         |                                             |                  |
| 6-phosphofructo-2-kinase/fructose-2,6-biphosphatase 2 gi 41055967 | 60086.5    | 6.9         | 9       | 33    | 0          |          |                           |           |         |                                             |                  |
| [Danio rerio]                                                     |            |             |         |       |            |          |                           |           |         |                                             |                  |

| Peptide Information |                                                                                        |             |         |       |            |                                           |           |         |                         |                  |
|---------------------|----------------------------------------------------------------------------------------|-------------|---------|-------|------------|-------------------------------------------|-----------|---------|-------------------------|------------------|
|                     | Calc. Mass                                                                             | Obsrv. Mass | ± da    | ± ppm | Start Seq. | End Sequence Seq.                         | Ion Score | C. I. % | Modification            | Rank Result Type |
| 41                  | 868.4345                                                                               | 868.4819    | 0.0474  | 55    | 184        | 189 RIECYK                                |           |         | Carbamidomethyl (C)[4]  | Mascot           |
|                     | 1045.5902                                                                              | 1045.509    | -0.0812 | -78   | 290        | 297 VWTSQLRR                              |           |         |                         | Mascot           |
|                     | 1320.6179                                                                              | 1320.521    | -0.0969 | -73   | 164        | 174 VSSPDYPERDR                           |           |         |                         | Mascot           |
|                     | 1498.7173                                                                              | 1498.645    | -0.0723 | -48   | 190        | 202 VTYQPLDPGEHDK                         |           |         |                         | Mascot           |
|                     | 1498.7173                                                                              | 1498.645    | -0.0723 | -48   | 190        | 202 VTYQPLDPGEHDK                         |           |         |                         | Mascot           |
|                     | 1520.8293                                                                              | 1520.6222   | -0.2071 | -136  | 229        | 240 IVYYLMNIHVQK                          |           |         |                         | Mascot           |
|                     | 1536.7693                                                                              | 1536.5989   | -0.1704 | -111  | 129        | 141 DLILSFAQDHSYK                         |           |         |                         | Mascot           |
|                     | 1939.047                                                                               | 1938.7604   | -0.2866 | -148  | 397        | 413 SANDLPYLKCPHVLK                       |           |         | Carbamidomethyl (C)[10] | Mascot           |
|                     | 2721.3552                                                                              | 2721.1875   | -0.1677 | -62   | 351        | 373 YPGGESYQDLVQRLEPVI<br>MELER           |           |         |                         | Mascot           |
|                     | 2721.3552                                                                              | 2721.1875   | -0.1677 | -62   | 351        | 373 YPGGESYQDLVQRLEPVI<br>MELER           |           |         |                         | Mascot           |
|                     | 3845.8135                                                                              | 3845.6292   | -0.1843 | -48   | 298        | 330 TIQTAEELGVPYEQWKIL<br>NEIDAGICEEMSYEK |           |         | Oxidation (M)[29]       | Mascot           |
|                     | PREDICTED: sterol 26-hydroxylase, mitochondrial-like gi 189520040 64557.6 9.23 10 32 0 |             |         |       |            |                                           |           |         |                         |                  |

| Peptide Information |             |      |       |       |     |          |     |       |                |                  |
|---------------------|-------------|------|-------|-------|-----|----------|-----|-------|----------------|------------------|
| Calc. Mass          | Obsrv. Mass | ± da | ± ppm | Start | End | Sequence | Ion | C. I. | % Modification | Rank Result Type |



|                     |                                                                         |             |         |       |            |              |                                         |          |           |         |                     | Seq. | Seq.        | Score |  |  |  |  |                        |  |        |  |  |
|---------------------|-------------------------------------------------------------------------|-------------|---------|-------|------------|--------------|-----------------------------------------|----------|-----------|---------|---------------------|------|-------------|-------|--|--|--|--|------------------------|--|--------|--|--|
|                     | 1017.576                                                                | 1017.5201   | -0.0559 | -55   | 194        | 202          | SALNPKMLK                               |          |           |         |                     |      |             |       |  |  |  |  | Oxidation (M)[7]       |  | Mascot |  |  |
|                     | 1017.576                                                                | 1017.5201   | -0.0559 | -55   | 194        | 202          | SALNPKMLK                               |          |           |         |                     |      |             |       |  |  |  |  | Oxidation (M)[7]       |  | Mascot |  |  |
|                     | 1070.6064                                                               | 1070.4818   | -0.1246 | -116  | 48         | 57           | ADRLAAQIGR                              |          |           |         |                     |      |             |       |  |  |  |  |                        |  | Mascot |  |  |
|                     | 1070.6064                                                               | 1070.4818   | -0.1246 | -116  | 48         | 57           | ADRLAAQIGR                              |          |           |         |                     |      |             |       |  |  |  |  |                        |  | Mascot |  |  |
|                     | 1102.6156                                                               | 1102.4674   | -0.1482 | -134  | 477        | 484          | FVPERWIR                                |          |           |         |                     |      |             |       |  |  |  |  |                        |  | Mascot |  |  |
|                     | 1222.611                                                                | 1222.4867   | -0.1243 | -102  | 116        | 125          | SHAMQVEHKKR                             |          |           |         |                     |      |             |       |  |  |  |  |                        |  | Mascot |  |  |
|                     | 1537.8156                                                               | 1537.6478   | -0.1678 | -109  | 393        | 405          | LHNEIVSVCNKK                            |          |           |         |                     |      |             |       |  |  |  |  | Carbamidomethyl (C)[9] |  | Mascot |  |  |
|                     | 1753.8768                                                               | 1753.8682   | -0.0086 | -5    | 490        | 505          | SQHHPYSSVPFGVGVR                        |          |           |         |                     |      |             |       |  |  |  |  |                        |  | Mascot |  |  |
|                     | 1767.8812                                                               | 1767.8766   | -0.0046 | -3    | 305        | 318          | RFVQAWDELYDVAR                          |          |           |         |                     |      |             |       |  |  |  |  |                        |  | Mascot |  |  |
|                     | 2278.2117                                                               | 2277.8945   | -0.3172 | -139  | 91         | 110          | TKDDLPGPNLATTVYWLF<br>VK                |          |           |         |                     |      |             |       |  |  |  |  |                        |  | Mascot |  |  |
|                     | 2278.2117                                                               | 2277.8945   | -0.3172 | -139  | 91         | 110          | TKDDLPGPNLATTVYWLF<br>VK                |          |           |         |                     |      |             |       |  |  |  |  |                        |  | Mascot |  |  |
|                     | 2284.2046                                                               | 2284.0698   | -0.1348 | -59   | 275        | 294          | FISAVNEMLALSETVLFFP<br>R                |          |           |         |                     |      |             |       |  |  |  |  |                        |  | Mascot |  |  |
|                     | 2300.1995                                                               | 2299.8782   | -0.3213 | -140  | 275        | 294          | FISAVNEMLALSETVLFFP<br>R                |          |           |         |                     |      |             |       |  |  |  |  | Oxidation (M)[8]       |  | Mascot |  |  |
|                     | 2743.4275                                                               | 2743.1721   | -0.2554 | -93   | 275        | 297          | FISAVNEMLALSETVLFFP<br>RWTR             |          |           |         |                     |      |             |       |  |  |  |  | Oxidation (M)[8]       |  | Mascot |  |  |
| 42                  | PREDICTED: interferon-induced guanylate-binding protein 1 [Danio rerio] |             |         |       |            | gi 326665123 |                                         | 110140.6 | 5.38      | 9       | 32                  | 0    |             |       |  |  |  |  |                        |  |        |  |  |
| Peptide Information |                                                                         |             |         |       |            |              |                                         |          |           |         |                     |      |             |       |  |  |  |  |                        |  |        |  |  |
|                     | Calc. Mass                                                              | Obsrv. Mass | ± da    | ± ppm | Start Seq. | End Seq.     | Sequence                                |          | Ion Score | C. I. % | Modification        | Rank | Result Type |       |  |  |  |  |                        |  |        |  |  |
|                     | 999.4716                                                                | 999.4486    | -0.023  | -23   | 784        | 790          | CQLFFER                                 |          |           |         |                     |      |             |       |  |  |  |  | Carbamidomethyl (C)[1] |  | Mascot |  |  |
|                     | 999.4716                                                                | 999.4486    | -0.023  | -23   | 784        | 790          | CQLFFER                                 |          |           |         |                     |      |             |       |  |  |  |  | Carbamidomethyl (C)[1] |  | Mascot |  |  |
|                     | 1017.5033                                                               | 1017.5201   | 0.0168  | 17    | 941        | 948          | LLMENEPR                                |          | 13        | 0       | Oxidation (M)[3]    |      |             |       |  |  |  |  |                        |  | Mascot |  |  |
|                     | 1017.5033                                                               | 1017.5201   | 0.0168  | 17    | 941        | 948          | LLMENEPR                                |          |           |         | Oxidation (M)[3]    |      |             |       |  |  |  |  |                        |  | Mascot |  |  |
|                     | 1338.7126                                                               | 1338.6365   | -0.0761 | -57   | 718        | 728          | DLSLFGLLWMK                             |          |           |         | Oxidation (M)[10]   |      |             |       |  |  |  |  |                        |  | Mascot |  |  |
|                     | 1498.7874                                                               | 1498.645    | -0.1424 | -95   | 205        | 217          | GHSLGTQRYNLPR                           |          |           |         |                     |      |             |       |  |  |  |  |                        |  | Mascot |  |  |
|                     | 1498.7874                                                               | 1498.645    | -0.1424 | -95   | 205        | 217          | GHSLGTQRYNLPR                           |          |           |         |                     |      |             |       |  |  |  |  |                        |  | Mascot |  |  |
|                     | 1515.7876                                                               | 1515.6729   | -0.1147 | -76   | 356        | 368          | AIKVFINMSFSDK                           |          |           |         | Oxidation (M)[8]    |      |             |       |  |  |  |  |                        |  | Mascot |  |  |
|                     | 1515.7876                                                               | 1515.6729   | -0.1147 | -76   | 356        | 368          | AIKVFINMSFSDK                           |          |           |         | Oxidation (M)[8]    |      |             |       |  |  |  |  |                        |  | Mascot |  |  |
|                     | 2233.0491                                                               | 2232.9709   | -0.0782 | -35   | 1          | 21           | MAFGVAMFAPVCLIEND<br>GFGK               |          |           |         | Oxidation (M)[1]    |      |             |       |  |  |  |  |                        |  | Mascot |  |  |
|                     | 2283.0652                                                               | 2283.075    | 0.0098  | 4     | 256        | 274          | FLHQAHTFCSYIYDNAQP<br>K                 |          |           |         |                     |      |             |       |  |  |  |  |                        |  | Mascot |  |  |
|                     | 2649.3779                                                               | 2649.2053   | -0.1726 | -65   | 707        | 728          | VTETHVMIDIRDLSLFGLL<br>WMK              |          |           |         | Oxidation (M)[7,21] |      |             |       |  |  |  |  |                        |  | Mascot |  |  |
|                     | 3845.8989                                                               | 3845.6292   | -0.2697 | -70   | 672        | 706          | LHLPHCEIFSEGDNMDGL<br>AVAHFTAGNIEIIQPIK |          |           |         | Oxidation (M)[15]   |      |             |       |  |  |  |  |                        |  | Mascot |  |  |
| 43                  | novel protein similar to vertebrate guanylate binding                   |             |         |       |            | gi 169159070 |                                         | 110269.7 | 5.36      | 9       | 32                  | 0    |             |       |  |  |  |  |                        |  |        |  |  |

protein family [Danio rerio]

| Peptide Information |                                                                           |         |       |              |                                             |           |         |                        |                  |
|---------------------|---------------------------------------------------------------------------|---------|-------|--------------|---------------------------------------------|-----------|---------|------------------------|------------------|
| Calc. Mass          | Obsrv. Mass                                                               | ± da    | ± ppm | Start Seq.   | End Sequence Seq.                           | Ion Score | C. I. % | Modification           | Rank Result Type |
| 999.4716            | 999.4486                                                                  | -0.023  | -23   | 785          | 791 CQLFFER                                 | 13        | 0       | Carbamidomethyl (C)[1] | Mascot           |
| 999.4716            | 999.4486                                                                  | -0.023  | -23   | 785          | 791 CQLFFER                                 |           |         | Carbamidomethyl (C)[1] | Mascot           |
| 1017.5033           | 1017.5201                                                                 | 0.0168  | 17    | 942          | 949 LLMENEPR                                |           |         | Oxidation (M)[3]       | Mascot           |
| 1017.5033           | 1017.5201                                                                 | 0.0168  | 17    | 942          | 949 LLMENEPR                                |           |         | Oxidation (M)[3]       | Mascot           |
| 1338.7126           | 1338.6365                                                                 | -0.0761 | -57   | 719          | 729 DLSLFGLLWMK                             |           |         | Oxidation (M)[10]      | Mascot           |
| 1498.7874           | 1498.645                                                                  | -0.1424 | -95   | 206          | 218 GHSLGTQRYNLPR                           |           |         |                        | Mascot           |
| 1498.7874           | 1498.645                                                                  | -0.1424 | -95   | 206          | 218 GHSLGTQRYNLPR                           |           |         |                        | Mascot           |
| 1515.7876           | 1515.6729                                                                 | -0.1147 | -76   | 357          | 369 AIKVFINMSFSDK                           |           |         | Oxidation (M)[8]       | Mascot           |
| 1515.7876           | 1515.6729                                                                 | -0.1147 | -76   | 357          | 369 AIKVFINMSFSDK                           |           |         | Oxidation (M)[8]       | Mascot           |
| 2233.0491           | 2232.9709                                                                 | -0.0782 | -35   | 1            | 21 MAFGVAMFAPVCLIEND<br>GFGK                |           |         | Oxidation (M)[1]       | Mascot           |
| 2283.0652           | 2283.075                                                                  | 0.0098  | 4     | 257          | 275 FLHQAHTFCSYIYDNAQP<br>K                 |           |         |                        | Mascot           |
| 2649.3779           | 2649.2053                                                                 | -0.1726 | -65   | 708          | 729 VTETHVMIDIRDLSLFGLL<br>WMK              |           |         | Oxidation (M)[7,21]    | Mascot           |
| 3845.8989           | 3845.6292                                                                 | -0.2697 | -70   | 673          | 707 LHLPHCEIFSEGDNMDGL<br>AVAHFTAGNIEIIQPIK |           |         | Oxidation (M)[15]      | Mascot           |
| 44                  | PREDICTED: putative uncharacterized zinc finger protein 814 [Danio rerio] |         |       | gi 189533627 | 40815.3                                     | 9.34      | 10      | 32                     | 0                |

| Peptide Information |             |         |       |            |                             |           |         |                                           |                  |
|---------------------|-------------|---------|-------|------------|-----------------------------|-----------|---------|-------------------------------------------|------------------|
| Calc. Mass          | Obsrv. Mass | ± da    | ± ppm | Start Seq. | End Sequence Seq.           | Ion Score | C. I. % | Modification                              | Rank Result Type |
| 999.4386            | 999.4486    | 0.01    | 10    | 74         | 81 FTCVQCGK                 |           |         | Carbamidomethyl (C)[3,6]                  | Mascot           |
| 999.4386            | 999.4486    | 0.01    | 10    | 74         | 81 FTCVQCGK                 |           |         | Carbamidomethyl (C)[3,6]                  | Mascot           |
| 1070.5121           | 1070.4818   | -0.0303 | -28   | 73         | 81 KFTCVQCGK                |           |         | Carbamidomethyl (C)[4]                    | Mascot           |
| 1070.5121           | 1070.4818   | -0.0303 | -28   | 73         | 81 KFTCVQCGK                |           |         | Carbamidomethyl (C)[4]                    | Mascot           |
| 1324.6943           | 1324.624    | -0.0703 | -53   | 145        | 154 FNEHMKIHIR              |           |         |                                           | Mascot           |
| 1677.736            | 1677.7216   | -0.0144 | -9    | 213        | 225 SFSCDQCEKTFRLR          |           |         | Carbamidomethyl (C)[4,7]                  | Mascot           |
| 1723.7712           | 1723.8583   | 0.0871  | 51    | 263        | 277 IHTGVRPYMCSDCGK         |           |         | Carbamidomethyl (C)[10]                   | Mascot           |
| 1739.7662           | 1739.8535   | 0.0873  | 50    | 263        | 277 IHTGVRPYMCSDCGK         |           |         | Carbamidomethyl (C)[10], Oxidation (M)[9] | Mascot           |
| 1753.7784           | 1753.8682   | 0.0898  | 51    | 179        | 193 FHSEERPFVCSQCGK         |           |         |                                           | Mascot           |
| 2170.1372           | 2169.8655   | -0.2717 | -125  | 231        | 249 EHLKVHAGLKPHVCSLC<br>GK |           |         | Carbamidomethyl (C)[14,17]                | Mascot           |
| 2233.0864           | 2232.9709   | -0.1155 | -52   | 120        | 137 HVRIHTGERPFICEHCGK      |           |         | Carbamidomethyl (C)[13,16]                | Mascot           |
| 2261.0371           | 2260.8677   | -0.1694 | -75   | 91         | 109 VHMRIHTGERPFTCTDC<br>GK |           |         | Carbamidomethyl (C)[14], Oxidation (M)[3] | Mascot           |

|    |                                            |           |         |     |             |     |                          |      |   |    |   |    |                                           |        |
|----|--------------------------------------------|-----------|---------|-----|-------------|-----|--------------------------|------|---|----|---|----|-------------------------------------------|--------|
|    | 2261.0371                                  | 2260.8677 | -0.1694 | -75 | 91          | 109 | VHMRIHTGERPFTCTDC<br>GK  |      |   |    |   |    | Carbamidomethyl (C)[14], Oxidation (M)[3] | Mascot |
|    | 2300.0984                                  | 2299.8782 | -0.2202 | -96 | 263         | 282 | IHTGVRPYMCSDCGKSF<br>TIK |      |   |    |   |    | Carbamidomethyl (C)[10]                   | Mascot |
| 45 | pre-mRNA-splicing factor 38A [Danio rerio] |           |         |     | gi 51011053 |     | 37527.2                  | 9.88 | 3 | 31 | 0 | 23 | 0                                         |        |

#### Peptide Information

| Calc. Mass | Obsrv. Mass | ± da    | ± ppm | Start Seq. | End Seq. | Sequence   | Ion Score | C. I. | % Modification         | Rank | Result | Type |
|------------|-------------|---------|-------|------------|----------|------------|-----------|-------|------------------------|------|--------|------|
| 1017.522   | 1017.5201   | -0.0019 | -2    | 157        | 164      | MCDIILPR   | 23        | 0     | Carbamidomethyl (C)[2] |      | Mascot |      |
| 1017.522   | 1017.5201   | -0.0019 | -2    | 157        | 164      | MCDIILPR   |           |       | Carbamidomethyl (C)[2] |      | Mascot |      |
| 1070.5265  | 1070.4818   | -0.0447 | -42   | 93         | 100      | NEDFKYVR   |           |       |                        |      | Mascot |      |
| 1070.5265  | 1070.4818   | -0.0447 | -42   | 93         | 100      | NEDFKYVR   |           |       |                        |      | Mascot |      |
| 1086.5135  | 1086.4794   | -0.0341 | -31   | 109        | 118      | LTGTSVDCYK |           |       |                        |      | Mascot |      |

|    |                                                       |  |  |  |              |  |        |      |   |  |    |        |  |
|----|-------------------------------------------------------|--|--|--|--------------|--|--------|------|---|--|----|--------|--|
| 46 | PREDICTED: zinc finger protein 608-like [Danio rerio] |  |  |  | gi 326669784 |  | 132330 | 7.18 | 1 |  | 27 | 54.979 |  |
|----|-------------------------------------------------------|--|--|--|--------------|--|--------|------|---|--|----|--------|--|

#### Peptide Information

| Calc. Mass | Obsrv. Mass | ± da    | ± ppm | Start Seq. | End Seq. | Sequence  | Ion Score | C. I.  | % Modification         | Rank | Result | Type |
|------------|-------------|---------|-------|------------|----------|-----------|-----------|--------|------------------------|------|--------|------|
| 1017.5509  | 1017.5201   | -0.0308 | -30   | 370        | 378      | SSPLICGKR | 27        | 54.979 | Carbamidomethyl (C)[6] | 3    | Mascot |      |

|    |                                                                                             |  |  |  |              |  |         |      |   |  |    |   |  |
|----|---------------------------------------------------------------------------------------------|--|--|--|--------------|--|---------|------|---|--|----|---|--|
| 47 | PREDICTED: leucine-rich repeat transmembrane neuronal protein 4-like, partial [Danio rerio] |  |  |  | gi 326669846 |  | 58370.5 | 9.65 | 1 |  | 22 | 0 |  |
|----|---------------------------------------------------------------------------------------------|--|--|--|--------------|--|---------|------|---|--|----|---|--|

#### Peptide Information

| Calc. Mass | Obsrv. Mass | ± da    | ± ppm | Start Seq. | End Seq. | Sequence | Ion Score | C. I. | % Modification | Rank | Result | Type |
|------------|-------------|---------|-------|------------|----------|----------|-----------|-------|----------------|------|--------|------|
| 1017.5264  | 1017.5201   | -0.0063 | -6    | 216        | 223      | INFSHFPR | 22        | 0     |                | 5    | Mascot |      |

|    |                                                            |  |  |  |              |  |         |      |   |  |    |   |  |
|----|------------------------------------------------------------|--|--|--|--------------|--|---------|------|---|--|----|---|--|
| 48 | PREDICTED: hypothetical protein LOC100534757 [Danio rerio] |  |  |  | gi 326674718 |  | 60556.1 | 7.13 | 1 |  | 22 | 0 |  |
|----|------------------------------------------------------------|--|--|--|--------------|--|---------|------|---|--|----|---|--|

#### Peptide Information

| Calc. Mass | Obsrv. Mass | ± da   | ± ppm | Start Seq. | End Seq. | Sequence | Ion Score | C. I. | % Modification                           | Rank | Result | Type |
|------------|-------------|--------|-------|------------|----------|----------|-----------|-------|------------------------------------------|------|--------|------|
| 1017.4855  | 1017.5201   | 0.0346 | 34    | 18         | 25       | LCVPEMPR | 22        | 0     | Carbamidomethyl (C)[2], Oxidation (M)[6] | 5    | Mascot |      |

|    |                                               |  |  |  |             |  |          |      |   |  |    |   |  |
|----|-----------------------------------------------|--|--|--|-------------|--|----------|------|---|--|----|---|--|
| 49 | Rho GTPase activating protein 4 [Danio rerio] |  |  |  | gi 41055389 |  | 103314.9 | 6.57 | 1 |  | 21 | 0 |  |
|----|-----------------------------------------------|--|--|--|-------------|--|----------|------|---|--|----|---|--|

#### Peptide Information

| Calc. Mass | Obsrv. Mass | ± da   | ± ppm | Start Seq. | End Seq. | Sequence  | Ion Score | C. I. | % Modification | Rank | Result | Type |
|------------|-------------|--------|-------|------------|----------|-----------|-----------|-------|----------------|------|--------|------|
| 1017.4483  | 1017.5201   | 0.0718 | 71    | 529        | 537      | GDDPLTDER | 21        | 0     |                | 7    | Mascot |      |

50    PREDICTED: saccin-like [Danio rerio]                      gi|326674209                      520909.9    6.27                      1                                              20                      0

Peptide Information

| Calc. Mass | Obsrv. Mass | ± da   | ± ppm | Start Seq. | End Seq. | Sequence | Ion Score | C. I. % | Modification           | Rank | Result Type |
|------------|-------------|--------|-------|------------|----------|----------|-----------|---------|------------------------|------|-------------|
| 1017.457   | 1017.5201   | 0.0631 | 62    | 2487       | 2494     | YCHGDIPR | 20        | 0       | Carbamidomethyl (C)[2] | 8    | Mascot      |

|                |           |                        |                |                |                    |
|----------------|-----------|------------------------|----------------|----------------|--------------------|
| Gel Idx/Pos    | 259/K11   | Instr./Gel Origin      | BA2060/110707A | Process Status | Analysis Succeeded |
| Plate [#] Name | [1] 31496 | Instrument Sample Name |                | Spectra        | 11                 |

| Rank | Protein Name                                                                  | Accession No. | Protein MW | Protein PI | Pep. Count | Protein Score | Protein Score C. I. % | Total Ion Score | Total Ion C. I. % |
|------|-------------------------------------------------------------------------------|---------------|------------|------------|------------|---------------|-----------------------|-----------------|-------------------|
| 1    | deoxyuridine 5'-triphosphate nucleotidohydrolase, mitochondrial [Danio rerio] | gi 54400512   | 20094.3    | 8.39       | 8          | 313           | 100                   | 259             | 100               |

Peptide Information

| Calc. Mass | Obsrv. Mass | ± da    | ± ppm | Start Seq. | End Seq. | Sequence                  | Ion Score | C. I. % | Modification           | Rank | Result Type |
|------------|-------------|---------|-------|------------|----------|---------------------------|-----------|---------|------------------------|------|-------------|
| 974.5339   | 974.4991    | -0.0348 | -36   | 152        | 159      | IAQLICEK                  |           |         | Carbamidomethyl (C)[6] |      | Mascot      |
| 1112.5695  | 1112.5323   | -0.0372 | -33   | 54         | 63       | LTEHATTPSR                |           |         |                        |      | Mascot      |
| 1321.7262  | 1321.6807   | -0.0455 | -34   | 130        | 141      | GNLGVVIFNFNK              |           |         |                        |      | Mascot      |
| 2051.0701  | 2051.0183   | -0.0518 | -25   | 14         | 33       | LNGLCLGRGAEVTEAVS<br>PHK  |           |         |                        |      | Mascot      |
| 2051.0959  | 2051.0183   | -0.0776 | -38   | 130        | 147      | GNLGVVIFNFNKEPFEVK        | 96        | 100     |                        |      | Mascot      |
| 2115.9216  | 2115.8401   | -0.0815 | -39   | 68         | 86       | AAGYDLYSAYDYSIGPM<br>DK   |           |         | Oxidation (M)[17]      |      | Mascot      |
| 2122.9961  | 2122.9131   | -0.083  | -39   | 160        | 176      | ICYPDLQELQTLDETER         |           |         | Carbamidomethyl (C)[2] |      | Mascot      |
| 2122.9961  | 2122.9131   | -0.083  | -39   | 160        | 176      | ICYPDLQELQTLDETER         | 164       | 100     | Carbamidomethyl (C)[2] |      | Mascot      |
| 2233.1248  | 2232.9985   | -0.1263 | -57   | 109        | 129      | SGLAVKHFVDVGAGVVD<br>EDYR |           |         |                        |      | Mascot      |

|   |                                                            |              |         |     |    |    |        |  |  |
|---|------------------------------------------------------------|--------------|---------|-----|----|----|--------|--|--|
| 2 | PREDICTED: hypothetical protein LOC100003217 [Danio rerio] | gi 326678765 | 31640.9 | 5.2 | 10 | 52 | 72.561 |  |  |
|---|------------------------------------------------------------|--------------|---------|-----|----|----|--------|--|--|

Peptide Information

| Calc. Mass | Obsrv. Mass | ± da    | ± ppm | Start Seq. | End Seq. | Sequence     | Ion Score | C. I. % | Modification           | Rank | Result Type |
|------------|-------------|---------|-------|------------|----------|--------------|-----------|---------|------------------------|------|-------------|
| 842.4114   | 842.4824    | 0.071   | 84    | 78         | 84       | SREAHDK      |           |         |                        |      | Mascot      |
| 974.5087   | 974.4991    | -0.0096 | -10   | 178        | 185      | EGQVCLIR     |           |         | Carbamidomethyl (C)[5] |      | Mascot      |
| 1112.6422  | 1112.5323   | -0.1099 | -99   | 168        | 177      | NRPGEIIVK    |           |         |                        |      | Mascot      |
| 1277.6704  | 1277.6637   | -0.0067 | -5    | 208        | 218      | LICEMARQIGK  |           |         | Oxidation (M)[5]       |      | Mascot      |
| 1321.5333  | 1321.6807   | 0.1474  | 112   | 196        | 207      | DMDSHIGNACMK |           |         |                        |      | Mascot      |
| 1475.7887  | 1475.699    | -0.0897 | -61   | 66         | 77       | TDLLRLSEEMR  |           |         |                        |      | Mascot      |

|           |           |         |     |     |     |                        |                                                    |        |
|-----------|-----------|---------|-----|-----|-----|------------------------|----------------------------------------------------|--------|
| 1493.6835 | 1493.6829 | -0.0006 | 0   | 53  | 65  | LCQECGLDAKGSR          | Carbamidomethyl (C)[2,5]                           | Mascot |
| 1838.9792 | 1838.8472 | -0.132  | -72 | 36  | 52  | VADATYSMSLTVGVIRR      |                                                    | Mascot |
| 2137.9319 | 2137.9116 | -0.0203 | -9  | 196 | 214 | DMDSHIGNACMKLICEMAR    |                                                    | Mascot |
| 2210.9482 | 2211.0212 | 0.073   | 33  | 196 | 214 | DMDSHIGNACMKLICEMAR    | Carbamidomethyl (C)[10], Oxidation (M)[2]          | Mascot |
| 2283.9646 | 2284.0823 | 0.1177  | 52  | 196 | 214 | DMDSHIGNACMKLICEMAR    | Carbamidomethyl (C)[10,15], Oxidation (M)[2,11]    | Mascot |
| 2299.9597 | 2300.0869 | 0.1272  | 55  | 196 | 214 | DMDSHIGNACMKLICEMAR    | Carbamidomethyl (C)[10,15], Oxidation (M)[2,11,17] | Mascot |
| 2584.1628 | 2584.1028 | -0.06   | -23 | 186 | 207 | EEFWSLGLLRDMDSHIGNACMK | Oxidation (M)[12,21]                               | Mascot |

3 PREDICTED: oocyte zinc finger protein XICOF6-like [Danio rerio] gi|326667072 46395.4 9.15 14 48 26.147

#### Peptide Information

| Calc. Mass | Obsrv. Mass | ± da    | ± ppm | Start Seq. | End Seq. | Sequence                     | Ion Score | C. I. % | Modification                                | Rank | Result Type |
|------------|-------------|---------|-------|------------|----------|------------------------------|-----------|---------|---------------------------------------------|------|-------------|
| 801.4399   | 801.3248    | -0.1151 | -144  | 81         | 86       | LKTHMR                       |           |         | Oxidation (M)[5]                            |      | Mascot      |
| 1277.4846  | 1277.6637   | 0.1791  | 140   | 373        | 381      | EYMCLECEK                    |           |         | Carbamidomethyl (C)[4,7], Oxidation (M)[3]  |      | Mascot      |
| 1589.7642  | 1589.7491   | -0.0151 | -9    | 158        | 170      | SFNHSSFLNLHMR                |           |         |                                             |      | Mascot      |
| 1589.7642  | 1589.7491   | -0.0151 | -9    | 158        | 170      | SFNHSSFLNLHMR                |           |         |                                             |      | Mascot      |
| 1611.7982  | 1611.7267   | -0.0715 | -44   | 171        | 185      | IHTGEKPLTCPQCGK              |           |         |                                             |      | Mascot      |
| 1676.7883  | 1676.6877   | -0.1006 | -60   | 227        | 241      | IHTGEKPFTCAQCGK              |           |         | Carbamidomethyl (C)[10]                     |      | Mascot      |
| 1688.7883  | 1688.6936   | -0.0947 | -56   | 115        | 129      | IHTGEKPFSCPCGK               |           |         | Carbamidomethyl (C)[10]                     |      | Mascot      |
| 1691.8243  | 1691.7391   | -0.0852 | -50   | 87         | 101      | IHTGEKPFTCTQCVK              |           |         |                                             |      | Mascot      |
| 1691.8243  | 1691.7391   | -0.0852 | -50   | 87         | 101      | IHTGEKPFTCTQCVK              |           |         |                                             |      | Mascot      |
| 1838.9607  | 1838.8472   | -0.1135 | -62   | 46         | 61       | IEDKTHLETDGVLNVR             |           |         |                                             |      | Mascot      |
| 1867.8499  | 1867.8522   | 0.0023  | 1     | 367        | 381      | IHTGVREYMCLECEK              |           |         | Carbamidomethyl (C)[10]                     |      | Mascot      |
| 2137.9287  | 2137.9116   | -0.0171 | -8    | 252        | 269      | HMMIHTGEKPFTCTQCGK           |           |         | Carbamidomethyl (C)[13], Oxidation (M)[2,3] |      | Mascot      |
| 2193.0071  | 2192.9666   | -0.0405 | -18   | 251        | 269      | KHMMIHTGEKPFTCTQCGK          |           |         | Oxidation (M)[3]                            |      | Mascot      |
| 2211.03    | 2211.0212   | -0.0088 | -4    | 21         | 38       | QEDLQEQTDLIKDYEEK            |           |         |                                             |      | Mascot      |
| 2233.0674  | 2232.9985   | -0.0689 | -31   | 83         | 101      | THMRIHTGEKPFTCTQCVK          |           |         | Oxidation (M)[3]                            |      | Mascot      |
| 3323.5981  | 3323.6125   | 0.0144  | 4     | 326        | 353      | SFIHSSHLNLHMRIHTGEKPFTCTQCGK |           |         | Carbamidomethyl (C)[23,26]                  |      | Mascot      |

4 PREDICTED: hypothetical protein LOC100330054 [Danio rerio] gi|326680669 21210.7 4.52 7 44 0

#### Peptide Information

| Calc. Mass | Obsrv. Mass | ± da    | ± ppm | Start Seq. | End Seq. | Sequence | Ion Score | C. I. % | Modification           | Rank | Result Type |
|------------|-------------|---------|-------|------------|----------|----------|-----------|---------|------------------------|------|-------------|
| 974.5087   | 974.4991    | -0.0096 | -10   | 87         | 94       | EGQVCLIR |           |         | Carbamidomethyl (C)[5] |      | Mascot      |

|   |                                                                                |           |         |     |     |             |                        |      |   |                                                    |   |  |        |
|---|--------------------------------------------------------------------------------|-----------|---------|-----|-----|-------------|------------------------|------|---|----------------------------------------------------|---|--|--------|
|   | 1112.6422                                                                      | 1112.5323 | -0.1099 | -99 | 77  | 86          | NRPGSEIIVK             |      |   |                                                    |   |  | Mascot |
|   | 1277.6704                                                                      | 1277.6637 | -0.0067 | -5  | 117 | 127         | LICEMARQIGK            |      |   | Oxidation (M)[5]                                   |   |  | Mascot |
|   | 1321.5333                                                                      | 1321.6807 | 0.1474  | 112 | 105 | 116         | DMDSHIGNACMK           |      |   |                                                    |   |  | Mascot |
|   | 1838.9131                                                                      | 1838.8472 | -0.0659 | -36 | 142 | 158         | ETPNNIVNGLPEDADLK      |      |   |                                                    |   |  | Mascot |
|   | 2137.9319                                                                      | 2137.9116 | -0.0203 | -9  | 105 | 123         | DMDSHIGNACMKLICEMAR    |      |   |                                                    |   |  | Mascot |
|   | 2210.9482                                                                      | 2211.0212 | 0.073   | 33  | 105 | 123         | DMDSHIGNACMKLICEMAR    |      |   | Carbamidomethyl (C)[10], Oxidation (M)[2]          |   |  | Mascot |
|   | 2283.9646                                                                      | 2284.0823 | 0.1177  | 52  | 105 | 123         | DMDSHIGNACMKLICEMAR    |      |   | Carbamidomethyl (C)[10,15], Oxidation (M)[2,11]    |   |  | Mascot |
|   | 2299.9597                                                                      | 2300.0869 | 0.1272  | 55  | 105 | 123         | DMDSHIGNACMKLICEMAR    |      |   | Carbamidomethyl (C)[10,15], Oxidation (M)[2,11,17] |   |  | Mascot |
|   | 2584.1628                                                                      | 2584.1028 | -0.06   | -23 | 95  | 116         | EEFWSLGLLRDMDSHIGNACMK |      |   | Oxidation (M)[12,21]                               |   |  | Mascot |
| 5 | TCR-alpha V segment I-2 (according to annotation by Tatsuya Ota) [Danio rerio] |           |         |     |     | gi 26984615 | 13055.5                | 6.59 | 6 | 43                                                 | 0 |  |        |

#### Peptide Information

| Calc. Mass | Obsrv. Mass | ± da    | ± ppm | Start Seq. | End Seq. | Sequence                  | Ion Score | C. I. % | Modification                               | Rank | Result Type |
|------------|-------------|---------|-------|------------|----------|---------------------------|-----------|---------|--------------------------------------------|------|-------------|
| 848.4471   | 848.4999    | 0.0528  | 62    | 32         | 38       | TERESVK                   |           |         |                                            |      | Mascot      |
| 1179.5349  | 1179.5593   | 0.0244  | 21    | 73         | 83       | SNSARDTSDAR               |           |         |                                            |      | Mascot      |
| 1851.9629  | 1851.8466   | -0.1163 | -63   | 4          | 20       | CMLLIILMASDVTAVDK         |           |         | Oxidation (M)[2]                           |      | Mascot      |
| 1867.9578  | 1867.8522   | -0.1056 | -57   | 4          | 20       | CMLLIILMASDVTAVDK         |           |         | Oxidation (M)[2,8]                         |      | Mascot      |
| 2225.1411  | 2225.0332   | -0.1079 | -48   | 1          | 20       | MNKCMLLIILMASDVTAVDK      |           |         | Oxidation (M)[1]                           |      | Mascot      |
| 2225.1411  | 2225.0332   | -0.1079 | -48   | 1          | 20       | MNKCMLLIILMASDVTAVDK      |           |         | Oxidation (M)[1]                           |      | Mascot      |
| 2298.1575  | 2298.0916   | -0.0659 | -29   | 1          | 20       | MNKCMLLIILMASDVTAVDK      |           |         | Carbamidomethyl (C)[4], Oxidation (M)[1,5] |      | Mascot      |
| 2501.332   | 2501.1472   | -0.1848 | -74   | 91         | 113      | ISTDLIIKTAALSDSALYYCALR   |           |         |                                            |      | Mascot      |
| 2705.3921  | 2705.0452   | -0.3469 | -128  | 4          | 28       | CMLLIILMASDVTAVDKIEPNSGSK |           |         | Carbamidomethyl (C)[1]                     |      | Mascot      |

|   |                                                                     |  |  |  |  |              |         |      |   |    |   |  |  |
|---|---------------------------------------------------------------------|--|--|--|--|--------------|---------|------|---|----|---|--|--|
| 6 | PREDICTED: hypothetical protein LOC100537788, partial [Danio rerio] |  |  |  |  | gi 326680782 | 28986.4 | 4.75 | 8 | 41 | 0 |  |  |
|---|---------------------------------------------------------------------|--|--|--|--|--------------|---------|------|---|----|---|--|--|

#### Peptide Information

| Calc. Mass | Obsrv. Mass | ± da    | ± ppm | Start Seq. | End Seq. | Sequence     | Ion Score | C. I. % | Modification           | Rank | Result Type |
|------------|-------------|---------|-------|------------|----------|--------------|-----------|---------|------------------------|------|-------------|
| 974.5087   | 974.4991    | -0.0096 | -10   | 167        | 174      | EGQVCLIR     |           |         | Carbamidomethyl (C)[5] |      | Mascot      |
| 1112.6422  | 1112.5323   | -0.1099 | -99   | 157        | 166      | NRPGSEIIVK   |           |         |                        |      | Mascot      |
| 1277.6704  | 1277.6637   | -0.0067 | -5    | 197        | 207      | LICEMARQIGK  |           |         | Oxidation (M)[5]       |      | Mascot      |
| 1321.5333  | 1321.6807   | 0.1474  | 112   | 185        | 196      | DMDSHIGNACMK |           |         |                        |      | Mascot      |
| 1475.7887  | 1475.699    | -0.0897 | -61   | 41         | 52       | TDLLRLSEEMR  |           |         |                        |      | Mascot      |

|   |                                 |           |         |     |             |     |                        |      |                                                    |        |   |    |   |
|---|---------------------------------|-----------|---------|-----|-------------|-----|------------------------|------|----------------------------------------------------|--------|---|----|---|
|   | 1493.6835                       | 1493.6829 | -0.0006 | 0   | 28          | 40  | LCQECGLDAKGSR          |      | Carbamidomethyl (C)[2,5]                           | Mascot |   |    |   |
|   | 2137.9319                       | 2137.9116 | -0.0203 | -9  | 185         | 203 | DMDSHIGNACMKLICEMAR    |      |                                                    | Mascot |   |    |   |
|   | 2210.9482                       | 2211.0212 | 0.073   | 33  | 185         | 203 | DMDSHIGNACMKLICEMAR    |      | Carbamidomethyl (C)[10], Oxidation (M)[2]          | Mascot |   |    |   |
|   | 2283.9646                       | 2284.0823 | 0.1177  | 52  | 185         | 203 | DMDSHIGNACMKLICEMAR    |      | Carbamidomethyl (C)[10,15], Oxidation (M)[2,11]    | Mascot |   |    |   |
|   | 2299.9597                       | 2300.0869 | 0.1272  | 55  | 185         | 203 | DMDSHIGNACMKLICEMAR    |      | Carbamidomethyl (C)[10,15], Oxidation (M)[2,11,17] | Mascot |   |    |   |
|   | 2584.1628                       | 2584.1028 | -0.06   | -23 | 175         | 196 | EEFWSLGLLRDMDSHIGNACMK |      | Oxidation (M)[12,21]                               | Mascot |   |    |   |
| 7 | LOC553337 protein [Danio rerio] |           |         |     | gi 61403613 |     | 68948.5                | 6.78 | 9                                                  | 41     | 0 | 18 | 0 |

#### Peptide Information

| Calc. Mass | Obsrv. Mass | ± da    | ± ppm | Start Seq. | End Seq. | Sequence                   | Ion Score | C. I. | % | Modification                    | Rank | Result Type |
|------------|-------------|---------|-------|------------|----------|----------------------------|-----------|-------|---|---------------------------------|------|-------------|
| 864.3702   | 864.4862    | 0.116   | 134   | 57         | 64       | QTGQCPCCK                  |           |       |   |                                 |      | Mascot      |
| 1045.5962  | 1045.5293   | -0.0669 | -64   | 209        | 217      | DIAMILEK                   |           |       |   |                                 |      | Mascot      |
| 1048.5204  | 1048.4287   | -0.0917 | -87   | 432        | 442      | GSDGVLKCGGR                |           |       |   |                                 |      | Mascot      |
| 1691.6689  | 1691.7391   | 0.0702  | 41    | 120        | 133      | QCNECEAFHWGDPR             |           |       |   |                                 |      | Mascot      |
| 1691.6689  | 1691.7391   | 0.0702  | 41    | 120        | 133      | QCNECEAFHWGDPR             |           |       |   |                                 |      | Mascot      |
| 1707.8547  | 1707.7111   | -0.1436 | -84   | 248        | 262      | EGTFNLISQTVDDLRL           |           |       |   |                                 |      | Mascot      |
| 2122.9458  | 2122.9131   | -0.0327 | -15   | 343        | 361      | CNASVYGPQSPVEQSQDTR        |           |       |   | Carbamidomethyl (C)[1]          |      | Mascot      |
| 2123.1018  | 2122.9131   | -0.1887 | -89   | 313        | 331      | ELENYLTAGLAEQFANVLK        | 19        |       | 0 |                                 |      | Mascot      |
| 2246.9966  | 2247.054    | 0.0574  | 26    | 183        | 201      | CVPCHPCFQLWDDVVCQVR        |           |       |   |                                 |      | Mascot      |
| 3323.5005  | 3323.6125   | 0.112   | 34    | 175        | 201      | GFTGNFPKCVPCPCFQLWDDVVCQVR |           |       |   | Carbamidomethyl (C)[9,12,15,24] |      | Mascot      |

8 PREDICTED: tripartite motif-containing protein 35-like [Danio rerio]

#### Peptide Information

| Calc. Mass | Obsrv. Mass | ± da    | ± ppm | Start Seq. | End Seq. | Sequence          | Ion Score | C. I. | % | Modification           | Rank | Result Type |
|------------|-------------|---------|-------|------------|----------|-------------------|-----------|-------|---|------------------------|------|-------------|
| 856.4523   | 856.498     | 0.0457  | 53    | 111        | 117      | DSEKHLK           |           |       |   |                        |      | Mascot      |
| 974.491    | 974.4991    | 0.0081  | 8     | 103        | 110      | QPVCLVCR          |           |       |   | Carbamidomethyl (C)[4] |      | Mascot      |
| 1045.5887  | 1045.5293   | -0.0594 | -57   | 131        | 139      | KEELNTALK         |           |       |   |                        |      | Mascot      |
| 1048.5786  | 1048.4287   | -0.1499 | -143  | 172        | 179      | QIKQQFEK          |           |       |   |                        |      | Mascot      |
| 1106.4718  | 1106.5103   | 0.0385  | 35    | 43         | 51       | NTQECPVCR         |           |       |   | Carbamidomethyl (C)[5] |      | Mascot      |
| 1448.7024  | 1448.8658   | 0.1634  | 113   | 20         | 32       | TPVILSCGHSFCK     |           |       |   | Carbamidomethyl (C)[7] |      | Mascot      |
| 1589.7893  | 1589.7491   | -0.0402 | -25   | 337        | 350      | GFNSGKHCWVVEVK    |           |       |   |                        |      | Mascot      |
| 1589.7893  | 1589.7491   | -0.0402 | -25   | 337        | 350      | GFNSGKHCWVVEVK    |           |       |   |                        |      | Mascot      |
| 2050.9651  | 2051.0183   | 0.0532  | 26    | 382        | 399      | YQYGQSGSSFCIKQALD |           |       |   |                        |      | Mascot      |

|   |                                              |           |         |     |     |              |                                  |      |   |    |                                           |  |        |
|---|----------------------------------------------|-----------|---------|-----|-----|--------------|----------------------------------|------|---|----|-------------------------------------------|--|--------|
|   | 2050.9651                                    | 2051.0183 | 0.0532  | 26  | 382 | 399          | R<br>YQYQQSGSSFCIKQALD<br>R      |      |   |    |                                           |  | Mascot |
|   | 2211.1372                                    | 2211.0212 | -0.116  | -52 | 52  | 71           | RPSMADPPVNLALKNL<br>ESR          |      |   |    |                                           |  | Mascot |
|   | 2284.1536                                    | 2284.0823 | -0.0713 | -31 | 52  | 71           | RPSMADPPVNLALKNL<br>ESR          |      |   |    | Carbamidomethyl (C)[17], Oxidation (M)[4] |  | Mascot |
|   | 3323.5593                                    | 3323.6125 | 0.0532  | 16  | 212 | 240          | EMNTHISALSHTITDTE<br>MLKANDVCFLK |      |   |    | Oxidation (M)[2, 19]                      |  | Mascot |
|   | 3338.6572                                    | 3338.6108 | -0.0464 | -14 | 281 | 309          | MQDIVQYTPVILNPNTA<br>PELELSDDLTR |      |   |    | Oxidation (M)[1]                          |  | Mascot |
| 9 | hypothetical protein LOC569884 [Danio rerio] |           |         |     |     | gi 113676725 | 17794.8                          | 4.74 | 6 | 39 | 0                                         |  |        |

#### Peptide Information

| Calc. Mass | Obsrv. Mass | ± da    | ± ppm | Start Seq. | End Seq. | Sequence                       | Ion Score | C. I. | % Modification                                        | Rank | Result Type |
|------------|-------------|---------|-------|------------|----------|--------------------------------|-----------|-------|-------------------------------------------------------|------|-------------|
| 974.5087   | 974.4991    | -0.0096 | -10   | 61         | 68       | EGQVCLIR                       |           |       | Carbamidomethyl (C)[5]                                |      | Mascot      |
| 1277.6704  | 1277.6637   | -0.0067 | -5    | 91         | 101      | LICEMARQIGK                    |           |       | Oxidation (M)[5]                                      |      | Mascot      |
| 1321.5333  | 1321.6807   | 0.1474  | 112   | 79         | 90       | DMDSHIGNACMK                   |           |       |                                                       |      | Mascot      |
| 2137.9319  | 2137.9116   | -0.0203 | -9    | 79         | 97       | DMDSHIGNACMKLICEM<br>R         |           |       |                                                       |      | Mascot      |
| 2144.1082  | 2143.9924   | -0.1158 | -54   | 2          | 23       | TAASPGISSVTSPQSSV<br>PI<br>TEK |           |       |                                                       |      | Mascot      |
| 2210.9482  | 2211.0212   | 0.073   | 33    | 79         | 97       | DMDSHIGNACMKLICEM<br>R         |           |       | Carbamidomethyl (C)[10], Oxidation (M)[2]             |      | Mascot      |
| 2247.1953  | 2247.054    | -0.1413 | -63   | 61         | 78       | EGQVCLIREEFWSLVLL<br>R         |           |       | Carbamidomethyl (C)[5]                                |      | Mascot      |
| 2283.9646  | 2284.0823   | 0.1177  | 52    | 79         | 97       | DMDSHIGNACMKLICEM<br>R         |           |       | Carbamidomethyl (C)[10, 15], Oxidation (M)[2, 11]     |      | Mascot      |
| 2299.9597  | 2300.0869   | 0.1272  | 55    | 79         | 97       | DMDSHIGNACMKLICEM<br>R         |           |       | Carbamidomethyl (C)[10, 15], Oxidation (M)[2, 11, 17] |      | Mascot      |

10 twist1b [Danio rerio] gi|62955613 18833.3 9.37 6 38 0

#### Peptide Information

| Calc. Mass | Obsrv. Mass | ± da    | ± ppm | Start Seq. | End Seq. | Sequence                              | Ion Score | C. I. | % Modification                            | Rank | Result Type |
|------------|-------------|---------|-------|------------|----------|---------------------------------------|-----------|-------|-------------------------------------------|------|-------------|
| 974.52     | 974.4991    | -0.0209 | -21   | 78         | 85       | VMANVRER                              |           |       |                                           |      | Mascot      |
| 1320.6907  | 1320.5386   | -0.1521 | -115  | 88         | 99       | TQSLNEAFAALR                          |           |       |                                           |      | Mascot      |
| 1448.7855  | 1448.8658   | 0.0803  | 55    | 88         | 100      | TQSLNEAFAALRK                         |           |       |                                           |      | Mascot      |
| 2072.9844  | 2073        | 0.0156  | 8     | 122        | 138      | YIDFLCQVLQSDDELDSK                    |           |       | Carbamidomethyl (C)[6]                    |      | Mascot      |
| 3323.5017  | 3323.6125   | 0.1108  | 33    | 122        | 149      | YIDFLCQVLQSDDELDSK<br>M<br>ASCSYVAHER |           |       | Carbamidomethyl (C)[6], Oxidation (M)[18] |      | Mascot      |
| 3338.5078  | 3338.6108   | 0.103   | 31    | 1          | 32       | MPEEPARDSSSPVSPA<br>DLSNSDGEPRPPK     |           |       |                                           |      | Mascot      |

11 PREDICTED: hypothetical protein LOC797100 [Danio rerio] gi|326681404 37240.7 5.09 8 38 0

#### Peptide Information

| Calc. Mass | Obsrv. Mass | ± da | ± ppm | Start | End | Sequence | Ion | C. I. | % Modification | Rank | Result Type |
|------------|-------------|------|-------|-------|-----|----------|-----|-------|----------------|------|-------------|
|------------|-------------|------|-------|-------|-----|----------|-----|-------|----------------|------|-------------|



| Score               |                                                            |             |         |       |              |          |                         |      |           |                                                    |                                                    |                  |
|---------------------|------------------------------------------------------------|-------------|---------|-------|--------------|----------|-------------------------|------|-----------|----------------------------------------------------|----------------------------------------------------|------------------|
|                     | 974.5087                                                   | 974.4991    | -0.0096 | -10   | 227          | 234      | EGQVCLIR                |      |           | Carbamidomethyl (C)[5]                             |                                                    | Mascot           |
|                     | 1112.6422                                                  | 1112.5323   | -0.1099 | -99   | 217          | 226      | NRPGSEIIVK              |      |           |                                                    |                                                    | Mascot           |
|                     | 1277.6704                                                  | 1277.6637   | -0.0067 | -5    | 257          | 267      | LICEMARQIGK             |      |           | Oxidation (M)[5]                                   |                                                    | Mascot           |
|                     | 1321.5333                                                  | 1321.6807   | 0.1474  | 112   | 245          | 256      | DMDSHIGNACMK            |      |           |                                                    |                                                    | Mascot           |
|                     | 1475.7887                                                  | 1475.699    | -0.0897 | -61   | 102          | 113      | TDLLRLSEEMR             |      |           |                                                    |                                                    | Mascot           |
|                     | 1493.6835                                                  | 1493.6829   | -0.0006 | 0     | 89           | 101      | LCQECGLDAKGSR           |      |           | Carbamidomethyl (C)[2,5]                           |                                                    | Mascot           |
|                     | 2137.9319                                                  | 2137.9116   | -0.0203 | -9    | 245          | 263      | DMDSHIGNACMKLICEMAR     |      |           |                                                    |                                                    | Mascot           |
|                     | 2210.9482                                                  | 2211.0212   | 0.073   | 33    | 245          | 263      | DMDSHIGNACMKLICEMAR     |      |           | Carbamidomethyl (C)[10], Oxidation (M)[2]          |                                                    | Mascot           |
|                     | 2283.9646                                                  | 2284.0823   | 0.1177  | 52    | 245          | 263      | DMDSHIGNACMKLICEMAR     |      |           | Carbamidomethyl (C)[10,15], Oxidation (M)[2,11]    |                                                    | Mascot           |
|                     | 2299.9597                                                  | 2300.0869   | 0.1272  | 55    | 245          | 263      | DMDSHIGNACMKLICEMAR     |      |           | Carbamidomethyl (C)[10,15], Oxidation (M)[2,11,17] |                                                    | Mascot           |
|                     | 2584.1628                                                  | 2584.1028   | -0.06   | -23   | 235          | 256      | EEFWSLGLLRDMDSHIGNACMK  |      |           | Oxidation (M)[12,21]                               |                                                    | Mascot           |
| 12                  | PREDICTED: hypothetical protein LOC100537225 [Danio rerio] |             |         |       | gi 326677219 |          | 17749.8                 | 4.92 | 6         | 37                                                 | 0                                                  |                  |
| Peptide Information |                                                            |             |         |       |              |          |                         |      |           |                                                    |                                                    |                  |
|                     | Calc. Mass                                                 | Obsrv. Mass | ± da    | ± ppm | Start Seq.   | End Seq. | Sequence                |      | Ion Score | C. I. %                                            | Modification                                       | Rank Result Type |
|                     | 974.5087                                                   | 974.4991    | -0.0096 | -10   | 61           | 68       | EGQVCLIR                |      |           |                                                    | Carbamidomethyl (C)[5]                             | Mascot           |
|                     | 1277.6704                                                  | 1277.6637   | -0.0067 | -5    | 91           | 101      | LICEMARQIGK             |      |           |                                                    | Oxidation (M)[5]                                   | Mascot           |
|                     | 1321.5333                                                  | 1321.6807   | 0.1474  | 112   | 79           | 90       | DMDSHIGNACMK            |      |           |                                                    |                                                    | Mascot           |
|                     | 2137.9319                                                  | 2137.9116   | -0.0203 | -9    | 79           | 97       | DMDSHIGNACMKLICEMAR     |      |           |                                                    |                                                    | Mascot           |
|                     | 2144.1082                                                  | 2143.9924   | -0.1158 | -54   | 2            | 23       | TAASPGISSVTSPQSSVPI TEK |      |           |                                                    |                                                    | Mascot           |
|                     | 2210.9482                                                  | 2211.0212   | 0.073   | 33    | 79           | 97       | DMDSHIGNACMKLICEMAR     |      |           |                                                    | Carbamidomethyl (C)[10], Oxidation (M)[2]          | Mascot           |
|                     | 2283.9646                                                  | 2284.0823   | 0.1177  | 52    | 79           | 97       | DMDSHIGNACMKLICEMAR     |      |           |                                                    | Carbamidomethyl (C)[10,15], Oxidation (M)[2,11]    | Mascot           |
|                     | 2299.9597                                                  | 2300.0869   | 0.1272  | 55    | 79           | 97       | DMDSHIGNACMKLICEMAR     |      |           |                                                    | Carbamidomethyl (C)[10,15], Oxidation (M)[2,11,17] | Mascot           |
|                     | 2584.1628                                                  | 2584.1028   | -0.06   | -23   | 69           | 90       | EEFWSLGLLRDMDSHIGNACMK  |      |           |                                                    | Oxidation (M)[12,21]                               | Mascot           |
| 13                  | PREDICTED: zinc finger protein 721-like [Danio rerio]      |             |         |       | gi 326670228 |          | 49031.8                 | 9.25 | 12        | 36                                                 | 0                                                  |                  |
| Peptide Information |                                                            |             |         |       |              |          |                         |      |           |                                                    |                                                    |                  |
|                     | Calc. Mass                                                 | Obsrv. Mass | ± da    | ± ppm | Start Seq.   | End Seq. | Sequence                |      | Ion Score | C. I. %                                            | Modification                                       | Rank Result Type |
|                     | 801.4399                                                   | 801.3248    | -0.1151 | -144  | 81           | 86       | LKTHMR                  |      |           |                                                    | Oxidation (M)[5]                                   | Mascot           |
|                     | 1045.4441                                                  | 1045.5293   | 0.0852  | 81    | 120          | 128      | TFTCTQCQK               |      |           |                                                    | Carbamidomethyl (C)[4]                             | Mascot           |
|                     | 1277.4846                                                  | 1277.6637   | 0.1791  | 140   | 343          | 351      | EYMCLECEK               |      |           |                                                    | Carbamidomethyl (C)[4,7], Oxidation (M)[3]         | Mascot           |

|    |                                                         |           |         |     |     |     |                               |  |  |  |              |          |                                               |    |    |   |  |        |
|----|---------------------------------------------------------|-----------|---------|-----|-----|-----|-------------------------------|--|--|--|--------------|----------|-----------------------------------------------|----|----|---|--|--------|
|    | 1493.7166                                               | 1493.6829 | -0.0337 | -23 | 213 | 225 | SFSQSSSLNLHMR                 |  |  |  |              |          |                                               |    |    |   |  | Mascot |
|    | 1611.8588                                               | 1611.7267 | -0.1321 | -82 | 46  | 59  | IEDKTHLETDGLLK                |  |  |  |              |          |                                               |    |    |   |  | Mascot |
|    | 1707.7828                                               | 1707.7111 | -0.0717 | -42 | 254 | 268 | IHTGEKPFCTCECGK               |  |  |  |              |          | Carbamidomethyl (C)[10]                       |    |    |   |  | Mascot |
|    | 1867.8499                                               | 1867.8522 | 0.0023  | 1   | 337 | 351 | IHTGVREYMCLECEK               |  |  |  |              |          | Carbamidomethyl (C)[10]                       |    |    |   |  | Mascot |
|    | 2137.9854                                               | 2137.9116 | -0.0738 | -35 | 343 | 360 | EYMCLECEKTFITAAELK            |  |  |  |              |          | Oxidation (M)[3]                              |    |    |   |  | Mascot |
|    | 2207.0591                                               | 2207.0269 | -0.0322 | -15 | 87  | 105 | IHTGEKPFSCYQYGKSFSK           |  |  |  |              |          |                                               |    |    |   |  | Mascot |
|    | 2283.0798                                               | 2283.0867 | 0.0069  | 3   | 83  | 101 | THMRIHTGEKPFSCYQY GK          |  |  |  |              |          |                                               |    |    |   |  | Mascot |
|    | 2283.0798                                               | 2283.0867 | 0.0069  | 3   | 83  | 101 | THMRIHTGEKPFSCYQY GK          |  |  |  |              |          |                                               |    |    |   |  | Mascot |
|    | 2299.0747                                               | 2299.0928 | 0.0181  | 8   | 83  | 101 | THMRIHTGEKPFSCYQY GK          |  |  |  |              |          | Oxidation (M)[3]                              |    |    |   |  | Mascot |
|    | 3323.554                                                | 3323.6125 | 0.0585  | 18  | 269 | 296 | SFIQSSCLNVHMRIHTGE KPFTCTQCGK |  |  |  |              |          | Carbamidomethyl (C)[7,23,26]                  |    |    |   |  | Mascot |
|    | 3338.5979                                               | 3338.6108 | 0.0129  | 4   | 297 | 324 | SFIHSSHLNQHLMIHTGE KPFKCTQCGK |  |  |  |              |          | Carbamidomethyl (C)[23,26], Oxidation (M)[13] |    |    |   |  | Mascot |
| 14 | PREDICTED: dynein heavy chain 1, axonemal [Danio rerio] |           |         |     |     |     |                               |  |  |  | gi 326671940 | 313752.7 | 5.5                                           | 24 | 35 | 0 |  |        |

#### Peptide Information

| Calc. Mass | Obsrv. Mass | ± da    | ± ppm | Start Seq. | End Seq. | Sequence           | Ion Score | C. I. % | Modification             | Rank | Result Type |
|------------|-------------|---------|-------|------------|----------|--------------------|-----------|---------|--------------------------|------|-------------|
| 856.5614   | 856.498     | -0.0634 | -74   | 2303       | 2310     | GIKANLLK           |           |         |                          |      | Mascot      |
| 974.5152   | 974.4991    | -0.0161 | -17   | 1401       | 1409     | VAVQAEETK          |           |         |                          |      | Mascot      |
| 1045.604   | 1045.5293   | -0.0747 | -71   | 1959       | 1967     | LEYVPVAVR          |           |         |                          |      | Mascot      |
| 1062.5863  | 1062.6523   | 0.066   | 62    | 493        | 502      | LCLSSGEIIK         |           |         |                          |      | Mascot      |
| 1106.5444  | 1106.5103   | -0.0341 | -31   | 352        | 360      | NVCANKCLK          |           |         | Carbamidomethyl (C)[3,7] |      | Mascot      |
| 1165.5922  | 1165.7048   | 0.1126  | 97    | 2770       | 2780     | QGVALICALDY        |           |         |                          |      | Mascot      |
| 1165.5922  | 1165.7048   | 0.1126  | 97    | 2770       | 2780     | QGVALICALDY        |           |         |                          |      | Mascot      |
| 1279.6715  | 1279.7307   | 0.0592  | 46    | 962        | 973      | VFQGILMAEAGK       |           |         | Oxidation (M)[7]         |      | Mascot      |
| 1448.7856  | 1448.8658   | 0.0802  | 55    | 2260       | 2271     | LIENIDPDKVHR       |           |         |                          |      | Mascot      |
| 1611.8563  | 1611.7267   | -0.1296 | -80   | 904        | 917      | GKIFSTILGSWMQK     |           |         | Oxidation (M)[12]        |      | Mascot      |
| 1688.8578  | 1688.6936   | -0.1642 | -97   | 978        | 990      | IQLLQLWYHESCR      |           |         |                          |      | Mascot      |
| 1691.8422  | 1691.7391   | -0.1031 | -61   | 2048       | 2061     | ILTNSKIDMAEWR      |           |         |                          |      | Mascot      |
| 1691.9366  | 1691.7391   | -0.1975 | -117  | 1499       | 1513     | GLLQDPGKFLESLEFK   |           |         |                          |      | Mascot      |
| 1707.837   | 1707.7111   | -0.1259 | -74   | 2048       | 2061     | ILTNSKIDMAEWR      |           |         | Oxidation (M)[10]        |      | Mascot      |
| 2031.9916  | 2031.913    | -0.0786 | -39   | 1304       | 1320     | CEQYLAELSRHNSVTPK  |           |         | Carbamidomethyl (C)[1]   |      | Mascot      |
| 2073.0586  | 2073        | -0.0586 | -28   | 2763       | 2780     | TQGHWIKQGVALICALDY |           |         | Carbamidomethyl (C)[14]  |      | Mascot      |
| 2115.9805  | 2115.8401   | -0.1404 | -66   | 1526       | 1543     | QVQPYMDNPEFHPDSIAK |           |         |                          |      | Mascot      |
| 2144.1104  | 2143.9924   | -0.118  | -55   | 1221       | 1239     | VRNIHTVLCMSPVGEVFR |           |         |                          |      | Mascot      |

|    |                                                                                                     |            |             |         |       |            |              |                                     |      |           |                                            |                         |  |      |        |      |        |
|----|-----------------------------------------------------------------------------------------------------|------------|-------------|---------|-------|------------|--------------|-------------------------------------|------|-----------|--------------------------------------------|-------------------------|--|------|--------|------|--------|
|    |                                                                                                     | 2207.0227  | 2207.0269   | 0.0042  | 2     | 886        | 903          | FTRHFNFLSFTEMEDASK                  |      |           |                                            |                         |  |      |        |      | Mascot |
|    |                                                                                                     | 2211.1248  | 2211.0212   | -0.1036 | -47   | 578        | 597          | ESIKEVITSMDSNLTCSSLK                |      |           |                                            |                         |  |      |        |      | Mascot |
|    |                                                                                                     | 2284.1411  | 2284.0823   | -0.0588 | -26   | 578        | 597          | ESIKEVITSMDSNLTCSSLK                |      |           | Carbamidomethyl (C)[16], Oxidation (M)[10] |                         |  |      |        |      | Mascot |
|    |                                                                                                     | 2298.082   | 2298.0916   | 0.0096  | 4     | 264        | 283          | LSSEQLSSQDHYDFGMR<br>AVK            |      |           |                                            |                         |  |      |        |      | Mascot |
|    |                                                                                                     | 2299.0798  | 2299.0928   | 0.013   | 6     | 2311       | 2330         | TYASVTEDFITSTKTAEFK                 |      |           | Carbamidomethyl (C)[13]                    |                         |  |      |        |      | Mascot |
|    |                                                                                                     | 2300.1301  | 2300.0869   | -0.0432 | -19   | 2527       | 2545         | YPVMYEEISMNTVLVQEVIR                |      |           |                                            |                         |  |      |        |      | Mascot |
|    |                                                                                                     | 2384.1987  | 2383.8545   | -0.3442 | -144  | 121        | 142          | ALAIQTVVFNCSDQLDFIAMGK              |      |           |                                            |                         |  |      |        |      | Mascot |
|    |                                                                                                     | 2705.2515  | 2705.0452   | -0.2063 | -76   | 2215       | 2240         | MNAISLGQGGGPSAEVMMHSAAMEKGK         |      |           | Oxidation (M)[1]                           |                         |  |      |        |      | Mascot |
|    |                                                                                                     | 3337.751   | 3337.5786   | -0.1724 | -52   | 906        | 934          | IFSTILGSWMQKTPEMKP<br>FCKPLVDATIR   |      |           |                                            |                         |  |      |        |      | Mascot |
| 15 | RecName: Full=Contactin-1a; AltName: Full=F3/F11/contactin; AltName: Full=Neural cell recognition m |            |             |         |       |            | gi 55976512  | 114263.1                            | 6.25 | 13        | 35                                         | 0                       |  |      |        |      |        |
|    | Peptide Information                                                                                 |            |             |         |       |            |              |                                     |      |           |                                            |                         |  |      |        |      |        |
|    |                                                                                                     | Calc. Mass | Obsrv. Mass | ± da    | ± ppm | Start Seq. | End Seq.     | Sequence                            |      | Ion Score | C. I.                                      | % Modification          |  | Rank | Result | Type |        |
|    |                                                                                                     | 856.5111   | 856.498     | -0.0131 | -15   | 434        | 441          | LLGARNGR                            |      |           |                                            |                         |  |      |        |      | Mascot |
|    |                                                                                                     | 1045.5173  | 1045.5293   | 0.012   | 11    | 562        | 569          | DAQHYQRK                            |      |           |                                            |                         |  |      |        |      | Mascot |
|    |                                                                                                     | 1062.5513  | 1062.6523   | 0.101   | 95    | 442        | 449          | VVFECRPR                            |      |           |                                            | Carbamidomethyl (C)[5]  |  |      |        |      | Mascot |
|    |                                                                                                     | 1106.5323  | 1106.5103   | -0.022  | -20   | 625        | 634          | VDEVTSDSVR                          |      |           |                                            |                         |  |      |        |      | Mascot |
|    |                                                                                                     | 1434.7231  | 1434.7156   | -0.0075 | -5    | 1          | 12           | MIPEAFQPRAMK                        |      |           |                                            | Oxidation (M)[1]        |  |      |        |      | Mascot |
|    |                                                                                                     | 1691.6965  | 1691.7391   | 0.0426  | 25    | 487        | 500          | SDEGKYTCFAENDR                      |      |           |                                            | Carbamidomethyl (C)[8]  |  |      |        |      | Mascot |
|    |                                                                                                     | 1691.6965  | 1691.7391   | 0.0426  | 25    | 487        | 500          | SDEGKYTCFAENDR                      |      |           |                                            | Carbamidomethyl (C)[8]  |  |      |        |      | Mascot |
|    |                                                                                                     | 1707.7683  | 1707.7111   | -0.0572 | -33   | 138        | 151          | VQFGYLDMFSTDER                      |      |           |                                            |                         |  |      |        |      | Mascot |
|    |                                                                                                     | 2224.9749  | 2225.0332   | 0.0583  | 26    | 388        | 406          | FSRLGFEDSGMYQCVAENR                 |      |           |                                            | Oxidation (M)[11]       |  |      |        |      | Mascot |
|    |                                                                                                     | 2224.9749  | 2225.0332   | 0.0583  | 26    | 388        | 406          | FSRLGFEDSGMYQCVAENR                 |      |           |                                            | Oxidation (M)[11]       |  |      |        |      | Mascot |
|    |                                                                                                     | 2283.092   | 2283.0867   | -0.0053 | -2    | 594        | 614          | YSCTAQTPVDNTTASAEVVVR               |      |           |                                            | Carbamidomethyl (C)[3]  |  |      |        |      | Mascot |
|    |                                                                                                     | 2283.092   | 2283.0867   | -0.0053 | -2    | 594        | 614          | YSCTAQTPVDNTTASAEVVVR               |      |           |                                            | Carbamidomethyl (C)[3]  |  |      |        |      | Mascot |
|    |                                                                                                     | 2284.2131  | 2284.0823   | -0.1308 | -57   | 442        | 460          | VVFECRPRAPRPNITWSK                  |      |           |                                            | Carbamidomethyl (C)[5]  |  |      |        |      | Mascot |
|    |                                                                                                     | 2299.1426  | 2299.0928   | -0.0498 | -22   | 986        | 1007         | GEYLVVRAHSEGGDGA<br>VAQVR           |      |           |                                            |                         |  |      |        |      | Mascot |
|    |                                                                                                     | 3323.5889  | 3323.6125   | 0.0236  | 7     | 665        | 694          | DAATSPVNVEGNAEMAT<br>VVNLLPWTEYEFRL |      |           |                                            |                         |  |      |        |      | Mascot |
|    |                                                                                                     | 3338.7102  | 3338.6108   | -0.0994 | -30   | 256        | 284          | SPDSWALLGQNVLTLECF<br>ALGNPIPQIRWR  |      |           |                                            | Carbamidomethyl (C)[16] |  |      |        |      | Mascot |
| 16 | hypothetical protein LOC100003716 [Danio rerio]                                                     |            |             |         |       |            | gi 190194311 | 21562.8                             | 4.99 | 6         | 34                                         | 0                       |  |      |        |      |        |

| Peptide Information |                                         |         |       |             |          |                        |           |       |                                                       |      |             |
|---------------------|-----------------------------------------|---------|-------|-------------|----------|------------------------|-----------|-------|-------------------------------------------------------|------|-------------|
| Calc. Mass          | Obsrv. Mass                             | ± da    | ± ppm | Start Seq.  | End Seq. | Sequence               | Ion Score | C. I. | % Modification                                        | Rank | Result Type |
| 974.545             | 974.4991                                | -0.0459 | -47   | 90          | 97       | EGKVCLIR               |           |       | Carbamidomethyl (C)[5]                                |      | Mascot      |
| 1112.6422           | 1112.5323                               | -0.1099 | -99   | 80          | 89       | NRPGSEIIVK             |           |       |                                                       |      | Mascot      |
| 1277.6704           | 1277.6637                               | -0.0067 | -5    | 120         | 130      | LICEMARQIGK            |           |       | Oxidation (M)[5]                                      |      | Mascot      |
| 1321.5333           | 1321.6807                               | 0.1474  | 112   | 108         | 119      | DMDSHIGNACMK           |           |       |                                                       |      | Mascot      |
| 2137.9319           | 2137.9116                               | -0.0203 | -9    | 108         | 126      | DMDSHIGNACMKLICEMAR    |           |       |                                                       |      | Mascot      |
| 2210.9482           | 2211.0212                               | 0.073   | 33    | 108         | 126      | DMDSHIGNACMKLICEMAR    |           |       | Carbamidomethyl (C)[10], Oxidation (M)[2]             |      | Mascot      |
| 2283.9646           | 2284.0823                               | 0.1177  | 52    | 108         | 126      | DMDSHIGNACMKLICEMAR    |           |       | Carbamidomethyl (C)[10, 15], Oxidation (M)[2, 11]     |      | Mascot      |
| 2299.9597           | 2300.0869                               | 0.1272  | 55    | 108         | 126      | DMDSHIGNACMKLICEMAR    |           |       | Carbamidomethyl (C)[10, 15], Oxidation (M)[2, 11, 17] |      | Mascot      |
| 2584.1628           | 2584.1028                               | -0.06   | -23   | 98          | 119      | EEFWSLGLLRDMDSHIGNACMK |           |       | Oxidation (M)[12, 21]                                 |      | Mascot      |
| 17                  | 40S ribosomal protein S21 [Danio rerio] |         |       | gi 41055255 |          | 8896.5                 | 8.71      | 5     | 34                                                    | 0    |             |

| Peptide Information |                                                                 |         |       |              |          |                     |           |       |                  |      |             |
|---------------------|-----------------------------------------------------------------|---------|-------|--------------|----------|---------------------|-----------|-------|------------------|------|-------------|
| Calc. Mass          | Obsrv. Mass                                                     | ± da    | ± ppm | Start Seq.   | End Seq. | Sequence            | Ion Score | C. I. | % Modification   | Rank | Result Type |
| 1045.6252           | 1045.5293                                                       | -0.0959 | -92   | 72           | 81       | LAKTDSIVAK          |           |       |                  |      | Mascot      |
| 1106.5146           | 1106.5103                                                       | -0.0043 | -4    | 62           | 71       | MGEADDSLLR          |           |       |                  |      | Mascot      |
| 1434.7257           | 1434.7156                                                       | -0.0101 | -7    | 62           | 74       | MGEADDSLLRLAK       |           |       | Oxidation (M)[1] |      | Mascot      |
| 1688.8577           | 1688.6936                                                       | -0.1641 | -97   | 46           | 60       | FNGQFKTYAICGAIR     |           |       |                  |      | Mascot      |
| 1994.0414           | 1993.8948                                                       | -0.1466 | -74   | 28           | 45       | DHASIQINIAEVDRVTRGR |           |       |                  |      | Mascot      |
| 18                  | PREDICTED: tudor domain-containing protein 7-like [Danio rerio] |         |       | gi 326669649 |          | 45873.8             | 9.21      | 8     | 34               | 0    |             |

| Peptide Information |             |         |       |            |          |                    |           |       |                     |      |             |
|---------------------|-------------|---------|-------|------------|----------|--------------------|-----------|-------|---------------------|------|-------------|
| Calc. Mass          | Obsrv. Mass | ± da    | ± ppm | Start Seq. | End Seq. | Sequence           | Ion Score | C. I. | % Modification      | Rank | Result Type |
| 848.4545            | 848.4999    | 0.0454  | 54    | 253        | 259      | MEEKALK            |           |       |                     |      | Mascot      |
| 864.4495            | 864.4862    | 0.0367  | 42    | 253        | 259      | MEEKALK            |           |       | Oxidation (M)[1]    |      | Mascot      |
| 870.4679            | 870.5129    | 0.045   | 52    | 298        | 305      | HELVSGTK           |           |       |                     |      | Mascot      |
| 974.553             | 974.4991    | -0.0539 | -55   | 45         | 52       | EVHAHILR           |           |       |                     |      | Mascot      |
| 1691.8859           | 1691.7391   | -0.1468 | -87   | 239        | 252      | LVVLMGEMILHYNK     |           |       | Oxidation (M)[5, 8] |      | Mascot      |
| 1691.8859           | 1691.7391   | -0.1468 | -87   | 239        | 252      | LVVLMGEMILHYNK     |           |       | Oxidation (M)[5, 8] |      | Mascot      |
| 1852.0076           | 1851.8466   | -0.161  | -87   | 89         | 104      | LQEVLNKHSNGLWVSK   |           |       |                     |      | Mascot      |
| 2193.1116           | 2192.9666   | -0.145  | -66   | 239        | 256      | LVVLMGEMILHYNKMEEK |           |       | Oxidation (M)[5]    |      | Mascot      |

|    |                                 |           |         |      |              |     |                          |      |   |    |                       |        |   |
|----|---------------------------------|-----------|---------|------|--------------|-----|--------------------------|------|---|----|-----------------------|--------|---|
|    | 2225.1013                       | 2225.0332 | -0.0681 | -31  | 239          | 256 | LVVLMGEMILHYNKMEEK       |      |   |    | Oxidation (M)[5,8,15] | Mascot |   |
|    | 2225.1013                       | 2225.0332 | -0.0681 | -31  | 239          | 256 | LVVLMGEMILHYNKMEEK       |      |   |    | Oxidation (M)[5,8,15] | Mascot |   |
|    | 2249.2903                       | 2248.9856 | -0.3047 | -135 | 277          | 297 | VLVKGVLNGLVSVFQLD<br>YGK |      |   |    |                       | Mascot |   |
|    | 2283.0308                       | 2283.0867 | 0.0559  | 24   | 381          | 399 | DIWLHDIMAEFTDEMTKT<br>A  |      |   |    | Oxidation (M)[8]      | Mascot |   |
|    | 2283.0308                       | 2283.0867 | 0.0559  | 24   | 381          | 399 | DIWLHDIMAEFTDEMTKT<br>A  |      |   |    | Oxidation (M)[8]      | Mascot |   |
|    | 2299.0256                       | 2299.0928 | 0.0672  | 29   | 381          | 399 | DIWLHDIMAEFTDEMTKT<br>A  |      |   |    | Oxidation (M)[8,15]   | Mascot |   |
| 19 | ZAR1-like protein [Danio rerio] |           |         |      | gi 313661374 |     | 36462.9                  | 9.07 | 7 | 34 | 0                     | 9      | 0 |

#### Peptide Information

|  | Calc. Mass | Obsrv. Mass | ± da    | ± ppm | Start Seq. | End Seq. | Sequence                 | Ion Score | C. I. | % | Modification            | Rank | Result Type |
|--|------------|-------------|---------|-------|------------|----------|--------------------------|-----------|-------|---|-------------------------|------|-------------|
|  | 1475.7198  | 1475.699    | -0.0208 | -14   | 297        | 309      | GKGLSCDTIYSFK            |           |       |   | Carbamidomethyl (C)[6]  |      | Mascot      |
|  | 1611.7294  | 1611.7267   | -0.0027 | -2    | 1          | 13       | MEDFIIPPYNCGR            |           |       |   | Carbamidomethyl (C)[11] |      | Mascot      |
|  | 1691.9915  | 1691.7391   | -0.2524 | -149  | 59         | 73       | AILSQVNPNTPLRLR          | 9         |       | 0 |                         |      | Mascot      |
|  | 1691.9915  | 1691.7391   | -0.2524 | -149  | 59         | 73       | AILSQVNPNTPLRLR          |           |       |   |                         |      | Mascot      |
|  | 2138.0415  | 2137.9116   | -0.1299 | -61   | 227        | 244      | WESAFVWCISGTSKVYF<br>K   |           |       |   |                         |      | Mascot      |
|  | 2144.0051  | 2143.9924   | -0.0127 | -6    | 223        | 240      | CNIRWESAFVWCISGTSK       |           |       |   | Carbamidomethyl (C)[1]  |      | Mascot      |
|  | 2246.8401  | 2247.054    | 0.2139  | 95    | 170        | 188      | TDSETEDEDDDEFCKPD<br>EK  |           |       |   |                         |      | Mascot      |
|  | 2299.0449  | 2299.0928   | 0.0479  | 21    | 250        | 269      | CQAGLNIPYRVESIQCV<br>CCK |           |       |   | Carbamidomethyl (C)[1]  |      | Mascot      |

20 PREDICTED: hypothetical protein LOC100004944 [Danio rerio] gi|125854141 69244.2 6.33 10 34 0

#### Peptide Information

|  | Calc. Mass | Obsrv. Mass | ± da    | ± ppm | Start Seq. | End Seq. | Sequence                | Ion Score | C. I. | % | Modification           | Rank | Result Type |
|--|------------|-------------|---------|-------|------------|----------|-------------------------|-----------|-------|---|------------------------|------|-------------|
|  | 974.5053   | 974.4991    | -0.0062 | -6    | 501        | 507      | EHEYRIK                 |           |       |   |                        |      | Mascot      |
|  | 1045.452   | 1045.5293   | 0.0773  | 74    | 472        | 479      | CHYSDHVK                |           |       |   | Carbamidomethyl (C)[1] |      | Mascot      |
|  | 1448.7744  | 1448.8658   | 0.0914  | 63    | 421        | 432      | ERVDIDLNLAYK            |           |       |   |                        |      | Mascot      |
|  | 1589.8679  | 1589.7491   | -0.1188 | -75   | 358        | 370      | TLKMTQDVLQIQR           |           |       |   | Oxidation (M)[4]       |      | Mascot      |
|  | 1589.8679  | 1589.7491   | -0.1188 | -75   | 358        | 370      | TLKMTQDVLQIQR           |           |       |   | Oxidation (M)[4]       |      | Mascot      |
|  | 1691.7911  | 1691.7391   | -0.052  | -31   | 410        | 422      | NFEYEVEVSYKER           |           |       |   |                        |      | Mascot      |
|  | 1691.7911  | 1691.7391   | -0.052  | -31   | 410        | 422      | NFEYEVEVSYKER           |           |       |   |                        |      | Mascot      |
|  | 1838.9503  | 1838.8472   | -0.1031 | -56   | 153        | 168      | TTLVNMVMNYMLGVER        |           |       |   |                        |      | Mascot      |
|  | 2032.1372  | 2031.913    | -0.2242 | -110  | 343        | 360      | GMTGLTQFINNIKPTLK       |           |       |   |                        |      | Mascot      |
|  | 2211.1147  | 2211.0212   | -0.0935 | -42   | 153        | 171      | TTLVNMVMNYMLGVERE<br>DK |           |       |   |                        |      | Mascot      |
|  | 2283.2595  | 2283.0867   | -0.1728 | -76   | 544        | 563      | IALNTDSLNTLLHIDFLIEK    |           |       |   |                        |      | Mascot      |

|    |                                      |           |         |     |              |     |                                   |      |    |    |   |  |  |  |  |        |
|----|--------------------------------------|-----------|---------|-----|--------------|-----|-----------------------------------|------|----|----|---|--|--|--|--|--------|
|    | 2283.2595                            | 2283.0867 | -0.1728 | -76 | 544          | 563 | IALNTDSLNTLLHIDFLIEK              |      |    |    |   |  |  |  |  | Mascot |
|    | 3323.3691                            | 3323.6125 | 0.2434  | 73  | 433          | 461 | ATCCTVCEENCHYPGCW<br>WVSNLSRCTVMK |      |    |    |   |  |  |  |  | Mascot |
| 21 | contactin-1a precursor [Danio rerio] |           |         |     | gi 136256388 |     | 114246.1                          | 6.19 | 13 | 34 | 0 |  |  |  |  |        |

#### Peptide Information

| Calc. Mass | Obsrv. Mass | ± da    | ± ppm | Start Seq. | End Seq. | Sequence                           | Ion Score | C. I. | % Modification         | Rank | Result Type |
|------------|-------------|---------|-------|------------|----------|------------------------------------|-----------|-------|------------------------|------|-------------|
| 856.5111   | 856.498     | -0.0131 | -15   | 434        | 441      | LLGARNGR                           |           |       |                        |      | Mascot      |
| 1045.5173  | 1045.5293   | 0.012   | 11    | 562        | 569      | DAQHYQRK                           |           |       |                        |      | Mascot      |
| 1062.5513  | 1062.6523   | 0.101   | 95    | 442        | 449      | VVFECRPR                           |           |       | Carbamidomethyl (C)[5] |      | Mascot      |
| 1106.5323  | 1106.5103   | -0.022  | -20   | 625        | 634      | VDEVTSDSVR                         |           |       |                        |      | Mascot      |
| 1434.7231  | 1434.7156   | -0.0075 | -5    | 1          | 12       | MIPEAFQPRAMK                       |           |       | Oxidation (M)[1]       |      | Mascot      |
| 1638.7581  | 1638.7953   | 0.0372  | 23    | 931        | 944      | MHYSGSSINIAWEK                     |           |       | Oxidation (M)[1]       |      | Mascot      |
| 1691.6965  | 1691.7391   | 0.0426  | 25    | 487        | 500      | SDEGKYTCFAENDR                     |           |       | Carbamidomethyl (C)[8] |      | Mascot      |
| 1691.6965  | 1691.7391   | 0.0426  | 25    | 487        | 500      | SDEGKYTCFAENDR                     |           |       | Carbamidomethyl (C)[8] |      | Mascot      |
| 1707.7683  | 1707.7111   | -0.0572 | -33   | 138        | 151      | VQFGYLDMFSTDER                     |           |       |                        |      | Mascot      |
| 2224.9749  | 2225.0332   | 0.0583  | 26    | 388        | 406      | FSRLGFEDSGMYQCVAE<br>NR            |           |       | Oxidation (M)[11]      |      | Mascot      |
| 2224.9749  | 2225.0332   | 0.0583  | 26    | 388        | 406      | FSRLGFEDSGMYQCVAE<br>NR            |           |       | Oxidation (M)[11]      |      | Mascot      |
| 2283.092   | 2283.0867   | -0.0053 | -2    | 594        | 614      | YSCTAQTPVDNTTASAE<br>VVR           |           |       | Carbamidomethyl (C)[3] |      | Mascot      |
| 2283.092   | 2283.0867   | -0.0053 | -2    | 594        | 614      | YSCTAQTPVDNTTASAE<br>VVR           |           |       | Carbamidomethyl (C)[3] |      | Mascot      |
| 2284.2131  | 2284.0823   | -0.1308 | -57   | 442        | 460      | VVFECRPRAAPRPNITW<br>SK            |           |       | Carbamidomethyl (C)[5] |      | Mascot      |
| 2299.1426  | 2299.0928   | -0.0498 | -22   | 986        | 1007     | GEYLVVEVRAHSEGGDGA<br>VAQVR        |           |       |                        |      | Mascot      |
| 3323.5889  | 3323.6125   | 0.0236  | 7     | 665        | 694      | DAATSPVNVEGNAEMAT<br>VNNLLPWTEYEFR |           |       |                        |      | Mascot      |

|    |                                                         |  |  |  |              |  |         |      |   |    |   |  |  |  |  |  |
|----|---------------------------------------------------------|--|--|--|--------------|--|---------|------|---|----|---|--|--|--|--|--|
| 22 | PREDICTED: hypothetical protein LOC797093 [Danio rerio] |  |  |  | gi 292619265 |  | 20771.1 | 4.73 | 6 | 33 | 0 |  |  |  |  |  |
|----|---------------------------------------------------------|--|--|--|--------------|--|---------|------|---|----|---|--|--|--|--|--|

#### Peptide Information

| Calc. Mass | Obsrv. Mass | ± da    | ± ppm | Start Seq. | End Seq. | Sequence                | Ion Score | C. I. | % Modification                            | Rank | Result Type |
|------------|-------------|---------|-------|------------|----------|-------------------------|-----------|-------|-------------------------------------------|------|-------------|
| 974.5087   | 974.4991    | -0.0096 | -10   | 79         | 86       | EGQVCLIR                |           |       | Carbamidomethyl (C)[5]                    |      | Mascot      |
| 1112.6422  | 1112.5323   | -0.1099 | -99   | 69         | 78       | NRPGSEIIVK              |           |       |                                           |      | Mascot      |
| 1277.6704  | 1277.6637   | -0.0067 | -5    | 109        | 119      | LICEMARQIGK             |           |       | Oxidation (M)[5]                          |      | Mascot      |
| 1321.5333  | 1321.6807   | 0.1474  | 112   | 97         | 108      | DMDSHIGNACMK            |           |       |                                           |      | Mascot      |
| 2137.9319  | 2137.9116   | -0.0203 | -9    | 97         | 115      | DMDSHIGNACMKLICEMA<br>R |           |       |                                           |      | Mascot      |
| 2210.9482  | 2211.0212   | 0.073   | 33    | 97         | 115      | DMDSHIGNACMKLICEMA<br>R |           |       | Carbamidomethyl (C)[10], Oxidation (M)[2] |      | Mascot      |

|    |                                                                       |           |        |     |    |              |                        |      |    |    |   |    |   |  |                                                    |        |
|----|-----------------------------------------------------------------------|-----------|--------|-----|----|--------------|------------------------|------|----|----|---|----|---|--|----------------------------------------------------|--------|
|    | 2283.9646                                                             | 2284.0823 | 0.1177 | 52  | 97 | 115          | DMDSHIGNACMKLICEMAR    |      |    |    |   |    |   |  | Carbamidomethyl (C)[10,15], Oxidation (M)[2,11]    | Mascot |
|    | 2299.9597                                                             | 2300.0869 | 0.1272 | 55  | 97 | 115          | DMDSHIGNACMKLICEMAR    |      |    |    |   |    |   |  | Carbamidomethyl (C)[10,15], Oxidation (M)[2,11,17] | Mascot |
|    | 2584.1628                                                             | 2584.1028 | -0.06  | -23 | 87 | 108          | EEFWSLGLLRDMDSHIGNACMK |      |    |    |   |    |   |  | Oxidation (M)[12,21]                               | Mascot |
| 23 | novel protein similar to vertebrate laminin beta family [Danio rerio] |           |        |     |    | gi 220675880 | 196922.5               | 5.59 | 14 | 32 | 0 | 18 | 0 |  |                                                    |        |

#### Peptide Information

| Calc. Mass | Obsrv. Mass | ± da    | ± ppm | Start Seq. | End Seq. | Sequence                      | Ion Score | C. I. | % Modification                  | Rank | Result Type |
|------------|-------------|---------|-------|------------|----------|-------------------------------|-----------|-------|---------------------------------|------|-------------|
| 864.3702   | 864.4862    | 0.116   | 134   | 1036       | 1043     | QTGQCPCCK                     |           |       |                                 |      | Mascot      |
| 1045.5962  | 1045.5293   | -0.0669 | -64   | 1188       | 1196     | DIAMILEK                      |           |       |                                 |      | Mascot      |
| 1048.5204  | 1048.4287   | -0.0917 | -87   | 1411       | 1421     | GSDGVLKCGGR                   |           |       |                                 |      | Mascot      |
| 1106.5259  | 1106.5103   | -0.0156 | -14   | 1655       | 1663     | TEQNREMAK                     |           |       |                                 |      | Mascot      |
| 1320.7092  | 1320.5386   | -0.1706 | -129  | 127        | 137      | TFRPAAMIER                    |           |       | Oxidation (M)[7]                |      | Mascot      |
| 1321.5809  | 1321.6807   | 0.0998  | 76    | 275        | 286      | DSGMIHGRCVCK                  |           |       | Oxidation (M)[4]                |      | Mascot      |
| 1691.6689  | 1691.7391   | 0.0702  | 41    | 1099       | 1112     | QCNECEAFHWGDPR                |           |       |                                 |      | Mascot      |
| 1691.6689  | 1691.7391   | 0.0702  | 41    | 1099       | 1112     | QCNECEAFHWGDPR                |           |       |                                 |      | Mascot      |
| 1707.8547  | 1707.7111   | -0.1436 | -84   | 1227       | 1241     | EGTFNLISQTVDDLRL              |           |       |                                 |      | Mascot      |
| 2122.9458  | 2122.9131   | -0.0327 | -15   | 1322       | 1340     | CNASVYGPQSPVEQSQDTR           |           |       | Carbamidomethyl (C)[1]          |      | Mascot      |
| 2123.1018  | 2122.9131   | -0.1887 | -89   | 1292       | 1310     | ELENYLTAGLAEQFANVLK           | 19        | 0     |                                 |      | Mascot      |
| 2246.9966  | 2247.054    | 0.0574  | 26    | 1162       | 1180     | CVPCHPCFQLWDDVVCQVR           |           |       |                                 |      | Mascot      |
| 2300.0984  | 2300.0869   | -0.0115 | -5    | 634        | 653      | CGNMLPTEQLYTVPMHNVR           |           |       |                                 |      | Mascot      |
| 3323.5005  | 3323.6125   | 0.112   | 34    | 1154       | 1180     | GFTGNFPKCVPCPCFQLWDDVVCQVR    |           |       | Carbamidomethyl (C)[9,12,15,24] |      | Mascot      |
| 3338.5632  | 3338.6108   | 0.0476  | 14    | 81         | 109      | VENVIYPMDSTGELTWWQAVNGEENVSVR |           |       | Oxidation (M)[8]                |      | Mascot      |

|    |                                         |  |  |  |  |             |         |      |    |    |   |  |  |  |  |  |
|----|-----------------------------------------|--|--|--|--|-------------|---------|------|----|----|---|--|--|--|--|--|
| 24 | protein ariadne-2 homolog [Danio rerio] |  |  |  |  | gi 47085901 | 57416.3 | 5.39 | 10 | 32 | 0 |  |  |  |  |  |
|----|-----------------------------------------|--|--|--|--|-------------|---------|------|----|----|---|--|--|--|--|--|

#### Peptide Information

| Calc. Mass | Obsrv. Mass | ± da    | ± ppm | Start Seq. | End Seq. | Sequence      | Ion Score | C. I. | % Modification             | Rank | Result Type |
|------------|-------------|---------|-------|------------|----------|---------------|-----------|-------|----------------------------|------|-------------|
| 1165.604   | 1165.7048   | 0.1008  | 86    | 355        | 362      | KYLFYFER      |           |       |                            |      | Mascot      |
| 1165.604   | 1165.7048   | 0.1008  | 86    | 355        | 362      | KYLFYFER      |           |       |                            |      | Mascot      |
| 1320.5533  | 1320.5386   | -0.0147 | -11   | 243        | 252      | CEEVFCFKCR    |           |       | Carbamidomethyl (C)[1]     |      | Mascot      |
| 1434.5962  | 1434.7156   | 0.1194  | 83    | 243        | 252      | CEEVFCFKCR    |           |       | Carbamidomethyl (C)[1,6,9] |      | Mascot      |
| 1691.7338  | 1691.7391   | 0.0053  | 3     | 238        | 250      | VQCSRCEEVFCFK |           |       | Carbamidomethyl (C)[3,6]   |      | Mascot      |
| 1691.7338  | 1691.7391   | 0.0053  | 3     | 238        | 250      | VQCSRCEEVFCFK |           |       | Carbamidomethyl (C)[3,6]   |      | Mascot      |
| 1707.7908  | 1707.7111   | -0.0797 | -47   | 50         | 62       | YQFNCLTYRESQR |           |       |                            |      | Mascot      |

|    |                                                 |           |         |      |              |     |                                   |      |                                          |        |   |
|----|-------------------------------------------------|-----------|---------|------|--------------|-----|-----------------------------------|------|------------------------------------------|--------|---|
|    | 1838.8094                                       | 1838.8472 | 0.0378  | 21   | 251          | 265 | CRQMYHAPTDCATIR                   |      | Carbamidomethyl (C)[1], Oxidation (M)[4] | Mascot |   |
|    | 2072.9375                                       | 2073      | 0.0625  | 30   | 102          | 120 | SNSSQLLCEAYAQPPTTTC<br>R          |      |                                          | Mascot |   |
|    | 2116.0881                                       | 2115.8401 | -0.248  | -117 | 183          | 200 | MPEDFVLPLLPSEELKDK                |      | Oxidation (M)[1]                         | Mascot |   |
|    | 2138.2178                                       | 2137.9116 | -0.3062 | -143 | 63           | 83  | VLTEQVNNVASALKVSPA<br>VAK         |      |                                          | Mascot |   |
|    | 2282.9653                                       | 2283.0867 | 0.1214  | 53   | 271          | 290 | CADDSETANYISAHTKDC<br>PK          |      | Carbamidomethyl (C)[1,18]                | Mascot |   |
|    | 2282.9653                                       | 2283.0867 | 0.1214  | 53   | 271          | 290 | CADDSETANYISAHTKDC<br>PK          |      | Carbamidomethyl (C)[1,18]                | Mascot |   |
|    | 3337.489                                        | 3337.5786 | 0.0896  | 27   | 154          | 182 | GCWEQHCTVLVKDGVG<br>VEISCMAQDCSLR |      | Carbamidomethyl (C)[2,7,21]              | Mascot |   |
| 25 | myosin binding protein C, cardiac [Danio rerio] |           |         |      | gi 172072588 |     | 142220.7                          | 6.34 | 15                                       | 32     | 0 |

#### Peptide Information

| Calc. Mass | Obsrv. Mass | ± da    | ± ppm | Start Seq. | End Seq. | Sequence                     | Ion Score | C. I. % | Modification                              | Rank | Result Type |
|------------|-------------|---------|-------|------------|----------|------------------------------|-----------|---------|-------------------------------------------|------|-------------|
| 848.4545   | 848.4999    | 0.0454  | 54    | 194        | 201      | VGESLLK                      |           |         |                                           |      | Mascot      |
| 850.4127   | 850.512     | 0.0993  | 117   | 212        | 218      | WMDLASK                      |           |         |                                           |      | Mascot      |
| 850.4127   | 850.512     | 0.0993  | 117   | 212        | 218      | WMDLASK                      |           |         |                                           |      | Mascot      |
| 1045.4585  | 1045.5293   | 0.0708  | 68    | 1157       | 1165     | DHDFSEAPK                    |           |         |                                           |      | Mascot      |
| 1051.524   | 1051.6782   | 0.1542  | 147   | 210        | 218      | GKWMDLASK                    |           |         | Oxidation (M)[4]                          |      | Mascot      |
| 1051.524   | 1051.6782   | 0.1542  | 147   | 210        | 218      | GKWMDLASK                    |           |         | Oxidation (M)[4]                          |      | Mascot      |
| 1062.5466  | 1062.6523   | 0.1057  | 99    | 379        | 387      | LDPAYQVEK                    |           |         |                                           |      | Mascot      |
| 1106.5048  | 1106.5103   | 0.0055  | 5     | 530        | 538      | EDCGHYRVK                    |           |         |                                           |      | Mascot      |
| 1179.5674  | 1179.5593   | -0.0081 | -7    | 1200       | 1209     | NKMDITNEAK                   |           |         | Oxidation (M)[3]                          |      | Mascot      |
| 1321.6569  | 1321.6807   | 0.0238  | 18    | 916        | 926      | DLPTGEKMQFR                  |           |         |                                           |      | Mascot      |
| 1589.9049  | 1589.7491   | -0.1558 | -98   | 639        | 651      | LNFLVKIDFVPR                 |           |         |                                           |      | Mascot      |
| 1589.9049  | 1589.7491   | -0.1558 | -98   | 639        | 651      | LNFLVKIDFVPR                 |           |         |                                           |      | Mascot      |
| 1611.7068  | 1611.7267   | 0.0199  | 12    | 1074       | 1087     | DNGNCDITGYNIQK               |           |         | Carbamidomethyl (C)[5]                    |      | Mascot      |
| 1851.8979  | 1851.8466   | -0.0513 | -28   | 1122       | 1138     | VYAANMVGLSPEPCLSK            |           |         | Carbamidomethyl (C)[14], Oxidation (M)[6] |      | Mascot      |
| 2032.036   | 2031.913    | -0.123  | -61   | 1057       | 1073     | VMDVWGFNVLEWKPP<br>K         |           |         | Oxidation (M)[2]                          |      | Mascot      |
| 2051.0444  | 2051.0183   | -0.0261 | -13   | 320        | 337      | AVHVSSTEPDVDVWDILQ<br>K      |           |         |                                           |      | Mascot      |
| 2051.0444  | 2051.0183   | -0.0261 | -13   | 320        | 337      | AVHVSSTEPDVDVWDILQ<br>K      |           |         |                                           |      | Mascot      |
| 2116.0315  | 2115.8401   | -0.1914 | -90   | 1104       | 1121     | RTNCVVSGLIMGNEYVFR           |           |         |                                           |      | Mascot      |
| 2584.2786  | 2584.1028   | -0.1758 | -68   | 1122       | 1145     | VYAANMVGLSPEPCLSK<br>DSAYIQK |           |         |                                           |      | Mascot      |

26 Synbl protein [Danio rerio] gi|141796272 31226.2 5.37 7 32 0

#### Peptide Information

| Calc. Mass | Obsrv. Mass | ± da | ± ppm | Start | End | Sequence | Ion | C. I. % | Modification | Rank | Result Type |
|------------|-------------|------|-------|-------|-----|----------|-----|---------|--------------|------|-------------|
|------------|-------------|------|-------|-------|-----|----------|-----|---------|--------------|------|-------------|



|    |                                               | Seq.      |           |         |      | Seq. |              |                          |      | Score |    |   |                  |  |        |
|----|-----------------------------------------------|-----------|-----------|---------|------|------|--------------|--------------------------|------|-------|----|---|------------------|--|--------|
| 27 | glial fibrillary acidic protein [Danio rerio] | 842.5709  | 842.4824  | -0.0885 | -105 | 18   | 24           | VEKLLLK                  |      |       |    |   |                  |  | Mascot |
|    |                                               | 1045.6769 | 1045.5293 | -0.1476 | -141 | 171  | 179          | LLFLLSALR                |      |       |    |   |                  |  | Mascot |
|    |                                               | 1691.8334 | 1691.7391 | -0.0943 | -56  | 2    | 17           | SLSDILSEIDGGDDKK         |      |       |    |   |                  |  | Mascot |
|    |                                               | 1691.8334 | 1691.7391 | -0.0943 | -56  | 2    | 17           | SLSDILSEIDGGDDKK         |      |       |    |   |                  |  | Mascot |
|    |                                               | 1838.8688 | 1838.8472 | -0.0216 | -12  | 1    | 17           | MSLSDILSEIDGGDDKK        |      |       |    |   | Oxidation (M)[1] |  | Mascot |
|    |                                               | 2050.9573 | 2051.0183 | 0.061   | 30   | 238  | 255          | ALFNLTMSPCDKDSLH<br>K    |      |       |    |   | Oxidation (M)[7] |  | Mascot |
|    |                                               | 2050.9573 | 2051.0183 | 0.061   | 30   | 238  | 255          | ALFNLTMSPCDKDSLH<br>K    |      |       |    |   | Oxidation (M)[7] |  | Mascot |
|    |                                               | 2249.0105 | 2248.9856 | -0.0249 | -11  | 25   | 43           | YNTENSRTFAFDLEEEGA<br>R  |      |       |    |   |                  |  | Mascot |
|    |                                               | 2283.0193 | 2283.0867 | 0.0674  | 30   | 98   | 118          | ICVAGHEGEPLAAQSAE<br>EER |      |       |    |   |                  |  | Mascot |
|    |                                               | 2283.0193 | 2283.0867 | 0.0674  | 30   | 98   | 118          | ICVAGHEGEPLAAQSAE<br>EER |      |       |    |   |                  |  | Mascot |
| 27 | glial fibrillary acidic protein [Danio rerio] |           |           |         |      |      | gij239596173 | 19203.6                  | 4.89 | 6     | 32 | 0 |                  |  |        |

| Peptide Information |             |         |       |     | Start Seq. | End Sequence    | Ion Score | C. I. % | Modification                               | Rank | Result Type |
|---------------------|-------------|---------|-------|-----|------------|-----------------|-----------|---------|--------------------------------------------|------|-------------|
| Calc. Mass          | Obsrv. Mass | ± da    | ± ppm |     |            |                 |           |         |                                            |      |             |
| 801.4399            | 801.3248    | -0.1151 | -144  | 368 | 373        | LKTHMR          |           |         | Oxidation (M)[5]                           |      | Mascot      |
| 870.4719            | 870.5129    | 0.041   | 47    | 361 | 367        | LFTQFSK         |           |         |                                            |      | Mascot      |
| 974.5166            | 974.4991    | -0.0175 | -18   | 170 | 177        | QGFTTHKR        |           |         |                                            |      | Mascot      |
| 1045.4441           | 1045.5293   | 0.0852  | 81    | 407 | 415        | TFTCTQCGK       |           |         | Carbamidomethyl (C)[4]                     |      | Mascot      |
| 1277.4846           | 1277.6637   | 0.1791  | 140   | 630 | 638        | EYMCLECEK       |           |         | Carbamidomethyl (C)[4,7], Oxidation (M)[3] |      | Mascot      |
| 1493.7166           | 1493.6829   | -0.0337 | -23   | 500 | 512        | SFSQSSSLNLHMR   |           |         |                                            |      | Mascot      |
| 1638.8203           | 1638.7953   | -0.025  | -15   | 290 | 304        | IHTGKKPHTCTQCGK |           |         |                                            |      | Mascot      |
| 1691.7992           | 1691.7391   | -0.0601 | -36   | 234 | 248        | IHTGERPYSCIQCGK |           |         |                                            |      | Mascot      |

|           |           |         |     |     |     |                                  |  |  |  |                                              |  |        |
|-----------|-----------|---------|-----|-----|-----|----------------------------------|--|--|--|----------------------------------------------|--|--------|
| 1691.7992 | 1691.7391 | -0.0601 | -36 | 234 | 248 | IHTGERPYSCIQCGK                  |  |  |  |                                              |  | Mascot |
| 1707.7828 | 1707.7111 | -0.0717 | -42 | 541 | 555 | IHTGEKPFTCTECGK                  |  |  |  | Carbamidomethyl (C)[10]                      |  | Mascot |
| 1867.8499 | 1867.8522 | 0.0023  | 1   | 624 | 638 | IHTGVREYMCLECEK                  |  |  |  | Carbamidomethyl (C)[10]                      |  | Mascot |
| 2137.9854 | 2137.9116 | -0.0738 | -35 | 630 | 647 | EYMCLECEKTFITAAELK               |  |  |  | Oxidation (M)[3]                             |  | Mascot |
| 2143.9648 | 2143.9924 | 0.0276  | 13  | 745 | 763 | STQCGKSFSLSNFNPH<br>MR           |  |  |  | Oxidation (M)[18]                            |  | Mascot |
| 2194.0994 | 2193.9949 | -0.1045 | -48 | 788 | 808 | LQPEGRSPICVPMANDLA<br>PAV        |  |  |  | Oxidation (M)[13]                            |  | Mascot |
| 2283.0327 | 2283.0867 | 0.054   | 24  | 342 | 360 | HHMRTHTGEKPFACTQC<br>GK          |  |  |  | Carbamidomethyl (C)[14,17]                   |  | Mascot |
| 2283.0327 | 2283.0867 | 0.054   | 24  | 342 | 360 | HHMRTHTGEKPFACTQC<br>GK          |  |  |  | Carbamidomethyl (C)[14,17]                   |  | Mascot |
| 2299.0278 | 2299.0928 | 0.065   | 28  | 342 | 360 | HHMRTHTGEKPFACTQC<br>GK          |  |  |  | Carbamidomethyl (C)[14,17], Oxidation (M)[3] |  | Mascot |
| 3323.554  | 3323.6125 | 0.0585  | 18  | 556 | 583 | SFIQSSCLNVHMRIHTGE<br>KPFTCTQCGK |  |  |  | Carbamidomethyl (C)[7,23,26]                 |  | Mascot |
| 3337.52   | 3337.5786 | 0.0586  | 18  | 193 | 220 | SFYHPGNFAVHMRIHTG<br>ERPYTQCGK   |  |  |  | Carbamidomethyl (C)[23], Oxidation (M)[12]   |  | Mascot |
| 3338.4268 | 3338.6108 | 0.184   | 55  | 444 | 471 | SFNCSSHLNEHMMIHTG<br>EKPFCTQCGK  |  |  |  | Carbamidomethyl (C)[4,23,26]                 |  | Mascot |

29 PREDICTED: hypothetical protein LOC100536366 gi|326674226 29395.1 8.05 7 32 0  
[Danio rerio]

#### Peptide Information

| Calc. Mass | Obsrv. Mass | ± da    | ± ppm | Start Seq. | End Seq. | Sequence                         | Ion Score | C. I. % | Modification                 | Rank | Result Type |
|------------|-------------|---------|-------|------------|----------|----------------------------------|-----------|---------|------------------------------|------|-------------|
| 882.4791   | 882.5361    | 0.057   | 65    | 111        | 117      | HLEKAER                          |           |         |                              |      | Mascot      |
| 996.439    | 996.5632    | 0.1242  | 125   | 249        | 256      | CMNVSTWR                         |           |         |                              |      | Mascot      |
| 996.439    | 996.5632    | 0.1242  | 125   | 249        | 256      | CMNVSTWR                         |           |         |                              |      | Mascot      |
| 1611.7245  | 1611.7267   | 0.0022  | 1     | 150        | 163      | QPQESVEGHQSEEEK                  |           |         |                              |      | Mascot      |
| 1994.0562  | 1993.8948   | -0.1614 | -81   | 79         | 95       | VFSCCLALQQTLLRDVK                |           |         | Carbamidomethyl (C)[4]       |      | Mascot      |
| 2051.0776  | 2051.0183   | -0.0593 | -29   | 79         | 95       | VFSCCLALQQTLLRDVK                |           |         | Carbamidomethyl (C)[4,5]     |      | Mascot      |
| 2051.0776  | 2051.0183   | -0.0593 | -29   | 79         | 95       | VFSCCLALQQTLLRDVK                |           |         | Carbamidomethyl (C)[4,5]     |      | Mascot      |
| 2248.9321  | 2248.9856   | 0.0535  | 24    | 29         | 45       | VFDYECCHLSHTHICCDR               |           |         | Carbamidomethyl (C)[6,14,15] |      | Mascot      |
| 2705.1904  | 2705.0452   | -0.1452 | -54   | 24         | 45       | EEIQKVFDYECCHLSHTH<br>CCDR       |           |         |                              |      | Mascot      |
| 3337.6807  | 3337.5786   | -0.1021 | -31   | 1          | 28       | MVEYDLFHQQIVSIMALL<br>SETAREEIQK |           |         | Oxidation (M)[1]             |      | Mascot      |

30 PREDICTED: hypothetical protein LOC100002352 gi|326667104 28311.2 4.72 7 32 0  
[Danio rerio]

#### Peptide Information

| Calc. Mass | Obsrv. Mass | ± da    | ± ppm | Start Seq. | End Seq. | Sequence   | Ion Score | C. I. % | Modification           | Rank | Result Type |
|------------|-------------|---------|-------|------------|----------|------------|-----------|---------|------------------------|------|-------------|
| 974.5087   | 974.4991    | -0.0096 | -10   | 149        | 156      | EGQVCLIR   |           |         | Carbamidomethyl (C)[5] |      | Mascot      |
| 1112.6422  | 1112.5323   | -0.1099 | -99   | 139        | 148      | NRPGSEIIVK |           |         |                        |      | Mascot      |

|    |                                                 |           |         |     |              |         |                     |    |    |   |                                                    |        |
|----|-------------------------------------------------|-----------|---------|-----|--------------|---------|---------------------|----|----|---|----------------------------------------------------|--------|
|    | 1277.6704                                       | 1277.6637 | -0.0067 | -5  | 179          | 189     | LICEMARQIGK         |    |    |   | Oxidation (M)[5]                                   | Mascot |
|    | 1320.5493                                       | 1320.5386 | -0.0107 | -8  | 167          | 178     | DMNSHIGNACMK        |    |    |   |                                                    | Mascot |
|    | 1475.7887                                       | 1475.699  | -0.0897 | -61 | 41           | 52      | TDLLRLSEEMR         |    |    |   |                                                    | Mascot |
|    | 1493.6835                                       | 1493.6829 | -0.0006 | 0   | 28           | 40      | LCQECGLDAKGSR       |    |    |   | Carbamidomethyl (C)[2,5]                           | Mascot |
|    | 2193.9695                                       | 2193.9949 | 0.0254  | 12  | 167          | 185     | DMNSHIGNACMKLICEMAR |    |    |   | Carbamidomethyl (C)[10]                            | Mascot |
|    | 2282.9807                                       | 2283.0867 | 0.106   | 46  | 167          | 185     | DMNSHIGNACMKLICEMAR |    |    |   | Carbamidomethyl (C)[10,15], Oxidation (M)[2,11]    | Mascot |
|    | 2282.9807                                       | 2283.0867 | 0.106   | 46  | 167          | 185     | DMNSHIGNACMKLICEMAR |    |    |   | Carbamidomethyl (C)[10,15], Oxidation (M)[2,11]    | Mascot |
|    | 2298.9756                                       | 2299.0928 | 0.1172  | 51  | 167          | 185     | DMNSHIGNACMKLICEMAR |    |    |   | Carbamidomethyl (C)[10,15], Oxidation (M)[2,11,17] | Mascot |
| 31 | methyltransferase-like protein 13 [Danio rerio] |           |         |     | gi 217416336 | 75976.5 | 5.99                | 10 | 31 | 0 |                                                    |        |

#### Peptide Information

| Calc. Mass | Obsrv. Mass | ± da    | ± ppm | Start Seq. | End Seq. | Sequence                        | Ion Score | C. I. | % Modification                                  | Rank | Result Type |
|------------|-------------|---------|-------|------------|----------|---------------------------------|-----------|-------|-------------------------------------------------|------|-------------|
| 864.4032   | 864.4862    | 0.083   | 96    | 504        | 510      | DFVPCAR                         |           |       | Carbamidomethyl (C)[5]                          |      | Mascot      |
| 1062.6306  | 1062.6523   | 0.0217  | 20    | 589        | 597      | KVYSLLSPR                       |           |       |                                                 |      | Mascot      |
| 1165.6221  | 1165.7048   | 0.0827  | 71    | 598        | 607      | GLFMLNLVCR                      |           |       |                                                 |      | Mascot      |
| 1165.6221  | 1165.7048   | 0.0827  | 71    | 598        | 607      | GLFMLNLVCR                      |           |       |                                                 |      | Mascot      |
| 1277.6459  | 1277.6637   | 0.0178  | 14    | 619        | 629      | VHSVFPCVFSR                     |           |       |                                                 |      | Mascot      |
| 1707.9033  | 1707.7111   | -0.1922 | -113  | 598        | 612      | GLFMLNLVCRDSALR                 |           |       |                                                 |      | Mascot      |
| 2123.0398  | 2122.9131   | -0.1267 | -60   | 569        | 588      | DTTLGMSCPPPAFVETSL LK           |           |       | Oxidation (M)[6]                                |      | Mascot      |
| 2123.0398  | 2122.9131   | -0.1267 | -60   | 569        | 588      | DTTLGMSCPPPAFVETSL LK           |           |       | Oxidation (M)[6]                                |      | Mascot      |
| 2138.1614  | 2137.9116   | -0.2498 | -117  | 590        | 607      | VYSLLSPRGLFMLNLVCR              |           |       | Carbamidomethyl (C)[17]                         |      | Mascot      |
| 2283.1826  | 2283.0867   | -0.0959 | -42   | 536        | 556      | LKVTLGDLHDHITTESE GER           |           |       |                                                 |      | Mascot      |
| 2283.1826  | 2283.0867   | -0.0959 | -42   | 536        | 556      | LKVTLGDLHDHITTESE GER           |           |       |                                                 |      | Mascot      |
| 2300.1226  | 2300.0869   | -0.0357 | -16   | 52         | 72       | VLVVGCGNSELSEQLYD VGYR          |           |       |                                                 |      | Mascot      |
| 3337.5254  | 3337.5786   | 0.0532  | 16    | 453        | 482      | SVDRGFLCCTHHEVMVALGLAMLGMDAINNK |           |       | Carbamidomethyl (C)[8], Oxidation (M)[15,21,24] |      | Mascot      |

32 WD repeat-containing protein 74 [Danio rerio] gi|115497604 41314.9 6.76 8 31 0

#### Peptide Information

| Calc. Mass | Obsrv. Mass | ± da    | ± ppm | Start Seq. | End Seq. | Sequence         | Ion Score | C. I. | % Modification         | Rank | Result Type |
|------------|-------------|---------|-------|------------|----------|------------------|-----------|-------|------------------------|------|-------------|
| 1062.5215  | 1062.6523   | 0.1308  | 123   | 204        | 212      | VYDPSTPQR        |           |       |                        |      | Mascot      |
| 1448.7605  | 1448.8658   | 0.1053  | 73    | 290        | 301      | VHSLEDRLQHK      |           |       |                        |      | Mascot      |
| 1638.7792  | 1638.7953   | 0.0161  | 10    | 74         | 89       | GIFTATKECGDPSQGK |           |       |                        |      | Mascot      |
| 1791.9309  | 1791.6654   | -0.2655 | -148  | 5          | 20       | SQICSIWLGETGILK  |           |       | Carbamidomethyl (C)[4] |      | Mascot      |

|    |                                        |           |         |     |     |             |                           |     |   |    |   |                         |        |
|----|----------------------------------------|-----------|---------|-----|-----|-------------|---------------------------|-----|---|----|---|-------------------------|--------|
|    | 2144.0439                              | 2143.9924 | -0.0515 | -24 | 183 | 201         | DISFIADSDKIVTCTGHHK       |     |   |    |   | Carbamidomethyl (C)[14] | Mascot |
|    | 2193.1406                              | 2192.9666 | -0.174  | -79 | 1   | 20          | MAAKSQICSIWLGSETGI<br>LK  |     |   |    |   | Carbamidomethyl (C)[8]  | Mascot |
|    | 2247.2166                              | 2247.054  | -0.1626 | -72 | 5   | 25          | SQICSIWLGSETGILKGVS<br>LR |     |   |    |   |                         | Mascot |
|    | 2282.9968                              | 2283.0867 | 0.0899  | 39  | 332 | 350         | AEEDEVDWDMETVTEK<br>TK    |     |   |    |   |                         | Mascot |
|    | 2282.9968                              | 2283.0867 | 0.0899  | 39  | 332 | 350         | AEEDEVDWDMETVTEK<br>TK    |     |   |    |   |                         | Mascot |
|    | 2298.9917                              | 2299.0928 | 0.1011  | 44  | 332 | 350         | AEEDEVDWDMETVTEK<br>TK    |     |   |    |   | Oxidation (M)[11]       | Mascot |
| 33 | embryonic globin beta e3 [Danio rerio] |           |         |     |     | gi 33089399 | 16093.4                   | 8.6 | 5 | 31 | 0 |                         |        |

#### Peptide Information

| Calc. Mass | Obsrv. Mass | ± da    | ± ppm | Start Seq. | End Seq. | Sequence                | Ion Score | C. I. | % | Modification           | Rank | Result Type |
|------------|-------------|---------|-------|------------|----------|-------------------------|-----------|-------|---|------------------------|------|-------------|
| 1045.5425  | 1045.5293   | -0.0132 | -13   | 93         | 101      | LQVDPGNFR               |           |       |   |                        |      | Mascot      |
| 1048.5092  | 1048.4287   | -0.0805 | -77   | 71         | 79       | ALNNMDNIK               |           |       |   | Oxidation (M)[5]       |      | Mascot      |
| 1321.6721  | 1321.6807   | 0.0086  | 7     | 28         | 37       | CLVVYPWTQR              |           |       |   | Carbamidomethyl (C)[1] |      | Mascot      |
| 1475.7522  | 1475.699    | -0.0532 | -36   | 67         | 79       | GLEKALNNMDNIK           |           |       |   | Oxidation (M)[9]       |      | Mascot      |
| 2122.9902  | 2122.9131   | -0.0771 | -36   | 38         | 56       | YFGGFGNLYNTEAIMANP<br>K |           |       |   | Oxidation (M)[15]      |      | Mascot      |
| 2122.9902  | 2122.9131   | -0.0771 | -36   | 38         | 56       | YFGGFGNLYNTEAIMANP<br>K |           |       |   | Oxidation (M)[15]      |      | Mascot      |

|    |                                                 |  |  |  |  |              |          |      |    |    |   |    |   |
|----|-------------------------------------------------|--|--|--|--|--------------|----------|------|----|----|---|----|---|
| 34 | PREDICTED: laminin subunit beta-1 [Danio rerio] |  |  |  |  | gi 326679113 | 197108.6 | 5.61 | 14 | 31 | 0 | 18 | 0 |
|----|-------------------------------------------------|--|--|--|--|--------------|----------|------|----|----|---|----|---|

#### Peptide Information

| Calc. Mass | Obsrv. Mass | ± da    | ± ppm | Start Seq. | End Seq. | Sequence                | Ion Score | C. I. | % | Modification           | Rank | Result Type |
|------------|-------------|---------|-------|------------|----------|-------------------------|-----------|-------|---|------------------------|------|-------------|
| 864.3702   | 864.4862    | 0.116   | 134   | 1036       | 1043     | QTGQCPCCK               |           |       |   |                        |      | Mascot      |
| 1045.5962  | 1045.5293   | -0.0669 | -64   | 1188       | 1196     | DIIAMILEK               |           |       |   |                        |      | Mascot      |
| 1048.5204  | 1048.4287   | -0.0917 | -87   | 1411       | 1421     | GSDGVCLKCGGR            |           |       |   |                        |      | Mascot      |
| 1106.5259  | 1106.5103   | -0.0156 | -14   | 1655       | 1663     | TEQNREMAK               |           |       |   |                        |      | Mascot      |
| 1320.7092  | 1320.5386   | -0.1706 | -129  | 139        | 149      | TFRPAAMIIR              |           |       |   | Oxidation (M)[7]       |      | Mascot      |
| 1321.5809  | 1321.6807   | 0.0998  | 76    | 287        | 298      | DSGMIHGRCVCK            |           |       |   | Oxidation (M)[4]       |      | Mascot      |
| 1691.6689  | 1691.7391   | 0.0702  | 41    | 1099       | 1112     | QCNECEAFHWGDPR          |           |       |   |                        |      | Mascot      |
| 1691.6689  | 1691.7391   | 0.0702  | 41    | 1099       | 1112     | QCNECEAFHWGDPR          |           |       |   |                        |      | Mascot      |
| 1707.8547  | 1707.7111   | -0.1436 | -84   | 1227       | 1241     | EGTFNLISQTVDDL          |           |       |   |                        |      | Mascot      |
| 2122.9458  | 2122.9131   | -0.0327 | -15   | 1322       | 1340     | CNASVYGPQSPVEQSQD<br>TR |           |       |   | Carbamidomethyl (C)[1] |      | Mascot      |
| 2123.1018  | 2122.9131   | -0.1887 | -89   | 1292       | 1310     | ELENYLTAGLAEQFANVL<br>K | 19        | 0     |   |                        |      | Mascot      |
| 2246.9966  | 2247.054    | 0.0574  | 26    | 1162       | 1180     | CVPCHPCFQLWDDVVCQ<br>VR |           |       |   |                        |      | Mascot      |
| 2300.0984  | 2300.0869   | -0.0115 | -5    | 634        | 653      | CGNMLPTEQLYTVMPH        |           |       |   |                        |      | Mascot      |

|    |                                                    |           |        |    |      |             |                                       |     |    |    |   |                                 |        |
|----|----------------------------------------------------|-----------|--------|----|------|-------------|---------------------------------------|-----|----|----|---|---------------------------------|--------|
|    | 3323.5005                                          | 3323.6125 | 0.112  | 34 | 1154 | 1180        | NVR<br>GFTGNFPKCVPCPCFQ<br>LWDDVVCQVR |     |    |    |   | Carbamidomethyl (C)[9,12,15,24] | Mascot |
|    | 3338.5632                                          | 3338.6108 | 0.0476 | 14 | 93   | 121         | VENVIYPMDSTGELTWW<br>QAVNGEENVSVR     |     |    |    |   | Oxidation (M)[8]                | Mascot |
| 35 | Down syndrome cell adhesion molecule [Danio rerio] |           |        |    |      | gi 71834586 | 224396.7                              | 8.5 | 19 | 31 | 0 |                                 |        |

#### Peptide Information

| Calc. Mass | Obsrv. Mass | ± da    | ± ppm | Start Seq. | End Seq. | Sequence                   | Ion Score | C. I. % | Modification                             | Rank | Result Type |
|------------|-------------|---------|-------|------------|----------|----------------------------|-----------|---------|------------------------------------------|------|-------------|
| 801.4286   | 801.3248    | -0.1038 | -130  | 1310       | 1316     | DVVLPCR                    |           |         |                                          |      | Mascot      |
| 842.4842   | 842.4824    | -0.0018 | -2    | 1748       | 1756     | TAKAGPAAR                  |           |         |                                          |      | Mascot      |
| 870.4389   | 870.5129    | 0.074   | 85    | 781        | 787      | SMYLVNK                    |           |         | Oxidation (M)[2]                         |      | Mascot      |
| 974.5087   | 974.4991    | -0.0096 | -10   | 503        | 511      | GSADIRPMK                  |           |         |                                          |      | Mascot      |
| 1048.5171  | 1048.4287   | -0.0884 | -84   | 934        | 941      | TETWERAR                   |           |         |                                          |      | Mascot      |
| 1051.5419  | 1051.6782   | 0.1363  | 130   | 1557       | 1566     | VYNSAGLAEK                 |           |         |                                          |      | Mascot      |
| 1051.5419  | 1051.6782   | 0.1363  | 130   | 1194       | 1204     | EDVPGPPGGVK                |           |         |                                          |      | Mascot      |
| 1106.5146  | 1106.5103   | -0.0043 | -4    | 1089       | 1098     | ATTMEDVPSR                 |           |         |                                          |      | Mascot      |
| 1179.5422  | 1179.5593   | 0.0171  | 14    | 1649       | 1658     | NTRPSDTMNK                 |           |         | Oxidation (M)[8]                         |      | Mascot      |
| 1277.6597  | 1277.6637   | 0.004   | 3     | 550        | 560      | QRAFENNGTLK                |           |         |                                          |      | Mascot      |
| 1448.6508  | 1448.8658   | 0.215   | 148   | 1935       | 1947     | EAAMGQACLEPQK              |           |         | Carbamidomethyl (C)[8], Oxidation (M)[4] |      | Mascot      |
| 1688.7115  | 1688.6936   | -0.0179 | -11   | 484        | 498      | CTCNNSAGTVSYQAR            |           |         | Carbamidomethyl (C)[1,3]                 |      | Mascot      |
| 2051.0479  | 2051.0183   | -0.0296 | -14   | 788        | 806      | IPAMITSYPNNSLATKGE<br>K    |           |         | Oxidation (M)[4]                         |      | Mascot      |
| 2051.0479  | 2051.0183   | -0.0296 | -14   | 788        | 806      | IPAMITSYPNNSLATKGE<br>K    |           |         | Oxidation (M)[4]                         |      | Mascot      |
| 2123.0979  | 2122.9131   | -0.1848 | -87   | 636        | 655      | SINASLGVTIDNIDFTSSL<br>R   |           |         |                                          |      | Mascot      |
| 2123.0979  | 2122.9131   | -0.1848 | -87   | 636        | 655      | SINASLGVTIDNIDFTSSL<br>R   |           |         |                                          |      | Mascot      |
| 2138.1638  | 2137.9116   | -0.2522 | -118  | 1950       | 1968     | SLKRPALLEPTPMEVPTS<br>R    |           |         | Oxidation (M)[13]                        |      | Mascot      |
| 2206.9783  | 2207.0269   | 0.0486  | 22    | 913        | 931      | WTMGFDGNSLITGYDIEC<br>K    |           |         | Carbamidomethyl (C)[18]                  |      | Mascot      |
| 2249.0542  | 2248.9856   | -0.0686 | -31   | 567        | 585      | ELDEGEYSCHVQVQPQL<br>FK    |           |         |                                          |      | Mascot      |
| 2298.2097  | 2298.0916   | -0.1181 | -51   | 1884       | 1904     | FTASPPKPQDVCRVINMA<br>VPK  |           |         |                                          |      | Mascot      |
| 2299.1565  | 2299.0928   | -0.0637 | -28   | 432        | 452      | GTPQPAITWTLDDDEVVAK<br>DSR |           |         |                                          |      | Mascot      |

36 kazrin [Danio rerio] gi|121583740 48879.4 6.17 8 31 0

#### Peptide Information

| Calc. Mass | Obsrv. Mass | ± da   | ± ppm | Start Seq. | End Seq. | Sequence | Ion Score | C. I. % | Modification | Rank | Result Type |
|------------|-------------|--------|-------|------------|----------|----------|-----------|---------|--------------|------|-------------|
| 850.4265   | 850.512     | 0.0855 | 101   | 28         | 35       | SELSATSR |           |         |              |      | Mascot      |

|           |           |         |     |     |     |                            |  |  |  |                                           |  |        |
|-----------|-----------|---------|-----|-----|-----|----------------------------|--|--|--|-------------------------------------------|--|--------|
| 850.4451  | 850.512   | 0.0669  | 79  | 390 | 397 | MSLGSLSR                   |  |  |  |                                           |  | Mascot |
| 856.4094  | 856.498   | 0.0886  | 103 | 333 | 339 | ISPCHSR                    |  |  |  | Carbamidomethyl (C)[4]                    |  | Mascot |
| 996.4852  | 996.5632  | 0.078   | 78  | 120 | 127 | QMKDMLSK                   |  |  |  | Oxidation (M)[2]                          |  | Mascot |
| 996.4852  | 996.5632  | 0.078   | 78  | 120 | 127 | QMKDMLSK                   |  |  |  | Oxidation (M)[2]                          |  | Mascot |
| 2115.9182 | 2115.8401 | -0.0781 | -37 | 366 | 382 | HRTHSLCNSMEDLEDQK          |  |  |  | Carbamidomethyl (C)[7], Oxidation (M)[10] |  | Mascot |
| 2207.1064 | 2207.0269 | -0.0795 | -36 | 314 | 332 | QSQQTLYHSHPADRQAA<br>LR    |  |  |  |                                           |  | Mascot |
| 2283.0781 | 2283.0867 | 0.0086  | 4   | 333 | 354 | ISPCHSRQPSIISDASAAD<br>GDR |  |  |  |                                           |  | Mascot |
| 2283.0781 | 2283.0867 | 0.0086  | 4   | 333 | 354 | ISPCHSRQPSIISDASAAD<br>GDR |  |  |  |                                           |  | Mascot |
| 2298.2161 | 2298.0916 | -0.1245 | -54 | 7   | 27  | QLAQRIDGAIQSASQEV<br>TLR   |  |  |  |                                           |  | Mascot |

37 caspase c [Danio rerio] gi|61806574 44909.8 5.99 10 31 0

#### Peptide Information

| Calc. Mass | Obsrv. Mass | ± da    | ± ppm | Start Seq. | End Seq. | Sequence                 | Ion Score | C. I. % | Modification            | Rank | Result Type |
|------------|-------------|---------|-------|------------|----------|--------------------------|-----------|---------|-------------------------|------|-------------|
| 1179.4882  | 1179.5593   | 0.0711  | 60    | 132        | 142      | SCPGCQSNVER              |           |         |                         |      | Mascot      |
| 1279.5889  | 1279.7307   | 0.1418  | 111   | 78         | 88       | TEFSCPHFVGR              |           |         |                         |      | Mascot      |
| 1321.6603  | 1321.6807   | 0.0204  | 15    | 271        | 282      | DLTAQGMLVAMR             |           |         | Oxidation (M)[7]        |      | Mascot      |
| 1838.9027  | 1838.8472   | -0.0555 | -30   | 96         | 110      | LSYQEICQLMPLTDK          |           |         | Carbamidomethyl (C)[7]  |      | Mascot      |
| 2122.9141  | 2122.9131   | -0.001  | 0     | 172        | 191      | EWKGVANNAGQC<br>CGNR     |           |         | Carbamidomethyl (C)[12] |      | Mascot      |
| 2123.0625  | 2122.9131   | -0.1494 | -70   | 96         | 112      | LSYQEICQLMPLTDKQR        |           |         | Carbamidomethyl (C)[7]  |      | Mascot      |
| 2193.1663  | 2192.9666   | -0.1997 | -91   | 228        | 245      | TRLALLINNVEFEYLNDR       |           |         |                         |      | Mascot      |
| 2283.0029  | 2283.0867   | 0.0838  | 37    | 288        | 307      | EEHAHSDSCFVLM<br>SHG     |           |         | Carbamidomethyl (C)[9]  |      | Mascot      |
| 2283.0029  | 2283.0867   | 0.0838  | 37    | 288        | 307      | EEHAHSDSCFVLM<br>SHG     |           |         | Carbamidomethyl (C)[9]  |      | Mascot      |
| 2284.1926  | 2284.0823   | -0.1103 | -48   | 251        | 270      | DELSMEMLLKGLGYTVV<br>TLR |           |         | Oxidation (M)[5]        |      | Mascot      |
| 2299.113   | 2299.0928   | -0.0202 | -9    | 91         | 110      | TCGAKLSYQEICQLMPLT<br>DK |           |         | Carbamidomethyl (C)[2]  |      | Mascot      |
| 2300.1875  | 2300.0869   | -0.1006 | -44   | 251        | 270      | DELSMEMLLKGLGYTVV<br>TLR |           |         | Oxidation (M)[5,7]      |      | Mascot      |

38 hemoglobin beta embryonic-3 [Danio rerio] gi|62632719 16590.7 8.58 5 31 0

#### Peptide Information

| Calc. Mass | Obsrv. Mass | ± da    | ± ppm | Start Seq. | End Seq. | Sequence      | Ion Score | C. I. % | Modification           | Rank | Result Type |
|------------|-------------|---------|-------|------------|----------|---------------|-----------|---------|------------------------|------|-------------|
| 1045.5425  | 1045.5293   | -0.0132 | -13   | 97         | 105      | LQVDPGNFR     |           |         |                        |      | Mascot      |
| 1048.5092  | 1048.4287   | -0.0805 | -77   | 75         | 83       | ALNNMDNIK     |           |         | Oxidation (M)[5]       |      | Mascot      |
| 1321.6721  | 1321.6807   | 0.0086  | 7     | 32         | 41       | CLVVYPWTQR    |           |         | Carbamidomethyl (C)[1] |      | Mascot      |
| 1475.7522  | 1475.699    | -0.0532 | -36   | 71         | 83       | GLEKALNNMDNIK |           |         | Oxidation (M)[9]       |      | Mascot      |

|                     |                                                            |             |         |       |              |          |                           |           |       |    |                            |                   |             |
|---------------------|------------------------------------------------------------|-------------|---------|-------|--------------|----------|---------------------------|-----------|-------|----|----------------------------|-------------------|-------------|
|                     | 2122.9902                                                  | 2122.9131   | -0.0771 | -36   | 42           | 60       | YFGGFGNLYNTEAIMANP<br>K   |           |       |    |                            | Oxidation (M)[15] | Mascot      |
|                     | 2122.9902                                                  | 2122.9131   | -0.0771 | -36   | 42           | 60       | YFGGFGNLYNTEAIMANP<br>K   |           |       |    |                            | Oxidation (M)[15] | Mascot      |
| 39                  | LOC556175 protein [Danio rerio]                            |             |         |       | gi 126631387 |          | 45733                     | 6.1       | 9     | 31 | 0                          |                   |             |
| Peptide Information |                                                            |             |         |       |              |          |                           |           |       |    |                            |                   |             |
|                     | Calc. Mass                                                 | Obsrv. Mass | ± da    | ± ppm | Start Seq.   | End Seq. | Sequence                  | Ion Score | C. I. | %  | Modification               | Rank              | Result Type |
|                     | 856.3869                                                   | 856.498     | 0.1111  | 130   | 78           | 84       | YNCITDK                   |           |       |    |                            |                   | Mascot      |
|                     | 1279.645                                                   | 1279.7307   | 0.0857  | 67    | 53           | 63       | LTDDDDLVLTK               |           |       |    | Oxidation (M)[6]           |                   | Mascot      |
|                     | 1791.8112                                                  | 1791.6654   | -0.1458 | -81   | 36           | 52       | SSDCCLKLAGNDQPGAR         |           |       |    | Carbamidomethyl (C)[4]     |                   | Mascot      |
|                     | 1851.7999                                                  | 1851.8466   | 0.0467  | 25    | 337          | 353      | HEEPVCEAFSGLMSSGR         |           |       |    | Oxidation (M)[13]          |                   | Mascot      |
|                     | 2073.0974                                                  | 2073        | -0.0974 | -47   | 280          | 298      | IEDDGAIHLSEAIKLPHSK       |           |       |    |                            |                   | Mascot      |
|                     | 2193.1318                                                  | 2192.9666   | -0.1652 | -75   | 53           | 72       | LTDDDDLVLTKTLEGNSA<br>IK  |           |       |    | Oxidation (M)[6]           |                   | Mascot      |
|                     | 2224.9775                                                  | 2225.0332   | 0.0557  | 25    | 394          | 414      | DSSNSALALMASDSWSQ<br>KSHS |           |       |    | Oxidation (M)[10]          |                   | Mascot      |
|                     | 2224.9775                                                  | 2225.0332   | 0.0557  | 25    | 394          | 414      | DSSNSALALMASDSWSQ<br>KSHS |           |       |    | Oxidation (M)[10]          |                   | Mascot      |
|                     | 2247.0896                                                  | 2247.054    | -0.0356 | -16   | 337          | 356      | HEEPVCEAFSGLMSSGR<br>LLK  |           |       |    | Carbamidomethyl (C)[6]     |                   | Mascot      |
|                     | 2283.155                                                   | 2283.0867   | -0.0683 | -30   | 78           | 97       | YNCITDKGAVHIAHLIQDS<br>K  |           |       |    | Carbamidomethyl (C)[3]     |                   | Mascot      |
|                     | 2283.155                                                   | 2283.0867   | -0.0683 | -30   | 78           | 97       | YNCITDKGAVHIAHLIQDS<br>K  |           |       |    | Carbamidomethyl (C)[3]     |                   | Mascot      |
| 40                  | PREDICTED: zinc finger protein 420 isoform 2 [Danio rerio] |             |         |       | gi 326678086 |          | 70371                     | 9.08      | 13    | 31 | 0                          |                   |             |
| Peptide Information |                                                            |             |         |       |              |          |                           |           |       |    |                            |                   |             |
|                     | Calc. Mass                                                 | Obsrv. Mass | ± da    | ± ppm | Start Seq.   | End Seq. | Sequence                  | Ion Score | C. I. | %  | Modification               | Rank              | Result Type |
|                     | 842.5206                                                   | 842.4824    | -0.0382 | -45   | 25           | 31       | QRQGLLK                   |           |       |    |                            |                   | Mascot      |
|                     | 864.4798                                                   | 864.4862    | 0.0064  | 7     | 591          | 597      | HRSVHTK                   |           |       |    |                            |                   | Mascot      |
|                     | 1045.536                                                   | 1045.5293   | -0.0067 | -6    | 134          | 141      | FHCARNLK                  |           |       |    | Carbamidomethyl (C)[3]     |                   | Mascot      |
|                     | 1062.5149                                                  | 1062.6523   | 0.1374  | 129   | 110          | 117      | YNLNVHMR                  |           |       |    | Oxidation (M)[7]           |                   | Mascot      |
|                     | 1112.4836                                                  | 1112.5323   | 0.0487  | 44    | 292          | 300      | THRCGHCGK                 |           |       |    | Carbamidomethyl (C)[4,7]   |                   | Mascot      |
|                     | 1691.7516                                                  | 1691.7391   | -0.0125 | -7    | 454          | 468      | VHTNEKPYSCPECGK           |           |       |    |                            |                   | Mascot      |
|                     | 1691.7516                                                  | 1691.7391   | -0.0125 | -7    | 454          | 468      | VHTNEKPYSCPECGK           |           |       |    |                            |                   | Mascot      |
|                     | 1838.8676                                                  | 1838.8472   | -0.0204 | -11   | 202          | 216      | IHTGVREFVCFCGK            |           |       |    | Carbamidomethyl (C)[10,13] |                   | Mascot      |
|                     | 1851.8477                                                  | 1851.8466   | -0.0011 | -1    | 276          | 291      | CSSHLNEHMIHTGEK           |           |       |    | Oxidation (M)[9]           |                   | Mascot      |
|                     | 2116.0393                                                  | 2115.8401   | -0.1992 | -94   | 110          | 126      | YNLNVHMRIHTGEQPYK         |           |       |    | Oxidation (M)[7]           |                   | Mascot      |
|                     | 2144.0125                                                  | 2143.9924   | -0.0201 | -9    | 367          | 384      | HQRIHTGEKPYTCTQCG<br>K    |           |       |    | Carbamidomethyl (C)[13]    |                   | Mascot      |
|                     | 2211.0798                                                  | 2211.0212   | -0.0586 | -27   | 450          | 468      | IHLRVHTNEKPYSCPECG        |           |       |    |                            |                   | Mascot      |

|  |           |           |        |    |     |     |                             |  |  |  |  |  |                  |  |  |  |        |
|--|-----------|-----------|--------|----|-----|-----|-----------------------------|--|--|--|--|--|------------------|--|--|--|--------|
|  | 2283.0579 | 2283.0867 | 0.0288 | 13 | 227 | 245 | K<br>HQMHTGEKPYKCSHCD<br>LR |  |  |  |  |  |                  |  |  |  | Mascot |
|  | 2283.0579 | 2283.0867 | 0.0288 | 13 | 227 | 245 | HQMHTGEKPYKCSHCD<br>LR      |  |  |  |  |  |                  |  |  |  | Mascot |
|  | 2298.0906 | 2298.0916 | 0.001  | 0  | 478 | 496 | LHQHVHTGVREFVCFEC<br>EK     |  |  |  |  |  |                  |  |  |  | Mascot |
|  | 2299.053  | 2299.0928 | 0.0398 | 17 | 227 | 245 | HQMHTGEKPYKCSHCD<br>LR      |  |  |  |  |  | Oxidation (M)[3] |  |  |  | Mascot |

41 gamma-soluble NSF attachment protein [Danio rerio] gi|61806530 33925.8 5.45 8 30 0

#### Peptide Information

| Calc. Mass | Obsrv. Mass | ± da    | ± ppm | Start Seq. | End Seq. | Sequence                    | Ion Score | C. I. % | Modification         | Rank | Result Type |
|------------|-------------|---------|-------|------------|----------|-----------------------------|-----------|---------|----------------------|------|-------------|
| 801.381    | 801.3248    | -0.0562 | -70   | 179        | 184      | EKSMYK                      |           |         | Oxidation (M)[4]     |      | Mascot      |
| 1045.5598  | 1045.5293   | -0.0305 | -29   | 123        | 131      | LMEPLDLSK                   |           |         |                      |      | Mascot      |
| 1277.5177  | 1277.6637   | 0.146   | 114   | 185        | 194      | EMENYPTCYK                  |           |         |                      |      | Mascot      |
| 1279.7303  | 1279.7307   | 0.0004  | 0     | 196        | 206      | CIAQVLVQLHR                 |           |         |                      |      | Mascot      |
| 2143.9634  | 2143.9924   | 0.029   | 14    | 100        | 119      | ASVMYVENGTPDTAAMA<br>LDR    |           |         | Oxidation (M)[4, 16] |      | Mascot      |
| 2225.022   | 2225.0332   | 0.0112  | 5     | 21         | 39       | TSFMKWKPDYDAASEY<br>AK      |           |         |                      |      | Mascot      |
| 2225.022   | 2225.0332   | 0.0112  | 5     | 21         | 39       | TSFMKWKPDYDAASEY<br>AK      |           |         |                      |      | Mascot      |
| 2299.1062  | 2299.0928   | -0.0134 | -6    | 49         | 68       | QLEQAKDAYLQEAHA<br>NNR      |           |         |                      |      | Mascot      |
| 2384.1221  | 2383.8545   | -0.2676 | -112  | 100        | 122      | ASVMYVENGTPDTAAMA<br>LDRAGK |           |         | Oxidation (M)[4]     |      | Mascot      |

42 PREDICTED: ribonuclease P 25 subunit [Danio rerio] gi|326680347 22061.4 8.78 6 30 0

#### Peptide Information

| Calc. Mass | Obsrv. Mass | ± da    | ± ppm | Start Seq. | End Seq. | Sequence                  | Ion Score | C. I. % | Modification | Rank | Result Type |
|------------|-------------|---------|-------|------------|----------|---------------------------|-----------|---------|--------------|------|-------------|
| 974.4901   | 974.4991    | 0.009   | 9     | 170        | 179      | QVDGVQGSGK                |           |         |              |      | Mascot      |
| 1165.6068  | 1165.7048   | 0.098   | 84    | 94         | 103      | TITCAEIMKR                |           |         |              |      | Mascot      |
| 1165.6068  | 1165.7048   | 0.098   | 84    | 94         | 103      | TITCAEIMKR                |           |         |              |      | Mascot      |
| 1277.7147  | 1277.6637   | -0.051  | -40   | 63         | 73       | IRNLLGFAMSR               |           |         |              |      | Mascot      |
| 1475.79    | 1475.699    | -0.091  | -62   | 183        | 195      | RPLSPCDHPGLKR             |           |         |              |      | Mascot      |
| 2193.1221  | 2192.9666   | -0.1555 | -71   | 36         | 56       | STGEPIPNPIGLASDVLE<br>MR  |           |         |              |      | Mascot      |
| 2299.1677  | 2299.0928   | -0.0749 | -33   | 4          | 24       | ELHDNTQPVQLNPTNPIG<br>PSK |           |         |              |      | Mascot      |

43 PREDICTED: probable ubiquitin carboxyl-terminal hydrolase 46-like [Danio rerio] gi|125820999 38676.4 6.04 8 30 0

#### Peptide Information

| Calc. Mass | Obsrv. Mass | ± da | ± ppm | Start | End | Sequence | Ion | C. I. % | Modification | Rank | Result Type |
|------------|-------------|------|-------|-------|-----|----------|-----|---------|--------------|------|-------------|
|------------|-------------|------|-------|-------|-----|----------|-----|---------|--------------|------|-------------|



|    |                                 |           |         | Seq. | Seq.         | Score |                             |      |   |                         |   |  |        |
|----|---------------------------------|-----------|---------|------|--------------|-------|-----------------------------|------|---|-------------------------|---|--|--------|
|    | 856.525                         | 856.498   | -0.027  | -32  | 239          | 246   | ILLTGPSR                    |      |   |                         |   |  | Mascot |
|    | 1279.7079                       | 1279.7307 | 0.0228  | 18   | 8            | 18    | VFEGKMINITK                 |      |   |                         |   |  | Mascot |
|    | 1434.7297                       | 1434.7156 | -0.0141 | -10  | 297          | 308   | LSWAEEIEKCVK                |      |   |                         |   |  | Mascot |
|    | 1688.7084                       | 1688.6936 | -0.0148 | -9   | 99           | 110   | FDFDYMQMRYEK                |      |   | Oxidation (M)[6]        |   |  | Mascot |
|    | 2032.0359                       | 2031.913  | -0.1229 | -60  | 125          | 141   | DNRPSYELYAVINHKGR           |      |   |                         |   |  | Mascot |
|    | 2249.2727                       | 2248.9856 | -0.2871 | -128 | 306          | 325   | CVKLSDPGPNVILWIIPIS<br>K    |      |   | Carbamidomethyl (C)[1]  |   |  | Mascot |
|    | 2501.2341                       | 2501.1472 | -0.0869 | -35  | 250          | 273   | STVGNILGGDYFPCRS<br>SETVTK  |      |   |                         |   |  | Mascot |
|    | 2705.3855                       | 2705.0452 | -0.3403 | -126 | 283          | 305   | VTVVDTPNLFCLNKLSWA<br>EEIEK |      |   | Carbamidomethyl (C)[11] |   |  | Mascot |
| 44 | LOC563686 protein [Danio rerio] |           |         |      | gi 156230217 |       | 25871.1                     | 4.92 | 6 | 30                      | 0 |  |        |

#### Peptide Information

|  | Calc. Mass | Obsrv. Mass | ± da    | ± ppm | Start Seq. | End Seq. | Sequence                    | Ion Score | C. I. | % | Modification                              | Rank | Result Type |
|--|------------|-------------|---------|-------|------------|----------|-----------------------------|-----------|-------|---|-------------------------------------------|------|-------------|
|  | 1165.5518  | 1165.7048   | 0.153   | 131   | 163        | 172      | TDQTTCCKPK                  |           |       |   | Carbamidomethyl (C)[6]                    |      | Mascot      |
|  | 1165.5518  | 1165.7048   | 0.153   | 131   | 163        | 172      | TDQTTCCKPK                  |           |       |   | Carbamidomethyl (C)[6]                    |      | Mascot      |
|  | 1321.653   | 1321.6807   | 0.0277  | 21    | 163        | 173      | TDQTTCCKPKR                 |           |       |   | Carbamidomethyl (C)[6]                    |      | Mascot      |
|  | 2031.8898  | 2031.913    | 0.0232  | 11    | 145        | 162      | DFGCEQGVAMIDANYGR           |           |       |   | Carbamidomethyl (C)[4], Oxidation (M)[11] |      | Mascot      |
|  | 2115.9724  | 2115.8401   | -0.1323 | -63   | 178        | 196      | HQNTNCLAPESLSTVSD<br>SR     |           |       |   | Carbamidomethyl (C)[6]                    |      | Mascot      |
|  | 2233.0779  | 2232.9985   | -0.0794 | -36   | 90         | 108      | DSPKFFYLCLNLAECVLT<br>R     |           |       |   | Carbamidomethyl (C)[9]                    |      | Mascot      |
|  | 2501.1685  | 2501.1472   | -0.0213 | -9    | 178        | 200      | HQNTNCLAPESLSTVSD<br>SREGAK |           |       |   | Carbamidomethyl (C)[6]                    |      | Mascot      |

45 PREDICTED: corepressor interacting with RBPJ 1, partial [Danio rerio] gi|326670450 18483 7.63 6 30 0 3 0

#### Peptide Information

|  | Calc. Mass | Obsrv. Mass | ± da    | ± ppm | Start Seq. | End Seq. | Sequence                    | Ion Score | C. I. | % | Modification            | Rank | Result Type |
|--|------------|-------------|---------|-------|------------|----------|-----------------------------|-----------|-------|---|-------------------------|------|-------------|
|  | 801.3889   | 801.3248    | -0.0641 | -80   | 13         | 19       | DFHPASK                     |           |       |   |                         |      | Mascot      |
|  | 1062.5612  | 1062.6523   | 0.0911  | 86    | 57         | 65       | LLMGDDRVRK                  |           |       |   | Oxidation (M)[3]        |      | Mascot      |
|  | 1279.5632  | 1279.7307   | 0.1675  | 131   | 1          | 11       | MGKSFANFMCK                 |           |       |   | Oxidation (M)[1]        |      | Mascot      |
|  | 1320.5897  | 1320.5386   | -0.0511 | -39   | 1          | 11       | MGKSFANFMCK                 |           |       |   | Carbamidomethyl (C)[10] |      | Mascot      |
|  | 1611.7471  | 1611.7267   | -0.0204 | -13   | 66         | 80       | NGLNFMYEAPPGASK             |           |       |   | Oxidation (M)[6]        |      | Mascot      |
|  | 1838.9105  | 1838.8472   | -0.0633 | -34   | 64         | 80       | VKNGLNFMYEAPPGASK           |           |       |   | Oxidation (M)[8]        |      | Mascot      |
|  | 2283.0266  | 2283.0867   | 0.0601  | 26    | 139        | 161      | ECPLFGLSGINASSMAGD<br>EAGTV |           |       |   | Carbamidomethyl (C)[2]  |      | Mascot      |
|  | 2283.0266  | 2283.0867   | 0.0601  | 26    | 139        | 161      | ECPLFGLSGINASSMAGD<br>EAGTV | 3         | 0     |   | Carbamidomethyl (C)[2]  |      | Mascot      |

|    |                                                    |           |        |    |              |     |                             |      |    |    |   |                                           |        |
|----|----------------------------------------------------|-----------|--------|----|--------------|-----|-----------------------------|------|----|----|---|-------------------------------------------|--------|
|    | 2299.0217                                          | 2299.0928 | 0.0711 | 31 | 139          | 161 | ECPLFGLSGINASSMAGD<br>EAGTV |      |    |    |   | Carbamidomethyl (C)[2], Oxidation (M)[15] | Mascot |
| 46 | PREDICTED: fer-1-like protein 6-like [Danio rerio] |           |        |    | gi 326670557 |     | 203004.8                    | 5.74 | 17 | 30 | 0 |                                           |        |

Peptide Information

| Calc. Mass | Obsrv. Mass | ± da    | ± ppm | Start Seq. | End Seq. | Sequence                          | Ion Score | C. I. | % Modification                           | Rank | Result Type |
|------------|-------------|---------|-------|------------|----------|-----------------------------------|-----------|-------|------------------------------------------|------|-------------|
| 801.4287   | 801.3248    | -0.1039 | -130  | 160        | 166      | LSVMHSK                           |           |       |                                          |      | Mascot      |
| 1277.5968  | 1277.6637   | 0.0669  | 52    | 439        | 452      | GGKTGTGAGGEEEEK                   |           |       |                                          |      | Mascot      |
| 1320.6431  | 1320.5386   | -0.1045 | -79   | 729        | 739      | DLLFSESPEQR                       |           |       |                                          |      | Mascot      |
| 1434.7231  | 1434.7156   | -0.0075 | -5    | 324        | 334      | EMFPPLCQRLK                       |           |       | Carbamidomethyl (C)[7], Oxidation (M)[2] |      | Mascot      |
| 1589.8474  | 1589.7491   | -0.0983 | -62   | 1699       | 1712     | GWWPFIKAGELTGK                    |           |       |                                          |      | Mascot      |
| 1589.8474  | 1589.7491   | -0.0983 | -62   | 1699       | 1712     | GWWPFIKAGELTGK                    |           |       |                                          |      | Mascot      |
| 1691.8893  | 1691.7391   | -0.1502 | -89   | 1415       | 1428     | DCMKPVDLLIKLCK                    |           |       | Carbamidomethyl (C)[2], Oxidation (M)[3] |      | Mascot      |
| 1691.8893  | 1691.7391   | -0.1502 | -89   | 1415       | 1428     | DCMKPVDLLIKLCK                    |           |       | Carbamidomethyl (C)[2], Oxidation (M)[3] |      | Mascot      |
| 1838.9041  | 1838.8472   | -0.0569 | -31   | 610        | 624      | MLSPEAWSLMHHVLR                   |           |       | Oxidation (M)[1,10]                      |      | Mascot      |
| 1993.925   | 1993.8948   | -0.0302 | -15   | 1150       | 1166     | RTADESADNVIDWWSK                  |           |       |                                          |      | Mascot      |
| 2050.9783  | 2051.0183   | 0.04    | 20    | 659        | 676      | QELESMTMAGGLLEPK<br>R             |           |       | Oxidation (M)[6,9]                       |      | Mascot      |
| 2050.9783  | 2051.0183   | 0.04    | 20    | 659        | 676      | QELESMTMAGGLLEPK<br>R             |           |       | Oxidation (M)[6,9]                       |      | Mascot      |
| 2123.0227  | 2122.9131   | -0.1096 | -52   | 1179       | 1196     | QKEDNPFPFLFENTSGM<br>R            |           |       |                                          |      | Mascot      |
| 2123.0227  | 2122.9131   | -0.1096 | -52   | 1179       | 1196     | QKEDNPFPFLFENTSGM<br>R            |           |       |                                          |      | Mascot      |
| 2137.9971  | 2137.9116   | -0.0855 | -40   | 1181       | 1198     | EDNPFPFLFENTSGMRD<br>R            |           |       |                                          |      | Mascot      |
| 2144.1975  | 2143.9924   | -0.2051 | -96   | 1058       | 1077     | AFGRSTLVGSHVINLAL<br>FK           |           |       |                                          |      | Mascot      |
| 2207.0989  | 2207.0269   | -0.072  | -33   | 1633       | 1650     | TEQKMPAVLVMQVWDFE<br>R            |           |       |                                          |      | Mascot      |
| 2211.1147  | 2211.0212   | -0.0935 | -42   | 1679       | 1696     | MEMLTELLENISIFQQKR                |           |       |                                          |      | Mascot      |
| 2225.1196  | 2225.0332   | -0.0864 | -39   | 1713       | 1732     | VEAEFHLVTAEAEKNPV<br>GR           |           |       |                                          |      | Mascot      |
| 2225.1196  | 2225.0332   | -0.0864 | -39   | 1713       | 1732     | VEAEFHLVTAEAEKNPV<br>GR           |           |       |                                          |      | Mascot      |
| 2233.1455  | 2232.9985   | -0.147  | -66   | 522        | 542      | KLEDVSVTAPLLDTTATM<br>PCK         |           |       |                                          |      | Mascot      |
| 2249.1404  | 2248.9856   | -0.1548 | -69   | 522        | 542      | KLEDVSVTAPLLDTTATM<br>PCK         |           |       | Oxidation (M)[18]                        |      | Mascot      |
| 3337.5144  | 3337.5786   | 0.0642  | 19    | 1577       | 1605     | GWLKGLEDDGQETDVHY<br>NSLTGEGNFNWR |           |       |                                          |      | Mascot      |

|    |                                                            |  |  |  |              |  |         |      |   |    |   |  |  |
|----|------------------------------------------------------------|--|--|--|--------------|--|---------|------|---|----|---|--|--|
| 47 | PREDICTED: hypothetical protein LOC100534694 [Danio rerio] |  |  |  | gi 326668999 |  | 48459.4 | 6.95 | 8 | 30 | 0 |  |  |
|----|------------------------------------------------------------|--|--|--|--------------|--|---------|------|---|----|---|--|--|

Peptide Information

| Calc. Mass | Obsrv. Mass | ± da | ± ppm | Start Seq. | End Seq. | Sequence | Ion Score | C. I. | % Modification | Rank | Result Type |
|------------|-------------|------|-------|------------|----------|----------|-----------|-------|----------------|------|-------------|
|------------|-------------|------|-------|------------|----------|----------|-----------|-------|----------------|------|-------------|

|    |                                          |           |         |      |              |     |                          |      |    |    |   |                          |  |  |  |  |        |
|----|------------------------------------------|-----------|---------|------|--------------|-----|--------------------------|------|----|----|---|--------------------------|--|--|--|--|--------|
|    | 974.5153                                 | 974.4991  | -0.0162 | -17  | 132          | 139 | QTIEELNK                 |      |    |    |   |                          |  |  |  |  | Mascot |
|    | 1106.5948                                | 1106.5103 | -0.0845 | -76  | 213          | 221 | MLITMIQEK                |      |    |    |   |                          |  |  |  |  | Mascot |
|    | 1320.6827                                | 1320.5386 | -0.1441 | -109 | 129          | 139 | MSKQTIEELNK              |      |    |    |   |                          |  |  |  |  | Mascot |
|    | 1688.8701                                | 1688.6936 | -0.1765 | -105 | 394          | 407 | ETEKELSNILDELK           |      |    |    |   |                          |  |  |  |  | Mascot |
|    | 1994.0045                                | 1993.8948 | -0.1097 | -55  | 222          | 239 | ITSTSCCIQNIQIAGTK        |      |    |    |   | Carbamidomethyl (C)[6,7] |  |  |  |  | Mascot |
|    | 2137.8181                                | 2137.9116 | 0.0935  | 44   | 417          | 433 | IPNSYDDDELMMMNK          |      |    |    |   | Oxidation (M)[12,13,14]  |  |  |  |  | Mascot |
|    | 2192.969                                 | 2192.9666 | -0.0024 | -1   | 242          | 261 | EFPESDQPPQSNQSGKN<br>SDK |      |    |    |   |                          |  |  |  |  | Mascot |
|    | 2283.1179                                | 2283.0867 | -0.0312 | -14  | 82           | 100 | SSYEYLPVNFSEDLHELI<br>K  |      |    |    |   |                          |  |  |  |  | Mascot |
|    | 2283.1179                                | 2283.0867 | -0.0312 | -14  | 82           | 100 | SSYEYLPVNFSEDLHELI<br>K  |      |    |    |   |                          |  |  |  |  | Mascot |
| 48 | Myosin, light chain kinase [Danio rerio] |           |         |      | gi 190337782 |     | 100584.4                 | 5.13 | 12 | 29 | 0 |                          |  |  |  |  |        |

#### Peptide Information

|  | Calc. Mass | Obsrv. Mass | $\pm$ da | $\pm$ ppm | Start Seq. | End Seq. | Sequence                  | Ion Score | C. I. | % Modification         | Rank | Result Type |
|--|------------|-------------|----------|-----------|------------|----------|---------------------------|-----------|-------|------------------------|------|-------------|
|  | 850.4053   | 850.512     | 0.1067   | 125       | 57         | 63       | NEAVDFR                   |           |       |                        |      | Mascot      |
|  | 850.4053   | 850.512     | 0.1067   | 125       | 57         | 63       | NEAVDFR                   |           |       |                        |      | Mascot      |
|  | 864.3945   | 864.4862    | 0.0917   | 106       | 777        | 784      | SSPTEDTK                  |           |       |                        |      | Mascot      |
|  | 1165.5518  | 1165.7048   | 0.153    | 131       | 726        | 735      | QDTTNMEAKK                |           |       |                        |      | Mascot      |
|  | 1165.5518  | 1165.7048   | 0.153    | 131       | 726        | 735      | QDTTNMEAKK                |           |       |                        |      | Mascot      |
|  | 1279.6351  | 1279.7307   | 0.0956   | 75        | 526        | 536      | LVQCIDAFEGK               |           |       | Carbamidomethyl (C)[4] |      | Mascot      |
|  | 1448.7491  | 1448.8658   | 0.1167   | 81        | 57         | 69       | NEAVDFRSVLGNK             |           |       |                        |      | Mascot      |
|  | 1493.7821  | 1493.6829   | -0.0992  | -66       | 265        | 277      | FTGALPISCTWLK             |           |       | Carbamidomethyl (C)[9] |      | Mascot      |
|  | 1676.8828  | 1676.6877   | -0.1951  | -116      | 570        | 583      | YMLQIVDGVNFIHK            |           |       |                        |      | Mascot      |
|  | 1851.8971  | 1851.8466   | -0.0505  | -27       | 777        | 793      | SSPTEDTKQFAAELEAK         |           |       |                        |      | Mascot      |
|  | 2032.0597  | 2031.913    | -0.1467  | -72       | 110        | 127      | EPVFVEKLSVTVLDGER         |           |       |                        |      | Mascot      |
|  | 2051.114   | 2051.0183   | -0.0957  | -47       | 584        | 601      | KGIVHLDLKPENIMCVNK        |           |       |                        |      | Mascot      |
|  | 2051.114   | 2051.0183   | -0.0957  | -47       | 584        | 601      | KGIVHLDLKPENIMCVNK        |           |       |                        |      | Mascot      |
|  | 2137.9043  | 2137.9116   | 0.0073   | 3         | 438        | 455      | EDEVEPSDDESEKVPDY<br>R    |           |       |                        |      | Mascot      |
|  | 2384.0823  | 2383.8545   | -0.2278  | -96       | 382        | 402      | WTDVASCNSTSYNVQDL<br>LPDR |           |       |                        |      | Mascot      |

49 novel protein [Danio rerio] gi|169146110 25865.2 5.07 7 29 0

#### Peptide Information

|  | Calc. Mass | Obsrv. Mass | $\pm$ da | $\pm$ ppm | Start Seq. | End Seq. | Sequence  | Ion Score | C. I. | % Modification | Rank | Result Type |
|--|------------|-------------|----------|-----------|------------|----------|-----------|-----------|-------|----------------|------|-------------|
|  | 848.3744   | 848.4999    | 0.1255   | 148       | 181        | 187      | AEEESQR   |           |       |                |      | Mascot      |
|  | 1045.5411  | 1045.5293   | -0.0118  | -11       | 99         | 107      | VIADLEEEK |           |       |                |      | Mascot      |

|    |                                                                                       |           |         |      |     |     |                  |          |      |    |    |   |                                            |  |  |  |        |
|----|---------------------------------------------------------------------------------------|-----------|---------|------|-----|-----|------------------|----------|------|----|----|---|--------------------------------------------|--|--|--|--------|
|    | 1112.6786                                                                             | 1112.5323 | -0.1463 | -131 | 85  | 94  | LLKQLAAER        |          |      |    |    |   |                                            |  |  |  | Mascot |
|    | 1179.5319                                                                             | 1179.5593 | 0.0274  | 23   | 73  | 82  | LVMAHCTNMK       |          |      |    |    |   | Oxidation (M)[3,9]                         |  |  |  | Mascot |
|    | 1320.5663                                                                             | 1320.5386 | -0.0277 | -21  | 48  | 59  | DSELSQAQDDGR     |          |      |    |    |   |                                            |  |  |  | Mascot |
|    | 1493.6909                                                                             | 1493.6829 | -0.008  | -5   | 73  | 84  | LVMAHCTNMKEK     |          |      |    |    |   | Carbamidomethyl (C)[6], Oxidation (M)[3,9] |  |  |  | Mascot |
|    | 1691.7542                                                                             | 1691.7391 | -0.0151 | -9   | 111 | 126 | AQDAAAGDDITDMLER |          |      |    |    |   |                                            |  |  |  | Mascot |
|    | 1691.7542                                                                             | 1691.7391 | -0.0151 | -9   | 111 | 126 | AQDAAAGDDITDMLER |          |      |    |    |   |                                            |  |  |  | Mascot |
|    | 1707.749                                                                              | 1707.7111 | -0.0379 | -22  | 111 | 126 | AQDAAAGDDITDMLER |          |      |    |    |   | Oxidation (M)[13]                          |  |  |  | Mascot |
| 50 | novel protein similar to vertebrate centrosomal protein 170kDa (CEP170) [Danio rerio] |           |         |      |     |     |                  |          |      |    |    |   |                                            |  |  |  |        |
|    |                                                                                       |           |         |      |     |     | gi 122890563     | 140783.3 | 7.09 | 14 | 29 | 0 |                                            |  |  |  |        |

# Peptide Information

| Calc. Mass | Obsrv. Mass | ± da    | ± ppm | Start Seq. | End Seq. | Sequence                        | Ion Score | C. I. % | Modification           | Rank | Result Type |
|------------|-------------|---------|-------|------------|----------|---------------------------------|-----------|---------|------------------------|------|-------------|
| 974.4836   | 974.4991    | 0.0155  | 16    | 506        | 513      | DRGTICPR                        |           |         | Carbamidomethyl (C)[6] |      | Mascot      |
| 996.4489   | 996.5632    | 0.1143  | 115   | 639        | 647      | VSAMACTEK                       |           |         | Carbamidomethyl (C)[6] |      | Mascot      |
| 996.4489   | 996.5632    | 0.1143  | 115   | 639        | 647      | VSAMACTEK                       |           |         | Carbamidomethyl (C)[6] |      | Mascot      |
| 1048.531   | 1048.4287   | -0.1023 | -98   | 1232       | 1239     | KWEEIESK                        |           |         |                        |      | Mascot      |
| 1320.6793  | 1320.5386   | -0.1407 | -107  | 486        | 497      | VFGVEDNQALTK                    |           |         |                        |      | Mascot      |
| 1434.7183  | 1434.7156   | -0.0027 | -2    | 861        | 874      | GQNISSKAEQTSGK                  |           |         |                        |      | Mascot      |
| 1475.7853  | 1475.699    | -0.0863 | -58   | 112        | 123      | HEKYTSQLQLTK                    |           |         |                        |      | Mascot      |
| 1589.8645  | 1589.7491   | -0.1154 | -73   | 486        | 499      | VFGVEDNQALTKLR                  |           |         |                        |      | Mascot      |
| 1589.8645  | 1589.7491   | -0.1154 | -73   | 486        | 499      | VFGVEDNQALTKLR                  |           |         |                        |      | Mascot      |
| 1611.839   | 1611.7267   | -0.1123 | -70   | 542        | 555      | WVSQWASLAASHIR                  |           |         |                        |      | Mascot      |
| 1638.7462  | 1638.7953   | 0.0491  | 30    | 28         | 41       | DDCELMLQSRSDVK                  |           |         |                        |      | Mascot      |
| 1676.8663  | 1676.6877   | -0.1786 | -107  | 1055       | 1068     | HPSHHTRPRPMAPR                  |           |         |                        |      | Mascot      |
| 1838.9242  | 1838.8472   | -0.077  | -42   | 139        | 156      | GAEGGKETEVRPSEPAPK              |           |         |                        |      | Mascot      |
| 2072.9519  | 2073        | 0.0481  | 23    | 1037       | 1054     | RVPIEYASTSEDEYGSNR              |           |         |                        |      | Mascot      |
| 2584.4192  | 2584.1028   | -0.3164 | -122  | 1242       | 1264     | AENEVLLLKTSNQEISSILQNLK         |           |         |                        |      | Mascot      |
| 3338.7585  | 3338.6108   | -0.1477 | -44   | 1266       | 1296     | VERQLLVIDIMVDPDGLTDALSNLGLTSPLM |           |         |                        |      | Mascot      |

|                       |           |                               |                |                       |                    |
|-----------------------|-----------|-------------------------------|----------------|-----------------------|--------------------|
| <b>Gel Idx/Pos</b>    | 260/K12   | <b>Instr./Gel Origin</b>      | BA2060/110707A | <b>Process Status</b> | Analysis Succeeded |
| <b>Plate [#] Name</b> | [1] 31496 | <b>Instrument Sample Name</b> |                | <b>Spectra</b>        | 11                 |

| Rank | Protein Name                                                                  | Accession No. | Protein MW | Protein PI | Pep. Count | Protein Score | Protein Score C. I. % | Total Ion Score | Total Ion C. I. % |
|------|-------------------------------------------------------------------------------|---------------|------------|------------|------------|---------------|-----------------------|-----------------|-------------------|
| 1    | deoxyuridine 5'-triphosphate nucleotidohydrolase, mitochondrial [Danio rerio] | gi 54400512   | 20094.3    | 8.39       | 4          | 138           | 100                   | 118             | 100               |

| Peptide Information |                                                                                                     |             |         |       |              |                                         |           |         |                         |                  |
|---------------------|-----------------------------------------------------------------------------------------------------|-------------|---------|-------|--------------|-----------------------------------------|-----------|---------|-------------------------|------------------|
|                     | Calc. Mass                                                                                          | Obsrv. Mass | ± da    | ± ppm | Start Seq.   | End Sequence Seq.                       | Ion Score | C. I. % | Modification            | Rank Result Type |
|                     | 1302.6835                                                                                           | 1302.6656   | -0.0179 | -14   | 149          | 159 GDRIAQLICEK                         |           |         | Carbamidomethyl (C)[9]  | Mascot           |
|                     | 2051.0701                                                                                           | 2051.0142   | -0.0559 | -27   | 14           | 33 LNGCLLGRGAEVTEAVS<br>PHK             |           |         |                         | Mascot           |
|                     | 2122.9961                                                                                           | 2122.9131   | -0.083  | -39   | 160          | 176 ICYPDLQELQTLDETER                   | 118       | 100     | Carbamidomethyl (C)[2]  | Mascot           |
|                     | 2122.9961                                                                                           | 2122.9131   | -0.083  | -39   | 160          | 176 ICYPDLQELQTLDETER                   |           |         | Carbamidomethyl (C)[2]  | Mascot           |
|                     | 2233.1248                                                                                           | 2232.9983   | -0.1265 | -57   | 109          | 129 SGLAVKHFVDVGAGVVD<br>EDYR           |           |         |                         | Mascot           |
| 2                   | RecName: Full=Contactin-1a; AltName: Full=F3/F11/contactin; AltName: Full=Neural cell recognition m |             |         |       | gij55976512  |                                         | 114263.1  | 6.25    | 15                      | 46 0             |
| Peptide Information |                                                                                                     |             |         |       |              |                                         |           |         |                         |                  |
|                     | Calc. Mass                                                                                          | Obsrv. Mass | ± da    | ± ppm | Start Seq.   | End Sequence Seq.                       | Ion Score | C. I. % | Modification            | Rank Result Type |
|                     | 856.5111                                                                                            | 856.4889    | -0.0222 | -26   | 434          | 441 LLGARNGR                            |           |         |                         | Mascot           |
|                     | 1045.5173                                                                                           | 1045.5258   | 0.0085  | 8     | 562          | 569 DAQHYQRK                            |           |         |                         | Mascot           |
|                     | 1062.5513                                                                                           | 1062.6549   | 0.1036  | 98    | 442          | 449 VVFECRPR                            |           |         | Carbamidomethyl (C)[5]  | Mascot           |
|                     | 1090.4912                                                                                           | 1090.491    | -0.0002 | 0     | 656          | 664 ESAAQQDWR                           |           |         |                         | Mascot           |
|                     | 1106.5323                                                                                           | 1106.5146   | -0.0177 | -16   | 625          | 634 VDEVTSDSVR                          |           |         |                         | Mascot           |
|                     | 1434.7231                                                                                           | 1434.7195   | -0.0036 | -3    | 1            | 12 MIPEAFQPRAMK                         |           |         | Oxidation (M)[1]        | Mascot           |
|                     | 1691.6965                                                                                           | 1691.7413   | 0.0448  | 26    | 487          | 500 SDEGKYTCFAENDR                      |           |         | Carbamidomethyl (C)[8]  | Mascot           |
|                     | 1691.6965                                                                                           | 1691.7413   | 0.0448  | 26    | 487          | 500 SDEGKYTCFAENDR                      |           |         | Carbamidomethyl (C)[8]  | Mascot           |
|                     | 1707.7683                                                                                           | 1707.7114   | -0.0569 | -33   | 138          | 151 VQFGYLDMFSTDER                      |           |         |                         | Mascot           |
|                     | 2224.9749                                                                                           | 2225.0334   | 0.0585  | 26    | 388          | 406 FSRLGFEDSGMYQCVAE<br>NR             |           |         | Oxidation (M)[11]       | Mascot           |
|                     | 2224.9749                                                                                           | 2225.0334   | 0.0585  | 26    | 388          | 406 FSRLGFEDSGMYQCVAE<br>NR             |           |         | Oxidation (M)[11]       | Mascot           |
|                     | 2230.0305                                                                                           | 2230.1023   | 0.0718  | 32    | 114          | 134 SKHAGNYTCVASNQYGS<br>VTSR           |           |         |                         | Mascot           |
|                     | 2283.092                                                                                            | 2283.0952   | 0.0032  | 1     | 594          | 614 YSCTAQTPVDNTTASAE<br>VVR            |           |         | Carbamidomethyl (C)[3]  | Mascot           |
|                     | 2283.092                                                                                            | 2283.0952   | 0.0032  | 1     | 594          | 614 YSCTAQTPVDNTTASAE<br>VVR            |           |         | Carbamidomethyl (C)[3]  | Mascot           |
|                     | 2284.2131                                                                                           | 2284.0898   | -0.1233 | -54   | 442          | 460 VVFECRPRAAPRPNITW<br>SK             |           |         | Carbamidomethyl (C)[5]  | Mascot           |
|                     | 2299.1426                                                                                           | 2299.1025   | -0.0401 | -17   | 986          | 1007 GEYLVEVRAHSEGGDGA<br>VAQVR         |           |         |                         | Mascot           |
|                     | 3323.5889                                                                                           | 3323.6208   | 0.0319  | 10    | 665          | 694 DAATSPVNVEGNAEMAT<br>VVNLLPWTEYEFR  |           |         |                         | Mascot           |
|                     | 3338.7102                                                                                           | 3338.6084   | -0.1018 | -30   | 256          | 284 SPDSWALLGQNVTLCECF<br>ALGNPIPIQIRWR |           |         | Carbamidomethyl (C)[16] | Mascot           |
| 3                   | contactin-1a precursor [Danio rerio]                                                                |             |         |       | gij136256388 |                                         | 114246.1  | 6.19    | 15                      | 44 0             |

| Peptide Information |                    |         |       |            |          |                                     |           |         |                        |      |             |
|---------------------|--------------------|---------|-------|------------|----------|-------------------------------------|-----------|---------|------------------------|------|-------------|
| Calc. Mass          | Obsrv. Mass        | ± da    | ± ppm | Start Seq. | End Seq. | Sequence                            | Ion Score | C. I. % | Modification           | Rank | Result Type |
| 856.5111            | 856.4889           | -0.0222 | -26   | 434        | 441      | LLGARNGR                            |           |         |                        |      | Mascot      |
| 1045.5173           | 1045.5258          | 0.0085  | 8     | 562        | 569      | DAQHYQRK                            |           |         |                        |      | Mascot      |
| 1062.5513           | 1062.6549          | 0.1036  | 98    | 442        | 449      | VVFECRPR                            |           |         | Carbamidomethyl (C)[5] |      | Mascot      |
| 1090.4912           | 1090.491           | -0.0002 | 0     | 656        | 664      | ESAAQQDWR                           |           |         |                        |      | Mascot      |
| 1106.5323           | 1106.5146          | -0.0177 | -16   | 625        | 634      | VDEVTSDSVR                          |           |         |                        |      | Mascot      |
| 1434.7231           | 1434.7195          | -0.0036 | -3    | 1          | 12       | MIPEAFQPRAMK                        |           |         | Oxidation (M)[1]       |      | Mascot      |
| 1638.7581           | 1638.7983          | 0.0402  | 25    | 931        | 944      | MHYSGSSINIAWEK                      |           |         | Oxidation (M)[1]       |      | Mascot      |
| 1691.6965           | 1691.7413          | 0.0448  | 26    | 487        | 500      | SDEGKYTCFAENDR                      |           |         | Carbamidomethyl (C)[8] |      | Mascot      |
| 1691.6965           | 1691.7413          | 0.0448  | 26    | 487        | 500      | SDEGKYTCFAENDR                      |           |         | Carbamidomethyl (C)[8] |      | Mascot      |
| 1707.7683           | 1707.7114          | -0.0569 | -33   | 138        | 151      | VQFGYLDMFSTDER                      |           |         |                        |      | Mascot      |
| 2224.9749           | 2225.0334          | 0.0585  | 26    | 388        | 406      | FSRLGFEDSGMYQCVAE<br>NR             |           |         | Oxidation (M)[11]      |      | Mascot      |
| 2224.9749           | 2225.0334          | 0.0585  | 26    | 388        | 406      | FSRLGFEDSGMYQCVAE<br>NR             |           |         | Oxidation (M)[11]      |      | Mascot      |
| 2230.0305           | 2230.1023          | 0.0718  | 32    | 114        | 134      | SKHAGNYTCVASNQYGS<br>VTSR           |           |         |                        |      | Mascot      |
| 2283.092            | 2283.0952          | 0.0032  | 1     | 594        | 614      | YSCTAQTTPVDNTTASAE<br>VVR           |           |         | Carbamidomethyl (C)[3] |      | Mascot      |
| 2283.092            | 2283.0952          | 0.0032  | 1     | 594        | 614      | YSCTAQTTPVDNTTASAE<br>VVR           |           |         | Carbamidomethyl (C)[3] |      | Mascot      |
| 2284.2131           | 2284.0898          | -0.1233 | -54   | 442        | 460      | VVFECRPRAAPRPNITW<br>SK             |           |         | Carbamidomethyl (C)[5] |      | Mascot      |
| 2299.1426           | 2299.1025          | -0.0401 | -17   | 986        | 1007     | GEYLVVEVRAHSEGGDGA<br>VAQVR         |           |         |                        |      | Mascot      |
| 3323.5889           | 3323.6208          | 0.0319  | 10    | 665        | 694      | DAATSPVNVVEGNAEMAT<br>VNNLLPWTEYEFR |           |         |                        |      | Mascot      |
| 4                   | Pbx2 [Danio rerio] |         |       | gi 7861936 | 18895.6  | 9.08                                | 7         | 44      | 0                      | 7    | 0           |

| Peptide Information |             |         |       |            |          |                         |           |         |                                          |                  |
|---------------------|-------------|---------|-------|------------|----------|-------------------------|-----------|---------|------------------------------------------|------------------|
| Calc. Mass          | Obsrv. Mass | ± da    | ± ppm | Start Seq. | End Seq. | Sequence                | Ion Score | C. I. % | Modification                             | Rank Result Type |
| 864.4686            | 864.501     | 0.0324  | 37    | 153        | 159      | SRFLDAR                 |           |         |                                          | Mascot           |
| 1051.5782           | 1051.6759   | 0.0977  | 93    | 133        | 141      | FSSIQTLQK               |           |         |                                          | Mascot           |
| 1179.6442           | 1179.5604   | -0.0838 | -71   | 1          | 10       | ALFSVLCEIK              |           |         | Carbamidomethyl (C)[7]                   | Mascot           |
| 1179.6732           | 1179.5604   | -0.1128 | -96   | 132        | 141      | KFSSIQTLQK              | 9         | 0       |                                          | Mascot           |
| 1307.6447           | 1307.6309   | -0.0138 | -11   | 142        | 152      | QSTCEAVMILR             |           |         | Carbamidomethyl (C)[4]                   | Mascot           |
| 1323.6395           | 1323.626    | -0.0135 | -10   | 142        | 152      | QSTCEAVMILR             |           |         | Carbamidomethyl (C)[4], Oxidation (M)[8] | Mascot           |
| 1493.7563           | 1493.6807   | -0.0756 | -51   | 142        | 154      | QSTCEAVMILRSR           |           |         |                                          | Mascot           |
| 2283.1836           | 2283.0952   | -0.0884 | -39   | 133        | 152      | FSSIQTLKQSTCEAVMI<br>LR |           |         |                                          | Mascot           |
| 2283.1836           | 2283.0952   | -0.0884 | -39   | 133        | 152      | FSSIQTLKQSTCEAVMI       |           |         |                                          | Mascot           |

|                     |                                                                                |             |         |       |            |              |                                |         |           |       |    |                                            |                  |
|---------------------|--------------------------------------------------------------------------------|-------------|---------|-------|------------|--------------|--------------------------------|---------|-----------|-------|----|--------------------------------------------|------------------|
|                     | 2299.1785                                                                      | 2299.1025   | -0.076  | -33   | 133        | 152          | LR<br>FSSIQTQLKQSTCEAVMI<br>LR |         |           |       |    | Oxidation (M)[17]                          | Mascot           |
| 5                   | TCR-alpha V segment I-2 (according to annotation by Tatsuya Ota) [Danio rerio] |             |         |       |            | gj 26984615  |                                | 13055.5 | 6.59      | 6     | 43 | 0                                          |                  |
| Peptide Information |                                                                                |             |         |       |            |              |                                |         |           |       |    |                                            |                  |
|                     | Calc. Mass                                                                     | Obsrv. Mass | ± da    | ± ppm | Start Seq. | End Seq.     | Sequence                       |         | Ion Score | C. I. | %  | Modification                               | Rank Result Type |
|                     | 848.4471                                                                       | 848.4927    | 0.0456  | 54    | 32         | 38           | TERESVK                        |         |           |       |    |                                            | Mascot           |
|                     | 1179.5349                                                                      | 1179.5604   | 0.0255  | 22    | 73         | 83           | SNSARDTSDAR                    |         |           |       |    |                                            | Mascot           |
|                     | 1179.5349                                                                      | 1179.5604   | 0.0255  | 22    | 73         | 83           | SNSARDTSDAR                    |         |           |       |    |                                            | Mascot           |
|                     | 1851.9629                                                                      | 1851.8528   | -0.1101 | -59   | 4          | 20           | CMLLIILMASDVTAVDK              |         |           |       |    | Oxidation (M)[2]                           | Mascot           |
|                     | 2225.1411                                                                      | 2225.0334   | -0.1077 | -48   | 1          | 20           | MNKCMLLIILMASDVTAVDK           |         |           |       |    | Oxidation (M)[1]                           | Mascot           |
|                     | 2225.1411                                                                      | 2225.0334   | -0.1077 | -48   | 1          | 20           | MNKCMLLIILMASDVTAVDK           |         |           |       |    | Oxidation (M)[1]                           | Mascot           |
|                     | 2298.1575                                                                      | 2298.0945   | -0.063  | -27   | 1          | 20           | MNKCMLLIILMASDVTAVDK           |         |           |       |    | Carbamidomethyl (C)[4], Oxidation (M)[1,5] | Mascot           |
|                     | 2501.332                                                                       | 2501.1433   | -0.1887 | -75   | 91         | 113          | ISTDLIIKTAALSDSALYYCALR        |         |           |       |    |                                            | Mascot           |
|                     | 2705.3921                                                                      | 2705.0432   | -0.3489 | -129  | 4          | 28           | CMLLIILMASDVTAVDKIEPNSGSK      |         |           |       |    | Carbamidomethyl (C)[1]                     | Mascot           |
| 6                   | small ubiquitin-related modifier 3 precursor [Danio rerio]                     |             |         |       |            | gj 239048085 |                                | 10690.3 | 5.34      | 6     | 43 | 0                                          |                  |
| Peptide Information |                                                                                |             |         |       |            |              |                                |         |           |       |    |                                            |                  |
|                     | Calc. Mass                                                                     | Obsrv. Mass | ± da    | ± ppm | Start Seq. | End Seq.     | Sequence                       |         | Ion Score | C. I. | %  | Modification                               | Rank Result Type |
|                     | 838.4893                                                                       | 838.5067    | 0.0174  | 21    | 35         | 41           | RHTPLSK                        |         |           |       |    |                                            | Mascot           |
|                     | 848.4182                                                                       | 848.4927    | 0.0745  | 88    | 1          | 7            | MSEEEKPK                       |         |           |       |    |                                            | Mascot           |
|                     | 864.4131                                                                       | 864.501     | 0.0879  | 102   | 1          | 7            | MSEEEKPK                       |         |           |       |    | Oxidation (M)[1]                           | Mascot           |
|                     | 1234.6426                                                                      | 1234.6324   | -0.0102 | -8    | 21         | 32           | VAGQDGSVVQFK                   |         |           |       |    |                                            | Mascot           |
|                     | 1277.6405                                                                      | 1277.6602   | 0.0197  | 15    | 1          | 11           | MSEEEKPKEGVK                   |         |           |       |    | Oxidation (M)[1]                           | Mascot           |
|                     | 1475.8217                                                                      | 1475.7014   | -0.1203 | -82   | 21         | 34           | VAGQDGSVVQFKIK                 |         |           |       |    |                                            | Mascot           |
|                     | 2299.1677                                                                      | 2299.1025   | -0.0652 | -28   | 12         | 32           | TENDHINLKVAGQDGSVVQFK          |         |           |       |    |                                            | Mascot           |
| 7                   | PREDICTED: tripartite motif-containing protein 35-like [Danio rerio]           |             |         |       |            | gj 326678845 |                                | 52995.6 | 8.51      | 11    | 41 | 0                                          |                  |
| Peptide Information |                                                                                |             |         |       |            |              |                                |         |           |       |    |                                            |                  |
|                     | Calc. Mass                                                                     | Obsrv. Mass | ± da    | ± ppm | Start Seq. | End Seq.     | Sequence                       |         | Ion Score | C. I. | %  | Modification                               | Rank Result Type |
|                     | 856.4523                                                                       | 856.4889    | 0.0366  | 43    | 111        | 117          | DSEKHLK                        |         |           |       |    |                                            | Mascot           |
|                     | 1045.5887                                                                      | 1045.5258   | -0.0629 | -60   | 131        | 139          | KEELNTALK                      |         |           |       |    |                                            | Mascot           |

|           |           |         |     |     |     |                                   |                                              |        |
|-----------|-----------|---------|-----|-----|-----|-----------------------------------|----------------------------------------------|--------|
| 1106.4718 | 1106.5146 | 0.0428  | 39  | 43  | 51  | NTQECPVCR                         | Carbamidomethyl (C)[5]                       | Mascot |
| 1323.6765 | 1323.626  | -0.0505 | -38 | 33  | 42  | ECLQEFWKIK                        |                                              | Mascot |
| 1448.7024 | 1448.8733 | 0.1709  | 118 | 20  | 32  | TPVILSCGHSFCK                     | Carbamidomethyl (C)[7]                       | Mascot |
| 1589.7893 | 1589.7465 | -0.0428 | -27 | 337 | 350 | GFNSGKHCVVVEVK                    |                                              | Mascot |
| 1589.7893 | 1589.7465 | -0.0428 | -27 | 337 | 350 | GFNSGKHCVVVEVK                    |                                              | Mascot |
| 2050.9651 | 2051.0142 | 0.0491  | 24  | 382 | 399 | YQYQQSGSFCIKQALD<br>R             |                                              | Mascot |
| 2211.1372 | 2211.0242 | -0.113  | -51 | 52  | 71  | RPSMADPPVNLALKNLC<br>ESR          |                                              | Mascot |
| 2284.1536 | 2284.0898 | -0.0638 | -28 | 52  | 71  | RPSMADPPVNLALKNLC<br>ESR          | Carbamidomethyl (C)[17], Oxidation (M)[4]    | Mascot |
| 2312.9871 | 2313.0933 | 0.1062  | 46  | 1   | 19  | MASSAEYDYICPVCQDIF<br>K           | Carbamidomethyl (C)[11,14], Oxidation (M)[1] | Mascot |
| 3323.5593 | 3323.6208 | 0.0615  | 19  | 212 | 240 | EMNTHISALSHTITDEE<br>MLKANDVCFLK  | Oxidation (M)[2,19]                          | Mascot |
| 3338.6572 | 3338.6084 | -0.0488 | -15 | 281 | 309 | MQDIVQYTPVILNPNTAH<br>PELELSDDLTR | Oxidation (M)[1]                             | Mascot |

8 LOC559236 protein [Danio rerio] gi|141796908 49941.7 8.76 10 39 0

#### Peptide Information

| Calc. Mass | Obsrv. Mass | ± da    | ± ppm | Start Seq. | End Seq. | Sequence                     | Ion Score | C. I. % | Modification                             | Rank | Result Type |
|------------|-------------|---------|-------|------------|----------|------------------------------|-----------|---------|------------------------------------------|------|-------------|
| 807.4141   | 807.3688    | -0.0453 | -56   | 314        | 320      | KVASSCR                      |           |         | Carbamidomethyl (C)[6]                   |      | Mascot      |
| 840.5665   | 840.4894    | -0.0771 | -92   | 8          | 14       | KPKLLNK                      |           |         |                                          |      | Mascot      |
| 850.4338   | 850.5124    | 0.0786  | 92    | 72         | 78       | SNEMLLK                      |           |         | Oxidation (M)[4]                         |      | Mascot      |
| 850.4338   | 850.5124    | 0.0786  | 92    | 72         | 78       | SNEMLLK                      |           |         | Oxidation (M)[4]                         |      | Mascot      |
| 1090.5674  | 1090.491    | -0.0764 | -70   | 315        | 324      | VASSCRSVPK                   |           |         | Carbamidomethyl (C)[5]                   |      | Mascot      |
| 1165.5419  | 1165.7042   | 0.1623  | 139   | 382        | 390      | CTNQTREWK                    |           |         |                                          |      | Mascot      |
| 1165.5419  | 1165.7042   | 0.1623  | 139   | 382        | 390      | CTNQTREWK                    |           |         |                                          |      | Mascot      |
| 1234.6283  | 1234.6324   | 0.0041  | 3     | 321        | 331      | SVPKTCALMER                  |           |         |                                          |      | Mascot      |
| 1307.6447  | 1307.6309   | -0.0138 | -11   | 321        | 331      | SVPKTCALMER                  |           |         | Carbamidomethyl (C)[6], Oxidation (M)[9] |      | Mascot      |
| 1434.7739  | 1434.7195   | -0.0544 | -38   | 170        | 181      | VHYGFILKSENK                 |           |         |                                          |      | Mascot      |
| 1993.9655  | 1993.8987   | -0.0668 | -34   | 250        | 266      | AQPWWTAEQTGYTDLVK            |           |         |                                          |      | Mascot      |
| 2239.1968  | 2239.0525   | -0.1443 | -64   | 79         | 98       | AVNTYREVAELPDVPPDL<br>IK     |           |         |                                          |      | Mascot      |
| 2705.29    | 2705.0432   | -0.2468 | -91   | 277        | 300      | DEALSVLDSNSGQFLPE<br>DENLREK |           |         |                                          |      | Mascot      |

9 PREDICTED: aspartyl/asparaginyl beta-hydroxylase [Danio rerio] gi|326669617 67711.7 6.74 11 39 0

#### Peptide Information

| Calc. Mass | Obsrv. Mass | ± da    | ± ppm | Start Seq. | End Seq. | Sequence | Ion Score | C. I. % | Modification           | Rank | Result Type |
|------------|-------------|---------|-------|------------|----------|----------|-----------|---------|------------------------|------|-------------|
| 807.4141   | 807.3688    | -0.0453 | -56   | 478        | 484      | KVASSCR  |           |         | Carbamidomethyl (C)[6] |      | Mascot      |



|           |                                                   |         |     |              |     |                              |      |    |    |                                          |  |  |        |
|-----------|---------------------------------------------------|---------|-----|--------------|-----|------------------------------|------|----|----|------------------------------------------|--|--|--------|
| 840.5665  | 840.4894                                          | -0.0771 | -92 | 172          | 178 | KPKLLNK                      |      |    |    |                                          |  |  | Mascot |
| 850.4338  | 850.5124                                          | 0.0786  | 92  | 236          | 242 | SNEMLLK                      |      |    |    | Oxidation (M)[4]                         |  |  | Mascot |
| 850.4338  | 850.5124                                          | 0.0786  | 92  | 236          | 242 | SNEMLLK                      |      |    |    | Oxidation (M)[4]                         |  |  | Mascot |
| 1090.5674 | 1090.491                                          | -0.0764 | -70 | 479          | 488 | VASSCRSVPK                   |      |    |    | Carbamidomethyl (C)[5]                   |  |  | Mascot |
| 1165.5419 | 1165.7042                                         | 0.1623  | 139 | 546          | 554 | CTNQTREWK                    |      |    |    |                                          |  |  | Mascot |
| 1165.5419 | 1165.7042                                         | 0.1623  | 139 | 546          | 554 | CTNQTREWK                    |      |    |    |                                          |  |  | Mascot |
| 1234.6283 | 1234.6324                                         | 0.0041  | 3   | 485          | 495 | SVPKTCALMER                  |      |    |    |                                          |  |  | Mascot |
| 1307.6447 | 1307.6309                                         | -0.0138 | -11 | 485          | 495 | SVPKTCALMER                  |      |    |    | Carbamidomethyl (C)[6], Oxidation (M)[9] |  |  | Mascot |
| 1434.7739 | 1434.7195                                         | -0.0544 | -38 | 334          | 345 | VHYGFILKSENK                 |      |    |    |                                          |  |  | Mascot |
| 1589.7765 | 1589.7465                                         | -0.03   | -19 | 14           | 27  | ESPVENTTVRSENK               |      |    |    |                                          |  |  | Mascot |
| 1589.7765 | 1589.7465                                         | -0.03   | -19 | 14           | 27  | ESPVENTTVRSENK               |      |    |    |                                          |  |  | Mascot |
| 1993.9655 | 1993.8987                                         | -0.0668 | -34 | 414          | 430 | AQPWWTAEQGYTDLVK             |      |    |    |                                          |  |  | Mascot |
| 2239.1968 | 2239.0525                                         | -0.1443 | -64 | 243          | 262 | AVNTYREVAELPDVPPDL<br>IK     |      |    |    |                                          |  |  | Mascot |
| 2705.29   | 2705.0432                                         | -0.2468 | -91 | 441          | 464 | DEALSVLDSNSGQFLPE<br>DENLREK |      |    |    |                                          |  |  | Mascot |
| 10        | PREDICTED: GAS2-like protein 2-like [Danio rerio] |         |     | gi 326668195 |     | 100432.5                     | 9.58 | 13 | 37 | 0                                        |  |  |        |

Peptide Information

| Calc. Mass | Obsrv. Mass | ± da    | ± ppm | Start Seq. | End Seq. | Sequence                | Ion Score | C. I. % | Modification            | Rank | Result | Type |
|------------|-------------|---------|-------|------------|----------|-------------------------|-----------|---------|-------------------------|------|--------|------|
| 807.4246   | 807.3688    | -0.0558 | -69   | 66         | 72       | VADDFLK                 |           |         |                         |      | Mascot |      |
| 856.3981   | 856.4889    | 0.0908  | 106   | 657        | 663      | IPSDHCK                 |           |         | Carbamidomethyl (C)[6]  |      | Mascot |      |
| 996.5883   | 996.5621    | -0.0262 | -26   | 808        | 815      | LRPCVRPR                |           |         |                         |      | Mascot |      |
| 996.5883   | 996.5621    | -0.0262 | -26   | 808        | 815      | LRPCVRPR                |           |         |                         |      | Mascot |      |
| 1045.5636  | 1045.5258   | -0.0378 | -36   | 668        | 677      | SASLDRATPK              |           |         |                         |      | Mascot |      |
| 1109.6062  | 1109.4491   | -0.1571 | -142  | 377        | 386      | DATRTPPVPR              |           |         |                         |      | Mascot |      |
| 1302.5968  | 1302.6656   | 0.0688  | 53    | 836        | 847      | TSCRDGGSHNLR            |           |         |                         |      | Mascot |      |
| 1460.8584  | 1460.7429   | -0.1155 | -79   | 265        | 277      | LTARPVTPVHEIK           |           |         |                         |      | Mascot |      |
| 1589.7594  | 1589.7465   | -0.0129 | -8    | 239        | 252      | VGGGWDTLEHYLDK          |           |         |                         |      | Mascot |      |
| 1589.7594  | 1589.7465   | -0.0129 | -8    | 239        | 252      | VGGGWDTLEHYLDK          |           |         |                         |      | Mascot |      |
| 2123.04    | 2122.9131   | -0.1269 | -60   | 113        | 130      | EMSIPDVLMFETDDLVL       |           |         |                         |      | Mascot |      |
| 2123.04    | 2122.9131   | -0.1269 | -60   | 113        | 130      | EMSIPDVLMFETDDLVL       |           |         |                         |      | Mascot |      |
| 2153.0002  | 2152.9797   | -0.0205 | -10   | 349        | 367      | ERPGTPQMFTCPDSKDS<br>LK |           |         | Oxidation (M)[8]        |      | Mascot |      |
| 2194.0266  | 2194.0044   | -0.0222 | -10   | 349        | 367      | ERPGTPQMFTCPDSKDS<br>LK |           |         | Carbamidomethyl (C)[11] |      | Mascot |      |
| 2283.1248  | 2283.0952   | -0.0296 | -13   | 113        | 131      | EMSIPDVLMFETDDLVL<br>K  |           |         | Oxidation (M)[2,9]      |      | Mascot |      |
| 2283.1248  | 2283.0952   | -0.0296 | -13   | 112        | 130      | KEMSIPDVLMFETDDLVL<br>R |           |         | Oxidation (M)[3,10]     |      | Mascot |      |

|    |                                        |           |         |     |              |         |                                 |   |    |   |  |                      |        |
|----|----------------------------------------|-----------|---------|-----|--------------|---------|---------------------------------|---|----|---|--|----------------------|--------|
|    | 3338.6616                              | 3338.6084 | -0.0532 | -16 | 183          | 211     | SLINIQNLDEMVLISRC<br>SCPSQFPMVK |   |    |   |  | Oxidation (M)[11,27] | Mascot |
| 11 | PREDICTED: protein CASC4 [Danio rerio] |           |         |     | gi 125821657 | 49396.4 | 6.03                            | 9 | 37 | 0 |  |                      |        |

Peptide Information

| Calc. Mass | Obsrv. Mass | ± da    | ± ppm | Start Seq. | End Seq. | Sequence                         | Ion Score | C. I. | % Modification       | Rank | Result Type |
|------------|-------------|---------|-------|------------|----------|----------------------------------|-----------|-------|----------------------|------|-------------|
| 801.4464   | 801.3264    | -0.12   | -150  | 369        | 376      | QVGAEGLK                         |           |       |                      |      | Mascot      |
| 864.476    | 864.501     | 0.025   | 29    | 1          | 8        | MIGFGAIR                         |           |       |                      |      | Mascot      |
| 882.5407   | 882.5356    | -0.0051 | -6    | 272        | 279      | KPAITPQK                         |           |       |                      |      | Mascot      |
| 1320.6178  | 1320.5358   | -0.082  | -62   | 420        | 431      | DAPGERNVYDGK                     |           |       |                      |      | Mascot      |
| 1460.6621  | 1460.7429   | 0.0808  | 55    | 67         | 78       | NSELMQVDTHR                      |           |       |                      |      | Mascot      |
| 1707.8547  | 1707.7114   | -0.1433 | -84   | 80         | 94       | QIDLKGDYSALQNK                   |           |       |                      |      | Mascot      |
| 2153.0581  | 2152.9797   | -0.0784 | -36   | 199        | 217      | NADSVVQHVDLDQSN<br>KR            |           |       |                      |      | Mascot      |
| 2194.1357  | 2194.0044   | -0.1313 | -60   | 272        | 291      | KPAITPQKHMEPAEAAA<br>MLK         |           |       | Oxidation (M)[10,18] |      | Mascot      |
| 3323.7126  | 3323.6208   | -0.0918 | -28   | 328        | 355      | LMNRDIPVQQQVPQPVVI<br>KPMLFDEDNK |           |       | Oxidation (M)[2,21]  |      | Mascot      |

|    |                                                                           |  |  |  |              |          |      |    |    |   |  |  |
|----|---------------------------------------------------------------------------|--|--|--|--------------|----------|------|----|----|---|--|--|
| 12 | PREDICTED: chromodomain-helicase-DNA-binding protein 9-like [Danio rerio] |  |  |  | gi 326669481 | 278654.9 | 8.67 | 22 | 36 | 0 |  |  |
|----|---------------------------------------------------------------------------|--|--|--|--------------|----------|------|----|----|---|--|--|

Peptide Information

| Calc. Mass | Obsrv. Mass | ± da    | ± ppm | Start Seq. | End Seq. | Sequence           | Ion Score | C. I. | % Modification                             | Rank | Result Type |
|------------|-------------|---------|-------|------------|----------|--------------------|-----------|-------|--------------------------------------------|------|-------------|
| 801.4213   | 801.3264    | -0.0949 | -118  | 164        | 171      | SHKAGSSK           |           |       |                                            |      | Mascot      |
| 842.4665   | 842.4807    | 0.0142  | 17    | 1477       | 1483     | AMARLHK            |           |       | Oxidation (M)[2]                           |      | Mascot      |
| 870.5043   | 870.5098    | 0.0055  | 6     | 1807       | 1815     | NASVVPGVK          |           |       |                                            |      | Mascot      |
| 1051.5604  | 1051.6759   | 0.1155  | 110   | 603        | 611      | NCKLLEGFK          |           |       |                                            |      | Mascot      |
| 1090.5172  | 1090.491    | -0.0262 | -24   | 740        | 748      | CCNHPYLIK          |           |       |                                            |      | Mascot      |
| 1106.5437  | 1106.5146   | -0.0291 | -26   | 2356       | 2365     | AERTEAQSSK         |           |       |                                            |      | Mascot      |
| 1179.6481  | 1179.5604   | -0.0877 | -74   | 1046       | 1055     | KQTRPFSSTK         |           |       |                                            |      | Mascot      |
| 1179.6481  | 1179.5604   | -0.0877 | -74   | 1046       | 1055     | KQTRPFSSTK         |           |       |                                            |      | Mascot      |
| 1234.6249  | 1234.6324   | 0.0075  | 6     | 1294       | 1303     | ADPKLCFLDR         |           |       | Carbamidomethyl (C)[6]                     |      | Mascot      |
| 1279.6021  | 1279.7313   | 0.1292  | 101   | 477        | 488      | NCILADEMGLGK       |           |       | Oxidation (M)[8]                           |      | Mascot      |
| 1320.5897  | 1320.5358   | -0.0539 | -41   | 1492       | 1501     | YLCAFIAMCR         |           |       | Carbamidomethyl (C)[3,9], Oxidation (M)[8] |      | Mascot      |
| 1460.7703  | 1460.7429   | -0.0274 | -19   | 2345       | 2358     | SSALNLSLDGKAER     |           |       |                                            |      | Mascot      |
| 1493.7668  | 1493.6807   | -0.0861 | -58   | 807        | 818      | CLDILEDYLIQR       |           |       |                                            |      | Mascot      |
| 2211.0322  | 2211.0242   | -0.008  | -4    | 1589       | 1606     | TDYHILRDPELCYMAAQR |           |       | Oxidation (M)[14]                          |      | Mascot      |
| 2230.0715  | 2230.1023   | 0.0308  | 14    | 459        | 475      | DYQLEGVNWLLFNWYNR  |           |       |                                            |      | Mascot      |
| 2239.115   | 2239.0525   | -0.0625 | -28   | 1121       | 1138     | DVEWICRALLSYCLVHYR |           |       |                                            |      | Mascot      |

|           |           |         |      |      |      |                                              |  |  |  |                                             |  |        |
|-----------|-----------|---------|------|------|------|----------------------------------------------|--|--|--|---------------------------------------------|--|--------|
| 2282.9988 | 2283.0952 | 0.0964  | 42   | 356  | 374  | AHFFADEDPFNPDYVEV<br>DR                      |  |  |  |                                             |  | Mascot |
| 2282.9988 | 2283.0952 | 0.0964  | 42   | 356  | 374  | AHFFADEDPFNPDYVEV<br>DR                      |  |  |  |                                             |  | Mascot |
| 2298.146  | 2298.0945 | -0.0515 | -22  | 1901 | 1922 | LLDNASTLPEDPSDSPQ<br>GSKVK                   |  |  |  |                                             |  | Mascot |
| 2299.1816 | 2299.1025 | -0.0791 | -34  | 273  | 293  | KPAVQLFVENPTEEDAAV<br>VDK                    |  |  |  |                                             |  | Mascot |
| 2384.2014 | 2383.8523 | -0.3491 | -146 | 1506 | 1527 | LPAIEGDMVDSSLAIQPIT<br>EER                   |  |  |  |                                             |  | Mascot |
| 2705.2483 | 2705.0432 | -0.2051 | -76  | 1262 | 1283 | SEMPAMWWMDLSDKCL<br>LLGVYK                   |  |  |  | Carbamidomethyl (C)[15], Oxidation (M)[3,6] |  | Mascot |
| 3338.5801 | 3338.6084 | 0.0283  | 8    | 1548 | 1575 | HPQLYEHLALCQPGPDL<br>PVWWETGSHDR             |  |  |  | Carbamidomethyl (C)[11]                     |  | Mascot |
| 3354.2637 | 3354.6326 | 0.3689  | 110  | 1770 | 1806 | SGSSSSSSSSSCSSGSS<br>SSSSSSSSSSEGSDEE<br>APK |  |  |  |                                             |  | Mascot |

13 Ddx52 protein [Danio rerio] gi|45768538 56399.3 9.89 9 34 0

#### Peptide Information

| Calc. Mass | Obsrv. Mass | ± da    | ± ppm | Start Seq. | End Seq. | Sequence                      | Ion Score | C. I. % | Modification            | Rank | Result Type |
|------------|-------------|---------|-------|------------|----------|-------------------------------|-----------|---------|-------------------------|------|-------------|
| 864.4573   | 864.501     | 0.0437  | 51    | 154        | 161      | LSEGVGFR                      |           |         |                         |      | Mascot      |
| 870.5407   | 870.5098    | -0.0309 | -35   | 134        | 141      | ALIISPTR                      |           |         |                         |      | Mascot      |
| 1302.6835  | 1302.6656   | -0.0179 | -14   | 100        | 112      | REILACAPTGS GK                |           |         |                         |      | Mascot      |
| 2123.1616  | 2122.9131   | -0.2485 | -117  | 113        | 130      | TMAFCLPLLAHLRQPLNK            |           |         | Carbamidomethyl (C)[5]  |      | Mascot      |
| 2123.1616  | 2122.9131   | -0.2485 | -117  | 113        | 130      | TMAFCLPLLAHLRQPLNK            |           |         | Carbamidomethyl (C)[5]  |      | Mascot      |
| 2283.3223  | 2283.0952   | -0.2271 | -99   | 302        | 321      | NLIKQGFLPPVLV FVQSID<br>R     |           |         |                         |      | Mascot      |
| 2283.3223  | 2283.0952   | -0.2271 | -99   | 302        | 321      | NLIKQGFLPPVLV FVQSID<br>R     |           |         |                         |      | Mascot      |
| 2313.1553  | 2313.0933   | -0.062  | -27   | 79         | 99       | AAGFQTPTPIQM QAVPL<br>MMHK    |           |         | Oxidation (M)[12]       |      | Mascot      |
| 2384.188   | 2383.8523   | -0.3357 | -141  | 324        | 343      | ELYHELVEGINVDVIHA<br>DR       |           |         |                         |      | Mascot      |
| 2501.2461  | 2501.1433   | -0.1028 | -41   | 79         | 100      | AAGFQTPTPIQM QAVPL<br>MMHKR   |           |         | Oxidation (M)[12,18,19] |      | Mascot      |
| 2705.3926  | 2705.0432   | -0.3494 | -129  | 277        | 301      | NSAAETVEQQLLFVGSE<br>NGKILAMR |           |         |                         |      | Mascot      |

14 small ubiquitin-related modifier 3-like precursor [Danio rerio] gi|55742575 10676.3 5.32 5 34 0

#### Peptide Information

| Calc. Mass | Obsrv. Mass | ± da    | ± ppm | Start Seq. | End Seq. | Sequence     | Ion Score | C. I. % | Modification     | Rank | Result Type |
|------------|-------------|---------|-------|------------|----------|--------------|-----------|---------|------------------|------|-------------|
| 838.4893   | 838.5067    | 0.0174  | 21    | 35         | 41       | RHTPLSK      |           |         |                  |      | Mascot      |
| 850.3975   | 850.5124    | 0.1149  | 135   | 1          | 7        | MSEDKPK      |           |         | Oxidation (M)[1] |      | Mascot      |
| 850.3975   | 850.5124    | 0.1149  | 135   | 1          | 7        | MSEDKPK      |           |         | Oxidation (M)[1] |      | Mascot      |
| 1234.6426  | 1234.6324   | -0.0102 | -8    | 21         | 32       | VAGQDGSVVQFK |           |         |                  |      | Mascot      |

|    |                                                               |           |         |     |              |    |                           |      |    |    |   |  |  |  |  |  |        |
|----|---------------------------------------------------------------|-----------|---------|-----|--------------|----|---------------------------|------|----|----|---|--|--|--|--|--|--------|
|    | 1475.8217                                                     | 1475.7014 | -0.1203 | -82 | 21           | 34 | VAGQDGSVVQFKIK            |      |    |    |   |  |  |  |  |  | Mascot |
|    | 2299.1677                                                     | 2299.1025 | -0.0652 | -28 | 12           | 32 | TENDHINLKVAGQDGSV<br>VQFK |      |    |    |   |  |  |  |  |  | Mascot |
| 15 | PREDICTED: hypothetical protein LOC100538239<br>[Danio rerio] |           |         |     | gi 326666745 |    | 68066.3                   | 6.58 | 10 | 33 | 0 |  |  |  |  |  |        |

#### Peptide Information

| Calc. Mass | Obsrv. Mass | ± da    | ± ppm | Start Seq. | End Seq. | Sequence                 | Ion Score | C. I. | % Modification   | Rank | Result Type |
|------------|-------------|---------|-------|------------|----------|--------------------------|-----------|-------|------------------|------|-------------|
| 838.4206   | 838.5067    | 0.0861  | 103   | 6          | 12       | DPVGHWK                  |           |       |                  |      | Mascot      |
| 840.4686   | 840.4894    | 0.0208  | 25    | 91         | 97       | LTHVQSR                  |           |       |                  |      | Mascot      |
| 870.458    | 870.5098    | 0.0518  | 60    | 359        | 365      | RAYFGTR                  |           |       |                  |      | Mascot      |
| 882.458    | 882.5356    | 0.0776  | 88    | 573        | 578      | EFFQRR                   |           |       |                  |      | Mascot      |
| 1277.7212  | 1277.6602   | -0.061  | -48   | 188        | 197      | RLTQQLDYIK               |           |       |                  |      | Mascot      |
| 1279.6012  | 1279.7313   | 0.1301  | 102   | 198        | 208      | EESNSTKDELK              |           |       |                  |      | Mascot      |
| 1475.858   | 1475.7014   | -0.1566 | -106  | 314        | 325      | TDYLLLREALIR             |           |       |                  |      | Mascot      |
| 1993.9601  | 1993.8987   | -0.0614 | -31   | 326        | 343      | EFDDIESEQGLVALETK        |           |       |                  |      | Mascot      |
| 2153.0583  | 2152.9797   | -0.0786 | -37   | 366        | 382      | NEPEMEEDLNFKILFLR        |           |       | Oxidation (M)[5] |      | Mascot      |
| 2194.0774  | 2194.0044   | -0.073  | -33   | 427        | 446      | IPAVYDFNTQSQDVALEG<br>AR |           |       |                  |      | Mascot      |

|    |                                                    |  |  |  |              |  |       |      |    |    |   |  |  |  |  |  |  |
|----|----------------------------------------------------|--|--|--|--------------|--|-------|------|----|----|---|--|--|--|--|--|--|
| 16 | Replication factor C (activator 1) 3 [Danio rerio] |  |  |  | gi 156230598 |  | 40370 | 8.72 | 10 | 33 | 0 |  |  |  |  |  |  |
|----|----------------------------------------------------|--|--|--|--------------|--|-------|------|----|----|---|--|--|--|--|--|--|

#### Peptide Information

| Calc. Mass | Obsrv. Mass | ± da    | ± ppm | Start Seq. | End Seq. | Sequence                   | Ion Score | C. I. | % Modification                                 | Rank | Result Type |
|------------|-------------|---------|-------|------------|----------|----------------------------|-----------|-------|------------------------------------------------|------|-------------|
| 801.3381   | 801.3264    | -0.0117 | -15   | 155        | 160      | YMATCR                     |           |       | Carbamidomethyl (C)[5]                         |      | Mascot      |
| 856.5363   | 856.4889    | -0.0474 | -55   | 271        | 277      | LLEVRAR                    |           |       |                                                |      | Mascot      |
| 1062.5911  | 1062.6549   | 0.0638  | 60    | 50         | 57       | TRIMCLLR                   |           |       | Carbamidomethyl (C)[5]                         |      | Mascot      |
| 1179.6984  | 1179.5604   | -0.138  | -117  | 203        | 213      | EGLLLPPELAK                |           |       |                                                |      | Mascot      |
| 1179.6984  | 1179.5604   | -0.138  | -117  | 203        | 213      | EGLLLPPELAK                |           |       |                                                |      | Mascot      |
| 1234.679   | 1234.6324   | -0.0466 | -38   | 58         | 68       | ELYGAGVEKLR                |           |       |                                                |      | Mascot      |
| 1307.7933  | 1307.6309   | -0.1624 | -124  | 202        | 213      | KEGLLLPPELAK               |           |       |                                                |      | Mascot      |
| 1493.6439  | 1493.6807   | 0.0368  | 25    | 345        | 356      | KFMEDGLDNFMF               |           |       |                                                |      | Mascot      |
| 1993.8962  | 1993.8987   | 0.0025  | 1     | 155        | 170      | YMATCRILCCNSTSK            |           |       | Carbamidomethyl (C)[5,10,11], Oxidation (M)[2] |      | Mascot      |
| 2208.0867  | 2208.0339   | -0.0528 | -24   | 309        | 327      | AEVAQMAAYYEHLRLQLG<br>NK   |           |       | Oxidation (M)[6]                               |      | Mascot      |
| 2300.1855  | 2300.0874   | -0.0981 | -43   | 28         | 49       | NLVQCGDFPHLLVYGPS<br>GAGKK |           |       |                                                |      | Mascot      |
| 2300.1855  | 2300.0874   | -0.0981 | -43   | 28         | 49       | NLVQCGDFPHLLVYGPS<br>GAGKK |           |       |                                                |      | Mascot      |

|    |                                              |  |  |  |              |  |         |      |    |    |   |  |  |  |  |  |  |
|----|----------------------------------------------|--|--|--|--------------|--|---------|------|----|----|---|--|--|--|--|--|--|
| 17 | PREDICTED: hypothetical protein LOC100004944 |  |  |  | gi 125854141 |  | 69244.2 | 6.33 | 10 | 33 | 0 |  |  |  |  |  |  |
|----|----------------------------------------------|--|--|--|--------------|--|---------|------|----|----|---|--|--|--|--|--|--|

[Danio rerio]

Peptide Information

| Calc. Mass | Obsrv. Mass | ± da    | ± ppm | Start Seq. | End Seq. | Sequence                          | Ion Score | C. I. % | Modification           | Rank | Result Type |
|------------|-------------|---------|-------|------------|----------|-----------------------------------|-----------|---------|------------------------|------|-------------|
| 1045.452   | 1045.5258   | 0.0738  | 71    | 472        | 479      | CHYSDHVK                          |           |         | Carbamidomethyl (C)[1] |      | Mascot      |
| 1448.7744  | 1448.8733   | 0.0989  | 68    | 421        | 432      | ERVDIDLNLAYK                      |           |         |                        |      | Mascot      |
| 1460.7389  | 1460.7429   | 0.004   | 3     | 22         | 34       | IPVLLSCSHNFCK                     |           |         |                        |      | Mascot      |
| 1589.8679  | 1589.7465   | -0.1214 | -76   | 358        | 370      | TLKMTQDVLQIQR                     |           |         | Oxidation (M)[4]       |      | Mascot      |
| 1589.8679  | 1589.7465   | -0.1214 | -76   | 358        | 370      | TLKMTQDVLQIQR                     |           |         | Oxidation (M)[4]       |      | Mascot      |
| 1691.7911  | 1691.7413   | -0.0498 | -29   | 410        | 422      | NFEYEVEVSYKER                     |           |         |                        |      | Mascot      |
| 1691.7911  | 1691.7413   | -0.0498 | -29   | 410        | 422      | NFEYEVEVSYKER                     |           |         |                        |      | Mascot      |
| 2152.8997  | 2152.9797   | 0.08    | 37    | 462        | 479      | DYHCTVCTNKCHYSDHV<br>K            |           |         |                        |      | Mascot      |
| 2211.1147  | 2211.0242   | -0.0905 | -41   | 153        | 171      | TTLVNMVMNYMLGVERE<br>DK           |           |         |                        |      | Mascot      |
| 2239.2485  | 2239.0525   | -0.196  | -88   | 278        | 298      | IVLLFTHSDGFPPSNALIA<br>VK         |           |         |                        |      | Mascot      |
| 2283.2595  | 2283.0952   | -0.1643 | -72   | 544        | 563      | IALNTDSLNTLLHIDFLIEK              |           |         |                        |      | Mascot      |
| 2283.2595  | 2283.0952   | -0.1643 | -72   | 544        | 563      | IALNTDSLNTLLHIDFLIEK              |           |         |                        |      | Mascot      |
| 3323.3691  | 3323.6208   | 0.2517  | 76    | 433        | 461      | ATCCTVCEENCHYPGCW<br>WVSNLSRCTVMK |           |         |                        |      | Mascot      |

18 PREDICTED: zinc finger protein 850-like [Danio rerio] gi|326666761 93003 9.53 17 32 0

Peptide Information

| Calc. Mass | Obsrv. Mass | ± da    | ± ppm | Start Seq. | End Seq. | Sequence                  | Ion Score | C. I. % | Modification                               | Rank | Result Type |
|------------|-------------|---------|-------|------------|----------|---------------------------|-----------|---------|--------------------------------------------|------|-------------|
| 801.4399   | 801.3264    | -0.1135 | -142  | 368        | 373      | LKTHMR                    |           |         | Oxidation (M)[5]                           |      | Mascot      |
| 870.4719   | 870.5098    | 0.0379  | 44    | 361        | 367      | LFTQFSK                   |           |         |                                            |      | Mascot      |
| 1045.4441  | 1045.5258   | 0.0817  | 78    | 407        | 415      | TFTCTQCGK                 |           |         | Carbamidomethyl (C)[4]                     |      | Mascot      |
| 1109.4867  | 1109.4491   | -0.0376 | -34   | 268        | 276      | SFICTHCGK                 |           |         | Carbamidomethyl (C)[4,7]                   |      | Mascot      |
| 1277.4846  | 1277.6602   | 0.1756  | 137   | 630        | 638      | EYMCLECEK                 |           |         | Carbamidomethyl (C)[4,7], Oxidation (M)[3] |      | Mascot      |
| 1307.5872  | 1307.6309   | 0.0437  | 33    | 327        | 337      | CTECGKTFFPK               |           |         | Carbamidomethyl (C)[1]                     |      | Mascot      |
| 1493.7166  | 1493.6807   | -0.0359 | -24   | 500        | 512      | SFSQSSSLNLHMR             |           |         |                                            |      | Mascot      |
| 1638.8203  | 1638.7983   | -0.022  | -13   | 290        | 304      | IHTGKKPHTCTQCGK           |           |         |                                            |      | Mascot      |
| 1691.7992  | 1691.7413   | -0.0579 | -34   | 234        | 248      | IHTGERPYSCIQCGK           |           |         |                                            |      | Mascot      |
| 1691.7992  | 1691.7413   | -0.0579 | -34   | 234        | 248      | IHTGERPYSCIQCGK           |           |         |                                            |      | Mascot      |
| 1707.7828  | 1707.7114   | -0.0714 | -42   | 541        | 555      | IHTGEKPFCTCECGK           |           |         | Carbamidomethyl (C)[10]                    |      | Mascot      |
| 2194.0994  | 2194.0044   | -0.095  | -43   | 788        | 808      | LQPEGRSPICVPMANDLA<br>PAV |           |         | Oxidation (M)[13]                          |      | Mascot      |
| 2208.0171  | 2208.0339   | 0.0168  | 8     | 90         | 108      | SNLDVHTREKPYTCEQC<br>GK   |           |         |                                            |      | Mascot      |

|    |                                                  |           |        |    |              |        |                |       |                                                 |        |
|----|--------------------------------------------------|-----------|--------|----|--------------|--------|----------------|-------|-------------------------------------------------|--------|
|    | 2283.0327                                        | 2283.0952 | 0.0625 | 27 | 342          | 360    | HHMRTHTGEKPFAC | TQC   | Carbamidomethyl (C)[14,17]                      | Mascot |
|    | 2283.0327                                        | 2283.0952 | 0.0625 | 27 | 342          | 360    | HHMRTHTGEKPFAC | TQC   | Carbamidomethyl (C)[14,17]                      | Mascot |
|    | 2299.0278                                        | 2299.1025 | 0.0747 | 32 | 342          | 360    | HHMRTHTGEKPFAC | TQC   | Carbamidomethyl (C)[14,17], Oxidation (M)[3]    | Mascot |
|    | 2313.0903                                        | 2313.0933 | 0.003  | 1  | 370          | 388    | THMRIHTGEKPF   | TCYQY | Oxidation (M)[3]                                | Mascot |
|    | 3323.554                                         | 3323.6208 | 0.0668 | 20 | 556          | 583    | SFIQSSCLNVHMR  | IHTGE | Carbamidomethyl (C)[7,23,26]                    | Mascot |
|    | 3337.52                                          | 3337.6189 | 0.0989 | 30 | 193          | 220    | SFYHPGNFAVHMR  | IHTG  | Carbamidomethyl (C)[23], Oxidation (M)[12]      | Mascot |
|    | 3338.4268                                        | 3338.6084 | 0.1816 | 54 | 444          | 471    | SFNCSSHLNEHMM  | IHTG  | Carbamidomethyl (C)[4,23,26]                    | Mascot |
|    | 3354.4216                                        | 3354.6326 | 0.211  | 63 | 444          | 471    | SFNCSSHLNEHMM  | IHTG  | Carbamidomethyl (C)[4,23,26], Oxidation (M)[12] | Mascot |
| 19 | RecName: Full=Tudor domain-containing protein 7B |           |        |    | gi 334351210 | 121757 | 8.62           | 13    | 32                                              | 0      |

Peptide Information

|    | Calc. Mass                                        | Obsrv. Mass | ± da    | ± ppm | Start Seq.   | End Seq. | Sequence              | Ion Score | C. I. | % Modification                             | Rank | Result Type |
|----|---------------------------------------------------|-------------|---------|-------|--------------|----------|-----------------------|-----------|-------|--------------------------------------------|------|-------------|
|    | 848.4545                                          | 848.4927    | 0.0382  | 45    | 939          | 945      | MEEKALK               |           |       |                                            |      | Mascot      |
|    | 864.4495                                          | 864.501     | 0.0515  | 60    | 939          | 945      | MEEKALK               |           |       | Oxidation (M)[1]                           |      | Mascot      |
|    | 870.4679                                          | 870.5098    | 0.0419  | 48    | 984          | 991      | HELVSGTK              |           |       |                                            |      | Mascot      |
|    | 1062.5499                                         | 1062.6549   | 0.105   | 99    | 1            | 9        | MADEELVKK             |           |       |                                            |      | Mascot      |
|    | 1109.4966                                         | 1109.4491   | -0.0475 | -43   | 516          | 525      | AQVCEVMADK            |           |       | Oxidation (M)[7]                           |      | Mascot      |
|    | 1320.6035                                         | 1320.5358   | -0.0677 | -51   | 146          | 157      | TGCMRDPQLDGK          |           |       |                                            |      | Mascot      |
|    | 1334.7579                                         | 1334.8436   | 0.0857  | 64    | 796          | 806      | RLAHVYLFTSK           |           |       |                                            |      | Mascot      |
|    | 1589.7999                                         | 1589.7465   | -0.0534 | -34   | 95           | 107      | KTGRPQVVNCQMR         |           |       | Carbamidomethyl (C)[10], Oxidation (M)[12] |      | Mascot      |
|    | 1589.7999                                         | 1589.7465   | -0.0534 | -34   | 95           | 107      | KTGRPQVVNCQMR         |           |       | Carbamidomethyl (C)[10], Oxidation (M)[12] |      | Mascot      |
|    | 1691.8859                                         | 1691.7413   | -0.1446 | -85   | 925          | 938      | LVVLMGEMILHYNK        |           |       | Oxidation (M)[5,8]                         |      | Mascot      |
|    | 1691.8859                                         | 1691.7413   | -0.1446 | -85   | 925          | 938      | LVVLMGEMILHYNK        |           |       | Oxidation (M)[5,8]                         |      | Mascot      |
|    | 1852.0076                                         | 1851.8528   | -0.1548 | -84   | 237          | 252      | LQEVLNKHSNGLWVSK      |           |       |                                            |      | Mascot      |
|    | 2225.1013                                         | 2225.0334   | -0.0679 | -31   | 925          | 942      | LVVLMGEMILHYNKMEEK    |           |       | Oxidation (M)[5,8,15]                      |      | Mascot      |
|    | 2225.1013                                         | 2225.0334   | -0.0679 | -31   | 925          | 942      | LVVLMGEMILHYNKMEEK    |           |       | Oxidation (M)[5,8,15]                      |      | Mascot      |
|    | 2249.1482                                         | 2248.9912   | -0.157  | -70   | 445          | 464      | VEYPSVLVVDASDTNCVILR  |           |       | Carbamidomethyl (C)[16]                    |      | Mascot      |
|    | 2283.0308                                         | 2283.0952   | 0.0644  | 28    | 1067         | 1085     | DIWLHDIMAEFTDEMTKTA   |           |       | Oxidation (M)[8]                           |      | Mascot      |
|    | 2283.0308                                         | 2283.0952   | 0.0644  | 28    | 1067         | 1085     | DIWLHDIMAEFTDEMTKTA   |           |       | Oxidation (M)[8]                           |      | Mascot      |
|    | 2299.0256                                         | 2299.1025   | 0.0769  | 33    | 1067         | 1085     | DIWLHDIMAEFTDEMTKTA   |           |       | Oxidation (M)[8,15]                        |      | Mascot      |
|    | 2313.3064                                         | 2313.0933   | -0.2131 | -92   | 714          | 734      | VLDILFVDVGVQASVEVIELR |           |       |                                            |      | Mascot      |
| 20 | novel protein with EGF-like domains [Danio rerio] |             |         |       | gi 220678202 |          | 16194.7               | 8.11      | 7     | 31                                         | 0    |             |

| Peptide Information |                         |        |       |             |          |                                |           |         |                                                   |                  |
|---------------------|-------------------------|--------|-------|-------------|----------|--------------------------------|-----------|---------|---------------------------------------------------|------------------|
| Calc. Mass          | Obsrv. Mass             | ± da   | ± ppm | Start Seq.  | End Seq. | Sequence                       | Ion Score | C. I. % | Modification                                      | Rank Result Type |
| 848.4545            | 848.4927                | 0.0382 | 45    | 140         | 146      | KLDCISL                        |           |         | Carbamidomethyl (C)[4]                            | Mascot           |
| 882.5083            | 882.5356                | 0.0273 | 31    | 2           | 8        | PFKSYIK                        |           |         |                                                   | Mascot           |
| 1302.6293           | 1302.6656               | 0.0363 | 28    | 60          | 70       | NINGVCQPICK                    |           |         | Carbamidomethyl (C)[6,10]                         | Mascot           |
| 1638.6635           | 1638.7983               | 0.1348 | 82    | 122         | 135      | CFCNNGHTLDTDGK                 |           |         | Carbamidomethyl (C)[1,3]                          | Mascot           |
| 2437.9814           | 2438.0833               | 0.1019 | 42    | 71          | 91       | RPCENGFCIGPDRCSCEGYK           |           |         | Carbamidomethyl (C)[3], Oxidation (M)[17]         | Mascot           |
| 3323.2585           | 3323.6208               | 0.3623 | 109   | 94          | 121      | DCSEDEVNECGLPERPCHSCMNTMGSYR   |           |         | Carbamidomethyl (C)[2,9,16], Oxidation (M)[21,24] | Mascot           |
| 3337.3105           | 3337.6189               | 0.3084 | 92    | 92          | 121      | GKDCSEDEVNECGLPERPCHSCMNTMGSYR |           |         | Oxidation (M)[23,26]                              | Mascot           |
| 21                  | caspase c [Danio rerio] |        |       | gi 61806574 |          | 44909.8                        | 5.99      | 10      | 31                                                | 0                |

| Peptide Information |                                                     |         |       |             |          |                           |           |         |                         |                  |
|---------------------|-----------------------------------------------------|---------|-------|-------------|----------|---------------------------|-----------|---------|-------------------------|------------------|
| Calc. Mass          | Obsrv. Mass                                         | ± da    | ± ppm | Start Seq.  | End Seq. | Sequence                  | Ion Score | C. I. % | Modification            | Rank Result Type |
| 1179.4882           | 1179.5604                                           | 0.0722  | 61    | 132         | 142      | SCPGCQSNVER               |           |         |                         | Mascot           |
| 1179.4882           | 1179.5604                                           | 0.0722  | 61    | 132         | 142      | SCPGCQSNVER               |           |         |                         | Mascot           |
| 1279.5889           | 1279.7313                                           | 0.1424  | 111   | 78          | 88       | TEFSCPHFVGR               |           |         |                         | Mascot           |
| 1323.619            | 1323.626                                            | 0.007   | 5     | 160         | 168      | KQTYYFCWK                 |           |         | Carbamidomethyl (C)[7]  | Mascot           |
| 2122.9141           | 2122.9131                                           | -0.001  | 0     | 172         | 191      | EWKGVANNAGQCGNSS<br>CGQR  |           |         | Carbamidomethyl (C)[12] | Mascot           |
| 2123.0625           | 2122.9131                                           | -0.1494 | -70   | 96          | 112      | LSYQEICQLMPLTDKQR         |           |         | Carbamidomethyl (C)[7]  | Mascot           |
| 2207.9397           | 2208.0339                                           | 0.0942  | 43    | 1           | 20       | MTDEADNWNGDLEEDAA<br>IAK  |           |         |                         | Mascot           |
| 2239.1096           | 2239.0525                                           | -0.0571 | -26   | 380         | 400      | DFCCLRSSTPVTVSDPLL<br>TGK |           |         |                         | Mascot           |
| 2283.0029           | 2283.0952                                           | 0.0923  | 40    | 288         | 307      | EEHAHSDSCFVVLMSHG<br>NAR  |           |         | Carbamidomethyl (C)[9]  | Mascot           |
| 2283.0029           | 2283.0952                                           | 0.0923  | 40    | 288         | 307      | EEHAHSDSCFVVLMSHG<br>NAR  |           |         | Carbamidomethyl (C)[9]  | Mascot           |
| 2284.1926           | 2284.0898                                           | -0.1028 | -45   | 251         | 270      | DELSMEMLLKGLGYTVV<br>TLR  |           |         | Oxidation (M)[5]        | Mascot           |
| 2299.113            | 2299.1025                                           | -0.0105 | -5    | 91          | 110      | TCGAKLSYQEICQLMPLT<br>DK  |           |         | Carbamidomethyl (C)[2]  | Mascot           |
| 2300.1875           | 2300.0874                                           | -0.1001 | -44   | 251         | 270      | DELSMEMLLKGLGYTVV<br>TLR  |           |         | Oxidation (M)[5,7]      | Mascot           |
| 2300.1875           | 2300.0874                                           | -0.1001 | -44   | 251         | 270      | DELSMEMLLKGLGYTVV<br>TLR  |           |         | Oxidation (M)[5,7]      | Mascot           |
| 22                  | B-cell receptor-associated protein 31 [Danio rerio] |         |       | gi 41056137 |          | 28021.8                   | 8.73      | 7       | 31                      | 0                |

| Peptide Information |             |      |       |            |          |          |           |       |                |                  |
|---------------------|-------------|------|-------|------------|----------|----------|-----------|-------|----------------|------------------|
| Calc. Mass          | Obsrv. Mass | ± da | ± ppm | Start Seq. | End Seq. | Sequence | Ion Score | C. I. | % Modification | Rank Result Type |

|  |           |           |         |     |     |     |                                    |  |  |                   |  |  |        |
|--|-----------|-----------|---------|-----|-----|-----|------------------------------------|--|--|-------------------|--|--|--------|
|  | 807.3301  | 807.3688  | 0.0387  | 48  | 238 | 244 | CDAQQDK                            |  |  |                   |  |  | Mascot |
|  | 842.4559  | 842.4807  | 0.0248  | 29  | 32  | 37  | WSKFFK                             |  |  |                   |  |  | Mascot |
|  | 996.4666  | 996.5621  | 0.0955  | 96  | 206 | 214 | SDSDVKAMK                          |  |  | Oxidation (M)[8]  |  |  | Mascot |
|  | 996.4666  | 996.5621  | 0.0955  | 96  | 206 | 214 | SDSDVKAMK                          |  |  | Oxidation (M)[8]  |  |  | Mascot |
|  | 1090.5739 | 1090.491  | -0.0829 | -76 | 202 | 211 | ALQKSDSDVK                         |  |  |                   |  |  | Mascot |
|  | 1307.743  | 1307.6309 | -0.1121 | -86 | 227 | 237 | LLEEHarLQAK                        |  |  |                   |  |  | Mascot |
|  | 2233.1909 | 2232.9983 | -0.1926 | -86 | 79  | 97  | VDLSNNPVAIEHIHMKLF<br>R            |  |  |                   |  |  | Mascot |
|  | 2249.1858 | 2248.9912 | -0.1946 | -87 | 79  | 97  | VDLSNNPVAIEHIHMKLF<br>R            |  |  | Oxidation (M)[15] |  |  | Mascot |
|  | 3323.8186 | 3323.6208 | -0.1978 | -60 | 1   | 30  | MSLQWTAVATFLYAEVL<br>AVLLLCVPFISPK |  |  |                   |  |  | Mascot |

23 PREDICTED: estrogen-related receptor gamma, partial [Danio rerio] gi|326675851 25552.3 5.28 6 30 0

#### Peptide Information

| Calc. Mass | Obsrv. Mass | ± da    | ± ppm | Start Seq. | End Seq. | Sequence                   | Ion Score | C. I. | % Modification    | Rank | Result Type |
|------------|-------------|---------|-------|------------|----------|----------------------------|-----------|-------|-------------------|------|-------------|
| 1106.5994  | 1106.5146   | -0.0848 | -77   | 197        | 205      | AIQHFYSIK                  |           |       |                   |      | Mascot      |
| 1109.5911  | 1109.4491   | -0.142  | -128  | 215        | 223      | LFLEMLEAK                  |           |       | Oxidation (M)[5]  |      | Mascot      |
| 1334.7678  | 1334.8436   | 0.0758  | 57    | 3          | 14       | IVSHLLVAEPEK               |           |       |                   |      | Mascot      |
| 1707.7969  | 1707.7114   | -0.0855 | -50   | 15         | 29       | IYAMPDPTMPESDIK            |           |       |                   |      | Mascot      |
| 2300.2683  | 2300.0874   | -0.1809 | -79   | 30         | 50       | ALTTLCDLADRELVIIGW<br>AK   |           |       |                   |      | Mascot      |
| 2300.2683  | 2300.0874   | -0.1809 | -79   | 30         | 50       | ALTTLCDLADRELVIIGW<br>AK   |           |       |                   |      | Mascot      |
| 2705.156   | 2705.0432   | -0.1128 | -42   | 83         | 104      | SLPYEDELVYAEDYVMD<br>EEHSR |           |       | Oxidation (M)[16] |      | Mascot      |

24 PREDICTED: hypothetical protein LOC100001066 [Danio rerio] gi|125826514 28023.4 6.32 6 30 0

#### Peptide Information

| Calc. Mass | Obsrv. Mass | ± da    | ± ppm | Start Seq. | End Seq. | Sequence                             | Ion Score | C. I. | % Modification | Rank | Result Type |
|------------|-------------|---------|-------|------------|----------|--------------------------------------|-----------|-------|----------------|------|-------------|
| 838.5145   | 838.5067    | -0.0078 | -9    | 235        | 241      | ALLKHEK                              |           |       |                |      | Mascot      |
| 1179.5164  | 1179.5604   | 0.044   | 37    | 74         | 83       | EDDVNESFPK                           |           |       |                |      | Mascot      |
| 1179.5164  | 1179.5604   | 0.044   | 37    | 74         | 83       | EDDVNESFPK                           |           |       |                |      | Mascot      |
| 1307.6334  | 1307.6309   | -0.0025 | -2    | 219        | 230      | LLDCVNCESIAK                         |           |       |                |      | Mascot      |
| 1448.7015  | 1448.8733   | 0.1718  | 119   | 74         | 85       | EDDVNESFPKLR                         |           |       |                |      | Mascot      |
| 1851.7926  | 1851.8528   | 0.0602  | 33    | 157        | 173      | DWGGGETGDRSIQDCQ<br>K                |           |       |                |      | Mascot      |
| 3323.6501  | 3323.6208   | -0.0293 | -9    | 121        | 153      | GSHVYAPTIGSSTGPVV<br>INTTTTTRGGSDYQK |           |       |                |      | Mascot      |

25 Ddx52 protein [Danio rerio] gi|81294184 66316.2 9.69 9 30 0



| Peptide Information |                                                 |             |         |       |             |          |                            |           |         |                         |                  |
|---------------------|-------------------------------------------------|-------------|---------|-------|-------------|----------|----------------------------|-----------|---------|-------------------------|------------------|
|                     | Calc. Mass                                      | Obsrv. Mass | ± da    | ± ppm | Start Seq.  | End Seq. | Sequence                   | Ion Score | C. I. % | Modification            | Rank Result Type |
|                     | 864.4573                                        | 864.501     | 0.0437  | 51    | 259         | 266      | LSEGVGFR                   |           |         |                         | Mascot           |
|                     | 870.5407                                        | 870.5098    | -0.0309 | -35   | 239         | 246      | ALIISPTR                   |           |         |                         | Mascot           |
|                     | 1302.6835                                       | 1302.6656   | -0.0179 | -14   | 205         | 217      | REILACAPTGS GK             |           |         |                         | Mascot           |
|                     | 2123.1616                                       | 2122.9131   | -0.2485 | -117  | 218         | 235      | TMAFCLPLLAHLRQPLNK         |           |         | Carbamidomethyl (C)[5]  | Mascot           |
|                     | 2123.1616                                       | 2122.9131   | -0.2485 | -117  | 218         | 235      | TMAFCLPLLAHLRQPLNK         |           |         | Carbamidomethyl (C)[5]  | Mascot           |
|                     | 2283.3223                                       | 2283.0952   | -0.2271 | -99   | 407         | 426      | NLIKQGFLPPVLV FVQSID R     |           |         |                         | Mascot           |
|                     | 2283.3223                                       | 2283.0952   | -0.2271 | -99   | 407         | 426      | NLIKQGFLPPVLV FVQSID R     |           |         |                         | Mascot           |
|                     | 2313.1553                                       | 2313.0933   | -0.062  | -27   | 184         | 204      | AAGFQTPTPIQM QAVPL MMHK    |           |         | Oxidation (M)[12]       | Mascot           |
|                     | 2384.188                                        | 2383.8523   | -0.3357 | -141  | 429         | 448      | ELYHELVEGINVDVIHA DR       |           |         |                         | Mascot           |
|                     | 2501.2461                                       | 2501.1433   | -0.1028 | -41   | 184         | 205      | AAGFQTPTPIQM QAVPL MMHKR   |           |         | Oxidation (M)[12,18,19] | Mascot           |
|                     | 2705.3926                                       | 2705.0432   | -0.3494 | -129  | 382         | 406      | NSAAETVEQQLLVFGSE NGKILAMR |           |         |                         | Mascot           |
| 26                  | retinoic acid receptor RXR-beta-A [Danio rerio] |             |         |       | gi 24308520 |          | 48341.3                    | 7.53      | 9       | 29                      | 0                |

| Peptide Information |                                              |             |         |       |             |          |                         |           |         |                                            |      |             |
|---------------------|----------------------------------------------|-------------|---------|-------|-------------|----------|-------------------------|-----------|---------|--------------------------------------------|------|-------------|
|                     | Calc. Mass                                   | Obsrv. Mass | ± da    | ± ppm | Start Seq.  | End Seq. | Sequence                | Ion Score | C. I. % | Modification                               | Rank | Result Type |
| 27                  | 842.3568                                     | 842.4807    | 0.1239  | 147   | 152         | 158      | CLAMGMK                 |           |         | Carbamidomethyl (C)[1], Oxidation (M)[4,6] |      | Mascot      |
|                     | 848.4294                                     | 848.4927    | 0.0633  | 75    | 133         | 139      | DCLVDKR                 |           |         |                                            |      | Mascot      |
|                     | 850.3909                                     | 850.5124    | 0.1215  | 143   | 91          | 98       | LCAICGDR                |           |         |                                            |      | Mascot      |
|                     | 850.3909                                     | 850.5124    | 0.1215  | 143   | 91          | 98       | LCAICGDR                |           |         |                                            |      | Mascot      |
|                     | 1106.5146                                    | 1106.5146   | 0       | 0     | 130         | 138      | DNKDCLVDK               |           |         | Carbamidomethyl (C)[5]                     |      | Mascot      |
|                     | 1234.683                                     | 1234.6324   | -0.0506 | -41   | 237         | 246      | QLFTLVEWAK              |           |         |                                            |      | Mascot      |
|                     | 1302.5242                                    | 1302.6656   | 0.1414  | 109   | 103         | 113      | HYGVYSCEGCK             |           |         | Carbamidomethyl (C)[7]                     |      | Mascot      |
|                     | 1323.6144                                    | 1323.626    | 0.0116  | 9     | 91          | 102      | LCAICGDRSSGK            |           |         | Carbamidomethyl (C)[2,5]                   |      | Mascot      |
|                     | 1460.709                                     | 1460.7429   | 0.0339  | 23    | 370         | 381      | EKVYASLEAYCK            |           |         | Carbamidomethyl (C)[11]                    |      | Mascot      |
|                     | 2501.2302                                    | 2501.1433   | -0.0869 | -35   | 417         | 438      | LIGDTPIDTFLMEMLEAPH QLT |           |         | Oxidation (M)[12]                          |      | Mascot      |
| 27                  | interferon regulatory factor 1 [Danio rerio] |             |         |       | gi 45387903 |          | 32848                   | 5.85      | 8       | 29                                         | 0    |             |

| Peptide Information |             |         |       |            |          |          |           |         |                  |      |             |
|---------------------|-------------|---------|-------|------------|----------|----------|-----------|---------|------------------|------|-------------|
| Calc. Mass          | Obsrv. Mass | ± da    | ± ppm | Start Seq. | End Seq. | Sequence | Ion Score | C. I. % | Modification     | Rank | Result Type |
| 807.4392            | 807.3688    | -0.0704 | -87   | 131        | 137      | MKGLSQK  |           |         | Oxidation (M)[1] |      | Mascot      |

|    |                                                                 |           |         |     |     |             |                          |                        |    |    |   |        |
|----|-----------------------------------------------------------------|-----------|---------|-----|-----|-------------|--------------------------|------------------------|----|----|---|--------|
|    | 870.4104                                                        | 870.5098  | 0.0994  | 114 | 44  | 50          | HGWEVDK                  |                        |    |    |   | Mascot |
|    | 1090.5463                                                       | 1090.491  | -0.0553 | -51 | 8   | 15          | MRPWLESR                 | Oxidation (M)[1]       |    |    |   | Mascot |
|    | 1179.6554                                                       | 1179.5604 | -0.095  | -81 | 108 | 117         | VYRMLPAVSK               | Oxidation (M)[4]       |    |    |   | Mascot |
|    | 1179.6554                                                       | 1179.5604 | -0.095  | -81 | 108 | 117         | VYRMLPAVSK               | Oxidation (M)[4]       |    |    |   | Mascot |
|    | 1448.676                                                        | 1448.8733 | 0.1973  | 136 | 83  | 95          | CAMNSLPDIEEVK            |                        |    |    |   | Mascot |
|    | 1691.7979                                                       | 1691.7413 | -0.0566 | -33 | 83  | 97          | CAMNSLPDIEEVKDK          |                        |    |    |   | Mascot |
|    | 1691.7979                                                       | 1691.7413 | -0.0566 | -33 | 83  | 97          | CAMNSLPDIEEVKDK          |                        |    |    |   | Mascot |
|    | 1707.7927                                                       | 1707.7114 | -0.0813 | -48 | 83  | 97          | CAMNSLPDIEEVKDK          | Oxidation (M)[3]       |    |    |   | Mascot |
|    | 1993.947                                                        | 1993.8987 | -0.0483 | -24 | 79  | 95          | ANFRCAMNSLPDIEEVK        | Carbamidomethyl (C)[5] |    |    |   | Mascot |
|    | 2298.9529                                                       | 2299.1025 | 0.1496  | 65  | 268 | 287         | SDSYTYTELWNSSSMPQ<br>SIC |                        |    |    |   | Mascot |
| 28 | MCM6 minichromosome maintenance deficient 6, like [Danio rerio] |           |         |     |     | gij70887711 | 93152.1                  | 5.23                   | 11 | 29 | 0 |        |

|    |                                                   |           |         |      |             |         |                            |    |    |   |                         |  |  |        |
|----|---------------------------------------------------|-----------|---------|------|-------------|---------|----------------------------|----|----|---|-------------------------|--|--|--------|
|    | 1165.6034                                         | 1165.7042 | 0.1008  | 86   | 225         | 234     | FCEQAVTIVR                 |    |    |   |                         |  |  | Mascot |
|    | 1165.6034                                         | 1165.7042 | 0.1008  | 86   | 225         | 234     | FCEQAVTIVR                 |    |    |   |                         |  |  | Mascot |
|    | 1234.5334                                         | 1234.6324 | 0.099   | 80   | 315         | 325     | SDETPEGWTGR                |    |    |   |                         |  |  | Mascot |
|    | 1434.879                                          | 1434.7195 | -0.1595 | -111 | 508         | 520     | LIGSREPLLLAR               |    |    |   |                         |  |  | Mascot |
|    | 1460.7566                                         | 1460.7429 | -0.0137 | -9   | 331         | 343     | EMQAAIVLQAGWK              |    |    |   | Oxidation (M)[2]        |  |  | Mascot |
|    | 1638.842                                          | 1638.7983 | -0.0437 | -27  | 534         | 546     | GYIIPNQKNIICR              |    |    |   | Carbamidomethyl (C)[12] |  |  | Mascot |
|    | 2123.0398                                         | 2122.9131 | -0.1267 | -60  | 235         | 254     | ALGCVISCFSDPEELPLT<br>TK   |    |    |   |                         |  |  | Mascot |
|    | 2123.0398                                         | 2122.9131 | -0.1267 | -60  | 235         | 254     | ALGCVISCFSDPEELPLT<br>TK   |    |    |   |                         |  |  | Mascot |
|    | 2283.1875                                         | 2283.0952 | -0.0923 | -40  | 447         | 466     | MFSPIPVCILHVINNDTLE<br>K   |    |    |   |                         |  |  | Mascot |
|    | 2283.2554                                         | 2283.0952 | -0.1602 | -70  | 8           | 29      | ESSAGLLQSQDALASNK<br>PLLLK |    |    |   |                         |  |  | Mascot |
|    | 2299.1824                                         | 2299.1025 | -0.0799 | -35  | 447         | 466     | MFSPIPVCILHVINNDTLE<br>K   |    |    |   | Oxidation (M)[1]        |  |  | Mascot |
| 30 | non-specific lipid-transfer protein [Danio rerio] |           |         |      | gi 41053664 | 57939.8 | 7.1                        | 10 | 29 | 0 |                         |  |  |        |

#### Peptide Information

|  | Calc. Mass | Obsrv. Mass | ± da    | ± ppm | Start Seq. | End Seq. | Sequence                       | Ion Score | C. I. | % Modification       | Rank | Result | Type |
|--|------------|-------------|---------|-------|------------|----------|--------------------------------|-----------|-------|----------------------|------|--------|------|
|  | 807.3842   | 807.3688    | -0.0154 | -19   | 474        | 482      | GSVSSDAGK                      |           |       |                      |      | Mascot |      |
|  | 838.4821   | 838.5067    | 0.0246  | 29    | 446        | 453      | IGGVFAFK                       |           |       |                      |      | Mascot |      |
|  | 882.4944   | 882.5356    | 0.0412  | 47    | 177        | 183      | VAWKNHK                        |           |       |                      |      | Mascot |      |
|  | 1045.4917  | 1045.5258   | 0.0341  | 33    | 136        | 143      | HMEVMINR                       |           |       | Oxidation (M)[2]     |      | Mascot |      |
|  | 1106.5436  | 1106.5146   | -0.029  | -26   | 471        | 482      | NGKGSVSSDAGK                   |           |       |                      |      | Mascot |      |
|  | 1165.5735  | 1165.7042   | 0.1307  | 112   | 435        | 444      | LQEEGEAYVK                     |           |       |                      |      | Mascot |      |
|  | 1165.5735  | 1165.7042   | 0.1307  | 112   | 435        | 444      | LQEEGEAYVK                     |           |       |                      |      | Mascot |      |
|  | 1302.5453  | 1302.6656   | 0.1203  | 92    | 126        | 135      | YMDRTNPMDK                     |           |       | Oxidation (M)[2,8]   |      | Mascot |      |
|  | 1852.0149  | 1851.8528   | -0.1621 | -88   | 8          | 24       | VFVIGVGMTKFEKPGAR              |           |       | Oxidation (M)[8]     |      | Mascot |      |
|  | 2194.1028  | 2194.0044   | -0.0984 | -45   | 516        | 535      | ITGNMGMMAMKLQNLQLT<br>PGK      |           |       | Oxidation (M)[5,7,9] |      | Mascot |      |
|  | 2705.3398  | 2705.0432   | -0.2966 | -110  | 347        | 372      | GHPLGATGLAQCAELCW<br>QLRAEAGPR |           |       |                      |      | Mascot |      |

31 hypothetical protein LOC493609 [Danio rerio] gi|56090176 25141.4 5.78 6 29 0

#### Peptide Information

|  | Calc. Mass | Obsrv. Mass | ± da   | ± ppm | Start Seq. | End Seq. | Sequence   | Ion Score | C. I. | % Modification   | Rank | Result | Type |
|--|------------|-------------|--------|-------|------------|----------|------------|-----------|-------|------------------|------|--------|------|
|  | 850.3974   | 850.5124    | 0.115  | 135   | 70         | 76       | AEEMLNK    |           |       | Oxidation (M)[4] |      | Mascot |      |
|  | 850.3974   | 850.5124    | 0.115  | 135   | 70         | 76       | AEEMLNK    |           |       | Oxidation (M)[4] |      | Mascot |      |
|  | 1179.5463  | 1179.5604   | 0.0141 | 12    | 208        | 217      | NYVTPVNQNM |           |       |                  |      | Mascot |      |

|    |                                                                                          |           |         |     |     |     |                                |  |  |  |  |  |                  |  |  |  |        |
|----|------------------------------------------------------------------------------------------|-----------|---------|-----|-----|-----|--------------------------------|--|--|--|--|--|------------------|--|--|--|--------|
|    | 1179.5463                                                                                | 1179.5604 | 0.0141  | 12  | 208 | 217 | NYVTPVNQNM                     |  |  |  |  |  |                  |  |  |  | Mascot |
|    | 1277.5514                                                                                | 1277.6602 | 0.1088  | 85  | 196 | 207 | GACHGQTGMFPR                   |  |  |  |  |  | Oxidation (M)[9] |  |  |  | Mascot |
|    | 1302.7052                                                                                | 1302.6656 | -0.0396 | -30 | 39  | 50  | AELNGKEGFIPK                   |  |  |  |  |  |                  |  |  |  | Mascot |
|    | 2152.9968                                                                                | 2152.9797 | -0.0171 | -8  | 27  | 44  | VLNEECDQNWYKAE<br>LN<br>G      |  |  |  |  |  |                  |  |  |  | Mascot |
|    | 2438.0798                                                                                | 2438.0833 | 0.0035  | 1   | 196 | 217 | GACHGQTGMFPRNYV<br>TP<br>VNQNM |  |  |  |  |  | Oxidation (M)[9] |  |  |  | Mascot |
| 32 | probable ATP-dependent RNA helicase DDX52 [Danio rerio] gi 113195544 68215.2 9.66 9 29 0 |           |         |     |     |     |                                |  |  |  |  |  |                  |  |  |  |        |

#### Peptide Information

| Calc. Mass | Obsrv. Mass | ± da    | ± ppm | Start Seq. | End Seq. | Sequence                          | Ion Score | C. I. | % Modification          | Rank | Result Type |
|------------|-------------|---------|-------|------------|----------|-----------------------------------|-----------|-------|-------------------------|------|-------------|
| 864.4573   | 864.501     | 0.0437  | 51    | 259        | 266      | LSEGVGFR                          |           |       |                         |      | Mascot      |
| 870.5407   | 870.5098    | -0.0309 | -35   | 239        | 246      | ALIISPTR                          |           |       |                         |      | Mascot      |
| 1302.6835  | 1302.6656   | -0.0179 | -14   | 205        | 217      | REILACAPTSGSK                     |           |       |                         |      | Mascot      |
| 2123.1616  | 2122.9131   | -0.2485 | -117  | 218        | 235      | TMAFCLPLLAHLRQPLNK                |           |       | Carbamidomethyl (C)[5]  |      | Mascot      |
| 2123.1616  | 2122.9131   | -0.2485 | -117  | 218        | 235      | TMAFCLPLLAHLRQPLNK                |           |       | Carbamidomethyl (C)[5]  |      | Mascot      |
| 2283.3223  | 2283.0952   | -0.2271 | -99   | 407        | 426      | NLIKQGFLPPVLV<br>FVQSID<br>R      |           |       |                         |      | Mascot      |
| 2283.3223  | 2283.0952   | -0.2271 | -99   | 407        | 426      | NLIKQGFLPPVLV<br>FVQSID<br>R      |           |       |                         |      | Mascot      |
| 2313.1553  | 2313.0933   | -0.062  | -27   | 184        | 204      | AAGFQTPTPIQMAV<br>PL<br>MMHK      |           |       | Oxidation (M)[12]       |      | Mascot      |
| 2384.188   | 2383.8523   | -0.3357 | -141  | 429        | 448      | ELYHELVEGINVD<br>VIHA<br>DR       |           |       |                         |      | Mascot      |
| 2501.2461  | 2501.1433   | -0.1028 | -41   | 184        | 205      | AAGFQTPTPIQMAV<br>PL<br>MMHKR     |           |       | Oxidation (M)[12,18,19] |      | Mascot      |
| 2705.3926  | 2705.0432   | -0.3494 | -129  | 382        | 406      | NSAAETVEQQLLFV<br>GSE<br>NGKILAMR |           |       |                         |      | Mascot      |

33 SH3 domain-binding protein 4-A [Danio rerio] gi|45387913 104947.5 7.73 12 28 0

#### Peptide Information

| Calc. Mass | Obsrv. Mass | ± da    | ± ppm | Start Seq. | End Seq. | Sequence               | Ion Score | C. I. | % Modification   | Rank | Result Type |
|------------|-------------|---------|-------|------------|----------|------------------------|-----------|-------|------------------|------|-------------|
| 842.5822   | 842.4807    | -0.1015 | -120  | 634        | 640      | LIKTVIR                |           |       |                  |      | Mascot      |
| 850.4338   | 850.5124    | 0.0786  | 92    | 358        | 364      | LSNMEIK                |           |       | Oxidation (M)[4] |      | Mascot      |
| 850.4338   | 850.5124    | 0.0786  | 92    | 358        | 364      | LSNMEIK                |           |       | Oxidation (M)[4] |      | Mascot      |
| 870.4726   | 870.5098    | 0.0372  | 43    | 1          | 7        | MAAHRIR                |           |       | Oxidation (M)[1] |      | Mascot      |
| 1045.4796  | 1045.5258   | 0.0462  | 44    | 762        | 770      | AELDSEPER              |           |       |                  |      | Mascot      |
| 1323.6283  | 1323.626    | -0.0023 | -2    | 778        | 788      | LKEDCLNMETK            |           |       |                  |      | Mascot      |
| 1334.6443  | 1334.8436   | 0.1993  | 149   | 379        | 390      | TESPM AEIVCVR          |           |       |                  |      | Mascot      |
| 1434.7158  | 1434.7195   | 0.0037  | 3     | 885        | 896      | DVIHELHMG LDR          |           |       |                  |      | Mascot      |
| 2230.2417  | 2230.1023   | -0.1394 | -63   | 813        | 831      | LIMDFVLLTTAVEV<br>APRW |           |       |                  |      | Mascot      |

|  |           |           |        |     |     |     |                                     |                        |  |  |  |  |  |  |  |  |        |
|--|-----------|-----------|--------|-----|-----|-----|-------------------------------------|------------------------|--|--|--|--|--|--|--|--|--------|
|  | 2284.2368 | 2284.0898 | -0.147 | -64 | 463 | 484 | R<br>TVVAIFGHDCAPKTLVLS<br>EVGK     |                        |  |  |  |  |  |  |  |  | Mascot |
|  | 2300.0686 | 2300.0874 | 0.0188 | 8   | 568 | 587 | DDQDCILAQFCVQTPQP<br>PPK            | Carbamidomethyl (C)[5] |  |  |  |  |  |  |  |  | Mascot |
|  | 2300.0686 | 2300.0874 | 0.0188 | 8   | 568 | 587 | DDQDCILAQFCVQTPQP<br>PPK            | Carbamidomethyl (C)[5] |  |  |  |  |  |  |  |  | Mascot |
|  | 3337.6052 | 3337.6189 | 0.0137 | 4   | 269 | 298 | LARSCHDLES LGQNPGW<br>GQTQPVETNIVCK | Carbamidomethyl (C)[5] |  |  |  |  |  |  |  |  | Mascot |
|  | 3338.5496 | 3338.6084 | 0.0588 | 18  | 856 | 884 | TGMVDSEAMWKPAYDFL<br>LTWAAQIGDSYR   | Oxidation (M)[3]       |  |  |  |  |  |  |  |  | Mascot |
|  | 3354.5444 | 3354.6326 | 0.0882 | 26  | 856 | 884 | TGMVDSEAMWKPAYDFL<br>LTWAAQIGDSYR   | Oxidation (M)[3,9]     |  |  |  |  |  |  |  |  | Mascot |

34

novel protein similar to human and mouse myeloid/lymphoid or mixed-lineage leukemia 3 (MLL3) [Danio

gi|157885936

82601.8

9.38

13

28

0

Peptide Information

| Calc. Mass | Obsrv. Mass | $\pm$ da | $\pm$ ppm | Start Seq. | End Seq. | Sequence                  | Ion Score | C. I. | % Modification           | Rank | Result Type |
|------------|-------------|----------|-----------|------------|----------|---------------------------|-----------|-------|--------------------------|------|-------------|
| 840.4937   | 840.4894    | -0.0043  | -5        | 462        | 469      | VLGPVAER                  |           |       |                          |      | Mascot      |
| 864.5189   | 864.501     | -0.0179  | -21       | 636        | 642      | ELLYKAK                   |           |       |                          |      | Mascot      |
| 870.4679   | 870.5098    | 0.0419   | 48        | 140        | 147      | SISEGHLK                  |           |       |                          |      | Mascot      |
| 996.5948   | 996.5621    | -0.0327  | -33       | 462        | 470      | VLGPVAERR                 |           |       |                          |      | Mascot      |
| 996.5948   | 996.5621    | -0.0327  | -33       | 462        | 470      | VLGPVAERR                 |           |       |                          |      | Mascot      |
| 1045.6152  | 1045.5258   | -0.0894  | -85       | 602        | 611      | IQGLGLFAAR                |           |       |                          |      | Mascot      |
| 1090.5602  | 1090.491    | -0.0692  | -63       | 179        | 187      | WTIDIAMPK                 |           |       | Oxidation (M)[7]         |      | Mascot      |
| 1106.5323  | 1106.5146   | -0.0177  | -16       | 35         | 43       | ITKDEEESR                 |           |       |                          |      | Mascot      |
| 1307.5685  | 1307.6309   | 0.0624   | 48        | 423        | 433      | YVCSVEEHEGR               |           |       |                          |      | Mascot      |
| 1460.6863  | 1460.7429   | 0.0566   | 39        | 188        | 200      | VAPQSSESELEER             |           |       |                          |      | Mascot      |
| 1707.8483  | 1707.7114   | -0.1369  | -80       | 499        | 513      | IAESLPGVEACSRYR           |           |       | Carbamidomethyl (C)[11]  |      | Mascot      |
| 2208.022   | 2208.0339   | 0.0119   | 5         | 275        | 294      | GQTVVCAFCQRLGATSG<br>CHR  |           |       | Carbamidomethyl (C)[6,9] |      | Mascot      |
| 2225.0112  | 2225.0334   | 0.0222   | 10        | 668        | 686      | YINHSCSPNCVAEVVTFE<br>R   |           |       | Carbamidomethyl (C)[6]   |      | Mascot      |
| 2225.0112  | 2225.0334   | 0.0222   | 10        | 668        | 686      | YINHSCSPNCVAEVVTFE<br>R   |           |       | Carbamidomethyl (C)[6]   |      | Mascot      |
| 2283.1562  | 2283.0952   | -0.061   | -27       | 328        | 348      | GAGAAAGLHVEHQLRCF<br>SVFR |           |       | Carbamidomethyl (C)[16]  |      | Mascot      |
| 2283.1562  | 2283.0952   | -0.061   | -27       | 328        | 348      | GAGAAAGLHVEHQLRCF<br>SVFR |           |       | Carbamidomethyl (C)[16]  |      | Mascot      |

35

mitochondrial import receptor subunit TOM70 [Danio rerio]

gi|41152392

65067.7

6.47

10

28

0

Peptide Information

| Calc. Mass | Obsrv. Mass | $\pm$ da | $\pm$ ppm | Start Seq. | End Seq. | Sequence | Ion Score | C. I. | % Modification | Rank | Result Type |
|------------|-------------|----------|-----------|------------|----------|----------|-----------|-------|----------------|------|-------------|
|------------|-------------|----------|-----------|------------|----------|----------|-----------|-------|----------------|------|-------------|

|           |           |         |     |     |     |                              |  |  |                        |  |  |        |
|-----------|-----------|---------|-----|-----|-----|------------------------------|--|--|------------------------|--|--|--------|
| 838.4127  | 838.5067  | 0.094   | 112 | 534 | 540 | AIDMFNK                      |  |  |                        |  |  | Mascot |
| 848.3995  | 848.4927  | 0.0932  | 110 | 256 | 263 | EGEASEVK                     |  |  |                        |  |  | Mascot |
| 850.4338  | 850.5124  | 0.0786  | 92  | 283 | 289 | IISECTK                      |  |  | Carbamidomethyl (C)[5] |  |  | Mascot |
| 850.4338  | 850.5124  | 0.0786  | 92  | 283 | 289 | IISECTK                      |  |  | Carbamidomethyl (C)[5] |  |  | Mascot |
| 1090.5562 | 1090.491  | -0.0652 | -60 | 325 | 334 | VINMNDASVK                   |  |  |                        |  |  | Mascot |
| 1106.551  | 1106.5146 | -0.0364 | -33 | 325 | 334 | VINMNDASVK                   |  |  | Oxidation (M)[4]       |  |  | Mascot |
| 1302.6763 | 1302.6656 | -0.0107 | -8  | 218 | 228 | EPLMPSPQFIK                  |  |  | Oxidation (M)[4]       |  |  | Mascot |
| 1434.6971 | 1434.7195 | 0.0224  | 16  | 418 | 430 | QAYTGNNPSQVQK                |  |  |                        |  |  | Mascot |
| 1448.793  | 1448.8733 | 0.0803  | 55  | 534 | 546 | AIDMFNKAINLAK                |  |  |                        |  |  | Mascot |
| 2051.0854 | 2051.0142 | -0.0712 | -35 | 400 | 417 | LRPDSALAAQKCFALY<br>R        |  |  |                        |  |  | Mascot |
| 2122.9307 | 2122.9131 | -0.0176 | -8  | 273 | 289 | QYMEEENYDKIISECTK            |  |  |                        |  |  | Mascot |
| 2122.9307 | 2122.9131 | -0.0176 | -8  | 273 | 289 | QYMEEENYDKIISECTK            |  |  |                        |  |  | Mascot |
| 2705.2256 | 2705.0432 | -0.1824 | -67 | 547 | 570 | SEMEMAHLVSLCDAAYA<br>QTEVAKK |  |  | Oxidation (M)[3]       |  |  | Mascot |

36 Zgc:136380 protein [Danio rerio] gi|146186683 55697 9.51 8 28 0

#### Peptide Information

| Calc. Mass | Obsrv. Mass | $\pm$ da | $\pm$ ppm | Start Seq. | End Seq. | Sequence                  | Ion Score | C. I. % | Modification     | Rank | Result Type |
|------------|-------------|----------|-----------|------------|----------|---------------------------|-----------|---------|------------------|------|-------------|
| 848.3818   | 848.4927    | 0.1109   | 131       | 53         | 60       | SDLGPCEK                  |           |         |                  |      | Mascot      |
| 850.3876   | 850.5124    | 0.1248   | 147       | 216        | 222      | QHMGYAK                   |           |         | Oxidation (M)[3] |      | Mascot      |
| 850.3876   | 850.5124    | 0.1248   | 147       | 216        | 222      | QHMGYAK                   |           |         | Oxidation (M)[3] |      | Mascot      |
| 882.4679   | 882.5356    | 0.0677   | 77        | 69         | 75       | LYEKSSR                   |           |         |                  |      | Mascot      |
| 1062.5677  | 1062.6549   | 0.0872   | 82        | 225        | 233      | STVEELKEK                 |           |         |                  |      | Mascot      |
| 1320.7158  | 1320.5358   | -0.18    | -136      | 88         | 98       | YLQSLLAEVER               |           |         |                  |      | Mascot      |
| 1851.9963  | 1851.8528   | -0.1435  | -77       | 84         | 98       | DFLRYLQSLLAEVER           |           |         |                  |      | Mascot      |
| 1993.9349  | 1993.8987   | -0.0362  | -18       | 170        | 187      | EELSSTHSTIESFAAQEK        |           |         |                  |      | Mascot      |
| 2299.0945  | 2299.1025   | 0.008    | 3         | 426        | 446      | GSVEKCNELSKPEPMEA<br>EPPK |           |         |                  |      | Mascot      |

37 coiled-coil domain-containing protein 123, mitochondrial precursor [Danio rerio] gi|41053710 79256.9 5.96 10 28 0

#### Peptide Information

| Calc. Mass | Obsrv. Mass | $\pm$ da | $\pm$ ppm | Start Seq. | End Seq. | Sequence     | Ion Score | C. I. % | Modification           | Rank | Result Type |
|------------|-------------|----------|-----------|------------|----------|--------------|-----------|---------|------------------------|------|-------------|
| 840.4937   | 840.4894    | -0.0043  | -5        | 69         | 76       | TVAIPSPR     |           |         |                        |      | Mascot      |
| 1090.4105  | 1090.491    | 0.0805   | 74        | 79         | 87       | SYSESDCSR    |           |         | Carbamidomethyl (C)[7] |      | Mascot      |
| 1279.7269  | 1279.7313   | 0.0044   | 3         | 366        | 375      | YQARFRPLTK   |           |         |                        |      | Mascot      |
| 1448.7162  | 1448.8733   | 0.1571   | 108       | 420        | 431      | SCEEELQSLRVR |           |         |                        |      | Mascot      |

|           |           |         |      |     |     |                             |                        |        |
|-----------|-----------|---------|------|-----|-----|-----------------------------|------------------------|--------|
| 1475.7522 | 1475.7014 | -0.0508 | -34  | 564 | 575 | VKTCEVEDLQVR                | Carbamidomethyl (C)[4] | Mascot |
| 1638.8077 | 1638.7983 | -0.0094 | -6   | 654 | 667 | DQLMLMASTLEKDK              | Oxidation (M)[4]       | Mascot |
| 2211.0823 | 2211.0242 | -0.0581 | -26  | 340 | 358 | QQAQELVDENDGLKMTV<br>HR     |                        | Mascot |
| 2233.2188 | 2232.9983 | -0.2205 | -99  | 536 | 555 | LALEHSLSLAEHQTVTDK<br>LK    |                        | Mascot |
| 2239.2769 | 2239.0525 | -0.2244 | -100 | 54  | 76  | SALAAAILSSSLTGRTVAI<br>PSPR |                        | Mascot |
| 2501.1707 | 2501.1433 | -0.0274 | -11  | 304 | 323 | CLQQSQHMKHLQQELCH<br>THR    | Oxidation (M)[8]       | Mascot |

38 novel protein similar to vertebrate IMP (inosine monophosphate) dehydrogenase 1 (IMPDH1) [Danio rerio] gi|94732690 8399.2 9.65 4 28 0

#### Peptide Information

| Calc. Mass | Obsrv. Mass | ± da   | ± ppm | Start Seq. | End Seq. | Sequence        | Ion Score | C. I. % | Modification           | Rank | Result Type |
|------------|-------------|--------|-------|------------|----------|-----------------|-----------|---------|------------------------|------|-------------|
| 848.393    | 848.4927    | 0.0997 | 118   | 1          | 8        | GCQDIGAK        |           |         | Carbamidomethyl (C)[2] |      | Mascot      |
| 1045.4692  | 1045.5258   | 0.0566 | 54    | 15         | 23       | SMMYSGELK       |           |         |                        |      | Mascot      |
| 1448.7491  | 1448.8733   | 0.1242 | 86    | 64         | 78       | AGPNVPSPAVTKHSS |           |         |                        |      | Mascot      |
| 1460.7889  | 1460.7429   | -0.046 | -31   | 1          | 14       | GCQDIGAKSLSILR  |           |         |                        |      | Mascot      |

39 PREDICTED: centrosomal protein of 152 kDa-like [Danio rerio] gi|189537675 179442.1 5.41 16 28 0

#### Peptide Information

| Calc. Mass | Obsrv. Mass | ± da    | ± ppm | Start Seq. | End Seq. | Sequence          | Ion Score | C. I. % | Modification     | Rank | Result Type |
|------------|-------------|---------|-------|------------|----------|-------------------|-----------|---------|------------------|------|-------------|
| 807.4108   | 807.3688    | -0.042  | -52   | 688        | 693      | TQQQFR            |           |         |                  |      | Mascot      |
| 840.5413   | 840.4894    | -0.0519 | -62   | 1357       | 1363     | QRAIKPK           |           |         |                  |      | Mascot      |
| 848.4658   | 848.4927    | 0.0269  | 32    | 1217       | 1223     | IKGDMLR           |           |         | Oxidation (M)[5] |      | Mascot      |
| 856.5138   | 856.4889    | -0.0249 | -29   | 1289       | 1296     | VLETPVAK          |           |         |                  |      | Mascot      |
| 996.5108   | 996.5621    | 0.0513  | 51    | 754        | 761      | LEENLHNK          |           |         |                  |      | Mascot      |
| 996.5108   | 996.5621    | 0.0513  | 51    | 754        | 761      | LEENLHNK          |           |         |                  |      | Mascot      |
| 1234.6174  | 1234.6324   | 0.015   | 12    | 1520       | 1531     | EPIPGSEGHGVR      |           |         |                  |      | Mascot      |
| 1277.6332  | 1277.6602   | 0.027   | 21    | 607        | 617      | DSQVRESSLEK       |           |         |                  |      | Mascot      |
| 1307.6842  | 1307.6309   | -0.0533 | -41   | 497        | 507      | EQINLYESAIAK      |           |         |                  |      | Mascot      |
| 1320.6027  | 1320.5358   | -0.0669 | -51   | 1054       | 1064     | RESPEDTETTR       |           |         |                  |      | Mascot      |
| 1434.6543  | 1434.7195   | 0.0652  | 45    | 224        | 235      | MFNPQVNNQNGR      |           |         | Oxidation (M)[1] |      | Mascot      |
| 1448.7493  | 1448.8733   | 0.124   | 86    | 540        | 552      | IHSTPHISDSNLK     |           |         |                  |      | Mascot      |
| 1460.6699  | 1460.7429   | 0.073   | 50    | 1299       | 1311     | HPRMQNAYGGSDK     |           |         |                  |      | Mascot      |
| 2225.1191  | 2225.0334   | -0.0857 | -39   | 730        | 749      | LTDLSQEVLAQECYLAV |           |         |                  |      | Mascot      |

|    |                                              |           |         |     |             |      |                                |      |   |    |                         |  |  |        |
|----|----------------------------------------------|-----------|---------|-----|-------------|------|--------------------------------|------|---|----|-------------------------|--|--|--------|
|    | 2225.1191                                    | 2225.0334 | -0.0857 | -39 | 730         | 749  | CK<br>LTDLSQEVLAVQECYLAV<br>CK |      |   |    |                         |  |  | Mascot |
|    | 2239.1289                                    | 2239.0525 | -0.0764 | -34 | 1341        | 1358 | QIHQIYNQTYTSLMSKQR             |      |   |    |                         |  |  | Mascot |
|    | 2313.1616                                    | 2313.0933 | -0.0683 | -30 | 435         | 454  | ASVINTLTHRLEESQQQC<br>AK       |      |   |    | Carbamidomethyl (C)[18] |  |  | Mascot |
|    | 2501.1975                                    | 2501.1433 | -0.0542 | -22 | 1253        | 1274 | RYYLTCQLLEDGGQS<br>AGAEK       |      |   |    | Carbamidomethyl (C)[6]  |  |  | Mascot |
| 40 | replication factor C subunit 3 [Danio rerio] |           |         |     | gi 41393079 |      | 40301.9                        | 8.81 | 9 | 28 | 0                       |  |  |        |

#### Peptide Information

| Calc. Mass | Obsrv. Mass | ± da    | ± ppm | Start Seq. | End Seq. | Sequence                   | Ion Score | C. I. | % Modification                                 | Rank | Result Type |
|------------|-------------|---------|-------|------------|----------|----------------------------|-----------|-------|------------------------------------------------|------|-------------|
| 801.3381   | 801.3264    | -0.0117 | -15   | 155        | 160      | YMATCR                     |           |       | Carbamidomethyl (C)[5]                         |      | Mascot      |
| 856.5363   | 856.4889    | -0.0474 | -55   | 271        | 277      | LLEVRAR                    |           |       |                                                |      | Mascot      |
| 1062.5911  | 1062.6549   | 0.0638  | 60    | 50         | 57       | TRIMCLLR                   |           |       | Carbamidomethyl (C)[5]                         |      | Mascot      |
| 1179.6984  | 1179.5604   | -0.138  | -117  | 203        | 213      | EGLLLPELAK                 |           |       |                                                |      | Mascot      |
| 1179.6984  | 1179.5604   | -0.138  | -117  | 203        | 213      | EGLLLPELAK                 |           |       |                                                |      | Mascot      |
| 1234.679   | 1234.6324   | -0.0466 | -38   | 58         | 68       | ELYGAGVEKLR                |           |       |                                                |      | Mascot      |
| 1307.5435  | 1307.6309   | 0.0874  | 67    | 346        | 356      | FMEDGLGNFMF                |           |       |                                                |      | Mascot      |
| 1323.5385  | 1323.626    | 0.0875  | 66    | 346        | 356      | FMEDGLGNFMF                |           |       | Oxidation (M)[2]                               |      | Mascot      |
| 1993.8962  | 1993.8987   | 0.0025  | 1     | 155        | 170      | YMATCRILCCNSTSK            |           |       | Carbamidomethyl (C)[5,10,11], Oxidation (M)[2] |      | Mascot      |
| 2208.0867  | 2208.0339   | -0.0528 | -24   | 309        | 327      | AEVAQMAAYYEHLQLG<br>NK     |           |       | Oxidation (M)[6]                               |      | Mascot      |
| 2300.1855  | 2300.0874   | -0.0981 | -43   | 28         | 49       | NLVQCGDFPHLLVYGPS<br>GAGKK |           |       |                                                |      | Mascot      |
| 2300.1855  | 2300.0874   | -0.0981 | -43   | 28         | 49       | NLVQCGDFPHLLVYGPS<br>GAGKK |           |       |                                                |      | Mascot      |

41 novel protein [Danio rerio] gi|220675953 64816 6.15 11 28 0

#### Peptide Information

| Calc. Mass | Obsrv. Mass | ± da    | ± ppm | Start Seq. | End Seq. | Sequence            | Ion Score | C. I. | % Modification         | Rank | Result Type |
|------------|-------------|---------|-------|------------|----------|---------------------|-----------|-------|------------------------|------|-------------|
| 807.4028   | 807.3688    | -0.034  | -42   | 6          | 12       | SGLDMLR             |           |       | Oxidation (M)[5]       |      | Mascot      |
| 842.5458   | 842.4807    | -0.0651 | -77   | 187        | 193      | IVQTLLR             |           |       |                        |      | Mascot      |
| 848.4294   | 848.4927    | 0.0633  | 75    | 253        | 260      | AMGKNSPK            |           |       | Oxidation (M)[2]       |      | Mascot      |
| 856.5502   | 856.4889    | -0.0613 | -72   | 228        | 235      | EALGLLLK            |           |       |                        |      | Mascot      |
| 1307.597   | 1307.6309   | 0.0339  | 26    | 98         | 109      | CSCPTDVLDAVK        |           |       | Carbamidomethyl (C)[1] |      | Mascot      |
| 1448.6951  | 1448.8733   | 0.1782  | 123   | 152        | 163      | EVCERVSDAWR         |           |       |                        |      | Mascot      |
| 1851.8872  | 1851.8528   | -0.0344 | -19   | 59         | 74       | FYSQHSSQDAVDLQVK    |           |       |                        |      | Mascot      |
| 2225.2109  | 2225.0334   | -0.1775 | -80   | 306        | 324      | NIAENVHEFPISRLVMVLK |           |       | Oxidation (M)[16]      |      | Mascot      |
| 2225.2109  | 2225.0334   | -0.1775 | -80   | 306        | 324      | NIAENVHEFPISRLVMVLK |           |       | Oxidation (M)[16]      |      | Mascot      |



|    |                                                                    |           |         |     |     |              |                            |      |    |    |   |                  |        |
|----|--------------------------------------------------------------------|-----------|---------|-----|-----|--------------|----------------------------|------|----|----|---|------------------|--------|
|    | 2239.0093                                                          | 2239.0525 | 0.0432  | 19  | 139 | 156          | CELQLMFEHPGFREVCE<br>R     |      |    |    |   | Oxidation (M)[6] | Mascot |
|    | 2249.1309                                                          | 2248.9912 | -0.1397 | -62 | 56  | 74           | QIRFYSQHSSQDAVDLQ<br>VK    |      |    |    |   |                  | Mascot |
|    | 2313.198                                                           | 2313.0933 | -0.1047 | -45 | 206 | 227          | SLSVLAAGIQQMENGNN<br>VQALR |      |    |    |   |                  | Mascot |
| 42 | PREDICTED: LOW QUALITY PROTEIN: ryanodine receptor 2 [Danio rerio] |           |         |     |     | gi 189530774 | 552356.6                   | 5.83 | 36 | 28 | 0 |                  |        |

#### Peptide Information

| Calc. Mass | Obsrv. Mass | $\pm$ da | $\pm$ ppm | Start Seq. | End Seq. | Sequence          | Ion Score | C. I. | % Modification         | Rank | Result Type |
|------------|-------------|----------|-----------|------------|----------|-------------------|-----------|-------|------------------------|------|-------------|
| 801.4464   | 801.3264    | -0.12    | -150      | 470        | 477      | QGDIGALK          |           |       |                        |      | Mascot      |
| 807.4359   | 807.3688    | -0.0671  | -83       | 4337       | 4342     | YQVEIR            |           |       |                        |      | Mascot      |
| 838.4603   | 838.5067    | 0.0464   | 55        | 1372       | 1377     | QRFMLK            |           |       | Oxidation (M)[4]       |      | Mascot      |
| 840.4614   | 840.4894    | 0.028    | 33        | 3510       | 3515     | LEIYFR            |           |       |                        |      | Mascot      |
| 848.4777   | 848.4927    | 0.015    | 18        | 3528       | 3533     | RPVWYK            |           |       |                        |      | Mascot      |
| 996.468    | 996.5621    | 0.0941   | 94        | 1563       | 1571     | NANPQCPPR         |           |       |                        |      | Mascot      |
| 996.5624   | 996.5621    | -0.0003  | 0         | 3510       | 3516     | LEIYFRR           |           |       |                        |      | Mascot      |
| 1045.5459  | 1045.5258   | -0.0201  | -19       | 75         | 83       | ALQEMLANR         |           |       |                        |      | Mascot      |
| 1051.5604  | 1051.6759   | 0.1155   | 110       | 2440       | 2448     | AAMVLFLLDR        |           |       | Oxidation (M)[3]       |      | Mascot      |
| 1062.5327  | 1062.6549   | 0.1222   | 115       | 1730       | 1738     | VERFPGSDR         |           |       |                        |      | Mascot      |
| 1090.5714  | 1090.491    | -0.0804  | -74       | 3549       | 3557     | MAPLYNLPR         |           |       | Oxidation (M)[1]       |      | Mascot      |
| 1109.599   | 1109.4491   | -0.1499  | -135      | 4108       | 4116     | QFIFDVVNK         |           |       |                        |      | Mascot      |
| 1165.567   | 1165.7042   | 0.1372   | 118       | 33         | 43       | LCLAAEGFGER       |           |       |                        |      | Mascot      |
| 1165.567   | 1165.7042   | 0.1372   | 118       | 33         | 43       | LCLAAEGFGER       |           |       |                        |      | Mascot      |
| 1179.6265  | 1179.5604   | -0.0661  | -56       | 2756       | 2765     | CMLVLGWTIK        |           |       | Oxidation (M)[2]       |      | Mascot      |
| 1179.6265  | 1179.5604   | -0.0661  | -56       | 2756       | 2765     | CMLVLGWTIK        |           |       | Oxidation (M)[2]       |      | Mascot      |
| 1277.6525  | 1277.6602   | 0.0077   | 6         | 893        | 903      | IEQGWTYGPVK       |           |       |                        |      | Mascot      |
| 1279.7157  | 1279.7313   | 0.0156   | 12        | 2896       | 2906     | FAYGLIQQALR       |           |       |                        |      | Mascot      |
| 1302.7239  | 1302.6656   | -0.0583  | -45       | 908        | 918      | KVHLCLVEFSK       |           |       |                        |      | Mascot      |
| 1307.6388  | 1307.6309   | -0.0079  | -6        | 2175       | 2184     | FLCYFCRISR        |           |       |                        |      | Mascot      |
| 1320.6517  | 1320.5358   | -0.1159  | -88       | 2130       | 2139     | VFYQHPLNMR        |           |       | Oxidation (M)[9]       |      | Mascot      |
| 1323.7242  | 1323.626    | -0.0982  | -74       | 3528       | 3537     | RPVWYKMSK         |           |       | Oxidation (M)[7]       |      | Mascot      |
| 1460.7202  | 1460.7429   | 0.0227   | 16        | 4570       | 4582     | VMAKYGELYGSAR     |           |       | Oxidation (M)[2]       |      | Mascot      |
| 1638.8268  | 1638.7983   | -0.0285  | -17       | 621        | 634      | SNQHLCIDTLLPER    |           |       |                        |      | Mascot      |
| 1691.7483  | 1691.7413   | -0.007   | -4        | 2699       | 2711     | YAEHTEKWSMEK      |           |       | Oxidation (M)[11]      |      | Mascot      |
| 1691.885   | 1691.7413   | -0.1437  | -85       | 2517       | 2532     | SGPVDELLQGVSLSK   |           |       |                        |      | Mascot      |
| 1707.886   | 1707.7114   | -0.1746  | -102      | 1572       | 1584     | LCVQHLTHTRWTR     |           |       | Carbamidomethyl (C)[2] |      | Mascot      |
| 1851.9381  | 1851.8528   | -0.0853  | -46       | 2376       | 2392     | CAPETHLIEAGKGEAIR |           |       | Carbamidomethyl (C)[1] |      | Mascot      |

|  |           |           |         |     |      |      |                        |  |  |  |  |  |                                              |  |  |  |        |
|--|-----------|-----------|---------|-----|------|------|------------------------|--|--|--|--|--|----------------------------------------------|--|--|--|--------|
|  | 2050.8359 | 2051.0142 | 0.1783  | 87  | 4343 | 4359 | EEDFHAVQDEEEDTETK      |  |  |  |  |  |                                              |  |  |  | Mascot |
|  | 2211.1018 | 2211.0242 | -0.0776 | -35 | 601  | 620  | NHKILDVLCVCHGMAVR      |  |  |  |  |  |                                              |  |  |  | Mascot |
|  | 2229.8894 | 2230.1023 | 0.2129  | 95  | 4721 | 4737 | CDDMLTCYMFHMYGVGR      |  |  |  |  |  | Carbamidomethyl (C)[1,7], Oxidation (M)[4,9] |  |  |  | Mascot |
|  | 2233.0884 | 2232.9983 | -0.0901 | -40 | 1898 | 1917 | VEAVISFSGDFVGHQLQEDQR  |  |  |  |  |  |                                              |  |  |  | Mascot |
|  | 2249.2024 | 2248.9912 | -0.2112 | -94 | 2517 | 2538 | SGPVDPELLQGVYLSKASGLTK |  |  |  |  |  |                                              |  |  |  | Mascot |
|  | 2283.2324 | 2283.0952 | -0.1372 | -60 | 3360 | 3378 | LFSLVAEVFIFWAKSHNFK    |  |  |  |  |  |                                              |  |  |  | Mascot |
|  | 2283.2324 | 2283.0952 | -0.1372 | -60 | 3360 | 3378 | LFSLVAEVFIFWAKSHNFK    |  |  |  |  |  |                                              |  |  |  | Mascot |
|  | 2284.0994 | 2284.0898 | -0.0096 | -4  | 3437 | 3458 | KLLSVAMNGCCHGDQGLVSHAK |  |  |  |  |  | Oxidation (M)[7]                             |  |  |  | Mascot |
|  | 2299.1294 | 2299.1025 | -0.0269 | -12 | 1563 | 1581 | NANPQCPRRLCVQHLTHTR    |  |  |  |  |  | Carbamidomethyl (C)[6,11]                    |  |  |  | Mascot |
|  | 2300.2068 | 2300.0874 | -0.1194 | -52 | 3106 | 3125 | ILSSLYILGTCSGSFIERQR   |  |  |  |  |  | Carbamidomethyl (C)[11]                      |  |  |  | Mascot |
|  | 2300.2068 | 2300.0874 | -0.1194 | -52 | 3106 | 3125 | ILSSLYILGTCSGSFIERQR   |  |  |  |  |  | Carbamidomethyl (C)[11]                      |  |  |  | Mascot |
|  | 2501.2944 | 2501.1433 | -0.1511 | -60 | 3877 | 3897 | LWDVVVGFVHFAHMQMKLSR   |  |  |  |  |  | Oxidation (M)[15]                            |  |  |  | Mascot |

43 prefoldin subunit 6 [Danio rerio] gi|41055782 14481.7 6.62 5 28 0

#### Peptide Information

| Calc. Mass | Obsrv. Mass | ± da    | ± ppm | Start Seq. | End Seq. | Sequence             | Ion Score | C. I. | % Modification   | Rank | Result Type |
|------------|-------------|---------|-------|------------|----------|----------------------|-----------|-------|------------------|------|-------------|
| 807.4141   | 807.3688    | -0.0453 | -56   | 26         | 32       | SMSARQK              |           |       |                  |      | Mascot      |
| 838.576    | 838.5067    | -0.0693 | -83   | 59         | 66       | LIGPVLVK             |           |       |                  |      | Mascot      |
| 996.4778   | 996.5621    | 0.0843  | 85    | 22         | 30       | DVSKSMSAR            |           |       | Oxidation (M)[6] |      | Mascot      |
| 996.4778   | 996.5621    | 0.0843  | 85    | 22         | 30       | DVSKSMSAR            |           |       | Oxidation (M)[6] |      | Mascot      |
| 1234.6426  | 1234.6324   | -0.0102 | -8    | 80         | 89       | LEYINGEIQR           |           |       |                  |      | Mascot      |
| 2233.157   | 2232.9983   | -0.1587 | -71   | 106        | 125      | EVLSSLQQEYQRAQGQAVAK |           |       |                  |      | Mascot      |

44 60S ribosomal protein L28 [Danio rerio] gi|41055030 15629.8 12.11 5 28 0

#### Peptide Information

| Calc. Mass | Obsrv. Mass | ± da    | ± ppm | Start Seq. | End Seq. | Sequence            | Ion Score | C. I. | % Modification   | Rank | Result Type |
|------------|-------------|---------|-------|------------|----------|---------------------|-----------|-------|------------------|------|-------------|
| 856.4787   | 856.4889    | 0.0102  | 12    | 41         | 47       | FNGLIHR             |           |       |                  |      | Mascot      |
| 1051.5895  | 1051.6759   | 0.0864  | 82    | 13         | 21       | NSSSFLIKR           |           |       |                  |      | Mascot      |
| 1279.6753  | 1279.7313   | 0.056   | 44    | 69         | 80       | SGQRKPATSYGK        |           |       |                  |      | Mascot      |
| 1639.0013  | 1638.7983   | -0.203  | -124  | 114        | 128      | RVSAILSSQKPVVVR     |           |       |                  |      | Mascot      |
| 2230.1802  | 2230.1023   | -0.0779 | -35   | 2          | 20       | ASPHLQWMVIRNSSSFLIK |           |       | Oxidation (M)[8] |      | Mascot      |

45 HMG box-containing protein 1 [Danio rerio] gi|66773076 53342.5 5.88 8 28 0

| Peptide Information |                                                                      |             |         |       |             |          |                           |           |         |                         |      |             |
|---------------------|----------------------------------------------------------------------|-------------|---------|-------|-------------|----------|---------------------------|-----------|---------|-------------------------|------|-------------|
|                     | Calc. Mass                                                           | Obsrv. Mass | ± da    | ± ppm | Start Seq.  | End Seq. | Sequence                  | Ion Score | C. I. % | Modification            | Rank | Result Type |
|                     | 801.4213                                                             | 801.3264    | -0.0949 | -118  | 7           | 13       | SQSVLPQR                  |           |         |                         |      | Mascot      |
|                     | 807.4069                                                             | 807.3688    | -0.0381 | -47   | 1           | 6        | MVWEVK                    |           |         | Oxidation (M)[1]        |      | Mascot      |
|                     | 848.393                                                              | 848.4927    | 0.0997  | 118   | 225         | 232      | GAQSNPMK                  |           |         | Oxidation (M)[7]        |      | Mascot      |
|                     | 1045.4806                                                            | 1045.5258   | 0.0452  | 43    | 448         | 455      | RMYTMEAK                  |           |         | Oxidation (M)[2]        |      | Mascot      |
|                     | 1475.6907                                                            | 1475.7014   | 0.0107  | 7     | 388         | 402      | SHASGSSGATPTKCK           |           |         | Carbamidomethyl (C)[14] |      | Mascot      |
|                     | 1589.8104                                                            | 1589.7465   | -0.0639 | -40   | 1           | 13       | MVWEVKSQSVLPQR            |           |         | Oxidation (M)[1]        |      | Mascot      |
|                     | 1589.8104                                                            | 1589.7465   | -0.0639 | -40   | 1           | 13       | MVWEVKSQSVLPQR            |           |         | Oxidation (M)[1]        |      | Mascot      |
|                     | 2208.0146                                                            | 2208.0339   | 0.0193  | 9     | 298         | 317      | HGIPCYDMQVGDLCCLPP<br>GHR |           |         |                         |      | Mascot      |
|                     | 2211.0273                                                            | 2211.0242   | -0.0031 | -1    | 333         | 352      | SYDFTPLDSSAVYVLSSM<br>GR  |           |         | Oxidation (M)[18]       |      | Mascot      |
| 46                  | NADH dehydrogenase (ubiquinone) 1 alpha subcomplex, 12 [Danio rerio] |             |         |       | gi 74315939 |          | 16958.4                   | 9.39      | 5       | 28                      | 0    |             |
| Peptide Information |                                                                      |             |         |       |             |          |                           |           |         |                         |      |             |
|                     | Calc. Mass                                                           | Obsrv. Mass | ± da    | ± ppm | Start Seq.  | End Seq. | Sequence                  | Ion Score | C. I. % | Modification            | Rank | Result Type |
|                     | 882.4501                                                             | 882.5356    | 0.0855  | 97    | 2           | 9        | AGYATLMR                  |           |         |                         |      | Mascot      |
|                     | 1045.4805                                                            | 1045.5258   | 0.0453  | 43    | 1           | 9        | MAGYATLMR                 |           |         | Oxidation (M)[1,8]      |      | Mascot      |
|                     | 1234.6215                                                            | 1234.6324   | 0.0109  | 9     | 11          | 22       | FVGFTGHGGVK               |           |         |                         |      | Mascot      |
|                     | 1460.7955                                                            | 1460.7429   | -0.0526 | -36   | 31          | 44       | VQETKTGALIGTDK            |           |         |                         |      | Mascot      |
|                     | 2230.042                                                             | 2230.1023   | 0.0603  | 27    | 90          | 108      | WLHCMTDDPPTTHPPEP<br>KK   |           |         |                         |      | Mascot      |
| 47                  | Pkm2a protein [Danio rerio]                                          |             |         |       | gi 45501385 |          | 58075.7                   | 6.36      | 9       | 28                      | 0    |             |
| Peptide Information |                                                                      |             |         |       |             |          |                           |           |         |                         |      |             |
|                     | Calc. Mass                                                           | Obsrv. Mass | ± da    | ± ppm | Start Seq.  | End Seq. | Sequence                  | Ion Score | C. I. % | Modification            | Rank | Result Type |
|                     | 840.5301                                                             | 840.4894    | -0.0407 | -48   | 449         | 456      | APILAVTR                  |           |         |                         |      | Mascot      |
|                     | 856.4457                                                             | 856.4889    | 0.0432  | 50    | 378         | 384      | TQHMIAR                   |           |         |                         |      | Mascot      |
|                     | 996.4818                                                             | 996.5621    | 0.0803  | 81    | 491         | 499      | VNFAMDVGK                 |           |         | Oxidation (M)[5]        |      | Mascot      |
|                     | 996.4818                                                             | 996.5621    | 0.0803  | 81    | 491         | 499      | VNFAMDVGK                 |           |         | Oxidation (M)[5]        |      | Mascot      |
|                     | 1062.5691                                                            | 1062.6549   | 0.0858  | 81    | 394         | 401      | QVFEDLRR                  |           |         |                         |      | Mascot      |
|                     | 1109.5811                                                            | 1109.4491   | -0.132  | -119  | 272         | 280      | LENHEGVRR                 |           |         |                         |      | Mascot      |
|                     | 1179.6289                                                            | 1179.5604   | -0.0685 | -58   | 58          | 67       | SVDTLKEMIK                |           |         | Oxidation (M)[8]        |      | Mascot      |
|                     | 1179.6289                                                            | 1179.5604   | -0.0685 | -58   | 58          | 67       | SVDTLKEMIK                |           |         | Oxidation (M)[8]        |      | Mascot      |

|  |           |           |         |     |    |    |               |  |  |  |  |  |  |  |  |  |  |  |  |  |  |  |  |  |  |  |  |  |  |  |  |  |  |  |  |  |  |  |  |  |  |  |  |  |  |  |  |  |  |  |  |  |  |  |  |  |  |  |  |  |  |  |  |  |  |  |  |  |  |  |  |  |  |  |  |  |  |  |  |  |  |  |  |  |  |  |  |  |  |  |  |  |  |  |  |  |  |  |  |  |  |  |  |  |  |  |  |  |  |  |  |  |  |  |  |  |  |  |  |  |  |  |  |  |  |  |  |  |  |  |  |  |  |  |  |  |  |  |  |  |  |  |  |  |  |  |  |  |  |  |  |  |  |  |  |  |  |  |  |  |  |  |  |  |  |  |  |  |  |  |  |  |  |  |  |  |  |  |  |  |  |  |  |  |  |  |  |  |  |  |  |  |  |  |  |  |  |  |  |  |  |  |  |  |  |  |  |  |  |  |  |  |  |  |  |  |  |  |  |  |  |  |  |  |  |  |  |  |  |  |  |  |  |  |  |  |  |  |  |  |  |  |  |  |  |  |  |  |  |  |  |  |  |  |  |  |  |  |  |  |  |  |  |  |  |  |  |  |  |  |  |  |  |  |  |  |  |  |  |  |  |  |  |  |  |  |  |  |  |  |  |  |  |  |  |  |  |  |  |  |  |  |  |  |  |  |  |  |  |  |  |  |  |  |  |  |  |  |  |  |  |  |  |  |  |  |  |  |  |  |  |  |  |  |  |  |  |  |  |  |  |  |  |  |  |  |  |  |  |  |  |  |  |  |  |  |  |  |  |  |  |  |  |  |  |  |  |  |  |  |  |  |  |  |  |  |  |  |  |  |  |  |  |  |  |  |  |  |  |  |  |  |  |  |  |  |  |  |  |  |  |  |  |  |  |  |  |  |  |  |  |  |  |  |  |  |  |  |  |  |  |  |  |  |  |  |  |  |  |  |  |  |  |  |  |  |  |  |  |  |  |  |  |  |  |  |  |  |  |  |  |  |  |  |  |  |  |  |  |  |  |  |  |  |  |  |  |  |  |  |  |  |  |  |  |  |  |  |  |  |  |  |  |  |  |  |  |  |  |  |  |  |  |  |  |  |  |  |  |  |  |  |  |  |  |  |  |  |  |  |  |  |  |  |  |  |  |  |  |  |  |  |  |  |  |  |  |  |  |  |  |  |  |  |  |  |  |  |  |  |  |  |  |  |  |  |  |  |  |  |  |  |  |  |  |  |  |  |  |  |  |  |  |  |  |  |  |  |  |  |  |  |  |  |  |  |  |  |  |  |  |  |  |  |  |  |  |  |  |  |  |  |  |  |  |  |  |  |  |  |  |  |  |  |  |  |  |  |  |  |  |  |  |  |  |  |  |  |  |  |  |  |  |  |  |  |  |  |  |  |  |  |  |  |  |  |  |  |  |  |  |  |  |  |  |  |  |  |  |  |  |  |  |  |  |  |  |  |  |  |  |  |  |  |  |  |  |  |  |  |  |  |  |  |  |  |  |  |  |  |  |  |  |  |  |  |  |  |  |  |  |  |  |  |  |  |  |  |  |  |  |  |  |  |  |  |  |  |  |  |  |  |  |  |  |  |  |  |  |  |  |  |  |  |  |  |  |  |  |  |  |  |  |  |  |  |  |  |  |  |  |  |  |  |  |  |  |  |  |  |  |  |  |  |  |  |  |  |  |  |  |  |  |  |  |  |  |  |  |  |  |  |  |  |  |  |  |  |  |  |  |  |  |  |  |  |  |  |  |  |  |  |  |  |  |  |  |  |  |  |  |  |  |  |  |  |  |  |  |  |  |  |  |  |  |  |  |  |  |  |  |  |  |  |  |  |  |  |  |  |  |  |  |  |  |  |  |  |  |  |  |  |  |  |  |  |  |  |  |  |  |  |  |  |  |  |  |  |  |  |  |  |  |  |  |  |  |  |  |  |  |  |  |  |  |  |  |  |  |  |  |  |  |  |  |  |  |  |  |  |  |  |  |  |  |  |  |  |  |  |  |  |  |  |  |  |  |  |  |  |  |  |  |  |  |  |  |  |  |  |  |  |  |  |  |  |  |  |  |  |  |  |  |  |  |  |  |  |  |  |  |  |  |  |  |  |  |  |  |  |  |  |  |  |  |  |  |  |  |  |  |  |  |  |  |  |  |  |  |  |  |  |  |  |  |  |  |  |  |  |  |  |  |  |  |  |  |  |  |  |  |  |  |  |  |  |  |  |  |  |  |  |  |  |  |  |  |  |  |  |  |  |  |  |  |  |  |  |  |  |  |  |  |  |  |  |  |  |  |  |  |  |  |  |  |  |  |  |  |  |  |  |  |  |  |  |  |  |  |  |  |  |  |  |  |  |  |  |  |  |  |  |  |  |  |  |  |  |  |  |  |  |  |  |  |  |  |  |  |  |  |  |  |  |  |  |  |  |  |  |  |  |  |  |  |  |  |  |  |  |  |  |  |  |  |  |  |  |  |  |  |  |  |  |  |  |  |  |  |  |  |  |  |  |  |  |  |  |  |  |  |  |  |  |  |  |  |  |  |  |  |  |  |  |  |  |  |  |  |  |  |  |  |  |  |  |  |  |  |  |  |  |  |  |  |  |  |  |  |  |  |  |  |  |  |  |  |  |  |  |  |  |  |  |  |  |  |  |  |  |  |  |  |  |  |  |  |  |  |  |  |  |  |  |  |  |  |  |  |  |  |  |  |  |  |  |  |  |  |  |  |  |  |  |  |  |  |  |  |  |  |  |  |  |  |  |  |  |  |  |  |  |  |  |  |  |  |  |  |  |  |  |  |  |  |  |  |  |  |  |  |  |  |  |  |  |  |  |  |  |  |  |  |  |  |  |  |  |  |  |  |  |  |  |  |  |  |  |  |  |  |  |  |  |  |  |  |  |  |  |  |  |  |  |  |  |  |  |  |  |  |  |  |  |  |  |  |  |  |  |  |  |  |  |  |  |  |  |  |  |  |  |  |  |  |  |  |  |  |  |  |  |  |  |  |  |  |  |  |  |  |  |  |  |  |  |  |  |  |  |  |  |  |  |  |  |  |  |  |  |  |  |  |  |  |  |  |  |  |  |  |  |  |  |  |  |  |  |  |  |  |  |  |  |  |  |  |  |  |  |  |  |  |  |  |  |  |  |  |  |  |  |  |  |  |  |  |  |    |
|--|-----------|-----------|---------|-----|----|----|---------------|--|--|--|--|--|--|--|--|--|--|--|--|--|--|--|--|--|--|--|--|--|--|--|--|--|--|--|--|--|--|--|--|--|--|--|--|--|--|--|--|--|--|--|--|--|--|--|--|--|--|--|--|--|--|--|--|--|--|--|--|--|--|--|--|--|--|--|--|--|--|--|--|--|--|--|--|--|--|--|--|--|--|--|--|--|--|--|--|--|--|--|--|--|--|--|--|--|--|--|--|--|--|--|--|--|--|--|--|--|--|--|--|--|--|--|--|--|--|--|--|--|--|--|--|--|--|--|--|--|--|--|--|--|--|--|--|--|--|--|--|--|--|--|--|--|--|--|--|--|--|--|--|--|--|--|--|--|--|--|--|--|--|--|--|--|--|--|--|--|--|--|--|--|--|--|--|--|--|--|--|--|--|--|--|--|--|--|--|--|--|--|--|--|--|--|--|--|--|--|--|--|--|--|--|--|--|--|--|--|--|--|--|--|--|--|--|--|--|--|--|--|--|--|--|--|--|--|--|--|--|--|--|--|--|--|--|--|--|--|--|--|--|--|--|--|--|--|--|--|--|--|--|--|--|--|--|--|--|--|--|--|--|--|--|--|--|--|--|--|--|--|--|--|--|--|--|--|--|--|--|--|--|--|--|--|--|--|--|--|--|--|--|--|--|--|--|--|--|--|--|--|--|--|--|--|--|--|--|--|--|--|--|--|--|--|--|--|--|--|--|--|--|--|--|--|--|--|--|--|--|--|--|--|--|--|--|--|--|--|--|--|--|--|--|--|--|--|--|--|--|--|--|--|--|--|--|--|--|--|--|--|--|--|--|--|--|--|--|--|--|--|--|--|--|--|--|--|--|--|--|--|--|--|--|--|--|--|--|--|--|--|--|--|--|--|--|--|--|--|--|--|--|--|--|--|--|--|--|--|--|--|--|--|--|--|--|--|--|--|--|--|--|--|--|--|--|--|--|--|--|--|--|--|--|--|--|--|--|--|--|--|--|--|--|--|--|--|--|--|--|--|--|--|--|--|--|--|--|--|--|--|--|--|--|--|--|--|--|--|--|--|--|--|--|--|--|--|--|--|--|--|--|--|--|--|--|--|--|--|--|--|--|--|--|--|--|--|--|--|--|--|--|--|--|--|--|--|--|--|--|--|--|--|--|--|--|--|--|--|--|--|--|--|--|--|--|--|--|--|--|--|--|--|--|--|--|--|--|--|--|--|--|--|--|--|--|--|--|--|--|--|--|--|--|--|--|--|--|--|--|--|--|--|--|--|--|--|--|--|--|--|--|--|--|--|--|--|--|--|--|--|--|--|--|--|--|--|--|--|--|--|--|--|--|--|--|--|--|--|--|--|--|--|--|--|--|--|--|--|--|--|--|--|--|--|--|--|--|--|--|--|--|--|--|--|--|--|--|--|--|--|--|--|--|--|--|--|--|--|--|--|--|--|--|--|--|--|--|--|--|--|--|--|--|--|--|--|--|--|--|--|--|--|--|--|--|--|--|--|--|--|--|--|--|--|--|--|--|--|--|--|--|--|--|--|--|--|--|--|--|--|--|--|--|--|--|--|--|--|--|--|--|--|--|--|--|--|--|--|--|--|--|--|--|--|--|--|--|--|--|--|--|--|--|--|--|--|--|--|--|--|--|--|--|--|--|--|--|--|--|--|--|--|--|--|--|--|--|--|--|--|--|--|--|--|--|--|--|--|--|--|--|--|--|--|--|--|--|--|--|--|--|--|--|--|--|--|--|--|--|--|--|--|--|--|--|--|--|--|--|--|--|--|--|--|--|--|--|--|--|--|--|--|--|--|--|--|--|--|--|--|--|--|--|--|--|--|--|--|--|--|--|--|--|--|--|--|--|--|--|--|--|--|--|--|--|--|--|--|--|--|--|--|--|--|--|--|--|--|--|--|--|--|--|--|--|--|--|--|--|--|--|--|--|--|--|--|--|--|--|--|--|--|--|--|--|--|--|--|--|--|--|--|--|--|--|--|--|--|--|--|--|--|--|--|--|--|--|--|--|--|--|--|--|--|--|--|--|--|--|--|--|--|--|--|--|--|--|--|--|--|--|--|--|--|--|--|--|--|--|--|--|--|--|--|--|--|--|--|--|--|--|--|--|--|--|--|--|--|--|--|--|--|--|--|--|--|--|--|--|--|--|--|--|--|--|--|--|--|--|--|--|--|--|--|--|--|--|--|--|--|--|--|--|--|--|--|--|--|--|--|--|--|--|--|--|--|--|--|--|--|--|--|--|--|--|--|--|--|--|--|--|--|--|--|--|--|--|--|--|--|--|--|--|--|--|--|--|--|--|--|--|--|--|--|--|--|--|--|--|--|--|--|--|--|--|--|--|--|--|--|--|--|--|--|--|--|--|--|--|--|--|--|--|--|--|--|--|--|--|--|--|--|--|--|--|--|--|--|--|--|--|--|--|--|--|--|--|--|--|--|--|--|--|--|--|--|--|--|--|--|--|--|--|--|--|--|--|--|--|--|--|--|--|--|--|--|--|--|--|--|--|--|--|--|--|--|--|--|--|--|--|--|--|--|--|--|--|--|--|--|--|--|--|--|--|--|--|--|--|--|--|--|--|--|--|--|--|--|--|--|--|--|--|--|--|--|--|--|--|--|--|--|--|--|--|--|--|--|--|--|--|--|--|--|--|--|--|--|--|--|--|--|--|--|--|--|--|--|--|--|--|--|--|--|--|--|--|--|--|--|--|--|--|--|--|--|--|--|--|--|--|--|--|--|--|--|--|--|--|--|--|--|--|--|--|--|--|--|--|--|--|--|--|--|--|--|--|--|--|--|--|--|--|--|--|--|--|--|--|--|--|--|--|--|--|--|--|--|--|--|--|--|--|--|--|--|--|--|--|--|--|--|--|--|--|--|--|--|--|--|--|--|--|--|--|--|--|--|--|--|--|--|--|--|--|--|--|--|--|--|--|--|--|--|--|--|--|--|--|--|--|--|--|--|--|--|--|--|--|--|--|--|--|--|--|--|--|--|--|--|--|--|--|--|--|--|--|--|--|--|--|--|--|--|--|--|--|--|--|--|--|--|--|--|--|--|--|--|--|--|--|--|--|--|--|--|--|--|--|--|--|--|--|--|--|--|--|--|--|--|--|--|--|--|--|--|--|--|--|--|--|--|--|--|--|--|--|--|--|--|----|
|  | 1302.6835 | 1302.6656 | -0.0179 | -14 | 45 | 57 | NTGIICTIGPASR |  |  |  |  |  |  |  |  |  |  |  |  |  |  |  |  |  |  |  |  |  |  |  |  |  |  |  |  |  |  |  |  |  |  |  |  |  |  |  |  |  |  |  |  |  |  |  |  |  |  |  |  |  |  |  |  |  |  |  |  |  |  |  |  |  |  |  |  |  |  |  |  |  |  |  |  |  |  |  |  |  |  |  |  |  |  |  |  |  |  |  |  |  |  |  |  |  |  |  |  |  |  |  |  |  |  |  |  |  |  |  |  |  |  |  |  |  |  |  |  |  |  |  |  |  |  |  |  |  |  |  |  |  |  |  |  |  |  |  |  |  |  |  |  |  |  |  |  |  |  |  |  |  |  |  |  |  |  |  |  |  |  |  |  |  |  |  |  |  |  |  |  |  |  |  |  |  |  |  |  |  |  |  |  |  |  |  |  |  |  |  |  |  |  |  |  |  |  |  |  |  |  |  |  |  |  |  |  |  |  |  |  |  |  |  |  |  |  |  |  |  |  |  |  |  |  |  |  |  |  |  |  |  |  |  |  |  |  |  |  |  |  |  |  |  |  |  |  |  |  |  |  |  |  |  |  |  |  |  |  |  |  |  |  |  |  |  |  |  |  |  |  |  |  |  |  |  |  |  |  |  |  |  |  |  |  |  |  |  |  |  |  |  |  |  |  |  |  |  |  |  |  |  |  |  |  |  |  |  |  |  |  |  |  |  |  |  |  |  |  |  |  |  |  |  |  |  |  |  |  |  |  |  |  |  |  |  |  |  |  |  |  |  |  |  |  |  |  |  |  |  |  |  |  |  |  |  |  |  |  |  |  |  |  |  |  |  |  |  |  |  |  |  |  |  |  |  |  |  |  |  |  |  |  |  |  |  |  |  |  |  |  |  |  |  |  |  |  |  |  |  |  |  |  |  |  |  |  |  |  |  |  |  |  |  |  |  |  |  |  |  |  |  |  |  |  |  |  |  |  |  |  |  |  |  |  |  |  |  |  |  |  |  |  |  |  |  |  |  |  |  |  |  |  |  |  |  |  |  |  |  |  |  |  |  |  |  |  |  |  |  |  |  |  |  |  |  |  |  |  |  |  |  |  |  |  |  |  |  |  |  |  |  |  |  |  |  |  |  |  |  |  |  |  |  |  |  |  |  |  |  |  |  |  |  |  |  |  |  |  |  |  |  |  |  |  |  |  |  |  |  |  |  |  |  |  |  |  |  |  |  |  |  |  |  |  |  |  |  |  |  |  |  |  |  |  |  |  |  |  |  |  |  |  |  |  |  |  |  |  |  |  |  |  |  |  |  |  |  |  |  |  |  |  |  |  |  |  |  |  |  |  |  |  |  |  |  |  |  |  |  |  |  |  |  |  |  |  |  |  |  |  |  |  |  |  |  |  |  |  |  |  |  |  |  |  |  |  |  |  |  |  |  |  |  |  |  |  |  |  |  |  |  |  |  |  |  |  |  |  |  |  |  |  |  |  |  |  |  |  |  |  |  |  |  |  |  |  |  |  |  |  |  |  |  |  |  |  |  |  |  |  |  |  |  |  |  |  |  |  |  |  |  |  |  |  |  |  |  |  |  |  |  |  |  |  |  |  |  |  |  |  |  |  |  |  |  |  |  |  |  |  |  |  |  |  |  |  |  |  |  |  |  |  |  |  |  |  |  |  |  |  |  |  |  |  |  |  |  |  |  |  |  |  |  |  |  |  |  |  |  |  |  |  |  |  |  |  |  |  |  |  |  |  |  |  |  |  |  |  |  |  |  |  |  |  |  |  |  |  |  |  |  |  |  |  |  |  |  |  |  |  |  |  |  |  |  |  |  |  |  |  |  |  |  |  |  |  |  |  |  |  |  |  |  |  |  |  |  |  |  |  |  |  |  |  |  |  |  |  |  |  |  |  |  |  |  |  |  |  |  |  |  |  |  |  |  |  |  |  |  |  |  |  |  |  |  |  |  |  |  |  |  |  |  |  |  |  |  |  |  |  |  |  |  |  |  |  |  |  |  |  |  |  |  |  |  |  |  |  |  |  |  |  |  |  |  |  |  |  |  |  |  |  |  |  |  |  |  |  |  |  |  |  |  |  |  |  |  |  |  |  |  |  |  |  |  |  |  |  |  |  |  |  |  |  |  |  |  |  |  |  |  |  |  |  |  |  |  |  |  |  |  |  |  |  |  |  |  |  |  |  |  |  |  |  |  |  |  |  |  |  |  |  |  |  |  |  |  |  |  |  |  |  |  |  |  |  |  |  |  |  |  |  |  |  |  |  |  |  |  |  |  |  |  |  |  |  |  |  |  |  |  |  |  |  |  |  |  |  |  |  |  |  |  |  |  |  |  |  |  |  |  |  |  |  |  |  |  |  |  |  |  |  |  |  |  |  |  |  |  |  |  |  |  |  |  |  |  |  |  |  |  |  |  |  |  |  |  |  |  |  |  |  |  |  |  |  |  |  |  |  |  |  |  |  |  |  |  |  |  |  |  |  |  |  |  |  |  |  |  |  |  |  |  |  |  |  |  |  |  |  |  |  |  |  |  |  |  |  |  |  |  |  |  |  |  |  |  |  |  |  |  |  |  |  |  |  |  |  |  |  |  |  |  |  |  |  |  |  |  |  |  |  |  |  |  |  |  |  |  |  |  |  |  |  |  |  |  |  |  |  |  |  |  |  |  |  |  |  |  |  |  |  |  |  |  |  |  |  |  |  |  |  |  |  |  |  |  |  |  |  |  |  |  |  |  |  |  |  |  |  |  |  |  |  |  |  |  |  |  |  |  |  |  |  |  |  |  |  |  |  |  |  |  |  |  |  |  |  |  |  |  |  |  |  |  |  |  |  |  |  |  |  |  |  |  |  |  |  |  |  |  |  |  |  |  |  |  |  |  |  |  |  |  |  |  |  |  |  |  |  |  |  |  |  |  |  |  |  |  |  |  |  |  |  |  |  |  |  |  |  |  |  |  |  |  |  |  |  |  |  |  |  |  |  |  |  |  |  |  |  |  |  |  |  |  |  |  |  |  |  |  |  |  |  |  |  |  |  |  |  |  |  |  |  |  |  |  |  |  |  |  |  |  |  |  |  |  |  |  |  |  |  |  |  |  |  |  |  |  |  |  |  |  |  |  |  |  |  |  |  |  |  |  |  |  |  |  |  |  |  |  |  |  |  |  |  |  |  |  | </ |
|--|-----------|-----------|---------|-----|----|----|---------------|--|--|--|--|--|--|--|--|--|--|--|--|--|--|--|--|--|--|--|--|--|--|--|--|--|--|--|--|--|--|--|--|--|--|--|--|--|--|--|--|--|--|--|--|--|--|--|--|--|--|--|--|--|--|--|--|--|--|--|--|--|--|--|--|--|--|--|--|--|--|--|--|--|--|--|--|--|--|--|--|--|--|--|--|--|--|--|--|--|--|--|--|--|--|--|--|--|--|--|--|--|--|--|--|--|--|--|--|--|--|--|--|--|--|--|--|--|--|--|--|--|--|--|--|--|--|--|--|--|--|--|--|--|--|--|--|--|--|--|--|--|--|--|--|--|--|--|--|--|--|--|--|--|--|--|--|--|--|--|--|--|--|--|--|--|--|--|--|--|--|--|--|--|--|--|--|--|--|--|--|--|--|--|--|--|--|--|--|--|--|--|--|--|--|--|--|--|--|--|--|--|--|--|--|--|--|--|--|--|--|--|--|--|--|--|--|--|--|--|--|--|--|--|--|--|--|--|--|--|--|--|--|--|--|--|--|--|--|--|--|--|--|--|--|--|--|--|--|--|--|--|--|--|--|--|--|--|--|--|--|--|--|--|--|--|--|--|--|--|--|--|--|--|--|--|--|--|--|--|--|--|--|--|--|--|--|--|--|--|--|--|--|--|--|--|--|--|--|--|--|--|--|--|--|--|--|--|--|--|--|--|--|--|--|--|--|--|--|--|--|--|--|--|--|--|--|--|--|--|--|--|--|--|--|--|--|--|--|--|--|--|--|--|--|--|--|--|--|--|--|--|--|--|--|--|--|--|--|--|--|--|--|--|--|--|--|--|--|--|--|--|--|--|--|--|--|--|--|--|--|--|--|--|--|--|--|--|--|--|--|--|--|--|--|--|--|--|--|--|--|--|--|--|--|--|--|--|--|--|--|--|--|--|--|--|--|--|--|--|--|--|--|--|--|--|--|--|--|--|--|--|--|--|--|--|--|--|--|--|--|--|--|--|--|--|--|--|--|--|--|--|--|--|--|--|--|--|--|--|--|--|--|--|--|--|--|--|--|--|--|--|--|--|--|--|--|--|--|--|--|--|--|--|--|--|--|--|--|--|--|--|--|--|--|--|--|--|--|--|--|--|--|--|--|--|--|--|--|--|--|--|--|--|--|--|--|--|--|--|--|--|--|--|--|--|--|--|--|--|--|--|--|--|--|--|--|--|--|--|--|--|--|--|--|--|--|--|--|--|--|--|--|--|--|--|--|--|--|--|--|--|--|--|--|--|--|--|--|--|--|--|--|--|--|--|--|--|--|--|--|--|--|--|--|--|--|--|--|--|--|--|--|--|--|--|--|--|--|--|--|--|--|--|--|--|--|--|--|--|--|--|--|--|--|--|--|--|--|--|--|--|--|--|--|--|--|--|--|--|--|--|--|--|--|--|--|--|--|--|--|--|--|--|--|--|--|--|--|--|--|--|--|--|--|--|--|--|--|--|--|--|--|--|--|--|--|--|--|--|--|--|--|--|--|--|--|--|--|--|--|--|--|--|--|--|--|--|--|--|--|--|--|--|--|--|--|--|--|--|--|--|--|--|--|--|--|--|--|--|--|--|--|--|--|--|--|--|--|--|--|--|--|--|--|--|--|--|--|--|--|--|--|--|--|--|--|--|--|--|--|--|--|--|--|--|--|--|--|--|--|--|--|--|--|--|--|--|--|--|--|--|--|--|--|--|--|--|--|--|--|--|--|--|--|--|--|--|--|--|--|--|--|--|--|--|--|--|--|--|--|--|--|--|--|--|--|--|--|--|--|--|--|--|--|--|--|--|--|--|--|--|--|--|--|--|--|--|--|--|--|--|--|--|--|--|--|--|--|--|--|--|--|--|--|--|--|--|--|--|--|--|--|--|--|--|--|--|--|--|--|--|--|--|--|--|--|--|--|--|--|--|--|--|--|--|--|--|--|--|--|--|--|--|--|--|--|--|--|--|--|--|--|--|--|--|--|--|--|--|--|--|--|--|--|--|--|--|--|--|--|--|--|--|--|--|--|--|--|--|--|--|--|--|--|--|--|--|--|--|--|--|--|--|--|--|--|--|--|--|--|--|--|--|--|--|--|--|--|--|--|--|--|--|--|--|--|--|--|--|--|--|--|--|--|--|--|--|--|--|--|--|--|--|--|--|--|--|--|--|--|--|--|--|--|--|--|--|--|--|--|--|--|--|--|--|--|--|--|--|--|--|--|--|--|--|--|--|--|--|--|--|--|--|--|--|--|--|--|--|--|--|--|--|--|--|--|--|--|--|--|--|--|--|--|--|--|--|--|--|--|--|--|--|--|--|--|--|--|--|--|--|--|--|--|--|--|--|--|--|--|--|--|--|--|--|--|--|--|--|--|--|--|--|--|--|--|--|--|--|--|--|--|--|--|--|--|--|--|--|--|--|--|--|--|--|--|--|--|--|--|--|--|--|--|--|--|--|--|--|--|--|--|--|--|--|--|--|--|--|--|--|--|--|--|--|--|--|--|--|--|--|--|--|--|--|--|--|--|--|--|--|--|--|--|--|--|--|--|--|--|--|--|--|--|--|--|--|--|--|--|--|--|--|--|--|--|--|--|--|--|--|--|--|--|--|--|--|--|--|--|--|--|--|--|--|--|--|--|--|--|--|--|--|--|--|--|--|--|--|--|--|--|--|--|--|--|--|--|--|--|--|--|--|--|--|--|--|--|--|--|--|--|--|--|--|--|--|--|--|--|--|--|--|--|--|--|--|--|--|--|--|--|--|--|--|--|--|--|--|--|--|--|--|--|--|--|--|--|--|--|--|--|--|--|--|--|--|--|--|--|--|--|--|--|--|--|--|--|--|--|--|--|--|--|--|--|--|--|--|--|--|--|--|--|--|--|--|--|--|--|--|--|--|--|--|--|--|--|--|--|--|--|--|--|--|--|--|--|--|--|--|--|--|--|--|--|--|--|--|--|--|--|--|--|--|--|--|--|--|--|--|--|--|--|--|--|--|--|--|--|--|--|--|--|--|--|--|--|--|--|--|--|--|--|--|--|--|--|--|--|--|--|--|--|--|--|--|--|--|--|--|--|--|--|--|--|--|--|--|--|--|--|--|--|--|--|--|--|--|--|--|--|--|--|--|--|--|--|--|--|--|--|--|--|--|--|--|--|--|--|--|----|

| Peptide Information |                       |             |         |       |             |                               |           |         |                                          |                  |        |
|---------------------|-----------------------|-------------|---------|-------|-------------|-------------------------------|-----------|---------|------------------------------------------|------------------|--------|
|                     | Calc. Mass            | Obsrv. Mass | ± da    | ± ppm | Start Seq.  | End Sequence Seq.             | Ion Score | C. I. % | Modification                             | Rank Result Type |        |
|                     | 1302.6835             | 1302.6605   | -0.023  | -18   | 149         | 159 GDRIAQLICEK               | 138       | 100     | Carbamidomethyl (C)[9]                   | Mascot           |        |
|                     | 2051.0701             | 2051.0081   | -0.062  | -30   | 14          | 33 LNGCLLGRGAEVTEAVS<br>PHK   |           |         | Mascot                                   |                  |        |
|                     | 2122.9961             | 2122.906    | -0.0901 | -42   | 160         | 176 ICYPDLQELQTLDETER         |           |         | Carbamidomethyl (C)[2]                   | Mascot           |        |
|                     | 2122.9961             | 2122.906    | -0.0901 | -42   | 160         | 176 ICYPDLQELQTLDETER         |           |         | Carbamidomethyl (C)[2]                   | Mascot           |        |
|                     | 2233.1248             | 2232.9912   | -0.1336 | -60   | 109         | 129 SGLAVKHFDVVGAGVVD<br>EDYR |           |         | Mascot                                   |                  |        |
| 2                   | Pbx2 [Danio rerio]    |             |         |       | gi 7861936  |                               | 18895.6   | 9.08    | 7                                        | 51 62.124        |        |
| Peptide Information |                       |             |         |       |             |                               |           |         |                                          |                  |        |
|                     | Calc. Mass            | Obsrv. Mass | ± da    | ± ppm | Start Seq.  | End Sequence Seq.             | Ion Score | C. I. % | Modification                             | Rank Result Type |        |
|                     | 864.4686              | 864.4808    | 0.0122  | 14    | 153         | 159 SRFLDAR                   | 12        | 0       |                                          | Mascot           |        |
|                     | 1051.5782             | 1051.6663   | 0.0881  | 84    | 133         | 141 FSSIQTQLK                 |           |         | Mascot                                   |                  |        |
|                     | 1051.5782             | 1051.6663   | 0.0881  | 84    | 133         | 141 FSSIQTQLK                 |           |         | Mascot                                   |                  |        |
|                     | 1179.6442             | 1179.5477   | -0.0965 | -82   | 1           | 10 ALFSVLCEIK                 |           |         | Carbamidomethyl (C)[7]                   | Mascot           |        |
|                     | 1179.6732             | 1179.5477   | -0.1255 | -106  | 132         | 141 KFSSIQTQLK                |           |         |                                          | Mascot           |        |
|                     | 1307.6447             | 1307.6224   | -0.0223 | -17   | 142         | 152 QSTCEAVMILR               |           |         | Carbamidomethyl (C)[4]                   | Mascot           |        |
|                     | 1323.6395             | 1323.6151   | -0.0244 | -18   | 142         | 152 QSTCEAVMILR               |           |         | Carbamidomethyl (C)[4], Oxidation (M)[8] | Mascot           |        |
|                     | 1323.6395             | 1323.6151   | -0.0244 | -18   | 142         | 152 QSTCEAVMILR               |           |         | Carbamidomethyl (C)[4], Oxidation (M)[8] | Mascot           |        |
|                     | 1493.7563             | 1493.6685   | -0.0878 | -59   | 142         | 154 QSTCEAVMILRSR             |           |         | 3                                        | 0                | Mascot |
|                     | 1493.7563             | 1493.6685   | -0.0878 | -59   | 142         | 154 QSTCEAVMILRSR             |           |         |                                          | Mascot           |        |
|                     | 2283.1836             | 2283.0889   | -0.0947 | -41   | 133         | 152 FSSIQTQLKQSTCEAVMI<br>LR  |           |         |                                          | Mascot           |        |
|                     | 2299.1785             | 2299.0923   | -0.0862 | -37   | 133         | 152 FSSIQTQLKQSTCEAVMI<br>LR  |           |         | Oxidation (M)[17]                        | Mascot           |        |
| 3                   | talin-1 [Danio rerio] |             |         |       | gi 57222259 |                               | 270469.6  | 5.86    | 21                                       | 48 37.141 18 0   |        |
| Peptide Information |                       |             |         |       |             |                               |           |         |                                          |                  |        |
|                     | Calc. Mass            | Obsrv. Mass | ± da    | ± ppm | Start Seq.  | End Sequence Seq.             | Ion Score | C. I. % | Modification                             | Rank Result Type |        |
|                     | 807.4359              | 807.3643    | -0.0716 | -89   | 1520        | 1526 QFVQSAK                  |           |         |                                          | Mascot           |        |
|                     | 1003.5054             | 1003.5089   | 0.0035  | 3     | 2506        | 2513 EKELEEAR                 |           |         | Mascot                                   |                  |        |
|                     | 1107.5906             | 1107.4929   | -0.0977 | -88   | 2262        | 2270 QQLANYSKR                |           |         | Mascot                                   |                  |        |
|                     | 1109.5442             | 1109.4427   | -0.1015 | -91   | 2206        | 2215 AVADMLRSCK               |           |         | Oxidation (M)[5]                         | Mascot           |        |
|                     | 1144.6321             | 1144.4624   | -0.1697 | -148  | 2461        | 2471 ASDNLVKAQK               |           |         | Mascot                                   |                  |        |
|                     | 1165.6576             | 1165.5326   | -0.125  | -107  | 1615        | 1625 SLAVNPKDPPK              |           |         | Mascot                                   |                  |        |

|   |                                                                                      |           |         |      |              |      |                            |      |    |    |   |  |  |  |  |                                            |        |
|---|--------------------------------------------------------------------------------------|-----------|---------|------|--------------|------|----------------------------|------|----|----|---|--|--|--|--|--------------------------------------------|--------|
|   | 1165.6576                                                                            | 1165.6959 | 0.0383  | 33   | 1615         | 1625 | SLAVNPKDPPK                |      |    |    |   |  |  |  |  |                                            | Mascot |
|   | 1165.6576                                                                            | 1165.6959 | 0.0383  | 33   | 1615         | 1625 | SLAVNPKDPPK                |      |    |    |   |  |  |  |  |                                            | Mascot |
|   | 1179.5422                                                                            | 1179.5477 | 0.0055  | 5    | 2441         | 2450 | ADQDSQTMKR                 |      |    |    |   |  |  |  |  |                                            | Mascot |
|   | 1179.5422                                                                            | 1179.5477 | 0.0055  | 5    | 2441         | 2450 | ADQDSQTMKR                 | 18   | 0  |    |   |  |  |  |  |                                            | Mascot |
|   | 1234.5811                                                                            | 1234.6252 | 0.0441  | 36   | 1541         | 1551 | ALDGAFNQENR                |      |    |    |   |  |  |  |  |                                            | Mascot |
|   | 1307.8158                                                                            | 1307.6224 | -0.1934 | -148 | 2318         | 2328 | LEQLKPRAKPK                |      |    |    |   |  |  |  |  |                                            | Mascot |
|   | 1316.6804                                                                            | 1316.5031 | -0.1773 | -135 | 2193         | 2204 | QEDVIATANLSR               |      |    |    |   |  |  |  |  |                                            | Mascot |
|   | 1377.6069                                                                            | 1377.517  | -0.0899 | -65  | 197          | 207  | FFYSDQNVDSR                |      |    |    |   |  |  |  |  |                                            | Mascot |
|   | 1397.7206                                                                            | 1397.6699 | -0.0507 | -36  | 1398         | 1411 | VLGEAMAGISHNAK             |      |    |    |   |  |  |  |  |                                            | Mascot |
|   | 1475.7886                                                                            | 1475.6886 | -0.1    | -68  | 859          | 872  | LLADATARMVEAAK             |      |    |    |   |  |  |  |  | Oxidation (M)[9]                           | Mascot |
|   | 1493.7628                                                                            | 1493.6685 | -0.0943 | -63  | 1601         | 1614 | AMLESSTGLIQTAR             |      |    |    |   |  |  |  |  | Oxidation (M)[2]                           | Mascot |
|   | 1493.7628                                                                            | 1493.6685 | -0.0943 | -63  | 1601         | 1614 | AMLESSTGLIQTAR             |      |    |    |   |  |  |  |  | Oxidation (M)[2]                           | Mascot |
|   | 1589.8931                                                                            | 1589.7379 | -0.1552 | -98  | 1855         | 1869 | TAKAIAVTQEMVTK             |      |    |    |   |  |  |  |  |                                            | Mascot |
|   | 1589.8931                                                                            | 1589.7379 | -0.1552 | -98  | 1855         | 1869 | TAKAIAVTQEMVTK             |      |    |    |   |  |  |  |  |                                            | Mascot |
|   | 1638.8077                                                                            | 1638.7908 | -0.0169 | -10  | 92           | 106  | MLDGTVKTMVDDSK             |      |    |    |   |  |  |  |  |                                            | Mascot |
|   | 2050.9419                                                                            | 2051.0081 | 0.0662  | 32   | 1656         | 1673 | ECDDAIEVLSNCIREVDK         |      |    |    |   |  |  |  |  |                                            | Mascot |
|   | 2123.0107                                                                            | 2122.906  | -0.1047 | -49  | 1002         | 1021 | ATVPTISDQASAMQLSQC<br>AK   |      |    |    |   |  |  |  |  | Carbamidomethyl (C)[18], Oxidation (M)[13] | Mascot |
|   | 2123.0107                                                                            | 2122.906  | -0.1047 | -49  | 1002         | 1021 | ATVPTISDQASAMQLSQC<br>AK   |      |    |    |   |  |  |  |  | Carbamidomethyl (C)[18], Oxidation (M)[13] | Mascot |
|   | 2211.1865                                                                            | 2211.0151 | -0.1714 | -78  | 2059         | 2080 | LGAASLGSEDPETQVVLI<br>NAVK |      |    |    |   |  |  |  |  |                                            | Mascot |
|   | 2225.1846                                                                            | 2225.0317 | -0.1529 | -69  | 718          | 738  | VVVAPTISSPVCQEQLIEA<br>GK  |      |    |    |   |  |  |  |  | Carbamidomethyl (C)[12]                    | Mascot |
|   | 2233.0952                                                                            | 2232.9912 | -0.104  | -47  | 1337         | 1357 | AVTDSINQLISMCTQQAP<br>GQK  |      |    |    |   |  |  |  |  |                                            | Mascot |
| 4 | PREDICTED: ankyrin repeat and BTB/POZ domain-containing protein 2-like [Danio rerio] |           |         |      | gi 189521623 |      | 111556.2                   | 5.84 | 15 | 46 | 0 |  |  |  |  |                                            |        |

Peptide Information

| Calc. Mass | Obsrv. Mass | ± da    | ± ppm | Start Seq. | End Seq. | Sequence   | Ion Score | C. I. % | Modification           | Rank | Result Type |
|------------|-------------|---------|-------|------------|----------|------------|-----------|---------|------------------------|------|-------------|
| 807.3818   | 807.3643    | -0.0175 | -22   | 206        | 211      | WMVDTR     |           |         |                        |      | Mascot      |
| 842.473    | 842.4733    | 0.0003  | 0     | 654        | 660      | LLSEPQR    |           |         |                        |      | Mascot      |
| 870.4614   | 870.5024    | 0.041   | 47    | 139        | 145      | LSVVHCR    |           |         | Carbamidomethyl (C)[6] |      | Mascot      |
| 882.4614   | 882.5284    | 0.067   | 76    | 997        | 1004     | LHSLCGPR   |           |         |                        |      | Mascot      |
| 1045.5173  | 1045.5181   | 0.0008  | 1     | 548        | 556      | HPSVHPESR  |           |         |                        |      | Mascot      |
| 1051.5306  | 1051.6663   | 0.1357  | 129   | 758        | 766      | DFTIIGEEK  |           |         |                        |      | Mascot      |
| 1051.5306  | 1051.6663   | 0.1357  | 129   | 758        | 766      | DFTIIGEEK  |           |         |                        |      | Mascot      |
| 1065.5259  | 1065.4639   | -0.062  | -58   | 418        | 426      | VAMVHAHR   |           |         | Oxidation (M)[3]       |      | Mascot      |
| 1118.5688  | 1118.4618   | -0.107  | -96   | 428        | 437      | SLLVDSDDVR |           |         |                        |      | Mascot      |

|           |           |         |      |     |     |                                    |  |  |  |  |                        |  |  |  |  |  |        |
|-----------|-----------|---------|------|-----|-----|------------------------------------|--|--|--|--|------------------------|--|--|--|--|--|--------|
| 1193.6161 | 1193.5642 | -0.0519 | -43  | 308 | 317 | ETAYAQLELR                         |  |  |  |  |                        |  |  |  |  |  | Mascot |
| 1235.6525 | 1235.4767 | -0.1758 | -142 | 191 | 202 | SSRCALSLSVGR                       |  |  |  |  |                        |  |  |  |  |  | Mascot |
| 1302.6041 | 1302.6605 | 0.0564  | 43   | 925 | 934 | RHCEILCSER                         |  |  |  |  | Carbamidomethyl (C)[3] |  |  |  |  |  | Mascot |
| 1307.7252 | 1307.6224 | -0.1028 | -79  | 849 | 859 | VLLMSASQRFR                        |  |  |  |  |                        |  |  |  |  |  | Mascot |
| 1323.7202 | 1323.6151 | -0.1051 | -79  | 849 | 859 | VLLMSASQRFR                        |  |  |  |  | Oxidation (M)[4]       |  |  |  |  |  | Mascot |
| 1323.7202 | 1323.6151 | -0.1051 | -79  | 849 | 859 | VLLMSASQRFR                        |  |  |  |  | Oxidation (M)[4]       |  |  |  |  |  | Mascot |
| 1397.811  | 1397.6699 | -0.1411 | -101 | 489 | 501 | TDLIGQAIQLLGR                      |  |  |  |  |                        |  |  |  |  |  | Mascot |
| 1434.7046 | 1434.707  | 0.0024  | 2    | 106 | 119 | VAGEGLCFAPESVR                     |  |  |  |  |                        |  |  |  |  |  | Mascot |
| 1434.7046 | 1434.707  | 0.0024  | 2    | 106 | 119 | VAGEGLCFAPESVR                     |  |  |  |  |                        |  |  |  |  |  | Mascot |
| 3312.6497 | 3312.1731 | -0.4766 | -144 | 318 | 347 | TLEQALLATCVGSLSELS<br>DLVSRAMHHMQR |  |  |  |  | Oxidation (M)[25]      |  |  |  |  |  | Mascot |

5 Zgc:136688 [Danio rerio] gi|49902960 48277.1 6.22 6 43 0 32 80.664

#### Peptide Information

| Calc. Mass | Obsrv. Mass | ± da    | ± ppm | Start Seq. | End Seq. | Sequence                | Ion Score | C. I. % | Modification              | Rank | Result Type |
|------------|-------------|---------|-------|------------|----------|-------------------------|-----------|---------|---------------------------|------|-------------|
| 842.4591   | 842.4733    | 0.0142  | 17    | 416        | 422      | TQGPRQR                 |           |         |                           |      | Mascot      |
| 1144.6069  | 1144.4624   | -0.1445 | -126  | 213        | 221      | VSQQRIEER               |           |         |                           |      | Mascot      |
| 1179.5609  | 1179.5477   | -0.0132 | -11   | 155        | 163      | KMQEQLCSR               |           |         | Carbamidomethyl (C)[7]    |      | Mascot      |
| 1179.5609  | 1179.5477   | -0.0132 | -11   | 155        | 163      | KMQEQLCSR               | 20        | 0       | Carbamidomethyl (C)[7]    |      | Mascot      |
| 1316.678   | 1316.5031   | -0.1749 | -133  | 164        | 173      | HDKLLEVFGR              |           |         | Carbamidomethyl (C)[9]    |      | Mascot      |
| 1533.6825  | 1533.6139   | -0.0686 | -45   | 30         | 42       | DPVTIPCGHSYCK           |           |         | Carbamidomethyl (C)[7,12] |      | Mascot      |
| 2123.0286  | 2122.906    | -0.1226 | -58   | 230        | 248      | QATQMLTSLAQTALEESE<br>R | 12        | 0       | Oxidation (M)[5]          |      | Mascot      |
| 2123.0286  | 2122.906    | -0.1226 | -58   | 230        | 248      | QATQMLTSLAQTALEESE<br>R |           |         | Oxidation (M)[5]          |      | Mascot      |

6 Zgc:136688 [Danio rerio] gi|89130587 47612.7 5.94 6 43 0 32 80.664

#### Peptide Information

| Calc. Mass | Obsrv. Mass | ± da    | ± ppm | Start Seq. | End Seq. | Sequence                | Ion Score | C. I. % | Modification              | Rank | Result Type |
|------------|-------------|---------|-------|------------|----------|-------------------------|-----------|---------|---------------------------|------|-------------|
| 842.4591   | 842.4733    | 0.0142  | 17    | 410        | 416      | TQGPRQR                 |           |         |                           |      | Mascot      |
| 1144.6069  | 1144.4624   | -0.1445 | -126  | 207        | 215      | VSQQRIEER               |           |         |                           |      | Mascot      |
| 1179.5609  | 1179.5477   | -0.0132 | -11   | 149        | 157      | KMQEQLCSR               |           |         | Carbamidomethyl (C)[7]    |      | Mascot      |
| 1179.5609  | 1179.5477   | -0.0132 | -11   | 149        | 157      | KMQEQLCSR               | 20        | 0       | Carbamidomethyl (C)[7]    |      | Mascot      |
| 1316.678   | 1316.5031   | -0.1749 | -133  | 158        | 167      | HDKLLEVFGR              |           |         | Carbamidomethyl (C)[9]    |      | Mascot      |
| 1533.6825  | 1533.6139   | -0.0686 | -45   | 24         | 36       | DPVTIPCGHSYCK           |           |         | Carbamidomethyl (C)[7,12] |      | Mascot      |
| 2123.0286  | 2122.906    | -0.1226 | -58   | 224        | 242      | QATQMLTSLAQTALEESE<br>R | 12        | 0       | Oxidation (M)[5]          |      | Mascot      |
| 2123.0286  | 2122.906    | -0.1226 | -58   | 224        | 242      | QATQMLTSLAQTALEESE      |           |         | Oxidation (M)[5]          |      | Mascot      |

7      PREDICTED: myosin-1c [Danio rerio]      R  
gi|326674254      122614.2      9.09      17      42      0      5      0

Peptide Information

| Calc. Mass | Obsrv. Mass | ± da    | ± ppm | Start Seq. | End Seq. | Sequence           | Ion Score | C. I. % | Modification             | Rank | Result Type |
|------------|-------------|---------|-------|------------|----------|--------------------|-----------|---------|--------------------------|------|-------------|
| 996.5104   | 996.5524    | 0.042   | 42    | 616        | 623      | LMEILMSK           |           |         | Oxidation (M)[2,6]       |      | Mascot      |
| 996.5104   | 996.5524    | 0.042   | 42    | 616        | 623      | LMEILMSK           |           |         | Oxidation (M)[2,6]       |      | Mascot      |
| 1045.5887  | 1045.5181   | -0.0706 | -68   | 695        | 704      | QVDGVSTLVK         |           |         |                          |      | Mascot      |
| 1051.5643  | 1051.6663   | 0.102   | 97    | 1055       | 1064     | NGHLSVTAPR         |           |         |                          |      | Mascot      |
| 1051.5643  | 1051.6663   | 0.102   | 97    | 1055       | 1064     | NGHLSVTAPR         |           |         |                          |      | Mascot      |
| 1062.5287  | 1062.6423   | 0.1136  | 107   | 195        | 203      | TLRNDNSSR          |           |         |                          |      | Mascot      |
| 1065.5145  | 1065.4639   | -0.0506 | -47   | 586        | 593      | ILNQCFDR           |           |         | Carbamidomethyl (C)[5]   |      | Mascot      |
| 1118.5762  | 1118.4618   | -0.1144 | -102  | 483        | 491      | IICDLVEEK          |           |         | Carbamidomethyl (C)[3]   |      | Mascot      |
| 1179.5796  | 1179.5477   | -0.0319 | -27   | 855        | 863      | LCMQNMVRK          |           |         | Carbamidomethyl (C)[2]   |      | Mascot      |
| 1179.5796  | 1179.5477   | -0.0319 | -27   | 854        | 862      | KLCMQNMVR          |           |         | Carbamidomethyl (C)[3]   |      | Mascot      |
| 1357.7004  | 1357.6583   | -0.0421 | -31   | 630        | 641      | CIKPNDKQAGR        |           |         | Carbamidomethyl (C)[1]   |      | Mascot      |
| 1377.6678  | 1377.517    | -0.1508 | -109  | 139        | 152      | DQCILISGESGAGK     |           |         |                          |      | Mascot      |
| 1393.551   | 1393.6404   | 0.0894  | 64    | 21         | 31       | NGEFYCQSTK         |           |         | Carbamidomethyl (C)[6,9] |      | Mascot      |
| 1434.6893  | 1434.707    | 0.0177  | 12    | 139        | 152      | DQCILISGESGAGK     |           |         | Carbamidomethyl (C)[3]   |      | Mascot      |
| 1434.6893  | 1434.707    | 0.0177  | 12    | 139        | 152      | DQCILISGESGAGK     |           |         | Carbamidomethyl (C)[3]   |      | Mascot      |
| 1493.8066  | 1493.6685   | -0.1381 | -92   | 611        | 623      | NSLAKLMEILMSK      |           |         | Oxidation (M)[7]         |      | Mascot      |
| 1493.8066  | 1493.6685   | -0.1381 | -92   | 611        | 623      | NSLAKLMEILMSK      |           |         | Oxidation (M)[7]         |      | Mascot      |
| 1533.7689  | 1533.6139   | -0.155  | -101  | 138        | 152      | RDQCILISGESGAGK    |           |         |                          |      | Mascot      |
| 1589.8434  | 1589.7379   | -0.1055 | -66   | 705        | 717      | HLGYKPEEYKLGR      |           |         |                          |      | Mascot      |
| 1589.8434  | 1589.7379   | -0.1055 | -66   | 705        | 717      | HLGYKPEEYKLGR      |           |         |                          |      | Mascot      |
| 1837.8326  | 1837.891    | 0.0584  | 32    | 680        | 694      | YKSLCPDTWPNWDGR    |           |         |                          |      | Mascot      |
| 2051.113   | 2051.0081   | -0.1049 | -51   | 993        | 1010     | QKGDVVLQNEHVIETLTK |           |         |                          |      | Mascot      |
| 2122.9763  | 2122.906    | -0.0703 | -33   | 803        | 818      | HQPRCPENEYFLDYVR   | 5         | 0       | Carbamidomethyl (C)[5]   |      | Mascot      |
| 2122.9763  | 2122.906    | -0.0703 | -33   | 803        | 818      | HQPRCPENEYFLDYVR   |           |         | Carbamidomethyl (C)[5]   |      | Mascot      |

8      finTRIM family, member 67 [Danio rerio]      gi|319655773      47640.8      6.05      5      41      0      32      80.664

Peptide Information

| Calc. Mass | Obsrv. Mass | ± da    | ± ppm | Start Seq. | End Seq. | Sequence  | Ion Score | C. I. % | Modification           | Rank | Result Type |
|------------|-------------|---------|-------|------------|----------|-----------|-----------|---------|------------------------|------|-------------|
| 842.4591   | 842.4733    | 0.0142  | 17    | 410        | 416      | TQGPRQR   |           |         |                        |      | Mascot      |
| 1179.5609  | 1179.5477   | -0.0132 | -11   | 149        | 157      | KMQEQLCSR |           |         | Carbamidomethyl (C)[7] |      | Mascot      |
| 1179.5609  | 1179.5477   | -0.0132 | -11   | 149        | 157      | KMQEQLCSR | 20        | 0       | Carbamidomethyl (C)[7] |      | Mascot      |



|   |                               |           |         |      |              |     |          |         |      |        |    |   |                           |        |
|---|-------------------------------|-----------|---------|------|--------------|-----|----------|---------|------|--------|----|---|---------------------------|--------|
|   | 1316.678                      | 1316.5031 | -0.1749 | -133 | 158          | 167 | HDKLLEVF | CR      |      |        |    |   | Carbamidomethyl (C)[9]    | Mascot |
|   | 1533.6825                     | 1533.6139 | -0.0686 | -45  | 24           | 36  | DPVTIP   | CGHSYCK |      |        |    |   | Carbamidomethyl (C)[7,12] | Mascot |
|   | 2123.0286                     | 2122.906  | -0.1226 | -58  | 224          | 242 | QATQML   | TL      | SAQT | ALEESE | 12 | 0 | Oxidation (M)[5]          | Mascot |
|   | 2123.0286                     | 2122.906  | -0.1226 | -58  | 224          | 242 | QATQML   | TL      | SAQT | ALEESE |    |   | Oxidation (M)[5]          | Mascot |
| 9 | Hapln1a protein [Danio rerio] |           |         |      | gi 190338272 |     | 36827.9  |         | 5.41 | 9      | 40 | 0 |                           |        |

#### Peptide Information

| Calc. Mass | Obsrv. Mass | ± da    | ± ppm | Start Seq. | End Seq. | Sequence        | Ion Score | C. I. | % | Modification           | Rank | Result Type |
|------------|-------------|---------|-------|------------|----------|-----------------|-----------|-------|---|------------------------|------|-------------|
| 1045.5095  | 1045.5181   | 0.0086  | 8     | 34         | 42       | GDNITLPCR       |           |       |   | Carbamidomethyl (C)[8] |      | Mascot      |
| 1062.5189  | 1062.6423   | 0.1234  | 116   | 263        | 271      | VGHMFAAWK       |           |       |   | Oxidation (M)[4]       |      | Mascot      |
| 1065.5073  | 1065.4639   | -0.0434 | -41   | 318        | 325      | LYGVYCYK        |           |       |   | Carbamidomethyl (C)[6] |      | Mascot      |
| 1302.6664  | 1302.6605   | -0.0059 | -5    | 233        | 242      | GRFYMIQPK       |           |       |   |                        |      | Mascot      |
| 1320.6293  | 1320.526    | -0.1033 | -78   | 222        | 232      | YDVFCFTAGLK     |           |       |   | Carbamidomethyl (C)[5] |      | Mascot      |
| 1448.7855  | 1448.8604   | 0.0749  | 52    | 43         | 55       | LDGQSTLFGNRIK   |           |       |   |                        |      | Mascot      |
| 1533.7518  | 1533.6139   | -0.1379 | -90   | 222        | 234      | YDVFCFTAGLKGR   |           |       |   | Carbamidomethyl (C)[5] |      | Mascot      |
| 1707.8159  | 1707.6991   | -0.1168 | -68   | 218        | 232      | SNSRYDVFCFTAGLK |           |       |   |                        |      | Mascot      |
| 1837.8901  | 1837.891    | 0.0009  | 0     | 298        | 314      | NCSPTAAVR       | FVGF      | PD    | K |                        |      | Mascot      |

10 novel protein similar to vertebrate hyaluronan and proteoglycan link protein 1 (HAPLN1) [Danio rerio]

gi|94732632 37663.3 5.42 9 40 0

#### Peptide Information

| Calc. Mass | Obsrv. Mass | ± da    | ± ppm | Start Seq. | End Seq. | Sequence        | Ion Score | C. I. | % | Modification           | Rank | Result Type |
|------------|-------------|---------|-------|------------|----------|-----------------|-----------|-------|---|------------------------|------|-------------|
| 1045.5095  | 1045.5181   | 0.0086  | 8     | 34         | 42       | GDNITLPCR       |           |       |   | Carbamidomethyl (C)[8] |      | Mascot      |
| 1062.5189  | 1062.6423   | 0.1234  | 116   | 271        | 279      | VGHMFAAWK       |           |       |   | Oxidation (M)[4]       |      | Mascot      |
| 1065.5073  | 1065.4639   | -0.0434 | -41   | 326        | 333      | LYGVYCYK        |           |       |   | Carbamidomethyl (C)[6] |      | Mascot      |
| 1302.6664  | 1302.6605   | -0.0059 | -5    | 241        | 250      | GRFYMIQPK       |           |       |   |                        |      | Mascot      |
| 1320.6293  | 1320.526    | -0.1033 | -78   | 230        | 240      | YDVFCFTAGLK     |           |       |   | Carbamidomethyl (C)[5] |      | Mascot      |
| 1448.7855  | 1448.8604   | 0.0749  | 52    | 43         | 55       | LDGQSTLFGNRIK   |           |       |   |                        |      | Mascot      |
| 1533.7518  | 1533.6139   | -0.1379 | -90   | 230        | 242      | YDVFCFTAGLKGR   |           |       |   | Carbamidomethyl (C)[5] |      | Mascot      |
| 1707.8159  | 1707.6991   | -0.1168 | -68   | 226        | 240      | SNSRYDVFCFTAGLK |           |       |   |                        |      | Mascot      |
| 1837.8901  | 1837.891    | 0.0009  | 0     | 306        | 322      | NCSPTAAVR       | FVGF      | PD    | K |                        |      | Mascot      |

11 Zgc:136688 protein [Danio rerio]

gi|62205380 48414.1 6.39 4 39 0 32 80.664

#### Peptide Information

| Calc. Mass | Obsrv. Mass | ± da | ± ppm | Start Seq. | End Seq. | Sequence | Ion Score | C. I. | % | Modification | Rank | Result Type |
|------------|-------------|------|-------|------------|----------|----------|-----------|-------|---|--------------|------|-------------|
|------------|-------------|------|-------|------------|----------|----------|-----------|-------|---|--------------|------|-------------|

|    |                               |           |           |         |     |     |              |                         |      |   |    |   |                           |  |  |  |        |
|----|-------------------------------|-----------|-----------|---------|-----|-----|--------------|-------------------------|------|---|----|---|---------------------------|--|--|--|--------|
|    |                               | 842.4591  | 842.4733  | 0.0142  | 17  | 417 | 423          | TQGPRQR                 |      |   |    |   |                           |  |  |  | Mascot |
|    |                               | 1179.5609 | 1179.5477 | -0.0132 | -11 | 156 | 164          | KMQEQLCSR               |      |   |    |   | Carbamidomethyl (C)[7]    |  |  |  | Mascot |
|    |                               | 1179.5609 | 1179.5477 | -0.0132 | -11 | 156 | 164          | KMQEQLCSR               | 20   |   | 0  |   | Carbamidomethyl (C)[7]    |  |  |  | Mascot |
|    |                               | 1533.6825 | 1533.6139 | -0.0686 | -45 | 31  | 43           | DPVTIPCGHSYCK           |      |   |    |   | Carbamidomethyl (C)[7,12] |  |  |  | Mascot |
|    |                               | 2123.0286 | 2122.906  | -0.1226 | -58 | 231 | 249          | QATQMLTLSAQTALEESE<br>R | 12   |   | 0  |   | Oxidation (M)[5]          |  |  |  | Mascot |
|    |                               | 2123.0286 | 2122.906  | -0.1226 | -58 | 231 | 249          | QATQMLTLSAQTALEESE<br>R |      |   |    |   | Oxidation (M)[5]          |  |  |  | Mascot |
| 12 | Hapln1a protein [Danio rerio] |           |           |         |     |     | gi 148745617 | 36813                   | 5.57 | 9 | 39 | 0 |                           |  |  |  |        |

#### Peptide Information

| Calc. Mass | Obsrv. Mass | ± da    | ± ppm | Start Seq. | End Seq. | Sequence          | Ion Score | C. I. | % | Modification           | Rank | Result Type |
|------------|-------------|---------|-------|------------|----------|-------------------|-----------|-------|---|------------------------|------|-------------|
| 1045.5095  | 1045.5181   | 0.0086  | 8     | 34         | 42       | GDNITLPCR         |           |       |   | Carbamidomethyl (C)[8] |      | Mascot      |
| 1062.5189  | 1062.6423   | 0.1234  | 116   | 263        | 271      | VGHMFAAWK         |           |       |   | Oxidation (M)[4]       |      | Mascot      |
| 1065.5073  | 1065.4639   | -0.0434 | -41   | 318        | 325      | LYGVYCYK          |           |       |   | Carbamidomethyl (C)[6] |      | Mascot      |
| 1302.6664  | 1302.6605   | -0.0059 | -5    | 233        | 242      | GRFYMIQPK         |           |       |   |                        |      | Mascot      |
| 1320.6293  | 1320.526    | -0.1033 | -78   | 222        | 232      | YDVFCFTAGLK       |           |       |   | Carbamidomethyl (C)[5] |      | Mascot      |
| 1448.7855  | 1448.8604   | 0.0749  | 52    | 43         | 55       | LDGQSTLFGNRIK     |           |       |   |                        |      | Mascot      |
| 1533.7518  | 1533.6139   | -0.1379 | -90   | 222        | 234      | YDVFCFTAGLKGR     |           |       |   | Carbamidomethyl (C)[5] |      | Mascot      |
| 1707.8159  | 1707.6991   | -0.1168 | -68   | 218        | 232      | SNSRYDVFCFTAGLK   |           |       |   |                        |      | Mascot      |
| 1837.8901  | 1837.891    | 0.0009  | 0     | 298        | 314      | NCSPTEAAVRVFGFPDK |           |       |   |                        |      | Mascot      |

13 pleckstrin homology domain-containing family G member 7 [Danio rerio] gi|113681918 49035.5 6.76 9 39 0

#### Peptide Information

| Calc. Mass | Obsrv. Mass | ± da    | ± ppm | Start Seq. | End Seq. | Sequence       | Ion Score | C. I. | % | Modification           | Rank | Result Type |
|------------|-------------|---------|-------|------------|----------|----------------|-----------|-------|---|------------------------|------|-------------|
| 1062.5037  | 1062.6423   | 0.1386  | 130   | 15         | 23       | AAQHPTMYK      |           |       |   | Oxidation (M)[6]       |      | Mascot      |
| 1165.6034  | 1165.5326   | -0.0708 | -61   | 1          | 10       | MSLVDFLQGR     |           |       |   |                        |      | Mascot      |
| 1165.6034  | 1165.6959   | 0.0925  | 79    | 1          | 10       | MSLVDFLQGR     |           |       |   |                        |      | Mascot      |
| 1165.6034  | 1165.6959   | 0.0925  | 79    | 1          | 10       | MSLVDFLQGR     |           |       |   |                        |      | Mascot      |
| 1193.6313  | 1193.5642   | -0.0671 | -56   | 219        | 227      | WLDNYQVKV      |           |       |   |                        |      | Mascot      |
| 1320.6001  | 1320.526    | -0.0741 | -56   | 61         | 70       | QCLQDIDSWR     |           |       |   | Carbamidomethyl (C)[2] |      | Mascot      |
| 1365.6289  | 1365.5846   | -0.0443 | -32   | 115        | 126      | AFSESICHCLQK   |           |       |   |                        |      | Mascot      |
| 1493.7239  | 1493.6685   | -0.0554 | -37   | 114        | 126      | KAFSESICHCLQK  |           |       |   |                        |      | Mascot      |
| 1493.7239  | 1493.6685   | -0.0554 | -37   | 114        | 126      | KAFSESICHCLQK  |           |       |   |                        |      | Mascot      |
| 1638.8519  | 1638.7908   | -0.0611 | -37   | 1          | 14       | MSLVDFLQGRSELK |           |       |   | Oxidation (M)[1]       |      | Mascot      |

|           |           |         |      |     |     |                         |  |  |  |  |                  |  |        |
|-----------|-----------|---------|------|-----|-----|-------------------------|--|--|--|--|------------------|--|--------|
| 1691.9037 | 1691.7314 | -0.1723 | -102 | 387 | 401 | AWMSEIEKAVSSLLK         |  |  |  |  |                  |  | Mascot |
| 1691.9037 | 1691.7314 | -0.1723 | -102 | 387 | 401 | AWMSEIEKAVSSLLK         |  |  |  |  |                  |  | Mascot |
| 1707.8986 | 1707.6991 | -0.1995 | -117 | 387 | 401 | AWMSEIEKAVSSLLK         |  |  |  |  | Oxidation (M)[3] |  | Mascot |
| 2283.9646 | 2284.0823 | 0.1177  | 52   | 95  | 113 | EMWTDPDSCSTQSLHDL<br>FR |  |  |  |  | Oxidation (M)[2] |  | Mascot |

14 RAS guanyl-releasing protein 1 [Danio rerio] gi|113678177 77834.7 7.57 11 38 0

#### Peptide Information

| Calc. Mass | Obsrv. Mass | ± da    | ± ppm | Start Seq. | End Seq. | Sequence                    | Ion Score | C. I. % | Modification                             | Rank | Result Type |
|------------|-------------|---------|-------|------------|----------|-----------------------------|-----------|---------|------------------------------------------|------|-------------|
| 842.4882   | 842.4733    | -0.0149 | -18   | 271        | 277      | FIHVAQK                     |           |         |                                          |      | Mascot      |
| 1003.5319  | 1003.5089   | -0.023  | -23   | 224        | 232      | SYVVHGSR                    |           |         |                                          |      | Mascot      |
| 1165.5703  | 1165.5326   | -0.0377 | -32   | 580        | 589      | DVVGMECLKR                  |           |         | Oxidation (M)[5]                         |      | Mascot      |
| 1165.5703  | 1165.6959   | 0.1256  | 108   | 580        | 589      | DVVGMECLKR                  |           |         | Oxidation (M)[5]                         |      | Mascot      |
| 1165.5703  | 1165.6959   | 0.1256  | 108   | 580        | 589      | DVVGMECLKR                  |           |         | Oxidation (M)[5]                         |      | Mascot      |
| 1279.5769  | 1279.7172   | 0.1403  | 110   | 33         | 43       | MTCPSAQEISR                 |           |         | Carbamidomethyl (C)[3]                   |      | Mascot      |
| 1357.5558  | 1357.6583   | 0.1025  | 76    | 569        | 579      | DCGVNCHKHCK                 |           |         | Carbamidomethyl (C)[2,6]                 |      | Mascot      |
| 1365.6793  | 1365.5846   | -0.0947 | -69   | 135        | 145      | LMFEMDPLEK                  |           |         |                                          |      | Mascot      |
| 1377.6256  | 1377.517    | -0.1086 | -79   | 213        | 223      | NFCNVSFIDYR                 |           |         |                                          |      | Mascot      |
| 1397.6691  | 1397.6699   | 0.0008  | 1     | 135        | 145      | LMFEMDPLEK                  |           |         | Oxidation (M)[2,5]                       |      | Mascot      |
| 1434.647   | 1434.707    | 0.06    | 42    | 213        | 223      | NFCNVSFIDYR                 |           |         | Carbamidomethyl (C)[3]                   |      | Mascot      |
| 1434.6538  | 1434.707    | 0.0532  | 37    | 577        | 588      | HCKDVVGMECLK                |           |         | Carbamidomethyl (C)[2], Oxidation (M)[8] |      | Mascot      |
| 1475.6803  | 1475.6886   | 0.0083  | 6     | 577        | 588      | HCKDVVGMECLK                |           |         | Carbamidomethyl (C)[2,10]                |      | Mascot      |
| 1851.8438  | 1851.8479   | 0.0041  | 2     | 513        | 528      | EEITSYFMRGMSVCAK            |           |         |                                          |      | Mascot      |
| 1867.8387  | 1867.8413   | 0.0026  | 1     | 513        | 528      | EEITSYFMRGMSVCAK            |           |         | Oxidation (M)[8]                         |      | Mascot      |
| 2284.2812  | 2284.0823   | -0.1989 | -87   | 433        | 454      | IQPVAPVKPPVVAEWGS<br>GVTPR  |           |         |                                          |      | Mascot      |
| 2501.2024  | 2501.1555   | -0.0469 | -19   | 33         | 55       | MTCPSAQEISRALQSPPA<br>HASFR |           |         | Oxidation (M)[1]                         |      | Mascot      |

15 PREDICTED: LOW QUALITY PROTEIN: ryanodine receptor 2 [Danio rerio] gi|189530774 552356.6 5.83 38 38 0

#### Peptide Information

| Calc. Mass | Obsrv. Mass | ± da    | ± ppm | Start Seq. | End Seq. | Sequence  | Ion Score | C. I. % | Modification           | Rank | Result Type |
|------------|-------------|---------|-------|------------|----------|-----------|-----------|---------|------------------------|------|-------------|
| 807.4359   | 807.3643    | -0.0716 | -89   | 4337       | 4342     | YQVEIR    |           |         |                        |      | Mascot      |
| 870.3774   | 870.5024    | 0.125   | 144   | 2742       | 2747     | DKECYR    |           |         | Carbamidomethyl (C)[4] |      | Mascot      |
| 996.468    | 996.5524    | 0.0844  | 85    | 1563       | 1571     | NANPQCPPR |           |         |                        |      | Mascot      |
| 996.5624   | 996.5524    | -0.01   | -10   | 3510       | 3516     | LEIYFRR   |           |         |                        |      | Mascot      |
| 1045.5459  | 1045.5181   | -0.0278 | -27   | 75         | 83       | ALQEMLANR |           |         |                        |      | Mascot      |

|           |           |         |      |      |      |                            |                          |        |
|-----------|-----------|---------|------|------|------|----------------------------|--------------------------|--------|
| 1051.5604 | 1051.6663 | 0.1059  | 101  | 2440 | 2448 | AAMVLFLDR                  | Oxidation (M)[3]         | Mascot |
| 1051.5604 | 1051.6663 | 0.1059  | 101  | 2440 | 2448 | AAMVLFLDR                  | Oxidation (M)[3]         | Mascot |
| 1062.5327 | 1062.6423 | 0.1096  | 103  | 1730 | 1738 | VERFPGSDR                  |                          | Mascot |
| 1065.4645 | 1065.4639 | -0.0006 | -1   | 2175 | 2181 | FLCYFCR                    | Carbamidomethyl (C)[3,6] | Mascot |
| 1107.6132 | 1107.4929 | -0.1203 | -109 | 3526 | 3533 | MKRPVWYK                   |                          | Mascot |
| 1109.599  | 1109.4427 | -0.1563 | -141 | 4108 | 4116 | QFIFDVVNK                  |                          | Mascot |
| 1144.6143 | 1144.4624 | -0.1519 | -133 | 1782 | 1792 | EAVMVVGQGVR                |                          | Mascot |
| 1165.567  | 1165.5326 | -0.0344 | -30  | 33   | 43   | LCLAAEGFGER                |                          | Mascot |
| 1165.567  | 1165.6959 | 0.1289  | 111  | 33   | 43   | LCLAAEGFGER                |                          | Mascot |
| 1165.567  | 1165.6959 | 0.1289  | 111  | 33   | 43   | LCLAAEGFGER                |                          | Mascot |
| 1179.6265 | 1179.5477 | -0.0788 | -67  | 2756 | 2765 | CMLVLGWTIK                 | Oxidation (M)[2]         | Mascot |
| 1179.6265 | 1179.5477 | -0.0788 | -67  | 2756 | 2765 | CMLVLGWTIK                 | Oxidation (M)[2]         | Mascot |
| 1277.6525 | 1277.6559 | 0.0034  | 3    | 893  | 903  | IEQGWTYGPVK                |                          | Mascot |
| 1279.7157 | 1279.7172 | 0.0015  | 1    | 2896 | 2906 | FAYGLIQQALR                |                          | Mascot |
| 1302.7239 | 1302.6605 | -0.0634 | -49  | 908  | 918  | KVHLCLVEFSK                |                          | Mascot |
| 1307.6388 | 1307.6224 | -0.0164 | -13  | 2175 | 2184 | FLCYFCRISR                 |                          | Mascot |
| 1320.6517 | 1320.526  | -0.1257 | -95  | 2130 | 2139 | VFYQHNPMLR                 | Oxidation (M)[9]         | Mascot |
| 1323.7242 | 1323.6151 | -0.1091 | -82  | 3528 | 3537 | RPVWYKMLSK                 | Oxidation (M)[7]         | Mascot |
| 1323.7242 | 1323.6151 | -0.1091 | -82  | 3528 | 3537 | RPVWYKMLSK                 | Oxidation (M)[7]         | Mascot |
| 1357.6351 | 1357.6583 | 0.0232  | 17   | 4175 | 4185 | MTRDLNCFSVR                | Oxidation (M)[1]         | Mascot |
| 1365.6393 | 1365.5846 | -0.0547 | -40  | 3461 | 3471 | FAQRDTEDEV                 |                          | Mascot |
| 1393.7004 | 1393.6404 | -0.06   | -43  | 4178 | 4188 | DLNCFSVRNIR                | Carbamidomethyl (C)[4]   | Mascot |
| 1596.6329 | 1596.7131 | 0.0802  | 50   | 3636 | 3649 | SCQSEEEQDEDGLK             |                          | Mascot |
| 1638.8268 | 1638.7908 | -0.036  | -22  | 621  | 634  | SNQHLCITLLPER              |                          | Mascot |
| 1691.7483 | 1691.7314 | -0.0169 | -10  | 2699 | 2711 | YAEHTHEKWSMEK              | Oxidation (M)[11]        | Mascot |
| 1691.885  | 1691.7314 | -0.1536 | -91  | 2517 | 2532 | SGPVDELLQGVYSLSK           |                          | Mascot |
| 1707.886  | 1707.6991 | -0.1869 | -109 | 1572 | 1584 | LCVQHLTHTRWTR              | Carbamidomethyl (C)[2]   | Mascot |
| 1791.8872 | 1791.6489 | -0.2383 | -133 | 2    | 16   | DIGEAEDEIQFLRTR            |                          | Mascot |
| 1837.9113 | 1837.891  | -0.0203 | -11  | 1920 | 1936 | YNEVVDALNMSAALTAR          |                          | Mascot |
| 1851.9381 | 1851.8479 | -0.0902 | -49  | 2376 | 2392 | CAPETHLIEAGKGEAIR          | Carbamidomethyl (C)[1]   | Mascot |
| 2050.8359 | 2051.0081 | 0.1722  | 84   | 4343 | 4359 | EEDFHAVQDEEEDTETK          |                          | Mascot |
| 2211.1018 | 2211.0151 | -0.0867 | -39  | 601  | 620  | NHKILDVLCSLCVCHGMA<br>VR   |                          | Mascot |
| 2233.0884 | 2232.9912 | -0.0972 | -44  | 1898 | 1917 | VEAVISFSGDFVGHLQED<br>QR   |                          | Mascot |
| 2283.2324 | 2283.0889 | -0.1435 | -63  | 3360 | 3378 | LFSLVAEVFIFWAKSHNF<br>K    |                          | Mascot |
| 2284.0994 | 2284.0823 | -0.0171 | -7   | 3437 | 3458 | KLLSVAMNGCCHGDQGL<br>VSHAK | Oxidation (M)[7]         | Mascot |

|    |                             |           |         |     |              |      |                           |      |                           |        |   |
|----|-----------------------------|-----------|---------|-----|--------------|------|---------------------------|------|---------------------------|--------|---|
|    | 2299.1294                   | 2299.0923 | -0.0371 | -16 | 1563         | 1581 | NANPQCPPRLCVQHLTH<br>TR   |      | Carbamidomethyl (C)[6,11] | Mascot |   |
|    | 2300.2068                   | 2300.0823 | -0.1245 | -54 | 3106         | 3125 | ILSSLYILGTCSGSFIERQ<br>R  |      | Carbamidomethyl (C)[11]   | Mascot |   |
|    | 2501.2944                   | 2501.1555 | -0.1389 | -56 | 3877         | 3897 | LWDAVVGFHLVFAHMQM<br>KLSR |      | Oxidation (M)[15]         | Mascot |   |
| 16 | novel protein [Danio rerio] |           |         |     | gi 148725934 |      | 20790.5                   | 5.31 | 7                         | 37     | 0 |

#### Peptide Information

| Calc. Mass | Obsrv. Mass | ± da    | ± ppm | Start Seq. | End Seq. | Sequence   | Ion Score | C. I. | % Modification         | Rank | Result Type |
|------------|-------------|---------|-------|------------|----------|------------|-----------|-------|------------------------|------|-------------|
| 807.3553   | 807.3643    | 0.009   | 11    | 11         | 17       | LGDMEDK    |           |       |                        |      | Mascot      |
| 842.3937   | 842.4733    | 0.0796  | 94    | 18         | 24       | HINCAER    |           |       |                        |      | Mascot      |
| 864.4131   | 864.4808    | 0.0677  | 78    | 2          | 8        | EEVSCLK    |           |       | Carbamidomethyl (C)[5] |      | Mascot      |
| 1003.4941  | 1003.5089   | 0.0148  | 15    | 94         | 101      | VEELEQEK   |           |       |                        |      | Mascot      |
| 1051.6007  | 1051.6663   | 0.0656  | 62    | 161        | 168      | HQELQRLK   |           |       |                        |      | Mascot      |
| 1051.6007  | 1051.6663   | 0.0656  | 62    | 161        | 168      | HQELQRLK   |           |       |                        |      | Mascot      |
| 1179.6112  | 1179.5477   | -0.0635 | -54   | 1          | 10       | MEEVSCLKLK |           |       |                        |      | Mascot      |
| 1179.6112  | 1179.5477   | -0.0635 | -54   | 1          | 10       | MEEVSCLKLK |           |       |                        |      | Mascot      |
| 1235.6062  | 1235.4767   | -0.1295 | -105  | 18         | 27       | HINCAERQHK |           |       |                        |      | Mascot      |

|    |                                      |  |  |  |              |  |          |      |    |    |   |
|----|--------------------------------------|--|--|--|--------------|--|----------|------|----|----|---|
| 17 | contactin-1a precursor [Danio rerio] |  |  |  | gi 136256388 |  | 114246.1 | 6.19 | 14 | 37 | 0 |
|----|--------------------------------------|--|--|--|--------------|--|----------|------|----|----|---|

#### Peptide Information

| Calc. Mass | Obsrv. Mass | ± da    | ± ppm | Start Seq. | End Seq. | Sequence                  | Ion Score | C. I. | % Modification         | Rank | Result Type |
|------------|-------------|---------|-------|------------|----------|---------------------------|-----------|-------|------------------------|------|-------------|
| 957.5152   | 957.3986    | -0.1166 | -122  | 2          | 9        | IPEAFQPR                  |           |       |                        |      | Mascot      |
| 1045.5173  | 1045.5181   | 0.0008  | 1     | 562        | 569      | DAQHYQRK                  |           |       |                        |      | Mascot      |
| 1062.5513  | 1062.6423   | 0.091   | 86    | 442        | 449      | VVFECRPR                  |           |       | Carbamidomethyl (C)[5] |      | Mascot      |
| 1118.4572  | 1118.4618   | 0.0046  | 4     | 492        | 500      | YTCFAENDR                 |           |       |                        |      | Mascot      |
| 1308.575   | 1308.6052   | 0.0302  | 23    | 898        | 910      | ACNGAGYGPASQR             |           |       | Carbamidomethyl (C)[2] |      | Mascot      |
| 1365.6857  | 1365.5846   | -0.1011 | -74   | 503        | 516      | ANSTGSL SITDATK           |           |       |                        |      | Mascot      |
| 1434.7231  | 1434.707    | -0.0161 | -11   | 1          | 12       | MIPEAFQPRAMK              |           |       | Oxidation (M)[1]       |      | Mascot      |
| 1434.7231  | 1434.707    | -0.0161 | -11   | 1          | 12       | MIPEAFQPRAMK              |           |       | Oxidation (M)[1]       |      | Mascot      |
| 1638.7581  | 1638.7908   | 0.0327  | 20    | 931        | 944      | MHYSGSSINIAWEK            |           |       | Oxidation (M)[1]       |      | Mascot      |
| 1691.6965  | 1691.7314   | 0.0349  | 21    | 487        | 500      | SDEGKYTCFAENDR            |           |       | Carbamidomethyl (C)[8] |      | Mascot      |
| 1691.6965  | 1691.7314   | 0.0349  | 21    | 487        | 500      | SDEGKYTCFAENDR            |           |       | Carbamidomethyl (C)[8] |      | Mascot      |
| 1707.7683  | 1707.6991   | -0.0692 | -41   | 138        | 151      | VQFGYLD MFSTDER           |           |       |                        |      | Mascot      |
| 2224.9749  | 2225.0317   | 0.0568  | 26    | 388        | 406      | FSRLGFEDSGMYQCVAE<br>NR   |           |       | Oxidation (M)[11]      |      | Mascot      |
| 2283.092   | 2283.0889   | -0.0031 | -1    | 594        | 614      | YSCTAQTPVDNTTASAE<br>LVVR |           |       | Carbamidomethyl (C)[3] |      | Mascot      |

|    |                                                                                |           |         |     |             |      |                           |      |    |    |   |  |                        |        |
|----|--------------------------------------------------------------------------------|-----------|---------|-----|-------------|------|---------------------------|------|----|----|---|--|------------------------|--------|
|    | 2284.2131                                                                      | 2284.0823 | -0.1308 | -57 | 442         | 460  | VVFECRPRAAPRPNITW<br>SK   |      |    |    |   |  | Carbamidomethyl (C)[5] | Mascot |
|    | 2299.1426                                                                      | 2299.0923 | -0.0503 | -22 | 986         | 1007 | GEYLVVRAHSEGGDGA<br>VAQVR |      |    |    |   |  |                        | Mascot |
| 18 | ectonucleotide pyrophosphatase/phosphodiesterase family member 2 [Danio rerio] |           |         |     | gi 41054802 |      | 97130.8                   | 8.14 | 15 | 37 | 0 |  |                        |        |

#### Peptide Information

| Calc. Mass | Obsrv. Mass | ± da    | ± ppm | Start Seq. | End Seq. | Sequence                 | Ion Score | C. I. % | Modification                             | Rank | Result Type |
|------------|-------------|---------|-------|------------|----------|--------------------------|-----------|---------|------------------------------------------|------|-------------|
| 957.4828   | 957.3986    | -0.0842 | -88   | 700        | 706      | VWSYFQK                  |           |         |                                          |      | Mascot      |
| 1045.3826  | 1045.5181   | 0.1355  | 130   | 123        | 130      | GDCCTNYR                 |           |         | Carbamidomethyl (C)[3,4]                 |      | Mascot      |
| 1184.5364  | 1184.5308   | -0.0056 | -5    | 92         | 102      | TAGGFECSEK               |           |         |                                          |      | Mascot      |
| 1340.5323  | 1340.6235   | 0.0912  | 68    | 463        | 474      | CGFAGDHGYDNK             |           |         | Carbamidomethyl (C)[1]                   |      | Mascot      |
| 1475.6583  | 1475.6886   | 0.0303  | 21    | 647        | 659      | VPTAYSQSCSNYR            |           |         |                                          |      | Mascot      |
| 1533.6243  | 1533.6139   | -0.0104 | -7    | 123        | 134      | GDCCTNYRSLCK             |           |         | Carbamidomethyl (C)[3,4,11]              |      | Mascot      |
| 1589.7933  | 1589.7379   | -0.0554 | -35   | 249        | 261      | WWGGQPIWITAMK            |           |         | Oxidation (M)[12]                        |      | Mascot      |
| 1589.7933  | 1589.7379   | -0.0554 | -35   | 249        | 261      | WWGGQPIWITAMK            |           |         | Oxidation (M)[12]                        |      | Mascot      |
| 1596.838   | 1596.7131   | -0.1249 | -78   | 816        | 828      | DVELLTGLDFYRR            |           |         |                                          |      | Mascot      |
| 1791.7504  | 1791.6489   | -0.1015 | -57   | 459        | 474      | NHEKCGFAGDHGYDNK         |           |         |                                          |      | Mascot      |
| 1851.9559  | 1851.8479   | -0.108  | -58   | 313        | 329      | LGPHSTELNSALRDVDK        |           |         |                                          |      | Mascot      |
| 1867.6754  | 1867.8413   | 0.1659  | 89    | 77         | 91       | TYNMCCSDFDDHCLK          |           |         | Carbamidomethyl (C)[5], Oxidation (M)[4] |      | Mascot      |
| 2210.999   | 2211.0151   | 0.0161  | 7     | 346        | 364      | CINIILVGDHGMEEAHCD<br>K  |           |         | Carbamidomethyl (C)[1,17]                |      | Mascot      |
| 2233.1545  | 2232.9912   | -0.1633 | -73   | 577        | 595      | QVIDDNKNLPYGRPAVM<br>FR  |           |         |                                          |      | Mascot      |
| 2282.9661  | 2283.0889   | 0.1228  | 54    | 58         | 76       | CFELVEADPPNCRCDNL<br>CK  |           |         | Carbamidomethyl (C)[1,12]                |      | Mascot      |
| 2300.2583  | 2300.0823   | -0.176  | -77   | 402        | 421      | AVVANLTCKKPDQHFKP<br>YLK |           |         |                                          |      | Mascot      |

|    |                          |  |  |  |             |  |         |      |   |    |   |  |  |
|----|--------------------------|--|--|--|-------------|--|---------|------|---|----|---|--|--|
| 19 | Zgc:123120 [Danio rerio] |  |  |  | gi 79158694 |  | 19987.2 | 5.87 | 6 | 36 | 0 |  |  |
|----|--------------------------|--|--|--|-------------|--|---------|------|---|----|---|--|--|

#### Peptide Information

| Calc. Mass | Obsrv. Mass | ± da    | ± ppm | Start Seq. | End Seq. | Sequence                   | Ion Score | C. I. % | Modification           | Rank | Result Type |
|------------|-------------|---------|-------|------------|----------|----------------------------|-----------|---------|------------------------|------|-------------|
| 870.5406   | 870.5024    | -0.0382 | -44   | 2          | 9        | SAQKVIPIK                  |           |         |                        |      | Mascot      |
| 1065.5358  | 1065.4639   | -0.0719 | -67   | 171        | 179      | RLSTQCSTI                  |           |         | Carbamidomethyl (C)[6] |      | Mascot      |
| 1235.5797  | 1235.4767   | -0.103  | -83   | 128        | 137      | NRICNTNTDK                 |           |         | Carbamidomethyl (C)[4] |      | Mascot      |
| 1323.5845  | 1323.6151   | 0.0306  | 23    | 130        | 140      | ICNTNTDKDDK                |           |         | Carbamidomethyl (C)[2] |      | Mascot      |
| 1323.5845  | 1323.6151   | 0.0306  | 23    | 130        | 140      | ICNTNTDKDDK                |           |         | Carbamidomethyl (C)[2] |      | Mascot      |
| 1596.7646  | 1596.7131   | -0.0515 | -32   | 46         | 59       | MLLEAQRESSSSSR             |           |         | Oxidation (M)[1]       |      | Mascot      |
| 2501.5186  | 2501.1555   | -0.3631 | -145  | 149        | 171      | LLPSPVLTHILMLGLGICI<br>GRR |           |         |                        |      | Mascot      |

20 PREDICTED: procollagen galactosyltransferase 2 [Danio rerio] gi|326664713 67895.4 6.35 9 36 0 11 0

Peptide Information

| Calc. Mass | Obsrv. Mass | ± da    | ± ppm | Start Seq. | End Seq. | Sequence                         | Ion Score | C. I. | % Modification         | Rank | Result Type |
|------------|-------------|---------|-------|------------|----------|----------------------------------|-----------|-------|------------------------|------|-------------|
| 1062.55    | 1062.6423   | 0.0923  | 87    | 423        | 431      | LNTIMEDVK                        |           |       |                        |      | Mascot      |
| 1118.5874  | 1118.4618   | -0.1256 | -112  | 162        | 171      | TLVAPMLDSR                       |           |       | Oxidation (M)[6]       |      | Mascot      |
| 1193.6161  | 1193.5642   | -0.0519 | -43   | 373        | 382      | DPYSDRVLTk                       |           |       |                        |      | Mascot      |
| 1234.646   | 1234.6252   | -0.0208 | -17   | 423        | 432      | LNTIMEDVKR                       |           |       | Oxidation (M)[5]       |      | Mascot      |
| 1365.6857  | 1365.5846   | -0.1011 | -74   | 568        | 581      | GGKTTTSVSESSPK                   |           |       |                        |      | Mascot      |
| 1397.7688  | 1397.6699   | -0.0989 | -71   | 190        | 200      | TPHYVPIRTWK                      |           |       |                        |      | Mascot      |
| 1851.921   | 1851.8479   | -0.0731 | -39   | 383        | 397      | GEIGCFLSHYNIWKK                  |           |       | Carbamidomethyl (C)[5] |      | Mascot      |
| 2123.0986  | 2122.906    | -0.1926 | -91   | 354        | 372      | AMNSTQLRTLGIEMLPGF<br>K          | 11        | 0     | Oxidation (M)[2]       |      | Mascot      |
| 2123.0986  | 2122.906    | -0.1926 | -91   | 354        | 372      | AMNSTQLRTLGIEMLPGF<br>K          |           |       | Oxidation (M)[2]       |      | Mascot      |
| 3311.7166  | 3312.1731   | 0.4565  | 138   | 297        | 324      | METSQYLHIVSKPKDTMA<br>FNQVYLINLK |           |       |                        |      | Mascot      |

21 novel protein [Danio rerio] gi|169146109 64501.6 6.3 10 36 0

Peptide Information

| Calc. Mass | Obsrv. Mass | ± da    | ± ppm | Start Seq. | End Seq. | Sequence                  | Ion Score | C. I. | % Modification                             | Rank | Result Type |
|------------|-------------|---------|-------|------------|----------|---------------------------|-----------|-------|--------------------------------------------|------|-------------|
| 996.5836   | 996.5524    | -0.0312 | -31   | 508        | 517      | SPGILSPGIR                |           |       |                                            |      | Mascot      |
| 996.5836   | 996.5524    | -0.0312 | -31   | 508        | 517      | SPGILSPGIR                |           |       |                                            |      | Mascot      |
| 1045.5411  | 1045.5181   | -0.023  | -22   | 118        | 126      | VIADLEEEK                 |           |       |                                            |      | Mascot      |
| 1065.4882  | 1065.4639   | -0.0243 | -23   | 280        | 287      | ELDEMKER                  |           |       | Oxidation (M)[5]                           |      | Mascot      |
| 1107.631   | 1107.4929   | -0.1381 | -125  | 527        | 536      | FHSPVPVPAKK               |           |       |                                            |      | Mascot      |
| 1179.5319  | 1179.5477   | 0.0158  | 13    | 92         | 101      | LVMAHCTNMK                |           |       | Oxidation (M)[3,9]                         |      | Mascot      |
| 1179.5319  | 1179.5477   | 0.0158  | 13    | 92         | 101      | LVMAHCTNMK                |           |       | Oxidation (M)[3,9]                         |      | Mascot      |
| 1307.7106  | 1307.6224   | -0.0882 | -67   | 524        | 535      | AEKFHSPVPVPAK             |           |       |                                            |      | Mascot      |
| 1320.5663  | 1320.526    | -0.0403 | -31   | 67         | 78       | DSELSQAQDDGR              |           |       |                                            |      | Mascot      |
| 1493.6909  | 1493.6685   | -0.0224 | -15   | 92         | 103      | LVMAHCTNMKEK              |           |       | Carbamidomethyl (C)[6], Oxidation (M)[3,9] |      | Mascot      |
| 1493.6909  | 1493.6685   | -0.0224 | -15   | 92         | 103      | LVMAHCTNMKEK              |           |       | Carbamidomethyl (C)[6], Oxidation (M)[3,9] |      | Mascot      |
| 1691.7542  | 1691.7314   | -0.0228 | -13   | 130        | 145      | AQDAAAGDDITDMLER          |           |       |                                            |      | Mascot      |
| 1691.7542  | 1691.7314   | -0.0228 | -13   | 130        | 145      | AQDAAAGDDITDMLER          |           |       |                                            |      | Mascot      |
| 1707.749   | 1707.6991   | -0.0499 | -29   | 130        | 145      | AQDAAAGDDITDMLER          |           |       | Oxidation (M)[13]                          |      | Mascot      |
| 1994.1029  | 1993.8905   | -0.2124 | -107  | 497        | 517      | NLAAASSPTGKSPGILSP<br>GIR |           |       |                                            |      | Mascot      |

22 novel protein similar to vertebrate transmembrane gi|220679023 61506.7 8.9 10 35 0

protein 209 (TMEM209) [Danio rerio]

| Peptide Information |                                               |         |       |              |          |                          |           |         |                                           |      |             |
|---------------------|-----------------------------------------------|---------|-------|--------------|----------|--------------------------|-----------|---------|-------------------------------------------|------|-------------|
| Calc. Mass          | Obsrv. Mass                                   | ± da    | ± ppm | Start Seq.   | End Seq. | Sequence                 | Ion Score | C. I. % | Modification                              | Rank | Result Type |
| 864.3945            | 864.4808                                      | 0.0863  | 100   | 297          | 304      | DDTELGSK                 |           |         |                                           |      | Mascot      |
| 1051.5088           | 1051.6663                                     | 0.1575  | 150   | 6            | 14       | EGMTSLIER                |           |         | Oxidation (M)[3]                          |      | Mascot      |
| 1051.5088           | 1051.6663                                     | 0.1575  | 150   | 6            | 14       | EGMTSLIER                |           |         | Oxidation (M)[3]                          |      | Mascot      |
| 1109.5586           | 1109.4427                                     | -0.1159 | -104  | 270          | 279      | TVGDYAQSLR               |           |         |                                           |      | Mascot      |
| 1307.5916           | 1307.6224                                     | 0.0308  | 24    | 260          | 269      | HSPSFWNYNR               |           |         |                                           |      | Mascot      |
| 1340.5721           | 1340.6235                                     | 0.0514  | 38    | 408          | 419      | ELAHSGCMSSFR             |           |         | Oxidation (M)[8]                          |      | Mascot      |
| 1393.7355           | 1393.6404                                     | -0.0951 | -68   | 6            | 17       | EGMTSLIERTIK             |           |         | Oxidation (M)[3]                          |      | Mascot      |
| 1397.5936           | 1397.6699                                     | 0.0763  | 55    | 408          | 419      | ELAHSGCMSSFR             |           |         | Carbamidomethyl (C)[7], Oxidation (M)[8]  |      | Mascot      |
| 1448.7413           | 1448.8604                                     | 0.1191  | 82    | 2            | 14       | TPSKEGMSLIER             |           |         |                                           |      | Mascot      |
| 1596.7257           | 1596.7131                                     | -0.0126 | -8    | 539          | 551      | SRPFGCECTVDLR            |           |         | Carbamidomethyl (C)[6,8]                  |      | Mascot      |
| 1638.7727           | 1638.7908                                     | 0.0181  | 11    | 406          | 419      | IKELAHSGCMSSFR           |           |         | Carbamidomethyl (C)[9], Oxidation (M)[10] |      | Mascot      |
| 2224.9861           | 2225.0317                                     | 0.0456  | 20    | 408          | 427      | ELAHSGCMSSFRWNGG<br>GDLK |           |         | Carbamidomethyl (C)[7], Oxidation (M)[8]  |      | Mascot      |
| 23                  | CTTNBP2 N-terminal-like protein [Danio rerio] |         |       | gi 116517238 |          | 65830.4                  | 6.2       | 10      | 35                                        | 0    |             |

| Peptide Information |             |         |       |            |          |                           |           |         |                                            |      |             |
|---------------------|-------------|---------|-------|------------|----------|---------------------------|-----------|---------|--------------------------------------------|------|-------------|
| Calc. Mass          | Obsrv. Mass | ± da    | ± ppm | Start Seq. | End Seq. | Sequence                  | Ion Score | C. I. % | Modification                               | Rank | Result Type |
| 996.5836            | 996.5524    | -0.0312 | -31   | 520        | 529      | SPGILSPGIR                |           |         |                                            |      | Mascot      |
| 996.5836            | 996.5524    | -0.0312 | -31   | 520        | 529      | SPGILSPGIR                |           |         |                                            |      | Mascot      |
| 1045.5411           | 1045.5181   | -0.023  | -22   | 130        | 138      | VIADLEEEK                 |           |         |                                            |      | Mascot      |
| 1065.4882           | 1065.4639   | -0.0243 | -23   | 292        | 299      | ELDEMKER                  |           |         | Oxidation (M)[5]                           |      | Mascot      |
| 1107.631            | 1107.4929   | -0.1381 | -125  | 539        | 548      | FHSPVPVPAKK               |           |         |                                            |      | Mascot      |
| 1179.5319           | 1179.5477   | 0.0158  | 13    | 104        | 113      | LVMAHCTNMK                |           |         | Oxidation (M)[3,9]                         |      | Mascot      |
| 1179.5319           | 1179.5477   | 0.0158  | 13    | 104        | 113      | LVMAHCTNMK                |           |         | Oxidation (M)[3,9]                         |      | Mascot      |
| 1307.7106           | 1307.6224   | -0.0882 | -67   | 536        | 547      | AEKFHSPVPVPAK             |           |         |                                            |      | Mascot      |
| 1320.5663           | 1320.526    | -0.0403 | -31   | 79         | 90       | DSELSQAQDDGR              |           |         |                                            |      | Mascot      |
| 1493.6909           | 1493.6685   | -0.0224 | -15   | 104        | 115      | LVMAHCTNMKEK              |           |         | Carbamidomethyl (C)[6], Oxidation (M)[3,9] |      | Mascot      |
| 1493.6909           | 1493.6685   | -0.0224 | -15   | 104        | 115      | LVMAHCTNMKEK              |           |         | Carbamidomethyl (C)[6], Oxidation (M)[3,9] |      | Mascot      |
| 1691.7542           | 1691.7314   | -0.0228 | -13   | 142        | 157      | AQDAAAGDDITDMLER          |           |         |                                            |      | Mascot      |
| 1691.7542           | 1691.7314   | -0.0228 | -13   | 142        | 157      | AQDAAAGDDITDMLER          |           |         |                                            |      | Mascot      |
| 1707.749            | 1707.6991   | -0.0499 | -29   | 142        | 157      | AQDAAAGDDITDMLER          |           |         | Oxidation (M)[13]                          |      | Mascot      |
| 1994.1029           | 1993.8905   | -0.2124 | -107  | 509        | 529      | NLAAASSPTGKSPGILSP<br>GIR |           |         |                                            |      | Mascot      |



24 intraflagellar transport protein 172 homolog [Danio rerio] gi|50539690 197598.9 5.6 18 35 0 8 0

Peptide Information

| Calc. Mass | Obsrv. Mass | ± da    | ± ppm | Start Seq. | End Seq. | Sequence          | Ion Score | C. I. | % Modification                           | Rank | Result Type |
|------------|-------------|---------|-------|------------|----------|-------------------|-----------|-------|------------------------------------------|------|-------------|
| 807.3818   | 807.3643    | -0.0175 | -22   | 1498       | 1503     | MWSDLR            |           |       |                                          |      | Mascot      |
| 882.4501   | 882.5284    | 0.0783  | 89    | 828        | 834      | ALECYRK           |           |       |                                          |      | Mascot      |
| 957.4896   | 957.3986    | -0.091  | -95   | 1          | 7        | MLKYMK            |           |       | Oxidation (M)[1]                         |      | Mascot      |
| 1051.5419  | 1051.6663   | 0.1244  | 118   | 1384       | 1391     | LEEYVDKR          |           |       |                                          |      | Mascot      |
| 1051.5419  | 1051.6663   | 0.1244  | 118   | 1384       | 1391     | LEEYVDKR          |           |       |                                          |      | Mascot      |
| 1165.6034  | 1165.5326   | -0.0708 | -61   | 1480       | 1488     | MFQELVNLR         |           |       | Oxidation (M)[1]                         |      | Mascot      |
| 1165.6034  | 1165.6959   | 0.0925  | 79    | 1480       | 1488     | MFQELVNLR         |           |       | Oxidation (M)[1]                         |      | Mascot      |
| 1165.6034  | 1165.6959   | 0.0925  | 79    | 1480       | 1488     | MFQELVNLR         |           |       | Oxidation (M)[1]                         |      | Mascot      |
| 1193.6095  | 1193.5642   | -0.0453 | -38   | 1173       | 1182     | EAVLMHVHNK        |           |       | Oxidation (M)[5]                         |      | Mascot      |
| 1279.6537  | 1279.7172   | 0.0635  | 50    | 1310       | 1320     | CWMKAAELAİK       |           |       | Oxidation (M)[3]                         |      | Mascot      |
| 1302.6648  | 1302.6605   | -0.0043 | -3    | 565        | 576      | GDIVDLERSNGK      |           |       |                                          |      | Mascot      |
| 1320.6803  | 1320.526    | -0.1543 | -117  | 1310       | 1320     | CWMKAAELAİK       |           |       | Carbamidomethyl (C)[1]                   |      | Mascot      |
| 1323.6222  | 1323.6151   | -0.0071 | -5    | 824        | 833      | NNQRALECYR        | 8         | 0     | Carbamidomethyl (C)[8]                   |      | Mascot      |
| 1323.6222  | 1323.6151   | -0.0071 | -5    | 824        | 833      | NNQRALECYR        |           |       | Carbamidomethyl (C)[8]                   |      | Mascot      |
| 1357.6416  | 1357.6583   | 0.0167  | 12    | 1717       | 1728     | TTHSPECQDVLK      |           |       |                                          |      | Mascot      |
| 1365.6467  | 1365.5846   | -0.0621 | -45   | 1421       | 1432     | GQWEKIDTASK       |           |       |                                          |      | Mascot      |
| 1448.7743  | 1448.8604   | 0.0861  | 59    | 39         | 50       | VVILYDEQGEKR      |           |       |                                          |      | Mascot      |
| 1533.8271  | 1533.6139   | -0.2132 | -139  | 659        | 672      | FLNETNKIADAVAK    |           |       |                                          |      | Mascot      |
| 1707.9388  | 1707.6991   | -0.2397 | -140  | 899        | 913      | ALHILELQEDRTAAK   |           |       |                                          |      | Mascot      |
| 1851.9612  | 1851.8479   | -0.1133 | -61   | 1080       | 1096     | THGGANAHKQVAYLWAK |           |       |                                          |      | Mascot      |
| 1868.0024  | 1867.8413   | -0.1611 | -86   | 1321       | 1337     | FLSHDKAVDVSQIVGPR |           |       |                                          |      | Mascot      |
| 2050.9875  | 2051.0081   | 0.0206  | 10    | 1173       | 1189     | EAVLMHVHNKDSNAQ   |           |       | Oxidation (M)[5]                         |      | Mascot      |
| 2211.0508  | 2211.0151   | -0.0357 | -16   | 19         | 38       | VTCTMAWAPNNKFAVCT |           |       |                                          |      | Mascot      |
| 2284.0671  | 2284.0823   | 0.0152  | 7     | 19         | 38       | VTCTMAWAPNNKFAVCT |           |       | Carbamidomethyl (C)[3], Oxidation (M)[4] |      | Mascot      |

25 RecName: Full=Keratin, type I cytoskeletal 18; gi|148886613 48601.1 5.53 10 35 0  
 AltName: Full=Cytokeratin-18; Short=CK-18; AltName:

Peptide Information

| Calc. Mass | Obsrv. Mass | ± da    | ± ppm | Start Seq. | End Seq. | Sequence | Ion Score | C. I. | % Modification | Rank | Result Type |
|------------|-------------|---------|-------|------------|----------|----------|-----------|-------|----------------|------|-------------|
| 807.3995   | 807.3643    | -0.0352 | -44   | 163        | 169      | LAADDFR  |           |       |                |      | Mascot      |
| 864.4461   | 864.4808    | 0.0347  | 40    | 387        | 394      | LLDGGDFK |           |       |                |      | Mascot      |

|  |           |           |         |     |     |     |              |  |  |  |  |  |                  |  |  |  |        |
|--|-----------|-----------|---------|-----|-----|-----|--------------|--|--|--|--|--|------------------|--|--|--|--------|
|  | 882.4753  | 882.5284  | 0.0531  | 60  | 260 | 266 | YEKMALK      |  |  |  |  |  |                  |  |  |  | Mascot |
|  | 996.4996  | 996.5524  | 0.0528  | 53  | 172 | 179 | YESELSIR     |  |  |  |  |  |                  |  |  |  | Mascot |
|  | 996.4996  | 996.5524  | 0.0528  | 53  | 172 | 179 | YESELSIR     |  |  |  |  |  |                  |  |  |  | Mascot |
|  | 1045.4697 | 1045.5181 | 0.0484  | 46  | 124 | 132 | GPDVHDYSR    |  |  |  |  |  |                  |  |  |  | Mascot |
|  | 1065.5575 | 1065.4639 | -0.0936 | -88 | 377 | 385 | LEAEIATYR    |  |  |  |  |  |                  |  |  |  | Mascot |
|  | 1107.5906 | 1107.4929 | -0.0977 | -88 | 25  | 33  | RTTNVPTYR    |  |  |  |  |  |                  |  |  |  | Mascot |
|  | 1307.6875 | 1307.6224 | -0.0651 | -50 | 407 | 418 | VMTVTQTLVDGK |  |  |  |  |  | Oxidation (M)[2] |  |  |  | Mascot |
|  | 1340.6879 | 1340.6235 | -0.0644 | -48 | 375 | 385 | MKLEAEIATYR  |  |  |  |  |  | Oxidation (M)[1] |  |  |  | Mascot |
|  | 1434.6893 | 1434.707  | 0.0177  | 12  | 246 | 257 | GQDLSQIMEEIR |  |  |  |  |  | Oxidation (M)[8] |  |  |  | Mascot |
|  | 1434.6893 | 1434.707  | 0.0177  | 12  | 246 | 257 | GQDLSQIMEEIR |  |  |  |  |  | Oxidation (M)[8] |  |  |  | Mascot |

26 protein-arginine deiminase type-2 [Danio rerio] gi|41056223 72843.2 5.62 11 35 0

#### Peptide Information

| Calc. Mass | Obsrv. Mass | ± da    | ± ppm | Start Seq. | End Seq. | Sequence       | Ion Score | C. I. | % Modification         | Rank | Result Type |
|------------|-------------|---------|-------|------------|----------|----------------|-----------|-------|------------------------|------|-------------|
| 1062.579   | 1062.6423   | 0.0633  | 60    | 5          | 13       | RSLTIDTEK      |           |       |                        |      | Mascot      |
| 1065.4604  | 1065.4639   | 0.0035  | 3     | 344        | 351      | ICHEYMNR       |           |       |                        |      | Mascot      |
| 1165.7344  | 1165.6959   | -0.0385 | -33   | 223        | 231      | YQLLKLFLK      |           |       |                        |      | Mascot      |
| 1165.7344  | 1165.6959   | -0.0385 | -33   | 223        | 231      | YQLLKLFLK      |           |       |                        |      | Mascot      |
| 1234.6427  | 1234.6252   | -0.0175 | -14   | 213        | 222      | TNTKTENLWK     |           |       |                        |      | Mascot      |
| 1277.7212  | 1277.6559   | -0.0653 | -51   | 480        | 491      | VFKSLQNSGLGK   |           |       |                        |      | Mascot      |
| 1320.6729  | 1320.526    | -0.1469 | -111  | 32         | 43       | CAPPQSKSFSIR   |           |       |                        |      | Mascot      |
| 1377.6943  | 1377.517    | -0.1773 | -129  | 32         | 43       | CAPPQSKSFSIR   |           |       | Carbamidomethyl (C)[1] |      | Mascot      |
| 1393.61    | 1393.6404   | 0.0304  | 22    | 344        | 354      | ICHEYMNRGDR    |           |       |                        |      | Mascot      |
| 1448.6686  | 1448.8604   | 0.1918  | 132   | 551        | 562      | VMEEKNEDSVPR   |           |       | Oxidation (M)[2]       |      | Mascot      |
| 1589.811   | 1589.7379   | -0.0731 | -46   | 636        | 647      | EPFTVRWWNLEL   |           |       |                        |      | Mascot      |
| 1589.811   | 1589.7379   | -0.0731 | -46   | 636        | 647      | EPFTVRWWNLEL   |           |       |                        |      | Mascot      |
| 1707.8887  | 1707.6991   | -0.1896 | -111  | 422        | 435      | NMTKVVQDFLWAQK |           |       |                        |      | Mascot      |
| 2233.1506  | 2232.9912   | -0.1594 | -71   | 194        | 212      | LSMHISQSTSESVR |           |       | Oxidation (M)[3]       |      | Mascot      |

27 RecName: Full=Intraflagellar transport protein 172 homolog gi|82232659 197655 5.61 18 34 0 8 0

#### Peptide Information

| Calc. Mass | Obsrv. Mass | ± da    | ± ppm | Start Seq. | End Seq. | Sequence | Ion Score | C. I. | % Modification | Rank | Result Type |
|------------|-------------|---------|-------|------------|----------|----------|-----------|-------|----------------|------|-------------|
| 807.3818   | 807.3643    | -0.0175 | -22   | 1498       | 1503     | MWSDLR   |           |       |                |      | Mascot      |
| 882.4501   | 882.5284    | 0.0783  | 89    | 828        | 834      | ALECYRK  |           |       |                |      | Mascot      |

|           |           |         |      |      |      |                   |   |   |  |  |  |                                          |        |
|-----------|-----------|---------|------|------|------|-------------------|---|---|--|--|--|------------------------------------------|--------|
| 957.4896  | 957.3986  | -0.091  | -95  | 1    | 7    | MLKYMK            |   |   |  |  |  | Oxidation (M)[1]                         | Mascot |
| 1051.5419 | 1051.6663 | 0.1244  | 118  | 1384 | 1391 | LEEYVDKR          |   |   |  |  |  |                                          | Mascot |
| 1051.5419 | 1051.6663 | 0.1244  | 118  | 1384 | 1391 | LEEYVDKR          |   |   |  |  |  |                                          | Mascot |
| 1165.6034 | 1165.5326 | -0.0708 | -61  | 1480 | 1488 | MFQELVNL          |   |   |  |  |  | Oxidation (M)[1]                         | Mascot |
| 1165.6034 | 1165.6959 | 0.0925  | 79   | 1480 | 1488 | MFQELVNL          |   |   |  |  |  | Oxidation (M)[1]                         | Mascot |
| 1165.6034 | 1165.6959 | 0.0925  | 79   | 1480 | 1488 | MFQELVNL          |   |   |  |  |  | Oxidation (M)[1]                         | Mascot |
| 1193.6095 | 1193.5642 | -0.0453 | -38  | 1173 | 1182 | EAVLMHVHNK        |   |   |  |  |  | Oxidation (M)[5]                         | Mascot |
| 1279.6537 | 1279.7172 | 0.0635  | 50   | 1310 | 1320 | CWMKAAELA         |   |   |  |  |  | Oxidation (M)[3]                         | Mascot |
| 1302.6648 | 1302.6605 | -0.0043 | -3   | 565  | 576  | GDIVDLERSNGK      |   |   |  |  |  |                                          | Mascot |
| 1320.6803 | 1320.526  | -0.1543 | -117 | 1310 | 1320 | CWMKAAELA         |   |   |  |  |  | Carbamidomethyl (C)[1]                   | Mascot |
| 1323.6222 | 1323.6151 | -0.0071 | -5   | 824  | 833  | NNQRALECYR        | 8 | 0 |  |  |  | Carbamidomethyl (C)[8]                   | Mascot |
| 1323.6222 | 1323.6151 | -0.0071 | -5   | 824  | 833  | NNQRALECYR        |   |   |  |  |  | Carbamidomethyl (C)[8]                   | Mascot |
| 1357.6416 | 1357.6583 | 0.0167  | 12   | 1717 | 1728 | TTHSPECQDVLK      |   |   |  |  |  |                                          | Mascot |
| 1365.6467 | 1365.5846 | -0.0621 | -45  | 1421 | 1432 | GQWEKCIDTASK      |   |   |  |  |  |                                          | Mascot |
| 1448.7743 | 1448.8604 | 0.0861  | 59   | 39   | 50   | VVILYDEQGEKR      |   |   |  |  |  |                                          | Mascot |
| 1533.8271 | 1533.6139 | -0.2132 | -139 | 659  | 672  | FLNETNKIADAVAK    |   |   |  |  |  |                                          | Mascot |
| 1707.9388 | 1707.6991 | -0.2397 | -140 | 899  | 913  | ALHILELQEDRTAAK   |   |   |  |  |  |                                          | Mascot |
| 1851.9612 | 1851.8479 | -0.1133 | -61  | 1080 | 1096 | THGGANAHKQVAYLWAK |   |   |  |  |  |                                          | Mascot |
| 1868.0024 | 1867.8413 | -0.1611 | -86  | 1321 | 1337 | FLSHDKAVDVSQIVGPR |   |   |  |  |  |                                          | Mascot |
| 2050.9875 | 2051.0081 | 0.0206  | 10   | 1173 | 1189 | EAVLMHVHNKDWSNAQ  |   |   |  |  |  | Oxidation (M)[5]                         | Mascot |
| 2211.0508 | 2211.0151 | -0.0357 | -16  | 19   | 38   | VTCEAWAPNNKFAVCT  |   |   |  |  |  |                                          | Mascot |
| 2284.0671 | 2284.0823 | 0.0152  | 7    | 19   | 38   | VTCEAWAPNNKFAVCT  |   |   |  |  |  | Carbamidomethyl (C)[3], Oxidation (M)[4] | Mascot |

28 pre-B-cell leukemia transcription factor 2 [Danio rerio] gi|18859217 44196.6 6.32 7 34 0

Peptide Information

| Calc. Mass | Obsrv. Mass | ± da    | ± ppm | Start Seq. | End Seq. | Sequence    | Ion Score | C. I. | % Modification                           | Rank | Result Type |
|------------|-------------|---------|-------|------------|----------|-------------|-----------|-------|------------------------------------------|------|-------------|
| 850.41     | 850.5063    | 0.0963  | 113   | 85         | 91       | HALNCHR     |           |       |                                          |      | Mascot      |
| 864.4686   | 864.4808    | 0.0122  | 14    | 247        | 253      | SRFLDAR     |           |       |                                          |      | Mascot      |
| 1051.5782  | 1051.6663   | 0.0881  | 84    | 227        | 235      | FSSIQTQLK   |           |       |                                          |      | Mascot      |
| 1051.5782  | 1051.6663   | 0.0881  | 84    | 227        | 235      | FSSIQTQLK   |           |       |                                          |      | Mascot      |
| 1179.6732  | 1179.5477   | -0.1255 | -106  | 226        | 235      | KFSSIQTQLK  |           |       |                                          |      | Mascot      |
| 1179.6732  | 1179.5477   | -0.1255 | -106  | 226        | 235      | KFSSIQTQLK  | 12        | 0     |                                          |      | Mascot      |
| 1307.6447  | 1307.6224   | -0.0223 | -17   | 236        | 246      | QSTCEAVMILR |           |       | Carbamidomethyl (C)[4]                   |      | Mascot      |
| 1323.6395  | 1323.6151   | -0.0244 | -18   | 236        | 246      | QSTCEAVMILR |           |       | Carbamidomethyl (C)[4], Oxidation (M)[8] |      | Mascot      |
| 1323.6395  | 1323.6151   | -0.0244 | -18   | 236        | 246      | QSTCEAVMILR |           |       | Carbamidomethyl (C)[4], Oxidation (M)[8] |      | Mascot      |

|    |                                                                                       |           |         |     |     |              |                          |      |    |                   |        |
|----|---------------------------------------------------------------------------------------|-----------|---------|-----|-----|--------------|--------------------------|------|----|-------------------|--------|
|    | 1493.7563                                                                             | 1493.6685 | -0.0878 | -59 | 236 | 248          | QSTCEAVMILRSR            | 3    | 0  |                   | Mascot |
|    | 1493.7563                                                                             | 1493.6685 | -0.0878 | -59 | 236 | 248          | QSTCEAVMILRSR            |      |    |                   | Mascot |
|    | 2283.1836                                                                             | 2283.0889 | -0.0947 | -41 | 227 | 246          | FSSIQTQLKQSTCEAVMI<br>LR |      |    |                   | Mascot |
|    | 2299.1785                                                                             | 2299.0923 | -0.0862 | -37 | 227 | 246          | FSSIQTQLKQSTCEAVMI<br>LR |      |    | Oxidation (M)[17] | Mascot |
| 29 | arf-GAP with coiled-coil, ANK repeat and PH domain-containing protein 3 [Danio rerio] |           |         |     |     | gi 131889644 | 94940.4                  | 5.88 | 13 | 34                | 0      |

#### Peptide Information

| Calc. Mass | Obsrv. Mass | ± da    | ± ppm | Start Seq. | End Sequence Seq. | Ion Score               | C. I. % | Modification                             | Rank | Result Type |
|------------|-------------|---------|-------|------------|-------------------|-------------------------|---------|------------------------------------------|------|-------------|
| 842.4478   | 842.4733    | 0.0255  | 30    | 494        | 501               | KPGPNSSR                |         |                                          |      | Mascot      |
| 1062.5135  | 1062.6423   | 0.1288  | 121   | 130        | 138               | EDMEIAQVK               |         |                                          |      | Mascot      |
| 1109.5078  | 1109.4427   | -0.0651 | -59   | 39         | 48                | LCSGMIEAGR              |         | Carbamidomethyl (C)[2], Oxidation (M)[5] |      | Mascot      |
| 1118.6245  | 1118.4618   | -0.1627 | -145  | 837        | 845               | TWLIYTPPK               |         |                                          |      | Mascot      |
| 1165.5453  | 1165.5326   | -0.0127 | -11   | 789        | 797               | LARMNEEMR               |         | Oxidation (M)[4]                         |      | Mascot      |
| 1165.5453  | 1165.6959   | 0.1506  | 129   | 789        | 797               | LARMNEEMR               |         | Oxidation (M)[4]                         |      | Mascot      |
| 1165.5453  | 1165.6959   | 0.1506  | 129   | 789        | 797               | LARMNEEMR               |         | Oxidation (M)[4]                         |      | Mascot      |
| 1179.6368  | 1179.5477   | -0.0891 | -76   | 664        | 673               | ELDPNTLLHK              |         |                                          |      | Mascot      |
| 1179.6368  | 1179.5477   | -0.0891 | -76   | 664        | 673               | ELDPNTLLHK              |         |                                          |      | Mascot      |
| 1279.5769  | 1279.7172   | 0.1403  | 110   | 521        | 532               | MCGSEALLEGGR            |         | Carbamidomethyl (C)[2]                   |      | Mascot      |
| 1448.6873  | 1448.8604   | 0.1731  | 119   | 317        | 328               | LCSVKPCEDIER            |         | Carbamidomethyl (C)[2]                   |      | Mascot      |
| 1493.8071  | 1493.6685   | -0.1386 | -93   | 664        | 676               | ELDPNTLLHKASR           |         |                                          |      | Mascot      |
| 1493.8071  | 1493.6685   | -0.1386 | -93   | 664        | 676               | ELDPNTLLHKASR           |         |                                          |      | Mascot      |
| 1638.8533  | 1638.7908   | -0.0625 | -38   | 56         | 69                | LFVNGIRDLSHHCK          |         |                                          |      | Mascot      |
| 1838.0535  | 1837.891    | -0.1625 | -88   | 166        | 181               | HLALDYVLQINVLQAK        |         |                                          |      | Mascot      |
| 2284.0664  | 2284.0823   | 0.0159  | 7     | 240        | 258               | HATIQQRRLMQDFAYDD<br>SK |         | Oxidation (M)[10]                        |      | Mascot      |
| 2300.1379  | 2300.0823   | -0.0556 | -24   | 259        | 278               | VEFNVDAPNGVVMGYL<br>FKR |         | Oxidation (M)[13]                        |      | Mascot      |

|    |                                                                     |  |  |  |  |              |         |      |    |    |   |
|----|---------------------------------------------------------------------|--|--|--|--|--------------|---------|------|----|----|---|
| 30 | PREDICTED: TNF receptor-associated factor 2 isoform 1 [Danio rerio] |  |  |  |  | gi 125817024 | 60032.9 | 8.49 | 11 | 34 | 0 |
|----|---------------------------------------------------------------------|--|--|--|--|--------------|---------|------|----|----|---|

#### Peptide Information

| Calc. Mass | Obsrv. Mass | ± da    | ± ppm | Start Seq. | End Sequence Seq. | Ion Score  | C. I. % | Modification           | Rank | Result Type |
|------------|-------------|---------|-------|------------|-------------------|------------|---------|------------------------|------|-------------|
| 957.3917   | 957.3986    | 0.0069  | 7     | 43         | 49                | YQCQCK     |         | Carbamidomethyl (C)[3] |      | Mascot      |
| 1051.5275  | 1051.6663   | 0.1388  | 132   | 1          | 10                | MISAAGTLCK |         | Carbamidomethyl (C)[9] |      | Mascot      |
| 1051.5275  | 1051.6663   | 0.1388  | 132   | 1          | 10                | MISAAGTLCK |         | Carbamidomethyl (C)[9] |      | Mascot      |
| 1065.5323  | 1065.4639   | -0.0684 | -64   | 425        | 434               | LYLNGDGTGR |         |                        |      | Mascot      |

|           |           |         |      |     |     |                |                           |  |  |  |        |
|-----------|-----------|---------|------|-----|-----|----------------|---------------------------|--|--|--|--------|
| 1118.5762 | 1118.4618 | -0.1144 | -102 | 33  | 42  | EVLSVSMEPK     |                           |  |  |  | Mascot |
| 1234.6613 | 1234.6252 | -0.0361 | -29  | 2   | 12  | ISAAGTLCKWK    | Carbamidomethyl (C)[8]    |  |  |  | Mascot |
| 1235.5837 | 1235.4767 | -0.107  | -87  | 213 | 222 | FQEHTKSCAK     | Carbamidomethyl (C)[8]    |  |  |  | Mascot |
| 1308.6803 | 1308.6052 | -0.0751 | -57  | 1   | 12  | MISAAGTLCKWK   |                           |  |  |  | Mascot |
| 1316.6991 | 1316.5031 | -0.196  | -149 | 461 | 471 | VTLMLLDQNNR    |                           |  |  |  | Mascot |
| 1365.7018 | 1365.5846 | -0.1172 | -86  | 1   | 12  | MISAAGTLCKWK   | Carbamidomethyl (C)[9]    |  |  |  | Mascot |
| 1397.6664 | 1397.6699 | 0.0035  | 3    | 43  | 53  | YQCQQCKDILR    |                           |  |  |  | Mascot |
| 1448.7488 | 1448.8604 | 0.1116  | 77   | 147 | 159 | CEACQVLILLSEK  |                           |  |  |  | Mascot |
| 1791.7975 | 1791.6489 | -0.1486 | -83  | 188 | 201 | AHDEICQKFPMQCK | Carbamidomethyl (C)[6,13] |  |  |  | Mascot |

31 small ubiquitin-related modifier 3 precursor [Danio rerio] gi|239048085 10690.3 5.34 5 34 0

Peptide Information

| Calc. Mass | Obsrv. Mass | ± da    | ± ppm | Start Seq. | End Seq. | Sequence                  | Ion Score | C. I. % | Modification     | Rank | Result Type |
|------------|-------------|---------|-------|------------|----------|---------------------------|-----------|---------|------------------|------|-------------|
| 864.4131   | 864.4808    | 0.0677  | 78    | 1          | 7        | MSEEEKPK                  |           |         | Oxidation (M)[1] |      | Mascot      |
| 1234.6426  | 1234.6252   | -0.0174 | -14   | 21         | 32       | VAGQDGSVVQFK              |           |         |                  |      | Mascot      |
| 1277.6405  | 1277.6559   | 0.0154  | 12    | 1          | 11       | MSEEEKPKEGVK              |           |         | Oxidation (M)[1] |      | Mascot      |
| 1475.8217  | 1475.6886   | -0.1331 | -90   | 21         | 34       | VAGQDGSVVQFKIK            |           |         |                  |      | Mascot      |
| 2299.1677  | 2299.0923   | -0.0754 | -33   | 12         | 32       | TENDHINLKVAGQDGSV<br>VQFK |           |         |                  |      | Mascot      |

32 interleukin 4/13B [Danio rerio] gi|193788073 13301.7 8.6 5 33 0

Peptide Information

| Calc. Mass | Obsrv. Mass | ± da    | ± ppm | Start Seq. | End Seq. | Sequence                | Ion Score | C. I. % | Modification           | Rank | Result Type |
|------------|-------------|---------|-------|------------|----------|-------------------------|-----------|---------|------------------------|------|-------------|
| 1051.5275  | 1051.6663   | 0.1388  | 132   | 55         | 64       | TLCQAGMALK              |           |         | Oxidation (M)[7]       |      | Mascot      |
| 1051.5275  | 1051.6663   | 0.1388  | 132   | 55         | 64       | TLCQAGMALK              |           |         | Oxidation (M)[7]       |      | Mascot      |
| 1179.6224  | 1179.5477   | -0.0747 | -63   | 54         | 64       | KTLCQAGMALK             |           |         | Oxidation (M)[8]       |      | Mascot      |
| 1179.6224  | 1179.5477   | -0.0747 | -63   | 54         | 64       | KTLCQAGMALK             | 7         | 0       | Oxidation (M)[8]       |      | Mascot      |
| 1277.6704  | 1277.6559   | -0.0145 | -11   | 55         | 66       | TLCQAGMALKGK            |           |         | Carbamidomethyl (C)[3] |      | Mascot      |
| 2299.269   | 2299.0923   | -0.1767 | -77   | 13         | 32       | TDEILLMEIIQSVNRIK       |           |         |                        |      | Mascot      |
| 2300.0903  | 2300.0823   | -0.008  | -3    | 36         | 54       | MDLDQFIPDIYETGHYSK<br>K |           |         |                        |      | Mascot      |

33 Zgc:111826 [Danio rerio] gi|63100816 53367.1 9.92 9 33 0

Peptide Information

| Calc. Mass | Obsrv. Mass | ± da    | ± ppm | Start Seq. | End Seq. | Sequence | Ion Score | C. I. % | Modification | Rank | Result Type |
|------------|-------------|---------|-------|------------|----------|----------|-----------|---------|--------------|------|-------------|
| 842.4842   | 842.4733    | -0.0109 | -13   | 307        | 314      | ASLNGPKR |           |         |              |      | Mascot      |

|  |           |           |         |      |     |     |                    |  |  |  |  |                   |  |  |  |  |        |
|--|-----------|-----------|---------|------|-----|-----|--------------------|--|--|--|--|-------------------|--|--|--|--|--------|
|  | 1045.6    | 1045.5181 | -0.0819 | -78  | 208 | 217 | KGNVSLTQAK         |  |  |  |  |                   |  |  |  |  | Mascot |
|  | 1062.5248 | 1062.6423 | 0.1175  | 111  | 474 | 481 | ELEEMQRK           |  |  |  |  |                   |  |  |  |  | Mascot |
|  | 1277.6637 | 1277.6559 | -0.0078 | -6   | 422 | 431 | HIREIFGYDK         |  |  |  |  |                   |  |  |  |  | Mascot |
|  | 1316.6705 | 1316.5031 | -0.1674 | -127 | 123 | 133 | NGRFPRPSEEK        |  |  |  |  |                   |  |  |  |  | Mascot |
|  | 1365.5839 | 1365.5846 | 0.0007  | 1    | 462 | 472 | MAVLEDEEEER        |  |  |  |  | Oxidation (M)[1]  |  |  |  |  | Mascot |
|  | 1589.7812 | 1589.7379 | -0.0433 | -27  | 318 | 333 | GVSGSQINRMSSGPGR   |  |  |  |  |                   |  |  |  |  | Mascot |
|  | 1589.7812 | 1589.7379 | -0.0433 | -27  | 318 | 333 | GVSGSQINRMSSGPGR   |  |  |  |  |                   |  |  |  |  | Mascot |
|  | 1851.8105 | 1851.8479 | 0.0374  | 20   | 436 | 450 | DESDYALKFMESSWK    |  |  |  |  | Oxidation (M)[10] |  |  |  |  | Mascot |
|  | 1868.0891 | 1867.8413 | -0.2478 | -133 | 375 | 392 | ILVKPSGPALPPITSSYK |  |  |  |  |                   |  |  |  |  | Mascot |

34 PREDICTED: zinc finger protein 420 isoform 2 [Danio rerio] gi|326678086 70371 9.08 13 33 0

#### Peptide Information

| Calc. Mass | Obsrv. Mass | ± da    | ± ppm | Start Seq. | End Seq. | Sequence            | Ion Score | C. I. | % Modification           | Rank | Result Type |
|------------|-------------|---------|-------|------------|----------|---------------------|-----------|-------|--------------------------|------|-------------|
| 842.5206   | 842.4733    | -0.0473 | -56   | 25         | 31       | QRQGLLK             |           |       |                          |      | Mascot      |
| 864.4798   | 864.4808    | 0.001   | 1     | 591        | 597      | HRSVHTK             |           |       |                          |      | Mascot      |
| 1045.536   | 1045.5181   | -0.0179 | -17   | 134        | 141      | FHCARNLK            |           |       | Carbamidomethyl (C)[3]   |      | Mascot      |
| 1062.5149  | 1062.6423   | 0.1274  | 120   | 110        | 117      | YNLNVHMR            |           |       | Oxidation (M)[7]         |      | Mascot      |
| 1107.6171  | 1107.4929   | -0.1242 | -112  | 469        | 477      | RFAQHAHLK           |           |       |                          |      | Mascot      |
| 1118.4645  | 1118.4618   | -0.0027 | -2    | 348        | 356      | GFVCFECEK           |           |       | Carbamidomethyl (C)[4]   |      | Mascot      |
| 1144.6143  | 1144.4624   | -0.1519 | -133  | 598        | 607      | EKPPSCSLRK          |           |       |                          |      | Mascot      |
| 1323.5933  | 1323.6151   | 0.0218  | 16    | 155        | 164      | CDHCSKTFIR          |           |       | Carbamidomethyl (C)[1,4] |      | Mascot      |
| 1323.5933  | 1323.6151   | 0.0218  | 16    | 155        | 164      | CDHCSKTFIR          |           |       | Carbamidomethyl (C)[1,4] |      | Mascot      |
| 1393.5723  | 1393.6404   | 0.0681  | 49    | 32         | 43       | DSEKMSDPEPCR        |           |       |                          |      | Mascot      |
| 1691.7516  | 1691.7314   | -0.0202 | -12   | 454        | 468      | VHTNEKPYSCECGK      |           |       |                          |      | Mascot      |
| 1691.7516  | 1691.7314   | -0.0202 | -12   | 454        | 468      | VHTNEKPYSCECGK      |           |       |                          |      | Mascot      |
| 1851.8477  | 1851.8479   | 0.0002  | 0     | 276        | 291      | CSSHLNEHMIHTGEK     |           |       | Oxidation (M)[9]         |      | Mascot      |
| 2211.0798  | 2211.0151   | -0.0647 | -29   | 450        | 468      | IHLRVHTNEKPYSCECGK  |           |       |                          |      | Mascot      |
| 2283.0579  | 2283.0889   | 0.031   | 14    | 227        | 245      | HQMIHTGEKPYKCSHCDLR |           |       |                          |      | Mascot      |
| 2299.053   | 2299.0923   | 0.0393  | 17    | 227        | 245      | HQMIHTGEKPYKCSHCDLR |           |       | Oxidation (M)[3]         |      | Mascot      |

35 MCM6 minichromosome maintenance deficient 6, like [Danio rerio] gi|70887711 93152.1 5.23 12 33 0

#### Peptide Information

| Calc. Mass | Obsrv. Mass | ± da | ± ppm | Start Seq. | End Seq. | Sequence | Ion Score | C. I. | % Modification | Rank | Result Type |
|------------|-------------|------|-------|------------|----------|----------|-----------|-------|----------------|------|-------------|
|------------|-------------|------|-------|------------|----------|----------|-----------|-------|----------------|------|-------------|

|    |                          |           |         |      |             |     |                           |      |   |                  |   |  |        |
|----|--------------------------|-----------|---------|------|-------------|-----|---------------------------|------|---|------------------|---|--|--------|
|    | 996.5261                 | 996.5524  | 0.0263  | 26   | 194         | 201 | FVDFQKGR                  |      |   |                  |   |  | Mascot |
|    | 996.5261                 | 996.5524  | 0.0263  | 26   | 194         | 201 | FVDFQKGR                  |      |   |                  |   |  | Mascot |
|    | 1165.6252                | 1165.5326 | -0.0926 | -79  | 747         | 755 | SELINWYLK                 |      |   |                  |   |  | Mascot |
|    | 1165.6252                | 1165.6959 | 0.0707  | 61   | 747         | 755 | SELINWYLK                 |      |   |                  |   |  | Mascot |
|    | 1165.6252                | 1165.6959 | 0.0707  | 61   | 747         | 755 | SELINWYLK                 |      |   |                  |   |  | Mascot |
|    | 1184.627                 | 1184.5308 | -0.0962 | -81  | 202         | 211 | IQETQAE LPR               |      |   |                  |   |  | Mascot |
|    | 1234.7228                | 1234.6252 | -0.0976 | -79  | 361         | 372 | GILLMLFGGVAK              |      |   | Oxidation (M)[5] |   |  | Mascot |
|    | 1277.6195                | 1277.6559 | 0.0364  | 28   | 321         | 330 | NQMTVLEWEK                |      |   |                  |   |  | Mascot |
|    | 1357.8162                | 1357.6583 | -0.1579 | -116 | 119         | 130 | ELSTVRIGTLR               |      |   |                  |   |  | Mascot |
|    | 1397.7495                | 1397.6699 | -0.0796 | -57  | 200         | 211 | GRIQETQAE LPR             |      |   |                  |   |  | Mascot |
|    | 1475.7502                | 1475.6886 | -0.0616 | -42  | 90          | 102 | HFARDHGNIPPSK             |      |   |                  |   |  | Mascot |
|    | 1691.8567                | 1691.7314 | -0.1253 | -74  | 509         | 523 | SLKQNVNMSAPIMSR           |      |   | Oxidation (M)[8] |   |  | Mascot |
|    | 1691.8567                | 1691.7314 | -0.1253 | -74  | 509         | 523 | SLKQNVNMSAPIMSR           |      |   | Oxidation (M)[8] |   |  | Mascot |
|    | 1707.8306                | 1707.6991 | -0.1315 | -77  | 168         | 182 | YTQPTICKNPVCANR           |      |   |                  |   |  | Mascot |
|    | 1852.0175                | 1851.8479 | -0.1696 | -92  | 410         | 429 | AVYTSGKASSAAGLTAAV<br>VK  |      |   |                  |   |  | Mascot |
|    | 2211.1875                | 2211.0151 | -0.1724 | -78  | 361         | 381 | GILLMLFGGVAKTTMEGT<br>SLR |      |   | Oxidation (M)[5] |   |  | Mascot |
| 36 | keratin 18 [Danio rerio] |           |         |      | gi 29335504 |     | 41247.4                   | 5.07 | 9 | 33               | 0 |  |        |

Peptide Information

| Calc. Mass | Obsrv. Mass | ± da    | ± ppm | Start Seq. | End Seq. | Sequence     | Ion Score | C. I. | % Modification   | Rank | Result Type |
|------------|-------------|---------|-------|------------|----------|--------------|-----------|-------|------------------|------|-------------|
| 807.3995   | 807.3643    | -0.0352 | -44   | 91         | 97       | LAADDFR      |           |       |                  |      | Mascot      |
| 864.4461   | 864.4808    | 0.0347  | 40    | 315        | 322      | LLDGGDFK     |           |       |                  |      | Mascot      |
| 882.4753   | 882.5284    | 0.0531  | 60    | 188        | 194      | YEKMALK      |           |       |                  |      | Mascot      |
| 996.4996   | 996.5524    | 0.0528  | 53    | 100        | 107      | YESELSIR     |           |       |                  |      | Mascot      |
| 996.4996   | 996.5524    | 0.0528  | 53    | 100        | 107      | YESELSIR     |           |       |                  |      | Mascot      |
| 1045.4697  | 1045.5181   | 0.0484  | 46    | 52         | 60       | GPDVHDYSR    |           |       |                  |      | Mascot      |
| 1065.5575  | 1065.4639   | -0.0936 | -88   | 305        | 313      | LEAEIATYR    |           |       |                  |      | Mascot      |
| 1307.6875  | 1307.6224   | -0.0651 | -50   | 335        | 346      | VMTVTQTLVDGK |           |       | Oxidation (M)[2] |      | Mascot      |
| 1340.6879  | 1340.6235   | -0.0644 | -48   | 303        | 313      | MKLEAEIATYR  |           |       | Oxidation (M)[1] |      | Mascot      |
| 1434.6893  | 1434.707    | 0.0177  | 12    | 174        | 185      | GQDLSQIMEEIR |           |       | Oxidation (M)[8] |      | Mascot      |
| 1434.6893  | 1434.707    | 0.0177  | 12    | 174        | 185      | GQDLSQIMEEIR |           |       | Oxidation (M)[8] |      | Mascot      |

37 PREDICTED: inner centromere protein A [Danio rerio] gi|326680010 93462.3 9.45 12 33 0

Peptide Information

| Calc. Mass | Obsrv. Mass | ± da | ± ppm | Start Seq. | End Seq. | Sequence | Ion Score | C. I. | % Modification | Rank | Result Type |
|------------|-------------|------|-------|------------|----------|----------|-----------|-------|----------------|------|-------------|
|------------|-------------|------|-------|------------|----------|----------|-----------|-------|----------------|------|-------------|

|    |                                                       |           |         |      |              |         |                                    |    |    |   |  |  |  |  |  |                   |        |
|----|-------------------------------------------------------|-----------|---------|------|--------------|---------|------------------------------------|----|----|---|--|--|--|--|--|-------------------|--------|
|    | 864.3992                                              | 864.4808  | 0.0816  | 94   | 681          | 686     | MEEQRR                             |    |    |   |  |  |  |  |  | Oxidation (M)[1]  | Mascot |
|    | 1045.5272                                             | 1045.5181 | -0.0091 | -9   | 472          | 479     | IEQENERK                           |    |    |   |  |  |  |  |  |                   | Mascot |
|    | 1144.5602                                             | 1144.4624 | -0.0978 | -85  | 404          | 413     | CLTSIAPHMR                         |    |    |   |  |  |  |  |  | Oxidation (M)[9]  | Mascot |
|    | 1234.6348                                             | 1234.6252 | -0.0096 | -8   | 523          | 532     | IEEKMAQLEK                         |    |    |   |  |  |  |  |  | Oxidation (M)[5]  | Mascot |
|    | 1279.7004                                             | 1279.7172 | 0.0168  | 13   | 133          | 144     | TAAPAEPEPIKR                       |    |    |   |  |  |  |  |  |                   | Mascot |
|    | 1302.6284                                             | 1302.6605 | 0.0321  | 25   | 573          | 582     | KQQQVEEEER                         |    |    |   |  |  |  |  |  |                   | Mascot |
|    | 1365.7372                                             | 1365.5846 | -0.1526 | -112 | 131          | 143     | NKTAAPAEPEPIK                      |    |    |   |  |  |  |  |  |                   | Mascot |
|    | 1448.8108                                             | 1448.8604 | 0.0496  | 34   | 440          | 452     | SFIKQSATKPDVK                      |    |    |   |  |  |  |  |  |                   | Mascot |
|    | 1638.7566                                             | 1638.7908 | 0.0342  | 21   | 360          | 376     | TSVTDDSGSGSIGDGR                   |    |    |   |  |  |  |  |  |                   | Mascot |
|    | 1994.0232                                             | 1993.8905 | -0.1327 | -67  | 422          | 439     | NQILMMTPGSLGRSTIMK                 |    |    |   |  |  |  |  |  | Oxidation (M)[5]  | Mascot |
|    | 2233.1743                                             | 2232.9912 | -0.1831 | -82  | 724          | 744     | STALNMTVDIENSVLKTP<br>VGK          |    |    |   |  |  |  |  |  | Oxidation (M)[6]  | Mascot |
|    | 3312.4443                                             | 3312.1731 | -0.2712 | -82  | 777          | 806     | GQKITVLVNPEDYGMDQ<br>NSDDSTDDESAPR |    |    |   |  |  |  |  |  | Oxidation (M)[15] | Mascot |
| 38 | PREDICTED: protein NLRC3-like isoform 1 [Danio rerio] |           |         |      | gi 326680616 | 88386.6 | 8.34                               | 12 | 32 | 0 |  |  |  |  |  |                   |        |

#### Peptide Information

| Calc. Mass | Obsrv. Mass | ± da    | ± ppm | Start Seq. | End Seq. | Sequence                        | Ion Score | C. I. | % Modification                                 | Rank | Result Type |
|------------|-------------|---------|-------|------------|----------|---------------------------------|-----------|-------|------------------------------------------------|------|-------------|
| 807.3995   | 807.3643    | -0.0352 | -44   | 147        | 152      | EFIENR                          |           |       |                                                |      | Mascot      |
| 1045.5272  | 1045.5181   | -0.0091 | -9    | 659        | 667      | GLLTQQDDR                       |           |       |                                                |      | Mascot      |
| 1062.5803  | 1062.6423   | 0.062   | 58    | 502        | 509      | FQIQQSRR                        |           |       |                                                |      | Mascot      |
| 1193.6484  | 1193.5642   | -0.0842 | -71   | 18         | 29       | SGSRVSSSVSLK                    |           |       |                                                |      | Mascot      |
| 1234.7041  | 1234.6252   | -0.0789 | -64   | 672        | 681      | EEIIAYIKQK                      |           |       |                                                |      | Mascot      |
| 1277.6484  | 1277.6559   | 0.0075  | 6     | 33         | 44       | SKGGNLPNFSEK                    |           |       |                                                |      | Mascot      |
| 1308.7058  | 1308.6052   | -0.1006 | -77   | 124        | 133      | FLKNQLENFR                      |           |       |                                                |      | Mascot      |
| 1323.6473  | 1323.6151   | -0.0322 | -24   | 751        | 760      | FQRSDECLIR                      |           |       | Carbamidomethyl (C)[7]                         |      | Mascot      |
| 1323.6473  | 1323.6151   | -0.0322 | -24   | 751        | 760      | FQRSDECLIR                      |           |       | Carbamidomethyl (C)[7]                         |      | Mascot      |
| 1434.6755  | 1434.707    | 0.0315  | 22    | 559        | 571      | ASVYSGMCTQIFK                   |           |       |                                                |      | Mascot      |
| 1434.6755  | 1434.707    | 0.0315  | 22    | 559        | 571      | ASVYSGMCTQIFK                   |           |       |                                                |      | Mascot      |
| 1867.9548  | 1867.8413   | -0.1135 | -61   | 536        | 550      | QLERNNVIFYESDLK                 |           |       |                                                |      | Mascot      |
| 2211.2092  | 2211.0151   | -0.1941 | -88   | 153        | 171      | SIITEAALDLTLFFLREMK             |           |       |                                                |      | Mascot      |
| 3311.6812  | 3312.1731   | 0.4919  | 149   | 449        | 475      | QSKSLFIMCHIPVFCWISV<br>TVLQNMLK |           |       | Carbamidomethyl (C)[9,15], Oxidation (M)[8,25] |      | Mascot      |

39 LOC553337 protein [Danio rerio] gi|61403613 68948.5 6.78 7 32 0 16 0

#### Peptide Information

| Calc. Mass | Obsrv. Mass | ± da | ± ppm | Start | End | Sequence | Ion | C. I. | % Modification | Rank | Result Type |
|------------|-------------|------|-------|-------|-----|----------|-----|-------|----------------|------|-------------|
|------------|-------------|------|-------|-------|-----|----------|-----|-------|----------------|------|-------------|



|    |                                                 |           | Seq.    |     | Seq.         | Score   |                               |    |                        |        |
|----|-------------------------------------------------|-----------|---------|-----|--------------|---------|-------------------------------|----|------------------------|--------|
|    | 864.3702                                        | 864.4808  | 0.1106  | 128 | 57           | 64      | QTGQCPCCK                     |    |                        | Mascot |
|    | 1045.5962                                       | 1045.5181 | -0.0781 | -75 | 209          | 217     | DIAMILEK                      |    |                        | Mascot |
|    | 1365.6361                                       | 1365.5846 | -0.0515 | -38 | 439          | 453     | CGGRGCNGTVGASVK               |    |                        | Mascot |
|    | 1691.6689                                       | 1691.7314 | 0.0625  | 37  | 120          | 133     | QCNECEAFHWGDPR                |    |                        | Mascot |
|    | 1691.6689                                       | 1691.7314 | 0.0625  | 37  | 120          | 133     | QCNECEAFHWGDPR                |    |                        | Mascot |
|    | 1707.8547                                       | 1707.6991 | -0.1556 | -91 | 248          | 262     | EGTFNLISQTVDDLK               |    |                        | Mascot |
|    | 2122.9458                                       | 2122.906  | -0.0398 | -19 | 343          | 361     | CNASVYGPQSPVEQSQD             |    | Carbamidomethyl (C)[1] | Mascot |
|    | 2123.1018                                       | 2122.906  | -0.1958 | -92 | 313          | 331     | TR<br>ELENYLTAGLAEQFANVL<br>K | 17 | 0                      | Mascot |
| 40 | hypothetical protein LOC100038791 [Danio rerio] |           |         |     | gi 147905023 | 50143.4 | 9.17                          | 12 | 32                     | 0      |

#### Peptide Information

| Calc. Mass |                                                                                                     | Obsrv. Mass | ± da    | ± ppm | Start Seq.  | End Seq. | Sequence                | Ion Score | C. I. | % Modification                              | Rank | Result Type |
|------------|-----------------------------------------------------------------------------------------------------|-------------|---------|-------|-------------|----------|-------------------------|-----------|-------|---------------------------------------------|------|-------------|
|            | 1051.616                                                                                            | 1051.6663   | 0.0503  | 48    | 302         | 309      | IHLRFHTK                |           |       |                                             |      | Mascot      |
|            | 1051.616                                                                                            | 1051.6663   | 0.0503  | 48    | 302         | 309      | IHLRFHTK                |           |       |                                             |      | Mascot      |
|            | 1107.4688                                                                                           | 1107.4929   | 0.0241  | 22    | 27          | 35       | EELSEDEEK               |           |       |                                             |      | Mascot      |
|            | 1118.4645                                                                                           | 1118.4618   | -0.0027 | -2    | 340         | 348      | EFVCFECGK               |           |       | Carbamidomethyl (C)[4]                      |      | Mascot      |
|            | 1165.5959                                                                                           | 1165.5326   | -0.0633 | -54   | 265         | 274      | SFNQSSNLIR              |           |       |                                             |      | Mascot      |
|            | 1165.5959                                                                                           | 1165.6959   | 0.1     | 86    | 265         | 274      | SFNQSSNLIR              |           |       |                                             |      | Mascot      |
|            | 1165.5959                                                                                           | 1165.6959   | 0.1     | 86    | 265         | 274      | SFNQSSNLIR              |           |       |                                             |      | Mascot      |
|            | 1193.5844                                                                                           | 1193.5642   | -0.0202 | -17   | 407         | 416      | SFSRSTCLHR              |           |       |                                             |      | Mascot      |
|            | 1302.5388                                                                                           | 1302.6605   | 0.1217  | 93    | 287         | 296      | CDQCGKTFMR              |           |       | Carbamidomethyl (C)[1,4]                    |      | Mascot      |
|            | 1533.7162                                                                                           | 1533.6139   | -0.1023 | -67   | 275         | 286      | HMMIHTGERPHR            |           |       | Oxidation (M)[2,3]                          |      | Mascot      |
|            | 1589.7312                                                                                           | 1589.7379   | 0.0067  | 4     | 321         | 333      | SFTMKSHCQAHQK           |           |       | Carbamidomethyl (C)[8]                      |      | Mascot      |
|            | 1589.7312                                                                                           | 1589.7379   | 0.0067  | 4     | 321         | 333      | SFTMKSHCQAHQK           |           |       | Carbamidomethyl (C)[8]                      |      | Mascot      |
|            | 1596.8315                                                                                           | 1596.7131   | -0.1184 | -74   | 218         | 230      | KHQMIHTGEKPYK           |           |       |                                             |      | Mascot      |
|            | 1837.9014                                                                                           | 1837.891    | -0.0104 | -6    | 129         | 143      | QSYLHQHMLIHTGEK         |           |       | Oxidation (M)[8]                            |      | Mascot      |
|            | 2123.0161                                                                                           | 2122.906    | -0.1101 | -52   | 107         | 125      | IHERIHTGGSFLTCTYCG<br>K |           |       |                                             |      | Mascot      |
|            | 2123.0161                                                                                           | 2122.906    | -0.1101 | -52   | 107         | 125      | IHERIHTGGSFLTCTYCG<br>K |           |       |                                             |      | Mascot      |
|            | 2224.958                                                                                            | 2225.0317   | 0.0737  | 33    | 275         | 292      | HMMIHTGERPHRCQCG<br>K   |           |       | Carbamidomethyl (C)[13], Oxidation (M)[2,3] |      | Mascot      |
| 41         | RecName: Full=Contactin-1a; AltName: Full=F3/F11/contactin; AltName: Full=Neural cell recognition m |             |         |       | gi 55976512 | 114263.1 | 6.25                    | 13        | 32    | 0                                           |      |             |

#### Peptide Information

|  | Calc. Mass | Obsrv. Mass | ± da    | ± ppm | Start Seq. | End Sequence Seq.            | Ion Score | C. I. % | Modification           | Rank | Result Type |
|--|------------|-------------|---------|-------|------------|------------------------------|-----------|---------|------------------------|------|-------------|
|  | 957.5152   | 957.3986    | -0.1166 | -122  | 2          | 9 IPEAFQPR                   |           |         |                        |      | Mascot      |
|  | 1045.5173  | 1045.5181   | 0.0008  | 1     | 562        | 569 DAQHYQRK                 |           |         |                        |      | Mascot      |
|  | 1062.5513  | 1062.6423   | 0.091   | 86    | 442        | 449 VVFECRPR                 |           |         | Carbamidomethyl (C)[5] |      | Mascot      |
|  | 1118.4572  | 1118.4618   | 0.0046  | 4     | 492        | 500 YTCFAENDR                |           |         |                        |      | Mascot      |
|  | 1308.575   | 1308.6052   | 0.0302  | 23    | 898        | 910 ACNGAGYGPASQR            |           |         | Carbamidomethyl (C)[2] |      | Mascot      |
|  | 1365.6857  | 1365.5846   | -0.1011 | -74   | 503        | 516 ANSTGSL SITDATK          |           |         |                        |      | Mascot      |
|  | 1434.7231  | 1434.707    | -0.0161 | -11   | 1          | 12 MIPEAFQPRAMK              |           |         | Oxidation (M)[1]       |      | Mascot      |
|  | 1434.7231  | 1434.707    | -0.0161 | -11   | 1          | 12 MIPEAFQPRAMK              |           |         | Oxidation (M)[1]       |      | Mascot      |
|  | 1691.6965  | 1691.7314   | 0.0349  | 21    | 487        | 500 SDEGKYTCFAENDR           |           |         | Carbamidomethyl (C)[8] |      | Mascot      |
|  | 1691.6965  | 1691.7314   | 0.0349  | 21    | 487        | 500 SDEGKYTCFAENDR           |           |         | Carbamidomethyl (C)[8] |      | Mascot      |
|  | 1707.7683  | 1707.6991   | -0.0692 | -41   | 138        | 151 VQFGYLD MFSTDER          |           |         |                        |      | Mascot      |
|  | 2224.9749  | 2225.0317   | 0.0568  | 26    | 388        | 406 FSRLGFEDSGMYQCVAE NR     |           |         | Oxidation (M)[11]      |      | Mascot      |
|  | 2283.092   | 2283.0889   | -0.0031 | -1    | 594        | 614 YSCTAQT PVDNTTASAE L VVR |           |         | Carbamidomethyl (C)[3] |      | Mascot      |
|  | 2284.2131  | 2284.0823   | -0.1308 | -57   | 442        | 460 VVFECRPR AAPRPNITW SK    |           |         | Carbamidomethyl (C)[5] |      | Mascot      |
|  | 2299.1426  | 2299.0923   | -0.0503 | -22   | 986        | 1007 GEYLVEVRAHSEGGDGA VAQVR |           |         |                        |      | Mascot      |

42 lft81 protein [Danio rerio] gi|145337899 29908.3 5.76 8 32 0

#### Peptide Information

|  | Calc. Mass | Obsrv. Mass | ± da    | ± ppm | Start Seq. | End Sequence Seq.          | Ion Score | C. I. % | Modification           | Rank | Result Type |
|--|------------|-------------|---------|-------|------------|----------------------------|-----------|---------|------------------------|------|-------------|
|  | 870.5519   | 870.5024    | -0.0495 | -57   | 200        | 206 VLRQQVK                |           |         |                        |      | Mascot      |
|  | 1045.5636  | 1045.5181   | -0.0455 | -44   | 14         | 21 TEEILRER                |           |         |                        |      | Mascot      |
|  | 1184.5173  | 1184.5308   | 0.0135  | 11    | 65         | 74 TLDDMSEMVK              |           |         | Oxidation (M)[5]       |      | Mascot      |
|  | 1365.693   | 1365.5846   | -0.1084 | -79   | 51         | 62 VSAIKSELDEMK            |           |         | Oxidation (M)[11]      |      | Mascot      |
|  | 1397.6399  | 1397.6699   | 0.03    | 21    | 63         | 74 GRTLDDMSEMVK            |           |         | Oxidation (M)[7]       |      | Mascot      |
|  | 1448.6976  | 1448.8604   | 0.1628  | 112   | 135        | 146 TLREETAQEESR           |           |         |                        |      | Mascot      |
|  | 2225.0879  | 2225.0317   | -0.0562 | -25   | 147        | 163 YHHINCEREIIESQIQR      |           |         | Carbamidomethyl (C)[6] |      | Mascot      |
|  | 2283.1914  | 2283.0889   | -0.1025 | -45   | 234        | 254 QCYLKAQSQAPIGHVIQD VGK |           |         |                        |      | Mascot      |

43 PREDICTED: alpha-1,6-mannosyl-glycoprotein 2-beta-N-acetylglucosaminyltransferase-like [Danio rerio] gi|326677383 47738.9 6.78 8 32 0

#### Peptide Information

|  | Calc. Mass | Obsrv. Mass | ± da | ± ppm | Start Seq. | End Sequence Seq. | Ion Score | C. I. % | Modification | Rank | Result Type |
|--|------------|-------------|------|-------|------------|-------------------|-----------|---------|--------------|------|-------------|
|--|------------|-------------|------|-------|------------|-------------------|-----------|---------|--------------|------|-------------|

|    |                                                               |           |         |     |              |         |                          |   |    |                                          |  |  |        |
|----|---------------------------------------------------------------|-----------|---------|-----|--------------|---------|--------------------------|---|----|------------------------------------------|--|--|--------|
|    | 850.4451                                                      | 850.5063  | 0.0612  | 72  | 241          | 247     | SMSELRK                  |   |    |                                          |  |  | Mascot |
|    | 1109.5474                                                     | 1109.4427 | -0.1047 | -94 | 274          | 283     | TETSGWLSTK               |   |    |                                          |  |  | Mascot |
|    | 1118.551                                                      | 1118.4618 | -0.0892 | -80 | 42           | 51      | ESTHTAVMVK               |   |    | Oxidation (M)[8]                         |  |  | Mascot |
|    | 1307.6525                                                     | 1307.6224 | -0.0301 | -23 | 339          | 350     | VIHTGDCGLHQQ             |   |    |                                          |  |  | Mascot |
|    | 1323.5668                                                     | 1323.6151 | 0.0483  | 36  | 351          | 361     | TDCRPEMAQEK              |   |    | Oxidation (M)[7]                         |  |  | Mascot |
|    | 1323.5668                                                     | 1323.6151 | 0.0483  | 36  | 351          | 361     | TDCRPEMAQEK              |   |    | Oxidation (M)[7]                         |  |  | Mascot |
|    | 1837.9133                                                     | 1837.891  | -0.0223 | -12 | 191          | 204     | EASITQTKHHWWWK           |   |    |                                          |  |  | Mascot |
|    | 1993.9318                                                     | 1993.8905 | -0.0413 | -21 | 351          | 367     | TDCRPEMAQEKVDSALK        |   |    | Carbamidomethyl (C)[3], Oxidation (M)[7] |  |  | Mascot |
|    | 2282.9751                                                     | 2283.0889 | 0.1138  | 50  | 32           | 51      | DDSNMEETDKESTHTAV<br>MVK |   |    | Oxidation (M)[5]                         |  |  | Mascot |
|    | 2298.97                                                       | 2299.0923 | 0.1223  | 53  | 32           | 51      | DDSNMEETDKESTHTAV<br>MVK |   |    | Oxidation (M)[5,18]                      |  |  | Mascot |
| 44 | PREDICTED: hypothetical protein LOC100538026<br>[Danio rerio] |           |         |     | gi 326673594 | 14275.3 | 8.81                     | 5 | 32 | 0                                        |  |  |        |

#### Peptide Information

| Calc. Mass | Obsrv. Mass | ± da    | ± ppm | Start Seq. | End Seq. | Sequence                | Ion Score | C. I. | % Modification         | Rank | Result Type |
|------------|-------------|---------|-------|------------|----------|-------------------------|-----------|-------|------------------------|------|-------------|
| 1051.5275  | 1051.6663   | 0.1388  | 132   | 63         | 72       | TLCQAGMALK              |           |       | Oxidation (M)[7]       |      | Mascot      |
| 1051.5275  | 1051.6663   | 0.1388  | 132   | 63         | 72       | TLCQAGMALK              |           |       | Oxidation (M)[7]       |      | Mascot      |
| 1179.6224  | 1179.5477   | -0.0747 | -63   | 62         | 72       | KTLCQAGMALK             |           |       | Oxidation (M)[8]       |      | Mascot      |
| 1179.6224  | 1179.5477   | -0.0747 | -63   | 62         | 72       | KTLCQAGMALK             | 7         | 0     | Oxidation (M)[8]       |      | Mascot      |
| 1277.6704  | 1277.6559   | -0.0145 | -11   | 63         | 74       | TLCQAGMALKGK            |           |       | Carbamidomethyl (C)[3] |      | Mascot      |
| 2299.269   | 2299.0923   | -0.1767 | -77   | 21         | 40       | TDEILLMEIIQSVNRILNGK    |           |       |                        |      | Mascot      |
| 2300.0903  | 2300.0823   | -0.008  | -3    | 44         | 62       | MDLDQFIPDIYETGHYSK<br>K |           |       |                        |      | Mascot      |

45 Josephin-1 [Danio rerio] gi|115497592 26182.5 9.34 6 32 0

#### Peptide Information

| Calc. Mass | Obsrv. Mass | ± da    | ± ppm | Start Seq. | End Seq. | Sequence                          | Ion Score | C. I. | % Modification         | Rank | Result Type |
|------------|-------------|---------|-------|------------|----------|-----------------------------------|-----------|-------|------------------------|------|-------------|
| 1051.5908  | 1051.6663   | 0.0755  | 72    | 170        | 177      | RQHWIGVR                          |           |       |                        |      | Mascot      |
| 1051.5908  | 1051.6663   | 0.0755  | 72    | 170        | 177      | RQHWIGVR                          |           |       |                        |      | Mascot      |
| 1179.6732  | 1179.5477   | -0.1255 | -106  | 96         | 106      | LSPSTLVTPHK                       |           |       |                        |      | Mascot      |
| 1179.6732  | 1179.5477   | -0.1255 | -106  | 96         | 106      | LSPSTLVTPHK                       |           |       |                        |      | Mascot      |
| 1307.7682  | 1307.6224   | -0.1458 | -111  | 96         | 107      | LSPSTLVTPHKK                      |           |       |                        |      | Mascot      |
| 1357.6635  | 1357.6583   | -0.0052 | -4    | 178        | 189      | EVAGVYYNLDISK                     |           |       |                        |      | Mascot      |
| 2233.0818  | 2232.9912   | -0.0906 | -41   | 67         | 86       | ELCALHALNNVFQDGAA<br>FSR          |           |       | Carbamidomethyl (C)[3] |      | Mascot      |
| 3312.5928  | 3312.1731   | -0.4197 | -127  | 108        | 136      | NMLGNGNYDVNVIMAAL<br>QTRGFEAVWWDK |           |       |                        |      | Mascot      |

46 Zgc:161981 [Danio rerio] gi|134026282 48921.5 6.76 8 31 0

Peptide Information

| Calc. Mass | Obsrv. Mass | ± da    | ± ppm | Start Seq. | End Seq. | Sequence                | Ion Score | C. I. | % Modification         | Rank | Result | Type |
|------------|-------------|---------|-------|------------|----------|-------------------------|-----------|-------|------------------------|------|--------|------|
| 1062.5037  | 1062.6423   | 0.1386  | 130   | 15         | 23       | AAQHPMTYK               |           |       | Oxidation (M)[6]       |      | Mascot |      |
| 1165.6034  | 1165.5326   | -0.0708 | -61   | 1          | 10       | MSLVDFLQGR              |           |       |                        |      | Mascot |      |
| 1165.6034  | 1165.6959   | 0.0925  | 79    | 1          | 10       | MSLVDFLQGR              |           |       |                        |      | Mascot |      |
| 1165.6034  | 1165.6959   | 0.0925  | 79    | 1          | 10       | MSLVDFLQGR              |           |       |                        |      | Mascot |      |
| 1193.6313  | 1193.5642   | -0.0671 | -56   | 219        | 227      | WLDNYQVKV               |           |       |                        |      | Mascot |      |
| 1320.6001  | 1320.526    | -0.0741 | -56   | 61         | 70       | QCLQDIDSWR              |           |       | Carbamidomethyl (C)[2] |      | Mascot |      |
| 1365.6289  | 1365.5846   | -0.0443 | -32   | 115        | 126      | AFSESICHCLQK            |           |       |                        |      | Mascot |      |
| 1493.7239  | 1493.6685   | -0.0554 | -37   | 114        | 126      | KAFSESICHCLQK           |           |       |                        |      | Mascot |      |
| 1493.7239  | 1493.6685   | -0.0554 | -37   | 114        | 126      | KAFSESICHCLQK           |           |       |                        |      | Mascot |      |
| 1638.8519  | 1638.7908   | -0.0611 | -37   | 1          | 14       | MSLVDFLQGRSELK          |           |       | Oxidation (M)[1]       |      | Mascot |      |
| 2283.9646  | 2284.0823   | 0.1177  | 52    | 95         | 113      | EMWTDPDSCSTQSLHDL<br>FR |           |       | Oxidation (M)[2]       |      | Mascot |      |

47 Ddx52 protein [Danio rerio] gi|45768538 56399.3 9.89 9 31 0

Peptide Information

| Calc. Mass | Obsrv. Mass | ± da    | ± ppm | Start Seq. | End Seq. | Sequence                   | Ion Score | C. I. | % Modification          | Rank | Result | Type |
|------------|-------------|---------|-------|------------|----------|----------------------------|-----------|-------|-------------------------|------|--------|------|
| 864.4573   | 864.4808    | 0.0235  | 27    | 154        | 161      | LSEGVGFR                   |           |       |                         |      | Mascot |      |
| 870.5407   | 870.5024    | -0.0383 | -44   | 134        | 141      | ALIISPTR                   |           |       |                         |      | Mascot |      |
| 1302.6835  | 1302.6605   | -0.023  | -18   | 100        | 112      | REILACAPTGSQK              |           |       |                         |      | Mascot |      |
| 1340.7355  | 1340.6235   | -0.112  | -84   | 162        | 173      | VHMINKGVEAVK               |           |       | Oxidation (M)[3]        |      | Mascot |      |
| 1397.6592  | 1397.6699   | 0.0107  | 8     | 431        | 443      | AGCPVPDYMIGFK              |           |       |                         |      | Mascot |      |
| 2123.1616  | 2122.906    | -0.2556 | -120  | 113        | 130      | TMAFCLPLLAHLRQPLNK         |           |       | Carbamidomethyl (C)[5]  |      | Mascot |      |
| 2123.1616  | 2122.906    | -0.2556 | -120  | 113        | 130      | TMAFCLPLLAHLRQPLNK         |           |       | Carbamidomethyl (C)[5]  |      | Mascot |      |
| 2283.3223  | 2283.0889   | -0.2334 | -102  | 302        | 321      | NLIKQGFLPPVLVVFQSID<br>R   |           |       |                         |      | Mascot |      |
| 2384.188   | 2383.8601   | -0.3279 | -138  | 324        | 343      | ELYHELVEGINVDVIHA<br>DR    |           |       |                         |      | Mascot |      |
| 2501.2461  | 2501.1555   | -0.0906 | -36   | 79         | 100      | AAGFQTPTPIQMCAVPL<br>MMHKR |           |       | Oxidation (M)[12,18,19] |      | Mascot |      |

48 novel protein similar to vertebrate glycosyltransferase 25 domain containing 1 (GLT25D1) [Danio rerio] gi|157885917 69346.2 6.44 9 31 0 11 0

Peptide Information

| Calc. Mass | Obsrv. Mass | ± da | ± ppm | Start Seq. | End Seq. | Sequence | Ion Score | C. I. | % Modification | Rank | Result | Type |
|------------|-------------|------|-------|------------|----------|----------|-----------|-------|----------------|------|--------|------|
|------------|-------------|------|-------|------------|----------|----------|-----------|-------|----------------|------|--------|------|

|    |                                        |           |         |      |              |     |                                  |      |    |    |   |  |                        |  |  |  |        |
|----|----------------------------------------|-----------|---------|------|--------------|-----|----------------------------------|------|----|----|---|--|------------------------|--|--|--|--------|
|    | 1062.55                                | 1062.6423 | 0.0923  | 87   | 437          | 445 | LNTIMEDVK                        |      |    |    |   |  |                        |  |  |  | Mascot |
|    | 1118.5874                              | 1118.4618 | -0.1256 | -112 | 176          | 185 | TLVAPMLDSR                       |      |    |    |   |  | Oxidation (M)[6]       |  |  |  | Mascot |
|    | 1193.6161                              | 1193.5642 | -0.0519 | -43  | 387          | 396 | DPYSDRVLTk                       |      |    |    |   |  |                        |  |  |  | Mascot |
|    | 1234.646                               | 1234.6252 | -0.0208 | -17  | 437          | 446 | LNTIMEDVKR                       |      |    |    |   |  | Oxidation (M)[5]       |  |  |  | Mascot |
|    | 1365.6857                              | 1365.5846 | -0.1011 | -74  | 582          | 595 | GGKTTTSVSESPK                    |      |    |    |   |  |                        |  |  |  | Mascot |
|    | 1397.7688                              | 1397.6699 | -0.0989 | -71  | 204          | 214 | TPHYVPIRTWK                      |      |    |    |   |  |                        |  |  |  | Mascot |
|    | 1851.921                               | 1851.8479 | -0.0731 | -39  | 397          | 411 | GEIGCFLSHYNIWKK                  |      |    |    |   |  | Carbamidomethyl (C)[5] |  |  |  | Mascot |
|    | 2123.0986                              | 2122.906  | -0.1926 | -91  | 368          | 386 | AMNSTQLRTLGIEMLPGF<br>K          | 11   |    | 0  |   |  | Oxidation (M)[2]       |  |  |  | Mascot |
|    | 2123.0986                              | 2122.906  | -0.1926 | -91  | 368          | 386 | AMNSTQLRTLGIEMLPGF<br>K          |      |    |    |   |  | Oxidation (M)[2]       |  |  |  | Mascot |
|    | 3311.7166                              | 3312.1731 | 0.4565  | 138  | 311          | 338 | METSQYLHIVSKPKDTMA<br>FNQVYLINLK |      |    |    |   |  |                        |  |  |  | Mascot |
| 49 | PREDICTED: EMILIN-2-like [Danio rerio] |           |         |      | gi 326664942 |     | 119160.6                         | 5.89 | 13 | 31 | 0 |  |                        |  |  |  |        |

#### Peptide Information

| Calc. Mass | Obsrv. Mass | ± da    | ± ppm | Start Seq. | End Seq. | Sequence                | Ion Score | C. I. | % Modification                              | Rank | Result Type |
|------------|-------------|---------|-------|------------|----------|-------------------------|-----------|-------|---------------------------------------------|------|-------------|
| 1062.583   | 1062.6423   | 0.0593  | 56    | 503        | 511      | FLIQGLEDK               |           |       |                                             |      | Mascot      |
| 1065.4807  | 1065.4639   | -0.0168 | -16   | 866        | 874      | RDQSSSEDTK              |           |       |                                             |      | Mascot      |
| 1118.6165  | 1118.4618   | -0.1547 | -138  | 1046       | 1056     | TAGKLAVSESR             |           |       |                                             |      | Mascot      |
| 1165.5823  | 1165.5326   | -0.0497 | -43   | 21         | 29       | NWCAFIVQK               |           |       | Carbamidomethyl (C)[3]                      |      | Mascot      |
| 1165.5823  | 1165.6959   | 0.1136  | 97    | 21         | 29       | NWCAFIVQK               |           |       | Carbamidomethyl (C)[3]                      |      | Mascot      |
| 1165.5823  | 1165.6959   | 0.1136  | 97    | 21         | 29       | NWCAFIVQK               |           |       | Carbamidomethyl (C)[3]                      |      | Mascot      |
| 1179.6117  | 1179.5477   | -0.064  | -54   | 130        | 138      | ETVQYDLRR               |           |       |                                             |      | Mascot      |
| 1179.6117  | 1179.5477   | -0.064  | -54   | 129        | 137      | RETVQYDLR               |           |       |                                             |      | Mascot      |
| 1235.6412  | 1235.4767   | -0.1645 | -133  | 1038       | 1049     | GDTMALVRTAGK            |           |       | Oxidation (M)[4]                            |      | Mascot      |
| 1589.7765  | 1589.7379   | -0.0386 | -24   | 673        | 688      | VNTTGVAEGVSAVDDR        |           |       |                                             |      | Mascot      |
| 1589.7765  | 1589.7379   | -0.0386 | -24   | 673        | 688      | VNTTGVAEGVSAVDDR        |           |       |                                             |      | Mascot      |
| 1837.8677  | 1837.891    | 0.0233  | 13    | 433        | 447      | NAETYCFYVEEKLTK         |           |       |                                             |      | Mascot      |
| 1993.9106  | 1993.8905   | -0.0201 | -10   | 574        | 590      | MSPEKQFINAHMQDTGK       |           |       | Oxidation (M)[1,12]                         |      | Mascot      |
| 2232.9583  | 2232.9912   | 0.0329  | 15    | 50         | 66       | CPEHQPDCEPQMIYRTR       |           |       | Carbamidomethyl (C)[1,8], Oxidation (M)[12] |      | Mascot      |
| 2283.0056  | 2283.0889   | 0.0833  | 36    | 427        | 444      | MNVTERNAETYCFYVEE<br>K  |           |       | Carbamidomethyl (C)[12]                     |      | Mascot      |
| 2299.0005  | 2299.0923   | 0.0918  | 40    | 427        | 444      | MNVTERNAETYCFYVEE<br>K  |           |       | Carbamidomethyl (C)[12], Oxidation (M)[1]   |      | Mascot      |
| 2384.0215  | 2383.8601   | -0.1614 | -68   | 77         | 95       | TVTELEWRCCPGYQGPD<br>CR |           |       | Carbamidomethyl (C)[9,10,18]                |      | Mascot      |

50 PREDICTED: ankyrin repeat domain-containing protein 46-like [Danio rerio] gi|292625777 25074.7 5.92 1 25 20.863

#### Peptide Information

| Calc. Mass | Obsrv. Mass | ± da | ± ppm | Start | End | Sequence | Ion | C. I. | % Modification | Rank | Result Type |
|------------|-------------|------|-------|-------|-----|----------|-----|-------|----------------|------|-------------|
|------------|-------------|------|-------|-------|-----|----------|-----|-------|----------------|------|-------------|

| Seq.      |          |         |    | Seq. |    |              |  | Score |        |  |          |
|-----------|----------|---------|----|------|----|--------------|--|-------|--------|--|----------|
| 1434.7158 | 1434.707 | -0.0088 | -6 | 30   | 41 | RLLESGFDPNMR |  | 25    | 18.301 |  | 1 Mascot |

|                |           |                        |                |                |                    |
|----------------|-----------|------------------------|----------------|----------------|--------------------|
| Gel Idx/Pos    | 262/K14   | Instr./Gel Origin      | BA2060/110707A | Process Status | Analysis Succeeded |
| Plate [#] Name | [1] 31496 | Instrument Sample Name |                | Spectra        | 11                 |

| Rank | Protein Name                            | Accession No. | Protein MW | Protein PI | Pep. Count | Protein Score | Protein Score C. I. % | Total Ion Score | Total Ion C. I. % |
|------|-----------------------------------------|---------------|------------|------------|------------|---------------|-----------------------|-----------------|-------------------|
| 1    | glutathione peroxidase 4B [Danio rerio] | gi 194462986  | 19207.5    | 6.73       | 10         | 305           | 100                   | 231             | 100               |

| Peptide Information |             |         |       |            |          |                     |           |         |                        |      |             |
|---------------------|-------------|---------|-------|------------|----------|---------------------|-----------|---------|------------------------|------|-------------|
| Calc. Mass          | Obsrv. Mass | ± da    | ± ppm | Start Seq. | End Seq. | Sequence            | Ion Score | C. I. % | Modification           | Rank | Result Type |
| 1194.5209           | 1194.5731   | 0.0522  | 44    | 2          | 12       | CAQASDWQSAK         |           |         |                        |      | Mascot      |
| 1280.6456           | 1280.5992   | -0.0464 | -36   | 70         | 80       | ILGFPCNQFGK         |           |         | Carbamidomethyl (C)[6] |      | Mascot      |
| 1280.6456           | 1280.5992   | -0.0464 | -36   | 70         | 80       | ILGFPCNQFGK         | 34        | 88.826  | Carbamidomethyl (C)[6] |      | Mascot      |
| 1290.6001           | 1290.559    | -0.0411 | -32   | 95         | 105      | GYNAEFDLFSK         | 72        | 99.998  |                        |      | Mascot      |
| 1290.6001           | 1290.559    | -0.0411 | -32   | 95         | 105      | GYNAEFDLFSK         |           |         |                        |      | Mascot      |
| 1324.6929           | 1324.6415   | -0.0514 | -39   | 34         | 45       | GYVCIITNVASK        |           |         | Carbamidomethyl (C)[4] |      | Mascot      |
| 1352.6039           | 1352.5568   | -0.0471 | -35   | 153        | 164      | YGPMDDPVVVEK        |           |         | Oxidation (M)[4]       |      | Mascot      |
| 1435.7328           | 1435.6986   | -0.0342 | -24   | 106        | 118      | IDVNGDAAHPLWK       |           |         |                        |      | Mascot      |
| 1562.7697           | 1562.7205   | -0.0492 | -31   | 81         | 94       | QEPGSEAEIKEFAK      |           |         |                        |      | Mascot      |
| 1805.8625           | 1805.8018   | -0.0607 | -34   | 153        | 168      | YGPMDDPVVVEKDLPK    |           |         | Oxidation (M)[4]       |      | Mascot      |
| 2037.011            | 2036.9403   | -0.0707 | -35   | 49         | 66       | TPVNYTQLAAMHVTYAE K |           |         |                        |      | Mascot      |
| 2053.0059           | 2052.9312   | -0.0747 | -36   | 49         | 66       | TPVNYTQLAAMHVTYAE K |           |         | Oxidation (M)[11]      |      | Mascot      |
| 2115.0127           | 2114.9412   | -0.0715 | -34   | 13         | 31       | SIYEFSaididgndvsLEK | 125       | 100     |                        |      | Mascot      |
| 2115.0127           | 2114.9412   | -0.0715 | -34   | 13         | 31       | SIYEFSaididgndvsLEK |           |         |                        |      | Mascot      |

|   |                                                                   |             |         |      |   |     |     |     |     |
|---|-------------------------------------------------------------------|-------------|---------|------|---|-----|-----|-----|-----|
| 2 | phospholipid hydroperoxide glutathione peroxidase B [Danio rerio] | gi 29648610 | 19103.4 | 6.92 | 9 | 297 | 100 | 231 | 100 |
|---|-------------------------------------------------------------------|-------------|---------|------|---|-----|-----|-----|-----|

| Peptide Information |             |         |       |            |          |             |           |         |                        |      |             |
|---------------------|-------------|---------|-------|------------|----------|-------------|-----------|---------|------------------------|------|-------------|
| Calc. Mass          | Obsrv. Mass | ± da    | ± ppm | Start Seq. | End Seq. | Sequence    | Ion Score | C. I. % | Modification           | Rank | Result Type |
| 1280.6456           | 1280.5992   | -0.0464 | -36   | 69         | 79       | ILGFPCNQFGK |           |         | Carbamidomethyl (C)[6] |      | Mascot      |
| 1280.6456           | 1280.5992   | -0.0464 | -36   | 69         | 79       | ILGFPCNQFGK | 34        | 88.826  | Carbamidomethyl (C)[6] |      | Mascot      |
| 1290.6001           | 1290.559    | -0.0411 | -32   | 94         | 104      | GYNAEFDLFSK | 72        | 99.998  |                        |      | Mascot      |
| 1290.6001           | 1290.559    | -0.0411 | -32   | 94         | 104      | GYNAEFDLFSK |           |         |                        |      | Mascot      |

|   |                                         |           |         |     |              |     |                        |      |     |     |                        |        |     |
|---|-----------------------------------------|-----------|---------|-----|--------------|-----|------------------------|------|-----|-----|------------------------|--------|-----|
|   | 1324.6929                               | 1324.6415 | -0.0514 | -39 | 33           | 44  | GYVCIITNVASK           |      |     |     | Carbamidomethyl (C)[4] | Mascot |     |
|   | 1352.6039                               | 1352.5568 | -0.0471 | -35 | 152          | 163 | YGPMDDPSPVEK           |      |     |     | Oxidation (M)[4]       | Mascot |     |
|   | 1435.7328                               | 1435.6986 | -0.0342 | -24 | 105          | 117 | IDVNGDAAHPLWK          |      |     |     |                        | Mascot |     |
|   | 1562.7697                               | 1562.7205 | -0.0492 | -31 | 80           | 93  | QEPGSEAEIKEFAK         |      |     |     |                        | Mascot |     |
|   | 1805.8625                               | 1805.8018 | -0.0607 | -34 | 152          | 167 | YGPMDDPSPVEKDLPK       |      |     |     | Oxidation (M)[4]       | Mascot |     |
|   | 2037.011                                | 2036.9403 | -0.0707 | -35 | 48           | 65  | TPVNYTQLAAMHVTYAE<br>K |      |     |     |                        | Mascot |     |
|   | 2053.0059                               | 2052.9312 | -0.0747 | -36 | 48           | 65  | TPVNYTQLAAMHVTYAE<br>K |      |     |     | Oxidation (M)[11]      | Mascot |     |
|   | 2115.0127                               | 2114.9412 | -0.0715 | -34 | 12           | 30  | SIYEFSIDIDGNDVSLEK     | 125  | 100 |     |                        | Mascot |     |
|   | 2115.0127                               | 2114.9412 | -0.0715 | -34 | 12           | 30  | SIYEFSIDIDGNDVSLEK     |      |     |     |                        | Mascot |     |
| 3 | glutathione peroxidase 4b [Danio rerio] |           |         |     | gi 169646767 |     | 21523.7                | 8.65 | 9   | 292 | 100                    | 231    | 100 |

#### Peptide Information

| Calc. Mass | Obsrv. Mass | ± da    | ± ppm | Start Seq. | End Seq. | Sequence               | Ion Score | C. I.  | % | Modification           | Rank | Result Type |
|------------|-------------|---------|-------|------------|----------|------------------------|-----------|--------|---|------------------------|------|-------------|
| 1280.6456  | 1280.5992   | -0.0464 | -36   | 91         | 101      | ILGFPCNQFGK            |           |        |   | Carbamidomethyl (C)[6] |      | Mascot      |
| 1280.6456  | 1280.5992   | -0.0464 | -36   | 91         | 101      | ILGFPCNQFGK            | 34        | 88.826 |   | Carbamidomethyl (C)[6] |      | Mascot      |
| 1290.6001  | 1290.559    | -0.0411 | -32   | 116        | 126      | GYNAEFDLFSK            | 72        | 99.998 |   |                        |      | Mascot      |
| 1290.6001  | 1290.559    | -0.0411 | -32   | 116        | 126      | GYNAEFDLFSK            |           |        |   |                        |      | Mascot      |
| 1324.6929  | 1324.6415   | -0.0514 | -39   | 55         | 66       | GYVCIITNVASK           |           |        |   | Carbamidomethyl (C)[4] |      | Mascot      |
| 1352.6039  | 1352.5568   | -0.0471 | -35   | 174        | 185      | YGPMDDPDVVEK           |           |        |   | Oxidation (M)[4]       |      | Mascot      |
| 1435.7328  | 1435.6986   | -0.0342 | -24   | 127        | 139      | IDVNGDAAHPLWK          |           |        |   |                        |      | Mascot      |
| 1562.7697  | 1562.7205   | -0.0492 | -31   | 102        | 115      | QEPGSEAEIKEFAK         |           |        |   |                        |      | Mascot      |
| 1805.8625  | 1805.8018   | -0.0607 | -34   | 174        | 189      | YGPMDDPDVVEKDLPK       |           |        |   | Oxidation (M)[4]       |      | Mascot      |
| 2037.011   | 2036.9403   | -0.0707 | -35   | 70         | 87       | TPVNYTQLAAMHVTYAE<br>K |           |        |   |                        |      | Mascot      |
| 2053.0059  | 2052.9312   | -0.0747 | -36   | 70         | 87       | TPVNYTQLAAMHVTYAE<br>K |           |        |   | Oxidation (M)[11]      |      | Mascot      |
| 2115.0127  | 2114.9412   | -0.0715 | -34   | 34         | 52       | SIYEFSIDIDGNDVSLEK     | 125       | 100    |   |                        |      | Mascot      |
| 2115.0127  | 2114.9412   | -0.0715 | -34   | 34         | 52       | SIYEFSIDIDGNDVSLEK     |           |        |   |                        |      | Mascot      |

|   |                             |  |  |  |  |  |             |         |      |   |     |     |     |     |
|---|-----------------------------|--|--|--|--|--|-------------|---------|------|---|-----|-----|-----|-----|
| 4 | Pfdn2 protein [Danio rerio] |  |  |  |  |  | gi 49522656 | 16921.6 | 6.89 | 8 | 251 | 100 | 200 | 100 |
|---|-----------------------------|--|--|--|--|--|-------------|---------|------|---|-----|-----|-----|-----|

#### Peptide Information

| Calc. Mass | Obsrv. Mass | ± da    | ± ppm | Start Seq. | End Seq. | Sequence  | Ion Score | C. I. | % | Modification | Rank | Result Type |
|------------|-------------|---------|-------|------------|----------|-----------|-----------|-------|---|--------------|------|-------------|
| 810.3992   | 810.3729    | -0.0263 | -32   | 112        | 117      | ELTEYR    |           |       |   |              |      | Mascot      |
| 850.4529   | 850.5093    | 0.0564  | 66    | 118        | 123      | ERYNIR    |           |       |   |              |      | Mascot      |
| 941.5778   | 941.5463    | -0.0315 | -33   | 71         | 79       | LVGGVLVER | 76        | 100   |   |              |      | Mascot      |
| 941.5778   | 941.5463    | -0.0315 | -33   | 71         | 79       | LVGGVLVER |           |       |   |              |      | Mascot      |

|  |           |           |         |     |     |     |                     |  |     |     |  |                  |  |  |  |  |        |
|--|-----------|-----------|---------|-----|-----|-----|---------------------|--|-----|-----|--|------------------|--|--|--|--|--------|
|  | 1003.5167 | 1003.5211 | 0.0044  | 4   | 131 | 140 | QGKADASQAK          |  |     |     |  |                  |  |  |  |  | Mascot |
|  | 1023.4701 | 1023.4826 | 0.0125  | 12  | 1   | 11  | AANSSNSTSGK         |  |     |     |  |                  |  |  |  |  | Mascot |
|  | 1648.8289 | 1648.7708 | -0.0581 | -35 | 16  | 30  | QSTPSAEQVVATFQR     |  | 124 | 100 |  |                  |  |  |  |  | Mascot |
|  | 1648.8289 | 1648.7708 | -0.0581 | -35 | 16  | 30  | QSTPSAEQVVATFQR     |  |     |     |  |                  |  |  |  |  | Mascot |
|  | 1711.9225 | 1711.8611 | -0.0614 | -36 | 83  | 97  | EVLPALENNKEQISK     |  |     |     |  |                  |  |  |  |  | Mascot |
|  | 2189.0793 | 2188.9924 | -0.0869 | -40 | 42  | 60  | AAEFEMEINEHSLVIDTLK |  |     |     |  |                  |  |  |  |  | Mascot |
|  | 2205.0745 | 2205.0007 | -0.0738 | -33 | 42  | 60  | AAEFEMEINEHSLVIDTLK |  |     |     |  | Oxidation (M)[6] |  |  |  |  | Mascot |

5

prefoldin subunit 2 [Danio rerio]

gi|113674508

17052.6

6.63

8

249

100

200

100

Peptide Information

| Calc. Mass | Obsrv. Mass | ± da    | ± ppm | Start Seq. | End Seq. | Sequence            | Ion Score | C. I. | % | Modification     | Rank | Result Type |
|------------|-------------|---------|-------|------------|----------|---------------------|-----------|-------|---|------------------|------|-------------|
| 810.3992   | 810.3729    | -0.0263 | -32   | 113        | 118      | ELTEYR              |           |       |   |                  |      | Mascot      |
| 850.4529   | 850.5093    | 0.0564  | 66    | 119        | 124      | ERYNIR              |           |       |   |                  |      | Mascot      |
| 941.5778   | 941.5463    | -0.0315 | -33   | 72         | 80       | LVGGVLVER           | 76        | 100   |   |                  |      | Mascot      |
| 941.5778   | 941.5463    | -0.0315 | -33   | 72         | 80       | LVGGVLVER           |           |       |   |                  |      | Mascot      |
| 1003.5167  | 1003.5211   | 0.0044  | 4     | 132        | 141      | QGKADASQAK          |           |       |   |                  |      | Mascot      |
| 1023.4701  | 1023.4826   | 0.0125  | 12    | 2          | 12       | AANSSNSTSGK         |           |       |   |                  |      | Mascot      |
| 1648.8289  | 1648.7708   | -0.0581 | -35   | 17         | 31       | QSTPSAEQVVATFQR     | 124       | 100   |   |                  |      | Mascot      |
| 1648.8289  | 1648.7708   | -0.0581 | -35   | 17         | 31       | QSTPSAEQVVATFQR     |           |       |   |                  |      | Mascot      |
| 1711.9225  | 1711.8611   | -0.0614 | -36   | 84         | 98       | EVLPALENNKEQISK     |           |       |   |                  |      | Mascot      |
| 2189.0793  | 2188.9924   | -0.0869 | -40   | 43         | 61       | AAEFEMEINEHSLVIDTLK |           |       |   |                  |      | Mascot      |
| 2205.0745  | 2205.0007   | -0.0738 | -33   | 43         | 61       | AAEFEMEINEHSLVIDTLK |           |       |   | Oxidation (M)[6] |      | Mascot      |

6

Glutathione peroxidase 4b [Danio rerio]

gi|63100578

12842.5

7.82

7

156

100

106

100

Peptide Information

| Calc. Mass | Obsrv. Mass | ± da    | ± ppm | Start Seq. | End Seq. | Sequence         | Ion Score | C. I.  | % | Modification           | Rank | Result Type |
|------------|-------------|---------|-------|------------|----------|------------------|-----------|--------|---|------------------------|------|-------------|
| 1280.6456  | 1280.5992   | -0.0464 | -36   | 12         | 22       | ILGFPCNQFGK      |           |        |   | Carbamidomethyl (C)[6] |      | Mascot      |
| 1280.6456  | 1280.5992   | -0.0464 | -36   | 12         | 22       | ILGFPCNQFGK      | 34        | 88.826 |   | Carbamidomethyl (C)[6] |      | Mascot      |
| 1290.6001  | 1290.559    | -0.0411 | -32   | 37         | 47       | GYNAEFDLFSK      | 72        | 99.998 |   |                        |      | Mascot      |
| 1290.6001  | 1290.559    | -0.0411 | -32   | 37         | 47       | GYNAEFDLFSK      |           |        |   |                        |      | Mascot      |
| 1320.6729  | 1320.5408   | -0.1321 | -100  | 1          | 11       | MHVTYAEKGLR      |           |        |   | Oxidation (M)[1]       |      | Mascot      |
| 1352.6039  | 1352.5568   | -0.0471 | -35   | 95         | 106      | YGPMDDPDVVEK     |           |        |   | Oxidation (M)[4]       |      | Mascot      |
| 1435.7328  | 1435.6986   | -0.0342 | -24   | 48         | 60       | IDVNGDAAHPLWK    |           |        |   |                        |      | Mascot      |
| 1562.7697  | 1562.7205   | -0.0492 | -31   | 23         | 36       | QEPGSEAEIKEFAK   |           |        |   |                        |      | Mascot      |
| 1805.8625  | 1805.8018   | -0.0607 | -34   | 95         | 110      | YGPMDDPDVVEKDLPK |           |        |   | Oxidation (M)[4]       |      | Mascot      |



| Peptide Information |             |         |       |            |                                 |           |         |                         |                  |
|---------------------|-------------|---------|-------|------------|---------------------------------|-----------|---------|-------------------------|------------------|
| Calc. Mass          | Obsrv. Mass | ± da    | ± ppm | Start Seq. | End Sequence Seq.               | Ion Score | C. I. % | Modification            | Rank Result Type |
| 807.4359            | 807.3687    | -0.0672 | -83   | 1520       | 1526 QFVQSAK                    |           |         |                         | Mascot           |
| 840.4131            | 840.4957    | 0.0826  | 98    | 1303       | 1310 TISMSSSK                   |           |         |                         | Mascot           |
| 856.408             | 856.4949    | 0.0869  | 101   | 1303       | 1310 TISMSSSK                   |           |         | Oxidation (M)[4]        | Mascot           |
| 860.4836            | 860.4314    | -0.0522 | -61   | 150        | 156 TLLRDDK                     |           |         |                         | Mascot           |
| 1003.5054           | 1003.5211   | 0.0157  | 16    | 2506       | 2513 EKELEEAR                   |           |         |                         | Mascot           |
| 1023.4411           | 1023.4826   | 0.0415  | 41    | 2441       | 2449 ADQDSQTMK                  |           |         |                         | Mascot           |
| 1107.5906           | 1107.501    | -0.0896 | -81   | 2262       | 2270 QQLANYSKR                  |           |         |                         | Mascot           |
| 1109.5442           | 1109.4574   | -0.0868 | -78   | 2206       | 2215 AVADMLRSCK                 |           |         | Oxidation (M)[5]        | Mascot           |
| 1160.635            | 1160.4971   | -0.1379 | -119  | 307        | 316 TYGVSFFLVK                  |           |         |                         | Mascot           |
| 1165.6576           | 1165.5482   | -0.1094 | -94   | 1615       | 1625 SLAVNPKDPPK                |           |         |                         | Mascot           |
| 1179.5422           | 1179.5624   | 0.0202  | 17    | 2441       | 2450 ADQDSQTMKR                 |           |         |                         | Mascot           |
| 1179.5422           | 1179.5624   | 0.0202  | 17    | 2441       | 2450 ADQDSQTMKR                 | 16        | 0       |                         | Mascot           |
| 1189.5232           | 1189.5941   | 0.0709  | 60    | 2002       | 2011 ENAETFADHR                 |           |         |                         | Mascot           |
| 1194.5797           | 1194.5731   | -0.0066 | -6    | 469        | 478 QHITSGQMHR                  |           |         |                         | Mascot           |
| 1234.5811           | 1234.639    | 0.0579  | 47    | 1541       | 1551 ALDGAFNQENR                |           |         |                         | Mascot           |
| 1234.5811           | 1234.639    | 0.0579  | 47    | 1541       | 1551 ALDGAFNQENR                |           |         |                         | Mascot           |
| 1280.5609           | 1280.5992   | 0.0383  | 30    | 285        | 295 NCQNMTEIAK                  |           |         |                         | Mascot           |
| 1280.5609           | 1280.5992   | 0.0383  | 30    | 285        | 295 NCQNMTEIAK                  |           |         |                         | Mascot           |
| 1307.8158           | 1307.6277   | -0.1881 | -144  | 2318       | 2328 LEQLKPRAKPK                |           |         |                         | Mascot           |
| 1320.7271           | 1320.5408   | -0.1863 | -141  | 424        | 434 KSTVLQQQFNK                 |           |         |                         | Mascot           |
| 1352.6735           | 1352.5568   | -0.1167 | -86   | 107        | 118 IVSDMLMTICAR                |           |         |                         | Mascot           |
| 1475.7886           | 1475.7058   | -0.0828 | -56   | 859        | 872 LLADATARMVEAAK              |           |         | Oxidation (M)[9]        | Mascot           |
| 1493.7628           | 1493.6804   | -0.0824 | -55   | 1601       | 1614 AMLESSTGLIQTAR             |           |         | Oxidation (M)[2]        | Mascot           |
| 1562.7921           | 1562.7205   | -0.0716 | -46   | 1538       | 1551 SIKALDGAFNQENR             |           |         |                         | Mascot           |
| 1638.8077           | 1638.8032   | -0.0045 | -3    | 92         | 106 MLDGTVKTMVDDSK              |           |         |                         | Mascot           |
| 2115.075            | 2114.9412   | -0.1338 | -63   | 589        | 609 LLAALMEDEGGNGQQLL<br>GAAK   |           |         | Oxidation (M)[6]        | Mascot           |
| 2115.075            | 2114.9412   | -0.1338 | -63   | 589        | 609 LLAALMEDEGGNGQQLL<br>GAAK   |           |         | Oxidation (M)[6]        | Mascot           |
| 2211.1865           | 2211.0291   | -0.1574 | -71   | 2059       | 2080 LGAASLGSEDPETQVVLI<br>NAVK |           |         |                         | Mascot           |
| 2225.1846           | 2225.0422   | -0.1424 | -64   | 718        | 738 VVVAPTISSPVCQEQLIEA<br>GK   |           |         | Carbamidomethyl (C)[12] | Mascot           |
| 2225.1846           | 2225.0422   | -0.1424 | -64   | 718        | 738 VVVAPTISSPVCQEQLIEA<br>GK   |           |         | Carbamidomethyl (C)[12] | Mascot           |
| 2233.0952           | 2233.0029   | -0.0923 | -41   | 1337       | 1357 AVTDSINQLISMCTQQAP         |           |         |                         | Mascot           |

|   |                                              |           |        |     |             |      |                                  |      |    |    |        |                   |        |
|---|----------------------------------------------|-----------|--------|-----|-------------|------|----------------------------------|------|----|----|--------|-------------------|--------|
|   | 2249.0901                                    | 2248.9861 | -0.104 | -46 | 1337        | 1357 | GQK<br>AVTDSINQLISMCTQQAP<br>GQK |      |    |    |        | Oxidation (M)[12] | Mascot |
| 8 | replication factor C subunit 3 [Danio rerio] |           |        |     | gi 41393079 |      | 40301.9                          | 8.81 | 12 | 56 | 87.458 |                   |        |

Peptide Information

| Calc. Mass | Obsrv. Mass | ± da    | ± ppm | Start Seq. | End Seq. | Sequence               | Ion Score | C. I. | % Modification                             | Rank | Result Type |
|------------|-------------|---------|-------|------------|----------|------------------------|-----------|-------|--------------------------------------------|------|-------------|
| 810.4216   | 810.3729    | -0.0487 | -60   | 143        | 149      | DAQHALR                |           |       |                                            |      | Mascot      |
| 856.5363   | 856.4949    | -0.0414 | -48   | 271        | 277      | LLEVRAR                |           |       |                                            |      | Mascot      |
| 941.6029   | 941.5463    | -0.0566 | -60   | 106        | 113      | VVIQELIK               |           |       |                                            |      | Mascot      |
| 941.6029   | 941.5463    | -0.0566 | -60   | 106        | 113      | VVIQELIK               |           |       |                                            |      | Mascot      |
| 1179.6984  | 1179.5624   | -0.136  | -115  | 203        | 213      | EGLLLPPELAK            |           |       |                                            |      | Mascot      |
| 1179.6984  | 1179.5624   | -0.136  | -115  | 203        | 213      | EGLLLPPELAK            |           |       |                                            |      | Mascot      |
| 1194.5792  | 1194.5731   | -0.0061 | -5    | 225        | 234      | KALLMCEACR             |           |       | Carbamidomethyl (C)[6]                     |      | Mascot      |
| 1234.679   | 1234.639    | -0.04   | -32   | 58         | 68       | ELYGAGVEKLR            |           |       |                                            |      | Mascot      |
| 1234.679   | 1234.639    | -0.04   | -32   | 58         | 68       | ELYGAGVEKLR            | 6         | 0     |                                            |      | Mascot      |
| 1290.564   | 1290.559    | -0.005  | -4    | 151        | 160      | TMEKYMATCR             | 1         | 0     | Carbamidomethyl (C)[9]                     |      | Mascot      |
| 1290.564   | 1290.559    | -0.005  | -4    | 151        | 160      | TMEKYMATCR             |           |       | Carbamidomethyl (C)[9]                     |      | Mascot      |
| 1307.5435  | 1307.6277   | 0.0842  | 64    | 346        | 356      | FMEDGLGNFMF            |           |       |                                            |      | Mascot      |
| 1435.6384  | 1435.6986   | 0.0602  | 42    | 345        | 356      | KFMEDGLGNFMF           |           |       |                                            |      | Mascot      |
| 2115.0935  | 2114.9412   | -0.1523 | -72   | 184        | 202      | VPLPSVEEVCSVLSGVCRK    |           |       | Carbamidomethyl (C)[10,17]                 |      | Mascot      |
| 2115.0935  | 2114.9412   | -0.1523 | -72   | 184        | 202      | VPLPSVEEVCSVLSGVCRK    |           |       | Carbamidomethyl (C)[10,17]                 |      | Mascot      |
| 2189.1458  | 2188.9924   | -0.1534 | -70   | 276        | 293      | ARLYELLTHCISPEVIMK     |           |       | Carbamidomethyl (C)[10], Oxidation (M)[17] |      | Mascot      |
| 2300.1855  | 2300.1023   | -0.0832 | -36   | 28         | 49       | NLVQCGDFPHLLVYGPSGAGKK |           |       |                                            |      | Mascot      |

|   |                                 |  |  |  |             |  |         |      |    |    |        |  |  |
|---|---------------------------------|--|--|--|-------------|--|---------|------|----|----|--------|--|--|
| 9 | alpha-tropomyosin [Danio rerio] |  |  |  | gi 55962545 |  | 28607.5 | 4.74 | 11 | 52 | 74.975 |  |  |
|---|---------------------------------|--|--|--|-------------|--|---------|------|----|----|--------|--|--|

Peptide Information

| Calc. Mass | Obsrv. Mass | ± da    | ± ppm | Start Seq. | End Seq. | Sequence    | Ion Score | C. I. | % Modification   | Rank | Result Type |
|------------|-------------|---------|-------|------------|----------|-------------|-----------|-------|------------------|------|-------------|
| 807.4029   | 807.3687    | -0.0342 | -42   | 163        | 169      | TVTNNMK     |           |       |                  |      | Mascot      |
| 810.3879   | 810.3729    | -0.015  | -19   | 185        | 190      | YEEEEK      |           |       |                  |      | Mascot      |
| 840.4097   | 840.4957    | 0.086   | 102   | 178        | 184      | YSAKEDK     |           |       |                  |      | Mascot      |
| 1107.5792  | 1107.501    | -0.0782 | -71   | 203        | 212      | AEFAERSVAK  |           |       |                  |      | Mascot      |
| 1109.4891  | 1109.4574   | -0.0317 | -29   | 83         | 92       | AADESERGMK  |           |       | Oxidation (M)[9] |      | Mascot      |
| 1228.7008  | 1228.6366   | -0.0642 | -52   | 66         | 76       | AQERLATALQK |           |       |                  |      | Mascot      |
| 1308.6178  | 1308.615    | -0.0028 | -2    | 198        | 208      | EAETRAEFAER |           |       |                  |      | Mascot      |
| 1324.6743  | 1324.6415   | -0.0328 | -25   | 170        | 181      | SLEAQAEKYSK |           |       |                  |      | Mascot      |

|  |           |           |         |     |     |     |                |  |                  |        |
|--|-----------|-----------|---------|-----|-----|-----|----------------|--|------------------|--------|
|  | 1475.7773 | 1475.7058 | -0.0715 | -48 | 105 | 116 | MELQEIQLKEAK   |  | Oxidation (M)[1] | Mascot |
|  | 1631.7983 | 1631.7461 | -0.0522 | -32 | 14  | 27  | IRSLQEQAEDAESR |  |                  | Mascot |
|  | 1631.7983 | 1631.7461 | -0.0522 | -32 | 14  | 27  | IRSLQEQAEDAESR |  |                  | Mascot |
|  | 1648.8098 | 1648.7708 | -0.039  | -24 | 101 | 113 | DEEKMEIQLK     |  | Oxidation (M)[5] | Mascot |
|  | 1648.8098 | 1648.7708 | -0.039  | -24 | 101 | 113 | DEEKMEIQLK     |  | Oxidation (M)[5] | Mascot |

10 hypothetical protein LOC100124602 [Danio rerio] gi|156616350 28791.8 4.83 11 50 52.316

#### Peptide Information

| Calc. Mass | Obsrv. Mass | ± da    | ± ppm | Start Seq. | End Seq. | Sequence     | Ion Score | C. I. % | Modification     | Rank | Result Type |
|------------|-------------|---------|-------|------------|----------|--------------|-----------|---------|------------------|------|-------------|
| 810.3879   | 810.3729    | -0.015  | -19   | 184        | 189      | YEEEIK       |           |         |                  |      | Mascot      |
| 882.4791   | 882.5356    | 0.0565  | 64    | 33         | 39       | ELAHERK      |           |         |                  |      | Mascot      |
| 1045.6     | 1045.5275   | -0.0725 | -69   | 2          | 11       | AATSLEAVKR   |           |         |                  |      | Mascot      |
| 1107.5792  | 1107.501    | -0.0782 | -71   | 202        | 211      | AEFAERSVAK   |           |         |                  |      | Mascot      |
| 1109.4891  | 1109.4574   | -0.0317 | -29   | 82         | 91       | AADESERGMK   |           |         | Oxidation (M)[9] |      | Mascot      |
| 1194.6729  | 1194.5731   | -0.0998 | -84   | 162        | 171      | VLDQTYKSLK   |           |         |                  |      | Mascot      |
| 1228.7008  | 1228.6366   | -0.0642 | -52   | 65         | 75       | AQERLATALQK  |           |         |                  |      | Mascot      |
| 1308.6178  | 1308.615    | -0.0028 | -2    | 197        | 207      | EAETRAEFAER  |           |         |                  |      | Mascot      |
| 1316.6328  | 1316.4816   | -0.1512 | -115  | 15         | 26       | LLQEQADGAEDK |           |         |                  |      | Mascot      |
| 1475.7773  | 1475.7058   | -0.0715 | -48   | 104        | 115      | MEIQEQLKEAK  |           |         | Oxidation (M)[1] |      | Mascot      |
| 1648.8098  | 1648.7708   | -0.039  | -24   | 100        | 112      | DEEKMEIQLK   |           |         | Oxidation (M)[5] |      | Mascot      |
| 1648.8098  | 1648.7708   | -0.039  | -24   | 100        | 112      | DEEKMEIQLK   |           |         | Oxidation (M)[5] |      | Mascot      |

11 CAD protein [Danio rerio] gi|57770415 247044.1 6.19 24 48 31.076

#### Peptide Information

| Calc. Mass | Obsrv. Mass | ± da    | ± ppm | Start Seq. | End Seq. | Sequence   | Ion Score | C. I. % | Modification           | Rank | Result Type |
|------------|-------------|---------|-------|------------|----------|------------|-----------|---------|------------------------|------|-------------|
| 807.3817   | 807.3687    | -0.013  | -16   | 1769       | 1774     | HMQFTK     |           |         | Oxidation (M)[2]       |      | Mascot      |
| 850.5145   | 850.5093    | -0.0052 | -6    | 751        | 757      | FLRVSTK    |           |         |                        |      | Mascot      |
| 860.4471   | 860.4314    | -0.0157 | -18   | 231        | 237      | ETVENIR    |           |         |                        |      | Mascot      |
| 870.4389   | 870.5094    | 0.0705  | 81    | 1307       | 1314     | AMLSTGFK   |           |         | Oxidation (M)[2]       |      | Mascot      |
| 882.4315   | 882.5356    | 0.1041  | 118   | 2156       | 2162     | ERFSSEK    |           |         |                        |      | Mascot      |
| 996.5948   | 996.5589    | -0.0359 | -36   | 1448       | 1456     | QIGQAPRVK  |           |         |                        |      | Mascot      |
| 1003.553   | 1003.5211   | -0.0319 | -32   | 368        | 376      | SGDLTVKQR  |           |         |                        |      | Mascot      |
| 1090.5211  | 1090.4939   | -0.0272 | -25   | 275        | 283      | GHNQPCIHK  |           |         | Carbamidomethyl (C)[6] |      | Mascot      |
| 1107.6409  | 1107.501    | -0.1399 | -126  | 1319       | 1328     | NILLSIGSYK |           |         |                        |      | Mascot      |
| 1165.5419  | 1165.5482   | 0.0063  | 5     | 1982       | 1992     | TSSSFAAMHR |           |         |                        |      | Mascot      |

|    |                                                    |             |       |      |    |    |        |
|----|----------------------------------------------------|-------------|-------|------|----|----|--------|
| 12 | Replication factor C (activator 1) 3 [Danio rerio] | gi156230598 | 40370 | 8.72 | 11 | 47 | 19.022 |
|----|----------------------------------------------------|-------------|-------|------|----|----|--------|

| Calc. Mass | Obsrv. Mass | ± da    | ± ppm | Start Seq. | End Seq. | Sequence         | Ion Score | C. I. | % Modification             | Rank | Result Type |
|------------|-------------|---------|-------|------------|----------|------------------|-----------|-------|----------------------------|------|-------------|
| 810.4216   | 810.3729    | -0.0487 | -60   | 143        | 149      | DAQHALR          |           |       |                            |      | Mascot      |
| 856.5363   | 856.4949    | -0.0414 | -48   | 271        | 277      | LLEVRAR          |           |       |                            |      | Mascot      |
| 941.6029   | 941.5463    | -0.0566 | -60   | 106        | 113      | VVIQELIK         |           |       |                            |      | Mascot      |
| 941.6029   | 941.5463    | -0.0566 | -60   | 106        | 113      | VVIQELIK         |           |       |                            |      | Mascot      |
| 1179.6984  | 1179.5624   | -0.136  | -115  | 203        | 213      | EGLLLPPELAK      |           |       |                            |      | Mascot      |
| 1179.6984  | 1179.5624   | -0.136  | -115  | 203        | 213      | EGLLLPPELAK      |           |       |                            |      | Mascot      |
| 1194.5792  | 1194.5731   | -0.0061 | -5    | 225        | 234      | KALLMCEACR       |           |       | Carbamidomethyl (C)[6]     |      | Mascot      |
| 1234.679   | 1234.639    | -0.04   | -32   | 58         | 68       | ELYGAGVEKLR      |           |       |                            |      | Mascot      |
| 1234.679   | 1234.639    | -0.04   | -32   | 58         | 68       | ELYGAGVEKLR      | 6         | 0     |                            |      | Mascot      |
| 1290.564   | 1290.559    | -0.005  | -4    | 151        | 160      | TMEKYMATCR       | 1         | 0     | Carbamidomethyl (C)[9]     |      | Mascot      |
| 1290.564   | 1290.559    | -0.005  | -4    | 151        | 160      | TMEKYMATCR       |           |       | Carbamidomethyl (C)[9]     |      | Mascot      |
| 1307.7933  | 1307.6277   | -0.1656 | -127  | 202        | 213      | KEGLLLPPELAK     |           |       |                            |      | Mascot      |
| 1493.6439  | 1493.6804   | 0.0365  | 24    | 345        | 356      | KFMEDGLDNFMF     |           |       |                            |      | Mascot      |
| 2115.0935  | 2114.9412   | -0.1523 | -72   | 184        | 202      | VPLPSVEEVCSVLGVC |           |       | Carbamidomethyl (C)[10,17] |      | Mascot      |

|    |                    |           |         |     |            |     |                              |      |   |    |        |   |   |  |  |                            |        |
|----|--------------------|-----------|---------|-----|------------|-----|------------------------------|------|---|----|--------|---|---|--|--|----------------------------|--------|
|    | 2115.0935          | 2114.9412 | -0.1523 | -72 | 184        | 202 | RK<br>VPLPSVEEVCSVLGVC<br>RK |      |   |    |        |   |   |  |  | Carbamidomethyl (C)[10,17] | Mascot |
|    | 2300.1855          | 2300.1023 | -0.0832 | -36 | 28         | 49  | NLVQCGDFPHLLVYGPS<br>GAGKK   |      |   |    |        |   |   |  |  |                            | Mascot |
| 13 | Pbx2 [Danio rerio] |           |         |     | gi 7861936 |     | 18895.6                      | 9.08 | 7 | 47 | 15.205 | 9 | 0 |  |  |                            |        |

#### Peptide Information

|  | Calc. Mass | Obsrv. Mass | ± da    | ± ppm | Start Seq. | End Seq. | Sequence                 | Ion Score | C. I. | % | Modification           | Rank | Result Type |
|--|------------|-------------|---------|-------|------------|----------|--------------------------|-----------|-------|---|------------------------|------|-------------|
|  | 1051.5782  | 1051.6774   | 0.0992  | 94    | 133        | 141      | FSSIQTQLK                |           |       |   |                        |      | Mascot      |
|  | 1179.6442  | 1179.5624   | -0.0818 | -69   | 1          | 10       | ALFSLVCEIK               |           |       |   | Carbamidomethyl (C)[7] |      | Mascot      |
|  | 1179.6732  | 1179.5624   | -0.1108 | -94   | 132        | 141      | KFSSIQTQLK               | 11        |       | 0 |                        |      | Mascot      |
|  | 1307.6447  | 1307.6277   | -0.017  | -13   | 142        | 152      | QSTCEAVMILR              |           |       |   | Carbamidomethyl (C)[4] |      | Mascot      |
|  | 1436.7817  | 1436.6782   | -0.1035 | -72   | 1          | 12       | ALFSLVCEIKEK             |           |       |   | Carbamidomethyl (C)[7] |      | Mascot      |
|  | 1493.7563  | 1493.6804   | -0.0759 | -51   | 142        | 154      | QSTCEAVMILRSR            |           |       |   |                        |      | Mascot      |
|  | 2283.1836  | 2283.1038   | -0.0798 | -35   | 133        | 152      | FSSIQTQLKQSTCEAVMI<br>LR |           |       |   |                        |      | Mascot      |
|  | 2283.1836  | 2283.1038   | -0.0798 | -35   | 133        | 152      | FSSIQTQLKQSTCEAVMI<br>LR |           |       |   |                        |      | Mascot      |

14 cytoplasmic FMR1-interacting protein 2 [Danio rerio] gi|148224828 145659 6.54 18 46 0

#### Peptide Information

|  | Calc. Mass | Obsrv. Mass | ± da    | ± ppm | Start Seq. | End Seq. | Sequence                | Ion Score | C. I. | % | Modification                             | Rank | Result Type |
|--|------------|-------------|---------|-------|------------|----------|-------------------------|-----------|-------|---|------------------------------------------|------|-------------|
|  | 810.3926   | 810.3729    | -0.0197 | -24   | 725        | 730      | FRAECK                  |           |       |   | Carbamidomethyl (C)[5]                   |      | Mascot      |
|  | 860.3679   | 860.4314    | 0.0635  | 74    | 98         | 104      | CNEQPNR                 |           |       |   |                                          |      | Mascot      |
|  | 868.4345   | 868.5179    | 0.0834  | 96    | 136        | 142      | FCSEVKR                 |           |       |   |                                          |      | Mascot      |
|  | 882.4171   | 882.5356    | 0.1185  | 134   | 176        | 182      | NMKCSVK                 |           |       |   | Carbamidomethyl (C)[4], Oxidation (M)[2] |      | Mascot      |
|  | 941.4733   | 941.5463    | 0.073   | 78    | 142        | 148      | RLCHAER                 | 12        |       | 0 | Carbamidomethyl (C)[3]                   |      | Mascot      |
|  | 941.4733   | 941.5463    | 0.073   | 78    | 143        | 149      | LCHAERR                 |           |       |   | Carbamidomethyl (C)[2]                   |      | Mascot      |
|  | 1045.5524  | 1045.5275   | -0.0249 | -24   | 1188       | 1196     | QDGKDEIHK               |           |       |   |                                          |      | Mascot      |
|  | 1107.4888  | 1107.501    | 0.0122  | 11    | 515        | 523      | TICDWEGAR               |           |       |   | Carbamidomethyl (C)[3]                   |      | Mascot      |
|  | 1160.6456  | 1160.4971   | -0.1485 | -128  | 714        | 724      | AMAGSVLLDKR             |           |       |   |                                          |      | Mascot      |
|  | 1194.5936  | 1194.5731   | -0.0205 | -17   | 466        | 475      | MESVFNQAIR              |           |       |   |                                          |      | Mascot      |
|  | 1302.7273  | 1302.6318   | -0.0955 | -73   | 949        | 959      | TLIEVMPKICR             |           |       |   |                                          |      | Mascot      |
|  | 1308.6001  | 1308.615    | 0.0149  | 11    | 179        | 189      | CSVKNDHSAYK             |           |       |   | Carbamidomethyl (C)[1]                   |      | Mascot      |
|  | 1631.8925  | 1631.7461   | -0.1464 | -90   | 111        | 124      | TVEVLEPEVTKLMK          |           |       |   | Oxidation (M)[13]                        |      | Mascot      |
|  | 1631.8925  | 1631.7461   | -0.1464 | -90   | 111        | 124      | TVEVLEPEVTKLMK          |           |       |   | Oxidation (M)[13]                        |      | Mascot      |
|  | 2036.9819  | 2036.9403   | -0.0416 | -20   | 266        | 283      | VMGFGLYLMGDNVSNIIY<br>K |           |       |   | Oxidation (M)[2]                         |      | Mascot      |

|           |           |         |      |      |      |                      |                    |        |
|-----------|-----------|---------|------|------|------|----------------------|--------------------|--------|
| 2052.9768 | 2052.9312 | -0.0456 | -22  | 266  | 283  | VMGFGLYLMDGNVSNYK    | Oxidation (M)[2,9] | Mascot |
| 2115.1306 | 2114.9412 | -0.1894 | -90  | 1210 | 1226 | YQILNNEIFAILNKYMK    |                    | Mascot |
| 2115.1306 | 2114.9412 | -0.1894 | -90  | 1210 | 1226 | YQILNNEIFAILNKYMK    |                    | Mascot |
| 2233.1572 | 2233.0029 | -0.1543 | -69  | 704  | 723  | LADQIFAYYKAMAGSVLLDK | Oxidation (M)[12]  | Mascot |
| 2249.2395 | 2248.9861 | -0.2534 | -113 | 914  | 933  | TICRLGQYQGIADVMEELLK |                    | Mascot |
| 2283.2205 | 2283.1038 | -0.1167 | -51  | 298  | 316  | FFKLQVVPLFGDMQIELSR  | Oxidation (M)[13]  | Mascot |
| 2283.2205 | 2283.1038 | -0.1167 | -51  | 298  | 316  | FFKLQVVPLFGDMQIELSR  | Oxidation (M)[13]  | Mascot |

15 PREDICTED: hypothetical protein LOC100002352 [Danio rerio] gi|326667104 28311.2 4.72 9 45 0

Peptide Information

| Calc. Mass | Obsrv. Mass | ± da    | ± ppm | Start Seq. | End Seq. | Sequence            | Ion Score | C. I. | % Modification                                  | Rank | Result Type |
|------------|-------------|---------|-------|------------|----------|---------------------|-----------|-------|-------------------------------------------------|------|-------------|
| 868.4159   | 868.5179    | 0.102   | 117   | 53         | 59       | SREAYDK             |           |       |                                                 |      | Mascot      |
| 1023.4887  | 1023.4826   | -0.0061 | -6    | 47         | 54       | LSEEMRSR            |           |       | Oxidation (M)[5]                                |      | Mascot      |
| 1277.6704  | 1277.6654   | -0.005  | -4    | 179        | 189      | LICEMARQIGK         |           |       | Oxidation (M)[5]                                |      | Mascot      |
| 1320.5493  | 1320.5408   | -0.0085 | -6    | 167        | 178      | DMNSHIGNACMK        |           |       |                                                 |      | Mascot      |
| 1352.5392  | 1352.5568   | 0.0176  | 13    | 167        | 178      | DMNSHIGNACMK        |           |       | Oxidation (M)[2,11]                             |      | Mascot      |
| 1436.662   | 1436.6782   | 0.0162  | 11    | 28         | 40       | LCQECGLDAKGSR       |           |       | Carbamidomethyl (C)[2]                          |      | Mascot      |
| 1475.7887  | 1475.7058   | -0.0829 | -56   | 41         | 52       | TDLLRLSEEMR         |           |       |                                                 |      | Mascot      |
| 1493.6835  | 1493.6804   | -0.0031 | -2    | 28         | 40       | LCQECGLDAKGSR       |           |       | Carbamidomethyl (C)[2,5]                        |      | Mascot      |
| 2189.1311  | 2188.9924   | -0.1387 | -63   | 103        | 121      | TACEPTLLNFLEPTKPWK  |           |       |                                                 |      | Mascot      |
| 2205.1484  | 2205.0007   | -0.1477 | -67   | 149        | 166      | EGQVCLIREEFWSLGLLR  |           |       | Carbamidomethyl (C)[5]                          |      | Mascot      |
| 2282.9807  | 2283.1038   | 0.1231  | 54    | 167        | 185      | DMNSHIGNACMKLICEMAR |           |       | Carbamidomethyl (C)[10,15], Oxidation (M)[2,11] |      | Mascot      |
| 2282.9807  | 2283.1038   | 0.1231  | 54    | 167        | 185      | DMNSHIGNACMKLICEMAR |           |       | Carbamidomethyl (C)[10,15], Oxidation (M)[2,11] |      | Mascot      |

16 PREDICTED: immunoglobulin-like and fibronectin type III domain-containing protein 1-like [Danio rerio] gi|326668817 134580.4 6.31 17 45 0

Peptide Information

| Calc. Mass | Obsrv. Mass | ± da    | ± ppm | Start Seq. | End Seq. | Sequence   | Ion Score | C. I. | % Modification         | Rank | Result Type |
|------------|-------------|---------|-------|------------|----------|------------|-----------|-------|------------------------|------|-------------|
| 807.3049   | 807.3687    | 0.0638  | 79    | 468        | 475      | GDGADGCR   |           |       | Carbamidomethyl (C)[7] |      | Mascot      |
| 860.4658   | 860.4314    | -0.0344 | -40   | 589        | 595      | LVVQNCK    |           |       | Carbamidomethyl (C)[6] |      | Mascot      |
| 1045.5823  | 1045.5275   | -0.0548 | -52   | 683        | 690      | LQIKDCLR   |           |       | Carbamidomethyl (C)[6] |      | Mascot      |
| 1107.5139  | 1107.501    | -0.0129 | -12   | 926        | 934      | DPEDFMVVR  |           |       |                        |      | Mascot      |
| 1179.5641  | 1179.5624   | -0.0017 | -1    | 1187       | 1196     | VRPEDSGEYK |           |       |                        |      | Mascot      |

|           |                                                                                 |         |     |              |      |                            |      |    |    |                         |  |  |        |
|-----------|---------------------------------------------------------------------------------|---------|-----|--------------|------|----------------------------|------|----|----|-------------------------|--|--|--------|
| 1179.5641 | 1179.5624                                                                       | -0.0017 | -1  | 1187         | 1196 | VRPEDSGEYK                 |      |    |    |                         |  |  | Mascot |
| 1189.6761 | 1189.5941                                                                       | -0.082  | -69 | 196          | 204  | WMLKQLNLK                  |      |    |    | Oxidation (M)[2]        |  |  | Mascot |
| 1234.6864 | 1234.639                                                                        | -0.0474 | -38 | 21           | 31   | VPGVMITQYVK                |      |    |    |                         |  |  | Mascot |
| 1234.6864 | 1234.639                                                                        | -0.0474 | -38 | 21           | 31   | VPGVMITQYVK                |      |    |    |                         |  |  | Mascot |
| 1302.6576 | 1302.6318                                                                       | -0.0258 | -20 | 984          | 995  | YDSGCVYTIVAK               |      |    |    |                         |  |  | Mascot |
| 1352.6692 | 1352.5568                                                                       | -0.1124 | -83 | 489          | 501  | YGQGEDITVVS GK             |      |    |    |                         |  |  | Mascot |
| 1434.7587 | 1434.7208                                                                       | -0.0379 | -26 | 845          | 857  | DGGNKILGYQIEK              |      |    |    |                         |  |  | Mascot |
| 1493.8145 | 1493.6804                                                                       | -0.1341 | -90 | 19           | 31   | SRVPGVMITQYVK              |      |    |    | Oxidation (M)[7]        |  |  | Mascot |
| 1648.7925 | 1648.7708                                                                       | -0.0217 | -13 | 76           | 89   | NKGDTTDPEQYKPR             |      |    |    |                         |  |  | Mascot |
| 1648.7925 | 1648.7708                                                                       | -0.0217 | -13 | 76           | 89   | NKGDTTDPEQYKPR             |      |    |    |                         |  |  | Mascot |
| 1711.738  | 1711.8611                                                                       | 0.1231  | 72  | 596          | 610  | DSDAGLYHFEVNGCK            |      |    |    | Carbamidomethyl (C)[14] |  |  | Mascot |
| 2052.8674 | 2052.9312                                                                       | 0.0638  | 31  | 410          | 429  | DGAGDGADDFARCLADE<br>QAR   |      |    |    |                         |  |  | Mascot |
| 2115.0176 | 2114.9412                                                                       | -0.0764 | -36 | 96           | 113  | EHVLEMPNVQVNQADTY<br>K     |      |    |    |                         |  |  | Mascot |
| 2115.0176 | 2114.9412                                                                       | -0.0764 | -36 | 96           | 113  | EHVLEMPNVQVNQADTY<br>K     |      |    |    |                         |  |  | Mascot |
| 2205.0525 | 2205.0007                                                                       | -0.0518 | -23 | 895          | 916  | VIAINSSGAGEPSTPSEM<br>VCAK |      |    |    | Carbamidomethyl (C)[20] |  |  | Mascot |
| 2233.0527 | 2233.0029                                                                       | -0.0498 | -22 | 917          | 934  | NPNMKPHFKDPEDFMVV<br>R     |      |    |    | Oxidation (M)[4, 15]    |  |  | Mascot |
| 17        | PREDICTED: vacuolar protein sorting-associated protein 41 homolog [Danio rerio] |         |     | gi 125853163 |      | 99028.4                    | 5.84 | 16 | 44 | 0                       |  |  |        |

#### Peptide Information

| Calc. Mass | Obsrv. Mass | ± da    | ± ppm | Start Seq. | End Seq. | Sequence     | Ion Score | C. I. % | Modification           | Rank | Result Type |
|------------|-------------|---------|-------|------------|----------|--------------|-----------|---------|------------------------|------|-------------|
| 850.4417   | 850.5093    | 0.0676  | 79    | 143        | 150      | QFVTGGNK     |           |         |                        |      | Mascot      |
| 996.4744   | 996.5589    | 0.0845  | 85    | 409        | 417      | GDYDTAARK    |           |         |                        |      | Mascot      |
| 1045.5272  | 1045.5275   | 0.0003  | 0     | 2          | 10       | AEVEEQGRK    |           |         |                        |      | Mascot      |
| 1090.6044  | 1090.4939   | -0.1105 | -101  | 57         | 66       | FLALGTHFGK   |           |         |                        |      | Mascot      |
| 1109.5911  | 1109.4574   | -0.1337 | -120  | 556        | 564      | IVLLMDFDK    |           |         | Oxidation (M)[5]       |      | Mascot      |
| 1160.6093  | 1160.4971   | -0.1122 | -97   | 843        | 853      | RGPGS GILEMK |           |         | Oxidation (M)[10]      |      | Mascot      |
| 1234.5192  | 1234.639    | 0.1198  | 97    | 46         | 56       | DAASCMTVHDK  |           |         | Carbamidomethyl (C)[5] |      | Mascot      |
| 1234.5192  | 1234.639    | 0.1198  | 97    | 46         | 56       | DAASCMTVHDK  |           |         | Carbamidomethyl (C)[5] |      | Mascot      |
| 1280.7109  | 1280.5992   | -0.1117 | -87   | 536        | 545      | HKDVYQLIHK   |           |         |                        |      | Mascot      |
| 1280.7109  | 1280.5992   | -0.1117 | -87   | 536        | 545      | HKDVYQLIHK   |           |         |                        |      | Mascot      |
| 1290.6974  | 1290.559    | -0.1384 | -107  | 578        | 588      | ISMDKVVEELK  |           |         |                        |      | Mascot      |
| 1290.6974  | 1290.559    | -0.1384 | -107  | 578        | 588      | ISMDKVVEELK  |           |         |                        |      | Mascot      |
| 1316.6263  | 1316.4816   | -0.1447 | -110  | 247        | 257      | DPTMRDLPSR   |           |         |                        |      | Mascot      |
| 1352.713   | 1352.5568   | -0.1562 | -115  | 554        | 564      | DKIVLLMDFDK  |           |         | Oxidation (M)[7]       |      | Mascot      |

|    |                                                                                                   |           |         |      |     |             |                           |      |    |    |   |  |  |        |
|----|---------------------------------------------------------------------------------------------------|-----------|---------|------|-----|-------------|---------------------------|------|----|----|---|--|--|--------|
|    | 1435.6311                                                                                         | 1435.6986 | 0.0675  | 47   | 117 | 128         | EGFHENFDCAPIK             |      |    |    |   |  |  | Mascot |
|    | 2053.1804                                                                                         | 2052.9312 | -0.2492 | -121 | 741 | 757         | DSLVKILHDYNLQILLR         |      |    |    |   |  |  | Mascot |
|    | 2249.0842                                                                                         | 2248.9861 | -0.0981 | -44  | 46  | 66          | DAASCMTVHDKFLALGT<br>HFGK |      |    |    |   |  |  | Mascot |
|    | 2283.1292                                                                                         | 2283.1038 | -0.0254 | -11  | 334 | 352         | DYRLEHSEGESLFYIISPK       |      |    |    |   |  |  | Mascot |
|    | 2283.1292                                                                                         | 2283.1038 | -0.0254 | -11  | 334 | 352         | DYRLEHSEGESLFYIISPK       |      |    |    |   |  |  | Mascot |
|    | 2300.2583                                                                                         | 2300.1023 | -0.156  | -68  | 452 | 470         | GDLRLRPAIYEMILHDFLK       |      |    |    |   |  |  | Mascot |
| 18 | carbamoyl-phosphate synthetase 2, aspartate<br>transcarbamylase, and dihydroorotase [Danio rerio] |           |         |      |     | gi 58615305 | 246620.8                  | 6.19 | 23 | 43 | 0 |  |  |        |

#### Peptide Information

| Calc. Mass | Obsrv. Mass | ± da    | ± ppm | Start Seq. | End Seq. | Sequence                  | Ion Score | C. I. % | Modification            | Rank | Result Type |
|------------|-------------|---------|-------|------------|----------|---------------------------|-----------|---------|-------------------------|------|-------------|
| 807.3817   | 807.3687    | -0.013  | -16   | 1765       | 1770     | HMQFTK                    |           |         | Oxidation (M)[2]        |      | Mascot      |
| 850.5145   | 850.5093    | -0.0052 | -6    | 747        | 753      | FLRVSTK                   |           |         |                         |      | Mascot      |
| 860.4471   | 860.4314    | -0.0157 | -18   | 231        | 237      | ETVENIR                   |           |         |                         |      | Mascot      |
| 870.4389   | 870.5094    | 0.0705  | 81    | 1303       | 1310     | AMLSTGFK                  |           |         | Oxidation (M)[2]        |      | Mascot      |
| 882.4315   | 882.5356    | 0.1041  | 118   | 2152       | 2158     | ERFSSEK                   |           |         |                         |      | Mascot      |
| 996.5948   | 996.5589    | -0.0359 | -36   | 1444       | 1452     | QIGQAPRVK                 |           |         |                         |      | Mascot      |
| 1090.5211  | 1090.4939   | -0.0272 | -25   | 275        | 283      | GHNQPCIHK                 |           |         | Carbamidomethyl (C)[6]  |      | Mascot      |
| 1107.6409  | 1107.501    | -0.1399 | -126  | 1315       | 1324     | NILLSIGSYK                |           |         |                         |      | Mascot      |
| 1165.5419  | 1165.5482   | 0.0063  | 5     | 1978       | 1988     | TSSSFAAMHR                |           |         |                         |      | Mascot      |
| 1228.726   | 1228.6366   | -0.0894 | -73   | 1230       | 1241     | TLGVDLVALATR              |           |         |                         |      | Mascot      |
| 1280.6732  | 1280.5992   | -0.074  | -58   | 2          | 13       | ASLVLEDGTTFK              |           |         |                         |      | Mascot      |
| 1280.6732  | 1280.5992   | -0.074  | -58   | 2          | 13       | ASLVLEDGTTFK              |           |         |                         |      | Mascot      |
| 1434.7019  | 1434.7208   | 0.0189  | 13    | 275        | 287      | GHNQPCIHKGTSR             |           |         |                         |      | Mascot      |
| 1435.6191  | 1435.6986   | 0.0795  | 55    | 854        | 865      | QDESAMPPEIMR              |           |         | Oxidation (M)[6,11]     |      | Mascot      |
| 1436.6549  | 1436.6782   | 0.0233  | 16    | 1966       | 1977     | VMASMFYEVSTR              |           |         | Oxidation (M)[2]        |      | Mascot      |
| 1493.7958  | 1493.6804   | -0.1154 | -77   | 2          | 15       | ASLVLEDGTTFKGR            |           |         |                         |      | Mascot      |
| 1562.8499  | 1562.7205   | -0.1294 | -83   | 1420       | 1433     | MAIDFSVPLITDIK            |           |         |                         |      | Mascot      |
| 2037.1378  | 2036.9403   | -0.1975 | -97   | 1223       | 1241     | SFPYVSKTLGVDLVALAT<br>R   |           |         |                         |      | Mascot      |
| 2052.8677  | 2052.9312   | 0.0635  | 31    | 1360       | 1376     | VMAVDWPFEESDCPNK          |           |         | Carbamidomethyl (C)[14] |      | Mascot      |
| 2114.9707  | 2114.9412   | -0.0295 | -14   | 946        | 964      | IGSSVEFDWCAVGCIMEL<br>R   |           |         |                         |      | Mascot      |
| 2114.9707  | 2114.9412   | -0.0295 | -14   | 946        | 964      | IGSSVEFDWCAVGCIMEL<br>R   |           |         |                         |      | Mascot      |
| 2189.092   | 2188.9924   | -0.0996 | -45   | 1933       | 1950     | QFSKEQMSHLFNAHTL<br>R     |           |         | Oxidation (M)[7]        |      | Mascot      |
| 2297.1494  | 2297.0933   | -0.0561 | -24   | 373        | 392      | LMEHLTFPGSPDPNAFV<br>RPR  |           |         | Oxidation (M)[2]        |      | Mascot      |
| 2298.1045  | 2298.1064   | 0.0019  | 1     | 2159       | 2178     | EYNACFGQFILTTPHIMTG<br>AK |           |         | Carbamidomethyl (C)[5]  |      | Mascot      |



|    |                                                                                    |           |        |   |     |              |                          |      |    |    |   |                         |        |
|----|------------------------------------------------------------------------------------|-----------|--------|---|-----|--------------|--------------------------|------|----|----|---|-------------------------|--------|
|    | 2300.0872                                                                          | 2300.1023 | 0.0151 | 7 | 946 | 965          | IGSSVEFDWCAVGCIMEL<br>RK |      |    |    |   | Carbamidomethyl (C)[10] | Mascot |
| 19 | PREDICTED: retrotransposable element Tf2 155 kDa protein type 1-like [Danio rerio] |           |        |   |     | gi 326669453 | 155185                   | 9.76 | 18 | 43 | 0 |                         |        |

| Peptide Information |             |         |       |            |          |                     |           |       |   |                        |      |             |
|---------------------|-------------|---------|-------|------------|----------|---------------------|-----------|-------|---|------------------------|------|-------------|
| Calc. Mass          | Obsrv. Mass | ± da    | ± ppm | Start Seq. | End Seq. | Sequence            | Ion Score | C. I. | % | Modification           | Rank | Result Type |
| 840.4362            | 840.4957    | 0.0595  | 71    | 820        | 826      | HWLEGAK             |           |       |   |                        |      | Mascot      |
| 868.4709            | 868.5179    | 0.047   | 54    | 417        | 424      | VPPPCLSR            |           |       |   |                        |      | Mascot      |
| 1090.5963           | 1090.4939   | -0.1024 | -94   | 1357       | 1367     | SSRGTSGLVLR         |           |       |   |                        |      | Mascot      |
| 1107.6157           | 1107.501    | -0.1147 | -104  | 837        | 845      | NLTYIREAK           |           |       |   |                        |      | Mascot      |
| 1160.6364           | 1160.4971   | -0.1393 | -120  | 966        | 973      | FWWPRLQK            |           |       |   |                        |      | Mascot      |
| 1165.6801           | 1165.5482   | -0.1319 | -113  | 520        | 529      | GLNHITIKNR          |           |       |   |                        |      | Mascot      |
| 1228.5667           | 1228.6366   | 0.0699  | 57    | 726        | 735      | SFVWTEMANK          |           |       |   | Oxidation (M)[7]       |      | Mascot      |
| 1234.7126           | 1234.639    | -0.0736 | -60   | 1213       | 1223     | RPGPTLRPGQR         |           |       |   |                        |      | Mascot      |
| 1234.7126           | 1234.639    | -0.0736 | -60   | 1213       | 1223     | RPGPTLRPGQR         |           |       |   |                        |      | Mascot      |
| 1290.6742           | 1290.559    | -0.1152 | -89   | 695        | 704      | FLGFANFYRR          |           |       |   |                        |      | Mascot      |
| 1290.7164           | 1290.559    | -0.1574 | -122  | 465        | 475      | GRLYSLSIPER         |           |       |   |                        |      | Mascot      |
| 1308.696            | 1308.615    | -0.081  | -62   | 851        | 860      | QARWALFFNR          |           |       |   |                        |      | Mascot      |
| 1434.7838           | 1434.7208   | -0.063  | -44   | 708        | 721      | GFSSIAEPLTALT       |           |       |   |                        |      | Mascot      |
| 1562.8788           | 1562.7205   | -0.1583 | -101  | 708        | 722      | GFSSIAEPLTALT       |           |       |   |                        |      | Mascot      |
| 1638.7717           | 1638.8032   | 0.0315  | 19    | 2          | 17       | EVNPAGEASPPSNVDR    |           |       |   |                        |      | Mascot      |
| 1711.8333           | 1711.8611   | 0.0278  | 16    | 780        | 793      | TDNKLHPCAYLSHR      |           |       |   | Carbamidomethyl (C)[8] |      | Mascot      |
| 2115.0923           | 2114.9412   | -0.1511 | -71   | 820        | 836      | HWLEGAKHPFLIWDHK    |           |       |   |                        |      | Mascot      |
| 2115.0923           | 2114.9412   | -0.1511 | -71   | 820        | 836      | HWLEGAKHPFLIWDHK    |           |       |   |                        |      | Mascot      |
| 2249.2588           | 2248.9861   | -0.2727 | -121  | 1278       | 1297     | LKPVVCSSFSPPSKPIPR  |           |       |   | Carbamidomethyl (C)[6] |      | Mascot      |
| 2298.3472           | 2298.1064   | -0.2408 | -105  | 396        | 416      | VIPKLKPLTFESPAPLPEP |           |       |   |                        |      | Mascot      |

|    |                                                                                    |  |  |  |  |             |         |     |   |    |   |  |
|----|------------------------------------------------------------------------------------|--|--|--|--|-------------|---------|-----|---|----|---|--|
| 20 | novel protein similar to vertebrate tropomyosin 4 (TPM4) (zgc:63909) [Danio rerio] |  |  |  |  | gi 94732583 | 23433.8 | 4.6 | 9 | 43 | 0 |  |
|----|------------------------------------------------------------------------------------|--|--|--|--|-------------|---------|-----|---|----|---|--|

| Peptide Information |             |         |       |            |          |            |           |       |   |                  |      |             |
|---------------------|-------------|---------|-------|------------|----------|------------|-----------|-------|---|------------------|------|-------------|
| Calc. Mass          | Obsrv. Mass | ± da    | ± ppm | Start Seq. | End Seq. | Sequence   | Ion Score | C. I. | % | Modification     | Rank | Result Type |
| 810.3879            | 810.3729    | -0.015  | -19   | 141        | 146      | YEEEEK     |           |       |   |                  |      | Mascot      |
| 850.3975            | 850.5093    | 0.1118  | 131   | 54         | 60       | AMKDEEK    |           |       |   |                  |      | Mascot      |
| 1109.4891           | 1109.4574   | -0.0317 | -29   | 39         | 48       | AADESERGMK |           |       |   | Oxidation (M)[9] |      | Mascot      |
| 1165.5592           | 1165.5482   | -0.011  | -9    | 61         | 69       | MEIQEMQLK  |           |       |   | Oxidation (M)[1] |      | Mascot      |

|    |                                                                    |             |         |       |              |          |               |           |       |    |                  |      |        |        |
|----|--------------------------------------------------------------------|-------------|---------|-------|--------------|----------|---------------|-----------|-------|----|------------------|------|--------|--------|
|    | 1234.5732                                                          | 1234.639    | 0.0658  | 53    | 99           | 109      | AEERAEVAECK   |           |       |    |                  |      |        | Mascot |
|    | 1234.5732                                                          | 1234.639    | 0.0658  | 53    | 99           | 109      | AEERAEVAECK   |           |       |    |                  |      |        | Mascot |
|    | 1308.6178                                                          | 1308.615    | -0.0028 | -2    | 154          | 164      | EAETRAEFAER   |           |       |    |                  |      |        | Mascot |
|    | 1352.6943                                                          | 1352.5568   | -0.1375 | -102  | 141          | 151      | YEEEIKVLSDK   |           |       |    |                  |      |        | Mascot |
|    | 1434.7322                                                          | 1434.7208   | -0.0114 | -8    | 172          | 184      | SIDDLEEKLSSAK |           |       |    |                  |      |        | Mascot |
|    | 1493.7338                                                          | 1493.6804   | -0.0534 | -36   | 61           | 72       | MEIQEMQLKEAK  |           |       |    | Oxidation (M)[1] |      |        | Mascot |
| 21 | tropomyosin alpha-4 chain isoform 2 [Danio rerio]                  |             |         |       | gi 47085929  |          | 28484.4       | 4.63      | 10    | 43 | 0                |      |        |        |
|    | Peptide Information                                                |             |         |       |              |          |               |           |       |    |                  |      |        |        |
|    | Calc. Mass                                                         | Obsrv. Mass | ± da    | ± ppm | Start Seq.   | End Seq. | Sequence      | Ion Score | C. I. | %  | Modification     | Rank | Result | Type   |
|    | 810.3879                                                           | 810.3729    | -0.015  | -19   | 185          | 190      | YEEEIK        |           |       |    |                  |      | Mascot |        |
|    | 850.3975                                                           | 850.5093    | 0.1118  | 131   | 98           | 104      | AMKDEEK       |           |       |    |                  |      | Mascot |        |
|    | 1109.4891                                                          | 1109.4574   | -0.0317 | -29   | 83           | 92       | AADESERGMK    |           |       |    | Oxidation (M)[9] |      | Mascot |        |
|    | 1165.5592                                                          | 1165.5482   | -0.011  | -9    | 105          | 113      | MEIQEMQLK     |           |       |    | Oxidation (M)[1] |      | Mascot |        |
|    | 1234.5732                                                          | 1234.639    | 0.0658  | 53    | 143          | 153      | AEERAEVAECK   |           |       |    |                  |      | Mascot |        |
|    | 1234.5732                                                          | 1234.639    | 0.0658  | 53    | 143          | 153      | AEERAEVAECK   |           |       |    |                  |      | Mascot |        |
|    | 1277.6882                                                          | 1277.6654   | -0.0228 | -18   | 1            | 12       | MTGVTSLDAVKR  |           |       |    |                  |      | Mascot |        |
|    | 1308.6178                                                          | 1308.615    | -0.0028 | -2    | 198          | 208      | EAETRAEFAER   |           |       |    |                  |      | Mascot |        |
|    | 1352.6943                                                          | 1352.5568   | -0.1375 | -102  | 185          | 195      | YEEEIKVLSDK   |           |       |    |                  |      | Mascot |        |
|    | 1434.7322                                                          | 1434.7208   | -0.0114 | -8    | 216          | 228      | SIDDLEEKLSSAK |           |       |    |                  |      | Mascot |        |
|    | 1493.7338                                                          | 1493.6804   | -0.0534 | -36   | 105          | 116      | MEIQEMQLKEAK  |           |       |    | Oxidation (M)[1] |      | Mascot |        |
| 22 | PREDICTED: LOW QUALITY PROTEIN: ryanodine receptor 2 [Danio rerio] |             |         |       | gi 189530774 |          | 552356.6      | 5.83      | 39    | 42 | 0                |      |        |        |
|    | Peptide Information                                                |             |         |       |              |          |               |           |       |    |                  |      |        |        |
|    | Calc. Mass                                                         | Obsrv. Mass | ± da    | ± ppm | Start Seq.   | End Seq. | Sequence      | Ion Score | C. I. | %  | Modification     | Rank | Result | Type   |
|    | 807.4359                                                           | 807.3687    | -0.0672 | -83   | 4337         | 4342     | YQVEIR        |           |       |    |                  |      | Mascot |        |
|    | 840.4614                                                           | 840.4957    | 0.0343  | 41    | 3510         | 3515     | LEIYFR        |           |       |    |                  |      | Mascot |        |
|    | 860.3719                                                           | 860.4314    | 0.0595  | 69    | 4415         | 4420     | NFYNMR        |           |       |    | Oxidation (M)[5] |      | Mascot |        |
|    | 996.5624                                                           | 996.5589    | -0.0035 | -4    | 3510         | 3516     | LEIYFRR       |           |       |    |                  |      | Mascot |        |
|    | 1045.5459                                                          | 1045.5275   | -0.0184 | -18   | 75           | 83       | ALQEMLANR     |           |       |    |                  |      | Mascot |        |
|    | 1051.5604                                                          | 1051.6774   | 0.117   | 111   | 2440         | 2448     | AAMVLFLDR     |           |       |    | Oxidation (M)[3] |      | Mascot |        |
|    | 1090.5714                                                          | 1090.4939   | -0.0775 | -71   | 3549         | 3557     | MAPLYNLPR     |           |       |    | Oxidation (M)[1] |      | Mascot |        |
|    | 1107.6132                                                          | 1107.501    | -0.1122 | -101  | 3526         | 3533     | MKRPVWYK      |           |       |    |                  |      | Mascot |        |
|    | 1109.599                                                           | 1109.4574   | -0.1416 | -128  | 4108         | 4116     | QFIDVVNK      |           |       |    |                  |      | Mascot |        |
|    | 1160.6091                                                          | 1160.4971   | -0.112  | -97   | 1782         | 1792     | EAVMVVGQGV    |           |       |    | Oxidation (M)[4] |      | Mascot |        |

|           |           |         |      |      |      |                            |                                              |        |
|-----------|-----------|---------|------|------|------|----------------------------|----------------------------------------------|--------|
| 1165.567  | 1165.5482 | -0.0188 | -16  | 33   | 43   | LCLAAEGFGER                |                                              | Mascot |
| 1179.6265 | 1179.5624 | -0.0641 | -54  | 2756 | 2765 | CMLVLGWTIK                 | Oxidation (M)[2]                             | Mascot |
| 1179.6265 | 1179.5624 | -0.0641 | -54  | 2756 | 2765 | CMLVLGWTIK                 | Oxidation (M)[2]                             | Mascot |
| 1228.6143 | 1228.6366 | 0.0223  | 18   | 314  | 324  | ADVKTAFADR                 |                                              | Mascot |
| 1277.6525 | 1277.6654 | 0.0129  | 10   | 893  | 903  | IEQGWTYGPVK                |                                              | Mascot |
| 1280.7361 | 1280.5992 | -0.1369 | -107 | 98   | 108  | TLLYGQAVLFR                |                                              | Mascot |
| 1280.7361 | 1280.5992 | -0.1369 | -107 | 98   | 108  | TLLYGQAVLFR                |                                              | Mascot |
| 1302.7239 | 1302.6318 | -0.0921 | -71  | 908  | 918  | KVHLCLVEFSK                |                                              | Mascot |
| 1307.6388 | 1307.6277 | -0.0111 | -8   | 2175 | 2184 | FLCYFCRISR                 |                                              | Mascot |
| 1320.6517 | 1320.5408 | -0.1109 | -84  | 2130 | 2139 | VFYQHPLMR                  | Oxidation (M)[9]                             | Mascot |
| 1324.6968 | 1324.6415 | -0.0553 | -42  | 1361 | 1371 | DHSQEKPSRLK                |                                              | Mascot |
| 1357.6819 | 1357.6691 | -0.0128 | -9   | 1379 | 1390 | KQELNTSHSSAR               |                                              | Mascot |
| 1436.8372 | 1436.6782 | -0.159  | -111 | 97   | 108  | RTLLYGQAVLFR               |                                              | Mascot |
| 1562.764  | 1562.7205 | -0.0435 | -28  | 2162 | 2174 | EIIFPKMVAHCCR              | Oxidation (M)[7]                             | Mascot |
| 1631.8057 | 1631.7461 | -0.0596 | -37  | 2313 | 2328 | GEGANGLLATMEEAIR           |                                              | Mascot |
| 1631.8057 | 1631.7461 | -0.0596 | -37  | 2313 | 2328 | GEGANGLLATMEEAIR           |                                              | Mascot |
| 1638.8268 | 1638.8032 | -0.0236 | -14  | 621  | 634  | SNQHLCDTLLPER              |                                              | Mascot |
| 1648.7999 | 1648.7708 | -0.0291 | -18  | 4256 | 4270 | DPTMVEAIGVQDAFR            |                                              | Mascot |
| 1648.7999 | 1648.7708 | -0.0291 | -18  | 4256 | 4270 | DPTMVEAIGVQDAFR            |                                              | Mascot |
| 1707.886  | 1707.7107 | -0.1753 | -103 | 1572 | 1584 | LCVQHLTHTRWTR              | Carbamidomethyl (C)[2]                       | Mascot |
| 1711.887  | 1711.8611 | -0.0259 | -15  | 2977 | 2991 | EMVTSLFCKLGLAR             | Carbamidomethyl (C)[8]                       | Mascot |
| 1806.0272 | 1805.8018 | -0.2254 | -125 | 2449 | 2463 | VYGVQDQQFVLRLLK            |                                              | Mascot |
| 2036.993  | 2036.9403 | -0.0527 | -26  | 828  | 843  | LELCHELTRNHTETQR           | Carbamidomethyl (C)[4]                       | Mascot |
| 2052.8728 | 2052.9312 | 0.0584  | 28   | 1843 | 1861 | TEETDELGESDGGAEK<br>EK     |                                              | Mascot |
| 2189.0332 | 2188.9924 | -0.0408 | -19  | 2280 | 2298 | FAVFCNGESVEENAYVV<br>VR    | Carbamidomethyl (C)[5]                       | Mascot |
| 2205.0684 | 2205.0007 | -0.0677 | -31  | 4550 | 4567 | MVINTPSYPSNYWDKFV<br>K     | Oxidation (M)[1]                             | Mascot |
| 2211.1018 | 2211.0291 | -0.0727 | -33  | 601  | 620  | NHKILDVLCSLCVCHGMA<br>VR   |                                              | Mascot |
| 2229.8894 | 2230.1233 | 0.2339  | 105  | 4721 | 4737 | CDDMLTCYMFHMYVGVR          | Carbamidomethyl (C)[1,7], Oxidation (M)[4,9] | Mascot |
| 2233.0884 | 2233.0029 | -0.0855 | -38  | 1898 | 1917 | VEAVISFSGDFVGHQLQED<br>QR  |                                              | Mascot |
| 2249.2024 | 2248.9861 | -0.2163 | -96  | 2517 | 2538 | SGPVDELLQGVYLSKA<br>SGLTK  |                                              | Mascot |
| 2283.2324 | 2283.1038 | -0.1286 | -56  | 3360 | 3378 | LFSLVAEVFIFWAKSHNF<br>K    |                                              | Mascot |
| 2283.2324 | 2283.1038 | -0.1286 | -56  | 3360 | 3378 | LFSLVAEVFIFWAKSHNF<br>K    |                                              | Mascot |
| 2284.0994 | 2284.0933 | -0.0061 | -3   | 3437 | 3458 | KLLSVAMNGCCHGDQGL<br>VSHAK | Oxidation (M)[7]                             | Mascot |
| 2300.2068 | 2300.1023 | -0.1045 | -45  | 3106 | 3125 | ILSSLYILGTCSGSFIERQ<br>R   | Carbamidomethyl (C)[11]                      | Mascot |

23 Zgc:172007 protein [Danio rerio] gi|161611828 57368.6 8.44 16 41 0

Peptide Information

| Calc. Mass | Obsrv. Mass | ± da    | ± ppm | Start Seq. | End Seq. | Sequence           | Ion Score | C. I. % | Modification               | Rank | Result Type |
|------------|-------------|---------|-------|------------|----------|--------------------|-----------|---------|----------------------------|------|-------------|
| 856.4497   | 856.4949    | 0.0452  | 53    | 215        | 220      | VFFCKR             |           |         | Carbamidomethyl (C)[4]     |      | Mascot      |
| 860.4117   | 860.4314    | 0.0197  | 23    | 285        | 291      | QSMNVHK            |           |         |                            |      | Mascot      |
| 1023.5179  | 1023.4826   | -0.0353 | -34   | 221        | 229      | CDISFPTLK          |           |         |                            |      | Mascot      |
| 1090.5284  | 1090.4939   | -0.0345 | -32   | 302        | 310      | CPHCVKTFR          |           |         |                            |      | Mascot      |
| 1109.4966  | 1109.4574   | -0.0392 | -35   | 2          | 11       | EVQVDVSCCK         |           |         |                            |      | Mascot      |
| 1179.619   | 1179.5624   | -0.0566 | -48   | 220        | 229      | RCDISFPTLK         |           |         |                            |      | Mascot      |
| 1179.6844  | 1179.5624   | -0.122  | -103  | 200        | 209      | LGNLLKHEQK         |           |         |                            |      | Mascot      |
| 1234.6613  | 1234.639    | -0.0223 | -18   | 182        | 191      | QKPKTTFPCK         |           |         | Carbamidomethyl (C)[9]     |      | Mascot      |
| 1234.6613  | 1234.639    | -0.0223 | -18   | 182        | 191      | QKPKTTFPCK         |           |         | Carbamidomethyl (C)[9]     |      | Mascot      |
| 1277.5548  | 1277.6654   | 0.1106  | 87    | 354        | 363      | MHQLQCCKR          |           |         | Oxidation (M)[1]           |      | Mascot      |
| 1307.587   | 1307.6277   | 0.0407  | 31    | 242        | 251      | KEFHCELCGK         |           |         | Carbamidomethyl (C)[5,8]   |      | Mascot      |
| 1308.6616  | 1308.615    | -0.0466 | -36   | 221        | 231      | CDISFPTLKER        |           |         |                            |      | Mascot      |
| 1435.7362  | 1435.6986   | -0.0376 | -26   | 252        | 264      | VSFSSGNLKTTHMK     |           |         |                            |      | Mascot      |
| 1436.5933  | 1436.6782   | 0.0849  | 59    | 269        | 279      | EKPFFHCSECDK       |           |         | Carbamidomethyl (C)[6,9]   |      | Mascot      |
| 2036.8953  | 2036.9403   | 0.045   | 22    | 269        | 284      | EKPFFHCSECDKHFSK   |           |         | Carbamidomethyl (C)[6,9]   |      | Mascot      |
| 2114.9382  | 2114.9412   | 0.003   | 1     | 321        | 338      | SHASERPYQCSECGKTFK |           |         | Carbamidomethyl (C)[10]    |      | Mascot      |
| 2114.9382  | 2114.9412   | 0.003   | 1     | 321        | 338      | SHASERPYQCSECGKTFK |           |         | Carbamidomethyl (C)[10]    |      | Mascot      |
| 2205.0188  | 2205.0007   | -0.0181 | -8    | 404        | 421      | VHTGERPYHCSVCGRSFR |           |         | Carbamidomethyl (C)[10,13] |      | Mascot      |

24 protein tyrosine phosphatase, receptor type, N polypeptide 2 [Danio rerio] gi|126540834 32113.7 10.05 8 40 0

Peptide Information

| Calc. Mass | Obsrv. Mass | ± da    | ± ppm | Start Seq. | End Seq. | Sequence             | Ion Score | C. I. % | Modification           | Rank | Result Type |
|------------|-------------|---------|-------|------------|----------|----------------------|-----------|---------|------------------------|------|-------------|
| 842.473    | 842.4818    | 0.0088  | 10    | 119        | 125      | ELSQLPR              |           |         |                        |      | Mascot      |
| 860.4584   | 860.4314    | -0.027  | -31   | 147        | 154      | AQKEAASR             |           |         |                        |      | Mascot      |
| 1051.6371  | 1051.6774   | 0.0403  | 38    | 95         | 103      | SVLQKLAHR            |           |         |                        |      | Mascot      |
| 1160.5115  | 1160.4971   | -0.0144 | -12   | 29         | 38       | FGCLFEDVCK           |           |         |                        |      | Mascot      |
| 1316.6125  | 1316.4816   | -0.1309 | -99   | 28         | 38       | RFGCLFEDVCK          |           |         |                        |      | Mascot      |
| 1435.725   | 1435.6986   | -0.0264 | -18   | 39         | 50       | LNEVCINGELFK         |           |         | Carbamidomethyl (C)[5] |      | Mascot      |
| 2225.135   | 2225.0422   | -0.0928 | -42   | 159        | 178      | FLQGFLPSDVSSFKQSPQGR |           |         |                        |      | Mascot      |
| 2225.135   | 2225.0422   | -0.0928 | -42   | 159        | 178      | FLQGFLPSDVSSFKQSP    |           |         |                        |      | Mascot      |

2297.1707

2297.0933

-0.0774

-34

55

QGR

ITTLTSTTHREYAVFGQC

LR

74

Mascot

25

PREDICTED: hypothetical protein LOC100007834 [Danio rerio]

gi|326666867

44783.5

5.16

10

40

0

| Peptide Information |             |         |       |            |          |                     |           |       |   |                                                    |                  |
|---------------------|-------------|---------|-------|------------|----------|---------------------|-----------|-------|---|----------------------------------------------------|------------------|
| Calc. Mass          | Obsrv. Mass | ± da    | ± ppm | Start Seq. | End Seq. | Sequence            | Ion Score | C. I. | % | Modification                                       | Rank Result Type |
| 868.4159            | 868.5179    | 0.102   | 117   | 195        | 201      | SREAYDK             |           |       |   |                                                    | Mascot           |
| 1003.4989           | 1003.5211   | 0.0222  | 22    | 20         | 28       | SMVHTAVSR           |           |       |   | Oxidation (M)[2]                                   | Mascot           |
| 1023.4887           | 1023.4826   | -0.0061 | -6    | 189        | 196      | LSEEMRSR            |           |       |   | Oxidation (M)[5]                                   | Mascot           |
| 1277.6704           | 1277.6654   | -0.005  | -4    | 324        | 334      | IICEMARQIGK         |           |       |   | Oxidation (M)[5]                                   | Mascot           |
| 1290.6899           | 1290.559    | -0.1309 | -101  | 146        | 156      | TEITVSEDRLK         |           |       |   |                                                    | Mascot           |
| 1290.6899           | 1290.559    | -0.1309 | -101  | 146        | 156      | TEITVSEDRLK         |           |       |   |                                                    | Mascot           |
| 1324.7623           | 1324.6415   | -0.1208 | -91   | 206        | 218      | IWAASGPLTALPK       |           |       |   |                                                    | Mascot           |
| 1436.662            | 1436.6782   | 0.0162  | 11    | 170        | 182      | LCQECGLDAKGSR       |           |       |   | Carbamidomethyl (C)[2]                             | Mascot           |
| 1475.7887           | 1475.7058   | -0.0829 | -56   | 183        | 194      | TDLLRLSEEMR         |           |       |   |                                                    | Mascot           |
| 1493.6835           | 1493.6804   | -0.0031 | -2    | 170        | 182      | LCQECGLDAKGSR       |           |       |   | Carbamidomethyl (C)[2,5]                           | Mascot           |
| 2205.1484           | 2205.0007   | -0.1477 | -67   | 294        | 311      | EGQVCLIREEFWSLGLLR  |           |       |   | Carbamidomethyl (C)[5]                             | Mascot           |
| 2210.9482           | 2211.0291   | 0.0809  | 37    | 312        | 330      | DMDSHIGNACMKIICEMAR |           |       |   | Carbamidomethyl (C)[10], Oxidation (M)[2]          | Mascot           |
| 2283.9646           | 2284.0933   | 0.1287  | 56    | 312        | 330      | DMDSHIGNACMKIICEMAR |           |       |   | Carbamidomethyl (C)[10,15], Oxidation (M)[2,11]    | Mascot           |
| 2299.9597           | 2300.1023   | 0.1426  | 62    | 312        | 330      | DMDSHIGNACMKIICEMAR |           |       |   | Carbamidomethyl (C)[10,15], Oxidation (M)[2,11,17] | Mascot           |

26

RecName: Full=Intraflagellar transport protein 172 homolog

gi|82232659

197655

5.61

21

40

0

| Peptide Information |             |         |       |            |          |           |           |       |   |                        |                  |
|---------------------|-------------|---------|-------|------------|----------|-----------|-----------|-------|---|------------------------|------------------|
| Calc. Mass          | Obsrv. Mass | ± da    | ± ppm | Start Seq. | End Seq. | Sequence  | Ion Score | C. I. | % | Modification           | Rank Result Type |
| 807.3818            | 807.3687    | -0.0131 | -16   | 1498       | 1503     | MWSDLR    |           |       |   |                        | Mascot           |
| 810.4542            | 810.3729    | -0.0813 | -100  | 2          | 7        | QLKYMK    |           |       |   |                        | Mascot           |
| 840.4032            | 840.4957    | 0.0925  | 110   | 1060       | 1066     | AAVNMYR   |           |       |   | Oxidation (M)[5]       | Mascot           |
| 860.4406            | 860.4314    | -0.0092 | -11   | 1698       | 1705     | RPGMAANK  |           |       |   | Oxidation (M)[4]       | Mascot           |
| 868.4232            | 868.5179    | 0.0947  | 109   | 1291       | 1297     | AVDCYLK   |           |       |   | Carbamidomethyl (C)[4] | Mascot           |
| 882.4501            | 882.5356    | 0.0855  | 97    | 828        | 834      | ALECYRK   |           |       |   |                        | Mascot           |
| 941.4947            | 941.5463    | 0.0516  | 55    | 1          | 7        | MQLKYMK   |           |       |   |                        | Mascot           |
| 941.4947            | 941.5463    | 0.0516  | 55    | 1          | 7        | MQLKYMK   |           |       |   |                        | Mascot           |
| 1023.5469           | 1023.4826   | -0.0643 | -63   | 1563       | 1571     | HTELIPADK |           |       |   |                        | Mascot           |

|           |                                            |         |      |              |      |                              |      |    |                                              |   |  |        |
|-----------|--------------------------------------------|---------|------|--------------|------|------------------------------|------|----|----------------------------------------------|---|--|--------|
| 1051.5419 | 1051.6774                                  | 0.1355  | 129  | 1384         | 1391 | LEEYVDKR                     |      |    |                                              |   |  | Mascot |
| 1165.6034 | 1165.5482                                  | -0.0552 | -47  | 1480         | 1488 | MFQELVNLR                    |      |    | Oxidation (M)[1]                             |   |  | Mascot |
| 1302.6648 | 1302.6318                                  | -0.033  | -25  | 565          | 576  | GDIVDLERSNGK                 |      |    |                                              |   |  | Mascot |
| 1320.6803 | 1320.5408                                  | -0.1395 | -106 | 1310         | 1320 | CWMKAAELAIAK                 |      |    | Carbamidomethyl (C)[1]                       |   |  | Mascot |
| 1352.7208 | 1352.5568                                  | -0.164  | -121 | 53           | 64   | FTTKPADPKYGG                 |      |    |                                              |   |  | Mascot |
| 1357.6416 | 1357.6691                                  | 0.0275  | 20   | 1717         | 1728 | TTHSPECQDVLLK                |      |    |                                              |   |  | Mascot |
| 1436.7314 | 1436.6782                                  | -0.0532 | -37  | 1480         | 1490 | MFQELVNLRDR                  |      |    | Oxidation (M)[1]                             |   |  | Mascot |
| 1648.8945 | 1648.7708                                  | -0.1237 | -75  | 282          | 295  | EIPNLYTITALSWK               |      |    |                                              |   |  | Mascot |
| 1648.8945 | 1648.7708                                  | -0.1237 | -75  | 282          | 295  | EIPNLYTITALSWK               |      |    |                                              |   |  | Mascot |
| 1707.9388 | 1707.7107                                  | -0.2281 | -134 | 899          | 913  | ALHILELQEDRTAAK              |      |    |                                              |   |  | Mascot |
| 1806.0483 | 1805.8018                                  | -0.2465 | -136 | 1556         | 1571 | LSISLLRHTELIPADK             |      |    |                                              |   |  | Mascot |
| 2188.9968 | 2188.9924                                  | -0.0044 | -2   | 301          | 319  | LSVGTLCGGVEMFDCCCLRR         |      |    | Carbamidomethyl (C)[7,15], Oxidation (M)[12] |   |  | Mascot |
| 2211.0508 | 2211.0291                                  | -0.0217 | -10  | 19           | 38   | VTCMAWAPNNAKFAVCTIDR         |      |    |                                              |   |  | Mascot |
| 2230.0234 | 2230.1233                                  | 0.0999  | 45   | 301          | 319  | LSVGTLCGGVEMFDCCCLRR         |      |    | Carbamidomethyl (C)[7,15,16]                 |   |  | Mascot |
| 2284.0671 | 2284.0933                                  | 0.0262  | 11   | 19           | 38   | VTCMAWAPNNAKFAVCTIDR         |      |    | Carbamidomethyl (C)[3], Oxidation (M)[4]     |   |  | Mascot |
| 3337.3862 | 3337.6648                                  | 0.2786  | 83   | 1263         | 1290 | EYESEGNWGVEGMIEQAQEWEQTGEYSR |      |    | Oxidation (M)[13]                            |   |  | Mascot |
| 27        | PREDICTED: myosin-I $\alpha$ [Danio rerio] |         |      | gi 326669927 |      | 125852                       | 9.11 | 16 | 39                                           | 0 |  |        |

#### Peptide Information

| Calc. Mass | Obsrv. Mass | $\pm$ da | $\pm$ ppm | Start Seq. | End Seq. | Sequence      | Ion Score | C. I. | % Modification         | Rank | Result Type |
|------------|-------------|----------|-----------|------------|----------|---------------|-----------|-------|------------------------|------|-------------|
| 840.4474   | 840.4957    | 0.0483   | 57        | 617        | 623      | AGFAYRR       |           |       |                        |      | Mascot      |
| 856.4886   | 856.4949    | 0.0063   | 7         | 798        | 805      | GPEKGQIK      |           |       |                        |      | Mascot      |
| 870.4138   | 870.5094    | 0.0956   | 110       | 710        | 715      | KYEQMR        |           |       | Oxidation (M)[5]       |      | Mascot      |
| 941.5778   | 941.5463    | -0.0315  | -33       | 778        | 785      | RDLILSPK      |           |       |                        |      | Mascot      |
| 941.5778   | 941.5463    | -0.0315  | -33       | 778        | 785      | RDLILSPK      |           |       |                        |      | Mascot      |
| 1023.4965  | 1023.4826   | -0.0139  | -14       | 160        | 168      | NNSSRFGK      |           |       |                        |      | Mascot      |
| 1051.524   | 1051.6774   | 0.1534   | 146       | 323        | 331      | IMDSKWAGK     |           |       | Oxidation (M)[2]       |      | Mascot      |
| 1107.535   | 1107.501    | -0.034   | -31       | 471        | 480      | DGADMTLLQK    |           |       | Oxidation (M)[5]       |      | Mascot      |
| 1189.575   | 1189.5941   | 0.0191   | 16        | 5          | 13       | YHWQSQNVK     |           |       |                        |      | Mascot      |
| 1280.7031  | 1280.5992   | -0.1039  | -81       | 847        | 856      | TEFLTLLCKR    |           |       | Carbamidomethyl (C)[8] |      | Mascot      |
| 1280.7031  | 1280.5992   | -0.1039  | -81       | 847        | 856      | TEFLTLLCKR    |           |       | Carbamidomethyl (C)[8] |      | Mascot      |
| 1302.5782  | 1302.6318   | 0.0536   | 41        | 507        | 517      | VSYDINGFCER   |           |       |                        |      | Mascot      |
| 1307.6511  | 1307.6277   | -0.0234  | -18       | 14         | 25       | QSGVDDMVLLSK  |           |       | Oxidation (M)[7]       |      | Mascot      |
| 1320.7383  | 1320.5408   | -0.1975  | -150      | 645        | 656      | GAEQQGVHLHLLR |           |       |                        |      | Mascot      |
| 1493.7305  | 1493.6804   | -0.0501  | -34       | 676        | 687      | NPESLFLLEEMR  |           |       | Oxidation (M)[11]      |      | Mascot      |

|  |           |           |         |     |     |     |                                   |  |  |  |                   |        |
|--|-----------|-----------|---------|-----|-----|-----|-----------------------------------|--|--|--|-------------------|--------|
|  | 1562.7882 | 1562.7205 | -0.0677 | -43 | 120 | 134 | YIMGYISKVSGGGSK                   |  |  |  | Oxidation (M)[3]  | Mascot |
|  | 2036.9818 | 2036.9403 | -0.0415 | -20 | 954 | 971 | GGGQQQQQKEVTYSMP<br>VR            |  |  |  | Oxidation (M)[15] | Mascot |
|  | 3337.5933 | 3337.6648 | 0.0715  | 21  | 819 | 846 | SVSLSTRQDDFFILHETE<br>YDSSLLESMFK |  |  |  |                   | Mascot |

28 carbamoyl-phosphate synthetase 2, aspartate transcarbamylase, and dihydroorotase [Danio rerio] gi|56207582 238582.8 6.21 22 39 0

Peptide Information

| Calc. Mass | Obsrv. Mass | ± da    | ± ppm | Start Seq. | End Seq. | Sequence                 | Ion Score | C. I. % | Modification            | Rank | Result Type |
|------------|-------------|---------|-------|------------|----------|--------------------------|-----------|---------|-------------------------|------|-------------|
| 807.3817   | 807.3687    | -0.013  | -16   | 1721       | 1726     | HMQFTK                   |           |         | Oxidation (M)[2]        |      | Mascot      |
| 850.5145   | 850.5093    | -0.0052 | -6    | 751        | 757      | FLRVSTK                  |           |         |                         |      | Mascot      |
| 860.4471   | 860.4314    | -0.0157 | -18   | 235        | 241      | ETVENIR                  |           |         |                         |      | Mascot      |
| 870.4389   | 870.5094    | 0.0705  | 81    | 1307       | 1314     | AMLSTGFK                 |           |         | Oxidation (M)[2]        |      | Mascot      |
| 882.4315   | 882.5356    | 0.1041  | 118   | 2108       | 2114     | ERFSSEK                  |           |         |                         |      | Mascot      |
| 996.5948   | 996.5589    | -0.0359 | -36   | 1448       | 1456     | QIGQAPRVK                |           |         |                         |      | Mascot      |
| 1090.5211  | 1090.4939   | -0.0272 | -25   | 279        | 287      | GHNQPCIHK                |           |         | Carbamidomethyl (C)[6]  |      | Mascot      |
| 1107.6409  | 1107.501    | -0.1399 | -126  | 1319       | 1328     | NILLSIGSYK               |           |         |                         |      | Mascot      |
| 1165.5419  | 1165.5482   | 0.0063  | 5     | 1934       | 1944     | TSSSFAAMHR               |           |         |                         |      | Mascot      |
| 1228.726   | 1228.6366   | -0.0894 | -73   | 1234       | 1245     | TLGVDLVALATR             |           |         |                         |      | Mascot      |
| 1302.6583  | 1302.6318   | -0.0265 | -20   | 2125       | 2136     | SSGCLLPAGRER             |           |         | Carbamidomethyl (C)[4]  |      | Mascot      |
| 1434.7019  | 1434.7208   | 0.0189  | 13    | 279        | 291      | GHNQPCIHKGTSR            |           |         |                         |      | Mascot      |
| 1435.6191  | 1435.6986   | 0.0795  | 55    | 858        | 869      | QDESAMPPEIMR             |           |         | Oxidation (M)[6,11]     |      | Mascot      |
| 1436.6549  | 1436.6782   | 0.0233  | 16    | 1922       | 1933     | VMASMFYEVSTR             |           |         | Oxidation (M)[2]        |      | Mascot      |
| 1562.8499  | 1562.7205   | -0.1294 | -83   | 1424       | 1437     | MAIDFSVPLITDIK           |           |         |                         |      | Mascot      |
| 2037.1378  | 2036.9403   | -0.1975 | -97   | 1227       | 1245     | SFPYVSKTLGVDLVALAT<br>R  |           |         |                         |      | Mascot      |
| 2052.8677  | 2052.9312   | 0.0635  | 31    | 1364       | 1380     | VMAVDWPFEEESDCPNK        |           |         | Carbamidomethyl (C)[14] |      | Mascot      |
| 2114.9707  | 2114.9412   | -0.0295 | -14   | 950        | 968      | IGSSVEFDWCAVGCIMEL<br>R  |           |         |                         |      | Mascot      |
| 2114.9707  | 2114.9412   | -0.0295 | -14   | 950        | 968      | IGSSVEFDWCAVGCIMEL<br>R  |           |         |                         |      | Mascot      |
| 2189.092   | 2188.9924   | -0.0996 | -45   | 1889       | 1906     | QFSKEQMSHLFNVHTL<br>R    |           |         | Oxidation (M)[7]        |      | Mascot      |
| 2297.1494  | 2297.0933   | -0.0561 | -24   | 377        | 396      | LMEHLTFPGSPDPNAFV<br>RPR |           |         | Oxidation (M)[2]        |      | Mascot      |
| 2298.1846  | 2298.1064   | -0.0782 | -34   | 1893       | 1911     | EQMSHLFNVHTLRLMV<br>QK   |           |         | Oxidation (M)[3]        |      | Mascot      |
| 2300.0872  | 2300.1023   | 0.0151  | 7     | 950        | 969      | IGSSVEFDWCAVGCIMEL<br>RK |           |         | Carbamidomethyl (C)[10] |      | Mascot      |

29 novel protein similar to MCM6 minichromosome maintenance deficient 6, mitotin (S. cerevisiae) (mcm6 gi|169158286 93177.2 5.26 13 39 0

### Peptide Information

| Calc. Mass | Obsrv. Mass | $\pm$ da | $\pm$ ppm | Start Seq. | End Seq. | Sequence                  | Ion Score | C. I. % | Modification           | Rank | Result Type |
|------------|-------------|----------|-----------|------------|----------|---------------------------|-----------|---------|------------------------|------|-------------|
| 856.49     | 856.4949    | 0.0049   | 6         | 87         | 93       | AVRHFAR                   |           |         |                        |      | Mascot      |
| 868.4233   | 868.5179    | 0.0946   | 109       | 185        | 191      | FMLDTNK                   |           |         |                        |      | Mascot      |
| 1165.6252  | 1165.5482   | -0.077   | -66       | 747        | 755      | SELINWYLK                 |           |         |                        |      | Mascot      |
| 1234.7228  | 1234.639    | -0.0838  | -68       | 361        | 372      | GILLMLFGGVAK              |           |         | Oxidation (M)[5]       |      | Mascot      |
| 1234.7228  | 1234.639    | -0.0838  | -68       | 361        | 372      | GILLMLFGGVAK              |           |         | Oxidation (M)[5]       |      | Mascot      |
| 1277.6195  | 1277.6654   | 0.0459   | 36        | 321        | 330      | NQMTVLEWEK                |           |         |                        |      | Mascot      |
| 1280.6932  | 1280.5992   | -0.094   | -73       | 80         | 89       | VYPFLCRAVR                |           |         | Carbamidomethyl (C)[6] |      | Mascot      |
| 1280.6932  | 1280.5992   | -0.094   | -73       | 80         | 89       | VYPFLCRAVR                |           |         | Carbamidomethyl (C)[6] |      | Mascot      |
| 1357.8162  | 1357.6691   | -0.1471  | -108      | 119        | 130      | ELSTVRIGTLLR              |           |         |                        |      | Mascot      |
| 1475.7502  | 1475.7058   | -0.0444  | -30       | 90         | 102      | HFARDHGNIPPSK             |           |         |                        |      | Mascot      |
| 1648.854   | 1648.7708   | -0.0832  | -50       | 264        | 279      | VTGKEGFEADGIQGLK          |           |         |                        |      | Mascot      |
| 1648.854   | 1648.7708   | -0.0832  | -50       | 264        | 279      | VTGKEGFEADGIQGLK          |           |         |                        |      | Mascot      |
| 1707.8306  | 1707.7107   | -0.1199  | -70       | 168        | 182      | YTQPTICKNPVCANR           |           |         |                        |      | Mascot      |
| 2053.002   | 2052.9312   | -0.0708  | -34       | 1          | 19       | MEPGVEAAGVHVRDELS<br>EK   |           |         |                        |      | Mascot      |
| 2211.1875  | 2211.0291   | -0.1584  | -72       | 361        | 381      | GILLMLFGGVAKTTMEGT<br>SLR |           |         | Oxidation (M)[5]       |      | Mascot      |
| 2297.1812  | 2297.0933   | -0.0879  | -38       | 575        | 593      | QFQPKITVEAQEFVVDQY<br>K   |           |         |                        |      | Mascot      |

30 MCM6 minichromosome maintenance deficient 6, like [Danio rerio] gi|70887711 93152.1 5.23 13 38 0

### Peptide Information

| Calc. Mass | Obsrv. Mass | $\pm$ da | $\pm$ ppm | Start Seq. | End Seq. | Sequence        | Ion Score | C. I. % | Modification           | Rank | Result Type |
|------------|-------------|----------|-----------|------------|----------|-----------------|-----------|---------|------------------------|------|-------------|
| 856.49     | 856.4949    | 0.0049   | 6         | 87         | 93       | AVRHFAR         |           |         |                        |      | Mascot      |
| 868.4233   | 868.5179    | 0.0946   | 109       | 185        | 191      | FMLDTNK         |           |         |                        |      | Mascot      |
| 996.5261   | 996.5589    | 0.0328   | 33        | 194        | 201      | FVDFQKGR        |           |         |                        |      | Mascot      |
| 1165.6252  | 1165.5482   | -0.077   | -66       | 747        | 755      | SELINWYLK       |           |         |                        |      | Mascot      |
| 1234.7228  | 1234.639    | -0.0838  | -68       | 361        | 372      | GILLMLFGGVAK    |           |         | Oxidation (M)[5]       |      | Mascot      |
| 1234.7228  | 1234.639    | -0.0838  | -68       | 361        | 372      | GILLMLFGGVAK    |           |         | Oxidation (M)[5]       |      | Mascot      |
| 1277.6195  | 1277.6654   | 0.0459   | 36        | 321        | 330      | NQMTVLEWEK      |           |         |                        |      | Mascot      |
| 1280.6932  | 1280.5992   | -0.094   | -73       | 80         | 89       | VYPFLCRAVR      |           |         | Carbamidomethyl (C)[6] |      | Mascot      |
| 1280.6932  | 1280.5992   | -0.094   | -73       | 80         | 89       | VYPFLCRAVR      |           |         | Carbamidomethyl (C)[6] |      | Mascot      |
| 1357.8162  | 1357.6691   | -0.1471  | -108      | 119        | 130      | ELSTVRIGTLLR    |           |         |                        |      | Mascot      |
| 1475.7502  | 1475.7058   | -0.0444  | -30       | 90         | 102      | HFARDHGNIPPSK   |           |         |                        |      | Mascot      |
| 1707.8306  | 1707.7107   | -0.1199  | -70       | 168        | 182      | YTQPTICKNPVCANR |           |         |                        |      | Mascot      |



|    |                                              |           |         |     |              |     |                           |      |    |    |   |  |                  |  |  |  |        |
|----|----------------------------------------------|-----------|---------|-----|--------------|-----|---------------------------|------|----|----|---|--|------------------|--|--|--|--------|
|    | 2053.002                                     | 2052.9312 | -0.0708 | -34 | 1            | 19  | MEPGVEAAGVHVRDELS<br>EK   |      |    |    |   |  |                  |  |  |  | Mascot |
|    | 2211.1875                                    | 2211.0291 | -0.1584 | -72 | 361          | 381 | GILLMLFGGVAKTTMEGT<br>SLR |      |    |    |   |  | Oxidation (M)[5] |  |  |  | Mascot |
|    | 2297.1812                                    | 2297.0933 | -0.0879 | -38 | 575          | 593 | QFQPKITVEAQEFVVDQY<br>K   |      |    |    |   |  |                  |  |  |  | Mascot |
| 31 | RAS guanyl-releasing protein 1 [Danio rerio] |           |         |     | gi 113678177 |     | 77834.7                   | 7.57 | 12 | 37 | 0 |  |                  |  |  |  |        |

Peptide Information

| Calc. Mass | Obsrv. Mass | ± da    | ± ppm | Start Seq. | End Seq. | Sequence                   | Ion Score | C. I. % | Modification                             | Rank | Result Type |
|------------|-------------|---------|-------|------------|----------|----------------------------|-----------|---------|------------------------------------------|------|-------------|
| 842.4882   | 842.4818    | -0.0064 | -8    | 271        | 277      | FIHVAQK                    |           |         |                                          |      | Mascot      |
| 1003.5319  | 1003.5211   | -0.0108 | -11   | 224        | 232      | SYVVHGSR                   |           |         |                                          |      | Mascot      |
| 1090.4873  | 1090.4939   | 0.0066  | 6     | 336        | 344      | VYSECTGFK                  |           |         | Carbamidomethyl (C)[5]                   |      | Mascot      |
| 1165.5703  | 1165.5482   | -0.0221 | -19   | 580        | 589      | DVVGMECLKR                 |           |         | Oxidation (M)[5]                         |      | Mascot      |
| 1189.567   | 1189.5941   | 0.0271  | 23    | 335        | 344      | RVYSECTGFK                 |           |         |                                          |      | Mascot      |
| 1357.5558  | 1357.6691   | 0.1133  | 83    | 569        | 579      | DCGVNCHKHCK                |           |         | Carbamidomethyl (C)[2,6]                 |      | Mascot      |
| 1434.6538  | 1434.7208   | 0.067   | 47    | 577        | 588      | HCKDVVGMECLK               |           |         | Carbamidomethyl (C)[2], Oxidation (M)[8] |      | Mascot      |
| 1435.6781  | 1435.6986   | 0.0205  | 14    | 32         | 43       | RMTCPSAQEISR               |           |         | Carbamidomethyl (C)[4]                   |      | Mascot      |
| 1436.7454  | 1436.6782   | -0.0672 | -47   | 103        | 114      | LLSLYKDCPAEK               |           |         | Carbamidomethyl (C)[8]                   |      | Mascot      |
| 1475.6803  | 1475.7058   | 0.0255  | 17    | 577        | 588      | HCKDVVGMECLK               |           |         | Carbamidomethyl (C)[2,10]                |      | Mascot      |
| 1648.6777  | 1648.7708   | 0.0931  | 56    | 563        | 576      | QGYHCKDCGVNCHK             |           |         | Carbamidomethyl (C)[5]                   |      | Mascot      |
| 1648.6777  | 1648.7708   | 0.0931  | 56    | 563        | 576      | QGYHCKDCGVNCHK             |           |         | Carbamidomethyl (C)[5]                   |      | Mascot      |
| 2115.1182  | 2114.9412   | -0.177  | -84   | 119        | 134      | RPQICHFIRQWISQFR           |           |         |                                          |      | Mascot      |
| 2115.1182  | 2114.9412   | -0.177  | -84   | 119        | 134      | RPQICHFIRQWISQFR           |           |         |                                          |      | Mascot      |
| 2284.2812  | 2284.0933   | -0.1879 | -82   | 433        | 454      | IQPVAPVKPPVVAEWGS<br>GVTPR |           |         |                                          |      | Mascot      |

32 GMP synthase [Danio rerio] gi|254588106 76886.8 6.55 12 37 0

Peptide Information

| Calc. Mass | Obsrv. Mass | ± da   | ± ppm | Start Seq. | End Seq. | Sequence    | Ion Score | C. I. % | Modification                             | Rank | Result Type |
|------------|-------------|--------|-------|------------|----------|-------------|-----------|---------|------------------------------------------|------|-------------|
| 807.3665   | 807.3687    | 0.0022 | 3     | 2          | 9        | ALCNGDSK    |           |         |                                          |      | Mascot      |
| 810.3596   | 810.3729    | 0.0133 | 16    | 222        | 227      | QMSCRI      |           |         | Carbamidomethyl (C)[4], Oxidation (M)[2] |      | Mascot      |
| 842.4301   | 842.4818    | 0.0517 | 61    | 552        | 558      | ICHNINR     |           |         |                                          |      | Mascot      |
| 870.493    | 870.5094    | 0.0164 | 19    | 10         | 17       | LDIVGEPK    |           |         |                                          |      | Mascot      |
| 1045.5061  | 1045.5275   | 0.0214 | 20    | 412        | 419      | DFHKDEVR    |           |         |                                          |      | Mascot      |
| 1179.535   | 1179.5624   | 0.0274 | 23    | 524        | 534      | SYSYVCGVSSK |           |         |                                          |      | Mascot      |
| 1179.535   | 1179.5624   | 0.0274 | 23    | 524        | 534      | SYSYVCGVSSK |           |         |                                          |      | Mascot      |
| 1228.6102  | 1228.6366   | 0.0264 | 21    | 622        | 631      | DPLQKQPSR   |           |         | Carbamidomethyl (C)[9]                   |      | Mascot      |

|           |           |         |     |     |     |                   |  |  |  |  |                  |  |        |
|-----------|-----------|---------|-----|-----|-----|-------------------|--|--|--|--|------------------|--|--------|
| 1277.6042 | 1277.6654 | 0.0612  | 48  | 325 | 335 | TLNMTTNPEEK       |  |  |  |  |                  |  | Mascot |
| 1631.885  | 1631.7461 | -0.1389 | -85 | 278 | 292 | ESQSVVEALTKLGIK   |  |  |  |  |                  |  | Mascot |
| 1631.885  | 1631.7461 | -0.1389 | -85 | 278 | 292 | ESQSVVEALTKLGIK   |  |  |  |  |                  |  | Mascot |
| 1638.9172 | 1638.8032 | -0.114  | -70 | 420 | 434 | ALGRELGLPEEIVSR   |  |  |  |  |                  |  | Mascot |
| 1711.9337 | 1711.8611 | -0.0726 | -42 | 165 | 181 | IVAQSGNIVAGIANEQK |  |  |  |  |                  |  | Mascot |
| 1805.8772 | 1805.8018 | -0.0754 | -42 | 1   | 17  | MALCNGDSKLDIVGEPK |  |  |  |  | Oxidation (M)[1] |  | Mascot |

33 dnaJ homolog subfamily C member 3 [Danio rerio] gi|323422969 57486.9 6.82 11 37 0

#### Peptide Information

| Calc. Mass | Obsrv. Mass | ± da    | ± ppm | Start Seq. | End Seq. | Sequence                 | Ion Score | C. I. % | Modification                             | Rank | Result Type |
|------------|-------------|---------|-------|------------|----------|--------------------------|-----------|---------|------------------------------------------|------|-------------|
| 1003.5782  | 1003.5211   | -0.0571 | -57   | 207        | 216      | AISDLKAASK               |           |         |                                          |      | Mascot      |
| 1045.5889  | 1045.5275   | -0.0614 | -59   | 87         | 96       | SKSALPDLSK               |           |         |                                          |      | Mascot      |
| 1109.6135  | 1109.4574   | -0.1561 | -141  | 77         | 86       | RATVYLAMGK               |           |         |                                          |      | Mascot      |
| 1179.5067  | 1179.5624   | 0.0557  | 47    | 310        | 318      | ERMCHCLSK                |           |         | Carbamidomethyl (C)[4], Oxidation (M)[3] |      | Mascot      |
| 1179.5067  | 1179.5624   | 0.0557  | 47    | 310        | 318      | ERMCHCLSK                |           |         | Carbamidomethyl (C)[4], Oxidation (M)[3] |      | Mascot      |
| 1189.5696  | 1189.5941   | 0.0245  | 21    | 140        | 149      | EEQEAQSQLK               |           |         |                                          |      | Mascot      |
| 1228.5991  | 1228.6366   | 0.0375  | 31    | 247        | 256      | ECLKLDQDHK               |           |         |                                          |      | Mascot      |
| 1320.6464  | 1320.5408   | -0.1056 | -80   | 447        | 457      | EVLTDPPEMRSK             |           |         | Oxidation (M)[8]                         |      | Mascot      |
| 1324.6466  | 1324.6415   | -0.0051 | -4    | 257        | 266      | QCFSHYKQVK               |           |         | Carbamidomethyl (C)[2]                   |      | Mascot      |
| 1648.7537  | 1648.7708   | 0.0171  | 10    | 251        | 263      | LDQDHKQCFSHYK            |           |         |                                          |      | Mascot      |
| 1648.7537  | 1648.7708   | 0.0171  | 10    | 251        | 263      | LDQDHKQCFSHYK            |           |         |                                          |      | Mascot      |
| 2115.075   | 2114.9412   | -0.1338 | -63   | 325        | 344      | AISVCSEVLNTDPQNVNA<br>LK |           |         |                                          |      | Mascot      |
| 2115.075   | 2114.9412   | -0.1338 | -63   | 325        | 344      | AISVCSEVLNTDPQNVNA<br>LK |           |         |                                          |      | Mascot      |
| 2205.1008  | 2205.0007   | -0.1001 | -45   | 291        | 309      | YESVMKTEPNVPHFTLN<br>AK  |           |         |                                          |      | Mascot      |

34 PREDICTED: retrotransposable element Tf2 155 kDa protein type 1-like [Danio rerio] gi|326677789 165743.2 9.59 17 36 0

#### Peptide Information

| Calc. Mass | Obsrv. Mass | ± da    | ± ppm | Start Seq. | End Seq. | Sequence    | Ion Score | C. I. % | Modification | Rank | Result Type |
|------------|-------------|---------|-------|------------|----------|-------------|-----------|---------|--------------|------|-------------|
| 840.4362   | 840.4957    | 0.0595  | 71    | 898        | 904      | HWLEGAK     |           |         |              |      | Mascot      |
| 868.4709   | 868.5179    | 0.047   | 54    | 495        | 502      | VPPPCLSR    |           |         |              |      | Mascot      |
| 1090.5963  | 1090.4939   | -0.1024 | -94   | 1435       | 1445     | SSRGTSGLVLR |           |         |              |      | Mascot      |
| 1107.6157  | 1107.501    | -0.1147 | -104  | 915        | 923      | NLTYYREAK   |           |         |              |      | Mascot      |
| 1160.6364  | 1160.4971   | -0.1393 | -120  | 1044       | 1051     | FWWPRLQK    |           |         |              |      | Mascot      |

|           |           |         |      |      |      |                           |  |  |  |                        |  |  |        |
|-----------|-----------|---------|------|------|------|---------------------------|--|--|--|------------------------|--|--|--------|
| 1165.6801 | 1165.5482 | -0.1319 | -113 | 598  | 607  | GLNHITIKNR                |  |  |  |                        |  |  | Mascot |
| 1228.5667 | 1228.6366 | 0.0699  | 57   | 804  | 813  | SFVWTEMANK                |  |  |  | Oxidation (M)[7]       |  |  | Mascot |
| 1234.7126 | 1234.639  | -0.0736 | -60  | 1291 | 1301 | RPGPTLRPGQR               |  |  |  |                        |  |  | Mascot |
| 1234.7126 | 1234.639  | -0.0736 | -60  | 1291 | 1301 | RPGPTLRPGQR               |  |  |  |                        |  |  | Mascot |
| 1290.6742 | 1290.559  | -0.1152 | -89  | 773  | 782  | FLGFANFYRR                |  |  |  |                        |  |  | Mascot |
| 1290.7164 | 1290.559  | -0.1574 | -122 | 543  | 553  | GRLYLSLIPER               |  |  |  |                        |  |  | Mascot |
| 1308.696  | 1308.615  | -0.081  | -62  | 929  | 938  | QARWALFFNR                |  |  |  |                        |  |  | Mascot |
| 1434.7838 | 1434.7208 | -0.063  | -44  | 786  | 799  | GFSSIAEPLTALT             |  |  |  |                        |  |  | Mascot |
| 1562.8788 | 1562.7205 | -0.1583 | -101 | 786  | 800  | GFSSIAEPLTALT             |  |  |  |                        |  |  | Mascot |
| 1638.7717 | 1638.8032 | 0.0315  | 19   | 2    | 17   | EVNPAGEASPPSNVDR          |  |  |  |                        |  |  | Mascot |
| 1711.8333 | 1711.8611 | 0.0278  | 16   | 858  | 871  | TDNKLHPCAYLSHR            |  |  |  | Carbamidomethyl (C)[8] |  |  | Mascot |
| 2115.0923 | 2114.9412 | -0.1511 | -71  | 898  | 914  | HWLEGAKHPFLIWDHK          |  |  |  |                        |  |  | Mascot |
| 2115.0923 | 2114.9412 | -0.1511 | -71  | 898  | 914  | HWLEGAKHPFLIWDHK          |  |  |  |                        |  |  | Mascot |
| 2298.3472 | 2298.1064 | -0.2408 | -105 | 474  | 494  | VIPKLKPLTFESPAPLPEP<br>PK |  |  |  |                        |  |  | Mascot |

35 tropomyosin alpha-1 chain [Danio rerio] gi|18859505 32702.7 4.7 10 36 0

| Peptide Information |             |         |       |            |          |               |           |       |                  |      |        |      |        |
|---------------------|-------------|---------|-------|------------|----------|---------------|-----------|-------|------------------|------|--------|------|--------|
| Calc. Mass          | Obsrv. Mass | ± da    | ± ppm | Start Seq. | End Seq. | Sequence      | Ion Score | C. I. | % Modification   | Rank | Result | Type |        |
| 807.4029            | 807.3687    | -0.0342 | -42   | 199        | 205      | TVTNNMK       |           |       |                  |      |        |      | Mascot |
| 810.3879            | 810.3729    | -0.015  | -19   | 221        | 226      | YEEEEK        |           |       |                  |      |        |      | Mascot |
| 840.4097            | 840.4957    | 0.086   | 102   | 214        | 220      | YSAKEDK       |           |       |                  |      |        |      | Mascot |
| 1107.5792           | 1107.501    | -0.0782 | -71   | 239        | 248      | AEFAERSVAK    |           |       |                  |      |        |      | Mascot |
| 1109.4891           | 1109.4574   | -0.0317 | -29   | 119        | 128      | AADESERGMK    |           |       | Oxidation (M)[9] |      |        |      | Mascot |
| 1228.7008           | 1228.6366   | -0.0642 | -52   | 102        | 112      | AQERLATALQK   |           |       |                  |      |        |      | Mascot |
| 1308.6178           | 1308.615    | -0.0028 | -2    | 234        | 244      | EAETRAEFAER   |           |       |                  |      |        |      | Mascot |
| 1324.6743           | 1324.6415   | -0.0328 | -25   | 206        | 217      | SLEAQAEKYSAK  |           |       |                  |      |        |      | Mascot |
| 1475.7773           | 1475.7058   | -0.0715 | -48   | 141        | 152      | MELQEIQLEAK   |           |       | Oxidation (M)[1] |      |        |      | Mascot |
| 1648.8098           | 1648.7708   | -0.039  | -24   | 137        | 149      | DEEKMEIQLEQLK |           |       | Oxidation (M)[5] |      |        |      | Mascot |
| 1648.8098           | 1648.7708   | -0.039  | -24   | 137        | 149      | DEEKMEIQLEQLK |           |       | Oxidation (M)[5] |      |        |      | Mascot |

36 novel protein (zgc:73157) [Danio rerio] gi|148725327 27482.5 6.7 7 36 0

| Peptide Information |             |        |       |            |          |            |           |       |                        |      |        |      |        |
|---------------------|-------------|--------|-------|------------|----------|------------|-----------|-------|------------------------|------|--------|------|--------|
| Calc. Mass          | Obsrv. Mass | ± da   | ± ppm | Start Seq. | End Seq. | Sequence   | Ion Score | C. I. | % Modification         | Rank | Result | Type |        |
| 842.4665            | 842.4818    | 0.0153 | 18    | 111        | 117      | MLKSAHR    |           |       |                        |      |        |      | Mascot |
| 1107.5              | 1107.501    | 0.001  | 1     | 203        | 212      | AWRGGTGDCK |           |       | Carbamidomethyl (C)[9] |      |        |      | Mascot |

|    |                                                                      |           |         |     |     |              |                          |      |    |    |   |                                           |        |
|----|----------------------------------------------------------------------|-----------|---------|-----|-----|--------------|--------------------------|------|----|----|---|-------------------------------------------|--------|
|    | 1307.6711                                                            | 1307.6277 | -0.0434 | -33 | 101 | 110          | LFRPMLNMNR               |      |    |    |   | Oxidation (M)[5]                          | Mascot |
|    | 1316.5422                                                            | 1316.4816 | -0.0606 | -46 | 5   | 17           | GENGMADSASSFK            |      |    |    |   | Oxidation (M)[5]                          | Mascot |
|    | 1562.8406                                                            | 1562.7205 | -0.1201 | -77 | 99  | 110          | VRLFRPMLNMNR             |      |    |    |   | Oxidation (M)[7]                          | Mascot |
|    | 1711.8805                                                            | 1711.8611 | -0.0194 | -11 | 101 | 113          | LFRPMLNMNRMLK            |      |    |    |   | Oxidation (M)[5,8,11]                     | Mascot |
|    | 2297.0181                                                            | 2297.0933 | 0.0752  | 33  | 114 | 133          | SAHRACLPSFDCAELME<br>CIK |      |    |    |   | Carbamidomethyl (C)[6], Oxidation (M)[16] | Mascot |
| 37 | novel protein similar to H.sapiens TTN, titin (TTN)<br>[Danio rerio] |           |         |     |     | gi 169154823 | 842970                   | 5.81 | 41 | 36 | 0 |                                           |        |

Peptide Information

| Calc. Mass | Obsrv. Mass | ± da    | ± ppm | Start Seq. | End Seq. | Sequence      | Ion Score | C. I. % | Modification           | Rank | Result Type |
|------------|-------------|---------|-------|------------|----------|---------------|-----------|---------|------------------------|------|-------------|
| 810.312    | 810.3729    | 0.0609  | 75    | 1194       | 1199     | MDEMER        |           |         |                        |      | Mascot      |
| 842.444    | 842.4818    | 0.0378  | 45    | 3102       | 3108     | SYKVSMK       |           |         |                        |      | Mascot      |
| 850.4814   | 850.5093    | 0.0279  | 33    | 1088       | 1094     | LTSVRMK       |           |         | Oxidation (M)[6]       |      | Mascot      |
| 856.4886   | 856.4949    | 0.0063  | 7     | 6818       | 6824     | LTLQEPR       |           |         |                        |      | Mascot      |
| 860.5022   | 860.4314    | -0.0708 | -82   | 2494       | 2500     | LMIQTVR       |           |         |                        |      | Mascot      |
| 870.4203   | 870.5094    | 0.0891  | 102   | 6420       | 6427     | LSDSGTYK      |           |         |                        |      | Mascot      |
| 882.4679   | 882.5356    | 0.0677  | 77    | 2483       | 2489     | YKVSTER       |           |         |                        |      | Mascot      |
| 996.536    | 996.5589    | 0.0229  | 23    | 2586       | 2593     | LTITETYSR     |           |         |                        |      | Mascot      |
| 1023.5217  | 1023.4826   | -0.0391 | -38   | 6866       | 6874     | DIRTGGNYK     |           |         |                        |      | Mascot      |
| 1045.5347  | 1045.5275   | -0.0072 | -7    | 6656       | 6665     | CQIGGTPEIK    |           |         |                        |      | Mascot      |
| 1051.5571  | 1051.6774   | 0.1203  | 114   | 6666       | 6674     | ISWFKADGK     |           |         |                        |      | Mascot      |
| 1090.5375  | 1090.4939   | -0.0436 | -40   | 4503       | 4512     | DKNPVSSDTK    |           |         |                        |      | Mascot      |
| 1107.48    | 1107.501    | 0.021   | 19    | 4973       | 4982     | NETEIGSDDK    |           |         |                        |      | Mascot      |
| 1160.6674  | 1160.4971   | -0.1703 | -147  | 3641       | 3650     | FVSNIKVEPK    |           |         |                        |      | Mascot      |
| 1189.5371  | 1189.5941   | 0.057   | 48    | 6578       | 6587     | DGQEIYSSYK    |           |         |                        |      | Mascot      |
| 1234.6096  | 1234.639    | 0.0294  | 24    | 6087       | 6097     | GKDASLNCELK   |           |         | Carbamidomethyl (C)[8] |      | Mascot      |
| 1234.6096  | 1234.639    | 0.0294  | 24    | 6087       | 6097     | GKDASLNCELK   |           |         | Carbamidomethyl (C)[8] |      | Mascot      |
| 1280.6337  | 1280.5992   | -0.0345 | -27   | 5020       | 5032     | CSCLVTVKGDAGK |           |         |                        |      | Mascot      |
| 1280.6766  | 1280.5992   | -0.0774 | -60   | 918        | 929      | TTVSMTLTVEAK  |           |         |                        |      | Mascot      |
| 1290.6875  | 1290.559    | -0.1285 | -100  | 1966       | 1976     | HYSLTIINAMK   |           |         |                        |      | Mascot      |
| 1290.6875  | 1290.559    | -0.1285 | -100  | 1966       | 1976     | HYSLTIINAMK   |           |         |                        |      | Mascot      |
| 1302.6584  | 1302.6318   | -0.0266 | -20   | 6683       | 6693     | MEFFKGIACLK   |           |         | Oxidation (M)[1]       |      | Mascot      |
| 1307.6842  | 1307.6277   | -0.0565 | -43   | 6215       | 6225     | ITFENNEVTLK   |           |         |                        |      | Mascot      |
| 1308.61    | 1308.615    | 0.005   | 4     | 5377       | 5388     | EVSSGIDCSVQK  |           |         | Carbamidomethyl (C)[8] |      | Mascot      |
| 1316.5684  | 1316.4816   | -0.0868 | -66   | 5081       | 5091     | GSMPMTISWMK   |           |         | Oxidation (M)[3,5,10]  |      | Mascot      |
| 1320.5914  | 1320.5408   | -0.0506 | -38   | 822        | 832      | LDDTDESQLEK   |           |         |                        |      | Mascot      |

|           |           |         |     |      |      |                                    |  |  |  |                                           |  |        |
|-----------|-----------|---------|-----|------|------|------------------------------------|--|--|--|-------------------------------------------|--|--------|
| 1352.6844 | 1352.5568 | -0.1276 | -94 | 6293 | 6304 | WFKDGVELSSGK                       |  |  |  |                                           |  | Mascot |
| 1435.7791 | 1435.6986 | -0.0805 | -56 | 6214 | 6225 | KITFENNEVTLK                       |  |  |  |                                           |  | Mascot |
| 1436.705  | 1436.6782 | -0.0268 | -19 | 5376 | 5388 | KEVSSGIDCSVQK                      |  |  |  | Carbamidomethyl (C)[9]                    |  | Mascot |
| 1475.804  | 1475.7058 | -0.0982 | -67 | 1964 | 1976 | GKHYSLTIIAMK                       |  |  |  |                                           |  | Mascot |
| 1493.6438 | 1493.6804 | 0.0366  | 25  | 5126 | 5138 | YTCHAQNEAGSQK                      |  |  |  | Carbamidomethyl (C)[3]                    |  | Mascot |
| 1631.7482 | 1631.7461 | -0.0021 | -1  | 1887 | 1901 | SFGSDEGQYKMAVGR                    |  |  |  |                                           |  | Mascot |
| 1631.7482 | 1631.7461 | -0.0021 | -1  | 1887 | 1901 | SFGSDEGQYKMAVGR                    |  |  |  |                                           |  | Mascot |
| 1638.9061 | 1638.8032 | -0.1029 | -63 | 7253 | 7266 | DIDIVELLRNVDPK                     |  |  |  |                                           |  | Mascot |
| 1648.8806 | 1648.7708 | -0.1098 | -67 | 971  | 984  | NSDIISPHKYPHIK                     |  |  |  |                                           |  | Mascot |
| 1648.8806 | 1648.7708 | -0.1098 | -67 | 971  | 984  | NSDIISPHKYPHIK                     |  |  |  |                                           |  | Mascot |
| 1805.8826 | 1805.8018 | -0.0808 | -45 | 1479 | 1493 | CRVIGKPDPECQWFK                    |  |  |  |                                           |  | Mascot |
| 2036.9515 | 2036.9403 | -0.0112 | -5  | 5856 | 5872 | ILQDENSMSLDIECLEK                  |  |  |  | Carbamidomethyl (C)[14]                   |  | Mascot |
| 2052.9463 | 2052.9312 | -0.0151 | -7  | 5856 | 5872 | ILQDENSMSLDIECLEK                  |  |  |  | Carbamidomethyl (C)[14], Oxidation (M)[8] |  | Mascot |
| 2115.1306 | 2114.9412 | -0.1894 | -90 | 7274 | 7291 | MYGITDFRGLLQAIEFLK                 |  |  |  |                                           |  | Mascot |
| 2115.1306 | 2114.9412 | -0.1894 | -90 | 7274 | 7291 | MYGITDFRGLLQAIEFLK                 |  |  |  |                                           |  | Mascot |
| 2205.0679 | 2205.0007 | -0.0672 | -30 | 4913 | 4933 | YTCQVSNDAKVSCTAA<br>LFVK           |  |  |  |                                           |  | Mascot |
| 2211.1438 | 2211.0291 | -0.1147 | -52 | 6494 | 6513 | SCEIALRGDTAILELHNID<br>K           |  |  |  |                                           |  | Mascot |
| 2232.9575 | 2233.0029 | 0.0454  | 20  | 1132 | 1149 | MINEFGYCSLDYEVAYS                  |  |  |  | Carbamidomethyl (C)[8], Oxidation (M)[1]  |  | Mascot |
| 2283.104  | 2283.1038 | -0.0002 | 0   | 2409 | 2430 | NVHFGDVGDKFVAGSA<br>ETAAK          |  |  |  |                                           |  | Mascot |
| 2283.104  | 2283.1038 | -0.0002 | 0   | 2409 | 2430 | NVHFGDVGDKFVAGSA<br>ETAAK          |  |  |  |                                           |  | Mascot |
| 2297.1516 | 2297.0933 | -0.0583 | -25 | 6550 | 6570 | NLSVEMGKSLILECTYAG<br>SPK          |  |  |  | Carbamidomethyl (C)[14]                   |  | Mascot |
| 3337.4834 | 3337.6648 | 0.1814  | 54  | 4346 | 4377 | DTGTYTCTAANEAGSSS<br>CSSSVTVQEPVFK |  |  |  | Carbamidomethyl (C)[7,18]                 |  | Mascot |

38 DnaJ (Hsp40) homolog, subfamily C, member 3 [Danio rerio] gi|29437212 57493.9 6.8 11 36 0

| Peptide Information |             |         |       |            |          |            |           |       |                                          |      |             |
|---------------------|-------------|---------|-------|------------|----------|------------|-----------|-------|------------------------------------------|------|-------------|
| Calc. Mass          | Obsrv. Mass | ± da    | ± ppm | Start Seq. | End Seq. | Sequence   | Ion Score | C. I. | % Modification                           | Rank | Result Type |
| 996.4243            | 996.5589    | 0.1346  | 135   | 70         | 76       | NYMAYYR    |           |       | Oxidation (M)[3]                         |      | Mascot      |
| 1003.5782           | 1003.5211   | -0.0571 | -57   | 207        | 216      | AISDLKAASK |           |       |                                          |      | Mascot      |
| 1045.5889           | 1045.5275   | -0.0614 | -59   | 87         | 96       | SKSALPDLSK |           |       |                                          |      | Mascot      |
| 1109.6135           | 1109.4574   | -0.1561 | -141  | 77         | 86       | RATVYLAMGK |           |       |                                          |      | Mascot      |
| 1179.5067           | 1179.5624   | 0.0557  | 47    | 310        | 318      | ERMCHCLSK  |           |       | Carbamidomethyl (C)[4], Oxidation (M)[3] |      | Mascot      |
| 1179.5067           | 1179.5624   | 0.0557  | 47    | 310        | 318      | ERMCHCLSK  |           |       | Carbamidomethyl (C)[4], Oxidation (M)[3] |      | Mascot      |
| 1189.5696           | 1189.5941   | 0.0245  | 21    | 140        | 149      | EEQEAQSQLK |           |       |                                          |      | Mascot      |
| 1228.5991           | 1228.6366   | 0.0375  | 31    | 247        | 256      | ECLKLDQDHK |           |       |                                          |      | Mascot      |

|    |                                                                           |           |         |     |              |     |                          |      |    |                        |        |
|----|---------------------------------------------------------------------------|-----------|---------|-----|--------------|-----|--------------------------|------|----|------------------------|--------|
|    | 1320.6464                                                                 | 1320.5408 | -0.1056 | -80 | 447          | 457 | EVLTDPEMRSK              |      |    | Oxidation (M)[8]       | Mascot |
|    | 1324.6466                                                                 | 1324.6415 | -0.0051 | -4  | 257          | 266 | QCFSHYKQVK               |      |    | Carbamidomethyl (C)[2] | Mascot |
|    | 1648.7537                                                                 | 1648.7708 | 0.0171  | 10  | 251          | 263 | LDQDHKQCFSHYK            |      |    |                        | Mascot |
|    | 1648.7537                                                                 | 1648.7708 | 0.0171  | 10  | 251          | 263 | LDQDHKQCFSHYK            |      |    |                        | Mascot |
|    | 2115.075                                                                  | 2114.9412 | -0.1338 | -63 | 325          | 344 | AISVCSEVLNTDPQNVNA<br>LK |      |    |                        | Mascot |
|    | 2115.075                                                                  | 2114.9412 | -0.1338 | -63 | 325          | 344 | AISVCSEVLNTDPQNVNA<br>LK |      |    |                        | Mascot |
| 39 | PREDICTED: chromodomain-helicase-DNA-binding protein 9-like [Danio rerio] |           |         |     | gi 326669481 |     | 278654.9                 | 8.67 | 23 | 36                     | 0      |

Peptide Information

| Calc. Mass | Obsrv. Mass | ± da    | ± ppm | Start Seq. | End Seq. | Sequence           | Ion Score | C. I. % | Modification                               | Rank | Result Type |
|------------|-------------|---------|-------|------------|----------|--------------------|-----------|---------|--------------------------------------------|------|-------------|
| 842.4665   | 842.4818    | 0.0153  | 18    | 1477       | 1483     | AMARLHK            |           |         | Oxidation (M)[2]                           |      | Mascot      |
| 860.4723   | 860.4314    | -0.0409 | -48   | 679        | 685      | LKEDVEK            |           |         |                                            |      | Mascot      |
| 870.5043   | 870.5094    | 0.0051  | 6     | 1807       | 1815     | NASVVPGVK          |           |         |                                            |      | Mascot      |
| 941.5349   | 941.5463    | 0.0114  | 12    | 2224       | 2231     | RPKNAMPK           |           |         |                                            |      | Mascot      |
| 941.5349   | 941.5463    | 0.0114  | 12    | 2224       | 2231     | RPKNAMPK           |           |         |                                            |      | Mascot      |
| 1051.5604  | 1051.6774   | 0.117   | 111   | 603        | 611      | NCKLLEGFK          |           |         |                                            |      | Mascot      |
| 1090.5172  | 1090.4939   | -0.0233 | -21   | 740        | 748      | CCNHPLYIK          |           |         |                                            |      | Mascot      |
| 1160.627   | 1160.4971   | -0.1299 | -112  | 935        | 944      | DNSLQQLSKK         |           |         |                                            |      | Mascot      |
| 1179.6481  | 1179.5624   | -0.0857 | -73   | 1046       | 1055     | KQTRPFSSTK         |           |         |                                            |      | Mascot      |
| 1179.6481  | 1179.5624   | -0.0857 | -73   | 1046       | 1055     | KQTRPFSSTK         |           |         |                                            |      | Mascot      |
| 1234.6249  | 1234.639    | 0.0141  | 11    | 1294       | 1303     | ADPKLCFLDR         |           |         | Carbamidomethyl (C)[6]                     |      | Mascot      |
| 1234.6637  | 1234.639    | -0.0247 | -20   | 981        | 991      | TKTITIESEGR        |           |         |                                            |      | Mascot      |
| 1280.6382  | 1280.5992   | -0.039  | -30   | 1284       | 1293     | HGYEKYNTIR         |           |         |                                            |      | Mascot      |
| 1280.6382  | 1280.5992   | -0.039  | -30   | 1284       | 1293     | HGYEKYNTIR         |           |         |                                            |      | Mascot      |
| 1290.6974  | 1290.559    | -0.1384 | -107  | 254        | 264      | ISDEEMKVIVK        |           |         |                                            |      | Mascot      |
| 1290.6974  | 1290.559    | -0.1384 | -107  | 254        | 264      | ISDEEMKVIVK        |           |         |                                            |      | Mascot      |
| 1320.5897  | 1320.5408   | -0.0489 | -37   | 1492       | 1501     | YLCAFIAMCR         |           |         | Carbamidomethyl (C)[3,9], Oxidation (M)[8] |      | Mascot      |
| 1435.7031  | 1435.6986   | -0.0045 | -3    | 476        | 488      | RNCILADEMGLGK      |           |         | Oxidation (M)[9]                           |      | Mascot      |
| 1493.7668  | 1493.6804   | -0.0864 | -58   | 807        | 818      | CLDILEDYLIQR       |           |         |                                            |      | Mascot      |
| 1648.7384  | 1648.7708   | 0.0324  | 20    | 149        | 163      | VMSPDSFPSSSSQHR    |           |         |                                            |      | Mascot      |
| 1648.7384  | 1648.7708   | 0.0324  | 20    | 149        | 163      | VMSPDSFPSSSSQHR    |           |         |                                            |      | Mascot      |
| 1805.8051  | 1805.8018   | -0.0033 | -2    | 645        | 659      | FPSENTFMQEFGDLK    |           |         | Oxidation (M)[8]                           |      | Mascot      |
| 2114.9819  | 2114.9412   | -0.0407 | -19   | 1485       | 1501     | TDESLHKYLCAFIAMCR  |           |         | Carbamidomethyl (C)[10,16]                 |      | Mascot      |
| 2114.9819  | 2114.9412   | -0.0407 | -19   | 1485       | 1501     | TDESLHKYLCAFIAMCR  |           |         | Carbamidomethyl (C)[10,16]                 |      | Mascot      |
| 2211.0322  | 2211.0291   | -0.0031 | -1    | 1589       | 1606     | TDYHILRDPELCYMAAQR |           |         | Oxidation (M)[14]                          |      | Mascot      |

|    |                                 |           |         |     |             |      |                            |     |    |    |   |  |  |  |  |  |        |
|----|---------------------------------|-----------|---------|-----|-------------|------|----------------------------|-----|----|----|---|--|--|--|--|--|--------|
|    | 2230.0715                       | 2230.1233 | 0.0518  | 23  | 459         | 475  | DYQLEGVNWLLFNWYNR          |     |    |    |   |  |  |  |  |  | Mascot |
|    | 2282.9988                       | 2283.1038 | 0.105   | 46  | 356         | 374  | AHFFADEDPFNPDYVEV<br>DR    |     |    |    |   |  |  |  |  |  | Mascot |
|    | 2282.9988                       | 2283.1038 | 0.105   | 46  | 356         | 374  | AHFFADEDPFNPDYVEV<br>DR    |     |    |    |   |  |  |  |  |  | Mascot |
|    | 2297.3015                       | 2297.0933 | -0.2082 | -91 | 502         | 522  | TGIKGPFLIIAPLSTIANWE<br>R  |     |    |    |   |  |  |  |  |  | Mascot |
|    | 2298.146                        | 2298.1064 | -0.0396 | -17 | 1901        | 1922 | LLDNASTLPEDPSDSPQ<br>GSKVK |     |    |    |   |  |  |  |  |  | Mascot |
| 40 | alpha-tropomyosin [Danio rerio] |           |         |     | gi 55962544 |      | 32720.7                    | 4.7 | 10 | 35 | 0 |  |  |  |  |  |        |

Peptide Information

|  | Calc. Mass | Obsrv. Mass | ± da    | ± ppm | Start Seq. | End Seq. | Sequence      | Ion Score | C. I. | % | Modification     | Rank | Result | Type |
|--|------------|-------------|---------|-------|------------|----------|---------------|-----------|-------|---|------------------|------|--------|------|
|  | 807.4029   | 807.3687    | -0.0342 | -42   | 199        | 205      | TVTNNMK       |           |       |   |                  |      | Mascot |      |
|  | 810.3879   | 810.3729    | -0.015  | -19   | 221        | 226      | YEEEIK        |           |       |   |                  |      | Mascot |      |
|  | 840.4097   | 840.4957    | 0.086   | 102   | 214        | 220      | YSAKEDK       |           |       |   |                  |      | Mascot |      |
|  | 1107.5792  | 1107.501    | -0.0782 | -71   | 239        | 248      | AEFAERSVAK    |           |       |   |                  |      | Mascot |      |
|  | 1109.4891  | 1109.4574   | -0.0317 | -29   | 119        | 128      | AADESERGMK    |           |       |   | Oxidation (M)[9] |      | Mascot |      |
|  | 1228.7008  | 1228.6366   | -0.0642 | -52   | 102        | 112      | AQERLATALQK   |           |       |   |                  |      | Mascot |      |
|  | 1308.6178  | 1308.615    | -0.0028 | -2    | 234        | 244      | EAETRAEFAER   |           |       |   |                  |      | Mascot |      |
|  | 1324.6743  | 1324.6415   | -0.0328 | -25   | 206        | 217      | SLEAQAEKYSK   |           |       |   |                  |      | Mascot |      |
|  | 1475.7773  | 1475.7058   | -0.0715 | -48   | 141        | 152      | MELQEIQLEAK   |           |       |   | Oxidation (M)[1] |      | Mascot |      |
|  | 1648.8098  | 1648.7708   | -0.039  | -24   | 137        | 149      | DEEKMEIQLEQLK |           |       |   | Oxidation (M)[5] |      | Mascot |      |
|  | 1648.8098  | 1648.7708   | -0.039  | -24   | 137        | 149      | DEEKMEIQLEQLK |           |       |   | Oxidation (M)[5] |      | Mascot |      |

|    |                             |  |  |  |              |  |         |      |   |    |   |    |   |  |  |  |  |
|----|-----------------------------|--|--|--|--------------|--|---------|------|---|----|---|----|---|--|--|--|--|
| 41 | novel protein [Danio rerio] |  |  |  | gi 220679270 |  | 57934.9 | 8.64 | 6 | 35 | 0 | 18 | 0 |  |  |  |  |
|----|-----------------------------|--|--|--|--------------|--|---------|------|---|----|---|----|---|--|--|--|--|

Peptide Information

|  | Calc. Mass | Obsrv. Mass | ± da    | ± ppm | Start Seq. | End Seq. | Sequence       | Ion Score | C. I. | % | Modification            | Rank | Result | Type |
|--|------------|-------------|---------|-------|------------|----------|----------------|-----------|-------|---|-------------------------|------|--------|------|
|  | 807.4583   | 807.3687    | -0.0896 | -111  | 321        | 326      | HERIPR         |           |       |   |                         |      | Mascot |      |
|  | 1160.4637  | 1160.4971   | 0.0334  | 29    | 6          | 14       | DHMTENEER      |           |       |   |                         |      | Mascot |      |
|  | 1179.6117  | 1179.5624   | -0.0493 | -42   | 127        | 136      | STSHSYLTRK     |           |       |   |                         |      | Mascot |      |
|  | 1179.6117  | 1179.5624   | -0.0493 | -42   | 127        | 136      | STSHSYLTRK     | 18        |       | 0 |                         |      | Mascot |      |
|  | 1189.6609  | 1189.5941   | -0.0668 | -56   | 291        | 301      | MGLLIATQTNK    |           |       |   |                         |      | Mascot |      |
|  | 1562.7843  | 1562.7205   | -0.0638 | -41   | 190        | 202      | EEQSITSNLLCIR  |           |       |   | Carbamidomethyl (C)[11] |      | Mascot |      |
|  | 1648.9131  | 1648.7708   | -0.1423 | -86   | 160        | 173      | DSPLFLPIMIIYAR |           |       |   |                         |      | Mascot |      |
|  | 1648.9131  | 1648.7708   | -0.1423 | -86   | 160        | 173      | DSPLFLPIMIIYAR |           |       |   |                         |      | Mascot |      |

|    |                                                                   |  |  |  |              |  |         |      |    |    |   |  |  |  |  |  |  |
|----|-------------------------------------------------------------------|--|--|--|--------------|--|---------|------|----|----|---|--|--|--|--|--|--|
| 42 | PREDICTED: actin filament-associated protein 1-like [Danio rerio] |  |  |  | gi 189525987 |  | 89049.3 | 9.08 | 13 | 35 | 0 |  |  |  |  |  |  |
|----|-------------------------------------------------------------------|--|--|--|--------------|--|---------|------|----|----|---|--|--|--|--|--|--|

| Peptide Information |                                                                         |          |           |              |          |                            |           |       |    |                                           |      |        |      |
|---------------------|-------------------------------------------------------------------------|----------|-----------|--------------|----------|----------------------------|-----------|-------|----|-------------------------------------------|------|--------|------|
| Calc. Mass          | Obsrv. Mass                                                             | $\pm$ da | $\pm$ ppm | Start Seq.   | End Seq. | Sequence                   | Ion Score | C. I. | %  | Modification                              | Rank | Result | Type |
| 842.473             | 842.4818                                                                | 0.0088   | 10        | 599          | 605      | LDKNQPK                    |           |       |    |                                           |      | Mascot |      |
| 850.3974            | 850.5093                                                                | 0.1119   | 132       | 690          | 696      | KVEDECK                    |           |       |    |                                           |      | Mascot |      |
| 941.5124            | 941.5463                                                                | 0.0339   | 36        | 181          | 188      | LLCYKSSK                   |           |       |    |                                           |      | Mascot |      |
| 941.5124            | 941.5463                                                                | 0.0339   | 36        | 181          | 188      | LLCYKSSK                   |           |       |    |                                           |      | Mascot |      |
| 996.5182            | 996.5589                                                                | 0.0407   | 41        | 178          | 185      | DNKLLCYK                   |           |       |    |                                           |      | Mascot |      |
| 1045.6074           | 1045.5275                                                               | -0.0799  | -76       | 172          | 180      | LLCVIKDNK                  |           |       |    |                                           |      | Mascot |      |
| 1160.5518           | 1160.4971                                                               | -0.0547  | -47       | 465          | 473      | QSFCFTSKR                  |           |       |    | Carbamidomethyl (C)[4]                    |      | Mascot |      |
| 1165.6211           | 1165.5482                                                               | -0.0729  | -63       | 18           | 27       | EYLTAGVREK                 |           |       |    |                                           |      | Mascot |      |
| 1234.6725           | 1234.639                                                                | -0.0335  | -27       | 153          | 162      | DARICAFLLR                 |           |       |    | Carbamidomethyl (C)[5]                    |      | Mascot |      |
| 1234.6725           | 1234.639                                                                | -0.0335  | -27       | 153          | 162      | DARICAFLLR                 |           |       |    | Carbamidomethyl (C)[5]                    |      | Mascot |      |
| 1435.813            | 1435.6986                                                               | -0.1144  | -80       | 166          | 177      | FGQWTKLLCVIK               |           |       |    |                                           |      | Mascot |      |
| 1648.938            | 1648.7708                                                               | -0.1672  | -101      | 219          | 234      | IVHQGADALVLAVQSK           |           |       |    |                                           |      | Mascot |      |
| 1648.938            | 1648.7708                                                               | -0.1672  | -101      | 219          | 234      | IVHQGADALVLAVQSK           |           |       |    |                                           |      | Mascot |      |
| 2211.1147           | 2211.0291                                                               | -0.0856  | -39       | 189          | 208      | DQTPQMELLLSGCSITHI<br>PK   |           |       |    |                                           |      | Mascot |      |
| 2233.124            | 2233.0029                                                               | -0.1211  | -54       | 408          | 428      | LLRNGQEVAVLEASSSES<br>MGR  |           |       |    |                                           |      | Mascot |      |
| 2248.9556           | 2248.9861                                                               | 0.0305   | 14        | 246          | 268      | EVCSNNGNGVVDGAG<br>SGSTVHK |           |       |    | Carbamidomethyl (C)[3]                    |      | Mascot |      |
| 2284.1311           | 2284.0933                                                               | -0.0378  | -17       | 189          | 208      | DQTPQMELLLSGCSITHI<br>PK   |           |       |    | Carbamidomethyl (C)[13], Oxidation (M)[6] |      | Mascot |      |
| 43                  | PREDICTED: cerebellar degeneration-related protein 2-like [Danio rerio] |          |           | gi 326666298 |          | 49910.8                    | 5.11      | 9     | 35 | 0                                         |      |        |      |

| Peptide Information |             |          |           |            |          |                         |           |       |   |                        |      |        |      |
|---------------------|-------------|----------|-----------|------------|----------|-------------------------|-----------|-------|---|------------------------|------|--------|------|
| Calc. Mass          | Obsrv. Mass | $\pm$ da | $\pm$ ppm | Start Seq. | End Seq. | Sequence                | Ion Score | C. I. | % | Modification           | Rank | Result | Type |
| 1165.5704           | 1165.5482   | -0.0222  | -19       | 152        | 162      | ALGAQSMSCCLK            |           |       |   | Carbamidomethyl (C)[9] |      | Mascot |      |
| 1228.6757           | 1228.6366   | -0.0391  | -32       | 98         | 107      | SNQRLVLENR              |           |       |   |                        |      | Mascot |      |
| 1280.6449           | 1280.5992   | -0.0457  | -36       | 151        | 162      | RALGAQSMSCCLK           |           |       |   | Oxidation (M)[8]       |      | Mascot |      |
| 1280.6449           | 1280.5992   | -0.0457  | -36       | 151        | 162      | RALGAQSMSCCLK           |           |       |   | Oxidation (M)[8]       |      | Mascot |      |
| 1307.6703           | 1307.6277   | -0.0426  | -33       | 262        | 272      | LLWRSESSSR              |           |       |   |                        |      | Mascot |      |
| 1352.7394           | 1352.5568   | -0.1826  | -135      | 102        | 112      | LVLENRTSQHR             |           |       |   |                        |      | Mascot |      |
| 1711.8545           | 1711.8611   | 0.0066   | 4         | 70         | 83       | QVDLLRQMNDQHAK          |           |       |   | Oxidation (M)[8]       |      | Mascot |      |
| 1805.9075           | 1805.8018   | -0.1057  | -59       | 367        | 383      | CQHGANSLSHKAVQTPK       |           |       |   |                        |      | Mascot |      |
| 2297.1077           | 2297.0933   | -0.0144  | -6        | 191        | 209      | CVEEEEETSTLQHS�HLK<br>K |           |       |   | Carbamidomethyl (C)[1] |      | Mascot |      |
| 2298.1104           | 2298.1064   | -0.004   | -2        | 152        | 171      | ALGAQSMSCCLKIYDLQQ      |           |       |   | Carbamidomethyl (C)[9] |      | Mascot |      |



44 immunoglobulin heavy chain variable segment 4-7 [Danio rerio] DK gi|56207367 13190.6 8.45 5 34 0

Peptide Information

| Calc. Mass | Obsrv. Mass | ± da    | ± ppm | Start Seq. | End Seq. | Sequence                 | Ion Score | C. I. % | Modification     | Rank | Result Type |
|------------|-------------|---------|-------|------------|----------|--------------------------|-----------|---------|------------------|------|-------------|
| 1109.595   | 1109.4574   | -0.1376 | -124  | 78         | 87       | TVYAKSVEGR               |           |         |                  |      | Mascot      |
| 1189.6245  | 1189.5941   | -0.0304 | -26   | 33         | 43       | KPGETLNLSCK              |           |         |                  |      | Mascot      |
| 1277.5466  | 1277.6654   | 0.1188  | 93    | 108        | 118      | TEDSAVYYCAR              |           |         |                  |      | Mascot      |
| 1711.8683  | 1711.8611   | -0.0072 | -4    | 93         | 107      | DNSNNMVYLKLSGLK          |           |         | Oxidation (M)[6] |      | Mascot      |
| 2230.0498  | 2230.1233   | 0.0735  | 33    | 44         | 63       | GSGFDFGQYGMQWIRQ<br>PAGK |           |         |                  |      | Mascot      |

45 novel protein similar to vertebrate SWIVSNF related, matrix associated, actin dependent regulator gi|55963379 29300 9.77 7 34 0

Peptide Information

| Calc. Mass | Obsrv. Mass | ± da    | ± ppm | Start Seq. | End Seq. | Sequence                  | Ion Score | C. I. % | Modification            | Rank | Result Type |
|------------|-------------|---------|-------|------------|----------|---------------------------|-----------|---------|-------------------------|------|-------------|
| 840.392    | 840.4957    | 0.1037  | 123   | 263        | 269      | QMPSKSY                   |           |         |                         |      | Mascot      |
| 856.3869   | 856.4949    | 0.108   | 126   | 263        | 269      | QMPSKSY                   |           |         | Oxidation (M)[2]        |      | Mascot      |
| 1234.5746  | 1234.639    | 0.0644  | 52    | 135        | 144      | CVSHSENRFRR               |           |         |                         |      | Mascot      |
| 1234.5746  | 1234.639    | 0.0644  | 52    | 135        | 144      | CVSHSENRFRR               |           |         |                         |      | Mascot      |
| 1320.6794  | 1320.5408   | -0.1386 | -105  | 159        | 170      | SIPSKNYDPATK              |           |         |                         |      | Mascot      |
| 1475.7522  | 1475.7058   | -0.0464 | -31   | 70         | 82       | QTQLIDINAACTK             |           |         | Carbamidomethyl (C)[11] |      | Mascot      |
| 2115.1848  | 2114.9412   | -0.2436 | -115  | 145        | 163      | VEVGYHADLILVFKSIPSK       |           |         |                         |      | Mascot      |
| 2115.1848  | 2114.9412   | -0.2436 | -115  | 145        | 163      | VEVGYHADLILVFKSIPSK       |           |         |                         |      | Mascot      |
| 2211.0286  | 2211.0291   | 0.0005  | 0     | 41         | 61       | HTQSGTTGGPAKNNQHF<br>ASDR |           |         |                         |      | Mascot      |
| 2230.1245  | 2230.1233   | -0.0012 | -1    | 62         | 82       | GQSGAPTRQTQLIDINAA<br>CTK |           |         | Carbamidomethyl (C)[19] |      | Mascot      |

46 novel protein similar to vertebrate tropomyosin 4 (TPM4) (zgc:63909) [Danio rerio] gi|94732584 23517.9 4.6 8 34 0

Peptide Information

| Calc. Mass | Obsrv. Mass | ± da    | ± ppm | Start Seq. | End Seq. | Sequence   | Ion Score | C. I. % | Modification     | Rank | Result Type |
|------------|-------------|---------|-------|------------|----------|------------|-----------|---------|------------------|------|-------------|
| 810.3879   | 810.3729    | -0.015  | -19   | 141        | 146      | YEEEIK     |           |         |                  |      | Mascot      |
| 850.3975   | 850.5093    | 0.1118  | 131   | 54         | 60       | AMKDEEK    |           |         |                  |      | Mascot      |
| 1109.4891  | 1109.4574   | -0.0317 | -29   | 39         | 48       | AADESERGMK |           |         | Oxidation (M)[9] |      | Mascot      |
| 1165.5592  | 1165.5482   | -0.011  | -9    | 61         | 69       | MEIQEMQLK  |           |         | Oxidation (M)[1] |      | Mascot      |

|  |           |           |         |      |     |     |              |  |  |  |  |  |                  |  |  |  |        |
|--|-----------|-----------|---------|------|-----|-----|--------------|--|--|--|--|--|------------------|--|--|--|--------|
|  | 1234.5732 | 1234.639  | 0.0658  | 53   | 99  | 109 | AEERAEEVAECK |  |  |  |  |  |                  |  |  |  | Mascot |
|  | 1234.5732 | 1234.639  | 0.0658  | 53   | 99  | 109 | AEERAEEVAECK |  |  |  |  |  |                  |  |  |  | Mascot |
|  | 1308.6178 | 1308.615  | -0.0028 | -2   | 154 | 164 | EAETRAEFAER  |  |  |  |  |  |                  |  |  |  | Mascot |
|  | 1352.6943 | 1352.5568 | -0.1375 | -102 | 141 | 151 | YEEIEKVLSDK  |  |  |  |  |  |                  |  |  |  | Mascot |
|  | 1493.7338 | 1493.6804 | -0.0534 | -36  | 61  | 72  | MEIQEMQLKEAK |  |  |  |  |  | Oxidation (M)[1] |  |  |  | Mascot |

47 PREDICTED: transposon TX1 uncharacterized 149 kDa gi|326674296 180436.7 7.83 20 34 0  
protein-like [Danio rerio]

#### Peptide Information

| Calc. Mass | Obsrv. Mass | ± da    | ± ppm | Start Seq. | End Seq. | Sequence                   | Ion Score | C. I. % | Modification             | Rank | Result Type |
|------------|-------------|---------|-------|------------|----------|----------------------------|-----------|---------|--------------------------|------|-------------|
| 807.3995   | 807.3687    | -0.0308 | -38   | 469        | 475      | EFNGNVK                    |           |         |                          |      | Mascot      |
| 850.4087   | 850.5093    | 0.1006  | 118   | 595        | 601      | DITQAMR                    |           |         | Oxidation (M)[6]         |      | Mascot      |
| 860.4849   | 860.4314    | -0.0535 | -62   | 500        | 506      | HHVNVVR                    |           |         |                          |      | Mascot      |
| 868.5073   | 868.5179    | 0.0106  | 12    | 51         | 57       | QVHMILK                    |           |         |                          |      | Mascot      |
| 996.493    | 996.5589    | 0.0659  | 66    | 564        | 571      | KQCFSDLR                   |           |         |                          |      | Mascot      |
| 1045.5717  | 1045.5275   | -0.0442 | -42   | 662        | 669      | FFFSLEKK                   |           |         |                          |      | Mascot      |
| 1179.6455  | 1179.5624   | -0.0831 | -70   | 1218       | 1226     | VWRLFSLCR                  |           |         |                          |      | Mascot      |
| 1179.6844  | 1179.5624   | -0.122  | -103  | 855        | 864      | SILDNVHLIR                 |           |         |                          |      | Mascot      |
| 1302.7239  | 1302.6318   | -0.0921 | -71   | 307        | 316      | MQLYELIKHK                 |           |         |                          |      | Mascot      |
| 1320.5571  | 1320.5408   | -0.0163 | -12   | 87         | 97       | CFGCGQEGHLR                |           |         | Carbamidomethyl (C)[1,4] |      | Mascot      |
| 1475.71    | 1475.7058   | -0.0042 | -3    | 583        | 594      | LFCQQAFAFNVSR              |           |         |                          |      | Mascot      |
| 1631.7997  | 1631.7461   | -0.0536 | -33   | 439        | 452      | LDRNHVEPHANSSR             |           |         |                          |      | Mascot      |
| 1631.7997  | 1631.7461   | -0.0536 | -33   | 439        | 452      | LDRNHVEPHANSSR             |           |         |                          |      | Mascot      |
| 1638.7904  | 1638.8032   | 0.0128  | 8     | 648        | 661      | SRYQNLTQMDAPSK             |           |         |                          |      | Mascot      |
| 1707.775   | 1707.7107   | -0.0643 | -38   | 1357       | 1370     | DVNLTMQKGTMYK              |           |         | Oxidation (M)[6,7,12]    |      | Mascot      |
| 2053.0073  | 2052.9312   | -0.0761 | -37   | 476        | 491      | QYTWLHTRENFISMAR           |           |         |                          |      | Mascot      |
| 2205.0605  | 2205.0007   | -0.0598 | -27   | 675        | 694      | YIHSLCAENGQVLTDA<br>SDIR   |           |         |                          |      | Mascot      |
| 2230.1299  | 2230.1233   | -0.0066 | -3    | 1202       | 1220     | NICLNGLPSFYCGLFKV<br>WR    |           |         |                          |      | Mascot      |
| 2249.1885  | 2248.9861   | -0.2024 | -90   | 1271       | 1291     | HVVDVAGTELNNVDAV<br>TNLLR  |           |         |                          |      | Mascot      |
| 2297.25    | 2297.0933   | -0.1567 | -68   | 1422       | 1443     | ILHGIVAVNAFISVVNSS<br>VDDK |           |         |                          |      | Mascot      |
| 2298.0818  | 2298.1064   | 0.0246  | 11    | 2          | 23       | AAAMETPASAFSGDAP<br>FERLSR |           |         | Oxidation (M)[4]         |      | Mascot      |

48 tropomyosin beta chain [Danio rerio] gi|50344894 32569.7 4.68 10 34 0

#### Peptide Information

| Calc. Mass | Obsrv. Mass | ± da | ± ppm | Start Seq. | End Seq. | Sequence | Ion Score | C. I. % | Modification | Rank | Result Type |
|------------|-------------|------|-------|------------|----------|----------|-----------|---------|--------------|------|-------------|
|------------|-------------|------|-------|------------|----------|----------|-----------|---------|--------------|------|-------------|

|  |  |  |  |  |  |  |  |  |  |  |  |  |  |  |  |  |  |  |  |  |  |  |  |  |  |  |  |  |  |  |  |  |  |  |  |  |  |  |  |  |  |  |  |  |  |  |  |  |  |  |  |  |  |  |  |  |  |  |  |  |  |  |  |  |  |  |  |  |  |  |  |  |  |  |  |  |  |  |  |  |  |  |  |  |  |  |  |  |  |  |  |  |  |  |  |  |  |  |  |  |  |  |  |  |  |  |  |  |  |  |  |  |  |  |  |  |  |  |  |  |  |  |  |  |  |  |  |  |  |  |  |  |  |  |  |  |  |  |  |  |  |  |  |  |  |  |  |  |  |  |  |  |  |  |  |  |  |  |  |  |  |  |  |  |  |  |  |  |  |  |  |  |  |  |  |  |  |  |  |  |  |  |  |  |  |  |  |  |  |  |  |  |  |  |  |  |  |  |  |  |  |  |  |  |  |  |  |  |  |  |  |  |  |  |  |  |  |  |  |  |  |  |  |  |  |  |  |  |  |  |  |  |  |  |  |  |  |  |  |  |  |  |  |  |  |  |  |  |  |  |  |  |  |  |  |  |  |  |  |  |  |  |  |  |  |  |  |  |  |  |  |  |  |  |  |  |  |  |  |  |  |  |  |  |  |  |  |  |  |  |  |  |  |  |  |  |  |  |  |  |  |  |  |  |  |  |  |  |  |  |  |  |  |  |  |  |  |  |  |  |  |  |  |  |  |  |  |  |  |  |  |  |  |  |  |  |  |  |  |  |  |  |  |  |  |  |  |  |  |  |  |  |  |  |  |  |  |  |  |  |  |  |  |  |  |  |  |  |  |  |  |  |  |  |  |  |  |  |  |  |  |  |  |  |  |  |  |  |  |  |  |  |  |  |  |  |  |  |  |  |  |  |  |  |  |  |  |  |  |  |  |  |  |  |  |  |  |  |  |  |  |  |  |  |  |  |  |  |  |  |  |  |  |  |  |  |  |  |  |  |  |  |  |  |  |  |  |  |  |  |  |  |  |  |  |  |  |  |  |  |  |  |  |  |  |  |  |  |  |  |  |  |  |  |  |  |  |  |  |  |  |  |  |  |  |  |  |  |  |  |  |  |  |  |  |  |  |  |  |  |  |  |  |  |  |  |  |  |  |  |  |  |  |  |  |  |  |  |  |  |  |  |  |  |  |  |  |  |  |  |  |  |  |  |  |  |  |  |  |  |  |  |  |  |  |  |  |  |  |  |  |  |  |  |  |  |  |  |  |  |  |  |  |  |  |  |  |  |  |  |  |  |  |  |  |  |  |  |  |  |  |  |  |  |  |  |  |  |  |  |  |  |  |  |  |  |  |  |  |  |  |  |  |  |  |  |  |  |  |  |  |  |  |  |  |  |  |  |  |  |  |  |  |  |  |  |  |  |  |  |  |  |  |  |  |  |  |  |  |  |  |  |  |  |  |  |  |  |  |  |  |  |  |  |  |  |  |  |  |  |  |  |  |  |  |  |  |  |  |  |  |  |  |  |  |  |  |  |  |  |  |  |  |  |  |  |  |  |  |  |  |  |  |  |  |  |  |  |  |  |  |  |  |  |  |  |  |  |  |  |  |  |  |  |  |  |  |  |  |  |  |  |  |  |  |  |  |  |  |  |  |  |  |  |  |  |  |  |  |  |  |  |  |  |  |  |  |  |  |  |  |  |  |  |  |  |  |  |  |  |  |  |  |  |  |  |  |  |  |  |  |  |  |  |  |  |  |  |  |  |  |  |  |  |  |  |  |  |  |  |  |  |  |  |  |  |  |  |  |  |  |  |  |  |  |  |  |  |  |  |  |  |  |  |  |  |  |  |  |  |  |  |  |  |  |  |  |  |  |  |  |  |  |  |  |  |  |  |  |  |  |  |  |  |  |  |  |  |  |  |  |  |  |  |  |  |  |  |  |  |  |  |  |  |  |  |  |  |  |  |  |  |  |  |  |  |  |  |  |  |  |  |  |  |  |  |  |  |  |  |  |  |  |  |  |  |  |  |  |  |  |  |  |  |  |  |  |  |  |  |  |  |  |  |  |  |  |  |  |  |  |  |  |  |  |  |  |  |  |  |  |  |  |  |  |  |  |  |  |  |  |  |  |  |  |  |  |  |  |  |  |  |  |  |  |  |  |  |  |  |  |  |  |  |  |  |  |  |  |  |  |  |  |  |  |  |  |  |  |  |  |  |  |  |  |  |  |  |  |  |  |  |  |  |  |  |  |  |  |  |  |  |  |  |  |  |  |  |  |  |  |  |  |  |  |  |  |  |  |  |  |  |  |  |  |  |  |  |  |  |  |  |  |  |  |  |  |  |  |  |  |  |  |  |  |  |  |  |  |  |  |  |  |  |  |  |  |  |  |  |  |  |  |  |  |  |  |  |  |  |  |  |  |  |  |  |  |  |  |  |  |  |  |  |  |  |  |  |  |  |  |  |  |  |  |  |  |  |  |  |  |  |  |  |  |  |  |  |  |  |  |  |  |  |  |  |  |  |  |  |  |  |  |  |  |  |  |  |  |  |  |  |  |  |  |  |  |  |  |  |  |  |  |  |  |  |  |  |  |  |  |  |  |  |  |  |  |  |  |  |  |  |  |  |  |  |  |  |  |  |  |  |  |  |  |  |  |  |  |  |  |  |  |  |  |  |  |  |  |  |  |  |  |  |  |  |  |  |  |  |  |  |  |  |  |  |  |  |  |  |  |  |  |  |  |  |  |  |  |  |  |  |  |  |  |  |  |  |  |  |  |  |  |  |  |  |  |  |  |  |  |  |  |  |  |  |  |  |  |  |  |  |  |  |  |  |  |  |  |  |  |  |  |  |  |  |  |  |  |  |  |  |  |  |  |  |  |  |  |  |  |  |  |  |  |  |  |  |  |  |  |  |  |  |  |  |  |  |  |  |  |  |  |  |  |  |  |  |  |  |  |  |  |  |  |  |  |  |  |  |  |  |  |  |  |  |  |  |  |  |  |  |  |  |  |  |  |  |  |  |  |  |  |  |  |  |  |  |  |  |  |  |  |  |  |  |  |  |  |  |  |  |  |  |  |  |  |  |  |  |  |  |  |  |  |  |  |  |  |  |  |  |  |  |  |  |  |  |  |  |  |  |  |  |  |  |  |  |  |  |  |  |  |  |  |  |  |  |  |  |  |  |  |  |  |  |  |  |  |  |  |  |  |  |  |  |  |  |
|--|--|--|--|--|--|--|--|--|--|--|--|--|--|--|--|--|--|--|--|--|--|--|--|--|--|--|--|--|--|--|--|--|--|--|--|--|--|--|--|--|--|--|--|--|--|--|--|--|--|--|--|--|--|--|--|--|--|--|--|--|--|--|--|--|--|--|--|--|--|--|--|--|--|--|--|--|--|--|--|--|--|--|--|--|--|--|--|--|--|--|--|--|--|--|--|--|--|--|--|--|--|--|--|--|--|--|--|--|--|--|--|--|--|--|--|--|--|--|--|--|--|--|--|--|--|--|--|--|--|--|--|--|--|--|--|--|--|--|--|--|--|--|--|--|--|--|--|--|--|--|--|--|--|--|--|--|--|--|--|--|--|--|--|--|--|--|--|--|--|--|--|--|--|--|--|--|--|--|--|--|--|--|--|--|--|--|--|--|--|--|--|--|--|--|--|--|--|--|--|--|--|--|--|--|--|--|--|--|--|--|--|--|--|--|--|--|--|--|--|--|--|--|--|--|--|--|--|--|--|--|--|--|--|--|--|--|--|--|--|--|--|--|--|--|--|--|--|--|--|--|--|--|--|--|--|--|--|--|--|--|--|--|--|--|--|--|--|--|--|--|--|--|--|--|--|--|--|--|--|--|--|--|--|--|--|--|--|--|--|--|--|--|--|--|--|--|--|--|--|--|--|--|--|--|--|--|--|--|--|--|--|--|--|--|--|--|--|--|--|--|--|--|--|--|--|--|--|--|--|--|--|--|--|--|--|--|--|--|--|--|--|--|--|--|--|--|--|--|--|--|--|--|--|--|--|--|--|--|--|--|--|--|--|--|--|--|--|--|--|--|--|--|--|--|--|--|--|--|--|--|--|--|--|--|--|--|--|--|--|--|--|--|--|--|--|--|--|--|--|--|--|--|--|--|--|--|--|--|--|--|--|--|--|--|--|--|--|--|--|--|--|--|--|--|--|--|--|--|--|--|--|--|--|--|--|--|--|--|--|--|--|--|--|--|--|--|--|--|--|--|--|--|--|--|--|--|--|--|--|--|--|--|--|--|--|--|--|--|--|--|--|--|--|--|--|--|--|--|--|--|--|--|--|--|--|--|--|--|--|--|--|--|--|--|--|--|--|--|--|--|--|--|--|--|--|--|--|--|--|--|--|--|--|--|--|--|--|--|--|--|--|--|--|--|--|--|--|--|--|--|--|--|--|--|--|--|--|--|--|--|--|--|--|--|--|--|--|--|--|--|--|--|--|--|--|--|--|--|--|--|--|--|--|--|--|--|--|--|--|--|--|--|--|--|--|--|--|--|--|--|--|--|--|--|--|--|--|--|--|--|--|--|--|--|--|--|--|--|--|--|--|--|--|--|--|--|--|--|--|--|--|--|--|--|--|--|--|--|--|--|--|--|--|--|--|--|--|--|--|--|--|--|--|--|--|--|--|--|--|--|--|--|--|--|--|--|--|--|--|--|--|--|--|--|--|--|--|--|--|--|--|--|--|--|--|--|--|--|--|--|--|--|--|--|--|--|--|--|--|--|--|--|--|--|--|--|--|--|--|--|--|--|--|--|--|--|--|--|--|--|--|--|--|--|--|--|--|--|--|--|--|--|--|--|--|--|--|--|--|--|--|--|--|--|--|--|--|--|--|--|--|--|--|--|--|--|--|--|--|--|--|--|--|--|--|--|--|--|--|--|--|--|--|--|--|--|--|--|--|--|--|--|--|--|--|--|--|--|--|--|--|--|--|--|--|--|--|--|--|--|--|--|--|--|--|--|--|--|--|--|--|--|--|--|--|--|--|--|--|--|--|--|--|--|--|--|--|--|--|--|--|--|--|--|--|--|--|--|--|--|--|--|--|--|--|--|--|--|--|--|--|--|--|--|--|--|--|--|--|--|--|--|--|--|--|--|--|--|--|--|--|--|--|--|--|--|--|--|--|--|--|--|--|--|--|--|--|--|--|--|--|--|--|--|--|--|--|--|--|--|--|--|--|--|--|--|--|--|--|--|--|--|--|--|--|--|--|--|--|--|--|--|--|--|--|--|--|--|--|--|--|--|--|--|--|--|--|--|--|--|--|--|--|--|--|--|--|--|--|--|--|--|--|--|--|--|--|--|--|--|--|--|--|--|--|--|--|--|--|--|--|--|--|--|--|--|--|--|--|--|--|--|--|--|--|--|--|--|--|--|--|--|--|--|--|--|--|--|--|--|--|--|--|--|--|--|--|--|--|--|--|--|--|--|--|--|--|--|--|--|--|--|--|--|--|--|--|--|--|--|--|--|--|--|--|--|--|--|--|--|--|--|--|--|--|--|--|--|--|--|--|--|--|--|--|--|--|--|--|--|--|--|--|--|--|--|--|--|--|--|--|--|--|--|--|--|--|--|--|--|--|--|--|--|--|--|--|--|--|--|--|--|--|--|--|--|--|--|--|--|--|--|--|--|--|--|--|--|--|--|--|--|--|--|--|--|--|--|--|--|--|--|--|--|--|--|--|--|--|--|--|--|--|--|--|--|--|--|--|--|--|--|--|--|--|--|--|--|--|--|--|--|--|--|--|--|--|--|--|--|--|--|--|--|--|--|--|--|--|--|--|--|--|--|--|--|--|--|--|--|--|--|--|--|--|--|--|--|--|--|--|--|--|--|--|--|--|--|--|--|--|--|--|--|--|--|--|--|--|--|--|--|--|--|--|--|--|--|--|--|--|--|--|--|--|--|--|--|--|--|--|--|--|--|--|--|--|--|--|--|--|--|--|--|--|--|--|--|--|--|--|--|--|--|--|--|--|--|--|--|--|--|--|--|--|--|--|--|--|--|--|--|--|--|--|--|--|--|--|--|--|--|--|--|--|--|--|--|--|--|--|--|--|--|--|--|--|--|--|--|--|--|--|--|--|--|--|--|--|--|--|--|--|--|--|--|--|--|--|--|--|--|--|--|--|--|--|--|--|--|--|--|--|--|--|--|--|--|--|--|--|--|--|--|--|--|--|--|--|--|--|--|--|--|--|--|--|--|--|--|--|--|--|--|--|--|--|--|--|--|--|--|--|--|--|--|--|--|--|--|--|--|--|--|--|--|--|--|--|--|--|--|--|--|--|--|--|--|--|--|--|--|--|--|--|--|--|--|--|--|--|--|--|--|--|--|--|--|--|--|--|--|--|--|--|--|--|--|--|--|--|--|--|--|--|--|--|--|--|--|--|--|--|--|--|--|--|--|
|  |  |  |  |  |  |  |  |  |  |  |  |  |  |  |  |  |  |  |  |  |  |  |  |  |  |  |  |  |  |  |  |  |  |  |  |  |  |  |  |  |  |  |  |  |  |  |  |  |  |  |  |  |  |  |  |  |  |  |  |  |  |  |  |  |  |  |  |  |  |  |  |  |  |  |  |  |  |  |  |  |  |  |  |  |  |  |  |  |  |  |  |  |  |  |  |  |  |  |  |  |  |  |  |  |  |  |  |  |  |  |  |  |  |  |  |  |  |  |  |  |  |  |  |  |  |  |  |  |  |  |  |  |  |  |  |  |  |  |  |  |  |  |  |  |  |  |  |  |  |  |  |  |  |  |  |  |  |  |  |  |  |  |  |  |  |  |  |  |  |  |  |  |  |  |  |  |  |  |  |  |  |  |  |  |  |  |  |  |  |  |  |  |  |  |  |  |  |  |  |  |  |  |  |  |  |  |  |  |  |  |  |  |  |  |  |  |  |  |  |  |  |  |  |  |  |  |  |  |  |  |  |  |  |  |  |  |  |  |  |  |  |  |  |  |  |  |  |  |  |  |  |  |  |  |  |  |  |  |  |  |  |  |  |  |  |  |  |  |  |  |  |  |  |  |  |  |  |  |  |  |  |  |  |  |  |  |  |  |  |  |  |  |  |  |  |  |  |  |  |  |  |  |  |  |  |  |  |  |  |  |  |  |  |  |  |  |  |  |  |  |  |  |  |  |  |  |  |  |  |  |  |  |  |  |  |  |  |  |  |  |  |  |  |  |  |  |  |  |  |  |  |  |  |  |  |  |  |  |  |  |  |  |  |  |  |  |  |  |  |  |  |  |  |  |  |  |  |  |  |  |  |  |  |  |  |  |  |  |  |  |  |  |  |  |  |  |  |  |  |  |  |  |  |  |  |  |  |  |  |  |  |  |  |  |  |  |  |  |  |  |  |  |  |  |  |  |  |  |  |  |  |  |  |  |  |  |  |  |  |  |  |  |  |  |  |  |  |  |  |  |  |  |  |  |  |  |  |  |  |  |  |  |  |  |  |  |  |  |  |  |  |  |  |  |  |  |  |  |  |  |  |  |  |  |  |  |  |  |  |  |  |  |  |  |  |  |  |  |  |  |  |  |  |  |  |  |  |  |  |  |  |  |  |  |  |  |  |  |  |  |  |  |  |  |  |  |  |  |  |  |  |  |  |  |  |  |  |  |  |  |  |  |  |  |  |  |  |  |  |  |  |  |  |  |  |  |  |  |  |  |  |  |  |  |  |  |  |  |  |  |  |  |  |  |  |  |  |  |  |  |  |  |  |  |  |  |  |  |  |  |  |  |  |  |  |  |  |  |  |  |  |  |  |  |  |  |  |  |  |  |  |  |  |  |  |  |  |  |  |  |  |  |  |  |  |  |  |  |  |  |  |  |  |  |  |  |  |  |  |  |  |  |  |  |  |  |  |  |  |  |  |  |  |  |  |  |  |  |  |  |  |  |  |  |  |  |  |  |  |  |  |  |  |  |  |  |  |  |  |  |  |  |  |  |  |  |  |  |  |  |  |  |  |  |  |  |  |  |  |  |  |  |  |  |  |  |  |  |  |  |  |  |  |  |  |  |  |  |  |  |  |  |  |  |  |  |  |  |  |  |  |  |  |  |  |  |  |  |  |  |  |  |  |  |  |  |  |  |  |  |  |  |  |  |  |  |  |  |  |  |  |  |  |  |  |  |  |  |  |  |  |  |  |  |  |  |  |  |  |  |  |  |  |  |  |  |  |  |  |  |  |  |  |  |  |  |  |  |  |  |  |  |  |  |  |  |  |  |  |  |  |  |  |  |  |  |  |  |  |  |  |  |  |  |  |  |  |  |  |  |  |  |  |  |  |  |  |  |  |  |  |  |  |  |  |  |  |  |  |  |  |  |  |  |  |  |  |  |  |  |  |  |  |  |  |  |  |  |  |  |  |  |  |  |  |  |  |  |  |  |  |  |  |  |  |  |  |  |  |  |  |  |  |  |  |  |  |  |  |  |  |  |  |  |  |  |  |  |  |  |  |  |  |  |  |  |  |  |  |  |  |  |  |  |  |  |  |  |  |  |  |  |  |  |  |  |  |  |  |  |  |  |  |  |  |  |  |  |  |  |  |  |  |  |  |  |  |  |  |  |  |  |  |  |  |  |  |  |  |  |  |  |  |  |  |  |  |  |  |  |  |  |  |  |  |  |  |  |  |  |  |  |  |  |  |  |  |  |  |  |  |  |  |  |  |  |  |  |  |  |  |  |  |  |  |  |  |  |  |  |  |  |  |  |  |  |  |  |  |  |  |  |  |  |  |  |  |  |  |  |  |  |  |  |  |  |  |  |  |  |  |  |  |  |  |  |  |  |  |  |  |  |  |  |  |  |  |  |  |  |  |  |  |  |  |  |  |  |  |  |  |  |  |  |  |  |  |  |  |  |  |  |  |  |  |  |  |  |  |  |  |  |  |  |  |  |  |  |  |  |  |  |  |  |  |  |  |  |  |  |  |  |  |  |  |  |  |  |  |  |  |  |  |  |  |  |  |  |  |  |  |  |  |  |  |  |  |  |  |  |  |  |  |  |  |  |  |  |  |  |  |  |  |  |  |  |  |  |  |  |  |  |  |  |  |  |  |  |  |  |  |  |  |  |  |  |  |  |  |  |  |  |  |  |  |  |  |  |  |  |  |  |  |  |  |  |  |  |  |  |  |  |  |  |  |  |  |  |  |  |  |  |  |  |  |  |  |  |  |  |  |  |  |  |  |  |  |  |  |  |  |  |  |  |  |  |  |  |  |  |  |  |  |  |  |  |  |  |  |  |  |  |  |  |  |  |  |  |  |  |  |  |  |  |  |  |  |  |  |  |  |  |  |  |  |  |  |  |  |  |  |  |  |  |  |  |  |  |  |  |  |  |  |  |  |  |  |  |  |  |  |  |  |  |  |  |  |  |  |  |  |  |  |  |  |  |  |  |  |  |  |  |  |  |  |  |  |  |  |  |  |  |  |  |  |  |  |  |  |  |  |  |  |  |  |  |  |  |  |  |  |  |  |  |  |  |  |  |  |  |  |  |  |  |  |  |  |  |  |  |  |  |  |  |  |  |  |  |  |  |  |  |  |  |  |  |  |  |  |  |  |  |  |  |  |  |  |  |  |  |  |  |  |  |  |  |  |  |  |  |  |  |  |  |  |  |  |  |
|--|--|--|--|--|--|--|--|--|--|--|--|--|--|--|--|--|--|--|--|--|--|--|--|--|--|--|--|--|--|--|--|--|--|--|--|--|--|--|--|--|--|--|--|--|--|--|--|--|--|--|--|--|--|--|--|--|--|--|--|--|--|--|--|--|--|--|--|--|--|--|--|--|--|--|--|--|--|--|--|--|--|--|--|--|--|--|--|--|--|--|--|--|--|--|--|--|--|--|--|--|--|--|--|--|--|--|--|--|--|--|--|--|--|--|--|--|--|--|--|--|--|--|--|--|--|--|--|--|--|--|--|--|--|--|--|--|--|--|--|--|--|--|--|--|--|--|--|--|--|--|--|--|--|--|--|--|--|--|--|--|--|--|--|--|--|--|--|--|--|--|--|--|--|--|--|--|--|--|--|--|--|--|--|--|--|--|--|--|--|--|--|--|--|--|--|--|--|--|--|--|--|--|--|--|--|--|--|--|--|--|--|--|--|--|--|--|--|--|--|--|--|--|--|--|--|--|--|--|--|--|--|--|--|--|--|--|--|--|--|--|--|--|--|--|--|--|--|--|--|--|--|--|--|--|--|--|--|--|--|--|--|--|--|--|--|--|--|--|--|--|--|--|--|--|--|--|--|--|--|--|--|--|--|--|--|--|--|--|--|--|--|--|--|--|--|--|--|--|--|--|--|--|--|--|--|--|--|--|--|--|--|--|--|--|--|--|--|--|--|--|--|--|--|--|--|--|--|--|--|--|--|--|--|--|--|--|--|--|--|--|--|--|--|--|--|--|--|--|--|--|--|--|--|--|--|--|--|--|--|--|--|--|--|--|--|--|--|--|--|--|--|--|--|--|--|--|--|--|--|--|--|--|--|--|--|--|--|--|--|--|--|--|--|--|--|--|--|--|--|--|--|--|--|--|--|--|--|--|--|--|--|--|--|--|--|--|--|--|--|--|--|--|--|--|--|--|--|--|--|--|--|--|--|--|--|--|--|--|--|--|--|--|--|--|--|--|--|--|--|--|--|--|--|--|--|--|--|--|--|--|--|--|--|--|--|--|--|--|--|--|--|--|--|--|--|--|--|--|--|--|--|--|--|--|--|--|--|--|--|--|--|--|--|--|--|--|--|--|--|--|--|--|--|--|--|--|--|--|--|--|--|--|--|--|--|--|--|--|--|--|--|--|--|--|--|--|--|--|--|--|--|--|--|--|--|--|--|--|--|--|--|--|--|--|--|--|--|--|--|--|--|--|--|--|--|--|--|--|--|--|--|--|--|--|--|--|--|--|--|--|--|--|--|--|--|--|--|--|--|--|--|--|--|--|--|--|--|--|--|--|--|--|--|--|--|--|--|--|--|--|--|--|--|--|--|--|--|--|--|--|--|--|--|--|--|--|--|--|--|--|--|--|--|--|--|--|--|--|--|--|--|--|--|--|--|--|--|--|--|--|--|--|--|--|--|--|--|--|--|--|--|--|--|--|--|--|--|--|--|--|--|--|--|--|--|--|--|--|--|--|--|--|--|--|--|--|--|--|--|--|--|--|--|--|--|--|--|--|--|--|--|--|--|--|--|--|--|--|--|--|--|--|--|--|--|--|--|--|--|--|--|--|--|--|--|--|--|--|--|--|--|--|--|--|--|--|--|--|--|--|--|--|--|--|--|--|--|--|--|--|--|--|--|--|--|--|--|--|--|--|--|--|--|--|--|--|--|--|--|--|--|--|--|--|--|--|--|--|--|--|--|--|--|--|--|--|--|--|--|--|--|--|--|--|--|--|--|--|--|--|--|--|--|--|--|--|--|--|--|--|--|--|--|--|--|--|--|--|--|--|--|--|--|--|--|--|--|--|--|--|--|--|--|--|--|--|--|--|--|--|--|--|--|--|--|--|--|--|--|--|--|--|--|--|--|--|--|--|--|--|--|--|--|--|--|--|--|--|--|--|--|--|--|--|--|--|--|--|--|--|--|--|--|--|--|--|--|--|--|--|--|--|--|--|--|--|--|--|--|--|--|--|--|--|--|--|--|--|--|--|--|--|--|--|--|--|--|--|--|--|--|--|--|--|--|--|--|--|--|--|--|--|--|--|--|--|--|--|--|--|--|--|--|--|--|--|--|--|--|--|--|--|--|--|--|--|--|--|--|--|--|--|--|--|--|--|--|--|--|--|--|--|--|--|--|--|--|--|--|--|--|--|--|--|--|--|--|--|--|--|--|--|--|--|--|--|--|--|--|--|--|--|--|--|--|--|--|--|--|--|--|--|--|--|--|--|--|--|--|--|--|--|--|--|--|--|--|--|--|--|--|--|--|--|--|--|--|--|--|--|--|--|--|--|--|--|--|--|--|--|--|--|--|--|--|--|--|--|--|--|--|--|--|--|--|--|--|--|--|--|--|--|--|--|--|--|--|--|--|--|--|--|--|--|--|--|--|--|--|--|--|--|--|--|--|--|--|--|--|--|--|--|--|--|--|--|--|--|--|--|--|--|--|--|--|--|--|--|--|--|--|--|--|--|--|--|--|--|--|--|--|--|--|--|--|--|--|--|--|--|--|--|--|--|--|--|--|--|--|--|--|--|--|--|--|--|--|--|--|--|--|--|--|--|--|--|--|--|--|--|--|--|--|--|--|--|--|--|--|--|--|--|--|--|--|--|--|--|--|--|--|--|--|--|--|--|--|--|--|--|--|--|--|--|--|--|--|--|--|--|--|--|--|--|--|--|--|--|--|--|--|--|--|--|--|--|--|--|--|--|--|--|--|--|--|--|--|--|--|--|--|--|--|--|--|--|--|--|--|--|--|--|--|--|--|--|--|--|--|--|--|--|--|--|--|--|--|--|--|--|--|--|--|--|--|--|--|--|--|--|--|--|--|--|--|--|--|--|--|--|--|--|--|--|--|--|--|--|--|--|--|--|--|--|--|--|--|--|--|--|--|--|--|--|--|--|--|--|--|--|--|--|--|--|--|--|--|--|--|--|--|--|--|--|--|--|--|--|--|--|--|--|--|--|--|--|--|--|--|--|--|--|--|--|--|--|--|--|--|--|--|--|--|--|--|--|--|--|--|--|--|--|--|--|--|--|--|--|--|--|--|--|--|--|--|--|--|--|--|--|--|--|--|--|--|--|--|--|--|--|--|--|--|--|--|--|--|--|--|--|--|--|--|--|--|--|--|--|--|--|--|--|--|--|--|--|--|--|--|--|--|--|--|--|--|--|--|--|

#### Peptide Information

|  | Calc. Mass | Obsrv. Mass | ± da    | ± ppm | Start Seq. | End Seq. | Sequence                   | Ion Score | C. I. | % Modification    | Rank | Result Type |
|--|------------|-------------|---------|-------|------------|----------|----------------------------|-----------|-------|-------------------|------|-------------|
|  | 850.4087   | 850.5093    | 0.1006  | 118   | 149        | 155      | KGQENMK                    |           |       | Oxidation (M)[6]  |      | Mascot      |
|  | 941.4839   | 941.5463    | 0.0624  | 66    | 123        | 129      | FQAEKYR                    |           |       |                   |      | Mascot      |
|  | 941.4839   | 941.5463    | 0.0624  | 66    | 123        | 129      | FQAEKYR                    |           |       |                   |      | Mascot      |
|  | 1280.6667  | 1280.5992   | -0.0675 | -53   | 164        | 173      | MLEYALKQER                 |           |       |                   |      | Mascot      |
|  | 1280.6667  | 1280.5992   | -0.0675 | -53   | 164        | 173      | MLEYALKQER                 |           |       |                   |      | Mascot      |
|  | 1631.85    | 1631.7461   | -0.1039 | -64   | 135        | 148      | DELRAQVAFLQGER             |           |       |                   |      | Mascot      |
|  | 1631.85    | 1631.7461   | -0.1039 | -64   | 135        | 148      | DELRAQVAFLQGER             |           |       |                   |      | Mascot      |
|  | 1638.7136  | 1638.8032   | 0.0896  | 55    | 49         | 67       | SGGMAGGTSQSPAGSG TGR       |           |       | Oxidation (M)[4]  |      | Mascot      |
|  | 2211.1187  | 2211.0291   | -0.0896 | -41   | 74         | 98       | AVLGPPASAVAAAAAGP MAGSSQSR |           |       | Oxidation (M)[18] |      | Mascot      |
|  | 2230.0264  | 2230.1233   | 0.0969  | 43    | 49         | 73       | SGGMAGGTSQSPAGSG TGRNPNGPK |           |       |                   |      | Mascot      |

50 PREDICTED: ankyrin repeat and SOCS box protein 14-like [Danio rerio] gi|326672037 66182.4 6.34 1 24 0

#### Peptide Information

|  | Calc. Mass | Obsrv. Mass | ± da   | ± ppm | Start Seq. | End Seq. | Sequence | Ion Score | C. I. | % Modification | Rank | Result Type |
|--|------------|-------------|--------|-------|------------|----------|----------|-----------|-------|----------------|------|-------------|
|  | 941.5414   | 941.5463    | 0.0049 | 5     | 45         | 52       | IVQISPER | 24        | 0     |                | 2    | Mascot      |

|                |           |                        |                |                |                    |
|----------------|-----------|------------------------|----------------|----------------|--------------------|
| Gel Idx/Pos    | 263/K15   | Instr./Gel Origin      | BA2060/110707A | Process Status | Analysis Succeeded |
| Plate [#] Name | [1] 31496 | Instrument Sample Name |                | Spectra        | 11                 |

| Rank | Protein Name                  | Accession No. | Protein MW | Protein PI | Pep. Count | Protein Score | Protein Score C. I. % | Total Ion Score | Total Ion C. I. % |
|------|-------------------------------|---------------|------------|------------|------------|---------------|-----------------------|-----------------|-------------------|
| 1    | cofilin 2, like [Danio rerio] | gi 47271384   | 18758.6    | 6.84       | 9          | 209           | 100                   | 152             | 100               |

Peptide Information

| Calc. Mass | Obsrv. Mass | ± da    | ± ppm | Start Seq. | End Seq. | Sequence               | Ion Score | C. I. % | Modification                             | Rank | Result Type |
|------------|-------------|---------|-------|------------|----------|------------------------|-----------|---------|------------------------------------------|------|-------------|
| 1002.4495  | 1002.4149   | -0.0346 | -35   | 71         | 78       | MLPPNDCR               |           |         | Carbamidomethyl (C)[7]                   |      | Mascot      |
| 1018.4444  | 1018.4113   | -0.0331 | -33   | 71         | 78       | MLPPNDCR               | 24        | 8.628   | Carbamidomethyl (C)[7], Oxidation (M)[1] |      | Mascot      |
| 1018.4444  | 1018.4113   | -0.0331 | -33   | 71         | 78       | MLPPNDCR               |           |         | Carbamidomethyl (C)[7], Oxidation (M)[1] |      | Mascot      |
| 1337.626   | 1337.5823   | -0.0437 | -33   | 79         | 89       | YALYDATYETK            |           |         |                                          |      | Mascot      |
| 1337.626   | 1337.5823   | -0.0437 | -33   | 79         | 89       | YALYDATYETK            | 66        | 99.994  |                                          |      | Mascot      |
| 1487.6583  | 1487.6096   | -0.0487 | -33   | 130        | 141      | HEWQVNGMDDIK           |           |         | Oxidation (M)[8]                         |      | Mascot      |
| 1542.8373  | 1542.786    | -0.0513 | -33   | 150        | 165      | LGGASVVSLEGKPLTD       |           |         |                                          |      | Mascot      |
| 1742.7915  | 1742.7335   | -0.058  | -33   | 130        | 143      | HEWQVNGMDDIKDR         |           |         |                                          |      | Mascot      |
| 1758.7864  | 1758.7297   | -0.0567 | -32   | 130        | 143      | HEWQVNGMDDIKDR         |           |         | Oxidation (M)[8]                         |      | Mascot      |
| 1990.0684  | 1990.0033   | -0.0651 | -33   | 93         | 109      | KEDLVFIFWAPESAPLK      |           |         |                                          |      | Mascot      |
| 2033.9749  | 2033.9081   | -0.0668 | -33   | 125        | 141      | FTGIKHEWQVNGMDDIK      |           |         | Oxidation (M)[13]                        |      | Mascot      |
| 2225.1482  | 2225.0488   | -0.0994 | -45   | 2          | 21       | ASGVTVEETVLTVFNEMK VR  |           |         | Oxidation (M)[17]                        |      | Mascot      |
| 2225.1482  | 2225.0488   | -0.0994 | -45   | 2          | 21       | ASGVTVEETVLTVFNEMK VR  |           |         | Oxidation (M)[17]                        |      | Mascot      |
| 2413.1704  | 2413.0979   | -0.0725 | -30   | 47         | 67       | HIIMEQQQEILQGDEGDP YLK |           |         |                                          |      | Mascot      |
| 2429.1653  | 2429.0942   | -0.0711 | -29   | 47         | 67       | HIIMEQQQEILQGDEGDP YLK |           |         | Oxidation (M)[4]                         |      | Mascot      |
| 2429.1653  | 2429.0942   | -0.0711 | -29   | 47         | 67       | HIIMEQQQEILQGDEGDP YLK | 62        | 99.983  | Oxidation (M)[4]                         |      | Mascot      |

|   |                                                       |              |         |      |    |    |   |  |  |
|---|-------------------------------------------------------|--------------|---------|------|----|----|---|--|--|
| 2 | S-adenosylhomocysteine hydrolase-like 1 [Danio rerio] | gi 148725375 | 61342.4 | 6.58 | 11 | 38 | 0 |  |  |
|---|-------------------------------------------------------|--------------|---------|------|----|----|---|--|--|

Peptide Information

| Calc. Mass | Obsrv. Mass | ± da    | ± ppm | Start Seq. | End Seq. | Sequence    | Ion Score | C. I. % | Modification | Rank | Result Type |
|------------|-------------|---------|-------|------------|----------|-------------|-----------|---------|--------------|------|-------------|
| 842.3712   | 842.4845    | 0.1133  | 135   | 125        | 132      | GSSDFCVK    |           |         |              |      | Mascot      |
| 868.4926   | 868.5161    | 0.0235  | 27    | 265        | 271      | YPSVFKK     |           |         |              |      | Mascot      |
| 870.5406   | 870.5145    | -0.0261 | -30   | 458        | 465      | VILLAEGR    |           |         |              |      | Mascot      |
| 1062.5691  | 1062.6591   | 0.09    | 85    | 133        | 141      | NIKQAEFGR   |           |         |              |      | Mascot      |
| 1069.6     | 1069.6053   | 0.0053  | 5     | 161        | 171      | AQGEKPLAGAK |           |         |              |      | Mascot      |

|   |                                                  |           |         |     |     |     |                                      |         |       |   |                                          |   |        |
|---|--------------------------------------------------|-----------|---------|-----|-----|-----|--------------------------------------|---------|-------|---|------------------------------------------|---|--------|
|   | 1092.532                                         | 1092.5529 | 0.0209  | 19  | 64  | 72  | IQFANQEDK                            |         |       |   |                                          |   | Mascot |
|   | 1542.7217                                        | 1542.786  | 0.0643  | 42  | 119 | 132 | SQVNSKGSSDFCVK                       |         |       |   | Carbamidomethyl (C)[12]                  |   | Mascot |
|   | 1758.8214                                        | 1758.7297 | -0.0917 | -52 | 22  | 37  | ESENVAEKYSAMTATK                     |         |       |   |                                          |   | Mascot |
|   | 1990.0273                                        | 1990.0033 | -0.024  | -12 | 142 | 158 | REIEIAEQDMSALISLR                    |         |       |   | Oxidation (M)[10]                        |   | Mascot |
|   | 2233.0159                                        | 2233.0164 | 0.0005  | 0   | 414 | 434 | NGCIVCNMGHSNTEIDV<br>SLR             |         |       |   |                                          |   | Mascot |
|   | 2249.0107                                        | 2248.9939 | -0.0168 | -7  | 414 | 434 | NGCIVCNMGHSNTEIDV<br>SLR             |         |       |   | Oxidation (M)[8]                         |   | Mascot |
|   | 2306.0322                                        | 2306.0542 | 0.022   | 10  | 414 | 434 | NGCIVCNMGHSNTEIDV<br>SLR             |         |       |   | Carbamidomethyl (C)[3], Oxidation (M)[8] |   | Mascot |
|   | 3499.6333                                        | 3499.7527 | 0.1194  | 34  | 349 | 380 | GCCSALKALGAIVCVTEI<br>DPICALQACMDGFR |         |       |   | Carbamidomethyl (C)[2,3,14,22]           |   | Mascot |
| 3 | mitochondrial uncoupling protein 3 [Danio rerio] |           |         |     |     |     | gi 37681967                          | 33714.6 | 10.02 | 8 | 38                                       | 0 |        |

#### Peptide Information

| Calc. Mass | Obsrv. Mass | ± da    | ± ppm | Start Seq. | End Seq. | Sequence                     | Ion Score | C. I. % | Modification                              | Rank | Result Type |
|------------|-------------|---------|-------|------------|----------|------------------------------|-----------|---------|-------------------------------------------|------|-------------|
| 850.4385   | 850.5157    | 0.0772  | 91    | 296        | 302      | RAMMVSR                      |           |         |                                           |      | Mascot      |
| 850.4385   | 850.5157    | 0.0772  | 91    | 296        | 302      | RAMMVSR                      |           |         |                                           |      | Mascot      |
| 866.5206   | 866.5067    | -0.0139 | -16   | 202        | 208      | EAILKHR                      |           |         |                                           |      | Mascot      |
| 882.4283   | 882.5367    | 0.1084  | 123   | 296        | 302      | RAMMVSR                      |           |         | Oxidation (M)[3,4]                        |      | Mascot      |
| 996.4713   | 996.5637    | 0.0924  | 93    | 297        | 304      | AMMVSRNR                     |           |         | Oxidation (M)[2,3]                        |      | Mascot      |
| 996.4713   | 996.5637    | 0.0924  | 93    | 297        | 304      | AMMVSRNR                     |           |         | Oxidation (M)[2,3]                        |      | Mascot      |
| 1069.5748  | 1069.6053   | 0.0305  | 29    | 109        | 118      | GKDNPNVAVR                   |           |         |                                           |      | Mascot      |
| 1677.9608  | 1677.8413   | -0.1195 | -71   | 1          | 16       | MVGLKPSDVPPLTVK              |           |         |                                           |      | Mascot      |
| 2211.1702  | 2211.0334   | -0.1368 | -62   | 76         | 95       | SLYNGLVAGLQRQMAFA<br>SIR     |           |         | Oxidation (M)[14]                         |      | Mascot      |
| 2237.0974  | 2237.0339   | -0.0635 | -28   | 119        | 140      | ILAGCTTGAMAVSMAQP<br>TDVVK   |           |         | Carbamidomethyl (C)[5], Oxidation (M)[10] |      | Mascot      |
| 2451.2405  | 2451.0718   | -0.1687 | -69   | 119        | 142      | ILAGCTTGAMAVSMAQP<br>TDVVKVR |           |         | Oxidation (M)[10,14]                      |      | Mascot      |

|   |                                                              |  |  |  |  |  |             |         |      |   |    |   |  |
|---|--------------------------------------------------------------|--|--|--|--|--|-------------|---------|------|---|----|---|--|
| 4 | bcl-2-related ovarian killer protein homolog B [Danio rerio] |  |  |  |  |  | gi 41055421 | 23818.6 | 7.71 | 7 | 38 | 0 |  |
|---|--------------------------------------------------------------|--|--|--|--|--|-------------|---------|------|---|----|---|--|

#### Peptide Information

| Calc. Mass | Obsrv. Mass | ± da    | ± ppm | Start Seq. | End Seq. | Sequence | Ion Score | C. I. % | Modification                             | Rank | Result Type |
|------------|-------------|---------|-------|------------|----------|----------|-----------|---------|------------------------------------------|------|-------------|
| 842.5134   | 842.4845    | -0.0289 | -34   | 161        | 167      | SLVPWLK  |           |         |                                          |      | Mascot      |
| 850.4668   | 850.5157    | 0.0489  | 57    | 26         | 32       | ELVFQSK  |           |         |                                          |      | Mascot      |
| 850.4668   | 850.5157    | 0.0489  | 57    | 26         | 32       | ELVFQSK  |           |         |                                          |      | Mascot      |
| 996.4236   | 996.5637    | 0.1401  | 141   | 178        | 185      | CVVNMDSR |           |         | Carbamidomethyl (C)[1], Oxidation (M)[5] |      | Mascot      |
| 996.4236   | 996.5637    | 0.1401  | 141   | 178        | 185      | CVVNMDSR |           |         | Carbamidomethyl (C)[1], Oxidation (M)[5] |      | Mascot      |
| 1018.5277  | 1018.4113   | -0.1164 | -114  | 204        | 211      | TMVYVLTk |           |         |                                          |      | Mascot      |

|           |           |         |      |     |     |                          |  |  |  |                  |  |        |
|-----------|-----------|---------|------|-----|-----|--------------------------|--|--|--|------------------|--|--------|
| 1018.5277 | 1018.4113 | -0.1164 | -114 | 204 | 211 | TMYVYLTK                 |  |  |  |                  |  | Mascot |
| 1759.8142 | 1759.7213 | -0.0929 | -53  | 74  | 87  | LGDELECMRPYVYR           |  |  |  | Oxidation (M)[8] |  | Mascot |
| 2194.1919 | 2194.0217 | -0.1702 | -78  | 186 | 203 | AHVHWLSTAVLTWREFIK       |  |  |  |                  |  | Mascot |
| 2271.126  | 2270.9895 | -0.1365 | -60  | 1   | 20  | MNVFARSSVLAAEMIDVF<br>DR |  |  |  |                  |  | Mascot |

5 novel protein similar to vertebrate protein kinase C, theta (PRKCQ) [Danio rerio] gi|55962227 81064.5 7.59 14 37 0

#### Peptide Information

| Calc. Mass | Obsrv. Mass | ± da    | ± ppm | Start Seq. | End Seq. | Sequence                        | Ion Score | C. I. | % Modification                           | Rank | Result Type |
|------------|-------------|---------|-------|------------|----------|---------------------------------|-----------|-------|------------------------------------------|------|-------------|
| 850.4781   | 850.5157    | 0.0376  | 44    | 31         | 37       | GQVYKQK                         |           |       |                                          |      | Mascot      |
| 850.4781   | 850.5157    | 0.0376  | 44    | 31         | 37       | GQVYKQK                         |           |       |                                          |      | Mascot      |
| 856.5362   | 856.4981    | -0.0381 | -44   | 623        | 630      | LGVKGNIR                        |           |       |                                          |      | Mascot      |
| 866.4036   | 866.5067    | 0.1031  | 119   | 204        | 212      | CTGSAVNSK                       |           |       |                                          |      | Mascot      |
| 1045.5459  | 1045.5341   | -0.0118 | -11   | 272        | 281      | VANLCGVNQK                      |           |       |                                          |      | Mascot      |
| 1069.5571  | 1069.6053   | 0.0482  | 45    | 187        | 195      | QCNAAIHKK                       |           |       | Carbamidomethyl (C)[2]                   |      | Mascot      |
| 1334.7096  | 1334.8551   | 0.1455  | 109   | 200        | 212      | VIAKCTGSAVNSK                   |           |       | Carbamidomethyl (C)[5]                   |      | Mascot      |
| 1359.5238  | 1359.5717   | 0.0479  | 35    | 257        | 267      | CEECGMNVHHK                     |           |       | Carbamidomethyl (C)[1], Oxidation (M)[6] |      | Mascot      |
| 1487.5992  | 1487.6096   | 0.0104  | 7     | 115        | 129      | SDAAGHGEDGETER                  |           |       |                                          |      | Mascot      |
| 1759.7131  | 1759.7213   | 0.0082  | 5     | 257        | 270      | CEECGMNVHHKCQK                  |           |       | Carbamidomethyl (C)[1,4]                 |      | Mascot      |
| 2237.1013  | 2237.0339   | -0.0674 | -30   | 282        | 301      | LMAEALAMIESTQQQAR<br>SSR        |           |       | Oxidation (M)[2]                         |      | Mascot      |
| 2284.0989  | 2284.0989   | 0       | 0     | 537        | 556      | TCTFCGTPDYIAPEILLGQ<br>K        |           |       | Carbamidomethyl (C)[2,5]                 |      | Mascot      |
| 2348.1624  | 2348.1743   | 0.0119  | 5     | 508        | 528      | LDNILLDTDGHKIADFGM<br>CK        |           |       | Oxidation (M)[19]                        |      | Mascot      |
| 2413.187   | 2413.0979   | -0.0891 | -37   | 36         | 55       | QKRPTMYPWSSSTFDAH<br>VHK        |           |       |                                          |      | Mascot      |
| 2429.1819  | 2429.0942   | -0.0877 | -36   | 36         | 55       | QKRPTMYPWSSSTFDAH<br>VHK        |           |       | Oxidation (M)[6]                         |      | Mascot      |
| 2429.1819  | 2429.0942   | -0.0877 | -36   | 36         | 55       | QKRPTMYPWSSSTFDAH<br>VHK        | 1         | 0     | Oxidation (M)[6]                         |      | Mascot      |
| 3337.5266  | 3337.6443   | 0.1177  | 35    | 154        | 180      | CHEFTATFFPQPTFCSVC<br>KEFVWGLNK |           |       | Carbamidomethyl (C)[1,15,18]             |      | Mascot      |

6 PREDICTED: calmodulin-regulated spectrin-associated protein 2-like [Danio rerio] gi|326665173 152570 7.7 16 36 0

#### Peptide Information

| Calc. Mass | Obsrv. Mass | ± da   | ± ppm | Start Seq. | End Seq. | Sequence | Ion Score | C. I. | % Modification   | Rank | Result Type |
|------------|-------------|--------|-------|------------|----------|----------|-----------|-------|------------------|------|-------------|
| 848.4736   | 848.5022    | 0.0286 | 34    | 836        | 841      | QFRELR   |           |       |                  |      | Mascot      |
| 850.3974   | 850.5157    | 0.1183 | 139   | 1          | 8        | MGDAAEIK |           |       | Oxidation (M)[1] |      | Mascot      |
| 850.3974   | 850.5157    | 0.1183 | 139   | 1          | 8        | MGDAAEIK |           |       | Oxidation (M)[1] |      | Mascot      |

|   |                                                                   |           |         |      |      |              |                                   |      |    |    |   |                                           |  |  |  |  |        |
|---|-------------------------------------------------------------------|-----------|---------|------|------|--------------|-----------------------------------|------|----|----|---|-------------------------------------------|--|--|--|--|--------|
|   | 1045.5347                                                         | 1045.5341 | -0.0006 | -1   | 946  | 954          | EKPCKPESK                         |      |    |    |   |                                           |  |  |  |  | Mascot |
|   | 1075.5378                                                         | 1075.5333 | -0.0045 | -4   | 2    | 11           | GDAAEIKESR                        |      |    |    |   |                                           |  |  |  |  | Mascot |
|   | 1133.5983                                                         | 1133.6821 | 0.0838  | 74   | 120  | 128          | LVTERDLCK                         |      |    |    |   | Carbamidomethyl (C)[8]                    |  |  |  |  | Mascot |
|   | 1279.694                                                          | 1279.7393 | 0.0453  | 35   | 710  | 720          | MGRTAFLNVVR                       |      |    |    |   | Oxidation (M)[1]                          |  |  |  |  | Mascot |
|   | 1337.7212                                                         | 1337.5823 | -0.1389 | -104 | 1277 | 1287         | TEANNFLILFR                       |      |    |    |   |                                           |  |  |  |  | Mascot |
|   | 1337.7212                                                         | 1337.5823 | -0.1389 | -104 | 1277 | 1287         | TEANNFLILFR                       |      |    |    |   |                                           |  |  |  |  | Mascot |
|   | 1488.7177                                                         | 1488.6006 | -0.1171 | -79  | 1045 | 1057         | DDLQGEEDIAQKK                     |      |    |    |   |                                           |  |  |  |  | Mascot |
|   | 1742.9218                                                         | 1742.7335 | -0.1883 | -108 | 902  | 916          | MLNTPQSVDSLPRLR                   |      |    |    |   | Oxidation (M)[1]                          |  |  |  |  | Mascot |
|   | 1759.873                                                          | 1759.7213 | -0.1517 | -86  | 1247 | 1261         | YIIQNALAHCCLAGR                   |      |    |    |   | Carbamidomethyl (C)[10,11]                |  |  |  |  | Mascot |
|   | 1887.8939                                                         | 1887.8065 | -0.0874 | -46  | 575  | 593          | SCPLPDTSGSPCSLLGTR                |      |    |    |   |                                           |  |  |  |  | Mascot |
|   | 2033.8943                                                         | 2033.9081 | 0.0138  | 7    | 352  | 369          | SSSMSYVDGCVGTWPK EK               |      |    |    |   | Carbamidomethyl (C)[10], Oxidation (M)[4] |  |  |  |  | Mascot |
|   | 2206.1094                                                         | 2206.0325 | -0.0769 | -35  | 1119 | 1138         | QLKLMEDMDSVIKPSPS GAK             |      |    |    |   | Oxidation (M)[5,8]                        |  |  |  |  | Mascot |
|   | 2306.1008                                                         | 2306.0542 | -0.0466 | -20  | 371  | 392          | SSAHGISFEIPLDDRTSSSSGR            |      |    |    |   |                                           |  |  |  |  | Mascot |
|   | 2413.062                                                          | 2413.0979 | 0.0359  | 15   | 1024 | 1044         | ETETGLGSKPDQKMCCG FFYR            |      |    |    |   | Oxidation (M)[14]                         |  |  |  |  | Mascot |
|   | 3324.6665                                                         | 3324.6443 | -0.0222 | -7   | 1161 | 1192         | TATGSRPRGYSVSSISLA SLNLADNESIQSDK |      |    |    |   |                                           |  |  |  |  | Mascot |
| 7 | novel protein similar to H.sapiens TTN, titin (TTN) [Danio rerio] |           |         |      |      | gi 169154823 | 842970                            | 5.81 | 41 | 35 | 0 |                                           |  |  |  |  |        |

Peptide Information

| Calc. Mass | Obsrv. Mass | ± da    | ± ppm | Start Seq. | End Seq. | Sequence   | Ion Score | C. I. | % Modification         | Rank | Result Type |
|------------|-------------|---------|-------|------------|----------|------------|-----------|-------|------------------------|------|-------------|
| 801.4253   | 801.3248    | -0.1005 | -125  | 6540       | 6546     | EAAHFVK    |           |       |                        |      | Mascot      |
| 842.444    | 842.4845    | 0.0405  | 48    | 3102       | 3108     | SYKVSMK    |           |       |                        |      | Mascot      |
| 848.4294   | 848.5022    | 0.0728  | 86    | 6494       | 6500     | SCEIALR    |           |       | Carbamidomethyl (C)[2] |      | Mascot      |
| 850.4814   | 850.5157    | 0.0343  | 40    | 1088       | 1094     | LTSVRMK    |           |       | Oxidation (M)[6]       |      | Mascot      |
| 850.4814   | 850.5157    | 0.0343  | 40    | 1088       | 1094     | LTSVRMK    |           |       | Oxidation (M)[6]       |      | Mascot      |
| 856.4886   | 856.4981    | 0.0095  | 11    | 6818       | 6824     | LTLQEPR    |           |       |                        |      | Mascot      |
| 866.4842   | 866.5067    | 0.0225  | 26    | 1692       | 1698     | YVVSRR     |           |       |                        |      | Mascot      |
| 870.4203   | 870.5145    | 0.0942  | 108   | 6420       | 6427     | LDSGTYK    |           |       |                        |      | Mascot      |
| 882.4679   | 882.5367    | 0.0688  | 78    | 2483       | 2489     | YKVSTER    |           |       |                        |      | Mascot      |
| 996.536    | 996.5637    | 0.0277  | 28    | 2586       | 2593     | LTITETYR   |           |       |                        |      | Mascot      |
| 996.536    | 996.5637    | 0.0277  | 28    | 2586       | 2593     | LTITETYR   |           |       |                        |      | Mascot      |
| 1002.4713  | 1002.4149   | -0.0564 | -56   | 7274       | 7281     | MYGITDFR   |           |       |                        |      | Mascot      |
| 1018.4662  | 1018.4113   | -0.0549 | -54   | 7274       | 7281     | MYGITDFR   |           |       | Oxidation (M)[1]       |      | Mascot      |
| 1018.4662  | 1018.4113   | -0.0549 | -54   | 7274       | 7281     | MYGITDFR   |           |       | Oxidation (M)[1]       |      | Mascot      |
| 1045.5347  | 1045.5341   | -0.0006 | -1    | 6656       | 6665     | CQIGGTPEIK |           |       |                        |      | Mascot      |

|   |                             |              |         |      |   |    |   |
|---|-----------------------------|--------------|---------|------|---|----|---|
| 8 | novel protein [Danio rerio] | gi 169153952 | 27199.6 | 6.32 | 7 | 34 | 0 |
|---|-----------------------------|--------------|---------|------|---|----|---|



### Peptide Information

| Calc. Mass | Obsrv. Mass | ± da    | ± ppm | Start Seq. | End Seq. | Sequence                        | Ion Score | C. I. % | Modification        | Rank | Result Type |
|------------|-------------|---------|-------|------------|----------|---------------------------------|-----------|---------|---------------------|------|-------------|
| 848.51     | 848.5022    | -0.0078 | -9    | 21         | 26       | LRLQYR                          |           |         |                     |      | Mascot      |
| 1002.5367  | 1002.4149   | -0.1218 | -121  | 99         | 106      | TRDVPWTK                        |           |         |                     |      | Mascot      |
| 1051.6371  | 1051.6779   | 0.0408  | 39    | 92         | 100      | HNILAVKTR                       |           |         |                     |      | Mascot      |
| 1051.6371  | 1051.6779   | 0.0408  | 39    | 92         | 100      | HNILAVKTR                       |           |         |                     |      | Mascot      |
| 1075.563   | 1075.5333   | -0.0297 | -28   | 153        | 161      | ETTLQQDIK                       |           |         |                     |      | Mascot      |
| 1279.606   | 1279.7393   | 0.1333  | 104   | 71         | 80       | TEMQRIESNR                      |           |         | Oxidation (M)[3]    |      | Mascot      |
| 2413.0647  | 2413.0979   | 0.0332  | 14    | 1          | 20       | MEKANEQADMLFIESEPE<br>NR        |           |         | Oxidation (M)[1,10] |      | Mascot      |
| 3324.6287  | 3324.6443   | 0.0156  | 5     | 162        | 189      | TYSHGYEAPIFLTSMET<br>LNFTSPYWKK |           |         |                     |      | Mascot      |

9

PREDICTED: macrophage-stimulating protein receptor  
[Danio rerio]

gi|292619047

154062

6.02

15

34

0

### Peptide Information

| Calc. Mass | Obsrv. Mass | ± da    | ± ppm | Start Seq. | End Seq. | Sequence                   | Ion Score | C. I. % | Modification           | Rank | Result Type |
|------------|-------------|---------|-------|------------|----------|----------------------------|-----------|---------|------------------------|------|-------------|
| 838.4451   | 838.5093    | 0.0642  | 77    | 737        | 743      | SRVMTTK                    |           |         | Oxidation (M)[4]       |      | Mascot      |
| 856.4345   | 856.4981    | 0.0636  | 74    | 1090       | 1096     | EIHCAVK                    |           |         | Carbamidomethyl (C)[4] |      | Mascot      |
| 866.4366   | 866.5067    | 0.0701  | 81    | 774        | 780      | NLDSVYR                    |           |         |                        |      | Mascot      |
| 882.4138   | 882.5367    | 0.1229  | 139   | 1206       | 1213     | VADFGMAR                   |           |         | Oxidation (M)[6]       |      | Mascot      |
| 996.4744   | 996.5637    | 0.0893  | 90    | 142        | 151      | ENGPPGPSK                  |           |         |                        |      | Mascot      |
| 996.4897   | 996.5637    | 0.074   | 74    | 978        | 985      | LSYFSHSR                   |           |         |                        |      | Mascot      |
| 1018.4808  | 1018.4113   | -0.0695 | -68   | 608        | 616      | SNCTHLLCK                  | 3         | 0       |                        |      | Mascot      |
| 1018.4808  | 1018.4113   | -0.0695 | -68   | 608        | 616      | SNCTHLLCK                  |           |         |                        |      | Mascot      |
| 1062.5248  | 1062.6591   | 0.1343  | 126   | 896        | 904      | VLDNEITCR                  |           |         |                        |      | Mascot      |
| 1075.5023  | 1075.5333   | 0.031   | 29    | 608        | 616      | SNCTHLLCK                  |           |         | Carbamidomethyl (C)[3] |      | Mascot      |
| 1334.6774  | 1334.8551   | 0.1777  | 133   | 1235       | 1245     | WMAIESLQTQK                |           |         |                        |      | Mascot      |
| 1359.5919  | 1359.5717   | -0.0202 | -15   | 1195       | 1205     | NCMLDESYTVK                |           |         | Carbamidomethyl (C)[2] |      | Mascot      |
| 2011.7377  | 2011.9376   | 0.1999  | 99    | 527        | 544      | FMGCGWCSGQCTWASE<br>CR     |           |         |                        |      | Mascot      |
| 2011.7377  | 2011.9376   | 0.1999  | 99    | 527        | 544      | FMGCGWCSGQCTWASE<br>CR     |           |         |                        |      | Mascot      |
| 2230.0222  | 2230.1057   | 0.0835  | 37    | 874        | 895      | LNLVSSCMSITMTVGDDV<br>CGGK |           |         |                        |      | Mascot      |
| 2299.1499  | 2299.1008   | -0.0491 | -21   | 204        | 223      | MSISVRRPVATEDGFYTD<br>VR   |           |         |                        |      | Mascot      |
| 2348.2432  | 2348.1743   | -0.0689 | -29   | 781        | 800      | TVVYFKPKESHLPVSTE<br>CR    |           |         |                        |      | Mascot      |
| 2413.3118  | 2413.0979   | -0.2139 | -89   | 710        | 731      | GNLSSIVCLSQPVTEVKD<br>VVLR |           |         | Carbamidomethyl (C)[8] |      | Mascot      |

10 novel protein similar to BCL2-related ovarian killer (bok, gi|169154887 zgc:64041) [Danio rerio] 24238.7 7.71 7 34 0

Peptide Information

| Calc. Mass | Obsrv. Mass | ± da    | ± ppm | Start Seq. | End Seq. | Sequence           | Ion Score | C. I. % | Modification                             | Rank | Result Type |
|------------|-------------|---------|-------|------------|----------|--------------------|-----------|---------|------------------------------------------|------|-------------|
| 842.5134   | 842.4845    | -0.0289 | -34   | 164        | 170      | SLVPWLK            |           |         |                                          |      | Mascot      |
| 850.4668   | 850.5157    | 0.0489  | 57    | 29         | 35       | ELVFQSK            |           |         |                                          |      | Mascot      |
| 850.4668   | 850.5157    | 0.0489  | 57    | 29         | 35       | ELVFQSK            |           |         |                                          |      | Mascot      |
| 868.3981   | 868.5161    | 0.118   | 136   | 3          | 9        | DMNVFAR            |           |         | Oxidation (M)[2]                         |      | Mascot      |
| 996.4236   | 996.5637    | 0.1401  | 141   | 181        | 188      | CVVNMDSR           |           |         | Carbamidomethyl (C)[1], Oxidation (M)[5] |      | Mascot      |
| 996.4236   | 996.5637    | 0.1401  | 141   | 181        | 188      | CVVNMDSR           |           |         | Carbamidomethyl (C)[1], Oxidation (M)[5] |      | Mascot      |
| 1018.5277  | 1018.4113   | -0.1164 | -114  | 207        | 214      | TMVYVLTk           |           |         |                                          |      | Mascot      |
| 1018.5277  | 1018.4113   | -0.1164 | -114  | 207        | 214      | TMVYVLTk           |           |         |                                          |      | Mascot      |
| 1759.8142  | 1759.7213   | -0.0929 | -53   | 77         | 90       | LGDELECMRPVYR      |           |         | Oxidation (M)[8]                         |      | Mascot      |
| 2194.1919  | 2194.0217   | -0.1702 | -78   | 189        | 206      | AHVHWLSTAVLTWREFIK |           |         |                                          |      | Mascot      |

11 PREDICTED: calmodulin-regulated spectrin-associated protein 2-like [Danio rerio] gi|326664590 145854.8 8.53 15 33 0

Peptide Information

| Calc. Mass | Obsrv. Mass | ± da    | ± ppm | Start Seq. | End Seq. | Sequence              | Ion Score | C. I. % | Modification           | Rank | Result Type |
|------------|-------------|---------|-------|------------|----------|-----------------------|-----------|---------|------------------------|------|-------------|
| 850.4529   | 850.5157    | 0.0628  | 74    | 467        | 473      | VVHNEPR               |           |         |                        |      | Mascot      |
| 850.4529   | 850.5157    | 0.0628  | 74    | 467        | 473      | VVHNEPR               |           |         |                        |      | Mascot      |
| 868.3981   | 868.5161    | 0.118   | 136   | 549        | 555      | MTNFAER               |           |         |                        |      | Mascot      |
| 870.5519   | 870.5145    | -0.0374 | -43   | 1012       | 1018     | RALLER                |           |         |                        |      | Mascot      |
| 1062.5691  | 1062.6591   | 0.09    | 85    | 776        | 785      | SPATPPHLSR            |           |         |                        |      | Mascot      |
| 1133.587   | 1133.6821   | 0.0951  | 84    | 1227       | 1235     | NKIIEMEKE             |           |         |                        |      | Mascot      |
| 1279.6133  | 1279.7393   | 0.126   | 98    | 1215       | 1226     | CCLAGKVNESQK          |           |         |                        |      | Mascot      |
| 1448.691   | 1448.8754   | 0.1844  | 127   | 733        | 743      | DMQRLTEQQQR           |           |         | Oxidation (M)[2]       |      | Mascot      |
| 1677.8589  | 1677.8413   | -0.0176 | -10   | 723        | 736      | LSSTLETLRQDMQR        |           |         |                        |      | Mascot      |
| 2012.1077  | 2011.9376   | -0.1701 | -85   | 767        | 785      | AWIIPSGPKSPATPPHLSR   |           |         |                        |      | Mascot      |
| 2012.1077  | 2011.9376   | -0.1701 | -85   | 767        | 785      | AWIIPSGPKSPATPPHLSR   |           |         |                        |      | Mascot      |
| 2194.0994  | 2194.0217   | -0.0777 | -35   | 2          | 22       | AMDAPAVKQSAPVPDICPLDR |           |         |                        |      | Mascot      |
| 2237.1636  | 2237.0339   | -0.1297 | -58   | 1301       | 1320     | TLSMSVDAFTIPGQLWNTKK  |           |         |                        |      | Mascot      |
| 2271.1074  | 2270.9895   | -0.1179 | -52   | 10         | 29       | QSAPVPDICPLDRYEPSQAK  |           |         | Carbamidomethyl (C)[9] |      | Mascot      |
| 2299.1162  | 2299.1008   | -0.0154 | -7    | 992        | 1011     | LGLDVFFKEEGLSEEEMA    |           |         |                        |      | Mascot      |

|    |                                     |           |         |     |             |      |                                      |                         |    |    |   |  |  |  |  |  |        |
|----|-------------------------------------|-----------|---------|-----|-------------|------|--------------------------------------|-------------------------|----|----|---|--|--|--|--|--|--------|
|    | 2314.1609                           | 2314.1025 | -0.0584 | -25 | 1254        | 1274 | QK<br>AIYTLDGQSEELHRLCGV<br>GPR      |                         |    |    |   |  |  |  |  |  | Mascot |
|    | 3337.615                            | 3337.6443 | 0.0293  | 9   | 32          | 63   | ASLSWLLSRSGPEESVS<br>SAVCADGSVCVSLQR | Carbamidomethyl (C)[21] |    |    |   |  |  |  |  |  | Mascot |
| 12 | KIAA0650-like protein [Danio rerio] |           |         |     | gi 57164644 |      | 131026.7                             | 7.89                    | 14 | 33 | 0 |  |  |  |  |  |        |

#### Peptide Information

| Calc. Mass | Obsrv. Mass | ± da    | ± ppm | Start Seq. | End Seq. | Sequence                  | Ion Score | C. I. % | Modification           | Rank | Result Type |
|------------|-------------|---------|-------|------------|----------|---------------------------|-----------|---------|------------------------|------|-------------|
| 850.5508   | 850.5157    | -0.0351 | -41   | 906        | 913      | VAHLALVK                  |           |         |                        |      | Mascot      |
| 850.5508   | 850.5157    | -0.0351 | -41   | 906        | 913      | VAHLALVK                  |           |         |                        |      | Mascot      |
| 866.4002   | 866.5067    | 0.1065  | 123   | 261        | 267      | LYDEGNR                   |           |         |                        |      | Mascot      |
| 870.4977   | 870.5145    | 0.0168  | 19    | 87         | 93       | MHTVKVR                   |           |         |                        |      | Mascot      |
| 996.5359   | 996.5637    | 0.0278  | 28    | 1          | 9        | TSFSIKEGK                 |           |         |                        |      | Mascot      |
| 996.5359   | 996.5637    | 0.0278  | 28    | 1          | 9        | TSFSIKEGK                 |           |         |                        |      | Mascot      |
| 1051.6398  | 1051.6779   | 0.0381  | 36    | 696        | 704      | TLLYSLTLK                 |           |         |                        |      | Mascot      |
| 1051.6398  | 1051.6779   | 0.0381  | 36    | 696        | 704      | TLLYSLTLK                 |           |         |                        |      | Mascot      |
| 1062.54    | 1062.6591   | 0.1191  | 112   | 889        | 897      | KCTVPDPFR                 |           |         |                        |      | Mascot      |
| 1069.6477  | 1069.6053   | -0.0424 | -40   | 213        | 221      | QLRVLPSTR                 |           |         |                        |      | Mascot      |
| 1133.5256  | 1133.6821   | 0.1565  | 138   | 1140       | 1149     | TPEQMSDAVR                |           |         |                        |      | Mascot      |
| 1165.5782  | 1165.7096   | 0.1314  | 113   | 1047       | 1057     | CNGKFGGLQNK               |           |         |                        |      | Mascot      |
| 1165.5782  | 1165.7096   | 0.1314  | 113   | 1047       | 1057     | CNGKFGGLQNK               |           |         |                        |      | Mascot      |
| 1279.6827  | 1279.7393   | 0.0566  | 44    | 419        | 428      | ELSFQLQRMK                |           |         |                        |      | Mascot      |
| 1487.7522  | 1487.6096   | -0.1426 | -96   | 602        | 617      | GLASGSCPPAAATLK           |           |         | Carbamidomethyl (C)[7] |      | Mascot      |
| 2237.2078  | 2237.0339   | -0.1739 | -78   | 15         | 35       | IGQVSPVHVGVFVSPL<br>DFR   |           |         |                        |      | Mascot      |
| 2306.1519  | 2306.0542   | -0.0977 | -42   | 581        | 601      | SEEGSAVKNICPANLSML<br>LWK |           |         | Oxidation (M)[17]      |      | Mascot      |
| 2314.1772  | 2314.1025   | -0.0747 | -32   | 1121       | 1139     | QELEEQEVELQEIEKTLA<br>R   |           |         |                        |      | Mascot      |

|    |                                                                 |  |  |  |              |  |          |      |    |    |   |  |  |  |  |  |  |
|----|-----------------------------------------------------------------|--|--|--|--------------|--|----------|------|----|----|---|--|--|--|--|--|--|
| 13 | PREDICTED: tudor domain-containing protein 6-like [Danio rerio] |  |  |  | gi 326677195 |  | 175311.1 | 5.97 | 16 | 32 | 0 |  |  |  |  |  |  |
|----|-----------------------------------------------------------------|--|--|--|--------------|--|----------|------|----|----|---|--|--|--|--|--|--|

#### Peptide Information

| Calc. Mass | Obsrv. Mass | ± da   | ± ppm | Start Seq. | End Seq. | Sequence  | Ion Score | C. I. % | Modification           | Rank | Result Type |
|------------|-------------|--------|-------|------------|----------|-----------|-----------|---------|------------------------|------|-------------|
| 848.4472   | 848.5022    | 0.055  | 65    | 438        | 445      | SPSSQKSK  |           |         |                        |      | Mascot      |
| 850.4668   | 850.5157    | 0.0489 | 57    | 264        | 270      | VFSQELK   |           |         |                        |      | Mascot      |
| 850.4668   | 850.5157    | 0.0489 | 57    | 264        | 270      | VFSQELK   |           |         |                        |      | Mascot      |
| 866.4803   | 866.5067    | 0.0264 | 30    | 1376       | 1382     | VICTFVK   |           |         | Carbamidomethyl (C)[3] |      | Mascot      |
| 996.5407   | 996.5637    | 0.023  | 23    | 591        | 599      | CSLHGVKPR |           |         |                        |      | Mascot      |

|    |                                     |           |         |      |             |         |                            |                                           |    |        |
|----|-------------------------------------|-----------|---------|------|-------------|---------|----------------------------|-------------------------------------------|----|--------|
|    | 996.5407                            | 996.5637  | 0.023   | 23   | 591         | 599     | CSLHGVKPR                  |                                           |    | Mascot |
|    | 1062.5109                           | 1062.6591 | 0.1482  | 139  | 1268        | 1276    | LNADQSRRCR                 |                                           |    | Mascot |
|    | 1334.7137                           | 1334.8551 | 0.1414  | 106  | 168         | 178     | TFLLDIPCLSR                | Carbamidomethyl (C)[8]                    |    | Mascot |
|    | 1359.73                             | 1359.5717 | -0.1583 | -116 | 1392        | 1404    | LDVNGVVGLGSVCK             | Carbamidomethyl (C)[12]                   |    | Mascot |
|    | 1487.7642                           | 1487.6096 | -0.1546 | -104 | 538         | 550     | AQDGVFYRAAVYK              |                                           |    | Mascot |
|    | 1677.8304                           | 1677.8413 | 0.0109  | 6    | 188         | 200     | KLYSDQFMEFVVR              | Oxidation (M)[8]                          |    | Mascot |
|    | 1742.8029                           | 1742.7335 | -0.0694 | -40  | 1449        | 1462    | GPQLFWCQYVAMDK             | Carbamidomethyl (C)[7]                    |    | Mascot |
|    | 1758.7979                           | 1758.7297 | -0.0682 | -39  | 1449        | 1462    | GPQLFWCQYVAMDK             | Carbamidomethyl (C)[7], Oxidation (M)[12] |    | Mascot |
|    | 1759.7877                           | 1759.7213 | -0.0664 | -38  | 422         | 437     | CSLDSDMTLADFAVQK           | Oxidation (M)[7]                          |    | Mascot |
|    | 1887.9528                           | 1887.8065 | -0.1463 | -77  | 734         | 749     | ARNAACLEVLMQDIQR           | Carbamidomethyl (C)[6]                    |    | Mascot |
|    | 2233.1128                           | 2233.0164 | -0.0964 | -43  | 1463        | 1482    | LQEISDMLQNIGNASETT<br>LR   |                                           |    | Mascot |
|    | 2249.1079                           | 2248.9939 | -0.114  | -51  | 1463        | 1482    | LQEISDMLQNIGNASETT<br>LR   | Oxidation (M)[7]                          |    | Mascot |
|    | 2413.1104                           | 2413.0979 | -0.0125 | -5   | 973         | 992     | CPQTFTGTVCFAKYTDGL<br>WYR  | Carbamidomethyl (C)[1]                    |    | Mascot |
|    | 2429.2493                           | 2429.0942 | -0.1551 | -64  | 310         | 331     | SVLQQVMSANNVEVLH<br>VDYGK  |                                           |    | Mascot |
|    | 2429.2493                           | 2429.0942 | -0.1551 | -64  | 310         | 331     | SVLQQVMSANNVEVLH<br>VDYGK  |                                           |    | Mascot |
|    | 2451.2361                           | 2451.0718 | -0.1643 | -67  | 628         | 649     | QQDTHIVQLVDPPLDGEK<br>DVSK |                                           |    | Mascot |
| 14 | kelch-like protein 31 [Danio rerio] |           |         |      | gi 51230529 | 70760.3 | 6.35                       | 10                                        | 31 | 0      |

### Peptide Information

| Calc. Mass | Obsrv. Mass | ± da    | ± ppm | Start Seq. | End Seq. | Sequence               | Ion Score | C. I. % | Modification                             | Rank | Result Type |
|------------|-------------|---------|-------|------------|----------|------------------------|-----------|---------|------------------------------------------|------|-------------|
| 996.493    | 996.5637    | 0.0707  | 71    | 190        | 197      | EEAQKFMR               |           |         | Oxidation (M)[7]                         |      | Mascot      |
| 996.493    | 996.5637    | 0.0707  | 71    | 190        | 197      | EEAQKFMR               |           |         | Oxidation (M)[7]                         |      | Mascot      |
| 1002.4205  | 1002.4149   | -0.0056 | -6    | 159        | 166      | MCSDFLMR               |           |         |                                          |      | Mascot      |
| 1018.4155  | 1018.4113   | -0.0042 | -4    | 159        | 166      | MCSDFLMR               |           |         | Oxidation (M)[1]                         |      | Mascot      |
| 1018.4155  | 1018.4113   | -0.0042 | -4    | 159        | 166      | MCSDFLMR               |           |         | Oxidation (M)[1]                         |      | Mascot      |
| 1075.4369  | 1075.5333   | 0.0964  | 90    | 159        | 166      | MCSDFLMR               |           |         | Carbamidomethyl (C)[2], Oxidation (M)[1] |      | Mascot      |
| 1448.7029  | 1448.8754   | 0.1725  | 119   | 385        | 396      | HAVSNFSRYDPR           |           |         |                                          |      | Mascot      |
| 1758.7275  | 1758.7297   | 0.0022  | 1     | 483        | 497      | AVCSYDPSTDSWQDK        |           |         | Carbamidomethyl (C)[3]                   |      | Mascot      |
| 1759.8176  | 1759.7213   | -0.0963 | -55   | 90         | 104      | VVMASCSEYIQNMLR        |           |         | Oxidation (M)[3]                         |      | Mascot      |
| 1887.9125  | 1887.8065   | -0.106  | -56   | 90         | 105      | VVMASCSEYIQNMLRK       |           |         | Oxidation (M)[3]                         |      | Mascot      |
| 2225.0405  | 2225.0488   | 0.0083  | 4     | 195        | 211      | FMRENFIEFSEMEQFLK      |           |         |                                          |      | Mascot      |
| 2225.0405  | 2225.0488   | 0.0083  | 4     | 195        | 211      | FMRENFIEFSEMEQFLK      |           |         |                                          |      | Mascot      |
| 2297.2275  | 2297.1055   | -0.122  | -53   | 112        | 133      | IELSDLSPVGLATVITYAYSGK |           |         |                                          |      | Mascot      |
| 2306.0679  | 2306.0542   | -0.0137 | -6    | 167        | 186      | ETSVENCMYVVNIADTYN     |           |         |                                          |      | Mascot      |

|                     |                                                                        |             |         |       |            |                               |                                        |         |           |       |                       |                          |                  |   |
|---------------------|------------------------------------------------------------------------|-------------|---------|-------|------------|-------------------------------|----------------------------------------|---------|-----------|-------|-----------------------|--------------------------|------------------|---|
|                     | 3337.4553                                                              | 3337.6443   | 0.189   | 57    | 159        | 186                           | LK<br>MCSDFLMRETSVENCMY<br>VVNIADTYNLK |         |           |       | Oxidation (M)[1,7,16] |                          | Mascot           |   |
| 15                  | PREDICTED: glutamate receptor, ionotropic kainate 5-like [Danio rerio] |             |         |       |            | gi 326674732                  |                                        | 39290.4 | 5.78      | 8     | 31                    | 0                        |                  |   |
| Peptide Information |                                                                        |             |         |       |            |                               |                                        |         |           |       |                       |                          |                  |   |
|                     | Calc. Mass                                                             | Obsrv. Mass | ± da    | ± ppm | Start Seq. | End Sequence Seq.             |                                        |         | Ion Score | C. I. | %                     | Modification             | Rank Result Type |   |
|                     | 864.4243                                                               | 864.4935    | 0.0692  | 80    | 339        | 345 ELLCSSR                   |                                        |         |           |       |                       | Carbamidomethyl (C)[4]   | Mascot           |   |
|                     | 1069.6476                                                              | 1069.6053   | -0.0423 | -40   | 52         | 61 GERLALALAR                 |                                        |         |           |       |                       |                          | Mascot           |   |
|                     | 1320.614                                                               | 1320.5322   | -0.0818 | -62   | 243        | 254 ASELGMTSAFYK              |                                        |         |           |       |                       | Oxidation (M)[6]         | Mascot           |   |
|                     | 1334.7791                                                              | 1334.8551   | 0.076   | 57    | 194        | 204 FLISRETLSIR               |                                        |         |           |       |                       |                          | Mascot           |   |
|                     | 1337.6188                                                              | 1337.5823   | -0.0365 | -27   | 39         | 51 MAAILDDSSVCGR              |                                        |         |           |       |                       |                          | Mascot           |   |
|                     | 1337.6188                                                              | 1337.5823   | -0.0365 | -27   | 39         | 51 MAAILDDSSVCGR              |                                        |         |           |       |                       |                          | Mascot           |   |
|                     | 1359.6613                                                              | 1359.5717   | -0.0896 | -66   | 168        | 180 SFSYPSASLVCAK             |                                        |         |           |       |                       |                          | Mascot           |   |
|                     | 1448.709                                                               | 1448.8754   | 0.1664  | 115   | 242        | 254 KASELGMTSAFYK             |                                        |         |           |       |                       | Oxidation (M)[7]         | Mascot           |   |
|                     | 2314.2085                                                              | 2314.1025   | -0.106  | -46   | 276        | 295 LVNDDHLHPNCTVKNKIVV<br>QR |                                        |         |           |       |                       |                          | Mascot           |   |
| 16                  | lipid phosphate phosphatase-related protein type 3b [Danio rerio]      |             |         |       |            | gi 315468535                  |                                        | 92766.3 | 7.91      | 8     | 31                    | 0                        | 18               | 0 |
| Peptide Information |                                                                        |             |         |       |            |                               |                                        |         |           |       |                       |                          |                  |   |
|                     | Calc. Mass                                                             | Obsrv. Mass | ± da    | ± ppm | Start Seq. | End Sequence Seq.             |                                        |         | Ion Score | C. I. | %                     | Modification             | Rank Result Type |   |
|                     | 842.4617                                                               | 842.4845    | 0.0228  | 27    | 406        | 413 VGEEPAIK                  |                                        |         |           |       |                       |                          | Mascot           |   |
|                     | 996.4423                                                               | 996.5637    | 0.1214  | 122   | 793        | 800 CGCVTMLR                  |                                        |         |           |       |                       | Carbamidomethyl (C)[1,3] | Mascot           |   |
|                     | 996.4423                                                               | 996.5637    | 0.1214  | 122   | 793        | 800 CGCVTMLR                  |                                        |         |           |       |                       | Carbamidomethyl (C)[1,3] | Mascot           |   |
|                     | 1018.5098                                                              | 1018.4113   | -0.0985 | -97   | 258        | 265 CTTDPLRR                  |                                        | 18      | 0         |       |                       | Carbamidomethyl (C)[1]   | Mascot           |   |
|                     | 1018.5098                                                              | 1018.4113   | -0.0985 | -97   | 258        | 265 CTTDPLRR                  |                                        |         |           |       |                       | Carbamidomethyl (C)[1]   | Mascot           |   |
|                     | 1075.5718                                                              | 1075.5333   | -0.0385 | -36   | 324        | 331 QPMTLKWR                  |                                        |         |           |       |                       | Oxidation (M)[3]         | Mascot           |   |
|                     | 1448.729                                                               | 1448.8754   | 0.1464  | 101   | 815        | 826 WIKNCLCGGLWR              |                                        |         |           |       |                       |                          | Mascot           |   |
|                     | 1887.9052                                                              | 1887.8065   | -0.0987 | -52   | 776        | 792 CLHLGISPTEDSKACTR         |                                        |         |           |       |                       | Carbamidomethyl (C)[1]   | Mascot           |   |
|                     | 2211.0732                                                              | 2211.0334   | -0.0398 | -18   | 13         | 31 RPKSNHCPSIPLVCAWS<br>CR    |                                        |         |           |       |                       | Carbamidomethyl (C)[7]   | Mascot           |   |
|                     | 2237.1304                                                              | 2237.0339   | -0.0965 | -43   | 246        | 264 IDTELLPSLFMRCTTDPL<br>R   |                                        |         |           |       |                       | Oxidation (M)[11]        | Mascot           |   |
| 17                  | novel protein [Danio rerio]                                            |             |         |       |            | gi 126632583                  |                                        | 6089.9  | 8.37      | 5     | 31                    | 0                        |                  |   |
| Peptide Information |                                                                        |             |         |       |            |                               |                                        |         |           |       |                       |                          |                  |   |
|                     | Calc. Mass                                                             | Obsrv. Mass | ± da    | ± ppm | Start Seq. | End Sequence Seq.             |                                        |         | Ion Score | C. I. | %                     | Modification             | Rank Result Type |   |

|  |           |           |         |     |    |    |                         |  |                                             |        |
|--|-----------|-----------|---------|-----|----|----|-------------------------|--|---------------------------------------------|--------|
|  | 1165.5895 | 1165.7096 | 0.1201  | 103 | 10 | 18 | CLRVNYGQR               |  | Carbamidomethyl (C)[1]                      | Mascot |
|  | 1165.5895 | 1165.7096 | 0.1201  | 103 | 10 | 18 | CLRVNYGQR               |  | Carbamidomethyl (C)[1]                      | Mascot |
|  | 1759.8362 | 1759.7213 | -0.1149 | -65 | 37 | 51 | RVSSCMYLPTCAIMK         |  | Carbamidomethyl (C)[5]                      | Mascot |
|  | 1989.9517 | 1990.0033 | 0.0516  | 26  | 38 | 54 | VSSCMYLPTCAIMKVT        |  | Carbamidomethyl (C)[4,10], Oxidation (M)[5] | Mascot |
|  | 2011.8848 | 2011.9376 | 0.0528  | 26  | 19 | 36 | CANDCPDVLYNTAEQSL<br>R  |  |                                             | Mascot |
|  | 2011.8848 | 2011.9376 | 0.0528  | 26  | 19 | 36 | CANDCPDVLYNTAEQSL<br>R  |  |                                             | Mascot |
|  | 2225.0073 | 2225.0488 | 0.0415  | 19  | 19 | 37 | CANDCPDVLYNTAEQSL<br>RR |  | Carbamidomethyl (C)[1]                      | Mascot |
|  | 2225.0073 | 2225.0488 | 0.0415  | 19  | 19 | 37 | CANDCPDVLYNTAEQSL<br>RR |  | Carbamidomethyl (C)[1]                      | Mascot |

18 PREDICTED: hypothetical protein LOC100537298 [Danio rerio] gi|326667816 6120 8.38 5 31 0

#### Peptide Information

| Calc. Mass | Obsrv. Mass | ± da    | ± ppm | Start Seq. | End Seq. | Sequence                | Ion Score | C. I. % | Modification                                | Rank | Result Type |
|------------|-------------|---------|-------|------------|----------|-------------------------|-----------|---------|---------------------------------------------|------|-------------|
| 1165.5895  | 1165.7096   | 0.1201  | 103   | 10         | 18       | CLRVNYGQR               |           |         | Carbamidomethyl (C)[1]                      |      | Mascot      |
| 1165.5895  | 1165.7096   | 0.1201  | 103   | 10         | 18       | CLRVNYGQR               |           |         | Carbamidomethyl (C)[1]                      |      | Mascot      |
| 1759.8838  | 1759.7213   | -0.1625 | -92   | 37         | 51       | RVLSCMHLPTCAIMK         |           |         | Carbamidomethyl (C)[5]                      |      | Mascot      |
| 1989.9993  | 1990.0033   | 0.004   | 2     | 38         | 54       | VLSCMHLPTCAIMKVT        |           |         | Carbamidomethyl (C)[4,10], Oxidation (M)[5] |      | Mascot      |
| 2011.8848  | 2011.9376   | 0.0528  | 26    | 19         | 36       | CANDCPDVLYNTAEQSL<br>R  |           |         |                                             |      | Mascot      |
| 2011.8848  | 2011.9376   | 0.0528  | 26    | 19         | 36       | CANDCPDVLYNTAEQSL<br>R  |           |         |                                             |      | Mascot      |
| 2225.0073  | 2225.0488   | 0.0415  | 19    | 19         | 37       | CANDCPDVLYNTAEQSL<br>RR |           |         | Carbamidomethyl (C)[1]                      |      | Mascot      |
| 2225.0073  | 2225.0488   | 0.0415  | 19    | 19         | 37       | CANDCPDVLYNTAEQSL<br>RR |           |         | Carbamidomethyl (C)[1]                      |      | Mascot      |

19 hydroxymethylbilane synthase [Danio rerio] gi|123210216 27156.3 6.33 6 30 0

#### Peptide Information

| Calc. Mass | Obsrv. Mass | ± da    | ± ppm | Start Seq. | End Seq. | Sequence                           | Ion Score | C. I. % | Modification                              | Rank | Result Type |
|------------|-------------|---------|-------|------------|----------|------------------------------------|-----------|---------|-------------------------------------------|------|-------------|
| 848.477    | 848.5022    | 0.0252  | 30    | 21         | 27       | VIRMGTR                            |           |         | Oxidation (M)[4]                          |      | Mascot      |
| 1075.6218  | 1075.5333   | -0.0885 | -82   | 142        | 151      | SVIGTSSLRR                         |           |         |                                           |      | Mascot      |
| 1448.7644  | 1448.8754   | 0.111   | 77    | 158        | 168      | RFPQLEFENIR                        |           |         |                                           |      | Mascot      |
| 1990.0426  | 1990.0033   | -0.0393 | -20   | 231        | 247      | DILEMVSVLHHPDTVLR                  |           |         | Oxidation (M)[5]                          |      | Mascot      |
| 2011.8807  | 2011.9376   | 0.0569  | 28    | 2          | 20       | MEMSGNDTISQEGNGKA<br>SR            |           |         |                                           |      | Mascot      |
| 2011.8807  | 2011.9376   | 0.0569  | 28    | 2          | 20       | MEMSGNDTISQEGNGKA<br>SR            |           |         |                                           |      | Mascot      |
| 3324.5808  | 3324.6443   | 0.0635  | 19    | 197        | 226      | MGWESRISQVLGPEDCM<br>YAVGQGALAVEVR |           |         | Carbamidomethyl (C)[16], Oxidation (M)[1] |      | Mascot      |

20 PREDICTED: melanoma inhibitory activity protein 3 gi|326677389 89000.9 6.13 11 30 0

[Danio rerio]

Peptide Information

| Calc. Mass | Obsrv. Mass | ± da    | ± ppm | Start Seq. | End Seq. | Sequence                  | Ion Score | C. I. % | Modification     | Rank | Result Type |
|------------|-------------|---------|-------|------------|----------|---------------------------|-----------|---------|------------------|------|-------------|
| 866.3859   | 866.5067    | 0.1208  | 139   | 321        | 327      | QMMDVSR                   |           |         |                  |      | Mascot      |
| 868.441    | 868.5161    | 0.0751  | 86    | 80         | 86       | SYQLTEK                   |           |         |                  |      | Mascot      |
| 1018.5363  | 1018.4113   | -0.125  | -123  | 519        | 526      | HMPPPQRR                  |           |         |                  |      | Mascot      |
| 1018.5363  | 1018.4113   | -0.125  | -123  | 519        | 526      | HMPPPQRR                  |           |         |                  |      | Mascot      |
| 1069.5524  | 1069.6053   | 0.0529  | 49    | 262        | 270      | ELEDSLCHK                 |           |         |                  |      | Mascot      |
| 1092.5605  | 1092.5529   | -0.0076 | -7    | 106        | 114      | ITELNDMIK                 |           |         | Oxidation (M)[7] |      | Mascot      |
| 1359.7478  | 1359.5717   | -0.1761 | -130  | 328        | 339      | IKATLSVVEDER              |           |         |                  |      | Mascot      |
| 1488.657   | 1488.6006   | -0.0564 | -38   | 363        | 374      | VMHDQMNLNNEK              |           |         | Oxidation (M)[2] |      | Mascot      |
| 1677.7748  | 1677.8413   | 0.0665  | 40    | 441        | 453      | IKDIEEEMQQNER             |           |         | Oxidation (M)[8] |      | Mascot      |
| 1758.8783  | 1758.7297   | -0.1486 | -84   | 560        | 575      | RGEPLGPRPPSDPHGR          |           |         |                  |      | Mascot      |
| 2033.9961  | 2033.9081   | -0.088  | -43   | 501        | 518      | ISDMEQSLFKLNSGPPDR        |           |         |                  |      | Mascot      |
| 2230.1768  | 2230.1057   | -0.0711 | -32   | 713        | 733      | GPPLGPPLGQRDVPPDF<br>FAPR |           |         |                  |      | Mascot      |

21 protein kinase C, theta [Danio rerio] gi|269315875 81814.9 8.06 13 30 0

Peptide Information

| Calc. Mass | Obsrv. Mass | ± da    | ± ppm | Start Seq. | End Seq. | Sequence                  | Ion Score | C. I. % | Modification                             | Rank | Result Type |
|------------|-------------|---------|-------|------------|----------|---------------------------|-----------|---------|------------------------------------------|------|-------------|
| 850.4781   | 850.5157    | 0.0376  | 44    | 42         | 48       | GQVYKQK                   |           |         |                                          |      | Mascot      |
| 850.4781   | 850.5157    | 0.0376  | 44    | 42         | 48       | GQVYKQK                   |           |         |                                          |      | Mascot      |
| 856.5362   | 856.4981    | -0.0381 | -44   | 628        | 635      | LGKGNIR                   |           |         |                                          |      | Mascot      |
| 866.4036   | 866.5067    | 0.1031  | 119   | 209        | 217      | CTGSAVNSK                 |           |         |                                          |      | Mascot      |
| 1045.5459  | 1045.5341   | -0.0118 | -11   | 277        | 286      | VANLCGVNQK                |           |         |                                          |      | Mascot      |
| 1069.5571  | 1069.6053   | 0.0482  | 45    | 192        | 200      | QCNAAIHKK                 |           |         | Carbamidomethyl (C)[2]                   |      | Mascot      |
| 1334.7096  | 1334.8551   | 0.1455  | 109   | 205        | 217      | VIAKCTGSAVNSK             |           |         | Carbamidomethyl (C)[5]                   |      | Mascot      |
| 1359.5238  | 1359.5717   | 0.0479  | 35    | 262        | 272      | CEECGMNVHHK               |           |         | Carbamidomethyl (C)[1], Oxidation (M)[6] |      | Mascot      |
| 1759.7131  | 1759.7213   | 0.0082  | 5     | 262        | 275      | CEECGMNVHHKCQK            |           |         | Carbamidomethyl (C)[1,4]                 |      | Mascot      |
| 2237.1013  | 2237.0339   | -0.0674 | -30   | 287        | 306      | LMAEALAMIESTQQQAR<br>SSR  |           |         | Oxidation (M)[2]                         |      | Mascot      |
| 2284.0989  | 2284.0989   | 0       | 0     | 542        | 561      | TCTFCGTPDYIAPEILLGQ<br>K  |           |         | Carbamidomethyl (C)[2,5]                 |      | Mascot      |
| 2348.1624  | 2348.1743   | 0.0119  | 5     | 513        | 533      | LDNILLDTDGHIKIADFGM<br>CK |           |         | Oxidation (M)[19]                        |      | Mascot      |
| 2413.187   | 2413.0979   | -0.0891 | -37   | 47         | 66       | QKRPTMYPPWSSTFDAH<br>VHK  |           |         |                                          |      | Mascot      |
| 2429.1819  | 2429.0942   | -0.0877 | -36   | 47         | 66       | QKRPTMYPPWSSTFDAH<br>VHK  |           |         | Oxidation (M)[6]                         |      | Mascot      |

|    |                                                   |           |         |     |              |     |                                 |      |   |                              |        |
|----|---------------------------------------------------|-----------|---------|-----|--------------|-----|---------------------------------|------|---|------------------------------|--------|
|    | 2429.1819                                         | 2429.0942 | -0.0877 | -36 | 47           | 66  | QKRPTMYPPWSSTFDAH<br>VHK        | 1    | 0 | Oxidation (M)[6]             | Mascot |
|    | 3337.5266                                         | 3337.6443 | 0.1177  | 35  | 159          | 185 | CHEFTATFFPQPTFC SVC<br>KEFWGLNK |      |   | Carbamidomethyl (C)[1,15,18] | Mascot |
| 22 | regulator of G-protein signaling 18 [Danio rerio] |           |         |     | gi 116268007 |     | 23936.1                         | 8.83 | 7 | 30                           | 0      |

#### Peptide Information

| Calc. Mass | Obsrv. Mass | ± da    | ± ppm | Start Seq. | End Seq. | Sequence                  | Ion Score | C. I. | % Modification         | Rank | Result Type |
|------------|-------------|---------|-------|------------|----------|---------------------------|-----------|-------|------------------------|------|-------------|
| 866.3937   | 866.5067    | 0.113   | 130   | 163        | 168      | RDCYPR                    |           |       | Carbamidomethyl (C)[3] |      | Mascot      |
| 870.4791   | 870.5145    | 0.0354  | 41    | 14         | 20       | ETHLRSK                   |           |       |                        |      | Mascot      |
| 1002.5149  | 1002.4149   | -0.1    | -100  | 182        | 190      | SGPPTMTRR                 |           |       |                        |      | Mascot      |
| 1018.5098  | 1018.4113   | -0.0985 | -97   | 181        | 189      | RSGPPTMTR                 |           |       | Oxidation (M)[7]       |      | Mascot      |
| 1018.5098  | 1018.4113   | -0.0985 | -97   | 182        | 190      | SGPPTMTRR                 |           |       | Oxidation (M)[6]       |      | Mascot      |
| 1337.5936  | 1337.5823   | -0.0113 | -8    | 1          | 11       | MRSEDEQLACR               |           |       |                        |      | Mascot      |
| 1337.5936  | 1337.5823   | -0.0113 | -8    | 1          | 11       | MRSEDEQLACR               |           |       |                        |      | Mascot      |
| 2236.9744  | 2237.0339   | 0.0595  | 27    | 83         | 100      | TEFSEENIEFWLACEDFK        |           |       |                        |      | Mascot      |
| 2299.1499  | 2299.1008   | -0.0491 | -21   | 136        | 156      | AAIEKNILQPTNSCFDAA<br>QHK |           |       |                        |      | Mascot      |

|    |                                                          |  |  |  |              |  |         |      |   |    |   |
|----|----------------------------------------------------------|--|--|--|--------------|--|---------|------|---|----|---|
| 23 | peptidyl-prolyl cis-trans isomerase FKBP10 [Danio rerio] |  |  |  | gi 255069762 |  | 68984.1 | 5.77 | 9 | 30 | 0 |
|----|----------------------------------------------------------|--|--|--|--------------|--|---------|------|---|----|---|

#### Peptide Information

| Calc. Mass | Obsrv. Mass | ± da    | ± ppm | Start Seq. | End Seq. | Sequence                   | Ion Score | C. I. | % Modification                           | Rank | Result Type |
|------------|-------------|---------|-------|------------|----------|----------------------------|-----------|-------|------------------------------------------|------|-------------|
| 801.4101   | 801.3248    | -0.0853 | -106  | 573        | 579      | DPDSVIR                    |           |       |                                          |      | Mascot      |
| 842.4188   | 842.4845    | 0.0657  | 78    | 307        | 313      | LPEPCAR                    |           |       | Carbamidomethyl (C)[5]                   |      | Mascot      |
| 864.4573   | 864.4935    | 0.0362  | 42    | 315        | 322      | SVAGDFIR                   |           |       |                                          |      | Mascot      |
| 1018.5349  | 1018.4113   | -0.1236 | -121  | 192        | 200      | VISTPKDCR                  | 2         | 0     |                                          |      | Mascot      |
| 1018.5349  | 1018.4113   | -0.1236 | -121  | 192        | 200      | VISTPKDCR                  |           |       |                                          |      | Mascot      |
| 1045.5775  | 1045.5341   | -0.0434 | -42   | 298        | 306      | DDIIVETLK                  |           |       |                                          |      | Mascot      |
| 1062.5314  | 1062.6591   | 0.1277  | 120   | 600        | 608      | LKVEDSEK                   |           |       |                                          |      | Mascot      |
| 1069.4731  | 1069.6053   | 0.1322  | 124   | 580        | 587      | DMFKNQDR                   |           |       | Oxidation (M)[2]                         |      | Mascot      |
| 1075.5564  | 1075.5333   | -0.0231 | -21   | 192        | 200      | VISTPKDCR                  |           |       | Carbamidomethyl (C)[8]                   |      | Mascot      |
| 1334.6667  | 1334.8551   | 0.1884  | 141   | 137        | 147      | GILGMCINERR                |           |       | Carbamidomethyl (C)[6], Oxidation (M)[5] |      | Mascot      |
| 2297.3228  | 2297.1055   | -0.2173 | -95   | 497        | 518      | GAGIVPGSAVLRFELELL<br>SLQK |           |       |                                          |      | Mascot      |

|    |                                                                       |  |  |  |             |  |         |      |    |    |   |
|----|-----------------------------------------------------------------------|--|--|--|-------------|--|---------|------|----|----|---|
| 24 | S-adenosylhomocysteine hydrolase-like protein variant 1 [Danio rerio] |  |  |  | gi 51980240 |  | 61366.5 | 6.58 | 10 | 30 | 0 |
|----|-----------------------------------------------------------------------|--|--|--|-------------|--|---------|------|----|----|---|

#### Peptide Information

| Calc. Mass | Obsrv. Mass | ± da | ± ppm | Start Seq. | End Seq. | Sequence | Ion Score | C. I. | % Modification | Rank | Result Type |
|------------|-------------|------|-------|------------|----------|----------|-----------|-------|----------------|------|-------------|
|------------|-------------|------|-------|------------|----------|----------|-----------|-------|----------------|------|-------------|



|  |           |           |         |     |     |     |                           |  |  |                                          |  |  |        |
|--|-----------|-----------|---------|-----|-----|-----|---------------------------|--|--|------------------------------------------|--|--|--------|
|  | 842.3712  | 842.4845  | 0.1133  | 135 | 125 | 132 | GSSDFCVK                  |  |  |                                          |  |  | Mascot |
|  | 868.4926  | 868.5161  | 0.0235  | 27  | 265 | 271 | YPSVFKK                   |  |  |                                          |  |  | Mascot |
|  | 870.5406  | 870.5145  | -0.0261 | -30 | 458 | 465 | VILLAEGR                  |  |  |                                          |  |  | Mascot |
|  | 1062.5691 | 1062.6591 | 0.09    | 85  | 133 | 141 | NIKQAEFGR                 |  |  |                                          |  |  | Mascot |
|  | 1069.6    | 1069.6053 | 0.0053  | 5   | 161 | 171 | AQGEKPLAGAK               |  |  |                                          |  |  | Mascot |
|  | 1092.532  | 1092.5529 | 0.0209  | 19  | 64  | 72  | IQFANQEDK                 |  |  |                                          |  |  | Mascot |
|  | 1542.7217 | 1542.786  | 0.0643  | 42  | 119 | 132 | SQVNSKGSSDFCVK            |  |  | Carbamidomethyl (C)[12]                  |  |  | Mascot |
|  | 1758.8214 | 1758.7297 | -0.0917 | -52 | 22  | 37  | ESENVAEKYSAMTATK          |  |  |                                          |  |  | Mascot |
|  | 1990.0273 | 1990.0033 | -0.024  | -12 | 142 | 158 | REIEIAEQDMSALISLR         |  |  | Oxidation (M)[10]                        |  |  | Mascot |
|  | 2233.0159 | 2233.0164 | 0.0005  | 0   | 414 | 434 | NGCIVCNMGHSNTEIDVA<br>SLR |  |  |                                          |  |  | Mascot |
|  | 2249.0107 | 2248.9939 | -0.0168 | -7  | 414 | 434 | NGCIVCNMGHSNTEIDVA<br>SLR |  |  | Oxidation (M)[8]                         |  |  | Mascot |
|  | 2306.0322 | 2306.0542 | 0.022   | 10  | 414 | 434 | NGCIVCNMGHSNTEIDVA<br>SLR |  |  | Carbamidomethyl (C)[3], Oxidation (M)[8] |  |  | Mascot |

25 novel protein [Danio rerio] gi|123230020 20555.4 8.96 6 30 0

#### Peptide Information

| Calc. Mass | Obsrv. Mass | ± da    | ± ppm | Start Seq. | End Seq. | Sequence                         | Ion Score | C. I. | % Modification               | Rank | Result Type |
|------------|-------------|---------|-------|------------|----------|----------------------------------|-----------|-------|------------------------------|------|-------------|
| 882.4468   | 882.5367    | 0.0899  | 102   | 4          | 10       | FIGDFQR                          |           |       |                              |      | Mascot      |
| 1002.5214  | 1002.4149   | -0.1065 | -106  | 41         | 50       | AGTDIDAAIR                       |           |       |                              |      | Mascot      |
| 1075.5176  | 1075.5333   | 0.0157  | 15    | 155        | 162      | THILWMCR                         |           |       | Oxidation (M)[6]             |      | Mascot      |
| 2348.2029  | 2348.1743   | -0.0286 | -12   | 21         | 40       | EVTILEQCQGFILYFCLITSR            |           |       |                              |      | Mascot      |
| 2451.0535  | 2451.0718   | 0.0183  | 7     | 155        | 173      | THILWMCRLFQTTSCCFC<br>S          |           |       | Carbamidomethyl (C)[7,15,16] |      | Mascot      |
| 3324.5188  | 3324.6443   | 0.1255  | 38    | 86         | 113      | ENTYLVDFLFNEDEGFM<br>NCQKNIDAINK |           |       |                              |      | Mascot      |

26 hypothetical protein LOC100136848 [Danio rerio] gi|167621498 26727.6 8.2 6 30 0

#### Peptide Information

| Calc. Mass | Obsrv. Mass | ± da    | ± ppm | Start Seq. | End Seq. | Sequence                     | Ion Score | C. I. | % Modification            | Rank | Result Type |
|------------|-------------|---------|-------|------------|----------|------------------------------|-----------|-------|---------------------------|------|-------------|
| 868.4999   | 868.5161    | 0.0162  | 19    | 221        | 227      | QNKHITK                      |           |       |                           |      | Mascot      |
| 1092.5718  | 1092.5529   | -0.0189 | -17   | 1          | 10       | MAQTSLQGGK                   |           |       | Oxidation (M)[1]          |      | Mascot      |
| 1487.7852  | 1487.6096   | -0.1756 | -118  | 55         | 70       | SSSWGVLVGGPGSGK              |           |       |                           |      | Mascot      |
| 2034.0323  | 2033.9081   | -0.1242 | -61   | 116        | 133      | GLVAQICRSGLVPDYEEK           |           |       | Carbamidomethyl (C)[7]    |      | Mascot      |
| 2306.1624  | 2306.0542   | -0.1082 | -47   | 30         | 54       | TSSLAPGAQEPIQPTAG<br>PPSGAGK |           |       |                           |      | Mascot      |
| 2451.2119  | 2451.0718   | -0.1401 | -57   | 102        | 123      | AEDAETLCVSGFVRGLV<br>AQICR   |           |       | Carbamidomethyl (C)[8,21] |      | Mascot      |

27 suppressor of hairless 2 [Danio rerio] gi|89077591 54452.2 8.28 8 30 0

Peptide Information

| Calc. Mass | Obsrv. Mass | ± da    | ± ppm | Start Seq. | End Seq. | Sequence                      | Ion Score | C. I. % | Modification                                 | Rank | Result Type |
|------------|-------------|---------|-------|------------|----------|-------------------------------|-----------|---------|----------------------------------------------|------|-------------|
| 801.3963   | 801.3248    | -0.0715 | -89   | 273        | 278      | CAFYLK                        |           |         | Carbamidomethyl (C)[1]                       |      | Mascot      |
| 848.4042   | 848.5022    | 0.098   | 116   | 71         | 76       | REQMER                        |           |         |                                              |      | Mascot      |
| 850.4529   | 850.5157    | 0.0628  | 74    | 25         | 30       | NYLRER                        |           |         |                                              |      | Mascot      |
| 850.4529   | 850.5157    | 0.0628  | 74    | 25         | 30       | NYLRER                        |           |         |                                              |      | Mascot      |
| 864.3992   | 864.4935    | 0.0943  | 109   | 71         | 76       | REQMER                        |           |         | Oxidation (M)[4]                             |      | Mascot      |
| 1092.5354  | 1092.5529   | 0.0175  | 16    | 163        | 173      | NADLCIASGTK                   |           |         |                                              |      | Mascot      |
| 1742.791   | 1742.7335   | -0.0575 | -33   | 384        | 399      | CGESMLCVVPDISAFR              |           |         | Oxidation (M)[5]                             |      | Mascot      |
| 2249.0754  | 2248.9939   | -0.0815 | -36   | 303        | 322      | EPNKEMINDGASWTIIST DK         |           |         |                                              |      | Mascot      |
| 2255.0405  | 2254.9973   | -0.0432 | -19   | 384        | 403      | CGESMLCVVPDISAFRE GWR         |           |         |                                              |      | Mascot      |
| 2271.0354  | 2270.9895   | -0.0459 | -20   | 384        | 403      | CGESMLCVVPDISAFRE GWR         |           |         | Oxidation (M)[5]                             |      | Mascot      |
| 3499.5046  | 3499.7527   | 0.2481  | 71    | 77         | 107      | DGCSEQESQPCAFIGN SEQEMQLNLEGG |           |         | Carbamidomethyl (C)[3,11], Oxidation (M)[23] |      | Mascot      |

28 S-adenosylhomocysteine hydrolase-like 1 [Danio rerio] gi|169146249 57466.4 6.88 10 29 0

Peptide Information

| Calc. Mass | Obsrv. Mass | ± da    | ± ppm | Start Seq. | End Seq. | Sequence                          | Ion Score | C. I. % | Modification                             | Rank | Result Type |
|------------|-------------|---------|-------|------------|----------|-----------------------------------|-----------|---------|------------------------------------------|------|-------------|
| 842.3712   | 842.4845    | 0.1133  | 135   | 86         | 93       | GSSDFCVK                          |           |         |                                          |      | Mascot      |
| 868.4926   | 868.5161    | 0.0235  | 27    | 226        | 232      | YPSVFKK                           |           |         |                                          |      | Mascot      |
| 870.5406   | 870.5145    | -0.0261 | -30   | 419        | 426      | VILLAEGR                          |           |         |                                          |      | Mascot      |
| 1062.5691  | 1062.6591   | 0.09    | 85    | 94         | 102      | NIKQAEFGR                         |           |         |                                          |      | Mascot      |
| 1069.6     | 1069.6053   | 0.0053  | 5     | 122        | 132      | AQGEKPLAGAK                       |           |         |                                          |      | Mascot      |
| 1092.532   | 1092.5529   | 0.0209  | 19    | 25         | 33       | IQFANQEDK                         |           |         |                                          |      | Mascot      |
| 1542.7217  | 1542.786    | 0.0643  | 42    | 80         | 93       | SQVNSKGSSDFCVK                    |           |         | Carbamidomethyl (C)[12]                  |      | Mascot      |
| 1990.0273  | 1990.0033   | -0.024  | -12   | 103        | 119      | REIEIAEQDMSALISLR                 |           |         | Oxidation (M)[10]                        |      | Mascot      |
| 2233.0159  | 2233.0164   | 0.0005  | 0     | 375        | 395      | NGCIVCNMGHSNTEIDVA SLR            |           |         |                                          |      | Mascot      |
| 2249.0107  | 2248.9939   | -0.0168 | -7    | 375        | 395      | NGCIVCNMGHSNTEIDVA SLR            |           |         | Oxidation (M)[8]                         |      | Mascot      |
| 2306.0322  | 2306.0542   | 0.022   | 10    | 375        | 395      | NGCIVCNMGHSNTEIDVA SLR            |           |         | Carbamidomethyl (C)[3], Oxidation (M)[8] |      | Mascot      |
| 3499.6333  | 3499.7527   | 0.1194  | 34    | 310        | 341      | GCCSALKALGAIVCVTEI DPICALQACMDGFR |           |         | Carbamidomethyl (C)[2,3,14,22]           |      | Mascot      |

29 mannose receptor C1-like protein [Danio rerio] gi|225542767 125553.6 6.53 14 29 0

Peptide Information

| Calc. Mass | Obsrv. Mass | $\pm$ da | $\pm$ ppm | Start Seq. | End Seq. | Sequence                  | Ion Score | C. I. % | Modification                                 | Rank | Result Type |
|------------|-------------|----------|-----------|------------|----------|---------------------------|-----------|---------|----------------------------------------------|------|-------------|
| 866.4406   | 866.5067    | 0.0661   | 76        | 674        | 680      | FLWTDGK                   |           |         |                                              |      | Mascot      |
| 1320.5095  | 1320.5322   | 0.0227   | 17        | 140        | 149      | WADHACEMER                |           |         | Carbamidomethyl (C)[6], Oxidation (M)[8]     |      | Mascot      |
| 1359.615   | 1359.5717   | -0.0433  | -32       | 339        | 348      | TWFEARDFCK                |           |         | Carbamidomethyl (C)[9]                       |      | Mascot      |
| 1488.6835  | 1488.6006   | -0.0829  | -56       | 49         | 60       | KMWNDALAACHR              |           |         | Carbamidomethyl (C)[10], Oxidation (M)[2]    |      | Mascot      |
| 1742.7771  | 1742.7335   | -0.0436  | -25       | 728        | 741      | VQMGDQGGFICKR             |           |         | Carbamidomethyl (C)[4,12], Oxidation (M)[3]  |      | Mascot      |
| 2211.0032  | 2211.0334   | 0.0302   | 14        | 565        | 583      | SMGFWDINCGVPLPSIC K       |           |         | Carbamidomethyl (C)[10,18], Oxidation (M)[2] |      | Mascot      |
| 2237.0664  | 2237.0339   | -0.0325  | -15       | 565        | 584      | SMGFWDINCGVPLPSIC KR      |           |         |                                              |      | Mascot      |
| 2247.9841  | 2248.0232   | 0.0391   | 17        | 722        | 740      | MTGMWKVQMGDQGG FICK       |           |         | Carbamidomethyl (C)[10]                      |      | Mascot      |
| 2248.9888  | 2248.9939   | 0.0051   | 2         | 179        | 197      | YGSYCYMSAIESKTFNEA K      |           |         | Carbamidomethyl (C)[5]                       |      | Mascot      |
| 2255.0107  | 2254.9973   | -0.0134  | -6        | 429        | 447      | DCEAYNDWICQIAIGTTP K      |           |         | Carbamidomethyl (C)[2,10]                    |      | Mascot      |
| 2314.0513  | 2314.1025   | 0.0512   | 22        | 267        | 288      | GCVAMLTGTSAGLWDVL DCNSK   |           |         | Carbamidomethyl (C)[2], Oxidation (M)[5]     |      | Mascot      |
| 2413.0508  | 2413.0979   | 0.0471   | 20        | 702        | 721      | MYEFGSENYDCVVMLRS PEK     |           |         | Oxidation (M)[1]                             |      | Mascot      |
| 2429.0457  | 2429.0942   | 0.0485   | 20        | 702        | 721      | MYEFGSENYDCVVMLRS PEK     |           |         | Oxidation (M)[1,14]                          |      | Mascot      |
| 2429.2241  | 2429.0942   | -0.1299  | -53       | 156        | 178      | KSSSKPEGAPEVVS LGC QAGWVR |           |         | Carbamidomethyl (C)[17]                      |      | Mascot      |
| 2451.1931  | 2451.0718   | -0.1213  | -49       | 192        | 213      | TFNEAKQICEQTGANLVD VASR   |           |         | Carbamidomethyl (C)[9]                       |      | Mascot      |

30

PREDICTED: macrophage-stimulating protein receptor-like [Danio rerio]

gi|189520374

146849.2

5.92

14

28

0

#### Peptide Information

| Calc. Mass | Obsrv. Mass | $\pm$ da | $\pm$ ppm | Start Seq. | End Seq. | Sequence         | Ion Score | C. I. % | Modification                             | Rank | Result Type |
|------------|-------------|----------|-----------|------------|----------|------------------|-----------|---------|------------------------------------------|------|-------------|
| 866.4188   | 866.5067    | 0.0879   | 101       | 1168       | 1175     | VADFGMAR         |           |         |                                          |      | Mascot      |
| 868.5111   | 868.5161    | 0.005    | 6         | 175        | 181      | HLSLIRR          |           |         |                                          |      | Mascot      |
| 882.4138   | 882.5367    | 0.1229   | 139       | 1168       | 1175     | VADFGMAR         |           |         | Oxidation (M)[6]                         |      | Mascot      |
| 1051.6622  | 1051.6779   | 0.0157   | 15        | 868        | 876      | IPKNLTIPR        |           |         |                                          |      | Mascot      |
| 1051.6622  | 1051.6779   | 0.0157   | 15        | 868        | 876      | IPKNLTIPR        |           |         |                                          |      | Mascot      |
| 1062.5248  | 1062.6591   | 0.1343   | 126       | 859        | 867      | VLDNEITCR        |           |         |                                          |      | Mascot      |
| 1069.5347  | 1069.6053   | 0.0706   | 66        | 1139       | 1147     | GMEYLANKK        |           |         | Oxidation (M)[2]                         |      | Mascot      |
| 1334.6774  | 1334.8551   | 0.1777   | 133       | 1197       | 1207     | WMALES LQTQK     |           |         |                                          |      | Mascot      |
| 1359.5919  | 1359.5717   | -0.0202  | -15       | 1157       | 1167     | NCMLDESFTVK      |           |         | Carbamidomethyl (C)[2], Oxidation (M)[3] |      | Mascot      |
| 1542.8022  | 1542.786    | -0.0162  | -11       | 181        | 193      | RLLNTENG FHDVK   |           |         |                                          |      | Mascot      |
| 1758.8704  | 1758.7297   | -0.1407  | -80       | 717        | 732      | VNPEVTGVNPNCGFRR |           |         |                                          |      | Mascot      |
| 1759.7518  | 1759.7213   | -0.0305  | -17       | 948        | 962      | TTAENYDRSPDGDYR  |           |         |                                          |      | Mascot      |

|           |           |         |     |     |     |                                    |                         |        |
|-----------|-----------|---------|-----|-----|-----|------------------------------------|-------------------------|--------|
| 2194.0842 | 2194.0217 | -0.0625 | -28 | 566 | 586 | VGNSDCTVVPKTSSSL                   |                         | Mascot |
| 2297.1008 | 2297.1055 | 0.0047  | 2   | 837 | 858 | LALVSGCMEIIMTVNGVD<br>CNAK         | Oxidation (M)[8]        | Mascot |
| 2314.1033 | 2314.1025 | -0.0008 | 0   | 712 | 731 | TFSYRVNPEVTGVNPNC<br>GFR           | Carbamidomethyl (C)[17] | Mascot |
| 3324.6128 | 3324.6443 | 0.0315  | 9   | 837 | 867 | LALVSGCMEIIMTVNGVD<br>CNAKVLNEITCR |                         | Mascot |

### Peptide Information

|           |           |         |      |     |     |                        |   |                         |        |
|-----------|-----------|---------|------|-----|-----|------------------------|---|-------------------------|--------|
| 864.4573  | 864.4935  | 0.0362  | 42   | 154 | 161 | LSEGVGFR               |   |                         | Mascot |
| 870.5407  | 870.5145  | -0.0262 | -30  | 134 | 141 | ALIISPTR               |   |                         | Mascot |
| 1018.4509 | 1018.4113 | -0.0396 | -39  | 492 | 501 | GEAPEVISNC             | 5 | 0                       | Mascot |
| 1018.4509 | 1018.4113 | -0.0396 | -39  | 492 | 501 | GEAPEVISNC             |   |                         | Mascot |
| 1075.4724 | 1075.5333 | 0.0609  | 57   | 492 | 501 | GEAPEVISNC             |   | Carbamidomethyl (C)[10] | Mascot |
| 1359.7048 | 1359.5717 | -0.1331 | -98  | 100 | 112 | REILACAPTGS GK         |   | Carbamidomethyl (C)[6]  | Mascot |
| 1542.8284 | 1542.786  | -0.0424 | -27  | 113 | 125 | TMAFCLPLLAHLR          |   | Carbamidomethyl (C)[5]  | Mascot |
| 1888.0109 | 1887.8065 | -0.2044 | -108 | 260 | 276 | WCKLNLNLSVVSIGAR       |   |                         | Mascot |
| 2283.3223 | 2283.1028 | -0.2195 | -96  | 302 | 321 | NLIKQGFLPPVLV FVQSID R |   |                         | Mascot |
| 2283.3223 | 2283.1028 | -0.2195 | -96  | 302 | 321 | NLIKQGFLPPVLV FVQSID R |   |                         | Mascot |
| 2297.1604 | 2297.1055 | -0.0549 | -24  | 79  | 99  | AAGFQTPTPIQMQAVPL MMHK |   |                         | Mascot |

### Peptide Information

|           |           |         |      |      |      |                 |                         |        |
|-----------|-----------|---------|------|------|------|-----------------|-------------------------|--------|
| 838.4669  | 838.5093  | 0.0424  | 51   | 1016 | 1022 | ISTFDKK         |                         | Mascot |
| 1018.5138 | 1018.4113 | -0.1025 | -101 | 1133 | 1141 | KCHVEAGFK       |                         | Mascot |
| 1018.5138 | 1018.4113 | -0.1025 | -101 | 1133 | 1141 | KCHVEAGFK       |                         | Mascot |
| 1051.5717 | 1051.6779 | 0.1062  | 101  | 520  | 527  | YRVVNICK        | Carbamidomethyl (C)[7]  | Mascot |
| 1051.5717 | 1051.6779 | 0.1062  | 101  | 520  | 527  | YRVVNICK        | Carbamidomethyl (C)[7]  | Mascot |
| 1075.5353 | 1075.5333 | -0.002  | -2   | 1133 | 1141 | KCHVEAGFK       | Carbamidomethyl (C)[2]  | Mascot |
| 1448.6951 | 1448.8754 | 0.1803  | 124  | 1285 | 1296 | HLLGSYEVCQR     | Carbamidomethyl (C)[10] | Mascot |
| 1488.6246 | 1488.6006 | -0.024  | -16  | 1595 | 1606 | DGRWTEFTMCK     |                         | Mascot |
| 1542.8022 | 1542.786  | -0.0162 | -11  | 316  | 330  | GWSVGIAADPTGRK  |                         | Mascot |
| 1758.8519 | 1758.7297 | -0.1222 | -69  | 255  | 269  | WMTGIYFSGQAEQLK |                         | Mascot |

|    |                                                |           |         |     |              |      |                             |      |   |    |   |                             |        |
|----|------------------------------------------------|-----------|---------|-----|--------------|------|-----------------------------|------|---|----|---|-----------------------------|--------|
|    | 1887.767                                       | 1887.8065 | 0.0395  | 21  | 1726         | 1741 | VIQFGVDCDQDECTCR            |      |   |    |   | Carbamidomethyl (C)[8]      | Mascot |
|    | 1989.9089                                      | 1990.0033 | 0.0944  | 47  | 355          | 371  | YQPDSWTHVVASYDGHK           |      |   |    |   |                             | Mascot |
|    | 2011.7831                                      | 2011.9376 | 0.1545  | 77  | 1707         | 1725 | AYCQYDGGDCCPSTLSS<br>GK     | 2    | 0 |    |   | Carbamidomethyl (C)[3]      | Mascot |
|    | 2011.7831                                      | 2011.9376 | 0.1545  | 77  | 1707         | 1725 | AYCQYDGGDCCPSTLSS<br>GK     |      |   |    |   | Carbamidomethyl (C)[3]      | Mascot |
|    | 2033.8691                                      | 2033.9081 | 0.039   | 19  | 776          | 793  | ACHDPDPVNDTCGLTQY<br>K      |      |   |    |   | Carbamidomethyl (C)[2]      | Mascot |
|    | 2248.9961                                      | 2248.9939 | -0.0022 | -1  | 774          | 793  | SKACHDPDPVNDTCGLT<br>QYK    |      |   |    |   | Carbamidomethyl (C)[4]      | Mascot |
|    | 2284.168                                       | 2284.0989 | -0.0691 | -30 | 2            | 24   | GAGKGWVGPGGTQLGNI<br>DTLTER |      |   |    |   |                             | Mascot |
|    | 2299.1428                                      | 2299.1008 | -0.042  | -18 | 250          | 269  | DVPTKWMGTGIYFSGQAE<br>QLK   |      |   |    |   |                             | Mascot |
|    | 2300.1663                                      | 2300.1042 | -0.0621 | -27 | 522          | 542  | VVNICKDNGSDPSVSLQ<br>QIQR   |      |   |    |   |                             | Mascot |
|    | 2306.0176                                      | 2306.0542 | 0.0366  | 16  | 774          | 793  | SKACHDPDPVNDTCGLT<br>QYK    |      |   |    |   | Carbamidomethyl (C)[4,14]   | Mascot |
|    | 2347.9238                                      | 2348.1743 | 0.2505  | 107 | 588          | 607  | HCDPECDHPLTGHDGGD<br>CLR    |      |   |    |   | Carbamidomethyl (C)[2,6,18] | Mascot |
| 33 | beta-1,3-galactosyltransferase 6 [Danio rerio] |           |         |     | gi 113675498 |      | 38567.2                     | 8.52 | 7 | 28 | 0 |                             |        |

#### Peptide Information

| Calc. Mass | Obsrv. Mass | ± da    | ± ppm | Start Seq. | End Seq. | Sequence                          | Ion Score | C. I. | % Modification          | Rank | Result Type |
|------------|-------------|---------|-------|------------|----------|-----------------------------------|-----------|-------|-------------------------|------|-------------|
| 848.4545   | 848.5022    | 0.0477  | 56    | 305        | 311      | LCKEEVK                           |           |       |                         |      | Mascot      |
| 1045.4949  | 1045.5341   | 0.0392  | 37    | 268        | 275      | FDTEYKSR                          |           |       |                         |      | Mascot      |
| 1092.5242  | 1092.5529   | 0.0287  | 26    | 287        | 295      | QSLEDMLEK                         |           |       |                         |      | Mascot      |
| 1133.6282  | 1133.6821   | 0.0539  | 48    | 1          | 9        | MNLLRLVCR                         |           |       | Oxidation (M)[1]        |      | Mascot      |
| 2230.042   | 2230.1057   | 0.0637  | 29    | 314        | 331      | LSYIYDWSVPPSQCCQR<br>K            |           |       | Carbamidomethyl (C)[14] |      | Mascot      |
| 2314.1108  | 2314.1025   | -0.0083 | -4    | 312        | 330      | LRLSYIYDWSVPPSQCC<br>QR           |           |       |                         |      | Mascot      |
| 3337.6238  | 3337.6443   | 0.0205  | 6     | 204        | 232      | WKESAWELCDYYLPYAL<br>GGGYVLSADLVR |           |       |                         |      | Mascot      |

34 caveolin-2 [Danio rerio] gi|50344956 18525.6 5.7 5 28 0

#### Peptide Information

| Calc. Mass | Obsrv. Mass | ± da    | ± ppm | Start Seq. | End Seq. | Sequence                           | Ion Score | C. I. | % Modification   | Rank | Result Type |
|------------|-------------|---------|-------|------------|----------|------------------------------------|-----------|-------|------------------|------|-------------|
| 850.4338   | 850.5157    | 0.0819  | 96    | 1          | 7        | MGLEKEK                            |           |       | Oxidation (M)[1] |      | Mascot      |
| 850.4338   | 850.5157    | 0.0819  | 96    | 1          | 7        | MGLEKEK                            |           |       | Oxidation (M)[1] |      | Mascot      |
| 856.5138   | 856.4981    | -0.0157 | -18   | 22         | 29       | SIEPILGK                           |           |       |                  |      | Mascot      |
| 1334.6699  | 1334.8551   | 0.1852  | 139   | 30         | 40       | KPNVYSEVQDR                        |           |       |                  |      | Mascot      |
| 2033.9563  | 2033.9081   | -0.0482 | -24   | 51         | 68       | VGFEIIAEPNSTHSFDR                  |           |       |                  |      | Mascot      |
| 3499.7644  | 3499.7527   | -0.0117 | -3    | 51         | 81       | VGFEIIAEPNSTHSFDR<br>VWIGSHAVFELVK |           |       |                  |      | Mascot      |

35 putative adenosylhomocysteinase 2 [Danio rerio] gi|41152036 56739.3 7.42 10 28 0

Peptide Information

| Calc. Mass | Obsrv. Mass | ± da    | ± ppm | Start Seq. | End Seq. | Sequence                             | Ion Score | C. I. | % Modification                           | Rank | Result Type |
|------------|-------------|---------|-------|------------|----------|--------------------------------------|-----------|-------|------------------------------------------|------|-------------|
| 842.3712   | 842.4845    | 0.1133  | 135   | 83         | 90       | GSSDFCVK                             |           |       |                                          |      | Mascot      |
| 868.4926   | 868.5161    | 0.0235  | 27    | 223        | 229      | YPSVFKK                              |           |       |                                          |      | Mascot      |
| 870.5406   | 870.5145    | -0.0261 | -30   | 416        | 423      | VILLAEGR                             |           |       |                                          |      | Mascot      |
| 1062.5691  | 1062.6591   | 0.09    | 85    | 91         | 99       | NIKQAEFGR                            |           |       |                                          |      | Mascot      |
| 1069.6     | 1069.6053   | 0.0053  | 5     | 119        | 129      | AQGEKPLAGAK                          |           |       |                                          |      | Mascot      |
| 1092.532   | 1092.5529   | 0.0209  | 19    | 22         | 30       | IQFANQEDK                            |           |       |                                          |      | Mascot      |
| 1542.7217  | 1542.786    | 0.0643  | 42    | 77         | 90       | SQVNSKGSSDFCVK                       |           |       | Carbamidomethyl (C)[12]                  |      | Mascot      |
| 1990.0273  | 1990.0033   | -0.024  | -12   | 100        | 116      | REIEIAEQDMSALISLR                    |           |       | Oxidation (M)[10]                        |      | Mascot      |
| 2233.0159  | 2233.0164   | 0.0005  | 0     | 372        | 392      | NGCIVCNMGHSNTEIDVA<br>SLR            |           |       |                                          |      | Mascot      |
| 2249.0107  | 2248.9939   | -0.0168 | -7    | 372        | 392      | NGCIVCNMGHSNTEIDVA<br>SLR            |           |       | Oxidation (M)[8]                         |      | Mascot      |
| 2306.0322  | 2306.0542   | 0.022   | 10    | 372        | 392      | NGCIVCNMGHSNTEIDVA<br>SLR            |           |       | Carbamidomethyl (C)[3], Oxidation (M)[8] |      | Mascot      |
| 3499.6333  | 3499.7527   | 0.1194  | 34    | 307        | 338      | GCCSALKALGAIVCVTEI<br>DPICALQACMDGFR |           |       | Carbamidomethyl (C)[2,3,14,22]           |      | Mascot      |

36 PREDICTED: tripartite motif-containing protein 59-like [Danio rerio] gi|125836979 39637.8 5.73 8 28 0

Peptide Information

| Calc. Mass | Obsrv. Mass | ± da    | ± ppm | Start Seq. | End Seq. | Sequence                  | Ion Score | C. I. | % Modification          | Rank | Result Type |
|------------|-------------|---------|-------|------------|----------|---------------------------|-----------|-------|-------------------------|------|-------------|
| 864.3668   | 864.4935    | 0.1267  | 147   | 157        | 162      | WEEMNR                    |           |       |                         |      | Mascot      |
| 1045.5636  | 1045.5341   | -0.0295 | -28   | 174        | 182      | SEALVQKDR                 |           |       |                         |      | Mascot      |
| 1165.61    | 1165.7096   | 0.0996  | 85    | 131        | 140      | IDDLQTAYVK                |           |       |                         |      | Mascot      |
| 1165.61    | 1165.7096   | 0.0996  | 85    | 131        | 140      | IDDLQTAYVK                |           |       |                         |      | Mascot      |
| 1279.6464  | 1279.7393   | 0.0929  | 73    | 200        | 209      | KEQFMQALER                |           |       |                         |      | Mascot      |
| 1990.0314  | 1990.0033   | -0.0281 | -14   | 210        | 226      | ANVLLNQAYEPLMEQLK         |           |       | Oxidation (M)[13]       |      | Mascot      |
| 2034.1633  | 2033.9081   | -0.2552 | -125  | 183        | 200      | EVALVFFQGLELTLAQKK        |           |       |                         |      | Mascot      |
| 2283.0281  | 2283.1028   | 0.0747  | 33    | 94         | 113      | SPSCPEHPGQPLNVYCV<br>QDR  |           |       | Carbamidomethyl (C)[4]  |      | Mascot      |
| 2283.0281  | 2283.1028   | 0.0747  | 33    | 94         | 113      | SPSCPEHPGQPLNVYCV<br>QDR  |           |       | Carbamidomethyl (C)[4]  |      | Mascot      |
| 2429.115   | 2429.0942   | -0.0208 | -9    | 298        | 318      | DLRDGPLPEISWHSESC<br>STSR |           |       | Carbamidomethyl (C)[17] |      | Mascot      |
| 2429.115   | 2429.0942   | -0.0208 | -9    | 298        | 318      | DLRDGPLPEISWHSESC<br>STSR | 0         | 0     | Carbamidomethyl (C)[17] |      | Mascot      |

37 CAD protein [Danio rerio] gi|57770415 247044.1 6.19 19 28 0

| Peptide Information |                                     |          |           |              |          |                            |           |       |                                           |      |             |
|---------------------|-------------------------------------|----------|-----------|--------------|----------|----------------------------|-----------|-------|-------------------------------------------|------|-------------|
| Calc. Mass          | Obsrv. Mass                         | $\pm$ da | $\pm$ ppm | Start Seq.   | End Seq. | Sequence                   | Ion Score | C. I. | % Modification                            | Rank | Result Type |
| 850.5145            | 850.5157                            | 0.0012   | 1         | 751          | 757      | FLRVSTK                    |           |       |                                           |      | Mascot      |
| 850.5145            | 850.5157                            | 0.0012   | 1         | 751          | 757      | FLRVSTK                    |           |       |                                           |      | Mascot      |
| 870.4389            | 870.5145                            | 0.0756   | 87        | 1307         | 1314     | AMLSTGFK                   |           |       | Oxidation (M)[2]                          |      | Mascot      |
| 882.4315            | 882.5367                            | 0.1052   | 119       | 2156         | 2162     | ERFSSEK                    |           |       |                                           |      | Mascot      |
| 996.5948            | 996.5637                            | -0.0311  | -31       | 1448         | 1456     | QIGQAPRVK                  |           |       |                                           |      | Mascot      |
| 996.5948            | 996.5637                            | -0.0311  | -31       | 1448         | 1456     | QIGQAPRVK                  |           |       |                                           |      | Mascot      |
| 1018.5316           | 1018.4113                           | -0.1203  | -118      | 169          | 177      | VFNPEGTVR                  |           |       |                                           |      | Mascot      |
| 1018.5349           | 1018.4113                           | -0.1236  | -121      | 764          | 773      | SVGEVMAIGR                 | 4         | 0     |                                           |      | Mascot      |
| 1133.6287           | 1133.6821                           | 0.0534   | 47        | 2089         | 2098     | HGRTVHSLAR                 |           |       |                                           |      | Mascot      |
| 1165.5419           | 1165.7096                           | 0.1677   | 144       | 1982         | 1992     | TSSSFAAAMHR                |           |       |                                           |      | Mascot      |
| 1165.5419           | 1165.7096                           | 0.1677   | 144       | 1982         | 1992     | TSSSFAAAMHR                |           |       |                                           |      | Mascot      |
| 1488.7474           | 1488.6006                           | -0.1468  | -99       | 1212         | 1223     | DDQLKVICENVR               |           |       | Carbamidomethyl (C)[9]                    |      | Mascot      |
| 1990.0426           | 1990.0033                           | -0.0393  | -20       | 169          | 186      | VFNPEGTVRITIDCGIK          |           |       | Carbamidomethyl (C)[15]                   |      | Mascot      |
| 2011.8412           | 2011.9376                           | 0.0964   | 48        | 1364         | 1380     | VMAVDWPFEEESDCPNK          |           |       | Oxidation (M)[2]                          |      | Mascot      |
| 2011.8412           | 2011.9376                           | 0.0964   | 48        | 1364         | 1380     | VMAVDWPFEEESDCPNK          |           |       | Oxidation (M)[2]                          |      | Mascot      |
| 2206.176            | 2206.0325                           | -0.1435  | -65       | 1836         | 1855     | VIEAMTPERPRQAAPVDA<br>VR   |           |       |                                           |      | Mascot      |
| 2248.0774           | 2248.0232                           | -0.0542  | -24       | 1035         | 1053     | QQCRILGTSPEFIDNAEN<br>R    |           |       | Carbamidomethyl (C)[3]                    |      | Mascot      |
| 2254.9631           | 2254.9973                           | 0.0342   | 15        | 1364         | 1382     | VMAVDWPFEEESDCPNK<br>DK    |           |       | Oxidation (M)[2]                          |      | Mascot      |
| 2271.0996           | 2270.9895                           | -0.1101  | -48       | 2010         | 2030     | GESLVDSVNTMSCYADVI<br>VLR  |           |       |                                           |      | Mascot      |
| 2297.1494           | 2297.1055                           | -0.0439  | -19       | 377          | 396      | LMEHLTFPGSPDPNAFV<br>RPR   |           |       | Oxidation (M)[2]                          |      | Mascot      |
| 2300.0872           | 2300.1042                           | 0.017    | 7         | 950          | 969      | IGSSVEFDWCAVGCIMEL<br>RK   |           |       | Carbamidomethyl (C)[10]                   |      | Mascot      |
| 2314.0994           | 2314.1025                           | 0.0031   | 1         | 2163         | 2182     | EYNACFGQFILTIPHIMTG<br>AK  |           |       | Carbamidomethyl (C)[5], Oxidation (M)[16] |      | Mascot      |
| 2413.1792           | 2413.0979                           | -0.0813  | -34       | 2163         | 2183     | EYNACFGQFILTIPHIMTG<br>AKR |           |       | Oxidation (M)[16]                         |      | Mascot      |
| 38                  | PHD finger protein 19 [Danio rerio] |          |           | gil190570268 |          | 63878.7                    | 8.52      | 9     | 28                                        | 0    |             |

| Peptide Information |             |          |           |            |          |            |           |       |                                          |      |             |
|---------------------|-------------|----------|-----------|------------|----------|------------|-----------|-------|------------------------------------------|------|-------------|
| Calc. Mass          | Obsrv. Mass | $\pm$ da | $\pm$ ppm | Start Seq. | End Seq. | Sequence   | Ion Score | C. I. | % Modification                           | Rank | Result Type |
| 864.4937            | 864.4935    | -0.0002  | 0         | 244        | 250      | GVEYIKR    |           |       |                                          |      | Mascot      |
| 866.3859            | 866.5067    | 0.1208   | 139       | 1          | 7        | MLESACR    |           |       | Carbamidomethyl (C)[6]                   |      | Mascot      |
| 870.396             | 870.5145    | 0.1185   | 136       | 205        | 210      | MLQCFR     |           |       | Carbamidomethyl (C)[4], Oxidation (M)[1] |      | Mascot      |
| 1092.6161           | 1092.5529   | -0.0632  | -58       | 336        | 345      | TRVPPNPPSK |           |       |                                          |      | Mascot      |

|    |                                                                           |           |         |     |     |             |                          |      |   |    |                                                  |  |        |
|----|---------------------------------------------------------------------------|-----------|---------|-----|-----|-------------|--------------------------|------|---|----|--------------------------------------------------|--|--------|
|    | 1320.6479                                                                 | 1320.5322 | -0.1157 | -88 | 233 | 243         | FYLFICAVCNK              |      |   |    |                                                  |  | Mascot |
|    | 1334.7314                                                                 | 1334.8551 | 0.1237  | 93  | 462 | 473         | LPTSNNYLLATK             |      |   |    |                                                  |  | Mascot |
|    | 2254.981                                                                  | 2254.9973 | 0.0163  | 7   | 97  | 116         | CSVCSDSLDPGNEILIC<br>GK  |      |   |    | Carbamidomethyl (C)[1,4,18]                      |  | Mascot |
|    | 2270.9761                                                                 | 2270.9895 | 0.0134  | 6   | 97  | 116         | CSVCSDSLDPGNEILIC<br>GK  |      |   |    | Carbamidomethyl (C)[1,4,18], Oxidation<br>(M)[7] |  | Mascot |
|    | 2300.1345                                                                 | 2300.1042 | -0.0303 | -13 | 273 | 290         | KYFELEEIVAFINNNDWR       |      |   |    |                                                  |  | Mascot |
|    | 2314.0688                                                                 | 2314.1025 | 0.0337  | 15  | 1   | 21          | MLESACRDGYLTAGES<br>LEPK |      |   |    | Carbamidomethyl (C)[6]                           |  | Mascot |
| 39 | PREDICTED: coiled-coil domain-containing protein<br>36-like [Danio rerio] |           |         |     |     | gi 68362494 | 61378.9                  | 7.97 | 9 | 28 | 0                                                |  |        |

#### Peptide Information

| Calc. Mass | Obsrv. Mass | ± da    | ± ppm | Start Seq. | End Seq. | Sequence                  | Ion Score | C. I. % | Modification           | Rank | Result Type |
|------------|-------------|---------|-------|------------|----------|---------------------------|-----------|---------|------------------------|------|-------------|
| 870.4355   | 870.5145    | 0.079   | 91    | 94         | 101      | FPSFTSGK                  |           |         |                        |      | Mascot      |
| 1165.5848  | 1165.7096   | 0.1248  | 107   | 132        | 140      | LQEYLENTR                 |           |         |                        |      | Mascot      |
| 1165.5848  | 1165.7096   | 0.1248  | 107   | 132        | 140      | LQEYLENTR                 |           |         |                        |      | Mascot      |
| 1320.6576  | 1320.5322   | -0.1254 | -95   | 208        | 218      | ELSSNMLNLQR               |           |         | Oxidation (M)[6]       |      | Mascot      |
| 1337.6439  | 1337.5823   | -0.0616 | -46   | 10         | 22       | EMLSIPSTSGGMK             |           |         |                        |      | Mascot      |
| 1337.6439  | 1337.5823   | -0.0616 | -46   | 10         | 22       | EMLSIPSTSGGMK             |           |         |                        |      | Mascot      |
| 1488.7627  | 1488.6006   | -0.1621 | -109  | 156        | 167      | NILVERMDHFSK              |           |         |                        |      | Mascot      |
| 1542.7806  | 1542.786    | 0.0054  | 4     | 270        | 281      | LFERFCVMLAEK              |           |         | Carbamidomethyl (C)[6] |      | Mascot      |
| 1990.0273  | 1990.0033   | -0.024  | -12   | 208        | 224      | ELSSNMLNLQRDLEALK         |           |         | Oxidation (M)[6]       |      | Mascot      |
| 2237.1382  | 2237.0339   | -0.1043 | -47   | 371        | 388      | FVDRPLESEKPMFVREN<br>K    |           |         | Oxidation (M)[12]      |      | Mascot      |
| 2306.1882  | 2306.0542   | -0.134  | -58   | 2          | 22       | KPSVWNIKEMLSIPSTSG<br>GMK |           |         | Oxidation (M)[10]      |      | Mascot      |

40 TAF6 RNA polymerase II, TATA box binding protein  
(TBP)-associated factor [Danio rerio] gi|122891283 63624.9 8.9 9 28 0

#### Peptide Information

| Calc. Mass | Obsrv. Mass | ± da    | ± ppm | Start Seq. | End Seq. | Sequence                 | Ion Score | C. I. % | Modification       | Rank | Result Type |
|------------|-------------|---------|-------|------------|----------|--------------------------|-----------|---------|--------------------|------|-------------|
| 838.5032   | 838.5093    | 0.0061  | 7     | 295        | 301      | ITKTFTK                  |           |         |                    |      | Mascot      |
| 850.4385   | 850.5157    | 0.0772  | 91    | 146        | 151      | MRMKPR                   |           |         | Oxidation (M)[1,3] |      | Mascot      |
| 850.4385   | 850.5157    | 0.0772  | 91    | 146        | 151      | MRMKPR                   |           |         | Oxidation (M)[1,3] |      | Mascot      |
| 870.5294   | 870.5145    | -0.0149 | -17   | 75         | 82       | VPLDVSLK                 |           |         |                    |      | Mascot      |
| 1165.6464  | 1165.7096   | 0.0632  | 54    | 298        | 307      | TFTKALLDEK               |           |         |                    |      | Mascot      |
| 1165.6464  | 1165.7096   | 0.0632  | 54    | 298        | 307      | TFTKALLDEK               |           |         |                    |      | Mascot      |
| 2230.1648  | 2230.1057   | -0.0591 | -27   | 179        | 198      | RAEALQSIATDPGLYQML<br>PR |           |         |                    |      | Mascot      |
| 2237.1382  | 2237.0339   | -0.1043 | -47   | 148        | 165      | MKPRSTHELSEVQQLYY        |           |         |                    |      | Mascot      |



|    |                                       |           |         |     |     |              |                               |      |                        |    |        |
|----|---------------------------------------|-----------|---------|-----|-----|--------------|-------------------------------|------|------------------------|----|--------|
|    | 2297.207                              | 2297.1055 | -0.1015 | -44 | 370 | 389          | K<br>HCASVVAKTRPVPDLVE<br>QYK |      | Carbamidomethyl (C)[2] |    | Mascot |
|    | 2314.1826                             | 2314.1025 | -0.0801 | -35 | 83  | 104          | AHWLSIDGVQPAIPENPP<br>SASK    |      |                        |    | Mascot |
|    | 2451.2913                             | 2451.0718 | -0.2195 | -90 | 452 | 475          | VPSSLTLMSTRPGTPTQP<br>SPPATK  |      |                        |    | Mascot |
| 41 | zinc finger protein Eos [Danio rerio] |           |         |     |     | gi 294489252 | 53711.7                       | 7.09 | 10                     | 27 | 0      |

#### Peptide Information

| Calc. Mass | Obsrv. Mass | ± da    | ± ppm | Start Seq. | End Seq. | Sequence                   | Ion Score | C. I. % | Modification                                  | Rank | Result Type |
|------------|-------------|---------|-------|------------|----------|----------------------------|-----------|---------|-----------------------------------------------|------|-------------|
| 882.4791   | 882.5367    | 0.0576  | 65    | 196        | 203      | DALTGHLR                   |           |         |                                               |      | Mascot      |
| 1487.7853  | 1487.6096   | -0.1757 | -118  | 204        | 217      | THSVSSPTVGKPYK             |           |         |                                               |      | Mascot      |
| 1542.7693  | 1542.786    | 0.0167  | 11    | 417        | 430      | EAMQVVDGEGRPVR             |           |         |                                               |      | Mascot      |
| 1989.9875  | 1990.0033   | 0.0158  | 8     | 54         | 71       | VELYSDEEAGGAPLVER<br>R     |           |         |                                               |      | Mascot      |
| 2224.8464  | 2225.0488   | 0.2024  | 91    | 2          | 22       | NADDCNGRSYMSGSGD<br>SSTER  |           |         | Oxidation (M)[11]                             |      | Mascot      |
| 2225.0657  | 2225.0488   | -0.0169 | -8    | 303        | 321      | HMLRNISEAPYDLDPND<br>K     |           |         |                                               |      | Mascot      |
| 2248.0527  | 2248.0232   | -0.0295 | -13   | 129        | 147      | CDICGMICIGPNVLMVHK<br>R    |           |         | Carbamidomethyl (C)[1,4], Oxidation (M)[6,15] |      | Mascot      |
| 2271.0256  | 2270.9895   | -0.0361 | -16   | 176        | 193      | LHSGEKPFKCPFCNYAC<br>R     |           |         | Carbamidomethyl (C)[10,13,17]                 |      | Mascot      |
| 2283.0029  | 2283.1028   | 0.0999  | 44    | 148        | 167      | SHTGERPFQCNCQGFASF<br>TQK  |           |         | Carbamidomethyl (C)[10]                       |      | Mascot      |
| 2283.0029  | 2283.1028   | 0.0999  | 44    | 148        | 167      | SHTGERPFQCNCQGFASF<br>TQK  |           |         | Carbamidomethyl (C)[10]                       |      | Mascot      |
| 2412.9084  | 2413.0979   | 0.1895  | 79    | 1          | 22       | MNADDCNGRSYMSGSG<br>DSSTER |           |         | Carbamidomethyl (C)[6], Oxidation (M)[1]      |      | Mascot      |
| 2428.9033  | 2429.0942   | 0.1909  | 79    | 1          | 22       | MNADDCNGRSYMSGSG<br>DSSTER |           |         | Carbamidomethyl (C)[6], Oxidation (M)[1,12]   |      | Mascot      |
| 2428.9033  | 2429.0942   | 0.1909  | 79    | 1          | 22       | MNADDCNGRSYMSGSG<br>DSSTER |           |         | Carbamidomethyl (C)[6], Oxidation (M)[1,12]   |      | Mascot      |

|    |                                                      |  |  |  |  |              |          |      |    |    |   |
|----|------------------------------------------------------|--|--|--|--|--------------|----------|------|----|----|---|
| 42 | PREDICTED: mannose receptor, C type 1a [Danio rerio] |  |  |  |  | gi 292616414 | 125680.7 | 6.61 | 13 | 27 | 0 |
|----|------------------------------------------------------|--|--|--|--|--------------|----------|------|----|----|---|

#### Peptide Information

| Calc. Mass | Obsrv. Mass | ± da    | ± ppm | Start Seq. | End Seq. | Sequence                | Ion Score | C. I. % | Modification                                 | Rank | Result Type |
|------------|-------------|---------|-------|------------|----------|-------------------------|-----------|---------|----------------------------------------------|------|-------------|
| 866.4406   | 866.5067    | 0.0661  | 76    | 675        | 681      | FLWTDGK                 |           |         |                                              |      | Mascot      |
| 1320.5095  | 1320.5322   | 0.0227  | 17    | 141        | 150      | WADHACEMER              |           |         | Carbamidomethyl (C)[6], Oxidation (M)[8]     |      | Mascot      |
| 1488.6835  | 1488.6006   | -0.0829 | -56   | 50         | 61       | KMWNDALAACHR            |           |         | Carbamidomethyl (C)[10], Oxidation (M)[2]    |      | Mascot      |
| 1742.7771  | 1742.7335   | -0.0436 | -25   | 729        | 742      | VQMGDQQGFIK             |           |         | Carbamidomethyl (C)[4,12], Oxidation (M)[3]  |      | Mascot      |
| 2211.0032  | 2211.0334   | 0.0302  | 14    | 566        | 584      | SMGFWDINCGVPLPSIC<br>K  |           |         | Carbamidomethyl (C)[10,18], Oxidation (M)[2] |      | Mascot      |
| 2237.0664  | 2237.0339   | -0.0325 | -15   | 566        | 585      | SMGFWDINCGVPLPSIC<br>KR |           |         |                                              |      | Mascot      |
| 2247.9841  | 2248.0232   | 0.0391  | 17    | 723        | 741      | MTGMWKVQMGDQQG          |           |         | Carbamidomethyl (C)[10]                      |      | Mascot      |

|    |                                              |           |         |     |     |             |                                 |      |                                          |        |   |
|----|----------------------------------------------|-----------|---------|-----|-----|-------------|---------------------------------|------|------------------------------------------|--------|---|
|    | 2248.9888                                    | 2248.9939 | 0.0051  | 2   | 180 | 198         | FICK<br>YGSYCYMSAIESKTFNEA<br>K |      | Carbamidomethyl (C)[5]                   | Mascot |   |
|    | 2255.0107                                    | 2254.9973 | -0.0134 | -6  | 430 | 448         | DCEAYNDWICQIAIGTTP<br>K         |      | Carbamidomethyl (C)[2,10]                | Mascot |   |
|    | 2314.0513                                    | 2314.1025 | 0.0512  | 22  | 268 | 289         | GCVAMLTGTSAGLWDVL<br>DCNSK      |      | Carbamidomethyl (C)[2], Oxidation (M)[5] | Mascot |   |
|    | 2413.0508                                    | 2413.0979 | 0.0471  | 20  | 703 | 722         | MYEFGSENYDCVVMLRS<br>PEK        |      | Oxidation (M)[1]                         | Mascot |   |
|    | 2429.0457                                    | 2429.0942 | 0.0485  | 20  | 703 | 722         | MYEFGSENYDCVVMLRS<br>PEK        |      | Oxidation (M)[1,14]                      | Mascot |   |
|    | 2429.2241                                    | 2429.0942 | -0.1299 | -53 | 157 | 179         | KSSSKPEGAPEVVSGLC<br>QAGWVR     |      | Carbamidomethyl (C)[17]                  | Mascot |   |
|    | 2451.1931                                    | 2451.0718 | -0.1213 | -49 | 193 | 214         | TFNEAKQICEQTGANLVD<br>VASR      |      | Carbamidomethyl (C)[9]                   | Mascot |   |
| 43 | SH3 domain-binding protein 4-A [Danio rerio] |           |         |     |     | gi 45387913 | 104947.5                        | 7.73 | 12                                       | 27     | 0 |

#### Peptide Information

| Calc. Mass | Obsrv. Mass | ± da    | ± ppm | Start Seq. | End Seq. | Sequence                           | Ion Score | C. I. | % Modification         | Rank | Result Type |
|------------|-------------|---------|-------|------------|----------|------------------------------------|-----------|-------|------------------------|------|-------------|
| 842.5822   | 842.4845    | -0.0977 | -116  | 634        | 640      | LIKTVIR                            |           |       |                        |      | Mascot      |
| 850.4338   | 850.5157    | 0.0819  | 96    | 358        | 364      | LSNMEIK                            |           |       | Oxidation (M)[4]       |      | Mascot      |
| 850.4338   | 850.5157    | 0.0819  | 96    | 358        | 364      | LSNMEIK                            |           |       | Oxidation (M)[4]       |      | Mascot      |
| 870.4726   | 870.5145    | 0.0419  | 48    | 1          | 7        | MAHRIR                             |           |       | Oxidation (M)[1]       |      | Mascot      |
| 1045.4796  | 1045.5341   | 0.0545  | 52    | 762        | 770      | AELDSEPER                          |           |       |                        |      | Mascot      |
| 1075.651   | 1075.5333   | -0.1177 | -109  | 446        | 455      | KVTLGLYGPK                         |           |       |                        |      | Mascot      |
| 1359.6111  | 1359.5717   | -0.0394 | -29   | 843        | 853      | QQMEAYEAPHR                        |           |       |                        |      | Mascot      |
| 1888.0612  | 1887.8065   | -0.2547 | -135  | 813        | 829      | LIMDFVLLTTAVEVAPR                  |           |       |                        |      | Mascot      |
| 2034.0609  | 2033.9081   | -0.1528 | -75   | 347        | 364      | CSTVSPVVEIKLSNMEIK                 |           |       | Carbamidomethyl (C)[1] |      | Mascot      |
| 2230.2417  | 2230.1057   | -0.136  | -61   | 813        | 831      | LIMDFVLLTTAVEVAPRW<br>R            |           |       |                        |      | Mascot      |
| 2284.2368  | 2284.0989   | -0.1379 | -60   | 463        | 484      | TVVAIFGHDCAPKLLVS<br>EVGK          |           |       |                        |      | Mascot      |
| 2300.0686  | 2300.1042   | 0.0356  | 15    | 568        | 587      | DDQDCILAQFCVQTPQP<br>PPK           |           |       | Carbamidomethyl (C)[5] |      | Mascot      |
| 3337.6052  | 3337.6443   | 0.0391  | 12    | 269        | 298      | LARSCHDLESLGQNPWG<br>GQTQPVETNIVCK |           |       | Carbamidomethyl (C)[5] |      | Mascot      |

44 PREDICTED: WAP, kazal, immunoglobulin, kunitz and NTR domain-containing protein 2-like [Danio rerio]

#### Peptide Information

| Calc. Mass | Obsrv. Mass | ± da   | ± ppm | Start Seq. | End Seq. | Sequence | Ion Score | C. I. | % Modification         | Rank | Result Type |
|------------|-------------|--------|-------|------------|----------|----------|-----------|-------|------------------------|------|-------------|
| 848.4294   | 848.5022    | 0.0728 | 86    | 458        | 464      | DEKMGLR  |           |       |                        |      | Mascot      |
| 864.4243   | 864.4935    | 0.0692 | 80    | 458        | 464      | DEKMGLR  |           |       | Oxidation (M)[4]       |      | Mascot      |
| 868.4055   | 868.5161    | 0.1106 | 127   | 421        | 427      | MVPSFCK  |           |       | Carbamidomethyl (C)[6] |      | Mascot      |
| 882.4138   | 882.5367    | 0.1229 | 139   | 63         | 69       | YMDIQGR  |           |       |                        |      | Mascot      |

|    |                                                             |           |           |         |     |     |              |                          |         |      |   |    |                                          |  |  |  |  |  |        |
|----|-------------------------------------------------------------|-----------|-----------|---------|-----|-----|--------------|--------------------------|---------|------|---|----|------------------------------------------|--|--|--|--|--|--------|
|    |                                                             | 1092.5718 | 1092.5529 | -0.0189 | -17 | 137 | 146          | GITLTEVTCR               |         |      |   |    |                                          |  |  |  |  |  | Mascot |
|    |                                                             | 1320.6108 | 1320.5322 | -0.0786 | -60 | 71  | 83           | GPMGMPKGVTC DK           |         |      |   |    |                                          |  |  |  |  |  | Mascot |
|    |                                                             | 1487.5083 | 1487.6096 | 0.1013  | 68  | 299 | 311          | APDMDDCGEESMR            |         |      |   |    | Oxidation (M)[4,12]                      |  |  |  |  |  | Mascot |
|    |                                                             | 1542.7151 | 1542.786  | 0.0709  | 46  | 57  | 69           | SCVAARYMDIQGR            |         |      |   |    | Carbamidomethyl (C)[2], Oxidation (M)[8] |  |  |  |  |  | Mascot |
|    |                                                             | 2205.9038 | 2206.0325 | 0.1287  | 58  | 108 | 126          | CGREPFFT CASDGMTYY<br>NK |         |      |   |    | Oxidation (M)[14]                        |  |  |  |  |  | Mascot |
|    |                                                             | 2224.9385 | 2225.0488 | 0.1103  | 50  | 378 | 397          | KCQSFVYGGCGGNENNF<br>ESK |         |      |   |    | Carbamidomethyl (C)[2]                   |  |  |  |  |  | Mascot |
|    |                                                             | 2224.9385 | 2225.0488 | 0.1103  | 50  | 378 | 397          | KCQSFVYGGCGGNENNF<br>ESK |         |      |   |    | Carbamidomethyl (C)[2]                   |  |  |  |  |  | Mascot |
| 45 | zinc finger and SCAN domain containing 2-like [Danio rerio] |           |           |         |     |     | gil160333132 |                          | 39573.1 | 8.67 | 8 | 27 | 0                                        |  |  |  |  |  |        |

|    |                       |           |         |     |     |             |                           |      |   |  |                  |   |        |
|----|-----------------------|-----------|---------|-----|-----|-------------|---------------------------|------|---|--|------------------|---|--------|
|    | 2348.2781             | 2348.1743 | -0.1038 | -44 | 103 | 123         | LLGVPNLYMVETIDSVKL<br>AEK |      |   |  | Oxidation (M)[9] |   | Mascot |
| 47 | podocin [Danio rerio] |           |         |     |     | gi 93141192 | 43665.1                   | 6.82 | 1 |  | 13               | 0 |        |

Peptide Information

| Calc. Mass | Obsrv. Mass | ± da    | ± ppm | Start Seq. | End Seq. | Sequence  | Ion Score | C. I. | % Modification   | Rank | Result Type |
|------------|-------------|---------|-------|------------|----------|-----------|-----------|-------|------------------|------|-------------|
| 1018.5349  | 1018.4113   | -0.1236 | -121  | 1          | 9        | MLPAGTEKR | 13        | 0     | Oxidation (M)[1] | 3    | Mascot      |

|    |                                                                         |             |         |      |   |  |    |   |  |  |  |
|----|-------------------------------------------------------------------------|-------------|---------|------|---|--|----|---|--|--|--|
| 48 | novel protein similar to vertebrate periphilin 1 (PPHLN1) [Danio rerio] | gi 55962621 | 17879.4 | 7.04 | 1 |  | 13 | 0 |  |  |  |
|----|-------------------------------------------------------------------------|-------------|---------|------|---|--|----|---|--|--|--|

Peptide Information

| Calc. Mass | Obsrv. Mass | ± da    | ± ppm | Start Seq. | End Seq. | Sequence | Ion Score | C. I. | % Modification | Rank | Result Type |
|------------|-------------|---------|-------|------------|----------|----------|-----------|-------|----------------|------|-------------|
| 1018.4337  | 1018.4113   | -0.0224 | -22   | 63         | 70       | NYHGEDQR | 13        | 0     |                | 5    | Mascot      |

|    |                                                                                           |              |         |      |   |  |    |   |  |  |  |
|----|-------------------------------------------------------------------------------------------|--------------|---------|------|---|--|----|---|--|--|--|
| 49 | [Pyruvate dehydrogenase [acetyl-transferring]]-phosphatase 1, mitochondrial [Danio rerio] | gi 162139004 | 58476.7 | 6.36 | 1 |  | 12 | 0 |  |  |  |
|----|-------------------------------------------------------------------------------------------|--------------|---------|------|---|--|----|---|--|--|--|

Peptide Information

| Calc. Mass | Obsrv. Mass | ± da    | ± ppm | Start Seq. | End Seq. | Sequence                 | Ion Score | C. I. | % Modification | Rank | Result Type |
|------------|-------------|---------|-------|------------|----------|--------------------------|-----------|-------|----------------|------|-------------|
| 2429.2646  | 2429.0942   | -0.1704 | -70   | 499        | 519      | MYRDDITIIVQFNPHVIGG<br>Q | 12        | 0     |                | 2    | Mascot      |

|    |                                                                    |              |          |      |   |  |    |   |  |  |  |
|----|--------------------------------------------------------------------|--------------|----------|------|---|--|----|---|--|--|--|
| 50 | PREDICTED: coiled-coil domain-containing protein 108 [Danio rerio] | gi 292617478 | 201573.9 | 6.25 | 1 |  | 11 | 0 |  |  |  |
|----|--------------------------------------------------------------------|--------------|----------|------|---|--|----|---|--|--|--|

Peptide Information

| Calc. Mass | Obsrv. Mass | ± da    | ± ppm | Start Seq. | End Seq. | Sequence | Ion Score | C. I. | % Modification         | Rank | Result Type |
|------------|-------------|---------|-------|------------|----------|----------|-----------|-------|------------------------|------|-------------|
| 1018.4774  | 1018.4113   | -0.0661 | -65   | 967        | 974      | WTIPADCR | 13        | 0     | Carbamidomethyl (C)[7] | 4    | Mascot      |

|                |           |                        |                |                |                    |
|----------------|-----------|------------------------|----------------|----------------|--------------------|
| Gel Idx/Pos    | 264/K16   | Instr./Gel Origin      | BA2060/110707A | Process Status | Analysis Succeeded |
| Plate [#] Name | [1] 31496 | Instrument Sample Name |                | Spectra        | 11                 |

| Rank | Protein Name                                   | Accession No. | Protein MW | Protein PI | Pep. Count | Protein Score | Protein Score C. I. % | Total Ion Score | Total Ion C. I. % |
|------|------------------------------------------------|---------------|------------|------------|------------|---------------|-----------------------|-----------------|-------------------|
| 1    | nucleoside diphosphate kinase-Z1 [Danio rerio] | gi 6644111    | 17282.9    | 7.77       | 10         | 334           | 100                   | 254             | 100               |

Peptide Information

| Calc. Mass | Obsrv. Mass | ± da | ± ppm | Start Seq. | End Seq. | Sequence | Ion Score | C. I. | % Modification | Rank | Result Type |
|------------|-------------|------|-------|------------|----------|----------|-----------|-------|----------------|------|-------------|
|------------|-------------|------|-------|------------|----------|----------|-----------|-------|----------------|------|-------------|

|   |                            |           |         |     |     |     |                                   |         |        |   |     |     |     |                        |  |        |
|---|----------------------------|-----------|---------|-----|-----|-----|-----------------------------------|---------|--------|---|-----|-----|-----|------------------------|--|--------|
|   | 838.4087                   | 838.5232  | 0.1145  | 137 | 1   | 7   | MSAKTER                           |         |        |   |     |     |     | Oxidation (M)[1]       |  | Mascot |
|   | 916.4886                   | 916.4656  | -0.023  | -25 | 51  | 57  | QHYIDLK                           |         |        |   |     |     |     |                        |  | Mascot |
|   | 1016.592                   | 1016.5694 | -0.0226 | -22 | 20  | 28  | GLMGEIIKR                         |         |        |   |     |     |     |                        |  | Mascot |
|   | 1032.587                   | 1032.5653 | -0.0217 | -21 | 20  | 28  | GLMGEIIKR                         |         |        |   |     |     |     | Oxidation (M)[3]       |  | Mascot |
|   | 1052.4829                  | 1052.4591 | -0.0238 | -23 | 107 | 115 | GDFCIEVGR                         |         |        |   |     |     |     | Carbamidomethyl (C)[4] |  | Mascot |
|   | 1052.4829                  | 1052.4591 | -0.0238 | -23 | 107 | 115 | GDFCIEVGR                         | 38      | 95.496 |   |     |     |     | Carbamidomethyl (C)[4] |  | Mascot |
|   | 1163.6306                  | 1163.6067 | -0.0239 | -21 | 41  | 50  | FLQASEDLLK                        |         |        |   |     |     |     |                        |  | Mascot |
|   | 1191.6521                  | 1191.6252 | -0.0269 | -23 | 58  | 67  | DRPFYPGLVK                        | 68      | 99.996 |   |     |     |     |                        |  | Mascot |
|   | 1191.6521                  | 1191.6252 | -0.0269 | -23 | 58  | 67  | DRPFYPGLVK                        |         |        |   |     |     |     |                        |  | Mascot |
|   | 1234.531                   | 1234.6521 | 0.1211  | 98  | 145 | 153 | HCAQQWIYE                         |         |        |   |     |     |     | Carbamidomethyl (C)[2] |  | Mascot |
|   | 1330.7477                  | 1330.7188 | -0.0289 | -22 | 8   | 19  | TFIAVKPDGVQR                      | 97      | 100    |   |     |     |     |                        |  | Mascot |
|   | 1330.7477                  | 1330.7188 | -0.0289 | -22 | 8   | 19  | TFIAVKPDGVQR                      |         |        |   |     |     |     |                        |  | Mascot |
|   | 1785.9164                  | 1785.8751 | -0.0413 | -23 | 90  | 106 | VMLGETNPADSKPGTIR                 |         |        |   |     |     |     |                        |  | Mascot |
|   | 1801.9113                  | 1801.8739 | -0.0374 | -21 | 90  | 106 | VMLGETNPADSKPGTIR                 |         |        |   |     |     |     | Oxidation (M)[2]       |  | Mascot |
|   | 1801.9113                  | 1801.8739 | -0.0374 | -21 | 90  | 106 | VMLGETNPADSKPGTIR                 | 51      | 99.797 |   |     |     |     | Oxidation (M)[2]       |  | Mascot |
|   | 3262.6267                  | 3262.5715 | -0.0552 | -17 | 116 | 144 | NIIHGSDSVDSANTEISLW<br>FKPEELVSFK |         |        |   |     |     |     |                        |  | Mascot |
| 2 | Nme2 protein [Danio rerio] |           |         |     |     |     | gi 33416409                       | 17220.8 | 7.74   | 9 | 321 | 100 | 254 | 100                    |  |        |

#### Peptide Information

| Calc. Mass | Obsrv. Mass | ± da    | ± ppm | Start Seq. | End Seq. | Sequence                          | Ion Score | C. I.  | % | Modification           | Rank | Result | Type   |
|------------|-------------|---------|-------|------------|----------|-----------------------------------|-----------|--------|---|------------------------|------|--------|--------|
| 916.4886   | 916.4656    | -0.023  | -25   | 51         | 57       | QHYIDLK                           |           |        |   |                        |      |        | Mascot |
| 1016.592   | 1016.5694   | -0.0226 | -22   | 20         | 28       | GLMGEIIKR                         |           |        |   |                        |      |        | Mascot |
| 1032.587   | 1032.5653   | -0.0217 | -21   | 20         | 28       | GLMGEIIKR                         |           |        |   | Oxidation (M)[3]       |      |        | Mascot |
| 1052.4829  | 1052.4591   | -0.0238 | -23   | 107        | 115      | GDFCIEVGR                         |           |        |   | Carbamidomethyl (C)[4] |      |        | Mascot |
| 1052.4829  | 1052.4591   | -0.0238 | -23   | 107        | 115      | GDFCIEVGR                         | 38        | 95.496 |   | Carbamidomethyl (C)[4] |      |        | Mascot |
| 1163.6306  | 1163.6067   | -0.0239 | -21   | 41         | 50       | FLQASEDLLK                        |           |        |   |                        |      |        | Mascot |
| 1191.6521  | 1191.6252   | -0.0269 | -23   | 58         | 67       | DRPFYPGLVK                        | 68        | 99.996 |   |                        |      |        | Mascot |
| 1191.6521  | 1191.6252   | -0.0269 | -23   | 58         | 67       | DRPFYPGLVK                        |           |        |   |                        |      |        | Mascot |
| 1330.7477  | 1330.7188   | -0.0289 | -22   | 8          | 19       | TFIAVKPDGVQR                      | 97        | 100    |   |                        |      |        | Mascot |
| 1330.7477  | 1330.7188   | -0.0289 | -22   | 8          | 19       | TFIAVKPDGVQR                      |           |        |   |                        |      |        | Mascot |
| 1785.9164  | 1785.8751   | -0.0413 | -23   | 90         | 106      | VMLGETNPADSKPGTIR                 |           |        |   |                        |      |        | Mascot |
| 1801.9113  | 1801.8739   | -0.0374 | -21   | 90         | 106      | VMLGETNPADSKPGTIR                 |           |        |   | Oxidation (M)[2]       |      |        | Mascot |
| 1801.9113  | 1801.8739   | -0.0374 | -21   | 90         | 106      | VMLGETNPADSKPGTIR                 | 51        | 99.797 |   | Oxidation (M)[2]       |      |        | Mascot |
| 2112.0503  | 2112.0046   | -0.0457 | -22   | 68         | 86       | YMSSGPVLAMVWEGLNV<br>VK           |           |        |   | Oxidation (M)[2,10]    |      |        | Mascot |
| 3262.6267  | 3262.5715   | -0.0552 | -17   | 116        | 144      | NIIHGSDSVDSANTEISLW<br>FKPEELVSFK |           |        |   |                        |      |        | Mascot |

3 nucleoside diphosphate kinase A [Danio rerio] gi|18859107 17222.8 7.74 9 223 100 157 100

Peptide Information

| Calc. Mass | Obsrv. Mass | ± da    | ± ppm | Start Seq. | End Seq. | Sequence                          | Ion Score | C. I.  | % Modification         | Rank | Result Type |
|------------|-------------|---------|-------|------------|----------|-----------------------------------|-----------|--------|------------------------|------|-------------|
| 838.4087   | 838.5232    | 0.1145  | 137   | 1          | 7        | MSAKTER                           |           |        | Oxidation (M)[1]       |      | Mascot      |
| 916.4886   | 916.4656    | -0.023  | -25   | 51         | 57       | QHYIDLK                           |           |        |                        |      | Mascot      |
| 1016.592   | 1016.5694   | -0.0226 | -22   | 20         | 28       | GLMGEIIKR                         |           |        |                        |      | Mascot      |
| 1032.587   | 1032.5653   | -0.0217 | -21   | 20         | 28       | GLMGEIIKR                         |           |        | Oxidation (M)[3]       |      | Mascot      |
| 1052.4829  | 1052.4591   | -0.0238 | -23   | 107        | 115      | GDFCIEVGR                         |           |        | Carbamidomethyl (C)[4] |      | Mascot      |
| 1052.4829  | 1052.4591   | -0.0238 | -23   | 107        | 115      | GDFCIEVGR                         | 38        | 95.496 | Carbamidomethyl (C)[4] |      | Mascot      |
| 1163.6306  | 1163.6067   | -0.0239 | -21   | 41         | 50       | FLQASEDLLK                        |           |        |                        |      | Mascot      |
| 1191.6521  | 1191.6252   | -0.0269 | -23   | 58         | 67       | DRPFYPLVK                         | 68        | 99.996 |                        |      | Mascot      |
| 1191.6521  | 1191.6252   | -0.0269 | -23   | 58         | 67       | DRPFYPLVK                         |           |        |                        |      | Mascot      |
| 1785.9164  | 1785.8751   | -0.0413 | -23   | 90         | 106      | VMLGETNPADSKPGTIR                 |           |        |                        |      | Mascot      |
| 1801.9113  | 1801.8739   | -0.0374 | -21   | 90         | 106      | VMLGETNPADSKPGTIR                 |           |        | Oxidation (M)[2]       |      | Mascot      |
| 1801.9113  | 1801.8739   | -0.0374 | -21   | 90         | 106      | VMLGETNPADSKPGTIR                 | 51        | 99.797 | Oxidation (M)[2]       |      | Mascot      |
| 2112.0503  | 2112.0046   | -0.0457 | -22   | 68         | 86       | YMSSGPVLAMVWEGLNV<br>VK           |           |        | Oxidation (M)[2,10]    |      | Mascot      |
| 3262.6267  | 3262.5715   | -0.0552 | -17   | 116        | 144      | NIIHGSDSVDSANTEISLW<br>FKPEELVSFK |           |        |                        |      | Mascot      |

4 nucleoside diphosphate kinase B [Danio rerio] gi|41053595 17112.8 6.75 7 179 100 135 100

Peptide Information

| Calc. Mass | Obsrv. Mass | ± da    | ± ppm | Start Seq. | End Seq. | Sequence          | Ion Score | C. I.  | % Modification         | Rank | Result Type |
|------------|-------------|---------|-------|------------|----------|-------------------|-----------|--------|------------------------|------|-------------|
| 916.4886   | 916.4656    | -0.023  | -25   | 51         | 57       | QHYIDLK           |           |        |                        |      | Mascot      |
| 1016.592   | 1016.5694   | -0.0226 | -22   | 20         | 28       | GLMGEIIKR         |           |        |                        |      | Mascot      |
| 1032.587   | 1032.5653   | -0.0217 | -21   | 20         | 28       | GLMGEIIKR         |           |        | Oxidation (M)[3]       |      | Mascot      |
| 1052.4829  | 1052.4591   | -0.0238 | -23   | 107        | 115      | GDFCIEVGR         |           |        | Carbamidomethyl (C)[4] |      | Mascot      |
| 1052.4829  | 1052.4591   | -0.0238 | -23   | 107        | 115      | GDFCIEVGR         | 38        | 95.496 | Carbamidomethyl (C)[4] |      | Mascot      |
| 1107.5681  | 1107.5242   | -0.0439 | -40   | 41         | 50       | FVQASEDLAK        |           |        |                        |      | Mascot      |
| 1137.5939  | 1137.5684   | -0.0255 | -22   | 58         | 67       | DQPFYAGLVK        |           |        |                        |      | Mascot      |
| 1330.7477  | 1330.7188   | -0.0289 | -22   | 8          | 19       | TFIAVKPDGVQR      | 97        | 100    |                        |      | Mascot      |
| 1330.7477  | 1330.7188   | -0.0289 | -22   | 8          | 19       | TFIAVKPDGVQR      |           |        |                        |      | Mascot      |
| 1818.9418  | 1818.8862   | -0.0556 | -31   | 90         | 106      | VMLGETDPFASKPGTIR |           |        |                        |      | Mascot      |
| 1834.9368  | 1834.8969   | -0.0399 | -22   | 90         | 106      | VMLGETDPFASKPGTIR |           |        | Oxidation (M)[2]       |      | Mascot      |

5 nucleoside diphosphate kinase 3 [Danio rerio] gi|18859071 19329.9 7.68 3 108 100 97 100

Peptide Information

| Calc. Mass | Obsrv. Mass | ± da    | ± ppm | Start Seq. | End Seq. | Sequence                | Ion Score | C. I. | % Modification      | Rank | Result Type |
|------------|-------------|---------|-------|------------|----------|-------------------------|-----------|-------|---------------------|------|-------------|
| 1330.7477  | 1330.7188   | -0.0289 | -22   | 24         | 35       | TFLAVKPDGVQR            | 97        | 100   |                     |      | Mascot      |
| 1330.7477  | 1330.7188   | -0.0289 | -22   | 24         | 35       | TFLAVKPDGVQR            |           |       |                     |      | Mascot      |
| 1815.9269  | 1815.8019   | -0.125  | -69   | 106        | 122      | KMLGETNPADSLPGTIR       |           |       | Oxidation (M)[2]    |      | Mascot      |
| 2112.0503  | 2112.0046   | -0.0457 | -22   | 84         | 102      | YMSSGPIVAMVWQGLDV<br>VK |           |       | Oxidation (M)[2,10] |      | Mascot      |

6 nucleoside diphosphate kinase-Z2 [Danio rerio] gi|6644113 16322.4 8.68 6 76 99.891 38 95.496

Peptide Information

| Calc. Mass | Obsrv. Mass | ± da    | ± ppm | Start Seq. | End Seq. | Sequence          | Ion Score | C. I.  | % Modification         | Rank | Result Type |
|------------|-------------|---------|-------|------------|----------|-------------------|-----------|--------|------------------------|------|-------------|
| 916.4886   | 916.4656    | -0.023  | -25   | 51         | 57       | QHYIDLK           |           |        |                        |      | Mascot      |
| 1016.592   | 1016.5694   | -0.0226 | -22   | 20         | 28       | GLMGEIIR          |           |        |                        |      | Mascot      |
| 1032.587   | 1032.5653   | -0.0217 | -21   | 20         | 28       | GLMGEIIR          |           |        | Oxidation (M)[3]       |      | Mascot      |
| 1052.4829  | 1052.4591   | -0.0238 | -23   | 107        | 115      | GDFCIEVGR         |           |        | Carbamidomethyl (C)[4] |      | Mascot      |
| 1052.4829  | 1052.4591   | -0.0238 | -23   | 107        | 115      | GDFCIEVGR         | 38        | 95.496 | Carbamidomethyl (C)[4] |      | Mascot      |
| 1107.5681  | 1107.5242   | -0.0439 | -40   | 41         | 50       | FVQASEDLAK        |           |        |                        |      | Mascot      |
| 1137.5939  | 1137.5684   | -0.0255 | -22   | 58         | 67       | DQPFYAGLVK        |           |        |                        |      | Mascot      |
| 1818.9418  | 1818.8862   | -0.0556 | -31   | 90         | 106      | VMLGETDPFASKPGTIR |           |        |                        |      | Mascot      |
| 1834.9368  | 1834.8969   | -0.0399 | -22   | 90         | 106      | VMLGETDPFASKPGTIR |           |        | Oxidation (M)[2]       |      | Mascot      |

7 hypothetical protein LOC503526 [Danio rerio] gi|60279671 43929 7.03 12 60 95.941

Peptide Information

| Calc. Mass | Obsrv. Mass | ± da    | ± ppm | Start Seq. | End Seq. | Sequence    | Ion Score | C. I. | % Modification | Rank | Result Type |
|------------|-------------|---------|-------|------------|----------|-------------|-----------|-------|----------------|------|-------------|
| 838.4318   | 838.5232    | 0.0914  | 109   | 120        | 125      | SFSWRR      |           |       |                |      | Mascot      |
| 848.4624   | 848.5057    | 0.0433  | 51    | 280        | 287      | DAAGVLFR    |           |       |                |      | Mascot      |
| 961.4333   | 961.4526    | 0.0193  | 20    | 132        | 139      | DQQAESQR    |           |       |                |      | Mascot      |
| 1032.4844  | 1032.5653   | 0.0809  | 78    | 87         | 94       | IEDLEEEER   |           |       |                |      | Mascot      |
| 1133.7041  | 1133.6927   | -0.0114 | -10   | 291        | 299      | ILVTYQRLK   |           |       |                |      | Mascot      |
| 1165.5782  | 1165.7203   | 0.1421  | 122   | 95         | 103      | DFLRCQLDR   |           |       |                |      | Mascot      |
| 1165.5782  | 1165.7203   | 0.1421  | 122   | 95         | 103      | DFLRCQLDR   |           |       |                |      | Mascot      |
| 1191.5891  | 1191.6252   | 0.0361  | 30    | 332        | 342      | LAEVGEFDPSK |           |       |                |      | Mascot      |
| 1191.5891  | 1191.6252   | 0.0361  | 30    | 332        | 342      | LAEVGEFDPSK |           |       |                |      | Mascot      |
| 1330.7842  | 1330.7188   | -0.0654 | -49   | 369        | 379      | KNLLLLPISYR |           |       |                |      | Mascot      |
| 1330.7842  | 1330.7188   | -0.0654 | -49   | 369        | 379      | KNLLLLPISYR |           |       |                |      | Mascot      |

|           |           |         |      |     |     |                          |        |
|-----------|-----------|---------|------|-----|-----|--------------------------|--------|
| 1448.7267 | 1448.8962 | 0.1695  | 117  | 332 | 344 | LAEVGEFDPSKEK            | Mascot |
| 1475.647  | 1475.7213 | 0.0743  | 50   | 128 | 139 | ENDRDQQAESQR             | Mascot |
| 1815.9963 | 1815.8019 | -0.1944 | -107 | 71  | 85  | TQLQISLEKNSWLQK          | Mascot |
| 2300.1853 | 2300.1196 | -0.0657 | -29  | 140 | 159 | LANRQSFQQRPTQQTSA<br>NPK | Mascot |
| 2300.1853 | 2300.1196 | -0.0657 | -29  | 140 | 159 | LANRQSFQQRPTQQTSA<br>NPK | Mascot |

8 PREDICTED: echinoderm microtubule associated protein like 6 [Danio rerio] gi|326672044 191942.5 7.32 22 59 94.134

#### Peptide Information

| Calc. Mass | Obsrv. Mass | ± da    | ± ppm | Start Seq. | End Seq. | Sequence                 | Ion Score | C. I. % | Modification           | Rank | Result Type |
|------------|-------------|---------|-------|------------|----------|--------------------------|-----------|---------|------------------------|------|-------------|
| 842.4617   | 842.4901    | 0.0284  | 34    | 433        | 439      | EDLPQLK                  |           |         |                        |      | Mascot      |
| 848.5239   | 848.5057    | -0.0182 | -21   | 596        | 602      | DKIFVVK                  |           |         |                        |      | Mascot      |
| 850.4451   | 850.5219    | 0.0768  | 90    | 1228       | 1234     | QTMSVLR                  |           |         | Oxidation (M)[3]       |      | Mascot      |
| 850.4451   | 850.5219    | 0.0768  | 90    | 1228       | 1234     | QTMSVLR                  |           |         | Oxidation (M)[3]       |      | Mascot      |
| 916.521    | 916.4656    | -0.0554 | -60   | 722        | 730      | RAALSPSSK                |           |         |                        |      | Mascot      |
| 961.5577   | 961.4526    | -0.1051 | -109  | 633        | 641      | RGIFGNLGK                |           |         |                        |      | Mascot      |
| 996.5546   | 996.5751    | 0.0205  | 21    | 714        | 721      | CLKTYAIK                 |           |         | Carbamidomethyl (C)[1] |      | Mascot      |
| 996.5546   | 996.5751    | 0.0205  | 21    | 714        | 721      | CLKTYAIK                 |           |         | Carbamidomethyl (C)[1] |      | Mascot      |
| 1051.651   | 1051.6913   | 0.0403  | 38    | 1117       | 1126     | AAPLPDKLVK               |           |         |                        |      | Mascot      |
| 1052.5657  | 1052.4591   | -0.1066 | -101  | 671        | 679      | DTTLMKSIK                |           |         | Oxidation (M)[5]       |      | Mascot      |
| 1052.5657  | 1052.4591   | -0.1066 | -101  | 671        | 679      | DTTLMKSIK                |           |         | Oxidation (M)[5]       |      | Mascot      |
| 1109.6102  | 1109.4716   | -0.1386 | -125  | 1466       | 1475     | IWGLATHPSK               |           |         |                        |      | Mascot      |
| 1137.6006  | 1137.5684   | -0.0322 | -28   | 608        | 617      | MDKLVTVGMMK              |           |         | Oxidation (M)[1]       |      | Mascot      |
| 1163.5725  | 1163.6067   | 0.0342  | 29    | 1625       | 1634     | LVSDQALMDR               |           |         | Oxidation (M)[8]       |      | Mascot      |
| 1179.5575  | 1179.5754   | 0.0179  | 15    | 1269       | 1278     | WQEGSRVCSK               |           |         |                        |      | Mascot      |
| 1308.5017  | 1308.6364   | 0.1347  | 103   | 642        | 652      | QETMMSACYGR              |           |         | Oxidation (M)[4,5]     |      | Mascot      |
| 1320.6769  | 1320.549    | -0.1279 | -97   | 176        | 187      | FWALCGNALTPK             |           |         |                        |      | Mascot      |
| 1330.6862  | 1330.7188   | 0.0326  | 24    | 1010       | 1021     | YVAHSANVTNVR             |           |         |                        |      | Mascot      |
| 1330.6862  | 1330.7188   | 0.0326  | 24    | 1010       | 1021     | YVAHSANVTNVR             |           |         |                        |      | Mascot      |
| 1785.9534  | 1785.8751   | -0.0783 | -44   | 35         | 50       | EIVYFVAGVGVVYNTR         |           |         |                        |      | Mascot      |
| 1818.8877  | 1818.8862   | -0.0015 | -1    | 677        | 693      | SIKAHDGPVFAMCSLDK        |           |         |                        |      | Mascot      |
| 1834.8826  | 1834.8969   | 0.0143  | 8     | 677        | 693      | SIKAHDGPVFAMCSLDK        |           |         | Oxidation (M)[12]      |      | Mascot      |
| 2083.0859  | 2083.0249   | -0.061  | -29   | 501        | 518      | FYLGHHDDILSLTVHPLK       |           |         |                        |      | Mascot      |
| 2283.2019  | 2283.1245   | -0.0774 | -34   | 1285       | 1304     | IFVVEFRPDSDTQFVSVG<br>IK |           |         |                        |      | Mascot      |
| 2283.2019  | 2283.1245   | -0.0774 | -34   | 1285       | 1304     | IFVVEFRPDSDTQFVSVG<br>IK |           |         |                        |      | Mascot      |



|  |           |           |        |    |      |      |                                     |  |  |  |  |                                            |        |
|--|-----------|-----------|--------|----|------|------|-------------------------------------|--|--|--|--|--------------------------------------------|--------|
|  | 2300.0764 | 2300.1196 | 0.0432 | 19 | 1135 | 1153 | TVEELSLDHVFGYRGFD<br>CR             |  |  |  |  | Carbamidomethyl (C)[18]                    | Mascot |
|  | 2300.0764 | 2300.1196 | 0.0432 | 19 | 1135 | 1153 | TVEELSLDHVFGYRGFD<br>CR             |  |  |  |  | Carbamidomethyl (C)[18]                    | Mascot |
|  | 3262.5479 | 3262.5715 | 0.0236 | 7  | 225  | 255  | GLNLTRTIQAAHGAGIFS<br>MHSCEEGFATGGR |  |  |  |  | Carbamidomethyl (C)[22], Oxidation (M)[19] | Mascot |
|  | 3338.6436 | 3338.6702 | 0.0266 | 8  | 949  | 979  | MEWATWTSVLGGTCEGI<br>WPTLSLVNASSLTK |  |  |  |  |                                            | Mascot |

9    PREDICTED: tetratricopeptide repeat protein 34-like    gi|326679115    119668.1    7.99    18    58    92.443  
[Danio rerio]

Peptide Information

| Calc. Mass | Obsrv. Mass | ± da    | ± ppm | Start Seq. | End Seq. | Sequence                           | Ion Score | C. I. % | Modification               | Rank | Result Type |
|------------|-------------|---------|-------|------------|----------|------------------------------------|-----------|---------|----------------------------|------|-------------|
| 882.4791   | 882.546     | 0.0669  | 76    | 126        | 133      | QTPQPVGR                           |           |         |                            |      | Mascot      |
| 916.5284   | 916.4656    | -0.0628 | -69   | 393        | 400      | LADCLLLR                           |           |         |                            |      | Mascot      |
| 961.5101   | 961.4526    | -0.0575 | -60   | 18         | 26       | ILFSGDPGR                          |           |         |                            |      | Mascot      |
| 996.4791   | 996.5751    | 0.096   | 96    | 656        | 663      | HCHTASKR                           |           |         | Carbamidomethyl (C)[2]     |      | Mascot      |
| 996.4791   | 996.5751    | 0.096   | 96    | 656        | 663      | HCHTASKR                           |           |         | Carbamidomethyl (C)[2]     |      | Mascot      |
| 1052.5483  | 1052.4591   | -0.0892 | -85   | 836        | 846      | GDVNAAGHLK                         |           |         |                            |      | Mascot      |
| 1052.5483  | 1052.4591   | -0.0892 | -85   | 836        | 846      | GDVNAAGHLK                         |           |         |                            |      | Mascot      |
| 1107.5714  | 1107.5242   | -0.0472 | -43   | 760        | 769      | EATQSMLSLK                         |           |         |                            |      | Mascot      |
| 1109.5739  | 1109.4716   | -0.1023 | -92   | 189        | 197      | AFYQQLSPR                          |           |         |                            |      | Mascot      |
| 1118.5259  | 1118.4878   | -0.0381 | -34   | 1076       | 1085     | REVSGPCTVN                         |           |         | Carbamidomethyl (C)[7]     |      | Mascot      |
| 1165.6252  | 1165.7203   | 0.0951  | 82    | 1050       | 1059     | AWFLTETGLK                         |           |         |                            |      | Mascot      |
| 1165.6252  | 1165.7203   | 0.0951  | 82    | 1050       | 1059     | AWFLTETGLK                         |           |         |                            |      | Mascot      |
| 1179.6302  | 1179.5754   | -0.0548 | -46   | 1028       | 1036     | QRLAEMYLR                          |           |         |                            |      | Mascot      |
| 1191.5422  | 1191.6252   | 0.083   | 70    | 7          | 17       | GAADLCREGDK                        |           |         | Carbamidomethyl (C)[6]     |      | Mascot      |
| 1191.5422  | 1191.6252   | 0.083   | 70    | 7          | 17       | GAADLCREGDK                        |           |         | Carbamidomethyl (C)[6]     |      | Mascot      |
| 1279.6528  | 1279.7494   | 0.0966  | 75    | 241        | 252      | ELQAAELFSSGK                       |           |         |                            |      | Mascot      |
| 1308.6881  | 1308.6364   | -0.0517 | -40   | 700        | 710      | ARCYALLGQWK                        |           |         |                            |      | Mascot      |
| 1330.7041  | 1330.7188   | 0.0147  | 11    | 617        | 627      | GFLYDAYQLLK                        |           |         |                            |      | Mascot      |
| 1330.7041  | 1330.7188   | 0.0147  | 11    | 617        | 627      | GFLYDAYQLLK                        |           |         |                            |      | Mascot      |
| 1493.8435  | 1493.701    | -0.1425 | -95   | 177        | 188      | ERQTQHVELIIK                       |           |         |                            |      | Mascot      |
| 1834.9194  | 1834.8969   | -0.0225 | -12   | 27         | 44       | AAALYTQAFGNHAGSTV<br>R             |           |         |                            |      | Mascot      |
| 2299.1797  | 2299.1255   | -0.0542 | -24   | 490        | 508      | LQLQDAAVTVRCLVPWN<br>CR            |           |         | Carbamidomethyl (C)[12,18] |      | Mascot      |
| 3262.5862  | 3262.5715   | -0.0147 | -5    | 48         | 78       | GLDTGHLEEVATLEAWL<br>DGSSHNSIEGPSK |           |         |                            |      | Mascot      |

10    RecName: Full=Contactin-1a; AltName:  
Full=F3/F11/contactin; AltName: Full=Neural cell  
recognition m    gi|55976512    114263.1    6.25    17    57    90.702

| Peptide Information |                                      |          |           |              |          |                                   |           |       |                         |        |             |
|---------------------|--------------------------------------|----------|-----------|--------------|----------|-----------------------------------|-----------|-------|-------------------------|--------|-------------|
| Calc. Mass          | Obsrv. Mass                          | $\pm$ da | $\pm$ ppm | Start Seq.   | End Seq. | Sequence                          | Ion Score | C. I. | % Modification          | Rank   | Result Type |
| 856.5111            | 856.5094                             | -0.0017  | -2        | 434          | 441      | LLGARNGR                          |           |       |                         |        | Mascot      |
| 1045.5173           | 1045.5388                            | 0.0215   | 21        | 562          | 569      | DAQHYQRK                          |           |       |                         |        | Mascot      |
| 1062.5513           | 1062.6699                            | 0.1186   | 112       | 442          | 449      | VVFECRPR                          |           |       | Carbamidomethyl (C)[5]  |        | Mascot      |
| 1107.6885           | 1107.5242                            | -0.1643  | -148      | 285          | 294      | KLDGVLPLR                         |           |       |                         |        | Mascot      |
| 1118.4572           | 1118.4878                            | 0.0306   | 27        | 492          | 500      | YTCFAENDR                         |           |       |                         |        | Mascot      |
| 1173.6626           | 1173.6058                            | -0.0568  | -48       | 788          | 797      | IPPSTRFEVK                        |           |       |                         |        | Mascot      |
| 1308.575            | 1308.6364                            | 0.0614   | 47        | 898          | 910      | ACNGAGYGPASQR                     |           |       | Carbamidomethyl (C)[2]  |        | Mascot      |
| 1434.7231           | 1434.738                             | 0.0149   | 10        | 1            | 12       | MIPEAFQPRAMK                      |           |       | Oxidation (M)[1]        |        | Mascot      |
| 1707.7683           | 1707.7284                            | -0.0399  | -23       | 138          | 151      | VQFGYLDMFSTDER                    |           |       |                         |        | Mascot      |
| 1815.9058           | 1815.8019                            | -0.1039  | -57       | 883          | 897      | LDNMKPDSHYLVEVR                   |           |       |                         |        | Mascot      |
| 1818.7786           | 1818.8862                            | 0.1076   | 59        | 391          | 406      | LGFEDESGMYQCVAENR                 |           |       |                         |        | Mascot      |
| 1834.7734           | 1834.8969                            | 0.1235   | 67        | 391          | 406      | LGFEDESGMYQCVAENR                 |           |       | Oxidation (M)[8]        |        | Mascot      |
| 2224.9749           | 2225.0674                            | 0.0925   | 42        | 388          | 406      | FSRLGFEDSGMYQCVAE<br>NR           |           |       | Oxidation (M)[11]       |        | Mascot      |
| 2224.9749           | 2225.0674                            | 0.0925   | 42        | 388          | 406      | FSRLGFEDSGMYQCVAE<br>NR           |           |       | Oxidation (M)[11]       |        | Mascot      |
| 2230.0305           | 2230.125                             | 0.0945   | 42        | 114          | 134      | SKHAGNYTCVASNQYGS<br>VTSR         |           |       |                         |        | Mascot      |
| 2283.092            | 2283.1245                            | 0.0325   | 14        | 594          | 614      | YSCTAQTPVDNTTASAE<br>L VVR        |           |       | Carbamidomethyl (C)[3]  |        | Mascot      |
| 2283.092            | 2283.1245                            | 0.0325   | 14        | 594          | 614      | YSCTAQTPVDNTTASAE<br>L VVR        |           |       | Carbamidomethyl (C)[3]  |        | Mascot      |
| 2284.2131           | 2284.1226                            | -0.0905  | -40       | 442          | 460      | VVFECRPRAPRPNITW<br>SK            |           |       | Carbamidomethyl (C)[5]  |        | Mascot      |
| 2299.1426           | 2299.1255                            | -0.0171  | -7        | 986          | 1007     | GEYLVEVRAHSEGGDGA<br>VAQVR        |           |       |                         |        | Mascot      |
| 3338.7102           | 3338.6702                            | -0.04    | -12       | 256          | 284      | SPDSWALLGQNVTLCE<br>F ALGNPIQIRWR |           |       | Carbamidomethyl (C)[16] |        | Mascot      |
| 11                  | contactin-1a precursor [Danio rerio] |          |           | gi 136256388 |          | 114246.1                          | 6.19      | 16    | 49                      | 48.906 |             |

| Peptide Information |             |          |           |            |          |               |           |       |                        |      |             |
|---------------------|-------------|----------|-----------|------------|----------|---------------|-----------|-------|------------------------|------|-------------|
| Calc. Mass          | Obsrv. Mass | $\pm$ da | $\pm$ ppm | Start Seq. | End Seq. | Sequence      | Ion Score | C. I. | % Modification         | Rank | Result Type |
| 856.5111            | 856.5094    | -0.0017  | -2        | 434        | 441      | LLGARNGR      |           |       |                        |      | Mascot      |
| 1045.5173           | 1045.5388   | 0.0215   | 21        | 562        | 569      | DAQHYQRK      |           |       |                        |      | Mascot      |
| 1062.5513           | 1062.6699   | 0.1186   | 112       | 442        | 449      | VVFECRPR      |           |       | Carbamidomethyl (C)[5] |      | Mascot      |
| 1107.6885           | 1107.5242   | -0.1643  | -148      | 285        | 294      | KLDGVLPLR     |           |       |                        |      | Mascot      |
| 1118.4572           | 1118.4878   | 0.0306   | 27        | 492        | 500      | YTCFAENDR     |           |       |                        |      | Mascot      |
| 1173.6626           | 1173.6058   | -0.0568  | -48       | 788        | 797      | IPPSTRFEVK    |           |       |                        |      | Mascot      |
| 1308.575            | 1308.6364   | 0.0614   | 47        | 898        | 910      | ACNGAGYGPASQR |           |       | Carbamidomethyl (C)[2] |      | Mascot      |

|  |           |           |         |     |     |      |                            |  |  |  |  |  |                        |        |
|--|-----------|-----------|---------|-----|-----|------|----------------------------|--|--|--|--|--|------------------------|--------|
|  | 1434.7231 | 1434.738  | 0.0149  | 10  | 1   | 12   | MIPEAFQPRAMK               |  |  |  |  |  | Oxidation (M)[1]       | Mascot |
|  | 1707.7683 | 1707.7284 | -0.0399 | -23 | 138 | 151  | VQFGYLDMFSTDER             |  |  |  |  |  |                        | Mascot |
|  | 1815.9058 | 1815.8019 | -0.1039 | -57 | 883 | 897  | LDNMKPDSHYLVEVR            |  |  |  |  |  |                        | Mascot |
|  | 1818.7786 | 1818.8862 | 0.1076  | 59  | 391 | 406  | LGFEDESGMYQCVAENR          |  |  |  |  |  |                        | Mascot |
|  | 1834.7734 | 1834.8969 | 0.1235  | 67  | 391 | 406  | LGFEDESGMYQCVAENR          |  |  |  |  |  | Oxidation (M)[8]       | Mascot |
|  | 2224.9749 | 2225.0674 | 0.0925  | 42  | 388 | 406  | FSRLGFEDSGMYQCVAE<br>NR    |  |  |  |  |  | Oxidation (M)[11]      | Mascot |
|  | 2224.9749 | 2225.0674 | 0.0925  | 42  | 388 | 406  | FSRLGFEDSGMYQCVAE<br>NR    |  |  |  |  |  | Oxidation (M)[11]      | Mascot |
|  | 2230.0305 | 2230.125  | 0.0945  | 42  | 114 | 134  | SKHAGNYTCVASNQYGS<br>VTSR  |  |  |  |  |  |                        | Mascot |
|  | 2283.092  | 2283.1245 | 0.0325  | 14  | 594 | 614  | YSCTAQTPVDNTTASAE<br>L VVR |  |  |  |  |  | Carbamidomethyl (C)[3] | Mascot |
|  | 2283.092  | 2283.1245 | 0.0325  | 14  | 594 | 614  | YSCTAQTPVDNTTASAE<br>L VVR |  |  |  |  |  | Carbamidomethyl (C)[3] | Mascot |
|  | 2284.2131 | 2284.1226 | -0.0905 | -40 | 442 | 460  | VVFECRPRAAPRPNITW<br>SK    |  |  |  |  |  | Carbamidomethyl (C)[5] | Mascot |
|  | 2299.1426 | 2299.1255 | -0.0171 | -7  | 986 | 1007 | GEYLVEVRAHSEGGDGA<br>VAQVR |  |  |  |  |  |                        | Mascot |

12 DEAD (Asp-Glu-Ala-Asp) box polypeptide 3 [Danio rerio] gi|187608185 78286.6 8.48 14 45 0

#### Peptide Information

| Calc. Mass | Obsrv. Mass | ± da    | ± ppm | Start Seq. | End Sequence Seq. | Ion Score          | C. I. % | Modification           | Rank | Result Type |
|------------|-------------|---------|-------|------------|-------------------|--------------------|---------|------------------------|------|-------------|
| 842.5094   | 842.4901    | -0.0193 | -23   | 436        | 442               | EIQILAR            |         |                        |      | Mascot      |
| 856.3947   | 856.5094    | 0.1147  | 134   | 140        | 146               | SAFFNDR            |         |                        |      | Mascot      |
| 868.4232   | 868.5291    | 0.1059  | 122   | 384        | 390               | IGLDYCK            |         | Carbamidomethyl (C)[6] |      | Mascot      |
| 996.5182   | 996.5751    | 0.0569  | 57    | 382        | 390               | GKIGLDYCK          |         |                        |      | Mascot      |
| 996.5182   | 996.5751    | 0.0569  | 57    | 382        | 390               | GKIGLDYCK          |         |                        |      | Mascot      |
| 1051.616   | 1051.6913   | 0.0753  | 72    | 34         | 41                | RYIPPHLR           |         |                        |      | Mascot      |
| 1137.6527  | 1137.5684   | -0.0843 | -74   | 35         | 43                | YIPPHLRNK          |         |                        |      | Mascot      |
| 1163.5902  | 1163.6067   | 0.0165  | 14    | 456        | 466               | VGSTSENITQK        |         |                        |      | Mascot      |
| 1173.582   | 1173.6058   | 0.0238  | 20    | 412        | 421               | IVEQDTMPPK         |         | Oxidation (M)[7]       |      | Mascot      |
| 1308.5637  | 1308.6364   | 0.0727  | 56    | 512        | 523               | EGYACTSIHGDR       |         |                        |      | Mascot      |
| 1320.5963  | 1320.549    | -0.0473 | -36   | 425        | 435               | QTMMFSATFPK        |         | Oxidation (M)[3,4]     |      | Mascot      |
| 1448.7744  | 1448.8962   | 0.1218  | 84    | 325        | 336               | ELALQIYDEARK       |         |                        |      | Mascot      |
| 1785.9956  | 1785.8751   | -0.1205 | -67   | 597        | 612               | NSNITKDLLDILVEAK   |         |                        |      | Mascot      |
| 2083.0244  | 2083.0249   | 0.0005  | 0     | 560        | 576               | HVINFDLPSDIEEYVHR  |         |                        |      | Mascot      |
| 2112.0981  | 2112.0046   | -0.0935 | -44   | 425        | 442               | QTMMFSATFPKEIQILAR |         |                        |      | Mascot      |

13 DEAD (Asp-Glu-Ala-Asp) box polypeptide 3 [Danio rerio] gi|124481673 78346.7 8.48 14 45 0

| Peptide Information |             |         |       |            |                       |           |         |                        |                  |
|---------------------|-------------|---------|-------|------------|-----------------------|-----------|---------|------------------------|------------------|
| Calc. Mass          | Obsrv. Mass | ± da    | ± ppm | Start Seq. | End Sequence Seq.     | Ion Score | C. I. % | Modification           | Rank Result Type |
| 842.5094            | 842.4901    | -0.0193 | -23   | 436        | 442 EIQLAR            |           |         |                        | Mascot           |
| 868.4232            | 868.5291    | 0.1059  | 122   | 384        | 390 IGLDYCK           |           |         | Carbamidomethyl (C)[6] | Mascot           |
| 916.4311            | 916.4656    | 0.0345  | 38    | 140        | 146 FAFFNDR           |           |         |                        | Mascot           |
| 996.5182            | 996.5751    | 0.0569  | 57    | 382        | 390 GKIGLDYCK         |           |         |                        | Mascot           |
| 996.5182            | 996.5751    | 0.0569  | 57    | 382        | 390 GKIGLDYCK         |           |         |                        | Mascot           |
| 1051.616            | 1051.6913   | 0.0753  | 72    | 34         | 41 RYIPPHLR           |           |         |                        | Mascot           |
| 1137.6527           | 1137.5684   | -0.0843 | -74   | 35         | 43 YIPPHLRNK          |           |         |                        | Mascot           |
| 1163.5902           | 1163.6067   | 0.0165  | 14    | 456        | 466 VGSTSENITQK       |           |         |                        | Mascot           |
| 1173.582            | 1173.6058   | 0.0238  | 20    | 412        | 421 IVEQDTMPPK        |           |         | Oxidation (M)[7]       | Mascot           |
| 1308.5637           | 1308.6364   | 0.0727  | 56    | 512        | 523 EGYACTSIHGDR      |           |         |                        | Mascot           |
| 1320.5963           | 1320.549    | -0.0473 | -36   | 425        | 435 QTMMFSATFPK       |           |         | Oxidation (M)[3,4]     | Mascot           |
| 1448.7744           | 1448.8962   | 0.1218  | 84    | 325        | 336 ELALQIYEARK       |           |         |                        | Mascot           |
| 1785.9956           | 1785.8751   | -0.1205 | -67   | 597        | 612 NSNITKDLLDILVEAK  |           |         |                        | Mascot           |
| 2083.0244           | 2083.0249   | 0.0005  | 0     | 560        | 576 HVINFDLPSDIEEYVHR |           |         |                        | Mascot           |
| 2112.0981           | 2112.0046   | -0.0935 | -44   | 425        | 442 QTMMFSATFPKEIQLAR |           |         |                        | Mascot           |

14 hypothetical protein LOC100037310 [Danio rerio] gi|147900003 27825.6 8.46 8 42 0

| Peptide Information |             |         |       |            |                        |           |         |                        |                  |
|---------------------|-------------|---------|-------|------------|------------------------|-----------|---------|------------------------|------------------|
| Calc. Mass          | Obsrv. Mass | ± da    | ± ppm | Start Seq. | End Sequence Seq.      | Ion Score | C. I. % | Modification           | Rank Result Type |
| 842.4189            | 842.4901    | 0.0712  | 85    | 2          | 9 AAPHSTMK             |           |         |                        | Mascot           |
| 1051.5605           | 1051.6913   | 0.1308  | 124   | 149        | 157 FLTDGMLVR          |           |         |                        | Mascot           |
| 1163.5725           | 1163.6067   | 0.0342  | 29    | 229        | 239 DTCGILTEGR         |           |         |                        | Mascot           |
| 1191.6112           | 1191.6252   | 0.014   | 12    | 158        | 167 EMMSDPLLKK         |           |         |                        | Mascot           |
| 1191.6112           | 1191.6252   | 0.014   | 12    | 158        | 167 EMMSDPLLKK         |           |         |                        | Mascot           |
| 1308.7344           | 1308.6364   | -0.098  | -75   | 147        | 157 IKFLTDGMLVR        |           |         | Oxidation (M)[8]       | Mascot           |
| 1320.5273           | 1320.549    | 0.0217  | 16    | 136        | 146 FDDCSDPHATR        |           |         | Carbamidomethyl (C)[4] | Mascot           |
| 1448.8723           | 1448.8962   | 0.0239  | 16    | 180        | 192 TLYTDIAIGLLKK      |           |         |                        | Mascot           |
| 2112.0537           | 2112.0046   | -0.0491 | -23   | 149        | 166 FLTDGMLVREMMSDPLLK |           |         | Oxidation (M)[6]       | Mascot           |

15 PREDICTED: transformation/transcription domain-associated protein [Danio rerio] gi|326672350 433471.2 8.52 33 40 0

| Peptide Information |             |      |       |            |                   |           |         |              |                  |
|---------------------|-------------|------|-------|------------|-------------------|-----------|---------|--------------|------------------|
| Calc. Mass          | Obsrv. Mass | ± da | ± ppm | Start Seq. | End Sequence Seq. | Ion Score | C. I. % | Modification | Rank Result Type |

|           |           |         |     |      |      |                           |                         |        |
|-----------|-----------|---------|-----|------|------|---------------------------|-------------------------|--------|
| 848.4083  | 848.5057  | 0.0974  | 115 | 3257 | 3263 | ATAPMWR                   | Oxidation (M)[5]        | Mascot |
| 882.5155  | 882.546   | 0.0305  | 35  | 2182 | 2189 | AVHSLLSR                  |                         | Mascot |
| 899.4291  | 899.4459  | 0.0168  | 19  | 305  | 311  | YSQQMVK                   | Oxidation (M)[5]        | Mascot |
| 961.4407  | 961.4526  | 0.0119  | 12  | 2930 | 2937 | NTSLHDMK                  | Oxidation (M)[7]        | Mascot |
| 1016.5676 | 1016.5694 | 0.0018  | 2   | 3530 | 3537 | HLFFTVPR                  |                         | Mascot |
| 1032.5394 | 1032.5653 | 0.0259  | 25  | 922  | 930  | ASIQLPMEK                 | Oxidation (M)[7]        | Mascot |
| 1045.5095 | 1045.5388 | 0.0293  | 28  | 3604 | 3612 | EVQGNMVP                  | Oxidation (M)[6]        | Mascot |
| 1066.4623 | 1066.4749 | 0.0126  | 12  | 1654 | 1662 | DNMAATNWK                 | Oxidation (M)[3]        | Mascot |
| 1109.566  | 1109.4716 | -0.0944 | -85 | 548  | 557  | TITWGITSCK                |                         | Mascot |
| 1133.587  | 1133.6927 | 0.1057  | 93  | 931  | 940  | AIETALDCLK                | Carbamidomethyl (C)[8]  | Mascot |
| 1137.5647 | 1137.5684 | 0.0037  | 3   | 3569 | 3578 | GIEHDNPISR                |                         | Mascot |
| 1165.5817 | 1165.7203 | 0.1386  | 119 | 606  | 615  | VANCQTVRMK                | Oxidation (M)[9]        | Mascot |
| 1165.5817 | 1165.7203 | 0.1386  | 119 | 606  | 615  | VANCQTVRMK                | Oxidation (M)[9]        | Mascot |
| 1173.5795 | 1173.6058 | 0.0263  | 22  | 1696 | 1704 | FLCNMTFLK                 | Carbamidomethyl (C)[3]  | Mascot |
| 1191.619  | 1191.6252 | 0.0062  | 5   | 1516 | 1526 | AMLIEAGSPFR               |                         | Mascot |
| 1191.619  | 1191.6252 | 0.0062  | 5   | 1516 | 1526 | AMLIEAGSPFR               |                         | Mascot |
| 1234.7054 | 1234.6521 | -0.0533 | -43 | 986  | 995  | WIPNVIISHR                |                         | Mascot |
| 1308.6212 | 1308.6364 | 0.0152  | 12  | 2020 | 2031 | GMSVDSAQDVKR              | Oxidation (M)[2]        | Mascot |
| 1316.5536 | 1316.5607 | 0.0071  | 5   | 2248 | 2259 | SACSNSSYIDR               |                         | Mascot |
| 1330.6897 | 1330.7188 | 0.0291  | 22  | 1666 | 1676 | LLAFCLLSYCK               | Carbamidomethyl (C)[5]  | Mascot |
| 1330.6897 | 1330.7188 | 0.0291  | 22  | 1666 | 1676 | LLAFCLLSYCK               | Carbamidomethyl (C)[5]  | Mascot |
| 1434.7079 | 1434.738  | 0.0301  | 21  | 2466 | 2477 | QCTELLAVCER               | Carbamidomethyl (C)[2]  | Mascot |
| 1448.8293 | 1448.8962 | 0.0669  | 46  | 1147 | 1159 | LGGVVSIFLMER              |                         | Mascot |
| 1475.8217 | 1475.7213 | -0.1004 | -68 | 1963 | 1975 | LGFTPSVTIEQRK             |                         | Mascot |
| 1493.7126 | 1493.701  | -0.0116 | -8  | 1311 | 1322 | LFTMDLNVMEHK              | Oxidation (M)[4]        | Mascot |
| 1785.8575 | 1785.8751 | 0.0176  | 10  | 2190 | 2206 | LMSTFPTEPSTSSVASK         | Oxidation (M)[2]        | Mascot |
| 1801.8109 | 1801.8739 | 0.063   | 35  | 1906 | 1919 | MEDGHQMLTHWTRK            | Oxidation (M)[1,7]      | Mascot |
| 1801.8109 | 1801.8739 | 0.063   | 35  | 1906 | 1919 | MEDGHQMLTHWTRK            | Oxidation (M)[1,7]      | Mascot |
| 1815.9309 | 1815.8019 | -0.129  | -71 | 297  | 311  | IYQDLVGKYSQQMVK           | Oxidation (M)[13]       | Mascot |
| 2211.0745 | 2211.0559 | -0.0186 | -8  | 1075 | 1094 | GMDPLVLIDAIACMAYEE<br>K   | Oxidation (M)[2]        | Mascot |
| 2230.0769 | 2230.125  | 0.0481  | 22  | 1323 | 1341 | VFYTELLNLCEAEDAALM<br>K   | Carbamidomethyl (C)[10] | Mascot |
| 2237.0981 | 2237.0571 | -0.041  | -18 | 3074 | 3092 | EMTAEFYALKGMFLAQIN<br>K   | Oxidation (M)[2,12]     | Mascot |
| 2249.2322 | 2249.0198 | -0.2124 | -94 | 2579 | 2599 | TGALLNALVQLCHISTPLA<br>EK | Carbamidomethyl (C)[12] | Mascot |
| 2283.0981 | 2283.1245 | 0.0264  | 12  | 3617 | 3634 | EWALHTFPNATDYWTFR<br>K    |                         | Mascot |
| 2283.0981 | 2283.1245 | 0.0264  | 12  | 3617 | 3634 | EWALHTFPNATDYWTFR         |                         | Mascot |

[illegible]

|    |                                                         |           |         |     |              |         |                          |   |    |   |  |                                          |  |        |
|----|---------------------------------------------------------|-----------|---------|-----|--------------|---------|--------------------------|---|----|---|--|------------------------------------------|--|--------|
|    | 1785.9172                                               | 1785.8751 | -0.0421 | -24 | 516          | 532     | VLDVLCSLCVCHGVAVR        |   |    |   |  |                                          |  | Mascot |
|    | 1801.7463                                               | 1801.8739 | 0.1276  | 71  | 2097         | 2110    | MVANCCRFLCYFCR           |   |    |   |  | Carbamidomethyl (C)[5], Oxidation (M)[1] |  | Mascot |
|    | 1801.7463                                               | 1801.8739 | 0.1276  | 71  | 2097         | 2110    | MVANCCRFLCYFCR           |   |    |   |  | Carbamidomethyl (C)[5], Oxidation (M)[1] |  | Mascot |
|    | 2082.9912                                               | 2083.0249 | 0.0337  | 16  | 2209         | 2227    | FAVFCNGESVEENANVV<br>VR  |   |    |   |  |                                          |  | Mascot |
|    | 2249.1396                                               | 2249.0198 | -0.1198 | -53 | 1556         | 1574    | FHYHTLRLYSAICALGNN<br>R  |   |    |   |  |                                          |  | Mascot |
|    | 2282.9839                                               | 2283.1245 | 0.1406  | 62  | 29           | 48      | HSYSGMYLCCLSTARSS<br>TDK |   |    |   |  | Carbamidomethyl (C)[9], Oxidation (M)[6] |  | Mascot |
|    | 2282.9839                                               | 2283.1245 | 0.1406  | 62  | 29           | 48      | HSYSGMYLCCLSTARSS<br>TDK |   |    |   |  | Carbamidomethyl (C)[9], Oxidation (M)[6] |  | Mascot |
| 17 | PREDICTED: hypothetical protein LOC797100 [Danio rerio] |           |         |     | gi 326681404 | 37240.7 | 5.09                     | 8 | 38 | 0 |  |                                          |  |        |

#### Peptide Information

| Calc. Mass | Obsrv. Mass | ± da    | ± ppm | Start Seq. | End Seq. | Sequence            | Ion Score | C. I. | % Modification                                        | Rank | Result Type |
|------------|-------------|---------|-------|------------|----------|---------------------|-----------|-------|-------------------------------------------------------|------|-------------|
| 868.4159   | 868.5291    | 0.1132  | 130   | 114        | 120      | SREAYDK             |           |       |                                                       |      | Mascot      |
| 1052.516   | 1052.4591   | -0.0569 | -54   | 201        | 208      | DWHPLQEK            |           |       |                                                       |      | Mascot      |
| 1052.516   | 1052.4591   | -0.0569 | -54   | 201        | 208      | DWHPLQEK            |           |       |                                                       |      | Mascot      |
| 1334.6919  | 1334.8641   | 0.1722  | 129   | 257        | 267      | LICEMARQIGK         |           |       | Carbamidomethyl (C)[3], Oxidation (M)[5]              |      | Mascot      |
| 1475.7887  | 1475.7213   | -0.0674 | -46   | 102        | 113      | TDLLRLSEEMR         |           |       |                                                       |      | Mascot      |
| 1493.6835  | 1493.701    | 0.0175  | 12    | 89         | 101      | LCQECGLDAKGSR       |           |       | Carbamidomethyl (C)[2,5]                              |      | Mascot      |
| 1785.9098  | 1785.8751   | -0.0347 | -19   | 268        | 281      | DIYIEDFYVVPVWK      |           |       |                                                       |      | Mascot      |
| 1815.775   | 1815.8019   | 0.0269  | 15    | 315        | 330      | FVVCESCLPSGSWDMV    |           |       | Carbamidomethyl (C)[4]                                |      | Mascot      |
| 2210.9482  | 2211.0559   | 0.1077  | 49    | 245        | 263      | DMDSHIGNACMKLICEMAR |           |       | Carbamidomethyl (C)[10], Oxidation (M)[2]             |      | Mascot      |
| 2283.9646  | 2284.1226   | 0.158   | 69    | 245        | 263      | DMDSHIGNACMKLICEMAR |           |       | Carbamidomethyl (C)[10, 15], Oxidation (M)[2, 11]     |      | Mascot      |
| 2299.9597  | 2300.1196   | 0.1599  | 70    | 245        | 263      | DMDSHIGNACMKLICEMAR |           |       | Carbamidomethyl (C)[10, 15], Oxidation (M)[2, 11, 17] |      | Mascot      |
| 2299.9597  | 2300.1196   | 0.1599  | 70    | 245        | 263      | DMDSHIGNACMKLICEMAR |           |       | Carbamidomethyl (C)[10, 15], Oxidation (M)[2, 11, 17] |      | Mascot      |

18 PREDICTED: hypothetical protein LOC100002352 [Danio rerio]

#### Peptide Information

| Calc. Mass | Obsrv. Mass | ± da    | ± ppm | Start Seq. | End Seq. | Sequence      | Ion Score | C. I. | % Modification                           | Rank | Result Type |
|------------|-------------|---------|-------|------------|----------|---------------|-----------|-------|------------------------------------------|------|-------------|
| 868.4159   | 868.5291    | 0.1132  | 130   | 53         | 59       | SREAYDK       |           |       |                                          |      | Mascot      |
| 1320.5493  | 1320.549    | -0.0003 | 0     | 167        | 178      | DMNSHIGNACMK  |           |       |                                          |      | Mascot      |
| 1334.6919  | 1334.8641   | 0.1722  | 129   | 179        | 189      | LICEMARQIGK   |           |       | Carbamidomethyl (C)[3], Oxidation (M)[5] |      | Mascot      |
| 1475.7887  | 1475.7213   | -0.0674 | -46   | 41         | 52       | TDLLRLSEEMR   |           |       |                                          |      | Mascot      |
| 1493.6835  | 1493.701    | 0.0175  | 12    | 28         | 40       | LCQECGLDAKGSR |           |       | Carbamidomethyl (C)[2,5]                 |      | Mascot      |

|           |                                                 |         |     |     |              |                     |      |    |    |   |                                                    |  |        |
|-----------|-------------------------------------------------|---------|-----|-----|--------------|---------------------|------|----|----|---|----------------------------------------------------|--|--------|
| 1785.9098 | 1785.8751                                       | -0.0347 | -19 | 190 | 203          | DIYIEDFYVVPVWK      |      |    |    |   |                                                    |  | Mascot |
| 1801.7594 | 1801.8739                                       | 0.1145  | 64  | 237 | 252          | FVVCENCLPSGSWDMV    |      |    |    |   | Oxidation (M)[15]                                  |  | Mascot |
| 1801.7594 | 1801.8739                                       | 0.1145  | 64  | 237 | 252          | FVVCENCLPSGSWDMV    |      |    |    |   | Oxidation (M)[15]                                  |  | Mascot |
| 2282.9807 | 2283.1245                                       | 0.1438  | 63  | 167 | 185          | DMNSHIGNACMKLICEMAR |      |    |    |   | Carbamidomethyl (C)[10,15], Oxidation (M)[2,11]    |  | Mascot |
| 2282.9807 | 2283.1245                                       | 0.1438  | 63  | 167 | 185          | DMNSHIGNACMKLICEMAR |      |    |    |   | Carbamidomethyl (C)[10,15], Oxidation (M)[2,11]    |  | Mascot |
| 2298.9756 | 2299.1255                                       | 0.1499  | 65  | 167 | 185          | DMNSHIGNACMKLICEMAR |      |    |    |   | Carbamidomethyl (C)[10,15], Oxidation (M)[2,11,17] |  | Mascot |
| 19        | PREDICTED: zinc finger protein 91 [Danio rerio] |         |     |     | gi 326678135 | 96401.5             | 9.32 | 19 | 37 | 0 |                                                    |  |        |

#### Peptide Information

| Calc. Mass | Obsrv. Mass | ± da    | ± ppm | Start Seq. | End Seq. | Sequence             | Ion Score | C. I. | % Modification                            | Rank | Result Type |
|------------|-------------|---------|-------|------------|----------|----------------------|-----------|-------|-------------------------------------------|------|-------------|
| 899.4879   | 899.4459    | -0.042  | -47   | 822        | 828      | HMKINTR              |           |       |                                           |      | Mascot      |
| 916.4734   | 916.4656    | -0.0078 | -9    | 324        | 331      | TETISHTK             |           |       |                                           |      | Mascot      |
| 961.4416   | 961.4526    | 0.011   | 11    | 486        | 493      | HVCLMCQK             |           |       |                                           |      | Mascot      |
| 1051.5643  | 1051.6913   | 0.127   | 121   | 107        | 115      | SFARQSSLR            |           |       |                                           |      | Mascot      |
| 1062.6558  | 1062.6699   | 0.0141  | 13    | 191        | 199      | TFSLLQILK            |           |       |                                           |      | Mascot      |
| 1137.5687  | 1137.5684   | -0.0003 | 0     | 616        | 624      | TFPNNFELR            |           |       |                                           |      | Mascot      |
| 1163.6241  | 1163.6067   | -0.0174 | -15   | 728        | 736      | TFLRPCELK            |           |       | Carbamidomethyl (C)[6]                    |      | Mascot      |
| 1191.5497  | 1191.6252   | 0.0755  | 63    | 285        | 294      | MSDPEPCRIK           |           |       | Oxidation (M)[1]                          |      | Mascot      |
| 1191.5497  | 1191.6252   | 0.0755  | 63    | 285        | 294      | MSDPEPCRIK           |           |       | Oxidation (M)[1]                          |      | Mascot      |
| 1785.7352  | 1785.8751   | 0.1399  | 78    | 741        | 755      | VHTMERPYSCSDCGK      |           |       | Carbamidomethyl (C)[10], Oxidation (M)[4] |      | Mascot      |
| 1834.821   | 1834.8969   | 0.0759  | 41    | 341        | 357      | AAENGFICTQCGKSYSR    |           |       |                                           |      | Mascot      |
| 2082.9849  | 2083.0249   | 0.04    | 19    | 204        | 221      | IHTGEKPYACTQCGKSFR   |           |       | Carbamidomethyl (C)[10]                   |      | Mascot      |
| 2098.9619  | 2099.0298   | 0.0679  | 32    | 626        | 643      | HFRVQTNEKPYSCCVCGK   |           |       |                                           |      | Mascot      |
| 2111.9573  | 2112.0046   | 0.0473  | 22    | 654        | 671      | HQMIHTGEKPYVCSHCGK   |           |       | Carbamidomethyl (C)[13]                   |      | Mascot      |
| 2211.1067  | 2211.0559   | -0.0508 | -23   | 135        | 153      | GFSHQSHFKAHQHIHTGVR  |           |       |                                           |      | Mascot      |
| 2224.8628  | 2225.0674   | 0.2046  | 92    | 598        | 615      | HMMIHNEENPHECDQCGK   |           |       | Carbamidomethyl (C)[13], Oxidation (M)[2] |      | Mascot      |
| 2224.8628  | 2225.0674   | 0.2046  | 92    | 598        | 615      | HMMIHNEENPHECDQCGK   |           |       | Carbamidomethyl (C)[13], Oxidation (M)[2] |      | Mascot      |
| 2230.0239  | 2230.125    | 0.1011  | 45    | 89         | 106      | HLRVHTNERPYSCSECGK   |           |       | Carbamidomethyl (C)[13,16]                |      | Mascot      |
| 2283.2061  | 2283.1245   | -0.0816 | -36   | 232        | 251      | IHTMENTNVIRALCGAILTR |           |       | Carbamidomethyl (C)[14]                   |      | Mascot      |
| 2283.2061  | 2283.1245   | -0.0816 | -36   | 232        | 251      | IHTMENTNVIRALCGAILTR |           |       | Carbamidomethyl (C)[14]                   |      | Mascot      |
| 2297.0735  | 2297.1226   | 0.0491  | 21    | 653        | 671      | KHQMIHTGEKPYVCSHC GK |           |       | Carbamidomethyl (C)[14,17]                |      | Mascot      |
| 2299.0781  | 2299.1255   | 0.0474  | 21    | 450        | 469      | MIHTGEKPFCAQCGKSFTR  |           |       | Carbamidomethyl (C)[11]                   |      | Mascot      |

|    |                                                       |  |  |  |              |         |      |    |    |   |  |  |  |
|----|-------------------------------------------------------|--|--|--|--------------|---------|------|----|----|---|--|--|--|
| 20 | PREDICTED: zinc finger protein 271-like [Danio rerio] |  |  |  | gi 326675814 | 34998.3 | 9.18 | 11 | 37 | 0 |  |  |  |
|----|-------------------------------------------------------|--|--|--|--------------|---------|------|----|----|---|--|--|--|



### Peptide Information

| Calc. Mass | Obsrv. Mass | $\pm$ da | $\pm$ ppm | Start Seq. | End Seq. | Sequence            | Ion Score | C. I. % | Modification            | Rank | Result Type |
|------------|-------------|----------|-----------|------------|----------|---------------------|-----------|---------|-------------------------|------|-------------|
| 1062.6055  | 1062.6699   | 0.0644   | 61        | 121        | 129      | HKLIHTGEK           |           |         |                         |      | Mascot      |
| 1107.627   | 1107.5242   | -0.1028  | -93       | 167        | 175      | SFTRITNLR           |           |         |                         |      | Mascot      |
| 1118.5953  | 1118.4878   | -0.1075  | -96       | 251        | 259      | RFSQPENLK           |           |         |                         |      | Mascot      |
| 1163.6532  | 1163.6067   | -0.0465  | -40       | 123        | 132      | LIHTGEKTHK          |           |         |                         |      | Mascot      |
| 1191.5497  | 1191.6252   | 0.0755   | 63        | 1          | 10       | MSDPEPCRIK          |           |         | Oxidation (M)[1]        |      | Mascot      |
| 1191.5497  | 1191.6252   | 0.0755   | 63        | 1          | 10       | MSDPEPCRIK          |           |         | Oxidation (M)[1]        |      | Mascot      |
| 1493.7971  | 1493.701    | -0.0961  | -64       | 205        | 216      | HQRIHTGEKPYK        |           |         |                         |      | Mascot      |
| 1834.8552  | 1834.8969   | 0.0417   | 23        | 11         | 25       | LEETEEQTDLKENEK     |           |         |                         |      | Mascot      |
| 2098.9937  | 2099.0298   | 0.0361   | 17        | 37         | 54       | TYHLLTEEKPFCTQCGK   |           |         |                         |      | Mascot      |
| 2284.1101  | 2284.1226   | 0.0125   | 5         | 36         | 54       | KTYHLLTEEKPFCTQCGK  |           |         | Carbamidomethyl (C)[14] |      | Mascot      |
| 2300.0005  | 2300.1196   | 0.1191   | 52        | 232        | 250      | RHEMIHTGEKPYECSHCDK |           |         |                         |      | Mascot      |
| 2300.0005  | 2300.1196   | 0.1191   | 52        | 233        | 251      | HEMIHTGEKPYECSHCDKR |           |         |                         |      | Mascot      |

21 PREDICTED: zinc finger protein 420 isoform 2 [Danio rerio] gi|326678086 70371 9.08 14 37 0

### Peptide Information

| Calc. Mass | Obsrv. Mass | $\pm$ da | $\pm$ ppm | Start Seq. | End Seq. | Sequence            | Ion Score | C. I. % | Modification           | Rank | Result Type |
|------------|-------------|----------|-----------|------------|----------|---------------------|-----------|---------|------------------------|------|-------------|
| 842.5206   | 842.4901    | -0.0305  | -36       | 25         | 31       | QRQGLLK             |           |         |                        |      | Mascot      |
| 864.4798   | 864.5037    | 0.0239   | 28        | 591        | 597      | HRSVHTK             |           |         |                        |      | Mascot      |
| 1016.5193  | 1016.5694   | 0.0501   | 49        | 598        | 606      | EKPPSCSLR           |           |         |                        |      | Mascot      |
| 1026.5215  | 1026.4753   | -0.0462  | -45       | 189        | 197      | SFTQTSSLR           |           |         |                        |      | Mascot      |
| 1045.536   | 1045.5388   | 0.0028   | 3         | 134        | 141      | FHCARNLK            |           |         | Carbamidomethyl (C)[3] |      | Mascot      |
| 1062.5149  | 1062.6699   | 0.155    | 146       | 110        | 117      | YNLNVHMR            |           |         | Oxidation (M)[7]       |      | Mascot      |
| 1107.6171  | 1107.5242   | -0.0929  | -84       | 469        | 477      | RFAQHAHLK           |           |         |                        |      | Mascot      |
| 1118.4645  | 1118.4878   | 0.0233   | 21        | 348        | 356      | GFVCFECEK           |           |         | Carbamidomethyl (C)[4] |      | Mascot      |
| 1191.5497  | 1191.6252   | 0.0755   | 63        | 36         | 45       | MSDPEPCRIK          |           |         | Oxidation (M)[1]       |      | Mascot      |
| 1191.5497  | 1191.6252   | 0.0755   | 63        | 36         | 45       | MSDPEPCRIK          |           |         | Oxidation (M)[1]       |      | Mascot      |
| 1785.8501  | 1785.8751   | 0.025    | 14        | 8          | 24       | SFSVESSELSSAAISER   |           |         |                        |      | Mascot      |
| 2211.0798  | 2211.0559   | -0.0239  | -11       | 450        | 468      | IHLRVHTNEKPYSCECGK  |           |         |                        |      | Mascot      |
| 2230.0605  | 2230.125    | 0.0645   | 29        | 276        | 294      | CSSHLNEHMIHTGEKTHR  |           |         |                        |      | Mascot      |
| 2283.0579  | 2283.1245   | 0.0666   | 29        | 227        | 245      | HQMIHTGEKPYKCSHCDLR |           |         |                        |      | Mascot      |
| 2283.0579  | 2283.1245   | 0.0666   | 29        | 227        | 245      | HQMIHTGEKPYKCSHCD   |           |         |                        |      | Mascot      |

|    |                                                                |           |        |    |              |     |                                  |      |   |    |   |                                              |        |
|----|----------------------------------------------------------------|-----------|--------|----|--------------|-----|----------------------------------|------|---|----|---|----------------------------------------------|--------|
|    | 2299.053                                                       | 2299.1255 | 0.0725 | 32 | 227          | 245 | LR<br>HQMIHTGEKPYKCSHCD<br>LR    |      |   |    |   | Oxidation (M)[3]                             | Mascot |
|    | 3262.4839                                                      | 3262.5715 | 0.0876 | 27 | 525          | 552 | TFSHIGHMNAHERVHTG<br>EKPFACHTCGK |      |   |    |   | Carbamidomethyl (C)[23,26], Oxidation (M)[8] | Mascot |
| 22 | PREDICTED: TRIO and F-actin-binding protein-like [Danio rerio] |           |        |    | gi 326664311 |     | 26022.2                          | 5.16 | 8 | 37 | 0 |                                              |        |

Peptide Information

| Calc. Mass | Obsrv. Mass | ± da    | ± ppm | Start Seq. | End Seq. | Sequence                | Ion Score | C. I. | % Modification   | Rank | Result Type |
|------------|-------------|---------|-------|------------|----------|-------------------------|-----------|-------|------------------|------|-------------|
| 848.4658   | 848.5057    | 0.0399  | 47    | 158        | 164      | EISCLRK                 |           |       |                  |      | Mascot      |
| 1045.5636  | 1045.5388   | -0.0248 | -24   | 194        | 202      | SERDINALK               |           |       |                  |      | Mascot      |
| 1107.5714  | 1107.5242   | -0.0472 | -43   | 110        | 118      | LTEEISLMR               |           |       | Oxidation (M)[8] |      | Mascot      |
| 1118.5259  | 1118.4878   | -0.0381 | -34   | 101        | 109      | MENQELQAR               |           |       |                  |      | Mascot      |
| 1163.6055  | 1163.6067   | 0.0012  | 1     | 126        | 136      | SGVVPLGSYER             |           |       |                  |      | Mascot      |
| 1179.6844  | 1179.5754   | -0.109  | -92   | 197        | 206      | DINALKQHLK              |           |       |                  |      | Mascot      |
| 1818.9054  | 1818.8862   | -0.0192 | -11   | 149        | 163      | ESEVEFLHKEISCLR         |           |       |                  |      | Mascot      |
| 2237.1633  | 2237.0571   | -0.1062 | -47   | 49         | 67       | QQLHESLSLQRELDGLS<br>QR |           |       |                  |      | Mascot      |

|    |                                                   |  |  |  |             |  |         |      |   |    |   |  |  |
|----|---------------------------------------------------|--|--|--|-------------|--|---------|------|---|----|---|--|--|
| 23 | tropomyosin alpha-4 chain isoform 2 [Danio rerio] |  |  |  | gi 47085929 |  | 28484.4 | 4.63 | 9 | 36 | 0 |  |  |
|----|---------------------------------------------------|--|--|--|-------------|--|---------|------|---|----|---|--|--|

Peptide Information

| Calc. Mass | Obsrv. Mass | ± da    | ± ppm | Start Seq. | End Seq. | Sequence      | Ion Score | C. I. | % Modification   | Rank | Result Type |
|------------|-------------|---------|-------|------------|----------|---------------|-----------|-------|------------------|------|-------------|
| 850.3975   | 850.5219    | 0.1244  | 146   | 98         | 104      | AMKDEEK       |           |       |                  |      | Mascot      |
| 850.3975   | 850.5219    | 0.1244  | 146   | 98         | 104      | AMKDEEK       |           |       |                  |      | Mascot      |
| 1109.4891  | 1109.4716   | -0.0175 | -16   | 83         | 92       | AADESERGMK    |           |       | Oxidation (M)[9] |      | Mascot      |
| 1137.582   | 1137.5684   | -0.0136 | -12   | 1          | 11       | MTGVTS�DAVK   |           |       | Oxidation (M)[1] |      | Mascot      |
| 1165.5592  | 1165.7203   | 0.1611  | 138   | 105        | 113      | MEIQEMQLK     |           |       | Oxidation (M)[1] |      | Mascot      |
| 1165.5592  | 1165.7203   | 0.1611  | 138   | 105        | 113      | MEIQEMQLK     |           |       | Oxidation (M)[1] |      | Mascot      |
| 1173.5858  | 1173.6058   | 0.02    | 17    | 34         | 42       | ELDNERELR     |           |       |                  |      | Mascot      |
| 1234.5732  | 1234.6521   | 0.0789  | 64    | 143        | 153      | AEERAEVAECK   |           |       |                  |      | Mascot      |
| 1308.6178  | 1308.6364   | 0.0186  | 14    | 198        | 208      | EAETRAEFAER   |           |       |                  |      | Mascot      |
| 1434.7322  | 1434.738    | 0.0058  | 4     | 216        | 228      | SIDDLEEKLSSAK |           |       |                  |      | Mascot      |
| 1493.7338  | 1493.701    | -0.0328 | -22   | 105        | 116      | MEIQEMQLKEAK  |           |       | Oxidation (M)[1] |      | Mascot      |

|    |                    |  |  |  |             |  |         |      |    |    |   |  |  |
|----|--------------------|--|--|--|-------------|--|---------|------|----|----|---|--|--|
| 24 | pl10 [Danio rerio] |  |  |  | gi 41282082 |  | 75799.5 | 8.28 | 12 | 36 | 0 |  |  |
|----|--------------------|--|--|--|-------------|--|---------|------|----|----|---|--|--|

Peptide Information

| Calc. Mass | Obsrv. Mass | ± da | ± ppm | Start Seq. | End Seq. | Sequence | Ion Score | C. I. | % Modification | Rank | Result Type |
|------------|-------------|------|-------|------------|----------|----------|-----------|-------|----------------|------|-------------|
|------------|-------------|------|-------|------------|----------|----------|-----------|-------|----------------|------|-------------|

[illegible]

### Peptide Information

| Calc. Mass | Obsrv. Mass | ± da    | ± ppm | Start Seq. | End Seq. | Sequence                  | Ion Score | C. I. % | Modification           | Rank | Result Type |
|------------|-------------|---------|-------|------------|----------|---------------------------|-----------|---------|------------------------|------|-------------|
| 848.4481   | 848.5057    | 0.0576  | 68    | 104        | 110      | QMGLMLR                   |           |         |                        |      | Mascot      |
| 856.5515   | 856.5094    | -0.0421 | -49   | 27         | 32       | IWLRLR                    |           |         |                        |      | Mascot      |
| 864.4429   | 864.5037    | 0.0608  | 70    | 104        | 110      | QMGLMLR                   |           |         | Oxidation (M)[2]       |      | Mascot      |
| 1045.5823  | 1045.5388   | -0.0435 | -42   | 37         | 44       | CLVKQLER                  |           |         | Carbamidomethyl (C)[1] |      | Mascot      |
| 1062.5691  | 1062.6699   | 0.1008  | 95    | 112        | 119      | TEEKPRFR                  |           |         |                        |      | Mascot      |
| 1133.5837  | 1133.6927   | 0.109   | 96    | 18         | 26       | YLQPDQIEK                 |           |         |                        |      | Mascot      |
| 1137.5535  | 1137.5684   | 0.0149  | 13    | 276        | 285      | SDAAILYNDR                |           |         |                        |      | Mascot      |
| 2249.1128  | 2249.0198   | -0.093  | -41   | 322        | 341      | ALVVEMVLATDMSCHFQ<br>QVK  |           |         |                        |      | Mascot      |
| 2283.2634  | 2283.1245   | -0.1389 | -61   | 193        | 213      | FKIPVSALVSFVEALEVG<br>YSK |           |         |                        |      | Mascot      |
| 2283.2634  | 2283.1245   | -0.1389 | -61   | 193        | 213      | FKIPVSALVSFVEALEVG<br>YSK |           |         |                        |      | Mascot      |
| 2299.2583  | 2299.1255   | -0.1328 | -58   | 195        | 215      | IPVSALVSFVEALEVGYS<br>KYK |           |         |                        |      | Mascot      |

### Peptide Information

| Calc. Mass | Obsrv. Mass | ± da    | ± ppm | Start Seq. | End Seq. | Sequence | Ion Score | C. I. % | Modification | Rank | Result Type |
|------------|-------------|---------|-------|------------|----------|----------|-----------|---------|--------------|------|-------------|
| 842.5094   | 842.4901    | -0.0193 | -23   | 420        | 426      | EIQILAR  |           |         |              |      | Mascot      |

|           |           |         |     |     |     |                                 |  |  |                                           |  |  |        |
|-----------|-----------|---------|-----|-----|-----|---------------------------------|--|--|-------------------------------------------|--|--|--------|
| 1051.616  | 1051.6913 | 0.0753  | 72  | 33  | 40  | RYIPPHLR                        |  |  |                                           |  |  | Mascot |
| 1137.6527 | 1137.5684 | -0.0843 | -74 | 34  | 42  | YIPPHLRNK                       |  |  |                                           |  |  | Mascot |
| 1163.5902 | 1163.6067 | 0.0165  | 14  | 440 | 450 | VGSTSENITQK                     |  |  |                                           |  |  | Mascot |
| 1173.582  | 1173.6058 | 0.0238  | 20  | 396 | 405 | IVEQDTMPPK                      |  |  | Oxidation (M)[7]                          |  |  | Mascot |
| 1308.5637 | 1308.6364 | 0.0727  | 56  | 496 | 507 | EGYACTSIHGDR                    |  |  |                                           |  |  | Mascot |
| 1320.5963 | 1320.549  | -0.0473 | -36 | 409 | 419 | QTMFMSATFPK                     |  |  | Oxidation (M)[3,4]                        |  |  | Mascot |
| 1448.7744 | 1448.8962 | 0.1218  | 84  | 309 | 320 | ELALQIYDEARK                    |  |  |                                           |  |  | Mascot |
| 1707.7582 | 1707.7284 | -0.0298 | -17 | 58  | 72  | SNGFVNGYHDGRDNR                 |  |  |                                           |  |  | Mascot |
| 2083.0244 | 2083.0249 | 0.0005  | 0   | 544 | 560 | HVINFDLPDIEEYVHR                |  |  |                                           |  |  | Mascot |
| 2112.0767 | 2112.0046 | -0.0721 | -34 | 325 | 343 | SHVRPCVVYGGADIGQQI<br>R         |  |  | Carbamidomethyl (C)[6]                    |  |  | Mascot |
| 3262.5217 | 3262.5715 | 0.0498  | 15  | 368 | 394 | IGLDYCNLYLVLDEADRL<br>DMGFEPQIR |  |  | Carbamidomethyl (C)[6], Oxidation (M)[17] |  |  | Mascot |

27

PREDICTED: coiled-coil domain-containing protein C16orf93 homolog [Danio rerio]

gi|292619525

33587.9

5.12

7

34

0

Peptide Information

| Calc. Mass | Obsrv. Mass | ± da    | ± ppm | Start Seq. | End Seq. | Sequence                           | Ion Score | C. I. | % | Modification         | Rank | Result Type |
|------------|-------------|---------|-------|------------|----------|------------------------------------|-----------|-------|---|----------------------|------|-------------|
| 848.4108   | 848.5057    | 0.0949  | 112   | 47         | 53       | STQDIER                            |           |       |   |                      |      | Mascot      |
| 870.4508   | 870.5245    | 0.0737  | 85    | 159        | 164      | HYFLYK                             |           |       |   |                      |      | Mascot      |
| 1032.5255  | 1032.5653   | 0.0398  | 39    | 250        | 257      | EV RNEVMR                          |           |       |   |                      |      | Mascot      |
| 1234.5182  | 1234.6521   | 0.1339  | 108   | 194        | 204      | SQSESPADEER                        |           |       |   |                      |      | Mascot      |
| 1818.9492  | 1818.8862   | -0.063  | -35   | 11         | 25       | EMKPFDKIMVPQVPK                    |           |       |   | Oxidation (M)[2,9]   |      | Mascot      |
| 2082.8843  | 2083.0249   | 0.1406  | 68    | 209        | 226      | ETEMDGEVQQSSELP<br>EM K            |           |       |   | Oxidation (M)[4]     |      | Mascot      |
| 2098.8792  | 2099.0298   | 0.1506  | 72    | 209        | 226      | ETEMDGEVQQSSELP<br>EM K            |           |       |   | Oxidation (M)[4, 17] |      | Mascot      |
| 3338.7549  | 3338.6702   | -0.0847 | -25   | 258        | 287      | LSAQLQQELKNSADQLN<br>NAISQLETNIQVK |           |       |   |                      |      | Mascot      |

28

PREDICTED: hypothetical protein LOC100003217 [Danio rerio]

gi|326678765

31640.9

5.2

8

34

0

Peptide Information

| Calc. Mass | Obsrv. Mass | ± da    | ± ppm | Start Seq. | End Seq. | Sequence      | Ion Score | C. I. | % | Modification                             | Rank | Result Type |
|------------|-------------|---------|-------|------------|----------|---------------|-----------|-------|---|------------------------------------------|------|-------------|
| 842.4114   | 842.4901    | 0.0787  | 93    | 78         | 84       | SREAHDK       |           |       |   |                                          |      | Mascot      |
| 916.4379   | 916.4656    | 0.0277  | 30    | 29         | 35       | MMTRSYK       |           |       |   |                                          |      | Mascot      |
| 1052.516   | 1052.4591   | -0.0569 | -54   | 152        | 159      | DWHPLQEK      |           |       |   |                                          |      | Mascot      |
| 1052.516   | 1052.4591   | -0.0569 | -54   | 152        | 159      | DWHPLQEK      |           |       |   |                                          |      | Mascot      |
| 1334.6919  | 1334.8641   | 0.1722  | 129   | 208        | 218      | LICEMARQIGK   |           |       |   | Carbamidomethyl (C)[3], Oxidation (M)[5] |      | Mascot      |
| 1475.7887  | 1475.7213   | -0.0674 | -46   | 66         | 77       | TDLLRLRLSEEMR |           |       |   |                                          |      | Mascot      |

|    |                                                                                                      |           |         |     |     |              |                     |      |    |    |   |  |                                                    |        |
|----|------------------------------------------------------------------------------------------------------|-----------|---------|-----|-----|--------------|---------------------|------|----|----|---|--|----------------------------------------------------|--------|
|    | 1493.6835                                                                                            | 1493.701  | 0.0175  | 12  | 53  | 65           | LCQECGLDAKGSR       |      |    |    |   |  | Carbamidomethyl (C)[2,5]                           | Mascot |
|    | 1785.9098                                                                                            | 1785.8751 | -0.0347 | -19 | 219 | 232          | DIYIEDFYVVPVWK      |      |    |    |   |  |                                                    | Mascot |
|    | 2210.9482                                                                                            | 2211.0559 | 0.1077  | 49  | 196 | 214          | DMDSHIGNACMKLICEMAR |      |    |    |   |  | Carbamidomethyl (C)[10], Oxidation (M)[2]          | Mascot |
|    | 2283.9646                                                                                            | 2284.1226 | 0.158   | 69  | 196 | 214          | DMDSHIGNACMKLICEMAR |      |    |    |   |  | Carbamidomethyl (C)[10,15], Oxidation (M)[2,11]    | Mascot |
|    | 2299.9597                                                                                            | 2300.1196 | 0.1599  | 70  | 196 | 214          | DMDSHIGNACMKLICEMAR |      |    |    |   |  | Carbamidomethyl (C)[10,15], Oxidation (M)[2,11,17] | Mascot |
|    | 2299.9597                                                                                            | 2300.1196 | 0.1599  | 70  | 196 | 214          | DMDSHIGNACMKLICEMAR |      |    |    |   |  | Carbamidomethyl (C)[10,15], Oxidation (M)[2,11,17] | Mascot |
| 29 | novel protein similar to vertebrate lanosterol synthase (2,3-oxidosqualene-lanosterol cyclase) (LSS) |           |         |     |     | gi 169153752 | 83610.3             | 6.09 | 11 | 34 | 0 |  |                                                    |        |

#### Peptide Information

| Calc. Mass | Obsrv. Mass | ± da    | ± ppm | Start Seq. | End Seq. | Sequence                       | Ion Score | C. I. % | Modification            | Rank | Result Type |
|------------|-------------|---------|-------|------------|----------|--------------------------------|-----------|---------|-------------------------|------|-------------|
| 868.4311   | 868.5291    | 0.098   | 113   | 441        | 448      | GGFPFSTR                       |           |         |                         |      | Mascot      |
| 882.425    | 882.546     | 0.121   | 137   | 564        | 570      | GLDYCRR                        |           |         |                         |      | Mascot      |
| 899.556    | 899.4459    | -0.1101 | -122  | 674        | 681      | GIQLLIDK                       |           |         |                         |      | Mascot      |
| 1062.5942  | 1062.6699   | 0.0757  | 71    | 665        | 673      | YPGTKVIER                      |           |         |                         |      | Mascot      |
| 1066.5132  | 1066.4749   | -0.0383 | -36   | 1          | 9        | MTEGTCLRR                      |           |         |                         |      | Mascot      |
| 1107.5979  | 1107.5242   | -0.0737 | -67   | 615        | 623      | RACEFLAK                       |           |         | Carbamidomethyl (C)[3]  |      | Mascot      |
| 1308.6233  | 1308.6364   | 0.0131  | 10    | 544        | 553      | HFHSVYPEHR                     |           |         |                         |      | Mascot      |
| 1320.7344  | 1320.549    | -0.1854 | -140  | 723        | 734      | LYPCNALTGKLG                   |           |         |                         |      | Mascot      |
| 1802.0027  | 1801.8739   | -0.1288 | -71   | 333        | 348      | CISIGPISKTINMLVR               |           |         | Carbamidomethyl (C)[1]  |      | Mascot      |
| 1802.0027  | 1801.8739   | -0.1288 | -71   | 333        | 348      | CISIGPISKTINMLVR               |           |         | Carbamidomethyl (C)[1]  |      | Mascot      |
| 2112.0032  | 2112.0046   | 0.0014  | 1     | 262        | 278      | QELYVQDYSTDWPAQR               |           |         |                         |      | Mascot      |
| 3262.6716  | 3262.5715   | -0.1001 | -31   | 88         | 117      | LQAEDGHWAGDYGGPLFLLPGLLITCHIAK |           |         | Carbamidomethyl (C)[26] |      | Mascot      |

|    |                                                                                                               |  |  |  |  |              |         |      |    |    |   |  |  |  |
|----|---------------------------------------------------------------------------------------------------------------|--|--|--|--|--------------|---------|------|----|----|---|--|--|--|
| 30 | novel protein similar to MCM6 minichromosome maintenance deficient 6, mitotin ( <i>S. cerevisiae</i> ) (mcm6) |  |  |  |  | gi 169158286 | 93177.2 | 5.26 | 12 | 34 | 0 |  |  |  |
|----|---------------------------------------------------------------------------------------------------------------|--|--|--|--|--------------|---------|------|----|----|---|--|--|--|

#### Peptide Information

| Calc. Mass | Obsrv. Mass | ± da    | ± ppm | Start Seq. | End Seq. | Sequence   | Ion Score | C. I. % | Modification | Rank | Result Type |
|------------|-------------|---------|-------|------------|----------|------------|-----------|---------|--------------|------|-------------|
| 856.49     | 856.5094    | 0.0194  | 23    | 87         | 93       | AVRHFAR    |           |         |              |      | Mascot      |
| 868.4233   | 868.5291    | 0.1058  | 122   | 185        | 191      | FMLDTNK    |           |         |              |      | Mascot      |
| 1026.5367  | 1026.4753   | -0.0614 | -60   | 192        | 199      | SRFVDFQK   |           |         |              |      | Mascot      |
| 1163.6531  | 1163.6067   | -0.0464 | -40   | 280        | 289      | ALGVRELSYR |           |         |              |      | Mascot      |
| 1165.6252  | 1165.7203   | 0.0951  | 82    | 747        | 755      | SELINWYLK  |           |         |              |      | Mascot      |
| 1165.6252  | 1165.7203   | 0.0951  | 82    | 747        | 755      | SELINWYLK  |           |         |              |      | Mascot      |

|           |           |         |     |     |     |                                 |                  |        |
|-----------|-----------|---------|-----|-----|-----|---------------------------------|------------------|--------|
| 1234.7228 | 1234.6521 | -0.0707 | -57 | 361 | 372 | GILLMLFGGVAK                    | Oxidation (M)[5] | Mascot |
| 1475.7502 | 1475.7213 | -0.0289 | -20 | 90  | 102 | HFARDHGNIPPSK                   |                  | Mascot |
| 1707.8306 | 1707.7284 | -0.1022 | -60 | 168 | 182 | YTQPTICKNPVCANR                 |                  | Mascot |
| 2211.1875 | 2211.0559 | -0.1316 | -60 | 361 | 381 | GILLMLFGGVAKTTMEGT<br>SLR       | Oxidation (M)[5] | Mascot |
| 2237.1304 | 2237.0571 | -0.0733 | -33 | 236 | 257 | CDFTGTLIVPDVSAMAL<br>AGTR       |                  | Mascot |
| 2297.1812 | 2297.1226 | -0.0586 | -26 | 575 | 593 | QFQPKITVEAQEFVVDQY<br>K         |                  | Mascot |
| 3262.5652 | 3262.5715 | 0.0063  | 2   | 53  | 79  | NTLTVSFSNIEHYNQQLA<br>TTIQEEYYR |                  | Mascot |

31 novel protein similar to vertebrate SWIVSNF related,  
matrix associated, actin dependent regulator gi|55963379 29300 9.77 7 34 0

#### Peptide Information

| Calc. Mass | Obsrv. Mass | ± da    | ± ppm | Start Seq. | End Seq. | Sequence                  | Ion Score | C. I. % | Modification            | Rank | Result Type |
|------------|-------------|---------|-------|------------|----------|---------------------------|-----------|---------|-------------------------|------|-------------|
| 856.3869   | 856.5094    | 0.1225  | 143   | 263        | 269      | QMPSKSY                   |           |         | Oxidation (M)[2]        |      | Mascot      |
| 1052.4863  | 1052.4591   | -0.0272 | -26   | 214        | 223      | DAAAMAALMR                |           |         | Oxidation (M)[5,9]      |      | Mascot      |
| 1052.4863  | 1052.4591   | -0.0272 | -26   | 214        | 223      | DAAAMAALMR                |           |         | Oxidation (M)[5,9]      |      | Mascot      |
| 1234.5746  | 1234.6521   | 0.0775  | 63    | 135        | 144      | CVSHSENRFR                |           |         |                         |      | Mascot      |
| 1320.6794  | 1320.549    | -0.1304 | -99   | 159        | 170      | SIPSKNYDPATK              |           |         |                         |      | Mascot      |
| 1475.7522  | 1475.7213   | -0.0309 | -21   | 70         | 82       | QTQLIDINAACTK             |           |         | Carbamidomethyl (C)[11] |      | Mascot      |
| 2211.0286  | 2211.0559   | 0.0273  | 12    | 41         | 61       | HTQSGTTGGPAKNNQHF<br>ASDR |           |         |                         |      | Mascot      |
| 2230.1245  | 2230.125    | 0.0005  | 0     | 62         | 82       | GQSGAPTRQTQLIDINAA<br>CTK |           |         | Carbamidomethyl (C)[19] |      | Mascot      |

32 small ubiquitin-related modifier 3 precursor [Danio rerio] gi|239048085 10690.3 5.34 5 34 0

#### Peptide Information

| Calc. Mass | Obsrv. Mass | ± da    | ± ppm | Start Seq. | End Seq. | Sequence                  | Ion Score | C. I. % | Modification     | Rank | Result Type |
|------------|-------------|---------|-------|------------|----------|---------------------------|-----------|---------|------------------|------|-------------|
| 838.4893   | 838.5232    | 0.0339  | 40    | 35         | 41       | RHTPLSK                   |           |         |                  |      | Mascot      |
| 848.4182   | 848.5057    | 0.0875  | 103   | 1          | 7        | MSEKPK                    |           |         |                  |      | Mascot      |
| 864.4131   | 864.5037    | 0.0906  | 105   | 1          | 7        | MSEKPK                    |           |         | Oxidation (M)[1] |      | Mascot      |
| 1234.6426  | 1234.6521   | 0.0095  | 8     | 21         | 32       | VAGQDGSVVQFK              |           |         |                  |      | Mascot      |
| 1475.8217  | 1475.7213   | -0.1004 | -68   | 21         | 34       | VAGQDGSVVQFKIK            |           |         |                  |      | Mascot      |
| 2299.1677  | 2299.1255   | -0.0422 | -18   | 12         | 32       | TENDHINLKVAGQDGSV<br>VQFK |           |         |                  |      | Mascot      |

33 small ubiquitin-related modifier 3-like precursor [Danio rerio] gi|55742575 10676.3 5.32 5 34 0

#### Peptide Information

| Calc. Mass | Obsrv. Mass | ± da | ± ppm | Start | End | Sequence | Ion | C. I. % | Modification | Rank | Result Type |
|------------|-------------|------|-------|-------|-----|----------|-----|---------|--------------|------|-------------|
|------------|-------------|------|-------|-------|-----|----------|-----|---------|--------------|------|-------------|

|                     |                                            |            |             |         |       |              |          |                           |         |           |       |    |                         | Seq. | Seq.   | Score  |  |  |  |  |  |
|---------------------|--------------------------------------------|------------|-------------|---------|-------|--------------|----------|---------------------------|---------|-----------|-------|----|-------------------------|------|--------|--------|--|--|--|--|--|
|                     |                                            | 838.4893   | 838.5232    | 0.0339  | 40    | 35           | 41       | RHTPLSK                   |         |           |       |    |                         |      |        | Mascot |  |  |  |  |  |
|                     |                                            | 850.3975   | 850.5219    | 0.1244  | 146   | 1            | 7        | MSEDKPK                   |         |           |       |    | Oxidation (M)[1]        |      |        | Mascot |  |  |  |  |  |
|                     |                                            | 850.3975   | 850.5219    | 0.1244  | 146   | 1            | 7        | MSEDKPK                   |         |           |       |    | Oxidation (M)[1]        |      |        | Mascot |  |  |  |  |  |
|                     |                                            | 1234.6426  | 1234.6521   | 0.0095  | 8     | 21           | 32       | VAGQDGSVVQFK              |         |           |       |    |                         |      |        | Mascot |  |  |  |  |  |
|                     |                                            | 1475.8217  | 1475.7213   | -0.1004 | -68   | 21           | 34       | VAGQDGSVVQFKIK            |         |           |       |    |                         |      |        | Mascot |  |  |  |  |  |
|                     |                                            | 2299.1677  | 2299.1255   | -0.0422 | -18   | 12           | 32       | TENDHINLKVAGQDGSV<br>VQFK |         |           |       |    |                         |      |        | Mascot |  |  |  |  |  |
| 34                  | novel protein [Danio rerio]                |            |             |         |       | gi 220679374 |          |                           | 21610.4 | 6.31      | 6     | 34 | 0                       |      |        |        |  |  |  |  |  |
| Peptide Information |                                            |            |             |         |       |              |          |                           |         |           |       |    |                         |      |        |        |  |  |  |  |  |
|                     |                                            | Calc. Mass | Obsrv. Mass | ± da    | ± ppm | Start Seq.   | End Seq. | Sequence                  |         | Ion Score | C. I. | %  | Modification            | Rank | Result | Type   |  |  |  |  |  |
|                     |                                            | 864.4097   | 864.5037    | 0.094   | 109   | 38           | 44       | DFTPEQK                   |         |           |       |    |                         |      |        | Mascot |  |  |  |  |  |
|                     |                                            | 868.4562   | 868.5291    | 0.0729  | 84    | 182          | 188      | FAFNLEK                   |         |           |       |    |                         |      |        | Mascot |  |  |  |  |  |
|                     |                                            | 882.4567   | 882.546     | 0.0893  | 101   | 189          | 196      | EISGYVSK                  |         |           |       |    |                         |      |        | Mascot |  |  |  |  |  |
|                     |                                            | 899.4403   | 899.4459    | 0.0056  | 6     | 141          | 147      | HCLEELR                   |         |           |       |    |                         |      |        | Mascot |  |  |  |  |  |
|                     |                                            | 1066.48    | 1066.4749   | -0.0051 | -5    | 28           | 37       | LFGAESGDDR                |         |           |       |    |                         |      |        | Mascot |  |  |  |  |  |
|                     |                                            | 1118.6099  | 1118.4878   | -0.1221 | -109  | 58           | 67       | QVRSVCLSR                 |         |           |       |    |                         |      |        | Mascot |  |  |  |  |  |
| 35                  | LOC562077 protein [Danio rerio]            |            |             |         |       | gi 163915615 |          |                           | 26138   | 7.3       | 7     | 34 | 0                       |      |        |        |  |  |  |  |  |
| Peptide Information |                                            |            |             |         |       |              |          |                           |         |           |       |    |                         |      |        |        |  |  |  |  |  |
|                     |                                            | Calc. Mass | Obsrv. Mass | ± da    | ± ppm | Start Seq.   | End Seq. | Sequence                  |         | Ion Score | C. I. | %  | Modification            | Rank | Result | Type   |  |  |  |  |  |
|                     |                                            | 856.5502   | 856.5094    | -0.0408 | -48   | 19           | 26       | GALIELLK                  |         |           |       |    |                         |      |        | Mascot |  |  |  |  |  |
|                     |                                            | 870.577    | 870.5245    | -0.0525 | -60   | 65           | 71       | VLKEILR                   |         |           |       |    |                         |      |        | Mascot |  |  |  |  |  |
|                     |                                            | 1032.6564  | 1032.5653   | -0.0911 | -88   | 209          | 216      | LLNLYIKR                  |         |           |       |    |                         |      |        | Mascot |  |  |  |  |  |
|                     |                                            | 1165.6801  | 1165.7203   | 0.0402  | 34    | 55           | 64       | DHTIRALALR                |         |           |       |    |                         |      |        | Mascot |  |  |  |  |  |
|                     |                                            | 1165.6801  | 1165.7203   | 0.0402  | 34    | 55           | 64       | DHTIRALALR                |         |           |       |    |                         |      |        | Mascot |  |  |  |  |  |
|                     |                                            | 1475.6802  | 1475.7213   | 0.0411  | 28    | 30           | 41       | EDSLAVWDEHFK              |         |           |       |    |                         |      |        | Mascot |  |  |  |  |  |
|                     |                                            | 2083.0125  | 2083.0249   | 0.0124  | 6     | 102          | 121      | AAEEAASTLAGSIHPEQC<br>IK  |         |           |       |    | Carbamidomethyl (C)[18] |      |        | Mascot |  |  |  |  |  |
|                     |                                            | 2099.157   | 2099.0298   | -0.1272 | -61   | 122          | 140      | VLCPIVQTADYPINLAAIK       |         |           |       |    | Carbamidomethyl (C)[3]  |      |        | Mascot |  |  |  |  |  |
| 36                  | splicing factor 3A subunit 2 [Danio rerio] |            |             |         |       | gi 41054840  |          |                           | 31327.2 | 9.6       | 7     | 33 | 0                       |      |        |        |  |  |  |  |  |
| Peptide Information |                                            |            |             |         |       |              |          |                           |         |           |       |    |                         |      |        |        |  |  |  |  |  |
|                     |                                            | Calc. Mass | Obsrv. Mass | ± da    | ± ppm | Start Seq.   | End Seq. | Sequence                  |         | Ion Score | C. I. | %  | Modification            | Rank | Result | Type   |  |  |  |  |  |

|    |                                              |           |         |     |             |     |                          |     |   |    |   |  |                        |  |  |  |        |
|----|----------------------------------------------|-----------|---------|-----|-------------|-----|--------------------------|-----|---|----|---|--|------------------------|--|--|--|--------|
|    | 882.4791                                     | 882.546   | 0.0669  | 76  | 159         | 165 | IEPPDRR                  |     |   |    |   |  |                        |  |  |  | Mascot |
|    | 961.4948                                     | 961.4526  | -0.0422 | -44 | 187         | 194 | EIDKAETR                 |     |   |    |   |  |                        |  |  |  | Mascot |
|    | 1107.4888                                    | 1107.5242 | 0.0354  | 32  | 49          | 57  | NHLGSYECK                |     |   |    |   |  | Carbamidomethyl (C)[8] |  |  |  | Mascot |
|    | 1191.7096                                    | 1191.6252 | -0.0844 | -71 | 217         | 229 | ALVAPSGPPVGVK            |     |   |    |   |  |                        |  |  |  | Mascot |
|    | 1191.7096                                    | 1191.6252 | -0.0844 | -71 | 217         | 229 | ALVAPSGPPVGVK            |     |   |    |   |  |                        |  |  |  | Mascot |
|    | 1279.5873                                    | 1279.7494 | 0.1621  | 127 | 11          | 24  | TGSGGVASASENR            |     |   |    |   |  |                        |  |  |  | Mascot |
|    | 2099.0339                                    | 2099.0298 | -0.0041 | -2  | 58          | 76  | LCLTLHNNEGSYLAHTQ<br>GK  |     |   |    |   |  |                        |  |  |  | Mascot |
|    | 2284.1501                                    | 2284.1226 | -0.0275 | -12 | 58          | 77  | LCLTLHNNEGSYLAHTQ<br>GKK |     |   |    |   |  | Carbamidomethyl (C)[2] |  |  |  | Mascot |
| 37 | proteasome subunit beta type-2 [Danio rerio] |           |         |     | gi 50540284 |     | 22571.6                  | 6.1 | 6 | 33 | 0 |  |                        |  |  |  |        |

#### Peptide Information

| Calc. Mass | Obsrv. Mass | ± da    | ± ppm | Start Seq. | End Seq. | Sequence  | Ion Score | C. I. | % Modification | Rank | Result Type |
|------------|-------------|---------|-------|------------|----------|-----------|-----------|-------|----------------|------|-------------|
| 848.4182   | 848.5057    | 0.0875  | 103   | 163        | 169      | CLEELNK   |           |       |                |      | Mascot      |
| 864.4573   | 864.5037    | 0.0464  | 54    | 87         | 93       | NLADYLR   |           |       |                |      | Mascot      |
| 882.4753   | 882.546     | 0.0707  | 80    | 35         | 41       | MFKLSEK   |           |       |                |      | Mascot      |
| 916.4985   | 916.4656    | -0.0329 | -36   | 154        | 161      | EEAVDLLK  |           |       |                |      | Mascot      |
| 1051.5717  | 1051.6913   | 0.1196  | 114   | 63         | 70       | NVQLYKMR  |           |       |                |      | Mascot      |
| 1107.5906  | 1107.5242   | -0.0664 | -60   | 87         | 95       | NLADYLRSR |           |       |                |      | Mascot      |

|    |                                                         |  |  |  |              |  |           |      |    |    |   |  |  |  |  |  |  |
|----|---------------------------------------------------------|--|--|--|--------------|--|-----------|------|----|----|---|--|--|--|--|--|--|
| 38 | PREDICTED: hypothetical protein LOC559994 [Danio rerio] |  |  |  | gi 326677062 |  | 1030064.3 | 5.62 | 48 | 33 | 0 |  |  |  |  |  |  |
|----|---------------------------------------------------------|--|--|--|--------------|--|-----------|------|----|----|---|--|--|--|--|--|--|

#### Peptide Information

| Calc. Mass | Obsrv. Mass | ± da    | ± ppm | Start Seq. | End Seq. | Sequence  | Ion Score | C. I. | % Modification   | Rank | Result Type |
|------------|-------------|---------|-------|------------|----------|-----------|-----------|-------|------------------|------|-------------|
| 838.5145   | 838.5232    | 0.0087  | 10    | 1894       | 1900     | EALHKLK   |           |       |                  |      | Mascot      |
| 850.5032   | 850.5219    | 0.0187  | 22    | 247        | 253      | LKELYGK   |           |       |                  |      | Mascot      |
| 850.5185   | 850.5219    | 0.0034  | 4     | 8569       | 8575     | IKPFAFK   |           |       |                  |      | Mascot      |
| 856.5138   | 856.5094    | -0.0044 | -5    | 1082       | 1089     | LGIIEPSK  |           |       |                  |      | Mascot      |
| 864.4321   | 864.5037    | 0.0716  | 83    | 3272       | 3278     | EERAFAGR  |           |       |                  |      | Mascot      |
| 870.5559   | 870.5245    | -0.0314 | -36   | 1536       | 1542     | ALLLWVR   |           |       |                  |      | Mascot      |
| 882.4679   | 882.546     | 0.0781  | 89    | 3102       | 3108     | NLHEELK   |           |       |                  |      | Mascot      |
| 899.4767   | 899.4459    | -0.0308 | -34   | 1192       | 1198     | LMDHVLRL  |           |       | Oxidation (M)[2] |      | Mascot      |
| 916.5363   | 916.4656    | -0.0707 | -77   | 1385       | 1391     | LFPREVR   |           |       |                  |      | Mascot      |
| 961.5425   | 961.4526    | -0.0899 | -93   | 8692       | 8699     | SETRLLSR  |           |       |                  |      | Mascot      |
| 1016.5523  | 1016.5694   | 0.0171  | 17    | 9136       | 9144     | ALIPFANDR |           |       |                  |      | Mascot      |
| 1026.464   | 1026.4753   | 0.0113  | 11    | 910        | 917      | TWYDQSAR  |           |       |                  |      | Mascot      |



|           |           |         |      |      |      |                            |                         |        |
|-----------|-----------|---------|------|------|------|----------------------------|-------------------------|--------|
| 1032.5758 | 1032.5653 | -0.0105 | -10  | 6197 | 6205 | QALMITLDK                  |                         | Mascot |
| 1045.5636 | 1045.5388 | -0.0248 | -24  | 8277 | 8285 | DLEVRSAQK                  |                         | Mascot |
| 1052.5411 | 1052.4591 | -0.082  | -78  | 1947 | 1955 | VLGAWESYK                  |                         | Mascot |
| 1052.5411 | 1052.4591 | -0.082  | -78  | 1947 | 1955 | VLGAWESYK                  |                         | Mascot |
| 1062.536  | 1062.6699 | 0.1339  | 126  | 3153 | 3160 | TKCLEQQR                   | Carbamidomethyl (C)[3]  | Mascot |
| 1107.6561 | 1107.5242 | -0.1319 | -119 | 8567 | 8575 | EKIKPFAFK                  |                         | Mascot |
| 1109.5231 | 1109.4716 | -0.0515 | -46  | 1656 | 1663 | EMKCWLQR                   | Oxidation (M)[2]        | Mascot |
| 1118.5476 | 1118.4878 | -0.0598 | -53  | 5497 | 5506 | ADVFSHTDVK                 |                         | Mascot |
| 1133.5731 | 1133.6927 | 0.1196  | 106  | 7273 | 7281 | ARLQDVMER                  | Oxidation (M)[7]        | Mascot |
| 1137.5205 | 1137.5684 | 0.0479  | 42   | 8630 | 8639 | LGELMNSSDR                 | Oxidation (M)[5]        | Mascot |
| 1163.5725 | 1163.6067 | 0.0342  | 29   | 2826 | 2835 | DMDLLSQSVR                 |                         | Mascot |
| 1173.611  | 1173.6058 | -0.0052 | -4   | 2063 | 2073 | DTLEVSSGPLR                |                         | Mascot |
| 1179.5674 | 1179.5754 | 0.008   | 7    | 2826 | 2835 | DMDLLSQSVR                 | Oxidation (M)[2]        | Mascot |
| 1191.4946 | 1191.6252 | 0.1306  | 110  | 4999 | 5009 | TMSESHGEADK                |                         | Mascot |
| 1191.4946 | 1191.6252 | 0.1306  | 110  | 4999 | 5009 | TMSESHGEADK                |                         | Mascot |
| 1234.6348 | 1234.6521 | 0.0173  | 14   | 3360 | 3370 | EQCASLTELK                 |                         | Mascot |
| 1279.6562 | 1279.7494 | 0.0932  | 73   | 5890 | 5900 | TLKQDVTMSEK                |                         | Mascot |
| 1308.6947 | 1308.6364 | -0.0583 | -45  | 9022 | 9032 | ALAYTITQNWK                |                         | Mascot |
| 1316.6416 | 1316.5607 | -0.0809 | -61  | 6672 | 6682 | VPEVPHCPEPR                | Carbamidomethyl (C)[7]  | Mascot |
| 1320.5968 | 1320.549  | -0.0478 | -36  | 8122 | 8131 | WSQYEEVSHR                 |                         | Mascot |
| 1334.7467 | 1334.8641 | 0.1174  | 88   | 733  | 743  | YPEVFPLRSVK                |                         | Mascot |
| 1434.8467 | 1434.738  | -0.1087 | -76  | 8569 | 8580 | IKPFAFKLLSDR               |                         | Mascot |
| 1475.7522 | 1475.7213 | -0.0309 | -21  | 6801 | 6813 | QEAKILECSVAER              |                         | Mascot |
| 1785.8588 | 1785.8751 | 0.0163  | 9    | 8808 | 8821 | MYGELLRDQNFQKQ             | Oxidation (M)[1]        | Mascot |
| 1801.9014 | 1801.8739 | -0.0275 | -15  | 7449 | 7464 | TYTTAKCIHGHANSLK           | Carbamidomethyl (C)[7]  | Mascot |
| 1801.9556 | 1801.8739 | -0.0817 | -45  | 2767 | 2781 | NHLDEHIQDVITVIR            |                         | Mascot |
| 1834.8552 | 1834.8969 | 0.0417  | 23   | 6462 | 6476 | EIREEVTELDEEESK            |                         | Mascot |
| 2083.0315 | 2083.0249 | -0.0066 | -3   | 6317 | 6335 | SVSSGHLSQGQIDWQNA<br>IR    |                         | Mascot |
| 2099.1528 | 2099.0298 | -0.123  | -59  | 6542 | 6559 | TTIPELRVQLQVCTEALK         | Carbamidomethyl (C)[13] | Mascot |
| 2112.0237 | 2112.0046 | -0.0191 | -9   | 4102 | 4120 | MTADSESQRQTSEITVLAT<br>R   | Oxidation (M)[1]        | Mascot |
| 2211.126  | 2211.0559 | -0.0701 | -32  | 8508 | 8526 | MSAAELQTTGVIYRLELC<br>R    | Carbamidomethyl (C)[18] | Mascot |
| 2224.9873 | 2225.0674 | 0.0801  | 36   | 4312 | 4333 | VTDAETSSQIGACAEDNE<br>SGIK |                         | Mascot |
| 2224.9873 | 2225.0674 | 0.0801  | 36   | 4312 | 4333 | VTDAETSSQIGACAEDNE<br>SGIK |                         | Mascot |
| 2230.1643 | 2230.125  | -0.0393 | -18  | 6653 | 6671 | DSLLALESVKHMLMELLC<br>K    | Carbamidomethyl (C)[18] | Mascot |
| 2233.0012 | 2233.0322 | 0.031   | 14   | 8235 | 8252 | DSTELEEWMRCAHEQLQ<br>K     |                         | Mascot |

|           |           |         |     |      |      |                          |                   |        |
|-----------|-----------|---------|-----|------|------|--------------------------|-------------------|--------|
| 2236.9792 | 2237.0571 | 0.0779  | 35  | 358  | 376  | MPICYLCNQEGHTKPMC<br>PR  | Oxidation (M)[1]  | Mascot |
| 2248.9961 | 2249.0198 | 0.0237  | 11  | 8235 | 8252 | DSTELEEWMRCAHEQLQ<br>K   | Oxidation (M)[9]  | Mascot |
| 2283.1333 | 2283.1245 | -0.0088 | -4  | 7195 | 7214 | ESPQICQDLQSLGHCRS<br>LR  |                   | Mascot |
| 2283.1333 | 2283.1245 | -0.0088 | -4  | 7195 | 7214 | ESPQICQDLQSLGHCRS<br>LR  |                   | Mascot |
| 2284.022  | 2284.1226 | 0.1006  | 44  | 3439 | 3458 | RVLDCDAPFESEADTL<br>MDR  |                   | Mascot |
| 2297.1455 | 2297.1226 | -0.0229 | -10 | 8621 | 8639 | VLLNQHWERLGELMNSS<br>DR  |                   | Mascot |
| 2299.0984 | 2299.1255 | 0.0271  | 12  | 2881 | 2901 | VEDIQHLTVSSDLAPCQ<br>NSR |                   | Mascot |
| 2300.0168 | 2300.1196 | 0.1028  | 45  | 3439 | 3458 | RVLDCDAPFESEADTL<br>MDR  | Oxidation (M)[18] | Mascot |
| 2300.0168 | 2300.1196 | 0.1028  | 45  | 3439 | 3458 | RVLDCDAPFESEADTL<br>MDR  | Oxidation (M)[18] | Mascot |

39 PREDICTED: hypothetical protein LOC100537788, partial [Danio rerio] gi|326680782 28986.4 4.75 7 33 0

#### Peptide Information

| Calc. Mass | Obsrv. Mass | ± da    | ± ppm | Start Seq. | End Seq. | Sequence            | Ion Score | C. I. % | Modification                                       | Rank | Result Type |
|------------|-------------|---------|-------|------------|----------|---------------------|-----------|---------|----------------------------------------------------|------|-------------|
| 868.4159   | 868.5291    | 0.1132  | 130   | 53         | 59       | SREAYDK             |           |         |                                                    |      | Mascot      |
| 1052.516   | 1052.4591   | -0.0569 | -54   | 141        | 148      | DWHPLQEK            |           |         |                                                    |      | Mascot      |
| 1052.516   | 1052.4591   | -0.0569 | -54   | 141        | 148      | DWHPLQEK            |           |         |                                                    |      | Mascot      |
| 1334.6919  | 1334.8641   | 0.1722  | 129   | 197        | 207      | LICEMARQIGK         |           |         | Carbamidomethyl (C)[3], Oxidation (M)[5]           |      | Mascot      |
| 1475.7887  | 1475.7213   | -0.0674 | -46   | 41         | 52       | TDLLRLSEEMR         |           |         |                                                    |      | Mascot      |
| 1493.6835  | 1493.701    | 0.0175  | 12    | 28         | 40       | LCQECGLDAKGSR       |           |         | Carbamidomethyl (C)[2,5]                           |      | Mascot      |
| 1785.9098  | 1785.8751   | -0.0347 | -19   | 208        | 221      | DIYIEDFYVVPVWK      |           |         |                                                    |      | Mascot      |
| 2210.9482  | 2211.0559   | 0.1077  | 49    | 185        | 203      | DMDSHIGNACMKLICEMAR |           |         | Carbamidomethyl (C)[10], Oxidation (M)[2]          |      | Mascot      |
| 2283.9646  | 2284.1226   | 0.158   | 69    | 185        | 203      | DMDSHIGNACMKLICEMAR |           |         | Carbamidomethyl (C)[10,15], Oxidation (M)[2,11]    |      | Mascot      |
| 2299.9597  | 2300.1196   | 0.1599  | 70    | 185        | 203      | DMDSHIGNACMKLICEMAR |           |         | Carbamidomethyl (C)[10,15], Oxidation (M)[2,11,17] |      | Mascot      |
| 2299.9597  | 2300.1196   | 0.1599  | 70    | 185        | 203      | DMDSHIGNACMKLICEMAR |           |         | Carbamidomethyl (C)[10,15], Oxidation (M)[2,11,17] |      | Mascot      |

40 RecName: Full=Tudor domain-containing protein 7B gi|334351210 121757 8.62 14 32 0

#### Peptide Information

| Calc. Mass | Obsrv. Mass | ± da   | ± ppm | Start Seq. | End Seq. | Sequence | Ion Score | C. I. % | Modification     | Rank | Result Type |
|------------|-------------|--------|-------|------------|----------|----------|-----------|---------|------------------|------|-------------|
| 848.4545   | 848.5057    | 0.0512 | 60    | 939        | 945      | MEEKALK  |           |         |                  |      | Mascot      |
| 864.4495   | 864.5037    | 0.0542 | 63    | 939        | 945      | MEEKALK  |           |         | Oxidation (M)[1] |      | Mascot      |
| 870.4679   | 870.5245    | 0.0566 | 65    | 984        | 991      | HELVSGTK |           |         |                  |      | Mascot      |
| 916.441    | 916.4656    | 0.0246 | 27    | 465        | 472      | YIGEGYSK |           |         |                  |      | Mascot      |

|    |                                                                    |           |           |         |      |             |      |                          |      |    |    |   |  |  |  |  |                         |        |
|----|--------------------------------------------------------------------|-----------|-----------|---------|------|-------------|------|--------------------------|------|----|----|---|--|--|--|--|-------------------------|--------|
|    |                                                                    | 1062.5499 | 1062.6699 | 0.12    | 113  | 1           | 9    | MADEELVKK                |      |    |    |   |  |  |  |  |                         | Mascot |
|    |                                                                    | 1107.5979 | 1107.5242 | -0.0737 | -67  | 184         | 192  | MTLPSRFQK                |      |    |    |   |  |  |  |  |                         | Mascot |
|    |                                                                    | 1109.4966 | 1109.4716 | -0.025  | -23  | 516         | 525  | AQVCEVMADK               |      |    |    |   |  |  |  |  | Oxidation (M)[7]        | Mascot |
|    |                                                                    | 1118.635  | 1118.4878 | -0.1472 | -132 | 10          | 19   | MVRAVLQSSK               |      |    |    |   |  |  |  |  |                         | Mascot |
|    |                                                                    | 1320.6035 | 1320.549  | -0.0545 | -41  | 146         | 157  | TGCMRDPQLDGK             |      |    |    |   |  |  |  |  |                         | Mascot |
|    |                                                                    | 1330.6671 | 1330.7188 | 0.0517  | 39   | 776         | 787  | DTVLHISDCSLK             |      |    |    |   |  |  |  |  |                         | Mascot |
|    |                                                                    | 1330.6671 | 1330.7188 | 0.0517  | 39   | 776         | 787  | DTVLHISDCSLK             |      |    |    |   |  |  |  |  |                         | Mascot |
|    |                                                                    | 1334.7579 | 1334.8641 | 0.1062  | 80   | 796         | 806  | RLAHVYLFTSK              |      |    |    |   |  |  |  |  |                         | Mascot |
|    |                                                                    | 1818.9556 | 1818.8862 | -0.0694 | -38  | 841         | 857  | SLNVPTATQTSSLKTDR        |      |    |    |   |  |  |  |  |                         | Mascot |
|    |                                                                    | 2225.1013 | 2225.0674 | -0.0339 | -15  | 925         | 942  | LVVLMGEMILHYNKMEEK       |      |    |    |   |  |  |  |  | Oxidation (M)[5,8,15]   | Mascot |
|    |                                                                    | 2225.1013 | 2225.0674 | -0.0339 | -15  | 925         | 942  | LVVLMGEMILHYNKMEEK       |      |    |    |   |  |  |  |  | Oxidation (M)[5,8,15]   | Mascot |
|    |                                                                    | 2249.1482 | 2249.0198 | -0.1284 | -57  | 445         | 464  | VEYPSVLVVDASDTNCVI<br>LR |      |    |    |   |  |  |  |  | Carbamidomethyl (C)[16] | Mascot |
|    |                                                                    | 2283.0308 | 2283.1245 | 0.0937  | 41   | 1067        | 1085 | DIWLHDIMAEFTDEMTKT<br>A  |      |    |    |   |  |  |  |  | Oxidation (M)[8]        | Mascot |
|    |                                                                    | 2283.0308 | 2283.1245 | 0.0937  | 41   | 1067        | 1085 | DIWLHDIMAEFTDEMTKT<br>A  |      |    |    |   |  |  |  |  | Oxidation (M)[8]        | Mascot |
|    |                                                                    | 2299.0256 | 2299.1255 | 0.0999  | 43   | 1067        | 1085 | DIWLHDIMAEFTDEMTKT<br>A  |      |    |    |   |  |  |  |  | Oxidation (M)[8,15]     | Mascot |
| 41 | MCM6 minichromosome maintenance deficient 6, like<br>[Danio rerio] |           |           |         |      | gil70887711 |      | 93152.1                  | 5.23 | 12 | 32 | 0 |  |  |  |  |                         |        |

### Peptide Information

| Calc. Mass | Obsrv. Mass | ± da    | ± ppm | Start Seq. | End Seq. | Sequence                       | Ion Score | C. I. % | Modification     | Rank | Result Type |
|------------|-------------|---------|-------|------------|----------|--------------------------------|-----------|---------|------------------|------|-------------|
| 856.49     | 856.5094    | 0.0194  | 23    | 87         | 93       | AVRHFAR                        |           |         |                  |      | Mascot      |
| 868.4233   | 868.5291    | 0.1058  | 122   | 185        | 191      | FMLDTNK                        |           |         |                  |      | Mascot      |
| 996.5261   | 996.5751    | 0.049   | 49    | 194        | 201      | FVDFQKGR                       |           |         |                  |      | Mascot      |
| 996.5261   | 996.5751    | 0.049   | 49    | 194        | 201      | FVDFQKGR                       |           |         |                  |      | Mascot      |
| 1026.5367  | 1026.4753   | -0.0614 | -60   | 192        | 199      | SRFVDFQK                       |           |         |                  |      | Mascot      |
| 1163.6531  | 1163.6067   | -0.0464 | -40   | 280        | 289      | ALGVRELSYR                     |           |         |                  |      | Mascot      |
| 1165.6252  | 1165.7203   | 0.0951  | 82    | 747        | 755      | SELINWYLK                      |           |         |                  |      | Mascot      |
| 1165.6252  | 1165.7203   | 0.0951  | 82    | 747        | 755      | SELINWYLK                      |           |         |                  |      | Mascot      |
| 1234.7228  | 1234.6521   | -0.0707 | -57   | 361        | 372      | GILLMLFGGVAK                   |           |         | Oxidation (M)[5] |      | Mascot      |
| 1475.7502  | 1475.7213   | -0.0289 | -20   | 90         | 102      | HFARDHGNIPPSK                  |           |         |                  |      | Mascot      |
| 1707.8306  | 1707.7284   | -0.1022 | -60   | 168        | 182      | YTQPTICKNPVCANR                |           |         |                  |      | Mascot      |
| 2211.1875  | 2211.0559   | -0.1316 | -60   | 361        | 381      | GILLMLFGGVAKTTMEGT<br>SLR      |           |         | Oxidation (M)[5] |      | Mascot      |
| 2297.1812  | 2297.1226   | -0.0586 | -26   | 575        | 593      | QFQPKITVEAQEFVDQY<br>K         |           |         |                  |      | Mascot      |
| 3262.5652  | 3262.5715   | 0.0063  | 2     | 53         | 79       | NTLTVSFSNIEHYNQQLA<br>TTIQEYYR |           |         |                  |      | Mascot      |

42 novel protein similar to H.sapiens TSC22 domain family, gi|169158974 14668.4 5.18 5 32 0  
member (zgc:85857) [Danio rerio]

Peptide Information

| Calc. Mass | Obsrv. Mass | ± da    | ± ppm | Start Seq. | End Seq. | Sequence        | Ion Score | C. I. % | Modification     | Rank | Result Type |
|------------|-------------|---------|-------|------------|----------|-----------------|-----------|---------|------------------|------|-------------|
| 1062.5499  | 1062.6699   | 0.12    | 113   | 42         | 50       | IEQAMDLVK       |           |         | Oxidation (M)[5] |      | Mascot      |
| 1066.6116  | 1066.4749   | -0.1367 | -128  | 3          | 11       | ETVLRVHGR       |           |         |                  |      | Mascot      |
| 1173.5503  | 1173.6058   | 0.0555  | 47    | 8          | 17       | VHGRDEMAMK      |           |         |                  |      | Mascot      |
| 1234.6273  | 1234.6521   | 0.0248  | 20    | 29         | 41       | SSSGASVVAIDNK   |           |         |                  |      | Mascot      |
| 1818.9418  | 1818.8862   | -0.0556 | -31   | 51         | 65       | SHLMYAVREEVEVLK |           |         | Oxidation (M)[4] |      | Mascot      |

43 SH3 domain-binding protein 4-A [Danio rerio] gi|45387913 104947.5 7.73 12 32 0

Peptide Information

| Calc. Mass | Obsrv. Mass | ± da    | ± ppm | Start Seq. | End Seq. | Sequence                          | Ion Score | C. I. % | Modification           | Rank | Result Type |
|------------|-------------|---------|-------|------------|----------|-----------------------------------|-----------|---------|------------------------|------|-------------|
| 842.5822   | 842.4901    | -0.0921 | -109  | 634        | 640      | LIKTVIR                           |           |         |                        |      | Mascot      |
| 850.4338   | 850.5219    | 0.0881  | 104   | 358        | 364      | LSNMEIK                           |           |         | Oxidation (M)[4]       |      | Mascot      |
| 850.4338   | 850.5219    | 0.0881  | 104   | 358        | 364      | LSNMEIK                           |           |         | Oxidation (M)[4]       |      | Mascot      |
| 870.4726   | 870.5245    | 0.0519  | 60    | 1          | 7        | MAAHRIR                           |           |         | Oxidation (M)[1]       |      | Mascot      |
| 1045.4796  | 1045.5388   | 0.0592  | 57    | 762        | 770      | AELDSEPER                         |           |         |                        |      | Mascot      |
| 1107.5793  | 1107.5242   | -0.0551 | -50   | 49         | 59       | LAPSTSFGTAR                       |           |         |                        |      | Mascot      |
| 1173.5647  | 1173.6058   | 0.0411  | 35    | 247        | 256      | APSPEQFQNR                        |           |         |                        |      | Mascot      |
| 1434.7158  | 1434.738    | 0.0222  | 15    | 885        | 896      | DVIHELHMGDLR                      |           |         |                        |      | Mascot      |
| 1815.8959  | 1815.8019   | -0.094  | -52   | 432        | 446      | HVSFSSNVWNHMKK                    |           |         | Oxidation (M)[12]      |      | Mascot      |
| 2230.2417  | 2230.125    | -0.1167 | -52   | 813        | 831      | LIMDFVLLTTAVEVAPRW<br>R           |           |         |                        |      | Mascot      |
| 2284.2368  | 2284.1226   | -0.1142 | -50   | 463        | 484      | TVVAIFGHDCAPKLLVS<br>EVGK         |           |         |                        |      | Mascot      |
| 2300.0686  | 2300.1196   | 0.051   | 22    | 568        | 587      | DDQDCILAQFCVQTPQP<br>PPK          |           |         | Carbamidomethyl (C)[5] |      | Mascot      |
| 2300.0686  | 2300.1196   | 0.051   | 22    | 568        | 587      | DDQDCILAQFCVQTPQP<br>PPK          |           |         | Carbamidomethyl (C)[5] |      | Mascot      |
| 3338.5496  | 3338.6702   | 0.1206  | 36    | 856        | 884      | TGMVDSEAMWKPAYDFL<br>LTWAAQIGDSYR |           |         | Oxidation (M)[3]       |      | Mascot      |

44 NEDD8 [Danio rerio] gi|142934400 9062.9 6.1 4 32 0

Peptide Information

| Calc. Mass | Obsrv. Mass | ± da    | ± ppm | Start Seq. | End Seq. | Sequence  | Ion Score | C. I. % | Modification | Rank | Result Type |
|------------|-------------|---------|-------|------------|----------|-----------|-----------|---------|--------------|------|-------------|
| 1052.5483  | 1052.4591   | -0.0892 | -85   | 34         | 42       | EGIPPQQQR |           |         |              |      | Mascot      |
| 1052.5483  | 1052.4591   | -0.0892 | -85   | 34         | 42       | EGIPPQQQR |           |         |              |      | Mascot      |

|           |           |         |      |    |    |                          |        |
|-----------|-----------|---------|------|----|----|--------------------------|--------|
| 1475.9056 | 1475.7213 | -0.1843 | -125 | 61 | 74 | IQGGSVLHLVLALR           | Mascot |
| 1801.943  | 1801.8739 | -0.0691 | -38  | 7  | 22 | TLTGKEIDIEPTDK           | Mascot |
| 1801.943  | 1801.8739 | -0.0691 | -38  | 7  | 22 | TLTGKEIDIEPTDK           | Mascot |
| 2083.177  | 2083.0249 | -0.1521 | -73  | 61 | 80 | IQGGSVLHLVLALRGGEN<br>LH | Mascot |

45 PREDICTED: transient receptor potential cation channel subfamily M member 6-like [Danio rerio] gi|326667824 34464.4 6.31 7 32 0

#### Peptide Information

| Calc. Mass | Obsrv. Mass | ± da    | ± ppm | Start Seq. | End Seq. | Sequence                 | Ion Score | C. I. % | Modification               | Rank | Result Type |
|------------|-------------|---------|-------|------------|----------|--------------------------|-----------|---------|----------------------------|------|-------------|
| 801.4213   | 801.3383    | -0.083  | -104  | 139        | 144      | EIQQQR                   |           |         |                            |      | Mascot      |
| 864.5189   | 864.5037    | -0.0152 | -18   | 106        | 113      | LGSVYVVK                 |           |         |                            |      | Mascot      |
| 961.5247   | 961.4526    | -0.0721 | -75   | 145        | 152      | AAQKLMQR                 |           |         | Oxidation (M)[6]           |      | Mascot      |
| 1066.3862  | 1066.4749   | 0.0887  | 83    | 276        | 283      | HTCNSCKK                 |           |         | Carbamidomethyl (C)[3,6,7] |      | Mascot      |
| 1137.4598  | 1137.5684   | 0.1086  | 95    | 276        | 284      | HTCNSCKK                 |           |         | Carbamidomethyl (C)[3,6]   |      | Mascot      |
| 1819.0588  | 1818.8862   | -0.1726 | -95   | 106        | 121      | LGSVYVVKAFRPEVVR         |           |         |                            |      | Mascot      |
| 2237.2388  | 2237.0571   | -0.1817 | -81   | 227        | 247      | ELLVLDLQGVGADLTDP<br>LIR |           |         |                            |      | Mascot      |

46 PREDICTED: rho GTPase-activating protein 21-like [Danio rerio] gi|326679518 211650.9 8.29 19 31 0

#### Peptide Information

| Calc. Mass | Obsrv. Mass | ± da    | ± ppm | Start Seq. | End Seq. | Sequence  | Ion Score | C. I. % | Modification                             | Rank | Result Type |
|------------|-------------|---------|-------|------------|----------|-----------|-----------|---------|------------------------------------------|------|-------------|
| 850.4417   | 850.5219    | 0.0802  | 94    | 225        | 231      | VFSENV    |           |         |                                          |      | Mascot      |
| 850.4417   | 850.5219    | 0.0802  | 94    | 225        | 231      | VFSENV    |           |         |                                          |      | Mascot      |
| 916.5098   | 916.4656    | -0.0442 | -48   | 84         | 92       | VNGESIIGK |           |         |                                          |      | Mascot      |
| 996.4971   | 996.5751    | 0.078   | 78    | 941        | 948      | GHCLYLYK  |           |         |                                          |      | Mascot      |
| 996.4971   | 996.5751    | 0.078   | 78    | 941        | 948      | GHCLYLYK  |           |         |                                          |      | Mascot      |
| 1016.4894  | 1016.5694   | 0.08    | 79    | 1095       | 1103     | DETSPPKDK |           |         |                                          |      | Mascot      |
| 1032.4819  | 1032.5653   | 0.0834  | 81    | 1479       | 1486     | NSFFMKDK  |           |         | Oxidation (M)[5]                         |      | Mascot      |
| 1045.5248  | 1045.5388   | 0.014   | 13    | 372        | 379      | RLMYGSR   |           |         |                                          |      | Mascot      |
| 1052.5748  | 1052.4591   | -0.1157 | -110  | 874        | 882      | HTHGFKGLR |           |         |                                          |      | Mascot      |
| 1052.5748  | 1052.4591   | -0.1157 | -110  | 874        | 882      | HTHGFKGLR |           |         |                                          |      | Mascot      |
| 1137.6561  | 1137.5684   | -0.0877 | -77   | 1656       | 1665     | LACRLPSHK |           |         |                                          |      | Mascot      |
| 1163.6274  | 1163.6067   | -0.0207 | -18   | 1707       | 1715     | LCRVLEVMK |           |         | Carbamidomethyl (C)[2], Oxidation (M)[8] |      | Mascot      |
| 1191.615   | 1191.6252   | 0.0102  | 9     | 1666       | 1675     | LIECDLSRR |           |         |                                          |      | Mascot      |
| 1191.615   | 1191.6252   | 0.0102  | 9     | 1666       | 1675     | LIECDLSRR |           |         |                                          |      | Mascot      |

|    |                                                    |           |         |     |              |       |                                       |    |    |                   |  |  |        |
|----|----------------------------------------------------|-----------|---------|-----|--------------|-------|---------------------------------------|----|----|-------------------|--|--|--------|
|    | 1234.6387                                          | 1234.6521 | 0.0134  | 11  | 402          | 413   | QKSASTTATPSR                          |    |    |                   |  |  | Mascot |
|    | 1279.6793                                          | 1279.7494 | 0.0701  | 55  | 2            | 12    | SFLFSSQAKHK                           |    |    |                   |  |  | Mascot |
|    | 1434.6754                                          | 1434.738  | 0.0626  | 44  | 441          | 454   | SASQERLGGAECAR                        |    |    |                   |  |  | Mascot |
|    | 1475.6986                                          | 1475.7213 | 0.0227  | 15  | 1077         | 1089  | ATSPHSPNKEHDR                         |    |    |                   |  |  | Mascot |
|    | 1801.9482                                          | 1801.8739 | -0.0743 | -41 | 55           | 70    | HFIVYPPESAVQSSLK                      |    |    |                   |  |  | Mascot |
|    | 1801.9482                                          | 1801.8739 | -0.0743 | -41 | 55           | 70    | HFIVYPPESAVQSSLK                      |    |    |                   |  |  | Mascot |
|    | 1815.7953                                          | 1815.8019 | 0.0066  | 4   | 1415         | 1430  | LQPSSSDDDLDTMFTK                      |    |    | Oxidation (M)[13] |  |  | Mascot |
|    | 2283.0723                                          | 2283.1245 | 0.0522  | 23  | 1781         | 1799  | HTMGGQRDFAELDVIHD<br>WR               |    |    |                   |  |  | Mascot |
|    | 2283.0723                                          | 2283.1245 | 0.0522  | 23  | 1781         | 1799  | HTMGGQRDFAELDVIHD<br>WR               |    |    |                   |  |  | Mascot |
|    | 2297.0137                                          | 2297.1226 | 0.1089  | 47  | 1431         | 1450  | NNNPTQKQSHQSQEED<br>AGR               |    |    |                   |  |  | Mascot |
|    | 2299.0674                                          | 2299.1255 | 0.0581  | 25  | 1781         | 1799  | HTMGGQRDFAELDVIHD<br>WR               |    |    | Oxidation (M)[3]  |  |  | Mascot |
|    | 3338.5588                                          | 3338.6702 | 0.1114  | 33  | 1513         | 1544  | CSISDPSSQLDETTSDLG<br>TMSSGASVPRTTRPR |    |    |                   |  |  | Mascot |
| 47 | Replication factor C (activator 1) 3 [Danio rerio] |           |         |     | gi 156230598 | 40370 | 8.72                                  | 10 | 31 | 0                 |  |  |        |

#### Peptide Information

| Calc. Mass | Obsrv. Mass | ± da    | ± ppm | Start Seq. | End Seq. | Sequence                   | Ion Score | C. I. % | Modification           | Rank | Result Type |
|------------|-------------|---------|-------|------------|----------|----------------------------|-----------|---------|------------------------|------|-------------|
| 801.3381   | 801.3383    | 0.0002  | 0     | 155        | 160      | YMATCR                     |           |         | Carbamidomethyl (C)[5] |      | Mascot      |
| 856.5363   | 856.5094    | -0.0269 | -31   | 271        | 277      | LLEVRAR                    |           |         |                        |      | Mascot      |
| 916.496    | 916.4656    | -0.0304 | -33   | 339        | 345      | FMAIYKK                    |           |         | Oxidation (M)[2]       |      | Mascot      |
| 1062.5911  | 1062.6699   | 0.0788  | 74    | 50         | 57       | TRIMCLLR                   |           |         | Carbamidomethyl (C)[5] |      | Mascot      |
| 1066.4843  | 1066.4749   | -0.0094 | -9    | 226        | 234      | ALLMCEACR                  |           |         | Carbamidomethyl (C)[5] |      | Mascot      |
| 1137.5577  | 1137.5684   | 0.0107  | 9     | 225        | 234      | KALLMCEACR                 |           |         |                        |      | Mascot      |
| 1179.6984  | 1179.5754   | -0.123  | -104  | 203        | 213      | EGLLLPPELAK                |           |         |                        |      | Mascot      |
| 1234.679   | 1234.6521   | -0.0269 | -22   | 58         | 68       | ELYGAGVEKLR                |           |         |                        |      | Mascot      |
| 1493.6439  | 1493.701    | 0.0571  | 38    | 345        | 356      | KFMEDGLDNFMF               |           |         |                        |      | Mascot      |
| 2300.1855  | 2300.1196   | -0.0659 | -29   | 28         | 49       | NLVQCGDFPHLLVYGPS<br>GAGKK |           |         |                        |      | Mascot      |
| 2300.1855  | 2300.1196   | -0.0659 | -29   | 28         | 49       | NLVQCGDFPHLLVYGPS<br>GAGKK |           |         |                        |      | Mascot      |

48 intraflagellar transport 81 homolog [Danio rerio] gi|159570779 78814.9 6.43 14 31 0

#### Peptide Information

| Calc. Mass | Obsrv. Mass | ± da    | ± ppm | Start Seq. | End Seq. | Sequence | Ion Score | C. I. % | Modification | Rank | Result Type |
|------------|-------------|---------|-------|------------|----------|----------|-----------|---------|--------------|------|-------------|
| 870.5519   | 870.5245    | -0.0274 | -31   | 616        | 622      | VLRQQVK  |           |         |              |      | Mascot      |
| 916.4734   | 916.4656    | -0.0078 | -9    | 367        | 374      | EELAAVER |           |         |              |      | Mascot      |
| 961.4948   | 961.4526    | -0.0422 | -44   | 543        | 550      | STLEQEVK |           |         |              |      | Mascot      |

|  |           |           |         |     |     |     |                           |  |  |  |  |                        |  |  |  |  |        |
|--|-----------|-----------|---------|-----|-----|-----|---------------------------|--|--|--|--|------------------------|--|--|--|--|--------|
|  | 1045.5636 | 1045.5388 | -0.0248 | -24 | 430 | 437 | TEEILRER                  |  |  |  |  |                        |  |  |  |  | Mascot |
|  | 1133.5698 | 1133.6927 | 0.1229  | 108 | 231 | 239 | NQLFQAEQR                 |  |  |  |  |                        |  |  |  |  | Mascot |
|  | 1173.6045 | 1173.6058 | 0.0013  | 1   | 281 | 289 | LPRELENMR                 |  |  |  |  | Oxidation (M)[8]       |  |  |  |  | Mascot |
|  | 1179.6342 | 1179.5754 | -0.0588 | -50 | 195 | 204 | RVEAVANHQR                |  |  |  |  |                        |  |  |  |  | Mascot |
|  | 1191.6289 | 1191.6252 | -0.0037 | -3  | 640 | 649 | DLETLECKK                 |  |  |  |  |                        |  |  |  |  | Mascot |
|  | 1191.6289 | 1191.6252 | -0.0037 | -3  | 640 | 649 | DLETLECKK                 |  |  |  |  |                        |  |  |  |  | Mascot |
|  | 1334.6844 | 1334.8641 | 0.1797  | 135 | 586 | 596 | ISQSMDVQVRR               |  |  |  |  | Oxidation (M)[5]       |  |  |  |  | Mascot |
|  | 1434.7006 | 1434.738  | 0.0374  | 26  | 375 | 386 | ELNMKTSQAQER              |  |  |  |  |                        |  |  |  |  | Mascot |
|  | 1448.6976 | 1448.8962 | 0.1986  | 137 | 551 | 562 | TLREETAQEEER              |  |  |  |  |                        |  |  |  |  | Mascot |
|  | 2225.0879 | 2225.0674 | -0.0205 | -9  | 563 | 579 | YHHINCEREIIESQIQR         |  |  |  |  | Carbamidomethyl (C)[6] |  |  |  |  | Mascot |
|  | 2225.0879 | 2225.0674 | -0.0205 | -9  | 563 | 579 | YHHINCEREIIESQIQR         |  |  |  |  | Carbamidomethyl (C)[6] |  |  |  |  | Mascot |
|  | 2233.1646 | 2233.0322 | -0.1324 | -59 | 291 | 310 | VVQYLQKVASEPAMGQA<br>ELR  |  |  |  |  | Oxidation (M)[14]      |  |  |  |  | Mascot |
|  | 2283.1914 | 2283.1245 | -0.0669 | -29 | 650 | 670 | QCYLKAQSQAPIGHVIQD<br>VGK |  |  |  |  |                        |  |  |  |  | Mascot |
|  | 2283.1914 | 2283.1245 | -0.0669 | -29 | 650 | 670 | QCYLKAQSQAPIGHVIQD<br>VGK |  |  |  |  |                        |  |  |  |  | Mascot |

49

PREDICTED: lysophosphatidic acid receptor 4-like [Danio rerio]

gi|125834502

39635.2

8.92

1

15

0

Peptide Information

| Calc. Mass | Obsrv. Mass | ± da   | ± ppm | Start Seq. | End Seq. | Sequence     | Ion Score | C. I. % | Modification           | Rank | Result | Type |
|------------|-------------|--------|-------|------------|----------|--------------|-----------|---------|------------------------|------|--------|------|
| 1330.6783  | 1330.7188   | 0.0405 | 30    | 216        | 227      | QPATLCQIGTNK | 15        | 0       | Carbamidomethyl (C)[6] | 3    | Mascot |      |

50

PREDICTED: hypothetical protein LOC100333744 [Danio rerio]

gi|292626810

67989.3

6.7

1

14

0

Peptide Information

| Calc. Mass | Obsrv. Mass | ± da   | ± ppm | Start Seq. | End Seq. | Sequence   | Ion Score | C. I. % | Modification | Rank | Result | Type |
|------------|-------------|--------|-------|------------|----------|------------|-----------|---------|--------------|------|--------|------|
| 1191.5865  | 1191.6252   | 0.0387 | 32    | 525        | 534      | QHHLDTTSPR | 14        | 0       |              | 2    | Mascot |      |

|                |           |                        |                |                |                    |
|----------------|-----------|------------------------|----------------|----------------|--------------------|
| Gel Idx/Pos    | 265/K17   | Instr./Gel Origin      | BA2060/110707A | Process Status | Analysis Succeeded |
| Plate [#] Name | [1] 31496 | Instrument Sample Name |                | Spectra        | 11                 |

| Rank | Protein Name                                   | Accession No. | Protein MW | Protein PI | Pep. Count | Protein Score | Protein Score C. I. % | Total Ion Score | Total Ion C. I. % |
|------|------------------------------------------------|---------------|------------|------------|------------|---------------|-----------------------|-----------------|-------------------|
| 1    | peptidylprolyl isomerase A, like [Danio rerio] | gi 41152400   | 17477.6    | 8.26       | 6          | 185           | 100                   | 152             | 100               |

Peptide Information

| Calc. Mass | Obsrv. Mass | ± da | ± ppm | Start Seq. | End Seq. | Sequence | Ion Score | C. I. % | Modification | Rank | Result | Type |
|------------|-------------|------|-------|------------|----------|----------|-----------|---------|--------------|------|--------|------|
|------------|-------------|------|-------|------------|----------|----------|-----------|---------|--------------|------|--------|------|

|   |                                            |             |           |         |            |          |                 |                 |        |        |                        |      |        |      |  |  |        |
|---|--------------------------------------------|-------------|-----------|---------|------------|----------|-----------------|-----------------|--------|--------|------------------------|------|--------|------|--|--|--------|
|   |                                            | 1142.5364   | 1142.5076 | -0.0288 | -25        | 83       | 91              | FEDENFTLK       |        |        |                        |      |        |      |  |  | Mascot |
|   |                                            | 1154.6093   | 1154.5826 | -0.0267 | -23        | 6        | 15              | VFFDITIDGK      | 67     | 99.993 |                        |      |        |      |  |  | Mascot |
|   |                                            | 1154.6093   | 1154.5826 | -0.0267 | -23        | 6        | 15              | VFFDITIDGK      |        |        |                        |      |        |      |  |  | Mascot |
|   |                                            | 1173.6409   | 1173.5985 | -0.0424 | -36        | 16       | 25              | EAGRIVMELR      |        |        |                        |      |        |      |  |  | Mascot |
|   |                                            | 1173.6409   | 1173.5985 | -0.0424 | -36        | 16       | 25              | EAGRIVMELR      |        |        |                        |      |        |      |  |  | Mascot |
|   |                                            | 1330.646    | 1330.7112 | 0.0652  | 49         | 38       | 49              | ALCTGEKGFGYK    |        |        | Carbamidomethyl (C)[3] |      |        |      |  |  | Mascot |
|   |                                            | 1371.7366   | 1371.7028 | -0.0338 | -25        | 132      | 144             | VVDGLDVVDAIEK   |        |        |                        |      |        |      |  |  | Mascot |
|   |                                            | 1804.8751   | 1804.8334 | -0.0417 | -23        | 77       | 91              | SIYGNKFEDENFTLK |        |        |                        |      |        |      |  |  | Mascot |
|   |                                            | 1804.8751   | 1804.8334 | -0.0417 | -23        | 77       | 91              | SIYGNKFEDENFTLK | 85     | 100    |                        |      |        |      |  |  | Mascot |
| 2 | peptidylprolyl isomerase A [Danio rerio]   |             |           |         |            |          | gi 37362270     | 17476.6         | 8.59   | 5      | 177                    | 100  | 152    | 100  |  |  |        |
|   | Peptide Information                        |             |           |         |            |          |                 |                 |        |        |                        |      |        |      |  |  |        |
|   | Calc. Mass                                 | Obsrv. Mass | ± da      | ± ppm   | Start Seq. | End Seq. | Sequence        | Ion Score       | C. I.  | %      | Modification           | Rank | Result | Type |  |  |        |
|   | 1142.5364                                  | 1142.5076   | -0.0288   | -25     | 83         | 91       | FEDENFTLK       |                 |        |        |                        |      |        |      |  |  | Mascot |
|   | 1154.6093                                  | 1154.5826   | -0.0267   | -23     | 6          | 15       | VFFDITIDGK      | 67              | 99.993 |        |                        |      |        |      |  |  | Mascot |
|   | 1154.6093                                  | 1154.5826   | -0.0267   | -23     | 6          | 15       | VFFDITIDGK      |                 |        |        |                        |      |        |      |  |  | Mascot |
|   | 1173.6409                                  | 1173.5985   | -0.0424   | -36     | 16         | 25       | EAGRIVMELR      |                 |        |        |                        |      |        |      |  |  | Mascot |
|   | 1173.6409                                  | 1173.5985   | -0.0424   | -36     | 16         | 25       | EAGRIVMELR      |                 |        |        |                        |      |        |      |  |  | Mascot |
|   | 1330.646                                   | 1330.7112   | 0.0652    | 49      | 38         | 49       | ALCTGEKGFGYK    |                 |        |        | Carbamidomethyl (C)[3] |      |        |      |  |  | Mascot |
|   | 1804.8751                                  | 1804.8334   | -0.0417   | -23     | 77         | 91       | SIYGNKFEDENFTLK |                 |        |        |                        |      |        |      |  |  | Mascot |
|   | 1804.8751                                  | 1804.8334   | -0.0417   | -23     | 77         | 91       | SIYGNKFEDENFTLK | 85              | 100    |        |                        |      |        |      |  |  | Mascot |
| 3 | 2-peptidylprolyl isomerase A [Danio rerio] |             |           |         |            |          | gi 47086533     | 17389.6         | 8.87   | 3      | 169                    | 100  | 156    | 100  |  |  |        |
|   | Peptide Information                        |             |           |         |            |          |                 |                 |        |        |                        |      |        |      |  |  |        |
|   | Calc. Mass                                 | Obsrv. Mass | ± da      | ± ppm   | Start Seq. | End Seq. | Sequence        | Ion Score       | C. I.  | %      | Modification           | Rank | Result | Type |  |  |        |
|   | 1371.6361                                  | 1371.7028   | 0.0667    | 49      | 38         | 49       | QLCTGQPGYGYK    |                 |        |        | Carbamidomethyl (C)[3] |      |        |      |  |  | Mascot |
|   | 1449.7484                                  | 1449.7129   | -0.0355   | -24     | 6          | 19       | VFFDLTAGGNPVGR  |                 |        |        |                        |      |        |      |  |  | Mascot |
|   | 1449.7484                                  | 1449.7129   | -0.0355   | -24     | 6          | 19       | VFFDLTAGGNPVGR  | 88              | 100    |        |                        |      |        |      |  |  | Mascot |
|   | 1638.9213                                  | 1638.8242   | -0.0971   | -59     | 126        | 140      | HVVFQQVVEGLDVIK | 67              | 99.994 |        |                        |      |        |      |  |  | Mascot |
|   | 1638.9213                                  | 1638.8242   | -0.0971   | -59     | 126        | 140      | HVVFQQVVEGLDVIK |                 |        |        |                        |      |        |      |  |  | Mascot |
| 4 | Ppia protein [Danio rerio]                 |             |           |         |            |          | gi 37590831     | 19357.6         | 9.3    | 3      | 167                    | 100  | 156    | 100  |  |  |        |
|   | Peptide Information                        |             |           |         |            |          |                 |                 |        |        |                        |      |        |      |  |  |        |
|   | Calc. Mass                                 | Obsrv. Mass | ± da      | ± ppm   | Start Seq. | End Seq. | Sequence        | Ion Score       | C. I.  | %      | Modification           | Rank | Result | Type |  |  |        |



|   |                                                          |            |             |         |       |            |              |                          |           |        |     |                        |                        |        |             |
|---|----------------------------------------------------------|------------|-------------|---------|-------|------------|--------------|--------------------------|-----------|--------|-----|------------------------|------------------------|--------|-------------|
|   |                                                          | 1371.6361  | 1371.7028   | 0.0667  | 49    | 57         | 68           | QLCTGQPGYGYK             |           |        |     |                        | Carbamidomethyl (C)[3] |        | Mascot      |
|   |                                                          | 1449.7484  | 1449.7129   | -0.0355 | -24   | 25         | 38           | VFFDLTAGGNPVGR           |           |        |     |                        |                        |        | Mascot      |
|   |                                                          | 1449.7484  | 1449.7129   | -0.0355 | -24   | 25         | 38           | VFFDLTAGGNPVGR           | 88        | 100    |     |                        |                        |        | Mascot      |
|   |                                                          | 1638.9213  | 1638.8242   | -0.0971 | -59   | 145        | 159          | HVVFQQVVEGLDVIK          | 67        | 99.994 |     |                        |                        |        | Mascot      |
|   |                                                          | 1638.9213  | 1638.8242   | -0.0971 | -59   | 145        | 159          | HVVFQQVVEGLDVIK          |           |        |     |                        |                        |        | Mascot      |
| 5 | Ppia protein [Danio rerio]                               |            |             |         |       |            | gi 29294733  | 20194.1                  | 9.54      | 3      | 166 | 100                    | 156                    | 100    |             |
|   | Peptide Information                                      |            |             |         |       |            |              |                          |           |        |     |                        |                        |        |             |
|   |                                                          | Calc. Mass | Obsrv. Mass | ± da    | ± ppm | Start Seq. | End Seq.     | Sequence                 | Ion Score | C. I.  | %   | Modification           |                        | Rank   | Result Type |
|   |                                                          | 1371.6361  | 1371.7028   | 0.0667  | 49    | 64         | 75           | QLCTGQPGYGYK             |           |        |     | Carbamidomethyl (C)[3] |                        |        | Mascot      |
|   |                                                          | 1449.7484  | 1449.7129   | -0.0355 | -24   | 32         | 45           | VFFDLTAGGNPVGR           |           |        |     |                        |                        |        | Mascot      |
|   |                                                          | 1449.7484  | 1449.7129   | -0.0355 | -24   | 32         | 45           | VFFDLTAGGNPVGR           | 88        | 100    |     |                        |                        |        | Mascot      |
|   |                                                          | 1638.9213  | 1638.8242   | -0.0971 | -59   | 152        | 166          | HVVFQQVVEGLDVIK          | 67        | 99.994 |     |                        |                        |        | Mascot      |
|   |                                                          | 1638.9213  | 1638.8242   | -0.0971 | -59   | 152        | 166          | HVVFQQVVEGLDVIK          |           |        |     |                        |                        |        | Mascot      |
| 6 | vitellogenin 6 [Danio rerio]                             |            |             |         |       |            | gi 57864787  | 38968.8                  | 8.92      | 5      | 84  | 99.982                 | 68                     | 99.995 |             |
|   | Peptide Information                                      |            |             |         |       |            |              |                          |           |        |     |                        |                        |        |             |
|   |                                                          | Calc. Mass | Obsrv. Mass | ± da    | ± ppm | Start Seq. | End Seq.     | Sequence                 | Ion Score | C. I.  | %   | Modification           |                        | Rank   | Result Type |
|   |                                                          | 1173.6262  | 1173.5985   | -0.0277 | -24   | 14         | 23           | LEFEVQVGPR               | 68        | 99.995 |     |                        |                        |        | Mascot      |
|   |                                                          | 1173.6262  | 1173.5985   | -0.0277 | -24   | 14         | 23           | LEFEVQVGPR               |           |        |     |                        |                        |        | Mascot      |
|   |                                                          | 1193.6348  | 1193.5977   | -0.0371 | -31   | 115        | 124          | TATIMEPFRK               |           |        |     |                        |                        |        | Mascot      |
|   |                                                          | 1791.8523  | 1791.6824   | -0.1699 | -95   | 227        | 241          | FSWGAECKQYAVFAK          |           |        |     | Carbamidomethyl (C)[7] |                        |        | Mascot      |
|   |                                                          | 1804.8687  | 1804.8334   | -0.0353 | -20   | 276        | 290          | CILNAAYDTGFRFEK          |           |        |     | Carbamidomethyl (C)[1] |                        |        | Mascot      |
|   |                                                          | 1804.8687  | 1804.8334   | -0.0353 | -20   | 276        | 290          | CILNAAYDTGFRFEK          |           |        |     | Carbamidomethyl (C)[1] |                        |        | Mascot      |
|   |                                                          | 2299.2292  | 2299.1326   | -0.0966 | -42   | 31         | 50           | QINIIDDDTPEGQAFLLKL<br>R |           |        |     |                        |                        |        | Mascot      |
| 7 | peptidylprolyl isomerase A (cyclophilin A) [Danio rerio] |            |             |         |       |            | gi 220673291 | 17392.6                  | 8.87      | 3      | 81  | 99.965                 | 67                     | 99.994 |             |
|   | Peptide Information                                      |            |             |         |       |            |              |                          |           |        |     |                        |                        |        |             |
|   |                                                          | Calc. Mass | Obsrv. Mass | ± da    | ± ppm | Start Seq. | End Seq.     | Sequence                 | Ion Score | C. I.  | %   | Modification           |                        | Rank   | Result Type |
|   |                                                          | 1371.6361  | 1371.7028   | 0.0667  | 49    | 38         | 49           | QLCTGQPGYGYK             |           |        |     | Carbamidomethyl (C)[3] |                        |        | Mascot      |
|   |                                                          | 1422.7375  | 1422.7      | -0.0375 | -26   | 6          | 19           | VFFDLTAGGSPVGR           |           |        |     |                        |                        |        | Mascot      |
|   |                                                          | 1638.9213  | 1638.8242   | -0.0971 | -59   | 126        | 140          | HVVFQQVVEGLDVIK          | 67        | 99.994 |     |                        |                        |        | Mascot      |
|   |                                                          | 1638.9213  | 1638.8242   | -0.0971 | -59   | 126        | 140          | HVVFQQVVEGLDVIK          |           |        |     |                        |                        |        | Mascot      |

8 Ppia protein [Danio rerio] gi|38541767 19459.7 9.3 3 79 99.945 67 99.994

Peptide Information

| Calc. Mass | Obsrv. Mass | ± da    | ± ppm | Start Seq. | End Seq. | Sequence        | Ion Score | C. I.  | % Modification         | Rank | Result | Type |
|------------|-------------|---------|-------|------------|----------|-----------------|-----------|--------|------------------------|------|--------|------|
| 1371.6361  | 1371.7028   | 0.0667  | 49    | 58         | 69       | QLCTGQPGYGYK    |           |        | Carbamidomethyl (C)[3] |      | Mascot |      |
| 1422.7375  | 1422.7      | -0.0375 | -26   | 26         | 39       | VFFDLTAGGSPVGR  |           |        |                        |      | Mascot |      |
| 1638.9213  | 1638.8242   | -0.0971 | -59   | 146        | 160      | HVVFGQVVEGLDVIK | 67        | 99.994 |                        |      | Mascot |      |
| 1638.9213  | 1638.8242   | -0.0971 | -59   | 146        | 160      | HVVFGQVVEGLDVIK |           |        |                        |      | Mascot |      |

9 vitellogenin 2 isoform 1 [Danio rerio] gi|113678458 179782.8 8.7 10 78 99.934 68 99.995

Peptide Information

| Calc. Mass | Obsrv. Mass | ± da    | ± ppm | Start Seq. | End Seq. | Sequence              | Ion Score | C. I.  | % Modification         | Rank | Result | Type |
|------------|-------------|---------|-------|------------|----------|-----------------------|-----------|--------|------------------------|------|--------|------|
| 850.4702   | 850.5191    | 0.0489  | 57    | 1547       | 1553     | MKLESVK               |           |        | Oxidation (M)[1]       |      | Mascot |      |
| 941.5414   | 941.4567    | -0.0847 | -90   | 303        | 311      | ISNAPAQIK             |           |        |                        |      | Mascot |      |
| 1052.5444  | 1052.4579   | -0.0865 | -82   | 1213       | 1222     | FCADGVLLSK            |           |        |                        |      | Mascot |      |
| 1109.5659  | 1109.4681   | -0.0978 | -88   | 1213       | 1222     | FCADGVLLSK            |           |        | Carbamidomethyl (C)[2] |      | Mascot |      |
| 1173.6262  | 1173.5985   | -0.0277 | -24   | 1024       | 1033     | LEFEVQVGPR            | 68        | 99.995 |                        |      | Mascot |      |
| 1173.6262  | 1173.5985   | -0.0277 | -24   | 1024       | 1033     | LEFEVQVGPR            |           |        |                        |      | Mascot |      |
| 1179.5892  | 1179.573    | -0.0162 | -14   | 164        | 173      | TQYVISEDPK            |           |        |                        |      | Mascot |      |
| 1179.5892  | 1179.573    | -0.0162 | -14   | 164        | 173      | TQYVISEDPK            |           |        |                        |      | Mascot |      |
| 1272.7675  | 1272.6376   | -0.1299 | -102  | 135        | 145      | GILNILQLNFK           |           |        |                        |      | Mascot |      |
| 1308.6616  | 1308.6292   | -0.0324 | -25   | 1225       | 1236     | VTSKVTWGAECK          |           |        |                        |      | Mascot |      |
| 1596.7699  | 1596.733    | -0.0369 | -23   | 983        | 996      | GCVEVHSHNAAFIR        |           |        | Carbamidomethyl (C)[2] |      | Mascot |      |
| 1851.8905  | 1851.8807   | -0.0098 | -5    | 147        | 163      | TQNIYELQEAGAQGCK      |           |        |                        |      | Mascot |      |
| 2233.2446  | 2233.0339   | -0.2107 | -94   | 425        | 445      | IATIPALREVVMLGYGSMIAK |           |        |                        |      | Mascot |      |

10 vitellogenin 2 [Danio rerio] gi|57864779 68993.5 7.84 5 78 99.921 68 99.995

Peptide Information

| Calc. Mass | Obsrv. Mass | ± da    | ± ppm | Start Seq. | End Seq. | Sequence   | Ion Score | C. I.  | % Modification         | Rank | Result | Type |
|------------|-------------|---------|-------|------------|----------|------------|-----------|--------|------------------------|------|--------|------|
| 850.4702   | 850.5191    | 0.0489  | 57    | 538        | 544      | MKLESVK    |           |        | Oxidation (M)[1]       |      | Mascot |      |
| 1052.5444  | 1052.4579   | -0.0865 | -82   | 204        | 213      | FCADGVLLSK |           |        |                        |      | Mascot |      |
| 1109.5659  | 1109.4681   | -0.0978 | -88   | 204        | 213      | FCADGVLLSK |           |        | Carbamidomethyl (C)[2] |      | Mascot |      |
| 1173.6262  | 1173.5985   | -0.0277 | -24   | 15         | 24       | LEFEVQVGPR | 68        | 99.995 |                        |      | Mascot |      |
| 1173.6262  | 1173.5985   | -0.0277 | -24   | 15         | 24       | LEFEVQVGPR |           |        |                        |      | Mascot |      |

|    |                              |           |         |     |              |     |                  |      |   |    |        |    |        |  |  |                           |        |
|----|------------------------------|-----------|---------|-----|--------------|-----|------------------|------|---|----|--------|----|--------|--|--|---------------------------|--------|
|    | 1308.6616                    | 1308.6292 | -0.0324 | -25 | 216          | 227 | VTSKVTWGAECK     |      |   |    |        |    |        |  |  |                           | Mascot |
|    | 1851.7418                    | 1851.8807 | 0.1389  | 75  | 607          | 622 | ETTDAHVACRCTEQCA |      |   |    |        |    |        |  |  | Carbamidomethyl (C)[9,11] | Mascot |
| 11 | vitellogenin 1 [Danio rerio] |           |         |     | gi 166795887 |     | 149452.5         | 8.68 | 8 | 77 | 99.917 | 68 | 99.995 |  |  |                           |        |

Peptide Information

| Calc. Mass | Obsrv. Mass | ± da    | ± ppm | Start Seq. | End Seq. | Sequence                      | Ion Score | C. I.  | % Modification                             | Rank | Result Type |
|------------|-------------|---------|-------|------------|----------|-------------------------------|-----------|--------|--------------------------------------------|------|-------------|
| 1173.6262  | 1173.5985   | -0.0277 | -24   | 1022       | 1031     | LEFEVQVGPR                    | 68        | 99.995 |                                            |      | Mascot      |
| 1173.6262  | 1173.5985   | -0.0277 | -24   | 1022       | 1031     | LEFEVQVGPR                    |           |        |                                            |      | Mascot      |
| 1596.7699  | 1596.733    | -0.0369 | -23   | 981        | 994      | GCVEVHSHNAAFIR                |           |        | Carbamidomethyl (C)[2]                     |      | Mascot      |
| 1638.8485  | 1638.8242   | -0.0243 | -15   | 668        | 683      | TYLAGAAADVVEFGVR              |           |        |                                            |      | Mascot      |
| 1638.8485  | 1638.8242   | -0.0243 | -15   | 668        | 683      | TYLAGAAADVVEFGVR              |           |        |                                            |      | Mascot      |
| 1791.8523  | 1791.6824   | -0.1699 | -95   | 1230       | 1244     | FSWGAECKQYAVFAK               |           |        | Carbamidomethyl (C)[7]                     |      | Mascot      |
| 1970.8695  | 1970.967    | 0.0975  | 49    | 147        | 163      | TQNIYEMQEAGAQQGVCR            |           |        | Carbamidomethyl (C)[16], Oxidation (M)[7]  |      | Mascot      |
| 2233.2009  | 2233.0339   | -0.167  | -75   | 593        | 614      | SLTRITAPDMAYVAGAAN<br>VAIK    |           |        |                                            |      | Mascot      |
| 2299.2292  | 2299.1326   | -0.0966 | -42   | 1039       | 1058     | QINIIDDDTPEGQAFLLKL<br>R      |           |        |                                            |      | Mascot      |
| 2705.3848  | 2705.0945   | -0.2903 | -107  | 1199       | 1223     | VQLIVSSIAENDNMKICAD<br>GALLSK |           |        | Carbamidomethyl (C)[17], Oxidation (M)[14] |      | Mascot      |

|    |                                              |  |  |  |              |  |          |      |   |    |        |    |        |  |  |  |  |
|----|----------------------------------------------|--|--|--|--------------|--|----------|------|---|----|--------|----|--------|--|--|--|--|
| 12 | hypothetical protein LOC678536 [Danio rerio] |  |  |  | gi 160420306 |  | 148750.2 | 8.89 | 8 | 77 | 99.909 | 68 | 99.995 |  |  |  |  |
|----|----------------------------------------------|--|--|--|--------------|--|----------|------|---|----|--------|----|--------|--|--|--|--|

Peptide Information

| Calc. Mass | Obsrv. Mass | ± da    | ± ppm | Start Seq. | End Seq. | Sequence                   | Ion Score | C. I.  | % Modification         | Rank | Result Type |
|------------|-------------|---------|-------|------------|----------|----------------------------|-----------|--------|------------------------|------|-------------|
| 1045.5465  | 1045.5389   | -0.0076 | -7    | 1346       | 1353     | DFLSWIHK                   |           |        |                        |      | Mascot      |
| 1118.5986  | 1118.4803   | -0.1183 | -106  | 1317       | 1325     | IPEITMSRR                  |           |        | Oxidation (M)[6]       |      | Mascot      |
| 1173.6262  | 1173.5985   | -0.0277 | -24   | 1022       | 1031     | LEFEVQVGPR                 | 68        | 99.995 |                        |      | Mascot      |
| 1173.6262  | 1173.5985   | -0.0277 | -24   | 1022       | 1031     | LEFEVQVGPR                 |           |        |                        |      | Mascot      |
| 1193.6348  | 1193.5977   | -0.0371 | -31   | 1116       | 1125     | TATIMEPFRK                 |           |        |                        |      | Mascot      |
| 1596.7699  | 1596.733    | -0.0369 | -23   | 981        | 994      | GCVEVHSHNAAFIR             |           |        | Carbamidomethyl (C)[2] |      | Mascot      |
| 1791.8523  | 1791.6824   | -0.1699 | -95   | 1228       | 1242     | FSWGAECKQYAVFAK            |           |        | Carbamidomethyl (C)[7] |      | Mascot      |
| 2233.2009  | 2233.0339   | -0.167  | -75   | 593        | 614      | SLTRITAPDMAYVAGAAN<br>VAIK |           |        |                        |      | Mascot      |
| 2299.2292  | 2299.1326   | -0.0966 | -42   | 1039       | 1058     | QINIIDDDTPEGQAFLLKL<br>R   |           |        |                        |      | Mascot      |

|    |                                                             |  |  |  |             |  |          |      |   |    |        |    |        |  |  |  |  |
|----|-------------------------------------------------------------|--|--|--|-------------|--|----------|------|---|----|--------|----|--------|--|--|--|--|
| 13 | novel protein similar to vitellogenin 1 (vg1) [Danio rerio] |  |  |  | gi 94733734 |  | 149808.5 | 8.83 | 8 | 77 | 99.907 | 68 | 99.995 |  |  |  |  |
|----|-------------------------------------------------------------|--|--|--|-------------|--|----------|------|---|----|--------|----|--------|--|--|--|--|

Peptide Information

| Calc. Mass | Obsrv. Mass | ± da | ± ppm | Start Seq. | End Seq. | Sequence | Ion Score | C. I. | % Modification | Rank | Result Type |
|------------|-------------|------|-------|------------|----------|----------|-----------|-------|----------------|------|-------------|
|------------|-------------|------|-------|------------|----------|----------|-----------|-------|----------------|------|-------------|

|    |                              |           |         |     |              |      |                            |      |                        |    |        |    |        |
|----|------------------------------|-----------|---------|-----|--------------|------|----------------------------|------|------------------------|----|--------|----|--------|
|    | 1173.6262                    | 1173.5985 | -0.0277 | -24 | 1026         | 1035 | LEFEVQVGPR                 | 68   | 99.995                 |    | Mascot |    |        |
|    | 1173.6262                    | 1173.5985 | -0.0277 | -24 | 1026         | 1035 | LEFEVQVGPR                 |      |                        |    | Mascot |    |        |
|    | 1193.6348                    | 1193.5977 | -0.0371 | -31 | 1125         | 1134 | TATIMEPFRK                 |      |                        |    | Mascot |    |        |
|    | 1596.7699                    | 1596.733  | -0.0369 | -23 | 985          | 998  | GCVEVHSHNAAFIR             |      | Carbamidomethyl (C)[2] |    | Mascot |    |        |
|    | 1638.8485                    | 1638.8242 | -0.0243 | -15 | 672          | 687  | TYLAGAAADVVEFGVR           |      |                        |    | Mascot |    |        |
|    | 1638.8485                    | 1638.8242 | -0.0243 | -15 | 672          | 687  | TYLAGAAADVVEFGVR           |      |                        |    | Mascot |    |        |
|    | 1791.8523                    | 1791.6824 | -0.1699 | -95 | 1237         | 1251 | FSWGAECKQYAVFAK            |      | Carbamidomethyl (C)[7] |    | Mascot |    |        |
|    | 1804.8687                    | 1804.8334 | -0.0353 | -20 | 1286         | 1300 | CILNAAYDTGFRFEK            |      | Carbamidomethyl (C)[1] |    | Mascot |    |        |
|    | 1804.8687                    | 1804.8334 | -0.0353 | -20 | 1286         | 1300 | CILNAAYDTGFRFEK            |      | Carbamidomethyl (C)[1] |    | Mascot |    |        |
|    | 2233.2009                    | 2233.0339 | -0.167  | -75 | 597          | 618  | SLTRITAPDMAYVAGAAN<br>VAIK |      |                        |    | Mascot |    |        |
|    | 2299.2292                    | 2299.1326 | -0.0966 | -42 | 1043         | 1062 | QINIIDDDTPEGQAFLLKL<br>R   |      |                        |    | Mascot |    |        |
| 14 | vitellogenin 6 [Danio rerio] |           |         |     | gi 303227889 |      | 150936.1                   | 8.84 | 8                      | 77 | 99.905 | 68 | 99.995 |

Peptide Information

|  | Calc. Mass | Obsrv. Mass | ± da    | ± ppm | Start Seq. | End Seq. | Sequence                   | Ion Score | C. I.  | % Modification         | Rank | Result Type |
|--|------------|-------------|---------|-------|------------|----------|----------------------------|-----------|--------|------------------------|------|-------------|
|  | 1173.6262  | 1173.5985   | -0.0277 | -24   | 1033       | 1042     | LEFEVQVGPR                 | 68        | 99.995 |                        |      | Mascot      |
|  | 1173.6262  | 1173.5985   | -0.0277 | -24   | 1033       | 1042     | LEFEVQVGPR                 |           |        |                        |      | Mascot      |
|  | 1193.6348  | 1193.5977   | -0.0371 | -31   | 1136       | 1145     | TATIMEPFRK                 |           |        |                        |      | Mascot      |
|  | 1596.7699  | 1596.733    | -0.0369 | -23   | 992        | 1005     | GCVEVHSHNAAFIR             |           |        | Carbamidomethyl (C)[2] |      | Mascot      |
|  | 1638.8485  | 1638.8242   | -0.0243 | -15   | 679        | 694      | TYLAGAAADVVEFGVR           |           |        |                        |      | Mascot      |
|  | 1638.8485  | 1638.8242   | -0.0243 | -15   | 679        | 694      | TYLAGAAADVVEFGVR           |           |        |                        |      | Mascot      |
|  | 1791.8523  | 1791.6824   | -0.1699 | -95   | 1248       | 1262     | FSWGAECKQYAVFAK            |           |        | Carbamidomethyl (C)[7] |      | Mascot      |
|  | 1804.8687  | 1804.8334   | -0.0353 | -20   | 1297       | 1311     | CILNAAYDTGFRFEK            |           |        | Carbamidomethyl (C)[1] |      | Mascot      |
|  | 1804.8687  | 1804.8334   | -0.0353 | -20   | 1297       | 1311     | CILNAAYDTGFRFEK            |           |        | Carbamidomethyl (C)[1] |      | Mascot      |
|  | 2233.2009  | 2233.0339   | -0.167  | -75   | 604        | 625      | SLTRITAPDMAYVAGAAN<br>VAIK |           |        |                        |      | Mascot      |
|  | 2299.2292  | 2299.1326   | -0.0966 | -42   | 1050       | 1069     | QINIIDDDTPEGQAFLLKL<br>R   |           |        |                        |      | Mascot      |

|    |                                  |  |  |  |              |  |          |      |   |    |        |    |        |
|----|----------------------------------|--|--|--|--------------|--|----------|------|---|----|--------|----|--------|
| 15 | Zgc:136383 protein [Danio rerio] |  |  |  | gi 159155252 |  | 123957.1 | 8.78 | 8 | 76 | 99.883 | 68 | 99.995 |
|----|----------------------------------|--|--|--|--------------|--|----------|------|---|----|--------|----|--------|

Peptide Information

|  | Calc. Mass | Obsrv. Mass | ± da    | ± ppm | Start Seq. | End Seq. | Sequence   | Ion Score | C. I.  | % Modification   | Rank | Result Type |
|--|------------|-------------|---------|-------|------------|----------|------------|-----------|--------|------------------|------|-------------|
|  | 1045.5465  | 1045.5389   | -0.0076 | -7    | 1123       | 1130     | DFLSWIHK   |           |        |                  |      | Mascot      |
|  | 1118.5986  | 1118.4803   | -0.1183 | -106  | 1094       | 1102     | IPEITMSRR  |           |        | Oxidation (M)[6] |      | Mascot      |
|  | 1173.6262  | 1173.5985   | -0.0277 | -24   | 799        | 808      | LEFEVQVGPR | 68        | 99.995 |                  |      | Mascot      |
|  | 1173.6262  | 1173.5985   | -0.0277 | -24   | 799        | 808      | LEFEVQVGPR |           |        |                  |      | Mascot      |

|  |           |           |         |     |      |      |                            |  |  |  |  |                        |  |  |        |
|--|-----------|-----------|---------|-----|------|------|----------------------------|--|--|--|--|------------------------|--|--|--------|
|  | 1193.6348 | 1193.5977 | -0.0371 | -31 | 893  | 902  | TATIMEPFRK                 |  |  |  |  |                        |  |  | Mascot |
|  | 1596.7699 | 1596.733  | -0.0369 | -23 | 758  | 771  | GCVEVHSHNAAFIR             |  |  |  |  | Carbamidomethyl (C)[2] |  |  | Mascot |
|  | 1791.8523 | 1791.6824 | -0.1699 | -95 | 1005 | 1019 | FSWGAECKQYAVFAK            |  |  |  |  | Carbamidomethyl (C)[7] |  |  | Mascot |
|  | 2233.2009 | 2233.0339 | -0.167  | -75 | 370  | 391  | SLTRITAPDMAYVAGAAN<br>VAIK |  |  |  |  |                        |  |  | Mascot |
|  | 2299.2292 | 2299.1326 | -0.0966 | -42 | 816  | 835  | QINIIDDDTPEGQAFLLKL<br>R   |  |  |  |  |                        |  |  | Mascot |

16 vitellogenin 5 [Danio rerio] gi|57864785 72820.8 9 4 75 99.853 68 99.995

Peptide Information

| Calc. Mass | Obsrv. Mass | ± da    | ± ppm | Start Seq. | End Seq. | Sequence                 | Ion Score | C. I. % | Modification           | Rank | Result Type |
|------------|-------------|---------|-------|------------|----------|--------------------------|-----------|---------|------------------------|------|-------------|
| 1173.6262  | 1173.5985   | -0.0277 | -24   | 331        | 340      | LEFEVQVGPR               | 68        | 99.995  |                        |      | Mascot      |
| 1173.6262  | 1173.5985   | -0.0277 | -24   | 331        | 340      | LEFEVQVGPR               |           |         |                        |      | Mascot      |
| 1596.7699  | 1596.733    | -0.0369 | -23   | 290        | 303      | GCVEVHSHNAAFIR           |           |         | Carbamidomethyl (C)[2] |      | Mascot      |
| 1791.8523  | 1791.6824   | -0.1699 | -95   | 536        | 550      | FSWGAECKQYAVFAK          |           |         | Carbamidomethyl (C)[7] |      | Mascot      |
| 2299.2292  | 2299.1326   | -0.0966 | -42   | 348        | 367      | QINIIDDDTPEGQAFLLKL<br>R |           |         |                        |      | Mascot      |

17 peptidylprolyl isomerase A (cyclophilin A) [Danio rerio] gi|220673292 10812.2 6.79 1 72 99.744 67 99.994

Peptide Information

| Calc. Mass | Obsrv. Mass | ± da    | ± ppm | Start Seq. | End Seq. | Sequence        | Ion Score | C. I. % | Modification | Rank | Result Type |
|------------|-------------|---------|-------|------------|----------|-----------------|-----------|---------|--------------|------|-------------|
| 1638.9213  | 1638.8242   | -0.0971 | -59   | 66         | 80       | HVVFQGVVEGLDVIK | 67        | 99.994  |              |      | Mascot      |
| 1638.9213  | 1638.8242   | -0.0971 | -59   | 66         | 80       | HVVFQGVVEGLDVIK |           |         |              |      | Mascot      |

18 Vtg1 protein [Danio rerio] gi|145337918 116565.5 9.07 5 68 99.209 68 99.995

Peptide Information

| Calc. Mass | Obsrv. Mass | ± da    | ± ppm | Start Seq. | End Seq. | Sequence                      | Ion Score | C. I. % | Modification                               | Rank | Result Type |
|------------|-------------|---------|-------|------------|----------|-------------------------------|-----------|---------|--------------------------------------------|------|-------------|
| 1173.6262  | 1173.5985   | -0.0277 | -24   | 728        | 737      | LEFEVQVGPR                    | 68        | 99.995  |                                            |      | Mascot      |
| 1173.6262  | 1173.5985   | -0.0277 | -24   | 728        | 737      | LEFEVQVGPR                    |           |         |                                            |      | Mascot      |
| 1596.7699  | 1596.733    | -0.0369 | -23   | 687        | 700      | GCVEVHSHNAAFIR                |           |         | Carbamidomethyl (C)[2]                     |      | Mascot      |
| 1791.8523  | 1791.6824   | -0.1699 | -95   | 936        | 950      | FSWGAECKQYAVFAK               |           |         | Carbamidomethyl (C)[7]                     |      | Mascot      |
| 2299.2292  | 2299.1326   | -0.0966 | -42   | 745        | 764      | QINIIDDDTPEGQAFLLKL<br>R      |           |         |                                            |      | Mascot      |
| 2705.3848  | 2705.0945   | -0.2903 | -107  | 905        | 929      | VQLIVSSIAENDNMKICAD<br>GALLSK |           |         | Carbamidomethyl (C)[17], Oxidation (M)[14] |      | Mascot      |

19 vitellogenin 5 [Danio rerio] gi|68448530 148868 8.77 4 68 99.209 68 99.995

Peptide Information

| Calc. Mass | Obsrv. Mass | ± da | ± ppm | Start | End | Sequence | Ion | C. I. % | Modification | Rank | Result Type |
|------------|-------------|------|-------|-------|-----|----------|-----|---------|--------------|------|-------------|
|------------|-------------|------|-------|-------|-----|----------|-----|---------|--------------|------|-------------|

|                     |                                                             |             |         |       |              |                     |                     |           |        |    |              |      |        | Seq.                                                | Seq.                                                | Score  |  |  |  |  |  |  |  |  |
|---------------------|-------------------------------------------------------------|-------------|---------|-------|--------------|---------------------|---------------------|-----------|--------|----|--------------|------|--------|-----------------------------------------------------|-----------------------------------------------------|--------|--|--|--|--|--|--|--|--|
|                     | 1173.6262                                                   | 1173.5985   | -0.0277 | -24   | 1022         | 1031                | LEFEVQVGPR          | 68        | 99.995 |    |              |      |        | Mascot                                              |                                                     |        |  |  |  |  |  |  |  |  |
|                     | 1173.6262                                                   | 1173.5985   | -0.0277 | -24   | 1022         | 1031                | LEFEVQVGPR          |           |        |    |              |      |        |                                                     | Mascot                                              |        |  |  |  |  |  |  |  |  |
|                     | 1791.8523                                                   | 1791.6824   | -0.1699 | -95   | 1230         | 1244                | FSWGAECKQYAVFAK     |           |        |    |              |      |        |                                                     | Carbamidomethyl (C)[7]<br>Mascot                    |        |  |  |  |  |  |  |  |  |
|                     | 1970.8695                                                   | 1970.967    | 0.0975  | 49    | 147          | 163                 | TQNIYEMQEAGAQGVCRR  |           |        |    |              |      |        |                                                     | Carbamidomethyl (C)[16], Oxidation (M)[7]<br>Mascot |        |  |  |  |  |  |  |  |  |
|                     | 2299.2292                                                   | 2299.1326   | -0.0966 | -42   | 1039         | 1058                | QINIIDDDTPEGQAFLLKL |           |        |    |              |      |        |                                                     | Mascot                                              |        |  |  |  |  |  |  |  |  |
| 20                  | vitellogenin 7 [Danio rerio]                                |             |         |       | gij156713467 |                     | 148739.2            | 8.76      | 5      | 68 | 99.209       | 68   | 99.995 |                                                     |                                                     |        |  |  |  |  |  |  |  |  |
| Peptide Information |                                                             |             |         |       |              |                     |                     |           |        |    |              |      |        |                                                     |                                                     |        |  |  |  |  |  |  |  |  |
| Calc. Mass          |                                                             | Obsrv. Mass | ± da    | ± ppm | Start Seq.   | End Seq.            | Sequence            | Ion Score | C. I.  | %  | Modification | Rank | Result | Type                                                |                                                     |        |  |  |  |  |  |  |  |  |
| 1109.4818           | 1109.4681                                                   | -0.0137     | -12     | 1087  | 1097         | SHSTSSSSSSR         |                     |           |        |    |              |      |        | Mascot                                              |                                                     |        |  |  |  |  |  |  |  |  |
| 1118.6238           | 1118.4803                                                   | -0.1435     | -128    | 1209  | 1219         | KICADGALLSK         |                     |           |        |    |              |      |        | Mascot                                              |                                                     |        |  |  |  |  |  |  |  |  |
| 1173.6262           | 1173.5985                                                   | -0.0277     | -24     | 1022  | 1031         | LEFEVQVGPR          | 68                  | 99.995    |        |    |              |      |        |                                                     |                                                     | Mascot |  |  |  |  |  |  |  |  |
| 1173.6262           | 1173.5985                                                   | -0.0277     | -24     | 1022  | 1031         | LEFEVQVGPR          |                     |           |        |    |              |      |        | Mascot                                              |                                                     |        |  |  |  |  |  |  |  |  |
| 1193.6083           | 1193.5977                                                   | -0.0106     | -9      | 828   | 837          | LESMTLDQLK          |                     |           |        |    |              |      |        | Oxidation (M)[4]<br>Mascot                          |                                                     |        |  |  |  |  |  |  |  |  |
| 1791.8523           | 1791.6824                                                   | -0.1699     | -95     | 1226  | 1240         | FSWGAECKQYAVFAK     |                     |           |        |    |              |      |        | Carbamidomethyl (C)[7]<br>Mascot                    |                                                     |        |  |  |  |  |  |  |  |  |
| 21                  | novel protein similar to vitellogenin 1 (vg1) [Danio rerio] |             |         |       | gij94733731  |                     | 149169.2            | 8.84      | 5      | 68 | 99.209       | 68   | 99.995 |                                                     |                                                     |        |  |  |  |  |  |  |  |  |
| Peptide Information |                                                             |             |         |       |              |                     |                     |           |        |    |              |      |        |                                                     |                                                     |        |  |  |  |  |  |  |  |  |
| Calc. Mass          |                                                             | Obsrv. Mass | ± da    | ± ppm | Start Seq.   | End Seq.            | Sequence            | Ion Score | C. I.  | %  | Modification | Rank | Result | Type                                                |                                                     |        |  |  |  |  |  |  |  |  |
| 1173.6262           | 1173.5985                                                   | -0.0277     | -24     | 1026  | 1035         | LEFEVQVGPR          | 68                  | 99.995    |        |    |              |      |        |                                                     |                                                     | Mascot |  |  |  |  |  |  |  |  |
| 1173.6262           | 1173.5985                                                   | -0.0277     | -24     | 1026  | 1035         | LEFEVQVGPR          |                     |           |        |    |              |      |        | Mascot                                              |                                                     |        |  |  |  |  |  |  |  |  |
| 1596.7699           | 1596.733                                                    | -0.0369     | -23     | 985   | 998          | GCVEVHSHNAAFIR      |                     |           |        |    |              |      |        | Carbamidomethyl (C)[2]<br>Mascot                    |                                                     |        |  |  |  |  |  |  |  |  |
| 1791.8523           | 1791.6824                                                   | -0.1699     | -95     | 1232  | 1246         | FSWGAECKQYAVFAK     |                     |           |        |    |              |      |        | Carbamidomethyl (C)[7]<br>Mascot                    |                                                     |        |  |  |  |  |  |  |  |  |
| 1970.8695           | 1970.967                                                    | 0.0975      | 49      | 151   | 167          | TQNIYEMQEAGAQGVCRR  |                     |           |        |    |              |      |        | Carbamidomethyl (C)[16], Oxidation (M)[7]<br>Mascot |                                                     |        |  |  |  |  |  |  |  |  |
| 2299.2292           | 2299.1326                                                   | -0.0966     | -42     | 1043  | 1062         | QINIIDDDTPEGQAFLLKL |                     |           |        |    |              |      |        | Mascot                                              |                                                     |        |  |  |  |  |  |  |  |  |
| 22                  | vitellogenin 1 [Danio rerio]                                |             |         |       | gij94733730  |                     | 149140.4            | 8.74      | 6      | 68 | 99.209       | 68   | 99.995 |                                                     |                                                     |        |  |  |  |  |  |  |  |  |
| Peptide Information |                                                             |             |         |       |              |                     |                     |           |        |    |              |      |        |                                                     |                                                     |        |  |  |  |  |  |  |  |  |
| Calc. Mass          |                                                             | Obsrv. Mass | ± da    | ± ppm | Start Seq.   | End Seq.            | Sequence            | Ion Score | C. I.  | %  | Modification | Rank | Result | Type                                                |                                                     |        |  |  |  |  |  |  |  |  |
| 1173.6262           | 1173.5985                                                   | -0.0277     | -24     | 1022  | 1031         | LEFEVQVGPR          | 68                  | 99.995    |        |    |              |      |        |                                                     |                                                     | Mascot |  |  |  |  |  |  |  |  |
| 1173.6262           | 1173.5985                                                   | -0.0277     | -24     | 1022  | 1031         | LEFEVQVGPR          |                     |           |        |    |              |      |        | Mascot                                              |                                                     |        |  |  |  |  |  |  |  |  |
| 1596.7699           | 1596.733                                                    | -0.0369     | -23     | 981   | 994          | GCVEVHSHNAAFIR      |                     |           |        |    |              |      |        | Carbamidomethyl (C)[2]<br>Mascot                    |                                                     |        |  |  |  |  |  |  |  |  |

|    |                                                |           |         |      |            |      |                               |      |   |    |                                            |        |        |
|----|------------------------------------------------|-----------|---------|------|------------|------|-------------------------------|------|---|----|--------------------------------------------|--------|--------|
|    | 1791.8523                                      | 1791.6824 | -0.1699 | -95  | 1230       | 1244 | FSWGAECKQYAVFAK               |      |   |    | Carbamidomethyl (C)[7]                     | Mascot |        |
|    | 1970.8695                                      | 1970.967  | 0.0975  | 49   | 147        | 163  | TQNIYEMQEAGAQQGVCR            |      |   |    | Carbamidomethyl (C)[16], Oxidation (M)[7]  | Mascot |        |
|    | 2299.2292                                      | 2299.1326 | -0.0966 | -42  | 1039       | 1058 | QINIIDDDTPEGQAFLLKL<br>R      |      |   |    |                                            | Mascot |        |
|    | 2705.3848                                      | 2705.0945 | -0.2903 | -107 | 1199       | 1223 | VQLIVSSIAENDNMKICAD<br>GALLSK |      |   |    | Carbamidomethyl (C)[17], Oxidation (M)[14] | Mascot |        |
| 23 | nucleoside diphosphate kinase-Z1 [Danio rerio] |           |         |      | gi 6644111 |      | 17282.9                       | 7.77 | 5 | 54 | 83.843                                     | 28     | 49.331 |

#### Peptide Information

|  | Calc. Mass | Obsrv. Mass | ± da    | ± ppm | Start Seq. | End Seq. | Sequence     | Ion Score | C. I.  | % | Modification           | Rank | Result Type |
|--|------------|-------------|---------|-------|------------|----------|--------------|-----------|--------|---|------------------------|------|-------------|
|  | 1032.587   | 1032.5682   | -0.0188 | -18   | 20         | 28       | GLMGEIIR     |           |        |   | Oxidation (M)[3]       |      | Mascot      |
|  | 1052.4829  | 1052.4579   | -0.025  | -24   | 107        | 115      | GDFCIEVGR    |           |        |   | Carbamidomethyl (C)[4] |      | Mascot      |
|  | 1191.6521  | 1191.6228   | -0.0293 | -25   | 58         | 67       | DRPFYPGLVK   | 28        | 49.331 |   |                        |      | Mascot      |
|  | 1191.6521  | 1191.6228   | -0.0293 | -25   | 58         | 67       | DRPFYPGLVK   |           |        |   |                        |      | Mascot      |
|  | 1234.531   | 1234.6508   | 0.1198  | 97    | 145        | 153      | HCAQQWIYE    |           |        |   | Carbamidomethyl (C)[2] |      | Mascot      |
|  | 1234.531   | 1234.6508   | 0.1198  | 97    | 145        | 153      | HCAQQWIYE    |           |        |   | Carbamidomethyl (C)[2] |      | Mascot      |
|  | 1330.7477  | 1330.7112   | -0.0365 | -27   | 8          | 19       | TFIAVKPDGVQR |           |        |   |                        |      | Mascot      |

|    |                                                                                 |  |  |  |              |  |          |      |    |    |        |  |  |
|----|---------------------------------------------------------------------------------|--|--|--|--------------|--|----------|------|----|----|--------|--|--|
| 24 | PREDICTED: transformation/transcription domain-associated protein [Danio rerio] |  |  |  | gi 326672350 |  | 433471.2 | 8.52 | 35 | 49 | 38.571 |  |  |
|----|---------------------------------------------------------------------------------|--|--|--|--------------|--|----------|------|----|----|--------|--|--|

#### Peptide Information

|  | Calc. Mass | Obsrv. Mass | ± da    | ± ppm | Start Seq. | End Seq. | Sequence    | Ion Score | C. I. | % | Modification           | Rank | Result Type |
|--|------------|-------------|---------|-------|------------|----------|-------------|-----------|-------|---|------------------------|------|-------------|
|  | 882.5155   | 882.5434    | 0.0279  | 32    | 2182       | 2189     | AVHSLLSR    |           |       |   |                        |      | Mascot      |
|  | 1003.4553  | 1003.5249   | 0.0696  | 69    | 3311       | 3318     | CYSVAFEK    |           |       |   | Carbamidomethyl (C)[1] |      | Mascot      |
|  | 1032.5394  | 1032.5682   | 0.0288  | 28    | 922        | 930      | ASIQLPMEK   |           |       |   | Oxidation (M)[7]       |      | Mascot      |
|  | 1045.5095  | 1045.5389   | 0.0294  | 28    | 3604       | 3612     | EVQGNMVPR   |           |       |   | Oxidation (M)[6]       |      | Mascot      |
|  | 1109.566   | 1109.4681   | -0.0979 | -88   | 548        | 557      | TITWGITSCK  |           |       |   |                        |      | Mascot      |
|  | 1142.5002  | 1142.5076   | 0.0074  | 6     | 2306       | 2314     | LSVMNMEMR   |           |       |   | Oxidation (M)[4,6]     |      | Mascot      |
|  | 1154.6238  | 1154.5826   | -0.0412 | -36   | 1263       | 1272     | SVTIIMEPHK  |           |       |   |                        |      | Mascot      |
|  | 1154.6238  | 1154.5826   | -0.0412 | -36   | 1263       | 1272     | SVTIIMEPHK  |           |       |   |                        |      | Mascot      |
|  | 1165.5817  | 1165.713    | 0.1313  | 113   | 606        | 615      | VANCQTVRMK  |           |       |   | Oxidation (M)[9]       |      | Mascot      |
|  | 1173.5795  | 1173.5985   | 0.019   | 16    | 1696       | 1704     | FLCNMTFLK   |           |       |   | Carbamidomethyl (C)[3] |      | Mascot      |
|  | 1173.5795  | 1173.5985   | 0.019   | 16    | 1696       | 1704     | FLCNMTFLK   |           |       |   | Carbamidomethyl (C)[3] |      | Mascot      |
|  | 1191.619   | 1191.6228   | 0.0038  | 3     | 1516       | 1526     | AMLIEAGSPFR |           |       |   |                        |      | Mascot      |
|  | 1191.619   | 1191.6228   | 0.0038  | 3     | 1516       | 1526     | AMLIEAGSPFR |           |       |   |                        |      | Mascot      |
|  | 1193.5337  | 1193.5977   | 0.064   | 54    | 3264       | 3272     | CSRIMHMQR   |           |       |   | Oxidation (M)[5,7]     |      | Mascot      |
|  | 1194.5573  | 1194.5844   | 0.0271  | 23    | 1653       | 1662     | KDNMAATNWK  |           |       |   | Oxidation (M)[4]       |      | Mascot      |

|    |                                               |           |         |      |             |      |                             |      |   |                         |   |    |        |  |  |  |  |        |
|----|-----------------------------------------------|-----------|---------|------|-------------|------|-----------------------------|------|---|-------------------------|---|----|--------|--|--|--|--|--------|
|    | 1234.7054                                     | 1234.6508 | -0.0546 | -44  | 986         | 995  | WIPNVIISHR                  |      |   |                         |   |    |        |  |  |  |  | Mascot |
|    | 1234.7405                                     | 1234.6508 | -0.0897 | -73  | 574         | 583  | ETQIYIKLVK                  | 4    | 0 |                         |   |    |        |  |  |  |  | Mascot |
|    | 1308.6212                                     | 1308.6292 | 0.008   | 6    | 2020        | 2031 | GMSVDSAQDVKR                |      |   | Oxidation (M)[2]        |   |    |        |  |  |  |  | Mascot |
|    | 1316.5536                                     | 1316.5491 | -0.0045 | -3   | 2248        | 2259 | SACSNSSYIDR                 |      |   |                         |   |    |        |  |  |  |  | Mascot |
|    | 1323.7168                                     | 1323.6375 | -0.0793 | -60  | 1226        | 1236 | SFHLVTHDLVR                 |      |   |                         |   |    |        |  |  |  |  | Mascot |
|    | 1330.6897                                     | 1330.7112 | 0.0215  | 16   | 1666        | 1676 | LLAFCLLSYCK                 |      |   | Carbamidomethyl (C)[5]  |   |    |        |  |  |  |  | Mascot |
|    | 1354.7511                                     | 1354.7355 | -0.0156 | -12  | 1893        | 1905 | QAMAILTPAVPAR               |      |   | Oxidation (M)[3]        |   |    |        |  |  |  |  | Mascot |
|    | 1357.6859                                     | 1357.686  | 0.0001  | 0    | 871         | 882  | NPAETISHVAYR                |      |   |                         |   |    |        |  |  |  |  | Mascot |
|    | 1422.8428                                     | 1422.7    | -0.1428 | -100 | 211         | 223  | THTIIPRGSLSLK               |      |   |                         |   |    |        |  |  |  |  | Mascot |
|    | 1434.7079                                     | 1434.7329 | 0.025   | 17   | 2466        | 2477 | QCTELLAVCER                 |      |   | Carbamidomethyl (C)[2]  |   |    |        |  |  |  |  | Mascot |
|    | 1475.8217                                     | 1475.7185 | -0.1032 | -70  | 1963        | 1975 | LGFTPSVTIEQRK               |      |   |                         |   |    |        |  |  |  |  | Mascot |
|    | 1493.681                                      | 1493.6968 | 0.0158  | 11   | 1452        | 1462 | FCDQMMQHRLK                 |      |   | Carbamidomethyl (C)[2]  |   |    |        |  |  |  |  | Mascot |
|    | 1493.7126                                     | 1493.6968 | -0.0158 | -11  | 1311        | 1322 | LFTMDLNVMEHK                |      |   | Oxidation (M)[4]        |   |    |        |  |  |  |  | Mascot |
|    | 1596.7548                                     | 1596.733  | -0.0218 | -14  | 2348        | 2362 | NSGNPMATNQVPNPR             |      |   |                         |   |    |        |  |  |  |  | Mascot |
|    | 1638.8958                                     | 1638.8242 | -0.0716 | -44  | 443         | 455  | DILMRMLEVFVLK               |      |   | Oxidation (M)[4,6]      |   |    |        |  |  |  |  | Mascot |
|    | 1638.8958                                     | 1638.8242 | -0.0716 | -44  | 443         | 455  | DILMRMLEVFVLK               |      |   | Oxidation (M)[4,6]      |   |    |        |  |  |  |  | Mascot |
|    | 1867.8928                                     | 1867.875  | -0.0178 | -10  | 915         | 930  | AEFTDCKASIQLPMEK            |      |   | Carbamidomethyl (C)[6]  |   |    |        |  |  |  |  | Mascot |
|    | 1971.0844                                     | 1970.967  | -0.1174 | -60  | 2411        | 2427 | LEPAFLSGLRCTQPLIR           |      |   | Carbamidomethyl (C)[11] |   |    |        |  |  |  |  | Mascot |
|    | 2191.1982                                     | 2190.9436 | -0.2546 | -116 | 369         | 387  | ETLRPLAYSTLADLVHHV<br>R     |      |   |                         |   |    |        |  |  |  |  | Mascot |
|    | 2211.0745                                     | 2211.054  | -0.0205 | -9   | 1075        | 1094 | GMDPLVLIDIAICMAYEE<br>K     |      |   | Oxidation (M)[2]        |   |    |        |  |  |  |  | Mascot |
|    | 2283.0981                                     | 2283.0212 | -0.0769 | -34  | 3617        | 3634 | EWALHTFPNATDYWTFR<br>K      |      |   |                         |   |    |        |  |  |  |  | Mascot |
|    | 2284.1384                                     | 2284.1206 | -0.0178 | -8   | 1175        | 1196 | ALLFVMMDLTGEVSNGA<br>VAMAK  |      |   | Oxidation (M)[6]        |   |    |        |  |  |  |  | Mascot |
|    | 2369.0874                                     | 2368.9512 | -0.1362 | -57  | 2616        | 2637 | QQHALSGEMGPFLCSGS<br>HQAQR  |      |   |                         |   |    |        |  |  |  |  | Mascot |
|    | 2584.2395                                     | 2584.1477 | -0.0918 | -36  | 1288        | 1310 | HQPANAQIGLMEGNTFC<br>TTLQPR |      |   | Carbamidomethyl (C)[17] |   |    |        |  |  |  |  | Mascot |
| 25 | nucleoside diphosphate kinase A [Danio rerio] |           |         |      | gi 18859107 |      | 17222.8                     | 7.74 | 4 | 46                      | 0 | 28 | 49.331 |  |  |  |  |        |

Peptide Information

|    | Calc. Mass                 | Obsrv. Mass | ± da    | ± ppm | Start Seq.  | End Seq. | Sequence     | Ion Score | C. I.  | %  | Modification           | Rank | Result Type |
|----|----------------------------|-------------|---------|-------|-------------|----------|--------------|-----------|--------|----|------------------------|------|-------------|
|    | 1032.587                   | 1032.5682   | -0.0188 | -18   | 20          | 28       | GLMGEIIKR    |           |        |    | Oxidation (M)[3]       |      | Mascot      |
|    | 1052.4829                  | 1052.4579   | -0.025  | -24   | 107         | 115      | GDFCIEVGR    |           |        |    | Carbamidomethyl (C)[4] |      | Mascot      |
|    | 1191.6521                  | 1191.6228   | -0.0293 | -25   | 58          | 67       | DRPFYPGLVK   | 28        | 49.331 |    |                        |      | Mascot      |
|    | 1191.6521                  | 1191.6228   | -0.0293 | -25   | 58          | 67       | DRPFYPGLVK   |           |        |    |                        |      | Mascot      |
|    | 1302.7164                  | 1302.6862   | -0.0302 | -23   | 8           | 19       | TFIAAKPDGVQR |           |        |    |                        |      | Mascot      |
| 26 | Nme2 protein [Danio rerio] |             |         |       | gi 33416409 |          | 17220.8      | 7.74      | 4      | 46 | 0                      | 28   | 49.331      |



| Peptide Information |                             |         |       |              |                   |           |        |                        |      |             |
|---------------------|-----------------------------|---------|-------|--------------|-------------------|-----------|--------|------------------------|------|-------------|
| Calc. Mass          | Obsrv. Mass                 | ± da    | ± ppm | Start Seq.   | End Sequence Seq. | Ion Score | C. I.  | % Modification         | Rank | Result Type |
| 1032.587            | 1032.5682                   | -0.0188 | -18   | 20           | 28 GLMGEIIKR      |           |        | Oxidation (M)[3]       |      | Mascot      |
| 1052.4829           | 1052.4579                   | -0.025  | -24   | 107          | 115 GDFCIEVGR     |           |        | Carbamidomethyl (C)[4] |      | Mascot      |
| 1191.6521           | 1191.6228                   | -0.0293 | -25   | 58           | 67 DRPFYPGLVK     | 28        | 49.331 |                        |      | Mascot      |
| 1191.6521           | 1191.6228                   | -0.0293 | -25   | 58           | 67 DRPFYPGLVK     |           |        |                        |      | Mascot      |
| 1330.7477           | 1330.7112                   | -0.0365 | -27   | 8            | 19 TFIAVKPDGVQR   |           |        |                        |      | Mascot      |
| 27                  | Baz1a protein [Danio rerio] |         |       | gi 148745704 | 35892.5           | 9.38      | 10     | 45                     | 0    |             |

| Peptide Information |                                                   |         |       |             |                               |           |       |                         |      |             |
|---------------------|---------------------------------------------------|---------|-------|-------------|-------------------------------|-----------|-------|-------------------------|------|-------------|
| Calc. Mass          | Obsrv. Mass                                       | ± da    | ± ppm | Start Seq.  | End Sequence Seq.             | Ion Score | C. I. | % Modification          | Rank | Result Type |
| 1045.3999           | 1045.5389                                         | 0.139   | 133   | 303         | 310 EQMMSMEK                  |           |       | Oxidation (M)[3,4]      |      | Mascot      |
| 1173.4949           | 1173.5985                                         | 0.1036  | 88    | 303         | 311 EQMMSMEKK                 |           |       | Oxidation (M)[3,4]      |      | Mascot      |
| 1173.4949           | 1173.5985                                         | 0.1036  | 88    | 303         | 311 EQMMSMEKK                 |           |       | Oxidation (M)[3,4]      |      | Mascot      |
| 1234.7782           | 1234.6508                                         | -0.1274 | -103  | 2           | 11 PLLHKKPFVR                 |           |       |                         |      | Mascot      |
| 1234.7782           | 1234.6508                                         | -0.1274 | -103  | 2           | 11 PLLHKKPFVR                 |           |       |                         |      | Mascot      |
| 1308.5936           | 1308.6292                                         | 0.0356  | 27    | 231         | 241 QHCEPMHGTIR               |           |       |                         |      | Mascot      |
| 1791.9357           | 1791.6824                                         | -0.2533 | -141  | 227         | 241 LLLKQHCPEMHTIR            |           |       | Oxidation (M)[10]       |      | Mascot      |
| 1838.8741           | 1838.88                                           | 0.0059  | 3     | 101         | 115 LHEICDDVYAYVKDR           |           |       |                         |      | Mascot      |
| 1867.9006           | 1867.875                                          | -0.0256 | -14   | 99          | 113 SRLHEICDDVYAYVK           |           |       | Carbamidomethyl (C)[7]  |      | Mascot      |
| 1971.0367           | 1970.967                                          | -0.0697 | -35   | 193         | 209 YRVQPVSPEACEPVIVK         |           |       | Carbamidomethyl (C)[11] |      | Mascot      |
| 2266.0518           | 2265.9595                                         | -0.0923 | -41   | 276         | 295 GRGRPPNNASSTEMNYI<br>EEK  |           |       | Oxidation (M)[14]       |      | Mascot      |
| 2283.1836           | 2283.0212                                         | -0.1624 | -71   | 195         | 215 VQPVSPEACEPVIVKVAQ<br>MSR |           |       | Oxidation (M)[19]       |      | Mascot      |
| 28                  | tropomyosin alpha-4 chain isoform 2 [Danio rerio] |         |       | gi 47085929 | 28484.4                       | 4.63      | 10    | 45                      | 0    |             |

| Peptide Information |             |        |       |            |                   |           |       |                  |      |             |
|---------------------|-------------|--------|-------|------------|-------------------|-----------|-------|------------------|------|-------------|
| Calc. Mass          | Obsrv. Mass | ± da   | ± ppm | Start Seq. | End Sequence Seq. | Ion Score | C. I. | % Modification   | Rank | Result Type |
| 850.3975            | 850.5191    | 0.1216 | 143   | 98         | 104 AMKDEEK       |           |       |                  |      | Mascot      |
| 1109.4891           | 1109.4681   | -0.021 | -19   | 83         | 92 AADESERGMK     |           |       | Oxidation (M)[9] |      | Mascot      |
| 1165.5592           | 1165.713    | 0.1538 | 132   | 105        | 113 MEIQEMQLK     |           |       | Oxidation (M)[1] |      | Mascot      |
| 1173.5858           | 1173.5985   | 0.0127 | 11    | 34         | 42 ELDNERELR      |           |       |                  |      | Mascot      |
| 1173.5858           | 1173.5985   | 0.0127 | 11    | 34         | 42 ELDNERELR      |           |       |                  |      | Mascot      |
| 1234.5732           | 1234.6508   | 0.0776 | 63    | 143        | 153 AEERAEVAECK   |           |       |                  |      | Mascot      |
| 1234.5732           | 1234.6508   | 0.0776 | 63    | 143        | 153 AEERAEVAECK   |           |       |                  |      | Mascot      |

|           |           |         |     |     |     |               |  |  |  |                  |  |        |
|-----------|-----------|---------|-----|-----|-----|---------------|--|--|--|------------------|--|--------|
| 1272.6542 | 1272.6376 | -0.0166 | -13 | 43  | 54  | EKAEGDVAALNR  |  |  |  |                  |  | Mascot |
| 1277.6882 | 1277.6771 | -0.0111 | -9  | 1   | 12  | MTGVTSLDAPVLR |  |  |  |                  |  | Mascot |
| 1308.6178 | 1308.6292 | 0.0114  | 9   | 198 | 208 | EAETRAEFAER   |  |  |  |                  |  | Mascot |
| 1434.7322 | 1434.7329 | 0.0007  | 0   | 216 | 228 | SIDDLLEKLSSAK |  |  |  |                  |  | Mascot |
| 1493.7338 | 1493.6968 | -0.037  | -25 | 105 | 116 | MEIQEMQLKEAK  |  |  |  | Oxidation (M)[1] |  | Mascot |
| 1493.7338 | 1493.6968 | -0.037  | -25 | 105 | 116 | MEIQEMQLKEAK  |  |  |  | Oxidation (M)[1] |  | Mascot |

29 Baz1a protein [Danio rerio] gi|120538654 37393.3 9.36 10 44 0

#### Peptide Information

| Calc. Mass | Obsrv. Mass | ± da    | ± ppm | Start Seq. | End Seq. | Sequence                   | Ion Score | C. I. % | Modification            | Rank | Result Type |
|------------|-------------|---------|-------|------------|----------|----------------------------|-----------|---------|-------------------------|------|-------------|
| 1045.3999  | 1045.5389   | 0.139   | 133   | 303        | 310      | EQMMSMEK                   |           |         | Oxidation (M)[3,4]      |      | Mascot      |
| 1234.7782  | 1234.6508   | -0.1274 | -103  | 2          | 11       | PLLHKKPFVR                 |           |         |                         |      | Mascot      |
| 1234.7782  | 1234.6508   | -0.1274 | -103  | 2          | 11       | PLLHKKPFVR                 |           |         |                         |      | Mascot      |
| 1308.5936  | 1308.6292   | 0.0356  | 27    | 231        | 241      | QHCEPMHGTIR                |           |         |                         |      | Mascot      |
| 1316.5796  | 1316.5491   | -0.0305 | -23   | 303        | 312      | EQMMSMEKFR                 |           |         |                         |      | Mascot      |
| 1791.9357  | 1791.6824   | -0.2533 | -141  | 227        | 241      | LLLKQHCEPMHGTIR            |           |         | Oxidation (M)[10]       |      | Mascot      |
| 1838.8741  | 1838.88     | 0.0059  | 3     | 101        | 115      | LHEICDDVYAYVKDR            |           |         |                         |      | Mascot      |
| 1867.9006  | 1867.875    | -0.0256 | -14   | 99         | 113      | SRLHEICDDVYAYVK            |           |         | Carbamidomethyl (C)[7]  |      | Mascot      |
| 1971.0367  | 1970.967    | -0.0697 | -35   | 193        | 209      | YRVQPVSPPEACEPVIVK         |           |         | Carbamidomethyl (C)[11] |      | Mascot      |
| 2266.0518  | 2265.9595   | -0.0923 | -41   | 276        | 295      | GRGRPPNNASSTEMNYI<br>EEK   |           |         | Oxidation (M)[14]       |      | Mascot      |
| 2283.1836  | 2283.0212   | -0.1624 | -71   | 195        | 215      | VQPVSPPEACEPVIVKVAQ<br>MSR |           |         | Oxidation (M)[19]       |      | Mascot      |

30 PREDICTED: zinc finger protein 585A-like [Danio rerio] gi|326677525 79301.1 8.57 16 42 0

#### Peptide Information

| Calc. Mass | Obsrv. Mass | ± da    | ± ppm | Start Seq. | End Seq. | Sequence    | Ion Score | C. I. % | Modification           | Rank | Result Type |
|------------|-------------|---------|-------|------------|----------|-------------|-----------|---------|------------------------|------|-------------|
| 1052.4288  | 1052.4579   | 0.0291  | 28    | 155        | 163      | QFACSHCEK   |           |         |                        |      | Mascot      |
| 1109.4503  | 1109.4681   | 0.0178  | 16    | 155        | 163      | QFACSHCEK   |           |         | Carbamidomethyl (C)[4] |      | Mascot      |
| 1118.5411  | 1118.4803   | -0.0608 | -54   | 615        | 623      | MHTGERPYK   |           |         |                        |      | Mascot      |
| 1142.6066  | 1142.5076   | -0.099  | -87   | 527        | 536      | DHLHIHSGVK  |           |         |                        |      | Mascot      |
| 1154.6542  | 1154.5826   | -0.0716 | -62   | 658        | 666      | RFAQIHNLR   |           |         |                        |      | Mascot      |
| 1154.6542  | 1154.5826   | -0.0716 | -62   | 658        | 666      | RFAQIHNLR   |           |         |                        |      | Mascot      |
| 1277.6445  | 1277.6771   | 0.0326  | 26    | 425        | 434      | SYMYSSELKK  |           |         | Oxidation (M)[3]       |      | Mascot      |
| 1302.7391  | 1302.6862   | -0.0529 | -41   | 290        | 299      | HCLVWIKYLYK |           |         |                        |      | Mascot      |
| 1371.6685  | 1371.7028   | 0.0343  | 25    | 44         | 54       | VEVSDEHCRIK |           |         | Carbamidomethyl (C)[8] |      | Mascot      |

|    |                                                            |           |         |     |     |              |                           |     |   |    |   |  |                                             |  |  |  |        |
|----|------------------------------------------------------------|-----------|---------|-----|-----|--------------|---------------------------|-----|---|----|---|--|---------------------------------------------|--|--|--|--------|
|    | 1449.7697                                                  | 1449.7129 | -0.0568 | -39 | 220 | 232          | SFTSSSTLKVHVK             |     |   |    |   |  |                                             |  |  |  | Mascot |
|    | 1449.7697                                                  | 1449.7129 | -0.0568 | -39 | 220 | 232          | SFTSSSTLKVHVK             |     |   |    |   |  |                                             |  |  |  | Mascot |
|    | 1596.7257                                                  | 1596.733  | 0.0073  | 5   | 177 | 191          | VHTGEKPHVCSDCGK           |     |   |    |   |  |                                             |  |  |  | Mascot |
|    | 1707.6924                                                  | 1707.7307 | 0.0383  | 22  | 475 | 489          | IHTGEDMFECTHCGK           |     |   |    |   |  |                                             |  |  |  | Mascot |
|    | 1791.7611                                                  | 1791.6824 | -0.0787 | -44 | 99  | 112          | TFICSECGRSYMHK            |     |   |    |   |  | Carbamidomethyl (C)[4,7], Oxidation (M)[12] |  |  |  | Mascot |
|    | 1851.8186                                                  | 1851.8807 | 0.0621  | 34  | 419 | 433          | CGQCGRSYMYISELK           |     |   |    |   |  | Carbamidomethyl (C)[1,4]                    |  |  |  | Mascot |
|    | 1867.8135                                                  | 1867.875  | 0.0615  | 33  | 419 | 433          | CGQCGRSYMYISELK           |     |   |    |   |  | Carbamidomethyl (C)[1,4], Oxidation (M)[9]  |  |  |  | Mascot |
|    | 2190.9556                                                  | 2190.9436 | -0.012  | -5  | 624 | 642          | CSYCEHSFGHSSGLRVH<br>ER   |     |   |    |   |  |                                             |  |  |  | Mascot |
|    | 2266.1021                                                  | 2265.9595 | -0.1426 | -63 | 671 | 691          | SPNGCLKFQSEQSLEAE<br>GTK  |     |   |    |   |  |                                             |  |  |  | Mascot |
|    | 2282.0354                                                  | 2281.9624 | -0.073  | -32 | 34  | 52           | HEDTEEQIVKEVSDEHC<br>R    |     |   |    |   |  |                                             |  |  |  | Mascot |
|    | 2284.0308                                                  | 2284.1206 | 0.0898  | 39  | 270 | 289          | CSSCGMSFALFHSLSQSH<br>EKK |     |   |    |   |  | Carbamidomethyl (C)[1]                      |  |  |  | Mascot |
| 31 | PREDICTED: hypothetical protein LOC100003217 [Danio rerio] |           |         |     |     | gi 326678765 | 31640.9                   | 5.2 | 9 | 40 | 0 |  |                                             |  |  |  |        |

#### Peptide Information

| Calc. Mass | Obsrv. Mass | ± da    | ± ppm | Start Seq. | End Seq. | Sequence               | Ion Score | C. I. | % Modification                                  | Rank | Result | Type   |
|------------|-------------|---------|-------|------------|----------|------------------------|-----------|-------|-------------------------------------------------|------|--------|--------|
| 842.4114   | 842.489     | 0.0776  | 92    | 78         | 84       | SREAHDK                |           |       |                                                 |      |        | Mascot |
| 1052.516   | 1052.4579   | -0.0581 | -55   | 152        | 159      | DWHPLQEK               |           |       |                                                 |      |        | Mascot |
| 1193.5289  | 1193.5977   | 0.0688  | 58    | 53         | 62       | LCQECGLDAK             |           |       | Carbamidomethyl (C)[2,5]                        |      |        | Mascot |
| 1277.6704  | 1277.6771   | 0.0067  | 5     | 208        | 218      | LICEMARQIGK            |           |       | Oxidation (M)[5]                                |      |        | Mascot |
| 1475.7887  | 1475.7185   | -0.0702 | -48   | 66         | 77       | TDLLRLSEEMR            |           |       |                                                 |      |        | Mascot |
| 1493.6835  | 1493.6968   | 0.0133  | 9     | 53         | 65       | LCQECGLDAKGSR          |           |       | Carbamidomethyl (C)[2,5]                        |      |        | Mascot |
| 1493.6835  | 1493.6968   | 0.0133  | 9     | 53         | 65       | LCQECGLDAKGSR          |           |       | Carbamidomethyl (C)[2,5]                        |      |        | Mascot |
| 1838.9792  | 1838.88     | -0.0992 | -54   | 36         | 52       | VADATYSMSLTVGVIRR      |           |       |                                                 |      |        | Mascot |
| 2210.9482  | 2211.054    | 0.1058  | 48    | 196        | 214      | DMDSHIGNACMKLICEMAR    |           |       | Carbamidomethyl (C)[10], Oxidation (M)[2]       |      |        | Mascot |
| 2283.9646  | 2284.1206   | 0.156   | 68    | 196        | 214      | DMDSHIGNACMKLICEMAR    |           |       | Carbamidomethyl (C)[10,15], Oxidation (M)[2,11] |      |        | Mascot |
| 2584.1628  | 2584.1477   | -0.0151 | -6    | 186        | 207      | EEFWSLGLLRDMDSHIGNACMK |           |       | Oxidation (M)[12,21]                            |      |        | Mascot |

32 transgelin 3a [Danio rerio] gi|156739273 24423.1 6.92 8 40 0

#### Peptide Information

| Calc. Mass | Obsrv. Mass | ± da    | ± ppm | Start Seq. | End Seq. | Sequence   | Ion Score | C. I. | % Modification | Rank | Result | Type   |
|------------|-------------|---------|-------|------------|----------|------------|-----------|-------|----------------|------|--------|--------|
| 1165.5782  | 1165.713    | 0.1348  | 116   | 197        | 205      | QIMRYDSPR  |           |       |                |      |        | Mascot |
| 1179.6013  | 1179.573    | -0.0283 | -24   | 55         | 64       | WLMSGTILCR |           |       |                |      |        | Mascot |
| 1179.6013  | 1179.573    | -0.0283 | -24   | 55         | 64       | WLMSGTILCR |           |       |                |      |        | Mascot |

|    |                                                                                   |           |           |         |     |              |         |                        |                  |    |   |    |        |
|----|-----------------------------------------------------------------------------------|-----------|-----------|---------|-----|--------------|---------|------------------------|------------------|----|---|----|--------|
|    |                                                                                   | 1191.5973 | 1191.6228 | 0.0255  | 21  | 172          | 182     | VVIGMQMGSNR            |                  |    |   |    | Mascot |
|    |                                                                                   | 1191.5973 | 1191.6228 | 0.0255  | 21  | 172          | 182     | VVIGMQMGSNR            |                  |    |   |    | Mascot |
|    |                                                                                   | 1193.5909 | 1193.5977 | 0.0068  | 6   | 160          | 168     | REFSEEQLR              |                  |    |   |    | Mascot |
|    |                                                                                   | 1234.6711 | 1234.6508 | -0.0203 | -16 | 128          | 139     | TLMALGSEALK            |                  |    |   |    | Mascot |
|    |                                                                                   | 1234.6711 | 1234.6508 | -0.0203 | -16 | 128          | 139     | TLMALGSEALK            |                  |    |   |    | Mascot |
|    |                                                                                   | 1308.6477 | 1308.6292 | -0.0185 | -14 | 1            | 12      | MANRGPSYGLSR           |                  |    |   |    | Mascot |
|    |                                                                                   | 1449.7332 | 1449.7129 | -0.0203 | -14 | 5            | 17      | GPSYGLSREVQEK          |                  |    |   |    | Mascot |
|    |                                                                                   | 1449.7332 | 1449.7129 | -0.0203 | -14 | 5            | 17      | GPSYGLSREVQEK          |                  |    |   |    | Mascot |
|    |                                                                                   | 1993.9647 | 1993.9221 | -0.0426 | -21 | 128          | 145     | TLMALGSEALTKDDGHY<br>R | Oxidation (M)[3] |    |   |    | Mascot |
| 33 | PREDICTED: guanine nucleotide-binding protein subunit alpha-15-like [Danio rerio] |           |           |         |     | gi 326678594 | 43174.9 | 8.7                    | 3                | 40 | 0 | 31 | 77.574 |

| Calc. Mass | Obsrv. Mass | ± da    | ± ppm | Start Seq. | End Seq. | Sequence         | Ion Score | C. I. % | Modification      | Rank | Result Type |
|------------|-------------|---------|-------|------------|----------|------------------|-----------|---------|-------------------|------|-------------|
| 1234.6902  | 1234.6508   | -0.0394 | -32   | 128        | 137      | LQRSYVEAIR       | 31        | 77.574  |                   |      | Mascot      |
| 1234.6902  | 1234.6508   | -0.0394 | -32   | 128        | 137      | LQRSYVEAIR       |           |         |                   |      | Mascot      |
| 1804.8395  | 1804.8334   | -0.0061 | -3    | 62         | 76       | QMRIIHGQGFSDDER  |           |         | Oxidation (M)[2]  |      | Mascot      |
| 1804.8395  | 1804.8334   | -0.0061 | -3    | 62         | 76       | QMRIIHGQGFSDDER  |           |         | Oxidation (M)[2]  |      | Mascot      |
| 2384.2053  | 2383.8975   | -0.3078 | -129  | 347        | 367      | SVFSDVKDILLNLQDF |           |         | Oxidation (M)[20] |      | Mascot      |

## Peptide Information

| Calc. Mass | Obsrv. Mass | ± da    | ± ppm | Start Seq. | End Seq. | Sequence       | Ion Score | C. I. % | Modification           | Rank | Result Type |
|------------|-------------|---------|-------|------------|----------|----------------|-----------|---------|------------------------|------|-------------|
| 842.5457   | 842.489     | -0.0567 | -67   | 717        | 724      | KVAVQLGK       |           |         |                        |      | Mascot      |
| 1052.5557  | 1052.4579   | -0.0978 | -93   | 989        | 997      | LFCVRGETK      |           |         |                        |      | Mascot      |
| 1109.5771  | 1109.4681   | -0.109  | -98   | 989        | 997      | LFCVRGETK      |           |         | Carbamidomethyl (C)[3] |      | Mascot      |
| 1173.5647  | 1173.5985   | 0.0338  | 29    | 841        | 851      | GHGLVFSEDGR    |           |         |                        |      | Mascot      |
| 1173.5647  | 1173.5985   | 0.0338  | 29    | 841        | 851      | GHGLVFSEDGR    |           |         |                        |      | Mascot      |
| 1179.5562  | 1179.573    | 0.0168  | 14    | 385        | 394      | NSTIEVMEEK     |           |         |                        |      | Mascot      |
| 1179.5674  | 1179.573    | 0.0056  | 5     | 1058       | 1068     | EMGLNSNSSLK    |           |         |                        |      | Mascot      |
| 1193.595   | 1193.5977   | 0.0027  | 2     | 777        | 785      | EKFLDWAER      |           |         |                        |      | Mascot      |
| 1316.6593  | 1316.5491   | -0.1102 | -84   | 766        | 776      | LSEHNETALFR    |           |         |                        |      | Mascot      |
| 1330.7001  | 1330.7112   | 0.0111  | 8     | 292        | 301      | ILQEKEEQWK     |           |         |                        |      | Mascot      |
| 1434.7257  | 1434.7329   | 0.0072  | 5     | 934        | 947      | GTSALMTVELGNNK |           |         |                        |      | Mascot      |
| 1449.5724  | 1449.7129   | 0.1405  | 97    | 168        | 178      | NEEDEEDREER    |           |         |                        |      | Mascot      |

|           |           |         |     |      |      |                             |                                  |
|-----------|-----------|---------|-----|------|------|-----------------------------|----------------------------------|
| 1449.5724 | 1449.7129 | 0.1405  | 97  | 168  | 178  | NEEDEEDREER                 | Mascot                           |
| 1493.8209 | 1493.6968 | -0.1241 | -83 | 786  | 798  | KPPKDEPVVEEVK               | Mascot                           |
| 1493.8209 | 1493.6968 | -0.1241 | -83 | 786  | 798  | KPPKDEPVVEEVK               | Mascot                           |
| 1804.8363 | 1804.8334 | -0.0029 | -2  | 579  | 593  | QCFFWSGEFANVIEK             | Mascot                           |
| 1804.8363 | 1804.8334 | -0.0029 | -2  | 579  | 593  | QCFFWSGEFANVIEK             | Mascot                           |
| 1867.962  | 1867.875  | -0.087  | -47 | 112  | 128  | EPTAATPLLQRQDSGQR           | Mascot                           |
| 2284.2092 | 2284.1206 | -0.0886 | -39 | 958  | 977  | EPPCFLQLFLGGLVIHKG<br>CR    | Carbamidomethyl (C)[4]<br>Mascot |
| 2501.1135 | 2501.1992 | 0.0857  | 34  | 645  | 667  | GAGEPGEDELYESAIIES<br>NCVYR | Mascot                           |
| 2584.1255 | 2584.1477 | 0.0222  | 9   | 1069 | 1090 | VNEMEEGTESKEFDAL<br>GNQDR   | Mascot                           |

35 leukotriene A-4 hydrolase [Danio rerio] gi|47086915 69145 6.17 10 39 0

Peptide Information

| Calc. Mass | Obsrv. Mass | ± da    | ± ppm | Start Seq. | End Seq. | Sequence                    | Ion Score | C. I. | % Modification            | Rank   | Result Type |
|------------|-------------|---------|-------|------------|----------|-----------------------------|-----------|-------|---------------------------|--------|-------------|
| 870.4389   | 870.5189    | 0.08    | 92    | 519        | 525      | KMGEVYK                     |           |       | Oxidation (M)[2]          | Mascot |             |
| 1118.6238  | 1118.4803   | -0.1435 | -128  | 165        | 174      | ELVALMSALR                  |           |       | Oxidation (M)[6]          | Mascot |             |
| 1173.6586  | 1173.5985   | -0.0601 | -51   | 61         | 72       | ISKVSANGQAAK                | 5         | 0     |                           | Mascot |             |
| 1173.6586  | 1173.5985   | -0.0601 | -51   | 61         | 72       | ISKVSANGQAAK                |           |       |                           | Mascot |             |
| 1308.698   | 1308.6292   | -0.0688 | -53   | 520        | 530      | MGEVYKLNNIK                 |           |       |                           | Mascot |             |
| 1320.6696  | 1320.5477   | -0.1219 | -92   | 154        | 164      | HTYYAQVSVPR                 |           |       |                           | Mascot |             |
| 1320.6696  | 1320.5477   | -0.1219 | -92   | 154        | 164      | HTYYAQVSVPR                 |           |       |                           | Mascot |             |
| 1323.7454  | 1323.6375   | -0.1079 | -82   | 593        | 605      | GSLHPVTAMLVAK               |           |       |                           | Mascot |             |
| 1354.7365  | 1354.7355   | -0.001  | -1    | 545        | 556      | AQWEEAVPLALK                |           |       |                           | Mascot |             |
| 1493.7021  | 1493.6968   | -0.0053 | -4    | 327        | 338      | MIARCMERGEQLR               |           |       | Carbamidomethyl (C)[5]    | Mascot |             |
| 1493.7021  | 1493.6968   | -0.0053 | -4    | 327        | 338      | MIARCMERGEQLR               |           |       | Carbamidomethyl (C)[5]    | Mascot |             |
| 1804.8007  | 1804.8334   | 0.0327  | 18    | 128        | 141      | HPYLFSQCQATHCR              |           |       | Carbamidomethyl (C)[8,13] | Mascot |             |
| 1804.8007  | 1804.8334   | 0.0327  | 18    | 128        | 141      | HPYLFSQCQATHCR              |           |       | Carbamidomethyl (C)[8,13] | Mascot |             |
| 2584.2979  | 2584.1477   | -0.1502 | -58   | 386        | 408      | GFALLYHLEELMGGPEVF<br>MGFVK |           |       |                           | Mascot |             |

36 novel protein (zgc:85809) [Danio rerio] gi|148725394 69172 6.25 10 38 0

Peptide Information

| Calc. Mass | Obsrv. Mass | ± da    | ± ppm | Start Seq. | End Seq. | Sequence     | Ion Score | C. I. | % Modification   | Rank   | Result Type |
|------------|-------------|---------|-------|------------|----------|--------------|-----------|-------|------------------|--------|-------------|
| 870.4389   | 870.5189    | 0.08    | 92    | 519        | 525      | KMGEVYK      |           |       | Oxidation (M)[2] | Mascot |             |
| 1118.6238  | 1118.4803   | -0.1435 | -128  | 165        | 174      | ELVALMSALR   |           |       | Oxidation (M)[6] | Mascot |             |
| 1173.6586  | 1173.5985   | -0.0601 | -51   | 61         | 72       | ISKVSANGQAAK | 5         | 0     |                  | Mascot |             |

|           |           |         |     |     |     |                             |  |  |  |                           |  |        |
|-----------|-----------|---------|-----|-----|-----|-----------------------------|--|--|--|---------------------------|--|--------|
| 1173.6586 | 1173.5985 | -0.0601 | -51 | 61  | 72  | ISKVSANGQAAK                |  |  |  |                           |  | Mascot |
| 1308.698  | 1308.6292 | -0.0688 | -53 | 520 | 530 | MGEVYKLNNIK                 |  |  |  |                           |  | Mascot |
| 1320.6696 | 1320.5477 | -0.1219 | -92 | 154 | 164 | HTYYAQVSVPR                 |  |  |  |                           |  | Mascot |
| 1320.6696 | 1320.5477 | -0.1219 | -92 | 154 | 164 | HTYYAQVSVPR                 |  |  |  |                           |  | Mascot |
| 1323.7454 | 1323.6375 | -0.1079 | -82 | 593 | 605 | GSLHPVTAMLVAK               |  |  |  |                           |  | Mascot |
| 1354.7365 | 1354.7355 | -0.001  | -1  | 545 | 556 | AQWEEAVPLALK                |  |  |  |                           |  | Mascot |
| 1493.7021 | 1493.6968 | -0.0053 | -4  | 327 | 338 | MIARCMERGEQLR               |  |  |  | Carbamidomethyl (C)[5]    |  | Mascot |
| 1493.7021 | 1493.6968 | -0.0053 | -4  | 327 | 338 | MIARCMERGEQLR               |  |  |  | Carbamidomethyl (C)[5]    |  | Mascot |
| 1804.8007 | 1804.8334 | 0.0327  | 18  | 128 | 141 | HPYLFSQCQATHCR              |  |  |  | Carbamidomethyl (C)[8,13] |  | Mascot |
| 1804.8007 | 1804.8334 | 0.0327  | 18  | 128 | 141 | HPYLFSQCQATHCR              |  |  |  | Carbamidomethyl (C)[8,13] |  | Mascot |
| 2584.2979 | 2584.1477 | -0.1502 | -58 | 386 | 408 | GFALLYHLEELMGGPEVF<br>MGFVK |  |  |  |                           |  | Mascot |

37 RecName: Full=Protein lunapark-B gi|114149971 45189.9 5.86 9 38 0

#### Peptide Information

| Calc. Mass | Obsrv. Mass | ± da    | ± ppm | Start Seq. | End Seq. | Sequence                     | Ion Score | C. I. | % Modification                             | Rank | Result Type |
|------------|-------------|---------|-------|------------|----------|------------------------------|-----------|-------|--------------------------------------------|------|-------------|
| 850.4304   | 850.5191    | 0.0887  | 104   | 139        | 145      | FDPESEKK                     |           |       |                                            |      | Mascot      |
| 1142.6642  | 1142.5076   | -0.1566 | -137  | 92         | 100      | KMLIFLFSK                    |           |       | Oxidation (M)[2]                           |      | Mascot      |
| 1154.6754  | 1154.5826   | -0.0928 | -80   | 93         | 101      | MLIFLFSKR                    |           |       |                                            |      | Mascot      |
| 1154.6754  | 1154.5826   | -0.0928 | -80   | 93         | 101      | MLIFLFSKR                    |           |       |                                            |      | Mascot      |
| 1173.5575  | 1173.5985   | 0.041   | 35    | 289        | 297      | EEFEFVAFR                    |           |       |                                            |      | Mascot      |
| 1173.5575  | 1173.5985   | 0.041   | 35    | 289        | 297      | EEFEFVAFR                    |           |       |                                            |      | Mascot      |
| 1354.5377  | 1354.7355   | 0.1978  | 146   | 298        | 308      | CAYCYFMNPAR                  |           |       | Oxidation (M)[7]                           |      | Mascot      |
| 1596.6755  | 1596.733    | 0.0575  | 36    | 298        | 309      | CAYCYFMNPARK                 |           |       | Carbamidomethyl (C)[1,4], Oxidation (M)[7] |      | Mascot      |
| 2233.1467  | 2233.0339   | -0.1128 | -51   | 170        | 191      | HIAMATPGPVLGPMSPG<br>TTPLR   |           |       | Oxidation (M)[4,14]                        |      | Mascot      |
| 2501.3115  | 2501.1992   | -0.1123 | -45   | 168        | 191      | QRHIAMATPGPVLGPMS<br>PGTTPLR |           |       | Oxidation (M)[6]                           |      | Mascot      |
| 2566.0989  | 2566.2185   | 0.1196  | 47    | 289        | 308      | EEFEFVAFRCAICYFMN<br>PAR     |           |       | Carbamidomethyl (C)[10], Oxidation (M)[16] |      | Mascot      |

38 pleckstrin homology domain-containing family G member 7 [Danio rerio] gi|113681918 49035.5 6.76 9 38 0

#### Peptide Information

| Calc. Mass | Obsrv. Mass | ± da    | ± ppm | Start Seq. | End Seq. | Sequence   | Ion Score | C. I. | % Modification         | Rank | Result Type |
|------------|-------------|---------|-------|------------|----------|------------|-----------|-------|------------------------|------|-------------|
| 1165.6034  | 1165.713    | 0.1096  | 94    | 1          | 10       | MSLVDFLQGR |           |       |                        |      | Mascot      |
| 1193.6313  | 1193.5977   | -0.0336 | -28   | 219        | 227      | WLDNYQKVK  |           |       |                        |      | Mascot      |
| 1320.6001  | 1320.5477   | -0.0524 | -40   | 61         | 70       | QCLQDIDSWR |           |       | Carbamidomethyl (C)[2] |      | Mascot      |
| 1320.6001  | 1320.5477   | -0.0524 | -40   | 61         | 70       | QCLQDIDSWR |           |       | Carbamidomethyl (C)[2] |      | Mascot      |

|           |           |         |     |     |     |                         |                        |        |
|-----------|-----------|---------|-----|-----|-----|-------------------------|------------------------|--------|
| 1422.6504 | 1422.7    | 0.0496  | 35  | 115 | 126 | AFSESICHCLQK            | Carbamidomethyl (C)[7] | Mascot |
| 1493.7239 | 1493.6968 | -0.0271 | -18 | 114 | 126 | KAFSESICHCLQK           |                        | Mascot |
| 1493.7239 | 1493.6968 | -0.0271 | -18 | 114 | 126 | KAFSESICHCLQK           |                        | Mascot |
| 1638.8519 | 1638.8242 | -0.0277 | -17 | 1   | 14  | MSLVDFLQGRSELK          | Oxidation (M)[1]       | Mascot |
| 1638.8519 | 1638.8242 | -0.0277 | -17 | 1   | 14  | MSLVDFLQGRSELK          | Oxidation (M)[1]       | Mascot |
| 1707.8986 | 1707.7307 | -0.1679 | -98 | 387 | 401 | AWMSEIEKAVSSLLK         | Oxidation (M)[3]       | Mascot |
| 1971.0586 | 1970.967  | -0.0916 | -46 | 228 | 243 | QLKETLVWLPVWESDK        |                        | Mascot |
| 2283.9646 | 2284.1206 | 0.156   | 68  | 95  | 113 | EMWTDPDSCSTQSLHDL<br>FR | Oxidation (M)[2]       | Mascot |

39 Idh3a protein [Danio rerio] gi|157423273 16736.4 6.89 6 38 0

Peptide Information

| Calc. Mass | Obsrv. Mass | ± da    | ± ppm | Start Seq. | End Seq. | Sequence          | Ion Score | C. I. % | Modification           | Rank | Result Type |
|------------|-------------|---------|-------|------------|----------|-------------------|-----------|---------|------------------------|------|-------------|
| 1003.489   | 1003.5249   | 0.0359  | 36    | 108        | 116      | HMGLHGHAK         |           |         | Oxidation (M)[2]       |      | Mascot      |
| 1109.5693  | 1109.4681   | -0.1012 | -91   | 7          | 17       | STVSCIMGAIK       |           |         |                        |      | Mascot      |
| 1316.707   | 1316.5491   | -0.1579 | -120  | 18         | 28       | TQTPQPRVFSR       |           |         |                        |      | Mascot      |
| 1357.5988  | 1357.686    | 0.0872  | 64    | 142        | 152      | CSEFTADICRR       |           |         | Carbamidomethyl (C)[1] |      | Mascot      |
| 1707.8669  | 1707.7307   | -0.1362 | -80   | 2          | 17       | ANAWRSTVSCIMGAIK  |           |         |                        |      | Mascot      |
| 1838.9073  | 1838.88     | -0.0273 | -15   | 1          | 17       | MANAWRSTVSCIMGAIK |           |         |                        |      | Mascot      |

40 Retinoid x receptor, beta b [Danio rerio] gi|190336859 46645.2 6.61 10 38 0

Peptide Information

| Calc. Mass | Obsrv. Mass | ± da    | ± ppm | Start Seq. | End Seq. | Sequence        | Ion Score | C. I. % | Modification                               | Rank | Result Type |
|------------|-------------|---------|-------|------------|----------|-----------------|-----------|---------|--------------------------------------------|------|-------------|
| 941.4365   | 941.4567    | 0.0202  | 21    | 150        | 157      | CLAMGMKR        |           |         | Oxidation (M)[4,6]                         |      | Mascot      |
| 1154.4863  | 1154.5826   | 0.0963  | 83    | 88         | 96       | RMCAICGDR       |           |         | Carbamidomethyl (C)[3,6], Oxidation (M)[2] |      | Mascot      |
| 1154.4863  | 1154.5826   | 0.0963  | 83    | 88         | 96       | RMCAICGDR       |           |         | Carbamidomethyl (C)[3,6], Oxidation (M)[2] |      | Mascot      |
| 1191.6588  | 1191.6228   | -0.036  | -30   | 312        | 321      | VLTELVCKMR      |           |         |                                            |      | Mascot      |
| 1191.6588  | 1191.6228   | -0.036  | -30   | 312        | 321      | VLTELVCKMR      |           |         |                                            |      | Mascot      |
| 1193.583   | 1193.5977   | 0.0147  | 12    | 76         | 87       | SVSGSGPMLSQK    |           |         | Oxidation (M)[8]                           |      | Mascot      |
| 1234.683   | 1234.6508   | -0.0322 | -26   | 224        | 233      | QLFTLVEWAK      |           |         |                                            |      | Mascot      |
| 1234.683   | 1234.6508   | -0.0322 | -26   | 224        | 233      | QLFTLVEWAK      |           |         |                                            |      | Mascot      |
| 1302.5242  | 1302.6862   | 0.162   | 124   | 101        | 111      | HYGVYSCEGCK     |           |         | Carbamidomethyl (C)[7]                     |      | Mascot      |
| 1357.5657  | 1357.686    | 0.1203  | 89    | 89         | 100      | MCAICGDRSSGK    |           |         | Carbamidomethyl (C)[2,5], Oxidation (M)[1] |      | Mascot      |
| 1475.7198  | 1475.7185   | -0.0013 | -1    | 359        | 370      | VYASLESYCKQK    |           |         | Carbamidomethyl (C)[9]                     |      | Mascot      |
| 1596.7179  | 1596.733    | 0.0151  | 9     | 322        | 334      | DMQMDKTELGCLR   |           |         | Carbamidomethyl (C)[11]                    |      | Mascot      |
| 1838.7988  | 1838.88     | 0.0812  | 44    | 101        | 115      | HYGVYSCEGCKGFFK |           |         | Carbamidomethyl (C)[7,10]                  |      | Mascot      |

41 Pkm2a protein [Danio rerio] gi|45501385 58075.7 6.36 8 37 0 14 0

Peptide Information

| Calc. Mass | Obsrv. Mass | ± da    | ± ppm | Start Seq. | End Seq. | Sequence                 | Ion Score | C. I. | % Modification       | Rank | Result | Type |
|------------|-------------|---------|-------|------------|----------|--------------------------|-----------|-------|----------------------|------|--------|------|
| 996.4818   | 996.5714    | 0.0896  | 90    | 491        | 499      | VNFAMDVGK                |           |       | Oxidation (M)[5]     |      | Mascot |      |
| 1109.5811  | 1109.4681   | -0.113  | -102  | 272        | 280      | LENHEGVRR                |           |       |                      |      | Mascot |      |
| 1118.6051  | 1118.4803   | -0.1248 | -112  | 127        | 137      | GSGTAEVELKK              |           |       |                      |      | Mascot |      |
| 1173.6837  | 1173.5985   | -0.0852 | -73   | 164        | 174      | NITKVVEVGSK              | 14        | 0     |                      |      | Mascot |      |
| 1173.6837  | 1173.5985   | -0.0852 | -73   | 164        | 174      | NITKVVEVGSK              |           |       |                      |      | Mascot |      |
| 1179.6289  | 1179.573    | -0.0559 | -47   | 58         | 67       | SVDTLKEMIK               |           |       | Oxidation (M)[8]     |      | Mascot |      |
| 1179.6289  | 1179.573    | -0.0559 | -47   | 58         | 67       | SVDTLKEMIK               |           |       | Oxidation (M)[8]     |      | Mascot |      |
| 1302.6835  | 1302.6862   | 0.0027  | 2     | 45         | 57       | NTGIICTIGPASR            |           |       |                      |      | Mascot |      |
| 2191.0562  | 2190.9436   | -0.1126 | -51   | 229        | 247      | DLQFGVEMGVDMIFASFI<br>R  |           |       | Oxidation (M)[8]     |      | Mascot |      |
| 2211.1003  | 2211.054    | -0.0463 | -21   | 318        | 337      | CNKAGKPIICATQMLES<br>MIK |           |       | Oxidation (M)[14,18] |      | Mascot |      |

42 PREDICTED: bromodomain adjacent to zinc finger domain protein 1A, partial [Danio rerio]

gi|125841384 81560.8 6.03 12 37 0

Peptide Information

| Calc. Mass | Obsrv. Mass | ± da    | ± ppm | Start Seq. | End Seq. | Sequence                   | Ion Score | C. I. | % Modification          | Rank | Result | Type |
|------------|-------------|---------|-------|------------|----------|----------------------------|-----------|-------|-------------------------|------|--------|------|
| 1045.3999  | 1045.5389   | 0.139   | 133   | 303        | 310      | EQMMSMEK                   |           |       | Oxidation (M)[3,4]      |      | Mascot |      |
| 1154.4341  | 1154.5826   | 0.1485  | 129   | 384        | 392      | EDMECDDLK                  |           |       | Carbamidomethyl (C)[5]  |      | Mascot |      |
| 1154.4341  | 1154.5826   | 0.1485  | 129   | 384        | 392      | EDMECDDLK                  |           |       | Carbamidomethyl (C)[5]  |      | Mascot |      |
| 1234.7782  | 1234.6508   | -0.1274 | -103  | 2          | 11       | PLLHKKPFVR                 |           |       |                         |      | Mascot |      |
| 1234.7782  | 1234.6508   | -0.1274 | -103  | 2          | 11       | PLLHKKPFVR                 |           |       |                         |      | Mascot |      |
| 1277.7939  | 1277.6771   | -0.1168 | -91   | 393        | 403      | ELPKPIPVKTR                |           |       |                         |      | Mascot |      |
| 1308.5936  | 1308.6292   | 0.0356  | 27    | 231        | 241      | QHCEPMHGTIR                |           |       |                         |      | Mascot |      |
| 1316.5796  | 1316.5491   | -0.0305 | -23   | 303        | 312      | EQMMSMEKFR                 |           |       |                         |      | Mascot |      |
| 1791.9357  | 1791.6824   | -0.2533 | -141  | 227        | 241      | LLLKQHCEPMHGTIR            |           |       | Oxidation (M)[10]       |      | Mascot |      |
| 1838.8741  | 1838.88     | 0.0059  | 3     | 101        | 115      | LHEICDDVYAYVKDR            |           |       |                         |      | Mascot |      |
| 1867.9006  | 1867.875    | -0.0256 | -14   | 99         | 113      | SRLHEICDDVYAYVK            |           |       | Carbamidomethyl (C)[7]  |      | Mascot |      |
| 1971.0367  | 1970.967    | -0.0697 | -35   | 193        | 209      | YRVQPVSPPEACEPVIVK         |           |       | Carbamidomethyl (C)[11] |      | Mascot |      |
| 1993.9912  | 1993.9221   | -0.0691 | -35   | 535        | 552      | LHILSSGADCGFTNAKFR         |           |       | Carbamidomethyl (C)[10] |      | Mascot |      |
| 2283.1836  | 2283.0212   | -0.1624 | -71   | 195        | 215      | VQPVSPPEACEPVIVKVAQ<br>MSR |           |       | Oxidation (M)[19]       |      | Mascot |      |

43 PREDICTED: Fanconi anemia-associated protein of 100 kDa-like [Danio rerio]

gi|326672411 90408.5 6.9 6 37 0 23 0



| Peptide Information |                                              |         |       |             |                             |           |                         |   |    |        |
|---------------------|----------------------------------------------|---------|-------|-------------|-----------------------------|-----------|-------------------------|---|----|--------|
| Calc. Mass          | Obsrv. Mass                                  | ± da    | ± ppm | Start Seq.  | End Sequence Seq.           | Ion Score | C. I. % Modification    |   |    |        |
| 1003.5505           | 1003.5249                                    | -0.0256 | -26   | 70          | 77 HRLYALCK                 |           |                         |   |    | Mascot |
| 1191.6368           | 1191.6228                                    | -0.014  | -12   | 39          | 48 DVLIFSVQDR               | 4         | 0                       |   |    | Mascot |
| 1191.6368           | 1191.6228                                    | -0.014  | -12   | 39          | 48 DVLIFSVQDR               |           |                         |   |    | Mascot |
| 1234.6062           | 1234.6508                                    | 0.0446  | 36    | 615         | 625 LEGSFSPNDIR             | 23        | 0                       |   |    | Mascot |
| 1234.6062           | 1234.6508                                    | 0.0446  | 36    | 615         | 625 LEGSFSPNDIR             |           |                         |   |    | Mascot |
| 1371.7413           | 1371.7028                                    | -0.0385 | -28   | 394         | 405 LMRVNLPGGSEK            |           |                         |   |    | Mascot |
| 2299.1704           | 2299.1326                                    | -0.0378 | -16   | 50          | 69 VKTVIQFEDSVTFLDLSDDK     |           |                         |   |    | Mascot |
| 2369.2896           | 2368.9512                                    | -0.3384 | -143  | 211         | 233 LLFGVDAALVSSPVILCGLPDGR |           | Carbamidomethyl (C)[17] |   |    |        |
| 44                  | pyruvate kinase isozymes M1/M2 [Danio rerio] |         |       | gi 40786398 |                             | 58020.6   | 6.54                    | 8 | 37 | 0 14 0 |

| Peptide Information |                                                                                         |             |         |       |              |                              |           |         |                       |      |             |
|---------------------|-----------------------------------------------------------------------------------------|-------------|---------|-------|--------------|------------------------------|-----------|---------|-----------------------|------|-------------|
|                     | Calc. Mass                                                                              | Obsrv. Mass | ± da    | ± ppm | Start Seq.   | End Sequence Seq.            | Ion Score | C. I. % | Modification          | Rank | Result Type |
|                     | 996.4818                                                                                | 996.5714    | 0.0896  | 90    | 491          | 499 VNFAMDVGK                |           |         | Oxidation (M)[5]      |      | Mascot      |
|                     | 1109.5811                                                                               | 1109.4681   | -0.113  | -102  | 272          | 280 LENHEGVRR                |           |         |                       |      | Mascot      |
|                     | 1118.6051                                                                               | 1118.4803   | -0.1248 | -112  | 127          | 137 GSGTAEVELKK              |           |         |                       |      | Mascot      |
|                     | 1173.6837                                                                               | 1173.5985   | -0.0852 | -73   | 164          | 174 NITKVVEVGSK              | 14        | 0       |                       |      | Mascot      |
|                     | 1173.6837                                                                               | 1173.5985   | -0.0852 | -73   | 164          | 174 NITKVVEVGSK              |           |         |                       |      | Mascot      |
|                     | 1179.6289                                                                               | 1179.573    | -0.0559 | -47   | 58           | 67 SVDTLKEMIK                |           |         | Oxidation (M)[8]      |      | Mascot      |
|                     | 1179.6289                                                                               | 1179.573    | -0.0559 | -47   | 58           | 67 SVDTLKEMIK                |           |         | Oxidation (M)[8]      |      | Mascot      |
|                     | 1302.6835                                                                               | 1302.6862   | 0.0027  | 2     | 45           | 57 NTGIICTIGPASR             |           |         |                       |      | Mascot      |
|                     | 2191.0562                                                                               | 2190.9436   | -0.1126 | -51   | 229          | 247 DLQFGVEMGVDMIFASFI<br>R  |           |         | Oxidation (M)[8]      |      | Mascot      |
|                     | 2211.1003                                                                               | 2211.054    | -0.0463 | -21   | 318          | 337 CNKAGKPIICATQMLES<br>MIK |           |         | Oxidation (M)[14, 18] |      | Mascot      |
| 45                  | PREDICTED: voltage-dependent L-type calcium channel subunit alpha-1F-like [Danio rerio] |             |         |       | gij326670278 |                              | 229245.1  | 5.61    | 1                     | 27   | 35.769      |

| Peptide Information |                               |         |       |              |                   |           |                      |   |  |           |
|---------------------|-------------------------------|---------|-------|--------------|-------------------|-----------|----------------------|---|--|-----------|
| Calc. Mass          | Obsrv. Mass                   | ± da    | ± ppm | Start Seq.   | End Sequence Seq. | Ion Score | C. I. % Modification |   |  |           |
| 1234.6976           | 1234.6508                     | -0.0468 | -38   | 913          | 923 SVIQCVFVAIR   | 27        | 35.769               |   |  | 2 Mascot  |
| 46                  | Ccdc101 protein [Danio rerio] |         |       | gi 201090170 |                   | 33213     | 8.21                 | 1 |  | 26 16.872 |

Peptide Information

|                     | Calc. Mass                                       | Obsrv. Mass | ± da    | ± ppm | Start Seq. | End Sequence Seq. |          | Ion Score | C. I. % | Modification           | Rank | Result Type |
|---------------------|--------------------------------------------------|-------------|---------|-------|------------|-------------------|----------|-----------|---------|------------------------|------|-------------|
|                     | 1234.5732                                        | 1234.6508   | 0.0776  | 63    | 68         | 78 ADAEAECSILR    |          | 26        | 16.872  | Carbamidomethyl (C)[7] | 3    | Mascot      |
| 47                  | PREDICTED: zinc finger protein 618 [Danio rerio] |             |         |       |            | gi 326668299      | 93606.8  | 7.47      | 1       | 21                     | 0    |             |
| Peptide Information |                                                  |             |         |       |            |                   |          |           |         |                        |      |             |
|                     | Calc. Mass                                       | Obsrv. Mass | ± da    | ± ppm | Start Seq. | End Sequence Seq. |          | Ion Score | C. I. % | Modification           | Rank | Result Type |
|                     | 1234.6348                                        | 1234.6508   | 0.016   | 13    | 395        | 406 EALGDMSSLALK  |          | 21        | 0       |                        | 5    | Mascot      |
| 48                  | gamma-tubulin complex component 2 [Danio rerio]  |             |         |       |            | gi 41056243       | 101578.7 | 6.08      | 1       | 21                     | 0    |             |
| Peptide Information |                                                  |             |         |       |            |                   |          |           |         |                        |      |             |
|                     | Calc. Mass                                       | Obsrv. Mass | ± da    | ± ppm | Start Seq. | End Sequence Seq. |          | Ion Score | C. I. % | Modification           | Rank | Result Type |
|                     | 1320.6287                                        | 1320.5477   | -0.081  | -61   | 736        | 746 DCMLTNPELLR   |          | 21        | 0       | Oxidation (M)[3]       | 1    | Mascot      |
| 49                  | adenosine receptor A2a [Danio rerio]             |             |         |       |            | gi 89886297       | 49078.7  | 8.38      | 1       | 19                     | 0    |             |
| Peptide Information |                                                  |             |         |       |            |                   |          |           |         |                        |      |             |
|                     | Calc. Mass                                       | Obsrv. Mass | ± da    | ± ppm | Start Seq. | End Sequence Seq. |          | Ion Score | C. I. % | Modification           | Rank | Result Type |
|                     | 1154.6165                                        | 1154.5826   | -0.0339 | -29   | 406        | 416 KHAGLDITDGK   |          | 19        | 0       |                        | 2    | Mascot      |
| 50                  | Msh2 protein [Danio rerio]                       |             |         |       |            | gi 182889828      | 103705.5 | 6.32      | 1       | 18                     | 0    |             |
| Peptide Information |                                                  |             |         |       |            |                   |          |           |         |                        |      |             |
|                     | Calc. Mass                                       | Obsrv. Mass | ± da    | ± ppm | Start Seq. | End Sequence Seq. |          | Ion Score | C. I. % | Modification           | Rank | Result Type |
|                     | 1234.6533                                        | 1234.6508   | -0.0025 | -2    | 265        | 275 IAMSCLEAVIK   |          | 18        | 0       | Carbamidomethyl (C)[5] | 6    | Mascot      |

|                |           |                        |                |                |                    |
|----------------|-----------|------------------------|----------------|----------------|--------------------|
| Gel Idx/Pos    | 266/K18   | Instr./Gel Origin      | BA2060/110707A | Process Status | Analysis Succeeded |
| Plate [#] Name | [1] 31496 | Instrument Sample Name |                | Spectra        | 11                 |

| Rank                | Protein Name                                  | Accession No. | Protein MW | Protein PI | Pep. Count | Protein Score     | Protein Score C. I. % | Total Ion Score | Total Ion C. I. % |              |      |             |
|---------------------|-----------------------------------------------|---------------|------------|------------|------------|-------------------|-----------------------|-----------------|-------------------|--------------|------|-------------|
| 1                   | glial fibrillary acidic protein [Danio rerio] | gi 239596173  | 19203.6    | 4.89       | 6          | 108               | 100                   | 77              | 100               |              |      |             |
| Peptide Information |                                               |               |            |            |            |                   |                       |                 |                   |              |      |             |
|                     | Calc. Mass                                    | Obsrv. Mass   | ± da       | ± ppm      | Start Seq. | End Sequence Seq. |                       | Ion Score       | C. I. %           | Modification | Rank | Result Type |

|  |           |           |         |     |     |     |               |    |     |  |  |  |  |  |  |        |
|--|-----------|-----------|---------|-----|-----|-----|---------------|----|-----|--|--|--|--|--|--|--------|
|  | 1060.5632 | 1060.537  | -0.0262 | -25 | 121 | 129 | KLLEGEESR     |    |     |  |  |  |  |  |  | Mascot |
|  | 1090.531  | 1090.5067 | -0.0243 | -22 | 62  | 69  | QLREMEER      |    |     |  |  |  |  |  |  | Mascot |
|  | 1118.5762 | 1118.4829 | -0.0933 | -83 | 84  | 92  | LEDEIQMLK     |    |     |  |  |  |  |  |  | Mascot |
|  | 1277.71   | 1277.6821 | -0.0279 | -22 | 110 | 120 | LALDIEIATYR   |    |     |  |  |  |  |  |  | Mascot |
|  | 1277.71   | 1277.6821 | -0.0279 | -22 | 110 | 120 | LALDIEIATYR   | 77 | 100 |  |  |  |  |  |  | Mascot |
|  | 1308.6543 | 1308.6281 | -0.0262 | -20 | 12  | 23  | SKFADLTDAANR  |    |     |  |  |  |  |  |  | Mascot |
|  | 1308.6543 | 1308.6281 | -0.0262 | -20 | 12  | 23  | SKFADLTDAANR  |    |     |  |  |  |  |  |  | Mascot |
|  | 1475.7522 | 1475.72   | -0.0322 | -22 | 41  | 53  | QIQGLTCDLESLR |    |     |  |  |  |  |  |  | Mascot |

2 RecName: Full=Glial fibrillary acidic protein;  
Short=GFAP gi|150383441 51218 5.34 9 105 100 77 100

#### Peptide Information

| Calc. Mass | Obsrv. Mass | ± da    | ± ppm | Start Seq. | End Seq. | Sequence      | Ion Score | C. I. | % | Modification     | Rank | Result Type |
|------------|-------------|---------|-------|------------|----------|---------------|-----------|-------|---|------------------|------|-------------|
| 1060.5632  | 1060.537    | -0.0262 | -25   | 380        | 388      | KLLEGEESR     |           |       |   |                  |      | Mascot      |
| 1064.4863  | 1064.5846   | 0.0983  | 92    | 83         | 91       | VEMMGLNDR     |           |       |   |                  |      | Mascot      |
| 1090.531   | 1090.5067   | -0.0243 | -22   | 321        | 328      | QLREMEER      |           |       |   |                  |      | Mascot      |
| 1118.5762  | 1118.4829   | -0.0933 | -83   | 343        | 351      | LEDEIQMLK     |           |       |   |                  |      | Mascot      |
| 1277.71    | 1277.6821   | -0.0279 | -22   | 369        | 379      | LALDIEIATYR   |           |       |   |                  |      | Mascot      |
| 1277.71    | 1277.6821   | -0.0279 | -22   | 369        | 379      | LALDIEIATYR   | 77        | 100   |   |                  |      | Mascot      |
| 1308.6543  | 1308.6281   | -0.0262 | -20   | 271        | 282      | SKFADLTDAANR  |           |       |   |                  |      | Mascot      |
| 1308.6543  | 1308.6281   | -0.0262 | -20   | 271        | 282      | SKFADLTDAANR  |           |       |   |                  |      | Mascot      |
| 1393.6165  | 1393.6974   | 0.0809  | 58    | 1          | 11       | MESQRSFSSYR   |           |       |   | Oxidation (M)[1] |      | Mascot      |
| 1434.756   | 1434.7361   | -0.0199 | -14   | 29         | 41       | HSTGRSLHSSPR  |           |       |   |                  |      | Mascot      |
| 1434.756   | 1434.7361   | -0.0199 | -14   | 29         | 41       | HSTGRSLHSSPR  |           |       |   |                  |      | Mascot      |
| 1475.7522  | 1475.72     | -0.0322 | -22   | 300        | 312      | QIQGLTCDLESLR |           |       |   |                  |      | Mascot      |

3 Gfap protein [Danio rerio] gi|124504410 51101 5.34 8 101 100 77 100

#### Peptide Information

| Calc. Mass | Obsrv. Mass | ± da    | ± ppm | Start Seq. | End Seq. | Sequence     | Ion Score | C. I. | % | Modification | Rank | Result Type |
|------------|-------------|---------|-------|------------|----------|--------------|-----------|-------|---|--------------|------|-------------|
| 1060.5632  | 1060.537    | -0.0262 | -25   | 379        | 387      | KLLEGEESR    |           |       |   |              |      | Mascot      |
| 1064.4863  | 1064.5846   | 0.0983  | 92    | 82         | 90       | VEMMGLNDR    |           |       |   |              |      | Mascot      |
| 1090.531   | 1090.5067   | -0.0243 | -22   | 320        | 327      | QLREMEER     |           |       |   |              |      | Mascot      |
| 1118.5762  | 1118.4829   | -0.0933 | -83   | 342        | 350      | LEDEIQMLK    |           |       |   |              |      | Mascot      |
| 1277.71    | 1277.6821   | -0.0279 | -22   | 368        | 378      | LALDIEIATYR  |           |       |   |              |      | Mascot      |
| 1277.71    | 1277.6821   | -0.0279 | -22   | 368        | 378      | LALDIEIATYR  | 77        | 100   |   |              |      | Mascot      |
| 1308.6543  | 1308.6281   | -0.0262 | -20   | 270        | 281      | SKFADLTDAANR |           |       |   |              |      | Mascot      |

|  |           |           |         |     |     |     |               |  |  |  |  |  |  |  |  |  |        |
|--|-----------|-----------|---------|-----|-----|-----|---------------|--|--|--|--|--|--|--|--|--|--------|
|  | 1308.6543 | 1308.6281 | -0.0262 | -20 | 270 | 281 | SKFADLTDAANR  |  |  |  |  |  |  |  |  |  | Mascot |
|  | 1434.756  | 1434.7361 | -0.0199 | -14 | 28  | 40  | HSTGRSLHSSPR  |  |  |  |  |  |  |  |  |  | Mascot |
|  | 1434.756  | 1434.7361 | -0.0199 | -14 | 28  | 40  | HSTGRSLHSSPR  |  |  |  |  |  |  |  |  |  | Mascot |
|  | 1475.7522 | 1475.72   | -0.0322 | -22 | 299 | 311 | QIQGLTCDLESLR |  |  |  |  |  |  |  |  |  | Mascot |

4 class III intermediate filament protein [Danio rerio] gi|38374177 51255 5.28 8 101 100 77 100

Peptide Information

| Calc. Mass | Obsrv. Mass | ± da    | ± ppm | Start Seq. | End Seq. | Sequence      | Ion Score | C. I. | % Modification   | Rank | Result Type |
|------------|-------------|---------|-------|------------|----------|---------------|-----------|-------|------------------|------|-------------|
| 1060.5632  | 1060.537    | -0.0262 | -25   | 380        | 388      | KLLEGEESR     |           |       |                  |      | Mascot      |
| 1064.4863  | 1064.5846   | 0.0983  | 92    | 83         | 91       | VEMMGLNDR     |           |       |                  |      | Mascot      |
| 1118.5762  | 1118.4829   | -0.0933 | -83   | 343        | 351      | LEDEIQMLK     |           |       |                  |      | Mascot      |
| 1277.71    | 1277.6821   | -0.0279 | -22   | 369        | 379      | LALDIEIATYR   |           |       |                  |      | Mascot      |
| 1277.71    | 1277.6821   | -0.0279 | -22   | 369        | 379      | LALDIEIATYR   | 77        | 100   |                  |      | Mascot      |
| 1308.6543  | 1308.6281   | -0.0262 | -20   | 271        | 282      | SKFADLTDAANR  |           |       |                  |      | Mascot      |
| 1308.6543  | 1308.6281   | -0.0262 | -20   | 271        | 282      | SKFADLTDAANR  |           |       |                  |      | Mascot      |
| 1393.6165  | 1393.6974   | 0.0809  | 58    | 1          | 11       | MESQRSFSSYR   |           |       | Oxidation (M)[1] |      | Mascot      |
| 1434.756   | 1434.7361   | -0.0199 | -14   | 29         | 41       | HSTGRSLHSSPR  |           |       |                  |      | Mascot      |
| 1434.756   | 1434.7361   | -0.0199 | -14   | 29         | 41       | HSTGRSLHSSPR  |           |       |                  |      | Mascot      |
| 1475.7522  | 1475.72     | -0.0322 | -22   | 300        | 312      | QIQGLTCDLESLR |           |       |                  |      | Mascot      |

5 glial fibrillary acidic protein [Danio rerio] gi|66393075 51190 5.34 8 99 100 77 100

Peptide Information

| Calc. Mass | Obsrv. Mass | ± da    | ± ppm | Start Seq. | End Seq. | Sequence      | Ion Score | C. I. | % Modification   | Rank | Result Type |
|------------|-------------|---------|-------|------------|----------|---------------|-----------|-------|------------------|------|-------------|
| 1060.5632  | 1060.537    | -0.0262 | -25   | 380        | 388      | KLLEGEESR     |           |       |                  |      | Mascot      |
| 1064.4863  | 1064.5846   | 0.0983  | 92    | 83         | 91       | VEMMGLNDR     |           |       |                  |      | Mascot      |
| 1118.5762  | 1118.4829   | -0.0933 | -83   | 343        | 351      | LEDEIQMLK     |           |       |                  |      | Mascot      |
| 1277.71    | 1277.6821   | -0.0279 | -22   | 369        | 379      | LALDIEIATYR   |           |       |                  |      | Mascot      |
| 1277.71    | 1277.6821   | -0.0279 | -22   | 369        | 379      | LALDIEIATYR   | 77        | 100   |                  |      | Mascot      |
| 1308.6543  | 1308.6281   | -0.0262 | -20   | 271        | 282      | SKFADLTDAANR  |           |       |                  |      | Mascot      |
| 1308.6543  | 1308.6281   | -0.0262 | -20   | 271        | 282      | SKFADLTDAANR  |           |       |                  |      | Mascot      |
| 1393.6165  | 1393.6974   | 0.0809  | 58    | 1          | 11       | MESQRSFSSYR   |           |       | Oxidation (M)[1] |      | Mascot      |
| 1434.756   | 1434.7361   | -0.0199 | -14   | 29         | 41       | HSTGRSLHSSPR  |           |       |                  |      | Mascot      |
| 1434.756   | 1434.7361   | -0.0199 | -14   | 29         | 41       | HSTGRSLHSSPR  |           |       |                  |      | Mascot      |
| 1475.7522  | 1475.72     | -0.0322 | -22   | 300        | 312      | QIQGLTCDLESLR |           |       |                  |      | Mascot      |

6 glial fibrillary acidic protein GFAP [Danio rerio] gi|31978943 50145.5 5.32 8 99 100 77 100

### Peptide Information

| Calc. Mass | Obsrv. Mass | $\pm$ da | $\pm$ ppm | Start Seq. | End Seq. | Sequence       | Ion Score | C. I. | % Modification   | Rank | Result Type |
|------------|-------------|----------|-----------|------------|----------|----------------|-----------|-------|------------------|------|-------------|
| 1060.5632  | 1060.537    | -0.0262  | -25       | 371        | 379      | KLLEGEESR      |           |       |                  |      | Mascot      |
| 1090.531   | 1090.5067   | -0.0243  | -22       | 312        | 319      | QLREMEER       |           |       |                  |      | Mascot      |
| 1118.5762  | 1118.4829   | -0.0933  | -83       | 334        | 342      | LEDEIQMLK      |           |       |                  |      | Mascot      |
| 1277.71    | 1277.6821   | -0.0279  | -22       | 360        | 370      | LALDIEIATYR    |           |       |                  |      | Mascot      |
| 1277.71    | 1277.6821   | -0.0279  | -22       | 360        | 370      | LALDIEIATYR    | 77        | 100   |                  |      | Mascot      |
| 1308.6543  | 1308.6281   | -0.0262  | -20       | 262        | 273      | SKFADLTDAANR   |           |       |                  |      | Mascot      |
| 1308.6543  | 1308.6281   | -0.0262  | -20       | 262        | 273      | SKFADLTDAANR   |           |       |                  |      | Mascot      |
| 1393.6165  | 1393.6974   | 0.0809   | 58        | 1          | 11       | MESQRSFSSYR    |           |       | Oxidation (M)[1] |      | Mascot      |
| 1434.756   | 1434.7361   | -0.0199  | -14       | 29         | 41       | HSTGRSLHSSPR   |           |       |                  |      | Mascot      |
| 1434.756   | 1434.7361   | -0.0199  | -14       | 29         | 41       | HSTGRSLHSSPR   |           |       |                  |      | Mascot      |
| 1475.7522  | 1475.72     | -0.0322  | -22       | 291        | 303      | QIQGLTCDLES LR |           |       |                  |      | Mascot      |

7 glial fibrillary acidic protein [Danio rerio] gi|20977259 42127.4 5.03 6 94 99.998 77 100

### Peptide Information

| Calc. Mass | Obsrv. Mass | $\pm$ da | $\pm$ ppm | Start Seq. | End Seq. | Sequence                     | Ion Score | C. I. | % Modification   | Rank | Result Type |
|------------|-------------|----------|-----------|------------|----------|------------------------------|-----------|-------|------------------|------|-------------|
| 1060.5632  | 1060.537    | -0.0262  | -25       | 296        | 304      | KLLEGEESR                    |           |       |                  |      | Mascot      |
| 1090.531   | 1090.5067   | -0.0243  | -22       | 237        | 244      | QLREMEER                     |           |       |                  |      | Mascot      |
| 1118.5762  | 1118.4829   | -0.0933  | -83       | 259        | 267      | LEDEIQMLK                    |           |       |                  |      | Mascot      |
| 1277.71    | 1277.6821   | -0.0279  | -22       | 285        | 295      | LALDIEIATYR                  |           |       |                  |      | Mascot      |
| 1277.71    | 1277.6821   | -0.0279  | -22       | 285        | 295      | LALDIEIATYR                  | 77        | 100   |                  |      | Mascot      |
| 1308.6543  | 1308.6281   | -0.0262  | -20       | 187        | 198      | SKFADLTDAANR                 |           |       |                  |      | Mascot      |
| 1308.6543  | 1308.6281   | -0.0262  | -20       | 187        | 198      | SKFADLTDAANR                 |           |       |                  |      | Mascot      |
| 2872.4734  | 2872.3191   | -0.1543  | -54       | 138        | 161      | ELHEQLMAQQVHVLDLV<br>SKPRLDR |           |       | Oxidation (M)[7] |      | Mascot      |

8 Krt4 protein [Danio rerio] gi|161612220 53979.9 5.34 6 93 99.998 77 100

### Peptide Information

| Calc. Mass | Obsrv. Mass | $\pm$ da | $\pm$ ppm | Start Seq. | End Seq. | Sequence  | Ion Score | C. I. | % Modification   | Rank | Result Type |
|------------|-------------|----------|-----------|------------|----------|-----------|-----------|-------|------------------|------|-------------|
| 882.4349   | 882.5468    | 0.1119   | 127       | 33         | 40       | MSSVTSVR  |           |       | Oxidation (M)[1] |      | Mascot      |
| 973.4948   | 973.5086    | 0.0138   | 14        | 173        | 181      | QLDGLGNEK |           |       |                  |      | Mascot      |
| 1003.5418  | 1003.5294   | -0.0124  | -12       | 112        | 119      | TQEKEQIK  |           |       |                  |      | Mascot      |
| 1003.5418  | 1003.5294   | -0.0124  | -12       | 112        | 119      | TQEKEQIK  |           |       |                  |      | Mascot      |

|  |           |           |         |     |     |     |             |    |     |  |  |  |  |  |  |  |        |
|--|-----------|-----------|---------|-----|-----|-----|-------------|----|-----|--|--|--|--|--|--|--|--------|
|  | 1060.5632 | 1060.537  | -0.0262 | -25 | 416 | 424 | KLLEGEESR   |    |     |  |  |  |  |  |  |  | Mascot |
|  | 1082.5992 | 1082.571  | -0.0282 | -26 | 125 | 133 | FASFDKVR    |    |     |  |  |  |  |  |  |  | Mascot |
|  | 1277.71   | 1277.6821 | -0.0279 | -22 | 405 | 415 | LALDIEIATYR |    |     |  |  |  |  |  |  |  | Mascot |
|  | 1277.71   | 1277.6821 | -0.0279 | -22 | 405 | 415 | LALDIEIATYR | 77 | 100 |  |  |  |  |  |  |  | Mascot |

9 Krt5 protein [Danio rerio] gi|39645432 57792.3 5.27 6 92 99.997 77 100

Peptide Information

| Calc. Mass | Obsrv. Mass | ± da    | ± ppm | Start Seq. | End Seq. | Sequence      | Ion Score | C. I. | % Modification   | Rank | Result Type |
|------------|-------------|---------|-------|------------|----------|---------------|-----------|-------|------------------|------|-------------|
| 973.4948   | 973.5086    | 0.0138  | 14    | 203        | 211      | QLDGLGNEK     |           |       |                  |      | Mascot      |
| 1003.5418  | 1003.5294   | -0.0124 | -12   | 142        | 149      | TQEKEQIK      |           |       |                  |      | Mascot      |
| 1003.5418  | 1003.5294   | -0.0124 | -12   | 142        | 149      | TQEKEQIK      |           |       |                  |      | Mascot      |
| 1060.5632  | 1060.537    | -0.0262 | -25   | 446        | 454      | KLLEGEESR     |           |       |                  |      | Mascot      |
| 1082.5992  | 1082.571    | -0.0282 | -26   | 155        | 163      | FASFDKVR      |           |       |                  |      | Mascot      |
| 1109.4825  | 1109.4669   | -0.0156 | -14   | 2          | 14       | SGGMGGGMGGGIR |           |       | Oxidation (M)[4] |      | Mascot      |
| 1277.71    | 1277.6821   | -0.0279 | -22   | 435        | 445      | LALDIEIATYR   |           |       |                  |      | Mascot      |
| 1277.71    | 1277.6821   | -0.0279 | -22   | 435        | 445      | LALDIEIATYR   | 77        | 100   |                  |      | Mascot      |

10 Zgc:158846 [Danio rerio] gi|158253572 55223 5.44 6 88 99.992 77 100

Peptide Information

| Calc. Mass | Obsrv. Mass | ± da    | ± ppm | Start Seq. | End Seq. | Sequence        | Ion Score | C. I. | % Modification   | Rank | Result Type |
|------------|-------------|---------|-------|------------|----------|-----------------|-----------|-------|------------------|------|-------------|
| 996.5472   | 996.5478    | 0.0006  | 1     | 421        | 429      | DIHNTGLVK       |           |       |                  |      | Mascot      |
| 1003.5418  | 1003.5294   | -0.0124 | -12   | 74         | 81       | TQEKEQIK        |           |       |                  |      | Mascot      |
| 1003.5418  | 1003.5294   | -0.0124 | -12   | 74         | 81       | TQEKEQIK        |           |       |                  |      | Mascot      |
| 1060.5632  | 1060.537    | -0.0262 | -25   | 378        | 386      | KLLEGEESR       |           |       |                  |      | Mascot      |
| 1082.5992  | 1082.571    | -0.0282 | -26   | 87         | 95       | FASFDKVR        |           |       |                  |      | Mascot      |
| 1277.71    | 1277.6821   | -0.0279 | -22   | 367        | 377      | LALDIEIATYR     |           |       |                  |      | Mascot      |
| 1277.71    | 1277.6821   | -0.0279 | -22   | 367        | 377      | LALDIEIATYR     | 77        | 100   |                  |      | Mascot      |
| 1851.9269  | 1851.8809   | -0.046  | -25   | 103        | 117      | MLETKWSVLQEQTSR |           |       | Oxidation (M)[1] |      | Mascot      |

11 keratin 4 [Danio rerio] gi|18858947 54242 5.42 5 87 99.992 77 100

Peptide Information

| Calc. Mass | Obsrv. Mass | ± da   | ± ppm | Start Seq. | End Seq. | Sequence  | Ion Score | C. I. | % Modification   | Rank | Result Type |
|------------|-------------|--------|-------|------------|----------|-----------|-----------|-------|------------------|------|-------------|
| 882.4349   | 882.5468    | 0.1119 | 127   | 33         | 40       | MSSVTSVR  |           |       | Oxidation (M)[1] |      | Mascot      |
| 973.4948   | 973.5086    | 0.0138 | 14    | 174        | 182      | QLDGLGNEK |           |       |                  |      | Mascot      |

|    |                                            |           |         |     |            |     |             |      |    |     |        |    |     |  |  |  |        |
|----|--------------------------------------------|-----------|---------|-----|------------|-----|-------------|------|----|-----|--------|----|-----|--|--|--|--------|
|    | 1003.5101                                  | 1003.5294 | 0.0193  | 19  | 389        | 396 | QDMARQVR    |      |    |     |        |    |     |  |  |  | Mascot |
|    | 1003.5101                                  | 1003.5294 | 0.0193  | 19  | 389        | 396 | QDMARQVR    |      |    |     |        |    |     |  |  |  | Mascot |
|    | 1060.5632                                  | 1060.537  | -0.0262 | -25 | 417        | 425 | KLLEGEESR   |      |    |     |        |    |     |  |  |  | Mascot |
|    | 1277.71                                    | 1277.6821 | -0.0279 | -22 | 406        | 416 | LALDIEIATYR |      |    |     |        |    |     |  |  |  | Mascot |
|    | 1277.71                                    | 1277.6821 | -0.0279 | -22 | 406        | 416 | LALDIEIATYR |      | 77 | 100 |        |    |     |  |  |  | Mascot |
| 12 | keratin type II, tail domain [Danio rerio] |           |         |     | gi 4107170 |     | 10583.9     | 8.29 | 2  | 87  | 99.991 | 77 | 100 |  |  |  |        |

Peptide Information

| Calc. Mass | Obsrv. Mass | ± da    | ± ppm | Start Seq. | End Seq. | Sequence    | Ion Score | C. I. | % Modification | Rank | Result Type |
|------------|-------------|---------|-------|------------|----------|-------------|-----------|-------|----------------|------|-------------|
| 1060.5632  | 1060.537    | -0.0262 | -25   | 15         | 23       | KLLEGEESR   |           |       |                |      | Mascot      |
| 1277.71    | 1277.6821   | -0.0279 | -22   | 4          | 14       | LALDIEIATYR |           |       |                |      | Mascot      |
| 1277.71    | 1277.6821   | -0.0279 | -22   | 4          | 14       | LALDIEIATYR | 77        | 100   |                |      | Mascot      |

|    |                                                          |  |  |  |              |  |         |      |   |    |       |    |     |  |  |  |  |
|----|----------------------------------------------------------|--|--|--|--------------|--|---------|------|---|----|-------|----|-----|--|--|--|--|
| 13 | PREDICTED: keratin, type II cytoskeletal 8 [Danio rerio] |  |  |  | gi 125849603 |  | 49959.2 | 5.46 | 6 | 87 | 99.99 | 77 | 100 |  |  |  |  |
|----|----------------------------------------------------------|--|--|--|--------------|--|---------|------|---|----|-------|----|-----|--|--|--|--|

Peptide Information

| Calc. Mass | Obsrv. Mass | ± da    | ± ppm | Start Seq. | End Seq. | Sequence    | Ion Score | C. I. | % Modification   | Rank | Result Type |
|------------|-------------|---------|-------|------------|----------|-------------|-----------|-------|------------------|------|-------------|
| 973.4948   | 973.5086    | 0.0138  | 14    | 343        | 350      | DLEEALQR    |           |       |                  |      | Mascot      |
| 1003.5418  | 1003.5294   | -0.0124 | -12   | 77         | 84       | TQEKEQIK    |           |       |                  |      | Mascot      |
| 1003.5418  | 1003.5294   | -0.0124 | -12   | 77         | 84       | TQEKEQIK    |           |       |                  |      | Mascot      |
| 1060.6361  | 1060.537    | -0.0991 | -93   | 422        | 430      | IVIKTTETR   |           |       |                  |      | Mascot      |
| 1090.4946  | 1090.5067   | 0.0121  | 11    | 138        | 146      | QMDVVNNDR   |           |       |                  |      | Mascot      |
| 1262.5906  | 1262.5718   | -0.0188 | -15   | 137        | 146      | RQMDVVNNDR  |           |       | Oxidation (M)[3] |      | Mascot      |
| 1277.71    | 1277.6821   | -0.0279 | -22   | 370        | 380      | LALDIEIATYR |           |       |                  |      | Mascot      |
| 1277.71    | 1277.6821   | -0.0279 | -22   | 370        | 380      | LALDIEIATYR | 77        | 100   |                  |      | Mascot      |

|    |                                                                  |  |  |  |              |  |         |      |   |    |        |    |     |  |  |  |  |
|----|------------------------------------------------------------------|--|--|--|--------------|--|---------|------|---|----|--------|----|-----|--|--|--|--|
| 14 | novel protein similar to vertebrate keratin family [Danio rerio] |  |  |  | gi 157885973 |  | 46874.6 | 5.23 | 5 | 86 | 99.989 | 77 | 100 |  |  |  |  |
|----|------------------------------------------------------------------|--|--|--|--------------|--|---------|------|---|----|--------|----|-----|--|--|--|--|

Peptide Information

| Calc. Mass | Obsrv. Mass | ± da    | ± ppm | Start Seq. | End Seq. | Sequence    | Ion Score | C. I. | % Modification   | Rank | Result Type |
|------------|-------------|---------|-------|------------|----------|-------------|-----------|-------|------------------|------|-------------|
| 973.4948   | 973.5086    | 0.0138  | 14    | 365        | 372      | DLEEALQR    |           |       |                  |      | Mascot      |
| 1003.5418  | 1003.5294   | -0.0124 | -12   | 99         | 106      | TQEKEQIK    |           |       |                  |      | Mascot      |
| 1003.5418  | 1003.5294   | -0.0124 | -12   | 99         | 106      | TQEKEQIK    |           |       |                  |      | Mascot      |
| 1090.4946  | 1090.5067   | 0.0121  | 11    | 160        | 168      | QMDVVNNDR   |           |       |                  |      | Mascot      |
| 1262.5906  | 1262.5718   | -0.0188 | -15   | 159        | 168      | RQMDVVNNDR  |           |       | Oxidation (M)[3] |      | Mascot      |
| 1277.71    | 1277.6821   | -0.0279 | -22   | 392        | 402      | LALDIEIATYR |           |       |                  |      | Mascot      |

|    |                         |           |         |     |             |     |             |      |    |     |        |    |        |
|----|-------------------------|-----------|---------|-----|-------------|-----|-------------|------|----|-----|--------|----|--------|
|    | 1277.71                 | 1277.6821 | -0.0279 | -22 | 392         | 402 | LALDIEIATYR |      | 77 | 100 |        |    | Mascot |
| 15 | keratin 8 [Danio rerio] |           |         |     | gi 29335502 |     | 55516.4     | 5.01 | 4  | 86  | 99.988 | 77 | 100    |

Peptide Information

| Calc. Mass | Obsrv. Mass | ± da    | ± ppm | Start Seq. | End Seq. | Sequence    | Ion Score | C. I. | % Modification   | Rank | Result Type |
|------------|-------------|---------|-------|------------|----------|-------------|-----------|-------|------------------|------|-------------|
| 1003.5418  | 1003.5294   | -0.0124 | -12   | 92         | 99       | TQEKEQIK    |           |       |                  |      | Mascot      |
| 1003.5418  | 1003.5294   | -0.0124 | -12   | 92         | 99       | TQEKEQIK    |           |       |                  |      | Mascot      |
| 1082.5992  | 1082.571    | -0.0282 | -26   | 105        | 113      | FASFDKVR    |           |       |                  |      | Mascot      |
| 1277.71    | 1277.6821   | -0.0279 | -22   | 385        | 395      | LALDIEIATYR |           |       |                  |      | Mascot      |
| 1277.71    | 1277.6821   | -0.0279 | -22   | 385        | 395      | LALDIEIATYR | 77        | 100   |                  |      | Mascot      |
| 1475.7635  | 1475.72     | -0.0435 | -29   | 308        | 319      | TEIADLNRMQR |           |       | Oxidation (M)[9] |      | Mascot      |

|    |                         |  |  |  |              |  |         |     |   |    |        |    |     |
|----|-------------------------|--|--|--|--------------|--|---------|-----|---|----|--------|----|-----|
| 16 | Keratin 8 [Danio rerio] |  |  |  | gi 159155987 |  | 57624.4 | 5.1 | 4 | 85 | 99.987 | 77 | 100 |
|----|-------------------------|--|--|--|--------------|--|---------|-----|---|----|--------|----|-----|

Peptide Information

| Calc. Mass | Obsrv. Mass | ± da    | ± ppm | Start Seq. | End Seq. | Sequence    | Ion Score | C. I. | % Modification   | Rank | Result Type |
|------------|-------------|---------|-------|------------|----------|-------------|-----------|-------|------------------|------|-------------|
| 1003.5418  | 1003.5294   | -0.0124 | -12   | 113        | 120      | TQEKEQIK    |           |       |                  |      | Mascot      |
| 1003.5418  | 1003.5294   | -0.0124 | -12   | 113        | 120      | TQEKEQIK    |           |       |                  |      | Mascot      |
| 1082.5992  | 1082.571    | -0.0282 | -26   | 126        | 134      | FASFDKVR    |           |       |                  |      | Mascot      |
| 1277.71    | 1277.6821   | -0.0279 | -22   | 406        | 416      | LALDIEIATYR |           |       |                  |      | Mascot      |
| 1277.71    | 1277.6821   | -0.0279 | -22   | 406        | 416      | LALDIEIATYR | 77        | 100   |                  |      | Mascot      |
| 1475.7635  | 1475.72     | -0.0435 | -29   | 329        | 340      | TEIADLNRMQR |           |       | Oxidation (M)[9] |      | Mascot      |

|    |                         |  |  |  |             |  |         |      |   |    |        |    |     |
|----|-------------------------|--|--|--|-------------|--|---------|------|---|----|--------|----|-----|
| 17 | keratin 5 [Danio rerio] |  |  |  | gi 18858425 |  | 58550.6 | 5.34 | 5 | 84 | 99.981 | 77 | 100 |
|----|-------------------------|--|--|--|-------------|--|---------|------|---|----|--------|----|-----|

Peptide Information

| Calc. Mass | Obsrv. Mass | ± da    | ± ppm | Start Seq. | End Seq. | Sequence    | Ion Score | C. I. | % Modification | Rank | Result Type |
|------------|-------------|---------|-------|------------|----------|-------------|-----------|-------|----------------|------|-------------|
| 973.4948   | 973.5086    | 0.0138  | 14    | 213        | 221      | QLDGLGNEK   |           |       |                |      | Mascot      |
| 1003.5418  | 1003.5294   | -0.0124 | -12   | 152        | 159      | TQEKEQIK    |           |       |                |      | Mascot      |
| 1003.5418  | 1003.5294   | -0.0124 | -12   | 152        | 159      | TQEKEQIK    |           |       |                |      | Mascot      |
| 1060.5632  | 1060.537    | -0.0262 | -25   | 456        | 464      | KLLEGESR    |           |       |                |      | Mascot      |
| 1082.5992  | 1082.571    | -0.0282 | -26   | 165        | 173      | FASFDKVR    |           |       |                |      | Mascot      |
| 1277.71    | 1277.6821   | -0.0279 | -22   | 445        | 455      | LALDIEIATYR |           |       |                |      | Mascot      |
| 1277.71    | 1277.6821   | -0.0279 | -22   | 445        | 455      | LALDIEIATYR | 77        | 100   |                |      | Mascot      |

|    |                                             |  |  |  |             |  |         |      |    |    |        |    |   |
|----|---------------------------------------------|--|--|--|-------------|--|---------|------|----|----|--------|----|---|
| 18 | centrosomal protein of 63 kDa [Danio rerio] |  |  |  | gi 41054808 |  | 79995.4 | 6.06 | 13 | 52 | 72.561 | 10 | 0 |
|----|---------------------------------------------|--|--|--|-------------|--|---------|------|----|----|--------|----|---|



| Peptide Information |                      |             |         |       |             |          |                |           |       |                        |      |        |      |   |
|---------------------|----------------------|-------------|---------|-------|-------------|----------|----------------|-----------|-------|------------------------|------|--------|------|---|
| Calc. Mass          |                      | Obsrv. Mass | ± da    | ± ppm | Start Seq.  | End Seq. | Sequence       | Ion Score | C. I. | % Modification         | Rank | Result | Type |   |
|                     | 832.3795             | 832.4694    | 0.0899  | 108   | 519         | 525      | ADEDVQR        |           |       |                        |      | Mascot |      |   |
|                     | 1036.531             | 1036.5082   | -0.0228 | -22   | 632         | 639      | FLEETLR        |           |       |                        |      | Mascot |      |   |
|                     | 1037.4503            | 1037.5016   | 0.0513  | 49    | 368         | 376      | CGEQEGMRK      |           |       |                        |      | Mascot |      |   |
|                     | 1045.4368            | 1045.5388   | 0.102   | 98    | 341         | 348      | QMEEHRSR       |           |       |                        |      | Mascot |      |   |
|                     | 1064.504             | 1064.5846   | 0.0806  | 76    | 656         | 664      | LENSNTVCK      |           |       | Carbamidomethyl (C)[8] |      | Mascot |      |   |
|                     | 1118.5986            | 1118.4829   | -0.1157 | -103  | 479         | 487      | LEMTELRAR      |           |       |                        |      | Mascot |      |   |
|                     | 1201.5292            | 1201.6139   | 0.0847  | 70    | 583         | 595      | SSASSASSSSSTR  |           |       |                        |      | Mascot |      |   |
|                     | 1300.708             | 1300.5455   | -0.1625 | -125  | 245         | 255      | STGVQQQLRR     |           |       |                        |      | Mascot |      |   |
|                     | 1329.624             | 1329.6919   | 0.0679  | 51    | 583         | 596      | SSASSASSSSSTRK |           |       |                        |      | Mascot |      |   |
|                     | 1393.6389            | 1393.6974   | 0.0585  | 42    | 209         | 220      | EQQVSCHAAHR    |           |       | Carbamidomethyl (C)[6] |      | Mascot |      |   |
|                     | 1493.7706            | 1493.6996   | -0.071  | -48   | 432         | 443      | LENQHNLNLLER   |           |       |                        |      | Mascot |      |   |
|                     | 1493.7706            | 1493.6996   | -0.071  | -48   | 432         | 443      | LENQHNLNLLER   |           |       |                        |      | Mascot |      |   |
|                     | 1638.8082            | 1638.8219   | 0.0137  | 8     | 182         | 195      | AQDSLHAQELELER |           |       |                        |      | Mascot |      |   |
|                     | 1638.8082            | 1638.8219   | 0.0137  | 8     | 182         | 195      | AQDSLHAQELELER | 10        | 0     |                        |      | Mascot |      |   |
|                     | 1707.7061            | 1707.7299   | 0.0238  | 14    | 341         | 354      | QMEEHSRCTAENK  |           |       | Oxidation (M)[2]       |      | Mascot |      |   |
| 19                  | taln-1 [Danio rerio] |             |         |       | gi 57222259 |          |                | 270469.6  | 5.86  | 22                     | 51   | 64.652 | 16   | 0 |

| Peptide Information |             |         |       |            |          |             |           |       |                        |      |             |
|---------------------|-------------|---------|-------|------------|----------|-------------|-----------|-------|------------------------|------|-------------|
| Calc. Mass          | Obsrv. Mass | ± da    | ± ppm | Start Seq. | End Seq. | Sequence    | Ion Score | C. I. | % Modification         | Rank | Result Type |
| 807.4359            | 807.3789    | -0.057  | -71   | 1520       | 1526     | QFVQSAK     |           |       |                        |      | Mascot      |
| 973.4883            | 973.5086    | 0.0203  | 21    | 1195       | 1203     | SVNCLPGQR   |           |       |                        |      | Mascot      |
| 1003.5054           | 1003.5294   | 0.024   | 24    | 2506       | 2513     | EKELEAR     | 4         | 0     |                        |      | Mascot      |
| 1003.5054           | 1003.5294   | 0.024   | 24    | 2506       | 2513     | EKELEAR     |           |       |                        |      | Mascot      |
| 1060.5132           | 1060.537    | 0.0238  | 22    | 67         | 74       | ALDYMLR     |           |       | Oxidation (M)[6]       |      | Mascot      |
| 1082.4783           | 1082.571    | 0.0927  | 86    | 1083       | 1092     | CSQDLGSSTK  |           |       | Carbamidomethyl (C)[1] |      | Mascot      |
| 1107.5906           | 1107.5156   | -0.075  | -68   | 2262       | 2270     | QQLANYSKR   |           |       |                        |      | Mascot      |
| 1109.5442           | 1109.4669   | -0.0773 | -70   | 2206       | 2215     | AVADMLRSCK  |           |       | Oxidation (M)[5]       |      | Mascot      |
| 1165.6576           | 1165.5582   | -0.0994 | -85   | 1615       | 1625     | SLAVNPKDPPK |           |       |                        |      | Mascot      |
| 1179.5422           | 1179.5731   | 0.0309  | 26    | 2441       | 2450     | ADQDSQTMKR  |           |       |                        |      | Mascot      |
| 1179.5422           | 1179.5731   | 0.0309  | 26    | 2441       | 2450     | ADQDSQTMKR  | 16        | 0     |                        |      | Mascot      |
| 1194.5797           | 1194.5847   | 0.005   | 4     | 469        | 478      | QHITSGQMHR  |           |       |                        |      | Mascot      |
| 1234.5811           | 1234.6512   | 0.0701  | 57    | 1541       | 1551     | ALDGAFNQENR |           |       |                        |      | Mascot      |
| 1234.5811           | 1234.6512   | 0.0701  | 57    | 1541       | 1551     | ALDGAFNQENR |           |       |                        |      | Mascot      |

|           |           |         |      |      |      |                                |                         |        |
|-----------|-----------|---------|------|------|------|--------------------------------|-------------------------|--------|
| 1262.7136 | 1262.5718 | -0.1418 | -112 | 329  | 339  | LLGITKESVMR                    | Oxidation (M)[10]       | Mascot |
| 1307.8158 | 1307.6526 | -0.1632 | -125 | 2318 | 2328 | LEQLKPRAKPK                    |                         | Mascot |
| 1316.6804 | 1316.4987 | -0.1817 | -138 | 2193 | 2204 | QEDVIATANLSR                   |                         | Mascot |
| 1320.7271 | 1320.5532 | -0.1739 | -132 | 424  | 434  | KSTVLQQQFNK                    |                         | Mascot |
| 1475.7886 | 1475.72   | -0.0686 | -46  | 859  | 872  | LLADATARMVEAAK                 | Oxidation (M)[9]        | Mascot |
| 1493.7628 | 1493.6996 | -0.0632 | -42  | 1601 | 1614 | AMLESSTGLIQTAR                 | Oxidation (M)[2]        | Mascot |
| 1493.7628 | 1493.6996 | -0.0632 | -42  | 1601 | 1614 | AMLESSTGLIQTAR                 | Oxidation (M)[2]        | Mascot |
| 1638.8077 | 1638.8219 | 0.0142  | 9    | 92   | 106  | MLDGTVKTMVDDSK                 |                         | Mascot |
| 1638.8077 | 1638.8219 | 0.0142  | 9    | 92   | 106  | MLDGTVKTMVDDSK                 |                         | Mascot |
| 2211.1865 | 2211.0513 | -0.1352 | -61  | 2059 | 2080 | LGAASLGSEDPETQVVLINAVK         |                         | Mascot |
| 2225.1846 | 2225.0667 | -0.1179 | -53  | 718  | 738  | VVVAPTISSPVCQEQLIEAGK          | Carbamidomethyl (C)[12] | Mascot |
| 2233.0952 | 2233.0325 | -0.0627 | -28  | 1337 | 1357 | AVTDSINQLISMCTQQAPGQK          |                         | Mascot |
| 3312.6814 | 3312.2224 | -0.459  | -139 | 1748 | 1776 | ILNSQQQMMNVLDQTKTLAESALQMLYTAK | Oxidation (M)[8,24]     | Mascot |

20 RAS guanylyl-releasing protein 1 [Danio rerio] gi|113678177 77834.7 7.57 13 50 53.402

#### Peptide Information

| Calc. Mass | Obsrv. Mass | ± da    | ± ppm | Start Seq. | End Seq. | Sequence                | Ion Score | C. I. % | Modification                             | Rank | Result Type |
|------------|-------------|---------|-------|------------|----------|-------------------------|-----------|---------|------------------------------------------|------|-------------|
| 842.4882   | 842.4883    | 0.0001  | 0     | 271        | 277      | FIHVAQK                 |           |         |                                          |      | Mascot      |
| 1003.3971  | 1003.5294   | 0.1323  | 132   | 1          | 8        | MGFDTMNR                |           |         | Oxidation (M)[1,6]                       |      | Mascot      |
| 1003.5319  | 1003.5294   | -0.0025 | -2    | 224        | 232      | SYVVHGSVR               |           |         |                                          |      | Mascot      |
| 1090.4873  | 1090.5067   | 0.0194  | 18    | 336        | 344      | VYSECTGFK               |           |         | Carbamidomethyl (C)[5]                   |      | Mascot      |
| 1157.6677  | 1157.5648   | -0.1029 | -89   | 678        | 687      | QHPPLEKVLP              |           |         |                                          |      | Mascot      |
| 1165.5703  | 1165.5582   | -0.0121 | -10   | 580        | 589      | DVVGMECLKR              |           |         | Oxidation (M)[5]                         |      | Mascot      |
| 1300.5343  | 1300.5455   | 0.0112  | 9     | 569        | 579      | DCGVNCHKHCK             |           |         | Carbamidomethyl (C)[2]                   |      | Mascot      |
| 1357.5558  | 1357.6864   | 0.1306  | 96    | 569        | 579      | DCGVNCHKHCK             |           |         | Carbamidomethyl (C)[2,6]                 |      | Mascot      |
| 1357.5558  | 1357.6864   | 0.1306  | 96    | 569        | 579      | DCGVNCHKHCK             |           |         | Carbamidomethyl (C)[2,6]                 |      | Mascot      |
| 1365.6793  | 1365.6073   | -0.072  | -53   | 135        | 145      | LMFEMDPLEK              |           |         |                                          |      | Mascot      |
| 1434.647   | 1434.7361   | 0.0891  | 62    | 213        | 223      | NFCNVSFIDYR             |           |         | Carbamidomethyl (C)[3]                   |      | Mascot      |
| 1434.6538  | 1434.7361   | 0.0823  | 57    | 577        | 588      | HCKDVVGMECLK            |           |         | Carbamidomethyl (C)[2], Oxidation (M)[8] |      | Mascot      |
| 1475.6803  | 1475.72     | 0.0397  | 27    | 577        | 588      | HCKDVVGMECLK            |           |         | Carbamidomethyl (C)[2,10]                |      | Mascot      |
| 1851.8438  | 1851.8809   | 0.0371  | 20    | 513        | 528      | EEITSYFMRGMSVCAK        |           |         |                                          |      | Mascot      |
| 1867.8387  | 1867.8777   | 0.039   | 21    | 513        | 528      | EEITSYFMRGMSVCAK        |           |         | Oxidation (M)[8]                         |      | Mascot      |
| 2284.2812  | 2284.1187   | -0.1625 | -71   | 433        | 454      | IQPVAPVKPPVVAEWGSGVTPR  |           |         |                                          |      | Mascot      |
| 2501.2024  | 2501.1843   | -0.0181 | -7    | 33         | 55       | MTCPSAQEISRALQSPPAHASFR |           |         | Oxidation (M)[1]                         |      | Mascot      |

21 RecName: Full=Centrosomal protein of 63 kDa; Short=Cep63 gi|257096328 83041.8 5.78 13 47 17.135 10 0

Peptide Information

| Calc. Mass | Obsrv. Mass | ± da    | ± ppm | Start Seq. | End Seq. | Sequence       | Ion Score | C. I. % | Modification           | Rank | Result Type |
|------------|-------------|---------|-------|------------|----------|----------------|-----------|---------|------------------------|------|-------------|
| 832.3795   | 832.4694    | 0.0899  | 108   | 546        | 552      | ADEDVQR        |           |         |                        |      | Mascot      |
| 1036.531   | 1036.5082   | -0.0228 | -22   | 659        | 666      | FLEETLR        |           |         |                        |      | Mascot      |
| 1037.4503  | 1037.5016   | 0.0513  | 49    | 395        | 403      | CGEQEGMRK      |           |         |                        |      | Mascot      |
| 1045.4368  | 1045.5388   | 0.102   | 98    | 368        | 375      | QMEEHRSR       |           |         |                        |      | Mascot      |
| 1064.504   | 1064.5846   | 0.0806  | 76    | 683        | 691      | LENSNTVCK      |           |         | Carbamidomethyl (C)[8] |      | Mascot      |
| 1118.5986  | 1118.4829   | -0.1157 | -103  | 506        | 514      | LEMTELRRAR     |           |         |                        |      | Mascot      |
| 1201.5292  | 1201.6139   | 0.0847  | 70    | 610        | 622      | SSASSASSSSSTR  |           |         |                        |      | Mascot      |
| 1300.708   | 1300.5455   | -0.1625 | -125  | 272        | 282      | STGVQQQLRR     |           |         |                        |      | Mascot      |
| 1329.624   | 1329.6919   | 0.0679  | 51    | 610        | 623      | SSASSASSSSSTRK |           |         |                        |      | Mascot      |
| 1393.6389  | 1393.6974   | 0.0585  | 42    | 236        | 247      | EQQVSCHAAHR    |           |         | Carbamidomethyl (C)[6] |      | Mascot      |
| 1493.7706  | 1493.6996   | -0.071  | -48   | 459        | 470      | LENQHLNDLLER   |           |         |                        |      | Mascot      |
| 1493.7706  | 1493.6996   | -0.071  | -48   | 459        | 470      | LENQHLNDLLER   |           |         |                        |      | Mascot      |
| 1638.8082  | 1638.8219   | 0.0137  | 8     | 209        | 222      | AQDSLHAQELELER |           |         |                        |      | Mascot      |
| 1638.8082  | 1638.8219   | 0.0137  | 8     | 209        | 222      | AQDSLHAQELELER | 10        | 0       |                        |      | Mascot      |
| 1707.7061  | 1707.7299   | 0.0238  | 14    | 368        | 381      | QMEEHRSRCTAENK |           |         | Oxidation (M)[2]       |      | Mascot      |

22 transgelin 3a [Danio rerio] gi|156739273 24423.1 6.92 9 46 0

Peptide Information

| Calc. Mass | Obsrv. Mass | ± da    | ± ppm | Start Seq. | End Seq. | Sequence          | Ion Score | C. I. % | Modification     | Rank | Result Type |
|------------|-------------|---------|-------|------------|----------|-------------------|-----------|---------|------------------|------|-------------|
| 1037.4899  | 1037.5016   | 0.0117  | 11    | 161        | 168      | EFSEEQLR          |           |         |                  |      | Mascot      |
| 1082.5914  | 1082.571    | -0.0204 | -19   | 80         | 88       | ITESKMVFK         |           |         |                  |      | Mascot      |
| 1157.5487  | 1157.5648   | 0.0161  | 14    | 146        | 154      | GDPDWFHRK         |           |         |                  |      | Mascot      |
| 1165.5782  | 1165.5582   | -0.02   | -17   | 197        | 205      | QIMRYDSPR         |           |         |                  |      | Mascot      |
| 1179.6013  | 1179.5731   | -0.0282 | -24   | 55         | 64       | WLMSGTILCR        |           |         |                  |      | Mascot      |
| 1179.6013  | 1179.5731   | -0.0282 | -24   | 55         | 64       | WLMSGTILCR        |           |         |                  |      | Mascot      |
| 1193.5909  | 1193.5867   | -0.0042 | -4    | 160        | 168      | REFSEEQLR         |           |         |                  |      | Mascot      |
| 1234.6711  | 1234.6512   | -0.0199 | -16   | 128        | 139      | TLMALGSEALTK      |           |         |                  |      | Mascot      |
| 1234.6711  | 1234.6512   | -0.0199 | -16   | 128        | 139      | TLMALGSEALTK      |           |         |                  |      | Mascot      |
| 1308.6477  | 1308.6281   | -0.0196 | -15   | 1          | 12       | MANRGPSYGLSR      |           |         |                  |      | Mascot      |
| 1308.6477  | 1308.6281   | -0.0196 | -15   | 1          | 12       | MANRGPSYGLSR      |           |         |                  |      | Mascot      |
| 1993.9647  | 1993.926    | -0.0387 | -19   | 128        | 145      | TLMALGSEALTKDDGHY |           |         | Oxidation (M)[3] |      | Mascot      |

23      R  
 hypothetical protein LOC100158480 [Xenopus  
 (Silurana) tropicalis]      gi|189230136      48869.1      6.2      10      45      0

Peptide Information

| Calc. Mass | Obsrv. Mass | ± da    | ± ppm | Start Seq. | End Seq. | Sequence                    | Ion Score | C. I. | % Modification    | Rank | Result Type |
|------------|-------------|---------|-------|------------|----------|-----------------------------|-----------|-------|-------------------|------|-------------|
| 807.3478   | 807.3789    | 0.0311  | 39    | 88         | 94       | ESQSN DK                    |           |       |                   |      | Mascot      |
| 882.5658   | 882.5468    | -0.019  | -22   | 141        | 148      | EAVILPIK                    |           |       |                   |      | Mascot      |
| 1003.4989  | 1003.5294   | 0.0305  | 30    | 1          | 9        | MAANN NLQK                  | 6         | 0     |                   |      | Mascot      |
| 1003.4989  | 1003.5294   | 0.0305  | 30    | 1          | 9        | MAANN NLQK                  |           |       |                   |      | Mascot      |
| 1045.5789  | 1045.5388   | -0.0401 | -38   | 348        | 356      | KVQSATHFK                   |           |       |                   |      | Mascot      |
| 1157.5109  | 1157.5648   | 0.0539  | 47    | 428        | 437      | KFTEDFGQEG                  |           |       |                   |      | Mascot      |
| 1300.712   | 1300.5455   | -0.1665 | -128  | 349        | 359      | VQSATHFKQVR                 |           |       |                   |      | Mascot      |
| 1323.8246  | 1323.6423   | -0.1823 | -138  | 137        | 148      | EALKEAVILPIK                |           |       |                   |      | Mascot      |
| 1323.8246  | 1323.6423   | -0.1823 | -138  | 137        | 148      | EALKEAVILPIK                |           |       |                   |      | Mascot      |
| 1493.8223  | 1493.6996   | -0.1227 | -82   | 288        | 299      | RIYIPLPEEHAR                |           |       |                   |      | Mascot      |
| 1493.8223  | 1493.6996   | -0.1227 | -82   | 288        | 299      | RIYIPLPEEHAR                |           |       |                   |      | Mascot      |
| 1994.0204  | 1993.926    | -0.0944 | -47   | 289        | 304      | IYIPLPEEHAR SFMFK           |           |       | Oxidation (M)[14] |      | Mascot      |
| 2283.1536  | 2283.1252   | -0.0284 | -12   | 305        | 325      | LNLGTT P NSLTESDFMTL<br>GKK |           |       | Oxidation (M)[16] |      | Mascot      |

24      vacuolar protein sorting 4 homolog b-like [Danio rerio]      gi|155369339      48868.1      6.66      10      45      0

Peptide Information

| Calc. Mass | Obsrv. Mass | ± da    | ± ppm | Start Seq. | End Seq. | Sequence             | Ion Score | C. I. | % Modification    | Rank | Result Type |
|------------|-------------|---------|-------|------------|----------|----------------------|-----------|-------|-------------------|------|-------------|
| 807.3478   | 807.3789    | 0.0311  | 39    | 88         | 94       | ESQSN DK             |           |       |                   |      | Mascot      |
| 882.5658   | 882.5468    | -0.019  | -22   | 141        | 148      | EAVILPIK             |           |       |                   |      | Mascot      |
| 1003.4989  | 1003.5294   | 0.0305  | 30    | 1          | 9        | MAANN NLQK           | 6         | 0     |                   |      | Mascot      |
| 1003.4989  | 1003.5294   | 0.0305  | 30    | 1          | 9        | MAANN NLQK           |           |       |                   |      | Mascot      |
| 1045.5789  | 1045.5388   | -0.0401 | -38   | 348        | 356      | KVQSATHFK            |           |       |                   |      | Mascot      |
| 1157.5109  | 1157.5648   | 0.0539  | 47    | 428        | 437      | KFTEDFGQEG           |           |       |                   |      | Mascot      |
| 1300.712   | 1300.5455   | -0.1665 | -128  | 349        | 359      | VQSATHFKQVR          |           |       |                   |      | Mascot      |
| 1323.8246  | 1323.6423   | -0.1823 | -138  | 137        | 148      | EALKEAVILPIK         |           |       |                   |      | Mascot      |
| 1323.8246  | 1323.6423   | -0.1823 | -138  | 137        | 148      | EALKEAVILPIK         |           |       |                   |      | Mascot      |
| 1493.8223  | 1493.6996   | -0.1227 | -82   | 288        | 299      | RIYIPLPEEHAR         |           |       |                   |      | Mascot      |
| 1493.8223  | 1493.6996   | -0.1227 | -82   | 288        | 299      | RIYIPLPEEHAR         |           |       |                   |      | Mascot      |
| 1994.0204  | 1993.926    | -0.0944 | -47   | 289        | 304      | IYIPLPEEHAR SFMFK    |           |       | Oxidation (M)[14] |      | Mascot      |
| 2283.1536  | 2283.1252   | -0.0284 | -12   | 305        | 325      | LNLGTT P NSLTESDFMTL |           |       | Oxidation (M)[16] |      | Mascot      |

25 vacuolar protein sorting-associated protein 4B [Danio rerio] GKK gi|41053850 48887.2 7 10 44 0

Peptide Information

| Calc. Mass | Obsrv. Mass | ± da    | ± ppm | Start Seq. | End Seq. | Sequence                   | Ion Score | C. I. | % Modification    | Rank | Result Type |
|------------|-------------|---------|-------|------------|----------|----------------------------|-----------|-------|-------------------|------|-------------|
| 807.3478   | 807.3789    | 0.0311  | 39    | 88         | 94       | ESQSNDK                    |           |       |                   |      | Mascot      |
| 882.5658   | 882.5468    | -0.019  | -22   | 141        | 148      | EAVILPIK                   |           |       |                   |      | Mascot      |
| 1003.4989  | 1003.5294   | 0.0305  | 30    | 1          | 9        | MAANNLQK                   | 6         | 0     |                   |      | Mascot      |
| 1003.4989  | 1003.5294   | 0.0305  | 30    | 1          | 9        | MAANNLQK                   |           |       |                   |      | Mascot      |
| 1045.5789  | 1045.5388   | -0.0401 | -38   | 348        | 356      | KVQSATHFK                  |           |       |                   |      | Mascot      |
| 1157.5109  | 1157.5648   | 0.0539  | 47    | 428        | 437      | KFTEDFGQEG                 |           |       |                   |      | Mascot      |
| 1300.712   | 1300.5455   | -0.1665 | -128  | 349        | 359      | VQSATHFKQVR                |           |       |                   |      | Mascot      |
| 1323.8246  | 1323.6423   | -0.1823 | -138  | 137        | 148      | EALKEAVILPIK               |           |       |                   |      | Mascot      |
| 1323.8246  | 1323.6423   | -0.1823 | -138  | 137        | 148      | EALKEAVILPIK               |           |       |                   |      | Mascot      |
| 1493.8223  | 1493.6996   | -0.1227 | -82   | 288        | 299      | RIYIPLPEEHAR               |           |       |                   |      | Mascot      |
| 1493.8223  | 1493.6996   | -0.1227 | -82   | 288        | 299      | RIYIPLPEEHAR               |           |       |                   |      | Mascot      |
| 1994.0204  | 1993.926    | -0.0944 | -47   | 289        | 304      | IYIPLPEEHARSMFK            |           |       | Oxidation (M)[14] |      | Mascot      |
| 2283.1536  | 2283.1252   | -0.0284 | -12   | 305        | 325      | LNLGTTNPNSLTESDFMTL<br>GKK |           |       | Oxidation (M)[16] |      | Mascot      |

26 PREDICTED: centrosomal protein of 152 kDa-like [Danio rerio] gi|189537675 179442.1 5.41 22 43 0

Peptide Information

| Calc. Mass | Obsrv. Mass | ± da    | ± ppm | Start Seq. | End Seq. | Sequence     | Ion Score | C. I. | % Modification                           | Rank | Result Type |
|------------|-------------|---------|-------|------------|----------|--------------|-----------|-------|------------------------------------------|------|-------------|
| 807.4108   | 807.3789    | -0.0319 | -40   | 688        | 693      | TQQQFR       |           |       |                                          |      | Mascot      |
| 832.4709   | 832.4694    | -0.0015 | -2    | 1217       | 1223     | IKGDMLR      |           |       |                                          |      | Mascot      |
| 913.4672   | 913.3871    | -0.0801 | -88   | 1136       | 1142     | HLEKACR      |           |       | Carbamidomethyl (C)[6]                   |      | Mascot      |
| 995.5268   | 995.493     | -0.0338 | -34   | 1101       | 1109     | HEAEIAGLR    |           |       |                                          |      | Mascot      |
| 996.5108   | 996.5478    | 0.037   | 37    | 754        | 761      | LEENLHNK     |           |       |                                          |      | Mascot      |
| 1037.5851  | 1037.5016   | -0.0835 | -80   | 980        | 987      | VQLQREHK     |           |       |                                          |      | Mascot      |
| 1060.4905  | 1060.537    | 0.0465  | 44    | 1045       | 1053     | EALQEGEER    |           |       |                                          |      | Mascot      |
| 1064.5227  | 1064.5846   | 0.0619  | 58    | 359        | 366      | LQMVELCR     |           |       | Carbamidomethyl (C)[7], Oxidation (M)[3] |      | Mascot      |
| 1157.6273  | 1157.5648   | -0.0625 | -54   | 340        | 348      | EQEIVKQQR    |           |       |                                          |      | Mascot      |
| 1234.6174  | 1234.6512   | 0.0338  | 27    | 1520       | 1531     | EPIPGSEGHGVR |           |       |                                          |      | Mascot      |
| 1234.6174  | 1234.6512   | 0.0338  | 27    | 1520       | 1531     | EPIPGSEGHGVR |           |       |                                          |      | Mascot      |
| 1262.5933  | 1262.5718   | -0.0215 | -17   | 669        | 678      | EMIQELDQEK   |           |       |                                          |      | Mascot      |

|           |           |         |      |      |      |                                   |  |  |  |                        |  |        |
|-----------|-----------|---------|------|------|------|-----------------------------------|--|--|--|------------------------|--|--------|
| 1277.6332 | 1277.6821 | 0.0489  | 38   | 607  | 617  | DSQVRESSLEK                       |  |  |  |                        |  | Mascot |
| 1277.6332 | 1277.6821 | 0.0489  | 38   | 607  | 617  | DSQVRESSLEK                       |  |  |  |                        |  | Mascot |
| 1307.6842 | 1307.6526 | -0.0316 | -24  | 497  | 507  | EQINLYESAIAK                      |  |  |  |                        |  | Mascot |
| 1308.6399 | 1308.6281 | -0.0118 | -9   | 658  | 668  | AVNSELCTKMR                       |  |  |  | Carbamidomethyl (C)[7] |  | Mascot |
| 1308.6399 | 1308.6281 | -0.0118 | -9   | 658  | 668  | AVNSELCTKMR                       |  |  |  | Carbamidomethyl (C)[7] |  | Mascot |
| 1320.6027 | 1320.5532 | -0.0495 | -37  | 1054 | 1064 | RESPEDTETTR                       |  |  |  |                        |  | Mascot |
| 1340.7103 | 1340.6432 | -0.0671 | -50  | 561  | 571  | NELQRCLSHLK                       |  |  |  |                        |  | Mascot |
| 1357.7686 | 1357.6864 | -0.0822 | -61  | 575  | 585  | LKISELQEELR                       |  |  |  |                        |  | Mascot |
| 1357.7686 | 1357.6864 | -0.0822 | -61  | 575  | 585  | LKISELQEELR                       |  |  |  |                        |  | Mascot |
| 1390.671  | 1390.6492 | -0.0218 | -16  | 908  | 918  | SAEERWQDTLR                       |  |  |  |                        |  | Mascot |
| 1434.6543 | 1434.7361 | 0.0818  | 57   | 224  | 235  | MFNPQVNNQNGR                      |  |  |  | Oxidation (M)[1]       |  | Mascot |
| 1434.6543 | 1434.7361 | 0.0818  | 57   | 224  | 235  | MFNPQVNNQNGR                      |  |  |  | Oxidation (M)[1]       |  | Mascot |
| 2225.1191 | 2225.0667 | -0.0524 | -24  | 730  | 749  | LTDLSQEVLAVQECYLAVCK              |  |  |  |                        |  | Mascot |
| 2501.1975 | 2501.1843 | -0.0132 | -5   | 1253 | 1274 | RYYLTCQLQELLEDDGGQS<br>AGAEK      |  |  |  | Carbamidomethyl (C)[6] |  | Mascot |
| 3312.6746 | 3312.2224 | -0.4522 | -137 | 1485 | 1513 | SIGDNSDVTIYKEIIQPQS<br>YSKPNVFVDR |  |  |  |                        |  | Mascot |

27 RecName: Full=Keratin, type I cytoskeletal 18; gi|148886613 48601.1 5.53 11 43 0  
AltName: Full=Cytokeratin-18; Short=CK-18; AltName:

#### Peptide Information

| Calc. Mass | Obsrv. Mass | ± da    | ± ppm | Start Seq. | End Seq. | Sequence     | Ion Score | C. I. % | Modification     | Rank | Result Type |
|------------|-------------|---------|-------|------------|----------|--------------|-----------|---------|------------------|------|-------------|
| 807.3995   | 807.3789    | -0.0206 | -26   | 163        | 169      | LAADDFR      |           |         |                  |      | Mascot      |
| 832.4523   | 832.4694    | 0.0171  | 21    | 322        | 329      | GSLEGLR      |           |         |                  |      | Mascot      |
| 882.4753   | 882.5468    | 0.0715  | 81    | 260        | 266      | YEKMALK      |           |         |                  |      | Mascot      |
| 996.4996   | 996.5478    | 0.0482  | 48    | 172        | 179      | YESELSIR     |           |         |                  |      | Mascot      |
| 1045.4697  | 1045.5388   | 0.0691  | 66    | 124        | 132      | GPDVHDYSR    |           |         |                  |      | Mascot      |
| 1107.5906  | 1107.5156   | -0.075  | -68   | 25         | 33       | RTTNVPTYR    |           |         |                  |      | Mascot      |
| 1157.6637  | 1157.5648   | -0.0989 | -85   | 102        | 111      | VRILEQANSK   |           |         |                  |      | Mascot      |
| 1201.6423  | 1201.6139   | -0.0284 | -24   | 395        | 404      | LQDALEEQKK   |           |         |                  |      | Mascot      |
| 1307.6875  | 1307.6526   | -0.0349 | -27   | 407        | 418      | VMTVTQTLVDGK |           |         | Oxidation (M)[2] |      | Mascot      |
| 1340.6879  | 1340.6432   | -0.0447 | -33   | 375        | 385      | MKLEAEIATYR  |           |         | Oxidation (M)[1] |      | Mascot      |
| 1434.6893  | 1434.7361   | 0.0468  | 33    | 246        | 257      | GQDLSQIMEEIR |           |         | Oxidation (M)[8] |      | Mascot      |
| 1434.6893  | 1434.7361   | 0.0468  | 33    | 246        | 257      | GQDLSQIMEEIR |           |         | Oxidation (M)[8] |      | Mascot      |

28 endoribonuclease Dicer [Danio rerio] gi|238814324 210682.5 5.14 20 43 0

#### Peptide Information

| Calc. Mass | Obsrv. Mass | ± da | ± ppm | Start Seq. | End Seq. | Sequence | Ion Score | C. I. % | Modification | Rank | Result Type |
|------------|-------------|------|-------|------------|----------|----------|-----------|---------|--------------|------|-------------|
|------------|-------------|------|-------|------------|----------|----------|-----------|---------|--------------|------|-------------|

[illegible]

| Calc. Mass | Obsrv. Mass | ± da    | ± ppm | Start Seq. | End Seq. | Sequence                  | Ion Score | C. I.  | % Modification         | Rank | Result Type |
|------------|-------------|---------|-------|------------|----------|---------------------------|-----------|--------|------------------------|------|-------------|
| 973.5254   | 973.5086    | -0.0168 | -17   | 220        | 226      | HYIHYLEK                  |           |        |                        |      | Mascot      |
| 1277.6307  | 1277.6821   | 0.0514  | 40    | 436        | 445      | CHDIIISTYR                |           |        | Carbamidomethyl (C)[1] |      | Mascot      |
| 1277.6307  | 1277.6821   | 0.0514  | 40    | 436        | 445      | CHDIIISTYR                | 35        | 90.205 | Carbamidomethyl (C)[1] |      | Mascot      |
| 2384.2344  | 2383.8896   | -0.3448 | -145  | 407        | 427      | NSAPVQVLQEYVNLIDDP<br>ELK |           |        |                        |      | Mascot      |

30 internexin neuronal intermediate filament protein, alpha gi|221307553 54608.2 5.47 10 42 0  
[Danio rerio]

Peptide Information

| Calc. Mass | Obsrv. Mass | ± da    | ± ppm | Start Seq. | End Sequence Seq.        | Ion Score | C. I. % Modification | Rank | Result Type |
|------------|-------------|---------|-------|------------|--------------------------|-----------|----------------------|------|-------------|
| 882.4427   | 882.5468    | 0.1041  | 118   | 114        | 120 NLEQHNK              |           |                      |      | Mascot      |
| 996.4996   | 996.5478    | 0.0482  | 48    | 267        | 275 GQYETLASK            |           |                      |      | Mascot      |
| 1037.4568  | 1037.5016   | 0.0448  | 43    | 202        | 210 DVDDATMVR            |           | Oxidation (M)[7]     |      | Mascot      |
| 1165.5518  | 1165.5582   | 0.0064  | 5     | 201        | 210 KDVDATMVR            |           | Oxidation (M)[8]     |      | Mascot      |
| 1262.674   | 1262.5718   | -0.1022 | -81   | 139        | 148 LAELYQQEIR           |           |                      |      | Mascot      |
| 1302.676   | 1302.6838   | 0.0078  | 6     | 328        | 338 GTNESLERQIR          |           |                      |      | Mascot      |
| 1308.6477  | 1308.6281   | -0.0196 | -15   | 23         | 34 FAGSRMSNVSPR          | 8         | 0                    |      | Mascot      |
| 1308.6477  | 1308.6281   | -0.0196 | -15   | 23         | 34 FAGSRMSNVSPR          |           |                      |      | Mascot      |
| 1393.7507  | 1393.6974   | -0.0533 | -38   | 384        | 395 MALDIEIAAYRK         |           |                      |      | Mascot      |
| 1838.8813  | 1838.8876   | 0.0063  | 3     | 288        | 303 FASLNEQATRTNEAMR     |           |                      |      | Mascot      |
| 2384.2166  | 2383.8896   | -0.327  | -137  | 375        | 394 EYQDLLNVKMALDIEIAAYR |           | Oxidation (M)[10]    |      | Mascot      |

31 PREDICTED: inner centromere protein A [Danio rerio] gi|326680010 93462.3 9.45 15 41 0

Peptide Information

| Calc. Mass | Obsrv. Mass | ± da    | ± ppm | Start Seq. | End Sequence Seq.      | Ion Score | C. I. % Modification                      | Rank | Result Type |
|------------|-------------|---------|-------|------------|------------------------|-----------|-------------------------------------------|------|-------------|
| 973.5312   | 973.5086    | -0.0226 | -23   | 444        | 452 QSATKPDVK          |           |                                           |      | Mascot      |
| 1036.4615  | 1036.5082   | 0.0467  | 45    | 386        | 395 AGESEMSTPK         |           |                                           |      | Mascot      |
| 1037.5197  | 1037.5016   | -0.0181 | -17   | 584        | 591 FQEMQAKR           |           |                                           |      | Mascot      |
| 1045.5272  | 1045.5388   | 0.0116  | 11    | 472        | 479 IEQENERK           |           |                                           |      | Mascot      |
| 1064.504   | 1064.5846   | 0.0806  | 76    | 71         | 79 VSMELNESR           |           |                                           |      | Mascot      |
| 1082.4419  | 1082.571    | 0.1291  | 119   | 167        | 176 QACEDSTSNK         |           |                                           |      | Mascot      |
| 1201.6171  | 1201.6139   | -0.0032 | -3    | 687        | 696 AEQEREALQK         |           |                                           |      | Mascot      |
| 1234.6348  | 1234.6512   | 0.0164  | 13    | 523        | 532 IEEKMAQLEK         |           | Oxidation (M)[5]                          |      | Mascot      |
| 1234.6348  | 1234.6512   | 0.0164  | 13    | 523        | 532 IEEKMAQLEK         |           | Oxidation (M)[5]                          |      | Mascot      |
| 1302.6284  | 1302.6838   | 0.0554  | 43    | 573        | 582 KQQQVEEEER         |           |                                           |      | Mascot      |
| 1329.6766  | 1329.6919   | 0.0153  | 12    | 403        | 413 KCLTSIAPHMR        |           | Carbamidomethyl (C)[2], Oxidation (M)[10] |      | Mascot      |
| 1365.7372  | 1365.6073   | -0.1299 | -95   | 131        | 143 NKTAAPAEPEPIK      |           |                                           |      | Mascot      |
| 1638.7566  | 1638.8219   | 0.0653  | 40    | 360        | 376 TSVTDDSGGSKSIGDGR  |           |                                           |      | Mascot      |
| 1638.7566  | 1638.8219   | 0.0653  | 40    | 360        | 376 TSVTDDSGGSKSIGDGR  | 1         | 0                                         |      | Mascot      |
| 1994.0232  | 1993.926    | -0.0972 | -49   | 422        | 439 NQILMMTPGSLGRSTIMK |           | Oxidation (M)[5]                          |      | Mascot      |



|    |                                                                                    |           |         |     |              |     |                                    |      |   |    |   |                   |        |
|----|------------------------------------------------------------------------------------|-----------|---------|-----|--------------|-----|------------------------------------|------|---|----|---|-------------------|--------|
|    | 2233.1743                                                                          | 2233.0325 | -0.1418 | -63 | 724          | 744 | STALNMTVDIENSVLKTP<br>VGK          |      |   |    |   | Oxidation (M)[6]  | Mascot |
|    | 3312.4443                                                                          | 3312.2224 | -0.2219 | -67 | 777          | 806 | GQKITVLVNPEDYGMDQ<br>NSDDSTDDESAPR |      |   |    |   | Oxidation (M)[15] | Mascot |
| 32 | PREDICTED: coiled-coil domain-containing protein<br>C16orf93 homolog [Danio rerio] |           |         |     | gi 292619525 |     | 33587.9                            | 5.12 | 8 | 41 | 0 |                   |        |

#### Peptide Information

| Calc. Mass | Obsrv. Mass | ± da    | ± ppm | Start Seq. | End Seq. | Sequence      | Ion Score | C. I. % | Modification            | Rank | Result Type |
|------------|-------------|---------|-------|------------|----------|---------------|-----------|---------|-------------------------|------|-------------|
| 807.3743   | 807.3789    | 0.0046  | 6     | 84         | 89       | EQNFNR        |           |         |                         |      | Mascot      |
| 870.4508   | 870.5181    | 0.0673  | 77    | 159        | 164      | HYFLYK        |           |         |                         |      | Mascot      |
| 973.5676   | 973.5086    | -0.059  | -61   | 245        | 252      | TIVEKEVR      |           |         |                         |      | Mascot      |
| 1060.5997  | 1060.537    | -0.0627 | -59   | 241        | 249      | SDLRTIVEK     |           |         |                         |      | Mascot      |
| 1157.6525  | 1157.5648   | -0.0877 | -76   | 258        | 267      | LSAQLQQELK    |           |         |                         |      | Mascot      |
| 1234.5182  | 1234.6512   | 0.133   | 108   | 194        | 204      | SQSESPADEER   |           |         |                         |      | Mascot      |
| 1234.5182  | 1234.6512   | 0.133   | 108   | 194        | 204      | SQSESPADEER   |           |         |                         |      | Mascot      |
| 1357.707   | 1357.6864   | -0.0206 | -15   | 232        | 244      | SPNPGLSSKSDLR |           |         |                         |      | Mascot      |
| 1357.707   | 1357.6864   | -0.0206 | -15   | 232        | 244      | SPNPGLSSKSDLR |           |         |                         |      | Mascot      |
| 1390.7107  | 1390.6492   | -0.0615 | -44   | 47         | 57       | STQDIERILCR   |           |         | Carbamidomethyl (C)[10] |      | Mascot      |

|    |                                                 |  |  |  |              |  |         |      |    |    |   |  |  |
|----|-------------------------------------------------|--|--|--|--------------|--|---------|------|----|----|---|--|--|
| 33 | hypothetical protein LOC100124602 [Danio rerio] |  |  |  | gi 156616350 |  | 28791.8 | 4.83 | 10 | 41 | 0 |  |  |
|----|-------------------------------------------------|--|--|--|--------------|--|---------|------|----|----|---|--|--|

#### Peptide Information

| Calc. Mass | Obsrv. Mass | ± da    | ± ppm | Start Seq. | End Seq. | Sequence      | Ion Score | C. I. % | Modification     | Rank | Result Type |
|------------|-------------|---------|-------|------------|----------|---------------|-----------|---------|------------------|------|-------------|
| 832.441    | 832.4694    | 0.0284  | 34    | 97         | 103      | ALKDEEK       |           |         |                  |      | Mascot      |
| 882.4791   | 882.5468    | 0.0677  | 77    | 33         | 39       | ELAHERK       |           |         |                  |      | Mascot      |
| 1036.5343  | 1036.5082   | -0.0261 | -25   | 1          | 10       | MAATSLEAVK    |           |         | Oxidation (M)[1] |      | Mascot      |
| 1045.6     | 1045.5388   | -0.0612 | -59   | 2          | 11       | AATSLEAVKR    |           |         |                  |      | Mascot      |
| 1107.5792  | 1107.5156   | -0.0636 | -57   | 202        | 211      | AEFAERSVAK    |           |         |                  |      | Mascot      |
| 1109.4891  | 1109.4669   | -0.0222 | -20   | 82         | 91       | AADESERGMK    |           |         | Oxidation (M)[9] |      | Mascot      |
| 1194.6729  | 1194.5847   | -0.0882 | -74   | 162        | 171      | VLDQTYKSLK    |           |         |                  |      | Mascot      |
| 1308.6178  | 1308.6281   | 0.0103  | 8     | 197        | 207      | EAETRAEFAER   |           |         |                  |      | Mascot      |
| 1308.6178  | 1308.6281   | 0.0103  | 8     | 197        | 207      | EAETRAEFAER   |           |         |                  |      | Mascot      |
| 1316.6328  | 1316.4987   | -0.1341 | -102  | 15         | 26       | LLQEQAADGAEDK |           |         |                  |      | Mascot      |
| 1475.7773  | 1475.72     | -0.0573 | -39   | 104        | 115      | MEIQEQLKEAK   |           |         | Oxidation (M)[1] |      | Mascot      |

|    |                                                                                    |  |  |  |              |  |          |      |    |    |   |  |  |
|----|------------------------------------------------------------------------------------|--|--|--|--------------|--|----------|------|----|----|---|--|--|
| 34 | PREDICTED: transformation/transcription<br>domain-associated protein [Danio rerio] |  |  |  | gi 326672350 |  | 433471.2 | 8.52 | 30 | 41 | 0 |  |  |
|----|------------------------------------------------------------------------------------|--|--|--|--------------|--|----------|------|----|----|---|--|--|

#### Peptide Information

| Calc. Mass | Obsrv. Mass | $\pm$ da | $\pm$ ppm | Start Seq. | End Seq. | Sequence         | Ion Score | C. I. | % Modification         | Rank | Result Type |
|------------|-------------|----------|-----------|------------|----------|------------------|-----------|-------|------------------------|------|-------------|
| 832.4312   | 832.4694    | 0.0382   | 46        | 1714       | 1720     | NYGITHK          |           |       |                        |      | Mascot      |
| 882.5155   | 882.5468    | 0.0313   | 35        | 2182       | 2189     | AVHSLLSR         |           |       |                        |      | Mascot      |
| 914.5206   | 914.5304    | 0.0098   | 11        | 268        | 274      | QHKLFNK          |           |       |                        |      | Mascot      |
| 995.5342   | 995.493     | -0.0412  | -41       | 112        | 119      | NILSVMFR         |           |       | Oxidation (M)[6]       |      | Mascot      |
| 1003.4553  | 1003.5294   | 0.0741   | 74        | 3311       | 3318     | CYSVAFEK         |           |       | Carbamidomethyl (C)[1] |      | Mascot      |
| 1003.4553  | 1003.5294   | 0.0741   | 74        | 3311       | 3318     | CYSVAFEK         |           |       | Carbamidomethyl (C)[1] |      | Mascot      |
| 1037.5448  | 1037.5016   | -0.0432  | -42       | 3084       | 3092     | GMFLAQINK        |           |       | Oxidation (M)[2]       |      | Mascot      |
| 1045.5095  | 1045.5388   | 0.0293   | 28        | 3604       | 3612     | EVQGNMVPR        |           |       | Oxidation (M)[6]       |      | Mascot      |
| 1060.5608  | 1060.537    | -0.0238  | -22       | 2506       | 2515     | AAFAMATHIK       |           |       |                        |      | Mascot      |
| 1109.566   | 1109.4669   | -0.0991  | -89       | 548        | 557      | TITWGITSCK       |           |       |                        |      | Mascot      |
| 1165.5817  | 1165.5582   | -0.0235  | -20       | 606        | 615      | VANCQTVRMK       |           |       | Oxidation (M)[9]       |      | Mascot      |
| 1193.5337  | 1193.5867   | 0.053    | 44        | 3264       | 3272     | CSRIMHMQR        |           |       | Oxidation (M)[5,7]     |      | Mascot      |
| 1194.5573  | 1194.5847   | 0.0274   | 23        | 1653       | 1662     | KDNMAATNWK       |           |       | Oxidation (M)[4]       |      | Mascot      |
| 1234.7054  | 1234.6512   | -0.0542  | -44       | 986        | 995      | WIPNVIISHR       |           |       |                        |      | Mascot      |
| 1234.7405  | 1234.6512   | -0.0893  | -72       | 574        | 583      | ETQIYIKLVK       | 7         | 0     |                        |      | Mascot      |
| 1262.6925  | 1262.5718   | -0.1207  | -96       | 3463       | 3472     | FMPRVEIVQK       |           |       | Oxidation (M)[2]       |      | Mascot      |
| 1308.5646  | 1308.6281   | 0.0635   | 49        | 1452       | 1461     | FCDQMMQHRLR      |           |       |                        |      | Mascot      |
| 1308.6212  | 1308.6281   | 0.0069   | 5         | 2020       | 2031     | GMSVDSAQDVKR     |           |       | Oxidation (M)[2]       |      | Mascot      |
| 1316.5536  | 1316.4987   | -0.0549  | -42       | 2248       | 2259     | SACSNSSSIDR      |           |       |                        |      | Mascot      |
| 1323.7168  | 1323.6423   | -0.0745  | -56       | 1226       | 1236     | SFHLVTHDLVR      |           |       |                        |      | Mascot      |
| 1323.7168  | 1323.6423   | -0.0745  | -56       | 1226       | 1236     | SFHLVTHDLVR      |           |       |                        |      | Mascot      |
| 1340.5544  | 1340.6432   | 0.0888   | 66        | 1452       | 1461     | FCDQMMQHRLR      |           |       | Oxidation (M)[5,6]     |      | Mascot      |
| 1357.6859  | 1357.6864   | 0.0005   | 0         | 871        | 882      | NPAETISHVAYR     |           |       |                        |      | Mascot      |
| 1357.6859  | 1357.6864   | 0.0005   | 0         | 871        | 882      | NPAETISHVAYR     |           |       |                        |      | Mascot      |
| 1365.5861  | 1365.6073   | 0.0212   | 16        | 1452       | 1461     | FCDQMMQHRLR      |           |       | Carbamidomethyl (C)[2] |      | Mascot      |
| 1393.6991  | 1393.6974   | -0.0017  | -1        | 728        | 740      | IVNSSMELAQSAK    |           |       | Oxidation (M)[6]       |      | Mascot      |
| 1434.7079  | 1434.7361   | 0.0282   | 20        | 2466       | 2477     | QCTELLAVCER      |           |       | Carbamidomethyl (C)[2] |      | Mascot      |
| 1434.7079  | 1434.7361   | 0.0282   | 20        | 2466       | 2477     | QCTELLAVCER      |           |       | Carbamidomethyl (C)[2] |      | Mascot      |
| 1475.8217  | 1475.72     | -0.1017  | -69       | 1963       | 1975     | LGFTPSVTIEQRK    |           |       |                        |      | Mascot      |
| 1493.7126  | 1493.6996   | -0.013   | -9        | 1311       | 1322     | LFTMDLNVMEHK     |           |       | Oxidation (M)[4]       |      | Mascot      |
| 1493.7126  | 1493.6996   | -0.013   | -9        | 1311       | 1322     | LFTMDLNVMEHK     |           |       | Oxidation (M)[4]       |      | Mascot      |
| 1638.8958  | 1638.8219   | -0.0739  | -45       | 443        | 455      | DILMRMLEVFVLK    |           |       | Oxidation (M)[4,6]     |      | Mascot      |
| 1638.8958  | 1638.8219   | -0.0739  | -45       | 443        | 455      | DILMRMLEVFVLK    |           |       | Oxidation (M)[4,6]     |      | Mascot      |
| 1867.8928  | 1867.8777   | -0.0151  | -8        | 915        | 930      | AEFTDCKASIQLPMEK |           |       | Carbamidomethyl (C)[6] |      | Mascot      |

|  |           |           |         |     |      |      |                               |  |                  |  |        |
|--|-----------|-----------|---------|-----|------|------|-------------------------------|--|------------------|--|--------|
|  | 2211.0745 | 2211.0513 | -0.0232 | -10 | 1075 | 1094 | GMDPLVLIDAIACMAYEE<br>K       |  | Oxidation (M)[2] |  | Mascot |
|  | 2283.0981 | 2283.1252 | 0.0271  | 12  | 3617 | 3634 | EWALHTFPNATDYWTFR<br>K        |  |                  |  | Mascot |
|  | 2284.1384 | 2284.1187 | -0.0197 | -9  | 1175 | 1196 | ALLFVMMDLTGEVSN<br>GAVAMAK    |  | Oxidation (M)[6] |  | Mascot |
|  | 2872.5024 | 2872.3191 | -0.1833 | -64 | 581  | 605  | LVKYAMQALDIYQVQIAG<br>NGQTYIR |  | Oxidation (M)[6] |  | Mascot |

35 PREDICTED: G protein-activated inward rectifier potassium channel 4-like [Danio rerio] gi|292623912 48753.5 5.51 10 41 0

#### Peptide Information

| Calc. Mass | Obsrv. Mass | ± da    | ± ppm | Start Seq. | End Seq. | Sequence                     | Ion Score | C. I. | % Modification         | Rank | Result Type |
|------------|-------------|---------|-------|------------|----------|------------------------------|-----------|-------|------------------------|------|-------------|
| 832.3514   | 832.4694    | 0.118   | 142   | 216        | 221      | MCLMFR                       |           |       | Oxidation (M)[1,4]     |      | Mascot      |
| 842.4842   | 842.4883    | 0.0041  | 5     | 191        | 197      | ISQPKNR                      |           |       |                        |      | Mascot      |
| 973.5789   | 973.5086    | -0.0703 | -72   | 239        | 246      | LIRSQQTK                     |           |       |                        |      | Mascot      |
| 1064.5054  | 1064.5846   | 0.0792  | 74    | 61         | 69       | CNVHHGNVK                    |           |       | Carbamidomethyl (C)[1] |      | Mascot      |
| 1157.5265  | 1157.5648   | 0.0383  | 33    | 213        | 221      | DNKMCLMFR                    |           |       |                        |      | Mascot      |
| 1307.6273  | 1307.6526   | 0.0253  | 19    | 58         | 69       | DGKCNVHHGNVK                 |           |       |                        |      | Mascot      |
| 1340.6636  | 1340.6432   | -0.0204 | -15   | 216        | 226      | MCLMFRVGDRL                  |           |       |                        |      | Mascot      |
| 1390.8165  | 1390.6492   | -0.1673 | -120  | 40         | 51       | THLISDPVKKPR                 |           |       |                        |      | Mascot      |
| 1852.0579  | 1851.8809   | -0.177  | -96   | 269        | 284      | LFLVSPLIISHEINEK             |           |       |                        |      | Mascot      |
| 2872.5066  | 2872.3191   | -0.1875 | -65   | 269        | 292      | LFLVSPLIISHEINEKSPF<br>WEMSR |           |       |                        |      | Mascot      |
| 2888.5015  | 2888.3325   | -0.169  | -59   | 269        | 292      | LFLVSPLIISHEINEKSPF<br>WEMSR |           |       | Oxidation (M)[22]      |      | Mascot      |

36 Pbx2 [Danio rerio] gi|7861936 18895.6 9.08 6 40 0

#### Peptide Information

| Calc. Mass | Obsrv. Mass | ± da    | ± ppm | Start Seq. | End Seq. | Sequence                 | Ion Score | C. I. | % Modification                           | Rank | Result Type |
|------------|-------------|---------|-------|------------|----------|--------------------------|-----------|-------|------------------------------------------|------|-------------|
| 1051.5782  | 1051.6875   | 0.1093  | 104   | 133        | 141      | FSSIQTQLK                |           |       |                                          |      | Mascot      |
| 1179.6442  | 1179.5731   | -0.0711 | -60   | 1          | 10       | ALFSVLCEIK               |           |       | Carbamidomethyl (C)[7]                   |      | Mascot      |
| 1179.6732  | 1179.5731   | -0.1001 | -85   | 132        | 141      | KFSSIQTQLK               | 11        | 0     |                                          |      | Mascot      |
| 1307.6447  | 1307.6526   | 0.0079  | 6     | 142        | 152      | QSTCEAVMILR              |           |       | Carbamidomethyl (C)[4]                   |      | Mascot      |
| 1323.6395  | 1323.6423   | 0.0028  | 2     | 142        | 152      | QSTCEAVMILR              |           |       | Carbamidomethyl (C)[4], Oxidation (M)[8] |      | Mascot      |
| 1323.6395  | 1323.6423   | 0.0028  | 2     | 142        | 152      | QSTCEAVMILR              |           |       | Carbamidomethyl (C)[4], Oxidation (M)[8] |      | Mascot      |
| 1493.7563  | 1493.6996   | -0.0567 | -38   | 142        | 154      | QSTCEAVMILRSR            |           |       |                                          |      | Mascot      |
| 1493.7563  | 1493.6996   | -0.0567 | -38   | 142        | 154      | QSTCEAVMILRSR            | 2         | 0     |                                          |      | Mascot      |
| 2283.1836  | 2283.1252   | -0.0584 | -26   | 133        | 152      | FSSIQTQLKQSTCEAVMI<br>LR |           |       |                                          |      | Mascot      |

37 CTTNBP2 N-terminal-like protein [Danio rerio] gi|116517238 65830.4 6.2 11 40 0

| Peptide Information |                             |         |       |              |                              |           |         |                                            |      |        |        |
|---------------------|-----------------------------|---------|-------|--------------|------------------------------|-----------|---------|--------------------------------------------|------|--------|--------|
| Calc. Mass          | Obsrv. Mass                 | ± da    | ± ppm | Start Seq.   | End Sequence Seq.            | Ion Score | C. I. % | Modification                               | Rank | Result | Type   |
| 914.5166            | 914.5304                    | 0.0138  | 15    | 119          | 126 QLAAAERR                 |           |         |                                            |      |        | Mascot |
| 996.5836            | 996.5478                    | -0.0358 | -36   | 520          | 529 SPGILSPGIR               |           |         |                                            |      |        | Mascot |
| 1045.5411           | 1045.5388                   | -0.0023 | -2    | 130          | 138 VIADLEEEK                |           |         |                                            |      |        | Mascot |
| 1107.631            | 1107.5156                   | -0.1154 | -104  | 539          | 548 FHSPVPVPAKK              |           |         |                                            |      |        | Mascot |
| 1179.5319           | 1179.5731                   | 0.0412  | 35    | 104          | 113 LVMAHCTNMK               |           |         | Oxidation (M)[3,9]                         |      |        | Mascot |
| 1179.5319           | 1179.5731                   | 0.0412  | 35    | 104          | 113 LVMAHCTNMK               |           |         | Oxidation (M)[3,9]                         |      |        | Mascot |
| 1201.6284           | 1201.6139                   | -0.0145 | -12   | 247          | 256 AQQIEARTER               |           |         |                                            |      |        | Mascot |
| 1307.7106           | 1307.6526                   | -0.058  | -44   | 536          | 547 AEKFHSPVPVPAK            |           |         |                                            |      |        | Mascot |
| 1320.5663           | 1320.5532                   | -0.0131 | -10   | 79           | 90 DSELSQAQDDGR              |           |         |                                            |      |        | Mascot |
| 1493.6909           | 1493.6996                   | 0.0087  | 6     | 104          | 115 LVMAHCTNMKEK             |           |         | Carbamidomethyl (C)[6], Oxidation (M)[3,9] |      |        | Mascot |
| 1493.6909           | 1493.6996                   | 0.0087  | 6     | 104          | 115 LVMAHCTNMKEK             |           |         | Carbamidomethyl (C)[6], Oxidation (M)[3,9] |      |        | Mascot |
| 1707.749            | 1707.7299                   | -0.0191 | -11   | 142          | 157 AQDAAAGDDITDMLER         |           |         | Oxidation (M)[13]                          |      |        | Mascot |
| 1994.1029           | 1993.926                    | -0.1769 | -89   | 509          | 529 NLAAASPTGKSPGILSP<br>GIR |           |         |                                            |      |        | Mascot |
| 38                  | novel protein [Danio rerio] |         |       | gi 169146109 |                              | 64501.6   | 6.3     | 11                                         | 40   | 0      |        |

| Peptide Information |                                                        |         |       |             |                              |           |         |                                            |      |        |        |
|---------------------|--------------------------------------------------------|---------|-------|-------------|------------------------------|-----------|---------|--------------------------------------------|------|--------|--------|
| Calc. Mass          | Obsrv. Mass                                            | ± da    | ± ppm | Start Seq.  | End Sequence Seq.            | Ion Score | C. I. % | Modification                               | Rank | Result | Type   |
| 914.5166            | 914.5304                                               | 0.0138  | 15    | 107         | 114 QLAAAERR                 |           |         |                                            |      |        | Mascot |
| 996.5836            | 996.5478                                               | -0.0358 | -36   | 508         | 517 SPGILSPGIR               |           |         |                                            |      |        | Mascot |
| 1045.5411           | 1045.5388                                              | -0.0023 | -2    | 118         | 126 VIADLEEEK                |           |         |                                            |      |        | Mascot |
| 1107.631            | 1107.5156                                              | -0.1154 | -104  | 527         | 536 FHSPVPVPAKK              |           |         |                                            |      |        | Mascot |
| 1179.5319           | 1179.5731                                              | 0.0412  | 35    | 92          | 101 LVMAHCTNMK               |           |         | Oxidation (M)[3,9]                         |      |        | Mascot |
| 1179.5319           | 1179.5731                                              | 0.0412  | 35    | 92          | 101 LVMAHCTNMK               |           |         | Oxidation (M)[3,9]                         |      |        | Mascot |
| 1201.6284           | 1201.6139                                              | -0.0145 | -12   | 235         | 244 AQQIEARTER               |           |         |                                            |      |        | Mascot |
| 1307.7106           | 1307.6526                                              | -0.058  | -44   | 524         | 535 AEKFHSPVPVPAK            |           |         |                                            |      |        | Mascot |
| 1320.5663           | 1320.5532                                              | -0.0131 | -10   | 67          | 78 DSELSQAQDDGR              |           |         |                                            |      |        | Mascot |
| 1493.6909           | 1493.6996                                              | 0.0087  | 6     | 92          | 103 LVMAHCTNMKEK             |           |         | Carbamidomethyl (C)[6], Oxidation (M)[3,9] |      |        | Mascot |
| 1493.6909           | 1493.6996                                              | 0.0087  | 6     | 92          | 103 LVMAHCTNMKEK             |           |         | Carbamidomethyl (C)[6], Oxidation (M)[3,9] |      |        | Mascot |
| 1707.749            | 1707.7299                                              | -0.0191 | -11   | 130         | 145 AQDAAAGDDITDMLER         |           |         | Oxidation (M)[13]                          |      |        | Mascot |
| 1994.1029           | 1993.926                                               | -0.1769 | -89   | 497         | 517 NLAAASPTGKSPGILSP<br>GIR |           |         |                                            |      |        | Mascot |
| 39                  | 28S ribosomal protein S15, mitochondrial [Danio rerio] |         |       | gi 50540040 |                              | 30971.5   | 10.11   | 9                                          | 40   | 0      |        |

| Peptide Information |                          |         |       |              |          |               |           |         |                  |      |             |
|---------------------|--------------------------|---------|-------|--------------|----------|---------------|-----------|---------|------------------|------|-------------|
| Calc. Mass          | Obsrv. Mass              | ± da    | ± ppm | Start Seq.   | End Seq. | Sequence      | Ion Score | C. I. % | Modification     | Rank | Result Type |
| 832.4158            | 832.4694                 | 0.0536  | 64    | 244          | 250      | AEEAERK       |           |         |                  |      | Mascot      |
| 995.5706            | 995.493                  | -0.0776 | -78   | 1            | 8        | MVLKSVFR      |           |         | Oxidation (M)[1] |      | Mascot      |
| 1037.5159           | 1037.5016                | -0.0143 | -14   | 169          | 176      | WMLMTIDK      |           |         |                  |      | Mascot      |
| 1045.4949           | 1045.5388                | 0.0439  | 42    | 187          | 194      | TRYDSFEK      |           |         |                  |      | Mascot      |
| 1118.5187           | 1118.4829                | -0.0358 | -32   | 189          | 197      | YDSFEKVCK     |           |         |                  |      | Mascot      |
| 1179.5125           | 1179.5731                | 0.0606  | 51    | 252          | 263      | SSSSTNPQETAA  |           |         |                  |      | Mascot      |
| 1179.5125           | 1179.5731                | 0.0606  | 51    | 252          | 263      | SSSSTNPQETAA  |           |         |                  |      | Mascot      |
| 1193.6169           | 1193.5867                | -0.0302 | -25   | 169          | 177      | WMLMTIDKR     |           |         |                  |      | Mascot      |
| 1234.7266           | 1234.6512                | -0.0754 | -61   | 5            | 15       | SVFRSTVLGLR   | 10        | 0       |                  |      | Mascot      |
| 1234.7266           | 1234.6512                | -0.0754 | -61   | 5            | 15       | SVFRSTVLGLR   |           |         |                  |      | Mascot      |
| 1307.6074           | 1307.6526                | 0.0452  | 35    | 251          | 263      | KSSSSTNPQETAA |           |         |                  |      | Mascot      |
| 40                  | Josephin-1 [Danio rerio] |         |       | gi 115497592 |          | 26182.5       | 9.34      | 7       | 40               | 0    |             |

| Peptide Information |                            |         |       |             |          |                                   |           |       |                        |      |             |
|---------------------|----------------------------|---------|-------|-------------|----------|-----------------------------------|-----------|-------|------------------------|------|-------------|
| Calc. Mass          | Obsrv. Mass                | ± da    | ± ppm | Start Seq.  | End Seq. | Sequence                          | Ion Score | C. I. | % Modification         | Rank | Result Type |
| 1051.5908           | 1051.6875                  | 0.0967  | 92    | 170         | 177      | RQHWIGVR                          |           |       |                        |      | Mascot      |
| 1179.6732           | 1179.5731                  | -0.1001 | -85   | 96          | 106      | LSPSTLVTPHK                       |           |       |                        |      | Mascot      |
| 1179.6732           | 1179.5731                  | -0.1001 | -85   | 96          | 106      | LSPSTLVTPHK                       |           |       |                        |      | Mascot      |
| 1307.7682           | 1307.6526                  | -0.1156 | -88   | 96          | 107      | LSPSTLVTPHKK                      |           |       |                        |      | Mascot      |
| 1357.6635           | 1357.6864                  | 0.0229  | 17    | 178         | 189      | EVAGVYYNLDISK                     |           |       |                        |      | Mascot      |
| 1357.6635           | 1357.6864                  | 0.0229  | 17    | 178         | 189      | EVAGVYYNLDISK                     |           |       |                        |      | Mascot      |
| 1838.8927           | 1838.8876                  | -0.0051 | -3    | 12          | 28       | GVGGFQELGCM PWKVS<br>K            |           |       | Oxidation (M)[11]      |      | Mascot      |
| 2233.0818           | 2233.0325                  | -0.0493 | -22   | 67          | 86       | ELCALHALNNVFQDGAA<br>FSR          |           |       | Carbamidomethyl (C)[3] |      | Mascot      |
| 3312.5928           | 3312.2224                  | -0.3704 | -112  | 108         | 136      | NMLGNGNYDVNVIMAAL<br>QTRGFEAVWWDK |           |       |                        |      | Mascot      |
| 41                  | Tcf3 protein [Danio rerio] |         |       | gi 71679753 |          | 53929.7                           | 6.39      | 10    | 40                     | 0    |             |

| Peptide Information |             |        |       |            |          |          |           |       |                                          |      |             |
|---------------------|-------------|--------|-------|------------|----------|----------|-----------|-------|------------------------------------------|------|-------------|
| Calc. Mass          | Obsrv. Mass | ± da   | ± ppm | Start Seq. | End Seq. | Sequence | Ion Score | C. I. | % Modification                           | Rank | Result Type |
| 832.4206            | 832.4694    | 0.0488 | 59    | 411        | 417      | RMANNAR  |           |       |                                          |      | Mascot      |
| 870.4791            | 870.5181    | 0.039  | 45    | 468        | 474      | ERNLNPK  |           |       |                                          |      | Mascot      |
| 973.4706            | 973.5086    | 0.038  | 39    | 435        | 441      | MCQLHLR  |           |       | Carbamidomethyl (C)[2], Oxidation (M)[1] |      | Mascot      |

|           |           |         |     |     |     |                                                    |  |  |  |  |  |  |        |
|-----------|-----------|---------|-----|-----|-----|----------------------------------------------------|--|--|--|--|--|--|--------|
| 1036.4429 | 1036.5082 | 0.0653  | 63  | 377 | 385 | SEDEKEDGK                                          |  |  |  |  |  |  | Mascot |
| 1082.5187 | 1082.571  | 0.0523  | 48  | 1   | 9   | MYNLEIDGK                                          |  |  |  |  |  |  | Mascot |
| 1118.5436 | 1118.4829 | -0.0607 | -54 | 184 | 196 | GANAGSSGAEIGK                                      |  |  |  |  |  |  | Mascot |
| 1165.5385 | 1165.5582 | 0.0197  | 17  | 41  | 50  | GSSQFYSPHR                                         |  |  |  |  |  |  | Mascot |
| 1234.5433 | 1234.6512 | 0.1079  | 87  | 366 | 376 | DDDENLSIADK                                        |  |  |  |  |  |  | Mascot |
| 1234.5433 | 1234.6512 | 0.1079  | 87  | 366 | 376 | DDDENLSIADK                                        |  |  |  |  |  |  | Mascot |
| 1323.6539 | 1323.6423 | -0.0116 | -9  | 2   | 12  | YNLEIDGKSER                                        |  |  |  |  |  |  | Mascot |
| 1323.6539 | 1323.6423 | -0.0116 | -9  | 2   | 12  | YNLEIDGKSER                                        |  |  |  |  |  |  | Mascot |
| 1867.8425 | 1867.8777 | 0.0352  | 19  | 486 | 504 | VTGEAQM <sup>+</sup> LSGLGGDGHA <sup>+</sup><br>HM |  |  |  |  |  |  | Mascot |

42 PREDICTED: ankyrin repeat and BTB/POZ domain-containing protein 2-like [Danio rerio] gi|189521623 111556.2 5.84 14 39 0

#### Peptide Information

| Calc. Mass | Obsrv. Mass | ± da    | ± ppm | Start Seq. | End Seq. | Sequence                           | Ion Score | C. I. % | Modification             | Rank | Result Type |
|------------|-------------|---------|-------|------------|----------|------------------------------------|-----------|---------|--------------------------|------|-------------|
| 807.3818   | 807.3789    | -0.0029 | -4    | 206        | 211      | WMVDTR                             |           |         |                          |      | Mascot      |
| 842.473    | 842.4883    | 0.0153  | 18    | 654        | 660      | LLSEPQR                            |           |         |                          |      | Mascot      |
| 870.4614   | 870.5181    | 0.0567  | 65    | 139        | 145      | LSVVHCR                            |           |         | Carbamidomethyl (C)[6]   |      | Mascot      |
| 882.4614   | 882.5468    | 0.0854  | 97    | 997        | 1004     | LHSLCGPR                           |           |         |                          |      | Mascot      |
| 1045.5173  | 1045.5388   | 0.0215  | 21    | 548        | 556      | HPSVHPESR                          |           |         |                          |      | Mascot      |
| 1051.5306  | 1051.6875   | 0.1569  | 149   | 758        | 766      | DFTIIGEEK                          |           |         |                          |      | Mascot      |
| 1082.4969  | 1082.571    | 0.0741  | 68    | 691        | 699      | SVCTSQLCK                          |           |         | Carbamidomethyl (C)[3,8] |      | Mascot      |
| 1118.5688  | 1118.4829   | -0.0859 | -77   | 428        | 437      | SLLVSDDDR                          |           |         |                          |      | Mascot      |
| 1193.6161  | 1193.5867   | -0.0294 | -25   | 308        | 317      | ETAYAQLER                          |           |         |                          |      | Mascot      |
| 1262.6674  | 1262.5718   | -0.0956 | -76   | 206        | 215      | WMVDTRISVR                         |           |         |                          |      | Mascot      |
| 1302.6041  | 1302.6838   | 0.0797  | 61    | 925        | 934      | RHCEILCSER                         |           |         | Carbamidomethyl (C)[3]   |      | Mascot      |
| 1307.7252  | 1307.6526   | -0.0726 | -56   | 849        | 859      | VLLMSASQRFR                        |           |         |                          |      | Mascot      |
| 1323.7202  | 1323.6423   | -0.0779 | -59   | 849        | 859      | VLLMSASQRFR                        |           |         | Oxidation (M)[4]         |      | Mascot      |
| 1323.7202  | 1323.6423   | -0.0779 | -59   | 849        | 859      | VLLMSASQRFR                        |           |         | Oxidation (M)[4]         |      | Mascot      |
| 1434.7046  | 1434.7361   | 0.0315  | 22    | 106        | 119      | VAGEGLCFAPESVR                     |           |         |                          |      | Mascot      |
| 1434.7046  | 1434.7361   | 0.0315  | 22    | 106        | 119      | VAGEGLCFAPESVR                     |           |         |                          |      | Mascot      |
| 3312.6497  | 3312.2224   | -0.4273 | -129  | 318        | 347      | TLEQALLATCVGSLSELS<br>DLVSRAMHHMQR |           |         | Oxidation (M)[25]        |      | Mascot      |

43 ras-related protein Rab-14 [Danio rerio] gi|41393147 23859.9 5.84 7 39 0

#### Peptide Information

| Calc. Mass | Obsrv. Mass | ± da | ± ppm | Start Seq. | End Seq. | Sequence | Ion Score | C. I. % | Modification | Rank | Result Type |
|------------|-------------|------|-------|------------|----------|----------|-----------|---------|--------------|------|-------------|
|------------|-------------|------|-------|------------|----------|----------|-----------|---------|--------------|------|-------------|

|  |           |           |         |      |     |     |                |  |  |   |   |                        |  |  |  |  |        |
|--|-----------|-----------|---------|------|-----|-----|----------------|--|--|---|---|------------------------|--|--|--|--|--------|
|  | 973.4949  | 973.5086  | 0.0137  | 14   | 202 | 210 | LSSDAQPQK      |  |  |   |   |                        |  |  |  |  | Mascot |
|  | 1165.6285 | 1165.5582 | -0.0703 | -60  | 14  | 24  | YIIIGDMGVGK    |  |  |   |   |                        |  |  |  |  | Mascot |
|  | 1262.6198 | 1262.5718 | -0.048  | -38  | 25  | 34  | SCLLHQFTEK     |  |  |   |   | Carbamidomethyl (C)[2] |  |  |  |  | Mascot |
|  | 1316.6593 | 1316.4987 | -0.1606 | -122 | 62  | 72  | LQIWDTAGQER    |  |  |   |   |                        |  |  |  |  | Mascot |
|  | 1390.7147 | 1390.6492 | -0.0655 | -47  | 25  | 35  | SCLLHQFTEKK    |  |  |   |   | Carbamidomethyl (C)[2] |  |  |  |  | Mascot |
|  | 1493.7118 | 1493.6996 | -0.0122 | -8   | 157 | 170 | TGENVEDAFLEAAK |  |  |   |   |                        |  |  |  |  | Mascot |
|  | 1493.7893 | 1493.6996 | -0.0897 | -60  | 83  | 96  | GAAGALMVYDITRR |  |  | 3 | 0 |                        |  |  |  |  | Mascot |

44 Idh3a protein [Danio rerio] gi|157423273 16736.4 6.89 6 39 0

Peptide Information

| Calc. Mass | Obsrv. Mass | ± da    | ± ppm | Start Seq. | End Seq. | Sequence          | Ion Score | C. I. | % | Modification           | Rank | Result Type |
|------------|-------------|---------|-------|------------|----------|-------------------|-----------|-------|---|------------------------|------|-------------|
| 1003.489   | 1003.5294   | 0.0404  | 40    | 108        | 116      | HMGLHGHAK         |           |       |   | Oxidation (M)[2]       |      | Mascot      |
| 1003.489   | 1003.5294   | 0.0404  | 40    | 108        | 116      | HMGLHGHAK         |           |       |   | Oxidation (M)[2]       |      | Mascot      |
| 1109.5693  | 1109.4669   | -0.1024 | -92   | 7          | 17       | STVSCIMGAIK       |           |       |   |                        |      | Mascot      |
| 1201.4976  | 1201.6139   | 0.1163  | 97    | 142        | 151      | CSEFTADICR        |           |       |   | Carbamidomethyl (C)[1] |      | Mascot      |
| 1300.5773  | 1300.5455   | -0.0318 | -24   | 142        | 152      | CSEFTADICRR       |           |       |   |                        |      | Mascot      |
| 1357.5988  | 1357.6864   | 0.0876  | 65    | 142        | 152      | CSEFTADICRR       |           |       |   | Carbamidomethyl (C)[1] |      | Mascot      |
| 1357.5988  | 1357.6864   | 0.0876  | 65    | 142        | 152      | CSEFTADICRR       |           |       |   | Carbamidomethyl (C)[1] |      | Mascot      |
| 1707.8669  | 1707.7299   | -0.137  | -80   | 2          | 17       | ANAWRSTVSCIMGAIK  |           |       |   |                        |      | Mascot      |
| 1838.9073  | 1838.8876   | -0.0197 | -11   | 1          | 17       | MANAWRSTVSCIMGAIK |           |       |   |                        |      | Mascot      |

45 PREDICTED: voltage-dependent L-type calcium channel subunit alpha-1F-like [Danio rerio] gi|326670278 229246.9 5.61 1 25 0

Peptide Information

| Calc. Mass | Obsrv. Mass | ± da    | ± ppm | Start Seq. | End Seq. | Sequence    | Ion Score | C. I. | % | Modification | Rank | Result Type |
|------------|-------------|---------|-------|------------|----------|-------------|-----------|-------|---|--------------|------|-------------|
| 1234.6976  | 1234.6512   | -0.0464 | -38   | 913        | 923      | SVIQCVFVAIR | 25        | 0     |   |              | 1    | Mascot      |

46 Ccdc101 protein [Danio rerio] gi|201090170 33213 8.21 1 24 0

Peptide Information

| Calc. Mass | Obsrv. Mass | ± da  | ± ppm | Start Seq. | End Seq. | Sequence    | Ion Score | C. I. | % | Modification           | Rank | Result Type |
|------------|-------------|-------|-------|------------|----------|-------------|-----------|-------|---|------------------------|------|-------------|
| 1234.5732  | 1234.6512   | 0.078 | 63    | 68         | 78       | ADAEAECSILR | 24        | 0     |   | Carbamidomethyl (C)[7] | 2    | Mascot      |

47 PREDICTED: guanine nucleotide-binding protein subunit alpha-15-like [Danio rerio] gi|326678594 43175 8.7 1 23 0

Peptide Information

| Calc. Mass | Obsrv. Mass | ± da | ± ppm | Start | End | Sequence | Ion | C. I. | % | Modification | Rank | Result Type |
|------------|-------------|------|-------|-------|-----|----------|-----|-------|---|--------------|------|-------------|
|------------|-------------|------|-------|-------|-----|----------|-----|-------|---|--------------|------|-------------|

|                     |                                                                           |  |  |            |             |         |       |            |          |              |              |         |           | Seq.    | Seq.         | Score            |   |  |   |        |  |  |  |
|---------------------|---------------------------------------------------------------------------|--|--|------------|-------------|---------|-------|------------|----------|--------------|--------------|---------|-----------|---------|--------------|------------------|---|--|---|--------|--|--|--|
|                     |                                                                           |  |  | 1234.6902  | 1234.6512   | -0.039  | -32   | 128        | 137      | LQRSYVEAIR   |              |         | 23        | 0       |              |                  |   |  | 3 | Mascot |  |  |  |
| 48                  | PREDICTED: ankyrin repeat domain-containing protein 46-like [Danio rerio] |  |  |            |             |         |       |            |          |              | gi 292625777 | 25074.7 | 5.92      | 1       |              | 20               | 0 |  |   |        |  |  |  |
| Peptide Information |                                                                           |  |  |            |             |         |       |            |          |              |              |         |           |         |              |                  |   |  |   |        |  |  |  |
|                     |                                                                           |  |  | Calc. Mass | Obsrv. Mass | ± da    | ± ppm | Start Seq. | End Seq. | Sequence     |              |         | Ion Score | C. I. % | Modification | Rank Result Type |   |  |   |        |  |  |  |
|                     |                                                                           |  |  | 1434.7158  | 1434.7361   | 0.0203  | 14    | 30         | 41       | RLLESGFDPNMR |              |         | 20        | 0       |              |                  |   |  | 1 | Mascot |  |  |  |
| 49                  | PREDICTED: zinc finger protein 618 [Danio rerio]                          |  |  |            |             |         |       |            |          |              | gi 326668299 | 93606.8 | 7.47      | 1       |              | 20               | 0 |  |   |        |  |  |  |
| Peptide Information |                                                                           |  |  |            |             |         |       |            |          |              |              |         |           |         |              |                  |   |  |   |        |  |  |  |
|                     |                                                                           |  |  | Calc. Mass | Obsrv. Mass | ± da    | ± ppm | Start Seq. | End Seq. | Sequence     |              |         | Ion Score | C. I. % | Modification | Rank Result Type |   |  |   |        |  |  |  |
|                     |                                                                           |  |  | 1234.6348  | 1234.6512   | 0.0164  | 13    | 395        | 406      | EALGDMSSLALK |              |         | 20        | 0       |              |                  |   |  | 5 | Mascot |  |  |  |
| 50                  | PREDICTED: myomesin-1 isoform 1 [Danio rerio]                             |  |  |            |             |         |       |            |          |              | gi 326669724 | 162996  | 5.92      | 1       |              | 20               | 0 |  |   |        |  |  |  |
| Peptide Information |                                                                           |  |  |            |             |         |       |            |          |              |              |         |           |         |              |                  |   |  |   |        |  |  |  |
|                     |                                                                           |  |  | Calc. Mass | Obsrv. Mass | ± da    | ± ppm | Start Seq. | End Seq. | Sequence     |              |         | Ion Score | C. I. % | Modification | Rank Result Type |   |  |   |        |  |  |  |
|                     |                                                                           |  |  | 1234.7041  | 1234.6512   | -0.0529 | -43   | 1204       | 1214     | KDAGIYEVVLK  |              |         | 22        | 0       |              |                  |   |  | 4 | Mascot |  |  |  |

|                |           |                        |                |                |                    |
|----------------|-----------|------------------------|----------------|----------------|--------------------|
| Gel Idx/Pos    | 267/K19   | Instr./Gel Origin      | BA2060/110707A | Process Status | Analysis Succeeded |
| Plate [#] Name | [1] 31496 | Instrument Sample Name |                | Spectra        | 11                 |

| Rank                | Protein Name                                              | Accession No. | Protein MW | Protein PI | Pep. Count | Protein Score     | Protein Score C. I. % | Total Ion Score | Total Ion C. I. % |      |             |
|---------------------|-----------------------------------------------------------|---------------|------------|------------|------------|-------------------|-----------------------|-----------------|-------------------|------|-------------|
| 1                   | RecName: Full=Glial fibrillary acidic protein; Short=GFAP | gi 150383441  | 51218      | 5.34       | 13         | 132               | 100                   | 76              | 100               |      |             |
| Peptide Information |                                                           |               |            |            |            |                   |                       |                 |                   |      |             |
| Calc. Mass          |                                                           | Obsrv. Mass   | ± da       | ± ppm      | Start Seq. | End Sequence Seq. | Ion Score             | C. I. %         | Modification      | Rank | Result Type |
| 1051.4916           |                                                           | 1051.5101     | 0.0185     | 18         | 292        | 299 QEANDYRR      |                       |                 |                   |      | Mascot      |
| 1060.5632           |                                                           | 1060.5397     | -0.0235    | -22        | 380        | 388 KLEGEESR      |                       |                 |                   |      | Mascot      |
| 1064.4863           |                                                           | 1064.5814     | 0.0951     | 89         | 83         | 91 VEMMGLNDR      |                       |                 |                   |      | Mascot      |
| 1090.531            |                                                           | 1090.5007     | -0.0303    | -28        | 321        | 328 QLREMEER      |                       |                 |                   |      | Mascot      |
| 1106.5259           |                                                           | 1106.5027     | -0.0232    | -21        | 321        | 328 QLREMEER      |                       |                 | Oxidation (M)[5]  |      | Mascot      |
| 1229.6597           |                                                           | 1229.4825     | -0.1772    | -144       | 165        | 174 QRLQDETALR    |                       |                 |                   |      | Mascot      |



|   |                           |           |         |      |             |       |                           |    |                  |     |    |     |        |
|---|---------------------------|-----------|---------|------|-------------|-------|---------------------------|----|------------------|-----|----|-----|--------|
|   | 1235.6266                 | 1235.5028 | -0.1238 | -100 | 124         | 133   | LGDIYQEELR                |    |                  |     |    |     | Mascot |
|   | 1246.5811                 | 1246.5112 | -0.0699 | -56  | 2           | 11    | ESQRSFSSYR                |    |                  |     |    |     | Mascot |
|   | 1277.71                   | 1277.6805 | -0.0295 | -23  | 369         | 379   | LALDIEIATYR               | 76 | 100              |     |    |     | Mascot |
|   | 1277.71                   | 1277.6805 | -0.0295 | -23  | 369         | 379   | LALDIEIATYR               |    |                  |     |    |     | Mascot |
|   | 1308.6543                 | 1308.6299 | -0.0244 | -19  | 271         | 282   | SKFADLTDAANR              |    |                  |     |    |     | Mascot |
|   | 1393.6165                 | 1393.6962 | 0.0797  | 57   | 1           | 11    | MESQRSFSSYR               |    | Oxidation (M)[1] |     |    |     | Mascot |
|   | 1434.756                  | 1434.7373 | -0.0187 | -13  | 29          | 41    | HSTGRSLHSSPR              |    |                  |     |    |     | Mascot |
|   | 1434.756                  | 1434.7373 | -0.0187 | -13  | 29          | 41    | HSTGRSLHSSPR              |    |                  |     |    |     | Mascot |
|   | 1475.7522                 | 1475.7231 | -0.0291 | -20  | 300         | 312   | QIQGLTCDLESLR             |    |                  |     |    |     | Mascot |
|   | 2566.0974                 | 2566.2104 | 0.113   | 44   | 252         | 272   | AQFEAMANSNMQETEE<br>WYRSK |    | Oxidation (M)[6] |     |    |     | Mascot |
| 2 | Gfp protein [Danio rerio] |           |         |      | g 124504410 | 51101 | 5.34                      | 12 | 127              | 100 | 76 | 100 |        |

| Calc. Mass | Obsrv. Mass | ± da    | ± ppm | Start Seq. | End Seq. | Sequence                  | Ion Score | C. I. % | Modification     | Rank | Result Type |
|------------|-------------|---------|-------|------------|----------|---------------------------|-----------|---------|------------------|------|-------------|
| 1051.4916  | 1051.5101   | 0.0185  | 18    | 291        | 298      | QEANDYRR                  |           |         |                  |      | Mascot      |
| 1060.5632  | 1060.5397   | -0.0235 | -22   | 379        | 387      | KLLEGEESR                 |           |         |                  |      | Mascot      |
| 1064.4863  | 1064.5814   | 0.0951  | 89    | 82         | 90       | VEMMGLNDR                 |           |         |                  |      | Mascot      |
| 1090.531   | 1090.5007   | -0.0303 | -28   | 320        | 327      | QLREMEER                  |           |         |                  |      | Mascot      |
| 1106.5259  | 1106.5027   | -0.0232 | -21   | 320        | 327      | QLREMEER                  |           |         | Oxidation (M)[5] |      | Mascot      |
| 1229.6597  | 1229.4825   | -0.1772 | -144  | 164        | 173      | QRLQDETALR                |           |         |                  |      | Mascot      |
| 1235.6266  | 1235.5028   | -0.1238 | -100  | 123        | 132      | LGDIYQEELR                |           |         |                  |      | Mascot      |
| 1246.5811  | 1246.5112   | -0.0699 | -56   | 1          | 10       | ESQRSFSSYR                |           |         |                  |      | Mascot      |
| 1277.71    | 1277.6805   | -0.0295 | -23   | 368        | 378      | LALDIEIATYR               | 76        | 100     |                  |      | Mascot      |
| 1277.71    | 1277.6805   | -0.0295 | -23   | 368        | 378      | LALDIEIATYR               |           |         |                  |      | Mascot      |
| 1308.6543  | 1308.6299   | -0.0244 | -19   | 270        | 281      | SKFADLTDAANR              |           |         |                  |      | Mascot      |
| 1434.756   | 1434.7373   | -0.0187 | -13   | 28         | 40       | HSTGRSLHSSPR              |           |         |                  |      | Mascot      |
| 1434.756   | 1434.7373   | -0.0187 | -13   | 28         | 40       | HSTGRSLHSSPR              |           |         |                  |      | Mascot      |
| 1475.7522  | 1475.7231   | -0.0291 | -20   | 299        | 311      | QIQGLTCDLES LR            |           |         |                  |      | Mascot      |
| 2566.0974  | 2566.2104   | 0.113   | 44    | 251        | 271      | AQFEAMANSNMQETEE<br>WYRSK |           |         | Oxidation (M)[6] |      | Mascot      |

| Calc. Mass | Obsrv. Mass | ± da   | ± ppm | Start Seq. | End Seq. | Sequence | Ion Score | C. I. % | Modification | Rank | Result Type |
|------------|-------------|--------|-------|------------|----------|----------|-----------|---------|--------------|------|-------------|
| 1051.4916  | 1051.5101   | 0.0185 | 18    | 283        | 290      | QEANDYRR |           |         |              |      | Mascot      |

|           |           |         |      |     |     |                           |  |  |  |  |  |  |  |  |  |  |  |  |        |
|-----------|-----------|---------|------|-----|-----|---------------------------|--|--|--|--|--|--|--|--|--|--|--|--|--------|
| 1060.5632 | 1060.5397 | -0.0235 | -22  | 371 | 379 | KLLEGEESR                 |  |  |  |  |  |  |  |  |  |  |  |  | Mascot |
| 1090.531  | 1090.5007 | -0.0303 | -28  | 312 | 319 | QLREMEER                  |  |  |  |  |  |  |  |  |  |  |  |  | Mascot |
| 1106.5259 | 1106.5027 | -0.0232 | -21  | 312 | 319 | QLREMEER                  |  |  |  |  |  |  |  |  |  |  |  |  | Mascot |
| 1229.6597 | 1229.4825 | -0.1772 | -144 | 156 | 165 | QRLQDETALR                |  |  |  |  |  |  |  |  |  |  |  |  | Mascot |
| 1235.6266 | 1235.5028 | -0.1238 | -100 | 115 | 124 | LGDIYQEELR                |  |  |  |  |  |  |  |  |  |  |  |  | Mascot |
| 1246.5811 | 1246.5112 | -0.0699 | -56  | 2   | 11  | ESQRSFSSYR                |  |  |  |  |  |  |  |  |  |  |  |  | Mascot |
| 1277.71   | 1277.6805 | -0.0295 | -23  | 360 | 370 | LALDIEIATYR               |  |  |  |  |  |  |  |  |  |  |  |  | Mascot |
| 1277.71   | 1277.6805 | -0.0295 | -23  | 360 | 370 | LALDIEIATYR               |  |  |  |  |  |  |  |  |  |  |  |  | Mascot |
| 1308.6543 | 1308.6299 | -0.0244 | -19  | 262 | 273 | SKFADLTDAANR              |  |  |  |  |  |  |  |  |  |  |  |  | Mascot |
| 1393.6165 | 1393.6962 | 0.0797  | 57   | 1   | 11  | MESQRSFSSYR               |  |  |  |  |  |  |  |  |  |  |  |  | Mascot |
| 1434.756  | 1434.7373 | -0.0187 | -13  | 29  | 41  | HSTGRSLHSSPR              |  |  |  |  |  |  |  |  |  |  |  |  | Mascot |
| 1434.756  | 1434.7373 | -0.0187 | -13  | 29  | 41  | HSTGRSLHSSPR              |  |  |  |  |  |  |  |  |  |  |  |  | Mascot |
| 1475.7522 | 1475.7231 | -0.0291 | -20  | 291 | 303 | QIQGLTCDLESLR             |  |  |  |  |  |  |  |  |  |  |  |  | Mascot |
| 2566.0974 | 2566.2104 | 0.113   | 44   | 243 | 263 | SQFEAMANSNMQETEE<br>WYRSK |  |  |  |  |  |  |  |  |  |  |  |  | Mascot |

4 class III intermediate filament protein [Danio rerio] gi|38374177 51255 5.28 12 126 100 76 100

Peptide Information

| Calc. Mass | Obsrv. Mass | ± da    | ± ppm | Start Seq. | End Seq. | Sequence                  | Ion Score | C. I. | % Modification | Rank | Result Type |
|------------|-------------|---------|-------|------------|----------|---------------------------|-----------|-------|----------------|------|-------------|
| 1051.4916  | 1051.5101   | 0.0185  | 18    | 292        | 299      | QEANDYRR                  |           |       |                |      | Mascot      |
| 1060.5632  | 1060.5397   | -0.0235 | -22   | 380        | 388      | KLLEGEESR                 |           |       |                |      | Mascot      |
| 1064.4863  | 1064.5814   | 0.0951  | 89    | 83         | 91       | VEMMGLNDR                 |           |       |                |      | Mascot      |
| 1229.6597  | 1229.4825   | -0.1772 | -144  | 165        | 174      | QRLQDETALR                |           |       |                |      | Mascot      |
| 1235.6266  | 1235.5028   | -0.1238 | -100  | 124        | 133      | LGDIYQEELR                |           |       |                |      | Mascot      |
| 1246.5811  | 1246.5112   | -0.0699 | -56   | 2          | 11       | ESQRSFSSYR                |           |       |                |      | Mascot      |
| 1277.71    | 1277.6805   | -0.0295 | -23   | 369        | 379      | LALDIEIATYR               |           |       |                |      | Mascot      |
| 1277.71    | 1277.6805   | -0.0295 | -23   | 369        | 379      | LALDIEIATYR               |           |       |                |      | Mascot      |
| 1308.6543  | 1308.6299   | -0.0244 | -19   | 271        | 282      | SKFADLTDAANR              |           |       |                |      | Mascot      |
| 1393.6165  | 1393.6962   | 0.0797  | 57    | 1          | 11       | MESQRSFSSYR               |           |       |                |      | Mascot      |
| 1434.756   | 1434.7373   | -0.0187 | -13   | 29         | 41       | HSTGRSLHSSPR              |           |       |                |      | Mascot      |
| 1434.756   | 1434.7373   | -0.0187 | -13   | 29         | 41       | HSTGRSLHSSPR              |           |       |                |      | Mascot      |
| 1475.7522  | 1475.7231   | -0.0291 | -20   | 300        | 312      | QIQGLTCDLESLR             |           |       |                |      | Mascot      |
| 2566.0974  | 2566.2104   | 0.113   | 44    | 252        | 272      | SQFEAMANSNMQETEE<br>WYRSK |           |       |                |      | Mascot      |

5 glial fibrillary acidic protein [Danio rerio] gi|66393075 51190 5.34 12 124 100 76 100

Peptide Information

| Calc. Mass | Obsrv. Mass | ± da | ± ppm | Start | End | Sequence | Ion | C. I. | % Modification | Rank | Result Type |
|------------|-------------|------|-------|-------|-----|----------|-----|-------|----------------|------|-------------|
|------------|-------------|------|-------|-------|-----|----------|-----|-------|----------------|------|-------------|

|                     |                                               |             |         |       |               |          |                           |         |           |       |     |                  |    | Seq. | Seq.   | Score |        |  |  |  |
|---------------------|-----------------------------------------------|-------------|---------|-------|---------------|----------|---------------------------|---------|-----------|-------|-----|------------------|----|------|--------|-------|--------|--|--|--|
|                     | 1051.4916                                     | 1051.5101   | 0.0185  | 18    | 292           | 299      | QEANDYRR                  |         |           |       |     |                  |    |      |        |       | Mascot |  |  |  |
|                     | 1060.5632                                     | 1060.5397   | -0.0235 | -22   | 380           | 388      | KLLEGEESR                 |         |           |       |     |                  |    |      |        |       | Mascot |  |  |  |
|                     | 1064.4863                                     | 1064.5814   | 0.0951  | 89    | 83            | 91       | VEMMGLNDR                 |         |           |       |     |                  |    |      |        |       | Mascot |  |  |  |
|                     | 1229.6597                                     | 1229.4825   | -0.1772 | -144  | 165           | 174      | QRLQDETALR                |         |           |       |     |                  |    |      |        |       | Mascot |  |  |  |
|                     | 1235.6266                                     | 1235.5028   | -0.1238 | -100  | 124           | 133      | LGDIYQEELR                |         |           |       |     |                  |    |      |        |       | Mascot |  |  |  |
|                     | 1246.5811                                     | 1246.5112   | -0.0699 | -56   | 2             | 11       | ESQRSFSSYR                |         |           |       |     |                  |    |      |        |       | Mascot |  |  |  |
|                     | 1277.71                                       | 1277.6805   | -0.0295 | -23   | 369           | 379      | LALDIEIATYR               | 76      |           | 100   |     |                  |    |      |        |       | Mascot |  |  |  |
|                     | 1277.71                                       | 1277.6805   | -0.0295 | -23   | 369           | 379      | LALDIEIATYR               |         |           |       |     |                  |    |      |        |       | Mascot |  |  |  |
|                     | 1308.6543                                     | 1308.6299   | -0.0244 | -19   | 271           | 282      | SKFADLTDAANR              |         |           |       |     |                  |    |      |        |       | Mascot |  |  |  |
|                     | 1393.6165                                     | 1393.6962   | 0.0797  | 57    | 1             | 11       | MESQRSFSSYR               |         |           |       |     | Oxidation (M)[1] |    |      |        |       | Mascot |  |  |  |
|                     | 1434.756                                      | 1434.7373   | -0.0187 | -13   | 29            | 41       | HSTGRSLHSSPR              |         |           |       |     |                  |    |      |        |       | Mascot |  |  |  |
|                     | 1434.756                                      | 1434.7373   | -0.0187 | -13   | 29            | 41       | HSTGRSLHSSPR              |         |           |       |     |                  |    |      |        |       | Mascot |  |  |  |
|                     | 1475.7522                                     | 1475.7231   | -0.0291 | -20   | 300           | 312      | QIQGLTCDLESLR             |         |           |       |     |                  |    |      |        |       | Mascot |  |  |  |
|                     | 2566.0974                                     | 2566.2104   | 0.113   | 44    | 252           | 272      | AQFEAMANSNMQETEE<br>WYRSK |         |           |       |     | Oxidation (M)[6] |    |      |        |       | Mascot |  |  |  |
| 6                   | glial fibrillary acidic protein [Danio rerio] |             |         |       | gij 37722304  |          |                           | 51205   | 5.34      | 12    | 123 | 100              | 76 | 100  |        |       |        |  |  |  |
| Peptide Information |                                               |             |         |       |               |          |                           |         |           |       |     |                  |    |      |        |       |        |  |  |  |
|                     | Calc. Mass                                    | Obsrv. Mass | ± da    | ± ppm | Start Seq.    | End Seq. | Sequence                  |         | Ion Score | C. I. | %   | Modification     |    | Rank | Result | Type  |        |  |  |  |
|                     | 1051.4916                                     | 1051.5101   | 0.0185  | 18    | 292           | 299      | QEANDYRR                  |         |           |       |     |                  |    |      |        |       | Mascot |  |  |  |
|                     | 1060.5632                                     | 1060.5397   | -0.0235 | -22   | 380           | 388      | KLLEGEESR                 |         |           |       |     |                  |    |      |        |       | Mascot |  |  |  |
|                     | 1064.4863                                     | 1064.5814   | 0.0951  | 89    | 83            | 91       | VEMMGLNDR                 |         |           |       |     |                  |    |      |        |       | Mascot |  |  |  |
|                     | 1090.531                                      | 1090.5007   | -0.0303 | -28   | 321           | 328      | QLREMEER                  |         |           |       |     |                  |    |      |        |       | Mascot |  |  |  |
|                     | 1106.5259                                     | 1106.5027   | -0.0232 | -21   | 321           | 328      | QLREMEER                  |         |           |       |     | Oxidation (M)[5] |    |      |        |       | Mascot |  |  |  |
|                     | 1229.6597                                     | 1229.4825   | -0.1772 | -144  | 165           | 174      | QRLQDETALR                |         |           |       |     |                  |    |      |        |       | Mascot |  |  |  |
|                     | 1235.6266                                     | 1235.5028   | -0.1238 | -100  | 124           | 133      | LGDIYQEELR                |         |           |       |     |                  |    |      |        |       | Mascot |  |  |  |
|                     | 1246.5811                                     | 1246.5112   | -0.0699 | -56   | 2             | 11       | ESQRSFSSYR                |         |           |       |     |                  |    |      |        |       | Mascot |  |  |  |
|                     | 1277.71                                       | 1277.6805   | -0.0295 | -23   | 369           | 379      | LALDIEIATYR               | 76      |           | 100   |     |                  |    |      |        |       | Mascot |  |  |  |
|                     | 1277.71                                       | 1277.6805   | -0.0295 | -23   | 369           | 379      | LALDIEIATYR               |         |           |       |     |                  |    |      |        |       | Mascot |  |  |  |
|                     | 1308.6543                                     | 1308.6299   | -0.0244 | -19   | 271           | 282      | SKFADLTDAANR              |         |           |       |     |                  |    |      |        |       | Mascot |  |  |  |
|                     | 1393.6165                                     | 1393.6962   | 0.0797  | 57    | 1             | 11       | MESQRSFSSYR               |         |           |       |     | Oxidation (M)[1] |    |      |        |       | Mascot |  |  |  |
|                     | 1434.756                                      | 1434.7373   | -0.0187 | -13   | 29            | 41       | HSTGRSLHSSPR              |         |           |       |     |                  |    |      |        |       | Mascot |  |  |  |
|                     | 1434.756                                      | 1434.7373   | -0.0187 | -13   | 29            | 41       | HSTGRSLHSSPR              |         |           |       |     |                  |    |      |        |       | Mascot |  |  |  |
|                     | 1475.7522                                     | 1475.7231   | -0.0291 | -20   | 300           | 312      | QIQGLTCDLESLR             |         |           |       |     |                  |    |      |        |       | Mascot |  |  |  |
| 7                   | glial fibrillary acidic protein [Danio rerio] |             |         |       | gij 239596173 |          |                           | 19203.6 | 4.89      | 6     | 108 | 100              | 76 | 100  |        |       |        |  |  |  |

| Peptide Information |                                               |             |         |       |             |                   |         |           |       |                  |      |             |     |
|---------------------|-----------------------------------------------|-------------|---------|-------|-------------|-------------------|---------|-----------|-------|------------------|------|-------------|-----|
|                     | Calc. Mass                                    | Obsrv. Mass | ± da    | ± ppm | Start Seq.  | End Sequence Seq. |         | Ion Score | C. I. | % Modification   | Rank | Result Type |     |
|                     | 1051.4916                                     | 1051.5101   | 0.0185  | 18    | 33          | 40 QEANDYRR       |         |           |       |                  |      | Mascot      |     |
|                     | 1060.5632                                     | 1060.5397   | -0.0235 | -22   | 121         | 129 KLLEGEESR     |         |           |       |                  |      | Mascot      |     |
|                     | 1090.531                                      | 1090.5007   | -0.0303 | -28   | 62          | 69 QLREMEER       |         |           |       |                  |      | Mascot      |     |
|                     | 1106.5259                                     | 1106.5027   | -0.0232 | -21   | 62          | 69 QLREMEER       |         |           |       | Oxidation (M)[5] |      | Mascot      |     |
|                     | 1277.71                                       | 1277.6805   | -0.0295 | -23   | 110         | 120 LALDIEIATYR   |         | 76        | 100   |                  |      | Mascot      |     |
|                     | 1277.71                                       | 1277.6805   | -0.0295 | -23   | 110         | 120 LALDIEIATYR   |         |           |       |                  |      | Mascot      |     |
|                     | 1308.6543                                     | 1308.6299   | -0.0244 | -19   | 12          | 23 SKFADLTDAANR   |         |           |       |                  |      | Mascot      |     |
|                     | 1475.7522                                     | 1475.7231   | -0.0291 | -20   | 41          | 53 QIQGLTCDLESLR  |         |           |       |                  |      | Mascot      |     |
| 8                   | glial fibrillary acidic protein [Danio rerio] |             |         |       | gi 20977259 |                   | 42127.4 | 5.03      | 8     | 103              | 100  | 76          | 100 |

| Peptide Information |                            |             |         |       |              |                            |         |           |       |                  |      |             |
|---------------------|----------------------------|-------------|---------|-------|--------------|----------------------------|---------|-----------|-------|------------------|------|-------------|
|                     | Calc. Mass                 | Obsrv. Mass | ± da    | ± ppm | Start Seq.   | End Sequence Seq.          |         | Ion Score | C. I. | % Modification   | Rank | Result Type |
|                     | 1051.4916                  | 1051.5101   | 0.0185  | 18    | 208          | 215 QEANDYRR               |         |           |       |                  |      | Mascot      |
|                     | 1060.5632                  | 1060.5397   | -0.0235 | -22   | 296          | 304 KLLEGEESR              |         |           |       |                  |      | Mascot      |
|                     | 1090.531                   | 1090.5007   | -0.0303 | -28   | 237          | 244 QLREMEER               |         |           |       |                  |      | Mascot      |
|                     | 1106.5259                  | 1106.5027   | -0.0232 | -21   | 237          | 244 QLREMEER               |         |           |       | Oxidation (M)[5] |      | Mascot      |
|                     | 1229.6597                  | 1229.4825   | -0.1772 | -144  | 81           | 90 QRLQDETALR              |         |           |       |                  |      | Mascot      |
|                     | 1235.6266                  | 1235.5028   | -0.1238 | -100  | 40           | 49 LGDIYQEELR              |         |           |       |                  |      | Mascot      |
|                     | 1277.71                    | 1277.6805   | -0.0295 | -23   | 285          | 295 LALDIEIATYR            |         | 76        | 100   |                  |      | Mascot      |
|                     | 1277.71                    | 1277.6805   | -0.0295 | -23   | 285          | 295 LALDIEIATYR            |         |           |       |                  |      | Mascot      |
|                     | 1308.6543                  | 1308.6299   | -0.0244 | -19   | 187          | 198 SKFADLTDAANR           |         |           |       |                  |      | Mascot      |
|                     | 2566.0974                  | 2566.2104   | 0.113   | 44    | 168          | 188 SQFEAMANSNMQETEE WYRSK |         |           |       |                  |      | Mascot      |
| 9                   | Krt4 protein [Danio rerio] |             |         |       | gi 161612220 |                            | 53979.9 | 5.34      | 7     | 98               | 100  | 76 100      |

| Peptide Information |             |         |       |            |                   |           |       |                  |      |             |
|---------------------|-------------|---------|-------|------------|-------------------|-----------|-------|------------------|------|-------------|
| Calc. Mass          | Obsrv. Mass | ± da    | ± ppm | Start Seq. | End Sequence Seq. | Ion Score | C. I. | % Modification   | Rank | Result Type |
| 882.4349            | 882.5441    | 0.1092  | 124   | 33         | 40 MSSVTSVR       |           |       | Oxidation (M)[1] |      | Mascot      |
| 973.4948            | 973.509     | 0.0142  | 15    | 173        | 181 QLDGLGNEK     |           |       |                  |      | Mascot      |
| 1003.5418           | 1003.527    | -0.0148 | -15   | 112        | 119 TQEKEQIK      |           |       |                  |      | Mascot      |
| 1003.5418           | 1003.527    | -0.0148 | -15   | 112        | 119 TQEKEQIK      |           |       |                  |      | Mascot      |
| 1060.5632           | 1060.5397   | -0.0235 | -22   | 416        | 424 KLLEGEESR     |           |       |                  |      | Mascot      |

|           |           |         |      |     |     |             |    |     |  |  |  |  |        |
|-----------|-----------|---------|------|-----|-----|-------------|----|-----|--|--|--|--|--------|
| 1065.5898 | 1065.4794 | -0.1104 | -104 | 487 | 496 | TSVTTVSSKR  |    |     |  |  |  |  | Mascot |
| 1082.5992 | 1082.5731 | -0.0261 | -24  | 125 | 133 | FASFDKVR    |    |     |  |  |  |  | Mascot |
| 1277.71   | 1277.6805 | -0.0295 | -23  | 405 | 415 | LALDIEIATYR | 76 | 100 |  |  |  |  | Mascot |
| 1277.71   | 1277.6805 | -0.0295 | -23  | 405 | 415 | LALDIEIATYR |    |     |  |  |  |  | Mascot |

10 Zgc:158846 [Danio rerio] gi|158253572 55223 5.44 8 97 100 76 100

Peptide Information

| Calc. Mass | Obsrv. Mass | ± da    | ± ppm | Start Seq. | End Seq. | Sequence             | Ion Score | C. I. | % Modification   | Rank | Result Type |
|------------|-------------|---------|-------|------------|----------|----------------------|-----------|-------|------------------|------|-------------|
| 996.5472   | 996.5406    | -0.0066 | -7    | 421        | 429      | DIHNTGLVK            |           |       |                  |      | Mascot      |
| 1003.5418  | 1003.527    | -0.0148 | -15   | 74         | 81       | TQEKEQIK             |           |       |                  |      | Mascot      |
| 1003.5418  | 1003.527    | -0.0148 | -15   | 74         | 81       | TQEKEQIK             |           |       |                  |      | Mascot      |
| 1060.5632  | 1060.5397   | -0.0235 | -22   | 378        | 386      | KLLEGEESR            |           |       |                  |      | Mascot      |
| 1082.5992  | 1082.5731   | -0.0261 | -24   | 87         | 95       | FASFDKVR             |           |       |                  |      | Mascot      |
| 1229.5718  | 1229.4825   | -0.0893 | -73   | 271        | 280      | YEEMQLTATK           |           |       | Oxidation (M)[4] |      | Mascot      |
| 1277.71    | 1277.6805   | -0.0295 | -23   | 367        | 377      | LALDIEIATYR          | 76        | 100   |                  |      | Mascot      |
| 1277.71    | 1277.6805   | -0.0295 | -23   | 367        | 377      | LALDIEIATYR          |           |       |                  |      | Mascot      |
| 1851.9269  | 1851.8829   | -0.044  | -24   | 103        | 117      | MLETKWSVLQEQTSR      |           |       | Oxidation (M)[1] |      | Mascot      |
| 2384.2529  | 2383.9021   | -0.3508 | -147  | 358        | 377      | EYQSLMNIKLALDIEIATYR |           |       |                  |      | Mascot      |

11 Krt5 protein [Danio rerio] gi|39645432 57792.3 5.27 6 91 99.997 76 100

Peptide Information

| Calc. Mass | Obsrv. Mass | ± da    | ± ppm | Start Seq. | End Seq. | Sequence      | Ion Score | C. I. | % Modification   | Rank | Result Type |
|------------|-------------|---------|-------|------------|----------|---------------|-----------|-------|------------------|------|-------------|
| 973.4948   | 973.509     | 0.0142  | 15    | 203        | 211      | QLDGLGNEK     |           |       |                  |      | Mascot      |
| 1003.5418  | 1003.527    | -0.0148 | -15   | 142        | 149      | TQEKEQIK      |           |       |                  |      | Mascot      |
| 1003.5418  | 1003.527    | -0.0148 | -15   | 142        | 149      | TQEKEQIK      |           |       |                  |      | Mascot      |
| 1060.5632  | 1060.5397   | -0.0235 | -22   | 446        | 454      | KLLEGEESR     |           |       |                  |      | Mascot      |
| 1082.5992  | 1082.5731   | -0.0261 | -24   | 155        | 163      | FASFDKVR      |           |       |                  |      | Mascot      |
| 1109.4825  | 1109.4762   | -0.0063 | -6    | 2          | 14       | SGGMGGGMGGGIR |           |       | Oxidation (M)[4] |      | Mascot      |
| 1277.71    | 1277.6805   | -0.0295 | -23   | 435        | 445      | LALDIEIATYR   | 76        | 100   |                  |      | Mascot      |
| 1277.71    | 1277.6805   | -0.0295 | -23   | 435        | 445      | LALDIEIATYR   |           |       |                  |      | Mascot      |

12 keratin 4 [Danio rerio] gi|18858947 54242 5.42 6 91 99.996 76 100

Peptide Information

| Calc. Mass | Obsrv. Mass | ± da | ± ppm | Start Seq. | End Seq. | Sequence | Ion Score | C. I. | % Modification | Rank | Result Type |
|------------|-------------|------|-------|------------|----------|----------|-----------|-------|----------------|------|-------------|
|------------|-------------|------|-------|------------|----------|----------|-----------|-------|----------------|------|-------------|

|    |                                                                       |           |         |      |     |     |             |      |   |     |        |                  |     |        |
|----|-----------------------------------------------------------------------|-----------|---------|------|-----|-----|-------------|------|---|-----|--------|------------------|-----|--------|
|    | 882.4349                                                              | 882.5441  | 0.1092  | 124  | 33  | 40  | MSSVTSVR    |      |   |     |        | Oxidation (M)[1] |     | Mascot |
|    | 973.4948                                                              | 973.509   | 0.0142  | 15   | 174 | 182 | QLDGLGNEK   |      |   |     |        |                  |     | Mascot |
|    | 1003.5101                                                             | 1003.527  | 0.0169  | 17   | 389 | 396 | QDMARQVR    |      |   |     |        |                  |     | Mascot |
|    | 1003.5101                                                             | 1003.527  | 0.0169  | 17   | 389 | 396 | QDMARQVR    |      |   |     |        |                  |     | Mascot |
|    | 1060.5632                                                             | 1060.5397 | -0.0235 | -22  | 417 | 425 | KLLEGEESR   |      |   |     |        |                  |     | Mascot |
|    | 1065.5898                                                             | 1065.4794 | -0.1104 | -104 | 488 | 497 | TSVTTVSSKR  |      |   |     |        |                  |     | Mascot |
|    | 1277.71                                                               | 1277.6805 | -0.0295 | -23  | 406 | 416 | LALDIEIATYR | 76   |   | 100 |        |                  |     | Mascot |
|    | 1277.71                                                               | 1277.6805 | -0.0295 | -23  | 406 | 416 | LALDIEIATYR |      |   |     |        |                  |     | Mascot |
| 13 | PREDICTED: keratin, type II cytoskeletal 8 [Danio rerio] gi 125849603 |           |         |      |     |     | 49959.2     | 5.46 | 7 | 90  | 99.996 | 76               | 100 |        |

#### Peptide Information

| Calc. Mass | Obsrv. Mass | ± da    | ± ppm | Start Seq. | End Seq. | Sequence    | Ion Score | C. I. | % Modification   | Rank | Result Type |
|------------|-------------|---------|-------|------------|----------|-------------|-----------|-------|------------------|------|-------------|
| 973.4948   | 973.509     | 0.0142  | 15    | 343        | 350      | DLEEALQR    |           |       |                  |      | Mascot      |
| 1003.5418  | 1003.527    | -0.0148 | -15   | 77         | 84       | TQEKEQIK    |           |       |                  |      | Mascot      |
| 1003.5418  | 1003.527    | -0.0148 | -15   | 77         | 84       | TQEKEQIK    |           |       |                  |      | Mascot      |
| 1060.6361  | 1060.5397   | -0.0964 | -91   | 422        | 430      | IVIKTTETR   |           |       |                  |      | Mascot      |
| 1065.5283  | 1065.4794   | -0.0489 | -46   | 426        | 434      | TTETRNSTR   |           |       |                  |      | Mascot      |
| 1090.4946  | 1090.5007   | 0.0061  | 6     | 138        | 146      | QMDVVNNDR   |           |       |                  |      | Mascot      |
| 1106.4895  | 1106.5027   | 0.0132  | 12    | 138        | 146      | QMDVVNNDR   |           |       | Oxidation (M)[2] |      | Mascot      |
| 1246.5957  | 1246.5112   | -0.0845 | -68   | 137        | 146      | RQMDVVNNDR  |           |       |                  |      | Mascot      |
| 1277.71    | 1277.6805   | -0.0295 | -23   | 370        | 380      | LALDIEIATYR | 76        |       | 100              |      | Mascot      |
| 1277.71    | 1277.6805   | -0.0295 | -23   | 370        | 380      | LALDIEIATYR |           |       |                  |      | Mascot      |

|    |                                                       |  |  |  |  |  |         |      |   |    |       |    |     |  |
|----|-------------------------------------------------------|--|--|--|--|--|---------|------|---|----|-------|----|-----|--|
| 14 | keratin type II, tail domain [Danio rerio] gi 4107170 |  |  |  |  |  | 10583.9 | 8.29 | 2 | 87 | 99.99 | 76 | 100 |  |
|----|-------------------------------------------------------|--|--|--|--|--|---------|------|---|----|-------|----|-----|--|

#### Peptide Information

| Calc. Mass | Obsrv. Mass | ± da    | ± ppm | Start Seq. | End Seq. | Sequence    | Ion Score | C. I. | % Modification | Rank | Result Type |
|------------|-------------|---------|-------|------------|----------|-------------|-----------|-------|----------------|------|-------------|
| 1060.5632  | 1060.5397   | -0.0235 | -22   | 15         | 23       | KLLEGEESR   |           |       |                |      | Mascot      |
| 1277.71    | 1277.6805   | -0.0295 | -23   | 4          | 14       | LALDIEIATYR | 76        |       | 100            |      | Mascot      |
| 1277.71    | 1277.6805   | -0.0295 | -23   | 4          | 14       | LALDIEIATYR |           |       |                |      | Mascot      |

|    |                                                                                                                    |  |  |  |  |  |         |      |    |    |        |    |        |  |
|----|--------------------------------------------------------------------------------------------------------------------|--|--|--|--|--|---------|------|----|----|--------|----|--------|--|
| 15 | RecName: Full=Keratin, type I cytoskeletal 18; gi 148886613<br>AltName: Full=Cytokeratin-18; Short=CK-18; AltName: |  |  |  |  |  | 48601.1 | 5.53 | 11 | 86 | 99.989 | 43 | 98.481 |  |
|----|--------------------------------------------------------------------------------------------------------------------|--|--|--|--|--|---------|------|----|----|--------|----|--------|--|

#### Peptide Information

| Calc. Mass | Obsrv. Mass | ± da    | ± ppm | Start Seq. | End Seq. | Sequence | Ion Score | C. I. | % Modification | Rank | Result Type |
|------------|-------------|---------|-------|------------|----------|----------|-----------|-------|----------------|------|-------------|
| 807.3995   | 807.3792    | -0.0203 | -25   | 163        | 169      | LAADDFR  | 43        |       | 98.481         |      | Mascot      |

|    |                                                                  |              |         |      |   |    |        |    |     |
|----|------------------------------------------------------------------|--------------|---------|------|---|----|--------|----|-----|
| 16 | novel protein similar to vertebrate keratin family [Danio rerio] | gi 157885973 | 46874.6 | 5.23 | 5 | 86 | 99.989 | 76 | 100 |
|----|------------------------------------------------------------------|--------------|---------|------|---|----|--------|----|-----|

| Calc. Mass | Obsrv. Mass | ± da    | ± ppm | Start Seq. | End Sequence Seq. | Ion Score | C. I. % Modification | Rank | Result Type |
|------------|-------------|---------|-------|------------|-------------------|-----------|----------------------|------|-------------|
| 973.4948   | 973.509     | 0.0142  | 15    | 365        | 372 DLEEALQR      |           |                      |      | Mascot      |
| 1003.5418  | 1003.527    | -0.0148 | -15   | 99         | 106 TQEKEQIK      |           |                      |      | Mascot      |
| 1003.5418  | 1003.527    | -0.0148 | -15   | 99         | 106 TQEKEQIK      |           |                      |      | Mascot      |
| 1090.4946  | 1090.5007   | 0.0061  | 6     | 160        | 168 QMDVVNNDR     |           |                      |      | Mascot      |
| 1106.4895  | 1106.5027   | 0.0132  | 12    | 160        | 168 QMDVVNNDR     |           | Oxidation (M)[2]     |      | Mascot      |
| 1246.5957  | 1246.5112   | -0.0845 | -68   | 159        | 168 RQMDVVNNDR    |           |                      |      | Mascot      |
| 1277.71    | 1277.6805   | -0.0295 | -23   | 392        | 402 LALDIEIATYR   | 76        | 100                  |      | Mascot      |
| 1277.71    | 1277.6805   | -0.0295 | -23   | 392        | 402 LALDIEIATYR   |           |                      |      | Mascot      |

| Calc. Mass | Obsrv. Mass | ± da    | ± ppm | Start Seq. | End Seq. | Sequence    | Ion Score | C. I. | % Modification   | Rank | Result Type |
|------------|-------------|---------|-------|------------|----------|-------------|-----------|-------|------------------|------|-------------|
| 1003.5418  | 1003.527    | -0.0148 | -15   | 92         | 99       | TQEKEQIK    |           |       |                  |      | Mascot      |
| 1003.5418  | 1003.527    | -0.0148 | -15   | 92         | 99       | TQEKEQIK    |           |       |                  |      | Mascot      |
| 1082.5992  | 1082.5731   | -0.0261 | -24   | 105        | 113      | FASFIDKVR   |           |       |                  |      | Mascot      |
| 1277.71    | 1277.6805   | -0.0295 | -23   | 385        | 395      | LALDIEIATYR | 76        | 100   |                  |      | Mascot      |
| 1277.71    | 1277.6805   | -0.0295 | -23   | 385        | 395      | LALDIEIATYR |           |       |                  |      | Mascot      |
| 1475.7635  | 1475.7231   | -0.0404 | -27   | 308        | 319      | TEIADLNRMQR |           |       | Oxidation (M)[9] |      | Mascot      |

18 Keratin 8 [Danio rerio] gi|159155987 57624.4 5.1 4 85 99.986 76 100

Peptide Information

| Calc. Mass | Obsrv. Mass | ± da    | ± ppm | Start Seq. | End Seq. | Sequence     | Ion Score | C. I. | % Modification   | Rank | Result | Type   |
|------------|-------------|---------|-------|------------|----------|--------------|-----------|-------|------------------|------|--------|--------|
| 1003.5418  | 1003.527    | -0.0148 | -15   | 113        | 120      | TQEKEQIK     |           |       |                  |      |        | Mascot |
| 1003.5418  | 1003.527    | -0.0148 | -15   | 113        | 120      | TQEKEQIK     |           |       |                  |      |        | Mascot |
| 1082.5992  | 1082.5731   | -0.0261 | -24   | 126        | 134      | FASFIDKVR    |           |       |                  |      |        | Mascot |
| 1277.71    | 1277.6805   | -0.0295 | -23   | 406        | 416      | LALDIEIATYR  | 76        | 100   |                  |      |        | Mascot |
| 1277.71    | 1277.6805   | -0.0295 | -23   | 406        | 416      | LALDIEIATYR  |           |       |                  |      |        | Mascot |
| 1475.7635  | 1475.7231   | -0.0404 | -27   | 329        | 340      | TEIADLNRMIQR |           |       | Oxidation (M)[9] |      |        | Mascot |

19 keratin 5 [Danio rerio] gi|18858425 58550.6 5.34 5 84 99.981 76 100

Peptide Information

| Calc. Mass | Obsrv. Mass | ± da    | ± ppm | Start Seq. | End Seq. | Sequence    | Ion Score | C. I. | % Modification | Rank | Result | Type   |
|------------|-------------|---------|-------|------------|----------|-------------|-----------|-------|----------------|------|--------|--------|
| 973.4948   | 973.509     | 0.0142  | 15    | 213        | 221      | QLDGLGNEK   |           |       |                |      |        | Mascot |
| 1003.5418  | 1003.527    | -0.0148 | -15   | 152        | 159      | TQEKEQIK    |           |       |                |      |        | Mascot |
| 1003.5418  | 1003.527    | -0.0148 | -15   | 152        | 159      | TQEKEQIK    |           |       |                |      |        | Mascot |
| 1060.5632  | 1060.5397   | -0.0235 | -22   | 456        | 464      | KLLEGEESR   |           |       |                |      |        | Mascot |
| 1082.5992  | 1082.5731   | -0.0261 | -24   | 165        | 173      | FASFIDKVR   |           |       |                |      |        | Mascot |
| 1277.71    | 1277.6805   | -0.0295 | -23   | 445        | 455      | LALDIEIATYR | 76        | 100   |                |      |        | Mascot |
| 1277.71    | 1277.6805   | -0.0295 | -23   | 445        | 455      | LALDIEIATYR |           |       |                |      |        | Mascot |

20 keratin 18 [Danio rerio] gi|29335504 41247.4 5.07 10 82 99.971 43 98.481

Peptide Information

| Calc. Mass | Obsrv. Mass | ± da    | ± ppm | Start Seq. | End Seq. | Sequence   | Ion Score | C. I.  | % Modification | Rank | Result | Type   |
|------------|-------------|---------|-------|------------|----------|------------|-----------|--------|----------------|------|--------|--------|
| 807.3995   | 807.3792    | -0.0203 | -25   | 91         | 97       | LAADDFR    | 43        | 98.481 |                |      |        | Mascot |
| 807.3995   | 807.3792    | -0.0203 | -25   | 91         | 97       | LAADDFR    |           |        |                |      |        | Mascot |
| 832.4523   | 832.464     | 0.0117  | 14    | 250        | 257      | GSLEGLTLR  |           |        |                |      |        | Mascot |
| 882.4753   | 882.5441    | 0.0688  | 78    | 188        | 194      | YEKMALK    |           |        |                |      |        | Mascot |
| 996.4996   | 996.5406    | 0.041   | 41    | 100        | 107      | YESELSIR   |           |        |                |      |        | Mascot |
| 1034.5629  | 1034.4895   | -0.0734 | -71   | 91         | 99       | LAADDFRVK  |           |        |                |      |        | Mascot |
| 1045.4697  | 1045.5392   | 0.0695  | 66    | 52         | 60       | GPDVHDYSR  |           |        |                |      |        | Mascot |
| 1065.5575  | 1065.4794   | -0.0781 | -73   | 305        | 313      | LEAEIATYR  |           |        |                |      |        | Mascot |
| 1201.6423  | 1201.6394   | -0.0029 | -2    | 323        | 332      | LQDALEEQKK |           |        |                |      |        | Mascot |



|    |                                |           |         |     |             |     |              |         |      |   |    |                  |        |        |
|----|--------------------------------|-----------|---------|-----|-------------|-----|--------------|---------|------|---|----|------------------|--------|--------|
|    | 1340.6879                      | 1340.6318 | -0.0561 | -42 | 303         | 313 | MKLEAEIATYR  |         |      |   |    | Oxidation (M)[1] | Mascot |        |
|    | 1434.6893                      | 1434.7373 | 0.048   | 33  | 174         | 185 | GQDLSQIMEEIR |         |      |   |    | Oxidation (M)[8] | Mascot |        |
|    | 1434.6893                      | 1434.7373 | 0.048   | 33  | 174         | 185 | GQDLSQIMEEIR |         |      |   |    | Oxidation (M)[8] | Mascot |        |
| 21 | cytokeratin-like [Danio rerio] |           |         |     | gi 62955621 |     |              | 47177.9 | 5.31 | 8 | 74 | 99.81            | 43     | 98.481 |

Peptide Information

| Calc. Mass | Obsrv. Mass | ± da    | ± ppm | Start Seq. | End Seq. | Sequence         | Ion Score | C. I.  | % Modification | Rank | Result Type |
|------------|-------------|---------|-------|------------|----------|------------------|-----------|--------|----------------|------|-------------|
| 807.3995   | 807.3792    | -0.0203 | -25   | 159        | 165      | LAADDFR          | 43        | 98.481 |                |      | Mascot      |
| 807.3995   | 807.3792    | -0.0203 | -25   | 159        | 165      | LAADDFR          |           |        |                |      | Mascot      |
| 1034.5629  | 1034.4895   | -0.0734 | -71   | 159        | 167      | LAADDFRVK        |           |        |                |      | Mascot      |
| 1107.547   | 1107.5149   | -0.0321 | -29   | 265        | 273      | DLEAWFQAK        |           |        |                |      | Mascot      |
| 1194.5861  | 1194.5852   | -0.0009 | -1    | 33         | 46       | AGSVYGGAGGSGVR   |           |        |                |      | Mascot      |
| 1235.6418  | 1235.5028   | -0.139  | -112  | 264        | 273      | KDLEAWFQAK       |           |        |                |      | Mascot      |
| 1320.6907  | 1320.5549   | -0.1358 | -103  | 113        | 124      | QFLDSKTAPSAR     |           |        |                |      | Mascot      |
| 1320.6907  | 1320.5549   | -0.1358 | -103  | 113        | 124      | QFLDSKTAPSAR     |           |        |                |      | Mascot      |
| 1390.7219  | 1390.6519   | -0.07   | -50   | 18         | 32       | VSVSGGGAGRVTGMR  |           |        |                |      | Mascot      |
| 1638.8181  | 1638.822    | 0.0039  | 2     | 414        | 429      | VVSSSSQSTSEVVSQK |           |        |                |      | Mascot      |
| 1638.8181  | 1638.822    | 0.0039  | 2     | 414        | 429      | VVSSSSQSTSEVVSQK |           |        |                |      | Mascot      |

|    |                                                                             |  |  |  |             |  |  |         |      |   |    |        |    |        |
|----|-----------------------------------------------------------------------------|--|--|--|-------------|--|--|---------|------|---|----|--------|----|--------|
| 22 | novel protein similar to type I cytokeratin, enveloping layer [Danio rerio] |  |  |  | gi 94732405 |  |  | 43116.8 | 5.22 | 7 | 69 | 99.386 | 43 | 98.481 |
|----|-----------------------------------------------------------------------------|--|--|--|-------------|--|--|---------|------|---|----|--------|----|--------|

Peptide Information

| Calc. Mass | Obsrv. Mass | ± da    | ± ppm | Start Seq. | End Seq. | Sequence        | Ion Score | C. I.  | % Modification | Rank | Result Type |
|------------|-------------|---------|-------|------------|----------|-----------------|-----------|--------|----------------|------|-------------|
| 807.3995   | 807.3792    | -0.0203 | -25   | 160        | 166      | LAADDFR         | 43        | 98.481 |                |      | Mascot      |
| 807.3995   | 807.3792    | -0.0203 | -25   | 160        | 166      | LAADDFR         |           |        |                |      | Mascot      |
| 1034.5629  | 1034.4895   | -0.0734 | -71   | 160        | 168      | LAADDFRVK       |           |        |                |      | Mascot      |
| 1107.547   | 1107.5149   | -0.0321 | -29   | 266        | 274      | DLEAWFQAK       |           |        |                |      | Mascot      |
| 1194.5861  | 1194.5852   | -0.0009 | -1    | 34         | 47       | AGSVYGGAGGSGVR  |           |        |                |      | Mascot      |
| 1235.6418  | 1235.5028   | -0.139  | -112  | 265        | 274      | KDLEAWFQAK      |           |        |                |      | Mascot      |
| 1320.6907  | 1320.5549   | -0.1358 | -103  | 114        | 125      | QFLDSKTAPSAR    |           |        |                |      | Mascot      |
| 1320.6907  | 1320.5549   | -0.1358 | -103  | 114        | 125      | QFLDSKTAPSAR    |           |        |                |      | Mascot      |
| 1390.7219  | 1390.6519   | -0.07   | -50   | 19         | 33       | VSVSGGGAGRVTGMR |           |        |                |      | Mascot      |

|    |                                  |  |  |  |              |  |  |         |      |   |    |        |    |        |
|----|----------------------------------|--|--|--|--------------|--|--|---------|------|---|----|--------|----|--------|
| 23 | Zgc:109868 protein [Danio rerio] |  |  |  | gi 120537710 |  |  | 47066.8 | 5.25 | 7 | 67 | 99.091 | 43 | 98.481 |
|----|----------------------------------|--|--|--|--------------|--|--|---------|------|---|----|--------|----|--------|

Peptide Information

| Calc. Mass | Obsrv. Mass | ± da | ± ppm | Start | End | Sequence | Ion | C. I. | % Modification | Rank | Result Type |
|------------|-------------|------|-------|-------|-----|----------|-----|-------|----------------|------|-------------|
|------------|-------------|------|-------|-------|-----|----------|-----|-------|----------------|------|-------------|

|                     |                                              |             |         |       |              |                   |                  |           |        |    |                                          |      |        | Seq.   | Seq.   | Score  |  |        |  |  |  |  |  |  |  |
|---------------------|----------------------------------------------|-------------|---------|-------|--------------|-------------------|------------------|-----------|--------|----|------------------------------------------|------|--------|--------|--------|--------|--|--------|--|--|--|--|--|--|--|
|                     | 807.3995                                     | 807.3792    | -0.0203 | -25   | 158          | 164               | LAADDFR          | 43        | 98.481 |    |                                          |      |        |        |        |        |  | Mascot |  |  |  |  |  |  |  |
|                     | 807.3995                                     | 807.3792    | -0.0203 | -25   | 158          | 164               | LAADDFR          |           |        |    |                                          |      |        |        |        | Mascot |  |        |  |  |  |  |  |  |  |
|                     | 1034.5629                                    | 1034.4895   | -0.0734 | -71   | 158          | 166               | LAADDFRVK        |           |        |    |                                          |      |        |        |        | Mascot |  |        |  |  |  |  |  |  |  |
|                     | 1107.547                                     | 1107.5149   | -0.0321 | -29   | 264          | 272               | DLEAWFQAK        |           |        |    |                                          |      |        |        |        | Mascot |  |        |  |  |  |  |  |  |  |
|                     | 1194.5861                                    | 1194.5852   | -0.0009 | -1    | 32           | 45                | AGSVYGGAGGSGVR   |           |        |    |                                          |      |        |        |        | Mascot |  |        |  |  |  |  |  |  |  |
|                     | 1235.6418                                    | 1235.5028   | -0.139  | -112  | 263          | 272               | KDLEAWFQAK       |           |        |    |                                          |      |        |        |        | Mascot |  |        |  |  |  |  |  |  |  |
|                     | 1320.6907                                    | 1320.5549   | -0.1358 | -103  | 112          | 123               | QFLDSKTAPSAR     |           |        |    |                                          |      |        |        |        | Mascot |  |        |  |  |  |  |  |  |  |
|                     | 1320.6907                                    | 1320.5549   | -0.1358 | -103  | 112          | 123               | QFLDSKTAPSAR     |           |        |    |                                          |      |        |        |        | Mascot |  |        |  |  |  |  |  |  |  |
|                     | 1638.8181                                    | 1638.822    | 0.0039  | 2     | 413          | 428               | VVSSSSQSTSEVVSQK |           |        |    |                                          |      |        |        |        | Mascot |  |        |  |  |  |  |  |  |  |
|                     | 1638.8181                                    | 1638.822    | 0.0039  | 2     | 413          | 428               | VVSSSSQSTSEVVSQK |           |        |    |                                          |      |        |        |        | Mascot |  |        |  |  |  |  |  |  |  |
| 24                  | hypothetical protein LOC436665 [Danio rerio] |             |         |       | gi 50539844  |                   | 47819.6          | 5.77      | 8      | 60 | 95.55                                    | 42   | 97.763 |        |        |        |  |        |  |  |  |  |  |  |  |
| Peptide Information |                                              |             |         |       |              |                   |                  |           |        |    |                                          |      |        |        |        |        |  |        |  |  |  |  |  |  |  |
| Calc. Mass          |                                              | Obsrv. Mass | ± da    | ± ppm | Start Seq.   | End Seq.          | Sequence         | Ion Score | C. I.  | %  | Modification                             | Rank | Result | Type   |        |        |  |        |  |  |  |  |  |  |  |
| 807.3665            | 807.3792                                     | 0.0127      | 16      | 7     | 14           | TSSCQGPK          |                  |           |        |    |                                          |      |        | Mascot |        |        |  |        |  |  |  |  |  |  |  |
| 807.3995            | 807.3792                                     | -0.0203     | -25     | 172   | 178          | LAADDFR           | 43               | 98.481    |        |    |                                          |      |        | Mascot |        |        |  |        |  |  |  |  |  |  |  |
| 1064.4863           | 1064.5814                                    | 0.0951      | 89      | 27    | 36           | CGTVTACAPK        |                  |           |        |    | Carbamidomethyl (C)[1,7]                 |      |        |        | Mascot |        |  |        |  |  |  |  |  |  |  |
| 1065.5463           | 1065.4794                                    | -0.0669     | -63     | 375   | 383          | DYDALLDIK         |                  |           |        |    |                                          |      |        |        | Mascot |        |  |        |  |  |  |  |  |  |  |
| 1308.6794           | 1308.6299                                    | -0.0495     | -38     | 375   | 385          | DYDALLDIKSR       |                  |           |        |    |                                          |      |        |        | Mascot |        |  |        |  |  |  |  |  |  |  |
| 1323.6548           | 1323.6425                                    | -0.0123     | -9      | 58    | 68           | RVGCYPDLLCK       |                  |           |        |    | Carbamidomethyl (C)[4]                   |      |        |        | Mascot |        |  |        |  |  |  |  |  |  |  |
| 1365.7122           | 1365.6112                                    | -0.101      | -74     | 384   | 394          | SRLEQEIATYR       |                  |           |        |    |                                          |      |        |        | Mascot |        |  |        |  |  |  |  |  |  |  |
| 1716.9136           | 1716.8134                                    | -0.1002     | -58     | 20    | 36           | SIVTPIRCGTVTACAPK |                  |           |        |    |                                          |      |        |        | Mascot |        |  |        |  |  |  |  |  |  |  |
| 25                  | type I cytokeratin [Danio rerio]             |             |         |       | gi 18858423  |                   | 46692.5          | 5.38      | 5      | 58 | 92.086                                   | 43   | 98.481 |        |        |        |  |        |  |  |  |  |  |  |  |
| Peptide Information |                                              |             |         |       |              |                   |                  |           |        |    |                                          |      |        |        |        |        |  |        |  |  |  |  |  |  |  |
| Calc. Mass          |                                              | Obsrv. Mass | ± da    | ± ppm | Start Seq.   | End Seq.          | Sequence         | Ion Score | C. I.  | %  | Modification                             | Rank | Result | Type   |        |        |  |        |  |  |  |  |  |  |  |
| 807.3995            | 807.3792                                     | -0.0203     | -25     | 158   | 164          | LAADDFR           | 43               | 98.481    |        |    |                                          |      |        | Mascot |        |        |  |        |  |  |  |  |  |  |  |
| 807.3995            | 807.3792                                     | -0.0203     | -25     | 158   | 164          | LAADDFR           |                  |           |        |    |                                          |      |        |        | Mascot |        |  |        |  |  |  |  |  |  |  |
| 972.5836            | 972.5529                                     | -0.0307     | -32     | 110   | 117          | IRQLLDSK          |                  |           |        |    |                                          |      |        |        | Mascot |        |  |        |  |  |  |  |  |  |  |
| 1034.5629           | 1034.4895                                    | -0.0734     | -71     | 158   | 166          | LAADDFRVK         |                  |           |        |    |                                          |      |        |        | Mascot |        |  |        |  |  |  |  |  |  |  |
| 1791.9269           | 1791.7307                                    | -0.1962     | -109    | 312   | 328          | LSMKASLEGTLADTQAR |                  |           |        |    |                                          |      |        |        | Mascot |        |  |        |  |  |  |  |  |  |  |
| 1838.7102           | 1838.8774                                    | 0.1672      | 91      | 2     | 18           | MSCSSTHTYMSSGGSSR |                  |           |        |    | Carbamidomethyl (C)[3], Oxidation (M)[1] |      |        |        | Mascot |        |  |        |  |  |  |  |  |  |  |
| 26                  | novel protein [Danio rerio]                  |             |         |       | gi 169146109 |                   | 64501.6          | 6.3       | 13     | 57 | 90.486                                   |      |        |        |        |        |  |        |  |  |  |  |  |  |  |

### Peptide Information

| Calc. Mass | Obsrv. Mass | $\pm$ da | $\pm$ ppm | Start Seq. | End Seq. | Sequence                      | Ion Score | C. I. % | Modification                               | Rank | Result Type |
|------------|-------------|----------|-----------|------------|----------|-------------------------------|-----------|---------|--------------------------------------------|------|-------------|
| 914.5166   | 914.5307    | 0.0141   | 15        | 107        | 114      | QLAAAERR                      |           |         |                                            |      | Mascot      |
| 996.5836   | 996.5406    | -0.043   | -43       | 508        | 517      | SPGILSPGIR                    |           |         |                                            |      | Mascot      |
| 1045.5411  | 1045.5392   | -0.0019  | -2        | 118        | 126      | VIADLEEEK                     |           |         |                                            |      | Mascot      |
| 1065.4882  | 1065.4794   | -0.0088  | -8        | 280        | 287      | ELDEMKER                      |           |         | Oxidation (M)[5]                           |      | Mascot      |
| 1107.631   | 1107.5149   | -0.1161  | -105      | 527        | 536      | FHSPVPVPAKK                   |           |         |                                            |      | Mascot      |
| 1179.5319  | 1179.575    | 0.0431   | 37        | 92         | 101      | LVMAHCTNMK                    |           |         | Oxidation (M)[3,9]                         |      | Mascot      |
| 1179.5319  | 1179.575    | 0.0431   | 37        | 92         | 101      | LVMAHCTNMK                    |           |         | Oxidation (M)[3,9]                         |      | Mascot      |
| 1201.6423  | 1201.6394   | -0.0029  | -2        | 118        | 127      | VIADLEEEKR                    |           |         |                                            |      | Mascot      |
| 1320.5663  | 1320.5549   | -0.0114  | -9        | 67         | 78       | DSELSQAQDDGR                  |           |         |                                            |      | Mascot      |
| 1320.5663  | 1320.5549   | -0.0114  | -9        | 67         | 78       | DSELSQAQDDGR                  |           |         |                                            |      | Mascot      |
| 1493.6909  | 1493.7014   | 0.0105   | 7         | 92         | 103      | LVMAHCTNMKEK                  |           |         | Carbamidomethyl (C)[6], Oxidation (M)[3,9] |      | Mascot      |
| 1493.6909  | 1493.7014   | 0.0105   | 7         | 92         | 103      | LVMAHCTNMKEK                  |           |         | Carbamidomethyl (C)[6], Oxidation (M)[3,9] |      | Mascot      |
| 1681.8616  | 1681.8075   | -0.0541  | -32       | 536        | 551      | KQGVNQSPNSPVPSSR              |           |         |                                            |      | Mascot      |
| 1707.749   | 1707.7336   | -0.0154  | -9        | 130        | 145      | AQDAAAGDDITDMLER              |           |         | Oxidation (M)[13]                          |      | Mascot      |
| 1994.1029  | 1993.9312   | -0.1717  | -86       | 497        | 517      | NLAAASSPTGKSPGILSP<br>GIR     |           |         |                                            |      | Mascot      |
| 1994.1029  | 1993.9312   | -0.1717  | -86       | 497        | 517      | NLAAASSPTGKSPGILSP<br>GIR     |           |         |                                            |      | Mascot      |
| 2566.2532  | 2566.2104   | -0.0428  | -17       | 483        | 507      | LPQSNSSPFGTDYRNLA<br>AASSPTGK |           |         |                                            |      | Mascot      |

27 CTTNBP2 N-terminal-like protein [Danio rerio] gi|116517238 65830.4 6.2 13 56 89.568

### Peptide Information

| Calc. Mass | Obsrv. Mass | $\pm$ da | $\pm$ ppm | Start Seq. | End Seq. | Sequence     | Ion Score | C. I. % | Modification                               | Rank | Result Type |
|------------|-------------|----------|-----------|------------|----------|--------------|-----------|---------|--------------------------------------------|------|-------------|
| 914.5166   | 914.5307    | 0.0141   | 15        | 119        | 126      | QLAAAERR     |           |         |                                            |      | Mascot      |
| 996.5836   | 996.5406    | -0.043   | -43       | 520        | 529      | SPGILSPGIR   |           |         |                                            |      | Mascot      |
| 1045.5411  | 1045.5392   | -0.0019  | -2        | 130        | 138      | VIADLEEEK    |           |         |                                            |      | Mascot      |
| 1065.4882  | 1065.4794   | -0.0088  | -8        | 292        | 299      | ELDEMKER     |           |         | Oxidation (M)[5]                           |      | Mascot      |
| 1107.631   | 1107.5149   | -0.1161  | -105      | 539        | 548      | FHSPVPVPAKK  |           |         |                                            |      | Mascot      |
| 1179.5319  | 1179.575    | 0.0431   | 37        | 104        | 113      | LVMAHCTNMK   |           |         | Oxidation (M)[3,9]                         |      | Mascot      |
| 1179.5319  | 1179.575    | 0.0431   | 37        | 104        | 113      | LVMAHCTNMK   |           |         | Oxidation (M)[3,9]                         |      | Mascot      |
| 1201.6423  | 1201.6394   | -0.0029  | -2        | 130        | 139      | VIADLEEEKR   |           |         |                                            |      | Mascot      |
| 1320.5663  | 1320.5549   | -0.0114  | -9        | 79         | 90       | DSELSQAQDDGR |           |         |                                            |      | Mascot      |
| 1320.5663  | 1320.5549   | -0.0114  | -9        | 79         | 90       | DSELSQAQDDGR |           |         |                                            |      | Mascot      |
| 1493.6909  | 1493.7014   | 0.0105   | 7         | 104        | 115      | LVMAHCTNMKEK |           |         | Carbamidomethyl (C)[6], Oxidation (M)[3,9] |      | Mascot      |

|    |                                              |           |         |     |     |              |                               |      |   |    |        |    |                                            |        |
|----|----------------------------------------------|-----------|---------|-----|-----|--------------|-------------------------------|------|---|----|--------|----|--------------------------------------------|--------|
|    | 1493.6909                                    | 1493.7014 | 0.0105  | 7   | 104 | 115          | LVMAHCTNMKEK                  |      |   |    |        |    | Carbamidomethyl (C)[6], Oxidation (M)[3,9] | Mascot |
|    | 1681.8616                                    | 1681.8075 | -0.0541 | -32 | 548 | 563          | KQGVNQSPNSPVPSSR              |      |   |    |        |    |                                            | Mascot |
|    | 1707.749                                     | 1707.7336 | -0.0154 | -9  | 142 | 157          | AQDAAAGDDITDMLER              |      |   |    |        |    | Oxidation (M)[13]                          | Mascot |
|    | 1994.1029                                    | 1993.9312 | -0.1717 | -86 | 509 | 529          | NLAAASSPTGKSPGILSP<br>GIR     |      |   |    |        |    |                                            | Mascot |
|    | 1994.1029                                    | 1993.9312 | -0.1717 | -86 | 509 | 529          | NLAAASSPTGKSPGILSP<br>GIR     |      |   |    |        |    |                                            | Mascot |
|    | 2566.2532                                    | 2566.2104 | -0.0428 | -17 | 495 | 519          | LPQSNSSPFGTDYRNLA<br>AASSPTGK |      |   |    |        |    |                                            | Mascot |
| 28 | hypothetical protein LOC559906 [Danio rerio] |           |         |     |     | gi 198282017 | 48541.8                       | 5.61 | 6 | 55 | 84.921 | 43 | 98.481                                     |        |

#### Peptide Information

| Calc. Mass | Obsrv. Mass | ± da    | ± ppm | Start Seq. | End Seq. | Sequence   | Ion Score | C. I.  | % Modification   | Rank | Result Type |
|------------|-------------|---------|-------|------------|----------|------------|-----------|--------|------------------|------|-------------|
| 807.3995   | 807.3792    | -0.0203 | -25   | 151        | 157      | LAADDFR    | 43        | 98.481 |                  |      | Mascot      |
| 807.3995   | 807.3792    | -0.0203 | -25   | 151        | 157      | LAADDFR    |           |        |                  |      | Mascot      |
| 882.4349   | 882.5441    | 0.1092  | 124   | 1          | 8        | MSSSLSVR   |           |        | Oxidation (M)[1] |      | Mascot      |
| 1037.5262  | 1037.5006   | -0.0256 | -25   | 353        | 360      | TDYEQLLR   |           |        |                  |      | Mascot      |
| 1051.4836  | 1051.5101   | 0.0265  | 25    | 74         | 82       | EAMQSLNSR  |           |        | Oxidation (M)[3] |      | Mascot      |
| 1090.5925  | 1090.5007   | -0.0918 | -84   | 403        | 412      | VVTQTMINGK |           |        |                  |      | Mascot      |
| 1106.5874  | 1106.5027   | -0.0847 | -77   | 403        | 412      | VVTQTMINGK |           |        | Oxidation (M)[6] |      | Mascot      |
| 1201.6899  | 1201.6394   | -0.0505 | -42   | 266        | 275      | KLETVQTQVR |           |        |                  |      | Mascot      |

|    |                                                          |  |  |  |  |              |         |      |   |    |        |    |        |  |
|----|----------------------------------------------------------|--|--|--|--|--------------|---------|------|---|----|--------|----|--------|--|
| 29 | type I cytokeratin, enveloping layer, like [Danio rerio] |  |  |  |  | gi 130504059 | 46617.6 | 5.13 | 4 | 53 | 79.659 | 43 | 98.481 |  |
|----|----------------------------------------------------------|--|--|--|--|--------------|---------|------|---|----|--------|----|--------|--|

#### Peptide Information

| Calc. Mass | Obsrv. Mass | ± da    | ± ppm | Start Seq. | End Seq. | Sequence       | Ion Score | C. I.  | % Modification   | Rank | Result Type |
|------------|-------------|---------|-------|------------|----------|----------------|-----------|--------|------------------|------|-------------|
| 807.3995   | 807.3792    | -0.0203 | -25   | 162        | 168      | LAADDFR        | 43        | 98.481 |                  |      | Mascot      |
| 807.3995   | 807.3792    | -0.0203 | -25   | 162        | 168      | LAADDFR        |           |        |                  |      | Mascot      |
| 914.407    | 914.5307    | 0.1237  | 135   | 1          | 8        | MMSSSSIR       |           |        | Oxidation (M)[1] |      | Mascot      |
| 1034.5629  | 1034.4895   | -0.0734 | -71   | 162        | 170      | LAADDFRVK      |           |        |                  |      | Mascot      |
| 1194.5861  | 1194.5852   | -0.0009 | -1    | 31         | 44       | AGSVYGGAGGSGVR |           |        |                  |      | Mascot      |

|    |                                                    |  |  |  |  |             |         |      |   |    |      |    |        |  |
|----|----------------------------------------------------|--|--|--|--|-------------|---------|------|---|----|------|----|--------|--|
| 30 | type I cytokeratin, enveloping layer [Danio rerio] |  |  |  |  | gi 94732411 | 40437.7 | 5.15 | 4 | 53 | 78.7 | 43 | 98.481 |  |
|----|----------------------------------------------------|--|--|--|--|-------------|---------|------|---|----|------|----|--------|--|

#### Peptide Information

| Calc. Mass | Obsrv. Mass | ± da    | ± ppm | Start Seq. | End Seq. | Sequence | Ion Score | C. I.  | % Modification   | Rank | Result Type |
|------------|-------------|---------|-------|------------|----------|----------|-----------|--------|------------------|------|-------------|
| 807.3995   | 807.3792    | -0.0203 | -25   | 100        | 106      | LAADDFR  | 43        | 98.481 |                  |      | Mascot      |
| 807.3995   | 807.3792    | -0.0203 | -25   | 100        | 106      | LAADDFR  |           |        |                  |      | Mascot      |
| 914.407    | 914.5307    | 0.1237  | 135   | 1          | 8        | MMSSSSIR |           |        | Oxidation (M)[1] |      | Mascot      |

|    |                          |           |           |         |     |     |             |                |      |   |    |        |    |        |  |  |        |
|----|--------------------------|-----------|-----------|---------|-----|-----|-------------|----------------|------|---|----|--------|----|--------|--|--|--------|
|    |                          | 1034.5629 | 1034.4895 | -0.0734 | -71 | 100 | 108         | LAADDFRVK      |      |   |    |        |    |        |  |  | Mascot |
|    |                          | 1194.5861 | 1194.5852 | -0.0009 | -1  | 31  | 44          | AGSVYGGAGGSGVR |      |   |    |        |    |        |  |  | Mascot |
| 31 | keratin 12 [Danio rerio] |           |           |         |     |     | gi 51010971 | 49963.6        | 5.31 | 4 | 53 | 77.177 | 43 | 98.481 |  |  |        |

Peptide Information

| Calc. Mass | Obsrv. Mass | ± da    | ± ppm | Start Seq. | End Seq. | Sequence        | Ion Score | C. I.  | % Modification    | Rank | Result | Type   |
|------------|-------------|---------|-------|------------|----------|-----------------|-----------|--------|-------------------|------|--------|--------|
| 807.3995   | 807.3792    | -0.0203 | -25   | 183        | 189      | LAADDFR         | 43        | 98.481 |                   |      |        | Mascot |
| 807.3995   | 807.3792    | -0.0203 | -25   | 183        | 189      | LAADDFR         |           |        |                   |      |        | Mascot |
| 1034.5629  | 1034.4895   | -0.0734 | -71   | 183        | 191      | LAADDFRVK       |           |        |                   |      |        | Mascot |
| 1179.5463  | 1179.575    | 0.0287  | 24    | 1          | 10       | MSSYSRSSFK      |           |        |                   |      |        | Mascot |
| 1179.5463  | 1179.575    | 0.0287  | 24    | 1          | 10       | MSSYSRSSFK      |           |        |                   |      |        | Mascot |
| 1434.6277  | 1434.7373   | 0.1096  | 76    | 7          | 21       | SSFKSSGGSMMSGGR |           |        | Oxidation (M)[10] |      |        | Mascot |
| 1434.6277  | 1434.7373   | 0.1096  | 76    | 7          | 21       | SSFKSSGGSMMSGGR |           |        | Oxidation (M)[10] |      |        | Mascot |

|    |                                              |  |  |  |  |  |              |         |      |   |    |        |    |        |  |  |  |
|----|----------------------------------------------|--|--|--|--|--|--------------|---------|------|---|----|--------|----|--------|--|--|--|
| 32 | hypothetical protein LOC768289 [Danio rerio] |  |  |  |  |  | gi 116875789 | 47729.2 | 6.11 | 4 | 53 | 75.545 | 43 | 98.481 |  |  |  |
|----|----------------------------------------------|--|--|--|--|--|--------------|---------|------|---|----|--------|----|--------|--|--|--|

Peptide Information

| Calc. Mass | Obsrv. Mass | ± da    | ± ppm | Start Seq. | End Seq. | Sequence   | Ion Score | C. I.  | % Modification | Rank | Result | Type   |
|------------|-------------|---------|-------|------------|----------|------------|-----------|--------|----------------|------|--------|--------|
| 807.3995   | 807.3792    | -0.0203 | -25   | 176        | 182      | LAADDFR    | 43        | 98.481 |                |      |        | Mascot |
| 807.3995   | 807.3792    | -0.0203 | -25   | 176        | 182      | LAADDFR    |           |        |                |      |        | Mascot |
| 1051.563   | 1051.5101   | -0.0529 | -50   | 2          | 11       | SISIQTTSSK |           |        |                |      |        | Mascot |
| 1060.5244  | 1060.5397   | 0.0153  | 14    | 185        | 192      | FEHELVMR   |           |        |                |      |        | Mascot |
| 1064.6099  | 1064.5814   | -0.0285 | -27   | 107        | 115      | LASYLDKVR  |           |        |                |      |        | Mascot |

|    |                                                    |  |  |  |  |  |             |         |      |   |    |        |    |        |  |  |  |
|----|----------------------------------------------------|--|--|--|--|--|-------------|---------|------|---|----|--------|----|--------|--|--|--|
| 33 | Type I cytokeratin, enveloping layer [Danio rerio] |  |  |  |  |  | gi 41388915 | 46524.6 | 5.13 | 3 | 50 | 60.338 | 43 | 98.481 |  |  |  |
|----|----------------------------------------------------|--|--|--|--|--|-------------|---------|------|---|----|--------|----|--------|--|--|--|

Peptide Information

| Calc. Mass | Obsrv. Mass | ± da    | ± ppm | Start Seq. | End Seq. | Sequence       | Ion Score | C. I.  | % Modification | Rank | Result | Type   |
|------------|-------------|---------|-------|------------|----------|----------------|-----------|--------|----------------|------|--------|--------|
| 807.3995   | 807.3792    | -0.0203 | -25   | 161        | 167      | LAADDFR        | 43        | 98.481 |                |      |        | Mascot |
| 807.3995   | 807.3792    | -0.0203 | -25   | 161        | 167      | LAADDFR        |           |        |                |      |        | Mascot |
| 1034.5629  | 1034.4895   | -0.0734 | -71   | 161        | 169      | LAADDFRVK      |           |        |                |      |        | Mascot |
| 1194.5861  | 1194.5852   | -0.0009 | -1    | 30         | 43       | AGSVYGGAGGSGVR |           |        |                |      |        | Mascot |

|    |                                              |  |  |  |  |  |             |         |      |   |    |        |    |        |  |  |  |
|----|----------------------------------------------|--|--|--|--|--|-------------|---------|------|---|----|--------|----|--------|--|--|--|
| 34 | hypothetical protein LOC678611 [Danio rerio] |  |  |  |  |  | gi 94536645 | 50899.8 | 8.17 | 3 | 50 | 58.469 | 43 | 98.481 |  |  |  |
|----|----------------------------------------------|--|--|--|--|--|-------------|---------|------|---|----|--------|----|--------|--|--|--|

Peptide Information

| Calc. Mass | Obsrv. Mass | ± da | ± ppm | Start Seq. | End Seq. | Sequence | Ion Score | C. I. | % Modification | Rank | Result | Type |
|------------|-------------|------|-------|------------|----------|----------|-----------|-------|----------------|------|--------|------|
|------------|-------------|------|-------|------------|----------|----------|-----------|-------|----------------|------|--------|------|

|    |                                                         |           |         |      |     |        |             |        |        |  |  |        |
|----|---------------------------------------------------------|-----------|---------|------|-----|--------|-------------|--------|--------|--|--|--------|
|    | 807.3995                                                | 807.3792  | -0.0203 | -25  | 180 | 186    | LAADDFR     | 43     | 98.481 |  |  | Mascot |
|    | 807.3995                                                | 807.3792  | -0.0203 | -25  | 180 | 186    | LAADDFR     |        |        |  |  | Mascot |
|    | 1064.6099                                               | 1064.5814 | -0.0285 | -27  | 111 | 119    | LASYLDKVR   |        |        |  |  | Mascot |
|    | 1320.7522                                               | 1320.5549 | -0.1973 | -149 | 382 | 392    | DYALLLDIKTR |        |        |  |  | Mascot |
|    | 1320.7522                                               | 1320.5549 | -0.1973 | -149 | 382 | 392    | DYALLLDIKTR |        |        |  |  | Mascot |
| 35 | PREDICTED: hypothetical protein LOC556118 [Danio rerio] |           |         |      |     |        |             |        |        |  |  |        |
|    | gi 326671688                                            | 82934.8   | 5.43    | 11   | 50  | 54.462 | 43          | 98.481 |        |  |  |        |

#### Peptide Information

| Calc. Mass | Obsrv. Mass | ± da    | ± ppm | Start Seq. | End Seq. | Sequence                 | Ion Score | C. I.  | % Modification           | Rank | Result Type |
|------------|-------------|---------|-------|------------|----------|--------------------------|-----------|--------|--------------------------|------|-------------|
| 807.3995   | 807.3792    | -0.0203 | -25   | 509        | 515      | LAADDFR                  | 43        | 98.481 |                          |      | Mascot      |
| 807.3995   | 807.3792    | -0.0203 | -25   | 509        | 515      | LAADDFR                  |           |        |                          |      | Mascot      |
| 1045.4659  | 1045.5392   | 0.0733  | 70    | 460        | 467      | QICDYFEK                 |           |        |                          |      | Mascot      |
| 1060.5997  | 1060.5397   | -0.06   | -57   | 490        | 499      | IKDATITNGK               |           |        |                          |      | Mascot      |
| 1065.5463  | 1065.4794   | -0.0669 | -63   | 712        | 720      | DYDALLDIK                |           |        |                          |      | Mascot      |
| 1107.5901  | 1107.5149   | -0.0752 | -68   | 537        | 546      | CILDKTCLAK               |           |        |                          |      | Mascot      |
| 1308.6794  | 1308.6299   | -0.0495 | -38   | 712        | 722      | DYDALLDIKSR              |           |        |                          |      | Mascot      |
| 1358.6456  | 1358.6821   | 0.0365  | 27    | 408        | 420      | FGARIMAGGCYGR            |           |        |                          |      | Mascot      |
| 1365.7122  | 1365.6112   | -0.101  | -74   | 721        | 731      | SRLEQEIATYR              |           |        |                          |      | Mascot      |
| 1681.7097  | 1681.8075   | 0.0978  | 58    | 613        | 624      | HCTEQECWFKEK             |           |        | Carbamidomethyl (C)[2,7] |      | Mascot      |
| 2384.0571  | 2383.9021   | -0.155  | -65   | 421        | 439      | DYDYHQLNEKATMQNLNDR      |           |        | Oxidation (M)[13]        |      | Mascot      |
| 2584.0203  | 2584.1487   | 0.1284  | 50    | 234        | 257      | TCSETCSETCPKPCSFTCPESCLK |           |        |                          |      | Mascot      |

36 PREDICTED: ankyrin repeat and BTB/POZ domain-containing protein 2-like [Danio rerio]

#### Peptide Information

| Calc. Mass | Obsrv. Mass | ± da    | ± ppm | Start Seq. | End Seq. | Sequence  | Ion Score | C. I. | % Modification         | Rank | Result Type |
|------------|-------------|---------|-------|------------|----------|-----------|-----------|-------|------------------------|------|-------------|
| 807.3818   | 807.3792    | -0.0026 | -3    | 206        | 211      | WMVDTR    |           |       |                        |      | Mascot      |
| 807.4392   | 807.3792    | -0.06   | -74   | 120        | 126      | SVSVLMR   | 9         | 0     | Oxidation (M)[6]       |      | Mascot      |
| 842.473    | 842.488     | 0.015   | 18    | 654        | 660      | LLSEPQR   |           |       |                        |      | Mascot      |
| 870.4614   | 870.5146    | 0.0532  | 61    | 139        | 145      | LSVVHCR   |           |       | Carbamidomethyl (C)[6] |      | Mascot      |
| 882.4614   | 882.5441    | 0.0827  | 94    | 997        | 1004     | LHSLCGPR  |           |       |                        |      | Mascot      |
| 1045.5173  | 1045.5392   | 0.0219  | 21    | 548        | 556      | HPSVHPESR |           |       |                        |      | Mascot      |
| 1051.5306  | 1051.5101   | -0.0205 | -19   | 758        | 766      | DFTIIGEEK |           |       |                        |      | Mascot      |

|           |           |         |      |     |     |                 |                          |        |
|-----------|-----------|---------|------|-----|-----|-----------------|--------------------------|--------|
| 1065.5259 | 1065.4794 | -0.0465 | -44  | 418 | 426 | VAMVHAEHR       | Oxidation (M)[3]         | Mascot |
| 1082.4969 | 1082.5731 | 0.0762  | 70   | 691 | 699 | SVCTSQLCK       | Carbamidomethyl (C)[3,8] | Mascot |
| 1193.6161 | 1193.5891 | -0.027  | -23  | 308 | 317 | ETAYAQLER       |                          | Mascot |
| 1235.6525 | 1235.5028 | -0.1497 | -121 | 191 | 202 | SSRCALSLSVGR    |                          | Mascot |
| 1302.6041 | 1302.6809 | 0.0768  | 59   | 925 | 934 | RHCEILCSER      | Carbamidomethyl (C)[3]   | Mascot |
| 1323.7202 | 1323.6425 | -0.0777 | -59  | 849 | 859 | VLLMSASQRFR     | Oxidation (M)[4]         | Mascot |
| 1434.7046 | 1434.7373 | 0.0327  | 23   | 106 | 119 | VAGEGLCFAPESVR  |                          | Mascot |
| 1434.7046 | 1434.7373 | 0.0327  | 23   | 106 | 119 | VAGEGLCFAPESVR  |                          | Mascot |
| 1681.9054 | 1681.8075 | -0.0979 | -58  | 438 | 452 | QTARLLLPGLDCEPR |                          | Mascot |

37 Si:ch211-20b12.1 [Danio rerio] gi|67678177 55996.8 8.09 4 47 19.022 38 94.983

#### Peptide Information

| Calc. Mass | Obsrv. Mass | ± da    | ± ppm | Start Seq. | End Seq. | Sequence                  | Ion Score | C. I.  | % Modification         | Rank | Result Type |
|------------|-------------|---------|-------|------------|----------|---------------------------|-----------|--------|------------------------|------|-------------|
| 973.5254   | 973.509     | -0.0164 | -17   | 220        | 226      | HYIHYLK                   |           |        |                        |      | Mascot      |
| 1229.5541  | 1229.4825   | -0.0716 | -58   | 244        | 253      | TEDMALMQYK                |           |        |                        |      | Mascot      |
| 1277.6307  | 1277.6805   | 0.0498  | 39    | 436        | 445      | CHDIIISTYR                | 38        | 94.983 | Carbamidomethyl (C)[1] |      | Mascot      |
| 1277.6307  | 1277.6805   | 0.0498  | 39    | 436        | 445      | CHDIIISTYR                |           |        | Carbamidomethyl (C)[1] |      | Mascot      |
| 2384.2344  | 2383.9021   | -0.3323 | -139  | 407        | 427      | NSAPVQVLQEYVNLIDDP<br>ELK |           |        |                        |      | Mascot      |

38 PREDICTED: UDP-GlcNAc:betaGal  
beta-1,3-N-acetylglucosaminyltransferase 2 [Danio  
rerio]

gi|125843963 48322.6 8.69 10 47 19.022

#### Peptide Information

| Calc. Mass | Obsrv. Mass | ± da    | ± ppm | Start Seq. | End Seq. | Sequence     | Ion Score | C. I. | % Modification         | Rank | Result Type |
|------------|-------------|---------|-------|------------|----------|--------------|-----------|-------|------------------------|------|-------------|
| 832.4597   | 832.464     | 0.0043  | 5     | 365        | 372      | ALGISPMK     |           |       | Oxidation (M)[7]       |      | Mascot      |
| 996.3947   | 996.5406    | 0.1459  | 146   | 412        | 420      | SMHSSMLTC    |           |       |                        |      | Mascot      |
| 1003.5101  | 1003.527    | 0.0169  | 17    | 401        | 408      | RSPQQTMR     | 1         | 0     |                        |      | Mascot      |
| 1003.5101  | 1003.527    | 0.0169  | 17    | 401        | 408      | RSPQQTMR     |           |       |                        |      | Mascot      |
| 1060.6626  | 1060.5397   | -0.1229 | -116  | 201        | 209      | VRTVFLLGR    |           |       |                        |      | Mascot      |
| 1107.4371  | 1107.5149   | 0.0778  | 70    | 158        | 166      | CALDNEDDR    |           |       | Carbamidomethyl (C)[1] |      | Mascot      |
| 1165.5847  | 1165.5566   | -0.0281 | -24   | 193        | 202      | EGEYDGLKVR   |           |       |                        |      | Mascot      |
| 1179.5753  | 1179.575    | -0.0003 | 0     | 378        | 386      | TFDIREQDR    |           |       |                        |      | Mascot      |
| 1179.5753  | 1179.575    | -0.0003 | 0     | 378        | 386      | TFDIREQDR    |           |       |                        |      | Mascot      |
| 1263.6229  | 1263.6665   | 0.0436  | 35    | 373        | 382      | HDGFRTFDIR   |           |       |                        |      | Mascot      |
| 1302.6736  | 1302.6809   | 0.0073  | 6     | 402        | 411      | SPQQTMRWLWR  |           |       |                        |      | Mascot      |
| 1493.7094  | 1493.7014   | -0.008  | -5    | 112        | 123      | FHCSPESFELLK |           |       | Carbamidomethyl (C)[3] |      | Mascot      |

|    |                                               |           |        |    |             |     |              |      |    |    |   |  |                        |        |
|----|-----------------------------------------------|-----------|--------|----|-------------|-----|--------------|------|----|----|---|--|------------------------|--------|
|    | 1493.7094                                     | 1493.7014 | -0.008 | -5 | 112         | 123 | FHCSPESFELLK |      |    |    |   |  | Carbamidomethyl (C)[3] | Mascot |
| 39 | peroxisomal bifunctional enzyme [Danio rerio] |           |        |    | gi 46309503 |     | 78458.1      | 9.18 | 13 | 46 | 0 |  |                        |        |

Peptide Information

| Calc. Mass | Obsrv. Mass | ± da    | ± ppm | Start Seq. | End Seq. | Sequence                 | Ion Score | C. I. | % | Modification           | Rank | Result Type |
|------------|-------------|---------|-------|------------|----------|--------------------------|-----------|-------|---|------------------------|------|-------------|
| 807.4722   | 807.3792    | -0.093  | -115  | 4          | 9        | YELVKR                   |           |       |   |                        |      | Mascot      |
| 807.4722   | 807.3792    | -0.093  | -115  | 4          | 9        | YELVKR                   |           |       |   |                        |      | Mascot      |
| 914.5417   | 914.5307    | -0.011  | -12   | 187        | 195      | AVGKPLSSR                |           |       |   |                        |      | Mascot      |
| 1107.5714  | 1107.5149   | -0.0565 | -51   | 449        | 459      | EAIATAMSLGK              |           |       |   | Oxidation (M)[7]       |      | Mascot      |
| 1165.7052  | 1165.5566   | -0.1486 | -127  | 696        | 706      | LVARGSPPIQK              |           |       |   |                        |      | Mascot      |
| 1234.5997  | 1234.6514   | 0.0517  | 42    | 709        | 718      | EHIKSMHSHL               |           |       |   | Oxidation (M)[6]       |      | Mascot      |
| 1234.5997  | 1234.6514   | 0.0517  | 42    | 709        | 718      | EHIKSMHSHL               |           |       |   | Oxidation (M)[6]       |      | Mascot      |
| 1263.6725  | 1263.6665   | -0.006  | -5    | 449        | 460      | EAIATAMSLGKR             |           |       |   | Oxidation (M)[7]       |      | Mascot      |
| 1358.7889  | 1358.6821   | -0.1068 | -79   | 317        | 329      | VGISVIAVESEKK            |           |       |   |                        |      | Mascot      |
| 1390.7181  | 1390.6519   | -0.0662 | -48   | 336        | 347      | QMVIGMLERDAK             |           |       |   |                        |      | Mascot      |
| 1393.7355  | 1393.6962   | -0.0393 | -28   | 446        | 459      | SSKEAIATAMSLGK           |           |       |   |                        |      | Mascot      |
| 1475.7423  | 1475.7231   | -0.0192 | -13   | 464        | 478      | VSVAVGNCPGFVGNR          |           |       |   |                        |      | Mascot      |
| 1791.8992  | 1791.7307   | -0.1685 | -94   | 461        | 478      | MGKVSVAVGNCPGFVGNR       |           |       |   |                        |      | Mascot      |
| 2501.4448  | 2501.1926   | -0.2522 | -101  | 141        | 164      | LIGIPAALELITTGRHVSAQEALK |           |       |   |                        |      | Mascot      |
| 2705.3347  | 2705.1094   | -0.2253 | -83   | 197        | 221      | LSMLTTPCPPGLDGIFEATMQVQK |           |       |   | Carbamidomethyl (C)[8] |      | Mascot      |

|    |                                              |  |  |  |              |  |          |     |    |    |   |    |   |
|----|----------------------------------------------|--|--|--|--------------|--|----------|-----|----|----|---|----|---|
| 40 | hypothetical protein LOC777712 [Danio rerio] |  |  |  | gi 118150536 |  | 102799.2 | 5.2 | 12 | 44 | 0 | 19 | 0 |
|----|----------------------------------------------|--|--|--|--------------|--|----------|-----|----|----|---|----|---|

Peptide Information

| Calc. Mass | Obsrv. Mass | ± da    | ± ppm | Start Seq. | End Seq. | Sequence      | Ion Score | C. I. | % | Modification             | Rank | Result Type |
|------------|-------------|---------|-------|------------|----------|---------------|-----------|-------|---|--------------------------|------|-------------|
| 807.3665   | 807.3792    | 0.0127  | 16    | 598        | 604      | SPAETMR       | 20        | 0     |   | Oxidation (M)[6]         |      | Mascot      |
| 807.3917   | 807.3792    | -0.0125 | -15   | 378        | 384      | DADIMVK       |           |       |   | Oxidation (M)[5]         |      | Mascot      |
| 1003.5206  | 1003.527    | 0.0064  | 6     | 317        | 324      | YDEPVPKR      |           |       |   |                          |      | Mascot      |
| 1003.5206  | 1003.527    | 0.0064  | 6     | 317        | 324      | YDEPVPKR      |           |       |   |                          |      | Mascot      |
| 1045.4983  | 1045.5392   | 0.0409  | 39    | 410        | 418      | EMPGELTPR     |           |       |   | Oxidation (M)[2]         |      | Mascot      |
| 1107.5648  | 1107.5149   | -0.0499 | -45   | 168        | 176      | CKCVVNSIK     |           |       |   | Carbamidomethyl (C)[1,3] |      | Mascot      |
| 1201.5042  | 1201.6394   | 0.1352  | 113   | 1          | 10       | MEKFDDSSK     |           |       |   |                          |      | Mascot      |
| 1234.6613  | 1234.6514   | -0.0099 | -8    | 170        | 179      | CVVNSIKTWK    |           |       |   | Carbamidomethyl (C)[1]   |      | Mascot      |
| 1234.6613  | 1234.6514   | -0.0099 | -8    | 170        | 179      | CVVNSIKTWK    |           |       |   | Carbamidomethyl (C)[1]   |      | Mascot      |
| 1277.5604  | 1277.6805   | 0.1201  | 94    | 62         | 74       | ATDTSSSADTGHK |           |       |   |                          |      | Mascot      |



|  |           |           |         |      |     |     |                  |  |  |  |  |  |                  |                         |  |  |  |        |
|--|-----------|-----------|---------|------|-----|-----|------------------|--|--|--|--|--|------------------|-------------------------|--|--|--|--------|
|  | 1277.5604 | 1277.6805 | 0.1201  | 94   | 62  | 74  | ATDTSSSADTGHK    |  |  |  |  |  |                  |                         |  |  |  | Mascot |
|  | 1393.6151 | 1393.6962 | 0.0811  | 58   | 503 | 514 | MEVGEEEEKKGK     |  |  |  |  |  |                  |                         |  |  |  | Mascot |
|  | 1434.7145 | 1434.7373 | 0.0228  | 16   | 630 | 641 | QQAMLELETVEK     |  |  |  |  |  | Oxidation (M)[4] |                         |  |  |  | Mascot |
|  | 1434.7145 | 1434.7373 | 0.0228  | 16   | 630 | 641 | QQAMLELETVEK     |  |  |  |  |  | Oxidation (M)[4] |                         |  |  |  | Mascot |
|  | 1791.9275 | 1791.7307 | -0.1968 | -110 | 308 | 323 | VEGIHSPPKYDEPVPK |  |  |  |  |  |                  |                         |  |  |  | Mascot |
|  | 1838.9945 | 1838.8774 | -0.1171 | -64  | 744 | 759 | RSFSVFGQILNVAICK |  |  |  |  |  |                  | Carbamidomethyl (C)[15] |  |  |  | Mascot |

41 centrosomal protein of 63 kDa [Danio rerio] gi|41054808 79995.4 6.06 12 44 0 10 0

#### Peptide Information

| Calc. Mass | Obsrv. Mass | ± da    | ± ppm | Start Seq. | End Seq. | Sequence                   | Ion Score | C. I. | % Modification          | Rank | Result Type |
|------------|-------------|---------|-------|------------|----------|----------------------------|-----------|-------|-------------------------|------|-------------|
| 832.3795   | 832.464     | 0.0845  | 102   | 519        | 525      | ADEDVQR                    |           |       |                         |      | Mascot      |
| 1037.4503  | 1037.5006   | 0.0503  | 48    | 368        | 376      | CGEQEGMRK                  |           |       |                         |      | Mascot      |
| 1045.4368  | 1045.5392   | 0.1024  | 98    | 341        | 348      | QMEEHHSR                   |           |       |                         |      | Mascot      |
| 1064.504   | 1064.5814   | 0.0774  | 73    | 656        | 664      | LENSNTVCK                  |           |       | Carbamidomethyl (C)[8]  |      | Mascot      |
| 1201.5292  | 1201.6394   | 0.1102  | 92    | 583        | 595      | SSASSASSSSSTR              |           |       |                         |      | Mascot      |
| 1246.6022  | 1246.5112   | -0.091  | -73   | 358        | 367      | DELERAEQTR                 |           |       |                         |      | Mascot      |
| 1263.6328  | 1263.6665   | 0.0337  | 27    | 234        | 244      | ATLDAQDQFVR                |           |       |                         |      | Mascot      |
| 1393.6389  | 1393.6962   | 0.0573  | 41    | 209        | 220      | EQQVVSCHAAHR               |           |       | Carbamidomethyl (C)[6]  |      | Mascot      |
| 1493.7706  | 1493.7014   | -0.0692 | -46   | 432        | 443      | LENQHNLNLLER               |           |       |                         |      | Mascot      |
| 1493.7706  | 1493.7014   | -0.0692 | -46   | 432        | 443      | LENQHNLNLLER               |           |       |                         |      | Mascot      |
| 1638.8082  | 1638.822    | 0.0138  | 8     | 182        | 195      | AQDSLHAQELELER             | 10        | 0     |                         |      | Mascot      |
| 1638.8082  | 1638.822    | 0.0138  | 8     | 182        | 195      | AQDSLHAQELELER             |           |       |                         |      | Mascot      |
| 1707.7061  | 1707.7336   | 0.0275  | 16    | 341        | 354      | QMEEHHSRCTAENK             |           |       | Oxidation (M)[2]        |      | Mascot      |
| 2584.2036  | 2584.1487   | -0.0549 | -21   | 665        | 686      | YLGKTGNPQNDVFWQGT<br>HSFCK |           |       | Carbamidomethyl (C)[21] |      | Mascot      |

42 Retinoid x receptor, beta b [Danio rerio] gi|190336859 46645.2 6.61 11 43 0

#### Peptide Information

| Calc. Mass | Obsrv. Mass | ± da    | ± ppm | Start Seq. | End Seq. | Sequence     | Ion Score | C. I. | % Modification         | Rank | Result Type |
|------------|-------------|---------|-------|------------|----------|--------------|-----------|-------|------------------------|------|-------------|
| 914.4036   | 914.5307    | 0.1271  | 139   | 121        | 127      | DLSYTCR      |           |       | Carbamidomethyl (C)[6] |      | Mascot      |
| 1064.7302  | 1064.5814   | -0.1488 | -140  | 381        | 389      | LLLRLPALR    |           |       |                        |      | Mascot      |
| 1193.583   | 1193.5891   | 0.0061  | 5     | 76         | 87       | SVSGSGPMLSQK |           |       | Oxidation (M)[8]       |      | Mascot      |
| 1229.584   | 1229.4825   | -0.1015 | -83   | 147        | 156      | YQKCLAMGMK   |           |       | Carbamidomethyl (C)[4] |      | Mascot      |
| 1234.683   | 1234.6514   | -0.0316 | -26   | 224        | 233      | QLFTLVEWAK   |           |       |                        |      | Mascot      |
| 1234.683   | 1234.6514   | -0.0316 | -26   | 224        | 233      | QLFTLVEWAK   |           |       |                        |      | Mascot      |
| 1302.5242  | 1302.6809   | 0.1567  | 120   | 101        | 111      | HYGVYSCGCK   |           |       | Carbamidomethyl (C)[7] |      | Mascot      |

|  |           |           |         |     |     |     |                 |  |  |  |  |                                            |        |
|--|-----------|-----------|---------|-----|-----|-----|-----------------|--|--|--|--|--------------------------------------------|--------|
|  | 1357.5657 | 1357.6866 | 0.1209  | 89  | 89  | 100 | MCAICGDRSSGK    |  |  |  |  | Carbamidomethyl (C)[2,5], Oxidation (M)[1] | Mascot |
|  | 1390.7842 | 1390.6519 | -0.1323 | -95 | 224 | 234 | QLFTLVEWAKR     |  |  |  |  |                                            | Mascot |
|  | 1475.7198 | 1475.7231 | 0.0033  | 2   | 359 | 370 | VYASLESYCKQK    |  |  |  |  | Carbamidomethyl (C)[9]                     | Mascot |
|  | 1681.9135 | 1681.8075 | -0.106  | -63 | 390 | 403 | SIGLKCLEHLFFFK  |  |  |  |  |                                            | Mascot |
|  | 1838.7988 | 1838.8774 | 0.0786  | 43  | 101 | 115 | HYGVYSCEGCKGFFK |  |  |  |  | Carbamidomethyl (C)[7,10]                  | Mascot |

43 PREDICTED: h-2 class I histocompatibility antigen, L-D alpha chain-like [Danio rerio] gi|326665439 43373 6.77 1 28 51.863

#### Peptide Information

| Calc. Mass | Obsrv. Mass | ± da    | ± ppm | Start Seq. | End Seq. | Sequence | Ion Score | C. I. % | Modification | Rank | Result Type |
|------------|-------------|---------|-------|------------|----------|----------|-----------|---------|--------------|------|-------------|
| 1003.5717  | 1003.527    | -0.0447 | -45   | 244        | 251      | DTMLVIRR | 28        | 51.863  |              | 1    | Mascot      |

44 apoptosis-inducing factor 1, mitochondrial [Danio rerio] gi|321267541 67019.8 8.58 1 22 0

#### Peptide Information

| Calc. Mass | Obsrv. Mass | ± da    | ± ppm | Start Seq. | End Seq. | Sequence | Ion Score | C. I. % | Modification | Rank | Result Type |
|------------|-------------|---------|-------|------------|----------|----------|-----------|---------|--------------|------|-------------|
| 807.4359   | 807.3792    | -0.0567 | -70   | 288        | 293      | KIEDFR   | 22        | 0       |              | 2    | Mascot      |

45 gamma-tubulin complex component 2 [Danio rerio] gi|41056243 101578.7 6.08 1 20 0

#### Peptide Information

| Calc. Mass | Obsrv. Mass | ± da    | ± ppm | Start Seq. | End Seq. | Sequence    | Ion Score | C. I. % | Modification     | Rank | Result Type |
|------------|-------------|---------|-------|------------|----------|-------------|-----------|---------|------------------|------|-------------|
| 1320.6287  | 1320.5549   | -0.0738 | -56   | 736        | 746      | DCMLTNPELLR | 20        | 0       | Oxidation (M)[3] | 1    | Mascot      |

46 novel protein [Danio rerio] gi|122890854 40988.8 5.14 1 20 0

#### Peptide Information

| Calc. Mass | Obsrv. Mass | ± da   | ± ppm | Start Seq. | End Seq. | Sequence | Ion Score | C. I. % | Modification     | Rank | Result Type |
|------------|-------------|--------|-------|------------|----------|----------|-----------|---------|------------------|------|-------------|
| 807.3665   | 807.3792    | 0.0127 | 16    | 47         | 53       | SPAETMR  | 20        | 0       | Oxidation (M)[6] | 3    | Mascot      |

47 zinc finger protein 300-like [Danio rerio] gi|165972459 38066.3 8.83 1 19 0

#### Peptide Information

| Calc. Mass | Obsrv. Mass | ± da   | ± ppm | Start Seq. | End Seq. | Sequence | Ion Score | C. I. % | Modification     | Rank | Result Type |
|------------|-------------|--------|-------|------------|----------|----------|-----------|---------|------------------|------|-------------|
| 1003.4625  | 1003.527    | 0.0645 | 64    | 178        | 185      | ESLNTHMR | 19        | 0       | Oxidation (M)[7] | 2    | Mascot      |

48 novel protein similar to vertebrate keratin family [Danio rerio] gi|94732403 47140.2 7.18 1 19 0

| Peptide Information |                                                                                          |             |        |       |              |                   |           |           |         |              |                  |
|---------------------|------------------------------------------------------------------------------------------|-------------|--------|-------|--------------|-------------------|-----------|-----------|---------|--------------|------------------|
|                     | Calc. Mass                                                                               | Obsrv. Mass | ± da   | ± ppm | Start Seq.   | End Sequence Seq. |           | Ion Score | C. I. % | Modification | Rank Result Type |
|                     | 1003.553                                                                                 | 1003.527    | -0.026 | -26   | 287          | 295               | SEINAVKSR | 19        | 0       |              | 2 Mascot         |
| 49                  | PREDICTED: proline-serine-threonine phosphatase-interacting protein 2-like [Danio rerio] |             |        |       | gi 326671025 |                   | 20641.2   | 8.75      | 1       | 19           | 0                |

| Peptide Information |                                                           |             |         |       |            |                   |         |           |         |              |                  |
|---------------------|-----------------------------------------------------------|-------------|---------|-------|------------|-------------------|---------|-----------|---------|--------------|------------------|
|                     | Calc. Mass                                                | Obsrv. Mass | ± da    | ± ppm | Start Seq. | End Sequence Seq. |         | Ion Score | C. I. % | Modification | Rank Result Type |
|                     | 807.4359                                                  | 807.3792    | -0.0567 | -70   | 103        | 108 KLEDFR        |         | 19        | 0       |              | 4 Mascot         |
| 50                  | kinetochore-associated protein NSL1 homolog [Danio rerio] |             |         |       |            | gi 70887679       | 26773.7 | 5.23      | 1       | 19           | 0                |

| Peptide Information |             |        |       |            |                   |           |         |              |      |        |      |
|---------------------|-------------|--------|-------|------------|-------------------|-----------|---------|--------------|------|--------|------|
| Calc. Mass          | Obsrv. Mass | ± da   | ± ppm | Start Seq. | End Sequence Seq. | Ion Score | C. I. % | Modification | Rank | Result | Type |
| 807.3631            | 807.3792    | 0.0161 | 20    | 6          | 12 ESGPDFR        | 19        | 0       |              | 4    | Mascot |      |

| Gel Idx/Pos    | 268/K20   | Instr./Gel Origin      | BA2060/110707A | Process Status | Analysis Succeeded |
|----------------|-----------|------------------------|----------------|----------------|--------------------|
| Plate [#] Name | [1] 31496 | Instrument Sample Name |                | Spectra        | 11                 |

| Rank | Protein Name                 | Accession No. | Protein MW | Protein PI | Pep. Count | Protein Score | Protein Score C. I. % | Total Ion Score | Total Ion C. I. % |
|------|------------------------------|---------------|------------|------------|------------|---------------|-----------------------|-----------------|-------------------|
| 1    | vitellogenin 1 [Danio rerio] | gi 166795887  | 149452.5   | 8.68       | 17         | 455           | 100                   | 409             | 100               |

| Peptide Information |             |         |       |            |          |               |           |        |                |                  |
|---------------------|-------------|---------|-------|------------|----------|---------------|-----------|--------|----------------|------------------|
| Calc. Mass          | Obsrv. Mass | ± da    | ± ppm | Start Seq. | End Seq. | Sequence      | Ion Score | C. I.  | % Modification | Rank Result Type |
| 811.3073            | 811.3304    | 0.0231  | 28    | 204        | 210      | CAECTER       |           |        |                | Mascot           |
| 828.421             | 828.3999    | -0.0211 | -25   | 1014       | 1021     | AEGPAVER      | 57        | 99.952 |                | Mascot           |
| 828.421             | 828.3999    | -0.0211 | -25   | 1014       | 1021     | AEGPAVER      |           |        |                | Mascot           |
| 992.5015            | 992.4919    | -0.0096 | -10   | 615        | 622      | LMNCKLDR      |           |        |                | Mascot           |
| 1081.5272           | 1081.5618   | 0.0346  | 32    | 1291       | 1299     | FERATNSEK     |           |        |                | Mascot           |
| 1173.6262           | 1173.6047   | -0.0215 | -18   | 1022       | 1031     | LEFEVQVGPR    | 86        | 100    |                | Mascot           |
| 1173.6262           | 1173.6047   | -0.0215 | -18   | 1022       | 1031     | LEFEVQVGPR    |           |        |                | Mascot           |
| 1255.6827           | 1255.5188   | -0.1639 | -131  | 1214       | 1225     | ICADGALLSKHK  |           |        |                | Mascot           |
| 1388.7017           | 1388.6863   | -0.0154 | -11   | 694        | 706      | SPAADESVDRITK |           |        |                | Mascot           |
| 1388.7017           | 1388.6863   | -0.0154 | -11   | 694        | 706      | SPAADESVDRITK |           |        |                | Mascot           |

|   |                            |           |         |      |              |      |                                     |      |     |     |     |                           |        |
|---|----------------------------|-----------|---------|------|--------------|------|-------------------------------------|------|-----|-----|-----|---------------------------|--------|
|   | 1469.7709                  | 1469.7382 | -0.0327 | -22  | 969          | 980  | TLCYAVPYIEIK                        |      |     |     |     | Carbamidomethyl (C)[3]    | Mascot |
|   | 1469.7709                  | 1469.7382 | -0.0327 | -22  | 969          | 980  | TLCYAVPYIEIK                        | 79   | 100 |     |     | Carbamidomethyl (C)[3]    | Mascot |
|   | 1539.7485                  | 1539.7108 | -0.0377 | -24  | 981          | 994  | GCVEVHSHNAAFIR                      |      |     |     |     |                           | Mascot |
|   | 1564.731                   | 1564.7134 | -0.0176 | -11  | 1067         | 1081 | NAPVSSESSSRNSR                      |      |     |     |     |                           | Mascot |
|   | 1596.7699                  | 1596.7355 | -0.0344 | -22  | 981          | 994  | GCVEVHSHNAAFIR                      | 98   | 100 |     |     | Carbamidomethyl (C)[2]    | Mascot |
|   | 1596.7699                  | 1596.7355 | -0.0344 | -22  | 981          | 994  | GCVEVHSHNAAFIR                      |      |     |     |     | Carbamidomethyl (C)[2]    | Mascot |
|   | 1638.8485                  | 1638.827  | -0.0215 | -13  | 668          | 683  | TYLAGAAADVVEFGVR                    |      |     |     |     |                           | Mascot |
|   | 1954.8745                  | 1954.9796 | 0.1051  | 54   | 147          | 163  | TQNIYEMQEAGAQQGVCR                  |      |     |     |     | Carbamidomethyl (C)[16]   | Mascot |
|   | 1954.8745                  | 1954.9796 | 0.1051  | 54   | 147          | 163  | TQNIYEMQEAGAQQGVCR                  |      |     |     |     | Carbamidomethyl (C)[16]   | Mascot |
|   | 1969.1381                  | 1968.9762 | -0.1619 | -82  | 1161         | 1178 | FLGNDIPPVFIIARAVR                   |      |     |     |     |                           | Mascot |
|   | 1983.0293                  | 1982.9869 | -0.0424 | -21  | 1014         | 1031 | AEGPAVERLEFEVQVGP<br>R              | 90   | 100 |     |     |                           | Mascot |
|   | 1983.0293                  | 1982.9869 | -0.0424 | -21  | 1014         | 1031 | AEGPAVERLEFEVQVGP<br>R              |      |     |     |     |                           | Mascot |
|   | 2005.1917                  | 2004.9718 | -0.2199 | -110 | 505          | 523  | TAANALPIRVQVDAILALR                 |      |     |     |     |                           | Mascot |
|   | 3047.5229                  | 3047.4531 | -0.0698 | -23  | 969          | 994  | TLCYAVPYIEIKGCVEVHS<br>HNAAFIR      |      |     |     |     | Carbamidomethyl (C)[3,14] | Mascot |
|   | 3338.6421                  | 3338.6995 | 0.0574  | 17   | 930          | 961  | SIPLVPELSLQNSQASYA<br>GDLSEMSSVASVR |      |     |     |     | Oxidation (M)[25]         | Mascot |
| 2 | Vtg1 protein [Danio rerio] |           |         |      | gi 145337918 |      | 116565.5                            | 9.07 | 12  | 436 | 100 | 409                       | 100    |

Peptide Information

| Calc. Mass | Obsrv. Mass | ± da    | ± ppm | Start Seq. | End Seq. | Sequence               | Ion Score | C. I.  | % Modification | Rank                   | Result Type |
|------------|-------------|---------|-------|------------|----------|------------------------|-----------|--------|----------------|------------------------|-------------|
| 811.442    | 811.3304    | -0.1116 | -138  | 22         | 28       | HLVSNNK                |           |        |                |                        | Mascot      |
| 828.421    | 828.3999    | -0.0211 | -25   | 720        | 727      | AEGPAVER               | 57        | 99.952 |                |                        | Mascot      |
| 828.421    | 828.3999    | -0.0211 | -25   | 720        | 727      | AEGPAVER               |           |        |                |                        | Mascot      |
| 1081.5272  | 1081.5618   | 0.0346  | 32    | 997        | 1005     | FERATNSEK              |           |        |                |                        | Mascot      |
| 1173.6262  | 1173.6047   | -0.0215 | -18   | 728        | 737      | LEFEVQVGPR             | 86        | 100    |                |                        | Mascot      |
| 1173.6262  | 1173.6047   | -0.0215 | -18   | 728        | 737      | LEFEVQVGPR             |           |        |                |                        | Mascot      |
| 1255.6827  | 1255.5188   | -0.1639 | -131  | 920        | 931      | ICADGALLSKHK           |           |        |                |                        | Mascot      |
| 1469.7709  | 1469.7382   | -0.0327 | -22   | 675        | 686      | TLCYAVPYIEIK           |           |        |                | Carbamidomethyl (C)[3] | Mascot      |
| 1469.7709  | 1469.7382   | -0.0327 | -22   | 675        | 686      | TLCYAVPYIEIK           | 79        | 100    |                | Carbamidomethyl (C)[3] | Mascot      |
| 1539.7485  | 1539.7108   | -0.0377 | -24   | 687        | 700      | GCVEVHSHNAAFIR         |           |        |                |                        | Mascot      |
| 1564.731   | 1564.7134   | -0.0176 | -11   | 773        | 787      | NAPVSSESSSRNSR         |           |        |                |                        | Mascot      |
| 1596.7699  | 1596.7355   | -0.0344 | -22   | 687        | 700      | GCVEVHSHNAAFIR         | 98        | 100    |                | Carbamidomethyl (C)[2] | Mascot      |
| 1596.7699  | 1596.7355   | -0.0344 | -22   | 687        | 700      | GCVEVHSHNAAFIR         |           |        |                | Carbamidomethyl (C)[2] | Mascot      |
| 1969.1381  | 1968.9762   | -0.1619 | -82   | 867        | 884      | FLGNDIPPVFIIARAVR      |           |        |                |                        | Mascot      |
| 1983.0293  | 1982.9869   | -0.0424 | -21   | 720        | 737      | AEGPAVERLEFEVQVGP<br>R | 90        | 100    |                |                        | Mascot      |
| 1983.0293  | 1982.9869   | -0.0424 | -21   | 720        | 737      | AEGPAVERLEFEVQVGP      |           |        |                |                        | Mascot      |

|                     |                                                             | 2005.1917  | 2004.9718   | -0.2199 | -110  | 211          | 229      | R<br>TAANALPIRVQVDAILALR       |           |        |     |                           |                           |        |        |  | Mascot |
|---------------------|-------------------------------------------------------------|------------|-------------|---------|-------|--------------|----------|--------------------------------|-----------|--------|-----|---------------------------|---------------------------|--------|--------|--|--------|
|                     |                                                             | 3047.5229  | 3047.4531   | -0.0698 | -23   | 675          | 700      | TLCYAVPYIEIKGCVEVHS<br>HNAAFIR |           |        |     |                           | Carbamidomethyl (C)[3,14] |        |        |  | Mascot |
| 3                   | Zgc:136383 protein [Danio rerio]                            |            |             |         |       | gi 159155252 | 123957.1 | 8.78                           | 12        | 435    | 100 | 410                       | 100                       |        |        |  |        |
| Peptide Information |                                                             |            |             |         |       |              |          |                                |           |        |     |                           |                           |        |        |  |        |
|                     |                                                             | Calc. Mass | Obsrv. Mass | ± da    | ± ppm | Start Seq.   | End Seq. | Sequence                       | Ion Score | C. I.  | %   | Modification              | Rank                      | Result | Type   |  |        |
|                     |                                                             | 828.421    | 828.3999    | -0.0211 | -25   | 791          | 798      | AEGPAVER                       | 57        | 99.952 |     |                           |                           |        | Mascot |  |        |
|                     |                                                             | 828.421    | 828.3999    | -0.0211 | -25   | 791          | 798      | AEGPAVER                       |           |        |     |                           |                           |        | Mascot |  |        |
|                     |                                                             | 992.5015   | 992.4919    | -0.0096 | -10   | 392          | 399      | LMNCKLDR                       |           |        |     |                           |                           |        | Mascot |  |        |
|                     |                                                             | 1045.5465  | 1045.5386   | -0.0079 | -8    | 1123         | 1130     | DFLSWIHK                       |           |        |     |                           |                           |        | Mascot |  |        |
|                     |                                                             | 1081.5347  | 1081.5618   | 0.0271  | 25    | 893          | 901      | TATIMEPFR                      |           |        |     | Oxidation (M)[5]          |                           |        | Mascot |  |        |
|                     |                                                             | 1173.6262  | 1173.6047   | -0.0215 | -18   | 799          | 808      | LEFEVQVGPR                     | 86        | 100    |     |                           |                           |        | Mascot |  |        |
|                     |                                                             | 1173.6262  | 1173.6047   | -0.0215 | -18   | 799          | 808      | LEFEVQVGPR                     |           |        |     |                           |                           |        | Mascot |  |        |
|                     |                                                             | 1255.6827  | 1255.5188   | -0.1639 | -131  | 989          | 1000     | ICADGALLSKHK                   |           |        |     |                           |                           |        | Mascot |  |        |
|                     |                                                             | 1388.7017  | 1388.6863   | -0.0154 | -11   | 471          | 483      | SPAADESVDRITK                  |           |        |     |                           |                           |        | Mascot |  |        |
|                     |                                                             | 1388.7017  | 1388.6863   | -0.0154 | -11   | 471          | 483      | SPAADESVDRITK                  |           |        |     |                           |                           |        | Mascot |  |        |
|                     |                                                             | 1469.7709  | 1469.7382   | -0.0327 | -22   | 746          | 757      | TLCYAVPYIEIK                   |           |        |     | Carbamidomethyl (C)[3]    |                           |        | Mascot |  |        |
|                     |                                                             | 1469.7709  | 1469.7382   | -0.0327 | -22   | 746          | 757      | TLCYAVPYIEIK                   | 79        | 100    |     | Carbamidomethyl (C)[3]    |                           |        | Mascot |  |        |
|                     |                                                             | 1539.7485  | 1539.7108   | -0.0377 | -24   | 758          | 771      | GCVEVHSHNAAFIR                 |           |        |     |                           |                           |        | Mascot |  |        |
|                     |                                                             | 1596.7699  | 1596.7355   | -0.0344 | -22   | 758          | 771      | GCVEVHSHNAAFIR                 | 98        | 100    |     | Carbamidomethyl (C)[2]    |                           |        | Mascot |  |        |
|                     |                                                             | 1596.7699  | 1596.7355   | -0.0344 | -22   | 758          | 771      | GCVEVHSHNAAFIR                 |           |        |     | Carbamidomethyl (C)[2]    |                           |        | Mascot |  |        |
|                     |                                                             | 1969.1381  | 1968.9762   | -0.1619 | -82   | 936          | 953      | FLGNDIPPVFIIARAVR              |           |        |     |                           |                           |        | Mascot |  |        |
|                     |                                                             | 1983.0293  | 1982.9869   | -0.0424 | -21   | 791          | 808      | AEGPAVERLEFEVQVGP<br>R         | 90        | 100    |     |                           |                           |        | Mascot |  |        |
|                     |                                                             | 1983.0293  | 1982.9869   | -0.0424 | -21   | 791          | 808      | AEGPAVERLEFEVQVGP<br>R         |           |        |     |                           |                           |        | Mascot |  |        |
|                     |                                                             | 3047.5229  | 3047.4531   | -0.0698 | -23   | 746          | 771      | TLCYAVPYIEIKGCVEVHS<br>HNAAFIR |           |        |     | Carbamidomethyl (C)[3,14] |                           |        | Mascot |  |        |
| 4                   | novel protein similar to vitellogenin 1 (vg1) [Danio rerio] |            |             |         |       | gi 94733733  | 149143.4 | 8.92                           | 13        | 435    | 100 | 409                       | 100                       |        |        |  |        |
| Peptide Information |                                                             |            |             |         |       |              |          |                                |           |        |     |                           |                           |        |        |  |        |
|                     |                                                             | Calc. Mass | Obsrv. Mass | ± da    | ± ppm | Start Seq.   | End Seq. | Sequence                       | Ion Score | C. I.  | %   | Modification              | Rank                      | Result | Type   |  |        |
|                     |                                                             | 828.421    | 828.3999    | -0.0211 | -25   | 1018         | 1025     | AEGPAVER                       | 57        | 99.952 |     |                           |                           |        | Mascot |  |        |
|                     |                                                             | 828.421    | 828.3999    | -0.0211 | -25   | 1018         | 1025     | AEGPAVER                       |           |        |     |                           |                           |        | Mascot |  |        |
|                     |                                                             | 992.5015   | 992.4919    | -0.0096 | -10   | 619          | 626      | LMNCKLDR                       |           |        |     |                           |                           |        | Mascot |  |        |
|                     |                                                             | 1045.5465  | 1045.5386   | -0.0079 | -8    | 1350         | 1357     | DFLSWIHK                       |           |        |     |                           |                           |        | Mascot |  |        |
|                     |                                                             | 1081.5347  | 1081.5618   | 0.0271  | 25    | 1120         | 1128     | TATIMEPFR                      |           |        |     | Oxidation (M)[5]          |                           |        | Mascot |  |        |

|           |           |         |      |      |      |                                  |    |     |                           |        |
|-----------|-----------|---------|------|------|------|----------------------------------|----|-----|---------------------------|--------|
| 1173.6262 | 1173.6047 | -0.0215 | -18  | 1026 | 1035 | LEFEVQVGPR                       | 86 | 100 |                           | Mascot |
| 1173.6262 | 1173.6047 | -0.0215 | -18  | 1026 | 1035 | LEFEVQVGPR                       |    |     |                           | Mascot |
| 1255.6827 | 1255.5188 | -0.1639 | -131 | 1216 | 1227 | ICADGALLSKHK                     |    |     |                           | Mascot |
| 1388.7017 | 1388.6863 | -0.0154 | -11  | 698  | 710  | SPAADESVDRITK                    |    |     |                           | Mascot |
| 1388.7017 | 1388.6863 | -0.0154 | -11  | 698  | 710  | SPAADESVDRITK                    |    |     |                           | Mascot |
| 1469.7709 | 1469.7382 | -0.0327 | -22  | 973  | 984  | TLCYAVPYIEIK                     |    |     | Carbamidomethyl (C)[3]    | Mascot |
| 1469.7709 | 1469.7382 | -0.0327 | -22  | 973  | 984  | TLCYAVPYIEIK                     | 79 | 100 | Carbamidomethyl (C)[3]    | Mascot |
| 1539.7485 | 1539.7108 | -0.0377 | -24  | 985  | 998  | GCVEVHSHNAAFIR                   |    |     |                           | Mascot |
| 1596.7699 | 1596.7355 | -0.0344 | -22  | 985  | 998  | GCVEVHSHNAAFIR                   | 98 | 100 | Carbamidomethyl (C)[2]    | Mascot |
| 1596.7699 | 1596.7355 | -0.0344 | -22  | 985  | 998  | GCVEVHSHNAAFIR                   |    |     | Carbamidomethyl (C)[2]    | Mascot |
| 1969.1381 | 1968.9762 | -0.1619 | -82  | 1163 | 1180 | FLGNDIPPVFAIARAVR                |    |     |                           | Mascot |
| 1983.0293 | 1982.9869 | -0.0424 | -21  | 1018 | 1035 | AEGPAVERLEFEVQVGPR               | 90 | 100 |                           | Mascot |
| 1983.0293 | 1982.9869 | -0.0424 | -21  | 1018 | 1035 | AEGPAVERLEFEVQVGPR               |    |     |                           | Mascot |
| 3047.5229 | 3047.4531 | -0.0698 | -23  | 973  | 998  | TLCYAVPYIEIKGCVEVHSHNAAFIR       |    |     | Carbamidomethyl (C)[3,14] | Mascot |
| 3444.8857 | 3445.3708 | 0.4851  | 141  | 1    | 32   | KPPAMRAVVLALTVALVASQQMNLVPEFAHDK |    |     |                           | Mascot |

5 vitellogenin 1 [Danio rerio] gi|21391472 127954.2 8.69 12 433 100 409 100

| Peptide Information |             |         |       |            |                        |           |         |                        |                  |
|---------------------|-------------|---------|-------|------------|------------------------|-----------|---------|------------------------|------------------|
| Calc. Mass          | Obsrv. Mass | ± da    | ± ppm | Start Seq. | End Sequence Seq.      | Ion Score | C. I. % | Modification           | Rank Result Type |
| 811.3073            | 811.3304    | 0.0231  | 28    | 13         | 19 CAECTER             |           |         |                        | Mascot           |
| 828.421             | 828.3999    | -0.0211 | -25   | 823        | 830 AEGPAVER           | 57        | 99.952  |                        | Mascot           |
| 828.421             | 828.3999    | -0.0211 | -25   | 823        | 830 AEGPAVER           |           |         |                        | Mascot           |
| 1081.5272           | 1081.5618   | 0.0346  | 32    | 1098       | 1106 FERATNSEK         |           |         |                        | Mascot           |
| 1173.6262           | 1173.6047   | -0.0215 | -18   | 831        | 840 LEFEVQVGPR         | 86        | 100     |                        | Mascot           |
| 1173.6262           | 1173.6047   | -0.0215 | -18   | 831        | 840 LEFEVQVGPR         |           |         |                        | Mascot           |
| 1255.6827           | 1255.5188   | -0.1639 | -131  | 1021       | 1032 ICADGALLSKHK      |           |         |                        | Mascot           |
| 1469.7709           | 1469.7382   | -0.0327 | -22   | 778        | 789 TLCYAVPYIEIK       |           |         | Carbamidomethyl (C)[3] | Mascot           |
| 1469.7709           | 1469.7382   | -0.0327 | -22   | 778        | 789 TLCYAVPYIEIK       | 79        | 100     | Carbamidomethyl (C)[3] | Mascot           |
| 1539.7485           | 1539.7108   | -0.0377 | -24   | 790        | 803 GCVEVHSHNAAFIR     |           |         |                        | Mascot           |
| 1564.731            | 1564.7134   | -0.0176 | -11   | 876        | 890 NAPVSSSESSSRNSR    |           |         |                        | Mascot           |
| 1596.7699           | 1596.7355   | -0.0344 | -22   | 790        | 803 GCVEVHSHNAAFIR     | 98        | 100     | Carbamidomethyl (C)[2] | Mascot           |
| 1596.7699           | 1596.7355   | -0.0344 | -22   | 790        | 803 GCVEVHSHNAAFIR     |           |         | Carbamidomethyl (C)[2] | Mascot           |
| 1969.1381           | 1968.9762   | -0.1619 | -82   | 968        | 985 FLGNDIPPVFAIARAVR  |           |         |                        | Mascot           |
| 1983.0293           | 1982.9869   | -0.0424 | -21   | 823        | 840 AEGPAVERLEFEVQVGPR | 90        | 100     |                        | Mascot           |

|   |                              |           |         |      |             |     |                                |      |    |     |     |                           |     |  |  |  |        |
|---|------------------------------|-----------|---------|------|-------------|-----|--------------------------------|------|----|-----|-----|---------------------------|-----|--|--|--|--------|
|   | 1983.0293                    | 1982.9869 | -0.0424 | -21  | 823         | 840 | AEGPAVERLEFEVQVGP<br>R         |      |    |     |     |                           |     |  |  |  | Mascot |
|   | 2005.1917                    | 2004.9718 | -0.2199 | -110 | 314         | 332 | TAANALPIRVQVDAILALR            |      |    |     |     |                           |     |  |  |  | Mascot |
|   | 3047.5229                    | 3047.4531 | -0.0698 | -23  | 778         | 803 | TLCYAVPYIEIKGCVEVHS<br>HNAAFIR |      |    |     |     | Carbamidomethyl (C)[3,14] |     |  |  |  | Mascot |
| 6 | vitellogenin 1 [Danio rerio] |           |         |      | gi 94733730 |     | 149140.4                       | 8.74 | 13 | 433 | 100 | 409                       | 100 |  |  |  |        |

#### Peptide Information

|  | Calc. Mass | Obsrv. Mass | ± da    | ± ppm | Start Seq. | End Seq. | Sequence                       | Ion Score | C. I.  | % Modification            | Rank | Result Type |
|--|------------|-------------|---------|-------|------------|----------|--------------------------------|-----------|--------|---------------------------|------|-------------|
|  | 811.3073   | 811.3304    | 0.0231  | 28    | 204        | 210      | CAECTER                        |           |        |                           |      | Mascot      |
|  | 828.421    | 828.3999    | -0.0211 | -25   | 1014       | 1021     | AEGPAVER                       | 57        | 99.952 |                           |      | Mascot      |
|  | 828.421    | 828.3999    | -0.0211 | -25   | 1014       | 1021     | AEGPAVER                       |           |        |                           |      | Mascot      |
|  | 1081.5272  | 1081.5618   | 0.0346  | 32    | 1291       | 1299     | FERATNSEK                      |           |        |                           |      | Mascot      |
|  | 1173.6262  | 1173.6047   | -0.0215 | -18   | 1022       | 1031     | LEFEVQVGPR                     | 86        | 100    |                           |      | Mascot      |
|  | 1173.6262  | 1173.6047   | -0.0215 | -18   | 1022       | 1031     | LEFEVQVGPR                     |           |        |                           |      | Mascot      |
|  | 1255.6827  | 1255.5188   | -0.1639 | -131  | 1214       | 1225     | ICADGALLSKHK                   |           |        |                           |      | Mascot      |
|  | 1469.7709  | 1469.7382   | -0.0327 | -22   | 969        | 980      | TLCYAVPYIEIK                   |           |        | Carbamidomethyl (C)[3]    |      | Mascot      |
|  | 1469.7709  | 1469.7382   | -0.0327 | -22   | 969        | 980      | TLCYAVPYIEIK                   | 79        | 100    | Carbamidomethyl (C)[3]    |      | Mascot      |
|  | 1539.7485  | 1539.7108   | -0.0377 | -24   | 981        | 994      | GCVEVHSHNAAFIR                 |           |        |                           |      | Mascot      |
|  | 1564.731   | 1564.7134   | -0.0176 | -11   | 1067       | 1081     | NAPVSSESSSRNSR                 |           |        |                           |      | Mascot      |
|  | 1596.7699  | 1596.7355   | -0.0344 | -22   | 981        | 994      | GCVEVHSHNAAFIR                 | 98        | 100    | Carbamidomethyl (C)[2]    |      | Mascot      |
|  | 1596.7699  | 1596.7355   | -0.0344 | -22   | 981        | 994      | GCVEVHSHNAAFIR                 |           |        | Carbamidomethyl (C)[2]    |      | Mascot      |
|  | 1954.8745  | 1954.9796   | 0.1051  | 54    | 147        | 163      | TQNIYEMQEAGAQGVCR              |           |        | Carbamidomethyl (C)[16]   |      | Mascot      |
|  | 1954.8745  | 1954.9796   | 0.1051  | 54    | 147        | 163      | TQNIYEMQEAGAQGVCR              |           |        | Carbamidomethyl (C)[16]   |      | Mascot      |
|  | 1969.1381  | 1968.9762   | -0.1619 | -82   | 1161       | 1178     | FLGNDIPPVFAIIRAVR              |           |        |                           |      | Mascot      |
|  | 1983.0293  | 1982.9869   | -0.0424 | -21   | 1014       | 1031     | AEGPAVERLEFEVQVGP<br>R         | 90        | 100    |                           |      | Mascot      |
|  | 1983.0293  | 1982.9869   | -0.0424 | -21   | 1014       | 1031     | AEGPAVERLEFEVQVGP<br>R         |           |        |                           |      | Mascot      |
|  | 2005.1917  | 2004.9718   | -0.2199 | -110  | 505        | 523      | TAANALPIRVQVDAILALR            |           |        |                           |      | Mascot      |
|  | 3047.5229  | 3047.4531   | -0.0698 | -23   | 969        | 994      | TLCYAVPYIEIKGCVEVHS<br>HNAAFIR |           |        | Carbamidomethyl (C)[3,14] |      | Mascot      |

|   |                              |  |  |  |             |  |         |   |   |     |     |     |     |  |  |  |  |
|---|------------------------------|--|--|--|-------------|--|---------|---|---|-----|-----|-----|-----|--|--|--|--|
| 7 | vitellogenin 5 [Danio rerio] |  |  |  | gi 57864785 |  | 72820.8 | 9 | 8 | 432 | 100 | 410 | 100 |  |  |  |  |
|---|------------------------------|--|--|--|-------------|--|---------|---|---|-----|-----|-----|-----|--|--|--|--|

#### Peptide Information

|  | Calc. Mass | Obsrv. Mass | ± da    | ± ppm | Start Seq. | End Seq. | Sequence   | Ion Score | C. I.  | % Modification | Rank | Result Type |
|--|------------|-------------|---------|-------|------------|----------|------------|-----------|--------|----------------|------|-------------|
|  | 828.421    | 828.3999    | -0.0211 | -25   | 323        | 330      | AEGPAVER   | 57        | 99.952 |                |      | Mascot      |
|  | 828.421    | 828.3999    | -0.0211 | -25   | 323        | 330      | AEGPAVER   |           |        |                |      | Mascot      |
|  | 1173.6262  | 1173.6047   | -0.0215 | -18   | 331        | 340      | LEFEVQVGPR | 86        | 100    |                |      | Mascot      |

|   |                                                                          |           |         |      |     |     |                                |      |     |                           |     |     |        |
|---|--------------------------------------------------------------------------|-----------|---------|------|-----|-----|--------------------------------|------|-----|---------------------------|-----|-----|--------|
|   | 1173.6262                                                                | 1173.6047 | -0.0215 | -18  | 331 | 340 | LEFEVQVGPR                     |      |     |                           |     |     | Mascot |
|   | 1255.6827                                                                | 1255.5188 | -0.1639 | -131 | 520 | 531 | ICADGALLSKHK                   |      |     |                           |     |     | Mascot |
|   | 1469.7709                                                                | 1469.7382 | -0.0327 | -22  | 278 | 289 | TLCYAVPYIEIK                   |      |     | Carbamidomethyl (C)[3]    |     |     | Mascot |
|   | 1469.7709                                                                | 1469.7382 | -0.0327 | -22  | 278 | 289 | TLCYAVPYIEIK                   | 79   | 100 | Carbamidomethyl (C)[3]    |     |     | Mascot |
|   | 1539.7485                                                                | 1539.7108 | -0.0377 | -24  | 290 | 303 | GCVEVHSHNAAFIR                 |      |     |                           |     |     | Mascot |
|   | 1596.7699                                                                | 1596.7355 | -0.0344 | -22  | 290 | 303 | GCVEVHSHNAAFIR                 | 98   | 100 | Carbamidomethyl (C)[2]    |     |     | Mascot |
|   | 1596.7699                                                                | 1596.7355 | -0.0344 | -22  | 290 | 303 | GCVEVHSHNAAFIR                 |      |     | Carbamidomethyl (C)[2]    |     |     | Mascot |
|   | 1969.1381                                                                | 1968.9762 | -0.1619 | -82  | 467 | 484 | FLGNDIPPVFALIAVR               |      |     |                           |     |     | Mascot |
|   | 1983.0293                                                                | 1982.9869 | -0.0424 | -21  | 323 | 340 | AEGPAVERLEFEVQVGPR             | 90   | 100 |                           |     |     | Mascot |
|   | 1983.0293                                                                | 1982.9869 | -0.0424 | -21  | 323 | 340 | AEGPAVERLEFEVQVGPR             |      |     |                           |     |     | Mascot |
|   | 3047.5229                                                                | 3047.4531 | -0.0698 | -23  | 278 | 303 | TLCYAVPYIEIKGCVEVHS<br>HNAAFIR |      |     | Carbamidomethyl (C)[3,14] |     |     | Mascot |
| 8 | novel protein similar to vitellogenin 1 (vg1) [Danio rerio]  gi 94733734 |           |         |      |     |     |                                |      |     |                           |     |     |        |
|   |                                                                          |           |         |      |     |     | 149808.5                       | 8.83 | 12  | 431                       | 100 | 410 | 100    |

| Calc. Mass | Obsrv. Mass | ± da    | ± ppm | Start Seq. | End Seq. | Sequence                   | Ion Score | C. I. % | Modification              | Rank | Result Type |
|------------|-------------|---------|-------|------------|----------|----------------------------|-----------|---------|---------------------------|------|-------------|
| 828.421    | 828.3999    | -0.0211 | -25   | 1018       | 1025     | AEGPAVER                   | 57        | 99.952  |                           |      | Mascot      |
| 828.421    | 828.3999    | -0.0211 | -25   | 1018       | 1025     | AEGPAVER                   |           |         |                           |      | Mascot      |
| 992.5015   | 992.4919    | -0.0096 | -10   | 619        | 626      | LMNCKLDR                   |           |         |                           |      | Mascot      |
| 1081.5347  | 1081.5618   | 0.0271  | 25    | 1125       | 1133     | TATIMEPFR                  |           |         | Oxidation (M)[5]          |      | Mascot      |
| 1173.6262  | 1173.6047   | -0.0215 | -18   | 1026       | 1035     | LEFEVQVGPR                 | 86        | 100     |                           |      | Mascot      |
| 1173.6262  | 1173.6047   | -0.0215 | -18   | 1026       | 1035     | LEFEVQVGPR                 |           |         |                           |      | Mascot      |
| 1255.6827  | 1255.5188   | -0.1639 | -131  | 1221       | 1232     | ICADGALLSKHK               |           |         |                           |      | Mascot      |
| 1388.7017  | 1388.6863   | -0.0154 | -11   | 698        | 710      | SPAADESVDRITK              |           |         |                           |      | Mascot      |
| 1388.7017  | 1388.6863   | -0.0154 | -11   | 698        | 710      | SPAADESVDRITK              |           |         |                           |      | Mascot      |
| 1469.7709  | 1469.7382   | -0.0327 | -22   | 973        | 984      | TLCYAVPYIEIK               |           |         | Carbamidomethyl (C)[3]    |      | Mascot      |
| 1469.7709  | 1469.7382   | -0.0327 | -22   | 973        | 984      | TLCYAVPYIEIK               | 79        | 100     | Carbamidomethyl (C)[3]    |      | Mascot      |
| 1539.7485  | 1539.7108   | -0.0377 | -24   | 985        | 998      | GCVEVHSHNAAFIR             |           |         |                           |      | Mascot      |
| 1596.7699  | 1596.7355   | -0.0344 | -22   | 985        | 998      | GCVEVHSHNAAFIR             | 98        | 100     | Carbamidomethyl (C)[2]    |      | Mascot      |
| 1596.7699  | 1596.7355   | -0.0344 | -22   | 985        | 998      | GCVEVHSHNAAFIR             |           |         | Carbamidomethyl (C)[2]    |      | Mascot      |
| 1638.8485  | 1638.827    | -0.0215 | -13   | 672        | 687      | TYLAGAAADVVEFGVR           |           |         |                           |      | Mascot      |
| 1969.1381  | 1968.9762   | -0.1619 | -82   | 1168       | 1185     | FLGNDIPPVFAIARAVR          |           |         |                           |      | Mascot      |
| 1983.0293  | 1982.9869   | -0.0424 | -21   | 1018       | 1035     | AEGPAVERLEFEVQVGPR         | 90        | 100     |                           |      | Mascot      |
| 1983.0293  | 1982.9869   | -0.0424 | -21   | 1018       | 1035     | AEGPAVERLEFEVQVGPR         |           |         |                           |      | Mascot      |
| 3047.5229  | 3047.4531   | -0.0698 | -23   | 973        | 998      | TLCYAVPYIEIKGCVEVHSHNAAFIR |           |         | Carbamidomethyl (C)[3,14] |      | Mascot      |



| Peptide Information |                                              |         |       |              |          |                            |           |        |     |                           |      |             |
|---------------------|----------------------------------------------|---------|-------|--------------|----------|----------------------------|-----------|--------|-----|---------------------------|------|-------------|
| Calc. Mass          | Obsrv. Mass                                  | ± da    | ± ppm | Start Seq.   | End Seq. | Sequence                   | Ion Score | C. I.  | %   | Modification              | Rank | Result Type |
| 828.421             | 828.3999                                     | -0.0211 | -25   | 1025         | 1032     | AEGPAVER                   | 57        | 99.952 |     |                           |      | Mascot      |
| 828.421             | 828.3999                                     | -0.0211 | -25   | 1025         | 1032     | AEGPAVER                   |           |        |     |                           |      | Mascot      |
| 992.5015            | 992.4919                                     | -0.0096 | -10   | 626          | 633      | LMNCKLDR                   |           |        |     |                           |      | Mascot      |
| 1081.5347           | 1081.5618                                    | 0.0271  | 25    | 1136         | 1144     | TATIMEPFR                  |           |        |     | Oxidation (M)[5]          |      | Mascot      |
| 1173.6262           | 1173.6047                                    | -0.0215 | -18   | 1033         | 1042     | LEFEVQVGPR                 | 86        | 100    |     |                           |      | Mascot      |
| 1173.6262           | 1173.6047                                    | -0.0215 | -18   | 1033         | 1042     | LEFEVQVGPR                 |           |        |     |                           |      | Mascot      |
| 1255.6827           | 1255.5188                                    | -0.1639 | -131  | 1232         | 1243     | ICADGALLSKHK               |           |        |     |                           |      | Mascot      |
| 1388.7017           | 1388.6863                                    | -0.0154 | -11   | 705          | 717      | SPAADESVDRITK              |           |        |     |                           |      | Mascot      |
| 1388.7017           | 1388.6863                                    | -0.0154 | -11   | 705          | 717      | SPAADESVDRITK              |           |        |     |                           |      | Mascot      |
| 1469.7709           | 1469.7382                                    | -0.0327 | -22   | 980          | 991      | TLCYAVPYIEIK               |           |        |     | Carbamidomethyl (C)[3]    |      | Mascot      |
| 1469.7709           | 1469.7382                                    | -0.0327 | -22   | 980          | 991      | TLCYAVPYIEIK               | 79        | 100    |     | Carbamidomethyl (C)[3]    |      | Mascot      |
| 1539.7485           | 1539.7108                                    | -0.0377 | -24   | 992          | 1005     | GCVEVHSHNAAFIR             |           |        |     |                           |      | Mascot      |
| 1596.7699           | 1596.7355                                    | -0.0344 | -22   | 992          | 1005     | GCVEVHSHNAAFIR             | 98        | 100    |     | Carbamidomethyl (C)[2]    |      | Mascot      |
| 1596.7699           | 1596.7355                                    | -0.0344 | -22   | 992          | 1005     | GCVEVHSHNAAFIR             |           |        |     | Carbamidomethyl (C)[2]    |      | Mascot      |
| 1638.8485           | 1638.827                                     | -0.0215 | -13   | 679          | 694      | TYLAGAAADVVEFGVR           |           |        |     |                           |      | Mascot      |
| 1969.1381           | 1968.9762                                    | -0.1619 | -82   | 1179         | 1196     | FLGNDIPPVFAIARAVR          |           |        |     |                           |      | Mascot      |
| 1983.0293           | 1982.9869                                    | -0.0424 | -21   | 1025         | 1042     | AEGPAVERLEFEVQVGPR         | 90        | 100    |     |                           |      | Mascot      |
| 1983.0293           | 1982.9869                                    | -0.0424 | -21   | 1025         | 1042     | AEGPAVERLEFEVQVGPR         |           |        |     |                           |      | Mascot      |
| 3047.5229           | 3047.4531                                    | -0.0698 | -23   | 980          | 1005     | TLCYAVPYIEIKGCVEVHSHNAAFIR |           |        |     | Carbamidomethyl (C)[3,14] |      | Mascot      |
| 10                  | hypothetical protein LOC678536 [Danio rerio] |         |       | gi 160420306 |          | 148750.2                   | 8.89      | 12     | 429 | 100                       | 409  | 100         |

| Peptide Information |             |         |       |            |                   |           |                      |  |  |                  |
|---------------------|-------------|---------|-------|------------|-------------------|-----------|----------------------|--|--|------------------|
| Calc. Mass          | Obsrv. Mass | ± da    | ± ppm | Start Seq. | End Sequence Seq. | Ion Score | C. I. % Modification |  |  | Rank Result Type |
| 828.421             | 828.3999    | -0.0211 | -25   | 1014       | 1021 AEGPAVER     | 57        | 99.952               |  |  | Mascot           |
| 828.421             | 828.3999    | -0.0211 | -25   | 1014       | 1021 AEGPAVER     |           |                      |  |  | Mascot           |
| 992.5015            | 992.4919    | -0.0096 | -10   | 615        | 622 LMNCKLDR      |           |                      |  |  | Mascot           |
| 1045.5465           | 1045.5386   | -0.0079 | -8    | 1346       | 1353 DFLSWIHK     |           |                      |  |  | Mascot           |
| 1081.5347           | 1081.5618   | 0.0271  | 25    | 1116       | 1124 TATIMEPFR    |           | Oxidation (M)[5]     |  |  | Mascot           |
| 1173.6262           | 1173.6047   | -0.0215 | -18   | 1022       | 1031 LEFEVQVGPR   | 86        | 100                  |  |  | Mascot           |
| 1173.6262           | 1173.6047   | -0.0215 | -18   | 1022       | 1031 LEFEVQVGPR   |           |                      |  |  | Mascot           |
| 1255.6827           | 1255.5188   | -0.1639 | -131  | 1212       | 1223 ICADGALLSKHK |           |                      |  |  | Mascot           |

|    |                                                                         |           |         |     |      |      |                            |          |      |                           |     |     |        |     |
|----|-------------------------------------------------------------------------|-----------|---------|-----|------|------|----------------------------|----------|------|---------------------------|-----|-----|--------|-----|
|    | 1388.7017                                                               | 1388.6863 | -0.0154 | -11 | 694  | 706  | SPAADESVDRI                |          |      |                           |     |     | Mascot |     |
|    | 1388.7017                                                               | 1388.6863 | -0.0154 | -11 | 694  | 706  | SPAADESVDRI                |          |      |                           |     |     | Mascot |     |
|    | 1469.7709                                                               | 1469.7382 | -0.0327 | -22 | 969  | 980  | TLCYAVPYIEIK               |          |      | Carbamidomethyl (C)[3]    |     |     | Mascot |     |
|    | 1469.7709                                                               | 1469.7382 | -0.0327 | -22 | 969  | 980  | TLCYAVPYIEIK               | 79       | 100  | Carbamidomethyl (C)[3]    |     |     | Mascot |     |
|    | 1539.7485                                                               | 1539.7108 | -0.0377 | -24 | 981  | 994  | GCVEVHSHNAAFIR             |          |      |                           |     |     | Mascot |     |
|    | 1596.7699                                                               | 1596.7355 | -0.0344 | -22 | 981  | 994  | GCVEVHSHNAAFIR             | 98       | 100  | Carbamidomethyl (C)[2]    |     |     | Mascot |     |
|    | 1596.7699                                                               | 1596.7355 | -0.0344 | -22 | 981  | 994  | GCVEVHSHNAAFIR             |          |      | Carbamidomethyl (C)[2]    |     |     | Mascot |     |
|    | 1969.1381                                                               | 1968.9762 | -0.1619 | -82 | 1159 | 1176 | FLGNDIPPVFALLRAVR          |          |      |                           |     |     | Mascot |     |
|    | 1983.0293                                                               | 1982.9869 | -0.0424 | -21 | 1014 | 1031 | AEGPAVERLEFEVQVGPR         | 90       | 100  |                           |     |     | Mascot |     |
|    | 1983.0293                                                               | 1982.9869 | -0.0424 | -21 | 1014 | 1031 | AEGPAVERLEFEVQVGPR         |          |      |                           |     |     | Mascot |     |
|    | 3047.5229                                                               | 3047.4531 | -0.0698 | -23 | 969  | 994  | TLCYAVPYIEIKGCVEVHSHNAAFIR |          |      | Carbamidomethyl (C)[3,14] |     |     | Mascot |     |
| 11 | novel protein similar to vitellogenin 1 (vg1) [Danio rerio] gi 94733731 |           |         |     |      |      |                            | 149169.2 | 8.84 | 11                        | 429 | 100 | 410    | 100 |

### Peptide Information

| Calc. Mass | Obsrv. Mass | $\pm$ da | $\pm$ ppm | Start Seq. | End Seq. | Sequence                       | Ion Score | C. I. | % Modification            | Rank | Result Type |
|------------|-------------|----------|-----------|------------|----------|--------------------------------|-----------|-------|---------------------------|------|-------------|
| 811.4196   | 811.3304    | -0.0892  | -110      | 1237       | 1243     | EYAVTTK                        |           |       |                           |      | Mascot      |
| 844.525    | 844.4007    | -0.1243  | -147      | 50         | 57       | AGIQIKSK                       |           |       |                           |      | Mascot      |
| 850.4702   | 850.3846    | -0.0856  | -101      | 1547       | 1553     | MKLESVK                        |           |       | Oxidation (M)[1]          |      | Mascot      |
| 1112.5769  | 1112.5208   | -0.0561  | -50       | 1119       | 1127     | TLTKMEAFR                      |           |       | Oxidation (M)[5]          |      | Mascot      |
| 1173.6262  | 1173.6047   | -0.0215  | -18       | 1024       | 1033     | LEFEVQVGPR                     | 86        | 100   |                           |      | Mascot      |
| 1173.6262  | 1173.6047   | -0.0215  | -18       | 1024       | 1033     | LEFEVQVGPR                     |           |       |                           |      | Mascot      |
| 1199.6881  | 1199.614    | -0.0741  | -62       | 1299       | 1309     | ELELTVALPSK                    |           |       |                           |      | Mascot      |
| 1217.6736  | 1217.5646   | -0.109   | -90       | 1059       | 1068     | LREILETESK                     |           |       |                           |      | Mascot      |
| 1388.7017  | 1388.6863   | -0.0154  | -11       | 694        | 706      | SPAADESVDRITK                  |           |       |                           |      | Mascot      |
| 1388.7017  | 1388.6863   | -0.0154  | -11       | 694        | 706      | SPAADESVDRITK                  |           |       |                           |      | Mascot      |
| 1469.7709  | 1469.7382   | -0.0327  | -22       | 971        | 982      | TLCYAVPYIEIK                   |           |       | Carbamidomethyl (C)[3]    |      | Mascot      |
| 1469.7709  | 1469.7382   | -0.0327  | -22       | 971        | 982      | TLCYAVPYIEIK                   | 79        | 100   | Carbamidomethyl (C)[3]    |      | Mascot      |
| 1507.7711  | 1507.7015   | -0.0696  | -46       | 1143       | 1156     | SSRSTGSSLEQIQK                 |           |       |                           |      | Mascot      |
| 1513.7467  | 1513.701    | -0.0457  | -30       | 733        | 745      | VFGQEMAFGRIDK                  |           |       | Oxidation (M)[6]          |      | Mascot      |
| 1539.7485  | 1539.7108   | -0.0377  | -24       | 983        | 996      | GCVEVHSHNAAFIR                 |           |       |                           |      | Mascot      |
| 1596.7699  | 1596.7355   | -0.0344  | -22       | 983        | 996      | GCVEVHSHNAAFIR                 | 98        | 100   | Carbamidomethyl (C)[2]    |      | Mascot      |
| 1596.7699  | 1596.7355   | -0.0344  | -22       | 983        | 996      | GCVEVHSHNAAFIR                 |           |       | Carbamidomethyl (C)[2]    |      | Mascot      |
| 1955.0232  | 1954.9796   | -0.0436  | -22       | 1016       | 1033     | AEGPAVEKLEFEVQVGP<br>R         | 128       | 100   |                           |      | Mascot      |
| 1955.0232  | 1954.9796   | -0.0436  | -22       | 1016       | 1033     | AEGPAVEKLEFEVQVGP<br>R         |           |       |                           |      | Mascot      |
| 3047.5229  | 3047.4531   | -0.0698  | -23       | 971        | 996      | TLCYAVPYIEIKGCVEVHS<br>HNAAFIR |           |       | Carbamidomethyl (C)[3,14] |      | Mascot      |

13 vitellogenin 5 [Danio rerio] gi|68448530 148868 8.77 9 323 100 312 100

### Peptide Information

| Calc. Mass | Obsrv. Mass | $\pm$ da | $\pm$ ppm | Start Seq. | End Seq. | Sequence     | Ion Score | C. I.  | % Modification         | Rank | Result Type |
|------------|-------------|----------|-----------|------------|----------|--------------|-----------|--------|------------------------|------|-------------|
| 828.421    | 828.3999    | -0.0211  | -25       | 1014       | 1021     | AEGPAVER     | 57        | 99.952 |                        |      | Mascot      |
| 828.421    | 828.3999    | -0.0211  | -25       | 1014       | 1021     | AEGPAVER     |           |        |                        |      | Mascot      |
| 992.5015   | 992.4919    | -0.0096  | -10       | 615        | 622      | LMNCKLDR     |           |        |                        |      | Mascot      |
| 1173.6262  | 1173.6047   | -0.0215  | -18       | 1022       | 1031     | LEFEVQVGPR   | 86        | 100    |                        |      | Mascot      |
| 1173.6262  | 1173.6047   | -0.0215  | -18       | 1022       | 1031     | LEFEVQVGPR   |           |        |                        |      | Mascot      |
| 1255.6827  | 1255.5188   | -0.1639  | -131      | 1214       | 1225     | ICADGALLSKHK |           |        |                        |      | Mascot      |
| 1469.7709  | 1469.7382   | -0.0327  | -22       | 969        | 980      | TLCYAVPYIEIK |           |        | Carbamidomethyl (C)[3] |      | Mascot      |
| 1469.7709  | 1469.7382   | -0.0327  | -22       | 969        | 980      | TLCYAVPYIEIK | 79        | 100    | Carbamidomethyl (C)[3] |      | Mascot      |

|    |                              |           |         |     |             |      |                        |      |   |     |     |                         |     |  |  |  |        |
|----|------------------------------|-----------|---------|-----|-------------|------|------------------------|------|---|-----|-----|-------------------------|-----|--|--|--|--------|
|    | 1505.7642                    | 1505.7271 | -0.0371 | -25 | 981         | 994  | GCVEVHSHNAALIR         |      |   |     |     |                         |     |  |  |  | Mascot |
|    | 1505.7642                    | 1505.7271 | -0.0371 | -25 | 981         | 994  | GCVEVHSHNAALIR         |      |   |     |     |                         |     |  |  |  | Mascot |
|    | 1954.8745                    | 1954.9796 | 0.1051  | 54  | 147         | 163  | TQNIYEMQEAGAQQGVCR     |      |   |     |     | Carbamidomethyl (C)[16] |     |  |  |  | Mascot |
|    | 1954.8745                    | 1954.9796 | 0.1051  | 54  | 147         | 163  | TQNIYEMQEAGAQQGVCR     |      |   |     |     | Carbamidomethyl (C)[16] |     |  |  |  | Mascot |
|    | 1969.1381                    | 1968.9762 | -0.1619 | -82 | 1161        | 1178 | FLGNDIPPVFAIARAVR      |      |   |     |     |                         |     |  |  |  | Mascot |
|    | 1983.0293                    | 1982.9869 | -0.0424 | -21 | 1014        | 1031 | AEGPAVERLEFEVQVGP<br>R | 90   |   | 100 |     |                         |     |  |  |  | Mascot |
|    | 1983.0293                    | 1982.9869 | -0.0424 | -21 | 1014        | 1031 | AEGPAVERLEFEVQVGP<br>R |      |   |     |     |                         |     |  |  |  | Mascot |
| 14 | vitellogenin 6 [Danio rerio] |           |         |     | gi 57864787 |      | 38968.8                | 8.92 | 6 | 256 | 100 | 233                     | 100 |  |  |  |        |

Peptide Information

| Calc. Mass | Obsrv. Mass | ± da    | ± ppm | Start Seq. | End Seq. | Sequence               | Ion Score | C. I.  | % Modification   | Rank | Result | Type   |
|------------|-------------|---------|-------|------------|----------|------------------------|-----------|--------|------------------|------|--------|--------|
| 828.421    | 828.3999    | -0.0211 | -25   | 6          | 13       | AEGPAVER               | 57        | 99.952 |                  |      |        | Mascot |
| 828.421    | 828.3999    | -0.0211 | -25   | 6          | 13       | AEGPAVER               |           |        |                  |      |        | Mascot |
| 1081.5347  | 1081.5618   | 0.0271  | 25    | 115        | 123      | TATIMEPFR              |           |        | Oxidation (M)[5] |      |        | Mascot |
| 1173.6262  | 1173.6047   | -0.0215 | -18   | 14         | 23       | LEFEVQVGPR             | 86        | 100    |                  |      |        | Mascot |
| 1173.6262  | 1173.6047   | -0.0215 | -18   | 14         | 23       | LEFEVQVGPR             |           |        |                  |      |        | Mascot |
| 1255.6827  | 1255.5188   | -0.1639 | -131  | 211        | 222      | ICADGALLSKHK           |           |        |                  |      |        | Mascot |
| 1969.1381  | 1968.9762   | -0.1619 | -82   | 158        | 175      | FLGNDIPPVFAIARAVR      |           |        |                  |      |        | Mascot |
| 1983.0293  | 1982.9869   | -0.0424 | -21   | 6          | 23       | AEGPAVERLEFEVQVGP<br>R | 90        | 100    |                  |      |        | Mascot |
| 1983.0293  | 1982.9869   | -0.0424 | -21   | 6          | 23       | AEGPAVERLEFEVQVGP<br>R |           |        |                  |      |        | Mascot |

|    |                              |  |  |  |             |  |         |      |   |     |     |     |     |  |  |  |  |
|----|------------------------------|--|--|--|-------------|--|---------|------|---|-----|-----|-----|-----|--|--|--|--|
| 15 | vitellogenin 2 [Danio rerio] |  |  |  | gi 57864779 |  | 68993.5 | 7.84 | 8 | 227 | 100 | 214 | 100 |  |  |  |  |
|----|------------------------------|--|--|--|-------------|--|---------|------|---|-----|-----|-----|-----|--|--|--|--|

Peptide Information

| Calc. Mass | Obsrv. Mass | ± da    | ± ppm | Start Seq. | End Seq. | Sequence               | Ion Score | C. I. | % Modification   | Rank | Result | Type   |
|------------|-------------|---------|-------|------------|----------|------------------------|-----------|-------|------------------|------|--------|--------|
| 811.4196   | 811.3304    | -0.0892 | -110  | 228        | 234      | EYAVTTK                |           |       |                  |      |        | Mascot |
| 850.4702   | 850.3846    | -0.0856 | -101  | 538        | 544      | MKLESVK                |           |       | Oxidation (M)[1] |      |        | Mascot |
| 1112.5769  | 1112.5208   | -0.0561 | -50   | 110        | 118      | TLTKMEAFR              |           |       | Oxidation (M)[5] |      |        | Mascot |
| 1173.6262  | 1173.6047   | -0.0215 | -18   | 15         | 24       | LEFEVQVGPR             | 86        | 100   |                  |      |        | Mascot |
| 1173.6262  | 1173.6047   | -0.0215 | -18   | 15         | 24       | LEFEVQVGPR             |           |       |                  |      |        | Mascot |
| 1199.6881  | 1199.614    | -0.0741 | -62   | 290        | 300      | ELELTVALPSK            |           |       |                  |      |        | Mascot |
| 1217.6736  | 1217.5646   | -0.109  | -90   | 50         | 59       | LREILETESK             |           |       |                  |      |        | Mascot |
| 1507.7711  | 1507.7015   | -0.0696 | -46   | 134        | 147      | SSRSTGSSLEQIQK         |           |       |                  |      |        | Mascot |
| 1955.0232  | 1954.9796   | -0.0436 | -22   | 7          | 24       | AEGPAVEKLEFEVQVGP<br>R | 128       | 100   |                  |      |        | Mascot |
| 1955.0232  | 1954.9796   | -0.0436 | -22   | 7          | 24       | AEGPAVEKLEFEVQVGP<br>R |           |       |                  |      |        | Mascot |

16 hemoglobin beta embryonic-1.1 isoform 1 [Danio rerio] gi|18858353 16151.4 6.89 4 104 100 82 100

Peptide Information

| Calc. Mass | Obsrv. Mass | ± da    | ± ppm | Start Seq. | End Seq. | Sequence      | Ion Score | C. I. | % Modification         | Rank | Result Type |
|------------|-------------|---------|-------|------------|----------|---------------|-----------|-------|------------------------|------|-------------|
| 1103.6571  | 1103.6316   | -0.0255 | -23   | 134        | 144      | FIAVAVSALGR   |           |       |                        |      | Mascot      |
| 1112.5483  | 1112.5208   | -0.0275 | -25   | 97         | 105      | LHVDPDNFR     |           |       |                        |      | Mascot      |
| 1335.6879  | 1335.6554   | -0.0325 | -24   | 32         | 41       | CLIVYPWTQR    |           |       | Carbamidomethyl (C)[1] |      | Mascot      |
| 1388.7168  | 1388.6863   | -0.0305 | -22   | 19         | 31       | ADYDVIGPQALAR | 82        | 100   |                        |      | Mascot      |
| 1388.7168  | 1388.6863   | -0.0305 | -22   | 19         | 31       | ADYDVIGPQALAR |           |       |                        |      | Mascot      |

17 embryonic 1 beta-globin family member [Danio rerio] gi|148236095 11951.2 6.81 3 100 100 82 100

Peptide Information

| Calc. Mass | Obsrv. Mass | ± da    | ± ppm | Start Seq. | End Seq. | Sequence      | Ion Score | C. I. | % Modification         | Rank | Result Type |
|------------|-------------|---------|-------|------------|----------|---------------|-----------|-------|------------------------|------|-------------|
| 1112.5483  | 1112.5208   | -0.0275 | -25   | 97         | 105      | LHVDPDNFR     |           |       |                        |      | Mascot      |
| 1335.6879  | 1335.6554   | -0.0325 | -24   | 32         | 41       | CLIVYPWTQR    |           |       | Carbamidomethyl (C)[1] |      | Mascot      |
| 1388.7168  | 1388.6863   | -0.0305 | -22   | 19         | 31       | ADYDVIGPQALAR | 82        | 100   |                        |      | Mascot      |
| 1388.7168  | 1388.6863   | -0.0305 | -22   | 19         | 31       | ADYDVIGPQALAR |           |       |                        |      | Mascot      |

18 novel protein similar to vitellogenin 1 (vg1) [Danio rerio] gi|94732723 147084.2 8.73 8 94 99.998 86 100

Peptide Information

| Calc. Mass | Obsrv. Mass | ± da    | ± ppm | Start Seq. | End Seq. | Sequence          | Ion Score | C. I. | % Modification | Rank | Result Type |
|------------|-------------|---------|-------|------------|----------|-------------------|-----------|-------|----------------|------|-------------|
| 844.4158   | 844.4007    | -0.0151 | -18   | 1014       | 1021     | AEGPSVER          |           |       |                |      | Mascot      |
| 1081.5272  | 1081.5618   | 0.0346  | 32    | 1272       | 1280     | FERATNSEK         |           |       |                |      | Mascot      |
| 1173.6262  | 1173.6047   | -0.0215 | -18   | 1022       | 1031     | LEFEVQVGPR        | 86        | 100   |                |      | Mascot      |
| 1173.6262  | 1173.6047   | -0.0215 | -18   | 1022       | 1031     | LEFEVQVGPR        |           |       |                |      | Mascot      |
| 1255.6827  | 1255.5188   | -0.1639 | -131  | 1195       | 1206     | ICADGALLSKHK      |           |       |                |      | Mascot      |
| 1378.6809  | 1378.731    | 0.0501  | 36    | 694        | 706      | SSAADESVDRTK      |           |       |                |      | Mascot      |
| 1529.7917  | 1529.6742   | -0.1175 | -77   | 1180       | 1193     | VQLIASSIAENDNR    |           |       |                |      | Mascot      |
| 1564.731   | 1564.7134   | -0.0176 | -11   | 1067       | 1081     | NAPVSSSSSRNSR     |           |       |                |      | Mascot      |
| 1969.1381  | 1968.9762   | -0.1619 | -82   | 1142       | 1159     | FLGNDLPPVFAIARAVR |           |       |                |      | Mascot      |

19 vitellogenin 7 [Danio rerio] gi|156713467 148739.2 8.76 8 94 99.998 86 100

Peptide Information

| Calc. Mass | Obsrv. Mass | ± da | ± ppm | Start Seq. | End Seq. | Sequence | Ion Score | C. I. | % Modification | Rank | Result Type |
|------------|-------------|------|-------|------------|----------|----------|-----------|-------|----------------|------|-------------|
|------------|-------------|------|-------|------------|----------|----------|-----------|-------|----------------|------|-------------|

[illegible]

### Peptide Information

| Calc. Mass | Obsrv. Mass | ± da    | ± ppm | Start Seq. | End Sequence | Ion Score                          | C. I. % Modification | Rank | Result Type |
|------------|-------------|---------|-------|------------|--------------|------------------------------------|----------------------|------|-------------|
| 992.4869   | 992.4919    | 0.005   | 5     | 485        | 492          | AMTVWQEK                           |                      |      | Mascot      |
| 1081.4949  | 1081.5618   | 0.0669  | 62    | 493        | 501          | WNTFIAENS                          |                      |      | Mascot      |
| 1127.5592  | 1127.5961   | 0.0369  | 33    | 272        | 281          | ANHPDFIGTR                         |                      |      | Mascot      |
| 1129.5632  | 1129.6129   | 0.0497  | 44    | 58         | 66           | MDSLLYMLK                          | Oxidation (M)[1]     |      | Mascot      |
| 1239.6216  | 1239.5477   | -0.0739 | -60   | 474        | 484          | YSSLSAQLQDK                        |                      |      | Mascot      |
| 1277.5757  | 1277.6804   | 0.1047  | 82    | 246        | 256          | AYELDGTTHDR                        |                      |      | Mascot      |
| 1318.642   | 1318.6349   | -0.0071 | -5    | 297        | 307          | QAVQEAIEMQR                        | Oxidation (M)[9]     |      | Mascot      |
| 1388.6986  | 1388.6863   | -0.0123 | -9    | 58         | 68           | MDSLLYMLKMK                        | Oxidation (M)[1]     |      | Mascot      |
| 1388.6986  | 1388.6863   | -0.0123 | -9    | 58         | 68           | MDSLLYMLKMK                        | Oxidation (M)[1]     |      | Mascot      |
| 1529.8104  | 1529.6742   | -0.1362 | -89   | 295        | 307          | VKQAVQEAIEMQR                      |                      |      | Mascot      |
| 1612.7635  | 1612.7328   | -0.0307 | -19   | 164        | 178          | ASLGDVTSFDNSLMR                    |                      |      | Mascot      |
| 3338.636   | 3338.6995   | 0.0635  | 19    | 1          | 31           | MIVSLCQDVSAAMVVLL<br>VCVSECKSMPPDR | Oxidation (M)[1]     |      | Mascot      |

|    |                                                      |              |         |     |   |    |   |    |   |
|----|------------------------------------------------------|--------------|---------|-----|---|----|---|----|---|
| 21 | tRNA wybutosine-synthesizing protein 5 [Danio rerio] | gi 117606244 | 38035.4 | 5.5 | 8 | 46 | 0 | 15 | 0 |
|----|------------------------------------------------------|--------------|---------|-----|---|----|---|----|---|

### Peptide Information

| Calc. Mass | Obsrv. Mass | ± da    | ± ppm | Start Seq. | End Seq. | Sequence  | Ion Score | C. I. | % Modification | Rank | Result Type |
|------------|-------------|---------|-------|------------|----------|-----------|-----------|-------|----------------|------|-------------|
| 816.4573   | 816.3804    | -0.0769 | -94   | 276        | 282      | ALQSLER   |           |       |                |      | Mascot      |
| 828.4573   | 828.3999    | -0.0574 | -69   | 117        | 123      | KEPADLR   | 16        | 0     |                |      | Mascot      |
| 828.4573   | 828.3999    | -0.0574 | -69   | 118        | 124      | EPADLRK   |           |       |                |      | Mascot      |
| 996.5771   | 996.577     | -0.0001 | 0     | 35         | 43       | RVPIGPCVR |           |       |                |      | Mascot      |

|    |                                    |           |        |     |              |     |                                 |     |   |    |   |  |  |        |
|----|------------------------------------|-----------|--------|-----|--------------|-----|---------------------------------|-----|---|----|---|--|--|--------|
|    | 1277.6624                          | 1277.6804 | 0.018  | 14  | 7            | 17  | LEVPVYTDVDK                     |     |   |    |   |  |  | Mascot |
|    | 1388.6653                          | 1388.6863 | 0.021  | 15  | 314          | 326 | KPINAAQENSDDT                   |     |   |    |   |  |  | Mascot |
|    | 1388.6653                          | 1388.6863 | 0.021  | 15  | 314          | 326 | KPINAAQENSDDT                   |     |   |    |   |  |  | Mascot |
|    | 1469.7358                          | 1469.7382 | 0.0024 | 2   | 69           | 79  | MDFLHKNFVYR                     |     |   |    |   |  |  | Mascot |
|    | 1469.7358                          | 1469.7382 | 0.0024 | 2   | 69           | 79  | MDFLHKNFVYR                     |     |   |    |   |  |  | Mascot |
|    | 3332.605                           | 3332.364  | -0.241 | -72 | 124          | 150 | KQFPELAEDFHVPQFFEP<br>EQFFSSVFR |     |   |    |   |  |  | Mascot |
| 22 | LRP2-binding protein [Danio rerio] |           |        |     | gi 148922942 |     | 38119.7                         | 5.7 | 9 | 43 | 0 |  |  |        |

Peptide Information

| Calc. Mass | Obsrv. Mass | ± da    | ± ppm | Start Seq. | End Seq. | Sequence                          | Ion Score | C. I. | % Modification          | Rank | Result Type |
|------------|-------------|---------|-------|------------|----------|-----------------------------------|-----------|-------|-------------------------|------|-------------|
| 992.5444   | 992.4919    | -0.0525 | -53   | 45         | 52       | TMNLLKEK                          |           |       | Oxidation (M)[2]        |      | Mascot      |
| 1081.5636  | 1081.5618   | -0.0018 | -2    | 333        | 342      | ELQIDAAHGK                        |           |       |                         |      | Mascot      |
| 1233.6157  | 1233.5332   | -0.0825 | -67   | 316        | 325      | AKHYCTQAVR                        |           |       | Carbamidomethyl (C)[5]  |      | Mascot      |
| 1277.6346  | 1277.6804   | 0.0458  | 36    | 291        | 301      | GIAIGMFYAR                        |           |       | Oxidation (M)[6]        |      | Mascot      |
| 1618.7191  | 1618.7167   | -0.0024 | -1    | 30         | 44       | EESTHSETNAASVEK                   |           |       |                         |      | Mascot      |
| 1816.9197  | 1816.9128   | -0.0069 | -4    | 318        | 332      | HYCTQAVRIDPLICK                   |           |       | Carbamidomethyl (C)[3]  |      | Mascot      |
| 1982.9124  | 1982.9869   | 0.0745  | 38    | 273        | 289      | DTAAIAQQTDCLEEVVR                 |           |       | Carbamidomethyl (C)[11] |      | Mascot      |
| 1982.9124  | 1982.9869   | 0.0745  | 38    | 273        | 289      | DTAAIAQQTDCLEEVVR                 |           |       | Carbamidomethyl (C)[11] |      | Mascot      |
| 2053.9858  | 2054.0234   | 0.0376  | 18    | 273        | 290      | DTAAIAQQTDCLEEVVRK                |           |       |                         |      | Mascot      |
| 3445.6367  | 3445.3708   | -0.2659 | -77   | 53         | 83       | AETGDSQATFLGQLHY<br>VQGCYAEELIFDR |           |       |                         |      | Mascot      |

|    |                             |  |  |  |              |  |         |      |   |    |   |  |  |  |
|----|-----------------------------|--|--|--|--------------|--|---------|------|---|----|---|--|--|--|
| 23 | novel protein [Danio rerio] |  |  |  | gi 122890840 |  | 34528.1 | 4.71 | 8 | 41 | 0 |  |  |  |
|----|-----------------------------|--|--|--|--------------|--|---------|------|---|----|---|--|--|--|

Peptide Information

| Calc. Mass | Obsrv. Mass | ± da    | ± ppm | Start Seq. | End Seq. | Sequence                           | Ion Score | C. I. | % Modification                           | Rank | Result Type |
|------------|-------------|---------|-------|------------|----------|------------------------------------|-----------|-------|------------------------------------------|------|-------------|
| 816.4825   | 816.3804    | -0.1021 | -125  | 144        | 150      | IESLQVK                            |           |       |                                          |      | Mascot      |
| 996.4489   | 996.577     | 0.1281  | 129   | 218        | 225      | VEMETLCR                           |           |       | Oxidation (M)[3]                         |      | Mascot      |
| 1103.5691  | 1103.6316   | 0.0625  | 57    | 168        | 176      | QELTAEKER                          |           |       |                                          |      | Mascot      |
| 1335.6328  | 1335.6554   | 0.0226  | 17    | 134        | 143      | NHQYQEFIEK                         |           |       |                                          |      | Mascot      |
| 1475.7775  | 1475.7228   | -0.0547 | -37   | 195        | 206      | LKMLIEEQSQEK                       |           |       |                                          |      | Mascot      |
| 1491.7723  | 1491.7197   | -0.0526 | -35   | 195        | 206      | LKMLIEEQSQEK                       |           |       | Oxidation (M)[3]                         |      | Mascot      |
| 1564.6874  | 1564.7134   | 0.026   | 17    | 80         | 92       | ATNTNEDWESEIR                      |           |       |                                          |      | Mascot      |
| 2410.197   | 2410.196    | -0.001  | 0     | 111        | 130      | QQAAEQEEHNLHVHNLQ<br>KTR           |           |       |                                          |      | Mascot      |
| 3494.6448  | 3494.4358   | -0.209  | -60   | 218        | 247      | VEMETLCRQAEQASQTV<br>LQDEIAALEMQEK |           |       | Carbamidomethyl (C)[7], Oxidation (M)[3] |      | Mascot      |

|    |                                                                                                    |  |  |  |             |  |       |      |    |    |   |  |  |  |
|----|----------------------------------------------------------------------------------------------------|--|--|--|-------------|--|-------|------|----|----|---|--|--|--|
| 24 | novel protein similar to vertebrate cat eye syndrome chromosome region, candidate 1 (CECR1) [Danio |  |  |  | gi 55962504 |  | 55355 | 6.19 | 10 | 39 | 0 |  |  |  |
|----|----------------------------------------------------------------------------------------------------|--|--|--|-------------|--|-------|------|----|----|---|--|--|--|

| Peptide Information |                                                         |             |         |       |            |                     |           |         |                  |      |             |    |   |
|---------------------|---------------------------------------------------------|-------------|---------|-------|------------|---------------------|-----------|---------|------------------|------|-------------|----|---|
|                     | Calc. Mass                                              | Obsrv. Mass | ± da    | ± ppm | Start Seq. | End Sequence Seq.   | Ion Score | C. I. % | Modification     | Rank | Result Type |    |   |
|                     | 992.4869                                                | 992.4919    | 0.005   | 5     | 470        | 477 AMTVWQEK        |           |         |                  |      | Mascot      |    |   |
|                     | 1081.4949                                               | 1081.5618   | 0.0669  | 62    | 478        | 486 WNTFIAENS       |           |         |                  |      | Mascot      |    |   |
|                     | 1127.5592                                               | 1127.5961   | 0.0369  | 33    | 257        | 266 ANHPDFIGTR      |           |         |                  |      | Mascot      |    |   |
|                     | 1129.5632                                               | 1129.6129   | 0.0497  | 44    | 43         | 51 MDSLLYMLK        |           |         | Oxidation (M)[1] |      | Mascot      |    |   |
|                     | 1239.6216                                               | 1239.5477   | -0.0739 | -60   | 459        | 469 YSSLSAQLQDK     |           |         |                  |      | Mascot      |    |   |
|                     | 1277.5757                                               | 1277.6804   | 0.1047  | 82    | 231        | 241 AYELDGTTHDR     |           |         |                  |      | Mascot      |    |   |
|                     | 1318.642                                                | 1318.6349   | -0.0071 | -5    | 282        | 292 QAVQEAIEMQR     |           |         | Oxidation (M)[9] |      | Mascot      |    |   |
|                     | 1388.6986                                               | 1388.6863   | -0.0123 | -9    | 43         | 53 MDSLLYMLKMK      |           |         | Oxidation (M)[1] |      | Mascot      |    |   |
|                     | 1388.6986                                               | 1388.6863   | -0.0123 | -9    | 43         | 53 MDSLLYMLKMK      |           |         | Oxidation (M)[1] |      | Mascot      |    |   |
|                     | 1529.8104                                               | 1529.6742   | -0.1362 | -89   | 280        | 292 VKQAVQEAIEMQR   |           |         |                  |      | Mascot      |    |   |
|                     | 1612.7635                                               | 1612.7328   | -0.0307 | -19   | 149        | 163 ASLGDVTSFDNSLMR |           |         |                  |      | Mascot      |    |   |
| 25                  | PREDICTED: hypothetical protein LOC572466 [Danio rerio] |             |         |       |            | gi 326674157        | 92255.6   | 6.11    | 11               | 39   | 0           | 11 | 0 |

| Peptide Information |                                                  |         |       |              |                                         |           |         |                            |      |             |
|---------------------|--------------------------------------------------|---------|-------|--------------|-----------------------------------------|-----------|---------|----------------------------|------|-------------|
| Calc. Mass          | Obsrv. Mass                                      | ± da    | ± ppm | Start Seq.   | End Sequence Seq.                       | Ion Score | C. I. % | Modification               | Rank | Result Type |
| 844.5137            | 844.4007                                         | -0.113  | -134  | 370          | 376 KVEEVIK                             |           |         |                            |      | Mascot      |
| 1103.5116           | 1103.6316                                        | 0.12    | 109   | 459          | 467 TTTDEHFPR                           |           |         |                            |      | Mascot      |
| 1173.5494           | 1173.6047                                        | 0.0553  | 47    | 690          | 699 SDAEENQRPK                          | 11        | 0       |                            |      | Mascot      |
| 1173.5494           | 1173.6047                                        | 0.0553  | 47    | 690          | 699 SDAEENQRPK                          |           |         |                            |      | Mascot      |
| 1217.6559           | 1217.5646                                        | -0.0913 | -75   | 319          | 329 CSTSSPIKLPK                         |           |         | Carbamidomethyl (C)[1]     |      | Mascot      |
| 1318.6494           | 1318.6349                                        | -0.0145 | -11   | 66           | 77 IHGSDIIMASMK                         |           |         | Oxidation (M)[8]           |      | Mascot      |
| 1335.7015           | 1335.6554                                        | -0.0461 | -35   | 35           | 45 HLQKAIPEDR                           |           |         |                            |      | Mascot      |
| 1513.7241           | 1513.701                                         | -0.0231 | -15   | 604          | 616 EQSVDEPSQNPRK                       |           |         |                            |      | Mascot      |
| 1618.804            | 1618.7167                                        | -0.0873 | -54   | 66           | 79 IHGSDIIMASMKQR                       |           |         | Oxidation (M)[8,11]        |      | Mascot      |
| 2004.9297           | 2004.9718                                        | 0.0421  | 21    | 558          | 574 FEDLDFDDGVDHTVKPR                   |           |         |                            |      | Mascot      |
| 3494.6631           | 3494.4358                                        | -0.2273 | -65   | 468          | 498 ALNITETFNMTNASTDYE<br>TESSPLAFNIKQK |           |         | Oxidation (M)[10]          |      | Mascot      |
| 3508.8174           | 3508.4207                                        | -0.3967 | -113  | 782          | 812 LTVGPWKEVMMMIVLEA<br>PLASTVVMQTTQLK |           |         | Oxidation (M)[10,11,12,25] |      | Mascot      |
| 3508.8174           | 3508.4207                                        | -0.3967 | -113  | 782          | 812 LTVGPWKEVMMMIVLEA<br>PLASTVVMQTTQLK |           |         | Oxidation (M)[10,11,12,25] |      | Mascot      |
| 26                  | PREDICTED: RING finger protein 214 [Danio rerio] |         |       | gi 326667931 |                                         | 39438.7   | 4.83    | 8                          | 38   | 0           |

Peptide Information



| Calc. Mass | Obsrv. Mass | $\pm$ da | $\pm$ ppm | Start Seq. | End Seq. | Sequence                       | Ion Score | C. I. | % Modification                           | Rank | Result Type |
|------------|-------------|----------|-----------|------------|----------|--------------------------------|-----------|-------|------------------------------------------|------|-------------|
| 816.4825   | 816.3804    | -0.1021  | -125      | 144        | 150      | IESLQVK                        |           |       |                                          |      | Mascot      |
| 996.4489   | 996.577     | 0.1281   | 129       | 218        | 225      | VEMETLCR                       |           |       | Oxidation (M)[3]                         |      | Mascot      |
| 1103.5691  | 1103.6316   | 0.0625   | 57        | 168        | 176      | QELTAEKER                      |           |       |                                          |      | Mascot      |
| 1335.6328  | 1335.6554   | 0.0226   | 17        | 134        | 143      | NHQYQEFIEK                     |           |       |                                          |      | Mascot      |
| 1475.7775  | 1475.7228   | -0.0547  | -37       | 195        | 206      | LKMLIEEQSQEK                   |           |       |                                          |      | Mascot      |
| 1491.7723  | 1491.7197   | -0.0526  | -35       | 195        | 206      | LKMLIEEQSQEK                   |           |       | Oxidation (M)[3]                         |      | Mascot      |
| 1564.6874  | 1564.7134   | 0.026    | 17        | 80         | 92       | ATNTNEDWESEIR                  |           |       |                                          |      | Mascot      |
| 2410.197   | 2410.196    | -0.001   | 0         | 111        | 130      | QQAAEQEEHNLHVHNLQKTR           |           |       |                                          |      | Mascot      |
| 3494.6448  | 3494.4358   | -0.209   | -60       | 218        | 247      | VEMETLCRQAEQASQTVLQDEIAALEMQEK |           |       | Carbamidomethyl (C)[7], Oxidation (M)[3] |      | Mascot      |

27 novel protein similar to vertebrate t-complex testis expressed 1 (Tctex1) [Danio rerio]

gi|94733341 11300.6 8.36 5 36 0

#### Peptide Information

| Calc. Mass | Obsrv. Mass | $\pm$ da | $\pm$ ppm | Start Seq. | End Seq. | Sequence         | Ion Score | C. I. | % Modification                             | Rank | Result Type |
|------------|-------------|----------|-----------|------------|----------|------------------|-----------|-------|--------------------------------------------|------|-------------|
| 1211.6527  | 1211.553    | -0.0997  | -82       | 52         | 61       | YIVTCIIMQK       |           |       |                                            |      | Mascot      |
| 1475.7172  | 1475.7228   | 0.0056   | 4         | 16         | 27       | AVIGRNMVEHNR     |           |       | Oxidation (M)[7]                           |      | Mascot      |
| 1491.8027  | 1491.7197   | -0.083   | -56       | 90         | 102      | HLVCIVSVFGLAI    |           |       | Carbamidomethyl (C)[4]                     |      | Mascot      |
| 1634.8999  | 1634.6932   | -0.2067  | -126      | 1          | 15       | AFIVDEVSSIVKEAK  |           |       |                                            |      | Mascot      |
| 1955.0856  | 1954.9796   | -0.106   | -54       | 46         | 61       | LGKPFKYIVTCIIMQK |           |       | Carbamidomethyl (C)[11], Oxidation (M)[14] |      | Mascot      |
| 1955.0856  | 1954.9796   | -0.106   | -54       | 46         | 61       | LGKPFKYIVTCIIMQK |           |       | Carbamidomethyl (C)[11], Oxidation (M)[14] |      | Mascot      |

28 PREDICTED: zinc-binding protein A33-like [Danio rerio]

gi|292610346 58802.6 7.49 11 36 0

#### Peptide Information

| Calc. Mass | Obsrv. Mass | $\pm$ da | $\pm$ ppm | Start Seq. | End Seq. | Sequence      | Ion Score | C. I. | % Modification         | Rank | Result Type |
|------------|-------------|----------|-----------|------------|----------|---------------|-----------|-------|------------------------|------|-------------|
| 816.3378   | 816.3804    | 0.0426   | 52        | 474        | 479      | MSFMER        |           |       | Oxidation (M)[1]       |      | Mascot      |
| 1127.5554  | 1127.5961   | 0.0407   | 36        | 272        | 279      | YQVWEKMK      |           |       | Oxidation (M)[7]       |      | Mascot      |
| 1173.6586  | 1173.6047   | -0.0539  | -46       | 144        | 154      | TLLSLQNGTAR   |           |       |                        |      | Mascot      |
| 1173.6586  | 1173.6047   | -0.0539  | -46       | 144        | 154      | TLLSLQNGTAR   |           |       |                        |      | Mascot      |
| 1388.5709  | 1388.6863   | 0.1154   | 83        | 407        | 417      | LDYVCDDTMEK   |           |       | Carbamidomethyl (C)[5] |      | Mascot      |
| 1388.5709  | 1388.6863   | 0.1154   | 83        | 407        | 417      | LDYVCDDTMEK   |           |       | Carbamidomethyl (C)[5] |      | Mascot      |
| 1513.6223  | 1513.701    | 0.0787   | 52        | 82         | 94       | DEDEQQCPVHGEK |           |       |                        |      | Mascot      |
| 1539.6646  | 1539.7108   | 0.0462   | 30        | 31         | 43       | QCIYDHWSSSGTR |           |       |                        |      | Mascot      |
| 1596.686   | 1596.7355   | 0.0495   | 31        | 31         | 43       | QCIYDHWSSSGTR |           |       | Carbamidomethyl (C)[2] |      | Mascot      |

|    |                                                    |           |         |     |     |              |                                  |      |                                             |        |   |
|----|----------------------------------------------------|-----------|---------|-----|-----|--------------|----------------------------------|------|---------------------------------------------|--------|---|
|    | 1596.686                                           | 1596.7355 | 0.0495  | 31  | 31  | 43           | QCIYDHWSSSGTR                    |      | Carbamidomethyl (C)[2]                      | Mascot |   |
|    | 1969.0364                                          | 1968.9762 | -0.0602 | -31 | 361 | 378          | GNPIMQPLIPANGFWGLK               |      | Oxidation (M)[5]                            | Mascot |   |
|    | 1982.8495                                          | 1982.9869 | 0.1374  | 69  | 187 | 202          | EEESRIMSLNEEEDK                  |      | Oxidation (M)[7]                            | Mascot |   |
|    | 1982.8495                                          | 1982.9869 | 0.1374  | 69  | 187 | 202          | EEESRIMSLNEEEDK                  |      | Oxidation (M)[7]                            | Mascot |   |
|    | 2004.8864                                          | 2004.9718 | 0.0854  | 43  | 382 | 397          | YMYHLMTAEGCEINIK                 |      | Carbamidomethyl (C)[11], Oxidation (M)[2,6] | Mascot |   |
|    | 2053.9617                                          | 2054.0234 | 0.0617  | 30  | 95  | 111          | IELFCQNDEQLLCARCR                |      |                                             | Mascot |   |
|    | 2225.0259                                          | 2225.0671 | 0.0412  | 19  | 95  | 111          | IELFCQNDEQLLCARCR                |      | Carbamidomethyl (C)[5,13,16]                | Mascot |   |
|    | 3346.4773                                          | 3346.3752 | -0.1021 | -31 | 82  | 109          | DEDEQQCPVHGEKIELF<br>CQNDEQLLCAR |      | Carbamidomethyl (C)[7]                      | Mascot |   |
|    | 3346.4773                                          | 3346.3752 | -0.1021 | -31 | 82  | 109          | DEDEQQCPVHGEKIELF<br>CQNDEQLLCAR |      | Carbamidomethyl (C)[7]                      | Mascot |   |
| 29 | thyroid hormone receptor alpha A 1-2 [Danio rerio] |           |         |     |     | gi 118162027 | 21523.9                          | 5.38 | 7                                           | 36     | 0 |

#### Peptide Information

| Calc. Mass | Obsrv. Mass | ± da    | ± ppm | Start Seq. | End Seq. | Sequence                       | Ion Score | C. I. | % | Modification                             | Rank | Result | Type |
|------------|-------------|---------|-------|------------|----------|--------------------------------|-----------|-------|---|------------------------------------------|------|--------|------|
| 1103.6605  | 1103.6316   | -0.0289 | -26   | 147        | 155      | LLMKVTNLR                      |           |       |   | Oxidation (M)[3]                         |      | Mascot |      |
| 1158.4774  | 1158.5857   | 0.1083  | 93    | 33         | 42       | GCCMEIMSLR                     |           |       |   | Oxidation (M)[4]                         |      | Mascot |      |
| 1165.5902  | 1165.7206   | 0.1304  | 112   | 138        | 146      | HNISHFWPK                      |           |       |   |                                          |      | Mascot |      |
| 1199.504   | 1199.614    | 0.11    | 92    | 33         | 42       | GCCMEIMSLR                     |           |       |   | Carbamidomethyl (C)[2]                   |      | Mascot |      |
| 1539.7262  | 1539.7108   | -0.0154 | -10   | 33         | 46       | GCCMEIMSLRAAVR                 |           |       |   |                                          |      | Mascot |      |
| 1596.7477  | 1596.7355   | -0.0122 | -8    | 33         | 46       | GCCMEIMSLRAAVR                 |           |       |   | Carbamidomethyl (C)[2]                   |      | Mascot |      |
| 1596.7477  | 1596.7355   | -0.0122 | -8    | 33         | 46       | GCCMEIMSLRAAVR                 |           |       |   | Carbamidomethyl (C)[2]                   |      | Mascot |      |
| 1612.7427  | 1612.7328   | -0.0099 | -6    | 33         | 46       | GCCMEIMSLRAAVR                 |           |       |   | Carbamidomethyl (C)[2], Oxidation (M)[4] |      | Mascot |      |
| 2005.0385  | 2004.9718   | -0.0667 | -33   | 16         | 32       | LPMFSELPCEIQILLK               |           |       |   | Oxidation (M)[3]                         |      | Mascot |      |
| 2211.0474  | 2211.0544   | 0.007   | 3     | 121        | 137      | CQEMYLLAFEHYINHRK              |           |       |   | Oxidation (M)[4]                         |      | Mascot |      |
| 3283.5725  | 3283.3528   | -0.2197 | -67   | 16         | 42       | LPMFSELPCEIQILLKGC<br>CMEIMSLR |           |       |   | Carbamidomethyl (C)[9,19,20]             |      | Mascot |      |

30 PREDICTED: protein NLRC3-like [Danio rerio] gi|326674421 124778.8 8.62 9 36 0 23 0

#### Peptide Information

| Calc. Mass | Obsrv. Mass | ± da    | ± ppm | Start Seq. | End Seq. | Sequence     | Ion Score | C. I. | % | Modification           | Rank | Result | Type |
|------------|-------------|---------|-------|------------|----------|--------------|-----------|-------|---|------------------------|------|--------|------|
| 850.3471   | 850.3846    | 0.0375  | 44    | 325        | 333      | GGEKGSACR    |           |       |   | Carbamidomethyl (C)[8] |      | Mascot |      |
| 1045.6074  | 1045.5386   | -0.0688 | -66   | 140        | 148      | SMKTPPIQIK   |           |       |   |                        |      | Mascot |      |
| 1129.6938  | 1129.6129   | -0.0809 | -72   | 455        | 466      | TVLTGKVAGVGK |           |       |   |                        |      | Mascot |      |
| 1173.6521  | 1173.6047   | -0.0474 | -40   | 1040       | 1049     | LQSLNLRACR   | 23        | 0     |   |                        |      | Mascot |      |
| 1173.6521  | 1173.6047   | -0.0474 | -40   | 1040       | 1049     | LQSLNLRACR   |           |       |   |                        |      | Mascot |      |
| 1239.6156  | 1239.5477   | -0.0679 | -55   | 381        | 390      | HQYLFEGFAK   |           |       |   |                        |      | Mascot |      |

|    |                                                   |           |         |     |              |      |                                    |      |    |    |   |   |   |  |  |  |  |  |        |
|----|---------------------------------------------------|-----------|---------|-----|--------------|------|------------------------------------|------|----|----|---|---|---|--|--|--|--|--|--------|
|    | 1318.6559                                         | 1318.6349 | -0.021  | -16 | 657          | 668  | MLSEAETAEIPK                       |      |    |    |   |   |   |  |  |  |  |  | Mascot |
|    | 1634.7156                                         | 1634.6932 | -0.0224 | -14 | 1005         | 1017 | EWCSYSIYNLNDK                      |      |    |    |   |   |   |  |  |  |  |  | Mascot |
|    | 3338.6062                                         | 3338.6995 | 0.0933  | 28  | 393          | 421  | NPTLLNEIYIDLYITEGGN<br>GEISNEHEYK  |      |    |    |   |   |   |  |  |  |  |  | Mascot |
|    | 3494.7073                                         | 3494.4358 | -0.2715 | -78 | 393          | 422  | NPTLLNEIYIDLYITEGGN<br>GEISNEHEYKR |      |    |    |   |   |   |  |  |  |  |  | Mascot |
| 31 | PREDICTED: GAS2-like protein 2-like [Danio rerio] |           |         |     | gi 326668195 |      | 100432.5                           | 9.58 | 11 | 35 | 0 | 8 | 0 |  |  |  |  |  |        |

#### Peptide Information

|  | Calc. Mass | Obsrv. Mass | ± da    | ± ppm | Start Seq. | End Seq. | Sequence                             | Ion Score | C. I. | % | Modification           | Rank | Result Type |
|--|------------|-------------|---------|-------|------------|----------|--------------------------------------|-----------|-------|---|------------------------|------|-------------|
|  | 844.4345   | 844.4007    | -0.0338 | -40   | 258        | 264      | CTSLVHK                              |           |       |   | Carbamidomethyl (C)[1] |      | Mascot      |
|  | 996.5883   | 996.577     | -0.0113 | -11   | 808        | 815      | LRPCVRPR                             |           |       |   |                        |      | Mascot      |
|  | 1045.5636  | 1045.5386   | -0.025  | -24   | 668        | 677      | SASLDRATPK                           |           |       |   |                        |      | Mascot      |
|  | 1103.5803  | 1103.6316   | 0.0513  | 46    | 339        | 348      | NTSSSPNKLR                           |           |       |   |                        |      | Mascot      |
|  | 1127.5803  | 1127.5961   | 0.0158  | 14    | 545        | 554      | RGQVEQAPDK                           |           |       |   |                        |      | Mascot      |
|  | 1255.6528  | 1255.5188   | -0.134  | -107  | 527        | 537      | IPQEEPSEKAK                          |           |       |   |                        |      | Mascot      |
|  | 1388.6838  | 1388.6863   | 0.0025  | 2     | 546        | 558      | GQVEQAPDKAMSK                        |           |       |   |                        |      | Mascot      |
|  | 1388.6838  | 1388.6863   | 0.0025  | 2     | 546        | 558      | GQVEQAPDKAMSK                        |           |       |   |                        |      | Mascot      |
|  | 1539.8278  | 1539.7108   | -0.117  | -76   | 217        | 229      | YRVGDSNTLIFVR                        |           |       |   |                        |      | Mascot      |
|  | 1596.7184  | 1596.7355   | 0.0171  | 11    | 324        | 337      | SSCSPDPEHQPTRR                       | 8         |       | 0 |                        |      | Mascot      |
|  | 1596.7184  | 1596.7355   | 0.0171  | 11    | 324        | 337      | SSCSPDPEHQPTRR                       |           |       |   |                        |      | Mascot      |
|  | 3338.6616  | 3338.6995   | 0.0379  | 11    | 183        | 211      | SLINIQLNDEMVLQLISRC<br>SCPSQFPMVK    |           |       |   | Oxidation (M)[11,27]   |      | Mascot      |
|  | 3508.5779  | 3508.4207   | -0.1572 | -45   | 717        | 748      | TEDSHTTTHHLKVKSPC<br>MTSSWSSLGSSMDSK |           |       |   | Oxidation (M)[18]      |      | Mascot      |
|  | 3508.5779  | 3508.4207   | -0.1572 | -45   | 717        | 748      | TEDSHTTTHHLKVKSPC<br>MTSSWSSLGSSMDSK |           |       |   | Oxidation (M)[18]      |      | Mascot      |

32 thyroid hormone receptor alpha B [Danio rerio] gi|118162029 21600 5.26 7 35 0

#### Peptide Information

|  | Calc. Mass | Obsrv. Mass | ± da    | ± ppm | Start Seq. | End Seq. | Sequence       | Ion Score | C. I. | % | Modification           | Rank | Result Type |
|--|------------|-------------|---------|-------|------------|----------|----------------|-----------|-------|---|------------------------|------|-------------|
|  | 850.4338   | 850.3846    | -0.0492 | -58   | 110        | 117      | TGLTCVEK       |           |       |   |                        |      | Mascot      |
|  | 1158.4774  | 1158.5857   | 0.1083  | 93    | 33         | 42       | GCCMEIMSLR     |           |       |   | Oxidation (M)[4]       |      | Mascot      |
|  | 1199.504   | 1199.614    | 0.11    | 92    | 33         | 42       | GCCMEIMSLR     |           |       |   | Carbamidomethyl (C)[2] |      | Mascot      |
|  | 1277.677   | 1277.6804   | 0.0034  | 3     | 110        | 120      | TGLTCVEKIEK    |           |       |   | Carbamidomethyl (C)[5] |      | Mascot      |
|  | 1529.7676  | 1529.6742   | -0.0934 | -61   | 151        | 164      | VTDLRMIGACHASR |           |       |   |                        |      | Mascot      |
|  | 1539.7262  | 1539.7108   | -0.0154 | -10   | 33         | 46       | GCCMEIMSLRAAVR |           |       |   |                        |      | Mascot      |
|  | 1596.7477  | 1596.7355   | -0.0122 | -8    | 33         | 46       | GCCMEIMSLRAAVR |           |       |   | Carbamidomethyl (C)[2] |      | Mascot      |
|  | 1596.7477  | 1596.7355   | -0.0122 | -8    | 33         | 46       | GCCMEIMSLRAAVR |           |       |   | Carbamidomethyl (C)[2] |      | Mascot      |

|           |           |         |     |    |    |                                |                                          |        |
|-----------|-----------|---------|-----|----|----|--------------------------------|------------------------------------------|--------|
| 1612.7427 | 1612.7328 | -0.0099 | -6  | 33 | 46 | GCCMEIMSLRAAVR                 | Carbamidomethyl (C)[2], Oxidation (M)[4] | Mascot |
| 2005.0385 | 2004.9718 | -0.0667 | -33 | 16 | 32 | LPMFSELPCEQIILLK               | Oxidation (M)[3]                         | Mascot |
| 3283.5725 | 3283.3528 | -0.2197 | -67 | 16 | 42 | LPMFSELPCEQIILLKGC<br>CMEIMSLR | Carbamidomethyl (C)[9,19,20]             | Mascot |

33 Zgc:111960 protein [Danio rerio] gi|166796880 39211.8 5.12 8 34 0

#### Peptide Information

| Calc. Mass | Obsrv. Mass | ± da    | ± ppm | Start Seq. | End Seq. | Sequence                 | Ion Score | C. I. % | Modification            | Rank | Result | Type |
|------------|-------------|---------|-------|------------|----------|--------------------------|-----------|---------|-------------------------|------|--------|------|
| 1103.5765  | 1103.6316   | 0.0551  | 50    | 225        | 233      | IAELELQCK                |           |         | Carbamidomethyl (C)[8]  |      | Mascot |      |
| 1195.5776  | 1195.583    | 0.0054  | 5     | 1          | 10       | MGEQPIFTTR               |           |         | Oxidation (M)[1]        |      | Mascot |      |
| 1233.6256  | 1233.5332   | -0.0924 | -75   | 178        | 187      | KCESELQALR               |           |         | Carbamidomethyl (C)[2]  |      | Mascot |      |
| 1318.7035  | 1318.6349   | -0.0686 | -52   | 223        | 233      | SKIAELELQCK              |           |         | Carbamidomethyl (C)[10] |      | Mascot |      |
| 1564.7384  | 1564.7134   | -0.025  | -16   | 179        | 192      | CESELQALRDSSAR           |           |         |                         |      | Mascot |      |
| 1816.9473  | 1816.9128   | -0.0345 | -19   | 225        | 239      | IAELELQCKELSVR           |           |         | Carbamidomethyl (C)[8]  |      | Mascot |      |
| 1994.0553  | 1993.9354   | -0.1199 | -60   | 152        | 170      | ISHSGPETAALKAEENDLL<br>K |           |         |                         |      | Mascot |      |
| 2054.0586  | 2054.0234   | -0.0352 | -17   | 324        | 340      | LLMEQLDGKIDELHEVR        |           |         | Oxidation (M)[3]        |      | Mascot |      |

34 Pkm2a protein [Danio rerio] gi|45501385 58075.7 6.36 6 34 0 16 0

#### Peptide Information

| Calc. Mass | Obsrv. Mass | ± da    | ± ppm | Start Seq. | End Seq. | Sequence                               | Ion Score | C. I. % | Modification            | Rank | Result | Type |
|------------|-------------|---------|-------|------------|----------|----------------------------------------|-----------|---------|-------------------------|------|--------|------|
| 996.4818   | 996.577     | 0.0952  | 96    | 491        | 499      | VNFAMDVGK                              |           |         | Oxidation (M)[5]        |      | Mascot |      |
| 1173.6837  | 1173.6047   | -0.079  | -67   | 164        | 174      | NITKVVEVGSK                            | 16        | 0       |                         |      | Mascot |      |
| 1173.6837  | 1173.6047   | -0.079  | -67   | 164        | 174      | NITKVVEVGSK                            |           |         |                         |      | Mascot |      |
| 1539.8601  | 1539.7108   | -0.1493 | -97   | 449        | 462      | APILAVTRNEQTAR                         |           |         |                         |      | Mascot |      |
| 2211.1003  | 2211.0544   | -0.0459 | -21   | 318        | 337      | CNKAGKPIICATQMLES<br>MIK               |           |         | Oxidation (M)[14,18]    |      | Mascot |      |
| 3338.6228  | 3338.6995   | 0.0767  | 23    | 463        | 490      | QAHLYRGIFPIYNSPSN<br>DVWAEDVDLR        |           |         |                         |      | Mascot |      |
| 3494.6414  | 3494.4358   | -0.2056 | -59   | 344        | 377      | AEGSDVANAVLDGADCI<br>MLSGETAKGDYPLEAVR |           |         | Carbamidomethyl (C)[16] |      | Mascot |      |

35 pyruvate kinase isozymes M1/M2 [Danio rerio] gi|40786398 58020.6 6.54 6 34 0 16 0

#### Peptide Information

| Calc. Mass | Obsrv. Mass | ± da   | ± ppm | Start Seq. | End Seq. | Sequence    | Ion Score | C. I. % | Modification     | Rank | Result | Type |
|------------|-------------|--------|-------|------------|----------|-------------|-----------|---------|------------------|------|--------|------|
| 996.4818   | 996.577     | 0.0952 | 96    | 491        | 499      | VNFAMDVGK   |           |         | Oxidation (M)[5] |      | Mascot |      |
| 1173.6837  | 1173.6047   | -0.079 | -67   | 164        | 174      | NITKVVEVGSK | 16        | 0       |                  |      | Mascot |      |
| 1173.6837  | 1173.6047   | -0.079 | -67   | 164        | 174      | NITKVVEVGSK |           |         |                  |      | Mascot |      |

|           |           |         |     |     |     |                                        |  |  |                         |  |  |        |
|-----------|-----------|---------|-----|-----|-----|----------------------------------------|--|--|-------------------------|--|--|--------|
| 1539.8601 | 1539.7108 | -0.1493 | -97 | 449 | 462 | APILAVTRNEQTAR                         |  |  |                         |  |  | Mascot |
| 2211.1003 | 2211.0544 | -0.0459 | -21 | 318 | 337 | CNKAGKPIICATQMLES<br>IK                |  |  | Oxidation (M)[14,18]    |  |  | Mascot |
| 3338.6228 | 3338.6995 | 0.0767  | 23  | 463 | 490 | QAHLYRGIFPIYNSPSN<br>DVWAEDVDLR        |  |  |                         |  |  | Mascot |
| 3494.6414 | 3494.4358 | -0.2056 | -59 | 344 | 377 | AEGSDVANAVLDGADCI<br>MLSGETAKGDYPLEAVR |  |  | Carbamidomethyl (C)[16] |  |  | Mascot |

36 RecName: Full=Regulator of telomere elongation helicase 1 gi|229891620 132720.1 7.72 18 34 0

Peptide Information

| Calc. Mass | Obsrv. Mass | ± da    | ± ppm | Start Seq. | End Seq. | Sequence                         | Ion Score | C. I. % | Modification                               | Rank | Result Type |
|------------|-------------|---------|-------|------------|----------|----------------------------------|-----------|---------|--------------------------------------------|------|-------------|
| 828.4686   | 828.3999    | -0.0687 | -83   | 689        | 696      | AVNQAIGR                         |           |         |                                            |      | Mascot      |
| 828.4686   | 828.3999    | -0.0687 | -83   | 689        | 696      | AVNQAIGR                         |           |         |                                            |      | Mascot      |
| 844.428    | 844.4007    | -0.0273 | -32   | 160        | 166      | VHMCRAK                          |           |         |                                            |      | Mascot      |
| 882.4468   | 882.5464    | 0.0996  | 113   | 743        | 749      | DVAQFFR                          |           |         |                                            |      | Mascot      |
| 1081.4467  | 1081.5618   | 0.1151  | 106   | 856        | 864      | EDTMVGEEER                       |           |         | Oxidation (M)[4]                           |      | Mascot      |
| 1158.5612  | 1158.5857   | 0.0245  | 21    | 733        | 742      | IYDGFGMTVR                       |           |         |                                            |      | Mascot      |
| 1195.6392  | 1195.583    | -0.0562 | -47   | 925        | 934      | LIMEALQSYK                       |           |         |                                            |      | Mascot      |
| 1199.5911  | 1199.614    | 0.0229  | 19    | 906        | 915      | TGKAFMMELR                       |           |         | Oxidation (M)[6]                           |      | Mascot      |
| 1211.634   | 1211.553    | -0.081  | -67   | 925        | 934      | LIMEALQSYK                       |           |         | Oxidation (M)[3]                           |      | Mascot      |
| 1255.4983  | 1255.5188   | 0.0205  | 16    | 1169       | 1177     | YRPSFHECC                        |           |         | Carbamidomethyl (C)[8,9]                   |      | Mascot      |
| 1277.4958  | 1277.6804   | 0.1846  | 145   | 659        | 667      | MQYLDEMCR                        |           |         | Carbamidomethyl (C)[8], Oxidation (M)[1,7] |      | Mascot      |
| 1335.6461  | 1335.6554   | 0.0093  | 7     | 1060       | 1072     | EGPSCSSLLSDIK                    |           |         |                                            |      | Mascot      |
| 1378.6454  | 1378.731    | 0.0856  | 62    | 142        | 152      | EQLCINQEVMR                      |           |         | Oxidation (M)[10]                          |      | Mascot      |
| 1388.6151  | 1388.6863   | 0.0712  | 51    | 171        | 181      | SCIFYNNVDEK                      |           |         | Carbamidomethyl (C)[2]                     |      | Mascot      |
| 1388.6151  | 1388.6863   | 0.0712  | 51    | 171        | 181      | SCIFYNNVDEK                      |           |         | Carbamidomethyl (C)[2]                     |      | Mascot      |
| 1475.658   | 1475.7228   | 0.0648  | 44    | 825        | 836      | LCIQYEMEMTSK                     |           |         |                                            |      | Mascot      |
| 1491.6528  | 1491.7197   | 0.0669  | 45    | 825        | 836      | LCIQYEMEMTSK                     |           |         | Oxidation (M)[7]                           |      | Mascot      |
| 1507.6477  | 1507.7015   | 0.0538  | 36    | 825        | 836      | LCIQYEMEMTSK                     |           |         | Oxidation (M)[7,9]                         |      | Mascot      |
| 1513.699   | 1513.701    | 0.002   | 1     | 811        | 824      | LDSEEHSGREGAAR                   |           |         |                                            |      | Mascot      |
| 1564.6692  | 1564.7134   | 0.0442  | 28    | 825        | 836      | LCIQYEMEMTSK                     |           |         | Carbamidomethyl (C)[2], Oxidation (M)[7,9] |      | Mascot      |
| 1634.806   | 1634.6932   | -0.1128 | -69   | 593        | 607      | GKGTFTVIDGYGK                    |           |         |                                            |      | Mascot      |
| 2211.0938  | 2211.0544   | -0.0394 | -18   | 917        | 934      | CLSHENFKLIMEALQSYK               |           |         | Carbamidomethyl (C)[1]                     |      | Mascot      |
| 3047.4502  | 3047.4531   | 0.0029  | 1     | 448        | 472      | QGNVLSYWCFSFGFSM<br>QELLRQEV     |           |         | Carbamidomethyl (C)[9], Oxidation (M)[16]  |      | Mascot      |
| 3338.6394  | 3338.6995   | 0.0601  | 18    | 1082       | 1110     | QMFSAQAYKTSNNYEQ<br>MVSTVVSLLTER |           |         |                                            |      | Mascot      |

37 6-phosphofructo-2-kinase/fructose-2,6-biphosphatase 4 [Danio rerio] gi|82658252 55754.4 6.31 11 34 0



| Peptide Information |             |          |           |            |          |                               |           |                      |  |                            |  |      |             |
|---------------------|-------------|----------|-----------|------------|----------|-------------------------------|-----------|----------------------|--|----------------------------|--|------|-------------|
| Calc. Mass          | Obsrv. Mass | $\pm$ da | $\pm$ ppm | Start Seq. | End Seq. | Sequence                      | Ion Score | C. I. % Modification |  |                            |  | Rank | Result Type |
| 811.3832            | 811.3304    | -0.0528  | -65       | 727        | 732      | DYEKEK                        |           |                      |  |                            |  |      | Mascot      |
| 816.4573            | 816.3804    | -0.0769  | -94       | 58         | 65       | NTLAVGNK                      |           |                      |  |                            |  |      | Mascot      |
| 844.4709            | 844.4007    | -0.0702  | -83       | 1006       | 1012     | MLTNLPR                       |           |                      |  |                            |  |      | Mascot      |
| 1045.4836           | 1045.5386   | 0.055    | 53        | 66         | 73       | EYDYQSLK                      |           |                      |  |                            |  |      | Mascot      |
| 1127.5765           | 1127.5961   | 0.0196   | 17        | 1366       | 1376     | TAMSTGVSVFK                   |           |                      |  |                            |  |      | Mascot      |
| 1158.6113           | 1158.5857   | -0.0256  | -22       | 751        | 760      | ENAENILSR                     |           |                      |  |                            |  |      | Mascot      |
| 1195.6205           | 1195.583    | -0.0375  | -31       | 1609       | 1618     | TDSEVEFIKK                    |           |                      |  |                            |  |      | Mascot      |
| 1199.751            | 1199.614    | -0.137   | -114      | 1167       | 1176     | IPNLKLQVFK                    |           |                      |  |                            |  |      | Mascot      |
| 1318.6018           | 1318.6349   | 0.0331   | 25        | 1631       | 1641     | QYLTMTAESMK                   |           |                      |  | Oxidation (M)[5]           |  |      | Mascot      |
| 1469.7053           | 1469.7382   | 0.0329   | 22        | 1618       | 1630     | KASCNSTQFEIGK                 |           |                      |  | Carbamidomethyl (C)[4]     |  |      | Mascot      |
| 1469.7053           | 1469.7382   | 0.0329   | 22        | 1618       | 1630     | KASCNSTQFEIGK                 |           |                      |  | Carbamidomethyl (C)[4]     |  |      | Mascot      |
| 1475.7423           | 1475.7228   | -0.0195  | -13       | 950        | 962      | RIDPNGVFGTPMR                 |           |                      |  | Oxidation (M)[12]          |  |      | Mascot      |
| 1491.7914           | 1491.7197   | -0.0717  | -48       | 153        | 165      | SARTVTLTFTQDPR                |           |                      |  |                            |  |      | Mascot      |
| 1507.7169           | 1507.7015   | -0.0154  | -10       | 665        | 679      | ASSAGGTCSDTLRPK               |           |                      |  | Carbamidomethyl (C)[8]     |  |      | Mascot      |
| 1638.8632           | 1638.827    | -0.0362  | -22       | 1134       | 1149     | TNPHKLMGAGVGVTEK              |           |                      |  |                            |  |      | Mascot      |
| 2211.2092           | 2211.0544   | -0.1548  | -70       | 169        | 188      | VEIIDMTDINGAKPLPPFK           |           |                      |  |                            |  |      | Mascot      |
| 3332.7937           | 3332.364    | -0.4297  | -129      | 2          | 29       | ARLLLCIFNLFVCFVQENVYLITAPK    |           |                      |  | Carbamidomethyl (C)[7]     |  |      | Mascot      |
| 3345.9048           | 3346.3752   | 0.4704   | 141       | 346        | 375      | FVETPFTLSIIATPPFIKGPLYAMRVLVK |           |                      |  |                            |  |      | Mascot      |
| 3345.9048           | 3346.3752   | 0.4704   | 141       | 346        | 375      | FVETPFTLSIIATPPFIKGPLYAMRVLVK |           |                      |  |                            |  |      | Mascot      |
| 3445.5139           | 3445.3708   | -0.1431  | -42       | 1652       | 1679     | FPLDSEAWVDWWPLESDCSDANCKQYVK  |           |                      |  | Carbamidomethyl (C)[18,23] |  |      | Mascot      |

40    PREDICTED: collagen alpha-3(VI) chain [Danio rerio]    gi|326670654    349571.2    6.91    21    33    0    22    0

| Peptide Information |             |          |           |            |          |              |           |                      |  |                  |  |      |             |
|---------------------|-------------|----------|-----------|------------|----------|--------------|-----------|----------------------|--|------------------|--|------|-------------|
| Calc. Mass          | Obsrv. Mass | $\pm$ da | $\pm$ ppm | Start Seq. | End Seq. | Sequence     | Ion Score | C. I. % Modification |  |                  |  | Rank | Result Type |
| 811.3766            | 811.3304    | -0.0462  | -57       | 418        | 424      | SSFPAMR      |           |                      |  | Oxidation (M)[6] |  |      | Mascot      |
| 816.3481            | 816.3804    | 0.0323   | 40        | 2263       | 2270     | GEPGEDGR     |           |                      |  |                  |  |      | Mascot      |
| 842.4413            | 842.4902    | 0.0489   | 58        | 1480       | 1486     | LRHMGGR      |           |                      |  | Oxidation (M)[4] |  |      | Mascot      |
| 844.4709            | 844.4007    | -0.0702  | -83       | 3201       | 3209     | ACGKAAPVK    |           |                      |  |                  |  |      | Mascot      |
| 882.454             | 882.5464    | 0.0924   | 105       | 2161       | 2169     | GGPGEPGRR    |           |                      |  |                  |  |      | Mascot      |
| 1081.5128           | 1081.5618   | 0.049    | 45        | 3118       | 3126     | CMKTVAEQR    |           |                      |  | Oxidation (M)[2] |  |      | Mascot      |
| 1103.5878           | 1103.6316   | 0.0438   | 40        | 1230       | 1238     | DMVQRVVEK    |           |                      |  |                  |  |      | Mascot      |
| 1129.6687           | 1129.6129   | -0.0558  | -49       | 1734       | 1745     | SAALGLKASGVR |           |                      |  |                  |  |      | Mascot      |

|  |           |           |         |      |      |      |                                     |    |  |  |   |  |                         |  |  |  |  |        |
|--|-----------|-----------|---------|------|------|------|-------------------------------------|----|--|--|---|--|-------------------------|--|--|--|--|--------|
|  | 1165.6588 | 1165.7206 | 0.0618  | 53   | 1971 | 1979 | GFRYTRPLR                           |    |  |  |   |  |                         |  |  |  |  | Mascot |
|  | 1199.6493 | 1199.614  | -0.0353 | -29  | 2738 | 2748 | GYFIVVMAVGK                         |    |  |  |   |  | Oxidation (M)[7]        |  |  |  |  | Mascot |
|  | 1277.6888 | 1277.6804 | -0.0084 | -7   | 1018 | 1027 | EFPIIQEFVR                          |    |  |  |   |  |                         |  |  |  |  | Mascot |
|  | 1318.7113 | 1318.6349 | -0.0764 | -58  | 430  | 440  | VVEKFNIEANR                         |    |  |  |   |  |                         |  |  |  |  | Mascot |
|  | 1388.7493 | 1388.6863 | -0.063  | -45  | 1119 | 1131 | ATDNIRQSATALK                       |    |  |  |   |  |                         |  |  |  |  | Mascot |
|  | 1388.7493 | 1388.6863 | -0.063  | -45  | 1119 | 1131 | ATDNIRQSATALK                       |    |  |  |   |  |                         |  |  |  |  | Mascot |
|  | 1469.7893 | 1469.7382 | -0.0511 | -35  | 2340 | 2353 | GPRGLGAVQC DLVK                     |    |  |  |   |  | Carbamidomethyl (C)[10] |  |  |  |  | Mascot |
|  | 1469.7893 | 1469.7382 | -0.0511 | -35  | 2340 | 2353 | GPRGLGAVQC DLVK                     | 22 |  |  | 0 |  | Carbamidomethyl (C)[10] |  |  |  |  | Mascot |
|  | 1475.7423 | 1475.7228 | -0.0195 | -13  | 1223 | 1234 | NEFPAIDMVQR                         |    |  |  |   |  |                         |  |  |  |  | Mascot |
|  | 1491.7373 | 1491.7197 | -0.0176 | -12  | 1223 | 1234 | NEFPAIDMVQR                         |    |  |  |   |  | Oxidation (M)[9]        |  |  |  |  | Mascot |
|  | 1505.6591 | 1505.7271 | 0.068   | 45   | 3168 | 3179 | WHYDPLSGNCTR                        |    |  |  |   |  | Carbamidomethyl (C)[10] |  |  |  |  | Mascot |
|  | 1505.6591 | 1505.7271 | 0.068   | 45   | 3168 | 3179 | WHYDPLSGNCTR                        |    |  |  |   |  | Carbamidomethyl (C)[10] |  |  |  |  | Mascot |
|  | 1564.942  | 1564.7134 | -0.2286 | -146 | 505  | 519  | LEGVPQILLLSGGR                      |    |  |  |   |  |                         |  |  |  |  | Mascot |
|  | 1612.739  | 1612.7328 | -0.0062 | -4   | 850  | 862  | DPEAHFYLN TYSR                      |    |  |  |   |  |                         |  |  |  |  | Mascot |
|  | 1618.7748 | 1618.7167 | -0.0581 | -36  | 251  | 264  | EPGANFYLN TYTTK                     |    |  |  |   |  |                         |  |  |  |  | Mascot |
|  | 2211.0862 | 2211.0544 | -0.0318 | -14  | 605  | 624  | DVVFLLDGS DGRNTFP<br>AMR            |    |  |  |   |  |                         |  |  |  |  | Mascot |
|  | 3445.6355 | 3445.3708 | -0.2647 | -77  | 2583 | 2612 | RDPTTDL DIDMAFILDSSE<br>STWPSVFTEIK |    |  |  |   |  | Oxidation (M)[11]       |  |  |  |  | Mascot |

41

hydroxymethylglutaryl-CoA synthase, cytoplasmic [Danio rerio]

gi|41055180

55900.4

5.41

9

33

0

Peptide Information

| Calc. Mass | Obsrv. Mass | ± da    | ± ppm | Start Seq. | End Seq. | Sequence                         | Ion Score | C. I. | % Modification            | Rank | Result Type |
|------------|-------------|---------|-------|------------|----------|----------------------------------|-----------|-------|---------------------------|------|-------------|
| 1081.5272  | 1081.5618   | 0.0346  | 32    | 69         | 78       | NGLSYESVGR                       |           |       |                           |      | Mascot      |
| 1165.5922  | 1165.7206   | 0.1284  | 110   | 408        | 418      | VSPGVFAETMK                      |           |       |                           |      | Mascot      |
| 1173.6296  | 1173.6047   | -0.0249 | -21   | 391        | 401      | LVSSLCDLPAR                      |           |       |                           |      | Mascot      |
| 1173.6296  | 1173.6047   | -0.0249 | -21   | 391        | 401      | LVSSLCDLPAR                      |           |       |                           |      | Mascot      |
| 1217.6624  | 1217.5646   | -0.0978 | -80   | 79         | 89       | LEVGTETIDK                       |           |       |                           |      | Mascot      |
| 1529.7118  | 1529.6742   | -0.0376 | -25   | 296        | 307      | IEDTYFDRDVEK                     |           |       |                           |      | Mascot      |
| 1610.7955  | 1610.7346   | -0.0609 | -38   | 65         | 78       | LMERNGLSYESVGR                   |           |       |                           |      | Mascot      |
| 2211.0459  | 2211.0544   | 0.0085  | 4     | 209        | 226      | LSIQCYLSALDQCYSVYK               |           |       | Carbamidomethyl (C)[5,13] |      | Mascot      |
| 2225.0688  | 2225.0671   | -0.0017 | -1    | 488        | 508      | MPRIPTTTAGPEVVMSN<br>GDH         |           |       | Oxidation (M)[1]          |      | Mascot      |
| 3283.522   | 3283.3528   | -0.1692 | -52   | 267        | 295      | LMLNDFLCHPSPNMESG<br>PFGLEAFRDVK |           |       | Oxidation (M)[2,14]       |      | Mascot      |

42

RecName: Full=Protein BCCIP homolog

gi|82178569

33862.1

4.37

8

32

0

Peptide Information

| Calc. Mass | Obsrv. Mass | ± da | ± ppm | Start | End | Sequence | Ion | C. I. | % Modification | Rank | Result Type |
|------------|-------------|------|-------|-------|-----|----------|-----|-------|----------------|------|-------------|
|------------|-------------|------|-------|-------|-----|----------|-----|-------|----------------|------|-------------|



|    | Seq.                    |           |         |     | Seq.         |     |                                  |  | Score |       |                                          |    |        |
|----|-------------------------|-----------|---------|-----|--------------|-----|----------------------------------|--|-------|-------|------------------------------------------|----|--------|
|    | 842.3964                | 842.4902  | 0.0938  | 111 | 295          | 301 | MTDYLTV                          |  |       |       |                                          |    | Mascot |
|    | 850.3723                | 850.3846  | 0.0123  | 14  | 191          | 197 | EMAEAGR                          |  |       |       | Oxidation (M)[2]                         |    | Mascot |
|    | 992.4102                | 992.4919  | 0.0817  | 82  | 145          | 153 | CSTPDGQER                        |  |       |       |                                          |    | Mascot |
|    | 1103.6824               | 1103.6316 | -0.0508 | -46 | 65           | 73  | TLLQQLFLK                        |  |       |       |                                          |    | Mascot |
|    | 1129.5203               | 1129.6129 | 0.0926  | 82  | 205          | 213 | CQFCLMISK                        |  |       |       | Carbamidomethyl (C)[1]                   |    | Mascot |
|    | 1378.7069               | 1378.731  | 0.0241  | 17  | 134          | 144 | LKDMILDQCVK                      |  |       |       | Carbamidomethyl (C)[9], Oxidation (M)[4] |    | Mascot |
|    | 2053.8987               | 2054.0234 | 0.1247  | 61  | 136          | 153 | DMILDQCVKCSTPDGQE<br>R           |  |       |       | Oxidation (M)[2]                         |    | Mascot |
|    | 3332.397                | 3332.364  | -0.033  | -10 | 251          | 278 | FSYCVQDEADSCATGKW<br>SYDDEPMKPFR |  |       |       | Carbamidomethyl (C)[4]                   |    | Mascot |
| 43 | Zgc:92237 [Danio rerio] |           |         |     | gi 156914835 |     |                                  |  | 28661 | 11.09 | 7                                        | 32 | 0      |

#### Peptide Information

|  | Calc. Mass | Obsrv. Mass | ± da    | ± ppm | Start Seq. | End Seq. | Sequence           | Ion Score | C. I. | % Modification                            | Rank | Result Type |
|--|------------|-------------|---------|-------|------------|----------|--------------------|-----------|-------|-------------------------------------------|------|-------------|
|  | 1277.71    | 1277.6804   | -0.0296 | -23   | 204        | 215      | EAAAEYAKLLAK       |           |       |                                           |      | Mascot      |
|  | 1335.6725  | 1335.6554   | -0.0171 | -13   | 3          | 14       | LNISFPATGCQK       |           |       | Carbamidomethyl (C)[10]                   |      | Mascot      |
|  | 1378.6783  | 1378.731    | 0.0527  | 38    | 52         | 64       | ISGGNDKQGFPMK      |           |       |                                           |      | Mascot      |
|  | 1529.8369  | 1529.6742   | -0.1627 | -106  | 75         | 87       | LLLSKGHSCYRPR      |           |       |                                           |      | Mascot      |
|  | 1610.8029  | 1610.7346   | -0.0683 | -42   | 1          | 14       | MKLNISFPATGCQK     |           |       | Carbamidomethyl (C)[12], Oxidation (M)[1] |      | Mascot      |
|  | 1638.7316  | 1638.827    | 0.0954  | 58    | 32         | 46       | MATEVAADSLGDEWK    |           |       | Oxidation (M)[1]                          |      | Mascot      |
|  | 1983.1418  | 1982.9869   | -0.1549 | -78   | 99         | 116      | GCIVDANLSVLNLVIVRK |           |       | Carbamidomethyl (C)[2]                    |      | Mascot      |
|  | 1983.1418  | 1982.9869   | -0.1549 | -78   | 99         | 116      | GCIVDANLSVLNLVIVRK |           |       | Carbamidomethyl (C)[2]                    |      | Mascot      |

44 frizzled homolog 7a [Danio rerio] gi|32996705 63652.8 8.21 9 32 0

#### Peptide Information

|  | Calc. Mass | Obsrv. Mass | ± da    | ± ppm | Start Seq. | End Seq. | Sequence                       | Ion Score | C. I. | % Modification                            | Rank | Result Type |
|--|------------|-------------|---------|-------|------------|----------|--------------------------------|-----------|-------|-------------------------------------------|------|-------------|
|  | 996.4489   | 996.577     | 0.1281  | 129   | 88         | 95       | VQCSMDLK                       |           |       | Carbamidomethyl (C)[3], Oxidation (M)[5]  |      | Mascot      |
|  | 1277.6089  | 1277.6804   | 0.0715  | 56    | 123        | 133      | ARQGCEALMNK                    |           |       | Carbamidomethyl (C)[5]                    |      | Mascot      |
|  | 1335.6957  | 1335.6554   | -0.0403 | -30   | 134        | 143      | FGFQWPERLR                     |           |       |                                           |      | Mascot      |
|  | 1507.733   | 1507.7015   | -0.0315 | -21   | 2          | 14       | AFLKMQHCCGITR                  |           |       |                                           |      | Mascot      |
|  | 1564.7545  | 1564.7134   | -0.0411 | -26   | 2          | 14       | AFLKMQHCCGITR                  |           |       | Carbamidomethyl (C)[8]                    |      | Mascot      |
|  | 1612.8192  | 1612.7328   | -0.0864 | -54   | 201        | 213      | VPTYLKYHFMGEK                  |           |       |                                           |      | Mascot      |
|  | 1638.7736  | 1638.827    | 0.0534  | 33    | 1          | 14       | MAFLKMQHCCGITR                 |           |       |                                           |      | Mascot      |
|  | 3047.5806  | 3047.4531   | -0.1275 | -42   | 240        | 265      | LWVGIWSILCCVSTLFTV<br>LTYLVDMR |           |       | Oxidation (M)[25]                         |      | Mascot      |
|  | 3338.647   | 3338.6995   | 0.0525  | 16    | 378        | 407      | TITILAMQVYGDMLTGV              |           |       | Carbamidomethyl (C)[19], Oxidation (M)[7] |      | Mascot      |

|    |                                                           |           |         |     |   |              |                                                    |      |    |    |   |  |        |
|----|-----------------------------------------------------------|-----------|---------|-----|---|--------------|----------------------------------------------------|------|----|----|---|--|--------|
|    | 3445.6853                                                 | 3445.3708 | -0.3145 | -91 | 6 | 35           | CYVGIYNVDSLRL<br>MQHCCGITRYFLLFTVA<br>LQTTSGQYHGEK |      |    |    |   |  | Mascot |
| 45 | PREDICTED: microtubule-associated protein 6 [Danio rerio] |           |         |     |   | gi 326671281 | 51366.2                                            | 9.48 | 10 | 32 | 0 |  |        |

| Peptide Information |             |         |       |            |          |                |           |       |   |                             |      |             |
|---------------------|-------------|---------|-------|------------|----------|----------------|-----------|-------|---|-----------------------------|------|-------------|
| Calc. Mass          | Obsrv. Mass | ± da    | ± ppm | Start Seq. | End Seq. | Sequence       | Ion Score | C. I. | % | Modification                | Rank | Result Type |
| 828.4032            | 828.3999    | -0.0033 | -4    | 403        | 409      | CALPDPR        |           |       |   | Carbamidomethyl (C)[1]      |      | Mascot      |
| 828.4032            | 828.3999    | -0.0033 | -4    | 403        | 409      | CALPDPR        |           |       |   | Carbamidomethyl (C)[1]      |      | Mascot      |
| 1127.5439           | 1127.5961   | 0.0522  | 46    | 220        | 229      | REVSSGSSYR     |           |       |   |                             |      | Mascot      |
| 1129.6211           | 1129.6129   | -0.0082 | -7    | 362        | 371      | EINNKLAEAK     |           |       |   |                             |      | Mascot      |
| 1173.6877           | 1173.6047   | -0.083  | -71   | 22         | 32       | ADIAVPLVFTK    |           |       |   |                             |      | Mascot      |
| 1173.6877           | 1173.6047   | -0.083  | -71   | 22         | 32       | ADIAVPLVFTK    |           |       |   |                             |      | Mascot      |
| 1388.7744           | 1388.6863   | -0.0881 | -63   | 313        | 326      | KSSSTSATPGKPLK |           |       |   |                             |      | Mascot      |
| 1388.7744           | 1388.6863   | -0.0881 | -63   | 314        | 327      | SSSTSATPGKPLKK |           |       |   |                             |      | Mascot      |
| 1491.7638           | 1491.7197   | -0.0441 | -30   | 398        | 409      | QHLWRCALPDPR   |           |       |   |                             |      | Mascot      |
| 1564.644            | 1564.7134   | 0.0694  | 44    | 146        | 159      | HSSPEMMMDSGVEK |           |       |   |                             |      | Mascot      |
| 1596.6339           | 1596.7355   | 0.1016  | 64    | 146        | 159      | HSSPEMMMDSGVEK |           |       |   | Oxidation (M)[6,7]          |      | Mascot      |
| 1596.6339           | 1596.7355   | 0.1016  | 64    | 146        | 159      | HSSPEMMMDSGVEK |           |       |   | Oxidation (M)[6,7]          |      | Mascot      |
| 1612.6288           | 1612.7328   | 0.104   | 64    | 146        | 159      | HSSPEMMMDSGVEK |           |       |   | Oxidation (M)[6,7,8]        |      | Mascot      |
| 1618.8159           | 1618.7167   | -0.0992 | -61   | 377        | 388      | QYHYIQLCQPIR   |           |       |   | Carbamidomethyl (C)[8]      |      | Mascot      |
| 1638.712            | 1638.827    | 0.115   | 70    | 2          | 14       | AWPCISRACCMAR  |           |       |   | Carbamidomethyl (C)[4,9,10] |      | Mascot      |

|    |                         |  |  |  |  |             |         |      |   |    |   |  |
|----|-------------------------|--|--|--|--|-------------|---------|------|---|----|---|--|
| 46 | TRalpha-B [Danio rerio] |  |  |  |  | gi 68132042 | 36168.4 | 6.51 | 8 | 32 | 0 |  |
|----|-------------------------|--|--|--|--|-------------|---------|------|---|----|---|--|

| Peptide Information |             |         |       |            |          |                  |           |       |   |                                          |      |             |
|---------------------|-------------|---------|-------|------------|----------|------------------|-----------|-------|---|------------------------------------------|------|-------------|
| Calc. Mass          | Obsrv. Mass | ± da    | ± ppm | Start Seq. | End Seq. | Sequence         | Ion Score | C. I. | % | Modification                             | Rank | Result Type |
| 811.442             | 811.3304    | -0.1116 | -138  | 76         | 82       | VVTEAHR          |           |       |   |                                          |      | Mascot      |
| 1103.6605           | 1103.6316   | -0.0289 | -26   | 273        | 281      | LLMKVTNLR        |           |       |   | Oxidation (M)[3]                         |      | Mascot      |
| 1158.4774           | 1158.5857   | 0.1083  | 93    | 159        | 168      | GCCMEIMSLR       |           |       |   | Oxidation (M)[4]                         |      | Mascot      |
| 1165.5902           | 1165.7206   | 0.1304  | 112   | 264        | 272      | HNISFWPK         |           |       |   |                                          |      | Mascot      |
| 1199.504            | 1199.614    | 0.11    | 92    | 159        | 168      | GCCMEIMSLR       |           |       |   | Carbamidomethyl (C)[2]                   |      | Mascot      |
| 1539.7262           | 1539.7108   | -0.0154 | -10   | 159        | 172      | GCCMEIMSLRAAVR   |           |       |   |                                          |      | Mascot      |
| 1596.7477           | 1596.7355   | -0.0122 | -8    | 159        | 172      | GCCMEIMSLRAAVR   |           |       |   | Carbamidomethyl (C)[2]                   |      | Mascot      |
| 1596.7477           | 1596.7355   | -0.0122 | -8    | 159        | 172      | GCCMEIMSLRAAVR   |           |       |   | Carbamidomethyl (C)[2]                   |      | Mascot      |
| 1612.7427           | 1612.7328   | -0.0099 | -6    | 159        | 172      | GCCMEIMSLRAAVR   |           |       |   | Carbamidomethyl (C)[2], Oxidation (M)[4] |      | Mascot      |
| 1634.8173           | 1634.6932   | -0.1241 | -76   | 195        | 210      | NGGFGVVSDAILDWGK |           |       |   |                                          |      | Mascot      |

|    |                                                     |           |         |     |             |     |                                 |      |   |    |                              |        |
|----|-----------------------------------------------------|-----------|---------|-----|-------------|-----|---------------------------------|------|---|----|------------------------------|--------|
|    | 2005.0385                                           | 2004.9718 | -0.0667 | -33 | 142         | 158 | LPMFSELPCEDQIILLK               |      |   |    | Oxidation (M)[3]             | Mascot |
|    | 3283.5725                                           | 3283.3528 | -0.2197 | -67 | 142         | 168 | LPMFSELPCEDQIILLKGC<br>CMEIMSLR |      |   |    | Carbamidomethyl (C)[9,19,20] | Mascot |
| 47 | ubiquitin domain-containing protein 2 [Danio rerio] |           |         |     | gi 50540502 |     | 26706.3                         | 5.26 | 6 | 32 | 0                            |        |

#### Peptide Information

| Calc. Mass | Obsrv. Mass | ± da    | ± ppm | Start Seq. | End Seq. | Sequence                              | Ion Score | C. I. | % Modification         | Rank | Result Type |
|------------|-------------|---------|-------|------------|----------|---------------------------------------|-----------|-------|------------------------|------|-------------|
| 842.5206   | 842.4902    | -0.0304 | -36   | 163        | 169      | DLRLAVR                               |           |       |                        |      | Mascot      |
| 1195.5736  | 1195.583    | 0.0094  | 8     | 170        | 179      | TDSVQQMKR                             |           |       | Oxidation (M)[8]       |      | Mascot      |
| 1388.7128  | 1388.6863   | -0.0265 | -19   | 181        | 193      | LQTQEGVAATSQR                         |           |       |                        |      | Mascot      |
| 1388.7128  | 1388.6863   | -0.0265 | -19   | 181        | 193      | LQTQEGVAATSQR                         |           |       |                        |      | Mascot      |
| 1513.6952  | 1513.701    | 0.0058  | 4     | 41         | 53       | SDYPMTDGLRSK                          |           |       | Oxidation (M)[5]       |      | Mascot      |
| 1596.7476  | 1596.7355   | -0.0121 | -8    | 39         | 51       | WKSDYPMTDGLR                          |           |       |                        |      | Mascot      |
| 1596.7476  | 1596.7355   | -0.0121 | -8    | 39         | 51       | WKSDYPMTDGLR                          |           |       |                        |      | Mascot      |
| 1612.7424  | 1612.7328   | -0.0096 | -6    | 39         | 51       | WKSDYPMTDGLR                          |           |       | Oxidation (M)[7]       |      | Mascot      |
| 3338.5237  | 3338.6995   | 0.1758  | 53    | 1          | 33       | MGGCVGSHHDSSGSLN<br>ENSDGTGVALGRNQPLK |           |       | Carbamidomethyl (C)[4] |      | Mascot      |

|    |                           |  |  |  |             |  |         |      |   |    |   |  |
|----|---------------------------|--|--|--|-------------|--|---------|------|---|----|---|--|
| 48 | Dci protein [Danio rerio] |  |  |  | gi 50417904 |  | 34229.5 | 8.58 | 7 | 32 | 0 |  |
|----|---------------------------|--|--|--|-------------|--|---------|------|---|----|---|--|

#### Peptide Information

| Calc. Mass | Obsrv. Mass | ± da    | ± ppm | Start Seq. | End Seq. | Sequence                             | Ion Score | C. I. | % Modification                             | Rank | Result Type |
|------------|-------------|---------|-------|------------|----------|--------------------------------------|-----------|-------|--------------------------------------------|------|-------------|
| 816.4032   | 816.3804    | -0.0228 | -28   | 174        | 180      | IMADNPR                              |           |       |                                            |      | Mascot      |
| 996.4965   | 996.577     | 0.0805  | 81    | 261        | 268      | QISKSMR                              |           |       | Oxidation (M)[6]                           |      | Mascot      |
| 1233.5358  | 1233.5332   | -0.0026 | -2    | 126        | 135      | SPEHCAEFWK                           |           |       |                                            |      | Mascot      |
| 1491.7325  | 1491.7197   | -0.0128 | -9    | 43         | 55       | YLVSKNDYSTSSK                        |           |       |                                            |      | Mascot      |
| 1596.7687  | 1596.7355   | -0.0332 | -21   | 1          | 15       | GNSDISAAFEMSVLR                      |           |       |                                            |      | Mascot      |
| 1596.7687  | 1596.7355   | -0.0332 | -21   | 1          | 15       | GNSDISAAFEMSVLR                      |           |       |                                            |      | Mascot      |
| 1612.7635  | 1612.7328   | -0.0307 | -19   | 1          | 15       | GNSDISAAFEMSVLR                      |           |       | Oxidation (M)[11]                          |      | Mascot      |
| 2211.1589  | 2211.0544   | -0.1045 | -47   | 241        | 260      | VLSTAAETMTKWLAI <sup>PDH</sup><br>AR |           |       |                                            |      | Mascot      |
| 3283.5149  | 3283.3528   | -0.1621 | -49   | 150        | 180      | VTIAAINGNSPAGGCLLA<br>MCCDYRIMADNPR  |           |       | Carbamidomethyl (C)[15], Oxidation (M)[19] |      | Mascot      |

|    |                                                            |  |  |  |              |  |          |      |    |    |   |  |
|----|------------------------------------------------------------|--|--|--|--------------|--|----------|------|----|----|---|--|
| 49 | PREDICTED: hypothetical protein LOC100007481 [Danio rerio] |  |  |  | gi 326664865 |  | 157182.2 | 8.05 | 16 | 32 | 0 |  |
|----|------------------------------------------------------------|--|--|--|--------------|--|----------|------|----|----|---|--|

#### Peptide Information

| Calc. Mass | Obsrv. Mass | ± da | ± ppm | Start Seq. | End Seq. | Sequence | Ion Score | C. I. | % Modification | Rank | Result Type |
|------------|-------------|------|-------|------------|----------|----------|-----------|-------|----------------|------|-------------|
|------------|-------------|------|-------|------------|----------|----------|-----------|-------|----------------|------|-------------|

|           |           |         |      |      |      |                               |  |  |  |                        |  |  |        |
|-----------|-----------|---------|------|------|------|-------------------------------|--|--|--|------------------------|--|--|--------|
| 828.4798  | 828.3999  | -0.0799 | -96  | 1322 | 1329 | NGLRVGGR                      |  |  |  |                        |  |  | Mascot |
| 828.5049  | 828.3999  | -0.105  | -127 | 773  | 780  | IRGLQG GK                     |  |  |  |                        |  |  | Mascot |
| 882.4719  | 882.5464  | 0.0745  | 84   | 684  | 690  | QFAEFLK                       |  |  |  |                        |  |  | Mascot |
| 1045.5173 | 1045.5386 | 0.0213  | 20   | 874  | 882  | QGSQSFVHR                     |  |  |  |                        |  |  | Mascot |
| 1081.4659 | 1081.5618 | 0.0959  | 89   | 1039 | 1047 | CYYPSSFSK                     |  |  |  |                        |  |  | Mascot |
| 1103.5844 | 1103.6316 | 0.0472  | 43   | 613  | 622  | VGVNDFSLR                     |  |  |  |                        |  |  | Mascot |
| 1233.6222 | 1233.5332 | -0.089  | -72  | 180  | 189  | DDIHSKYSIR                    |  |  |  |                        |  |  | Mascot |
| 1335.6176 | 1335.6554 | 0.0378  | 28   | 347  | 358  | TSSYNTYSGTVR                  |  |  |  |                        |  |  | Mascot |
| 1388.7202 | 1388.6863 | -0.0339 | -24  | 887  | 898  | EMRVPTANDVLK                  |  |  |  | Oxidation (M)[2]       |  |  | Mascot |
| 1388.7202 | 1388.6863 | -0.0339 | -24  | 887  | 898  | EMRVPTANDVLK                  |  |  |  | Oxidation (M)[2]       |  |  | Mascot |
| 1475.7682 | 1475.7228 | -0.0454 | -31  | 931  | 942  | EYGHFQLPLPFK                  |  |  |  |                        |  |  | Mascot |
| 1529.6835 | 1529.6742 | -0.0093 | -6   | 191  | 205  | KMGQGGCGSVYEGTR               |  |  |  |                        |  |  | Mascot |
| 1539.7195 | 1539.7108 | -0.0087 | -6   | 290  | 301  | VFSEEMARHFMR                  |  |  |  |                        |  |  | Mascot |
| 1564.942  | 1564.7134 | -0.2286 | -146 | 1216 | 1229 | LLVGDPVKLVQVR                 |  |  |  |                        |  |  | Mascot |
| 1817.0181 | 1816.9128 | -0.1053 | -58  | 1243 | 1258 | FGHFSSLRTLINVVAR              |  |  |  |                        |  |  | Mascot |
| 2053.9548 | 2054.0234 | 0.0686  | 33   | 282  | 297  | QFWLSHDRVFEEMAR               |  |  |  | Oxidation (M)[14]      |  |  | Mascot |
| 3445.6289 | 3445.3708 | -0.2581 | -75  | 623  | 652  | EFSDFLQGCEAIPQVKGLSILNDCEENYK |  |  |  | Carbamidomethyl (C)[9] |  |  | Mascot |

50

28S ribosomal protein S18c, mitochondrial [Danio rerio]

gi|148540187

15133.9

9.57

1

22

0

Peptide Information

| Calc. Mass | Obsrv. Mass | ± da   | ± ppm | Start Seq. | End Sequence Seq. | Ion Score   | C. I. % | Modification | Rank                     | Result | Type   |
|------------|-------------|--------|-------|------------|-------------------|-------------|---------|--------------|--------------------------|--------|--------|
| 1469.7126  | 1469.7382   | 0.0256 | 17    | 58         | 69                | TCILCNVTDFK | 22      | 0            | Carbamidomethyl (C)[2,5] | 2      | Mascot |

|                |           |                        |                |                |                    |
|----------------|-----------|------------------------|----------------|----------------|--------------------|
| Gel Idx/Pos    | 269/K21   | Instr./Gel Origin      | BA2060/110707A | Process Status | Analysis Succeeded |
| Plate [#] Name | [1] 31496 | Instrument Sample Name |                | Spectra        | 11                 |

| Rank | Protein Name                           | Accession No. | Protein MW | Protein PI | Pep. Count | Protein Score | Protein Score C. I. % | Total Ion Score | Total Ion C. I. % |
|------|----------------------------------------|---------------|------------|------------|------------|---------------|-----------------------|-----------------|-------------------|
| 1    | vitellogenin 2 isoform 1 [Danio rerio] | gi 113678458  | 179782.8   | 8.7        | 11         | 173           | 100                   | 158             | 100               |

Peptide Information

| Calc. Mass | Obsrv. Mass | ± da    | ± ppm | Start Seq. | End Sequence Seq. | Ion Score  | C. I. % | Modification           | Rank | Result | Type   |
|------------|-------------|---------|-------|------------|-------------------|------------|---------|------------------------|------|--------|--------|
| 850.4702   | 850.5274    | 0.0572  | 67    | 1547       | 1553              | MKLESVK    |         | Oxidation (M)[1]       |      |        | Mascot |
| 995.4397   | 995.498     | 0.0583  | 59    | 1541       | 1548              | DASQCRMK   |         | Carbamidomethyl (C)[5] |      |        | Mascot |
| 1096.5819  | 1096.5802   | -0.0017 | -2    | 1119       | 1127              | TLTKMEAFR  |         |                        |      |        | Mascot |
| 1109.5659  | 1109.4674   | -0.0985 | -89   | 1213       | 1222              | FCADGVLLSK |         | Carbamidomethyl (C)[2] |      |        | Mascot |

|           |           |         |     |      |      |                                 |    |     |  |  |  |                         |        |
|-----------|-----------|---------|-----|------|------|---------------------------------|----|-----|--|--|--|-------------------------|--------|
| 1112.5769 | 1112.5265 | -0.0504 | -45 | 1119 | 1127 | TLTKMEAFR                       |    |     |  |  |  | Oxidation (M)[5]        | Mascot |
| 1173.6262 | 1173.6045 | -0.0217 | -18 | 1024 | 1033 | LEFEVQVGPR                      |    |     |  |  |  |                         | Mascot |
| 1173.6262 | 1173.6045 | -0.0217 | -18 | 1024 | 1033 | LEFEVQVGPR                      | 78 | 100 |  |  |  |                         | Mascot |
| 1179.5892 | 1179.58   | -0.0092 | -8  | 164  | 173  | TQYVISEDPK                      |    |     |  |  |  |                         | Mascot |
| 1179.5892 | 1179.58   | -0.0092 | -8  | 164  | 173  | TQYVISEDPK                      |    |     |  |  |  |                         | Mascot |
| 1308.6616 | 1308.6348 | -0.0268 | -20 | 1225 | 1236 | VTSKVTWGAECK                    |    |     |  |  |  |                         | Mascot |
| 1308.6616 | 1308.6348 | -0.0268 | -20 | 1225 | 1236 | VTSKVTWGAECK                    |    |     |  |  |  |                         | Mascot |
| 1365.6831 | 1365.6183 | -0.0648 | -47 | 1225 | 1236 | VTSKVTWGAECK                    |    |     |  |  |  | Carbamidomethyl (C)[11] | Mascot |
| 1388.7017 | 1388.6914 | -0.0103 | -7  | 694  | 706  | SPAADESVDRITK                   |    |     |  |  |  |                         | Mascot |
| 1596.7699 | 1596.7397 | -0.0302 | -19 | 983  | 996  | GCVEVHSHNAAFIR                  |    |     |  |  |  | Carbamidomethyl (C)[2]  | Mascot |
| 1596.7699 | 1596.7397 | -0.0302 | -19 | 983  | 996  | GCVEVHSHNAAFIR                  | 81 | 100 |  |  |  | Carbamidomethyl (C)[2]  | Mascot |
| 2233.2446 | 2233.0374 | -0.2072 | -93 | 425  | 445  | IATIPALREVVMLGYGSMI<br>AK       |    |     |  |  |  |                         | Mascot |
| 2872.5964 | 2872.343  | -0.2534 | -88 | 472  | 498  | NDIPEITLALKVLGNAGHP<br>SSLKPIMK |    |     |  |  |  | Oxidation (M)[26]       | Mascot |

2 vitellogenin 6 [Danio rerio] gi|303227889 150936.1 8.84 9 169 100 158 100

#### Peptide Information

| Calc. Mass | Obsrv. Mass | ± da    | ± ppm | Start Seq. | End Seq. | Sequence                   | Ion Score | C. I. % | Modification            | Rank | Result Type |
|------------|-------------|---------|-------|------------|----------|----------------------------|-----------|---------|-------------------------|------|-------------|
| 1090.5925  | 1090.5095   | -0.083  | -76   | 1337       | 1345     | IPEITMSKR                  |           |         | Oxidation (M)[6]        |      | Mascot      |
| 1173.6262  | 1173.6045   | -0.0217 | -18   | 1033       | 1042     | LEFEVQVGPR                 |           |         |                         |      | Mascot      |
| 1173.6262  | 1173.6045   | -0.0217 | -18   | 1033       | 1042     | LEFEVQVGPR                 | 78        | 100     |                         |      | Mascot      |
| 1193.6348  | 1193.5941   | -0.0407 | -34   | 1136       | 1145     | TATIMEPFRK                 |           |         |                         |      | Mascot      |
| 1305.746   | 1305.7136   | -0.0324 | -25   | 2          | 13       | LSGVLHKPPAMR               |           |         |                         |      | Mascot      |
| 1383.6725  | 1383.6626   | -0.0099 | -7    | 1244       | 1255     | VTAKFSWGAECK               |           |         | Carbamidomethyl (C)[11] |      | Mascot      |
| 1388.7017  | 1388.6914   | -0.0103 | -7    | 705        | 717      | SPAADESVDRITK              |           |         |                         |      | Mascot      |
| 1596.7699  | 1596.7397   | -0.0302 | -19   | 992        | 1005     | GCVEVHSHNAAFIR             |           |         | Carbamidomethyl (C)[2]  |      | Mascot      |
| 1596.7699  | 1596.7397   | -0.0302 | -19   | 992        | 1005     | GCVEVHSHNAAFIR             | 81        | 100     | Carbamidomethyl (C)[2]  |      | Mascot      |
| 1638.8485  | 1638.8273   | -0.0212 | -13   | 679        | 694      | TYLAGAAADVVEFGVR           |           |         |                         |      | Mascot      |
| 2233.2009  | 2233.0374   | -0.1635 | -73   | 604        | 625      | SLTRITAPDMAYVAGAAN<br>VAIK |           |         |                         |      | Mascot      |

3 hypothetical protein LOC678536 [Danio rerio] gi|160420306 148750.2 8.89 9 168 100 158 100

#### Peptide Information

| Calc. Mass | Obsrv. Mass | ± da    | ± ppm | Start Seq. | End Seq. | Sequence  | Ion Score | C. I. % | Modification     | Rank | Result Type |
|------------|-------------|---------|-------|------------|----------|-----------|-----------|---------|------------------|------|-------------|
| 1045.5465  | 1045.5438   | -0.0027 | -3    | 1346       | 1353     | DFLSWIHK  |           |         |                  |      | Mascot      |
| 1118.5986  | 1118.4894   | -0.1092 | -98   | 1317       | 1325     | IPEITMSRR |           |         | Oxidation (M)[6] |      | Mascot      |

|   |                                                                                                         |           |         |     |      |      |                            |    |     |  |                         |  |  |  |        |
|---|---------------------------------------------------------------------------------------------------------|-----------|---------|-----|------|------|----------------------------|----|-----|--|-------------------------|--|--|--|--------|
|   | 1173.6262                                                                                               | 1173.6045 | -0.0217 | -18 | 1022 | 1031 | LEFEVQVGPR                 |    |     |  |                         |  |  |  | Mascot |
|   | 1173.6262                                                                                               | 1173.6045 | -0.0217 | -18 | 1022 | 1031 | LEFEVQVGPR                 | 78 | 100 |  |                         |  |  |  | Mascot |
|   | 1193.6348                                                                                               | 1193.5941 | -0.0407 | -34 | 1116 | 1125 | TATIMEPFRK                 |    |     |  |                         |  |  |  | Mascot |
|   | 1383.6725                                                                                               | 1383.6626 | -0.0099 | -7  | 1224 | 1235 | VTAKFSWGAECK               |    |     |  | Carbamidomethyl (C)[11] |  |  |  | Mascot |
|   | 1388.7017                                                                                               | 1388.6914 | -0.0103 | -7  | 694  | 706  | SPAADESVDRITK              |    |     |  |                         |  |  |  | Mascot |
|   | 1596.7699                                                                                               | 1596.7397 | -0.0302 | -19 | 981  | 994  | GCVEVHSHNAAFIR             |    |     |  | Carbamidomethyl (C)[2]  |  |  |  | Mascot |
|   | 1596.7699                                                                                               | 1596.7397 | -0.0302 | -19 | 981  | 994  | GCVEVHSHNAAFIR             | 81 | 100 |  | Carbamidomethyl (C)[2]  |  |  |  | Mascot |
|   | 1999.078                                                                                                | 1998.9027 | -0.1753 | -88 | 54   | 71   | VSSKVLSSAVTENTYLMK         |    |     |  | Oxidation (M)[17]       |  |  |  | Mascot |
|   | 2233.2009                                                                                               | 2233.0374 | -0.1635 | -73 | 593  | 614  | SLTRITAPDMAYVAGAAN<br>VAIK |    |     |  |                         |  |  |  | Mascot |
| 4 | novel protein similar to vitellogenin 1 (vg1) [Danio rerio] gi 94733734 149808.5 8.83 8 168 100 158 100 |           |         |     |      |      |                            |    |     |  |                         |  |  |  |        |

Peptide Information

| Calc. Mass | Obsrv. Mass | ± da    | ± ppm | Start Seq. | End Seq. | Sequence                   | Ion Score | C. I. | % | Modification            | Rank | Result | Type |
|------------|-------------|---------|-------|------------|----------|----------------------------|-----------|-------|---|-------------------------|------|--------|------|
| 1090.5925  | 1090.5095   | -0.083  | -76   | 1326       | 1334     | IPEITMSKR                  |           |       |   | Oxidation (M)[6]        |      | Mascot |      |
| 1173.6262  | 1173.6045   | -0.0217 | -18   | 1026       | 1035     | LEFEVQVGPR                 |           |       |   |                         |      | Mascot |      |
| 1173.6262  | 1173.6045   | -0.0217 | -18   | 1026       | 1035     | LEFEVQVGPR                 | 78        | 100   |   |                         |      | Mascot |      |
| 1193.6348  | 1193.5941   | -0.0407 | -34   | 1125       | 1134     | TATIMEPFRK                 |           |       |   |                         |      | Mascot |      |
| 1383.6725  | 1383.6626   | -0.0099 | -7    | 1233       | 1244     | VTAKFSWGAECK               |           |       |   | Carbamidomethyl (C)[11] |      | Mascot |      |
| 1388.7017  | 1388.6914   | -0.0103 | -7    | 698        | 710      | SPAADESVDRITK              |           |       |   |                         |      | Mascot |      |
| 1596.7699  | 1596.7397   | -0.0302 | -19   | 985        | 998      | GCVEVHSHNAAFIR             |           |       |   | Carbamidomethyl (C)[2]  |      | Mascot |      |
| 1596.7699  | 1596.7397   | -0.0302 | -19   | 985        | 998      | GCVEVHSHNAAFIR             | 81        | 100   |   | Carbamidomethyl (C)[2]  |      | Mascot |      |
| 1638.8485  | 1638.8273   | -0.0212 | -13   | 672        | 687      | TYLAGAAADVVEFGVR           |           |       |   |                         |      | Mascot |      |
| 2233.2009  | 2233.0374   | -0.1635 | -73   | 597        | 618      | SLTRITAPDMAYVAGAAN<br>VAIK |           |       |   |                         |      | Mascot |      |

5 vitellogenin 1 [Danio rerio] gi|166795887 149452.5 8.68 7 167 100 158 100

Peptide Information

| Calc. Mass | Obsrv. Mass | ± da    | ± ppm | Start Seq. | End Seq. | Sequence          | Ion Score | C. I. | % | Modification           | Rank | Result | Type |
|------------|-------------|---------|-------|------------|----------|-------------------|-----------|-------|---|------------------------|------|--------|------|
| 1090.5925  | 1090.5095   | -0.083  | -76   | 1319       | 1327     | IPEITMSKR         |           |       |   | Oxidation (M)[6]       |      | Mascot |      |
| 1173.6262  | 1173.6045   | -0.0217 | -18   | 1022       | 1031     | LEFEVQVGPR        |           |       |   |                        |      | Mascot |      |
| 1173.6262  | 1173.6045   | -0.0217 | -18   | 1022       | 1031     | LEFEVQVGPR        | 78        | 100   |   |                        |      | Mascot |      |
| 1388.7017  | 1388.6914   | -0.0103 | -7    | 694        | 706      | SPAADESVDRITK     |           |       |   |                        |      | Mascot |      |
| 1596.7699  | 1596.7397   | -0.0302 | -19   | 981        | 994      | GCVEVHSHNAAFIR    |           |       |   | Carbamidomethyl (C)[2] |      | Mascot |      |
| 1596.7699  | 1596.7397   | -0.0302 | -19   | 981        | 994      | GCVEVHSHNAAFIR    | 81        | 100   |   | Carbamidomethyl (C)[2] |      | Mascot |      |
| 1638.8485  | 1638.8273   | -0.0212 | -13   | 668        | 683      | TYLAGAAADVVEFGVR  |           |       |   |                        |      | Mascot |      |
| 1998.8339  | 1998.9027   | 0.0688  | 34    | 1098       | 1117     | SSSSSSQSSSSSMSSSR |           |       |   |                        |      | Mascot |      |

|                     |                                                                                                         |             |         |       |            |          |                                   |           |       |   |                         |      |             |  |        |
|---------------------|---------------------------------------------------------------------------------------------------------|-------------|---------|-------|------------|----------|-----------------------------------|-----------|-------|---|-------------------------|------|-------------|--|--------|
|                     | 2233.2009                                                                                               | 2233.0374   | -0.1635 | -73   | 593        | 614      | MSK<br>SLTRITAPDMAYVAGAAN<br>VAIK |           |       |   |                         |      |             |  | Mascot |
| 6                   | novel protein similar to vitellogenin 1 (vg1) [Danio rerio] gi 94733733 149143.4 8.92 9 166 100 158 100 |             |         |       |            |          |                                   |           |       |   |                         |      |             |  |        |
| Peptide Information |                                                                                                         |             |         |       |            |          |                                   |           |       |   |                         |      |             |  |        |
|                     | Calc. Mass                                                                                              | Obsrv. Mass | ± da    | ± ppm | Start Seq. | End Seq. | Sequence                          | Ion Score | C. I. | % | Modification            | Rank | Result Type |  |        |
|                     | 1045.5465                                                                                               | 1045.5438   | -0.0027 | -3    | 1350       | 1357     | DFLSWIHK                          |           |       |   |                         |      | Mascot      |  |        |
|                     | 1118.5986                                                                                               | 1118.4894   | -0.1092 | -98   | 1321       | 1329     | IPEITMSRR                         |           |       |   | Oxidation (M)[6]        |      | Mascot      |  |        |
|                     | 1173.6262                                                                                               | 1173.6045   | -0.0217 | -18   | 1026       | 1035     | LEFEVQVGPR                        |           |       |   |                         |      | Mascot      |  |        |
|                     | 1173.6262                                                                                               | 1173.6045   | -0.0217 | -18   | 1026       | 1035     | LEFEVQVGPR                        | 78        | 100   |   |                         |      | Mascot      |  |        |
|                     | 1193.6348                                                                                               | 1193.5941   | -0.0407 | -34   | 1120       | 1129     | TATIMEPFRK                        |           |       |   |                         |      | Mascot      |  |        |
|                     | 1383.6725                                                                                               | 1383.6626   | -0.0099 | -7    | 1228       | 1239     | VTAKFSWGAECK                      |           |       |   | Carbamidomethyl (C)[11] |      | Mascot      |  |        |
|                     | 1388.7017                                                                                               | 1388.6914   | -0.0103 | -7    | 698        | 710      | SPAADESVDRTK                      |           |       |   |                         |      | Mascot      |  |        |
|                     | 1596.7699                                                                                               | 1596.7397   | -0.0302 | -19   | 985        | 998      | GCVEVHSHNAAFIR                    |           |       |   | Carbamidomethyl (C)[2]  |      | Mascot      |  |        |
|                     | 1596.7699                                                                                               | 1596.7397   | -0.0302 | -19   | 985        | 998      | GCVEVHSHNAAFIR                    | 81        | 100   |   | Carbamidomethyl (C)[2]  |      | Mascot      |  |        |
|                     | 1999.078                                                                                                | 1998.9027   | -0.1753 | -88   | 58         | 75       | VSSKVL SAVTENTYLMK                |           |       |   | Oxidation (M)[17]       |      | Mascot      |  |        |
|                     | 2233.2009                                                                                               | 2233.0374   | -0.1635 | -73   | 597        | 618      | SLTRITAPDMAYVAGAAN<br>VAIK        |           |       |   |                         |      | Mascot      |  |        |
| 7                   | Zgc:136383 protein [Danio rerio] gi 159155252 123957.1 8.78 8 165 100 158 100                           |             |         |       |            |          |                                   |           |       |   |                         |      |             |  |        |
| Peptide Information |                                                                                                         |             |         |       |            |          |                                   |           |       |   |                         |      |             |  |        |
|                     | Calc. Mass                                                                                              | Obsrv. Mass | ± da    | ± ppm | Start Seq. | End Seq. | Sequence                          | Ion Score | C. I. | % | Modification            | Rank | Result Type |  |        |
|                     | 1045.5465                                                                                               | 1045.5438   | -0.0027 | -3    | 1123       | 1130     | DFLSWIHK                          |           |       |   |                         |      | Mascot      |  |        |
|                     | 1118.5986                                                                                               | 1118.4894   | -0.1092 | -98   | 1094       | 1102     | IPEITMSRR                         |           |       |   | Oxidation (M)[6]        |      | Mascot      |  |        |
|                     | 1173.6262                                                                                               | 1173.6045   | -0.0217 | -18   | 799        | 808      | LEFEVQVGPR                        |           |       |   |                         |      | Mascot      |  |        |
|                     | 1173.6262                                                                                               | 1173.6045   | -0.0217 | -18   | 799        | 808      | LEFEVQVGPR                        | 78        | 100   |   |                         |      | Mascot      |  |        |
|                     | 1193.6348                                                                                               | 1193.5941   | -0.0407 | -34   | 893        | 902      | TATIMEPFRK                        |           |       |   |                         |      | Mascot      |  |        |
|                     | 1383.6725                                                                                               | 1383.6626   | -0.0099 | -7    | 1001       | 1012     | VTAKFSWGAECK                      |           |       |   | Carbamidomethyl (C)[11] |      | Mascot      |  |        |
|                     | 1388.7017                                                                                               | 1388.6914   | -0.0103 | -7    | 471        | 483      | SPAADESVDRTK                      |           |       |   |                         |      | Mascot      |  |        |
|                     | 1596.7699                                                                                               | 1596.7397   | -0.0302 | -19   | 758        | 771      | GCVEVHSHNAAFIR                    |           |       |   | Carbamidomethyl (C)[2]  |      | Mascot      |  |        |
|                     | 1596.7699                                                                                               | 1596.7397   | -0.0302 | -19   | 758        | 771      | GCVEVHSHNAAFIR                    | 81        | 100   |   | Carbamidomethyl (C)[2]  |      | Mascot      |  |        |
|                     | 2233.2009                                                                                               | 2233.0374   | -0.1635 | -73   | 370        | 391      | SLTRITAPDMAYVAGAAN<br>VAIK        |           |       |   |                         |      | Mascot      |  |        |
| 8                   | vitellogenin 1 [Danio rerio] gi 21391472 127954.2 8.69 3 158 100 158 100                                |             |         |       |            |          |                                   |           |       |   |                         |      |             |  |        |
| Peptide Information |                                                                                                         |             |         |       |            |          |                                   |           |       |   |                         |      |             |  |        |
|                     | Calc. Mass                                                                                              | Obsrv. Mass | ± da    | ± ppm | Start Seq. | End Seq. | Sequence                          | Ion Score | C. I. | % | Modification            | Rank | Result Type |  |        |

|    |                                        |            |             |         |       |            |             |                        |           |       |   |              |                        |      |             |
|----|----------------------------------------|------------|-------------|---------|-------|------------|-------------|------------------------|-----------|-------|---|--------------|------------------------|------|-------------|
|    |                                        | 1090.5925  | 1090.5095   | -0.083  | -76   | 1126       | 1134        | IPEITMSKR              |           |       |   |              | Oxidation (M)[6]       |      | Mascot      |
|    |                                        | 1173.6262  | 1173.6045   | -0.0217 | -18   | 831        | 840         | LEFEVQVGPR             |           |       |   |              |                        |      | Mascot      |
|    |                                        | 1173.6262  | 1173.6045   | -0.0217 | -18   | 831        | 840         | LEFEVQVGPR             | 78        | 100   |   |              |                        |      | Mascot      |
|    |                                        | 1596.7699  | 1596.7397   | -0.0302 | -19   | 790        | 803         | GCVEVHSHNAAFIR         |           |       |   |              | Carbamidomethyl (C)[2] |      | Mascot      |
|    |                                        | 1596.7699  | 1596.7397   | -0.0302 | -19   | 790        | 803         | GCVEVHSHNAAFIR         | 81        | 100   |   |              | Carbamidomethyl (C)[2] |      | Mascot      |
| 9  | novel alpha-type globin [Danio rerio]  |            |             |         |       |            | gi 27802790 |                        | 15913.3   | 7.98  | 4 | 140          | 100                    | 118  | 100         |
|    | Peptide Information                    |            |             |         |       |            |             |                        |           |       |   |              |                        |      |             |
|    |                                        | Calc. Mass | Obsrv. Mass | ± da    | ± ppm | Start Seq. | End Seq.    | Sequence               | Ion Score | C. I. | % | Modification |                        | Rank | Result Type |
|    |                                        | 1096.6038  | 1096.5802   | -0.0236 | -22   | 33         | 41          | TLFVYPQTK              |           |       |   |              |                        |      | Mascot      |
|    |                                        | 1305.7412  | 1305.7136   | -0.0276 | -21   | 130        | 141         | FLAQVSLALSEK           |           |       |   |              |                        |      | Mascot      |
|    |                                        | 1673.9043  | 1673.8759   | -0.0284 | -17   | 80         | 94          | GGLLTLSLHAFMLR         |           |       |   |              | Oxidation (M)[13]      |      | Mascot      |
|    |                                        | 1976.9501  | 1976.9142   | -0.0359 | -18   | 42         | 58          | TYFSHWADLSPNSPQVK      | 118       | 100   |   |              |                        |      | Mascot      |
|    |                                        | 1976.9501  | 1976.9142   | -0.0359 | -18   | 42         | 58          | TYFSHWADLSPNSPQVK      |           |       |   |              |                        |      | Mascot      |
| 10 | alpha globin [Danio rerio]             |            |             |         |       |            | gi 1477580  |                        | 12323.6   | 8.93  | 2 | 100          | 100                    | 90   | 100         |
|    | Peptide Information                    |            |             |         |       |            |             |                        |           |       |   |              |                        |      |             |
|    |                                        | Calc. Mass | Obsrv. Mass | ± da    | ± ppm | Start Seq. | End Seq.    | Sequence               | Ion Score | C. I. | % | Modification |                        | Rank | Result Type |
|    |                                        | 1096.5707  | 1096.5802   | 0.0095  | 9     | 33         | 41          | MLTVYPQTK              |           |       |   |              | Oxidation (M)[1]       |      | Mascot      |
|    |                                        | 1976.9865  | 1976.9142   | -0.0723 | -37   | 42         | 59          | TYFSHWADLSPGSGPVK<br>K | 90        | 100   |   |              |                        |      | Mascot      |
|    |                                        | 1976.9865  | 1976.9142   | -0.0723 | -37   | 42         | 59          | TYFSHWADLSPGSGPVK<br>K |           |       |   |              |                        |      | Mascot      |
| 11 | hemoglobin subunit alpha [Danio rerio] |            |             |         |       |            | gi 47271417 |                        | 15498.2   | 7.98  | 2 | 99           | 100                    | 90   | 100         |
|    | Peptide Information                    |            |             |         |       |            |             |                        |           |       |   |              |                        |      |             |
|    |                                        | Calc. Mass | Obsrv. Mass | ± da    | ± ppm | Start Seq. | End Seq.    | Sequence               | Ion Score | C. I. | % | Modification |                        | Rank | Result Type |
|    |                                        | 1096.5707  | 1096.5802   | 0.0095  | 9     | 33         | 41          | MLTVYPQTK              |           |       |   |              | Oxidation (M)[1]       |      | Mascot      |
|    |                                        | 1976.9865  | 1976.9142   | -0.0723 | -37   | 42         | 59          | TYFSHWADLSPGSGPVK<br>K | 90        | 100   |   |              |                        |      | Mascot      |
|    |                                        | 1976.9865  | 1976.9142   | -0.0723 | -37   | 42         | 59          | TYFSHWADLSPGSGPVK<br>K |           |       |   |              |                        |      | Mascot      |
| 12 | vitellogenin 6 [Danio rerio]           |            |             |         |       |            | gi 57864787 |                        | 38968.8   | 8.92  | 4 | 88           | 99.993                 | 78   | 100         |
|    | Peptide Information                    |            |             |         |       |            |             |                        |           |       |   |              |                        |      |             |
|    |                                        | Calc. Mass | Obsrv. Mass | ± da    | ± ppm | Start Seq. | End Seq.    | Sequence               | Ion Score | C. I. | % | Modification |                        | Rank | Result Type |



|  |           |           |         |     |     |     |              |    |     |  |  |                         |        |
|--|-----------|-----------|---------|-----|-----|-----|--------------|----|-----|--|--|-------------------------|--------|
|  | 1090.5925 | 1090.5095 | -0.083  | -76 | 316 | 324 | IPEITMSKR    |    |     |  |  | Oxidation (M)[6]        | Mascot |
|  | 1173.6262 | 1173.6045 | -0.0217 | -18 | 14  | 23  | LEFEVQVGPR   |    |     |  |  |                         | Mascot |
|  | 1173.6262 | 1173.6045 | -0.0217 | -18 | 14  | 23  | LEFEVQVGPR   | 78 | 100 |  |  |                         | Mascot |
|  | 1193.6348 | 1193.5941 | -0.0407 | -34 | 115 | 124 | TATIMEPFRK   |    |     |  |  |                         | Mascot |
|  | 1383.6725 | 1383.6626 | -0.0099 | -7  | 223 | 234 | VTAKFSWGAECK |    |     |  |  | Carbamidomethyl (C)[11] | Mascot |

13 vitellogenin 2 [Danio rerio] gi|57864779 68993.5 7.84 6 86 99.989 78 100

#### Peptide Information

| Calc. Mass | Obsrv. Mass | ± da    | ± ppm | Start Seq. | End Seq. | Sequence     | Ion Score | C. I. | % | Modification            | Rank | Result | Type |
|------------|-------------|---------|-------|------------|----------|--------------|-----------|-------|---|-------------------------|------|--------|------|
| 850.4702   | 850.5274    | 0.0572  | 67    | 538        | 544      | MKLESVK      |           |       |   | Oxidation (M)[1]        |      | Mascot |      |
| 995.4397   | 995.498     | 0.0583  | 59    | 532        | 539      | DASQCRMK     |           |       |   | Carbamidomethyl (C)[5]  |      | Mascot |      |
| 1096.5819  | 1096.5802   | -0.0017 | -2    | 110        | 118      | TLTKMEAFR    |           |       |   |                         |      | Mascot |      |
| 1109.5659  | 1109.4674   | -0.0985 | -89   | 204        | 213      | FCADGVLLSK   |           |       |   | Carbamidomethyl (C)[2]  |      | Mascot |      |
| 1112.5769  | 1112.5265   | -0.0504 | -45   | 110        | 118      | TLTKMEAFR    |           |       |   | Oxidation (M)[5]        |      | Mascot |      |
| 1173.6262  | 1173.6045   | -0.0217 | -18   | 15         | 24       | LEFEVQVGPR   |           |       |   |                         |      | Mascot |      |
| 1173.6262  | 1173.6045   | -0.0217 | -18   | 15         | 24       | LEFEVQVGPR   | 78        | 100   |   |                         |      | Mascot |      |
| 1308.6616  | 1308.6348   | -0.0268 | -20   | 216        | 227      | VTSKVTWGAECK |           |       |   |                         |      | Mascot |      |
| 1308.6616  | 1308.6348   | -0.0268 | -20   | 216        | 227      | VTSKVTWGAECK |           |       |   |                         |      | Mascot |      |
| 1365.6831  | 1365.6183   | -0.0648 | -47   | 216        | 227      | VTSKVTWGAECK |           |       |   | Carbamidomethyl (C)[11] |      | Mascot |      |

14 vitellogenin 7 [Danio rerio] gi|156713467 148739.2 8.76 7 86 99.989 78 100

#### Peptide Information

| Calc. Mass | Obsrv. Mass | ± da    | ± ppm | Start Seq. | End Seq. | Sequence            | Ion Score | C. I. | % | Modification     | Rank | Result | Type |
|------------|-------------|---------|-------|------------|----------|---------------------|-----------|-------|---|------------------|------|--------|------|
| 1090.5925  | 1090.5095   | -0.083  | -76   | 1315       | 1323     | IPEITMSKR           |           |       |   | Oxidation (M)[6] |      | Mascot |      |
| 1109.4818  | 1109.4674   | -0.0144 | -13   | 1087       | 1097     | SHSTSSSSSSR         |           |       |   |                  |      | Mascot |      |
| 1118.6238  | 1118.4894   | -0.1344 | -120  | 1209       | 1219     | KICADGALLSK         |           |       |   |                  |      | Mascot |      |
| 1173.6262  | 1173.6045   | -0.0217 | -18   | 1022       | 1031     | LEFEVQVGPR          |           |       |   |                  |      | Mascot |      |
| 1173.6262  | 1173.6045   | -0.0217 | -18   | 1022       | 1031     | LEFEVQVGPR          | 78        | 100   |   |                  |      | Mascot |      |
| 1193.6083  | 1193.5941   | -0.0142 | -12   | 828        | 837      | LESMTLDQLK          |           |       |   | Oxidation (M)[4] |      | Mascot |      |
| 1977.1855  | 1976.9142   | -0.2713 | -137  | 505        | 523      | TAANALPIKVQVDAILALR |           |       |   |                  |      | Mascot |      |
| 1977.1855  | 1976.9142   | -0.2713 | -137  | 505        | 523      | TAANALPIKVQVDAILALR |           |       |   |                  |      | Mascot |      |
| 1999.0243  | 1998.9027   | -0.1216 | -61   | 1014       | 1031     | AEGPSVERLEFEVQVGPR  |           |       |   |                  |      | Mascot |      |

15 vitellogenin 5 [Danio rerio] gi|68448530 148868 8.77 2 78 99.926 78 100

#### Peptide Information

|    | Calc. Mass                                       | Obsrv. Mass | ± da    | ± ppm | Start Seq.   | End Sequence Seq. | Ion Score | C. I. % | Modification     | Rank  | Result Type |
|----|--------------------------------------------------|-------------|---------|-------|--------------|-------------------|-----------|---------|------------------|-------|-------------|
|    | 1090.5925                                        | 1090.5095   | -0.083  | -76   | 1319         | 1327 IPEITMSKR    |           |         | Oxidation (M)[6] |       | Mascot      |
|    | 1173.6262                                        | 1173.6045   | -0.0217 | -18   | 1022         | 1031 LEFEVQVGPR   |           |         |                  |       | Mascot      |
|    | 1173.6262                                        | 1173.6045   | -0.0217 | -18   | 1022         | 1031 LEFEVQVGPR   | 78        | 100     |                  |       | Mascot      |
| 16 | PREDICTED: zinc finger protein 729 [Danio rerio] |             |         |       | gi 326678104 | 141499.3          | 9.06      | 29      | 62               | 97.06 |             |

#### Peptide Information

|  | Calc. Mass | Obsrv. Mass | ± da    | ± ppm | Start Seq. | End Sequence Seq.     | Ion Score | C. I. % | Modification                               | Rank | Result Type |
|--|------------|-------------|---------|-------|------------|-----------------------|-----------|---------|--------------------------------------------|------|-------------|
|  | 850.4603   | 850.5274    | 0.0671  | 79    | 574        | 580 GVFLMQR           |           |         |                                            |      | Mascot      |
|  | 882.4501   | 882.5476    | 0.0975  | 110   | 126        | 132 CDKTFLR           |           |         |                                            |      | Mascot      |
|  | 989.5751   | 989.5548    | -0.0203 | -21   | 1170       | 1177 AHLRVHTR         |           |         |                                            |      | Mascot      |
|  | 989.5751   | 989.5548    | -0.0203 | -21   | 1170       | 1177 AHLRVHTR         |           |         |                                            |      | Mascot      |
|  | 995.3491   | 995.498     | 0.1489  | 150   | 931        | 937 CSHCEMR           |           |         | Carbamidomethyl (C)[1,4], Oxidation (M)[6] |      | Mascot      |
|  | 996.5109   | 996.5501    | 0.0392  | 39    | 441        | 449 SFATQSSLR         |           |         |                                            |      | Mascot      |
|  | 1003.6159  | 1003.532    | -0.0839 | -84   | 138        | 145 IHLRVHTK          |           |         |                                            |      | Mascot      |
|  | 1003.6159  | 1003.532    | -0.0839 | -84   | 138        | 145 IHLRVHTK          |           |         |                                            |      | Mascot      |
|  | 1037.5132  | 1037.5089   | -0.0043 | -4    | 22         | 29 HCLQLHMR           |           |         |                                            |      | Mascot      |
|  | 1045.4731  | 1045.5438   | 0.0707  | 68    | 288        | 296 QHTSANEMK         |           |         |                                            |      | Mascot      |
|  | 1096.5568  | 1096.5802   | 0.0234  | 21    | 279        | 287 HMKIHTGEK         |           |         | Oxidation (M)[2]                           |      | Mascot      |
|  | 1107.5695  | 1107.5178   | -0.0517 | -47   | 622        | 630 SFRQSAHFK         |           |         |                                            |      | Mascot      |
|  | 1109.41    | 1109.4674   | 0.0574  | 52    | 900        | 908 EFMCFACDK         |           |         | Oxidation (M)[3]                           |      | Mascot      |
|  | 1112.5443  | 1112.5265   | -0.0178 | -16   | 737        | 746 QSGTLNAHER        |           |         |                                            |      | Mascot      |
|  | 1118.4791  | 1118.4894   | 0.0103  | 9     | 584        | 593 KCFTCTQCGK        |           |         |                                            |      | Mascot      |
|  | 1165.4764  | 1165.5636   | 0.0872  | 75    | 491        | 499 CSYCDKSFR         |           |         | Carbamidomethyl (C)[1]                     |      | Mascot      |
|  | 1194.6201  | 1194.5868   | -0.0333 | -28   | 273        | 281 WSHLQKHK          |           |         |                                            |      | Mascot      |
|  | 1277.642   | 1277.6868   | 0.0448  | 35    | 360        | 369 SKQSLQFHMR        |           |         | Oxidation (M)[9]                           |      | Mascot      |
|  | 1300.6024  | 1300.569    | -0.0334 | -26   | 788        | 799 SVTCDVCGKNFK      |           |         |                                            |      | Mascot      |
|  | 1305.6699  | 1305.7136   | 0.0437  | 33    | 269        | 278 SYTRWSHLQK        |           |         |                                            |      | Mascot      |
|  | 1308.5533  | 1308.6348   | 0.0815  | 62    | 987        | 996 CSFCIMTFSR        |           |         | Carbamidomethyl (C)[1,4]                   |      | Mascot      |
|  | 1308.5533  | 1308.6348   | 0.0815  | 62    | 987        | 996 CSFCIMTFSR        |           |         | Carbamidomethyl (C)[1,4]                   |      | Mascot      |
|  | 1316.5796  | 1316.5417   | -0.0379 | -29   | 847        | 856 CDQCSKMFik        |           |         | Carbamidomethyl (C)[1,4]                   |      | Mascot      |
|  | 1357.6239  | 1357.6906   | 0.0667  | 49    | 788        | 799 SVTCDVCGKNFK      |           |         | Carbamidomethyl (C)[4]                     |      | Mascot      |
|  | 1383.5715  | 1383.6626   | 0.0911  | 66    | 931        | 940 CSHCEMRFT         |           |         | Carbamidomethyl (C)[1,4]                   |      | Mascot      |
|  | 1673.7233  | 1673.8759   | 0.1526  | 91    | 697        | 709 EHMCFECQKTFVR     |           |         | Oxidation (M)[3]                           |      | Mascot      |
|  | 1976.8259  | 1976.9142   | 0.0883  | 45    | 288        | 304 QHTSANEMKMSDPEPCR |           |         | Oxidation (M)[8]                           |      | Mascot      |

|           |           |         |    |      |      |                               |                                                |        |
|-----------|-----------|---------|----|------|------|-------------------------------|------------------------------------------------|--------|
| 1976.8259 | 1976.9142 | 0.0883  | 45 | 288  | 304  | QHTSANEMKMSDPEPCR             | Oxidation (M)[8]                               | Mascot |
| 1998.916  | 1998.9027 | -0.0133 | -7 | 1034 | 1049 | IHTGEKPYQCSYCEKR              | Carbamidomethyl (C)[10]                        | Mascot |
| 2282.999  | 2283.1355 | 0.1365  | 60 | 1058 | 1076 | THEMSHTGEKPFKCAFC<br>EK       | Carbamidomethyl (C)[14], Oxidation (M)[4]      | Mascot |
| 2284.0168 | 2284.1343 | 0.1175  | 51 | 716  | 733  | HQMIHTGEKPYRCSHCD<br>K        | Carbamidomethyl (C)[13,16]                     | Mascot |
| 2367.1543 | 2367.2139 | 0.0596  | 25 | 775  | 796  | THTGLSHTLHVSKSVTCD<br>VCGK    | Carbamidomethyl (C)[17]                        | Mascot |
| 2872.311  | 2872.343  | 0.032   | 11 | 22   | 44   | HCLQLHMRIHTGEKPYTC<br>TECGK   | Carbamidomethyl (C)[2,18,21], Oxidation (M)[7] | Mascot |
| 2888.3276 | 2888.3442 | 0.0166  | 6  | 1086 | 1110 | AHMRIHIGDKPYSCSYCE<br>STFSLSR |                                                | Mascot |

17 PREDICTED: transformation/transcription domain-associated protein [Danio rerio] gi|326672350 433471.2 8.52 33 60 95.34

#### Peptide Information

| Calc. Mass | Obsrv. Mass | ± da    | ± ppm | Start Seq. | End Sequence Seq. | Ion Score    | C. I. % | Modification           | Rank | Result Type |
|------------|-------------|---------|-------|------------|-------------------|--------------|---------|------------------------|------|-------------|
| 882.5155   | 882.5476    | 0.0321  | 36    | 2182       | 2189              | AVHSLLSR     |         |                        |      | Mascot      |
| 995.5342   | 995.498     | -0.0362 | -36   | 112        | 119               | NILSVMFR     |         | Oxidation (M)[6]       |      | Mascot      |
| 1003.4553  | 1003.532    | 0.0767  | 76    | 3311       | 3318              | CYSVAFEK     |         | Carbamidomethyl (C)[1] |      | Mascot      |
| 1003.4553  | 1003.532    | 0.0767  | 76    | 3311       | 3318              | CYSVAFEK     |         | Carbamidomethyl (C)[1] |      | Mascot      |
| 1037.5448  | 1037.5089   | -0.0359 | -35   | 3084       | 3092              | GMFLAQINK    |         | Oxidation (M)[2]       |      | Mascot      |
| 1045.5095  | 1045.5438   | 0.0343  | 33    | 3604       | 3612              | EVQGNMVPR    |         | Oxidation (M)[6]       |      | Mascot      |
| 1096.5858  | 1096.5802   | -0.0056 | -5    | 3590       | 3599              | GTQASHQVLR   |         |                        |      | Mascot      |
| 1103.5223  | 1103.6367   | 0.1144  | 104   | 2371       | 2378              | MMTYIEKR     |         | Oxidation (M)[1,2]     |      | Mascot      |
| 1109.566   | 1109.4674   | -0.0986 | -89   | 548        | 557               | TITWGITSCK   |         |                        |      | Mascot      |
| 1165.5817  | 1165.5636   | -0.0181 | -16   | 606        | 615               | VANCQTVRMK   |         | Oxidation (M)[9]       |      | Mascot      |
| 1165.5817  | 1165.7239   | 0.1422  | 122   | 606        | 615               | VANCQTVRMK   |         | Oxidation (M)[9]       |      | Mascot      |
| 1173.5795  | 1173.6045   | 0.025   | 21    | 1696       | 1704              | FLCNMTFLK    |         | Carbamidomethyl (C)[3] |      | Mascot      |
| 1173.5795  | 1173.6045   | 0.025   | 21    | 1696       | 1704              | FLCNMTFLK    |         | Carbamidomethyl (C)[3] |      | Mascot      |
| 1193.5337  | 1193.5941   | 0.0604  | 51    | 3264       | 3272              | CSRIMHMQR    |         | Oxidation (M)[5,7]     |      | Mascot      |
| 1194.5573  | 1194.5868   | 0.0295  | 25    | 1653       | 1662              | KDNMAATNWK   |         | Oxidation (M)[4]       |      | Mascot      |
| 1234.7054  | 1234.656    | -0.0494 | -40   | 986        | 995               | WIPNVIISHR   |         |                        |      | Mascot      |
| 1234.7405  | 1234.656    | -0.0845 | -68   | 574        | 583               | ETQIYIKLVK   | 6       | 0                      |      | Mascot      |
| 1308.5646  | 1308.6348   | 0.0702  | 54    | 1452       | 1461              | FCDQMMQHLLR  |         |                        |      | Mascot      |
| 1308.6212  | 1308.6348   | 0.0136  | 10    | 2020       | 2031              | GMSVDSAQDVKR |         | Oxidation (M)[2]       |      | Mascot      |
| 1316.5536  | 1316.5417   | -0.0119 | -9    | 2248       | 2259              | SACSNSSYIDR  |         |                        |      | Mascot      |
| 1323.7168  | 1323.6461   | -0.0707 | -53   | 1226       | 1236              | SFHLVTHDLVR  |         |                        |      | Mascot      |
| 1340.5544  | 1340.6548   | 0.1004  | 75    | 1452       | 1461              | FCDQMMQHLLR  |         | Oxidation (M)[5,6]     |      | Mascot      |
| 1357.6859  | 1357.6906   | 0.0047  | 3     | 871        | 882               | NPAETISHVAYR |         |                        |      | Mascot      |

|           |           |         |     |      |      |                               |                          |        |
|-----------|-----------|---------|-----|------|------|-------------------------------|--------------------------|--------|
| 1365.5861 | 1365.6183 | 0.0322  | 24  | 1452 | 1461 | FCDQMMQHRLR                   | Carbamidomethyl (C)[2]   | Mascot |
| 1388.7202 | 1388.6914 | -0.0288 | -21 | 2930 | 2941 | NTSLHDMKTVVK                  | Oxidation (M)[7]         | Mascot |
| 1434.7079 | 1434.7445 | 0.0366  | 26  | 2466 | 2477 | QCTELLAVCER                   | Carbamidomethyl (C)[2]   | Mascot |
| 1434.7079 | 1434.7445 | 0.0366  | 26  | 2466 | 2477 | QCTELLAVCER                   | Carbamidomethyl (C)[2]   | Mascot |
| 1475.8217 | 1475.73   | -0.0917 | -62 | 1963 | 1975 | LGFTPSVTIEQRK                 |                          | Mascot |
| 1493.7126 | 1493.7084 | -0.0042 | -3  | 1311 | 1322 | LFTMDLNVMEHK                  | Oxidation (M)[4]         | Mascot |
| 1493.7126 | 1493.7084 | -0.0042 | -3  | 1311 | 1322 | LFTMDLNVMEHK                  | Oxidation (M)[4]         | Mascot |
| 1596.7548 | 1596.7397 | -0.0151 | -9  | 2348 | 2362 | NSGNPMATNQVPNPR               |                          | Mascot |
| 1596.7548 | 1596.7397 | -0.0151 | -9  | 2348 | 2362 | NSGNPMATNQVPNPR               |                          | Mascot |
| 1638.8958 | 1638.8273 | -0.0685 | -42 | 443  | 455  | DILMRMLEVFVLK                 | Oxidation (M)[4,6]       | Mascot |
| 1673.8639 | 1673.8759 | 0.012   | 7   | 3799 | 3814 | VNTLVAAANSLDNLCR              |                          | Mascot |
| 1976.9819 | 1976.9142 | -0.0677 | -34 | 2836 | 2852 | EALVQVELSCPKEMAWK             | 5 0 Oxidation (M)[14]    | Mascot |
| 1976.9819 | 1976.9142 | -0.0677 | -34 | 2836 | 2852 | EALVQVELSCPKEMAWK             | Oxidation (M)[14]        | Mascot |
| 1998.941  | 1998.9027 | -0.0383 | -19 | 2550 | 2566 | EQAERDAGNQLHMLTNR             | Oxidation (M)[13]        | Mascot |
| 2211.0745 | 2211.0671 | -0.0074 | -3  | 1075 | 1094 | GMDPLVLIDAIACMAYEE<br>K       | Oxidation (M)[2]         | Mascot |
| 2283.0981 | 2283.1355 | 0.0374  | 16  | 3617 | 3634 | EWALHTFPNATDYWTFR<br>K        |                          | Mascot |
| 2284.1384 | 2284.1343 | -0.0041 | -2  | 1175 | 1196 | ALLFVMMDLTGEVSNGA<br>VAMAK    | Oxidation (M)[6]         | Mascot |
| 2367.2312 | 2367.2139 | -0.0173 | -7  | 1844 | 1864 | TCVDPACKYSGHLLLAHII<br>AK     | Carbamidomethyl (C)[2,7] | Mascot |
| 2872.5024 | 2872.343  | -0.1594 | -55 | 581  | 605  | LVKYAMQALDIYQVQIAG<br>NGQTYIR | Oxidation (M)[6]         | Mascot |

18 histone cluster 1, H4-like [Danio rerio] gi|115495857 11344.3 11.36 3 59 94.891 47 99.428

#### Peptide Information

| Calc. Mass | Obsrv. Mass | ± da    | ± ppm | Start Seq. | End Sequence Seq. | Ion Score | C. I. % | Modification | Rank | Result | Type   |
|------------|-------------|---------|-------|------------|-------------------|-----------|---------|--------------|------|--------|--------|
| 989.5778   | 989.5548    | -0.023  | -23   | 61         | 68 VFLENVIR       | 47        | 99.428  |              |      |        | Mascot |
| 989.5778   | 989.5548    | -0.023  | -23   | 61         | 68 VFLENVIR       |           |         |              |      |        | Mascot |
| 1180.6208  | 1180.5898   | -0.031  | -26   | 47         | 56 ISGLIYEETR     |           |         |              |      |        | Mascot |
| 1325.7535  | 1325.7267   | -0.0268 | -20   | 25         | 36 DNIQGITKPAIR   |           |         |              |      |        | Mascot |

19 PREDICTED: histone H4-like [Danio rerio] gi|326674617 11654.6 11.61 3 59 94.65 47 99.428

#### Peptide Information

| Calc. Mass | Obsrv. Mass | ± da   | ± ppm | Start Seq. | End Sequence Seq. | Ion Score | C. I. % | Modification | Rank | Result | Type   |
|------------|-------------|--------|-------|------------|-------------------|-----------|---------|--------------|------|--------|--------|
| 989.5778   | 989.5548    | -0.023 | -23   | 61         | 68 VFLENVIR       | 47        | 99.428  |              |      |        | Mascot |
| 989.5778   | 989.5548    | -0.023 | -23   | 61         | 68 VFLENVIR       |           |         |              |      |        | Mascot |
| 1180.6208  | 1180.5898   | -0.031 | -26   | 47         | 56 ISGLIYEETR     |           |         |              |      |        | Mascot |

1325.7535 1325.7267 -0.0268 -20 25 36 DNIQGITKPAIR Mascot

20 CTTNBP2 N-terminal-like protein [Danio rerio] gi|116517238 65830.4 6.2 12 46 0

Peptide Information

| Calc. Mass | Obsrv. Mass | ± da    | ± ppm | Start Seq. | End Seq. | Sequence                  | Ion Score | C. I. % | Modification                               | Rank | Result Type |
|------------|-------------|---------|-------|------------|----------|---------------------------|-----------|---------|--------------------------------------------|------|-------------|
| 996.5836   | 996.5501    | -0.0335 | -34   | 520        | 529      | SPGILSPGIR                |           |         |                                            |      | Mascot      |
| 1045.5411  | 1045.5438   | 0.0027  | 3     | 130        | 138      | VIADLEEEK                 |           |         |                                            |      | Mascot      |
| 1103.5004  | 1103.6367   | 0.1363  | 124   | 352        | 360      | EPEFPAEER                 |           |         |                                            |      | Mascot      |
| 1107.631   | 1107.5178   | -0.1132 | -102  | 539        | 548      | FHSPVPVPAKK               |           |         |                                            |      | Mascot      |
| 1112.6786  | 1112.5265   | -0.1521 | -137  | 116        | 125      | LLKQLAAAER                |           |         |                                            |      | Mascot      |
| 1179.5319  | 1179.58     | 0.0481  | 41    | 104        | 113      | LVMAHCTNMK                |           |         | Oxidation (M)[3,9]                         |      | Mascot      |
| 1179.5319  | 1179.58     | 0.0481  | 41    | 104        | 113      | LVMAHCTNMK                |           |         | Oxidation (M)[3,9]                         |      | Mascot      |
| 1201.6284  | 1201.5876   | -0.0408 | -34   | 247        | 256      | AQQIEARTER                |           |         |                                            |      | Mascot      |
| 1320.5663  | 1320.5581   | -0.0082 | -6    | 79         | 90       | DSELSQAQDDGR              |           |         |                                            |      | Mascot      |
| 1493.6909  | 1493.7084   | 0.0175  | 12    | 104        | 115      | LVMAHCTNMKEK              |           |         | Carbamidomethyl (C)[6], Oxidation (M)[3,9] |      | Mascot      |
| 1493.6909  | 1493.7084   | 0.0175  | 12    | 104        | 115      | LVMAHCTNMKEK              |           |         | Carbamidomethyl (C)[6], Oxidation (M)[3,9] |      | Mascot      |
| 1707.749   | 1707.7418   | -0.0072 | -4    | 142        | 157      | AQDAAAGDDITDMLER          |           |         | Oxidation (M)[13]                          |      | Mascot      |
| 1976.8978  | 1976.9142   | 0.0164  | 8     | 142        | 159      | AQDAAAGDDITDMLERE<br>R    |           |         |                                            |      | Mascot      |
| 1976.8978  | 1976.9142   | 0.0164  | 8     | 142        | 159      | AQDAAAGDDITDMLERE<br>R    |           |         |                                            |      | Mascot      |
| 1994.1029  | 1993.9376   | -0.1653 | -83   | 509        | 529      | NLAAASSPTGKSPGILSP<br>GIR |           |         |                                            |      | Mascot      |

21 novel protein [Danio rerio] gi|169146109 64501.6 6.3 12 45 0

Peptide Information

| Calc. Mass | Obsrv. Mass | ± da    | ± ppm | Start Seq. | End Seq. | Sequence     | Ion Score | C. I. % | Modification                               | Rank | Result Type |
|------------|-------------|---------|-------|------------|----------|--------------|-----------|---------|--------------------------------------------|------|-------------|
| 996.5836   | 996.5501    | -0.0335 | -34   | 508        | 517      | SPGILSPGIR   |           |         |                                            |      | Mascot      |
| 1045.5411  | 1045.5438   | 0.0027  | 3     | 118        | 126      | VIADLEEEK    |           |         |                                            |      | Mascot      |
| 1103.5004  | 1103.6367   | 0.1363  | 124   | 340        | 348      | EPEFPAEER    |           |         |                                            |      | Mascot      |
| 1107.631   | 1107.5178   | -0.1132 | -102  | 527        | 536      | FHSPVPVPAKK  |           |         |                                            |      | Mascot      |
| 1112.6786  | 1112.5265   | -0.1521 | -137  | 104        | 113      | LLKQLAAAER   |           |         |                                            |      | Mascot      |
| 1179.5319  | 1179.58     | 0.0481  | 41    | 92         | 101      | LVMAHCTNMK   |           |         | Oxidation (M)[3,9]                         |      | Mascot      |
| 1179.5319  | 1179.58     | 0.0481  | 41    | 92         | 101      | LVMAHCTNMK   |           |         | Oxidation (M)[3,9]                         |      | Mascot      |
| 1201.6284  | 1201.5876   | -0.0408 | -34   | 235        | 244      | AQQIEARTER   |           |         |                                            |      | Mascot      |
| 1320.5663  | 1320.5581   | -0.0082 | -6    | 67         | 78       | DSELSQAQDDGR |           |         |                                            |      | Mascot      |
| 1493.6909  | 1493.7084   | 0.0175  | 12    | 92         | 103      | LVMAHCTNMKEK |           |         | Carbamidomethyl (C)[6], Oxidation (M)[3,9] |      | Mascot      |

|    |                                                                      |           |         |     |     |              |                          |      |   |    |   |                                            |        |
|----|----------------------------------------------------------------------|-----------|---------|-----|-----|--------------|--------------------------|------|---|----|---|--------------------------------------------|--------|
|    | 1493.6909                                                            | 1493.7084 | 0.0175  | 12  | 92  | 103          | LVMAHCTNMKEK             |      |   |    |   | Carbamidomethyl (C)[6], Oxidation (M)[3,9] | Mascot |
|    | 1707.749                                                             | 1707.7418 | -0.0072 | -4  | 130 | 145          | AQDAAAGDDITDMLER         |      |   |    |   | Oxidation (M)[13]                          | Mascot |
|    | 1976.8978                                                            | 1976.9142 | 0.0164  | 8   | 130 | 147          | AQDAAAGDDITDMLERE<br>R   |      |   |    |   |                                            | Mascot |
|    | 1976.8978                                                            | 1976.9142 | 0.0164  | 8   | 130 | 147          | AQDAAAGDDITDMLERE<br>R   |      |   |    |   |                                            | Mascot |
|    | 1994.1029                                                            | 1993.9376 | -0.1653 | -83 | 497 | 517          | NLAAASPTGKSPGILSP<br>GIR |      |   |    |   |                                            | Mascot |
| 22 | eukaryotic translation initiation factor 4 gamma, 2<br>[Danio rerio] |           |         |     |     | gi 126567349 | 16939.9                  | 6.67 | 7 | 45 | 0 |                                            |        |

#### Peptide Information

| Calc. Mass | Obsrv. Mass | ± da    | ± ppm | Start Seq. | End Seq. | Sequence           | Ion Score | C. I. | % | Modification           | Rank | Result Type |
|------------|-------------|---------|-------|------------|----------|--------------------|-----------|-------|---|------------------------|------|-------------|
| 995.5996   | 995.498     | -0.1016 | -102  | 39         | 47       | TTKKPPPAR          |           |       |   |                        |      | Mascot      |
| 1003.5604  | 1003.532    | -0.0284 | -28   | 91         | 98       | IILCSLER           |           |       |   | Carbamidomethyl (C)[4] |      | Mascot      |
| 1003.5604  | 1003.532    | -0.0284 | -28   | 91         | 98       | IILCSLER           |           |       |   | Carbamidomethyl (C)[4] |      | Mascot      |
| 1194.63    | 1194.5868   | -0.0432 | -36   | 1          | 11       | TMIPPSAQPPR        |           |       |   |                        |      | Mascot      |
| 1277.7576  | 1277.6868   | -0.0708 | -55   | 42         | 52       | KPPPAR EELLK       |           |       |   |                        |      | Mascot      |
| 1388.8036  | 1388.6914   | -0.1122 | -81   | 139        | 150      | IEVDIPLVKSYL       |           |       |   |                        |      | Mascot      |
| 1596.7687  | 1596.7397   | -0.029  | -18   | 53         | 65       | MTENIVTEYLNNR      |           |       |   |                        |      | Mascot      |
| 1596.7687  | 1596.7397   | -0.029  | -18   | 53         | 65       | MTENIVTEYLNNR      |           |       |   |                        |      | Mascot      |
| 2225.1118  | 2225.0811   | -0.0307 | -14   | 48         | 65       | EELLKMTENIVTEYLNNR |           |       |   | Oxidation (M)[6]       |      | Mascot      |

23 endoribonuclease Dicer [Danio rerio] gi|238814324 210682.5 5.14 22 43 0

#### Peptide Information

| Calc. Mass | Obsrv. Mass | ± da    | ± ppm | Start Seq. | End Seq. | Sequence     | Ion Score | C. I. | % | Modification             | Rank | Result Type |
|------------|-------------|---------|-------|------------|----------|--------------|-----------|-------|---|--------------------------|------|-------------|
| 807.4247   | 807.3853    | -0.0394 | -49   | 280        | 286      | DPTFISK      |           |       |   |                          |      | Mascot      |
| 842.5458   | 842.4924    | -0.0534 | -63   | 567        | 573      | AIEKILR      |           |       |   |                          |      | Mascot      |
| 882.4791   | 882.5476    | 0.0685  | 78    | 70         | 76       | ELSHQIR      |           |       |   |                          |      | Mascot      |
| 1096.5568  | 1096.5802   | 0.0234  | 21    | 1332       | 1340     | KVSNCNL YR   |           |       |   |                          |      | Mascot      |
| 1103.5844  | 1103.6367   | 0.0523  | 47    | 1008       | 1016     | AKWESLQNK    |           |       |   |                          |      | Mascot      |
| 1109.5837  | 1109.4674   | -0.1163 | -105  | 555        | 563      | TKTFQEDLK    |           |       |   |                          |      | Mascot      |
| 1165.45    | 1165.5636   | 0.1136  | 97    | 200        | 208      | CDPCDLEEK    |           |       |   | Carbamidomethyl (C)[1,4] |      | Mascot      |
| 1180.5779  | 1180.5898   | 0.0119  | 10    | 477        | 485      | NKQMEVEFR    |           |       |   |                          |      | Mascot      |
| 1234.4979  | 1234.656    | 0.1581  | 128   | 1591       | 1600     | CMFEHPDAER   |           |       |   |                          |      | Mascot      |
| 1234.4979  | 1234.656    | 0.1581  | 128   | 1591       | 1600     | CMFEHPDAER   |           |       |   |                          |      | Mascot      |
| 1300.65    | 1300.569    | -0.081  | -62   | 663        | 674      | VPVTGPVMNCAR |           |       |   | Carbamidomethyl (C)[10]  |      | Mascot      |
| 1305.6243  | 1305.7136   | 0.0893  | 68    | 1799       | 1809     | ELLEMEPETAK  |           |       |   | Oxidation (M)[5]         |      | Mascot      |

|           |           |         |      |      |      |                          |                                           |        |
|-----------|-----------|---------|------|------|------|--------------------------|-------------------------------------------|--------|
| 1316.6449 | 1316.5417 | -0.1032 | -78  | 663  | 674  | VPVTGPVMNCAR             | Carbamidomethyl (C)[10], Oxidation (M)[8] | Mascot |
| 1320.7344 | 1320.5581 | -0.1763 | -133 | 1554 | 1565 | AAQLFLCSLGLK             | Carbamidomethyl (C)[7]                    | Mascot |
| 1323.6837 | 1323.6461 | -0.0376 | -28  | 1333 | 1343 | VSNCNLYRLGK              | Carbamidomethyl (C)[4]                    | Mascot |
| 1325.546  | 1325.7267 | 0.1807  | 136  | 1723 | 1733 | NEMQGMDSCLR              | Oxidation (M)[3]                          | Mascot |
| 1340.6917 | 1340.6548 | -0.0369 | -28  | 1854 | 1865 | SLKANQPQVQNN             |                                           | Mascot |
| 1357.7838 | 1357.6906 | -0.0932 | -69  | 651  | 662  | STLFLPINSPLR             |                                           | Mascot |
| 1358.6191 | 1358.6842 | 0.0651  | 48   | 639  | 650  | CKTVEMNTGGYR             |                                           | Mascot |
| 1638.7107 | 1638.8273 | 0.1166  | 71   | 174  | 187  | EIMKICEGPCSCPR           | Carbamidomethyl (C)[6], Oxidation (M)[3]  | Mascot |
| 1976.9634 | 1976.9142 | -0.0492 | -25  | 1799 | 1815 | ELLEMEPETAKFSPAER        |                                           | Mascot |
| 1976.9634 | 1976.9142 | -0.0492 | -25  | 1799 | 1815 | ELLEMEPETAKFSPAER        |                                           | Mascot |
| 2128.1406 | 2127.9717 | -0.1689 | -79  | 294  | 313  | AVLTVLGPWCADKAAGI<br>MVR | Carbamidomethyl (C)[10]                   | Mascot |
| 2211.1379 | 2211.0671 | -0.0708 | -32  | 155  | 173  | INLLVFDECHLAITGHPYR      |                                           | Mascot |
| 2284.2998 | 2284.1343 | -0.1655 | -72  | 1017 | 1036 | QILVPELCAIHIPASLWR<br>K  |                                           | Mascot |

24 novel protein similar to vertebrate EPH receptor B2 (EPHB2) (zgc:112296) [Danio rerio] gi|122891188 110778.1 5.33 9 42 0

#### Peptide Information

| Calc. Mass | Obsrv. Mass | ± da    | ± ppm | Start Seq. | End Seq. | Sequence                  | Ion Score | C. I. % | Modification           | Rank | Result Type |
|------------|-------------|---------|-------|------------|----------|---------------------------|-----------|---------|------------------------|------|-------------|
| 989.5374   | 989.5548    | 0.0174  | 18    | 491        | 499      | SQTNTAVIR                 | 14        | 0       |                        |      | Mascot      |
| 989.5374   | 989.5548    | 0.0174  | 18    | 491        | 499      | SQTNTAVIR                 |           |         |                        |      | Mascot      |
| 1033.4917  | 1033.4958   | 0.0041  | 4     | 289        | 297      | CLQCPINSR                 |           |         |                        |      | Mascot      |
| 1090.5132  | 1090.5095   | -0.0037 | -3    | 289        | 297      | CLQCPINSR                 |           |         | Carbamidomethyl (C)[1] |      | Mascot      |
| 1107.5649  | 1107.5178   | -0.0471 | -43   | 970        | 978      | ILNSVQMMR                 |           |         | Oxidation (M)[7]       |      | Mascot      |
| 1179.6805  | 1179.58     | -0.1005 | -85   | 650        | 659      | EMFVAIKTLK                |           |         |                        |      | Mascot      |
| 1179.6805  | 1179.58     | -0.1005 | -85   | 650        | 659      | EMFVAIKTLK                |           |         |                        |      | Mascot      |
| 1234.6215  | 1234.656    | 0.0345  | 28    | 795        | 804      | WTAPEAIQYR                |           |         |                        |      | Mascot      |
| 1234.6215  | 1234.656    | 0.0345  | 28    | 795        | 804      | WTAPEAIQYR                | 12        | 0       |                        |      | Mascot      |
| 1323.6473  | 1323.6461   | -0.0012 | -1    | 95         | 105      | FSVRDCSSIPR               |           |         | Carbamidomethyl (C)[6] |      | Mascot      |
| 2127.9666  | 2127.9717   | 0.0051  | 2     | 61         | 77       | TYQVCNVFDANQNNWV<br>R     |           |         | Carbamidomethyl (C)[5] |      | Mascot      |
| 2225.0518  | 2225.0811   | 0.0293  | 13    | 175        | 194      | NGFYLAFAQDYGGCMSLI<br>AVR |           |         |                        |      | Mascot      |
| 2367.1465  | 2367.2139   | 0.0674  | 28    | 970        | 989      | ILNSVQMMRAQMNQIQS<br>VEV  |           |         | Oxidation (M)[7,8,12]  |      | Mascot      |

25 Gfap protein [Danio rerio] gi|124504410 51101 5.34 11 42 0

#### Peptide Information

| Calc. Mass | Obsrv. Mass | ± da | ± ppm | Start Seq. | End Seq. | Sequence | Ion Score | C. I. % | Modification | Rank | Result Type |
|------------|-------------|------|-------|------------|----------|----------|-----------|---------|--------------|------|-------------|
|------------|-------------|------|-------|------------|----------|----------|-----------|---------|--------------|------|-------------|

|                     |                                                                              |            |             |         |       |            |              |                            |           |       |                        |   |      |        |      |  |        |
|---------------------|------------------------------------------------------------------------------|------------|-------------|---------|-------|------------|--------------|----------------------------|-----------|-------|------------------------|---|------|--------|------|--|--------|
|                     |                                                                              | 850.4265   | 850.5274    | 0.1009  | 119   | 434        | 440          | ESTTERK                    |           |       |                        |   |      |        |      |  | Mascot |
|                     |                                                                              | 1090.531   | 1090.5095   | -0.0215 | -20   | 320        | 327          | QLREMEER                   |           |       |                        |   |      |        |      |  | Mascot |
|                     |                                                                              | 1096.4762  | 1096.5802   | 0.104   | 95    | 82         | 90           | VEMMGLNDR                  |           |       | Oxidation (M)[3,4]     |   |      |        |      |  | Mascot |
|                     |                                                                              | 1112.6099  | 1112.5265   | -0.0834 | -75   | 91         | 99           | FASYIEKVR                  |           |       |                        |   |      |        |      |  | Mascot |
|                     |                                                                              | 1118.5762  | 1118.4894   | -0.0868 | -78   | 342        | 350          | LEDEIQMLK                  |           |       |                        |   |      |        |      |  | Mascot |
|                     |                                                                              | 1277.71    | 1277.6868   | -0.0232 | -18   | 368        | 378          | LALDIEIATYR                |           |       |                        |   |      |        |      |  | Mascot |
|                     |                                                                              | 1308.6543  | 1308.6348   | -0.0195 | -15   | 270        | 281          | SKFADLTDAANR               |           |       |                        |   |      |        |      |  | Mascot |
|                     |                                                                              | 1308.6543  | 1308.6348   | -0.0195 | -15   | 270        | 281          | SKFADLTDAANR               |           |       |                        |   |      |        |      |  | Mascot |
|                     |                                                                              | 1335.6288  | 1335.6609   | 0.0321  | 24    | 174        | 184          | QEAENNLNTR                 |           |       |                        |   |      |        |      |  | Mascot |
|                     |                                                                              | 1434.756   | 1434.7445   | -0.0115 | -8    | 28         | 40           | HSTGRSLHSSPR               |           |       |                        |   |      |        |      |  | Mascot |
|                     |                                                                              | 1434.756   | 1434.7445   | -0.0115 | -8    | 28         | 40           | HSTGRSLHSSPR               |           |       |                        |   |      |        |      |  | Mascot |
|                     |                                                                              | 1475.7522  | 1475.73     | -0.0222 | -15   | 299        | 311          | QIQGLTCDLESLR              |           |       |                        |   |      |        |      |  | Mascot |
|                     |                                                                              | 2366.9653  | 2367.2139   | 0.2486  | 105   | 251        | 269          | AQFEAMANSNMQETEE<br>WYR    |           |       | Oxidation (M)[6,11]    |   |      |        |      |  | Mascot |
| 26                  | PREDICTED: tRNA-dihydrouridine synthase 2-like<br>[Danio rerio]              |            |             |         |       |            | gi 292628574 | 56676.6                    | 6.04      | 12    | 42                     | 0 |      |        |      |  |        |
| Peptide Information |                                                                              |            |             |         |       |            |              |                            |           |       |                        |   |      |        |      |  |        |
|                     |                                                                              | Calc. Mass | Obsrv. Mass | ± da    | ± ppm | Start Seq. | End Seq.     | Sequence                   | Ion Score | C. I. | % Modification         |   | Rank | Result | Type |  |        |
|                     |                                                                              | 842.473    | 842.4924    | 0.0194  | 23    | 436        | 443          | TLGLPEGR                   |           |       |                        |   |      |        |      |  | Mascot |
|                     |                                                                              | 989.5447   | 989.5548    | 0.0101  | 10    | 152        | 160          | GISKPVTK                   |           |       | Carbamidomethyl (C)[8] |   |      |        |      |  | Mascot |
|                     |                                                                              | 989.5447   | 989.5548    | 0.0101  | 10    | 152        | 160          | GISKPVTK                   |           |       | Carbamidomethyl (C)[8] |   |      |        |      |  | Mascot |
|                     |                                                                              | 1045.4628  | 1045.5438   | 0.081   | 77    | 288        | 295          | YCLCQMLR                   |           |       | Oxidation (M)[6]       |   |      |        |      |  | Mascot |
|                     |                                                                              | 1051.6007  | 1051.6914   | 0.0907  | 86    | 180        | 190          | TGVAIAIVHGR                |           |       |                        |   |      |        |      |  | Mascot |
|                     |                                                                              | 1103.5626  | 1103.6367   | 0.0741  | 67    | 494        | 504          | VVNGVCGQTAR                |           |       |                        |   |      |        |      |  | Mascot |
|                     |                                                                              | 1112.5007  | 1112.5265   | 0.0258  | 23    | 279        | 287          | YDNNPFNTK                  |           |       |                        |   |      |        |      |  | Mascot |
|                     |                                                                              | 1194.5724  | 1194.5868   | 0.0144  | 12    | 249        | 258          | AAMWNPSVFR                 |           |       | Oxidation (M)[3]       |   |      |        |      |  | Mascot |
|                     |                                                                              | 1201.7085  | 1201.5876   | -0.1209 | -101  | 152        | 162          | GISKPVTKIR                 |           |       |                        |   |      |        |      |  | Mascot |
|                     |                                                                              | 1277.6041  | 1277.6868   | 0.0827  | 65    | 129        | 141          | GGMGSALLSDPEK              |           |       | Oxidation (M)[3]       |   |      |        |      |  | Mascot |
|                     |                                                                              | 1300.5959  | 1300.569    | -0.0269 | -21   | 288        | 297          | YCLCQMLRDR                 |           |       |                        |   |      |        |      |  | Mascot |
|                     |                                                                              | 1316.5908  | 1316.5417   | -0.0491 | -37   | 288        | 297          | YCLCQMLRDR                 |           |       | Oxidation (M)[6]       |   |      |        |      |  | Mascot |
|                     |                                                                              | 1357.6173  | 1357.6906   | 0.0733  | 54    | 288        | 297          | YCLCQMLRDR                 |           |       | Carbamidomethyl (C)[2] |   |      |        |      |  | Mascot |
|                     |                                                                              | 1365.6467  | 1365.6183   | -0.0284 | -21   | 89         | 100          | VVFQMGTDAPER               |           |       | Oxidation (M)[5]       |   |      |        |      |  | Mascot |
|                     |                                                                              | 2384.1484  | 2383.9133   | -0.2351 | -99   | 237        | 258          | ESTGASSVMLARAAMWN<br>PSVFR |           |       | Oxidation (M)[9]       |   |      |        |      |  | Mascot |
| 27                  | solute carrier family 27 (fatty acid transporter), member 6<br>[Danio rerio] |            |             |         |       |            | gi 116517266 | 52964.1                    | 8.67      | 11    | 42                     | 0 |      |        |      |  |        |



| Peptide Information |                                                     |         |       |            |                              |           |       |                        |      |             |
|---------------------|-----------------------------------------------------|---------|-------|------------|------------------------------|-----------|-------|------------------------|------|-------------|
| Calc. Mass          | Obsrv. Mass                                         | ± da    | ± ppm | Start Seq. | End Sequence Seq.            | Ion Score | C. I. | % Modification         | Rank | Result Type |
| 850.4669            | 850.5274                                            | 0.0605  | 71    | 94         | 100 LFQDTVK                  |           |       |                        |      | Mascot      |
| 989.6141            | 989.5548                                            | -0.0593 | -60   | 447        | 454 ILRDVFK                  |           |       |                        |      | Mascot      |
| 989.6141            | 989.5548                                            | -0.0593 | -60   | 447        | 454 ILRDVFK                  |           |       |                        |      | Mascot      |
| 1033.4269           | 1033.4958                                           | 0.0689  | 67    | 407        | 414 DHNGFCQR                 |           |       | Carbamidomethyl (C)[6] |      | Mascot      |
| 1103.5383           | 1103.6367                                           | 0.0984  | 89    | 21         | 28 LCFPYFWK                  |           |       |                        |      | Mascot      |
| 1112.6099           | 1112.5265                                           | -0.0834 | -75   | 39         | 47 YGARLEIYK                 |           |       |                        |      | Mascot      |
| 1180.7048           | 1180.5898                                           | -0.115  | -97   | 232        | 242 AAVITHLQSLK              |           |       |                        |      | Mascot      |
| 1300.7107           | 1300.569                                            | -0.1417 | -109  | 196        | 207 IEKSSQEPIAAK             |           |       |                        |      | Mascot      |
| 1358.7214           | 1358.6842                                           | -0.0372 | -27   | 376        | 387 IGAVGRSNFFYK             |           |       |                        |      | Mascot      |
| 1388.6488           | 1388.6914                                           | 0.0426  | 31    | 407        | 417 DHNGFCQRVQK              |           |       | Carbamidomethyl (C)[6] |      | Mascot      |
| 1434.7773           | 1434.7445                                           | -0.0328 | -23   | 125        | 137 LGCALAFLNTNIK            |           |       | Carbamidomethyl (C)[3] |      | Mascot      |
| 1434.7773           | 1434.7445                                           | -0.0328 | -23   | 125        | 137 LGCALAFLNTNIK            |           |       | Carbamidomethyl (C)[3] |      | Mascot      |
| 2366.9968           | 2367.2139                                           | 0.2171  | 92    | 450        | 470 DVFVKGDYFNTGDLMA<br>EDED |           |       | Oxidation (M)[16]      |      | Mascot      |
| 28                  | DNA replication licensing factor Mcm5 [Danio rerio] |         |       |            | gi 22347793                  | 79099.5   | 6.88  | 13                     | 41   | 0 8 0       |

| Peptide Information |             |         |       |            |                        |           |       |                  |      |             |
|---------------------|-------------|---------|-------|------------|------------------------|-----------|-------|------------------|------|-------------|
| Calc. Mass          | Obsrv. Mass | ± da    | ± ppm | Start Seq. | End Sequence Seq.      | Ion Score | C. I. | % Modification   | Rank | Result Type |
| 995.5421            | 995.498     | -0.0441 | -44   | 38         | 44 EFLRQFR             |           |       |                  |      | Mascot      |
| 1033.5636           | 1033.4958   | -0.0678 | -66   | 140        | 148 SLKSEQVSR          |           |       |                  |      | Mascot      |
| 1037.4801           | 1037.5089   | 0.0288  | 28    | 169        | 177 VCLQCRGCR          |           |       |                  |      | Mascot      |
| 1045.6              | 1045.5438   | -0.0562 | -54   | 143        | 151 SEQVSRLVK          |           |       |                  |      | Mascot      |
| 1107.5979           | 1107.5178   | -0.0801 | -72   | 354        | 364 AIACLLFGGSR        |           |       |                  |      | Mascot      |
| 1173.6045           | 1173.6045   | 0       | 0     | 572        | 583 CGPRLSAAAAEK       |           |       |                  |      | Mascot      |
| 1173.6045           | 1173.6045   | 0       | 0     | 572        | 583 CGPRLSAAAAEK       |           |       |                  |      | Mascot      |
| 1365.6896           | 1365.6183   | -0.0713 | -52   | 340        | 352 SLAPSIYGSDDLK      |           |       |                  |      | Mascot      |
| 1434.7086           | 1434.7445   | 0.0359  | 25    | 208        | 219 CPVDPYFIIPDR       |           |       |                  |      | Mascot      |
| 1434.7086           | 1434.7445   | 0.0359  | 25    | 208        | 219 CPVDPYFIIPDR       | 8         |       | 0                |      | Mascot      |
| 1493.7845           | 1493.7084   | -0.0761 | -51   | 340        | 353 SLAPSIYGSDDLKK     |           |       |                  |      | Mascot      |
| 1493.7845           | 1493.7084   | -0.0761 | -51   | 340        | 353 SLAPSIYGSDDLKK     |           |       |                  |      | Mascot      |
| 1638.7401           | 1638.8273   | 0.0872  | 53    | 524        | 536 DHHDQQRDMTLAR      |           |       | Oxidation (M)[9] |      | Mascot      |
| 1977.0076           | 1976.9142   | -0.0934 | -47   | 685        | 702 FAIGSQVSEHSIIQDFAK |           |       |                  |      | Mascot      |
| 1977.0076           | 1976.9142   | -0.0934 | -47   | 685        | 702 FAIGSQVSEHSIIQDFAK |           |       |                  |      | Mascot      |

|           |           |         |     |     |     |                          |        |
|-----------|-----------|---------|-----|-----|-----|--------------------------|--------|
| 2233.1611 | 2233.0374 | -0.1237 | -55 | 685 | 704 | FAIGSQVSEHSIIQDFAKQ<br>K | Mascot |
| 2284.1238 | 2284.1343 | 0.0105  | 5   | 454 | 473 | EDDRVAIHEAMEQQTISI<br>AK | Mascot |

29 PREDICTED: ankyrin repeat domain-containing protein gi|326669621 312386 6.8 25 41 0  
11 [Danio rerio]

Peptide Information

| Calc. Mass | Obsrv. Mass | ± da    | ± ppm | Start Seq. | End Seq. | Sequence                       | Ion Score | C. I. % Modification   | Rank | Result Type |
|------------|-------------|---------|-------|------------|----------|--------------------------------|-----------|------------------------|------|-------------|
| 850.4516   | 850.5274    | 0.0758  | 89    | 511        | 518      | DSSTLSLK                       |           |                        |      | Mascot      |
| 882.4791   | 882.5476    | 0.0685  | 78    | 2605       | 2611     | LQHSIER                        |           |                        |      | Mascot      |
| 989.5625   | 989.5548    | -0.0077 | -8    | 1666       | 1675     | KTGSVDAALK                     |           |                        |      | Mascot      |
| 989.5625   | 989.5548    | -0.0077 | -8    | 1666       | 1675     | KTGSVDAALK                     |           |                        |      | Mascot      |
| 995.5198   | 995.498     | -0.0218 | -22   | 2689       | 2696     | MKTCLLMR                       |           |                        |      | Mascot      |
| 996.5472   | 996.5501    | 0.0029  | 3     | 434        | 442      | QPAPQTNIK                      |           |                        |      | Mascot      |
| 1003.557   | 1003.532    | -0.025  | -25   | 1824       | 1831     | RPLDVEFK                       |           |                        |      | Mascot      |
| 1003.557   | 1003.532    | -0.025  | -25   | 1824       | 1831     | RPLDVEFK                       |           |                        |      | Mascot      |
| 1033.5095  | 1033.4958   | -0.0137 | -13   | 2427       | 2435     | AQMLANQNK                      |           | Oxidation (M)[3]       |      | Mascot      |
| 1045.5636  | 1045.5438   | -0.0198 | -19   | 920        | 928      | RPEKETASK                      |           |                        |      | Mascot      |
| 1096.4476  | 1096.5802   | 0.1326  | 121   | 257        | 266      | YGGDPCQSNR                     |           |                        |      | Mascot      |
| 1103.5367  | 1103.6367   | 0.1     | 91    | 724        | 732      | SEDKDWPVK                      |           |                        |      | Mascot      |
| 1107.5251  | 1107.5178   | -0.0073 | -7    | 2001       | 2009     | KAWLECSDR                      |           |                        |      | Mascot      |
| 1118.6051  | 1118.4894   | -0.1157 | -103  | 1667       | 1677     | TGSVDAALKEK                    |           |                        |      | Mascot      |
| 1194.5306  | 1194.5868   | 0.0562  | 47    | 1017       | 1026     | DKPESETTCK                     |           | Carbamidomethyl (C)[9] |      | Mascot      |
| 1300.6743  | 1300.569    | -0.1053 | -81   | 187        | 198      | ELINEGADVNVK                   |           |                        |      | Mascot      |
| 1302.7263  | 1302.6896   | -0.0367 | -28   | 891        | 901      | LIVETVKEESR                    |           |                        |      | Mascot      |
| 1335.6548  | 1335.6609   | 0.0061  | 5     | 95         | 107      | SGLPFGMGMPGIR                  |           | Oxidation (M)[7]       |      | Mascot      |
| 1357.6958  | 1357.6906   | -0.0052 | -4    | 1065       | 1075     | NLDQEKEKPEK                    |           |                        |      | Mascot      |
| 1358.6985  | 1358.6842   | -0.0143 | -11   | 334        | 346      | GMDPPKSTTTPVK                  |           |                        |      | Mascot      |
| 1383.6387  | 1383.6626   | 0.0239  | 17    | 1343       | 1354     | NSEISLDSFTDR                   |           |                        |      | Mascot      |
| 1460.7227  | 1460.7727   | 0.05    | 34    | 690        | 702      | SLIVETESPSENR                  |           |                        |      | Mascot      |
| 1493.7271  | 1493.7084   | -0.0187 | -13   | 2674       | 2685     | QFISWIQDVDDK                   |           |                        |      | Mascot      |
| 1493.7271  | 1493.7084   | -0.0187 | -13   | 2674       | 2685     | QFISWIQDVDDK                   |           |                        |      | Mascot      |
| 1998.8597  | 1998.9027   | 0.043   | 22    | 1192       | 1208     | KDSTPDIDEMDNFQTDK              |           |                        |      | Mascot      |
| 2128.0186  | 2127.9717   | -0.0469 | -22   | 561        | 580      | TVSSPTMSDVSSLSDSV<br>RTR       |           | Oxidation (M)[7]       |      | Mascot      |
| 2225.084   | 2225.0811   | -0.0029 | -1    | 95         | 115      | SGLPFGMGMPGIRAGYP<br>LSER      |           | Oxidation (M)[7,9]     |      | Mascot      |
| 2872.3682  | 2872.343    | -0.0252 | -9    | 187        | 212      | ELINEGADVNVKDFAGW<br>TALHEACNR |           |                        |      | Mascot      |

30 DNA replication licensing factor MCM5 [Danio rerio] gi|46358340 81720 8.34 13 41 0 8 0

Peptide Information

| Calc. Mass | Obsrv. Mass | ± da    | ± ppm | Start Seq. | End Sequence Seq.            | Ion Score | C. I. % | Modification     | Rank | Result Type |
|------------|-------------|---------|-------|------------|------------------------------|-----------|---------|------------------|------|-------------|
| 995.5421   | 995.498     | -0.0441 | -44   | 38         | 44 EFLRQFR                   |           |         |                  |      | Mascot      |
| 1033.5636  | 1033.4958   | -0.0678 | -66   | 140        | 148 SLKSEQVSR                |           |         |                  |      | Mascot      |
| 1037.4801  | 1037.5089   | 0.0288  | 28    | 169        | 177 VCLQCRGCR                |           |         |                  |      | Mascot      |
| 1045.6     | 1045.5438   | -0.0562 | -54   | 143        | 151 SEQVSRLVK                |           |         |                  |      | Mascot      |
| 1107.5979  | 1107.5178   | -0.0801 | -72   | 354        | 364 AIACLLFGGSR              |           |         |                  |      | Mascot      |
| 1173.6045  | 1173.6045   | 0       | 0     | 572        | 583 CGPRLSAAAAEK             |           |         |                  |      | Mascot      |
| 1173.6045  | 1173.6045   | 0       | 0     | 572        | 583 CGPRLSAAAAEK             |           |         |                  |      | Mascot      |
| 1365.6896  | 1365.6183   | -0.0713 | -52   | 340        | 352 SLAPSIYGSDDLK            |           |         |                  |      | Mascot      |
| 1434.7086  | 1434.7445   | 0.0359  | 25    | 208        | 219 CPVDPYFIIPDR             |           |         |                  |      | Mascot      |
| 1434.7086  | 1434.7445   | 0.0359  | 25    | 208        | 219 CPVDPYFIIPDR             | 8         | 0       |                  |      | Mascot      |
| 1493.7845  | 1493.7084   | -0.0761 | -51   | 340        | 353 SLAPSIYGSDDLKK           |           |         |                  |      | Mascot      |
| 1493.7845  | 1493.7084   | -0.0761 | -51   | 340        | 353 SLAPSIYGSDDLKK           |           |         |                  |      | Mascot      |
| 1638.7401  | 1638.8273   | 0.0872  | 53    | 524        | 536 DHHDQQRDMTLAR            |           |         | Oxidation (M)[9] |      | Mascot      |
| 1977.0076  | 1976.9142   | -0.0934 | -47   | 685        | 702 FAIGSQVSEHSIIQDFAK       |           |         |                  |      | Mascot      |
| 1977.0076  | 1976.9142   | -0.0934 | -47   | 685        | 702 FAIGSQVSEHSIIQDFAK       |           |         |                  |      | Mascot      |
| 2233.1611  | 2233.0374   | -0.1237 | -55   | 685        | 704 FAIGSQVSEHSIIQDFAKQ<br>K |           |         |                  |      | Mascot      |
| 2284.1238  | 2284.1343   | 0.0105  | 5     | 454        | 473 EDDRVAIHEAMEQQTISI<br>AK |           |         |                  |      | Mascot      |

31 RecName: Full=Glial fibrillary acidic protein;  
Short=GFAP

gi|150383441 51218 5.34 11 41 0

Peptide Information

| Calc. Mass | Obsrv. Mass | ± da    | ± ppm | Start Seq. | End Sequence Seq. | Ion Score | C. I. % | Modification       | Rank | Result Type |
|------------|-------------|---------|-------|------------|-------------------|-----------|---------|--------------------|------|-------------|
| 850.4265   | 850.5274    | 0.1009  | 119   | 435        | 441 ESTTERK       |           |         |                    |      | Mascot      |
| 1090.531   | 1090.5095   | -0.0215 | -20   | 321        | 328 QLREMEER      |           |         |                    |      | Mascot      |
| 1096.4762  | 1096.5802   | 0.104   | 95    | 83         | 91 VEMMGLNDR      |           |         | Oxidation (M)[3,4] |      | Mascot      |
| 1112.6099  | 1112.5265   | -0.0834 | -75   | 92         | 100 FASYIEKVR     |           |         |                    |      | Mascot      |
| 1118.5762  | 1118.4894   | -0.0868 | -78   | 343        | 351 LEDEIQMLK     |           |         |                    |      | Mascot      |
| 1277.71    | 1277.6868   | -0.0232 | -18   | 369        | 379 LALDIEIATYR   |           |         |                    |      | Mascot      |
| 1308.6543  | 1308.6348   | -0.0195 | -15   | 271        | 282 SKFADLTDAANR  |           |         |                    |      | Mascot      |
| 1308.6543  | 1308.6348   | -0.0195 | -15   | 271        | 282 SKFADLTDAANR  |           |         |                    |      | Mascot      |
| 1335.6288  | 1335.6609   | 0.0321  | 24    | 175        | 185 QEAENNLNTR    |           |         |                    |      | Mascot      |

|           |           |         |     |     |     |                         |        |
|-----------|-----------|---------|-----|-----|-----|-------------------------|--------|
| 1434.756  | 1434.7445 | -0.0115 | -8  | 29  | 41  | HSTGRSLSHSSPR           | Mascot |
| 1434.756  | 1434.7445 | -0.0115 | -8  | 29  | 41  | HSTGRSLSHSSPR           | Mascot |
| 1475.7522 | 1475.73   | -0.0222 | -15 | 300 | 312 | QIQGLTCDLESLR           | Mascot |
| 2366.9653 | 2367.2139 | 0.2486  | 105 | 252 | 270 | AQFEAMANSNMQETEE<br>WYR | Mascot |

Oxidation (M)[6,11]

32 MCM5 minichromosome maintenance deficient 5 (S. cerevisiae) [Danio rerio] gi|27882312 81732.9 8.05 13 40 0 8 0

Peptide Information

| Calc. Mass | Obsrv. Mass | ± da    | ± ppm | Start Seq. | End Seq. | Sequence                 | Ion Score | C. I. % | Modification     | Rank | Result Type |
|------------|-------------|---------|-------|------------|----------|--------------------------|-----------|---------|------------------|------|-------------|
| 995.5421   | 995.498     | -0.0441 | -44   | 38         | 44       | EFLRQFR                  |           |         |                  |      | Mascot      |
| 1033.5636  | 1033.4958   | -0.0678 | -66   | 140        | 148      | SLKSEQVSR                |           |         |                  |      | Mascot      |
| 1037.4801  | 1037.5089   | 0.0288  | 28    | 169        | 177      | VCLQCRGCR                |           |         |                  |      | Mascot      |
| 1045.6     | 1045.5438   | -0.0562 | -54   | 143        | 151      | SEQVSRLVK                |           |         |                  |      | Mascot      |
| 1107.5979  | 1107.5178   | -0.0801 | -72   | 354        | 364      | AIACLLFGGSR              |           |         |                  |      | Mascot      |
| 1173.6045  | 1173.6045   | 0       | 0     | 572        | 583      | CGPRLSAAAAEK             |           |         |                  |      | Mascot      |
| 1173.6045  | 1173.6045   | 0       | 0     | 572        | 583      | CGPRLSAAAAEK             |           |         |                  |      | Mascot      |
| 1365.6896  | 1365.6183   | -0.0713 | -52   | 340        | 352      | SLAPSIYGSDDLK            |           |         |                  |      | Mascot      |
| 1434.7086  | 1434.7445   | 0.0359  | 25    | 208        | 219      | CPVDPYFIIPDR             |           |         |                  |      | Mascot      |
| 1434.7086  | 1434.7445   | 0.0359  | 25    | 208        | 219      | CPVDPYFIIPDR             | 8         | 0       |                  |      | Mascot      |
| 1493.7845  | 1493.7084   | -0.0761 | -51   | 340        | 353      | SLAPSIYGSDDLKK           |           |         |                  |      | Mascot      |
| 1493.7845  | 1493.7084   | -0.0761 | -51   | 340        | 353      | SLAPSIYGSDDLKK           |           |         |                  |      | Mascot      |
| 1638.7401  | 1638.8273   | 0.0872  | 53    | 524        | 536      | DHHDQQRDMTLAR            |           |         | Oxidation (M)[9] |      | Mascot      |
| 1977.0076  | 1976.9142   | -0.0934 | -47   | 685        | 702      | FAIGSQVSEHSIIQDFAK       |           |         |                  |      | Mascot      |
| 1977.0076  | 1976.9142   | -0.0934 | -47   | 685        | 702      | FAIGSQVSEHSIIQDFAK       |           |         |                  |      | Mascot      |
| 2233.1611  | 2233.0374   | -0.1237 | -55   | 685        | 704      | FAIGSQVSEHSIIQDFAKQ<br>K |           |         |                  |      | Mascot      |
| 2284.1238  | 2284.1343   | 0.0105  | 5     | 454        | 473      | EDDRVAIHEAMEQQTISI<br>AK |           |         |                  |      | Mascot      |

33 PREDICTED: suppressor of tumorigenicity 14 protein-like [Danio rerio] gi|326679664 80911.3 8.4 15 40 0

Peptide Information

| Calc. Mass | Obsrv. Mass | ± da    | ± ppm | Start Seq. | End Seq. | Sequence  | Ion Score | C. I. % | Modification             | Rank | Result Type |
|------------|-------------|---------|-------|------------|----------|-----------|-----------|---------|--------------------------|------|-------------|
| 850.4893   | 850.5274    | 0.0381  | 45    | 129        | 136      | VPSGHVVR  |           |         |                          |      | Mascot      |
| 995.3896   | 995.498     | 0.1084  | 109   | 404        | 411      | CYHMC PNK |           |         |                          |      | Mascot      |
| 1037.4866  | 1037.5089   | 0.0223  | 21    | 450        | 458      | CASGKCLNK |           |         | Carbamidomethyl (C)[1,6] |      | Mascot      |
| 1090.5752  | 1090.5095   | -0.0657 | -60   | 707        | 715      | QNRPGVYTR |           |         |                          |      | Mascot      |

|           |           |         |     |     |     |                   |  |  |  |                          |  |  |        |
|-----------|-----------|---------|-----|-----|-----|-------------------|--|--|--|--------------------------|--|--|--------|
| 1109.4966 | 1109.4674 | -0.0292 | -26 | 417 | 427 | ASVCDGIVDCK       |  |  |  |                          |  |  | Mascot |
| 1118.5259 | 1118.4894 | -0.0365 | -33 | 289 | 298 | LCNPIGDSSR        |  |  |  | Carbamidomethyl (C)[2]   |  |  | Mascot |
| 1173.5292 | 1173.6045 | 0.0753  | 64  | 546 | 554 | SWRAYMGMR         |  |  |  | Oxidation (M)[6]         |  |  | Mascot |
| 1173.5292 | 1173.6045 | 0.0753  | 64  | 546 | 554 | SWRAYMGMR         |  |  |  | Oxidation (M)[6]         |  |  | Mascot |
| 1194.5055 | 1194.5868 | 0.0813  | 68  | 468 | 477 | DCKDGSDELK        |  |  |  | Carbamidomethyl (C)[2]   |  |  | Mascot |
| 1300.6896 | 1300.569  | -0.1206 | -93 | 20  | 31  | FSAPPAIAEELR      |  |  |  |                          |  |  | Mascot |
| 1302.6146 | 1302.6896 | 0.075   | 58  | 438 | 449 | AFSKGCSPSSFK      |  |  |  | Carbamidomethyl (C)[6]   |  |  | Mascot |
| 1305.5529 | 1305.7136 | 0.1607  | 123 | 53  | 61  | NEERYMYER         |  |  |  | Oxidation (M)[7]         |  |  | Mascot |
| 1383.5264 | 1383.6626 | 0.1362  | 98  | 351 | 362 | VCDGDKDCSDGR      |  |  |  | Carbamidomethyl (C)[2,8] |  |  | Mascot |
| 1475.7385 | 1475.73   | -0.0085 | -6  | 172 | 185 | WCGPLSGTSPVMK     |  |  |  |                          |  |  | Mascot |
| 1596.7153 | 1596.7397 | 0.0244  | 15  | 404 | 416 | CYHMCPNKLQK       |  |  |  | Oxidation (M)[4]         |  |  | Mascot |
| 1596.7153 | 1596.7397 | 0.0244  | 15  | 404 | 416 | CYHMCPNKLQK       |  |  |  | Oxidation (M)[4]         |  |  | Mascot |
| 1976.9688 | 1976.9142 | -0.0546 | -28 | 320 | 336 | GFYLIYRAFSPESACPR |  |  |  |                          |  |  | Mascot |
| 1976.9688 | 1976.9142 | -0.0546 | -28 | 320 | 336 | GFYLIYRAFSPESACPR |  |  |  |                          |  |  | Mascot |

34 39S ribosomal protein L17, mitochondrial [Danio rerio] gi|52219200 19088.2 9.81 8 40 0

#### Peptide Information

| Calc. Mass | Obsrv. Mass | ± da    | ± ppm | Start Seq. | End Seq. | Sequence           | Ion Score | C. I. | % | Modification      | Rank | Result Type |
|------------|-------------|---------|-------|------------|----------|--------------------|-----------|-------|---|-------------------|------|-------------|
| 850.5032   | 850.5274    | 0.0242  | 28    | 59         | 65       | LIDYAKK            |           |       |   |                   |      | Mascot      |
| 995.5229   | 995.498     | -0.0249 | -25   | 119        | 127      | AAMAVLEYK          |           |       |   |                   |      | Mascot      |
| 1037.4568  | 1037.5089   | 0.0521  | 50    | 158        | 166      | AQMATEKQD          |           |       |   | Oxidation (M)[3]  |      | Mascot      |
| 1179.6521  | 1179.58     | -0.0721 | -61   | 128        | 138      | GNPFPLNPVK         |           |       |   |                   |      | Mascot      |
| 1179.6521  | 1179.58     | -0.0721 | -61   | 128        | 138      | GNPFPLNPVK         |           |       |   |                   |      | Mascot      |
| 1180.5514  | 1180.5898   | 0.0384  | 33    | 155        | 164      | EEKAQMATEK         |           |       |   | Oxidation (M)[6]  |      | Mascot      |
| 1335.7532  | 1335.6609   | -0.0923 | -69   | 128        | 139      | GNPFPLNPVKR        |           |       |   |                   |      | Mascot      |
| 1638.8156  | 1638.8273   | 0.0117  | 7     | 114        | 127      | ENLDRAAMAVLEYK     |           |       |   | Oxidation (M)[8]  |      | Mascot      |
| 1998.9449  | 1998.9027   | -0.0422 | -21   | 97         | 113      | FENQTAGYTNNMARLPNR |           |       |   | Oxidation (M)[11] |      | Mascot      |

35 histone acetyltransferase type B catalytic subunit [Danio rerio] gi|52218998 47819.9 5.54 6 40 0 19 0

#### Peptide Information

| Calc. Mass | Obsrv. Mass | ± da    | ± ppm | Start Seq. | End Seq. | Sequence     | Ion Score | C. I. | % | Modification | Rank | Result Type |
|------------|-------------|---------|-------|------------|----------|--------------|-----------|-------|---|--------------|------|-------------|
| 989.6141   | 989.5548    | -0.0593 | -60   | 274        | 281      | LRDFVLVK     | 19        | 0     |   |              |      | Mascot      |
| 989.6141   | 989.5548    | -0.0593 | -60   | 274        | 281      | LRDFVLVK     |           |       |   |              |      | Mascot      |
| 1109.4966  | 1109.4674   | -0.0292 | -26   | 16         | 25       | CDTNEAICLK   |           |       |   |              |      | Mascot      |
| 1308.6868  | 1308.6348   | -0.052  | -40   | 282        | 293      | LCLTLPSFASEK |           |       |   |              |      | Mascot      |

|    |                                                               |           |         |     |              |          |                                |    |    |   |    |   |                        |  |  |  |  |        |
|----|---------------------------------------------------------------|-----------|---------|-----|--------------|----------|--------------------------------|----|----|---|----|---|------------------------|--|--|--|--|--------|
|    | 1308.6868                                                     | 1308.6348 | -0.052  | -40 | 282          | 293      | LCLTLPSFASEK                   |    |    |   |    |   |                        |  |  |  |  | Mascot |
|    | 1365.7083                                                     | 1365.6183 | -0.09   | -66 | 282          | 293      | LCLTLPSFASEK                   |    |    |   |    |   | Carbamidomethyl (C)[2] |  |  |  |  | Mascot |
|    | 1707.7908                                                     | 1707.7418 | -0.049  | -29 | 153          | 166      | VDISCPGFREYHER                 |    |    |   |    |   |                        |  |  |  |  | Mascot |
|    | 1976.9923                                                     | 1976.9142 | -0.0781 | -40 | 259          | 275      | VQDITAEDPSENYVKLR              |    |    |   |    |   |                        |  |  |  |  | Mascot |
|    | 1976.9923                                                     | 1976.9142 | -0.0781 | -40 | 259          | 275      | VQDITAEDPSENYVKLR              |    |    |   |    |   |                        |  |  |  |  | Mascot |
|    | 2888.3804                                                     | 2888.3442 | -0.0362 | -13 | 282          | 307      | LCLTLPSFASEKLSQGFS<br>EEMASEAR |    |    |   |    |   | Carbamidomethyl (C)[2] |  |  |  |  | Mascot |
| 36 | PREDICTED: hypothetical protein LOC100149090<br>[Danio rerio] |           |         |     | gi 189525019 | 121743.1 | 9.85                           | 16 | 40 | 0 | 14 | 0 |                        |  |  |  |  |        |

Peptide Information

| Calc. Mass | Obsrv. Mass | ± da    | ± ppm | Start Seq. | End Seq. | Sequence               | Ion Score | C. I. | % Modification         | Rank | Result Type |
|------------|-------------|---------|-------|------------|----------|------------------------|-----------|-------|------------------------|------|-------------|
| 882.4753   | 882.5476    | 0.0723  | 82    | 366        | 372      | MLESFKK                |           |       |                        |      | Mascot      |
| 1118.6238  | 1118.4894   | -0.1344 | -120  | 431        | 440      | MTDNLKVAVK             |           |       |                        |      | Mascot      |
| 1179.6116  | 1179.58     | -0.0316 | -27   | 853        | 863      | SGGFLNETKAR            |           |       |                        |      | Mascot      |
| 1179.6116  | 1179.58     | -0.0316 | -27   | 853        | 863      | SGGFLNETKAR            |           |       |                        |      | Mascot      |
| 1180.5269  | 1180.5898   | 0.0629  | 53    | 232        | 241      | EDHYFDGGLK             |           |       |                        |      | Mascot      |
| 1193.6234  | 1193.5941   | -0.0293 | -25   | 902        | 912      | LIDFGCGDLLK            |           |       |                        |      | Mascot      |
| 1201.4725  | 1201.5876   | 0.1151  | 96    | 967        | 976      | MNSSCWSSSR             |           |       | Carbamidomethyl (C)[5] |      | Mascot      |
| 1234.595   | 1234.656    | 0.061   | 49    | 298        | 307      | EESFVEEPLR             |           |       |                        |      | Mascot      |
| 1234.595   | 1234.656    | 0.061   | 49    | 298        | 307      | EESFVEEPLR             |           |       |                        |      | Mascot      |
| 1300.5891  | 1300.569    | -0.0201 | -15   | 285        | 293      | MYFDWRPNR              |           |       | Oxidation (M)[1]       |      | Mascot      |
| 1302.6801  | 1302.6896   | 0.0095  | 7     | 218        | 228      | RGEIFGEEPLR            |           |       |                        |      | Mascot      |
| 1308.6218  | 1308.6348   | 0.013   | 10    | 231        | 241      | KEDHYFDGGLK            |           |       |                        |      | Mascot      |
| 1308.6218  | 1308.6348   | 0.013   | 10    | 231        | 241      | KEDHYFDGGLK            |           |       |                        |      | Mascot      |
| 1320.5814  | 1320.5581   | -0.0233 | -18   | 271        | 281      | REEGFDEGPER            |           |       |                        |      | Mascot      |
| 1357.6594  | 1357.6906   | 0.0312  | 23    | 85         | 96       | IEDGLDEGPERK           |           |       |                        |      | Mascot      |
| 1358.6521  | 1358.6842   | 0.0321  | 24    | 202        | 211      | YEYLECLNRR             |           |       |                        |      | Mascot      |
| 1977.0396  | 1976.9142   | -0.1254 | -63   | 714        | 731      | NLLQPITVEMVSALSSMK     | 14        | 0     | Oxidation (M)[10]      |      | Mascot      |
| 1977.0396  | 1976.9142   | -0.1254 | -63   | 714        | 731      | NLLQPITVEMVSALSSMK     |           |       | Oxidation (M)[10]      |      | Mascot      |
| 2225.0955  | 2225.0811   | -0.0144 | -6    | 550        | 567      | NMRMTGNIDFVLLWTQN<br>R |           |       | Oxidation (M)[2]       |      | Mascot      |
| 2283.0056  | 2283.1355   | 0.1299  | 57    | 354        | 371      | EESVVEHPMWRMLESF<br>K  |           |       | Oxidation (M)[10,13]   |      | Mascot      |

|    |                             |  |  |  |              |         |      |   |    |   |  |  |  |  |  |  |  |  |
|----|-----------------------------|--|--|--|--------------|---------|------|---|----|---|--|--|--|--|--|--|--|--|
| 37 | novel protein [Danio rerio] |  |  |  | gi 169146110 | 25865.2 | 5.07 | 8 | 40 | 0 |  |  |  |  |  |  |  |  |
|----|-----------------------------|--|--|--|--------------|---------|------|---|----|---|--|--|--|--|--|--|--|--|

Peptide Information

| Calc. Mass | Obsrv. Mass | ± da | ± ppm | Start Seq. | End Seq. | Sequence | Ion Score | C. I. | % Modification | Rank | Result Type |
|------------|-------------|------|-------|------------|----------|----------|-----------|-------|----------------|------|-------------|
|------------|-------------|------|-------|------------|----------|----------|-----------|-------|----------------|------|-------------|

|           |           |         |      |     |     |                        |  |  |  |                                            |  |  |        |
|-----------|-----------|---------|------|-----|-----|------------------------|--|--|--|--------------------------------------------|--|--|--------|
| 1045.5411 | 1045.5438 | 0.0027  | 3    | 99  | 107 | VIADLEEEK              |  |  |  |                                            |  |  | Mascot |
| 1112.6786 | 1112.5265 | -0.1521 | -137 | 85  | 94  | LLKQLAAAEER            |  |  |  |                                            |  |  | Mascot |
| 1179.5319 | 1179.58   | 0.0481  | 41   | 73  | 82  | LVMAHCTNMK             |  |  |  | Oxidation (M)[3,9]                         |  |  | Mascot |
| 1179.5319 | 1179.58   | 0.0481  | 41   | 73  | 82  | LVMAHCTNMK             |  |  |  | Oxidation (M)[3,9]                         |  |  | Mascot |
| 1201.6284 | 1201.5876 | -0.0408 | -34  | 216 | 225 | AQQIEARTER             |  |  |  |                                            |  |  | Mascot |
| 1320.5663 | 1320.5581 | -0.0082 | -6   | 48  | 59  | DSELSQAQDDGR           |  |  |  |                                            |  |  | Mascot |
| 1493.6909 | 1493.7084 | 0.0175  | 12   | 73  | 84  | LVMAHCTNMKEK           |  |  |  | Carbamidomethyl (C)[6], Oxidation (M)[3,9] |  |  | Mascot |
| 1493.6909 | 1493.7084 | 0.0175  | 12   | 73  | 84  | LVMAHCTNMKEK           |  |  |  | Carbamidomethyl (C)[6], Oxidation (M)[3,9] |  |  | Mascot |
| 1707.749  | 1707.7418 | -0.0072 | -4   | 111 | 126 | AQDAAAGDDITDMLER       |  |  |  | Oxidation (M)[13]                          |  |  | Mascot |
| 1976.8978 | 1976.9142 | 0.0164  | 8    | 111 | 128 | AQDAAAGDDITDMLERE<br>R |  |  |  |                                            |  |  | Mascot |
| 1976.8978 | 1976.9142 | 0.0164  | 8    | 111 | 128 | AQDAAAGDDITDMLERE<br>R |  |  |  |                                            |  |  | Mascot |

38 PREDICTED: disco-interacting protein 2 homolog C [Danio rerio] gi|189536803 170745 7.39 16 40 0

#### Peptide Information

| Calc. Mass | Obsrv. Mass | ± da    | ± ppm | Start Seq. | End Seq. | Sequence           | Ion Score | C. I. % | Modification            | Rank | Result Type |
|------------|-------------|---------|-------|------------|----------|--------------------|-----------|---------|-------------------------|------|-------------|
| 807.4471   | 807.3853    | -0.0618 | -77   | 1285       | 1291     | DLGLHPR            |           |         |                         |      | Mascot      |
| 882.4501   | 882.5476    | 0.0975  | 110   | 581        | 587      | VCQYKGK            |           |         | Carbamidomethyl (C)[2]  |      | Mascot      |
| 996.4852   | 996.5501    | 0.0649  | 65    | 1014       | 1021     | IATMLMER           |           |         | Oxidation (M)[4,6]      |      | Mascot      |
| 1045.5887  | 1045.5438   | -0.0449 | -43   | 1242       | 1251     | GLGLQTESLK         |           |         |                         |      | Mascot      |
| 1096.5126  | 1096.5802   | 0.0676  | 62    | 793        | 802      | MDGLMVVSGR         |           |         | Oxidation (M)[1,5]      |      | Mascot      |
| 1103.6055  | 1103.6367   | 0.0312  | 28    | 504        | 514      | DGSVLGVTVTR        |           |         |                         |      | Mascot      |
| 1165.567   | 1165.5636   | -0.0034 | -3    | 1166       | 1174     | LQCELYPSR          |           |         | Carbamidomethyl (C)[3]  |      | Mascot      |
| 1165.567   | 1165.7239   | 0.1569  | 135   | 1166       | 1174     | LQCELYPSR          |           |         | Carbamidomethyl (C)[3]  |      | Mascot      |
| 1234.6022  | 1234.656    | 0.0538  | 44    | 1423       | 1433     | RTELTASGER         |           |         |                         |      | Mascot      |
| 1234.6022  | 1234.656    | 0.0538  | 44    | 1423       | 1433     | RTELTASGER         | 6         | 0       |                         |      | Mascot      |
| 1308.665   | 1308.6348   | -0.0302 | -23   | 1011       | 1021     | AEKIATMLMER        |           |         | Oxidation (M)[7]        |      | Mascot      |
| 1308.665   | 1308.6348   | -0.0302 | -23   | 1011       | 1021     | AEKIATMLMER        |           |         | Oxidation (M)[7]        |      | Mascot      |
| 1316.6917  | 1316.5417   | -0.15   | -114  | 605        | 615      | DQRDINLSSLR        |           |         |                         |      | Mascot      |
| 1493.7781  | 1493.7084   | -0.0697 | -47   | 1163       | 1174     | SIKLQCELYPSR       |           |         | Carbamidomethyl (C)[6]  |      | Mascot      |
| 1493.7781  | 1493.7084   | -0.0697 | -47   | 1163       | 1174     | SIKLQCELYPSR       |           |         | Carbamidomethyl (C)[6]  |      | Mascot      |
| 1596.7621  | 1596.7397   | -0.0224 | -14   | 1152       | 1165     | MSHTATSAFCRSIK     |           |         | Carbamidomethyl (C)[10] |      | Mascot      |
| 1596.7621  | 1596.7397   | -0.0224 | -14   | 1152       | 1165     | MSHTATSAFCRSIK     |           |         | Carbamidomethyl (C)[10] |      | Mascot      |
| 2128.0811  | 2127.9717   | -0.1094 | -51   | 1074       | 1092     | MIVEVSRSAVMTTQIISK |           |         | Oxidation (M)[1,12]     |      | Mascot      |
| 2211.1074  | 2211.0671   | -0.0403 | -18   | 676        | 695      | GVLSMQGLSYGVIRVDS  |           |         | Oxidation (M)[5]        |      | Mascot      |

|                     |                                                                                         |            |             |         |       |            |              |                                   |      |                                           |         |                        |                  |
|---------------------|-----------------------------------------------------------------------------------------|------------|-------------|---------|-------|------------|--------------|-----------------------------------|------|-------------------------------------------|---------|------------------------|------------------|
|                     |                                                                                         | 2283.092   | 2283.1355   | 0.0435  | 19    | 236        | 257          | EER<br>YGNAELMETGDGVPVSS<br>RVSAK |      | Oxidation (M)[7]                          |         | Mascot                 |                  |
|                     |                                                                                         | 2872.3645  | 2872.343    | -0.0215 | -7    | 616        | 641          | MLVVADGSNPWSISSCD<br>AFLNVFQSK    |      | Carbamidomethyl (C)[16]                   |         | Mascot                 |                  |
|                     |                                                                                         | 2888.3594  | 2888.3442   | -0.0152 | -5    | 616        | 641          | MLVVADGSNPWSISSCD<br>AFLNVFQSK    |      | Carbamidomethyl (C)[16], Oxidation (M)[1] |         | Mascot                 |                  |
| 39                  | PREDICTED: voltage-dependent L-type calcium channel subunit alpha-1F-like [Danio rerio] |            |             |         |       |            | gij326670278 | 229246.9                          | 5.61 | 1                                         | 27      | 39.78                  |                  |
| Peptide Information |                                                                                         |            |             |         |       |            |              |                                   |      |                                           |         |                        |                  |
|                     |                                                                                         | Calc. Mass | Obsrv. Mass | ± da    | ± ppm | Start Seq. | End Seq.     | Sequence                          |      | Ion Score                                 | C. I. % | Modification           | Rank Result Type |
|                     |                                                                                         | 1234.6976  | 1234.656    | -0.0416 | -34   | 913        | 923          | SVIQCVFVAIR                       |      | 27                                        | 39.78   |                        | 1 Mascot         |
| 40                  | Ccdc101 protein [Danio rerio]                                                           |            |             |         |       |            | gij201090170 | 33213                             | 8.21 | 1                                         | 26      | 25.228                 |                  |
| Peptide Information |                                                                                         |            |             |         |       |            |              |                                   |      |                                           |         |                        |                  |
|                     |                                                                                         | Calc. Mass | Obsrv. Mass | ± da    | ± ppm | Start Seq. | End Seq.     | Sequence                          |      | Ion Score                                 | C. I. % | Modification           | Rank Result Type |
|                     |                                                                                         | 1234.5732  | 1234.656    | 0.0828  | 67    | 68         | 78           | ADAEAECSILR                       |      | 26                                        | 25.228  | Carbamidomethyl (C)[7] | 2 Mascot         |
| 41                  | PREDICTED: guanine nucleotide-binding protein subunit alpha-15-like [Danio rerio]       |            |             |         |       |            | gij326678594 | 43175                             | 8.7  | 1                                         | 25      | 0                      |                  |
| Peptide Information |                                                                                         |            |             |         |       |            |              |                                   |      |                                           |         |                        |                  |
|                     |                                                                                         | Calc. Mass | Obsrv. Mass | ± da    | ± ppm | Start Seq. | End Seq.     | Sequence                          |      | Ion Score                                 | C. I. % | Modification           | Rank Result Type |
|                     |                                                                                         | 1234.6902  | 1234.656    | -0.0342 | -28   | 128        | 137          | LQRSYVEAIR                        |      | 25                                        | 0       |                        | 3 Mascot         |
| 42                  | PREDICTED: zinc finger protein 618 [Danio rerio]                                        |            |             |         |       |            | gij326668299 | 93606.8                           | 7.47 | 1                                         | 22      | 0                      |                  |
| Peptide Information |                                                                                         |            |             |         |       |            |              |                                   |      |                                           |         |                        |                  |
|                     |                                                                                         | Calc. Mass | Obsrv. Mass | ± da    | ± ppm | Start Seq. | End Seq.     | Sequence                          |      | Ion Score                                 | C. I. % | Modification           | Rank Result Type |
|                     |                                                                                         | 1234.6348  | 1234.656    | 0.0212  | 17    | 395        | 406          | EALGDMSSLALK                      |      | 22                                        | 0       |                        | 4 Mascot         |
| 43                  | PREDICTED: tyrosine-protein kinase Mer [Danio rerio]                                    |            |             |         |       |            | gij326673150 | 133520.5                          | 5.76 | 1                                         | 21      | 0                      |                  |
| Peptide Information |                                                                                         |            |             |         |       |            |              |                                   |      |                                           |         |                        |                  |
|                     |                                                                                         | Calc. Mass | Obsrv. Mass | ± da    | ± ppm | Start Seq. | End Seq.     | Sequence                          |      | Ion Score                                 | C. I. % | Modification           | Rank Result Type |
|                     |                                                                                         | 989.5447   | 989.5548    | 0.0101  | 10    | 667        | 674          | LQDVMIVR                          |      | 21                                        | 0       | Oxidation (M)[5]       | 2 Mascot         |
| 44                  | tubulin--tyrosine ligase-like protein 12 [Danio rerio]                                  |            |             |         |       |            | gij41053788  | 73163.3                           | 4.98 | 1                                         | 20      | 0                      |                  |



| Peptide Information |                                                                                    |             |        |       |            |                    |          |           |         |                          |                  |
|---------------------|------------------------------------------------------------------------------------|-------------|--------|-------|------------|--------------------|----------|-----------|---------|--------------------------|------------------|
|                     | Calc. Mass                                                                         | Obsrv. Mass | ± da   | ± ppm | Start Seq. | End Sequence Seq.  |          | Ion Score | C. I. % | Modification             | Rank Result Type |
|                     | 1234.5546                                                                          | 1234.656    | 0.1014 | 82    | 2          | 12 QNGSVNTEEEK     |          | 20        | 0       |                          | 5 Mascot         |
| 45                  | LOC570454 protein [Danio rerio]                                                    |             |        |       |            | gi 156230358       | 81395.7  | 9.83      | 1       | 20                       | 0                |
| Peptide Information |                                                                                    |             |        |       |            |                    |          |           |         |                          |                  |
|                     | Calc. Mass                                                                         | Obsrv. Mass | ± da   | ± ppm | Start Seq. | End Sequence Seq.  |          | Ion Score | C. I. % | Modification             | Rank Result Type |
|                     | 1234.679                                                                           | 1234.656    | -0.023 | -19   | 547        | 556 KDLEFQSVLR     |          | 20        | 0       |                          | 6 Mascot         |
| 46                  | PREDICTED: retrotransposable element Tf2 155 kDa protein type 1-like [Danio rerio] |             |        |       |            | gi 326673727       | 159286.3 | 9.53      | 1       | 19                       | 0                |
| Peptide Information |                                                                                    |             |        |       |            |                    |          |           |         |                          |                  |
|                     | Calc. Mass                                                                         | Obsrv. Mass | ± da   | ± ppm | Start Seq. | End Sequence Seq.  |          | Ion Score | C. I. % | Modification             | Rank Result Type |
|                     | 1596.653                                                                           | 1596.7397   | 0.0867 | 54    | 837        | 849 LSSCECNYPHVGDR |          | 19        | 0       | Carbamidomethyl (C)[4,6] | 2 Mascot         |
| 47                  | PREDICTED: ankyrin repeat domain-containing protein 46-like [Danio rerio]          |             |        |       |            | gi 292625777       | 25074.7  | 5.92      | 1       | 19                       | 0                |
| Peptide Information |                                                                                    |             |        |       |            |                    |          |           |         |                          |                  |
|                     | Calc. Mass                                                                         | Obsrv. Mass | ± da   | ± ppm | Start Seq. | End Sequence Seq.  |          | Ion Score | C. I. % | Modification             | Rank Result Type |
|                     | 1434.7158                                                                          | 1434.7445   | 0.0287 | 20    | 30         | 41 RLLESGFDPNMR    |          | 19        | 0       |                          | 1 Mascot         |
| 48                  | PREDICTED: glucose-6-phosphate 1-dehydrogenase [Danio rerio]                       |             |        |       |            | gi 292626918       | 59657.3  | 6.39      | 1       | 19                       | 0                |
| Peptide Information |                                                                                    |             |        |       |            |                    |          |           |         |                          |                  |
|                     | Calc. Mass                                                                         | Obsrv. Mass | ± da   | ± ppm | Start Seq. | End Sequence Seq.  |          | Ion Score | C. I. % | Modification             | Rank Result Type |
|                     | 989.5261                                                                           | 989.5548    | 0.0287 | 29    | 81         | 89 SDLTVDAIR       |          | 19        | 0       |                          | 4 Mascot         |
| 49                  | RecName: Full=Protein misato homolog 1                                             |             |        |       |            | gi 123888190       | 64882.9  | 5.08      | 1       | 18                       | 0                |
| Peptide Information |                                                                                    |             |        |       |            |                    |          |           |         |                          |                  |
|                     | Calc. Mass                                                                         | Obsrv. Mass | ± da   | ± ppm | Start Seq. | End Sequence Seq.  |          | Ion Score | C. I. % | Modification             | Rank Result Type |
|                     | 1234.5732                                                                          | 1234.656    | 0.0828 | 67    | 406        | 416 SLSACPEISDR    |          | 18        | 0       | Carbamidomethyl (C)[5]   | 8 Mascot         |
| 50                  | rho-associated, coiled-coil containing protein kinase 2b [Danio rerio]             |             |        |       |            | gi 148226029       | 162077.2 | 5.8       | 1       | 16                       | 0                |

| Peptide Information      |                                              |               |            |            |                                  |               |                       |                        |                   |             |
|--------------------------|----------------------------------------------|---------------|------------|------------|----------------------------------|---------------|-----------------------|------------------------|-------------------|-------------|
| Calc. Mass               | Obsrv. Mass                                  | ± da          | ± ppm      | Start Seq. | End Sequence Seq.                | Ion Score     | C. I. %               | Modification           | Rank              | Result Type |
| 1003.5167                | 1003.532                                     | 0.0153        | 15         | 1102       | 1109 DSDIERLR                    | 18            | 0                     |                        | 1                 | Mascot      |
| Gel Idx/Pos 270/K22      |                                              |               |            |            | Instr./Gel Origin BA2060/110707A |               |                       | Process Status         |                   |             |
| Plate [#] Name [1] 31496 |                                              |               |            |            | Instrument Sample Name           |               |                       | Spectra                |                   |             |
| Analysis Succeeded       |                                              |               |            |            | 11                               |               |                       |                        |                   |             |
| Rank                     | Protein Name                                 | Accession No. | Protein MW | Protein PI | Pep. Count                       | Protein Score | Protein Score C. I. % | Total Ion Score        | Total Ion C. I. % |             |
| 1                        | hypothetical protein LOC678536 [Danio rerio] | gil160420306  | 148750.2   | 8.89       | 25                               | 786           | 100                   | 677                    | 100               |             |
| Peptide Information      |                                              |               |            |            |                                  |               |                       |                        |                   |             |
| Calc. Mass               | Obsrv. Mass                                  | ± da          | ± ppm      | Start Seq. | End Sequence Seq.                | Ion Score     | C. I. %               | Modification           | Rank              | Result Type |
| 821.4628                 | 821.4509                                     | -0.0119       | -14        | 545        | 551 ALHPEVR                      |               |                       |                        |                   | Mascot      |
| 890.5094                 | 890.4976                                     | -0.0118       | -13        | 425        | 432 FSTVPALR                     |               |                       |                        |                   | Mascot      |
| 1023.5105                | 1023.4974                                    | -0.0131       | -13        | 195        | 203 DVGLAYTER                    |               |                       |                        |                   | Mascot      |
| 1044.4528                | 1044.4392                                    | -0.0136       | -13        | 184        | 191 DLSHCQER                     |               |                       | Carbamidomethyl (C)[5] |                   | Mascot      |
| 1070.4861                | 1070.4707                                    | -0.0154       | -14        | 921        | 929 NIEDHSAER                    |               |                       |                        |                   | Mascot      |
| 1097.6677                | 1097.6544                                    | -0.0133       | -12        | 514        | 523 VQVDAILALR                   |               |                       |                        |                   | Mascot      |
| 1097.6677                | 1097.6544                                    | -0.0133       | -12        | 514        | 523 VQVDAILALR                   | 89            | 100                   |                        |                   | Mascot      |
| 1115.6935                | 1115.6783                                    | -0.0152       | -14        | 333        | 341 FVQLVQLLR                    | 71            | 99.998                |                        |                   | Mascot      |
| 1115.6935                | 1115.6783                                    | -0.0152       | -14        | 333        | 341 FVQLVQLLR                    |               |                       |                        |                   | Mascot      |
| 1121.599                 | 1121.5836                                    | -0.0154       | -14        | 348        | 356 IEAIWSQFK                    |               |                       |                        |                   | Mascot      |
| 1187.6631                | 1187.6013                                    | -0.0618       | -52        | 1057       | 1066 LREILDTEAK                  |               |                       |                        |                   | Mascot      |
| 1215.6005                | 1215.5856                                    | -0.0149       | -12        | 164        | 173 THYVINEDPK                   |               |                       |                        |                   | Mascot      |
| 1259.5797                | 1259.5645                                    | -0.0152       | -12        | 182        | 191 SKDLSHCQER                   |               |                       | Carbamidomethyl (C)[7] |                   | Mascot      |
| 1379.7351                | 1379.7249                                    | -0.0102       | -7         | 433        | 445 EVAMLGYGSLIAR                |               |                       |                        |                   | Mascot      |
| 1382.7889                | 1382.7667                                    | -0.0222       | -16        | 303        | 315 ISDAPAQIVEVLK                |               |                       |                        |                   | Mascot      |
| 1395.73                  | 1395.7166                                    | -0.0134       | -10        | 433        | 445 EVAMLGYGSLIAR                |               |                       | Oxidation (M)[4]       |                   | Mascot      |
| 1477.91                  | 1477.8926                                    | -0.0174       | -12        | 532        | 544 LVQPIALQLVLDR                |               |                       |                        |                   | Mascot      |
| 1477.91                  | 1477.8926                                    | -0.0174       | -12        | 532        | 544 LVQPIALQLVLDR                | 65            | 99.992                |                        |                   | Mascot      |
| 1515.7478                | 1515.7296                                    | -0.0182       | -12        | 733        | 745 VFGQEVAYVNFDK                |               |                       |                        |                   | Mascot      |
| 1608.838                 | 1608.8176                                    | -0.0204       | -13        | 668        | 683 AYLAGAAADVVEFGVR             |               |                       |                        |                   | Mascot      |
| 1608.838                 | 1608.8176                                    | -0.0204       | -13        | 668        | 683 AYLAGAAADVVEFGVR             | 138           | 100                   |                        |                   | Mascot      |
| 1666.8767                | 1666.8589                                    | -0.0178       | -11        | 483        | 498 VMGNAGHPSSLKPIMK             |               |                       |                        |                   | Mascot      |

|   |                              |           |         |     |             |     |                                 |      |        |                          |     |     |     |  |  |  |  |  |        |
|---|------------------------------|-----------|---------|-----|-------------|-----|---------------------------------|------|--------|--------------------------|-----|-----|-----|--|--|--|--|--|--------|
|   | 1695.8999                    | 1695.8778 | -0.0221 | -13 | 119         | 134 | VFAPAGVSPTVMNLHR                |      |        |                          |     |     |     |  |  |  |  |  | Mascot |
|   | 1699.9377                    | 1699.9154 | -0.0223 | -13 | 34          | 49  | YEALLLGGLPQEGLAR                |      |        |                          |     |     |     |  |  |  |  |  | Mascot |
|   | 1699.9377                    | 1699.9154 | -0.0223 | -13 | 34          | 49  | YEALLLGGLPQEGLAR                | 70   | 99.997 |                          |     |     |     |  |  |  |  |  | Mascot |
|   | 1711.8948                    | 1711.8741 | -0.0207 | -12 | 119         | 134 | VFAPAGVSPTVMNLHR                | 3    | 0      | Oxidation (M)[12]        |     |     |     |  |  |  |  |  | Mascot |
|   | 1711.8948                    | 1711.8741 | -0.0207 | -12 | 119         | 134 | VFAPAGVSPTVMNLHR                |      |        | Oxidation (M)[12]        |     |     |     |  |  |  |  |  | Mascot |
|   | 1751.9724                    | 1751.949  | -0.0234 | -13 | 746         | 761 | TIIEEAIPMTGPKPR                 |      |        |                          |     |     |     |  |  |  |  |  | Mascot |
|   | 1767.9673                    | 1767.9484 | -0.0189 | -11 | 746         | 761 | TIIEEAIPMTGPKPR                 |      |        | Oxidation (M)[9]         |     |     |     |  |  |  |  |  | Mascot |
|   | 1812.8877                    | 1812.8676 | -0.0201 | -11 | 72          | 86  | LMDPLLYEYAGTWPK                 |      |        | Oxidation (M)[2]         |     |     |     |  |  |  |  |  | Mascot |
|   | 1936.9181                    | 1936.8918 | -0.0263 | -14 | 147         | 163 | TQNIYELQEAGAQQVCR               | 142  | 100    | Carbamidomethyl (C)[16]  |     |     |     |  |  |  |  |  | Mascot |
|   | 1936.9181                    | 1936.8918 | -0.0263 | -14 | 147         | 163 | TQNIYELQEAGAQQVCR               |      |        | Carbamidomethyl (C)[16]  |     |     |     |  |  |  |  |  | Mascot |
|   | 1991.0959                    | 1991.0699 | -0.026  | -13 | 32          | 49  | YKYEALLLGGLPQEGLAR              | 106  | 100    |                          |     |     |     |  |  |  |  |  | Mascot |
|   | 1991.0959                    | 1991.0699 | -0.026  | -13 | 32          | 49  | YKYEALLLGGLPQEGLAR              |      |        |                          |     |     |     |  |  |  |  |  | Mascot |
|   | 2563.3765                    | 2563.3469 | -0.0296 | -12 | 897         | 920 | VEALPVDLPEHIASASFE<br>TLAVVR    |      |        |                          |     |     |     |  |  |  |  |  | Mascot |
|   | 2912.512                     | 2912.4717 | -0.0403 | -14 | 446         | 471 | HCIAVPTCPAELLRIPIHEI<br>ATEAVSK |      |        | Carbamidomethyl (C)[2,8] |     |     |     |  |  |  |  |  | Mascot |
| 2 | vitellogenin 1 [Danio rerio] |           |         |     | gi 94733730 |     | 149140.4                        | 8.74 | 26     | 582                      | 100 | 470 | 100 |  |  |  |  |  |        |

Peptide Information

|  | Calc. Mass | Obsrv. Mass | ± da    | ± ppm | Start Seq. | End Seq. | Sequence      | Ion Score | C. I.  | % Modification         | Rank | Result Type |
|--|------------|-------------|---------|-------|------------|----------|---------------|-----------|--------|------------------------|------|-------------|
|  | 821.4628   | 821.4509    | -0.0119 | -14   | 545        | 551      | ALHPEVR       |           |        |                        |      | Mascot      |
|  | 888.5301   | 888.5164    | -0.0137 | -15   | 425        | 432      | FATIPALR      |           |        |                        |      | Mascot      |
|  | 1023.5105  | 1023.4974   | -0.0131 | -13   | 195        | 203      | DVGLAYTER     |           |        |                        |      | Mascot      |
|  | 1044.4528  | 1044.4392   | -0.0136 | -13   | 184        | 191      | DLSHCQER      |           |        | Carbamidomethyl (C)[5] |      | Mascot      |
|  | 1070.4861  | 1070.4707   | -0.0154 | -14   | 921        | 929      | NIEDHSAER     |           |        |                        |      | Mascot      |
|  | 1097.6677  | 1097.6544   | -0.0133 | -12   | 514        | 523      | VQVDAILALR    |           |        |                        |      | Mascot      |
|  | 1097.6677  | 1097.6544   | -0.0133 | -12   | 514        | 523      | VQVDAILALR    | 89        | 100    |                        |      | Mascot      |
|  | 1115.6935  | 1115.6783   | -0.0152 | -14   | 333        | 341      | FVQLVQLLR     | 71        | 99.998 |                        |      | Mascot      |
|  | 1115.6935  | 1115.6783   | -0.0152 | -14   | 333        | 341      | FVQLVQLLR     |           |        |                        |      | Mascot      |
|  | 1121.599   | 1121.5836   | -0.0154 | -14   | 348        | 356      | IEAIWSQFK     |           |        |                        |      | Mascot      |
|  | 1187.6631  | 1187.6013   | -0.0618 | -52   | 1057       | 1066     | LREILDTEAK    |           |        |                        |      | Mascot      |
|  | 1215.6005  | 1215.5856   | -0.0149 | -12   | 164        | 173      | THYVINEDPK    |           |        |                        |      | Mascot      |
|  | 1259.5797  | 1259.5645   | -0.0152 | -12   | 182        | 191      | SKDLSHCQER    |           |        | Carbamidomethyl (C)[7] |      | Mascot      |
|  | 1379.7603  | 1379.7249   | -0.0354 | -26   | 433        | 445      | EVVMLGYGSLIAK |           |        |                        |      | Mascot      |
|  | 1382.7889  | 1382.7667   | -0.0222 | -16   | 303        | 315      | ISDAPAQIVEVLK |           |        |                        |      | Mascot      |
|  | 1395.7301  | 1395.7166   | -0.0135 | -10   | 192        | 203      | IMKDVGLAYTER  |           |        |                        |      | Mascot      |
|  | 1463.8944  | 1463.8763   | -0.0181 | -12   | 532        | 544      | LVQPVALQLVLDR |           |        |                        |      | Mascot      |
|  | 1463.8944  | 1463.8763   | -0.0181 | -12   | 532        | 544      | LVQPVALQLVLDR | 97        | 100    |                        |      | Mascot      |

|   |                                                                         |           |         |     |     |          |                                 |     |        |                                           |     |     |        |
|---|-------------------------------------------------------------------------|-----------|---------|-----|-----|----------|---------------------------------|-----|--------|-------------------------------------------|-----|-----|--------|
|   | 1515.7478                                                               | 1515.7296 | -0.0182 | -12 | 733 | 745      | VFGQEVAYVNFDK                   |     |        |                                           |     |     | Mascot |
|   | 1622.8536                                                               | 1622.832  | -0.0216 | -13 | 668 | 683      | AYLAGAAADVIEFGVR                | 144 | 100    |                                           |     |     | Mascot |
|   | 1622.8536                                                               | 1622.832  | -0.0216 | -13 | 668 | 683      | AYLAGAAADVIEFGVR                |     |        |                                           |     |     | Mascot |
|   | 1666.8767                                                               | 1666.8589 | -0.0178 | -11 | 483 | 498      | VMGNAGHPSSLKPIMK                |     |        |                                           |     |     | Mascot |
|   | 1695.8999                                                               | 1695.8778 | -0.0221 | -13 | 119 | 134      | VFAPAGVSPTVMNLHR                |     |        |                                           |     |     | Mascot |
|   | 1699.9047                                                               | 1699.9154 | 0.0107  | 6   | 597 | 614      | ITAPDMASVAGAANVAIK              |     |        |                                           |     |     | Mascot |
|   | 1699.9377                                                               | 1699.9154 | -0.0223 | -13 | 34  | 49       | YEALLLGGLPQEGLAR                | 70  | 99.997 |                                           |     |     | Mascot |
|   | 1711.8948                                                               | 1711.8741 | -0.0207 | -12 | 119 | 134      | VFAPAGVSPTVMNLHR                | 3   | 0      | Oxidation (M)[12]                         |     |     | Mascot |
|   | 1711.8948                                                               | 1711.8741 | -0.0207 | -12 | 119 | 134      | VFAPAGVSPTVMNLHR                |     |        | Oxidation (M)[12]                         |     |     | Mascot |
|   | 1723.9412                                                               | 1723.9097 | -0.0315 | -18 | 746 | 761      | TIIIEAIPMATGPKPR                |     |        |                                           |     |     | Mascot |
|   | 1739.936                                                                | 1739.9099 | -0.0261 | -15 | 746 | 761      | TIIIEAIPMATGPKPR                |     |        | Oxidation (M)[9]                          |     |     | Mascot |
|   | 1812.8877                                                               | 1812.8676 | -0.0201 | -11 | 72  | 86       | LMDPLLYEYAGTWPK                 |     |        | Oxidation (M)[2]                          |     |     | Mascot |
|   | 1954.8745                                                               | 1954.8512 | -0.0233 | -12 | 147 | 163      | TQNIYMQEAGAAGVCR                |     |        | Carbamidomethyl (C)[16]                   |     |     | Mascot |
|   | 1970.8695                                                               | 1970.8505 | -0.019  | -10 | 147 | 163      | TQNIYMQEAGAAGVCR                |     |        | Carbamidomethyl (C)[16], Oxidation (M)[7] |     |     | Mascot |
|   | 2627.3716                                                               | 2627.3389 | -0.0327 | -12 | 897 | 920      | VEALPVLPPEHIASASFET<br>YAVVR    |     |        |                                           |     |     | Mascot |
|   | 2938.5164                                                               | 2938.4805 | -0.0359 | -12 | 446 | 471      | YCVAVPTCPAELLRIPIHEI<br>ATEAISK |     |        | Carbamidomethyl (C)[2,8]                  |     |     | Mascot |
| 3 | novel protein similar to vitellogenin 1 (vg1) [Danio rerio] gi 94733734 |           |         |     |     | 149808.5 | 8.83                            | 24  | 566    | 100                                       | 469 | 100 |        |

### Peptide Information

| Calc. Mass | Obsrv. Mass | ± da    | ± ppm | Start Seq. | End Seq. | Sequence      | Ion Score | C. I.  | % Modification         | Rank | Result Type |
|------------|-------------|---------|-------|------------|----------|---------------|-----------|--------|------------------------|------|-------------|
| 821.4628   | 821.4509    | -0.0119 | -14   | 549        | 555      | ALHPEVR       |           |        |                        |      | Mascot      |
| 902.5458   | 902.5313    | -0.0145 | -16   | 429        | 436      | FVSIPALR      |           |        |                        |      | Mascot      |
| 1023.5105  | 1023.4974   | -0.0131 | -13   | 199        | 207      | DVGLAYTER     |           |        |                        |      | Mascot      |
| 1044.4528  | 1044.4392   | -0.0136 | -13   | 188        | 195      | DLSHCQER      |           |        | Carbamidomethyl (C)[5] |      | Mascot      |
| 1070.4861  | 1070.4707   | -0.0154 | -14   | 925        | 933      | NIEDHSAER     |           |        |                        |      | Mascot      |
| 1097.6677  | 1097.6544   | -0.0133 | -12   | 518        | 527      | VQVDAILALR    |           |        |                        |      | Mascot      |
| 1097.6677  | 1097.6544   | -0.0133 | -12   | 518        | 527      | VQVDAILALR    | 89        | 100    |                        |      | Mascot      |
| 1115.6935  | 1115.6783   | -0.0152 | -14   | 337        | 345      | FVQLVQLLR     | 71        | 99.998 |                        |      | Mascot      |
| 1115.6935  | 1115.6783   | -0.0152 | -14   | 337        | 345      | FVQLVQLLR     |           |        |                        |      | Mascot      |
| 1121.599   | 1121.5836   | -0.0154 | -14   | 352        | 360      | IEAIWSQFK     |           |        |                        |      | Mascot      |
| 1187.6631  | 1187.6013   | -0.0618 | -52   | 1061       | 1070     | LREILDTEAK    |           |        |                        |      | Mascot      |
| 1215.6005  | 1215.5856   | -0.0149 | -12   | 168        | 177      | THYVINEDPK    |           |        |                        |      | Mascot      |
| 1259.5797  | 1259.5645   | -0.0152 | -12   | 186        | 195      | SKDLSHCQER    |           |        | Carbamidomethyl (C)[7] |      | Mascot      |
| 1379.7603  | 1379.7249   | -0.0354 | -26   | 437        | 449      | EVVMLGYGSLIAK |           |        |                        |      | Mascot      |
| 1395.7301  | 1395.7166   | -0.0135 | -10   | 196        | 207      | IMKDVGLAYTER  |           |        |                        |      | Mascot      |

|           |           |         |     |     |     |                              |     |        |                                   |
|-----------|-----------|---------|-----|-----|-----|------------------------------|-----|--------|-----------------------------------|
| 1463.8944 | 1463.8763 | -0.0181 | -12 | 536 | 548 | LVQPVALQLVLDR                |     |        | Mascot                            |
| 1463.8944 | 1463.8763 | -0.0181 | -12 | 536 | 548 | LVQPVALQLVLDR                | 97  | 100    | Mascot                            |
| 1515.7478 | 1515.7296 | -0.0182 | -12 | 737 | 749 | VFGQEVAYVNFDK                |     |        | Mascot                            |
| 1638.8485 | 1638.8286 | -0.0199 | -12 | 672 | 687 | TYLAGAAADVVEFGVR             |     |        | Mascot                            |
| 1666.8767 | 1666.8589 | -0.0178 | -11 | 487 | 502 | VMGNAGHPSSLKPIMK             |     |        | Mascot                            |
| 1695.8999 | 1695.8778 | -0.0221 | -13 | 123 | 138 | VFAPAGVSPTVMNLHR             |     |        | Mascot                            |
| 1699.9377 | 1699.9154 | -0.0223 | -13 | 38  | 53  | YEALLLGGLPQEGLAR             |     |        | Mascot                            |
| 1699.9377 | 1699.9154 | -0.0223 | -13 | 38  | 53  | YEALLLGGLPQEGLAR             | 70  | 99.997 | Mascot                            |
| 1711.8948 | 1711.8741 | -0.0207 | -12 | 123 | 138 | VFAPAGVSPTVMNLHR             | 3   | 0      | Oxidation (M)[12]<br>Mascot       |
| 1711.8948 | 1711.8741 | -0.0207 | -12 | 123 | 138 | VFAPAGVSPTVMNLHR             |     |        | Oxidation (M)[12]<br>Mascot       |
| 1751.9724 | 1751.949  | -0.0234 | -13 | 750 | 765 | TIIEEAIPMTGPKPR              |     |        | Mascot                            |
| 1767.9673 | 1767.9484 | -0.0189 | -11 | 750 | 765 | TIIEEAIPMTGPKPR              |     |        | Oxidation (M)[9]<br>Mascot        |
| 1812.8877 | 1812.8676 | -0.0201 | -11 | 76  | 90  | LMDPLLYEYAGTWPK              |     |        | Oxidation (M)[2]<br>Mascot        |
| 1936.9181 | 1936.8918 | -0.0263 | -14 | 151 | 167 | TQNIYELQEAGAQQVCR            | 142 | 100    | Carbamidomethyl (C)[16]<br>Mascot |
| 1936.9181 | 1936.8918 | -0.0263 | -14 | 151 | 167 | TQNIYELQEAGAQQVCR            |     |        | Carbamidomethyl (C)[16]<br>Mascot |
| 1991.176  | 1991.0699 | -0.1061 | -53 | 509 | 527 | TAANALPVRVQVDAILAL<br>R      |     |        | Mascot                            |
| 1991.176  | 1991.0699 | -0.1061 | -53 | 509 | 527 | TAANALPVRVQVDAILAL<br>R      |     |        | Mascot                            |
| 2587.3513 | 2587.3228 | -0.0285 | -11 | 901 | 924 | VEALPVDLPEHIASASFE<br>THAVVR |     |        | Mascot                            |

### Peptide Information

|           |           |         |     |     |     |                              |     |        |        |
|-----------|-----------|---------|-----|-----|-----|------------------------------|-----|--------|--------|
| 1379.7603 | 1379.7249 | -0.0354 | -26 | 444 | 456 | EVVMLGYGSLIAK                |     |        | Mascot |
| 1395.7301 | 1395.7166 | -0.0135 | -10 | 203 | 214 | IMKDVGLAYTER                 |     |        | Mascot |
| 1463.8944 | 1463.8763 | -0.0181 | -12 | 543 | 555 | LVQPVALQLVLDR                |     |        | Mascot |
| 1463.8944 | 1463.8763 | -0.0181 | -12 | 543 | 555 | LVQPVALQLVLDR                | 97  | 100    | Mascot |
| 1515.7478 | 1515.7296 | -0.0182 | -12 | 744 | 756 | VFGQEVAYVNFDK                |     |        | Mascot |
| 1638.8485 | 1638.8286 | -0.0199 | -12 | 679 | 694 | TYLAGAAADVVEFGVR             |     |        | Mascot |
| 1666.8767 | 1666.8589 | -0.0178 | -11 | 494 | 509 | VMGNAGHPSSLKPIMK             |     |        | Mascot |
| 1695.8999 | 1695.8778 | -0.0221 | -13 | 130 | 145 | VFAPAGVSPTVMNLHR             |     |        | Mascot |
| 1699.9377 | 1699.9154 | -0.0223 | -13 | 45  | 60  | YEALLLGGLPQEGLAR             |     |        | Mascot |
| 1699.9377 | 1699.9154 | -0.0223 | -13 | 45  | 60  | YEALLLGGLPQEGLAR             | 70  | 99.997 | Mascot |
| 1711.8948 | 1711.8741 | -0.0207 | -12 | 130 | 145 | VFAPAGVSPTVMNLHR             | 3   | 0      | Mascot |
| 1711.8948 | 1711.8741 | -0.0207 | -12 | 130 | 145 | VFAPAGVSPTVMNLHR             |     |        | Mascot |
| 1751.9724 | 1751.949  | -0.0234 | -13 | 757 | 772 | TIIEEAIPMVTGPKPR             |     |        | Mascot |
| 1767.9673 | 1767.9484 | -0.0189 | -11 | 757 | 772 | TIIEEAIPMVTGPKPR             |     |        | Mascot |
| 1812.8877 | 1812.8676 | -0.0201 | -11 | 83  | 97  | LMDPLLYEYAGTWPK              |     |        | Mascot |
| 1936.9181 | 1936.8918 | -0.0263 | -14 | 158 | 174 | TQNIYELQEAGAQQVCR            | 142 | 100    | Mascot |
| 1936.9181 | 1936.8918 | -0.0263 | -14 | 158 | 174 | TQNIYELQEAGAQQVCR            |     |        | Mascot |
| 1991.176  | 1991.0699 | -0.1061 | -53 | 516 | 534 | TAANALPVRVQVDAILAL<br>R      |     |        | Mascot |
| 1991.176  | 1991.0699 | -0.1061 | -53 | 516 | 534 | TAANALPVRVQVDAILAL<br>R      |     |        | Mascot |
| 2587.3513 | 2587.3228 | -0.0285 | -11 | 908 | 931 | VEALPVDLPEHIASASFE<br>THAVVR |     |        | Mascot |

### Peptide Information

|   |                              |           |         |     |             |      |                     |      |        |     |                                           |        |     |
|---|------------------------------|-----------|---------|-----|-------------|------|---------------------|------|--------|-----|-------------------------------------------|--------|-----|
|   | 1259.5797                    | 1259.5645 | -0.0152 | -12 | 186         | 195  | SKDLSHCQER          |      |        |     | Carbamidomethyl (C)[7]                    | Mascot |     |
|   | 1324.5975                    | 1324.6707 | 0.0732  | 55  | 1071        | 1083 | NTPVSSESSSSSR       |      |        |     |                                           | Mascot |     |
|   | 1379.7603                    | 1379.7249 | -0.0354 | -26 | 437         | 449  | EVVMLGYGSLIAK       |      |        |     |                                           | Mascot |     |
|   | 1395.7301                    | 1395.7166 | -0.0135 | -10 | 196         | 207  | IMKDVGLAYTER        |      |        |     |                                           | Mascot |     |
|   | 1463.8944                    | 1463.8763 | -0.0181 | -12 | 536         | 548  | LVQPVALQLVLDR       |      |        |     |                                           | Mascot |     |
|   | 1463.8944                    | 1463.8763 | -0.0181 | -12 | 536         | 548  | LVQPVALQLVLDR       | 97   | 100    |     |                                           | Mascot |     |
|   | 1515.7478                    | 1515.7296 | -0.0182 | -12 | 737         | 749  | VFGQEVAYVNFDK       |      |        |     |                                           | Mascot |     |
|   | 1549.8373                    | 1549.8157 | -0.0216 | -14 | 723         | 736  | ALPTDRPLASAYFK      |      |        |     |                                           | Mascot |     |
|   | 1622.8536                    | 1622.832  | -0.0216 | -13 | 672         | 687  | AYLAGAAADVIEFGVR    | 144  | 100    |     |                                           | Mascot |     |
|   | 1622.8536                    | 1622.832  | -0.0216 | -13 | 672         | 687  | AYLAGAAADVIEFGVR    |      |        |     |                                           | Mascot |     |
|   | 1666.8767                    | 1666.8589 | -0.0178 | -11 | 487         | 502  | VMGNAGHPSSLKPIMK    |      |        |     |                                           | Mascot |     |
|   | 1699.9047                    | 1699.9154 | 0.0107  | 6   | 601         | 618  | ITAPDMASVAGAAANVAIK |      |        |     |                                           | Mascot |     |
|   | 1699.9377                    | 1699.9154 | -0.0223 | -13 | 38          | 53   | YEALLGGLPQEGLAR     | 70   | 99.997 |     |                                           | Mascot |     |
|   | 1721.9043                    | 1721.8861 | -0.0182 | -11 | 123         | 138  | VFAPAGVSPTVMNLYR    |      |        |     |                                           | Mascot |     |
|   | 1737.8992                    | 1737.9032 | 0.004   | 2   | 123         | 138  | VFAPAGVSPTVMNLYR    |      |        |     | Oxidation (M)[12]                         | Mascot |     |
|   | 1954.8745                    | 1954.8512 | -0.0233 | -12 | 151         | 167  | TQNIYEMQEAGAQQVCR   |      |        |     | Carbamidomethyl (C)[16]                   | Mascot |     |
|   | 1970.8695                    | 1970.8505 | -0.019  | -10 | 151         | 167  | TQNIYEMQEAGAQQVCR   |      |        |     | Carbamidomethyl (C)[16], Oxidation (M)[7] | Mascot |     |
| 6 | vitellogenin 5 [Danio rerio] |           |         |     | gi 68448530 |      | 148868              | 8.77 | 22     | 543 | 100                                       | 470    | 100 |

Peptide Information

| Calc. Mass | Obsrv. Mass | ± da    | ± ppm | Start Seq. | End Seq. | Sequence      | Ion Score | C. I.  | % | Modification           | Rank | Result Type |
|------------|-------------|---------|-------|------------|----------|---------------|-----------|--------|---|------------------------|------|-------------|
| 821.4628   | 821.4509    | -0.0119 | -14   | 545        | 551      | ALHPEVR       |           |        |   |                        |      | Mascot      |
| 1023.5105  | 1023.4974   | -0.0131 | -13   | 195        | 203      | DVGLAYTER     |           |        |   |                        |      | Mascot      |
| 1044.4528  | 1044.4392   | -0.0136 | -13   | 184        | 191      | DLSHCQER      |           |        |   | Carbamidomethyl (C)[5] |      | Mascot      |
| 1070.4861  | 1070.4707   | -0.0154 | -14   | 921        | 929      | NIEDHSAER     |           |        |   |                        |      | Mascot      |
| 1097.6677  | 1097.6544   | -0.0133 | -12   | 514        | 523      | VQVDAILALR    |           |        |   |                        |      | Mascot      |
| 1097.6677  | 1097.6544   | -0.0133 | -12   | 514        | 523      | VQVDAILALR    | 89        | 100    |   |                        |      | Mascot      |
| 1115.6935  | 1115.6783   | -0.0152 | -14   | 333        | 341      | FVQLVQLLR     | 71        | 99.998 |   |                        |      | Mascot      |
| 1115.6935  | 1115.6783   | -0.0152 | -14   | 333        | 341      | FVQLVQLLR     |           |        |   |                        |      | Mascot      |
| 1121.599   | 1121.5836   | -0.0154 | -14   | 348        | 356      | IEAIWSQFK     |           |        |   |                        |      | Mascot      |
| 1187.6631  | 1187.6013   | -0.0618 | -52   | 1057       | 1066     | LREILDTEAK    |           |        |   |                        |      | Mascot      |
| 1215.6005  | 1215.5856   | -0.0149 | -12   | 164        | 173      | THYVINEDPK    |           |        |   |                        |      | Mascot      |
| 1259.5797  | 1259.5645   | -0.0152 | -12   | 182        | 191      | SKDLSHCQER    |           |        |   | Carbamidomethyl (C)[7] |      | Mascot      |
| 1324.5975  | 1324.6707   | 0.0732  | 55    | 1067       | 1079     | NTPVSSESSSSSR |           |        |   |                        |      | Mascot      |
| 1379.7603  | 1379.7249   | -0.0354 | -26   | 433        | 445      | EVVMLGYGSLIAK |           |        |   |                        |      | Mascot      |
| 1395.7301  | 1395.7166   | -0.0135 | -10   | 192        | 203      | IMKDVGLAYTER  |           |        |   |                        |      | Mascot      |

|   |                                                                                                          |           |         |     |     |     |                    |     |        |  |  |                                           |  |  |  |  |        |
|---|----------------------------------------------------------------------------------------------------------|-----------|---------|-----|-----|-----|--------------------|-----|--------|--|--|-------------------------------------------|--|--|--|--|--------|
|   | 1463.8944                                                                                                | 1463.8763 | -0.0181 | -12 | 532 | 544 | LVQPVALQLVLDR      |     |        |  |  |                                           |  |  |  |  | Mascot |
|   | 1463.8944                                                                                                | 1463.8763 | -0.0181 | -12 | 532 | 544 | LVQPVALQLVLDR      | 97  | 100    |  |  |                                           |  |  |  |  | Mascot |
|   | 1515.7478                                                                                                | 1515.7296 | -0.0182 | -12 | 733 | 745 | VFGQEVAYVNFDK      |     |        |  |  |                                           |  |  |  |  | Mascot |
|   | 1549.8373                                                                                                | 1549.8157 | -0.0216 | -14 | 719 | 732 | ALPTDRPLASAYFK     |     |        |  |  |                                           |  |  |  |  | Mascot |
|   | 1622.8536                                                                                                | 1622.832  | -0.0216 | -13 | 668 | 683 | AYLAGAAADVIEFGVR   | 144 | 100    |  |  |                                           |  |  |  |  | Mascot |
|   | 1622.8536                                                                                                | 1622.832  | -0.0216 | -13 | 668 | 683 | AYLAGAAADVIEFGVR   |     |        |  |  |                                           |  |  |  |  | Mascot |
|   | 1666.8767                                                                                                | 1666.8589 | -0.0178 | -11 | 483 | 498 | VMGNAGHPSSLKPIMK   |     |        |  |  |                                           |  |  |  |  | Mascot |
|   | 1699.9047                                                                                                | 1699.9154 | 0.0107  | 6   | 597 | 614 | ITAPDMASVAGAANVAIK |     |        |  |  |                                           |  |  |  |  | Mascot |
|   | 1699.9377                                                                                                | 1699.9154 | -0.0223 | -13 | 34  | 49  | YEALLLGGLPQEGRLAR  | 70  | 99.997 |  |  |                                           |  |  |  |  | Mascot |
|   | 1737.9568                                                                                                | 1737.9032 | -0.0536 | -31 | 746 | 761 | SIIEEAIPMTGPKPR    |     |        |  |  |                                           |  |  |  |  | Mascot |
|   | 1954.8745                                                                                                | 1954.8512 | -0.0233 | -12 | 147 | 163 | TQNIYEMQEAGAQQGVCR |     |        |  |  | Carbamidomethyl (C)[16]                   |  |  |  |  | Mascot |
|   | 1970.8695                                                                                                | 1970.8505 | -0.019  | -10 | 147 | 163 | TQNIYEMQEAGAQQGVCR |     |        |  |  | Carbamidomethyl (C)[16], Oxidation (M)[7] |  |  |  |  | Mascot |
| 7 | novel protein similar to vitellogenin 1 (vg1) [Danio rerio] gi 94732723 147084.2 8.73 18 485 100 435 100 |           |         |     |     |     |                    |     |        |  |  |                                           |  |  |  |  |        |

Peptide Information

| Calc. Mass | Obsrv. Mass | ± da    | ± ppm | Start Seq. | End Sequence Seq. | Ion Score          | C. I. | % Modification         | Rank | Result Type |
|------------|-------------|---------|-------|------------|-------------------|--------------------|-------|------------------------|------|-------------|
| 821.4628   | 821.4509    | -0.0119 | -14   | 545        | 551               | ALHPEVR            |       |                        |      | Mascot      |
| 1044.4528  | 1044.4392   | -0.0136 | -13   | 184        | 191               | DLSHCQER           |       | Carbamidomethyl (C)[5] |      | Mascot      |
| 1070.4861  | 1070.4707   | -0.0154 | -14   | 921        | 929               | NIEDHSAER          |       |                        |      | Mascot      |
| 1097.6677  | 1097.6544   | -0.0133 | -12   | 514        | 523               | VQVDAILALR         |       |                        |      | Mascot      |
| 1097.6677  | 1097.6544   | -0.0133 | -12   | 514        | 523               | VQVDAILALR         | 89    | 100                    |      | Mascot      |
| 1115.6935  | 1115.6783   | -0.0152 | -14   | 333        | 341               | FVQLVQLLR          | 71    | 99.998                 |      | Mascot      |
| 1115.6935  | 1115.6783   | -0.0152 | -14   | 333        | 341               | FVQLVQLLR          |       |                        |      | Mascot      |
| 1187.6631  | 1187.6013   | -0.0618 | -52   | 1057       | 1066              | LREILDTEAK         |       |                        |      | Mascot      |
| 1215.6005  | 1215.5856   | -0.0149 | -12   | 164        | 173               | THYVINEDPK         |       |                        |      | Mascot      |
| 1259.5797  | 1259.5645   | -0.0152 | -12   | 182        | 191               | SKDLSHCQER         |       | Carbamidomethyl (C)[7] |      | Mascot      |
| 1379.7603  | 1379.7249   | -0.0354 | -26   | 433        | 445               | EVVMLGYGSLIAK      |       |                        |      | Mascot      |
| 1395.7551  | 1395.7166   | -0.0385 | -28   | 433        | 445               | EVVMLGYGSLIAK      |       | Oxidation (M)[4]       |      | Mascot      |
| 1477.91    | 1477.8926   | -0.0174 | -12   | 532        | 544               | LVQPIALQLVLDR      |       |                        |      | Mascot      |
| 1477.91    | 1477.8926   | -0.0174 | -12   | 532        | 544               | LVQPIALQLVLDR      | 65    | 99.992                 |      | Mascot      |
| 1515.7478  | 1515.7296   | -0.0182 | -12   | 733        | 745               | VFGQEVAYVNFDK      |       |                        |      | Mascot      |
| 1622.7743  | 1622.832    | 0.0577  | 36    | 981        | 994               | GCVEVHSYNAAFIR     |       | Carbamidomethyl (C)[2] |      | Mascot      |
| 1622.7743  | 1622.832    | 0.0577  | 36    | 981        | 994               | GCVEVHSYNAAFIR     |       | Carbamidomethyl (C)[2] |      | Mascot      |
| 1666.8767  | 1666.8589   | -0.0178 | -11   | 483        | 498               | VMGNAGHPSSLKPIMK   |       |                        |      | Mascot      |
| 1699.9047  | 1699.9154   | 0.0107  | 6     | 597        | 614               | ITAPDMASVAGAANVAIK |       |                        |      | Mascot      |
| 1699.9377  | 1699.9154   | -0.0223 | -13   | 34         | 49                | YEALLLGGLPQEGRLAR  | 70    | 99.997                 |      | Mascot      |



|   |                              |           |         |     |             |     |                   |      |     |     |     |     |                         |  |  |  |        |
|---|------------------------------|-----------|---------|-----|-------------|-----|-------------------|------|-----|-----|-----|-----|-------------------------|--|--|--|--------|
|   | 1721.9043                    | 1721.8861 | -0.0182 | -11 | 119         | 134 | VFAPAGVSPTVMNLYR  |      |     |     |     |     |                         |  |  |  | Mascot |
|   | 1737.8992                    | 1737.9032 | 0.004   | 2   | 119         | 134 | VFAPAGVSPTVMNLYR  |      |     |     |     |     | Oxidation (M)[12]       |  |  |  | Mascot |
|   | 1812.8877                    | 1812.8676 | -0.0201 | -11 | 72          | 86  | LMDPLLYEYAGTWPK   |      |     |     |     |     | Oxidation (M)[2]        |  |  |  | Mascot |
|   | 1936.9181                    | 1936.8918 | -0.0263 | -14 | 147         | 163 | TQNIYELQEAGAQQGVC |      | 142 | 100 |     |     | Carbamidomethyl (C)[16] |  |  |  | Mascot |
|   | 1936.9181                    | 1936.8918 | -0.0263 | -14 | 147         | 163 | TQNIYELQEAGAQQGVC |      |     |     |     |     | Carbamidomethyl (C)[16] |  |  |  | Mascot |
| 8 | vitellogenin 1 [Danio rerio] |           |         |     | gi 21391472 |     | 127954.2          | 8.69 | 18  | 460 | 100 | 402 | 100                     |  |  |  |        |

#### Peptide Information

| Calc. Mass | Obsrv. Mass | ± da    | ± ppm | Start Seq. | End Seq. | Sequence                       | Ion Score | C. I.  | % Modification | Rank | Result Type |
|------------|-------------|---------|-------|------------|----------|--------------------------------|-----------|--------|----------------|------|-------------|
| 821.4628   | 821.4509    | -0.0119 | -14   | 354        | 360      | ALHPEVR                        |           |        |                |      | Mascot      |
| 888.5301   | 888.5164    | -0.0137 | -15   | 234        | 241      | FATIPALR                       |           |        |                |      | Mascot      |
| 1023.5105  | 1023.4974   | -0.0131 | -13   | 4          | 12       | DVGLAYTER                      |           |        |                |      | Mascot      |
| 1070.4861  | 1070.4707   | -0.0154 | -14   | 730        | 738      | NIEDHSAER                      |           |        |                |      | Mascot      |
| 1097.6677  | 1097.6544   | -0.0133 | -12   | 323        | 332      | VQVDAILALR                     |           |        |                |      | Mascot      |
| 1097.6677  | 1097.6544   | -0.0133 | -12   | 323        | 332      | VQVDAILALR                     | 89        | 100    |                |      | Mascot      |
| 1115.6935  | 1115.6783   | -0.0152 | -14   | 142        | 150      | FVQLVQLLR                      | 71        | 99.998 |                |      | Mascot      |
| 1115.6935  | 1115.6783   | -0.0152 | -14   | 142        | 150      | FVQLVQLLR                      |           |        |                |      | Mascot      |
| 1121.599   | 1121.5836   | -0.0154 | -14   | 157        | 165      | IEAIWSQFK                      |           |        |                |      | Mascot      |
| 1187.6631  | 1187.6013   | -0.0618 | -52   | 866        | 875      | LREILDTEAK                     |           |        |                |      | Mascot      |
| 1379.7603  | 1379.7249   | -0.0354 | -26   | 242        | 254      | EVVMLGYGSLIAK                  |           |        |                |      | Mascot      |
| 1382.7889  | 1382.7667   | -0.0222 | -16   | 112        | 124      | ISDAPAQIVEVLK                  |           |        |                |      | Mascot      |
| 1395.7301  | 1395.7166   | -0.0135 | -10   | 1          | 12       | IMKDVGLAYTER                   |           |        |                |      | Mascot      |
| 1463.8944  | 1463.8763   | -0.0181 | -12   | 341        | 353      | LVQPVALQLVLDR                  |           |        |                |      | Mascot      |
| 1463.8944  | 1463.8763   | -0.0181 | -12   | 341        | 353      | LVQPVALQLVLDR                  | 97        | 100    |                |      | Mascot      |
| 1515.7478  | 1515.7296   | -0.0182 | -12   | 542        | 554      | VFGQEVAYVNFDK                  |           |        |                |      | Mascot      |
| 1622.8536  | 1622.832    | -0.0216 | -13   | 477        | 492      | AYLAGAAADVIEFGVR               | 144       | 100    |                |      | Mascot      |
| 1622.8536  | 1622.832    | -0.0216 | -13   | 477        | 492      | AYLAGAAADVIEFGVR               |           |        |                |      | Mascot      |
| 1666.8767  | 1666.8589   | -0.0178 | -11   | 292        | 307      | VMGNAGHPSSLKPIMK               |           |        |                |      | Mascot      |
| 1699.9047  | 1699.9154   | 0.0107  | 6     | 406        | 423      | ITAPDMASVAGAAANVAIK            |           |        |                |      | Mascot      |
| 1699.9047  | 1699.9154   | 0.0107  | 6     | 406        | 423      | ITAPDMASVAGAAANVAIK            |           |        |                |      | Mascot      |
| 1723.9412  | 1723.9097   | -0.0315 | -18   | 555        | 570      | TIIEEAIPMATGPKPR               |           |        |                |      | Mascot      |
| 1739.936   | 1739.9099   | -0.0261 | -15   | 555        | 570      | TIIEEAIPMATGPKPR               |           |        |                |      | Mascot      |
| 2938.5164  | 2938.4805   | -0.0359 | -12   | 255        | 280      | YCVAVPTCPAELLRPIHEI<br>ATEAISK |           |        |                |      | Mascot      |

|   |                            |  |  |  |              |  |          |      |    |     |     |     |     |  |  |  |  |
|---|----------------------------|--|--|--|--------------|--|----------|------|----|-----|-----|-----|-----|--|--|--|--|
| 9 | Vtg1 protein [Danio rerio] |  |  |  | gi 145337918 |  | 116565.5 | 9.07 | 17 | 459 | 100 | 402 | 100 |  |  |  |  |
|---|----------------------------|--|--|--|--------------|--|----------|------|----|-----|-----|-----|-----|--|--|--|--|

#### Peptide Information

|    | Calc. Mass                       | Obsrv. Mass | ± da    | ± ppm | Start Seq.   | End Sequence Seq.               |          | Ion Score | C. I.  | % Modification           | Rank | Result Type |     |
|----|----------------------------------|-------------|---------|-------|--------------|---------------------------------|----------|-----------|--------|--------------------------|------|-------------|-----|
|    | 821.4628                         | 821.4509    | -0.0119 | -14   | 251          | 257 ALHPEVR                     |          |           |        |                          |      | Mascot      |     |
|    | 888.5301                         | 888.5164    | -0.0137 | -15   | 131          | 138 FATIPALR                    |          |           |        |                          |      | Mascot      |     |
|    | 1070.4861                        | 1070.4707   | -0.0154 | -14   | 627          | 635 NIEDHSAER                   |          |           |        |                          |      | Mascot      |     |
|    | 1097.6677                        | 1097.6544   | -0.0133 | -12   | 220          | 229 VQVDAILALR                  |          |           |        |                          |      | Mascot      |     |
|    | 1097.6677                        | 1097.6544   | -0.0133 | -12   | 220          | 229 VQVDAILALR                  |          | 89        | 100    |                          |      | Mascot      |     |
|    | 1115.6935                        | 1115.6783   | -0.0152 | -14   | 39           | 47 FVQLVQLLR                    |          | 71        | 99.998 |                          |      | Mascot      |     |
|    | 1115.6935                        | 1115.6783   | -0.0152 | -14   | 39           | 47 FVQLVQLLR                    |          |           |        |                          |      | Mascot      |     |
|    | 1121.599                         | 1121.5836   | -0.0154 | -14   | 54           | 62 IEAIWSQFK                    |          |           |        |                          |      | Mascot      |     |
|    | 1187.6631                        | 1187.6013   | -0.0618 | -52   | 763          | 772 LREILDTEAK                  |          |           |        |                          |      | Mascot      |     |
|    | 1379.7603                        | 1379.7249   | -0.0354 | -26   | 139          | 151 EVVMLGYGSLIAK               |          |           |        |                          |      | Mascot      |     |
|    | 1382.7889                        | 1382.7667   | -0.0222 | -16   | 9            | 21 ISDAPAQIVEVLK                |          |           |        |                          |      | Mascot      |     |
|    | 1395.7551                        | 1395.7166   | -0.0385 | -28   | 139          | 151 EVVMLGYGSLIAK               |          |           |        | Oxidation (M)[4]         |      | Mascot      |     |
|    | 1463.8944                        | 1463.8763   | -0.0181 | -12   | 238          | 250 LVQPVALQLVLDR               |          |           |        |                          |      | Mascot      |     |
|    | 1463.8944                        | 1463.8763   | -0.0181 | -12   | 238          | 250 LVQPVALQLVLDR               |          | 97        | 100    |                          |      | Mascot      |     |
|    | 1515.7478                        | 1515.7296   | -0.0182 | -12   | 439          | 451 VFGQEVAYVNFDK               |          |           |        |                          |      | Mascot      |     |
|    | 1622.8536                        | 1622.832    | -0.0216 | -13   | 374          | 389 AYLAGAAADVIEFGVR            |          | 144       | 100    |                          |      | Mascot      |     |
|    | 1622.8536                        | 1622.832    | -0.0216 | -13   | 374          | 389 AYLAGAAADVIEFGVR            |          |           |        |                          |      | Mascot      |     |
|    | 1666.8767                        | 1666.8589   | -0.0178 | -11   | 189          | 204 VMGNAGHPSSLKPIMK            |          |           |        |                          |      | Mascot      |     |
|    | 1699.9047                        | 1699.9154   | 0.0107  | 6     | 303          | 320 ITAPDMASVAGAANVAIK          |          |           |        |                          |      | Mascot      |     |
|    | 1699.9047                        | 1699.9154   | 0.0107  | 6     | 303          | 320 ITAPDMASVAGAANVAIK          |          |           |        |                          |      | Mascot      |     |
|    | 1723.9412                        | 1723.9097   | -0.0315 | -18   | 452          | 467 TIIEEAIPMATGPKPR            |          |           |        |                          |      | Mascot      |     |
|    | 1739.936                         | 1739.9099   | -0.0261 | -15   | 452          | 467 TIIEEAIPMATGPKPR            |          |           |        | Oxidation (M)[9]         |      | Mascot      |     |
|    | 2627.3716                        | 2627.3389   | -0.0327 | -12   | 603          | 626 VEALPVELPEHIASASFET YAVVR   |          |           |        |                          |      | Mascot      |     |
|    | 2938.5164                        | 2938.4805   | -0.0359 | -12   | 152          | 177 YCVAVPTCPAELLRPIHEI ATEAISK |          |           |        | Carbamidomethyl (C)[2,8] |      | Mascot      |     |
| 10 | Zgc:136383 protein [Danio rerio] |             |         |       | gi 159155252 |                                 | 123957.1 | 8.78      | 18     | 425                      | 100  | 362         | 100 |

Peptide Information

|  | Calc. Mass | Obsrv. Mass | ± da    | ± ppm | Start Seq. | End Sequence Seq. | Ion Score | C. I. | % Modification | Rank | Result Type |
|--|------------|-------------|---------|-------|------------|-------------------|-----------|-------|----------------|------|-------------|
|  | 821.4628   | 821.4509    | -0.0119 | -14   | 322        | 328 ALHPEVR       |           |       |                |      | Mascot      |
|  | 890.5094   | 890.4976    | -0.0118 | -13   | 202        | 209 FSTVPALR      |           |       |                |      | Mascot      |
|  | 1070.4861  | 1070.4707   | -0.0154 | -14   | 698        | 706 NIEDHSAER     |           |       |                |      | Mascot      |
|  | 1097.6677  | 1097.6544   | -0.0133 | -12   | 291        | 300 VQVDAILALR    |           |       |                |      | Mascot      |
|  | 1097.6677  | 1097.6544   | -0.0133 | -12   | 291        | 300 VQVDAILALR    | 89        | 100   |                |      | Mascot      |

|    |                              |           |         |     |              |      |                                |      |        |                          |     |     |     |        |
|----|------------------------------|-----------|---------|-----|--------------|------|--------------------------------|------|--------|--------------------------|-----|-----|-----|--------|
|    | 1115.6935                    | 1115.6783 | -0.0152 | -14 | 110          | 118  | FVQLVQLLR                      | 71   | 99.998 |                          |     |     |     | Mascot |
|    | 1115.6935                    | 1115.6783 | -0.0152 | -14 | 110          | 118  | FVQLVQLLR                      |      |        |                          |     |     |     | Mascot |
|    | 1121.599                     | 1121.5836 | -0.0154 | -14 | 125          | 133  | IEAIWSQFK                      |      |        |                          |     |     |     | Mascot |
|    | 1187.6631                    | 1187.6013 | -0.0618 | -52 | 834          | 843  | LREILDTEAK                     |      |        |                          |     |     |     | Mascot |
|    | 1379.7351                    | 1379.7249 | -0.0102 | -7  | 210          | 222  | EVAMLGYGSLIAR                  |      |        |                          |     |     |     | Mascot |
|    | 1382.7889                    | 1382.7667 | -0.0222 | -16 | 80           | 92   | ISDAPAQIVEVLK                  |      |        |                          |     |     |     | Mascot |
|    | 1395.73                      | 1395.7166 | -0.0134 | -10 | 210          | 222  | EVAMLGYGSLIAR                  |      |        | Oxidation (M)[4]         |     |     |     | Mascot |
|    | 1477.91                      | 1477.8926 | -0.0174 | -12 | 309          | 321  | LVQPIALQLVLDR                  |      |        |                          |     |     |     | Mascot |
|    | 1477.91                      | 1477.8926 | -0.0174 | -12 | 309          | 321  | LVQPIALQLVLDR                  | 65   | 99.992 |                          |     |     |     | Mascot |
|    | 1515.7478                    | 1515.7296 | -0.0182 | -12 | 510          | 522  | VFGQEVAYVNFDK                  |      |        |                          |     |     |     | Mascot |
|    | 1608.838                     | 1608.8176 | -0.0204 | -13 | 445          | 460  | AYLAGAAADVVEFGVR               |      |        |                          |     |     |     | Mascot |
|    | 1608.838                     | 1608.8176 | -0.0204 | -13 | 445          | 460  | AYLAGAAADVVEFGVR               | 138  | 100    |                          |     |     |     | Mascot |
|    | 1666.8767                    | 1666.8589 | -0.0178 | -11 | 260          | 275  | VMGNAGHPSSLKPIMK               |      |        |                          |     |     |     | Mascot |
|    | 1699.9524                    | 1699.9154 | -0.037  | -22 | 1087         | 1101 | SLNVIARIPETMSR                 |      |        |                          |     |     |     | Mascot |
|    | 1699.9524                    | 1699.9154 | -0.037  | -22 | 1087         | 1101 | SLNVIARIPETMSR                 |      |        |                          |     |     |     | Mascot |
|    | 1721.9618                    | 1721.8861 | -0.0757 | -44 | 523          | 538  | TIIEEAIPMVAGPKPR               |      |        |                          |     |     |     | Mascot |
|    | 1737.9568                    | 1737.9032 | -0.0536 | -31 | 523          | 538  | TIIEEAIPMVAGPKPR               |      |        | Oxidation (M)[9]         |     |     |     | Mascot |
|    | 1991.176                     | 1991.0699 | -0.1061 | -53 | 282          | 300  | TAANALPVRVQVDAILAL<br>R        |      |        |                          |     |     |     | Mascot |
|    | 1991.176                     | 1991.0699 | -0.1061 | -53 | 282          | 300  | TAANALPVRVQVDAILAL<br>R        |      |        |                          |     |     |     | Mascot |
|    | 2563.3765                    | 2563.3469 | -0.0296 | -12 | 674          | 697  | VEALPVDLPEHIASASFE<br>TLAVVR   |      |        |                          |     |     |     | Mascot |
|    | 2912.512                     | 2912.4717 | -0.0403 | -14 | 223          | 248  | HCIAVPTCPAELLRIPIEI<br>ATEAVSK |      |        | Carbamidomethyl (C)[2,8] |     |     |     | Mascot |
| 11 | vitellogenin 1 [Danio rerio] |           |         |     | gi 166795887 |      | 149452.5                       | 8.68 | 23     | 417                      | 100 | 327 | 100 |        |

Peptide Information

| Calc. Mass | Obsrv. Mass | ± da    | ± ppm | Start Seq. | End Seq. | Sequence   | Ion Score | C. I.  | % Modification         | Rank | Result Type |
|------------|-------------|---------|-------|------------|----------|------------|-----------|--------|------------------------|------|-------------|
| 821.4628   | 821.4509    | -0.0119 | -14   | 545        | 551      | ALHPEVR    |           |        |                        |      | Mascot      |
| 888.5301   | 888.5164    | -0.0137 | -15   | 425        | 432      | FATIPALR   |           |        |                        |      | Mascot      |
| 1044.4528  | 1044.4392   | -0.0136 | -13   | 184        | 191      | DLSHCQER   |           |        | Carbamidomethyl (C)[5] |      | Mascot      |
| 1070.4861  | 1070.4707   | -0.0154 | -14   | 921        | 929      | NIEDHSAER  |           |        |                        |      | Mascot      |
| 1097.6677  | 1097.6544   | -0.0133 | -12   | 514        | 523      | VQVDAILALR |           |        |                        |      | Mascot      |
| 1097.6677  | 1097.6544   | -0.0133 | -12   | 514        | 523      | VQVDAILALR | 89        | 100    |                        |      | Mascot      |
| 1115.6935  | 1115.6783   | -0.0152 | -14   | 333        | 341      | FVQLVQLLR  | 71        | 99.998 |                        |      | Mascot      |
| 1115.6935  | 1115.6783   | -0.0152 | -14   | 333        | 341      | FVQLVQLLR  |           |        |                        |      | Mascot      |
| 1121.599   | 1121.5836   | -0.0154 | -14   | 348        | 356      | IEAIWSQFK  |           |        |                        |      | Mascot      |
| 1187.6631  | 1187.6013   | -0.0618 | -52   | 1057       | 1066     | LREILDTEAK |           |        |                        |      | Mascot      |

|           |                              |         |     |     |              |                                |          |      |        |     |     |     |     |  |  |  |  |                                           |        |
|-----------|------------------------------|---------|-----|-----|--------------|--------------------------------|----------|------|--------|-----|-----|-----|-----|--|--|--|--|-------------------------------------------|--------|
| 1215.6005 | 1215.5856                    | -0.0149 | -12 | 164 | 173          | THYVINEDPK                     |          |      |        |     |     |     |     |  |  |  |  |                                           | Mascot |
| 1259.5797 | 1259.5645                    | -0.0152 | -12 | 182 | 191          | SKDLSHCQER                     |          |      |        |     |     |     |     |  |  |  |  | Carbamidomethyl (C)[7]                    | Mascot |
| 1379.7603 | 1379.7249                    | -0.0354 | -26 | 433 | 445          | EVVMLGYGSLIAK                  |          |      |        |     |     |     |     |  |  |  |  |                                           | Mascot |
| 1382.7889 | 1382.7667                    | -0.0222 | -16 | 303 | 315          | ISDAPAQIVEVLK                  |          |      |        |     |     |     |     |  |  |  |  |                                           | Mascot |
| 1395.7551 | 1395.7166                    | -0.0385 | -28 | 433 | 445          | EVVMLGYGSLIAK                  |          |      |        |     |     |     |     |  |  |  |  | Oxidation (M)[4]                          | Mascot |
| 1463.8944 | 1463.8763                    | -0.0181 | -12 | 532 | 544          | LVQPVALQLVLDR                  |          |      |        |     |     |     |     |  |  |  |  |                                           | Mascot |
| 1463.8944 | 1463.8763                    | -0.0181 | -12 | 532 | 544          | LVQPVALQLVLDR                  | 97       |      | 100    |     |     |     |     |  |  |  |  |                                           | Mascot |
| 1515.7478 | 1515.7296                    | -0.0182 | -12 | 733 | 745          | VFGQEVAYVNFDK                  |          |      |        |     |     |     |     |  |  |  |  |                                           | Mascot |
| 1638.8485 | 1638.8286                    | -0.0199 | -12 | 668 | 683          | TYLAGAAADVVEFGVR               |          |      |        |     |     |     |     |  |  |  |  |                                           | Mascot |
| 1666.8767 | 1666.8589                    | -0.0178 | -11 | 483 | 498          | VMGNAGHPSSLKPIMK               |          |      |        |     |     |     |     |  |  |  |  |                                           | Mascot |
| 1695.8999 | 1695.8778                    | -0.0221 | -13 | 119 | 134          | VFAPAGVSPTVMNLHR               |          |      |        |     |     |     |     |  |  |  |  |                                           | Mascot |
| 1699.9377 | 1699.9154                    | -0.0223 | -13 | 34  | 49           | YEALLLGGLPQEGLAR               |          |      |        |     |     |     |     |  |  |  |  |                                           | Mascot |
| 1699.9377 | 1699.9154                    | -0.0223 | -13 | 34  | 49           | YEALLLGGLPQEGLAR               | 70       |      | 99.997 |     |     |     |     |  |  |  |  |                                           | Mascot |
| 1711.8948 | 1711.8741                    | -0.0207 | -12 | 119 | 134          | VFAPAGVSPTVMNLHR               | 3        |      | 0      |     |     |     |     |  |  |  |  | Oxidation (M)[12]                         | Mascot |
| 1711.8948 | 1711.8741                    | -0.0207 | -12 | 119 | 134          | VFAPAGVSPTVMNLHR               |          |      |        |     |     |     |     |  |  |  |  | Oxidation (M)[12]                         | Mascot |
| 1751.9724 | 1751.949                     | -0.0234 | -13 | 746 | 761          | TIIEEAIPMTGPKPR                |          |      |        |     |     |     |     |  |  |  |  |                                           | Mascot |
| 1767.9673 | 1767.9484                    | -0.0189 | -11 | 746 | 761          | TIIEEAIPMTGPKPR                |          |      |        |     |     |     |     |  |  |  |  | Oxidation (M)[9]                          | Mascot |
| 1812.8877 | 1812.8676                    | -0.0201 | -11 | 72  | 86           | LMDPLLYEYAGTWPK                |          |      |        |     |     |     |     |  |  |  |  | Oxidation (M)[2]                          | Mascot |
| 1954.8745 | 1954.8512                    | -0.0233 | -12 | 147 | 163          | TQNIYEMQEAGAQQGVCR             |          |      |        |     |     |     |     |  |  |  |  | Carbamidomethyl (C)[16]                   | Mascot |
| 1970.8695 | 1970.8505                    | -0.019  | -10 | 147 | 163          | TQNIYEMQEAGAQQGVCR             |          |      |        |     |     |     |     |  |  |  |  | Carbamidomethyl (C)[16], Oxidation (M)[7] | Mascot |
| 2627.3716 | 2627.3389                    | -0.0327 | -12 | 897 | 920          | VEALPVELPEHIASASFET<br>YAVVR   |          |      |        |     |     |     |     |  |  |  |  |                                           | Mascot |
| 2938.5164 | 2938.4805                    | -0.0359 | -12 | 446 | 471          | YCVAVPTCPAELLRPIHEI<br>ATEAISK |          |      |        |     |     |     |     |  |  |  |  | Carbamidomethyl (C)[2,8]                  | Mascot |
| 12        | vitellogenin 7 [Danio rerio] |         |     |     | gi 156713467 |                                | 148739.2 | 8.76 | 16     | 330 | 100 | 293 | 100 |  |  |  |  |                                           |        |

Peptide Information

| Calc. Mass | Obsrv. Mass | ± da    | ± ppm | Start Seq. | End Seq. | Sequence   | Ion Score | C. I.  | % Modification         | Rank | Result Type |
|------------|-------------|---------|-------|------------|----------|------------|-----------|--------|------------------------|------|-------------|
| 821.4628   | 821.4509    | -0.0119 | -14   | 545        | 551      | ALHPEVR    |           |        |                        |      | Mascot      |
| 1044.4528  | 1044.4392   | -0.0136 | -13   | 184        | 191      | DLSHCQER   |           |        | Carbamidomethyl (C)[5] |      | Mascot      |
| 1070.4861  | 1070.4707   | -0.0154 | -14   | 921        | 929      | NIEDHSAER  |           |        |                        |      | Mascot      |
| 1097.6677  | 1097.6544   | -0.0133 | -12   | 514        | 523      | VQVDAILALR |           |        |                        |      | Mascot      |
| 1097.6677  | 1097.6544   | -0.0133 | -12   | 514        | 523      | VQVDAILALR | 89        | 100    |                        |      | Mascot      |
| 1115.6935  | 1115.6783   | -0.0152 | -14   | 333        | 341      | FVQLVQLLR  | 71        | 99.998 |                        |      | Mascot      |
| 1115.6935  | 1115.6783   | -0.0152 | -14   | 333        | 341      | FVQLVQLLR  |           |        |                        |      | Mascot      |
| 1187.6631  | 1187.6013   | -0.0618 | -52   | 1057       | 1066     | LREILDTEAK |           |        |                        |      | Mascot      |
| 1215.6005  | 1215.5856   | -0.0149 | -12   | 164        | 173      | THYVINEDPK |           |        |                        |      | Mascot      |
| 1259.5797  | 1259.5645   | -0.0152 | -12   | 182        | 191      | SKDLSHCQER |           |        | Carbamidomethyl (C)[7] |      | Mascot      |

|           |                              |         |     |     |             |                    |         |    |        |     |     |     |     |                   |  |  |  |  |        |
|-----------|------------------------------|---------|-----|-----|-------------|--------------------|---------|----|--------|-----|-----|-----|-----|-------------------|--|--|--|--|--------|
| 1379.7603 | 1379.7249                    | -0.0354 | -26 | 433 | 445         | EVVMLGYGSLIAK      |         |    |        |     |     |     |     |                   |  |  |  |  | Mascot |
| 1395.7551 | 1395.7166                    | -0.0385 | -28 | 433 | 445         | EVVMLGYGSLIAK      |         |    |        |     |     |     |     | Oxidation (M)[4]  |  |  |  |  | Mascot |
| 1477.91   | 1477.8926                    | -0.0174 | -12 | 532 | 544         | LVQPIALQLVLDR      |         |    |        |     |     |     |     |                   |  |  |  |  | Mascot |
| 1477.91   | 1477.8926                    | -0.0174 | -12 | 532 | 544         | LVQPIALQLVLDR      |         | 65 | 99.992 |     |     |     |     |                   |  |  |  |  | Mascot |
| 1515.7478 | 1515.7296                    | -0.0182 | -12 | 733 | 745         | VFGQEVAYVNFDK      |         |    |        |     |     |     |     |                   |  |  |  |  | Mascot |
| 1666.8767 | 1666.8589                    | -0.0178 | -11 | 483 | 498         | VMGNAGHPSSLKPIMK   |         |    |        |     |     |     |     |                   |  |  |  |  | Mascot |
| 1699.9047 | 1699.9154                    | 0.0107  | 6   | 597 | 614         | ITAPDMASVAGAANVAIK |         |    |        |     |     |     |     |                   |  |  |  |  | Mascot |
| 1699.9377 | 1699.9154                    | -0.0223 | -13 | 34  | 49          | YEALLLGGLPQEGLAR   |         | 70 | 99.997 |     |     |     |     |                   |  |  |  |  | Mascot |
| 1721.9043 | 1721.8861                    | -0.0182 | -11 | 119 | 134         | VFAPAGVSPTVMNLYR   |         |    |        |     |     |     |     |                   |  |  |  |  | Mascot |
| 1737.8992 | 1737.9032                    | 0.004   | 2   | 119 | 134         | VFAPAGVSPTVMNLYR   |         |    |        |     |     |     |     | Oxidation (M)[12] |  |  |  |  | Mascot |
| 1812.8877 | 1812.8676                    | -0.0201 | -11 | 72  | 86          | LMDPLLYEYAGTWPK    |         |    |        |     |     |     |     | Oxidation (M)[2]  |  |  |  |  | Mascot |
| 13        | vitellogenin 1 [Danio rerio] |         |     |     | gi 21391474 |                    | 21118.2 | 9  | 7      | 259 | 100 | 212 | 100 |                   |  |  |  |  |        |

Peptide Information

| Calc. Mass | Obsrv. Mass | ± da    | ± ppm | Start Seq. | End Seq. | Sequence          | Ion Score | C. I.  | % | Modification            | Rank | Result | Type |
|------------|-------------|---------|-------|------------|----------|-------------------|-----------|--------|---|-------------------------|------|--------|------|
| 1044.4528  | 1044.4392   | -0.0136 | -13   | 184        | 191      | DLSHCQER          |           |        |   | Carbamidomethyl (C)[5]  |      | Mascot |      |
| 1215.6005  | 1215.5856   | -0.0149 | -12   | 164        | 173      | THYVINEDPK        |           |        |   |                         |      | Mascot |      |
| 1259.5797  | 1259.5645   | -0.0152 | -12   | 182        | 191      | SKDLSHCQER        |           |        |   | Carbamidomethyl (C)[7]  |      | Mascot |      |
| 1695.8999  | 1695.8778   | -0.0221 | -13   | 119        | 134      | VFAPAGVSPTVMNLHR  |           |        |   |                         |      | Mascot |      |
| 1699.9377  | 1699.9154   | -0.0223 | -13   | 34         | 49       | YEALLLGGLPQEGLAR  |           |        |   |                         |      | Mascot |      |
| 1699.9377  | 1699.9154   | -0.0223 | -13   | 34         | 49       | YEALLLGGLPQEGLAR  | 70        | 99.997 |   |                         |      | Mascot |      |
| 1711.8948  | 1711.8741   | -0.0207 | -12   | 119        | 134      | VFAPAGVSPTVMNLHR  | 3         | 0      |   | Oxidation (M)[12]       |      | Mascot |      |
| 1711.8948  | 1711.8741   | -0.0207 | -12   | 119        | 134      | VFAPAGVSPTVMNLHR  |           |        |   | Oxidation (M)[12]       |      | Mascot |      |
| 1812.8877  | 1812.8676   | -0.0201 | -11   | 72         | 86       | LMDPLLYEYAGTWPK   |           |        |   | Oxidation (M)[2]        |      | Mascot |      |
| 1936.9181  | 1936.8918   | -0.0263 | -14   | 147        | 163      | TQNIYELQEAGAQQVCR | 142       | 100    |   | Carbamidomethyl (C)[16] |      | Mascot |      |
| 1936.9181  | 1936.8918   | -0.0263 | -14   | 147        | 163      | TQNIYELQEAGAQQVCR |           |        |   | Carbamidomethyl (C)[16] |      | Mascot |      |

14 vitellogenin 2 isoform 1 [Danio rerio] gi|113678458 179782.8 8.7 15 157 100 124 100

Peptide Information

| Calc. Mass | Obsrv. Mass | ± da    | ± ppm | Start Seq. | End Seq. | Sequence   | Ion Score | C. I. | % | Modification           | Rank | Result | Type |
|------------|-------------|---------|-------|------------|----------|------------|-----------|-------|---|------------------------|------|--------|------|
| 1044.4528  | 1044.4392   | -0.0136 | -13   | 184        | 191      | DLSHCQER   |           |       |   | Carbamidomethyl (C)[5] |      | Mascot |      |
| 1095.6885  | 1095.6724   | -0.0161 | -15   | 780        | 789      | AKPLLVAEVR |           |       |   |                        |      | Mascot |      |
| 1097.6677  | 1097.6544   | -0.0133 | -12   | 514        | 523      | VQVDAILALR |           |       |   |                        |      | Mascot |      |
| 1097.6677  | 1097.6544   | -0.0133 | -12   | 514        | 523      | VQVDAILALR | 89        | 100   |   |                        |      | Mascot |      |
| 1115.6055  | 1115.6783   | 0.0728  | 65    | 1557       | 1566     | QVILNGQESK | 9         | 0     |   |                        |      | Mascot |      |

|    |                                                     |           |         |     |              |      |                                |     |    |        |     |     |                          |  |  |  |  |  |        |
|----|-----------------------------------------------------|-----------|---------|-----|--------------|------|--------------------------------|-----|----|--------|-----|-----|--------------------------|--|--|--|--|--|--------|
|    | 1115.6055                                           | 1115.6783 | 0.0728  | 65  | 1557         | 1566 | QVILNGQESK                     |     |    |        |     |     |                          |  |  |  |  |  | Mascot |
|    | 1141.5459                                           | 1141.5315 | -0.0144 | -13 | 733          | 742  | VFGQEMAFGR                     |     |    |        |     |     |                          |  |  |  |  |  | Mascot |
|    | 1149.6779                                           | 1149.6653 | -0.0126 | -11 | 333          | 341  | FVQLVQFLR                      |     |    |        |     |     |                          |  |  |  |  |  | Mascot |
|    | 1157.5408                                           | 1157.5298 | -0.011  | -10 | 733          | 742  | VFGQEMAFGR                     |     |    |        |     |     | Oxidation (M)[6]         |  |  |  |  |  | Mascot |
|    | 1179.5892                                           | 1179.5874 | -0.0018 | -2  | 164          | 173  | TQYVISEDPK                     |     |    |        |     |     |                          |  |  |  |  |  | Mascot |
|    | 1187.6167                                           | 1187.6013 | -0.0154 | -13 | 770          | 779  | ALQEGISWQR                     |     |    |        |     |     |                          |  |  |  |  |  | Mascot |
|    | 1477.91                                             | 1477.8926 | -0.0174 | -12 | 532          | 544  | LVQPVALQLVLER                  |     |    |        |     |     |                          |  |  |  |  |  | Mascot |
|    | 1477.91                                             | 1477.8926 | -0.0174 | -12 | 532          | 544  | LVQPVALQLVLER                  |     | 34 | 90.569 |     |     |                          |  |  |  |  |  | Mascot |
|    | 1666.8799                                           | 1666.8589 | -0.021  | -13 | 668          | 683  | AYLAGAATDVIEFGLR               |     |    |        |     |     |                          |  |  |  |  |  | Mascot |
|    | 1689.9323                                           | 1689.9099 | -0.0224 | -13 | 119          | 134  | VFAPAGVSPSVLNLYR               |     |    |        |     |     |                          |  |  |  |  |  | Mascot |
|    | 1737.699                                            | 1737.9032 | 0.2042  | 118 | 1616         | 1631 | ETTDAAHVACRTEQCA               |     |    |        |     |     |                          |  |  |  |  |  | Mascot |
|    | 1955.0232                                           | 1954.8512 | -0.172  | -88 | 1016         | 1033 | AEGPAVEKLEFEVQVGP<br>R         |     |    |        |     |     |                          |  |  |  |  |  | Mascot |
|    | 2645.3608                                           | 2645.325  | -0.0358 | -14 | 897          | 920  | IEALPVELPEHIASASFET<br>FAFAR   |     |    |        |     |     |                          |  |  |  |  |  | Mascot |
|    | 2938.5164                                           | 2938.4805 | -0.0359 | -12 | 446          | 471  | YCVAVPTCPAELLRIPIEI<br>ATEAISK |     |    |        |     |     | Carbamidomethyl (C)[2,8] |  |  |  |  |  | Mascot |
| 15 | PREDICTED: vitellogenin-like, partial [Danio rerio] |           |         |     | gi 326681170 |      | 93358.3                        | 9.2 | 11 | 151    | 100 | 124 | 100                      |  |  |  |  |  |        |

Peptide Information

| Calc. Mass | Obsrv. Mass | ± da    | ± ppm | Start Seq. | End Seq. | Sequence                       | Ion Score | C. I.  | % Modification           | Rank | Result Type |
|------------|-------------|---------|-------|------------|----------|--------------------------------|-----------|--------|--------------------------|------|-------------|
| 1044.4528  | 1044.4392   | -0.0136 | -13   | 184        | 191      | DLSHCQER                       |           |        | Carbamidomethyl (C)[5]   |      | Mascot      |
| 1095.6885  | 1095.6724   | -0.0161 | -15   | 780        | 789      | AKPLLVAEVR                     |           |        |                          |      | Mascot      |
| 1097.6677  | 1097.6544   | -0.0133 | -12   | 514        | 523      | VQVDAILALR                     |           |        |                          |      | Mascot      |
| 1097.6677  | 1097.6544   | -0.0133 | -12   | 514        | 523      | VQVDAILALR                     | 89        | 100    |                          |      | Mascot      |
| 1141.5459  | 1141.5315   | -0.0144 | -13   | 733        | 742      | VFGQEMAFGR                     |           |        |                          |      | Mascot      |
| 1149.6779  | 1149.6653   | -0.0126 | -11   | 333        | 341      | FVQLVQFLR                      |           |        |                          |      | Mascot      |
| 1157.5408  | 1157.5298   | -0.011  | -10   | 733        | 742      | VFGQEMAFGR                     |           |        | Oxidation (M)[6]         |      | Mascot      |
| 1179.5892  | 1179.5874   | -0.0018 | -2    | 164        | 173      | TQYVISEDPK                     |           |        |                          |      | Mascot      |
| 1187.6167  | 1187.6013   | -0.0154 | -13   | 770        | 779      | ALQEGISWQR                     |           |        |                          |      | Mascot      |
| 1477.91    | 1477.8926   | -0.0174 | -12   | 532        | 544      | LVQPVALQLVLER                  |           |        |                          |      | Mascot      |
| 1477.91    | 1477.8926   | -0.0174 | -12   | 532        | 544      | LVQPVALQLVLER                  | 34        | 90.569 |                          |      | Mascot      |
| 1666.8799  | 1666.8589   | -0.021  | -13   | 668        | 683      | AYLAGAATDVIEFGLR               |           |        |                          |      | Mascot      |
| 1689.9323  | 1689.9099   | -0.0224 | -13   | 119        | 134      | VFAPAGVSPSVLNLYR               |           |        |                          |      | Mascot      |
| 2938.5164  | 2938.4805   | -0.0359 | -12   | 446        | 471      | YCVAVPTCPAELLRIPIEI<br>ATEAISK |           |        | Carbamidomethyl (C)[2,8] |      | Mascot      |

|    |                                                |  |  |  |              |  |         |      |   |    |        |    |        |  |  |  |  |  |  |
|----|------------------------------------------------|--|--|--|--------------|--|---------|------|---|----|--------|----|--------|--|--|--|--|--|--|
| 16 | Unknown (protein for MGC:174137) [Danio rerio] |  |  |  | gi 152012733 |  | 17051.5 | 7.71 | 2 | 78 | 99.937 | 70 | 99.997 |  |  |  |  |  |  |
|----|------------------------------------------------|--|--|--|--------------|--|---------|------|---|----|--------|----|--------|--|--|--|--|--|--|

Peptide Information

|                     |                                                             | Calc. Mass   | Obsrv. Mass | ± da    | ± ppm | Start Seq. | End Sequence Seq.                  | Ion Score | C. I.  | % Modification                | Rank | Result Type |
|---------------------|-------------------------------------------------------------|--------------|-------------|---------|-------|------------|------------------------------------|-----------|--------|-------------------------------|------|-------------|
|                     |                                                             | 1699.9377    | 1699.9154   | -0.0223 | -13   | 34         | 49 YEALLLGGLPQEGLAR                |           |        |                               |      | Mascot      |
|                     |                                                             | 1699.9377    | 1699.9154   | -0.0223 | -13   | 34         | 49 YEALLLGGLPQEGLAR                | 70        | 99.997 |                               |      | Mascot      |
|                     |                                                             | 1812.8877    | 1812.8676   | -0.0201 | -11   | 72         | 86 LMDPLLYEYAGTWPK                 |           |        | Oxidation (M)[2]              |      | Mascot      |
| 17                  | novel protein similar to vitellogenin 1 (vg1) [Danio rerio] | gi 94732724  | 24001.7     | 5.6     | 1     | 71         | 99.63                              | 71        | 99.998 |                               |      |             |
| Peptide Information |                                                             |              |             |         |       |            |                                    |           |        |                               |      |             |
|                     |                                                             | Calc. Mass   | Obsrv. Mass | ± da    | ± ppm | Start Seq. | End Sequence Seq.                  | Ion Score | C. I.  | % Modification                | Rank | Result Type |
|                     |                                                             | 1115.6935    | 1115.6783   | -0.0152 | -14   | 128        | 136 FVQLVQLLR                      | 71        | 99.998 |                               |      | Mascot      |
|                     |                                                             | 1115.6935    | 1115.6783   | -0.0152 | -14   | 128        | 136 FVQLVQLLR                      |           |        |                               |      | Mascot      |
| 18                  | vitellogenin 2 isoform 2 [Danio rerio]                      | gi 160333705 | 93050.4     | 8.22    | 7     | 56         | 87.743                             | 34        | 90.569 |                               |      |             |
| Peptide Information |                                                             |              |             |         |       |            |                                    |           |        |                               |      |             |
|                     |                                                             | Calc. Mass   | Obsrv. Mass | ± da    | ± ppm | Start Seq. | End Sequence Seq.                  | Ion Score | C. I.  | % Modification                | Rank | Result Type |
|                     |                                                             | 1115.6055    | 1115.6783   | 0.0728  | 65    | 760        | 769 QVILNGQESK                     | 9         | 0      |                               |      | Mascot      |
|                     |                                                             | 1115.6055    | 1115.6783   | 0.0728  | 65    | 760        | 769 QVILNGQESK                     |           |        |                               |      | Mascot      |
|                     |                                                             | 1149.6779    | 1149.6653   | -0.0126 | -11   | 79         | 87 FVQLVQFLR                       |           |        |                               |      | Mascot      |
|                     |                                                             | 1187.5474    | 1187.6013   | 0.0539  | 45    | 819        | 828 ETDDAHVVCRR                    |           |        | Carbamidomethyl (C)[9]        |      | Mascot      |
|                     |                                                             | 1477.91      | 1477.8926   | -0.0174 | -12   | 278        | 290 LVQPVALQLVLR                   |           |        |                               |      | Mascot      |
|                     |                                                             | 1477.91      | 1477.8926   | -0.0174 | -12   | 278        | 290 LVQPVALQLVLR                   | 34        | 90.569 |                               |      | Mascot      |
|                     |                                                             | 1936.7946    | 1936.8918   | 0.0972  | 50    | 819        | 834 ETDDAHVVCRCRTEQCA              |           |        | Carbamidomethyl (C)[9,11,15]  |      | Mascot      |
|                     |                                                             | 1936.9908    | 1936.8918   | -0.099  | -51   | 62         | 78 HLVENNVMVRDDAPLK                |           |        | Oxidation (M)[9]              |      | Mascot      |
|                     |                                                             | 2938.5164    | 2938.4805   | -0.0359 | -12   | 192        | 217 YCVAVPTCPAELLRPIHEI<br>ATEAISK |           |        | Carbamidomethyl (C)[2,8]      |      | Mascot      |
| 19                  | PREDICTED: anosmin-1-like, partial [Danio rerio]            | gi 326670889 | 21409.4     | 8.83    | 9     | 55         | 87.166                             |           |        |                               |      |             |
| Peptide Information |                                                             |              |             |         |       |            |                                    |           |        |                               |      |             |
|                     |                                                             | Calc. Mass   | Obsrv. Mass | ± da    | ± ppm | Start Seq. | End Sequence Seq.                  | Ion Score | C. I.  | % Modification                | Rank | Result Type |
|                     |                                                             | 882.5519     | 882.556     | 0.0041  | 5     | 86         | 93 GSPLKPRK                        |           |        |                               |      | Mascot      |
|                     |                                                             | 1023.5693    | 1023.4974   | -0.0719 | -70   | 168        | 177 VAAVNVHGTR                     |           |        |                               |      | Mascot      |
|                     |                                                             | 1515.7802    | 1515.7296   | -0.0506 | -33   | 2          | 16 GPEGKPVSGSTQFPK                 |           |        |                               |      | Mascot      |
|                     |                                                             | 1666.6189    | 1666.8589   | 0.24    | 144   | 68         | 81 CCSNGCGHTCQTPK                  |           |        | Carbamidomethyl (C)[1,2,6,10] |      | Mascot      |
|                     |                                                             | 1689.8112    | 1689.9099   | 0.0987  | 58    | 30         | 44 SVQTLKQGDCPAEEK                 |           |        | Carbamidomethyl (C)[10]       |      | Mascot      |
|                     |                                                             | 1711.9238    | 1711.8741   | -0.0497 | -29   | 168        | 184 VAAVNVHGTRGFTAPSK              |           |        |                               |      | Mascot      |

|    |                                  |           |         |     |              |     |                         |      |   |    |        |  |                            |  |  |  |        |
|----|----------------------------------|-----------|---------|-----|--------------|-----|-------------------------|------|---|----|--------|--|----------------------------|--|--|--|--------|
|    | 1711.9238                        | 1711.8741 | -0.0497 | -29 | 168          | 184 | VAAVNVHGTRGFTAPSK       |      |   |    |        |  |                            |  |  |  | Mascot |
|    | 1737.6924                        | 1737.9032 | 0.2108  | 121 | 67           | 81  | KCCSNGCGHTCQTPK         |      |   |    |        |  | Carbamidomethyl (C)[2,3,7] |  |  |  | Mascot |
|    | 1767.9025                        | 1767.9484 | 0.0459  | 26  | 94           | 108 | DLQFVEHPSGQLELR         |      |   |    |        |  |                            |  |  |  | Mascot |
|    | 2284.147                         | 2284.1487 | 0.0017  | 1   | 94           | 112 | DLQFVEHPSGQLELRWS<br>SR |      |   |    |        |  |                            |  |  |  | Mascot |
| 20 | Zgc:171915 protein [Danio rerio] |           |         |     | gi 156230187 |     | 32406                   | 8.38 | 9 | 48 | 31.076 |  |                            |  |  |  |        |

#### Peptide Information

| Calc. Mass | Obsrv. Mass | ± da    | ± ppm | Start Seq. | End Seq. | Sequence                      | Ion Score | C. I. % | Modification                             | Rank | Result Type |
|------------|-------------|---------|-------|------------|----------|-------------------------------|-----------|---------|------------------------------------------|------|-------------|
| 842.5246   | 842.4983    | -0.0263 | -31   | 263        | 269      | GKIHIFK                       |           |         |                                          |      | Mascot      |
| 1044.4489  | 1044.4392   | -0.0097 | -9    | 270        | 277      | YLNMEACK                      |           |         | Carbamidomethyl (C)[7], Oxidation (M)[4] |      | Mascot      |
| 1070.6093  | 1070.4707   | -0.1386 | -129  | 161        | 170      | LVSLPEDLGK                    |           |         |                                          |      | Mascot      |
| 1382.8187  | 1382.7667   | -0.052  | -38   | 149        | 160      | LPLKVLACNNK                   |           |         | Carbamidomethyl (C)[9]                   |      | Mascot      |
| 1477.7943  | 1477.8926   | 0.0983  | 67    | 229        | 240      | VTSIPVCYRNLR                  |           |         | Carbamidomethyl (C)[7]                   |      | Mascot      |
| 1477.7943  | 1477.8926   | 0.0983  | 67    | 229        | 240      | VTSIPVCYRNLR                  |           |         | Carbamidomethyl (C)[7]                   |      | Mascot      |
| 1515.7761  | 1515.7296   | -0.0465 | -31   | 51         | 66       | ALDEAAATGGLNLSGR              |           |         |                                          |      | Mascot      |
| 1666.8444  | 1666.8589   | 0.0145  | 9     | 265        | 277      | IHIFKYNMEACK                  |           |         | Carbamidomethyl (C)[12]                  |      | Mascot      |
| 2211.1841  | 2211.0786   | -0.1055 | -48   | 210        | 228      | LPPELAELPLVRLDFSCN<br>K       |           |         | Carbamidomethyl (C)[17]                  |      | Mascot      |
| 2627.4338  | 2627.3389   | -0.0949 | -36   | 241        | 264      | HLQSIILDNNPLQSPPAQI<br>CIK GK |           |         |                                          |      | Mascot      |

|    |                                  |  |  |  |              |  |         |      |    |    |        |  |  |  |  |  |  |
|----|----------------------------------|--|--|--|--------------|--|---------|------|----|----|--------|--|--|--|--|--|--|
| 21 | Zgc:158611 protein [Danio rerio] |  |  |  | gi 124481798 |  | 67832.2 | 7.55 | 13 | 48 | 26.147 |  |  |  |  |  |  |
|----|----------------------------------|--|--|--|--------------|--|---------|------|----|----|--------|--|--|--|--|--|--|

#### Peptide Information

| Calc. Mass | Obsrv. Mass | ± da    | ± ppm | Start Seq. | End Seq. | Sequence         | Ion Score | C. I. % | Modification             | Rank | Result Type |
|------------|-------------|---------|-------|------------|----------|------------------|-----------|---------|--------------------------|------|-------------|
| 821.4556   | 821.4509    | -0.0047 | -6    | 484        | 489      | LFEWVK           |           |         |                          |      | Mascot      |
| 1187.5626  | 1187.6013   | 0.0387  | 33    | 318        | 327      | GQMLPADFHR       |           |         | Oxidation (M)[3]         |      | Mascot      |
| 1215.4955  | 1215.5856   | 0.0901  | 74    | 223        | 231      | YECPMCSLR        |           |         | Carbamidomethyl (C)[3,6] |      | Mascot      |
| 1324.6604  | 1324.6707   | 0.0103  | 8     | 137        | 147      | TTQTPSNYTRR      |           |         |                          |      | Mascot      |
| 1379.6332  | 1379.7249   | 0.0917  | 66    | 210        | 222      | ISAESNDRAGGMR    |           |         | Oxidation (M)[12]        |      | Mascot      |
| 1463.7523  | 1463.8763   | 0.124   | 85    | 553        | 565      | VLSQDTVTSMVQR    |           |         |                          |      | Mascot      |
| 1463.7523  | 1463.8763   | 0.124   | 85    | 553        | 565      | VLSQDTVTSMVQR    | 2         | 0       |                          |      | Mascot      |
| 1493.8335  | 1493.7157   | -0.1178 | -79   | 466        | 478      | ARIVDFHKPTGPR    |           |         |                          |      | Mascot      |
| 1549.7162  | 1549.8157   | 0.0995  | 64    | 330        | 344      | AEMLESLASGVDDGR  |           |         |                          |      | Mascot      |
| 1699.7592  | 1699.9154   | 0.1562  | 92    | 57         | 71       | DYQDTNVTMVNSGQK  |           |         |                          |      | Mascot      |
| 1699.7592  | 1699.9154   | 0.1562  | 92    | 57         | 71       | DYQDTNVTMVNSGQK  |           |         |                          |      | Mascot      |
| 1721.8123  | 1721.8861   | 0.0738  | 43    | 329        | 344      | RAEMLESLASGVDDGR |           |         | Oxidation (M)[4]         |      | Mascot      |



|           |           |         |     |     |     |                              |                        |        |
|-----------|-----------|---------|-----|-----|-----|------------------------------|------------------------|--------|
| 1970.8906 | 1970.8505 | -0.0401 | -20 | 72  | 89  | NDCITKSTSNVNATNTCK           | Carbamidomethyl (C)[3] | Mascot |
| 1991.0201 | 1991.0699 | 0.0498  | 25  | 392 | 407 | NIQMLLSSLHRMEQYK             |                        | Mascot |
| 1991.0201 | 1991.0699 | 0.0498  | 25  | 392 | 407 | NIQMLLSSLHRMEQYK             |                        | Mascot |
| 2627.2056 | 2627.3389 | 0.1333  | 51  | 419 | 442 | VQALMEEAWAQGADPQ<br>GASHFNNR |                        | Mascot |

22 Zgc:171573 protein [Danio rerio] gi|166796220 28101.6 9.65 8 43 0

#### Peptide Information

| Calc. Mass | Obsrv. Mass | ± da    | ± ppm | Start Seq. | End Seq. | Sequence                | Ion Score | C. I. % | Modification              | Rank | Result Type |
|------------|-------------|---------|-------|------------|----------|-------------------------|-----------|---------|---------------------------|------|-------------|
| 902.4689   | 902.5313    | 0.0624  | 69    | 87         | 93       | DERQLNK                 |           |         |                           |      | Mascot      |
| 1097.5334  | 1097.6544   | 0.121   | 110   | 2          | 10       | NQVEHLSDR               |           |         |                           |      | Mascot      |
| 1097.5334  | 1097.6544   | 0.121   | 110   | 2          | 10       | NQVEHLSDR               |           |         |                           |      | Mascot      |
| 1121.5255  | 1121.5836   | 0.0581  | 52    | 168        | 176      | KQEENNMTK               |           |         |                           |      | Mascot      |
| 1338.7627  | 1338.6855   | -0.0772 | -58   | 127        | 139      | ILPGLVGEDLGQK           |           |         |                           |      | Mascot      |
| 1608.9067  | 1608.8176   | -0.0891 | -55   | 127        | 141      | ILPGLVGEDLGQKNR         |           |         |                           |      | Mascot      |
| 1608.9067  | 1608.8176   | -0.0891 | -55   | 127        | 141      | ILPGLVGEDLGQKNR         |           |         |                           |      | Mascot      |
| 1711.9701  | 1711.8741   | -0.096  | -56   | 35         | 50       | VRTIGVDIDALGQQVK        |           |         |                           |      | Mascot      |
| 1711.9701  | 1711.8741   | -0.096  | -56   | 35         | 50       | VRTIGVDIDALGQQVK        |           |         |                           |      | Mascot      |
| 1937.045   | 1936.8918   | -0.1532 | -79   | 122        | 139      | QEGQRILPGLVGEDLGQ<br>K  |           |         |                           |      | Mascot      |
| 1937.045   | 1936.8918   | -0.1532 | -79   | 122        | 139      | QEGQRILPGLVGEDLGQ<br>K  |           |         |                           |      | Mascot      |
| 2211.042   | 2211.0786   | 0.0366  | 17    | 65         | 83       | VYADDLLCSDGIACILEQ<br>R |           |         | Carbamidomethyl (C)[8,14] |      | Mascot      |

23 zinc finger with UFM1-specific peptidase domain-like [Danio rerio] gi|262263368 67968.3 7.81 12 42 0

#### Peptide Information

| Calc. Mass | Obsrv. Mass | ± da    | ± ppm | Start Seq. | End Seq. | Sequence        | Ion Score | C. I. % | Modification             | Rank | Result Type |
|------------|-------------|---------|-------|------------|----------|-----------------|-----------|---------|--------------------------|------|-------------|
| 821.4556   | 821.4509    | -0.0047 | -6    | 484        | 489      | LFIEWVK         |           |         |                          |      | Mascot      |
| 1187.5626  | 1187.6013   | 0.0387  | 33    | 318        | 327      | GQMLPADFHR      |           |         | Oxidation (M)[3]         |      | Mascot      |
| 1215.4955  | 1215.5856   | 0.0901  | 74    | 223        | 231      | YECPMCSLR       |           |         | Carbamidomethyl (C)[3,6] |      | Mascot      |
| 1324.6604  | 1324.6707   | 0.0103  | 8     | 137        | 147      | TTQTPSNYTRR     |           |         |                          |      | Mascot      |
| 1379.6332  | 1379.7249   | 0.0917  | 66    | 210        | 222      | ISAESNDRAGGMR   |           |         | Oxidation (M)[12]        |      | Mascot      |
| 1463.7523  | 1463.8763   | 0.124   | 85    | 553        | 565      | VLSQDTVTSMVQR   |           |         |                          |      | Mascot      |
| 1463.7523  | 1463.8763   | 0.124   | 85    | 553        | 565      | VLSQDTVTSMVQR   | 2         | 0       |                          |      | Mascot      |
| 1493.8335  | 1493.7157   | -0.1178 | -79   | 466        | 478      | ARIVDFHKPTGPR   |           |         |                          |      | Mascot      |
| 1549.7162  | 1549.8157   | 0.0995  | 64    | 330        | 344      | AEMLESLASGVDDGR |           |         |                          |      | Mascot      |
| 1699.7592  | 1699.9154   | 0.1562  | 92    | 57         | 71       | DYQDTNVTMVNSGQK |           |         |                          |      | Mascot      |

|           |           |         |     |     |     |                              |  |  |  |                        |  |  |        |
|-----------|-----------|---------|-----|-----|-----|------------------------------|--|--|--|------------------------|--|--|--------|
| 1699.7592 | 1699.9154 | 0.1562  | 92  | 57  | 71  | DYQDTNVTMVNSGQK              |  |  |  |                        |  |  | Mascot |
| 1721.8123 | 1721.8861 | 0.0738  | 43  | 329 | 344 | RAEMLESLASGVDDGR             |  |  |  | Oxidation (M)[4]       |  |  | Mascot |
| 1970.8906 | 1970.8505 | -0.0401 | -20 | 72  | 89  | NDCITKSTSNVNATNTCK           |  |  |  | Carbamidomethyl (C)[3] |  |  | Mascot |
| 2627.2056 | 2627.3389 | 0.1333  | 51  | 419 | 442 | VQALMEEAWAQQADPQ<br>GASHFNRR |  |  |  |                        |  |  | Mascot |

24 PREDICTED: leucine-rich repeat and calponin  
homology domain-containing protein 3 [Danio rerio]

gi|326675903 80065.8 7.57 12 40 0

#### Peptide Information

| Calc. Mass | Obsrv. Mass | ± da    | ± ppm | Start Seq. | End Seq. | Sequence                      | Ion Score | C. I. % | Modification                             | Rank | Result Type |
|------------|-------------|---------|-------|------------|----------|-------------------------------|-----------|---------|------------------------------------------|------|-------------|
| 842.5246   | 842.4983    | -0.0263 | -31   | 263        | 269      | GKIHIFK                       |           |         |                                          |      | Mascot      |
| 1044.4489  | 1044.4392   | -0.0097 | -9    | 270        | 277      | YLNMEACK                      |           |         | Carbamidomethyl (C)[7], Oxidation (M)[4] |      | Mascot      |
| 1070.6093  | 1070.4707   | -0.1386 | -129  | 161        | 170      | LVSLPEDLGK                    |           |         |                                          |      | Mascot      |
| 1382.8187  | 1382.7667   | -0.052  | -38   | 149        | 160      | LPLKVLIACNNK                  |           |         | Carbamidomethyl (C)[9]                   |      | Mascot      |
| 1463.739   | 1463.8763   | 0.1373  | 94    | 552        | 563      | GPNQRPESYLFR                  |           |         |                                          |      | Mascot      |
| 1463.739   | 1463.8763   | 0.1373  | 94    | 552        | 563      | GPNQRPESYLFR                  |           |         |                                          |      | Mascot      |
| 1477.7943  | 1477.8926   | 0.0983  | 67    | 229        | 240      | VTSIPVCYRNLR                  |           |         | Carbamidomethyl (C)[7]                   |      | Mascot      |
| 1477.7943  | 1477.8926   | 0.0983  | 67    | 229        | 240      | VTSIPVCYRNLR                  |           |         | Carbamidomethyl (C)[7]                   |      | Mascot      |
| 1515.7761  | 1515.7296   | -0.0465 | -31   | 51         | 66       | ALDEAAATGGLNLSGR              |           |         |                                          |      | Mascot      |
| 1666.8444  | 1666.8589   | 0.0145  | 9     | 265        | 277      | IHIFKYLNMEACK                 |           |         | Carbamidomethyl (C)[12]                  |      | Mascot      |
| 1737.9017  | 1737.9032   | 0.0015  | 1     | 711        | 728      | HTSPSPSTPTTAGTALVL            |           |         |                                          |      | Mascot      |
| 1970.9567  | 1970.8505   | -0.1062 | -54   | 321        | 337      | RWSGNEPSDELSDLPLR             |           |         |                                          |      | Mascot      |
| 2211.1841  | 2211.0786   | -0.1055 | -48   | 210        | 228      | LPPELAELPLVRLDFSCN<br>K       |           |         | Carbamidomethyl (C)[17]                  |      | Mascot      |
| 2627.4338  | 2627.3389   | -0.0949 | -36   | 241        | 264      | HLQSIILDNNPLQSPPAQI<br>CIK GK |           |         |                                          |      | Mascot      |

25 PREDICTED: caspase-8-like [Danio rerio]

gi|125845888 39333.1 7.51 10 39 0

#### Peptide Information

| Calc. Mass | Obsrv. Mass | ± da    | ± ppm | Start Seq. | End Seq. | Sequence     | Ion Score | C. I. % | Modification            | Rank | Result Type |
|------------|-------------|---------|-------|------------|----------|--------------|-----------|---------|-------------------------|------|-------------|
| 890.4213   | 890.4976    | 0.0763  | 86    | 241        | 249      | VEADAGNSK    |           |         |                         |      | Mascot      |
| 996.5043   | 996.5853    | 0.081   | 81    | 296        | 303      | NLEKHCPR     |           |         |                         |      | Mascot      |
| 1121.5334  | 1121.5836   | 0.0502  | 45    | 272        | 281      | STTNGHVSYSR  |           |         |                         |      | Mascot      |
| 1164.5565  | 1164.552    | -0.0045 | -4    | 5          | 14       | ESVDKICENK   |           |         |                         |      | Mascot      |
| 1179.5826  | 1179.5874   | 0.0048  | 4     | 207        | 216      | DPFTGVKQCQK  |           |         | Carbamidomethyl (C)[8]  |      | Mascot      |
| 1382.6521  | 1382.7667   | 0.1146  | 83    | 285        | 295      | EGSWFIQSLCR  |           |         | Carbamidomethyl (C)[10] |      | Mascot      |
| 1493.7126  | 1493.7157   | 0.0031  | 2     | 80         | 91       | QDCVLENFPMLK |           |         | Carbamidomethyl (C)[3]  |      | Mascot      |

|    |                                              |           |         |     |              |        |                             |   |    |   |    |        |                        |  |  |  |        |
|----|----------------------------------------------|-----------|---------|-----|--------------|--------|-----------------------------|---|----|---|----|--------|------------------------|--|--|--|--------|
|    | 1954.9989                                    | 1954.8512 | -0.1477 | -76 | 223          | 240    | LFFIQGCRGANSLQACVK          |   |    |   |    |        |                        |  |  |  | Mascot |
|    | 1970.9496                                    | 1970.8505 | -0.0991 | -50 | 114          | 131    | GICVIINNEIFSSGMMSR          |   |    |   |    |        |                        |  |  |  | Mascot |
|    | 2627.3608                                    | 2627.3389 | -0.0219 | -8  | 300          | 322    | HCPRGADILTILLYVNNEV<br>SSQK |   |    |   |    |        | Carbamidomethyl (C)[2] |  |  |  | Mascot |
| 26 | PREDICTED: protein argonaute-3 [Danio rerio] |           |         |     | gi 189530413 | 101302 | 9.23                        | 8 | 38 | 0 | 28 | 55.066 |                        |  |  |  |        |

#### Peptide Information

| Calc. Mass | Obsrv. Mass | ± da    | ± ppm | Start Seq. | End Seq. | Sequence          | Ion Score | C. I.  | % | Modification                             | Rank | Result Type |
|------------|-------------|---------|-------|------------|----------|-------------------|-----------|--------|---|------------------------------------------|------|-------------|
| 1115.5448  | 1115.6783   | 0.1335  | 120   | 1          | 9        | MNLLVCHGR         | 28        | 55.066 |   | Carbamidomethyl (C)[6], Oxidation (M)[1] |      | Mascot      |
| 1115.5448  | 1115.6783   | 0.1335  | 120   | 1          | 9        | MNLLVCHGR         |           |        |   | Carbamidomethyl (C)[6], Oxidation (M)[1] |      | Mascot      |
| 1141.6     | 1141.5315   | -0.0685 | -60   | 329        | 337      | TVAQYFREK         |           |        |   |                                          |      | Mascot      |
| 1379.72    | 1379.7249   | 0.0049  | 4     | 377        | 388      | KLTDNQTSTMIK      |           |        |   |                                          |      | Mascot      |
| 1395.7148  | 1395.7166   | 0.0018  | 1     | 377        | 388      | KLTDNQTSTMIK      |           |        |   | Oxidation (M)[10]                        |      | Mascot      |
| 1608.6967  | 1608.8176   | 0.1209  | 75    | 516        | 529      | DAGMPIQGQPCFCK    |           |        |   | Carbamidomethyl (C)[11,13]               |      | Mascot      |
| 1608.6967  | 1608.8176   | 0.1209  | 75    | 516        | 529      | DAGMPIQGQPCFCK    |           |        |   | Carbamidomethyl (C)[11,13]               |      | Mascot      |
| 1622.8649  | 1622.832    | -0.0329 | -20   | 97         | 110      | VTIFGDRRPVYDGK    |           |        |   |                                          |      | Mascot      |
| 1622.8649  | 1622.832    | -0.0329 | -20   | 97         | 110      | VTIFGDRRPVYDGK    |           |        |   |                                          |      | Mascot      |
| 1666.8429  | 1666.8589   | 0.016   | 10    | 378        | 392      | LTDNQTSTMIKATAR   |           |        |   | Oxidation (M)[9]                         |      | Mascot      |
| 1812.9425  | 1812.8676   | -0.0749 | -41   | 358        | 373      | HTYLPLEVCNIVAGQR  |           |        |   |                                          |      | Mascot      |
| 1936.9077  | 1936.8918   | -0.0159 | -8    | 513        | 529      | ISKDAGMPIQGQPCFCK |           |        |   | Carbamidomethyl (C)[14,16]               |      | Mascot      |
| 1936.9077  | 1936.8918   | -0.0159 | -8    | 513        | 529      | ISKDAGMPIQGQPCFCK |           |        |   | Carbamidomethyl (C)[14,16]               |      | Mascot      |

|    |                                                                       |  |  |  |             |          |      |    |    |   |    |       |  |  |  |  |  |
|----|-----------------------------------------------------------------------|--|--|--|-------------|----------|------|----|----|---|----|-------|--|--|--|--|--|
| 27 | striated muscle preferentially expressed protein kinase [Danio rerio] |  |  |  | gi 55741920 | 333474.3 | 8.12 | 13 | 38 | 0 | 28 | 60.07 |  |  |  |  |  |
|----|-----------------------------------------------------------------------|--|--|--|-------------|----------|------|----|----|---|----|-------|--|--|--|--|--|

#### Peptide Information

| Calc. Mass | Obsrv. Mass | ± da    | ± ppm | Start Seq. | End Seq. | Sequence   | Ion Score | C. I.  | % | Modification           | Rank | Result Type |
|------------|-------------|---------|-------|------------|----------|------------|-----------|--------|---|------------------------|------|-------------|
| 842.4189   | 842.4983    | 0.0794  | 94    | 887        | 892      | KMTQYR     |           |        |   | Oxidation (M)[2]       |      | Mascot      |
| 888.4032   | 888.5164    | 0.1132  | 127   | 1004       | 1010     | GVCYSFR    |           |        |   | Carbamidomethyl (C)[3] |      | Mascot      |
| 890.5094   | 890.4976    | -0.0118 | -13   | 713        | 719      | EPLFTRK    |           |        |   |                        |      | Mascot      |
| 902.5305   | 902.5313    | 0.0008  | 1     | 440        | 447      | INLADKTK   |           |        |   |                        |      | Mascot      |
| 1095.5542  | 1095.6724   | 0.1182  | 108   | 1771       | 1779     | TSSLDRNFR  |           |        |   |                        |      | Mascot      |
| 1097.6313  | 1097.6544   | 0.0231  | 21    | 2194       | 2203     | INDSPVLALR |           |        |   |                        |      | Mascot      |
| 1097.6313  | 1097.6544   | 0.0231  | 21    | 2194       | 2203     | INDSPVLALR | 31        | 78.394 |   |                        |      | Mascot      |
| 1115.5327  | 1115.6783   | 0.1456  | 131   | 2025       | 2034     | SEESSVPVQR |           |        |   |                        |      | Mascot      |
| 1115.5327  | 1115.6783   | 0.1456  | 131   | 2025       | 2034     | SEESSVPVQR |           |        |   |                        |      | Mascot      |
| 1149.504   | 1149.6653   | 0.1613  | 140   | 667        | 675      | MQFDGHRCR  |           |        |   |                        |      | Mascot      |

|           |           |         |     |      |      |                 |                        |        |
|-----------|-----------|---------|-----|------|------|-----------------|------------------------|--------|
| 1382.6984 | 1382.7667 | 0.0683  | 49  | 1729 | 1739 | EDYALKLDLMR     | Oxidation (M)[10]      | Mascot |
| 1434.7886 | 1434.7498 | -0.0388 | -27 | 2073 | 2085 | EVGLGLIGRFSMR   |                        | Mascot |
| 1493.6182 | 1493.7157 | 0.0975  | 65  | 2366 | 2379 | LCDGMNLEACPDGR  |                        | Mascot |
| 1695.9138 | 1695.8778 | -0.036  | -21 | 2707 | 2720 | MFIAKIIPYDQQTK  |                        | Mascot |
| 1699.9298 | 1699.9154 | -0.0144 | -8  | 698  | 712  | EELICTANLLVIPSK | Carbamidomethyl (C)[5] | Mascot |
| 1699.9298 | 1699.9154 | -0.0144 | -8  | 698  | 712  | EELICTANLLVIPSK | Carbamidomethyl (C)[5] | Mascot |
| 1711.9087 | 1711.8741 | -0.0346 | -20 | 2707 | 2720 | MFIAKIIPYDQQTK  | Oxidation (M)[1]       | Mascot |
| 1711.9087 | 1711.8741 | -0.0346 | -20 | 2707 | 2720 | MFIAKIIPYDQQTK  | Oxidation (M)[1]       | Mascot |

28 novel protein similar to vertebrate eukaryotic translation elongation factor 2 (EEF2) [Danio rerio] gi|94732996 95091.6 5.9 15 37 0

#### Peptide Information

| Calc. Mass | Obsrv. Mass | ± da    | ± ppm | Start Seq. | End Seq. | Sequence         | Ion Score | C. I. % | Modification                                | Rank | Result Type |
|------------|-------------|---------|-------|------------|----------|------------------|-----------|---------|---------------------------------------------|------|-------------|
| 890.4764   | 890.4976    | 0.0212  | 24    | 251        | 257      | VEDMIKR          |           |         |                                             |      | Mascot      |
| 1044.4965  | 1044.4392   | -0.0573 | -55   | 489        | 496      | AYNMRVMK         |           |         | Oxidation (M)[4,7]                          |      | Mascot      |
| 1070.5265  | 1070.4707   | -0.0558 | -52   | 570        | 578      | KSDPFASYR        |           |         |                                             |      | Mascot      |
| 1115.6241  | 1115.6783   | 0.0542  | 49    | 587        | 596      | QLCLAKTPNK       |           |         |                                             |      | Mascot      |
| 1115.6241  | 1115.6783   | 0.0542  | 49    | 587        | 596      | QLCLAKTPNK       |           |         |                                             |      | Mascot      |
| 1121.5078  | 1121.5836   | 0.0758  | 68    | 687        | 696      | EGVLCANMR        |           |         |                                             |      | Mascot      |
| 1141.6146  | 1141.5315   | -0.0831 | -73   | 829        | 838      | AAHIMADIRK       |           |         | Oxidation (M)[5]                            |      | Mascot      |
| 1149.615   | 1149.6653   | 0.0503  | 44    | 33         | 42       | STLTDWLVS        |           |         |                                             |      | Mascot      |
| 1234.6096  | 1234.6647   | 0.0551  | 45    | 62         | 71       | DEQERCITIK       |           |         |                                             |      | Mascot      |
| 1338.6833  | 1338.6855   | 0.0022  | 2     | 414        | 426      | VFSGCVSTGLNVR    |           |         |                                             |      | Mascot      |
| 1382.662   | 1382.7667   | 0.1047  | 76    | 558        | 569      | DLEEDHACIPLK     |           |         |                                             |      | Mascot      |
| 1395.7048  | 1395.7166   | 0.0118  | 8     | 414        | 426      | VFSGCVSTGLNVR    |           |         | Carbamidomethyl (C)[5]                      |      | Mascot      |
| 1463.7094  | 1463.8763   | 0.1669  | 114   | 687        | 699      | EGVLCANMRGIR     |           |         | Oxidation (M)[9]                            |      | Mascot      |
| 1463.7094  | 1463.8763   | 0.1669  | 114   | 687        | 699      | EGVLCANMRGIR     |           |         | Oxidation (M)[9]                            |      | Mascot      |
| 1475.8329  | 1475.736    | -0.0969 | -66   | 752        | 764      | SVIGNIYGELVRR    |           |         |                                             |      | Mascot      |
| 1699.7852  | 1699.9154   | 0.1302  | 77    | 385        | 398      | NCDPKAPLMYISK    |           |         | Carbamidomethyl (C)[2], Oxidation (M)[9,10] |      | Mascot      |
| 1699.7852  | 1699.9154   | 0.1302  | 77    | 385        | 398      | NCDPKAPLMYISK    |           |         | Carbamidomethyl (C)[2], Oxidation (M)[9,10] |      | Mascot      |
| 1711.8762  | 1711.8741   | -0.0021 | -1    | 700        | 714      | FEIHDTLTSTAIHR   |           |         |                                             |      | Mascot      |
| 1711.8762  | 1711.8741   | -0.0021 | -1    | 700        | 714      | FEIHDTLTSTAIHR   |           |         |                                             |      | Mascot      |
| 1970.9606  | 1970.8505   | -0.1101 | -56   | 630        | 645      | AQYLAENYKWEVTEAR |           |         |                                             |      | Mascot      |

29 glycerol-3-phosphate dehydrogenase, mitochondrial [Danio rerio] gi|113679506 58913.5 8.81 10 37 0

#### Peptide Information

|    | Calc. Mass                 | Obsrv. Mass | ± da    | ± ppm | Start Seq.   | End Sequence Seq.         | Ion Score | C. I. % | Modification           | Rank | Result Type |
|----|----------------------------|-------------|---------|-------|--------------|---------------------------|-----------|---------|------------------------|------|-------------|
|    | 821.3868                   | 821.4509    | 0.0641  | 78    | 264          | 270 VCGARCR               |           |         | Carbamidomethyl (C)[2] |      | Mascot      |
|    | 890.4876                   | 890.4976    | 0.01    | 11    | 510          | 517 MAQVTGKR              |           |         |                        |      | Mascot      |
|    | 1095.5907                  | 1095.6724   | 0.0817  | 75    | 199          | 207 ALEFFPMLK             |           |         |                        |      | Mascot      |
|    | 1164.6049                  | 1164.552    | -0.0529 | -45   | 473          | 481 DWTPTLYIR             |           |         |                        |      | Mascot      |
|    | 1395.73                    | 1395.7166   | -0.0134 | -10   | 504          | 516 SFEVAKMAQVTGK         |           |         |                        |      | Mascot      |
|    | 1477.7645                  | 1477.8926   | 0.1281  | 87    | 271          | 283 DVVTGQEFDIRAK         |           |         |                        |      | Mascot      |
|    | 1477.7645                  | 1477.8926   | 0.1281  | 87    | 271          | 283 DVVTGQEFDIRAK         |           |         |                        |      | Mascot      |
|    | 1493.7417                  | 1493.7157   | -0.026  | -17   | 284          | 297 CVINATGPFTDSLRL       |           |         |                        |      | Mascot      |
|    | 1689.8918                  | 1689.9099   | 0.0181  | 11    | 32           | 46 NQARLAYVEAQGELK        |           |         |                        |      | Mascot      |
|    | 1699.8246                  | 1699.9154   | 0.0908  | 53    | 94           | 109 TALVERSDFSSGTSSR      |           |         |                        |      | Mascot      |
|    | 1699.8246                  | 1699.9154   | 0.0908  | 53    | 94           | 109 TALVERSDFSSGTSSR      |           |         |                        |      | Mascot      |
|    | 2225.2036                  | 2225.0916   | -0.112  | -50   | 390          | 410 RGDVLAASGIRPLVTD PSSK |           |         |                        |      | Mascot      |
| 30 | GCN2 protein [Danio rerio] |             |         |       | gi 199601442 |                           | 62048.9   | 4.77    | 7                      | 37   | 0           |

#### Peptide Information

|    | Calc. Mass                                                                     | Obsrv. Mass | ± da    | ± ppm | Start Seq.   | End Sequence Seq.  | Ion Score | C. I. % | Modification           | Rank | Result Type |
|----|--------------------------------------------------------------------------------|-------------|---------|-------|--------------|--------------------|-----------|---------|------------------------|------|-------------|
|    | 890.5359                                                                       | 890.4976    | -0.0383 | -43   | 364          | 369 LWRLFR         |           |         |                        |      | Mascot      |
|    | 902.4478                                                                       | 902.5313    | 0.0835  | 93    | 1            | 7 FEQSHVR          |           |         |                        |      | Mascot      |
|    | 1115.6782                                                                      | 1115.6783   | 0.0001  | 0     | 177          | 186 IKGEVTLLSR     | 14        | 0       |                        |      | Mascot      |
|    | 1115.6782                                                                      | 1115.6783   | 0.0001  | 0     | 177          | 186 IKGEVTLLSR     |           |         |                        |      | Mascot      |
|    | 1187.5878                                                                      | 1187.6013   | 0.0135  | 11    | 155          | 164 LDGCYYAVKR     |           |         |                        |      | Mascot      |
|    | 1699.8901                                                                      | 1699.9154   | 0.0253  | 15    | 41           | 55 EYPLTVPDTLPADLR |           |         |                        |      | Mascot      |
|    | 1699.8901                                                                      | 1699.9154   | 0.0253  | 15    | 41           | 55 EYPLTVPDTLPADLR | 0         | 0       |                        |      | Mascot      |
|    | 1711.7527                                                                      | 1711.8741   | 0.1214  | 71    | 56           | 69 DFLNRCVCLDDADR  | 3         | 0       | Carbamidomethyl (C)[6] |      | Mascot      |
|    | 1711.7527                                                                      | 1711.8741   | 0.1214  | 71    | 56           | 69 DFLNRCVCLDDADR  |           |         | Carbamidomethyl (C)[6] |      | Mascot      |
|    | 1721.8051                                                                      | 1721.8861   | 0.081   | 47    | 539          | 553 SDLLPPQMEESLH  |           |         |                        |      | Mascot      |
|    | 1737.8                                                                         | 1737.9032   | 0.1032  | 59    | 539          | 553 SDLLPPQMEESLH  |           |         | Oxidation (M)[9]       |      | Mascot      |
| 31 | PREDICTED: VPS10 domain-containing receptor SorCS3-like, partial [Danio rerio] |             |         |       | gi 326664238 |                    | 117642.8  | 6.09    | 13                     | 36   | 0           |

#### Peptide Information

|  | Calc. Mass | Obsrv. Mass | ± da   | ± ppm | Start Seq. | End Sequence Seq. | Ion Score | C. I. % | Modification | Rank | Result Type |
|--|------------|-------------|--------|-------|------------|-------------------|-----------|---------|--------------|------|-------------|
|  | 902.4617   | 902.5313    | 0.0696 | 77    | 305        | 311 TYITYNK       |           |         |              |      | Mascot      |

|    |                               |           |         |      |              |     |                             |      |   |    |                         |  |                  |  |  |  |        |
|----|-------------------------------|-----------|---------|------|--------------|-----|-----------------------------|------|---|----|-------------------------|--|------------------|--|--|--|--------|
|    | 1044.4819                     | 1044.4392 | -0.0427 | -41  | 833          | 840 | SEDFLFMR                    |      |   |    |                         |  |                  |  |  |  | Mascot |
|    | 1070.5299                     | 1070.4707 | -0.0592 | -55  | 595          | 603 | GVKEMYTAR                   |      |   |    |                         |  | Oxidation (M)[5] |  |  |  | Mascot |
|    | 1095.6058                     | 1095.6724 | 0.0666  | 61   | 119          | 126 | KWQLVHER                    |      |   |    |                         |  |                  |  |  |  | Mascot |
|    | 1115.5844                     | 1115.6783 | 0.0939  | 84   | 305          | 313 | TYITYNKGR                   |      |   |    |                         |  |                  |  |  |  | Mascot |
|    | 1115.5844                     | 1115.6783 | 0.0939  | 84   | 305          | 313 | TYITYNKGR                   |      |   |    |                         |  |                  |  |  |  | Mascot |
|    | 1215.6045                     | 1215.5856 | -0.0189 | -16  | 132          | 141 | FYWSVTGLDK                  |      |   |    |                         |  |                  |  |  |  | Mascot |
|    | 1259.6167                     | 1259.5645 | -0.0522 | -41  | 423          | 432 | HLWISFDEGR                  |      |   |    |                         |  |                  |  |  |  | Mascot |
|    | 1395.7631                     | 1395.7166 | -0.0465 | -33  | 259          | 270 | GIYFTLALENV                 |      |   |    |                         |  |                  |  |  |  | Mascot |
|    | 1493.8798                     | 1493.7157 | -0.1641 | -110 | 408          | 422 | GGALVAVKQPTVPTR             |      |   |    |                         |  |                  |  |  |  | Mascot |
|    | 1711.7428                     | 1711.8741 | 0.1313  | 77   | 516          | 529 | RPGNYCMVGWDNSR              | 4    |   | 0  | Carbamidomethyl (C)[6]  |  |                  |  |  |  | Mascot |
|    | 1711.7428                     | 1711.8741 | 0.1313  | 77   | 516          | 529 | RPGNYCMVGWDNSR              |      |   |    | Carbamidomethyl (C)[6]  |  |                  |  |  |  | Mascot |
|    | 1739.9438                     | 1739.9099 | -0.0339 | -19  | 259          | 273 | GIYFTLALENVRTSR             |      |   |    |                         |  |                  |  |  |  | Mascot |
|    | 2563.2498                     | 2563.3469 | 0.0971  | 38   | 784          | 806 | TIAIQGKVYTFECVTEENA<br>SFGR |      |   |    |                         |  |                  |  |  |  | Mascot |
|    | 2645.1331                     | 2645.325  | 0.1919  | 73   | 142          | 163 | EFDLVHMEATPDGHCQ<br>YVTCR   |      |   |    | Carbamidomethyl (C)[16] |  |                  |  |  |  | Mascot |
| 32 | Myo1bl2 protein [Danio rerio] |           |         |      | gi 197247094 |     | 28225.8                     | 9.46 | 9 | 35 | 0                       |  |                  |  |  |  |        |

Peptide Information

| Calc. Mass | Obsrv. Mass | ± da    | ± ppm | Start Seq. | End Seq. | Sequence         | Ion Score | C. I. | % | Modification            | Rank | Result Type |
|------------|-------------|---------|-------|------------|----------|------------------|-----------|-------|---|-------------------------|------|-------------|
| 868.441    | 868.5146    | 0.0736  | 85    | 47         | 53       | KATYEEK          |           |       |   |                         |      | Mascot      |
| 890.4288   | 890.4976    | 0.0688  | 77    | 2          | 9        | PSMSPIDK         |           |       |   | Oxidation (M)[3]        |      | Mascot      |
| 996.4996   | 996.5853    | 0.0857  | 86    | 40         | 47       | SQFTEEEK         |           |       |   |                         |      | Mascot      |
| 1121.6201  | 1121.5836   | -0.0365 | -33   | 54         | 63       | LAASELFKDK       |           |       |   |                         |      | Mascot      |
| 1141.5306  | 1141.5315   | 0.0009  | 1     | 189        | 199      | LYCTGAASAER      |           |       |   |                         |      | Mascot      |
| 1187.5691  | 1187.6013   | 0.0322  | 27    | 38         | 46       | YRSQFTEEK        |           |       |   |                         |      | Mascot      |
| 1324.7219  | 1324.6707   | -0.0512 | -39   | 240        | 251      | NNRLLEVSVPSP     |           |       |   |                         |      | Mascot      |
| 1666.8217  | 1666.8589   | 0.0372  | 22    | 223        | 237      | FIQGTPKNSNSVSCK  |           |       |   | Carbamidomethyl (C)[14] |      | Mascot      |
| 1937.0378  | 1936.8918   | -0.146  | -75   | 200        | 215      | NQIKIDISDEFLVQFK |           |       |   |                         |      | Mascot      |
| 1937.0378  | 1936.8918   | -0.146  | -75   | 200        | 215      | NQIKIDISDEFLVQFK |           |       |   |                         |      | Mascot      |

33 calcium-binding protein 39 [Danio rerio] gi|50344946 39766.6 6.22 9 35 0

Peptide Information

| Calc. Mass | Obsrv. Mass | ± da   | ± ppm | Start Seq. | End Seq. | Sequence | Ion Score | C. I. | % | Modification | Rank | Result Type |
|------------|-------------|--------|-------|------------|----------|----------|-----------|-------|---|--------------|------|-------------|
| 882.5155   | 882.556     | 0.0405 | 46    | 190        | 196      | DLLTRHK  |           |       |   |              |      | Mascot      |
| 888.4937   | 888.5164    | 0.0227 | 26    | 280        | 287      | VFVANPNK |           |       |   |              |      | Mascot      |
| 890.495    | 890.4976    | 0.0026 | 3     | 258        | 264      | LMMNLLR  |           |       |   |              |      | Mascot      |

|  |           |           |         |     |     |     |                  |  |  |  |                        |  |  |  |  |  |        |
|--|-----------|-----------|---------|-----|-----|-----|------------------|--|--|--|------------------------|--|--|--|--|--|--------|
|  | 1097.5771 | 1097.6544 | 0.0773  | 70  | 8   | 17  | SHKCPADIVK       |  |  |  |                        |  |  |  |  |  | Mascot |
|  | 1097.5771 | 1097.6544 | 0.0773  | 70  | 8   | 17  | SHKCPADIVK       |  |  |  |                        |  |  |  |  |  | Mascot |
|  | 1149.6118 | 1149.6653 | 0.0535  | 47  | 258 | 266 | LMMNLLRDK        |  |  |  | Oxidation (M)[2]       |  |  |  |  |  | Mascot |
|  | 1157.6346 | 1157.5298 | -0.1048 | -91 | 11  | 20  | CPADIVKNLK       |  |  |  | Carbamidomethyl (C)[1] |  |  |  |  |  | Mascot |
|  | 1379.7106 | 1379.7249 | 0.0143  | 10  | 269 | 279 | NIQFEAFHVFK      |  |  |  |                        |  |  |  |  |  | Mascot |
|  | 1622.8438 | 1622.832  | -0.0118 | -7  | 267 | 279 | SRNIQFEAFHVFK    |  |  |  |                        |  |  |  |  |  | Mascot |
|  | 1622.8438 | 1622.832  | -0.0118 | -7  | 267 | 279 | SRNIQFEAFHVFK    |  |  |  |                        |  |  |  |  |  | Mascot |
|  | 1751.8455 | 1751.949  | 0.1035  | 59  | 133 | 148 | GYESPDIALNCGIMLR |  |  |  |                        |  |  |  |  |  | Mascot |
|  | 1767.8405 | 1767.9484 | 0.1079  | 61  | 133 | 148 | GYESPDIALNCGIMLR |  |  |  | Oxidation (M)[14]      |  |  |  |  |  | Mascot |

34 PREDICTED: tetratricopeptide repeat protein 34-like [Danio rerio] gi|326679115 119668.1 7.99 14 35 0

#### Peptide Information

| Calc. Mass | Obsrv. Mass | ± da    | ± ppm | Start Seq. | End Seq. | Sequence                  | Ion Score | C. I. | % Modification                            | Rank | Result Type |
|------------|-------------|---------|-------|------------|----------|---------------------------|-----------|-------|-------------------------------------------|------|-------------|
| 882.4791   | 882.556     | 0.0769  | 87    | 126        | 133      | QTPQPVGR                  |           |       |                                           |      | Mascot      |
| 996.4791   | 996.5853    | 0.1062  | 107   | 656        | 663      | HCHTASKR                  |           |       | Carbamidomethyl (C)[2]                    |      | Mascot      |
| 1179.6302  | 1179.5874   | -0.0428 | -36   | 1028       | 1036     | QRLAEMYLR                 |           |       |                                           |      | Mascot      |
| 1215.6514  | 1215.5856   | -0.0658 | -54   | 350        | 359      | EAVLMRPDLR                |           |       | Oxidation (M)[5]                          |      | Mascot      |
| 1324.6791  | 1324.6707   | -0.0084 | -6    | 948        | 959      | AACLAQLGLHDR              |           |       | Carbamidomethyl (C)[3]                    |      | Mascot      |
| 1395.7526  | 1395.7166   | -0.036  | -26   | 393        | 404      | LADCLLLRGEHR              |           |       |                                           |      | Mascot      |
| 1493.8435  | 1493.7157   | -0.1278 | -86   | 177        | 188      | ERQTQHVELIHK              |           |       |                                           |      | Mascot      |
| 1608.8387  | 1608.8176   | -0.0211 | -13   | 946        | 959      | QRAACLAQLGLHDR            |           |       | Carbamidomethyl (C)[5]                    |      | Mascot      |
| 1608.8387  | 1608.8176   | -0.0211 | -13   | 946        | 959      | QRAACLAQLGLHDR            |           |       | Carbamidomethyl (C)[5]                    |      | Mascot      |
| 1622.8068  | 1622.832    | 0.0252  | 16    | 376        | 390      | ALCHLEPDGGGRELR           |           |       |                                           |      | Mascot      |
| 1622.8068  | 1622.832    | 0.0252  | 16    | 376        | 390      | ALCHLEPDGGGRELR           |           |       |                                           |      | Mascot      |
| 1812.8875  | 1812.8676   | -0.0199 | -11   | 318        | 334      | QQFQSLFSDSIGTAAAR         |           |       |                                           |      | Mascot      |
| 1990.8997  | 1991.0699   | 0.1702  | 85    | 472        | 489      | MMAGSHYLTALDYATAS R       |           |       | Oxidation (M)[1,2]                        |      | Mascot      |
| 1990.8997  | 1991.0699   | 0.1702  | 85    | 472        | 489      | MMAGSHYLTALDYATAS R       |           |       | Oxidation (M)[1,2]                        |      | Mascot      |
| 2587.3872  | 2587.3228   | -0.0644 | -25   | 628        | 650      | KLINSGDTTCLRPLLSVTS LQDR  |           |       | Carbamidomethyl (C)[10]                   |      | Mascot      |
| 2627.2705  | 2627.3389   | 0.0684  | 26    | 723        | 744      | QPDNVQSLCGRAFTYLM LNQQK   |           |       | Carbamidomethyl (C)[9], Oxidation (M)[17] |      | Mascot      |
| 2645.2368  | 2645.325    | 0.0882  | 33    | 100        | 123      | MESVMQGTGQASDEIFA RCSALLK |           |       | Carbamidomethyl (C)[19], Oxidation (M)[1] |      | Mascot      |

35 novel protein (zgc:77855) [Danio rerio] gi|55963407 33960.8 5.02 8 35 0

#### Peptide Information

| Calc. Mass | Obsrv. Mass | ± da | ± ppm | Start Seq. | End Seq. | Sequence | Ion Score | C. I. | % Modification | Rank | Result Type |
|------------|-------------|------|-------|------------|----------|----------|-----------|-------|----------------|------|-------------|
|------------|-------------|------|-------|------------|----------|----------|-----------|-------|----------------|------|-------------|

|  |  |  |  |  |  |  |  |  |  |  |  |  |  |  |  |  |  |  |  |  |  |  |  |  |  |  |  |  |  |  |  |  |  |  |  |  |  |  |  |  |  |  |  |  |  |  |  |  |  |  |  |  |  |  |  |  |  |  |  |  |  |  |  |  |  |  |  |  |  |  |  |  |  |  |  |  |  |  |  |  |  |  |  |  |  |  |  |  |  |  |  |  |  |  |  |  |  |  |  |  |  |  |  |  |  |  |  |  |  |  |  |  |  |  |  |  |  |  |  |  |  |  |  |  |  |  |  |  |  |  |  |  |  |  |  |  |  |  |  |  |  |  |  |  |  |  |  |  |  |  |  |  |  |  |  |  |  |  |  |  |  |  |  |  |  |  |  |  |  |  |  |  |  |  |  |  |  |  |  |  |  |  |  |  |  |  |  |  |  |  |  |  |  |  |  |  |  |  |  |  |  |  |  |  |  |  |  |  |  |  |  |  |  |  |  |  |  |  |  |  |  |  |  |  |  |  |  |  |  |  |  |  |  |  |  |  |  |  |  |  |  |  |  |  |  |  |  |  |  |  |  |  |  |  |  |  |  |  |  |  |  |  |  |  |  |  |  |  |  |  |  |  |  |  |  |  |  |  |  |  |  |  |  |  |  |  |  |  |  |  |  |  |  |  |  |  |  |  |  |  |  |  |  |  |  |  |  |  |  |  |  |  |  |  |  |  |  |  |  |  |  |  |  |  |  |  |  |  |  |  |  |  |  |  |  |  |  |  |  |  |  |  |  |  |  |  |  |  |  |  |  |  |  |  |  |  |  |  |  |  |  |  |  |  |  |  |  |  |  |  |  |  |  |  |  |  |  |  |  |  |  |  |  |  |  |  |  |  |  |  |  |  |  |  |  |  |  |  |  |  |  |  |  |  |  |  |  |  |  |  |  |  |  |  |  |  |  |  |  |  |  |  |  |  |  |  |  |  |  |  |  |  |  |  |  |  |  |  |  |  |  |  |  |  |  |  |  |  |  |  |  |  |  |  |  |  |  |  |  |  |  |  |  |  |  |  |  |  |  |  |  |  |  |  |  |  |  |  |  |  |  |  |  |  |  |  |  |  |  |  |  |  |  |  |  |  |  |  |  |  |  |  |  |  |  |  |  |  |  |  |  |  |  |  |  |  |  |  |  |  |  |  |  |  |  |  |  |  |  |  |  |  |  |  |  |  |  |  |  |  |  |  |  |  |  |  |  |  |  |  |  |  |  |  |  |  |  |  |  |  |  |  |  |  |  |  |  |  |  |  |  |  |  |  |  |  |  |  |  |  |  |  |  |  |  |  |  |  |  |  |  |  |  |  |  |  |  |  |  |  |  |  |  |  |  |  |  |  |  |  |  |  |  |  |  |  |  |  |  |  |  |  |  |  |  |  |  |  |  |  |  |  |  |  |  |  |  |  |  |  |  |  |  |  |  |  |  |  |  |  |  |  |  |  |  |  |  |  |  |  |  |  |  |  |  |  |  |  |  |  |  |  |  |  |  |  |  |  |  |  |  |  |  |  |  |  |  |  |  |  |  |  |  |  |  |  |  |  |  |  |  |  |  |  |  |  |  |  |  |  |  |  |  |  |  |  |  |  |  |  |  |  |  |  |  |  |  |  |  |  |  |  |  |  |  |  |  |  |  |  |  |  |  |  |  |  |  |  |  |  |  |  |  |  |  |  |  |  |  |  |  |  |  |  |  |  |  |  |  |  |  |  |  |  |  |  |  |  |  |  |  |  |  |  |  |  |  |  |  |  |  |  |  |  |  |  |  |  |  |  |  |  |  |  |  |  |  |  |  |  |  |  |  |  |  |  |  |  |  |  |  |  |  |  |  |  |  |  |  |  |  |  |  |  |  |  |  |  |  |  |  |  |  |  |  |  |  |  |  |  |  |  |  |  |  |  |  |  |  |  |  |  |  |  |  |  |  |  |  |  |  |  |  |  |  |  |  |  |  |  |  |  |  |  |  |  |  |  |  |  |  |  |  |  |  |  |  |  |  |  |  |  |  |  |  |  |  |  |  |  |  |  |  |  |  |  |  |  |  |  |  |  |  |  |  |  |  |  |  |  |  |  |  |  |  |  |  |  |  |  |  |  |  |  |  |  |  |  |  |  |  |  |  |  |  |  |  |  |  |  |  |  |  |  |  |  |  |  |  |  |  |  |  |  |  |  |  |  |  |  |  |  |  |  |  |  |  |  |  |  |  |  |  |  |  |  |  |  |  |  |  |  |  |  |  |  |  |  |  |  |  |  |  |  |  |  |  |  |  |  |  |  |  |  |  |  |  |  |  |  |  |  |  |  |  |  |  |  |  |  |  |  |  |  |  |  |  |  |  |  |  |  |  |  |  |  |  |  |  |  |  |  |  |  |  |  |  |  |  |  |  |  |  |  |  |  |  |  |  |  |  |  |  |  |  |  |  |  |  |  |  |  |  |  |  |  |  |  |  |  |  |  |  |  |  |  |  |  |  |  |  |  |  |  |  |  |  |  |  |  |  |  |  |  |  |  |  |  |  |  |  |  |  |  |  |  |  |  |  |  |  |  |  |  |  |  |  |  |  |  |  |  |  |  |  |  |  |  |  |  |  |  |  |  |  |  |  |  |  |  |  |  |  |  |  |  |  |  |  |  |  |  |  |  |  |  |  |  |  |  |  |  |  |  |  |  |  |  |  |  |  |  |  |  |  |  |  |  |  |  |  |  |  |  |  |  |  |  |  |  |  |  |  |  |  |  |  |  |  |  |  |  |  |  |  |  |  |  |  |  |  |  |  |  |  |  |  |  |  |  |  |  |  |  |  |  |  |  |  |  |  |  |  |  |  |  |  |  |  |  |  |  |  |  |  |  |  |  |  |  |  |  |  |  |  |  |  |  |  |  |  |  |  |  |  |  |  |  |  |  |  |  |  |  |  |  |  |  |  |  |  |  |  |  |  |  |  |  |  |  |  |  |  |  |  |  |  |  |  |  |  |  |  |  |  |  |  |  |  |  |  |  |  |  |  |  |  |  |  |  |  |  |  |  |  |  |  |  |  |  |  |  |  |  |  |  |  |  |  |  |  |  |  |  |  |  |  |  |  |  |  |  |  |  |  |  |  |  |  |  |  |  |
|--|--|--|--|--|--|--|--|--|--|--|--|--|--|--|--|--|--|--|--|--|--|--|--|--|--|--|--|--|--|--|--|--|--|--|--|--|--|--|--|--|--|--|--|--|--|--|--|--|--|--|--|--|--|--|--|--|--|--|--|--|--|--|--|--|--|--|--|--|--|--|--|--|--|--|--|--|--|--|--|--|--|--|--|--|--|--|--|--|--|--|--|--|--|--|--|--|--|--|--|--|--|--|--|--|--|--|--|--|--|--|--|--|--|--|--|--|--|--|--|--|--|--|--|--|--|--|--|--|--|--|--|--|--|--|--|--|--|--|--|--|--|--|--|--|--|--|--|--|--|--|--|--|--|--|--|--|--|--|--|--|--|--|--|--|--|--|--|--|--|--|--|--|--|--|--|--|--|--|--|--|--|--|--|--|--|--|--|--|--|--|--|--|--|--|--|--|--|--|--|--|--|--|--|--|--|--|--|--|--|--|--|--|--|--|--|--|--|--|--|--|--|--|--|--|--|--|--|--|--|--|--|--|--|--|--|--|--|--|--|--|--|--|--|--|--|--|--|--|--|--|--|--|--|--|--|--|--|--|--|--|--|--|--|--|--|--|--|--|--|--|--|--|--|--|--|--|--|--|--|--|--|--|--|--|--|--|--|--|--|--|--|--|--|--|--|--|--|--|--|--|--|--|--|--|--|--|--|--|--|--|--|--|--|--|--|--|--|--|--|--|--|--|--|--|--|--|--|--|--|--|--|--|--|--|--|--|--|--|--|--|--|--|--|--|--|--|--|--|--|--|--|--|--|--|--|--|--|--|--|--|--|--|--|--|--|--|--|--|--|--|--|--|--|--|--|--|--|--|--|--|--|--|--|--|--|--|--|--|--|--|--|--|--|--|--|--|--|--|--|--|--|--|--|--|--|--|--|--|--|--|--|--|--|--|--|--|--|--|--|--|--|--|--|--|--|--|--|--|--|--|--|--|--|--|--|--|--|--|--|--|--|--|--|--|--|--|--|--|--|--|--|--|--|--|--|--|--|--|--|--|--|--|--|--|--|--|--|--|--|--|--|--|--|--|--|--|--|--|--|--|--|--|--|--|--|--|--|--|--|--|--|--|--|--|--|--|--|--|--|--|--|--|--|--|--|--|--|--|--|--|--|--|--|--|--|--|--|--|--|--|--|--|--|--|--|--|--|--|--|--|--|--|--|--|--|--|--|--|--|--|--|--|--|--|--|--|--|--|--|--|--|--|--|--|--|--|--|--|--|--|--|--|--|--|--|--|--|--|--|--|--|--|--|--|--|--|--|--|--|--|--|--|--|--|--|--|--|--|--|--|--|--|--|--|--|--|--|--|--|--|--|--|--|--|--|--|--|--|--|--|--|--|--|--|--|--|--|--|--|--|--|--|--|--|--|--|--|--|--|--|--|--|--|--|--|--|--|--|--|--|--|--|--|--|--|--|--|--|--|--|--|--|--|--|--|--|--|--|--|--|--|--|--|--|--|--|--|--|--|--|--|--|--|--|--|--|--|--|--|--|--|--|--|--|--|--|--|--|--|--|--|--|--|--|--|--|--|--|--|--|--|--|--|--|--|--|--|--|--|--|--|--|--|--|--|--|--|--|--|--|--|--|--|--|--|--|--|--|--|--|--|--|--|--|--|--|--|--|--|--|--|--|--|--|--|--|--|--|--|--|--|--|--|--|--|--|--|--|--|--|--|--|--|--|--|--|--|--|--|--|--|--|--|--|--|--|--|--|--|--|--|--|--|--|--|--|--|--|--|--|--|--|--|--|--|--|--|--|--|--|--|--|--|--|--|--|--|--|--|--|--|--|--|--|--|--|--|--|--|--|--|--|--|--|--|--|--|--|--|--|--|--|--|--|--|--|--|--|--|--|--|--|--|--|--|--|--|--|--|--|--|--|--|--|--|--|--|--|--|--|--|--|--|--|--|--|--|--|--|--|--|--|--|--|--|--|--|--|--|--|--|--|--|--|--|--|--|--|--|--|--|--|--|--|--|--|--|--|--|--|--|--|--|--|--|--|--|--|--|--|--|--|--|--|--|--|--|--|--|--|--|--|--|--|--|--|--|--|--|--|--|--|--|--|--|--|--|--|--|--|--|--|--|--|--|--|--|--|--|--|--|--|--|--|--|--|--|--|--|--|--|--|--|--|--|--|--|--|--|--|--|--|--|--|--|--|--|--|--|--|--|--|--|--|--|--|--|--|--|--|--|--|--|--|--|--|--|--|--|--|--|--|--|--|--|--|--|--|--|--|--|--|--|--|--|--|--|--|--|--|--|--|--|--|--|--|--|--|--|--|--|--|--|--|--|--|--|--|--|--|--|--|--|--|--|--|--|--|--|--|--|--|--|--|--|--|--|--|--|--|--|--|--|--|--|--|--|--|--|--|--|--|--|--|--|--|--|--|--|--|--|--|--|--|--|--|--|--|--|--|--|--|--|--|--|--|--|--|--|--|--|--|--|--|--|--|--|--|--|--|--|--|--|--|--|--|--|--|--|--|--|--|--|--|--|--|--|--|--|--|--|--|--|--|--|--|--|--|--|--|--|--|--|--|--|--|--|--|--|--|--|--|--|--|--|--|--|--|--|--|--|--|--|--|--|--|--|--|--|--|--|--|--|--|--|--|--|--|--|--|--|--|--|--|--|--|--|--|--|--|--|--|--|--|--|--|--|--|--|--|--|--|--|--|--|--|--|--|--|--|--|--|--|--|--|--|--|--|--|--|--|--|--|--|--|--|--|--|--|--|--|--|--|--|--|--|--|--|--|--|--|--|--|--|--|--|--|--|--|--|--|--|--|--|--|--|--|--|--|--|--|--|--|--|--|--|--|--|--|--|--|--|--|--|--|--|--|--|--|--|--|--|--|--|--|--|--|--|--|--|--|--|--|--|--|--|--|--|--|--|--|--|--|--|--|--|--|--|--|--|--|--|--|--|--|--|--|--|--|--|--|--|--|--|--|--|--|--|--|--|--|--|--|--|--|--|--|--|--|--|--|--|--|--|--|--|--|--|--|--|--|--|--|--|--|--|--|--|--|--|--|--|--|--|--|--|--|--|--|--|--|--|--|--|--|--|--|--|--|--|--|--|--|--|--|--|--|--|--|--|--|--|
|  |  |  |  |  |  |  |  |  |  |  |  |  |  |  |  |  |  |  |  |  |  |  |  |  |  |  |  |  |  |  |  |  |  |  |  |  |  |  |  |  |  |  |  |  |  |  |  |  |  |  |  |  |  |  |  |  |  |  |  |  |  |  |  |  |  |  |  |  |  |  |  |  |  |  |  |  |  |  |  |  |  |  |  |  |  |  |  |  |  |  |  |  |  |  |  |  |  |  |  |  |  |  |  |  |  |  |  |  |  |  |  |  |  |  |  |  |  |  |  |  |  |  |  |  |  |  |  |  |  |  |  |  |  |  |  |  |  |  |  |  |  |  |  |  |  |  |  |  |  |  |  |  |  |  |  |  |  |  |  |  |  |  |  |  |  |  |  |  |  |  |  |  |  |  |  |  |  |  |  |  |  |  |  |  |  |  |  |  |  |  |  |  |  |  |  |  |  |  |  |  |  |  |  |  |  |  |  |  |  |  |  |  |  |  |  |  |  |  |  |  |  |  |  |  |  |  |  |  |  |  |  |  |  |  |  |  |  |  |  |  |  |  |  |  |  |  |  |  |  |  |  |  |  |  |  |  |  |  |  |  |  |  |  |  |  |  |  |  |  |  |  |  |  |  |  |  |  |  |  |  |  |  |  |  |  |  |  |  |  |  |  |  |  |  |  |  |  |  |  |  |  |  |  |  |  |  |  |  |  |  |  |  |  |  |  |  |  |  |  |  |  |  |  |  |  |  |  |  |  |  |  |  |  |  |  |  |  |  |  |  |  |  |  |  |  |  |  |  |  |  |  |  |  |  |  |  |  |  |  |  |  |  |  |  |  |  |  |  |  |  |  |  |  |  |  |  |  |  |  |  |  |  |  |  |  |  |  |  |  |  |  |  |  |  |  |  |  |  |  |  |  |  |  |  |  |  |  |  |  |  |  |  |  |  |  |  |  |  |  |  |  |  |  |  |  |  |  |  |  |  |  |  |  |  |  |  |  |  |  |  |  |  |  |  |  |  |  |  |  |  |  |  |  |  |  |  |  |  |  |  |  |  |  |  |  |  |  |  |  |  |  |  |  |  |  |  |  |  |  |  |  |  |  |  |  |  |  |  |  |  |  |  |  |  |  |  |  |  |  |  |  |  |  |  |  |  |  |  |  |  |  |  |  |  |  |  |  |  |  |  |  |  |  |  |  |  |  |  |  |  |  |  |  |  |  |  |  |  |  |  |  |  |  |  |  |  |  |  |  |  |  |  |  |  |  |  |  |  |  |  |  |  |  |  |  |  |  |  |  |  |  |  |  |  |  |  |  |  |  |  |  |  |  |  |  |  |  |  |  |  |  |  |  |  |  |  |  |  |  |  |  |  |  |  |  |  |  |  |  |  |  |  |  |  |  |  |  |  |  |  |  |  |  |  |  |  |  |  |  |  |  |  |  |  |  |  |  |  |  |  |  |  |  |  |  |  |  |  |  |  |  |  |  |  |  |  |  |  |  |  |  |  |  |  |  |  |  |  |  |  |  |  |  |  |  |  |  |  |  |  |  |  |  |  |  |  |  |  |  |  |  |  |  |  |  |  |  |  |  |  |  |  |  |  |  |  |  |  |  |  |  |  |  |  |  |  |  |  |  |  |  |  |  |  |  |  |  |  |  |  |  |  |  |  |  |  |  |  |  |  |  |  |  |  |  |  |  |  |  |  |  |  |  |  |  |  |  |  |  |  |  |  |  |  |  |  |  |  |  |  |  |  |  |  |  |  |  |  |  |  |  |  |  |  |  |  |  |  |  |  |  |  |  |  |  |  |  |  |  |  |  |  |  |  |  |  |  |  |  |  |  |  |  |  |  |  |  |  |  |  |  |  |  |  |  |  |  |  |  |  |  |  |  |  |  |  |  |  |  |  |  |  |  |  |  |  |  |  |  |  |  |  |  |  |  |  |  |  |  |  |  |  |  |  |  |  |  |  |  |  |  |  |  |  |  |  |  |  |  |  |  |  |  |  |  |  |  |  |  |  |  |  |  |  |  |  |  |  |  |  |  |  |  |  |  |  |  |  |  |  |  |  |  |  |  |  |  |  |  |  |  |  |  |  |  |  |  |  |  |  |  |  |  |  |  |  |  |  |  |  |  |  |  |  |  |  |  |  |  |  |  |  |  |  |  |  |  |  |  |  |  |  |  |  |  |  |  |  |  |  |  |  |  |  |  |  |  |  |  |  |  |  |  |  |  |  |  |  |  |  |  |  |  |  |  |  |  |  |  |  |  |  |  |  |  |  |  |  |  |  |  |  |  |  |  |  |  |  |  |  |  |  |  |  |  |  |  |  |  |  |  |  |  |  |  |  |  |  |  |  |  |  |  |  |  |  |  |  |  |  |  |  |  |  |  |  |  |  |  |  |  |  |  |  |  |  |  |  |  |  |  |  |  |  |  |  |  |  |  |  |  |  |  |  |  |  |  |  |  |  |  |  |  |  |  |  |  |  |  |  |  |  |  |  |  |  |  |  |  |  |  |  |  |  |  |  |  |  |  |  |  |  |  |  |  |  |  |  |  |  |  |  |  |  |  |  |  |  |  |  |  |  |  |  |  |  |  |  |  |  |  |  |  |  |  |  |  |  |  |  |  |  |  |  |  |  |  |  |  |  |  |  |  |  |  |  |  |  |  |  |  |  |  |  |  |  |  |  |  |  |  |  |  |  |  |  |  |  |  |  |  |  |  |  |  |  |  |  |  |  |  |  |  |  |  |  |  |  |  |  |  |  |  |  |  |  |  |  |  |  |  |  |  |  |  |  |  |  |  |  |  |  |  |  |  |  |  |  |  |  |  |  |  |  |  |  |  |  |  |  |  |  |  |  |  |  |  |  |  |  |  |  |  |  |  |  |  |  |  |  |  |  |  |  |  |  |  |  |  |  |  |  |  |  |  |  |  |  |  |  |  |  |  |  |  |  |  |  |  |  |  |  |  |  |  |  |  |  |  |  |  |  |  |  |  |  |  |  |  |  |  |  |  |  |  |  |  |  |  |  |  |  |  |  |  |  |  |  |  |  |  |  |  |  |  |  |  |  |  |  |  |  |  |  |  |  |  |  |  |  |  |  |  |  |  |  |  |  |  |  |  |  |  |  |  |  |  |  |  |  |  |  |
|--|--|--|--|--|--|--|--|--|--|--|--|--|--|--|--|--|--|--|--|--|--|--|--|--|--|--|--|--|--|--|--|--|--|--|--|--|--|--|--|--|--|--|--|--|--|--|--|--|--|--|--|--|--|--|--|--|--|--|--|--|--|--|--|--|--|--|--|--|--|--|--|--|--|--|--|--|--|--|--|--|--|--|--|--|--|--|--|--|--|--|--|--|--|--|--|--|--|--|--|--|--|--|--|--|--|--|--|--|--|--|--|--|--|--|--|--|--|--|--|--|--|--|--|--|--|--|--|--|--|--|--|--|--|--|--|--|--|--|--|--|--|--|--|--|--|--|--|--|--|--|--|--|--|--|--|--|--|--|--|--|--|--|--|--|--|--|--|--|--|--|--|--|--|--|--|--|--|--|--|--|--|--|--|--|--|--|--|--|--|--|--|--|--|--|--|--|--|--|--|--|--|--|--|--|--|--|--|--|--|--|--|--|--|--|--|--|--|--|--|--|--|--|--|--|--|--|--|--|--|--|--|--|--|--|--|--|--|--|--|--|--|--|--|--|--|--|--|--|--|--|--|--|--|--|--|--|--|--|--|--|--|--|--|--|--|--|--|--|--|--|--|--|--|--|--|--|--|--|--|--|--|--|--|--|--|--|--|--|--|--|--|--|--|--|--|--|--|--|--|--|--|--|--|--|--|--|--|--|--|--|--|--|--|--|--|--|--|--|--|--|--|--|--|--|--|--|--|--|--|--|--|--|--|--|--|--|--|--|--|--|--|--|--|--|--|--|--|--|--|--|--|--|--|--|--|--|--|--|--|--|--|--|--|--|--|--|--|--|--|--|--|--|--|--|--|--|--|--|--|--|--|--|--|--|--|--|--|--|--|--|--|--|--|--|--|--|--|--|--|--|--|--|--|--|--|--|--|--|--|--|--|--|--|--|--|--|--|--|--|--|--|--|--|--|--|--|--|--|--|--|--|--|--|--|--|--|--|--|--|--|--|--|--|--|--|--|--|--|--|--|--|--|--|--|--|--|--|--|--|--|--|--|--|--|--|--|--|--|--|--|--|--|--|--|--|--|--|--|--|--|--|--|--|--|--|--|--|--|--|--|--|--|--|--|--|--|--|--|--|--|--|--|--|--|--|--|--|--|--|--|--|--|--|--|--|--|--|--|--|--|--|--|--|--|--|--|--|--|--|--|--|--|--|--|--|--|--|--|--|--|--|--|--|--|--|--|--|--|--|--|--|--|--|--|--|--|--|--|--|--|--|--|--|--|--|--|--|--|--|--|--|--|--|--|--|--|--|--|--|--|--|--|--|--|--|--|--|--|--|--|--|--|--|--|--|--|--|--|--|--|--|--|--|--|--|--|--|--|--|--|--|--|--|--|--|--|--|--|--|--|--|--|--|--|--|--|--|--|--|--|--|--|--|--|--|--|--|--|--|--|--|--|--|--|--|--|--|--|--|--|--|--|--|--|--|--|--|--|--|--|--|--|--|--|--|--|--|--|--|--|--|--|--|--|--|--|--|--|--|--|--|--|--|--|--|--|--|--|--|--|--|--|--|--|--|--|--|--|--|--|--|--|--|--|--|--|--|--|--|--|--|--|--|--|--|--|--|--|--|--|--|--|--|--|--|--|--|--|--|--|--|--|--|--|--|--|--|--|--|--|--|--|--|--|--|--|--|--|--|--|--|--|--|--|--|--|--|--|--|--|--|--|--|--|--|--|--|--|--|--|--|--|--|--|--|--|--|--|--|--|--|--|--|--|--|--|--|--|--|--|--|--|--|--|--|--|--|--|--|--|--|--|--|--|--|--|--|--|--|--|--|--|--|--|--|--|--|--|--|--|--|--|--|--|--|--|--|--|--|--|--|--|--|--|--|--|--|--|--|--|--|--|--|--|--|--|--|--|--|--|--|--|--|--|--|--|--|--|--|--|--|--|--|--|--|--|--|--|--|--|--|--|--|--|--|--|--|--|--|--|--|--|--|--|--|--|--|--|--|--|--|--|--|--|--|--|--|--|--|--|--|--|--|--|--|--|--|--|--|--|--|--|--|--|--|--|--|--|--|--|--|--|--|--|--|--|--|--|--|--|--|--|--|--|--|--|--|--|--|--|--|--|--|--|--|--|--|--|--|--|--|--|--|--|--|--|--|--|--|--|--|--|--|--|--|--|--|--|--|--|--|--|--|--|--|--|--|--|--|--|--|--|--|--|--|--|--|--|--|--|--|--|--|--|--|--|--|--|--|--|--|--|--|--|--|--|--|--|--|--|--|--|--|--|--|--|--|--|--|--|--|--|--|--|--|--|--|--|--|--|--|--|--|--|--|--|--|--|--|--|--|--|--|--|--|--|--|--|--|--|--|--|--|--|--|--|--|--|--|--|--|--|--|--|--|--|--|--|--|--|--|--|--|--|--|--|--|--|--|--|--|--|--|--|--|--|--|--|--|--|--|--|--|--|--|--|--|--|--|--|--|--|--|--|--|--|--|--|--|--|--|--|--|--|--|--|--|--|--|--|--|--|--|--|--|--|--|--|--|--|--|--|--|--|--|--|--|--|--|--|--|--|--|--|--|--|--|--|--|--|--|--|--|--|--|--|--|--|--|--|--|--|--|--|--|--|--|--|--|--|--|--|--|--|--|--|--|--|--|--|--|--|--|--|--|--|--|--|--|--|--|--|--|--|--|--|--|--|--|--|--|--|--|--|--|--|--|--|--|--|--|--|--|--|--|--|--|--|--|--|--|--|--|--|--|--|--|--|--|--|--|--|--|--|--|--|--|--|--|--|--|--|--|--|--|--|--|--|--|--|--|--|--|--|--|--|--|--|--|--|--|--|--|--|--|--|--|--|--|--|--|--|--|--|--|--|--|--|--|--|--|--|--|--|--|--|--|--|--|--|--|--|--|--|--|--|--|--|--|--|--|--|--|--|--|--|--|--|--|--|--|--|--|--|--|--|--|--|--|--|--|--|--|--|--|--|--|--|--|--|--|--|--|--|--|--|--|--|--|--|--|--|--|--|--|--|--|--|--|--|--|--|--|--|--|--|--|--|--|--|--|--|--|--|--|--|--|--|--|--|--|--|--|--|--|--|--|--|--|--|--|--|--|--|--|--|--|--|--|--|--|--|

36 ERBB receptor feedback inhibitor 1 [Danio rerio] gi|134133290 50478.6 9.21 9 34 0

#### Peptide Information

| Calc. Mass | Obsrv. Mass | ± da    | ± ppm | Start Seq. | End Seq. | Sequence             | Ion Score | C. I. | % Modification         | Rank | Result Type |
|------------|-------------|---------|-------|------------|----------|----------------------|-----------|-------|------------------------|------|-------------|
| 882.425    | 882.556     | 0.131   | 148   | 191        | 197      | YGMPSTR              |           |       | Oxidation (M)[3]       |      | Mascot      |
| 1382.7097  | 1382.7667   | 0.057   | 41    | 332        | 344      | EPLSACPRTSPK         |           |       |                        |      | Mascot      |
| 1477.8009  | 1477.8926   | 0.0917  | 62    | 69         | 81       | VLPTSYSAVEKQR        |           |       |                        |      | Mascot      |
| 1477.8009  | 1477.8926   | 0.0917  | 62    | 69         | 81       | VLPTSYSAVEKQR        |           |       |                        |      | Mascot      |
| 1666.7906  | 1666.8589   | 0.0683  | 41    | 30         | 44       | GSHWHSMAGAKPSWK      |           |       |                        |      | Mascot      |
| 1723.7969  | 1723.9097   | 0.1128  | 65    | 260        | 275      | SHSGPAGCFNKTASFR     |           |       | Carbamidomethyl (C)[8] |      | Mascot      |
| 1990.8964  | 1991.0699   | 0.1735  | 87    | 201        | 218      | GCGQINYAYFEGPTSQQK   |           |       |                        |      | Mascot      |
| 1990.9031  | 1991.0699   | 0.1668  | 84    | 374        | 391      | QNSEGSPCILPVMENGMK   |           |       | Carbamidomethyl (C)[8] |      | Mascot      |
| 2284.0498  | 2284.1487   | 0.0989  | 43    | 30         | 49       | GSHWHSMAGAKPSWKCNDLR |           |       | Oxidation (M)[7]       |      | Mascot      |
| 2563.4507  | 2563.3469   | -0.1038 | -40   | 282        | 303      | YTHNLDKPEVPPRPIPPRIK |           |       |                        |      | Mascot      |

37 PREDICTED: mitogen-activated protein kinase kinase 2-like [Danio rerio] gi|68361880 69346.8 6.37 11 34 0

#### Peptide Information

| Calc. Mass | Obsrv. Mass | ± da    | ± ppm | Start Seq. | End Seq. | Sequence        | Ion Score | C. I. | % Modification   | Rank | Result Type |
|------------|-------------|---------|-------|------------|----------|-----------------|-----------|-------|------------------|------|-------------|
| 1215.6077  | 1215.5856   | -0.0221 | -18   | 34         | 44       | ASSPKNQNDVR     |           |       |                  |      | Mascot      |
| 1259.5725  | 1259.5645   | -0.008  | -6    | 374        | 384      | VFLCYDADTGR     |           |       |                  |      | Mascot      |
| 1338.7012  | 1338.6855   | -0.0157 | -12   | 455        | 466      | SYGALTENVTRK    |           |       |                  |      | Mascot      |
| 1477.6805  | 1477.8926   | 0.2121  | 144   | 390        | 402      | QVQFDPDPSPETSK  |           |       |                  |      | Mascot      |
| 1477.6805  | 1477.8926   | 0.2121  | 144   | 390        | 402      | QVQFDPDPSPETSK  |           |       |                  |      | Mascot      |
| 1493.7343  | 1493.7157   | -0.0186 | -12   | 496        | 510      | DSAGNVKLGDFGASR |           |       |                  |      | Mascot      |
| 1689.8226  | 1689.9099   | 0.0873  | 52    | 436        | 450      | TLSIFMEYMPGGSIK |           |       | Oxidation (M)[6] |      | Mascot      |



|    |                             |           |         |      |     |     |                              |      |      |   |    |   |                  |   |  |  |  |        |
|----|-----------------------------|-----------|---------|------|-----|-----|------------------------------|------|------|---|----|---|------------------|---|--|--|--|--------|
|    | 1813.0217                   | 1812.8676 | -0.1541 | -85  | 55  | 70  | ILQFPRPVSLDLSAK              |      |      |   |    |   |                  |   |  |  |  | Mascot |
|    | 1955.092                    | 1954.8512 | -0.2408 | -123 | 20  | 38  | SSRPSVLSDLAKPKASSP<br>K      |      |      |   |    |   |                  |   |  |  |  | Mascot |
|    | 2284.0989                   | 2284.1487 | 0.0498  | 22   | 431 | 450 | DTHEKTLISIFMEYMPGGS<br>IK    |      |      |   |    |   |                  |   |  |  |  | Mascot |
|    | 2587.3086                   | 2587.3228 | 0.0142  | 5    | 577 | 599 | IATQPTNPTLPPHVSDHC<br>RDFLK  |      |      |   |    |   |                  |   |  |  |  | Mascot |
|    | 2938.3716                   | 2938.4805 | 0.1089  | 37   | 234 | 257 | MPRALSYPDNHQEFPEY<br>DIPVFEK |      |      |   |    |   | Oxidation (M)[1] |   |  |  |  | Mascot |
| 38 | novel protein [Danio rerio] |           |         |      |     |     | gi 126540716                 | 8191 | 6.01 | 2 | 34 | 0 | 21               | 0 |  |  |  |        |

#### Peptide Information

| Calc. Mass | Obsrv. Mass | ± da    | ± ppm | Start Seq. | End Seq. | Sequence     | Ion Score | C. I. | % Modification | Rank | Result Type |
|------------|-------------|---------|-------|------------|----------|--------------|-----------|-------|----------------|------|-------------|
| 1097.679   | 1097.6544   | -0.0246 | -22   | 2          | 11       | PSRVSVAILR   |           |       |                |      | Mascot      |
| 1097.679   | 1097.6544   | -0.0246 | -22   | 2          | 11       | PSRVSVAILR   | 21        |       | 0              |      | Mascot      |
| 1515.6863  | 1515.7296   | 0.0433  | 29    | 43         | 54       | QHSEFYVDHPEK |           |       |                |      | Mascot      |

39 novel protein similar to human ankyrin repeat and MYND domain containing 1 (ANKMY1) [Danio rerio]

#### Peptide Information

| Calc. Mass | Obsrv. Mass | ± da    | ± ppm | Start Seq. | End Seq. | Sequence                   | Ion Score | C. I. | % Modification                               | Rank | Result Type |
|------------|-------------|---------|-------|------------|----------|----------------------------|-----------|-------|----------------------------------------------|------|-------------|
| 1141.651   | 1141.5315   | -0.1195 | -105  | 391        | 400      | CVRLPVVNGK                 |           |       | Carbamidomethyl (C)[1]                       |      | Mascot      |
| 1338.6913  | 1338.6855   | -0.0058 | -4    | 265        | 275      | TPYHALSKHER                |           |       |                                              |      | Mascot      |
| 1382.7247  | 1382.7667   | 0.042   | 30    | 401        | 412      | SNSGRIEPNRPR               |           |       |                                              |      | Mascot      |
| 1434.7556  | 1434.7498   | -0.0058 | -4    | 282        | 293      | RQLLGMLMGDLMR              |           |       | Oxidation (M)[7,11]                          |      | Mascot      |
| 1549.7172  | 1549.8157   | 0.0985  | 64    | 227        | 241      | AGADVLMPVMVCDGR            |           |       | Oxidation (M)[7]                             |      | Mascot      |
| 1622.7335  | 1622.832    | 0.0985  | 61    | 227        | 241      | AGADVLMPVMVCDGR            |           |       | Carbamidomethyl (C)[12], Oxidation (M)[7,10] |      | Mascot      |
| 1622.7335  | 1622.832    | 0.0985  | 61    | 227        | 241      | AGADVLMPVMVCDGR            |           |       | Carbamidomethyl (C)[12], Oxidation (M)[7,10] |      | Mascot      |
| 1689.8234  | 1689.9099   | 0.0865  | 51    | 227        | 242      | AGADVLMPVMVCDGRR           |           |       |                                              |      | Mascot      |
| 1721.8131  | 1721.8861   | 0.073   | 42    | 227        | 242      | AGADVLMPVMVCDGRR           |           |       | Oxidation (M)[7,10]                          |      | Mascot      |
| 1937.016   | 1936.8918   | -0.1242 | -64   | 42         | 58       | LLECGARTDIPLPEQK           |           |       | Carbamidomethyl (C)[4]                       |      | Mascot      |
| 1937.016   | 1936.8918   | -0.1242 | -64   | 42         | 58       | LLECGARTDIPLPEQK           |           |       | Carbamidomethyl (C)[4]                       |      | Mascot      |
| 2211.0745  | 2211.0786   | 0.0041  | 2     | 321        | 341      | SAVTSSLLNSPESISRMS<br>CNK  |           |       |                                              |      | Mascot      |
| 2284.0908  | 2284.1487   | 0.0579  | 25    | 321        | 341      | SAVTSSLLNSPESISRMS<br>CNK  |           |       | Carbamidomethyl (C)[19], Oxidation (M)[17]   |      | Mascot      |
| 2645.1475  | 2645.325    | 0.1775  | 67    | 357        | 379      | SVGVHLTACSRCEVYY<br>CSNTCR |           |       | Carbamidomethyl (C)[9]                       |      | Mascot      |

40 PREDICTED: zinc finger protein 622 [Danio rerio]

gi|292610913 56305.1 5.71 11 34 0

#### Peptide Information

| Calc. Mass | Obsrv. Mass | ± da    | ± ppm | Start Seq. | End Sequence Seq.   | Ion Score | C. I. % | Modification     | Rank | Result Type |
|------------|-------------|---------|-------|------------|---------------------|-----------|---------|------------------|------|-------------|
| 868.4635   | 868.5146    | 0.0511  | 59    | 134        | 140 HQQAEKK         |           |         |                  |      | Mascot      |
| 888.3945   | 888.5164    | 0.1219  | 137   | 380        | 387 DGELPDDK        |           |         |                  |      | Mascot      |
| 890.4954   | 890.4976    | 0.0022  | 2     | 417        | 423 QRFGVQR         |           |         |                  |      | Mascot      |
| 1044.5684  | 1044.4392   | -0.1292 | -124  | 156        | 165 NLEKGAGLDK      |           |         |                  |      | Mascot      |
| 1164.5643  | 1164.552    | -0.0123 | -11   | 51         | 60 VQFSDGEVQR       |           |         |                  |      | Mascot      |
| 1179.5649  | 1179.5874   | 0.0225  | 19    | 318        | 327 VCLWCNEKGK      |           |         |                  |      | Mascot      |
| 1187.6378  | 1187.6013   | -0.0365 | -31   | 141        | 151 ALATAQETVQR     |           |         |                  |      | Mascot      |
| 1434.7231  | 1434.7498   | 0.0267  | 19    | 313        | 325 VGVGKVCLWCNEK   |           |         |                  |      | Mascot      |
| 1689.8589  | 1689.9099   | 0.051   | 30    | 141        | 155 ALATAQETVQRMNEK |           |         |                  |      | Mascot      |
| 1699.8394  | 1699.9154   | 0.076   | 45    | 1          | 15 MKQLEVIDFVCSGSK  |           |         | Oxidation (M)[1] |      | Mascot      |
| 1699.8394  | 1699.9154   | 0.076   | 45    | 1          | 15 MKQLEVIDFVCSGSK  |           |         | Oxidation (M)[1] |      | Mascot      |
| 1739.7983  | 1739.9099   | 0.1116  | 64    | 119        | 133 FSTDNAYTNHIQSNK |           |         |                  |      | Mascot      |

41 PREDICTED: ninein [Danio rerio] gi|326673087 160970.7 4.92 18 34 0

#### Peptide Information

| Calc. Mass | Obsrv. Mass | ± da    | ± ppm | Start Seq. | End Sequence Seq.     | Ion Score | C. I. % | Modification            | Rank | Result Type |
|------------|-------------|---------|-------|------------|-----------------------|-----------|---------|-------------------------|------|-------------|
| 821.3709   | 821.4509    | 0.08    | 97    | 612        | 618 AMVDEEK           |           |         |                         |      | Mascot      |
| 868.4886   | 868.5146    | 0.026   | 30    | 1200       | 1207 HLEALSAK         |           |         |                         |      | Mascot      |
| 888.5148   | 888.5164    | 0.0016  | 2     | 1077       | 1083 TEKELLR          |           |         |                         |      | Mascot      |
| 1044.5432  | 1044.4392   | -0.104  | -100  | 1175       | 1182 EENQQLKR         |           |         |                         |      | Mascot      |
| 1070.4684  | 1070.4707   | 0.0023  | 2     | 533        | 540 RSYEEQCR          |           |         |                         |      | Mascot      |
| 1157.6161  | 1157.5298   | -0.0863 | -75   | 824        | 833 EALQAVLEER        |           |         |                         |      | Mascot      |
| 1164.5314  | 1164.552    | 0.0206  | 18    | 641        | 649 GEMERELER         |           |         | Oxidation (M)[3]        |      | Mascot      |
| 1179.6256  | 1179.5874   | -0.0382 | -32   | 383        | 392 FLDLTAEKLG        |           |         |                         |      | Mascot      |
| 1234.6824  | 1234.6647   | -0.0177 | -14   | 277        | 288 ISCALSSIALR       |           |         |                         |      | Mascot      |
| 1259.6128  | 1259.5645   | -0.0483 | -38   | 840        | 848 LRQQWDEER         |           |         |                         |      | Mascot      |
| 1382.7208  | 1382.7667   | 0.0459  | 33    | 366        | 376 HLLECVDLERR       |           |         |                         |      | Mascot      |
| 1463.6907  | 1463.8763   | 0.1856  | 127   | 964        | 975 TDIAEQRSEVCR      |           |         | Carbamidomethyl (C)[11] |      | Mascot      |
| 1463.6907  | 1463.8763   | 0.1856  | 127   | 964        | 975 TDIAEQRSEVCR      |           |         | Carbamidomethyl (C)[11] |      | Mascot      |
| 1555.6805  | 1555.7247   | 0.0442  | 28    | 534        | 545 SYEEQCRELQDR      |           |         |                         |      | Mascot      |
| 1666.8065  | 1666.8589   | 0.0524  | 31    | 1182       | 1195 RQMNELSSELQTSK   |           |         | Oxidation (M)[3]        |      | Mascot      |
| 1695.8846  | 1695.8778   | -0.0068 | -4    | 362        | 375 AEIRHLLECVDLER    |           |         |                         |      | Mascot      |
| 1739.8494  | 1739.9099   | 0.0605  | 35    | 895        | 908 QHKEALQACLEQER    |           |         | Carbamidomethyl (C)[9]  |      | Mascot      |
| 1936.9585  | 1936.8918   | -0.0667 | -34   | 1158       | 1174 VWAELSGLMEAEHSLK |           |         |                         |      | Mascot      |

|    |                                                     |           |         |     |      |      |                       |  |  |  |              |         |      |    |    |   |        |
|----|-----------------------------------------------------|-----------|---------|-----|------|------|-----------------------|--|--|--|--------------|---------|------|----|----|---|--------|
|    | 1936.9585                                           | 1936.8918 | -0.0667 | -34 | 1158 | 1174 | VWAELSGLMEAEHSLK      |  |  |  |              |         |      |    |    |   | Mascot |
|    | 2284.1616                                           | 2284.1487 | -0.0129 | -6  | 849  | 867  | ASMENKHHALLQLQE<br>ER |  |  |  |              |         |      |    |    |   | Mascot |
| 42 | novel NACHT domain containing protein [Danio rerio] |           |         |     |      |      |                       |  |  |  | gi 169158294 | 81351.9 | 5.71 | 12 | 34 | 0 |        |

Peptide Information

| Calc. Mass | Obsrv. Mass | ± da    | ± ppm | Start Seq. | End Seq. | Sequence        | Ion Score | C. I. | % Modification    | Rank | Result Type |
|------------|-------------|---------|-------|------------|----------|-----------------|-----------|-------|-------------------|------|-------------|
| 882.4791   | 882.556     | 0.0769  | 87    | 670        | 676      | EIQSHLR         |           |       |                   |      | Mascot      |
| 902.44     | 902.5313    | 0.0913  | 101   | 370        | 377      | IPADCIDR        |           |       |                   |      | Mascot      |
| 1044.5908  | 1044.4392   | -0.1516 | -145  | 298        | 306      | GLNLTRNTR       |           |       |                   |      | Mascot      |
| 1097.5183  | 1097.6544   | 0.1361  | 124   | 577        | 585      | DESMIDFLK       |           |       |                   |      | Mascot      |
| 1097.5183  | 1097.6544   | 0.1361  | 124   | 577        | 585      | DESMIDFLK       |           |       |                   |      | Mascot      |
| 1157.5909  | 1157.5298   | -0.0611 | -53   | 8          | 17       | DSLSEKHSVR      |           |       |                   |      | Mascot      |
| 1164.6047  | 1164.552    | -0.0527 | -45   | 75         | 83       | WIFQNLESK       |           |       |                   |      | Mascot      |
| 1234.7041  | 1234.6647   | -0.0394 | -32   | 633        | 642      | EEIIAYIKQK      |           |       |                   |      | Mascot      |
| 1338.694   | 1338.6855   | -0.0085 | -6    | 287        | 297      | DLITQFFPETK     |           |       |                   |      | Mascot      |
| 1434.6755  | 1434.7498   | 0.0743  | 52    | 522        | 534      | ASVYSGMCTQIFK   |           |       |                   |      | Mascot      |
| 1463.7377  | 1463.8763   | 0.1386  | 95    | 98         | 109      | ILQEENSQEFVK    |           |       |                   |      | Mascot      |
| 1463.7377  | 1463.8763   | 0.1386  | 95    | 98         | 109      | ILQEENSQEFVK    |           |       |                   |      | Mascot      |
| 1555.8551  | 1555.7247   | -0.1304 | -84   | 616        | 628      | QLLRGLLTQQDDR   |           |       |                   |      | Mascot      |
| 1812.9564  | 1812.8676   | -0.0888 | -49   | 120        | 134      | EAALDLTLFFLREMK |           |       | Oxidation (M)[14] |      | Mascot      |

|    |                                                                                       |  |  |  |  |  |  |  |  |  |              |          |      |   |    |   |    |   |
|----|---------------------------------------------------------------------------------------|--|--|--|--|--|--|--|--|--|--------------|----------|------|---|----|---|----|---|
| 43 | novel protein similar to vertebrate transmembrane protein 16H (TMEM16H) [Danio rerio] |  |  |  |  |  |  |  |  |  | gi 169158193 | 112029.6 | 5.99 | 9 | 34 | 0 | 21 | 0 |
|----|---------------------------------------------------------------------------------------|--|--|--|--|--|--|--|--|--|--------------|----------|------|---|----|---|----|---|

Peptide Information

| Calc. Mass | Obsrv. Mass | ± da    | ± ppm | Start Seq. | End Seq. | Sequence       | Ion Score | C. I. | % Modification         | Rank | Result Type |
|------------|-------------|---------|-------|------------|----------|----------------|-----------|-------|------------------------|------|-------------|
| 890.5094   | 890.4976    | -0.0118 | -13   | 449        | 455      | QFLQNIK        |           |       |                        |      | Mascot      |
| 1115.6782  | 1115.6783   | 0.0001  | 0     | 2          | 11       | SSAVLEKLLR     | 21        | 0     |                        |      | Mascot      |
| 1115.6782  | 1115.6783   | 0.0001  | 0     | 2          | 11       | SSAVLEKLLR     |           |       |                        |      | Mascot      |
| 1121.4891  | 1121.5836   | 0.0945  | 84    | 614        | 624      | AAGGENNTMEK    |           |       |                        |      | Mascot      |
| 1149.6626  | 1149.6653   | 0.0027  | 2     | 520        | 529      | SLISSYRVPK     |           |       |                        |      | Mascot      |
| 1463.8654  | 1463.8763   | 0.0109  | 7     | 437        | 448      | LKEMLATLLIFR   |           |       | Oxidation (M)[4]       |      | Mascot      |
| 1463.8654  | 1463.8763   | 0.0109  | 7     | 437        | 448      | LKEMLATLLIFR   |           |       | Oxidation (M)[4]       |      | Mascot      |
| 1515.7537  | 1515.7296   | -0.0241 | -16   | 527        | 540      | VPKTEEVDDDAGLK |           |       |                        |      | Mascot      |
| 1549.7825  | 1549.8157   | 0.0332  | 21    | 493        | 505      | IRLTCQASLDMNK  |           |       | Carbamidomethyl (C)[5] |      | Mascot      |
| 1555.7097  | 1555.7247   | 0.015   | 10    | 203        | 215      | QPLDDVCDYFGVK  |           |       | Carbamidomethyl (C)[7] |      | Mascot      |

1666.921 1666.8589 -0.0621 -37 174 186 RVILQMFLHEQR Mascot

44 heat shock factor 2 [Danio rerio] gi|33468692 55494.6 4.58 9 34 0

Peptide Information

| Calc. Mass | Obsrv. Mass | ± da    | ± ppm | Start Seq. | End Seq. | Sequence                    | Ion Score | C. I. | % Modification    | Rank | Result Type |
|------------|-------------|---------|-------|------------|----------|-----------------------------|-----------|-------|-------------------|------|-------------|
| 1044.4932  | 1044.4392   | -0.054  | -52   | 64         | 71       | QLNMYGFR                    |           |       | Oxidation (M)[4]  |      | Mascot      |
| 1095.6633  | 1095.6724   | 0.0091  | 8     | 198        | 207      | RPLALNINGK                  |           |       |                   |      | Mascot      |
| 1164.5015  | 1164.552    | 0.0505  | 43    | 397        | 406      | ENLDSENTDK                  |           |       |                   |      | Mascot      |
| 1463.6953  | 1463.8763   | 0.181   | 124   | 86         | 97       | DGPVEFQHPYFK                |           |       |                   |      | Mascot      |
| 1463.6953  | 1463.8763   | 0.181   | 124   | 86         | 97       | DGPVEFQHPYFK                |           |       |                   |      | Mascot      |
| 1475.7675  | 1475.736    | -0.0315 | -21   | 1          | 13       | MKHSSNVPAFLTK               |           |       | Oxidation (M)[1]  |      | Mascot      |
| 1477.6765  | 1477.8926   | 0.2161  | 146   | 394        | 406      | ANKENLDSENTDK               |           |       |                   |      | Mascot      |
| 1477.6765  | 1477.8926   | 0.2161  | 146   | 394        | 406      | ANKENLDSENTDK               |           |       |                   |      | Mascot      |
| 1739.8751  | 1739.9099   | 0.0348  | 20    | 211        | 224      | FIHQLFEEDIDHSK              |           |       |                   |      | Mascot      |
| 1955.0021  | 1954.8512   | -0.1509 | -77   | 209        | 224      | SKFIHQLFEEDIDHSK            |           |       |                   |      | Mascot      |
| 2627.3457  | 2627.3389   | -0.0068 | -3    | 129        | 151      | ILTSVQSVHEQQENMDA<br>RLATLK |           |       | Oxidation (M)[15] |      | Mascot      |

45 si:dkey-172o19.1 [Danio rerio] gi|157676729 60016.7 8.74 8 33 0 9 0

Peptide Information

| Calc. Mass | Obsrv. Mass | ± da    | ± ppm | Start Seq. | End Seq. | Sequence          | Ion Score | C. I. | % Modification          | Rank | Result Type |
|------------|-------------|---------|-------|------------|----------|-------------------|-----------|-------|-------------------------|------|-------------|
| 842.5206   | 842.4983    | -0.0223 | -26   | 111        | 117      | LRANQLK           |           |       |                         |      | Mascot      |
| 1097.6942  | 1097.6544   | -0.0398 | -36   | 362        | 369      | LLWILQRR          |           |       |                         |      | Mascot      |
| 1097.6942  | 1097.6544   | -0.0398 | -36   | 362        | 369      | LLWILQRR          |           |       |                         |      | Mascot      |
| 1157.5983  | 1157.5298   | -0.0685 | -59   | 378        | 388      | SPVCTAPVEVR       |           |       |                         |      | Mascot      |
| 1338.7991  | 1338.6855   | -0.1136 | -85   | 459        | 470      | VIVLPEGTLEIR      |           |       |                         |      | Mascot      |
| 1555.775   | 1555.7247   | -0.0503 | -32   | 209        | 221      | YLSVASLEEQNFR     |           |       |                         |      | Mascot      |
| 1740.0013  | 1739.9099   | -0.0914 | -53   | 455        | 470      | STGRVIVLPEGTLEIR  |           |       |                         |      | Mascot      |
| 1812.9279  | 1812.8676   | -0.0603 | -33   | 433        | 448      | AEGDPTPVIFWISQRR  |           |       |                         |      | Mascot      |
| 1991.0491  | 1991.0699   | 0.0208  | 10    | 416        | 432      | LQQLTAREGQVVSFVCR | 9         | 0     | Carbamidomethyl (C)[16] |      | Mascot      |
| 1991.0491  | 1991.0699   | 0.0208  | 10    | 416        | 432      | LQQLTAREGQVVSFVCR |           |       | Carbamidomethyl (C)[16] |      | Mascot      |

46 PREDICTED: hypothetical protein LOC562947 [Danio rerio] gi|292610701 116105.4 5.91 9 33 0 21 0

Peptide Information

| Calc. Mass | Obsrv. Mass | ± da | ± ppm | Start Seq. | End Seq. | Sequence | Ion Score | C. I. | % Modification | Rank | Result Type |
|------------|-------------|------|-------|------------|----------|----------|-----------|-------|----------------|------|-------------|
|------------|-------------|------|-------|------------|----------|----------|-----------|-------|----------------|------|-------------|

|    |                                                            |              |             |         |       |            |          |                |           |        |                        |      |        |      |  |        |
|----|------------------------------------------------------------|--------------|-------------|---------|-------|------------|----------|----------------|-----------|--------|------------------------|------|--------|------|--|--------|
|    |                                                            | 890.5094     | 890.4976    | -0.0118 | -13   | 449        | 455      | QFLQNIK        |           |        |                        |      |        |      |  | Mascot |
|    |                                                            | 1115.6782    | 1115.6783   | 0.0001  | 0     | 2          | 11       | SSAVLEKLLR     | 21        | 0      |                        |      |        |      |  | Mascot |
|    |                                                            | 1115.6782    | 1115.6783   | 0.0001  | 0     | 2          | 11       | SSAVLEKLLR     |           |        |                        |      |        |      |  | Mascot |
|    |                                                            | 1121.4891    | 1121.5836   | 0.0945  | 84    | 614        | 624      | AAGGENNTEK     |           |        |                        |      |        |      |  | Mascot |
|    |                                                            | 1149.6626    | 1149.6653   | 0.0027  | 2     | 520        | 529      | SLISSYRVPK     |           |        |                        |      |        |      |  | Mascot |
|    |                                                            | 1463.8654    | 1463.8763   | 0.0109  | 7     | 437        | 448      | LKEMLATLLIFR   |           |        | Oxidation (M)[4]       |      |        |      |  | Mascot |
|    |                                                            | 1463.8654    | 1463.8763   | 0.0109  | 7     | 437        | 448      | LKEMLATLLIFR   |           |        | Oxidation (M)[4]       |      |        |      |  | Mascot |
|    |                                                            | 1515.7537    | 1515.7296   | -0.0241 | -16   | 527        | 540      | VPKTEEVDDDAGLK |           |        |                        |      |        |      |  | Mascot |
|    |                                                            | 1549.7825    | 1549.8157   | 0.0332  | 21    | 493        | 505      | IRLTCQASLDMNK  |           |        | Carbamidomethyl (C)[5] |      |        |      |  | Mascot |
|    |                                                            | 1555.7097    | 1555.7247   | 0.015   | 10    | 203        | 215      | QPLDDVCDYFGVK  |           |        | Carbamidomethyl (C)[7] |      |        |      |  | Mascot |
|    |                                                            | 1666.921     | 1666.8589   | -0.0621 | -37   | 174        | 186      | RVILQMFPLHEQR  |           |        |                        |      |        |      |  | Mascot |
| 47 | PREDICTED: hypothetical protein LOC568908 [Danio rerio]    | gi 326666001 | 246789.2    | 9.26    | 1     |            |          |                |           | 29     | 63.308                 |      |        |      |  |        |
|    | Peptide Information                                        |              |             |         |       |            |          |                |           |        |                        |      |        |      |  |        |
|    |                                                            | Calc. Mass   | Obsrv. Mass | ± da    | ± ppm | Start Seq. | End Seq. | Sequence       | Ion Score | C. I.  | % Modification         | Rank | Result | Type |  |        |
|    |                                                            | 1097.679     | 1097.6544   | -0.0246 | -22   | 720        | 729      | RLSTPAIALR     | 29        | 63.308 |                        | 3    | Mascot |      |  |        |
| 48 | SPEG complex locus [Danio rerio]                           | gi 123295462 | 333650.8    | 8.15    | 1     |            |          |                |           | 28     | 60.07                  |      |        |      |  |        |
|    | Peptide Information                                        |              |             |         |       |            |          |                |           |        |                        |      |        |      |  |        |
|    |                                                            | Calc. Mass   | Obsrv. Mass | ± da    | ± ppm | Start Seq. | End Seq. | Sequence       | Ion Score | C. I.  | % Modification         | Rank | Result | Type |  |        |
|    |                                                            | 1097.6313    | 1097.6544   | 0.0231  | 21    | 2193       | 2202     | INDSPVLALR     | 31        | 78.394 |                        | 2    | Mascot |      |  |        |
| 49 | hypothetical protein LOC557841 [Danio rerio]               | gi 165972361 | 51603.5     | 6.11    | 1     |            |          |                |           | 20     | 0                      |      |        |      |  |        |
|    | Peptide Information                                        |              |             |         |       |            |          |                |           |        |                        |      |        |      |  |        |
|    |                                                            | Calc. Mass   | Obsrv. Mass | ± da    | ± ppm | Start Seq. | End Seq. | Sequence       | Ion Score | C. I.  | % Modification         | Rank | Result | Type |  |        |
|    |                                                            | 1097.5837    | 1097.6544   | 0.0707  | 64    | 57         | 66       | DDPPSNLVLK     | 20        | 0      |                        | 5    | Mascot |      |  |        |
| 50 | PREDICTED: hypothetical protein LOC100536674 [Danio rerio] | gi 326678668 | 141952.3    | 9.22    | 1     |            |          |                |           | 20     | 0                      |      |        |      |  |        |
|    | Peptide Information                                        |              |             |         |       |            |          |                |           |        |                        |      |        |      |  |        |
|    |                                                            | Calc. Mass   | Obsrv. Mass | ± da    | ± ppm | Start Seq. | End Seq. | Sequence       | Ion Score | C. I.  | % Modification         | Rank | Result | Type |  |        |
|    |                                                            | 1115.6354    | 1115.6783   | 0.0429  | 38    | 263        | 271      | VMKPEARIR      | 20        | 0      | Oxidation (M)[2]       | 4    | Mascot |      |  |        |

|                |           |                        |                |                |                    |
|----------------|-----------|------------------------|----------------|----------------|--------------------|
| Gel Idx/Pos    | 271/K23   | Instr./Gel Origin      | BA2060/110707A | Process Status | Analysis Succeeded |
| Plate [#] Name | [1] 31496 | Instrument Sample Name |                | Spectra        | 11                 |

| Rank | Protein Name | Accession No. | Protein MW | Protein PI | Pep. Count | Protein Score | Protein Score C. I. % | Total Ion Score | Total Ion C. I. % |
|------|--------------|---------------|------------|------------|------------|---------------|-----------------------|-----------------|-------------------|
|------|--------------|---------------|------------|------------|------------|---------------|-----------------------|-----------------|-------------------|

|   |                                                         |             |         |      |    |     |     |     |     |
|---|---------------------------------------------------------|-------------|---------|------|----|-----|-----|-----|-----|
| 1 | fast skeletal myosin alkali light chain 1 [Danio rerio] | gi 41053385 | 20918.4 | 4.63 | 12 | 441 | 100 | 344 | 100 |
|---|---------------------------------------------------------|-------------|---------|------|----|-----|-----|-----|-----|

Peptide Information

| Calc. Mass | Obsrv. Mass | ± da    | ± ppm | Start Seq. | End Sequence Seq.                   | Ion Score | C. I. % | Modification                                 | Rank | Result Type |
|------------|-------------|---------|-------|------------|-------------------------------------|-----------|---------|----------------------------------------------|------|-------------|
| 959.5771   | 959.5641    | -0.013  | -14   | 150        | 158 IVLSTLGEK                       |           |         |                                              |      | Mascot      |
| 1010.5305  | 1010.5165   | -0.014  | -14   | 53         | 60 EAFLLFDR                         | 66        | 99.993  |                                              |      | Mascot      |
| 1010.5305  | 1010.5165   | -0.014  | -14   | 53         | 60 EAFLLFDR                         |           |         |                                              |      | Mascot      |
| 1293.662   | 1293.6469   | -0.0151 | -12   | 66         | 76 VAYNQIADIMR                      | 90        | 100     |                                              |      | Mascot      |
| 1293.662   | 1293.6469   | -0.0151 | -12   | 66         | 76 VAYNQIADIMR                      |           |         |                                              |      | Mascot      |
| 1301.6008  | 1301.5853   | -0.0155 | -12   | 123        | 133 ATYDDYVEGLR                     | 102       | 100     |                                              |      | Mascot      |
| 1301.6008  | 1301.5853   | -0.0155 | -12   | 123        | 133 ATYDDYVEGLR                     |           |         |                                              |      | Mascot      |
| 1309.6569  | 1309.642    | -0.0149 | -11   | 66         | 76 VAYNQIADIMR                      | 17        | 0       | Oxidation (M)[10]                            |      | Mascot      |
| 1309.6569  | 1309.642    | -0.0149 | -11   | 66         | 76 VAYNQIADIMR                      |           |         | Oxidation (M)[10]                            |      | Mascot      |
| 1543.7897  | 1543.7684   | -0.0213 | -14   | 90         | 103 ILGNPTADDMVNKR                  |           |         |                                              |      | Mascot      |
| 1559.7847  | 1559.7657   | -0.019  | -12   | 90         | 103 ILGNPTADDMVNKR                  |           |         | Oxidation (M)[10]                            |      | Mascot      |
| 1560.6636  | 1560.6442   | -0.0194 | -12   | 41         | 52 LDFTQDQMEDYR                     |           |         |                                              |      | Mascot      |
| 1576.6584  | 1576.6393   | -0.0191 | -12   | 41         | 52 LDFTQDQMEDYR                     | 55        | 99.915  | Oxidation (M)[8]                             |      | Mascot      |
| 1576.6584  | 1576.6393   | -0.0191 | -12   | 41         | 52 LDFTQDQMEDYR                     |           |         | Oxidation (M)[8]                             |      | Mascot      |
| 1722.8479  | 1722.8202   | -0.0277 | -16   | 134        | 149 VFDKEGNGTVMGAELR                |           |         |                                              |      | Mascot      |
| 1738.8428  | 1738.8202   | -0.0226 | -13   | 134        | 149 VFDKEGNGTVMGAELR                |           |         | Oxidation (M)[11]                            |      | Mascot      |
| 2190.1262  | 2190.1038   | -0.0224 | -10   | 104        | 122 VDFEGFLPMLQVVINNP<br>K          |           |         | Oxidation (M)[9]                             |      | Mascot      |
| 2233.1394  | 2233.052    | -0.0874 | -39   | 66         | 85 VAYNQIADIMRALGQNPT<br>NK         |           |         | Oxidation (M)[10]                            |      | Mascot      |
| 2330.2324  | 2330.2039   | -0.0285 | -12   | 103        | 122 RVD FEGFLPMLQVVINNP<br>NK       |           |         |                                              |      | Mascot      |
| 2346.2273  | 2346.1995   | -0.0278 | -12   | 103        | 122 RVD FEGFLPMLQVVINNP<br>NK       |           |         | Oxidation (M)[10]                            |      | Mascot      |
| 2346.2273  | 2346.1995   | -0.0278 | -12   | 103        | 122 RVD FEGFLPMLQVVINNP<br>NK       | 31        | 79.655  | Oxidation (M)[10]                            |      | Mascot      |
| 2568.1711  | 2568.1582   | -0.0129 | -5    | 41         | 60 LDFTQDQMEDYREAFLL<br>FDR         |           |         | Oxidation (M)[8]                             |      | Mascot      |
| 3109.3071  | 3109.2981   | -0.009  | -3    | 159        | 185 MSEAEIDALMQGQEDEN<br>GCVNYEAFVK |           |         | Carbamidomethyl (C)[19], Oxidation (M)[1,10] |      | Mascot      |

|   |                                                                           |             |       |      |   |    |        |    |        |
|---|---------------------------------------------------------------------------|-------------|-------|------|---|----|--------|----|--------|
| 2 | myosin, light chain 6, alkali, smooth muscle and non-muscle [Danio rerio] | gi 54400408 | 16926 | 4.43 | 2 | 75 | 99.846 | 66 | 99.993 |
|---|---------------------------------------------------------------------------|-------------|-------|------|---|----|--------|----|--------|

| Peptide Information |                                  |             |         |       |             |          |                  |           |        |                   |                  |
|---------------------|----------------------------------|-------------|---------|-------|-------------|----------|------------------|-----------|--------|-------------------|------------------|
|                     | Calc. Mass                       | Obsrv. Mass | ± da    | ± ppm | Start Seq.  | End Seq. | Sequence         | Ion Score | C. I.  | % Modification    | Rank Result Type |
|                     | 1010.5305                        | 1010.5165   | -0.014  | -14   | 14          | 21       | EAFLLFDR         | 66        | 99.993 |                   | Mascot           |
|                     | 1010.5305                        | 1010.5165   | -0.014  | -14   | 14          | 21       | EAFLLFDR         |           |        |                   | Mascot           |
|                     | 1722.8479                        | 1722.8202   | -0.0277 | -16   | 95          | 110      | VFDKEGNGTVMGAELR |           |        |                   | Mascot           |
|                     | 1738.8428                        | 1738.8202   | -0.0226 | -13   | 95          | 110      | VFDKEGNGTVMGAELR |           |        | Oxidation (M)[11] | Mascot           |
| 3                   | Zgc:153867 protein [Danio rerio] |             |         |       | gi 94574333 |          | 18621.1          | 4.67      | 2      | 74 99.827 66      | 99.993           |

| Peptide Information |                                  |             |         |       |             |          |                  |           |        |                   |                  |
|---------------------|----------------------------------|-------------|---------|-------|-------------|----------|------------------|-----------|--------|-------------------|------------------|
|                     | Calc. Mass                       | Obsrv. Mass | ± da    | ± ppm | Start Seq.  | End Seq. | Sequence         | Ion Score | C. I.  | % Modification    | Rank Result Type |
|                     | 1010.5305                        | 1010.5165   | -0.014  | -14   | 31          | 38       | EAFLLFDR         | 66        | 99.993 |                   | Mascot           |
|                     | 1010.5305                        | 1010.5165   | -0.014  | -14   | 31          | 38       | EAFLLFDR         |           |        |                   | Mascot           |
|                     | 1722.8479                        | 1722.8202   | -0.0277 | -16   | 112         | 127      | VFDKEGNGTVMGAELR |           |        |                   | Mascot           |
|                     | 1738.8428                        | 1738.8202   | -0.0226 | -13   | 112         | 127      | VFDKEGNGTVMGAELR |           |        | Oxidation (M)[11] | Mascot           |
| 4                   | Zgc:153867 protein [Danio rerio] |             |         |       | gi 55250139 |          | 19069.4          | 4.73      | 2      | 74 99.823 66      | 99.993           |

| Peptide Information |                                  |             |         |       |             |          |                  |           |        |                   |                  |
|---------------------|----------------------------------|-------------|---------|-------|-------------|----------|------------------|-----------|--------|-------------------|------------------|
|                     | Calc. Mass                       | Obsrv. Mass | ± da    | ± ppm | Start Seq.  | End Seq. | Sequence         | Ion Score | C. I.  | % Modification    | Rank Result Type |
|                     | 1010.5305                        | 1010.5165   | -0.014  | -14   | 35          | 42       | EAFLLFDR         | 66        | 99.993 |                   | Mascot           |
|                     | 1010.5305                        | 1010.5165   | -0.014  | -14   | 35          | 42       | EAFLLFDR         |           |        |                   | Mascot           |
|                     | 1722.8479                        | 1722.8202   | -0.0277 | -16   | 116         | 131      | VFDKEGNGTVMGAELR |           |        |                   | Mascot           |
|                     | 1738.8428                        | 1738.8202   | -0.0226 | -13   | 116         | 131      | VFDKEGNGTVMGAELR |           |        | Oxidation (M)[11] | Mascot           |
| 5                   | Zgc:153867 protein [Danio rerio] |             |         |       | gi 78070496 |          | 19320.5          | 4.8       | 2      | 74 99.819 66      | 99.993           |

| Peptide Information |                                                                   |             |         |       |              |          |                  |           |        |                   |                  |
|---------------------|-------------------------------------------------------------------|-------------|---------|-------|--------------|----------|------------------|-----------|--------|-------------------|------------------|
|                     | Calc. Mass                                                        | Obsrv. Mass | ± da    | ± ppm | Start Seq.   | End Seq. | Sequence         | Ion Score | C. I.  | % Modification    | Rank Result Type |
|                     | 1010.5305                                                         | 1010.5165   | -0.014  | -14   | 37           | 44       | EAFLLFDR         | 66        | 99.993 |                   | Mascot           |
|                     | 1010.5305                                                         | 1010.5165   | -0.014  | -14   | 37           | 44       | EAFLLFDR         |           |        |                   | Mascot           |
|                     | 1722.8479                                                         | 1722.8202   | -0.0277 | -16   | 118          | 133      | VFDKEGNGTVMGAELR |           |        |                   | Mascot           |
|                     | 1738.8428                                                         | 1738.8202   | -0.0226 | -13   | 118          | 133      | VFDKEGNGTVMGAELR |           |        | Oxidation (M)[11] | Mascot           |
| 6                   | hypothetical protein LOC100158490 [Xenopus (Silurana) tropicalis] |             |         |       | gi 189230156 |          | 18396.6          | 4.37      | 1      | 70 99.585 66      | 99.993           |

Peptide Information

|  | Calc. Mass | Obsrv. Mass | ± da   | ± ppm | Start Seq. | End Sequence Seq. | Ion Score | C. I. % | Modification | Rank | Result Type |
|--|------------|-------------|--------|-------|------------|-------------------|-----------|---------|--------------|------|-------------|
|  | 1010.5305  | 1010.5165   | -0.014 | -14   | 14         | 21 EAFLLFDR       | 66        | 99.993  |              |      | Mascot      |
|  | 1010.5305  | 1010.5165   | -0.014 | -14   | 14         | 21 EAFLLFDR       |           |         |              |      | Mascot      |

7 MCM6 minichromosome maintenance deficient 6, like [Danio rerio] gi|70887711 93152.1 5.23 15 52 69.914

#### Peptide Information

|  | Calc. Mass | Obsrv. Mass | ± da    | ± ppm | Start Seq. | End Sequence Seq.            | Ion Score | C. I. % | Modification           | Rank | Result Type |
|--|------------|-------------|---------|-------|------------|------------------------------|-----------|---------|------------------------|------|-------------|
|  | 856.49     | 856.5181    | 0.0281  | 33    | 87         | 93 AVRHFAR                   |           |         |                        |      | Mascot      |
|  | 996.5261   | 996.5831    | 0.057   | 57    | 194        | 201 FVDFQKGR                 |           |         |                        |      | Mascot      |
|  | 1010.4975  | 1010.5165   | 0.019   | 19    | 168        | 175 YTQPTICK                 |           |         | Carbamidomethyl (C)[7] |      | Mascot      |
|  | 1010.4975  | 1010.5165   | 0.019   | 19    | 168        | 175 YTQPTICK                 |           |         | Carbamidomethyl (C)[7] |      | Mascot      |
|  | 1165.6252  | 1165.5731   | -0.0521 | -45   | 747        | 755 SELINWYLK                |           |         |                        |      | Mascot      |
|  | 1165.6252  | 1165.7286   | 0.1034  | 89    | 747        | 755 SELINWYLK                |           |         |                        |      | Mascot      |
|  | 1165.6252  | 1165.7286   | 0.1034  | 89    | 747        | 755 SELINWYLK                |           |         |                        |      | Mascot      |
|  | 1234.7228  | 1234.6627   | -0.0601 | -49   | 361        | 372 GILLMLFGGVAK             |           |         | Oxidation (M)[5]       |      | Mascot      |
|  | 1277.6195  | 1277.6964   | 0.0769  | 60    | 321        | 330 NQMTVLEWEK               |           |         |                        |      | Mascot      |
|  | 1293.6321  | 1293.6469   | 0.0148  | 11    | 268        | 279 EGFETDGIQGLK             |           |         |                        |      | Mascot      |
|  | 1293.6321  | 1293.6469   | 0.0148  | 11    | 268        | 279 EGFETDGIQGLK             |           |         |                        |      | Mascot      |
|  | 1325.7899  | 1325.6357   | -0.1542 | -116  | 212        | 223 GSIPRSVEVILR             |           |         |                        |      | Mascot      |
|  | 1357.8162  | 1357.6971   | -0.1191 | -88   | 119        | 130 ELSTVRIGTLLR             |           |         |                        |      | Mascot      |
|  | 1475.7502  | 1475.7354   | -0.0148 | -10   | 90         | 102 HFARDHGNIPPSK            |           |         |                        |      | Mascot      |
|  | 1675.8618  | 1675.813    | -0.0488 | -29   | 509        | 523 SLKQNVNMSAPIMSR          |           |         |                        |      | Mascot      |
|  | 1707.8306  | 1707.7535   | -0.0771 | -45   | 168        | 182 YTQPTICKNPVCANR          |           |         |                        |      | Mascot      |
|  | 2211.1875  | 2211.0769   | -0.1106 | -50   | 361        | 381 GILLMLFGGVAKTTMEGT SLR   |           |         | Oxidation (M)[5]       |      | Mascot      |
|  | 2523.2734  | 2523.3225   | 0.0491  | 19    | 138        | 160 THPVHPELVSGTFLCLDC QSVIK |           |         |                        |      | Mascot      |
|  | 2523.2734  | 2523.3225   | 0.0491  | 19    | 138        | 160 THPVHPELVSGTFLCLDC QSVIK |           |         |                        |      | Mascot      |
|  | 2545.2637  | 2545.2864   | 0.0227  | 9     | 459        | 480 MDLKDQVAIHEAMEQQTI SITK  |           |         | Oxidation (M)[1]       |      | Mascot      |

8 finTRIM family protein [Danio rerio] gi|208019355 19958.9 7.27 8 45 0

#### Peptide Information

|  | Calc. Mass | Obsrv. Mass | ± da    | ± ppm | Start Seq. | End Sequence Seq. | Ion Score | C. I. % | Modification | Rank | Result Type |
|--|------------|-------------|---------|-------|------------|-------------------|-----------|---------|--------------|------|-------------|
|  | 801.4577   | 801.342     | -0.1157 | -144  | 146        | 151 LQERQK        |           |         |              |      | Mascot      |



|   |                             |           |         |     |              |     |                                |      |   |    |   |                          |        |  |  |  |  |        |
|---|-----------------------------|-----------|---------|-----|--------------|-----|--------------------------------|------|---|----|---|--------------------------|--------|--|--|--|--|--------|
|   | 1179.5865                   | 1179.5854 | -0.0011 | -1  | 137          | 145 | ETQSRFQQR                      |      |   |    |   |                          |        |  |  |  |  | Mascot |
|   | 1193.5658                   | 1193.6003 | 0.0345  | 29  | 118          | 128 | HHDTVSAAAER                    |      |   |    |   |                          |        |  |  |  |  | Mascot |
|   | 1293.6838                   | 1293.6469 | -0.0369 | -29 | 165          | 174 | RSDIDLWYIL                     |      |   |    |   |                          |        |  |  |  |  | Mascot |
|   | 1293.6838                   | 1293.6469 | -0.0369 | -29 | 165          | 174 | RSDIDLWYIL                     |      |   |    |   |                          |        |  |  |  |  | Mascot |
|   | 1993.8387                   | 1993.948  | 0.1093  | 55  | 102          | 117 | TDHCCICYLCVVDQHK               |      |   |    |   | Carbamidomethyl (C)[4,5] |        |  |  |  |  | Mascot |
|   | 2299.1145                   | 2299.1499 | 0.0354  | 15  | 47           | 65  | AVKSCLVCLNSYCLTHFQ<br>R        |      |   |    |   | Carbamidomethyl (C)[5,8] |        |  |  |  |  | Mascot |
|   | 2330.1116                   | 2330.2039 | 0.0923  | 40  | 20           | 44  | LQAAGPAQSPAASGDVE<br>CVVCTGAK  |      |   |    |   |                          |        |  |  |  |  | Mascot |
|   | 2545.2385                   | 2545.2864 | 0.0479  | 19  | 18           | 44  | SKLQAAGPAQSPAASGD<br>VECVCTGAK |      |   |    |   |                          |        |  |  |  |  | Mascot |
| 9 | Cul4a protein [Danio rerio] |           |         |     | gi 182889784 |     | 73439.7                        | 6.31 | 7 | 44 | 0 | 35                       | 92.528 |  |  |  |  |        |

Peptide Information

| Calc. Mass | Obsrv. Mass | ± da    | ± ppm | Start Seq. | End Seq. | Sequence      | Ion Score | C. I.  | % | Modification     | Rank | Result Type |
|------------|-------------|---------|-------|------------|----------|---------------|-----------|--------|---|------------------|------|-------------|
| 1010.5669  | 1010.5165   | -0.0504 | -50   | 136        | 143      | SIFLFLDR      | 35        | 92.528 |   |                  |      | Mascot      |
| 1010.5669  | 1010.5165   | -0.0504 | -50   | 136        | 143      | SIFLFLDR      |           |        |   |                  |      | Mascot      |
| 1234.6976  | 1234.6627   | -0.0349 | -28   | 83         | 92       | VSPMLYKQLR    |           |        |   |                  |      | Mascot      |
| 1277.765   | 1277.6964   | -0.0686 | -54   | 417        | 426      | ILDKIMIIFR    |           |        |   | Oxidation (M)[6] |      | Mascot      |
| 1301.7059  | 1301.5853   | -0.1206 | -93   | 600        | 611      | VATGIEEGELKR  |           |        |   |                  |      | Mascot      |
| 1301.7059  | 1301.5853   | -0.1206 | -93   | 600        | 611      | VATGIEEGELKR  |           |        |   |                  |      | Mascot      |
| 1316.7419  | 1316.5748   | -0.1671 | -127  | 446        | 458      | LLVGKSASVDAEK |           |        |   |                  |      | Mascot      |
| 1475.6971  | 1475.7354   | 0.0383  | 26    | 404        | 416      | AGNKEATEEELER |           |        |   |                  |      | Mascot      |
| 1560.6417  | 1560.6442   | 0.0025  | 2     | 355        | 367      | DQMDSVTQSCFQR |           |        |   | Oxidation (M)[3] |      | Mascot      |

|    |                                |  |  |  |             |  |         |      |   |    |   |    |   |  |  |  |  |  |
|----|--------------------------------|--|--|--|-------------|--|---------|------|---|----|---|----|---|--|--|--|--|--|
| 10 | protein cereblon [Danio rerio] |  |  |  | gi 51591891 |  | 49063.5 | 5.86 | 7 | 44 | 0 | 22 | 0 |  |  |  |  |  |
|----|--------------------------------|--|--|--|-------------|--|---------|------|---|----|---|----|---|--|--|--|--|--|

Peptide Information

| Calc. Mass | Obsrv. Mass | ± da    | ± ppm | Start Seq. | End Seq. | Sequence                   | Ion Score | C. I. | % | Modification                             | Rank | Result Type |
|------------|-------------|---------|-------|------------|----------|----------------------------|-----------|-------|---|------------------------------------------|------|-------------|
| 850.4814   | 850.5318    | 0.0504  | 59    | 242        | 248      | TLMSRVK                    |           |       |   | Oxidation (M)[3]                         |      | Mascot      |
| 1010.4281  | 1010.5165   | 0.0884  | 87    | 300        | 307      | CELDIMDR                   | 22        | 0     |   | Oxidation (M)[6]                         |      | Mascot      |
| 1010.4281  | 1010.5165   | 0.0884  | 87    | 300        | 307      | CELDIMDR                   |           |       |   | Oxidation (M)[6]                         |      | Mascot      |
| 1109.4503  | 1109.4769   | 0.0266  | 24    | 383        | 391      | TCSSHMGWK                  |           |       |   | Carbamidomethyl (C)[2], Oxidation (M)[6] |      | Mascot      |
| 1193.6385  | 1193.6003   | -0.0382 | -32   | 203        | 212      | HTQTTPPQKR                 |           |       |   |                                          |      | Mascot      |
| 1279.6133  | 1279.7506   | 0.1373  | 107   | 298        | 307      | LRCELDIMDR                 |           |       |   | Oxidation (M)[8]                         |      | Mascot      |
| 1320.6399  | 1320.575    | -0.0649 | -49   | 298        | 307      | LRCELDIMDR                 |           |       |   | Carbamidomethyl (C)[3]                   |      | Mascot      |
| 1475.7164  | 1475.7354   | 0.019   | 13    | 124        | 136      | AEFGTTAEIYAFR              |           |       |   |                                          |      | Mascot      |
| 2282.2061  | 2282.1521   | -0.054  | -24   | 410        | 431      | SALLPTIPQGEEGVEGSR<br>LLCL |           |       |   |                                          |      | Mascot      |

11 novel protein similar to MCM6 minichromosome maintenance deficient 6, mitotin (*S. cerevisiae*) (mcm6) gi|169158286 93177.2 5.26 13 41 0

Peptide Information

| Calc. Mass | Obsrv. Mass | $\pm$ da | $\pm$ ppm | Start Seq. | End Seq. | Sequence                    | Ion Score | C. I. % | Modification           | Rank | Result Type |
|------------|-------------|----------|-----------|------------|----------|-----------------------------|-----------|---------|------------------------|------|-------------|
| 856.49     | 856.5181    | 0.0281   | 33        | 87         | 93       | AVRH FAR                    |           |         |                        |      | Mascot      |
| 1010.4975  | 1010.5165   | 0.019    | 19        | 168        | 175      | YTQPTICK                    |           |         | Carbamidomethyl (C)[7] |      | Mascot      |
| 1010.4975  | 1010.5165   | 0.019    | 19        | 168        | 175      | YTQPTICK                    |           |         | Carbamidomethyl (C)[7] |      | Mascot      |
| 1165.6252  | 1165.5731   | -0.0521  | -45       | 747        | 755      | SELINWYLK                   |           |         |                        |      | Mascot      |
| 1165.6252  | 1165.7286   | 0.1034   | 89        | 747        | 755      | SELINWYLK                   |           |         |                        |      | Mascot      |
| 1165.6252  | 1165.7286   | 0.1034   | 89        | 747        | 755      | SELINWYLK                   |           |         |                        |      | Mascot      |
| 1234.7228  | 1234.6627   | -0.0601  | -49       | 361        | 372      | GILLMLFGGVAK                |           |         | Oxidation (M)[5]       |      | Mascot      |
| 1277.6195  | 1277.6964   | 0.0769   | 60        | 321        | 330      | NQMTVLEWEK                  |           |         |                        |      | Mascot      |
| 1293.6144  | 1293.6469   | 0.0325   | 25        | 321        | 330      | NQMTVLEWEK                  |           |         | Oxidation (M)[3]       |      | Mascot      |
| 1293.6144  | 1293.6469   | 0.0325   | 25        | 321        | 330      | NQMTVLEWEK                  |           |         | Oxidation (M)[3]       |      | Mascot      |
| 1325.7899  | 1325.6357   | -0.1542  | -116      | 212        | 223      | GSIPRSVEVILR                |           |         |                        |      | Mascot      |
| 1357.8162  | 1357.6971   | -0.1191  | -88       | 119        | 130      | ELSTVRIGTLLR                |           |         |                        |      | Mascot      |
| 1475.7502  | 1475.7354   | -0.0148  | -10       | 90         | 102      | HFARDHGNIPPSK               |           |         |                        |      | Mascot      |
| 1675.8618  | 1675.813    | -0.0488  | -29       | 509        | 523      | SLKQNVNMSAPIMSR             |           |         |                        |      | Mascot      |
| 1707.8306  | 1707.7535   | -0.0771  | -45       | 168        | 182      | YTQPTICKNPVCANR             |           |         |                        |      | Mascot      |
| 2211.1875  | 2211.0769   | -0.1106  | -50       | 361        | 381      | GILLMLFGGVAKTTMEGT<br>SLR   |           |         | Oxidation (M)[5]       |      | Mascot      |
| 2523.2734  | 2523.3225   | 0.0491   | 19        | 138        | 160      | THPVHPELVSGTFLCLDC<br>QSVIK |           |         |                        |      | Mascot      |
| 2523.2734  | 2523.3225   | 0.0491   | 19        | 138        | 160      | THPVHPELVSGTFLCLDC<br>QSVIK |           |         |                        |      | Mascot      |
| 2545.2637  | 2545.2864   | 0.0227   | 9         | 459        | 480      | MDLKDQVAIHEAMEQQTI<br>SITK  |           |         | Oxidation (M)[1]       |      | Mascot      |

12 PREDICTED: hypothetical protein LOC100003217 [Danio rerio] gi|326678765 31640.9 5.2 9 40 0

Peptide Information

| Calc. Mass | Obsrv. Mass | $\pm$ da | $\pm$ ppm | Start Seq. | End Seq. | Sequence          | Ion Score | C. I. % | Modification             | Rank | Result Type |
|------------|-------------|----------|-----------|------------|----------|-------------------|-----------|---------|--------------------------|------|-------------|
| 842.4114   | 842.4988    | 0.0874   | 104       | 78         | 84       | SREAHDK           |           |         |                          |      | Mascot      |
| 1193.5289  | 1193.6003   | 0.0714   | 60        | 53         | 62       | LCQECGLDAK        |           |         | Carbamidomethyl (C)[2,5] |      | Mascot      |
| 1277.6704  | 1277.6964   | 0.026    | 20        | 208        | 218      | LICEMARQIGK       |           |         | Oxidation (M)[5]         |      | Mascot      |
| 1475.7887  | 1475.7354   | -0.0533  | -36       | 66         | 77       | TDLLRLSEEMR       |           |         |                          |      | Mascot      |
| 1493.6835  | 1493.7147   | 0.0312   | 21        | 53         | 65       | LCQECGLDAKGSR     |           |         | Carbamidomethyl (C)[2,5] |      | Mascot      |
| 1838.9792  | 1838.9033   | -0.0759  | -41       | 36         | 52       | VADATYSMSLTVGVIRR |           |         |                          |      | Mascot      |

|    |                         |           |         |    |              |         |                        |   |                                                    |        |    |        |
|----|-------------------------|-----------|---------|----|--------------|---------|------------------------|---|----------------------------------------------------|--------|----|--------|
|    | 2210.9482               | 2211.0769 | 0.1287  | 58 | 196          | 214     | DMDSHIGNACMKLICEMAR    |   | Carbamidomethyl (C)[10], Oxidation (M)[2]          | Mascot |    |        |
|    | 2283.9646               | 2284.1465 | 0.1819  | 80 | 196          | 214     | DMDSHIGNACMKLICEMAR    |   | Carbamidomethyl (C)[10,15], Oxidation (M)[2,11]    | Mascot |    |        |
|    | 2299.9597               | 2300.1455 | 0.1858  | 81 | 196          | 214     | DMDSHIGNACMKLICEMAR    |   | Carbamidomethyl (C)[10,15], Oxidation (M)[2,11,17] | Mascot |    |        |
|    | 2346.1799               | 2346.1995 | 0.0196  | 8  | 132          | 151     | TACEPTLLNFLEPTKPWER    |   |                                                    | Mascot |    |        |
|    | 2346.1799               | 2346.1995 | 0.0196  | 8  | 132          | 151     | TACEPTLLNFLEPTKPWER    |   |                                                    | Mascot |    |        |
|    | 2568.168                | 2568.1582 | -0.0098 | -4 | 186          | 207     | EEFWSLGLLRDMDSHIGNACMK |   | Oxidation (M)[12]                                  | Mascot |    |        |
| 13 | cullin-4B [Danio rerio] |           |         |    | gi 170932540 | 99363.2 | 7.79                   | 8 | 40                                                 | 0      | 35 | 92.528 |

#### Peptide Information

| Calc. Mass | Obsrv. Mass | ± da    | ± ppm | Start Seq. | End Seq. | Sequence              | Ion Score | C. I.  | % Modification         | Rank | Result Type |
|------------|-------------|---------|-------|------------|----------|-----------------------|-----------|--------|------------------------|------|-------------|
| 807.4215   | 807.3876    | -0.0339 | -42   | 250        | 255      | QMIMIR                |           |        | Oxidation (M)[2]       |      | Mascot      |
| 992.453    | 992.502     | 0.049   | 49    | 750        | 758      | SKDVEDGDK             |           |        |                        |      | Mascot      |
| 1010.5669  | 1010.5165   | -0.0504 | -50   | 256        | 263      | SIFLFLDR              | 35        | 92.528 |                        |      | Mascot      |
| 1010.5669  | 1010.5165   | -0.0504 | -50   | 256        | 263      | SIFLFLDR              |           |        |                        |      | Mascot      |
| 1032.4091  | 1032.4996   | 0.0905  | 88    | 759        | 766      | FSCNDDFK              |           |        | Carbamidomethyl (C)[3] |      | Mascot      |
| 1165.6112  | 1165.5731   | -0.0381 | -33   | 661        | 670      | TFYLGKHSGR            |           |        |                        |      | Mascot      |
| 1165.6112  | 1165.7286   | 0.1174  | 101   | 661        | 670      | TFYLGKHSGR            |           |        |                        |      | Mascot      |
| 1165.6112  | 1165.7286   | 0.1174  | 101   | 661        | 670      | TFYLGKHSGR            |           |        |                        |      | Mascot      |
| 1279.7266  | 1279.7506   | 0.024   | 19    | 537        | 546      | MLDKIMIIFR            |           |        |                        |      | Mascot      |
| 1316.7419  | 1316.5748   | -0.1671 | -127  | 566        | 578      | LLVGKSASVDAEK         |           |        |                        |      | Mascot      |
| 2545.2466  | 2545.2864   | 0.0398  | 16    | 264        | 284      | TYVLQNSMLPSIWDMLGELFR |           |        | Oxidation (M)[8, 15]   |      | Mascot      |

|    |                                                         |  |  |  |              |           |      |    |    |   |  |  |
|----|---------------------------------------------------------|--|--|--|--------------|-----------|------|----|----|---|--|--|
| 14 | PREDICTED: hypothetical protein LOC559994 [Danio rerio] |  |  |  | gi 326677062 | 1030064.3 | 5.62 | 46 | 39 | 0 |  |  |
|----|---------------------------------------------------------|--|--|--|--------------|-----------|------|----|----|---|--|--|

#### Peptide Information

| Calc. Mass | Obsrv. Mass | ± da    | ± ppm | Start Seq. | End Seq. | Sequence  | Ion Score | C. I. | % Modification | Rank | Result Type |
|------------|-------------|---------|-------|------------|----------|-----------|-----------|-------|----------------|------|-------------|
| 807.3478   | 807.3876    | 0.0398  | 49    | 1925       | 1931     | EADSETR   |           |       |                |      | Mascot      |
| 850.5185   | 850.5318    | 0.0133  | 16    | 8569       | 8575     | IKPFAFK   |           |       |                |      | Mascot      |
| 856.5138   | 856.5181    | 0.0043  | 5     | 1082       | 1089     | LGIIEPSK  |           |       |                |      | Mascot      |
| 864.4321   | 864.4979    | 0.0658  | 76    | 3272       | 3278     | EERAFGR   |           |       |                |      | Mascot      |
| 870.5559   | 870.5313    | -0.0246 | -28   | 1536       | 1542     | ALLLWVR   |           |       |                |      | Mascot      |
| 882.4679   | 882.5547    | 0.0868  | 98    | 3102       | 3108     | NLHEELK   |           |       |                |      | Mascot      |
| 959.5342   | 959.5641    | 0.0299  | 31    | 2348       | 2355     | VQMKPQTK  |           |       |                |      | Mascot      |
| 1032.5758  | 1032.4996   | -0.0762 | -74   | 6197       | 6205     | QALMITLDK |           |       |                |      | Mascot      |

|           |           |         |      |      |      |                     |                             |        |
|-----------|-----------|---------|------|------|------|---------------------|-----------------------------|--------|
| 1045.5636 | 1045.5497 | -0.0139 | -13  | 8277 | 8285 | DLEVRSAQK           |                             | Mascot |
| 1109.5231 | 1109.4769 | -0.0462 | -42  | 1656 | 1663 | EMKCWLQR            | Oxidation (M)[2]            | Mascot |
| 1118.5476 | 1118.4932 | -0.0544 | -49  | 5497 | 5506 | ADVFSHTDVK          |                             | Mascot |
| 1179.5674 | 1179.5854 | 0.018   | 15   | 2826 | 2835 | DMDLLSQSVR          | Oxidation (M)[2]            | Mascot |
| 1193.6195 | 1193.6003 | -0.0192 | -16  | 4707 | 4717 | ALKQGVMTSDK         | Oxidation (M)[8]            | Mascot |
| 1234.6348 | 1234.6627 | 0.0279  | 23   | 3360 | 3370 | EQCASLTELK          |                             | Mascot |
| 1279.6562 | 1279.7506 | 0.0944  | 74   | 5890 | 5900 | TLKQDVTMSEK         |                             | Mascot |
| 1293.6118 | 1293.6469 | 0.0351  | 27   | 607  | 616  | FCMYQGLLYR          |                             | Mascot |
| 1293.6118 | 1293.6469 | 0.0351  | 27   | 607  | 616  | FCMYQGLLYR          |                             | Mascot |
| 1301.6095 | 1301.5853 | -0.0242 | -19  | 1286 | 1296 | SFLGMAGFYHR         | Oxidation (M)[5]            | Mascot |
| 1301.6095 | 1301.5853 | -0.0242 | -19  | 1286 | 1296 | SFLGMAGFYHR         | Oxidation (M)[5]            | Mascot |
| 1308.6947 | 1308.6404 | -0.0543 | -41  | 9022 | 9032 | ALAYTITQNWK         |                             | Mascot |
| 1309.6068 | 1309.642  | 0.0352  | 27   | 607  | 616  | FCMYQGLLYR          | Oxidation (M)[3]            | Mascot |
| 1309.6068 | 1309.642  | 0.0352  | 27   | 607  | 616  | FCMYQGLLYR          | Oxidation (M)[3]            | Mascot |
| 1316.6416 | 1316.5748 | -0.0668 | -51  | 6672 | 6682 | VPEVPHCPEPR         | Carbamidomethyl (C)[7]      | Mascot |
| 1320.5968 | 1320.575  | -0.0218 | -17  | 8122 | 8131 | WSQYEEVSHR          |                             | Mascot |
| 1323.6208 | 1323.5704 | -0.0504 | -38  | 6495 | 6505 | KTESALEEMNR         | Oxidation (M)[9]            | Mascot |
| 1325.5687 | 1325.6357 | 0.067   | 51   | 8822 | 8831 | CQCWMELLDK          | Carbamidomethyl (C)[1]      | Mascot |
| 1331.6664 | 1331.6158 | -0.0506 | -38  | 722  | 732  | FMLVVTDYATR         | Oxidation (M)[2]            | Mascot |
| 1357.7296 | 1357.6971 | -0.0325 | -24  | 277  | 287  | MLSPQLQVWVR         |                             | Mascot |
| 1365.6566 | 1365.6373 | -0.0193 | -14  | 4398 | 4409 | AELESLQTSEMK        |                             | Mascot |
| 1434.8467 | 1434.7489 | -0.0978 | -68  | 8569 | 8580 | IKPFAFKLLSDR        |                             | Mascot |
| 1475.7522 | 1475.7354 | -0.0168 | -11  | 6801 | 6813 | QEAKILECSVAER       |                             | Mascot |
| 1559.8024 | 1559.7657 | -0.0367 | -24  | 398  | 412  | AERSPASTTVEINGK     |                             | Mascot |
| 1560.8203 | 1560.6442 | -0.1761 | -113 | 3313 | 3325 | FLTDMESKLHALR       |                             | Mascot |
| 1576.8152 | 1576.6393 | -0.1759 | -112 | 3313 | 3325 | FLTDMESKLHALR       | Oxidation (M)[5]            | Mascot |
| 1576.8152 | 1576.6393 | -0.1759 | -112 | 3313 | 3325 | FLTDMESKLHALR       | Oxidation (M)[5]            | Mascot |
| 1675.7819 | 1675.813  | 0.0311  | 19   | 8068 | 8080 | YFQDMQQNLVMVK       | Oxidation (M)[5,11]         | Mascot |
| 1722.7786 | 1722.8202 | 0.0416  | 24   | 7847 | 7861 | EEPMNGEMSTRNSIK     |                             | Mascot |
| 1723.7196 | 1723.8141 | 0.0945  | 55   | 675  | 688  | TCPECQKVSSDCPR      | Carbamidomethyl (C)[2,5,12] | Mascot |
| 1723.7196 | 1723.8141 | 0.0945  | 55   | 675  | 688  | TCPECQKVSSDCPR      | Carbamidomethyl (C)[2,5,12] | Mascot |
| 1738.7734 | 1738.8202 | 0.0468  | 27   | 7847 | 7861 | EEPMNGEMSTRNSIK     | Oxidation (M)[4]            | Mascot |
| 1739.6847 | 1739.8097 | 0.125   | 72   | 5874 | 5889 | SSHMDTCSNEDNESGIK   | 0 0                         | Mascot |
| 1739.8486 | 1739.8097 | -0.0389 | -22  | 1664 | 1678 | AYQELLDWISTEGK      |                             | Mascot |
| 2190.0747 | 2190.1038 | 0.0291  | 13   | 8548 | 8566 | ELNQPDIWTCSTEVLNLK  |                             | Mascot |
| 2211.126  | 2211.0769 | -0.0491 | -22  | 8508 | 8526 | MSAAELQTTGVIYRLELCR | Carbamidomethyl (C)[18]     | Mascot |

|    |                                                            |           |         |     |      |      |                                 |         |      |                        |    |   |  |        |
|----|------------------------------------------------------------|-----------|---------|-----|------|------|---------------------------------|---------|------|------------------------|----|---|--|--------|
|    | 2224.9873                                                  | 2225.0923 | 0.105   | 47  | 4312 | 4333 | VTDAETSSQIGACAEDNE<br>SGIK      |         |      |                        |    |   |  | Mascot |
|    | 2233.0012                                                  | 2233.052  | 0.0508  | 23  | 8235 | 8252 | DSTELEEWMRCAHEQLQ<br>K          |         |      |                        |    |   |  | Mascot |
|    | 2282.261                                                   | 2282.1521 | -0.1089 | -48 | 8671 | 8691 | VMEASKLLIGMQPQSA<br>PLIK        |         |      |                        |    |   |  | Mascot |
|    | 2284.022                                                   | 2284.1465 | 0.1245  | 55  | 3439 | 3458 | RVLDCTDAPFESEADTL<br>MDR        |         |      |                        |    |   |  | Mascot |
|    | 2299.0984                                                  | 2299.1499 | 0.0515  | 22  | 2881 | 2901 | VEDIQHLTVSSDLAPCQ<br>NSR        |         |      |                        |    |   |  | Mascot |
|    | 2300.0168                                                  | 2300.1455 | 0.1287  | 56  | 3439 | 3458 | RVLDCTDAPFESEADTL<br>MDR        |         |      | Oxidation (M)[18]      |    |   |  | Mascot |
|    | 2330.1833                                                  | 2330.2039 | 0.0206  | 9   | 8286 | 8307 | VSAESTGTQILQLTNSEA<br>PDLR      |         |      |                        |    |   |  | Mascot |
|    | 2346.1758                                                  | 2346.1995 | 0.0237  | 10  | 8547 | 8566 | RELNQPDWTCSTEVLN<br>LK          |         |      |                        |    |   |  | Mascot |
|    | 2346.1758                                                  | 2346.1995 | 0.0237  | 10  | 8547 | 8566 | RELNQPDWTCSTEVLN<br>LK          |         |      |                        |    |   |  | Mascot |
|    | 2523.2759                                                  | 2523.3225 | 0.0466  | 18  | 3386 | 3408 | AEQTIGDQASYMGKDNL<br>QLLISK     |         |      |                        |    |   |  | Mascot |
|    | 2523.2759                                                  | 2523.3225 | 0.0466  | 18  | 3386 | 3408 | AEQTIGDQASYMGKDNL<br>QLLISK     |         |      |                        |    |   |  | Mascot |
|    | 2568.2532                                                  | 2568.1582 | -0.095  | -37 | 4168 | 4191 | CASIEATEMSLGTGDIVQ<br>SKLTEK    |         |      | Carbamidomethyl (C)[1] |    |   |  | Mascot |
|    | 3109.4377                                                  | 3109.2981 | -0.1396 | -45 | 1992 | 2019 | QAQLNEAGNFIEMSDTS<br>TSHSLSDCLR |         |      | Oxidation (M)[14]      |    |   |  | Mascot |
| 15 | histone-lysine N-methyltransferase SUV39H1-A [Danio rerio] |           |         |     |      |      | gi 57525753                     | 47361.8 | 8.67 | 11                     | 39 | 0 |  |        |

#### Peptide Information

|    | Calc. Mass                  | Obsrv. Mass | ± da    | ± ppm | Start Seq.   | End Seq. | Sequence                           | Ion Score | C. I. % | Modification                             | Rank | Result Type |
|----|-----------------------------|-------------|---------|-------|--------------|----------|------------------------------------|-----------|---------|------------------------------------------|------|-------------|
|    | 807.3712                    | 807.3876    | 0.0164  | 20    | 401          | 407      | CGVRNCR                            |           |         |                                          |      | Mascot      |
|    | 850.4781                    | 850.5318    | 0.0537  | 63    | 285          | 291      | RGVLYDK                            |           |         |                                          |      | Mascot      |
|    | 864.3926                    | 864.4979    | 0.1053  | 122   | 401          | 407      | CGVRNCR                            |           |         | Carbamidomethyl (C)[1]                   |      | Mascot      |
|    | 959.4549                    | 959.5641    | 0.1092  | 114   | 394          | 400      | RVHMECK                            |           |         | Carbamidomethyl (C)[6]                   |      | Mascot      |
|    | 1118.6602                   | 1118.4932   | -0.167  | -149  | 28           | 37       | LVCKQLSVTK                         |           |         |                                          |      | Mascot      |
|    | 1234.549                    | 1234.6627   | 0.1137  | 92    | 395          | 404      | VHMECKCGVR                         |           |         | Carbamidomethyl (C)[5], Oxidation (M)[3] |      | Mascot      |
|    | 1308.5988                   | 1308.6404   | 0.0416  | 32    | 366          | 377      | MTVDPVDAESTK                       |           |         | Oxidation (M)[1]                         |      | Mascot      |
|    | 1493.7126                   | 1493.7147   | 0.0021  | 1     | 212          | 224      | VMPGVPIYECNSK                      |           |         | Carbamidomethyl (C)[10]                  |      | Mascot      |
|    | 1560.7046                   | 1560.6442   | -0.0604 | -39   | 130          | 141      | WEDLMNQTCRHK                       |           |         |                                          |      | Mascot      |
|    | 1576.6996                   | 1576.6393   | -0.0603 | -38   | 130          | 141      | WEDLMNQTCRHK                       |           |         | Oxidation (M)[5]                         |      | Mascot      |
|    | 1576.6996                   | 1576.6393   | -0.0603 | -38   | 130          | 141      | WEDLMNQTCRHK                       |           |         | Oxidation (M)[5]                         |      | Mascot      |
|    | 1738.9309                   | 1738.8202   | -0.1107 | -64   | 235          | 248      | VVQRGIQYDLICFK                     |           |         | Carbamidomethyl (C)[11]                  |      | Mascot      |
|    | 2233.033                    | 2233.052    | 0.019   | 9     | 266          | 284      | NSFVMEYLGEIITDDEAE<br>R            |           |         | Oxidation (M)[5]                         |      | Mascot      |
|    | 3109.3589                   | 3109.2981   | -0.0608 | -20   | 170          | 199      | GVDMNAVIVGCEADCVC<br>SQPVDGCCPGLLK |           |         | Carbamidomethyl (C)[11,13]               |      | Mascot      |
| 16 | ldh3a protein [Danio rerio] |             |         |       | gi 157423273 |          | 16736.4                            | 6.89      | 6       | 39                                       | 0    |             |

| Peptide Information |                          |         |       |              |                      |           |         |                        |      |             |
|---------------------|--------------------------|---------|-------|--------------|----------------------|-----------|---------|------------------------|------|-------------|
| Calc. Mass          | Obsrv. Mass              | ± da    | ± ppm | Start Seq.   | End Sequence Seq.    | Ion Score | C. I. % | Modification           | Rank | Result Type |
| 1003.489            | 1003.5405                | 0.0515  | 51    | 108          | 116 HMGLHGHAK        |           |         | Oxidation (M)[2]       |      | Mascot      |
| 1109.5693           | 1109.4769                | -0.0924 | -83   | 7            | 17 STVSCIMGAIK       |           |         |                        |      | Mascot      |
| 1316.707            | 1316.5748                | -0.1322 | -100  | 18           | 28 TQTPQPRVF SR      |           |         |                        |      | Mascot      |
| 1357.5988           | 1357.6971                | 0.0983  | 72    | 142          | 152 CSEFTADICRR      |           |         | Carbamidomethyl (C)[1] |      | Mascot      |
| 1707.8669           | 1707.7535                | -0.1134 | -66   | 2            | 17 ANAWRSTVSCIMGAIK  |           |         |                        |      | Mascot      |
| 1723.8618           | 1723.8141                | -0.0477 | -28   | 2            | 17 ANAWRSTVSCIMGAIK  |           |         | Oxidation (M)[12]      |      | Mascot      |
| 1723.8618           | 1723.8141                | -0.0477 | -28   | 2            | 17 ANAWRSTVSCIMGAIK  |           |         | Oxidation (M)[12]      |      | Mascot      |
| 1838.9073           | 1838.9033                | -0.004  | -2    | 1            | 17 MANAWRSTVSCIMGAIK |           |         |                        |      | Mascot      |
| 17                  | Josephin-1 [Danio rerio] |         |       | gi 115497592 | 26182.5              | 9.34      | 7       | 38                     | 0    |             |

| Peptide Information |                    |         |       |            |                              |           |         |                        |      |             |
|---------------------|--------------------|---------|-------|------------|------------------------------|-----------|---------|------------------------|------|-------------|
| Calc. Mass          | Obsrv. Mass        | ± da    | ± ppm | Start Seq. | End Sequence Seq.            | Ion Score | C. I. % | Modification           | Rank | Result Type |
| 1051.5908           | 1051.6998          | 0.109   | 104   | 170        | 177 RQHWIGVR                 |           |         |                        |      | Mascot      |
| 1179.6732           | 1179.5854          | -0.0878 | -74   | 96         | 106 LSPSTLVTPHK              |           |         |                        |      | Mascot      |
| 1293.6375           | 1293.6469          | 0.0094  | 7     | 128        | 137 GFEAVWWDKR               |           |         |                        |      | Mascot      |
| 1293.6375           | 1293.6469          | 0.0094  | 7     | 128        | 137 GFEAVWWDKR               |           |         |                        |      | Mascot      |
| 1357.6635           | 1357.6971          | 0.0336  | 25    | 178        | 189 EVAGVYYNLD SK            |           |         |                        |      | Mascot      |
| 1838.8927           | 1838.9033          | 0.0106  | 6     | 12         | 28 VG GGFQELGCMPWKVS<br>K    |           |         | Oxidation (M)[11]      |      | Mascot      |
| 2233.0818           | 2233.052           | -0.0298 | -13   | 67         | 86 ELCALHALNNVFQDGAA<br>FSR  |           |         | Carbamidomethyl (C)[3] |      | Mascot      |
| 2282.2139           | 2282.1521          | -0.0618 | -27   | 87         | 106 DALQDIYQRLSPSTLVTP<br>HK |           |         |                        |      | Mascot      |
| 18                  | Pbx2 [Danio rerio] |         |       | gi 7861936 | 18895.6                      | 9.08      | 7       | 38                     | 0    |             |

| Peptide Information |             |         |       |            |                              |           |         |                                          |      |             |
|---------------------|-------------|---------|-------|------------|------------------------------|-----------|---------|------------------------------------------|------|-------------|
| Calc. Mass          | Obsrv. Mass | ± da    | ± ppm | Start Seq. | End Sequence Seq.            | Ion Score | C. I. % | Modification                             | Rank | Result Type |
| 864.4686            | 864.4979    | 0.0293  | 34    | 153        | 159 SRFLDAR                  |           |         |                                          |      | Mascot      |
| 1051.5782           | 1051.6998   | 0.1216  | 116   | 133        | 141 FSSIQTQLK                |           |         |                                          |      | Mascot      |
| 1179.6442           | 1179.5854   | -0.0588 | -50   | 1          | 10 ALF SVLCEIK               |           |         | Carbamidomethyl (C)[7]                   |      | Mascot      |
| 1323.6395           | 1323.5704   | -0.0691 | -52   | 142        | 152 QSTCEAVMILR              |           |         | Carbamidomethyl (C)[4], Oxidation (M)[8] |      | Mascot      |
| 1493.7563           | 1493.7147   | -0.0416 | -28   | 142        | 154 QSTCEAVMILRSR            |           |         |                                          |      | Mascot      |
| 2299.1785           | 2299.1499   | -0.0286 | -12   | 133        | 152 FSSIQTQLKQSTCEAVMI<br>LR |           |         | Oxidation (M)[17]                        |      | Mascot      |
| 3109.4717           | 3109.2981   | -0.1736 | -56   | 84         | 109 NIYHTELEKYEQACSEST       |           |         |                                          |      | Mascot      |

19      contactin-1a precursor [Danio rerio]      THVMNLLR  
 gi|136256388      114246.1      6.19      14      38      0

Peptide Information

| Calc. Mass | Obsrv. Mass | ± da    | ± ppm | Start Seq. | End Seq. | Sequence                   | Ion Score | C. I. % | Modification                               | Rank | Result Type |
|------------|-------------|---------|-------|------------|----------|----------------------------|-----------|---------|--------------------------------------------|------|-------------|
| 856.5111   | 856.5181    | 0.007   | 8     | 434        | 441      | LLGARNGR                   |           |         |                                            |      | Mascot      |
| 959.4979   | 959.5641    | 0.0662  | 69    | 977        | 984      | QSIDLPMR                   |           |         |                                            |      | Mascot      |
| 1010.5629  | 1010.5165   | -0.0464 | -46   | 785        | 793      | DPKIPPSTR                  |           |         |                                            |      | Mascot      |
| 1010.5629  | 1010.5165   | -0.0464 | -46   | 785        | 793      | DPKIPPSTR                  |           |         |                                            |      | Mascot      |
| 1045.5173  | 1045.5497   | 0.0324  | 31    | 562        | 569      | DAQHYQRK                   |           |         |                                            |      | Mascot      |
| 1118.4572  | 1118.4932   | 0.036   | 32    | 492        | 500      | YTCFAENDR                  |           |         |                                            |      | Mascot      |
| 1308.575   | 1308.6404   | 0.0654  | 50    | 898        | 910      | ACNGAGYGPASQR              |           |         | Carbamidomethyl (C)[2]                     |      | Mascot      |
| 1331.5797  | 1331.6158   | 0.0361  | 27    | 492        | 502      | YTCFAENDRGR                |           |         |                                            |      | Mascot      |
| 1365.6857  | 1365.6373   | -0.0484 | -35   | 503        | 516      | ANSTGSL SITDATK            |           |         |                                            |      | Mascot      |
| 1434.7231  | 1434.7489   | 0.0258  | 18    | 1          | 12       | MIPEAFQPRAMK               |           |         | Oxidation (M)[1]                           |      | Mascot      |
| 1707.7683  | 1707.7535   | -0.0148 | -9    | 138        | 151      | VQFGYLD MFSTDER            |           |         |                                            |      | Mascot      |
| 1723.7632  | 1723.8141   | 0.0509  | 30    | 138        | 151      | VQFGYLD MFSTDER            |           |         | Oxidation (M)[8]                           |      | Mascot      |
| 1723.7632  | 1723.8141   | 0.0509  | 30    | 138        | 151      | VQFGYLD MFSTDER            |           |         | Oxidation (M)[8]                           |      | Mascot      |
| 2225.1772  | 2225.0923   | -0.0849 | -38   | 695        | 716      | VIATNTLTGPPSESPK<br>TTTR   |           |         |                                            |      | Mascot      |
| 2281.9963  | 2282.1521   | 0.1558  | 68    | 388        | 406      | FSRLGFEDSGMYQCVAE<br>NR    |           |         | Carbamidomethyl (C)[14], Oxidation (M)[11] |      | Mascot      |
| 2284.2131  | 2284.1465   | -0.0666 | -29   | 442        | 460      | VVFECRPRAAPRPNITW<br>SK    |           |         | Carbamidomethyl (C)[5]                     |      | Mascot      |
| 2299.1426  | 2299.1499   | 0.0073  | 3     | 986        | 1007     | GEYLVEVRAHSEGGDGA<br>VAQVR |           |         |                                            |      | Mascot      |

20      hypothetical protein LOC494059 [Danio rerio]      gi|56693275      26532.2      6.1      7      38      0

Peptide Information

| Calc. Mass | Obsrv. Mass | ± da    | ± ppm | Start Seq. | End Seq. | Sequence         | Ion Score | C. I. % | Modification     | Rank | Result Type |
|------------|-------------|---------|-------|------------|----------|------------------|-----------|---------|------------------|------|-------------|
| 1010.4272  | 1010.5165   | 0.0893  | 88    | 179        | 187      | TSSEESQDK        |           |         |                  |      | Mascot      |
| 1010.4272  | 1010.5165   | 0.0893  | 88    | 179        | 187      | TSSEESQDK        |           |         |                  |      | Mascot      |
| 1179.574   | 1179.5854   | 0.0114  | 10    | 165        | 174      | EETEDTVTKK       |           |         |                  |      | Mascot      |
| 1309.6609  | 1309.642    | -0.0189 | -14   | 108        | 118      | WMEQSLPPPPK      |           |         |                  |      | Mascot      |
| 1309.6609  | 1309.642    | -0.0189 | -14   | 108        | 118      | WMEQSLPPPPK      |           |         |                  |      | Mascot      |
| 1325.6559  | 1325.6357   | -0.0202 | -15   | 108        | 118      | WMEQSLPPPPK      |           |         | Oxidation (M)[2] |      | Mascot      |
| 1434.7263  | 1434.7489   | 0.0226  | 16    | 16         | 27       | EAVWSFKPEDVK     |           |         |                  |      | Mascot      |
| 1675.9054  | 1675.813    | -0.0924 | -55   | 14         | 27       | LKEAVWSFKPEDVK   |           |         |                  |      | Mascot      |
| 1738.778   | 1738.8202   | 0.0422  | 24    | 46         | 60       | HEHDGNE LGTTPEFR |           |         |                  |      | Mascot      |

Mascot

### Peptide Information

| Calc. Mass | Obsrv. Mass | ± da    | ± ppm | Start Seq. | End Sequence               | Ion Score | C. I. % Modification                     | Rank | Result Type |
|------------|-------------|---------|-------|------------|----------------------------|-----------|------------------------------------------|------|-------------|
| 1045.4806  | 1045.5497   | 0.0691  | 66    | 66         | 74 CMDVLPPDR               |           |                                          |      | Mascot      |
| 1118.4969  | 1118.4932   | -0.0037 | -3    | 66         | 74 CMDVLPPDR               |           | Carbamidomethyl (C)[1], Oxidation (M)[2] |      | Mascot      |
| 1331.6195  | 1331.6158   | -0.0037 | -3    | 64         | 74 NRCMDVLPPDR             |           | Oxidation (M)[4]                         |      | Mascot      |
| 1493.8185  | 1493.7147   | -0.1038 | -69   | 121        | 133 LVPGLPLYIYRSC          |           |                                          |      | Mascot      |
| 1722.8843  | 1722.8202   | -0.0641 | -37   | 35         | 48 EEFRTLNMVTPTLR          |           | Oxidation (M)[8]                         |      | Mascot      |
| 1723.8795  | 1723.8141   | -0.0654 | -38   | 49         | 63 VEDCSIALPRNHEK          |           |                                          |      | Mascot      |
| 1723.8795  | 1723.8141   | -0.0654 | -38   | 49         | 63 VEDCSIALPRNHEK          |           |                                          |      | Mascot      |
| 2233.019   | 2233.052    | 0.033   | 15    | 16         | 34 SGYYDMNRLDPQTNSSQ<br>IK |           | Oxidation (M)[6]                         |      | Mascot      |

### Peptide Information

| Calc. Mass | Obsrv. Mass | ± da    | ± ppm | Start Seq. | End Sequence             | Ion Score | C. I. % | Modification       | Rank | Result Type |
|------------|-------------|---------|-------|------------|--------------------------|-----------|---------|--------------------|------|-------------|
| 801.4365   | 801.342     | -0.0945 | -118  | 36         | 41 QNHKFK                |           |         |                    |      | Mascot      |
| 807.4028   | 807.3876    | -0.0152 | -19   | 5          | 10 RVMEEK                |           |         | Oxidation (M)[3]   |      | Mascot      |
| 856.4886   | 856.5181    | 0.0295  | 34    | 455        | 461 KQENIPK              |           |         |                    |      | Mascot      |
| 959.5883   | 959.5641    | -0.0242 | -25   | 235        | 242 TLVETRLK             |           |         |                    |      | Mascot      |
| 1010.5009  | 1010.5165   | 0.0156  | 15    | 493        | 500 MSILMDLR             | 14        | 0       | Oxidation (M)[1,5] |      | Mascot      |
| 1010.5009  | 1010.5165   | 0.0156  | 15    | 493        | 500 MSILMDLR             |           |         | Oxidation (M)[1,5] |      | Mascot      |
| 1032.62    | 1032.4996   | -0.1204 | -117  | 514        | 521 ELKPVYRK             |           |         |                    |      | Mascot      |
| 1234.5984  | 1234.6627   | 0.0643  | 52    | 419        | 429 EVNALLECESK          |           |         |                    |      | Mascot      |
| 1331.5396  | 1331.6158   | 0.0762  | 57    | 282        | 292 ECYPADFDICR          |           |         |                    |      | Mascot      |
| 2568.2729  | 2568.1582   | -0.1147 | -45   | 312        | 332 SSIEFDCAYILSWIKIYYPK |           |         |                    |      | Mascot      |

## Peptide Information

| Calc. Mass | Obsrv. Mass | ± da    | ± ppm | Start Seq. | End Seq. | Sequence | Ion Score | C. I. % | Modification     | Rank | Result Type |
|------------|-------------|---------|-------|------------|----------|----------|-----------|---------|------------------|------|-------------|
| 807.4579   | 807.3876    | -0.0703 | -87   | 421        | 426      | LKLMMR   |           |         | Oxidation (M)[4] |      | Mascot      |
| 850.4451   | 850.5318    | 0.0867  | 102   | 408        | 414      | ERMGTLK  |           |         | Oxidation (M)[3] |      | Mascot      |



|    |                                                         |           |         |     |     |             |                              |      |   |    |   |  |                      |  |  |  |        |
|----|---------------------------------------------------------|-----------|---------|-----|-----|-------------|------------------------------|------|---|----|---|--|----------------------|--|--|--|--------|
|    | 882.5043                                                | 882.5547  | 0.0504  | 57  | 212 | 219         | SHLDGLLK                     |      |   |    |   |  |                      |  |  |  | Mascot |
|    | 1193.6385                                               | 1193.6003 | -0.0382 | -32 | 96  | 106         | KNHSHGSVSLK                  |      |   |    |   |  |                      |  |  |  | Mascot |
|    | 1320.6616                                               | 1320.575  | -0.0866 | -66 | 107 | 118         | SSHGFSIMPTIK                 |      |   |    |   |  | Oxidation (M)[8]     |  |  |  | Mascot |
|    | 2282.1484                                               | 2282.1521 | 0.0037  | 2   | 386 | 405         | MSVSKAQNIYGIPHSTLE<br>YK     |      |   |    |   |  | Oxidation (M)[1]     |  |  |  | Mascot |
|    | 2300.1589                                               | 2300.1455 | -0.0134 | -6  | 366 | 385         | YRQYNSEILEEAIIVMS<br>GK      |      |   |    |   |  |                      |  |  |  | Mascot |
|    | 2545.2524                                               | 2545.2864 | 0.034   | 13  | 368 | 390         | QYNSEILEEAIIVMSGK<br>MSVSK   |      |   |    |   |  | Oxidation (M)[15,19] |  |  |  | Mascot |
|    | 2568.2537                                               | 2568.1582 | -0.0955 | -37 | 16  | 39          | TSSTQDVPQPQSQPNGT<br>KDQSLPK |      |   |    |   |  |                      |  |  |  | Mascot |
| 24 | heterogeneous nuclear ribonucleoprotein G [Danio rerio] |           |         |     |     | gi 47086837 | 41595.9                      | 10.1 | 9 | 36 | 0 |  |                      |  |  |  |        |

#### Peptide Information

| Calc. Mass | Obsrv. Mass | ± da    | ± ppm | Start Seq. | End Seq. | Sequence                 | Ion Score | C. I. | % Modification    | Rank | Result Type |
|------------|-------------|---------|-------|------------|----------|--------------------------|-----------|-------|-------------------|------|-------------|
| 801.3889   | 801.342     | -0.0469 | -59   | 215        | 221      | DYGPPPR                  |           |       |                   |      | Mascot      |
| 864.4355   | 864.4979    | 0.0624  | 72    | 179        | 185      | DSLMSRR                  |           |       |                   |      | Mascot      |
| 1308.7344  | 1308.6404   | -0.094  | -72   | 31         | 41       | FGRISEVLLMK              |           |       | Oxidation (M)[10] |      | Mascot      |
| 1316.6997  | 1316.5748   | -0.1249 | -95   | 23         | 33       | VLEAYFSKFGR              |           |       |                   |      | Mascot      |
| 1434.588   | 1434.7489   | 0.1609  | 112   | 236        | 248      | DDYGSGSRGYSDR            |           |       |                   |      | Mascot      |
| 1723.8511  | 1723.8141   | -0.037  | -21   | 256        | 270      | EPRGYIDRPSAGSYR          |           |       |                   |      | Mascot      |
| 1723.8511  | 1723.8141   | -0.037  | -21   | 256        | 270      | EPRGYIDRPSAGSYR          |           |       |                   |      | Mascot      |
| 1738.778   | 1738.8202   | 0.0422  | 24    | 271        | 286      | DPYDGYGNSRSAPPSR         |           |       |                   |      | Mascot      |
| 2233.1458  | 2233.052    | -0.0938 | -42   | 2          | 22       | AEADRPGLKFIGLNTET<br>SEK |           |       |                   |      | Mascot      |
| 2346.2227  | 2346.1995   | -0.0232 | -10   | 10         | 30       | LFIGLNTETSEKVLEAYF<br>SK |           |       |                   |      | Mascot      |
| 2346.2227  | 2346.1995   | -0.0232 | -10   | 10         | 30       | LFIGLNTETSEKVLEAYF<br>SK |           |       |                   |      | Mascot      |

|    |                                                                                           |  |  |  |  |              |         |      |   |    |   |  |  |  |  |  |  |
|----|-------------------------------------------------------------------------------------------|--|--|--|--|--------------|---------|------|---|----|---|--|--|--|--|--|--|
| 25 | novel protein similar to H.sapiens OLFM1, olfactomedin 1 (OLFM1, zgc:92039) [Danio rerio] |  |  |  |  | gi 220676963 | 17247.8 | 9.07 | 6 | 35 | 0 |  |  |  |  |  |  |
|----|-------------------------------------------------------------------------------------------|--|--|--|--|--------------|---------|------|---|----|---|--|--|--|--|--|--|

#### Peptide Information

| Calc. Mass | Obsrv. Mass | ± da    | ± ppm | Start Seq. | End Seq. | Sequence        | Ion Score | C. I. | % Modification           | Rank | Result Type |
|------------|-------------|---------|-------|------------|----------|-----------------|-----------|-------|--------------------------|------|-------------|
| 807.3665   | 807.3876    | 0.0211  | 26    | 125        | 130      | MEDQLR          |           |       | Oxidation (M)[1]         |      | Mascot      |
| 850.4781   | 850.5318    | 0.0537  | 63    | 131        | 137      | GLETKFR         |           |       |                          |      | Mascot      |
| 864.4825   | 864.4979    | 0.0154  | 18    | 118        | 124      | DLQYVVK         |           |       |                          |      | Mascot      |
| 992.5523   | 992.502     | -0.0503 | -51   | 145        | 152      | QNIKQYK         |           |       |                          |      | Mascot      |
| 1675.8431  | 1675.813    | -0.0301 | -18   | 101        | 114      | VQNMTQSIQVLDQR  |           |       | Oxidation (M)[4]         |      | Mascot      |
| 1739.7695  | 1739.8097   | 0.0402  | 23    | 73         | 87       | CVCTVVAPQQTMCGR |           |       | Carbamidomethyl (C)[1,3] |      | Mascot      |

|    |                                         |           |        |    |             |         |               |   |    |   |  |  |                          |        |
|----|-----------------------------------------|-----------|--------|----|-------------|---------|---------------|---|----|---|--|--|--------------------------|--------|
|    | 1739.7695                               | 1739.8097 | 0.0402 | 23 | 73          | 87      | CVCTVVAPQQTMC |   |    |   |  |  | Carbamidomethyl (C)[1,3] | Mascot |
| 26 | RNA binding motif protein [Danio rerio] |           |        |    | gi 37595358 | 30616.8 | 9.84          | 8 | 35 | 0 |  |  |                          |        |

Peptide Information

| Calc. Mass | Obsrv. Mass | ± da    | ± ppm | Start Seq. | End Seq. | Sequence                  | Ion Score | C. I. | % Modification    | Rank | Result Type |
|------------|-------------|---------|-------|------------|----------|---------------------------|-----------|-------|-------------------|------|-------------|
| 801.3889   | 801.342     | -0.0469 | -59   | 215        | 221      | DYGPPPR                   |           |       |                   |      | Mascot      |
| 864.4355   | 864.4979    | 0.0624  | 72    | 179        | 185      | DSLMSRR                   |           |       |                   |      | Mascot      |
| 1308.7344  | 1308.6404   | -0.094  | -72   | 31         | 41       | FGRISEVLLMK               |           |       | Oxidation (M)[10] |      | Mascot      |
| 1316.6997  | 1316.5748   | -0.1249 | -95   | 23         | 33       | VLEAYFSKFGR               |           |       |                   |      | Mascot      |
| 1434.588   | 1434.7489   | 0.1609  | 112   | 236        | 248      | DDYGSGSRGYSDR             |           |       |                   |      | Mascot      |
| 1723.8511  | 1723.8141   | -0.037  | -21   | 256        | 270      | EPRGYIDRPSAGSYR           |           |       |                   |      | Mascot      |
| 1723.8511  | 1723.8141   | -0.037  | -21   | 256        | 270      | EPRGYIDRPSAGSYR           |           |       |                   |      | Mascot      |
| 2233.1458  | 2233.052    | -0.0938 | -42   | 2          | 22       | AEADRPGLFIGGLNTET<br>SEK  |           |       |                   |      | Mascot      |
| 2346.2227  | 2346.1995   | -0.0232 | -10   | 10         | 30       | LFIGGLNTETSEKYLEAYF<br>SK |           |       |                   |      | Mascot      |
| 2346.2227  | 2346.1995   | -0.0232 | -10   | 10         | 30       | LFIGGLNTETSEKYLEAYF<br>SK |           |       |                   |      | Mascot      |

|    |                                                                                                     |  |  |  |              |         |      |   |    |   |  |  |  |
|----|-----------------------------------------------------------------------------------------------------|--|--|--|--------------|---------|------|---|----|---|--|--|--|
| 27 | novel protein similar to H.sapiens LCOR, ligand dependent nuclear receptor corepressor (LCOR, zgc:1 |  |  |  | gi 220672934 | 52136.8 | 8.35 | 9 | 35 | 0 |  |  |  |
|----|-----------------------------------------------------------------------------------------------------|--|--|--|--------------|---------|------|---|----|---|--|--|--|

Peptide Information

| Calc. Mass | Obsrv. Mass | ± da    | ± ppm | Start Seq. | End Seq. | Sequence                    | Ion Score | C. I. | % Modification       | Rank | Result Type |
|------------|-------------|---------|-------|------------|----------|-----------------------------|-----------|-------|----------------------|------|-------------|
| 807.4579   | 807.3876    | -0.0703 | -87   | 437        | 442      | LKLMMR                      |           |       | Oxidation (M)[4]     |      | Mascot      |
| 850.4451   | 850.5318    | 0.0867  | 102   | 424        | 430      | ERMGTLLK                    |           |       | Oxidation (M)[3]     |      | Mascot      |
| 882.5043   | 882.5547    | 0.0504  | 57    | 228        | 235      | SHLDGLLK                    |           |       |                      |      | Mascot      |
| 1193.6385  | 1193.6003   | -0.0382 | -32   | 112        | 122      | KNHSHGSVSLK                 |           |       |                      |      | Mascot      |
| 1320.6616  | 1320.575    | -0.0866 | -66   | 123        | 134      | SSHGFSIMPTIK                |           |       | Oxidation (M)[8]     |      | Mascot      |
| 2282.1484  | 2282.1521   | 0.0037  | 2     | 402        | 421      | MSVSKAQNIYGIPHTLE<br>YK     |           |       | Oxidation (M)[1]     |      | Mascot      |
| 2300.1589  | 2300.1455   | -0.0134 | -6    | 382        | 401      | YRQYNSEILEEIAIVVMS<br>GK    |           |       |                      |      | Mascot      |
| 2545.2524  | 2545.2864   | 0.034   | 13    | 384        | 406      | QYNSEILEEIAIVVMSGK<br>MSVSK |           |       | Oxidation (M)[15,19] |      | Mascot      |
| 2568.2537  | 2568.1582   | -0.0955 | -37   | 32         | 55       | TSSTQDVPQPQSPNGT<br>KDQSLPK |           |       |                      |      | Mascot      |

|    |                            |  |  |  |              |         |      |   |    |   |  |  |  |
|----|----------------------------|--|--|--|--------------|---------|------|---|----|---|--|--|--|
| 28 | vwa2 protein [Danio rerio] |  |  |  | gi 272938025 | 16568.8 | 7.94 | 6 | 35 | 0 |  |  |  |
|----|----------------------------|--|--|--|--------------|---------|------|---|----|---|--|--|--|

Peptide Information

| Calc. Mass | Obsrv. Mass | ± da | ± ppm | Start Seq. | End Seq. | Sequence | Ion Score | C. I. | % Modification | Rank | Result Type |
|------------|-------------|------|-------|------------|----------|----------|-----------|-------|----------------|------|-------------|
|------------|-------------|------|-------|------------|----------|----------|-----------|-------|----------------|------|-------------|

|    |                      |           |           |         |     |             |    |                           |      |                            |    |   |    |        |        |
|----|----------------------|-----------|-----------|---------|-----|-------------|----|---------------------------|------|----------------------------|----|---|----|--------|--------|
|    |                      | 842.4518  | 842.4988  | 0.047   | 56  | 64          | 69 | YNKVYR                    |      |                            |    |   |    |        | Mascot |
|    |                      | 1109.5295 | 1109.4769 | -0.0526 | -47 | 23          | 31 | VESYPCVQK                 |      | Carbamidomethyl (C)[6]     |    |   |    |        | Mascot |
|    |                      | 1279.6252 | 1279.7506 | 0.1254  | 98  | 38          | 47 | QLQGNFVCWK                |      | Carbamidomethyl (C)[8]     |    |   |    |        | Mascot |
|    |                      | 1365.6957 | 1365.6373 | -0.0584 | -43 | 67          | 77 | VYRQHPAVCHR               |      |                            |    |   |    |        | Mascot |
|    |                      | 1723.8934 | 1723.8141 | -0.0793 | -46 | 23          | 37 | VESYPCVQKTLETVK           |      |                            |    |   |    |        | Mascot |
|    |                      | 1723.8934 | 1723.8141 | -0.0793 | -46 | 23          | 37 | VESYPCVQKTLETVK           |      |                            |    |   |    |        | Mascot |
|    |                      | 2346.1138 | 2346.1995 | 0.0857  | 37  | 1           | 22 | VNGLFTSLTSSVCMSIP<br>SGCK |      | Carbamidomethyl (C)[14,21] |    |   |    |        | Mascot |
|    |                      | 2346.1138 | 2346.1995 | 0.0857  | 37  | 1           | 22 | VNGLFTSLTSSVCMSIP<br>SGCK |      | Carbamidomethyl (C)[14,21] |    |   |    |        | Mascot |
| 29 | sorcin [Danio rerio] |           |           |         |     | gi 41055144 |    | 18946.9                   | 5.39 | 2                          | 34 | 0 | 26 | 34.164 |        |

31 small ubiquitin-related modifier 3 precursor [Danio rerio] gi|239048085 10690.3 5.34 5 33 0

Peptide Information

| Calc. Mass | Obsrv. Mass | ± da    | ± ppm | Start Seq. | End Seq. | Sequence                  | Ion Score | C. I. % | Modification     | Rank | Result Type |
|------------|-------------|---------|-------|------------|----------|---------------------------|-----------|---------|------------------|------|-------------|
| 864.4131   | 864.4979    | 0.0848  | 98    | 1          | 7        | MSEEEKPK                  |           |         | Oxidation (M)[1] |      | Mascot      |
| 1234.6426  | 1234.6627   | 0.0201  | 16    | 21         | 32       | VAGQDGSVVQFK              |           |         |                  |      | Mascot      |
| 1277.6405  | 1277.6964   | 0.0559  | 44    | 1          | 11       | MSEEEKPKEGVK              |           |         | Oxidation (M)[1] |      | Mascot      |
| 1475.8217  | 1475.7354   | -0.0863 | -58   | 21         | 34       | VAGQDGSVVQFKIK            |           |         |                  |      | Mascot      |
| 2299.1677  | 2299.1499   | -0.0178 | -8    | 12         | 32       | TENDHINLKVAGQDGSV<br>VQFK |           |         |                  |      | Mascot      |

32 protein lin-7 homolog C [Danio rerio] gi|52219174 22315.8 8.97 6 33 0

Peptide Information

| Calc. Mass | Obsrv. Mass | ± da    | ± ppm | Start Seq. | End Seq. | Sequence                | Ion Score | C. I. % | Modification           | Rank | Result Type |
|------------|-------------|---------|-------|------------|----------|-------------------------|-----------|---------|------------------------|------|-------------|
| 959.4978   | 959.5641    | 0.0663  | 69    | 1          | 9        | MASLGEPVR               |           |         |                        |      | Mascot      |
| 992.4717   | 992.502     | 0.0303  | 31    | 177        | 184      | VLEEMESR                |           |         |                        |      | Mascot      |
| 1010.4975  | 1010.5165   | 0.019   | 19    | 41         | 48       | VLQSEFCK                |           |         | Carbamidomethyl (C)[7] |      | Mascot      |
| 1010.4975  | 1010.5165   | 0.019   | 19    | 41         | 48       | VLQSEFCK                |           |         | Carbamidomethyl (C)[7] |      | Mascot      |
| 1279.6827  | 1279.7506   | 0.0679  | 53    | 41         | 51       | VLQSEFCKAVR             |           |         |                        |      | Mascot      |
| 1357.7256  | 1357.6971   | -0.0285 | -21   | 1          | 12       | MASLGEPVRLER            |           |         |                        |      | Mascot      |
| 2190.0896  | 2190.1038   | 0.0142  | 6     | 136        | 155      | RGDQLLSVNGVSVGEH<br>HEK |           |         |                        |      | Mascot      |

33 interferon regulatory factor 1 [Danio rerio] gi|45387903 32848 5.85 7 33 0

Peptide Information

| Calc. Mass | Obsrv. Mass | ± da    | ± ppm | Start Seq. | End Seq. | Sequence                | Ion Score | C. I. % | Modification           | Rank | Result Type |
|------------|-------------|---------|-------|------------|----------|-------------------------|-----------|---------|------------------------|------|-------------|
| 807.4392   | 807.3876    | -0.0516 | -64   | 131        | 137      | MKGLSQK                 |           |         | Oxidation (M)[1]       |      | Mascot      |
| 870.4104   | 870.5313    | 0.1209  | 139   | 44         | 50       | HGWEVDK                 |           |         |                        |      | Mascot      |
| 1179.6554  | 1179.5854   | -0.07   | -59   | 108        | 117      | VYRMLPAVSK              |           |         | Oxidation (M)[4]       |      | Mascot      |
| 1309.6172  | 1309.642    | 0.0248  | 19    | 217        | 227      | DSSQWLQNFQK             | 3         | 0       |                        |      | Mascot      |
| 1309.6172  | 1309.642    | 0.0248  | 19    | 217        | 227      | DSSQWLQNFQK             |           |         |                        |      | Mascot      |
| 1707.7927  | 1707.7535   | -0.0392 | -23   | 83         | 97       | CAMNSLPDIEEVKDK         |           |         | Oxidation (M)[3]       |      | Mascot      |
| 1993.947   | 1993.948    | 0.001   | 1     | 79         | 95       | ANFRCAMNSLPDIEEVK       |           |         | Carbamidomethyl (C)[5] |      | Mascot      |
| 2298.9529  | 2299.1499   | 0.197   | 86    | 268        | 287      | SDSYTYTELWNSSMPQ<br>SIC |           |         |                        |      | Mascot      |

34 PREDICTED: ankyrin repeat and BTB/POZ gi|189521623 111556.2 5.84 13 32 0

domain-containing protein 2-like [Danio rerio]

| Peptide Information |                                                  |         |       |             |                                |           |         |                          |                  |
|---------------------|--------------------------------------------------|---------|-------|-------------|--------------------------------|-----------|---------|--------------------------|------------------|
| Calc. Mass          | Obsrv. Mass                                      | ± da    | ± ppm | Start Seq.  | End Sequence Seq.              | Ion Score | C. I. % | Modification             | Rank Result Type |
| 807.3818            | 807.3876                                         | 0.0058  | 7     | 206         | 211 WMVDTR                     |           |         |                          | Mascot           |
| 842.473             | 842.4988                                         | 0.0258  | 31    | 654         | 660 LLSEPQR                    |           |         |                          | Mascot           |
| 870.4614            | 870.5313                                         | 0.0699  | 80    | 139         | 145 LSVVHCR                    |           |         | Carbamidomethyl (C)[6]   | Mascot           |
| 882.4614            | 882.5547                                         | 0.0933  | 106   | 997         | 1004 LHSLCGPR                  |           |         |                          | Mascot           |
| 1032.5208           | 1032.4996                                        | -0.0212 | -21   | 677         | 684 EEQEKLEK                   |           |         |                          | Mascot           |
| 1045.5173           | 1045.5497                                        | 0.0324  | 31    | 548         | 556 HPSVHPESR                  |           |         |                          | Mascot           |
| 1118.5688           | 1118.4932                                        | -0.0756 | -68   | 428         | 437 SLLVDSDDVR                 |           |         |                          | Mascot           |
| 1193.6161           | 1193.6003                                        | -0.0158 | -13   | 308         | 317 ETAYAQLRLR                 |           |         |                          | Mascot           |
| 1309.6351           | 1309.642                                         | 0.0069  | 5     | 691         | 701 SVCTSQLCKAR                |           |         | Carbamidomethyl (C)[3,8] | Mascot           |
| 1309.6351           | 1309.642                                         | 0.0069  | 5     | 691         | 701 SVCTSQLCKAR                |           |         | Carbamidomethyl (C)[3,8] | Mascot           |
| 1323.7202           | 1323.5704                                        | -0.1498 | -113  | 849         | 859 VLLMSASQRFR                |           |         | Oxidation (M)[4]         | Mascot           |
| 1434.7046           | 1434.7489                                        | 0.0443  | 31    | 106         | 119 VAGEGLCFAPESVR             |           |         |                          | Mascot           |
| 1738.9269           | 1738.8202                                        | -0.1067 | -61   | 438         | 452 QTARLLLPGLDCEPR            |           |         | Carbamidomethyl (C)[12]  | Mascot           |
| 2346.1768           | 2346.1995                                        | 0.0227  | 10    | 794         | 815 QLAAVFCHCVCSTAAPSI<br>LAVK |           |         | Carbamidomethyl (C)[7,9] | Mascot           |
| 2346.1768           | 2346.1995                                        | 0.0227  | 10    | 794         | 815 QLAAVFCHCVCSTAAPSI<br>LAVK |           |         | Carbamidomethyl (C)[7,9] | Mascot           |
| 35                  | seryl-tRNA synthetase, cytoplasmic [Danio rerio] |         |       | gi 51468022 | 58680.9                        | 5.74      | 10      | 32                       | 0                |

| Peptide Information |             |         |       |            |                       |           |         |                   |                  |
|---------------------|-------------|---------|-------|------------|-----------------------|-----------|---------|-------------------|------------------|
| Calc. Mass          | Obsrv. Mass | ± da    | ± ppm | Start Seq. | End Sequence Seq.     | Ion Score | C. I. % | Modification      | Rank Result Type |
| 856.4523            | 856.5181    | 0.0658  | 77    | 13         | 20 GGDPEIIR           |           |         |                   | Mascot           |
| 864.4686            | 864.4979    | 0.0293  | 34    | 311        | 317 DTRGIFR           |           |         |                   | Mascot           |
| 1010.4094           | 1010.5165   | 0.1071  | 106   | 507        | 515 VENMSVNDS         |           |         | Oxidation (M)[4]  | Mascot           |
| 1010.4094           | 1010.5165   | 0.1071  | 106   | 507        | 515 VENMSVNDS         |           |         | Oxidation (M)[4]  | Mascot           |
| 1165.567            | 1165.5731   | 0.0061  | 5     | 158        | 167 TWGDCTVQKK        |           |         |                   | Mascot           |
| 1165.567            | 1165.7286   | 0.1616  | 139   | 158        | 167 TWGDCTVQKK        |           |         |                   | Mascot           |
| 1165.567            | 1165.7286   | 0.1616  | 139   | 158        | 167 TWGDCTVQKK        |           |         |                   | Mascot           |
| 1316.7283           | 1316.5748   | -0.1535 | -117  | 458        | 469 AFMPPGLTEIHK      |           |         |                   | Mascot           |
| 1325.6848           | 1325.6357   | -0.0491 | -37   | 124        | 133 LEAERFEYLR        |           |         |                   | Mascot           |
| 1493.8434           | 1493.7147   | -0.1287 | -86   | 361        | 375 IVNIVSGALNHAASK   |           |         |                   | Mascot           |
| 1722.8672           | 1722.8202   | -0.047  | -27   | 219        | 231 NYNLLYTPFFMRK     |           |         | Oxidation (M)[11] | Mascot           |
| 2330.1221           | 2330.2039   | 0.0818  | 35    | 231        | 249 KEVMQEVAQLSQFDEEL |           |         | Oxidation (M)[4]  | Mascot           |

[illegible]

|    |                                                                                      |           |         |     |     |     |                          |  |  |  |                  |        |
|----|--------------------------------------------------------------------------------------|-----------|---------|-----|-----|-----|--------------------------|--|--|--|------------------|--------|
|    | 1739.8489                                                                            | 1739.8097 | -0.0392 | -23 | 426 | 443 | MVKGMGGAMDLVASAG<br>TK   |  |  |  | Oxidation (M)[1] | Mascot |
|    | 1739.8489                                                                            | 1739.8097 | -0.0392 | -23 | 426 | 443 | MVKGMGGAMDLVASAG<br>TK   |  |  |  | Oxidation (M)[1] | Mascot |
|    | 2233.1345                                                                            | 2233.052  | -0.0825 | -37 | 132 | 151 | QYLSGELEVELTPQGTLA<br>ER |  |  |  |                  | Mascot |
| 38 | PREDICTED: suppressor of IKBKE 1-like [Danio rerio] gi 125852483 24679.3 5.47 7 32 0 |           |         |     |     |     |                          |  |  |  |                  |        |

#### Peptide Information

| Calc. Mass | Obsrv. Mass | ± da    | ± ppm | Start Seq. | End Seq. | Sequence                | Ion Score | C. I. | % Modification          | Rank | Result Type |
|------------|-------------|---------|-------|------------|----------|-------------------------|-----------|-------|-------------------------|------|-------------|
| 1277.6517  | 1277.6964   | 0.0447  | 35    | 2          | 13       | SCSLEKVLGDAR            |           |       |                         |      | Mascot      |
| 1301.7787  | 1301.5853   | -0.1934 | -149  | 179        | 190      | ELRGLLSISSVK            |           |       |                         |      | Mascot      |
| 1301.7787  | 1301.5853   | -0.1934 | -149  | 179        | 190      | ELRGLLSISSVK            |           |       |                         |      | Mascot      |
| 1331.6326  | 1331.6158   | -0.0168 | -13   | 197        | 208      | NPPETTSETVEK            |           |       |                         |      | Mascot      |
| 1675.7657  | 1675.813    | 0.0473  | 28    | 197        | 211      | NPPETTSETVEKQES         |           |       |                         |      | Mascot      |
| 1707.7167  | 1707.7535   | 0.0368  | 22    | 54         | 66       | YMEENTEQELSR            |           |       | Oxidation (M)[2]        |      | Mascot      |
| 1993.8855  | 1993.948    | 0.0625  | 31    | 154        | 169      | QAVQMDDQHYCSVKER        |           |       | Carbamidomethyl (C)[11] |      | Mascot      |
| 2330.1848  | 2330.2039   | 0.0191  | 8     | 89         | 107      | ELWLSLEEHQYALELIMG<br>R |           |       |                         |      | Mascot      |
| 2346.1797  | 2346.1995   | 0.0198  | 8     | 89         | 107      | ELWLSLEEHQYALELIMG<br>R |           |       | Oxidation (M)[17]       |      | Mascot      |
| 2346.1797  | 2346.1995   | 0.0198  | 8     | 89         | 107      | ELWLSLEEHQYALELIMG<br>R |           |       | Oxidation (M)[17]       |      | Mascot      |

39 PREDICTED: hypothetical protein LOC100538192 [Danio rerio] gi|326664724 234026 9.01 22 32 0

#### Peptide Information

| Calc. Mass | Obsrv. Mass | ± da    | ± ppm | Start Seq. | End Seq. | Sequence     | Ion Score | C. I. | % Modification         | Rank | Result Type |
|------------|-------------|---------|-------|------------|----------|--------------|-----------|-------|------------------------|------|-------------|
| 807.4722   | 807.3876    | -0.0846 | -105  | 572        | 578      | AFTNKVK      |           |       |                        |      | Mascot      |
| 850.4205   | 850.5318    | 0.1113  | 131   | 201        | 207      | AEFAWAR      |           |       |                        |      | Mascot      |
| 856.4424   | 856.5181    | 0.0757  | 88    | 1963       | 1968     | WHTKER       |           |       |                        |      | Mascot      |
| 864.4131   | 864.4979    | 0.0848  | 98    | 1          | 8        | MAEEALGK     |           |       | Oxidation (M)[1]       |      | Mascot      |
| 870.4654   | 870.5313    | 0.0659  | 76    | 465        | 470      | IFFCRK       |           |       | Carbamidomethyl (C)[4] |      | Mascot      |
| 996.5624   | 996.5831    | 0.0207  | 21    | 173        | 180      | WIPAPERK     |           |       |                        |      | Mascot      |
| 1118.6567  | 1118.4932   | -0.1635 | -146  | 1004       | 1014     | GVFAALGDIKK  |           |       |                        |      | Mascot      |
| 1165.5887  | 1165.5731   | -0.0156 | -13   | 1450       | 1458     | YSVEEWPKK    |           |       |                        |      | Mascot      |
| 1165.5887  | 1165.7286   | 0.1399  | 120   | 1450       | 1458     | YSVEEWPKK    |           |       |                        |      | Mascot      |
| 1165.5887  | 1165.7286   | 0.1399  | 120   | 1450       | 1458     | YSVEEWPKK    |           |       |                        |      | Mascot      |
| 1308.7383  | 1308.6404   | -0.0979 | -75   | 719        | 729      | IDLLISHREGR  |           |       |                        |      | Mascot      |
| 1320.653   | 1320.575    | -0.078  | -59   | 1819       | 1830     | LETSELEAEATK |           |       |                        |      | Mascot      |

|    |                               |           |         |      |             |      |                     |      |   |    |   |                         |  |  |  |        |
|----|-------------------------------|-----------|---------|------|-------------|------|---------------------|------|---|----|---|-------------------------|--|--|--|--------|
|    | 1325.7113                     | 1325.6357 | -0.0756 | -57  | 1284        | 1294 | FHRSLTTPPGWK        |      |   |    |   |                         |  |  |  | Mascot |
|    | 1357.7871                     | 1357.6971 | -0.09   | -66  | 339         | 349  | RVIELIQMVEK         |      |   |    |   |                         |  |  |  | Mascot |
|    | 1493.8984                     | 1493.7147 | -0.1837 | -123 | 644         | 657  | ITLVVHGVGKMAIR      |      |   |    |   |                         |  |  |  | Mascot |
|    | 1576.6954                     | 1576.6393 | -0.0561 | -36  | 1920        | 1933 | GDPGDFDFVGYYPK      |      |   |    |   |                         |  |  |  | Mascot |
|    | 1576.6954                     | 1576.6393 | -0.0561 | -36  | 1920        | 1933 | GDPGDFDFVGYYPK      |      |   |    |   |                         |  |  |  | Mascot |
|    | 1675.7527                     | 1675.813  | 0.0603  | 36   | 447         | 462  | DSTEAGCIVCGAEKHR    |      |   |    |   |                         |  |  |  | Mascot |
|    | 1738.8547                     | 1738.8202 | -0.0345 | -20  | 809         | 822  | SSLASNREFIDWWK      |      |   |    |   |                         |  |  |  | Mascot |
|    | 1739.7297                     | 1739.8097 | 0.08    | 46   | 823         | 838  | WDSIGTACEPKCGGCR    |      |   |    |   | Carbamidomethyl (C)[8]  |  |  |  | Mascot |
|    | 1739.7297                     | 1739.8097 | 0.08    | 46   | 823         | 838  | WDSIGTACEPKCGGCR    |      |   |    |   | Carbamidomethyl (C)[8]  |  |  |  | Mascot |
|    | 2190.0859                     | 2190.1038 | 0.0179  | 8    | 1900        | 1919 | EDCVEYVNPNSLLLGSR   |      |   |    |   |                         |  |  |  | Mascot |
|    | 2211.0215                     | 2211.0769 | 0.0554  | 25   | 816         | 833  | EFIDWWKWDSIGTACEPK  |      |   |    |   |                         |  |  |  | Mascot |
|    | 2299.1758                     | 2299.1499 | -0.0259 | -11  | 1049        | 1069 | VNIGDRPAGCIAQLAMRE  |      |   |    |   | Carbamidomethyl (C)[10] |  |  |  | Mascot |
|    | 2300.1956                     | 2300.1455 | -0.0501 | -22  | 671         | 691  | TPEGTVKAHQLICYGLEEI |      |   |    |   |                         |  |  |  | Mascot |
|    | 2346.22                       | 2346.1995 | -0.0205 | -9   | 1969        | 1989 | NVAVGDVVWLADQNALR   |      |   |    |   |                         |  |  |  | Mascot |
|    | 2346.22                       | 2346.1995 | -0.0205 | -9   | 1969        | 1989 | NVAVGDVVWLADQNALR   |      |   |    |   |                         |  |  |  | Mascot |
| 40 | olfactomedin 1b [Danio rerio] |           |         |      | gi 51011063 |      | 14508.5             | 8.86 | 6 | 31 | 0 |                         |  |  |  |        |

Peptide Information

| Calc. Mass | Obsrv. Mass | ± da    | ± ppm | Start Seq. | End Seq. | Sequence         | Ion Score | C. I. | % Modification           | Rank | Result | Type |
|------------|-------------|---------|-------|------------|----------|------------------|-----------|-------|--------------------------|------|--------|------|
| 807.3665   | 807.3876    | 0.0211  | 26    | 97         | 102      | MEDQLR           |           |       | Oxidation (M)[1]         |      | Mascot |      |
| 850.4781   | 850.5318    | 0.0537  | 63    | 103        | 109      | GLETKFR          |           |       |                          |      | Mascot |      |
| 864.4825   | 864.4979    | 0.0154  | 18    | 90         | 96       | DLQYVVK          |           |       |                          |      | Mascot |      |
| 992.5523   | 992.502     | -0.0503 | -51   | 117        | 124      | QNIAKQYK         |           |       |                          |      | Mascot |      |
| 1675.8431  | 1675.813    | -0.0301 | -18   | 73         | 86       | VQNMTQSIQVLDQR   |           |       | Oxidation (M)[4]         |      | Mascot |      |
| 1739.7695  | 1739.8097   | 0.0402  | 23    | 45         | 59       | CVCTVVAPQQTMCSSR |           |       | Carbamidomethyl (C)[1,3] |      | Mascot |      |
| 1739.7695  | 1739.8097   | 0.0402  | 23    | 45         | 59       | CVCTVVAPQQTMCSSR |           |       | Carbamidomethyl (C)[1,3] |      | Mascot |      |

41 transgelin 3a [Danio rerio] gi|156739273 24423.1 6.92 7 31 0

Peptide Information

| Calc. Mass | Obsrv. Mass | ± da    | ± ppm | Start Seq. | End Seq. | Sequence  | Ion Score | C. I. | % Modification | Rank | Result | Type |
|------------|-------------|---------|-------|------------|----------|-----------|-----------|-------|----------------|------|--------|------|
| 1165.5782  | 1165.5731   | -0.0051 | -4    | 197        | 205      | QIMRYDSPR |           |       |                |      | Mascot |      |
| 1165.5782  | 1165.7286   | 0.1504  | 129   | 197        | 205      | QIMRYDSPR |           |       |                |      | Mascot |      |
| 1165.5782  | 1165.7286   | 0.1504  | 129   | 197        | 205      | QIMRYDSPR |           |       |                |      | Mascot |      |



|    |                                              |           |         |     |     |     |                        |         |      |   |    |   |                  |  |  |  |        |
|----|----------------------------------------------|-----------|---------|-----|-----|-----|------------------------|---------|------|---|----|---|------------------|--|--|--|--------|
|    | 1179.6013                                    | 1179.5854 | -0.0159 | -13 | 55  | 64  | WLMMSGTILCR            |         |      |   |    |   |                  |  |  |  | Mascot |
|    | 1193.5909                                    | 1193.6003 | 0.0094  | 8   | 160 | 168 | REFSEEQLR              |         |      |   |    |   |                  |  |  |  | Mascot |
|    | 1234.6711                                    | 1234.6627 | -0.0084 | -7  | 128 | 139 | TLMALGSEALTK           |         |      |   |    |   |                  |  |  |  | Mascot |
|    | 1308.6477                                    | 1308.6404 | -0.0073 | -6  | 1   | 12  | MANRGPSYGLSR           |         |      |   |    |   |                  |  |  |  | Mascot |
|    | 1559.8315                                    | 1559.7657 | -0.0658 | -42 | 65  | 78  | LINSLYPSGEEPIK         |         |      |   |    |   |                  |  |  |  | Mascot |
|    | 1993.9647                                    | 1993.948  | -0.0167 | -8  | 128 | 145 | TLMALGSEALTKDDGHY<br>R |         |      |   |    |   | Oxidation (M)[3] |  |  |  | Mascot |
| 42 | hypothetical protein LOC566166 [Danio rerio] |           |         |     |     |     | gi 134133273           | 39171.1 | 5.57 | 9 | 31 | 0 |                  |  |  |  |        |

Peptide Information

| Calc. Mass | Obsrv. Mass | ± da    | ± ppm | Start Seq. | End Seq. | Sequence                 | Ion Score | C. I. | % Modification           | Rank | Result Type |
|------------|-------------|---------|-------|------------|----------|--------------------------|-----------|-------|--------------------------|------|-------------|
| 801.4576   | 801.342     | -0.1156 | -144  | 273        | 278      | REVEIR                   |           |       |                          |      | Mascot      |
| 807.3301   | 807.3876    | 0.0575  | 71    | 173        | 179      | CENDAQK                  |           |       |                          |      | Mascot      |
| 1293.6442  | 1293.6469   | 0.0027  | 2     | 279        | 289      | GCSIWCVEKIR              |           |       |                          |      | Mascot      |
| 1293.6442  | 1293.6469   | 0.0027  | 2     | 279        | 289      | GCSIWCVEKIR              |           |       |                          |      | Mascot      |
| 1309.7263  | 1309.642    | -0.0843 | -64   | 290        | 299      | QHLWKLVEEK               |           |       |                          |      | Mascot      |
| 1309.7263  | 1309.642    | -0.0843 | -64   | 290        | 299      | QHLWKLVEEK               |           |       |                          |      | Mascot      |
| 1323.5304  | 1323.5704   | 0.04    | 30    | 83         | 92       | EDEQCEVVC                |           |       | Carbamidomethyl (C)[5,9] |      | Mascot      |
| 1357.6793  | 1357.6971   | 0.0178  | 13    | 325        | 335      | EMAHIPHHTR               |           |       | Oxidation (M)[2]         |      | Mascot      |
| 1365.6644  | 1365.6373   | -0.0271 | -20   | 18         | 29       | SRDVFVDEGDK              |           |       |                          |      | Mascot      |
| 1707.8192  | 1707.7535   | -0.0657 | -38   | 274        | 287      | EVEIRGCSIWCVEK           |           |       | Carbamidomethyl (C)[7]   |      | Mascot      |
| 2346.1069  | 2346.1995   | 0.0926  | 39    | 31         | 50       | VAQMIYELRDSDEFTASG<br>WK |           |       |                          |      | Mascot      |
| 2346.1069  | 2346.1995   | 0.0926  | 39    | 31         | 50       | VAQMIYELRDSDEFTASG<br>WK |           |       |                          |      | Mascot      |

43 RAS guanyl-releasing protein 1 [Danio rerio] gi|113678177 77834.7 7.57 10 31 0

Peptide Information

| Calc. Mass | Obsrv. Mass | ± da    | ± ppm | Start Seq. | End Seq. | Sequence    | Ion Score | C. I. | % Modification           | Rank | Result Type |
|------------|-------------|---------|-------|------------|----------|-------------|-----------|-------|--------------------------|------|-------------|
| 842.4882   | 842.4988    | 0.0106  | 13    | 271        | 277      | FIHVAQK     |           |       |                          |      | Mascot      |
| 1003.5319  | 1003.5405   | 0.0086  | 9     | 224        | 232      | SYVVHGSR    |           |       |                          |      | Mascot      |
| 1165.5703  | 1165.5731   | 0.0028  | 2     | 580        | 589      | DVVGMECLKR  |           |       | Oxidation (M)[5]         |      | Mascot      |
| 1165.5703  | 1165.7286   | 0.1583  | 136   | 580        | 589      | DVVGMECLKR  |           |       | Oxidation (M)[5]         |      | Mascot      |
| 1165.5703  | 1165.7286   | 0.1583  | 136   | 580        | 589      | DVVGMECLKR  |           |       | Oxidation (M)[5]         |      | Mascot      |
| 1279.5769  | 1279.7506   | 0.1737  | 136   | 33         | 43       | MTCPSAQEISR |           |       | Carbamidomethyl (C)[3]   |      | Mascot      |
| 1331.681   | 1331.6158   | -0.0652 | -49   | 463        | 473      | HVKQMVDSIMK |           |       | Oxidation (M)[5]         |      | Mascot      |
| 1357.5558  | 1357.6971   | 0.1413  | 104   | 569        | 579      | DCGVNCHKHK  |           |       | Carbamidomethyl (C)[2,6] |      | Mascot      |
| 1365.6793  | 1365.6373   | -0.042  | -31   | 135        | 145      | LMFEMDPLEK  |           |       |                          |      | Mascot      |

|    |                                                  |           |         |      |              |          |                                    |    |    |   |  |                                          |        |
|----|--------------------------------------------------|-----------|---------|------|--------------|----------|------------------------------------|----|----|---|--|------------------------------------------|--------|
|    | 1434.6538                                        | 1434.7489 | 0.0951  | 66   | 577          | 588      | HCKDVVGMECLK                       |    |    |   |  | Carbamidomethyl (C)[2], Oxidation (M)[8] | Mascot |
|    | 1475.6803                                        | 1475.7354 | 0.0551  | 37   | 577          | 588      | HCKDVVGMECLK                       |    |    |   |  | Carbamidomethyl (C)[2,10]                | Mascot |
|    | 2284.2812                                        | 2284.1465 | -0.1347 | -59  | 433          | 454      | IQPVAPVKPPVVAEWGS<br>GVTPR         |    |    |   |  |                                          | Mascot |
|    | 3109.7407                                        | 3109.2981 | -0.4426 | -142 | 433          | 462      | IQPVAPVKPPVVAEWGS<br>GVTPRLDPATISK |    |    |   |  |                                          | Mascot |
| 44 | cytoplasmic dynein 1 heavy chain 1 [Danio rerio] |           |         |      | gi 112363126 | 532854.1 | 6.06                               | 29 | 31 | 0 |  |                                          |        |

# Peptide Information

| Calc. Mass | Obsrv. Mass | ± da    | ± ppm | Start Seq. | End Seq. | Sequence        | Ion Score | C. I. % | Modification      | Rank | Result Type |
|------------|-------------|---------|-------|------------|----------|-----------------|-----------|---------|-------------------|------|-------------|
| 850.4087   | 850.5318    | 0.1231  | 145   | 59         | 65       | SALEQMR         |           |         | Oxidation (M)[6]  |      | Mascot      |
| 870.4389   | 870.5313    | 0.0924  | 106   | 656        | 662      | QLTAYMK         |           |         | Oxidation (M)[6]  |      | Mascot      |
| 959.5342   | 959.5641    | 0.0299  | 31    | 990        | 997      | MNLSLPR         |           |         | Oxidation (M)[1]  |      | Mascot      |
| 992.4903   | 992.502     | 0.0117  | 12    | 3384       | 3393     | ASLACGPMVK      |           |         | Oxidation (M)[8]  |      | Mascot      |
| 1010.5451  | 1010.5165   | -0.0286 | -28   | 656        | 663      | QLTAYMKR        |           |         |                   |      | Mascot      |
| 1010.5451  | 1010.5165   | -0.0286 | -28   | 656        | 663      | QLTAYMKR        |           |         |                   |      | Mascot      |
| 1045.5272  | 1045.5497   | 0.0225  | 22    | 2836       | 2843     | LVEDEERR        |           |         |                   |      | Mascot      |
| 1109.5739  | 1109.4769   | -0.097  | -87   | 3861       | 3869     | DLFQVAFNR       |           |         |                   |      | Mascot      |
| 1165.6212  | 1165.5731   | -0.0481 | -41   | 3438       | 3447     | DLEASIARYK      |           |         |                   |      | Mascot      |
| 1165.6212  | 1165.7286   | 0.1074  | 92    | 3438       | 3447     | DLEASIARYK      |           |         |                   |      | Mascot      |
| 1165.6212  | 1165.7286   | 0.1074  | 92    | 3438       | 3447     | DLEASIARYK      |           |         |                   |      | Mascot      |
| 1179.6368  | 1179.5854   | -0.0514 | -44   | 2551       | 2560     | VPQIEVETHK      |           |         |                   |      | Mascot      |
| 1277.6598  | 1277.6964   | 0.0366  | 29    | 4143       | 4153     | IFVFEPPGGMK     |           |         | Oxidation (M)[10] |      | Mascot      |
| 1309.6899  | 1309.642    | -0.0479 | -37   | 1181       | 1190     | QFEKQVDLFR      | 9         | 0       |                   |      | Mascot      |
| 1309.6899  | 1309.642    | -0.0479 | -37   | 1181       | 1190     | QFEKQVDLFR      |           |         |                   |      | Mascot      |
| 1320.6793  | 1320.575    | -0.1043 | -79   | 223        | 234      | GEKPKVTDFGDK    |           |         |                   |      | Mascot      |
| 1323.6427  | 1323.5704   | -0.0723 | -55   | 1041       | 1051     | ENVSEVEQYVK     |           |         |                   |      | Mascot      |
| 1325.6736  | 1325.6357   | -0.0379 | -29   | 835        | 845      | LAETVFNFQEK     |           |         |                   |      | Mascot      |
| 1331.7318  | 1331.6158   | -0.116  | -87   | 4399       | 4409     | TVENIKDPLFR     |           |         |                   |      | Mascot      |
| 1365.7412  | 1365.6373   | -0.1039 | -76   | 1099       | 1110     | KEFGPVIIDYGK    |           |         |                   |      | Mascot      |
| 1434.7886  | 1434.7489   | -0.0397 | -28   | 2034       | 2045     | LFRSLAMTKPDR    |           |         |                   |      | Mascot      |
| 1475.6835  | 1475.7354   | 0.0519  | 35    | 3682       | 3694     | DPTVEFPPDLCSR   |           |         |                   |      | Mascot      |
| 1707.7867  | 1707.7535   | -0.0332 | -19   | 4362       | 4376     | QRSTSSSDAQPAWMR |           |         |                   |      | Mascot      |
| 1723.7816  | 1723.8141   | 0.0325  | 19    | 4362       | 4376     | QRSTSSSDAQPAWMR |           |         | Oxidation (M)[14] |      | Mascot      |
| 1723.7816  | 1723.8141   | 0.0325  | 19    | 4362       | 4376     | QRSTSSSDAQPAWMR |           |         | Oxidation (M)[14] |      | Mascot      |
| 1739.9261  | 1739.8097   | -0.1164 | -67   | 4599       | 4612     | RNMVTLPVYLNFR   |           |         | Oxidation (M)[3]  |      | Mascot      |
| 1739.9261  | 1739.8097   | -0.1164 | -67   | 4599       | 4612     | RNMVTLPVYLNFR   |           |         | Oxidation (M)[3]  |      | Mascot      |

|           |           |         |      |      |      |                              |                        |        |
|-----------|-----------|---------|------|------|------|------------------------------|------------------------|--------|
| 2210.9944 | 2211.0769 | 0.0825  | 37   | 531  | 550  | EVDGLDVSKEGMEAWEA<br>AMK     | Oxidation (M)[12]      | Mascot |
| 2233.0627 | 2233.052  | -0.0107 | -5   | 3561 | 3580 | WQANSLPADDLCTENAI<br>MLK     |                        | Mascot |
| 2282.1638 | 2282.1521 | -0.0117 | -5   | 3121 | 3139 | VPDYMPIVYDKLPQPPTH<br>R      | Oxidation (M)[5]       | Mascot |
| 2284.2561 | 2284.1465 | -0.1096 | -48  | 4504 | 4523 | NIHVNLRGLFVPEAYITAT<br>R     |                        | Mascot |
| 2299.1572 | 2299.1499 | -0.0073 | -3   | 2004 | 2024 | QVKVSAEMAIFITMNPGR<br>AGR    | Oxidation (M)[8]       | Mascot |
| 2330.1233 | 2330.2039 | 0.0806  | 35   | 2844 | 2862 | WTDENIDMVALKHFPNID<br>R      | Oxidation (M)[8]       | Mascot |
| 2346.0728 | 2346.1995 | 0.1267  | 54   | 4342 | 4360 | LLKMQMLEDDEDLAYET<br>EK      | Oxidation (M)[4,6]     | Mascot |
| 2346.0728 | 2346.1995 | 0.1267  | 54   | 4342 | 4360 | LLKMQMLEDDEDLAYET<br>EK      | Oxidation (M)[4,6]     | Mascot |
| 2545.2561 | 2545.2864 | 0.0303  | 12   | 3705 | 3726 | SSLQSQCLNEVLKAERP<br>DVDEK   | Carbamidomethyl (C)[7] | Mascot |
| 3109.6257 | 3109.2981 | -0.3276 | -105 | 2726 | 2752 | FLRHVPVYVDYPGPASL<br>TQYGTFR |                        | Mascot |

45 PREDICTED: hypothetical protein LOC100538307 [Danio rerio] gi|326667461 234046 8.95 22 31 0

#### Peptide Information

| Calc. Mass | Obsrv. Mass | ± da    | ± ppm | Start Seq. | End Seq. | Sequence         | Ion Score | C. I. % Modification   | Rank | Result Type |
|------------|-------------|---------|-------|------------|----------|------------------|-----------|------------------------|------|-------------|
| 807.4722   | 807.3876    | -0.0846 | -105  | 572        | 578      | AFTNKVK          |           |                        |      | Mascot      |
| 850.4205   | 850.5318    | 0.1113  | 131   | 201        | 207      | AEFAWAR          |           |                        |      | Mascot      |
| 856.4424   | 856.5181    | 0.0757  | 88    | 1963       | 1968     | WHTKER           |           |                        |      | Mascot      |
| 864.4131   | 864.4979    | 0.0848  | 98    | 1          | 8        | MAEEALGK         |           | Oxidation (M)[1]       |      | Mascot      |
| 870.4654   | 870.5313    | 0.0659  | 76    | 465        | 470      | IFFCRK           |           | Carbamidomethyl (C)[4] |      | Mascot      |
| 996.5624   | 996.5831    | 0.0207  | 21    | 173        | 180      | WIPAPERK         |           |                        |      | Mascot      |
| 1118.6567  | 1118.4932   | -0.1635 | -146  | 1004       | 1014     | GVFAALGDIKK      |           |                        |      | Mascot      |
| 1165.5887  | 1165.5731   | -0.0156 | -13   | 1450       | 1458     | YSVEEWPKK        |           |                        |      | Mascot      |
| 1165.5887  | 1165.7286   | 0.1399  | 120   | 1450       | 1458     | YSVEEWPKK        |           |                        |      | Mascot      |
| 1165.5887  | 1165.7286   | 0.1399  | 120   | 1450       | 1458     | YSVEEWPKK        |           |                        |      | Mascot      |
| 1308.7383  | 1308.6404   | -0.0979 | -75   | 719        | 729      | IDLLISHREGR      |           |                        |      | Mascot      |
| 1320.653   | 1320.575    | -0.078  | -59   | 1819       | 1830     | LETSELEAEATK     |           |                        |      | Mascot      |
| 1325.7113  | 1325.6357   | -0.0756 | -57   | 1284       | 1294     | FHRSLTPPGWK      |           |                        |      | Mascot      |
| 1357.7871  | 1357.6971   | -0.09   | -66   | 339        | 349      | RVIELIQMVEK      |           |                        |      | Mascot      |
| 1493.8984  | 1493.7147   | -0.1837 | -123  | 644        | 657      | ITLVVHGVGKMAIR   |           |                        |      | Mascot      |
| 1576.6954  | 1576.6393   | -0.0561 | -36   | 1920       | 1933     | GDPGDFDFVGYPYK   |           |                        |      | Mascot      |
| 1576.6954  | 1576.6393   | -0.0561 | -36   | 1920       | 1933     | GDPGDFDFVGYPYK   |           |                        |      | Mascot      |
| 1675.7527  | 1675.813    | 0.0603  | 36    | 447        | 462      | DSTEAGCIVCGAEKHR |           |                        |      | Mascot      |
| 1738.8547  | 1738.8202   | -0.0345 | -20   | 809        | 822      | SSLASNREFIDWWK   |           |                        |      | Mascot      |

|  |           |           |         |     |      |      |                           |                         |        |
|--|-----------|-----------|---------|-----|------|------|---------------------------|-------------------------|--------|
|  | 1739.7297 | 1739.8097 | 0.08    | 46  | 823  | 838  | WDSIGTACEPKCGGCR          | Carbamidomethyl (C)[8]  | Mascot |
|  | 1739.7297 | 1739.8097 | 0.08    | 46  | 823  | 838  | WDSIGTACEPKCGGCR          | Carbamidomethyl (C)[8]  | Mascot |
|  | 1838.783  | 1838.9033 | 0.1203  | 65  | 839  | 855  | CGNCQPPGGKEMTLAEER        | Oxidation (M)[11]       | Mascot |
|  | 2211.0215 | 2211.0769 | 0.0554  | 25  | 816  | 833  | EFIDWWKWDSIGTACEP<br>K    |                         | Mascot |
|  | 2299.1758 | 2299.1499 | -0.0259 | -11 | 1049 | 1069 | VNIGDRPAGCIAQLAMRE<br>TAR | Carbamidomethyl (C)[10] | Mascot |
|  | 2300.1956 | 2300.1455 | -0.0501 | -22 | 671  | 691  | TPEGTVKAHQLICYGLEEI<br>AK |                         | Mascot |
|  | 2346.22   | 2346.1995 | -0.0205 | -9  | 1969 | 1989 | NVAVGDVWWLADQNALR<br>SQYK |                         | Mascot |
|  | 2346.22   | 2346.1995 | -0.0205 | -9  | 1969 | 1989 | NVAVGDVWWLADQNALR<br>SQYK |                         | Mascot |

46

pleckstrin homology domain-containing family G member 7 [Danio rerio]

gi|113681918

49035.5

6.76

8

31

0

Peptide Information

| Calc. Mass | Obsrv. Mass | ± da    | ± ppm | Start Seq. | End Seq. | Sequence                | Ion Score | C. I. % | Modification            | Rank | Result Type |
|------------|-------------|---------|-------|------------|----------|-------------------------|-----------|---------|-------------------------|------|-------------|
| 1165.6034  | 1165.5731   | -0.0303 | -26   | 1          | 10       | MSLVDFLQGR              |           |         |                         |      | Mascot      |
| 1165.6034  | 1165.7286   | 0.1252  | 107   | 1          | 10       | MSLVDFLQGR              |           |         |                         |      | Mascot      |
| 1165.6034  | 1165.7286   | 0.1252  | 107   | 1          | 10       | MSLVDFLQGR              |           |         |                         |      | Mascot      |
| 1193.6313  | 1193.6003   | -0.031  | -26   | 219        | 227      | WLDNYQKVK               |           |         |                         |      | Mascot      |
| 1320.6001  | 1320.575    | -0.0251 | -19   | 61         | 70       | QCLQDIDSWR              |           |         | Carbamidomethyl (C)[2]  |      | Mascot      |
| 1365.6289  | 1365.6373   | 0.0084  | 6     | 115        | 126      | AFSESICHCLQK            |           |         |                         |      | Mascot      |
| 1493.7239  | 1493.7147   | -0.0092 | -6    | 114        | 126      | KAFSESICHCLQK           |           |         |                         |      | Mascot      |
| 1559.6947  | 1559.7657   | 0.071   | 46    | 145        | 156      | EDFGSFVKWCER            |           |         | Carbamidomethyl (C)[10] |      | Mascot      |
| 1707.8986  | 1707.7535   | -0.1451 | -85   | 387        | 401      | AWMSEIEKAVSSLLK         |           |         | Oxidation (M)[3]        |      | Mascot      |
| 2283.9646  | 2284.1465   | 0.1819  | 80    | 95         | 113      | EMWTDPDSCSTQSLHDL<br>FR |           |         | Oxidation (M)[2]        |      | Mascot      |

47

endoribonuclease Dicer [Danio rerio]

gi|238814324

210682.5

5.14

17

31

0

Peptide Information

| Calc. Mass | Obsrv. Mass | ± da    | ± ppm | Start Seq. | End Seq. | Sequence  | Ion Score | C. I. % | Modification             | Rank | Result Type |
|------------|-------------|---------|-------|------------|----------|-----------|-----------|---------|--------------------------|------|-------------|
| 801.4286   | 801.342     | -0.0866 | -108  | 738        | 744      | AIPECLR   |           |         |                          |      | Mascot      |
| 807.4247   | 807.3876    | -0.0371 | -46   | 280        | 286      | DPTFISK   |           |         |                          |      | Mascot      |
| 842.5458   | 842.4988    | -0.047  | -56   | 567        | 573      | AIEKILR   |           |         |                          |      | Mascot      |
| 882.4791   | 882.5547    | 0.0756  | 86    | 70         | 76       | ELSHQIR   |           |         |                          |      | Mascot      |
| 959.6036   | 959.5641    | -0.0395 | -41   | 358        | 365      | FVTPKVIR  |           |         |                          |      | Mascot      |
| 1109.5837  | 1109.4769   | -0.1068 | -96   | 555        | 563      | TKTFQEDLK |           |         |                          |      | Mascot      |
| 1165.45    | 1165.5731   | 0.1231  | 106   | 200        | 208      | CDPCDLEEK |           |         | Carbamidomethyl (C)[1,4] |      | Mascot      |

|    |                      |           |         |      |            |      |                     |      |   |                                           |    |   |        |
|----|----------------------|-----------|---------|------|------------|------|---------------------|------|---|-------------------------------------------|----|---|--------|
|    | 1234.4979            | 1234.6627 | 0.1648  | 133  | 1591       | 1600 | CMFEHPDAER          |      |   |                                           |    |   | Mascot |
|    | 1309.5511            | 1309.642  | 0.0909  | 69   | 1723       | 1733 | NEMQGMDSELR         | 3    | 0 |                                           |    |   | Mascot |
|    | 1309.5511            | 1309.642  | 0.0909  | 69   | 1723       | 1733 | NEMQGMDSELR         |      |   |                                           |    |   | Mascot |
|    | 1316.6449            | 1316.5748 | -0.0701 | -53  | 663        | 674  | VPVTGPMNCAR         |      |   | Carbamidomethyl (C)[10], Oxidation (M)[8] |    |   | Mascot |
|    | 1320.7344            | 1320.575  | -0.1594 | -121 | 1554       | 1565 | AAQLFLCSLGLK        |      |   | Carbamidomethyl (C)[7]                    |    |   | Mascot |
|    | 1323.6837            | 1323.5704 | -0.1133 | -86  | 1333       | 1343 | VSNCNLYRLGK         |      |   | Carbamidomethyl (C)[4]                    |    |   | Mascot |
|    | 1325.546             | 1325.6357 | 0.0897  | 68   | 1723       | 1733 | NEMQGMDSELR         |      |   | Oxidation (M)[3]                          |    |   | Mascot |
|    | 1357.7838            | 1357.6971 | -0.0867 | -64  | 651        | 662  | STFLPINSPLR         |      |   |                                           |    |   | Mascot |
|    | 1723.9517            | 1723.8141 | -0.1376 | -80  | 1647       | 1661 | LEFLGDAILYLITK      |      |   |                                           |    |   | Mascot |
|    | 1723.9517            | 1723.8141 | -0.1376 | -80  | 1647       | 1661 | LEFLGDAILYLITK      |      |   |                                           |    |   | Mascot |
|    | 2211.1379            | 2211.0769 | -0.061  | -28  | 155        | 173  | INLLVFDECHLAITGHPYR |      |   |                                           |    |   | Mascot |
|    | 2284.2998            | 2284.1465 | -0.1533 | -67  | 1017       | 1036 | QILVPELCAIHPIASLWR  |      |   |                                           |    |   | Mascot |
|    | 2346.168             | 2346.1995 | 0.0315  | 13   | 188        | 208  | ILGLTASILNGKDCPCDLE |      |   | Carbamidomethyl (C)[13,16]                |    |   | Mascot |
|    | 2346.168             | 2346.1995 | 0.0315  | 13   | 188        | 208  | ILGLTASILNGKDCPCDLE |      |   | Carbamidomethyl (C)[13,16]                |    |   | Mascot |
| 48 | ReverB [Danio rerio] |           |         |      | gi 2352003 |      | 5105.5              | 9.66 | 1 |                                           | 20 | 0 |        |

#### Peptide Information

| Calc. Mass | Obsrv. Mass | ± da   | ± ppm | Start Seq. | End Seq. | Sequence    | Ion Score | C. I. % | Modification      | Rank | Result Type |
|------------|-------------|--------|-------|------------|----------|-------------|-----------|---------|-------------------|------|-------------|
| 1293.6112  | 1293.6469   | 0.0357 | 28    | 10         | 20       | CLKNESCPIMR | 10        | 0       |                   | 8    | Mascot      |
| 1309.6061  | 1309.642    | 0.0359 | 27    | 10         | 20       | CLKNESCPIMR | 20        | 0       | Oxidation (M)[10] | 1    | Mascot      |

49 neurogenic locus notch homolog protein 1 precursor [Danio rerio] gi|18859115 262131.8 5.02 1 19 0

#### Peptide Information

| Calc. Mass | Obsrv. Mass | ± da   | ± ppm | Start Seq. | End Seq. | Sequence          | Ion Score | C. I. % | Modification            | Rank | Result Type |
|------------|-------------|--------|-------|------------|----------|-------------------|-----------|---------|-------------------------|------|-------------|
| 1723.7738  | 1723.8141   | 0.0403 | 23    | 1311       | 1327     | DTPCKNGGTCAVASNTK | 19        | 0       | Carbamidomethyl (C)[10] | 1    | Mascot      |

50 PREDICTED: hypothetical protein LOC116993 [Danio rerio] gi|326668004 548762.3 4.51 1 17 0

#### Peptide Information

| Calc. Mass | Obsrv. Mass | ± da    | ± ppm | Start Seq. | End Seq. | Sequence    | Ion Score | C. I. % | Modification | Rank | Result Type |
|------------|-------------|---------|-------|------------|----------|-------------|-----------|---------|--------------|------|-------------|
| 1301.6121  | 1301.5853   | -0.0268 | -21   | 224        | 234      | NKDASGYDYLR | 19        | 0       |              | 2    | Mascot      |

|                |           |                        |                |  |  |  |                |                    |  |
|----------------|-----------|------------------------|----------------|--|--|--|----------------|--------------------|--|
| Gel Idx/Pos    | 272/K24   | Instr./Gel Origin      | BA2060/110707A |  |  |  | Process Status | Analysis Succeeded |  |
| Plate [#] Name | [1] 31496 | Instrument Sample Name |                |  |  |  | Spectra        | 11                 |  |

| Rank                | Protein Name                                                             | Accession No. | Protein MW | Protein PI | Pep. Count | Protein Score               | Protein Score C. I. % | Total Ion Score | Total Ion C. I. % |                                |
|---------------------|--------------------------------------------------------------------------|---------------|------------|------------|------------|-----------------------------|-----------------------|-----------------|-------------------|--------------------------------|
| 1                   | myosin, light polypeptide 2, skeletal muscle [Danio rerio]               | gi 18859049   | 18853.3    | 4.68       | 7          | 250                         | 100                   | 208             | 100               |                                |
| Peptide Information |                                                                          |               |            |            |            |                             |                       |                 |                   |                                |
|                     | Calc. Mass                                                               | Obsrv. Mass   | ± da       | ± ppm      | Start Seq. | End Sequence Seq.           |                       | Ion Score       | C. I. %           | Modification Rank Result Type  |
|                     | 1206.6113                                                                | 1206.5894     | -0.0219    | -18        | 33         | 42 EAFTIIDQNR               |                       | 79              | 100               | Mascot                         |
|                     | 1206.6113                                                                | 1206.5894     | -0.0219    | -18        | 33         | 42 EAFTIIDQNR               |                       |                 |                   | Mascot                         |
|                     | 1588.858                                                                 | 1588.8296     | -0.0284    | -18        | 92         | 106 LKGADPEDVIVSAFK         |                       |                 |                   | Mascot                         |
|                     | 1653.7788                                                                | 1653.7505     | -0.0283    | -17        | 119        | 131 EFLEELLTTQCDR           |                       | 129             | 100               | Carbamidomethyl (C)[11] Mascot |
|                     | 1653.7788                                                                | 1653.7505     | -0.0283    | -17        | 119        | 131 EFLEELLTTQCDR           |                       |                 |                   | Carbamidomethyl (C)[11] Mascot |
|                     | 1720.7847                                                                | 1720.7566     | -0.0281    | -16        | 156        | 169 NICYVITHGEEKEE          |                       |                 |                   | Carbamidomethyl (C)[3] Mascot  |
|                     | 1789.9113                                                                | 1789.8832     | -0.0281    | -16        | 49         | 64 DDLRDVLASMGQLNVK         |                       |                 |                   | Oxidation (M)[10] Mascot       |
|                     | 1876.9227                                                                | 1876.8947     | -0.028     | -15        | 139        | 155 NLWAAFPPDVAGNVQDYK      |                       |                 |                   | Mascot                         |
|                     | 2510.114                                                                 | 2510.0913     | -0.0227    | -9         | 10         | 32 AAGGEGSSNVFSMFEQS QIQEYK |                       |                 |                   | Oxidation (M)[13] Mascot       |
| 2                   | myosin light chain, phosphorylatable, fast skeletal muscle [Danio rerio] | gi 52219166   | 19110.5    | 4.64       | 4          | 225                         | 100                   | 208             | 100               |                                |
| Peptide Information |                                                                          |               |            |            |            |                             |                       |                 |                   |                                |
|                     | Calc. Mass                                                               | Obsrv. Mass   | ± da       | ± ppm      | Start Seq. | End Sequence Seq.           |                       | Ion Score       | C. I. %           | Modification Rank Result Type  |
|                     | 1206.6113                                                                | 1206.5894     | -0.0219    | -18        | 33         | 42 EAFTIIDQNR               |                       | 79              | 100               | Mascot                         |
|                     | 1206.6113                                                                | 1206.5894     | -0.0219    | -18        | 33         | 42 EAFTIIDQNR               |                       |                 |                   | Mascot                         |
|                     | 1588.858                                                                 | 1588.8296     | -0.0284    | -18        | 92         | 106 LKGADPEDVIVSAFK         |                       |                 |                   | Mascot                         |
|                     | 1653.7788                                                                | 1653.7505     | -0.0283    | -17        | 119        | 131 EFLEELLTTQCDR           |                       | 129             | 100               | Carbamidomethyl (C)[11] Mascot |
|                     | 1653.7788                                                                | 1653.7505     | -0.0283    | -17        | 119        | 131 EFLEELLTTQCDR           |                       |                 |                   | Carbamidomethyl (C)[11] Mascot |
|                     | 1876.9227                                                                | 1876.8947     | -0.028     | -15        | 139        | 155 NLWAAFPPDVAGNVQDYK      |                       |                 |                   | Mascot                         |
| 3                   | Gfap protein [Danio rerio]                                               | gi 124504410  | 51101      | 5.34       | 8          | 109                         | 100                   | 83              | 100               |                                |
| Peptide Information |                                                                          |               |            |            |            |                             |                       |                 |                   |                                |
|                     | Calc. Mass                                                               | Obsrv. Mass   | ± da       | ± ppm      | Start Seq. | End Sequence Seq.           |                       | Ion Score       | C. I. %           | Modification Rank Result Type  |
|                     | 850.4265                                                                 | 850.4256      | -0.0009    | -1         | 434        | 440 ESTTERK                 |                       |                 |                   | Mascot                         |

|           |           |         |     |     |     |                         |    |     |  |  |  |                     |  |  |  |  |        |
|-----------|-----------|---------|-----|-----|-----|-------------------------|----|-----|--|--|--|---------------------|--|--|--|--|--------|
| 850.4265  | 850.5252  | 0.0987  | 116 | 434 | 440 | ESTTERK                 |    |     |  |  |  |                     |  |  |  |  | Mascot |
| 1090.531  | 1090.5089 | -0.0221 | -20 | 320 | 327 | QLREMEER                |    |     |  |  |  |                     |  |  |  |  | Mascot |
| 1118.5762 | 1118.4875 | -0.0887 | -79 | 342 | 350 | LEDEIQMLK               |    |     |  |  |  |                     |  |  |  |  | Mascot |
| 1277.71   | 1277.686  | -0.024  | -19 | 368 | 378 | LALDIEIATYR             | 83 | 100 |  |  |  |                     |  |  |  |  | Mascot |
| 1277.71   | 1277.686  | -0.024  | -19 | 368 | 378 | LALDIEIATYR             |    |     |  |  |  |                     |  |  |  |  | Mascot |
| 1308.6543 | 1308.6346 | -0.0197 | -15 | 270 | 281 | SKFADLTDAANR            |    |     |  |  |  |                     |  |  |  |  | Mascot |
| 1434.756  | 1434.7439 | -0.0121 | -8  | 28  | 40  | HSTGRSLHSSPR            |    |     |  |  |  |                     |  |  |  |  | Mascot |
| 1434.756  | 1434.7439 | -0.0121 | -8  | 28  | 40  | HSTGRSLHSSPR            |    |     |  |  |  |                     |  |  |  |  | Mascot |
| 1475.7522 | 1475.73   | -0.0222 | -15 | 299 | 311 | QIQGLTCDLESLR           |    |     |  |  |  |                     |  |  |  |  | Mascot |
| 2366.9653 | 2367.229  | 0.2637  | 111 | 251 | 269 | AQFEAMANSNMQETEE<br>WYR |    |     |  |  |  | Oxidation (M)[6,11] |  |  |  |  | Mascot |

4 RecName: Full=Glial fibrillary acidic protein;  
Short=GFAP gi|150383441 51218 5.34 8 108 100 83 100

#### Peptide Information

| Calc. Mass | Obsrv. Mass | ± da    | ± ppm | Start Seq. | End Seq. | Sequence                | Ion Score | C. I. | % Modification | Rank | Result Type |
|------------|-------------|---------|-------|------------|----------|-------------------------|-----------|-------|----------------|------|-------------|
| 850.4265   | 850.4256    | -0.0009 | -1    | 435        | 441      | ESTTERK                 |           |       |                |      | Mascot      |
| 850.4265   | 850.5252    | 0.0987  | 116   | 435        | 441      | ESTTERK                 |           |       |                |      | Mascot      |
| 1090.531   | 1090.5089   | -0.0221 | -20   | 321        | 328      | QLREMEER                |           |       |                |      | Mascot      |
| 1118.5762  | 1118.4875   | -0.0887 | -79   | 343        | 351      | LEDEIQMLK               |           |       |                |      | Mascot      |
| 1277.71    | 1277.686    | -0.024  | -19   | 369        | 379      | LALDIEIATYR             | 83        | 100   |                |      | Mascot      |
| 1277.71    | 1277.686    | -0.024  | -19   | 369        | 379      | LALDIEIATYR             |           |       |                |      | Mascot      |
| 1308.6543  | 1308.6346   | -0.0197 | -15   | 271        | 282      | SKFADLTDAANR            |           |       |                |      | Mascot      |
| 1434.756   | 1434.7439   | -0.0121 | -8    | 29         | 41       | HSTGRSLHSSPR            |           |       |                |      | Mascot      |
| 1434.756   | 1434.7439   | -0.0121 | -8    | 29         | 41       | HSTGRSLHSSPR            |           |       |                |      | Mascot      |
| 1475.7522  | 1475.73     | -0.0222 | -15   | 300        | 312      | QIQGLTCDLESLR           |           |       |                |      | Mascot      |
| 2366.9653  | 2367.229    | 0.2637  | 111   | 252        | 270      | AQFEAMANSNMQETEE<br>WYR |           |       |                |      | Mascot      |

5 myosin, light chain 10, regulatory [Danio rerio] gi|62955715 18955.3 4.65 6 107 100 76 100

#### Peptide Information

| Calc. Mass | Obsrv. Mass | ± da    | ± ppm | Start Seq. | End Seq. | Sequence   | Ion Score | C. I.  | % Modification | Rank | Result Type |
|------------|-------------|---------|-------|------------|----------|------------|-----------|--------|----------------|------|-------------|
| 850.4417   | 850.4256    | -0.0161 | -19   | 50         | 57       | DTFAALGR   |           |        |                |      | Mascot      |
| 850.4417   | 850.5252    | 0.0835  | 98    | 50         | 57       | DTFAALGR   |           |        |                |      | Mascot      |
| 1192.5957  | 1192.5741   | -0.0216 | -18   | 40         | 49       | DGFIDKNDLR |           |        |                |      | Mascot      |
| 1192.5957  | 1192.5741   | -0.0216 | -18   | 40         | 49       | DGFIDKNDLR | 67        | 99.994 |                |      | Mascot      |
| 1224.5677  | 1224.5442   | -0.0235 | -19   | 30         | 39       | EAFITMDQNR |           |        |                |      | Mascot      |

|   |                                                    |           |         |     |             |     |                  |      |   |     |     |    |                        |        |
|---|----------------------------------------------------|-----------|---------|-----|-------------|-----|------------------|------|---|-----|-----|----|------------------------|--------|
|   | 1240.5626                                          | 1240.5388 | -0.0238 | -19 | 30          | 39  | EAFITMDQNR       |      |   |     |     |    | Oxidation (M)[6]       | Mascot |
|   | 1434.7111                                          | 1434.7439 | 0.0328  | 23  | 91          | 103 | GTDPEETILNAFK    | 9    |   | 0   |     |    |                        | Mascot |
|   | 1434.7111                                          | 1434.7439 | 0.0328  | 23  | 91          | 103 | GTDPEETILNAFK    |      |   |     |     |    |                        | Mascot |
|   | 1675.8901                                          | 1675.8612 | -0.0289 | -17 | 89          | 103 | LKGTDPREETILNAFK |      |   |     |     |    |                        | Mascot |
|   | 1834.8275                                          | 1834.7976 | -0.0299 | -16 | 153         | 167 | NLCYVITHGEDKEQE  |      |   |     |     |    | Carbamidomethyl (C)[3] | Mascot |
| 6 | glial fibrillary acidic protein GFAP [Danio rerio] |           |         |     | gi 31978943 |     | 50145.5          | 5.32 | 8 | 107 | 100 | 83 | 100                    |        |

Peptide Information

| Calc. Mass | Obsrv. Mass | ± da    | ± ppm | Start Seq. | End Seq. | Sequence             | Ion Score | C. I. | %   | Modification     | Rank | Result Type |
|------------|-------------|---------|-------|------------|----------|----------------------|-----------|-------|-----|------------------|------|-------------|
| 850.4265   | 850.4256    | -0.0009 | -1    | 426        | 432      | ESTTERK              |           |       |     |                  |      | Mascot      |
| 850.4265   | 850.5252    | 0.0987  | 116   | 426        | 432      | ESTTERK              |           |       |     |                  |      | Mascot      |
| 1090.531   | 1090.5089   | -0.0221 | -20   | 312        | 319      | QLREMEER             |           |       |     |                  |      | Mascot      |
| 1118.5762  | 1118.4875   | -0.0887 | -79   | 334        | 342      | LEDEIQMLK            |           |       |     |                  |      | Mascot      |
| 1277.71    | 1277.686    | -0.024  | -19   | 360        | 370      | LALDIEIATYR          | 83        |       | 100 |                  |      | Mascot      |
| 1277.71    | 1277.686    | -0.024  | -19   | 360        | 370      | LALDIEIATYR          |           |       |     |                  |      | Mascot      |
| 1308.6543  | 1308.6346   | -0.0197 | -15   | 262        | 273      | SKFADLTDAANR         |           |       |     |                  |      | Mascot      |
| 1434.756   | 1434.7439   | -0.0121 | -8    | 29         | 41       | HSTGRSLHSSPR         |           |       |     |                  |      | Mascot      |
| 1434.756   | 1434.7439   | -0.0121 | -8    | 29         | 41       | HSTGRSLHSSPR         |           |       |     |                  |      | Mascot      |
| 1475.7522  | 1475.73     | -0.0222 | -15   | 291        | 303      | QIQGLTCDLESLR        |           |       |     |                  |      | Mascot      |
| 2366.9653  | 2367.229    | 0.2637  | 111   | 243        | 261      | SQFEAMANSNMQETEE WYR |           |       |     | Oxidation (M)[6] |      | Mascot      |

|   |                                               |  |  |  |              |  |         |      |   |     |     |    |     |  |
|---|-----------------------------------------------|--|--|--|--------------|--|---------|------|---|-----|-----|----|-----|--|
| 7 | glial fibrillary acidic protein [Danio rerio] |  |  |  | gi 239596173 |  | 19203.6 | 4.89 | 5 | 107 | 100 | 83 | 100 |  |
|---|-----------------------------------------------|--|--|--|--------------|--|---------|------|---|-----|-----|----|-----|--|

Peptide Information

| Calc. Mass | Obsrv. Mass | ± da    | ± ppm | Start Seq. | End Seq. | Sequence      | Ion Score | C. I. | %   | Modification | Rank | Result Type |
|------------|-------------|---------|-------|------------|----------|---------------|-----------|-------|-----|--------------|------|-------------|
| 1090.531   | 1090.5089   | -0.0221 | -20   | 62         | 69       | QLREMEER      |           |       |     |              |      | Mascot      |
| 1118.5762  | 1118.4875   | -0.0887 | -79   | 84         | 92       | LEDEIQMLK     |           |       |     |              |      | Mascot      |
| 1277.71    | 1277.686    | -0.024  | -19   | 110        | 120      | LALDIEIATYR   | 83        |       | 100 |              |      | Mascot      |
| 1277.71    | 1277.686    | -0.024  | -19   | 110        | 120      | LALDIEIATYR   |           |       |     |              |      | Mascot      |
| 1308.6543  | 1308.6346   | -0.0197 | -15   | 12         | 23       | SKFADLTDAANR  |           |       |     |              |      | Mascot      |
| 1475.7522  | 1475.73     | -0.0222 | -15   | 41         | 53       | QIQGLTCDLESLR |           |       |     |              |      | Mascot      |

|   |                                               |  |  |  |             |  |         |      |   |     |     |    |     |  |
|---|-----------------------------------------------|--|--|--|-------------|--|---------|------|---|-----|-----|----|-----|--|
| 8 | glial fibrillary acidic protein [Danio rerio] |  |  |  | gi 20977259 |  | 42127.4 | 5.03 | 7 | 105 | 100 | 83 | 100 |  |
|---|-----------------------------------------------|--|--|--|-------------|--|---------|------|---|-----|-----|----|-----|--|

Peptide Information

| Calc. Mass | Obsrv. Mass | ± da | ± ppm | Start Seq. | End Seq. | Sequence | Ion Score | C. I. | % | Modification | Rank | Result Type |
|------------|-------------|------|-------|------------|----------|----------|-----------|-------|---|--------------|------|-------------|
|------------|-------------|------|-------|------------|----------|----------|-----------|-------|---|--------------|------|-------------|



|   |                                                       |           |         |     |     |     |                              |       |      |   |     |                  |    |     |  |        |
|---|-------------------------------------------------------|-----------|---------|-----|-----|-----|------------------------------|-------|------|---|-----|------------------|----|-----|--|--------|
|   | 850.4265                                              | 850.4256  | -0.0009 | -1  | 351 | 357 | ESTTERK                      |       |      |   |     |                  |    |     |  | Mascot |
|   | 850.4265                                              | 850.5252  | 0.0987  | 116 | 351 | 357 | ESTTERK                      |       |      |   |     |                  |    |     |  | Mascot |
|   | 1090.531                                              | 1090.5089 | -0.0221 | -20 | 237 | 244 | QLREMEER                     |       |      |   |     |                  |    |     |  | Mascot |
|   | 1118.5762                                             | 1118.4875 | -0.0887 | -79 | 259 | 267 | LEDEIQMLK                    |       |      |   |     |                  |    |     |  | Mascot |
|   | 1277.71                                               | 1277.686  | -0.024  | -19 | 285 | 295 | LALDIEIATYR                  | 83    | 100  |   |     |                  |    |     |  | Mascot |
|   | 1277.71                                               | 1277.686  | -0.024  | -19 | 285 | 295 | LALDIEIATYR                  |       |      |   |     |                  |    |     |  | Mascot |
|   | 1308.6543                                             | 1308.6346 | -0.0197 | -15 | 187 | 198 | SKFADLTDAANR                 |       |      |   |     |                  |    |     |  | Mascot |
|   | 2366.9653                                             | 2367.229  | 0.2637  | 111 | 168 | 186 | SQFEAMANSNMQETEE<br>WYR      |       |      |   |     | Oxidation (M)[6] |    |     |  | Mascot |
|   | 2872.4734                                             | 2872.3606 | -0.1128 | -39 | 138 | 161 | ELHEQLMAQQVHVDLDV<br>SKPRLDR |       |      |   |     | Oxidation (M)[7] |    |     |  | Mascot |
| 9 | class III intermediate filament protein [Danio rerio] |           |         |     |     |     | gi 38374177                  | 51255 | 5.28 | 7 | 104 | 100              | 83 | 100 |  |        |

Peptide Information

| Calc. Mass | Obsrv. Mass | ± da    | ± ppm | Start Seq. | End Seq. | Sequence                | Ion Score | C. I. | % | Modification     | Rank | Result Type |
|------------|-------------|---------|-------|------------|----------|-------------------------|-----------|-------|---|------------------|------|-------------|
| 850.4265   | 850.4256    | -0.0009 | -1    | 435        | 441      | ESTTERK                 |           |       |   |                  |      | Mascot      |
| 850.4265   | 850.5252    | 0.0987  | 116   | 435        | 441      | ESTTERK                 |           |       |   |                  |      | Mascot      |
| 1118.5762  | 1118.4875   | -0.0887 | -79   | 343        | 351      | LEDEIQMLK               |           |       |   |                  |      | Mascot      |
| 1277.71    | 1277.686    | -0.024  | -19   | 369        | 379      | LALDIEIATYR             | 83        | 100   |   |                  |      | Mascot      |
| 1277.71    | 1277.686    | -0.024  | -19   | 369        | 379      | LALDIEIATYR             |           |       |   |                  |      | Mascot      |
| 1308.6543  | 1308.6346   | -0.0197 | -15   | 271        | 282      | SKFADLTDAANR            |           |       |   |                  |      | Mascot      |
| 1434.756   | 1434.7439   | -0.0121 | -8    | 29         | 41       | HSTGRSLHSSPR            |           |       |   |                  |      | Mascot      |
| 1434.756   | 1434.7439   | -0.0121 | -8    | 29         | 41       | HSTGRSLHSSPR            |           |       |   |                  |      | Mascot      |
| 1475.7522  | 1475.73     | -0.0222 | -15   | 300        | 312      | QIQGLTCDLESLR           |           |       |   |                  |      | Mascot      |
| 2366.9653  | 2367.229    | 0.2637  | 111   | 252        | 270      | SQFEAMANSNMQETEE<br>WYR |           |       |   | Oxidation (M)[6] |      | Mascot      |

|    |                                               |  |  |  |  |  |             |       |      |   |     |     |    |     |  |  |
|----|-----------------------------------------------|--|--|--|--|--|-------------|-------|------|---|-----|-----|----|-----|--|--|
| 10 | glial fibrillary acidic protein [Danio rerio] |  |  |  |  |  | gi 66393075 | 51190 | 5.34 | 7 | 103 | 100 | 83 | 100 |  |  |
|----|-----------------------------------------------|--|--|--|--|--|-------------|-------|------|---|-----|-----|----|-----|--|--|

Peptide Information

| Calc. Mass | Obsrv. Mass | ± da    | ± ppm | Start Seq. | End Seq. | Sequence     | Ion Score | C. I. | % | Modification | Rank | Result Type |
|------------|-------------|---------|-------|------------|----------|--------------|-----------|-------|---|--------------|------|-------------|
| 850.4265   | 850.4256    | -0.0009 | -1    | 435        | 441      | ESTTERK      |           |       |   |              |      | Mascot      |
| 850.4265   | 850.5252    | 0.0987  | 116   | 435        | 441      | ESTTERK      |           |       |   |              |      | Mascot      |
| 1118.5762  | 1118.4875   | -0.0887 | -79   | 343        | 351      | LEDEIQMLK    |           |       |   |              |      | Mascot      |
| 1277.71    | 1277.686    | -0.024  | -19   | 369        | 379      | LALDIEIATYR  | 83        | 100   |   |              |      | Mascot      |
| 1277.71    | 1277.686    | -0.024  | -19   | 369        | 379      | LALDIEIATYR  |           |       |   |              |      | Mascot      |
| 1308.6543  | 1308.6346   | -0.0197 | -15   | 271        | 282      | SKFADLTDAANR |           |       |   |              |      | Mascot      |
| 1434.756   | 1434.7439   | -0.0121 | -8    | 29         | 41       | HSTGRSLHSSPR |           |       |   |              |      | Mascot      |
| 1434.756   | 1434.7439   | -0.0121 | -8    | 29         | 41       | HSTGRSLHSSPR |           |       |   |              |      | Mascot      |

|    |                                               |           |          |         |     |     |             |                         |      |   |     |     |                     |     |  |  |  |        |
|----|-----------------------------------------------|-----------|----------|---------|-----|-----|-------------|-------------------------|------|---|-----|-----|---------------------|-----|--|--|--|--------|
|    |                                               | 1475.7522 | 1475.73  | -0.0222 | -15 | 300 | 312         | QIQGLTCDLES LR          |      |   |     |     |                     |     |  |  |  | Mascot |
|    |                                               | 2366.9653 | 2367.229 | 0.2637  | 111 | 252 | 270         | AQFEAMANSNMQETEE<br>WYR |      |   |     |     | Oxidation (M)[6,11] |     |  |  |  | Mascot |
| 11 | glial fibrillary acidic protein [Danio rerio] |           |          |         |     |     | gi 37722304 | 51205                   | 5.34 | 7 | 101 | 100 | 83                  | 100 |  |  |  |        |

Peptide Information

| Calc. Mass | Obsrv. Mass | ± da    | ± ppm | Start Seq. | End Seq. | Sequence       | Ion Score | C. I. | %   | Modification | Rank | Result Type |
|------------|-------------|---------|-------|------------|----------|----------------|-----------|-------|-----|--------------|------|-------------|
| 850.4265   | 850.4256    | -0.0009 | -1    | 435        | 441      | ESTTERK        |           |       |     |              |      | Mascot      |
| 850.4265   | 850.5252    | 0.0987  | 116   | 435        | 441      | ESTTERK        |           |       |     |              |      | Mascot      |
| 1090.531   | 1090.5089   | -0.0221 | -20   | 321        | 328      | QLREMEER       |           |       |     |              |      | Mascot      |
| 1118.5762  | 1118.4875   | -0.0887 | -79   | 343        | 351      | LEDEIQMLK      |           |       |     |              |      | Mascot      |
| 1277.71    | 1277.686    | -0.024  | -19   | 369        | 379      | LALDIEIATYR    | 83        |       | 100 |              |      | Mascot      |
| 1277.71    | 1277.686    | -0.024  | -19   | 369        | 379      | LALDIEIATYR    |           |       |     |              |      | Mascot      |
| 1308.6543  | 1308.6346   | -0.0197 | -15   | 271        | 282      | SKFADLTDAANR   |           |       |     |              |      | Mascot      |
| 1434.756   | 1434.7439   | -0.0121 | -8    | 29         | 41       | HSTGRSLSHSSPR  |           |       |     |              |      | Mascot      |
| 1434.756   | 1434.7439   | -0.0121 | -8    | 29         | 41       | HSTGRSLSHSSPR  |           |       |     |              |      | Mascot      |
| 1475.7522  | 1475.73     | -0.0222 | -15   | 300        | 312      | QIQGLTCDLES LR |           |       |     |              |      | Mascot      |

|    |                          |  |  |  |  |  |              |       |      |   |    |     |    |     |  |  |  |  |
|----|--------------------------|--|--|--|--|--|--------------|-------|------|---|----|-----|----|-----|--|--|--|--|
| 12 | Zgc:158846 [Danio rerio] |  |  |  |  |  | gi 158253572 | 55223 | 5.44 | 6 | 97 | 100 | 83 | 100 |  |  |  |  |
|----|--------------------------|--|--|--|--|--|--------------|-------|------|---|----|-----|----|-----|--|--|--|--|

Peptide Information

| Calc. Mass | Obsrv. Mass | ± da    | ± ppm | Start Seq. | End Seq. | Sequence                  | Ion Score | C. I. | %   | Modification       | Rank | Result Type |
|------------|-------------|---------|-------|------------|----------|---------------------------|-----------|-------|-----|--------------------|------|-------------|
| 996.5472   | 996.5773    | 0.0301  | 30    | 421        | 429      | DIHNTGLVK                 |           |       |     |                    |      | Mascot      |
| 1003.5418  | 1003.5322   | -0.0096 | -10   | 74         | 81       | TQEKEQIK                  |           |       |     |                    |      | Mascot      |
| 1206.626   | 1206.5894   | -0.0366 | -30   | 25         | 35       | TPLSRSGMVSR               |           |       |     | Oxidation (M)[8]   |      | Mascot      |
| 1206.626   | 1206.5894   | -0.0366 | -30   | 25         | 35       | TPLSRSGMVSR               |           |       |     | Oxidation (M)[8]   |      | Mascot      |
| 1277.71    | 1277.686    | -0.024  | -19   | 367        | 377      | LALDIEIATYR               | 83        |       | 100 |                    |      | Mascot      |
| 1277.71    | 1277.686    | -0.024  | -19   | 367        | 377      | LALDIEIATYR               |           |       |     |                    |      | Mascot      |
| 1876.8568  | 1876.8947   | 0.0379  | 20    | 118        | 133      | QSNIDMMFEGYIAGLR          |           |       |     | Oxidation (M)[6,7] |      | Mascot      |
| 2384.2529  | 2383.9199   | -0.333  | -140  | 358        | 377      | EYQSLMNIK LALDIEIATY<br>R |           |       |     |                    |      | Mascot      |

|    |                            |  |  |  |  |  |              |         |      |   |    |        |    |     |  |  |  |  |
|----|----------------------------|--|--|--|--|--|--------------|---------|------|---|----|--------|----|-----|--|--|--|--|
| 13 | Krt4 protein [Danio rerio] |  |  |  |  |  | gi 161612220 | 53979.9 | 5.34 | 5 | 95 | 99.999 | 83 | 100 |  |  |  |  |
|----|----------------------------|--|--|--|--|--|--------------|---------|------|---|----|--------|----|-----|--|--|--|--|

Peptide Information

| Calc. Mass | Obsrv. Mass | ± da   | ± ppm | Start Seq. | End Seq. | Sequence  | Ion Score | C. I. | % | Modification     | Rank | Result Type |
|------------|-------------|--------|-------|------------|----------|-----------|-----------|-------|---|------------------|------|-------------|
| 882.4349   | 882.5496    | 0.1147 | 130   | 33         | 40       | MSSVTSVR  |           |       |   | Oxidation (M)[1] |      | Mascot      |
| 973.4948   | 973.5106    | 0.0158 | 16    | 173        | 181      | QLDGLGNEK |           |       |   |                  |      | Mascot      |

|  |           |           |         |     |     |     |                 |    |     |  |  |  |  |  |  |        |
|--|-----------|-----------|---------|-----|-----|-----|-----------------|----|-----|--|--|--|--|--|--|--------|
|  | 1003.5418 | 1003.5322 | -0.0096 | -10 | 112 | 119 | TQEKEQIK        |    |     |  |  |  |  |  |  | Mascot |
|  | 1277.71   | 1277.686  | -0.024  | -19 | 405 | 415 | LALDIEIATYR     | 83 | 100 |  |  |  |  |  |  | Mascot |
|  | 1277.71   | 1277.686  | -0.024  | -19 | 405 | 415 | LALDIEIATYR     |    |     |  |  |  |  |  |  | Mascot |
|  | 1588.7748 | 1588.8296 | 0.0548  | 34  | 1   | 15  | MSTRSISYSSGGGIR |    |     |  |  |  |  |  |  | Mascot |

14 keratin 4 [Danio rerio] gi|18858947 54242 5.42 5 95 99.999 83 100

Peptide Information

| Calc. Mass | Obsrv. Mass | ± da   | ± ppm | Start Seq. | End Seq. | Sequence        | Ion Score | C. I. | % Modification   | Rank | Result Type |
|------------|-------------|--------|-------|------------|----------|-----------------|-----------|-------|------------------|------|-------------|
| 882.4349   | 882.5496    | 0.1147 | 130   | 33         | 40       | MSSVTSVR        |           |       | Oxidation (M)[1] |      | Mascot      |
| 973.4948   | 973.5106    | 0.0158 | 16    | 174        | 182      | QLDGLGNEK       |           |       |                  |      | Mascot      |
| 1003.5101  | 1003.5322   | 0.0221 | 22    | 389        | 396      | QDMARQVR        |           |       |                  |      | Mascot      |
| 1277.71    | 1277.686    | -0.024 | -19   | 406        | 416      | LALDIEIATYR     | 83        | 100   |                  |      | Mascot      |
| 1277.71    | 1277.686    | -0.024 | -19   | 406        | 416      | LALDIEIATYR     |           |       |                  |      | Mascot      |
| 1588.7748  | 1588.8296   | 0.0548 | 34    | 1          | 15       | MSTRSISYSSGGGIR |           |       |                  |      | Mascot      |

15 Krt5 protein [Danio rerio] gi|39645432 57792.3 5.27 5 94 99.998 83 100

Peptide Information

| Calc. Mass | Obsrv. Mass | ± da    | ± ppm | Start Seq. | End Seq. | Sequence       | Ion Score | C. I. | % Modification   | Rank | Result Type |
|------------|-------------|---------|-------|------------|----------|----------------|-----------|-------|------------------|------|-------------|
| 973.4948   | 973.5106    | 0.0158  | 16    | 203        | 211      | QLDGLGNEK      |           |       |                  |      | Mascot      |
| 1003.5418  | 1003.5322   | -0.0096 | -10   | 142        | 149      | TQEKEQIK       |           |       |                  |      | Mascot      |
| 1109.4825  | 1109.4685   | -0.014  | -13   | 2          | 14       | SGGMGGGMGGGIR  |           |       | Oxidation (M)[4] |      | Mascot      |
| 1224.5282  | 1224.5442   | 0.016   | 13    | 1          | 14       | MSGGMGGGMGGGIR |           |       |                  |      | Mascot      |
| 1240.5231  | 1240.5388   | 0.0157  | 13    | 1          | 14       | MSGGMGGGMGGGIR |           |       | Oxidation (M)[1] |      | Mascot      |
| 1277.71    | 1277.686    | -0.024  | -19   | 435        | 445      | LALDIEIATYR    | 83        | 100   |                  |      | Mascot      |
| 1277.71    | 1277.686    | -0.024  | -19   | 435        | 445      | LALDIEIATYR    |           |       |                  |      | Mascot      |

16 novel protein similar to vertebrate keratin family [Danio rerio] gi|157885973 46874.6 5.23 5 93 99.998 83 100

Peptide Information

| Calc. Mass | Obsrv. Mass | ± da    | ± ppm | Start Seq. | End Seq. | Sequence    | Ion Score | C. I. | % Modification | Rank | Result Type |
|------------|-------------|---------|-------|------------|----------|-------------|-----------|-------|----------------|------|-------------|
| 973.4948   | 973.5106    | 0.0158  | 16    | 365        | 372      | DLEEALQR    |           |       |                |      | Mascot      |
| 1003.5418  | 1003.5322   | -0.0096 | -10   | 99         | 106      | TQEKEQIK    |           |       |                |      | Mascot      |
| 1090.4946  | 1090.5089   | 0.0143  | 13    | 160        | 168      | QMDVVNNDR   |           |       |                |      | Mascot      |
| 1277.71    | 1277.686    | -0.024  | -19   | 392        | 402      | LALDIEIATYR | 83        | 100   |                |      | Mascot      |

|    |                            |          |          |        |     |     |             |                          |      |   |    |        |    |     |  |        |
|----|----------------------------|----------|----------|--------|-----|-----|-------------|--------------------------|------|---|----|--------|----|-----|--|--------|
|    |                            | 1277.71  | 1277.686 | -0.024 | -19 | 392 | 402         | LALDIEIATYR              |      |   |    |        |    |     |  | Mascot |
|    |                            | 2367.219 | 2367.229 | 0.01   | 4   | 224 | 243         | VGALTDEINFLRTIYDEEL<br>R |      |   |    |        |    |     |  | Mascot |
| 17 | Krt4 protein [Danio rerio] |          |          |        |     |     | gi 44890667 | 53993.9                  | 5.34 | 4 | 92 | 99.997 | 83 | 100 |  |        |

Peptide Information

| Calc. Mass | Obsrv. Mass | ± da    | ± ppm | Start Seq. | End Seq. | Sequence    | Ion Score | C. I. | % Modification   | Rank | Result Type |
|------------|-------------|---------|-------|------------|----------|-------------|-----------|-------|------------------|------|-------------|
| 882.4349   | 882.5496    | 0.1147  | 130   | 33         | 40       | MSSVTSVR    |           |       | Oxidation (M)[1] |      | Mascot      |
| 973.4948   | 973.5106    | 0.0158  | 16    | 173        | 181      | QLDGLGNEK   |           |       |                  |      | Mascot      |
| 1003.5418  | 1003.5322   | -0.0096 | -10   | 112        | 119      | TQEKEQIK    |           |       |                  |      | Mascot      |
| 1277.71    | 1277.686    | -0.024  | -19   | 405        | 415      | LALDIEIATYR | 83        | 100   |                  |      | Mascot      |
| 1277.71    | 1277.686    | -0.024  | -19   | 405        | 415      | LALDIEIATYR |           |       |                  |      | Mascot      |

|    |                                                          |              |         |      |   |    |        |    |     |  |  |
|----|----------------------------------------------------------|--------------|---------|------|---|----|--------|----|-----|--|--|
| 18 | PREDICTED: keratin, type II cytoskeletal 8 [Danio rerio] | gi 125849603 | 49959.2 | 5.46 | 5 | 92 | 99.997 | 83 | 100 |  |  |
|----|----------------------------------------------------------|--------------|---------|------|---|----|--------|----|-----|--|--|

Peptide Information

| Calc. Mass | Obsrv. Mass | ± da    | ± ppm | Start Seq. | End Seq. | Sequence                 | Ion Score | C. I. | % Modification | Rank | Result Type |
|------------|-------------|---------|-------|------------|----------|--------------------------|-----------|-------|----------------|------|-------------|
| 973.4948   | 973.5106    | 0.0158  | 16    | 343        | 350      | DLEEALQR                 |           |       |                |      | Mascot      |
| 1003.5418  | 1003.5322   | -0.0096 | -10   | 77         | 84       | TQEKEQIK                 |           |       |                |      | Mascot      |
| 1090.4946  | 1090.5089   | 0.0143  | 13    | 138        | 146      | QMDVVNNDR                |           |       |                |      | Mascot      |
| 1277.71    | 1277.686    | -0.024  | -19   | 370        | 380      | LALDIEIATYR              | 83        | 100   |                |      | Mascot      |
| 1277.71    | 1277.686    | -0.024  | -19   | 370        | 380      | LALDIEIATYR              |           |       |                |      | Mascot      |
| 2367.219   | 2367.229    | 0.01    | 4     | 202        | 221      | VGALTDEINFLRTIYDEEL<br>R |           |       |                |      | Mascot      |

|    |                         |             |         |      |   |    |        |    |     |  |  |
|----|-------------------------|-------------|---------|------|---|----|--------|----|-----|--|--|
| 19 | keratin 8 [Danio rerio] | gi 29335502 | 55516.4 | 5.01 | 4 | 92 | 99.997 | 83 | 100 |  |  |
|----|-------------------------|-------------|---------|------|---|----|--------|----|-----|--|--|

Peptide Information

| Calc. Mass | Obsrv. Mass | ± da    | ± ppm | Start Seq. | End Seq. | Sequence        | Ion Score | C. I. | % Modification   | Rank | Result Type |
|------------|-------------|---------|-------|------------|----------|-----------------|-----------|-------|------------------|------|-------------|
| 1003.5418  | 1003.5322   | -0.0096 | -10   | 92         | 99       | TQEKEQIK        |           |       |                  |      | Mascot      |
| 1277.71    | 1277.686    | -0.024  | -19   | 385        | 395      | LALDIEIATYR     | 83        | 100   |                  |      | Mascot      |
| 1277.71    | 1277.686    | -0.024  | -19   | 385        | 395      | LALDIEIATYR     |           |       |                  |      | Mascot      |
| 1475.7635  | 1475.73     | -0.0335 | -23   | 308        | 319      | TEIADLNRMQIR    |           |       | Oxidation (M)[9] |      | Mascot      |
| 1675.7856  | 1675.8612   | 0.0756  | 45    | 1          | 15       | RNFSSLSYSGPSMSR |           |       |                  |      | Mascot      |

|    |                         |              |         |     |   |    |        |    |     |  |  |
|----|-------------------------|--------------|---------|-----|---|----|--------|----|-----|--|--|
| 20 | Keratin 8 [Danio rerio] | gi 159155987 | 57624.4 | 5.1 | 3 | 89 | 99.995 | 83 | 100 |  |  |
|----|-------------------------|--------------|---------|-----|---|----|--------|----|-----|--|--|

Peptide Information

| Calc. Mass | Obsrv. Mass | ± da | ± ppm | Start Seq. | End Seq. | Sequence | Ion Score | C. I. | % Modification | Rank | Result Type |
|------------|-------------|------|-------|------------|----------|----------|-----------|-------|----------------|------|-------------|
|------------|-------------|------|-------|------------|----------|----------|-----------|-------|----------------|------|-------------|

|    |                                                                                                     |            |             |         |       |            |                   |             |         |      |           |       |                  |    |        |      |             |
|----|-----------------------------------------------------------------------------------------------------|------------|-------------|---------|-------|------------|-------------------|-------------|---------|------|-----------|-------|------------------|----|--------|------|-------------|
|    |                                                                                                     | 1003.5418  | 1003.5322   | -0.0096 | -10   | 113        | 120               | TQEKEQIK    |         |      |           |       |                  |    |        |      | Mascot      |
|    |                                                                                                     | 1277.71    | 1277.686    | -0.024  | -19   | 406        | 416               | LALDIEIATYR | 83      | 100  |           |       |                  |    |        |      | Mascot      |
|    |                                                                                                     | 1277.71    | 1277.686    | -0.024  | -19   | 406        | 416               | LALDIEIATYR |         |      |           |       |                  |    |        |      | Mascot      |
|    |                                                                                                     | 1475.7635  | 1475.73     | -0.0335 | -23   | 329        | 340               | TEIADLNRMQR |         |      |           |       | Oxidation (M)[9] |    |        |      | Mascot      |
| 21 | keratin 5 [Danio rerio]                                                                             |            |             |         |       |            | gi 18858425       |             | 58550.6 | 5.34 | 3         | 89    | 99.995           | 83 | 100    |      |             |
|    | Peptide Information                                                                                 |            |             |         |       |            |                   |             |         |      |           |       |                  |    |        |      |             |
|    |                                                                                                     | Calc. Mass | Obsrv. Mass | ± da    | ± ppm | Start Seq. | End Sequence Seq. |             |         |      | Ion Score | C. I. | % Modification   |    |        | Rank | Result Type |
|    |                                                                                                     | 973.4948   | 973.5106    | 0.0158  | 16    | 213        | 221 QLDGLGNEK     |             |         |      |           |       |                  |    |        |      | Mascot      |
|    |                                                                                                     | 1003.5418  | 1003.5322   | -0.0096 | -10   | 152        | 159 TQEKEQIK      |             |         |      |           |       |                  |    |        |      | Mascot      |
|    |                                                                                                     | 1277.71    | 1277.686    | -0.024  | -19   | 445        | 455 LALDIEIATYR   | 83          | 100     |      |           |       |                  |    |        |      | Mascot      |
|    |                                                                                                     | 1277.71    | 1277.686    | -0.024  | -19   | 445        | 455 LALDIEIATYR   |             |         |      |           |       |                  |    |        |      | Mascot      |
| 22 | keratin type II, tail domain [Danio rerio]                                                          |            |             |         |       |            | gi 4107170        |             | 10583.9 | 8.29 | 1         | 88    | 99.992           | 83 | 100    |      |             |
|    | Peptide Information                                                                                 |            |             |         |       |            |                   |             |         |      |           |       |                  |    |        |      |             |
|    |                                                                                                     | Calc. Mass | Obsrv. Mass | ± da    | ± ppm | Start Seq. | End Sequence Seq. |             |         |      | Ion Score | C. I. | % Modification   |    |        | Rank | Result Type |
|    |                                                                                                     | 1277.71    | 1277.686    | -0.024  | -19   | 4          | 14 LALDIEIATYR    | 83          | 100     |      |           |       |                  |    |        |      | Mascot      |
|    |                                                                                                     | 1277.71    | 1277.686    | -0.024  | -19   | 4          | 14 LALDIEIATYR    |             |         |      |           |       |                  |    |        |      | Mascot      |
| 23 | PREDICTED: myosin regulatory light chain 2, ventricular/cardiac muscle isoform-like, partial [Danio |            |             |         |       |            | gi 326667504      |             | 19377.6 | 4.75 | 4         | 82    | 99.971           | 67 | 99.994 |      |             |
|    | Peptide Information                                                                                 |            |             |         |       |            |                   |             |         |      |           |       |                  |    |        |      |             |
|    |                                                                                                     | Calc. Mass | Obsrv. Mass | ± da    | ± ppm | Start Seq. | End Sequence Seq. |             |         |      | Ion Score | C. I. | % Modification   |    |        | Rank | Result Type |
|    |                                                                                                     | 850.4417   | 850.4256    | -0.0161 | -19   | 54         | 61 DTFAALGR       |             |         |      |           |       |                  |    |        |      | Mascot      |
|    |                                                                                                     | 850.4417   | 850.5252    | 0.0835  | 98    | 54         | 61 DTFAALGR       |             |         |      |           |       |                  |    |        |      | Mascot      |
|    |                                                                                                     | 1192.5957  | 1192.5741   | -0.0216 | -18   | 44         | 53 DGFIDKNDLR     |             |         |      |           |       |                  |    |        |      | Mascot      |
|    |                                                                                                     | 1192.5957  | 1192.5741   | -0.0216 | -18   | 44         | 53 DGFIDKNDLR     | 67          | 99.994  |      |           |       |                  |    |        |      | Mascot      |
|    |                                                                                                     | 1224.5677  | 1224.5442   | -0.0235 | -19   | 34         | 43 EAFTIMDQNR     |             |         |      |           |       |                  |    |        |      | Mascot      |
|    |                                                                                                     | 1240.5626  | 1240.5388   | -0.0238 | -19   | 34         | 43 EAFTIMDQNR     |             |         |      |           |       | Oxidation (M)[6] |    |        |      | Mascot      |
|    |                                                                                                     | 1588.8251  | 1588.8296   | 0.0045  | 3     | 62         | 74 LNVKQEEIDEMLK  |             |         |      |           |       |                  |    |        |      | Mascot      |
| 24 | myosin, light polypeptide 2, regulatory, cardiac, slow [Danio rerio]                                |            |             |         |       |            | gi 91176296       |             | 19106.4 | 4.79 | 4         | 81    | 99.962           | 67 | 99.994 |      |             |
|    | Peptide Information                                                                                 |            |             |         |       |            |                   |             |         |      |           |       |                  |    |        |      |             |
|    |                                                                                                     | Calc. Mass | Obsrv. Mass | ± da    | ± ppm | Start      | End Sequence      |             |         |      | Ion       | C. I. | % Modification   |    |        | Rank | Result Type |

|    |                       |           |         | Seq. | Seq.        | Score |              |      |        |                  |        |    |        |
|----|-----------------------|-----------|---------|------|-------------|-------|--------------|------|--------|------------------|--------|----|--------|
|    | 850.4417              | 850.4256  | -0.0161 | -19  | 51          | 58    | DTFAALGR     |      |        |                  |        |    | Mascot |
|    | 850.4417              | 850.5252  | 0.0835  | 98   | 51          | 58    | DTFAALGR     |      |        |                  |        |    | Mascot |
|    | 1192.5957             | 1192.5741 | -0.0216 | -18  | 41          | 50    | DGFIDKNDLR   |      |        |                  |        |    | Mascot |
|    | 1192.5957             | 1192.5741 | -0.0216 | -18  | 41          | 50    | DGFIDKNDLR   | 67   | 99.994 |                  |        |    | Mascot |
|    | 1224.5677             | 1224.5442 | -0.0235 | -19  | 31          | 40    | EFTIMDQNR    |      |        |                  |        |    | Mascot |
|    | 1240.5626             | 1240.5388 | -0.0238 | -19  | 31          | 40    | EFTIMDQNR    |      |        | Oxidation (M)[6] |        |    | Mascot |
|    | 1588.8251             | 1588.8296 | 0.0045  | 3    | 59          | 71    | LNKQEELDEMLK |      |        |                  |        |    | Mascot |
| 25 | talin-1 [Danio rerio] |           |         |      | gi 57222259 |       | 270469.6     | 5.86 | 22     | 62               | 97.498 | 29 | 58.272 |

Peptide Information

| Calc. Mass | Obsrv. Mass | ± da    | ± ppm | Start Seq. | End Seq. | Sequence        | Ion Score | C. I.  | % Modification           | Rank | Result Type |
|------------|-------------|---------|-------|------------|----------|-----------------|-----------|--------|--------------------------|------|-------------|
| 807.4359   | 807.3833    | -0.0526 | -65   | 1520       | 1526     | QFVQSAK         |           |        |                          |      | Mascot      |
| 973.4883   | 973.5106    | 0.0223  | 23    | 1195       | 1203     | SVNCLPGQR       |           |        |                          |      | Mascot      |
| 1003.5054  | 1003.5322   | 0.0268  | 27    | 2506       | 2513     | EKELEEAR        |           |        |                          |      | Mascot      |
| 1107.5906  | 1107.5193   | -0.0713 | -64   | 2262       | 2270     | QQLANYSKR       |           |        |                          |      | Mascot      |
| 1109.5442  | 1109.4685   | -0.0757 | -68   | 2206       | 2215     | AVADMLRSCK      |           |        | Oxidation (M)[5]         |      | Mascot      |
| 1165.6576  | 1165.5636   | -0.094  | -81   | 1615       | 1625     | SLAVNPKDPPK     |           |        |                          |      | Mascot      |
| 1165.6576  | 1165.723    | 0.0654  | 56    | 1615       | 1625     | SLAVNPKDPPK     |           |        |                          |      | Mascot      |
| 1165.6576  | 1165.723    | 0.0654  | 56    | 1615       | 1625     | SLAVNPKDPPK     |           |        |                          |      | Mascot      |
| 1179.5422  | 1179.5793   | 0.0371  | 31    | 2441       | 2450     | ADQDSQTMKR      |           |        |                          |      | Mascot      |
| 1179.5422  | 1179.5793   | 0.0371  | 31    | 2441       | 2450     | ADQDSQTMKR      | 29        | 58.272 |                          |      | Mascot      |
| 1192.5626  | 1192.5741   | 0.0115  | 10    | 1055       | 1064     | GLERDMQEA       |           |        | Oxidation (M)[6]         |      | Mascot      |
| 1192.6321  | 1192.5741   | -0.058  | -49   | 425        | 434      | STVLQQQFNK      |           |        |                          |      | Mascot      |
| 1234.5811  | 1234.6553   | 0.0742  | 60    | 1541       | 1551     | ALDGAFNQENR     |           |        |                          |      | Mascot      |
| 1234.5811  | 1234.6553   | 0.0742  | 60    | 1541       | 1551     | ALDGAFNQENR     |           |        |                          |      | Mascot      |
| 1307.8158  | 1307.6515   | -0.1643 | -126  | 2318       | 2328     | LEQLKPRAKPK     |           |        |                          |      | Mascot      |
| 1316.6804  | 1316.5348   | -0.1456 | -111  | 2193       | 2204     | QEDVIATANLSR    |           |        |                          |      | Mascot      |
| 1320.7271  | 1320.558    | -0.1691 | -128  | 424        | 434      | KSTVLQQQFNK     |           |        |                          |      | Mascot      |
| 1475.7886  | 1475.73     | -0.0586 | -40   | 859        | 872      | LLADATARMVEAAK  |           |        | Oxidation (M)[9]         |      | Mascot      |
| 1493.7628  | 1493.7075   | -0.0553 | -37   | 1601       | 1614     | AMLESSTGLIQTAR  |           |        | Oxidation (M)[2]         |      | Mascot      |
| 1493.7628  | 1493.7075   | -0.0553 | -37   | 1601       | 1614     | AMLESSTGLIQTAR  |           |        | Oxidation (M)[2]         |      | Mascot      |
| 1638.8077  | 1638.8301   | 0.0224  | 14    | 92         | 106      | MLDGTVKTMVDDSK  |           |        |                          |      | Mascot      |
| 1675.8003  | 1675.8612   | 0.0609  | 36    | 1497       | 1511     | HTSALCNACRLASSK |           |        | Carbamidomethyl (C)[6,9] |      | Mascot      |
| 1720.8038  | 1720.7566   | -0.0472 | -27   | 165        | 178      | LHTDELNLWDHGR   |           |        |                          |      | Mascot      |

|  |           |           |         |     |      |      |                            |  |  |  |  |  |  |  |  |                         |        |
|--|-----------|-----------|---------|-----|------|------|----------------------------|--|--|--|--|--|--|--|--|-------------------------|--------|
|  | 1834.8309 | 1834.7976 | -0.0333 | -18 | 1784 | 1799 | AAHTQEALEESVQMMK           |  |  |  |  |  |  |  |  | Oxidation (M)[14, 15]   | Mascot |
|  | 2211.1865 | 2211.0754 | -0.1111 | -50 | 2059 | 2080 | LGAASLGSEDPETQVVLI<br>NAVK |  |  |  |  |  |  |  |  |                         | Mascot |
|  | 2225.1846 | 2225.0862 | -0.0984 | -44 | 718  | 738  | VVVAPTISSPVCQEQLIEA<br>GK  |  |  |  |  |  |  |  |  | Carbamidomethyl (C)[12] | Mascot |
|  | 2233.0952 | 2233.0569 | -0.0383 | -17 | 1337 | 1357 | AVTDSINQLISMCTQQAP<br>GQK  |  |  |  |  |  |  |  |  |                         | Mascot |

26 NGFI-A-binding protein 2 [Danio rerio] gi|167555174 54626.2 6.01 12 51 65.456 8 0

#### Peptide Information

| Calc. Mass | Obsrv. Mass | ± da    | ± ppm | Start Seq. | End Seq. | Sequence               | Ion Score | C. I. | % | Modification           | Rank | Result | Type |
|------------|-------------|---------|-------|------------|----------|------------------------|-----------|-------|---|------------------------|------|--------|------|
| 1037.4568  | 1037.5077   | 0.0509  | 49    | 463        | 470      | QISEMEER               |           |       |   | Oxidation (M)[5]       |      | Mascot |      |
| 1090.6367  | 1090.5089   | -0.1278 | -117  | 323        | 331      | RVELFSLAR              |           |       |   |                        |      | Mascot |      |
| 1118.4961  | 1118.4875   | -0.0086 | -8    | 481        | 491      | SSSPANTKDDP            |           |       |   |                        |      | Mascot |      |
| 1193.5579  | 1193.5833   | 0.0254  | 21    | 462        | 470      | RQISEMEER              |           |       |   | Oxidation (M)[6]       |      | Mascot |      |
| 1263.5886  | 1263.67     | 0.0814  | 64    | 238        | 248      | TMPQADQTEVK            |           |       |   | Oxidation (M)[2]       |      | Mascot |      |
| 1300.6855  | 1300.5425   | -0.143  | -110  | 375        | 386      | LSKDPAVNSDVR           |           |       |   |                        |      | Mascot |      |
| 1365.5521  | 1365.6152   | 0.0631  | 46    | 114        | 126      | SMSNGQPGSPCER          |           |       |   | Oxidation (M)[2]       |      | Mascot |      |
| 1493.6471  | 1493.7075   | 0.0604  | 40    | 113        | 126      | KSMSNGQPGSPCER         |           |       |   | Oxidation (M)[3]       |      | Mascot |      |
| 1493.6471  | 1493.7075   | 0.0604  | 40    | 113        | 126      | KSMSNGQPGSPCER         | 8         | 0     |   | Oxidation (M)[3]       |      | Mascot |      |
| 1588.917   | 1588.8296   | -0.0874 | -55   | 6          | 18       | TLGELQLYRVLQR          |           |       |   |                        |      | Mascot |      |
| 1720.6788  | 1720.7566   | 0.0778  | 45    | 348        | 363      | TYSEDCSASAECAAQK       |           |       |   | Carbamidomethyl (C)[6] |      | Mascot |      |
| 1876.78    | 1876.8947   | 0.1147  | 61    | 348        | 364      | TYSEDCSASAECAAQKR      |           |       |   | Carbamidomethyl (C)[6] |      | Mascot |      |
| 2225.0955  | 2225.0862   | -0.0093 | -4    | 297        | 315      | QLTHHEMLINEAAQFCI<br>R |           |       |   |                        |      | Mascot |      |

27 Idh3a protein [Danio rerio] gi|157423273 16736.4 6.89 7 48 31.076

#### Peptide Information

| Calc. Mass | Obsrv. Mass | ± da    | ± ppm | Start Seq. | End Seq. | Sequence          | Ion Score | C. I. | % | Modification           | Rank | Result | Type |
|------------|-------------|---------|-------|------------|----------|-------------------|-----------|-------|---|------------------------|------|--------|------|
| 1003.489   | 1003.5322   | 0.0432  | 43    | 108        | 116      | HMGLHGHAK         |           |       |   | Oxidation (M)[2]       |      | Mascot |      |
| 1109.5693  | 1109.4685   | -0.1008 | -91   | 7          | 17       | STVSCIMGAIK       |           |       |   |                        |      | Mascot |      |
| 1201.4976  | 1201.6172   | 0.1196  | 100   | 142        | 151      | CSEFTADICR        |           |       |   | Carbamidomethyl (C)[1] |      | Mascot |      |
| 1300.5773  | 1300.5425   | -0.0348 | -27   | 142        | 152      | CSEFTADICRR       |           |       |   |                        |      | Mascot |      |
| 1316.707   | 1316.5348   | -0.1722 | -131  | 18         | 28       | TQTPQPRVFSR       |           |       |   |                        |      | Mascot |      |
| 1357.5988  | 1357.6908   | 0.092   | 68    | 142        | 152      | CSEFTADICRR       |           |       |   | Carbamidomethyl (C)[1] |      | Mascot |      |
| 1707.8669  | 1707.7412   | -0.1257 | -74   | 2          | 17       | ANAWRSTVSCIMGAIK  |           |       |   |                        |      | Mascot |      |
| 1838.9073  | 1838.8915   | -0.0158 | -9    | 1          | 17       | MANAWRSTVSCIMGAIK |           |       |   |                        |      | Mascot |      |

28 Pus7 protein [Danio rerio] gi|133778700 44955.3 9.55 6 48 24.426 28 56.406

| Peptide Information |                            |             |         |       |             |          |                           |           |        |    |                  |      |             |
|---------------------|----------------------------|-------------|---------|-------|-------------|----------|---------------------------|-----------|--------|----|------------------|------|-------------|
|                     | Calc. Mass                 | Obsrv. Mass | ± da    | ± ppm | Start Seq.  | End Seq. | Sequence                  | Ion Score | C. I.  | %  | Modification     | Rank | Result Type |
|                     | 1179.6289                  | 1179.5793   | -0.0496 | -42   | 375         | 384      | EVLKMDTSIK                |           |        |    | Oxidation (M)[5] |      | Mascot      |
|                     | 1179.6289                  | 1179.5793   | -0.0496 | -42   | 375         | 384      | EVLKMDTSIK                |           |        |    | Oxidation (M)[5] |      | Mascot      |
|                     | 1365.8002                  | 1365.6152   | -0.185  | -135  | 192         | 203      | HNIITAFALIPR              |           |        |    |                  |      | Mascot      |
|                     | 1390.7358                  | 1390.6589   | -0.0769 | -55   | 1           | 12       | KDTMEAINILSR              |           |        |    |                  |      | Mascot      |
|                     | 1653.7095                  | 1653.7505   | 0.041   | 25    | 283         | 296      | EMLSADDLDIDNMR            | 28        | 56.406 |    | Oxidation (M)[2] |      | Mascot      |
|                     | 1653.7095                  | 1653.7505   | 0.041   | 25    | 283         | 296      | EMLSADDLDIDNMR            |           |        |    | Oxidation (M)[2] |      | Mascot      |
|                     | 1993.9648                  | 1993.9424   | -0.0224 | -11   | 379         | 395      | MDTSIKNQTLNTSWLN          |           |        |    |                  |      | Mascot      |
|                     | 1993.9648                  | 1993.9424   | -0.0224 | -11   | 379         | 395      | MDTSIKNQTLNTSWLN          |           |        |    |                  |      | Mascot      |
|                     | 2369.1338                  | 2368.9758   | -0.158  | -67   | 354         | 374      | YCALKMEFSLPSSTYATM<br>AVR |           |        |    |                  |      | Mascot      |
| 29                  | Pus7 protein [Danio rerio] |             |         |       | gi 41388921 |          | 36953                     | 9.27      | 5      | 46 | 0.375            | 28   | 56.406      |

| Peptide Information |                             |             |           |         |              |          |          |                           |       |        |              |                  |        |
|---------------------|-----------------------------|-------------|-----------|---------|--------------|----------|----------|---------------------------|-------|--------|--------------|------------------|--------|
|                     | Calc. Mass                  | Obsrv. Mass | ± da      | ± ppm   | Start Seq.   | End Seq. | Sequence | Ion Score                 | C. I. | %      | Modification | Rank Result Type |        |
| 30                  |                             | 1179.6289   | 1179.5793 | -0.0496 | -42          | 306      | 315      | EVLKMDTSIK                |       |        |              | Oxidation (M)[5] | Mascot |
|                     |                             | 1179.6289   | 1179.5793 | -0.0496 | -42          | 306      | 315      | EVLKMDTSIK                |       |        |              | Oxidation (M)[5] | Mascot |
|                     |                             | 1365.8002   | 1365.6152 | -0.185  | -135         | 123      | 134      | HNIITAFALIPR              |       |        |              |                  | Mascot |
|                     |                             | 1653.7095   | 1653.7505 | 0.041   | 25           | 214      | 227      | EMLSADDLDIDNMR            | 28    | 56.406 |              | Oxidation (M)[2] | Mascot |
|                     |                             | 1653.7095   | 1653.7505 | 0.041   | 25           | 214      | 227      | EMLSADDLDIDNMR            |       |        |              | Oxidation (M)[2] | Mascot |
|                     |                             | 1993.9648   | 1993.9424 | -0.0224 | -11          | 310      | 326      | MDTSIKNQTLNTSWLN          |       |        |              |                  | Mascot |
|                     |                             | 1993.9648   | 1993.9424 | -0.0224 | -11          | 310      | 326      | MDTSIKNQTLNTSWLN          |       |        |              |                  | Mascot |
|                     |                             | 2369.1338   | 2368.9758 | -0.158  | -67          | 285      | 305      | YCALKMEFSLPSSTYATM<br>AVR |       |        |              |                  | Mascot |
| 30                  | novel protein [Danio rerio] |             |           |         | gi 148725934 |          | 20790.5  | 5.31                      | 8     | 45     | 0            |                  |        |

| Peptide Information |             |         |       |            |          |            |           |       |   |                        |                  |
|---------------------|-------------|---------|-------|------------|----------|------------|-----------|-------|---|------------------------|------------------|
| Calc. Mass          | Obsrv. Mass | ± da    | ± ppm | Start Seq. | End Seq. | Sequence   | Ion Score | C. I. | % | Modification           | Rank Result Type |
| 807.3916            | 807.3833    | -0.0083 | -10   | 2          | 8        | EEVSCLK    |           |       |   |                        | Mascot           |
| 842.3937            | 842.4921    | 0.0984  | 117   | 18         | 24       | HINCAER    |           |       |   |                        | Mascot           |
| 995.4536            | 995.4966    | 0.043   | 43    | 1          | 8        | MEEVSCLK   |           |       |   | Carbamidomethyl (C)[6] | Mascot           |
| 1003.4941           | 1003.5322   | 0.0381  | 38    | 94         | 101      | VEELEQEK   |           |       |   |                        | Mascot           |
| 1051.6007           | 1051.6942   | 0.0935  | 89    | 161        | 168      | HQELQRLK   |           |       |   |                        | Mascot           |
| 1179.6112           | 1179.5793   | -0.0319 | -27   | 1          | 10       | MEEVSCLKLK |           |       |   |                        | Mascot           |



|    |                                                  |           |         |     |     |     |                 |         |     |   |    |   |    |        |  |  |        |
|----|--------------------------------------------------|-----------|---------|-----|-----|-----|-----------------|---------|-----|---|----|---|----|--------|--|--|--------|
|    | 1179.6112                                        | 1179.5793 | -0.0319 | -27 | 1   | 10  | MEEVSCLKLK      |         |     |   |    |   |    |        |  |  | Mascot |
|    | 1720.85                                          | 1720.7566 | -0.0934 | -54 | 140 | 154 | APVSVDSAEREEIYR |         |     |   |    |   |    |        |  |  | Mascot |
|    | 1789.8602                                        | 1789.8832 | 0.023   | 13  | 94  | 107 | VEELEQEKTHYEQK  |         |     |   |    |   |    |        |  |  | Mascot |
| 31 | pseudouridylate synthase 7 homolog [Danio rerio] |           |         |     |     |     | gi 170015989    | 71573.2 | 6.3 | 7 | 45 | 0 | 28 | 56.406 |  |  |        |

#### Peptide Information

|  | Calc. Mass | Obsrv. Mass | ± da    | ± ppm | Start Seq. | End Seq. | Sequence                  | Ion Score | C. I.  | % | Modification     | Rank | Result | Type |
|--|------------|-------------|---------|-------|------------|----------|---------------------------|-----------|--------|---|------------------|------|--------|------|
|  | 1179.6289  | 1179.5793   | -0.0496 | -42   | 607        | 616      | EVLKMDTSIK                |           |        |   | Oxidation (M)[5] |      | Mascot |      |
|  | 1179.6289  | 1179.5793   | -0.0496 | -42   | 607        | 616      | EVLKMDTSIK                |           |        |   | Oxidation (M)[5] |      | Mascot |      |
|  | 1307.6324  | 1307.6515   | 0.0191  | 15    | 2          | 14       | EDTAASVTLGSEK             |           |        |   |                  |      | Mascot |      |
|  | 1365.8002  | 1365.6152   | -0.185  | -135  | 424        | 435      | HNIITAFALIPR              |           |        |   |                  |      | Mascot |      |
|  | 1653.7095  | 1653.7505   | 0.041   | 25    | 515        | 528      | EMLSADDLDIDNMR            | 28        | 56.406 |   | Oxidation (M)[2] |      | Mascot |      |
|  | 1653.7095  | 1653.7505   | 0.041   | 25    | 515        | 528      | EMLSADDLDIDNMR            |           |        |   | Oxidation (M)[2] |      | Mascot |      |
|  | 1720.9016  | 1720.7566   | -0.145  | -84   | 73         | 87       | FISEHTGFSGILKER           |           |        |   |                  |      | Mascot |      |
|  | 1993.9648  | 1993.9424   | -0.0224 | -11   | 611        | 627      | MDTSIKNQTLNNTSWLN         |           |        |   |                  |      | Mascot |      |
|  | 1993.9648  | 1993.9424   | -0.0224 | -11   | 611        | 627      | MDTSIKNQTLNNTSWLN         |           |        |   |                  |      | Mascot |      |
|  | 2369.1338  | 2368.9758   | -0.158  | -67   | 586        | 606      | YCALKMEFSLPSSTYATM<br>AVR |           |        |   |                  |      | Mascot |      |

|    |                            |  |  |  |  |  |              |         |      |   |    |   |    |        |  |  |  |
|----|----------------------------|--|--|--|--|--|--------------|---------|------|---|----|---|----|--------|--|--|--|
| 32 | Pus7 protein [Danio rerio] |  |  |  |  |  | gi 124504398 | 38608.9 | 9.39 | 5 | 44 | 0 | 28 | 56.406 |  |  |  |
|----|----------------------------|--|--|--|--|--|--------------|---------|------|---|----|---|----|--------|--|--|--|

#### Peptide Information

|  | Calc. Mass | Obsrv. Mass | ± da    | ± ppm | Start Seq. | End Seq. | Sequence                  | Ion Score | C. I.  | % | Modification     | Rank | Result | Type |
|--|------------|-------------|---------|-------|------------|----------|---------------------------|-----------|--------|---|------------------|------|--------|------|
|  | 1179.6289  | 1179.5793   | -0.0496 | -42   | 320        | 329      | EVLKMDTSIK                |           |        |   | Oxidation (M)[5] |      | Mascot |      |
|  | 1179.6289  | 1179.5793   | -0.0496 | -42   | 320        | 329      | EVLKMDTSIK                |           |        |   | Oxidation (M)[5] |      | Mascot |      |
|  | 1365.8002  | 1365.6152   | -0.185  | -135  | 137        | 148      | HNIITAFALIPR              |           |        |   |                  |      | Mascot |      |
|  | 1653.7095  | 1653.7505   | 0.041   | 25    | 228        | 241      | EMLSADDLDIDNMR            | 28        | 56.406 |   | Oxidation (M)[2] |      | Mascot |      |
|  | 1653.7095  | 1653.7505   | 0.041   | 25    | 228        | 241      | EMLSADDLDIDNMR            |           |        |   | Oxidation (M)[2] |      | Mascot |      |
|  | 1993.9648  | 1993.9424   | -0.0224 | -11   | 324        | 340      | MDTSIKNQTLNNTSWLN         |           |        |   |                  |      | Mascot |      |
|  | 1993.9648  | 1993.9424   | -0.0224 | -11   | 324        | 340      | MDTSIKNQTLNNTSWLN         |           |        |   |                  |      | Mascot |      |
|  | 2369.1338  | 2368.9758   | -0.158  | -67   | 299        | 319      | YCALKMEFSLPSSTYATM<br>AVR |           |        |   |                  |      | Mascot |      |

|    |                                              |  |  |  |  |  |              |         |      |   |    |   |    |        |  |  |  |
|----|----------------------------------------------|--|--|--|--|--|--------------|---------|------|---|----|---|----|--------|--|--|--|
| 33 | hypothetical protein LOC571418 [Danio rerio] |  |  |  |  |  | gi 167555156 | 77922.8 | 4.77 | 7 | 44 | 0 | 29 | 61.236 |  |  |  |
|----|----------------------------------------------|--|--|--|--|--|--------------|---------|------|---|----|---|----|--------|--|--|--|

#### Peptide Information

|  | Calc. Mass | Obsrv. Mass | ± da   | ± ppm | Start Seq. | End Seq. | Sequence | Ion Score | C. I. | % | Modification | Rank | Result | Type |
|--|------------|-------------|--------|-------|------------|----------|----------|-----------|-------|---|--------------|------|--------|------|
|  | 973.5676   | 973.5106    | -0.057 | -59   | 189        | 196      | EIIDSKIR |           |       |   |              |      | Mascot |      |

|  |           |           |         |     |     |     |                |    |        |  |  |  |  |  |  |  |        |
|--|-----------|-----------|---------|-----|-----|-----|----------------|----|--------|--|--|--|--|--|--|--|--------|
|  | 1003.5505 | 1003.5322 | -0.0183 | -18 | 373 | 380 | SHKFLCLR       |    |        |  |  |  |  |  |  |  | Mascot |
|  | 1192.5328 | 1192.5741 | 0.0413  | 35  | 313 | 322 | DSETDVEELR     |    |        |  |  |  |  |  |  |  | Mascot |
|  | 1192.5328 | 1192.5741 | 0.0413  | 35  | 313 | 322 | DSETDVEELR     | 29 | 61.236 |  |  |  |  |  |  |  | Mascot |
|  | 1240.6361 | 1240.5388 | -0.0973 | -78 | 628 | 637 | WTGDNLFFIK     |    |        |  |  |  |  |  |  |  | Mascot |
|  | 1320.6278 | 1320.558  | -0.0698 | -53 | 313 | 323 | DSETDVEELRK    |    |        |  |  |  |  |  |  |  | Mascot |
|  | 1357.6642 | 1357.6908 | 0.0266  | 20  | 327 | 337 | THTMQQAKEQR    |    |        |  |  |  |  |  |  |  | Mascot |
|  | 1588.8074 | 1588.8296 | 0.0222  | 14  | 574 | 587 | AMQDQDSPMLLVIK |    |        |  |  |  |  |  |  |  | Mascot |

34 PREDICTED: calcium-binding mitochondrial carrier protein SCaMC-3-like [Danio rerio] gi|68353838 53167.4 7.21 11 44 0

#### Peptide Information

| Calc. Mass | Obsrv. Mass | ± da    | ± ppm | Start Seq. | End Seq. | Sequence                  | Ion Score | C. I. | % Modification         | Rank | Result Type |
|------------|-------------|---------|-------|------------|----------|---------------------------|-----------|-------|------------------------|------|-------------|
| 842.4981   | 842.4921    | -0.006  | -7    | 259        | 266      | IAPETAIK                  |           |       |                        |      | Mascot      |
| 850.4338   | 850.4256    | -0.0082 | -10   | 128        | 134      | ILQSMKD                   |           |       | Oxidation (M)[5]       |      | Mascot      |
| 850.4338   | 850.5252    | 0.0914  | 107   | 128        | 134      | ILQSMKD                   |           |       | Oxidation (M)[5]       |      | Mascot      |
| 1037.556   | 1037.5077   | -0.0483 | -47   | 91         | 98       | LMFRSLDR                  |           |       |                        |      | Mascot      |
| 1179.4695  | 1179.5793   | 0.1098  | 93    | 11         | 20       | CQDSGVDQDR                |           |       | Carbamidomethyl (C)[1] |      | Mascot      |
| 1179.4695  | 1179.5793   | 0.1098  | 93    | 11         | 20       | CQDSGVDQDR                |           |       | Carbamidomethyl (C)[1] |      | Mascot      |
| 1357.6416  | 1357.6908   | 0.0492  | 36    | 320        | 332      | KTGQYSSVADCAK             |           |       |                        |      | Mascot      |
| 1383.6975  | 1383.6641   | -0.0334 | -24   | 279        | 291      | GSNEGGLTKVHER             |           |       |                        |      | Mascot      |
| 1390.7688  | 1390.6589   | -0.1099 | -79   | 433        | 445      | SIVAQEGVVGLYR             |           |       |                        |      | Mascot      |
| 1588.7213  | 1588.8296   | 0.1083  | 68    | 135        | 146      | DHSMTIDWIEWR              |           |       |                        |      | Mascot      |
| 1835.0312  | 1834.7976   | -0.2336 | -127  | 259        | 274      | IAPETAIKFLAYEQIK          |           |       |                        |      | Mascot      |
| 2283.0962  | 2283.1533   | 0.0571  | 25    | 166        | 185      | HSVMLDIGEHLTPDEFS<br>EK   |           |       |                        |      | Mascot      |
| 2369.0681  | 2368.9758   | -0.0923 | -39   | 64         | 83       | AGDINHDLGQLDFEEFTEY<br>LR |           |       |                        |      | Mascot      |

35 novel protein similar to Janus kinase family (a protein tyrosine kinase, leukocyte) [Danio rerio] gi|169145296 125997.7 6.83 16 42 0

#### Peptide Information

| Calc. Mass | Obsrv. Mass | ± da    | ± ppm | Start Seq. | End Seq. | Sequence    | Ion Score | C. I. | % Modification   | Rank | Result Type |
|------------|-------------|---------|-------|------------|----------|-------------|-----------|-------|------------------|------|-------------|
| 850.4603   | 850.4256    | -0.0347 | -41   | 399        | 405      | NGMFLLR     |           |       |                  |      | Mascot      |
| 850.4603   | 850.5252    | 0.0649  | 76    | 399        | 405      | NGMFLLR     |           |       |                  |      | Mascot      |
| 1037.5812  | 1037.5077   | -0.0735 | -71   | 1055       | 1064     | LPAPAQCPLK  |           |       |                  |      | Mascot      |
| 1107.5867  | 1107.5193   | -0.0674 | -61   | 597        | 605      | NIMVQEFVK   |           |       |                  |      | Mascot      |
| 1118.6238  | 1118.4875   | -0.1363 | -122  | 482        | 490      | ELTNMIIR    |           |       | Oxidation (M)[5] |      | Mascot      |
| 1179.6302  | 1179.5793   | -0.0509 | -43   | 395        | 405      | AGGKNGMFLLR |           |       | Oxidation (M)[7] |      | Mascot      |

|    |                                                        |           |         |      |             |         |                           |   |                         |   |        |
|----|--------------------------------------------------------|-----------|---------|------|-------------|---------|---------------------------|---|-------------------------|---|--------|
|    | 1179.6302                                              | 1179.5793 | -0.0509 | -43  | 395         | 405     | AGGKNGMFLLR               |   | Oxidation (M)[7]        |   | Mascot |
|    | 1192.6758                                              | 1192.5741 | -0.1017 | -85  | 920         | 929     | LLLFASQICK                |   | Carbamidomethyl (C)[9]  |   | Mascot |
|    | 1192.6758                                              | 1192.5741 | -0.1017 | -85  | 920         | 929     | LLLFASQICK                |   | Carbamidomethyl (C)[9]  |   | Mascot |
|    | 1206.5558                                              | 1206.5894 | 0.0336  | 28   | 2           | 11      | SEEEEVPLMK                |   | Oxidation (M)[9]        |   | Mascot |
|    | 1206.5558                                              | 1206.5894 | 0.0336  | 28   | 2           | 11      | SEEEEVPLMK                |   | Oxidation (M)[9]        |   | Mascot |
|    | 1263.7493                                              | 1263.67   | -0.0793 | -63  | 919         | 929     | KLLLFASQICK               |   |                         |   | Mascot |
|    | 1307.6226                                              | 1307.6515 | 0.0289  | 22   | 805         | 814     | KQQEDVFEER                |   |                         |   | Mascot |
|    | 1316.6692                                              | 1316.5348 | -0.1344 | -102 | 1088        | 1098    | DLIENSLDER                |   |                         |   | Mascot |
|    | 1475.7094                                              | 1475.73   | 0.0206  | 14   | 308         | 319     | RLCQEQMPLGR               |   | Oxidation (M)[7]        |   | Mascot |
|    | 1839.0197                                              | 1838.8915 | -0.1282 | -70  | 1035        | 1050    | YVHSPSMAIHLTLLK           |   | Oxidation (M)[7]        |   | Mascot |
|    | 2211.0791                                              | 2211.0754 | -0.0037 | -2   | 290         | 307     | QEWQTFCDFPQIIDISIK        |   |                         |   | Mascot |
|    | 2225.0115                                              | 2225.0862 | 0.0747  | 34   | 564         | 582     | NCWESLFEAASLSQIS<br>HR    |   | Oxidation (M)[13]       |   | Mascot |
|    | 2367.1802                                              | 2367.229  | 0.0488  | 21   | 290         | 308     | QEWQTFCDFPQIIDISIKR       |   |                         |   | Mascot |
|    | 2369.1946                                              | 2368.9758 | -0.2188 | -92  | 685         | 704     | IPWVAPEVLDLTLEIELECD<br>K |   | Carbamidomethyl (C)[18] |   | Mascot |
| 36 | 28S ribosomal protein S15, mitochondrial [Danio rerio] |           |         |      | gi 50540040 | 30971.5 | 10.11                     | 9 | 42                      | 0 |        |

Peptide Information

|  | Calc. Mass | Obsrv. Mass | ± da    | ± ppm | Start Seq. | End Sequence Seq. | Ion Score | C. I. | % Modification   | Rank | Result Type |
|--|------------|-------------|---------|-------|------------|-------------------|-----------|-------|------------------|------|-------------|
|  | 995.5706   | 995.4966    | -0.074  | -74   | 1          | 8 MVLKSVFR        |           |       | Oxidation (M)[1] |      | Mascot      |
|  | 1037.5159  | 1037.5077   | -0.0082 | -8    | 169        | 176 WMLMTIDK      |           |       |                  |      | Mascot      |
|  | 1045.4949  | 1045.5433   | 0.0484  | 46    | 187        | 194 TRYDSFEK      |           |       |                  |      | Mascot      |
|  | 1118.5187  | 1118.4875   | -0.0312 | -28   | 189        | 197 YDSFEKVCK     |           |       |                  |      | Mascot      |
|  | 1179.5125  | 1179.5793   | 0.0668  | 57    | 252        | 263 SSSSTNPQETAA  |           |       |                  |      | Mascot      |
|  | 1179.5125  | 1179.5793   | 0.0668  | 57    | 252        | 263 SSSSTNPQETAA  |           |       |                  |      | Mascot      |
|  | 1193.6169  | 1193.5833   | -0.0336 | -28   | 169        | 177 WMLMTIDKR     |           |       |                  |      | Mascot      |
|  | 1234.7266  | 1234.6553   | -0.0713 | -58   | 5          | 15 SVFRSTVLGLR    |           |       |                  |      | Mascot      |
|  | 1234.7266  | 1234.6553   | -0.0713 | -58   | 5          | 15 SVFRSTVLGLR    | 8         |       | 0                |      | Mascot      |
|  | 1307.6074  | 1307.6515   | 0.0441  | 34    | 251        | 263 KSSSSTNPQETAA |           |       |                  |      | Mascot      |
|  | 1653.8707  | 1653.7505   | -0.1202 | -73   | 49         | 62 HFKGDETLNQPVR  |           |       |                  |      | Mascot      |
|  | 1653.8707  | 1653.7505   | -0.1202 | -73   | 49         | 62 HFKGDETLNQPVR  |           |       |                  |      | Mascot      |

|    |                                |  |  |  |             |         |      |   |    |   |    |        |
|----|--------------------------------|--|--|--|-------------|---------|------|---|----|---|----|--------|
| 37 | Si:ch211-20b12.1 [Danio rerio] |  |  |  | gi 67678177 | 55996.8 | 8.09 | 5 | 41 | 0 | 30 | 70.797 |
|----|--------------------------------|--|--|--|-------------|---------|------|---|----|---|----|--------|

Peptide Information

|  | Calc. Mass | Obsrv. Mass | ± da | ± ppm | Start Seq. | End Sequence Seq. | Ion Score | C. I. | % Modification | Rank | Result Type |
|--|------------|-------------|------|-------|------------|-------------------|-----------|-------|----------------|------|-------------|
|--|------------|-------------|------|-------|------------|-------------------|-----------|-------|----------------|------|-------------|

|    |                                          |           |         |      |              |     |                           |      |        |                        |   |  |  |  |  |  |  |        |
|----|------------------------------------------|-----------|---------|------|--------------|-----|---------------------------|------|--------|------------------------|---|--|--|--|--|--|--|--------|
|    | 973.5254                                 | 973.5106  | -0.0148 | -15  | 220          | 226 | HYIHYLK                   |      |        |                        |   |  |  |  |  |  |  | Mascot |
|    | 1277.6307                                | 1277.686  | 0.0553  | 43   | 436          | 445 | CHDIIISTYR                | 30   | 70.797 | Carbamidomethyl (C)[1] |   |  |  |  |  |  |  | Mascot |
|    | 1277.6307                                | 1277.686  | 0.0553  | 43   | 436          | 445 | CHDIIISTYR                |      |        | Carbamidomethyl (C)[1] |   |  |  |  |  |  |  | Mascot |
|    | 1675.826                                 | 1675.8612 | 0.0352  | 21   | 220          | 232 | HYIHYLKEMGEQK             |      |        |                        |   |  |  |  |  |  |  | Mascot |
|    | 1834.813                                 | 1834.7976 | -0.0154 | -8   | 19           | 33  | AFTFDEDEDEFSLK            |      |        |                        |   |  |  |  |  |  |  | Mascot |
|    | 2384.2344                                | 2383.9199 | -0.3145 | -132 | 407          | 427 | NSAPVQVLQEYVNLIDDP<br>ELK |      |        |                        |   |  |  |  |  |  |  | Mascot |
| 38 | novel protein (wu:fj53d02) [Danio rerio] |           |         |      | gi 122891311 |     | 95823.2                   | 6.41 | 15     | 41                     | 0 |  |  |  |  |  |  |        |

#### Peptide Information

| Calc. Mass | Obsrv. Mass | ± da    | ± ppm | Start Seq. | End Seq. | Sequence                 | Ion Score | C. I. | % | Modification                             | Rank | Result Type |
|------------|-------------|---------|-------|------------|----------|--------------------------|-----------|-------|---|------------------------------------------|------|-------------|
| 807.3917   | 807.3833    | -0.0084 | -10   | 404        | 410      | MVPTTDK                  |           |       |   | Oxidation (M)[1]                         |      | Mascot      |
| 850.4781   | 850.4256    | -0.0525 | -62   | 635        | 641      | ARYLAEK                  |           |       |   |                                          |      | Mascot      |
| 850.4781   | 850.5252    | 0.0471  | 55    | 635        | 641      | ARYLAEK                  |           |       |   |                                          |      | Mascot      |
| 973.5002   | 973.5106    | 0.0104  | 11    | 411        | 418      | GRFYAFGR                 |           |       |   |                                          |      | Mascot      |
| 1118.5801  | 1118.4875   | -0.0926 | -83   | 623        | 632      | GDVSSRQELK               |           |       |   |                                          |      | Mascot      |
| 1224.4983  | 1224.5442   | 0.0459  | 37    | 692        | 701      | EGALCEENMR               |           |       |   | Carbamidomethyl (C)[5], Oxidation (M)[9] |      | Mascot      |
| 1234.6096  | 1234.6553   | 0.0457  | 37    | 62         | 71       | DEQERCITIK               |           |       |   |                                          |      | Mascot      |
| 1234.6096  | 1234.6553   | 0.0457  | 37    | 62         | 71       | DEQERCITIK               |           |       |   |                                          |      | Mascot      |
| 1307.6525  | 1307.6515   | -0.001  | -1    | 21         | 32       | NMSVIAHVDHGK             |           |       |   |                                          |      | Mascot      |
| 1308.6583  | 1308.6346   | -0.0237 | -18   | 680        | 691      | DSVVAGFWATK              |           |       |   |                                          |      | Mascot      |
| 1316.7144  | 1316.5348   | -0.1796 | -136  | 430        | 441      | VRIMGPNFTPGK             |           |       |   |                                          |      | Mascot      |
| 1323.6473  | 1323.6482   | 0.0009  | 1     | 21         | 32       | NMSVIAHVDHGK             |           |       |   | Oxidation (M)[2]                         |      | Mascot      |
| 1475.7896  | 1475.73     | -0.0596 | -40   | 151        | 162      | IKPVLMMNKMDR             |           |       |   |                                          |      | Mascot      |
| 1493.6835  | 1493.7075   | 0.024   | 16    | 692        | 704      | EGALCEENMRAVR            |           |       |   | Oxidation (M)[9]                         |      | Mascot      |
| 1493.6835  | 1493.7075   | 0.024   | 16    | 692        | 704      | EGALCEENMRAVR            |           |       |   | Oxidation (M)[9]                         |      | Mascot      |
| 1707.8734  | 1707.7412   | -0.1322 | -77   | 2          | 15       | VNFTVDQIREIMDK           |           |       |   |                                          |      | Mascot      |
| 1790.0033  | 1789.8832   | -0.1201 | -67   | 288        | 302      | LPRTFCQLVLDPIFK          |           |       |   |                                          |      | Mascot      |
| 1838.9139  | 1838.8915   | -0.0224 | -12   | 1          | 15       | MVNFTVDQIREIMDK          |           |       |   |                                          |      | Mascot      |
| 2510.2119  | 2510.0913   | -0.1206 | -48   | 72         | 93       | STAISLYELSENDAFIK<br>QCK |           |       |   |                                          |      | Mascot      |

39 Pbx2 [Danio rerio] gi|7861936 18895.6 9.08 6 40 0

#### Peptide Information

| Calc. Mass | Obsrv. Mass | ± da    | ± ppm | Start Seq. | End Seq. | Sequence   | Ion Score | C. I. | % | Modification           | Rank | Result Type |
|------------|-------------|---------|-------|------------|----------|------------|-----------|-------|---|------------------------|------|-------------|
| 1051.5782  | 1051.6942   | 0.116   | 110   | 133        | 141      | FSSIQTQLK  |           |       |   |                        |      | Mascot      |
| 1179.6442  | 1179.5793   | -0.0649 | -55   | 1          | 10       | ALFSLVCEIK |           |       |   | Carbamidomethyl (C)[7] |      | Mascot      |

|    |                             |           |         |     |              |     |                          |      |   |                                          |        |
|----|-----------------------------|-----------|---------|-----|--------------|-----|--------------------------|------|---|------------------------------------------|--------|
|    | 1179.6732                   | 1179.5793 | -0.0939 | -80 | 132          | 141 | KFSSIQTQLK               | 10   | 0 |                                          | Mascot |
|    | 1307.6447                   | 1307.6515 | 0.0068  | 5   | 142          | 152 | QSTCEAVMILR              |      |   | Carbamidomethyl (C)[4]                   | Mascot |
|    | 1323.6395                   | 1323.6482 | 0.0087  | 7   | 142          | 152 | QSTCEAVMILR              |      |   | Carbamidomethyl (C)[4], Oxidation (M)[8] | Mascot |
|    | 1493.7563                   | 1493.7075 | -0.0488 | -33 | 142          | 154 | QSTCEAVMILRSR            |      |   |                                          | Mascot |
|    | 1493.7563                   | 1493.7075 | -0.0488 | -33 | 142          | 154 | QSTCEAVMILRSR            | 2    | 0 |                                          | Mascot |
|    | 2283.1836                   | 2283.1533 | -0.0303 | -13 | 133          | 152 | FSSIQTQLKQSTCEAVMI<br>LR |      |   |                                          | Mascot |
| 40 | transgelin 3a [Danio rerio] |           |         |     | gi 156739273 |     | 24423.1                  | 6.92 | 8 | 40                                       | 0      |

#### Peptide Information

| Calc. Mass | Obsrv. Mass | ± da    | ± ppm | Start Seq. | End Seq. | Sequence               | Ion Score | C. I. | % Modification   | Rank | Result Type |
|------------|-------------|---------|-------|------------|----------|------------------------|-----------|-------|------------------|------|-------------|
| 1037.4899  | 1037.5077   | 0.0178  | 17    | 161        | 168      | EFSEEQLR               |           |       |                  |      | Mascot      |
| 1165.5782  | 1165.5636   | -0.0146 | -13   | 197        | 205      | QIMRYDSPR              |           |       |                  |      | Mascot      |
| 1165.5782  | 1165.723    | 0.1448  | 124   | 197        | 205      | QIMRYDSPR              |           |       |                  |      | Mascot      |
| 1165.5782  | 1165.723    | 0.1448  | 124   | 197        | 205      | QIMRYDSPR              |           |       |                  |      | Mascot      |
| 1179.6013  | 1179.5793   | -0.022  | -19   | 55         | 64       | WLMSGTILCR             |           |       |                  |      | Mascot      |
| 1179.6013  | 1179.5793   | -0.022  | -19   | 55         | 64       | WLMSGTILCR             |           |       |                  |      | Mascot      |
| 1193.5909  | 1193.5833   | -0.0076 | -6    | 160        | 168      | REFSEEQLR              |           |       |                  |      | Mascot      |
| 1234.6711  | 1234.6553   | -0.0158 | -13   | 128        | 139      | TLMALGSEALTK           |           |       |                  |      | Mascot      |
| 1234.6711  | 1234.6553   | -0.0158 | -13   | 128        | 139      | TLMALGSEALTK           |           |       |                  |      | Mascot      |
| 1308.6477  | 1308.6346   | -0.0131 | -10   | 1          | 12       | MANRGPSYGLSR           |           |       |                  |      | Mascot      |
| 1383.6321  | 1383.6641   | 0.032   | 23    | 183        | 196      | GASQSGMVGYGTPR         |           |       | Oxidation (M)[7] |      | Mascot      |
| 1993.9647  | 1993.9424   | -0.0223 | -11   | 128        | 145      | TLMALGSEALTKDDGHY<br>R |           |       | Oxidation (M)[3] |      | Mascot      |
| 1993.9647  | 1993.9424   | -0.0223 | -11   | 128        | 145      | TLMALGSEALTKDDGHY<br>R |           |       | Oxidation (M)[3] |      | Mascot      |

|    |                                                                                                     |  |  |  |              |  |         |      |    |    |   |
|----|-----------------------------------------------------------------------------------------------------|--|--|--|--------------|--|---------|------|----|----|---|
| 41 | novel protein similar to MCM6 minichromosome maintenance deficient 6, mitotin (S. cerevisiae) (mcm6 |  |  |  | gi 169158286 |  | 93177.2 | 5.26 | 13 | 39 | 0 |
|----|-----------------------------------------------------------------------------------------------------|--|--|--|--------------|--|---------|------|----|----|---|

#### Peptide Information

| Calc. Mass | Obsrv. Mass | ± da    | ± ppm | Start Seq. | End Seq. | Sequence     | Ion Score | C. I. | % Modification   | Rank | Result Type |
|------------|-------------|---------|-------|------------|----------|--------------|-----------|-------|------------------|------|-------------|
| 973.5789   | 973.5106    | -0.0683 | -70   | 117        | 124      | IRELSTVR     |           |       |                  |      | Mascot      |
| 995.4826   | 995.4966    | 0.014   | 14    | 373        | 381      | TTMEGTSLR    |           |       |                  |      | Mascot      |
| 1165.6252  | 1165.5636   | -0.0616 | -53   | 747        | 755      | SELINWYLK    |           |       |                  |      | Mascot      |
| 1165.6252  | 1165.723    | 0.0978  | 84    | 747        | 755      | SELINWYLK    |           |       |                  |      | Mascot      |
| 1165.6252  | 1165.723    | 0.0978  | 84    | 747        | 755      | SELINWYLK    |           |       |                  |      | Mascot      |
| 1234.7228  | 1234.6553   | -0.0675 | -55   | 361        | 372      | GILLMLFGGVAK |           |       | Oxidation (M)[5] |      | Mascot      |

|    |                                                                                   |           |         |      |     |              |                           |         |     |   |    |   |    |                  |        |
|----|-----------------------------------------------------------------------------------|-----------|---------|------|-----|--------------|---------------------------|---------|-----|---|----|---|----|------------------|--------|
|    | 1234.7228                                                                         | 1234.6553 | -0.0675 | -55  | 361 | 372          | GILLMLFGGVAK              |         |     |   |    |   |    | Oxidation (M)[5] | Mascot |
|    | 1263.6216                                                                         | 1263.67   | 0.0484  | 38   | 268 | 279          | EGFEADGIQGLK              |         |     |   |    |   |    |                  | Mascot |
|    | 1277.6195                                                                         | 1277.686  | 0.0665  | 52   | 321 | 330          | NQMTVLEWEK                |         |     |   |    |   |    |                  | Mascot |
|    | 1277.6195                                                                         | 1277.686  | 0.0665  | 52   | 321 | 330          | NQMTVLEWEK                |         |     |   |    |   |    |                  | Mascot |
|    | 1357.8162                                                                         | 1357.6908 | -0.1254 | -92  | 119 | 130          | ELSTVRIGTLLR              |         |     |   |    |   |    |                  | Mascot |
|    | 1390.8239                                                                         | 1390.6589 | -0.165  | -119 | 360 | 372          | RGILLMLFGGVAK             |         |     |   |    |   |    | Oxidation (M)[6] | Mascot |
|    | 1475.7502                                                                         | 1475.73   | -0.0202 | -14  | 90  | 102          | HFARDHGNIPPSK             |         |     |   |    |   |    |                  | Mascot |
|    | 1675.8618                                                                         | 1675.8612 | -0.0006 | 0    | 509 | 523          | SLKQNVNMSAPIMSR           |         |     |   |    |   |    |                  | Mascot |
|    | 1707.8306                                                                         | 1707.7412 | -0.0894 | -52  | 168 | 182          | YTQPTICKNPVCANR           |         |     |   |    |   |    |                  | Mascot |
|    | 1789.9065                                                                         | 1789.8832 | -0.0233 | -13  | 756 | 771          | EIESEIDSEAEVAKK           |         |     |   |    |   |    |                  | Mascot |
|    | 2211.1875                                                                         | 2211.0754 | -0.1121 | -51  | 361 | 381          | GILLMLFGGVAKTTMEGT<br>SLR |         |     |   |    |   |    | Oxidation (M)[5] | Mascot |
| 42 | PREDICTED: guanine nucleotide-binding protein subunit alpha-15-like [Danio rerio] |           |         |      |     | gi 326678594 |                           | 43174.9 | 8.7 | 4 | 39 | 0 | 27 | 41.866           |        |

#### Peptide Information

| Calc. Mass | Obsrv. Mass | ± da    | ± ppm | Start Seq. | End Seq. | Sequence              | Ion Score | C. I.  | % Modification          | Rank | Result Type |
|------------|-------------|---------|-------|------------|----------|-----------------------|-----------|--------|-------------------------|------|-------------|
| 1234.6902  | 1234.6553   | -0.0349 | -28   | 128        | 137      | LQRSYVEAIR            |           |        |                         |      | Mascot      |
| 1234.6902  | 1234.6553   | -0.0349 | -28   | 128        | 137      | LQRSYVEAIR            | 27        | 41.866 |                         |      | Mascot      |
| 2367.0459  | 2367.229    | 0.1831  | 77    | 2          | 20       | GHYYTGPCIVWFLSEEEK    |           |        |                         |      | Mascot      |
| 2384.2053  | 2383.9199   | -0.2854 | -120  | 347        | 367      | SVFSDVKDILLNALQDFEMA  |           |        | Oxidation (M)[20]       |      | Mascot      |
| 2510.1975  | 2510.0913   | -0.1062 | -42   | 82         | 102      | LVYQNIFKSMQAMTEAMSELK |           |        | Oxidation (M)[10,13,17] |      | Mascot      |

|    |                                                                       |  |  |  |  |  |              |         |      |   |    |   |  |  |
|----|-----------------------------------------------------------------------|--|--|--|--|--|--------------|---------|------|---|----|---|--|--|
| 43 | pleckstrin homology domain-containing family G member 7 [Danio rerio] |  |  |  |  |  | gi 113681918 | 49035.5 | 6.76 | 9 | 39 | 0 |  |  |
|----|-----------------------------------------------------------------------|--|--|--|--|--|--------------|---------|------|---|----|---|--|--|

#### Peptide Information

| Calc. Mass | Obsrv. Mass | ± da    | ± ppm | Start Seq. | End Seq. | Sequence      | Ion Score | C. I. | % Modification         | Rank | Result Type |
|------------|-------------|---------|-------|------------|----------|---------------|-----------|-------|------------------------|------|-------------|
| 1165.6034  | 1165.5636   | -0.0398 | -34   | 1          | 10       | MSLVDFLQGR    |           |       |                        |      | Mascot      |
| 1165.6034  | 1165.723    | 0.1196  | 103   | 1          | 10       | MSLVDFLQGR    |           |       |                        |      | Mascot      |
| 1165.6034  | 1165.723    | 0.1196  | 103   | 1          | 10       | MSLVDFLQGR    |           |       |                        |      | Mascot      |
| 1193.6313  | 1193.5833   | -0.048  | -40   | 219        | 227      | WLDNYQVK      |           |       |                        |      | Mascot      |
| 1224.4884  | 1224.5442   | 0.0558  | 46    | 153        | 161      | WCERNEECR     |           |       |                        |      | Mascot      |
| 1263.5786  | 1263.67     | 0.0914  | 72    | 61         | 70       | QCLQDIDSWR    |           |       |                        |      | Mascot      |
| 1320.6001  | 1320.558    | -0.0421 | -32   | 61         | 70       | QCLQDIDSWR    |           |       | Carbamidomethyl (C)[2] |      | Mascot      |
| 1365.6289  | 1365.6152   | -0.0137 | -10   | 115        | 126      | AFSESICHCLQK  |           |       |                        |      | Mascot      |
| 1493.7239  | 1493.7075   | -0.0164 | -11   | 114        | 126      | KAFSESICHCLQK |           |       |                        |      | Mascot      |

|    |                       |           |         |     |              |     |                         |      |    |    |   |    |                  |  |  |  |        |
|----|-----------------------|-----------|---------|-----|--------------|-----|-------------------------|------|----|----|---|----|------------------|--|--|--|--------|
|    | 1493.7239             | 1493.7075 | -0.0164 | -11 | 114          | 126 | KAFSESICHCLQK           |      |    |    |   |    |                  |  |  |  | Mascot |
|    | 1638.8519             | 1638.8301 | -0.0218 | -13 | 1            | 14  | MSLVDFLQGRSELK          |      |    |    |   |    | Oxidation (M)[1] |  |  |  | Mascot |
|    | 1707.8986             | 1707.7412 | -0.1574 | -92 | 387          | 401 | AWMSEIEKAVSSLLK         |      |    |    |   |    | Oxidation (M)[3] |  |  |  | Mascot |
|    | 2283.9646             | 2284.1438 | 0.1792  | 78  | 95           | 113 | EMWTDPDSCSTQSLHDL<br>FR |      |    |    |   |    | Oxidation (M)[2] |  |  |  | Mascot |
| 44 | titin a [Danio rerio] |           |         |     | gi 110005909 |     | 3646149.2               | 6.18 | 69 | 39 | 0 | 13 | 0                |  |  |  |        |

| Peptide Information |             |         |       |            |          |             |           |       |                        |      |        |        |  |  |  |  |  |
|---------------------|-------------|---------|-------|------------|----------|-------------|-----------|-------|------------------------|------|--------|--------|--|--|--|--|--|
| Calc. Mass          | Obsrv. Mass | ± da    | ± ppm | Start Seq. | End Seq. | Sequence    | Ion Score | C. I. | % Modification         | Rank | Result | Type   |  |  |  |  |  |
| 807.3882            | 807.3833    | -0.0049 | -6    | 10412      | 10418    | EPATFDK     |           |       |                        |      |        | Mascot |  |  |  |  |  |
| 842.4981            | 842.4921    | -0.006  | -7    | 8812       | 8818     | EDILPKK     |           |       |                        |      |        | Mascot |  |  |  |  |  |
| 850.4417            | 850.4256    | -0.0161 | -19   | 12407      | 12413    | DNVFSLR     |           |       |                        |      |        | Mascot |  |  |  |  |  |
| 850.5396            | 850.5252    | -0.0144 | -17   | 17926      | 17932    | FLLTKTK     |           |       |                        |      |        | Mascot |  |  |  |  |  |
| 882.4679            | 882.5496    | 0.0817  | 93    | 2876       | 2882     | YKVSTER     |           |       |                        |      |        | Mascot |  |  |  |  |  |
| 973.5101            | 973.5106    | 0.0005  | 1     | 14544      | 14552    | GDHGVFTIK   |           |       |                        |      |        | Mascot |  |  |  |  |  |
| 995.538             | 995.4966    | -0.0414 | -42   | 1755       | 1762     | AERVVHER    |           |       |                        |      |        | Mascot |  |  |  |  |  |
| 996.591             | 996.5773    | -0.0137 | -14   | 9064       | 9072     | MKAVPLPPK   |           |       | Oxidation (M)[1]       |      |        | Mascot |  |  |  |  |  |
| 1003.4301           | 1003.5322   | 0.1021  | 102   | 21943      | 21950    | TGCEYQFR    |           |       |                        |      |        | Mascot |  |  |  |  |  |
| 1037.5514           | 1037.5077   | -0.0437 | -42   | 5042       | 5050     | ETAAYLEIK   |           |       |                        |      |        | Mascot |  |  |  |  |  |
| 1045.5347           | 1045.5433   | 0.0086  | 8     | 7144       | 7153     | CQIGGTPEIK  |           |       |                        |      |        | Mascot |  |  |  |  |  |
| 1051.6259           | 1051.6942   | 0.0683  | 65    | 32375      | 32384    | SPIASPPRVK  |           |       |                        |      |        | Mascot |  |  |  |  |  |
| 1090.4987           | 1090.5089   | 0.0102  | 9     | 30271      | 30280    | YYAGCGTSLR  |           |       |                        |      |        | Mascot |  |  |  |  |  |
| 1107.4922           | 1107.5193   | 0.0271  | 24    | 20158      | 20166    | LAENVMDCR   |           |       | Carbamidomethyl (C)[8] |      |        | Mascot |  |  |  |  |  |
| 1109.4966           | 1109.4685   | -0.0281 | -25   | 27153      | 27161    | CQCEVTELK   |           |       | Carbamidomethyl (C)[1] |      |        | Mascot |  |  |  |  |  |
| 1118.5477           | 1118.4875   | -0.0602 | -54   | 15824      | 15833    | LSWDTSGPQK  |           |       |                        |      |        | Mascot |  |  |  |  |  |
| 1165.5582           | 1165.5636   | 0.0054  | 5     | 32119      | 32129    | ESETSAEVSVK |           |       |                        |      |        | Mascot |  |  |  |  |  |
| 1165.6211           | 1165.723    | 0.1019  | 87    | 28447      | 28457    | VSAENKFGVSK |           |       |                        |      |        | Mascot |  |  |  |  |  |
| 1165.6211           | 1165.723    | 0.1019  | 87    | 28447      | 28457    | VSAENKFGVSK |           |       |                        |      |        | Mascot |  |  |  |  |  |
| 1179.6078           | 1179.5793   | -0.0285 | -24   | 28311      | 28319    | VTWKLEEMK   |           |       | Oxidation (M)[8]       |      |        | Mascot |  |  |  |  |  |
| 1179.7096           | 1179.5793   | -0.1303 | -110  | 10001      | 10010    | KEITPTHILK  |           |       |                        |      |        | Mascot |  |  |  |  |  |
| 1192.5626           | 1192.5741   | 0.0115  | 10    | 17549      | 17559    | AVNMIGEGETR |           |       | Oxidation (M)[4]       |      |        | Mascot |  |  |  |  |  |
| 1192.5858           | 1192.5741   | -0.0117 | -10   | 12122      | 12130    | WFRDGNEIR   | 16        |       | 0                      |      |        | Mascot |  |  |  |  |  |
| 1193.5586           | 1193.5833   | 0.0247  | 21    | 28591      | 28601    | WSVPFNDGGSK |           |       |                        |      |        | Mascot |  |  |  |  |  |
| 1201.6133           | 1201.6172   | 0.0039  | 3     | 8745       | 8754     | EMIPTQIPEK  |           |       | Oxidation (M)[2]       |      |        | Mascot |  |  |  |  |  |
| 1206.5823           | 1206.5894   | 0.0071  | 6     | 622        | 631      | NLDELWVSCK  |           |       |                        |      |        | Mascot |  |  |  |  |  |
| 1206.6729           | 1206.5894   | -0.0835 | -69   | 20481      | 20491    | YVLTLENVAGK | 4         |       | 0                      |      |        | Mascot |  |  |  |  |  |
| 1224.6041           | 1224.5442   | -0.0599 | -49   | 17524      | 17533    | DDLKQCAYR   |           |       |                        |      |        | Mascot |  |  |  |  |  |

|           |           |         |      |       |       |                    |                                             |        |
|-----------|-----------|---------|------|-------|-------|--------------------|---------------------------------------------|--------|
| 1234.6096 | 1234.6553 | 0.0457  | 37   | 6575  | 6585  | GKDASLNCELK        | Carbamidomethyl (C)[8]                      | Mascot |
| 1234.6096 | 1234.6553 | 0.0457  | 37   | 6575  | 6585  | GKDASLNCELK        | Carbamidomethyl (C)[8]                      | Mascot |
| 1240.6168 | 1240.5388 | -0.078  | -63  | 9126  | 9135  | QDDEVLHKEK         |                                             | Mascot |
| 1263.6943 | 1263.67   | -0.0243 | -19  | 15216 | 15225 | LLFETKEIDR         |                                             | Mascot |
| 1277.7688 | 1277.686  | -0.0828 | -65  | 16200 | 16211 | EKIVVHAGGVIR       |                                             | Mascot |
| 1277.7688 | 1277.686  | -0.0828 | -65  | 16200 | 16211 | EKIVVHAGGVIR       |                                             | Mascot |
| 1300.5735 | 1300.5425 | -0.031  | -24  | 5575  | 5585  | GSMPMTISWMK        | Oxidation (M)[3,5]                          | Mascot |
| 1307.6842 | 1307.6515 | -0.0327 | -25  | 6703  | 6713  | ITFENNEVTLK        |                                             | Mascot |
| 1308.6278 | 1308.6346 | 0.0068  | 5    | 1763  | 1773  | STEETEELRSK        |                                             | Mascot |
| 1316.5684 | 1316.5348 | -0.0336 | -26  | 5575  | 5585  | GSMPMTISWMK        | Oxidation (M)[3,5,10]                       | Mascot |
| 1320.5914 | 1320.558  | -0.0334 | -25  | 1215  | 1225  | LDDTDESQLER        |                                             | Mascot |
| 1323.6362 | 1323.6482 | 0.012   | 9    | 18414 | 18424 | TWTNCTNDLKK        |                                             | Mascot |
| 1329.6355 | 1329.6433 | 0.0078  | 6    | 21565 | 21576 | YMLTVENSSGTK       |                                             | Mascot |
| 1340.7467 | 1340.661  | -0.0857 | -64  | 2708  | 2718  | LHQLKIMNTSR        |                                             | Mascot |
| 1365.6063 | 1365.6152 | 0.0089  | 7    | 5815  | 5827  | NQAGSDQCSGTLK      | Carbamidomethyl (C)[8]                      | Mascot |
| 1383.7339 | 1383.6641 | -0.0698 | -50  | 28250 | 28262 | VKAQNDAGISQPR      |                                             | Mascot |
| 1390.6559 | 1390.6589 | 0.003   | 2    | 22797 | 22807 | ITYYEVEMQAK        | Oxidation (M)[8]                            | Mascot |
| 1434.8931 | 1434.7439 | -0.1492 | -104 | 8541  | 8553  | IIPLKTDIPLPSK      |                                             | Mascot |
| 1434.8931 | 1434.7439 | -0.1492 | -104 | 8541  | 8553  | IIPLKTDIPLPSK      |                                             | Mascot |
| 1475.7601 | 1475.73   | -0.0301 | -20  | 30138 | 30150 | VFAENETGLSRPR      |                                             | Mascot |
| 1493.7166 | 1493.7075 | -0.0091 | -6   | 28125 | 28136 | LSWQEVSECTR        |                                             | Mascot |
| 1493.8257 | 1493.7075 | -0.1182 | -79  | 63    | 77    | AVLMIPAVTAAHSGR    |                                             | Mascot |
| 1588.7635 | 1588.8296 | 0.0661  | 42   | 17742 | 17757 | VSAENKCGPGPATETK   |                                             | Mascot |
| 1638.9061 | 1638.8301 | -0.076  | -46  | 7730  | 7743  | DIDIVELLRNVDPK     |                                             | Mascot |
| 1653.7577 | 1653.7505 | -0.0072 | -4   | 28440 | 28452 | YMEYTFRVSANENK     | Oxidation (M)[2]                            | Mascot |
| 1653.7822 | 1653.7505 | -0.0317 | -19  | 6852  | 6866  | DTQSIVGKSMELDCK    |                                             | Mascot |
| 1675.7996 | 1675.8612 | 0.0616  | 37   | 27046 | 27060 | AFTIVTNECANTTYK    |                                             | Mascot |
| 1707.8557 | 1707.7412 | -0.1145 | -67  | 20153 | 20166 | LLWTKLAENVMDCR     | Oxidation (M)[11]                           | Mascot |
| 1716.9166 | 1716.8212 | -0.0954 | -56  | 3493  | 3507  | VELSQLSAAEKWVEK    |                                             | Mascot |
| 1720.8024 | 1720.7566 | -0.0458 | -27  | 18634 | 18649 | KDSGYYSLSAENSTAK   |                                             | Mascot |
| 1789.8901 | 1789.8832 | -0.0069 | -4   | 10091 | 10106 | ESFAVTNKADCIVHQB   |                                             | Mascot |
| 1834.8173 | 1834.7976 | -0.0197 | -11  | 11858 | 11871 | HYFSITMMKDCEIK     | Carbamidomethyl (C)[11], Oxidation (M)[7,8] | Mascot |
| 1838.9    | 1838.8915 | -0.0085 | -5   | 25318 | 25333 | DPCAPPSQPRVMNITR   | Carbamidomethyl (C)[3]                      | Mascot |
| 1876.8898 | 1876.8947 | 0.0049  | 3    | 1661  | 1675  | LHYDGIHYLEITDCK    | Carbamidomethyl (C)[14]                     | Mascot |
| 1993.9358 | 1993.9424 | 0.0066  | 3    | 4822  | 4838  | LECQVDEDTGVSIIWMR  |                                             | Mascot |
| 1994.1182 | 1993.9424 | -0.1758 | -88  | 4601  | 4618  | TSTSSHLTVIPRVPPVFR |                                             | Mascot |



|    |                                                                 |           |         |     |             |         |                               |    |                                          |        |
|----|-----------------------------------------------------------------|-----------|---------|-----|-------------|---------|-------------------------------|----|------------------------------------------|--------|
|    | 2211.0713                                                       | 2211.0754 | 0.0041  | 2   | 29957       | 29976   | TPLCPPEPPSFPPEIMDV<br>TK      |    | Oxidation (M)[16]                        | Mascot |
|    | 2225.0801                                                       | 2225.0862 | 0.0061  | 3   | 488         | 506     | IRKPMHVEGAQMEEEAD<br>VR       |    |                                          | Mascot |
|    | 2232.9575                                                       | 2233.0569 | 0.0994  | 45  | 1525        | 1542    | MINEFGYCSLDYEVAYS             |    | Carbamidomethyl (C)[8], Oxidation (M)[1] | Mascot |
|    | 2283.1511                                                       | 2283.1533 | 0.0022  | 1   | 15583       | 15602   | IFMDISADELLCVRAGTPF<br>K      |    | Carbamidomethyl (C)[12]                  | Mascot |
|    | 2284.1389                                                       | 2284.1438 | 0.0049  | 2   | 21385       | 21405   | ACDTIFQPGPPGNPRVLD<br>TTK     |    | Carbamidomethyl (C)[2]                   | Mascot |
|    | 2367.2917                                                       | 2367.229  | -0.0627 | -26 | 23929       | 23950   | SDPRPLASPVIADVTIEP<br>SFK     |    |                                          | Mascot |
|    | 2369.1428                                                       | 2368.9758 | -0.167  | -70 | 26899       | 26919   | DILEEADVLDISMSTQYI<br>AK      |    |                                          | Mascot |
|    | 2384.0129                                                       | 2383.9199 | -0.093  | -39 | 30220       | 30239   | NHSLSVMTDEQEDEGLY<br>TCR      |    | Carbamidomethyl (C)[19]                  | Mascot |
|    | 2510.114                                                        | 2510.0913 | -0.0227 | -9  | 16823       | 16844   | AGDEEWLQVNQTPDSCP<br>STTFK    |    | Carbamidomethyl (C)[16]                  | Mascot |
|    | 2872.4258                                                       | 2872.3606 | -0.0652 | -23 | 28183       | 28208   | RLDVIDTTSTTASLVWMK<br>PEHDGGS |    |                                          | Mascot |
| 45 | MCM6 minichromosome maintenance deficient 6, like [Danio rerio] |           |         |     | gi 70887711 | 93152.1 | 5.23                          | 13 | 39                                       | 0      |

#### Peptide Information

| Calc. Mass | Obsrv. Mass | $\pm$ da | $\pm$ ppm | Start Seq. | End Seq. | Sequence                  | Ion Score | C. I. | % Modification   | Rank | Result Type |
|------------|-------------|----------|-----------|------------|----------|---------------------------|-----------|-------|------------------|------|-------------|
| 973.5789   | 973.5106    | -0.0683  | -70       | 117        | 124      | IRELSTVR                  |           |       |                  |      | Mascot      |
| 995.4826   | 995.4966    | 0.014    | 14        | 373        | 381      | TTMEGTSR                  |           |       |                  |      | Mascot      |
| 996.5261   | 996.5773    | 0.0512   | 51        | 194        | 201      | FVDFQKGR                  |           |       |                  |      | Mascot      |
| 1165.6252  | 1165.5636   | -0.0616  | -53       | 747        | 755      | SELINWYLK                 |           |       |                  |      | Mascot      |
| 1165.6252  | 1165.723    | 0.0978   | 84        | 747        | 755      | SELINWYLK                 |           |       |                  |      | Mascot      |
| 1165.6252  | 1165.723    | 0.0978   | 84        | 747        | 755      | SELINWYLK                 |           |       |                  |      | Mascot      |
| 1234.7228  | 1234.6553   | -0.0675  | -55       | 361        | 372      | GILLMLFGGVAK              |           |       | Oxidation (M)[5] |      | Mascot      |
| 1234.7228  | 1234.6553   | -0.0675  | -55       | 361        | 372      | GILLMLFGGVAK              |           |       | Oxidation (M)[5] |      | Mascot      |
| 1277.6195  | 1277.686    | 0.0665   | 52        | 321        | 330      | NQMTVLEWEK                |           |       |                  |      | Mascot      |
| 1277.6195  | 1277.686    | 0.0665   | 52        | 321        | 330      | NQMTVLEWEK                |           |       |                  |      | Mascot      |
| 1357.8162  | 1357.6908   | -0.1254  | -92       | 119        | 130      | ELSTVRIGTLR               |           |       |                  |      | Mascot      |
| 1390.8239  | 1390.6589   | -0.165   | -119      | 360        | 372      | RGILLMLFGGVAK             |           |       | Oxidation (M)[6] |      | Mascot      |
| 1475.7502  | 1475.73     | -0.0202  | -14       | 90         | 102      | HFARDHGNIPPSK             |           |       |                  |      | Mascot      |
| 1675.8618  | 1675.8612   | -0.0006  | 0         | 509        | 523      | SLKQNVNMSAPIMSR           |           |       |                  |      | Mascot      |
| 1707.8306  | 1707.7412   | -0.0894  | -52       | 168        | 182      | YTQPTICKNPVCANR           |           |       |                  |      | Mascot      |
| 1789.9065  | 1789.8832   | -0.0233  | -13       | 756        | 771      | EIESEIDSEAEVAKK           |           |       |                  |      | Mascot      |
| 2211.1875  | 2211.0754   | -0.1121  | -51       | 361        | 381      | GILLMLFGGVAKTTMEGT<br>SLR |           |       | Oxidation (M)[5] |      | Mascot      |

|    |                            |  |  |  |             |          |      |    |    |   |
|----|----------------------------|--|--|--|-------------|----------|------|----|----|---|
| 46 | Ect2 protein [Danio rerio] |  |  |  | gi 66911847 | 109863.5 | 8.59 | 16 | 38 | 0 |
|----|----------------------------|--|--|--|-------------|----------|------|----|----|---|

#### Peptide Information

| Calc. Mass | Obsrv. Mass | ± da    | ± ppm | Start Seq. | End Seq. | Sequence                   | Ion Score | C. I. | % Modification                           | Rank | Result Type |
|------------|-------------|---------|-------|------------|----------|----------------------------|-----------|-------|------------------------------------------|------|-------------|
| 973.4995   | 973.5106    | 0.0111  | 11    | 562        | 568      | CERQKPR                    |           |       | Carbamidomethyl (C)[1]                   |      | Mascot      |
| 1165.5266  | 1165.5636   | 0.037   | 32    | 290        | 298      | NNMEERTQK                  |           |       | Oxidation (M)[3]                         |      | Mascot      |
| 1201.5807  | 1201.6172   | 0.0365  | 30    | 85         | 95       | EGQPGTEAREK                |           |       |                                          |      | Mascot      |
| 1206.6412  | 1206.5894   | -0.0518 | -43   | 779        | 787      | TTWLRTLCL                  |           |       | Carbamidomethyl (C)[8]                   |      | Mascot      |
| 1206.6412  | 1206.5894   | -0.0518 | -43   | 779        | 787      | TTWLRTLCL                  |           |       | Carbamidomethyl (C)[8]                   |      | Mascot      |
| 1224.5314  | 1224.5442   | 0.0128  | 10    | 852        | 862      | AFMANGTPDER                |           |       | Oxidation (M)[3]                         |      | Mascot      |
| 1234.5304  | 1234.6553   | 0.1249  | 101   | 863        | 873      | SPCPDADRMSR                |           |       |                                          |      | Mascot      |
| 1234.5304  | 1234.6553   | 0.1249  | 101   | 863        | 873      | SPCPDADRMSR                | 0         | 0     |                                          |      | Mascot      |
| 1300.6896  | 1300.5425   | -0.1471 | -113  | 396        | 406      | ETEISPFPPRK                |           |       |                                          |      | Mascot      |
| 1307.5468  | 1307.6515   | 0.1047  | 80    | 863        | 873      | SPCPDADRMSR                |           |       | Carbamidomethyl (C)[3], Oxidation (M)[9] |      | Mascot      |
| 1308.7457  | 1308.6346   | -0.1111 | -85   | 727        | 737      | HITLMPLSQIR                |           |       |                                          |      | Mascot      |
| 1323.6838  | 1323.6482   | -0.0356 | -27   | 953        | 964      | CRDLLAPPEPGR               |           |       |                                          |      | Mascot      |
| 1340.6692  | 1340.661    | -0.0082 | -6    | 14         | 25       | SILVDSSVYDSR               |           |       |                                          |      | Mascot      |
| 1434.7303  | 1434.7439   | 0.0136  | 9     | 784        | 795      | TLCRQVANTICR               |           |       | Carbamidomethyl (C)[3]                   |      | Mascot      |
| 1434.7303  | 1434.7439   | 0.0136  | 9     | 784        | 795      | TLCRQVANTICR               |           |       | Carbamidomethyl (C)[3]                   |      | Mascot      |
| 1653.7478  | 1653.7505   | 0.0027  | 2     | 337        | 349      | QEWFWGSIQMDAR              |           |       |                                          |      | Mascot      |
| 1653.7478  | 1653.7505   | 0.0027  | 2     | 337        | 349      | QEWFWGSIQMDAR              |           |       |                                          |      | Mascot      |
| 1675.8757  | 1675.8612   | -0.0145 | -9    | 54         | 68       | VVLVGEACKMAELEK            |           |       | Carbamidomethyl (C)[8]                   |      | Mascot      |
| 1720.7847  | 1720.7566   | -0.0281 | -16   | 515        | 528      | ADLEELVMNWSEER             |           |       |                                          |      | Mascot      |
| 1838.9971  | 1838.8915   | -0.1056 | -57   | 885        | 902      | SASTFSLTGSIKSAVVQR         |           |       |                                          |      | Mascot      |
| 2369.1323  | 2368.9758   | -0.1565 | -66   | 874        | 896      | MSSSSTLAMRSASTFSL<br>TGSIK |           |       | Oxidation (M)[1,9]                       |      | Mascot      |

47 myoferlin [Danio rerio] gi|319738633 229877.2 5.76 22 38 0

#### Peptide Information

| Calc. Mass | Obsrv. Mass | ± da    | ± ppm | Start Seq. | End Seq. | Sequence    | Ion Score | C. I. | % Modification         | Rank | Result Type |
|------------|-------------|---------|-------|------------|----------|-------------|-----------|-------|------------------------|------|-------------|
| 842.409    | 842.4921    | 0.0831  | 99    | 991        | 996      | MYHVHR      |           |       |                        |      | Mascot      |
| 973.5464   | 973.5106    | -0.0358 | -37   | 1845       | 1852     | SEFRIPPK    |           |       |                        |      | Mascot      |
| 1037.4945  | 1037.5077   | 0.0132  | 13    | 213        | 221      | VHVCGETHR   |           |       |                        |      | Mascot      |
| 1109.5924  | 1109.4685   | -0.1239 | -112  | 1984       | 1991     | TCKFIVWR    |           |       | Carbamidomethyl (C)[2] |      | Mascot      |
| 1165.5735  | 1165.5636   | -0.0099 | -8    | 718        | 727      | LFEEATDVNK  |           |       |                        |      | Mascot      |
| 1165.5735  | 1165.723    | 0.1495  | 128   | 718        | 727      | LFEEATDVNK  |           |       |                        |      | Mascot      |
| 1165.5735  | 1165.723    | 0.1495  | 128   | 718        | 727      | LFEEATDVNK  |           |       |                        |      | Mascot      |
| 1193.6273  | 1193.5833   | -0.044  | -37   | 653        | 663      | FAVQSKATDAR |           |       |                        |      | Mascot      |

|    |                                                                        |           |         |      |              |          |                            |   |                         |        |        |
|----|------------------------------------------------------------------------|-----------|---------|------|--------------|----------|----------------------------|---|-------------------------|--------|--------|
|    | 1206.517                                                               | 1206.5894 | 0.0724  | 60   | 1459         | 1468     | EFMGLTDFCK                 |   | Oxidation (M)[3]        |        | Mascot |
|    | 1206.517                                                               | 1206.5894 | 0.0724  | 60   | 1459         | 1468     | EFMGLTDFCK                 |   | Oxidation (M)[3]        |        | Mascot |
|    | 1263.5997                                                              | 1263.67   | 0.0703  | 56   | 1188         | 1198     | DQVGKDEMLGR                |   | Oxidation (M)[8]        |        | Mascot |
|    | 1277.6405                                                              | 1277.686  | 0.0455  | 36   | 705          | 716      | DKALEGIMEGAK               |   | Oxidation (M)[8]        |        | Mascot |
|    | 1277.6405                                                              | 1277.686  | 0.0455  | 36   | 705          | 716      | DKALEGIMEGAK               |   | Oxidation (M)[8]        |        | Mascot |
|    | 1307.6267                                                              | 1307.6515 | 0.0248  | 19   | 1416         | 1425     | EKETVDWWSK                 |   |                         |        | Mascot |
|    | 1308.6947                                                              | 1308.6346 | -0.0601 | -46  | 429          | 438      | IKLTVYDWDR                 |   |                         |        | Mascot |
|    | 1323.5997                                                              | 1323.6482 | 0.0485  | 37   | 1539         | 1549     | DNNGKCDPYIK                |   | Carbamidomethyl (C)[6]  |        | Mascot |
|    | 1365.7122                                                              | 1365.6152 | -0.097  | -71  | 1704         | 1715     | TQGLVPEHVETR               |   |                         |        | Mascot |
|    | 1390.7035                                                              | 1390.6589 | -0.0446 | -32  | 814          | 825      | VNMWLGLATEEK               |   |                         |        | Mascot |
|    | 1675.8835                                                              | 1675.8612 | -0.0223 | -13  | 812          | 825      | IRVNMWLGLATEEK             |   | Oxidation (M)[5]        |        | Mascot |
|    | 1720.9056                                                              | 1720.7566 | -0.149  | -87  | 384          | 398      | NLVDPFVEAWFAGKK            |   |                         |        | Mascot |
|    | 1789.9187                                                              | 1789.8832 | -0.0355 | -20  | 1199         | 1216     | STCVPLVKLASGMDGSP<br>K     |   |                         |        | Mascot |
|    | 1834.9255                                                              | 1834.7976 | -0.1279 | -70  | 309          | 325      | VSMFVVGTDGEPPEKK           |   | Oxidation (M)[3]        |        | Mascot |
|    | 1994.1168                                                              | 1993.9424 | -0.1744 | -87  | 684          | 701      | IPDLEGKPNLTSLDIQIK         |   |                         |        | Mascot |
|    | 1994.1168                                                              | 1993.9424 | -0.1744 | -87  | 684          | 701      | IPDLEGKPNLTSLDIQIK         |   |                         |        | Mascot |
|    | 2225.0654                                                              | 2225.0862 | 0.0208  | 9    | 1556         | 1574     | SVDDRDNYMPLTLNPVF<br>GR    |   | Oxidation (M)[9]        |        | Mascot |
|    | 2367.1589                                                              | 2367.229  | 0.0701  | 30   | 1965         | 1983     | LDPPKRPETSFFWFTNP<br>CK    |   | Carbamidomethyl (C)[18] |        | Mascot |
|    | 2384.1938                                                              | 2383.9199 | -0.2739 | -115 | 326          | 347      | EQDSDKDDVESNLLLPA<br>GVALR |   |                         |        | Mascot |
| 48 | PREDICTED: histone-lysine N-methyltransferase SETD2-like [Danio rerio] |           |         |      | gi 326674803 | 158096.4 | 4.83                       | 1 | 25                      | 14.605 |        |

#### Peptide Information

| Calc. Mass | Obsrv. Mass | ± da   | ± ppm | Start Seq. | End Sequence Seq. | Ion Score | C. I. % | Modification             | Rank | Result Type |
|------------|-------------|--------|-------|------------|-------------------|-----------|---------|--------------------------|------|-------------|
| 1653.7393  | 1653.7505   | 0.0112 | 7     | 528        | 540 MQCEAILSKEER  | 25        | 14.605  | Carbamidomethyl (C)[3,5] | 3    | Mascot      |

|    |                                                |  |  |  |             |         |      |   |    |   |  |
|----|------------------------------------------------|--|--|--|-------------|---------|------|---|----|---|--|
| 49 | DNA polymerase epsilon subunit 2 [Danio rerio] |  |  |  | gi 27545241 | 59223.9 | 5.65 | 1 | 22 | 0 |  |
|----|------------------------------------------------|--|--|--|-------------|---------|------|---|----|---|--|

#### Peptide Information

| Calc. Mass | Obsrv. Mass | ± da    | ± ppm | Start Seq. | End Sequence Seq. | Ion Score | C. I. % | Modification | Rank | Result Type |
|------------|-------------|---------|-------|------------|-------------------|-----------|---------|--------------|------|-------------|
| 1206.6589  | 1206.5894   | -0.0695 | -58   | 132        | 140 ERYTILQQR     | 24        | 0       |              | 2    | Mascot      |

|    |                                |  |  |  |              |       |      |   |    |   |  |
|----|--------------------------------|--|--|--|--------------|-------|------|---|----|---|--|
| 50 | Ccadc101 protein [Danio rerio] |  |  |  | gi 201090170 | 33213 | 8.21 | 1 | 23 | 0 |  |
|----|--------------------------------|--|--|--|--------------|-------|------|---|----|---|--|

#### Peptide Information

| Calc. Mass | Obsrv. Mass | ± da | ± ppm | Start Seq. | End Sequence Seq. | Ion Score | C. I. % | Modification | Rank | Result Type |
|------------|-------------|------|-------|------------|-------------------|-----------|---------|--------------|------|-------------|
|------------|-------------|------|-------|------------|-------------------|-----------|---------|--------------|------|-------------|

1234.5732

1234.6553

0.0821

67

68

78 ADAEAECSILR

23

0 Carbamidomethyl (C)[7]

2 Mascot

---
